# Supplementary material for: Ultra-high density intra-specific genetic linkage maps accelerate identification of functionally relevant molecular tags governing important agronomic traits in chickpea
Source: PubMed Central journal article supplement (PMC5386344; doi:10.1038/srep09468), 2015-05-05
Supplement: srep09468-s1.pdf [file srep09468-s1.pdf]

# **Ultra-high density intra-specific genetic linkage maps accelerate identification of functionally relevant molecular tags governing important agronomic traits in chickpea**

**Alice Kujur<sup>1a</sup>, Hari D. Upadhyaya<sup>2a</sup>, Tanima Shree<sup>1</sup>, Deepak Bajaj<sup>1</sup>, Shouvik Das<sup>1</sup>, Maneesha S. Saxena<sup>1</sup>, Saurabh Badoni<sup>1</sup>, Vinod Kumar<sup>3</sup>, Shailesh Tripathi<sup>4</sup>, C.L.L. Gowda<sup>2</sup>, Shivali Sharma<sup>2</sup>, Sube Singh<sup>2</sup>, Akhilesh K. Tyagi<sup>1</sup>, Swarup K. Parida<sup>1\*</sup>**

<sup>1</sup>National Institute of Plant Genome Research (NIPGR), Aruna Asaf Ali Marg, New Delhi 110067, India

<sup>2</sup>International Crops Research Institute for the Semi-Arid Tropics (ICRISAT), Patancheru 502324, Andhra Pradesh, India

<sup>3</sup>National Research Centre on Plant Biotechnology (NRCPB), New Delhi 110012, India

<sup>4</sup>Division of Genetics, Indian Agricultural Research Institute (IARI), New Delhi 110012, India

\*Corresponding author

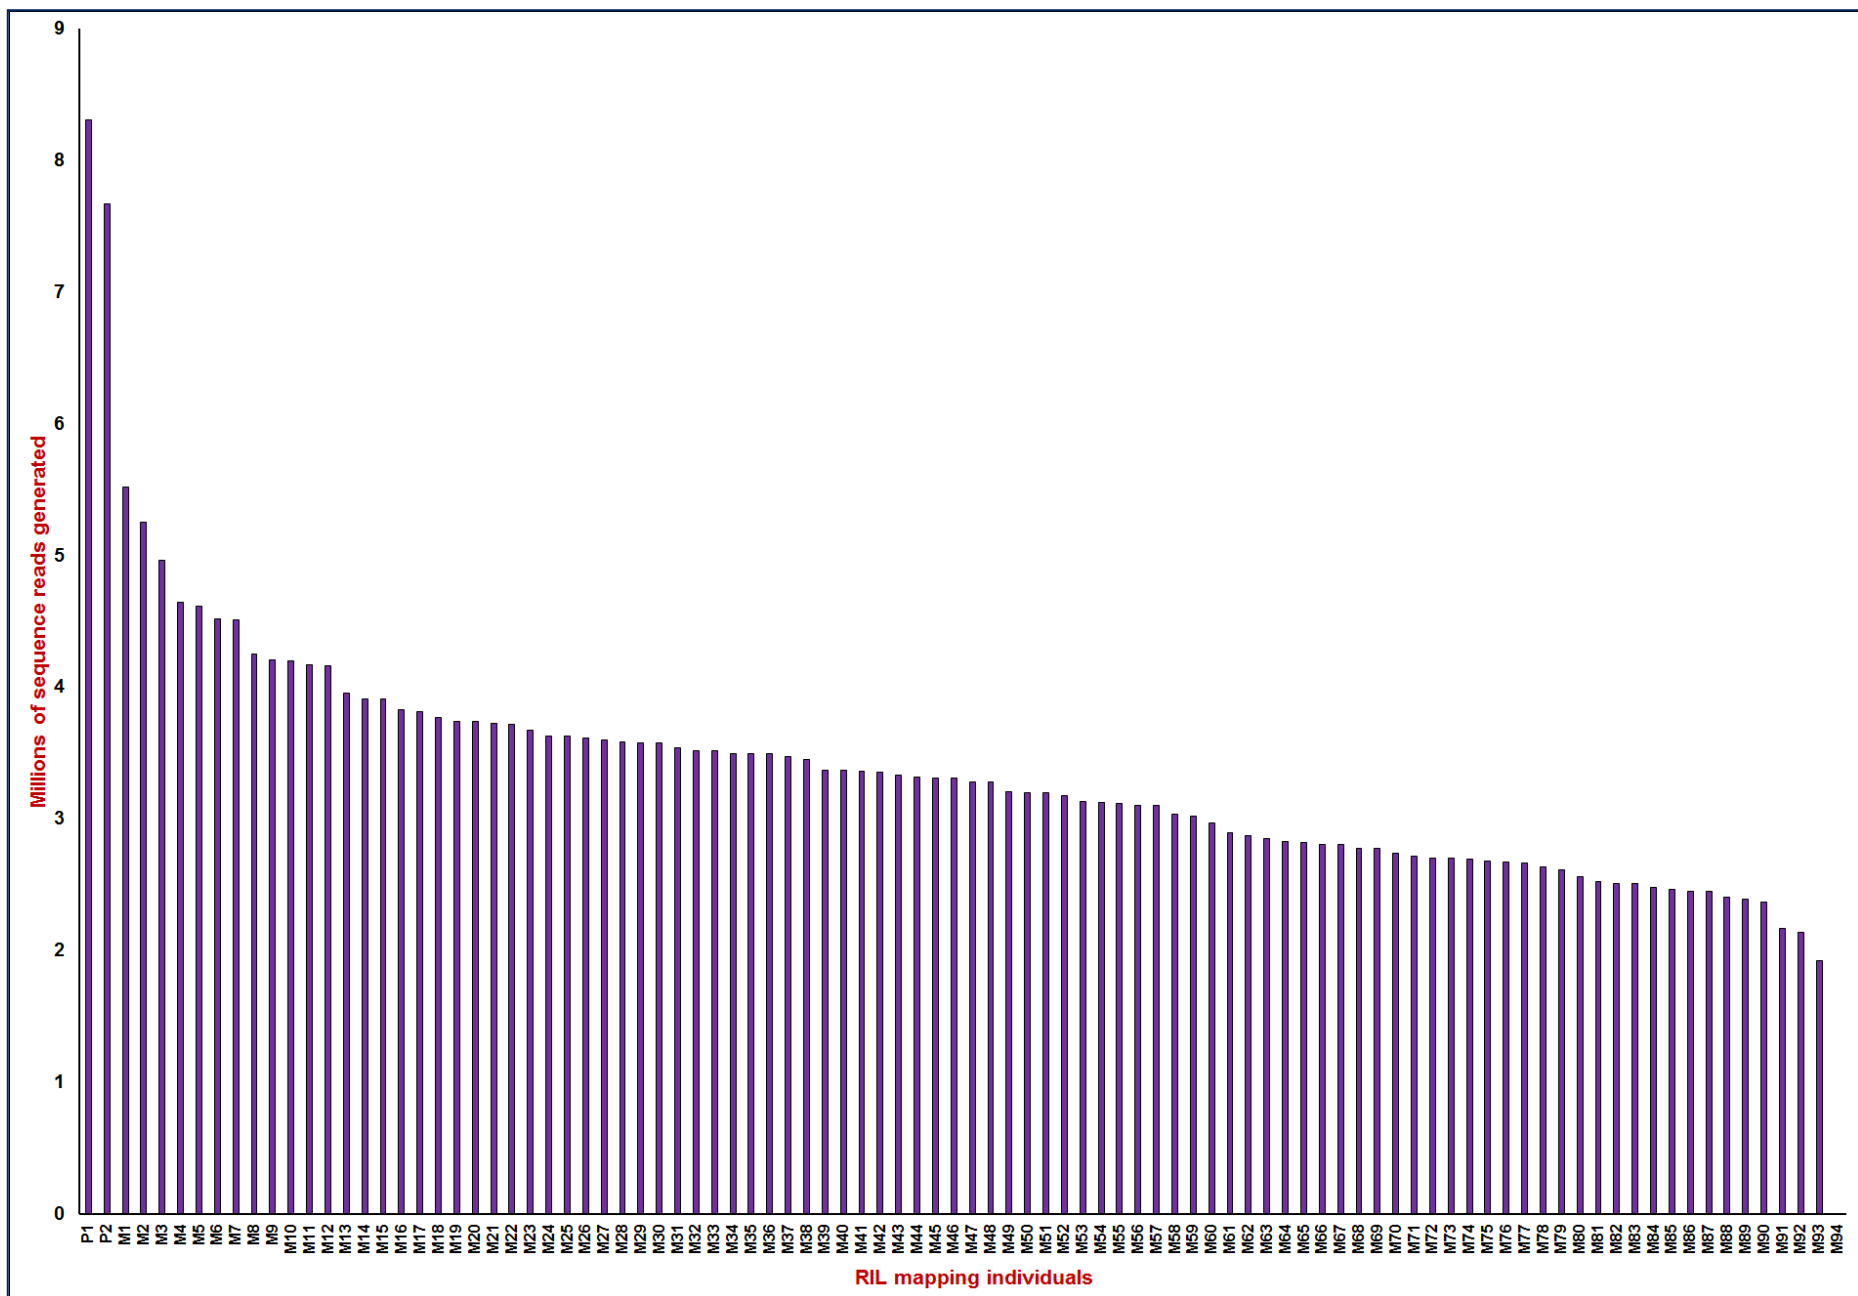

**Figure S1:** Frequency distribution of millions sequence reads generated from a representative set of 96 individuals [including two mapping parental genotypes (P1 and P2) and 93 RIL mapping individuals (M1-M93)] using a 288-plex GBS assay. P1: ICC 12299 and P2: ICC 8261. M94: Negative control (without genomic DNA) blank sample.

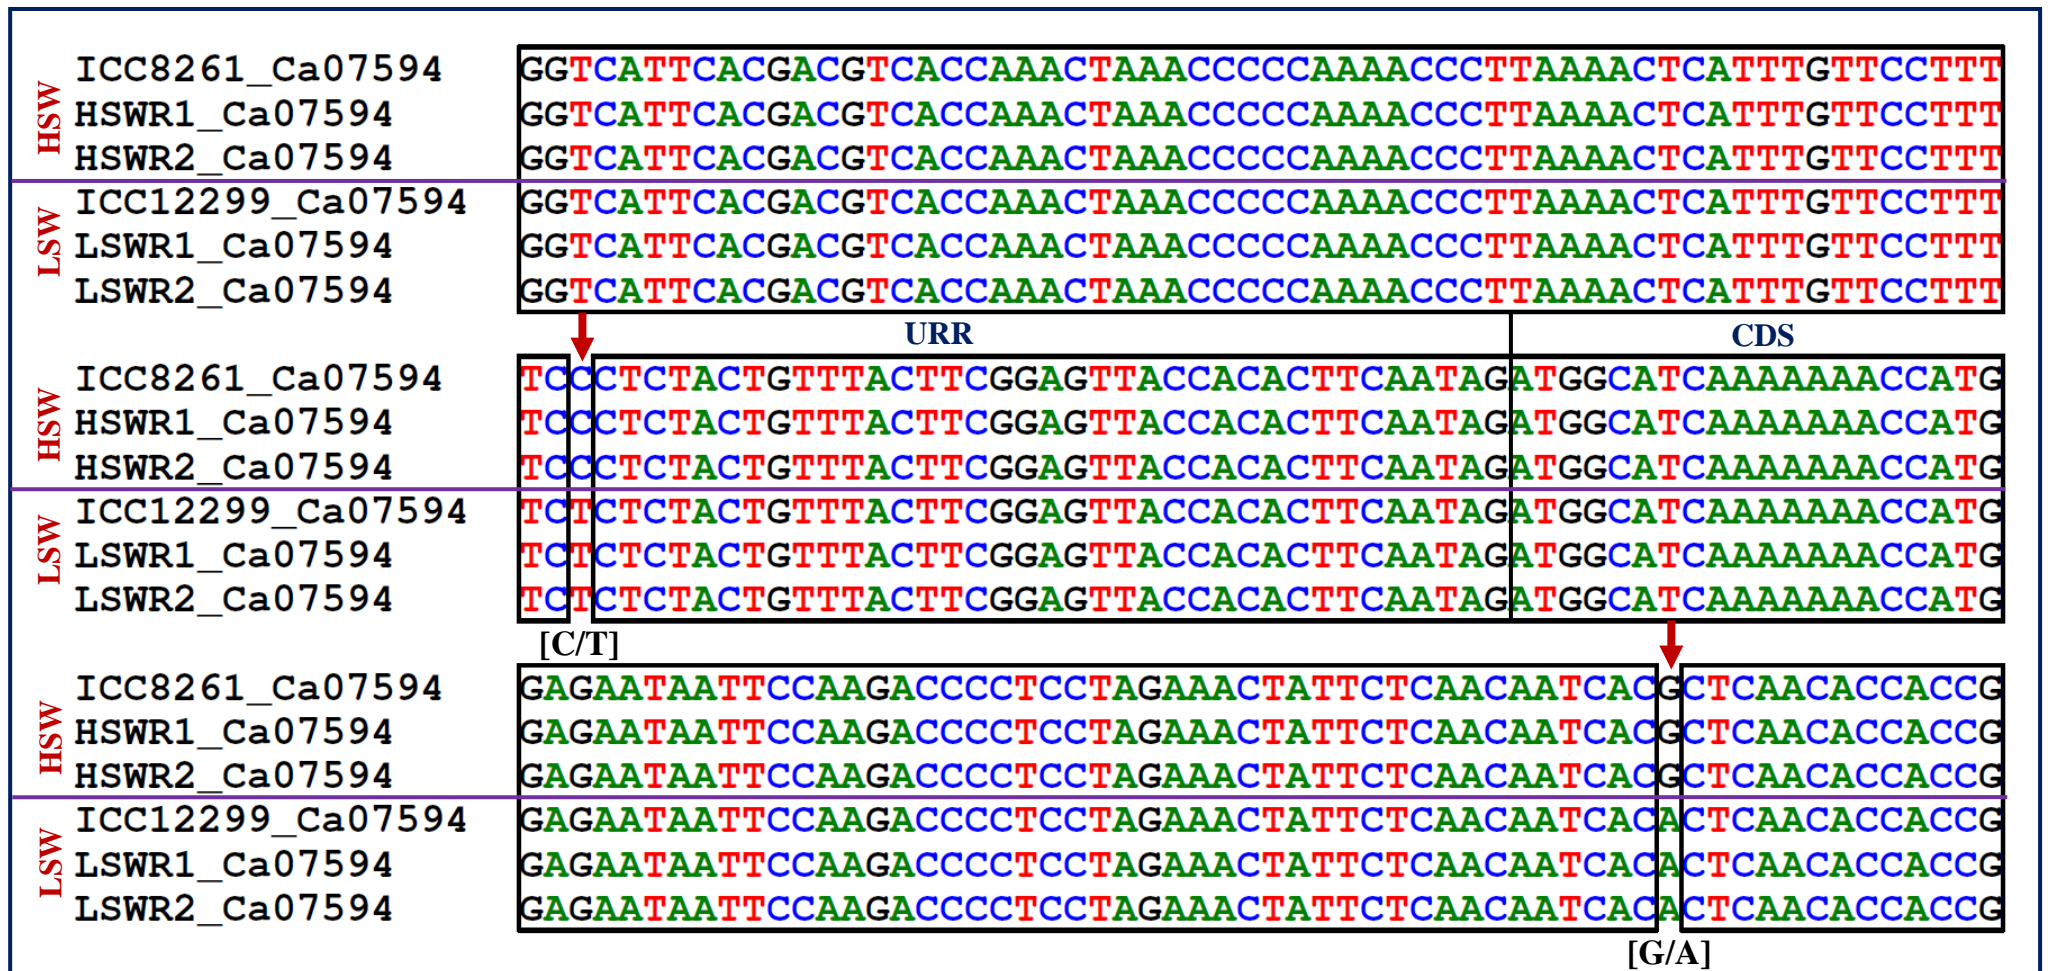

**Figure S2A:** A representative figure showing the validation of two GBS-based SNP loci (C/T and G/A) in the upstream regulatory and coding sequences (CDS) of a *kabuli* embryo defective protein coding gene (Ca07594) by the multiple alignment of amplicon resequences generated from high and low seed weight mapping parental genotypes (ICC 8261 and ICC 12299) and selective homozygous RIL mapping individuals. The two validated SNP loci showing differentiation between high and low seed weight parental genotypes and RIL mapping individuals are highlighted. HSWR: High Seed Weight RILs and LSWR: Low Seed Weight RILs.

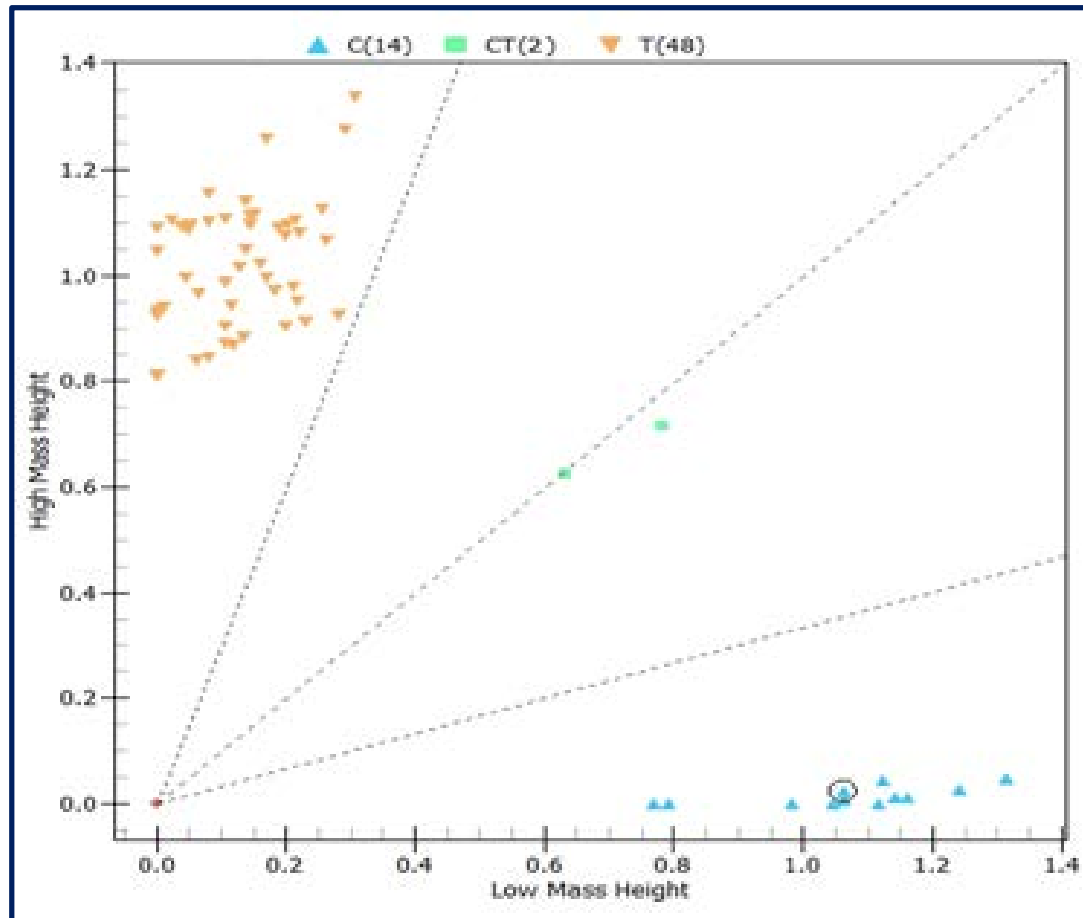

**Figure S2B:** Call cluster plots for one representative SNP locus (C/T) validating the GBS-based genotyping information generated in mapping parental genotypes (ICC 12299 and ICC 8261) and selected RIL mapping individuals using a MALDI-TOF mass array. Distinct differentiation of homozygous and heterozygous SNPs based on the mass differences of corresponding alleles are evident.

Ca\_Desi\_LG01

Table of SNP data for Ca\_Desi\_LG01, listing SNP IDs and their corresponding values from 0.0 to 85.7.

Ca\_Desi\_LG02

Table of SNP data for Ca\_Desi\_LG02, listing SNP IDs and their corresponding values from 0.0 to 85.7.

Ca\_Desi\_LG03

Table of SNP data for Ca\_Desi\_LG03, listing SNP IDs and their corresponding values from 0.0 to 85.7.

Ca\_Desi\_LG04

Table of SNP data for Ca\_Desi\_LG04, listing SNP IDs and their corresponding values from 0.0 to 85.7.

Figure S3 (Cont...)

Ca\_Desig\_LG05

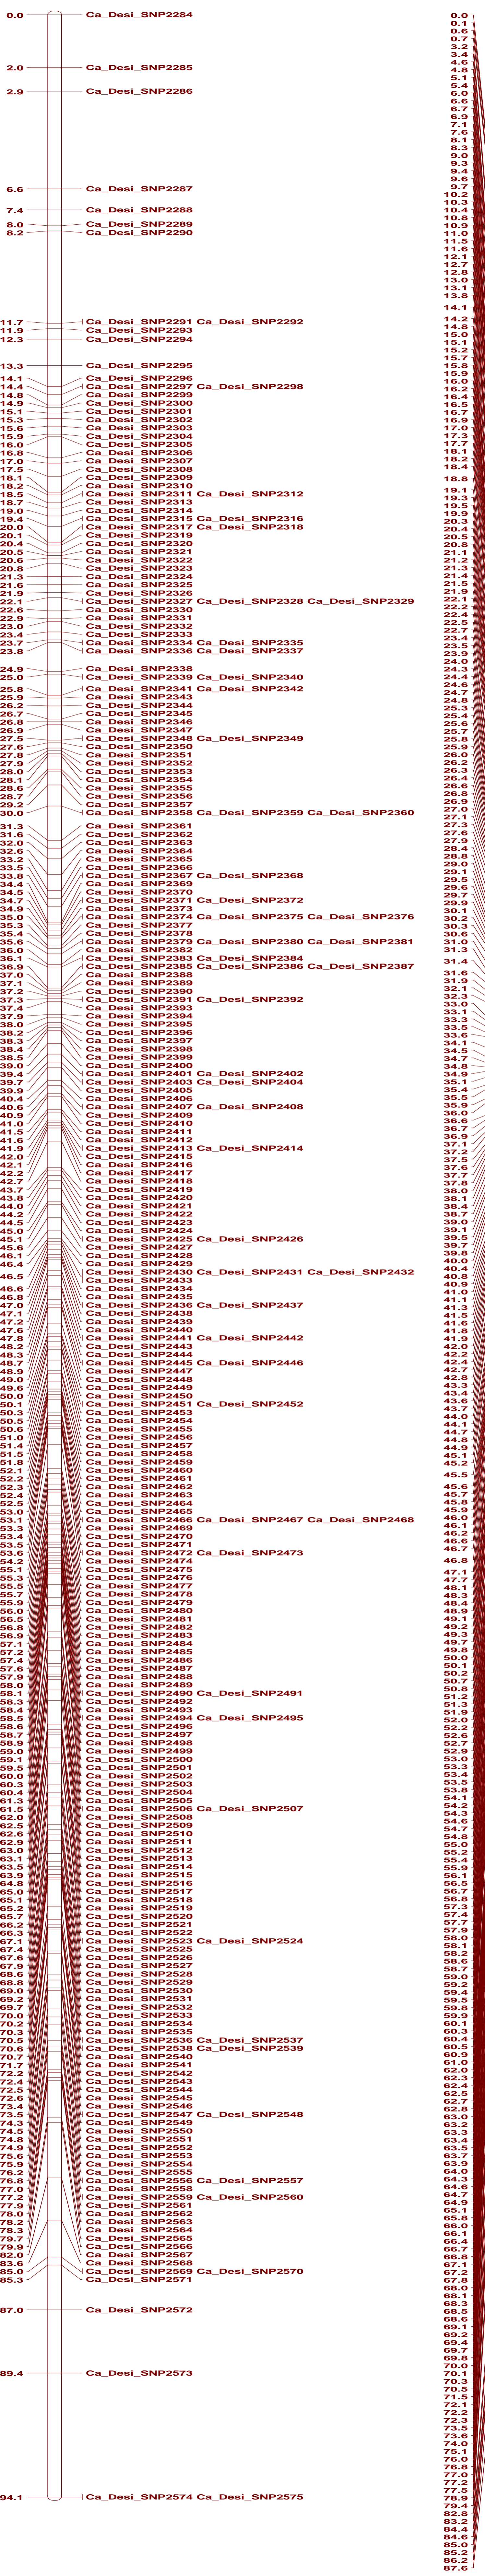

Ca\_Desig\_LG06

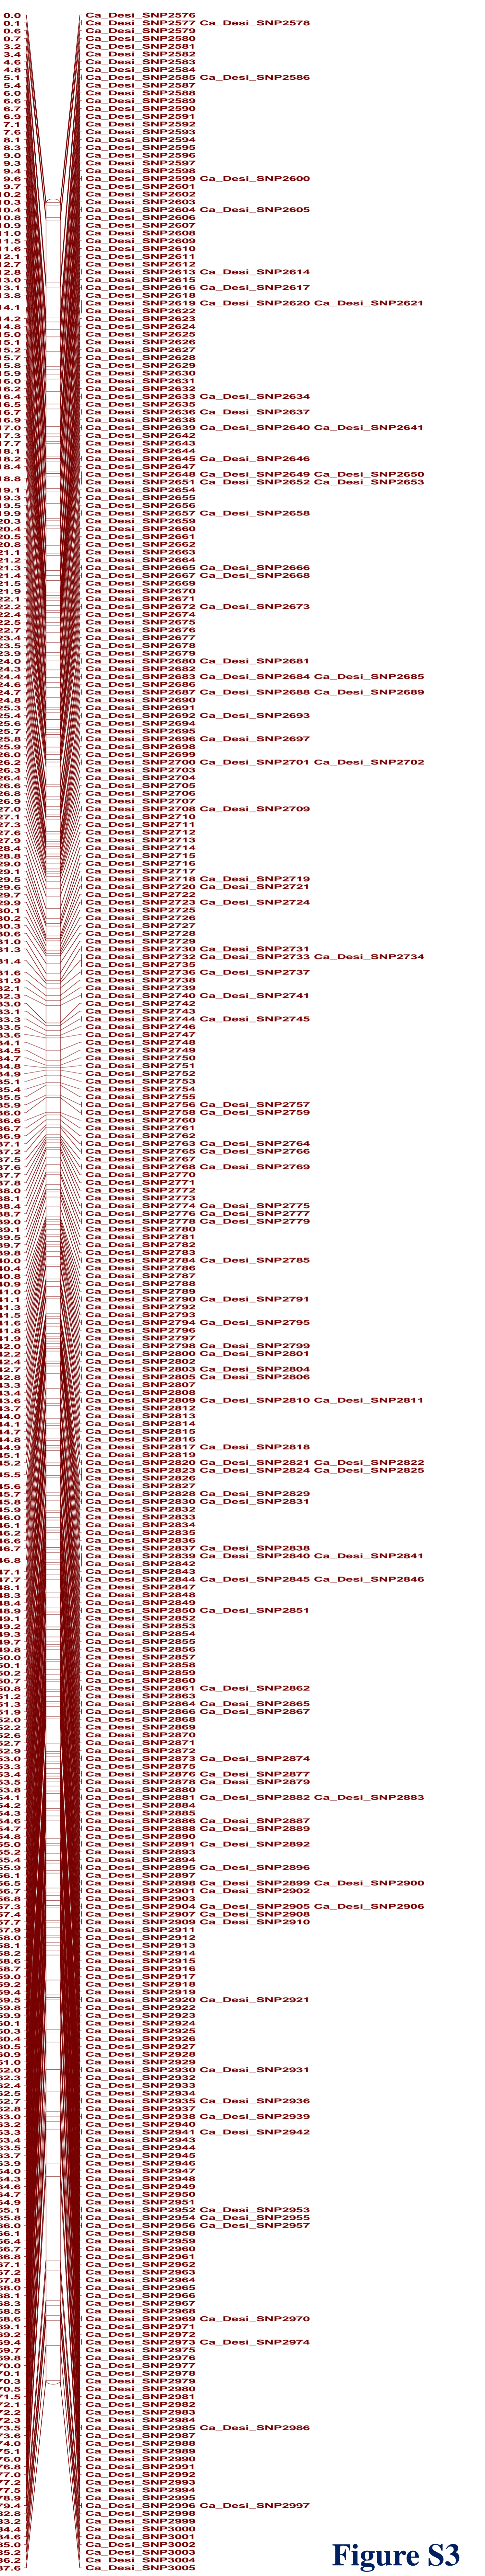

Ca\_Desig\_LG07

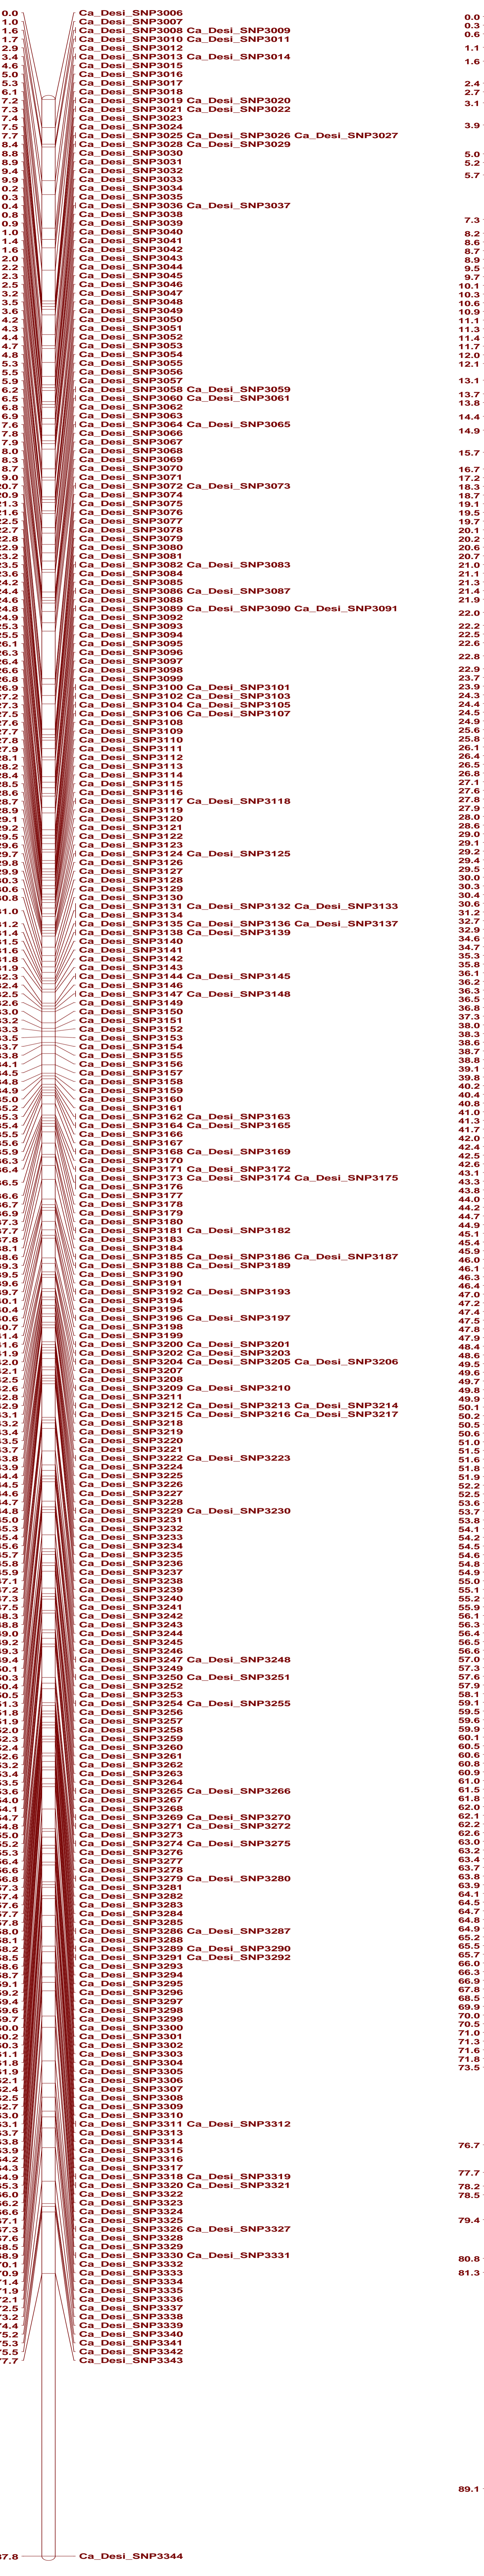

Ca\_Desig\_LG08

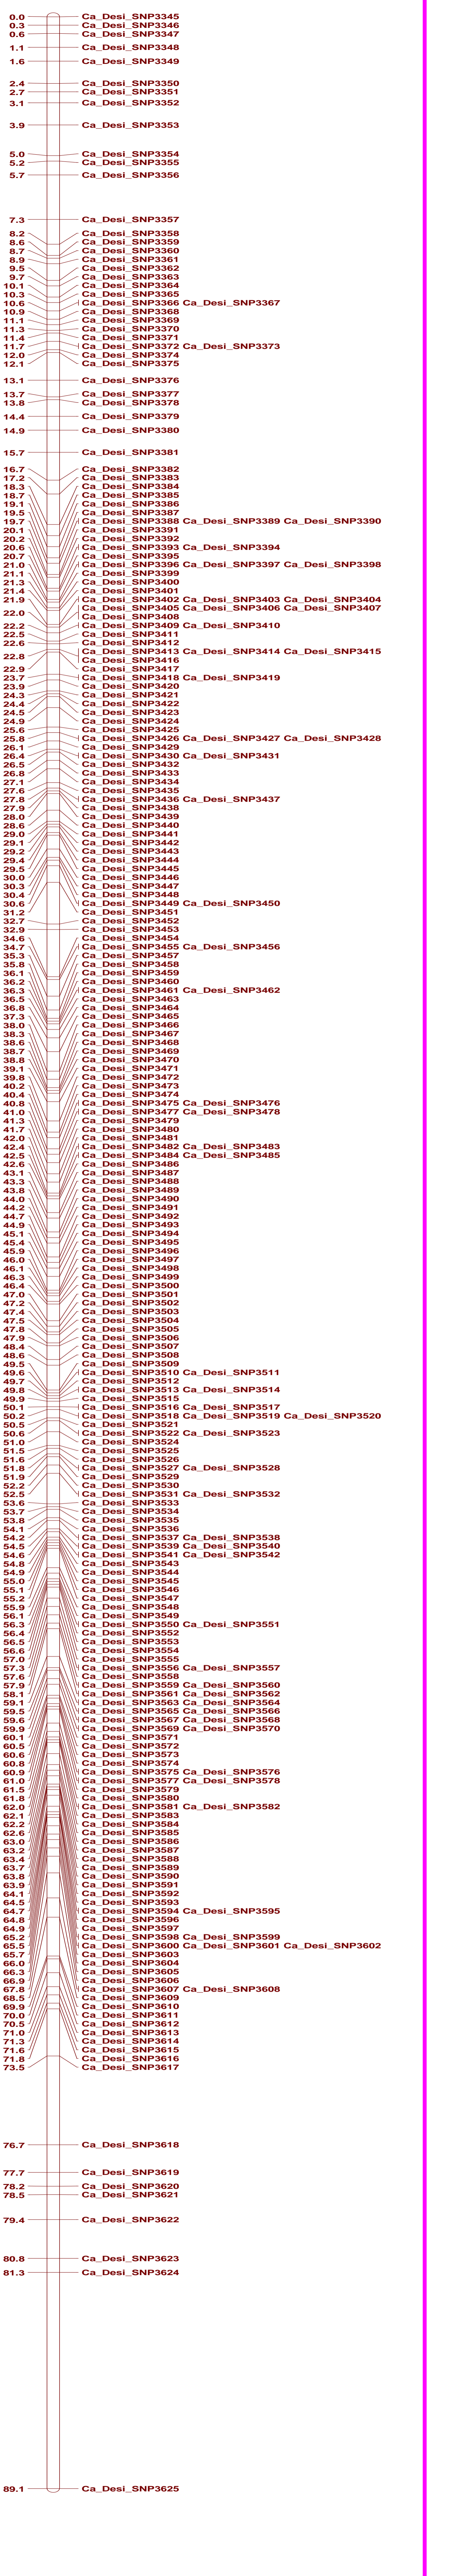

Figure S3

**Figure S3.** A 3625 SNP markers-based ultra-high density intra-specific genetic linkage map (ICC 12299 x ICC 8261) constructed using reference *desi* genome-based GBS assay. The genetic distance (cM) and identity of the SNP loci integrated on the eight LGs are indicated on the left and right side of each LGs, respectively. The identity of SNP loci mentioned on the right side of chromosomes that corresponds to the marker IDs as mentioned details in the Table S3 and S6.

Ca\_Kabuli\_LG01

Ca\_Kabuli\_LG02

Ca\_Kabuli\_LG03

Ca\_Kabuli\_LG04

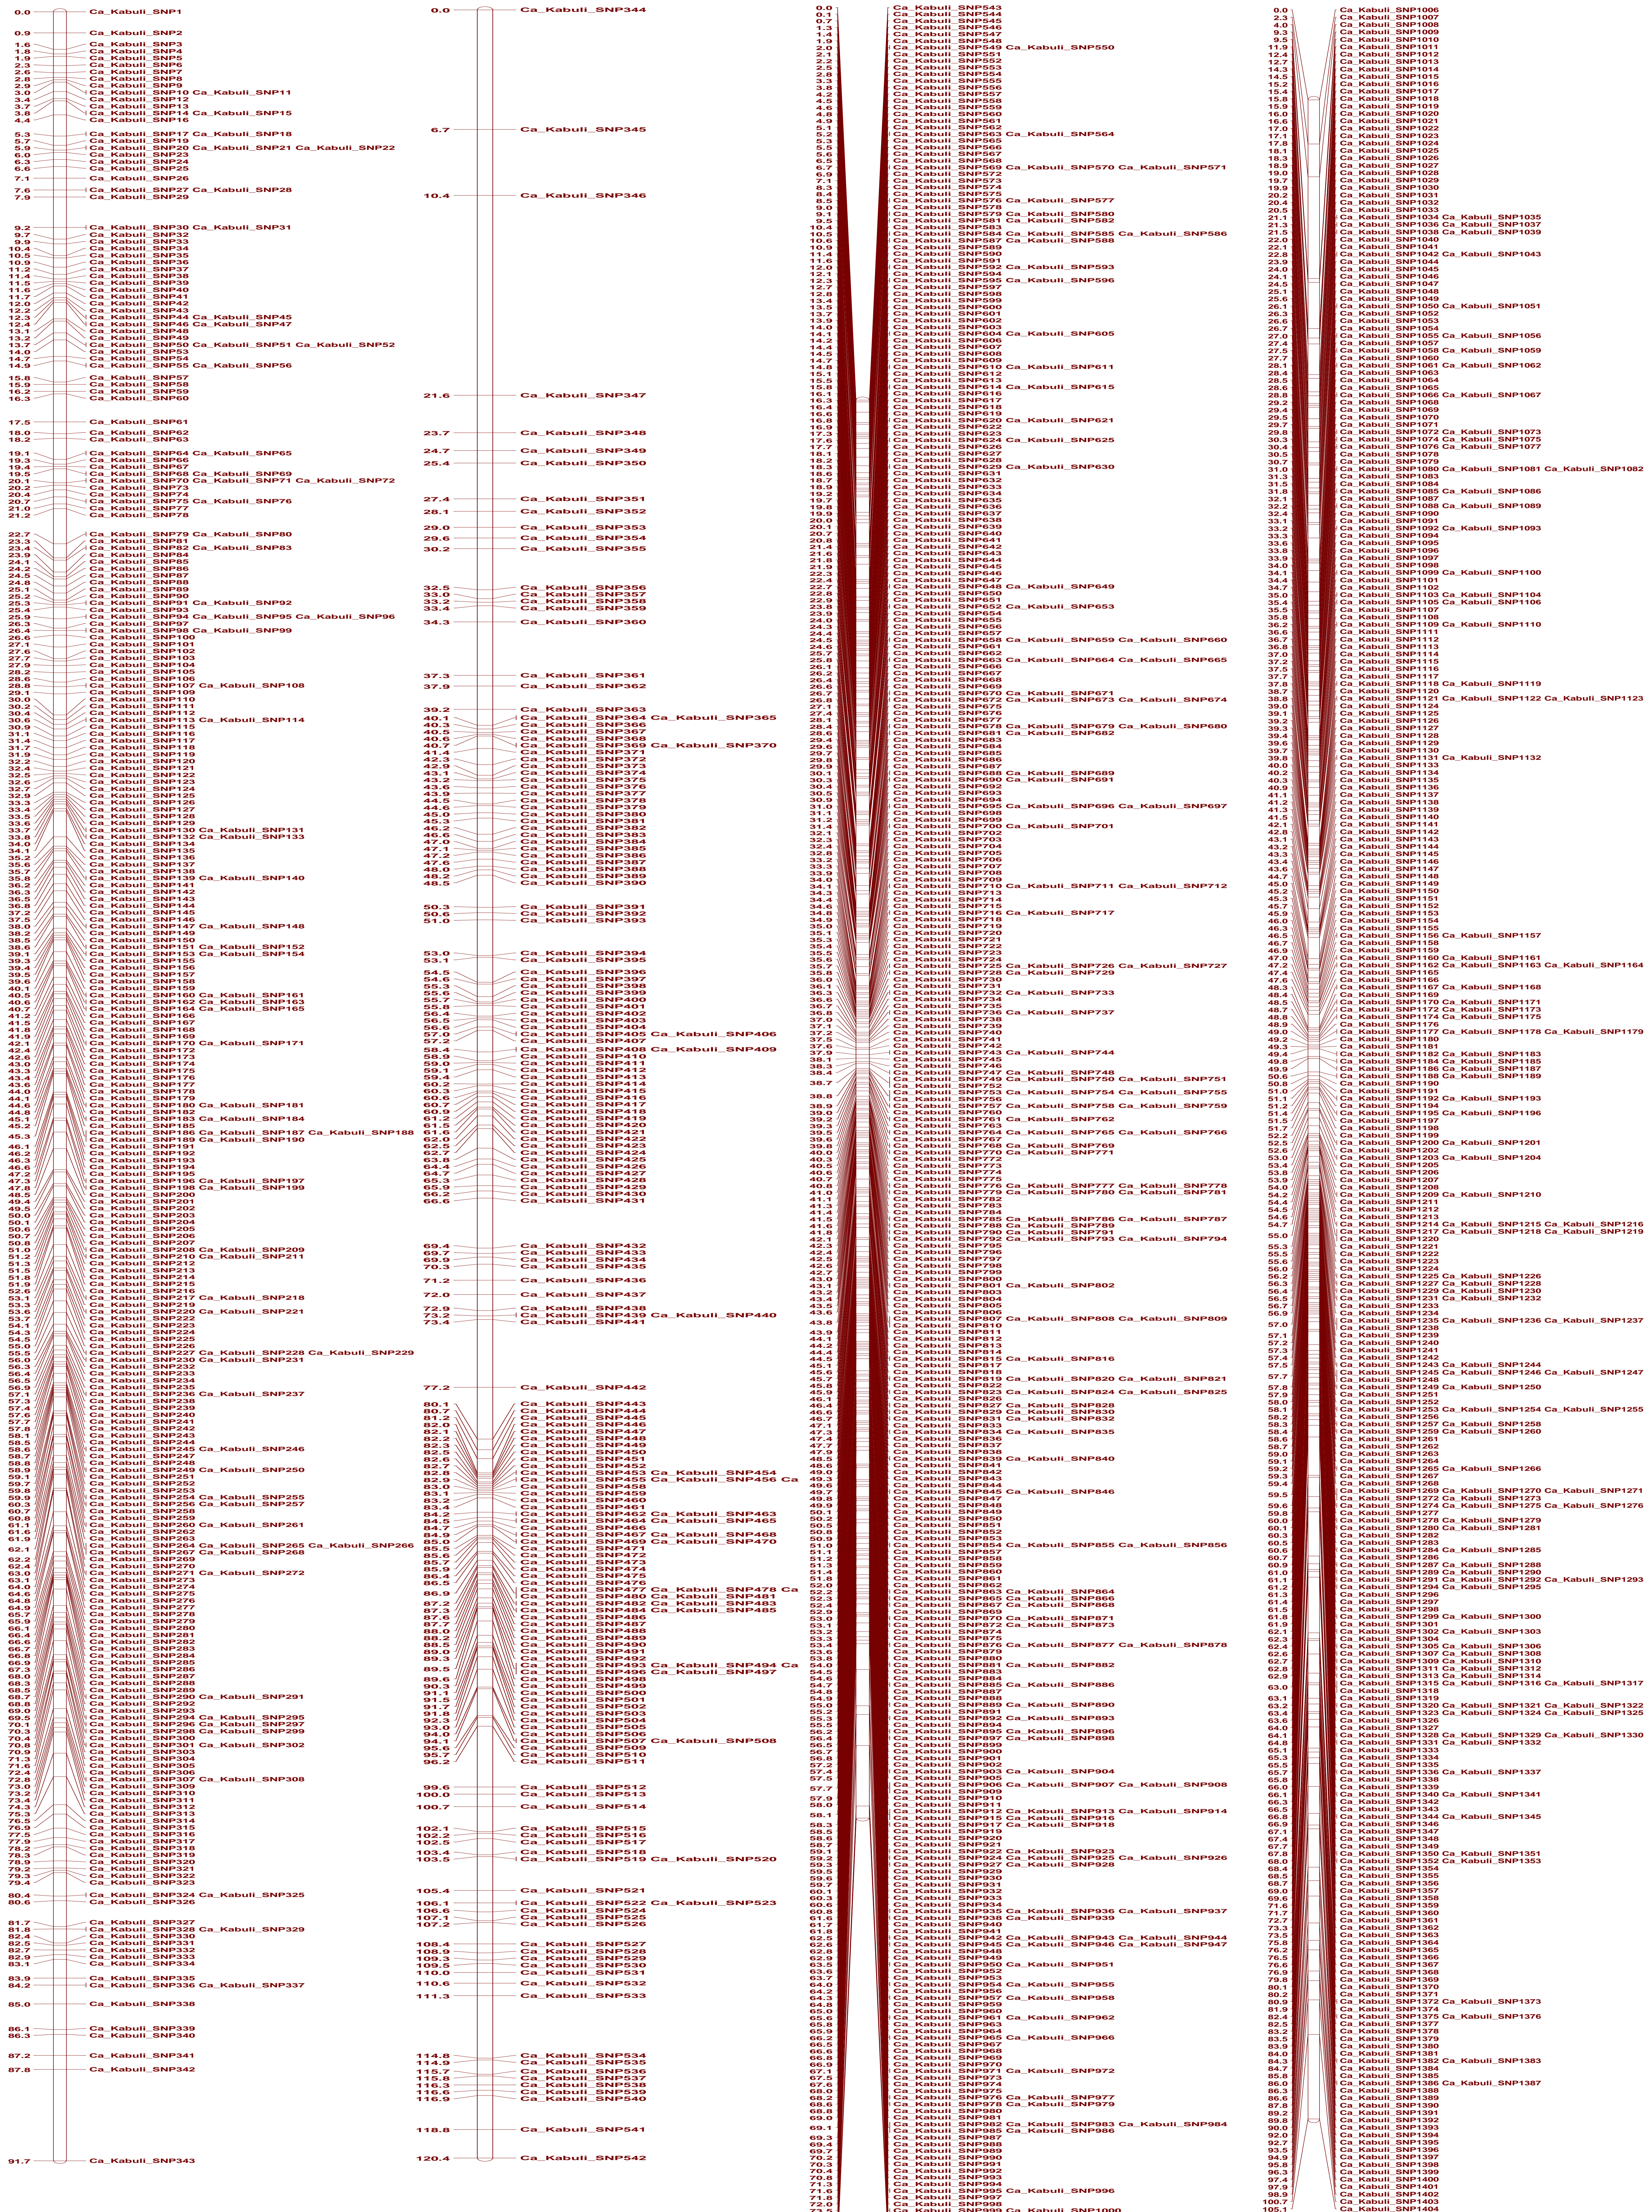

Figure S4 (Cont...)



Ca\_Kabuli\_LG05

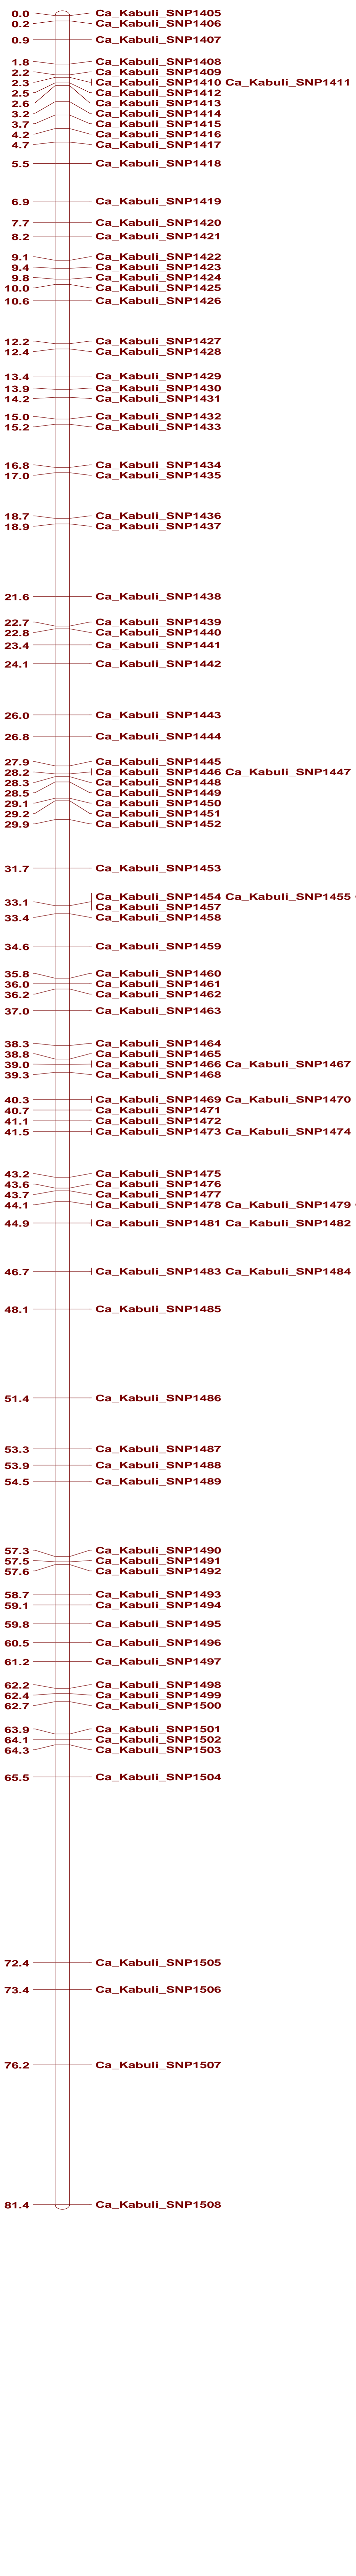

Ca\_Kabuli\_LG06

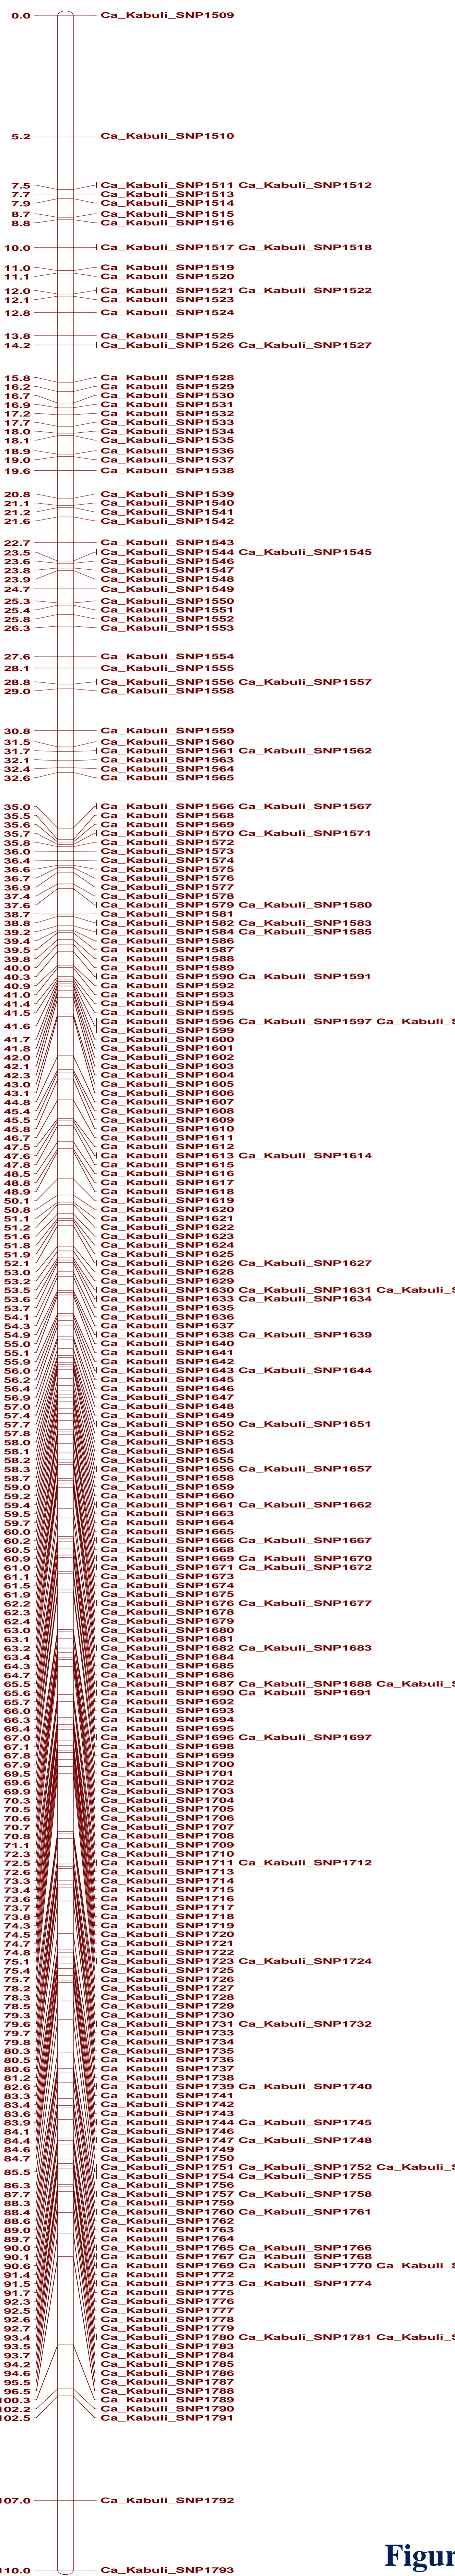

Ca\_Kabuli\_LG07

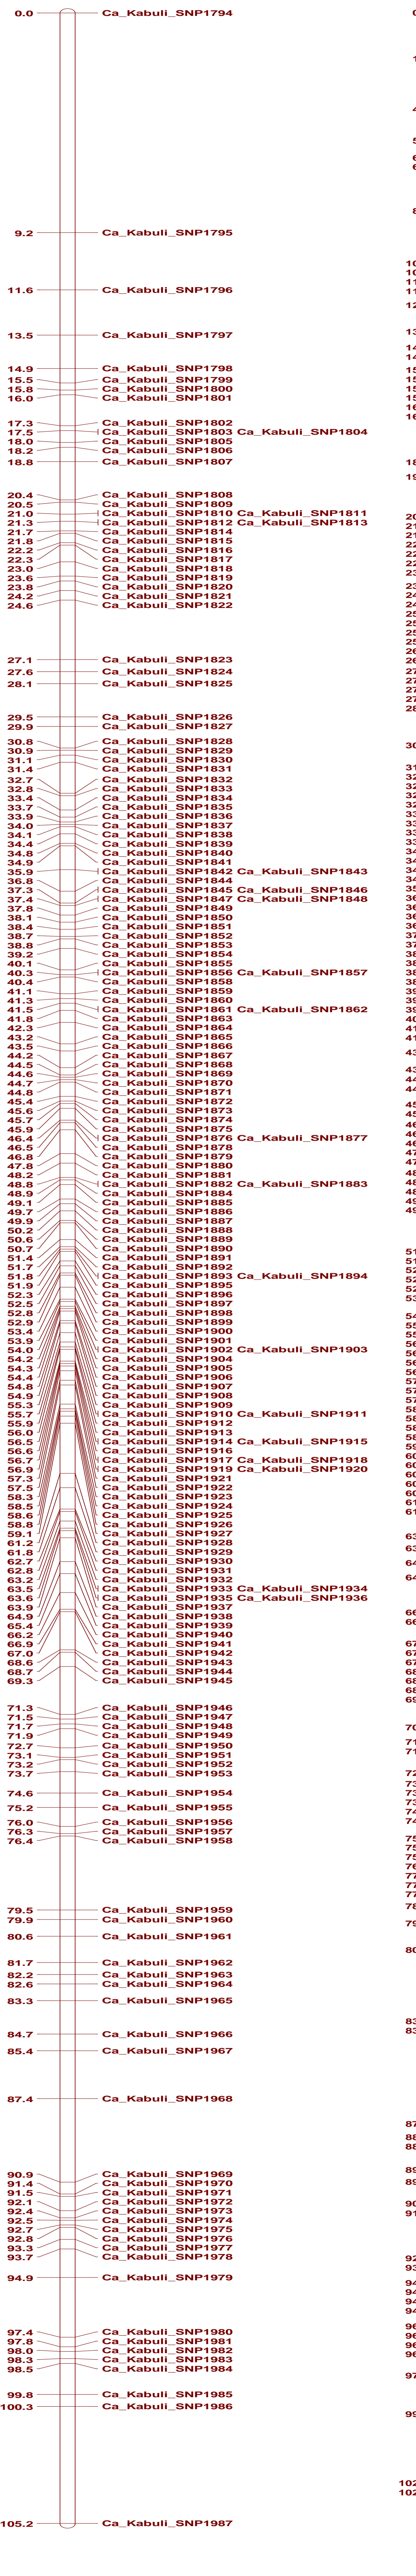

Ca\_Kabuli\_LG08

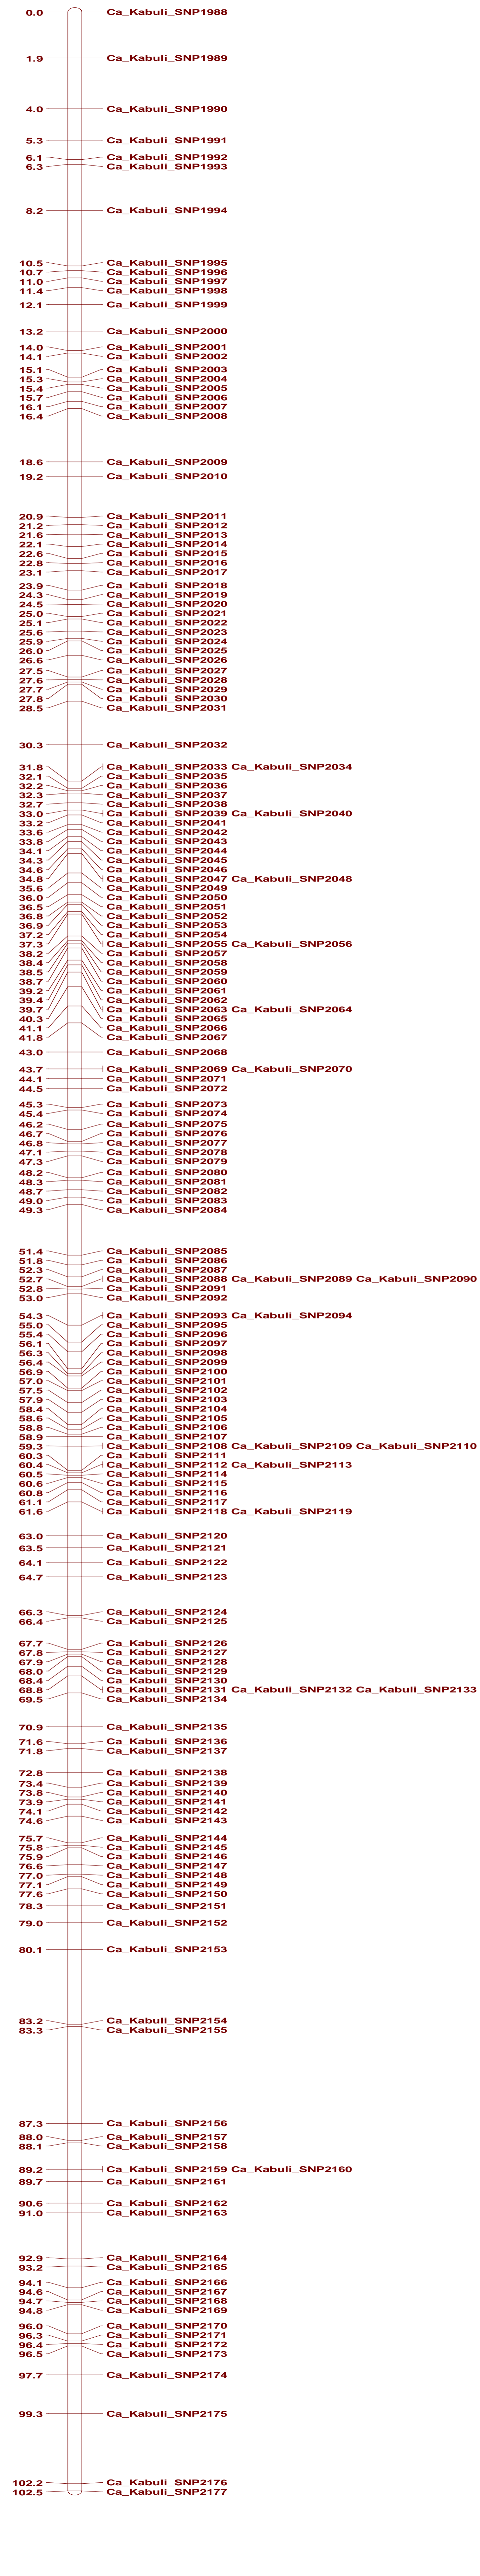

Figure S4

**Figure S4:** A 3625 SNP markers-based ultra-high density intra-specific genetic linkage map (ICC 12299 x ICC 8261) constructed using reference *kabuli* genome-based GBS assay. The genetic distance (cM) and identity of the SNP loci integrated on the eight LGs are indicated on the left and right side of each LGs, respectively. The identity of SNP loci mentioned on the right side of chromosomes that corresponds to the marker IDs as mentioned details in the Table S3 and S6.

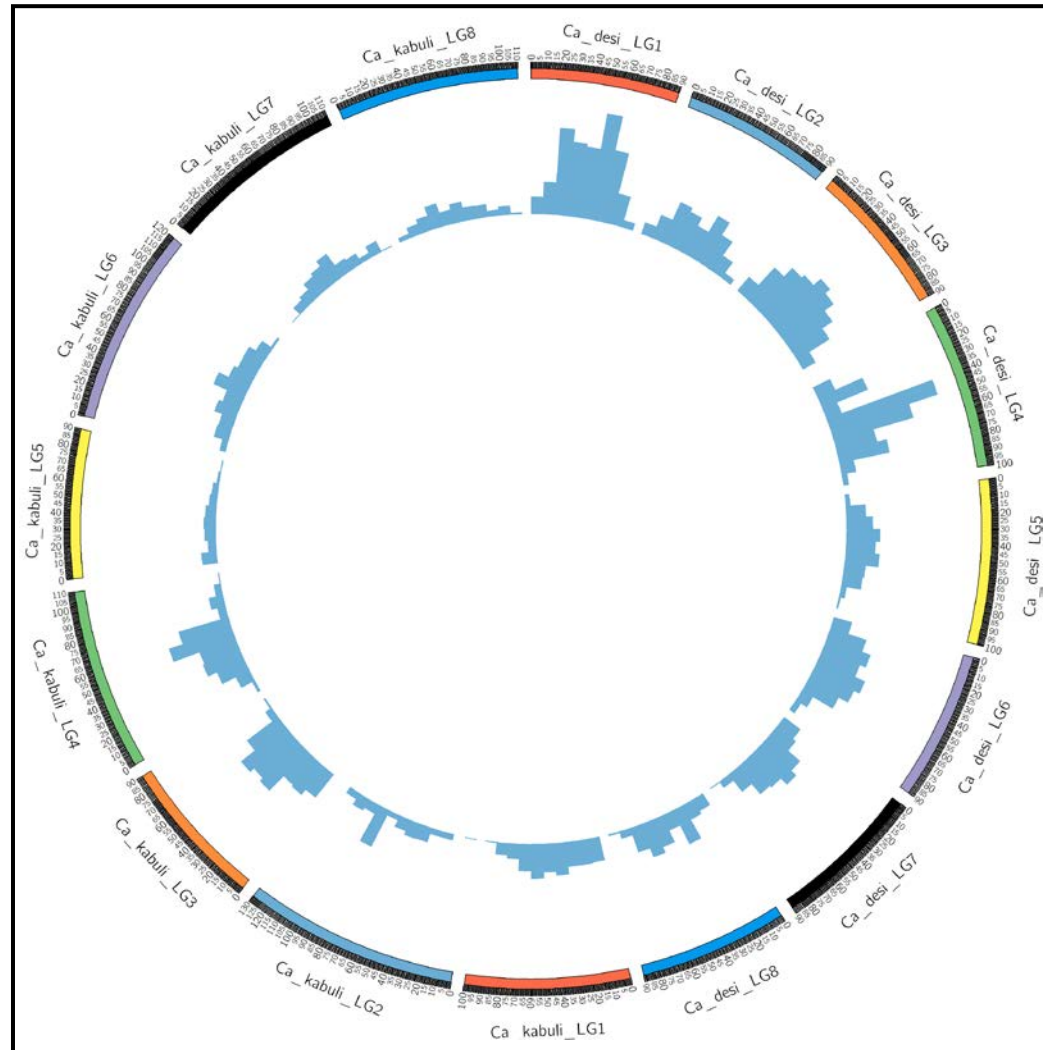

**Figure S5:** Distribution of 3625 and 2177 SNP markers mapped on eight *desi* and *kabuli* LGs of ultra-high density intra-specific genetic linkage maps (ICC 12299 x ICC 8261), respectively are depicted in the Circos circular ideogram. The innermost circles display the distribution of SNPs genetically mapped on eight LGs, while outermost circles represent the eight *desi* and *kabuli* chickpea LGs coded with different colours.

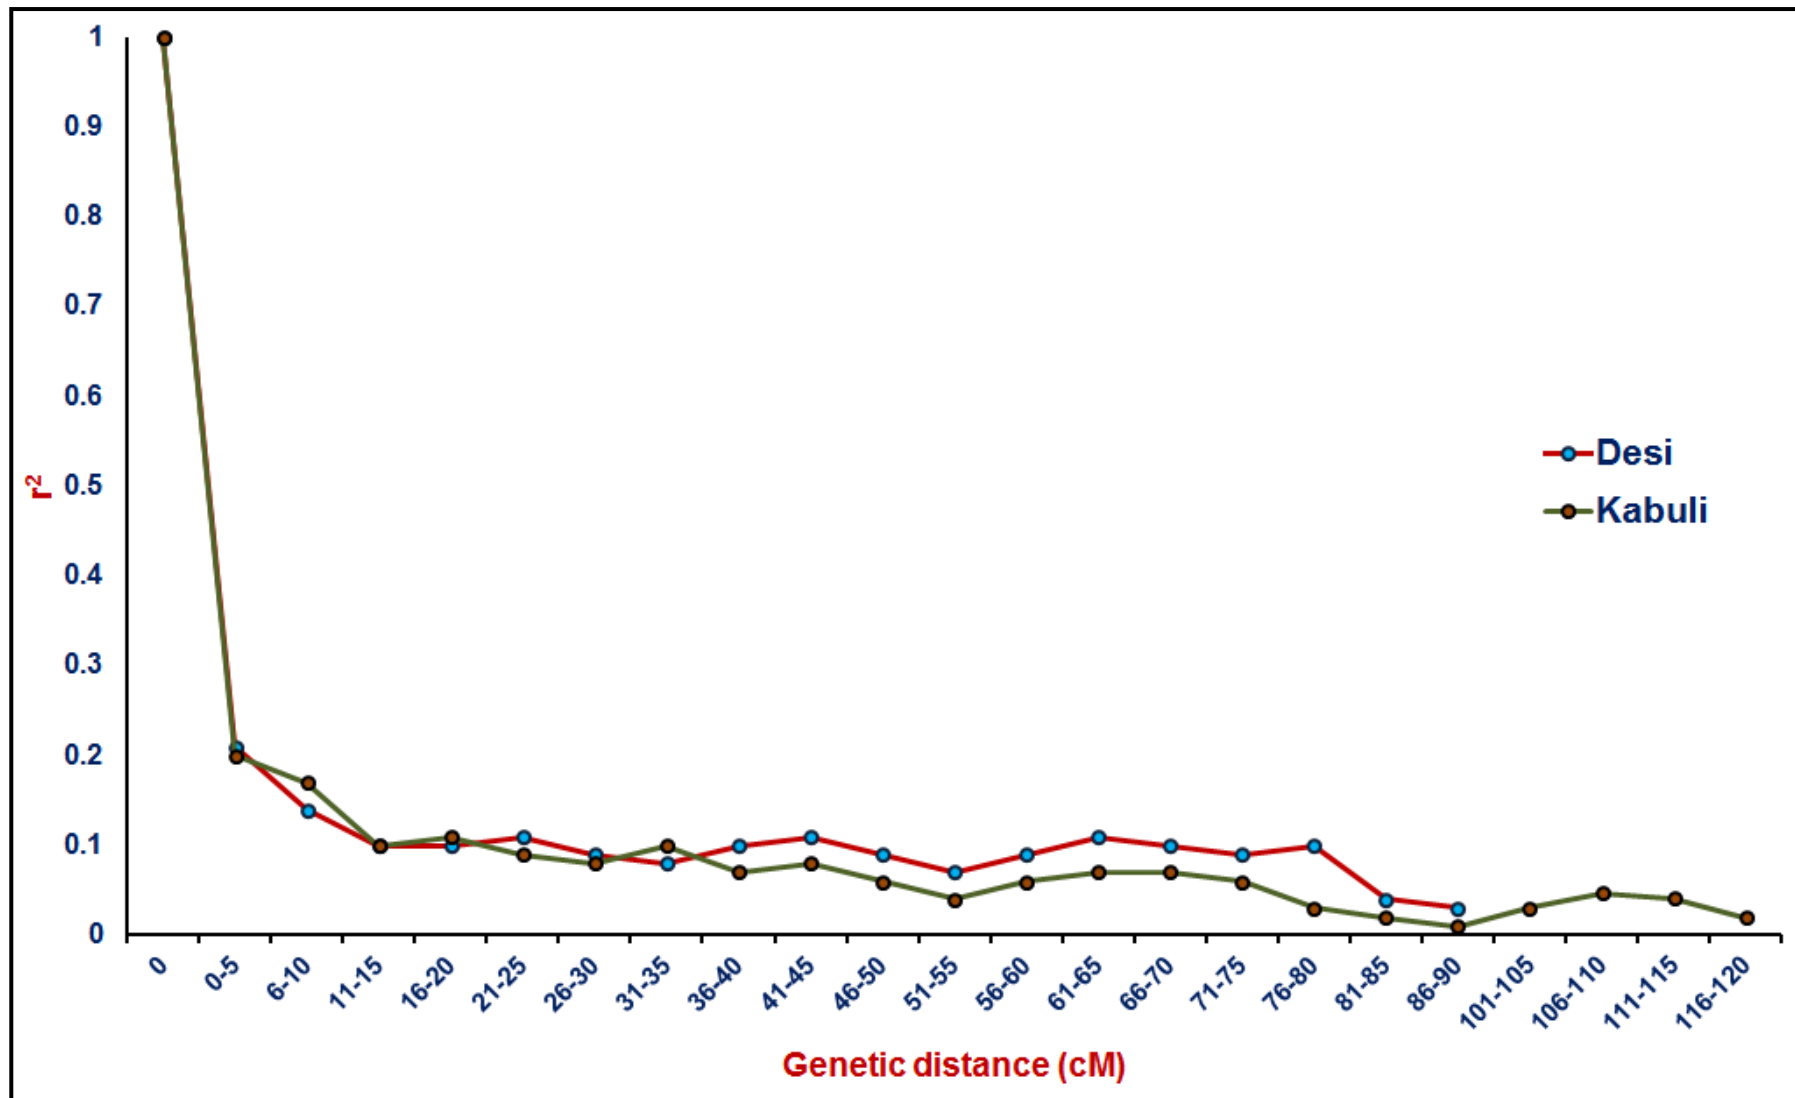

**Figure S6:** Genome-wide LD decay (mean  $r^2$ ) estimated using 3625 and 2689 SNPs that are mapped on eight *desi* and *kabuli* LGs of ultra-high density intra-specific genetic maps, respectively. For LD decay, the  $r^2$  value of the SNP marker genetic distance of 0 cM is considered 1. The plotted curved lines indicate the mean  $r^2$  values among markers spaced with uniform 5 cM physical intervals from 0 to 120 cM.

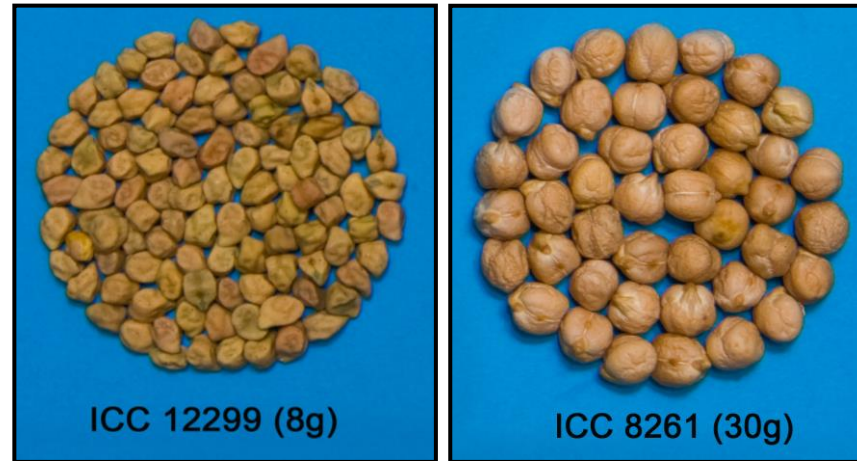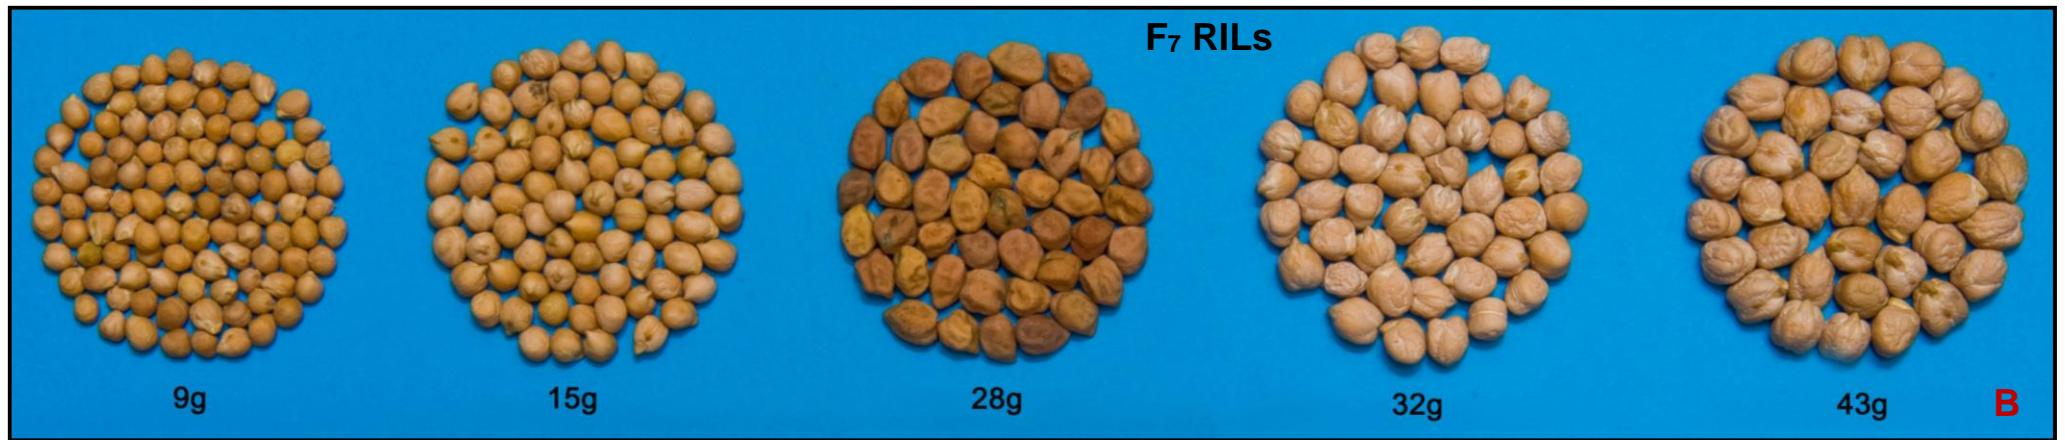

**Figure S7:** A snapshot depicting a wider phenotypic trait variation of 100-seed weight (9-43 g) among two parental genotypes (A) (ICC 12299 x ICC 8261) of an intra-specific RIL mapping population (ICC 12299 x ICC 8261) and five selected RIL mapping individuals (B).

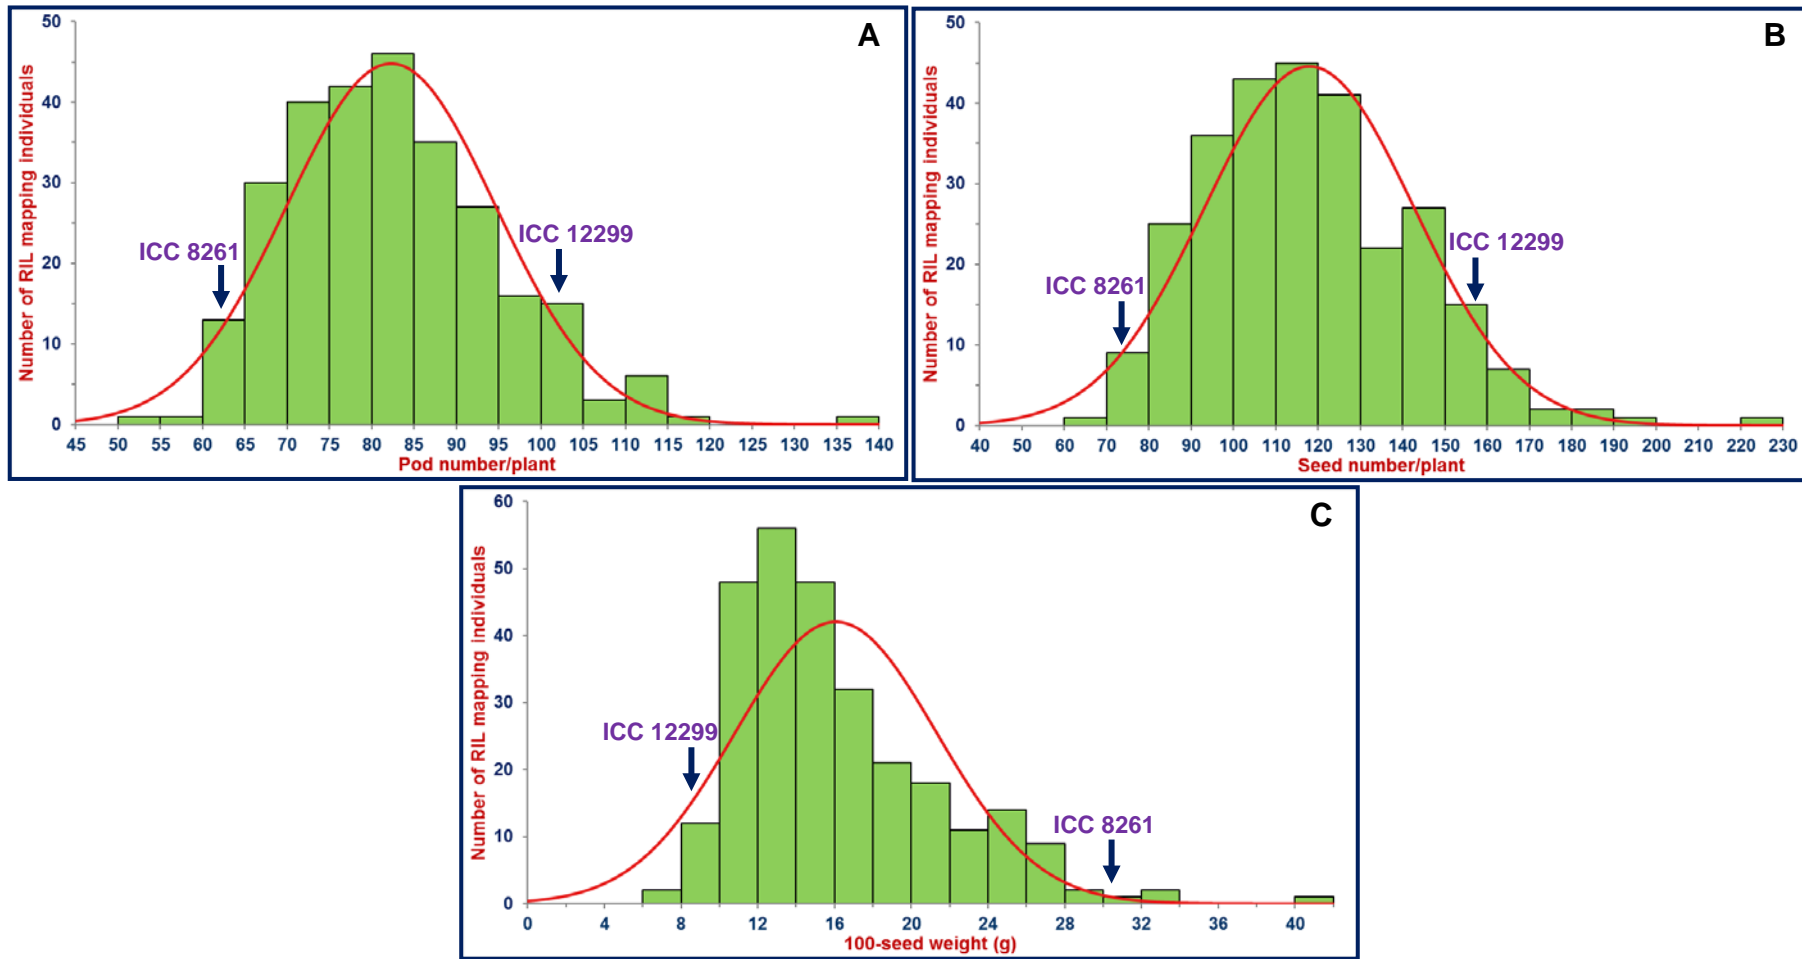

**Figure S8:** Frequency distribution of three quantitative agronomic traits, namely PN (A), SN (B) and SW (C) in 275 mapping individuals and parental genotypes of a  $F_7$  RIL population (ICC 12299 x ICC 8261) depicted bi-directional transgressive segregation including goodness of fit to the normal distribution.

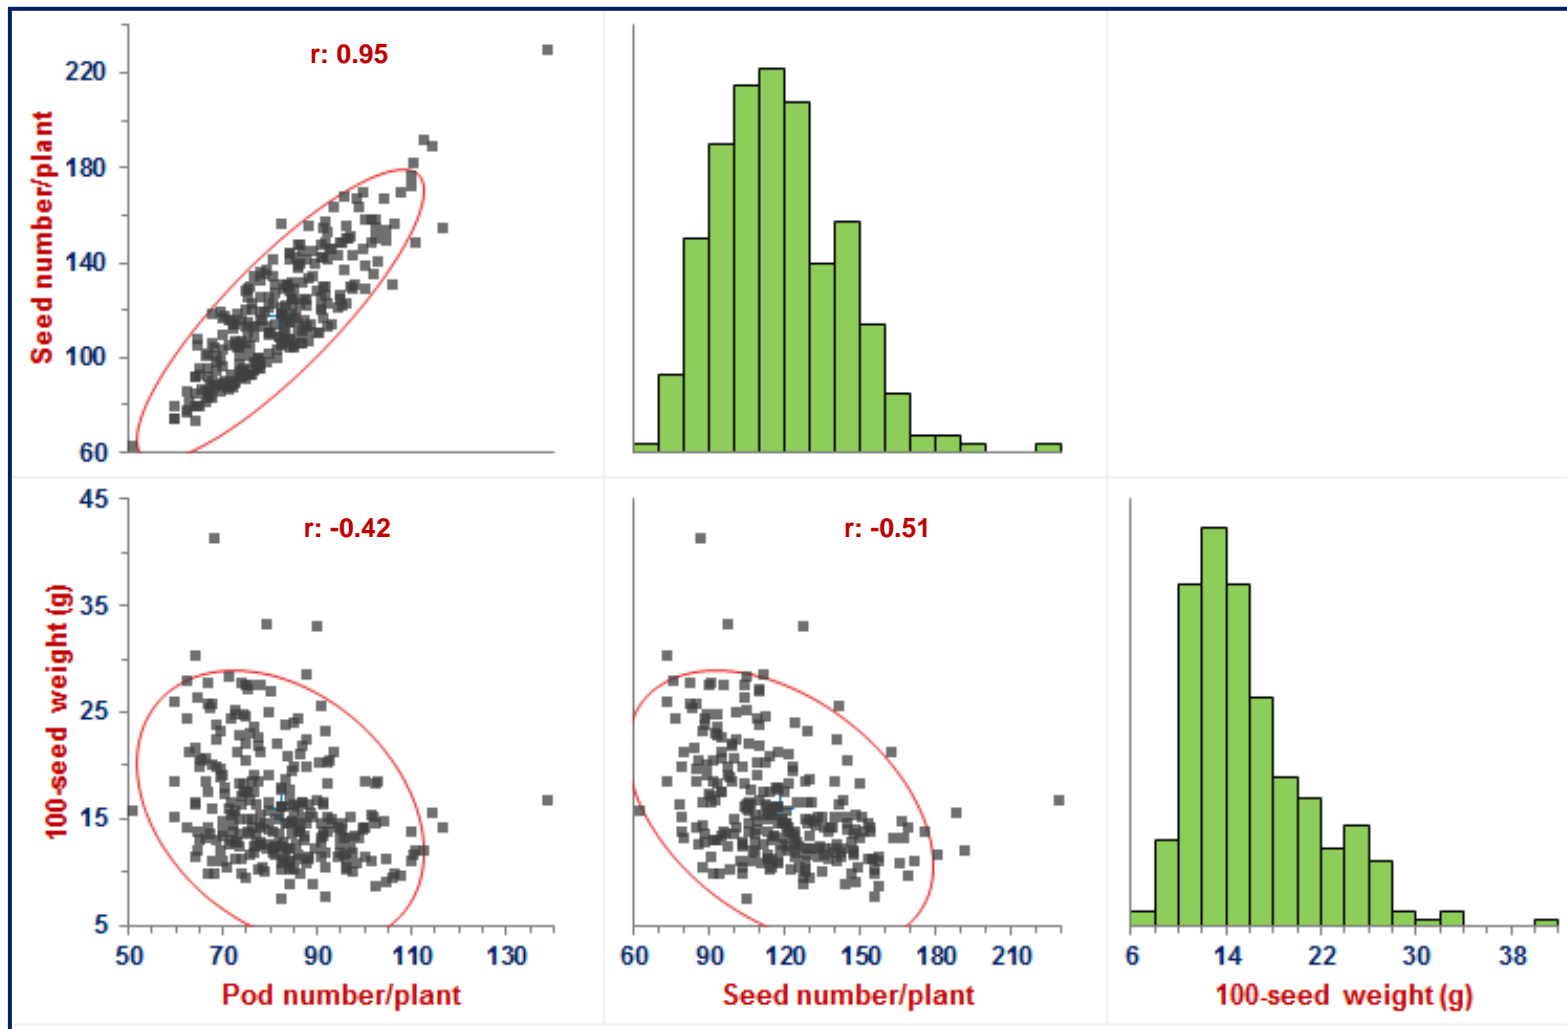

**Figure S9:** Pearson's correlation coefficients ( $r$ ) estimated among three quantitative agronomic traits (PN, SN and SW) in a RIL mapping population (ICC 12299 x ICC 8261).

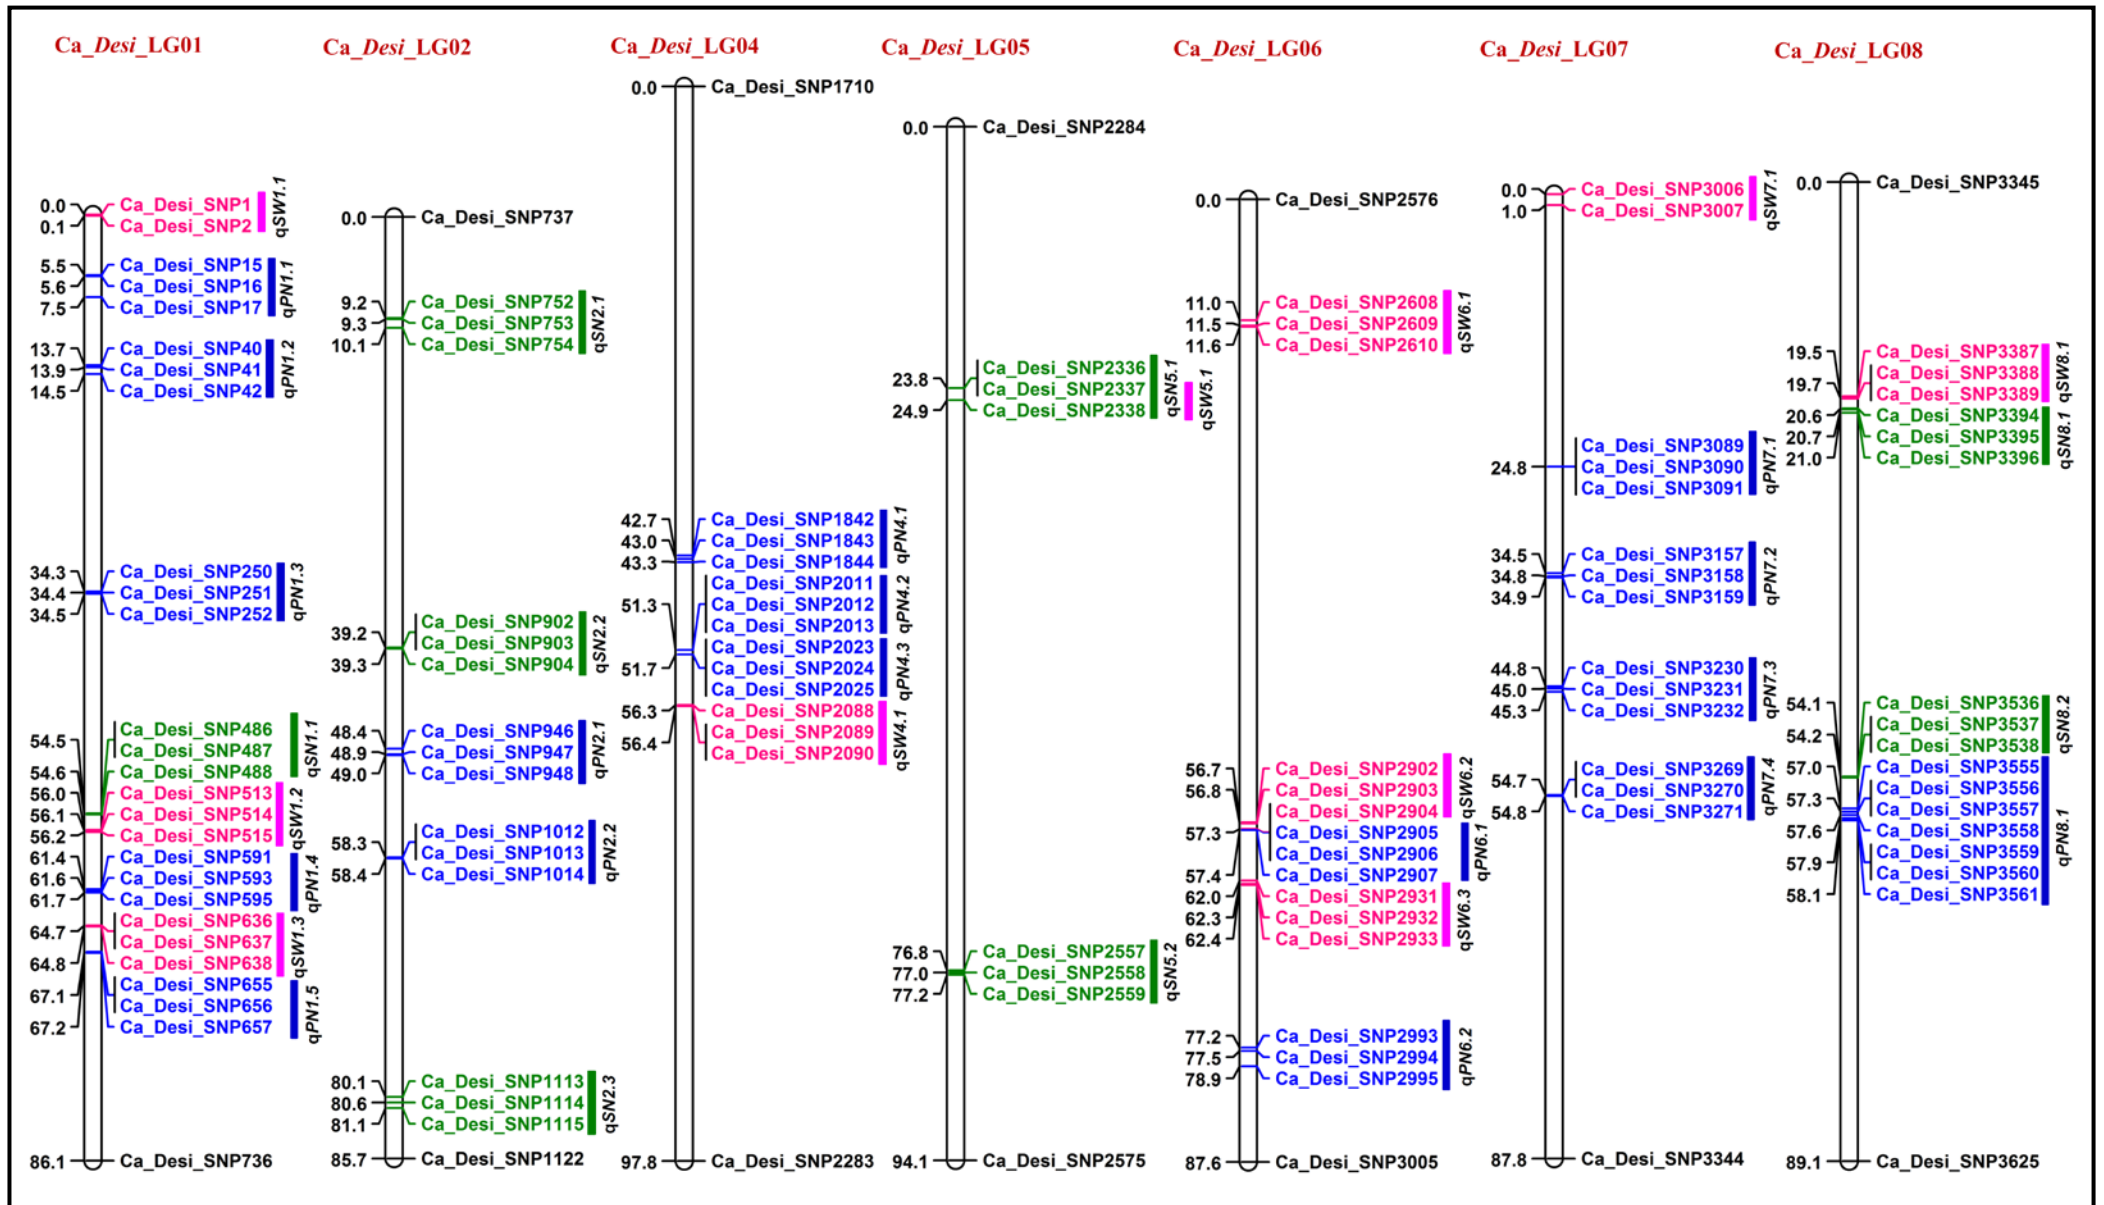

**Figure S10:** Thirty-three major genomic regions harbouring 35 significant robust QTLs (PVE 17.9-39.7%) associated with PN, SN and SW identified and mapped on seven *desi* LGs of an ultra-high density intra-specific genetic map (ICC 12299 x ICC 8261) with a significant LOD >5.0 ( $p < 0.05$ ). The genetic distance (cM) and identity of the SNP loci integrated on the LGs are indicated on the left and right side of the LGs, respectively. Blue, green and pink lines represent the robust QTLs governing PN, SN and SW mapped on seven LGs and validated across geographical locations as well as years/seasons in field.



### Pod number/plant (PN)

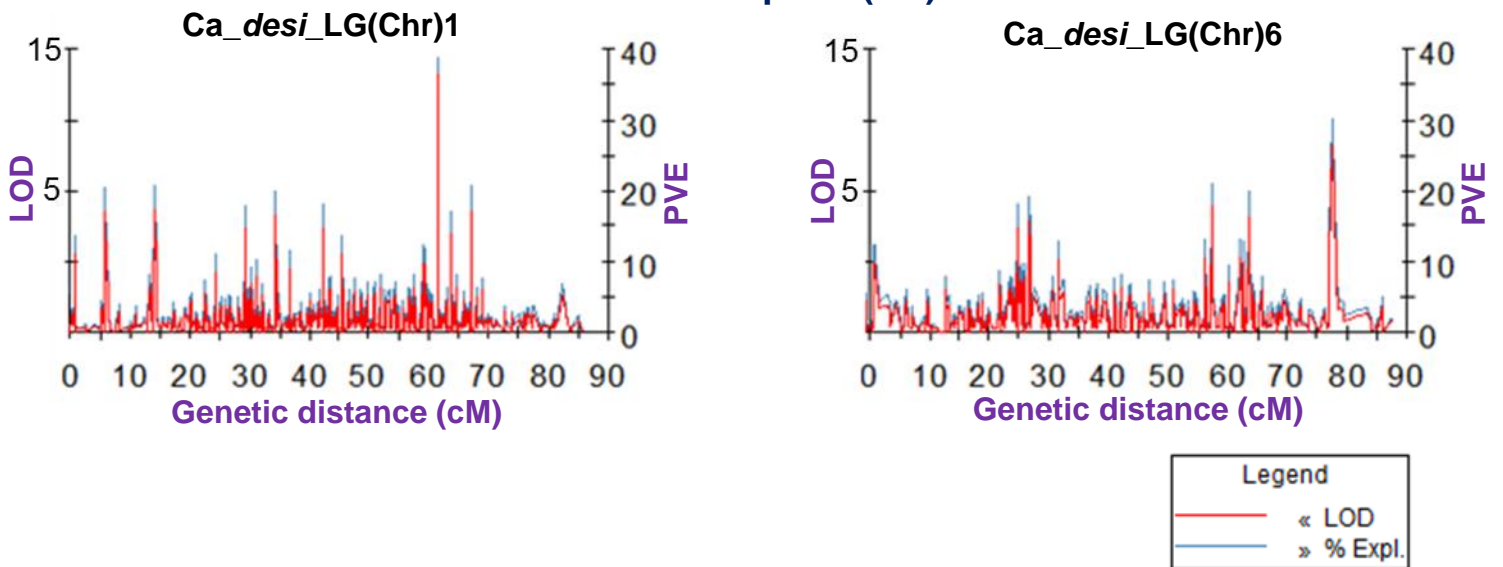

### Seed number/plant (SN)

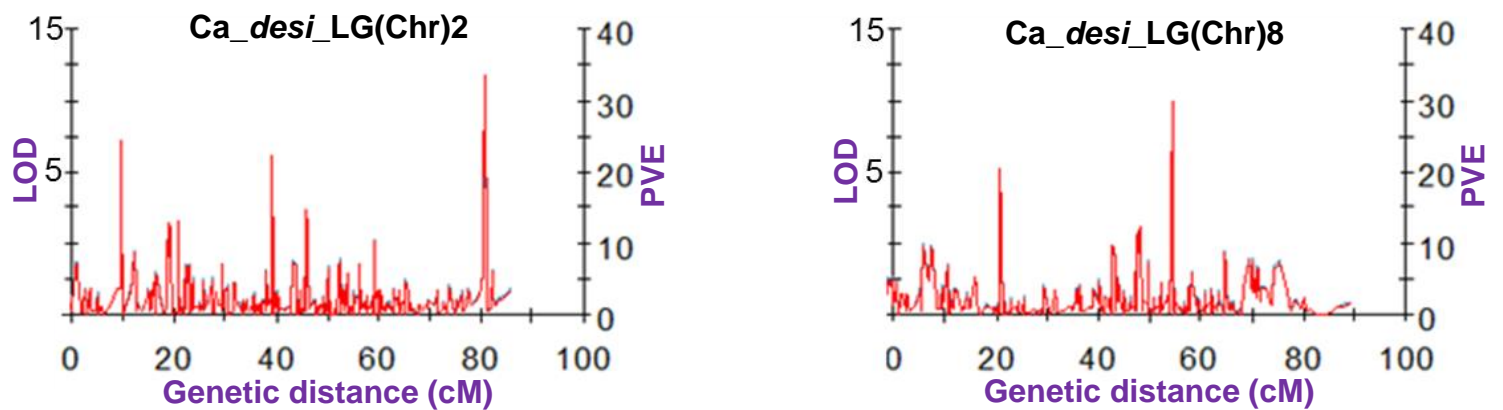

### 100-seed weight (SW)

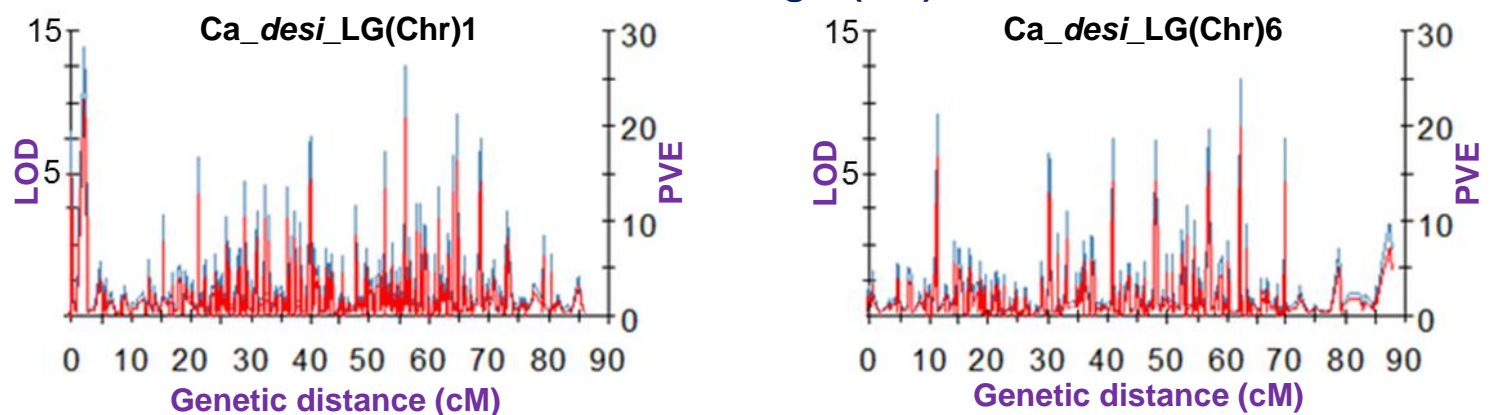

**Figure S11:** A representative figure depicting the PVE and peak LOD scores of SNP markers at major genomic regions harbouring the robust PN, SN and SW QTLs that were identified and mapped on *desi* LGs of an ultra-high density intra-specific genetic linkage map (ICC 12299 x ICC 8261). The x-axis indicates the genetic distance (cM) among SNP loci mapped at significant QTL regions of a linkage map, while y-axis shows the LOD and PVE estimates of SNPs covering the target QTL interval.

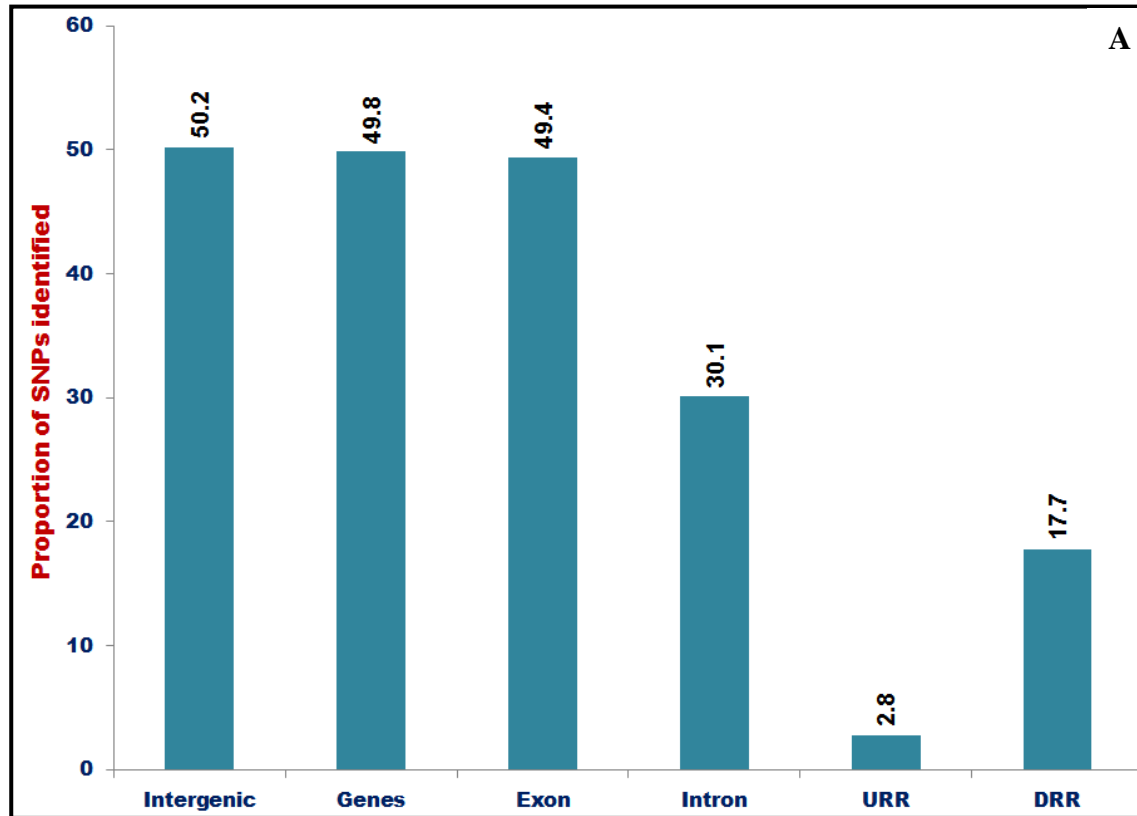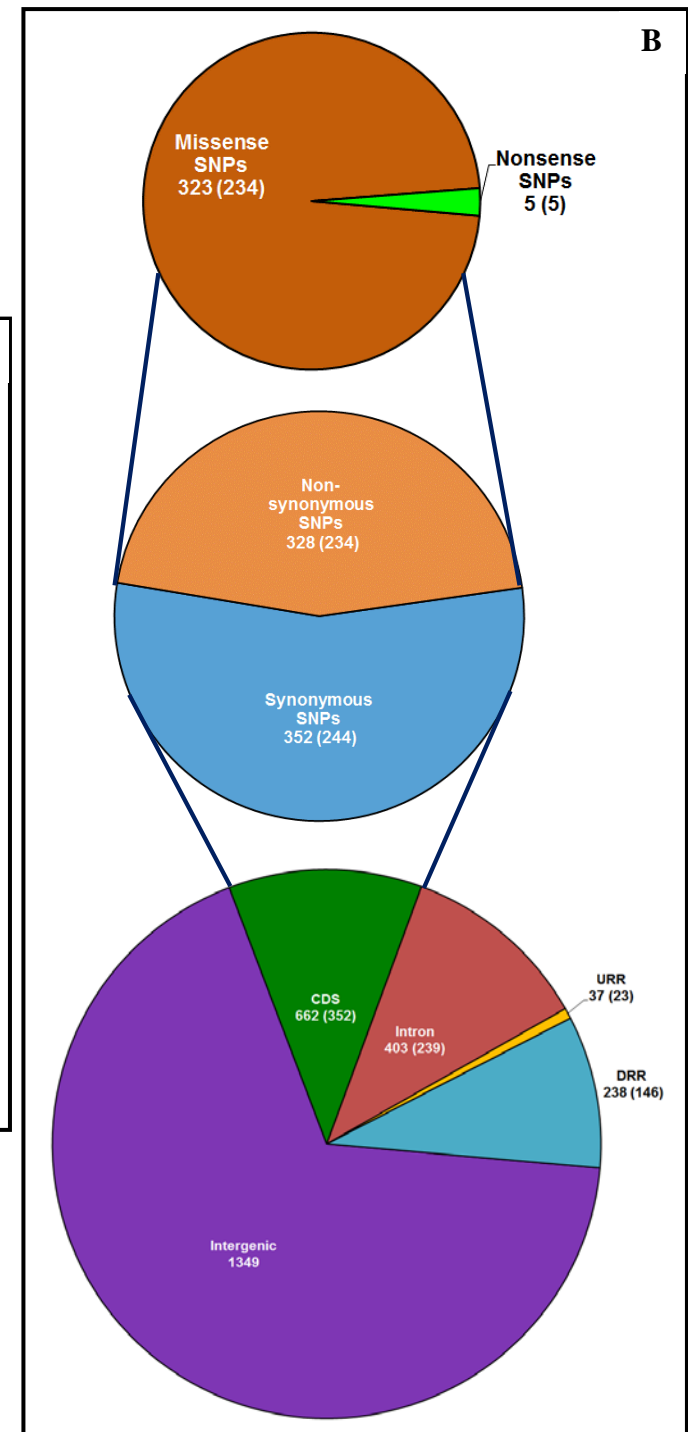

**Figure S12:** (A) Proportionate distribution of 2177 SNPs identified in different coding and non-coding sequence components and intergenic regions of 760 genes annotated from *kabuli* chickpea genome. (B) Number of SNPs, including synonymous and non-synonymous (missense and nonsense) SNPs annotated in the coding (CDS) as well as non-coding (intronic and regulatory) sequences of genes and intergenic regions of *kabuli* chickpea genome. The URR (upstream regulatory region) and DRR (downstream regulatory region) of genes were defined as 2000-bp upstream sequences from the translation start codon (ATG) and 1000-bp downstream sequences from the stop codon, respectively.

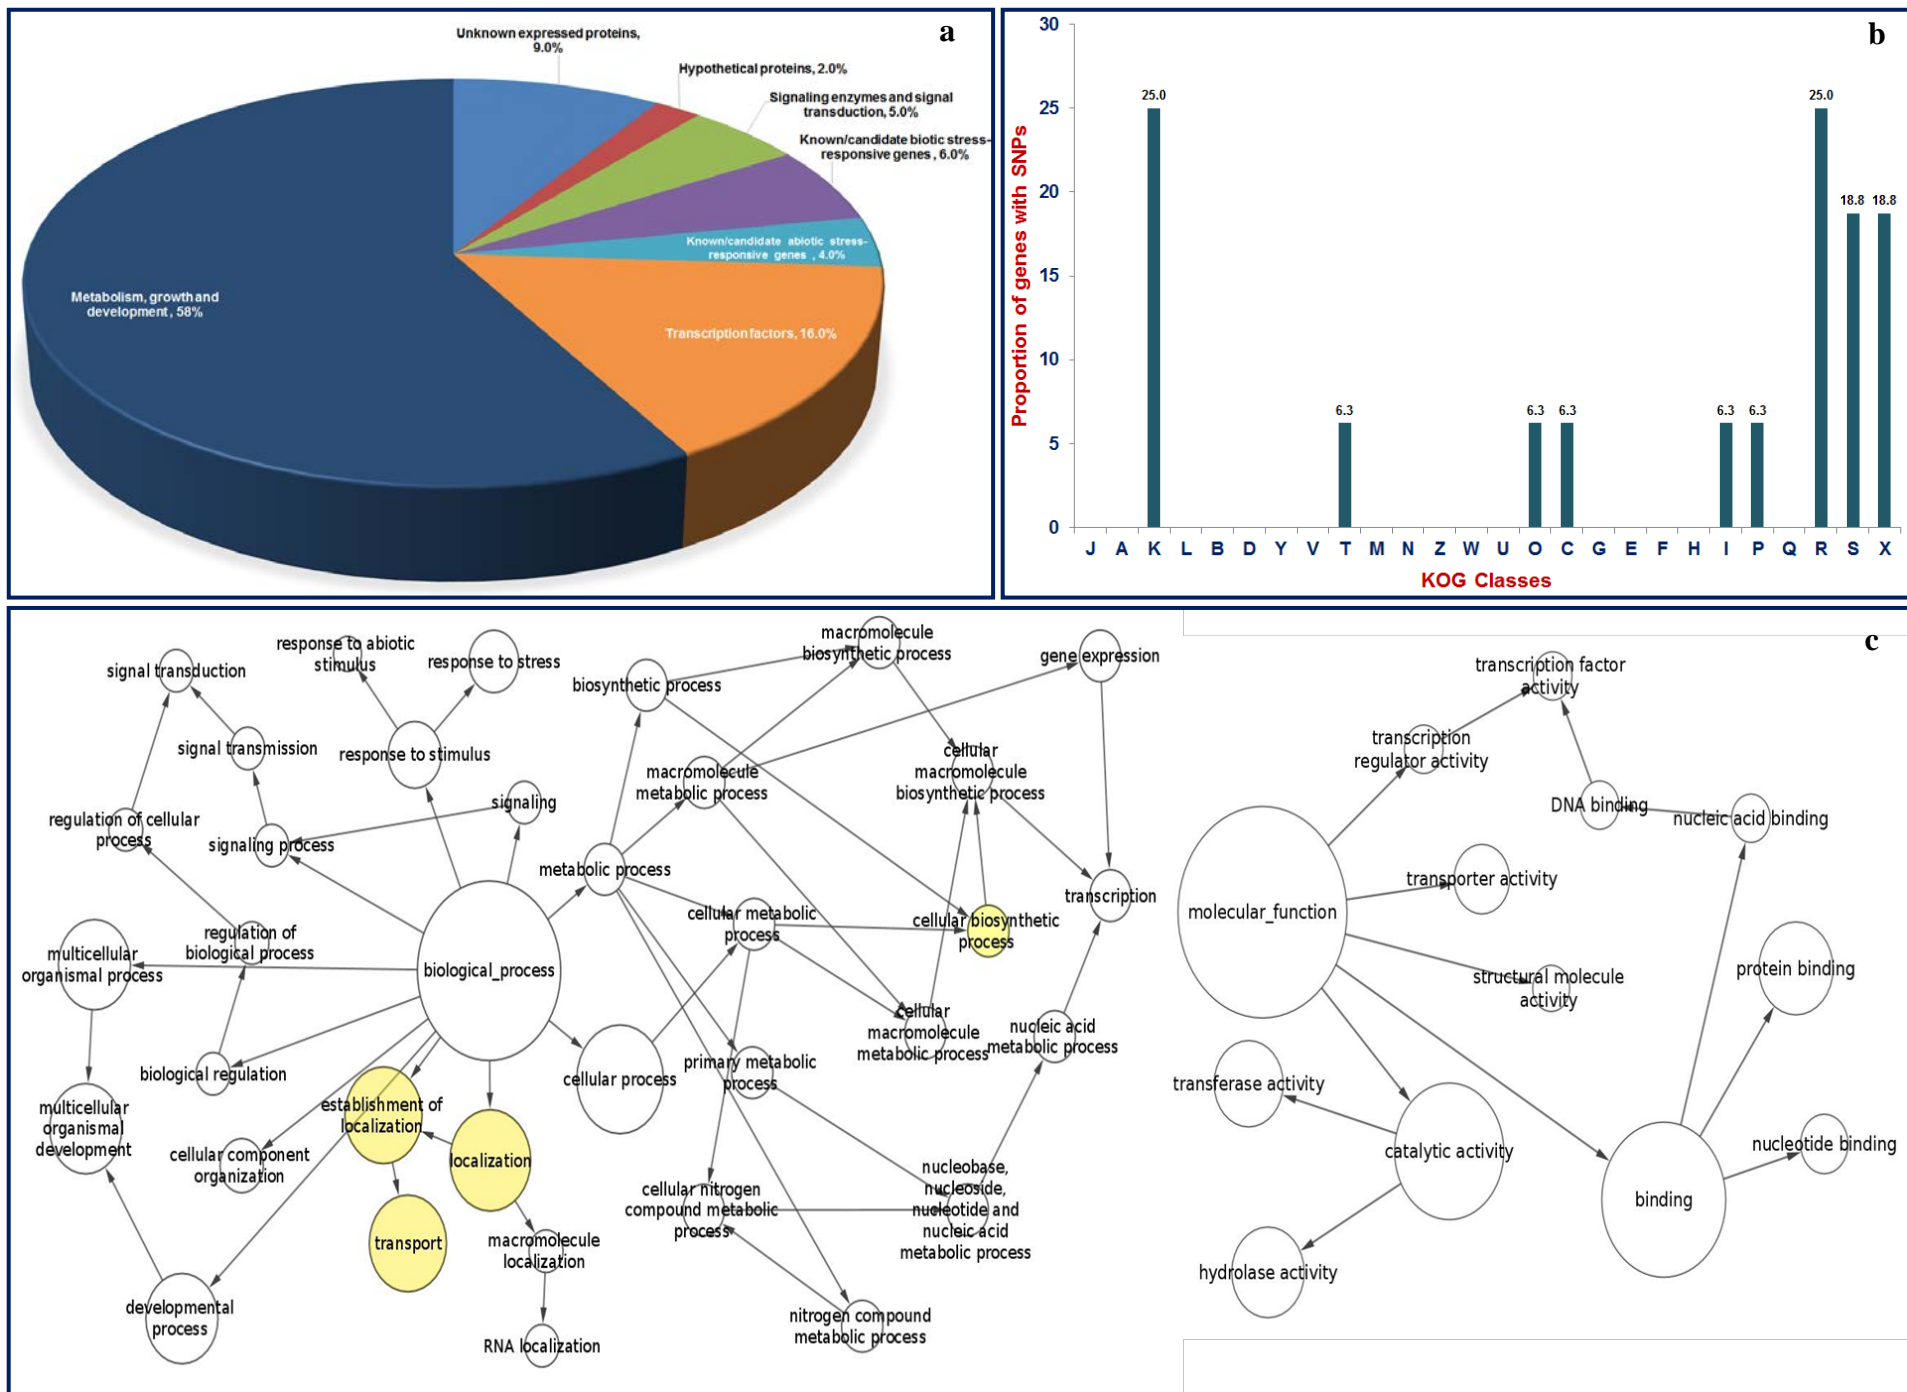

**Figure S13:** (a) Functional annotation of SNP-containing 635 *desi* chickpea genes. (b) KOG-based putative function determination of *desi* genes identified with SNPs. The diverse KOG classes are defined as K: Transcription, T: Signal transduction mechanisms, O: Post-translational modification, protein turnover and chaperones, C: Energy production and conversion, I: Lipid transport and metabolism, P: Inorganic ion transport and metabolism, R: General function prediction only, S: Function unknown and X: Unnamed proteins. (c) Gene ontology (GO) enrichment analysis of the SNPs-carrying *desi* genes. The number of genes in each category is directly proportional to the node size. The nodes were colour shaded (white and yellow) according to the significance level (P value < 0.05).

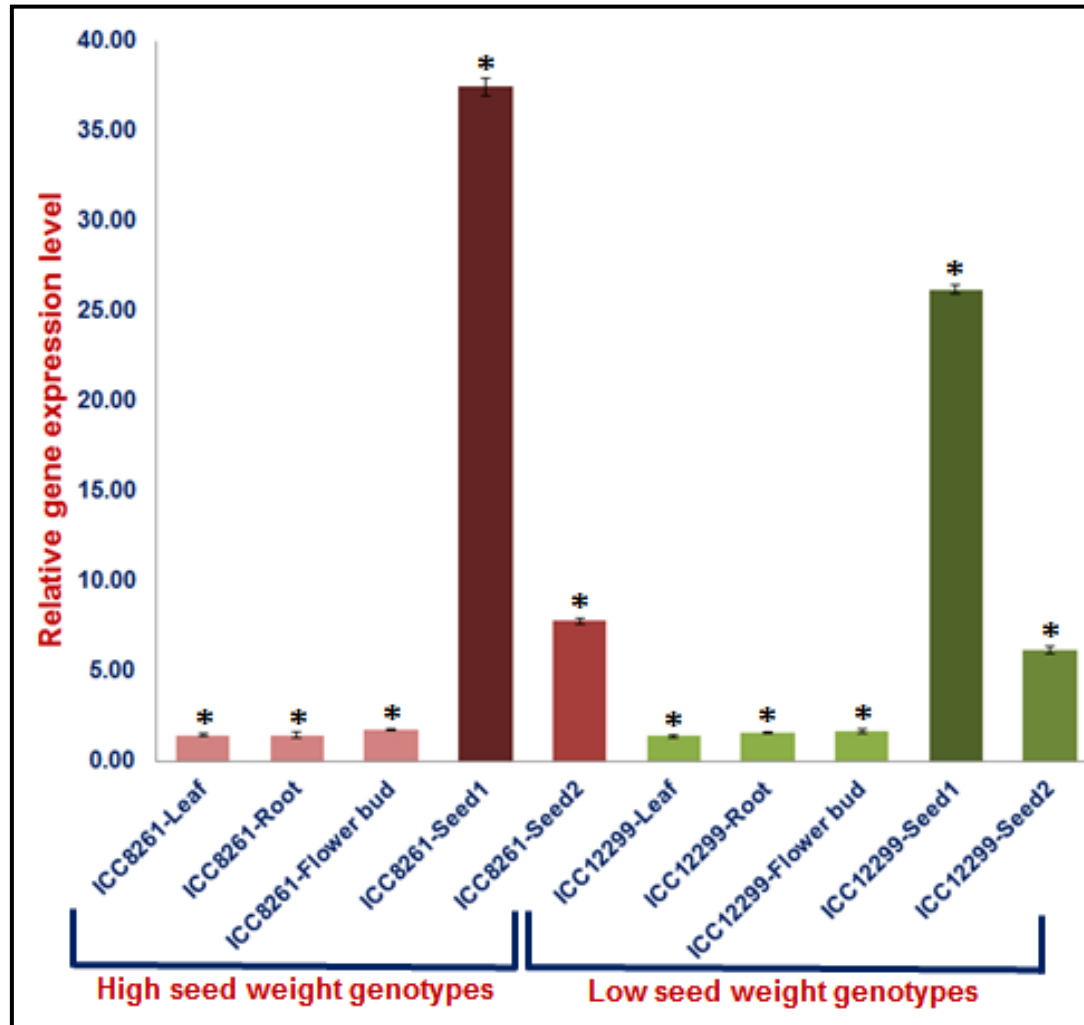

**Figure S14:** Differential expression profiling of a strong SW-associated embryo defective gene in three different vegetative (leaf and root) and reproductive (flower bud) tissues, as well as seed developmental stages of high (ICC 8261) and low (ICC 12299) seed weight parental genotypes of a RIL mapping population (ICC 12299 x ICC 8261) using quantitative RT-PCR assay. The *elongation factor-1 alpha* gene was used as the internal control in the RT-PCR. The bars indicate the standard error. \*Significance at  $p \leq 0.001$ .

**Table S1:** Genomic distribution of SNPs physically mapped on eight *desi* and *kabuli* chickpea chromosomes

| Chromosomes  | Size (Mb) of chromosomes (pseudomolecules) |               | Number (%) of SNPs mapped |               | Average map density (kb) |               |
|--------------|--------------------------------------------|---------------|---------------------------|---------------|--------------------------|---------------|
|              | <i>Desi</i>                                | <i>Kabuli</i> | <i>Desi</i>               | <i>Kabuli</i> | <i>Desi</i>              | <i>Kabuli</i> |
| Ca_Chr01     | 14.79                                      | 48.36         | 893 (11.2)                | 1944 (13.5)   | 16.6                     | 24.9          |
| Ca_Chr02     | 17.30                                      | 36.63         | 949 (11.9)                | 1088 (7.6)    | 18.2                     | 33.7          |
| Ca_Chr03     | 23.38                                      | 39.99         | 1548 (19.4)               | 1787 (12.4)   | 15.1                     | 22.4          |
| Ca_Chr04     | 22.09                                      | 49.19         | 1468 (18.4)               | 2854 (19.9)   | 15.0                     | 17.2          |
| Ca_Chr05     | 16.30                                      | 48.17         | 949 (11.9)                | 1735 (12.1)   | 17.2                     | 27.8          |
| Ca_Chr06     | 11.48                                      | 59.46         | 792 (9.9)                 | 2229 (15.5)   | 14.5                     | 26.7          |
| Ca_Chr07     | 8.46                                       | 48.96         | 610 (7.7)                 | 1931 (13.4)   | 13.9                     | 25.4          |
| Ca_Chr08     | 10.57                                      | 16.48         | 759 (9.5)                 | 795 (5.5)     | 13.9                     | 20.7          |
| <b>Total</b> | <b>124.37</b>                              | <b>347.24</b> | <b>7968</b>               | <b>14363</b>  | <b>15.6</b>              | <b>24.2</b>   |

Ca\_Chr: *Cicer arietinum* Chromosome

**Table S2: 43358 SNPs identified using reference *desi* and *kabuli* genome-based GBS assay showing differentiation between the parental genotypes (ICC 12299 and ICC 8261) of a RIL mapping population (ICC 12299 x ICC 8261)**

| <b>SNP IDs</b>               | <b>Chromosomes</b> | <b>Physical positions (bp)</b> | <b>SNPs</b> | <b>NCBI SNPdb accession IDs (NCBI_ss#)</b> |
|------------------------------|--------------------|--------------------------------|-------------|--------------------------------------------|
| Ca_Kabuli_NC_021160.1_548    | Ca_kabuli_chr01    | 548                            | [G/C]       | 1067289484                                 |
| Ca_Kabuli_NC_021160.1_578    | Ca_kabuli_chr01    | 578                            | [G/A]       | 1067289485                                 |
| Ca_Kabuli_NC_021160.1_579    | Ca_kabuli_chr01    | 579                            | [C/T]       | 1067289486                                 |
| Ca_Kabuli_NC_021160.1_586    | Ca_kabuli_chr01    | 586                            | [G/C]       | 1067289487                                 |
| Ca_Kabuli_NC_021160.1_824    | Ca_kabuli_chr01    | 824                            | [A/G]       | 1067289488                                 |
| Ca_Kabuli_NC_021160.1_66934  | Ca_kabuli_chr01    | 66934                          | [A/G]       | 1067289489                                 |
| Ca_Kabuli_NC_021160.1_66944  | Ca_kabuli_chr01    | 66944                          | [T/C]       | 1067289490                                 |
| Ca_Kabuli_NC_021160.1_128752 | Ca_kabuli_chr01    | 128752                         | [A/G]       | 1067289491                                 |
| Ca_Kabuli_NC_021160.1_128768 | Ca_kabuli_chr01    | 128768                         | [T/C]       | 1067289492                                 |
| Ca_Kabuli_NC_021160.1_175476 | Ca_kabuli_chr01    | 175476                         | [T/G]       | 1067289493                                 |
| Ca_Kabuli_NC_021160.1_175489 | Ca_kabuli_chr01    | 175489                         | [A/T]       | 1067289494                                 |
| Ca_Kabuli_NC_021160.1_175529 | Ca_kabuli_chr01    | 175529                         | [T/C]       | 1067289495                                 |
| Ca_Kabuli_NC_021160.1_175544 | Ca_kabuli_chr01    | 175544                         | [T/A]       | 1067289496                                 |
| Ca_Kabuli_NC_021160.1_177441 | Ca_kabuli_chr01    | 177441                         | [A/G]       | 1067289497                                 |
| Ca_Kabuli_NC_021160.1_177449 | Ca_kabuli_chr01    | 177449                         | [T/A]       | 1067289498                                 |
| Ca_Kabuli_NC_021160.1_177513 | Ca_kabuli_chr01    | 177513                         | [A/C]       | 1067289499                                 |
| Ca_Kabuli_NC_021160.1_208931 | Ca_kabuli_chr01    | 208931                         | [T/G]       | 1067289500                                 |
| Ca_Kabuli_NC_021160.1_208998 | Ca_kabuli_chr01    | 208998                         | [A/C]       | 1067289501                                 |
| Ca_Kabuli_NC_021160.1_215042 | Ca_kabuli_chr01    | 215042                         | [C/T]       | 1067289502                                 |
| Ca_Kabuli_NC_021160.1_215048 | Ca_kabuli_chr01    | 215048                         | [C/T]       | 1067289503                                 |
| Ca_Kabuli_NC_021160.1_215053 | Ca_kabuli_chr01    | 215053                         | [G/T]       | 1067289504                                 |
| Ca_Kabuli_NC_021160.1_215058 | Ca_kabuli_chr01    | 215058                         | [C/T]       | 1067289505                                 |
| Ca_Kabuli_NC_021160.1_314255 | Ca_kabuli_chr01    | 314255                         | [A/C]       | 1067289506                                 |
| Ca_Kabuli_NC_021160.1_347520 | Ca_kabuli_chr01    | 347520                         | [T/C]       | 1067289507                                 |
| Ca_Kabuli_NC_021160.1_347541 | Ca_kabuli_chr01    | 347541                         | [T/G]       | 1067289508                                 |
| Ca_Kabuli_NC_021160.1_347544 | Ca_kabuli_chr01    | 347544                         | [A/G]       | 1067289509                                 |
| Ca_Kabuli_NC_021160.1_347572 | Ca_kabuli_chr01    | 347572                         | [T/C]       | 1067289510                                 |
| Ca_Kabuli_NC_021160.1_347579 | Ca_kabuli_chr01    | 347579                         | [A/C]       | 1067289511                                 |
| Ca_Kabuli_NC_021160.1_347581 | Ca_kabuli_chr01    | 347581                         | [T/G]       | 1067289512                                 |
| Ca_Kabuli_NC_021160.1_347600 | Ca_kabuli_chr01    | 347600                         | [C/A]       | 1067289513                                 |
| Ca_Kabuli_NC_021160.1_347620 | Ca_kabuli_chr01    | 347620                         | [A/C]       | 1067289514                                 |

| <b>SNP IDs</b>               | <b>Chromosomes</b> | <b>Physical positions (bp)</b> | <b>SNPs</b> | <b>NCBI SNPdb accession IDs (NCBI_ss#)</b> |
|------------------------------|--------------------|--------------------------------|-------------|--------------------------------------------|
| Ca_Kabuli_NC_021160.1_406585 | Ca_kabuli_chr01    | 406585                         | [T/A]       | 1067289515                                 |
| Ca_Kabuli_NC_021160.1_406609 | Ca_kabuli_chr01    | 406609                         | [A/C]       | 1067289516                                 |
| Ca_Kabuli_NC_021160.1_411808 | Ca_kabuli_chr01    | 411808                         | [A/C]       | 1067289517                                 |
| Ca_Kabuli_NC_021160.1_411816 | Ca_kabuli_chr01    | 411816                         | [A/C]       | 1067289518                                 |
| Ca_Kabuli_NC_021160.1_412550 | Ca_kabuli_chr01    | 412550                         | [T/C]       | 1067289519                                 |
| Ca_Kabuli_NC_021160.1_435273 | Ca_kabuli_chr01    | 435273                         | [T/G]       | 1067289520                                 |
| Ca_Kabuli_NC_021160.1_435274 | Ca_kabuli_chr01    | 435274                         | [G/T]       | 1067289521                                 |
| Ca_Kabuli_NC_021160.1_435275 | Ca_kabuli_chr01    | 435275                         | [T/G]       | 1067289522                                 |
| Ca_Kabuli_NC_021160.1_439736 | Ca_kabuli_chr01    | 439736                         | [C/A]       | 1067289523                                 |
| Ca_Kabuli_NC_021160.1_446443 | Ca_kabuli_chr01    | 446443                         | [A/C]       | 1067289524                                 |
| Ca_Kabuli_NC_021160.1_446450 | Ca_kabuli_chr01    | 446450                         | [A/C]       | 1067289525                                 |
| Ca_Kabuli_NC_021160.1_456630 | Ca_kabuli_chr01    | 456630                         | [A/G]       | 1067289526                                 |
| Ca_Kabuli_NC_021160.1_460015 | Ca_kabuli_chr01    | 460015                         | [A/G]       | 1067289527                                 |
| Ca_Kabuli_NC_021160.1_460017 | Ca_kabuli_chr01    | 460017                         | [A/G]       | 1067289528                                 |
| Ca_Kabuli_NC_021160.1_462814 | Ca_kabuli_chr01    | 462814                         | [C/A]       | 1067289529                                 |
| Ca_Kabuli_NC_021160.1_469512 | Ca_kabuli_chr01    | 469512                         | [A/G]       | 1067289530                                 |
| Ca_Kabuli_NC_021160.1_501991 | Ca_kabuli_chr01    | 501991                         | [A/C]       | 1067289531                                 |
| Ca_Kabuli_NC_021160.1_515995 | Ca_kabuli_chr01    | 515995                         | [A/C]       | 1067289532                                 |
| Ca_Kabuli_NC_021160.1_550453 | Ca_kabuli_chr01    | 550453                         | [A/C]       | 1067289533                                 |
| Ca_Kabuli_NC_021160.1_567381 | Ca_kabuli_chr01    | 567381                         | [A/G]       | 1067289534                                 |
| Ca_Kabuli_NC_021160.1_570997 | Ca_kabuli_chr01    | 570997                         | [G/A]       | 1067289535                                 |
| Ca_Kabuli_NC_021160.1_571002 | Ca_kabuli_chr01    | 571002                         | [A/G]       | 1067289536                                 |
| Ca_Kabuli_NC_021160.1_581039 | Ca_kabuli_chr01    | 581039                         | [A/C]       | 1067289537                                 |
| Ca_Kabuli_NC_021160.1_581154 | Ca_kabuli_chr01    | 581154                         | [T/G]       | 1067289538                                 |
| Ca_Kabuli_NC_021160.1_581199 | Ca_kabuli_chr01    | 581199                         | [A/G]       | 1067289539                                 |
| Ca_Kabuli_NC_021160.1_581365 | Ca_kabuli_chr01    | 581365                         | [A/G]       | 1067289540                                 |
| Ca_Kabuli_NC_021160.1_591765 | Ca_kabuli_chr01    | 591765                         | [T/A]       | 1067289541                                 |
| Ca_Kabuli_NC_021160.1_645358 | Ca_kabuli_chr01    | 645358                         | [T/C]       | 1067289542                                 |
| Ca_Kabuli_NC_021160.1_662573 | Ca_kabuli_chr01    | 662573                         | [A/G]       | 1067289543                                 |
| Ca_Kabuli_NC_021160.1_662611 | Ca_kabuli_chr01    | 662611                         | [T/G]       | 1067289544                                 |
| Ca_Kabuli_NC_021160.1_671345 | Ca_kabuli_chr01    | 671345                         | [T/G]       | 1067289545                                 |
| Ca_Kabuli_NC_021160.1_685641 | Ca_kabuli_chr01    | 685641                         | [A/G]       | 1067289546                                 |
| Ca_Kabuli_NC_021160.1_685650 | Ca_kabuli_chr01    | 685650                         | [A/G]       | 1067289547                                 |
| Ca_Kabuli_NC_021160.1_685679 | Ca_kabuli_chr01    | 685679                         | [A/G]       | 1067289548                                 |

| <b>SNP IDs</b>               | <b>Chromosomes</b> | <b>Physical positions (bp)</b> | <b>SNPs</b> | <b>NCBI SNPdb accession IDs (NCBI_ss#)</b> |
|------------------------------|--------------------|--------------------------------|-------------|--------------------------------------------|
| Ca_Kabuli_NC_021160.1_685686 | Ca_kabuli_chr01    | 685686                         | [T/C]       | 1067289549                                 |
| Ca_Kabuli_NC_021160.1_696914 | Ca_kabuli_chr01    | 696914                         | [T/G]       | 1067289550                                 |
| Ca_Kabuli_NC_021160.1_704102 | Ca_kabuli_chr01    | 704102                         | [T/C]       | 1067289551                                 |
| Ca_Kabuli_NC_021160.1_706166 | Ca_kabuli_chr01    | 706166                         | [T/C]       | 1067289552                                 |
| Ca_Kabuli_NC_021160.1_706190 | Ca_kabuli_chr01    | 706190                         | [T/A]       | 1067289553                                 |
| Ca_Kabuli_NC_021160.1_720109 | Ca_kabuli_chr01    | 720109                         | [G/T]       | 1067289554                                 |
| Ca_Kabuli_NC_021160.1_741535 | Ca_kabuli_chr01    | 741535                         | [C/T]       | 1067289555                                 |
| Ca_Kabuli_NC_021160.1_742033 | Ca_kabuli_chr01    | 742033                         | [T/G]       | 1067289556                                 |
| Ca_Kabuli_NC_021160.1_746096 | Ca_kabuli_chr01    | 746096                         | [T/C]       | 1067289557                                 |
| Ca_Kabuli_NC_021160.1_750693 | Ca_kabuli_chr01    | 750693                         | [C/T]       | 1067289558                                 |
| Ca_Kabuli_NC_021160.1_777240 | Ca_kabuli_chr01    | 777240                         | [G/A]       | 1067289559                                 |
| Ca_Kabuli_NC_021160.1_777273 | Ca_kabuli_chr01    | 777273                         | [C/T]       | 1067289560                                 |
| Ca_Kabuli_NC_021160.1_777556 | Ca_kabuli_chr01    | 777556                         | [C/G]       | 1067289561                                 |
| Ca_Kabuli_NC_021160.1_777557 | Ca_kabuli_chr01    | 777557                         | [T/G]       | 1067289562                                 |
| Ca_Kabuli_NC_021160.1_790696 | Ca_kabuli_chr01    | 790696                         | [G/T]       | 1067289563                                 |
| Ca_Kabuli_NC_021160.1_866835 | Ca_kabuli_chr01    | 866835                         | [T/G]       | 1067289564                                 |
| Ca_Kabuli_NC_021160.1_866889 | Ca_kabuli_chr01    | 866889                         | [A/C]       | 1067289565                                 |
| Ca_Kabuli_NC_021160.1_872327 | Ca_kabuli_chr01    | 872327                         | [T/G]       | 1067289566                                 |
| Ca_Kabuli_NC_021160.1_872372 | Ca_kabuli_chr01    | 872372                         | [A/T]       | 1067289567                                 |
| Ca_Kabuli_NC_021160.1_872379 | Ca_kabuli_chr01    | 872379                         | [A/G]       | 1067289568                                 |
| Ca_Kabuli_NC_021160.1_881379 | Ca_kabuli_chr01    | 881379                         | [T/C]       | 1067289569                                 |
| Ca_Kabuli_NC_021160.1_881484 | Ca_kabuli_chr01    | 881484                         | [T/G]       | 1067289570                                 |
| Ca_Kabuli_NC_021160.1_881491 | Ca_kabuli_chr01    | 881491                         | [T/G]       | 1067289571                                 |
| Ca_Kabuli_NC_021160.1_881514 | Ca_kabuli_chr01    | 881514                         | [T/G]       | 1067289572                                 |
| Ca_Kabuli_NC_021160.1_881567 | Ca_kabuli_chr01    | 881567                         | [T/A]       | 1067289573                                 |
| Ca_Kabuli_NC_021160.1_881603 | Ca_kabuli_chr01    | 881603                         | [C/A]       | 1067289574                                 |
| Ca_Kabuli_NC_021160.1_881741 | Ca_kabuli_chr01    | 881741                         | [A/G]       | 1067289575                                 |
| Ca_Kabuli_NC_021160.1_910457 | Ca_kabuli_chr01    | 910457                         | [T/A]       | 1067289576                                 |
| Ca_Kabuli_NC_021160.1_910624 | Ca_kabuli_chr01    | 910624                         | [A/C]       | 1067289577                                 |
| Ca_Kabuli_NC_021160.1_929474 | Ca_kabuli_chr01    | 929474                         | [A/G]       | 1067289578                                 |
| Ca_Kabuli_NC_021160.1_929497 | Ca_kabuli_chr01    | 929497                         | [A/C]       | 1067289579                                 |
| Ca_Kabuli_NC_021160.1_929504 | Ca_kabuli_chr01    | 929504                         | [T/C]       | 1067289580                                 |
| Ca_Kabuli_NC_021160.1_929517 | Ca_kabuli_chr01    | 929517                         | [T/G]       | 1067289581                                 |
| Ca_Kabuli_NC_021160.1_929533 | Ca_kabuli_chr01    | 929533                         | [T/C]       | 1067289582                                 |



| <b>SNP IDs</b>                | <b>Chromosomes</b> | <b>Physical positions (bp)</b> | <b>SNPs</b> | <b>NCBI SNPdb accession IDs (NCBI_ss#)</b> |
|-------------------------------|--------------------|--------------------------------|-------------|--------------------------------------------|
| Ca_Kabuli_NC_021160.1_929582  | Ca_kabuli_chr01    | 929582                         | [T/G]       | 1067289583                                 |
| Ca_Kabuli_NC_021160.1_930042  | Ca_kabuli_chr01    | 930042                         | [A/C]       | 1067289584                                 |
| Ca_Kabuli_NC_021160.1_996350  | Ca_kabuli_chr01    | 996350                         | [G/T]       | 1067289585                                 |
| Ca_Kabuli_NC_021160.1_996382  | Ca_kabuli_chr01    | 996382                         | [A/T]       | 1067289586                                 |
| Ca_Kabuli_NC_021160.1_1007741 | Ca_kabuli_chr01    | 1007741                        | [A/C]       | 1067289587                                 |
| Ca_Kabuli_NC_021160.1_1018924 | Ca_kabuli_chr01    | 1018924                        | [T/C]       | 1067289588                                 |
| Ca_Kabuli_NC_021160.1_1018934 | Ca_kabuli_chr01    | 1018934                        | [A/G]       | 1067289589                                 |
| Ca_Kabuli_NC_021160.1_1018971 | Ca_kabuli_chr01    | 1018971                        | [T/A]       | 1067289590                                 |
| Ca_Kabuli_NC_021160.1_1023523 | Ca_kabuli_chr01    | 1023523                        | [T/C]       | 1067289591                                 |
| Ca_Kabuli_NC_021160.1_1023539 | Ca_kabuli_chr01    | 1023539                        | [A/C]       | 1067289592                                 |
| Ca_Kabuli_NC_021160.1_1026178 | Ca_kabuli_chr01    | 1026178                        | [A/G]       | 1067289593                                 |
| Ca_Kabuli_NC_021160.1_1085254 | Ca_kabuli_chr01    | 1085254                        | [A/C]       | 1067289594                                 |
| Ca_Kabuli_NC_021160.1_1085263 | Ca_kabuli_chr01    | 1085263                        | [A/C]       | 1067289595                                 |
| Ca_Kabuli_NC_021160.1_1085323 | Ca_kabuli_chr01    | 1085323                        | [A/T]       | 1067289596                                 |
| Ca_Kabuli_NC_021160.1_1092487 | Ca_kabuli_chr01    | 1092487                        | [A/T]       | 1067289597                                 |
| Ca_Kabuli_NC_021160.1_1092494 | Ca_kabuli_chr01    | 1092494                        | [T/C]       | 1067289598                                 |
| Ca_Kabuli_NC_021160.1_1092495 | Ca_kabuli_chr01    | 1092495                        | [C/T]       | 1067289599                                 |
| Ca_Kabuli_NC_021160.1_1092566 | Ca_kabuli_chr01    | 1092566                        | [A/C]       | 1067289600                                 |
| Ca_Kabuli_NC_021160.1_1110408 | Ca_kabuli_chr01    | 1110408                        | [T/C]       | 1067289601                                 |
| Ca_Kabuli_NC_021160.1_1110435 | Ca_kabuli_chr01    | 1110435                        | [T/G]       | 1067289602                                 |
| Ca_Kabuli_NC_021160.1_1110440 | Ca_kabuli_chr01    | 1110440                        | [A/G]       | 1067289603                                 |
| Ca_Kabuli_NC_021160.1_1115360 | Ca_kabuli_chr01    | 1115360                        | [A/C]       | 1067289604                                 |
| Ca_Kabuli_NC_021160.1_1115425 | Ca_kabuli_chr01    | 1115425                        | [A/G]       | 1067289605                                 |
| Ca_Kabuli_NC_021160.1_1116012 | Ca_kabuli_chr01    | 1116012                        | [A/C]       | 1067289606                                 |
| Ca_Kabuli_NC_021160.1_1116018 | Ca_kabuli_chr01    | 1116018                        | [T/C]       | 1067289607                                 |
| Ca_Kabuli_NC_021160.1_1116051 | Ca_kabuli_chr01    | 1116051                        | [A/G]       | 1067289608                                 |
| Ca_Kabuli_NC_021160.1_1117444 | Ca_kabuli_chr01    | 1117444                        | [G/T]       | 1067289609                                 |
| Ca_Kabuli_NC_021160.1_1117450 | Ca_kabuli_chr01    | 1117450                        | [G/T]       | 1067289610                                 |
| Ca_Kabuli_NC_021160.1_1117455 | Ca_kabuli_chr01    | 1117455                        | [G/A]       | 1067289611                                 |
| Ca_Kabuli_NC_021160.1_1117458 | Ca_kabuli_chr01    | 1117458                        | [A/G]       | 1067289612                                 |
| Ca_Kabuli_NC_021160.1_1117461 | Ca_kabuli_chr01    | 1117461                        | [C/G]       | 1067289613                                 |
| Ca_Kabuli_NC_021160.1_1117632 | Ca_kabuli_chr01    | 1117632                        | [T/G]       | 1067289614                                 |
| Ca_Kabuli_NC_021160.1_1140008 | Ca_kabuli_chr01    | 1140008                        | [T/C]       | 1067289615                                 |
| Ca_Kabuli_NC_021160.1_1140062 | Ca_kabuli_chr01    | 1140062                        | [A/G]       | 1067289616                                 |

| <b>SNP IDs</b>                | <b>Chromosomes</b> | <b>Physical positions (bp)</b> | <b>SNPs</b> | <b>NCBI SNPdb accession IDs (NCBI_ss#)</b> |
|-------------------------------|--------------------|--------------------------------|-------------|--------------------------------------------|
| Ca_Kabuli_NC_021160.1_1140071 | Ca_kabuli_chr01    | 1140071                        | [A/G]       | 1067289617                                 |
| Ca_Kabuli_NC_021160.1_1140313 | Ca_kabuli_chr01    | 1140313                        | [A/C]       | 1067289618                                 |
| Ca_Kabuli_NC_021160.1_1140950 | Ca_kabuli_chr01    | 1140950                        | [A/C]       | 1067289619                                 |
| Ca_Kabuli_NC_021160.1_1150972 | Ca_kabuli_chr01    | 1150972                        | [A/C]       | 1067289620                                 |
| Ca_Kabuli_NC_021160.1_1150996 | Ca_kabuli_chr01    | 1150996                        | [A/C]       | 1067289621                                 |
| Ca_Kabuli_NC_021160.1_1159421 | Ca_kabuli_chr01    | 1159421                        | [A/C]       | 1067289622                                 |
| Ca_Kabuli_NC_021160.1_1159493 | Ca_kabuli_chr01    | 1159493                        | [T/C]       | 1067289623                                 |
| Ca_Kabuli_NC_021160.1_1159524 | Ca_kabuli_chr01    | 1159524                        | [A/G]       | 1067289624                                 |
| Ca_Kabuli_NC_021160.1_1159534 | Ca_kabuli_chr01    | 1159534                        | [A/G]       | 1067289625                                 |
| Ca_Kabuli_NC_021160.1_1292470 | Ca_kabuli_chr01    | 1292470                        | [C/A]       | 1067289626                                 |
| Ca_Kabuli_NC_021160.1_1292471 | Ca_kabuli_chr01    | 1292471                        | [A/T]       | 1067289627                                 |
| Ca_Kabuli_NC_021160.1_1292472 | Ca_kabuli_chr01    | 1292472                        | [A/C]       | 1067289628                                 |
| Ca_Kabuli_NC_021160.1_1292473 | Ca_kabuli_chr01    | 1292473                        | [G/T]       | 1067289629                                 |
| Ca_Kabuli_NC_021160.1_1295534 | Ca_kabuli_chr01    | 1295534                        | [T/C]       | 1067289630                                 |
| Ca_Kabuli_NC_021160.1_1295549 | Ca_kabuli_chr01    | 1295549                        | [T/G]       | 1067289631                                 |
| Ca_Kabuli_NC_021160.1_1335478 | Ca_kabuli_chr01    | 1335478                        | [T/A]       | 1067289632                                 |
| Ca_Kabuli_NC_021160.1_1335528 | Ca_kabuli_chr01    | 1335528                        | [T/C]       | 1067289633                                 |
| Ca_Kabuli_NC_021160.1_1344050 | Ca_kabuli_chr01    | 1344050                        | [A/T]       | 1067289634                                 |
| Ca_Kabuli_NC_021160.1_1344076 | Ca_kabuli_chr01    | 1344076                        | [T/C]       | 1067289635                                 |
| Ca_Kabuli_NC_021160.1_1344082 | Ca_kabuli_chr01    | 1344082                        | [T/C]       | 1067289636                                 |
| Ca_Kabuli_NC_021160.1_1344095 | Ca_kabuli_chr01    | 1344095                        | [A/T]       | 1067289637                                 |
| Ca_Kabuli_NC_021160.1_1430182 | Ca_kabuli_chr01    | 1430182                        | [A/G]       | 1067289638                                 |
| Ca_Kabuli_NC_021160.1_1434713 | Ca_kabuli_chr01    | 1434713                        | [T/G]       | 1067289639                                 |
| Ca_Kabuli_NC_021160.1_1434724 | Ca_kabuli_chr01    | 1434724                        | [T/C]       | 1067289640                                 |
| Ca_Kabuli_NC_021160.1_1449812 | Ca_kabuli_chr01    | 1449812                        | [T/A]       | 1067289641                                 |
| Ca_Kabuli_NC_021160.1_1449954 | Ca_kabuli_chr01    | 1449954                        | [T/G]       | 1067289642                                 |
| Ca_Kabuli_NC_021160.1_1449972 | Ca_kabuli_chr01    | 1449972                        | [A/C]       | 1067289643                                 |
| Ca_Kabuli_NC_021160.1_1449987 | Ca_kabuli_chr01    | 1449987                        | [T/C]       | 1067289644                                 |
| Ca_Kabuli_NC_021160.1_1461574 | Ca_kabuli_chr01    | 1461574                        | [T/G]       | 1067289645                                 |
| Ca_Kabuli_NC_021160.1_1527423 | Ca_kabuli_chr01    | 1527423                        | [T/C]       | 1067289646                                 |
| Ca_Kabuli_NC_021160.1_1527513 | Ca_kabuli_chr01    | 1527513                        | [A/G]       | 1067289647                                 |
| Ca_Kabuli_NC_021160.1_1528325 | Ca_kabuli_chr01    | 1528325                        | [A/G]       | 1067289648                                 |
| Ca_Kabuli_NC_021160.1_1546603 | Ca_kabuli_chr01    | 1546603                        | [T/G]       | 1067289649                                 |
| Ca_Kabuli_NC_021160.1_1546615 | Ca_kabuli_chr01    | 1546615                        | [T/G]       | 1067289650                                 |

| <b>SNP IDs</b>                | <b>Chromosomes</b> | <b>Physical positions (bp)</b> | <b>SNPs</b> | <b>NCBI SNPdb accession IDs (NCBI_ss#)</b> |
|-------------------------------|--------------------|--------------------------------|-------------|--------------------------------------------|
| Ca_Kabuli_NC_021160.1_1546631 | Ca_kabuli_chr01    | 1546631                        | [T/G]       | 1067289651                                 |
| Ca_Kabuli_NC_021160.1_1546688 | Ca_kabuli_chr01    | 1546688                        | [A/C]       | 1067289652                                 |
| Ca_Kabuli_NC_021160.1_1547809 | Ca_kabuli_chr01    | 1547809                        | [T/A]       | 1067289653                                 |
| Ca_Kabuli_NC_021160.1_1650119 | Ca_kabuli_chr01    | 1650119                        | [T/C]       | 1067289654                                 |
| Ca_Kabuli_NC_021160.1_1650130 | Ca_kabuli_chr01    | 1650130                        | [T/C]       | 1067289655                                 |
| Ca_Kabuli_NC_021160.1_1650141 | Ca_kabuli_chr01    | 1650141                        | [T/C]       | 1067289656                                 |
| Ca_Kabuli_NC_021160.1_1732879 | Ca_kabuli_chr01    | 1732879                        | [G/C]       | 1067289657                                 |
| Ca_Kabuli_NC_021160.1_1769544 | Ca_kabuli_chr01    | 1769544                        | [T/C]       | 1067289658                                 |
| Ca_Kabuli_NC_021160.1_1769581 | Ca_kabuli_chr01    | 1769581                        | [A/C]       | 1067289659                                 |
| Ca_Kabuli_NC_021160.1_1782760 | Ca_kabuli_chr01    | 1782760                        | [G/A]       | 1067289660                                 |
| Ca_Kabuli_NC_021160.1_1782793 | Ca_kabuli_chr01    | 1782793                        | [G/T]       | 1067289661                                 |
| Ca_Kabuli_NC_021160.1_1783207 | Ca_kabuli_chr01    | 1783207                        | [G/A]       | 1067289662                                 |
| Ca_Kabuli_NC_021160.1_1825840 | Ca_kabuli_chr01    | 1825840                        | [G/A]       | 1067289663                                 |
| Ca_Kabuli_NC_021160.1_1858156 | Ca_kabuli_chr01    | 1858156                        | [T/C]       | 1067289664                                 |
| Ca_Kabuli_NC_021160.1_1858159 | Ca_kabuli_chr01    | 1858159                        | [A/G]       | 1067289665                                 |
| Ca_Kabuli_NC_021160.1_1858161 | Ca_kabuli_chr01    | 1858161                        | [A/C]       | 1067289666                                 |
| Ca_Kabuli_NC_021160.1_1858177 | Ca_kabuli_chr01    | 1858177                        | [T/C]       | 1067289667                                 |
| Ca_Kabuli_NC_021160.1_1858202 | Ca_kabuli_chr01    | 1858202                        | [T/C]       | 1067289668                                 |
| Ca_Kabuli_NC_021160.1_1858226 | Ca_kabuli_chr01    | 1858226                        | [G/A]       | 1067289669                                 |
| Ca_Kabuli_NC_021160.1_1858509 | Ca_kabuli_chr01    | 1858509                        | [C/T]       | 1067289670                                 |
| Ca_Kabuli_NC_021160.1_1858717 | Ca_kabuli_chr01    | 1858717                        | [A/G]       | 1067289671                                 |
| Ca_Kabuli_NC_021160.1_1861696 | Ca_kabuli_chr01    | 1861696                        | [C/T]       | 1067289672                                 |
| Ca_Kabuli_NC_021160.1_1861707 | Ca_kabuli_chr01    | 1861707                        | [T/G]       | 1067289673                                 |
| Ca_Kabuli_NC_021160.1_1861837 | Ca_kabuli_chr01    | 1861837                        | [T/G]       | 1067289674                                 |
| Ca_Kabuli_NC_021160.1_1861887 | Ca_kabuli_chr01    | 1861887                        | [G/A]       | 1067289675                                 |
| Ca_Kabuli_NC_021160.1_1904230 | Ca_kabuli_chr01    | 1904230                        | [G/T]       | 1067289676                                 |
| Ca_Kabuli_NC_021160.1_1904238 | Ca_kabuli_chr01    | 1904238                        | [A/G]       | 1067289677                                 |
| Ca_Kabuli_NC_021160.1_1904281 | Ca_kabuli_chr01    | 1904281                        | [T/A]       | 1067289678                                 |
| Ca_Kabuli_NC_021160.1_1904334 | Ca_kabuli_chr01    | 1904334                        | [T/G]       | 1067289679                                 |
| Ca_Kabuli_NC_021160.1_1935519 | Ca_kabuli_chr01    | 1935519                        | [T/A]       | 1067289680                                 |
| Ca_Kabuli_NC_021160.1_1935557 | Ca_kabuli_chr01    | 1935557                        | [A/T]       | 1067289681                                 |
| Ca_Kabuli_NC_021160.1_1962690 | Ca_kabuli_chr01    | 1962690                        | [A/C]       | 1067289682                                 |
| Ca_Kabuli_NC_021160.1_1968750 | Ca_kabuli_chr01    | 1968750                        | [T/G]       | 1067289683                                 |
| Ca_Kabuli_NC_021160.1_1968823 | Ca_kabuli_chr01    | 1968823                        | [G/A]       | 1067289684                                 |

| <b>SNP IDs</b>                | <b>Chromosomes</b> | <b>Physical positions (bp)</b> | <b>SNPs</b> | <b>NCBI SNPdb accession IDs (NCBI_ss#)</b> |
|-------------------------------|--------------------|--------------------------------|-------------|--------------------------------------------|
| Ca_Kabuli_NC_021160.1_1968826 | Ca_kabuli_chr01    | 1968826                        | [G/A]       | 1067289685                                 |
| Ca_Kabuli_NC_021160.1_1968828 | Ca_kabuli_chr01    | 1968828                        | [G/A]       | 1067289686                                 |
| Ca_Kabuli_NC_021160.1_1968837 | Ca_kabuli_chr01    | 1968837                        | [A/G]       | 1067289687                                 |
| Ca_Kabuli_NC_021160.1_1971936 | Ca_kabuli_chr01    | 1971936                        | [T/G]       | 1067289688                                 |
| Ca_Kabuli_NC_021160.1_1971964 | Ca_kabuli_chr01    | 1971964                        | [A/C]       | 1067289689                                 |
| Ca_Kabuli_NC_021160.1_1971975 | Ca_kabuli_chr01    | 1971975                        | [A/T]       | 1067289690                                 |
| Ca_Kabuli_NC_021160.1_2002932 | Ca_kabuli_chr01    | 2002932                        | [A/G]       | 1067289691                                 |
| Ca_Kabuli_NC_021160.1_2002944 | Ca_kabuli_chr01    | 2002944                        | [A/G]       | 1067289692                                 |
| Ca_Kabuli_NC_021160.1_2020960 | Ca_kabuli_chr01    | 2020960                        | [T/C]       | 1067289693                                 |
| Ca_Kabuli_NC_021160.1_2041027 | Ca_kabuli_chr01    | 2041027                        | [C/G]       | 1067289694                                 |
| Ca_Kabuli_NC_021160.1_2042071 | Ca_kabuli_chr01    | 2042071                        | [C/G]       | 1067289695                                 |
| Ca_Kabuli_NC_021160.1_2044359 | Ca_kabuli_chr01    | 2044359                        | [C/T]       | 1067289696                                 |
| Ca_Kabuli_NC_021160.1_2050368 | Ca_kabuli_chr01    | 2050368                        | [T/C]       | 1067289697                                 |
| Ca_Kabuli_NC_021160.1_2050386 | Ca_kabuli_chr01    | 2050386                        | [T/G]       | 1067289698                                 |
| Ca_Kabuli_NC_021160.1_2053744 | Ca_kabuli_chr01    | 2053744                        | [C/A]       | 1067289699                                 |
| Ca_Kabuli_NC_021160.1_2053784 | Ca_kabuli_chr01    | 2053784                        | [C/A]       | 1067289700                                 |
| Ca_Kabuli_NC_021160.1_2053787 | Ca_kabuli_chr01    | 2053787                        | [C/A]       | 1067289701                                 |
| Ca_Kabuli_NC_021160.1_2053788 | Ca_kabuli_chr01    | 2053788                        | [A/G]       | 1067289702                                 |
| Ca_Kabuli_NC_021160.1_2053819 | Ca_kabuli_chr01    | 2053819                        | [C/A]       | 1067289703                                 |
| Ca_Kabuli_NC_021160.1_2053830 | Ca_kabuli_chr01    | 2053830                        | [A/G]       | 1067289704                                 |
| Ca_Kabuli_NC_021160.1_2053833 | Ca_kabuli_chr01    | 2053833                        | [T/G]       | 1067289705                                 |
| Ca_Kabuli_NC_021160.1_2053856 | Ca_kabuli_chr01    | 2053856                        | [T/G]       | 1067289706                                 |
| Ca_Kabuli_NC_021160.1_2072627 | Ca_kabuli_chr01    | 2072627                        | [A/T]       | 1067289707                                 |
| Ca_Kabuli_NC_021160.1_2074894 | Ca_kabuli_chr01    | 2074894                        | [G/C]       | 1067289708                                 |
| Ca_Kabuli_NC_021160.1_2074900 | Ca_kabuli_chr01    | 2074900                        | [G/A]       | 1067289709                                 |
| Ca_Kabuli_NC_021160.1_2074902 | Ca_kabuli_chr01    | 2074902                        | [A/G]       | 1067289710                                 |
| Ca_Kabuli_NC_021160.1_2074904 | Ca_kabuli_chr01    | 2074904                        | [A/T]       | 1067289711                                 |
| Ca_Kabuli_NC_021160.1_2075012 | Ca_kabuli_chr01    | 2075012                        | [C/A]       | 1067289712                                 |
| Ca_Kabuli_NC_021160.1_2075013 | Ca_kabuli_chr01    | 2075013                        | [A/G]       | 1067289713                                 |
| Ca_Kabuli_NC_021160.1_2075015 | Ca_kabuli_chr01    | 2075015                        | [A/G]       | 1067289714                                 |
| Ca_Kabuli_NC_021160.1_2082760 | Ca_kabuli_chr01    | 2082760                        | [C/G]       | 1067289715                                 |
| Ca_Kabuli_NC_021160.1_2083003 | Ca_kabuli_chr01    | 2083003                        | [G/C]       | 1067289716                                 |
| Ca_Kabuli_NC_021160.1_2102245 | Ca_kabuli_chr01    | 2102245                        | [G/A]       | 1067289717                                 |
| Ca_Kabuli_NC_021160.1_2178832 | Ca_kabuli_chr01    | 2178832                        | [C/A]       | 1067289718                                 |

| <b>SNP IDs</b>                | <b>Chromosomes</b> | <b>Physical positions (bp)</b> | <b>SNPs</b> | <b>NCBI SNPdb accession IDs (NCBI_ss#)</b> |
|-------------------------------|--------------------|--------------------------------|-------------|--------------------------------------------|
| Ca_Kabuli_NC_021160.1_2178833 | Ca_kabuli_chr01    | 2178833                        | [T/G]       | 1067289719                                 |
| Ca_Kabuli_NC_021160.1_2188439 | Ca_kabuli_chr01    | 2188439                        | [T/G]       | 1067289720                                 |
| Ca_Kabuli_NC_021160.1_2188498 | Ca_kabuli_chr01    | 2188498                        | [A/G]       | 1067289721                                 |
| Ca_Kabuli_NC_021160.1_2220109 | Ca_kabuli_chr01    | 2220109                        | [C/T]       | 1067289722                                 |
| Ca_Kabuli_NC_021160.1_2232774 | Ca_kabuli_chr01    | 2232774                        | [A/T]       | 1067289723                                 |
| Ca_Kabuli_NC_021160.1_2232775 | Ca_kabuli_chr01    | 2232775                        | [A/T]       | 1067289724                                 |
| Ca_Kabuli_NC_021160.1_2232777 | Ca_kabuli_chr01    | 2232777                        | [T/G]       | 1067289725                                 |
| Ca_Kabuli_NC_021160.1_2232778 | Ca_kabuli_chr01    | 2232778                        | [T/A]       | 1067289726                                 |
| Ca_Kabuli_NC_021160.1_2252270 | Ca_kabuli_chr01    | 2252270                        | [C/T]       | 1067289727                                 |
| Ca_Kabuli_NC_021160.1_2252473 | Ca_kabuli_chr01    | 2252473                        | [G/A]       | 1067289728                                 |
| Ca_Kabuli_NC_021160.1_2276929 | Ca_kabuli_chr01    | 2276929                        | [C/T]       | 1067289729                                 |
| Ca_Kabuli_NC_021160.1_2287391 | Ca_kabuli_chr01    | 2287391                        | [T/A]       | 1067289730                                 |
| Ca_Kabuli_NC_021160.1_2287408 | Ca_kabuli_chr01    | 2287408                        | [A/T]       | 1067289731                                 |
| Ca_Kabuli_NC_021160.1_2287427 | Ca_kabuli_chr01    | 2287427                        | [C/A]       | 1067289732                                 |
| Ca_Kabuli_NC_021160.1_2287439 | Ca_kabuli_chr01    | 2287439                        | [T/A]       | 1067289733                                 |
| Ca_Kabuli_NC_021160.1_2288179 | Ca_kabuli_chr01    | 2288179                        | [A/T]       | 1067289734                                 |
| Ca_Kabuli_NC_021160.1_2288186 | Ca_kabuli_chr01    | 2288186                        | [A/C]       | 1067289735                                 |
| Ca_Kabuli_NC_021160.1_2288207 | Ca_kabuli_chr01    | 2288207                        | [T/G]       | 1067289736                                 |
| Ca_Kabuli_NC_021160.1_2290092 | Ca_kabuli_chr01    | 2290092                        | [A/G]       | 1067289737                                 |
| Ca_Kabuli_NC_021160.1_2305216 | Ca_kabuli_chr01    | 2305216                        | [T/G]       | 1067289738                                 |
| Ca_Kabuli_NC_021160.1_2305246 | Ca_kabuli_chr01    | 2305246                        | [T/A]       | 1067289739                                 |
| Ca_Kabuli_NC_021160.1_2305477 | Ca_kabuli_chr01    | 2305477                        | [C/T]       | 1067289740                                 |
| Ca_Kabuli_NC_021160.1_2305786 | Ca_kabuli_chr01    | 2305786                        | [A/T]       | 1067289741                                 |
| Ca_Kabuli_NC_021160.1_2305837 | Ca_kabuli_chr01    | 2305837                        | [G/T]       | 1067289742                                 |
| Ca_Kabuli_NC_021160.1_2306002 | Ca_kabuli_chr01    | 2306002                        | [G/A]       | 1067289743                                 |
| Ca_Kabuli_NC_021160.1_2306323 | Ca_kabuli_chr01    | 2306323                        | [C/T]       | 1067289744                                 |
| Ca_Kabuli_NC_021160.1_2306340 | Ca_kabuli_chr01    | 2306340                        | [T/C]       | 1067289745                                 |
| Ca_Kabuli_NC_021160.1_2313615 | Ca_kabuli_chr01    | 2313615                        | [A/G]       | 1067289746                                 |
| Ca_Kabuli_NC_021160.1_2366246 | Ca_kabuli_chr01    | 2366246                        | [A/G]       | 1067289747                                 |
| Ca_Kabuli_NC_021160.1_2366251 | Ca_kabuli_chr01    | 2366251                        | [A/G]       | 1067289748                                 |
| Ca_Kabuli_NC_021160.1_2373480 | Ca_kabuli_chr01    | 2373480                        | [T/G]       | 1067289749                                 |
| Ca_Kabuli_NC_021160.1_2387858 | Ca_kabuli_chr01    | 2387858                        | [T/C]       | 1067289750                                 |
| Ca_Kabuli_NC_021160.1_2387861 | Ca_kabuli_chr01    | 2387861                        | [A/G]       | 1067289751                                 |
| Ca_Kabuli_NC_021160.1_2387876 | Ca_kabuli_chr01    | 2387876                        | [A/C]       | 1067289752                                 |

| <b>SNP IDs</b>                | <b>Chromosomes</b> | <b>Physical positions (bp)</b> | <b>SNPs</b> | <b>NCBI SNPdb accession IDs (NCBI_ss#)</b> |
|-------------------------------|--------------------|--------------------------------|-------------|--------------------------------------------|
| Ca_Kabuli_NC_021160.1_2395804 | Ca_kabuli_chr01    | 2395804                        | [A/T]       | 1067289753                                 |
| Ca_Kabuli_NC_021160.1_2400287 | Ca_kabuli_chr01    | 2400287                        | [C/A]       | 1067289754                                 |
| Ca_Kabuli_NC_021160.1_2439915 | Ca_kabuli_chr01    | 2439915                        | [G/A]       | 1067289755                                 |
| Ca_Kabuli_NC_021160.1_2439917 | Ca_kabuli_chr01    | 2439917                        | [A/G]       | 1067289756                                 |
| Ca_Kabuli_NC_021160.1_2439970 | Ca_kabuli_chr01    | 2439970                        | [C/A]       | 1067289757                                 |
| Ca_Kabuli_NC_021160.1_2439971 | Ca_kabuli_chr01    | 2439971                        | [A/C]       | 1067289758                                 |
| Ca_Kabuli_NC_021160.1_2439972 | Ca_kabuli_chr01    | 2439972                        | [A/C]       | 1067289759                                 |
| Ca_Kabuli_NC_021160.1_2452204 | Ca_kabuli_chr01    | 2452204                        | [C/G]       | 1067289760                                 |
| Ca_Kabuli_NC_021160.1_2457898 | Ca_kabuli_chr01    | 2457898                        | [A/G]       | 1067289761                                 |
| Ca_Kabuli_NC_021160.1_2473309 | Ca_kabuli_chr01    | 2473309                        | [T/C]       | 1067289762                                 |
| Ca_Kabuli_NC_021160.1_2481257 | Ca_kabuli_chr01    | 2481257                        | [A/T]       | 1067289763                                 |
| Ca_Kabuli_NC_021160.1_2510835 | Ca_kabuli_chr01    | 2510835                        | [T/A]       | 1067289764                                 |
| Ca_Kabuli_NC_021160.1_2510854 | Ca_kabuli_chr01    | 2510854                        | [A/C]       | 1067289765                                 |
| Ca_Kabuli_NC_021160.1_2513880 | Ca_kabuli_chr01    | 2513880                        | [A/G]       | 1067289766                                 |
| Ca_Kabuli_NC_021160.1_2513902 | Ca_kabuli_chr01    | 2513902                        | [T/C]       | 1067289767                                 |
| Ca_Kabuli_NC_021160.1_2538961 | Ca_kabuli_chr01    | 2538961                        | [T/C]       | 1067289768                                 |
| Ca_Kabuli_NC_021160.1_2539571 | Ca_kabuli_chr01    | 2539571                        | [T/G]       | 1067289769                                 |
| Ca_Kabuli_NC_021160.1_2542639 | Ca_kabuli_chr01    | 2542639                        | [T/C]       | 1067289770                                 |
| Ca_Kabuli_NC_021160.1_2542648 | Ca_kabuli_chr01    | 2542648                        | [G/T]       | 1067289771                                 |
| Ca_Kabuli_NC_021160.1_2542652 | Ca_kabuli_chr01    | 2542652                        | [G/A]       | 1067289772                                 |
| Ca_Kabuli_NC_021160.1_2542653 | Ca_kabuli_chr01    | 2542653                        | [C/A]       | 1067289773                                 |
| Ca_Kabuli_NC_021160.1_2542658 | Ca_kabuli_chr01    | 2542658                        | [G/A]       | 1067289774                                 |
| Ca_Kabuli_NC_021160.1_2542705 | Ca_kabuli_chr01    | 2542705                        | [T/A]       | 1067289775                                 |
| Ca_Kabuli_NC_021160.1_2542727 | Ca_kabuli_chr01    | 2542727                        | [T/A]       | 1067289776                                 |
| Ca_Kabuli_NC_021160.1_2638990 | Ca_kabuli_chr01    | 2638990                        | [A/T]       | 1067289777                                 |
| Ca_Kabuli_NC_021160.1_2638991 | Ca_kabuli_chr01    | 2638991                        | [T/G]       | 1067289778                                 |
| Ca_Kabuli_NC_021160.1_2638992 | Ca_kabuli_chr01    | 2638992                        | [C/G]       | 1067289779                                 |
| Ca_Kabuli_NC_021160.1_2638993 | Ca_kabuli_chr01    | 2638993                        | [T/G]       | 1067289780                                 |
| Ca_Kabuli_NC_021160.1_2649712 | Ca_kabuli_chr01    | 2649712                        | [A/G]       | 1067289781                                 |
| Ca_Kabuli_NC_021160.1_2649739 | Ca_kabuli_chr01    | 2649739                        | [A/T]       | 1067289782                                 |
| Ca_Kabuli_NC_021160.1_2649792 | Ca_kabuli_chr01    | 2649792                        | [A/G]       | 1067289783                                 |
| Ca_Kabuli_NC_021160.1_2649872 | Ca_kabuli_chr01    | 2649872                        | [A/C]       | 1067289784                                 |
| Ca_Kabuli_NC_021160.1_2649905 | Ca_kabuli_chr01    | 2649905                        | [T/C]       | 1067289785                                 |
| Ca_Kabuli_NC_021160.1_2649916 | Ca_kabuli_chr01    | 2649916                        | [T/C]       | 1067289786                                 |

| <b>SNP IDs</b>                | <b>Chromosomes</b> | <b>Physical positions (bp)</b> | <b>SNPs</b> | <b>NCBI SNPdb accession IDs (NCBI_ss#)</b> |
|-------------------------------|--------------------|--------------------------------|-------------|--------------------------------------------|
| Ca_Kabuli_NC_021160.1_2649963 | Ca_kabuli_chr01    | 2649963                        | [A/G]       | 1067289787                                 |
| Ca_Kabuli_NC_021160.1_2671432 | Ca_kabuli_chr01    | 2671432                        | [T/G]       | 1067289788                                 |
| Ca_Kabuli_NC_021160.1_2733653 | Ca_kabuli_chr01    | 2733653                        | [T/G]       | 1067289789                                 |
| Ca_Kabuli_NC_021160.1_2733669 | Ca_kabuli_chr01    | 2733669                        | [T/G]       | 1067289790                                 |
| Ca_Kabuli_NC_021160.1_2733701 | Ca_kabuli_chr01    | 2733701                        | [G/T]       | 1067289791                                 |
| Ca_Kabuli_NC_021160.1_2739513 | Ca_kabuli_chr01    | 2739513                        | [A/G]       | 1067289792                                 |
| Ca_Kabuli_NC_021160.1_2739522 | Ca_kabuli_chr01    | 2739522                        | [A/G]       | 1067289793                                 |
| Ca_Kabuli_NC_021160.1_2783500 | Ca_kabuli_chr01    | 2783500                        | [T/A]       | 1067289794                                 |
| Ca_Kabuli_NC_021160.1_2786629 | Ca_kabuli_chr01    | 2786629                        | [A/C]       | 1067289795                                 |
| Ca_Kabuli_NC_021160.1_2786970 | Ca_kabuli_chr01    | 2786970                        | [T/A]       | 1067289796                                 |
| Ca_Kabuli_NC_021160.1_2787024 | Ca_kabuli_chr01    | 2787024                        | [A/G]       | 1067289797                                 |
| Ca_Kabuli_NC_021160.1_2787040 | Ca_kabuli_chr01    | 2787040                        | [A/G]       | 1067289798                                 |
| Ca_Kabuli_NC_021160.1_2808035 | Ca_kabuli_chr01    | 2808035                        | [C/A]       | 1067289799                                 |
| Ca_Kabuli_NC_021160.1_2808039 | Ca_kabuli_chr01    | 2808039                        | [A/G]       | 1067289800                                 |
| Ca_Kabuli_NC_021160.1_2808079 | Ca_kabuli_chr01    | 2808079                        | [T/G]       | 1067289801                                 |
| Ca_Kabuli_NC_021160.1_2855971 | Ca_kabuli_chr01    | 2855971                        | [T/C]       | 1067289802                                 |
| Ca_Kabuli_NC_021160.1_2855972 | Ca_kabuli_chr01    | 2855972                        | [G/T]       | 1067289803                                 |
| Ca_Kabuli_NC_021160.1_2883189 | Ca_kabuli_chr01    | 2883189                        | [G/C]       | 1067289804                                 |
| Ca_Kabuli_NC_021160.1_2883194 | Ca_kabuli_chr01    | 2883194                        | [T/C]       | 1067289805                                 |
| Ca_Kabuli_NC_021160.1_2883201 | Ca_kabuli_chr01    | 2883201                        | [G/A]       | 1067289806                                 |
| Ca_Kabuli_NC_021160.1_2883663 | Ca_kabuli_chr01    | 2883663                        | [C/A]       | 1067289807                                 |
| Ca_Kabuli_NC_021160.1_2883664 | Ca_kabuli_chr01    | 2883664                        | [A/G]       | 1067289808                                 |
| Ca_Kabuli_NC_021160.1_2883684 | Ca_kabuli_chr01    | 2883684                        | [G/T]       | 1067289809                                 |
| Ca_Kabuli_NC_021160.1_2883716 | Ca_kabuli_chr01    | 2883716                        | [A/C]       | 1067289810                                 |
| Ca_Kabuli_NC_021160.1_2883717 | Ca_kabuli_chr01    | 2883717                        | [C/A]       | 1067289811                                 |
| Ca_Kabuli_NC_021160.1_2885508 | Ca_kabuli_chr01    | 2885508                        | [C/T]       | 1067289812                                 |
| Ca_Kabuli_NC_021160.1_2885525 | Ca_kabuli_chr01    | 2885525                        | [C/T]       | 1067289813                                 |
| Ca_Kabuli_NC_021160.1_2885987 | Ca_kabuli_chr01    | 2885987                        | [A/T]       | 1067289814                                 |
| Ca_Kabuli_NC_021160.1_2885988 | Ca_kabuli_chr01    | 2885988                        | [G/C]       | 1067289815                                 |
| Ca_Kabuli_NC_021160.1_2885997 | Ca_kabuli_chr01    | 2885997                        | [A/G]       | 1067289816                                 |
| Ca_Kabuli_NC_021160.1_2886005 | Ca_kabuli_chr01    | 2886005                        | [A/G]       | 1067289817                                 |
| Ca_Kabuli_NC_021160.1_2886442 | Ca_kabuli_chr01    | 2886442                        | [A/G]       | 1067289818                                 |
| Ca_Kabuli_NC_021160.1_2888375 | Ca_kabuli_chr01    | 2888375                        | [A/C]       | 1067289819                                 |
| Ca_Kabuli_NC_021160.1_2936921 | Ca_kabuli_chr01    | 2936921                        | [A/C]       | 1067289820                                 |

| <b>SNP IDs</b>                | <b>Chromosomes</b> | <b>Physical positions (bp)</b> | <b>SNPs</b> | <b>NCBI SNPdb accession IDs (NCBI_ss#)</b> |
|-------------------------------|--------------------|--------------------------------|-------------|--------------------------------------------|
| Ca_Kabuli_NC_021160.1_2948213 | Ca_kabuli_chr01    | 2948213                        | [A/C]       | 1067289821                                 |
| Ca_Kabuli_NC_021160.1_2948247 | Ca_kabuli_chr01    | 2948247                        | [A/G]       | 1067289822                                 |
| Ca_Kabuli_NC_021160.1_2948248 | Ca_kabuli_chr01    | 2948248                        | [A/G]       | 1067289823                                 |
| Ca_Kabuli_NC_021160.1_2948249 | Ca_kabuli_chr01    | 2948249                        | [C/A]       | 1067289824                                 |
| Ca_Kabuli_NC_021160.1_2948253 | Ca_kabuli_chr01    | 2948253                        | [C/T]       | 1067289825                                 |
| Ca_Kabuli_NC_021160.1_2948258 | Ca_kabuli_chr01    | 2948258                        | [C/A]       | 1067289826                                 |
| Ca_Kabuli_NC_021160.1_2948260 | Ca_kabuli_chr01    | 2948260                        | [G/A]       | 1067289827                                 |
| Ca_Kabuli_NC_021160.1_2997728 | Ca_kabuli_chr01    | 2997728                        | [T/G]       | 1067289828                                 |
| Ca_Kabuli_NC_021160.1_3006195 | Ca_kabuli_chr01    | 3006195                        | [T/A]       | 1067289829                                 |
| Ca_Kabuli_NC_021160.1_3009393 | Ca_kabuli_chr01    | 3009393                        | [A/C]       | 1067289830                                 |
| Ca_Kabuli_NC_021160.1_3032090 | Ca_kabuli_chr01    | 3032090                        | [T/G]       | 1067289831                                 |
| Ca_Kabuli_NC_021160.1_3034364 | Ca_kabuli_chr01    | 3034364                        | [A/C]       | 1067289832                                 |
| Ca_Kabuli_NC_021160.1_3051969 | Ca_kabuli_chr01    | 3051969                        | [C/A]       | 1067289833                                 |
| Ca_Kabuli_NC_021160.1_3052183 | Ca_kabuli_chr01    | 3052183                        | [T/A]       | 1067289834                                 |
| Ca_Kabuli_NC_021160.1_3052591 | Ca_kabuli_chr01    | 3052591                        | [A/T]       | 1067289835                                 |
| Ca_Kabuli_NC_021160.1_3052594 | Ca_kabuli_chr01    | 3052594                        | [C/T]       | 1067289836                                 |
| Ca_Kabuli_NC_021160.1_3052634 | Ca_kabuli_chr01    | 3052634                        | [T/G]       | 1067289837                                 |
| Ca_Kabuli_NC_021160.1_3052640 | Ca_kabuli_chr01    | 3052640                        | [A/G]       | 1067289838                                 |
| Ca_Kabuli_NC_021160.1_3081902 | Ca_kabuli_chr01    | 3081902                        | [A/C]       | 1067289839                                 |
| Ca_Kabuli_NC_021160.1_3143867 | Ca_kabuli_chr01    | 3143867                        | [T/G]       | 1067289840                                 |
| Ca_Kabuli_NC_021160.1_3154736 | Ca_kabuli_chr01    | 3154736                        | [C/A]       | 1067289841                                 |
| Ca_Kabuli_NC_021160.1_3154739 | Ca_kabuli_chr01    | 3154739                        | [C/T]       | 1067289842                                 |
| Ca_Kabuli_NC_021160.1_3154806 | Ca_kabuli_chr01    | 3154806                        | [A/C]       | 1067289843                                 |
| Ca_Kabuli_NC_021160.1_3230872 | Ca_kabuli_chr01    | 3230872                        | [A/G]       | 1067289844                                 |
| Ca_Kabuli_NC_021160.1_3235705 | Ca_kabuli_chr01    | 3235705                        | [A/C]       | 1067289845                                 |
| Ca_Kabuli_NC_021160.1_3235729 | Ca_kabuli_chr01    | 3235729                        | [T/A]       | 1067289846                                 |
| Ca_Kabuli_NC_021160.1_3260240 | Ca_kabuli_chr01    | 3260240                        | [G/A]       | 1067289847                                 |
| Ca_Kabuli_NC_021160.1_3260243 | Ca_kabuli_chr01    | 3260243                        | [C/A]       | 1067289848                                 |
| Ca_Kabuli_NC_021160.1_3260252 | Ca_kabuli_chr01    | 3260252                        | [A/G]       | 1067289849                                 |
| Ca_Kabuli_NC_021160.1_3260253 | Ca_kabuli_chr01    | 3260253                        | [A/G]       | 1067289850                                 |
| Ca_Kabuli_NC_021160.1_3298109 | Ca_kabuli_chr01    | 3298109                        | [T/A]       | 1067289851                                 |
| Ca_Kabuli_NC_021160.1_3298206 | Ca_kabuli_chr01    | 3298206                        | [A/C]       | 1067289852                                 |
| Ca_Kabuli_NC_021160.1_3298295 | Ca_kabuli_chr01    | 3298295                        | [T/G]       | 1067289853                                 |
| Ca_Kabuli_NC_021160.1_3298317 | Ca_kabuli_chr01    | 3298317                        | [T/A]       | 1067289854                                 |



| <b>SNP IDs</b>                | <b>Chromosomes</b> | <b>Physical positions (bp)</b> | <b>SNPs</b> | <b>NCBI SNPdb accession IDs (NCBI_ss#)</b> |
|-------------------------------|--------------------|--------------------------------|-------------|--------------------------------------------|
| Ca_Kabuli_NC_021160.1_3349259 | Ca_kabuli_chr01    | 3349259                        | [C/G]       | 1067289855                                 |
| Ca_Kabuli_NC_021160.1_3349819 | Ca_kabuli_chr01    | 3349819                        | [T/C]       | 1067289856                                 |
| Ca_Kabuli_NC_021160.1_3364890 | Ca_kabuli_chr01    | 3364890                        | [T/C]       | 1067289857                                 |
| Ca_Kabuli_NC_021160.1_3405838 | Ca_kabuli_chr01    | 3405838                        | [G/T]       | 1067289858                                 |
| Ca_Kabuli_NC_021160.1_3481995 | Ca_kabuli_chr01    | 3481995                        | [T/A]       | 1067289859                                 |
| Ca_Kabuli_NC_021160.1_3503132 | Ca_kabuli_chr01    | 3503132                        | [A/C]       | 1067289860                                 |
| Ca_Kabuli_NC_021160.1_3503209 | Ca_kabuli_chr01    | 3503209                        | [T/C]       | 1067289861                                 |
| Ca_Kabuli_NC_021160.1_3503231 | Ca_kabuli_chr01    | 3503231                        | [T/G]       | 1067289862                                 |
| Ca_Kabuli_NC_021160.1_3503244 | Ca_kabuli_chr01    | 3503244                        | [A/C]       | 1067289863                                 |
| Ca_Kabuli_NC_021160.1_3503249 | Ca_kabuli_chr01    | 3503249                        | [A/T]       | 1067289864                                 |
| Ca_Kabuli_NC_021160.1_3544578 | Ca_kabuli_chr01    | 3544578                        | [T/A]       | 1067289865                                 |
| Ca_Kabuli_NC_021160.1_3544912 | Ca_kabuli_chr01    | 3544912                        | [A/C]       | 1067289866                                 |
| Ca_Kabuli_NC_021160.1_3546461 | Ca_kabuli_chr01    | 3546461                        | [C/T]       | 1067289867                                 |
| Ca_Kabuli_NC_021160.1_3546462 | Ca_kabuli_chr01    | 3546462                        | [G/C]       | 1067289868                                 |
| Ca_Kabuli_NC_021160.1_3546463 | Ca_kabuli_chr01    | 3546463                        | [G/T]       | 1067289869                                 |
| Ca_Kabuli_NC_021160.1_3607175 | Ca_kabuli_chr01    | 3607175                        | [A/G]       | 1067289870                                 |
| Ca_Kabuli_NC_021160.1_3611230 | Ca_kabuli_chr01    | 3611230                        | [A/G]       | 1067289871                                 |
| Ca_Kabuli_NC_021160.1_3711498 | Ca_kabuli_chr01    | 3711498                        | [T/G]       | 1067289872                                 |
| Ca_Kabuli_NC_021160.1_3711500 | Ca_kabuli_chr01    | 3711500                        | [A/G]       | 1067289873                                 |
| Ca_Kabuli_NC_021160.1_3711510 | Ca_kabuli_chr01    | 3711510                        | [T/A]       | 1067289874                                 |
| Ca_Kabuli_NC_021160.1_3711516 | Ca_kabuli_chr01    | 3711516                        | [T/G]       | 1067289875                                 |
| Ca_Kabuli_NC_021160.1_3711525 | Ca_kabuli_chr01    | 3711525                        | [T/G]       | 1067289876                                 |
| Ca_Kabuli_NC_021160.1_3711551 | Ca_kabuli_chr01    | 3711551                        | [A/C]       | 1067289877                                 |
| Ca_Kabuli_NC_021160.1_3736950 | Ca_kabuli_chr01    | 3736950                        | [G/A]       | 1067289878                                 |
| Ca_Kabuli_NC_021160.1_3736953 | Ca_kabuli_chr01    | 3736953                        | [G/A]       | 1067289879                                 |
| Ca_Kabuli_NC_021160.1_3736956 | Ca_kabuli_chr01    | 3736956                        | [T/G]       | 1067289880                                 |
| Ca_Kabuli_NC_021160.1_3852265 | Ca_kabuli_chr01    | 3852265                        | [A/G]       | 1067289881                                 |
| Ca_Kabuli_NC_021160.1_3853187 | Ca_kabuli_chr01    | 3853187                        | [A/C]       | 1067289882                                 |
| Ca_Kabuli_NC_021160.1_3853190 | Ca_kabuli_chr01    | 3853190                        | [A/G]       | 1067289883                                 |
| Ca_Kabuli_NC_021160.1_3853392 | Ca_kabuli_chr01    | 3853392                        | [T/C]       | 1067289884                                 |
| Ca_Kabuli_NC_021160.1_3853397 | Ca_kabuli_chr01    | 3853397                        | [T/G]       | 1067289885                                 |
| Ca_Kabuli_NC_021160.1_3853462 | Ca_kabuli_chr01    | 3853462                        | [A/G]       | 1067289886                                 |
| Ca_Kabuli_NC_021160.1_3853547 | Ca_kabuli_chr01    | 3853547                        | [T/C]       | 1067289887                                 |
| Ca_Kabuli_NC_021160.1_3909375 | Ca_kabuli_chr01    | 3909375                        | [A/G]       | 1067289888                                 |

| <b>SNP IDs</b>                | <b>Chromosomes</b> | <b>Physical positions (bp)</b> | <b>SNPs</b> | <b>NCBI SNPdb accession IDs (NCBI_ss#)</b> |
|-------------------------------|--------------------|--------------------------------|-------------|--------------------------------------------|
| Ca_Kabuli_NC_021160.1_3911111 | Ca_kabuli_chr01    | 3911111                        | [T/G]       | 1067289889                                 |
| Ca_Kabuli_NC_021160.1_3911134 | Ca_kabuli_chr01    | 3911134                        | [A/G]       | 1067289890                                 |
| Ca_Kabuli_NC_021160.1_3911408 | Ca_kabuli_chr01    | 3911408                        | [A/G]       | 1067289891                                 |
| Ca_Kabuli_NC_021160.1_3927976 | Ca_kabuli_chr01    | 3927976                        | [A/G]       | 1067289892                                 |
| Ca_Kabuli_NC_021160.1_3940980 | Ca_kabuli_chr01    | 3940980                        | [T/G]       | 1067289893                                 |
| Ca_Kabuli_NC_021160.1_3941139 | Ca_kabuli_chr01    | 3941139                        | [T/A]       | 1067289894                                 |
| Ca_Kabuli_NC_021160.1_3941141 | Ca_kabuli_chr01    | 3941141                        | [T/C]       | 1067289895                                 |
| Ca_Kabuli_NC_021160.1_3941142 | Ca_kabuli_chr01    | 3941142                        | [G/T]       | 1067289896                                 |
| Ca_Kabuli_NC_021160.1_3952796 | Ca_kabuli_chr01    | 3952796                        | [T/G]       | 1067289897                                 |
| Ca_Kabuli_NC_021160.1_3952823 | Ca_kabuli_chr01    | 3952823                        | [T/G]       | 1067289898                                 |
| Ca_Kabuli_NC_021160.1_3972668 | Ca_kabuli_chr01    | 3972668                        | [A/C]       | 1067289899                                 |
| Ca_Kabuli_NC_021160.1_4017064 | Ca_kabuli_chr01    | 4017064                        | [A/T]       | 1067289900                                 |
| Ca_Kabuli_NC_021160.1_4017077 | Ca_kabuli_chr01    | 4017077                        | [T/G]       | 1067289901                                 |
| Ca_Kabuli_NC_021160.1_4030790 | Ca_kabuli_chr01    | 4030790                        | [A/C]       | 1067289902                                 |
| Ca_Kabuli_NC_021160.1_4187752 | Ca_kabuli_chr01    | 4187752                        | [T/G]       | 1067289903                                 |
| Ca_Kabuli_NC_021160.1_4187762 | Ca_kabuli_chr01    | 4187762                        | [A/T]       | 1067289904                                 |
| Ca_Kabuli_NC_021160.1_4189333 | Ca_kabuli_chr01    | 4189333                        | [T/C]       | 1067289905                                 |
| Ca_Kabuli_NC_021160.1_4293010 | Ca_kabuli_chr01    | 4293010                        | [A/C]       | 1067289906                                 |
| Ca_Kabuli_NC_021160.1_4302705 | Ca_kabuli_chr01    | 4302705                        | [C/A]       | 1067289907                                 |
| Ca_Kabuli_NC_021160.1_4302706 | Ca_kabuli_chr01    | 4302706                        | [A/G]       | 1067289908                                 |
| Ca_Kabuli_NC_021160.1_4302770 | Ca_kabuli_chr01    | 4302770                        | [A/C]       | 1067289909                                 |
| Ca_Kabuli_NC_021160.1_4320391 | Ca_kabuli_chr01    | 4320391                        | [A/G]       | 1067289910                                 |
| Ca_Kabuli_NC_021160.1_4320404 | Ca_kabuli_chr01    | 4320404                        | [A/G]       | 1067289911                                 |
| Ca_Kabuli_NC_021160.1_4372894 | Ca_kabuli_chr01    | 4372894                        | [T/C]       | 1067289912                                 |
| Ca_Kabuli_NC_021160.1_4375775 | Ca_kabuli_chr01    | 4375775                        | [A/G]       | 1067289913                                 |
| Ca_Kabuli_NC_021160.1_4386125 | Ca_kabuli_chr01    | 4386125                        | [A/C]       | 1067289914                                 |
| Ca_Kabuli_NC_021160.1_4386145 | Ca_kabuli_chr01    | 4386145                        | [A/T]       | 1067289915                                 |
| Ca_Kabuli_NC_021160.1_4386162 | Ca_kabuli_chr01    | 4386162                        | [A/C]       | 1067289916                                 |
| Ca_Kabuli_NC_021160.1_4423934 | Ca_kabuli_chr01    | 4423934                        | [A/G]       | 1067289917                                 |
| Ca_Kabuli_NC_021160.1_4423978 | Ca_kabuli_chr01    | 4423978                        | [A/G]       | 1067289918                                 |
| Ca_Kabuli_NC_021160.1_4423984 | Ca_kabuli_chr01    | 4423984                        | [A/C]       | 1067289919                                 |
| Ca_Kabuli_NC_021160.1_4429013 | Ca_kabuli_chr01    | 4429013                        | [T/C]       | 1067289920                                 |
| Ca_Kabuli_NC_021160.1_4429024 | Ca_kabuli_chr01    | 4429024                        | [T/C]       | 1067289921                                 |
| Ca_Kabuli_NC_021160.1_4456639 | Ca_kabuli_chr01    | 4456639                        | [T/C]       | 1067289922                                 |

| <b>SNP IDs</b>                | <b>Chromosomes</b> | <b>Physical positions (bp)</b> | <b>SNPs</b> | <b>NCBI SNPdb accession IDs (NCBI_ss#)</b> |
|-------------------------------|--------------------|--------------------------------|-------------|--------------------------------------------|
| Ca_Kabuli_NC_021160.1_4456648 | Ca_kabuli_chr01    | 4456648                        | [T/A]       | 1067289923                                 |
| Ca_Kabuli_NC_021160.1_4466616 | Ca_kabuli_chr01    | 4466616                        | [T/G]       | 1067289924                                 |
| Ca_Kabuli_NC_021160.1_4569479 | Ca_kabuli_chr01    | 4569479                        | [A/C]       | 1067289925                                 |
| Ca_Kabuli_NC_021160.1_4569555 | Ca_kabuli_chr01    | 4569555                        | [T/G]       | 1067289926                                 |
| Ca_Kabuli_NC_021160.1_4569576 | Ca_kabuli_chr01    | 4569576                        | [T/G]       | 1067289927                                 |
| Ca_Kabuli_NC_021160.1_4569615 | Ca_kabuli_chr01    | 4569615                        | [T/A]       | 1067289928                                 |
| Ca_Kabuli_NC_021160.1_4569653 | Ca_kabuli_chr01    | 4569653                        | [T/C]       | 1067289929                                 |
| Ca_Kabuli_NC_021160.1_4580855 | Ca_kabuli_chr01    | 4580855                        | [T/C]       | 1067289930                                 |
| Ca_Kabuli_NC_021160.1_4580881 | Ca_kabuli_chr01    | 4580881                        | [A/G]       | 1067289931                                 |
| Ca_Kabuli_NC_021160.1_4626197 | Ca_kabuli_chr01    | 4626197                        | [A/C]       | 1067289932                                 |
| Ca_Kabuli_NC_021160.1_4631461 | Ca_kabuli_chr01    | 4631461                        | [A/C]       | 1067289933                                 |
| Ca_Kabuli_NC_021160.1_4737620 | Ca_kabuli_chr01    | 4737620                        | [G/C]       | 1067289934                                 |
| Ca_Kabuli_NC_021160.1_4737621 | Ca_kabuli_chr01    | 4737621                        | [G/T]       | 1067289935                                 |
| Ca_Kabuli_NC_021160.1_4781690 | Ca_kabuli_chr01    | 4781690                        | [A/C]       | 1067289936                                 |
| Ca_Kabuli_NC_021160.1_4781714 | Ca_kabuli_chr01    | 4781714                        | [A/T]       | 1067289937                                 |
| Ca_Kabuli_NC_021160.1_4827194 | Ca_kabuli_chr01    | 4827194                        | [A/C]       | 1067289938                                 |
| Ca_Kabuli_NC_021160.1_4827200 | Ca_kabuli_chr01    | 4827200                        | [A/C]       | 1067289939                                 |
| Ca_Kabuli_NC_021160.1_4827202 | Ca_kabuli_chr01    | 4827202                        | [T/C]       | 1067289940                                 |
| Ca_Kabuli_NC_021160.1_4899835 | Ca_kabuli_chr01    | 4899835                        | [T/G]       | 1067289941                                 |
| Ca_Kabuli_NC_021160.1_4899882 | Ca_kabuli_chr01    | 4899882                        | [A/C]       | 1067289942                                 |
| Ca_Kabuli_NC_021160.1_4902036 | Ca_kabuli_chr01    | 4902036                        | [C/T]       | 1067289943                                 |
| Ca_Kabuli_NC_021160.1_4906830 | Ca_kabuli_chr01    | 4906830                        | [T/C]       | 1067289944                                 |
| Ca_Kabuli_NC_021160.1_4906831 | Ca_kabuli_chr01    | 4906831                        | [G/T]       | 1067289945                                 |
| Ca_Kabuli_NC_021160.1_4908732 | Ca_kabuli_chr01    | 4908732                        | [A/T]       | 1067289946                                 |
| Ca_Kabuli_NC_021160.1_4908733 | Ca_kabuli_chr01    | 4908733                        | [C/A]       | 1067289947                                 |
| Ca_Kabuli_NC_021160.1_4948887 | Ca_kabuli_chr01    | 4948887                        | [T/G]       | 1067289948                                 |
| Ca_Kabuli_NC_021160.1_4950486 | Ca_kabuli_chr01    | 4950486                        | [A/G]       | 1067289949                                 |
| Ca_Kabuli_NC_021160.1_4950743 | Ca_kabuli_chr01    | 4950743                        | [T/G]       | 1067289950                                 |
| Ca_Kabuli_NC_021160.1_4996269 | Ca_kabuli_chr01    | 4996269                        | [A/C]       | 1067289951                                 |
| Ca_Kabuli_NC_021160.1_4996279 | Ca_kabuli_chr01    | 4996279                        | [G/C]       | 1067289952                                 |
| Ca_Kabuli_NC_021160.1_4996282 | Ca_kabuli_chr01    | 4996282                        | [A/T]       | 1067289953                                 |
| Ca_Kabuli_NC_021160.1_4996302 | Ca_kabuli_chr01    | 4996302                        | [T/C]       | 1067289954                                 |
| Ca_Kabuli_NC_021160.1_4996818 | Ca_kabuli_chr01    | 4996818                        | [T/G]       | 1067289955                                 |
| Ca_Kabuli_NC_021160.1_4996834 | Ca_kabuli_chr01    | 4996834                        | [A/G]       | 1067289956                                 |

| <b>SNP IDs</b>                | <b>Chromosomes</b> | <b>Physical positions (bp)</b> | <b>SNPs</b> | <b>NCBI SNPdb accession IDs (NCBI_ss#)</b> |
|-------------------------------|--------------------|--------------------------------|-------------|--------------------------------------------|
| Ca_Kabuli_NC_021160.1_5068304 | Ca_kabuli_chr01    | 5068304                        | [T/C]       | 1067289957                                 |
| Ca_Kabuli_NC_021160.1_5068311 | Ca_kabuli_chr01    | 5068311                        | [T/C]       | 1067289958                                 |
| Ca_Kabuli_NC_021160.1_5068341 | Ca_kabuli_chr01    | 5068341                        | [A/C]       | 1067289959                                 |
| Ca_Kabuli_NC_021160.1_5071992 | Ca_kabuli_chr01    | 5071992                        | [T/A]       | 1067289960                                 |
| Ca_Kabuli_NC_021160.1_5087503 | Ca_kabuli_chr01    | 5087503                        | [T/G]       | 1067289961                                 |
| Ca_Kabuli_NC_021160.1_5094543 | Ca_kabuli_chr01    | 5094543                        | [A/C]       | 1067289962                                 |
| Ca_Kabuli_NC_021160.1_5094544 | Ca_kabuli_chr01    | 5094544                        | [G/T]       | 1067289963                                 |
| Ca_Kabuli_NC_021160.1_5107995 | Ca_kabuli_chr01    | 5107995                        | [A/C]       | 1067289964                                 |
| Ca_Kabuli_NC_021160.1_5108029 | Ca_kabuli_chr01    | 5108029                        | [A/G]       | 1067289965                                 |
| Ca_Kabuli_NC_021160.1_5164105 | Ca_kabuli_chr01    | 5164105                        | [T/G]       | 1067289966                                 |
| Ca_Kabuli_NC_021160.1_5164186 | Ca_kabuli_chr01    | 5164186                        | [G/A]       | 1067289967                                 |
| Ca_Kabuli_NC_021160.1_5164198 | Ca_kabuli_chr01    | 5164198                        | [C/A]       | 1067289968                                 |
| Ca_Kabuli_NC_021160.1_5249782 | Ca_kabuli_chr01    | 5249782                        | [T/C]       | 1067289969                                 |
| Ca_Kabuli_NC_021160.1_5249783 | Ca_kabuli_chr01    | 5249783                        | [C/T]       | 1067289970                                 |
| Ca_Kabuli_NC_021160.1_5249784 | Ca_kabuli_chr01    | 5249784                        | [T/C]       | 1067289971                                 |
| Ca_Kabuli_NC_021160.1_5249798 | Ca_kabuli_chr01    | 5249798                        | [T/C]       | 1067289972                                 |
| Ca_Kabuli_NC_021160.1_5249808 | Ca_kabuli_chr01    | 5249808                        | [T/C]       | 1067289973                                 |
| Ca_Kabuli_NC_021160.1_5249822 | Ca_kabuli_chr01    | 5249822                        | [T/A]       | 1067289974                                 |
| Ca_Kabuli_NC_021160.1_5249868 | Ca_kabuli_chr01    | 5249868                        | [G/A]       | 1067289975                                 |
| Ca_Kabuli_NC_021160.1_5288463 | Ca_kabuli_chr01    | 5288463                        | [A/C]       | 1067289976                                 |
| Ca_Kabuli_NC_021160.1_5288475 | Ca_kabuli_chr01    | 5288475                        | [A/C]       | 1067289977                                 |
| Ca_Kabuli_NC_021160.1_5288478 | Ca_kabuli_chr01    | 5288478                        | [A/C]       | 1067289978                                 |
| Ca_Kabuli_NC_021160.1_5363160 | Ca_kabuli_chr01    | 5363160                        | [A/C]       | 1067289979                                 |
| Ca_Kabuli_NC_021160.1_5430636 | Ca_kabuli_chr01    | 5430636                        | [T/C]       | 1067289980                                 |
| Ca_Kabuli_NC_021160.1_5430640 | Ca_kabuli_chr01    | 5430640                        | [A/T]       | 1067289981                                 |
| Ca_Kabuli_NC_021160.1_5430645 | Ca_kabuli_chr01    | 5430645                        | [A/C]       | 1067289982                                 |
| Ca_Kabuli_NC_021160.1_5430652 | Ca_kabuli_chr01    | 5430652                        | [T/C]       | 1067289983                                 |
| Ca_Kabuli_NC_021160.1_5430676 | Ca_kabuli_chr01    | 5430676                        | [T/A]       | 1067289984                                 |
| Ca_Kabuli_NC_021160.1_5487600 | Ca_kabuli_chr01    | 5487600                        | [A/C]       | 1067289985                                 |
| Ca_Kabuli_NC_021160.1_5489570 | Ca_kabuli_chr01    | 5489570                        | [T/G]       | 1067289986                                 |
| Ca_Kabuli_NC_021160.1_5498288 | Ca_kabuli_chr01    | 5498288                        | [T/G]       | 1067289987                                 |
| Ca_Kabuli_NC_021160.1_5498291 | Ca_kabuli_chr01    | 5498291                        | [T/G]       | 1067289988                                 |
| Ca_Kabuli_NC_021160.1_5567072 | Ca_kabuli_chr01    | 5567072                        | [C/T]       | 1067289989                                 |
| Ca_Kabuli_NC_021160.1_5576985 | Ca_kabuli_chr01    | 5576985                        | [A/G]       | 1067289990                                 |

| <b>SNP IDs</b>                | <b>Chromosomes</b> | <b>Physical positions (bp)</b> | <b>SNPs</b> | <b>NCBI SNPdb accession IDs (NCBI_ss#)</b> |
|-------------------------------|--------------------|--------------------------------|-------------|--------------------------------------------|
| Ca_Kabuli_NC_021160.1_5666149 | Ca_kabuli_chr01    | 5666149                        | [A/C]       | 1067289991                                 |
| Ca_Kabuli_NC_021160.1_5666152 | Ca_kabuli_chr01    | 5666152                        | [A/G]       | 1067289992                                 |
| Ca_Kabuli_NC_021160.1_5666237 | Ca_kabuli_chr01    | 5666237                        | [T/G]       | 1067289993                                 |
| Ca_Kabuli_NC_021160.1_5666260 | Ca_kabuli_chr01    | 5666260                        | [T/G]       | 1067289994                                 |
| Ca_Kabuli_NC_021160.1_5666263 | Ca_kabuli_chr01    | 5666263                        | [T/G]       | 1067289995                                 |
| Ca_Kabuli_NC_021160.1_5749429 | Ca_kabuli_chr01    | 5749429                        | [A/G]       | 1067289996                                 |
| Ca_Kabuli_NC_021160.1_5749438 | Ca_kabuli_chr01    | 5749438                        | [T/G]       | 1067289997                                 |
| Ca_Kabuli_NC_021160.1_5749452 | Ca_kabuli_chr01    | 5749452                        | [C/T]       | 1067289998                                 |
| Ca_Kabuli_NC_021160.1_5793815 | Ca_kabuli_chr01    | 5793815                        | [G/A]       | 1067289999                                 |
| Ca_Kabuli_NC_021160.1_5862586 | Ca_kabuli_chr01    | 5862586                        | [T/C]       | 1067290000                                 |
| Ca_Kabuli_NC_021160.1_5933308 | Ca_kabuli_chr01    | 5933308                        | [T/G]       | 1067290001                                 |
| Ca_Kabuli_NC_021160.1_5978264 | Ca_kabuli_chr01    | 5978264                        | [A/C]       | 1067290002                                 |
| Ca_Kabuli_NC_021160.1_5978287 | Ca_kabuli_chr01    | 5978287                        | [C/T]       | 1067290003                                 |
| Ca_Kabuli_NC_021160.1_6011790 | Ca_kabuli_chr01    | 6011790                        | [A/G]       | 1067290004                                 |
| Ca_Kabuli_NC_021160.1_6088245 | Ca_kabuli_chr01    | 6088245                        | [T/C]       | 1067290005                                 |
| Ca_Kabuli_NC_021160.1_6097569 | Ca_kabuli_chr01    | 6097569                        | [G/A]       | 1067290006                                 |
| Ca_Kabuli_NC_021160.1_6097599 | Ca_kabuli_chr01    | 6097599                        | [A/C]       | 1067290007                                 |
| Ca_Kabuli_NC_021160.1_6224010 | Ca_kabuli_chr01    | 6224010                        | [G/C]       | 1067290008                                 |
| Ca_Kabuli_NC_021160.1_6224015 | Ca_kabuli_chr01    | 6224015                        | [T/C]       | 1067290009                                 |
| Ca_Kabuli_NC_021160.1_6257582 | Ca_kabuli_chr01    | 6257582                        | [T/C]       | 1067290010                                 |
| Ca_Kabuli_NC_021160.1_6257712 | Ca_kabuli_chr01    | 6257712                        | [T/A]       | 1067290011                                 |
| Ca_Kabuli_NC_021160.1_6259026 | Ca_kabuli_chr01    | 6259026                        | [C/T]       | 1067290012                                 |
| Ca_Kabuli_NC_021160.1_6259419 | Ca_kabuli_chr01    | 6259419                        | [G/T]       | 1067290013                                 |
| Ca_Kabuli_NC_021160.1_6259466 | Ca_kabuli_chr01    | 6259466                        | [T/A]       | 1067290014                                 |
| Ca_Kabuli_NC_021160.1_6268630 | Ca_kabuli_chr01    | 6268630                        | [A/G]       | 1067290015                                 |
| Ca_Kabuli_NC_021160.1_6268776 | Ca_kabuli_chr01    | 6268776                        | [A/C]       | 1067290016                                 |
| Ca_Kabuli_NC_021160.1_6268787 | Ca_kabuli_chr01    | 6268787                        | [G/A]       | 1067290017                                 |
| Ca_Kabuli_NC_021160.1_6279597 | Ca_kabuli_chr01    | 6279597                        | [A/C]       | 1067290018                                 |
| Ca_Kabuli_NC_021160.1_6296986 | Ca_kabuli_chr01    | 6296986                        | [A/C]       | 1067290019                                 |
| Ca_Kabuli_NC_021160.1_6304919 | Ca_kabuli_chr01    | 6304919                        | [C/A]       | 1067290020                                 |
| Ca_Kabuli_NC_021160.1_6315397 | Ca_kabuli_chr01    | 6315397                        | [G/C]       | 1067290021                                 |
| Ca_Kabuli_NC_021160.1_6315399 | Ca_kabuli_chr01    | 6315399                        | [G/T]       | 1067290022                                 |
| Ca_Kabuli_NC_021160.1_6329022 | Ca_kabuli_chr01    | 6329022                        | [T/C]       | 1067290023                                 |
| Ca_Kabuli_NC_021160.1_6329054 | Ca_kabuli_chr01    | 6329054                        | [A/G]       | 1067290024                                 |

| <b>SNP IDs</b>                | <b>Chromosomes</b> | <b>Physical positions (bp)</b> | <b>SNPs</b> | <b>NCBI SNPdb accession IDs (NCBI_ss#)</b> |
|-------------------------------|--------------------|--------------------------------|-------------|--------------------------------------------|
| Ca_Kabuli_NC_021160.1_6329089 | Ca_kabuli_chr01    | 6329089                        | [A/G]       | 1067290025                                 |
| Ca_Kabuli_NC_021160.1_6329096 | Ca_kabuli_chr01    | 6329096                        | [C/T]       | 1067290026                                 |
| Ca_Kabuli_NC_021160.1_6329121 | Ca_kabuli_chr01    | 6329121                        | [G/A]       | 1067290027                                 |
| Ca_Kabuli_NC_021160.1_6329786 | Ca_kabuli_chr01    | 6329786                        | [T/G]       | 1067290028                                 |
| Ca_Kabuli_NC_021160.1_6329847 | Ca_kabuli_chr01    | 6329847                        | [G/A]       | 1067290029                                 |
| Ca_Kabuli_NC_021160.1_6331686 | Ca_kabuli_chr01    | 6331686                        | [A/G]       | 1067290030                                 |
| Ca_Kabuli_NC_021160.1_6332104 | Ca_kabuli_chr01    | 6332104                        | [G/A]       | 1067290031                                 |
| Ca_Kabuli_NC_021160.1_6332153 | Ca_kabuli_chr01    | 6332153                        | [T/C]       | 1067290032                                 |
| Ca_Kabuli_NC_021160.1_6390541 | Ca_kabuli_chr01    | 6390541                        | [T/A]       | 1067290033                                 |
| Ca_Kabuli_NC_021160.1_6391016 | Ca_kabuli_chr01    | 6391016                        | [A/G]       | 1067290034                                 |
| Ca_Kabuli_NC_021160.1_6433592 | Ca_kabuli_chr01    | 6433592                        | [G/T]       | 1067290035                                 |
| Ca_Kabuli_NC_021160.1_6433838 | Ca_kabuli_chr01    | 6433838                        | [C/T]       | 1067290036                                 |
| Ca_Kabuli_NC_021160.1_6433919 | Ca_kabuli_chr01    | 6433919                        | [A/C]       | 1067290037                                 |
| Ca_Kabuli_NC_021160.1_6433934 | Ca_kabuli_chr01    | 6433934                        | [T/A]       | 1067290038                                 |
| Ca_Kabuli_NC_021160.1_6435319 | Ca_kabuli_chr01    | 6435319                        | [T/C]       | 1067290039                                 |
| Ca_Kabuli_NC_021160.1_6435331 | Ca_kabuli_chr01    | 6435331                        | [T/C]       | 1067290040                                 |
| Ca_Kabuli_NC_021160.1_6435499 | Ca_kabuli_chr01    | 6435499                        | [C/T]       | 1067290041                                 |
| Ca_Kabuli_NC_021160.1_6437643 | Ca_kabuli_chr01    | 6437643                        | [A/G]       | 1067290042                                 |
| Ca_Kabuli_NC_021160.1_6478765 | Ca_kabuli_chr01    | 6478765                        | [G/A]       | 1067290043                                 |
| Ca_Kabuli_NC_021160.1_6478794 | Ca_kabuli_chr01    | 6478794                        | [G/A]       | 1067290044                                 |
| Ca_Kabuli_NC_021160.1_6520998 | Ca_kabuli_chr01    | 6520998                        | [T/C]       | 1067290045                                 |
| Ca_Kabuli_NC_021160.1_6591483 | Ca_kabuli_chr01    | 6591483                        | [T/G]       | 1067290046                                 |
| Ca_Kabuli_NC_021160.1_6591493 | Ca_kabuli_chr01    | 6591493                        | [A/T]       | 1067290047                                 |
| Ca_Kabuli_NC_021160.1_6591527 | Ca_kabuli_chr01    | 6591527                        | [T/G]       | 1067290048                                 |
| Ca_Kabuli_NC_021160.1_6621746 | Ca_kabuli_chr01    | 6621746                        | [T/C]       | 1067290049                                 |
| Ca_Kabuli_NC_021160.1_6621752 | Ca_kabuli_chr01    | 6621752                        | [T/G]       | 1067290050                                 |
| Ca_Kabuli_NC_021160.1_6621759 | Ca_kabuli_chr01    | 6621759                        | [G/A]       | 1067290051                                 |
| Ca_Kabuli_NC_021160.1_6635359 | Ca_kabuli_chr01    | 6635359                        | [A/C]       | 1067290052                                 |
| Ca_Kabuli_NC_021160.1_6635791 | Ca_kabuli_chr01    | 6635791                        | [A/G]       | 1067290053                                 |
| Ca_Kabuli_NC_021160.1_6635809 | Ca_kabuli_chr01    | 6635809                        | [A/G]       | 1067290054                                 |
| Ca_Kabuli_NC_021160.1_6678449 | Ca_kabuli_chr01    | 6678449                        | [T/G]       | 1067290055                                 |
| Ca_Kabuli_NC_021160.1_6678554 | Ca_kabuli_chr01    | 6678554                        | [T/G]       | 1067290056                                 |
| Ca_Kabuli_NC_021160.1_6678612 | Ca_kabuli_chr01    | 6678612                        | [A/G]       | 1067290057                                 |
| Ca_Kabuli_NC_021160.1_6734885 | Ca_kabuli_chr01    | 6734885                        | [A/G]       | 1067290058                                 |

| <b>SNP IDs</b>                | <b>Chromosomes</b> | <b>Physical positions (bp)</b> | <b>SNPs</b> | <b>NCBI SNPdb accession IDs (NCBI_ss#)</b> |
|-------------------------------|--------------------|--------------------------------|-------------|--------------------------------------------|
| Ca_Kabuli_NC_021160.1_6761335 | Ca_kabuli_chr01    | 6761335                        | [C/A]       | 1067290059                                 |
| Ca_Kabuli_NC_021160.1_6803365 | Ca_kabuli_chr01    | 6803365                        | [A/G]       | 1067290060                                 |
| Ca_Kabuli_NC_021160.1_6803370 | Ca_kabuli_chr01    | 6803370                        | [T/C]       | 1067290061                                 |
| Ca_Kabuli_NC_021160.1_6848555 | Ca_kabuli_chr01    | 6848555                        | [A/C]       | 1067290062                                 |
| Ca_Kabuli_NC_021160.1_6879106 | Ca_kabuli_chr01    | 6879106                        | [T/C]       | 1067290063                                 |
| Ca_Kabuli_NC_021160.1_6879157 | Ca_kabuli_chr01    | 6879157                        | [A/C]       | 1067290064                                 |
| Ca_Kabuli_NC_021160.1_6880831 | Ca_kabuli_chr01    | 6880831                        | [A/C]       | 1067290065                                 |
| Ca_Kabuli_NC_021160.1_6880849 | Ca_kabuli_chr01    | 6880849                        | [A/G]       | 1067290066                                 |
| Ca_Kabuli_NC_021160.1_6880903 | Ca_kabuli_chr01    | 6880903                        | [A/T]       | 1067290067                                 |
| Ca_Kabuli_NC_021160.1_6881779 | Ca_kabuli_chr01    | 6881779                        | [A/G]       | 1067290068                                 |
| Ca_Kabuli_NC_021160.1_6911785 | Ca_kabuli_chr01    | 6911785                        | [T/C]       | 1067290069                                 |
| Ca_Kabuli_NC_021160.1_6952381 | Ca_kabuli_chr01    | 6952381                        | [T/G]       | 1067290070                                 |
| Ca_Kabuli_NC_021160.1_7066766 | Ca_kabuli_chr01    | 7066766                        | [A/G]       | 1067290071                                 |
| Ca_Kabuli_NC_021160.1_7066768 | Ca_kabuli_chr01    | 7066768                        | [A/C]       | 1067290072                                 |
| Ca_Kabuli_NC_021160.1_7066781 | Ca_kabuli_chr01    | 7066781                        | [A/G]       | 1067290073                                 |
| Ca_Kabuli_NC_021160.1_7066793 | Ca_kabuli_chr01    | 7066793                        | [A/C]       | 1067290074                                 |
| Ca_Kabuli_NC_021160.1_7084295 | Ca_kabuli_chr01    | 7084295                        | [T/C]       | 1067290075                                 |
| Ca_Kabuli_NC_021160.1_7084306 | Ca_kabuli_chr01    | 7084306                        | [A/C]       | 1067290076                                 |
| Ca_Kabuli_NC_021160.1_7111622 | Ca_kabuli_chr01    | 7111622                        | [A/G]       | 1067290077                                 |
| Ca_Kabuli_NC_021160.1_7160640 | Ca_kabuli_chr01    | 7160640                        | [T/G]       | 1067290078                                 |
| Ca_Kabuli_NC_021160.1_7160645 | Ca_kabuli_chr01    | 7160645                        | [T/C]       | 1067290079                                 |
| Ca_Kabuli_NC_021160.1_7160664 | Ca_kabuli_chr01    | 7160664                        | [A/G]       | 1067290080                                 |
| Ca_Kabuli_NC_021160.1_7183663 | Ca_kabuli_chr01    | 7183663                        | [A/G]       | 1067290081                                 |
| Ca_Kabuli_NC_021160.1_7231728 | Ca_kabuli_chr01    | 7231728                        | [T/C]       | 1067290082                                 |
| Ca_Kabuli_NC_021160.1_7327934 | Ca_kabuli_chr01    | 7327934                        | [G/T]       | 1067290083                                 |
| Ca_Kabuli_NC_021160.1_7330067 | Ca_kabuli_chr01    | 7330067                        | [A/G]       | 1067290084                                 |
| Ca_Kabuli_NC_021160.1_7439391 | Ca_kabuli_chr01    | 7439391                        | [A/C]       | 1067290085                                 |
| Ca_Kabuli_NC_021160.1_7440335 | Ca_kabuli_chr01    | 7440335                        | [T/C]       | 1067290086                                 |
| Ca_Kabuli_NC_021160.1_7440343 | Ca_kabuli_chr01    | 7440343                        | [A/G]       | 1067290087                                 |
| Ca_Kabuli_NC_021160.1_7440354 | Ca_kabuli_chr01    | 7440354                        | [A/G]       | 1067290088                                 |
| Ca_Kabuli_NC_021160.1_7486081 | Ca_kabuli_chr01    | 7486081                        | [T/G]       | 1067290089                                 |
| Ca_Kabuli_NC_021160.1_7486104 | Ca_kabuli_chr01    | 7486104                        | [A/C]       | 1067290090                                 |
| Ca_Kabuli_NC_021160.1_7486109 | Ca_kabuli_chr01    | 7486109                        | [T/G]       | 1067290091                                 |
| Ca_Kabuli_NC_021160.1_7486195 | Ca_kabuli_chr01    | 7486195                        | [T/C]       | 1067290092                                 |

| <b>SNP IDs</b>                | <b>Chromosomes</b> | <b>Physical positions (bp)</b> | <b>SNPs</b> | <b>NCBI SNPdb accession IDs (NCBI_ss#)</b> |
|-------------------------------|--------------------|--------------------------------|-------------|--------------------------------------------|
| Ca_Kabuli_NC_021160.1_7486199 | Ca_kabuli_chr01    | 7486199                        | [A/G]       | 1067290093                                 |
| Ca_Kabuli_NC_021160.1_7486207 | Ca_kabuli_chr01    | 7486207                        | [A/G]       | 1067290094                                 |
| Ca_Kabuli_NC_021160.1_7486222 | Ca_kabuli_chr01    | 7486222                        | [T/G]       | 1067290095                                 |
| Ca_Kabuli_NC_021160.1_7500494 | Ca_kabuli_chr01    | 7500494                        | [T/G]       | 1067290096                                 |
| Ca_Kabuli_NC_021160.1_7500497 | Ca_kabuli_chr01    | 7500497                        | [T/G]       | 1067290097                                 |
| Ca_Kabuli_NC_021160.1_7500514 | Ca_kabuli_chr01    | 7500514                        | [C/A]       | 1067290098                                 |
| Ca_Kabuli_NC_021160.1_7500515 | Ca_kabuli_chr01    | 7500515                        | [C/G]       | 1067290099                                 |
| Ca_Kabuli_NC_021160.1_7500516 | Ca_kabuli_chr01    | 7500516                        | [G/A]       | 1067290100                                 |
| Ca_Kabuli_NC_021160.1_7500627 | Ca_kabuli_chr01    | 7500627                        | [T/C]       | 1067290101                                 |
| Ca_Kabuli_NC_021160.1_7504924 | Ca_kabuli_chr01    | 7504924                        | [T/A]       | 1067290102                                 |
| Ca_Kabuli_NC_021160.1_7509839 | Ca_kabuli_chr01    | 7509839                        | [A/T]       | 1067290103                                 |
| Ca_Kabuli_NC_021160.1_7554807 | Ca_kabuli_chr01    | 7554807                        | [A/C]       | 1067290104                                 |
| Ca_Kabuli_NC_021160.1_7554818 | Ca_kabuli_chr01    | 7554818                        | [A/G]       | 1067290105                                 |
| Ca_Kabuli_NC_021160.1_7554828 | Ca_kabuli_chr01    | 7554828                        | [A/G]       | 1067290106                                 |
| Ca_Kabuli_NC_021160.1_7565585 | Ca_kabuli_chr01    | 7565585                        | [C/G]       | 1067290107                                 |
| Ca_Kabuli_NC_021160.1_7565676 | Ca_kabuli_chr01    | 7565676                        | [T/G]       | 1067290108                                 |
| Ca_Kabuli_NC_021160.1_7604966 | Ca_kabuli_chr01    | 7604966                        | [A/C]       | 1067290109                                 |
| Ca_Kabuli_NC_021160.1_7678588 | Ca_kabuli_chr01    | 7678588                        | [G/A]       | 1067290110                                 |
| Ca_Kabuli_NC_021160.1_7679328 | Ca_kabuli_chr01    | 7679328                        | [A/G]       | 1067290111                                 |
| Ca_Kabuli_NC_021160.1_7690613 | Ca_kabuli_chr01    | 7690613                        | [T/G]       | 1067290112                                 |
| Ca_Kabuli_NC_021160.1_7690620 | Ca_kabuli_chr01    | 7690620                        | [T/G]       | 1067290113                                 |
| Ca_Kabuli_NC_021160.1_7811388 | Ca_kabuli_chr01    | 7811388                        | [C/T]       | 1067290114                                 |
| Ca_Kabuli_NC_021160.1_7811444 | Ca_kabuli_chr01    | 7811444                        | [G/T]       | 1067290115                                 |
| Ca_Kabuli_NC_021160.1_7897505 | Ca_kabuli_chr01    | 7897505                        | [T/G]       | 1067290116                                 |
| Ca_Kabuli_NC_021160.1_7897545 | Ca_kabuli_chr01    | 7897545                        | [A/G]       | 1067290117                                 |
| Ca_Kabuli_NC_021160.1_7915141 | Ca_kabuli_chr01    | 7915141                        | [G/A]       | 1067290118                                 |
| Ca_Kabuli_NC_021160.1_7916143 | Ca_kabuli_chr01    | 7916143                        | [T/G]       | 1067290119                                 |
| Ca_Kabuli_NC_021160.1_7916152 | Ca_kabuli_chr01    | 7916152                        | [G/A]       | 1067290120                                 |
| Ca_Kabuli_NC_021160.1_7916540 | Ca_kabuli_chr01    | 7916540                        | [A/T]       | 1067290121                                 |
| Ca_Kabuli_NC_021160.1_7916564 | Ca_kabuli_chr01    | 7916564                        | [A/G]       | 1067290122                                 |
| Ca_Kabuli_NC_021160.1_7916572 | Ca_kabuli_chr01    | 7916572                        | [T/C]       | 1067290123                                 |
| Ca_Kabuli_NC_021160.1_7916583 | Ca_kabuli_chr01    | 7916583                        | [T/G]       | 1067290124                                 |
| Ca_Kabuli_NC_021160.1_7916636 | Ca_kabuli_chr01    | 7916636                        | [T/C]       | 1067290125                                 |
| Ca_Kabuli_NC_021160.1_7925666 | Ca_kabuli_chr01    | 7925666                        | [A/C]       | 1067290126                                 |



| <b>SNP IDs</b>                | <b>Chromosomes</b> | <b>Physical positions (bp)</b> | <b>SNPs</b> | <b>NCBI SNPdb accession IDs (NCBI_ss#)</b> |
|-------------------------------|--------------------|--------------------------------|-------------|--------------------------------------------|
| Ca_Kabuli_NC_021160.1_7925774 | Ca_kabuli_chr01    | 7925774                        | [C/T]       | 1067290127                                 |
| Ca_Kabuli_NC_021160.1_7925780 | Ca_kabuli_chr01    | 7925780                        | [A/C]       | 1067290128                                 |
| Ca_Kabuli_NC_021160.1_7934892 | Ca_kabuli_chr01    | 7934892                        | [G/T]       | 1067290129                                 |
| Ca_Kabuli_NC_021160.1_7935389 | Ca_kabuli_chr01    | 7935389                        | [A/T]       | 1067290130                                 |
| Ca_Kabuli_NC_021160.1_7935401 | Ca_kabuli_chr01    | 7935401                        | [T/G]       | 1067290131                                 |
| Ca_Kabuli_NC_021160.1_7969141 | Ca_kabuli_chr01    | 7969141                        | [A/C]       | 1067290132                                 |
| Ca_Kabuli_NC_021160.1_7969189 | Ca_kabuli_chr01    | 7969189                        | [T/G]       | 1067290133                                 |
| Ca_Kabuli_NC_021160.1_7969218 | Ca_kabuli_chr01    | 7969218                        | [T/C]       | 1067290134                                 |
| Ca_Kabuli_NC_021160.1_7971308 | Ca_kabuli_chr01    | 7971308                        | [G/A]       | 1067290135                                 |
| Ca_Kabuli_NC_021160.1_8036666 | Ca_kabuli_chr01    | 8036666                        | [C/T]       | 1067290136                                 |
| Ca_Kabuli_NC_021160.1_8036903 | Ca_kabuli_chr01    | 8036903                        | [A/T]       | 1067290137                                 |
| Ca_Kabuli_NC_021160.1_8036917 | Ca_kabuli_chr01    | 8036917                        | [T/G]       | 1067290138                                 |
| Ca_Kabuli_NC_021160.1_8045800 | Ca_kabuli_chr01    | 8045800                        | [A/C]       | 1067290139                                 |
| Ca_Kabuli_NC_021160.1_8045827 | Ca_kabuli_chr01    | 8045827                        | [T/G]       | 1067290140                                 |
| Ca_Kabuli_NC_021160.1_8072470 | Ca_kabuli_chr01    | 8072470                        | [T/G]       | 1067290141                                 |
| Ca_Kabuli_NC_021160.1_8075742 | Ca_kabuli_chr01    | 8075742                        | [G/T]       | 1067290142                                 |
| Ca_Kabuli_NC_021160.1_8100906 | Ca_kabuli_chr01    | 8100906                        | [C/T]       | 1067290143                                 |
| Ca_Kabuli_NC_021160.1_8108014 | Ca_kabuli_chr01    | 8108014                        | [C/T]       | 1067290144                                 |
| Ca_Kabuli_NC_021160.1_8108207 | Ca_kabuli_chr01    | 8108207                        | [T/A]       | 1067290145                                 |
| Ca_Kabuli_NC_021160.1_8108211 | Ca_kabuli_chr01    | 8108211                        | [A/C]       | 1067290146                                 |
| Ca_Kabuli_NC_021160.1_8108226 | Ca_kabuli_chr01    | 8108226                        | [A/G]       | 1067290147                                 |
| Ca_Kabuli_NC_021160.1_8108233 | Ca_kabuli_chr01    | 8108233                        | [T/G]       | 1067290148                                 |
| Ca_Kabuli_NC_021160.1_8112247 | Ca_kabuli_chr01    | 8112247                        | [A/G]       | 1067290149                                 |
| Ca_Kabuli_NC_021160.1_8112280 | Ca_kabuli_chr01    | 8112280                        | [T/A]       | 1067290150                                 |
| Ca_Kabuli_NC_021160.1_8112294 | Ca_kabuli_chr01    | 8112294                        | [T/G]       | 1067290151                                 |
| Ca_Kabuli_NC_021160.1_8112343 | Ca_kabuli_chr01    | 8112343                        | [C/T]       | 1067290152                                 |
| Ca_Kabuli_NC_021160.1_8113173 | Ca_kabuli_chr01    | 8113173                        | [T/C]       | 1067290153                                 |
| Ca_Kabuli_NC_021160.1_8113179 | Ca_kabuli_chr01    | 8113179                        | [T/A]       | 1067290154                                 |
| Ca_Kabuli_NC_021160.1_8113260 | Ca_kabuli_chr01    | 8113260                        | [A/G]       | 1067290155                                 |
| Ca_Kabuli_NC_021160.1_8113398 | Ca_kabuli_chr01    | 8113398                        | [C/G]       | 1067290156                                 |
| Ca_Kabuli_NC_021160.1_8113403 | Ca_kabuli_chr01    | 8113403                        | [A/T]       | 1067290157                                 |
| Ca_Kabuli_NC_021160.1_8113449 | Ca_kabuli_chr01    | 8113449                        | [T/A]       | 1067290158                                 |
| Ca_Kabuli_NC_021160.1_8113502 | Ca_kabuli_chr01    | 8113502                        | [T/G]       | 1067290159                                 |
| Ca_Kabuli_NC_021160.1_8131096 | Ca_kabuli_chr01    | 8131096                        | [A/C]       | 1067290160                                 |

| <b>SNP IDs</b>                | <b>Chromosomes</b> | <b>Physical positions (bp)</b> | <b>SNPs</b> | <b>NCBI SNPdb accession IDs (NCBI_ss#)</b> |
|-------------------------------|--------------------|--------------------------------|-------------|--------------------------------------------|
| Ca_Kabuli_NC_021160.1_8131157 | Ca_kabuli_chr01    | 8131157                        | [T/G]       | 1067290161                                 |
| Ca_Kabuli_NC_021160.1_8133516 | Ca_kabuli_chr01    | 8133516                        | [G/A]       | 1067290162                                 |
| Ca_Kabuli_NC_021160.1_8231238 | Ca_kabuli_chr01    | 8231238                        | [A/C]       | 1067290163                                 |
| Ca_Kabuli_NC_021160.1_8238567 | Ca_kabuli_chr01    | 8238567                        | [A/G]       | 1067290164                                 |
| Ca_Kabuli_NC_021160.1_8238575 | Ca_kabuli_chr01    | 8238575                        | [A/G]       | 1067290165                                 |
| Ca_Kabuli_NC_021160.1_8238577 | Ca_kabuli_chr01    | 8238577                        | [G/C]       | 1067290166                                 |
| Ca_Kabuli_NC_021160.1_8238584 | Ca_kabuli_chr01    | 8238584                        | [A/T]       | 1067290167                                 |
| Ca_Kabuli_NC_021160.1_8238598 | Ca_kabuli_chr01    | 8238598                        | [T/C]       | 1067290168                                 |
| Ca_Kabuli_NC_021160.1_8238621 | Ca_kabuli_chr01    | 8238621                        | [T/C]       | 1067290169                                 |
| Ca_Kabuli_NC_021160.1_8389189 | Ca_kabuli_chr01    | 8389189                        | [C/A]       | 1067290170                                 |
| Ca_Kabuli_NC_021160.1_8389216 | Ca_kabuli_chr01    | 8389216                        | [T/C]       | 1067290171                                 |
| Ca_Kabuli_NC_021160.1_8389256 | Ca_kabuli_chr01    | 8389256                        | [A/C]       | 1067290172                                 |
| Ca_Kabuli_NC_021160.1_8465699 | Ca_kabuli_chr01    | 8465699                        | [A/G]       | 1067290173                                 |
| Ca_Kabuli_NC_021160.1_8465711 | Ca_kabuli_chr01    | 8465711                        | [T/C]       | 1067290174                                 |
| Ca_Kabuli_NC_021160.1_8542017 | Ca_kabuli_chr01    | 8542017                        | [T/A]       | 1067290175                                 |
| Ca_Kabuli_NC_021160.1_8669467 | Ca_kabuli_chr01    | 8669467                        | [C/T]       | 1067290176                                 |
| Ca_Kabuli_NC_021160.1_8677266 | Ca_kabuli_chr01    | 8677266                        | [A/T]       | 1067290177                                 |
| Ca_Kabuli_NC_021160.1_8682168 | Ca_kabuli_chr01    | 8682168                        | [T/C]       | 1067290178                                 |
| Ca_Kabuli_NC_021160.1_8682190 | Ca_kabuli_chr01    | 8682190                        | [T/G]       | 1067290179                                 |
| Ca_Kabuli_NC_021160.1_8692680 | Ca_kabuli_chr01    | 8692680                        | [T/G]       | 1067290180                                 |
| Ca_Kabuli_NC_021160.1_8697279 | Ca_kabuli_chr01    | 8697279                        | [G/T]       | 1067290181                                 |
| Ca_Kabuli_NC_021160.1_8737370 | Ca_kabuli_chr01    | 8737370                        | [A/G]       | 1067290182                                 |
| Ca_Kabuli_NC_021160.1_8738746 | Ca_kabuli_chr01    | 8738746                        | [T/G]       | 1067290183                                 |
| Ca_Kabuli_NC_021160.1_8738752 | Ca_kabuli_chr01    | 8738752                        | [A/G]       | 1067290184                                 |
| Ca_Kabuli_NC_021160.1_8776194 | Ca_kabuli_chr01    | 8776194                        | [A/C]       | 1067290185                                 |
| Ca_Kabuli_NC_021160.1_8807347 | Ca_kabuli_chr01    | 8807347                        | [A/T]       | 1067290186                                 |
| Ca_Kabuli_NC_021160.1_8822309 | Ca_kabuli_chr01    | 8822309                        | [T/G]       | 1067290187                                 |
| Ca_Kabuli_NC_021160.1_8822364 | Ca_kabuli_chr01    | 8822364                        | [A/T]       | 1067290188                                 |
| Ca_Kabuli_NC_021160.1_8822383 | Ca_kabuli_chr01    | 8822383                        | [T/C]       | 1067290189                                 |
| Ca_Kabuli_NC_021160.1_8824843 | Ca_kabuli_chr01    | 8824843                        | [A/G]       | 1067290190                                 |
| Ca_Kabuli_NC_021160.1_8871047 | Ca_kabuli_chr01    | 8871047                        | [T/C]       | 1067290191                                 |
| Ca_Kabuli_NC_021160.1_8871080 | Ca_kabuli_chr01    | 8871080                        | [T/C]       | 1067290192                                 |
| Ca_Kabuli_NC_021160.1_8871092 | Ca_kabuli_chr01    | 8871092                        | [T/C]       | 1067290193                                 |
| Ca_Kabuli_NC_021160.1_8891438 | Ca_kabuli_chr01    | 8891438                        | [T/G]       | 1067290194                                 |

| <b>SNP IDs</b>                | <b>Chromosomes</b> | <b>Physical positions (bp)</b> | <b>SNPs</b> | <b>NCBI SNPdb accession IDs (NCBI_ss#)</b> |
|-------------------------------|--------------------|--------------------------------|-------------|--------------------------------------------|
| Ca_Kabuli_NC_021160.1_8891458 | Ca_kabuli_chr01    | 8891458                        | [T/G]       | 1067290195                                 |
| Ca_Kabuli_NC_021160.1_8891473 | Ca_kabuli_chr01    | 8891473                        | [A/T]       | 1067290196                                 |
| Ca_Kabuli_NC_021160.1_8891485 | Ca_kabuli_chr01    | 8891485                        | [T/G]       | 1067290197                                 |
| Ca_Kabuli_NC_021160.1_8894567 | Ca_kabuli_chr01    | 8894567                        | [A/T]       | 1067290198                                 |
| Ca_Kabuli_NC_021160.1_8894568 | Ca_kabuli_chr01    | 8894568                        | [T/C]       | 1067290199                                 |
| Ca_Kabuli_NC_021160.1_8894569 | Ca_kabuli_chr01    | 8894569                        | [G/T]       | 1067290200                                 |
| Ca_Kabuli_NC_021160.1_8897947 | Ca_kabuli_chr01    | 8897947                        | [A/T]       | 1067290201                                 |
| Ca_Kabuli_NC_021160.1_8897963 | Ca_kabuli_chr01    | 8897963                        | [T/C]       | 1067290202                                 |
| Ca_Kabuli_NC_021160.1_8901692 | Ca_kabuli_chr01    | 8901692                        | [A/C]       | 1067290203                                 |
| Ca_Kabuli_NC_021160.1_8941054 | Ca_kabuli_chr01    | 8941054                        | [A/G]       | 1067290204                                 |
| Ca_Kabuli_NC_021160.1_8942144 | Ca_kabuli_chr01    | 8942144                        | [A/C]       | 1067290205                                 |
| Ca_Kabuli_NC_021160.1_8949732 | Ca_kabuli_chr01    | 8949732                        | [T/A]       | 1067290206                                 |
| Ca_Kabuli_NC_021160.1_8949771 | Ca_kabuli_chr01    | 8949771                        | [A/T]       | 1067290207                                 |
| Ca_Kabuli_NC_021160.1_8971649 | Ca_kabuli_chr01    | 8971649                        | [A/G]       | 1067290208                                 |
| Ca_Kabuli_NC_021160.1_8971684 | Ca_kabuli_chr01    | 8971684                        | [A/C]       | 1067290209                                 |
| Ca_Kabuli_NC_021160.1_8971710 | Ca_kabuli_chr01    | 8971710                        | [A/C]       | 1067290210                                 |
| Ca_Kabuli_NC_021160.1_8971786 | Ca_kabuli_chr01    | 8971786                        | [A/G]       | 1067290211                                 |
| Ca_Kabuli_NC_021160.1_8971801 | Ca_kabuli_chr01    | 8971801                        | [A/C]       | 1067290212                                 |
| Ca_Kabuli_NC_021160.1_8972032 | Ca_kabuli_chr01    | 8972032                        | [C/G]       | 1067290213                                 |
| Ca_Kabuli_NC_021160.1_8976243 | Ca_kabuli_chr01    | 8976243                        | [A/C]       | 1067290214                                 |
| Ca_Kabuli_NC_021160.1_8980198 | Ca_kabuli_chr01    | 8980198                        | [A/C]       | 1067290215                                 |
| Ca_Kabuli_NC_021160.1_9007413 | Ca_kabuli_chr01    | 9007413                        | [A/C]       | 1067290216                                 |
| Ca_Kabuli_NC_021160.1_9031488 | Ca_kabuli_chr01    | 9031488                        | [T/A]       | 1067290217                                 |
| Ca_Kabuli_NC_021160.1_9031497 | Ca_kabuli_chr01    | 9031497                        | [G/A]       | 1067290218                                 |
| Ca_Kabuli_NC_021160.1_9032161 | Ca_kabuli_chr01    | 9032161                        | [T/C]       | 1067290219                                 |
| Ca_Kabuli_NC_021160.1_9032196 | Ca_kabuli_chr01    | 9032196                        | [T/G]       | 1067290220                                 |
| Ca_Kabuli_NC_021160.1_9064167 | Ca_kabuli_chr01    | 9064167                        | [T/C]       | 1067290221                                 |
| Ca_Kabuli_NC_021160.1_9064170 | Ca_kabuli_chr01    | 9064170                        | [T/C]       | 1067290222                                 |
| Ca_Kabuli_NC_021160.1_9064225 | Ca_kabuli_chr01    | 9064225                        | [A/G]       | 1067290223                                 |
| Ca_Kabuli_NC_021160.1_9085302 | Ca_kabuli_chr01    | 9085302                        | [A/C]       | 1067290224                                 |
| Ca_Kabuli_NC_021160.1_9097860 | Ca_kabuli_chr01    | 9097860                        | [T/C]       | 1067290225                                 |
| Ca_Kabuli_NC_021160.1_9097864 | Ca_kabuli_chr01    | 9097864                        | [T/C]       | 1067290226                                 |
| Ca_Kabuli_NC_021160.1_9097878 | Ca_kabuli_chr01    | 9097878                        | [A/G]       | 1067290227                                 |
| Ca_Kabuli_NC_021160.1_9097879 | Ca_kabuli_chr01    | 9097879                        | [C/A]       | 1067290228                                 |

| <b>SNP IDs</b>                | <b>Chromosomes</b> | <b>Physical positions (bp)</b> | <b>SNPs</b> | <b>NCBI SNPdb accession IDs (NCBI_ss#)</b> |
|-------------------------------|--------------------|--------------------------------|-------------|--------------------------------------------|
| Ca_Kabuli_NC_021160.1_9097881 | Ca_kabuli_chr01    | 9097881                        | [C/G]       | 1067290229                                 |
| Ca_Kabuli_NC_021160.1_9097885 | Ca_kabuli_chr01    | 9097885                        | [A/G]       | 1067290230                                 |
| Ca_Kabuli_NC_021160.1_9097999 | Ca_kabuli_chr01    | 9097999                        | [A/C]       | 1067290231                                 |
| Ca_Kabuli_NC_021160.1_9098048 | Ca_kabuli_chr01    | 9098048                        | [A/C]       | 1067290232                                 |
| Ca_Kabuli_NC_021160.1_9105452 | Ca_kabuli_chr01    | 9105452                        | [T/G]       | 1067290233                                 |
| Ca_Kabuli_NC_021160.1_9199585 | Ca_kabuli_chr01    | 9199585                        | [T/C]       | 1067290234                                 |
| Ca_Kabuli_NC_021160.1_9199591 | Ca_kabuli_chr01    | 9199591                        | [T/C]       | 1067290235                                 |
| Ca_Kabuli_NC_021160.1_9270090 | Ca_kabuli_chr01    | 9270090                        | [T/G]       | 1067290236                                 |
| Ca_Kabuli_NC_021160.1_9384194 | Ca_kabuli_chr01    | 9384194                        | [T/C]       | 1067290237                                 |
| Ca_Kabuli_NC_021160.1_9384265 | Ca_kabuli_chr01    | 9384265                        | [A/T]       | 1067290238                                 |
| Ca_Kabuli_NC_021160.1_9433023 | Ca_kabuli_chr01    | 9433023                        | [G/A]       | 1067290239                                 |
| Ca_Kabuli_NC_021160.1_9468055 | Ca_kabuli_chr01    | 9468055                        | [A/G]       | 1067290240                                 |
| Ca_Kabuli_NC_021160.1_9468064 | Ca_kabuli_chr01    | 9468064                        | [C/T]       | 1067290241                                 |
| Ca_Kabuli_NC_021160.1_9484646 | Ca_kabuli_chr01    | 9484646                        | [T/C]       | 1067290242                                 |
| Ca_Kabuli_NC_021160.1_9497704 | Ca_kabuli_chr01    | 9497704                        | [T/A]       | 1067290243                                 |
| Ca_Kabuli_NC_021160.1_9497705 | Ca_kabuli_chr01    | 9497705                        | [C/A]       | 1067290244                                 |
| Ca_Kabuli_NC_021160.1_9497706 | Ca_kabuli_chr01    | 9497706                        | [T/G]       | 1067290245                                 |
| Ca_Kabuli_NC_021160.1_9500436 | Ca_kabuli_chr01    | 9500436                        | [T/C]       | 1067290246                                 |
| Ca_Kabuli_NC_021160.1_9500455 | Ca_kabuli_chr01    | 9500455                        | [A/C]       | 1067290247                                 |
| Ca_Kabuli_NC_021160.1_9534606 | Ca_kabuli_chr01    | 9534606                        | [A/C]       | 1067290248                                 |
| Ca_Kabuli_NC_021160.1_9535634 | Ca_kabuli_chr01    | 9535634                        | [A/G]       | 1067290249                                 |
| Ca_Kabuli_NC_021160.1_9570032 | Ca_kabuli_chr01    | 9570032                        | [A/G]       | 1067290250                                 |
| Ca_Kabuli_NC_021160.1_9570058 | Ca_kabuli_chr01    | 9570058                        | [A/G]       | 1067290251                                 |
| Ca_Kabuli_NC_021160.1_9596690 | Ca_kabuli_chr01    | 9596690                        | [C/A]       | 1067290252                                 |
| Ca_Kabuli_NC_021160.1_9596691 | Ca_kabuli_chr01    | 9596691                        | [T/G]       | 1067290253                                 |
| Ca_Kabuli_NC_021160.1_9603920 | Ca_kabuli_chr01    | 9603920                        | [T/A]       | 1067290254                                 |
| Ca_Kabuli_NC_021160.1_9705108 | Ca_kabuli_chr01    | 9705108                        | [T/G]       | 1067290255                                 |
| Ca_Kabuli_NC_021160.1_9705127 | Ca_kabuli_chr01    | 9705127                        | [C/T]       | 1067290256                                 |
| Ca_Kabuli_NC_021160.1_9705151 | Ca_kabuli_chr01    | 9705151                        | [A/G]       | 1067290257                                 |
| Ca_Kabuli_NC_021160.1_9705183 | Ca_kabuli_chr01    | 9705183                        | [T/G]       | 1067290258                                 |
| Ca_Kabuli_NC_021160.1_9705197 | Ca_kabuli_chr01    | 9705197                        | [T/G]       | 1067290259                                 |
| Ca_Kabuli_NC_021160.1_9705199 | Ca_kabuli_chr01    | 9705199                        | [A/G]       | 1067290260                                 |
| Ca_Kabuli_NC_021160.1_9705217 | Ca_kabuli_chr01    | 9705217                        | [A/G]       | 1067290261                                 |
| Ca_Kabuli_NC_021160.1_9705244 | Ca_kabuli_chr01    | 9705244                        | [A/G]       | 1067290262                                 |

| <b>SNP IDs</b>                 | <b>Chromosomes</b> | <b>Physical positions (bp)</b> | <b>SNPs</b> | <b>NCBI SNPdb accession IDs (NCBI_ss#)</b> |
|--------------------------------|--------------------|--------------------------------|-------------|--------------------------------------------|
| Ca_Kabuli_NC_021160.1_9745090  | Ca_kabuli_chr01    | 9745090                        | [C/A]       | 1067290263                                 |
| Ca_Kabuli_NC_021160.1_9745091  | Ca_kabuli_chr01    | 9745091                        | [A/G]       | 1067290264                                 |
| Ca_Kabuli_NC_021160.1_9752908  | Ca_kabuli_chr01    | 9752908                        | [T/G]       | 1067290265                                 |
| Ca_Kabuli_NC_021160.1_9756950  | Ca_kabuli_chr01    | 9756950                        | [T/A]       | 1067290266                                 |
| Ca_Kabuli_NC_021160.1_9757008  | Ca_kabuli_chr01    | 9757008                        | [A/C]       | 1067290267                                 |
| Ca_Kabuli_NC_021160.1_9779385  | Ca_kabuli_chr01    | 9779385                        | [T/A]       | 1067290268                                 |
| Ca_Kabuli_NC_021160.1_9797297  | Ca_kabuli_chr01    | 9797297                        | [T/C]       | 1067290269                                 |
| Ca_Kabuli_NC_021160.1_9797352  | Ca_kabuli_chr01    | 9797352                        | [G/T]       | 1067290270                                 |
| Ca_Kabuli_NC_021160.1_9797353  | Ca_kabuli_chr01    | 9797353                        | [T/C]       | 1067290271                                 |
| Ca_Kabuli_NC_021160.1_9801542  | Ca_kabuli_chr01    | 9801542                        | [T/G]       | 1067290272                                 |
| Ca_Kabuli_NC_021160.1_9807759  | Ca_kabuli_chr01    | 9807759                        | [T/G]       | 1067290273                                 |
| Ca_Kabuli_NC_021160.1_9808455  | Ca_kabuli_chr01    | 9808455                        | [A/C]       | 1067290274                                 |
| Ca_Kabuli_NC_021160.1_9808476  | Ca_kabuli_chr01    | 9808476                        | [G/A]       | 1067290275                                 |
| Ca_Kabuli_NC_021160.1_9810246  | Ca_kabuli_chr01    | 9810246                        | [T/C]       | 1067290276                                 |
| Ca_Kabuli_NC_021160.1_9810284  | Ca_kabuli_chr01    | 9810284                        | [A/G]       | 1067290277                                 |
| Ca_Kabuli_NC_021160.1_9810295  | Ca_kabuli_chr01    | 9810295                        | [T/C]       | 1067290278                                 |
| Ca_Kabuli_NC_021160.1_9816351  | Ca_kabuli_chr01    | 9816351                        | [T/C]       | 1067290279                                 |
| Ca_Kabuli_NC_021160.1_9896510  | Ca_kabuli_chr01    | 9896510                        | [A/G]       | 1067290280                                 |
| Ca_Kabuli_NC_021160.1_9921381  | Ca_kabuli_chr01    | 9921381                        | [C/A]       | 1067290281                                 |
| Ca_Kabuli_NC_021160.1_9921382  | Ca_kabuli_chr01    | 9921382                        | [A/G]       | 1067290282                                 |
| Ca_Kabuli_NC_021160.1_9921383  | Ca_kabuli_chr01    | 9921383                        | [G/A]       | 1067290283                                 |
| Ca_Kabuli_NC_021160.1_9932701  | Ca_kabuli_chr01    | 9932701                        | [T/C]       | 1067290284                                 |
| Ca_Kabuli_NC_021160.1_9952513  | Ca_kabuli_chr01    | 9952513                        | [A/G]       | 1067290285                                 |
| Ca_Kabuli_NC_021160.1_9952565  | Ca_kabuli_chr01    | 9952565                        | [T/G]       | 1067290286                                 |
| Ca_Kabuli_NC_021160.1_10093170 | Ca_kabuli_chr01    | 10093170                       | [T/A]       | 1067290287                                 |
| Ca_Kabuli_NC_021160.1_10155527 | Ca_kabuli_chr01    | 10155527                       | [T/G]       | 1067290288                                 |
| Ca_Kabuli_NC_021160.1_10155547 | Ca_kabuli_chr01    | 10155547                       | [T/C]       | 1067290289                                 |
| Ca_Kabuli_NC_021160.1_10186582 | Ca_kabuli_chr01    | 10186582                       | [T/G]       | 1067290290                                 |
| Ca_Kabuli_NC_021160.1_10186667 | Ca_kabuli_chr01    | 10186667                       | [T/G]       | 1067290291                                 |
| Ca_Kabuli_NC_021160.1_10269116 | Ca_kabuli_chr01    | 10269116                       | [C/T]       | 1067290292                                 |
| Ca_Kabuli_NC_021160.1_10269117 | Ca_kabuli_chr01    | 10269117                       | [A/C]       | 1067290293                                 |
| Ca_Kabuli_NC_021160.1_10269118 | Ca_kabuli_chr01    | 10269118                       | [G/T]       | 1067290294                                 |
| Ca_Kabuli_NC_021160.1_10289771 | Ca_kabuli_chr01    | 10289771                       | [T/G]       | 1067290295                                 |
| Ca_Kabuli_NC_021160.1_10289805 | Ca_kabuli_chr01    | 10289805                       | [T/G]       | 1067290296                                 |

| <b>SNP IDs</b>                 | <b>Chromosomes</b> | <b>Physical positions (bp)</b> | <b>SNPs</b> | <b>NCBI SNPdb accession IDs (NCBI_ss#)</b> |
|--------------------------------|--------------------|--------------------------------|-------------|--------------------------------------------|
| Ca_Kabuli_NC_021160.1_10289825 | Ca_kabuli_chr01    | 10289825                       | [A/G]       | 1067290297                                 |
| Ca_Kabuli_NC_021160.1_10298355 | Ca_kabuli_chr01    | 10298355                       | [A/T]       | 1067290298                                 |
| Ca_Kabuli_NC_021160.1_10298363 | Ca_kabuli_chr01    | 10298363                       | [T/C]       | 1067290299                                 |
| Ca_Kabuli_NC_021160.1_10339063 | Ca_kabuli_chr01    | 10339063                       | [G/T]       | 1067290300                                 |
| Ca_Kabuli_NC_021160.1_10364978 | Ca_kabuli_chr01    | 10364978                       | [T/A]       | 1067290301                                 |
| Ca_Kabuli_NC_021160.1_10364981 | Ca_kabuli_chr01    | 10364981                       | [C/A]       | 1067290302                                 |
| Ca_Kabuli_NC_021160.1_10364986 | Ca_kabuli_chr01    | 10364986                       | [C/G]       | 1067290303                                 |
| Ca_Kabuli_NC_021160.1_10364992 | Ca_kabuli_chr01    | 10364992                       | [C/A]       | 1067290304                                 |
| Ca_Kabuli_NC_021160.1_10364999 | Ca_kabuli_chr01    | 10364999                       | [G/A]       | 1067290305                                 |
| Ca_Kabuli_NC_021160.1_10366346 | Ca_kabuli_chr01    | 10366346                       | [T/C]       | 1067290306                                 |
| Ca_Kabuli_NC_021160.1_10366380 | Ca_kabuli_chr01    | 10366380                       | [A/T]       | 1067290307                                 |
| Ca_Kabuli_NC_021160.1_10410393 | Ca_kabuli_chr01    | 10410393                       | [T/A]       | 1067290308                                 |
| Ca_Kabuli_NC_021160.1_10440427 | Ca_kabuli_chr01    | 10440427                       | [A/G]       | 1067290309                                 |
| Ca_Kabuli_NC_021160.1_10460268 | Ca_kabuli_chr01    | 10460268                       | [A/G]       | 1067290310                                 |
| Ca_Kabuli_NC_021160.1_10482467 | Ca_kabuli_chr01    | 10482467                       | [A/G]       | 1067290311                                 |
| Ca_Kabuli_NC_021160.1_10486212 | Ca_kabuli_chr01    | 10486212                       | [T/G]       | 1067290312                                 |
| Ca_Kabuli_NC_021160.1_10528100 | Ca_kabuli_chr01    | 10528100                       | [A/C]       | 1067290313                                 |
| Ca_Kabuli_NC_021160.1_10672358 | Ca_kabuli_chr01    | 10672358                       | [C/A]       | 1067290314                                 |
| Ca_Kabuli_NC_021160.1_10672359 | Ca_kabuli_chr01    | 10672359                       | [A/G]       | 1067290315                                 |
| Ca_Kabuli_NC_021160.1_10672360 | Ca_kabuli_chr01    | 10672360                       | [T/A]       | 1067290316                                 |
| Ca_Kabuli_NC_021160.1_10697416 | Ca_kabuli_chr01    | 10697416                       | [T/G]       | 1067290317                                 |
| Ca_Kabuli_NC_021160.1_10698016 | Ca_kabuli_chr01    | 10698016                       | [T/A]       | 1067290318                                 |
| Ca_Kabuli_NC_021160.1_10712205 | Ca_kabuli_chr01    | 10712205                       | [T/G]       | 1067290319                                 |
| Ca_Kabuli_NC_021160.1_10715409 | Ca_kabuli_chr01    | 10715409                       | [A/C]       | 1067290320                                 |
| Ca_Kabuli_NC_021160.1_10715410 | Ca_kabuli_chr01    | 10715410                       | [T/A]       | 1067290321                                 |
| Ca_Kabuli_NC_021160.1_10715411 | Ca_kabuli_chr01    | 10715411                       | [C/A]       | 1067290322                                 |
| Ca_Kabuli_NC_021160.1_10715412 | Ca_kabuli_chr01    | 10715412                       | [T/G]       | 1067290323                                 |
| Ca_Kabuli_NC_021160.1_10739566 | Ca_kabuli_chr01    | 10739566                       | [C/A]       | 1067290324                                 |
| Ca_Kabuli_NC_021160.1_10739567 | Ca_kabuli_chr01    | 10739567                       | [A/T]       | 1067290325                                 |
| Ca_Kabuli_NC_021160.1_10806321 | Ca_kabuli_chr01    | 10806321                       | [A/C]       | 1067290326                                 |
| Ca_Kabuli_NC_021160.1_10861266 | Ca_kabuli_chr01    | 10861266                       | [A/G]       | 1067290327                                 |
| Ca_Kabuli_NC_021160.1_10861285 | Ca_kabuli_chr01    | 10861285                       | [A/G]       | 1067290328                                 |
| Ca_Kabuli_NC_021160.1_10861326 | Ca_kabuli_chr01    | 10861326                       | [T/G]       | 1067290329                                 |
| Ca_Kabuli_NC_021160.1_10861328 | Ca_kabuli_chr01    | 10861328                       | [T/G]       | 1067290330                                 |

| <b>SNP IDs</b>                 | <b>Chromosomes</b> | <b>Physical positions (bp)</b> | <b>SNPs</b> | <b>NCBI SNPdb accession IDs (NCBI_ss#)</b> |
|--------------------------------|--------------------|--------------------------------|-------------|--------------------------------------------|
| Ca_Kabuli_NC_021160.1_10863032 | Ca_kabuli_chr01    | 10863032                       | [T/A]       | 1067290331                                 |
| Ca_Kabuli_NC_021160.1_10863037 | Ca_kabuli_chr01    | 10863037                       | [T/C]       | 1067290332                                 |
| Ca_Kabuli_NC_021160.1_10863079 | Ca_kabuli_chr01    | 10863079                       | [A/G]       | 1067290333                                 |
| Ca_Kabuli_NC_021160.1_10863094 | Ca_kabuli_chr01    | 10863094                       | [T/C]       | 1067290334                                 |
| Ca_Kabuli_NC_021160.1_10888044 | Ca_kabuli_chr01    | 10888044                       | [A/G]       | 1067290335                                 |
| Ca_Kabuli_NC_021160.1_10888047 | Ca_kabuli_chr01    | 10888047                       | [C/T]       | 1067290336                                 |
| Ca_Kabuli_NC_021160.1_10895661 | Ca_kabuli_chr01    | 10895661                       | [T/C]       | 1067290337                                 |
| Ca_Kabuli_NC_021160.1_10895664 | Ca_kabuli_chr01    | 10895664                       | [T/C]       | 1067290338                                 |
| Ca_Kabuli_NC_021160.1_10895673 | Ca_kabuli_chr01    | 10895673                       | [T/A]       | 1067290339                                 |
| Ca_Kabuli_NC_021160.1_10896314 | Ca_kabuli_chr01    | 10896314                       | [A/G]       | 1067290340                                 |
| Ca_Kabuli_NC_021160.1_10896328 | Ca_kabuli_chr01    | 10896328                       | [G/A]       | 1067290341                                 |
| Ca_Kabuli_NC_021160.1_10896363 | Ca_kabuli_chr01    | 10896363                       | [G/T]       | 1067290342                                 |
| Ca_Kabuli_NC_021160.1_10899031 | Ca_kabuli_chr01    | 10899031                       | [T/C]       | 1067290343                                 |
| Ca_Kabuli_NC_021160.1_10899032 | Ca_kabuli_chr01    | 10899032                       | [G/T]       | 1067290344                                 |
| Ca_Kabuli_NC_021160.1_10914064 | Ca_kabuli_chr01    | 10914064                       | [T/C]       | 1067290345                                 |
| Ca_Kabuli_NC_021160.1_10914094 | Ca_kabuli_chr01    | 10914094                       | [T/C]       | 1067290346                                 |
| Ca_Kabuli_NC_021160.1_10953405 | Ca_kabuli_chr01    | 10953405                       | [A/G]       | 1067290347                                 |
| Ca_Kabuli_NC_021160.1_10963892 | Ca_kabuli_chr01    | 10963892                       | [A/C]       | 1067290348                                 |
| Ca_Kabuli_NC_021160.1_10963897 | Ca_kabuli_chr01    | 10963897                       | [A/T]       | 1067290349                                 |
| Ca_Kabuli_NC_021160.1_10963917 | Ca_kabuli_chr01    | 10963917                       | [A/C]       | 1067290350                                 |
| Ca_Kabuli_NC_021160.1_10963954 | Ca_kabuli_chr01    | 10963954                       | [T/C]       | 1067290351                                 |
| Ca_Kabuli_NC_021160.1_11045048 | Ca_kabuli_chr01    | 11045048                       | [T/C]       | 1067290352                                 |
| Ca_Kabuli_NC_021160.1_11045064 | Ca_kabuli_chr01    | 11045064                       | [T/G]       | 1067290353                                 |
| Ca_Kabuli_NC_021160.1_11046645 | Ca_kabuli_chr01    | 11046645                       | [A/T]       | 1067290354                                 |
| Ca_Kabuli_NC_021160.1_11053473 | Ca_kabuli_chr01    | 11053473                       | [A/G]       | 1067290355                                 |
| Ca_Kabuli_NC_021160.1_11096731 | Ca_kabuli_chr01    | 11096731                       | [T/C]       | 1067290356                                 |
| Ca_Kabuli_NC_021160.1_11096787 | Ca_kabuli_chr01    | 11096787                       | [T/G]       | 1067290357                                 |
| Ca_Kabuli_NC_021160.1_11100632 | Ca_kabuli_chr01    | 11100632                       | [T/C]       | 1067290358                                 |
| Ca_Kabuli_NC_021160.1_11100676 | Ca_kabuli_chr01    | 11100676                       | [A/G]       | 1067290359                                 |
| Ca_Kabuli_NC_021160.1_11105572 | Ca_kabuli_chr01    | 11105572                       | [A/C]       | 1067290360                                 |
| Ca_Kabuli_NC_021160.1_11111108 | Ca_kabuli_chr01    | 11111108                       | [A/C]       | 1067290361                                 |
| Ca_Kabuli_NC_021160.1_11172819 | Ca_kabuli_chr01    | 11172819                       | [T/G]       | 1067290362                                 |
| Ca_Kabuli_NC_021160.1_11191087 | Ca_kabuli_chr01    | 11191087                       | [A/T]       | 1067290363                                 |
| Ca_Kabuli_NC_021160.1_11193223 | Ca_kabuli_chr01    | 11193223                       | [A/T]       | 1067290364                                 |

| <b>SNP IDs</b>                 | <b>Chromosomes</b> | <b>Physical positions (bp)</b> | <b>SNPs</b> | <b>NCBI SNPdb accession IDs (NCBI_ss#)</b> |
|--------------------------------|--------------------|--------------------------------|-------------|--------------------------------------------|
| Ca_Kabuli_NC_021160.1_11193251 | Ca_kabuli_chr01    | 11193251                       | [T/A]       | 1067290365                                 |
| Ca_Kabuli_NC_021160.1_11193266 | Ca_kabuli_chr01    | 11193266                       | [T/G]       | 1067290366                                 |
| Ca_Kabuli_NC_021160.1_11230109 | Ca_kabuli_chr01    | 11230109                       | [T/C]       | 1067290367                                 |
| Ca_Kabuli_NC_021160.1_11230377 | Ca_kabuli_chr01    | 11230377                       | [A/C]       | 1067290368                                 |
| Ca_Kabuli_NC_021160.1_11231022 | Ca_kabuli_chr01    | 11231022                       | [T/G]       | 1067290369                                 |
| Ca_Kabuli_NC_021160.1_11231081 | Ca_kabuli_chr01    | 11231081                       | [A/G]       | 1067290370                                 |
| Ca_Kabuli_NC_021160.1_11231094 | Ca_kabuli_chr01    | 11231094                       | [A/G]       | 1067290371                                 |
| Ca_Kabuli_NC_021160.1_11277751 | Ca_kabuli_chr01    | 11277751                       | [A/C]       | 1067290372                                 |
| Ca_Kabuli_NC_021160.1_11277808 | Ca_kabuli_chr01    | 11277808                       | [A/G]       | 1067290373                                 |
| Ca_Kabuli_NC_021160.1_11277812 | Ca_kabuli_chr01    | 11277812                       | [T/C]       | 1067290374                                 |
| Ca_Kabuli_NC_021160.1_11277832 | Ca_kabuli_chr01    | 11277832                       | [A/C]       | 1067290375                                 |
| Ca_Kabuli_NC_021160.1_11277884 | Ca_kabuli_chr01    | 11277884                       | [A/T]       | 1067290376                                 |
| Ca_Kabuli_NC_021160.1_11277913 | Ca_kabuli_chr01    | 11277913                       | [T/A]       | 1067290377                                 |
| Ca_Kabuli_NC_021160.1_11277945 | Ca_kabuli_chr01    | 11277945                       | [A/G]       | 1067290378                                 |
| Ca_Kabuli_NC_021160.1_11277953 | Ca_kabuli_chr01    | 11277953                       | [T/G]       | 1067290379                                 |
| Ca_Kabuli_NC_021160.1_11277961 | Ca_kabuli_chr01    | 11277961                       | [A/G]       | 1067290380                                 |
| Ca_Kabuli_NC_021160.1_11285295 | Ca_kabuli_chr01    | 11285295                       | [A/G]       | 1067290381                                 |
| Ca_Kabuli_NC_021160.1_11336814 | Ca_kabuli_chr01    | 11336814                       | [T/G]       | 1067290382                                 |
| Ca_Kabuli_NC_021160.1_11336858 | Ca_kabuli_chr01    | 11336858                       | [A/C]       | 1067290383                                 |
| Ca_Kabuli_NC_021160.1_11340761 | Ca_kabuli_chr01    | 11340761                       | [T/C]       | 1067290384                                 |
| Ca_Kabuli_NC_021160.1_11342365 | Ca_kabuli_chr01    | 11342365                       | [A/G]       | 1067290385                                 |
| Ca_Kabuli_NC_021160.1_11361625 | Ca_kabuli_chr01    | 11361625                       | [A/C]       | 1067290386                                 |
| Ca_Kabuli_NC_021160.1_11361687 | Ca_kabuli_chr01    | 11361687                       | [T/A]       | 1067290387                                 |
| Ca_Kabuli_NC_021160.1_11374655 | Ca_kabuli_chr01    | 11374655                       | [T/A]       | 1067290388                                 |
| Ca_Kabuli_NC_021160.1_11374733 | Ca_kabuli_chr01    | 11374733                       | [A/G]       | 1067290389                                 |
| Ca_Kabuli_NC_021160.1_11405118 | Ca_kabuli_chr01    | 11405118                       | [G/A]       | 1067290390                                 |
| Ca_Kabuli_NC_021160.1_11405133 | Ca_kabuli_chr01    | 11405133                       | [A/G]       | 1067290391                                 |
| Ca_Kabuli_NC_021160.1_11405155 | Ca_kabuli_chr01    | 11405155                       | [T/C]       | 1067290392                                 |
| Ca_Kabuli_NC_021160.1_11405163 | Ca_kabuli_chr01    | 11405163                       | [T/C]       | 1067290393                                 |
| Ca_Kabuli_NC_021160.1_11487640 | Ca_kabuli_chr01    | 11487640                       | [C/A]       | 1067290394                                 |
| Ca_Kabuli_NC_021160.1_11487664 | Ca_kabuli_chr01    | 11487664                       | [C/T]       | 1067290395                                 |
| Ca_Kabuli_NC_021160.1_11502160 | Ca_kabuli_chr01    | 11502160                       | [G/T]       | 1067290396                                 |
| Ca_Kabuli_NC_021160.1_11537936 | Ca_kabuli_chr01    | 11537936                       | [T/C]       | 1067290397                                 |
| Ca_Kabuli_NC_021160.1_11599706 | Ca_kabuli_chr01    | 11599706                       | [T/G]       | 1067290398                                 |



| <b>SNP IDs</b>                 | <b>Chromosomes</b> | <b>Physical positions (bp)</b> | <b>SNPs</b> | <b>NCBI SNPdb accession IDs (NCBI_ss#)</b> |
|--------------------------------|--------------------|--------------------------------|-------------|--------------------------------------------|
| Ca_Kabuli_NC_021160.1_11669101 | Ca_kabuli_chr01    | 11669101                       | [A/G]       | 1067290399                                 |
| Ca_Kabuli_NC_021160.1_11669721 | Ca_kabuli_chr01    | 11669721                       | [T/G]       | 1067290400                                 |
| Ca_Kabuli_NC_021160.1_11669794 | Ca_kabuli_chr01    | 11669794                       | [G/T]       | 1067290401                                 |
| Ca_Kabuli_NC_021160.1_11676536 | Ca_kabuli_chr01    | 11676536                       | [A/T]       | 1067290402                                 |
| Ca_Kabuli_NC_021160.1_11676582 | Ca_kabuli_chr01    | 11676582                       | [T/C]       | 1067290403                                 |
| Ca_Kabuli_NC_021160.1_11676658 | Ca_kabuli_chr01    | 11676658                       | [A/C]       | 1067290404                                 |
| Ca_Kabuli_NC_021160.1_11703765 | Ca_kabuli_chr01    | 11703765                       | [A/C]       | 1067290405                                 |
| Ca_Kabuli_NC_021160.1_11706510 | Ca_kabuli_chr01    | 11706510                       | [T/G]       | 1067290406                                 |
| Ca_Kabuli_NC_021160.1_11706577 | Ca_kabuli_chr01    | 11706577                       | [T/C]       | 1067290407                                 |
| Ca_Kabuli_NC_021160.1_11706597 | Ca_kabuli_chr01    | 11706597                       | [A/G]       | 1067290408                                 |
| Ca_Kabuli_NC_021160.1_11746090 | Ca_kabuli_chr01    | 11746090                       | [T/C]       | 1067290409                                 |
| Ca_Kabuli_NC_021160.1_11746122 | Ca_kabuli_chr01    | 11746122                       | [T/C]       | 1067290410                                 |
| Ca_Kabuli_NC_021160.1_11749976 | Ca_kabuli_chr01    | 11749976                       | [A/C]       | 1067290411                                 |
| Ca_Kabuli_NC_021160.1_11749979 | Ca_kabuli_chr01    | 11749979                       | [A/C]       | 1067290412                                 |
| Ca_Kabuli_NC_021160.1_11955897 | Ca_kabuli_chr01    | 11955897                       | [T/G]       | 1067290413                                 |
| Ca_Kabuli_NC_021160.1_11970674 | Ca_kabuli_chr01    | 11970674                       | [A/C]       | 1067290414                                 |
| Ca_Kabuli_NC_021160.1_11972242 | Ca_kabuli_chr01    | 11972242                       | [T/C]       | 1067290415                                 |
| Ca_Kabuli_NC_021160.1_11972251 | Ca_kabuli_chr01    | 11972251                       | [G/A]       | 1067290416                                 |
| Ca_Kabuli_NC_021160.1_12013222 | Ca_kabuli_chr01    | 12013222                       | [A/T]       | 1067290417                                 |
| Ca_Kabuli_NC_021160.1_12131395 | Ca_kabuli_chr01    | 12131395                       | [T/C]       | 1067290418                                 |
| Ca_Kabuli_NC_021160.1_12159607 | Ca_kabuli_chr01    | 12159607                       | [A/C]       | 1067290419                                 |
| Ca_Kabuli_NC_021160.1_12169598 | Ca_kabuli_chr01    | 12169598                       | [G/A]       | 1067290420                                 |
| Ca_Kabuli_NC_021160.1_12189933 | Ca_kabuli_chr01    | 12189933                       | [A/C]       | 1067290421                                 |
| Ca_Kabuli_NC_021160.1_12326230 | Ca_kabuli_chr01    | 12326230                       | [A/G]       | 1067290422                                 |
| Ca_Kabuli_NC_021160.1_12326232 | Ca_kabuli_chr01    | 12326232                       | [T/G]       | 1067290423                                 |
| Ca_Kabuli_NC_021160.1_12326242 | Ca_kabuli_chr01    | 12326242                       | [G/T]       | 1067290424                                 |
| Ca_Kabuli_NC_021160.1_12326264 | Ca_kabuli_chr01    | 12326264                       | [T/G]       | 1067290425                                 |
| Ca_Kabuli_NC_021160.1_12337445 | Ca_kabuli_chr01    | 12337445                       | [T/C]       | 1067290426                                 |
| Ca_Kabuli_NC_021160.1_12340978 | Ca_kabuli_chr01    | 12340978                       | [A/C]       | 1067290427                                 |
| Ca_Kabuli_NC_021160.1_12341006 | Ca_kabuli_chr01    | 12341006                       | [T/G]       | 1067290428                                 |
| Ca_Kabuli_NC_021160.1_12341059 | Ca_kabuli_chr01    | 12341059                       | [A/C]       | 1067290429                                 |
| Ca_Kabuli_NC_021160.1_12341081 | Ca_kabuli_chr01    | 12341081                       | [T/C]       | 1067290430                                 |
| Ca_Kabuli_NC_021160.1_12341147 | Ca_kabuli_chr01    | 12341147                       | [T/G]       | 1067290431                                 |
| Ca_Kabuli_NC_021160.1_12372201 | Ca_kabuli_chr01    | 12372201                       | [C/T]       | 1067290432                                 |

| <b>SNP IDs</b>                 | <b>Chromosomes</b> | <b>Physical positions (bp)</b> | <b>SNPs</b> | <b>NCBI SNPdb accession IDs (NCBI_ss#)</b> |
|--------------------------------|--------------------|--------------------------------|-------------|--------------------------------------------|
| Ca_Kabuli_NC_021160.1_12390750 | Ca_kabuli_chr01    | 12390750                       | [T/C]       | 1067290433                                 |
| Ca_Kabuli_NC_021160.1_12390781 | Ca_kabuli_chr01    | 12390781                       | [A/G]       | 1067290434                                 |
| Ca_Kabuli_NC_021160.1_12412979 | Ca_kabuli_chr01    | 12412979                       | [A/T]       | 1067290435                                 |
| Ca_Kabuli_NC_021160.1_12413012 | Ca_kabuli_chr01    | 12413012                       | [G/T]       | 1067290436                                 |
| Ca_Kabuli_NC_021160.1_12413016 | Ca_kabuli_chr01    | 12413016                       | [T/A]       | 1067290437                                 |
| Ca_Kabuli_NC_021160.1_12413080 | Ca_kabuli_chr01    | 12413080                       | [C/T]       | 1067290438                                 |
| Ca_Kabuli_NC_021160.1_12434148 | Ca_kabuli_chr01    | 12434148                       | [T/G]       | 1067290439                                 |
| Ca_Kabuli_NC_021160.1_12439871 | Ca_kabuli_chr01    | 12439871                       | [T/G]       | 1067290440                                 |
| Ca_Kabuli_NC_021160.1_12517452 | Ca_kabuli_chr01    | 12517452                       | [T/C]       | 1067290441                                 |
| Ca_Kabuli_NC_021160.1_12517473 | Ca_kabuli_chr01    | 12517473                       | [A/G]       | 1067290442                                 |
| Ca_Kabuli_NC_021160.1_12561061 | Ca_kabuli_chr01    | 12561061                       | [A/G]       | 1067290443                                 |
| Ca_Kabuli_NC_021160.1_12561084 | Ca_kabuli_chr01    | 12561084                       | [T/A]       | 1067290444                                 |
| Ca_Kabuli_NC_021160.1_12561121 | Ca_kabuli_chr01    | 12561121                       | [T/A]       | 1067290445                                 |
| Ca_Kabuli_NC_021160.1_12575980 | Ca_kabuli_chr01    | 12575980                       | [T/C]       | 1067290446                                 |
| Ca_Kabuli_NC_021160.1_12588797 | Ca_kabuli_chr01    | 12588797                       | [A/C]       | 1067290447                                 |
| Ca_Kabuli_NC_021160.1_12640616 | Ca_kabuli_chr01    | 12640616                       | [T/C]       | 1067290448                                 |
| Ca_Kabuli_NC_021160.1_12640627 | Ca_kabuli_chr01    | 12640627                       | [T/C]       | 1067290449                                 |
| Ca_Kabuli_NC_021160.1_12640721 | Ca_kabuli_chr01    | 12640721                       | [G/T]       | 1067290450                                 |
| Ca_Kabuli_NC_021160.1_12641452 | Ca_kabuli_chr01    | 12641452                       | [A/C]       | 1067290451                                 |
| Ca_Kabuli_NC_021160.1_12642126 | Ca_kabuli_chr01    | 12642126                       | [T/A]       | 1067290452                                 |
| Ca_Kabuli_NC_021160.1_12642147 | Ca_kabuli_chr01    | 12642147                       | [A/C]       | 1067290453                                 |
| Ca_Kabuli_NC_021160.1_12688435 | Ca_kabuli_chr01    | 12688435                       | [A/C]       | 1067290454                                 |
| Ca_Kabuli_NC_021160.1_12704408 | Ca_kabuli_chr01    | 12704408                       | [T/A]       | 1067290455                                 |
| Ca_Kabuli_NC_021160.1_12704473 | Ca_kabuli_chr01    | 12704473                       | [A/G]       | 1067290456                                 |
| Ca_Kabuli_NC_021160.1_12713237 | Ca_kabuli_chr01    | 12713237                       | [T/C]       | 1067290457                                 |
| Ca_Kabuli_NC_021160.1_12736318 | Ca_kabuli_chr01    | 12736318                       | [T/G]       | 1067290458                                 |
| Ca_Kabuli_NC_021160.1_12736332 | Ca_kabuli_chr01    | 12736332                       | [A/G]       | 1067290459                                 |
| Ca_Kabuli_NC_021160.1_12736575 | Ca_kabuli_chr01    | 12736575                       | [T/G]       | 1067290460                                 |
| Ca_Kabuli_NC_021160.1_12772559 | Ca_kabuli_chr01    | 12772559                       | [G/C]       | 1067290461                                 |
| Ca_Kabuli_NC_021160.1_12773810 | Ca_kabuli_chr01    | 12773810                       | [A/C]       | 1067290462                                 |
| Ca_Kabuli_NC_021160.1_12800435 | Ca_kabuli_chr01    | 12800435                       | [C/A]       | 1067290463                                 |
| Ca_Kabuli_NC_021160.1_12800436 | Ca_kabuli_chr01    | 12800436                       | [T/G]       | 1067290464                                 |
| Ca_Kabuli_NC_021160.1_12800607 | Ca_kabuli_chr01    | 12800607                       | [T/A]       | 1067290465                                 |
| Ca_Kabuli_NC_021160.1_12800610 | Ca_kabuli_chr01    | 12800610                       | [A/C]       | 1067290466                                 |

| <b>SNP IDs</b>                 | <b>Chromosomes</b> | <b>Physical positions (bp)</b> | <b>SNPs</b> | <b>NCBI SNPdb accession IDs (NCBI_ss#)</b> |
|--------------------------------|--------------------|--------------------------------|-------------|--------------------------------------------|
| Ca_Kabuli_NC_021160.1_12824152 | Ca_kabuli_chr01    | 12824152                       | [A/C]       | 1067290467                                 |
| Ca_Kabuli_NC_021160.1_12844395 | Ca_kabuli_chr01    | 12844395                       | [A/G]       | 1067290468                                 |
| Ca_Kabuli_NC_021160.1_12880420 | Ca_kabuli_chr01    | 12880420                       | [T/A]       | 1067290469                                 |
| Ca_Kabuli_NC_021160.1_12948219 | Ca_kabuli_chr01    | 12948219                       | [A/G]       | 1067290470                                 |
| Ca_Kabuli_NC_021160.1_12948253 | Ca_kabuli_chr01    | 12948253                       | [T/A]       | 1067290471                                 |
| Ca_Kabuli_NC_021160.1_12990248 | Ca_kabuli_chr01    | 12990248                       | [T/C]       | 1067290472                                 |
| Ca_Kabuli_NC_021160.1_12990448 | Ca_kabuli_chr01    | 12990448                       | [T/C]       | 1067290473                                 |
| Ca_Kabuli_NC_021160.1_12990476 | Ca_kabuli_chr01    | 12990476                       | [T/C]       | 1067290474                                 |
| Ca_Kabuli_NC_021160.1_12990489 | Ca_kabuli_chr01    | 12990489                       | [T/C]       | 1067290475                                 |
| Ca_Kabuli_NC_021160.1_12990780 | Ca_kabuli_chr01    | 12990780                       | [A/T]       | 1067290476                                 |
| Ca_Kabuli_NC_021160.1_12990784 | Ca_kabuli_chr01    | 12990784                       | [T/C]       | 1067290477                                 |
| Ca_Kabuli_NC_021160.1_12990819 | Ca_kabuli_chr01    | 12990819                       | [A/G]       | 1067290478                                 |
| Ca_Kabuli_NC_021160.1_12991618 | Ca_kabuli_chr01    | 12991618                       | [T/C]       | 1067290479                                 |
| Ca_Kabuli_NC_021160.1_12991624 | Ca_kabuli_chr01    | 12991624                       | [A/G]       | 1067290480                                 |
| Ca_Kabuli_NC_021160.1_12991635 | Ca_kabuli_chr01    | 12991635                       | [A/G]       | 1067290481                                 |
| Ca_Kabuli_NC_021160.1_12991638 | Ca_kabuli_chr01    | 12991638                       | [A/C]       | 1067290482                                 |
| Ca_Kabuli_NC_021160.1_12991923 | Ca_kabuli_chr01    | 12991923                       | [T/C]       | 1067290483                                 |
| Ca_Kabuli_NC_021160.1_12991944 | Ca_kabuli_chr01    | 12991944                       | [A/G]       | 1067290484                                 |
| Ca_Kabuli_NC_021160.1_12991962 | Ca_kabuli_chr01    | 12991962                       | [T/A]       | 1067290485                                 |
| Ca_Kabuli_NC_021160.1_12992439 | Ca_kabuli_chr01    | 12992439                       | [A/C]       | 1067290486                                 |
| Ca_Kabuli_NC_021160.1_12992445 | Ca_kabuli_chr01    | 12992445                       | [A/C]       | 1067290487                                 |
| Ca_Kabuli_NC_021160.1_12992448 | Ca_kabuli_chr01    | 12992448                       | [T/C]       | 1067290488                                 |
| Ca_Kabuli_NC_021160.1_12992456 | Ca_kabuli_chr01    | 12992456                       | [T/C]       | 1067290489                                 |
| Ca_Kabuli_NC_021160.1_12993764 | Ca_kabuli_chr01    | 12993764                       | [T/C]       | 1067290490                                 |
| Ca_Kabuli_NC_021160.1_12993785 | Ca_kabuli_chr01    | 12993785                       | [T/C]       | 1067290491                                 |
| Ca_Kabuli_NC_021160.1_12993883 | Ca_kabuli_chr01    | 12993883                       | [A/G]       | 1067290492                                 |
| Ca_Kabuli_NC_021160.1_12993887 | Ca_kabuli_chr01    | 12993887                       | [A/G]       | 1067290493                                 |
| Ca_Kabuli_NC_021160.1_12993898 | Ca_kabuli_chr01    | 12993898                       | [T/C]       | 1067290494                                 |
| Ca_Kabuli_NC_021160.1_12993909 | Ca_kabuli_chr01    | 12993909                       | [A/G]       | 1067290495                                 |
| Ca_Kabuli_NC_021160.1_12993953 | Ca_kabuli_chr01    | 12993953                       | [T/A]       | 1067290496                                 |
| Ca_Kabuli_NC_021160.1_12994024 | Ca_kabuli_chr01    | 12994024                       | [T/C]       | 1067290497                                 |
| Ca_Kabuli_NC_021160.1_12994053 | Ca_kabuli_chr01    | 12994053                       | [T/C]       | 1067290498                                 |
| Ca_Kabuli_NC_021160.1_12994470 | Ca_kabuli_chr01    | 12994470                       | [A/T]       | 1067290499                                 |
| Ca_Kabuli_NC_021160.1_13034730 | Ca_kabuli_chr01    | 13034730                       | [A/G]       | 1067290500                                 |

| <b>SNP IDs</b>                 | <b>Chromosomes</b> | <b>Physical positions (bp)</b> | <b>SNPs</b> | <b>NCBI SNPdb accession IDs (NCBI_ss#)</b> |
|--------------------------------|--------------------|--------------------------------|-------------|--------------------------------------------|
| Ca_Kabuli_NC_021160.1_13034733 | Ca_kabuli_chr01    | 13034733                       | [A/C]       | 1067290501                                 |
| Ca_Kabuli_NC_021160.1_13034756 | Ca_kabuli_chr01    | 13034756                       | [T/C]       | 1067290502                                 |
| Ca_Kabuli_NC_021160.1_13034785 | Ca_kabuli_chr01    | 13034785                       | [G/A]       | 1067290503                                 |
| Ca_Kabuli_NC_021160.1_13034819 | Ca_kabuli_chr01    | 13034819                       | [A/G]       | 1067290504                                 |
| Ca_Kabuli_NC_021160.1_13034821 | Ca_kabuli_chr01    | 13034821                       | [T/C]       | 1067290505                                 |
| Ca_Kabuli_NC_021160.1_13040711 | Ca_kabuli_chr01    | 13040711                       | [A/T]       | 1067290506                                 |
| Ca_Kabuli_NC_021160.1_13112887 | Ca_kabuli_chr01    | 13112887                       | [T/A]       | 1067290507                                 |
| Ca_Kabuli_NC_021160.1_13112892 | Ca_kabuli_chr01    | 13112892                       | [T/G]       | 1067290508                                 |
| Ca_Kabuli_NC_021160.1_13156427 | Ca_kabuli_chr01    | 13156427                       | [A/C]       | 1067290509                                 |
| Ca_Kabuli_NC_021160.1_13158171 | Ca_kabuli_chr01    | 13158171                       | [T/A]       | 1067290510                                 |
| Ca_Kabuli_NC_021160.1_13203052 | Ca_kabuli_chr01    | 13203052                       | [A/C]       | 1067290511                                 |
| Ca_Kabuli_NC_021160.1_13262992 | Ca_kabuli_chr01    | 13262992                       | [T/G]       | 1067290512                                 |
| Ca_Kabuli_NC_021160.1_13263007 | Ca_kabuli_chr01    | 13263007                       | [A/C]       | 1067290513                                 |
| Ca_Kabuli_NC_021160.1_13267650 | Ca_kabuli_chr01    | 13267650                       | [A/C]       | 1067290514                                 |
| Ca_Kabuli_NC_021160.1_13365552 | Ca_kabuli_chr01    | 13365552                       | [T/C]       | 1067290515                                 |
| Ca_Kabuli_NC_021160.1_13365564 | Ca_kabuli_chr01    | 13365564                       | [T/G]       | 1067290516                                 |
| Ca_Kabuli_NC_021160.1_13404600 | Ca_kabuli_chr01    | 13404600                       | [T/G]       | 1067290517                                 |
| Ca_Kabuli_NC_021160.1_13501332 | Ca_kabuli_chr01    | 13501332                       | [A/C]       | 1067290518                                 |
| Ca_Kabuli_NC_021160.1_13549635 | Ca_kabuli_chr01    | 13549635                       | [T/C]       | 1067290519                                 |
| Ca_Kabuli_NC_021160.1_13593876 | Ca_kabuli_chr01    | 13593876                       | [T/C]       | 1067290520                                 |
| Ca_Kabuli_NC_021160.1_13596442 | Ca_kabuli_chr01    | 13596442                       | [T/C]       | 1067290521                                 |
| Ca_Kabuli_NC_021160.1_13607447 | Ca_kabuli_chr01    | 13607447                       | [A/C]       | 1067290522                                 |
| Ca_Kabuli_NC_021160.1_13607463 | Ca_kabuli_chr01    | 13607463                       | [A/G]       | 1067290523                                 |
| Ca_Kabuli_NC_021160.1_13607468 | Ca_kabuli_chr01    | 13607468                       | [A/G]       | 1067290524                                 |
| Ca_Kabuli_NC_021160.1_13637683 | Ca_kabuli_chr01    | 13637683                       | [A/C]       | 1067290525                                 |
| Ca_Kabuli_NC_021160.1_13637714 | Ca_kabuli_chr01    | 13637714                       | [A/G]       | 1067290526                                 |
| Ca_Kabuli_NC_021160.1_13641192 | Ca_kabuli_chr01    | 13641192                       | [T/C]       | 1067290527                                 |
| Ca_Kabuli_NC_021160.1_13668866 | Ca_kabuli_chr01    | 13668866                       | [T/G]       | 1067290528                                 |
| Ca_Kabuli_NC_021160.1_13679996 | Ca_kabuli_chr01    | 13679996                       | [A/G]       | 1067290529                                 |
| Ca_Kabuli_NC_021160.1_13680008 | Ca_kabuli_chr01    | 13680008                       | [G/C]       | 1067290530                                 |
| Ca_Kabuli_NC_021160.1_13759589 | Ca_kabuli_chr01    | 13759589                       | [G/C]       | 1067290531                                 |
| Ca_Kabuli_NC_021160.1_13828672 | Ca_kabuli_chr01    | 13828672                       | [A/C]       | 1067290532                                 |
| Ca_Kabuli_NC_021160.1_13880760 | Ca_kabuli_chr01    | 13880760                       | [T/C]       | 1067290533                                 |
| Ca_Kabuli_NC_021160.1_13880810 | Ca_kabuli_chr01    | 13880810                       | [A/G]       | 1067290534                                 |

| <b>SNP IDs</b>                 | <b>Chromosomes</b> | <b>Physical positions (bp)</b> | <b>SNPs</b> | <b>NCBI SNPdb accession IDs (NCBI_ss#)</b> |
|--------------------------------|--------------------|--------------------------------|-------------|--------------------------------------------|
| Ca_Kabuli_NC_021160.1_14004185 | Ca_kabuli_chr01    | 14004185                       | [A/C]       | 1067290535                                 |
| Ca_Kabuli_NC_021160.1_14015757 | Ca_kabuli_chr01    | 14015757                       | [T/C]       | 1067290536                                 |
| Ca_Kabuli_NC_021160.1_14022915 | Ca_kabuli_chr01    | 14022915                       | [A/G]       | 1067290537                                 |
| Ca_Kabuli_NC_021160.1_14022932 | Ca_kabuli_chr01    | 14022932                       | [A/C]       | 1067290538                                 |
| Ca_Kabuli_NC_021160.1_14023047 | Ca_kabuli_chr01    | 14023047                       | [A/C]       | 1067290539                                 |
| Ca_Kabuli_NC_021160.1_14026370 | Ca_kabuli_chr01    | 14026370                       | [T/G]       | 1067290540                                 |
| Ca_Kabuli_NC_021160.1_14047891 | Ca_kabuli_chr01    | 14047891                       | [G/A]       | 1067290541                                 |
| Ca_Kabuli_NC_021160.1_14047892 | Ca_kabuli_chr01    | 14047892                       | [A/T]       | 1067290542                                 |
| Ca_Kabuli_NC_021160.1_14047896 | Ca_kabuli_chr01    | 14047896                       | [T/G]       | 1067290543                                 |
| Ca_Kabuli_NC_021160.1_14047901 | Ca_kabuli_chr01    | 14047901                       | [T/C]       | 1067290544                                 |
| Ca_Kabuli_NC_021160.1_14076966 | Ca_kabuli_chr01    | 14076966                       | [T/A]       | 1067290545                                 |
| Ca_Kabuli_NC_021160.1_14181789 | Ca_kabuli_chr01    | 14181789                       | [T/G]       | 1067290546                                 |
| Ca_Kabuli_NC_021160.1_14181834 | Ca_kabuli_chr01    | 14181834                       | [A/C]       | 1067290547                                 |
| Ca_Kabuli_NC_021160.1_14207277 | Ca_kabuli_chr01    | 14207277                       | [G/A]       | 1067290548                                 |
| Ca_Kabuli_NC_021160.1_14240580 | Ca_kabuli_chr01    | 14240580                       | [A/G]       | 1067290549                                 |
| Ca_Kabuli_NC_021160.1_14240590 | Ca_kabuli_chr01    | 14240590                       | [T/G]       | 1067290550                                 |
| Ca_Kabuli_NC_021160.1_14244545 | Ca_kabuli_chr01    | 14244545                       | [T/C]       | 1067290551                                 |
| Ca_Kabuli_NC_021160.1_14259438 | Ca_kabuli_chr01    | 14259438                       | [A/C]       | 1067290552                                 |
| Ca_Kabuli_NC_021160.1_14282344 | Ca_kabuli_chr01    | 14282344                       | [A/G]       | 1067290553                                 |
| Ca_Kabuli_NC_021160.1_14282377 | Ca_kabuli_chr01    | 14282377                       | [A/G]       | 1067290554                                 |
| Ca_Kabuli_NC_021160.1_14296994 | Ca_kabuli_chr01    | 14296994                       | [A/C]       | 1067290555                                 |
| Ca_Kabuli_NC_021160.1_14296995 | Ca_kabuli_chr01    | 14296995                       | [G/T]       | 1067290556                                 |
| Ca_Kabuli_NC_021160.1_14296996 | Ca_kabuli_chr01    | 14296996                       | [A/C]       | 1067290557                                 |
| Ca_Kabuli_NC_021160.1_14296997 | Ca_kabuli_chr01    | 14296997                       | [T/A]       | 1067290558                                 |
| Ca_Kabuli_NC_021160.1_14390428 | Ca_kabuli_chr01    | 14390428                       | [C/A]       | 1067290559                                 |
| Ca_Kabuli_NC_021160.1_14390429 | Ca_kabuli_chr01    | 14390429                       | [T/G]       | 1067290560                                 |
| Ca_Kabuli_NC_021160.1_14390430 | Ca_kabuli_chr01    | 14390430                       | [T/A]       | 1067290561                                 |
| Ca_Kabuli_NC_021160.1_14390431 | Ca_kabuli_chr01    | 14390431                       | [A/T]       | 1067290562                                 |
| Ca_Kabuli_NC_021160.1_14405466 | Ca_kabuli_chr01    | 14405466                       | [C/A]       | 1067290563                                 |
| Ca_Kabuli_NC_021160.1_14409571 | Ca_kabuli_chr01    | 14409571                       | [A/C]       | 1067290564                                 |
| Ca_Kabuli_NC_021160.1_14409604 | Ca_kabuli_chr01    | 14409604                       | [A/C]       | 1067290565                                 |
| Ca_Kabuli_NC_021160.1_14410147 | Ca_kabuli_chr01    | 14410147                       | [A/C]       | 1067290566                                 |
| Ca_Kabuli_NC_021160.1_14410862 | Ca_kabuli_chr01    | 14410862                       | [T/C]       | 1067290567                                 |
| Ca_Kabuli_NC_021160.1_14411513 | Ca_kabuli_chr01    | 14411513                       | [T/G]       | 1067290568                                 |

| <b>SNP IDs</b>                 | <b>Chromosomes</b> | <b>Physical positions (bp)</b> | <b>SNPs</b> | <b>NCBI SNPdb accession IDs (NCBI_ss#)</b> |
|--------------------------------|--------------------|--------------------------------|-------------|--------------------------------------------|
| Ca_Kabuli_NC_021160.1_14411531 | Ca_kabuli_chr01    | 14411531                       | [T/A]       | 1067290569                                 |
| Ca_Kabuli_NC_021160.1_14489206 | Ca_kabuli_chr01    | 14489206                       | [C/A]       | 1067290570                                 |
| Ca_Kabuli_NC_021160.1_14489208 | Ca_kabuli_chr01    | 14489208                       | [T/A]       | 1067290571                                 |
| Ca_Kabuli_NC_021160.1_14489210 | Ca_kabuli_chr01    | 14489210                       | [A/C]       | 1067290572                                 |
| Ca_Kabuli_NC_021160.1_14489212 | Ca_kabuli_chr01    | 14489212                       | [T/G]       | 1067290573                                 |
| Ca_Kabuli_NC_021160.1_14583058 | Ca_kabuli_chr01    | 14583058                       | [A/G]       | 1067290574                                 |
| Ca_Kabuli_NC_021160.1_14583073 | Ca_kabuli_chr01    | 14583073                       | [A/C]       | 1067290575                                 |
| Ca_Kabuli_NC_021160.1_14583076 | Ca_kabuli_chr01    | 14583076                       | [A/G]       | 1067290576                                 |
| Ca_Kabuli_NC_021160.1_14617743 | Ca_kabuli_chr01    | 14617743                       | [T/G]       | 1067290577                                 |
| Ca_Kabuli_NC_021160.1_14617751 | Ca_kabuli_chr01    | 14617751                       | [T/A]       | 1067290578                                 |
| Ca_Kabuli_NC_021160.1_14617832 | Ca_kabuli_chr01    | 14617832                       | [T/A]       | 1067290579                                 |
| Ca_Kabuli_NC_021160.1_14617834 | Ca_kabuli_chr01    | 14617834                       | [G/T]       | 1067290580                                 |
| Ca_Kabuli_NC_021160.1_14617869 | Ca_kabuli_chr01    | 14617869                       | [A/C]       | 1067290581                                 |
| Ca_Kabuli_NC_021160.1_14623270 | Ca_kabuli_chr01    | 14623270                       | [C/T]       | 1067290582                                 |
| Ca_Kabuli_NC_021160.1_14623271 | Ca_kabuli_chr01    | 14623271                       | [T/C]       | 1067290583                                 |
| Ca_Kabuli_NC_021160.1_14623279 | Ca_kabuli_chr01    | 14623279                       | [T/G]       | 1067290584                                 |
| Ca_Kabuli_NC_021160.1_14631966 | Ca_kabuli_chr01    | 14631966                       | [T/C]       | 1067290585                                 |
| Ca_Kabuli_NC_021160.1_14631995 | Ca_kabuli_chr01    | 14631995                       | [A/C]       | 1067290586                                 |
| Ca_Kabuli_NC_021160.1_14801393 | Ca_kabuli_chr01    | 14801393                       | [T/G]       | 1067290587                                 |
| Ca_Kabuli_NC_021160.1_14801397 | Ca_kabuli_chr01    | 14801397                       | [T/C]       | 1067290588                                 |
| Ca_Kabuli_NC_021160.1_14801430 | Ca_kabuli_chr01    | 14801430                       | [A/C]       | 1067290589                                 |
| Ca_Kabuli_NC_021160.1_14801444 | Ca_kabuli_chr01    | 14801444                       | [A/C]       | 1067290590                                 |
| Ca_Kabuli_NC_021160.1_14801466 | Ca_kabuli_chr01    | 14801466                       | [A/G]       | 1067290591                                 |
| Ca_Kabuli_NC_021160.1_14884927 | Ca_kabuli_chr01    | 14884927                       | [A/G]       | 1067290592                                 |
| Ca_Kabuli_NC_021160.1_14884951 | Ca_kabuli_chr01    | 14884951                       | [T/A]       | 1067290593                                 |
| Ca_Kabuli_NC_021160.1_14911564 | Ca_kabuli_chr01    | 14911564                       | [A/C]       | 1067290594                                 |
| Ca_Kabuli_NC_021160.1_14960025 | Ca_kabuli_chr01    | 14960025                       | [C/T]       | 1067290595                                 |
| Ca_Kabuli_NC_021160.1_15008621 | Ca_kabuli_chr01    | 15008621                       | [C/A]       | 1067290596                                 |
| Ca_Kabuli_NC_021160.1_15008622 | Ca_kabuli_chr01    | 15008622                       | [A/G]       | 1067290597                                 |
| Ca_Kabuli_NC_021160.1_15021857 | Ca_kabuli_chr01    | 15021857                       | [A/C]       | 1067290598                                 |
| Ca_Kabuli_NC_021160.1_15104356 | Ca_kabuli_chr01    | 15104356                       | [T/G]       | 1067290599                                 |
| Ca_Kabuli_NC_021160.1_15108435 | Ca_kabuli_chr01    | 15108435                       | [T/A]       | 1067290600                                 |
| Ca_Kabuli_NC_021160.1_15140980 | Ca_kabuli_chr01    | 15140980                       | [T/G]       | 1067290601                                 |
| Ca_Kabuli_NC_021160.1_15144307 | Ca_kabuli_chr01    | 15144307                       | [T/C]       | 1067290602                                 |

| <b>SNP IDs</b>                 | <b>Chromosomes</b> | <b>Physical positions (bp)</b> | <b>SNPs</b> | <b>NCBI SNPdb accession IDs (NCBI_ss#)</b> |
|--------------------------------|--------------------|--------------------------------|-------------|--------------------------------------------|
| Ca_Kabuli_NC_021160.1_15146092 | Ca_kabuli_chr01    | 15146092                       | [T/C]       | 1067290603                                 |
| Ca_Kabuli_NC_021160.1_15146099 | Ca_kabuli_chr01    | 15146099                       | [A/G]       | 1067290604                                 |
| Ca_Kabuli_NC_021160.1_15146104 | Ca_kabuli_chr01    | 15146104                       | [A/G]       | 1067290605                                 |
| Ca_Kabuli_NC_021160.1_15154171 | Ca_kabuli_chr01    | 15154171                       | [T/G]       | 1067290606                                 |
| Ca_Kabuli_NC_021160.1_15167660 | Ca_kabuli_chr01    | 15167660                       | [A/C]       | 1067290607                                 |
| Ca_Kabuli_NC_021160.1_15196079 | Ca_kabuli_chr01    | 15196079                       | [T/C]       | 1067290608                                 |
| Ca_Kabuli_NC_021160.1_15196091 | Ca_kabuli_chr01    | 15196091                       | [A/C]       | 1067290609                                 |
| Ca_Kabuli_NC_021160.1_15233627 | Ca_kabuli_chr01    | 15233627                       | [C/A]       | 1067290610                                 |
| Ca_Kabuli_NC_021160.1_15233628 | Ca_kabuli_chr01    | 15233628                       | [C/T]       | 1067290611                                 |
| Ca_Kabuli_NC_021160.1_15233629 | Ca_kabuli_chr01    | 15233629                       | [G/C]       | 1067290612                                 |
| Ca_Kabuli_NC_021160.1_15233630 | Ca_kabuli_chr01    | 15233630                       | [G/T]       | 1067290613                                 |
| Ca_Kabuli_NC_021160.1_15253222 | Ca_kabuli_chr01    | 15253222                       | [T/C]       | 1067290614                                 |
| Ca_Kabuli_NC_021160.1_15253233 | Ca_kabuli_chr01    | 15253233                       | [C/A]       | 1067290615                                 |
| Ca_Kabuli_NC_021160.1_15253238 | Ca_kabuli_chr01    | 15253238                       | [G/C]       | 1067290616                                 |
| Ca_Kabuli_NC_021160.1_15253243 | Ca_kabuli_chr01    | 15253243                       | [T/C]       | 1067290617                                 |
| Ca_Kabuli_NC_021160.1_15253253 | Ca_kabuli_chr01    | 15253253                       | [A/G]       | 1067290618                                 |
| Ca_Kabuli_NC_021160.1_15253257 | Ca_kabuli_chr01    | 15253257                       | [A/G]       | 1067290619                                 |
| Ca_Kabuli_NC_021160.1_15253261 | Ca_kabuli_chr01    | 15253261                       | [A/G]       | 1067290620                                 |
| Ca_Kabuli_NC_021160.1_15285011 | Ca_kabuli_chr01    | 15285011                       | [G/T]       | 1067290621                                 |
| Ca_Kabuli_NC_021160.1_15291788 | Ca_kabuli_chr01    | 15291788                       | [T/C]       | 1067290622                                 |
| Ca_Kabuli_NC_021160.1_15291832 | Ca_kabuli_chr01    | 15291832                       | [T/A]       | 1067290623                                 |
| Ca_Kabuli_NC_021160.1_15291847 | Ca_kabuli_chr01    | 15291847                       | [A/G]       | 1067290624                                 |
| Ca_Kabuli_NC_021160.1_15373744 | Ca_kabuli_chr01    | 15373744                       | [C/A]       | 1067290625                                 |
| Ca_Kabuli_NC_021160.1_15373745 | Ca_kabuli_chr01    | 15373745                       | [C/G]       | 1067290626                                 |
| Ca_Kabuli_NC_021160.1_15373746 | Ca_kabuli_chr01    | 15373746                       | [T/A]       | 1067290627                                 |
| Ca_Kabuli_NC_021160.1_15493528 | Ca_kabuli_chr01    | 15493528                       | [T/G]       | 1067290628                                 |
| Ca_Kabuli_NC_021160.1_15645681 | Ca_kabuli_chr01    | 15645681                       | [G/A]       | 1067290629                                 |
| Ca_Kabuli_NC_021160.1_15645682 | Ca_kabuli_chr01    | 15645682                       | [A/T]       | 1067290630                                 |
| Ca_Kabuli_NC_021160.1_15645684 | Ca_kabuli_chr01    | 15645684                       | [C/T]       | 1067290631                                 |
| Ca_Kabuli_NC_021160.1_15645685 | Ca_kabuli_chr01    | 15645685                       | [T/G]       | 1067290632                                 |
| Ca_Kabuli_NC_021160.1_15683176 | Ca_kabuli_chr01    | 15683176                       | [T/C]       | 1067290633                                 |
| Ca_Kabuli_NC_021160.1_15799075 | Ca_kabuli_chr01    | 15799075                       | [T/G]       | 1067290634                                 |
| Ca_Kabuli_NC_021160.1_15936187 | Ca_kabuli_chr01    | 15936187                       | [A/G]       | 1067290635                                 |
| Ca_Kabuli_NC_021160.1_15938115 | Ca_kabuli_chr01    | 15938115                       | [C/A]       | 1067290636                                 |

| <b>SNP IDs</b>                 | <b>Chromosomes</b> | <b>Physical positions (bp)</b> | <b>SNPs</b> | <b>NCBI SNPdb accession IDs (NCBI_ss#)</b> |
|--------------------------------|--------------------|--------------------------------|-------------|--------------------------------------------|
| Ca_Kabuli_NC_021160.1_15938116 | Ca_kabuli_chr01    | 15938116                       | [T/G]       | 1067290637                                 |
| Ca_Kabuli_NC_021160.1_15959271 | Ca_kabuli_chr01    | 15959271                       | [A/G]       | 1067290638                                 |
| Ca_Kabuli_NC_021160.1_15959355 | Ca_kabuli_chr01    | 15959355                       | [T/C]       | 1067290639                                 |
| Ca_Kabuli_NC_021160.1_15959392 | Ca_kabuli_chr01    | 15959392                       | [A/C]       | 1067290640                                 |
| Ca_Kabuli_NC_021160.1_15959435 | Ca_kabuli_chr01    | 15959435                       | [G/A]       | 1067290641                                 |
| Ca_Kabuli_NC_021160.1_15960425 | Ca_kabuli_chr01    | 15960425                       | [A/C]       | 1067290642                                 |
| Ca_Kabuli_NC_021160.1_15960455 | Ca_kabuli_chr01    | 15960455                       | [A/G]       | 1067290643                                 |
| Ca_Kabuli_NC_021160.1_15960476 | Ca_kabuli_chr01    | 15960476                       | [T/G]       | 1067290644                                 |
| Ca_Kabuli_NC_021160.1_15964019 | Ca_kabuli_chr01    | 15964019                       | [A/T]       | 1067290645                                 |
| Ca_Kabuli_NC_021160.1_15964060 | Ca_kabuli_chr01    | 15964060                       | [T/A]       | 1067290646                                 |
| Ca_Kabuli_NC_021160.1_15965278 | Ca_kabuli_chr01    | 15965278                       | [A/G]       | 1067290647                                 |
| Ca_Kabuli_NC_021160.1_15965367 | Ca_kabuli_chr01    | 15965367                       | [A/C]       | 1067290648                                 |
| Ca_Kabuli_NC_021160.1_16061265 | Ca_kabuli_chr01    | 16061265                       | [T/G]       | 1067290649                                 |
| Ca_Kabuli_NC_021160.1_16114593 | Ca_kabuli_chr01    | 16114593                       | [A/G]       | 1067290650                                 |
| Ca_Kabuli_NC_021160.1_16228094 | Ca_kabuli_chr01    | 16228094                       | [G/T]       | 1067290651                                 |
| Ca_Kabuli_NC_021160.1_16376274 | Ca_kabuli_chr01    | 16376274                       | [T/A]       | 1067290652                                 |
| Ca_Kabuli_NC_021160.1_16385973 | Ca_kabuli_chr01    | 16385973                       | [T/A]       | 1067290653                                 |
| Ca_Kabuli_NC_021160.1_16385979 | Ca_kabuli_chr01    | 16385979                       | [T/A]       | 1067290654                                 |
| Ca_Kabuli_NC_021160.1_16385986 | Ca_kabuli_chr01    | 16385986                       | [A/C]       | 1067290655                                 |
| Ca_Kabuli_NC_021160.1_16386014 | Ca_kabuli_chr01    | 16386014                       | [A/T]       | 1067290656                                 |
| Ca_Kabuli_NC_021160.1_16386016 | Ca_kabuli_chr01    | 16386016                       | [T/C]       | 1067290657                                 |
| Ca_Kabuli_NC_021160.1_16386040 | Ca_kabuli_chr01    | 16386040                       | [A/C]       | 1067290658                                 |
| Ca_Kabuli_NC_021160.1_16386050 | Ca_kabuli_chr01    | 16386050                       | [T/C]       | 1067290659                                 |
| Ca_Kabuli_NC_021160.1_16386063 | Ca_kabuli_chr01    | 16386063                       | [A/G]       | 1067290660                                 |
| Ca_Kabuli_NC_021160.1_16386076 | Ca_kabuli_chr01    | 16386076                       | [A/C]       | 1067290661                                 |
| Ca_Kabuli_NC_021160.1_16419482 | Ca_kabuli_chr01    | 16419482                       | [A/T]       | 1067290662                                 |
| Ca_Kabuli_NC_021160.1_16467635 | Ca_kabuli_chr01    | 16467635                       | [G/T]       | 1067290663                                 |
| Ca_Kabuli_NC_021160.1_16509078 | Ca_kabuli_chr01    | 16509078                       | [T/C]       | 1067290664                                 |
| Ca_Kabuli_NC_021160.1_16511324 | Ca_kabuli_chr01    | 16511324                       | [T/G]       | 1067290665                                 |
| Ca_Kabuli_NC_021160.1_16513357 | Ca_kabuli_chr01    | 16513357                       | [A/G]       | 1067290666                                 |
| Ca_Kabuli_NC_021160.1_16526502 | Ca_kabuli_chr01    | 16526502                       | [T/A]       | 1067290667                                 |
| Ca_Kabuli_NC_021160.1_16526608 | Ca_kabuli_chr01    | 16526608                       | [A/T]       | 1067290668                                 |
| Ca_Kabuli_NC_021160.1_16526710 | Ca_kabuli_chr01    | 16526710                       | [C/A]       | 1067290669                                 |
| Ca_Kabuli_NC_021160.1_16527348 | Ca_kabuli_chr01    | 16527348                       | [C/T]       | 1067290670                                 |



| <b>SNP IDs</b>                 | <b>Chromosomes</b> | <b>Physical positions (bp)</b> | <b>SNPs</b> | <b>NCBI SNPdb accession IDs (NCBI_ss#)</b> |
|--------------------------------|--------------------|--------------------------------|-------------|--------------------------------------------|
| Ca_Kabuli_NC_021160.1_16527372 | Ca_kabuli_chr01    | 16527372                       | [A/C]       | 1067290671                                 |
| Ca_Kabuli_NC_021160.1_16552357 | Ca_kabuli_chr01    | 16552357                       | [T/C]       | 1067290672                                 |
| Ca_Kabuli_NC_021160.1_16589738 | Ca_kabuli_chr01    | 16589738                       | [A/G]       | 1067290673                                 |
| Ca_Kabuli_NC_021160.1_16589752 | Ca_kabuli_chr01    | 16589752                       | [A/C]       | 1067290674                                 |
| Ca_Kabuli_NC_021160.1_16609370 | Ca_kabuli_chr01    | 16609370                       | [A/G]       | 1067290675                                 |
| Ca_Kabuli_NC_021160.1_16609385 | Ca_kabuli_chr01    | 16609385                       | [T/C]       | 1067290676                                 |
| Ca_Kabuli_NC_021160.1_16609399 | Ca_kabuli_chr01    | 16609399                       | [A/C]       | 1067290677                                 |
| Ca_Kabuli_NC_021160.1_16609410 | Ca_kabuli_chr01    | 16609410                       | [T/G]       | 1067290678                                 |
| Ca_Kabuli_NC_021160.1_16609413 | Ca_kabuli_chr01    | 16609413                       | [T/C]       | 1067290679                                 |
| Ca_Kabuli_NC_021160.1_16614308 | Ca_kabuli_chr01    | 16614308                       | [A/C]       | 1067290680                                 |
| Ca_Kabuli_NC_021160.1_16614769 | Ca_kabuli_chr01    | 16614769                       | [A/C]       | 1067290681                                 |
| Ca_Kabuli_NC_021160.1_16636571 | Ca_kabuli_chr01    | 16636571                       | [A/C]       | 1067290682                                 |
| Ca_Kabuli_NC_021160.1_16636574 | Ca_kabuli_chr01    | 16636574                       | [A/T]       | 1067290683                                 |
| Ca_Kabuli_NC_021160.1_16883186 | Ca_kabuli_chr01    | 16883186                       | [A/G]       | 1067290684                                 |
| Ca_Kabuli_NC_021160.1_16901797 | Ca_kabuli_chr01    | 16901797                       | [T/G]       | 1067290685                                 |
| Ca_Kabuli_NC_021160.1_16908580 | Ca_kabuli_chr01    | 16908580                       | [T/G]       | 1067290686                                 |
| Ca_Kabuli_NC_021160.1_16923207 | Ca_kabuli_chr01    | 16923207                       | [A/T]       | 1067290687                                 |
| Ca_Kabuli_NC_021160.1_16926191 | Ca_kabuli_chr01    | 16926191                       | [T/G]       | 1067290688                                 |
| Ca_Kabuli_NC_021160.1_16933366 | Ca_kabuli_chr01    | 16933366                       | [A/T]       | 1067290689                                 |
| Ca_Kabuli_NC_021160.1_16947273 | Ca_kabuli_chr01    | 16947273                       | [T/C]       | 1067290690                                 |
| Ca_Kabuli_NC_021160.1_16947309 | Ca_kabuli_chr01    | 16947309                       | [T/G]       | 1067290691                                 |
| Ca_Kabuli_NC_021160.1_16947321 | Ca_kabuli_chr01    | 16947321                       | [T/C]       | 1067290692                                 |
| Ca_Kabuli_NC_021160.1_16985736 | Ca_kabuli_chr01    | 16985736                       | [A/C]       | 1067290693                                 |
| Ca_Kabuli_NC_021160.1_17027471 | Ca_kabuli_chr01    | 17027471                       | [T/C]       | 1067290694                                 |
| Ca_Kabuli_NC_021160.1_17027509 | Ca_kabuli_chr01    | 17027509                       | [T/C]       | 1067290695                                 |
| Ca_Kabuli_NC_021160.1_17027523 | Ca_kabuli_chr01    | 17027523                       | [A/C]       | 1067290696                                 |
| Ca_Kabuli_NC_021160.1_17027527 | Ca_kabuli_chr01    | 17027527                       | [A/G]       | 1067290697                                 |
| Ca_Kabuli_NC_021160.1_17027531 | Ca_kabuli_chr01    | 17027531                       | [A/G]       | 1067290698                                 |
| Ca_Kabuli_NC_021160.1_17092346 | Ca_kabuli_chr01    | 17092346                       | [T/G]       | 1067290699                                 |
| Ca_Kabuli_NC_021160.1_17093633 | Ca_kabuli_chr01    | 17093633                       | [G/A]       | 1067290700                                 |
| Ca_Kabuli_NC_021160.1_17093640 | Ca_kabuli_chr01    | 17093640                       | [T/G]       | 1067290701                                 |
| Ca_Kabuli_NC_021160.1_17167022 | Ca_kabuli_chr01    | 17167022                       | [T/A]       | 1067290702                                 |
| Ca_Kabuli_NC_021160.1_17170729 | Ca_kabuli_chr01    | 17170729                       | [A/C]       | 1067290703                                 |
| Ca_Kabuli_NC_021160.1_17182813 | Ca_kabuli_chr01    | 17182813                       | [A/T]       | 1067290704                                 |

| <b>SNP IDs</b>                 | <b>Chromosomes</b> | <b>Physical positions (bp)</b> | <b>SNPs</b> | <b>NCBI SNPdb accession IDs (NCBI_ss#)</b> |
|--------------------------------|--------------------|--------------------------------|-------------|--------------------------------------------|
| Ca_Kabuli_NC_021160.1_17182831 | Ca_kabuli_chr01    | 17182831                       | [A/G]       | 1067290705                                 |
| Ca_Kabuli_NC_021160.1_17316493 | Ca_kabuli_chr01    | 17316493                       | [C/A]       | 1067290706                                 |
| Ca_Kabuli_NC_021160.1_17328742 | Ca_kabuli_chr01    | 17328742                       | [T/G]       | 1067290707                                 |
| Ca_Kabuli_NC_021160.1_17333012 | Ca_kabuli_chr01    | 17333012                       | [A/C]       | 1067290708                                 |
| Ca_Kabuli_NC_021160.1_17333045 | Ca_kabuli_chr01    | 17333045                       | [A/C]       | 1067290709                                 |
| Ca_Kabuli_NC_021160.1_17333054 | Ca_kabuli_chr01    | 17333054                       | [A/G]       | 1067290710                                 |
| Ca_Kabuli_NC_021160.1_17349988 | Ca_kabuli_chr01    | 17349988                       | [T/A]       | 1067290711                                 |
| Ca_Kabuli_NC_021160.1_17359380 | Ca_kabuli_chr01    | 17359380                       | [A/G]       | 1067290712                                 |
| Ca_Kabuli_NC_021160.1_17359685 | Ca_kabuli_chr01    | 17359685                       | [T/C]       | 1067290713                                 |
| Ca_Kabuli_NC_021160.1_17359686 | Ca_kabuli_chr01    | 17359686                       | [T/C]       | 1067290714                                 |
| Ca_Kabuli_NC_021160.1_17359714 | Ca_kabuli_chr01    | 17359714                       | [A/C]       | 1067290715                                 |
| Ca_Kabuli_NC_021160.1_17359716 | Ca_kabuli_chr01    | 17359716                       | [A/C]       | 1067290716                                 |
| Ca_Kabuli_NC_021160.1_17359743 | Ca_kabuli_chr01    | 17359743                       | [A/G]       | 1067290717                                 |
| Ca_Kabuli_NC_021160.1_17363280 | Ca_kabuli_chr01    | 17363280                       | [A/C]       | 1067290718                                 |
| Ca_Kabuli_NC_021160.1_17363352 | Ca_kabuli_chr01    | 17363352                       | [T/C]       | 1067290719                                 |
| Ca_Kabuli_NC_021160.1_17363360 | Ca_kabuli_chr01    | 17363360                       | [A/G]       | 1067290720                                 |
| Ca_Kabuli_NC_021160.1_17391874 | Ca_kabuli_chr01    | 17391874                       | [T/C]       | 1067290721                                 |
| Ca_Kabuli_NC_021160.1_17391875 | Ca_kabuli_chr01    | 17391875                       | [C/A]       | 1067290722                                 |
| Ca_Kabuli_NC_021160.1_17391876 | Ca_kabuli_chr01    | 17391876                       | [T/G]       | 1067290723                                 |
| Ca_Kabuli_NC_021160.1_17400763 | Ca_kabuli_chr01    | 17400763                       | [T/A]       | 1067290724                                 |
| Ca_Kabuli_NC_021160.1_17400780 | Ca_kabuli_chr01    | 17400780                       | [A/G]       | 1067290725                                 |
| Ca_Kabuli_NC_021160.1_17400793 | Ca_kabuli_chr01    | 17400793                       | [A/G]       | 1067290726                                 |
| Ca_Kabuli_NC_021160.1_17400854 | Ca_kabuli_chr01    | 17400854                       | [T/G]       | 1067290727                                 |
| Ca_Kabuli_NC_021160.1_17400906 | Ca_kabuli_chr01    | 17400906                       | [T/C]       | 1067290728                                 |
| Ca_Kabuli_NC_021160.1_17400915 | Ca_kabuli_chr01    | 17400915                       | [A/G]       | 1067290729                                 |
| Ca_Kabuli_NC_021160.1_17404449 | Ca_kabuli_chr01    | 17404449                       | [T/C]       | 1067290730                                 |
| Ca_Kabuli_NC_021160.1_17404456 | Ca_kabuli_chr01    | 17404456                       | [T/G]       | 1067290731                                 |
| Ca_Kabuli_NC_021160.1_17404507 | Ca_kabuli_chr01    | 17404507                       | [T/A]       | 1067290732                                 |
| Ca_Kabuli_NC_021160.1_17404509 | Ca_kabuli_chr01    | 17404509                       | [A/G]       | 1067290733                                 |
| Ca_Kabuli_NC_021160.1_17404560 | Ca_kabuli_chr01    | 17404560                       | [C/T]       | 1067290734                                 |
| Ca_Kabuli_NC_021160.1_17404569 | Ca_kabuli_chr01    | 17404569                       | [T/C]       | 1067290735                                 |
| Ca_Kabuli_NC_021160.1_17404571 | Ca_kabuli_chr01    | 17404571                       | [A/G]       | 1067290736                                 |
| Ca_Kabuli_NC_021160.1_17404587 | Ca_kabuli_chr01    | 17404587                       | [T/C]       | 1067290737                                 |
| Ca_Kabuli_NC_021160.1_17404600 | Ca_kabuli_chr01    | 17404600                       | [C/A]       | 1067290738                                 |

| <b>SNP IDs</b>                 | <b>Chromosomes</b> | <b>Physical positions (bp)</b> | <b>SNPs</b> | <b>NCBI SNPdb accession IDs (NCBI_ss#)</b> |
|--------------------------------|--------------------|--------------------------------|-------------|--------------------------------------------|
| Ca_Kabuli_NC_021160.1_17437379 | Ca_kabuli_chr01    | 17437379                       | [T/G]       | 1067290739                                 |
| Ca_Kabuli_NC_021160.1_17437391 | Ca_kabuli_chr01    | 17437391                       | [T/G]       | 1067290740                                 |
| Ca_Kabuli_NC_021160.1_17458109 | Ca_kabuli_chr01    | 17458109                       | [T/G]       | 1067290741                                 |
| Ca_Kabuli_NC_021160.1_17458129 | Ca_kabuli_chr01    | 17458129                       | [T/A]       | 1067290742                                 |
| Ca_Kabuli_NC_021160.1_17462446 | Ca_kabuli_chr01    | 17462446                       | [C/T]       | 1067290743                                 |
| Ca_Kabuli_NC_021160.1_17462461 | Ca_kabuli_chr01    | 17462461                       | [G/A]       | 1067290744                                 |
| Ca_Kabuli_NC_021160.1_17462468 | Ca_kabuli_chr01    | 17462468                       | [T/C]       | 1067290745                                 |
| Ca_Kabuli_NC_021160.1_17462494 | Ca_kabuli_chr01    | 17462494                       | [A/T]       | 1067290746                                 |
| Ca_Kabuli_NC_021160.1_17462593 | Ca_kabuli_chr01    | 17462593                       | [A/G]       | 1067290747                                 |
| Ca_Kabuli_NC_021160.1_17522357 | Ca_kabuli_chr01    | 17522357                       | [G/C]       | 1067290748                                 |
| Ca_Kabuli_NC_021160.1_17522359 | Ca_kabuli_chr01    | 17522359                       | [T/C]       | 1067290749                                 |
| Ca_Kabuli_NC_021160.1_17522489 | Ca_kabuli_chr01    | 17522489                       | [T/C]       | 1067290750                                 |
| Ca_Kabuli_NC_021160.1_17522490 | Ca_kabuli_chr01    | 17522490                       | [C/T]       | 1067290751                                 |
| Ca_Kabuli_NC_021160.1_17522492 | Ca_kabuli_chr01    | 17522492                       | [C/T]       | 1067290752                                 |
| Ca_Kabuli_NC_021160.1_17522499 | Ca_kabuli_chr01    | 17522499                       | [T/C]       | 1067290753                                 |
| Ca_Kabuli_NC_021160.1_17523917 | Ca_kabuli_chr01    | 17523917                       | [G/T]       | 1067290754                                 |
| Ca_Kabuli_NC_021160.1_17523919 | Ca_kabuli_chr01    | 17523919                       | [T/C]       | 1067290755                                 |
| Ca_Kabuli_NC_021160.1_17523921 | Ca_kabuli_chr01    | 17523921                       | [C/T]       | 1067290756                                 |
| Ca_Kabuli_NC_021160.1_17523925 | Ca_kabuli_chr01    | 17523925                       | [G/C]       | 1067290757                                 |
| Ca_Kabuli_NC_021160.1_17558878 | Ca_kabuli_chr01    | 17558878                       | [A/G]       | 1067290758                                 |
| Ca_Kabuli_NC_021160.1_17558882 | Ca_kabuli_chr01    | 17558882                       | [C/A]       | 1067290759                                 |
| Ca_Kabuli_NC_021160.1_17558883 | Ca_kabuli_chr01    | 17558883                       | [T/G]       | 1067290760                                 |
| Ca_Kabuli_NC_021160.1_17558896 | Ca_kabuli_chr01    | 17558896                       | [A/G]       | 1067290761                                 |
| Ca_Kabuli_NC_021160.1_17558960 | Ca_kabuli_chr01    | 17558960                       | [A/G]       | 1067290762                                 |
| Ca_Kabuli_NC_021160.1_17558994 | Ca_kabuli_chr01    | 17558994                       | [A/C]       | 1067290763                                 |
| Ca_Kabuli_NC_021160.1_17571776 | Ca_kabuli_chr01    | 17571776                       | [T/C]       | 1067290764                                 |
| Ca_Kabuli_NC_021160.1_17571793 | Ca_kabuli_chr01    | 17571793                       | [T/G]       | 1067290765                                 |
| Ca_Kabuli_NC_021160.1_17571806 | Ca_kabuli_chr01    | 17571806                       | [A/G]       | 1067290766                                 |
| Ca_Kabuli_NC_021160.1_17576835 | Ca_kabuli_chr01    | 17576835                       | [A/C]       | 1067290767                                 |
| Ca_Kabuli_NC_021160.1_17590658 | Ca_kabuli_chr01    | 17590658                       | [A/G]       | 1067290768                                 |
| Ca_Kabuli_NC_021160.1_17653519 | Ca_kabuli_chr01    | 17653519                       | [T/C]       | 1067290769                                 |
| Ca_Kabuli_NC_021160.1_17653537 | Ca_kabuli_chr01    | 17653537                       | [A/G]       | 1067290770                                 |
| Ca_Kabuli_NC_021160.1_17653549 | Ca_kabuli_chr01    | 17653549                       | [T/G]       | 1067290771                                 |
| Ca_Kabuli_NC_021160.1_17653552 | Ca_kabuli_chr01    | 17653552                       | [T/G]       | 1067290772                                 |

| <b>SNP IDs</b>                 | <b>Chromosomes</b> | <b>Physical positions (bp)</b> | <b>SNPs</b> | <b>NCBI SNPdb accession IDs (NCBI_ss#)</b> |
|--------------------------------|--------------------|--------------------------------|-------------|--------------------------------------------|
| Ca_Kabuli_NC_021160.1_17653553 | Ca_kabuli_chr01    | 17653553                       | [A/C]       | 1067290773                                 |
| Ca_Kabuli_NC_021160.1_17653557 | Ca_kabuli_chr01    | 17653557                       | [A/C]       | 1067290774                                 |
| Ca_Kabuli_NC_021160.1_17706867 | Ca_kabuli_chr01    | 17706867                       | [T/C]       | 1067290775                                 |
| Ca_Kabuli_NC_021160.1_17706889 | Ca_kabuli_chr01    | 17706889                       | [A/G]       | 1067290776                                 |
| Ca_Kabuli_NC_021160.1_17759272 | Ca_kabuli_chr01    | 17759272                       | [A/G]       | 1067290777                                 |
| Ca_Kabuli_NC_021160.1_17761284 | Ca_kabuli_chr01    | 17761284                       | [A/G]       | 1067290778                                 |
| Ca_Kabuli_NC_021160.1_17761393 | Ca_kabuli_chr01    | 17761393                       | [A/G]       | 1067290779                                 |
| Ca_Kabuli_NC_021160.1_17763486 | Ca_kabuli_chr01    | 17763486                       | [T/G]       | 1067290780                                 |
| Ca_Kabuli_NC_021160.1_17763492 | Ca_kabuli_chr01    | 17763492                       | [T/G]       | 1067290781                                 |
| Ca_Kabuli_NC_021160.1_17763498 | Ca_kabuli_chr01    | 17763498                       | [T/C]       | 1067290782                                 |
| Ca_Kabuli_NC_021160.1_17778537 | Ca_kabuli_chr01    | 17778537                       | [T/G]       | 1067290783                                 |
| Ca_Kabuli_NC_021160.1_17799607 | Ca_kabuli_chr01    | 17799607                       | [C/A]       | 1067290784                                 |
| Ca_Kabuli_NC_021160.1_17799615 | Ca_kabuli_chr01    | 17799615                       | [A/G]       | 1067290785                                 |
| Ca_Kabuli_NC_021160.1_17799621 | Ca_kabuli_chr01    | 17799621                       | [A/G]       | 1067290786                                 |
| Ca_Kabuli_NC_021160.1_17799635 | Ca_kabuli_chr01    | 17799635                       | [A/G]       | 1067290787                                 |
| Ca_Kabuli_NC_021160.1_17820791 | Ca_kabuli_chr01    | 17820791                       | [A/G]       | 1067290788                                 |
| Ca_Kabuli_NC_021160.1_17866910 | Ca_kabuli_chr01    | 17866910                       | [T/G]       | 1067290789                                 |
| Ca_Kabuli_NC_021160.1_17866946 | Ca_kabuli_chr01    | 17866946                       | [C/G]       | 1067290790                                 |
| Ca_Kabuli_NC_021160.1_17867617 | Ca_kabuli_chr01    | 17867617                       | [A/C]       | 1067290791                                 |
| Ca_Kabuli_NC_021160.1_17961745 | Ca_kabuli_chr01    | 17961745                       | [C/A]       | 1067290792                                 |
| Ca_Kabuli_NC_021160.1_17961746 | Ca_kabuli_chr01    | 17961746                       | [A/G]       | 1067290793                                 |
| Ca_Kabuli_NC_021160.1_17983266 | Ca_kabuli_chr01    | 17983266                       | [A/G]       | 1067290794                                 |
| Ca_Kabuli_NC_021160.1_17983298 | Ca_kabuli_chr01    | 17983298                       | [T/G]       | 1067290795                                 |
| Ca_Kabuli_NC_021160.1_17983306 | Ca_kabuli_chr01    | 17983306                       | [T/G]       | 1067290796                                 |
| Ca_Kabuli_NC_021160.1_17983310 | Ca_kabuli_chr01    | 17983310                       | [T/G]       | 1067290797                                 |
| Ca_Kabuli_NC_021160.1_18015870 | Ca_kabuli_chr01    | 18015870                       | [T/G]       | 1067290798                                 |
| Ca_Kabuli_NC_021160.1_18017331 | Ca_kabuli_chr01    | 18017331                       | [A/G]       | 1067290799                                 |
| Ca_Kabuli_NC_021160.1_18068251 | Ca_kabuli_chr01    | 18068251                       | [A/C]       | 1067290800                                 |
| Ca_Kabuli_NC_021160.1_18085174 | Ca_kabuli_chr01    | 18085174                       | [T/G]       | 1067290801                                 |
| Ca_Kabuli_NC_021160.1_18092984 | Ca_kabuli_chr01    | 18092984                       | [T/C]       | 1067290802                                 |
| Ca_Kabuli_NC_021160.1_18093009 | Ca_kabuli_chr01    | 18093009                       | [T/C]       | 1067290803                                 |
| Ca_Kabuli_NC_021160.1_18093020 | Ca_kabuli_chr01    | 18093020                       | [T/G]       | 1067290804                                 |
| Ca_Kabuli_NC_021160.1_18098525 | Ca_kabuli_chr01    | 18098525                       | [T/C]       | 1067290805                                 |
| Ca_Kabuli_NC_021160.1_18098574 | Ca_kabuli_chr01    | 18098574                       | [A/T]       | 1067290806                                 |

| <b>SNP IDs</b>                 | <b>Chromosomes</b> | <b>Physical positions (bp)</b> | <b>SNPs</b> | <b>NCBI SNPdb accession IDs (NCBI_ss#)</b> |
|--------------------------------|--------------------|--------------------------------|-------------|--------------------------------------------|
| Ca_Kabuli_NC_021160.1_18137644 | Ca_kabuli_chr01    | 18137644                       | [T/C]       | 1067290807                                 |
| Ca_Kabuli_NC_021160.1_18137673 | Ca_kabuli_chr01    | 18137673                       | [A/G]       | 1067290808                                 |
| Ca_Kabuli_NC_021160.1_18156778 | Ca_kabuli_chr01    | 18156778                       | [T/C]       | 1067290809                                 |
| Ca_Kabuli_NC_021160.1_18156837 | Ca_kabuli_chr01    | 18156837                       | [A/C]       | 1067290810                                 |
| Ca_Kabuli_NC_021160.1_18172904 | Ca_kabuli_chr01    | 18172904                       | [T/C]       | 1067290811                                 |
| Ca_Kabuli_NC_021160.1_18172944 | Ca_kabuli_chr01    | 18172944                       | [T/G]       | 1067290812                                 |
| Ca_Kabuli_NC_021160.1_18371385 | Ca_kabuli_chr01    | 18371385                       | [C/A]       | 1067290813                                 |
| Ca_Kabuli_NC_021160.1_18460647 | Ca_kabuli_chr01    | 18460647                       | [A/C]       | 1067290814                                 |
| Ca_Kabuli_NC_021160.1_18503993 | Ca_kabuli_chr01    | 18503993                       | [A/C]       | 1067290815                                 |
| Ca_Kabuli_NC_021160.1_18504001 | Ca_kabuli_chr01    | 18504001                       | [A/C]       | 1067290816                                 |
| Ca_Kabuli_NC_021160.1_18745989 | Ca_kabuli_chr01    | 18745989                       | [T/G]       | 1067290817                                 |
| Ca_Kabuli_NC_021160.1_18748594 | Ca_kabuli_chr01    | 18748594                       | [C/A]       | 1067290818                                 |
| Ca_Kabuli_NC_021160.1_18748595 | Ca_kabuli_chr01    | 18748595                       | [C/G]       | 1067290819                                 |
| Ca_Kabuli_NC_021160.1_18748596 | Ca_kabuli_chr01    | 18748596                       | [G/A]       | 1067290820                                 |
| Ca_Kabuli_NC_021160.1_18764083 | Ca_kabuli_chr01    | 18764083                       | [T/A]       | 1067290821                                 |
| Ca_Kabuli_NC_021160.1_18764113 | Ca_kabuli_chr01    | 18764113                       | [A/G]       | 1067290822                                 |
| Ca_Kabuli_NC_021160.1_18765875 | Ca_kabuli_chr01    | 18765875                       | [A/G]       | 1067290823                                 |
| Ca_Kabuli_NC_021160.1_18765881 | Ca_kabuli_chr01    | 18765881                       | [T/C]       | 1067290824                                 |
| Ca_Kabuli_NC_021160.1_18771081 | Ca_kabuli_chr01    | 18771081                       | [T/G]       | 1067290825                                 |
| Ca_Kabuli_NC_021160.1_18784103 | Ca_kabuli_chr01    | 18784103                       | [A/C]       | 1067290826                                 |
| Ca_Kabuli_NC_021160.1_18784153 | Ca_kabuli_chr01    | 18784153                       | [A/G]       | 1067290827                                 |
| Ca_Kabuli_NC_021160.1_18784172 | Ca_kabuli_chr01    | 18784172                       | [A/C]       | 1067290828                                 |
| Ca_Kabuli_NC_021160.1_18797833 | Ca_kabuli_chr01    | 18797833                       | [C/A]       | 1067290829                                 |
| Ca_Kabuli_NC_021160.1_18835334 | Ca_kabuli_chr01    | 18835334                       | [T/C]       | 1067290830                                 |
| Ca_Kabuli_NC_021160.1_19165710 | Ca_kabuli_chr01    | 19165710                       | [C/A]       | 1067290831                                 |
| Ca_Kabuli_NC_021160.1_19165714 | Ca_kabuli_chr01    | 19165714                       | [T/A]       | 1067290832                                 |
| Ca_Kabuli_NC_021160.1_19165715 | Ca_kabuli_chr01    | 19165715                       | [C/A]       | 1067290833                                 |
| Ca_Kabuli_NC_021160.1_19209701 | Ca_kabuli_chr01    | 19209701                       | [T/A]       | 1067290834                                 |
| Ca_Kabuli_NC_021160.1_19252764 | Ca_kabuli_chr01    | 19252764                       | [T/G]       | 1067290835                                 |
| Ca_Kabuli_NC_021160.1_19252846 | Ca_kabuli_chr01    | 19252846                       | [A/G]       | 1067290836                                 |
| Ca_Kabuli_NC_021160.1_19252879 | Ca_kabuli_chr01    | 19252879                       | [A/G]       | 1067290837                                 |
| Ca_Kabuli_NC_021160.1_19254161 | Ca_kabuli_chr01    | 19254161                       | [A/G]       | 1067290838                                 |
| Ca_Kabuli_NC_021160.1_19359812 | Ca_kabuli_chr01    | 19359812                       | [A/C]       | 1067290839                                 |
| Ca_Kabuli_NC_021160.1_19360048 | Ca_kabuli_chr01    | 19360048                       | [A/G]       | 1067290840                                 |

| <b>SNP IDs</b>                 | <b>Chromosomes</b> | <b>Physical positions (bp)</b> | <b>SNPs</b> | <b>NCBI SNPdb accession IDs (NCBI_ss#)</b> |
|--------------------------------|--------------------|--------------------------------|-------------|--------------------------------------------|
| Ca_Kabuli_NC_021160.1_19526652 | Ca_kabuli_chr01    | 19526652                       | [G/T]       | 1067290841                                 |
| Ca_Kabuli_NC_021160.1_19539805 | Ca_kabuli_chr01    | 19539805                       | [T/G]       | 1067290842                                 |
| Ca_Kabuli_NC_021160.1_19876064 | Ca_kabuli_chr01    | 19876064                       | [T/G]       | 1067290843                                 |
| Ca_Kabuli_NC_021160.1_19902827 | Ca_kabuli_chr01    | 19902827                       | [T/A]       | 1067290844                                 |
| Ca_Kabuli_NC_021160.1_20005201 | Ca_kabuli_chr01    | 20005201                       | [T/A]       | 1067290845                                 |
| Ca_Kabuli_NC_021160.1_20056368 | Ca_kabuli_chr01    | 20056368                       | [A/C]       | 1067290846                                 |
| Ca_Kabuli_NC_021160.1_20070148 | Ca_kabuli_chr01    | 20070148                       | [A/G]       | 1067290847                                 |
| Ca_Kabuli_NC_021160.1_20070159 | Ca_kabuli_chr01    | 20070159                       | [T/G]       | 1067290848                                 |
| Ca_Kabuli_NC_021160.1_20070197 | Ca_kabuli_chr01    | 20070197                       | [T/A]       | 1067290849                                 |
| Ca_Kabuli_NC_021160.1_20091291 | Ca_kabuli_chr01    | 20091291                       | [T/G]       | 1067290850                                 |
| Ca_Kabuli_NC_021160.1_20092567 | Ca_kabuli_chr01    | 20092567                       | [T/C]       | 1067290851                                 |
| Ca_Kabuli_NC_021160.1_20107182 | Ca_kabuli_chr01    | 20107182                       | [G/A]       | 1067290852                                 |
| Ca_Kabuli_NC_021160.1_20113713 | Ca_kabuli_chr01    | 20113713                       | [T/C]       | 1067290853                                 |
| Ca_Kabuli_NC_021160.1_21739090 | Ca_kabuli_chr01    | 21739090                       | [T/C]       | 1067290854                                 |
| Ca_Kabuli_NC_021160.1_21739123 | Ca_kabuli_chr01    | 21739123                       | [A/G]       | 1067290855                                 |
| Ca_Kabuli_NC_021160.1_21739125 | Ca_kabuli_chr01    | 21739125                       | [T/C]       | 1067290856                                 |
| Ca_Kabuli_NC_021160.1_21739126 | Ca_kabuli_chr01    | 21739126                       | [G/T]       | 1067290857                                 |
| Ca_Kabuli_NC_021160.1_21739129 | Ca_kabuli_chr01    | 21739129                       | [C/T]       | 1067290858                                 |
| Ca_Kabuli_NC_021160.1_21739425 | Ca_kabuli_chr01    | 21739425                       | [A/T]       | 1067290859                                 |
| Ca_Kabuli_NC_021160.1_21749813 | Ca_kabuli_chr01    | 21749813                       | [G/A]       | 1067290860                                 |
| Ca_Kabuli_NC_021160.1_21822951 | Ca_kabuli_chr01    | 21822951                       | [A/G]       | 1067290861                                 |
| Ca_Kabuli_NC_021160.1_21822958 | Ca_kabuli_chr01    | 21822958                       | [A/G]       | 1067290862                                 |
| Ca_Kabuli_NC_021160.1_21917899 | Ca_kabuli_chr01    | 21917899                       | [A/G]       | 1067290863                                 |
| Ca_Kabuli_NC_021160.1_22369879 | Ca_kabuli_chr01    | 22369879                       | [T/C]       | 1067290864                                 |
| Ca_Kabuli_NC_021160.1_22369882 | Ca_kabuli_chr01    | 22369882                       | [A/G]       | 1067290865                                 |
| Ca_Kabuli_NC_021160.1_22369908 | Ca_kabuli_chr01    | 22369908                       | [A/T]       | 1067290866                                 |
| Ca_Kabuli_NC_021160.1_22433014 | Ca_kabuli_chr01    | 22433014                       | [T/G]       | 1067290867                                 |
| Ca_Kabuli_NC_021160.1_22433020 | Ca_kabuli_chr01    | 22433020                       | [A/C]       | 1067290868                                 |
| Ca_Kabuli_NC_021160.1_22433050 | Ca_kabuli_chr01    | 22433050                       | [A/G]       | 1067290869                                 |
| Ca_Kabuli_NC_021160.1_22465218 | Ca_kabuli_chr01    | 22465218                       | [T/C]       | 1067290870                                 |
| Ca_Kabuli_NC_021160.1_22465224 | Ca_kabuli_chr01    | 22465224                       | [A/C]       | 1067290871                                 |
| Ca_Kabuli_NC_021160.1_22465269 | Ca_kabuli_chr01    | 22465269                       | [A/G]       | 1067290872                                 |
| Ca_Kabuli_NC_021160.1_22465279 | Ca_kabuli_chr01    | 22465279                       | [T/A]       | 1067290873                                 |
| Ca_Kabuli_NC_021160.1_22465582 | Ca_kabuli_chr01    | 22465582                       | [A/T]       | 1067290874                                 |

| <b>SNP IDs</b>                 | <b>Chromosomes</b> | <b>Physical positions (bp)</b> | <b>SNPs</b> | <b>NCBI SNPdb accession IDs (NCBI_ss#)</b> |
|--------------------------------|--------------------|--------------------------------|-------------|--------------------------------------------|
| Ca_Kabuli_NC_021160.1_22465603 | Ca_kabuli_chr01    | 22465603                       | [A/C]       | 1067290875                                 |
| Ca_Kabuli_NC_021160.1_22514655 | Ca_kabuli_chr01    | 22514655                       | [G/T]       | 1067290876                                 |
| Ca_Kabuli_NC_021160.1_22744673 | Ca_kabuli_chr01    | 22744673                       | [A/C]       | 1067290877                                 |
| Ca_Kabuli_NC_021160.1_22744691 | Ca_kabuli_chr01    | 22744691                       | [A/G]       | 1067290878                                 |
| Ca_Kabuli_NC_021160.1_23147204 | Ca_kabuli_chr01    | 23147204                       | [T/C]       | 1067290879                                 |
| Ca_Kabuli_NC_021160.1_23148736 | Ca_kabuli_chr01    | 23148736                       | [A/C]       | 1067290880                                 |
| Ca_Kabuli_NC_021160.1_23148858 | Ca_kabuli_chr01    | 23148858                       | [A/G]       | 1067290881                                 |
| Ca_Kabuli_NC_021160.1_23149053 | Ca_kabuli_chr01    | 23149053                       | [G/A]       | 1067290882                                 |
| Ca_Kabuli_NC_021160.1_23149096 | Ca_kabuli_chr01    | 23149096                       | [A/G]       | 1067290883                                 |
| Ca_Kabuli_NC_021160.1_23155387 | Ca_kabuli_chr01    | 23155387                       | [T/C]       | 1067290884                                 |
| Ca_Kabuli_NC_021160.1_23155450 | Ca_kabuli_chr01    | 23155450                       | [A/G]       | 1067290885                                 |
| Ca_Kabuli_NC_021160.1_23558999 | Ca_kabuli_chr01    | 23558999                       | [A/T]       | 1067290886                                 |
| Ca_Kabuli_NC_021160.1_23602532 | Ca_kabuli_chr01    | 23602532                       | [A/C]       | 1067290887                                 |
| Ca_Kabuli_NC_021160.1_23885558 | Ca_kabuli_chr01    | 23885558                       | [T/G]       | 1067290888                                 |
| Ca_Kabuli_NC_021160.1_23885577 | Ca_kabuli_chr01    | 23885577                       | [C/G]       | 1067290889                                 |
| Ca_Kabuli_NC_021160.1_24070339 | Ca_kabuli_chr01    | 24070339                       | [T/A]       | 1067290890                                 |
| Ca_Kabuli_NC_021160.1_24070476 | Ca_kabuli_chr01    | 24070476                       | [A/G]       | 1067290891                                 |
| Ca_Kabuli_NC_021160.1_24070485 | Ca_kabuli_chr01    | 24070485                       | [A/G]       | 1067290892                                 |
| Ca_Kabuli_NC_021160.1_24070557 | Ca_kabuli_chr01    | 24070557                       | [T/C]       | 1067290893                                 |
| Ca_Kabuli_NC_021160.1_24070595 | Ca_kabuli_chr01    | 24070595                       | [T/C]       | 1067290894                                 |
| Ca_Kabuli_NC_021160.1_24070851 | Ca_kabuli_chr01    | 24070851                       | [T/C]       | 1067290895                                 |
| Ca_Kabuli_NC_021160.1_24070917 | Ca_kabuli_chr01    | 24070917                       | [A/G]       | 1067290896                                 |
| Ca_Kabuli_NC_021160.1_24070982 | Ca_kabuli_chr01    | 24070982                       | [T/C]       | 1067290897                                 |
| Ca_Kabuli_NC_021160.1_24072521 | Ca_kabuli_chr01    | 24072521                       | [T/G]       | 1067290898                                 |
| Ca_Kabuli_NC_021160.1_24247479 | Ca_kabuli_chr01    | 24247479                       | [A/C]       | 1067290899                                 |
| Ca_Kabuli_NC_021160.1_24247497 | Ca_kabuli_chr01    | 24247497                       | [T/C]       | 1067290900                                 |
| Ca_Kabuli_NC_021160.1_24247576 | Ca_kabuli_chr01    | 24247576                       | [A/T]       | 1067290901                                 |
| Ca_Kabuli_NC_021160.1_24247596 | Ca_kabuli_chr01    | 24247596                       | [T/C]       | 1067290902                                 |
| Ca_Kabuli_NC_021160.1_24450415 | Ca_kabuli_chr01    | 24450415                       | [T/C]       | 1067290903                                 |
| Ca_Kabuli_NC_021160.1_24450483 | Ca_kabuli_chr01    | 24450483                       | [T/G]       | 1067290904                                 |
| Ca_Kabuli_NC_021160.1_24450511 | Ca_kabuli_chr01    | 24450511                       | [A/G]       | 1067290905                                 |
| Ca_Kabuli_NC_021160.1_24505912 | Ca_kabuli_chr01    | 24505912                       | [T/G]       | 1067290906                                 |
| Ca_Kabuli_NC_021160.1_24560013 | Ca_kabuli_chr01    | 24560013                       | [A/C]       | 1067290907                                 |
| Ca_Kabuli_NC_021160.1_24658542 | Ca_kabuli_chr01    | 24658542                       | [T/G]       | 1067290908                                 |

| <b>SNP IDs</b>                 | <b>Chromosomes</b> | <b>Physical positions (bp)</b> | <b>SNPs</b> | <b>NCBI SNPdb accession IDs (NCBI_ss#)</b> |
|--------------------------------|--------------------|--------------------------------|-------------|--------------------------------------------|
| Ca_Kabuli_NC_021160.1_24658546 | Ca_kabuli_chr01    | 24658546                       | [G/A]       | 1067290909                                 |
| Ca_Kabuli_NC_021160.1_24845112 | Ca_kabuli_chr01    | 24845112                       | [A/C]       | 1067290910                                 |
| Ca_Kabuli_NC_021160.1_24845135 | Ca_kabuli_chr01    | 24845135                       | [T/G]       | 1067290911                                 |
| Ca_Kabuli_NC_021160.1_24868038 | Ca_kabuli_chr01    | 24868038                       | [T/A]       | 1067290912                                 |
| Ca_Kabuli_NC_021160.1_24983868 | Ca_kabuli_chr01    | 24983868                       | [A/T]       | 1067290913                                 |
| Ca_Kabuli_NC_021160.1_24983895 | Ca_kabuli_chr01    | 24983895                       | [T/C]       | 1067290914                                 |
| Ca_Kabuli_NC_021160.1_24984524 | Ca_kabuli_chr01    | 24984524                       | [T/A]       | 1067290915                                 |
| Ca_Kabuli_NC_021160.1_24984532 | Ca_kabuli_chr01    | 24984532                       | [A/T]       | 1067290916                                 |
| Ca_Kabuli_NC_021160.1_24984538 | Ca_kabuli_chr01    | 24984538                       | [A/C]       | 1067290917                                 |
| Ca_Kabuli_NC_021160.1_24984614 | Ca_kabuli_chr01    | 24984614                       | [A/G]       | 1067290918                                 |
| Ca_Kabuli_NC_021160.1_25060354 | Ca_kabuli_chr01    | 25060354                       | [A/C]       | 1067290919                                 |
| Ca_Kabuli_NC_021160.1_25176176 | Ca_kabuli_chr01    | 25176176                       | [T/C]       | 1067290920                                 |
| Ca_Kabuli_NC_021160.1_25176210 | Ca_kabuli_chr01    | 25176210                       | [A/G]       | 1067290921                                 |
| Ca_Kabuli_NC_021160.1_25176218 | Ca_kabuli_chr01    | 25176218                       | [A/G]       | 1067290922                                 |
| Ca_Kabuli_NC_021160.1_25664814 | Ca_kabuli_chr01    | 25664814                       | [T/C]       | 1067290923                                 |
| Ca_Kabuli_NC_021160.1_25733402 | Ca_kabuli_chr01    | 25733402                       | [T/C]       | 1067290924                                 |
| Ca_Kabuli_NC_021160.1_25733416 | Ca_kabuli_chr01    | 25733416                       | [T/G]       | 1067290925                                 |
| Ca_Kabuli_NC_021160.1_25733432 | Ca_kabuli_chr01    | 25733432                       | [A/G]       | 1067290926                                 |
| Ca_Kabuli_NC_021160.1_25843908 | Ca_kabuli_chr01    | 25843908                       | [A/G]       | 1067290927                                 |
| Ca_Kabuli_NC_021160.1_25987757 | Ca_kabuli_chr01    | 25987757                       | [A/T]       | 1067290928                                 |
| Ca_Kabuli_NC_021160.1_25987803 | Ca_kabuli_chr01    | 25987803                       | [A/C]       | 1067290929                                 |
| Ca_Kabuli_NC_021160.1_26150856 | Ca_kabuli_chr01    | 26150856                       | [A/C]       | 1067290930                                 |
| Ca_Kabuli_NC_021160.1_26326715 | Ca_kabuli_chr01    | 26326715                       | [T/A]       | 1067290931                                 |
| Ca_Kabuli_NC_021160.1_26579621 | Ca_kabuli_chr01    | 26579621                       | [A/C]       | 1067290932                                 |
| Ca_Kabuli_NC_021160.1_26613090 | Ca_kabuli_chr01    | 26613090                       | [T/C]       | 1067290933                                 |
| Ca_Kabuli_NC_021160.1_26769028 | Ca_kabuli_chr01    | 26769028                       | [T/G]       | 1067290934                                 |
| Ca_Kabuli_NC_021160.1_26769098 | Ca_kabuli_chr01    | 26769098                       | [A/C]       | 1067290935                                 |
| Ca_Kabuli_NC_021160.1_26807402 | Ca_kabuli_chr01    | 26807402                       | [C/A]       | 1067290936                                 |
| Ca_Kabuli_NC_021160.1_26807403 | Ca_kabuli_chr01    | 26807403                       | [T/C]       | 1067290937                                 |
| Ca_Kabuli_NC_021160.1_26807421 | Ca_kabuli_chr01    | 26807421                       | [A/C]       | 1067290938                                 |
| Ca_Kabuli_NC_021160.1_26921411 | Ca_kabuli_chr01    | 26921411                       | [A/G]       | 1067290939                                 |
| Ca_Kabuli_NC_021160.1_26921421 | Ca_kabuli_chr01    | 26921421                       | [T/C]       | 1067290940                                 |
| Ca_Kabuli_NC_021160.1_26922011 | Ca_kabuli_chr01    | 26922011                       | [T/G]       | 1067290941                                 |
| Ca_Kabuli_NC_021160.1_26922027 | Ca_kabuli_chr01    | 26922027                       | [T/G]       | 1067290942                                 |



| <b>SNP IDs</b>                 | <b>Chromosomes</b> | <b>Physical positions (bp)</b> | <b>SNPs</b> | <b>NCBI SNPdb accession IDs (NCBI_ss#)</b> |
|--------------------------------|--------------------|--------------------------------|-------------|--------------------------------------------|
| Ca_Kabuli_NC_021160.1_26922042 | Ca_kabuli_chr01    | 26922042                       | [A/C]       | 1067290943                                 |
| Ca_Kabuli_NC_021160.1_26950435 | Ca_kabuli_chr01    | 26950435                       | [A/C]       | 1067290944                                 |
| Ca_Kabuli_NC_021160.1_26974025 | Ca_kabuli_chr01    | 26974025                       | [T/G]       | 1067290945                                 |
| Ca_Kabuli_NC_021160.1_26974090 | Ca_kabuli_chr01    | 26974090                       | [A/G]       | 1067290946                                 |
| Ca_Kabuli_NC_021160.1_27012643 | Ca_kabuli_chr01    | 27012643                       | [A/T]       | 1067290947                                 |
| Ca_Kabuli_NC_021160.1_27012644 | Ca_kabuli_chr01    | 27012644                       | [A/C]       | 1067290948                                 |
| Ca_Kabuli_NC_021160.1_27012645 | Ca_kabuli_chr01    | 27012645                       | [G/T]       | 1067290949                                 |
| Ca_Kabuli_NC_021160.1_27017559 | Ca_kabuli_chr01    | 27017559                       | [G/A]       | 1067290950                                 |
| Ca_Kabuli_NC_021160.1_27017560 | Ca_kabuli_chr01    | 27017560                       | [A/G]       | 1067290951                                 |
| Ca_Kabuli_NC_021160.1_27017570 | Ca_kabuli_chr01    | 27017570                       | [A/G]       | 1067290952                                 |
| Ca_Kabuli_NC_021160.1_27017606 | Ca_kabuli_chr01    | 27017606                       | [C/T]       | 1067290953                                 |
| Ca_Kabuli_NC_021160.1_27252494 | Ca_kabuli_chr01    | 27252494                       | [T/C]       | 1067290954                                 |
| Ca_Kabuli_NC_021160.1_27252495 | Ca_kabuli_chr01    | 27252495                       | [A/T]       | 1067290955                                 |
| Ca_Kabuli_NC_021160.1_27618900 | Ca_kabuli_chr01    | 27618900                       | [T/G]       | 1067290956                                 |
| Ca_Kabuli_NC_021160.1_27745471 | Ca_kabuli_chr01    | 27745471                       | [C/T]       | 1067290957                                 |
| Ca_Kabuli_NC_021160.1_27831051 | Ca_kabuli_chr01    | 27831051                       | [G/T]       | 1067290958                                 |
| Ca_Kabuli_NC_021160.1_27831071 | Ca_kabuli_chr01    | 27831071                       | [G/A]       | 1067290959                                 |
| Ca_Kabuli_NC_021160.1_28065106 | Ca_kabuli_chr01    | 28065106                       | [A/T]       | 1067290960                                 |
| Ca_Kabuli_NC_021160.1_28065140 | Ca_kabuli_chr01    | 28065140                       | [C/T]       | 1067290961                                 |
| Ca_Kabuli_NC_021160.1_28073495 | Ca_kabuli_chr01    | 28073495                       | [A/G]       | 1067290962                                 |
| Ca_Kabuli_NC_021160.1_28074557 | Ca_kabuli_chr01    | 28074557                       | [T/A]       | 1067290963                                 |
| Ca_Kabuli_NC_021160.1_28082758 | Ca_kabuli_chr01    | 28082758                       | [C/T]       | 1067290964                                 |
| Ca_Kabuli_NC_021160.1_28088369 | Ca_kabuli_chr01    | 28088369                       | [C/A]       | 1067290965                                 |
| Ca_Kabuli_NC_021160.1_28088501 | Ca_kabuli_chr01    | 28088501                       | [T/C]       | 1067290966                                 |
| Ca_Kabuli_NC_021160.1_28207010 | Ca_kabuli_chr01    | 28207010                       | [A/T]       | 1067290967                                 |
| Ca_Kabuli_NC_021160.1_28208813 | Ca_kabuli_chr01    | 28208813                       | [T/C]       | 1067290968                                 |
| Ca_Kabuli_NC_021160.1_28209985 | Ca_kabuli_chr01    | 28209985                       | [A/G]       | 1067290969                                 |
| Ca_Kabuli_NC_021160.1_28343923 | Ca_kabuli_chr01    | 28343923                       | [T/G]       | 1067290970                                 |
| Ca_Kabuli_NC_021160.1_28377349 | Ca_kabuli_chr01    | 28377349                       | [C/A]       | 1067290971                                 |
| Ca_Kabuli_NC_021160.1_28379428 | Ca_kabuli_chr01    | 28379428                       | [A/C]       | 1067290972                                 |
| Ca_Kabuli_NC_021160.1_28379447 | Ca_kabuli_chr01    | 28379447                       | [T/A]       | 1067290973                                 |
| Ca_Kabuli_NC_021160.1_28404490 | Ca_kabuli_chr01    | 28404490                       | [A/T]       | 1067290974                                 |
| Ca_Kabuli_NC_021160.1_28404500 | Ca_kabuli_chr01    | 28404500                       | [T/C]       | 1067290975                                 |
| Ca_Kabuli_NC_021160.1_28404515 | Ca_kabuli_chr01    | 28404515                       | [A/C]       | 1067290976                                 |

| <b>SNP IDs</b>                 | <b>Chromosomes</b> | <b>Physical positions (bp)</b> | <b>SNPs</b> | <b>NCBI SNPdb accession IDs (NCBI_ss#)</b> |
|--------------------------------|--------------------|--------------------------------|-------------|--------------------------------------------|
| Ca_Kabuli_NC_021160.1_28404524 | Ca_kabuli_chr01    | 28404524                       | [A/C]       | 1067290977                                 |
| Ca_Kabuli_NC_021160.1_28472701 | Ca_kabuli_chr01    | 28472701                       | [T/G]       | 1067290978                                 |
| Ca_Kabuli_NC_021160.1_28472705 | Ca_kabuli_chr01    | 28472705                       | [G/A]       | 1067290979                                 |
| Ca_Kabuli_NC_021160.1_28473940 | Ca_kabuli_chr01    | 28473940                       | [T/C]       | 1067290980                                 |
| Ca_Kabuli_NC_021160.1_28656143 | Ca_kabuli_chr01    | 28656143                       | [T/G]       | 1067290981                                 |
| Ca_Kabuli_NC_021160.1_28656167 | Ca_kabuli_chr01    | 28656167                       | [C/G]       | 1067290982                                 |
| Ca_Kabuli_NC_021160.1_28656179 | Ca_kabuli_chr01    | 28656179                       | [A/G]       | 1067290983                                 |
| Ca_Kabuli_NC_021160.1_28684536 | Ca_kabuli_chr01    | 28684536                       | [A/C]       | 1067290984                                 |
| Ca_Kabuli_NC_021160.1_28684574 | Ca_kabuli_chr01    | 28684574                       | [A/C]       | 1067290985                                 |
| Ca_Kabuli_NC_021160.1_28684627 | Ca_kabuli_chr01    | 28684627                       | [T/G]       | 1067290986                                 |
| Ca_Kabuli_NC_021160.1_28684637 | Ca_kabuli_chr01    | 28684637                       | [A/G]       | 1067290987                                 |
| Ca_Kabuli_NC_021160.1_28788675 | Ca_kabuli_chr01    | 28788675                       | [T/G]       | 1067290988                                 |
| Ca_Kabuli_NC_021160.1_28790140 | Ca_kabuli_chr01    | 28790140                       | [A/C]       | 1067290989                                 |
| Ca_Kabuli_NC_021160.1_28832901 | Ca_kabuli_chr01    | 28832901                       | [A/C]       | 1067290990                                 |
| Ca_Kabuli_NC_021160.1_28849194 | Ca_kabuli_chr01    | 28849194                       | [T/C]       | 1067290991                                 |
| Ca_Kabuli_NC_021160.1_29056015 | Ca_kabuli_chr01    | 29056015                       | [A/G]       | 1067290992                                 |
| Ca_Kabuli_NC_021160.1_29138250 | Ca_kabuli_chr01    | 29138250                       | [A/G]       | 1067290993                                 |
| Ca_Kabuli_NC_021160.1_29171283 | Ca_kabuli_chr01    | 29171283                       | [T/G]       | 1067290994                                 |
| Ca_Kabuli_NC_021160.1_29171293 | Ca_kabuli_chr01    | 29171293                       | [A/G]       | 1067290995                                 |
| Ca_Kabuli_NC_021160.1_29215364 | Ca_kabuli_chr01    | 29215364                       | [C/A]       | 1067290996                                 |
| Ca_Kabuli_NC_021160.1_30226559 | Ca_kabuli_chr01    | 30226559                       | [T/C]       | 1067290997                                 |
| Ca_Kabuli_NC_021160.1_30227916 | Ca_kabuli_chr01    | 30227916                       | [T/G]       | 1067290998                                 |
| Ca_Kabuli_NC_021160.1_30227929 | Ca_kabuli_chr01    | 30227929                       | [A/G]       | 1067290999                                 |
| Ca_Kabuli_NC_021160.1_30232233 | Ca_kabuli_chr01    | 30232233                       | [T/C]       | 1067291000                                 |
| Ca_Kabuli_NC_021160.1_30637112 | Ca_kabuli_chr01    | 30637112                       | [A/T]       | 1067291001                                 |
| Ca_Kabuli_NC_021160.1_30641066 | Ca_kabuli_chr01    | 30641066                       | [A/C]       | 1067291002                                 |
| Ca_Kabuli_NC_021160.1_30990317 | Ca_kabuli_chr01    | 30990317                       | [G/A]       | 1067291003                                 |
| Ca_Kabuli_NC_021160.1_31091042 | Ca_kabuli_chr01    | 31091042                       | [A/G]       | 1067291004                                 |
| Ca_Kabuli_NC_021160.1_31091093 | Ca_kabuli_chr01    | 31091093                       | [A/G]       | 1067291005                                 |
| Ca_Kabuli_NC_021160.1_31091097 | Ca_kabuli_chr01    | 31091097                       | [C/G]       | 1067291006                                 |
| Ca_Kabuli_NC_021160.1_31136007 | Ca_kabuli_chr01    | 31136007                       | [C/T]       | 1067291007                                 |
| Ca_Kabuli_NC_021160.1_31393408 | Ca_kabuli_chr01    | 31393408                       | [A/T]       | 1067291008                                 |
| Ca_Kabuli_NC_021160.1_31528988 | Ca_kabuli_chr01    | 31528988                       | [C/A]       | 1067291009                                 |
| Ca_Kabuli_NC_021160.1_31528989 | Ca_kabuli_chr01    | 31528989                       | [T/G]       | 1067291010                                 |

| <b>SNP IDs</b>                 | <b>Chromosomes</b> | <b>Physical positions (bp)</b> | <b>SNPs</b> | <b>NCBI SNPdb accession IDs (NCBI_ss#)</b> |
|--------------------------------|--------------------|--------------------------------|-------------|--------------------------------------------|
| Ca_Kabuli_NC_021160.1_31528990 | Ca_kabuli_chr01    | 31528990                       | [T/A]       | 1067291011                                 |
| Ca_Kabuli_NC_021160.1_31528991 | Ca_kabuli_chr01    | 31528991                       | [G/T]       | 1067291012                                 |
| Ca_Kabuli_NC_021160.1_31535245 | Ca_kabuli_chr01    | 31535245                       | [T/A]       | 1067291013                                 |
| Ca_Kabuli_NC_021160.1_31535330 | Ca_kabuli_chr01    | 31535330                       | [T/G]       | 1067291014                                 |
| Ca_Kabuli_NC_021160.1_31535331 | Ca_kabuli_chr01    | 31535331                       | [A/T]       | 1067291015                                 |
| Ca_Kabuli_NC_021160.1_31535332 | Ca_kabuli_chr01    | 31535332                       | [A/T]       | 1067291016                                 |
| Ca_Kabuli_NC_021160.1_31590263 | Ca_kabuli_chr01    | 31590263                       | [C/G]       | 1067291017                                 |
| Ca_Kabuli_NC_021160.1_31640687 | Ca_kabuli_chr01    | 31640687                       | [T/C]       | 1067291018                                 |
| Ca_Kabuli_NC_021160.1_32081147 | Ca_kabuli_chr01    | 32081147                       | [C/A]       | 1067291019                                 |
| Ca_Kabuli_NC_021160.1_32280752 | Ca_kabuli_chr01    | 32280752                       | [A/T]       | 1067291020                                 |
| Ca_Kabuli_NC_021160.1_32286505 | Ca_kabuli_chr01    | 32286505                       | [G/A]       | 1067291021                                 |
| Ca_Kabuli_NC_021160.1_32286506 | Ca_kabuli_chr01    | 32286506                       | [A/C]       | 1067291022                                 |
| Ca_Kabuli_NC_021160.1_32467929 | Ca_kabuli_chr01    | 32467929                       | [G/A]       | 1067291023                                 |
| Ca_Kabuli_NC_021160.1_32467954 | Ca_kabuli_chr01    | 32467954                       | [A/C]       | 1067291024                                 |
| Ca_Kabuli_NC_021160.1_33186572 | Ca_kabuli_chr01    | 33186572                       | [A/G]       | 1067291025                                 |
| Ca_Kabuli_NC_021160.1_33186629 | Ca_kabuli_chr01    | 33186629                       | [T/C]       | 1067291026                                 |
| Ca_Kabuli_NC_021160.1_33372256 | Ca_kabuli_chr01    | 33372256                       | [C/T]       | 1067291027                                 |
| Ca_Kabuli_NC_021160.1_33695857 | Ca_kabuli_chr01    | 33695857                       | [A/G]       | 1067291028                                 |
| Ca_Kabuli_NC_021160.1_33696064 | Ca_kabuli_chr01    | 33696064                       | [T/A]       | 1067291029                                 |
| Ca_Kabuli_NC_021160.1_33696065 | Ca_kabuli_chr01    | 33696065                       | [C/T]       | 1067291030                                 |
| Ca_Kabuli_NC_021160.1_33696066 | Ca_kabuli_chr01    | 33696066                       | [T/G]       | 1067291031                                 |
| Ca_Kabuli_NC_021160.1_34161921 | Ca_kabuli_chr01    | 34161921                       | [G/A]       | 1067291032                                 |
| Ca_Kabuli_NC_021160.1_34272001 | Ca_kabuli_chr01    | 34272001                       | [C/G]       | 1067291033                                 |
| Ca_Kabuli_NC_021160.1_34272024 | Ca_kabuli_chr01    | 34272024                       | [A/G]       | 1067291034                                 |
| Ca_Kabuli_NC_021160.1_34272025 | Ca_kabuli_chr01    | 34272025                       | [A/G]       | 1067291035                                 |
| Ca_Kabuli_NC_021160.1_34309435 | Ca_kabuli_chr01    | 34309435                       | [A/G]       | 1067291036                                 |
| Ca_Kabuli_NC_021160.1_34324590 | Ca_kabuli_chr01    | 34324590                       | [A/T]       | 1067291037                                 |
| Ca_Kabuli_NC_021160.1_34324635 | Ca_kabuli_chr01    | 34324635                       | [A/T]       | 1067291038                                 |
| Ca_Kabuli_NC_021160.1_34324641 | Ca_kabuli_chr01    | 34324641                       | [A/G]       | 1067291039                                 |
| Ca_Kabuli_NC_021160.1_34355775 | Ca_kabuli_chr01    | 34355775                       | [T/G]       | 1067291040                                 |
| Ca_Kabuli_NC_021160.1_34403069 | Ca_kabuli_chr01    | 34403069                       | [T/C]       | 1067291041                                 |
| Ca_Kabuli_NC_021160.1_34476088 | Ca_kabuli_chr01    | 34476088                       | [T/C]       | 1067291042                                 |
| Ca_Kabuli_NC_021160.1_34476185 | Ca_kabuli_chr01    | 34476185                       | [T/A]       | 1067291043                                 |
| Ca_Kabuli_NC_021160.1_34513857 | Ca_kabuli_chr01    | 34513857                       | [T/C]       | 1067291044                                 |

| <b>SNP IDs</b>                 | <b>Chromosomes</b> | <b>Physical positions (bp)</b> | <b>SNPs</b> | <b>NCBI SNPdb accession IDs (NCBI_ss#)</b> |
|--------------------------------|--------------------|--------------------------------|-------------|--------------------------------------------|
| Ca_Kabuli_NC_021160.1_34727251 | Ca_kabuli_chr01    | 34727251                       | [T/G]       | 1067291045                                 |
| Ca_Kabuli_NC_021160.1_34727756 | Ca_kabuli_chr01    | 34727756                       | [T/C]       | 1067291046                                 |
| Ca_Kabuli_NC_021160.1_34867480 | Ca_kabuli_chr01    | 34867480                       | [T/G]       | 1067291047                                 |
| Ca_Kabuli_NC_021160.1_34911011 | Ca_kabuli_chr01    | 34911011                       | [T/C]       | 1067291048                                 |
| Ca_Kabuli_NC_021160.1_34911033 | Ca_kabuli_chr01    | 34911033                       | [T/G]       | 1067291049                                 |
| Ca_Kabuli_NC_021160.1_34949071 | Ca_kabuli_chr01    | 34949071                       | [T/C]       | 1067291050                                 |
| Ca_Kabuli_NC_021160.1_34950909 | Ca_kabuli_chr01    | 34950909                       | [T/G]       | 1067291051                                 |
| Ca_Kabuli_NC_021160.1_34975381 | Ca_kabuli_chr01    | 34975381                       | [A/G]       | 1067291052                                 |
| Ca_Kabuli_NC_021160.1_34975385 | Ca_kabuli_chr01    | 34975385                       | [T/C]       | 1067291053                                 |
| Ca_Kabuli_NC_021160.1_34975398 | Ca_kabuli_chr01    | 34975398                       | [C/T]       | 1067291054                                 |
| Ca_Kabuli_NC_021160.1_34979124 | Ca_kabuli_chr01    | 34979124                       | [T/G]       | 1067291055                                 |
| Ca_Kabuli_NC_021160.1_35041275 | Ca_kabuli_chr01    | 35041275                       | [C/T]       | 1067291056                                 |
| Ca_Kabuli_NC_021160.1_35041283 | Ca_kabuli_chr01    | 35041283                       | [T/C]       | 1067291057                                 |
| Ca_Kabuli_NC_021160.1_35260260 | Ca_kabuli_chr01    | 35260260                       | [A/G]       | 1067291058                                 |
| Ca_Kabuli_NC_021160.1_35260363 | Ca_kabuli_chr01    | 35260363                       | [G/A]       | 1067291059                                 |
| Ca_Kabuli_NC_021160.1_35260396 | Ca_kabuli_chr01    | 35260396                       | [T/G]       | 1067291060                                 |
| Ca_Kabuli_NC_021160.1_35708846 | Ca_kabuli_chr01    | 35708846                       | [T/C]       | 1067291061                                 |
| Ca_Kabuli_NC_021160.1_35708882 | Ca_kabuli_chr01    | 35708882                       | [A/C]       | 1067291062                                 |
| Ca_Kabuli_NC_021160.1_35708891 | Ca_kabuli_chr01    | 35708891                       | [A/T]       | 1067291063                                 |
| Ca_Kabuli_NC_021160.1_36094441 | Ca_kabuli_chr01    | 36094441                       | [T/C]       | 1067291064                                 |
| Ca_Kabuli_NC_021160.1_36362260 | Ca_kabuli_chr01    | 36362260                       | [T/A]       | 1067291065                                 |
| Ca_Kabuli_NC_021160.1_36362281 | Ca_kabuli_chr01    | 36362281                       | [T/C]       | 1067291066                                 |
| Ca_Kabuli_NC_021160.1_36362302 | Ca_kabuli_chr01    | 36362302                       | [T/C]       | 1067291067                                 |
| Ca_Kabuli_NC_021160.1_36362304 | Ca_kabuli_chr01    | 36362304                       | [G/T]       | 1067291068                                 |
| Ca_Kabuli_NC_021160.1_36362341 | Ca_kabuli_chr01    | 36362341                       | [T/C]       | 1067291069                                 |
| Ca_Kabuli_NC_021160.1_36408325 | Ca_kabuli_chr01    | 36408325                       | [T/A]       | 1067291070                                 |
| Ca_Kabuli_NC_021160.1_36408358 | Ca_kabuli_chr01    | 36408358                       | [A/C]       | 1067291071                                 |
| Ca_Kabuli_NC_021160.1_36633911 | Ca_kabuli_chr01    | 36633911                       | [A/G]       | 1067291072                                 |
| Ca_Kabuli_NC_021160.1_36633917 | Ca_kabuli_chr01    | 36633917                       | [A/G]       | 1067291073                                 |
| Ca_Kabuli_NC_021160.1_36633956 | Ca_kabuli_chr01    | 36633956                       | [A/G]       | 1067291074                                 |
| Ca_Kabuli_NC_021160.1_36679586 | Ca_kabuli_chr01    | 36679586                       | [A/G]       | 1067291075                                 |
| Ca_Kabuli_NC_021160.1_37355995 | Ca_kabuli_chr01    | 37355995                       | [T/G]       | 1067291076                                 |
| Ca_Kabuli_NC_021160.1_37356085 | Ca_kabuli_chr01    | 37356085                       | [T/C]       | 1067291077                                 |
| Ca_Kabuli_NC_021160.1_37356089 | Ca_kabuli_chr01    | 37356089                       | [T/G]       | 1067291078                                 |

| <b>SNP IDs</b>                 | <b>Chromosomes</b> | <b>Physical positions (bp)</b> | <b>SNPs</b> | <b>NCBI SNPdb accession IDs (NCBI_ss#)</b> |
|--------------------------------|--------------------|--------------------------------|-------------|--------------------------------------------|
| Ca_Kabuli_NC_021160.1_37356115 | Ca_kabuli_chr01    | 37356115                       | [T/C]       | 1067291079                                 |
| Ca_Kabuli_NC_021160.1_37608107 | Ca_kabuli_chr01    | 37608107                       | [T/A]       | 1067291080                                 |
| Ca_Kabuli_NC_021160.1_37608120 | Ca_kabuli_chr01    | 37608120                       | [A/G]       | 1067291081                                 |
| Ca_Kabuli_NC_021160.1_37648716 | Ca_kabuli_chr01    | 37648716                       | [A/C]       | 1067291082                                 |
| Ca_Kabuli_NC_021160.1_37648729 | Ca_kabuli_chr01    | 37648729                       | [A/G]       | 1067291083                                 |
| Ca_Kabuli_NC_021160.1_37654055 | Ca_kabuli_chr01    | 37654055                       | [T/C]       | 1067291084                                 |
| Ca_Kabuli_NC_021160.1_37658162 | Ca_kabuli_chr01    | 37658162                       | [G/C]       | 1067291085                                 |
| Ca_Kabuli_NC_021160.1_37658166 | Ca_kabuli_chr01    | 37658166                       | [A/T]       | 1067291086                                 |
| Ca_Kabuli_NC_021160.1_37690416 | Ca_kabuli_chr01    | 37690416                       | [G/A]       | 1067291087                                 |
| Ca_Kabuli_NC_021160.1_37690465 | Ca_kabuli_chr01    | 37690465                       | [T/C]       | 1067291088                                 |
| Ca_Kabuli_NC_021160.1_37690497 | Ca_kabuli_chr01    | 37690497                       | [A/T]       | 1067291089                                 |
| Ca_Kabuli_NC_021160.1_37690498 | Ca_kabuli_chr01    | 37690498                       | [C/A]       | 1067291090                                 |
| Ca_Kabuli_NC_021160.1_37722095 | Ca_kabuli_chr01    | 37722095                       | [G/A]       | 1067291091                                 |
| Ca_Kabuli_NC_021160.1_37722143 | Ca_kabuli_chr01    | 37722143                       | [G/C]       | 1067291092                                 |
| Ca_Kabuli_NC_021160.1_37732133 | Ca_kabuli_chr01    | 37732133                       | [C/T]       | 1067291093                                 |
| Ca_Kabuli_NC_021160.1_37732150 | Ca_kabuli_chr01    | 37732150                       | [T/C]       | 1067291094                                 |
| Ca_Kabuli_NC_021160.1_37768299 | Ca_kabuli_chr01    | 37768299                       | [A/G]       | 1067291095                                 |
| Ca_Kabuli_NC_021160.1_37768333 | Ca_kabuli_chr01    | 37768333                       | [C/T]       | 1067291096                                 |
| Ca_Kabuli_NC_021160.1_37771605 | Ca_kabuli_chr01    | 37771605                       | [A/G]       | 1067291097                                 |
| Ca_Kabuli_NC_021160.1_37792731 | Ca_kabuli_chr01    | 37792731                       | [G/A]       | 1067291098                                 |
| Ca_Kabuli_NC_021160.1_37862342 | Ca_kabuli_chr01    | 37862342                       | [T/G]       | 1067291099                                 |
| Ca_Kabuli_NC_021160.1_37862352 | Ca_kabuli_chr01    | 37862352                       | [T/G]       | 1067291100                                 |
| Ca_Kabuli_NC_021160.1_37862383 | Ca_kabuli_chr01    | 37862383                       | [A/T]       | 1067291101                                 |
| Ca_Kabuli_NC_021160.1_37863217 | Ca_kabuli_chr01    | 37863217                       | [G/T]       | 1067291102                                 |
| Ca_Kabuli_NC_021160.1_37864681 | Ca_kabuli_chr01    | 37864681                       | [A/G]       | 1067291103                                 |
| Ca_Kabuli_NC_021160.1_37864684 | Ca_kabuli_chr01    | 37864684                       | [T/C]       | 1067291104                                 |
| Ca_Kabuli_NC_021160.1_37869004 | Ca_kabuli_chr01    | 37869004                       | [G/C]       | 1067291105                                 |
| Ca_Kabuli_NC_021160.1_37869082 | Ca_kabuli_chr01    | 37869082                       | [C/G]       | 1067291106                                 |
| Ca_Kabuli_NC_021160.1_37869136 | Ca_kabuli_chr01    | 37869136                       | [G/T]       | 1067291107                                 |
| Ca_Kabuli_NC_021160.1_37870666 | Ca_kabuli_chr01    | 37870666                       | [T/C]       | 1067291108                                 |
| Ca_Kabuli_NC_021160.1_37870835 | Ca_kabuli_chr01    | 37870835                       | [G/A]       | 1067291109                                 |
| Ca_Kabuli_NC_021160.1_37892139 | Ca_kabuli_chr01    | 37892139                       | [T/A]       | 1067291110                                 |
| Ca_Kabuli_NC_021160.1_38111568 | Ca_kabuli_chr01    | 38111568                       | [A/G]       | 1067291111                                 |
| Ca_Kabuli_NC_021160.1_38193253 | Ca_kabuli_chr01    | 38193253                       | [A/T]       | 1067291112                                 |

| <b>SNP IDs</b>                 | <b>Chromosomes</b> | <b>Physical positions (bp)</b> | <b>SNPs</b> | <b>NCBI SNPdb accession IDs (NCBI_ss#)</b> |
|--------------------------------|--------------------|--------------------------------|-------------|--------------------------------------------|
| Ca_Kabuli_NC_021160.1_38252610 | Ca_kabuli_chr01    | 38252610                       | [T/G]       | 1067291113                                 |
| Ca_Kabuli_NC_021160.1_38440513 | Ca_kabuli_chr01    | 38440513                       | [A/G]       | 1067291114                                 |
| Ca_Kabuli_NC_021160.1_38451588 | Ca_kabuli_chr01    | 38451588                       | [A/C]       | 1067291115                                 |
| Ca_Kabuli_NC_021160.1_38508170 | Ca_kabuli_chr01    | 38508170                       | [T/C]       | 1067291116                                 |
| Ca_Kabuli_NC_021160.1_38508171 | Ca_kabuli_chr01    | 38508171                       | [G/T]       | 1067291117                                 |
| Ca_Kabuli_NC_021160.1_38508280 | Ca_kabuli_chr01    | 38508280                       | [A/G]       | 1067291118                                 |
| Ca_Kabuli_NC_021160.1_38508295 | Ca_kabuli_chr01    | 38508295                       | [A/G]       | 1067291119                                 |
| Ca_Kabuli_NC_021160.1_38596501 | Ca_kabuli_chr01    | 38596501                       | [T/C]       | 1067291120                                 |
| Ca_Kabuli_NC_021160.1_38678724 | Ca_kabuli_chr01    | 38678724                       | [T/C]       | 1067291121                                 |
| Ca_Kabuli_NC_021160.1_38811851 | Ca_kabuli_chr01    | 38811851                       | [C/A]       | 1067291122                                 |
| Ca_Kabuli_NC_021160.1_38811939 | Ca_kabuli_chr01    | 38811939                       | [A/G]       | 1067291123                                 |
| Ca_Kabuli_NC_021160.1_38811946 | Ca_kabuli_chr01    | 38811946                       | [C/A]       | 1067291124                                 |
| Ca_Kabuli_NC_021160.1_38811964 | Ca_kabuli_chr01    | 38811964                       | [C/T]       | 1067291125                                 |
| Ca_Kabuli_NC_021160.1_38811965 | Ca_kabuli_chr01    | 38811965                       | [A/G]       | 1067291126                                 |
| Ca_Kabuli_NC_021160.1_38817471 | Ca_kabuli_chr01    | 38817471                       | [A/C]       | 1067291127                                 |
| Ca_Kabuli_NC_021160.1_38877670 | Ca_kabuli_chr01    | 38877670                       | [T/C]       | 1067291128                                 |
| Ca_Kabuli_NC_021160.1_38877710 | Ca_kabuli_chr01    | 38877710                       | [T/A]       | 1067291129                                 |
| Ca_Kabuli_NC_021160.1_38877711 | Ca_kabuli_chr01    | 38877711                       | [A/T]       | 1067291130                                 |
| Ca_Kabuli_NC_021160.1_38884980 | Ca_kabuli_chr01    | 38884980                       | [G/C]       | 1067291131                                 |
| Ca_Kabuli_NC_021160.1_39107150 | Ca_kabuli_chr01    | 39107150                       | [G/C]       | 1067291132                                 |
| Ca_Kabuli_NC_021160.1_39436182 | Ca_kabuli_chr01    | 39436182                       | [T/C]       | 1067291133                                 |
| Ca_Kabuli_NC_021160.1_39439352 | Ca_kabuli_chr01    | 39439352                       | [T/A]       | 1067291134                                 |
| Ca_Kabuli_NC_021160.1_39439823 | Ca_kabuli_chr01    | 39439823                       | [T/C]       | 1067291135                                 |
| Ca_Kabuli_NC_021160.1_39587402 | Ca_kabuli_chr01    | 39587402                       | [G/A]       | 1067291136                                 |
| Ca_Kabuli_NC_021160.1_39587534 | Ca_kabuli_chr01    | 39587534                       | [A/G]       | 1067291137                                 |
| Ca_Kabuli_NC_021160.1_39616074 | Ca_kabuli_chr01    | 39616074                       | [T/A]       | 1067291138                                 |
| Ca_Kabuli_NC_021160.1_39616101 | Ca_kabuli_chr01    | 39616101                       | [T/G]       | 1067291139                                 |
| Ca_Kabuli_NC_021160.1_39616113 | Ca_kabuli_chr01    | 39616113                       | [A/G]       | 1067291140                                 |
| Ca_Kabuli_NC_021160.1_39616118 | Ca_kabuli_chr01    | 39616118                       | [T/G]       | 1067291141                                 |
| Ca_Kabuli_NC_021160.1_39663380 | Ca_kabuli_chr01    | 39663380                       | [C/T]       | 1067291142                                 |
| Ca_Kabuli_NC_021160.1_39663432 | Ca_kabuli_chr01    | 39663432                       | [C/G]       | 1067291143                                 |
| Ca_Kabuli_NC_021160.1_39663435 | Ca_kabuli_chr01    | 39663435                       | [T/C]       | 1067291144                                 |
| Ca_Kabuli_NC_021160.1_39663465 | Ca_kabuli_chr01    | 39663465                       | [T/A]       | 1067291145                                 |
| Ca_Kabuli_NC_021160.1_39663484 | Ca_kabuli_chr01    | 39663484                       | [A/C]       | 1067291146                                 |

| <b>SNP IDs</b>                 | <b>Chromosomes</b> | <b>Physical positions (bp)</b> | <b>SNPs</b> | <b>NCBI SNPdb accession IDs (NCBI_ss#)</b> |
|--------------------------------|--------------------|--------------------------------|-------------|--------------------------------------------|
| Ca_Kabuli_NC_021160.1_39663824 | Ca_kabuli_chr01    | 39663824                       | [G/C]       | 1067291147                                 |
| Ca_Kabuli_NC_021160.1_39720383 | Ca_kabuli_chr01    | 39720383                       | [A/T]       | 1067291148                                 |
| Ca_Kabuli_NC_021160.1_39746552 | Ca_kabuli_chr01    | 39746552                       | [A/G]       | 1067291149                                 |
| Ca_Kabuli_NC_021160.1_40025764 | Ca_kabuli_chr01    | 40025764                       | [G/A]       | 1067291150                                 |
| Ca_Kabuli_NC_021160.1_40136941 | Ca_kabuli_chr01    | 40136941                       | [T/G]       | 1067291151                                 |
| Ca_Kabuli_NC_021160.1_40137856 | Ca_kabuli_chr01    | 40137856                       | [A/T]       | 1067291152                                 |
| Ca_Kabuli_NC_021160.1_40137893 | Ca_kabuli_chr01    | 40137893                       | [T/G]       | 1067291153                                 |
| Ca_Kabuli_NC_021160.1_40137902 | Ca_kabuli_chr01    | 40137902                       | [A/G]       | 1067291154                                 |
| Ca_Kabuli_NC_021160.1_40199841 | Ca_kabuli_chr01    | 40199841                       | [T/A]       | 1067291155                                 |
| Ca_Kabuli_NC_021160.1_40199917 | Ca_kabuli_chr01    | 40199917                       | [T/C]       | 1067291156                                 |
| Ca_Kabuli_NC_021160.1_40199920 | Ca_kabuli_chr01    | 40199920                       | [C/G]       | 1067291157                                 |
| Ca_Kabuli_NC_021160.1_40199922 | Ca_kabuli_chr01    | 40199922                       | [C/A]       | 1067291158                                 |
| Ca_Kabuli_NC_021160.1_40214167 | Ca_kabuli_chr01    | 40214167                       | [C/T]       | 1067291159                                 |
| Ca_Kabuli_NC_021160.1_40224804 | Ca_kabuli_chr01    | 40224804                       | [A/G]       | 1067291160                                 |
| Ca_Kabuli_NC_021160.1_40224834 | Ca_kabuli_chr01    | 40224834                       | [C/G]       | 1067291161                                 |
| Ca_Kabuli_NC_021160.1_40224835 | Ca_kabuli_chr01    | 40224835                       | [T/A]       | 1067291162                                 |
| Ca_Kabuli_NC_021160.1_40335668 | Ca_kabuli_chr01    | 40335668                       | [C/T]       | 1067291163                                 |
| Ca_Kabuli_NC_021160.1_40336759 | Ca_kabuli_chr01    | 40336759                       | [C/T]       | 1067291164                                 |
| Ca_Kabuli_NC_021160.1_40339065 | Ca_kabuli_chr01    | 40339065                       | [T/C]       | 1067291165                                 |
| Ca_Kabuli_NC_021160.1_40343216 | Ca_kabuli_chr01    | 40343216                       | [G/T]       | 1067291166                                 |
| Ca_Kabuli_NC_021160.1_40346280 | Ca_kabuli_chr01    | 40346280                       | [A/C]       | 1067291167                                 |
| Ca_Kabuli_NC_021160.1_40358747 | Ca_kabuli_chr01    | 40358747                       | [T/G]       | 1067291168                                 |
| Ca_Kabuli_NC_021160.1_40359876 | Ca_kabuli_chr01    | 40359876                       | [T/A]       | 1067291169                                 |
| Ca_Kabuli_NC_021160.1_40365171 | Ca_kabuli_chr01    | 40365171                       | [G/A]       | 1067291170                                 |
| Ca_Kabuli_NC_021160.1_40365226 | Ca_kabuli_chr01    | 40365226                       | [G/T]       | 1067291171                                 |
| Ca_Kabuli_NC_021160.1_40365231 | Ca_kabuli_chr01    | 40365231                       | [C/A]       | 1067291172                                 |
| Ca_Kabuli_NC_021160.1_40367634 | Ca_kabuli_chr01    | 40367634                       | [T/C]       | 1067291173                                 |
| Ca_Kabuli_NC_021160.1_40367940 | Ca_kabuli_chr01    | 40367940                       | [G/A]       | 1067291174                                 |
| Ca_Kabuli_NC_021160.1_40368805 | Ca_kabuli_chr01    | 40368805                       | [A/T]       | 1067291175                                 |
| Ca_Kabuli_NC_021160.1_40368847 | Ca_kabuli_chr01    | 40368847                       | [T/C]       | 1067291176                                 |
| Ca_Kabuli_NC_021160.1_40419760 | Ca_kabuli_chr01    | 40419760                       | [C/T]       | 1067291177                                 |
| Ca_Kabuli_NC_021160.1_40497408 | Ca_kabuli_chr01    | 40497408                       | [T/C]       | 1067291178                                 |
| Ca_Kabuli_NC_021160.1_40497413 | Ca_kabuli_chr01    | 40497413                       | [A/C]       | 1067291179                                 |
| Ca_Kabuli_NC_021160.1_40567085 | Ca_kabuli_chr01    | 40567085                       | [T/C]       | 1067291180                                 |

| <b>SNP IDs</b>                 | <b>Chromosomes</b> | <b>Physical positions (bp)</b> | <b>SNPs</b> | <b>NCBI SNPdb accession IDs (NCBI_ss#)</b> |
|--------------------------------|--------------------|--------------------------------|-------------|--------------------------------------------|
| Ca_Kabuli_NC_021160.1_40570753 | Ca_kabuli_chr01    | 40570753                       | [A/C]       | 1067291181                                 |
| Ca_Kabuli_NC_021160.1_40570789 | Ca_kabuli_chr01    | 40570789                       | [A/G]       | 1067291182                                 |
| Ca_Kabuli_NC_021160.1_40572132 | Ca_kabuli_chr01    | 40572132                       | [T/C]       | 1067291183                                 |
| Ca_Kabuli_NC_021160.1_40617637 | Ca_kabuli_chr01    | 40617637                       | [A/C]       | 1067291184                                 |
| Ca_Kabuli_NC_021160.1_40745827 | Ca_kabuli_chr01    | 40745827                       | [G/C]       | 1067291185                                 |
| Ca_Kabuli_NC_021160.1_40746094 | Ca_kabuli_chr01    | 40746094                       | [T/G]       | 1067291186                                 |
| Ca_Kabuli_NC_021160.1_41075343 | Ca_kabuli_chr01    | 41075343                       | [T/G]       | 1067291187                                 |
| Ca_Kabuli_NC_021160.1_41125525 | Ca_kabuli_chr01    | 41125525                       | [T/G]       | 1067291188                                 |
| Ca_Kabuli_NC_021160.1_41169162 | Ca_kabuli_chr01    | 41169162                       | [G/A]       | 1067291189                                 |
| Ca_Kabuli_NC_021160.1_41179697 | Ca_kabuli_chr01    | 41179697                       | [T/G]       | 1067291190                                 |
| Ca_Kabuli_NC_021160.1_41185412 | Ca_kabuli_chr01    | 41185412                       | [A/C]       | 1067291191                                 |
| Ca_Kabuli_NC_021160.1_41339399 | Ca_kabuli_chr01    | 41339399                       | [T/G]       | 1067291192                                 |
| Ca_Kabuli_NC_021160.1_41344968 | Ca_kabuli_chr01    | 41344968                       | [A/G]       | 1067291193                                 |
| Ca_Kabuli_NC_021160.1_41437183 | Ca_kabuli_chr01    | 41437183                       | [A/C]       | 1067291194                                 |
| Ca_Kabuli_NC_021160.1_41437428 | Ca_kabuli_chr01    | 41437428                       | [G/C]       | 1067291195                                 |
| Ca_Kabuli_NC_021160.1_41437429 | Ca_kabuli_chr01    | 41437429                       | [C/G]       | 1067291196                                 |
| Ca_Kabuli_NC_021160.1_41437430 | Ca_kabuli_chr01    | 41437430                       | [A/C]       | 1067291197                                 |
| Ca_Kabuli_NC_021160.1_41463514 | Ca_kabuli_chr01    | 41463514                       | [T/C]       | 1067291198                                 |
| Ca_Kabuli_NC_021160.1_41463532 | Ca_kabuli_chr01    | 41463532                       | [A/G]       | 1067291199                                 |
| Ca_Kabuli_NC_021160.1_41730114 | Ca_kabuli_chr01    | 41730114                       | [A/C]       | 1067291200                                 |
| Ca_Kabuli_NC_021160.1_41777827 | Ca_kabuli_chr01    | 41777827                       | [T/G]       | 1067291201                                 |
| Ca_Kabuli_NC_021160.1_41782803 | Ca_kabuli_chr01    | 41782803                       | [T/G]       | 1067291202                                 |
| Ca_Kabuli_NC_021160.1_41795347 | Ca_kabuli_chr01    | 41795347                       | [A/G]       | 1067291203                                 |
| Ca_Kabuli_NC_021160.1_41795349 | Ca_kabuli_chr01    | 41795349                       | [T/G]       | 1067291204                                 |
| Ca_Kabuli_NC_021160.1_41822418 | Ca_kabuli_chr01    | 41822418                       | [A/C]       | 1067291205                                 |
| Ca_Kabuli_NC_021160.1_41866970 | Ca_kabuli_chr01    | 41866970                       | [T/C]       | 1067291206                                 |
| Ca_Kabuli_NC_021160.1_41867002 | Ca_kabuli_chr01    | 41867002                       | [T/G]       | 1067291207                                 |
| Ca_Kabuli_NC_021160.1_41897246 | Ca_kabuli_chr01    | 41897246                       | [C/T]       | 1067291208                                 |
| Ca_Kabuli_NC_021160.1_41927994 | Ca_kabuli_chr01    | 41927994                       | [T/C]       | 1067291209                                 |
| Ca_Kabuli_NC_021160.1_41966344 | Ca_kabuli_chr01    | 41966344                       | [T/C]       | 1067291210                                 |
| Ca_Kabuli_NC_021160.1_41981278 | Ca_kabuli_chr01    | 41981278                       | [C/T]       | 1067291211                                 |
| Ca_Kabuli_NC_021160.1_41981286 | Ca_kabuli_chr01    | 41981286                       | [G/C]       | 1067291212                                 |
| Ca_Kabuli_NC_021160.1_42189352 | Ca_kabuli_chr01    | 42189352                       | [T/G]       | 1067291213                                 |
| Ca_Kabuli_NC_021160.1_42253413 | Ca_kabuli_chr01    | 42253413                       | [A/C]       | 1067291214                                 |



| <b>SNP IDs</b>                 | <b>Chromosomes</b> | <b>Physical positions (bp)</b> | <b>SNPs</b> | <b>NCBI SNPdb accession IDs (NCBI_ss#)</b> |
|--------------------------------|--------------------|--------------------------------|-------------|--------------------------------------------|
| Ca_Kabuli_NC_021160.1_42271245 | Ca_kabuli_chr01    | 42271245                       | [C/G]       | 1067291215                                 |
| Ca_Kabuli_NC_021160.1_42298514 | Ca_kabuli_chr01    | 42298514                       | [T/G]       | 1067291216                                 |
| Ca_Kabuli_NC_021160.1_42298524 | Ca_kabuli_chr01    | 42298524                       | [T/C]       | 1067291217                                 |
| Ca_Kabuli_NC_021160.1_42298531 | Ca_kabuli_chr01    | 42298531                       | [G/A]       | 1067291218                                 |
| Ca_Kabuli_NC_021160.1_42298544 | Ca_kabuli_chr01    | 42298544                       | [A/G]       | 1067291219                                 |
| Ca_Kabuli_NC_021160.1_42439795 | Ca_kabuli_chr01    | 42439795                       | [A/C]       | 1067291220                                 |
| Ca_Kabuli_NC_021160.1_42450096 | Ca_kabuli_chr01    | 42450096                       | [T/G]       | 1067291221                                 |
| Ca_Kabuli_NC_021160.1_42450112 | Ca_kabuli_chr01    | 42450112                       | [T/A]       | 1067291222                                 |
| Ca_Kabuli_NC_021160.1_42450120 | Ca_kabuli_chr01    | 42450120                       | [T/C]       | 1067291223                                 |
| Ca_Kabuli_NC_021160.1_42450147 | Ca_kabuli_chr01    | 42450147                       | [T/C]       | 1067291224                                 |
| Ca_Kabuli_NC_021160.1_42450658 | Ca_kabuli_chr01    | 42450658                       | [T/G]       | 1067291225                                 |
| Ca_Kabuli_NC_021160.1_42450714 | Ca_kabuli_chr01    | 42450714                       | [T/G]       | 1067291226                                 |
| Ca_Kabuli_NC_021160.1_42450812 | Ca_kabuli_chr01    | 42450812                       | [T/C]       | 1067291227                                 |
| Ca_Kabuli_NC_021160.1_42450822 | Ca_kabuli_chr01    | 42450822                       | [A/G]       | 1067291228                                 |
| Ca_Kabuli_NC_021160.1_42450834 | Ca_kabuli_chr01    | 42450834                       | [T/G]       | 1067291229                                 |
| Ca_Kabuli_NC_021160.1_42450901 | Ca_kabuli_chr01    | 42450901                       | [T/G]       | 1067291230                                 |
| Ca_Kabuli_NC_021160.1_42450930 | Ca_kabuli_chr01    | 42450930                       | [A/T]       | 1067291231                                 |
| Ca_Kabuli_NC_021160.1_42450936 | Ca_kabuli_chr01    | 42450936                       | [T/G]       | 1067291232                                 |
| Ca_Kabuli_NC_021160.1_42450967 | Ca_kabuli_chr01    | 42450967                       | [T/C]       | 1067291233                                 |
| Ca_Kabuli_NC_021160.1_42450979 | Ca_kabuli_chr01    | 42450979                       | [T/G]       | 1067291234                                 |
| Ca_Kabuli_NC_021160.1_42450982 | Ca_kabuli_chr01    | 42450982                       | [T/G]       | 1067291235                                 |
| Ca_Kabuli_NC_021160.1_42451008 | Ca_kabuli_chr01    | 42451008                       | [A/T]       | 1067291236                                 |
| Ca_Kabuli_NC_021160.1_42451015 | Ca_kabuli_chr01    | 42451015                       | [A/G]       | 1067291237                                 |
| Ca_Kabuli_NC_021160.1_42451027 | Ca_kabuli_chr01    | 42451027                       | [A/G]       | 1067291238                                 |
| Ca_Kabuli_NC_021160.1_42451298 | Ca_kabuli_chr01    | 42451298                       | [T/C]       | 1067291239                                 |
| Ca_Kabuli_NC_021160.1_42451338 | Ca_kabuli_chr01    | 42451338                       | [T/C]       | 1067291240                                 |
| Ca_Kabuli_NC_021160.1_42451374 | Ca_kabuli_chr01    | 42451374                       | [A/G]       | 1067291241                                 |
| Ca_Kabuli_NC_021160.1_42451376 | Ca_kabuli_chr01    | 42451376                       | [T/C]       | 1067291242                                 |
| Ca_Kabuli_NC_021160.1_42451456 | Ca_kabuli_chr01    | 42451456                       | [T/A]       | 1067291243                                 |
| Ca_Kabuli_NC_021160.1_42451459 | Ca_kabuli_chr01    | 42451459                       | [T/G]       | 1067291244                                 |
| Ca_Kabuli_NC_021160.1_42451502 | Ca_kabuli_chr01    | 42451502                       | [T/C]       | 1067291245                                 |
| Ca_Kabuli_NC_021160.1_42451504 | Ca_kabuli_chr01    | 42451504                       | [A/G]       | 1067291246                                 |
| Ca_Kabuli_NC_021160.1_42451528 | Ca_kabuli_chr01    | 42451528                       | [T/C]       | 1067291247                                 |
| Ca_Kabuli_NC_021160.1_42451535 | Ca_kabuli_chr01    | 42451535                       | [T/C]       | 1067291248                                 |

| <b>SNP IDs</b>                 | <b>Chromosomes</b> | <b>Physical positions (bp)</b> | <b>SNPs</b> | <b>NCBI SNPdb accession IDs (NCBI_ss#)</b> |
|--------------------------------|--------------------|--------------------------------|-------------|--------------------------------------------|
| Ca_Kabuli_NC_021160.1_42451540 | Ca_kabuli_chr01    | 42451540                       | [T/C]       | 1067291249                                 |
| Ca_Kabuli_NC_021160.1_42451619 | Ca_kabuli_chr01    | 42451619                       | [T/C]       | 1067291250                                 |
| Ca_Kabuli_NC_021160.1_42451624 | Ca_kabuli_chr01    | 42451624                       | [T/C]       | 1067291251                                 |
| Ca_Kabuli_NC_021160.1_42451629 | Ca_kabuli_chr01    | 42451629                       | [A/G]       | 1067291252                                 |
| Ca_Kabuli_NC_021160.1_42451653 | Ca_kabuli_chr01    | 42451653                       | [A/C]       | 1067291253                                 |
| Ca_Kabuli_NC_021160.1_42451664 | Ca_kabuli_chr01    | 42451664                       | [A/C]       | 1067291254                                 |
| Ca_Kabuli_NC_021160.1_42451680 | Ca_kabuli_chr01    | 42451680                       | [T/C]       | 1067291255                                 |
| Ca_Kabuli_NC_021160.1_42451708 | Ca_kabuli_chr01    | 42451708                       | [T/C]       | 1067291256                                 |
| Ca_Kabuli_NC_021160.1_42451717 | Ca_kabuli_chr01    | 42451717                       | [G/A]       | 1067291257                                 |
| Ca_Kabuli_NC_021160.1_42451778 | Ca_kabuli_chr01    | 42451778                       | [T/C]       | 1067291258                                 |
| Ca_Kabuli_NC_021160.1_42451780 | Ca_kabuli_chr01    | 42451780                       | [T/C]       | 1067291259                                 |
| Ca_Kabuli_NC_021160.1_42451783 | Ca_kabuli_chr01    | 42451783                       | [T/A]       | 1067291260                                 |
| Ca_Kabuli_NC_021160.1_42451795 | Ca_kabuli_chr01    | 42451795                       | [T/A]       | 1067291261                                 |
| Ca_Kabuli_NC_021160.1_42451815 | Ca_kabuli_chr01    | 42451815                       | [T/C]       | 1067291262                                 |
| Ca_Kabuli_NC_021160.1_42451818 | Ca_kabuli_chr01    | 42451818                       | [T/G]       | 1067291263                                 |
| Ca_Kabuli_NC_021160.1_42451831 | Ca_kabuli_chr01    | 42451831                       | [A/G]       | 1067291264                                 |
| Ca_Kabuli_NC_021160.1_42451855 | Ca_kabuli_chr01    | 42451855                       | [T/C]       | 1067291265                                 |
| Ca_Kabuli_NC_021160.1_42451862 | Ca_kabuli_chr01    | 42451862                       | [T/C]       | 1067291266                                 |
| Ca_Kabuli_NC_021160.1_42451882 | Ca_kabuli_chr01    | 42451882                       | [A/T]       | 1067291267                                 |
| Ca_Kabuli_NC_021160.1_42451966 | Ca_kabuli_chr01    | 42451966                       | [A/C]       | 1067291268                                 |
| Ca_Kabuli_NC_021160.1_42451986 | Ca_kabuli_chr01    | 42451986                       | [T/C]       | 1067291269                                 |
| Ca_Kabuli_NC_021160.1_42452026 | Ca_kabuli_chr01    | 42452026                       | [T/G]       | 1067291270                                 |
| Ca_Kabuli_NC_021160.1_42452035 | Ca_kabuli_chr01    | 42452035                       | [T/C]       | 1067291271                                 |
| Ca_Kabuli_NC_021160.1_42452110 | Ca_kabuli_chr01    | 42452110                       | [T/C]       | 1067291272                                 |
| Ca_Kabuli_NC_021160.1_42452191 | Ca_kabuli_chr01    | 42452191                       | [T/G]       | 1067291273                                 |
| Ca_Kabuli_NC_021160.1_42452552 | Ca_kabuli_chr01    | 42452552                       | [T/C]       | 1067291274                                 |
| Ca_Kabuli_NC_021160.1_42452623 | Ca_kabuli_chr01    | 42452623                       | [T/C]       | 1067291275                                 |
| Ca_Kabuli_NC_021160.1_42452638 | Ca_kabuli_chr01    | 42452638                       | [T/G]       | 1067291276                                 |
| Ca_Kabuli_NC_021160.1_42452642 | Ca_kabuli_chr01    | 42452642                       | [A/G]       | 1067291277                                 |
| Ca_Kabuli_NC_021160.1_42452647 | Ca_kabuli_chr01    | 42452647                       | [T/G]       | 1067291278                                 |
| Ca_Kabuli_NC_021160.1_42452648 | Ca_kabuli_chr01    | 42452648                       | [A/G]       | 1067291279                                 |
| Ca_Kabuli_NC_021160.1_42452664 | Ca_kabuli_chr01    | 42452664                       | [A/C]       | 1067291280                                 |
| Ca_Kabuli_NC_021160.1_42452675 | Ca_kabuli_chr01    | 42452675                       | [A/G]       | 1067291281                                 |
| Ca_Kabuli_NC_021160.1_42452683 | Ca_kabuli_chr01    | 42452683                       | [A/G]       | 1067291282                                 |

| <b>SNP IDs</b>                 | <b>Chromosomes</b> | <b>Physical positions (bp)</b> | <b>SNPs</b> | <b>NCBI SNPdb accession IDs (NCBI_ss#)</b> |
|--------------------------------|--------------------|--------------------------------|-------------|--------------------------------------------|
| Ca_Kabuli_NC_021160.1_42452722 | Ca_kabuli_chr01    | 42452722                       | [T/C]       | 1067291283                                 |
| Ca_Kabuli_NC_021160.1_42452748 | Ca_kabuli_chr01    | 42452748                       | [A/C]       | 1067291284                                 |
| Ca_Kabuli_NC_021160.1_42452803 | Ca_kabuli_chr01    | 42452803                       | [T/C]       | 1067291285                                 |
| Ca_Kabuli_NC_021160.1_42452810 | Ca_kabuli_chr01    | 42452810                       | [A/G]       | 1067291286                                 |
| Ca_Kabuli_NC_021160.1_42452826 | Ca_kabuli_chr01    | 42452826                       | [A/C]       | 1067291287                                 |
| Ca_Kabuli_NC_021160.1_42452832 | Ca_kabuli_chr01    | 42452832                       | [T/G]       | 1067291288                                 |
| Ca_Kabuli_NC_021160.1_42452837 | Ca_kabuli_chr01    | 42452837                       | [A/C]       | 1067291289                                 |
| Ca_Kabuli_NC_021160.1_42452872 | Ca_kabuli_chr01    | 42452872                       | [T/G]       | 1067291290                                 |
| Ca_Kabuli_NC_021160.1_42452882 | Ca_kabuli_chr01    | 42452882                       | [A/G]       | 1067291291                                 |
| Ca_Kabuli_NC_021160.1_42452885 | Ca_kabuli_chr01    | 42452885                       | [A/G]       | 1067291292                                 |
| Ca_Kabuli_NC_021160.1_42452959 | Ca_kabuli_chr01    | 42452959                       | [T/G]       | 1067291293                                 |
| Ca_Kabuli_NC_021160.1_42452962 | Ca_kabuli_chr01    | 42452962                       | [A/C]       | 1067291294                                 |
| Ca_Kabuli_NC_021160.1_42452976 | Ca_kabuli_chr01    | 42452976                       | [A/C]       | 1067291295                                 |
| Ca_Kabuli_NC_021160.1_42453025 | Ca_kabuli_chr01    | 42453025                       | [T/C]       | 1067291296                                 |
| Ca_Kabuli_NC_021160.1_42453051 | Ca_kabuli_chr01    | 42453051                       | [A/C]       | 1067291297                                 |
| Ca_Kabuli_NC_021160.1_42453070 | Ca_kabuli_chr01    | 42453070                       | [A/G]       | 1067291298                                 |
| Ca_Kabuli_NC_021160.1_42453083 | Ca_kabuli_chr01    | 42453083                       | [A/G]       | 1067291299                                 |
| Ca_Kabuli_NC_021160.1_42860146 | Ca_kabuli_chr01    | 42860146                       | [T/C]       | 1067291300                                 |
| Ca_Kabuli_NC_021160.1_43053356 | Ca_kabuli_chr01    | 43053356                       | [C/G]       | 1067291301                                 |
| Ca_Kabuli_NC_021160.1_43053372 | Ca_kabuli_chr01    | 43053372                       | [T/G]       | 1067291302                                 |
| Ca_Kabuli_NC_021160.1_43053545 | Ca_kabuli_chr01    | 43053545                       | [T/G]       | 1067291303                                 |
| Ca_Kabuli_NC_021160.1_43303530 | Ca_kabuli_chr01    | 43303530                       | [A/T]       | 1067291304                                 |
| Ca_Kabuli_NC_021160.1_43304549 | Ca_kabuli_chr01    | 43304549                       | [A/G]       | 1067291305                                 |
| Ca_Kabuli_NC_021160.1_43304559 | Ca_kabuli_chr01    | 43304559                       | [T/G]       | 1067291306                                 |
| Ca_Kabuli_NC_021160.1_43304608 | Ca_kabuli_chr01    | 43304608                       | [T/A]       | 1067291307                                 |
| Ca_Kabuli_NC_021160.1_43305961 | Ca_kabuli_chr01    | 43305961                       | [T/G]       | 1067291308                                 |
| Ca_Kabuli_NC_021160.1_43543945 | Ca_kabuli_chr01    | 43543945                       | [A/C]       | 1067291309                                 |
| Ca_Kabuli_NC_021160.1_43543958 | Ca_kabuli_chr01    | 43543958                       | [T/C]       | 1067291310                                 |
| Ca_Kabuli_NC_021160.1_43543961 | Ca_kabuli_chr01    | 43543961                       | [A/C]       | 1067291311                                 |
| Ca_Kabuli_NC_021160.1_43543972 | Ca_kabuli_chr01    | 43543972                       | [T/C]       | 1067291312                                 |
| Ca_Kabuli_NC_021160.1_43725046 | Ca_kabuli_chr01    | 43725046                       | [T/G]       | 1067291313                                 |
| Ca_Kabuli_NC_021160.1_43727856 | Ca_kabuli_chr01    | 43727856                       | [T/A]       | 1067291314                                 |
| Ca_Kabuli_NC_021160.1_43753049 | Ca_kabuli_chr01    | 43753049                       | [A/C]       | 1067291315                                 |
| Ca_Kabuli_NC_021160.1_43754076 | Ca_kabuli_chr01    | 43754076                       | [T/G]       | 1067291316                                 |

| <b>SNP IDs</b>                 | <b>Chromosomes</b> | <b>Physical positions (bp)</b> | <b>SNPs</b> | <b>NCBI SNPdb accession IDs (NCBI_ss#)</b> |
|--------------------------------|--------------------|--------------------------------|-------------|--------------------------------------------|
| Ca_Kabuli_NC_021160.1_43782277 | Ca_kabuli_chr01    | 43782277                       | [T/G]       | 1067291317                                 |
| Ca_Kabuli_NC_021160.1_43924558 | Ca_kabuli_chr01    | 43924558                       | [T/G]       | 1067291318                                 |
| Ca_Kabuli_NC_021160.1_43924562 | Ca_kabuli_chr01    | 43924562                       | [A/G]       | 1067291319                                 |
| Ca_Kabuli_NC_021160.1_43929264 | Ca_kabuli_chr01    | 43929264                       | [A/G]       | 1067291320                                 |
| Ca_Kabuli_NC_021160.1_43933984 | Ca_kabuli_chr01    | 43933984                       | [C/T]       | 1067291321                                 |
| Ca_Kabuli_NC_021160.1_43934070 | Ca_kabuli_chr01    | 43934070                       | [T/C]       | 1067291322                                 |
| Ca_Kabuli_NC_021160.1_43994989 | Ca_kabuli_chr01    | 43994989                       | [T/C]       | 1067291323                                 |
| Ca_Kabuli_NC_021160.1_44096017 | Ca_kabuli_chr01    | 44096017                       | [T/C]       | 1067291324                                 |
| Ca_Kabuli_NC_021160.1_44096052 | Ca_kabuli_chr01    | 44096052                       | [G/C]       | 1067291325                                 |
| Ca_Kabuli_NC_021160.1_44096065 | Ca_kabuli_chr01    | 44096065                       | [A/G]       | 1067291326                                 |
| Ca_Kabuli_NC_021160.1_44096071 | Ca_kabuli_chr01    | 44096071                       | [A/C]       | 1067291327                                 |
| Ca_Kabuli_NC_021160.1_44096088 | Ca_kabuli_chr01    | 44096088                       | [T/G]       | 1067291328                                 |
| Ca_Kabuli_NC_021160.1_44444216 | Ca_kabuli_chr01    | 44444216                       | [T/G]       | 1067291329                                 |
| Ca_Kabuli_NC_021160.1_44444218 | Ca_kabuli_chr01    | 44444218                       | [A/G]       | 1067291330                                 |
| Ca_Kabuli_NC_021160.1_44518201 | Ca_kabuli_chr01    | 44518201                       | [C/A]       | 1067291331                                 |
| Ca_Kabuli_NC_021160.1_44518202 | Ca_kabuli_chr01    | 44518202                       | [C/G]       | 1067291332                                 |
| Ca_Kabuli_NC_021160.1_44518203 | Ca_kabuli_chr01    | 44518203                       | [T/A]       | 1067291333                                 |
| Ca_Kabuli_NC_021160.1_44862154 | Ca_kabuli_chr01    | 44862154                       | [T/G]       | 1067291334                                 |
| Ca_Kabuli_NC_021160.1_45044113 | Ca_kabuli_chr01    | 45044113                       | [A/G]       | 1067291335                                 |
| Ca_Kabuli_NC_021160.1_45074532 | Ca_kabuli_chr01    | 45074532                       | [T/C]       | 1067291336                                 |
| Ca_Kabuli_NC_021160.1_45088864 | Ca_kabuli_chr01    | 45088864                       | [T/C]       | 1067291337                                 |
| Ca_Kabuli_NC_021160.1_45088871 | Ca_kabuli_chr01    | 45088871                       | [A/G]       | 1067291338                                 |
| Ca_Kabuli_NC_021160.1_45088948 | Ca_kabuli_chr01    | 45088948                       | [A/G]       | 1067291339                                 |
| Ca_Kabuli_NC_021160.1_45484919 | Ca_kabuli_chr01    | 45484919                       | [A/G]       | 1067291340                                 |
| Ca_Kabuli_NC_021160.1_45484925 | Ca_kabuli_chr01    | 45484925                       | [A/C]       | 1067291341                                 |
| Ca_Kabuli_NC_021160.1_45484951 | Ca_kabuli_chr01    | 45484951                       | [T/C]       | 1067291342                                 |
| Ca_Kabuli_NC_021160.1_45826522 | Ca_kabuli_chr01    | 45826522                       | [A/T]       | 1067291343                                 |
| Ca_Kabuli_NC_021160.1_45826559 | Ca_kabuli_chr01    | 45826559                       | [T/C]       | 1067291344                                 |
| Ca_Kabuli_NC_021160.1_45826625 | Ca_kabuli_chr01    | 45826625                       | [A/G]       | 1067291345                                 |
| Ca_Kabuli_NC_021160.1_46437023 | Ca_kabuli_chr01    | 46437023                       | [T/G]       | 1067291346                                 |
| Ca_Kabuli_NC_021160.1_46456567 | Ca_kabuli_chr01    | 46456567                       | [G/A]       | 1067291347                                 |
| Ca_Kabuli_NC_021160.1_46523221 | Ca_kabuli_chr01    | 46523221                       | [T/C]       | 1067291348                                 |
| Ca_Kabuli_NC_021160.1_46717322 | Ca_kabuli_chr01    | 46717322                       | [G/A]       | 1067291349                                 |
| Ca_Kabuli_NC_021160.1_46736579 | Ca_kabuli_chr01    | 46736579                       | [A/C]       | 1067291350                                 |

| <b>SNP IDs</b>                 | <b>Chromosomes</b> | <b>Physical positions (bp)</b> | <b>SNPs</b> | <b>NCBI SNPdb accession IDs (NCBI_ss#)</b> |
|--------------------------------|--------------------|--------------------------------|-------------|--------------------------------------------|
| Ca_Kabuli_NC_021160.1_46737758 | Ca_kabuli_chr01    | 46737758                       | [T/C]       | 1067291351                                 |
| Ca_Kabuli_NC_021160.1_46737770 | Ca_kabuli_chr01    | 46737770                       | [G/A]       | 1067291352                                 |
| Ca_Kabuli_NC_021160.1_46737781 | Ca_kabuli_chr01    | 46737781                       | [A/G]       | 1067291353                                 |
| Ca_Kabuli_NC_021160.1_46764836 | Ca_kabuli_chr01    | 46764836                       | [T/C]       | 1067291354                                 |
| Ca_Kabuli_NC_021160.1_46779325 | Ca_kabuli_chr01    | 46779325                       | [T/G]       | 1067291355                                 |
| Ca_Kabuli_NC_021160.1_46779336 | Ca_kabuli_chr01    | 46779336                       | [T/A]       | 1067291356                                 |
| Ca_Kabuli_NC_021160.1_46779362 | Ca_kabuli_chr01    | 46779362                       | [A/C]       | 1067291357                                 |
| Ca_Kabuli_NC_021160.1_46779764 | Ca_kabuli_chr01    | 46779764                       | [G/A]       | 1067291358                                 |
| Ca_Kabuli_NC_021160.1_46793271 | Ca_kabuli_chr01    | 46793271                       | [A/T]       | 1067291359                                 |
| Ca_Kabuli_NC_021160.1_46793284 | Ca_kabuli_chr01    | 46793284                       | [T/C]       | 1067291360                                 |
| Ca_Kabuli_NC_021160.1_46830882 | Ca_kabuli_chr01    | 46830882                       | [T/C]       | 1067291361                                 |
| Ca_Kabuli_NC_021160.1_46830911 | Ca_kabuli_chr01    | 46830911                       | [A/G]       | 1067291362                                 |
| Ca_Kabuli_NC_021160.1_46871009 | Ca_kabuli_chr01    | 46871009                       | [A/C]       | 1067291363                                 |
| Ca_Kabuli_NC_021160.1_46941841 | Ca_kabuli_chr01    | 46941841                       | [T/C]       | 1067291364                                 |
| Ca_Kabuli_NC_021160.1_46968694 | Ca_kabuli_chr01    | 46968694                       | [T/C]       | 1067291365                                 |
| Ca_Kabuli_NC_021160.1_46968740 | Ca_kabuli_chr01    | 46968740                       | [T/C]       | 1067291366                                 |
| Ca_Kabuli_NC_021160.1_46969221 | Ca_kabuli_chr01    | 46969221                       | [T/G]       | 1067291367                                 |
| Ca_Kabuli_NC_021160.1_46969302 | Ca_kabuli_chr01    | 46969302                       | [A/G]       | 1067291368                                 |
| Ca_Kabuli_NC_021160.1_47045613 | Ca_kabuli_chr01    | 47045613                       | [C/T]       | 1067291369                                 |
| Ca_Kabuli_NC_021160.1_47045650 | Ca_kabuli_chr01    | 47045650                       | [A/G]       | 1067291370                                 |
| Ca_Kabuli_NC_021160.1_47203105 | Ca_kabuli_chr01    | 47203105                       | [A/G]       | 1067291371                                 |
| Ca_Kabuli_NC_021160.1_47203115 | Ca_kabuli_chr01    | 47203115                       | [A/C]       | 1067291372                                 |
| Ca_Kabuli_NC_021160.1_47203136 | Ca_kabuli_chr01    | 47203136                       | [T/C]       | 1067291373                                 |
| Ca_Kabuli_NC_021160.1_47203161 | Ca_kabuli_chr01    | 47203161                       | [T/A]       | 1067291374                                 |
| Ca_Kabuli_NC_021160.1_47203165 | Ca_kabuli_chr01    | 47203165                       | [T/C]       | 1067291375                                 |
| Ca_Kabuli_NC_021160.1_47468656 | Ca_kabuli_chr01    | 47468656                       | [C/A]       | 1067291376                                 |
| Ca_Kabuli_NC_021160.1_47755803 | Ca_kabuli_chr01    | 47755803                       | [T/A]       | 1067291377                                 |
| Ca_Kabuli_NC_021160.1_47889964 | Ca_kabuli_chr01    | 47889964                       | [T/G]       | 1067291378                                 |
| Ca_Kabuli_NC_021160.1_47889984 | Ca_kabuli_chr01    | 47889984                       | [T/G]       | 1067291379                                 |
| Ca_Kabuli_NC_021160.1_47889995 | Ca_kabuli_chr01    | 47889995                       | [T/G]       | 1067291380                                 |
| Ca_Kabuli_NC_021160.1_47890812 | Ca_kabuli_chr01    | 47890812                       | [A/G]       | 1067291381                                 |
| Ca_Kabuli_NC_021160.1_47896376 | Ca_kabuli_chr01    | 47896376                       | [A/T]       | 1067291382                                 |
| Ca_Kabuli_NC_021160.1_47896398 | Ca_kabuli_chr01    | 47896398                       | [T/G]       | 1067291383                                 |
| Ca_Kabuli_NC_021160.1_47901296 | Ca_kabuli_chr01    | 47901296                       | [T/G]       | 1067291384                                 |

| <b>SNP IDs</b>                 | <b>Chromosomes</b> | <b>Physical positions (bp)</b> | <b>SNPs</b> | <b>NCBI SNPdb accession IDs (NCBI_ss#)</b> |
|--------------------------------|--------------------|--------------------------------|-------------|--------------------------------------------|
| Ca_Kabuli_NC_021160.1_47947941 | Ca_kabuli_chr01    | 47947941                       | [C/A]       | 1067291385                                 |
| Ca_Kabuli_NC_021160.1_47947964 | Ca_kabuli_chr01    | 47947964                       | [A/C]       | 1067291386                                 |
| Ca_Kabuli_NC_021160.1_47979058 | Ca_kabuli_chr01    | 47979058                       | [C/A]       | 1067291387                                 |
| Ca_Kabuli_NC_021160.1_48002634 | Ca_kabuli_chr01    | 48002634                       | [A/C]       | 1067291388                                 |
| Ca_Kabuli_NC_021160.1_48026686 | Ca_kabuli_chr01    | 48026686                       | [T/C]       | 1067291389                                 |
| Ca_Kabuli_NC_021160.1_48027623 | Ca_kabuli_chr01    | 48027623                       | [T/G]       | 1067291390                                 |
| Ca_Kabuli_NC_021160.1_48027987 | Ca_kabuli_chr01    | 48027987                       | [T/G]       | 1067291391                                 |
| Ca_Kabuli_NC_021160.1_48027996 | Ca_kabuli_chr01    | 48027996                       | [T/G]       | 1067291392                                 |
| Ca_Kabuli_NC_021160.1_48028119 | Ca_kabuli_chr01    | 48028119                       | [A/T]       | 1067291393                                 |
| Ca_Kabuli_NC_021160.1_48028129 | Ca_kabuli_chr01    | 48028129                       | [T/G]       | 1067291394                                 |
| Ca_Kabuli_NC_021160.1_48028131 | Ca_kabuli_chr01    | 48028131                       | [A/G]       | 1067291395                                 |
| Ca_Kabuli_NC_021160.1_48028136 | Ca_kabuli_chr01    | 48028136                       | [G/A]       | 1067291396                                 |
| Ca_Kabuli_NC_021160.1_48028139 | Ca_kabuli_chr01    | 48028139                       | [G/A]       | 1067291397                                 |
| Ca_Kabuli_NC_021160.1_48028191 | Ca_kabuli_chr01    | 48028191                       | [G/T]       | 1067291398                                 |
| Ca_Kabuli_NC_021160.1_48028282 | Ca_kabuli_chr01    | 48028282                       | [T/G]       | 1067291399                                 |
| Ca_Kabuli_NC_021160.1_48028382 | Ca_kabuli_chr01    | 48028382                       | [T/C]       | 1067291400                                 |
| Ca_Kabuli_NC_021160.1_48028943 | Ca_kabuli_chr01    | 48028943                       | [T/G]       | 1067291401                                 |
| Ca_Kabuli_NC_021160.1_48028958 | Ca_kabuli_chr01    | 48028958                       | [T/G]       | 1067291402                                 |
| Ca_Kabuli_NC_021160.1_48028982 | Ca_kabuli_chr01    | 48028982                       | [A/G]       | 1067291403                                 |
| Ca_Kabuli_NC_021160.1_48049250 | Ca_kabuli_chr01    | 48049250                       | [A/C]       | 1067291404                                 |
| Ca_Kabuli_NC_021160.1_48049256 | Ca_kabuli_chr01    | 48049256                       | [A/C]       | 1067291405                                 |
| Ca_Kabuli_NC_021160.1_48049275 | Ca_kabuli_chr01    | 48049275                       | [T/C]       | 1067291406                                 |
| Ca_Kabuli_NC_021160.1_48132202 | Ca_kabuli_chr01    | 48132202                       | [T/G]       | 1067291407                                 |
| Ca_Kabuli_NC_021160.1_48132210 | Ca_kabuli_chr01    | 48132210                       | [T/C]       | 1067291408                                 |
| Ca_Kabuli_NC_021160.1_48198820 | Ca_kabuli_chr01    | 48198820                       | [A/T]       | 1067291409                                 |
| Ca_Kabuli_NC_021160.1_48198825 | Ca_kabuli_chr01    | 48198825                       | [A/C]       | 1067291410                                 |
| Ca_Kabuli_NC_021160.1_48198899 | Ca_kabuli_chr01    | 48198899                       | [A/C]       | 1067291411                                 |
| Ca_Kabuli_NC_021160.1_48198921 | Ca_kabuli_chr01    | 48198921                       | [T/C]       | 1067291412                                 |
| Ca_Kabuli_NC_021160.1_48198926 | Ca_kabuli_chr01    | 48198926                       | [T/A]       | 1067291413                                 |
| Ca_Kabuli_NC_021160.1_48198934 | Ca_kabuli_chr01    | 48198934                       | [T/A]       | 1067291414                                 |
| Ca_Kabuli_NC_021160.1_48265598 | Ca_kabuli_chr01    | 48265598                       | [T/C]       | 1067291415                                 |
| Ca_Kabuli_NC_021160.1_48265618 | Ca_kabuli_chr01    | 48265618                       | [C/T]       | 1067291416                                 |
| Ca_Kabuli_NC_021160.1_48265652 | Ca_kabuli_chr01    | 48265652                       | [T/C]       | 1067291417                                 |
| Ca_Kabuli_NC_021160.1_48273236 | Ca_kabuli_chr01    | 48273236                       | [T/C]       | 1067291418                                 |

| <b>SNP IDs</b>                 | <b>Chromosomes</b> | <b>Physical positions (bp)</b> | <b>SNPs</b> | <b>NCBI SNPdb accession IDs (NCBI_ss#)</b> |
|--------------------------------|--------------------|--------------------------------|-------------|--------------------------------------------|
| Ca_Kabuli_NC_021160.1_48273253 | Ca_kabuli_chr01    | 48273253                       | [A/C]       | 1067291419                                 |
| Ca_Kabuli_NC_021160.1_48273267 | Ca_kabuli_chr01    | 48273267                       | [G/A]       | 1067291420                                 |
| Ca_Kabuli_NC_021160.1_48273272 | Ca_kabuli_chr01    | 48273272                       | [A/C]       | 1067291421                                 |
| Ca_Kabuli_NC_021160.1_48273277 | Ca_kabuli_chr01    | 48273277                       | [A/G]       | 1067291422                                 |
| Ca_Kabuli_NC_021160.1_48273344 | Ca_kabuli_chr01    | 48273344                       | [T/G]       | 1067291423                                 |
| Ca_Kabuli_NC_021160.1_48273389 | Ca_kabuli_chr01    | 48273389                       | [A/C]       | 1067291424                                 |
| Ca_Kabuli_NC_021160.1_48273411 | Ca_kabuli_chr01    | 48273411                       | [A/G]       | 1067291425                                 |
| Ca_Kabuli_NC_021160.1_48338891 | Ca_kabuli_chr01    | 48338891                       | [T/G]       | 1067291426                                 |
| Ca_Kabuli_NC_021160.1_48338900 | Ca_kabuli_chr01    | 48338900                       | [A/C]       | 1067291427                                 |
| Ca_Kabuli_NC_021161.1_104226   | Ca_kabuli_chr02    | 104226                         | [T/C]       | 1067291428                                 |
| Ca_Kabuli_NC_021161.1_106736   | Ca_kabuli_chr02    | 106736                         | [A/C]       | 1067291429                                 |
| Ca_Kabuli_NC_021161.1_113402   | Ca_kabuli_chr02    | 113402                         | [T/C]       | 1067291430                                 |
| Ca_Kabuli_NC_021161.1_113411   | Ca_kabuli_chr02    | 113411                         | [G/C]       | 1067291431                                 |
| Ca_Kabuli_NC_021161.1_113464   | Ca_kabuli_chr02    | 113464                         | [T/C]       | 1067291432                                 |
| Ca_Kabuli_NC_021161.1_188971   | Ca_kabuli_chr02    | 188971                         | [T/G]       | 1067291433                                 |
| Ca_Kabuli_NC_021161.1_233551   | Ca_kabuli_chr02    | 233551                         | [T/G]       | 1067291434                                 |
| Ca_Kabuli_NC_021161.1_451206   | Ca_kabuli_chr02    | 451206                         | [T/C]       | 1067291435                                 |
| Ca_Kabuli_NC_021161.1_451304   | Ca_kabuli_chr02    | 451304                         | [T/G]       | 1067291436                                 |
| Ca_Kabuli_NC_021161.1_487221   | Ca_kabuli_chr02    | 487221                         | [C/A]       | 1067291437                                 |
| Ca_Kabuli_NC_021161.1_543389   | Ca_kabuli_chr02    | 543389                         | [A/C]       | 1067291438                                 |
| Ca_Kabuli_NC_021161.1_737212   | Ca_kabuli_chr02    | 737212                         | [T/C]       | 1067291439                                 |
| Ca_Kabuli_NC_021161.1_737222   | Ca_kabuli_chr02    | 737222                         | [A/C]       | 1067291440                                 |
| Ca_Kabuli_NC_021161.1_737224   | Ca_kabuli_chr02    | 737224                         | [T/C]       | 1067291441                                 |
| Ca_Kabuli_NC_021161.1_737237   | Ca_kabuli_chr02    | 737237                         | [T/C]       | 1067291442                                 |
| Ca_Kabuli_NC_021161.1_737253   | Ca_kabuli_chr02    | 737253                         | [T/C]       | 1067291443                                 |
| Ca_Kabuli_NC_021161.1_737773   | Ca_kabuli_chr02    | 737773                         | [T/C]       | 1067291444                                 |
| Ca_Kabuli_NC_021161.1_737776   | Ca_kabuli_chr02    | 737776                         | [T/C]       | 1067291445                                 |
| Ca_Kabuli_NC_021161.1_737786   | Ca_kabuli_chr02    | 737786                         | [A/G]       | 1067291446                                 |
| Ca_Kabuli_NC_021161.1_737825   | Ca_kabuli_chr02    | 737825                         | [A/T]       | 1067291447                                 |
| Ca_Kabuli_NC_021161.1_737828   | Ca_kabuli_chr02    | 737828                         | [A/G]       | 1067291448                                 |
| Ca_Kabuli_NC_021161.1_740087   | Ca_kabuli_chr02    | 740087                         | [T/C]       | 1067291449                                 |
| Ca_Kabuli_NC_021161.1_740088   | Ca_kabuli_chr02    | 740088                         | [C/T]       | 1067291450                                 |
| Ca_Kabuli_NC_021161.1_1190385  | Ca_kabuli_chr02    | 1190385                        | [G/T]       | 1067291451                                 |
| Ca_Kabuli_NC_021161.1_1190394  | Ca_kabuli_chr02    | 1190394                        | [C/A]       | 1067291452                                 |

| <b>SNP IDs</b>                | <b>Chromosomes</b> | <b>Physical positions (bp)</b> | <b>SNPs</b> | <b>NCBI SNPdb accession IDs (NCBI_ss#)</b> |
|-------------------------------|--------------------|--------------------------------|-------------|--------------------------------------------|
| Ca_Kabuli_NC_021161.1_1198086 | Ca_kabuli_chr02    | 1198086                        | [A/G]       | 1067291453                                 |
| Ca_Kabuli_NC_021161.1_1234985 | Ca_kabuli_chr02    | 1234985                        | [A/G]       | 1067291454                                 |
| Ca_Kabuli_NC_021161.1_1242088 | Ca_kabuli_chr02    | 1242088                        | [T/A]       | 1067291455                                 |
| Ca_Kabuli_NC_021161.1_1314335 | Ca_kabuli_chr02    | 1314335                        | [A/G]       | 1067291456                                 |
| Ca_Kabuli_NC_021161.1_1565538 | Ca_kabuli_chr02    | 1565538                        | [A/C]       | 1067291457                                 |
| Ca_Kabuli_NC_021161.1_1565539 | Ca_kabuli_chr02    | 1565539                        | [G/A]       | 1067291458                                 |
| Ca_Kabuli_NC_021161.1_1565540 | Ca_kabuli_chr02    | 1565540                        | [A/C]       | 1067291459                                 |
| Ca_Kabuli_NC_021161.1_1565541 | Ca_kabuli_chr02    | 1565541                        | [T/C]       | 1067291460                                 |
| Ca_Kabuli_NC_021161.1_1573716 | Ca_kabuli_chr02    | 1573716                        | [T/C]       | 1067291461                                 |
| Ca_Kabuli_NC_021161.1_1584393 | Ca_kabuli_chr02    | 1584393                        | [T/G]       | 1067291462                                 |
| Ca_Kabuli_NC_021161.1_1584412 | Ca_kabuli_chr02    | 1584412                        | [C/A]       | 1067291463                                 |
| Ca_Kabuli_NC_021161.1_1584413 | Ca_kabuli_chr02    | 1584413                        | [A/G]       | 1067291464                                 |
| Ca_Kabuli_NC_021161.1_1610606 | Ca_kabuli_chr02    | 1610606                        | [T/C]       | 1067291465                                 |
| Ca_Kabuli_NC_021161.1_1624937 | Ca_kabuli_chr02    | 1624937                        | [A/C]       | 1067291466                                 |
| Ca_Kabuli_NC_021161.1_1671279 | Ca_kabuli_chr02    | 1671279                        | [T/C]       | 1067291467                                 |
| Ca_Kabuli_NC_021161.1_1704218 | Ca_kabuli_chr02    | 1704218                        | [A/C]       | 1067291468                                 |
| Ca_Kabuli_NC_021161.1_1704229 | Ca_kabuli_chr02    | 1704229                        | [T/C]       | 1067291469                                 |
| Ca_Kabuli_NC_021161.1_1713310 | Ca_kabuli_chr02    | 1713310                        | [T/G]       | 1067291470                                 |
| Ca_Kabuli_NC_021161.1_1728819 | Ca_kabuli_chr02    | 1728819                        | [G/C]       | 1067291471                                 |
| Ca_Kabuli_NC_021161.1_1728820 | Ca_kabuli_chr02    | 1728820                        | [G/C]       | 1067291472                                 |
| Ca_Kabuli_NC_021161.1_1801332 | Ca_kabuli_chr02    | 1801332                        | [T/C]       | 1067291473                                 |
| Ca_Kabuli_NC_021161.1_1803466 | Ca_kabuli_chr02    | 1803466                        | [T/G]       | 1067291474                                 |
| Ca_Kabuli_NC_021161.1_1804162 | Ca_kabuli_chr02    | 1804162                        | [T/C]       | 1067291475                                 |
| Ca_Kabuli_NC_021161.1_1804184 | Ca_kabuli_chr02    | 1804184                        | [A/C]       | 1067291476                                 |
| Ca_Kabuli_NC_021161.1_1819997 | Ca_kabuli_chr02    | 1819997                        | [T/G]       | 1067291477                                 |
| Ca_Kabuli_NC_021161.1_1828324 | Ca_kabuli_chr02    | 1828324                        | [T/A]       | 1067291478                                 |
| Ca_Kabuli_NC_021161.1_1828333 | Ca_kabuli_chr02    | 1828333                        | [T/G]       | 1067291479                                 |
| Ca_Kabuli_NC_021161.1_1828346 | Ca_kabuli_chr02    | 1828346                        | [T/G]       | 1067291480                                 |
| Ca_Kabuli_NC_021161.1_1828360 | Ca_kabuli_chr02    | 1828360                        | [A/G]       | 1067291481                                 |
| Ca_Kabuli_NC_021161.1_1828388 | Ca_kabuli_chr02    | 1828388                        | [A/C]       | 1067291482                                 |
| Ca_Kabuli_NC_021161.1_1865072 | Ca_kabuli_chr02    | 1865072                        | [T/C]       | 1067291483                                 |
| Ca_Kabuli_NC_021161.1_1865197 | Ca_kabuli_chr02    | 1865197                        | [A/G]       | 1067291484                                 |
| Ca_Kabuli_NC_021161.1_1882667 | Ca_kabuli_chr02    | 1882667                        | [T/A]       | 1067291485                                 |
| Ca_Kabuli_NC_021161.1_1882676 | Ca_kabuli_chr02    | 1882676                        | [T/A]       | 1067291486                                 |



| <b>SNP IDs</b>                | <b>Chromosomes</b> | <b>Physical positions (bp)</b> | <b>SNPs</b> | <b>NCBI SNPdb accession IDs (NCBI_ss#)</b> |
|-------------------------------|--------------------|--------------------------------|-------------|--------------------------------------------|
| Ca_Kabuli_NC_021161.1_1884640 | Ca_kabuli_chr02    | 1884640                        | [T/C]       | 1067291487                                 |
| Ca_Kabuli_NC_021161.1_1884649 | Ca_kabuli_chr02    | 1884649                        | [T/G]       | 1067291488                                 |
| Ca_Kabuli_NC_021161.1_1884670 | Ca_kabuli_chr02    | 1884670                        | [T/G]       | 1067291489                                 |
| Ca_Kabuli_NC_021161.1_1884694 | Ca_kabuli_chr02    | 1884694                        | [A/G]       | 1067291490                                 |
| Ca_Kabuli_NC_021161.1_1901253 | Ca_kabuli_chr02    | 1901253                        | [A/T]       | 1067291491                                 |
| Ca_Kabuli_NC_021161.1_1953645 | Ca_kabuli_chr02    | 1953645                        | [A/G]       | 1067291492                                 |
| Ca_Kabuli_NC_021161.1_2003544 | Ca_kabuli_chr02    | 2003544                        | [T/C]       | 1067291493                                 |
| Ca_Kabuli_NC_021161.1_2003584 | Ca_kabuli_chr02    | 2003584                        | [A/C]       | 1067291494                                 |
| Ca_Kabuli_NC_021161.1_2078923 | Ca_kabuli_chr02    | 2078923                        | [T/A]       | 1067291495                                 |
| Ca_Kabuli_NC_021161.1_2080305 | Ca_kabuli_chr02    | 2080305                        | [A/G]       | 1067291496                                 |
| Ca_Kabuli_NC_021161.1_2080312 | Ca_kabuli_chr02    | 2080312                        | [A/G]       | 1067291497                                 |
| Ca_Kabuli_NC_021161.1_2080356 | Ca_kabuli_chr02    | 2080356                        | [T/G]       | 1067291498                                 |
| Ca_Kabuli_NC_021161.1_2080358 | Ca_kabuli_chr02    | 2080358                        | [T/A]       | 1067291499                                 |
| Ca_Kabuli_NC_021161.1_2080361 | Ca_kabuli_chr02    | 2080361                        | [A/G]       | 1067291500                                 |
| Ca_Kabuli_NC_021161.1_2080413 | Ca_kabuli_chr02    | 2080413                        | [T/G]       | 1067291501                                 |
| Ca_Kabuli_NC_021161.1_2080418 | Ca_kabuli_chr02    | 2080418                        | [T/G]       | 1067291502                                 |
| Ca_Kabuli_NC_021161.1_2085354 | Ca_kabuli_chr02    | 2085354                        | [T/C]       | 1067291503                                 |
| Ca_Kabuli_NC_021161.1_2085406 | Ca_kabuli_chr02    | 2085406                        | [T/A]       | 1067291504                                 |
| Ca_Kabuli_NC_021161.1_2086795 | Ca_kabuli_chr02    | 2086795                        | [T/G]       | 1067291505                                 |
| Ca_Kabuli_NC_021161.1_2227452 | Ca_kabuli_chr02    | 2227452                        | [A/G]       | 1067291506                                 |
| Ca_Kabuli_NC_021161.1_2227506 | Ca_kabuli_chr02    | 2227506                        | [T/C]       | 1067291507                                 |
| Ca_Kabuli_NC_021161.1_2312002 | Ca_kabuli_chr02    | 2312002                        | [T/C]       | 1067291508                                 |
| Ca_Kabuli_NC_021161.1_2312049 | Ca_kabuli_chr02    | 2312049                        | [T/C]       | 1067291509                                 |
| Ca_Kabuli_NC_021161.1_2312071 | Ca_kabuli_chr02    | 2312071                        | [T/C]       | 1067291510                                 |
| Ca_Kabuli_NC_021161.1_2416367 | Ca_kabuli_chr02    | 2416367                        | [T/G]       | 1067291511                                 |
| Ca_Kabuli_NC_021161.1_2420820 | Ca_kabuli_chr02    | 2420820                        | [T/C]       | 1067291512                                 |
| Ca_Kabuli_NC_021161.1_2420851 | Ca_kabuli_chr02    | 2420851                        | [A/G]       | 1067291513                                 |
| Ca_Kabuli_NC_021161.1_2424862 | Ca_kabuli_chr02    | 2424862                        | [T/C]       | 1067291514                                 |
| Ca_Kabuli_NC_021161.1_2577056 | Ca_kabuli_chr02    | 2577056                        | [A/T]       | 1067291515                                 |
| Ca_Kabuli_NC_021161.1_2577077 | Ca_kabuli_chr02    | 2577077                        | [T/G]       | 1067291516                                 |
| Ca_Kabuli_NC_021161.1_2578333 | Ca_kabuli_chr02    | 2578333                        | [A/C]       | 1067291517                                 |
| Ca_Kabuli_NC_021161.1_2578341 | Ca_kabuli_chr02    | 2578341                        | [T/C]       | 1067291518                                 |
| Ca_Kabuli_NC_021161.1_2578373 | Ca_kabuli_chr02    | 2578373                        | [T/C]       | 1067291519                                 |
| Ca_Kabuli_NC_021161.1_2579095 | Ca_kabuli_chr02    | 2579095                        | [T/C]       | 1067291520                                 |

| <b>SNP IDs</b>                | <b>Chromosomes</b> | <b>Physical positions (bp)</b> | <b>SNPs</b> | <b>NCBI SNPdb accession IDs (NCBI_ss#)</b> |
|-------------------------------|--------------------|--------------------------------|-------------|--------------------------------------------|
| Ca_Kabuli_NC_021161.1_2579106 | Ca_kabuli_chr02    | 2579106                        | [T/C]       | 1067291521                                 |
| Ca_Kabuli_NC_021161.1_2697827 | Ca_kabuli_chr02    | 2697827                        | [T/C]       | 1067291522                                 |
| Ca_Kabuli_NC_021161.1_2697829 | Ca_kabuli_chr02    | 2697829                        | [A/G]       | 1067291523                                 |
| Ca_Kabuli_NC_021161.1_2697860 | Ca_kabuli_chr02    | 2697860                        | [T/G]       | 1067291524                                 |
| Ca_Kabuli_NC_021161.1_2762971 | Ca_kabuli_chr02    | 2762971                        | [C/G]       | 1067291525                                 |
| Ca_Kabuli_NC_021161.1_2762973 | Ca_kabuli_chr02    | 2762973                        | [G/A]       | 1067291526                                 |
| Ca_Kabuli_NC_021161.1_2762974 | Ca_kabuli_chr02    | 2762974                        | [G/A]       | 1067291527                                 |
| Ca_Kabuli_NC_021161.1_2762977 | Ca_kabuli_chr02    | 2762977                        | [A/G]       | 1067291528                                 |
| Ca_Kabuli_NC_021161.1_2965854 | Ca_kabuli_chr02    | 2965854                        | [T/C]       | 1067291529                                 |
| Ca_Kabuli_NC_021161.1_2965856 | Ca_kabuli_chr02    | 2965856                        | [T/C]       | 1067291530                                 |
| Ca_Kabuli_NC_021161.1_2965861 | Ca_kabuli_chr02    | 2965861                        | [T/C]       | 1067291531                                 |
| Ca_Kabuli_NC_021161.1_2965874 | Ca_kabuli_chr02    | 2965874                        | [T/C]       | 1067291532                                 |
| Ca_Kabuli_NC_021161.1_2965903 | Ca_kabuli_chr02    | 2965903                        | [T/G]       | 1067291533                                 |
| Ca_Kabuli_NC_021161.1_3044461 | Ca_kabuli_chr02    | 3044461                        | [T/C]       | 1067291534                                 |
| Ca_Kabuli_NC_021161.1_3074493 | Ca_kabuli_chr02    | 3074493                        | [T/G]       | 1067291535                                 |
| Ca_Kabuli_NC_021161.1_3074499 | Ca_kabuli_chr02    | 3074499                        | [A/G]       | 1067291536                                 |
| Ca_Kabuli_NC_021161.1_3074517 | Ca_kabuli_chr02    | 3074517                        | [C/A]       | 1067291537                                 |
| Ca_Kabuli_NC_021161.1_3074518 | Ca_kabuli_chr02    | 3074518                        | [T/C]       | 1067291538                                 |
| Ca_Kabuli_NC_021161.1_3099939 | Ca_kabuli_chr02    | 3099939                        | [A/G]       | 1067291539                                 |
| Ca_Kabuli_NC_021161.1_3099967 | Ca_kabuli_chr02    | 3099967                        | [A/T]       | 1067291540                                 |
| Ca_Kabuli_NC_021161.1_3145552 | Ca_kabuli_chr02    | 3145552                        | [A/G]       | 1067291541                                 |
| Ca_Kabuli_NC_021161.1_3145555 | Ca_kabuli_chr02    | 3145555                        | [T/C]       | 1067291542                                 |
| Ca_Kabuli_NC_021161.1_3145568 | Ca_kabuli_chr02    | 3145568                        | [A/G]       | 1067291543                                 |
| Ca_Kabuli_NC_021161.1_3151157 | Ca_kabuli_chr02    | 3151157                        | [T/A]       | 1067291544                                 |
| Ca_Kabuli_NC_021161.1_3164292 | Ca_kabuli_chr02    | 3164292                        | [T/A]       | 1067291545                                 |
| Ca_Kabuli_NC_021161.1_3164298 | Ca_kabuli_chr02    | 3164298                        | [A/T]       | 1067291546                                 |
| Ca_Kabuli_NC_021161.1_3450843 | Ca_kabuli_chr02    | 3450843                        | [T/C]       | 1067291547                                 |
| Ca_Kabuli_NC_021161.1_3450856 | Ca_kabuli_chr02    | 3450856                        | [A/C]       | 1067291548                                 |
| Ca_Kabuli_NC_021161.1_3450886 | Ca_kabuli_chr02    | 3450886                        | [A/C]       | 1067291549                                 |
| Ca_Kabuli_NC_021161.1_3450889 | Ca_kabuli_chr02    | 3450889                        | [A/C]       | 1067291550                                 |
| Ca_Kabuli_NC_021161.1_3450898 | Ca_kabuli_chr02    | 3450898                        | [A/C]       | 1067291551                                 |
| Ca_Kabuli_NC_021161.1_3480904 | Ca_kabuli_chr02    | 3480904                        | [A/G]       | 1067291552                                 |
| Ca_Kabuli_NC_021161.1_3482714 | Ca_kabuli_chr02    | 3482714                        | [A/C]       | 1067291553                                 |
| Ca_Kabuli_NC_021161.1_3548778 | Ca_kabuli_chr02    | 3548778                        | [C/T]       | 1067291554                                 |

| <b>SNP IDs</b>                | <b>Chromosomes</b> | <b>Physical positions (bp)</b> | <b>SNPs</b> | <b>NCBI SNPdb accession IDs (NCBI_ss#)</b> |
|-------------------------------|--------------------|--------------------------------|-------------|--------------------------------------------|
| Ca_Kabuli_NC_021161.1_3548789 | Ca_kabuli_chr02    | 3548789                        | [T/G]       | 1067291555                                 |
| Ca_Kabuli_NC_021161.1_3548818 | Ca_kabuli_chr02    | 3548818                        | [A/G]       | 1067291556                                 |
| Ca_Kabuli_NC_021161.1_3663621 | Ca_kabuli_chr02    | 3663621                        | [A/T]       | 1067291557                                 |
| Ca_Kabuli_NC_021161.1_3688767 | Ca_kabuli_chr02    | 3688767                        | [T/G]       | 1067291558                                 |
| Ca_Kabuli_NC_021161.1_3706508 | Ca_kabuli_chr02    | 3706508                        | [C/T]       | 1067291559                                 |
| Ca_Kabuli_NC_021161.1_3789782 | Ca_kabuli_chr02    | 3789782                        | [C/T]       | 1067291560                                 |
| Ca_Kabuli_NC_021161.1_3789793 | Ca_kabuli_chr02    | 3789793                        | [A/G]       | 1067291561                                 |
| Ca_Kabuli_NC_021161.1_3808452 | Ca_kabuli_chr02    | 3808452                        | [T/C]       | 1067291562                                 |
| Ca_Kabuli_NC_021161.1_3808473 | Ca_kabuli_chr02    | 3808473                        | [A/T]       | 1067291563                                 |
| Ca_Kabuli_NC_021161.1_3808490 | Ca_kabuli_chr02    | 3808490                        | [C/T]       | 1067291564                                 |
| Ca_Kabuli_NC_021161.1_3808491 | Ca_kabuli_chr02    | 3808491                        | [C/T]       | 1067291565                                 |
| Ca_Kabuli_NC_021161.1_3856590 | Ca_kabuli_chr02    | 3856590                        | [A/T]       | 1067291566                                 |
| Ca_Kabuli_NC_021161.1_3870877 | Ca_kabuli_chr02    | 3870877                        | [A/G]       | 1067291567                                 |
| Ca_Kabuli_NC_021161.1_3904829 | Ca_kabuli_chr02    | 3904829                        | [A/C]       | 1067291568                                 |
| Ca_Kabuli_NC_021161.1_3908947 | Ca_kabuli_chr02    | 3908947                        | [G/C]       | 1067291569                                 |
| Ca_Kabuli_NC_021161.1_3908953 | Ca_kabuli_chr02    | 3908953                        | [A/C]       | 1067291570                                 |
| Ca_Kabuli_NC_021161.1_3915501 | Ca_kabuli_chr02    | 3915501                        | [T/C]       | 1067291571                                 |
| Ca_Kabuli_NC_021161.1_3915506 | Ca_kabuli_chr02    | 3915506                        | [A/T]       | 1067291572                                 |
| Ca_Kabuli_NC_021161.1_3915511 | Ca_kabuli_chr02    | 3915511                        | [T/C]       | 1067291573                                 |
| Ca_Kabuli_NC_021161.1_3915512 | Ca_kabuli_chr02    | 3915512                        | [A/G]       | 1067291574                                 |
| Ca_Kabuli_NC_021161.1_3915517 | Ca_kabuli_chr02    | 3915517                        | [T/C]       | 1067291575                                 |
| Ca_Kabuli_NC_021161.1_3915524 | Ca_kabuli_chr02    | 3915524                        | [A/G]       | 1067291576                                 |
| Ca_Kabuli_NC_021161.1_3930249 | Ca_kabuli_chr02    | 3930249                        | [T/C]       | 1067291577                                 |
| Ca_Kabuli_NC_021161.1_3930269 | Ca_kabuli_chr02    | 3930269                        | [T/A]       | 1067291578                                 |
| Ca_Kabuli_NC_021161.1_3930290 | Ca_kabuli_chr02    | 3930290                        | [A/G]       | 1067291579                                 |
| Ca_Kabuli_NC_021161.1_3941385 | Ca_kabuli_chr02    | 3941385                        | [A/T]       | 1067291580                                 |
| Ca_Kabuli_NC_021161.1_3941386 | Ca_kabuli_chr02    | 3941386                        | [G/A]       | 1067291581                                 |
| Ca_Kabuli_NC_021161.1_3941387 | Ca_kabuli_chr02    | 3941387                        | [T/G]       | 1067291582                                 |
| Ca_Kabuli_NC_021161.1_4360467 | Ca_kabuli_chr02    | 4360467                        | [A/G]       | 1067291583                                 |
| Ca_Kabuli_NC_021161.1_4360507 | Ca_kabuli_chr02    | 4360507                        | [T/G]       | 1067291584                                 |
| Ca_Kabuli_NC_021161.1_4433263 | Ca_kabuli_chr02    | 4433263                        | [T/C]       | 1067291585                                 |
| Ca_Kabuli_NC_021161.1_4433272 | Ca_kabuli_chr02    | 4433272                        | [A/C]       | 1067291586                                 |
| Ca_Kabuli_NC_021161.1_4433290 | Ca_kabuli_chr02    | 4433290                        | [T/C]       | 1067291587                                 |
| Ca_Kabuli_NC_021161.1_4576979 | Ca_kabuli_chr02    | 4576979                        | [A/T]       | 1067291588                                 |

| <b>SNP IDs</b>                | <b>Chromosomes</b> | <b>Physical positions (bp)</b> | <b>SNPs</b> | <b>NCBI SNPdb accession IDs (NCBI_ss#)</b> |
|-------------------------------|--------------------|--------------------------------|-------------|--------------------------------------------|
| Ca_Kabuli_NC_021161.1_4966188 | Ca_kabuli_chr02    | 4966188                        | [T/C]       | 1067291589                                 |
| Ca_Kabuli_NC_021161.1_4994596 | Ca_kabuli_chr02    | 4994596                        | [T/C]       | 1067291590                                 |
| Ca_Kabuli_NC_021161.1_4994635 | Ca_kabuli_chr02    | 4994635                        | [T/G]       | 1067291591                                 |
| Ca_Kabuli_NC_021161.1_5079638 | Ca_kabuli_chr02    | 5079638                        | [A/C]       | 1067291592                                 |
| Ca_Kabuli_NC_021161.1_5101163 | Ca_kabuli_chr02    | 5101163                        | [T/G]       | 1067291593                                 |
| Ca_Kabuli_NC_021161.1_5119812 | Ca_kabuli_chr02    | 5119812                        | [G/T]       | 1067291594                                 |
| Ca_Kabuli_NC_021161.1_5209689 | Ca_kabuli_chr02    | 5209689                        | [A/G]       | 1067291595                                 |
| Ca_Kabuli_NC_021161.1_5247387 | Ca_kabuli_chr02    | 5247387                        | [T/G]       | 1067291596                                 |
| Ca_Kabuli_NC_021161.1_5259270 | Ca_kabuli_chr02    | 5259270                        | [A/C]       | 1067291597                                 |
| Ca_Kabuli_NC_021161.1_5298384 | Ca_kabuli_chr02    | 5298384                        | [A/C]       | 1067291598                                 |
| Ca_Kabuli_NC_021161.1_5299261 | Ca_kabuli_chr02    | 5299261                        | [A/G]       | 1067291599                                 |
| Ca_Kabuli_NC_021161.1_5299270 | Ca_kabuli_chr02    | 5299270                        | [T/C]       | 1067291600                                 |
| Ca_Kabuli_NC_021161.1_5299272 | Ca_kabuli_chr02    | 5299272                        | [T/C]       | 1067291601                                 |
| Ca_Kabuli_NC_021161.1_5342942 | Ca_kabuli_chr02    | 5342942                        | [A/C]       | 1067291602                                 |
| Ca_Kabuli_NC_021161.1_5359143 | Ca_kabuli_chr02    | 5359143                        | [T/G]       | 1067291603                                 |
| Ca_Kabuli_NC_021161.1_5417026 | Ca_kabuli_chr02    | 5417026                        | [T/G]       | 1067291604                                 |
| Ca_Kabuli_NC_021161.1_5417046 | Ca_kabuli_chr02    | 5417046                        | [A/G]       | 1067291605                                 |
| Ca_Kabuli_NC_021161.1_5417051 | Ca_kabuli_chr02    | 5417051                        | [T/G]       | 1067291606                                 |
| Ca_Kabuli_NC_021161.1_5417088 | Ca_kabuli_chr02    | 5417088                        | [A/T]       | 1067291607                                 |
| Ca_Kabuli_NC_021161.1_5444255 | Ca_kabuli_chr02    | 5444255                        | [A/G]       | 1067291608                                 |
| Ca_Kabuli_NC_021161.1_5444287 | Ca_kabuli_chr02    | 5444287                        | [A/C]       | 1067291609                                 |
| Ca_Kabuli_NC_021161.1_5449788 | Ca_kabuli_chr02    | 5449788                        | [T/A]       | 1067291610                                 |
| Ca_Kabuli_NC_021161.1_5449794 | Ca_kabuli_chr02    | 5449794                        | [A/G]       | 1067291611                                 |
| Ca_Kabuli_NC_021161.1_5451160 | Ca_kabuli_chr02    | 5451160                        | [A/C]       | 1067291612                                 |
| Ca_Kabuli_NC_021161.1_5451165 | Ca_kabuli_chr02    | 5451165                        | [A/C]       | 1067291613                                 |
| Ca_Kabuli_NC_021161.1_5451190 | Ca_kabuli_chr02    | 5451190                        | [A/G]       | 1067291614                                 |
| Ca_Kabuli_NC_021161.1_5462998 | Ca_kabuli_chr02    | 5462998                        | [T/G]       | 1067291615                                 |
| Ca_Kabuli_NC_021161.1_5472554 | Ca_kabuli_chr02    | 5472554                        | [A/G]       | 1067291616                                 |
| Ca_Kabuli_NC_021161.1_5472556 | Ca_kabuli_chr02    | 5472556                        | [T/G]       | 1067291617                                 |
| Ca_Kabuli_NC_021161.1_5564516 | Ca_kabuli_chr02    | 5564516                        | [A/C]       | 1067291618                                 |
| Ca_Kabuli_NC_021161.1_5601080 | Ca_kabuli_chr02    | 5601080                        | [A/G]       | 1067291619                                 |
| Ca_Kabuli_NC_021161.1_5601093 | Ca_kabuli_chr02    | 5601093                        | [G/T]       | 1067291620                                 |
| Ca_Kabuli_NC_021161.1_5601099 | Ca_kabuli_chr02    | 5601099                        | [A/G]       | 1067291621                                 |
| Ca_Kabuli_NC_021161.1_5601105 | Ca_kabuli_chr02    | 5601105                        | [A/G]       | 1067291622                                 |

| <b>SNP IDs</b>                | <b>Chromosomes</b> | <b>Physical positions (bp)</b> | <b>SNPs</b> | <b>NCBI SNPdb accession IDs (NCBI_ss#)</b> |
|-------------------------------|--------------------|--------------------------------|-------------|--------------------------------------------|
| Ca_Kabuli_NC_021161.1_5627158 | Ca_kabuli_chr02    | 5627158                        | [G/T]       | 1067291623                                 |
| Ca_Kabuli_NC_021161.1_5661608 | Ca_kabuli_chr02    | 5661608                        | [T/C]       | 1067291624                                 |
| Ca_Kabuli_NC_021161.1_5661664 | Ca_kabuli_chr02    | 5661664                        | [T/C]       | 1067291625                                 |
| Ca_Kabuli_NC_021161.1_5829447 | Ca_kabuli_chr02    | 5829447                        | [T/C]       | 1067291626                                 |
| Ca_Kabuli_NC_021161.1_5829454 | Ca_kabuli_chr02    | 5829454                        | [A/C]       | 1067291627                                 |
| Ca_Kabuli_NC_021161.1_5866786 | Ca_kabuli_chr02    | 5866786                        | [T/C]       | 1067291628                                 |
| Ca_Kabuli_NC_021161.1_5866794 | Ca_kabuli_chr02    | 5866794                        | [C/A]       | 1067291629                                 |
| Ca_Kabuli_NC_021161.1_5866795 | Ca_kabuli_chr02    | 5866795                        | [A/G]       | 1067291630                                 |
| Ca_Kabuli_NC_021161.1_5938046 | Ca_kabuli_chr02    | 5938046                        | [A/G]       | 1067291631                                 |
| Ca_Kabuli_NC_021161.1_6052668 | Ca_kabuli_chr02    | 6052668                        | [A/C]       | 1067291632                                 |
| Ca_Kabuli_NC_021161.1_6054862 | Ca_kabuli_chr02    | 6054862                        | [A/G]       | 1067291633                                 |
| Ca_Kabuli_NC_021161.1_6054880 | Ca_kabuli_chr02    | 6054880                        | [A/G]       | 1067291634                                 |
| Ca_Kabuli_NC_021161.1_6054890 | Ca_kabuli_chr02    | 6054890                        | [T/C]       | 1067291635                                 |
| Ca_Kabuli_NC_021161.1_6130262 | Ca_kabuli_chr02    | 6130262                        | [A/G]       | 1067291636                                 |
| Ca_Kabuli_NC_021161.1_6130275 | Ca_kabuli_chr02    | 6130275                        | [T/G]       | 1067291637                                 |
| Ca_Kabuli_NC_021161.1_6130277 | Ca_kabuli_chr02    | 6130277                        | [A/T]       | 1067291638                                 |
| Ca_Kabuli_NC_021161.1_6130289 | Ca_kabuli_chr02    | 6130289                        | [A/G]       | 1067291639                                 |
| Ca_Kabuli_NC_021161.1_6130302 | Ca_kabuli_chr02    | 6130302                        | [T/A]       | 1067291640                                 |
| Ca_Kabuli_NC_021161.1_6162613 | Ca_kabuli_chr02    | 6162613                        | [A/C]       | 1067291641                                 |
| Ca_Kabuli_NC_021161.1_6246589 | Ca_kabuli_chr02    | 6246589                        | [A/G]       | 1067291642                                 |
| Ca_Kabuli_NC_021161.1_6256294 | Ca_kabuli_chr02    | 6256294                        | [T/C]       | 1067291643                                 |
| Ca_Kabuli_NC_021161.1_6257163 | Ca_kabuli_chr02    | 6257163                        | [T/G]       | 1067291644                                 |
| Ca_Kabuli_NC_021161.1_6321964 | Ca_kabuli_chr02    | 6321964                        | [G/A]       | 1067291645                                 |
| Ca_Kabuli_NC_021161.1_6367684 | Ca_kabuli_chr02    | 6367684                        | [T/G]       | 1067291646                                 |
| Ca_Kabuli_NC_021161.1_6367704 | Ca_kabuli_chr02    | 6367704                        | [A/C]       | 1067291647                                 |
| Ca_Kabuli_NC_021161.1_6392257 | Ca_kabuli_chr02    | 6392257                        | [T/C]       | 1067291648                                 |
| Ca_Kabuli_NC_021161.1_6392296 | Ca_kabuli_chr02    | 6392296                        | [T/C]       | 1067291649                                 |
| Ca_Kabuli_NC_021161.1_6396845 | Ca_kabuli_chr02    | 6396845                        | [T/C]       | 1067291650                                 |
| Ca_Kabuli_NC_021161.1_6396873 | Ca_kabuli_chr02    | 6396873                        | [A/G]       | 1067291651                                 |
| Ca_Kabuli_NC_021161.1_6396886 | Ca_kabuli_chr02    | 6396886                        | [A/G]       | 1067291652                                 |
| Ca_Kabuli_NC_021161.1_6397711 | Ca_kabuli_chr02    | 6397711                        | [T/G]       | 1067291653                                 |
| Ca_Kabuli_NC_021161.1_6408374 | Ca_kabuli_chr02    | 6408374                        | [C/G]       | 1067291654                                 |
| Ca_Kabuli_NC_021161.1_6408390 | Ca_kabuli_chr02    | 6408390                        | [T/A]       | 1067291655                                 |
| Ca_Kabuli_NC_021161.1_6412020 | Ca_kabuli_chr02    | 6412020                        | [C/T]       | 1067291656                                 |

| <b>SNP IDs</b>                | <b>Chromosomes</b> | <b>Physical positions (bp)</b> | <b>SNPs</b> | <b>NCBI SNPdb accession IDs (NCBI_ss#)</b> |
|-------------------------------|--------------------|--------------------------------|-------------|--------------------------------------------|
| Ca_Kabuli_NC_021161.1_6412028 | Ca_kabuli_chr02    | 6412028                        | [A/G]       | 1067291657                                 |
| Ca_Kabuli_NC_021161.1_6728716 | Ca_kabuli_chr02    | 6728716                        | [A/T]       | 1067291658                                 |
| Ca_Kabuli_NC_021161.1_6750401 | Ca_kabuli_chr02    | 6750401                        | [T/G]       | 1067291659                                 |
| Ca_Kabuli_NC_021161.1_6750409 | Ca_kabuli_chr02    | 6750409                        | [T/A]       | 1067291660                                 |
| Ca_Kabuli_NC_021161.1_6750412 | Ca_kabuli_chr02    | 6750412                        | [A/C]       | 1067291661                                 |
| Ca_Kabuli_NC_021161.1_6750437 | Ca_kabuli_chr02    | 6750437                        | [A/G]       | 1067291662                                 |
| Ca_Kabuli_NC_021161.1_6936812 | Ca_kabuli_chr02    | 6936812                        | [A/G]       | 1067291663                                 |
| Ca_Kabuli_NC_021161.1_6936821 | Ca_kabuli_chr02    | 6936821                        | [T/C]       | 1067291664                                 |
| Ca_Kabuli_NC_021161.1_6936827 | Ca_kabuli_chr02    | 6936827                        | [T/C]       | 1067291665                                 |
| Ca_Kabuli_NC_021161.1_7046939 | Ca_kabuli_chr02    | 7046939                        | [T/A]       | 1067291666                                 |
| Ca_Kabuli_NC_021161.1_7046942 | Ca_kabuli_chr02    | 7046942                        | [T/C]       | 1067291667                                 |
| Ca_Kabuli_NC_021161.1_7047004 | Ca_kabuli_chr02    | 7047004                        | [T/G]       | 1067291668                                 |
| Ca_Kabuli_NC_021161.1_7047015 | Ca_kabuli_chr02    | 7047015                        | [C/G]       | 1067291669                                 |
| Ca_Kabuli_NC_021161.1_7047141 | Ca_kabuli_chr02    | 7047141                        | [A/G]       | 1067291670                                 |
| Ca_Kabuli_NC_021161.1_7047143 | Ca_kabuli_chr02    | 7047143                        | [T/A]       | 1067291671                                 |
| Ca_Kabuli_NC_021161.1_7047182 | Ca_kabuli_chr02    | 7047182                        | [A/C]       | 1067291672                                 |
| Ca_Kabuli_NC_021161.1_7047186 | Ca_kabuli_chr02    | 7047186                        | [A/C]       | 1067291673                                 |
| Ca_Kabuli_NC_021161.1_7047212 | Ca_kabuli_chr02    | 7047212                        | [A/C]       | 1067291674                                 |
| Ca_Kabuli_NC_021161.1_7051422 | Ca_kabuli_chr02    | 7051422                        | [A/G]       | 1067291675                                 |
| Ca_Kabuli_NC_021161.1_7051424 | Ca_kabuli_chr02    | 7051424                        | [G/A]       | 1067291676                                 |
| Ca_Kabuli_NC_021161.1_7051426 | Ca_kabuli_chr02    | 7051426                        | [A/C]       | 1067291677                                 |
| Ca_Kabuli_NC_021161.1_7051427 | Ca_kabuli_chr02    | 7051427                        | [C/G]       | 1067291678                                 |
| Ca_Kabuli_NC_021161.1_7083705 | Ca_kabuli_chr02    | 7083705                        | [T/C]       | 1067291679                                 |
| Ca_Kabuli_NC_021161.1_7125951 | Ca_kabuli_chr02    | 7125951                        | [T/G]       | 1067291680                                 |
| Ca_Kabuli_NC_021161.1_7125959 | Ca_kabuli_chr02    | 7125959                        | [C/A]       | 1067291681                                 |
| Ca_Kabuli_NC_021161.1_7125970 | Ca_kabuli_chr02    | 7125970                        | [G/A]       | 1067291682                                 |
| Ca_Kabuli_NC_021161.1_7125992 | Ca_kabuli_chr02    | 7125992                        | [T/G]       | 1067291683                                 |
| Ca_Kabuli_NC_021161.1_7126029 | Ca_kabuli_chr02    | 7126029                        | [A/C]       | 1067291684                                 |
| Ca_Kabuli_NC_021161.1_7126046 | Ca_kabuli_chr02    | 7126046                        | [A/C]       | 1067291685                                 |
| Ca_Kabuli_NC_021161.1_7570375 | Ca_kabuli_chr02    | 7570375                        | [T/G]       | 1067291686                                 |
| Ca_Kabuli_NC_021161.1_7570376 | Ca_kabuli_chr02    | 7570376                        | [T/G]       | 1067291687                                 |
| Ca_Kabuli_NC_021161.1_7570377 | Ca_kabuli_chr02    | 7570377                        | [G/T]       | 1067291688                                 |
| Ca_Kabuli_NC_021161.1_7570378 | Ca_kabuli_chr02    | 7570378                        | [G/A]       | 1067291689                                 |
| Ca_Kabuli_NC_021161.1_7570379 | Ca_kabuli_chr02    | 7570379                        | [A/G]       | 1067291690                                 |

| <b>SNP IDs</b>                | <b>Chromosomes</b> | <b>Physical positions (bp)</b> | <b>SNPs</b> | <b>NCBI SNPdb accession IDs (NCBI_ss#)</b> |
|-------------------------------|--------------------|--------------------------------|-------------|--------------------------------------------|
| Ca_Kabuli_NC_021161.1_7616802 | Ca_kabuli_chr02    | 7616802                        | [G/A]       | 1067291691                                 |
| Ca_Kabuli_NC_021161.1_7616806 | Ca_kabuli_chr02    | 7616806                        | [T/G]       | 1067291692                                 |
| Ca_Kabuli_NC_021161.1_7616890 | Ca_kabuli_chr02    | 7616890                        | [T/G]       | 1067291693                                 |
| Ca_Kabuli_NC_021161.1_7668523 | Ca_kabuli_chr02    | 7668523                        | [A/C]       | 1067291694                                 |
| Ca_Kabuli_NC_021161.1_7679627 | Ca_kabuli_chr02    | 7679627                        | [A/T]       | 1067291695                                 |
| Ca_Kabuli_NC_021161.1_7679693 | Ca_kabuli_chr02    | 7679693                        | [C/G]       | 1067291696                                 |
| Ca_Kabuli_NC_021161.1_7701199 | Ca_kabuli_chr02    | 7701199                        | [T/G]       | 1067291697                                 |
| Ca_Kabuli_NC_021161.1_7701201 | Ca_kabuli_chr02    | 7701201                        | [T/G]       | 1067291698                                 |
| Ca_Kabuli_NC_021161.1_7701203 | Ca_kabuli_chr02    | 7701203                        | [T/G]       | 1067291699                                 |
| Ca_Kabuli_NC_021161.1_7701206 | Ca_kabuli_chr02    | 7701206                        | [T/A]       | 1067291700                                 |
| Ca_Kabuli_NC_021161.1_7701208 | Ca_kabuli_chr02    | 7701208                        | [A/T]       | 1067291701                                 |
| Ca_Kabuli_NC_021161.1_7701216 | Ca_kabuli_chr02    | 7701216                        | [T/G]       | 1067291702                                 |
| Ca_Kabuli_NC_021161.1_7711924 | Ca_kabuli_chr02    | 7711924                        | [T/A]       | 1067291703                                 |
| Ca_Kabuli_NC_021161.1_7712233 | Ca_kabuli_chr02    | 7712233                        | [T/G]       | 1067291704                                 |
| Ca_Kabuli_NC_021161.1_7712249 | Ca_kabuli_chr02    | 7712249                        | [T/G]       | 1067291705                                 |
| Ca_Kabuli_NC_021161.1_7714220 | Ca_kabuli_chr02    | 7714220                        | [G/A]       | 1067291706                                 |
| Ca_Kabuli_NC_021161.1_7714332 | Ca_kabuli_chr02    | 7714332                        | [A/T]       | 1067291707                                 |
| Ca_Kabuli_NC_021161.1_7714392 | Ca_kabuli_chr02    | 7714392                        | [G/A]       | 1067291708                                 |
| Ca_Kabuli_NC_021161.1_7715048 | Ca_kabuli_chr02    | 7715048                        | [C/T]       | 1067291709                                 |
| Ca_Kabuli_NC_021161.1_7715055 | Ca_kabuli_chr02    | 7715055                        | [T/C]       | 1067291710                                 |
| Ca_Kabuli_NC_021161.1_7715065 | Ca_kabuli_chr02    | 7715065                        | [C/T]       | 1067291711                                 |
| Ca_Kabuli_NC_021161.1_7715074 | Ca_kabuli_chr02    | 7715074                        | [T/A]       | 1067291712                                 |
| Ca_Kabuli_NC_021161.1_7753419 | Ca_kabuli_chr02    | 7753419                        | [G/C]       | 1067291713                                 |
| Ca_Kabuli_NC_021161.1_7753425 | Ca_kabuli_chr02    | 7753425                        | [T/C]       | 1067291714                                 |
| Ca_Kabuli_NC_021161.1_7753440 | Ca_kabuli_chr02    | 7753440                        | [C/T]       | 1067291715                                 |
| Ca_Kabuli_NC_021161.1_7753668 | Ca_kabuli_chr02    | 7753668                        | [A/T]       | 1067291716                                 |
| Ca_Kabuli_NC_021161.1_7852704 | Ca_kabuli_chr02    | 7852704                        | [T/C]       | 1067291717                                 |
| Ca_Kabuli_NC_021161.1_7852705 | Ca_kabuli_chr02    | 7852705                        | [A/G]       | 1067291718                                 |
| Ca_Kabuli_NC_021161.1_7852713 | Ca_kabuli_chr02    | 7852713                        | [G/A]       | 1067291719                                 |
| Ca_Kabuli_NC_021161.1_7861570 | Ca_kabuli_chr02    | 7861570                        | [A/C]       | 1067291720                                 |
| Ca_Kabuli_NC_021161.1_7870840 | Ca_kabuli_chr02    | 7870840                        | [A/T]       | 1067291721                                 |
| Ca_Kabuli_NC_021161.1_7870843 | Ca_kabuli_chr02    | 7870843                        | [A/C]       | 1067291722                                 |
| Ca_Kabuli_NC_021161.1_7870943 | Ca_kabuli_chr02    | 7870943                        | [T/G]       | 1067291723                                 |
| Ca_Kabuli_NC_021161.1_7871084 | Ca_kabuli_chr02    | 7871084                        | [T/A]       | 1067291724                                 |

| <b>SNP IDs</b>                 | <b>Chromosomes</b> | <b>Physical positions (bp)</b> | <b>SNPs</b> | <b>NCBI SNPdb accession IDs (NCBI_ss#)</b> |
|--------------------------------|--------------------|--------------------------------|-------------|--------------------------------------------|
| Ca_Kabuli_NC_021161.1_7871118  | Ca_kabuli_chr02    | 7871118                        | [A/G]       | 1067291725                                 |
| Ca_Kabuli_NC_021161.1_7872709  | Ca_kabuli_chr02    | 7872709                        | [A/C]       | 1067291726                                 |
| Ca_Kabuli_NC_021161.1_7872719  | Ca_kabuli_chr02    | 7872719                        | [A/C]       | 1067291727                                 |
| Ca_Kabuli_NC_021161.1_8200027  | Ca_kabuli_chr02    | 8200027                        | [A/G]       | 1067291728                                 |
| Ca_Kabuli_NC_021161.1_8201025  | Ca_kabuli_chr02    | 8201025                        | [A/C]       | 1067291729                                 |
| Ca_Kabuli_NC_021161.1_8261979  | Ca_kabuli_chr02    | 8261979                        | [T/A]       | 1067291730                                 |
| Ca_Kabuli_NC_021161.1_8261989  | Ca_kabuli_chr02    | 8261989                        | [T/G]       | 1067291731                                 |
| Ca_Kabuli_NC_021161.1_8337534  | Ca_kabuli_chr02    | 8337534                        | [A/C]       | 1067291732                                 |
| Ca_Kabuli_NC_021161.1_8360347  | Ca_kabuli_chr02    | 8360347                        | [T/A]       | 1067291733                                 |
| Ca_Kabuli_NC_021161.1_8360348  | Ca_kabuli_chr02    | 8360348                        | [C/A]       | 1067291734                                 |
| Ca_Kabuli_NC_021161.1_8360349  | Ca_kabuli_chr02    | 8360349                        | [T/G]       | 1067291735                                 |
| Ca_Kabuli_NC_021161.1_8375893  | Ca_kabuli_chr02    | 8375893                        | [T/C]       | 1067291736                                 |
| Ca_Kabuli_NC_021161.1_8375895  | Ca_kabuli_chr02    | 8375895                        | [A/G]       | 1067291737                                 |
| Ca_Kabuli_NC_021161.1_8516215  | Ca_kabuli_chr02    | 8516215                        | [T/A]       | 1067291738                                 |
| Ca_Kabuli_NC_021161.1_8516235  | Ca_kabuli_chr02    | 8516235                        | [A/C]       | 1067291739                                 |
| Ca_Kabuli_NC_021161.1_8516269  | Ca_kabuli_chr02    | 8516269                        | [A/G]       | 1067291740                                 |
| Ca_Kabuli_NC_021161.1_8516291  | Ca_kabuli_chr02    | 8516291                        | [T/G]       | 1067291741                                 |
| Ca_Kabuli_NC_021161.1_8600511  | Ca_kabuli_chr02    | 8600511                        | [A/T]       | 1067291742                                 |
| Ca_Kabuli_NC_021161.1_8634831  | Ca_kabuli_chr02    | 8634831                        | [A/G]       | 1067291743                                 |
| Ca_Kabuli_NC_021161.1_8733429  | Ca_kabuli_chr02    | 8733429                        | [A/T]       | 1067291744                                 |
| Ca_Kabuli_NC_021161.1_8782786  | Ca_kabuli_chr02    | 8782786                        | [T/C]       | 1067291745                                 |
| Ca_Kabuli_NC_021161.1_8782791  | Ca_kabuli_chr02    | 8782791                        | [T/C]       | 1067291746                                 |
| Ca_Kabuli_NC_021161.1_8802121  | Ca_kabuli_chr02    | 8802121                        | [T/C]       | 1067291747                                 |
| Ca_Kabuli_NC_021161.1_9459001  | Ca_kabuli_chr02    | 9459001                        | [T/G]       | 1067291748                                 |
| Ca_Kabuli_NC_021161.1_9598708  | Ca_kabuli_chr02    | 9598708                        | [A/C]       | 1067291749                                 |
| Ca_Kabuli_NC_021161.1_9621950  | Ca_kabuli_chr02    | 9621950                        | [A/C]       | 1067291750                                 |
| Ca_Kabuli_NC_021161.1_9621953  | Ca_kabuli_chr02    | 9621953                        | [A/C]       | 1067291751                                 |
| Ca_Kabuli_NC_021161.1_9621986  | Ca_kabuli_chr02    | 9621986                        | [T/G]       | 1067291752                                 |
| Ca_Kabuli_NC_021161.1_9756907  | Ca_kabuli_chr02    | 9756907                        | [G/T]       | 1067291753                                 |
| Ca_Kabuli_NC_021161.1_9756955  | Ca_kabuli_chr02    | 9756955                        | [G/A]       | 1067291754                                 |
| Ca_Kabuli_NC_021161.1_9857985  | Ca_kabuli_chr02    | 9857985                        | [T/G]       | 1067291755                                 |
| Ca_Kabuli_NC_021161.1_9906081  | Ca_kabuli_chr02    | 9906081                        | [T/G]       | 1067291756                                 |
| Ca_Kabuli_NC_021161.1_9986816  | Ca_kabuli_chr02    | 9986816                        | [T/G]       | 1067291757                                 |
| Ca_Kabuli_NC_021161.1_10023259 | Ca_kabuli_chr02    | 10023259                       | [T/G]       | 1067291758                                 |



| <b>SNP IDs</b>                 | <b>Chromosomes</b> | <b>Physical positions (bp)</b> | <b>SNPs</b> | <b>NCBI SNPdb accession IDs (NCBI_ss#)</b> |
|--------------------------------|--------------------|--------------------------------|-------------|--------------------------------------------|
| Ca_Kabuli_NC_021161.1_10033970 | Ca_kabuli_chr02    | 10033970                       | [T/G]       | 1067291759                                 |
| Ca_Kabuli_NC_021161.1_10049340 | Ca_kabuli_chr02    | 10049340                       | [G/T]       | 1067291760                                 |
| Ca_Kabuli_NC_021161.1_10067451 | Ca_kabuli_chr02    | 10067451                       | [A/G]       | 1067291761                                 |
| Ca_Kabuli_NC_021161.1_10068454 | Ca_kabuli_chr02    | 10068454                       | [C/A]       | 1067291762                                 |
| Ca_Kabuli_NC_021161.1_10068455 | Ca_kabuli_chr02    | 10068455                       | [T/G]       | 1067291763                                 |
| Ca_Kabuli_NC_021161.1_10434697 | Ca_kabuli_chr02    | 10434697                       | [T/G]       | 1067291764                                 |
| Ca_Kabuli_NC_021161.1_10637651 | Ca_kabuli_chr02    | 10637651                       | [A/C]       | 1067291765                                 |
| Ca_Kabuli_NC_021161.1_10761032 | Ca_kabuli_chr02    | 10761032                       | [A/G]       | 1067291766                                 |
| Ca_Kabuli_NC_021161.1_10863335 | Ca_kabuli_chr02    | 10863335                       | [T/C]       | 1067291767                                 |
| Ca_Kabuli_NC_021161.1_10863413 | Ca_kabuli_chr02    | 10863413                       | [A/C]       | 1067291768                                 |
| Ca_Kabuli_NC_021161.1_10943245 | Ca_kabuli_chr02    | 10943245                       | [A/C]       | 1067291769                                 |
| Ca_Kabuli_NC_021161.1_10943421 | Ca_kabuli_chr02    | 10943421                       | [A/T]       | 1067291770                                 |
| Ca_Kabuli_NC_021161.1_11018696 | Ca_kabuli_chr02    | 11018696                       | [T/C]       | 1067291771                                 |
| Ca_Kabuli_NC_021161.1_11121406 | Ca_kabuli_chr02    | 11121406                       | [T/G]       | 1067291772                                 |
| Ca_Kabuli_NC_021161.1_11121441 | Ca_kabuli_chr02    | 11121441                       | [A/C]       | 1067291773                                 |
| Ca_Kabuli_NC_021161.1_11246842 | Ca_kabuli_chr02    | 11246842                       | [G/A]       | 1067291774                                 |
| Ca_Kabuli_NC_021161.1_11353931 | Ca_kabuli_chr02    | 11353931                       | [T/C]       | 1067291775                                 |
| Ca_Kabuli_NC_021161.1_11353934 | Ca_kabuli_chr02    | 11353934                       | [A/T]       | 1067291776                                 |
| Ca_Kabuli_NC_021161.1_11441401 | Ca_kabuli_chr02    | 11441401                       | [T/C]       | 1067291777                                 |
| Ca_Kabuli_NC_021161.1_11441435 | Ca_kabuli_chr02    | 11441435                       | [A/G]       | 1067291778                                 |
| Ca_Kabuli_NC_021161.1_11456773 | Ca_kabuli_chr02    | 11456773                       | [A/C]       | 1067291779                                 |
| Ca_Kabuli_NC_021161.1_11456976 | Ca_kabuli_chr02    | 11456976                       | [T/A]       | 1067291780                                 |
| Ca_Kabuli_NC_021161.1_11456995 | Ca_kabuli_chr02    | 11456995                       | [T/G]       | 1067291781                                 |
| Ca_Kabuli_NC_021161.1_11457021 | Ca_kabuli_chr02    | 11457021                       | [T/C]       | 1067291782                                 |
| Ca_Kabuli_NC_021161.1_11682390 | Ca_kabuli_chr02    | 11682390                       | [T/C]       | 1067291783                                 |
| Ca_Kabuli_NC_021161.1_11682433 | Ca_kabuli_chr02    | 11682433                       | [A/G]       | 1067291784                                 |
| Ca_Kabuli_NC_021161.1_11922886 | Ca_kabuli_chr02    | 11922886                       | [T/C]       | 1067291785                                 |
| Ca_Kabuli_NC_021161.1_11922903 | Ca_kabuli_chr02    | 11922903                       | [C/G]       | 1067291786                                 |
| Ca_Kabuli_NC_021161.1_11922922 | Ca_kabuli_chr02    | 11922922                       | [A/G]       | 1067291787                                 |
| Ca_Kabuli_NC_021161.1_12006214 | Ca_kabuli_chr02    | 12006214                       | [A/C]       | 1067291788                                 |
| Ca_Kabuli_NC_021161.1_12006236 | Ca_kabuli_chr02    | 12006236                       | [T/A]       | 1067291789                                 |
| Ca_Kabuli_NC_021161.1_12006243 | Ca_kabuli_chr02    | 12006243                       | [A/C]       | 1067291790                                 |
| Ca_Kabuli_NC_021161.1_12006260 | Ca_kabuli_chr02    | 12006260                       | [T/A]       | 1067291791                                 |
| Ca_Kabuli_NC_021161.1_12154019 | Ca_kabuli_chr02    | 12154019                       | [T/G]       | 1067291792                                 |

| <b>SNP IDs</b>                 | <b>Chromosomes</b> | <b>Physical positions (bp)</b> | <b>SNPs</b> | <b>NCBI SNPdb accession IDs (NCBI_ss#)</b> |
|--------------------------------|--------------------|--------------------------------|-------------|--------------------------------------------|
| Ca_Kabuli_NC_021161.1_12154074 | Ca_kabuli_chr02    | 12154074                       | [A/C]       | 1067291793                                 |
| Ca_Kabuli_NC_021161.1_12274519 | Ca_kabuli_chr02    | 12274519                       | [T/C]       | 1067291794                                 |
| Ca_Kabuli_NC_021161.1_12278521 | Ca_kabuli_chr02    | 12278521                       | [A/T]       | 1067291795                                 |
| Ca_Kabuli_NC_021161.1_12298536 | Ca_kabuli_chr02    | 12298536                       | [T/A]       | 1067291796                                 |
| Ca_Kabuli_NC_021161.1_12515511 | Ca_kabuli_chr02    | 12515511                       | [T/G]       | 1067291797                                 |
| Ca_Kabuli_NC_021161.1_12517618 | Ca_kabuli_chr02    | 12517618                       | [A/G]       | 1067291798                                 |
| Ca_Kabuli_NC_021161.1_12517629 | Ca_kabuli_chr02    | 12517629                       | [A/G]       | 1067291799                                 |
| Ca_Kabuli_NC_021161.1_12517654 | Ca_kabuli_chr02    | 12517654                       | [A/G]       | 1067291800                                 |
| Ca_Kabuli_NC_021161.1_12517665 | Ca_kabuli_chr02    | 12517665                       | [A/G]       | 1067291801                                 |
| Ca_Kabuli_NC_021161.1_12517674 | Ca_kabuli_chr02    | 12517674                       | [A/G]       | 1067291802                                 |
| Ca_Kabuli_NC_021161.1_12518273 | Ca_kabuli_chr02    | 12518273                       | [T/G]       | 1067291803                                 |
| Ca_Kabuli_NC_021161.1_12519390 | Ca_kabuli_chr02    | 12519390                       | [T/C]       | 1067291804                                 |
| Ca_Kabuli_NC_021161.1_12519400 | Ca_kabuli_chr02    | 12519400                       | [A/C]       | 1067291805                                 |
| Ca_Kabuli_NC_021161.1_12519406 | Ca_kabuli_chr02    | 12519406                       | [A/G]       | 1067291806                                 |
| Ca_Kabuli_NC_021161.1_12519410 | Ca_kabuli_chr02    | 12519410                       | [A/G]       | 1067291807                                 |
| Ca_Kabuli_NC_021161.1_12519430 | Ca_kabuli_chr02    | 12519430                       | [T/A]       | 1067291808                                 |
| Ca_Kabuli_NC_021161.1_12737860 | Ca_kabuli_chr02    | 12737860                       | [A/C]       | 1067291809                                 |
| Ca_Kabuli_NC_021161.1_12792699 | Ca_kabuli_chr02    | 12792699                       | [T/G]       | 1067291810                                 |
| Ca_Kabuli_NC_021161.1_12792706 | Ca_kabuli_chr02    | 12792706                       | [T/C]       | 1067291811                                 |
| Ca_Kabuli_NC_021161.1_12794446 | Ca_kabuli_chr02    | 12794446                       | [T/A]       | 1067291812                                 |
| Ca_Kabuli_NC_021161.1_12862857 | Ca_kabuli_chr02    | 12862857                       | [T/C]       | 1067291813                                 |
| Ca_Kabuli_NC_021161.1_13079528 | Ca_kabuli_chr02    | 13079528                       | [T/A]       | 1067291814                                 |
| Ca_Kabuli_NC_021161.1_13135203 | Ca_kabuli_chr02    | 13135203                       | [T/A]       | 1067291815                                 |
| Ca_Kabuli_NC_021161.1_13135230 | Ca_kabuli_chr02    | 13135230                       | [A/G]       | 1067291816                                 |
| Ca_Kabuli_NC_021161.1_13136109 | Ca_kabuli_chr02    | 13136109                       | [T/C]       | 1067291817                                 |
| Ca_Kabuli_NC_021161.1_13217756 | Ca_kabuli_chr02    | 13217756                       | [A/G]       | 1067291818                                 |
| Ca_Kabuli_NC_021161.1_13217758 | Ca_kabuli_chr02    | 13217758                       | [T/C]       | 1067291819                                 |
| Ca_Kabuli_NC_021161.1_13217809 | Ca_kabuli_chr02    | 13217809                       | [T/C]       | 1067291820                                 |
| Ca_Kabuli_NC_021161.1_13217903 | Ca_kabuli_chr02    | 13217903                       | [A/C]       | 1067291821                                 |
| Ca_Kabuli_NC_021161.1_13217904 | Ca_kabuli_chr02    | 13217904                       | [G/T]       | 1067291822                                 |
| Ca_Kabuli_NC_021161.1_13217905 | Ca_kabuli_chr02    | 13217905                       | [A/C]       | 1067291823                                 |
| Ca_Kabuli_NC_021161.1_13217906 | Ca_kabuli_chr02    | 13217906                       | [T/C]       | 1067291824                                 |
| Ca_Kabuli_NC_021161.1_13297592 | Ca_kabuli_chr02    | 13297592                       | [T/G]       | 1067291825                                 |
| Ca_Kabuli_NC_021161.1_13297594 | Ca_kabuli_chr02    | 13297594                       | [T/G]       | 1067291826                                 |

| <b>SNP IDs</b>                 | <b>Chromosomes</b> | <b>Physical positions (bp)</b> | <b>SNPs</b> | <b>NCBI SNPdb accession IDs (NCBI_ss#)</b> |
|--------------------------------|--------------------|--------------------------------|-------------|--------------------------------------------|
| Ca_Kabuli_NC_021161.1_13297596 | Ca_kabuli_chr02    | 13297596                       | [G/A]       | 1067291827                                 |
| Ca_Kabuli_NC_021161.1_13297600 | Ca_kabuli_chr02    | 13297600                       | [C/T]       | 1067291828                                 |
| Ca_Kabuli_NC_021161.1_13297603 | Ca_kabuli_chr02    | 13297603                       | [A/G]       | 1067291829                                 |
| Ca_Kabuli_NC_021161.1_13354975 | Ca_kabuli_chr02    | 13354975                       | [T/G]       | 1067291830                                 |
| Ca_Kabuli_NC_021161.1_13355140 | Ca_kabuli_chr02    | 13355140                       | [C/A]       | 1067291831                                 |
| Ca_Kabuli_NC_021161.1_13355647 | Ca_kabuli_chr02    | 13355647                       | [A/C]       | 1067291832                                 |
| Ca_Kabuli_NC_021161.1_13355677 | Ca_kabuli_chr02    | 13355677                       | [T/C]       | 1067291833                                 |
| Ca_Kabuli_NC_021161.1_13411523 | Ca_kabuli_chr02    | 13411523                       | [A/C]       | 1067291834                                 |
| Ca_Kabuli_NC_021161.1_13411540 | Ca_kabuli_chr02    | 13411540                       | [T/G]       | 1067291835                                 |
| Ca_Kabuli_NC_021161.1_13411543 | Ca_kabuli_chr02    | 13411543                       | [T/G]       | 1067291836                                 |
| Ca_Kabuli_NC_021161.1_13435061 | Ca_kabuli_chr02    | 13435061                       | [A/T]       | 1067291837                                 |
| Ca_Kabuli_NC_021161.1_13529048 | Ca_kabuli_chr02    | 13529048                       | [A/G]       | 1067291838                                 |
| Ca_Kabuli_NC_021161.1_13529086 | Ca_kabuli_chr02    | 13529086                       | [T/C]       | 1067291839                                 |
| Ca_Kabuli_NC_021161.1_13539273 | Ca_kabuli_chr02    | 13539273                       | [C/A]       | 1067291840                                 |
| Ca_Kabuli_NC_021161.1_13541139 | Ca_kabuli_chr02    | 13541139                       | [T/G]       | 1067291841                                 |
| Ca_Kabuli_NC_021161.1_13541148 | Ca_kabuli_chr02    | 13541148                       | [G/T]       | 1067291842                                 |
| Ca_Kabuli_NC_021161.1_13541156 | Ca_kabuli_chr02    | 13541156                       | [A/G]       | 1067291843                                 |
| Ca_Kabuli_NC_021161.1_13541171 | Ca_kabuli_chr02    | 13541171                       | [A/G]       | 1067291844                                 |
| Ca_Kabuli_NC_021161.1_13541195 | Ca_kabuli_chr02    | 13541195                       | [A/T]       | 1067291845                                 |
| Ca_Kabuli_NC_021161.1_13632204 | Ca_kabuli_chr02    | 13632204                       | [T/G]       | 1067291846                                 |
| Ca_Kabuli_NC_021161.1_13632221 | Ca_kabuli_chr02    | 13632221                       | [T/G]       | 1067291847                                 |
| Ca_Kabuli_NC_021161.1_13756720 | Ca_kabuli_chr02    | 13756720                       | [A/G]       | 1067291848                                 |
| Ca_Kabuli_NC_021161.1_13923504 | Ca_kabuli_chr02    | 13923504                       | [A/G]       | 1067291849                                 |
| Ca_Kabuli_NC_021161.1_13946495 | Ca_kabuli_chr02    | 13946495                       | [A/G]       | 1067291850                                 |
| Ca_Kabuli_NC_021161.1_14005994 | Ca_kabuli_chr02    | 14005994                       | [T/C]       | 1067291851                                 |
| Ca_Kabuli_NC_021161.1_14006013 | Ca_kabuli_chr02    | 14006013                       | [A/G]       | 1067291852                                 |
| Ca_Kabuli_NC_021161.1_14006027 | Ca_kabuli_chr02    | 14006027                       | [A/G]       | 1067291853                                 |
| Ca_Kabuli_NC_021161.1_14101836 | Ca_kabuli_chr02    | 14101836                       | [A/T]       | 1067291854                                 |
| Ca_Kabuli_NC_021161.1_14134347 | Ca_kabuli_chr02    | 14134347                       | [G/T]       | 1067291855                                 |
| Ca_Kabuli_NC_021161.1_14134364 | Ca_kabuli_chr02    | 14134364                       | [A/G]       | 1067291856                                 |
| Ca_Kabuli_NC_021161.1_14134371 | Ca_kabuli_chr02    | 14134371                       | [A/C]       | 1067291857                                 |
| Ca_Kabuli_NC_021161.1_14134676 | Ca_kabuli_chr02    | 14134676                       | [T/C]       | 1067291858                                 |
| Ca_Kabuli_NC_021161.1_14134681 | Ca_kabuli_chr02    | 14134681                       | [C/A]       | 1067291859                                 |
| Ca_Kabuli_NC_021161.1_14134712 | Ca_kabuli_chr02    | 14134712                       | [A/G]       | 1067291860                                 |

| <b>SNP IDs</b>                 | <b>Chromosomes</b> | <b>Physical positions (bp)</b> | <b>SNPs</b> | <b>NCBI SNPdb accession IDs (NCBI_ss#)</b> |
|--------------------------------|--------------------|--------------------------------|-------------|--------------------------------------------|
| Ca_Kabuli_NC_021161.1_14134719 | Ca_kabuli_chr02    | 14134719                       | [A/G]       | 1067291861                                 |
| Ca_Kabuli_NC_021161.1_14136036 | Ca_kabuli_chr02    | 14136036                       | [A/C]       | 1067291862                                 |
| Ca_Kabuli_NC_021161.1_14136050 | Ca_kabuli_chr02    | 14136050                       | [T/C]       | 1067291863                                 |
| Ca_Kabuli_NC_021161.1_14136061 | Ca_kabuli_chr02    | 14136061                       | [A/C]       | 1067291864                                 |
| Ca_Kabuli_NC_021161.1_14136223 | Ca_kabuli_chr02    | 14136223                       | [A/C]       | 1067291865                                 |
| Ca_Kabuli_NC_021161.1_14136229 | Ca_kabuli_chr02    | 14136229                       | [A/C]       | 1067291866                                 |
| Ca_Kabuli_NC_021161.1_14188615 | Ca_kabuli_chr02    | 14188615                       | [T/G]       | 1067291867                                 |
| Ca_Kabuli_NC_021161.1_15201537 | Ca_kabuli_chr02    | 15201537                       | [G/T]       | 1067291868                                 |
| Ca_Kabuli_NC_021161.1_15363526 | Ca_kabuli_chr02    | 15363526                       | [G/A]       | 1067291869                                 |
| Ca_Kabuli_NC_021161.1_15363570 | Ca_kabuli_chr02    | 15363570                       | [C/A]       | 1067291870                                 |
| Ca_Kabuli_NC_021161.1_15363572 | Ca_kabuli_chr02    | 15363572                       | [T/A]       | 1067291871                                 |
| Ca_Kabuli_NC_021161.1_15389426 | Ca_kabuli_chr02    | 15389426                       | [T/C]       | 1067291872                                 |
| Ca_Kabuli_NC_021161.1_15389455 | Ca_kabuli_chr02    | 15389455                       | [A/G]       | 1067291873                                 |
| Ca_Kabuli_NC_021161.1_15390723 | Ca_kabuli_chr02    | 15390723                       | [A/C]       | 1067291874                                 |
| Ca_Kabuli_NC_021161.1_15610615 | Ca_kabuli_chr02    | 15610615                       | [A/T]       | 1067291875                                 |
| Ca_Kabuli_NC_021161.1_15821481 | Ca_kabuli_chr02    | 15821481                       | [G/A]       | 1067291876                                 |
| Ca_Kabuli_NC_021161.1_15821500 | Ca_kabuli_chr02    | 15821500                       | [A/C]       | 1067291877                                 |
| Ca_Kabuli_NC_021161.1_15821568 | Ca_kabuli_chr02    | 15821568                       | [T/G]       | 1067291878                                 |
| Ca_Kabuli_NC_021161.1_16448465 | Ca_kabuli_chr02    | 16448465                       | [A/T]       | 1067291879                                 |
| Ca_Kabuli_NC_021161.1_16448473 | Ca_kabuli_chr02    | 16448473                       | [T/G]       | 1067291880                                 |
| Ca_Kabuli_NC_021161.1_16448478 | Ca_kabuli_chr02    | 16448478                       | [A/T]       | 1067291881                                 |
| Ca_Kabuli_NC_021161.1_16552569 | Ca_kabuli_chr02    | 16552569                       | [T/C]       | 1067291882                                 |
| Ca_Kabuli_NC_021161.1_16563121 | Ca_kabuli_chr02    | 16563121                       | [A/T]       | 1067291883                                 |
| Ca_Kabuli_NC_021161.1_16563123 | Ca_kabuli_chr02    | 16563123                       | [C/T]       | 1067291884                                 |
| Ca_Kabuli_NC_021161.1_16563125 | Ca_kabuli_chr02    | 16563125                       | [A/T]       | 1067291885                                 |
| Ca_Kabuli_NC_021161.1_16563133 | Ca_kabuli_chr02    | 16563133                       | [A/T]       | 1067291886                                 |
| Ca_Kabuli_NC_021161.1_16692101 | Ca_kabuli_chr02    | 16692101                       | [T/C]       | 1067291887                                 |
| Ca_Kabuli_NC_021161.1_16692126 | Ca_kabuli_chr02    | 16692126                       | [A/G]       | 1067291888                                 |
| Ca_Kabuli_NC_021161.1_16692134 | Ca_kabuli_chr02    | 16692134                       | [T/C]       | 1067291889                                 |
| Ca_Kabuli_NC_021161.1_16692137 | Ca_kabuli_chr02    | 16692137                       | [A/C]       | 1067291890                                 |
| Ca_Kabuli_NC_021161.1_17010035 | Ca_kabuli_chr02    | 17010035                       | [C/A]       | 1067291891                                 |
| Ca_Kabuli_NC_021161.1_17010037 | Ca_kabuli_chr02    | 17010037                       | [G/A]       | 1067291892                                 |
| Ca_Kabuli_NC_021161.1_17010038 | Ca_kabuli_chr02    | 17010038                       | [C/T]       | 1067291893                                 |
| Ca_Kabuli_NC_021161.1_17010039 | Ca_kabuli_chr02    | 17010039                       | [A/C]       | 1067291894                                 |

| <b>SNP IDs</b>                 | <b>Chromosomes</b> | <b>Physical positions (bp)</b> | <b>SNPs</b> | <b>NCBI SNPdb accession IDs (NCBI_ss#)</b> |
|--------------------------------|--------------------|--------------------------------|-------------|--------------------------------------------|
| Ca_Kabuli_NC_021161.1_17029096 | Ca_kabuli_chr02    | 17029096                       | [G/C]       | 1067291895                                 |
| Ca_Kabuli_NC_021161.1_17185183 | Ca_kabuli_chr02    | 17185183                       | [A/T]       | 1067291896                                 |
| Ca_Kabuli_NC_021161.1_17185186 | Ca_kabuli_chr02    | 17185186                       | [A/G]       | 1067291897                                 |
| Ca_Kabuli_NC_021161.1_17185200 | Ca_kabuli_chr02    | 17185200                       | [A/C]       | 1067291898                                 |
| Ca_Kabuli_NC_021161.1_17204167 | Ca_kabuli_chr02    | 17204167                       | [C/T]       | 1067291899                                 |
| Ca_Kabuli_NC_021161.1_17427646 | Ca_kabuli_chr02    | 17427646                       | [T/G]       | 1067291900                                 |
| Ca_Kabuli_NC_021161.1_17427679 | Ca_kabuli_chr02    | 17427679                       | [T/G]       | 1067291901                                 |
| Ca_Kabuli_NC_021161.1_17681915 | Ca_kabuli_chr02    | 17681915                       | [C/T]       | 1067291902                                 |
| Ca_Kabuli_NC_021161.1_17910565 | Ca_kabuli_chr02    | 17910565                       | [T/G]       | 1067291903                                 |
| Ca_Kabuli_NC_021161.1_18457266 | Ca_kabuli_chr02    | 18457266                       | [A/G]       | 1067291904                                 |
| Ca_Kabuli_NC_021161.1_18631374 | Ca_kabuli_chr02    | 18631374                       | [T/G]       | 1067291905                                 |
| Ca_Kabuli_NC_021161.1_18631385 | Ca_kabuli_chr02    | 18631385                       | [T/G]       | 1067291906                                 |
| Ca_Kabuli_NC_021161.1_18631471 | Ca_kabuli_chr02    | 18631471                       | [T/A]       | 1067291907                                 |
| Ca_Kabuli_NC_021161.1_18631478 | Ca_kabuli_chr02    | 18631478                       | [A/C]       | 1067291908                                 |
| Ca_Kabuli_NC_021161.1_18671571 | Ca_kabuli_chr02    | 18671571                       | [C/T]       | 1067291909                                 |
| Ca_Kabuli_NC_021161.1_18671572 | Ca_kabuli_chr02    | 18671572                       | [C/T]       | 1067291910                                 |
| Ca_Kabuli_NC_021161.1_18671574 | Ca_kabuli_chr02    | 18671574                       | [G/A]       | 1067291911                                 |
| Ca_Kabuli_NC_021161.1_18712473 | Ca_kabuli_chr02    | 18712473                       | [C/T]       | 1067291912                                 |
| Ca_Kabuli_NC_021161.1_19204733 | Ca_kabuli_chr02    | 19204733                       | [C/T]       | 1067291913                                 |
| Ca_Kabuli_NC_021161.1_19204759 | Ca_kabuli_chr02    | 19204759                       | [T/A]       | 1067291914                                 |
| Ca_Kabuli_NC_021161.1_19901544 | Ca_kabuli_chr02    | 19901544                       | [A/C]       | 1067291915                                 |
| Ca_Kabuli_NC_021161.1_19901593 | Ca_kabuli_chr02    | 19901593                       | [G/A]       | 1067291916                                 |
| Ca_Kabuli_NC_021161.1_19901595 | Ca_kabuli_chr02    | 19901595                       | [T/C]       | 1067291917                                 |
| Ca_Kabuli_NC_021161.1_20042847 | Ca_kabuli_chr02    | 20042847                       | [T/C]       | 1067291918                                 |
| Ca_Kabuli_NC_021161.1_20812096 | Ca_kabuli_chr02    | 20812096                       | [G/A]       | 1067291919                                 |
| Ca_Kabuli_NC_021161.1_20829560 | Ca_kabuli_chr02    | 20829560                       | [T/G]       | 1067291920                                 |
| Ca_Kabuli_NC_021161.1_20829582 | Ca_kabuli_chr02    | 20829582                       | [T/A]       | 1067291921                                 |
| Ca_Kabuli_NC_021161.1_21159158 | Ca_kabuli_chr02    | 21159158                       | [A/T]       | 1067291922                                 |
| Ca_Kabuli_NC_021161.1_21159254 | Ca_kabuli_chr02    | 21159254                       | [C/T]       | 1067291923                                 |
| Ca_Kabuli_NC_021161.1_21159275 | Ca_kabuli_chr02    | 21159275                       | [G/A]       | 1067291924                                 |
| Ca_Kabuli_NC_021161.1_21764792 | Ca_kabuli_chr02    | 21764792                       | [T/C]       | 1067291925                                 |
| Ca_Kabuli_NC_021161.1_21849874 | Ca_kabuli_chr02    | 21849874                       | [A/T]       | 1067291926                                 |
| Ca_Kabuli_NC_021161.1_21904437 | Ca_kabuli_chr02    | 21904437                       | [T/C]       | 1067291927                                 |
| Ca_Kabuli_NC_021161.1_22104801 | Ca_kabuli_chr02    | 22104801                       | [G/A]       | 1067291928                                 |

| <b>SNP IDs</b>                 | <b>Chromosomes</b> | <b>Physical positions (bp)</b> | <b>SNPs</b> | <b>NCBI SNPdb accession IDs (NCBI_ss#)</b> |
|--------------------------------|--------------------|--------------------------------|-------------|--------------------------------------------|
| Ca_Kabuli_NC_021161.1_22419663 | Ca_kabuli_chr02    | 22419663                       | [T/C]       | 1067291929                                 |
| Ca_Kabuli_NC_021161.1_22536190 | Ca_kabuli_chr02    | 22536190                       | [A/G]       | 1067291930                                 |
| Ca_Kabuli_NC_021161.1_22542135 | Ca_kabuli_chr02    | 22542135                       | [T/G]       | 1067291931                                 |
| Ca_Kabuli_NC_021161.1_22542274 | Ca_kabuli_chr02    | 22542274                       | [G/T]       | 1067291932                                 |
| Ca_Kabuli_NC_021161.1_22702701 | Ca_kabuli_chr02    | 22702701                       | [A/G]       | 1067291933                                 |
| Ca_Kabuli_NC_021161.1_22704098 | Ca_kabuli_chr02    | 22704098                       | [T/G]       | 1067291934                                 |
| Ca_Kabuli_NC_021161.1_22719678 | Ca_kabuli_chr02    | 22719678                       | [T/A]       | 1067291935                                 |
| Ca_Kabuli_NC_021161.1_22770275 | Ca_kabuli_chr02    | 22770275                       | [A/C]       | 1067291936                                 |
| Ca_Kabuli_NC_021161.1_22770306 | Ca_kabuli_chr02    | 22770306                       | [T/C]       | 1067291937                                 |
| Ca_Kabuli_NC_021161.1_22818416 | Ca_kabuli_chr02    | 22818416                       | [T/C]       | 1067291938                                 |
| Ca_Kabuli_NC_021161.1_22849526 | Ca_kabuli_chr02    | 22849526                       | [C/G]       | 1067291939                                 |
| Ca_Kabuli_NC_021161.1_23127798 | Ca_kabuli_chr02    | 23127798                       | [T/C]       | 1067291940                                 |
| Ca_Kabuli_NC_021161.1_23127810 | Ca_kabuli_chr02    | 23127810                       | [A/C]       | 1067291941                                 |
| Ca_Kabuli_NC_021161.1_23141573 | Ca_kabuli_chr02    | 23141573                       | [A/C]       | 1067291942                                 |
| Ca_Kabuli_NC_021161.1_23181177 | Ca_kabuli_chr02    | 23181177                       | [A/C]       | 1067291943                                 |
| Ca_Kabuli_NC_021161.1_23182319 | Ca_kabuli_chr02    | 23182319                       | [A/G]       | 1067291944                                 |
| Ca_Kabuli_NC_021161.1_23217505 | Ca_kabuli_chr02    | 23217505                       | [A/T]       | 1067291945                                 |
| Ca_Kabuli_NC_021161.1_23217508 | Ca_kabuli_chr02    | 23217508                       | [A/C]       | 1067291946                                 |
| Ca_Kabuli_NC_021161.1_23217524 | Ca_kabuli_chr02    | 23217524                       | [A/C]       | 1067291947                                 |
| Ca_Kabuli_NC_021161.1_23219939 | Ca_kabuli_chr02    | 23219939                       | [C/A]       | 1067291948                                 |
| Ca_Kabuli_NC_021161.1_23297194 | Ca_kabuli_chr02    | 23297194                       | [T/G]       | 1067291949                                 |
| Ca_Kabuli_NC_021161.1_23297203 | Ca_kabuli_chr02    | 23297203                       | [T/A]       | 1067291950                                 |
| Ca_Kabuli_NC_021161.1_23297341 | Ca_kabuli_chr02    | 23297341                       | [A/C]       | 1067291951                                 |
| Ca_Kabuli_NC_021161.1_23297458 | Ca_kabuli_chr02    | 23297458                       | [A/G]       | 1067291952                                 |
| Ca_Kabuli_NC_021161.1_23329362 | Ca_kabuli_chr02    | 23329362                       | [T/C]       | 1067291953                                 |
| Ca_Kabuli_NC_021161.1_23329385 | Ca_kabuli_chr02    | 23329385                       | [T/C]       | 1067291954                                 |
| Ca_Kabuli_NC_021161.1_23329392 | Ca_kabuli_chr02    | 23329392                       | [A/C]       | 1067291955                                 |
| Ca_Kabuli_NC_021161.1_23337832 | Ca_kabuli_chr02    | 23337832                       | [C/A]       | 1067291956                                 |
| Ca_Kabuli_NC_021161.1_23337834 | Ca_kabuli_chr02    | 23337834                       | [A/C]       | 1067291957                                 |
| Ca_Kabuli_NC_021161.1_23346218 | Ca_kabuli_chr02    | 23346218                       | [G/A]       | 1067291958                                 |
| Ca_Kabuli_NC_021161.1_23346299 | Ca_kabuli_chr02    | 23346299                       | [A/C]       | 1067291959                                 |
| Ca_Kabuli_NC_021161.1_23354434 | Ca_kabuli_chr02    | 23354434                       | [A/C]       | 1067291960                                 |
| Ca_Kabuli_NC_021161.1_23433522 | Ca_kabuli_chr02    | 23433522                       | [A/G]       | 1067291961                                 |
| Ca_Kabuli_NC_021161.1_23435792 | Ca_kabuli_chr02    | 23435792                       | [A/G]       | 1067291962                                 |

| <b>SNP IDs</b>                 | <b>Chromosomes</b> | <b>Physical positions (bp)</b> | <b>SNPs</b> | <b>NCBI SNPdb accession IDs (NCBI_ss#)</b> |
|--------------------------------|--------------------|--------------------------------|-------------|--------------------------------------------|
| Ca_Kabuli_NC_021161.1_23435886 | Ca_kabuli_chr02    | 23435886                       | [A/C]       | 1067291963                                 |
| Ca_Kabuli_NC_021161.1_23439889 | Ca_kabuli_chr02    | 23439889                       | [A/G]       | 1067291964                                 |
| Ca_Kabuli_NC_021161.1_23441701 | Ca_kabuli_chr02    | 23441701                       | [T/A]       | 1067291965                                 |
| Ca_Kabuli_NC_021161.1_23441737 | Ca_kabuli_chr02    | 23441737                       | [A/C]       | 1067291966                                 |
| Ca_Kabuli_NC_021161.1_23910254 | Ca_kabuli_chr02    | 23910254                       | [T/C]       | 1067291967                                 |
| Ca_Kabuli_NC_021161.1_23933608 | Ca_kabuli_chr02    | 23933608                       | [G/C]       | 1067291968                                 |
| Ca_Kabuli_NC_021161.1_23960995 | Ca_kabuli_chr02    | 23960995                       | [T/C]       | 1067291969                                 |
| Ca_Kabuli_NC_021161.1_24048033 | Ca_kabuli_chr02    | 24048033                       | [T/G]       | 1067291970                                 |
| Ca_Kabuli_NC_021161.1_24048084 | Ca_kabuli_chr02    | 24048084                       | [A/C]       | 1067291971                                 |
| Ca_Kabuli_NC_021161.1_24048087 | Ca_kabuli_chr02    | 24048087                       | [A/C]       | 1067291972                                 |
| Ca_Kabuli_NC_021161.1_24092328 | Ca_kabuli_chr02    | 24092328                       | [T/C]       | 1067291973                                 |
| Ca_Kabuli_NC_021161.1_24092331 | Ca_kabuli_chr02    | 24092331                       | [T/C]       | 1067291974                                 |
| Ca_Kabuli_NC_021161.1_24101339 | Ca_kabuli_chr02    | 24101339                       | [A/C]       | 1067291975                                 |
| Ca_Kabuli_NC_021161.1_24164862 | Ca_kabuli_chr02    | 24164862                       | [A/C]       | 1067291976                                 |
| Ca_Kabuli_NC_021161.1_24220954 | Ca_kabuli_chr02    | 24220954                       | [A/C]       | 1067291977                                 |
| Ca_Kabuli_NC_021161.1_24220955 | Ca_kabuli_chr02    | 24220955                       | [G/T]       | 1067291978                                 |
| Ca_Kabuli_NC_021161.1_24286153 | Ca_kabuli_chr02    | 24286153                       | [C/A]       | 1067291979                                 |
| Ca_Kabuli_NC_021161.1_24511121 | Ca_kabuli_chr02    | 24511121                       | [G/A]       | 1067291980                                 |
| Ca_Kabuli_NC_021161.1_24542913 | Ca_kabuli_chr02    | 24542913                       | [T/A]       | 1067291981                                 |
| Ca_Kabuli_NC_021161.1_24542917 | Ca_kabuli_chr02    | 24542917                       | [A/C]       | 1067291982                                 |
| Ca_Kabuli_NC_021161.1_24542934 | Ca_kabuli_chr02    | 24542934                       | [A/G]       | 1067291983                                 |
| Ca_Kabuli_NC_021161.1_24709026 | Ca_kabuli_chr02    | 24709026                       | [T/G]       | 1067291984                                 |
| Ca_Kabuli_NC_021161.1_24709295 | Ca_kabuli_chr02    | 24709295                       | [G/A]       | 1067291985                                 |
| Ca_Kabuli_NC_021161.1_24709315 | Ca_kabuli_chr02    | 24709315                       | [T/G]       | 1067291986                                 |
| Ca_Kabuli_NC_021161.1_24712004 | Ca_kabuli_chr02    | 24712004                       | [T/C]       | 1067291987                                 |
| Ca_Kabuli_NC_021161.1_24741144 | Ca_kabuli_chr02    | 24741144                       | [T/A]       | 1067291988                                 |
| Ca_Kabuli_NC_021161.1_24741159 | Ca_kabuli_chr02    | 24741159                       | [T/G]       | 1067291989                                 |
| Ca_Kabuli_NC_021161.1_24741195 | Ca_kabuli_chr02    | 24741195                       | [C/T]       | 1067291990                                 |
| Ca_Kabuli_NC_021161.1_24744708 | Ca_kabuli_chr02    | 24744708                       | [T/G]       | 1067291991                                 |
| Ca_Kabuli_NC_021161.1_24744717 | Ca_kabuli_chr02    | 24744717                       | [T/G]       | 1067291992                                 |
| Ca_Kabuli_NC_021161.1_24846391 | Ca_kabuli_chr02    | 24846391                       | [A/C]       | 1067291993                                 |
| Ca_Kabuli_NC_021161.1_24911088 | Ca_kabuli_chr02    | 24911088                       | [A/G]       | 1067291994                                 |
| Ca_Kabuli_NC_021161.1_24911135 | Ca_kabuli_chr02    | 24911135                       | [A/G]       | 1067291995                                 |
| Ca_Kabuli_NC_021161.1_25141453 | Ca_kabuli_chr02    | 25141453                       | [T/C]       | 1067291996                                 |

| <b>SNP IDs</b>                 | <b>Chromosomes</b> | <b>Physical positions (bp)</b> | <b>SNPs</b> | <b>NCBI SNPdb accession IDs (NCBI_ss#)</b> |
|--------------------------------|--------------------|--------------------------------|-------------|--------------------------------------------|
| Ca_Kabuli_NC_021161.1_25141456 | Ca_kabuli_chr02    | 25141456                       | [T/C]       | 1067291997                                 |
| Ca_Kabuli_NC_021161.1_25141465 | Ca_kabuli_chr02    | 25141465                       | [T/C]       | 1067291998                                 |
| Ca_Kabuli_NC_021161.1_25141474 | Ca_kabuli_chr02    | 25141474                       | [T/C]       | 1067291999                                 |
| Ca_Kabuli_NC_021161.1_25141487 | Ca_kabuli_chr02    | 25141487                       | [A/G]       | 1067292000                                 |
| Ca_Kabuli_NC_021161.1_25141493 | Ca_kabuli_chr02    | 25141493                       | [A/T]       | 1067292001                                 |
| Ca_Kabuli_NC_021161.1_25141504 | Ca_kabuli_chr02    | 25141504                       | [T/C]       | 1067292002                                 |
| Ca_Kabuli_NC_021161.1_25141506 | Ca_kabuli_chr02    | 25141506                       | [A/T]       | 1067292003                                 |
| Ca_Kabuli_NC_021161.1_25249607 | Ca_kabuli_chr02    | 25249607                       | [T/C]       | 1067292004                                 |
| Ca_Kabuli_NC_021161.1_25249615 | Ca_kabuli_chr02    | 25249615                       | [T/G]       | 1067292005                                 |
| Ca_Kabuli_NC_021161.1_25249618 | Ca_kabuli_chr02    | 25249618                       | [A/G]       | 1067292006                                 |
| Ca_Kabuli_NC_021161.1_25249635 | Ca_kabuli_chr02    | 25249635                       | [A/C]       | 1067292007                                 |
| Ca_Kabuli_NC_021161.1_25317252 | Ca_kabuli_chr02    | 25317252                       | [T/G]       | 1067292008                                 |
| Ca_Kabuli_NC_021161.1_25321120 | Ca_kabuli_chr02    | 25321120                       | [T/G]       | 1067292009                                 |
| Ca_Kabuli_NC_021161.1_25321812 | Ca_kabuli_chr02    | 25321812                       | [T/A]       | 1067292010                                 |
| Ca_Kabuli_NC_021161.1_25321837 | Ca_kabuli_chr02    | 25321837                       | [A/C]       | 1067292011                                 |
| Ca_Kabuli_NC_021161.1_25349105 | Ca_kabuli_chr02    | 25349105                       | [G/T]       | 1067292012                                 |
| Ca_Kabuli_NC_021161.1_25508879 | Ca_kabuli_chr02    | 25508879                       | [A/C]       | 1067292013                                 |
| Ca_Kabuli_NC_021161.1_25508914 | Ca_kabuli_chr02    | 25508914                       | [A/C]       | 1067292014                                 |
| Ca_Kabuli_NC_021161.1_25508941 | Ca_kabuli_chr02    | 25508941                       | [A/T]       | 1067292015                                 |
| Ca_Kabuli_NC_021161.1_25508973 | Ca_kabuli_chr02    | 25508973                       | [T/C]       | 1067292016                                 |
| Ca_Kabuli_NC_021161.1_25725665 | Ca_kabuli_chr02    | 25725665                       | [G/T]       | 1067292017                                 |
| Ca_Kabuli_NC_021161.1_25725688 | Ca_kabuli_chr02    | 25725688                       | [G/A]       | 1067292018                                 |
| Ca_Kabuli_NC_021161.1_25725692 | Ca_kabuli_chr02    | 25725692                       | [C/T]       | 1067292019                                 |
| Ca_Kabuli_NC_021161.1_25941062 | Ca_kabuli_chr02    | 25941062                       | [A/C]       | 1067292020                                 |
| Ca_Kabuli_NC_021161.1_25941072 | Ca_kabuli_chr02    | 25941072                       | [T/C]       | 1067292021                                 |
| Ca_Kabuli_NC_021161.1_25984147 | Ca_kabuli_chr02    | 25984147                       | [A/G]       | 1067292022                                 |
| Ca_Kabuli_NC_021161.1_25984184 | Ca_kabuli_chr02    | 25984184                       | [A/G]       | 1067292023                                 |
| Ca_Kabuli_NC_021161.1_25984208 | Ca_kabuli_chr02    | 25984208                       | [T/C]       | 1067292024                                 |
| Ca_Kabuli_NC_021161.1_26025852 | Ca_kabuli_chr02    | 26025852                       | [A/G]       | 1067292025                                 |
| Ca_Kabuli_NC_021161.1_26025885 | Ca_kabuli_chr02    | 26025885                       | [A/G]       | 1067292026                                 |
| Ca_Kabuli_NC_021161.1_26035673 | Ca_kabuli_chr02    | 26035673                       | [C/T]       | 1067292027                                 |
| Ca_Kabuli_NC_021161.1_26035674 | Ca_kabuli_chr02    | 26035674                       | [G/C]       | 1067292028                                 |
| Ca_Kabuli_NC_021161.1_26035675 | Ca_kabuli_chr02    | 26035675                       | [G/T]       | 1067292029                                 |
| Ca_Kabuli_NC_021161.1_26051628 | Ca_kabuli_chr02    | 26051628                       | [A/T]       | 1067292030                                 |



| <b>SNP IDs</b>                 | <b>Chromosomes</b> | <b>Physical positions (bp)</b> | <b>SNPs</b> | <b>NCBI SNPdb accession IDs (NCBI_ss#)</b> |
|--------------------------------|--------------------|--------------------------------|-------------|--------------------------------------------|
| Ca_Kabuli_NC_021161.1_26051650 | Ca_kabuli_chr02    | 26051650                       | [G/T]       | 1067292031                                 |
| Ca_Kabuli_NC_021161.1_26051657 | Ca_kabuli_chr02    | 26051657                       | [A/T]       | 1067292032                                 |
| Ca_Kabuli_NC_021161.1_26051659 | Ca_kabuli_chr02    | 26051659                       | [T/G]       | 1067292033                                 |
| Ca_Kabuli_NC_021161.1_26061758 | Ca_kabuli_chr02    | 26061758                       | [T/A]       | 1067292034                                 |
| Ca_Kabuli_NC_021161.1_26092916 | Ca_kabuli_chr02    | 26092916                       | [C/A]       | 1067292035                                 |
| Ca_Kabuli_NC_021161.1_26092997 | Ca_kabuli_chr02    | 26092997                       | [A/C]       | 1067292036                                 |
| Ca_Kabuli_NC_021161.1_26121429 | Ca_kabuli_chr02    | 26121429                       | [A/G]       | 1067292037                                 |
| Ca_Kabuli_NC_021161.1_26121431 | Ca_kabuli_chr02    | 26121431                       | [G/T]       | 1067292038                                 |
| Ca_Kabuli_NC_021161.1_26121448 | Ca_kabuli_chr02    | 26121448                       | [C/T]       | 1067292039                                 |
| Ca_Kabuli_NC_021161.1_26121519 | Ca_kabuli_chr02    | 26121519                       | [T/G]       | 1067292040                                 |
| Ca_Kabuli_NC_021161.1_26417225 | Ca_kabuli_chr02    | 26417225                       | [C/A]       | 1067292041                                 |
| Ca_Kabuli_NC_021161.1_26417226 | Ca_kabuli_chr02    | 26417226                       | [T/G]       | 1067292042                                 |
| Ca_Kabuli_NC_021161.1_26457480 | Ca_kabuli_chr02    | 26457480                       | [G/A]       | 1067292043                                 |
| Ca_Kabuli_NC_021161.1_26706735 | Ca_kabuli_chr02    | 26706735                       | [A/C]       | 1067292044                                 |
| Ca_Kabuli_NC_021161.1_26706740 | Ca_kabuli_chr02    | 26706740                       | [C/A]       | 1067292045                                 |
| Ca_Kabuli_NC_021161.1_26706752 | Ca_kabuli_chr02    | 26706752                       | [C/T]       | 1067292046                                 |
| Ca_Kabuli_NC_021161.1_26706782 | Ca_kabuli_chr02    | 26706782                       | [G/A]       | 1067292047                                 |
| Ca_Kabuli_NC_021161.1_26832618 | Ca_kabuli_chr02    | 26832618                       | [G/T]       | 1067292048                                 |
| Ca_Kabuli_NC_021161.1_26871568 | Ca_kabuli_chr02    | 26871568                       | [C/A]       | 1067292049                                 |
| Ca_Kabuli_NC_021161.1_26871569 | Ca_kabuli_chr02    | 26871569                       | [T/G]       | 1067292050                                 |
| Ca_Kabuli_NC_021161.1_26871570 | Ca_kabuli_chr02    | 26871570                       | [T/A]       | 1067292051                                 |
| Ca_Kabuli_NC_021161.1_26871571 | Ca_kabuli_chr02    | 26871571                       | [C/T]       | 1067292052                                 |
| Ca_Kabuli_NC_021161.1_26875498 | Ca_kabuli_chr02    | 26875498                       | [A/T]       | 1067292053                                 |
| Ca_Kabuli_NC_021161.1_27056842 | Ca_kabuli_chr02    | 27056842                       | [T/C]       | 1067292054                                 |
| Ca_Kabuli_NC_021161.1_27056855 | Ca_kabuli_chr02    | 27056855                       | [T/G]       | 1067292055                                 |
| Ca_Kabuli_NC_021161.1_27057554 | Ca_kabuli_chr02    | 27057554                       | [T/G]       | 1067292056                                 |
| Ca_Kabuli_NC_021161.1_27063609 | Ca_kabuli_chr02    | 27063609                       | [A/C]       | 1067292057                                 |
| Ca_Kabuli_NC_021161.1_27063610 | Ca_kabuli_chr02    | 27063610                       | [G/T]       | 1067292058                                 |
| Ca_Kabuli_NC_021161.1_27063723 | Ca_kabuli_chr02    | 27063723                       | [T/A]       | 1067292059                                 |
| Ca_Kabuli_NC_021161.1_27091401 | Ca_kabuli_chr02    | 27091401                       | [A/G]       | 1067292060                                 |
| Ca_Kabuli_NC_021161.1_27091403 | Ca_kabuli_chr02    | 27091403                       | [T/C]       | 1067292061                                 |
| Ca_Kabuli_NC_021161.1_27130718 | Ca_kabuli_chr02    | 27130718                       | [T/G]       | 1067292062                                 |
| Ca_Kabuli_NC_021161.1_27130753 | Ca_kabuli_chr02    | 27130753                       | [A/C]       | 1067292063                                 |
| Ca_Kabuli_NC_021161.1_27172568 | Ca_kabuli_chr02    | 27172568                       | [G/A]       | 1067292064                                 |

| <b>SNP IDs</b>                 | <b>Chromosomes</b> | <b>Physical positions (bp)</b> | <b>SNPs</b> | <b>NCBI SNPdb accession IDs (NCBI_ss#)</b> |
|--------------------------------|--------------------|--------------------------------|-------------|--------------------------------------------|
| Ca_Kabuli_NC_021161.1_27172580 | Ca_kabuli_chr02    | 27172580                       | [G/A]       | 1067292065                                 |
| Ca_Kabuli_NC_021161.1_27172582 | Ca_kabuli_chr02    | 27172582                       | [A/G]       | 1067292066                                 |
| Ca_Kabuli_NC_021161.1_27183708 | Ca_kabuli_chr02    | 27183708                       | [A/C]       | 1067292067                                 |
| Ca_Kabuli_NC_021161.1_27254655 | Ca_kabuli_chr02    | 27254655                       | [C/T]       | 1067292068                                 |
| Ca_Kabuli_NC_021161.1_27336078 | Ca_kabuli_chr02    | 27336078                       | [T/C]       | 1067292069                                 |
| Ca_Kabuli_NC_021161.1_27373969 | Ca_kabuli_chr02    | 27373969                       | [A/T]       | 1067292070                                 |
| Ca_Kabuli_NC_021161.1_27374109 | Ca_kabuli_chr02    | 27374109                       | [A/C]       | 1067292071                                 |
| Ca_Kabuli_NC_021161.1_27623253 | Ca_kabuli_chr02    | 27623253                       | [A/C]       | 1067292072                                 |
| Ca_Kabuli_NC_021161.1_27693643 | Ca_kabuli_chr02    | 27693643                       | [T/G]       | 1067292073                                 |
| Ca_Kabuli_NC_021161.1_27693652 | Ca_kabuli_chr02    | 27693652                       | [T/C]       | 1067292074                                 |
| Ca_Kabuli_NC_021161.1_27693703 | Ca_kabuli_chr02    | 27693703                       | [A/G]       | 1067292075                                 |
| Ca_Kabuli_NC_021161.1_27693707 | Ca_kabuli_chr02    | 27693707                       | [T/C]       | 1067292076                                 |
| Ca_Kabuli_NC_021161.1_27703354 | Ca_kabuli_chr02    | 27703354                       | [A/G]       | 1067292077                                 |
| Ca_Kabuli_NC_021161.1_27757565 | Ca_kabuli_chr02    | 27757565                       | [G/T]       | 1067292078                                 |
| Ca_Kabuli_NC_021161.1_27757573 | Ca_kabuli_chr02    | 27757573                       | [T/C]       | 1067292079                                 |
| Ca_Kabuli_NC_021161.1_27757800 | Ca_kabuli_chr02    | 27757800                       | [T/C]       | 1067292080                                 |
| Ca_Kabuli_NC_021161.1_27758034 | Ca_kabuli_chr02    | 27758034                       | [T/C]       | 1067292081                                 |
| Ca_Kabuli_NC_021161.1_27766605 | Ca_kabuli_chr02    | 27766605                       | [A/C]       | 1067292082                                 |
| Ca_Kabuli_NC_021161.1_27835859 | Ca_kabuli_chr02    | 27835859                       | [G/T]       | 1067292083                                 |
| Ca_Kabuli_NC_021161.1_27847700 | Ca_kabuli_chr02    | 27847700                       | [A/C]       | 1067292084                                 |
| Ca_Kabuli_NC_021161.1_27899966 | Ca_kabuli_chr02    | 27899966                       | [A/T]       | 1067292085                                 |
| Ca_Kabuli_NC_021161.1_27928698 | Ca_kabuli_chr02    | 27928698                       | [A/T]       | 1067292086                                 |
| Ca_Kabuli_NC_021161.1_27987041 | Ca_kabuli_chr02    | 27987041                       | [A/T]       | 1067292087                                 |
| Ca_Kabuli_NC_021161.1_27987046 | Ca_kabuli_chr02    | 27987046                       | [A/G]       | 1067292088                                 |
| Ca_Kabuli_NC_021161.1_27987048 | Ca_kabuli_chr02    | 27987048                       | [T/C]       | 1067292089                                 |
| Ca_Kabuli_NC_021161.1_28018175 | Ca_kabuli_chr02    | 28018175                       | [G/C]       | 1067292090                                 |
| Ca_Kabuli_NC_021161.1_28022987 | Ca_kabuli_chr02    | 28022987                       | [T/G]       | 1067292091                                 |
| Ca_Kabuli_NC_021161.1_28022995 | Ca_kabuli_chr02    | 28022995                       | [T/A]       | 1067292092                                 |
| Ca_Kabuli_NC_021161.1_28022999 | Ca_kabuli_chr02    | 28022999                       | [A/C]       | 1067292093                                 |
| Ca_Kabuli_NC_021161.1_28023007 | Ca_kabuli_chr02    | 28023007                       | [T/C]       | 1067292094                                 |
| Ca_Kabuli_NC_021161.1_28060919 | Ca_kabuli_chr02    | 28060919                       | [T/G]       | 1067292095                                 |
| Ca_Kabuli_NC_021161.1_28097382 | Ca_kabuli_chr02    | 28097382                       | [G/T]       | 1067292096                                 |
| Ca_Kabuli_NC_021161.1_28097386 | Ca_kabuli_chr02    | 28097386                       | [C/A]       | 1067292097                                 |
| Ca_Kabuli_NC_021161.1_28097391 | Ca_kabuli_chr02    | 28097391                       | [A/G]       | 1067292098                                 |

| <b>SNP IDs</b>                 | <b>Chromosomes</b> | <b>Physical positions (bp)</b> | <b>SNPs</b> | <b>NCBI SNPdb accession IDs (NCBI_ss#)</b> |
|--------------------------------|--------------------|--------------------------------|-------------|--------------------------------------------|
| Ca_Kabuli_NC_021161.1_28097395 | Ca_kabuli_chr02    | 28097395                       | [T/C]       | 1067292099                                 |
| Ca_Kabuli_NC_021161.1_28101712 | Ca_kabuli_chr02    | 28101712                       | [T/C]       | 1067292100                                 |
| Ca_Kabuli_NC_021161.1_28101727 | Ca_kabuli_chr02    | 28101727                       | [A/G]       | 1067292101                                 |
| Ca_Kabuli_NC_021161.1_28101732 | Ca_kabuli_chr02    | 28101732                       | [T/C]       | 1067292102                                 |
| Ca_Kabuli_NC_021161.1_28101741 | Ca_kabuli_chr02    | 28101741                       | [A/C]       | 1067292103                                 |
| Ca_Kabuli_NC_021161.1_28101828 | Ca_kabuli_chr02    | 28101828                       | [T/C]       | 1067292104                                 |
| Ca_Kabuli_NC_021161.1_28101831 | Ca_kabuli_chr02    | 28101831                       | [T/G]       | 1067292105                                 |
| Ca_Kabuli_NC_021161.1_28101852 | Ca_kabuli_chr02    | 28101852                       | [A/C]       | 1067292106                                 |
| Ca_Kabuli_NC_021161.1_28228930 | Ca_kabuli_chr02    | 28228930                       | [A/C]       | 1067292107                                 |
| Ca_Kabuli_NC_021161.1_28228939 | Ca_kabuli_chr02    | 28228939                       | [A/C]       | 1067292108                                 |
| Ca_Kabuli_NC_021161.1_28229093 | Ca_kabuli_chr02    | 28229093                       | [A/C]       | 1067292109                                 |
| Ca_Kabuli_NC_021161.1_28665207 | Ca_kabuli_chr02    | 28665207                       | [A/T]       | 1067292110                                 |
| Ca_Kabuli_NC_021161.1_28665211 | Ca_kabuli_chr02    | 28665211                       | [T/C]       | 1067292111                                 |
| Ca_Kabuli_NC_021161.1_28665212 | Ca_kabuli_chr02    | 28665212                       | [G/T]       | 1067292112                                 |
| Ca_Kabuli_NC_021161.1_28665239 | Ca_kabuli_chr02    | 28665239                       | [G/T]       | 1067292113                                 |
| Ca_Kabuli_NC_021161.1_28897971 | Ca_kabuli_chr02    | 28897971                       | [T/G]       | 1067292114                                 |
| Ca_Kabuli_NC_021161.1_28897976 | Ca_kabuli_chr02    | 28897976                       | [T/G]       | 1067292115                                 |
| Ca_Kabuli_NC_021161.1_28949900 | Ca_kabuli_chr02    | 28949900                       | [C/T]       | 1067292116                                 |
| Ca_Kabuli_NC_021161.1_28949901 | Ca_kabuli_chr02    | 28949901                       | [T/C]       | 1067292117                                 |
| Ca_Kabuli_NC_021161.1_29336266 | Ca_kabuli_chr02    | 29336266                       | [A/G]       | 1067292118                                 |
| Ca_Kabuli_NC_021161.1_29710344 | Ca_kabuli_chr02    | 29710344                       | [A/G]       | 1067292119                                 |
| Ca_Kabuli_NC_021161.1_29710346 | Ca_kabuli_chr02    | 29710346                       | [T/C]       | 1067292120                                 |
| Ca_Kabuli_NC_021161.1_29711375 | Ca_kabuli_chr02    | 29711375                       | [T/G]       | 1067292121                                 |
| Ca_Kabuli_NC_021161.1_29711387 | Ca_kabuli_chr02    | 29711387                       | [A/C]       | 1067292122                                 |
| Ca_Kabuli_NC_021161.1_29712020 | Ca_kabuli_chr02    | 29712020                       | [A/G]       | 1067292123                                 |
| Ca_Kabuli_NC_021161.1_29712050 | Ca_kabuli_chr02    | 29712050                       | [A/G]       | 1067292124                                 |
| Ca_Kabuli_NC_021161.1_29712056 | Ca_kabuli_chr02    | 29712056                       | [A/G]       | 1067292125                                 |
| Ca_Kabuli_NC_021161.1_29798328 | Ca_kabuli_chr02    | 29798328                       | [A/C]       | 1067292126                                 |
| Ca_Kabuli_NC_021161.1_29948418 | Ca_kabuli_chr02    | 29948418                       | [A/G]       | 1067292127                                 |
| Ca_Kabuli_NC_021161.1_29999079 | Ca_kabuli_chr02    | 29999079                       | [A/T]       | 1067292128                                 |
| Ca_Kabuli_NC_021161.1_30004243 | Ca_kabuli_chr02    | 30004243                       | [A/C]       | 1067292129                                 |
| Ca_Kabuli_NC_021161.1_30091140 | Ca_kabuli_chr02    | 30091140                       | [C/T]       | 1067292130                                 |
| Ca_Kabuli_NC_021161.1_30091146 | Ca_kabuli_chr02    | 30091146                       | [A/T]       | 1067292131                                 |
| Ca_Kabuli_NC_021161.1_30091161 | Ca_kabuli_chr02    | 30091161                       | [A/C]       | 1067292132                                 |

| <b>SNP IDs</b>                 | <b>Chromosomes</b> | <b>Physical positions (bp)</b> | <b>SNPs</b> | <b>NCBI SNPdb accession IDs (NCBI_ss#)</b> |
|--------------------------------|--------------------|--------------------------------|-------------|--------------------------------------------|
| Ca_Kabuli_NC_021161.1_30091173 | Ca_kabuli_chr02    | 30091173                       | [C/T]       | 1067292133                                 |
| Ca_Kabuli_NC_021161.1_30091263 | Ca_kabuli_chr02    | 30091263                       | [A/C]       | 1067292134                                 |
| Ca_Kabuli_NC_021161.1_30133224 | Ca_kabuli_chr02    | 30133224                       | [A/G]       | 1067292135                                 |
| Ca_Kabuli_NC_021161.1_30335130 | Ca_kabuli_chr02    | 30335130                       | [T/G]       | 1067292136                                 |
| Ca_Kabuli_NC_021161.1_30335160 | Ca_kabuli_chr02    | 30335160                       | [T/C]       | 1067292137                                 |
| Ca_Kabuli_NC_021161.1_30335194 | Ca_kabuli_chr02    | 30335194                       | [A/G]       | 1067292138                                 |
| Ca_Kabuli_NC_021161.1_30335212 | Ca_kabuli_chr02    | 30335212                       | [T/A]       | 1067292139                                 |
| Ca_Kabuli_NC_021161.1_30389175 | Ca_kabuli_chr02    | 30389175                       | [A/C]       | 1067292140                                 |
| Ca_Kabuli_NC_021161.1_30408063 | Ca_kabuli_chr02    | 30408063                       | [A/T]       | 1067292141                                 |
| Ca_Kabuli_NC_021161.1_30408087 | Ca_kabuli_chr02    | 30408087                       | [A/G]       | 1067292142                                 |
| Ca_Kabuli_NC_021161.1_30422750 | Ca_kabuli_chr02    | 30422750                       | [T/G]       | 1067292143                                 |
| Ca_Kabuli_NC_021161.1_30422768 | Ca_kabuli_chr02    | 30422768                       | [A/G]       | 1067292144                                 |
| Ca_Kabuli_NC_021161.1_30422772 | Ca_kabuli_chr02    | 30422772                       | [A/C]       | 1067292145                                 |
| Ca_Kabuli_NC_021161.1_30423017 | Ca_kabuli_chr02    | 30423017                       | [A/C]       | 1067292146                                 |
| Ca_Kabuli_NC_021161.1_30423031 | Ca_kabuli_chr02    | 30423031                       | [T/C]       | 1067292147                                 |
| Ca_Kabuli_NC_021161.1_30702078 | Ca_kabuli_chr02    | 30702078                       | [T/G]       | 1067292148                                 |
| Ca_Kabuli_NC_021161.1_30702097 | Ca_kabuli_chr02    | 30702097                       | [T/G]       | 1067292149                                 |
| Ca_Kabuli_NC_021161.1_30867559 | Ca_kabuli_chr02    | 30867559                       | [T/A]       | 1067292150                                 |
| Ca_Kabuli_NC_021161.1_30867590 | Ca_kabuli_chr02    | 30867590                       | [A/T]       | 1067292151                                 |
| Ca_Kabuli_NC_021161.1_30867592 | Ca_kabuli_chr02    | 30867592                       | [T/C]       | 1067292152                                 |
| Ca_Kabuli_NC_021161.1_30867595 | Ca_kabuli_chr02    | 30867595                       | [A/C]       | 1067292153                                 |
| Ca_Kabuli_NC_021161.1_30868458 | Ca_kabuli_chr02    | 30868458                       | [T/G]       | 1067292154                                 |
| Ca_Kabuli_NC_021161.1_30868461 | Ca_kabuli_chr02    | 30868461                       | [A/G]       | 1067292155                                 |
| Ca_Kabuli_NC_021161.1_30880119 | Ca_kabuli_chr02    | 30880119                       | [A/C]       | 1067292156                                 |
| Ca_Kabuli_NC_021161.1_30903543 | Ca_kabuli_chr02    | 30903543                       | [G/A]       | 1067292157                                 |
| Ca_Kabuli_NC_021161.1_30903557 | Ca_kabuli_chr02    | 30903557                       | [G/A]       | 1067292158                                 |
| Ca_Kabuli_NC_021161.1_30903566 | Ca_kabuli_chr02    | 30903566                       | [T/A]       | 1067292159                                 |
| Ca_Kabuli_NC_021161.1_30907564 | Ca_kabuli_chr02    | 30907564                       | [A/C]       | 1067292160                                 |
| Ca_Kabuli_NC_021161.1_30907567 | Ca_kabuli_chr02    | 30907567                       | [A/C]       | 1067292161                                 |
| Ca_Kabuli_NC_021161.1_30918734 | Ca_kabuli_chr02    | 30918734                       | [G/C]       | 1067292162                                 |
| Ca_Kabuli_NC_021161.1_30920461 | Ca_kabuli_chr02    | 30920461                       | [C/T]       | 1067292163                                 |
| Ca_Kabuli_NC_021161.1_30921092 | Ca_kabuli_chr02    | 30921092                       | [C/A]       | 1067292164                                 |
| Ca_Kabuli_NC_021161.1_30921994 | Ca_kabuli_chr02    | 30921994                       | [T/C]       | 1067292165                                 |
| Ca_Kabuli_NC_021161.1_30925755 | Ca_kabuli_chr02    | 30925755                       | [A/T]       | 1067292166                                 |

| <b>SNP IDs</b>                 | <b>Chromosomes</b> | <b>Physical positions (bp)</b> | <b>SNPs</b> | <b>NCBI SNPdb accession IDs (NCBI_ss#)</b> |
|--------------------------------|--------------------|--------------------------------|-------------|--------------------------------------------|
| Ca_Kabuli_NC_021161.1_30926690 | Ca_kabuli_chr02    | 30926690                       | [T/G]       | 1067292167                                 |
| Ca_Kabuli_NC_021161.1_30928725 | Ca_kabuli_chr02    | 30928725                       | [A/G]       | 1067292168                                 |
| Ca_Kabuli_NC_021161.1_30950434 | Ca_kabuli_chr02    | 30950434                       | [A/T]       | 1067292169                                 |
| Ca_Kabuli_NC_021161.1_30950703 | Ca_kabuli_chr02    | 30950703                       | [C/T]       | 1067292170                                 |
| Ca_Kabuli_NC_021161.1_30951724 | Ca_kabuli_chr02    | 30951724                       | [T/A]       | 1067292171                                 |
| Ca_Kabuli_NC_021161.1_30954305 | Ca_kabuli_chr02    | 30954305                       | [T/G]       | 1067292172                                 |
| Ca_Kabuli_NC_021161.1_30954317 | Ca_kabuli_chr02    | 30954317                       | [G/A]       | 1067292173                                 |
| Ca_Kabuli_NC_021161.1_30977522 | Ca_kabuli_chr02    | 30977522                       | [A/T]       | 1067292174                                 |
| Ca_Kabuli_NC_021161.1_30977528 | Ca_kabuli_chr02    | 30977528                       | [C/T]       | 1067292175                                 |
| Ca_Kabuli_NC_021161.1_30977572 | Ca_kabuli_chr02    | 30977572                       | [A/G]       | 1067292176                                 |
| Ca_Kabuli_NC_021161.1_30997935 | Ca_kabuli_chr02    | 30997935                       | [T/G]       | 1067292177                                 |
| Ca_Kabuli_NC_021161.1_31005845 | Ca_kabuli_chr02    | 31005845                       | [C/T]       | 1067292178                                 |
| Ca_Kabuli_NC_021161.1_31005847 | Ca_kabuli_chr02    | 31005847                       | [T/G]       | 1067292179                                 |
| Ca_Kabuli_NC_021161.1_31199538 | Ca_kabuli_chr02    | 31199538                       | [T/A]       | 1067292180                                 |
| Ca_Kabuli_NC_021161.1_31205503 | Ca_kabuli_chr02    | 31205503                       | [A/G]       | 1067292181                                 |
| Ca_Kabuli_NC_021161.1_31205617 | Ca_kabuli_chr02    | 31205617                       | [A/T]       | 1067292182                                 |
| Ca_Kabuli_NC_021161.1_31205639 | Ca_kabuli_chr02    | 31205639                       | [T/G]       | 1067292183                                 |
| Ca_Kabuli_NC_021161.1_31427865 | Ca_kabuli_chr02    | 31427865                       | [A/G]       | 1067292184                                 |
| Ca_Kabuli_NC_021161.1_31427883 | Ca_kabuli_chr02    | 31427883                       | [A/G]       | 1067292185                                 |
| Ca_Kabuli_NC_021161.1_31427886 | Ca_kabuli_chr02    | 31427886                       | [A/G]       | 1067292186                                 |
| Ca_Kabuli_NC_021161.1_31428417 | Ca_kabuli_chr02    | 31428417                       | [T/C]       | 1067292187                                 |
| Ca_Kabuli_NC_021161.1_31534265 | Ca_kabuli_chr02    | 31534265                       | [A/C]       | 1067292188                                 |
| Ca_Kabuli_NC_021161.1_31534283 | Ca_kabuli_chr02    | 31534283                       | [G/A]       | 1067292189                                 |
| Ca_Kabuli_NC_021161.1_31686697 | Ca_kabuli_chr02    | 31686697                       | [C/A]       | 1067292190                                 |
| Ca_Kabuli_NC_021161.1_31686714 | Ca_kabuli_chr02    | 31686714                       | [C/T]       | 1067292191                                 |
| Ca_Kabuli_NC_021161.1_31686744 | Ca_kabuli_chr02    | 31686744                       | [G/C]       | 1067292192                                 |
| Ca_Kabuli_NC_021161.1_31686751 | Ca_kabuli_chr02    | 31686751                       | [A/T]       | 1067292193                                 |
| Ca_Kabuli_NC_021161.1_31823306 | Ca_kabuli_chr02    | 31823306                       | [T/A]       | 1067292194                                 |
| Ca_Kabuli_NC_021161.1_31837712 | Ca_kabuli_chr02    | 31837712                       | [A/G]       | 1067292195                                 |
| Ca_Kabuli_NC_021161.1_31837724 | Ca_kabuli_chr02    | 31837724                       | [T/C]       | 1067292196                                 |
| Ca_Kabuli_NC_021161.1_31837731 | Ca_kabuli_chr02    | 31837731                       | [A/C]       | 1067292197                                 |
| Ca_Kabuli_NC_021161.1_31908639 | Ca_kabuli_chr02    | 31908639                       | [A/C]       | 1067292198                                 |
| Ca_Kabuli_NC_021161.1_31908666 | Ca_kabuli_chr02    | 31908666                       | [A/G]       | 1067292199                                 |
| Ca_Kabuli_NC_021161.1_31908845 | Ca_kabuli_chr02    | 31908845                       | [T/G]       | 1067292200                                 |

| <b>SNP IDs</b>                 | <b>Chromosomes</b> | <b>Physical positions (bp)</b> | <b>SNPs</b> | <b>NCBI SNPdb accession IDs (NCBI_ss#)</b> |
|--------------------------------|--------------------|--------------------------------|-------------|--------------------------------------------|
| Ca_Kabuli_NC_021161.1_31975310 | Ca_kabuli_chr02    | 31975310                       | [A/G]       | 1067292201                                 |
| Ca_Kabuli_NC_021161.1_31975322 | Ca_kabuli_chr02    | 31975322                       | [A/C]       | 1067292202                                 |
| Ca_Kabuli_NC_021161.1_31975327 | Ca_kabuli_chr02    | 31975327                       | [A/G]       | 1067292203                                 |
| Ca_Kabuli_NC_021161.1_31975343 | Ca_kabuli_chr02    | 31975343                       | [T/G]       | 1067292204                                 |
| Ca_Kabuli_NC_021161.1_32034289 | Ca_kabuli_chr02    | 32034289                       | [G/A]       | 1067292205                                 |
| Ca_Kabuli_NC_021161.1_32058615 | Ca_kabuli_chr02    | 32058615                       | [T/G]       | 1067292206                                 |
| Ca_Kabuli_NC_021161.1_32096180 | Ca_kabuli_chr02    | 32096180                       | [C/G]       | 1067292207                                 |
| Ca_Kabuli_NC_021161.1_32096186 | Ca_kabuli_chr02    | 32096186                       | [T/A]       | 1067292208                                 |
| Ca_Kabuli_NC_021161.1_32096192 | Ca_kabuli_chr02    | 32096192                       | [A/C]       | 1067292209                                 |
| Ca_Kabuli_NC_021161.1_32096226 | Ca_kabuli_chr02    | 32096226                       | [A/G]       | 1067292210                                 |
| Ca_Kabuli_NC_021161.1_32099907 | Ca_kabuli_chr02    | 32099907                       | [T/C]       | 1067292211                                 |
| Ca_Kabuli_NC_021161.1_32119094 | Ca_kabuli_chr02    | 32119094                       | [T/A]       | 1067292212                                 |
| Ca_Kabuli_NC_021161.1_32119331 | Ca_kabuli_chr02    | 32119331                       | [A/T]       | 1067292213                                 |
| Ca_Kabuli_NC_021161.1_32121949 | Ca_kabuli_chr02    | 32121949                       | [C/G]       | 1067292214                                 |
| Ca_Kabuli_NC_021161.1_32129260 | Ca_kabuli_chr02    | 32129260                       | [T/A]       | 1067292215                                 |
| Ca_Kabuli_NC_021161.1_32280969 | Ca_kabuli_chr02    | 32280969                       | [T/A]       | 1067292216                                 |
| Ca_Kabuli_NC_021161.1_32283139 | Ca_kabuli_chr02    | 32283139                       | [G/T]       | 1067292217                                 |
| Ca_Kabuli_NC_021161.1_32283172 | Ca_kabuli_chr02    | 32283172                       | [A/G]       | 1067292218                                 |
| Ca_Kabuli_NC_021161.1_32348054 | Ca_kabuli_chr02    | 32348054                       | [A/T]       | 1067292219                                 |
| Ca_Kabuli_NC_021161.1_32348870 | Ca_kabuli_chr02    | 32348870                       | [C/T]       | 1067292220                                 |
| Ca_Kabuli_NC_021161.1_32352022 | Ca_kabuli_chr02    | 32352022                       | [C/T]       | 1067292221                                 |
| Ca_Kabuli_NC_021161.1_32352044 | Ca_kabuli_chr02    | 32352044                       | [T/C]       | 1067292222                                 |
| Ca_Kabuli_NC_021161.1_32352045 | Ca_kabuli_chr02    | 32352045                       | [G/A]       | 1067292223                                 |
| Ca_Kabuli_NC_021161.1_32481983 | Ca_kabuli_chr02    | 32481983                       | [T/G]       | 1067292224                                 |
| Ca_Kabuli_NC_021161.1_32482739 | Ca_kabuli_chr02    | 32482739                       | [C/T]       | 1067292225                                 |
| Ca_Kabuli_NC_021161.1_32506300 | Ca_kabuli_chr02    | 32506300                       | [T/G]       | 1067292226                                 |
| Ca_Kabuli_NC_021161.1_32642277 | Ca_kabuli_chr02    | 32642277                       | [T/C]       | 1067292227                                 |
| Ca_Kabuli_NC_021161.1_32670089 | Ca_kabuli_chr02    | 32670089                       | [C/A]       | 1067292228                                 |
| Ca_Kabuli_NC_021161.1_32670090 | Ca_kabuli_chr02    | 32670090                       | [T/G]       | 1067292229                                 |
| Ca_Kabuli_NC_021161.1_32670181 | Ca_kabuli_chr02    | 32670181                       | [T/G]       | 1067292230                                 |
| Ca_Kabuli_NC_021161.1_32742369 | Ca_kabuli_chr02    | 32742369                       | [A/G]       | 1067292231                                 |
| Ca_Kabuli_NC_021161.1_32742428 | Ca_kabuli_chr02    | 32742428                       | [A/G]       | 1067292232                                 |
| Ca_Kabuli_NC_021161.1_32781827 | Ca_kabuli_chr02    | 32781827                       | [A/C]       | 1067292233                                 |
| Ca_Kabuli_NC_021161.1_32781914 | Ca_kabuli_chr02    | 32781914                       | [A/C]       | 1067292234                                 |

| <b>SNP IDs</b>                 | <b>Chromosomes</b> | <b>Physical positions (bp)</b> | <b>SNPs</b> | <b>NCBI SNPdb accession IDs (NCBI_ss#)</b> |
|--------------------------------|--------------------|--------------------------------|-------------|--------------------------------------------|
| Ca_Kabuli_NC_021161.1_32844731 | Ca_kabuli_chr02    | 32844731                       | [C/G]       | 1067292235                                 |
| Ca_Kabuli_NC_021161.1_32844733 | Ca_kabuli_chr02    | 32844733                       | [T/G]       | 1067292236                                 |
| Ca_Kabuli_NC_021161.1_32844735 | Ca_kabuli_chr02    | 32844735                       | [C/T]       | 1067292237                                 |
| Ca_Kabuli_NC_021161.1_32844739 | Ca_kabuli_chr02    | 32844739                       | [G/C]       | 1067292238                                 |
| Ca_Kabuli_NC_021161.1_32902901 | Ca_kabuli_chr02    | 32902901                       | [A/G]       | 1067292239                                 |
| Ca_Kabuli_NC_021161.1_32934618 | Ca_kabuli_chr02    | 32934618                       | [A/C]       | 1067292240                                 |
| Ca_Kabuli_NC_021161.1_32936857 | Ca_kabuli_chr02    | 32936857                       | [T/G]       | 1067292241                                 |
| Ca_Kabuli_NC_021161.1_32936865 | Ca_kabuli_chr02    | 32936865                       | [A/C]       | 1067292242                                 |
| Ca_Kabuli_NC_021161.1_32936925 | Ca_kabuli_chr02    | 32936925                       | [T/C]       | 1067292243                                 |
| Ca_Kabuli_NC_021161.1_32936931 | Ca_kabuli_chr02    | 32936931                       | [T/A]       | 1067292244                                 |
| Ca_Kabuli_NC_021161.1_32937000 | Ca_kabuli_chr02    | 32937000                       | [A/C]       | 1067292245                                 |
| Ca_Kabuli_NC_021161.1_32957496 | Ca_kabuli_chr02    | 32957496                       | [T/C]       | 1067292246                                 |
| Ca_Kabuli_NC_021161.1_32957534 | Ca_kabuli_chr02    | 32957534                       | [T/A]       | 1067292247                                 |
| Ca_Kabuli_NC_021161.1_33103130 | Ca_kabuli_chr02    | 33103130                       | [A/G]       | 1067292248                                 |
| Ca_Kabuli_NC_021161.1_33103134 | Ca_kabuli_chr02    | 33103134                       | [T/A]       | 1067292249                                 |
| Ca_Kabuli_NC_021161.1_33103180 | Ca_kabuli_chr02    | 33103180                       | [T/A]       | 1067292250                                 |
| Ca_Kabuli_NC_021161.1_33103378 | Ca_kabuli_chr02    | 33103378                       | [T/C]       | 1067292251                                 |
| Ca_Kabuli_NC_021161.1_33103384 | Ca_kabuli_chr02    | 33103384                       | [A/G]       | 1067292252                                 |
| Ca_Kabuli_NC_021161.1_33103403 | Ca_kabuli_chr02    | 33103403                       | [A/G]       | 1067292253                                 |
| Ca_Kabuli_NC_021161.1_33103404 | Ca_kabuli_chr02    | 33103404                       | [C/A]       | 1067292254                                 |
| Ca_Kabuli_NC_021161.1_33103418 | Ca_kabuli_chr02    | 33103418                       | [G/T]       | 1067292255                                 |
| Ca_Kabuli_NC_021161.1_33103654 | Ca_kabuli_chr02    | 33103654                       | [T/G]       | 1067292256                                 |
| Ca_Kabuli_NC_021161.1_33103780 | Ca_kabuli_chr02    | 33103780                       | [T/G]       | 1067292257                                 |
| Ca_Kabuli_NC_021161.1_33103839 | Ca_kabuli_chr02    | 33103839                       | [T/G]       | 1067292258                                 |
| Ca_Kabuli_NC_021161.1_33103873 | Ca_kabuli_chr02    | 33103873                       | [T/G]       | 1067292259                                 |
| Ca_Kabuli_NC_021161.1_33104575 | Ca_kabuli_chr02    | 33104575                       | [A/C]       | 1067292260                                 |
| Ca_Kabuli_NC_021161.1_33143206 | Ca_kabuli_chr02    | 33143206                       | [C/A]       | 1067292261                                 |
| Ca_Kabuli_NC_021161.1_33172840 | Ca_kabuli_chr02    | 33172840                       | [T/C]       | 1067292262                                 |
| Ca_Kabuli_NC_021161.1_33172934 | Ca_kabuli_chr02    | 33172934                       | [A/C]       | 1067292263                                 |
| Ca_Kabuli_NC_021161.1_33196153 | Ca_kabuli_chr02    | 33196153                       | [T/C]       | 1067292264                                 |
| Ca_Kabuli_NC_021161.1_33198774 | Ca_kabuli_chr02    | 33198774                       | [T/G]       | 1067292265                                 |
| Ca_Kabuli_NC_021161.1_33198797 | Ca_kabuli_chr02    | 33198797                       | [T/G]       | 1067292266                                 |
| Ca_Kabuli_NC_021161.1_33302708 | Ca_kabuli_chr02    | 33302708                       | [T/G]       | 1067292267                                 |
| Ca_Kabuli_NC_021161.1_33309055 | Ca_kabuli_chr02    | 33309055                       | [T/C]       | 1067292268                                 |

| <b>SNP IDs</b>                 | <b>Chromosomes</b> | <b>Physical positions (bp)</b> | <b>SNPs</b> | <b>NCBI SNPdb accession IDs (NCBI_ss#)</b> |
|--------------------------------|--------------------|--------------------------------|-------------|--------------------------------------------|
| Ca_Kabuli_NC_021161.1_33326509 | Ca_kabuli_chr02    | 33326509                       | [A/T]       | 1067292269                                 |
| Ca_Kabuli_NC_021161.1_33340390 | Ca_kabuli_chr02    | 33340390                       | [A/C]       | 1067292270                                 |
| Ca_Kabuli_NC_021161.1_33340412 | Ca_kabuli_chr02    | 33340412                       | [T/G]       | 1067292271                                 |
| Ca_Kabuli_NC_021161.1_33345575 | Ca_kabuli_chr02    | 33345575                       | [A/G]       | 1067292272                                 |
| Ca_Kabuli_NC_021161.1_33398549 | Ca_kabuli_chr02    | 33398549                       | [T/C]       | 1067292273                                 |
| Ca_Kabuli_NC_021161.1_33398550 | Ca_kabuli_chr02    | 33398550                       | [G/A]       | 1067292274                                 |
| Ca_Kabuli_NC_021161.1_33399065 | Ca_kabuli_chr02    | 33399065                       | [T/C]       | 1067292275                                 |
| Ca_Kabuli_NC_021161.1_33399066 | Ca_kabuli_chr02    | 33399066                       | [G/T]       | 1067292276                                 |
| Ca_Kabuli_NC_021161.1_33399381 | Ca_kabuli_chr02    | 33399381                       | [C/T]       | 1067292277                                 |
| Ca_Kabuli_NC_021161.1_33399393 | Ca_kabuli_chr02    | 33399393                       | [C/A]       | 1067292278                                 |
| Ca_Kabuli_NC_021161.1_33399397 | Ca_kabuli_chr02    | 33399397                       | [C/T]       | 1067292279                                 |
| Ca_Kabuli_NC_021161.1_33486730 | Ca_kabuli_chr02    | 33486730                       | [T/G]       | 1067292280                                 |
| Ca_Kabuli_NC_021161.1_33490058 | Ca_kabuli_chr02    | 33490058                       | [C/A]       | 1067292281                                 |
| Ca_Kabuli_NC_021161.1_33490962 | Ca_kabuli_chr02    | 33490962                       | [A/G]       | 1067292282                                 |
| Ca_Kabuli_NC_021161.1_33490965 | Ca_kabuli_chr02    | 33490965                       | [T/G]       | 1067292283                                 |
| Ca_Kabuli_NC_021161.1_33647899 | Ca_kabuli_chr02    | 33647899                       | [A/C]       | 1067292284                                 |
| Ca_Kabuli_NC_021161.1_33718719 | Ca_kabuli_chr02    | 33718719                       | [T/C]       | 1067292285                                 |
| Ca_Kabuli_NC_021161.1_33756537 | Ca_kabuli_chr02    | 33756537                       | [G/C]       | 1067292286                                 |
| Ca_Kabuli_NC_021161.1_33785359 | Ca_kabuli_chr02    | 33785359                       | [A/C]       | 1067292287                                 |
| Ca_Kabuli_NC_021161.1_33786074 | Ca_kabuli_chr02    | 33786074                       | [A/G]       | 1067292288                                 |
| Ca_Kabuli_NC_021161.1_33786282 | Ca_kabuli_chr02    | 33786282                       | [A/C]       | 1067292289                                 |
| Ca_Kabuli_NC_021161.1_33788911 | Ca_kabuli_chr02    | 33788911                       | [A/C]       | 1067292290                                 |
| Ca_Kabuli_NC_021161.1_33798764 | Ca_kabuli_chr02    | 33798764                       | [A/G]       | 1067292291                                 |
| Ca_Kabuli_NC_021161.1_34203159 | Ca_kabuli_chr02    | 34203159                       | [T/G]       | 1067292292                                 |
| Ca_Kabuli_NC_021161.1_34223036 | Ca_kabuli_chr02    | 34223036                       | [T/G]       | 1067292293                                 |
| Ca_Kabuli_NC_021161.1_34223049 | Ca_kabuli_chr02    | 34223049                       | [T/G]       | 1067292294                                 |
| Ca_Kabuli_NC_021161.1_34290093 | Ca_kabuli_chr02    | 34290093                       | [C/A]       | 1067292295                                 |
| Ca_Kabuli_NC_021161.1_34290094 | Ca_kabuli_chr02    | 34290094                       | [T/G]       | 1067292296                                 |
| Ca_Kabuli_NC_021161.1_34290095 | Ca_kabuli_chr02    | 34290095                       | [T/A]       | 1067292297                                 |
| Ca_Kabuli_NC_021161.1_34290096 | Ca_kabuli_chr02    | 34290096                       | [C/T]       | 1067292298                                 |
| Ca_Kabuli_NC_021161.1_34299057 | Ca_kabuli_chr02    | 34299057                       | [C/T]       | 1067292299                                 |
| Ca_Kabuli_NC_021161.1_34299079 | Ca_kabuli_chr02    | 34299079                       | [A/C]       | 1067292300                                 |
| Ca_Kabuli_NC_021161.1_34299113 | Ca_kabuli_chr02    | 34299113                       | [T/C]       | 1067292301                                 |
| Ca_Kabuli_NC_021161.1_34300027 | Ca_kabuli_chr02    | 34300027                       | [A/T]       | 1067292302                                 |



| <b>SNP IDs</b>                 | <b>Chromosomes</b> | <b>Physical positions (bp)</b> | <b>SNPs</b> | <b>NCBI SNPdb accession IDs (NCBI_ss#)</b> |
|--------------------------------|--------------------|--------------------------------|-------------|--------------------------------------------|
| Ca_Kabuli_NC_021161.1_34428931 | Ca_kabuli_chr02    | 34428931                       | [T/C]       | 1067292303                                 |
| Ca_Kabuli_NC_021161.1_34428959 | Ca_kabuli_chr02    | 34428959                       | [C/A]       | 1067292304                                 |
| Ca_Kabuli_NC_021161.1_34428963 | Ca_kabuli_chr02    | 34428963                       | [A/G]       | 1067292305                                 |
| Ca_Kabuli_NC_021161.1_34429196 | Ca_kabuli_chr02    | 34429196                       | [A/C]       | 1067292306                                 |
| Ca_Kabuli_NC_021161.1_34432572 | Ca_kabuli_chr02    | 34432572                       | [A/T]       | 1067292307                                 |
| Ca_Kabuli_NC_021161.1_34432614 | Ca_kabuli_chr02    | 34432614                       | [A/G]       | 1067292308                                 |
| Ca_Kabuli_NC_021161.1_34432615 | Ca_kabuli_chr02    | 34432615                       | [A/C]       | 1067292309                                 |
| Ca_Kabuli_NC_021161.1_34551849 | Ca_kabuli_chr02    | 34551849                       | [A/C]       | 1067292310                                 |
| Ca_Kabuli_NC_021161.1_34551879 | Ca_kabuli_chr02    | 34551879                       | [A/C]       | 1067292311                                 |
| Ca_Kabuli_NC_021161.1_34734325 | Ca_kabuli_chr02    | 34734325                       | [T/G]       | 1067292312                                 |
| Ca_Kabuli_NC_021161.1_34734460 | Ca_kabuli_chr02    | 34734460                       | [T/G]       | 1067292313                                 |
| Ca_Kabuli_NC_021161.1_34734539 | Ca_kabuli_chr02    | 34734539                       | [T/G]       | 1067292314                                 |
| Ca_Kabuli_NC_021161.1_34739789 | Ca_kabuli_chr02    | 34739789                       | [A/G]       | 1067292315                                 |
| Ca_Kabuli_NC_021161.1_34739790 | Ca_kabuli_chr02    | 34739790                       | [C/A]       | 1067292316                                 |
| Ca_Kabuli_NC_021161.1_34739791 | Ca_kabuli_chr02    | 34739791                       | [C/T]       | 1067292317                                 |
| Ca_Kabuli_NC_021161.1_34739792 | Ca_kabuli_chr02    | 34739792                       | [A/C]       | 1067292318                                 |
| Ca_Kabuli_NC_021161.1_34739793 | Ca_kabuli_chr02    | 34739793                       | [G/T]       | 1067292319                                 |
| Ca_Kabuli_NC_021161.1_34751340 | Ca_kabuli_chr02    | 34751340                       | [T/G]       | 1067292320                                 |
| Ca_Kabuli_NC_021161.1_34752118 | Ca_kabuli_chr02    | 34752118                       | [T/G]       | 1067292321                                 |
| Ca_Kabuli_NC_021161.1_34752121 | Ca_kabuli_chr02    | 34752121                       | [T/C]       | 1067292322                                 |
| Ca_Kabuli_NC_021161.1_34752174 | Ca_kabuli_chr02    | 34752174                       | [A/G]       | 1067292323                                 |
| Ca_Kabuli_NC_021161.1_34752177 | Ca_kabuli_chr02    | 34752177                       | [T/C]       | 1067292324                                 |
| Ca_Kabuli_NC_021161.1_34827344 | Ca_kabuli_chr02    | 34827344                       | [A/G]       | 1067292325                                 |
| Ca_Kabuli_NC_021161.1_34827373 | Ca_kabuli_chr02    | 34827373                       | [T/A]       | 1067292326                                 |
| Ca_Kabuli_NC_021161.1_34847978 | Ca_kabuli_chr02    | 34847978                       | [A/C]       | 1067292327                                 |
| Ca_Kabuli_NC_021161.1_34848963 | Ca_kabuli_chr02    | 34848963                       | [G/C]       | 1067292328                                 |
| Ca_Kabuli_NC_021161.1_34848964 | Ca_kabuli_chr02    | 34848964                       | [G/T]       | 1067292329                                 |
| Ca_Kabuli_NC_021161.1_34862134 | Ca_kabuli_chr02    | 34862134                       | [T/G]       | 1067292330                                 |
| Ca_Kabuli_NC_021161.1_34862139 | Ca_kabuli_chr02    | 34862139                       | [A/G]       | 1067292331                                 |
| Ca_Kabuli_NC_021161.1_34982412 | Ca_kabuli_chr02    | 34982412                       | [C/T]       | 1067292332                                 |
| Ca_Kabuli_NC_021161.1_35009235 | Ca_kabuli_chr02    | 35009235                       | [T/G]       | 1067292333                                 |
| Ca_Kabuli_NC_021161.1_35009270 | Ca_kabuli_chr02    | 35009270                       | [A/C]       | 1067292334                                 |
| Ca_Kabuli_NC_021161.1_35015348 | Ca_kabuli_chr02    | 35015348                       | [T/G]       | 1067292335                                 |
| Ca_Kabuli_NC_021161.1_35046871 | Ca_kabuli_chr02    | 35046871                       | [T/G]       | 1067292336                                 |

| <b>SNP IDs</b>                 | <b>Chromosomes</b> | <b>Physical positions (bp)</b> | <b>SNPs</b> | <b>NCBI SNPdb accession IDs (NCBI_ss#)</b> |
|--------------------------------|--------------------|--------------------------------|-------------|--------------------------------------------|
| Ca_Kabuli_NC_021161.1_35046926 | Ca_kabuli_chr02    | 35046926                       | [A/G]       | 1067292337                                 |
| Ca_Kabuli_NC_021161.1_35046934 | Ca_kabuli_chr02    | 35046934                       | [A/G]       | 1067292338                                 |
| Ca_Kabuli_NC_021161.1_35059431 | Ca_kabuli_chr02    | 35059431                       | [T/C]       | 1067292339                                 |
| Ca_Kabuli_NC_021161.1_35059446 | Ca_kabuli_chr02    | 35059446                       | [A/G]       | 1067292340                                 |
| Ca_Kabuli_NC_021161.1_35060279 | Ca_kabuli_chr02    | 35060279                       | [A/C]       | 1067292341                                 |
| Ca_Kabuli_NC_021161.1_35096553 | Ca_kabuli_chr02    | 35096553                       | [T/G]       | 1067292342                                 |
| Ca_Kabuli_NC_021161.1_35103037 | Ca_kabuli_chr02    | 35103037                       | [A/C]       | 1067292343                                 |
| Ca_Kabuli_NC_021161.1_35103042 | Ca_kabuli_chr02    | 35103042                       | [T/C]       | 1067292344                                 |
| Ca_Kabuli_NC_021161.1_35103055 | Ca_kabuli_chr02    | 35103055                       | [A/G]       | 1067292345                                 |
| Ca_Kabuli_NC_021161.1_35103065 | Ca_kabuli_chr02    | 35103065                       | [A/C]       | 1067292346                                 |
| Ca_Kabuli_NC_021161.1_35121975 | Ca_kabuli_chr02    | 35121975                       | [A/T]       | 1067292347                                 |
| Ca_Kabuli_NC_021161.1_35121976 | Ca_kabuli_chr02    | 35121976                       | [T/C]       | 1067292348                                 |
| Ca_Kabuli_NC_021161.1_35121978 | Ca_kabuli_chr02    | 35121978                       | [T/C]       | 1067292349                                 |
| Ca_Kabuli_NC_021161.1_35121998 | Ca_kabuli_chr02    | 35121998                       | [A/G]       | 1067292350                                 |
| Ca_Kabuli_NC_021161.1_35122022 | Ca_kabuli_chr02    | 35122022                       | [A/G]       | 1067292351                                 |
| Ca_Kabuli_NC_021161.1_35122026 | Ca_kabuli_chr02    | 35122026                       | [T/G]       | 1067292352                                 |
| Ca_Kabuli_NC_021161.1_35122057 | Ca_kabuli_chr02    | 35122057                       | [A/C]       | 1067292353                                 |
| Ca_Kabuli_NC_021161.1_35147373 | Ca_kabuli_chr02    | 35147373                       | [A/C]       | 1067292354                                 |
| Ca_Kabuli_NC_021161.1_35154578 | Ca_kabuli_chr02    | 35154578                       | [T/G]       | 1067292355                                 |
| Ca_Kabuli_NC_021161.1_35154655 | Ca_kabuli_chr02    | 35154655                       | [A/C]       | 1067292356                                 |
| Ca_Kabuli_NC_021161.1_35171834 | Ca_kabuli_chr02    | 35171834                       | [A/C]       | 1067292357                                 |
| Ca_Kabuli_NC_021161.1_35171853 | Ca_kabuli_chr02    | 35171853                       | [T/G]       | 1067292358                                 |
| Ca_Kabuli_NC_021161.1_35209974 | Ca_kabuli_chr02    | 35209974                       | [T/A]       | 1067292359                                 |
| Ca_Kabuli_NC_021161.1_35363488 | Ca_kabuli_chr02    | 35363488                       | [T/C]       | 1067292360                                 |
| Ca_Kabuli_NC_021161.1_35441180 | Ca_kabuli_chr02    | 35441180                       | [G/A]       | 1067292361                                 |
| Ca_Kabuli_NC_021161.1_35441200 | Ca_kabuli_chr02    | 35441200                       | [T/C]       | 1067292362                                 |
| Ca_Kabuli_NC_021161.1_35441204 | Ca_kabuli_chr02    | 35441204                       | [T/C]       | 1067292363                                 |
| Ca_Kabuli_NC_021161.1_35441210 | Ca_kabuli_chr02    | 35441210                       | [T/C]       | 1067292364                                 |
| Ca_Kabuli_NC_021161.1_35441214 | Ca_kabuli_chr02    | 35441214                       | [T/C]       | 1067292365                                 |
| Ca_Kabuli_NC_021161.1_35441216 | Ca_kabuli_chr02    | 35441216                       | [G/C]       | 1067292366                                 |
| Ca_Kabuli_NC_021161.1_35441220 | Ca_kabuli_chr02    | 35441220                       | [T/C]       | 1067292367                                 |
| Ca_Kabuli_NC_021161.1_35441225 | Ca_kabuli_chr02    | 35441225                       | [T/C]       | 1067292368                                 |
| Ca_Kabuli_NC_021161.1_35441227 | Ca_kabuli_chr02    | 35441227                       | [T/C]       | 1067292369                                 |
| Ca_Kabuli_NC_021161.1_35449653 | Ca_kabuli_chr02    | 35449653                       | [A/G]       | 1067292370                                 |

| <b>SNP IDs</b>                 | <b>Chromosomes</b> | <b>Physical positions (bp)</b> | <b>SNPs</b> | <b>NCBI SNPdb accession IDs (NCBI_ss#)</b> |
|--------------------------------|--------------------|--------------------------------|-------------|--------------------------------------------|
| Ca_Kabuli_NC_021161.1_35476121 | Ca_kabuli_chr02    | 35476121                       | [A/G]       | 1067292371                                 |
| Ca_Kabuli_NC_021161.1_35476125 | Ca_kabuli_chr02    | 35476125                       | [T/C]       | 1067292372                                 |
| Ca_Kabuli_NC_021161.1_35505884 | Ca_kabuli_chr02    | 35505884                       | [T/G]       | 1067292373                                 |
| Ca_Kabuli_NC_021161.1_35505927 | Ca_kabuli_chr02    | 35505927                       | [T/C]       | 1067292374                                 |
| Ca_Kabuli_NC_021161.1_35505948 | Ca_kabuli_chr02    | 35505948                       | [A/G]       | 1067292375                                 |
| Ca_Kabuli_NC_021161.1_35505960 | Ca_kabuli_chr02    | 35505960                       | [T/C]       | 1067292376                                 |
| Ca_Kabuli_NC_021161.1_35506245 | Ca_kabuli_chr02    | 35506245                       | [A/G]       | 1067292377                                 |
| Ca_Kabuli_NC_021161.1_35506254 | Ca_kabuli_chr02    | 35506254                       | [G/A]       | 1067292378                                 |
| Ca_Kabuli_NC_021161.1_35506256 | Ca_kabuli_chr02    | 35506256                       | [G/A]       | 1067292379                                 |
| Ca_Kabuli_NC_021161.1_35506258 | Ca_kabuli_chr02    | 35506258                       | [G/A]       | 1067292380                                 |
| Ca_Kabuli_NC_021161.1_35506259 | Ca_kabuli_chr02    | 35506259                       | [G/A]       | 1067292381                                 |
| Ca_Kabuli_NC_021161.1_35533250 | Ca_kabuli_chr02    | 35533250                       | [T/G]       | 1067292382                                 |
| Ca_Kabuli_NC_021161.1_35533271 | Ca_kabuli_chr02    | 35533271                       | [T/G]       | 1067292383                                 |
| Ca_Kabuli_NC_021161.1_35593355 | Ca_kabuli_chr02    | 35593355                       | [C/G]       | 1067292384                                 |
| Ca_Kabuli_NC_021161.1_35593363 | Ca_kabuli_chr02    | 35593363                       | [C/T]       | 1067292385                                 |
| Ca_Kabuli_NC_021161.1_35593412 | Ca_kabuli_chr02    | 35593412                       | [T/G]       | 1067292386                                 |
| Ca_Kabuli_NC_021161.1_35593713 | Ca_kabuli_chr02    | 35593713                       | [T/C]       | 1067292387                                 |
| Ca_Kabuli_NC_021161.1_35593731 | Ca_kabuli_chr02    | 35593731                       | [A/G]       | 1067292388                                 |
| Ca_Kabuli_NC_021161.1_35593749 | Ca_kabuli_chr02    | 35593749                       | [T/C]       | 1067292389                                 |
| Ca_Kabuli_NC_021161.1_35601566 | Ca_kabuli_chr02    | 35601566                       | [T/C]       | 1067292390                                 |
| Ca_Kabuli_NC_021161.1_35601571 | Ca_kabuli_chr02    | 35601571                       | [A/C]       | 1067292391                                 |
| Ca_Kabuli_NC_021161.1_35601578 | Ca_kabuli_chr02    | 35601578                       | [C/T]       | 1067292392                                 |
| Ca_Kabuli_NC_021161.1_35601657 | Ca_kabuli_chr02    | 35601657                       | [T/C]       | 1067292393                                 |
| Ca_Kabuli_NC_021161.1_35601691 | Ca_kabuli_chr02    | 35601691                       | [A/G]       | 1067292394                                 |
| Ca_Kabuli_NC_021161.1_35612587 | Ca_kabuli_chr02    | 35612587                       | [C/A]       | 1067292395                                 |
| Ca_Kabuli_NC_021161.1_35612644 | Ca_kabuli_chr02    | 35612644                       | [G/A]       | 1067292396                                 |
| Ca_Kabuli_NC_021161.1_35613135 | Ca_kabuli_chr02    | 35613135                       | [T/C]       | 1067292397                                 |
| Ca_Kabuli_NC_021161.1_35661053 | Ca_kabuli_chr02    | 35661053                       | [C/T]       | 1067292398                                 |
| Ca_Kabuli_NC_021161.1_35670478 | Ca_kabuli_chr02    | 35670478                       | [A/G]       | 1067292399                                 |
| Ca_Kabuli_NC_021161.1_35670520 | Ca_kabuli_chr02    | 35670520                       | [A/T]       | 1067292400                                 |
| Ca_Kabuli_NC_021161.1_35676127 | Ca_kabuli_chr02    | 35676127                       | [G/A]       | 1067292401                                 |
| Ca_Kabuli_NC_021161.1_35676704 | Ca_kabuli_chr02    | 35676704                       | [T/A]       | 1067292402                                 |
| Ca_Kabuli_NC_021161.1_35708845 | Ca_kabuli_chr02    | 35708845                       | [A/C]       | 1067292403                                 |
| Ca_Kabuli_NC_021161.1_35709004 | Ca_kabuli_chr02    | 35709004                       | [C/T]       | 1067292404                                 |

| <b>SNP IDs</b>                 | <b>Chromosomes</b> | <b>Physical positions (bp)</b> | <b>SNPs</b> | <b>NCBI SNPdb accession IDs (NCBI_ss#)</b> |
|--------------------------------|--------------------|--------------------------------|-------------|--------------------------------------------|
| Ca_Kabuli_NC_021161.1_35709032 | Ca_kabuli_chr02    | 35709032                       | [T/C]       | 1067292405                                 |
| Ca_Kabuli_NC_021161.1_35709129 | Ca_kabuli_chr02    | 35709129                       | [C/G]       | 1067292406                                 |
| Ca_Kabuli_NC_021161.1_35727800 | Ca_kabuli_chr02    | 35727800                       | [G/A]       | 1067292407                                 |
| Ca_Kabuli_NC_021161.1_35754653 | Ca_kabuli_chr02    | 35754653                       | [C/T]       | 1067292408                                 |
| Ca_Kabuli_NC_021161.1_35754677 | Ca_kabuli_chr02    | 35754677                       | [T/A]       | 1067292409                                 |
| Ca_Kabuli_NC_021161.1_35754679 | Ca_kabuli_chr02    | 35754679                       | [A/T]       | 1067292410                                 |
| Ca_Kabuli_NC_021161.1_35760155 | Ca_kabuli_chr02    | 35760155                       | [G/A]       | 1067292411                                 |
| Ca_Kabuli_NC_021161.1_35760165 | Ca_kabuli_chr02    | 35760165                       | [A/G]       | 1067292412                                 |
| Ca_Kabuli_NC_021161.1_35760170 | Ca_kabuli_chr02    | 35760170                       | [A/G]       | 1067292413                                 |
| Ca_Kabuli_NC_021161.1_35770311 | Ca_kabuli_chr02    | 35770311                       | [A/G]       | 1067292414                                 |
| Ca_Kabuli_NC_021161.1_35770313 | Ca_kabuli_chr02    | 35770313                       | [A/G]       | 1067292415                                 |
| Ca_Kabuli_NC_021161.1_35795410 | Ca_kabuli_chr02    | 35795410                       | [T/C]       | 1067292416                                 |
| Ca_Kabuli_NC_021161.1_35795440 | Ca_kabuli_chr02    | 35795440                       | [T/C]       | 1067292417                                 |
| Ca_Kabuli_NC_021161.1_35795510 | Ca_kabuli_chr02    | 35795510                       | [C/A]       | 1067292418                                 |
| Ca_Kabuli_NC_021161.1_35795511 | Ca_kabuli_chr02    | 35795511                       | [T/G]       | 1067292419                                 |
| Ca_Kabuli_NC_021161.1_35859086 | Ca_kabuli_chr02    | 35859086                       | [A/G]       | 1067292420                                 |
| Ca_Kabuli_NC_021161.1_35875663 | Ca_kabuli_chr02    | 35875663                       | [T/G]       | 1067292421                                 |
| Ca_Kabuli_NC_021161.1_35894728 | Ca_kabuli_chr02    | 35894728                       | [T/C]       | 1067292422                                 |
| Ca_Kabuli_NC_021161.1_35896680 | Ca_kabuli_chr02    | 35896680                       | [T/G]       | 1067292423                                 |
| Ca_Kabuli_NC_021161.1_35972953 | Ca_kabuli_chr02    | 35972953                       | [C/A]       | 1067292424                                 |
| Ca_Kabuli_NC_021161.1_35986432 | Ca_kabuli_chr02    | 35986432                       | [G/C]       | 1067292425                                 |
| Ca_Kabuli_NC_021161.1_36008104 | Ca_kabuli_chr02    | 36008104                       | [T/C]       | 1067292426                                 |
| Ca_Kabuli_NC_021161.1_36016362 | Ca_kabuli_chr02    | 36016362                       | [A/G]       | 1067292427                                 |
| Ca_Kabuli_NC_021161.1_36018141 | Ca_kabuli_chr02    | 36018141                       | [T/G]       | 1067292428                                 |
| Ca_Kabuli_NC_021161.1_36039313 | Ca_kabuli_chr02    | 36039313                       | [C/T]       | 1067292429                                 |
| Ca_Kabuli_NC_021161.1_36039387 | Ca_kabuli_chr02    | 36039387                       | [T/C]       | 1067292430                                 |
| Ca_Kabuli_NC_021161.1_36039398 | Ca_kabuli_chr02    | 36039398                       | [A/C]       | 1067292431                                 |
| Ca_Kabuli_NC_021161.1_36046593 | Ca_kabuli_chr02    | 36046593                       | [G/T]       | 1067292432                                 |
| Ca_Kabuli_NC_021161.1_36046595 | Ca_kabuli_chr02    | 36046595                       | [T/G]       | 1067292433                                 |
| Ca_Kabuli_NC_021161.1_36046720 | Ca_kabuli_chr02    | 36046720                       | [T/A]       | 1067292434                                 |
| Ca_Kabuli_NC_021161.1_36046741 | Ca_kabuli_chr02    | 36046741                       | [G/A]       | 1067292435                                 |
| Ca_Kabuli_NC_021161.1_36046767 | Ca_kabuli_chr02    | 36046767                       | [T/A]       | 1067292436                                 |
| Ca_Kabuli_NC_021161.1_36046820 | Ca_kabuli_chr02    | 36046820                       | [T/A]       | 1067292437                                 |
| Ca_Kabuli_NC_021161.1_36051329 | Ca_kabuli_chr02    | 36051329                       | [T/C]       | 1067292438                                 |

| <b>SNP IDs</b>                 | <b>Chromosomes</b> | <b>Physical positions (bp)</b> | <b>SNPs</b> | <b>NCBI SNPdb accession IDs (NCBI_ss#)</b> |
|--------------------------------|--------------------|--------------------------------|-------------|--------------------------------------------|
| Ca_Kabuli_NC_021161.1_36055099 | Ca_kabuli_chr02    | 36055099                       | [T/C]       | 1067292439                                 |
| Ca_Kabuli_NC_021161.1_36055128 | Ca_kabuli_chr02    | 36055128                       | [T/A]       | 1067292440                                 |
| Ca_Kabuli_NC_021161.1_36055150 | Ca_kabuli_chr02    | 36055150                       | [A/G]       | 1067292441                                 |
| Ca_Kabuli_NC_021161.1_36069340 | Ca_kabuli_chr02    | 36069340                       | [C/T]       | 1067292442                                 |
| Ca_Kabuli_NC_021161.1_36069379 | Ca_kabuli_chr02    | 36069379                       | [A/G]       | 1067292443                                 |
| Ca_Kabuli_NC_021161.1_36069394 | Ca_kabuli_chr02    | 36069394                       | [T/C]       | 1067292444                                 |
| Ca_Kabuli_NC_021161.1_36072247 | Ca_kabuli_chr02    | 36072247                       | [A/C]       | 1067292445                                 |
| Ca_Kabuli_NC_021161.1_36073955 | Ca_kabuli_chr02    | 36073955                       | [T/C]       | 1067292446                                 |
| Ca_Kabuli_NC_021161.1_36073971 | Ca_kabuli_chr02    | 36073971                       | [A/G]       | 1067292447                                 |
| Ca_Kabuli_NC_021161.1_36073980 | Ca_kabuli_chr02    | 36073980                       | [A/C]       | 1067292448                                 |
| Ca_Kabuli_NC_021161.1_36074024 | Ca_kabuli_chr02    | 36074024                       | [T/G]       | 1067292449                                 |
| Ca_Kabuli_NC_021161.1_36074147 | Ca_kabuli_chr02    | 36074147                       | [C/T]       | 1067292450                                 |
| Ca_Kabuli_NC_021161.1_36088577 | Ca_kabuli_chr02    | 36088577                       | [T/A]       | 1067292451                                 |
| Ca_Kabuli_NC_021161.1_36088676 | Ca_kabuli_chr02    | 36088676                       | [C/T]       | 1067292452                                 |
| Ca_Kabuli_NC_021161.1_36101377 | Ca_kabuli_chr02    | 36101377                       | [T/C]       | 1067292453                                 |
| Ca_Kabuli_NC_021161.1_36101414 | Ca_kabuli_chr02    | 36101414                       | [T/C]       | 1067292454                                 |
| Ca_Kabuli_NC_021161.1_36101450 | Ca_kabuli_chr02    | 36101450                       | [T/C]       | 1067292455                                 |
| Ca_Kabuli_NC_021161.1_36117647 | Ca_kabuli_chr02    | 36117647                       | [A/G]       | 1067292456                                 |
| Ca_Kabuli_NC_021161.1_36117695 | Ca_kabuli_chr02    | 36117695                       | [A/T]       | 1067292457                                 |
| Ca_Kabuli_NC_021161.1_36165245 | Ca_kabuli_chr02    | 36165245                       | [G/T]       | 1067292458                                 |
| Ca_Kabuli_NC_021161.1_36171226 | Ca_kabuli_chr02    | 36171226                       | [T/G]       | 1067292459                                 |
| Ca_Kabuli_NC_021161.1_36171325 | Ca_kabuli_chr02    | 36171325                       | [C/A]       | 1067292460                                 |
| Ca_Kabuli_NC_021161.1_36171326 | Ca_kabuli_chr02    | 36171326                       | [T/G]       | 1067292461                                 |
| Ca_Kabuli_NC_021161.1_36171327 | Ca_kabuli_chr02    | 36171327                       | [T/A]       | 1067292462                                 |
| Ca_Kabuli_NC_021161.1_36238770 | Ca_kabuli_chr02    | 36238770                       | [C/T]       | 1067292463                                 |
| Ca_Kabuli_NC_021161.1_36238788 | Ca_kabuli_chr02    | 36238788                       | [A/C]       | 1067292464                                 |
| Ca_Kabuli_NC_021161.1_36238792 | Ca_kabuli_chr02    | 36238792                       | [A/G]       | 1067292465                                 |
| Ca_Kabuli_NC_021161.1_36238798 | Ca_kabuli_chr02    | 36238798                       | [A/G]       | 1067292466                                 |
| Ca_Kabuli_NC_021161.1_36240619 | Ca_kabuli_chr02    | 36240619                       | [T/G]       | 1067292467                                 |
| Ca_Kabuli_NC_021161.1_36275166 | Ca_kabuli_chr02    | 36275166                       | [T/A]       | 1067292468                                 |
| Ca_Kabuli_NC_021161.1_36275167 | Ca_kabuli_chr02    | 36275167                       | [G/T]       | 1067292469                                 |
| Ca_Kabuli_NC_021161.1_36275168 | Ca_kabuli_chr02    | 36275168                       | [A/C]       | 1067292470                                 |
| Ca_Kabuli_NC_021161.1_36275169 | Ca_kabuli_chr02    | 36275169                       | [G/T]       | 1067292471                                 |
| Ca_Kabuli_NC_021161.1_36276820 | Ca_kabuli_chr02    | 36276820                       | [T/C]       | 1067292472                                 |

| <b>SNP IDs</b>                 | <b>Chromosomes</b> | <b>Physical positions (bp)</b> | <b>SNPs</b> | <b>NCBI SNPdb accession IDs (NCBI_ss#)</b> |
|--------------------------------|--------------------|--------------------------------|-------------|--------------------------------------------|
| Ca_Kabuli_NC_021161.1_36276876 | Ca_kabuli_chr02    | 36276876                       | [T/C]       | 1067292473                                 |
| Ca_Kabuli_NC_021161.1_36276883 | Ca_kabuli_chr02    | 36276883                       | [T/G]       | 1067292474                                 |
| Ca_Kabuli_NC_021161.1_36276889 | Ca_kabuli_chr02    | 36276889                       | [G/A]       | 1067292475                                 |
| Ca_Kabuli_NC_021161.1_36276891 | Ca_kabuli_chr02    | 36276891                       | [T/G]       | 1067292476                                 |
| Ca_Kabuli_NC_021161.1_36276907 | Ca_kabuli_chr02    | 36276907                       | [T/G]       | 1067292477                                 |
| Ca_Kabuli_NC_021161.1_36323595 | Ca_kabuli_chr02    | 36323595                       | [T/G]       | 1067292478                                 |
| Ca_Kabuli_NC_021161.1_36323606 | Ca_kabuli_chr02    | 36323606                       | [T/G]       | 1067292479                                 |
| Ca_Kabuli_NC_021161.1_36323618 | Ca_kabuli_chr02    | 36323618                       | [G/A]       | 1067292480                                 |
| Ca_Kabuli_NC_021161.1_36323646 | Ca_kabuli_chr02    | 36323646                       | [A/G]       | 1067292481                                 |
| Ca_Kabuli_NC_021161.1_36326190 | Ca_kabuli_chr02    | 36326190                       | [T/C]       | 1067292482                                 |
| Ca_Kabuli_NC_021161.1_36326312 | Ca_kabuli_chr02    | 36326312                       | [T/C]       | 1067292483                                 |
| Ca_Kabuli_NC_021161.1_36326346 | Ca_kabuli_chr02    | 36326346                       | [T/A]       | 1067292484                                 |
| Ca_Kabuli_NC_021161.1_36326352 | Ca_kabuli_chr02    | 36326352                       | [A/G]       | 1067292485                                 |
| Ca_Kabuli_NC_021161.1_36326413 | Ca_kabuli_chr02    | 36326413                       | [A/G]       | 1067292486                                 |
| Ca_Kabuli_NC_021161.1_36335214 | Ca_kabuli_chr02    | 36335214                       | [T/G]       | 1067292487                                 |
| Ca_Kabuli_NC_021161.1_36343886 | Ca_kabuli_chr02    | 36343886                       | [T/G]       | 1067292488                                 |
| Ca_Kabuli_NC_021161.1_36346216 | Ca_kabuli_chr02    | 36346216                       | [A/C]       | 1067292489                                 |
| Ca_Kabuli_NC_021161.1_36357168 | Ca_kabuli_chr02    | 36357168                       | [T/G]       | 1067292490                                 |
| Ca_Kabuli_NC_021161.1_36375623 | Ca_kabuli_chr02    | 36375623                       | [A/C]       | 1067292491                                 |
| Ca_Kabuli_NC_021161.1_36375627 | Ca_kabuli_chr02    | 36375627                       | [A/C]       | 1067292492                                 |
| Ca_Kabuli_NC_021161.1_36399776 | Ca_kabuli_chr02    | 36399776                       | [T/C]       | 1067292493                                 |
| Ca_Kabuli_NC_021161.1_36399778 | Ca_kabuli_chr02    | 36399778                       | [T/C]       | 1067292494                                 |
| Ca_Kabuli_NC_021161.1_36427777 | Ca_kabuli_chr02    | 36427777                       | [T/C]       | 1067292495                                 |
| Ca_Kabuli_NC_021161.1_36427779 | Ca_kabuli_chr02    | 36427779                       | [T/G]       | 1067292496                                 |
| Ca_Kabuli_NC_021161.1_36453677 | Ca_kabuli_chr02    | 36453677                       | [A/C]       | 1067292497                                 |
| Ca_Kabuli_NC_021161.1_36453707 | Ca_kabuli_chr02    | 36453707                       | [T/G]       | 1067292498                                 |
| Ca_Kabuli_NC_021161.1_36461900 | Ca_kabuli_chr02    | 36461900                       | [A/T]       | 1067292499                                 |
| Ca_Kabuli_NC_021161.1_36461939 | Ca_kabuli_chr02    | 36461939                       | [T/C]       | 1067292500                                 |
| Ca_Kabuli_NC_021161.1_36466832 | Ca_kabuli_chr02    | 36466832                       | [C/A]       | 1067292501                                 |
| Ca_Kabuli_NC_021161.1_36466982 | Ca_kabuli_chr02    | 36466982                       | [T/A]       | 1067292502                                 |
| Ca_Kabuli_NC_021161.1_36466992 | Ca_kabuli_chr02    | 36466992                       | [A/T]       | 1067292503                                 |
| Ca_Kabuli_NC_021161.1_36466995 | Ca_kabuli_chr02    | 36466995                       | [A/G]       | 1067292504                                 |
| Ca_Kabuli_NC_021161.1_36467002 | Ca_kabuli_chr02    | 36467002                       | [T/C]       | 1067292505                                 |
| Ca_Kabuli_NC_021161.1_36467100 | Ca_kabuli_chr02    | 36467100                       | [A/C]       | 1067292506                                 |

| <b>SNP IDs</b>                 | <b>Chromosomes</b> | <b>Physical positions (bp)</b> | <b>SNPs</b> | <b>NCBI SNPdb accession IDs (NCBI_ss#)</b> |
|--------------------------------|--------------------|--------------------------------|-------------|--------------------------------------------|
| Ca_Kabuli_NC_021161.1_36467109 | Ca_kabuli_chr02    | 36467109                       | [A/C]       | 1067292507                                 |
| Ca_Kabuli_NC_021161.1_36505271 | Ca_kabuli_chr02    | 36505271                       | [A/C]       | 1067292508                                 |
| Ca_Kabuli_NC_021161.1_36505764 | Ca_kabuli_chr02    | 36505764                       | [T/C]       | 1067292509                                 |
| Ca_Kabuli_NC_021161.1_36533802 | Ca_kabuli_chr02    | 36533802                       | [T/G]       | 1067292510                                 |
| Ca_Kabuli_NC_021161.1_36533883 | Ca_kabuli_chr02    | 36533883                       | [A/C]       | 1067292511                                 |
| Ca_Kabuli_NC_021161.1_36533885 | Ca_kabuli_chr02    | 36533885                       | [A/C]       | 1067292512                                 |
| Ca_Kabuli_NC_021161.1_36565919 | Ca_kabuli_chr02    | 36565919                       | [A/C]       | 1067292513                                 |
| Ca_Kabuli_NC_021161.1_36565937 | Ca_kabuli_chr02    | 36565937                       | [A/G]       | 1067292514                                 |
| Ca_Kabuli_NC_021161.1_36634330 | Ca_kabuli_chr02    | 36634330                       | [A/G]       | 1067292515                                 |
| Ca_Kabuli_NC_021162.1_17783    | Ca_kabuli_chr03    | 17783                          | [T/G]       | 1067292516                                 |
| Ca_Kabuli_NC_021162.1_17786    | Ca_kabuli_chr03    | 17786                          | [T/C]       | 1067292517                                 |
| Ca_Kabuli_NC_021162.1_17826    | Ca_kabuli_chr03    | 17826                          | [A/C]       | 1067292518                                 |
| Ca_Kabuli_NC_021162.1_55508    | Ca_kabuli_chr03    | 55508                          | [A/G]       | 1067292519                                 |
| Ca_Kabuli_NC_021162.1_55510    | Ca_kabuli_chr03    | 55510                          | [A/C]       | 1067292520                                 |
| Ca_Kabuli_NC_021162.1_57241    | Ca_kabuli_chr03    | 57241                          | [T/A]       | 1067292521                                 |
| Ca_Kabuli_NC_021162.1_57271    | Ca_kabuli_chr03    | 57271                          | [T/C]       | 1067292522                                 |
| Ca_Kabuli_NC_021162.1_72801    | Ca_kabuli_chr03    | 72801                          | [T/G]       | 1067292523                                 |
| Ca_Kabuli_NC_021162.1_171675   | Ca_kabuli_chr03    | 171675                         | [A/T]       | 1067292524                                 |
| Ca_Kabuli_NC_021162.1_202442   | Ca_kabuli_chr03    | 202442                         | [T/G]       | 1067292525                                 |
| Ca_Kabuli_NC_021162.1_228564   | Ca_kabuli_chr03    | 228564                         | [A/C]       | 1067292526                                 |
| Ca_Kabuli_NC_021162.1_419704   | Ca_kabuli_chr03    | 419704                         | [A/T]       | 1067292527                                 |
| Ca_Kabuli_NC_021162.1_559006   | Ca_kabuli_chr03    | 559006                         | [T/C]       | 1067292528                                 |
| Ca_Kabuli_NC_021162.1_559031   | Ca_kabuli_chr03    | 559031                         | [A/T]       | 1067292529                                 |
| Ca_Kabuli_NC_021162.1_559070   | Ca_kabuli_chr03    | 559070                         | [A/T]       | 1067292530                                 |
| Ca_Kabuli_NC_021162.1_638768   | Ca_kabuli_chr03    | 638768                         | [A/C]       | 1067292531                                 |
| Ca_Kabuli_NC_021162.1_654821   | Ca_kabuli_chr03    | 654821                         | [A/G]       | 1067292532                                 |
| Ca_Kabuli_NC_021162.1_654827   | Ca_kabuli_chr03    | 654827                         | [T/G]       | 1067292533                                 |
| Ca_Kabuli_NC_021162.1_654847   | Ca_kabuli_chr03    | 654847                         | [A/C]       | 1067292534                                 |
| Ca_Kabuli_NC_021162.1_654931   | Ca_kabuli_chr03    | 654931                         | [A/C]       | 1067292535                                 |
| Ca_Kabuli_NC_021162.1_726856   | Ca_kabuli_chr03    | 726856                         | [G/A]       | 1067292536                                 |
| Ca_Kabuli_NC_021162.1_726877   | Ca_kabuli_chr03    | 726877                         | [A/C]       | 1067292537                                 |
| Ca_Kabuli_NC_021162.1_726898   | Ca_kabuli_chr03    | 726898                         | [T/G]       | 1067292538                                 |
| Ca_Kabuli_NC_021162.1_774205   | Ca_kabuli_chr03    | 774205                         | [C/G]       | 1067292539                                 |
| Ca_Kabuli_NC_021162.1_779153   | Ca_kabuli_chr03    | 779153                         | [T/C]       | 1067292540                                 |

| <b>SNP IDs</b>                | <b>Chromosomes</b> | <b>Physical positions (bp)</b> | <b>SNPs</b> | <b>NCBI SNPdb accession IDs (NCBI_ss#)</b> |
|-------------------------------|--------------------|--------------------------------|-------------|--------------------------------------------|
| Ca_Kabuli_NC_021162.1_779217  | Ca_kabuli_chr03    | 779217                         | [A/G]       | 1067292541                                 |
| Ca_Kabuli_NC_021162.1_938903  | Ca_kabuli_chr03    | 938903                         | [T/A]       | 1067292542                                 |
| Ca_Kabuli_NC_021162.1_1307829 | Ca_kabuli_chr03    | 1307829                        | [T/C]       | 1067292543                                 |
| Ca_Kabuli_NC_021162.1_1307833 | Ca_kabuli_chr03    | 1307833                        | [T/G]       | 1067292544                                 |
| Ca_Kabuli_NC_021162.1_1307848 | Ca_kabuli_chr03    | 1307848                        | [A/G]       | 1067292545                                 |
| Ca_Kabuli_NC_021162.1_1307876 | Ca_kabuli_chr03    | 1307876                        | [A/C]       | 1067292546                                 |
| Ca_Kabuli_NC_021162.1_1507162 | Ca_kabuli_chr03    | 1507162                        | [G/A]       | 1067292547                                 |
| Ca_Kabuli_NC_021162.1_1507166 | Ca_kabuli_chr03    | 1507166                        | [A/T]       | 1067292548                                 |
| Ca_Kabuli_NC_021162.1_1507167 | Ca_kabuli_chr03    | 1507167                        | [C/T]       | 1067292549                                 |
| Ca_Kabuli_NC_021162.1_1746337 | Ca_kabuli_chr03    | 1746337                        | [T/G]       | 1067292550                                 |
| Ca_Kabuli_NC_021162.1_1746346 | Ca_kabuli_chr03    | 1746346                        | [A/T]       | 1067292551                                 |
| Ca_Kabuli_NC_021162.1_1918964 | Ca_kabuli_chr03    | 1918964                        | [A/C]       | 1067292552                                 |
| Ca_Kabuli_NC_021162.1_2097376 | Ca_kabuli_chr03    | 2097376                        | [T/G]       | 1067292553                                 |
| Ca_Kabuli_NC_021162.1_2461959 | Ca_kabuli_chr03    | 2461959                        | [A/G]       | 1067292554                                 |
| Ca_Kabuli_NC_021162.1_2461960 | Ca_kabuli_chr03    | 2461960                        | [A/G]       | 1067292555                                 |
| Ca_Kabuli_NC_021162.1_2657331 | Ca_kabuli_chr03    | 2657331                        | [G/A]       | 1067292556                                 |
| Ca_Kabuli_NC_021162.1_2773414 | Ca_kabuli_chr03    | 2773414                        | [C/A]       | 1067292557                                 |
| Ca_Kabuli_NC_021162.1_2825562 | Ca_kabuli_chr03    | 2825562                        | [G/A]       | 1067292558                                 |
| Ca_Kabuli_NC_021162.1_2825574 | Ca_kabuli_chr03    | 2825574                        | [T/C]       | 1067292559                                 |
| Ca_Kabuli_NC_021162.1_2899877 | Ca_kabuli_chr03    | 2899877                        | [A/C]       | 1067292560                                 |
| Ca_Kabuli_NC_021162.1_2919136 | Ca_kabuli_chr03    | 2919136                        | [T/C]       | 1067292561                                 |
| Ca_Kabuli_NC_021162.1_2919165 | Ca_kabuli_chr03    | 2919165                        | [G/A]       | 1067292562                                 |
| Ca_Kabuli_NC_021162.1_2919167 | Ca_kabuli_chr03    | 2919167                        | [T/G]       | 1067292563                                 |
| Ca_Kabuli_NC_021162.1_2919168 | Ca_kabuli_chr03    | 2919168                        | [G/T]       | 1067292564                                 |
| Ca_Kabuli_NC_021162.1_2919169 | Ca_kabuli_chr03    | 2919169                        | [T/G]       | 1067292565                                 |
| Ca_Kabuli_NC_021162.1_2919171 | Ca_kabuli_chr03    | 2919171                        | [T/G]       | 1067292566                                 |
| Ca_Kabuli_NC_021162.1_2931012 | Ca_kabuli_chr03    | 2931012                        | [A/C]       | 1067292567                                 |
| Ca_Kabuli_NC_021162.1_2931017 | Ca_kabuli_chr03    | 2931017                        | [A/C]       | 1067292568                                 |
| Ca_Kabuli_NC_021162.1_2975130 | Ca_kabuli_chr03    | 2975130                        | [A/C]       | 1067292569                                 |
| Ca_Kabuli_NC_021162.1_2975136 | Ca_kabuli_chr03    | 2975136                        | [A/G]       | 1067292570                                 |
| Ca_Kabuli_NC_021162.1_2975145 | Ca_kabuli_chr03    | 2975145                        | [C/T]       | 1067292571                                 |
| Ca_Kabuli_NC_021162.1_2975157 | Ca_kabuli_chr03    | 2975157                        | [A/G]       | 1067292572                                 |
| Ca_Kabuli_NC_021162.1_2975166 | Ca_kabuli_chr03    | 2975166                        | [A/T]       | 1067292573                                 |
| Ca_Kabuli_NC_021162.1_2975179 | Ca_kabuli_chr03    | 2975179                        | [T/G]       | 1067292574                                 |



| <b>SNP IDs</b>                | <b>Chromosomes</b> | <b>Physical positions (bp)</b> | <b>SNPs</b> | <b>NCBI SNPdb accession IDs (NCBI_ss#)</b> |
|-------------------------------|--------------------|--------------------------------|-------------|--------------------------------------------|
| Ca_Kabuli_NC_021162.1_2983757 | Ca_kabuli_chr03    | 2983757                        | [T/G]       | 1067292575                                 |
| Ca_Kabuli_NC_021162.1_2985176 | Ca_kabuli_chr03    | 2985176                        | [T/G]       | 1067292576                                 |
| Ca_Kabuli_NC_021162.1_3139678 | Ca_kabuli_chr03    | 3139678                        | [T/G]       | 1067292577                                 |
| Ca_Kabuli_NC_021162.1_3182276 | Ca_kabuli_chr03    | 3182276                        | [T/G]       | 1067292578                                 |
| Ca_Kabuli_NC_021162.1_3182360 | Ca_kabuli_chr03    | 3182360                        | [A/C]       | 1067292579                                 |
| Ca_Kabuli_NC_021162.1_3182403 | Ca_kabuli_chr03    | 3182403                        | [G/A]       | 1067292580                                 |
| Ca_Kabuli_NC_021162.1_3516526 | Ca_kabuli_chr03    | 3516526                        | [A/C]       | 1067292581                                 |
| Ca_Kabuli_NC_021162.1_3524264 | Ca_kabuli_chr03    | 3524264                        | [T/C]       | 1067292582                                 |
| Ca_Kabuli_NC_021162.1_3524268 | Ca_kabuli_chr03    | 3524268                        | [T/G]       | 1067292583                                 |
| Ca_Kabuli_NC_021162.1_3557377 | Ca_kabuli_chr03    | 3557377                        | [T/A]       | 1067292584                                 |
| Ca_Kabuli_NC_021162.1_3603410 | Ca_kabuli_chr03    | 3603410                        | [T/C]       | 1067292585                                 |
| Ca_Kabuli_NC_021162.1_3603423 | Ca_kabuli_chr03    | 3603423                        | [T/G]       | 1067292586                                 |
| Ca_Kabuli_NC_021162.1_3617555 | Ca_kabuli_chr03    | 3617555                        | [G/A]       | 1067292587                                 |
| Ca_Kabuli_NC_021162.1_3617576 | Ca_kabuli_chr03    | 3617576                        | [T/G]       | 1067292588                                 |
| Ca_Kabuli_NC_021162.1_3617617 | Ca_kabuli_chr03    | 3617617                        | [A/C]       | 1067292589                                 |
| Ca_Kabuli_NC_021162.1_3617635 | Ca_kabuli_chr03    | 3617635                        | [A/G]       | 1067292590                                 |
| Ca_Kabuli_NC_021162.1_3701398 | Ca_kabuli_chr03    | 3701398                        | [T/A]       | 1067292591                                 |
| Ca_Kabuli_NC_021162.1_3701401 | Ca_kabuli_chr03    | 3701401                        | [A/T]       | 1067292592                                 |
| Ca_Kabuli_NC_021162.1_3723547 | Ca_kabuli_chr03    | 3723547                        | [T/C]       | 1067292593                                 |
| Ca_Kabuli_NC_021162.1_3723555 | Ca_kabuli_chr03    | 3723555                        | [A/G]       | 1067292594                                 |
| Ca_Kabuli_NC_021162.1_3723651 | Ca_kabuli_chr03    | 3723651                        | [C/G]       | 1067292595                                 |
| Ca_Kabuli_NC_021162.1_3744880 | Ca_kabuli_chr03    | 3744880                        | [T/G]       | 1067292596                                 |
| Ca_Kabuli_NC_021162.1_3764428 | Ca_kabuli_chr03    | 3764428                        | [A/G]       | 1067292597                                 |
| Ca_Kabuli_NC_021162.1_3764549 | Ca_kabuli_chr03    | 3764549                        | [A/G]       | 1067292598                                 |
| Ca_Kabuli_NC_021162.1_4149626 | Ca_kabuli_chr03    | 4149626                        | [A/G]       | 1067292599                                 |
| Ca_Kabuli_NC_021162.1_4149639 | Ca_kabuli_chr03    | 4149639                        | [T/C]       | 1067292600                                 |
| Ca_Kabuli_NC_021162.1_4173267 | Ca_kabuli_chr03    | 4173267                        | [T/G]       | 1067292601                                 |
| Ca_Kabuli_NC_021162.1_4243649 | Ca_kabuli_chr03    | 4243649                        | [G/T]       | 1067292602                                 |
| Ca_Kabuli_NC_021162.1_4243651 | Ca_kabuli_chr03    | 4243651                        | [C/T]       | 1067292603                                 |
| Ca_Kabuli_NC_021162.1_4359042 | Ca_kabuli_chr03    | 4359042                        | [T/C]       | 1067292604                                 |
| Ca_Kabuli_NC_021162.1_4472934 | Ca_kabuli_chr03    | 4472934                        | [A/C]       | 1067292605                                 |
| Ca_Kabuli_NC_021162.1_4596782 | Ca_kabuli_chr03    | 4596782                        | [A/C]       | 1067292606                                 |
| Ca_Kabuli_NC_021162.1_4597188 | Ca_kabuli_chr03    | 4597188                        | [A/G]       | 1067292607                                 |
| Ca_Kabuli_NC_021162.1_4597224 | Ca_kabuli_chr03    | 4597224                        | [C/T]       | 1067292608                                 |

| <b>SNP IDs</b>                | <b>Chromosomes</b> | <b>Physical positions (bp)</b> | <b>SNPs</b> | <b>NCBI SNPdb accession IDs (NCBI_ss#)</b> |
|-------------------------------|--------------------|--------------------------------|-------------|--------------------------------------------|
| Ca_Kabuli_NC_021162.1_4597225 | Ca_kabuli_chr03    | 4597225                        | [T/G]       | 1067292609                                 |
| Ca_Kabuli_NC_021162.1_4597252 | Ca_kabuli_chr03    | 4597252                        | [A/G]       | 1067292610                                 |
| Ca_Kabuli_NC_021162.1_4639221 | Ca_kabuli_chr03    | 4639221                        | [T/G]       | 1067292611                                 |
| Ca_Kabuli_NC_021162.1_4766681 | Ca_kabuli_chr03    | 4766681                        | [A/C]       | 1067292612                                 |
| Ca_Kabuli_NC_021162.1_4771806 | Ca_kabuli_chr03    | 4771806                        | [A/G]       | 1067292613                                 |
| Ca_Kabuli_NC_021162.1_4823781 | Ca_kabuli_chr03    | 4823781                        | [T/G]       | 1067292614                                 |
| Ca_Kabuli_NC_021162.1_4823784 | Ca_kabuli_chr03    | 4823784                        | [T/G]       | 1067292615                                 |
| Ca_Kabuli_NC_021162.1_4823787 | Ca_kabuli_chr03    | 4823787                        | [T/G]       | 1067292616                                 |
| Ca_Kabuli_NC_021162.1_4823818 | Ca_kabuli_chr03    | 4823818                        | [C/A]       | 1067292617                                 |
| Ca_Kabuli_NC_021162.1_4823820 | Ca_kabuli_chr03    | 4823820                        | [T/A]       | 1067292618                                 |
| Ca_Kabuli_NC_021162.1_4920818 | Ca_kabuli_chr03    | 4920818                        | [T/C]       | 1067292619                                 |
| Ca_Kabuli_NC_021162.1_4920825 | Ca_kabuli_chr03    | 4920825                        | [A/G]       | 1067292620                                 |
| Ca_Kabuli_NC_021162.1_5106054 | Ca_kabuli_chr03    | 5106054                        | [A/C]       | 1067292621                                 |
| Ca_Kabuli_NC_021162.1_5106055 | Ca_kabuli_chr03    | 5106055                        | [G/A]       | 1067292622                                 |
| Ca_Kabuli_NC_021162.1_5106056 | Ca_kabuli_chr03    | 5106056                        | [A/T]       | 1067292623                                 |
| Ca_Kabuli_NC_021162.1_5106057 | Ca_kabuli_chr03    | 5106057                        | [T/G]       | 1067292624                                 |
| Ca_Kabuli_NC_021162.1_5179256 | Ca_kabuli_chr03    | 5179256                        | [T/G]       | 1067292625                                 |
| Ca_Kabuli_NC_021162.1_5224973 | Ca_kabuli_chr03    | 5224973                        | [A/G]       | 1067292626                                 |
| Ca_Kabuli_NC_021162.1_5224976 | Ca_kabuli_chr03    | 5224976                        | [A/G]       | 1067292627                                 |
| Ca_Kabuli_NC_021162.1_5224979 | Ca_kabuli_chr03    | 5224979                        | [T/G]       | 1067292628                                 |
| Ca_Kabuli_NC_021162.1_5514227 | Ca_kabuli_chr03    | 5514227                        | [A/C]       | 1067292629                                 |
| Ca_Kabuli_NC_021162.1_5514329 | Ca_kabuli_chr03    | 5514329                        | [G/C]       | 1067292630                                 |
| Ca_Kabuli_NC_021162.1_5738698 | Ca_kabuli_chr03    | 5738698                        | [T/C]       | 1067292631                                 |
| Ca_Kabuli_NC_021162.1_5740327 | Ca_kabuli_chr03    | 5740327                        | [A/G]       | 1067292632                                 |
| Ca_Kabuli_NC_021162.1_5742330 | Ca_kabuli_chr03    | 5742330                        | [A/G]       | 1067292633                                 |
| Ca_Kabuli_NC_021162.1_5742342 | Ca_kabuli_chr03    | 5742342                        | [A/C]       | 1067292634                                 |
| Ca_Kabuli_NC_021162.1_5742351 | Ca_kabuli_chr03    | 5742351                        | [T/A]       | 1067292635                                 |
| Ca_Kabuli_NC_021162.1_6169510 | Ca_kabuli_chr03    | 6169510                        | [A/C]       | 1067292636                                 |
| Ca_Kabuli_NC_021162.1_6683590 | Ca_kabuli_chr03    | 6683590                        | [T/C]       | 1067292637                                 |
| Ca_Kabuli_NC_021162.1_6683625 | Ca_kabuli_chr03    | 6683625                        | [A/G]       | 1067292638                                 |
| Ca_Kabuli_NC_021162.1_6683651 | Ca_kabuli_chr03    | 6683651                        | [T/A]       | 1067292639                                 |
| Ca_Kabuli_NC_021162.1_6889802 | Ca_kabuli_chr03    | 6889802                        | [T/G]       | 1067292640                                 |
| Ca_Kabuli_NC_021162.1_6899409 | Ca_kabuli_chr03    | 6899409                        | [A/G]       | 1067292641                                 |
| Ca_Kabuli_NC_021162.1_6899636 | Ca_kabuli_chr03    | 6899636                        | [T/A]       | 1067292642                                 |

| <b>SNP IDs</b>                | <b>Chromosomes</b> | <b>Physical positions (bp)</b> | <b>SNPs</b> | <b>NCBI SNPdb accession IDs (NCBI_ss#)</b> |
|-------------------------------|--------------------|--------------------------------|-------------|--------------------------------------------|
| Ca_Kabuli_NC_021162.1_6899649 | Ca_kabuli_chr03    | 6899649                        | [T/G]       | 1067292643                                 |
| Ca_Kabuli_NC_021162.1_6899667 | Ca_kabuli_chr03    | 6899667                        | [T/C]       | 1067292644                                 |
| Ca_Kabuli_NC_021162.1_6899670 | Ca_kabuli_chr03    | 6899670                        | [T/C]       | 1067292645                                 |
| Ca_Kabuli_NC_021162.1_6899681 | Ca_kabuli_chr03    | 6899681                        | [T/A]       | 1067292646                                 |
| Ca_Kabuli_NC_021162.1_7013451 | Ca_kabuli_chr03    | 7013451                        | [T/C]       | 1067292647                                 |
| Ca_Kabuli_NC_021162.1_7013458 | Ca_kabuli_chr03    | 7013458                        | [T/C]       | 1067292648                                 |
| Ca_Kabuli_NC_021162.1_7013496 | Ca_kabuli_chr03    | 7013496                        | [A/T]       | 1067292649                                 |
| Ca_Kabuli_NC_021162.1_7013629 | Ca_kabuli_chr03    | 7013629                        | [A/C]       | 1067292650                                 |
| Ca_Kabuli_NC_021162.1_7022117 | Ca_kabuli_chr03    | 7022117                        | [T/A]       | 1067292651                                 |
| Ca_Kabuli_NC_021162.1_7026895 | Ca_kabuli_chr03    | 7026895                        | [C/A]       | 1067292652                                 |
| Ca_Kabuli_NC_021162.1_7204053 | Ca_kabuli_chr03    | 7204053                        | [G/A]       | 1067292653                                 |
| Ca_Kabuli_NC_021162.1_7204071 | Ca_kabuli_chr03    | 7204071                        | [T/C]       | 1067292654                                 |
| Ca_Kabuli_NC_021162.1_7204087 | Ca_kabuli_chr03    | 7204087                        | [C/T]       | 1067292655                                 |
| Ca_Kabuli_NC_021162.1_7204088 | Ca_kabuli_chr03    | 7204088                        | [G/C]       | 1067292656                                 |
| Ca_Kabuli_NC_021162.1_7204099 | Ca_kabuli_chr03    | 7204099                        | [C/T]       | 1067292657                                 |
| Ca_Kabuli_NC_021162.1_7204105 | Ca_kabuli_chr03    | 7204105                        | [G/A]       | 1067292658                                 |
| Ca_Kabuli_NC_021162.1_7245991 | Ca_kabuli_chr03    | 7245991                        | [A/G]       | 1067292659                                 |
| Ca_Kabuli_NC_021162.1_7246022 | Ca_kabuli_chr03    | 7246022                        | [T/G]       | 1067292660                                 |
| Ca_Kabuli_NC_021162.1_7246048 | Ca_kabuli_chr03    | 7246048                        | [T/C]       | 1067292661                                 |
| Ca_Kabuli_NC_021162.1_7246052 | Ca_kabuli_chr03    | 7246052                        | [T/C]       | 1067292662                                 |
| Ca_Kabuli_NC_021162.1_7246820 | Ca_kabuli_chr03    | 7246820                        | [T/G]       | 1067292663                                 |
| Ca_Kabuli_NC_021162.1_7433676 | Ca_kabuli_chr03    | 7433676                        | [T/C]       | 1067292664                                 |
| Ca_Kabuli_NC_021162.1_7433689 | Ca_kabuli_chr03    | 7433689                        | [A/G]       | 1067292665                                 |
| Ca_Kabuli_NC_021162.1_7433694 | Ca_kabuli_chr03    | 7433694                        | [T/A]       | 1067292666                                 |
| Ca_Kabuli_NC_021162.1_7460294 | Ca_kabuli_chr03    | 7460294                        | [C/A]       | 1067292667                                 |
| Ca_Kabuli_NC_021162.1_7461841 | Ca_kabuli_chr03    | 7461841                        | [A/C]       | 1067292668                                 |
| Ca_Kabuli_NC_021162.1_7654641 | Ca_kabuli_chr03    | 7654641                        | [G/A]       | 1067292669                                 |
| Ca_Kabuli_NC_021162.1_7654644 | Ca_kabuli_chr03    | 7654644                        | [A/T]       | 1067292670                                 |
| Ca_Kabuli_NC_021162.1_7654669 | Ca_kabuli_chr03    | 7654669                        | [T/A]       | 1067292671                                 |
| Ca_Kabuli_NC_021162.1_7660001 | Ca_kabuli_chr03    | 7660001                        | [C/A]       | 1067292672                                 |
| Ca_Kabuli_NC_021162.1_7660002 | Ca_kabuli_chr03    | 7660002                        | [A/G]       | 1067292673                                 |
| Ca_Kabuli_NC_021162.1_7693883 | Ca_kabuli_chr03    | 7693883                        | [T/G]       | 1067292674                                 |
| Ca_Kabuli_NC_021162.1_7694182 | Ca_kabuli_chr03    | 7694182                        | [T/C]       | 1067292675                                 |
| Ca_Kabuli_NC_021162.1_7694212 | Ca_kabuli_chr03    | 7694212                        | [A/G]       | 1067292676                                 |

| <b>SNP IDs</b>                 | <b>Chromosomes</b> | <b>Physical positions (bp)</b> | <b>SNPs</b> | <b>NCBI SNPdb accession IDs (NCBI_ss#)</b> |
|--------------------------------|--------------------|--------------------------------|-------------|--------------------------------------------|
| Ca_Kabuli_NC_021162.1_7694220  | Ca_kabuli_chr03    | 7694220                        | [T/G]       | 1067292677                                 |
| Ca_Kabuli_NC_021162.1_7694228  | Ca_kabuli_chr03    | 7694228                        | [T/G]       | 1067292678                                 |
| Ca_Kabuli_NC_021162.1_7826991  | Ca_kabuli_chr03    | 7826991                        | [G/T]       | 1067292679                                 |
| Ca_Kabuli_NC_021162.1_8536213  | Ca_kabuli_chr03    | 8536213                        | [C/T]       | 1067292680                                 |
| Ca_Kabuli_NC_021162.1_8536275  | Ca_kabuli_chr03    | 8536275                        | [C/T]       | 1067292681                                 |
| Ca_Kabuli_NC_021162.1_8536295  | Ca_kabuli_chr03    | 8536295                        | [A/T]       | 1067292682                                 |
| Ca_Kabuli_NC_021162.1_8536421  | Ca_kabuli_chr03    | 8536421                        | [A/C]       | 1067292683                                 |
| Ca_Kabuli_NC_021162.1_8668904  | Ca_kabuli_chr03    | 8668904                        | [A/C]       | 1067292684                                 |
| Ca_Kabuli_NC_021162.1_8712519  | Ca_kabuli_chr03    | 8712519                        | [A/G]       | 1067292685                                 |
| Ca_Kabuli_NC_021162.1_8933210  | Ca_kabuli_chr03    | 8933210                        | [A/C]       | 1067292686                                 |
| Ca_Kabuli_NC_021162.1_8933221  | Ca_kabuli_chr03    | 8933221                        | [T/A]       | 1067292687                                 |
| Ca_Kabuli_NC_021162.1_8933245  | Ca_kabuli_chr03    | 8933245                        | [G/T]       | 1067292688                                 |
| Ca_Kabuli_NC_021162.1_9221402  | Ca_kabuli_chr03    | 9221402                        | [T/G]       | 1067292689                                 |
| Ca_Kabuli_NC_021162.1_9221435  | Ca_kabuli_chr03    | 9221435                        | [T/G]       | 1067292690                                 |
| Ca_Kabuli_NC_021162.1_9221892  | Ca_kabuli_chr03    | 9221892                        | [T/C]       | 1067292691                                 |
| Ca_Kabuli_NC_021162.1_9221894  | Ca_kabuli_chr03    | 9221894                        | [A/T]       | 1067292692                                 |
| Ca_Kabuli_NC_021162.1_9221932  | Ca_kabuli_chr03    | 9221932                        | [T/G]       | 1067292693                                 |
| Ca_Kabuli_NC_021162.1_9221984  | Ca_kabuli_chr03    | 9221984                        | [T/A]       | 1067292694                                 |
| Ca_Kabuli_NC_021162.1_9222083  | Ca_kabuli_chr03    | 9222083                        | [A/C]       | 1067292695                                 |
| Ca_Kabuli_NC_021162.1_9411780  | Ca_kabuli_chr03    | 9411780                        | [G/A]       | 1067292696                                 |
| Ca_Kabuli_NC_021162.1_9492468  | Ca_kabuli_chr03    | 9492468                        | [A/C]       | 1067292697                                 |
| Ca_Kabuli_NC_021162.1_9492489  | Ca_kabuli_chr03    | 9492489                        | [A/C]       | 1067292698                                 |
| Ca_Kabuli_NC_021162.1_9794311  | Ca_kabuli_chr03    | 9794311                        | [T/G]       | 1067292699                                 |
| Ca_Kabuli_NC_021162.1_9794318  | Ca_kabuli_chr03    | 9794318                        | [A/G]       | 1067292700                                 |
| Ca_Kabuli_NC_021162.1_9794320  | Ca_kabuli_chr03    | 9794320                        | [T/C]       | 1067292701                                 |
| Ca_Kabuli_NC_021162.1_9794355  | Ca_kabuli_chr03    | 9794355                        | [T/A]       | 1067292702                                 |
| Ca_Kabuli_NC_021162.1_9842188  | Ca_kabuli_chr03    | 9842188                        | [T/C]       | 1067292703                                 |
| Ca_Kabuli_NC_021162.1_9898715  | Ca_kabuli_chr03    | 9898715                        | [T/A]       | 1067292704                                 |
| Ca_Kabuli_NC_021162.1_10102706 | Ca_kabuli_chr03    | 10102706                       | [A/C]       | 1067292705                                 |
| Ca_Kabuli_NC_021162.1_10102718 | Ca_kabuli_chr03    | 10102718                       | [A/C]       | 1067292706                                 |
| Ca_Kabuli_NC_021162.1_10142131 | Ca_kabuli_chr03    | 10142131                       | [T/G]       | 1067292707                                 |
| Ca_Kabuli_NC_021162.1_10159836 | Ca_kabuli_chr03    | 10159836                       | [C/A]       | 1067292708                                 |
| Ca_Kabuli_NC_021162.1_10159849 | Ca_kabuli_chr03    | 10159849                       | [T/G]       | 1067292709                                 |
| Ca_Kabuli_NC_021162.1_10201302 | Ca_kabuli_chr03    | 10201302                       | [T/C]       | 1067292710                                 |

| <b>SNP IDs</b>                 | <b>Chromosomes</b> | <b>Physical positions (bp)</b> | <b>SNPs</b> | <b>NCBI SNPdb accession IDs (NCBI_ss#)</b> |
|--------------------------------|--------------------|--------------------------------|-------------|--------------------------------------------|
| Ca_Kabuli_NC_021162.1_10201315 | Ca_kabuli_chr03    | 10201315                       | [A/C]       | 1067292711                                 |
| Ca_Kabuli_NC_021162.1_10201322 | Ca_kabuli_chr03    | 10201322                       | [T/C]       | 1067292712                                 |
| Ca_Kabuli_NC_021162.1_10201377 | Ca_kabuli_chr03    | 10201377                       | [T/G]       | 1067292713                                 |
| Ca_Kabuli_NC_021162.1_10201628 | Ca_kabuli_chr03    | 10201628                       | [A/C]       | 1067292714                                 |
| Ca_Kabuli_NC_021162.1_10810939 | Ca_kabuli_chr03    | 10810939                       | [A/G]       | 1067292715                                 |
| Ca_Kabuli_NC_021162.1_11378171 | Ca_kabuli_chr03    | 11378171                       | [T/G]       | 1067292716                                 |
| Ca_Kabuli_NC_021162.1_11378182 | Ca_kabuli_chr03    | 11378182                       | [T/C]       | 1067292717                                 |
| Ca_Kabuli_NC_021162.1_11378192 | Ca_kabuli_chr03    | 11378192                       | [A/G]       | 1067292718                                 |
| Ca_Kabuli_NC_021162.1_11378540 | Ca_kabuli_chr03    | 11378540                       | [T/G]       | 1067292719                                 |
| Ca_Kabuli_NC_021162.1_11392951 | Ca_kabuli_chr03    | 11392951                       | [A/C]       | 1067292720                                 |
| Ca_Kabuli_NC_021162.1_11677779 | Ca_kabuli_chr03    | 11677779                       | [T/A]       | 1067292721                                 |
| Ca_Kabuli_NC_021162.1_11677780 | Ca_kabuli_chr03    | 11677780                       | [C/A]       | 1067292722                                 |
| Ca_Kabuli_NC_021162.1_11677781 | Ca_kabuli_chr03    | 11677781                       | [T/G]       | 1067292723                                 |
| Ca_Kabuli_NC_021162.1_11707759 | Ca_kabuli_chr03    | 11707759                       | [A/G]       | 1067292724                                 |
| Ca_Kabuli_NC_021162.1_11812070 | Ca_kabuli_chr03    | 11812070                       | [T/G]       | 1067292725                                 |
| Ca_Kabuli_NC_021162.1_11812168 | Ca_kabuli_chr03    | 11812168                       | [T/C]       | 1067292726                                 |
| Ca_Kabuli_NC_021162.1_11906828 | Ca_kabuli_chr03    | 11906828                       | [G/A]       | 1067292727                                 |
| Ca_Kabuli_NC_021162.1_12045674 | Ca_kabuli_chr03    | 12045674                       | [A/G]       | 1067292728                                 |
| Ca_Kabuli_NC_021162.1_12058482 | Ca_kabuli_chr03    | 12058482                       | [A/C]       | 1067292729                                 |
| Ca_Kabuli_NC_021162.1_12058588 | Ca_kabuli_chr03    | 12058588                       | [A/C]       | 1067292730                                 |
| Ca_Kabuli_NC_021162.1_12095667 | Ca_kabuli_chr03    | 12095667                       | [T/A]       | 1067292731                                 |
| Ca_Kabuli_NC_021162.1_12224519 | Ca_kabuli_chr03    | 12224519                       | [T/C]       | 1067292732                                 |
| Ca_Kabuli_NC_021162.1_12294550 | Ca_kabuli_chr03    | 12294550                       | [T/C]       | 1067292733                                 |
| Ca_Kabuli_NC_021162.1_12294581 | Ca_kabuli_chr03    | 12294581                       | [A/G]       | 1067292734                                 |
| Ca_Kabuli_NC_021162.1_12412724 | Ca_kabuli_chr03    | 12412724                       | [T/G]       | 1067292735                                 |
| Ca_Kabuli_NC_021162.1_12412765 | Ca_kabuli_chr03    | 12412765                       | [A/G]       | 1067292736                                 |
| Ca_Kabuli_NC_021162.1_12599378 | Ca_kabuli_chr03    | 12599378                       | [T/G]       | 1067292737                                 |
| Ca_Kabuli_NC_021162.1_12599387 | Ca_kabuli_chr03    | 12599387                       | [A/T]       | 1067292738                                 |
| Ca_Kabuli_NC_021162.1_12599496 | Ca_kabuli_chr03    | 12599496                       | [A/G]       | 1067292739                                 |
| Ca_Kabuli_NC_021162.1_12785073 | Ca_kabuli_chr03    | 12785073                       | [T/G]       | 1067292740                                 |
| Ca_Kabuli_NC_021162.1_12897831 | Ca_kabuli_chr03    | 12897831                       | [A/C]       | 1067292741                                 |
| Ca_Kabuli_NC_021162.1_12897853 | Ca_kabuli_chr03    | 12897853                       | [T/C]       | 1067292742                                 |
| Ca_Kabuli_NC_021162.1_12931582 | Ca_kabuli_chr03    | 12931582                       | [T/A]       | 1067292743                                 |
| Ca_Kabuli_NC_021162.1_12931626 | Ca_kabuli_chr03    | 12931626                       | [T/C]       | 1067292744                                 |

| <b>SNP IDs</b>                 | <b>Chromosomes</b> | <b>Physical positions (bp)</b> | <b>SNPs</b> | <b>NCBI SNPdb accession IDs (NCBI_ss#)</b> |
|--------------------------------|--------------------|--------------------------------|-------------|--------------------------------------------|
| Ca_Kabuli_NC_021162.1_13344037 | Ca_kabuli_chr03    | 13344037                       | [A/G]       | 1067292745                                 |
| Ca_Kabuli_NC_021162.1_13351178 | Ca_kabuli_chr03    | 13351178                       | [A/T]       | 1067292746                                 |
| Ca_Kabuli_NC_021162.1_13351186 | Ca_kabuli_chr03    | 13351186                       | [A/G]       | 1067292747                                 |
| Ca_Kabuli_NC_021162.1_13396902 | Ca_kabuli_chr03    | 13396902                       | [A/C]       | 1067292748                                 |
| Ca_Kabuli_NC_021162.1_13396908 | Ca_kabuli_chr03    | 13396908                       | [C/T]       | 1067292749                                 |
| Ca_Kabuli_NC_021162.1_13397005 | Ca_kabuli_chr03    | 13397005                       | [A/T]       | 1067292750                                 |
| Ca_Kabuli_NC_021162.1_13397024 | Ca_kabuli_chr03    | 13397024                       | [A/G]       | 1067292751                                 |
| Ca_Kabuli_NC_021162.1_13401136 | Ca_kabuli_chr03    | 13401136                       | [T/G]       | 1067292752                                 |
| Ca_Kabuli_NC_021162.1_13401272 | Ca_kabuli_chr03    | 13401272                       | [A/C]       | 1067292753                                 |
| Ca_Kabuli_NC_021162.1_13401311 | Ca_kabuli_chr03    | 13401311                       | [T/C]       | 1067292754                                 |
| Ca_Kabuli_NC_021162.1_13401328 | Ca_kabuli_chr03    | 13401328                       | [T/G]       | 1067292755                                 |
| Ca_Kabuli_NC_021162.1_13401339 | Ca_kabuli_chr03    | 13401339                       | [T/G]       | 1067292756                                 |
| Ca_Kabuli_NC_021162.1_13420618 | Ca_kabuli_chr03    | 13420618                       | [T/G]       | 1067292757                                 |
| Ca_Kabuli_NC_021162.1_13420634 | Ca_kabuli_chr03    | 13420634                       | [A/G]       | 1067292758                                 |
| Ca_Kabuli_NC_021162.1_13420739 | Ca_kabuli_chr03    | 13420739                       | [T/G]       | 1067292759                                 |
| Ca_Kabuli_NC_021162.1_13746694 | Ca_kabuli_chr03    | 13746694                       | [T/C]       | 1067292760                                 |
| Ca_Kabuli_NC_021162.1_13746781 | Ca_kabuli_chr03    | 13746781                       | [A/C]       | 1067292761                                 |
| Ca_Kabuli_NC_021162.1_13746893 | Ca_kabuli_chr03    | 13746893                       | [A/G]       | 1067292762                                 |
| Ca_Kabuli_NC_021162.1_13830248 | Ca_kabuli_chr03    | 13830248                       | [T/C]       | 1067292763                                 |
| Ca_Kabuli_NC_021162.1_13830249 | Ca_kabuli_chr03    | 13830249                       | [A/G]       | 1067292764                                 |
| Ca_Kabuli_NC_021162.1_13830253 | Ca_kabuli_chr03    | 13830253                       | [A/G]       | 1067292765                                 |
| Ca_Kabuli_NC_021162.1_14458398 | Ca_kabuli_chr03    | 14458398                       | [T/C]       | 1067292766                                 |
| Ca_Kabuli_NC_021162.1_14458415 | Ca_kabuli_chr03    | 14458415                       | [T/G]       | 1067292767                                 |
| Ca_Kabuli_NC_021162.1_14497303 | Ca_kabuli_chr03    | 14497303                       | [T/G]       | 1067292768                                 |
| Ca_Kabuli_NC_021162.1_14556858 | Ca_kabuli_chr03    | 14556858                       | [T/G]       | 1067292769                                 |
| Ca_Kabuli_NC_021162.1_14653148 | Ca_kabuli_chr03    | 14653148                       | [A/C]       | 1067292770                                 |
| Ca_Kabuli_NC_021162.1_14653297 | Ca_kabuli_chr03    | 14653297                       | [A/G]       | 1067292771                                 |
| Ca_Kabuli_NC_021162.1_14653304 | Ca_kabuli_chr03    | 14653304                       | [T/G]       | 1067292772                                 |
| Ca_Kabuli_NC_021162.1_14653315 | Ca_kabuli_chr03    | 14653315                       | [C/G]       | 1067292773                                 |
| Ca_Kabuli_NC_021162.1_14653316 | Ca_kabuli_chr03    | 14653316                       | [G/C]       | 1067292774                                 |
| Ca_Kabuli_NC_021162.1_14653322 | Ca_kabuli_chr03    | 14653322                       | [A/C]       | 1067292775                                 |
| Ca_Kabuli_NC_021162.1_14658158 | Ca_kabuli_chr03    | 14658158                       | [T/C]       | 1067292776                                 |
| Ca_Kabuli_NC_021162.1_14658170 | Ca_kabuli_chr03    | 14658170                       | [A/C]       | 1067292777                                 |
| Ca_Kabuli_NC_021162.1_14665738 | Ca_kabuli_chr03    | 14665738                       | [T/C]       | 1067292778                                 |

| <b>SNP IDs</b>                 | <b>Chromosomes</b> | <b>Physical positions (bp)</b> | <b>SNPs</b> | <b>NCBI SNPdb accession IDs (NCBI_ss#)</b> |
|--------------------------------|--------------------|--------------------------------|-------------|--------------------------------------------|
| Ca_Kabuli_NC_021162.1_14665746 | Ca_kabuli_chr03    | 14665746                       | [T/G]       | 1067292779                                 |
| Ca_Kabuli_NC_021162.1_14746564 | Ca_kabuli_chr03    | 14746564                       | [T/G]       | 1067292780                                 |
| Ca_Kabuli_NC_021162.1_14746627 | Ca_kabuli_chr03    | 14746627                       | [A/G]       | 1067292781                                 |
| Ca_Kabuli_NC_021162.1_14812960 | Ca_kabuli_chr03    | 14812960                       | [A/C]       | 1067292782                                 |
| Ca_Kabuli_NC_021162.1_14814985 | Ca_kabuli_chr03    | 14814985                       | [T/C]       | 1067292783                                 |
| Ca_Kabuli_NC_021162.1_15744994 | Ca_kabuli_chr03    | 15744994                       | [T/C]       | 1067292784                                 |
| Ca_Kabuli_NC_021162.1_15745044 | Ca_kabuli_chr03    | 15745044                       | [A/C]       | 1067292785                                 |
| Ca_Kabuli_NC_021162.1_15745095 | Ca_kabuli_chr03    | 15745095                       | [G/C]       | 1067292786                                 |
| Ca_Kabuli_NC_021162.1_15745126 | Ca_kabuli_chr03    | 15745126                       | [A/C]       | 1067292787                                 |
| Ca_Kabuli_NC_021162.1_15745152 | Ca_kabuli_chr03    | 15745152                       | [A/C]       | 1067292788                                 |
| Ca_Kabuli_NC_021162.1_15745173 | Ca_kabuli_chr03    | 15745173                       | [A/G]       | 1067292789                                 |
| Ca_Kabuli_NC_021162.1_15745199 | Ca_kabuli_chr03    | 15745199                       | [T/G]       | 1067292790                                 |
| Ca_Kabuli_NC_021162.1_15745297 | Ca_kabuli_chr03    | 15745297                       | [T/C]       | 1067292791                                 |
| Ca_Kabuli_NC_021162.1_15745336 | Ca_kabuli_chr03    | 15745336                       | [A/C]       | 1067292792                                 |
| Ca_Kabuli_NC_021162.1_15745337 | Ca_kabuli_chr03    | 15745337                       | [G/T]       | 1067292793                                 |
| Ca_Kabuli_NC_021162.1_15745349 | Ca_kabuli_chr03    | 15745349                       | [A/C]       | 1067292794                                 |
| Ca_Kabuli_NC_021162.1_15900664 | Ca_kabuli_chr03    | 15900664                       | [A/C]       | 1067292795                                 |
| Ca_Kabuli_NC_021162.1_15962245 | Ca_kabuli_chr03    | 15962245                       | [A/C]       | 1067292796                                 |
| Ca_Kabuli_NC_021162.1_15962248 | Ca_kabuli_chr03    | 15962248                       | [T/C]       | 1067292797                                 |
| Ca_Kabuli_NC_021162.1_15962250 | Ca_kabuli_chr03    | 15962250                       | [A/C]       | 1067292798                                 |
| Ca_Kabuli_NC_021162.1_16032127 | Ca_kabuli_chr03    | 16032127                       | [A/G]       | 1067292799                                 |
| Ca_Kabuli_NC_021162.1_16032139 | Ca_kabuli_chr03    | 16032139                       | [A/T]       | 1067292800                                 |
| Ca_Kabuli_NC_021162.1_16032148 | Ca_kabuli_chr03    | 16032148                       | [A/C]       | 1067292801                                 |
| Ca_Kabuli_NC_021162.1_16071260 | Ca_kabuli_chr03    | 16071260                       | [T/G]       | 1067292802                                 |
| Ca_Kabuli_NC_021162.1_16071272 | Ca_kabuli_chr03    | 16071272                       | [A/C]       | 1067292803                                 |
| Ca_Kabuli_NC_021162.1_16071317 | Ca_kabuli_chr03    | 16071317                       | [T/C]       | 1067292804                                 |
| Ca_Kabuli_NC_021162.1_16071323 | Ca_kabuli_chr03    | 16071323                       | [T/C]       | 1067292805                                 |
| Ca_Kabuli_NC_021162.1_16071333 | Ca_kabuli_chr03    | 16071333                       | [T/C]       | 1067292806                                 |
| Ca_Kabuli_NC_021162.1_16071359 | Ca_kabuli_chr03    | 16071359                       | [T/C]       | 1067292807                                 |
| Ca_Kabuli_NC_021162.1_16071381 | Ca_kabuli_chr03    | 16071381                       | [T/C]       | 1067292808                                 |
| Ca_Kabuli_NC_021162.1_16072277 | Ca_kabuli_chr03    | 16072277                       | [T/C]       | 1067292809                                 |
| Ca_Kabuli_NC_021162.1_16072279 | Ca_kabuli_chr03    | 16072279                       | [A/C]       | 1067292810                                 |
| Ca_Kabuli_NC_021162.1_16072287 | Ca_kabuli_chr03    | 16072287                       | [A/G]       | 1067292811                                 |
| Ca_Kabuli_NC_021162.1_16072290 | Ca_kabuli_chr03    | 16072290                       | [T/A]       | 1067292812                                 |

| <b>SNP IDs</b>                 | <b>Chromosomes</b> | <b>Physical positions (bp)</b> | <b>SNPs</b> | <b>NCBI SNPdb accession IDs (NCBI_ss#)</b> |
|--------------------------------|--------------------|--------------------------------|-------------|--------------------------------------------|
| Ca_Kabuli_NC_021162.1_16072305 | Ca_kabuli_chr03    | 16072305                       | [A/G]       | 1067292813                                 |
| Ca_Kabuli_NC_021162.1_16072318 | Ca_kabuli_chr03    | 16072318                       | [A/G]       | 1067292814                                 |
| Ca_Kabuli_NC_021162.1_16396606 | Ca_kabuli_chr03    | 16396606                       | [T/C]       | 1067292815                                 |
| Ca_Kabuli_NC_021162.1_16396641 | Ca_kabuli_chr03    | 16396641                       | [T/C]       | 1067292816                                 |
| Ca_Kabuli_NC_021162.1_16458098 | Ca_kabuli_chr03    | 16458098                       | [T/C]       | 1067292817                                 |
| Ca_Kabuli_NC_021162.1_16458103 | Ca_kabuli_chr03    | 16458103                       | [T/G]       | 1067292818                                 |
| Ca_Kabuli_NC_021162.1_16458107 | Ca_kabuli_chr03    | 16458107                       | [T/G]       | 1067292819                                 |
| Ca_Kabuli_NC_021162.1_16534322 | Ca_kabuli_chr03    | 16534322                       | [T/A]       | 1067292820                                 |
| Ca_Kabuli_NC_021162.1_16534353 | Ca_kabuli_chr03    | 16534353                       | [A/G]       | 1067292821                                 |
| Ca_Kabuli_NC_021162.1_16534362 | Ca_kabuli_chr03    | 16534362                       | [A/G]       | 1067292822                                 |
| Ca_Kabuli_NC_021162.1_16534366 | Ca_kabuli_chr03    | 16534366                       | [T/C]       | 1067292823                                 |
| Ca_Kabuli_NC_021162.1_16948797 | Ca_kabuli_chr03    | 16948797                       | [T/C]       | 1067292824                                 |
| Ca_Kabuli_NC_021162.1_17056557 | Ca_kabuli_chr03    | 17056557                       | [G/C]       | 1067292825                                 |
| Ca_Kabuli_NC_021162.1_17056558 | Ca_kabuli_chr03    | 17056558                       | [G/T]       | 1067292826                                 |
| Ca_Kabuli_NC_021162.1_17056566 | Ca_kabuli_chr03    | 17056566                       | [A/G]       | 1067292827                                 |
| Ca_Kabuli_NC_021162.1_17072178 | Ca_kabuli_chr03    | 17072178                       | [A/G]       | 1067292828                                 |
| Ca_Kabuli_NC_021162.1_17072181 | Ca_kabuli_chr03    | 17072181                       | [A/C]       | 1067292829                                 |
| Ca_Kabuli_NC_021162.1_17072193 | Ca_kabuli_chr03    | 17072193                       | [T/C]       | 1067292830                                 |
| Ca_Kabuli_NC_021162.1_17072194 | Ca_kabuli_chr03    | 17072194                       | [C/T]       | 1067292831                                 |
| Ca_Kabuli_NC_021162.1_17072200 | Ca_kabuli_chr03    | 17072200                       | [C/A]       | 1067292832                                 |
| Ca_Kabuli_NC_021162.1_17178219 | Ca_kabuli_chr03    | 17178219                       | [T/G]       | 1067292833                                 |
| Ca_Kabuli_NC_021162.1_17179915 | Ca_kabuli_chr03    | 17179915                       | [T/G]       | 1067292834                                 |
| Ca_Kabuli_NC_021162.1_17181173 | Ca_kabuli_chr03    | 17181173                       | [T/C]       | 1067292835                                 |
| Ca_Kabuli_NC_021162.1_17181193 | Ca_kabuli_chr03    | 17181193                       | [A/G]       | 1067292836                                 |
| Ca_Kabuli_NC_021162.1_17181201 | Ca_kabuli_chr03    | 17181201                       | [T/G]       | 1067292837                                 |
| Ca_Kabuli_NC_021162.1_17186987 | Ca_kabuli_chr03    | 17186987                       | [C/A]       | 1067292838                                 |
| Ca_Kabuli_NC_021162.1_17186988 | Ca_kabuli_chr03    | 17186988                       | [T/G]       | 1067292839                                 |
| Ca_Kabuli_NC_021162.1_17186990 | Ca_kabuli_chr03    | 17186990                       | [G/T]       | 1067292840                                 |
| Ca_Kabuli_NC_021162.1_17205756 | Ca_kabuli_chr03    | 17205756                       | [C/A]       | 1067292841                                 |
| Ca_Kabuli_NC_021162.1_17335816 | Ca_kabuli_chr03    | 17335816                       | [T/A]       | 1067292842                                 |
| Ca_Kabuli_NC_021162.1_17335817 | Ca_kabuli_chr03    | 17335817                       | [A/T]       | 1067292843                                 |
| Ca_Kabuli_NC_021162.1_17335831 | Ca_kabuli_chr03    | 17335831                       | [A/G]       | 1067292844                                 |
| Ca_Kabuli_NC_021162.1_17335839 | Ca_kabuli_chr03    | 17335839                       | [T/A]       | 1067292845                                 |
| Ca_Kabuli_NC_021162.1_17679400 | Ca_kabuli_chr03    | 17679400                       | [G/C]       | 1067292846                                 |



| <b>SNP IDs</b>                 | <b>Chromosomes</b> | <b>Physical positions (bp)</b> | <b>SNPs</b> | <b>NCBI SNPdb accession IDs (NCBI_ss#)</b> |
|--------------------------------|--------------------|--------------------------------|-------------|--------------------------------------------|
| Ca_Kabuli_NC_021162.1_17679402 | Ca_kabuli_chr03    | 17679402                       | [T/G]       | 1067292847                                 |
| Ca_Kabuli_NC_021162.1_17914677 | Ca_kabuli_chr03    | 17914677                       | [T/G]       | 1067292848                                 |
| Ca_Kabuli_NC_021162.1_17917871 | Ca_kabuli_chr03    | 17917871                       | [T/G]       | 1067292849                                 |
| Ca_Kabuli_NC_021162.1_17917890 | Ca_kabuli_chr03    | 17917890                       | [T/C]       | 1067292850                                 |
| Ca_Kabuli_NC_021162.1_17918036 | Ca_kabuli_chr03    | 17918036                       | [A/C]       | 1067292851                                 |
| Ca_Kabuli_NC_021162.1_17918037 | Ca_kabuli_chr03    | 17918037                       | [G/A]       | 1067292852                                 |
| Ca_Kabuli_NC_021162.1_17918038 | Ca_kabuli_chr03    | 17918038                       | [A/C]       | 1067292853                                 |
| Ca_Kabuli_NC_021162.1_17918039 | Ca_kabuli_chr03    | 17918039                       | [T/A]       | 1067292854                                 |
| Ca_Kabuli_NC_021162.1_17920352 | Ca_kabuli_chr03    | 17920352                       | [A/G]       | 1067292855                                 |
| Ca_Kabuli_NC_021162.1_17920362 | Ca_kabuli_chr03    | 17920362                       | [A/G]       | 1067292856                                 |
| Ca_Kabuli_NC_021162.1_17920365 | Ca_kabuli_chr03    | 17920365                       | [A/C]       | 1067292857                                 |
| Ca_Kabuli_NC_021162.1_17920367 | Ca_kabuli_chr03    | 17920367                       | [A/C]       | 1067292858                                 |
| Ca_Kabuli_NC_021162.1_17920406 | Ca_kabuli_chr03    | 17920406                       | [A/G]       | 1067292859                                 |
| Ca_Kabuli_NC_021162.1_17936579 | Ca_kabuli_chr03    | 17936579                       | [T/G]       | 1067292860                                 |
| Ca_Kabuli_NC_021162.1_17984963 | Ca_kabuli_chr03    | 17984963                       | [T/G]       | 1067292861                                 |
| Ca_Kabuli_NC_021162.1_17984974 | Ca_kabuli_chr03    | 17984974                       | [A/G]       | 1067292862                                 |
| Ca_Kabuli_NC_021162.1_17984978 | Ca_kabuli_chr03    | 17984978                       | [T/G]       | 1067292863                                 |
| Ca_Kabuli_NC_021162.1_17984981 | Ca_kabuli_chr03    | 17984981                       | [T/G]       | 1067292864                                 |
| Ca_Kabuli_NC_021162.1_18110539 | Ca_kabuli_chr03    | 18110539                       | [C/A]       | 1067292865                                 |
| Ca_Kabuli_NC_021162.1_18110584 | Ca_kabuli_chr03    | 18110584                       | [A/G]       | 1067292866                                 |
| Ca_Kabuli_NC_021162.1_18118249 | Ca_kabuli_chr03    | 18118249                       | [G/T]       | 1067292867                                 |
| Ca_Kabuli_NC_021162.1_18173457 | Ca_kabuli_chr03    | 18173457                       | [A/T]       | 1067292868                                 |
| Ca_Kabuli_NC_021162.1_18173467 | Ca_kabuli_chr03    | 18173467                       | [A/G]       | 1067292869                                 |
| Ca_Kabuli_NC_021162.1_18215380 | Ca_kabuli_chr03    | 18215380                       | [G/A]       | 1067292870                                 |
| Ca_Kabuli_NC_021162.1_18337498 | Ca_kabuli_chr03    | 18337498                       | [T/G]       | 1067292871                                 |
| Ca_Kabuli_NC_021162.1_18337501 | Ca_kabuli_chr03    | 18337501                       | [A/T]       | 1067292872                                 |
| Ca_Kabuli_NC_021162.1_18355403 | Ca_kabuli_chr03    | 18355403                       | [T/G]       | 1067292873                                 |
| Ca_Kabuli_NC_021162.1_18355409 | Ca_kabuli_chr03    | 18355409                       | [A/C]       | 1067292874                                 |
| Ca_Kabuli_NC_021162.1_18506357 | Ca_kabuli_chr03    | 18506357                       | [G/A]       | 1067292875                                 |
| Ca_Kabuli_NC_021162.1_18573699 | Ca_kabuli_chr03    | 18573699                       | [A/C]       | 1067292876                                 |
| Ca_Kabuli_NC_021162.1_18645184 | Ca_kabuli_chr03    | 18645184                       | [A/C]       | 1067292877                                 |
| Ca_Kabuli_NC_021162.1_18650824 | Ca_kabuli_chr03    | 18650824                       | [T/A]       | 1067292878                                 |
| Ca_Kabuli_NC_021162.1_18650838 | Ca_kabuli_chr03    | 18650838                       | [T/C]       | 1067292879                                 |
| Ca_Kabuli_NC_021162.1_18832490 | Ca_kabuli_chr03    | 18832490                       | [T/G]       | 1067292880                                 |

| <b>SNP IDs</b>                 | <b>Chromosomes</b> | <b>Physical positions (bp)</b> | <b>SNPs</b> | <b>NCBI SNPdb accession IDs (NCBI_ss#)</b> |
|--------------------------------|--------------------|--------------------------------|-------------|--------------------------------------------|
| Ca_Kabuli_NC_021162.1_18832514 | Ca_kabuli_chr03    | 18832514                       | [A/G]       | 1067292881                                 |
| Ca_Kabuli_NC_021162.1_18832517 | Ca_kabuli_chr03    | 18832517                       | [A/G]       | 1067292882                                 |
| Ca_Kabuli_NC_021162.1_18833450 | Ca_kabuli_chr03    | 18833450                       | [T/C]       | 1067292883                                 |
| Ca_Kabuli_NC_021162.1_18833484 | Ca_kabuli_chr03    | 18833484                       | [A/G]       | 1067292884                                 |
| Ca_Kabuli_NC_021162.1_18835241 | Ca_kabuli_chr03    | 18835241                       | [A/C]       | 1067292885                                 |
| Ca_Kabuli_NC_021162.1_18835286 | Ca_kabuli_chr03    | 18835286                       | [A/G]       | 1067292886                                 |
| Ca_Kabuli_NC_021162.1_18939339 | Ca_kabuli_chr03    | 18939339                       | [T/C]       | 1067292887                                 |
| Ca_Kabuli_NC_021162.1_18939424 | Ca_kabuli_chr03    | 18939424                       | [A/C]       | 1067292888                                 |
| Ca_Kabuli_NC_021162.1_19102331 | Ca_kabuli_chr03    | 19102331                       | [C/T]       | 1067292889                                 |
| Ca_Kabuli_NC_021162.1_19102333 | Ca_kabuli_chr03    | 19102333                       | [C/G]       | 1067292890                                 |
| Ca_Kabuli_NC_021162.1_19102337 | Ca_kabuli_chr03    | 19102337                       | [C/T]       | 1067292891                                 |
| Ca_Kabuli_NC_021162.1_19102339 | Ca_kabuli_chr03    | 19102339                       | [A/C]       | 1067292892                                 |
| Ca_Kabuli_NC_021162.1_19102345 | Ca_kabuli_chr03    | 19102345                       | [A/T]       | 1067292893                                 |
| Ca_Kabuli_NC_021162.1_19102358 | Ca_kabuli_chr03    | 19102358                       | [A/G]       | 1067292894                                 |
| Ca_Kabuli_NC_021162.1_19372802 | Ca_kabuli_chr03    | 19372802                       | [A/T]       | 1067292895                                 |
| Ca_Kabuli_NC_021162.1_19372804 | Ca_kabuli_chr03    | 19372804                       | [A/C]       | 1067292896                                 |
| Ca_Kabuli_NC_021162.1_19445920 | Ca_kabuli_chr03    | 19445920                       | [T/A]       | 1067292897                                 |
| Ca_Kabuli_NC_021162.1_19445925 | Ca_kabuli_chr03    | 19445925                       | [A/G]       | 1067292898                                 |
| Ca_Kabuli_NC_021162.1_19472565 | Ca_kabuli_chr03    | 19472565                       | [T/C]       | 1067292899                                 |
| Ca_Kabuli_NC_021162.1_19561510 | Ca_kabuli_chr03    | 19561510                       | [T/G]       | 1067292900                                 |
| Ca_Kabuli_NC_021162.1_19787136 | Ca_kabuli_chr03    | 19787136                       | [T/C]       | 1067292901                                 |
| Ca_Kabuli_NC_021162.1_19788683 | Ca_kabuli_chr03    | 19788683                       | [T/G]       | 1067292902                                 |
| Ca_Kabuli_NC_021162.1_19792757 | Ca_kabuli_chr03    | 19792757                       | [T/C]       | 1067292903                                 |
| Ca_Kabuli_NC_021162.1_19792758 | Ca_kabuli_chr03    | 19792758                       | [G/T]       | 1067292904                                 |
| Ca_Kabuli_NC_021162.1_19805016 | Ca_kabuli_chr03    | 19805016                       | [T/C]       | 1067292905                                 |
| Ca_Kabuli_NC_021162.1_19805030 | Ca_kabuli_chr03    | 19805030                       | [A/C]       | 1067292906                                 |
| Ca_Kabuli_NC_021162.1_19850575 | Ca_kabuli_chr03    | 19850575                       | [A/C]       | 1067292907                                 |
| Ca_Kabuli_NC_021162.1_19850583 | Ca_kabuli_chr03    | 19850583                       | [A/C]       | 1067292908                                 |
| Ca_Kabuli_NC_021162.1_19850645 | Ca_kabuli_chr03    | 19850645                       | [A/C]       | 1067292909                                 |
| Ca_Kabuli_NC_021162.1_19855208 | Ca_kabuli_chr03    | 19855208                       | [A/C]       | 1067292910                                 |
| Ca_Kabuli_NC_021162.1_19855230 | Ca_kabuli_chr03    | 19855230                       | [T/C]       | 1067292911                                 |
| Ca_Kabuli_NC_021162.1_19855235 | Ca_kabuli_chr03    | 19855235                       | [T/C]       | 1067292912                                 |
| Ca_Kabuli_NC_021162.1_19857584 | Ca_kabuli_chr03    | 19857584                       | [T/G]       | 1067292913                                 |
| Ca_Kabuli_NC_021162.1_19922709 | Ca_kabuli_chr03    | 19922709                       | [C/A]       | 1067292914                                 |

| <b>SNP IDs</b>                 | <b>Chromosomes</b> | <b>Physical positions (bp)</b> | <b>SNPs</b> | <b>NCBI SNPdb accession IDs (NCBI_ss#)</b> |
|--------------------------------|--------------------|--------------------------------|-------------|--------------------------------------------|
| Ca_Kabuli_NC_021162.1_19954392 | Ca_kabuli_chr03    | 19954392                       | [T/A]       | 1067292915                                 |
| Ca_Kabuli_NC_021162.1_19978334 | Ca_kabuli_chr03    | 19978334                       | [A/C]       | 1067292916                                 |
| Ca_Kabuli_NC_021162.1_19978343 | Ca_kabuli_chr03    | 19978343                       | [A/C]       | 1067292917                                 |
| Ca_Kabuli_NC_021162.1_20030427 | Ca_kabuli_chr03    | 20030427                       | [T/G]       | 1067292918                                 |
| Ca_Kabuli_NC_021162.1_20030447 | Ca_kabuli_chr03    | 20030447                       | [A/T]       | 1067292919                                 |
| Ca_Kabuli_NC_021162.1_20081473 | Ca_kabuli_chr03    | 20081473                       | [A/G]       | 1067292920                                 |
| Ca_Kabuli_NC_021162.1_20172508 | Ca_kabuli_chr03    | 20172508                       | [A/T]       | 1067292921                                 |
| Ca_Kabuli_NC_021162.1_20179054 | Ca_kabuli_chr03    | 20179054                       | [A/G]       | 1067292922                                 |
| Ca_Kabuli_NC_021162.1_20179062 | Ca_kabuli_chr03    | 20179062                       | [T/G]       | 1067292923                                 |
| Ca_Kabuli_NC_021162.1_20179729 | Ca_kabuli_chr03    | 20179729                       | [T/G]       | 1067292924                                 |
| Ca_Kabuli_NC_021162.1_20240118 | Ca_kabuli_chr03    | 20240118                       | [T/G]       | 1067292925                                 |
| Ca_Kabuli_NC_021162.1_20244346 | Ca_kabuli_chr03    | 20244346                       | [A/C]       | 1067292926                                 |
| Ca_Kabuli_NC_021162.1_20495749 | Ca_kabuli_chr03    | 20495749                       | [C/A]       | 1067292927                                 |
| Ca_Kabuli_NC_021162.1_20552836 | Ca_kabuli_chr03    | 20552836                       | [T/G]       | 1067292928                                 |
| Ca_Kabuli_NC_021162.1_20680409 | Ca_kabuli_chr03    | 20680409                       | [A/T]       | 1067292929                                 |
| Ca_Kabuli_NC_021162.1_20680438 | Ca_kabuli_chr03    | 20680438                       | [T/C]       | 1067292930                                 |
| Ca_Kabuli_NC_021162.1_20690198 | Ca_kabuli_chr03    | 20690198                       | [A/T]       | 1067292931                                 |
| Ca_Kabuli_NC_021162.1_20823116 | Ca_kabuli_chr03    | 20823116                       | [A/C]       | 1067292932                                 |
| Ca_Kabuli_NC_021162.1_20823144 | Ca_kabuli_chr03    | 20823144                       | [T/C]       | 1067292933                                 |
| Ca_Kabuli_NC_021162.1_21020225 | Ca_kabuli_chr03    | 21020225                       | [T/G]       | 1067292934                                 |
| Ca_Kabuli_NC_021162.1_21069658 | Ca_kabuli_chr03    | 21069658                       | [A/C]       | 1067292935                                 |
| Ca_Kabuli_NC_021162.1_21069672 | Ca_kabuli_chr03    | 21069672                       | [A/G]       | 1067292936                                 |
| Ca_Kabuli_NC_021162.1_21069690 | Ca_kabuli_chr03    | 21069690                       | [T/A]       | 1067292937                                 |
| Ca_Kabuli_NC_021162.1_21069905 | Ca_kabuli_chr03    | 21069905                       | [T/C]       | 1067292938                                 |
| Ca_Kabuli_NC_021162.1_21069917 | Ca_kabuli_chr03    | 21069917                       | [A/G]       | 1067292939                                 |
| Ca_Kabuli_NC_021162.1_21069935 | Ca_kabuli_chr03    | 21069935                       | [T/A]       | 1067292940                                 |
| Ca_Kabuli_NC_021162.1_21218591 | Ca_kabuli_chr03    | 21218591                       | [A/T]       | 1067292941                                 |
| Ca_Kabuli_NC_021162.1_21218610 | Ca_kabuli_chr03    | 21218610                       | [A/G]       | 1067292942                                 |
| Ca_Kabuli_NC_021162.1_21231086 | Ca_kabuli_chr03    | 21231086                       | [T/G]       | 1067292943                                 |
| Ca_Kabuli_NC_021162.1_21231111 | Ca_kabuli_chr03    | 21231111                       | [A/C]       | 1067292944                                 |
| Ca_Kabuli_NC_021162.1_21231140 | Ca_kabuli_chr03    | 21231140                       | [T/C]       | 1067292945                                 |
| Ca_Kabuli_NC_021162.1_21231160 | Ca_kabuli_chr03    | 21231160                       | [A/C]       | 1067292946                                 |
| Ca_Kabuli_NC_021162.1_21231163 | Ca_kabuli_chr03    | 21231163                       | [A/C]       | 1067292947                                 |
| Ca_Kabuli_NC_021162.1_21231172 | Ca_kabuli_chr03    | 21231172                       | [T/C]       | 1067292948                                 |

| <b>SNP IDs</b>                 | <b>Chromosomes</b> | <b>Physical positions (bp)</b> | <b>SNPs</b> | <b>NCBI SNPdb accession IDs (NCBI_ss#)</b> |
|--------------------------------|--------------------|--------------------------------|-------------|--------------------------------------------|
| Ca_Kabuli_NC_021162.1_21231187 | Ca_kabuli_chr03    | 21231187                       | [T/A]       | 1067292949                                 |
| Ca_Kabuli_NC_021162.1_21231229 | Ca_kabuli_chr03    | 21231229                       | [T/C]       | 1067292950                                 |
| Ca_Kabuli_NC_021162.1_21231232 | Ca_kabuli_chr03    | 21231232                       | [T/C]       | 1067292951                                 |
| Ca_Kabuli_NC_021162.1_21231265 | Ca_kabuli_chr03    | 21231265                       | [A/C]       | 1067292952                                 |
| Ca_Kabuli_NC_021162.1_21231277 | Ca_kabuli_chr03    | 21231277                       | [A/C]       | 1067292953                                 |
| Ca_Kabuli_NC_021162.1_21232585 | Ca_kabuli_chr03    | 21232585                       | [A/C]       | 1067292954                                 |
| Ca_Kabuli_NC_021162.1_21272962 | Ca_kabuli_chr03    | 21272962                       | [A/C]       | 1067292955                                 |
| Ca_Kabuli_NC_021162.1_21273423 | Ca_kabuli_chr03    | 21273423                       | [T/A]       | 1067292956                                 |
| Ca_Kabuli_NC_021162.1_21278656 | Ca_kabuli_chr03    | 21278656                       | [T/C]       | 1067292957                                 |
| Ca_Kabuli_NC_021162.1_21278657 | Ca_kabuli_chr03    | 21278657                       | [G/T]       | 1067292958                                 |
| Ca_Kabuli_NC_021162.1_21288619 | Ca_kabuli_chr03    | 21288619                       | [T/A]       | 1067292959                                 |
| Ca_Kabuli_NC_021162.1_21315975 | Ca_kabuli_chr03    | 21315975                       | [A/C]       | 1067292960                                 |
| Ca_Kabuli_NC_021162.1_21315978 | Ca_kabuli_chr03    | 21315978                       | [A/C]       | 1067292961                                 |
| Ca_Kabuli_NC_021162.1_21315987 | Ca_kabuli_chr03    | 21315987                       | [A/T]       | 1067292962                                 |
| Ca_Kabuli_NC_021162.1_21382890 | Ca_kabuli_chr03    | 21382890                       | [A/T]       | 1067292963                                 |
| Ca_Kabuli_NC_021162.1_21382893 | Ca_kabuli_chr03    | 21382893                       | [C/T]       | 1067292964                                 |
| Ca_Kabuli_NC_021162.1_21421225 | Ca_kabuli_chr03    | 21421225                       | [T/G]       | 1067292965                                 |
| Ca_Kabuli_NC_021162.1_21421464 | Ca_kabuli_chr03    | 21421464                       | [A/G]       | 1067292966                                 |
| Ca_Kabuli_NC_021162.1_21421539 | Ca_kabuli_chr03    | 21421539                       | [A/C]       | 1067292967                                 |
| Ca_Kabuli_NC_021162.1_21435569 | Ca_kabuli_chr03    | 21435569                       | [A/T]       | 1067292968                                 |
| Ca_Kabuli_NC_021162.1_21445329 | Ca_kabuli_chr03    | 21445329                       | [T/G]       | 1067292969                                 |
| Ca_Kabuli_NC_021162.1_21445352 | Ca_kabuli_chr03    | 21445352                       | [T/G]       | 1067292970                                 |
| Ca_Kabuli_NC_021162.1_21446288 | Ca_kabuli_chr03    | 21446288                       | [A/G]       | 1067292971                                 |
| Ca_Kabuli_NC_021162.1_21489237 | Ca_kabuli_chr03    | 21489237                       | [A/C]       | 1067292972                                 |
| Ca_Kabuli_NC_021162.1_21489262 | Ca_kabuli_chr03    | 21489262                       | [A/C]       | 1067292973                                 |
| Ca_Kabuli_NC_021162.1_21524254 | Ca_kabuli_chr03    | 21524254                       | [A/C]       | 1067292974                                 |
| Ca_Kabuli_NC_021162.1_21531470 | Ca_kabuli_chr03    | 21531470                       | [A/C]       | 1067292975                                 |
| Ca_Kabuli_NC_021162.1_21534108 | Ca_kabuli_chr03    | 21534108                       | [A/T]       | 1067292976                                 |
| Ca_Kabuli_NC_021162.1_21558364 | Ca_kabuli_chr03    | 21558364                       | [T/C]       | 1067292977                                 |
| Ca_Kabuli_NC_021162.1_21558387 | Ca_kabuli_chr03    | 21558387                       | [T/A]       | 1067292978                                 |
| Ca_Kabuli_NC_021162.1_21558393 | Ca_kabuli_chr03    | 21558393                       | [A/G]       | 1067292979                                 |
| Ca_Kabuli_NC_021162.1_21558403 | Ca_kabuli_chr03    | 21558403                       | [A/G]       | 1067292980                                 |
| Ca_Kabuli_NC_021162.1_21558424 | Ca_kabuli_chr03    | 21558424                       | [T/C]       | 1067292981                                 |
| Ca_Kabuli_NC_021162.1_21627581 | Ca_kabuli_chr03    | 21627581                       | [T/G]       | 1067292982                                 |

| <b>SNP IDs</b>                 | <b>Chromosomes</b> | <b>Physical positions (bp)</b> | <b>SNPs</b> | <b>NCBI SNPdb accession IDs (NCBI_ss#)</b> |
|--------------------------------|--------------------|--------------------------------|-------------|--------------------------------------------|
| Ca_Kabuli_NC_021162.1_21627668 | Ca_kabuli_chr03    | 21627668                       | [T/G]       | 1067292983                                 |
| Ca_Kabuli_NC_021162.1_21627698 | Ca_kabuli_chr03    | 21627698                       | [T/G]       | 1067292984                                 |
| Ca_Kabuli_NC_021162.1_21646857 | Ca_kabuli_chr03    | 21646857                       | [T/C]       | 1067292985                                 |
| Ca_Kabuli_NC_021162.1_21646881 | Ca_kabuli_chr03    | 21646881                       | [A/G]       | 1067292986                                 |
| Ca_Kabuli_NC_021162.1_21646953 | Ca_kabuli_chr03    | 21646953                       | [T/C]       | 1067292987                                 |
| Ca_Kabuli_NC_021162.1_21657205 | Ca_kabuli_chr03    | 21657205                       | [C/A]       | 1067292988                                 |
| Ca_Kabuli_NC_021162.1_21657206 | Ca_kabuli_chr03    | 21657206                       | [A/G]       | 1067292989                                 |
| Ca_Kabuli_NC_021162.1_21686530 | Ca_kabuli_chr03    | 21686530                       | [T/G]       | 1067292990                                 |
| Ca_Kabuli_NC_021162.1_21687416 | Ca_kabuli_chr03    | 21687416                       | [A/T]       | 1067292991                                 |
| Ca_Kabuli_NC_021162.1_21687443 | Ca_kabuli_chr03    | 21687443                       | [T/A]       | 1067292992                                 |
| Ca_Kabuli_NC_021162.1_21687959 | Ca_kabuli_chr03    | 21687959                       | [A/C]       | 1067292993                                 |
| Ca_Kabuli_NC_021162.1_21687960 | Ca_kabuli_chr03    | 21687960                       | [A/T]       | 1067292994                                 |
| Ca_Kabuli_NC_021162.1_21687962 | Ca_kabuli_chr03    | 21687962                       | [T/G]       | 1067292995                                 |
| Ca_Kabuli_NC_021162.1_21687964 | Ca_kabuli_chr03    | 21687964                       | [A/T]       | 1067292996                                 |
| Ca_Kabuli_NC_021162.1_21687966 | Ca_kabuli_chr03    | 21687966                       | [C/A]       | 1067292997                                 |
| Ca_Kabuli_NC_021162.1_21687969 | Ca_kabuli_chr03    | 21687969                       | [G/A]       | 1067292998                                 |
| Ca_Kabuli_NC_021162.1_21687978 | Ca_kabuli_chr03    | 21687978                       | [A/G]       | 1067292999                                 |
| Ca_Kabuli_NC_021162.1_21700173 | Ca_kabuli_chr03    | 21700173                       | [T/A]       | 1067293000                                 |
| Ca_Kabuli_NC_021162.1_21700175 | Ca_kabuli_chr03    | 21700175                       | [A/G]       | 1067293001                                 |
| Ca_Kabuli_NC_021162.1_21700206 | Ca_kabuli_chr03    | 21700206                       | [A/G]       | 1067293002                                 |
| Ca_Kabuli_NC_021162.1_21744356 | Ca_kabuli_chr03    | 21744356                       | [A/C]       | 1067293003                                 |
| Ca_Kabuli_NC_021162.1_21863769 | Ca_kabuli_chr03    | 21863769                       | [C/A]       | 1067293004                                 |
| Ca_Kabuli_NC_021162.1_22007864 | Ca_kabuli_chr03    | 22007864                       | [A/G]       | 1067293005                                 |
| Ca_Kabuli_NC_021162.1_22007902 | Ca_kabuli_chr03    | 22007902                       | [T/G]       | 1067293006                                 |
| Ca_Kabuli_NC_021162.1_22007904 | Ca_kabuli_chr03    | 22007904                       | [T/G]       | 1067293007                                 |
| Ca_Kabuli_NC_021162.1_22007924 | Ca_kabuli_chr03    | 22007924                       | [T/C]       | 1067293008                                 |
| Ca_Kabuli_NC_021162.1_22009451 | Ca_kabuli_chr03    | 22009451                       | [A/C]       | 1067293009                                 |
| Ca_Kabuli_NC_021162.1_22009465 | Ca_kabuli_chr03    | 22009465                       | [T/G]       | 1067293010                                 |
| Ca_Kabuli_NC_021162.1_22014101 | Ca_kabuli_chr03    | 22014101                       | [A/G]       | 1067293011                                 |
| Ca_Kabuli_NC_021162.1_22014121 | Ca_kabuli_chr03    | 22014121                       | [T/C]       | 1067293012                                 |
| Ca_Kabuli_NC_021162.1_22015131 | Ca_kabuli_chr03    | 22015131                       | [T/G]       | 1067293013                                 |
| Ca_Kabuli_NC_021162.1_22060236 | Ca_kabuli_chr03    | 22060236                       | [A/C]       | 1067293014                                 |
| Ca_Kabuli_NC_021162.1_22061919 | Ca_kabuli_chr03    | 22061919                       | [A/C]       | 1067293015                                 |
| Ca_Kabuli_NC_021162.1_22185338 | Ca_kabuli_chr03    | 22185338                       | [A/G]       | 1067293016                                 |

| <b>SNP IDs</b>                 | <b>Chromosomes</b> | <b>Physical positions (bp)</b> | <b>SNPs</b> | <b>NCBI SNPdb accession IDs (NCBI_ss#)</b> |
|--------------------------------|--------------------|--------------------------------|-------------|--------------------------------------------|
| Ca_Kabuli_NC_021162.1_22185431 | Ca_kabuli_chr03    | 22185431                       | [T/G]       | 1067293017                                 |
| Ca_Kabuli_NC_021162.1_22187794 | Ca_kabuli_chr03    | 22187794                       | [A/C]       | 1067293018                                 |
| Ca_Kabuli_NC_021162.1_22188162 | Ca_kabuli_chr03    | 22188162                       | [A/C]       | 1067293019                                 |
| Ca_Kabuli_NC_021162.1_22199967 | Ca_kabuli_chr03    | 22199967                       | [T/A]       | 1067293020                                 |
| Ca_Kabuli_NC_021162.1_22200730 | Ca_kabuli_chr03    | 22200730                       | [A/C]       | 1067293021                                 |
| Ca_Kabuli_NC_021162.1_22202826 | Ca_kabuli_chr03    | 22202826                       | [A/C]       | 1067293022                                 |
| Ca_Kabuli_NC_021162.1_22209591 | Ca_kabuli_chr03    | 22209591                       | [T/C]       | 1067293023                                 |
| Ca_Kabuli_NC_021162.1_22225100 | Ca_kabuli_chr03    | 22225100                       | [G/T]       | 1067293024                                 |
| Ca_Kabuli_NC_021162.1_22225125 | Ca_kabuli_chr03    | 22225125                       | [G/T]       | 1067293025                                 |
| Ca_Kabuli_NC_021162.1_22225128 | Ca_kabuli_chr03    | 22225128                       | [G/T]       | 1067293026                                 |
| Ca_Kabuli_NC_021162.1_22225134 | Ca_kabuli_chr03    | 22225134                       | [A/T]       | 1067293027                                 |
| Ca_Kabuli_NC_021162.1_22225139 | Ca_kabuli_chr03    | 22225139                       | [G/T]       | 1067293028                                 |
| Ca_Kabuli_NC_021162.1_22294715 | Ca_kabuli_chr03    | 22294715                       | [T/C]       | 1067293029                                 |
| Ca_Kabuli_NC_021162.1_22294722 | Ca_kabuli_chr03    | 22294722                       | [A/T]       | 1067293030                                 |
| Ca_Kabuli_NC_021162.1_22294727 | Ca_kabuli_chr03    | 22294727                       | [T/C]       | 1067293031                                 |
| Ca_Kabuli_NC_021162.1_22294753 | Ca_kabuli_chr03    | 22294753                       | [A/G]       | 1067293032                                 |
| Ca_Kabuli_NC_021162.1_22329341 | Ca_kabuli_chr03    | 22329341                       | [T/G]       | 1067293033                                 |
| Ca_Kabuli_NC_021162.1_22345311 | Ca_kabuli_chr03    | 22345311                       | [T/C]       | 1067293034                                 |
| Ca_Kabuli_NC_021162.1_22346166 | Ca_kabuli_chr03    | 22346166                       | [A/C]       | 1067293035                                 |
| Ca_Kabuli_NC_021162.1_22407084 | Ca_kabuli_chr03    | 22407084                       | [A/C]       | 1067293036                                 |
| Ca_Kabuli_NC_021162.1_22462445 | Ca_kabuli_chr03    | 22462445                       | [C/A]       | 1067293037                                 |
| Ca_Kabuli_NC_021162.1_22462446 | Ca_kabuli_chr03    | 22462446                       | [T/G]       | 1067293038                                 |
| Ca_Kabuli_NC_021162.1_22462448 | Ca_kabuli_chr03    | 22462448                       | [G/T]       | 1067293039                                 |
| Ca_Kabuli_NC_021162.1_22539439 | Ca_kabuli_chr03    | 22539439                       | [A/C]       | 1067293040                                 |
| Ca_Kabuli_NC_021162.1_22539555 | Ca_kabuli_chr03    | 22539555                       | [A/C]       | 1067293041                                 |
| Ca_Kabuli_NC_021162.1_22539925 | Ca_kabuli_chr03    | 22539925                       | [T/C]       | 1067293042                                 |
| Ca_Kabuli_NC_021162.1_22539942 | Ca_kabuli_chr03    | 22539942                       | [A/G]       | 1067293043                                 |
| Ca_Kabuli_NC_021162.1_22610064 | Ca_kabuli_chr03    | 22610064                       | [T/C]       | 1067293044                                 |
| Ca_Kabuli_NC_021162.1_22610071 | Ca_kabuli_chr03    | 22610071                       | [T/G]       | 1067293045                                 |
| Ca_Kabuli_NC_021162.1_22610073 | Ca_kabuli_chr03    | 22610073                       | [T/G]       | 1067293046                                 |
| Ca_Kabuli_NC_021162.1_22610112 | Ca_kabuli_chr03    | 22610112                       | [T/C]       | 1067293047                                 |
| Ca_Kabuli_NC_021162.1_22690218 | Ca_kabuli_chr03    | 22690218                       | [T/C]       | 1067293048                                 |
| Ca_Kabuli_NC_021162.1_22696727 | Ca_kabuli_chr03    | 22696727                       | [A/T]       | 1067293049                                 |
| Ca_Kabuli_NC_021162.1_22718070 | Ca_kabuli_chr03    | 22718070                       | [T/C]       | 1067293050                                 |

| <b>SNP IDs</b>                 | <b>Chromosomes</b> | <b>Physical positions (bp)</b> | <b>SNPs</b> | <b>NCBI SNPdb accession IDs (NCBI_ss#)</b> |
|--------------------------------|--------------------|--------------------------------|-------------|--------------------------------------------|
| Ca_Kabuli_NC_021162.1_22718091 | Ca_kabuli_chr03    | 22718091                       | [T/G]       | 1067293051                                 |
| Ca_Kabuli_NC_021162.1_22719600 | Ca_kabuli_chr03    | 22719600                       | [C/A]       | 1067293052                                 |
| Ca_Kabuli_NC_021162.1_22719603 | Ca_kabuli_chr03    | 22719603                       | [A/C]       | 1067293053                                 |
| Ca_Kabuli_NC_021162.1_22719605 | Ca_kabuli_chr03    | 22719605                       | [T/G]       | 1067293054                                 |
| Ca_Kabuli_NC_021162.1_22727382 | Ca_kabuli_chr03    | 22727382                       | [T/C]       | 1067293055                                 |
| Ca_Kabuli_NC_021162.1_22730700 | Ca_kabuli_chr03    | 22730700                       | [T/G]       | 1067293056                                 |
| Ca_Kabuli_NC_021162.1_22772522 | Ca_kabuli_chr03    | 22772522                       | [A/C]       | 1067293057                                 |
| Ca_Kabuli_NC_021162.1_22772533 | Ca_kabuli_chr03    | 22772533                       | [A/G]       | 1067293058                                 |
| Ca_Kabuli_NC_021162.1_22794680 | Ca_kabuli_chr03    | 22794680                       | [A/T]       | 1067293059                                 |
| Ca_Kabuli_NC_021162.1_22794692 | Ca_kabuli_chr03    | 22794692                       | [T/A]       | 1067293060                                 |
| Ca_Kabuli_NC_021162.1_22812683 | Ca_kabuli_chr03    | 22812683                       | [T/G]       | 1067293061                                 |
| Ca_Kabuli_NC_021162.1_22812692 | Ca_kabuli_chr03    | 22812692                       | [T/G]       | 1067293062                                 |
| Ca_Kabuli_NC_021162.1_22849461 | Ca_kabuli_chr03    | 22849461                       | [A/G]       | 1067293063                                 |
| Ca_Kabuli_NC_021162.1_22849484 | Ca_kabuli_chr03    | 22849484                       | [T/C]       | 1067293064                                 |
| Ca_Kabuli_NC_021162.1_22868707 | Ca_kabuli_chr03    | 22868707                       | [A/G]       | 1067293065                                 |
| Ca_Kabuli_NC_021162.1_22868717 | Ca_kabuli_chr03    | 22868717                       | [A/C]       | 1067293066                                 |
| Ca_Kabuli_NC_021162.1_22868721 | Ca_kabuli_chr03    | 22868721                       | [A/C]       | 1067293067                                 |
| Ca_Kabuli_NC_021162.1_22927162 | Ca_kabuli_chr03    | 22927162                       | [T/G]       | 1067293068                                 |
| Ca_Kabuli_NC_021162.1_22937333 | Ca_kabuli_chr03    | 22937333                       | [C/T]       | 1067293069                                 |
| Ca_Kabuli_NC_021162.1_22937403 | Ca_kabuli_chr03    | 22937403                       | [G/T]       | 1067293070                                 |
| Ca_Kabuli_NC_021162.1_22993218 | Ca_kabuli_chr03    | 22993218                       | [A/C]       | 1067293071                                 |
| Ca_Kabuli_NC_021162.1_22993243 | Ca_kabuli_chr03    | 22993243                       | [A/C]       | 1067293072                                 |
| Ca_Kabuli_NC_021162.1_22995324 | Ca_kabuli_chr03    | 22995324                       | [A/C]       | 1067293073                                 |
| Ca_Kabuli_NC_021162.1_23042271 | Ca_kabuli_chr03    | 23042271                       | [T/A]       | 1067293074                                 |
| Ca_Kabuli_NC_021162.1_23042281 | Ca_kabuli_chr03    | 23042281                       | [A/C]       | 1067293075                                 |
| Ca_Kabuli_NC_021162.1_23053022 | Ca_kabuli_chr03    | 23053022                       | [T/G]       | 1067293076                                 |
| Ca_Kabuli_NC_021162.1_23222201 | Ca_kabuli_chr03    | 23222201                       | [C/T]       | 1067293077                                 |
| Ca_Kabuli_NC_021162.1_23222202 | Ca_kabuli_chr03    | 23222202                       | [T/C]       | 1067293078                                 |
| Ca_Kabuli_NC_021162.1_23222203 | Ca_kabuli_chr03    | 23222203                       | [T/C]       | 1067293079                                 |
| Ca_Kabuli_NC_021162.1_23271812 | Ca_kabuli_chr03    | 23271812                       | [T/C]       | 1067293080                                 |
| Ca_Kabuli_NC_021162.1_23271823 | Ca_kabuli_chr03    | 23271823                       | [A/G]       | 1067293081                                 |
| Ca_Kabuli_NC_021162.1_23273108 | Ca_kabuli_chr03    | 23273108                       | [G/T]       | 1067293082                                 |
| Ca_Kabuli_NC_021162.1_23273222 | Ca_kabuli_chr03    | 23273222                       | [T/C]       | 1067293083                                 |
| Ca_Kabuli_NC_021162.1_23275720 | Ca_kabuli_chr03    | 23275720                       | [T/A]       | 1067293084                                 |

| <b>SNP IDs</b>                 | <b>Chromosomes</b> | <b>Physical positions (bp)</b> | <b>SNPs</b> | <b>NCBI SNPdb accession IDs (NCBI_ss#)</b> |
|--------------------------------|--------------------|--------------------------------|-------------|--------------------------------------------|
| Ca_Kabuli_NC_021162.1_23275763 | Ca_kabuli_chr03    | 23275763                       | [A/C]       | 1067293085                                 |
| Ca_Kabuli_NC_021162.1_23298846 | Ca_kabuli_chr03    | 23298846                       | [A/G]       | 1067293086                                 |
| Ca_Kabuli_NC_021162.1_23303162 | Ca_kabuli_chr03    | 23303162                       | [A/G]       | 1067293087                                 |
| Ca_Kabuli_NC_021162.1_23340881 | Ca_kabuli_chr03    | 23340881                       | [T/C]       | 1067293088                                 |
| Ca_Kabuli_NC_021162.1_23340882 | Ca_kabuli_chr03    | 23340882                       | [T/C]       | 1067293089                                 |
| Ca_Kabuli_NC_021162.1_23340883 | Ca_kabuli_chr03    | 23340883                       | [T/C]       | 1067293090                                 |
| Ca_Kabuli_NC_021162.1_23340884 | Ca_kabuli_chr03    | 23340884                       | [T/C]       | 1067293091                                 |
| Ca_Kabuli_NC_021162.1_23340885 | Ca_kabuli_chr03    | 23340885                       | [T/C]       | 1067293092                                 |
| Ca_Kabuli_NC_021162.1_23340886 | Ca_kabuli_chr03    | 23340886                       | [T/A]       | 1067293093                                 |
| Ca_Kabuli_NC_021162.1_23340887 | Ca_kabuli_chr03    | 23340887                       | [A/C]       | 1067293094                                 |
| Ca_Kabuli_NC_021162.1_23341077 | Ca_kabuli_chr03    | 23341077                       | [A/C]       | 1067293095                                 |
| Ca_Kabuli_NC_021162.1_23341373 | Ca_kabuli_chr03    | 23341373                       | [A/G]       | 1067293096                                 |
| Ca_Kabuli_NC_021162.1_23401529 | Ca_kabuli_chr03    | 23401529                       | [A/C]       | 1067293097                                 |
| Ca_Kabuli_NC_021162.1_23401530 | Ca_kabuli_chr03    | 23401530                       | [G/A]       | 1067293098                                 |
| Ca_Kabuli_NC_021162.1_23401531 | Ca_kabuli_chr03    | 23401531                       | [A/C]       | 1067293099                                 |
| Ca_Kabuli_NC_021162.1_23401532 | Ca_kabuli_chr03    | 23401532                       | [T/A]       | 1067293100                                 |
| Ca_Kabuli_NC_021162.1_23444074 | Ca_kabuli_chr03    | 23444074                       | [A/C]       | 1067293101                                 |
| Ca_Kabuli_NC_021162.1_23461331 | Ca_kabuli_chr03    | 23461331                       | [T/C]       | 1067293102                                 |
| Ca_Kabuli_NC_021162.1_23482443 | Ca_kabuli_chr03    | 23482443                       | [A/G]       | 1067293103                                 |
| Ca_Kabuli_NC_021162.1_23694570 | Ca_kabuli_chr03    | 23694570                       | [A/G]       | 1067293104                                 |
| Ca_Kabuli_NC_021162.1_23694597 | Ca_kabuli_chr03    | 23694597                       | [A/G]       | 1067293105                                 |
| Ca_Kabuli_NC_021162.1_23695129 | Ca_kabuli_chr03    | 23695129                       | [A/C]       | 1067293106                                 |
| Ca_Kabuli_NC_021162.1_23695185 | Ca_kabuli_chr03    | 23695185                       | [T/C]       | 1067293107                                 |
| Ca_Kabuli_NC_021162.1_23721066 | Ca_kabuli_chr03    | 23721066                       | [A/C]       | 1067293108                                 |
| Ca_Kabuli_NC_021162.1_23727724 | Ca_kabuli_chr03    | 23727724                       | [T/G]       | 1067293109                                 |
| Ca_Kabuli_NC_021162.1_23727749 | Ca_kabuli_chr03    | 23727749                       | [T/G]       | 1067293110                                 |
| Ca_Kabuli_NC_021162.1_23765099 | Ca_kabuli_chr03    | 23765099                       | [A/C]       | 1067293111                                 |
| Ca_Kabuli_NC_021162.1_23780028 | Ca_kabuli_chr03    | 23780028                       | [T/G]       | 1067293112                                 |
| Ca_Kabuli_NC_021162.1_23800346 | Ca_kabuli_chr03    | 23800346                       | [A/T]       | 1067293113                                 |
| Ca_Kabuli_NC_021162.1_23800411 | Ca_kabuli_chr03    | 23800411                       | [T/C]       | 1067293114                                 |
| Ca_Kabuli_NC_021162.1_23800432 | Ca_kabuli_chr03    | 23800432                       | [A/T]       | 1067293115                                 |
| Ca_Kabuli_NC_021162.1_23800459 | Ca_kabuli_chr03    | 23800459                       | [A/G]       | 1067293116                                 |
| Ca_Kabuli_NC_021162.1_23865001 | Ca_kabuli_chr03    | 23865001                       | [A/C]       | 1067293117                                 |
| Ca_Kabuli_NC_021162.1_23930065 | Ca_kabuli_chr03    | 23930065                       | [T/G]       | 1067293118                                 |



| <b>SNP IDs</b>                 | <b>Chromosomes</b> | <b>Physical positions (bp)</b> | <b>SNPs</b> | <b>NCBI SNPdb accession IDs (NCBI_ss#)</b> |
|--------------------------------|--------------------|--------------------------------|-------------|--------------------------------------------|
| Ca_Kabuli_NC_021162.1_23969850 | Ca_kabuli_chr03    | 23969850                       | [T/G]       | 1067293119                                 |
| Ca_Kabuli_NC_021162.1_23978265 | Ca_kabuli_chr03    | 23978265                       | [T/A]       | 1067293120                                 |
| Ca_Kabuli_NC_021162.1_24024538 | Ca_kabuli_chr03    | 24024538                       | [A/C]       | 1067293121                                 |
| Ca_Kabuli_NC_021162.1_24024544 | Ca_kabuli_chr03    | 24024544                       | [A/C]       | 1067293122                                 |
| Ca_Kabuli_NC_021162.1_24024548 | Ca_kabuli_chr03    | 24024548                       | [T/C]       | 1067293123                                 |
| Ca_Kabuli_NC_021162.1_24024554 | Ca_kabuli_chr03    | 24024554                       | [T/C]       | 1067293124                                 |
| Ca_Kabuli_NC_021162.1_24024661 | Ca_kabuli_chr03    | 24024661                       | [C/A]       | 1067293125                                 |
| Ca_Kabuli_NC_021162.1_24024662 | Ca_kabuli_chr03    | 24024662                       | [T/G]       | 1067293126                                 |
| Ca_Kabuli_NC_021162.1_24025826 | Ca_kabuli_chr03    | 24025826                       | [A/C]       | 1067293127                                 |
| Ca_Kabuli_NC_021162.1_24026374 | Ca_kabuli_chr03    | 24026374                       | [T/C]       | 1067293128                                 |
| Ca_Kabuli_NC_021162.1_24064895 | Ca_kabuli_chr03    | 24064895                       | [A/G]       | 1067293129                                 |
| Ca_Kabuli_NC_021162.1_24084754 | Ca_kabuli_chr03    | 24084754                       | [G/T]       | 1067293130                                 |
| Ca_Kabuli_NC_021162.1_24084757 | Ca_kabuli_chr03    | 24084757                       | [A/T]       | 1067293131                                 |
| Ca_Kabuli_NC_021162.1_24084788 | Ca_kabuli_chr03    | 24084788                       | [T/C]       | 1067293132                                 |
| Ca_Kabuli_NC_021162.1_24162196 | Ca_kabuli_chr03    | 24162196                       | [T/C]       | 1067293133                                 |
| Ca_Kabuli_NC_021162.1_24194574 | Ca_kabuli_chr03    | 24194574                       | [T/C]       | 1067293134                                 |
| Ca_Kabuli_NC_021162.1_24238308 | Ca_kabuli_chr03    | 24238308                       | [T/C]       | 1067293135                                 |
| Ca_Kabuli_NC_021162.1_24240003 | Ca_kabuli_chr03    | 24240003                       | [T/C]       | 1067293136                                 |
| Ca_Kabuli_NC_021162.1_24240011 | Ca_kabuli_chr03    | 24240011                       | [T/G]       | 1067293137                                 |
| Ca_Kabuli_NC_021162.1_24240019 | Ca_kabuli_chr03    | 24240019                       | [G/A]       | 1067293138                                 |
| Ca_Kabuli_NC_021162.1_24240022 | Ca_kabuli_chr03    | 24240022                       | [T/A]       | 1067293139                                 |
| Ca_Kabuli_NC_021162.1_24240025 | Ca_kabuli_chr03    | 24240025                       | [G/A]       | 1067293140                                 |
| Ca_Kabuli_NC_021162.1_24240028 | Ca_kabuli_chr03    | 24240028                       | [G/A]       | 1067293141                                 |
| Ca_Kabuli_NC_021162.1_24247162 | Ca_kabuli_chr03    | 24247162                       | [T/C]       | 1067293142                                 |
| Ca_Kabuli_NC_021162.1_24262412 | Ca_kabuli_chr03    | 24262412                       | [C/A]       | 1067293143                                 |
| Ca_Kabuli_NC_021162.1_24262413 | Ca_kabuli_chr03    | 24262413                       | [C/G]       | 1067293144                                 |
| Ca_Kabuli_NC_021162.1_24262414 | Ca_kabuli_chr03    | 24262414                       | [T/A]       | 1067293145                                 |
| Ca_Kabuli_NC_021162.1_24262415 | Ca_kabuli_chr03    | 24262415                       | [C/T]       | 1067293146                                 |
| Ca_Kabuli_NC_021162.1_24297032 | Ca_kabuli_chr03    | 24297032                       | [T/C]       | 1067293147                                 |
| Ca_Kabuli_NC_021162.1_24297033 | Ca_kabuli_chr03    | 24297033                       | [A/C]       | 1067293148                                 |
| Ca_Kabuli_NC_021162.1_24297866 | Ca_kabuli_chr03    | 24297866                       | [A/C]       | 1067293149                                 |
| Ca_Kabuli_NC_021162.1_24297875 | Ca_kabuli_chr03    | 24297875                       | [A/G]       | 1067293150                                 |
| Ca_Kabuli_NC_021162.1_24297887 | Ca_kabuli_chr03    | 24297887                       | [T/C]       | 1067293151                                 |
| Ca_Kabuli_NC_021162.1_24390790 | Ca_kabuli_chr03    | 24390790                       | [T/G]       | 1067293152                                 |

| <b>SNP IDs</b>                 | <b>Chromosomes</b> | <b>Physical positions (bp)</b> | <b>SNPs</b> | <b>NCBI SNPdb accession IDs (NCBI_ss#)</b> |
|--------------------------------|--------------------|--------------------------------|-------------|--------------------------------------------|
| Ca_Kabuli_NC_021162.1_24390802 | Ca_kabuli_chr03    | 24390802                       | [T/G]       | 1067293153                                 |
| Ca_Kabuli_NC_021162.1_24390832 | Ca_kabuli_chr03    | 24390832                       | [T/G]       | 1067293154                                 |
| Ca_Kabuli_NC_021162.1_24390881 | Ca_kabuli_chr03    | 24390881                       | [A/T]       | 1067293155                                 |
| Ca_Kabuli_NC_021162.1_24417498 | Ca_kabuli_chr03    | 24417498                       | [A/C]       | 1067293156                                 |
| Ca_Kabuli_NC_021162.1_24417507 | Ca_kabuli_chr03    | 24417507                       | [A/G]       | 1067293157                                 |
| Ca_Kabuli_NC_021162.1_24418066 | Ca_kabuli_chr03    | 24418066                       | [T/G]       | 1067293158                                 |
| Ca_Kabuli_NC_021162.1_24459620 | Ca_kabuli_chr03    | 24459620                       | [T/A]       | 1067293159                                 |
| Ca_Kabuli_NC_021162.1_24481380 | Ca_kabuli_chr03    | 24481380                       | [T/C]       | 1067293160                                 |
| Ca_Kabuli_NC_021162.1_24481409 | Ca_kabuli_chr03    | 24481409                       | [A/G]       | 1067293161                                 |
| Ca_Kabuli_NC_021162.1_24540205 | Ca_kabuli_chr03    | 24540205                       | [T/G]       | 1067293162                                 |
| Ca_Kabuli_NC_021162.1_24540313 | Ca_kabuli_chr03    | 24540313                       | [T/G]       | 1067293163                                 |
| Ca_Kabuli_NC_021162.1_24637837 | Ca_kabuli_chr03    | 24637837                       | [A/C]       | 1067293164                                 |
| Ca_Kabuli_NC_021162.1_24697785 | Ca_kabuli_chr03    | 24697785                       | [A/T]       | 1067293165                                 |
| Ca_Kabuli_NC_021162.1_24798127 | Ca_kabuli_chr03    | 24798127                       | [A/G]       | 1067293166                                 |
| Ca_Kabuli_NC_021162.1_24880665 | Ca_kabuli_chr03    | 24880665                       | [T/G]       | 1067293167                                 |
| Ca_Kabuli_NC_021162.1_24894262 | Ca_kabuli_chr03    | 24894262                       | [G/C]       | 1067293168                                 |
| Ca_Kabuli_NC_021162.1_24935188 | Ca_kabuli_chr03    | 24935188                       | [T/C]       | 1067293169                                 |
| Ca_Kabuli_NC_021162.1_25032514 | Ca_kabuli_chr03    | 25032514                       | [A/C]       | 1067293170                                 |
| Ca_Kabuli_NC_021162.1_25032520 | Ca_kabuli_chr03    | 25032520                       | [A/G]       | 1067293171                                 |
| Ca_Kabuli_NC_021162.1_25046405 | Ca_kabuli_chr03    | 25046405                       | [T/G]       | 1067293172                                 |
| Ca_Kabuli_NC_021162.1_25046559 | Ca_kabuli_chr03    | 25046559                       | [T/A]       | 1067293173                                 |
| Ca_Kabuli_NC_021162.1_25046562 | Ca_kabuli_chr03    | 25046562                       | [T/A]       | 1067293174                                 |
| Ca_Kabuli_NC_021162.1_25145247 | Ca_kabuli_chr03    | 25145247                       | [T/C]       | 1067293175                                 |
| Ca_Kabuli_NC_021162.1_25244223 | Ca_kabuli_chr03    | 25244223                       | [A/C]       | 1067293176                                 |
| Ca_Kabuli_NC_021162.1_25244226 | Ca_kabuli_chr03    | 25244226                       | [A/C]       | 1067293177                                 |
| Ca_Kabuli_NC_021162.1_25244244 | Ca_kabuli_chr03    | 25244244                       | [A/G]       | 1067293178                                 |
| Ca_Kabuli_NC_021162.1_25311403 | Ca_kabuli_chr03    | 25311403                       | [T/A]       | 1067293179                                 |
| Ca_Kabuli_NC_021162.1_25333190 | Ca_kabuli_chr03    | 25333190                       | [T/C]       | 1067293180                                 |
| Ca_Kabuli_NC_021162.1_25333208 | Ca_kabuli_chr03    | 25333208                       | [T/A]       | 1067293181                                 |
| Ca_Kabuli_NC_021162.1_25385388 | Ca_kabuli_chr03    | 25385388                       | [T/C]       | 1067293182                                 |
| Ca_Kabuli_NC_021162.1_25385389 | Ca_kabuli_chr03    | 25385389                       | [T/G]       | 1067293183                                 |
| Ca_Kabuli_NC_021162.1_25385394 | Ca_kabuli_chr03    | 25385394                       | [C/A]       | 1067293184                                 |
| Ca_Kabuli_NC_021162.1_25385425 | Ca_kabuli_chr03    | 25385425                       | [A/C]       | 1067293185                                 |
| Ca_Kabuli_NC_021162.1_25444137 | Ca_kabuli_chr03    | 25444137                       | [A/C]       | 1067293186                                 |

| <b>SNP IDs</b>                 | <b>Chromosomes</b> | <b>Physical positions (bp)</b> | <b>SNPs</b> | <b>NCBI SNPdb accession IDs (NCBI_ss#)</b> |
|--------------------------------|--------------------|--------------------------------|-------------|--------------------------------------------|
| Ca_Kabuli_NC_021162.1_25462227 | Ca_kabuli_chr03    | 25462227                       | [A/C]       | 1067293187                                 |
| Ca_Kabuli_NC_021162.1_25505355 | Ca_kabuli_chr03    | 25505355                       | [T/G]       | 1067293188                                 |
| Ca_Kabuli_NC_021162.1_25505442 | Ca_kabuli_chr03    | 25505442                       | [A/G]       | 1067293189                                 |
| Ca_Kabuli_NC_021162.1_25537761 | Ca_kabuli_chr03    | 25537761                       | [T/A]       | 1067293190                                 |
| Ca_Kabuli_NC_021162.1_25537766 | Ca_kabuli_chr03    | 25537766                       | [T/A]       | 1067293191                                 |
| Ca_Kabuli_NC_021162.1_25537803 | Ca_kabuli_chr03    | 25537803                       | [A/G]       | 1067293192                                 |
| Ca_Kabuli_NC_021162.1_25579982 | Ca_kabuli_chr03    | 25579982                       | [C/A]       | 1067293193                                 |
| Ca_Kabuli_NC_021162.1_25579983 | Ca_kabuli_chr03    | 25579983                       | [A/G]       | 1067293194                                 |
| Ca_Kabuli_NC_021162.1_25579984 | Ca_kabuli_chr03    | 25579984                       | [T/A]       | 1067293195                                 |
| Ca_Kabuli_NC_021162.1_25580084 | Ca_kabuli_chr03    | 25580084                       | [T/G]       | 1067293196                                 |
| Ca_Kabuli_NC_021162.1_25580104 | Ca_kabuli_chr03    | 25580104                       | [A/C]       | 1067293197                                 |
| Ca_Kabuli_NC_021162.1_25614515 | Ca_kabuli_chr03    | 25614515                       | [T/G]       | 1067293198                                 |
| Ca_Kabuli_NC_021162.1_25673614 | Ca_kabuli_chr03    | 25673614                       | [A/G]       | 1067293199                                 |
| Ca_Kabuli_NC_021162.1_25675094 | Ca_kabuli_chr03    | 25675094                       | [A/T]       | 1067293200                                 |
| Ca_Kabuli_NC_021162.1_25688342 | Ca_kabuli_chr03    | 25688342                       | [T/C]       | 1067293201                                 |
| Ca_Kabuli_NC_021162.1_25688408 | Ca_kabuli_chr03    | 25688408                       | [A/C]       | 1067293202                                 |
| Ca_Kabuli_NC_021162.1_25702286 | Ca_kabuli_chr03    | 25702286                       | [T/G]       | 1067293203                                 |
| Ca_Kabuli_NC_021162.1_25711777 | Ca_kabuli_chr03    | 25711777                       | [T/G]       | 1067293204                                 |
| Ca_Kabuli_NC_021162.1_25757728 | Ca_kabuli_chr03    | 25757728                       | [T/G]       | 1067293205                                 |
| Ca_Kabuli_NC_021162.1_25757753 | Ca_kabuli_chr03    | 25757753                       | [A/G]       | 1067293206                                 |
| Ca_Kabuli_NC_021162.1_25822560 | Ca_kabuli_chr03    | 25822560                       | [T/C]       | 1067293207                                 |
| Ca_Kabuli_NC_021162.1_25822584 | Ca_kabuli_chr03    | 25822584                       | [T/A]       | 1067293208                                 |
| Ca_Kabuli_NC_021162.1_25987849 | Ca_kabuli_chr03    | 25987849                       | [A/T]       | 1067293209                                 |
| Ca_Kabuli_NC_021162.1_26120260 | Ca_kabuli_chr03    | 26120260                       | [A/T]       | 1067293210                                 |
| Ca_Kabuli_NC_021162.1_26120261 | Ca_kabuli_chr03    | 26120261                       | [T/C]       | 1067293211                                 |
| Ca_Kabuli_NC_021162.1_26120262 | Ca_kabuli_chr03    | 26120262                       | [C/G]       | 1067293212                                 |
| Ca_Kabuli_NC_021162.1_26120263 | Ca_kabuli_chr03    | 26120263                       | [T/G]       | 1067293213                                 |
| Ca_Kabuli_NC_021162.1_26178545 | Ca_kabuli_chr03    | 26178545                       | [T/C]       | 1067293214                                 |
| Ca_Kabuli_NC_021162.1_26178553 | Ca_kabuli_chr03    | 26178553                       | [T/C]       | 1067293215                                 |
| Ca_Kabuli_NC_021162.1_26198241 | Ca_kabuli_chr03    | 26198241                       | [T/A]       | 1067293216                                 |
| Ca_Kabuli_NC_021162.1_26198286 | Ca_kabuli_chr03    | 26198286                       | [A/G]       | 1067293217                                 |
| Ca_Kabuli_NC_021162.1_26198292 | Ca_kabuli_chr03    | 26198292                       | [A/G]       | 1067293218                                 |
| Ca_Kabuli_NC_021162.1_26322681 | Ca_kabuli_chr03    | 26322681                       | [T/G]       | 1067293219                                 |
| Ca_Kabuli_NC_021162.1_26322700 | Ca_kabuli_chr03    | 26322700                       | [G/A]       | 1067293220                                 |

| <b>SNP IDs</b>                 | <b>Chromosomes</b> | <b>Physical positions (bp)</b> | <b>SNPs</b> | <b>NCBI SNPdb accession IDs (NCBI_ss#)</b> |
|--------------------------------|--------------------|--------------------------------|-------------|--------------------------------------------|
| Ca_Kabuli_NC_021162.1_26322701 | Ca_kabuli_chr03    | 26322701                       | [T/G]       | 1067293221                                 |
| Ca_Kabuli_NC_021162.1_26335843 | Ca_kabuli_chr03    | 26335843                       | [T/G]       | 1067293222                                 |
| Ca_Kabuli_NC_021162.1_26340845 | Ca_kabuli_chr03    | 26340845                       | [T/C]       | 1067293223                                 |
| Ca_Kabuli_NC_021162.1_26340848 | Ca_kabuli_chr03    | 26340848                       | [T/A]       | 1067293224                                 |
| Ca_Kabuli_NC_021162.1_26340920 | Ca_kabuli_chr03    | 26340920                       | [A/C]       | 1067293225                                 |
| Ca_Kabuli_NC_021162.1_26340924 | Ca_kabuli_chr03    | 26340924                       | [A/C]       | 1067293226                                 |
| Ca_Kabuli_NC_021162.1_26344534 | Ca_kabuli_chr03    | 26344534                       | [A/G]       | 1067293227                                 |
| Ca_Kabuli_NC_021162.1_26344535 | Ca_kabuli_chr03    | 26344535                       | [A/G]       | 1067293228                                 |
| Ca_Kabuli_NC_021162.1_26557385 | Ca_kabuli_chr03    | 26557385                       | [A/G]       | 1067293229                                 |
| Ca_Kabuli_NC_021162.1_26573634 | Ca_kabuli_chr03    | 26573634                       | [A/T]       | 1067293230                                 |
| Ca_Kabuli_NC_021162.1_26573636 | Ca_kabuli_chr03    | 26573636                       | [T/C]       | 1067293231                                 |
| Ca_Kabuli_NC_021162.1_26573647 | Ca_kabuli_chr03    | 26573647                       | [T/A]       | 1067293232                                 |
| Ca_Kabuli_NC_021162.1_26573660 | Ca_kabuli_chr03    | 26573660                       | [T/C]       | 1067293233                                 |
| Ca_Kabuli_NC_021162.1_26624198 | Ca_kabuli_chr03    | 26624198                       | [T/C]       | 1067293234                                 |
| Ca_Kabuli_NC_021162.1_26624219 | Ca_kabuli_chr03    | 26624219                       | [A/C]       | 1067293235                                 |
| Ca_Kabuli_NC_021162.1_26624244 | Ca_kabuli_chr03    | 26624244                       | [T/C]       | 1067293236                                 |
| Ca_Kabuli_NC_021162.1_26624258 | Ca_kabuli_chr03    | 26624258                       | [A/G]       | 1067293237                                 |
| Ca_Kabuli_NC_021162.1_26627140 | Ca_kabuli_chr03    | 26627140                       | [T/G]       | 1067293238                                 |
| Ca_Kabuli_NC_021162.1_26636607 | Ca_kabuli_chr03    | 26636607                       | [A/C]       | 1067293239                                 |
| Ca_Kabuli_NC_021162.1_26646079 | Ca_kabuli_chr03    | 26646079                       | [T/C]       | 1067293240                                 |
| Ca_Kabuli_NC_021162.1_26646080 | Ca_kabuli_chr03    | 26646080                       | [T/G]       | 1067293241                                 |
| Ca_Kabuli_NC_021162.1_26649150 | Ca_kabuli_chr03    | 26649150                       | [A/C]       | 1067293242                                 |
| Ca_Kabuli_NC_021162.1_26659077 | Ca_kabuli_chr03    | 26659077                       | [A/C]       | 1067293243                                 |
| Ca_Kabuli_NC_021162.1_26659082 | Ca_kabuli_chr03    | 26659082                       | [T/C]       | 1067293244                                 |
| Ca_Kabuli_NC_021162.1_26659093 | Ca_kabuli_chr03    | 26659093                       | [G/C]       | 1067293245                                 |
| Ca_Kabuli_NC_021162.1_26659097 | Ca_kabuli_chr03    | 26659097                       | [A/C]       | 1067293246                                 |
| Ca_Kabuli_NC_021162.1_26659108 | Ca_kabuli_chr03    | 26659108                       | [T/C]       | 1067293247                                 |
| Ca_Kabuli_NC_021162.1_26659111 | Ca_kabuli_chr03    | 26659111                       | [T/C]       | 1067293248                                 |
| Ca_Kabuli_NC_021162.1_26659115 | Ca_kabuli_chr03    | 26659115                       | [A/G]       | 1067293249                                 |
| Ca_Kabuli_NC_021162.1_26726839 | Ca_kabuli_chr03    | 26726839                       | [T/G]       | 1067293250                                 |
| Ca_Kabuli_NC_021162.1_26757751 | Ca_kabuli_chr03    | 26757751                       | [C/A]       | 1067293251                                 |
| Ca_Kabuli_NC_021162.1_26757752 | Ca_kabuli_chr03    | 26757752                       | [A/G]       | 1067293252                                 |
| Ca_Kabuli_NC_021162.1_26849263 | Ca_kabuli_chr03    | 26849263                       | [A/C]       | 1067293253                                 |
| Ca_Kabuli_NC_021162.1_26849303 | Ca_kabuli_chr03    | 26849303                       | [T/C]       | 1067293254                                 |

| <b>SNP IDs</b>                 | <b>Chromosomes</b> | <b>Physical positions (bp)</b> | <b>SNPs</b> | <b>NCBI SNPdb accession IDs (NCBI_ss#)</b> |
|--------------------------------|--------------------|--------------------------------|-------------|--------------------------------------------|
| Ca_Kabuli_NC_021162.1_26900231 | Ca_kabuli_chr03    | 26900231                       | [T/C]       | 1067293255                                 |
| Ca_Kabuli_NC_021162.1_26900252 | Ca_kabuli_chr03    | 26900252                       | [G/A]       | 1067293256                                 |
| Ca_Kabuli_NC_021162.1_26900271 | Ca_kabuli_chr03    | 26900271                       | [T/G]       | 1067293257                                 |
| Ca_Kabuli_NC_021162.1_26910675 | Ca_kabuli_chr03    | 26910675                       | [C/A]       | 1067293258                                 |
| Ca_Kabuli_NC_021162.1_26911144 | Ca_kabuli_chr03    | 26911144                       | [T/A]       | 1067293259                                 |
| Ca_Kabuli_NC_021162.1_26911172 | Ca_kabuli_chr03    | 26911172                       | [A/G]       | 1067293260                                 |
| Ca_Kabuli_NC_021162.1_26916665 | Ca_kabuli_chr03    | 26916665                       | [A/C]       | 1067293261                                 |
| Ca_Kabuli_NC_021162.1_26942286 | Ca_kabuli_chr03    | 26942286                       | [A/C]       | 1067293262                                 |
| Ca_Kabuli_NC_021162.1_27061234 | Ca_kabuli_chr03    | 27061234                       | [T/G]       | 1067293263                                 |
| Ca_Kabuli_NC_021162.1_27061288 | Ca_kabuli_chr03    | 27061288                       | [A/G]       | 1067293264                                 |
| Ca_Kabuli_NC_021162.1_27061317 | Ca_kabuli_chr03    | 27061317                       | [A/G]       | 1067293265                                 |
| Ca_Kabuli_NC_021162.1_27105602 | Ca_kabuli_chr03    | 27105602                       | [A/C]       | 1067293266                                 |
| Ca_Kabuli_NC_021162.1_27157795 | Ca_kabuli_chr03    | 27157795                       | [A/T]       | 1067293267                                 |
| Ca_Kabuli_NC_021162.1_27194182 | Ca_kabuli_chr03    | 27194182                       | [T/G]       | 1067293268                                 |
| Ca_Kabuli_NC_021162.1_27335334 | Ca_kabuli_chr03    | 27335334                       | [A/C]       | 1067293269                                 |
| Ca_Kabuli_NC_021162.1_27342507 | Ca_kabuli_chr03    | 27342507                       | [T/A]       | 1067293270                                 |
| Ca_Kabuli_NC_021162.1_27342792 | Ca_kabuli_chr03    | 27342792                       | [C/A]       | 1067293271                                 |
| Ca_Kabuli_NC_021162.1_27393412 | Ca_kabuli_chr03    | 27393412                       | [A/T]       | 1067293272                                 |
| Ca_Kabuli_NC_021162.1_27417562 | Ca_kabuli_chr03    | 27417562                       | [G/A]       | 1067293273                                 |
| Ca_Kabuli_NC_021162.1_27420406 | Ca_kabuli_chr03    | 27420406                       | [A/C]       | 1067293274                                 |
| Ca_Kabuli_NC_021162.1_27447278 | Ca_kabuli_chr03    | 27447278                       | [T/G]       | 1067293275                                 |
| Ca_Kabuli_NC_021162.1_27447290 | Ca_kabuli_chr03    | 27447290                       | [T/G]       | 1067293276                                 |
| Ca_Kabuli_NC_021162.1_27447386 | Ca_kabuli_chr03    | 27447386                       | [A/G]       | 1067293277                                 |
| Ca_Kabuli_NC_021162.1_27447418 | Ca_kabuli_chr03    | 27447418                       | [T/G]       | 1067293278                                 |
| Ca_Kabuli_NC_021162.1_27447427 | Ca_kabuli_chr03    | 27447427                       | [T/C]       | 1067293279                                 |
| Ca_Kabuli_NC_021162.1_27447437 | Ca_kabuli_chr03    | 27447437                       | [T/G]       | 1067293280                                 |
| Ca_Kabuli_NC_021162.1_27447448 | Ca_kabuli_chr03    | 27447448                       | [A/G]       | 1067293281                                 |
| Ca_Kabuli_NC_021162.1_27447640 | Ca_kabuli_chr03    | 27447640                       | [A/G]       | 1067293282                                 |
| Ca_Kabuli_NC_021162.1_27450765 | Ca_kabuli_chr03    | 27450765                       | [A/C]       | 1067293283                                 |
| Ca_Kabuli_NC_021162.1_27452679 | Ca_kabuli_chr03    | 27452679                       | [A/C]       | 1067293284                                 |
| Ca_Kabuli_NC_021162.1_27457005 | Ca_kabuli_chr03    | 27457005                       | [A/C]       | 1067293285                                 |
| Ca_Kabuli_NC_021162.1_27470325 | Ca_kabuli_chr03    | 27470325                       | [T/C]       | 1067293286                                 |
| Ca_Kabuli_NC_021162.1_27470503 | Ca_kabuli_chr03    | 27470503                       | [A/G]       | 1067293287                                 |
| Ca_Kabuli_NC_021162.1_27484075 | Ca_kabuli_chr03    | 27484075                       | [A/G]       | 1067293288                                 |

| <b>SNP IDs</b>                 | <b>Chromosomes</b> | <b>Physical positions (bp)</b> | <b>SNPs</b> | <b>NCBI SNPdb accession IDs (NCBI_ss#)</b> |
|--------------------------------|--------------------|--------------------------------|-------------|--------------------------------------------|
| Ca_Kabuli_NC_021162.1_27484082 | Ca_kabuli_chr03    | 27484082                       | [T/A]       | 1067293289                                 |
| Ca_Kabuli_NC_021162.1_27484086 | Ca_kabuli_chr03    | 27484086                       | [T/C]       | 1067293290                                 |
| Ca_Kabuli_NC_021162.1_27529943 | Ca_kabuli_chr03    | 27529943                       | [T/G]       | 1067293291                                 |
| Ca_Kabuli_NC_021162.1_27529950 | Ca_kabuli_chr03    | 27529950                       | [T/G]       | 1067293292                                 |
| Ca_Kabuli_NC_021162.1_27529992 | Ca_kabuli_chr03    | 27529992                       | [G/A]       | 1067293293                                 |
| Ca_Kabuli_NC_021162.1_27597269 | Ca_kabuli_chr03    | 27597269                       | [A/T]       | 1067293294                                 |
| Ca_Kabuli_NC_021162.1_27597304 | Ca_kabuli_chr03    | 27597304                       | [A/G]       | 1067293295                                 |
| Ca_Kabuli_NC_021162.1_27597411 | Ca_kabuli_chr03    | 27597411                       | [A/C]       | 1067293296                                 |
| Ca_Kabuli_NC_021162.1_27597936 | Ca_kabuli_chr03    | 27597936                       | [T/G]       | 1067293297                                 |
| Ca_Kabuli_NC_021162.1_27597961 | Ca_kabuli_chr03    | 27597961                       | [G/T]       | 1067293298                                 |
| Ca_Kabuli_NC_021162.1_27622568 | Ca_kabuli_chr03    | 27622568                       | [T/G]       | 1067293299                                 |
| Ca_Kabuli_NC_021162.1_27633010 | Ca_kabuli_chr03    | 27633010                       | [T/A]       | 1067293300                                 |
| Ca_Kabuli_NC_021162.1_27633018 | Ca_kabuli_chr03    | 27633018                       | [A/G]       | 1067293301                                 |
| Ca_Kabuli_NC_021162.1_27633033 | Ca_kabuli_chr03    | 27633033                       | [A/G]       | 1067293302                                 |
| Ca_Kabuli_NC_021162.1_27635497 | Ca_kabuli_chr03    | 27635497                       | [T/G]       | 1067293303                                 |
| Ca_Kabuli_NC_021162.1_27654688 | Ca_kabuli_chr03    | 27654688                       | [G/C]       | 1067293304                                 |
| Ca_Kabuli_NC_021162.1_27654689 | Ca_kabuli_chr03    | 27654689                       | [G/T]       | 1067293305                                 |
| Ca_Kabuli_NC_021162.1_27673719 | Ca_kabuli_chr03    | 27673719                       | [A/G]       | 1067293306                                 |
| Ca_Kabuli_NC_021162.1_27738444 | Ca_kabuli_chr03    | 27738444                       | [A/C]       | 1067293307                                 |
| Ca_Kabuli_NC_021162.1_27812554 | Ca_kabuli_chr03    | 27812554                       | [A/G]       | 1067293308                                 |
| Ca_Kabuli_NC_021162.1_27812588 | Ca_kabuli_chr03    | 27812588                       | [T/G]       | 1067293309                                 |
| Ca_Kabuli_NC_021162.1_27824684 | Ca_kabuli_chr03    | 27824684                       | [A/C]       | 1067293310                                 |
| Ca_Kabuli_NC_021162.1_27876459 | Ca_kabuli_chr03    | 27876459                       | [A/G]       | 1067293311                                 |
| Ca_Kabuli_NC_021162.1_27887405 | Ca_kabuli_chr03    | 27887405                       | [T/C]       | 1067293312                                 |
| Ca_Kabuli_NC_021162.1_27906649 | Ca_kabuli_chr03    | 27906649                       | [A/T]       | 1067293313                                 |
| Ca_Kabuli_NC_021162.1_27906656 | Ca_kabuli_chr03    | 27906656                       | [G/C]       | 1067293314                                 |
| Ca_Kabuli_NC_021162.1_27906658 | Ca_kabuli_chr03    | 27906658                       | [T/G]       | 1067293315                                 |
| Ca_Kabuli_NC_021162.1_27906660 | Ca_kabuli_chr03    | 27906660                       | [A/C]       | 1067293316                                 |
| Ca_Kabuli_NC_021162.1_27955085 | Ca_kabuli_chr03    | 27955085                       | [G/A]       | 1067293317                                 |
| Ca_Kabuli_NC_021162.1_27955095 | Ca_kabuli_chr03    | 27955095                       | [T/C]       | 1067293318                                 |
| Ca_Kabuli_NC_021162.1_27955532 | Ca_kabuli_chr03    | 27955532                       | [A/C]       | 1067293319                                 |
| Ca_Kabuli_NC_021162.1_27969031 | Ca_kabuli_chr03    | 27969031                       | [A/T]       | 1067293320                                 |
| Ca_Kabuli_NC_021162.1_28028961 | Ca_kabuli_chr03    | 28028961                       | [T/G]       | 1067293321                                 |
| Ca_Kabuli_NC_021162.1_28080234 | Ca_kabuli_chr03    | 28080234                       | [T/C]       | 1067293322                                 |

| <b>SNP IDs</b>                 | <b>Chromosomes</b> | <b>Physical positions (bp)</b> | <b>SNPs</b> | <b>NCBI SNPdb accession IDs (NCBI_ss#)</b> |
|--------------------------------|--------------------|--------------------------------|-------------|--------------------------------------------|
| Ca_Kabuli_NC_021162.1_28154628 | Ca_kabuli_chr03    | 28154628                       | [A/G]       | 1067293323                                 |
| Ca_Kabuli_NC_021162.1_28174583 | Ca_kabuli_chr03    | 28174583                       | [A/T]       | 1067293324                                 |
| Ca_Kabuli_NC_021162.1_28176369 | Ca_kabuli_chr03    | 28176369                       | [T/G]       | 1067293325                                 |
| Ca_Kabuli_NC_021162.1_28176370 | Ca_kabuli_chr03    | 28176370                       | [G/C]       | 1067293326                                 |
| Ca_Kabuli_NC_021162.1_28176375 | Ca_kabuli_chr03    | 28176375                       | [A/C]       | 1067293327                                 |
| Ca_Kabuli_NC_021162.1_28176378 | Ca_kabuli_chr03    | 28176378                       | [T/A]       | 1067293328                                 |
| Ca_Kabuli_NC_021162.1_28176380 | Ca_kabuli_chr03    | 28176380                       | [A/C]       | 1067293329                                 |
| Ca_Kabuli_NC_021162.1_28272304 | Ca_kabuli_chr03    | 28272304                       | [A/G]       | 1067293330                                 |
| Ca_Kabuli_NC_021162.1_28288214 | Ca_kabuli_chr03    | 28288214                       | [A/G]       | 1067293331                                 |
| Ca_Kabuli_NC_021162.1_28309399 | Ca_kabuli_chr03    | 28309399                       | [T/C]       | 1067293332                                 |
| Ca_Kabuli_NC_021162.1_28309431 | Ca_kabuli_chr03    | 28309431                       | [A/G]       | 1067293333                                 |
| Ca_Kabuli_NC_021162.1_28408993 | Ca_kabuli_chr03    | 28408993                       | [T/C]       | 1067293334                                 |
| Ca_Kabuli_NC_021162.1_28478128 | Ca_kabuli_chr03    | 28478128                       | [A/G]       | 1067293335                                 |
| Ca_Kabuli_NC_021162.1_28478614 | Ca_kabuli_chr03    | 28478614                       | [A/C]       | 1067293336                                 |
| Ca_Kabuli_NC_021162.1_28596286 | Ca_kabuli_chr03    | 28596286                       | [T/A]       | 1067293337                                 |
| Ca_Kabuli_NC_021162.1_28602055 | Ca_kabuli_chr03    | 28602055                       | [C/A]       | 1067293338                                 |
| Ca_Kabuli_NC_021162.1_28604025 | Ca_kabuli_chr03    | 28604025                       | [A/C]       | 1067293339                                 |
| Ca_Kabuli_NC_021162.1_28613009 | Ca_kabuli_chr03    | 28613009                       | [C/A]       | 1067293340                                 |
| Ca_Kabuli_NC_021162.1_28665366 | Ca_kabuli_chr03    | 28665366                       | [A/C]       | 1067293341                                 |
| Ca_Kabuli_NC_021162.1_28679667 | Ca_kabuli_chr03    | 28679667                       | [T/G]       | 1067293342                                 |
| Ca_Kabuli_NC_021162.1_28706204 | Ca_kabuli_chr03    | 28706204                       | [A/C]       | 1067293343                                 |
| Ca_Kabuli_NC_021162.1_28706216 | Ca_kabuli_chr03    | 28706216                       | [A/C]       | 1067293344                                 |
| Ca_Kabuli_NC_021162.1_28746492 | Ca_kabuli_chr03    | 28746492                       | [T/C]       | 1067293345                                 |
| Ca_Kabuli_NC_021162.1_28746535 | Ca_kabuli_chr03    | 28746535                       | [A/G]       | 1067293346                                 |
| Ca_Kabuli_NC_021162.1_28746547 | Ca_kabuli_chr03    | 28746547                       | [A/T]       | 1067293347                                 |
| Ca_Kabuli_NC_021162.1_28845997 | Ca_kabuli_chr03    | 28845997                       | [A/G]       | 1067293348                                 |
| Ca_Kabuli_NC_021162.1_28926587 | Ca_kabuli_chr03    | 28926587                       | [T/A]       | 1067293349                                 |
| Ca_Kabuli_NC_021162.1_28943991 | Ca_kabuli_chr03    | 28943991                       | [A/T]       | 1067293350                                 |
| Ca_Kabuli_NC_021162.1_28944017 | Ca_kabuli_chr03    | 28944017                       | [A/C]       | 1067293351                                 |
| Ca_Kabuli_NC_021162.1_28963956 | Ca_kabuli_chr03    | 28963956                       | [T/G]       | 1067293352                                 |
| Ca_Kabuli_NC_021162.1_28971120 | Ca_kabuli_chr03    | 28971120                       | [T/G]       | 1067293353                                 |
| Ca_Kabuli_NC_021162.1_28994737 | Ca_kabuli_chr03    | 28994737                       | [A/C]       | 1067293354                                 |
| Ca_Kabuli_NC_021162.1_28999814 | Ca_kabuli_chr03    | 28999814                       | [A/T]       | 1067293355                                 |
| Ca_Kabuli_NC_021162.1_29039804 | Ca_kabuli_chr03    | 29039804                       | [A/C]       | 1067293356                                 |

| <b>SNP IDs</b>                 | <b>Chromosomes</b> | <b>Physical positions (bp)</b> | <b>SNPs</b> | <b>NCBI SNPdb accession IDs (NCBI_ss#)</b> |
|--------------------------------|--------------------|--------------------------------|-------------|--------------------------------------------|
| Ca_Kabuli_NC_021162.1_29039839 | Ca_kabuli_chr03    | 29039839                       | [T/A]       | 1067293357                                 |
| Ca_Kabuli_NC_021162.1_29039846 | Ca_kabuli_chr03    | 29039846                       | [T/C]       | 1067293358                                 |
| Ca_Kabuli_NC_021162.1_29044203 | Ca_kabuli_chr03    | 29044203                       | [T/C]       | 1067293359                                 |
| Ca_Kabuli_NC_021162.1_29056416 | Ca_kabuli_chr03    | 29056416                       | [A/C]       | 1067293360                                 |
| Ca_Kabuli_NC_021162.1_29107925 | Ca_kabuli_chr03    | 29107925                       | [A/T]       | 1067293361                                 |
| Ca_Kabuli_NC_021162.1_29107926 | Ca_kabuli_chr03    | 29107926                       | [A/C]       | 1067293362                                 |
| Ca_Kabuli_NC_021162.1_29107927 | Ca_kabuli_chr03    | 29107927                       | [G/T]       | 1067293363                                 |
| Ca_Kabuli_NC_021162.1_29108886 | Ca_kabuli_chr03    | 29108886                       | [A/C]       | 1067293364                                 |
| Ca_Kabuli_NC_021162.1_29137907 | Ca_kabuli_chr03    | 29137907                       | [T/G]       | 1067293365                                 |
| Ca_Kabuli_NC_021162.1_29137962 | Ca_kabuli_chr03    | 29137962                       | [A/G]       | 1067293366                                 |
| Ca_Kabuli_NC_021162.1_29155860 | Ca_kabuli_chr03    | 29155860                       | [A/T]       | 1067293367                                 |
| Ca_Kabuli_NC_021162.1_29177819 | Ca_kabuli_chr03    | 29177819                       | [T/C]       | 1067293368                                 |
| Ca_Kabuli_NC_021162.1_29177823 | Ca_kabuli_chr03    | 29177823                       | [T/C]       | 1067293369                                 |
| Ca_Kabuli_NC_021162.1_29207307 | Ca_kabuli_chr03    | 29207307                       | [A/C]       | 1067293370                                 |
| Ca_Kabuli_NC_021162.1_29215229 | Ca_kabuli_chr03    | 29215229                       | [A/G]       | 1067293371                                 |
| Ca_Kabuli_NC_021162.1_29216108 | Ca_kabuli_chr03    | 29216108                       | [T/A]       | 1067293372                                 |
| Ca_Kabuli_NC_021162.1_29216111 | Ca_kabuli_chr03    | 29216111                       | [G/T]       | 1067293373                                 |
| Ca_Kabuli_NC_021162.1_29264741 | Ca_kabuli_chr03    | 29264741                       | [G/T]       | 1067293374                                 |
| Ca_Kabuli_NC_021162.1_29302274 | Ca_kabuli_chr03    | 29302274                       | [T/G]       | 1067293375                                 |
| Ca_Kabuli_NC_021162.1_29302301 | Ca_kabuli_chr03    | 29302301                       | [A/C]       | 1067293376                                 |
| Ca_Kabuli_NC_021162.1_29304122 | Ca_kabuli_chr03    | 29304122                       | [A/G]       | 1067293377                                 |
| Ca_Kabuli_NC_021162.1_29311320 | Ca_kabuli_chr03    | 29311320                       | [A/C]       | 1067293378                                 |
| Ca_Kabuli_NC_021162.1_29326050 | Ca_kabuli_chr03    | 29326050                       | [T/G]       | 1067293379                                 |
| Ca_Kabuli_NC_021162.1_29326060 | Ca_kabuli_chr03    | 29326060                       | [T/G]       | 1067293380                                 |
| Ca_Kabuli_NC_021162.1_29348144 | Ca_kabuli_chr03    | 29348144                       | [A/C]       | 1067293381                                 |
| Ca_Kabuli_NC_021162.1_29359041 | Ca_kabuli_chr03    | 29359041                       | [A/C]       | 1067293382                                 |
| Ca_Kabuli_NC_021162.1_29359088 | Ca_kabuli_chr03    | 29359088                       | [T/A]       | 1067293383                                 |
| Ca_Kabuli_NC_021162.1_29370197 | Ca_kabuli_chr03    | 29370197                       | [A/C]       | 1067293384                                 |
| Ca_Kabuli_NC_021162.1_29370446 | Ca_kabuli_chr03    | 29370446                       | [A/C]       | 1067293385                                 |
| Ca_Kabuli_NC_021162.1_29371503 | Ca_kabuli_chr03    | 29371503                       | [T/G]       | 1067293386                                 |
| Ca_Kabuli_NC_021162.1_29375433 | Ca_kabuli_chr03    | 29375433                       | [A/C]       | 1067293387                                 |
| Ca_Kabuli_NC_021162.1_29375449 | Ca_kabuli_chr03    | 29375449                       | [T/C]       | 1067293388                                 |
| Ca_Kabuli_NC_021162.1_29375995 | Ca_kabuli_chr03    | 29375995                       | [T/C]       | 1067293389                                 |
| Ca_Kabuli_NC_021162.1_29376023 | Ca_kabuli_chr03    | 29376023                       | [A/T]       | 1067293390                                 |



| <b>SNP IDs</b>                 | <b>Chromosomes</b> | <b>Physical positions (bp)</b> | <b>SNPs</b> | <b>NCBI SNPdb accession IDs (NCBI_ss#)</b> |
|--------------------------------|--------------------|--------------------------------|-------------|--------------------------------------------|
| Ca_Kabuli_NC_021162.1_29376043 | Ca_kabuli_chr03    | 29376043                       | [T/C]       | 1067293391                                 |
| Ca_Kabuli_NC_021162.1_29415845 | Ca_kabuli_chr03    | 29415845                       | [A/C]       | 1067293392                                 |
| Ca_Kabuli_NC_021162.1_29454570 | Ca_kabuli_chr03    | 29454570                       | [T/G]       | 1067293393                                 |
| Ca_Kabuli_NC_021162.1_29455943 | Ca_kabuli_chr03    | 29455943                       | [T/G]       | 1067293394                                 |
| Ca_Kabuli_NC_021162.1_29547542 | Ca_kabuli_chr03    | 29547542                       | [T/C]       | 1067293395                                 |
| Ca_Kabuli_NC_021162.1_29547555 | Ca_kabuli_chr03    | 29547555                       | [A/G]       | 1067293396                                 |
| Ca_Kabuli_NC_021162.1_29547570 | Ca_kabuli_chr03    | 29547570                       | [A/G]       | 1067293397                                 |
| Ca_Kabuli_NC_021162.1_29591562 | Ca_kabuli_chr03    | 29591562                       | [T/C]       | 1067293398                                 |
| Ca_Kabuli_NC_021162.1_29591680 | Ca_kabuli_chr03    | 29591680                       | [T/C]       | 1067293399                                 |
| Ca_Kabuli_NC_021162.1_29591688 | Ca_kabuli_chr03    | 29591688                       | [T/G]       | 1067293400                                 |
| Ca_Kabuli_NC_021162.1_29603771 | Ca_kabuli_chr03    | 29603771                       | [A/C]       | 1067293401                                 |
| Ca_Kabuli_NC_021162.1_29603783 | Ca_kabuli_chr03    | 29603783                       | [A/T]       | 1067293402                                 |
| Ca_Kabuli_NC_021162.1_29608246 | Ca_kabuli_chr03    | 29608246                       | [T/G]       | 1067293403                                 |
| Ca_Kabuli_NC_021162.1_29640019 | Ca_kabuli_chr03    | 29640019                       | [A/T]       | 1067293404                                 |
| Ca_Kabuli_NC_021162.1_29666126 | Ca_kabuli_chr03    | 29666126                       | [A/G]       | 1067293405                                 |
| Ca_Kabuli_NC_021162.1_29666138 | Ca_kabuli_chr03    | 29666138                       | [C/T]       | 1067293406                                 |
| Ca_Kabuli_NC_021162.1_29666633 | Ca_kabuli_chr03    | 29666633                       | [C/T]       | 1067293407                                 |
| Ca_Kabuli_NC_021162.1_29675395 | Ca_kabuli_chr03    | 29675395                       | [T/C]       | 1067293408                                 |
| Ca_Kabuli_NC_021162.1_29675397 | Ca_kabuli_chr03    | 29675397                       | [A/T]       | 1067293409                                 |
| Ca_Kabuli_NC_021162.1_29675414 | Ca_kabuli_chr03    | 29675414                       | [A/G]       | 1067293410                                 |
| Ca_Kabuli_NC_021162.1_29676483 | Ca_kabuli_chr03    | 29676483                       | [G/T]       | 1067293411                                 |
| Ca_Kabuli_NC_021162.1_29676507 | Ca_kabuli_chr03    | 29676507                       | [A/G]       | 1067293412                                 |
| Ca_Kabuli_NC_021162.1_29676564 | Ca_kabuli_chr03    | 29676564                       | [A/G]       | 1067293413                                 |
| Ca_Kabuli_NC_021162.1_29689658 | Ca_kabuli_chr03    | 29689658                       | [A/G]       | 1067293414                                 |
| Ca_Kabuli_NC_021162.1_29689666 | Ca_kabuli_chr03    | 29689666                       | [T/C]       | 1067293415                                 |
| Ca_Kabuli_NC_021162.1_29689668 | Ca_kabuli_chr03    | 29689668                       | [A/T]       | 1067293416                                 |
| Ca_Kabuli_NC_021162.1_29689677 | Ca_kabuli_chr03    | 29689677                       | [G/T]       | 1067293417                                 |
| Ca_Kabuli_NC_021162.1_29698166 | Ca_kabuli_chr03    | 29698166                       | [G/T]       | 1067293418                                 |
| Ca_Kabuli_NC_021162.1_29744834 | Ca_kabuli_chr03    | 29744834                       | [T/C]       | 1067293419                                 |
| Ca_Kabuli_NC_021162.1_29744849 | Ca_kabuli_chr03    | 29744849                       | [T/G]       | 1067293420                                 |
| Ca_Kabuli_NC_021162.1_29744861 | Ca_kabuli_chr03    | 29744861                       | [A/G]       | 1067293421                                 |
| Ca_Kabuli_NC_021162.1_29761540 | Ca_kabuli_chr03    | 29761540                       | [T/C]       | 1067293422                                 |
| Ca_Kabuli_NC_021162.1_29761550 | Ca_kabuli_chr03    | 29761550                       | [A/C]       | 1067293423                                 |
| Ca_Kabuli_NC_021162.1_29761556 | Ca_kabuli_chr03    | 29761556                       | [A/T]       | 1067293424                                 |

| <b>SNP IDs</b>                 | <b>Chromosomes</b> | <b>Physical positions (bp)</b> | <b>SNPs</b> | <b>NCBI SNPdb accession IDs (NCBI_ss#)</b> |
|--------------------------------|--------------------|--------------------------------|-------------|--------------------------------------------|
| Ca_Kabuli_NC_021162.1_29788933 | Ca_kabuli_chr03    | 29788933                       | [C/T]       | 1067293425                                 |
| Ca_Kabuli_NC_021162.1_29788974 | Ca_kabuli_chr03    | 29788974                       | [C/T]       | 1067293426                                 |
| Ca_Kabuli_NC_021162.1_29803764 | Ca_kabuli_chr03    | 29803764                       | [A/G]       | 1067293427                                 |
| Ca_Kabuli_NC_021162.1_29803779 | Ca_kabuli_chr03    | 29803779                       | [G/A]       | 1067293428                                 |
| Ca_Kabuli_NC_021162.1_29803962 | Ca_kabuli_chr03    | 29803962                       | [A/G]       | 1067293429                                 |
| Ca_Kabuli_NC_021162.1_29803967 | Ca_kabuli_chr03    | 29803967                       | [T/G]       | 1067293430                                 |
| Ca_Kabuli_NC_021162.1_29804030 | Ca_kabuli_chr03    | 29804030                       | [A/G]       | 1067293431                                 |
| Ca_Kabuli_NC_021162.1_29804058 | Ca_kabuli_chr03    | 29804058                       | [A/T]       | 1067293432                                 |
| Ca_Kabuli_NC_021162.1_29804078 | Ca_kabuli_chr03    | 29804078                       | [A/G]       | 1067293433                                 |
| Ca_Kabuli_NC_021162.1_29804107 | Ca_kabuli_chr03    | 29804107                       | [C/A]       | 1067293434                                 |
| Ca_Kabuli_NC_021162.1_29804207 | Ca_kabuli_chr03    | 29804207                       | [C/G]       | 1067293435                                 |
| Ca_Kabuli_NC_021162.1_29804223 | Ca_kabuli_chr03    | 29804223                       | [A/T]       | 1067293436                                 |
| Ca_Kabuli_NC_021162.1_29804225 | Ca_kabuli_chr03    | 29804225                       | [G/A]       | 1067293437                                 |
| Ca_Kabuli_NC_021162.1_29807091 | Ca_kabuli_chr03    | 29807091                       | [C/G]       | 1067293438                                 |
| Ca_Kabuli_NC_021162.1_29807248 | Ca_kabuli_chr03    | 29807248                       | [A/G]       | 1067293439                                 |
| Ca_Kabuli_NC_021162.1_29836313 | Ca_kabuli_chr03    | 29836313                       | [T/C]       | 1067293440                                 |
| Ca_Kabuli_NC_021162.1_29840004 | Ca_kabuli_chr03    | 29840004                       | [T/C]       | 1067293441                                 |
| Ca_Kabuli_NC_021162.1_29840012 | Ca_kabuli_chr03    | 29840012                       | [A/T]       | 1067293442                                 |
| Ca_Kabuli_NC_021162.1_29840021 | Ca_kabuli_chr03    | 29840021                       | [T/C]       | 1067293443                                 |
| Ca_Kabuli_NC_021162.1_29840022 | Ca_kabuli_chr03    | 29840022                       | [C/A]       | 1067293444                                 |
| Ca_Kabuli_NC_021162.1_29840029 | Ca_kabuli_chr03    | 29840029                       | [C/G]       | 1067293445                                 |
| Ca_Kabuli_NC_021162.1_29840046 | Ca_kabuli_chr03    | 29840046                       | [T/C]       | 1067293446                                 |
| Ca_Kabuli_NC_021162.1_29843906 | Ca_kabuli_chr03    | 29843906                       | [T/C]       | 1067293447                                 |
| Ca_Kabuli_NC_021162.1_29843912 | Ca_kabuli_chr03    | 29843912                       | [T/C]       | 1067293448                                 |
| Ca_Kabuli_NC_021162.1_29843922 | Ca_kabuli_chr03    | 29843922                       | [A/C]       | 1067293449                                 |
| Ca_Kabuli_NC_021162.1_29856537 | Ca_kabuli_chr03    | 29856537                       | [T/C]       | 1067293450                                 |
| Ca_Kabuli_NC_021162.1_29858002 | Ca_kabuli_chr03    | 29858002                       | [A/G]       | 1067293451                                 |
| Ca_Kabuli_NC_021162.1_29858046 | Ca_kabuli_chr03    | 29858046                       | [C/T]       | 1067293452                                 |
| Ca_Kabuli_NC_021162.1_29859161 | Ca_kabuli_chr03    | 29859161                       | [C/A]       | 1067293453                                 |
| Ca_Kabuli_NC_021162.1_29869303 | Ca_kabuli_chr03    | 29869303                       | [T/G]       | 1067293454                                 |
| Ca_Kabuli_NC_021162.1_29869380 | Ca_kabuli_chr03    | 29869380                       | [G/A]       | 1067293455                                 |
| Ca_Kabuli_NC_021162.1_29869381 | Ca_kabuli_chr03    | 29869381                       | [G/A]       | 1067293456                                 |
| Ca_Kabuli_NC_021162.1_29869535 | Ca_kabuli_chr03    | 29869535                       | [C/T]       | 1067293457                                 |
| Ca_Kabuli_NC_021162.1_29872672 | Ca_kabuli_chr03    | 29872672                       | [A/C]       | 1067293458                                 |

| <b>SNP IDs</b>                 | <b>Chromosomes</b> | <b>Physical positions (bp)</b> | <b>SNPs</b> | <b>NCBI SNPdb accession IDs (NCBI_ss#)</b> |
|--------------------------------|--------------------|--------------------------------|-------------|--------------------------------------------|
| Ca_Kabuli_NC_021162.1_29882784 | Ca_kabuli_chr03    | 29882784                       | [A/G]       | 1067293459                                 |
| Ca_Kabuli_NC_021162.1_29908941 | Ca_kabuli_chr03    | 29908941                       | [C/G]       | 1067293460                                 |
| Ca_Kabuli_NC_021162.1_29912456 | Ca_kabuli_chr03    | 29912456                       | [T/A]       | 1067293461                                 |
| Ca_Kabuli_NC_021162.1_29912475 | Ca_kabuli_chr03    | 29912475                       | [T/G]       | 1067293462                                 |
| Ca_Kabuli_NC_021162.1_29913183 | Ca_kabuli_chr03    | 29913183                       | [C/T]       | 1067293463                                 |
| Ca_Kabuli_NC_021162.1_29915542 | Ca_kabuli_chr03    | 29915542                       | [A/C]       | 1067293464                                 |
| Ca_Kabuli_NC_021162.1_29915545 | Ca_kabuli_chr03    | 29915545                       | [A/C]       | 1067293465                                 |
| Ca_Kabuli_NC_021162.1_29932378 | Ca_kabuli_chr03    | 29932378                       | [C/G]       | 1067293466                                 |
| Ca_Kabuli_NC_021162.1_29932502 | Ca_kabuli_chr03    | 29932502                       | [G/C]       | 1067293467                                 |
| Ca_Kabuli_NC_021162.1_29932504 | Ca_kabuli_chr03    | 29932504                       | [T/A]       | 1067293468                                 |
| Ca_Kabuli_NC_021162.1_29954498 | Ca_kabuli_chr03    | 29954498                       | [G/A]       | 1067293469                                 |
| Ca_Kabuli_NC_021162.1_29954612 | Ca_kabuli_chr03    | 29954612                       | [T/G]       | 1067293470                                 |
| Ca_Kabuli_NC_021162.1_29954648 | Ca_kabuli_chr03    | 29954648                       | [A/T]       | 1067293471                                 |
| Ca_Kabuli_NC_021162.1_29958058 | Ca_kabuli_chr03    | 29958058                       | [T/C]       | 1067293472                                 |
| Ca_Kabuli_NC_021162.1_29958817 | Ca_kabuli_chr03    | 29958817                       | [T/A]       | 1067293473                                 |
| Ca_Kabuli_NC_021162.1_29958818 | Ca_kabuli_chr03    | 29958818                       | [T/G]       | 1067293474                                 |
| Ca_Kabuli_NC_021162.1_29958891 | Ca_kabuli_chr03    | 29958891                       | [G/C]       | 1067293475                                 |
| Ca_Kabuli_NC_021162.1_29958977 | Ca_kabuli_chr03    | 29958977                       | [A/C]       | 1067293476                                 |
| Ca_Kabuli_NC_021162.1_29974527 | Ca_kabuli_chr03    | 29974527                       | [T/C]       | 1067293477                                 |
| Ca_Kabuli_NC_021162.1_29974595 | Ca_kabuli_chr03    | 29974595                       | [C/T]       | 1067293478                                 |
| Ca_Kabuli_NC_021162.1_29982638 | Ca_kabuli_chr03    | 29982638                       | [A/G]       | 1067293479                                 |
| Ca_Kabuli_NC_021162.1_30004207 | Ca_kabuli_chr03    | 30004207                       | [C/T]       | 1067293480                                 |
| Ca_Kabuli_NC_021162.1_30004211 | Ca_kabuli_chr03    | 30004211                       | [C/T]       | 1067293481                                 |
| Ca_Kabuli_NC_021162.1_30004213 | Ca_kabuli_chr03    | 30004213                       | [A/T]       | 1067293482                                 |
| Ca_Kabuli_NC_021162.1_30004311 | Ca_kabuli_chr03    | 30004311                       | [T/G]       | 1067293483                                 |
| Ca_Kabuli_NC_021162.1_30009740 | Ca_kabuli_chr03    | 30009740                       | [A/G]       | 1067293484                                 |
| Ca_Kabuli_NC_021162.1_30009749 | Ca_kabuli_chr03    | 30009749                       | [T/A]       | 1067293485                                 |
| Ca_Kabuli_NC_021162.1_30011584 | Ca_kabuli_chr03    | 30011584                       | [T/C]       | 1067293486                                 |
| Ca_Kabuli_NC_021162.1_30011669 | Ca_kabuli_chr03    | 30011669                       | [A/G]       | 1067293487                                 |
| Ca_Kabuli_NC_021162.1_30011759 | Ca_kabuli_chr03    | 30011759                       | [T/C]       | 1067293488                                 |
| Ca_Kabuli_NC_021162.1_30012090 | Ca_kabuli_chr03    | 30012090                       | [G/A]       | 1067293489                                 |
| Ca_Kabuli_NC_021162.1_30012110 | Ca_kabuli_chr03    | 30012110                       | [T/G]       | 1067293490                                 |
| Ca_Kabuli_NC_021162.1_30029868 | Ca_kabuli_chr03    | 30029868                       | [A/G]       | 1067293491                                 |
| Ca_Kabuli_NC_021162.1_30141530 | Ca_kabuli_chr03    | 30141530                       | [T/C]       | 1067293492                                 |

| <b>SNP IDs</b>                 | <b>Chromosomes</b> | <b>Physical positions (bp)</b> | <b>SNPs</b> | <b>NCBI SNPdb accession IDs (NCBI_ss#)</b> |
|--------------------------------|--------------------|--------------------------------|-------------|--------------------------------------------|
| Ca_Kabuli_NC_021162.1_30141539 | Ca_kabuli_chr03    | 30141539                       | [T/G]       | 1067293493                                 |
| Ca_Kabuli_NC_021162.1_30141557 | Ca_kabuli_chr03    | 30141557                       | [T/G]       | 1067293494                                 |
| Ca_Kabuli_NC_021162.1_30141581 | Ca_kabuli_chr03    | 30141581                       | [A/C]       | 1067293495                                 |
| Ca_Kabuli_NC_021162.1_30142292 | Ca_kabuli_chr03    | 30142292                       | [T/G]       | 1067293496                                 |
| Ca_Kabuli_NC_021162.1_30166602 | Ca_kabuli_chr03    | 30166602                       | [T/C]       | 1067293497                                 |
| Ca_Kabuli_NC_021162.1_30166615 | Ca_kabuli_chr03    | 30166615                       | [A/G]       | 1067293498                                 |
| Ca_Kabuli_NC_021162.1_30166636 | Ca_kabuli_chr03    | 30166636                       | [T/G]       | 1067293499                                 |
| Ca_Kabuli_NC_021162.1_30166640 | Ca_kabuli_chr03    | 30166640                       | [A/G]       | 1067293500                                 |
| Ca_Kabuli_NC_021162.1_30169536 | Ca_kabuli_chr03    | 30169536                       | [T/C]       | 1067293501                                 |
| Ca_Kabuli_NC_021162.1_30169571 | Ca_kabuli_chr03    | 30169571                       | [A/G]       | 1067293502                                 |
| Ca_Kabuli_NC_021162.1_30202456 | Ca_kabuli_chr03    | 30202456                       | [T/C]       | 1067293503                                 |
| Ca_Kabuli_NC_021162.1_30221802 | Ca_kabuli_chr03    | 30221802                       | [T/C]       | 1067293504                                 |
| Ca_Kabuli_NC_021162.1_30221810 | Ca_kabuli_chr03    | 30221810                       | [A/T]       | 1067293505                                 |
| Ca_Kabuli_NC_021162.1_30221826 | Ca_kabuli_chr03    | 30221826                       | [A/G]       | 1067293506                                 |
| Ca_Kabuli_NC_021162.1_30221829 | Ca_kabuli_chr03    | 30221829                       | [T/C]       | 1067293507                                 |
| Ca_Kabuli_NC_021162.1_30267655 | Ca_kabuli_chr03    | 30267655                       | [A/C]       | 1067293508                                 |
| Ca_Kabuli_NC_021162.1_30317360 | Ca_kabuli_chr03    | 30317360                       | [T/C]       | 1067293509                                 |
| Ca_Kabuli_NC_021162.1_30317409 | Ca_kabuli_chr03    | 30317409                       | [T/G]       | 1067293510                                 |
| Ca_Kabuli_NC_021162.1_30317414 | Ca_kabuli_chr03    | 30317414                       | [T/C]       | 1067293511                                 |
| Ca_Kabuli_NC_021162.1_30317438 | Ca_kabuli_chr03    | 30317438                       | [A/C]       | 1067293512                                 |
| Ca_Kabuli_NC_021162.1_30317453 | Ca_kabuli_chr03    | 30317453                       | [T/C]       | 1067293513                                 |
| Ca_Kabuli_NC_021162.1_30321216 | Ca_kabuli_chr03    | 30321216                       | [T/C]       | 1067293514                                 |
| Ca_Kabuli_NC_021162.1_30321271 | Ca_kabuli_chr03    | 30321271                       | [A/C]       | 1067293515                                 |
| Ca_Kabuli_NC_021162.1_30321289 | Ca_kabuli_chr03    | 30321289                       | [T/C]       | 1067293516                                 |
| Ca_Kabuli_NC_021162.1_30321322 | Ca_kabuli_chr03    | 30321322                       | [T/G]       | 1067293517                                 |
| Ca_Kabuli_NC_021162.1_30321326 | Ca_kabuli_chr03    | 30321326                       | [T/G]       | 1067293518                                 |
| Ca_Kabuli_NC_021162.1_30321350 | Ca_kabuli_chr03    | 30321350                       | [T/C]       | 1067293519                                 |
| Ca_Kabuli_NC_021162.1_30321364 | Ca_kabuli_chr03    | 30321364                       | [A/G]       | 1067293520                                 |
| Ca_Kabuli_NC_021162.1_30321368 | Ca_kabuli_chr03    | 30321368                       | [T/G]       | 1067293521                                 |
| Ca_Kabuli_NC_021162.1_30321380 | Ca_kabuli_chr03    | 30321380                       | [T/C]       | 1067293522                                 |
| Ca_Kabuli_NC_021162.1_30358849 | Ca_kabuli_chr03    | 30358849                       | [T/G]       | 1067293523                                 |
| Ca_Kabuli_NC_021162.1_30358873 | Ca_kabuli_chr03    | 30358873                       | [T/G]       | 1067293524                                 |
| Ca_Kabuli_NC_021162.1_30376309 | Ca_kabuli_chr03    | 30376309                       | [T/C]       | 1067293525                                 |
| Ca_Kabuli_NC_021162.1_30383534 | Ca_kabuli_chr03    | 30383534                       | [T/C]       | 1067293526                                 |

| <b>SNP IDs</b>                 | <b>Chromosomes</b> | <b>Physical positions (bp)</b> | <b>SNPs</b> | <b>NCBI SNPdb accession IDs (NCBI_ss#)</b> |
|--------------------------------|--------------------|--------------------------------|-------------|--------------------------------------------|
| Ca_Kabuli_NC_021162.1_30397271 | Ca_kabuli_chr03    | 30397271                       | [C/T]       | 1067293527                                 |
| Ca_Kabuli_NC_021162.1_30397293 | Ca_kabuli_chr03    | 30397293                       | [C/T]       | 1067293528                                 |
| Ca_Kabuli_NC_021162.1_30397295 | Ca_kabuli_chr03    | 30397295                       | [A/G]       | 1067293529                                 |
| Ca_Kabuli_NC_021162.1_30408222 | Ca_kabuli_chr03    | 30408222                       | [T/A]       | 1067293530                                 |
| Ca_Kabuli_NC_021162.1_30409084 | Ca_kabuli_chr03    | 30409084                       | [A/G]       | 1067293531                                 |
| Ca_Kabuli_NC_021162.1_30433704 | Ca_kabuli_chr03    | 30433704                       | [A/G]       | 1067293532                                 |
| Ca_Kabuli_NC_021162.1_30475732 | Ca_kabuli_chr03    | 30475732                       | [T/G]       | 1067293533                                 |
| Ca_Kabuli_NC_021162.1_30475735 | Ca_kabuli_chr03    | 30475735                       | [A/G]       | 1067293534                                 |
| Ca_Kabuli_NC_021162.1_30475744 | Ca_kabuli_chr03    | 30475744                       | [T/G]       | 1067293535                                 |
| Ca_Kabuli_NC_021162.1_30510344 | Ca_kabuli_chr03    | 30510344                       | [T/G]       | 1067293536                                 |
| Ca_Kabuli_NC_021162.1_30578369 | Ca_kabuli_chr03    | 30578369                       | [A/C]       | 1067293537                                 |
| Ca_Kabuli_NC_021162.1_30591340 | Ca_kabuli_chr03    | 30591340                       | [A/C]       | 1067293538                                 |
| Ca_Kabuli_NC_021162.1_30614369 | Ca_kabuli_chr03    | 30614369                       | [C/T]       | 1067293539                                 |
| Ca_Kabuli_NC_021162.1_30642253 | Ca_kabuli_chr03    | 30642253                       | [A/G]       | 1067293540                                 |
| Ca_Kabuli_NC_021162.1_30672187 | Ca_kabuli_chr03    | 30672187                       | [T/G]       | 1067293541                                 |
| Ca_Kabuli_NC_021162.1_30672192 | Ca_kabuli_chr03    | 30672192                       | [C/G]       | 1067293542                                 |
| Ca_Kabuli_NC_021162.1_30675504 | Ca_kabuli_chr03    | 30675504                       | [A/C]       | 1067293543                                 |
| Ca_Kabuli_NC_021162.1_30756961 | Ca_kabuli_chr03    | 30756961                       | [A/C]       | 1067293544                                 |
| Ca_Kabuli_NC_021162.1_30790251 | Ca_kabuli_chr03    | 30790251                       | [A/G]       | 1067293545                                 |
| Ca_Kabuli_NC_021162.1_30790253 | Ca_kabuli_chr03    | 30790253                       | [T/G]       | 1067293546                                 |
| Ca_Kabuli_NC_021162.1_30790267 | Ca_kabuli_chr03    | 30790267                       | [T/G]       | 1067293547                                 |
| Ca_Kabuli_NC_021162.1_30791688 | Ca_kabuli_chr03    | 30791688                       | [C/T]       | 1067293548                                 |
| Ca_Kabuli_NC_021162.1_30836998 | Ca_kabuli_chr03    | 30836998                       | [T/G]       | 1067293549                                 |
| Ca_Kabuli_NC_021162.1_30837031 | Ca_kabuli_chr03    | 30837031                       | [G/A]       | 1067293550                                 |
| Ca_Kabuli_NC_021162.1_30837130 | Ca_kabuli_chr03    | 30837130                       | [A/G]       | 1067293551                                 |
| Ca_Kabuli_NC_021162.1_30837284 | Ca_kabuli_chr03    | 30837284                       | [T/C]       | 1067293552                                 |
| Ca_Kabuli_NC_021162.1_30932016 | Ca_kabuli_chr03    | 30932016                       | [T/C]       | 1067293553                                 |
| Ca_Kabuli_NC_021162.1_30932019 | Ca_kabuli_chr03    | 30932019                       | [A/C]       | 1067293554                                 |
| Ca_Kabuli_NC_021162.1_31020202 | Ca_kabuli_chr03    | 31020202                       | [T/C]       | 1067293555                                 |
| Ca_Kabuli_NC_021162.1_31020250 | Ca_kabuli_chr03    | 31020250                       | [A/G]       | 1067293556                                 |
| Ca_Kabuli_NC_021162.1_31020278 | Ca_kabuli_chr03    | 31020278                       | [T/A]       | 1067293557                                 |
| Ca_Kabuli_NC_021162.1_31091032 | Ca_kabuli_chr03    | 31091032                       | [A/C]       | 1067293558                                 |
| Ca_Kabuli_NC_021162.1_31091037 | Ca_kabuli_chr03    | 31091037                       | [A/C]       | 1067293559                                 |
| Ca_Kabuli_NC_021162.1_31091054 | Ca_kabuli_chr03    | 31091054                       | [A/G]       | 1067293560                                 |

| <b>SNP IDs</b>                 | <b>Chromosomes</b> | <b>Physical positions (bp)</b> | <b>SNPs</b> | <b>NCBI SNPdb accession IDs (NCBI_ss#)</b> |
|--------------------------------|--------------------|--------------------------------|-------------|--------------------------------------------|
| Ca_Kabuli_NC_021162.1_31091085 | Ca_kabuli_chr03    | 31091085                       | [A/C]       | 1067293561                                 |
| Ca_Kabuli_NC_021162.1_31091141 | Ca_kabuli_chr03    | 31091141                       | [A/C]       | 1067293562                                 |
| Ca_Kabuli_NC_021162.1_31091171 | Ca_kabuli_chr03    | 31091171                       | [T/A]       | 1067293563                                 |
| Ca_Kabuli_NC_021162.1_31091890 | Ca_kabuli_chr03    | 31091890                       | [A/G]       | 1067293564                                 |
| Ca_Kabuli_NC_021162.1_31091901 | Ca_kabuli_chr03    | 31091901                       | [T/C]       | 1067293565                                 |
| Ca_Kabuli_NC_021162.1_31091908 | Ca_kabuli_chr03    | 31091908                       | [A/G]       | 1067293566                                 |
| Ca_Kabuli_NC_021162.1_31091936 | Ca_kabuli_chr03    | 31091936                       | [C/G]       | 1067293567                                 |
| Ca_Kabuli_NC_021162.1_31091960 | Ca_kabuli_chr03    | 31091960                       | [T/G]       | 1067293568                                 |
| Ca_Kabuli_NC_021162.1_31097470 | Ca_kabuli_chr03    | 31097470                       | [G/C]       | 1067293569                                 |
| Ca_Kabuli_NC_021162.1_31174333 | Ca_kabuli_chr03    | 31174333                       | [A/G]       | 1067293570                                 |
| Ca_Kabuli_NC_021162.1_31174340 | Ca_kabuli_chr03    | 31174340                       | [A/G]       | 1067293571                                 |
| Ca_Kabuli_NC_021162.1_31228545 | Ca_kabuli_chr03    | 31228545                       | [G/T]       | 1067293572                                 |
| Ca_Kabuli_NC_021162.1_31228546 | Ca_kabuli_chr03    | 31228546                       | [C/T]       | 1067293573                                 |
| Ca_Kabuli_NC_021162.1_31228552 | Ca_kabuli_chr03    | 31228552                       | [C/A]       | 1067293574                                 |
| Ca_Kabuli_NC_021162.1_31228555 | Ca_kabuli_chr03    | 31228555                       | [A/T]       | 1067293575                                 |
| Ca_Kabuli_NC_021162.1_31228557 | Ca_kabuli_chr03    | 31228557                       | [G/T]       | 1067293576                                 |
| Ca_Kabuli_NC_021162.1_31228559 | Ca_kabuli_chr03    | 31228559                       | [T/C]       | 1067293577                                 |
| Ca_Kabuli_NC_021162.1_31228561 | Ca_kabuli_chr03    | 31228561                       | [C/A]       | 1067293578                                 |
| Ca_Kabuli_NC_021162.1_31267639 | Ca_kabuli_chr03    | 31267639                       | [T/A]       | 1067293579                                 |
| Ca_Kabuli_NC_021162.1_31268122 | Ca_kabuli_chr03    | 31268122                       | [T/C]       | 1067293580                                 |
| Ca_Kabuli_NC_021162.1_31268127 | Ca_kabuli_chr03    | 31268127                       | [T/C]       | 1067293581                                 |
| Ca_Kabuli_NC_021162.1_31268138 | Ca_kabuli_chr03    | 31268138                       | [A/G]       | 1067293582                                 |
| Ca_Kabuli_NC_021162.1_31279605 | Ca_kabuli_chr03    | 31279605                       | [A/G]       | 1067293583                                 |
| Ca_Kabuli_NC_021162.1_31279606 | Ca_kabuli_chr03    | 31279606                       | [A/G]       | 1067293584                                 |
| Ca_Kabuli_NC_021162.1_31279616 | Ca_kabuli_chr03    | 31279616                       | [A/T]       | 1067293585                                 |
| Ca_Kabuli_NC_021162.1_31288191 | Ca_kabuli_chr03    | 31288191                       | [T/C]       | 1067293586                                 |
| Ca_Kabuli_NC_021162.1_31288200 | Ca_kabuli_chr03    | 31288200                       | [T/C]       | 1067293587                                 |
| Ca_Kabuli_NC_021162.1_31288208 | Ca_kabuli_chr03    | 31288208                       | [T/G]       | 1067293588                                 |
| Ca_Kabuli_NC_021162.1_31301705 | Ca_kabuli_chr03    | 31301705                       | [G/A]       | 1067293589                                 |
| Ca_Kabuli_NC_021162.1_31302060 | Ca_kabuli_chr03    | 31302060                       | [C/T]       | 1067293590                                 |
| Ca_Kabuli_NC_021162.1_31312923 | Ca_kabuli_chr03    | 31312923                       | [T/G]       | 1067293591                                 |
| Ca_Kabuli_NC_021162.1_31313019 | Ca_kabuli_chr03    | 31313019                       | [T/C]       | 1067293592                                 |
| Ca_Kabuli_NC_021162.1_31313409 | Ca_kabuli_chr03    | 31313409                       | [T/C]       | 1067293593                                 |
| Ca_Kabuli_NC_021162.1_31313641 | Ca_kabuli_chr03    | 31313641                       | [G/T]       | 1067293594                                 |

| <b>SNP IDs</b>                 | <b>Chromosomes</b> | <b>Physical positions (bp)</b> | <b>SNPs</b> | <b>NCBI SNPdb accession IDs (NCBI_ss#)</b> |
|--------------------------------|--------------------|--------------------------------|-------------|--------------------------------------------|
| Ca_Kabuli_NC_021162.1_31317512 | Ca_kabuli_chr03    | 31317512                       | [A/C]       | 1067293595                                 |
| Ca_Kabuli_NC_021162.1_31317521 | Ca_kabuli_chr03    | 31317521                       | [T/G]       | 1067293596                                 |
| Ca_Kabuli_NC_021162.1_31317600 | Ca_kabuli_chr03    | 31317600                       | [A/G]       | 1067293597                                 |
| Ca_Kabuli_NC_021162.1_31321725 | Ca_kabuli_chr03    | 31321725                       | [G/A]       | 1067293598                                 |
| Ca_Kabuli_NC_021162.1_31321877 | Ca_kabuli_chr03    | 31321877                       | [A/G]       | 1067293599                                 |
| Ca_Kabuli_NC_021162.1_31321907 | Ca_kabuli_chr03    | 31321907                       | [C/T]       | 1067293600                                 |
| Ca_Kabuli_NC_021162.1_31322012 | Ca_kabuli_chr03    | 31322012                       | [A/G]       | 1067293601                                 |
| Ca_Kabuli_NC_021162.1_31322014 | Ca_kabuli_chr03    | 31322014                       | [C/T]       | 1067293602                                 |
| Ca_Kabuli_NC_021162.1_31322336 | Ca_kabuli_chr03    | 31322336                       | [T/C]       | 1067293603                                 |
| Ca_Kabuli_NC_021162.1_31322404 | Ca_kabuli_chr03    | 31322404                       | [C/T]       | 1067293604                                 |
| Ca_Kabuli_NC_021162.1_31331685 | Ca_kabuli_chr03    | 31331685                       | [A/G]       | 1067293605                                 |
| Ca_Kabuli_NC_021162.1_31338240 | Ca_kabuli_chr03    | 31338240                       | [A/C]       | 1067293606                                 |
| Ca_Kabuli_NC_021162.1_31341330 | Ca_kabuli_chr03    | 31341330                       | [A/T]       | 1067293607                                 |
| Ca_Kabuli_NC_021162.1_31341359 | Ca_kabuli_chr03    | 31341359                       | [A/C]       | 1067293608                                 |
| Ca_Kabuli_NC_021162.1_31341373 | Ca_kabuli_chr03    | 31341373                       | [T/C]       | 1067293609                                 |
| Ca_Kabuli_NC_021162.1_31342009 | Ca_kabuli_chr03    | 31342009                       | [A/C]       | 1067293610                                 |
| Ca_Kabuli_NC_021162.1_31342024 | Ca_kabuli_chr03    | 31342024                       | [A/G]       | 1067293611                                 |
| Ca_Kabuli_NC_021162.1_31354988 | Ca_kabuli_chr03    | 31354988                       | [G/C]       | 1067293612                                 |
| Ca_Kabuli_NC_021162.1_31355001 | Ca_kabuli_chr03    | 31355001                       | [C/T]       | 1067293613                                 |
| Ca_Kabuli_NC_021162.1_31355026 | Ca_kabuli_chr03    | 31355026                       | [T/C]       | 1067293614                                 |
| Ca_Kabuli_NC_021162.1_31357728 | Ca_kabuli_chr03    | 31357728                       | [T/G]       | 1067293615                                 |
| Ca_Kabuli_NC_021162.1_31357730 | Ca_kabuli_chr03    | 31357730                       | [G/T]       | 1067293616                                 |
| Ca_Kabuli_NC_021162.1_31357732 | Ca_kabuli_chr03    | 31357732                       | [G/C]       | 1067293617                                 |
| Ca_Kabuli_NC_021162.1_31358137 | Ca_kabuli_chr03    | 31358137                       | [T/G]       | 1067293618                                 |
| Ca_Kabuli_NC_021162.1_31361550 | Ca_kabuli_chr03    | 31361550                       | [A/C]       | 1067293619                                 |
| Ca_Kabuli_NC_021162.1_31410134 | Ca_kabuli_chr03    | 31410134                       | [T/G]       | 1067293620                                 |
| Ca_Kabuli_NC_021162.1_31411720 | Ca_kabuli_chr03    | 31411720                       | [A/G]       | 1067293621                                 |
| Ca_Kabuli_NC_021162.1_31411932 | Ca_kabuli_chr03    | 31411932                       | [T/G]       | 1067293622                                 |
| Ca_Kabuli_NC_021162.1_31413589 | Ca_kabuli_chr03    | 31413589                       | [T/G]       | 1067293623                                 |
| Ca_Kabuli_NC_021162.1_31431216 | Ca_kabuli_chr03    | 31431216                       | [T/C]       | 1067293624                                 |
| Ca_Kabuli_NC_021162.1_31437752 | Ca_kabuli_chr03    | 31437752                       | [A/C]       | 1067293625                                 |
| Ca_Kabuli_NC_021162.1_31437784 | Ca_kabuli_chr03    | 31437784                       | [A/G]       | 1067293626                                 |
| Ca_Kabuli_NC_021162.1_31457191 | Ca_kabuli_chr03    | 31457191                       | [T/C]       | 1067293627                                 |
| Ca_Kabuli_NC_021162.1_31478882 | Ca_kabuli_chr03    | 31478882                       | [T/C]       | 1067293628                                 |

| <b>SNP IDs</b>                 | <b>Chromosomes</b> | <b>Physical positions (bp)</b> | <b>SNPs</b> | <b>NCBI SNPdb accession IDs (NCBI_ss#)</b> |
|--------------------------------|--------------------|--------------------------------|-------------|--------------------------------------------|
| Ca_Kabuli_NC_021162.1_31479308 | Ca_kabuli_chr03    | 31479308                       | [G/A]       | 1067293629                                 |
| Ca_Kabuli_NC_021162.1_31479392 | Ca_kabuli_chr03    | 31479392                       | [T/C]       | 1067293630                                 |
| Ca_Kabuli_NC_021162.1_31487486 | Ca_kabuli_chr03    | 31487486                       | [G/T]       | 1067293631                                 |
| Ca_Kabuli_NC_021162.1_31516662 | Ca_kabuli_chr03    | 31516662                       | [T/G]       | 1067293632                                 |
| Ca_Kabuli_NC_021162.1_31516766 | Ca_kabuli_chr03    | 31516766                       | [C/T]       | 1067293633                                 |
| Ca_Kabuli_NC_021162.1_31517201 | Ca_kabuli_chr03    | 31517201                       | [G/A]       | 1067293634                                 |
| Ca_Kabuli_NC_021162.1_31519880 | Ca_kabuli_chr03    | 31519880                       | [T/C]       | 1067293635                                 |
| Ca_Kabuli_NC_021162.1_31520119 | Ca_kabuli_chr03    | 31520119                       | [T/C]       | 1067293636                                 |
| Ca_Kabuli_NC_021162.1_31520198 | Ca_kabuli_chr03    | 31520198                       | [A/G]       | 1067293637                                 |
| Ca_Kabuli_NC_021162.1_31520225 | Ca_kabuli_chr03    | 31520225                       | [T/A]       | 1067293638                                 |
| Ca_Kabuli_NC_021162.1_31520840 | Ca_kabuli_chr03    | 31520840                       | [A/G]       | 1067293639                                 |
| Ca_Kabuli_NC_021162.1_31520906 | Ca_kabuli_chr03    | 31520906                       | [T/A]       | 1067293640                                 |
| Ca_Kabuli_NC_021162.1_31520907 | Ca_kabuli_chr03    | 31520907                       | [A/T]       | 1067293641                                 |
| Ca_Kabuli_NC_021162.1_31520908 | Ca_kabuli_chr03    | 31520908                       | [G/T]       | 1067293642                                 |
| Ca_Kabuli_NC_021162.1_31521142 | Ca_kabuli_chr03    | 31521142                       | [C/T]       | 1067293643                                 |
| Ca_Kabuli_NC_021162.1_31521155 | Ca_kabuli_chr03    | 31521155                       | [A/T]       | 1067293644                                 |
| Ca_Kabuli_NC_021162.1_31530104 | Ca_kabuli_chr03    | 31530104                       | [G/A]       | 1067293645                                 |
| Ca_Kabuli_NC_021162.1_31537963 | Ca_kabuli_chr03    | 31537963                       | [A/T]       | 1067293646                                 |
| Ca_Kabuli_NC_021162.1_31542359 | Ca_kabuli_chr03    | 31542359                       | [A/C]       | 1067293647                                 |
| Ca_Kabuli_NC_021162.1_31542386 | Ca_kabuli_chr03    | 31542386                       | [T/G]       | 1067293648                                 |
| Ca_Kabuli_NC_021162.1_31542398 | Ca_kabuli_chr03    | 31542398                       | [T/G]       | 1067293649                                 |
| Ca_Kabuli_NC_021162.1_31617723 | Ca_kabuli_chr03    | 31617723                       | [T/C]       | 1067293650                                 |
| Ca_Kabuli_NC_021162.1_31617741 | Ca_kabuli_chr03    | 31617741                       | [T/C]       | 1067293651                                 |
| Ca_Kabuli_NC_021162.1_31617743 | Ca_kabuli_chr03    | 31617743                       | [T/A]       | 1067293652                                 |
| Ca_Kabuli_NC_021162.1_31621021 | Ca_kabuli_chr03    | 31621021                       | [A/T]       | 1067293653                                 |
| Ca_Kabuli_NC_021162.1_31621033 | Ca_kabuli_chr03    | 31621033                       | [T/G]       | 1067293654                                 |
| Ca_Kabuli_NC_021162.1_31625771 | Ca_kabuli_chr03    | 31625771                       | [T/C]       | 1067293655                                 |
| Ca_Kabuli_NC_021162.1_31625792 | Ca_kabuli_chr03    | 31625792                       | [T/C]       | 1067293656                                 |
| Ca_Kabuli_NC_021162.1_31629855 | Ca_kabuli_chr03    | 31629855                       | [G/T]       | 1067293657                                 |
| Ca_Kabuli_NC_021162.1_31630195 | Ca_kabuli_chr03    | 31630195                       | [C/T]       | 1067293658                                 |
| Ca_Kabuli_NC_021162.1_31630512 | Ca_kabuli_chr03    | 31630512                       | [T/A]       | 1067293659                                 |
| Ca_Kabuli_NC_021162.1_31630555 | Ca_kabuli_chr03    | 31630555                       | [T/G]       | 1067293660                                 |
| Ca_Kabuli_NC_021162.1_31631584 | Ca_kabuli_chr03    | 31631584                       | [A/G]       | 1067293661                                 |
| Ca_Kabuli_NC_021162.1_31631622 | Ca_kabuli_chr03    | 31631622                       | [A/G]       | 1067293662                                 |



| <b>SNP IDs</b>                 | <b>Chromosomes</b> | <b>Physical positions (bp)</b> | <b>SNPs</b> | <b>NCBI SNPdb accession IDs (NCBI_ss#)</b> |
|--------------------------------|--------------------|--------------------------------|-------------|--------------------------------------------|
| Ca_Kabuli_NC_021162.1_31631644 | Ca_kabuli_chr03    | 31631644                       | [C/A]       | 1067293663                                 |
| Ca_Kabuli_NC_021162.1_31646806 | Ca_kabuli_chr03    | 31646806                       | [G/T]       | 1067293664                                 |
| Ca_Kabuli_NC_021162.1_31646807 | Ca_kabuli_chr03    | 31646807                       | [T/G]       | 1067293665                                 |
| Ca_Kabuli_NC_021162.1_31689184 | Ca_kabuli_chr03    | 31689184                       | [T/C]       | 1067293666                                 |
| Ca_Kabuli_NC_021162.1_31698429 | Ca_kabuli_chr03    | 31698429                       | [C/A]       | 1067293667                                 |
| Ca_Kabuli_NC_021162.1_31698432 | Ca_kabuli_chr03    | 31698432                       | [A/C]       | 1067293668                                 |
| Ca_Kabuli_NC_021162.1_31698469 | Ca_kabuli_chr03    | 31698469                       | [A/G]       | 1067293669                                 |
| Ca_Kabuli_NC_021162.1_31729709 | Ca_kabuli_chr03    | 31729709                       | [A/C]       | 1067293670                                 |
| Ca_Kabuli_NC_021162.1_31729713 | Ca_kabuli_chr03    | 31729713                       | [A/C]       | 1067293671                                 |
| Ca_Kabuli_NC_021162.1_31749084 | Ca_kabuli_chr03    | 31749084                       | [T/C]       | 1067293672                                 |
| Ca_Kabuli_NC_021162.1_31749113 | Ca_kabuli_chr03    | 31749113                       | [A/G]       | 1067293673                                 |
| Ca_Kabuli_NC_021162.1_31765232 | Ca_kabuli_chr03    | 31765232                       | [T/C]       | 1067293674                                 |
| Ca_Kabuli_NC_021162.1_31788112 | Ca_kabuli_chr03    | 31788112                       | [A/G]       | 1067293675                                 |
| Ca_Kabuli_NC_021162.1_31790392 | Ca_kabuli_chr03    | 31790392                       | [T/C]       | 1067293676                                 |
| Ca_Kabuli_NC_021162.1_31790393 | Ca_kabuli_chr03    | 31790393                       | [G/T]       | 1067293677                                 |
| Ca_Kabuli_NC_021162.1_31799510 | Ca_kabuli_chr03    | 31799510                       | [T/G]       | 1067293678                                 |
| Ca_Kabuli_NC_021162.1_31799518 | Ca_kabuli_chr03    | 31799518                       | [G/C]       | 1067293679                                 |
| Ca_Kabuli_NC_021162.1_31814796 | Ca_kabuli_chr03    | 31814796                       | [T/A]       | 1067293680                                 |
| Ca_Kabuli_NC_021162.1_31814841 | Ca_kabuli_chr03    | 31814841                       | [A/G]       | 1067293681                                 |
| Ca_Kabuli_NC_021162.1_31817431 | Ca_kabuli_chr03    | 31817431                       | [G/T]       | 1067293682                                 |
| Ca_Kabuli_NC_021162.1_31842500 | Ca_kabuli_chr03    | 31842500                       | [T/G]       | 1067293683                                 |
| Ca_Kabuli_NC_021162.1_31859066 | Ca_kabuli_chr03    | 31859066                       | [A/C]       | 1067293684                                 |
| Ca_Kabuli_NC_021162.1_31864865 | Ca_kabuli_chr03    | 31864865                       | [A/T]       | 1067293685                                 |
| Ca_Kabuli_NC_021162.1_31901267 | Ca_kabuli_chr03    | 31901267                       | [T/G]       | 1067293686                                 |
| Ca_Kabuli_NC_021162.1_31912607 | Ca_kabuli_chr03    | 31912607                       | [T/A]       | 1067293687                                 |
| Ca_Kabuli_NC_021162.1_31930943 | Ca_kabuli_chr03    | 31930943                       | [T/C]       | 1067293688                                 |
| Ca_Kabuli_NC_021162.1_31931009 | Ca_kabuli_chr03    | 31931009                       | [T/G]       | 1067293689                                 |
| Ca_Kabuli_NC_021162.1_31951942 | Ca_kabuli_chr03    | 31951942                       | [T/G]       | 1067293690                                 |
| Ca_Kabuli_NC_021162.1_31951994 | Ca_kabuli_chr03    | 31951994                       | [A/G]       | 1067293691                                 |
| Ca_Kabuli_NC_021162.1_31952316 | Ca_kabuli_chr03    | 31952316                       | [G/T]       | 1067293692                                 |
| Ca_Kabuli_NC_021162.1_31952326 | Ca_kabuli_chr03    | 31952326                       | [C/A]       | 1067293693                                 |
| Ca_Kabuli_NC_021162.1_31952330 | Ca_kabuli_chr03    | 31952330                       | [T/C]       | 1067293694                                 |
| Ca_Kabuli_NC_021162.1_31952333 | Ca_kabuli_chr03    | 31952333                       | [T/G]       | 1067293695                                 |
| Ca_Kabuli_NC_021162.1_31952337 | Ca_kabuli_chr03    | 31952337                       | [C/T]       | 1067293696                                 |

| <b>SNP IDs</b>                 | <b>Chromosomes</b> | <b>Physical positions (bp)</b> | <b>SNPs</b> | <b>NCBI SNPdb accession IDs (NCBI_ss#)</b> |
|--------------------------------|--------------------|--------------------------------|-------------|--------------------------------------------|
| Ca_Kabuli_NC_021162.1_31978674 | Ca_kabuli_chr03    | 31978674                       | [A/C]       | 1067293697                                 |
| Ca_Kabuli_NC_021162.1_31978693 | Ca_kabuli_chr03    | 31978693                       | [A/G]       | 1067293698                                 |
| Ca_Kabuli_NC_021162.1_32378057 | Ca_kabuli_chr03    | 32378057                       | [C/A]       | 1067293699                                 |
| Ca_Kabuli_NC_021162.1_32441088 | Ca_kabuli_chr03    | 32441088                       | [T/G]       | 1067293700                                 |
| Ca_Kabuli_NC_021162.1_32441092 | Ca_kabuli_chr03    | 32441092                       | [T/C]       | 1067293701                                 |
| Ca_Kabuli_NC_021162.1_32448969 | Ca_kabuli_chr03    | 32448969                       | [T/G]       | 1067293702                                 |
| Ca_Kabuli_NC_021162.1_32452041 | Ca_kabuli_chr03    | 32452041                       | [A/C]       | 1067293703                                 |
| Ca_Kabuli_NC_021162.1_32473005 | Ca_kabuli_chr03    | 32473005                       | [A/G]       | 1067293704                                 |
| Ca_Kabuli_NC_021162.1_32473007 | Ca_kabuli_chr03    | 32473007                       | [T/C]       | 1067293705                                 |
| Ca_Kabuli_NC_021162.1_32473062 | Ca_kabuli_chr03    | 32473062                       | [T/A]       | 1067293706                                 |
| Ca_Kabuli_NC_021162.1_32535281 | Ca_kabuli_chr03    | 32535281                       | [A/G]       | 1067293707                                 |
| Ca_Kabuli_NC_021162.1_32593710 | Ca_kabuli_chr03    | 32593710                       | [A/G]       | 1067293708                                 |
| Ca_Kabuli_NC_021162.1_32593718 | Ca_kabuli_chr03    | 32593718                       | [A/G]       | 1067293709                                 |
| Ca_Kabuli_NC_021162.1_32593731 | Ca_kabuli_chr03    | 32593731                       | [A/G]       | 1067293710                                 |
| Ca_Kabuli_NC_021162.1_32593736 | Ca_kabuli_chr03    | 32593736                       | [T/C]       | 1067293711                                 |
| Ca_Kabuli_NC_021162.1_32639819 | Ca_kabuli_chr03    | 32639819                       | [T/A]       | 1067293712                                 |
| Ca_Kabuli_NC_021162.1_32663061 | Ca_kabuli_chr03    | 32663061                       | [A/G]       | 1067293713                                 |
| Ca_Kabuli_NC_021162.1_32694474 | Ca_kabuli_chr03    | 32694474                       | [A/C]       | 1067293714                                 |
| Ca_Kabuli_NC_021162.1_32706136 | Ca_kabuli_chr03    | 32706136                       | [A/G]       | 1067293715                                 |
| Ca_Kabuli_NC_021162.1_32706248 | Ca_kabuli_chr03    | 32706248                       | [T/C]       | 1067293716                                 |
| Ca_Kabuli_NC_021162.1_32706377 | Ca_kabuli_chr03    | 32706377                       | [T/C]       | 1067293717                                 |
| Ca_Kabuli_NC_021162.1_32706412 | Ca_kabuli_chr03    | 32706412                       | [A/C]       | 1067293718                                 |
| Ca_Kabuli_NC_021162.1_32734708 | Ca_kabuli_chr03    | 32734708                       | [A/C]       | 1067293719                                 |
| Ca_Kabuli_NC_021162.1_32734718 | Ca_kabuli_chr03    | 32734718                       | [A/C]       | 1067293720                                 |
| Ca_Kabuli_NC_021162.1_32734724 | Ca_kabuli_chr03    | 32734724                       | [T/C]       | 1067293721                                 |
| Ca_Kabuli_NC_021162.1_32735238 | Ca_kabuli_chr03    | 32735238                       | [A/T]       | 1067293722                                 |
| Ca_Kabuli_NC_021162.1_32735258 | Ca_kabuli_chr03    | 32735258                       | [T/C]       | 1067293723                                 |
| Ca_Kabuli_NC_021162.1_32735266 | Ca_kabuli_chr03    | 32735266                       | [A/T]       | 1067293724                                 |
| Ca_Kabuli_NC_021162.1_32735291 | Ca_kabuli_chr03    | 32735291                       | [T/A]       | 1067293725                                 |
| Ca_Kabuli_NC_021162.1_32759265 | Ca_kabuli_chr03    | 32759265                       | [T/C]       | 1067293726                                 |
| Ca_Kabuli_NC_021162.1_32759278 | Ca_kabuli_chr03    | 32759278                       | [T/G]       | 1067293727                                 |
| Ca_Kabuli_NC_021162.1_32759292 | Ca_kabuli_chr03    | 32759292                       | [A/C]       | 1067293728                                 |
| Ca_Kabuli_NC_021162.1_32799371 | Ca_kabuli_chr03    | 32799371                       | [T/A]       | 1067293729                                 |
| Ca_Kabuli_NC_021162.1_32826988 | Ca_kabuli_chr03    | 32826988                       | [T/C]       | 1067293730                                 |

| <b>SNP IDs</b>                 | <b>Chromosomes</b> | <b>Physical positions (bp)</b> | <b>SNPs</b> | <b>NCBI SNPdb accession IDs (NCBI_ss#)</b> |
|--------------------------------|--------------------|--------------------------------|-------------|--------------------------------------------|
| Ca_Kabuli_NC_021162.1_32827079 | Ca_kabuli_chr03    | 32827079                       | [T/C]       | 1067293731                                 |
| Ca_Kabuli_NC_021162.1_32840343 | Ca_kabuli_chr03    | 32840343                       | [T/C]       | 1067293732                                 |
| Ca_Kabuli_NC_021162.1_32840345 | Ca_kabuli_chr03    | 32840345                       | [A/G]       | 1067293733                                 |
| Ca_Kabuli_NC_021162.1_32840378 | Ca_kabuli_chr03    | 32840378                       | [A/G]       | 1067293734                                 |
| Ca_Kabuli_NC_021162.1_32840387 | Ca_kabuli_chr03    | 32840387                       | [A/G]       | 1067293735                                 |
| Ca_Kabuli_NC_021162.1_32845301 | Ca_kabuli_chr03    | 32845301                       | [T/G]       | 1067293736                                 |
| Ca_Kabuli_NC_021162.1_32845448 | Ca_kabuli_chr03    | 32845448                       | [A/C]       | 1067293737                                 |
| Ca_Kabuli_NC_021162.1_32880614 | Ca_kabuli_chr03    | 32880614                       | [T/C]       | 1067293738                                 |
| Ca_Kabuli_NC_021162.1_32880623 | Ca_kabuli_chr03    | 32880623                       | [T/C]       | 1067293739                                 |
| Ca_Kabuli_NC_021162.1_32880658 | Ca_kabuli_chr03    | 32880658                       | [A/G]       | 1067293740                                 |
| Ca_Kabuli_NC_021162.1_33056013 | Ca_kabuli_chr03    | 33056013                       | [T/G]       | 1067293741                                 |
| Ca_Kabuli_NC_021162.1_33056288 | Ca_kabuli_chr03    | 33056288                       | [A/T]       | 1067293742                                 |
| Ca_Kabuli_NC_021162.1_33078629 | Ca_kabuli_chr03    | 33078629                       | [T/G]       | 1067293743                                 |
| Ca_Kabuli_NC_021162.1_33081726 | Ca_kabuli_chr03    | 33081726                       | [C/A]       | 1067293744                                 |
| Ca_Kabuli_NC_021162.1_33120876 | Ca_kabuli_chr03    | 33120876                       | [T/C]       | 1067293745                                 |
| Ca_Kabuli_NC_021162.1_33171927 | Ca_kabuli_chr03    | 33171927                       | [A/G]       | 1067293746                                 |
| Ca_Kabuli_NC_021162.1_33173947 | Ca_kabuli_chr03    | 33173947                       | [A/C]       | 1067293747                                 |
| Ca_Kabuli_NC_021162.1_33173959 | Ca_kabuli_chr03    | 33173959                       | [A/T]       | 1067293748                                 |
| Ca_Kabuli_NC_021162.1_33173997 | Ca_kabuli_chr03    | 33173997                       | [T/C]       | 1067293749                                 |
| Ca_Kabuli_NC_021162.1_33174023 | Ca_kabuli_chr03    | 33174023                       | [A/C]       | 1067293750                                 |
| Ca_Kabuli_NC_021162.1_33242163 | Ca_kabuli_chr03    | 33242163                       | [T/A]       | 1067293751                                 |
| Ca_Kabuli_NC_021162.1_33242164 | Ca_kabuli_chr03    | 33242164                       | [G/T]       | 1067293752                                 |
| Ca_Kabuli_NC_021162.1_33513756 | Ca_kabuli_chr03    | 33513756                       | [T/C]       | 1067293753                                 |
| Ca_Kabuli_NC_021162.1_33520864 | Ca_kabuli_chr03    | 33520864                       | [A/T]       | 1067293754                                 |
| Ca_Kabuli_NC_021162.1_33520890 | Ca_kabuli_chr03    | 33520890                       | [A/T]       | 1067293755                                 |
| Ca_Kabuli_NC_021162.1_33522970 | Ca_kabuli_chr03    | 33522970                       | [A/G]       | 1067293756                                 |
| Ca_Kabuli_NC_021162.1_33522999 | Ca_kabuli_chr03    | 33522999                       | [A/G]       | 1067293757                                 |
| Ca_Kabuli_NC_021162.1_33523006 | Ca_kabuli_chr03    | 33523006                       | [A/T]       | 1067293758                                 |
| Ca_Kabuli_NC_021162.1_33523032 | Ca_kabuli_chr03    | 33523032                       | [T/A]       | 1067293759                                 |
| Ca_Kabuli_NC_021162.1_33526209 | Ca_kabuli_chr03    | 33526209                       | [A/G]       | 1067293760                                 |
| Ca_Kabuli_NC_021162.1_33627826 | Ca_kabuli_chr03    | 33627826                       | [A/C]       | 1067293761                                 |
| Ca_Kabuli_NC_021162.1_33715215 | Ca_kabuli_chr03    | 33715215                       | [T/G]       | 1067293762                                 |
| Ca_Kabuli_NC_021162.1_33898279 | Ca_kabuli_chr03    | 33898279                       | [C/G]       | 1067293763                                 |
| Ca_Kabuli_NC_021162.1_33898282 | Ca_kabuli_chr03    | 33898282                       | [C/T]       | 1067293764                                 |

| <b>SNP IDs</b>                 | <b>Chromosomes</b> | <b>Physical positions (bp)</b> | <b>SNPs</b> | <b>NCBI SNPdb accession IDs (NCBI_ss#)</b> |
|--------------------------------|--------------------|--------------------------------|-------------|--------------------------------------------|
| Ca_Kabuli_NC_021162.1_33898283 | Ca_kabuli_chr03    | 33898283                       | [A/G]       | 1067293765                                 |
| Ca_Kabuli_NC_021162.1_33898285 | Ca_kabuli_chr03    | 33898285                       | [A/G]       | 1067293766                                 |
| Ca_Kabuli_NC_021162.1_33900522 | Ca_kabuli_chr03    | 33900522                       | [A/C]       | 1067293767                                 |
| Ca_Kabuli_NC_021162.1_33904394 | Ca_kabuli_chr03    | 33904394                       | [T/A]       | 1067293768                                 |
| Ca_Kabuli_NC_021162.1_34206048 | Ca_kabuli_chr03    | 34206048                       | [C/A]       | 1067293769                                 |
| Ca_Kabuli_NC_021162.1_34387300 | Ca_kabuli_chr03    | 34387300                       | [A/G]       | 1067293770                                 |
| Ca_Kabuli_NC_021162.1_34387310 | Ca_kabuli_chr03    | 34387310                       | [T/A]       | 1067293771                                 |
| Ca_Kabuli_NC_021162.1_34387322 | Ca_kabuli_chr03    | 34387322                       | [T/G]       | 1067293772                                 |
| Ca_Kabuli_NC_021162.1_34434203 | Ca_kabuli_chr03    | 34434203                       | [A/C]       | 1067293773                                 |
| Ca_Kabuli_NC_021162.1_34496893 | Ca_kabuli_chr03    | 34496893                       | [A/G]       | 1067293774                                 |
| Ca_Kabuli_NC_021162.1_34496910 | Ca_kabuli_chr03    | 34496910                       | [T/C]       | 1067293775                                 |
| Ca_Kabuli_NC_021162.1_34496927 | Ca_kabuli_chr03    | 34496927                       | [A/G]       | 1067293776                                 |
| Ca_Kabuli_NC_021162.1_34496933 | Ca_kabuli_chr03    | 34496933                       | [A/C]       | 1067293777                                 |
| Ca_Kabuli_NC_021162.1_34496941 | Ca_kabuli_chr03    | 34496941                       | [T/C]       | 1067293778                                 |
| Ca_Kabuli_NC_021162.1_34496945 | Ca_kabuli_chr03    | 34496945                       | [A/C]       | 1067293779                                 |
| Ca_Kabuli_NC_021162.1_34576560 | Ca_kabuli_chr03    | 34576560                       | [A/C]       | 1067293780                                 |
| Ca_Kabuli_NC_021162.1_34576588 | Ca_kabuli_chr03    | 34576588                       | [A/G]       | 1067293781                                 |
| Ca_Kabuli_NC_021162.1_34603704 | Ca_kabuli_chr03    | 34603704                       | [A/C]       | 1067293782                                 |
| Ca_Kabuli_NC_021162.1_34603709 | Ca_kabuli_chr03    | 34603709                       | [A/C]       | 1067293783                                 |
| Ca_Kabuli_NC_021162.1_34603724 | Ca_kabuli_chr03    | 34603724                       | [A/T]       | 1067293784                                 |
| Ca_Kabuli_NC_021162.1_34603975 | Ca_kabuli_chr03    | 34603975                       | [A/C]       | 1067293785                                 |
| Ca_Kabuli_NC_021162.1_34650253 | Ca_kabuli_chr03    | 34650253                       | [T/C]       | 1067293786                                 |
| Ca_Kabuli_NC_021162.1_34699109 | Ca_kabuli_chr03    | 34699109                       | [T/G]       | 1067293787                                 |
| Ca_Kabuli_NC_021162.1_34699114 | Ca_kabuli_chr03    | 34699114                       | [C/A]       | 1067293788                                 |
| Ca_Kabuli_NC_021162.1_34722866 | Ca_kabuli_chr03    | 34722866                       | [G/A]       | 1067293789                                 |
| Ca_Kabuli_NC_021162.1_34722868 | Ca_kabuli_chr03    | 34722868                       | [T/G]       | 1067293790                                 |
| Ca_Kabuli_NC_021162.1_34722869 | Ca_kabuli_chr03    | 34722869                       | [G/A]       | 1067293791                                 |
| Ca_Kabuli_NC_021162.1_34722876 | Ca_kabuli_chr03    | 34722876                       | [T/G]       | 1067293792                                 |
| Ca_Kabuli_NC_021162.1_34722893 | Ca_kabuli_chr03    | 34722893                       | [T/G]       | 1067293793                                 |
| Ca_Kabuli_NC_021162.1_34722942 | Ca_kabuli_chr03    | 34722942                       | [T/G]       | 1067293794                                 |
| Ca_Kabuli_NC_021162.1_34722960 | Ca_kabuli_chr03    | 34722960                       | [T/A]       | 1067293795                                 |
| Ca_Kabuli_NC_021162.1_34860356 | Ca_kabuli_chr03    | 34860356                       | [A/G]       | 1067293796                                 |
| Ca_Kabuli_NC_021162.1_34896470 | Ca_kabuli_chr03    | 34896470                       | [T/G]       | 1067293797                                 |
| Ca_Kabuli_NC_021162.1_34911630 | Ca_kabuli_chr03    | 34911630                       | [A/C]       | 1067293798                                 |

| <b>SNP IDs</b>                 | <b>Chromosomes</b> | <b>Physical positions (bp)</b> | <b>SNPs</b> | <b>NCBI SNPdb accession IDs (NCBI_ss#)</b> |
|--------------------------------|--------------------|--------------------------------|-------------|--------------------------------------------|
| Ca_Kabuli_NC_021162.1_34982544 | Ca_kabuli_chr03    | 34982544                       | [C/T]       | 1067293799                                 |
| Ca_Kabuli_NC_021162.1_35029896 | Ca_kabuli_chr03    | 35029896                       | [A/G]       | 1067293800                                 |
| Ca_Kabuli_NC_021162.1_35029902 | Ca_kabuli_chr03    | 35029902                       | [T/C]       | 1067293801                                 |
| Ca_Kabuli_NC_021162.1_35029903 | Ca_kabuli_chr03    | 35029903                       | [A/T]       | 1067293802                                 |
| Ca_Kabuli_NC_021162.1_35029931 | Ca_kabuli_chr03    | 35029931                       | [A/T]       | 1067293803                                 |
| Ca_Kabuli_NC_021162.1_35061822 | Ca_kabuli_chr03    | 35061822                       | [A/G]       | 1067293804                                 |
| Ca_Kabuli_NC_021162.1_35061823 | Ca_kabuli_chr03    | 35061823                       | [A/C]       | 1067293805                                 |
| Ca_Kabuli_NC_021162.1_35061827 | Ca_kabuli_chr03    | 35061827                       | [G/T]       | 1067293806                                 |
| Ca_Kabuli_NC_021162.1_35061829 | Ca_kabuli_chr03    | 35061829                       | [T/G]       | 1067293807                                 |
| Ca_Kabuli_NC_021162.1_35071244 | Ca_kabuli_chr03    | 35071244                       | [T/C]       | 1067293808                                 |
| Ca_Kabuli_NC_021162.1_35071852 | Ca_kabuli_chr03    | 35071852                       | [T/G]       | 1067293809                                 |
| Ca_Kabuli_NC_021162.1_35082215 | Ca_kabuli_chr03    | 35082215                       | [A/C]       | 1067293810                                 |
| Ca_Kabuli_NC_021162.1_35082253 | Ca_kabuli_chr03    | 35082253                       | [T/C]       | 1067293811                                 |
| Ca_Kabuli_NC_021162.1_35084142 | Ca_kabuli_chr03    | 35084142                       | [A/G]       | 1067293812                                 |
| Ca_Kabuli_NC_021162.1_35085576 | Ca_kabuli_chr03    | 35085576                       | [T/A]       | 1067293813                                 |
| Ca_Kabuli_NC_021162.1_35085580 | Ca_kabuli_chr03    | 35085580                       | [A/G]       | 1067293814                                 |
| Ca_Kabuli_NC_021162.1_35085618 | Ca_kabuli_chr03    | 35085618                       | [T/C]       | 1067293815                                 |
| Ca_Kabuli_NC_021162.1_35085622 | Ca_kabuli_chr03    | 35085622                       | [A/G]       | 1067293816                                 |
| Ca_Kabuli_NC_021162.1_35085659 | Ca_kabuli_chr03    | 35085659                       | [A/C]       | 1067293817                                 |
| Ca_Kabuli_NC_021162.1_35184964 | Ca_kabuli_chr03    | 35184964                       | [T/C]       | 1067293818                                 |
| Ca_Kabuli_NC_021162.1_35184973 | Ca_kabuli_chr03    | 35184973                       | [A/C]       | 1067293819                                 |
| Ca_Kabuli_NC_021162.1_35195902 | Ca_kabuli_chr03    | 35195902                       | [A/G]       | 1067293820                                 |
| Ca_Kabuli_NC_021162.1_35298513 | Ca_kabuli_chr03    | 35298513                       | [C/A]       | 1067293821                                 |
| Ca_Kabuli_NC_021162.1_35298514 | Ca_kabuli_chr03    | 35298514                       | [A/G]       | 1067293822                                 |
| Ca_Kabuli_NC_021162.1_35298515 | Ca_kabuli_chr03    | 35298515                       | [T/A]       | 1067293823                                 |
| Ca_Kabuli_NC_021162.1_35332171 | Ca_kabuli_chr03    | 35332171                       | [A/C]       | 1067293824                                 |
| Ca_Kabuli_NC_021162.1_35354403 | Ca_kabuli_chr03    | 35354403                       | [A/T]       | 1067293825                                 |
| Ca_Kabuli_NC_021162.1_35354446 | Ca_kabuli_chr03    | 35354446                       | [T/C]       | 1067293826                                 |
| Ca_Kabuli_NC_021162.1_35384915 | Ca_kabuli_chr03    | 35384915                       | [T/C]       | 1067293827                                 |
| Ca_Kabuli_NC_021162.1_35414268 | Ca_kabuli_chr03    | 35414268                       | [T/A]       | 1067293828                                 |
| Ca_Kabuli_NC_021162.1_35414306 | Ca_kabuli_chr03    | 35414306                       | [T/G]       | 1067293829                                 |
| Ca_Kabuli_NC_021162.1_35424830 | Ca_kabuli_chr03    | 35424830                       | [T/C]       | 1067293830                                 |
| Ca_Kabuli_NC_021162.1_35424833 | Ca_kabuli_chr03    | 35424833                       | [T/C]       | 1067293831                                 |
| Ca_Kabuli_NC_021162.1_35424855 | Ca_kabuli_chr03    | 35424855                       | [T/A]       | 1067293832                                 |

| <b>SNP IDs</b>                 | <b>Chromosomes</b> | <b>Physical positions (bp)</b> | <b>SNPs</b> | <b>NCBI SNPdb accession IDs (NCBI_ss#)</b> |
|--------------------------------|--------------------|--------------------------------|-------------|--------------------------------------------|
| Ca_Kabuli_NC_021162.1_35424896 | Ca_kabuli_chr03    | 35424896                       | [T/A]       | 1067293833                                 |
| Ca_Kabuli_NC_021162.1_35425042 | Ca_kabuli_chr03    | 35425042                       | [G/T]       | 1067293834                                 |
| Ca_Kabuli_NC_021162.1_35425085 | Ca_kabuli_chr03    | 35425085                       | [G/C]       | 1067293835                                 |
| Ca_Kabuli_NC_021162.1_35425110 | Ca_kabuli_chr03    | 35425110                       | [T/C]       | 1067293836                                 |
| Ca_Kabuli_NC_021162.1_35425159 | Ca_kabuli_chr03    | 35425159                       | [A/G]       | 1067293837                                 |
| Ca_Kabuli_NC_021162.1_35464889 | Ca_kabuli_chr03    | 35464889                       | [T/G]       | 1067293838                                 |
| Ca_Kabuli_NC_021162.1_35465375 | Ca_kabuli_chr03    | 35465375                       | [G/C]       | 1067293839                                 |
| Ca_Kabuli_NC_021162.1_35465376 | Ca_kabuli_chr03    | 35465376                       | [T/C]       | 1067293840                                 |
| Ca_Kabuli_NC_021162.1_35465380 | Ca_kabuli_chr03    | 35465380                       | [G/T]       | 1067293841                                 |
| Ca_Kabuli_NC_021162.1_35478610 | Ca_kabuli_chr03    | 35478610                       | [G/T]       | 1067293842                                 |
| Ca_Kabuli_NC_021162.1_35484047 | Ca_kabuli_chr03    | 35484047                       | [A/T]       | 1067293843                                 |
| Ca_Kabuli_NC_021162.1_35490904 | Ca_kabuli_chr03    | 35490904                       | [T/C]       | 1067293844                                 |
| Ca_Kabuli_NC_021162.1_35631684 | Ca_kabuli_chr03    | 35631684                       | [T/G]       | 1067293845                                 |
| Ca_Kabuli_NC_021162.1_35631690 | Ca_kabuli_chr03    | 35631690                       | [T/C]       | 1067293846                                 |
| Ca_Kabuli_NC_021162.1_35631718 | Ca_kabuli_chr03    | 35631718                       | [T/G]       | 1067293847                                 |
| Ca_Kabuli_NC_021162.1_35676141 | Ca_kabuli_chr03    | 35676141                       | [T/C]       | 1067293848                                 |
| Ca_Kabuli_NC_021162.1_35676164 | Ca_kabuli_chr03    | 35676164                       | [T/G]       | 1067293849                                 |
| Ca_Kabuli_NC_021162.1_35807358 | Ca_kabuli_chr03    | 35807358                       | [A/C]       | 1067293850                                 |
| Ca_Kabuli_NC_021162.1_35807390 | Ca_kabuli_chr03    | 35807390                       | [A/C]       | 1067293851                                 |
| Ca_Kabuli_NC_021162.1_35826134 | Ca_kabuli_chr03    | 35826134                       | [A/G]       | 1067293852                                 |
| Ca_Kabuli_NC_021162.1_35829777 | Ca_kabuli_chr03    | 35829777                       | [G/C]       | 1067293853                                 |
| Ca_Kabuli_NC_021162.1_35853464 | Ca_kabuli_chr03    | 35853464                       | [A/C]       | 1067293854                                 |
| Ca_Kabuli_NC_021162.1_35853514 | Ca_kabuli_chr03    | 35853514                       | [T/A]       | 1067293855                                 |
| Ca_Kabuli_NC_021162.1_35853624 | Ca_kabuli_chr03    | 35853624                       | [T/C]       | 1067293856                                 |
| Ca_Kabuli_NC_021162.1_35853657 | Ca_kabuli_chr03    | 35853657                       | [T/G]       | 1067293857                                 |
| Ca_Kabuli_NC_021162.1_35897932 | Ca_kabuli_chr03    | 35897932                       | [T/C]       | 1067293858                                 |
| Ca_Kabuli_NC_021162.1_35898227 | Ca_kabuli_chr03    | 35898227                       | [A/C]       | 1067293859                                 |
| Ca_Kabuli_NC_021162.1_35898233 | Ca_kabuli_chr03    | 35898233                       | [A/C]       | 1067293860                                 |
| Ca_Kabuli_NC_021162.1_35920747 | Ca_kabuli_chr03    | 35920747                       | [T/C]       | 1067293861                                 |
| Ca_Kabuli_NC_021162.1_35920780 | Ca_kabuli_chr03    | 35920780                       | [T/G]       | 1067293862                                 |
| Ca_Kabuli_NC_021162.1_35927676 | Ca_kabuli_chr03    | 35927676                       | [T/G]       | 1067293863                                 |
| Ca_Kabuli_NC_021162.1_35979412 | Ca_kabuli_chr03    | 35979412                       | [G/T]       | 1067293864                                 |
| Ca_Kabuli_NC_021162.1_35979490 | Ca_kabuli_chr03    | 35979490                       | [T/C]       | 1067293865                                 |
| Ca_Kabuli_NC_021162.1_36003699 | Ca_kabuli_chr03    | 36003699                       | [A/G]       | 1067293866                                 |

| <b>SNP IDs</b>                 | <b>Chromosomes</b> | <b>Physical positions (bp)</b> | <b>SNPs</b> | <b>NCBI SNPdb accession IDs (NCBI_ss#)</b> |
|--------------------------------|--------------------|--------------------------------|-------------|--------------------------------------------|
| Ca_Kabuli_NC_021162.1_36004668 | Ca_kabuli_chr03    | 36004668                       | [G/A]       | 1067293867                                 |
| Ca_Kabuli_NC_021162.1_36009983 | Ca_kabuli_chr03    | 36009983                       | [G/C]       | 1067293868                                 |
| Ca_Kabuli_NC_021162.1_36034934 | Ca_kabuli_chr03    | 36034934                       | [C/A]       | 1067293869                                 |
| Ca_Kabuli_NC_021162.1_36036333 | Ca_kabuli_chr03    | 36036333                       | [G/C]       | 1067293870                                 |
| Ca_Kabuli_NC_021162.1_36036341 | Ca_kabuli_chr03    | 36036341                       | [T/A]       | 1067293871                                 |
| Ca_Kabuli_NC_021162.1_36036353 | Ca_kabuli_chr03    | 36036353                       | [G/A]       | 1067293872                                 |
| Ca_Kabuli_NC_021162.1_36039133 | Ca_kabuli_chr03    | 36039133                       | [T/C]       | 1067293873                                 |
| Ca_Kabuli_NC_021162.1_36046845 | Ca_kabuli_chr03    | 36046845                       | [A/C]       | 1067293874                                 |
| Ca_Kabuli_NC_021162.1_36046937 | Ca_kabuli_chr03    | 36046937                       | [A/C]       | 1067293875                                 |
| Ca_Kabuli_NC_021162.1_36046938 | Ca_kabuli_chr03    | 36046938                       | [C/G]       | 1067293876                                 |
| Ca_Kabuli_NC_021162.1_36046951 | Ca_kabuli_chr03    | 36046951                       | [C/T]       | 1067293877                                 |
| Ca_Kabuli_NC_021162.1_36046961 | Ca_kabuli_chr03    | 36046961                       | [A/C]       | 1067293878                                 |
| Ca_Kabuli_NC_021162.1_36046966 | Ca_kabuli_chr03    | 36046966                       | [C/T]       | 1067293879                                 |
| Ca_Kabuli_NC_021162.1_36050259 | Ca_kabuli_chr03    | 36050259                       | [G/T]       | 1067293880                                 |
| Ca_Kabuli_NC_021162.1_36050319 | Ca_kabuli_chr03    | 36050319                       | [C/T]       | 1067293881                                 |
| Ca_Kabuli_NC_021162.1_36060899 | Ca_kabuli_chr03    | 36060899                       | [T/G]       | 1067293882                                 |
| Ca_Kabuli_NC_021162.1_36060930 | Ca_kabuli_chr03    | 36060930                       | [A/C]       | 1067293883                                 |
| Ca_Kabuli_NC_021162.1_36066511 | Ca_kabuli_chr03    | 36066511                       | [T/G]       | 1067293884                                 |
| Ca_Kabuli_NC_021162.1_36066583 | Ca_kabuli_chr03    | 36066583                       | [C/T]       | 1067293885                                 |
| Ca_Kabuli_NC_021162.1_36070879 | Ca_kabuli_chr03    | 36070879                       | [C/G]       | 1067293886                                 |
| Ca_Kabuli_NC_021162.1_36070972 | Ca_kabuli_chr03    | 36070972                       | [A/G]       | 1067293887                                 |
| Ca_Kabuli_NC_021162.1_36071033 | Ca_kabuli_chr03    | 36071033                       | [G/A]       | 1067293888                                 |
| Ca_Kabuli_NC_021162.1_36072770 | Ca_kabuli_chr03    | 36072770                       | [A/G]       | 1067293889                                 |
| Ca_Kabuli_NC_021162.1_36085966 | Ca_kabuli_chr03    | 36085966                       | [A/G]       | 1067293890                                 |
| Ca_Kabuli_NC_021162.1_36086013 | Ca_kabuli_chr03    | 36086013                       | [A/C]       | 1067293891                                 |
| Ca_Kabuli_NC_021162.1_36086028 | Ca_kabuli_chr03    | 36086028                       | [G/T]       | 1067293892                                 |
| Ca_Kabuli_NC_021162.1_36118120 | Ca_kabuli_chr03    | 36118120                       | [C/T]       | 1067293893                                 |
| Ca_Kabuli_NC_021162.1_36132391 | Ca_kabuli_chr03    | 36132391                       | [A/G]       | 1067293894                                 |
| Ca_Kabuli_NC_021162.1_36132432 | Ca_kabuli_chr03    | 36132432                       | [A/G]       | 1067293895                                 |
| Ca_Kabuli_NC_021162.1_36132445 | Ca_kabuli_chr03    | 36132445                       | [T/G]       | 1067293896                                 |
| Ca_Kabuli_NC_021162.1_36132586 | Ca_kabuli_chr03    | 36132586                       | [G/T]       | 1067293897                                 |
| Ca_Kabuli_NC_021162.1_36150722 | Ca_kabuli_chr03    | 36150722                       | [A/G]       | 1067293898                                 |
| Ca_Kabuli_NC_021162.1_36178343 | Ca_kabuli_chr03    | 36178343                       | [A/G]       | 1067293899                                 |
| Ca_Kabuli_NC_021162.1_36194086 | Ca_kabuli_chr03    | 36194086                       | [G/C]       | 1067293900                                 |

| <b>SNP IDs</b>                 | <b>Chromosomes</b> | <b>Physical positions (bp)</b> | <b>SNPs</b> | <b>NCBI SNPdb accession IDs (NCBI_ss#)</b> |
|--------------------------------|--------------------|--------------------------------|-------------|--------------------------------------------|
| Ca_Kabuli_NC_021162.1_36205806 | Ca_kabuli_chr03    | 36205806                       | [G/T]       | 1067293901                                 |
| Ca_Kabuli_NC_021162.1_36205819 | Ca_kabuli_chr03    | 36205819                       | [G/A]       | 1067293902                                 |
| Ca_Kabuli_NC_021162.1_36205845 | Ca_kabuli_chr03    | 36205845                       | [G/A]       | 1067293903                                 |
| Ca_Kabuli_NC_021162.1_36206037 | Ca_kabuli_chr03    | 36206037                       | [A/G]       | 1067293904                                 |
| Ca_Kabuli_NC_021162.1_36206046 | Ca_kabuli_chr03    | 36206046                       | [T/C]       | 1067293905                                 |
| Ca_Kabuli_NC_021162.1_36206085 | Ca_kabuli_chr03    | 36206085                       | [T/C]       | 1067293906                                 |
| Ca_Kabuli_NC_021162.1_36206138 | Ca_kabuli_chr03    | 36206138                       | [A/G]       | 1067293907                                 |
| Ca_Kabuli_NC_021162.1_36206615 | Ca_kabuli_chr03    | 36206615                       | [C/A]       | 1067293908                                 |
| Ca_Kabuli_NC_021162.1_36212843 | Ca_kabuli_chr03    | 36212843                       | [T/A]       | 1067293909                                 |
| Ca_Kabuli_NC_021162.1_36227565 | Ca_kabuli_chr03    | 36227565                       | [T/A]       | 1067293910                                 |
| Ca_Kabuli_NC_021162.1_36227566 | Ca_kabuli_chr03    | 36227566                       | [T/A]       | 1067293911                                 |
| Ca_Kabuli_NC_021162.1_36228032 | Ca_kabuli_chr03    | 36228032                       | [G/T]       | 1067293912                                 |
| Ca_Kabuli_NC_021162.1_36228034 | Ca_kabuli_chr03    | 36228034                       | [T/G]       | 1067293913                                 |
| Ca_Kabuli_NC_021162.1_36228121 | Ca_kabuli_chr03    | 36228121                       | [T/A]       | 1067293914                                 |
| Ca_Kabuli_NC_021162.1_36228142 | Ca_kabuli_chr03    | 36228142                       | [A/G]       | 1067293915                                 |
| Ca_Kabuli_NC_021162.1_36242492 | Ca_kabuli_chr03    | 36242492                       | [A/G]       | 1067293916                                 |
| Ca_Kabuli_NC_021162.1_36242501 | Ca_kabuli_chr03    | 36242501                       | [A/G]       | 1067293917                                 |
| Ca_Kabuli_NC_021162.1_36242504 | Ca_kabuli_chr03    | 36242504                       | [C/T]       | 1067293918                                 |
| Ca_Kabuli_NC_021162.1_36242544 | Ca_kabuli_chr03    | 36242544                       | [T/A]       | 1067293919                                 |
| Ca_Kabuli_NC_021162.1_36247792 | Ca_kabuli_chr03    | 36247792                       | [T/C]       | 1067293920                                 |
| Ca_Kabuli_NC_021162.1_36260856 | Ca_kabuli_chr03    | 36260856                       | [A/G]       | 1067293921                                 |
| Ca_Kabuli_NC_021162.1_36260890 | Ca_kabuli_chr03    | 36260890                       | [A/G]       | 1067293922                                 |
| Ca_Kabuli_NC_021162.1_36282085 | Ca_kabuli_chr03    | 36282085                       | [T/A]       | 1067293923                                 |
| Ca_Kabuli_NC_021162.1_36282088 | Ca_kabuli_chr03    | 36282088                       | [T/G]       | 1067293924                                 |
| Ca_Kabuli_NC_021162.1_36282091 | Ca_kabuli_chr03    | 36282091                       | [T/G]       | 1067293925                                 |
| Ca_Kabuli_NC_021162.1_36282094 | Ca_kabuli_chr03    | 36282094                       | [T/G]       | 1067293926                                 |
| Ca_Kabuli_NC_021162.1_36282105 | Ca_kabuli_chr03    | 36282105                       | [A/T]       | 1067293927                                 |
| Ca_Kabuli_NC_021162.1_36282123 | Ca_kabuli_chr03    | 36282123                       | [A/G]       | 1067293928                                 |
| Ca_Kabuli_NC_021162.1_36293697 | Ca_kabuli_chr03    | 36293697                       | [T/C]       | 1067293929                                 |
| Ca_Kabuli_NC_021162.1_36330750 | Ca_kabuli_chr03    | 36330750                       | [A/G]       | 1067293930                                 |
| Ca_Kabuli_NC_021162.1_36330815 | Ca_kabuli_chr03    | 36330815                       | [T/C]       | 1067293931                                 |
| Ca_Kabuli_NC_021162.1_36334653 | Ca_kabuli_chr03    | 36334653                       | [A/G]       | 1067293932                                 |
| Ca_Kabuli_NC_021162.1_36334699 | Ca_kabuli_chr03    | 36334699                       | [T/G]       | 1067293933                                 |
| Ca_Kabuli_NC_021162.1_36361339 | Ca_kabuli_chr03    | 36361339                       | [C/T]       | 1067293934                                 |



| <b>SNP IDs</b>                 | <b>Chromosomes</b> | <b>Physical positions (bp)</b> | <b>SNPs</b> | <b>NCBI SNPdb accession IDs (NCBI_ss#)</b> |
|--------------------------------|--------------------|--------------------------------|-------------|--------------------------------------------|
| Ca_Kabuli_NC_021162.1_36378294 | Ca_kabuli_chr03    | 36378294                       | [G/T]       | 1067293935                                 |
| Ca_Kabuli_NC_021162.1_36380423 | Ca_kabuli_chr03    | 36380423                       | [G/A]       | 1067293936                                 |
| Ca_Kabuli_NC_021162.1_36387718 | Ca_kabuli_chr03    | 36387718                       | [T/C]       | 1067293937                                 |
| Ca_Kabuli_NC_021162.1_36407587 | Ca_kabuli_chr03    | 36407587                       | [G/A]       | 1067293938                                 |
| Ca_Kabuli_NC_021162.1_36417921 | Ca_kabuli_chr03    | 36417921                       | [G/A]       | 1067293939                                 |
| Ca_Kabuli_NC_021162.1_36417942 | Ca_kabuli_chr03    | 36417942                       | [T/C]       | 1067293940                                 |
| Ca_Kabuli_NC_021162.1_36418025 | Ca_kabuli_chr03    | 36418025                       | [A/G]       | 1067293941                                 |
| Ca_Kabuli_NC_021162.1_36432389 | Ca_kabuli_chr03    | 36432389                       | [G/A]       | 1067293942                                 |
| Ca_Kabuli_NC_021162.1_36441575 | Ca_kabuli_chr03    | 36441575                       | [A/G]       | 1067293943                                 |
| Ca_Kabuli_NC_021162.1_36441593 | Ca_kabuli_chr03    | 36441593                       | [T/A]       | 1067293944                                 |
| Ca_Kabuli_NC_021162.1_36441594 | Ca_kabuli_chr03    | 36441594                       | [G/A]       | 1067293945                                 |
| Ca_Kabuli_NC_021162.1_36441595 | Ca_kabuli_chr03    | 36441595                       | [T/C]       | 1067293946                                 |
| Ca_Kabuli_NC_021162.1_36447525 | Ca_kabuli_chr03    | 36447525                       | [C/T]       | 1067293947                                 |
| Ca_Kabuli_NC_021162.1_36463010 | Ca_kabuli_chr03    | 36463010                       | [A/T]       | 1067293948                                 |
| Ca_Kabuli_NC_021162.1_36563350 | Ca_kabuli_chr03    | 36563350                       | [C/T]       | 1067293949                                 |
| Ca_Kabuli_NC_021162.1_36568324 | Ca_kabuli_chr03    | 36568324                       | [A/C]       | 1067293950                                 |
| Ca_Kabuli_NC_021162.1_36573324 | Ca_kabuli_chr03    | 36573324                       | [T/C]       | 1067293951                                 |
| Ca_Kabuli_NC_021162.1_36573411 | Ca_kabuli_chr03    | 36573411                       | [A/C]       | 1067293952                                 |
| Ca_Kabuli_NC_021162.1_36584095 | Ca_kabuli_chr03    | 36584095                       | [A/G]       | 1067293953                                 |
| Ca_Kabuli_NC_021162.1_36584127 | Ca_kabuli_chr03    | 36584127                       | [T/G]       | 1067293954                                 |
| Ca_Kabuli_NC_021162.1_36588765 | Ca_kabuli_chr03    | 36588765                       | [A/T]       | 1067293955                                 |
| Ca_Kabuli_NC_021162.1_36588788 | Ca_kabuli_chr03    | 36588788                       | [A/G]       | 1067293956                                 |
| Ca_Kabuli_NC_021162.1_36588914 | Ca_kabuli_chr03    | 36588914                       | [A/C]       | 1067293957                                 |
| Ca_Kabuli_NC_021162.1_36609256 | Ca_kabuli_chr03    | 36609256                       | [T/G]       | 1067293958                                 |
| Ca_Kabuli_NC_021162.1_36610509 | Ca_kabuli_chr03    | 36610509                       | [A/G]       | 1067293959                                 |
| Ca_Kabuli_NC_021162.1_36634188 | Ca_kabuli_chr03    | 36634188                       | [T/G]       | 1067293960                                 |
| Ca_Kabuli_NC_021162.1_36644077 | Ca_kabuli_chr03    | 36644077                       | [A/G]       | 1067293961                                 |
| Ca_Kabuli_NC_021162.1_36644129 | Ca_kabuli_chr03    | 36644129                       | [A/G]       | 1067293962                                 |
| Ca_Kabuli_NC_021162.1_36658776 | Ca_kabuli_chr03    | 36658776                       | [A/T]       | 1067293963                                 |
| Ca_Kabuli_NC_021162.1_36749838 | Ca_kabuli_chr03    | 36749838                       | [A/C]       | 1067293964                                 |
| Ca_Kabuli_NC_021162.1_36749851 | Ca_kabuli_chr03    | 36749851                       | [A/G]       | 1067293965                                 |
| Ca_Kabuli_NC_021162.1_36749942 | Ca_kabuli_chr03    | 36749942                       | [T/C]       | 1067293966                                 |
| Ca_Kabuli_NC_021162.1_36749980 | Ca_kabuli_chr03    | 36749980                       | [A/G]       | 1067293967                                 |
| Ca_Kabuli_NC_021162.1_36752677 | Ca_kabuli_chr03    | 36752677                       | [A/C]       | 1067293968                                 |

| <b>SNP IDs</b>                 | <b>Chromosomes</b> | <b>Physical positions (bp)</b> | <b>SNPs</b> | <b>NCBI SNPdb accession IDs (NCBI_ss#)</b> |
|--------------------------------|--------------------|--------------------------------|-------------|--------------------------------------------|
| Ca_Kabuli_NC_021162.1_36752691 | Ca_kabuli_chr03    | 36752691                       | [A/T]       | 1067293969                                 |
| Ca_Kabuli_NC_021162.1_36752752 | Ca_kabuli_chr03    | 36752752                       | [T/C]       | 1067293970                                 |
| Ca_Kabuli_NC_021162.1_36752763 | Ca_kabuli_chr03    | 36752763                       | [A/G]       | 1067293971                                 |
| Ca_Kabuli_NC_021162.1_36752765 | Ca_kabuli_chr03    | 36752765                       | [T/C]       | 1067293972                                 |
| Ca_Kabuli_NC_021162.1_36752778 | Ca_kabuli_chr03    | 36752778                       | [A/G]       | 1067293973                                 |
| Ca_Kabuli_NC_021162.1_36752828 | Ca_kabuli_chr03    | 36752828                       | [A/G]       | 1067293974                                 |
| Ca_Kabuli_NC_021162.1_36754270 | Ca_kabuli_chr03    | 36754270                       | [T/G]       | 1067293975                                 |
| Ca_Kabuli_NC_021162.1_36754366 | Ca_kabuli_chr03    | 36754366                       | [A/C]       | 1067293976                                 |
| Ca_Kabuli_NC_021162.1_36754369 | Ca_kabuli_chr03    | 36754369                       | [A/C]       | 1067293977                                 |
| Ca_Kabuli_NC_021162.1_36816705 | Ca_kabuli_chr03    | 36816705                       | [T/C]       | 1067293978                                 |
| Ca_Kabuli_NC_021162.1_36816725 | Ca_kabuli_chr03    | 36816725                       | [T/C]       | 1067293979                                 |
| Ca_Kabuli_NC_021162.1_36816752 | Ca_kabuli_chr03    | 36816752                       | [A/C]       | 1067293980                                 |
| Ca_Kabuli_NC_021162.1_36825508 | Ca_kabuli_chr03    | 36825508                       | [T/C]       | 1067293981                                 |
| Ca_Kabuli_NC_021162.1_36860990 | Ca_kabuli_chr03    | 36860990                       | [A/C]       | 1067293982                                 |
| Ca_Kabuli_NC_021162.1_36871004 | Ca_kabuli_chr03    | 36871004                       | [T/A]       | 1067293983                                 |
| Ca_Kabuli_NC_021162.1_36871092 | Ca_kabuli_chr03    | 36871092                       | [T/C]       | 1067293984                                 |
| Ca_Kabuli_NC_021162.1_36871094 | Ca_kabuli_chr03    | 36871094                       | [A/G]       | 1067293985                                 |
| Ca_Kabuli_NC_021162.1_36871099 | Ca_kabuli_chr03    | 36871099                       | [A/T]       | 1067293986                                 |
| Ca_Kabuli_NC_021162.1_36871115 | Ca_kabuli_chr03    | 36871115                       | [T/G]       | 1067293987                                 |
| Ca_Kabuli_NC_021162.1_36871128 | Ca_kabuli_chr03    | 36871128                       | [T/C]       | 1067293988                                 |
| Ca_Kabuli_NC_021162.1_36872737 | Ca_kabuli_chr03    | 36872737                       | [A/C]       | 1067293989                                 |
| Ca_Kabuli_NC_021162.1_36872747 | Ca_kabuli_chr03    | 36872747                       | [A/C]       | 1067293990                                 |
| Ca_Kabuli_NC_021162.1_36883124 | Ca_kabuli_chr03    | 36883124                       | [T/C]       | 1067293991                                 |
| Ca_Kabuli_NC_021162.1_36883176 | Ca_kabuli_chr03    | 36883176                       | [A/C]       | 1067293992                                 |
| Ca_Kabuli_NC_021162.1_36935486 | Ca_kabuli_chr03    | 36935486                       | [T/A]       | 1067293993                                 |
| Ca_Kabuli_NC_021162.1_36935487 | Ca_kabuli_chr03    | 36935487                       | [A/T]       | 1067293994                                 |
| Ca_Kabuli_NC_021162.1_36935488 | Ca_kabuli_chr03    | 36935488                       | [G/C]       | 1067293995                                 |
| Ca_Kabuli_NC_021162.1_36935489 | Ca_kabuli_chr03    | 36935489                       | [G/T]       | 1067293996                                 |
| Ca_Kabuli_NC_021162.1_36967289 | Ca_kabuli_chr03    | 36967289                       | [A/C]       | 1067293997                                 |
| Ca_Kabuli_NC_021162.1_37155895 | Ca_kabuli_chr03    | 37155895                       | [A/G]       | 1067293998                                 |
| Ca_Kabuli_NC_021162.1_37155901 | Ca_kabuli_chr03    | 37155901                       | [T/C]       | 1067293999                                 |
| Ca_Kabuli_NC_021162.1_37155955 | Ca_kabuli_chr03    | 37155955                       | [T/A]       | 1067294000                                 |
| Ca_Kabuli_NC_021162.1_37160795 | Ca_kabuli_chr03    | 37160795                       | [A/C]       | 1067294001                                 |
| Ca_Kabuli_NC_021162.1_37160804 | Ca_kabuli_chr03    | 37160804                       | [A/G]       | 1067294002                                 |

| <b>SNP IDs</b>                 | <b>Chromosomes</b> | <b>Physical positions (bp)</b> | <b>SNPs</b> | <b>NCBI SNPdb accession IDs (NCBI_ss#)</b> |
|--------------------------------|--------------------|--------------------------------|-------------|--------------------------------------------|
| Ca_Kabuli_NC_021162.1_37160944 | Ca_kabuli_chr03    | 37160944                       | [A/G]       | 1067294003                                 |
| Ca_Kabuli_NC_021162.1_37178482 | Ca_kabuli_chr03    | 37178482                       | [A/T]       | 1067294004                                 |
| Ca_Kabuli_NC_021162.1_37178516 | Ca_kabuli_chr03    | 37178516                       | [T/C]       | 1067294005                                 |
| Ca_Kabuli_NC_021162.1_37267774 | Ca_kabuli_chr03    | 37267774                       | [A/T]       | 1067294006                                 |
| Ca_Kabuli_NC_021162.1_37267875 | Ca_kabuli_chr03    | 37267875                       | [C/A]       | 1067294007                                 |
| Ca_Kabuli_NC_021162.1_37267898 | Ca_kabuli_chr03    | 37267898                       | [T/G]       | 1067294008                                 |
| Ca_Kabuli_NC_021162.1_37269067 | Ca_kabuli_chr03    | 37269067                       | [C/A]       | 1067294009                                 |
| Ca_Kabuli_NC_021162.1_37297922 | Ca_kabuli_chr03    | 37297922                       | [A/G]       | 1067294010                                 |
| Ca_Kabuli_NC_021162.1_37303602 | Ca_kabuli_chr03    | 37303602                       | [T/A]       | 1067294011                                 |
| Ca_Kabuli_NC_021162.1_37309436 | Ca_kabuli_chr03    | 37309436                       | [A/G]       | 1067294012                                 |
| Ca_Kabuli_NC_021162.1_37314823 | Ca_kabuli_chr03    | 37314823                       | [A/G]       | 1067294013                                 |
| Ca_Kabuli_NC_021162.1_37314832 | Ca_kabuli_chr03    | 37314832                       | [T/A]       | 1067294014                                 |
| Ca_Kabuli_NC_021162.1_37316815 | Ca_kabuli_chr03    | 37316815                       | [C/G]       | 1067294015                                 |
| Ca_Kabuli_NC_021162.1_37316816 | Ca_kabuli_chr03    | 37316816                       | [T/C]       | 1067294016                                 |
| Ca_Kabuli_NC_021162.1_37316817 | Ca_kabuli_chr03    | 37316817                       | [G/T]       | 1067294017                                 |
| Ca_Kabuli_NC_021162.1_37316818 | Ca_kabuli_chr03    | 37316818                       | [T/G]       | 1067294018                                 |
| Ca_Kabuli_NC_021162.1_37322763 | Ca_kabuli_chr03    | 37322763                       | [A/C]       | 1067294019                                 |
| Ca_Kabuli_NC_021162.1_37322808 | Ca_kabuli_chr03    | 37322808                       | [T/C]       | 1067294020                                 |
| Ca_Kabuli_NC_021162.1_37378323 | Ca_kabuli_chr03    | 37378323                       | [A/C]       | 1067294021                                 |
| Ca_Kabuli_NC_021162.1_37436493 | Ca_kabuli_chr03    | 37436493                       | [A/G]       | 1067294022                                 |
| Ca_Kabuli_NC_021162.1_37438110 | Ca_kabuli_chr03    | 37438110                       | [T/C]       | 1067294023                                 |
| Ca_Kabuli_NC_021162.1_37438148 | Ca_kabuli_chr03    | 37438148                       | [G/A]       | 1067294024                                 |
| Ca_Kabuli_NC_021162.1_37439576 | Ca_kabuli_chr03    | 37439576                       | [T/C]       | 1067294025                                 |
| Ca_Kabuli_NC_021162.1_37472189 | Ca_kabuli_chr03    | 37472189                       | [T/C]       | 1067294026                                 |
| Ca_Kabuli_NC_021162.1_37472240 | Ca_kabuli_chr03    | 37472240                       | [A/G]       | 1067294027                                 |
| Ca_Kabuli_NC_021162.1_37499211 | Ca_kabuli_chr03    | 37499211                       | [A/G]       | 1067294028                                 |
| Ca_Kabuli_NC_021162.1_37499253 | Ca_kabuli_chr03    | 37499253                       | [A/C]       | 1067294029                                 |
| Ca_Kabuli_NC_021162.1_37499259 | Ca_kabuli_chr03    | 37499259                       | [A/G]       | 1067294030                                 |
| Ca_Kabuli_NC_021162.1_37608935 | Ca_kabuli_chr03    | 37608935                       | [C/A]       | 1067294031                                 |
| Ca_Kabuli_NC_021162.1_37608936 | Ca_kabuli_chr03    | 37608936                       | [T/G]       | 1067294032                                 |
| Ca_Kabuli_NC_021162.1_37608937 | Ca_kabuli_chr03    | 37608937                       | [T/A]       | 1067294033                                 |
| Ca_Kabuli_NC_021162.1_37637640 | Ca_kabuli_chr03    | 37637640                       | [A/T]       | 1067294034                                 |
| Ca_Kabuli_NC_021162.1_37637641 | Ca_kabuli_chr03    | 37637641                       | [A/T]       | 1067294035                                 |
| Ca_Kabuli_NC_021162.1_37637642 | Ca_kabuli_chr03    | 37637642                       | [A/T]       | 1067294036                                 |

| <b>SNP IDs</b>                 | <b>Chromosomes</b> | <b>Physical positions (bp)</b> | <b>SNPs</b> | <b>NCBI SNPdb accession IDs (NCBI_ss#)</b> |
|--------------------------------|--------------------|--------------------------------|-------------|--------------------------------------------|
| Ca_Kabuli_NC_021162.1_37759195 | Ca_kabuli_chr03    | 37759195                       | [T/A]       | 1067294037                                 |
| Ca_Kabuli_NC_021162.1_37759428 | Ca_kabuli_chr03    | 37759428                       | [G/A]       | 1067294038                                 |
| Ca_Kabuli_NC_021162.1_37765723 | Ca_kabuli_chr03    | 37765723                       | [T/C]       | 1067294039                                 |
| Ca_Kabuli_NC_021162.1_37765738 | Ca_kabuli_chr03    | 37765738                       | [C/T]       | 1067294040                                 |
| Ca_Kabuli_NC_021162.1_37765765 | Ca_kabuli_chr03    | 37765765                       | [T/G]       | 1067294041                                 |
| Ca_Kabuli_NC_021162.1_37765767 | Ca_kabuli_chr03    | 37765767                       | [A/G]       | 1067294042                                 |
| Ca_Kabuli_NC_021162.1_37806633 | Ca_kabuli_chr03    | 37806633                       | [T/C]       | 1067294043                                 |
| Ca_Kabuli_NC_021162.1_37806647 | Ca_kabuli_chr03    | 37806647                       | [C/A]       | 1067294044                                 |
| Ca_Kabuli_NC_021162.1_37817266 | Ca_kabuli_chr03    | 37817266                       | [A/C]       | 1067294045                                 |
| Ca_Kabuli_NC_021162.1_37822882 | Ca_kabuli_chr03    | 37822882                       | [A/T]       | 1067294046                                 |
| Ca_Kabuli_NC_021162.1_37866125 | Ca_kabuli_chr03    | 37866125                       | [A/G]       | 1067294047                                 |
| Ca_Kabuli_NC_021162.1_37866133 | Ca_kabuli_chr03    | 37866133                       | [A/G]       | 1067294048                                 |
| Ca_Kabuli_NC_021162.1_37942807 | Ca_kabuli_chr03    | 37942807                       | [A/G]       | 1067294049                                 |
| Ca_Kabuli_NC_021162.1_37951112 | Ca_kabuli_chr03    | 37951112                       | [C/T]       | 1067294050                                 |
| Ca_Kabuli_NC_021162.1_37985776 | Ca_kabuli_chr03    | 37985776                       | [T/A]       | 1067294051                                 |
| Ca_Kabuli_NC_021162.1_37985947 | Ca_kabuli_chr03    | 37985947                       | [A/T]       | 1067294052                                 |
| Ca_Kabuli_NC_021162.1_37985977 | Ca_kabuli_chr03    | 37985977                       | [A/G]       | 1067294053                                 |
| Ca_Kabuli_NC_021162.1_37986028 | Ca_kabuli_chr03    | 37986028                       | [G/A]       | 1067294054                                 |
| Ca_Kabuli_NC_021162.1_38015973 | Ca_kabuli_chr03    | 38015973                       | [C/G]       | 1067294055                                 |
| Ca_Kabuli_NC_021162.1_38016234 | Ca_kabuli_chr03    | 38016234                       | [T/C]       | 1067294056                                 |
| Ca_Kabuli_NC_021162.1_38026725 | Ca_kabuli_chr03    | 38026725                       | [G/A]       | 1067294057                                 |
| Ca_Kabuli_NC_021162.1_38029092 | Ca_kabuli_chr03    | 38029092                       | [T/C]       | 1067294058                                 |
| Ca_Kabuli_NC_021162.1_38029101 | Ca_kabuli_chr03    | 38029101                       | [A/C]       | 1067294059                                 |
| Ca_Kabuli_NC_021162.1_38029131 | Ca_kabuli_chr03    | 38029131                       | [A/T]       | 1067294060                                 |
| Ca_Kabuli_NC_021162.1_38034006 | Ca_kabuli_chr03    | 38034006                       | [G/C]       | 1067294061                                 |
| Ca_Kabuli_NC_021162.1_38046362 | Ca_kabuli_chr03    | 38046362                       | [A/G]       | 1067294062                                 |
| Ca_Kabuli_NC_021162.1_38046522 | Ca_kabuli_chr03    | 38046522                       | [A/G]       | 1067294063                                 |
| Ca_Kabuli_NC_021162.1_38049996 | Ca_kabuli_chr03    | 38049996                       | [A/G]       | 1067294064                                 |
| Ca_Kabuli_NC_021162.1_38054694 | Ca_kabuli_chr03    | 38054694                       | [G/C]       | 1067294065                                 |
| Ca_Kabuli_NC_021162.1_38055488 | Ca_kabuli_chr03    | 38055488                       | [T/C]       | 1067294066                                 |
| Ca_Kabuli_NC_021162.1_38059303 | Ca_kabuli_chr03    | 38059303                       | [T/C]       | 1067294067                                 |
| Ca_Kabuli_NC_021162.1_38060814 | Ca_kabuli_chr03    | 38060814                       | [A/G]       | 1067294068                                 |
| Ca_Kabuli_NC_021162.1_38074259 | Ca_kabuli_chr03    | 38074259                       | [C/A]       | 1067294069                                 |
| Ca_Kabuli_NC_021162.1_38076428 | Ca_kabuli_chr03    | 38076428                       | [T/C]       | 1067294070                                 |

| <b>SNP IDs</b>                 | <b>Chromosomes</b> | <b>Physical positions (bp)</b> | <b>SNPs</b> | <b>NCBI SNPdb accession IDs (NCBI_ss#)</b> |
|--------------------------------|--------------------|--------------------------------|-------------|--------------------------------------------|
| Ca_Kabuli_NC_021162.1_38076432 | Ca_kabuli_chr03    | 38076432                       | [A/G]       | 1067294071                                 |
| Ca_Kabuli_NC_021162.1_38076439 | Ca_kabuli_chr03    | 38076439                       | [A/G]       | 1067294072                                 |
| Ca_Kabuli_NC_021162.1_38076449 | Ca_kabuli_chr03    | 38076449                       | [T/C]       | 1067294073                                 |
| Ca_Kabuli_NC_021162.1_38076458 | Ca_kabuli_chr03    | 38076458                       | [A/G]       | 1067294074                                 |
| Ca_Kabuli_NC_021162.1_38088503 | Ca_kabuli_chr03    | 38088503                       | [A/C]       | 1067294075                                 |
| Ca_Kabuli_NC_021162.1_38103366 | Ca_kabuli_chr03    | 38103366                       | [T/G]       | 1067294076                                 |
| Ca_Kabuli_NC_021162.1_38103367 | Ca_kabuli_chr03    | 38103367                       | [T/G]       | 1067294077                                 |
| Ca_Kabuli_NC_021162.1_38103368 | Ca_kabuli_chr03    | 38103368                       | [T/A]       | 1067294078                                 |
| Ca_Kabuli_NC_021162.1_38103369 | Ca_kabuli_chr03    | 38103369                       | [T/G]       | 1067294079                                 |
| Ca_Kabuli_NC_021162.1_38103375 | Ca_kabuli_chr03    | 38103375                       | [T/C]       | 1067294080                                 |
| Ca_Kabuli_NC_021162.1_38103524 | Ca_kabuli_chr03    | 38103524                       | [C/T]       | 1067294081                                 |
| Ca_Kabuli_NC_021162.1_38112801 | Ca_kabuli_chr03    | 38112801                       | [C/T]       | 1067294082                                 |
| Ca_Kabuli_NC_021162.1_38112802 | Ca_kabuli_chr03    | 38112802                       | [T/C]       | 1067294083                                 |
| Ca_Kabuli_NC_021162.1_38112971 | Ca_kabuli_chr03    | 38112971                       | [A/G]       | 1067294084                                 |
| Ca_Kabuli_NC_021162.1_38115564 | Ca_kabuli_chr03    | 38115564                       | [A/T]       | 1067294085                                 |
| Ca_Kabuli_NC_021162.1_38117169 | Ca_kabuli_chr03    | 38117169                       | [C/T]       | 1067294086                                 |
| Ca_Kabuli_NC_021162.1_38117584 | Ca_kabuli_chr03    | 38117584                       | [G/A]       | 1067294087                                 |
| Ca_Kabuli_NC_021162.1_38117585 | Ca_kabuli_chr03    | 38117585                       | [A/C]       | 1067294088                                 |
| Ca_Kabuli_NC_021162.1_38119199 | Ca_kabuli_chr03    | 38119199                       | [T/C]       | 1067294089                                 |
| Ca_Kabuli_NC_021162.1_38119204 | Ca_kabuli_chr03    | 38119204                       | [T/G]       | 1067294090                                 |
| Ca_Kabuli_NC_021162.1_38119236 | Ca_kabuli_chr03    | 38119236                       | [T/G]       | 1067294091                                 |
| Ca_Kabuli_NC_021162.1_38127341 | Ca_kabuli_chr03    | 38127341                       | [C/T]       | 1067294092                                 |
| Ca_Kabuli_NC_021162.1_38130410 | Ca_kabuli_chr03    | 38130410                       | [A/G]       | 1067294093                                 |
| Ca_Kabuli_NC_021162.1_38145115 | Ca_kabuli_chr03    | 38145115                       | [T/C]       | 1067294094                                 |
| Ca_Kabuli_NC_021162.1_38147699 | Ca_kabuli_chr03    | 38147699                       | [T/C]       | 1067294095                                 |
| Ca_Kabuli_NC_021162.1_38166877 | Ca_kabuli_chr03    | 38166877                       | [A/C]       | 1067294096                                 |
| Ca_Kabuli_NC_021162.1_38166921 | Ca_kabuli_chr03    | 38166921                       | [A/G]       | 1067294097                                 |
| Ca_Kabuli_NC_021162.1_38167980 | Ca_kabuli_chr03    | 38167980                       | [T/A]       | 1067294098                                 |
| Ca_Kabuli_NC_021162.1_38169101 | Ca_kabuli_chr03    | 38169101                       | [A/G]       | 1067294099                                 |
| Ca_Kabuli_NC_021162.1_38169102 | Ca_kabuli_chr03    | 38169102                       | [T/G]       | 1067294100                                 |
| Ca_Kabuli_NC_021162.1_38171434 | Ca_kabuli_chr03    | 38171434                       | [A/G]       | 1067294101                                 |
| Ca_Kabuli_NC_021162.1_38171484 | Ca_kabuli_chr03    | 38171484                       | [T/C]       | 1067294102                                 |
| Ca_Kabuli_NC_021162.1_38171485 | Ca_kabuli_chr03    | 38171485                       | [A/C]       | 1067294103                                 |
| Ca_Kabuli_NC_021162.1_38171486 | Ca_kabuli_chr03    | 38171486                       | [G/A]       | 1067294104                                 |

| <b>SNP IDs</b>                 | <b>Chromosomes</b> | <b>Physical positions (bp)</b> | <b>SNPs</b> | <b>NCBI SNPdb accession IDs (NCBI_ss#)</b> |
|--------------------------------|--------------------|--------------------------------|-------------|--------------------------------------------|
| Ca_Kabuli_NC_021162.1_38171987 | Ca_kabuli_chr03    | 38171987                       | [C/A]       | 1067294105                                 |
| Ca_Kabuli_NC_021162.1_38200748 | Ca_kabuli_chr03    | 38200748                       | [T/G]       | 1067294106                                 |
| Ca_Kabuli_NC_021162.1_38202223 | Ca_kabuli_chr03    | 38202223                       | [T/C]       | 1067294107                                 |
| Ca_Kabuli_NC_021162.1_38205470 | Ca_kabuli_chr03    | 38205470                       | [A/G]       | 1067294108                                 |
| Ca_Kabuli_NC_021162.1_38205481 | Ca_kabuli_chr03    | 38205481                       | [A/T]       | 1067294109                                 |
| Ca_Kabuli_NC_021162.1_38205491 | Ca_kabuli_chr03    | 38205491                       | [C/A]       | 1067294110                                 |
| Ca_Kabuli_NC_021162.1_38205503 | Ca_kabuli_chr03    | 38205503                       | [G/C]       | 1067294111                                 |
| Ca_Kabuli_NC_021162.1_38211280 | Ca_kabuli_chr03    | 38211280                       | [T/C]       | 1067294112                                 |
| Ca_Kabuli_NC_021162.1_38216263 | Ca_kabuli_chr03    | 38216263                       | [A/T]       | 1067294113                                 |
| Ca_Kabuli_NC_021162.1_38220857 | Ca_kabuli_chr03    | 38220857                       | [T/C]       | 1067294114                                 |
| Ca_Kabuli_NC_021162.1_38220882 | Ca_kabuli_chr03    | 38220882                       | [T/G]       | 1067294115                                 |
| Ca_Kabuli_NC_021162.1_38220946 | Ca_kabuli_chr03    | 38220946                       | [T/G]       | 1067294116                                 |
| Ca_Kabuli_NC_021162.1_38220958 | Ca_kabuli_chr03    | 38220958                       | [A/G]       | 1067294117                                 |
| Ca_Kabuli_NC_021162.1_38220982 | Ca_kabuli_chr03    | 38220982                       | [T/G]       | 1067294118                                 |
| Ca_Kabuli_NC_021162.1_38222733 | Ca_kabuli_chr03    | 38222733                       | [C/G]       | 1067294119                                 |
| Ca_Kabuli_NC_021162.1_38222747 | Ca_kabuli_chr03    | 38222747                       | [G/A]       | 1067294120                                 |
| Ca_Kabuli_NC_021162.1_38237628 | Ca_kabuli_chr03    | 38237628                       | [A/G]       | 1067294121                                 |
| Ca_Kabuli_NC_021162.1_38290472 | Ca_kabuli_chr03    | 38290472                       | [T/C]       | 1067294122                                 |
| Ca_Kabuli_NC_021162.1_38294310 | Ca_kabuli_chr03    | 38294310                       | [A/G]       | 1067294123                                 |
| Ca_Kabuli_NC_021162.1_38315599 | Ca_kabuli_chr03    | 38315599                       | [A/C]       | 1067294124                                 |
| Ca_Kabuli_NC_021162.1_38379763 | Ca_kabuli_chr03    | 38379763                       | [A/C]       | 1067294125                                 |
| Ca_Kabuli_NC_021162.1_38401004 | Ca_kabuli_chr03    | 38401004                       | [A/G]       | 1067294126                                 |
| Ca_Kabuli_NC_021162.1_38423974 | Ca_kabuli_chr03    | 38423974                       | [T/C]       | 1067294127                                 |
| Ca_Kabuli_NC_021162.1_38423983 | Ca_kabuli_chr03    | 38423983                       | [A/C]       | 1067294128                                 |
| Ca_Kabuli_NC_021162.1_38424010 | Ca_kabuli_chr03    | 38424010                       | [T/C]       | 1067294129                                 |
| Ca_Kabuli_NC_021162.1_38449908 | Ca_kabuli_chr03    | 38449908                       | [A/G]       | 1067294130                                 |
| Ca_Kabuli_NC_021162.1_38452070 | Ca_kabuli_chr03    | 38452070                       | [A/C]       | 1067294131                                 |
| Ca_Kabuli_NC_021162.1_38460864 | Ca_kabuli_chr03    | 38460864                       | [T/C]       | 1067294132                                 |
| Ca_Kabuli_NC_021162.1_38465347 | Ca_kabuli_chr03    | 38465347                       | [A/T]       | 1067294133                                 |
| Ca_Kabuli_NC_021162.1_38496218 | Ca_kabuli_chr03    | 38496218                       | [A/G]       | 1067294134                                 |
| Ca_Kabuli_NC_021162.1_38496232 | Ca_kabuli_chr03    | 38496232                       | [T/G]       | 1067294135                                 |
| Ca_Kabuli_NC_021162.1_38496235 | Ca_kabuli_chr03    | 38496235                       | [T/A]       | 1067294136                                 |
| Ca_Kabuli_NC_021162.1_38508707 | Ca_kabuli_chr03    | 38508707                       | [T/C]       | 1067294137                                 |
| Ca_Kabuli_NC_021162.1_38508723 | Ca_kabuli_chr03    | 38508723                       | [A/C]       | 1067294138                                 |

| <b>SNP IDs</b>                 | <b>Chromosomes</b> | <b>Physical positions (bp)</b> | <b>SNPs</b> | <b>NCBI SNPdb accession IDs (NCBI_ss#)</b> |
|--------------------------------|--------------------|--------------------------------|-------------|--------------------------------------------|
| Ca_Kabuli_NC_021162.1_38511390 | Ca_kabuli_chr03    | 38511390                       | [T/C]       | 1067294139                                 |
| Ca_Kabuli_NC_021162.1_38511392 | Ca_kabuli_chr03    | 38511392                       | [A/G]       | 1067294140                                 |
| Ca_Kabuli_NC_021162.1_38539721 | Ca_kabuli_chr03    | 38539721                       | [T/G]       | 1067294141                                 |
| Ca_Kabuli_NC_021162.1_38572158 | Ca_kabuli_chr03    | 38572158                       | [T/C]       | 1067294142                                 |
| Ca_Kabuli_NC_021162.1_38592068 | Ca_kabuli_chr03    | 38592068                       | [T/G]       | 1067294143                                 |
| Ca_Kabuli_NC_021162.1_38592071 | Ca_kabuli_chr03    | 38592071                       | [A/G]       | 1067294144                                 |
| Ca_Kabuli_NC_021162.1_38604320 | Ca_kabuli_chr03    | 38604320                       | [T/C]       | 1067294145                                 |
| Ca_Kabuli_NC_021162.1_38624786 | Ca_kabuli_chr03    | 38624786                       | [C/T]       | 1067294146                                 |
| Ca_Kabuli_NC_021162.1_38624799 | Ca_kabuli_chr03    | 38624799                       | [T/G]       | 1067294147                                 |
| Ca_Kabuli_NC_021162.1_38624802 | Ca_kabuli_chr03    | 38624802                       | [G/T]       | 1067294148                                 |
| Ca_Kabuli_NC_021162.1_38624805 | Ca_kabuli_chr03    | 38624805                       | [T/A]       | 1067294149                                 |
| Ca_Kabuli_NC_021162.1_38629643 | Ca_kabuli_chr03    | 38629643                       | [G/A]       | 1067294150                                 |
| Ca_Kabuli_NC_021162.1_38702928 | Ca_kabuli_chr03    | 38702928                       | [A/T]       | 1067294151                                 |
| Ca_Kabuli_NC_021162.1_38731433 | Ca_kabuli_chr03    | 38731433                       | [T/C]       | 1067294152                                 |
| Ca_Kabuli_NC_021162.1_38764360 | Ca_kabuli_chr03    | 38764360                       | [A/C]       | 1067294153                                 |
| Ca_Kabuli_NC_021162.1_38764380 | Ca_kabuli_chr03    | 38764380                       | [T/C]       | 1067294154                                 |
| Ca_Kabuli_NC_021162.1_38764384 | Ca_kabuli_chr03    | 38764384                       | [T/C]       | 1067294155                                 |
| Ca_Kabuli_NC_021162.1_38766264 | Ca_kabuli_chr03    | 38766264                       | [A/G]       | 1067294156                                 |
| Ca_Kabuli_NC_021162.1_38766265 | Ca_kabuli_chr03    | 38766265                       | [G/A]       | 1067294157                                 |
| Ca_Kabuli_NC_021162.1_38772170 | Ca_kabuli_chr03    | 38772170                       | [A/C]       | 1067294158                                 |
| Ca_Kabuli_NC_021162.1_38772184 | Ca_kabuli_chr03    | 38772184                       | [A/G]       | 1067294159                                 |
| Ca_Kabuli_NC_021162.1_38772193 | Ca_kabuli_chr03    | 38772193                       | [T/C]       | 1067294160                                 |
| Ca_Kabuli_NC_021162.1_38772196 | Ca_kabuli_chr03    | 38772196                       | [T/C]       | 1067294161                                 |
| Ca_Kabuli_NC_021162.1_38772204 | Ca_kabuli_chr03    | 38772204                       | [T/G]       | 1067294162                                 |
| Ca_Kabuli_NC_021162.1_38785851 | Ca_kabuli_chr03    | 38785851                       | [T/G]       | 1067294163                                 |
| Ca_Kabuli_NC_021162.1_38790727 | Ca_kabuli_chr03    | 38790727                       | [T/C]       | 1067294164                                 |
| Ca_Kabuli_NC_021162.1_38790740 | Ca_kabuli_chr03    | 38790740                       | [A/G]       | 1067294165                                 |
| Ca_Kabuli_NC_021162.1_38793194 | Ca_kabuli_chr03    | 38793194                       | [T/C]       | 1067294166                                 |
| Ca_Kabuli_NC_021162.1_38809117 | Ca_kabuli_chr03    | 38809117                       | [T/G]       | 1067294167                                 |
| Ca_Kabuli_NC_021162.1_38809122 | Ca_kabuli_chr03    | 38809122                       | [T/G]       | 1067294168                                 |
| Ca_Kabuli_NC_021162.1_38818172 | Ca_kabuli_chr03    | 38818172                       | [T/G]       | 1067294169                                 |
| Ca_Kabuli_NC_021162.1_38818290 | Ca_kabuli_chr03    | 38818290                       | [A/C]       | 1067294170                                 |
| Ca_Kabuli_NC_021162.1_38818305 | Ca_kabuli_chr03    | 38818305                       | [T/G]       | 1067294171                                 |
| Ca_Kabuli_NC_021162.1_38822052 | Ca_kabuli_chr03    | 38822052                       | [T/A]       | 1067294172                                 |

| <b>SNP IDs</b>                 | <b>Chromosomes</b> | <b>Physical positions (bp)</b> | <b>SNPs</b> | <b>NCBI SNPdb accession IDs (NCBI_ss#)</b> |
|--------------------------------|--------------------|--------------------------------|-------------|--------------------------------------------|
| Ca_Kabuli_NC_021162.1_38822054 | Ca_kabuli_chr03    | 38822054                       | [T/A]       | 1067294173                                 |
| Ca_Kabuli_NC_021162.1_38828026 | Ca_kabuli_chr03    | 38828026                       | [T/G]       | 1067294174                                 |
| Ca_Kabuli_NC_021162.1_38828029 | Ca_kabuli_chr03    | 38828029                       | [T/C]       | 1067294175                                 |
| Ca_Kabuli_NC_021162.1_38878722 | Ca_kabuli_chr03    | 38878722                       | [A/T]       | 1067294176                                 |
| Ca_Kabuli_NC_021162.1_38878767 | Ca_kabuli_chr03    | 38878767                       | [A/G]       | 1067294177                                 |
| Ca_Kabuli_NC_021162.1_38878783 | Ca_kabuli_chr03    | 38878783                       | [T/A]       | 1067294178                                 |
| Ca_Kabuli_NC_021162.1_38878858 | Ca_kabuli_chr03    | 38878858                       | [T/G]       | 1067294179                                 |
| Ca_Kabuli_NC_021162.1_38888421 | Ca_kabuli_chr03    | 38888421                       | [A/G]       | 1067294180                                 |
| Ca_Kabuli_NC_021162.1_38895997 | Ca_kabuli_chr03    | 38895997                       | [T/C]       | 1067294181                                 |
| Ca_Kabuli_NC_021162.1_38896031 | Ca_kabuli_chr03    | 38896031                       | [T/G]       | 1067294182                                 |
| Ca_Kabuli_NC_021162.1_38913449 | Ca_kabuli_chr03    | 38913449                       | [C/T]       | 1067294183                                 |
| Ca_Kabuli_NC_021162.1_38923357 | Ca_kabuli_chr03    | 38923357                       | [A/G]       | 1067294184                                 |
| Ca_Kabuli_NC_021162.1_38923382 | Ca_kabuli_chr03    | 38923382                       | [T/C]       | 1067294185                                 |
| Ca_Kabuli_NC_021162.1_38923390 | Ca_kabuli_chr03    | 38923390                       | [A/G]       | 1067294186                                 |
| Ca_Kabuli_NC_021162.1_38954393 | Ca_kabuli_chr03    | 38954393                       | [T/G]       | 1067294187                                 |
| Ca_Kabuli_NC_021162.1_38964923 | Ca_kabuli_chr03    | 38964923                       | [T/A]       | 1067294188                                 |
| Ca_Kabuli_NC_021162.1_38964964 | Ca_kabuli_chr03    | 38964964                       | [A/G]       | 1067294189                                 |
| Ca_Kabuli_NC_021162.1_38969280 | Ca_kabuli_chr03    | 38969280                       | [T/C]       | 1067294190                                 |
| Ca_Kabuli_NC_021162.1_38987817 | Ca_kabuli_chr03    | 38987817                       | [T/G]       | 1067294191                                 |
| Ca_Kabuli_NC_021162.1_38987846 | Ca_kabuli_chr03    | 38987846                       | [A/C]       | 1067294192                                 |
| Ca_Kabuli_NC_021162.1_38987868 | Ca_kabuli_chr03    | 38987868                       | [A/C]       | 1067294193                                 |
| Ca_Kabuli_NC_021162.1_38987909 | Ca_kabuli_chr03    | 38987909                       | [A/T]       | 1067294194                                 |
| Ca_Kabuli_NC_021162.1_38987921 | Ca_kabuli_chr03    | 38987921                       | [G/C]       | 1067294195                                 |
| Ca_Kabuli_NC_021162.1_39084932 | Ca_kabuli_chr03    | 39084932                       | [A/C]       | 1067294196                                 |
| Ca_Kabuli_NC_021162.1_39084943 | Ca_kabuli_chr03    | 39084943                       | [T/A]       | 1067294197                                 |
| Ca_Kabuli_NC_021162.1_39085112 | Ca_kabuli_chr03    | 39085112                       | [A/G]       | 1067294198                                 |
| Ca_Kabuli_NC_021162.1_39085156 | Ca_kabuli_chr03    | 39085156                       | [T/G]       | 1067294199                                 |
| Ca_Kabuli_NC_021162.1_39085188 | Ca_kabuli_chr03    | 39085188                       | [T/G]       | 1067294200                                 |
| Ca_Kabuli_NC_021162.1_39093228 | Ca_kabuli_chr03    | 39093228                       | [A/T]       | 1067294201                                 |
| Ca_Kabuli_NC_021162.1_39093229 | Ca_kabuli_chr03    | 39093229                       | [A/T]       | 1067294202                                 |
| Ca_Kabuli_NC_021162.1_39115312 | Ca_kabuli_chr03    | 39115312                       | [A/C]       | 1067294203                                 |
| Ca_Kabuli_NC_021162.1_39118486 | Ca_kabuli_chr03    | 39118486                       | [T/C]       | 1067294204                                 |
| Ca_Kabuli_NC_021162.1_39118505 | Ca_kabuli_chr03    | 39118505                       | [A/C]       | 1067294205                                 |
| Ca_Kabuli_NC_021162.1_39118508 | Ca_kabuli_chr03    | 39118508                       | [T/C]       | 1067294206                                 |



| <b>SNP IDs</b>                 | <b>Chromosomes</b> | <b>Physical positions (bp)</b> | <b>SNPs</b> | <b>NCBI SNPdb accession IDs (NCBI_ss#)</b> |
|--------------------------------|--------------------|--------------------------------|-------------|--------------------------------------------|
| Ca_Kabuli_NC_021162.1_39120063 | Ca_kabuli_chr03    | 39120063                       | [T/C]       | 1067294207                                 |
| Ca_Kabuli_NC_021162.1_39121150 | Ca_kabuli_chr03    | 39121150                       | [A/C]       | 1067294208                                 |
| Ca_Kabuli_NC_021162.1_39124757 | Ca_kabuli_chr03    | 39124757                       | [A/C]       | 1067294209                                 |
| Ca_Kabuli_NC_021162.1_39124767 | Ca_kabuli_chr03    | 39124767                       | [A/C]       | 1067294210                                 |
| Ca_Kabuli_NC_021162.1_39124782 | Ca_kabuli_chr03    | 39124782                       | [A/T]       | 1067294211                                 |
| Ca_Kabuli_NC_021162.1_39152610 | Ca_kabuli_chr03    | 39152610                       | [T/C]       | 1067294212                                 |
| Ca_Kabuli_NC_021162.1_39152618 | Ca_kabuli_chr03    | 39152618                       | [T/C]       | 1067294213                                 |
| Ca_Kabuli_NC_021162.1_39202533 | Ca_kabuli_chr03    | 39202533                       | [A/G]       | 1067294214                                 |
| Ca_Kabuli_NC_021162.1_39207111 | Ca_kabuli_chr03    | 39207111                       | [C/T]       | 1067294215                                 |
| Ca_Kabuli_NC_021162.1_39207119 | Ca_kabuli_chr03    | 39207119                       | [A/T]       | 1067294216                                 |
| Ca_Kabuli_NC_021162.1_39236691 | Ca_kabuli_chr03    | 39236691                       | [A/G]       | 1067294217                                 |
| Ca_Kabuli_NC_021162.1_39236734 | Ca_kabuli_chr03    | 39236734                       | [T/A]       | 1067294218                                 |
| Ca_Kabuli_NC_021162.1_39236796 | Ca_kabuli_chr03    | 39236796                       | [A/G]       | 1067294219                                 |
| Ca_Kabuli_NC_021162.1_39236813 | Ca_kabuli_chr03    | 39236813                       | [A/G]       | 1067294220                                 |
| Ca_Kabuli_NC_021162.1_39237231 | Ca_kabuli_chr03    | 39237231                       | [A/G]       | 1067294221                                 |
| Ca_Kabuli_NC_021162.1_39254527 | Ca_kabuli_chr03    | 39254527                       | [T/G]       | 1067294222                                 |
| Ca_Kabuli_NC_021162.1_39255720 | Ca_kabuli_chr03    | 39255720                       | [T/A]       | 1067294223                                 |
| Ca_Kabuli_NC_021162.1_39255797 | Ca_kabuli_chr03    | 39255797                       | [T/C]       | 1067294224                                 |
| Ca_Kabuli_NC_021162.1_39257226 | Ca_kabuli_chr03    | 39257226                       | [A/T]       | 1067294225                                 |
| Ca_Kabuli_NC_021162.1_39289349 | Ca_kabuli_chr03    | 39289349                       | [T/A]       | 1067294226                                 |
| Ca_Kabuli_NC_021162.1_39289350 | Ca_kabuli_chr03    | 39289350                       | [A/T]       | 1067294227                                 |
| Ca_Kabuli_NC_021162.1_39289463 | Ca_kabuli_chr03    | 39289463                       | [T/G]       | 1067294228                                 |
| Ca_Kabuli_NC_021162.1_39289489 | Ca_kabuli_chr03    | 39289489                       | [T/G]       | 1067294229                                 |
| Ca_Kabuli_NC_021162.1_39289511 | Ca_kabuli_chr03    | 39289511                       | [A/G]       | 1067294230                                 |
| Ca_Kabuli_NC_021162.1_39289940 | Ca_kabuli_chr03    | 39289940                       | [T/C]       | 1067294231                                 |
| Ca_Kabuli_NC_021162.1_39323757 | Ca_kabuli_chr03    | 39323757                       | [T/C]       | 1067294232                                 |
| Ca_Kabuli_NC_021162.1_39323759 | Ca_kabuli_chr03    | 39323759                       | [T/C]       | 1067294233                                 |
| Ca_Kabuli_NC_021162.1_39323768 | Ca_kabuli_chr03    | 39323768                       | [T/C]       | 1067294234                                 |
| Ca_Kabuli_NC_021162.1_39323772 | Ca_kabuli_chr03    | 39323772                       | [A/G]       | 1067294235                                 |
| Ca_Kabuli_NC_021162.1_39323813 | Ca_kabuli_chr03    | 39323813                       | [T/A]       | 1067294236                                 |
| Ca_Kabuli_NC_021162.1_39452574 | Ca_kabuli_chr03    | 39452574                       | [A/C]       | 1067294237                                 |
| Ca_Kabuli_NC_021162.1_39486151 | Ca_kabuli_chr03    | 39486151                       | [A/C]       | 1067294238                                 |
| Ca_Kabuli_NC_021162.1_39491576 | Ca_kabuli_chr03    | 39491576                       | [T/G]       | 1067294239                                 |
| Ca_Kabuli_NC_021162.1_39491577 | Ca_kabuli_chr03    | 39491577                       | [A/T]       | 1067294240                                 |

| <b>SNP IDs</b>                 | <b>Chromosomes</b> | <b>Physical positions (bp)</b> | <b>SNPs</b> | <b>NCBI SNPdb accession IDs (NCBI_ss#)</b> |
|--------------------------------|--------------------|--------------------------------|-------------|--------------------------------------------|
| Ca_Kabuli_NC_021162.1_39491592 | Ca_kabuli_chr03    | 39491592                       | [T/C]       | 1067294241                                 |
| Ca_Kabuli_NC_021162.1_39491595 | Ca_kabuli_chr03    | 39491595                       | [A/C]       | 1067294242                                 |
| Ca_Kabuli_NC_021162.1_39504201 | Ca_kabuli_chr03    | 39504201                       | [T/C]       | 1067294243                                 |
| Ca_Kabuli_NC_021162.1_39504225 | Ca_kabuli_chr03    | 39504225                       | [C/T]       | 1067294244                                 |
| Ca_Kabuli_NC_021162.1_39504237 | Ca_kabuli_chr03    | 39504237                       | [C/A]       | 1067294245                                 |
| Ca_Kabuli_NC_021162.1_39504242 | Ca_kabuli_chr03    | 39504242                       | [A/G]       | 1067294246                                 |
| Ca_Kabuli_NC_021162.1_39519534 | Ca_kabuli_chr03    | 39519534                       | [T/G]       | 1067294247                                 |
| Ca_Kabuli_NC_021162.1_39546930 | Ca_kabuli_chr03    | 39546930                       | [T/G]       | 1067294248                                 |
| Ca_Kabuli_NC_021162.1_39590693 | Ca_kabuli_chr03    | 39590693                       | [A/C]       | 1067294249                                 |
| Ca_Kabuli_NC_021162.1_39592298 | Ca_kabuli_chr03    | 39592298                       | [A/C]       | 1067294250                                 |
| Ca_Kabuli_NC_021162.1_39611444 | Ca_kabuli_chr03    | 39611444                       | [A/G]       | 1067294251                                 |
| Ca_Kabuli_NC_021162.1_39611446 | Ca_kabuli_chr03    | 39611446                       | [T/A]       | 1067294252                                 |
| Ca_Kabuli_NC_021162.1_39611461 | Ca_kabuli_chr03    | 39611461                       | [A/G]       | 1067294253                                 |
| Ca_Kabuli_NC_021162.1_39611468 | Ca_kabuli_chr03    | 39611468                       | [T/C]       | 1067294254                                 |
| Ca_Kabuli_NC_021162.1_39612358 | Ca_kabuli_chr03    | 39612358                       | [A/G]       | 1067294255                                 |
| Ca_Kabuli_NC_021162.1_39612568 | Ca_kabuli_chr03    | 39612568                       | [A/T]       | 1067294256                                 |
| Ca_Kabuli_NC_021162.1_39628916 | Ca_kabuli_chr03    | 39628916                       | [G/A]       | 1067294257                                 |
| Ca_Kabuli_NC_021162.1_39642781 | Ca_kabuli_chr03    | 39642781                       | [A/T]       | 1067294258                                 |
| Ca_Kabuli_NC_021162.1_39642782 | Ca_kabuli_chr03    | 39642782                       | [T/C]       | 1067294259                                 |
| Ca_Kabuli_NC_021162.1_39642783 | Ca_kabuli_chr03    | 39642783                       | [G/T]       | 1067294260                                 |
| Ca_Kabuli_NC_021162.1_39642805 | Ca_kabuli_chr03    | 39642805                       | [A/G]       | 1067294261                                 |
| Ca_Kabuli_NC_021162.1_39644723 | Ca_kabuli_chr03    | 39644723                       | [A/C]       | 1067294262                                 |
| Ca_Kabuli_NC_021162.1_39701359 | Ca_kabuli_chr03    | 39701359                       | [T/C]       | 1067294263                                 |
| Ca_Kabuli_NC_021162.1_39701373 | Ca_kabuli_chr03    | 39701373                       | [T/G]       | 1067294264                                 |
| Ca_Kabuli_NC_021162.1_39701412 | Ca_kabuli_chr03    | 39701412                       | [A/C]       | 1067294265                                 |
| Ca_Kabuli_NC_021162.1_39701553 | Ca_kabuli_chr03    | 39701553                       | [A/C]       | 1067294266                                 |
| Ca_Kabuli_NC_021162.1_39720656 | Ca_kabuli_chr03    | 39720656                       | [T/G]       | 1067294267                                 |
| Ca_Kabuli_NC_021162.1_39720772 | Ca_kabuli_chr03    | 39720772                       | [T/G]       | 1067294268                                 |
| Ca_Kabuli_NC_021162.1_39722359 | Ca_kabuli_chr03    | 39722359                       | [T/G]       | 1067294269                                 |
| Ca_Kabuli_NC_021162.1_39787520 | Ca_kabuli_chr03    | 39787520                       | [A/T]       | 1067294270                                 |
| Ca_Kabuli_NC_021162.1_39787759 | Ca_kabuli_chr03    | 39787759                       | [A/C]       | 1067294271                                 |
| Ca_Kabuli_NC_021162.1_39793492 | Ca_kabuli_chr03    | 39793492                       | [A/C]       | 1067294272                                 |
| Ca_Kabuli_NC_021162.1_39793532 | Ca_kabuli_chr03    | 39793532                       | [A/T]       | 1067294273                                 |
| Ca_Kabuli_NC_021162.1_39793549 | Ca_kabuli_chr03    | 39793549                       | [T/C]       | 1067294274                                 |

| <b>SNP IDs</b>                 | <b>Chromosomes</b> | <b>Physical positions (bp)</b> | <b>SNPs</b> | <b>NCBI SNPdb accession IDs (NCBI_ss#)</b> |
|--------------------------------|--------------------|--------------------------------|-------------|--------------------------------------------|
| Ca_Kabuli_NC_021162.1_39817064 | Ca_kabuli_chr03    | 39817064                       | [T/A]       | 1067294275                                 |
| Ca_Kabuli_NC_021162.1_39817996 | Ca_kabuli_chr03    | 39817996                       | [T/C]       | 1067294276                                 |
| Ca_Kabuli_NC_021162.1_39839763 | Ca_kabuli_chr03    | 39839763                       | [T/G]       | 1067294277                                 |
| Ca_Kabuli_NC_021162.1_39839975 | Ca_kabuli_chr03    | 39839975                       | [C/A]       | 1067294278                                 |
| Ca_Kabuli_NC_021162.1_39839979 | Ca_kabuli_chr03    | 39839979                       | [G/A]       | 1067294279                                 |
| Ca_Kabuli_NC_021162.1_39839981 | Ca_kabuli_chr03    | 39839981                       | [G/T]       | 1067294280                                 |
| Ca_Kabuli_NC_021162.1_39839997 | Ca_kabuli_chr03    | 39839997                       | [G/T]       | 1067294281                                 |
| Ca_Kabuli_NC_021162.1_39840000 | Ca_kabuli_chr03    | 39840000                       | [C/T]       | 1067294282                                 |
| Ca_Kabuli_NC_021162.1_39871160 | Ca_kabuli_chr03    | 39871160                       | [A/G]       | 1067294283                                 |
| Ca_Kabuli_NC_021162.1_39871167 | Ca_kabuli_chr03    | 39871167                       | [T/G]       | 1067294284                                 |
| Ca_Kabuli_NC_021162.1_39871219 | Ca_kabuli_chr03    | 39871219                       | [A/G]       | 1067294285                                 |
| Ca_Kabuli_NC_021162.1_39871226 | Ca_kabuli_chr03    | 39871226                       | [A/C]       | 1067294286                                 |
| Ca_Kabuli_NC_021162.1_39876167 | Ca_kabuli_chr03    | 39876167                       | [A/C]       | 1067294287                                 |
| Ca_Kabuli_NC_021162.1_39876187 | Ca_kabuli_chr03    | 39876187                       | [A/C]       | 1067294288                                 |
| Ca_Kabuli_NC_021162.1_39883317 | Ca_kabuli_chr03    | 39883317                       | [T/C]       | 1067294289                                 |
| Ca_Kabuli_NC_021162.1_39891064 | Ca_kabuli_chr03    | 39891064                       | [A/G]       | 1067294290                                 |
| Ca_Kabuli_NC_021162.1_39896359 | Ca_kabuli_chr03    | 39896359                       | [A/G]       | 1067294291                                 |
| Ca_Kabuli_NC_021162.1_39896366 | Ca_kabuli_chr03    | 39896366                       | [A/C]       | 1067294292                                 |
| Ca_Kabuli_NC_021162.1_39896379 | Ca_kabuli_chr03    | 39896379                       | [A/G]       | 1067294293                                 |
| Ca_Kabuli_NC_021162.1_39896390 | Ca_kabuli_chr03    | 39896390                       | [T/G]       | 1067294294                                 |
| Ca_Kabuli_NC_021162.1_39899805 | Ca_kabuli_chr03    | 39899805                       | [T/C]       | 1067294295                                 |
| Ca_Kabuli_NC_021162.1_39914426 | Ca_kabuli_chr03    | 39914426                       | [T/C]       | 1067294296                                 |
| Ca_Kabuli_NC_021162.1_39922275 | Ca_kabuli_chr03    | 39922275                       | [T/G]       | 1067294297                                 |
| Ca_Kabuli_NC_021162.1_39922314 | Ca_kabuli_chr03    | 39922314                       | [T/C]       | 1067294298                                 |
| Ca_Kabuli_NC_021162.1_39923370 | Ca_kabuli_chr03    | 39923370                       | [T/C]       | 1067294299                                 |
| Ca_Kabuli_NC_021162.1_39955553 | Ca_kabuli_chr03    | 39955553                       | [T/G]       | 1067294300                                 |
| Ca_Kabuli_NC_021162.1_39955735 | Ca_kabuli_chr03    | 39955735                       | [A/G]       | 1067294301                                 |
| Ca_Kabuli_NC_021162.1_39963553 | Ca_kabuli_chr03    | 39963553                       | [A/G]       | 1067294302                                 |
| Ca_Kabuli_NC_021163.1_167225   | Ca_kabuli_chr04    | 167225                         | [A/C]       | 1067294303                                 |
| Ca_Kabuli_NC_021163.1_167229   | Ca_kabuli_chr04    | 167229                         | [T/G]       | 1067294304                                 |
| Ca_Kabuli_NC_021163.1_394659   | Ca_kabuli_chr04    | 394659                         | [T/G]       | 1067294305                                 |
| Ca_Kabuli_NC_021163.1_394676   | Ca_kabuli_chr04    | 394676                         | [A/C]       | 1067294306                                 |
| Ca_Kabuli_NC_021163.1_394681   | Ca_kabuli_chr04    | 394681                         | [A/T]       | 1067294307                                 |
| Ca_Kabuli_NC_021163.1_394687   | Ca_kabuli_chr04    | 394687                         | [A/C]       | 1067294308                                 |

| <b>SNP IDs</b>               | <b>Chromosomes</b> | <b>Physical positions (bp)</b> | <b>SNPs</b> | <b>NCBI SNPdb accession IDs (NCBI_ss#)</b> |
|------------------------------|--------------------|--------------------------------|-------------|--------------------------------------------|
| Ca_Kabuli_NC_021163.1_394776 | Ca_kabuli_chr04    | 394776                         | [A/T]       | 1067294309                                 |
| Ca_Kabuli_NC_021163.1_402558 | Ca_kabuli_chr04    | 402558                         | [T/A]       | 1067294310                                 |
| Ca_Kabuli_NC_021163.1_402584 | Ca_kabuli_chr04    | 402584                         | [A/C]       | 1067294311                                 |
| Ca_Kabuli_NC_021163.1_411969 | Ca_kabuli_chr04    | 411969                         | [A/G]       | 1067294312                                 |
| Ca_Kabuli_NC_021163.1_455240 | Ca_kabuli_chr04    | 455240                         | [A/G]       | 1067294313                                 |
| Ca_Kabuli_NC_021163.1_455248 | Ca_kabuli_chr04    | 455248                         | [T/C]       | 1067294314                                 |
| Ca_Kabuli_NC_021163.1_479818 | Ca_kabuli_chr04    | 479818                         | [A/C]       | 1067294315                                 |
| Ca_Kabuli_NC_021163.1_479845 | Ca_kabuli_chr04    | 479845                         | [A/T]       | 1067294316                                 |
| Ca_Kabuli_NC_021163.1_479908 | Ca_kabuli_chr04    | 479908                         | [A/C]       | 1067294317                                 |
| Ca_Kabuli_NC_021163.1_479914 | Ca_kabuli_chr04    | 479914                         | [A/C]       | 1067294318                                 |
| Ca_Kabuli_NC_021163.1_479971 | Ca_kabuli_chr04    | 479971                         | [A/G]       | 1067294319                                 |
| Ca_Kabuli_NC_021163.1_479974 | Ca_kabuli_chr04    | 479974                         | [A/T]       | 1067294320                                 |
| Ca_Kabuli_NC_021163.1_479979 | Ca_kabuli_chr04    | 479979                         | [T/C]       | 1067294321                                 |
| Ca_Kabuli_NC_021163.1_480004 | Ca_kabuli_chr04    | 480004                         | [A/C]       | 1067294322                                 |
| Ca_Kabuli_NC_021163.1_480031 | Ca_kabuli_chr04    | 480031                         | [T/C]       | 1067294323                                 |
| Ca_Kabuli_NC_021163.1_480049 | Ca_kabuli_chr04    | 480049                         | [A/C]       | 1067294324                                 |
| Ca_Kabuli_NC_021163.1_480057 | Ca_kabuli_chr04    | 480057                         | [A/C]       | 1067294325                                 |
| Ca_Kabuli_NC_021163.1_480100 | Ca_kabuli_chr04    | 480100                         | [A/C]       | 1067294326                                 |
| Ca_Kabuli_NC_021163.1_480105 | Ca_kabuli_chr04    | 480105                         | [T/C]       | 1067294327                                 |
| Ca_Kabuli_NC_021163.1_480118 | Ca_kabuli_chr04    | 480118                         | [A/C]       | 1067294328                                 |
| Ca_Kabuli_NC_021163.1_480190 | Ca_kabuli_chr04    | 480190                         | [A/G]       | 1067294329                                 |
| Ca_Kabuli_NC_021163.1_480209 | Ca_kabuli_chr04    | 480209                         | [A/G]       | 1067294330                                 |
| Ca_Kabuli_NC_021163.1_480215 | Ca_kabuli_chr04    | 480215                         | [T/C]       | 1067294331                                 |
| Ca_Kabuli_NC_021163.1_480231 | Ca_kabuli_chr04    | 480231                         | [T/C]       | 1067294332                                 |
| Ca_Kabuli_NC_021163.1_480253 | Ca_kabuli_chr04    | 480253                         | [A/C]       | 1067294333                                 |
| Ca_Kabuli_NC_021163.1_485149 | Ca_kabuli_chr04    | 485149                         | [T/G]       | 1067294334                                 |
| Ca_Kabuli_NC_021163.1_488123 | Ca_kabuli_chr04    | 488123                         | [A/C]       | 1067294335                                 |
| Ca_Kabuli_NC_021163.1_504924 | Ca_kabuli_chr04    | 504924                         | [A/G]       | 1067294336                                 |
| Ca_Kabuli_NC_021163.1_590915 | Ca_kabuli_chr04    | 590915                         | [T/G]       | 1067294337                                 |
| Ca_Kabuli_NC_021163.1_595903 | Ca_kabuli_chr04    | 595903                         | [T/C]       | 1067294338                                 |
| Ca_Kabuli_NC_021163.1_595910 | Ca_kabuli_chr04    | 595910                         | [A/G]       | 1067294339                                 |
| Ca_Kabuli_NC_021163.1_615690 | Ca_kabuli_chr04    | 615690                         | [A/C]       | 1067294340                                 |
| Ca_Kabuli_NC_021163.1_615692 | Ca_kabuli_chr04    | 615692                         | [C/A]       | 1067294341                                 |
| Ca_Kabuli_NC_021163.1_615694 | Ca_kabuli_chr04    | 615694                         | [A/G]       | 1067294342                                 |

| <b>SNP IDs</b>               | <b>Chromosomes</b> | <b>Physical positions (bp)</b> | <b>SNPs</b> | <b>NCBI SNPdb accession IDs (NCBI_ss#)</b> |
|------------------------------|--------------------|--------------------------------|-------------|--------------------------------------------|
| Ca_Kabuli_NC_021163.1_615695 | Ca_kabuli_chr04    | 615695                         | [G/T]       | 1067294343                                 |
| Ca_Kabuli_NC_021163.1_615704 | Ca_kabuli_chr04    | 615704                         | [C/T]       | 1067294344                                 |
| Ca_Kabuli_NC_021163.1_615706 | Ca_kabuli_chr04    | 615706                         | [T/G]       | 1067294345                                 |
| Ca_Kabuli_NC_021163.1_615709 | Ca_kabuli_chr04    | 615709                         | [A/C]       | 1067294346                                 |
| Ca_Kabuli_NC_021163.1_646567 | Ca_kabuli_chr04    | 646567                         | [C/T]       | 1067294347                                 |
| Ca_Kabuli_NC_021163.1_659987 | Ca_kabuli_chr04    | 659987                         | [A/C]       | 1067294348                                 |
| Ca_Kabuli_NC_021163.1_660041 | Ca_kabuli_chr04    | 660041                         | [A/C]       | 1067294349                                 |
| Ca_Kabuli_NC_021163.1_660047 | Ca_kabuli_chr04    | 660047                         | [A/G]       | 1067294350                                 |
| Ca_Kabuli_NC_021163.1_660064 | Ca_kabuli_chr04    | 660064                         | [T/C]       | 1067294351                                 |
| Ca_Kabuli_NC_021163.1_660069 | Ca_kabuli_chr04    | 660069                         | [T/A]       | 1067294352                                 |
| Ca_Kabuli_NC_021163.1_677313 | Ca_kabuli_chr04    | 677313                         | [T/C]       | 1067294353                                 |
| Ca_Kabuli_NC_021163.1_709948 | Ca_kabuli_chr04    | 709948                         | [T/G]       | 1067294354                                 |
| Ca_Kabuli_NC_021163.1_746247 | Ca_kabuli_chr04    | 746247                         | [A/C]       | 1067294355                                 |
| Ca_Kabuli_NC_021163.1_746275 | Ca_kabuli_chr04    | 746275                         | [T/C]       | 1067294356                                 |
| Ca_Kabuli_NC_021163.1_746300 | Ca_kabuli_chr04    | 746300                         | [T/A]       | 1067294357                                 |
| Ca_Kabuli_NC_021163.1_746381 | Ca_kabuli_chr04    | 746381                         | [A/C]       | 1067294358                                 |
| Ca_Kabuli_NC_021163.1_749219 | Ca_kabuli_chr04    | 749219                         | [T/C]       | 1067294359                                 |
| Ca_Kabuli_NC_021163.1_767589 | Ca_kabuli_chr04    | 767589                         | [G/T]       | 1067294360                                 |
| Ca_Kabuli_NC_021163.1_767591 | Ca_kabuli_chr04    | 767591                         | [T/C]       | 1067294361                                 |
| Ca_Kabuli_NC_021163.1_767610 | Ca_kabuli_chr04    | 767610                         | [T/C]       | 1067294362                                 |
| Ca_Kabuli_NC_021163.1_770860 | Ca_kabuli_chr04    | 770860                         | [T/C]       | 1067294363                                 |
| Ca_Kabuli_NC_021163.1_790620 | Ca_kabuli_chr04    | 790620                         | [C/A]       | 1067294364                                 |
| Ca_Kabuli_NC_021163.1_790621 | Ca_kabuli_chr04    | 790621                         | [A/G]       | 1067294365                                 |
| Ca_Kabuli_NC_021163.1_825623 | Ca_kabuli_chr04    | 825623                         | [T/G]       | 1067294366                                 |
| Ca_Kabuli_NC_021163.1_825654 | Ca_kabuli_chr04    | 825654                         | [A/G]       | 1067294367                                 |
| Ca_Kabuli_NC_021163.1_825679 | Ca_kabuli_chr04    | 825679                         | [A/G]       | 1067294368                                 |
| Ca_Kabuli_NC_021163.1_827616 | Ca_kabuli_chr04    | 827616                         | [A/G]       | 1067294369                                 |
| Ca_Kabuli_NC_021163.1_827636 | Ca_kabuli_chr04    | 827636                         | [T/C]       | 1067294370                                 |
| Ca_Kabuli_NC_021163.1_827638 | Ca_kabuli_chr04    | 827638                         | [A/G]       | 1067294371                                 |
| Ca_Kabuli_NC_021163.1_839231 | Ca_kabuli_chr04    | 839231                         | [A/C]       | 1067294372                                 |
| Ca_Kabuli_NC_021163.1_839232 | Ca_kabuli_chr04    | 839232                         | [A/G]       | 1067294373                                 |
| Ca_Kabuli_NC_021163.1_848062 | Ca_kabuli_chr04    | 848062                         | [T/C]       | 1067294374                                 |
| Ca_Kabuli_NC_021163.1_848334 | Ca_kabuli_chr04    | 848334                         | [A/G]       | 1067294375                                 |
| Ca_Kabuli_NC_021163.1_868836 | Ca_kabuli_chr04    | 868836                         | [A/G]       | 1067294376                                 |

| <b>SNP IDs</b>                | <b>Chromosomes</b> | <b>Physical positions (bp)</b> | <b>SNPs</b> | <b>NCBI SNPdb accession IDs (NCBI_ss#)</b> |
|-------------------------------|--------------------|--------------------------------|-------------|--------------------------------------------|
| Ca_Kabuli_NC_021163.1_868864  | Ca_kabuli_chr04    | 868864                         | [T/C]       | 1067294377                                 |
| Ca_Kabuli_NC_021163.1_875369  | Ca_kabuli_chr04    | 875369                         | [T/A]       | 1067294378                                 |
| Ca_Kabuli_NC_021163.1_875388  | Ca_kabuli_chr04    | 875388                         | [A/G]       | 1067294379                                 |
| Ca_Kabuli_NC_021163.1_875453  | Ca_kabuli_chr04    | 875453                         | [A/C]       | 1067294380                                 |
| Ca_Kabuli_NC_021163.1_877393  | Ca_kabuli_chr04    | 877393                         | [C/A]       | 1067294381                                 |
| Ca_Kabuli_NC_021163.1_877394  | Ca_kabuli_chr04    | 877394                         | [T/G]       | 1067294382                                 |
| Ca_Kabuli_NC_021163.1_877395  | Ca_kabuli_chr04    | 877395                         | [T/A]       | 1067294383                                 |
| Ca_Kabuli_NC_021163.1_877396  | Ca_kabuli_chr04    | 877396                         | [A/T]       | 1067294384                                 |
| Ca_Kabuli_NC_021163.1_921871  | Ca_kabuli_chr04    | 921871                         | [A/T]       | 1067294385                                 |
| Ca_Kabuli_NC_021163.1_921872  | Ca_kabuli_chr04    | 921872                         | [T/C]       | 1067294386                                 |
| Ca_Kabuli_NC_021163.1_921873  | Ca_kabuli_chr04    | 921873                         | [G/T]       | 1067294387                                 |
| Ca_Kabuli_NC_021163.1_929061  | Ca_kabuli_chr04    | 929061                         | [A/C]       | 1067294388                                 |
| Ca_Kabuli_NC_021163.1_951370  | Ca_kabuli_chr04    | 951370                         | [T/G]       | 1067294389                                 |
| Ca_Kabuli_NC_021163.1_999365  | Ca_kabuli_chr04    | 999365                         | [A/C]       | 1067294390                                 |
| Ca_Kabuli_NC_021163.1_1044930 | Ca_kabuli_chr04    | 1044930                        | [A/C]       | 1067294391                                 |
| Ca_Kabuli_NC_021163.1_1049374 | Ca_kabuli_chr04    | 1049374                        | [T/C]       | 1067294392                                 |
| Ca_Kabuli_NC_021163.1_1049400 | Ca_kabuli_chr04    | 1049400                        | [A/G]       | 1067294393                                 |
| Ca_Kabuli_NC_021163.1_1049406 | Ca_kabuli_chr04    | 1049406                        | [T/C]       | 1067294394                                 |
| Ca_Kabuli_NC_021163.1_1049408 | Ca_kabuli_chr04    | 1049408                        | [T/C]       | 1067294395                                 |
| Ca_Kabuli_NC_021163.1_1049432 | Ca_kabuli_chr04    | 1049432                        | [T/C]       | 1067294396                                 |
| Ca_Kabuli_NC_021163.1_1052600 | Ca_kabuli_chr04    | 1052600                        | [T/C]       | 1067294397                                 |
| Ca_Kabuli_NC_021163.1_1052606 | Ca_kabuli_chr04    | 1052606                        | [T/C]       | 1067294398                                 |
| Ca_Kabuli_NC_021163.1_1052633 | Ca_kabuli_chr04    | 1052633                        | [T/C]       | 1067294399                                 |
| Ca_Kabuli_NC_021163.1_1052642 | Ca_kabuli_chr04    | 1052642                        | [T/G]       | 1067294400                                 |
| Ca_Kabuli_NC_021163.1_1052648 | Ca_kabuli_chr04    | 1052648                        | [A/G]       | 1067294401                                 |
| Ca_Kabuli_NC_021163.1_1149922 | Ca_kabuli_chr04    | 1149922                        | [C/A]       | 1067294402                                 |
| Ca_Kabuli_NC_021163.1_1149924 | Ca_kabuli_chr04    | 1149924                        | [C/A]       | 1067294403                                 |
| Ca_Kabuli_NC_021163.1_1149925 | Ca_kabuli_chr04    | 1149925                        | [C/T]       | 1067294404                                 |
| Ca_Kabuli_NC_021163.1_1189966 | Ca_kabuli_chr04    | 1189966                        | [G/T]       | 1067294405                                 |
| Ca_Kabuli_NC_021163.1_1189985 | Ca_kabuli_chr04    | 1189985                        | [A/C]       | 1067294406                                 |
| Ca_Kabuli_NC_021163.1_1217605 | Ca_kabuli_chr04    | 1217605                        | [A/C]       | 1067294407                                 |
| Ca_Kabuli_NC_021163.1_1220348 | Ca_kabuli_chr04    | 1220348                        | [A/T]       | 1067294408                                 |
| Ca_Kabuli_NC_021163.1_1228284 | Ca_kabuli_chr04    | 1228284                        | [T/C]       | 1067294409                                 |
| Ca_Kabuli_NC_021163.1_1259915 | Ca_kabuli_chr04    | 1259915                        | [T/C]       | 1067294410                                 |

| <b>SNP IDs</b>                | <b>Chromosomes</b> | <b>Physical positions (bp)</b> | <b>SNPs</b> | <b>NCBI SNPdb accession IDs (NCBI_ss#)</b> |
|-------------------------------|--------------------|--------------------------------|-------------|--------------------------------------------|
| Ca_Kabuli_NC_021163.1_1259950 | Ca_kabuli_chr04    | 1259950                        | [A/G]       | 1067294411                                 |
| Ca_Kabuli_NC_021163.1_1373679 | Ca_kabuli_chr04    | 1373679                        | [A/T]       | 1067294412                                 |
| Ca_Kabuli_NC_021163.1_1390447 | Ca_kabuli_chr04    | 1390447                        | [T/A]       | 1067294413                                 |
| Ca_Kabuli_NC_021163.1_1390455 | Ca_kabuli_chr04    | 1390455                        | [A/G]       | 1067294414                                 |
| Ca_Kabuli_NC_021163.1_1390513 | Ca_kabuli_chr04    | 1390513                        | [A/C]       | 1067294415                                 |
| Ca_Kabuli_NC_021163.1_1395074 | Ca_kabuli_chr04    | 1395074                        | [T/G]       | 1067294416                                 |
| Ca_Kabuli_NC_021163.1_1395113 | Ca_kabuli_chr04    | 1395113                        | [A/T]       | 1067294417                                 |
| Ca_Kabuli_NC_021163.1_1399303 | Ca_kabuli_chr04    | 1399303                        | [T/A]       | 1067294418                                 |
| Ca_Kabuli_NC_021163.1_1474768 | Ca_kabuli_chr04    | 1474768                        | [T/C]       | 1067294419                                 |
| Ca_Kabuli_NC_021163.1_1474782 | Ca_kabuli_chr04    | 1474782                        | [A/G]       | 1067294420                                 |
| Ca_Kabuli_NC_021163.1_1474879 | Ca_kabuli_chr04    | 1474879                        | [A/T]       | 1067294421                                 |
| Ca_Kabuli_NC_021163.1_1474916 | Ca_kabuli_chr04    | 1474916                        | [T/C]       | 1067294422                                 |
| Ca_Kabuli_NC_021163.1_1489043 | Ca_kabuli_chr04    | 1489043                        | [G/C]       | 1067294423                                 |
| Ca_Kabuli_NC_021163.1_1493821 | Ca_kabuli_chr04    | 1493821                        | [T/C]       | 1067294424                                 |
| Ca_Kabuli_NC_021163.1_1493835 | Ca_kabuli_chr04    | 1493835                        | [T/G]       | 1067294425                                 |
| Ca_Kabuli_NC_021163.1_1513737 | Ca_kabuli_chr04    | 1513737                        | [A/G]       | 1067294426                                 |
| Ca_Kabuli_NC_021163.1_1526320 | Ca_kabuli_chr04    | 1526320                        | [T/G]       | 1067294427                                 |
| Ca_Kabuli_NC_021163.1_1526322 | Ca_kabuli_chr04    | 1526322                        | [G/A]       | 1067294428                                 |
| Ca_Kabuli_NC_021163.1_1657205 | Ca_kabuli_chr04    | 1657205                        | [A/G]       | 1067294429                                 |
| Ca_Kabuli_NC_021163.1_1657224 | Ca_kabuli_chr04    | 1657224                        | [T/G]       | 1067294430                                 |
| Ca_Kabuli_NC_021163.1_1657254 | Ca_kabuli_chr04    | 1657254                        | [T/C]       | 1067294431                                 |
| Ca_Kabuli_NC_021163.1_1657258 | Ca_kabuli_chr04    | 1657258                        | [A/G]       | 1067294432                                 |
| Ca_Kabuli_NC_021163.1_1687365 | Ca_kabuli_chr04    | 1687365                        | [T/C]       | 1067294433                                 |
| Ca_Kabuli_NC_021163.1_1687391 | Ca_kabuli_chr04    | 1687391                        | [A/G]       | 1067294434                                 |
| Ca_Kabuli_NC_021163.1_1708370 | Ca_kabuli_chr04    | 1708370                        | [T/C]       | 1067294435                                 |
| Ca_Kabuli_NC_021163.1_1710449 | Ca_kabuli_chr04    | 1710449                        | [T/A]       | 1067294436                                 |
| Ca_Kabuli_NC_021163.1_1711775 | Ca_kabuli_chr04    | 1711775                        | [A/G]       | 1067294437                                 |
| Ca_Kabuli_NC_021163.1_1711813 | Ca_kabuli_chr04    | 1711813                        | [T/C]       | 1067294438                                 |
| Ca_Kabuli_NC_021163.1_1711822 | Ca_kabuli_chr04    | 1711822                        | [T/C]       | 1067294439                                 |
| Ca_Kabuli_NC_021163.1_1711838 | Ca_kabuli_chr04    | 1711838                        | [T/C]       | 1067294440                                 |
| Ca_Kabuli_NC_021163.1_1718415 | Ca_kabuli_chr04    | 1718415                        | [T/C]       | 1067294441                                 |
| Ca_Kabuli_NC_021163.1_1718483 | Ca_kabuli_chr04    | 1718483                        | [A/G]       | 1067294442                                 |
| Ca_Kabuli_NC_021163.1_1755063 | Ca_kabuli_chr04    | 1755063                        | [G/A]       | 1067294443                                 |
| Ca_Kabuli_NC_021163.1_1773978 | Ca_kabuli_chr04    | 1773978                        | [A/C]       | 1067294444                                 |

| <b>SNP IDs</b>                | <b>Chromosomes</b> | <b>Physical positions (bp)</b> | <b>SNPs</b> | <b>NCBI SNPdb accession IDs (NCBI_ss#)</b> |
|-------------------------------|--------------------|--------------------------------|-------------|--------------------------------------------|
| Ca_Kabuli_NC_021163.1_1785677 | Ca_kabuli_chr04    | 1785677                        | [A/C]       | 1067294445                                 |
| Ca_Kabuli_NC_021163.1_1813891 | Ca_kabuli_chr04    | 1813891                        | [A/C]       | 1067294446                                 |
| Ca_Kabuli_NC_021163.1_1813907 | Ca_kabuli_chr04    | 1813907                        | [T/C]       | 1067294447                                 |
| Ca_Kabuli_NC_021163.1_1813924 | Ca_kabuli_chr04    | 1813924                        | [T/A]       | 1067294448                                 |
| Ca_Kabuli_NC_021163.1_1816071 | Ca_kabuli_chr04    | 1816071                        | [T/A]       | 1067294449                                 |
| Ca_Kabuli_NC_021163.1_1816718 | Ca_kabuli_chr04    | 1816718                        | [A/G]       | 1067294450                                 |
| Ca_Kabuli_NC_021163.1_1843971 | Ca_kabuli_chr04    | 1843971                        | [T/G]       | 1067294451                                 |
| Ca_Kabuli_NC_021163.1_1988657 | Ca_kabuli_chr04    | 1988657                        | [T/A]       | 1067294452                                 |
| Ca_Kabuli_NC_021163.1_1988667 | Ca_kabuli_chr04    | 1988667                        | [A/T]       | 1067294453                                 |
| Ca_Kabuli_NC_021163.1_1988678 | Ca_kabuli_chr04    | 1988678                        | [T/C]       | 1067294454                                 |
| Ca_Kabuli_NC_021163.1_2015452 | Ca_kabuli_chr04    | 2015452                        | [A/C]       | 1067294455                                 |
| Ca_Kabuli_NC_021163.1_2015473 | Ca_kabuli_chr04    | 2015473                        | [C/T]       | 1067294456                                 |
| Ca_Kabuli_NC_021163.1_2015480 | Ca_kabuli_chr04    | 2015480                        | [A/T]       | 1067294457                                 |
| Ca_Kabuli_NC_021163.1_2015482 | Ca_kabuli_chr04    | 2015482                        | [T/C]       | 1067294458                                 |
| Ca_Kabuli_NC_021163.1_2025198 | Ca_kabuli_chr04    | 2025198                        | [T/G]       | 1067294459                                 |
| Ca_Kabuli_NC_021163.1_2032449 | Ca_kabuli_chr04    | 2032449                        | [G/A]       | 1067294460                                 |
| Ca_Kabuli_NC_021163.1_2032475 | Ca_kabuli_chr04    | 2032475                        | [G/A]       | 1067294461                                 |
| Ca_Kabuli_NC_021163.1_2032480 | Ca_kabuli_chr04    | 2032480                        | [C/T]       | 1067294462                                 |
| Ca_Kabuli_NC_021163.1_2032481 | Ca_kabuli_chr04    | 2032481                        | [T/G]       | 1067294463                                 |
| Ca_Kabuli_NC_021163.1_2032773 | Ca_kabuli_chr04    | 2032773                        | [T/A]       | 1067294464                                 |
| Ca_Kabuli_NC_021163.1_2034266 | Ca_kabuli_chr04    | 2034266                        | [C/T]       | 1067294465                                 |
| Ca_Kabuli_NC_021163.1_2034304 | Ca_kabuli_chr04    | 2034304                        | [G/A]       | 1067294466                                 |
| Ca_Kabuli_NC_021163.1_2034429 | Ca_kabuli_chr04    | 2034429                        | [C/T]       | 1067294467                                 |
| Ca_Kabuli_NC_021163.1_2035841 | Ca_kabuli_chr04    | 2035841                        | [C/T]       | 1067294468                                 |
| Ca_Kabuli_NC_021163.1_2035894 | Ca_kabuli_chr04    | 2035894                        | [C/A]       | 1067294469                                 |
| Ca_Kabuli_NC_021163.1_2051581 | Ca_kabuli_chr04    | 2051581                        | [A/C]       | 1067294470                                 |
| Ca_Kabuli_NC_021163.1_2059046 | Ca_kabuli_chr04    | 2059046                        | [T/A]       | 1067294471                                 |
| Ca_Kabuli_NC_021163.1_2059070 | Ca_kabuli_chr04    | 2059070                        | [T/A]       | 1067294472                                 |
| Ca_Kabuli_NC_021163.1_2059080 | Ca_kabuli_chr04    | 2059080                        | [A/G]       | 1067294473                                 |
| Ca_Kabuli_NC_021163.1_2059082 | Ca_kabuli_chr04    | 2059082                        | [T/C]       | 1067294474                                 |
| Ca_Kabuli_NC_021163.1_2060248 | Ca_kabuli_chr04    | 2060248                        | [T/C]       | 1067294475                                 |
| Ca_Kabuli_NC_021163.1_2060283 | Ca_kabuli_chr04    | 2060283                        | [A/G]       | 1067294476                                 |
| Ca_Kabuli_NC_021163.1_2085185 | Ca_kabuli_chr04    | 2085185                        | [A/C]       | 1067294477                                 |
| Ca_Kabuli_NC_021163.1_2107404 | Ca_kabuli_chr04    | 2107404                        | [T/G]       | 1067294478                                 |



| <b>SNP IDs</b>                | <b>Chromosomes</b> | <b>Physical positions (bp)</b> | <b>SNPs</b> | <b>NCBI SNPdb accession IDs (NCBI_ss#)</b> |
|-------------------------------|--------------------|--------------------------------|-------------|--------------------------------------------|
| Ca_Kabuli_NC_021163.1_2107516 | Ca_kabuli_chr04    | 2107516                        | [G/T]       | 1067294479                                 |
| Ca_Kabuli_NC_021163.1_2113227 | Ca_kabuli_chr04    | 2113227                        | [C/T]       | 1067294480                                 |
| Ca_Kabuli_NC_021163.1_2125779 | Ca_kabuli_chr04    | 2125779                        | [A/T]       | 1067294481                                 |
| Ca_Kabuli_NC_021163.1_2125792 | Ca_kabuli_chr04    | 2125792                        | [T/G]       | 1067294482                                 |
| Ca_Kabuli_NC_021163.1_2213688 | Ca_kabuli_chr04    | 2213688                        | [A/C]       | 1067294483                                 |
| Ca_Kabuli_NC_021163.1_2238501 | Ca_kabuli_chr04    | 2238501                        | [A/G]       | 1067294484                                 |
| Ca_Kabuli_NC_021163.1_2238519 | Ca_kabuli_chr04    | 2238519                        | [A/G]       | 1067294485                                 |
| Ca_Kabuli_NC_021163.1_2240156 | Ca_kabuli_chr04    | 2240156                        | [T/C]       | 1067294486                                 |
| Ca_Kabuli_NC_021163.1_2256939 | Ca_kabuli_chr04    | 2256939                        | [T/C]       | 1067294487                                 |
| Ca_Kabuli_NC_021163.1_2258450 | Ca_kabuli_chr04    | 2258450                        | [A/G]       | 1067294488                                 |
| Ca_Kabuli_NC_021163.1_2258453 | Ca_kabuli_chr04    | 2258453                        | [T/A]       | 1067294489                                 |
| Ca_Kabuli_NC_021163.1_2270375 | Ca_kabuli_chr04    | 2270375                        | [A/C]       | 1067294490                                 |
| Ca_Kabuli_NC_021163.1_2311915 | Ca_kabuli_chr04    | 2311915                        | [T/C]       | 1067294491                                 |
| Ca_Kabuli_NC_021163.1_2313927 | Ca_kabuli_chr04    | 2313927                        | [T/A]       | 1067294492                                 |
| Ca_Kabuli_NC_021163.1_2314051 | Ca_kabuli_chr04    | 2314051                        | [A/G]       | 1067294493                                 |
| Ca_Kabuli_NC_021163.1_2396821 | Ca_kabuli_chr04    | 2396821                        | [T/G]       | 1067294494                                 |
| Ca_Kabuli_NC_021163.1_2396873 | Ca_kabuli_chr04    | 2396873                        | [A/C]       | 1067294495                                 |
| Ca_Kabuli_NC_021163.1_2450534 | Ca_kabuli_chr04    | 2450534                        | [T/A]       | 1067294496                                 |
| Ca_Kabuli_NC_021163.1_2545456 | Ca_kabuli_chr04    | 2545456                        | [A/T]       | 1067294497                                 |
| Ca_Kabuli_NC_021163.1_2575939 | Ca_kabuli_chr04    | 2575939                        | [T/C]       | 1067294498                                 |
| Ca_Kabuli_NC_021163.1_2609880 | Ca_kabuli_chr04    | 2609880                        | [T/C]       | 1067294499                                 |
| Ca_Kabuli_NC_021163.1_2609893 | Ca_kabuli_chr04    | 2609893                        | [T/C]       | 1067294500                                 |
| Ca_Kabuli_NC_021163.1_2609926 | Ca_kabuli_chr04    | 2609926                        | [C/A]       | 1067294501                                 |
| Ca_Kabuli_NC_021163.1_2609927 | Ca_kabuli_chr04    | 2609927                        | [T/G]       | 1067294502                                 |
| Ca_Kabuli_NC_021163.1_2609928 | Ca_kabuli_chr04    | 2609928                        | [C/A]       | 1067294503                                 |
| Ca_Kabuli_NC_021163.1_2609930 | Ca_kabuli_chr04    | 2609930                        | [T/C]       | 1067294504                                 |
| Ca_Kabuli_NC_021163.1_2630862 | Ca_kabuli_chr04    | 2630862                        | [T/C]       | 1067294505                                 |
| Ca_Kabuli_NC_021163.1_2630886 | Ca_kabuli_chr04    | 2630886                        | [T/C]       | 1067294506                                 |
| Ca_Kabuli_NC_021163.1_2632382 | Ca_kabuli_chr04    | 2632382                        | [T/G]       | 1067294507                                 |
| Ca_Kabuli_NC_021163.1_2632386 | Ca_kabuli_chr04    | 2632386                        | [T/G]       | 1067294508                                 |
| Ca_Kabuli_NC_021163.1_2886775 | Ca_kabuli_chr04    | 2886775                        | [T/G]       | 1067294509                                 |
| Ca_Kabuli_NC_021163.1_2887609 | Ca_kabuli_chr04    | 2887609                        | [T/G]       | 1067294510                                 |
| Ca_Kabuli_NC_021163.1_2948204 | Ca_kabuli_chr04    | 2948204                        | [A/G]       | 1067294511                                 |
| Ca_Kabuli_NC_021163.1_3002801 | Ca_kabuli_chr04    | 3002801                        | [T/C]       | 1067294512                                 |

| <b>SNP IDs</b>                | <b>Chromosomes</b> | <b>Physical positions (bp)</b> | <b>SNPs</b> | <b>NCBI SNPdb accession IDs (NCBI_ss#)</b> |
|-------------------------------|--------------------|--------------------------------|-------------|--------------------------------------------|
| Ca_Kabuli_NC_021163.1_3002810 | Ca_kabuli_chr04    | 3002810                        | [T/A]       | 1067294513                                 |
| Ca_Kabuli_NC_021163.1_3002826 | Ca_kabuli_chr04    | 3002826                        | [A/C]       | 1067294514                                 |
| Ca_Kabuli_NC_021163.1_3037899 | Ca_kabuli_chr04    | 3037899                        | [A/C]       | 1067294515                                 |
| Ca_Kabuli_NC_021163.1_3037905 | Ca_kabuli_chr04    | 3037905                        | [A/C]       | 1067294516                                 |
| Ca_Kabuli_NC_021163.1_3038006 | Ca_kabuli_chr04    | 3038006                        | [A/G]       | 1067294517                                 |
| Ca_Kabuli_NC_021163.1_3038141 | Ca_kabuli_chr04    | 3038141                        | [A/C]       | 1067294518                                 |
| Ca_Kabuli_NC_021163.1_3144608 | Ca_kabuli_chr04    | 3144608                        | [T/C]       | 1067294519                                 |
| Ca_Kabuli_NC_021163.1_3164076 | Ca_kabuli_chr04    | 3164076                        | [A/G]       | 1067294520                                 |
| Ca_Kabuli_NC_021163.1_3164094 | Ca_kabuli_chr04    | 3164094                        | [T/G]       | 1067294521                                 |
| Ca_Kabuli_NC_021163.1_3226079 | Ca_kabuli_chr04    | 3226079                        | [T/C]       | 1067294522                                 |
| Ca_Kabuli_NC_021163.1_3226091 | Ca_kabuli_chr04    | 3226091                        | [T/G]       | 1067294523                                 |
| Ca_Kabuli_NC_021163.1_3226123 | Ca_kabuli_chr04    | 3226123                        | [T/G]       | 1067294524                                 |
| Ca_Kabuli_NC_021163.1_3245405 | Ca_kabuli_chr04    | 3245405                        | [C/T]       | 1067294525                                 |
| Ca_Kabuli_NC_021163.1_3245647 | Ca_kabuli_chr04    | 3245647                        | [A/G]       | 1067294526                                 |
| Ca_Kabuli_NC_021163.1_3280217 | Ca_kabuli_chr04    | 3280217                        | [G/A]       | 1067294527                                 |
| Ca_Kabuli_NC_021163.1_3284239 | Ca_kabuli_chr04    | 3284239                        | [T/G]       | 1067294528                                 |
| Ca_Kabuli_NC_021163.1_3284312 | Ca_kabuli_chr04    | 3284312                        | [G/A]       | 1067294529                                 |
| Ca_Kabuli_NC_021163.1_3284956 | Ca_kabuli_chr04    | 3284956                        | [T/A]       | 1067294530                                 |
| Ca_Kabuli_NC_021163.1_3290298 | Ca_kabuli_chr04    | 3290298                        | [G/T]       | 1067294531                                 |
| Ca_Kabuli_NC_021163.1_3307908 | Ca_kabuli_chr04    | 3307908                        | [A/T]       | 1067294532                                 |
| Ca_Kabuli_NC_021163.1_3353586 | Ca_kabuli_chr04    | 3353586                        | [A/G]       | 1067294533                                 |
| Ca_Kabuli_NC_021163.1_3369440 | Ca_kabuli_chr04    | 3369440                        | [G/A]       | 1067294534                                 |
| Ca_Kabuli_NC_021163.1_3369444 | Ca_kabuli_chr04    | 3369444                        | [G/A]       | 1067294535                                 |
| Ca_Kabuli_NC_021163.1_3400828 | Ca_kabuli_chr04    | 3400828                        | [C/G]       | 1067294536                                 |
| Ca_Kabuli_NC_021163.1_3427522 | Ca_kabuli_chr04    | 3427522                        | [G/T]       | 1067294537                                 |
| Ca_Kabuli_NC_021163.1_3428588 | Ca_kabuli_chr04    | 3428588                        | [T/G]       | 1067294538                                 |
| Ca_Kabuli_NC_021163.1_3428929 | Ca_kabuli_chr04    | 3428929                        | [T/C]       | 1067294539                                 |
| Ca_Kabuli_NC_021163.1_3429035 | Ca_kabuli_chr04    | 3429035                        | [G/A]       | 1067294540                                 |
| Ca_Kabuli_NC_021163.1_3429335 | Ca_kabuli_chr04    | 3429335                        | [T/C]       | 1067294541                                 |
| Ca_Kabuli_NC_021163.1_3453350 | Ca_kabuli_chr04    | 3453350                        | [A/T]       | 1067294542                                 |
| Ca_Kabuli_NC_021163.1_3453989 | Ca_kabuli_chr04    | 3453989                        | [A/G]       | 1067294543                                 |
| Ca_Kabuli_NC_021163.1_3456454 | Ca_kabuli_chr04    | 3456454                        | [A/G]       | 1067294544                                 |
| Ca_Kabuli_NC_021163.1_3542115 | Ca_kabuli_chr04    | 3542115                        | [A/G]       | 1067294545                                 |
| Ca_Kabuli_NC_021163.1_3542150 | Ca_kabuli_chr04    | 3542150                        | [A/G]       | 1067294546                                 |

| <b>SNP IDs</b>                | <b>Chromosomes</b> | <b>Physical positions (bp)</b> | <b>SNPs</b> | <b>NCBI SNPdb accession IDs (NCBI_ss#)</b> |
|-------------------------------|--------------------|--------------------------------|-------------|--------------------------------------------|
| Ca_Kabuli_NC_021163.1_3642099 | Ca_kabuli_chr04    | 3642099                        | [A/C]       | 1067294547                                 |
| Ca_Kabuli_NC_021163.1_3642100 | Ca_kabuli_chr04    | 3642100                        | [T/A]       | 1067294548                                 |
| Ca_Kabuli_NC_021163.1_3699203 | Ca_kabuli_chr04    | 3699203                        | [T/G]       | 1067294549                                 |
| Ca_Kabuli_NC_021163.1_3719218 | Ca_kabuli_chr04    | 3719218                        | [A/G]       | 1067294550                                 |
| Ca_Kabuli_NC_021163.1_3735377 | Ca_kabuli_chr04    | 3735377                        | [T/C]       | 1067294551                                 |
| Ca_Kabuli_NC_021163.1_3741522 | Ca_kabuli_chr04    | 3741522                        | [T/G]       | 1067294552                                 |
| Ca_Kabuli_NC_021163.1_3741539 | Ca_kabuli_chr04    | 3741539                        | [T/G]       | 1067294553                                 |
| Ca_Kabuli_NC_021163.1_3741562 | Ca_kabuli_chr04    | 3741562                        | [T/G]       | 1067294554                                 |
| Ca_Kabuli_NC_021163.1_3762538 | Ca_kabuli_chr04    | 3762538                        | [A/C]       | 1067294555                                 |
| Ca_Kabuli_NC_021163.1_3762551 | Ca_kabuli_chr04    | 3762551                        | [C/G]       | 1067294556                                 |
| Ca_Kabuli_NC_021163.1_3762559 | Ca_kabuli_chr04    | 3762559                        | [T/G]       | 1067294557                                 |
| Ca_Kabuli_NC_021163.1_3762569 | Ca_kabuli_chr04    | 3762569                        | [G/C]       | 1067294558                                 |
| Ca_Kabuli_NC_021163.1_3857904 | Ca_kabuli_chr04    | 3857904                        | [G/C]       | 1067294559                                 |
| Ca_Kabuli_NC_021163.1_3857947 | Ca_kabuli_chr04    | 3857947                        | [T/C]       | 1067294560                                 |
| Ca_Kabuli_NC_021163.1_3857951 | Ca_kabuli_chr04    | 3857951                        | [T/C]       | 1067294561                                 |
| Ca_Kabuli_NC_021163.1_3887025 | Ca_kabuli_chr04    | 3887025                        | [A/C]       | 1067294562                                 |
| Ca_Kabuli_NC_021163.1_3888185 | Ca_kabuli_chr04    | 3888185                        | [A/G]       | 1067294563                                 |
| Ca_Kabuli_NC_021163.1_3888244 | Ca_kabuli_chr04    | 3888244                        | [T/G]       | 1067294564                                 |
| Ca_Kabuli_NC_021163.1_3890552 | Ca_kabuli_chr04    | 3890552                        | [T/C]       | 1067294565                                 |
| Ca_Kabuli_NC_021163.1_3890741 | Ca_kabuli_chr04    | 3890741                        | [A/G]       | 1067294566                                 |
| Ca_Kabuli_NC_021163.1_3890777 | Ca_kabuli_chr04    | 3890777                        | [A/G]       | 1067294567                                 |
| Ca_Kabuli_NC_021163.1_3890779 | Ca_kabuli_chr04    | 3890779                        | [A/G]       | 1067294568                                 |
| Ca_Kabuli_NC_021163.1_3890784 | Ca_kabuli_chr04    | 3890784                        | [T/C]       | 1067294569                                 |
| Ca_Kabuli_NC_021163.1_3945255 | Ca_kabuli_chr04    | 3945255                        | [A/C]       | 1067294570                                 |
| Ca_Kabuli_NC_021163.1_3990334 | Ca_kabuli_chr04    | 3990334                        | [G/A]       | 1067294571                                 |
| Ca_Kabuli_NC_021163.1_3990682 | Ca_kabuli_chr04    | 3990682                        | [G/A]       | 1067294572                                 |
| Ca_Kabuli_NC_021163.1_3990867 | Ca_kabuli_chr04    | 3990867                        | [A/G]       | 1067294573                                 |
| Ca_Kabuli_NC_021163.1_4006205 | Ca_kabuli_chr04    | 4006205                        | [A/G]       | 1067294574                                 |
| Ca_Kabuli_NC_021163.1_4006206 | Ca_kabuli_chr04    | 4006206                        | [G/A]       | 1067294575                                 |
| Ca_Kabuli_NC_021163.1_4027829 | Ca_kabuli_chr04    | 4027829                        | [T/A]       | 1067294576                                 |
| Ca_Kabuli_NC_021163.1_4027849 | Ca_kabuli_chr04    | 4027849                        | [T/A]       | 1067294577                                 |
| Ca_Kabuli_NC_021163.1_4027882 | Ca_kabuli_chr04    | 4027882                        | [A/C]       | 1067294578                                 |
| Ca_Kabuli_NC_021163.1_4037453 | Ca_kabuli_chr04    | 4037453                        | [A/G]       | 1067294579                                 |
| Ca_Kabuli_NC_021163.1_4037486 | Ca_kabuli_chr04    | 4037486                        | [A/G]       | 1067294580                                 |

| <b>SNP IDs</b>                | <b>Chromosomes</b> | <b>Physical positions (bp)</b> | <b>SNPs</b> | <b>NCBI SNPdb accession IDs (NCBI_ss#)</b> |
|-------------------------------|--------------------|--------------------------------|-------------|--------------------------------------------|
| Ca_Kabuli_NC_021163.1_4097989 | Ca_kabuli_chr04    | 4097989                        | [G/A]       | 1067294581                                 |
| Ca_Kabuli_NC_021163.1_4098041 | Ca_kabuli_chr04    | 4098041                        | [G/A]       | 1067294582                                 |
| Ca_Kabuli_NC_021163.1_4098049 | Ca_kabuli_chr04    | 4098049                        | [T/G]       | 1067294583                                 |
| Ca_Kabuli_NC_021163.1_4141183 | Ca_kabuli_chr04    | 4141183                        | [T/G]       | 1067294584                                 |
| Ca_Kabuli_NC_021163.1_4154507 | Ca_kabuli_chr04    | 4154507                        | [T/G]       | 1067294585                                 |
| Ca_Kabuli_NC_021163.1_4219919 | Ca_kabuli_chr04    | 4219919                        | [T/A]       | 1067294586                                 |
| Ca_Kabuli_NC_021163.1_4219935 | Ca_kabuli_chr04    | 4219935                        | [A/C]       | 1067294587                                 |
| Ca_Kabuli_NC_021163.1_4219958 | Ca_kabuli_chr04    | 4219958                        | [T/G]       | 1067294588                                 |
| Ca_Kabuli_NC_021163.1_4229392 | Ca_kabuli_chr04    | 4229392                        | [A/T]       | 1067294589                                 |
| Ca_Kabuli_NC_021163.1_4245016 | Ca_kabuli_chr04    | 4245016                        | [G/C]       | 1067294590                                 |
| Ca_Kabuli_NC_021163.1_4251974 | Ca_kabuli_chr04    | 4251974                        | [C/A]       | 1067294591                                 |
| Ca_Kabuli_NC_021163.1_4251975 | Ca_kabuli_chr04    | 4251975                        | [T/G]       | 1067294592                                 |
| Ca_Kabuli_NC_021163.1_4251976 | Ca_kabuli_chr04    | 4251976                        | [C/A]       | 1067294593                                 |
| Ca_Kabuli_NC_021163.1_4252110 | Ca_kabuli_chr04    | 4252110                        | [T/G]       | 1067294594                                 |
| Ca_Kabuli_NC_021163.1_4252144 | Ca_kabuli_chr04    | 4252144                        | [T/G]       | 1067294595                                 |
| Ca_Kabuli_NC_021163.1_4255810 | Ca_kabuli_chr04    | 4255810                        | [T/G]       | 1067294596                                 |
| Ca_Kabuli_NC_021163.1_4255935 | Ca_kabuli_chr04    | 4255935                        | [T/G]       | 1067294597                                 |
| Ca_Kabuli_NC_021163.1_4255963 | Ca_kabuli_chr04    | 4255963                        | [T/C]       | 1067294598                                 |
| Ca_Kabuli_NC_021163.1_4255972 | Ca_kabuli_chr04    | 4255972                        | [A/T]       | 1067294599                                 |
| Ca_Kabuli_NC_021163.1_4256030 | Ca_kabuli_chr04    | 4256030                        | [T/G]       | 1067294600                                 |
| Ca_Kabuli_NC_021163.1_4257158 | Ca_kabuli_chr04    | 4257158                        | [T/G]       | 1067294601                                 |
| Ca_Kabuli_NC_021163.1_4257182 | Ca_kabuli_chr04    | 4257182                        | [T/G]       | 1067294602                                 |
| Ca_Kabuli_NC_021163.1_4305814 | Ca_kabuli_chr04    | 4305814                        | [T/C]       | 1067294603                                 |
| Ca_Kabuli_NC_021163.1_4305819 | Ca_kabuli_chr04    | 4305819                        | [A/G]       | 1067294604                                 |
| Ca_Kabuli_NC_021163.1_4305821 | Ca_kabuli_chr04    | 4305821                        | [A/G]       | 1067294605                                 |
| Ca_Kabuli_NC_021163.1_4305832 | Ca_kabuli_chr04    | 4305832                        | [A/G]       | 1067294606                                 |
| Ca_Kabuli_NC_021163.1_4305880 | Ca_kabuli_chr04    | 4305880                        | [T/C]       | 1067294607                                 |
| Ca_Kabuli_NC_021163.1_4305883 | Ca_kabuli_chr04    | 4305883                        | [A/G]       | 1067294608                                 |
| Ca_Kabuli_NC_021163.1_4309183 | Ca_kabuli_chr04    | 4309183                        | [A/G]       | 1067294609                                 |
| Ca_Kabuli_NC_021163.1_4309184 | Ca_kabuli_chr04    | 4309184                        | [A/T]       | 1067294610                                 |
| Ca_Kabuli_NC_021163.1_4309185 | Ca_kabuli_chr04    | 4309185                        | [T/A]       | 1067294611                                 |
| Ca_Kabuli_NC_021163.1_4309245 | Ca_kabuli_chr04    | 4309245                        | [A/T]       | 1067294612                                 |
| Ca_Kabuli_NC_021163.1_4309263 | Ca_kabuli_chr04    | 4309263                        | [T/C]       | 1067294613                                 |
| Ca_Kabuli_NC_021163.1_4309269 | Ca_kabuli_chr04    | 4309269                        | [T/C]       | 1067294614                                 |

| <b>SNP IDs</b>                | <b>Chromosomes</b> | <b>Physical positions (bp)</b> | <b>SNPs</b> | <b>NCBI SNPdb accession IDs (NCBI_ss#)</b> |
|-------------------------------|--------------------|--------------------------------|-------------|--------------------------------------------|
| Ca_Kabuli_NC_021163.1_4309286 | Ca_kabuli_chr04    | 4309286                        | [T/A]       | 1067294615                                 |
| Ca_Kabuli_NC_021163.1_4309296 | Ca_kabuli_chr04    | 4309296                        | [T/C]       | 1067294616                                 |
| Ca_Kabuli_NC_021163.1_4309304 | Ca_kabuli_chr04    | 4309304                        | [T/A]       | 1067294617                                 |
| Ca_Kabuli_NC_021163.1_4309307 | Ca_kabuli_chr04    | 4309307                        | [G/T]       | 1067294618                                 |
| Ca_Kabuli_NC_021163.1_4320567 | Ca_kabuli_chr04    | 4320567                        | [T/A]       | 1067294619                                 |
| Ca_Kabuli_NC_021163.1_4325394 | Ca_kabuli_chr04    | 4325394                        | [T/G]       | 1067294620                                 |
| Ca_Kabuli_NC_021163.1_4343571 | Ca_kabuli_chr04    | 4343571                        | [T/G]       | 1067294621                                 |
| Ca_Kabuli_NC_021163.1_4375250 | Ca_kabuli_chr04    | 4375250                        | [A/T]       | 1067294622                                 |
| Ca_Kabuli_NC_021163.1_4375271 | Ca_kabuli_chr04    | 4375271                        | [T/C]       | 1067294623                                 |
| Ca_Kabuli_NC_021163.1_4389287 | Ca_kabuli_chr04    | 4389287                        | [T/C]       | 1067294624                                 |
| Ca_Kabuli_NC_021163.1_4403125 | Ca_kabuli_chr04    | 4403125                        | [T/C]       | 1067294625                                 |
| Ca_Kabuli_NC_021163.1_4403140 | Ca_kabuli_chr04    | 4403140                        | [A/C]       | 1067294626                                 |
| Ca_Kabuli_NC_021163.1_4403177 | Ca_kabuli_chr04    | 4403177                        | [G/C]       | 1067294627                                 |
| Ca_Kabuli_NC_021163.1_4403178 | Ca_kabuli_chr04    | 4403178                        | [A/C]       | 1067294628                                 |
| Ca_Kabuli_NC_021163.1_4403213 | Ca_kabuli_chr04    | 4403213                        | [A/C]       | 1067294629                                 |
| Ca_Kabuli_NC_021163.1_4403248 | Ca_kabuli_chr04    | 4403248                        | [A/G]       | 1067294630                                 |
| Ca_Kabuli_NC_021163.1_4426493 | Ca_kabuli_chr04    | 4426493                        | [T/G]       | 1067294631                                 |
| Ca_Kabuli_NC_021163.1_4426534 | Ca_kabuli_chr04    | 4426534                        | [T/C]       | 1067294632                                 |
| Ca_Kabuli_NC_021163.1_4452213 | Ca_kabuli_chr04    | 4452213                        | [T/G]       | 1067294633                                 |
| Ca_Kabuli_NC_021163.1_4452245 | Ca_kabuli_chr04    | 4452245                        | [C/A]       | 1067294634                                 |
| Ca_Kabuli_NC_021163.1_4452246 | Ca_kabuli_chr04    | 4452246                        | [A/C]       | 1067294635                                 |
| Ca_Kabuli_NC_021163.1_4452247 | Ca_kabuli_chr04    | 4452247                        | [A/G]       | 1067294636                                 |
| Ca_Kabuli_NC_021163.1_4452252 | Ca_kabuli_chr04    | 4452252                        | [G/A]       | 1067294637                                 |
| Ca_Kabuli_NC_021163.1_4452335 | Ca_kabuli_chr04    | 4452335                        | [A/G]       | 1067294638                                 |
| Ca_Kabuli_NC_021163.1_4452337 | Ca_kabuli_chr04    | 4452337                        | [T/G]       | 1067294639                                 |
| Ca_Kabuli_NC_021163.1_4453889 | Ca_kabuli_chr04    | 4453889                        | [T/G]       | 1067294640                                 |
| Ca_Kabuli_NC_021163.1_4462406 | Ca_kabuli_chr04    | 4462406                        | [A/C]       | 1067294641                                 |
| Ca_Kabuli_NC_021163.1_4462408 | Ca_kabuli_chr04    | 4462408                        | [C/T]       | 1067294642                                 |
| Ca_Kabuli_NC_021163.1_4476250 | Ca_kabuli_chr04    | 4476250                        | [A/T]       | 1067294643                                 |
| Ca_Kabuli_NC_021163.1_4476258 | Ca_kabuli_chr04    | 4476258                        | [T/G]       | 1067294644                                 |
| Ca_Kabuli_NC_021163.1_4498780 | Ca_kabuli_chr04    | 4498780                        | [C/T]       | 1067294645                                 |
| Ca_Kabuli_NC_021163.1_4535558 | Ca_kabuli_chr04    | 4535558                        | [A/C]       | 1067294646                                 |
| Ca_Kabuli_NC_021163.1_4536205 | Ca_kabuli_chr04    | 4536205                        | [G/A]       | 1067294647                                 |
| Ca_Kabuli_NC_021163.1_4536270 | Ca_kabuli_chr04    | 4536270                        | [T/G]       | 1067294648                                 |

| <b>SNP IDs</b>                | <b>Chromosomes</b> | <b>Physical positions (bp)</b> | <b>SNPs</b> | <b>NCBI SNPdb accession IDs (NCBI_ss#)</b> |
|-------------------------------|--------------------|--------------------------------|-------------|--------------------------------------------|
| Ca_Kabuli_NC_021163.1_4536328 | Ca_kabuli_chr04    | 4536328                        | [G/T]       | 1067294649                                 |
| Ca_Kabuli_NC_021163.1_4567258 | Ca_kabuli_chr04    | 4567258                        | [A/G]       | 1067294650                                 |
| Ca_Kabuli_NC_021163.1_4567284 | Ca_kabuli_chr04    | 4567284                        | [T/C]       | 1067294651                                 |
| Ca_Kabuli_NC_021163.1_4567299 | Ca_kabuli_chr04    | 4567299                        | [A/G]       | 1067294652                                 |
| Ca_Kabuli_NC_021163.1_4605188 | Ca_kabuli_chr04    | 4605188                        | [A/G]       | 1067294653                                 |
| Ca_Kabuli_NC_021163.1_4605235 | Ca_kabuli_chr04    | 4605235                        | [A/C]       | 1067294654                                 |
| Ca_Kabuli_NC_021163.1_4605290 | Ca_kabuli_chr04    | 4605290                        | [A/G]       | 1067294655                                 |
| Ca_Kabuli_NC_021163.1_4605293 | Ca_kabuli_chr04    | 4605293                        | [T/G]       | 1067294656                                 |
| Ca_Kabuli_NC_021163.1_4605356 | Ca_kabuli_chr04    | 4605356                        | [A/T]       | 1067294657                                 |
| Ca_Kabuli_NC_021163.1_4622091 | Ca_kabuli_chr04    | 4622091                        | [T/C]       | 1067294658                                 |
| Ca_Kabuli_NC_021163.1_4622094 | Ca_kabuli_chr04    | 4622094                        | [A/C]       | 1067294659                                 |
| Ca_Kabuli_NC_021163.1_4622921 | Ca_kabuli_chr04    | 4622921                        | [T/A]       | 1067294660                                 |
| Ca_Kabuli_NC_021163.1_4633934 | Ca_kabuli_chr04    | 4633934                        | [T/C]       | 1067294661                                 |
| Ca_Kabuli_NC_021163.1_4633959 | Ca_kabuli_chr04    | 4633959                        | [T/C]       | 1067294662                                 |
| Ca_Kabuli_NC_021163.1_4635998 | Ca_kabuli_chr04    | 4635998                        | [T/G]       | 1067294663                                 |
| Ca_Kabuli_NC_021163.1_4636518 | Ca_kabuli_chr04    | 4636518                        | [T/G]       | 1067294664                                 |
| Ca_Kabuli_NC_021163.1_4636555 | Ca_kabuli_chr04    | 4636555                        | [A/C]       | 1067294665                                 |
| Ca_Kabuli_NC_021163.1_4675176 | Ca_kabuli_chr04    | 4675176                        | [T/G]       | 1067294666                                 |
| Ca_Kabuli_NC_021163.1_4675182 | Ca_kabuli_chr04    | 4675182                        | [T/G]       | 1067294667                                 |
| Ca_Kabuli_NC_021163.1_4679252 | Ca_kabuli_chr04    | 4679252                        | [A/C]       | 1067294668                                 |
| Ca_Kabuli_NC_021163.1_4689116 | Ca_kabuli_chr04    | 4689116                        | [T/C]       | 1067294669                                 |
| Ca_Kabuli_NC_021163.1_4689148 | Ca_kabuli_chr04    | 4689148                        | [A/G]       | 1067294670                                 |
| Ca_Kabuli_NC_021163.1_4822685 | Ca_kabuli_chr04    | 4822685                        | [T/C]       | 1067294671                                 |
| Ca_Kabuli_NC_021163.1_4890259 | Ca_kabuli_chr04    | 4890259                        | [T/C]       | 1067294672                                 |
| Ca_Kabuli_NC_021163.1_4890299 | Ca_kabuli_chr04    | 4890299                        | [T/C]       | 1067294673                                 |
| Ca_Kabuli_NC_021163.1_4897950 | Ca_kabuli_chr04    | 4897950                        | [A/C]       | 1067294674                                 |
| Ca_Kabuli_NC_021163.1_4911083 | Ca_kabuli_chr04    | 4911083                        | [T/C]       | 1067294675                                 |
| Ca_Kabuli_NC_021163.1_4911130 | Ca_kabuli_chr04    | 4911130                        | [T/C]       | 1067294676                                 |
| Ca_Kabuli_NC_021163.1_4911160 | Ca_kabuli_chr04    | 4911160                        | [A/C]       | 1067294677                                 |
| Ca_Kabuli_NC_021163.1_4920706 | Ca_kabuli_chr04    | 4920706                        | [T/C]       | 1067294678                                 |
| Ca_Kabuli_NC_021163.1_4920712 | Ca_kabuli_chr04    | 4920712                        | [A/T]       | 1067294679                                 |
| Ca_Kabuli_NC_021163.1_4928157 | Ca_kabuli_chr04    | 4928157                        | [A/G]       | 1067294680                                 |
| Ca_Kabuli_NC_021163.1_4928180 | Ca_kabuli_chr04    | 4928180                        | [A/T]       | 1067294681                                 |
| Ca_Kabuli_NC_021163.1_4928192 | Ca_kabuli_chr04    | 4928192                        | [T/A]       | 1067294682                                 |

| <b>SNP IDs</b>                | <b>Chromosomes</b> | <b>Physical positions (bp)</b> | <b>SNPs</b> | <b>NCBI SNPdb accession IDs (NCBI_ss#)</b> |
|-------------------------------|--------------------|--------------------------------|-------------|--------------------------------------------|
| Ca_Kabuli_NC_021163.1_4928764 | Ca_kabuli_chr04    | 4928764                        | [T/C]       | 1067294683                                 |
| Ca_Kabuli_NC_021163.1_4928770 | Ca_kabuli_chr04    | 4928770                        | [A/T]       | 1067294684                                 |
| Ca_Kabuli_NC_021163.1_4951176 | Ca_kabuli_chr04    | 4951176                        | [A/G]       | 1067294685                                 |
| Ca_Kabuli_NC_021163.1_4951189 | Ca_kabuli_chr04    | 4951189                        | [G/C]       | 1067294686                                 |
| Ca_Kabuli_NC_021163.1_4951194 | Ca_kabuli_chr04    | 4951194                        | [G/C]       | 1067294687                                 |
| Ca_Kabuli_NC_021163.1_4951205 | Ca_kabuli_chr04    | 4951205                        | [A/C]       | 1067294688                                 |
| Ca_Kabuli_NC_021163.1_4953602 | Ca_kabuli_chr04    | 4953602                        | [T/G]       | 1067294689                                 |
| Ca_Kabuli_NC_021163.1_4953623 | Ca_kabuli_chr04    | 4953623                        | [T/G]       | 1067294690                                 |
| Ca_Kabuli_NC_021163.1_4953681 | Ca_kabuli_chr04    | 4953681                        | [T/C]       | 1067294691                                 |
| Ca_Kabuli_NC_021163.1_4953690 | Ca_kabuli_chr04    | 4953690                        | [A/G]       | 1067294692                                 |
| Ca_Kabuli_NC_021163.1_4953697 | Ca_kabuli_chr04    | 4953697                        | [A/C]       | 1067294693                                 |
| Ca_Kabuli_NC_021163.1_5017018 | Ca_kabuli_chr04    | 5017018                        | [A/C]       | 1067294694                                 |
| Ca_Kabuli_NC_021163.1_5017088 | Ca_kabuli_chr04    | 5017088                        | [A/G]       | 1067294695                                 |
| Ca_Kabuli_NC_021163.1_5017090 | Ca_kabuli_chr04    | 5017090                        | [G/C]       | 1067294696                                 |
| Ca_Kabuli_NC_021163.1_5017120 | Ca_kabuli_chr04    | 5017120                        | [A/C]       | 1067294697                                 |
| Ca_Kabuli_NC_021163.1_5086698 | Ca_kabuli_chr04    | 5086698                        | [A/G]       | 1067294698                                 |
| Ca_Kabuli_NC_021163.1_5086729 | Ca_kabuli_chr04    | 5086729                        | [A/G]       | 1067294699                                 |
| Ca_Kabuli_NC_021163.1_5086736 | Ca_kabuli_chr04    | 5086736                        | [T/C]       | 1067294700                                 |
| Ca_Kabuli_NC_021163.1_5092361 | Ca_kabuli_chr04    | 5092361                        | [C/A]       | 1067294701                                 |
| Ca_Kabuli_NC_021163.1_5101729 | Ca_kabuli_chr04    | 5101729                        | [A/G]       | 1067294702                                 |
| Ca_Kabuli_NC_021163.1_5155611 | Ca_kabuli_chr04    | 5155611                        | [A/C]       | 1067294703                                 |
| Ca_Kabuli_NC_021163.1_5155621 | Ca_kabuli_chr04    | 5155621                        | [A/G]       | 1067294704                                 |
| Ca_Kabuli_NC_021163.1_5186399 | Ca_kabuli_chr04    | 5186399                        | [T/C]       | 1067294705                                 |
| Ca_Kabuli_NC_021163.1_5186403 | Ca_kabuli_chr04    | 5186403                        | [T/C]       | 1067294706                                 |
| Ca_Kabuli_NC_021163.1_5186412 | Ca_kabuli_chr04    | 5186412                        | [A/G]       | 1067294707                                 |
| Ca_Kabuli_NC_021163.1_5207834 | Ca_kabuli_chr04    | 5207834                        | [A/G]       | 1067294708                                 |
| Ca_Kabuli_NC_021163.1_5207847 | Ca_kabuli_chr04    | 5207847                        | [A/G]       | 1067294709                                 |
| Ca_Kabuli_NC_021163.1_5207850 | Ca_kabuli_chr04    | 5207850                        | [A/G]       | 1067294710                                 |
| Ca_Kabuli_NC_021163.1_5207854 | Ca_kabuli_chr04    | 5207854                        | [A/G]       | 1067294711                                 |
| Ca_Kabuli_NC_021163.1_5207859 | Ca_kabuli_chr04    | 5207859                        | [T/C]       | 1067294712                                 |
| Ca_Kabuli_NC_021163.1_5223159 | Ca_kabuli_chr04    | 5223159                        | [A/T]       | 1067294713                                 |
| Ca_Kabuli_NC_021163.1_5232361 | Ca_kabuli_chr04    | 5232361                        | [T/A]       | 1067294714                                 |
| Ca_Kabuli_NC_021163.1_5232391 | Ca_kabuli_chr04    | 5232391                        | [C/A]       | 1067294715                                 |
| Ca_Kabuli_NC_021163.1_5232392 | Ca_kabuli_chr04    | 5232392                        | [G/C]       | 1067294716                                 |

| <b>SNP IDs</b>                | <b>Chromosomes</b> | <b>Physical positions (bp)</b> | <b>SNPs</b> | <b>NCBI SNPdb accession IDs (NCBI_ss#)</b> |
|-------------------------------|--------------------|--------------------------------|-------------|--------------------------------------------|
| Ca_Kabuli_NC_021163.1_5232399 | Ca_kabuli_chr04    | 5232399                        | [A/G]       | 1067294717                                 |
| Ca_Kabuli_NC_021163.1_5232401 | Ca_kabuli_chr04    | 5232401                        | [T/C]       | 1067294718                                 |
| Ca_Kabuli_NC_021163.1_5233608 | Ca_kabuli_chr04    | 5233608                        | [A/C]       | 1067294719                                 |
| Ca_Kabuli_NC_021163.1_5233609 | Ca_kabuli_chr04    | 5233609                        | [C/A]       | 1067294720                                 |
| Ca_Kabuli_NC_021163.1_5233635 | Ca_kabuli_chr04    | 5233635                        | [A/C]       | 1067294721                                 |
| Ca_Kabuli_NC_021163.1_5233688 | Ca_kabuli_chr04    | 5233688                        | [A/C]       | 1067294722                                 |
| Ca_Kabuli_NC_021163.1_5233719 | Ca_kabuli_chr04    | 5233719                        | [T/C]       | 1067294723                                 |
| Ca_Kabuli_NC_021163.1_5272594 | Ca_kabuli_chr04    | 5272594                        | [A/C]       | 1067294724                                 |
| Ca_Kabuli_NC_021163.1_5274012 | Ca_kabuli_chr04    | 5274012                        | [T/C]       | 1067294725                                 |
| Ca_Kabuli_NC_021163.1_5282090 | Ca_kabuli_chr04    | 5282090                        | [A/C]       | 1067294726                                 |
| Ca_Kabuli_NC_021163.1_5310888 | Ca_kabuli_chr04    | 5310888                        | [T/C]       | 1067294727                                 |
| Ca_Kabuli_NC_021163.1_5321389 | Ca_kabuli_chr04    | 5321389                        | [T/A]       | 1067294728                                 |
| Ca_Kabuli_NC_021163.1_5321414 | Ca_kabuli_chr04    | 5321414                        | [A/G]       | 1067294729                                 |
| Ca_Kabuli_NC_021163.1_5321423 | Ca_kabuli_chr04    | 5321423                        | [T/C]       | 1067294730                                 |
| Ca_Kabuli_NC_021163.1_5321435 | Ca_kabuli_chr04    | 5321435                        | [T/C]       | 1067294731                                 |
| Ca_Kabuli_NC_021163.1_5345499 | Ca_kabuli_chr04    | 5345499                        | [T/A]       | 1067294732                                 |
| Ca_Kabuli_NC_021163.1_5347480 | Ca_kabuli_chr04    | 5347480                        | [A/C]       | 1067294733                                 |
| Ca_Kabuli_NC_021163.1_5347481 | Ca_kabuli_chr04    | 5347481                        | [G/T]       | 1067294734                                 |
| Ca_Kabuli_NC_021163.1_5376927 | Ca_kabuli_chr04    | 5376927                        | [A/T]       | 1067294735                                 |
| Ca_Kabuli_NC_021163.1_5376928 | Ca_kabuli_chr04    | 5376928                        | [A/C]       | 1067294736                                 |
| Ca_Kabuli_NC_021163.1_5376929 | Ca_kabuli_chr04    | 5376929                        | [G/T]       | 1067294737                                 |
| Ca_Kabuli_NC_021163.1_5377171 | Ca_kabuli_chr04    | 5377171                        | [T/G]       | 1067294738                                 |
| Ca_Kabuli_NC_021163.1_5390317 | Ca_kabuli_chr04    | 5390317                        | [G/A]       | 1067294739                                 |
| Ca_Kabuli_NC_021163.1_5390321 | Ca_kabuli_chr04    | 5390321                        | [T/C]       | 1067294740                                 |
| Ca_Kabuli_NC_021163.1_5390428 | Ca_kabuli_chr04    | 5390428                        | [A/C]       | 1067294741                                 |
| Ca_Kabuli_NC_021163.1_5401291 | Ca_kabuli_chr04    | 5401291                        | [T/G]       | 1067294742                                 |
| Ca_Kabuli_NC_021163.1_5401310 | Ca_kabuli_chr04    | 5401310                        | [T/G]       | 1067294743                                 |
| Ca_Kabuli_NC_021163.1_5405992 | Ca_kabuli_chr04    | 5405992                        | [T/G]       | 1067294744                                 |
| Ca_Kabuli_NC_021163.1_5406164 | Ca_kabuli_chr04    | 5406164                        | [A/C]       | 1067294745                                 |
| Ca_Kabuli_NC_021163.1_5408156 | Ca_kabuli_chr04    | 5408156                        | [A/C]       | 1067294746                                 |
| Ca_Kabuli_NC_021163.1_5458449 | Ca_kabuli_chr04    | 5458449                        | [A/G]       | 1067294747                                 |
| Ca_Kabuli_NC_021163.1_5528418 | Ca_kabuli_chr04    | 5528418                        | [T/G]       | 1067294748                                 |
| Ca_Kabuli_NC_021163.1_5528421 | Ca_kabuli_chr04    | 5528421                        | [T/G]       | 1067294749                                 |
| Ca_Kabuli_NC_021163.1_5528426 | Ca_kabuli_chr04    | 5528426                        | [A/G]       | 1067294750                                 |



| <b>SNP IDs</b>                | <b>Chromosomes</b> | <b>Physical positions (bp)</b> | <b>SNPs</b> | <b>NCBI SNPdb accession IDs (NCBI_ss#)</b> |
|-------------------------------|--------------------|--------------------------------|-------------|--------------------------------------------|
| Ca_Kabuli_NC_021163.1_5575091 | Ca_kabuli_chr04    | 5575091                        | [A/T]       | 1067294751                                 |
| Ca_Kabuli_NC_021163.1_5575822 | Ca_kabuli_chr04    | 5575822                        | [A/T]       | 1067294752                                 |
| Ca_Kabuli_NC_021163.1_5595089 | Ca_kabuli_chr04    | 5595089                        | [A/C]       | 1067294753                                 |
| Ca_Kabuli_NC_021163.1_5595101 | Ca_kabuli_chr04    | 5595101                        | [A/G]       | 1067294754                                 |
| Ca_Kabuli_NC_021163.1_5613386 | Ca_kabuli_chr04    | 5613386                        | [A/T]       | 1067294755                                 |
| Ca_Kabuli_NC_021163.1_5630336 | Ca_kabuli_chr04    | 5630336                        | [G/A]       | 1067294756                                 |
| Ca_Kabuli_NC_021163.1_5630342 | Ca_kabuli_chr04    | 5630342                        | [A/T]       | 1067294757                                 |
| Ca_Kabuli_NC_021163.1_5647745 | Ca_kabuli_chr04    | 5647745                        | [T/G]       | 1067294758                                 |
| Ca_Kabuli_NC_021163.1_5647748 | Ca_kabuli_chr04    | 5647748                        | [T/C]       | 1067294759                                 |
| Ca_Kabuli_NC_021163.1_5647760 | Ca_kabuli_chr04    | 5647760                        | [T/G]       | 1067294760                                 |
| Ca_Kabuli_NC_021163.1_5701888 | Ca_kabuli_chr04    | 5701888                        | [C/T]       | 1067294761                                 |
| Ca_Kabuli_NC_021163.1_5701900 | Ca_kabuli_chr04    | 5701900                        | [G/T]       | 1067294762                                 |
| Ca_Kabuli_NC_021163.1_5701902 | Ca_kabuli_chr04    | 5701902                        | [C/T]       | 1067294763                                 |
| Ca_Kabuli_NC_021163.1_5701905 | Ca_kabuli_chr04    | 5701905                        | [C/T]       | 1067294764                                 |
| Ca_Kabuli_NC_021163.1_5701907 | Ca_kabuli_chr04    | 5701907                        | [G/T]       | 1067294765                                 |
| Ca_Kabuli_NC_021163.1_5701913 | Ca_kabuli_chr04    | 5701913                        | [T/C]       | 1067294766                                 |
| Ca_Kabuli_NC_021163.1_5701919 | Ca_kabuli_chr04    | 5701919                        | [A/T]       | 1067294767                                 |
| Ca_Kabuli_NC_021163.1_5710437 | Ca_kabuli_chr04    | 5710437                        | [T/A]       | 1067294768                                 |
| Ca_Kabuli_NC_021163.1_5710447 | Ca_kabuli_chr04    | 5710447                        | [T/G]       | 1067294769                                 |
| Ca_Kabuli_NC_021163.1_5747426 | Ca_kabuli_chr04    | 5747426                        | [A/C]       | 1067294770                                 |
| Ca_Kabuli_NC_021163.1_5779788 | Ca_kabuli_chr04    | 5779788                        | [A/T]       | 1067294771                                 |
| Ca_Kabuli_NC_021163.1_5779789 | Ca_kabuli_chr04    | 5779789                        | [A/C]       | 1067294772                                 |
| Ca_Kabuli_NC_021163.1_5779790 | Ca_kabuli_chr04    | 5779790                        | [C/A]       | 1067294773                                 |
| Ca_Kabuli_NC_021163.1_5779959 | Ca_kabuli_chr04    | 5779959                        | [A/G]       | 1067294774                                 |
| Ca_Kabuli_NC_021163.1_5841468 | Ca_kabuli_chr04    | 5841468                        | [A/C]       | 1067294775                                 |
| Ca_Kabuli_NC_021163.1_5900290 | Ca_kabuli_chr04    | 5900290                        | [C/T]       | 1067294776                                 |
| Ca_Kabuli_NC_021163.1_5907409 | Ca_kabuli_chr04    | 5907409                        | [T/G]       | 1067294777                                 |
| Ca_Kabuli_NC_021163.1_5907465 | Ca_kabuli_chr04    | 5907465                        | [C/A]       | 1067294778                                 |
| Ca_Kabuli_NC_021163.1_5907470 | Ca_kabuli_chr04    | 5907470                        | [G/C]       | 1067294779                                 |
| Ca_Kabuli_NC_021163.1_5907472 | Ca_kabuli_chr04    | 5907472                        | [C/A]       | 1067294780                                 |
| Ca_Kabuli_NC_021163.1_5919776 | Ca_kabuli_chr04    | 5919776                        | [T/G]       | 1067294781                                 |
| Ca_Kabuli_NC_021163.1_5920631 | Ca_kabuli_chr04    | 5920631                        | [A/C]       | 1067294782                                 |
| Ca_Kabuli_NC_021163.1_5920659 | Ca_kabuli_chr04    | 5920659                        | [T/G]       | 1067294783                                 |
| Ca_Kabuli_NC_021163.1_5975388 | Ca_kabuli_chr04    | 5975388                        | [T/A]       | 1067294784                                 |

| <b>SNP IDs</b>                | <b>Chromosomes</b> | <b>Physical positions (bp)</b> | <b>SNPs</b> | <b>NCBI SNPdb accession IDs (NCBI_ss#)</b> |
|-------------------------------|--------------------|--------------------------------|-------------|--------------------------------------------|
| Ca_Kabuli_NC_021163.1_5997952 | Ca_kabuli_chr04    | 5997952                        | [A/C]       | 1067294785                                 |
| Ca_Kabuli_NC_021163.1_5997958 | Ca_kabuli_chr04    | 5997958                        | [A/C]       | 1067294786                                 |
| Ca_Kabuli_NC_021163.1_5997964 | Ca_kabuli_chr04    | 5997964                        | [A/C]       | 1067294787                                 |
| Ca_Kabuli_NC_021163.1_6006828 | Ca_kabuli_chr04    | 6006828                        | [T/G]       | 1067294788                                 |
| Ca_Kabuli_NC_021163.1_6006836 | Ca_kabuli_chr04    | 6006836                        | [A/G]       | 1067294789                                 |
| Ca_Kabuli_NC_021163.1_6006843 | Ca_kabuli_chr04    | 6006843                        | [T/G]       | 1067294790                                 |
| Ca_Kabuli_NC_021163.1_6040583 | Ca_kabuli_chr04    | 6040583                        | [A/C]       | 1067294791                                 |
| Ca_Kabuli_NC_021163.1_6041154 | Ca_kabuli_chr04    | 6041154                        | [A/C]       | 1067294792                                 |
| Ca_Kabuli_NC_021163.1_6076570 | Ca_kabuli_chr04    | 6076570                        | [T/G]       | 1067294793                                 |
| Ca_Kabuli_NC_021163.1_6076597 | Ca_kabuli_chr04    | 6076597                        | [A/T]       | 1067294794                                 |
| Ca_Kabuli_NC_021163.1_6083434 | Ca_kabuli_chr04    | 6083434                        | [T/G]       | 1067294795                                 |
| Ca_Kabuli_NC_021163.1_6102249 | Ca_kabuli_chr04    | 6102249                        | [T/G]       | 1067294796                                 |
| Ca_Kabuli_NC_021163.1_6205353 | Ca_kabuli_chr04    | 6205353                        | [A/G]       | 1067294797                                 |
| Ca_Kabuli_NC_021163.1_6264855 | Ca_kabuli_chr04    | 6264855                        | [T/A]       | 1067294798                                 |
| Ca_Kabuli_NC_021163.1_6281228 | Ca_kabuli_chr04    | 6281228                        | [A/C]       | 1067294799                                 |
| Ca_Kabuli_NC_021163.1_6338691 | Ca_kabuli_chr04    | 6338691                        | [C/A]       | 1067294800                                 |
| Ca_Kabuli_NC_021163.1_6338692 | Ca_kabuli_chr04    | 6338692                        | [T/G]       | 1067294801                                 |
| Ca_Kabuli_NC_021163.1_6389134 | Ca_kabuli_chr04    | 6389134                        | [T/C]       | 1067294802                                 |
| Ca_Kabuli_NC_021163.1_6389180 | Ca_kabuli_chr04    | 6389180                        | [A/G]       | 1067294803                                 |
| Ca_Kabuli_NC_021163.1_6389193 | Ca_kabuli_chr04    | 6389193                        | [A/G]       | 1067294804                                 |
| Ca_Kabuli_NC_021163.1_6389195 | Ca_kabuli_chr04    | 6389195                        | [A/G]       | 1067294805                                 |
| Ca_Kabuli_NC_021163.1_6389203 | Ca_kabuli_chr04    | 6389203                        | [A/C]       | 1067294806                                 |
| Ca_Kabuli_NC_021163.1_6391444 | Ca_kabuli_chr04    | 6391444                        | [A/C]       | 1067294807                                 |
| Ca_Kabuli_NC_021163.1_6408516 | Ca_kabuli_chr04    | 6408516                        | [A/G]       | 1067294808                                 |
| Ca_Kabuli_NC_021163.1_6408553 | Ca_kabuli_chr04    | 6408553                        | [A/G]       | 1067294809                                 |
| Ca_Kabuli_NC_021163.1_6411034 | Ca_kabuli_chr04    | 6411034                        | [T/C]       | 1067294810                                 |
| Ca_Kabuli_NC_021163.1_6411039 | Ca_kabuli_chr04    | 6411039                        | [G/A]       | 1067294811                                 |
| Ca_Kabuli_NC_021163.1_6415015 | Ca_kabuli_chr04    | 6415015                        | [T/G]       | 1067294812                                 |
| Ca_Kabuli_NC_021163.1_6415032 | Ca_kabuli_chr04    | 6415032                        | [A/C]       | 1067294813                                 |
| Ca_Kabuli_NC_021163.1_6456474 | Ca_kabuli_chr04    | 6456474                        | [T/C]       | 1067294814                                 |
| Ca_Kabuli_NC_021163.1_6461026 | Ca_kabuli_chr04    | 6461026                        | [G/C]       | 1067294815                                 |
| Ca_Kabuli_NC_021163.1_6462846 | Ca_kabuli_chr04    | 6462846                        | [C/A]       | 1067294816                                 |
| Ca_Kabuli_NC_021163.1_6462847 | Ca_kabuli_chr04    | 6462847                        | [T/G]       | 1067294817                                 |
| Ca_Kabuli_NC_021163.1_6507498 | Ca_kabuli_chr04    | 6507498                        | [T/G]       | 1067294818                                 |

| <b>SNP IDs</b>                | <b>Chromosomes</b> | <b>Physical positions (bp)</b> | <b>SNPs</b> | <b>NCBI SNPdb accession IDs (NCBI_ss#)</b> |
|-------------------------------|--------------------|--------------------------------|-------------|--------------------------------------------|
| Ca_Kabuli_NC_021163.1_6507522 | Ca_kabuli_chr04    | 6507522                        | [A/C]       | 1067294819                                 |
| Ca_Kabuli_NC_021163.1_6514899 | Ca_kabuli_chr04    | 6514899                        | [T/C]       | 1067294820                                 |
| Ca_Kabuli_NC_021163.1_6514900 | Ca_kabuli_chr04    | 6514900                        | [G/T]       | 1067294821                                 |
| Ca_Kabuli_NC_021163.1_6544317 | Ca_kabuli_chr04    | 6544317                        | [A/C]       | 1067294822                                 |
| Ca_Kabuli_NC_021163.1_6544397 | Ca_kabuli_chr04    | 6544397                        | [T/A]       | 1067294823                                 |
| Ca_Kabuli_NC_021163.1_6544399 | Ca_kabuli_chr04    | 6544399                        | [A/T]       | 1067294824                                 |
| Ca_Kabuli_NC_021163.1_6559477 | Ca_kabuli_chr04    | 6559477                        | [T/C]       | 1067294825                                 |
| Ca_Kabuli_NC_021163.1_6562602 | Ca_kabuli_chr04    | 6562602                        | [T/C]       | 1067294826                                 |
| Ca_Kabuli_NC_021163.1_6562628 | Ca_kabuli_chr04    | 6562628                        | [T/G]       | 1067294827                                 |
| Ca_Kabuli_NC_021163.1_6567319 | Ca_kabuli_chr04    | 6567319                        | [T/A]       | 1067294828                                 |
| Ca_Kabuli_NC_021163.1_6621474 | Ca_kabuli_chr04    | 6621474                        | [A/T]       | 1067294829                                 |
| Ca_Kabuli_NC_021163.1_6622339 | Ca_kabuli_chr04    | 6622339                        | [T/C]       | 1067294830                                 |
| Ca_Kabuli_NC_021163.1_6622368 | Ca_kabuli_chr04    | 6622368                        | [A/G]       | 1067294831                                 |
| Ca_Kabuli_NC_021163.1_6635780 | Ca_kabuli_chr04    | 6635780                        | [T/G]       | 1067294832                                 |
| Ca_Kabuli_NC_021163.1_6664462 | Ca_kabuli_chr04    | 6664462                        | [A/C]       | 1067294833                                 |
| Ca_Kabuli_NC_021163.1_6666908 | Ca_kabuli_chr04    | 6666908                        | [T/G]       | 1067294834                                 |
| Ca_Kabuli_NC_021163.1_6666916 | Ca_kabuli_chr04    | 6666916                        | [A/C]       | 1067294835                                 |
| Ca_Kabuli_NC_021163.1_6749909 | Ca_kabuli_chr04    | 6749909                        | [T/C]       | 1067294836                                 |
| Ca_Kabuli_NC_021163.1_6761719 | Ca_kabuli_chr04    | 6761719                        | [T/A]       | 1067294837                                 |
| Ca_Kabuli_NC_021163.1_6761759 | Ca_kabuli_chr04    | 6761759                        | [A/C]       | 1067294838                                 |
| Ca_Kabuli_NC_021163.1_6761763 | Ca_kabuli_chr04    | 6761763                        | [T/C]       | 1067294839                                 |
| Ca_Kabuli_NC_021163.1_6816250 | Ca_kabuli_chr04    | 6816250                        | [A/T]       | 1067294840                                 |
| Ca_Kabuli_NC_021163.1_6851628 | Ca_kabuli_chr04    | 6851628                        | [G/T]       | 1067294841                                 |
| Ca_Kabuli_NC_021163.1_6854067 | Ca_kabuli_chr04    | 6854067                        | [A/C]       | 1067294842                                 |
| Ca_Kabuli_NC_021163.1_6854127 | Ca_kabuli_chr04    | 6854127                        | [T/G]       | 1067294843                                 |
| Ca_Kabuli_NC_021163.1_6854135 | Ca_kabuli_chr04    | 6854135                        | [T/A]       | 1067294844                                 |
| Ca_Kabuli_NC_021163.1_6854162 | Ca_kabuli_chr04    | 6854162                        | [A/C]       | 1067294845                                 |
| Ca_Kabuli_NC_021163.1_6854187 | Ca_kabuli_chr04    | 6854187                        | [A/G]       | 1067294846                                 |
| Ca_Kabuli_NC_021163.1_6854533 | Ca_kabuli_chr04    | 6854533                        | [A/C]       | 1067294847                                 |
| Ca_Kabuli_NC_021163.1_6889964 | Ca_kabuli_chr04    | 6889964                        | [T/G]       | 1067294848                                 |
| Ca_Kabuli_NC_021163.1_6889967 | Ca_kabuli_chr04    | 6889967                        | [A/T]       | 1067294849                                 |
| Ca_Kabuli_NC_021163.1_6889974 | Ca_kabuli_chr04    | 6889974                        | [T/G]       | 1067294850                                 |
| Ca_Kabuli_NC_021163.1_6889978 | Ca_kabuli_chr04    | 6889978                        | [G/A]       | 1067294851                                 |
| Ca_Kabuli_NC_021163.1_6889981 | Ca_kabuli_chr04    | 6889981                        | [T/G]       | 1067294852                                 |

| <b>SNP IDs</b>                | <b>Chromosomes</b> | <b>Physical positions (bp)</b> | <b>SNPs</b> | <b>NCBI SNPdb accession IDs (NCBI_ss#)</b> |
|-------------------------------|--------------------|--------------------------------|-------------|--------------------------------------------|
| Ca_Kabuli_NC_021163.1_6918370 | Ca_kabuli_chr04    | 6918370                        | [T/C]       | 1067294853                                 |
| Ca_Kabuli_NC_021163.1_6952860 | Ca_kabuli_chr04    | 6952860                        | [T/G]       | 1067294854                                 |
| Ca_Kabuli_NC_021163.1_6952876 | Ca_kabuli_chr04    | 6952876                        | [T/G]       | 1067294855                                 |
| Ca_Kabuli_NC_021163.1_7040253 | Ca_kabuli_chr04    | 7040253                        | [A/C]       | 1067294856                                 |
| Ca_Kabuli_NC_021163.1_7040258 | Ca_kabuli_chr04    | 7040258                        | [A/C]       | 1067294857                                 |
| Ca_Kabuli_NC_021163.1_7068169 | Ca_kabuli_chr04    | 7068169                        | [C/A]       | 1067294858                                 |
| Ca_Kabuli_NC_021163.1_7068170 | Ca_kabuli_chr04    | 7068170                        | [C/G]       | 1067294859                                 |
| Ca_Kabuli_NC_021163.1_7068171 | Ca_kabuli_chr04    | 7068171                        | [G/A]       | 1067294860                                 |
| Ca_Kabuli_NC_021163.1_7069673 | Ca_kabuli_chr04    | 7069673                        | [A/G]       | 1067294861                                 |
| Ca_Kabuli_NC_021163.1_7069678 | Ca_kabuli_chr04    | 7069678                        | [C/T]       | 1067294862                                 |
| Ca_Kabuli_NC_021163.1_7069713 | Ca_kabuli_chr04    | 7069713                        | [C/T]       | 1067294863                                 |
| Ca_Kabuli_NC_021163.1_7142438 | Ca_kabuli_chr04    | 7142438                        | [T/G]       | 1067294864                                 |
| Ca_Kabuli_NC_021163.1_7143222 | Ca_kabuli_chr04    | 7143222                        | [T/C]       | 1067294865                                 |
| Ca_Kabuli_NC_021163.1_7143229 | Ca_kabuli_chr04    | 7143229                        | [C/T]       | 1067294866                                 |
| Ca_Kabuli_NC_021163.1_7143232 | Ca_kabuli_chr04    | 7143232                        | [C/T]       | 1067294867                                 |
| Ca_Kabuli_NC_021163.1_7143234 | Ca_kabuli_chr04    | 7143234                        | [C/T]       | 1067294868                                 |
| Ca_Kabuli_NC_021163.1_7143254 | Ca_kabuli_chr04    | 7143254                        | [A/C]       | 1067294869                                 |
| Ca_Kabuli_NC_021163.1_7155819 | Ca_kabuli_chr04    | 7155819                        | [A/G]       | 1067294870                                 |
| Ca_Kabuli_NC_021163.1_7155857 | Ca_kabuli_chr04    | 7155857                        | [T/G]       | 1067294871                                 |
| Ca_Kabuli_NC_021163.1_7155864 | Ca_kabuli_chr04    | 7155864                        | [A/G]       | 1067294872                                 |
| Ca_Kabuli_NC_021163.1_7163978 | Ca_kabuli_chr04    | 7163978                        | [T/C]       | 1067294873                                 |
| Ca_Kabuli_NC_021163.1_7163980 | Ca_kabuli_chr04    | 7163980                        | [A/C]       | 1067294874                                 |
| Ca_Kabuli_NC_021163.1_7163982 | Ca_kabuli_chr04    | 7163982                        | [C/T]       | 1067294875                                 |
| Ca_Kabuli_NC_021163.1_7164004 | Ca_kabuli_chr04    | 7164004                        | [A/C]       | 1067294876                                 |
| Ca_Kabuli_NC_021163.1_7187783 | Ca_kabuli_chr04    | 7187783                        | [T/A]       | 1067294877                                 |
| Ca_Kabuli_NC_021163.1_7350212 | Ca_kabuli_chr04    | 7350212                        | [A/T]       | 1067294878                                 |
| Ca_Kabuli_NC_021163.1_7395128 | Ca_kabuli_chr04    | 7395128                        | [A/G]       | 1067294879                                 |
| Ca_Kabuli_NC_021163.1_7417035 | Ca_kabuli_chr04    | 7417035                        | [T/G]       | 1067294880                                 |
| Ca_Kabuli_NC_021163.1_7417042 | Ca_kabuli_chr04    | 7417042                        | [T/G]       | 1067294881                                 |
| Ca_Kabuli_NC_021163.1_7523665 | Ca_kabuli_chr04    | 7523665                        | [T/C]       | 1067294882                                 |
| Ca_Kabuli_NC_021163.1_7523666 | Ca_kabuli_chr04    | 7523666                        | [A/T]       | 1067294883                                 |
| Ca_Kabuli_NC_021163.1_7523689 | Ca_kabuli_chr04    | 7523689                        | [A/C]       | 1067294884                                 |
| Ca_Kabuli_NC_021163.1_7548603 | Ca_kabuli_chr04    | 7548603                        | [A/C]       | 1067294885                                 |
| Ca_Kabuli_NC_021163.1_7548632 | Ca_kabuli_chr04    | 7548632                        | [G/T]       | 1067294886                                 |

| <b>SNP IDs</b>                | <b>Chromosomes</b> | <b>Physical positions (bp)</b> | <b>SNPs</b> | <b>NCBI SNPdb accession IDs (NCBI_ss#)</b> |
|-------------------------------|--------------------|--------------------------------|-------------|--------------------------------------------|
| Ca_Kabuli_NC_021163.1_7548635 | Ca_kabuli_chr04    | 7548635                        | [C/G]       | 1067294887                                 |
| Ca_Kabuli_NC_021163.1_7548636 | Ca_kabuli_chr04    | 7548636                        | [G/C]       | 1067294888                                 |
| Ca_Kabuli_NC_021163.1_7548639 | Ca_kabuli_chr04    | 7548639                        | [T/G]       | 1067294889                                 |
| Ca_Kabuli_NC_021163.1_7548640 | Ca_kabuli_chr04    | 7548640                        | [A/C]       | 1067294890                                 |
| Ca_Kabuli_NC_021163.1_7561479 | Ca_kabuli_chr04    | 7561479                        | [A/G]       | 1067294891                                 |
| Ca_Kabuli_NC_021163.1_7561491 | Ca_kabuli_chr04    | 7561491                        | [A/G]       | 1067294892                                 |
| Ca_Kabuli_NC_021163.1_7561495 | Ca_kabuli_chr04    | 7561495                        | [A/G]       | 1067294893                                 |
| Ca_Kabuli_NC_021163.1_7561515 | Ca_kabuli_chr04    | 7561515                        | [T/G]       | 1067294894                                 |
| Ca_Kabuli_NC_021163.1_7587496 | Ca_kabuli_chr04    | 7587496                        | [T/C]       | 1067294895                                 |
| Ca_Kabuli_NC_021163.1_7739201 | Ca_kabuli_chr04    | 7739201                        | [T/G]       | 1067294896                                 |
| Ca_Kabuli_NC_021163.1_7771941 | Ca_kabuli_chr04    | 7771941                        | [A/G]       | 1067294897                                 |
| Ca_Kabuli_NC_021163.1_7771948 | Ca_kabuli_chr04    | 7771948                        | [T/C]       | 1067294898                                 |
| Ca_Kabuli_NC_021163.1_7771956 | Ca_kabuli_chr04    | 7771956                        | [A/G]       | 1067294899                                 |
| Ca_Kabuli_NC_021163.1_7806626 | Ca_kabuli_chr04    | 7806626                        | [A/C]       | 1067294900                                 |
| Ca_Kabuli_NC_021163.1_7867676 | Ca_kabuli_chr04    | 7867676                        | [A/T]       | 1067294901                                 |
| Ca_Kabuli_NC_021163.1_7883714 | Ca_kabuli_chr04    | 7883714                        | [A/C]       | 1067294902                                 |
| Ca_Kabuli_NC_021163.1_7898356 | Ca_kabuli_chr04    | 7898356                        | [T/C]       | 1067294903                                 |
| Ca_Kabuli_NC_021163.1_7898383 | Ca_kabuli_chr04    | 7898383                        | [T/C]       | 1067294904                                 |
| Ca_Kabuli_NC_021163.1_7898392 | Ca_kabuli_chr04    | 7898392                        | [A/G]       | 1067294905                                 |
| Ca_Kabuli_NC_021163.1_7920411 | Ca_kabuli_chr04    | 7920411                        | [G/A]       | 1067294906                                 |
| Ca_Kabuli_NC_021163.1_8025364 | Ca_kabuli_chr04    | 8025364                        | [A/C]       | 1067294907                                 |
| Ca_Kabuli_NC_021163.1_8050741 | Ca_kabuli_chr04    | 8050741                        | [A/T]       | 1067294908                                 |
| Ca_Kabuli_NC_021163.1_8063576 | Ca_kabuli_chr04    | 8063576                        | [T/A]       | 1067294909                                 |
| Ca_Kabuli_NC_021163.1_8063608 | Ca_kabuli_chr04    | 8063608                        | [A/G]       | 1067294910                                 |
| Ca_Kabuli_NC_021163.1_8115068 | Ca_kabuli_chr04    | 8115068                        | [T/G]       | 1067294911                                 |
| Ca_Kabuli_NC_021163.1_8115233 | Ca_kabuli_chr04    | 8115233                        | [A/C]       | 1067294912                                 |
| Ca_Kabuli_NC_021163.1_8116598 | Ca_kabuli_chr04    | 8116598                        | [T/C]       | 1067294913                                 |
| Ca_Kabuli_NC_021163.1_8116604 | Ca_kabuli_chr04    | 8116604                        | [T/G]       | 1067294914                                 |
| Ca_Kabuli_NC_021163.1_8116611 | Ca_kabuli_chr04    | 8116611                        | [A/G]       | 1067294915                                 |
| Ca_Kabuli_NC_021163.1_8127200 | Ca_kabuli_chr04    | 8127200                        | [T/C]       | 1067294916                                 |
| Ca_Kabuli_NC_021163.1_8127204 | Ca_kabuli_chr04    | 8127204                        | [T/C]       | 1067294917                                 |
| Ca_Kabuli_NC_021163.1_8127255 | Ca_kabuli_chr04    | 8127255                        | [A/G]       | 1067294918                                 |
| Ca_Kabuli_NC_021163.1_8129337 | Ca_kabuli_chr04    | 8129337                        | [T/C]       | 1067294919                                 |
| Ca_Kabuli_NC_021163.1_8129348 | Ca_kabuli_chr04    | 8129348                        | [A/T]       | 1067294920                                 |

| <b>SNP IDs</b>                | <b>Chromosomes</b> | <b>Physical positions (bp)</b> | <b>SNPs</b> | <b>NCBI SNPdb accession IDs (NCBI_ss#)</b> |
|-------------------------------|--------------------|--------------------------------|-------------|--------------------------------------------|
| Ca_Kabuli_NC_021163.1_8129397 | Ca_kabuli_chr04    | 8129397                        | [A/G]       | 1067294921                                 |
| Ca_Kabuli_NC_021163.1_8186648 | Ca_kabuli_chr04    | 8186648                        | [A/C]       | 1067294922                                 |
| Ca_Kabuli_NC_021163.1_8186655 | Ca_kabuli_chr04    | 8186655                        | [A/C]       | 1067294923                                 |
| Ca_Kabuli_NC_021163.1_8186677 | Ca_kabuli_chr04    | 8186677                        | [A/C]       | 1067294924                                 |
| Ca_Kabuli_NC_021163.1_8194139 | Ca_kabuli_chr04    | 8194139                        | [T/C]       | 1067294925                                 |
| Ca_Kabuli_NC_021163.1_8236340 | Ca_kabuli_chr04    | 8236340                        | [T/G]       | 1067294926                                 |
| Ca_Kabuli_NC_021163.1_8236402 | Ca_kabuli_chr04    | 8236402                        | [A/C]       | 1067294927                                 |
| Ca_Kabuli_NC_021163.1_8237305 | Ca_kabuli_chr04    | 8237305                        | [A/G]       | 1067294928                                 |
| Ca_Kabuli_NC_021163.1_8245769 | Ca_kabuli_chr04    | 8245769                        | [A/G]       | 1067294929                                 |
| Ca_Kabuli_NC_021163.1_8268995 | Ca_kabuli_chr04    | 8268995                        | [T/C]       | 1067294930                                 |
| Ca_Kabuli_NC_021163.1_8290396 | Ca_kabuli_chr04    | 8290396                        | [A/C]       | 1067294931                                 |
| Ca_Kabuli_NC_021163.1_8302146 | Ca_kabuli_chr04    | 8302146                        | [A/G]       | 1067294932                                 |
| Ca_Kabuli_NC_021163.1_8302168 | Ca_kabuli_chr04    | 8302168                        | [T/C]       | 1067294933                                 |
| Ca_Kabuli_NC_021163.1_8302198 | Ca_kabuli_chr04    | 8302198                        | [A/C]       | 1067294934                                 |
| Ca_Kabuli_NC_021163.1_8304444 | Ca_kabuli_chr04    | 8304444                        | [A/C]       | 1067294935                                 |
| Ca_Kabuli_NC_021163.1_8356201 | Ca_kabuli_chr04    | 8356201                        | [A/C]       | 1067294936                                 |
| Ca_Kabuli_NC_021163.1_8361398 | Ca_kabuli_chr04    | 8361398                        | [A/C]       | 1067294937                                 |
| Ca_Kabuli_NC_021163.1_8361399 | Ca_kabuli_chr04    | 8361399                        | [G/A]       | 1067294938                                 |
| Ca_Kabuli_NC_021163.1_8367480 | Ca_kabuli_chr04    | 8367480                        | [T/G]       | 1067294939                                 |
| Ca_Kabuli_NC_021163.1_8369566 | Ca_kabuli_chr04    | 8369566                        | [A/C]       | 1067294940                                 |
| Ca_Kabuli_NC_021163.1_8404188 | Ca_kabuli_chr04    | 8404188                        | [A/T]       | 1067294941                                 |
| Ca_Kabuli_NC_021163.1_8471002 | Ca_kabuli_chr04    | 8471002                        | [A/G]       | 1067294942                                 |
| Ca_Kabuli_NC_021163.1_8473138 | Ca_kabuli_chr04    | 8473138                        | [T/G]       | 1067294943                                 |
| Ca_Kabuli_NC_021163.1_8475634 | Ca_kabuli_chr04    | 8475634                        | [A/C]       | 1067294944                                 |
| Ca_Kabuli_NC_021163.1_8496747 | Ca_kabuli_chr04    | 8496747                        | [A/G]       | 1067294945                                 |
| Ca_Kabuli_NC_021163.1_8533012 | Ca_kabuli_chr04    | 8533012                        | [T/C]       | 1067294946                                 |
| Ca_Kabuli_NC_021163.1_8533017 | Ca_kabuli_chr04    | 8533017                        | [T/C]       | 1067294947                                 |
| Ca_Kabuli_NC_021163.1_8596243 | Ca_kabuli_chr04    | 8596243                        | [T/G]       | 1067294948                                 |
| Ca_Kabuli_NC_021163.1_8596268 | Ca_kabuli_chr04    | 8596268                        | [T/G]       | 1067294949                                 |
| Ca_Kabuli_NC_021163.1_8620826 | Ca_kabuli_chr04    | 8620826                        | [T/C]       | 1067294950                                 |
| Ca_Kabuli_NC_021163.1_8627547 | Ca_kabuli_chr04    | 8627547                        | [A/G]       | 1067294951                                 |
| Ca_Kabuli_NC_021163.1_8656398 | Ca_kabuli_chr04    | 8656398                        | [A/G]       | 1067294952                                 |
| Ca_Kabuli_NC_021163.1_8656635 | Ca_kabuli_chr04    | 8656635                        | [T/C]       | 1067294953                                 |
| Ca_Kabuli_NC_021163.1_8659774 | Ca_kabuli_chr04    | 8659774                        | [G/A]       | 1067294954                                 |

| <b>SNP IDs</b>                | <b>Chromosomes</b> | <b>Physical positions (bp)</b> | <b>SNPs</b> | <b>NCBI SNPdb accession IDs (NCBI_ss#)</b> |
|-------------------------------|--------------------|--------------------------------|-------------|--------------------------------------------|
| Ca_Kabuli_NC_021163.1_8660115 | Ca_kabuli_chr04    | 8660115                        | [T/A]       | 1067294955                                 |
| Ca_Kabuli_NC_021163.1_8660123 | Ca_kabuli_chr04    | 8660123                        | [A/G]       | 1067294956                                 |
| Ca_Kabuli_NC_021163.1_8660125 | Ca_kabuli_chr04    | 8660125                        | [A/C]       | 1067294957                                 |
| Ca_Kabuli_NC_021163.1_8660131 | Ca_kabuli_chr04    | 8660131                        | [T/C]       | 1067294958                                 |
| Ca_Kabuli_NC_021163.1_8660144 | Ca_kabuli_chr04    | 8660144                        | [T/C]       | 1067294959                                 |
| Ca_Kabuli_NC_021163.1_8660196 | Ca_kabuli_chr04    | 8660196                        | [T/C]       | 1067294960                                 |
| Ca_Kabuli_NC_021163.1_8660198 | Ca_kabuli_chr04    | 8660198                        | [T/C]       | 1067294961                                 |
| Ca_Kabuli_NC_021163.1_8660205 | Ca_kabuli_chr04    | 8660205                        | [A/G]       | 1067294962                                 |
| Ca_Kabuli_NC_021163.1_8660252 | Ca_kabuli_chr04    | 8660252                        | [A/G]       | 1067294963                                 |
| Ca_Kabuli_NC_021163.1_8661559 | Ca_kabuli_chr04    | 8661559                        | [G/A]       | 1067294964                                 |
| Ca_Kabuli_NC_021163.1_8661588 | Ca_kabuli_chr04    | 8661588                        | [T/C]       | 1067294965                                 |
| Ca_Kabuli_NC_021163.1_8661607 | Ca_kabuli_chr04    | 8661607                        | [T/C]       | 1067294966                                 |
| Ca_Kabuli_NC_021163.1_8662340 | Ca_kabuli_chr04    | 8662340                        | [G/C]       | 1067294967                                 |
| Ca_Kabuli_NC_021163.1_8662348 | Ca_kabuli_chr04    | 8662348                        | [C/A]       | 1067294968                                 |
| Ca_Kabuli_NC_021163.1_8662350 | Ca_kabuli_chr04    | 8662350                        | [G/A]       | 1067294969                                 |
| Ca_Kabuli_NC_021163.1_8668945 | Ca_kabuli_chr04    | 8668945                        | [C/T]       | 1067294970                                 |
| Ca_Kabuli_NC_021163.1_8669513 | Ca_kabuli_chr04    | 8669513                        | [A/G]       | 1067294971                                 |
| Ca_Kabuli_NC_021163.1_8669515 | Ca_kabuli_chr04    | 8669515                        | [T/C]       | 1067294972                                 |
| Ca_Kabuli_NC_021163.1_8669560 | Ca_kabuli_chr04    | 8669560                        | [A/C]       | 1067294973                                 |
| Ca_Kabuli_NC_021163.1_8677598 | Ca_kabuli_chr04    | 8677598                        | [C/T]       | 1067294974                                 |
| Ca_Kabuli_NC_021163.1_8681906 | Ca_kabuli_chr04    | 8681906                        | [A/T]       | 1067294975                                 |
| Ca_Kabuli_NC_021163.1_8681949 | Ca_kabuli_chr04    | 8681949                        | [A/G]       | 1067294976                                 |
| Ca_Kabuli_NC_021163.1_8682191 | Ca_kabuli_chr04    | 8682191                        | [T/C]       | 1067294977                                 |
| Ca_Kabuli_NC_021163.1_8683428 | Ca_kabuli_chr04    | 8683428                        | [C/T]       | 1067294978                                 |
| Ca_Kabuli_NC_021163.1_8683435 | Ca_kabuli_chr04    | 8683435                        | [T/C]       | 1067294979                                 |
| Ca_Kabuli_NC_021163.1_8683887 | Ca_kabuli_chr04    | 8683887                        | [G/A]       | 1067294980                                 |
| Ca_Kabuli_NC_021163.1_8683953 | Ca_kabuli_chr04    | 8683953                        | [C/G]       | 1067294981                                 |
| Ca_Kabuli_NC_021163.1_8684184 | Ca_kabuli_chr04    | 8684184                        | [G/A]       | 1067294982                                 |
| Ca_Kabuli_NC_021163.1_8684185 | Ca_kabuli_chr04    | 8684185                        | [G/A]       | 1067294983                                 |
| Ca_Kabuli_NC_021163.1_8684220 | Ca_kabuli_chr04    | 8684220                        | [A/G]       | 1067294984                                 |
| Ca_Kabuli_NC_021163.1_8685875 | Ca_kabuli_chr04    | 8685875                        | [G/A]       | 1067294985                                 |
| Ca_Kabuli_NC_021163.1_8686216 | Ca_kabuli_chr04    | 8686216                        | [A/T]       | 1067294986                                 |
| Ca_Kabuli_NC_021163.1_8692150 | Ca_kabuli_chr04    | 8692150                        | [C/T]       | 1067294987                                 |
| Ca_Kabuli_NC_021163.1_8692321 | Ca_kabuli_chr04    | 8692321                        | [C/T]       | 1067294988                                 |

| <b>SNP IDs</b>                | <b>Chromosomes</b> | <b>Physical positions (bp)</b> | <b>SNPs</b> | <b>NCBI SNPdb accession IDs (NCBI_ss#)</b> |
|-------------------------------|--------------------|--------------------------------|-------------|--------------------------------------------|
| Ca_Kabuli_NC_021163.1_8695562 | Ca_kabuli_chr04    | 8695562                        | [T/C]       | 1067294989                                 |
| Ca_Kabuli_NC_021163.1_8696395 | Ca_kabuli_chr04    | 8696395                        | [G/C]       | 1067294990                                 |
| Ca_Kabuli_NC_021163.1_8697219 | Ca_kabuli_chr04    | 8697219                        | [C/T]       | 1067294991                                 |
| Ca_Kabuli_NC_021163.1_8697220 | Ca_kabuli_chr04    | 8697220                        | [A/T]       | 1067294992                                 |
| Ca_Kabuli_NC_021163.1_8697226 | Ca_kabuli_chr04    | 8697226                        | [A/G]       | 1067294993                                 |
| Ca_Kabuli_NC_021163.1_8751611 | Ca_kabuli_chr04    | 8751611                        | [T/C]       | 1067294994                                 |
| Ca_Kabuli_NC_021163.1_8751618 | Ca_kabuli_chr04    | 8751618                        | [A/C]       | 1067294995                                 |
| Ca_Kabuli_NC_021163.1_8751626 | Ca_kabuli_chr04    | 8751626                        | [A/C]       | 1067294996                                 |
| Ca_Kabuli_NC_021163.1_8751629 | Ca_kabuli_chr04    | 8751629                        | [T/C]       | 1067294997                                 |
| Ca_Kabuli_NC_021163.1_8751638 | Ca_kabuli_chr04    | 8751638                        | [A/C]       | 1067294998                                 |
| Ca_Kabuli_NC_021163.1_8751642 | Ca_kabuli_chr04    | 8751642                        | [A/C]       | 1067294999                                 |
| Ca_Kabuli_NC_021163.1_8752822 | Ca_kabuli_chr04    | 8752822                        | [T/C]       | 1067295000                                 |
| Ca_Kabuli_NC_021163.1_8776321 | Ca_kabuli_chr04    | 8776321                        | [C/A]       | 1067295001                                 |
| Ca_Kabuli_NC_021163.1_8776322 | Ca_kabuli_chr04    | 8776322                        | [T/G]       | 1067295002                                 |
| Ca_Kabuli_NC_021163.1_8776323 | Ca_kabuli_chr04    | 8776323                        | [T/A]       | 1067295003                                 |
| Ca_Kabuli_NC_021163.1_8776324 | Ca_kabuli_chr04    | 8776324                        | [C/T]       | 1067295004                                 |
| Ca_Kabuli_NC_021163.1_8777418 | Ca_kabuli_chr04    | 8777418                        | [T/C]       | 1067295005                                 |
| Ca_Kabuli_NC_021163.1_8782609 | Ca_kabuli_chr04    | 8782609                        | [C/T]       | 1067295006                                 |
| Ca_Kabuli_NC_021163.1_8783887 | Ca_kabuli_chr04    | 8783887                        | [G/A]       | 1067295007                                 |
| Ca_Kabuli_NC_021163.1_8791636 | Ca_kabuli_chr04    | 8791636                        | [A/C]       | 1067295008                                 |
| Ca_Kabuli_NC_021163.1_8791651 | Ca_kabuli_chr04    | 8791651                        | [A/C]       | 1067295009                                 |
| Ca_Kabuli_NC_021163.1_8805116 | Ca_kabuli_chr04    | 8805116                        | [C/T]       | 1067295010                                 |
| Ca_Kabuli_NC_021163.1_8805504 | Ca_kabuli_chr04    | 8805504                        | [G/A]       | 1067295011                                 |
| Ca_Kabuli_NC_021163.1_8805667 | Ca_kabuli_chr04    | 8805667                        | [T/C]       | 1067295012                                 |
| Ca_Kabuli_NC_021163.1_8805839 | Ca_kabuli_chr04    | 8805839                        | [A/G]       | 1067295013                                 |
| Ca_Kabuli_NC_021163.1_8805867 | Ca_kabuli_chr04    | 8805867                        | [C/A]       | 1067295014                                 |
| Ca_Kabuli_NC_021163.1_8806078 | Ca_kabuli_chr04    | 8806078                        | [A/G]       | 1067295015                                 |
| Ca_Kabuli_NC_021163.1_8806108 | Ca_kabuli_chr04    | 8806108                        | [T/C]       | 1067295016                                 |
| Ca_Kabuli_NC_021163.1_8806137 | Ca_kabuli_chr04    | 8806137                        | [T/C]       | 1067295017                                 |
| Ca_Kabuli_NC_021163.1_8809411 | Ca_kabuli_chr04    | 8809411                        | [A/C]       | 1067295018                                 |
| Ca_Kabuli_NC_021163.1_8844835 | Ca_kabuli_chr04    | 8844835                        | [A/G]       | 1067295019                                 |
| Ca_Kabuli_NC_021163.1_8845593 | Ca_kabuli_chr04    | 8845593                        | [T/G]       | 1067295020                                 |
| Ca_Kabuli_NC_021163.1_8845663 | Ca_kabuli_chr04    | 8845663                        | [A/G]       | 1067295021                                 |
| Ca_Kabuli_NC_021163.1_8848673 | Ca_kabuli_chr04    | 8848673                        | [T/C]       | 1067295022                                 |



| <b>SNP IDs</b>                | <b>Chromosomes</b> | <b>Physical positions (bp)</b> | <b>SNPs</b> | <b>NCBI SNPdb accession IDs (NCBI_ss#)</b> |
|-------------------------------|--------------------|--------------------------------|-------------|--------------------------------------------|
| Ca_Kabuli_NC_021163.1_8848689 | Ca_kabuli_chr04    | 8848689                        | [A/C]       | 1067295023                                 |
| Ca_Kabuli_NC_021163.1_8849693 | Ca_kabuli_chr04    | 8849693                        | [A/T]       | 1067295024                                 |
| Ca_Kabuli_NC_021163.1_8852420 | Ca_kabuli_chr04    | 8852420                        | [C/T]       | 1067295025                                 |
| Ca_Kabuli_NC_021163.1_8865427 | Ca_kabuli_chr04    | 8865427                        | [A/G]       | 1067295026                                 |
| Ca_Kabuli_NC_021163.1_8919168 | Ca_kabuli_chr04    | 8919168                        | [A/T]       | 1067295027                                 |
| Ca_Kabuli_NC_021163.1_8919205 | Ca_kabuli_chr04    | 8919205                        | [A/T]       | 1067295028                                 |
| Ca_Kabuli_NC_021163.1_8919209 | Ca_kabuli_chr04    | 8919209                        | [A/G]       | 1067295029                                 |
| Ca_Kabuli_NC_021163.1_8919223 | Ca_kabuli_chr04    | 8919223                        | [T/C]       | 1067295030                                 |
| Ca_Kabuli_NC_021163.1_8919308 | Ca_kabuli_chr04    | 8919308                        | [A/C]       | 1067295031                                 |
| Ca_Kabuli_NC_021163.1_8919332 | Ca_kabuli_chr04    | 8919332                        | [A/G]       | 1067295032                                 |
| Ca_Kabuli_NC_021163.1_8919427 | Ca_kabuli_chr04    | 8919427                        | [A/C]       | 1067295033                                 |
| Ca_Kabuli_NC_021163.1_8922803 | Ca_kabuli_chr04    | 8922803                        | [A/C]       | 1067295034                                 |
| Ca_Kabuli_NC_021163.1_8926390 | Ca_kabuli_chr04    | 8926390                        | [C/A]       | 1067295035                                 |
| Ca_Kabuli_NC_021163.1_8952820 | Ca_kabuli_chr04    | 8952820                        | [T/G]       | 1067295036                                 |
| Ca_Kabuli_NC_021163.1_8986026 | Ca_kabuli_chr04    | 8986026                        | [T/A]       | 1067295037                                 |
| Ca_Kabuli_NC_021163.1_8986274 | Ca_kabuli_chr04    | 8986274                        | [A/C]       | 1067295038                                 |
| Ca_Kabuli_NC_021163.1_9075516 | Ca_kabuli_chr04    | 9075516                        | [T/C]       | 1067295039                                 |
| Ca_Kabuli_NC_021163.1_9075538 | Ca_kabuli_chr04    | 9075538                        | [T/G]       | 1067295040                                 |
| Ca_Kabuli_NC_021163.1_9075543 | Ca_kabuli_chr04    | 9075543                        | [T/G]       | 1067295041                                 |
| Ca_Kabuli_NC_021163.1_9075565 | Ca_kabuli_chr04    | 9075565                        | [A/G]       | 1067295042                                 |
| Ca_Kabuli_NC_021163.1_9075592 | Ca_kabuli_chr04    | 9075592                        | [A/G]       | 1067295043                                 |
| Ca_Kabuli_NC_021163.1_9096853 | Ca_kabuli_chr04    | 9096853                        | [A/C]       | 1067295044                                 |
| Ca_Kabuli_NC_021163.1_9099191 | Ca_kabuli_chr04    | 9099191                        | [T/G]       | 1067295045                                 |
| Ca_Kabuli_NC_021163.1_9115267 | Ca_kabuli_chr04    | 9115267                        | [T/C]       | 1067295046                                 |
| Ca_Kabuli_NC_021163.1_9115502 | Ca_kabuli_chr04    | 9115502                        | [T/C]       | 1067295047                                 |
| Ca_Kabuli_NC_021163.1_9115563 | Ca_kabuli_chr04    | 9115563                        | [A/G]       | 1067295048                                 |
| Ca_Kabuli_NC_021163.1_9187861 | Ca_kabuli_chr04    | 9187861                        | [T/C]       | 1067295049                                 |
| Ca_Kabuli_NC_021163.1_9243289 | Ca_kabuli_chr04    | 9243289                        | [A/C]       | 1067295050                                 |
| Ca_Kabuli_NC_021163.1_9243310 | Ca_kabuli_chr04    | 9243310                        | [A/T]       | 1067295051                                 |
| Ca_Kabuli_NC_021163.1_9250479 | Ca_kabuli_chr04    | 9250479                        | [A/G]       | 1067295052                                 |
| Ca_Kabuli_NC_021163.1_9250487 | Ca_kabuli_chr04    | 9250487                        | [A/C]       | 1067295053                                 |
| Ca_Kabuli_NC_021163.1_9325185 | Ca_kabuli_chr04    | 9325185                        | [T/A]       | 1067295054                                 |
| Ca_Kabuli_NC_021163.1_9325208 | Ca_kabuli_chr04    | 9325208                        | [A/C]       | 1067295055                                 |
| Ca_Kabuli_NC_021163.1_9325219 | Ca_kabuli_chr04    | 9325219                        | [T/C]       | 1067295056                                 |

| <b>SNP IDs</b>                 | <b>Chromosomes</b> | <b>Physical positions (bp)</b> | <b>SNPs</b> | <b>NCBI SNPdb accession IDs (NCBI_ss#)</b> |
|--------------------------------|--------------------|--------------------------------|-------------|--------------------------------------------|
| Ca_Kabuli_NC_021163.1_9331930  | Ca_kabuli_chr04    | 9331930                        | [A/T]       | 1067295057                                 |
| Ca_Kabuli_NC_021163.1_9331931  | Ca_kabuli_chr04    | 9331931                        | [T/A]       | 1067295058                                 |
| Ca_Kabuli_NC_021163.1_9404962  | Ca_kabuli_chr04    | 9404962                        | [A/C]       | 1067295059                                 |
| Ca_Kabuli_NC_021163.1_9451895  | Ca_kabuli_chr04    | 9451895                        | [T/A]       | 1067295060                                 |
| Ca_Kabuli_NC_021163.1_9451905  | Ca_kabuli_chr04    | 9451905                        | [T/G]       | 1067295061                                 |
| Ca_Kabuli_NC_021163.1_9498227  | Ca_kabuli_chr04    | 9498227                        | [A/C]       | 1067295062                                 |
| Ca_Kabuli_NC_021163.1_9498228  | Ca_kabuli_chr04    | 9498228                        | [C/T]       | 1067295063                                 |
| Ca_Kabuli_NC_021163.1_9541066  | Ca_kabuli_chr04    | 9541066                        | [A/C]       | 1067295064                                 |
| Ca_Kabuli_NC_021163.1_9541081  | Ca_kabuli_chr04    | 9541081                        | [T/G]       | 1067295065                                 |
| Ca_Kabuli_NC_021163.1_9541086  | Ca_kabuli_chr04    | 9541086                        | [T/C]       | 1067295066                                 |
| Ca_Kabuli_NC_021163.1_9580315  | Ca_kabuli_chr04    | 9580315                        | [T/C]       | 1067295067                                 |
| Ca_Kabuli_NC_021163.1_9580349  | Ca_kabuli_chr04    | 9580349                        | [T/C]       | 1067295068                                 |
| Ca_Kabuli_NC_021163.1_9580351  | Ca_kabuli_chr04    | 9580351                        | [A/T]       | 1067295069                                 |
| Ca_Kabuli_NC_021163.1_9580421  | Ca_kabuli_chr04    | 9580421                        | [A/G]       | 1067295070                                 |
| Ca_Kabuli_NC_021163.1_9611920  | Ca_kabuli_chr04    | 9611920                        | [T/A]       | 1067295071                                 |
| Ca_Kabuli_NC_021163.1_9661566  | Ca_kabuli_chr04    | 9661566                        | [T/A]       | 1067295072                                 |
| Ca_Kabuli_NC_021163.1_9803227  | Ca_kabuli_chr04    | 9803227                        | [C/T]       | 1067295073                                 |
| Ca_Kabuli_NC_021163.1_9803230  | Ca_kabuli_chr04    | 9803230                        | [C/T]       | 1067295074                                 |
| Ca_Kabuli_NC_021163.1_9823199  | Ca_kabuli_chr04    | 9823199                        | [T/C]       | 1067295075                                 |
| Ca_Kabuli_NC_021163.1_9840885  | Ca_kabuli_chr04    | 9840885                        | [T/C]       | 1067295076                                 |
| Ca_Kabuli_NC_021163.1_9908004  | Ca_kabuli_chr04    | 9908004                        | [A/T]       | 1067295077                                 |
| Ca_Kabuli_NC_021163.1_9908049  | Ca_kabuli_chr04    | 9908049                        | [A/T]       | 1067295078                                 |
| Ca_Kabuli_NC_021163.1_9908096  | Ca_kabuli_chr04    | 9908096                        | [T/G]       | 1067295079                                 |
| Ca_Kabuli_NC_021163.1_9908280  | Ca_kabuli_chr04    | 9908280                        | [T/C]       | 1067295080                                 |
| Ca_Kabuli_NC_021163.1_9908289  | Ca_kabuli_chr04    | 9908289                        | [T/C]       | 1067295081                                 |
| Ca_Kabuli_NC_021163.1_9908305  | Ca_kabuli_chr04    | 9908305                        | [A/T]       | 1067295082                                 |
| Ca_Kabuli_NC_021163.1_9908336  | Ca_kabuli_chr04    | 9908336                        | [A/G]       | 1067295083                                 |
| Ca_Kabuli_NC_021163.1_9908346  | Ca_kabuli_chr04    | 9908346                        | [A/G]       | 1067295084                                 |
| Ca_Kabuli_NC_021163.1_9976026  | Ca_kabuli_chr04    | 9976026                        | [A/G]       | 1067295085                                 |
| Ca_Kabuli_NC_021163.1_9980947  | Ca_kabuli_chr04    | 9980947                        | [A/G]       | 1067295086                                 |
| Ca_Kabuli_NC_021163.1_9980957  | Ca_kabuli_chr04    | 9980957                        | [A/G]       | 1067295087                                 |
| Ca_Kabuli_NC_021163.1_9980959  | Ca_kabuli_chr04    | 9980959                        | [A/C]       | 1067295088                                 |
| Ca_Kabuli_NC_021163.1_9980970  | Ca_kabuli_chr04    | 9980970                        | [T/A]       | 1067295089                                 |
| Ca_Kabuli_NC_021163.1_10007142 | Ca_kabuli_chr04    | 10007142                       | [A/G]       | 1067295090                                 |

| <b>SNP IDs</b>                 | <b>Chromosomes</b> | <b>Physical positions (bp)</b> | <b>SNPs</b> | <b>NCBI SNPdb accession IDs (NCBI_ss#)</b> |
|--------------------------------|--------------------|--------------------------------|-------------|--------------------------------------------|
| Ca_Kabuli_NC_021163.1_10007190 | Ca_kabuli_chr04    | 10007190                       | [T/A]       | 1067295091                                 |
| Ca_Kabuli_NC_021163.1_10024207 | Ca_kabuli_chr04    | 10024207                       | [T/A]       | 1067295092                                 |
| Ca_Kabuli_NC_021163.1_10024246 | Ca_kabuli_chr04    | 10024246                       | [A/G]       | 1067295093                                 |
| Ca_Kabuli_NC_021163.1_10026849 | Ca_kabuli_chr04    | 10026849                       | [A/C]       | 1067295094                                 |
| Ca_Kabuli_NC_021163.1_10026868 | Ca_kabuli_chr04    | 10026868                       | [A/G]       | 1067295095                                 |
| Ca_Kabuli_NC_021163.1_10049947 | Ca_kabuli_chr04    | 10049947                       | [T/C]       | 1067295096                                 |
| Ca_Kabuli_NC_021163.1_10049951 | Ca_kabuli_chr04    | 10049951                       | [A/C]       | 1067295097                                 |
| Ca_Kabuli_NC_021163.1_10049963 | Ca_kabuli_chr04    | 10049963                       | [A/C]       | 1067295098                                 |
| Ca_Kabuli_NC_021163.1_10049980 | Ca_kabuli_chr04    | 10049980                       | [A/G]       | 1067295099                                 |
| Ca_Kabuli_NC_021163.1_10053932 | Ca_kabuli_chr04    | 10053932                       | [A/T]       | 1067295100                                 |
| Ca_Kabuli_NC_021163.1_10053933 | Ca_kabuli_chr04    | 10053933                       | [G/C]       | 1067295101                                 |
| Ca_Kabuli_NC_021163.1_10053934 | Ca_kabuli_chr04    | 10053934                       | [G/T]       | 1067295102                                 |
| Ca_Kabuli_NC_021163.1_10082251 | Ca_kabuli_chr04    | 10082251                       | [T/C]       | 1067295103                                 |
| Ca_Kabuli_NC_021163.1_10151639 | Ca_kabuli_chr04    | 10151639                       | [T/G]       | 1067295104                                 |
| Ca_Kabuli_NC_021163.1_10151684 | Ca_kabuli_chr04    | 10151684                       | [A/C]       | 1067295105                                 |
| Ca_Kabuli_NC_021163.1_10151688 | Ca_kabuli_chr04    | 10151688                       | [A/C]       | 1067295106                                 |
| Ca_Kabuli_NC_021163.1_10152130 | Ca_kabuli_chr04    | 10152130                       | [T/G]       | 1067295107                                 |
| Ca_Kabuli_NC_021163.1_10152160 | Ca_kabuli_chr04    | 10152160                       | [A/C]       | 1067295108                                 |
| Ca_Kabuli_NC_021163.1_10184474 | Ca_kabuli_chr04    | 10184474                       | [T/G]       | 1067295109                                 |
| Ca_Kabuli_NC_021163.1_10200521 | Ca_kabuli_chr04    | 10200521                       | [C/A]       | 1067295110                                 |
| Ca_Kabuli_NC_021163.1_10200523 | Ca_kabuli_chr04    | 10200523                       | [A/C]       | 1067295111                                 |
| Ca_Kabuli_NC_021163.1_10205223 | Ca_kabuli_chr04    | 10205223                       | [T/C]       | 1067295112                                 |
| Ca_Kabuli_NC_021163.1_10236946 | Ca_kabuli_chr04    | 10236946                       | [T/C]       | 1067295113                                 |
| Ca_Kabuli_NC_021163.1_10236955 | Ca_kabuli_chr04    | 10236955                       | [T/C]       | 1067295114                                 |
| Ca_Kabuli_NC_021163.1_10236977 | Ca_kabuli_chr04    | 10236977                       | [A/C]       | 1067295115                                 |
| Ca_Kabuli_NC_021163.1_10236987 | Ca_kabuli_chr04    | 10236987                       | [A/C]       | 1067295116                                 |
| Ca_Kabuli_NC_021163.1_10305241 | Ca_kabuli_chr04    | 10305241                       | [T/A]       | 1067295117                                 |
| Ca_Kabuli_NC_021163.1_10305261 | Ca_kabuli_chr04    | 10305261                       | [A/C]       | 1067295118                                 |
| Ca_Kabuli_NC_021163.1_10355491 | Ca_kabuli_chr04    | 10355491                       | [T/C]       | 1067295119                                 |
| Ca_Kabuli_NC_021163.1_10355514 | Ca_kabuli_chr04    | 10355514                       | [A/T]       | 1067295120                                 |
| Ca_Kabuli_NC_021163.1_10355527 | Ca_kabuli_chr04    | 10355527                       | [T/A]       | 1067295121                                 |
| Ca_Kabuli_NC_021163.1_10355547 | Ca_kabuli_chr04    | 10355547                       | [A/T]       | 1067295122                                 |
| Ca_Kabuli_NC_021163.1_10355549 | Ca_kabuli_chr04    | 10355549                       | [A/C]       | 1067295123                                 |
| Ca_Kabuli_NC_021163.1_10419430 | Ca_kabuli_chr04    | 10419430                       | [T/C]       | 1067295124                                 |

| <b>SNP IDs</b>                 | <b>Chromosomes</b> | <b>Physical positions (bp)</b> | <b>SNPs</b> | <b>NCBI SNPdb accession IDs (NCBI_ss#)</b> |
|--------------------------------|--------------------|--------------------------------|-------------|--------------------------------------------|
| Ca_Kabuli_NC_021163.1_10420290 | Ca_kabuli_chr04    | 10420290                       | [T/C]       | 1067295125                                 |
| Ca_Kabuli_NC_021163.1_10422406 | Ca_kabuli_chr04    | 10422406                       | [T/C]       | 1067295126                                 |
| Ca_Kabuli_NC_021163.1_10430193 | Ca_kabuli_chr04    | 10430193                       | [A/G]       | 1067295127                                 |
| Ca_Kabuli_NC_021163.1_10430603 | Ca_kabuli_chr04    | 10430603                       | [G/A]       | 1067295128                                 |
| Ca_Kabuli_NC_021163.1_10430613 | Ca_kabuli_chr04    | 10430613                       | [C/A]       | 1067295129                                 |
| Ca_Kabuli_NC_021163.1_10430617 | Ca_kabuli_chr04    | 10430617                       | [A/C]       | 1067295130                                 |
| Ca_Kabuli_NC_021163.1_10430622 | Ca_kabuli_chr04    | 10430622                       | [A/C]       | 1067295131                                 |
| Ca_Kabuli_NC_021163.1_10434774 | Ca_kabuli_chr04    | 10434774                       | [T/A]       | 1067295132                                 |
| Ca_Kabuli_NC_021163.1_10475828 | Ca_kabuli_chr04    | 10475828                       | [A/T]       | 1067295133                                 |
| Ca_Kabuli_NC_021163.1_10475829 | Ca_kabuli_chr04    | 10475829                       | [A/C]       | 1067295134                                 |
| Ca_Kabuli_NC_021163.1_10475830 | Ca_kabuli_chr04    | 10475830                       | [G/T]       | 1067295135                                 |
| Ca_Kabuli_NC_021163.1_10547652 | Ca_kabuli_chr04    | 10547652                       | [A/T]       | 1067295136                                 |
| Ca_Kabuli_NC_021163.1_10547674 | Ca_kabuli_chr04    | 10547674                       | [A/T]       | 1067295137                                 |
| Ca_Kabuli_NC_021163.1_10595816 | Ca_kabuli_chr04    | 10595816                       | [A/C]       | 1067295138                                 |
| Ca_Kabuli_NC_021163.1_10595824 | Ca_kabuli_chr04    | 10595824                       | [A/C]       | 1067295139                                 |
| Ca_Kabuli_NC_021163.1_10601686 | Ca_kabuli_chr04    | 10601686                       | [A/C]       | 1067295140                                 |
| Ca_Kabuli_NC_021163.1_10643322 | Ca_kabuli_chr04    | 10643322                       | [G/A]       | 1067295141                                 |
| Ca_Kabuli_NC_021163.1_10643323 | Ca_kabuli_chr04    | 10643323                       | [A/G]       | 1067295142                                 |
| Ca_Kabuli_NC_021163.1_10643425 | Ca_kabuli_chr04    | 10643425                       | [A/T]       | 1067295143                                 |
| Ca_Kabuli_NC_021163.1_10645995 | Ca_kabuli_chr04    | 10645995                       | [A/T]       | 1067295144                                 |
| Ca_Kabuli_NC_021163.1_10917698 | Ca_kabuli_chr04    | 10917698                       | [A/G]       | 1067295145                                 |
| Ca_Kabuli_NC_021163.1_10917706 | Ca_kabuli_chr04    | 10917706                       | [A/T]       | 1067295146                                 |
| Ca_Kabuli_NC_021163.1_10917734 | Ca_kabuli_chr04    | 10917734                       | [A/G]       | 1067295147                                 |
| Ca_Kabuli_NC_021163.1_10950829 | Ca_kabuli_chr04    | 10950829                       | [A/C]       | 1067295148                                 |
| Ca_Kabuli_NC_021163.1_10971334 | Ca_kabuli_chr04    | 10971334                       | [A/T]       | 1067295149                                 |
| Ca_Kabuli_NC_021163.1_10991873 | Ca_kabuli_chr04    | 10991873                       | [A/C]       | 1067295150                                 |
| Ca_Kabuli_NC_021163.1_11040063 | Ca_kabuli_chr04    | 11040063                       | [T/C]       | 1067295151                                 |
| Ca_Kabuli_NC_021163.1_11040087 | Ca_kabuli_chr04    | 11040087                       | [T/G]       | 1067295152                                 |
| Ca_Kabuli_NC_021163.1_11041726 | Ca_kabuli_chr04    | 11041726                       | [A/G]       | 1067295153                                 |
| Ca_Kabuli_NC_021163.1_11041734 | Ca_kabuli_chr04    | 11041734                       | [T/C]       | 1067295154                                 |
| Ca_Kabuli_NC_021163.1_11041765 | Ca_kabuli_chr04    | 11041765                       | [T/C]       | 1067295155                                 |
| Ca_Kabuli_NC_021163.1_11051314 | Ca_kabuli_chr04    | 11051314                       | [A/C]       | 1067295156                                 |
| Ca_Kabuli_NC_021163.1_11051318 | Ca_kabuli_chr04    | 11051318                       | [T/C]       | 1067295157                                 |
| Ca_Kabuli_NC_021163.1_11051330 | Ca_kabuli_chr04    | 11051330                       | [A/G]       | 1067295158                                 |

| <b>SNP IDs</b>                 | <b>Chromosomes</b> | <b>Physical positions (bp)</b> | <b>SNPs</b> | <b>NCBI SNPdb accession IDs (NCBI_ss#)</b> |
|--------------------------------|--------------------|--------------------------------|-------------|--------------------------------------------|
| Ca_Kabuli_NC_021163.1_11051337 | Ca_kabuli_chr04    | 11051337                       | [A/C]       | 1067295159                                 |
| Ca_Kabuli_NC_021163.1_11051349 | Ca_kabuli_chr04    | 11051349                       | [A/C]       | 1067295160                                 |
| Ca_Kabuli_NC_021163.1_11059414 | Ca_kabuli_chr04    | 11059414                       | [T/G]       | 1067295161                                 |
| Ca_Kabuli_NC_021163.1_11111630 | Ca_kabuli_chr04    | 11111630                       | [T/G]       | 1067295162                                 |
| Ca_Kabuli_NC_021163.1_11111662 | Ca_kabuli_chr04    | 11111662                       | [T/G]       | 1067295163                                 |
| Ca_Kabuli_NC_021163.1_11113204 | Ca_kabuli_chr04    | 11113204                       | [T/G]       | 1067295164                                 |
| Ca_Kabuli_NC_021163.1_11113225 | Ca_kabuli_chr04    | 11113225                       | [G/T]       | 1067295165                                 |
| Ca_Kabuli_NC_021163.1_11114238 | Ca_kabuli_chr04    | 11114238                       | [T/C]       | 1067295166                                 |
| Ca_Kabuli_NC_021163.1_11114250 | Ca_kabuli_chr04    | 11114250                       | [T/C]       | 1067295167                                 |
| Ca_Kabuli_NC_021163.1_11142264 | Ca_kabuli_chr04    | 11142264                       | [A/G]       | 1067295168                                 |
| Ca_Kabuli_NC_021163.1_11196786 | Ca_kabuli_chr04    | 11196786                       | [A/C]       | 1067295169                                 |
| Ca_Kabuli_NC_021163.1_11212154 | Ca_kabuli_chr04    | 11212154                       | [T/C]       | 1067295170                                 |
| Ca_Kabuli_NC_021163.1_11212351 | Ca_kabuli_chr04    | 11212351                       | [C/T]       | 1067295171                                 |
| Ca_Kabuli_NC_021163.1_11230372 | Ca_kabuli_chr04    | 11230372                       | [A/C]       | 1067295172                                 |
| Ca_Kabuli_NC_021163.1_11230387 | Ca_kabuli_chr04    | 11230387                       | [A/C]       | 1067295173                                 |
| Ca_Kabuli_NC_021163.1_11230431 | Ca_kabuli_chr04    | 11230431                       | [A/C]       | 1067295174                                 |
| Ca_Kabuli_NC_021163.1_11230443 | Ca_kabuli_chr04    | 11230443                       | [A/G]       | 1067295175                                 |
| Ca_Kabuli_NC_021163.1_11231056 | Ca_kabuli_chr04    | 11231056                       | [T/C]       | 1067295176                                 |
| Ca_Kabuli_NC_021163.1_11231079 | Ca_kabuli_chr04    | 11231079                       | [A/G]       | 1067295177                                 |
| Ca_Kabuli_NC_021163.1_11231087 | Ca_kabuli_chr04    | 11231087                       | [T/C]       | 1067295178                                 |
| Ca_Kabuli_NC_021163.1_11231129 | Ca_kabuli_chr04    | 11231129                       | [T/A]       | 1067295179                                 |
| Ca_Kabuli_NC_021163.1_11231131 | Ca_kabuli_chr04    | 11231131                       | [A/G]       | 1067295180                                 |
| Ca_Kabuli_NC_021163.1_11231135 | Ca_kabuli_chr04    | 11231135                       | [T/C]       | 1067295181                                 |
| Ca_Kabuli_NC_021163.1_11231137 | Ca_kabuli_chr04    | 11231137                       | [G/A]       | 1067295182                                 |
| Ca_Kabuli_NC_021163.1_11231142 | Ca_kabuli_chr04    | 11231142                       | [G/A]       | 1067295183                                 |
| Ca_Kabuli_NC_021163.1_11231162 | Ca_kabuli_chr04    | 11231162                       | [A/G]       | 1067295184                                 |
| Ca_Kabuli_NC_021163.1_11231185 | Ca_kabuli_chr04    | 11231185                       | [T/C]       | 1067295185                                 |
| Ca_Kabuli_NC_021163.1_11243872 | Ca_kabuli_chr04    | 11243872                       | [T/C]       | 1067295186                                 |
| Ca_Kabuli_NC_021163.1_11243888 | Ca_kabuli_chr04    | 11243888                       | [G/A]       | 1067295187                                 |
| Ca_Kabuli_NC_021163.1_11244334 | Ca_kabuli_chr04    | 11244334                       | [G/T]       | 1067295188                                 |
| Ca_Kabuli_NC_021163.1_11244395 | Ca_kabuli_chr04    | 11244395                       | [T/G]       | 1067295189                                 |
| Ca_Kabuli_NC_021163.1_11246093 | Ca_kabuli_chr04    | 11246093                       | [A/G]       | 1067295190                                 |
| Ca_Kabuli_NC_021163.1_11246164 | Ca_kabuli_chr04    | 11246164                       | [A/G]       | 1067295191                                 |
| Ca_Kabuli_NC_021163.1_11246173 | Ca_kabuli_chr04    | 11246173                       | [T/C]       | 1067295192                                 |

| <b>SNP IDs</b>                 | <b>Chromosomes</b> | <b>Physical positions (bp)</b> | <b>SNPs</b> | <b>NCBI SNPdb accession IDs (NCBI_ss#)</b> |
|--------------------------------|--------------------|--------------------------------|-------------|--------------------------------------------|
| Ca_Kabuli_NC_021163.1_11248605 | Ca_kabuli_chr04    | 11248605                       | [A/T]       | 1067295193                                 |
| Ca_Kabuli_NC_021163.1_11257588 | Ca_kabuli_chr04    | 11257588                       | [C/T]       | 1067295194                                 |
| Ca_Kabuli_NC_021163.1_11272888 | Ca_kabuli_chr04    | 11272888                       | [C/T]       | 1067295195                                 |
| Ca_Kabuli_NC_021163.1_11272904 | Ca_kabuli_chr04    | 11272904                       | [C/A]       | 1067295196                                 |
| Ca_Kabuli_NC_021163.1_11273328 | Ca_kabuli_chr04    | 11273328                       | [T/C]       | 1067295197                                 |
| Ca_Kabuli_NC_021163.1_11273405 | Ca_kabuli_chr04    | 11273405                       | [T/A]       | 1067295198                                 |
| Ca_Kabuli_NC_021163.1_11274281 | Ca_kabuli_chr04    | 11274281                       | [C/T]       | 1067295199                                 |
| Ca_Kabuli_NC_021163.1_11276140 | Ca_kabuli_chr04    | 11276140                       | [A/G]       | 1067295200                                 |
| Ca_Kabuli_NC_021163.1_11276166 | Ca_kabuli_chr04    | 11276166                       | [A/G]       | 1067295201                                 |
| Ca_Kabuli_NC_021163.1_11276186 | Ca_kabuli_chr04    | 11276186                       | [T/C]       | 1067295202                                 |
| Ca_Kabuli_NC_021163.1_11276225 | Ca_kabuli_chr04    | 11276225                       | [T/C]       | 1067295203                                 |
| Ca_Kabuli_NC_021163.1_11276413 | Ca_kabuli_chr04    | 11276413                       | [C/G]       | 1067295204                                 |
| Ca_Kabuli_NC_021163.1_11277138 | Ca_kabuli_chr04    | 11277138                       | [G/A]       | 1067295205                                 |
| Ca_Kabuli_NC_021163.1_11277513 | Ca_kabuli_chr04    | 11277513                       | [T/C]       | 1067295206                                 |
| Ca_Kabuli_NC_021163.1_11277574 | Ca_kabuli_chr04    | 11277574                       | [C/G]       | 1067295207                                 |
| Ca_Kabuli_NC_021163.1_11305651 | Ca_kabuli_chr04    | 11305651                       | [T/A]       | 1067295208                                 |
| Ca_Kabuli_NC_021163.1_11328227 | Ca_kabuli_chr04    | 11328227                       | [G/T]       | 1067295209                                 |
| Ca_Kabuli_NC_021163.1_11333394 | Ca_kabuli_chr04    | 11333394                       | [G/C]       | 1067295210                                 |
| Ca_Kabuli_NC_021163.1_11343230 | Ca_kabuli_chr04    | 11343230                       | [C/G]       | 1067295211                                 |
| Ca_Kabuli_NC_021163.1_11343257 | Ca_kabuli_chr04    | 11343257                       | [C/T]       | 1067295212                                 |
| Ca_Kabuli_NC_021163.1_11398889 | Ca_kabuli_chr04    | 11398889                       | [G/A]       | 1067295213                                 |
| Ca_Kabuli_NC_021163.1_11410315 | Ca_kabuli_chr04    | 11410315                       | [A/C]       | 1067295214                                 |
| Ca_Kabuli_NC_021163.1_11414502 | Ca_kabuli_chr04    | 11414502                       | [A/C]       | 1067295215                                 |
| Ca_Kabuli_NC_021163.1_11414537 | Ca_kabuli_chr04    | 11414537                       | [A/T]       | 1067295216                                 |
| Ca_Kabuli_NC_021163.1_11435253 | Ca_kabuli_chr04    | 11435253                       | [G/T]       | 1067295217                                 |
| Ca_Kabuli_NC_021163.1_11435255 | Ca_kabuli_chr04    | 11435255                       | [A/G]       | 1067295218                                 |
| Ca_Kabuli_NC_021163.1_11435380 | Ca_kabuli_chr04    | 11435380                       | [T/C]       | 1067295219                                 |
| Ca_Kabuli_NC_021163.1_11435651 | Ca_kabuli_chr04    | 11435651                       | [A/G]       | 1067295220                                 |
| Ca_Kabuli_NC_021163.1_11440109 | Ca_kabuli_chr04    | 11440109                       | [T/C]       | 1067295221                                 |
| Ca_Kabuli_NC_021163.1_11441604 | Ca_kabuli_chr04    | 11441604                       | [A/T]       | 1067295222                                 |
| Ca_Kabuli_NC_021163.1_11441673 | Ca_kabuli_chr04    | 11441673                       | [A/G]       | 1067295223                                 |
| Ca_Kabuli_NC_021163.1_11441735 | Ca_kabuli_chr04    | 11441735                       | [T/G]       | 1067295224                                 |
| Ca_Kabuli_NC_021163.1_11465057 | Ca_kabuli_chr04    | 11465057                       | [G/C]       | 1067295225                                 |
| Ca_Kabuli_NC_021163.1_11465075 | Ca_kabuli_chr04    | 11465075                       | [C/T]       | 1067295226                                 |

| <b>SNP IDs</b>                 | <b>Chromosomes</b> | <b>Physical positions (bp)</b> | <b>SNPs</b> | <b>NCBI SNPdb accession IDs (NCBI_ss#)</b> |
|--------------------------------|--------------------|--------------------------------|-------------|--------------------------------------------|
| Ca_Kabuli_NC_021163.1_11490100 | Ca_kabuli_chr04    | 11490100                       | [T/C]       | 1067295227                                 |
| Ca_Kabuli_NC_021163.1_11490155 | Ca_kabuli_chr04    | 11490155                       | [A/G]       | 1067295228                                 |
| Ca_Kabuli_NC_021163.1_11490159 | Ca_kabuli_chr04    | 11490159                       | [A/G]       | 1067295229                                 |
| Ca_Kabuli_NC_021163.1_11490192 | Ca_kabuli_chr04    | 11490192                       | [A/G]       | 1067295230                                 |
| Ca_Kabuli_NC_021163.1_11490496 | Ca_kabuli_chr04    | 11490496                       | [G/A]       | 1067295231                                 |
| Ca_Kabuli_NC_021163.1_11491021 | Ca_kabuli_chr04    | 11491021                       | [G/A]       | 1067295232                                 |
| Ca_Kabuli_NC_021163.1_11491864 | Ca_kabuli_chr04    | 11491864                       | [C/A]       | 1067295233                                 |
| Ca_Kabuli_NC_021163.1_11517517 | Ca_kabuli_chr04    | 11517517                       | [A/C]       | 1067295234                                 |
| Ca_Kabuli_NC_021163.1_11517565 | Ca_kabuli_chr04    | 11517565                       | [A/T]       | 1067295235                                 |
| Ca_Kabuli_NC_021163.1_11547141 | Ca_kabuli_chr04    | 11547141                       | [A/C]       | 1067295236                                 |
| Ca_Kabuli_NC_021163.1_11645662 | Ca_kabuli_chr04    | 11645662                       | [A/G]       | 1067295237                                 |
| Ca_Kabuli_NC_021163.1_11645683 | Ca_kabuli_chr04    | 11645683                       | [A/G]       | 1067295238                                 |
| Ca_Kabuli_NC_021163.1_11645733 | Ca_kabuli_chr04    | 11645733                       | [A/G]       | 1067295239                                 |
| Ca_Kabuli_NC_021163.1_11645828 | Ca_kabuli_chr04    | 11645828                       | [T/G]       | 1067295240                                 |
| Ca_Kabuli_NC_021163.1_11646345 | Ca_kabuli_chr04    | 11646345                       | [A/C]       | 1067295241                                 |
| Ca_Kabuli_NC_021163.1_11648201 | Ca_kabuli_chr04    | 11648201                       | [A/C]       | 1067295242                                 |
| Ca_Kabuli_NC_021163.1_11745632 | Ca_kabuli_chr04    | 11745632                       | [A/G]       | 1067295243                                 |
| Ca_Kabuli_NC_021163.1_11771986 | Ca_kabuli_chr04    | 11771986                       | [A/T]       | 1067295244                                 |
| Ca_Kabuli_NC_021163.1_11772008 | Ca_kabuli_chr04    | 11772008                       | [A/C]       | 1067295245                                 |
| Ca_Kabuli_NC_021163.1_11772025 | Ca_kabuli_chr04    | 11772025                       | [T/G]       | 1067295246                                 |
| Ca_Kabuli_NC_021163.1_11825176 | Ca_kabuli_chr04    | 11825176                       | [T/G]       | 1067295247                                 |
| Ca_Kabuli_NC_021163.1_11923283 | Ca_kabuli_chr04    | 11923283                       | [A/G]       | 1067295248                                 |
| Ca_Kabuli_NC_021163.1_11923288 | Ca_kabuli_chr04    | 11923288                       | [A/G]       | 1067295249                                 |
| Ca_Kabuli_NC_021163.1_11951124 | Ca_kabuli_chr04    | 11951124                       | [T/G]       | 1067295250                                 |
| Ca_Kabuli_NC_021163.1_11951399 | Ca_kabuli_chr04    | 11951399                       | [T/C]       | 1067295251                                 |
| Ca_Kabuli_NC_021163.1_11951415 | Ca_kabuli_chr04    | 11951415                       | [A/C]       | 1067295252                                 |
| Ca_Kabuli_NC_021163.1_11985461 | Ca_kabuli_chr04    | 11985461                       | [A/C]       | 1067295253                                 |
| Ca_Kabuli_NC_021163.1_11985676 | Ca_kabuli_chr04    | 11985676                       | [T/C]       | 1067295254                                 |
| Ca_Kabuli_NC_021163.1_11985713 | Ca_kabuli_chr04    | 11985713                       | [T/C]       | 1067295255                                 |
| Ca_Kabuli_NC_021163.1_11985720 | Ca_kabuli_chr04    | 11985720                       | [A/G]       | 1067295256                                 |
| Ca_Kabuli_NC_021163.1_12004205 | Ca_kabuli_chr04    | 12004205                       | [A/C]       | 1067295257                                 |
| Ca_Kabuli_NC_021163.1_12004209 | Ca_kabuli_chr04    | 12004209                       | [C/T]       | 1067295258                                 |
| Ca_Kabuli_NC_021163.1_12156799 | Ca_kabuli_chr04    | 12156799                       | [T/C]       | 1067295259                                 |
| Ca_Kabuli_NC_021163.1_12156812 | Ca_kabuli_chr04    | 12156812                       | [T/C]       | 1067295260                                 |

| <b>SNP IDs</b>                 | <b>Chromosomes</b> | <b>Physical positions (bp)</b> | <b>SNPs</b> | <b>NCBI SNPdb accession IDs (NCBI_ss#)</b> |
|--------------------------------|--------------------|--------------------------------|-------------|--------------------------------------------|
| Ca_Kabuli_NC_021163.1_12156821 | Ca_kabuli_chr04    | 12156821                       | [A/G]       | 1067295261                                 |
| Ca_Kabuli_NC_021163.1_12156835 | Ca_kabuli_chr04    | 12156835                       | [G/A]       | 1067295262                                 |
| Ca_Kabuli_NC_021163.1_12156840 | Ca_kabuli_chr04    | 12156840                       | [T/G]       | 1067295263                                 |
| Ca_Kabuli_NC_021163.1_12156855 | Ca_kabuli_chr04    | 12156855                       | [T/A]       | 1067295264                                 |
| Ca_Kabuli_NC_021163.1_12162780 | Ca_kabuli_chr04    | 12162780                       | [A/G]       | 1067295265                                 |
| Ca_Kabuli_NC_021163.1_12162794 | Ca_kabuli_chr04    | 12162794                       | [T/C]       | 1067295266                                 |
| Ca_Kabuli_NC_021163.1_12162806 | Ca_kabuli_chr04    | 12162806                       | [A/G]       | 1067295267                                 |
| Ca_Kabuli_NC_021163.1_12167568 | Ca_kabuli_chr04    | 12167568                       | [A/G]       | 1067295268                                 |
| Ca_Kabuli_NC_021163.1_12170567 | Ca_kabuli_chr04    | 12170567                       | [C/A]       | 1067295269                                 |
| Ca_Kabuli_NC_021163.1_12170568 | Ca_kabuli_chr04    | 12170568                       | [T/G]       | 1067295270                                 |
| Ca_Kabuli_NC_021163.1_12175299 | Ca_kabuli_chr04    | 12175299                       | [A/C]       | 1067295271                                 |
| Ca_Kabuli_NC_021163.1_12175301 | Ca_kabuli_chr04    | 12175301                       | [A/T]       | 1067295272                                 |
| Ca_Kabuli_NC_021163.1_12175302 | Ca_kabuli_chr04    | 12175302                       | [G/T]       | 1067295273                                 |
| Ca_Kabuli_NC_021163.1_12249389 | Ca_kabuli_chr04    | 12249389                       | [T/C]       | 1067295274                                 |
| Ca_Kabuli_NC_021163.1_12249407 | Ca_kabuli_chr04    | 12249407                       | [A/G]       | 1067295275                                 |
| Ca_Kabuli_NC_021163.1_12249474 | Ca_kabuli_chr04    | 12249474                       | [T/G]       | 1067295276                                 |
| Ca_Kabuli_NC_021163.1_12305192 | Ca_kabuli_chr04    | 12305192                       | [T/A]       | 1067295277                                 |
| Ca_Kabuli_NC_021163.1_12305208 | Ca_kabuli_chr04    | 12305208                       | [C/A]       | 1067295278                                 |
| Ca_Kabuli_NC_021163.1_12305216 | Ca_kabuli_chr04    | 12305216                       | [A/C]       | 1067295279                                 |
| Ca_Kabuli_NC_021163.1_12305234 | Ca_kabuli_chr04    | 12305234                       | [A/C]       | 1067295280                                 |
| Ca_Kabuli_NC_021163.1_12316617 | Ca_kabuli_chr04    | 12316617                       | [G/A]       | 1067295281                                 |
| Ca_Kabuli_NC_021163.1_12431831 | Ca_kabuli_chr04    | 12431831                       | [T/G]       | 1067295282                                 |
| Ca_Kabuli_NC_021163.1_12431864 | Ca_kabuli_chr04    | 12431864                       | [T/G]       | 1067295283                                 |
| Ca_Kabuli_NC_021163.1_12462635 | Ca_kabuli_chr04    | 12462635                       | [A/G]       | 1067295284                                 |
| Ca_Kabuli_NC_021163.1_12462644 | Ca_kabuli_chr04    | 12462644                       | [C/T]       | 1067295285                                 |
| Ca_Kabuli_NC_021163.1_12484911 | Ca_kabuli_chr04    | 12484911                       | [A/T]       | 1067295286                                 |
| Ca_Kabuli_NC_021163.1_12490280 | Ca_kabuli_chr04    | 12490280                       | [G/A]       | 1067295287                                 |
| Ca_Kabuli_NC_021163.1_12506450 | Ca_kabuli_chr04    | 12506450                       | [T/A]       | 1067295288                                 |
| Ca_Kabuli_NC_021163.1_12525328 | Ca_kabuli_chr04    | 12525328                       | [G/A]       | 1067295289                                 |
| Ca_Kabuli_NC_021163.1_12525639 | Ca_kabuli_chr04    | 12525639                       | [T/A]       | 1067295290                                 |
| Ca_Kabuli_NC_021163.1_12526606 | Ca_kabuli_chr04    | 12526606                       | [G/T]       | 1067295291                                 |
| Ca_Kabuli_NC_021163.1_12533089 | Ca_kabuli_chr04    | 12533089                       | [A/G]       | 1067295292                                 |
| Ca_Kabuli_NC_021163.1_12534847 | Ca_kabuli_chr04    | 12534847                       | [C/T]       | 1067295293                                 |
| Ca_Kabuli_NC_021163.1_12558541 | Ca_kabuli_chr04    | 12558541                       | [C/T]       | 1067295294                                 |



| <b>SNP IDs</b>                 | <b>Chromosomes</b> | <b>Physical positions (bp)</b> | <b>SNPs</b> | <b>NCBI SNPdb accession IDs (NCBI_ss#)</b> |
|--------------------------------|--------------------|--------------------------------|-------------|--------------------------------------------|
| Ca_Kabuli_NC_021163.1_12558680 | Ca_kabuli_chr04    | 12558680                       | [C/T]       | 1067295295                                 |
| Ca_Kabuli_NC_021163.1_12568599 | Ca_kabuli_chr04    | 12568599                       | [A/G]       | 1067295296                                 |
| Ca_Kabuli_NC_021163.1_12568602 | Ca_kabuli_chr04    | 12568602                       | [C/T]       | 1067295297                                 |
| Ca_Kabuli_NC_021163.1_12568707 | Ca_kabuli_chr04    | 12568707                       | [A/G]       | 1067295298                                 |
| Ca_Kabuli_NC_021163.1_12568845 | Ca_kabuli_chr04    | 12568845                       | [G/T]       | 1067295299                                 |
| Ca_Kabuli_NC_021163.1_12568905 | Ca_kabuli_chr04    | 12568905                       | [G/A]       | 1067295300                                 |
| Ca_Kabuli_NC_021163.1_12578606 | Ca_kabuli_chr04    | 12578606                       | [A/T]       | 1067295301                                 |
| Ca_Kabuli_NC_021163.1_12578627 | Ca_kabuli_chr04    | 12578627                       | [T/C]       | 1067295302                                 |
| Ca_Kabuli_NC_021163.1_12581371 | Ca_kabuli_chr04    | 12581371                       | [G/T]       | 1067295303                                 |
| Ca_Kabuli_NC_021163.1_12581403 | Ca_kabuli_chr04    | 12581403                       | [A/G]       | 1067295304                                 |
| Ca_Kabuli_NC_021163.1_12581430 | Ca_kabuli_chr04    | 12581430                       | [A/C]       | 1067295305                                 |
| Ca_Kabuli_NC_021163.1_12581457 | Ca_kabuli_chr04    | 12581457                       | [A/G]       | 1067295306                                 |
| Ca_Kabuli_NC_021163.1_12581461 | Ca_kabuli_chr04    | 12581461                       | [A/G]       | 1067295307                                 |
| Ca_Kabuli_NC_021163.1_12581711 | Ca_kabuli_chr04    | 12581711                       | [T/G]       | 1067295308                                 |
| Ca_Kabuli_NC_021163.1_12609670 | Ca_kabuli_chr04    | 12609670                       | [A/C]       | 1067295309                                 |
| Ca_Kabuli_NC_021163.1_12609673 | Ca_kabuli_chr04    | 12609673                       | [C/G]       | 1067295310                                 |
| Ca_Kabuli_NC_021163.1_12661547 | Ca_kabuli_chr04    | 12661547                       | [A/G]       | 1067295311                                 |
| Ca_Kabuli_NC_021163.1_12661585 | Ca_kabuli_chr04    | 12661585                       | [A/G]       | 1067295312                                 |
| Ca_Kabuli_NC_021163.1_12706307 | Ca_kabuli_chr04    | 12706307                       | [T/G]       | 1067295313                                 |
| Ca_Kabuli_NC_021163.1_12740322 | Ca_kabuli_chr04    | 12740322                       | [T/G]       | 1067295314                                 |
| Ca_Kabuli_NC_021163.1_12744974 | Ca_kabuli_chr04    | 12744974                       | [T/C]       | 1067295315                                 |
| Ca_Kabuli_NC_021163.1_12744984 | Ca_kabuli_chr04    | 12744984                       | [T/G]       | 1067295316                                 |
| Ca_Kabuli_NC_021163.1_12745003 | Ca_kabuli_chr04    | 12745003                       | [T/G]       | 1067295317                                 |
| Ca_Kabuli_NC_021163.1_12745010 | Ca_kabuli_chr04    | 12745010                       | [A/G]       | 1067295318                                 |
| Ca_Kabuli_NC_021163.1_12854305 | Ca_kabuli_chr04    | 12854305                       | [T/G]       | 1067295319                                 |
| Ca_Kabuli_NC_021163.1_12854341 | Ca_kabuli_chr04    | 12854341                       | [T/C]       | 1067295320                                 |
| Ca_Kabuli_NC_021163.1_12869088 | Ca_kabuli_chr04    | 12869088                       | [A/T]       | 1067295321                                 |
| Ca_Kabuli_NC_021163.1_12879612 | Ca_kabuli_chr04    | 12879612                       | [T/G]       | 1067295322                                 |
| Ca_Kabuli_NC_021163.1_12879635 | Ca_kabuli_chr04    | 12879635                       | [T/G]       | 1067295323                                 |
| Ca_Kabuli_NC_021163.1_12879671 | Ca_kabuli_chr04    | 12879671                       | [A/C]       | 1067295324                                 |
| Ca_Kabuli_NC_021163.1_12949212 | Ca_kabuli_chr04    | 12949212                       | [A/G]       | 1067295325                                 |
| Ca_Kabuli_NC_021163.1_12973591 | Ca_kabuli_chr04    | 12973591                       | [A/T]       | 1067295326                                 |
| Ca_Kabuli_NC_021163.1_13018762 | Ca_kabuli_chr04    | 13018762                       | [T/G]       | 1067295327                                 |
| Ca_Kabuli_NC_021163.1_13018807 | Ca_kabuli_chr04    | 13018807                       | [A/G]       | 1067295328                                 |

| <b>SNP IDs</b>                 | <b>Chromosomes</b> | <b>Physical positions (bp)</b> | <b>SNPs</b> | <b>NCBI SNPdb accession IDs (NCBI_ss#)</b> |
|--------------------------------|--------------------|--------------------------------|-------------|--------------------------------------------|
| Ca_Kabuli_NC_021163.1_13063677 | Ca_kabuli_chr04    | 13063677                       | [T/C]       | 1067295329                                 |
| Ca_Kabuli_NC_021163.1_13063682 | Ca_kabuli_chr04    | 13063682                       | [T/C]       | 1067295330                                 |
| Ca_Kabuli_NC_021163.1_13063695 | Ca_kabuli_chr04    | 13063695                       | [T/C]       | 1067295331                                 |
| Ca_Kabuli_NC_021163.1_13063715 | Ca_kabuli_chr04    | 13063715                       | [G/A]       | 1067295332                                 |
| Ca_Kabuli_NC_021163.1_13063722 | Ca_kabuli_chr04    | 13063722                       | [A/C]       | 1067295333                                 |
| Ca_Kabuli_NC_021163.1_13063788 | Ca_kabuli_chr04    | 13063788                       | [T/G]       | 1067295334                                 |
| Ca_Kabuli_NC_021163.1_13063818 | Ca_kabuli_chr04    | 13063818                       | [A/T]       | 1067295335                                 |
| Ca_Kabuli_NC_021163.1_13071325 | Ca_kabuli_chr04    | 13071325                       | [T/G]       | 1067295336                                 |
| Ca_Kabuli_NC_021163.1_13072102 | Ca_kabuli_chr04    | 13072102                       | [T/C]       | 1067295337                                 |
| Ca_Kabuli_NC_021163.1_13072107 | Ca_kabuli_chr04    | 13072107                       | [T/C]       | 1067295338                                 |
| Ca_Kabuli_NC_021163.1_13072147 | Ca_kabuli_chr04    | 13072147                       | [A/C]       | 1067295339                                 |
| Ca_Kabuli_NC_021163.1_13072243 | Ca_kabuli_chr04    | 13072243                       | [A/T]       | 1067295340                                 |
| Ca_Kabuli_NC_021163.1_13103650 | Ca_kabuli_chr04    | 13103650                       | [T/G]       | 1067295341                                 |
| Ca_Kabuli_NC_021163.1_13282984 | Ca_kabuli_chr04    | 13282984                       | [A/C]       | 1067295342                                 |
| Ca_Kabuli_NC_021163.1_13283002 | Ca_kabuli_chr04    | 13283002                       | [T/G]       | 1067295343                                 |
| Ca_Kabuli_NC_021163.1_13283013 | Ca_kabuli_chr04    | 13283013                       | [C/A]       | 1067295344                                 |
| Ca_Kabuli_NC_021163.1_13296229 | Ca_kabuli_chr04    | 13296229                       | [A/G]       | 1067295345                                 |
| Ca_Kabuli_NC_021163.1_13296553 | Ca_kabuli_chr04    | 13296553                       | [T/G]       | 1067295346                                 |
| Ca_Kabuli_NC_021163.1_13297343 | Ca_kabuli_chr04    | 13297343                       | [T/A]       | 1067295347                                 |
| Ca_Kabuli_NC_021163.1_13297360 | Ca_kabuli_chr04    | 13297360                       | [A/G]       | 1067295348                                 |
| Ca_Kabuli_NC_021163.1_13376268 | Ca_kabuli_chr04    | 13376268                       | [A/T]       | 1067295349                                 |
| Ca_Kabuli_NC_021163.1_13376279 | Ca_kabuli_chr04    | 13376279                       | [T/C]       | 1067295350                                 |
| Ca_Kabuli_NC_021163.1_13376289 | Ca_kabuli_chr04    | 13376289                       | [A/C]       | 1067295351                                 |
| Ca_Kabuli_NC_021163.1_13376308 | Ca_kabuli_chr04    | 13376308                       | [A/C]       | 1067295352                                 |
| Ca_Kabuli_NC_021163.1_13376323 | Ca_kabuli_chr04    | 13376323                       | [A/C]       | 1067295353                                 |
| Ca_Kabuli_NC_021163.1_13376456 | Ca_kabuli_chr04    | 13376456                       | [A/G]       | 1067295354                                 |
| Ca_Kabuli_NC_021163.1_13406799 | Ca_kabuli_chr04    | 13406799                       | [A/C]       | 1067295355                                 |
| Ca_Kabuli_NC_021163.1_13414172 | Ca_kabuli_chr04    | 13414172                       | [T/G]       | 1067295356                                 |
| Ca_Kabuli_NC_021163.1_13462251 | Ca_kabuli_chr04    | 13462251                       | [T/C]       | 1067295357                                 |
| Ca_Kabuli_NC_021163.1_13462253 | Ca_kabuli_chr04    | 13462253                       | [C/T]       | 1067295358                                 |
| Ca_Kabuli_NC_021163.1_13500661 | Ca_kabuli_chr04    | 13500661                       | [A/C]       | 1067295359                                 |
| Ca_Kabuli_NC_021163.1_13500667 | Ca_kabuli_chr04    | 13500667                       | [C/T]       | 1067295360                                 |
| Ca_Kabuli_NC_021163.1_13500833 | Ca_kabuli_chr04    | 13500833                       | [A/C]       | 1067295361                                 |
| Ca_Kabuli_NC_021163.1_13500834 | Ca_kabuli_chr04    | 13500834                       | [G/C]       | 1067295362                                 |

| <b>SNP IDs</b>                 | <b>Chromosomes</b> | <b>Physical positions (bp)</b> | <b>SNPs</b> | <b>NCBI SNPdb accession IDs (NCBI_ss#)</b> |
|--------------------------------|--------------------|--------------------------------|-------------|--------------------------------------------|
| Ca_Kabuli_NC_021163.1_13500835 | Ca_kabuli_chr04    | 13500835                       | [A/C]       | 1067295363                                 |
| Ca_Kabuli_NC_021163.1_13566612 | Ca_kabuli_chr04    | 13566612                       | [G/C]       | 1067295364                                 |
| Ca_Kabuli_NC_021163.1_13566613 | Ca_kabuli_chr04    | 13566613                       | [G/T]       | 1067295365                                 |
| Ca_Kabuli_NC_021163.1_13587985 | Ca_kabuli_chr04    | 13587985                       | [G/T]       | 1067295366                                 |
| Ca_Kabuli_NC_021163.1_13588874 | Ca_kabuli_chr04    | 13588874                       | [T/G]       | 1067295367                                 |
| Ca_Kabuli_NC_021163.1_13588928 | Ca_kabuli_chr04    | 13588928                       | [C/T]       | 1067295368                                 |
| Ca_Kabuli_NC_021163.1_13588950 | Ca_kabuli_chr04    | 13588950                       | [A/T]       | 1067295369                                 |
| Ca_Kabuli_NC_021163.1_13588951 | Ca_kabuli_chr04    | 13588951                       | [T/C]       | 1067295370                                 |
| Ca_Kabuli_NC_021163.1_13588952 | Ca_kabuli_chr04    | 13588952                       | [G/T]       | 1067295371                                 |
| Ca_Kabuli_NC_021163.1_13588956 | Ca_kabuli_chr04    | 13588956                       | [T/C]       | 1067295372                                 |
| Ca_Kabuli_NC_021163.1_13589022 | Ca_kabuli_chr04    | 13589022                       | [A/G]       | 1067295373                                 |
| Ca_Kabuli_NC_021163.1_13589070 | Ca_kabuli_chr04    | 13589070                       | [T/C]       | 1067295374                                 |
| Ca_Kabuli_NC_021163.1_13589074 | Ca_kabuli_chr04    | 13589074                       | [A/G]       | 1067295375                                 |
| Ca_Kabuli_NC_021163.1_13641148 | Ca_kabuli_chr04    | 13641148                       | [A/C]       | 1067295376                                 |
| Ca_Kabuli_NC_021163.1_13643245 | Ca_kabuli_chr04    | 13643245                       | [A/G]       | 1067295377                                 |
| Ca_Kabuli_NC_021163.1_13646680 | Ca_kabuli_chr04    | 13646680                       | [A/C]       | 1067295378                                 |
| Ca_Kabuli_NC_021163.1_13646739 | Ca_kabuli_chr04    | 13646739                       | [T/A]       | 1067295379                                 |
| Ca_Kabuli_NC_021163.1_13646753 | Ca_kabuli_chr04    | 13646753                       | [A/G]       | 1067295380                                 |
| Ca_Kabuli_NC_021163.1_13646756 | Ca_kabuli_chr04    | 13646756                       | [A/C]       | 1067295381                                 |
| Ca_Kabuli_NC_021163.1_13646762 | Ca_kabuli_chr04    | 13646762                       | [A/G]       | 1067295382                                 |
| Ca_Kabuli_NC_021163.1_13646773 | Ca_kabuli_chr04    | 13646773                       | [A/G]       | 1067295383                                 |
| Ca_Kabuli_NC_021163.1_13660846 | Ca_kabuli_chr04    | 13660846                       | [A/G]       | 1067295384                                 |
| Ca_Kabuli_NC_021163.1_13687456 | Ca_kabuli_chr04    | 13687456                       | [A/G]       | 1067295385                                 |
| Ca_Kabuli_NC_021163.1_13687728 | Ca_kabuli_chr04    | 13687728                       | [T/C]       | 1067295386                                 |
| Ca_Kabuli_NC_021163.1_13697850 | Ca_kabuli_chr04    | 13697850                       | [A/T]       | 1067295387                                 |
| Ca_Kabuli_NC_021163.1_13697853 | Ca_kabuli_chr04    | 13697853                       | [G/A]       | 1067295388                                 |
| Ca_Kabuli_NC_021163.1_13697894 | Ca_kabuli_chr04    | 13697894                       | [T/A]       | 1067295389                                 |
| Ca_Kabuli_NC_021163.1_13699663 | Ca_kabuli_chr04    | 13699663                       | [A/G]       | 1067295390                                 |
| Ca_Kabuli_NC_021163.1_13702641 | Ca_kabuli_chr04    | 13702641                       | [A/G]       | 1067295391                                 |
| Ca_Kabuli_NC_021163.1_13704352 | Ca_kabuli_chr04    | 13704352                       | [A/G]       | 1067295392                                 |
| Ca_Kabuli_NC_021163.1_13713367 | Ca_kabuli_chr04    | 13713367                       | [G/C]       | 1067295393                                 |
| Ca_Kabuli_NC_021163.1_13713380 | Ca_kabuli_chr04    | 13713380                       | [G/T]       | 1067295394                                 |
| Ca_Kabuli_NC_021163.1_13717261 | Ca_kabuli_chr04    | 13717261                       | [G/A]       | 1067295395                                 |
| Ca_Kabuli_NC_021163.1_13724666 | Ca_kabuli_chr04    | 13724666                       | [C/G]       | 1067295396                                 |

| <b>SNP IDs</b>                 | <b>Chromosomes</b> | <b>Physical positions (bp)</b> | <b>SNPs</b> | <b>NCBI SNPdb accession IDs (NCBI_ss#)</b> |
|--------------------------------|--------------------|--------------------------------|-------------|--------------------------------------------|
| Ca_Kabuli_NC_021163.1_13726718 | Ca_kabuli_chr04    | 13726718                       | [T/G]       | 1067295397                                 |
| Ca_Kabuli_NC_021163.1_13742737 | Ca_kabuli_chr04    | 13742737                       | [A/G]       | 1067295398                                 |
| Ca_Kabuli_NC_021163.1_13742744 | Ca_kabuli_chr04    | 13742744                       | [A/C]       | 1067295399                                 |
| Ca_Kabuli_NC_021163.1_13742754 | Ca_kabuli_chr04    | 13742754                       | [A/T]       | 1067295400                                 |
| Ca_Kabuli_NC_021163.1_13758029 | Ca_kabuli_chr04    | 13758029                       | [T/A]       | 1067295401                                 |
| Ca_Kabuli_NC_021163.1_13773428 | Ca_kabuli_chr04    | 13773428                       | [T/C]       | 1067295402                                 |
| Ca_Kabuli_NC_021163.1_13787353 | Ca_kabuli_chr04    | 13787353                       | [C/T]       | 1067295403                                 |
| Ca_Kabuli_NC_021163.1_13787448 | Ca_kabuli_chr04    | 13787448                       | [C/A]       | 1067295404                                 |
| Ca_Kabuli_NC_021163.1_13787649 | Ca_kabuli_chr04    | 13787649                       | [C/T]       | 1067295405                                 |
| Ca_Kabuli_NC_021163.1_13787770 | Ca_kabuli_chr04    | 13787770                       | [C/A]       | 1067295406                                 |
| Ca_Kabuli_NC_021163.1_13787775 | Ca_kabuli_chr04    | 13787775                       | [G/A]       | 1067295407                                 |
| Ca_Kabuli_NC_021163.1_13838126 | Ca_kabuli_chr04    | 13838126                       | [T/A]       | 1067295408                                 |
| Ca_Kabuli_NC_021163.1_13838172 | Ca_kabuli_chr04    | 13838172                       | [A/C]       | 1067295409                                 |
| Ca_Kabuli_NC_021163.1_13838222 | Ca_kabuli_chr04    | 13838222                       | [A/T]       | 1067295410                                 |
| Ca_Kabuli_NC_021163.1_13838240 | Ca_kabuli_chr04    | 13838240                       | [T/G]       | 1067295411                                 |
| Ca_Kabuli_NC_021163.1_13838278 | Ca_kabuli_chr04    | 13838278                       | [T/G]       | 1067295412                                 |
| Ca_Kabuli_NC_021163.1_13838625 | Ca_kabuli_chr04    | 13838625                       | [T/A]       | 1067295413                                 |
| Ca_Kabuli_NC_021163.1_13838656 | Ca_kabuli_chr04    | 13838656                       | [A/C]       | 1067295414                                 |
| Ca_Kabuli_NC_021163.1_13838784 | Ca_kabuli_chr04    | 13838784                       | [T/C]       | 1067295415                                 |
| Ca_Kabuli_NC_021163.1_13838796 | Ca_kabuli_chr04    | 13838796                       | [G/A]       | 1067295416                                 |
| Ca_Kabuli_NC_021163.1_13838932 | Ca_kabuli_chr04    | 13838932                       | [T/G]       | 1067295417                                 |
| Ca_Kabuli_NC_021163.1_13839288 | Ca_kabuli_chr04    | 13839288                       | [A/G]       | 1067295418                                 |
| Ca_Kabuli_NC_021163.1_13839294 | Ca_kabuli_chr04    | 13839294                       | [G/A]       | 1067295419                                 |
| Ca_Kabuli_NC_021163.1_13839804 | Ca_kabuli_chr04    | 13839804                       | [T/G]       | 1067295420                                 |
| Ca_Kabuli_NC_021163.1_13839825 | Ca_kabuli_chr04    | 13839825                       | [A/C]       | 1067295421                                 |
| Ca_Kabuli_NC_021163.1_13839840 | Ca_kabuli_chr04    | 13839840                       | [A/C]       | 1067295422                                 |
| Ca_Kabuli_NC_021163.1_13839935 | Ca_kabuli_chr04    | 13839935                       | [T/G]       | 1067295423                                 |
| Ca_Kabuli_NC_021163.1_13839938 | Ca_kabuli_chr04    | 13839938                       | [T/A]       | 1067295424                                 |
| Ca_Kabuli_NC_021163.1_13840191 | Ca_kabuli_chr04    | 13840191                       | [A/T]       | 1067295425                                 |
| Ca_Kabuli_NC_021163.1_13840227 | Ca_kabuli_chr04    | 13840227                       | [A/C]       | 1067295426                                 |
| Ca_Kabuli_NC_021163.1_13840230 | Ca_kabuli_chr04    | 13840230                       | [T/C]       | 1067295427                                 |
| Ca_Kabuli_NC_021163.1_13840233 | Ca_kabuli_chr04    | 13840233                       | [A/G]       | 1067295428                                 |
| Ca_Kabuli_NC_021163.1_13840244 | Ca_kabuli_chr04    | 13840244                       | [A/G]       | 1067295429                                 |
| Ca_Kabuli_NC_021163.1_13840288 | Ca_kabuli_chr04    | 13840288                       | [A/G]       | 1067295430                                 |

| <b>SNP IDs</b>                 | <b>Chromosomes</b> | <b>Physical positions (bp)</b> | <b>SNPs</b> | <b>NCBI SNPdb accession IDs (NCBI_ss#)</b> |
|--------------------------------|--------------------|--------------------------------|-------------|--------------------------------------------|
| Ca_Kabuli_NC_021163.1_13840484 | Ca_kabuli_chr04    | 13840484                       | [C/T]       | 1067295431                                 |
| Ca_Kabuli_NC_021163.1_13841279 | Ca_kabuli_chr04    | 13841279                       | [A/C]       | 1067295432                                 |
| Ca_Kabuli_NC_021163.1_13841340 | Ca_kabuli_chr04    | 13841340                       | [T/G]       | 1067295433                                 |
| Ca_Kabuli_NC_021163.1_13845581 | Ca_kabuli_chr04    | 13845581                       | [T/A]       | 1067295434                                 |
| Ca_Kabuli_NC_021163.1_13845620 | Ca_kabuli_chr04    | 13845620                       | [C/A]       | 1067295435                                 |
| Ca_Kabuli_NC_021163.1_13858972 | Ca_kabuli_chr04    | 13858972                       | [G/A]       | 1067295436                                 |
| Ca_Kabuli_NC_021163.1_13873036 | Ca_kabuli_chr04    | 13873036                       | [A/G]       | 1067295437                                 |
| Ca_Kabuli_NC_021163.1_13873042 | Ca_kabuli_chr04    | 13873042                       | [A/G]       | 1067295438                                 |
| Ca_Kabuli_NC_021163.1_13884235 | Ca_kabuli_chr04    | 13884235                       | [T/G]       | 1067295439                                 |
| Ca_Kabuli_NC_021163.1_13941139 | Ca_kabuli_chr04    | 13941139                       | [T/C]       | 1067295440                                 |
| Ca_Kabuli_NC_021163.1_13941148 | Ca_kabuli_chr04    | 13941148                       | [T/C]       | 1067295441                                 |
| Ca_Kabuli_NC_021163.1_13941162 | Ca_kabuli_chr04    | 13941162                       | [C/A]       | 1067295442                                 |
| Ca_Kabuli_NC_021163.1_13941176 | Ca_kabuli_chr04    | 13941176                       | [A/T]       | 1067295443                                 |
| Ca_Kabuli_NC_021163.1_13949558 | Ca_kabuli_chr04    | 13949558                       | [C/T]       | 1067295444                                 |
| Ca_Kabuli_NC_021163.1_13949567 | Ca_kabuli_chr04    | 13949567                       | [A/T]       | 1067295445                                 |
| Ca_Kabuli_NC_021163.1_13970609 | Ca_kabuli_chr04    | 13970609                       | [T/A]       | 1067295446                                 |
| Ca_Kabuli_NC_021163.1_13970649 | Ca_kabuli_chr04    | 13970649                       | [A/C]       | 1067295447                                 |
| Ca_Kabuli_NC_021163.1_13970661 | Ca_kabuli_chr04    | 13970661                       | [T/C]       | 1067295448                                 |
| Ca_Kabuli_NC_021163.1_14056922 | Ca_kabuli_chr04    | 14056922                       | [A/C]       | 1067295449                                 |
| Ca_Kabuli_NC_021163.1_14056927 | Ca_kabuli_chr04    | 14056927                       | [T/G]       | 1067295450                                 |
| Ca_Kabuli_NC_021163.1_14082077 | Ca_kabuli_chr04    | 14082077                       | [T/C]       | 1067295451                                 |
| Ca_Kabuli_NC_021163.1_14082094 | Ca_kabuli_chr04    | 14082094                       | [T/A]       | 1067295452                                 |
| Ca_Kabuli_NC_021163.1_14104005 | Ca_kabuli_chr04    | 14104005                       | [T/A]       | 1067295453                                 |
| Ca_Kabuli_NC_021163.1_14104032 | Ca_kabuli_chr04    | 14104032                       | [T/C]       | 1067295454                                 |
| Ca_Kabuli_NC_021163.1_14104076 | Ca_kabuli_chr04    | 14104076                       | [A/G]       | 1067295455                                 |
| Ca_Kabuli_NC_021163.1_14104131 | Ca_kabuli_chr04    | 14104131                       | [T/G]       | 1067295456                                 |
| Ca_Kabuli_NC_021163.1_14132752 | Ca_kabuli_chr04    | 14132752                       | [T/A]       | 1067295457                                 |
| Ca_Kabuli_NC_021163.1_14132760 | Ca_kabuli_chr04    | 14132760                       | [C/A]       | 1067295458                                 |
| Ca_Kabuli_NC_021163.1_14181644 | Ca_kabuli_chr04    | 14181644                       | [A/C]       | 1067295459                                 |
| Ca_Kabuli_NC_021163.1_14199386 | Ca_kabuli_chr04    | 14199386                       | [A/C]       | 1067295460                                 |
| Ca_Kabuli_NC_021163.1_14206908 | Ca_kabuli_chr04    | 14206908                       | [C/T]       | 1067295461                                 |
| Ca_Kabuli_NC_021163.1_14206957 | Ca_kabuli_chr04    | 14206957                       | [G/C]       | 1067295462                                 |
| Ca_Kabuli_NC_021163.1_14440413 | Ca_kabuli_chr04    | 14440413                       | [A/C]       | 1067295463                                 |
| Ca_Kabuli_NC_021163.1_14440418 | Ca_kabuli_chr04    | 14440418                       | [A/C]       | 1067295464                                 |

| <b>SNP IDs</b>                 | <b>Chromosomes</b> | <b>Physical positions (bp)</b> | <b>SNPs</b> | <b>NCBI SNPdb accession IDs (NCBI_ss#)</b> |
|--------------------------------|--------------------|--------------------------------|-------------|--------------------------------------------|
| Ca_Kabuli_NC_021163.1_14448716 | Ca_kabuli_chr04    | 14448716                       | [T/A]       | 1067295465                                 |
| Ca_Kabuli_NC_021163.1_14453927 | Ca_kabuli_chr04    | 14453927                       | [T/C]       | 1067295466                                 |
| Ca_Kabuli_NC_021163.1_14453933 | Ca_kabuli_chr04    | 14453933                       | [T/C]       | 1067295467                                 |
| Ca_Kabuli_NC_021163.1_14453944 | Ca_kabuli_chr04    | 14453944                       | [A/G]       | 1067295468                                 |
| Ca_Kabuli_NC_021163.1_14453958 | Ca_kabuli_chr04    | 14453958                       | [A/G]       | 1067295469                                 |
| Ca_Kabuli_NC_021163.1_14453970 | Ca_kabuli_chr04    | 14453970                       | [A/G]       | 1067295470                                 |
| Ca_Kabuli_NC_021163.1_14562403 | Ca_kabuli_chr04    | 14562403                       | [C/A]       | 1067295471                                 |
| Ca_Kabuli_NC_021163.1_14562412 | Ca_kabuli_chr04    | 14562412                       | [C/A]       | 1067295472                                 |
| Ca_Kabuli_NC_021163.1_14562427 | Ca_kabuli_chr04    | 14562427                       | [A/C]       | 1067295473                                 |
| Ca_Kabuli_NC_021163.1_14656292 | Ca_kabuli_chr04    | 14656292                       | [G/T]       | 1067295474                                 |
| Ca_Kabuli_NC_021163.1_14656293 | Ca_kabuli_chr04    | 14656293                       | [G/C]       | 1067295475                                 |
| Ca_Kabuli_NC_021163.1_14656294 | Ca_kabuli_chr04    | 14656294                       | [G/T]       | 1067295476                                 |
| Ca_Kabuli_NC_021163.1_14657763 | Ca_kabuli_chr04    | 14657763                       | [A/G]       | 1067295477                                 |
| Ca_Kabuli_NC_021163.1_14685587 | Ca_kabuli_chr04    | 14685587                       | [A/C]       | 1067295478                                 |
| Ca_Kabuli_NC_021163.1_14685600 | Ca_kabuli_chr04    | 14685600                       | [A/C]       | 1067295479                                 |
| Ca_Kabuli_NC_021163.1_14698743 | Ca_kabuli_chr04    | 14698743                       | [T/G]       | 1067295480                                 |
| Ca_Kabuli_NC_021163.1_14699239 | Ca_kabuli_chr04    | 14699239                       | [A/C]       | 1067295481                                 |
| Ca_Kabuli_NC_021163.1_14699270 | Ca_kabuli_chr04    | 14699270                       | [T/C]       | 1067295482                                 |
| Ca_Kabuli_NC_021163.1_14699274 | Ca_kabuli_chr04    | 14699274                       | [T/C]       | 1067295483                                 |
| Ca_Kabuli_NC_021163.1_14706369 | Ca_kabuli_chr04    | 14706369                       | [T/G]       | 1067295484                                 |
| Ca_Kabuli_NC_021163.1_14706386 | Ca_kabuli_chr04    | 14706386                       | [T/G]       | 1067295485                                 |
| Ca_Kabuli_NC_021163.1_14777481 | Ca_kabuli_chr04    | 14777481                       | [T/G]       | 1067295486                                 |
| Ca_Kabuli_NC_021163.1_14785531 | Ca_kabuli_chr04    | 14785531                       | [T/C]       | 1067295487                                 |
| Ca_Kabuli_NC_021163.1_14785557 | Ca_kabuli_chr04    | 14785557                       | [A/C]       | 1067295488                                 |
| Ca_Kabuli_NC_021163.1_14786100 | Ca_kabuli_chr04    | 14786100                       | [T/C]       | 1067295489                                 |
| Ca_Kabuli_NC_021163.1_14786128 | Ca_kabuli_chr04    | 14786128                       | [T/G]       | 1067295490                                 |
| Ca_Kabuli_NC_021163.1_14786141 | Ca_kabuli_chr04    | 14786141                       | [T/C]       | 1067295491                                 |
| Ca_Kabuli_NC_021163.1_14818654 | Ca_kabuli_chr04    | 14818654                       | [T/G]       | 1067295492                                 |
| Ca_Kabuli_NC_021163.1_14831250 | Ca_kabuli_chr04    | 14831250                       | [T/G]       | 1067295493                                 |
| Ca_Kabuli_NC_021163.1_14831252 | Ca_kabuli_chr04    | 14831252                       | [T/A]       | 1067295494                                 |
| Ca_Kabuli_NC_021163.1_14960465 | Ca_kabuli_chr04    | 14960465                       | [G/A]       | 1067295495                                 |
| Ca_Kabuli_NC_021163.1_14960467 | Ca_kabuli_chr04    | 14960467                       | [T/G]       | 1067295496                                 |
| Ca_Kabuli_NC_021163.1_14985691 | Ca_kabuli_chr04    | 14985691                       | [A/C]       | 1067295497                                 |
| Ca_Kabuli_NC_021163.1_14985692 | Ca_kabuli_chr04    | 14985692                       | [C/A]       | 1067295498                                 |

| <b>SNP IDs</b>                 | <b>Chromosomes</b> | <b>Physical positions (bp)</b> | <b>SNPs</b> | <b>NCBI SNPdb accession IDs (NCBI_ss#)</b> |
|--------------------------------|--------------------|--------------------------------|-------------|--------------------------------------------|
| Ca_Kabuli_NC_021163.1_14985694 | Ca_kabuli_chr04    | 14985694                       | [C/A]       | 1067295499                                 |
| Ca_Kabuli_NC_021163.1_14985695 | Ca_kabuli_chr04    | 14985695                       | [A/C]       | 1067295500                                 |
| Ca_Kabuli_NC_021163.1_15022229 | Ca_kabuli_chr04    | 15022229                       | [T/C]       | 1067295501                                 |
| Ca_Kabuli_NC_021163.1_15022234 | Ca_kabuli_chr04    | 15022234                       | [C/G]       | 1067295502                                 |
| Ca_Kabuli_NC_021163.1_15022256 | Ca_kabuli_chr04    | 15022256                       | [T/G]       | 1067295503                                 |
| Ca_Kabuli_NC_021163.1_15022269 | Ca_kabuli_chr04    | 15022269                       | [T/A]       | 1067295504                                 |
| Ca_Kabuli_NC_021163.1_15022270 | Ca_kabuli_chr04    | 15022270                       | [T/A]       | 1067295505                                 |
| Ca_Kabuli_NC_021163.1_15036349 | Ca_kabuli_chr04    | 15036349                       | [A/C]       | 1067295506                                 |
| Ca_Kabuli_NC_021163.1_15039822 | Ca_kabuli_chr04    | 15039822                       | [C/A]       | 1067295507                                 |
| Ca_Kabuli_NC_021163.1_15039994 | Ca_kabuli_chr04    | 15039994                       | [A/T]       | 1067295508                                 |
| Ca_Kabuli_NC_021163.1_15109654 | Ca_kabuli_chr04    | 15109654                       | [T/G]       | 1067295509                                 |
| Ca_Kabuli_NC_021163.1_15109738 | Ca_kabuli_chr04    | 15109738                       | [G/T]       | 1067295510                                 |
| Ca_Kabuli_NC_021163.1_15143547 | Ca_kabuli_chr04    | 15143547                       | [T/A]       | 1067295511                                 |
| Ca_Kabuli_NC_021163.1_15177151 | Ca_kabuli_chr04    | 15177151                       | [T/G]       | 1067295512                                 |
| Ca_Kabuli_NC_021163.1_15190651 | Ca_kabuli_chr04    | 15190651                       | [T/C]       | 1067295513                                 |
| Ca_Kabuli_NC_021163.1_15190655 | Ca_kabuli_chr04    | 15190655                       | [A/G]       | 1067295514                                 |
| Ca_Kabuli_NC_021163.1_15190663 | Ca_kabuli_chr04    | 15190663                       | [T/C]       | 1067295515                                 |
| Ca_Kabuli_NC_021163.1_15240690 | Ca_kabuli_chr04    | 15240690                       | [A/C]       | 1067295516                                 |
| Ca_Kabuli_NC_021163.1_15273133 | Ca_kabuli_chr04    | 15273133                       | [T/C]       | 1067295517                                 |
| Ca_Kabuli_NC_021163.1_15273138 | Ca_kabuli_chr04    | 15273138                       | [A/G]       | 1067295518                                 |
| Ca_Kabuli_NC_021163.1_15273145 | Ca_kabuli_chr04    | 15273145                       | [T/C]       | 1067295519                                 |
| Ca_Kabuli_NC_021163.1_15273159 | Ca_kabuli_chr04    | 15273159                       | [T/C]       | 1067295520                                 |
| Ca_Kabuli_NC_021163.1_15273171 | Ca_kabuli_chr04    | 15273171                       | [A/G]       | 1067295521                                 |
| Ca_Kabuli_NC_021163.1_15299038 | Ca_kabuli_chr04    | 15299038                       | [T/G]       | 1067295522                                 |
| Ca_Kabuli_NC_021163.1_15299210 | Ca_kabuli_chr04    | 15299210                       | [T/C]       | 1067295523                                 |
| Ca_Kabuli_NC_021163.1_15299223 | Ca_kabuli_chr04    | 15299223                       | [A/G]       | 1067295524                                 |
| Ca_Kabuli_NC_021163.1_15389690 | Ca_kabuli_chr04    | 15389690                       | [A/G]       | 1067295525                                 |
| Ca_Kabuli_NC_021163.1_15389702 | Ca_kabuli_chr04    | 15389702                       | [T/C]       | 1067295526                                 |
| Ca_Kabuli_NC_021163.1_15389711 | Ca_kabuli_chr04    | 15389711                       | [A/G]       | 1067295527                                 |
| Ca_Kabuli_NC_021163.1_15389726 | Ca_kabuli_chr04    | 15389726                       | [A/T]       | 1067295528                                 |
| Ca_Kabuli_NC_021163.1_15402086 | Ca_kabuli_chr04    | 15402086                       | [T/G]       | 1067295529                                 |
| Ca_Kabuli_NC_021163.1_15402093 | Ca_kabuli_chr04    | 15402093                       | [A/T]       | 1067295530                                 |
| Ca_Kabuli_NC_021163.1_15402097 | Ca_kabuli_chr04    | 15402097                       | [T/G]       | 1067295531                                 |
| Ca_Kabuli_NC_021163.1_15447013 | Ca_kabuli_chr04    | 15447013                       | [A/G]       | 1067295532                                 |

| <b>SNP IDs</b>                 | <b>Chromosomes</b> | <b>Physical positions (bp)</b> | <b>SNPs</b> | <b>NCBI SNPdb accession IDs (NCBI_ss#)</b> |
|--------------------------------|--------------------|--------------------------------|-------------|--------------------------------------------|
| Ca_Kabuli_NC_021163.1_15452440 | Ca_kabuli_chr04    | 15452440                       | [T/G]       | 1067295533                                 |
| Ca_Kabuli_NC_021163.1_15542631 | Ca_kabuli_chr04    | 15542631                       | [T/G]       | 1067295534                                 |
| Ca_Kabuli_NC_021163.1_15552657 | Ca_kabuli_chr04    | 15552657                       | [T/C]       | 1067295535                                 |
| Ca_Kabuli_NC_021163.1_15651804 | Ca_kabuli_chr04    | 15651804                       | [C/A]       | 1067295536                                 |
| Ca_Kabuli_NC_021163.1_15697080 | Ca_kabuli_chr04    | 15697080                       | [T/C]       | 1067295537                                 |
| Ca_Kabuli_NC_021163.1_15697119 | Ca_kabuli_chr04    | 15697119                       | [A/C]       | 1067295538                                 |
| Ca_Kabuli_NC_021163.1_15697125 | Ca_kabuli_chr04    | 15697125                       | [A/C]       | 1067295539                                 |
| Ca_Kabuli_NC_021163.1_15697146 | Ca_kabuli_chr04    | 15697146                       | [A/G]       | 1067295540                                 |
| Ca_Kabuli_NC_021163.1_15697413 | Ca_kabuli_chr04    | 15697413                       | [A/G]       | 1067295541                                 |
| Ca_Kabuli_NC_021163.1_15697418 | Ca_kabuli_chr04    | 15697418                       | [A/G]       | 1067295542                                 |
| Ca_Kabuli_NC_021163.1_15697805 | Ca_kabuli_chr04    | 15697805                       | [A/C]       | 1067295543                                 |
| Ca_Kabuli_NC_021163.1_15698219 | Ca_kabuli_chr04    | 15698219                       | [T/C]       | 1067295544                                 |
| Ca_Kabuli_NC_021163.1_15698342 | Ca_kabuli_chr04    | 15698342                       | [A/C]       | 1067295545                                 |
| Ca_Kabuli_NC_021163.1_15700605 | Ca_kabuli_chr04    | 15700605                       | [A/T]       | 1067295546                                 |
| Ca_Kabuli_NC_021163.1_15703805 | Ca_kabuli_chr04    | 15703805                       | [A/T]       | 1067295547                                 |
| Ca_Kabuli_NC_021163.1_15743441 | Ca_kabuli_chr04    | 15743441                       | [T/C]       | 1067295548                                 |
| Ca_Kabuli_NC_021163.1_15743459 | Ca_kabuli_chr04    | 15743459                       | [A/T]       | 1067295549                                 |
| Ca_Kabuli_NC_021163.1_15744703 | Ca_kabuli_chr04    | 15744703                       | [T/G]       | 1067295550                                 |
| Ca_Kabuli_NC_021163.1_15744732 | Ca_kabuli_chr04    | 15744732                       | [A/C]       | 1067295551                                 |
| Ca_Kabuli_NC_021163.1_15821266 | Ca_kabuli_chr04    | 15821266                       | [A/C]       | 1067295552                                 |
| Ca_Kabuli_NC_021163.1_15821270 | Ca_kabuli_chr04    | 15821270                       | [A/C]       | 1067295553                                 |
| Ca_Kabuli_NC_021163.1_15900593 | Ca_kabuli_chr04    | 15900593                       | [A/G]       | 1067295554                                 |
| Ca_Kabuli_NC_021163.1_15900602 | Ca_kabuli_chr04    | 15900602                       | [G/A]       | 1067295555                                 |
| Ca_Kabuli_NC_021163.1_15900604 | Ca_kabuli_chr04    | 15900604                       | [G/A]       | 1067295556                                 |
| Ca_Kabuli_NC_021163.1_15900605 | Ca_kabuli_chr04    | 15900605                       | [T/G]       | 1067295557                                 |
| Ca_Kabuli_NC_021163.1_15916534 | Ca_kabuli_chr04    | 15916534                       | [G/A]       | 1067295558                                 |
| Ca_Kabuli_NC_021163.1_15926160 | Ca_kabuli_chr04    | 15926160                       | [G/A]       | 1067295559                                 |
| Ca_Kabuli_NC_021163.1_15934462 | Ca_kabuli_chr04    | 15934462                       | [G/A]       | 1067295560                                 |
| Ca_Kabuli_NC_021163.1_15934607 | Ca_kabuli_chr04    | 15934607                       | [T/A]       | 1067295561                                 |
| Ca_Kabuli_NC_021163.1_15934901 | Ca_kabuli_chr04    | 15934901                       | [G/T]       | 1067295562                                 |
| Ca_Kabuli_NC_021163.1_15942084 | Ca_kabuli_chr04    | 15942084                       | [A/G]       | 1067295563                                 |
| Ca_Kabuli_NC_021163.1_15942490 | Ca_kabuli_chr04    | 15942490                       | [A/G]       | 1067295564                                 |
| Ca_Kabuli_NC_021163.1_15942542 | Ca_kabuli_chr04    | 15942542                       | [A/C]       | 1067295565                                 |
| Ca_Kabuli_NC_021163.1_15957070 | Ca_kabuli_chr04    | 15957070                       | [A/T]       | 1067295566                                 |



| <b>SNP IDs</b>                 | <b>Chromosomes</b> | <b>Physical positions (bp)</b> | <b>SNPs</b> | <b>NCBI SNPdb accession IDs (NCBI_ss#)</b> |
|--------------------------------|--------------------|--------------------------------|-------------|--------------------------------------------|
| Ca_Kabuli_NC_021163.1_15962223 | Ca_kabuli_chr04    | 15962223                       | [A/G]       | 1067295567                                 |
| Ca_Kabuli_NC_021163.1_15962674 | Ca_kabuli_chr04    | 15962674                       | [G/A]       | 1067295568                                 |
| Ca_Kabuli_NC_021163.1_16027227 | Ca_kabuli_chr04    | 16027227                       | [A/G]       | 1067295569                                 |
| Ca_Kabuli_NC_021163.1_16027259 | Ca_kabuli_chr04    | 16027259                       | [A/C]       | 1067295570                                 |
| Ca_Kabuli_NC_021163.1_16027281 | Ca_kabuli_chr04    | 16027281                       | [A/G]       | 1067295571                                 |
| Ca_Kabuli_NC_021163.1_16046928 | Ca_kabuli_chr04    | 16046928                       | [C/T]       | 1067295572                                 |
| Ca_Kabuli_NC_021163.1_16149795 | Ca_kabuli_chr04    | 16149795                       | [T/C]       | 1067295573                                 |
| Ca_Kabuli_NC_021163.1_16149998 | Ca_kabuli_chr04    | 16149998                       | [C/T]       | 1067295574                                 |
| Ca_Kabuli_NC_021163.1_16150042 | Ca_kabuli_chr04    | 16150042                       | [T/G]       | 1067295575                                 |
| Ca_Kabuli_NC_021163.1_16278671 | Ca_kabuli_chr04    | 16278671                       | [A/T]       | 1067295576                                 |
| Ca_Kabuli_NC_021163.1_16361657 | Ca_kabuli_chr04    | 16361657                       | [A/T]       | 1067295577                                 |
| Ca_Kabuli_NC_021163.1_16446946 | Ca_kabuli_chr04    | 16446946                       | [T/A]       | 1067295578                                 |
| Ca_Kabuli_NC_021163.1_16446962 | Ca_kabuli_chr04    | 16446962                       | [A/G]       | 1067295579                                 |
| Ca_Kabuli_NC_021163.1_16447212 | Ca_kabuli_chr04    | 16447212                       | [T/C]       | 1067295580                                 |
| Ca_Kabuli_NC_021163.1_16447213 | Ca_kabuli_chr04    | 16447213                       | [C/T]       | 1067295581                                 |
| Ca_Kabuli_NC_021163.1_16447214 | Ca_kabuli_chr04    | 16447214                       | [C/T]       | 1067295582                                 |
| Ca_Kabuli_NC_021163.1_16448174 | Ca_kabuli_chr04    | 16448174                       | [T/C]       | 1067295583                                 |
| Ca_Kabuli_NC_021163.1_16448200 | Ca_kabuli_chr04    | 16448200                       | [T/G]       | 1067295584                                 |
| Ca_Kabuli_NC_021163.1_16457949 | Ca_kabuli_chr04    | 16457949                       | [T/A]       | 1067295585                                 |
| Ca_Kabuli_NC_021163.1_16457966 | Ca_kabuli_chr04    | 16457966                       | [T/G]       | 1067295586                                 |
| Ca_Kabuli_NC_021163.1_16457971 | Ca_kabuli_chr04    | 16457971                       | [A/C]       | 1067295587                                 |
| Ca_Kabuli_NC_021163.1_16457977 | Ca_kabuli_chr04    | 16457977                       | [A/T]       | 1067295588                                 |
| Ca_Kabuli_NC_021163.1_16500750 | Ca_kabuli_chr04    | 16500750                       | [T/G]       | 1067295589                                 |
| Ca_Kabuli_NC_021163.1_16500752 | Ca_kabuli_chr04    | 16500752                       | [T/A]       | 1067295590                                 |
| Ca_Kabuli_NC_021163.1_16500755 | Ca_kabuli_chr04    | 16500755                       | [T/C]       | 1067295591                                 |
| Ca_Kabuli_NC_021163.1_16501487 | Ca_kabuli_chr04    | 16501487                       | [T/A]       | 1067295592                                 |
| Ca_Kabuli_NC_021163.1_16517910 | Ca_kabuli_chr04    | 16517910                       | [T/G]       | 1067295593                                 |
| Ca_Kabuli_NC_021163.1_16532045 | Ca_kabuli_chr04    | 16532045                       | [A/G]       | 1067295594                                 |
| Ca_Kabuli_NC_021163.1_16536720 | Ca_kabuli_chr04    | 16536720                       | [T/A]       | 1067295595                                 |
| Ca_Kabuli_NC_021163.1_16537984 | Ca_kabuli_chr04    | 16537984                       | [A/C]       | 1067295596                                 |
| Ca_Kabuli_NC_021163.1_16586896 | Ca_kabuli_chr04    | 16586896                       | [A/T]       | 1067295597                                 |
| Ca_Kabuli_NC_021163.1_16622385 | Ca_kabuli_chr04    | 16622385                       | [T/A]       | 1067295598                                 |
| Ca_Kabuli_NC_021163.1_16622409 | Ca_kabuli_chr04    | 16622409                       | [T/G]       | 1067295599                                 |
| Ca_Kabuli_NC_021163.1_16622418 | Ca_kabuli_chr04    | 16622418                       | [A/C]       | 1067295600                                 |

| <b>SNP IDs</b>                 | <b>Chromosomes</b> | <b>Physical positions (bp)</b> | <b>SNPs</b> | <b>NCBI SNPdb accession IDs (NCBI_ss#)</b> |
|--------------------------------|--------------------|--------------------------------|-------------|--------------------------------------------|
| Ca_Kabuli_NC_021163.1_16622467 | Ca_kabuli_chr04    | 16622467                       | [A/G]       | 1067295601                                 |
| Ca_Kabuli_NC_021163.1_16622499 | Ca_kabuli_chr04    | 16622499                       | [A/G]       | 1067295602                                 |
| Ca_Kabuli_NC_021163.1_16622505 | Ca_kabuli_chr04    | 16622505                       | [T/A]       | 1067295603                                 |
| Ca_Kabuli_NC_021163.1_16622509 | Ca_kabuli_chr04    | 16622509                       | [C/G]       | 1067295604                                 |
| Ca_Kabuli_NC_021163.1_16622512 | Ca_kabuli_chr04    | 16622512                       | [A/G]       | 1067295605                                 |
| Ca_Kabuli_NC_021163.1_16622521 | Ca_kabuli_chr04    | 16622521                       | [A/C]       | 1067295606                                 |
| Ca_Kabuli_NC_021163.1_16622550 | Ca_kabuli_chr04    | 16622550                       | [T/C]       | 1067295607                                 |
| Ca_Kabuli_NC_021163.1_16622568 | Ca_kabuli_chr04    | 16622568                       | [T/A]       | 1067295608                                 |
| Ca_Kabuli_NC_021163.1_16622571 | Ca_kabuli_chr04    | 16622571                       | [T/C]       | 1067295609                                 |
| Ca_Kabuli_NC_021163.1_16628556 | Ca_kabuli_chr04    | 16628556                       | [A/G]       | 1067295610                                 |
| Ca_Kabuli_NC_021163.1_16628559 | Ca_kabuli_chr04    | 16628559                       | [T/G]       | 1067295611                                 |
| Ca_Kabuli_NC_021163.1_16628605 | Ca_kabuli_chr04    | 16628605                       | [G/A]       | 1067295612                                 |
| Ca_Kabuli_NC_021163.1_16629643 | Ca_kabuli_chr04    | 16629643                       | [T/C]       | 1067295613                                 |
| Ca_Kabuli_NC_021163.1_16629646 | Ca_kabuli_chr04    | 16629646                       | [T/C]       | 1067295614                                 |
| Ca_Kabuli_NC_021163.1_16630376 | Ca_kabuli_chr04    | 16630376                       | [A/C]       | 1067295615                                 |
| Ca_Kabuli_NC_021163.1_16670183 | Ca_kabuli_chr04    | 16670183                       | [A/G]       | 1067295616                                 |
| Ca_Kabuli_NC_021163.1_16670198 | Ca_kabuli_chr04    | 16670198                       | [A/G]       | 1067295617                                 |
| Ca_Kabuli_NC_021163.1_16754113 | Ca_kabuli_chr04    | 16754113                       | [C/A]       | 1067295618                                 |
| Ca_Kabuli_NC_021163.1_16773172 | Ca_kabuli_chr04    | 16773172                       | [A/C]       | 1067295619                                 |
| Ca_Kabuli_NC_021163.1_16782993 | Ca_kabuli_chr04    | 16782993                       | [C/A]       | 1067295620                                 |
| Ca_Kabuli_NC_021163.1_16783500 | Ca_kabuli_chr04    | 16783500                       | [A/C]       | 1067295621                                 |
| Ca_Kabuli_NC_021163.1_16789488 | Ca_kabuli_chr04    | 16789488                       | [T/G]       | 1067295622                                 |
| Ca_Kabuli_NC_021163.1_16789494 | Ca_kabuli_chr04    | 16789494                       | [T/G]       | 1067295623                                 |
| Ca_Kabuli_NC_021163.1_16789497 | Ca_kabuli_chr04    | 16789497                       | [T/G]       | 1067295624                                 |
| Ca_Kabuli_NC_021163.1_16789500 | Ca_kabuli_chr04    | 16789500                       | [T/G]       | 1067295625                                 |
| Ca_Kabuli_NC_021163.1_16789518 | Ca_kabuli_chr04    | 16789518                       | [G/T]       | 1067295626                                 |
| Ca_Kabuli_NC_021163.1_16830347 | Ca_kabuli_chr04    | 16830347                       | [T/G]       | 1067295627                                 |
| Ca_Kabuli_NC_021163.1_16830372 | Ca_kabuli_chr04    | 16830372                       | [A/T]       | 1067295628                                 |
| Ca_Kabuli_NC_021163.1_16830398 | Ca_kabuli_chr04    | 16830398                       | [T/C]       | 1067295629                                 |
| Ca_Kabuli_NC_021163.1_16846275 | Ca_kabuli_chr04    | 16846275                       | [A/T]       | 1067295630                                 |
| Ca_Kabuli_NC_021163.1_16847692 | Ca_kabuli_chr04    | 16847692                       | [A/C]       | 1067295631                                 |
| Ca_Kabuli_NC_021163.1_16847697 | Ca_kabuli_chr04    | 16847697                       | [A/C]       | 1067295632                                 |
| Ca_Kabuli_NC_021163.1_16847711 | Ca_kabuli_chr04    | 16847711                       | [A/G]       | 1067295633                                 |
| Ca_Kabuli_NC_021163.1_16847739 | Ca_kabuli_chr04    | 16847739                       | [T/C]       | 1067295634                                 |

| <b>SNP IDs</b>                 | <b>Chromosomes</b> | <b>Physical positions (bp)</b> | <b>SNPs</b> | <b>NCBI SNPdb accession IDs (NCBI_ss#)</b> |
|--------------------------------|--------------------|--------------------------------|-------------|--------------------------------------------|
| Ca_Kabuli_NC_021163.1_16866627 | Ca_kabuli_chr04    | 16866627                       | [T/G]       | 1067295635                                 |
| Ca_Kabuli_NC_021163.1_16872519 | Ca_kabuli_chr04    | 16872519                       | [T/G]       | 1067295636                                 |
| Ca_Kabuli_NC_021163.1_16889591 | Ca_kabuli_chr04    | 16889591                       | [T/A]       | 1067295637                                 |
| Ca_Kabuli_NC_021163.1_16926491 | Ca_kabuli_chr04    | 16926491                       | [A/G]       | 1067295638                                 |
| Ca_Kabuli_NC_021163.1_16926503 | Ca_kabuli_chr04    | 16926503                       | [A/G]       | 1067295639                                 |
| Ca_Kabuli_NC_021163.1_16926506 | Ca_kabuli_chr04    | 16926506                       | [A/C]       | 1067295640                                 |
| Ca_Kabuli_NC_021163.1_16926515 | Ca_kabuli_chr04    | 16926515                       | [A/C]       | 1067295641                                 |
| Ca_Kabuli_NC_021163.1_16926524 | Ca_kabuli_chr04    | 16926524                       | [T/C]       | 1067295642                                 |
| Ca_Kabuli_NC_021163.1_16926596 | Ca_kabuli_chr04    | 16926596                       | [T/C]       | 1067295643                                 |
| Ca_Kabuli_NC_021163.1_16926635 | Ca_kabuli_chr04    | 16926635                       | [A/G]       | 1067295644                                 |
| Ca_Kabuli_NC_021163.1_16926652 | Ca_kabuli_chr04    | 16926652                       | [T/C]       | 1067295645                                 |
| Ca_Kabuli_NC_021163.1_16926656 | Ca_kabuli_chr04    | 16926656                       | [A/G]       | 1067295646                                 |
| Ca_Kabuli_NC_021163.1_16931381 | Ca_kabuli_chr04    | 16931381                       | [T/G]       | 1067295647                                 |
| Ca_Kabuli_NC_021163.1_16932273 | Ca_kabuli_chr04    | 16932273                       | [A/C]       | 1067295648                                 |
| Ca_Kabuli_NC_021163.1_16932276 | Ca_kabuli_chr04    | 16932276                       | [C/T]       | 1067295649                                 |
| Ca_Kabuli_NC_021163.1_17003904 | Ca_kabuli_chr04    | 17003904                       | [A/T]       | 1067295650                                 |
| Ca_Kabuli_NC_021163.1_17028391 | Ca_kabuli_chr04    | 17028391                       | [T/G]       | 1067295651                                 |
| Ca_Kabuli_NC_021163.1_17109263 | Ca_kabuli_chr04    | 17109263                       | [A/G]       | 1067295652                                 |
| Ca_Kabuli_NC_021163.1_17109297 | Ca_kabuli_chr04    | 17109297                       | [A/G]       | 1067295653                                 |
| Ca_Kabuli_NC_021163.1_17115127 | Ca_kabuli_chr04    | 17115127                       | [A/C]       | 1067295654                                 |
| Ca_Kabuli_NC_021163.1_17148049 | Ca_kabuli_chr04    | 17148049                       | [C/G]       | 1067295655                                 |
| Ca_Kabuli_NC_021163.1_17148050 | Ca_kabuli_chr04    | 17148050                       | [C/A]       | 1067295656                                 |
| Ca_Kabuli_NC_021163.1_17148052 | Ca_kabuli_chr04    | 17148052                       | [G/C]       | 1067295657                                 |
| Ca_Kabuli_NC_021163.1_17148053 | Ca_kabuli_chr04    | 17148053                       | [G/T]       | 1067295658                                 |
| Ca_Kabuli_NC_021163.1_17202598 | Ca_kabuli_chr04    | 17202598                       | [A/T]       | 1067295659                                 |
| Ca_Kabuli_NC_021163.1_17202605 | Ca_kabuli_chr04    | 17202605                       | [A/G]       | 1067295660                                 |
| Ca_Kabuli_NC_021163.1_17203994 | Ca_kabuli_chr04    | 17203994                       | [A/C]       | 1067295661                                 |
| Ca_Kabuli_NC_021163.1_17203997 | Ca_kabuli_chr04    | 17203997                       | [A/C]       | 1067295662                                 |
| Ca_Kabuli_NC_021163.1_17204002 | Ca_kabuli_chr04    | 17204002                       | [T/C]       | 1067295663                                 |
| Ca_Kabuli_NC_021163.1_17228576 | Ca_kabuli_chr04    | 17228576                       | [T/C]       | 1067295664                                 |
| Ca_Kabuli_NC_021163.1_17228599 | Ca_kabuli_chr04    | 17228599                       | [A/T]       | 1067295665                                 |
| Ca_Kabuli_NC_021163.1_17264493 | Ca_kabuli_chr04    | 17264493                       | [C/A]       | 1067295666                                 |
| Ca_Kabuli_NC_021163.1_17274890 | Ca_kabuli_chr04    | 17274890                       | [A/G]       | 1067295667                                 |
| Ca_Kabuli_NC_021163.1_17274893 | Ca_kabuli_chr04    | 17274893                       | [T/C]       | 1067295668                                 |

| <b>SNP IDs</b>                 | <b>Chromosomes</b> | <b>Physical positions (bp)</b> | <b>SNPs</b> | <b>NCBI SNPdb accession IDs (NCBI_ss#)</b> |
|--------------------------------|--------------------|--------------------------------|-------------|--------------------------------------------|
| Ca_Kabuli_NC_021163.1_17274913 | Ca_kabuli_chr04    | 17274913                       | [C/A]       | 1067295669                                 |
| Ca_Kabuli_NC_021163.1_17275870 | Ca_kabuli_chr04    | 17275870                       | [T/C]       | 1067295670                                 |
| Ca_Kabuli_NC_021163.1_17278732 | Ca_kabuli_chr04    | 17278732                       | [C/T]       | 1067295671                                 |
| Ca_Kabuli_NC_021163.1_17278734 | Ca_kabuli_chr04    | 17278734                       | [T/C]       | 1067295672                                 |
| Ca_Kabuli_NC_021163.1_17303693 | Ca_kabuli_chr04    | 17303693                       | [A/C]       | 1067295673                                 |
| Ca_Kabuli_NC_021163.1_17305899 | Ca_kabuli_chr04    | 17305899                       | [T/G]       | 1067295674                                 |
| Ca_Kabuli_NC_021163.1_17306028 | Ca_kabuli_chr04    | 17306028                       | [T/C]       | 1067295675                                 |
| Ca_Kabuli_NC_021163.1_17306043 | Ca_kabuli_chr04    | 17306043                       | [A/G]       | 1067295676                                 |
| Ca_Kabuli_NC_021163.1_17309658 | Ca_kabuli_chr04    | 17309658                       | [A/C]       | 1067295677                                 |
| Ca_Kabuli_NC_021163.1_17309659 | Ca_kabuli_chr04    | 17309659                       | [C/T]       | 1067295678                                 |
| Ca_Kabuli_NC_021163.1_17396352 | Ca_kabuli_chr04    | 17396352                       | [T/G]       | 1067295679                                 |
| Ca_Kabuli_NC_021163.1_17401841 | Ca_kabuli_chr04    | 17401841                       | [T/G]       | 1067295680                                 |
| Ca_Kabuli_NC_021163.1_17408093 | Ca_kabuli_chr04    | 17408093                       | [A/G]       | 1067295681                                 |
| Ca_Kabuli_NC_021163.1_17427162 | Ca_kabuli_chr04    | 17427162                       | [T/C]       | 1067295682                                 |
| Ca_Kabuli_NC_021163.1_17427181 | Ca_kabuli_chr04    | 17427181                       | [T/G]       | 1067295683                                 |
| Ca_Kabuli_NC_021163.1_17429446 | Ca_kabuli_chr04    | 17429446                       | [C/A]       | 1067295684                                 |
| Ca_Kabuli_NC_021163.1_17446750 | Ca_kabuli_chr04    | 17446750                       | [T/G]       | 1067295685                                 |
| Ca_Kabuli_NC_021163.1_17449395 | Ca_kabuli_chr04    | 17449395                       | [A/T]       | 1067295686                                 |
| Ca_Kabuli_NC_021163.1_17449417 | Ca_kabuli_chr04    | 17449417                       | [T/C]       | 1067295687                                 |
| Ca_Kabuli_NC_021163.1_17451460 | Ca_kabuli_chr04    | 17451460                       | [T/G]       | 1067295688                                 |
| Ca_Kabuli_NC_021163.1_17473015 | Ca_kabuli_chr04    | 17473015                       | [T/C]       | 1067295689                                 |
| Ca_Kabuli_NC_021163.1_17473018 | Ca_kabuli_chr04    | 17473018                       | [C/T]       | 1067295690                                 |
| Ca_Kabuli_NC_021163.1_17473210 | Ca_kabuli_chr04    | 17473210                       | [A/C]       | 1067295691                                 |
| Ca_Kabuli_NC_021163.1_17473225 | Ca_kabuli_chr04    | 17473225                       | [A/G]       | 1067295692                                 |
| Ca_Kabuli_NC_021163.1_17473312 | Ca_kabuli_chr04    | 17473312                       | [C/A]       | 1067295693                                 |
| Ca_Kabuli_NC_021163.1_17494744 | Ca_kabuli_chr04    | 17494744                       | [A/C]       | 1067295694                                 |
| Ca_Kabuli_NC_021163.1_17494756 | Ca_kabuli_chr04    | 17494756                       | [T/A]       | 1067295695                                 |
| Ca_Kabuli_NC_021163.1_17494770 | Ca_kabuli_chr04    | 17494770                       | [G/A]       | 1067295696                                 |
| Ca_Kabuli_NC_021163.1_17494771 | Ca_kabuli_chr04    | 17494771                       | [C/T]       | 1067295697                                 |
| Ca_Kabuli_NC_021163.1_17494772 | Ca_kabuli_chr04    | 17494772                       | [G/C]       | 1067295698                                 |
| Ca_Kabuli_NC_021163.1_17494773 | Ca_kabuli_chr04    | 17494773                       | [G/T]       | 1067295699                                 |
| Ca_Kabuli_NC_021163.1_17497238 | Ca_kabuli_chr04    | 17497238                       | [A/C]       | 1067295700                                 |
| Ca_Kabuli_NC_021163.1_17595267 | Ca_kabuli_chr04    | 17595267                       | [A/G]       | 1067295701                                 |
| Ca_Kabuli_NC_021163.1_17595297 | Ca_kabuli_chr04    | 17595297                       | [A/G]       | 1067295702                                 |

| <b>SNP IDs</b>                 | <b>Chromosomes</b> | <b>Physical positions (bp)</b> | <b>SNPs</b> | <b>NCBI SNPdb accession IDs (NCBI_ss#)</b> |
|--------------------------------|--------------------|--------------------------------|-------------|--------------------------------------------|
| Ca_Kabuli_NC_021163.1_17621574 | Ca_kabuli_chr04    | 17621574                       | [T/G]       | 1067295703                                 |
| Ca_Kabuli_NC_021163.1_17621583 | Ca_kabuli_chr04    | 17621583                       | [A/G]       | 1067295704                                 |
| Ca_Kabuli_NC_021163.1_17621619 | Ca_kabuli_chr04    | 17621619                       | [T/G]       | 1067295705                                 |
| Ca_Kabuli_NC_021163.1_17622943 | Ca_kabuli_chr04    | 17622943                       | [T/G]       | 1067295706                                 |
| Ca_Kabuli_NC_021163.1_17622952 | Ca_kabuli_chr04    | 17622952                       | [T/C]       | 1067295707                                 |
| Ca_Kabuli_NC_021163.1_17622969 | Ca_kabuli_chr04    | 17622969                       | [T/G]       | 1067295708                                 |
| Ca_Kabuli_NC_021163.1_17622979 | Ca_kabuli_chr04    | 17622979                       | [A/G]       | 1067295709                                 |
| Ca_Kabuli_NC_021163.1_17647678 | Ca_kabuli_chr04    | 17647678                       | [T/C]       | 1067295710                                 |
| Ca_Kabuli_NC_021163.1_17647684 | Ca_kabuli_chr04    | 17647684                       | [T/G]       | 1067295711                                 |
| Ca_Kabuli_NC_021163.1_17647689 | Ca_kabuli_chr04    | 17647689                       | [G/T]       | 1067295712                                 |
| Ca_Kabuli_NC_021163.1_17647693 | Ca_kabuli_chr04    | 17647693                       | [T/G]       | 1067295713                                 |
| Ca_Kabuli_NC_021163.1_17647716 | Ca_kabuli_chr04    | 17647716                       | [T/G]       | 1067295714                                 |
| Ca_Kabuli_NC_021163.1_17652717 | Ca_kabuli_chr04    | 17652717                       | [T/G]       | 1067295715                                 |
| Ca_Kabuli_NC_021163.1_17685071 | Ca_kabuli_chr04    | 17685071                       | [A/T]       | 1067295716                                 |
| Ca_Kabuli_NC_021163.1_17685098 | Ca_kabuli_chr04    | 17685098                       | [T/C]       | 1067295717                                 |
| Ca_Kabuli_NC_021163.1_17718922 | Ca_kabuli_chr04    | 17718922                       | [T/G]       | 1067295718                                 |
| Ca_Kabuli_NC_021163.1_17751940 | Ca_kabuli_chr04    | 17751940                       | [T/A]       | 1067295719                                 |
| Ca_Kabuli_NC_021163.1_17771707 | Ca_kabuli_chr04    | 17771707                       | [T/C]       | 1067295720                                 |
| Ca_Kabuli_NC_021163.1_17839101 | Ca_kabuli_chr04    | 17839101                       | [A/C]       | 1067295721                                 |
| Ca_Kabuli_NC_021163.1_17839132 | Ca_kabuli_chr04    | 17839132                       | [A/G]       | 1067295722                                 |
| Ca_Kabuli_NC_021163.1_17847854 | Ca_kabuli_chr04    | 17847854                       | [T/G]       | 1067295723                                 |
| Ca_Kabuli_NC_021163.1_17858133 | Ca_kabuli_chr04    | 17858133                       | [C/T]       | 1067295724                                 |
| Ca_Kabuli_NC_021163.1_17858140 | Ca_kabuli_chr04    | 17858140                       | [A/C]       | 1067295725                                 |
| Ca_Kabuli_NC_021163.1_17886842 | Ca_kabuli_chr04    | 17886842                       | [A/C]       | 1067295726                                 |
| Ca_Kabuli_NC_021163.1_17913708 | Ca_kabuli_chr04    | 17913708                       | [A/T]       | 1067295727                                 |
| Ca_Kabuli_NC_021163.1_17913711 | Ca_kabuli_chr04    | 17913711                       | [T/C]       | 1067295728                                 |
| Ca_Kabuli_NC_021163.1_17913719 | Ca_kabuli_chr04    | 17913719                       | [G/C]       | 1067295729                                 |
| Ca_Kabuli_NC_021163.1_17913726 | Ca_kabuli_chr04    | 17913726                       | [G/A]       | 1067295730                                 |
| Ca_Kabuli_NC_021163.1_17913731 | Ca_kabuli_chr04    | 17913731                       | [A/C]       | 1067295731                                 |
| Ca_Kabuli_NC_021163.1_17914220 | Ca_kabuli_chr04    | 17914220                       | [T/A]       | 1067295732                                 |
| Ca_Kabuli_NC_021163.1_17914257 | Ca_kabuli_chr04    | 17914257                       | [A/C]       | 1067295733                                 |
| Ca_Kabuli_NC_021163.1_17914277 | Ca_kabuli_chr04    | 17914277                       | [A/C]       | 1067295734                                 |
| Ca_Kabuli_NC_021163.1_17920556 | Ca_kabuli_chr04    | 17920556                       | [A/G]       | 1067295735                                 |
| Ca_Kabuli_NC_021163.1_17920572 | Ca_kabuli_chr04    | 17920572                       | [T/C]       | 1067295736                                 |

| <b>SNP IDs</b>                 | <b>Chromosomes</b> | <b>Physical positions (bp)</b> | <b>SNPs</b> | <b>NCBI SNPdb accession IDs (NCBI_ss#)</b> |
|--------------------------------|--------------------|--------------------------------|-------------|--------------------------------------------|
| Ca_Kabuli_NC_021163.1_17920613 | Ca_kabuli_chr04    | 17920613                       | [T/G]       | 1067295737                                 |
| Ca_Kabuli_NC_021163.1_17920629 | Ca_kabuli_chr04    | 17920629                       | [T/C]       | 1067295738                                 |
| Ca_Kabuli_NC_021163.1_17920771 | Ca_kabuli_chr04    | 17920771                       | [A/C]       | 1067295739                                 |
| Ca_Kabuli_NC_021163.1_17953824 | Ca_kabuli_chr04    | 17953824                       | [T/C]       | 1067295740                                 |
| Ca_Kabuli_NC_021163.1_17953846 | Ca_kabuli_chr04    | 17953846                       | [T/C]       | 1067295741                                 |
| Ca_Kabuli_NC_021163.1_17990878 | Ca_kabuli_chr04    | 17990878                       | [G/T]       | 1067295742                                 |
| Ca_Kabuli_NC_021163.1_17990879 | Ca_kabuli_chr04    | 17990879                       | [G/C]       | 1067295743                                 |
| Ca_Kabuli_NC_021163.1_17990880 | Ca_kabuli_chr04    | 17990880                       | [G/T]       | 1067295744                                 |
| Ca_Kabuli_NC_021163.1_17992406 | Ca_kabuli_chr04    | 17992406                       | [T/G]       | 1067295745                                 |
| Ca_Kabuli_NC_021163.1_17992532 | Ca_kabuli_chr04    | 17992532                       | [A/T]       | 1067295746                                 |
| Ca_Kabuli_NC_021163.1_17992540 | Ca_kabuli_chr04    | 17992540                       | [T/A]       | 1067295747                                 |
| Ca_Kabuli_NC_021163.1_17992553 | Ca_kabuli_chr04    | 17992553                       | [T/C]       | 1067295748                                 |
| Ca_Kabuli_NC_021163.1_18013299 | Ca_kabuli_chr04    | 18013299                       | [G/A]       | 1067295749                                 |
| Ca_Kabuli_NC_021163.1_18070194 | Ca_kabuli_chr04    | 18070194                       | [T/C]       | 1067295750                                 |
| Ca_Kabuli_NC_021163.1_18071074 | Ca_kabuli_chr04    | 18071074                       | [A/C]       | 1067295751                                 |
| Ca_Kabuli_NC_021163.1_18071095 | Ca_kabuli_chr04    | 18071095                       | [A/C]       | 1067295752                                 |
| Ca_Kabuli_NC_021163.1_18071100 | Ca_kabuli_chr04    | 18071100                       | [A/C]       | 1067295753                                 |
| Ca_Kabuli_NC_021163.1_18071129 | Ca_kabuli_chr04    | 18071129                       | [T/C]       | 1067295754                                 |
| Ca_Kabuli_NC_021163.1_18071135 | Ca_kabuli_chr04    | 18071135                       | [T/G]       | 1067295755                                 |
| Ca_Kabuli_NC_021163.1_18071138 | Ca_kabuli_chr04    | 18071138                       | [T/C]       | 1067295756                                 |
| Ca_Kabuli_NC_021163.1_18071152 | Ca_kabuli_chr04    | 18071152                       | [T/C]       | 1067295757                                 |
| Ca_Kabuli_NC_021163.1_18089508 | Ca_kabuli_chr04    | 18089508                       | [A/C]       | 1067295758                                 |
| Ca_Kabuli_NC_021163.1_18117799 | Ca_kabuli_chr04    | 18117799                       | [G/T]       | 1067295759                                 |
| Ca_Kabuli_NC_021163.1_18167607 | Ca_kabuli_chr04    | 18167607                       | [A/T]       | 1067295760                                 |
| Ca_Kabuli_NC_021163.1_18167620 | Ca_kabuli_chr04    | 18167620                       | [T/C]       | 1067295761                                 |
| Ca_Kabuli_NC_021163.1_18167660 | Ca_kabuli_chr04    | 18167660                       | [A/C]       | 1067295762                                 |
| Ca_Kabuli_NC_021163.1_18167679 | Ca_kabuli_chr04    | 18167679                       | [T/C]       | 1067295763                                 |
| Ca_Kabuli_NC_021163.1_18168367 | Ca_kabuli_chr04    | 18168367                       | [A/C]       | 1067295764                                 |
| Ca_Kabuli_NC_021163.1_18168378 | Ca_kabuli_chr04    | 18168378                       | [G/A]       | 1067295765                                 |
| Ca_Kabuli_NC_021163.1_18168379 | Ca_kabuli_chr04    | 18168379                       | [C/G]       | 1067295766                                 |
| Ca_Kabuli_NC_021163.1_18168381 | Ca_kabuli_chr04    | 18168381                       | [C/G]       | 1067295767                                 |
| Ca_Kabuli_NC_021163.1_18168385 | Ca_kabuli_chr04    | 18168385                       | [G/T]       | 1067295768                                 |
| Ca_Kabuli_NC_021163.1_18168387 | Ca_kabuli_chr04    | 18168387                       | [C/T]       | 1067295769                                 |
| Ca_Kabuli_NC_021163.1_18171478 | Ca_kabuli_chr04    | 18171478                       | [A/C]       | 1067295770                                 |

| <b>SNP IDs</b>                 | <b>Chromosomes</b> | <b>Physical positions (bp)</b> | <b>SNPs</b> | <b>NCBI SNPdb accession IDs (NCBI_ss#)</b> |
|--------------------------------|--------------------|--------------------------------|-------------|--------------------------------------------|
| Ca_Kabuli_NC_021163.1_18171483 | Ca_kabuli_chr04    | 18171483                       | [A/T]       | 1067295771                                 |
| Ca_Kabuli_NC_021163.1_18171498 | Ca_kabuli_chr04    | 18171498                       | [A/C]       | 1067295772                                 |
| Ca_Kabuli_NC_021163.1_18171505 | Ca_kabuli_chr04    | 18171505                       | [A/G]       | 1067295773                                 |
| Ca_Kabuli_NC_021163.1_18171522 | Ca_kabuli_chr04    | 18171522                       | [T/G]       | 1067295774                                 |
| Ca_Kabuli_NC_021163.1_18171534 | Ca_kabuli_chr04    | 18171534                       | [A/G]       | 1067295775                                 |
| Ca_Kabuli_NC_021163.1_18171542 | Ca_kabuli_chr04    | 18171542                       | [A/G]       | 1067295776                                 |
| Ca_Kabuli_NC_021163.1_18427444 | Ca_kabuli_chr04    | 18427444                       | [A/G]       | 1067295777                                 |
| Ca_Kabuli_NC_021163.1_18433965 | Ca_kabuli_chr04    | 18433965                       | [A/G]       | 1067295778                                 |
| Ca_Kabuli_NC_021163.1_18433977 | Ca_kabuli_chr04    | 18433977                       | [T/C]       | 1067295779                                 |
| Ca_Kabuli_NC_021163.1_18433981 | Ca_kabuli_chr04    | 18433981                       | [T/C]       | 1067295780                                 |
| Ca_Kabuli_NC_021163.1_18433987 | Ca_kabuli_chr04    | 18433987                       | [A/G]       | 1067295781                                 |
| Ca_Kabuli_NC_021163.1_18435345 | Ca_kabuli_chr04    | 18435345                       | [T/A]       | 1067295782                                 |
| Ca_Kabuli_NC_021163.1_18435353 | Ca_kabuli_chr04    | 18435353                       | [T/A]       | 1067295783                                 |
| Ca_Kabuli_NC_021163.1_18485909 | Ca_kabuli_chr04    | 18485909                       | [T/G]       | 1067295784                                 |
| Ca_Kabuli_NC_021163.1_18493810 | Ca_kabuli_chr04    | 18493810                       | [T/G]       | 1067295785                                 |
| Ca_Kabuli_NC_021163.1_18505268 | Ca_kabuli_chr04    | 18505268                       | [T/C]       | 1067295786                                 |
| Ca_Kabuli_NC_021163.1_18505312 | Ca_kabuli_chr04    | 18505312                       | [A/G]       | 1067295787                                 |
| Ca_Kabuli_NC_021163.1_18523370 | Ca_kabuli_chr04    | 18523370                       | [A/G]       | 1067295788                                 |
| Ca_Kabuli_NC_021163.1_18523398 | Ca_kabuli_chr04    | 18523398                       | [G/T]       | 1067295789                                 |
| Ca_Kabuli_NC_021163.1_18526794 | Ca_kabuli_chr04    | 18526794                       | [A/G]       | 1067295790                                 |
| Ca_Kabuli_NC_021163.1_18585411 | Ca_kabuli_chr04    | 18585411                       | [A/G]       | 1067295791                                 |
| Ca_Kabuli_NC_021163.1_18585421 | Ca_kabuli_chr04    | 18585421                       | [A/G]       | 1067295792                                 |
| Ca_Kabuli_NC_021163.1_18592828 | Ca_kabuli_chr04    | 18592828                       | [T/C]       | 1067295793                                 |
| Ca_Kabuli_NC_021163.1_18628594 | Ca_kabuli_chr04    | 18628594                       | [T/A]       | 1067295794                                 |
| Ca_Kabuli_NC_021163.1_18633561 | Ca_kabuli_chr04    | 18633561                       | [T/G]       | 1067295795                                 |
| Ca_Kabuli_NC_021163.1_18719393 | Ca_kabuli_chr04    | 18719393                       | [T/C]       | 1067295796                                 |
| Ca_Kabuli_NC_021163.1_18719417 | Ca_kabuli_chr04    | 18719417                       | [A/G]       | 1067295797                                 |
| Ca_Kabuli_NC_021163.1_18719419 | Ca_kabuli_chr04    | 18719419                       | [C/G]       | 1067295798                                 |
| Ca_Kabuli_NC_021163.1_18719438 | Ca_kabuli_chr04    | 18719438                       | [A/G]       | 1067295799                                 |
| Ca_Kabuli_NC_021163.1_18719451 | Ca_kabuli_chr04    | 18719451                       | [A/G]       | 1067295800                                 |
| Ca_Kabuli_NC_021163.1_18719461 | Ca_kabuli_chr04    | 18719461                       | [A/G]       | 1067295801                                 |
| Ca_Kabuli_NC_021163.1_18719463 | Ca_kabuli_chr04    | 18719463                       | [A/G]       | 1067295802                                 |
| Ca_Kabuli_NC_021163.1_18720247 | Ca_kabuli_chr04    | 18720247                       | [A/G]       | 1067295803                                 |
| Ca_Kabuli_NC_021163.1_18720318 | Ca_kabuli_chr04    | 18720318                       | [A/C]       | 1067295804                                 |

| <b>SNP IDs</b>                 | <b>Chromosomes</b> | <b>Physical positions (bp)</b> | <b>SNPs</b> | <b>NCBI SNPdb accession IDs (NCBI_ss#)</b> |
|--------------------------------|--------------------|--------------------------------|-------------|--------------------------------------------|
| Ca_Kabuli_NC_021163.1_18723809 | Ca_kabuli_chr04    | 18723809                       | [A/G]       | 1067295805                                 |
| Ca_Kabuli_NC_021163.1_18727628 | Ca_kabuli_chr04    | 18727628                       | [T/C]       | 1067295806                                 |
| Ca_Kabuli_NC_021163.1_18727657 | Ca_kabuli_chr04    | 18727657                       | [T/G]       | 1067295807                                 |
| Ca_Kabuli_NC_021163.1_18747915 | Ca_kabuli_chr04    | 18747915                       | [A/G]       | 1067295808                                 |
| Ca_Kabuli_NC_021163.1_18752357 | Ca_kabuli_chr04    | 18752357                       | [A/G]       | 1067295809                                 |
| Ca_Kabuli_NC_021163.1_18855201 | Ca_kabuli_chr04    | 18855201                       | [T/C]       | 1067295810                                 |
| Ca_Kabuli_NC_021163.1_18867076 | Ca_kabuli_chr04    | 18867076                       | [A/C]       | 1067295811                                 |
| Ca_Kabuli_NC_021163.1_18867117 | Ca_kabuli_chr04    | 18867117                       | [T/G]       | 1067295812                                 |
| Ca_Kabuli_NC_021163.1_18875677 | Ca_kabuli_chr04    | 18875677                       | [A/C]       | 1067295813                                 |
| Ca_Kabuli_NC_021163.1_18886200 | Ca_kabuli_chr04    | 18886200                       | [A/C]       | 1067295814                                 |
| Ca_Kabuli_NC_021163.1_18912194 | Ca_kabuli_chr04    | 18912194                       | [A/C]       | 1067295815                                 |
| Ca_Kabuli_NC_021163.1_18923641 | Ca_kabuli_chr04    | 18923641                       | [G/T]       | 1067295816                                 |
| Ca_Kabuli_NC_021163.1_18943307 | Ca_kabuli_chr04    | 18943307                       | [A/C]       | 1067295817                                 |
| Ca_Kabuli_NC_021163.1_18958392 | Ca_kabuli_chr04    | 18958392                       | [A/T]       | 1067295818                                 |
| Ca_Kabuli_NC_021163.1_18958409 | Ca_kabuli_chr04    | 18958409                       | [G/A]       | 1067295819                                 |
| Ca_Kabuli_NC_021163.1_18959763 | Ca_kabuli_chr04    | 18959763                       | [A/C]       | 1067295820                                 |
| Ca_Kabuli_NC_021163.1_18994533 | Ca_kabuli_chr04    | 18994533                       | [G/A]       | 1067295821                                 |
| Ca_Kabuli_NC_021163.1_18994535 | Ca_kabuli_chr04    | 18994535                       | [A/C]       | 1067295822                                 |
| Ca_Kabuli_NC_021163.1_18994536 | Ca_kabuli_chr04    | 18994536                       | [G/T]       | 1067295823                                 |
| Ca_Kabuli_NC_021163.1_19056752 | Ca_kabuli_chr04    | 19056752                       | [A/C]       | 1067295824                                 |
| Ca_Kabuli_NC_021163.1_19056787 | Ca_kabuli_chr04    | 19056787                       | [A/G]       | 1067295825                                 |
| Ca_Kabuli_NC_021163.1_19057199 | Ca_kabuli_chr04    | 19057199                       | [T/G]       | 1067295826                                 |
| Ca_Kabuli_NC_021163.1_19057215 | Ca_kabuli_chr04    | 19057215                       | [T/A]       | 1067295827                                 |
| Ca_Kabuli_NC_021163.1_19061732 | Ca_kabuli_chr04    | 19061732                       | [T/G]       | 1067295828                                 |
| Ca_Kabuli_NC_021163.1_19061738 | Ca_kabuli_chr04    | 19061738                       | [A/G]       | 1067295829                                 |
| Ca_Kabuli_NC_021163.1_19152663 | Ca_kabuli_chr04    | 19152663                       | [C/T]       | 1067295830                                 |
| Ca_Kabuli_NC_021163.1_19152665 | Ca_kabuli_chr04    | 19152665                       | [A/C]       | 1067295831                                 |
| Ca_Kabuli_NC_021163.1_19166053 | Ca_kabuli_chr04    | 19166053                       | [T/G]       | 1067295832                                 |
| Ca_Kabuli_NC_021163.1_19207681 | Ca_kabuli_chr04    | 19207681                       | [T/C]       | 1067295833                                 |
| Ca_Kabuli_NC_021163.1_19211864 | Ca_kabuli_chr04    | 19211864                       | [A/C]       | 1067295834                                 |
| Ca_Kabuli_NC_021163.1_19227621 | Ca_kabuli_chr04    | 19227621                       | [T/G]       | 1067295835                                 |
| Ca_Kabuli_NC_021163.1_19227624 | Ca_kabuli_chr04    | 19227624                       | [T/C]       | 1067295836                                 |
| Ca_Kabuli_NC_021163.1_19263967 | Ca_kabuli_chr04    | 19263967                       | [T/G]       | 1067295837                                 |
| Ca_Kabuli_NC_021163.1_19540579 | Ca_kabuli_chr04    | 19540579                       | [T/G]       | 1067295838                                 |



| <b>SNP IDs</b>                 | <b>Chromosomes</b> | <b>Physical positions (bp)</b> | <b>SNPs</b> | <b>NCBI SNPdb accession IDs (NCBI_ss#)</b> |
|--------------------------------|--------------------|--------------------------------|-------------|--------------------------------------------|
| Ca_Kabuli_NC_021163.1_19593695 | Ca_kabuli_chr04    | 19593695                       | [C/A]       | 1067295839                                 |
| Ca_Kabuli_NC_021163.1_19593696 | Ca_kabuli_chr04    | 19593696                       | [C/G]       | 1067295840                                 |
| Ca_Kabuli_NC_021163.1_19593699 | Ca_kabuli_chr04    | 19593699                       | [A/C]       | 1067295841                                 |
| Ca_Kabuli_NC_021163.1_19593700 | Ca_kabuli_chr04    | 19593700                       | [T/G]       | 1067295842                                 |
| Ca_Kabuli_NC_021163.1_19660464 | Ca_kabuli_chr04    | 19660464                       | [A/C]       | 1067295843                                 |
| Ca_Kabuli_NC_021163.1_19687982 | Ca_kabuli_chr04    | 19687982                       | [T/C]       | 1067295844                                 |
| Ca_Kabuli_NC_021163.1_19712368 | Ca_kabuli_chr04    | 19712368                       | [A/C]       | 1067295845                                 |
| Ca_Kabuli_NC_021163.1_19712457 | Ca_kabuli_chr04    | 19712457                       | [A/T]       | 1067295846                                 |
| Ca_Kabuli_NC_021163.1_19712931 | Ca_kabuli_chr04    | 19712931                       | [G/A]       | 1067295847                                 |
| Ca_Kabuli_NC_021163.1_19733301 | Ca_kabuli_chr04    | 19733301                       | [A/C]       | 1067295848                                 |
| Ca_Kabuli_NC_021163.1_19738361 | Ca_kabuli_chr04    | 19738361                       | [C/G]       | 1067295849                                 |
| Ca_Kabuli_NC_021163.1_19738371 | Ca_kabuli_chr04    | 19738371                       | [A/G]       | 1067295850                                 |
| Ca_Kabuli_NC_021163.1_19738402 | Ca_kabuli_chr04    | 19738402                       | [A/C]       | 1067295851                                 |
| Ca_Kabuli_NC_021163.1_19755453 | Ca_kabuli_chr04    | 19755453                       | [T/C]       | 1067295852                                 |
| Ca_Kabuli_NC_021163.1_19755467 | Ca_kabuli_chr04    | 19755467                       | [T/C]       | 1067295853                                 |
| Ca_Kabuli_NC_021163.1_19765190 | Ca_kabuli_chr04    | 19765190                       | [T/C]       | 1067295854                                 |
| Ca_Kabuli_NC_021163.1_19765194 | Ca_kabuli_chr04    | 19765194                       | [T/G]       | 1067295855                                 |
| Ca_Kabuli_NC_021163.1_19765202 | Ca_kabuli_chr04    | 19765202                       | [A/T]       | 1067295856                                 |
| Ca_Kabuli_NC_021163.1_19765230 | Ca_kabuli_chr04    | 19765230                       | [A/G]       | 1067295857                                 |
| Ca_Kabuli_NC_021163.1_19765242 | Ca_kabuli_chr04    | 19765242                       | [C/T]       | 1067295858                                 |
| Ca_Kabuli_NC_021163.1_19869636 | Ca_kabuli_chr04    | 19869636                       | [A/C]       | 1067295859                                 |
| Ca_Kabuli_NC_021163.1_19869708 | Ca_kabuli_chr04    | 19869708                       | [A/G]       | 1067295860                                 |
| Ca_Kabuli_NC_021163.1_19869717 | Ca_kabuli_chr04    | 19869717                       | [T/G]       | 1067295861                                 |
| Ca_Kabuli_NC_021163.1_19869722 | Ca_kabuli_chr04    | 19869722                       | [T/G]       | 1067295862                                 |
| Ca_Kabuli_NC_021163.1_19869742 | Ca_kabuli_chr04    | 19869742                       | [A/C]       | 1067295863                                 |
| Ca_Kabuli_NC_021163.1_19870269 | Ca_kabuli_chr04    | 19870269                       | [A/G]       | 1067295864                                 |
| Ca_Kabuli_NC_021163.1_20161601 | Ca_kabuli_chr04    | 20161601                       | [A/G]       | 1067295865                                 |
| Ca_Kabuli_NC_021163.1_20193277 | Ca_kabuli_chr04    | 20193277                       | [T/G]       | 1067295866                                 |
| Ca_Kabuli_NC_021163.1_20193298 | Ca_kabuli_chr04    | 20193298                       | [T/G]       | 1067295867                                 |
| Ca_Kabuli_NC_021163.1_20215275 | Ca_kabuli_chr04    | 20215275                       | [A/G]       | 1067295868                                 |
| Ca_Kabuli_NC_021163.1_20229504 | Ca_kabuli_chr04    | 20229504                       | [A/C]       | 1067295869                                 |
| Ca_Kabuli_NC_021163.1_20229510 | Ca_kabuli_chr04    | 20229510                       | [T/C]       | 1067295870                                 |
| Ca_Kabuli_NC_021163.1_20229520 | Ca_kabuli_chr04    | 20229520                       | [A/G]       | 1067295871                                 |
| Ca_Kabuli_NC_021163.1_20398685 | Ca_kabuli_chr04    | 20398685                       | [A/C]       | 1067295872                                 |

| <b>SNP IDs</b>                 | <b>Chromosomes</b> | <b>Physical positions (bp)</b> | <b>SNPs</b> | <b>NCBI SNPdb accession IDs (NCBI_ss#)</b> |
|--------------------------------|--------------------|--------------------------------|-------------|--------------------------------------------|
| Ca_Kabuli_NC_021163.1_20398714 | Ca_kabuli_chr04    | 20398714                       | [A/T]       | 1067295873                                 |
| Ca_Kabuli_NC_021163.1_20435986 | Ca_kabuli_chr04    | 20435986                       | [T/C]       | 1067295874                                 |
| Ca_Kabuli_NC_021163.1_20435998 | Ca_kabuli_chr04    | 20435998                       | [A/G]       | 1067295875                                 |
| Ca_Kabuli_NC_021163.1_20436025 | Ca_kabuli_chr04    | 20436025                       | [T/G]       | 1067295876                                 |
| Ca_Kabuli_NC_021163.1_20473194 | Ca_kabuli_chr04    | 20473194                       | [A/C]       | 1067295877                                 |
| Ca_Kabuli_NC_021163.1_20599115 | Ca_kabuli_chr04    | 20599115                       | [C/T]       | 1067295878                                 |
| Ca_Kabuli_NC_021163.1_20668758 | Ca_kabuli_chr04    | 20668758                       | [T/G]       | 1067295879                                 |
| Ca_Kabuli_NC_021163.1_20668802 | Ca_kabuli_chr04    | 20668802                       | [A/C]       | 1067295880                                 |
| Ca_Kabuli_NC_021163.1_20669172 | Ca_kabuli_chr04    | 20669172                       | [A/C]       | 1067295881                                 |
| Ca_Kabuli_NC_021163.1_20669340 | Ca_kabuli_chr04    | 20669340                       | [A/G]       | 1067295882                                 |
| Ca_Kabuli_NC_021163.1_20669365 | Ca_kabuli_chr04    | 20669365                       | [A/C]       | 1067295883                                 |
| Ca_Kabuli_NC_021163.1_20669387 | Ca_kabuli_chr04    | 20669387                       | [A/G]       | 1067295884                                 |
| Ca_Kabuli_NC_021163.1_20669520 | Ca_kabuli_chr04    | 20669520                       | [A/C]       | 1067295885                                 |
| Ca_Kabuli_NC_021163.1_20696943 | Ca_kabuli_chr04    | 20696943                       | [A/G]       | 1067295886                                 |
| Ca_Kabuli_NC_021163.1_20697620 | Ca_kabuli_chr04    | 20697620                       | [C/T]       | 1067295887                                 |
| Ca_Kabuli_NC_021163.1_20697689 | Ca_kabuli_chr04    | 20697689                       | [A/T]       | 1067295888                                 |
| Ca_Kabuli_NC_021163.1_20745125 | Ca_kabuli_chr04    | 20745125                       | [A/C]       | 1067295889                                 |
| Ca_Kabuli_NC_021163.1_20764801 | Ca_kabuli_chr04    | 20764801                       | [T/C]       | 1067295890                                 |
| Ca_Kabuli_NC_021163.1_20764818 | Ca_kabuli_chr04    | 20764818                       | [A/G]       | 1067295891                                 |
| Ca_Kabuli_NC_021163.1_20764913 | Ca_kabuli_chr04    | 20764913                       | [T/G]       | 1067295892                                 |
| Ca_Kabuli_NC_021163.1_20905105 | Ca_kabuli_chr04    | 20905105                       | [A/G]       | 1067295893                                 |
| Ca_Kabuli_NC_021163.1_20907409 | Ca_kabuli_chr04    | 20907409                       | [T/C]       | 1067295894                                 |
| Ca_Kabuli_NC_021163.1_20907435 | Ca_kabuli_chr04    | 20907435                       | [A/C]       | 1067295895                                 |
| Ca_Kabuli_NC_021163.1_21385323 | Ca_kabuli_chr04    | 21385323                       | [T/G]       | 1067295896                                 |
| Ca_Kabuli_NC_021163.1_21409377 | Ca_kabuli_chr04    | 21409377                       | [T/G]       | 1067295897                                 |
| Ca_Kabuli_NC_021163.1_21593215 | Ca_kabuli_chr04    | 21593215                       | [G/A]       | 1067295898                                 |
| Ca_Kabuli_NC_021163.1_21830594 | Ca_kabuli_chr04    | 21830594                       | [A/G]       | 1067295899                                 |
| Ca_Kabuli_NC_021163.1_22079563 | Ca_kabuli_chr04    | 22079563                       | [T/C]       | 1067295900                                 |
| Ca_Kabuli_NC_021163.1_22079657 | Ca_kabuli_chr04    | 22079657                       | [A/C]       | 1067295901                                 |
| Ca_Kabuli_NC_021163.1_22099567 | Ca_kabuli_chr04    | 22099567                       | [A/T]       | 1067295902                                 |
| Ca_Kabuli_NC_021163.1_22108956 | Ca_kabuli_chr04    | 22108956                       | [A/G]       | 1067295903                                 |
| Ca_Kabuli_NC_021163.1_22108961 | Ca_kabuli_chr04    | 22108961                       | [T/G]       | 1067295904                                 |
| Ca_Kabuli_NC_021163.1_22108978 | Ca_kabuli_chr04    | 22108978                       | [T/A]       | 1067295905                                 |
| Ca_Kabuli_NC_021163.1_22124986 | Ca_kabuli_chr04    | 22124986                       | [C/A]       | 1067295906                                 |

| <b>SNP IDs</b>                 | <b>Chromosomes</b> | <b>Physical positions (bp)</b> | <b>SNPs</b> | <b>NCBI SNPdb accession IDs (NCBI_ss#)</b> |
|--------------------------------|--------------------|--------------------------------|-------------|--------------------------------------------|
| Ca_Kabuli_NC_021163.1_22124987 | Ca_kabuli_chr04    | 22124987                       | [T/G]       | 1067295907                                 |
| Ca_Kabuli_NC_021163.1_22124988 | Ca_kabuli_chr04    | 22124988                       | [G/A]       | 1067295908                                 |
| Ca_Kabuli_NC_021163.1_22238028 | Ca_kabuli_chr04    | 22238028                       | [A/C]       | 1067295909                                 |
| Ca_Kabuli_NC_021163.1_22266672 | Ca_kabuli_chr04    | 22266672                       | [A/T]       | 1067295910                                 |
| Ca_Kabuli_NC_021163.1_22266678 | Ca_kabuli_chr04    | 22266678                       | [C/A]       | 1067295911                                 |
| Ca_Kabuli_NC_021163.1_22289520 | Ca_kabuli_chr04    | 22289520                       | [T/C]       | 1067295912                                 |
| Ca_Kabuli_NC_021163.1_22289561 | Ca_kabuli_chr04    | 22289561                       | [A/C]       | 1067295913                                 |
| Ca_Kabuli_NC_021163.1_22293448 | Ca_kabuli_chr04    | 22293448                       | [T/G]       | 1067295914                                 |
| Ca_Kabuli_NC_021163.1_22293455 | Ca_kabuli_chr04    | 22293455                       | [T/A]       | 1067295915                                 |
| Ca_Kabuli_NC_021163.1_22295491 | Ca_kabuli_chr04    | 22295491                       | [A/C]       | 1067295916                                 |
| Ca_Kabuli_NC_021163.1_22375189 | Ca_kabuli_chr04    | 22375189                       | [T/G]       | 1067295917                                 |
| Ca_Kabuli_NC_021163.1_22375612 | Ca_kabuli_chr04    | 22375612                       | [A/C]       | 1067295918                                 |
| Ca_Kabuli_NC_021163.1_22695001 | Ca_kabuli_chr04    | 22695001                       | [A/G]       | 1067295919                                 |
| Ca_Kabuli_NC_021163.1_22827207 | Ca_kabuli_chr04    | 22827207                       | [T/C]       | 1067295920                                 |
| Ca_Kabuli_NC_021163.1_22850596 | Ca_kabuli_chr04    | 22850596                       | [C/G]       | 1067295921                                 |
| Ca_Kabuli_NC_021163.1_22850617 | Ca_kabuli_chr04    | 22850617                       | [T/C]       | 1067295922                                 |
| Ca_Kabuli_NC_021163.1_22850630 | Ca_kabuli_chr04    | 22850630                       | [C/A]       | 1067295923                                 |
| Ca_Kabuli_NC_021163.1_22850637 | Ca_kabuli_chr04    | 22850637                       | [T/G]       | 1067295924                                 |
| Ca_Kabuli_NC_021163.1_22850643 | Ca_kabuli_chr04    | 22850643                       | [T/A]       | 1067295925                                 |
| Ca_Kabuli_NC_021163.1_22860484 | Ca_kabuli_chr04    | 22860484                       | [T/G]       | 1067295926                                 |
| Ca_Kabuli_NC_021163.1_22860656 | Ca_kabuli_chr04    | 22860656                       | [C/A]       | 1067295927                                 |
| Ca_Kabuli_NC_021163.1_22864624 | Ca_kabuli_chr04    | 22864624                       | [A/G]       | 1067295928                                 |
| Ca_Kabuli_NC_021163.1_22865436 | Ca_kabuli_chr04    | 22865436                       | [A/T]       | 1067295929                                 |
| Ca_Kabuli_NC_021163.1_22904068 | Ca_kabuli_chr04    | 22904068                       | [T/C]       | 1067295930                                 |
| Ca_Kabuli_NC_021163.1_22908336 | Ca_kabuli_chr04    | 22908336                       | [A/T]       | 1067295931                                 |
| Ca_Kabuli_NC_021163.1_22908350 | Ca_kabuli_chr04    | 22908350                       | [T/A]       | 1067295932                                 |
| Ca_Kabuli_NC_021163.1_22908360 | Ca_kabuli_chr04    | 22908360                       | [A/G]       | 1067295933                                 |
| Ca_Kabuli_NC_021163.1_22971678 | Ca_kabuli_chr04    | 22971678                       | [A/C]       | 1067295934                                 |
| Ca_Kabuli_NC_021163.1_22971687 | Ca_kabuli_chr04    | 22971687                       | [A/G]       | 1067295935                                 |
| Ca_Kabuli_NC_021163.1_22971797 | Ca_kabuli_chr04    | 22971797                       | [T/C]       | 1067295936                                 |
| Ca_Kabuli_NC_021163.1_22971853 | Ca_kabuli_chr04    | 22971853                       | [A/C]       | 1067295937                                 |
| Ca_Kabuli_NC_021163.1_23104495 | Ca_kabuli_chr04    | 23104495                       | [T/G]       | 1067295938                                 |
| Ca_Kabuli_NC_021163.1_23104498 | Ca_kabuli_chr04    | 23104498                       | [T/G]       | 1067295939                                 |
| Ca_Kabuli_NC_021163.1_23107182 | Ca_kabuli_chr04    | 23107182                       | [A/G]       | 1067295940                                 |

| <b>SNP IDs</b>                 | <b>Chromosomes</b> | <b>Physical positions (bp)</b> | <b>SNPs</b> | <b>NCBI SNPdb accession IDs (NCBI_ss#)</b> |
|--------------------------------|--------------------|--------------------------------|-------------|--------------------------------------------|
| Ca_Kabuli_NC_021163.1_23157619 | Ca_kabuli_chr04    | 23157619                       | [T/G]       | 1067295941                                 |
| Ca_Kabuli_NC_021163.1_23157635 | Ca_kabuli_chr04    | 23157635                       | [T/C]       | 1067295942                                 |
| Ca_Kabuli_NC_021163.1_23157638 | Ca_kabuli_chr04    | 23157638                       | [T/C]       | 1067295943                                 |
| Ca_Kabuli_NC_021163.1_23157671 | Ca_kabuli_chr04    | 23157671                       | [A/G]       | 1067295944                                 |
| Ca_Kabuli_NC_021163.1_23194502 | Ca_kabuli_chr04    | 23194502                       | [T/G]       | 1067295945                                 |
| Ca_Kabuli_NC_021163.1_23195429 | Ca_kabuli_chr04    | 23195429                       | [G/T]       | 1067295946                                 |
| Ca_Kabuli_NC_021163.1_23195437 | Ca_kabuli_chr04    | 23195437                       | [T/C]       | 1067295947                                 |
| Ca_Kabuli_NC_021163.1_23195447 | Ca_kabuli_chr04    | 23195447                       | [G/T]       | 1067295948                                 |
| Ca_Kabuli_NC_021163.1_23203064 | Ca_kabuli_chr04    | 23203064                       | [A/C]       | 1067295949                                 |
| Ca_Kabuli_NC_021163.1_23203077 | Ca_kabuli_chr04    | 23203077                       | [A/G]       | 1067295950                                 |
| Ca_Kabuli_NC_021163.1_23267869 | Ca_kabuli_chr04    | 23267869                       | [A/C]       | 1067295951                                 |
| Ca_Kabuli_NC_021163.1_23267883 | Ca_kabuli_chr04    | 23267883                       | [A/C]       | 1067295952                                 |
| Ca_Kabuli_NC_021163.1_23267886 | Ca_kabuli_chr04    | 23267886                       | [T/A]       | 1067295953                                 |
| Ca_Kabuli_NC_021163.1_23267891 | Ca_kabuli_chr04    | 23267891                       | [C/A]       | 1067295954                                 |
| Ca_Kabuli_NC_021163.1_23267915 | Ca_kabuli_chr04    | 23267915                       | [A/C]       | 1067295955                                 |
| Ca_Kabuli_NC_021163.1_23314676 | Ca_kabuli_chr04    | 23314676                       | [A/C]       | 1067295956                                 |
| Ca_Kabuli_NC_021163.1_23331556 | Ca_kabuli_chr04    | 23331556                       | [A/C]       | 1067295957                                 |
| Ca_Kabuli_NC_021163.1_23333583 | Ca_kabuli_chr04    | 23333583                       | [A/C]       | 1067295958                                 |
| Ca_Kabuli_NC_021163.1_23337322 | Ca_kabuli_chr04    | 23337322                       | [T/C]       | 1067295959                                 |
| Ca_Kabuli_NC_021163.1_23337349 | Ca_kabuli_chr04    | 23337349                       | [T/C]       | 1067295960                                 |
| Ca_Kabuli_NC_021163.1_23337430 | Ca_kabuli_chr04    | 23337430                       | [A/C]       | 1067295961                                 |
| Ca_Kabuli_NC_021163.1_23449152 | Ca_kabuli_chr04    | 23449152                       | [A/C]       | 1067295962                                 |
| Ca_Kabuli_NC_021163.1_23449214 | Ca_kabuli_chr04    | 23449214                       | [A/C]       | 1067295963                                 |
| Ca_Kabuli_NC_021163.1_23449298 | Ca_kabuli_chr04    | 23449298                       | [A/G]       | 1067295964                                 |
| Ca_Kabuli_NC_021163.1_23634799 | Ca_kabuli_chr04    | 23634799                       | [A/C]       | 1067295965                                 |
| Ca_Kabuli_NC_021163.1_23671430 | Ca_kabuli_chr04    | 23671430                       | [T/C]       | 1067295966                                 |
| Ca_Kabuli_NC_021163.1_23731599 | Ca_kabuli_chr04    | 23731599                       | [T/A]       | 1067295967                                 |
| Ca_Kabuli_NC_021163.1_23872475 | Ca_kabuli_chr04    | 23872475                       | [T/G]       | 1067295968                                 |
| Ca_Kabuli_NC_021163.1_23921817 | Ca_kabuli_chr04    | 23921817                       | [T/G]       | 1067295969                                 |
| Ca_Kabuli_NC_021163.1_24240537 | Ca_kabuli_chr04    | 24240537                       | [A/C]       | 1067295970                                 |
| Ca_Kabuli_NC_021163.1_24240556 | Ca_kabuli_chr04    | 24240556                       | [T/A]       | 1067295971                                 |
| Ca_Kabuli_NC_021163.1_24261779 | Ca_kabuli_chr04    | 24261779                       | [A/C]       | 1067295972                                 |
| Ca_Kabuli_NC_021163.1_24533026 | Ca_kabuli_chr04    | 24533026                       | [A/G]       | 1067295973                                 |
| Ca_Kabuli_NC_021163.1_24586826 | Ca_kabuli_chr04    | 24586826                       | [T/G]       | 1067295974                                 |

| <b>SNP IDs</b>                 | <b>Chromosomes</b> | <b>Physical positions (bp)</b> | <b>SNPs</b> | <b>NCBI SNPdb accession IDs (NCBI_ss#)</b> |
|--------------------------------|--------------------|--------------------------------|-------------|--------------------------------------------|
| Ca_Kabuli_NC_021163.1_24591218 | Ca_kabuli_chr04    | 24591218                       | [A/C]       | 1067295975                                 |
| Ca_Kabuli_NC_021163.1_24591231 | Ca_kabuli_chr04    | 24591231                       | [A/T]       | 1067295976                                 |
| Ca_Kabuli_NC_021163.1_24591243 | Ca_kabuli_chr04    | 24591243                       | [A/G]       | 1067295977                                 |
| Ca_Kabuli_NC_021163.1_24615928 | Ca_kabuli_chr04    | 24615928                       | [A/G]       | 1067295978                                 |
| Ca_Kabuli_NC_021163.1_24615942 | Ca_kabuli_chr04    | 24615942                       | [T/C]       | 1067295979                                 |
| Ca_Kabuli_NC_021163.1_24615969 | Ca_kabuli_chr04    | 24615969                       | [A/G]       | 1067295980                                 |
| Ca_Kabuli_NC_021163.1_24615973 | Ca_kabuli_chr04    | 24615973                       | [A/C]       | 1067295981                                 |
| Ca_Kabuli_NC_021163.1_24615990 | Ca_kabuli_chr04    | 24615990                       | [T/C]       | 1067295982                                 |
| Ca_Kabuli_NC_021163.1_24713674 | Ca_kabuli_chr04    | 24713674                       | [A/T]       | 1067295983                                 |
| Ca_Kabuli_NC_021163.1_24713717 | Ca_kabuli_chr04    | 24713717                       | [T/C]       | 1067295984                                 |
| Ca_Kabuli_NC_021163.1_24713725 | Ca_kabuli_chr04    | 24713725                       | [A/G]       | 1067295985                                 |
| Ca_Kabuli_NC_021163.1_24713734 | Ca_kabuli_chr04    | 24713734                       | [T/A]       | 1067295986                                 |
| Ca_Kabuli_NC_021163.1_24719395 | Ca_kabuli_chr04    | 24719395                       | [T/C]       | 1067295987                                 |
| Ca_Kabuli_NC_021163.1_24719409 | Ca_kabuli_chr04    | 24719409                       | [T/G]       | 1067295988                                 |
| Ca_Kabuli_NC_021163.1_24719466 | Ca_kabuli_chr04    | 24719466                       | [T/G]       | 1067295989                                 |
| Ca_Kabuli_NC_021163.1_24719561 | Ca_kabuli_chr04    | 24719561                       | [A/G]       | 1067295990                                 |
| Ca_Kabuli_NC_021163.1_24729157 | Ca_kabuli_chr04    | 24729157                       | [T/C]       | 1067295991                                 |
| Ca_Kabuli_NC_021163.1_24729192 | Ca_kabuli_chr04    | 24729192                       | [C/A]       | 1067295992                                 |
| Ca_Kabuli_NC_021163.1_24729195 | Ca_kabuli_chr04    | 24729195                       | [G/A]       | 1067295993                                 |
| Ca_Kabuli_NC_021163.1_24729198 | Ca_kabuli_chr04    | 24729198                       | [A/C]       | 1067295994                                 |
| Ca_Kabuli_NC_021163.1_24729294 | Ca_kabuli_chr04    | 24729294                       | [A/C]       | 1067295995                                 |
| Ca_Kabuli_NC_021163.1_24771768 | Ca_kabuli_chr04    | 24771768                       | [A/C]       | 1067295996                                 |
| Ca_Kabuli_NC_021163.1_24771771 | Ca_kabuli_chr04    | 24771771                       | [A/C]       | 1067295997                                 |
| Ca_Kabuli_NC_021163.1_24856201 | Ca_kabuli_chr04    | 24856201                       | [A/G]       | 1067295998                                 |
| Ca_Kabuli_NC_021163.1_24857501 | Ca_kabuli_chr04    | 24857501                       | [A/G]       | 1067295999                                 |
| Ca_Kabuli_NC_021163.1_24861477 | Ca_kabuli_chr04    | 24861477                       | [T/G]       | 1067296000                                 |
| Ca_Kabuli_NC_021163.1_25251375 | Ca_kabuli_chr04    | 25251375                       | [T/C]       | 1067296001                                 |
| Ca_Kabuli_NC_021163.1_25251379 | Ca_kabuli_chr04    | 25251379                       | [A/G]       | 1067296002                                 |
| Ca_Kabuli_NC_021163.1_25386077 | Ca_kabuli_chr04    | 25386077                       | [G/A]       | 1067296003                                 |
| Ca_Kabuli_NC_021163.1_25386310 | Ca_kabuli_chr04    | 25386310                       | [A/T]       | 1067296004                                 |
| Ca_Kabuli_NC_021163.1_25386321 | Ca_kabuli_chr04    | 25386321                       | [T/C]       | 1067296005                                 |
| Ca_Kabuli_NC_021163.1_25513681 | Ca_kabuli_chr04    | 25513681                       | [A/G]       | 1067296006                                 |
| Ca_Kabuli_NC_021163.1_25513690 | Ca_kabuli_chr04    | 25513690                       | [T/C]       | 1067296007                                 |
| Ca_Kabuli_NC_021163.1_25650720 | Ca_kabuli_chr04    | 25650720                       | [A/T]       | 1067296008                                 |

| <b>SNP IDs</b>                 | <b>Chromosomes</b> | <b>Physical positions (bp)</b> | <b>SNPs</b> | <b>NCBI SNPdb accession IDs (NCBI_ss#)</b> |
|--------------------------------|--------------------|--------------------------------|-------------|--------------------------------------------|
| Ca_Kabuli_NC_021163.1_25657291 | Ca_kabuli_chr04    | 25657291                       | [T/C]       | 1067296009                                 |
| Ca_Kabuli_NC_021163.1_25700553 | Ca_kabuli_chr04    | 25700553                       | [T/G]       | 1067296010                                 |
| Ca_Kabuli_NC_021163.1_25729905 | Ca_kabuli_chr04    | 25729905                       | [C/A]       | 1067296011                                 |
| Ca_Kabuli_NC_021163.1_25817794 | Ca_kabuli_chr04    | 25817794                       | [T/C]       | 1067296012                                 |
| Ca_Kabuli_NC_021163.1_25818698 | Ca_kabuli_chr04    | 25818698                       | [A/G]       | 1067296013                                 |
| Ca_Kabuli_NC_021163.1_25818711 | Ca_kabuli_chr04    | 25818711                       | [T/C]       | 1067296014                                 |
| Ca_Kabuli_NC_021163.1_25818719 | Ca_kabuli_chr04    | 25818719                       | [T/C]       | 1067296015                                 |
| Ca_Kabuli_NC_021163.1_25818731 | Ca_kabuli_chr04    | 25818731                       | [C/G]       | 1067296016                                 |
| Ca_Kabuli_NC_021163.1_25818733 | Ca_kabuli_chr04    | 25818733                       | [T/C]       | 1067296017                                 |
| Ca_Kabuli_NC_021163.1_25818741 | Ca_kabuli_chr04    | 25818741                       | [T/G]       | 1067296018                                 |
| Ca_Kabuli_NC_021163.1_25843911 | Ca_kabuli_chr04    | 25843911                       | [T/C]       | 1067296019                                 |
| Ca_Kabuli_NC_021163.1_25843927 | Ca_kabuli_chr04    | 25843927                       | [A/G]       | 1067296020                                 |
| Ca_Kabuli_NC_021163.1_25843931 | Ca_kabuli_chr04    | 25843931                       | [T/C]       | 1067296021                                 |
| Ca_Kabuli_NC_021163.1_25843937 | Ca_kabuli_chr04    | 25843937                       | [T/A]       | 1067296022                                 |
| Ca_Kabuli_NC_021163.1_25855756 | Ca_kabuli_chr04    | 25855756                       | [C/A]       | 1067296023                                 |
| Ca_Kabuli_NC_021163.1_25985095 | Ca_kabuli_chr04    | 25985095                       | [T/C]       | 1067296024                                 |
| Ca_Kabuli_NC_021163.1_26002991 | Ca_kabuli_chr04    | 26002991                       | [A/C]       | 1067296025                                 |
| Ca_Kabuli_NC_021163.1_26089832 | Ca_kabuli_chr04    | 26089832                       | [C/T]       | 1067296026                                 |
| Ca_Kabuli_NC_021163.1_26219483 | Ca_kabuli_chr04    | 26219483                       | [T/G]       | 1067296027                                 |
| Ca_Kabuli_NC_021163.1_26221325 | Ca_kabuli_chr04    | 26221325                       | [C/T]       | 1067296028                                 |
| Ca_Kabuli_NC_021163.1_26221326 | Ca_kabuli_chr04    | 26221326                       | [C/T]       | 1067296029                                 |
| Ca_Kabuli_NC_021163.1_26221327 | Ca_kabuli_chr04    | 26221327                       | [G/T]       | 1067296030                                 |
| Ca_Kabuli_NC_021163.1_26221336 | Ca_kabuli_chr04    | 26221336                       | [A/C]       | 1067296031                                 |
| Ca_Kabuli_NC_021163.1_26221338 | Ca_kabuli_chr04    | 26221338                       | [A/C]       | 1067296032                                 |
| Ca_Kabuli_NC_021163.1_26529578 | Ca_kabuli_chr04    | 26529578                       | [A/G]       | 1067296033                                 |
| Ca_Kabuli_NC_021163.1_26530930 | Ca_kabuli_chr04    | 26530930                       | [A/C]       | 1067296034                                 |
| Ca_Kabuli_NC_021163.1_26532751 | Ca_kabuli_chr04    | 26532751                       | [T/C]       | 1067296035                                 |
| Ca_Kabuli_NC_021163.1_26532763 | Ca_kabuli_chr04    | 26532763                       | [T/G]       | 1067296036                                 |
| Ca_Kabuli_NC_021163.1_26611657 | Ca_kabuli_chr04    | 26611657                       | [A/C]       | 1067296037                                 |
| Ca_Kabuli_NC_021163.1_26612521 | Ca_kabuli_chr04    | 26612521                       | [T/A]       | 1067296038                                 |
| Ca_Kabuli_NC_021163.1_26612597 | Ca_kabuli_chr04    | 26612597                       | [G/T]       | 1067296039                                 |
| Ca_Kabuli_NC_021163.1_26645875 | Ca_kabuli_chr04    | 26645875                       | [A/G]       | 1067296040                                 |
| Ca_Kabuli_NC_021163.1_26660664 | Ca_kabuli_chr04    | 26660664                       | [C/T]       | 1067296041                                 |
| Ca_Kabuli_NC_021163.1_26764829 | Ca_kabuli_chr04    | 26764829                       | [T/G]       | 1067296042                                 |

| <b>SNP IDs</b>                 | <b>Chromosomes</b> | <b>Physical positions (bp)</b> | <b>SNPs</b> | <b>NCBI SNPdb accession IDs (NCBI_ss#)</b> |
|--------------------------------|--------------------|--------------------------------|-------------|--------------------------------------------|
| Ca_Kabuli_NC_021163.1_26764860 | Ca_kabuli_chr04    | 26764860                       | [T/C]       | 1067296043                                 |
| Ca_Kabuli_NC_021163.1_26764869 | Ca_kabuli_chr04    | 26764869                       | [A/C]       | 1067296044                                 |
| Ca_Kabuli_NC_021163.1_26834518 | Ca_kabuli_chr04    | 26834518                       | [T/C]       | 1067296045                                 |
| Ca_Kabuli_NC_021163.1_26869917 | Ca_kabuli_chr04    | 26869917                       | [A/C]       | 1067296046                                 |
| Ca_Kabuli_NC_021163.1_26941637 | Ca_kabuli_chr04    | 26941637                       | [A/T]       | 1067296047                                 |
| Ca_Kabuli_NC_021163.1_26989112 | Ca_kabuli_chr04    | 26989112                       | [T/G]       | 1067296048                                 |
| Ca_Kabuli_NC_021163.1_26989197 | Ca_kabuli_chr04    | 26989197                       | [A/C]       | 1067296049                                 |
| Ca_Kabuli_NC_021163.1_27142314 | Ca_kabuli_chr04    | 27142314                       | [G/A]       | 1067296050                                 |
| Ca_Kabuli_NC_021163.1_27493041 | Ca_kabuli_chr04    | 27493041                       | [A/G]       | 1067296051                                 |
| Ca_Kabuli_NC_021163.1_27493045 | Ca_kabuli_chr04    | 27493045                       | [T/G]       | 1067296052                                 |
| Ca_Kabuli_NC_021163.1_27493051 | Ca_kabuli_chr04    | 27493051                       | [A/G]       | 1067296053                                 |
| Ca_Kabuli_NC_021163.1_27617813 | Ca_kabuli_chr04    | 27617813                       | [A/C]       | 1067296054                                 |
| Ca_Kabuli_NC_021163.1_27669925 | Ca_kabuli_chr04    | 27669925                       | [T/G]       | 1067296055                                 |
| Ca_Kabuli_NC_021163.1_27774461 | Ca_kabuli_chr04    | 27774461                       | [T/C]       | 1067296056                                 |
| Ca_Kabuli_NC_021163.1_27777836 | Ca_kabuli_chr04    | 27777836                       | [T/C]       | 1067296057                                 |
| Ca_Kabuli_NC_021163.1_27777882 | Ca_kabuli_chr04    | 27777882                       | [T/C]       | 1067296058                                 |
| Ca_Kabuli_NC_021163.1_27786230 | Ca_kabuli_chr04    | 27786230                       | [A/C]       | 1067296059                                 |
| Ca_Kabuli_NC_021163.1_27971105 | Ca_kabuli_chr04    | 27971105                       | [T/A]       | 1067296060                                 |
| Ca_Kabuli_NC_021163.1_28060949 | Ca_kabuli_chr04    | 28060949                       | [T/G]       | 1067296061                                 |
| Ca_Kabuli_NC_021163.1_28060964 | Ca_kabuli_chr04    | 28060964                       | [C/G]       | 1067296062                                 |
| Ca_Kabuli_NC_021163.1_28060969 | Ca_kabuli_chr04    | 28060969                       | [A/G]       | 1067296063                                 |
| Ca_Kabuli_NC_021163.1_28092574 | Ca_kabuli_chr04    | 28092574                       | [T/A]       | 1067296064                                 |
| Ca_Kabuli_NC_021163.1_28092616 | Ca_kabuli_chr04    | 28092616                       | [A/G]       | 1067296065                                 |
| Ca_Kabuli_NC_021163.1_28092687 | Ca_kabuli_chr04    | 28092687                       | [A/G]       | 1067296066                                 |
| Ca_Kabuli_NC_021163.1_28092694 | Ca_kabuli_chr04    | 28092694                       | [T/C]       | 1067296067                                 |
| Ca_Kabuli_NC_021163.1_28092705 | Ca_kabuli_chr04    | 28092705                       | [G/T]       | 1067296068                                 |
| Ca_Kabuli_NC_021163.1_28092707 | Ca_kabuli_chr04    | 28092707                       | [A/G]       | 1067296069                                 |
| Ca_Kabuli_NC_021163.1_28092712 | Ca_kabuli_chr04    | 28092712                       | [T/G]       | 1067296070                                 |
| Ca_Kabuli_NC_021163.1_28092719 | Ca_kabuli_chr04    | 28092719                       | [G/T]       | 1067296071                                 |
| Ca_Kabuli_NC_021163.1_28092727 | Ca_kabuli_chr04    | 28092727                       | [T/A]       | 1067296072                                 |
| Ca_Kabuli_NC_021163.1_28246738 | Ca_kabuli_chr04    | 28246738                       | [C/T]       | 1067296073                                 |
| Ca_Kabuli_NC_021163.1_28246744 | Ca_kabuli_chr04    | 28246744                       | [C/T]       | 1067296074                                 |
| Ca_Kabuli_NC_021163.1_28246755 | Ca_kabuli_chr04    | 28246755                       | [C/T]       | 1067296075                                 |
| Ca_Kabuli_NC_021163.1_28246771 | Ca_kabuli_chr04    | 28246771                       | [A/G]       | 1067296076                                 |

| <b>SNP IDs</b>                 | <b>Chromosomes</b> | <b>Physical positions (bp)</b> | <b>SNPs</b> | <b>NCBI SNPdb accession IDs (NCBI_ss#)</b> |
|--------------------------------|--------------------|--------------------------------|-------------|--------------------------------------------|
| Ca_Kabuli_NC_021163.1_28246772 | Ca_kabuli_chr04    | 28246772                       | [G/T]       | 1067296077                                 |
| Ca_Kabuli_NC_021163.1_28299145 | Ca_kabuli_chr04    | 28299145                       | [T/G]       | 1067296078                                 |
| Ca_Kabuli_NC_021163.1_28299148 | Ca_kabuli_chr04    | 28299148                       | [T/G]       | 1067296079                                 |
| Ca_Kabuli_NC_021163.1_28344258 | Ca_kabuli_chr04    | 28344258                       | [C/G]       | 1067296080                                 |
| Ca_Kabuli_NC_021163.1_28431767 | Ca_kabuli_chr04    | 28431767                       | [A/G]       | 1067296081                                 |
| Ca_Kabuli_NC_021163.1_28516385 | Ca_kabuli_chr04    | 28516385                       | [T/A]       | 1067296082                                 |
| Ca_Kabuli_NC_021163.1_28517090 | Ca_kabuli_chr04    | 28517090                       | [G/T]       | 1067296083                                 |
| Ca_Kabuli_NC_021163.1_28669356 | Ca_kabuli_chr04    | 28669356                       | [C/A]       | 1067296084                                 |
| Ca_Kabuli_NC_021163.1_28669368 | Ca_kabuli_chr04    | 28669368                       | [C/A]       | 1067296085                                 |
| Ca_Kabuli_NC_021163.1_28669413 | Ca_kabuli_chr04    | 28669413                       | [A/G]       | 1067296086                                 |
| Ca_Kabuli_NC_021163.1_28790027 | Ca_kabuli_chr04    | 28790027                       | [T/C]       | 1067296087                                 |
| Ca_Kabuli_NC_021163.1_28790030 | Ca_kabuli_chr04    | 28790030                       | [A/C]       | 1067296088                                 |
| Ca_Kabuli_NC_021163.1_28790033 | Ca_kabuli_chr04    | 28790033                       | [C/T]       | 1067296089                                 |
| Ca_Kabuli_NC_021163.1_28790034 | Ca_kabuli_chr04    | 28790034                       | [T/C]       | 1067296090                                 |
| Ca_Kabuli_NC_021163.1_28790036 | Ca_kabuli_chr04    | 28790036                       | [T/C]       | 1067296091                                 |
| Ca_Kabuli_NC_021163.1_28790047 | Ca_kabuli_chr04    | 28790047                       | [T/C]       | 1067296092                                 |
| Ca_Kabuli_NC_021163.1_28790066 | Ca_kabuli_chr04    | 28790066                       | [A/G]       | 1067296093                                 |
| Ca_Kabuli_NC_021163.1_28790085 | Ca_kabuli_chr04    | 28790085                       | [A/G]       | 1067296094                                 |
| Ca_Kabuli_NC_021163.1_28863988 | Ca_kabuli_chr04    | 28863988                       | [T/G]       | 1067296095                                 |
| Ca_Kabuli_NC_021163.1_28867193 | Ca_kabuli_chr04    | 28867193                       | [A/G]       | 1067296096                                 |
| Ca_Kabuli_NC_021163.1_28940492 | Ca_kabuli_chr04    | 28940492                       | [T/G]       | 1067296097                                 |
| Ca_Kabuli_NC_021163.1_28947438 | Ca_kabuli_chr04    | 28947438                       | [T/C]       | 1067296098                                 |
| Ca_Kabuli_NC_021163.1_28947455 | Ca_kabuli_chr04    | 28947455                       | [A/T]       | 1067296099                                 |
| Ca_Kabuli_NC_021163.1_28947498 | Ca_kabuli_chr04    | 28947498                       | [G/C]       | 1067296100                                 |
| Ca_Kabuli_NC_021163.1_29092466 | Ca_kabuli_chr04    | 29092466                       | [A/G]       | 1067296101                                 |
| Ca_Kabuli_NC_021163.1_29092487 | Ca_kabuli_chr04    | 29092487                       | [T/C]       | 1067296102                                 |
| Ca_Kabuli_NC_021163.1_29092521 | Ca_kabuli_chr04    | 29092521                       | [T/C]       | 1067296103                                 |
| Ca_Kabuli_NC_021163.1_29318025 | Ca_kabuli_chr04    | 29318025                       | [A/G]       | 1067296104                                 |
| Ca_Kabuli_NC_021163.1_29318150 | Ca_kabuli_chr04    | 29318150                       | [G/A]       | 1067296105                                 |
| Ca_Kabuli_NC_021163.1_29323082 | Ca_kabuli_chr04    | 29323082                       | [T/C]       | 1067296106                                 |
| Ca_Kabuli_NC_021163.1_29476239 | Ca_kabuli_chr04    | 29476239                       | [C/T]       | 1067296107                                 |
| Ca_Kabuli_NC_021163.1_29524038 | Ca_kabuli_chr04    | 29524038                       | [A/C]       | 1067296108                                 |
| Ca_Kabuli_NC_021163.1_29524039 | Ca_kabuli_chr04    | 29524039                       | [G/T]       | 1067296109                                 |
| Ca_Kabuli_NC_021163.1_29524040 | Ca_kabuli_chr04    | 29524040                       | [A/C]       | 1067296110                                 |



| <b>SNP IDs</b>                 | <b>Chromosomes</b> | <b>Physical positions (bp)</b> | <b>SNPs</b> | <b>NCBI SNPdb accession IDs (NCBI_ss#)</b> |
|--------------------------------|--------------------|--------------------------------|-------------|--------------------------------------------|
| Ca_Kabuli_NC_021163.1_29671606 | Ca_kabuli_chr04    | 29671606                       | [G/A]       | 1067296111                                 |
| Ca_Kabuli_NC_021163.1_29675337 | Ca_kabuli_chr04    | 29675337                       | [C/T]       | 1067296112                                 |
| Ca_Kabuli_NC_021163.1_29680412 | Ca_kabuli_chr04    | 29680412                       | [C/T]       | 1067296113                                 |
| Ca_Kabuli_NC_021163.1_29680875 | Ca_kabuli_chr04    | 29680875                       | [G/C]       | 1067296114                                 |
| Ca_Kabuli_NC_021163.1_29682902 | Ca_kabuli_chr04    | 29682902                       | [T/C]       | 1067296115                                 |
| Ca_Kabuli_NC_021163.1_29682905 | Ca_kabuli_chr04    | 29682905                       | [C/T]       | 1067296116                                 |
| Ca_Kabuli_NC_021163.1_29682915 | Ca_kabuli_chr04    | 29682915                       | [G/A]       | 1067296117                                 |
| Ca_Kabuli_NC_021163.1_29682948 | Ca_kabuli_chr04    | 29682948                       | [T/A]       | 1067296118                                 |
| Ca_Kabuli_NC_021163.1_29689175 | Ca_kabuli_chr04    | 29689175                       | [A/T]       | 1067296119                                 |
| Ca_Kabuli_NC_021163.1_29923380 | Ca_kabuli_chr04    | 29923380                       | [A/G]       | 1067296120                                 |
| Ca_Kabuli_NC_021163.1_29958122 | Ca_kabuli_chr04    | 29958122                       | [G/T]       | 1067296121                                 |
| Ca_Kabuli_NC_021163.1_29972164 | Ca_kabuli_chr04    | 29972164                       | [G/A]       | 1067296122                                 |
| Ca_Kabuli_NC_021163.1_29972199 | Ca_kabuli_chr04    | 29972199                       | [A/T]       | 1067296123                                 |
| Ca_Kabuli_NC_021163.1_30131105 | Ca_kabuli_chr04    | 30131105                       | [T/C]       | 1067296124                                 |
| Ca_Kabuli_NC_021163.1_30151880 | Ca_kabuli_chr04    | 30151880                       | [C/G]       | 1067296125                                 |
| Ca_Kabuli_NC_021163.1_30153505 | Ca_kabuli_chr04    | 30153505                       | [G/C]       | 1067296126                                 |
| Ca_Kabuli_NC_021163.1_30153519 | Ca_kabuli_chr04    | 30153519                       | [A/C]       | 1067296127                                 |
| Ca_Kabuli_NC_021163.1_30153522 | Ca_kabuli_chr04    | 30153522                       | [A/C]       | 1067296128                                 |
| Ca_Kabuli_NC_021163.1_30153525 | Ca_kabuli_chr04    | 30153525                       | [A/C]       | 1067296129                                 |
| Ca_Kabuli_NC_021163.1_30258044 | Ca_kabuli_chr04    | 30258044                       | [T/A]       | 1067296130                                 |
| Ca_Kabuli_NC_021163.1_30258045 | Ca_kabuli_chr04    | 30258045                       | [T/A]       | 1067296131                                 |
| Ca_Kabuli_NC_021163.1_30258056 | Ca_kabuli_chr04    | 30258056                       | [G/A]       | 1067296132                                 |
| Ca_Kabuli_NC_021163.1_30258565 | Ca_kabuli_chr04    | 30258565                       | [A/G]       | 1067296133                                 |
| Ca_Kabuli_NC_021163.1_30258588 | Ca_kabuli_chr04    | 30258588                       | [T/C]       | 1067296134                                 |
| Ca_Kabuli_NC_021163.1_30258593 | Ca_kabuli_chr04    | 30258593                       | [T/C]       | 1067296135                                 |
| Ca_Kabuli_NC_021163.1_30258595 | Ca_kabuli_chr04    | 30258595                       | [A/G]       | 1067296136                                 |
| Ca_Kabuli_NC_021163.1_30258596 | Ca_kabuli_chr04    | 30258596                       | [G/C]       | 1067296137                                 |
| Ca_Kabuli_NC_021163.1_30258604 | Ca_kabuli_chr04    | 30258604                       | [C/A]       | 1067296138                                 |
| Ca_Kabuli_NC_021163.1_30258607 | Ca_kabuli_chr04    | 30258607                       | [C/A]       | 1067296139                                 |
| Ca_Kabuli_NC_021163.1_30258611 | Ca_kabuli_chr04    | 30258611                       | [A/C]       | 1067296140                                 |
| Ca_Kabuli_NC_021163.1_30258621 | Ca_kabuli_chr04    | 30258621                       | [T/G]       | 1067296141                                 |
| Ca_Kabuli_NC_021163.1_30259993 | Ca_kabuli_chr04    | 30259993                       | [T/G]       | 1067296142                                 |
| Ca_Kabuli_NC_021163.1_30259999 | Ca_kabuli_chr04    | 30259999                       | [T/G]       | 1067296143                                 |
| Ca_Kabuli_NC_021163.1_30260494 | Ca_kabuli_chr04    | 30260494                       | [A/G]       | 1067296144                                 |

| <b>SNP IDs</b>                 | <b>Chromosomes</b> | <b>Physical positions (bp)</b> | <b>SNPs</b> | <b>NCBI SNPdb accession IDs (NCBI_ss#)</b> |
|--------------------------------|--------------------|--------------------------------|-------------|--------------------------------------------|
| Ca_Kabuli_NC_021163.1_30260593 | Ca_kabuli_chr04    | 30260593                       | [A/G]       | 1067296145                                 |
| Ca_Kabuli_NC_021163.1_30260626 | Ca_kabuli_chr04    | 30260626                       | [A/G]       | 1067296146                                 |
| Ca_Kabuli_NC_021163.1_30261173 | Ca_kabuli_chr04    | 30261173                       | [A/G]       | 1067296147                                 |
| Ca_Kabuli_NC_021163.1_30299995 | Ca_kabuli_chr04    | 30299995                       | [T/A]       | 1067296148                                 |
| Ca_Kabuli_NC_021163.1_30300334 | Ca_kabuli_chr04    | 30300334                       | [C/T]       | 1067296149                                 |
| Ca_Kabuli_NC_021163.1_30301019 | Ca_kabuli_chr04    | 30301019                       | [T/C]       | 1067296150                                 |
| Ca_Kabuli_NC_021163.1_30301039 | Ca_kabuli_chr04    | 30301039                       | [A/G]       | 1067296151                                 |
| Ca_Kabuli_NC_021163.1_30302554 | Ca_kabuli_chr04    | 30302554                       | [A/G]       | 1067296152                                 |
| Ca_Kabuli_NC_021163.1_30308656 | Ca_kabuli_chr04    | 30308656                       | [C/A]       | 1067296153                                 |
| Ca_Kabuli_NC_021163.1_30308668 | Ca_kabuli_chr04    | 30308668                       | [A/C]       | 1067296154                                 |
| Ca_Kabuli_NC_021163.1_30308684 | Ca_kabuli_chr04    | 30308684                       | [T/C]       | 1067296155                                 |
| Ca_Kabuli_NC_021163.1_30308699 | Ca_kabuli_chr04    | 30308699                       | [T/G]       | 1067296156                                 |
| Ca_Kabuli_NC_021163.1_30308712 | Ca_kabuli_chr04    | 30308712                       | [T/A]       | 1067296157                                 |
| Ca_Kabuli_NC_021163.1_30308759 | Ca_kabuli_chr04    | 30308759                       | [T/G]       | 1067296158                                 |
| Ca_Kabuli_NC_021163.1_30334005 | Ca_kabuli_chr04    | 30334005                       | [G/A]       | 1067296159                                 |
| Ca_Kabuli_NC_021163.1_30463074 | Ca_kabuli_chr04    | 30463074                       | [G/T]       | 1067296160                                 |
| Ca_Kabuli_NC_021163.1_30463076 | Ca_kabuli_chr04    | 30463076                       | [A/G]       | 1067296161                                 |
| Ca_Kabuli_NC_021163.1_30463117 | Ca_kabuli_chr04    | 30463117                       | [A/C]       | 1067296162                                 |
| Ca_Kabuli_NC_021163.1_30580071 | Ca_kabuli_chr04    | 30580071                       | [A/G]       | 1067296163                                 |
| Ca_Kabuli_NC_021163.1_30580097 | Ca_kabuli_chr04    | 30580097                       | [C/A]       | 1067296164                                 |
| Ca_Kabuli_NC_021163.1_30580108 | Ca_kabuli_chr04    | 30580108                       | [A/G]       | 1067296165                                 |
| Ca_Kabuli_NC_021163.1_30599220 | Ca_kabuli_chr04    | 30599220                       | [A/C]       | 1067296166                                 |
| Ca_Kabuli_NC_021163.1_30603949 | Ca_kabuli_chr04    | 30603949                       | [C/A]       | 1067296167                                 |
| Ca_Kabuli_NC_021163.1_30603950 | Ca_kabuli_chr04    | 30603950                       | [A/G]       | 1067296168                                 |
| Ca_Kabuli_NC_021163.1_30603951 | Ca_kabuli_chr04    | 30603951                       | [T/A]       | 1067296169                                 |
| Ca_Kabuli_NC_021163.1_30668893 | Ca_kabuli_chr04    | 30668893                       | [C/A]       | 1067296170                                 |
| Ca_Kabuli_NC_021163.1_30668957 | Ca_kabuli_chr04    | 30668957                       | [G/A]       | 1067296171                                 |
| Ca_Kabuli_NC_021163.1_30668958 | Ca_kabuli_chr04    | 30668958                       | [A/G]       | 1067296172                                 |
| Ca_Kabuli_NC_021163.1_30674579 | Ca_kabuli_chr04    | 30674579                       | [A/C]       | 1067296173                                 |
| Ca_Kabuli_NC_021163.1_30676612 | Ca_kabuli_chr04    | 30676612                       | [T/C]       | 1067296174                                 |
| Ca_Kabuli_NC_021163.1_30676655 | Ca_kabuli_chr04    | 30676655                       | [A/G]       | 1067296175                                 |
| Ca_Kabuli_NC_021163.1_30676669 | Ca_kabuli_chr04    | 30676669                       | [A/G]       | 1067296176                                 |
| Ca_Kabuli_NC_021163.1_30852711 | Ca_kabuli_chr04    | 30852711                       | [G/A]       | 1067296177                                 |
| Ca_Kabuli_NC_021163.1_31142124 | Ca_kabuli_chr04    | 31142124                       | [G/A]       | 1067296178                                 |

| <b>SNP IDs</b>                 | <b>Chromosomes</b> | <b>Physical positions (bp)</b> | <b>SNPs</b> | <b>NCBI SNPdb accession IDs (NCBI_ss#)</b> |
|--------------------------------|--------------------|--------------------------------|-------------|--------------------------------------------|
| Ca_Kabuli_NC_021163.1_31142126 | Ca_kabuli_chr04    | 31142126                       | [G/A]       | 1067296179                                 |
| Ca_Kabuli_NC_021163.1_31221198 | Ca_kabuli_chr04    | 31221198                       | [A/G]       | 1067296180                                 |
| Ca_Kabuli_NC_021163.1_31221205 | Ca_kabuli_chr04    | 31221205                       | [T/A]       | 1067296181                                 |
| Ca_Kabuli_NC_021163.1_31221206 | Ca_kabuli_chr04    | 31221206                       | [A/T]       | 1067296182                                 |
| Ca_Kabuli_NC_021163.1_31221226 | Ca_kabuli_chr04    | 31221226                       | [T/G]       | 1067296183                                 |
| Ca_Kabuli_NC_021163.1_31221264 | Ca_kabuli_chr04    | 31221264                       | [T/G]       | 1067296184                                 |
| Ca_Kabuli_NC_021163.1_31224001 | Ca_kabuli_chr04    | 31224001                       | [G/A]       | 1067296185                                 |
| Ca_Kabuli_NC_021163.1_31224341 | Ca_kabuli_chr04    | 31224341                       | [C/G]       | 1067296186                                 |
| Ca_Kabuli_NC_021163.1_31263205 | Ca_kabuli_chr04    | 31263205                       | [T/A]       | 1067296187                                 |
| Ca_Kabuli_NC_021163.1_31594126 | Ca_kabuli_chr04    | 31594126                       | [A/C]       | 1067296188                                 |
| Ca_Kabuli_NC_021163.1_31600685 | Ca_kabuli_chr04    | 31600685                       | [A/C]       | 1067296189                                 |
| Ca_Kabuli_NC_021163.1_31843049 | Ca_kabuli_chr04    | 31843049                       | [A/C]       | 1067296190                                 |
| Ca_Kabuli_NC_021163.1_31843050 | Ca_kabuli_chr04    | 31843050                       | [G/T]       | 1067296191                                 |
| Ca_Kabuli_NC_021163.1_31849494 | Ca_kabuli_chr04    | 31849494                       | [T/G]       | 1067296192                                 |
| Ca_Kabuli_NC_021163.1_31849509 | Ca_kabuli_chr04    | 31849509                       | [A/C]       | 1067296193                                 |
| Ca_Kabuli_NC_021163.1_31884008 | Ca_kabuli_chr04    | 31884008                       | [A/T]       | 1067296194                                 |
| Ca_Kabuli_NC_021163.1_31987824 | Ca_kabuli_chr04    | 31987824                       | [A/G]       | 1067296195                                 |
| Ca_Kabuli_NC_021163.1_31987833 | Ca_kabuli_chr04    | 31987833                       | [T/C]       | 1067296196                                 |
| Ca_Kabuli_NC_021163.1_31987866 | Ca_kabuli_chr04    | 31987866                       | [A/T]       | 1067296197                                 |
| Ca_Kabuli_NC_021163.1_31987877 | Ca_kabuli_chr04    | 31987877                       | [T/C]       | 1067296198                                 |
| Ca_Kabuli_NC_021163.1_32042494 | Ca_kabuli_chr04    | 32042494                       | [T/C]       | 1067296199                                 |
| Ca_Kabuli_NC_021163.1_32042503 | Ca_kabuli_chr04    | 32042503                       | [A/G]       | 1067296200                                 |
| Ca_Kabuli_NC_021163.1_32042517 | Ca_kabuli_chr04    | 32042517                       | [C/G]       | 1067296201                                 |
| Ca_Kabuli_NC_021163.1_32042593 | Ca_kabuli_chr04    | 32042593                       | [T/G]       | 1067296202                                 |
| Ca_Kabuli_NC_021163.1_32042619 | Ca_kabuli_chr04    | 32042619                       | [T/G]       | 1067296203                                 |
| Ca_Kabuli_NC_021163.1_32068987 | Ca_kabuli_chr04    | 32068987                       | [A/G]       | 1067296204                                 |
| Ca_Kabuli_NC_021163.1_32115072 | Ca_kabuli_chr04    | 32115072                       | [T/G]       | 1067296205                                 |
| Ca_Kabuli_NC_021163.1_32115091 | Ca_kabuli_chr04    | 32115091                       | [T/G]       | 1067296206                                 |
| Ca_Kabuli_NC_021163.1_32128327 | Ca_kabuli_chr04    | 32128327                       | [T/G]       | 1067296207                                 |
| Ca_Kabuli_NC_021163.1_32213012 | Ca_kabuli_chr04    | 32213012                       | [T/G]       | 1067296208                                 |
| Ca_Kabuli_NC_021163.1_32421887 | Ca_kabuli_chr04    | 32421887                       | [T/C]       | 1067296209                                 |
| Ca_Kabuli_NC_021163.1_32604583 | Ca_kabuli_chr04    | 32604583                       | [A/T]       | 1067296210                                 |
| Ca_Kabuli_NC_021163.1_32639136 | Ca_kabuli_chr04    | 32639136                       | [A/C]       | 1067296211                                 |
| Ca_Kabuli_NC_021163.1_32639138 | Ca_kabuli_chr04    | 32639138                       | [T/C]       | 1067296212                                 |

| <b>SNP IDs</b>                 | <b>Chromosomes</b> | <b>Physical positions (bp)</b> | <b>SNPs</b> | <b>NCBI SNPdb accession IDs (NCBI_ss#)</b> |
|--------------------------------|--------------------|--------------------------------|-------------|--------------------------------------------|
| Ca_Kabuli_NC_021163.1_32639172 | Ca_kabuli_chr04    | 32639172                       | [A/C]       | 1067296213                                 |
| Ca_Kabuli_NC_021163.1_32639301 | Ca_kabuli_chr04    | 32639301                       | [A/C]       | 1067296214                                 |
| Ca_Kabuli_NC_021163.1_32779855 | Ca_kabuli_chr04    | 32779855                       | [T/C]       | 1067296215                                 |
| Ca_Kabuli_NC_021163.1_32793291 | Ca_kabuli_chr04    | 32793291                       | [T/A]       | 1067296216                                 |
| Ca_Kabuli_NC_021163.1_32835192 | Ca_kabuli_chr04    | 32835192                       | [C/A]       | 1067296217                                 |
| Ca_Kabuli_NC_021163.1_32853834 | Ca_kabuli_chr04    | 32853834                       | [T/C]       | 1067296218                                 |
| Ca_Kabuli_NC_021163.1_32853838 | Ca_kabuli_chr04    | 32853838                       | [G/T]       | 1067296219                                 |
| Ca_Kabuli_NC_021163.1_33276089 | Ca_kabuli_chr04    | 33276089                       | [C/T]       | 1067296220                                 |
| Ca_Kabuli_NC_021163.1_33316940 | Ca_kabuli_chr04    | 33316940                       | [A/C]       | 1067296221                                 |
| Ca_Kabuli_NC_021163.1_33920345 | Ca_kabuli_chr04    | 33920345                       | [A/T]       | 1067296222                                 |
| Ca_Kabuli_NC_021163.1_33920355 | Ca_kabuli_chr04    | 33920355                       | [A/G]       | 1067296223                                 |
| Ca_Kabuli_NC_021163.1_33920443 | Ca_kabuli_chr04    | 33920443                       | [A/C]       | 1067296224                                 |
| Ca_Kabuli_NC_021163.1_33929609 | Ca_kabuli_chr04    | 33929609                       | [A/G]       | 1067296225                                 |
| Ca_Kabuli_NC_021163.1_33929613 | Ca_kabuli_chr04    | 33929613                       | [G/C]       | 1067296226                                 |
| Ca_Kabuli_NC_021163.1_33929633 | Ca_kabuli_chr04    | 33929633                       | [T/G]       | 1067296227                                 |
| Ca_Kabuli_NC_021163.1_33929643 | Ca_kabuli_chr04    | 33929643                       | [T/C]       | 1067296228                                 |
| Ca_Kabuli_NC_021163.1_33929876 | Ca_kabuli_chr04    | 33929876                       | [A/T]       | 1067296229                                 |
| Ca_Kabuli_NC_021163.1_33929902 | Ca_kabuli_chr04    | 33929902                       | [T/C]       | 1067296230                                 |
| Ca_Kabuli_NC_021163.1_33934513 | Ca_kabuli_chr04    | 33934513                       | [A/C]       | 1067296231                                 |
| Ca_Kabuli_NC_021163.1_34222778 | Ca_kabuli_chr04    | 34222778                       | [T/G]       | 1067296232                                 |
| Ca_Kabuli_NC_021163.1_34314413 | Ca_kabuli_chr04    | 34314413                       | [T/G]       | 1067296233                                 |
| Ca_Kabuli_NC_021163.1_34314462 | Ca_kabuli_chr04    | 34314462                       | [A/G]       | 1067296234                                 |
| Ca_Kabuli_NC_021163.1_34317134 | Ca_kabuli_chr04    | 34317134                       | [C/T]       | 1067296235                                 |
| Ca_Kabuli_NC_021163.1_34354537 | Ca_kabuli_chr04    | 34354537                       | [T/C]       | 1067296236                                 |
| Ca_Kabuli_NC_021163.1_34354562 | Ca_kabuli_chr04    | 34354562                       | [A/G]       | 1067296237                                 |
| Ca_Kabuli_NC_021163.1_34487028 | Ca_kabuli_chr04    | 34487028                       | [T/C]       | 1067296238                                 |
| Ca_Kabuli_NC_021163.1_34487061 | Ca_kabuli_chr04    | 34487061                       | [A/G]       | 1067296239                                 |
| Ca_Kabuli_NC_021163.1_34517809 | Ca_kabuli_chr04    | 34517809                       | [T/C]       | 1067296240                                 |
| Ca_Kabuli_NC_021163.1_34744388 | Ca_kabuli_chr04    | 34744388                       | [A/G]       | 1067296241                                 |
| Ca_Kabuli_NC_021163.1_34751509 | Ca_kabuli_chr04    | 34751509                       | [G/A]       | 1067296242                                 |
| Ca_Kabuli_NC_021163.1_34798446 | Ca_kabuli_chr04    | 34798446                       | [A/T]       | 1067296243                                 |
| Ca_Kabuli_NC_021163.1_34798494 | Ca_kabuli_chr04    | 34798494                       | [A/G]       | 1067296244                                 |
| Ca_Kabuli_NC_021163.1_34798572 | Ca_kabuli_chr04    | 34798572                       | [A/G]       | 1067296245                                 |
| Ca_Kabuli_NC_021163.1_34798602 | Ca_kabuli_chr04    | 34798602                       | [A/G]       | 1067296246                                 |

| <b>SNP IDs</b>                 | <b>Chromosomes</b> | <b>Physical positions (bp)</b> | <b>SNPs</b> | <b>NCBI SNPdb accession IDs (NCBI_ss#)</b> |
|--------------------------------|--------------------|--------------------------------|-------------|--------------------------------------------|
| Ca_Kabuli_NC_021163.1_34798657 | Ca_kabuli_chr04    | 34798657                       | [A/C]       | 1067296247                                 |
| Ca_Kabuli_NC_021163.1_34915986 | Ca_kabuli_chr04    | 34915986                       | [C/T]       | 1067296248                                 |
| Ca_Kabuli_NC_021163.1_34917020 | Ca_kabuli_chr04    | 34917020                       | [A/G]       | 1067296249                                 |
| Ca_Kabuli_NC_021163.1_34917022 | Ca_kabuli_chr04    | 34917022                       | [T/C]       | 1067296250                                 |
| Ca_Kabuli_NC_021163.1_34924595 | Ca_kabuli_chr04    | 34924595                       | [A/C]       | 1067296251                                 |
| Ca_Kabuli_NC_021163.1_35141281 | Ca_kabuli_chr04    | 35141281                       | [A/T]       | 1067296252                                 |
| Ca_Kabuli_NC_021163.1_35168915 | Ca_kabuli_chr04    | 35168915                       | [C/T]       | 1067296253                                 |
| Ca_Kabuli_NC_021163.1_35168939 | Ca_kabuli_chr04    | 35168939                       | [C/T]       | 1067296254                                 |
| Ca_Kabuli_NC_021163.1_35170261 | Ca_kabuli_chr04    | 35170261                       | [A/C]       | 1067296255                                 |
| Ca_Kabuli_NC_021163.1_35170263 | Ca_kabuli_chr04    | 35170263                       | [A/C]       | 1067296256                                 |
| Ca_Kabuli_NC_021163.1_35170563 | Ca_kabuli_chr04    | 35170563                       | [A/T]       | 1067296257                                 |
| Ca_Kabuli_NC_021163.1_35171719 | Ca_kabuli_chr04    | 35171719                       | [C/T]       | 1067296258                                 |
| Ca_Kabuli_NC_021163.1_35228143 | Ca_kabuli_chr04    | 35228143                       | [A/G]       | 1067296259                                 |
| Ca_Kabuli_NC_021163.1_35228155 | Ca_kabuli_chr04    | 35228155                       | [T/A]       | 1067296260                                 |
| Ca_Kabuli_NC_021163.1_35229659 | Ca_kabuli_chr04    | 35229659                       | [C/T]       | 1067296261                                 |
| Ca_Kabuli_NC_021163.1_35229966 | Ca_kabuli_chr04    | 35229966                       | [C/T]       | 1067296262                                 |
| Ca_Kabuli_NC_021163.1_35231891 | Ca_kabuli_chr04    | 35231891                       | [C/T]       | 1067296263                                 |
| Ca_Kabuli_NC_021163.1_35257027 | Ca_kabuli_chr04    | 35257027                       | [G/T]       | 1067296264                                 |
| Ca_Kabuli_NC_021163.1_35257072 | Ca_kabuli_chr04    | 35257072                       | [G/A]       | 1067296265                                 |
| Ca_Kabuli_NC_021163.1_35298965 | Ca_kabuli_chr04    | 35298965                       | [A/G]       | 1067296266                                 |
| Ca_Kabuli_NC_021163.1_35298969 | Ca_kabuli_chr04    | 35298969                       | [T/C]       | 1067296267                                 |
| Ca_Kabuli_NC_021163.1_35298973 | Ca_kabuli_chr04    | 35298973                       | [A/G]       | 1067296268                                 |
| Ca_Kabuli_NC_021163.1_35298985 | Ca_kabuli_chr04    | 35298985                       | [A/G]       | 1067296269                                 |
| Ca_Kabuli_NC_021163.1_35298992 | Ca_kabuli_chr04    | 35298992                       | [T/C]       | 1067296270                                 |
| Ca_Kabuli_NC_021163.1_35299005 | Ca_kabuli_chr04    | 35299005                       | [T/C]       | 1067296271                                 |
| Ca_Kabuli_NC_021163.1_35299046 | Ca_kabuli_chr04    | 35299046                       | [C/T]       | 1067296272                                 |
| Ca_Kabuli_NC_021163.1_35302598 | Ca_kabuli_chr04    | 35302598                       | [T/C]       | 1067296273                                 |
| Ca_Kabuli_NC_021163.1_35303983 | Ca_kabuli_chr04    | 35303983                       | [A/G]       | 1067296274                                 |
| Ca_Kabuli_NC_021163.1_35304102 | Ca_kabuli_chr04    | 35304102                       | [C/T]       | 1067296275                                 |
| Ca_Kabuli_NC_021163.1_35309647 | Ca_kabuli_chr04    | 35309647                       | [T/G]       | 1067296276                                 |
| Ca_Kabuli_NC_021163.1_35327989 | Ca_kabuli_chr04    | 35327989                       | [G/A]       | 1067296277                                 |
| Ca_Kabuli_NC_021163.1_35328213 | Ca_kabuli_chr04    | 35328213                       | [C/T]       | 1067296278                                 |
| Ca_Kabuli_NC_021163.1_35328336 | Ca_kabuli_chr04    | 35328336                       | [C/A]       | 1067296279                                 |
| Ca_Kabuli_NC_021163.1_35328337 | Ca_kabuli_chr04    | 35328337                       | [A/G]       | 1067296280                                 |

| <b>SNP IDs</b>                 | <b>Chromosomes</b> | <b>Physical positions (bp)</b> | <b>SNPs</b> | <b>NCBI SNPdb accession IDs (NCBI_ss#)</b> |
|--------------------------------|--------------------|--------------------------------|-------------|--------------------------------------------|
| Ca_Kabuli_NC_021163.1_35346388 | Ca_kabuli_chr04    | 35346388                       | [A/G]       | 1067296281                                 |
| Ca_Kabuli_NC_021163.1_35346407 | Ca_kabuli_chr04    | 35346407                       | [A/G]       | 1067296282                                 |
| Ca_Kabuli_NC_021163.1_35346558 | Ca_kabuli_chr04    | 35346558                       | [T/G]       | 1067296283                                 |
| Ca_Kabuli_NC_021163.1_35346857 | Ca_kabuli_chr04    | 35346857                       | [G/A]       | 1067296284                                 |
| Ca_Kabuli_NC_021163.1_35347408 | Ca_kabuli_chr04    | 35347408                       | [A/G]       | 1067296285                                 |
| Ca_Kabuli_NC_021163.1_35381267 | Ca_kabuli_chr04    | 35381267                       | [C/T]       | 1067296286                                 |
| Ca_Kabuli_NC_021163.1_35381289 | Ca_kabuli_chr04    | 35381289                       | [G/T]       | 1067296287                                 |
| Ca_Kabuli_NC_021163.1_35393506 | Ca_kabuli_chr04    | 35393506                       | [G/T]       | 1067296288                                 |
| Ca_Kabuli_NC_021163.1_35393510 | Ca_kabuli_chr04    | 35393510                       | [T/C]       | 1067296289                                 |
| Ca_Kabuli_NC_021163.1_35393527 | Ca_kabuli_chr04    | 35393527                       | [A/G]       | 1067296290                                 |
| Ca_Kabuli_NC_021163.1_35393530 | Ca_kabuli_chr04    | 35393530                       | [C/A]       | 1067296291                                 |
| Ca_Kabuli_NC_021163.1_35393532 | Ca_kabuli_chr04    | 35393532                       | [T/C]       | 1067296292                                 |
| Ca_Kabuli_NC_021163.1_35393534 | Ca_kabuli_chr04    | 35393534                       | [A/G]       | 1067296293                                 |
| Ca_Kabuli_NC_021163.1_35393544 | Ca_kabuli_chr04    | 35393544                       | [A/G]       | 1067296294                                 |
| Ca_Kabuli_NC_021163.1_35393551 | Ca_kabuli_chr04    | 35393551                       | [A/G]       | 1067296295                                 |
| Ca_Kabuli_NC_021163.1_35393565 | Ca_kabuli_chr04    | 35393565                       | [C/G]       | 1067296296                                 |
| Ca_Kabuli_NC_021163.1_35416662 | Ca_kabuli_chr04    | 35416662                       | [T/C]       | 1067296297                                 |
| Ca_Kabuli_NC_021163.1_35455095 | Ca_kabuli_chr04    | 35455095                       | [A/C]       | 1067296298                                 |
| Ca_Kabuli_NC_021163.1_35512265 | Ca_kabuli_chr04    | 35512265                       | [G/A]       | 1067296299                                 |
| Ca_Kabuli_NC_021163.1_35512303 | Ca_kabuli_chr04    | 35512303                       | [A/G]       | 1067296300                                 |
| Ca_Kabuli_NC_021163.1_35517792 | Ca_kabuli_chr04    | 35517792                       | [C/T]       | 1067296301                                 |
| Ca_Kabuli_NC_021163.1_35517793 | Ca_kabuli_chr04    | 35517793                       | [T/C]       | 1067296302                                 |
| Ca_Kabuli_NC_021163.1_35530456 | Ca_kabuli_chr04    | 35530456                       | [G/A]       | 1067296303                                 |
| Ca_Kabuli_NC_021163.1_35574088 | Ca_kabuli_chr04    | 35574088                       | [G/C]       | 1067296304                                 |
| Ca_Kabuli_NC_021163.1_35574338 | Ca_kabuli_chr04    | 35574338                       | [T/A]       | 1067296305                                 |
| Ca_Kabuli_NC_021163.1_35634712 | Ca_kabuli_chr04    | 35634712                       | [A/G]       | 1067296306                                 |
| Ca_Kabuli_NC_021163.1_35634751 | Ca_kabuli_chr04    | 35634751                       | [A/G]       | 1067296307                                 |
| Ca_Kabuli_NC_021163.1_35634873 | Ca_kabuli_chr04    | 35634873                       | [T/G]       | 1067296308                                 |
| Ca_Kabuli_NC_021163.1_35648681 | Ca_kabuli_chr04    | 35648681                       | [C/T]       | 1067296309                                 |
| Ca_Kabuli_NC_021163.1_35652742 | Ca_kabuli_chr04    | 35652742                       | [T/C]       | 1067296310                                 |
| Ca_Kabuli_NC_021163.1_35961593 | Ca_kabuli_chr04    | 35961593                       | [A/C]       | 1067296311                                 |
| Ca_Kabuli_NC_021163.1_35961617 | Ca_kabuli_chr04    | 35961617                       | [A/G]       | 1067296312                                 |
| Ca_Kabuli_NC_021163.1_35977422 | Ca_kabuli_chr04    | 35977422                       | [G/A]       | 1067296313                                 |
| Ca_Kabuli_NC_021163.1_35982209 | Ca_kabuli_chr04    | 35982209                       | [A/C]       | 1067296314                                 |

| <b>SNP IDs</b>                 | <b>Chromosomes</b> | <b>Physical positions (bp)</b> | <b>SNPs</b> | <b>NCBI SNPdb accession IDs (NCBI_ss#)</b> |
|--------------------------------|--------------------|--------------------------------|-------------|--------------------------------------------|
| Ca_Kabuli_NC_021163.1_36153995 | Ca_kabuli_chr04    | 36153995                       | [A/G]       | 1067296315                                 |
| Ca_Kabuli_NC_021163.1_36154744 | Ca_kabuli_chr04    | 36154744                       | [T/C]       | 1067296316                                 |
| Ca_Kabuli_NC_021163.1_36154786 | Ca_kabuli_chr04    | 36154786                       | [T/A]       | 1067296317                                 |
| Ca_Kabuli_NC_021163.1_36154836 | Ca_kabuli_chr04    | 36154836                       | [T/G]       | 1067296318                                 |
| Ca_Kabuli_NC_021163.1_36154844 | Ca_kabuli_chr04    | 36154844                       | [T/G]       | 1067296319                                 |
| Ca_Kabuli_NC_021163.1_36184787 | Ca_kabuli_chr04    | 36184787                       | [C/A]       | 1067296320                                 |
| Ca_Kabuli_NC_021163.1_36184788 | Ca_kabuli_chr04    | 36184788                       | [A/G]       | 1067296321                                 |
| Ca_Kabuli_NC_021163.1_36276466 | Ca_kabuli_chr04    | 36276466                       | [T/G]       | 1067296322                                 |
| Ca_Kabuli_NC_021163.1_36276514 | Ca_kabuli_chr04    | 36276514                       | [A/C]       | 1067296323                                 |
| Ca_Kabuli_NC_021163.1_36448985 | Ca_kabuli_chr04    | 36448985                       | [A/C]       | 1067296324                                 |
| Ca_Kabuli_NC_021163.1_36464945 | Ca_kabuli_chr04    | 36464945                       | [T/G]       | 1067296325                                 |
| Ca_Kabuli_NC_021163.1_36464998 | Ca_kabuli_chr04    | 36464998                       | [A/G]       | 1067296326                                 |
| Ca_Kabuli_NC_021163.1_36466198 | Ca_kabuli_chr04    | 36466198                       | [G/A]       | 1067296327                                 |
| Ca_Kabuli_NC_021163.1_36466237 | Ca_kabuli_chr04    | 36466237                       | [G/A]       | 1067296328                                 |
| Ca_Kabuli_NC_021163.1_36467980 | Ca_kabuli_chr04    | 36467980                       | [A/C]       | 1067296329                                 |
| Ca_Kabuli_NC_021163.1_36489013 | Ca_kabuli_chr04    | 36489013                       | [A/G]       | 1067296330                                 |
| Ca_Kabuli_NC_021163.1_36537074 | Ca_kabuli_chr04    | 36537074                       | [T/G]       | 1067296331                                 |
| Ca_Kabuli_NC_021163.1_36537161 | Ca_kabuli_chr04    | 36537161                       | [A/T]       | 1067296332                                 |
| Ca_Kabuli_NC_021163.1_36537194 | Ca_kabuli_chr04    | 36537194                       | [T/G]       | 1067296333                                 |
| Ca_Kabuli_NC_021163.1_36537228 | Ca_kabuli_chr04    | 36537228                       | [T/C]       | 1067296334                                 |
| Ca_Kabuli_NC_021163.1_36537249 | Ca_kabuli_chr04    | 36537249                       | [A/G]       | 1067296335                                 |
| Ca_Kabuli_NC_021163.1_36537255 | Ca_kabuli_chr04    | 36537255                       | [A/G]       | 1067296336                                 |
| Ca_Kabuli_NC_021163.1_36541109 | Ca_kabuli_chr04    | 36541109                       | [A/T]       | 1067296337                                 |
| Ca_Kabuli_NC_021163.1_36639382 | Ca_kabuli_chr04    | 36639382                       | [C/T]       | 1067296338                                 |
| Ca_Kabuli_NC_021163.1_36639442 | Ca_kabuli_chr04    | 36639442                       | [G/A]       | 1067296339                                 |
| Ca_Kabuli_NC_021163.1_36645009 | Ca_kabuli_chr04    | 36645009                       | [T/C]       | 1067296340                                 |
| Ca_Kabuli_NC_021163.1_36670226 | Ca_kabuli_chr04    | 36670226                       | [G/A]       | 1067296341                                 |
| Ca_Kabuli_NC_021163.1_36673677 | Ca_kabuli_chr04    | 36673677                       | [C/A]       | 1067296342                                 |
| Ca_Kabuli_NC_021163.1_36677713 | Ca_kabuli_chr04    | 36677713                       | [C/G]       | 1067296343                                 |
| Ca_Kabuli_NC_021163.1_36712806 | Ca_kabuli_chr04    | 36712806                       | [C/T]       | 1067296344                                 |
| Ca_Kabuli_NC_021163.1_36738213 | Ca_kabuli_chr04    | 36738213                       | [C/G]       | 1067296345                                 |
| Ca_Kabuli_NC_021163.1_36738233 | Ca_kabuli_chr04    | 36738233                       | [A/G]       | 1067296346                                 |
| Ca_Kabuli_NC_021163.1_36738433 | Ca_kabuli_chr04    | 36738433                       | [T/A]       | 1067296347                                 |
| Ca_Kabuli_NC_021163.1_36753781 | Ca_kabuli_chr04    | 36753781                       | [C/T]       | 1067296348                                 |

| <b>SNP IDs</b>                 | <b>Chromosomes</b> | <b>Physical positions (bp)</b> | <b>SNPs</b> | <b>NCBI SNPdb accession IDs (NCBI_ss#)</b> |
|--------------------------------|--------------------|--------------------------------|-------------|--------------------------------------------|
| Ca_Kabuli_NC_021163.1_36753800 | Ca_kabuli_chr04    | 36753800                       | [A/G]       | 1067296349                                 |
| Ca_Kabuli_NC_021163.1_36753988 | Ca_kabuli_chr04    | 36753988                       | [A/G]       | 1067296350                                 |
| Ca_Kabuli_NC_021163.1_36754016 | Ca_kabuli_chr04    | 36754016                       | [C/T]       | 1067296351                                 |
| Ca_Kabuli_NC_021163.1_36754377 | Ca_kabuli_chr04    | 36754377                       | [T/A]       | 1067296352                                 |
| Ca_Kabuli_NC_021163.1_36754378 | Ca_kabuli_chr04    | 36754378                       | [C/T]       | 1067296353                                 |
| Ca_Kabuli_NC_021163.1_36754542 | Ca_kabuli_chr04    | 36754542                       | [A/T]       | 1067296354                                 |
| Ca_Kabuli_NC_021163.1_36756913 | Ca_kabuli_chr04    | 36756913                       | [A/G]       | 1067296355                                 |
| Ca_Kabuli_NC_021163.1_36799668 | Ca_kabuli_chr04    | 36799668                       | [T/G]       | 1067296356                                 |
| Ca_Kabuli_NC_021163.1_36799701 | Ca_kabuli_chr04    | 36799701                       | [A/G]       | 1067296357                                 |
| Ca_Kabuli_NC_021163.1_36831273 | Ca_kabuli_chr04    | 36831273                       | [C/T]       | 1067296358                                 |
| Ca_Kabuli_NC_021163.1_36831477 | Ca_kabuli_chr04    | 36831477                       | [G/C]       | 1067296359                                 |
| Ca_Kabuli_NC_021163.1_36831478 | Ca_kabuli_chr04    | 36831478                       | [G/T]       | 1067296360                                 |
| Ca_Kabuli_NC_021163.1_36834689 | Ca_kabuli_chr04    | 36834689                       | [T/A]       | 1067296361                                 |
| Ca_Kabuli_NC_021163.1_36844197 | Ca_kabuli_chr04    | 36844197                       | [A/G]       | 1067296362                                 |
| Ca_Kabuli_NC_021163.1_36934733 | Ca_kabuli_chr04    | 36934733                       | [A/G]       | 1067296363                                 |
| Ca_Kabuli_NC_021163.1_36975360 | Ca_kabuli_chr04    | 36975360                       | [G/A]       | 1067296364                                 |
| Ca_Kabuli_NC_021163.1_36975361 | Ca_kabuli_chr04    | 36975361                       | [C/A]       | 1067296365                                 |
| Ca_Kabuli_NC_021163.1_36977253 | Ca_kabuli_chr04    | 36977253                       | [A/G]       | 1067296366                                 |
| Ca_Kabuli_NC_021163.1_36979926 | Ca_kabuli_chr04    | 36979926                       | [G/T]       | 1067296367                                 |
| Ca_Kabuli_NC_021163.1_36984727 | Ca_kabuli_chr04    | 36984727                       | [G/C]       | 1067296368                                 |
| Ca_Kabuli_NC_021163.1_36984795 | Ca_kabuli_chr04    | 36984795                       | [A/T]       | 1067296369                                 |
| Ca_Kabuli_NC_021163.1_37006188 | Ca_kabuli_chr04    | 37006188                       | [A/G]       | 1067296370                                 |
| Ca_Kabuli_NC_021163.1_37010914 | Ca_kabuli_chr04    | 37010914                       | [A/G]       | 1067296371                                 |
| Ca_Kabuli_NC_021163.1_37010940 | Ca_kabuli_chr04    | 37010940                       | [G/A]       | 1067296372                                 |
| Ca_Kabuli_NC_021163.1_37010957 | Ca_kabuli_chr04    | 37010957                       | [A/G]       | 1067296373                                 |
| Ca_Kabuli_NC_021163.1_37186531 | Ca_kabuli_chr04    | 37186531                       | [C/T]       | 1067296374                                 |
| Ca_Kabuli_NC_021163.1_37241235 | Ca_kabuli_chr04    | 37241235                       | [G/A]       | 1067296375                                 |
| Ca_Kabuli_NC_021163.1_37241491 | Ca_kabuli_chr04    | 37241491                       | [G/A]       | 1067296376                                 |
| Ca_Kabuli_NC_021163.1_37243069 | Ca_kabuli_chr04    | 37243069                       | [T/C]       | 1067296377                                 |
| Ca_Kabuli_NC_021163.1_37243095 | Ca_kabuli_chr04    | 37243095                       | [T/A]       | 1067296378                                 |
| Ca_Kabuli_NC_021163.1_37243121 | Ca_kabuli_chr04    | 37243121                       | [A/G]       | 1067296379                                 |
| Ca_Kabuli_NC_021163.1_37243129 | Ca_kabuli_chr04    | 37243129                       | [A/C]       | 1067296380                                 |
| Ca_Kabuli_NC_021163.1_37273166 | Ca_kabuli_chr04    | 37273166                       | [T/C]       | 1067296381                                 |
| Ca_Kabuli_NC_021163.1_37293773 | Ca_kabuli_chr04    | 37293773                       | [T/A]       | 1067296382                                 |



| <b>SNP IDs</b>                 | <b>Chromosomes</b> | <b>Physical positions (bp)</b> | <b>SNPs</b> | <b>NCBI SNPdb accession IDs (NCBI_ss#)</b> |
|--------------------------------|--------------------|--------------------------------|-------------|--------------------------------------------|
| Ca_Kabuli_NC_021163.1_37316713 | Ca_kabuli_chr04    | 37316713                       | [A/T]       | 1067296383                                 |
| Ca_Kabuli_NC_021163.1_37316734 | Ca_kabuli_chr04    | 37316734                       | [A/C]       | 1067296384                                 |
| Ca_Kabuli_NC_021163.1_37316738 | Ca_kabuli_chr04    | 37316738                       | [C/T]       | 1067296385                                 |
| Ca_Kabuli_NC_021163.1_37329491 | Ca_kabuli_chr04    | 37329491                       | [T/C]       | 1067296386                                 |
| Ca_Kabuli_NC_021163.1_37330335 | Ca_kabuli_chr04    | 37330335                       | [G/T]       | 1067296387                                 |
| Ca_Kabuli_NC_021163.1_37330337 | Ca_kabuli_chr04    | 37330337                       | [G/T]       | 1067296388                                 |
| Ca_Kabuli_NC_021163.1_37330358 | Ca_kabuli_chr04    | 37330358                       | [A/C]       | 1067296389                                 |
| Ca_Kabuli_NC_021163.1_37348360 | Ca_kabuli_chr04    | 37348360                       | [A/C]       | 1067296390                                 |
| Ca_Kabuli_NC_021163.1_37349160 | Ca_kabuli_chr04    | 37349160                       | [A/T]       | 1067296391                                 |
| Ca_Kabuli_NC_021163.1_37349161 | Ca_kabuli_chr04    | 37349161                       | [T/C]       | 1067296392                                 |
| Ca_Kabuli_NC_021163.1_37349162 | Ca_kabuli_chr04    | 37349162                       | [G/T]       | 1067296393                                 |
| Ca_Kabuli_NC_021163.1_37349212 | Ca_kabuli_chr04    | 37349212                       | [C/A]       | 1067296394                                 |
| Ca_Kabuli_NC_021163.1_37356889 | Ca_kabuli_chr04    | 37356889                       | [C/T]       | 1067296395                                 |
| Ca_Kabuli_NC_021163.1_37356892 | Ca_kabuli_chr04    | 37356892                       | [T/C]       | 1067296396                                 |
| Ca_Kabuli_NC_021163.1_37356919 | Ca_kabuli_chr04    | 37356919                       | [T/A]       | 1067296397                                 |
| Ca_Kabuli_NC_021163.1_37356951 | Ca_kabuli_chr04    | 37356951                       | [C/T]       | 1067296398                                 |
| Ca_Kabuli_NC_021163.1_37359987 | Ca_kabuli_chr04    | 37359987                       | [A/T]       | 1067296399                                 |
| Ca_Kabuli_NC_021163.1_37360011 | Ca_kabuli_chr04    | 37360011                       | [G/T]       | 1067296400                                 |
| Ca_Kabuli_NC_021163.1_37364980 | Ca_kabuli_chr04    | 37364980                       | [A/G]       | 1067296401                                 |
| Ca_Kabuli_NC_021163.1_37371411 | Ca_kabuli_chr04    | 37371411                       | [C/T]       | 1067296402                                 |
| Ca_Kabuli_NC_021163.1_37433440 | Ca_kabuli_chr04    | 37433440                       | [G/T]       | 1067296403                                 |
| Ca_Kabuli_NC_021163.1_37437877 | Ca_kabuli_chr04    | 37437877                       | [A/C]       | 1067296404                                 |
| Ca_Kabuli_NC_021163.1_37440652 | Ca_kabuli_chr04    | 37440652                       | [G/A]       | 1067296405                                 |
| Ca_Kabuli_NC_021163.1_37449545 | Ca_kabuli_chr04    | 37449545                       | [C/T]       | 1067296406                                 |
| Ca_Kabuli_NC_021163.1_37450206 | Ca_kabuli_chr04    | 37450206                       | [C/A]       | 1067296407                                 |
| Ca_Kabuli_NC_021163.1_37450294 | Ca_kabuli_chr04    | 37450294                       | [C/T]       | 1067296408                                 |
| Ca_Kabuli_NC_021163.1_37450306 | Ca_kabuli_chr04    | 37450306                       | [A/C]       | 1067296409                                 |
| Ca_Kabuli_NC_021163.1_37450326 | Ca_kabuli_chr04    | 37450326                       | [T/A]       | 1067296410                                 |
| Ca_Kabuli_NC_021163.1_37453497 | Ca_kabuli_chr04    | 37453497                       | [C/G]       | 1067296411                                 |
| Ca_Kabuli_NC_021163.1_37453540 | Ca_kabuli_chr04    | 37453540                       | [T/C]       | 1067296412                                 |
| Ca_Kabuli_NC_021163.1_37453578 | Ca_kabuli_chr04    | 37453578                       | [A/G]       | 1067296413                                 |
| Ca_Kabuli_NC_021163.1_37453643 | Ca_kabuli_chr04    | 37453643                       | [G/C]       | 1067296414                                 |
| Ca_Kabuli_NC_021163.1_37454296 | Ca_kabuli_chr04    | 37454296                       | [A/G]       | 1067296415                                 |
| Ca_Kabuli_NC_021163.1_37454374 | Ca_kabuli_chr04    | 37454374                       | [C/T]       | 1067296416                                 |

| <b>SNP IDs</b>                 | <b>Chromosomes</b> | <b>Physical positions (bp)</b> | <b>SNPs</b> | <b>NCBI SNPdb accession IDs (NCBI_ss#)</b> |
|--------------------------------|--------------------|--------------------------------|-------------|--------------------------------------------|
| Ca_Kabuli_NC_021163.1_37454636 | Ca_kabuli_chr04    | 37454636                       | [A/G]       | 1067296417                                 |
| Ca_Kabuli_NC_021163.1_37454675 | Ca_kabuli_chr04    | 37454675                       | [T/G]       | 1067296418                                 |
| Ca_Kabuli_NC_021163.1_37455038 | Ca_kabuli_chr04    | 37455038                       | [A/C]       | 1067296419                                 |
| Ca_Kabuli_NC_021163.1_37549862 | Ca_kabuli_chr04    | 37549862                       | [T/G]       | 1067296420                                 |
| Ca_Kabuli_NC_021163.1_37549883 | Ca_kabuli_chr04    | 37549883                       | [T/C]       | 1067296421                                 |
| Ca_Kabuli_NC_021163.1_37550161 | Ca_kabuli_chr04    | 37550161                       | [T/G]       | 1067296422                                 |
| Ca_Kabuli_NC_021163.1_37570104 | Ca_kabuli_chr04    | 37570104                       | [G/T]       | 1067296423                                 |
| Ca_Kabuli_NC_021163.1_37574409 | Ca_kabuli_chr04    | 37574409                       | [G/A]       | 1067296424                                 |
| Ca_Kabuli_NC_021163.1_37576578 | Ca_kabuli_chr04    | 37576578                       | [A/C]       | 1067296425                                 |
| Ca_Kabuli_NC_021163.1_37630404 | Ca_kabuli_chr04    | 37630404                       | [A/G]       | 1067296426                                 |
| Ca_Kabuli_NC_021163.1_37630445 | Ca_kabuli_chr04    | 37630445                       | [A/G]       | 1067296427                                 |
| Ca_Kabuli_NC_021163.1_37632954 | Ca_kabuli_chr04    | 37632954                       | [A/T]       | 1067296428                                 |
| Ca_Kabuli_NC_021163.1_37632972 | Ca_kabuli_chr04    | 37632972                       | [C/T]       | 1067296429                                 |
| Ca_Kabuli_NC_021163.1_37632973 | Ca_kabuli_chr04    | 37632973                       | [G/A]       | 1067296430                                 |
| Ca_Kabuli_NC_021163.1_37633044 | Ca_kabuli_chr04    | 37633044                       | [C/T]       | 1067296431                                 |
| Ca_Kabuli_NC_021163.1_37650745 | Ca_kabuli_chr04    | 37650745                       | [A/G]       | 1067296432                                 |
| Ca_Kabuli_NC_021163.1_37650783 | Ca_kabuli_chr04    | 37650783                       | [C/A]       | 1067296433                                 |
| Ca_Kabuli_NC_021163.1_37688124 | Ca_kabuli_chr04    | 37688124                       | [G/T]       | 1067296434                                 |
| Ca_Kabuli_NC_021163.1_37688361 | Ca_kabuli_chr04    | 37688361                       | [G/T]       | 1067296435                                 |
| Ca_Kabuli_NC_021163.1_37690030 | Ca_kabuli_chr04    | 37690030                       | [A/G]       | 1067296436                                 |
| Ca_Kabuli_NC_021163.1_37690366 | Ca_kabuli_chr04    | 37690366                       | [A/G]       | 1067296437                                 |
| Ca_Kabuli_NC_021163.1_37698067 | Ca_kabuli_chr04    | 37698067                       | [T/C]       | 1067296438                                 |
| Ca_Kabuli_NC_021163.1_37698508 | Ca_kabuli_chr04    | 37698508                       | [T/G]       | 1067296439                                 |
| Ca_Kabuli_NC_021163.1_37698673 | Ca_kabuli_chr04    | 37698673                       | [C/A]       | 1067296440                                 |
| Ca_Kabuli_NC_021163.1_37699173 | Ca_kabuli_chr04    | 37699173                       | [A/C]       | 1067296441                                 |
| Ca_Kabuli_NC_021163.1_37699981 | Ca_kabuli_chr04    | 37699981                       | [G/T]       | 1067296442                                 |
| Ca_Kabuli_NC_021163.1_37706480 | Ca_kabuli_chr04    | 37706480                       | [T/A]       | 1067296443                                 |
| Ca_Kabuli_NC_021163.1_37706496 | Ca_kabuli_chr04    | 37706496                       | [G/A]       | 1067296444                                 |
| Ca_Kabuli_NC_021163.1_37706498 | Ca_kabuli_chr04    | 37706498                       | [T/G]       | 1067296445                                 |
| Ca_Kabuli_NC_021163.1_37708217 | Ca_kabuli_chr04    | 37708217                       | [A/C]       | 1067296446                                 |
| Ca_Kabuli_NC_021163.1_37708220 | Ca_kabuli_chr04    | 37708220                       | [A/C]       | 1067296447                                 |
| Ca_Kabuli_NC_021163.1_37708249 | Ca_kabuli_chr04    | 37708249                       | [G/T]       | 1067296448                                 |
| Ca_Kabuli_NC_021163.1_37708256 | Ca_kabuli_chr04    | 37708256                       | [A/G]       | 1067296449                                 |
| Ca_Kabuli_NC_021163.1_37723097 | Ca_kabuli_chr04    | 37723097                       | [T/G]       | 1067296450                                 |

| <b>SNP IDs</b>                 | <b>Chromosomes</b> | <b>Physical positions (bp)</b> | <b>SNPs</b> | <b>NCBI SNPdb accession IDs (NCBI_ss#)</b> |
|--------------------------------|--------------------|--------------------------------|-------------|--------------------------------------------|
| Ca_Kabuli_NC_021163.1_37754127 | Ca_kabuli_chr04    | 37754127                       | [C/T]       | 1067296451                                 |
| Ca_Kabuli_NC_021163.1_37754128 | Ca_kabuli_chr04    | 37754128                       | [T/C]       | 1067296452                                 |
| Ca_Kabuli_NC_021163.1_37754129 | Ca_kabuli_chr04    | 37754129                       | [G/T]       | 1067296453                                 |
| Ca_Kabuli_NC_021163.1_37797651 | Ca_kabuli_chr04    | 37797651                       | [C/G]       | 1067296454                                 |
| Ca_Kabuli_NC_021163.1_37797676 | Ca_kabuli_chr04    | 37797676                       | [T/C]       | 1067296455                                 |
| Ca_Kabuli_NC_021163.1_37797966 | Ca_kabuli_chr04    | 37797966                       | [T/G]       | 1067296456                                 |
| Ca_Kabuli_NC_021163.1_37806689 | Ca_kabuli_chr04    | 37806689                       | [T/C]       | 1067296457                                 |
| Ca_Kabuli_NC_021163.1_37858969 | Ca_kabuli_chr04    | 37858969                       | [T/G]       | 1067296458                                 |
| Ca_Kabuli_NC_021163.1_37859003 | Ca_kabuli_chr04    | 37859003                       | [T/C]       | 1067296459                                 |
| Ca_Kabuli_NC_021163.1_37859011 | Ca_kabuli_chr04    | 37859011                       | [A/G]       | 1067296460                                 |
| Ca_Kabuli_NC_021163.1_37897351 | Ca_kabuli_chr04    | 37897351                       | [C/A]       | 1067296461                                 |
| Ca_Kabuli_NC_021163.1_37898485 | Ca_kabuli_chr04    | 37898485                       | [G/T]       | 1067296462                                 |
| Ca_Kabuli_NC_021163.1_37899646 | Ca_kabuli_chr04    | 37899646                       | [A/G]       | 1067296463                                 |
| Ca_Kabuli_NC_021163.1_37899651 | Ca_kabuli_chr04    | 37899651                       | [T/C]       | 1067296464                                 |
| Ca_Kabuli_NC_021163.1_38008062 | Ca_kabuli_chr04    | 38008062                       | [A/T]       | 1067296465                                 |
| Ca_Kabuli_NC_021163.1_38008082 | Ca_kabuli_chr04    | 38008082                       | [C/T]       | 1067296466                                 |
| Ca_Kabuli_NC_021163.1_38008205 | Ca_kabuli_chr04    | 38008205                       | [G/A]       | 1067296467                                 |
| Ca_Kabuli_NC_021163.1_38008227 | Ca_kabuli_chr04    | 38008227                       | [G/T]       | 1067296468                                 |
| Ca_Kabuli_NC_021163.1_38008527 | Ca_kabuli_chr04    | 38008527                       | [A/T]       | 1067296469                                 |
| Ca_Kabuli_NC_021163.1_38008567 | Ca_kabuli_chr04    | 38008567                       | [C/A]       | 1067296470                                 |
| Ca_Kabuli_NC_021163.1_38029136 | Ca_kabuli_chr04    | 38029136                       | [G/T]       | 1067296471                                 |
| Ca_Kabuli_NC_021163.1_38029208 | Ca_kabuli_chr04    | 38029208                       | [G/A]       | 1067296472                                 |
| Ca_Kabuli_NC_021163.1_38029215 | Ca_kabuli_chr04    | 38029215                       | [A/T]       | 1067296473                                 |
| Ca_Kabuli_NC_021163.1_38029358 | Ca_kabuli_chr04    | 38029358                       | [A/G]       | 1067296474                                 |
| Ca_Kabuli_NC_021163.1_38029380 | Ca_kabuli_chr04    | 38029380                       | [A/G]       | 1067296475                                 |
| Ca_Kabuli_NC_021163.1_38038959 | Ca_kabuli_chr04    | 38038959                       | [G/A]       | 1067296476                                 |
| Ca_Kabuli_NC_021163.1_38039046 | Ca_kabuli_chr04    | 38039046                       | [T/C]       | 1067296477                                 |
| Ca_Kabuli_NC_021163.1_38039251 | Ca_kabuli_chr04    | 38039251                       | [G/C]       | 1067296478                                 |
| Ca_Kabuli_NC_021163.1_38039289 | Ca_kabuli_chr04    | 38039289                       | [G/A]       | 1067296479                                 |
| Ca_Kabuli_NC_021163.1_38060338 | Ca_kabuli_chr04    | 38060338                       | [T/A]       | 1067296480                                 |
| Ca_Kabuli_NC_021163.1_38060368 | Ca_kabuli_chr04    | 38060368                       | [G/C]       | 1067296481                                 |
| Ca_Kabuli_NC_021163.1_38153183 | Ca_kabuli_chr04    | 38153183                       | [A/C]       | 1067296482                                 |
| Ca_Kabuli_NC_021163.1_38153198 | Ca_kabuli_chr04    | 38153198                       | [T/G]       | 1067296483                                 |
| Ca_Kabuli_NC_021163.1_38153216 | Ca_kabuli_chr04    | 38153216                       | [C/T]       | 1067296484                                 |

| <b>SNP IDs</b>                 | <b>Chromosomes</b> | <b>Physical positions (bp)</b> | <b>SNPs</b> | <b>NCBI SNPdb accession IDs (NCBI_ss#)</b> |
|--------------------------------|--------------------|--------------------------------|-------------|--------------------------------------------|
| Ca_Kabuli_NC_021163.1_38157210 | Ca_kabuli_chr04    | 38157210                       | [T/G]       | 1067296485                                 |
| Ca_Kabuli_NC_021163.1_38157279 | Ca_kabuli_chr04    | 38157279                       | [T/A]       | 1067296486                                 |
| Ca_Kabuli_NC_021163.1_38172943 | Ca_kabuli_chr04    | 38172943                       | [A/T]       | 1067296487                                 |
| Ca_Kabuli_NC_021163.1_38179583 | Ca_kabuli_chr04    | 38179583                       | [A/C]       | 1067296488                                 |
| Ca_Kabuli_NC_021163.1_38181292 | Ca_kabuli_chr04    | 38181292                       | [G/A]       | 1067296489                                 |
| Ca_Kabuli_NC_021163.1_38181893 | Ca_kabuli_chr04    | 38181893                       | [G/T]       | 1067296490                                 |
| Ca_Kabuli_NC_021163.1_38194159 | Ca_kabuli_chr04    | 38194159                       | [T/C]       | 1067296491                                 |
| Ca_Kabuli_NC_021163.1_38195346 | Ca_kabuli_chr04    | 38195346                       | [A/G]       | 1067296492                                 |
| Ca_Kabuli_NC_021163.1_38215267 | Ca_kabuli_chr04    | 38215267                       | [A/G]       | 1067296493                                 |
| Ca_Kabuli_NC_021163.1_38226374 | Ca_kabuli_chr04    | 38226374                       | [C/A]       | 1067296494                                 |
| Ca_Kabuli_NC_021163.1_38246261 | Ca_kabuli_chr04    | 38246261                       | [A/C]       | 1067296495                                 |
| Ca_Kabuli_NC_021163.1_38246303 | Ca_kabuli_chr04    | 38246303                       | [A/T]       | 1067296496                                 |
| Ca_Kabuli_NC_021163.1_38246306 | Ca_kabuli_chr04    | 38246306                       | [G/T]       | 1067296497                                 |
| Ca_Kabuli_NC_021163.1_38246739 | Ca_kabuli_chr04    | 38246739                       | [T/G]       | 1067296498                                 |
| Ca_Kabuli_NC_021163.1_38246753 | Ca_kabuli_chr04    | 38246753                       | [A/G]       | 1067296499                                 |
| Ca_Kabuli_NC_021163.1_38246775 | Ca_kabuli_chr04    | 38246775                       | [C/A]       | 1067296500                                 |
| Ca_Kabuli_NC_021163.1_38288823 | Ca_kabuli_chr04    | 38288823                       | [T/G]       | 1067296501                                 |
| Ca_Kabuli_NC_021163.1_38289052 | Ca_kabuli_chr04    | 38289052                       | [A/G]       | 1067296502                                 |
| Ca_Kabuli_NC_021163.1_38289066 | Ca_kabuli_chr04    | 38289066                       | [A/G]       | 1067296503                                 |
| Ca_Kabuli_NC_021163.1_38302165 | Ca_kabuli_chr04    | 38302165                       | [A/T]       | 1067296504                                 |
| Ca_Kabuli_NC_021163.1_38302413 | Ca_kabuli_chr04    | 38302413                       | [G/A]       | 1067296505                                 |
| Ca_Kabuli_NC_021163.1_38302445 | Ca_kabuli_chr04    | 38302445                       | [G/A]       | 1067296506                                 |
| Ca_Kabuli_NC_021163.1_38323250 | Ca_kabuli_chr04    | 38323250                       | [T/A]       | 1067296507                                 |
| Ca_Kabuli_NC_021163.1_38323321 | Ca_kabuli_chr04    | 38323321                       | [T/G]       | 1067296508                                 |
| Ca_Kabuli_NC_021163.1_38323345 | Ca_kabuli_chr04    | 38323345                       | [T/A]       | 1067296509                                 |
| Ca_Kabuli_NC_021163.1_38343796 | Ca_kabuli_chr04    | 38343796                       | [T/C]       | 1067296510                                 |
| Ca_Kabuli_NC_021163.1_38358096 | Ca_kabuli_chr04    | 38358096                       | [G/T]       | 1067296511                                 |
| Ca_Kabuli_NC_021163.1_38358129 | Ca_kabuli_chr04    | 38358129                       | [G/A]       | 1067296512                                 |
| Ca_Kabuli_NC_021163.1_38358146 | Ca_kabuli_chr04    | 38358146                       | [A/C]       | 1067296513                                 |
| Ca_Kabuli_NC_021163.1_38358398 | Ca_kabuli_chr04    | 38358398                       | [A/G]       | 1067296514                                 |
| Ca_Kabuli_NC_021163.1_38358672 | Ca_kabuli_chr04    | 38358672                       | [T/G]       | 1067296515                                 |
| Ca_Kabuli_NC_021163.1_38358798 | Ca_kabuli_chr04    | 38358798                       | [T/A]       | 1067296516                                 |
| Ca_Kabuli_NC_021163.1_38358829 | Ca_kabuli_chr04    | 38358829                       | [A/G]       | 1067296517                                 |
| Ca_Kabuli_NC_021163.1_38358849 | Ca_kabuli_chr04    | 38358849                       | [T/C]       | 1067296518                                 |

| <b>SNP IDs</b>                 | <b>Chromosomes</b> | <b>Physical positions (bp)</b> | <b>SNPs</b> | <b>NCBI SNPdb accession IDs (NCBI_ss#)</b> |
|--------------------------------|--------------------|--------------------------------|-------------|--------------------------------------------|
| Ca_Kabuli_NC_021163.1_38359493 | Ca_kabuli_chr04    | 38359493                       | [T/G]       | 1067296519                                 |
| Ca_Kabuli_NC_021163.1_38362132 | Ca_kabuli_chr04    | 38362132                       | [A/T]       | 1067296520                                 |
| Ca_Kabuli_NC_021163.1_38363041 | Ca_kabuli_chr04    | 38363041                       | [C/T]       | 1067296521                                 |
| Ca_Kabuli_NC_021163.1_38370768 | Ca_kabuli_chr04    | 38370768                       | [A/C]       | 1067296522                                 |
| Ca_Kabuli_NC_021163.1_38370848 | Ca_kabuli_chr04    | 38370848                       | [A/G]       | 1067296523                                 |
| Ca_Kabuli_NC_021163.1_38370926 | Ca_kabuli_chr04    | 38370926                       | [T/C]       | 1067296524                                 |
| Ca_Kabuli_NC_021163.1_38370939 | Ca_kabuli_chr04    | 38370939                       | [C/A]       | 1067296525                                 |
| Ca_Kabuli_NC_021163.1_38370941 | Ca_kabuli_chr04    | 38370941                       | [A/G]       | 1067296526                                 |
| Ca_Kabuli_NC_021163.1_38381635 | Ca_kabuli_chr04    | 38381635                       | [C/T]       | 1067296527                                 |
| Ca_Kabuli_NC_021163.1_38381646 | Ca_kabuli_chr04    | 38381646                       | [G/A]       | 1067296528                                 |
| Ca_Kabuli_NC_021163.1_38382829 | Ca_kabuli_chr04    | 38382829                       | [A/C]       | 1067296529                                 |
| Ca_Kabuli_NC_021163.1_38382947 | Ca_kabuli_chr04    | 38382947                       | [C/A]       | 1067296530                                 |
| Ca_Kabuli_NC_021163.1_38405153 | Ca_kabuli_chr04    | 38405153                       | [C/T]       | 1067296531                                 |
| Ca_Kabuli_NC_021163.1_38421833 | Ca_kabuli_chr04    | 38421833                       | [A/G]       | 1067296532                                 |
| Ca_Kabuli_NC_021163.1_38422037 | Ca_kabuli_chr04    | 38422037                       | [T/C]       | 1067296533                                 |
| Ca_Kabuli_NC_021163.1_38425720 | Ca_kabuli_chr04    | 38425720                       | [T/A]       | 1067296534                                 |
| Ca_Kabuli_NC_021163.1_38474093 | Ca_kabuli_chr04    | 38474093                       | [C/T]       | 1067296535                                 |
| Ca_Kabuli_NC_021163.1_38474108 | Ca_kabuli_chr04    | 38474108                       | [T/C]       | 1067296536                                 |
| Ca_Kabuli_NC_021163.1_38474123 | Ca_kabuli_chr04    | 38474123                       | [A/T]       | 1067296537                                 |
| Ca_Kabuli_NC_021163.1_38474149 | Ca_kabuli_chr04    | 38474149                       | [T/C]       | 1067296538                                 |
| Ca_Kabuli_NC_021163.1_38475310 | Ca_kabuli_chr04    | 38475310                       | [A/C]       | 1067296539                                 |
| Ca_Kabuli_NC_021163.1_38475425 | Ca_kabuli_chr04    | 38475425                       | [G/A]       | 1067296540                                 |
| Ca_Kabuli_NC_021163.1_38475449 | Ca_kabuli_chr04    | 38475449                       | [T/A]       | 1067296541                                 |
| Ca_Kabuli_NC_021163.1_38475547 | Ca_kabuli_chr04    | 38475547                       | [C/T]       | 1067296542                                 |
| Ca_Kabuli_NC_021163.1_38534421 | Ca_kabuli_chr04    | 38534421                       | [T/C]       | 1067296543                                 |
| Ca_Kabuli_NC_021163.1_38536170 | Ca_kabuli_chr04    | 38536170                       | [A/G]       | 1067296544                                 |
| Ca_Kabuli_NC_021163.1_38536332 | Ca_kabuli_chr04    | 38536332                       | [A/C]       | 1067296545                                 |
| Ca_Kabuli_NC_021163.1_38538925 | Ca_kabuli_chr04    | 38538925                       | [G/T]       | 1067296546                                 |
| Ca_Kabuli_NC_021163.1_38540247 | Ca_kabuli_chr04    | 38540247                       | [G/A]       | 1067296547                                 |
| Ca_Kabuli_NC_021163.1_38592107 | Ca_kabuli_chr04    | 38592107                       | [T/G]       | 1067296548                                 |
| Ca_Kabuli_NC_021163.1_38592115 | Ca_kabuli_chr04    | 38592115                       | [A/G]       | 1067296549                                 |
| Ca_Kabuli_NC_021163.1_38659536 | Ca_kabuli_chr04    | 38659536                       | [T/A]       | 1067296550                                 |
| Ca_Kabuli_NC_021163.1_38659625 | Ca_kabuli_chr04    | 38659625                       | [A/T]       | 1067296551                                 |
| Ca_Kabuli_NC_021163.1_38659636 | Ca_kabuli_chr04    | 38659636                       | [T/G]       | 1067296552                                 |

| <b>SNP IDs</b>                 | <b>Chromosomes</b> | <b>Physical positions (bp)</b> | <b>SNPs</b> | <b>NCBI SNPdb accession IDs (NCBI_ss#)</b> |
|--------------------------------|--------------------|--------------------------------|-------------|--------------------------------------------|
| Ca_Kabuli_NC_021163.1_38668599 | Ca_kabuli_chr04    | 38668599                       | [A/T]       | 1067296553                                 |
| Ca_Kabuli_NC_021163.1_38673440 | Ca_kabuli_chr04    | 38673440                       | [A/G]       | 1067296554                                 |
| Ca_Kabuli_NC_021163.1_38673445 | Ca_kabuli_chr04    | 38673445                       | [A/G]       | 1067296555                                 |
| Ca_Kabuli_NC_021163.1_38673456 | Ca_kabuli_chr04    | 38673456                       | [T/C]       | 1067296556                                 |
| Ca_Kabuli_NC_021163.1_38673464 | Ca_kabuli_chr04    | 38673464                       | [A/G]       | 1067296557                                 |
| Ca_Kabuli_NC_021163.1_38673483 | Ca_kabuli_chr04    | 38673483                       | [A/G]       | 1067296558                                 |
| Ca_Kabuli_NC_021163.1_38673501 | Ca_kabuli_chr04    | 38673501                       | [T/C]       | 1067296559                                 |
| Ca_Kabuli_NC_021163.1_38679967 | Ca_kabuli_chr04    | 38679967                       | [T/C]       | 1067296560                                 |
| Ca_Kabuli_NC_021163.1_38679991 | Ca_kabuli_chr04    | 38679991                       | [T/C]       | 1067296561                                 |
| Ca_Kabuli_NC_021163.1_38680297 | Ca_kabuli_chr04    | 38680297                       | [A/C]       | 1067296562                                 |
| Ca_Kabuli_NC_021163.1_38680306 | Ca_kabuli_chr04    | 38680306                       | [A/C]       | 1067296563                                 |
| Ca_Kabuli_NC_021163.1_38721160 | Ca_kabuli_chr04    | 38721160                       | [A/G]       | 1067296564                                 |
| Ca_Kabuli_NC_021163.1_38721207 | Ca_kabuli_chr04    | 38721207                       | [A/C]       | 1067296565                                 |
| Ca_Kabuli_NC_021163.1_38724356 | Ca_kabuli_chr04    | 38724356                       | [C/A]       | 1067296566                                 |
| Ca_Kabuli_NC_021163.1_38756507 | Ca_kabuli_chr04    | 38756507                       | [T/C]       | 1067296567                                 |
| Ca_Kabuli_NC_021163.1_38756510 | Ca_kabuli_chr04    | 38756510                       | [C/G]       | 1067296568                                 |
| Ca_Kabuli_NC_021163.1_38759544 | Ca_kabuli_chr04    | 38759544                       | [T/G]       | 1067296569                                 |
| Ca_Kabuli_NC_021163.1_38770348 | Ca_kabuli_chr04    | 38770348                       | [T/A]       | 1067296570                                 |
| Ca_Kabuli_NC_021163.1_38770450 | Ca_kabuli_chr04    | 38770450                       | [C/G]       | 1067296571                                 |
| Ca_Kabuli_NC_021163.1_38785451 | Ca_kabuli_chr04    | 38785451                       | [A/C]       | 1067296572                                 |
| Ca_Kabuli_NC_021163.1_38829961 | Ca_kabuli_chr04    | 38829961                       | [A/T]       | 1067296573                                 |
| Ca_Kabuli_NC_021163.1_38829998 | Ca_kabuli_chr04    | 38829998                       | [C/G]       | 1067296574                                 |
| Ca_Kabuli_NC_021163.1_38833182 | Ca_kabuli_chr04    | 38833182                       | [T/G]       | 1067296575                                 |
| Ca_Kabuli_NC_021163.1_38833280 | Ca_kabuli_chr04    | 38833280                       | [T/C]       | 1067296576                                 |
| Ca_Kabuli_NC_021163.1_38833304 | Ca_kabuli_chr04    | 38833304                       | [C/A]       | 1067296577                                 |
| Ca_Kabuli_NC_021163.1_38833521 | Ca_kabuli_chr04    | 38833521                       | [G/A]       | 1067296578                                 |
| Ca_Kabuli_NC_021163.1_38834474 | Ca_kabuli_chr04    | 38834474                       | [G/A]       | 1067296579                                 |
| Ca_Kabuli_NC_021163.1_38834477 | Ca_kabuli_chr04    | 38834477                       | [G/A]       | 1067296580                                 |
| Ca_Kabuli_NC_021163.1_38836356 | Ca_kabuli_chr04    | 38836356                       | [T/C]       | 1067296581                                 |
| Ca_Kabuli_NC_021163.1_38836381 | Ca_kabuli_chr04    | 38836381                       | [T/A]       | 1067296582                                 |
| Ca_Kabuli_NC_021163.1_38836398 | Ca_kabuli_chr04    | 38836398                       | [T/C]       | 1067296583                                 |
| Ca_Kabuli_NC_021163.1_38836436 | Ca_kabuli_chr04    | 38836436                       | [T/G]       | 1067296584                                 |
| Ca_Kabuli_NC_021163.1_38836454 | Ca_kabuli_chr04    | 38836454                       | [A/C]       | 1067296585                                 |
| Ca_Kabuli_NC_021163.1_38836455 | Ca_kabuli_chr04    | 38836455                       | [A/C]       | 1067296586                                 |

| <b>SNP IDs</b>                 | <b>Chromosomes</b> | <b>Physical positions (bp)</b> | <b>SNPs</b> | <b>NCBI SNPdb accession IDs (NCBI_ss#)</b> |
|--------------------------------|--------------------|--------------------------------|-------------|--------------------------------------------|
| Ca_Kabuli_NC_021163.1_38836457 | Ca_kabuli_chr04    | 38836457                       | [A/T]       | 1067296587                                 |
| Ca_Kabuli_NC_021163.1_38836649 | Ca_kabuli_chr04    | 38836649                       | [T/C]       | 1067296588                                 |
| Ca_Kabuli_NC_021163.1_38888779 | Ca_kabuli_chr04    | 38888779                       | [T/C]       | 1067296589                                 |
| Ca_Kabuli_NC_021163.1_38888791 | Ca_kabuli_chr04    | 38888791                       | [C/G]       | 1067296590                                 |
| Ca_Kabuli_NC_021163.1_38888936 | Ca_kabuli_chr04    | 38888936                       | [T/G]       | 1067296591                                 |
| Ca_Kabuli_NC_021163.1_38888996 | Ca_kabuli_chr04    | 38888996                       | [T/C]       | 1067296592                                 |
| Ca_Kabuli_NC_021163.1_38918394 | Ca_kabuli_chr04    | 38918394                       | [T/A]       | 1067296593                                 |
| Ca_Kabuli_NC_021163.1_38918424 | Ca_kabuli_chr04    | 38918424                       | [A/G]       | 1067296594                                 |
| Ca_Kabuli_NC_021163.1_38918724 | Ca_kabuli_chr04    | 38918724                       | [C/A]       | 1067296595                                 |
| Ca_Kabuli_NC_021163.1_38928945 | Ca_kabuli_chr04    | 38928945                       | [G/C]       | 1067296596                                 |
| Ca_Kabuli_NC_021163.1_38929639 | Ca_kabuli_chr04    | 38929639                       | [T/A]       | 1067296597                                 |
| Ca_Kabuli_NC_021163.1_38929681 | Ca_kabuli_chr04    | 38929681                       | [A/G]       | 1067296598                                 |
| Ca_Kabuli_NC_021163.1_38948380 | Ca_kabuli_chr04    | 38948380                       | [A/G]       | 1067296599                                 |
| Ca_Kabuli_NC_021163.1_38948391 | Ca_kabuli_chr04    | 38948391                       | [A/C]       | 1067296600                                 |
| Ca_Kabuli_NC_021163.1_38948405 | Ca_kabuli_chr04    | 38948405                       | [C/A]       | 1067296601                                 |
| Ca_Kabuli_NC_021163.1_38948407 | Ca_kabuli_chr04    | 38948407                       | [G/C]       | 1067296602                                 |
| Ca_Kabuli_NC_021163.1_38976822 | Ca_kabuli_chr04    | 38976822                       | [C/A]       | 1067296603                                 |
| Ca_Kabuli_NC_021163.1_38976835 | Ca_kabuli_chr04    | 38976835                       | [G/T]       | 1067296604                                 |
| Ca_Kabuli_NC_021163.1_38978405 | Ca_kabuli_chr04    | 38978405                       | [A/G]       | 1067296605                                 |
| Ca_Kabuli_NC_021163.1_38978417 | Ca_kabuli_chr04    | 38978417                       | [T/A]       | 1067296606                                 |
| Ca_Kabuli_NC_021163.1_38978427 | Ca_kabuli_chr04    | 38978427                       | [A/G]       | 1067296607                                 |
| Ca_Kabuli_NC_021163.1_38978435 | Ca_kabuli_chr04    | 38978435                       | [A/G]       | 1067296608                                 |
| Ca_Kabuli_NC_021163.1_38978466 | Ca_kabuli_chr04    | 38978466                       | [T/A]       | 1067296609                                 |
| Ca_Kabuli_NC_021163.1_38979793 | Ca_kabuli_chr04    | 38979793                       | [T/A]       | 1067296610                                 |
| Ca_Kabuli_NC_021163.1_39033052 | Ca_kabuli_chr04    | 39033052                       | [A/G]       | 1067296611                                 |
| Ca_Kabuli_NC_021163.1_39033073 | Ca_kabuli_chr04    | 39033073                       | [G/C]       | 1067296612                                 |
| Ca_Kabuli_NC_021163.1_39033314 | Ca_kabuli_chr04    | 39033314                       | [C/G]       | 1067296613                                 |
| Ca_Kabuli_NC_021163.1_39033838 | Ca_kabuli_chr04    | 39033838                       | [C/A]       | 1067296614                                 |
| Ca_Kabuli_NC_021163.1_39042794 | Ca_kabuli_chr04    | 39042794                       | [A/G]       | 1067296615                                 |
| Ca_Kabuli_NC_021163.1_39042938 | Ca_kabuli_chr04    | 39042938                       | [T/G]       | 1067296616                                 |
| Ca_Kabuli_NC_021163.1_39047261 | Ca_kabuli_chr04    | 39047261                       | [C/T]       | 1067296617                                 |
| Ca_Kabuli_NC_021163.1_39052494 | Ca_kabuli_chr04    | 39052494                       | [A/G]       | 1067296618                                 |
| Ca_Kabuli_NC_021163.1_39081951 | Ca_kabuli_chr04    | 39081951                       | [A/G]       | 1067296619                                 |
| Ca_Kabuli_NC_021163.1_39085061 | Ca_kabuli_chr04    | 39085061                       | [A/G]       | 1067296620                                 |

| <b>SNP IDs</b>                 | <b>Chromosomes</b> | <b>Physical positions (bp)</b> | <b>SNPs</b> | <b>NCBI SNPdb accession IDs (NCBI_ss#)</b> |
|--------------------------------|--------------------|--------------------------------|-------------|--------------------------------------------|
| Ca_Kabuli_NC_021163.1_39085068 | Ca_kabuli_chr04    | 39085068                       | [A/G]       | 1067296621                                 |
| Ca_Kabuli_NC_021163.1_39086017 | Ca_kabuli_chr04    | 39086017                       | [A/T]       | 1067296622                                 |
| Ca_Kabuli_NC_021163.1_39086269 | Ca_kabuli_chr04    | 39086269                       | [G/A]       | 1067296623                                 |
| Ca_Kabuli_NC_021163.1_39110692 | Ca_kabuli_chr04    | 39110692                       | [A/G]       | 1067296624                                 |
| Ca_Kabuli_NC_021163.1_39116656 | Ca_kabuli_chr04    | 39116656                       | [A/G]       | 1067296625                                 |
| Ca_Kabuli_NC_021163.1_39116795 | Ca_kabuli_chr04    | 39116795                       | [C/G]       | 1067296626                                 |
| Ca_Kabuli_NC_021163.1_39136826 | Ca_kabuli_chr04    | 39136826                       | [C/T]       | 1067296627                                 |
| Ca_Kabuli_NC_021163.1_39635719 | Ca_kabuli_chr04    | 39635719                       | [G/T]       | 1067296628                                 |
| Ca_Kabuli_NC_021163.1_39635734 | Ca_kabuli_chr04    | 39635734                       | [A/C]       | 1067296629                                 |
| Ca_Kabuli_NC_021163.1_39655306 | Ca_kabuli_chr04    | 39655306                       | [G/A]       | 1067296630                                 |
| Ca_Kabuli_NC_021163.1_39715083 | Ca_kabuli_chr04    | 39715083                       | [A/G]       | 1067296631                                 |
| Ca_Kabuli_NC_021163.1_39715112 | Ca_kabuli_chr04    | 39715112                       | [T/C]       | 1067296632                                 |
| Ca_Kabuli_NC_021163.1_39718739 | Ca_kabuli_chr04    | 39718739                       | [A/C]       | 1067296633                                 |
| Ca_Kabuli_NC_021163.1_39719808 | Ca_kabuli_chr04    | 39719808                       | [A/C]       | 1067296634                                 |
| Ca_Kabuli_NC_021163.1_39803289 | Ca_kabuli_chr04    | 39803289                       | [A/C]       | 1067296635                                 |
| Ca_Kabuli_NC_021163.1_39849639 | Ca_kabuli_chr04    | 39849639                       | [T/G]       | 1067296636                                 |
| Ca_Kabuli_NC_021163.1_40010143 | Ca_kabuli_chr04    | 40010143                       | [A/C]       | 1067296637                                 |
| Ca_Kabuli_NC_021163.1_40010165 | Ca_kabuli_chr04    | 40010165                       | [A/C]       | 1067296638                                 |
| Ca_Kabuli_NC_021163.1_40010180 | Ca_kabuli_chr04    | 40010180                       | [A/C]       | 1067296639                                 |
| Ca_Kabuli_NC_021163.1_40061970 | Ca_kabuli_chr04    | 40061970                       | [A/C]       | 1067296640                                 |
| Ca_Kabuli_NC_021163.1_40159151 | Ca_kabuli_chr04    | 40159151                       | [A/C]       | 1067296641                                 |
| Ca_Kabuli_NC_021163.1_40179388 | Ca_kabuli_chr04    | 40179388                       | [C/A]       | 1067296642                                 |
| Ca_Kabuli_NC_021163.1_40179389 | Ca_kabuli_chr04    | 40179389                       | [A/G]       | 1067296643                                 |
| Ca_Kabuli_NC_021163.1_40349066 | Ca_kabuli_chr04    | 40349066                       | [A/C]       | 1067296644                                 |
| Ca_Kabuli_NC_021163.1_40349094 | Ca_kabuli_chr04    | 40349094                       | [T/C]       | 1067296645                                 |
| Ca_Kabuli_NC_021163.1_40349101 | Ca_kabuli_chr04    | 40349101                       | [T/C]       | 1067296646                                 |
| Ca_Kabuli_NC_021163.1_40349123 | Ca_kabuli_chr04    | 40349123                       | [T/C]       | 1067296647                                 |
| Ca_Kabuli_NC_021163.1_40349143 | Ca_kabuli_chr04    | 40349143                       | [A/C]       | 1067296648                                 |
| Ca_Kabuli_NC_021163.1_40349162 | Ca_kabuli_chr04    | 40349162                       | [C/G]       | 1067296649                                 |
| Ca_Kabuli_NC_021163.1_40349163 | Ca_kabuli_chr04    | 40349163                       | [A/G]       | 1067296650                                 |
| Ca_Kabuli_NC_021163.1_40349186 | Ca_kabuli_chr04    | 40349186                       | [A/C]       | 1067296651                                 |
| Ca_Kabuli_NC_021163.1_40368254 | Ca_kabuli_chr04    | 40368254                       | [T/G]       | 1067296652                                 |
| Ca_Kabuli_NC_021163.1_40375385 | Ca_kabuli_chr04    | 40375385                       | [A/G]       | 1067296653                                 |
| Ca_Kabuli_NC_021163.1_40387949 | Ca_kabuli_chr04    | 40387949                       | [T/C]       | 1067296654                                 |



| <b>SNP IDs</b>                 | <b>Chromosomes</b> | <b>Physical positions (bp)</b> | <b>SNPs</b> | <b>NCBI SNPdb accession IDs (NCBI_ss#)</b> |
|--------------------------------|--------------------|--------------------------------|-------------|--------------------------------------------|
| Ca_Kabuli_NC_021163.1_40387974 | Ca_kabuli_chr04    | 40387974                       | [T/C]       | 1067296655                                 |
| Ca_Kabuli_NC_021163.1_40429302 | Ca_kabuli_chr04    | 40429302                       | [T/C]       | 1067296656                                 |
| Ca_Kabuli_NC_021163.1_40435006 | Ca_kabuli_chr04    | 40435006                       | [C/T]       | 1067296657                                 |
| Ca_Kabuli_NC_021163.1_40472031 | Ca_kabuli_chr04    | 40472031                       | [T/C]       | 1067296658                                 |
| Ca_Kabuli_NC_021163.1_40481316 | Ca_kabuli_chr04    | 40481316                       | [T/G]       | 1067296659                                 |
| Ca_Kabuli_NC_021163.1_40481319 | Ca_kabuli_chr04    | 40481319                       | [A/G]       | 1067296660                                 |
| Ca_Kabuli_NC_021163.1_40481321 | Ca_kabuli_chr04    | 40481321                       | [C/T]       | 1067296661                                 |
| Ca_Kabuli_NC_021163.1_40481324 | Ca_kabuli_chr04    | 40481324                       | [C/T]       | 1067296662                                 |
| Ca_Kabuli_NC_021163.1_40513601 | Ca_kabuli_chr04    | 40513601                       | [A/C]       | 1067296663                                 |
| Ca_Kabuli_NC_021163.1_40513718 | Ca_kabuli_chr04    | 40513718                       | [T/G]       | 1067296664                                 |
| Ca_Kabuli_NC_021163.1_40513788 | Ca_kabuli_chr04    | 40513788                       | [A/C]       | 1067296665                                 |
| Ca_Kabuli_NC_021163.1_40597195 | Ca_kabuli_chr04    | 40597195                       | [T/G]       | 1067296666                                 |
| Ca_Kabuli_NC_021163.1_40795107 | Ca_kabuli_chr04    | 40795107                       | [T/C]       | 1067296667                                 |
| Ca_Kabuli_NC_021163.1_40801814 | Ca_kabuli_chr04    | 40801814                       | [A/C]       | 1067296668                                 |
| Ca_Kabuli_NC_021163.1_40801824 | Ca_kabuli_chr04    | 40801824                       | [A/G]       | 1067296669                                 |
| Ca_Kabuli_NC_021163.1_40805737 | Ca_kabuli_chr04    | 40805737                       | [T/C]       | 1067296670                                 |
| Ca_Kabuli_NC_021163.1_40805740 | Ca_kabuli_chr04    | 40805740                       | [C/A]       | 1067296671                                 |
| Ca_Kabuli_NC_021163.1_40805952 | Ca_kabuli_chr04    | 40805952                       | [A/C]       | 1067296672                                 |
| Ca_Kabuli_NC_021163.1_40805972 | Ca_kabuli_chr04    | 40805972                       | [G/A]       | 1067296673                                 |
| Ca_Kabuli_NC_021163.1_40816988 | Ca_kabuli_chr04    | 40816988                       | [T/C]       | 1067296674                                 |
| Ca_Kabuli_NC_021163.1_40839857 | Ca_kabuli_chr04    | 40839857                       | [T/G]       | 1067296675                                 |
| Ca_Kabuli_NC_021163.1_40913750 | Ca_kabuli_chr04    | 40913750                       | [T/C]       | 1067296676                                 |
| Ca_Kabuli_NC_021163.1_40913786 | Ca_kabuli_chr04    | 40913786                       | [A/G]       | 1067296677                                 |
| Ca_Kabuli_NC_021163.1_40913801 | Ca_kabuli_chr04    | 40913801                       | [T/G]       | 1067296678                                 |
| Ca_Kabuli_NC_021163.1_40941094 | Ca_kabuli_chr04    | 40941094                       | [A/T]       | 1067296679                                 |
| Ca_Kabuli_NC_021163.1_40941283 | Ca_kabuli_chr04    | 40941283                       | [A/G]       | 1067296680                                 |
| Ca_Kabuli_NC_021163.1_41069987 | Ca_kabuli_chr04    | 41069987                       | [T/C]       | 1067296681                                 |
| Ca_Kabuli_NC_021163.1_41094084 | Ca_kabuli_chr04    | 41094084                       | [T/G]       | 1067296682                                 |
| Ca_Kabuli_NC_021163.1_41094127 | Ca_kabuli_chr04    | 41094127                       | [T/C]       | 1067296683                                 |
| Ca_Kabuli_NC_021163.1_41094150 | Ca_kabuli_chr04    | 41094150                       | [T/G]       | 1067296684                                 |
| Ca_Kabuli_NC_021163.1_41094179 | Ca_kabuli_chr04    | 41094179                       | [A/G]       | 1067296685                                 |
| Ca_Kabuli_NC_021163.1_41094186 | Ca_kabuli_chr04    | 41094186                       | [A/C]       | 1067296686                                 |
| Ca_Kabuli_NC_021163.1_41094723 | Ca_kabuli_chr04    | 41094723                       | [A/C]       | 1067296687                                 |
| Ca_Kabuli_NC_021163.1_41094730 | Ca_kabuli_chr04    | 41094730                       | [A/C]       | 1067296688                                 |

| <b>SNP IDs</b>                 | <b>Chromosomes</b> | <b>Physical positions (bp)</b> | <b>SNPs</b> | <b>NCBI SNPdb accession IDs (NCBI_ss#)</b> |
|--------------------------------|--------------------|--------------------------------|-------------|--------------------------------------------|
| Ca_Kabuli_NC_021163.1_41094736 | Ca_kabuli_chr04    | 41094736                       | [A/T]       | 1067296689                                 |
| Ca_Kabuli_NC_021163.1_41094904 | Ca_kabuli_chr04    | 41094904                       | [A/C]       | 1067296690                                 |
| Ca_Kabuli_NC_021163.1_41119721 | Ca_kabuli_chr04    | 41119721                       | [T/G]       | 1067296691                                 |
| Ca_Kabuli_NC_021163.1_41119725 | Ca_kabuli_chr04    | 41119725                       | [A/G]       | 1067296692                                 |
| Ca_Kabuli_NC_021163.1_41139450 | Ca_kabuli_chr04    | 41139450                       | [A/G]       | 1067296693                                 |
| Ca_Kabuli_NC_021163.1_41139466 | Ca_kabuli_chr04    | 41139466                       | [T/C]       | 1067296694                                 |
| Ca_Kabuli_NC_021163.1_41139484 | Ca_kabuli_chr04    | 41139484                       | [A/G]       | 1067296695                                 |
| Ca_Kabuli_NC_021163.1_41139606 | Ca_kabuli_chr04    | 41139606                       | [A/C]       | 1067296696                                 |
| Ca_Kabuli_NC_021163.1_41142249 | Ca_kabuli_chr04    | 41142249                       | [T/C]       | 1067296697                                 |
| Ca_Kabuli_NC_021163.1_41145896 | Ca_kabuli_chr04    | 41145896                       | [T/A]       | 1067296698                                 |
| Ca_Kabuli_NC_021163.1_41145941 | Ca_kabuli_chr04    | 41145941                       | [A/G]       | 1067296699                                 |
| Ca_Kabuli_NC_021163.1_41145944 | Ca_kabuli_chr04    | 41145944                       | [A/C]       | 1067296700                                 |
| Ca_Kabuli_NC_021163.1_41207338 | Ca_kabuli_chr04    | 41207338                       | [T/C]       | 1067296701                                 |
| Ca_Kabuli_NC_021163.1_41207368 | Ca_kabuli_chr04    | 41207368                       | [A/C]       | 1067296702                                 |
| Ca_Kabuli_NC_021163.1_41229597 | Ca_kabuli_chr04    | 41229597                       | [T/A]       | 1067296703                                 |
| Ca_Kabuli_NC_021163.1_41280087 | Ca_kabuli_chr04    | 41280087                       | [A/G]       | 1067296704                                 |
| Ca_Kabuli_NC_021163.1_41285837 | Ca_kabuli_chr04    | 41285837                       | [A/T]       | 1067296705                                 |
| Ca_Kabuli_NC_021163.1_41285842 | Ca_kabuli_chr04    | 41285842                       | [G/T]       | 1067296706                                 |
| Ca_Kabuli_NC_021163.1_41289867 | Ca_kabuli_chr04    | 41289867                       | [A/C]       | 1067296707                                 |
| Ca_Kabuli_NC_021163.1_41328938 | Ca_kabuli_chr04    | 41328938                       | [T/C]       | 1067296708                                 |
| Ca_Kabuli_NC_021163.1_41339625 | Ca_kabuli_chr04    | 41339625                       | [G/C]       | 1067296709                                 |
| Ca_Kabuli_NC_021163.1_41344843 | Ca_kabuli_chr04    | 41344843                       | [T/A]       | 1067296710                                 |
| Ca_Kabuli_NC_021163.1_41344947 | Ca_kabuli_chr04    | 41344947                       | [A/C]       | 1067296711                                 |
| Ca_Kabuli_NC_021163.1_41344958 | Ca_kabuli_chr04    | 41344958                       | [A/G]       | 1067296712                                 |
| Ca_Kabuli_NC_021163.1_41427086 | Ca_kabuli_chr04    | 41427086                       | [C/A]       | 1067296713                                 |
| Ca_Kabuli_NC_021163.1_41445209 | Ca_kabuli_chr04    | 41445209                       | [A/G]       | 1067296714                                 |
| Ca_Kabuli_NC_021163.1_41445212 | Ca_kabuli_chr04    | 41445212                       | [A/G]       | 1067296715                                 |
| Ca_Kabuli_NC_021163.1_41455142 | Ca_kabuli_chr04    | 41455142                       | [A/C]       | 1067296716                                 |
| Ca_Kabuli_NC_021163.1_41568682 | Ca_kabuli_chr04    | 41568682                       | [A/T]       | 1067296717                                 |
| Ca_Kabuli_NC_021163.1_41571837 | Ca_kabuli_chr04    | 41571837                       | [A/T]       | 1067296718                                 |
| Ca_Kabuli_NC_021163.1_41571840 | Ca_kabuli_chr04    | 41571840                       | [A/G]       | 1067296719                                 |
| Ca_Kabuli_NC_021163.1_41571849 | Ca_kabuli_chr04    | 41571849                       | [A/T]       | 1067296720                                 |
| Ca_Kabuli_NC_021163.1_41571864 | Ca_kabuli_chr04    | 41571864                       | [T/C]       | 1067296721                                 |
| Ca_Kabuli_NC_021163.1_41571876 | Ca_kabuli_chr04    | 41571876                       | [T/G]       | 1067296722                                 |

| <b>SNP IDs</b>                 | <b>Chromosomes</b> | <b>Physical positions (bp)</b> | <b>SNPs</b> | <b>NCBI SNPdb accession IDs (NCBI_ss#)</b> |
|--------------------------------|--------------------|--------------------------------|-------------|--------------------------------------------|
| Ca_Kabuli_NC_021163.1_41571904 | Ca_kabuli_chr04    | 41571904                       | [T/C]       | 1067296723                                 |
| Ca_Kabuli_NC_021163.1_41577452 | Ca_kabuli_chr04    | 41577452                       | [T/G]       | 1067296724                                 |
| Ca_Kabuli_NC_021163.1_41580613 | Ca_kabuli_chr04    | 41580613                       | [T/C]       | 1067296725                                 |
| Ca_Kabuli_NC_021163.1_41600485 | Ca_kabuli_chr04    | 41600485                       | [A/C]       | 1067296726                                 |
| Ca_Kabuli_NC_021163.1_41700764 | Ca_kabuli_chr04    | 41700764                       | [A/C]       | 1067296727                                 |
| Ca_Kabuli_NC_021163.1_41702759 | Ca_kabuli_chr04    | 41702759                       | [T/G]       | 1067296728                                 |
| Ca_Kabuli_NC_021163.1_41749243 | Ca_kabuli_chr04    | 41749243                       | [A/C]       | 1067296729                                 |
| Ca_Kabuli_NC_021163.1_41751117 | Ca_kabuli_chr04    | 41751117                       | [T/C]       | 1067296730                                 |
| Ca_Kabuli_NC_021163.1_41772742 | Ca_kabuli_chr04    | 41772742                       | [A/G]       | 1067296731                                 |
| Ca_Kabuli_NC_021163.1_41772809 | Ca_kabuli_chr04    | 41772809                       | [A/T]       | 1067296732                                 |
| Ca_Kabuli_NC_021163.1_41790245 | Ca_kabuli_chr04    | 41790245                       | [A/C]       | 1067296733                                 |
| Ca_Kabuli_NC_021163.1_41790247 | Ca_kabuli_chr04    | 41790247                       | [C/T]       | 1067296734                                 |
| Ca_Kabuli_NC_021163.1_41864886 | Ca_kabuli_chr04    | 41864886                       | [A/C]       | 1067296735                                 |
| Ca_Kabuli_NC_021163.1_41864916 | Ca_kabuli_chr04    | 41864916                       | [A/C]       | 1067296736                                 |
| Ca_Kabuli_NC_021163.1_41865096 | Ca_kabuli_chr04    | 41865096                       | [T/C]       | 1067296737                                 |
| Ca_Kabuli_NC_021163.1_41955962 | Ca_kabuli_chr04    | 41955962                       | [T/C]       | 1067296738                                 |
| Ca_Kabuli_NC_021163.1_41969260 | Ca_kabuli_chr04    | 41969260                       | [C/G]       | 1067296739                                 |
| Ca_Kabuli_NC_021163.1_41969261 | Ca_kabuli_chr04    | 41969261                       | [T/G]       | 1067296740                                 |
| Ca_Kabuli_NC_021163.1_41973674 | Ca_kabuli_chr04    | 41973674                       | [A/G]       | 1067296741                                 |
| Ca_Kabuli_NC_021163.1_41973694 | Ca_kabuli_chr04    | 41973694                       | [T/C]       | 1067296742                                 |
| Ca_Kabuli_NC_021163.1_41973700 | Ca_kabuli_chr04    | 41973700                       | [T/G]       | 1067296743                                 |
| Ca_Kabuli_NC_021163.1_41973708 | Ca_kabuli_chr04    | 41973708                       | [A/G]       | 1067296744                                 |
| Ca_Kabuli_NC_021163.1_41973711 | Ca_kabuli_chr04    | 41973711                       | [G/T]       | 1067296745                                 |
| Ca_Kabuli_NC_021163.1_42001659 | Ca_kabuli_chr04    | 42001659                       | [G/A]       | 1067296746                                 |
| Ca_Kabuli_NC_021163.1_42038742 | Ca_kabuli_chr04    | 42038742                       | [A/T]       | 1067296747                                 |
| Ca_Kabuli_NC_021163.1_42038745 | Ca_kabuli_chr04    | 42038745                       | [A/T]       | 1067296748                                 |
| Ca_Kabuli_NC_021163.1_42089384 | Ca_kabuli_chr04    | 42089384                       | [T/G]       | 1067296749                                 |
| Ca_Kabuli_NC_021163.1_42089391 | Ca_kabuli_chr04    | 42089391                       | [T/G]       | 1067296750                                 |
| Ca_Kabuli_NC_021163.1_42143779 | Ca_kabuli_chr04    | 42143779                       | [G/A]       | 1067296751                                 |
| Ca_Kabuli_NC_021163.1_42143836 | Ca_kabuli_chr04    | 42143836                       | [G/A]       | 1067296752                                 |
| Ca_Kabuli_NC_021163.1_42246426 | Ca_kabuli_chr04    | 42246426                       | [T/A]       | 1067296753                                 |
| Ca_Kabuli_NC_021163.1_42246450 | Ca_kabuli_chr04    | 42246450                       | [C/T]       | 1067296754                                 |
| Ca_Kabuli_NC_021163.1_42246458 | Ca_kabuli_chr04    | 42246458                       | [C/T]       | 1067296755                                 |
| Ca_Kabuli_NC_021163.1_42246467 | Ca_kabuli_chr04    | 42246467                       | [G/T]       | 1067296756                                 |

| <b>SNP IDs</b>                 | <b>Chromosomes</b> | <b>Physical positions (bp)</b> | <b>SNPs</b> | <b>NCBI SNPdb accession IDs (NCBI_ss#)</b> |
|--------------------------------|--------------------|--------------------------------|-------------|--------------------------------------------|
| Ca_Kabuli_NC_021163.1_42246640 | Ca_kabuli_chr04    | 42246640                       | [A/G]       | 1067296757                                 |
| Ca_Kabuli_NC_021163.1_42246664 | Ca_kabuli_chr04    | 42246664                       | [A/C]       | 1067296758                                 |
| Ca_Kabuli_NC_021163.1_42246701 | Ca_kabuli_chr04    | 42246701                       | [T/C]       | 1067296759                                 |
| Ca_Kabuli_NC_021163.1_42496219 | Ca_kabuli_chr04    | 42496219                       | [T/G]       | 1067296760                                 |
| Ca_Kabuli_NC_021163.1_42499678 | Ca_kabuli_chr04    | 42499678                       | [T/G]       | 1067296761                                 |
| Ca_Kabuli_NC_021163.1_42504525 | Ca_kabuli_chr04    | 42504525                       | [A/G]       | 1067296762                                 |
| Ca_Kabuli_NC_021163.1_42592198 | Ca_kabuli_chr04    | 42592198                       | [G/A]       | 1067296763                                 |
| Ca_Kabuli_NC_021163.1_42592210 | Ca_kabuli_chr04    | 42592210                       | [C/G]       | 1067296764                                 |
| Ca_Kabuli_NC_021163.1_42592212 | Ca_kabuli_chr04    | 42592212                       | [A/G]       | 1067296765                                 |
| Ca_Kabuli_NC_021163.1_42592218 | Ca_kabuli_chr04    | 42592218                       | [C/T]       | 1067296766                                 |
| Ca_Kabuli_NC_021163.1_42592232 | Ca_kabuli_chr04    | 42592232                       | [G/A]       | 1067296767                                 |
| Ca_Kabuli_NC_021163.1_43319788 | Ca_kabuli_chr04    | 43319788                       | [T/G]       | 1067296768                                 |
| Ca_Kabuli_NC_021163.1_43319793 | Ca_kabuli_chr04    | 43319793                       | [T/C]       | 1067296769                                 |
| Ca_Kabuli_NC_021163.1_43379488 | Ca_kabuli_chr04    | 43379488                       | [A/G]       | 1067296770                                 |
| Ca_Kabuli_NC_021163.1_43431772 | Ca_kabuli_chr04    | 43431772                       | [A/T]       | 1067296771                                 |
| Ca_Kabuli_NC_021163.1_43497610 | Ca_kabuli_chr04    | 43497610                       | [C/T]       | 1067296772                                 |
| Ca_Kabuli_NC_021163.1_43497613 | Ca_kabuli_chr04    | 43497613                       | [T/C]       | 1067296773                                 |
| Ca_Kabuli_NC_021163.1_43519154 | Ca_kabuli_chr04    | 43519154                       | [A/G]       | 1067296774                                 |
| Ca_Kabuli_NC_021163.1_43519190 | Ca_kabuli_chr04    | 43519190                       | [T/C]       | 1067296775                                 |
| Ca_Kabuli_NC_021163.1_43519197 | Ca_kabuli_chr04    | 43519197                       | [T/C]       | 1067296776                                 |
| Ca_Kabuli_NC_021163.1_43519217 | Ca_kabuli_chr04    | 43519217                       | [T/C]       | 1067296777                                 |
| Ca_Kabuli_NC_021163.1_43571877 | Ca_kabuli_chr04    | 43571877                       | [C/T]       | 1067296778                                 |
| Ca_Kabuli_NC_021163.1_43662160 | Ca_kabuli_chr04    | 43662160                       | [T/C]       | 1067296779                                 |
| Ca_Kabuli_NC_021163.1_43676592 | Ca_kabuli_chr04    | 43676592                       | [A/C]       | 1067296780                                 |
| Ca_Kabuli_NC_021163.1_43723198 | Ca_kabuli_chr04    | 43723198                       | [G/T]       | 1067296781                                 |
| Ca_Kabuli_NC_021163.1_43723199 | Ca_kabuli_chr04    | 43723199                       | [C/G]       | 1067296782                                 |
| Ca_Kabuli_NC_021163.1_43723203 | Ca_kabuli_chr04    | 43723203                       | [A/C]       | 1067296783                                 |
| Ca_Kabuli_NC_021163.1_43723205 | Ca_kabuli_chr04    | 43723205                       | [T/A]       | 1067296784                                 |
| Ca_Kabuli_NC_021163.1_43723223 | Ca_kabuli_chr04    | 43723223                       | [A/G]       | 1067296785                                 |
| Ca_Kabuli_NC_021163.1_43726334 | Ca_kabuli_chr04    | 43726334                       | [T/C]       | 1067296786                                 |
| Ca_Kabuli_NC_021163.1_43726342 | Ca_kabuli_chr04    | 43726342                       | [T/C]       | 1067296787                                 |
| Ca_Kabuli_NC_021163.1_43726378 | Ca_kabuli_chr04    | 43726378                       | [T/C]       | 1067296788                                 |
| Ca_Kabuli_NC_021163.1_43726405 | Ca_kabuli_chr04    | 43726405                       | [A/G]       | 1067296789                                 |
| Ca_Kabuli_NC_021163.1_43729057 | Ca_kabuli_chr04    | 43729057                       | [A/G]       | 1067296790                                 |

| <b>SNP IDs</b>                 | <b>Chromosomes</b> | <b>Physical positions (bp)</b> | <b>SNPs</b> | <b>NCBI SNPdb accession IDs (NCBI_ss#)</b> |
|--------------------------------|--------------------|--------------------------------|-------------|--------------------------------------------|
| Ca_Kabuli_NC_021163.1_43729060 | Ca_kabuli_chr04    | 43729060                       | [A/T]       | 1067296791                                 |
| Ca_Kabuli_NC_021163.1_43730681 | Ca_kabuli_chr04    | 43730681                       | [A/G]       | 1067296792                                 |
| Ca_Kabuli_NC_021163.1_43840662 | Ca_kabuli_chr04    | 43840662                       | [T/G]       | 1067296793                                 |
| Ca_Kabuli_NC_021163.1_43840663 | Ca_kabuli_chr04    | 43840663                       | [A/T]       | 1067296794                                 |
| Ca_Kabuli_NC_021163.1_43840673 | Ca_kabuli_chr04    | 43840673                       | [T/G]       | 1067296795                                 |
| Ca_Kabuli_NC_021163.1_43840689 | Ca_kabuli_chr04    | 43840689                       | [T/C]       | 1067296796                                 |
| Ca_Kabuli_NC_021163.1_43859940 | Ca_kabuli_chr04    | 43859940                       | [A/G]       | 1067296797                                 |
| Ca_Kabuli_NC_021163.1_43889033 | Ca_kabuli_chr04    | 43889033                       | [A/T]       | 1067296798                                 |
| Ca_Kabuli_NC_021163.1_43922411 | Ca_kabuli_chr04    | 43922411                       | [A/C]       | 1067296799                                 |
| Ca_Kabuli_NC_021163.1_43922418 | Ca_kabuli_chr04    | 43922418                       | [A/C]       | 1067296800                                 |
| Ca_Kabuli_NC_021163.1_43922440 | Ca_kabuli_chr04    | 43922440                       | [A/C]       | 1067296801                                 |
| Ca_Kabuli_NC_021163.1_43942501 | Ca_kabuli_chr04    | 43942501                       | [T/C]       | 1067296802                                 |
| Ca_Kabuli_NC_021163.1_43945389 | Ca_kabuli_chr04    | 43945389                       | [T/C]       | 1067296803                                 |
| Ca_Kabuli_NC_021163.1_43945395 | Ca_kabuli_chr04    | 43945395                       | [A/C]       | 1067296804                                 |
| Ca_Kabuli_NC_021163.1_43979186 | Ca_kabuli_chr04    | 43979186                       | [T/C]       | 1067296805                                 |
| Ca_Kabuli_NC_021163.1_43979187 | Ca_kabuli_chr04    | 43979187                       | [G/T]       | 1067296806                                 |
| Ca_Kabuli_NC_021163.1_44059060 | Ca_kabuli_chr04    | 44059060                       | [C/T]       | 1067296807                                 |
| Ca_Kabuli_NC_021163.1_44067747 | Ca_kabuli_chr04    | 44067747                       | [T/A]       | 1067296808                                 |
| Ca_Kabuli_NC_021163.1_44067748 | Ca_kabuli_chr04    | 44067748                       | [A/C]       | 1067296809                                 |
| Ca_Kabuli_NC_021163.1_44090715 | Ca_kabuli_chr04    | 44090715                       | [A/T]       | 1067296810                                 |
| Ca_Kabuli_NC_021163.1_44239776 | Ca_kabuli_chr04    | 44239776                       | [A/T]       | 1067296811                                 |
| Ca_Kabuli_NC_021163.1_44239872 | Ca_kabuli_chr04    | 44239872                       | [T/C]       | 1067296812                                 |
| Ca_Kabuli_NC_021163.1_44239889 | Ca_kabuli_chr04    | 44239889                       | [A/G]       | 1067296813                                 |
| Ca_Kabuli_NC_021163.1_44250230 | Ca_kabuli_chr04    | 44250230                       | [A/G]       | 1067296814                                 |
| Ca_Kabuli_NC_021163.1_44260893 | Ca_kabuli_chr04    | 44260893                       | [A/C]       | 1067296815                                 |
| Ca_Kabuli_NC_021163.1_44261160 | Ca_kabuli_chr04    | 44261160                       | [T/A]       | 1067296816                                 |
| Ca_Kabuli_NC_021163.1_44261172 | Ca_kabuli_chr04    | 44261172                       | [A/C]       | 1067296817                                 |
| Ca_Kabuli_NC_021163.1_44261181 | Ca_kabuli_chr04    | 44261181                       | [A/C]       | 1067296818                                 |
| Ca_Kabuli_NC_021163.1_44261184 | Ca_kabuli_chr04    | 44261184                       | [A/C]       | 1067296819                                 |
| Ca_Kabuli_NC_021163.1_44261928 | Ca_kabuli_chr04    | 44261928                       | [A/C]       | 1067296820                                 |
| Ca_Kabuli_NC_021163.1_44261934 | Ca_kabuli_chr04    | 44261934                       | [A/C]       | 1067296821                                 |
| Ca_Kabuli_NC_021163.1_44261940 | Ca_kabuli_chr04    | 44261940                       | [A/C]       | 1067296822                                 |
| Ca_Kabuli_NC_021163.1_44261967 | Ca_kabuli_chr04    | 44261967                       | [A/C]       | 1067296823                                 |
| Ca_Kabuli_NC_021163.1_44261970 | Ca_kabuli_chr04    | 44261970                       | [T/C]       | 1067296824                                 |

| <b>SNP IDs</b>                 | <b>Chromosomes</b> | <b>Physical positions (bp)</b> | <b>SNPs</b> | <b>NCBI SNPdb accession IDs (NCBI_ss#)</b> |
|--------------------------------|--------------------|--------------------------------|-------------|--------------------------------------------|
| Ca_Kabuli_NC_021163.1_44353354 | Ca_kabuli_chr04    | 44353354                       | [C/T]       | 1067296825                                 |
| Ca_Kabuli_NC_021163.1_44354390 | Ca_kabuli_chr04    | 44354390                       | [T/C]       | 1067296826                                 |
| Ca_Kabuli_NC_021163.1_44354436 | Ca_kabuli_chr04    | 44354436                       | [A/T]       | 1067296827                                 |
| Ca_Kabuli_NC_021163.1_44363092 | Ca_kabuli_chr04    | 44363092                       | [A/T]       | 1067296828                                 |
| Ca_Kabuli_NC_021163.1_44366719 | Ca_kabuli_chr04    | 44366719                       | [T/A]       | 1067296829                                 |
| Ca_Kabuli_NC_021163.1_44367755 | Ca_kabuli_chr04    | 44367755                       | [A/C]       | 1067296830                                 |
| Ca_Kabuli_NC_021163.1_44367782 | Ca_kabuli_chr04    | 44367782                       | [C/A]       | 1067296831                                 |
| Ca_Kabuli_NC_021163.1_44372986 | Ca_kabuli_chr04    | 44372986                       | [C/T]       | 1067296832                                 |
| Ca_Kabuli_NC_021163.1_44372998 | Ca_kabuli_chr04    | 44372998                       | [C/T]       | 1067296833                                 |
| Ca_Kabuli_NC_021163.1_44373020 | Ca_kabuli_chr04    | 44373020                       | [G/C]       | 1067296834                                 |
| Ca_Kabuli_NC_021163.1_44373412 | Ca_kabuli_chr04    | 44373412                       | [C/T]       | 1067296835                                 |
| Ca_Kabuli_NC_021163.1_44385456 | Ca_kabuli_chr04    | 44385456                       | [A/G]       | 1067296836                                 |
| Ca_Kabuli_NC_021163.1_44385457 | Ca_kabuli_chr04    | 44385457                       | [C/T]       | 1067296837                                 |
| Ca_Kabuli_NC_021163.1_44388391 | Ca_kabuli_chr04    | 44388391                       | [G/C]       | 1067296838                                 |
| Ca_Kabuli_NC_021163.1_44411260 | Ca_kabuli_chr04    | 44411260                       | [A/T]       | 1067296839                                 |
| Ca_Kabuli_NC_021163.1_44411345 | Ca_kabuli_chr04    | 44411345                       | [C/T]       | 1067296840                                 |
| Ca_Kabuli_NC_021163.1_44411391 | Ca_kabuli_chr04    | 44411391                       | [G/C]       | 1067296841                                 |
| Ca_Kabuli_NC_021163.1_44431319 | Ca_kabuli_chr04    | 44431319                       | [A/C]       | 1067296842                                 |
| Ca_Kabuli_NC_021163.1_44431436 | Ca_kabuli_chr04    | 44431436                       | [T/C]       | 1067296843                                 |
| Ca_Kabuli_NC_021163.1_44431501 | Ca_kabuli_chr04    | 44431501                       | [T/C]       | 1067296844                                 |
| Ca_Kabuli_NC_021163.1_44433095 | Ca_kabuli_chr04    | 44433095                       | [A/G]       | 1067296845                                 |
| Ca_Kabuli_NC_021163.1_44439492 | Ca_kabuli_chr04    | 44439492                       | [G/T]       | 1067296846                                 |
| Ca_Kabuli_NC_021163.1_44439570 | Ca_kabuli_chr04    | 44439570                       | [C/T]       | 1067296847                                 |
| Ca_Kabuli_NC_021163.1_44446575 | Ca_kabuli_chr04    | 44446575                       | [G/A]       | 1067296848                                 |
| Ca_Kabuli_NC_021163.1_44451062 | Ca_kabuli_chr04    | 44451062                       | [C/T]       | 1067296849                                 |
| Ca_Kabuli_NC_021163.1_44451765 | Ca_kabuli_chr04    | 44451765                       | [G/A]       | 1067296850                                 |
| Ca_Kabuli_NC_021163.1_44453175 | Ca_kabuli_chr04    | 44453175                       | [C/A]       | 1067296851                                 |
| Ca_Kabuli_NC_021163.1_44453192 | Ca_kabuli_chr04    | 44453192                       | [A/G]       | 1067296852                                 |
| Ca_Kabuli_NC_021163.1_44453216 | Ca_kabuli_chr04    | 44453216                       | [A/G]       | 1067296853                                 |
| Ca_Kabuli_NC_021163.1_44458789 | Ca_kabuli_chr04    | 44458789                       | [T/C]       | 1067296854                                 |
| Ca_Kabuli_NC_021163.1_44472237 | Ca_kabuli_chr04    | 44472237                       | [T/A]       | 1067296855                                 |
| Ca_Kabuli_NC_021163.1_44472269 | Ca_kabuli_chr04    | 44472269                       | [T/G]       | 1067296856                                 |
| Ca_Kabuli_NC_021163.1_44534136 | Ca_kabuli_chr04    | 44534136                       | [C/A]       | 1067296857                                 |
| Ca_Kabuli_NC_021163.1_44534137 | Ca_kabuli_chr04    | 44534137                       | [T/G]       | 1067296858                                 |

| <b>SNP IDs</b>                 | <b>Chromosomes</b> | <b>Physical positions (bp)</b> | <b>SNPs</b> | <b>NCBI SNPdb accession IDs (NCBI_ss#)</b> |
|--------------------------------|--------------------|--------------------------------|-------------|--------------------------------------------|
| Ca_Kabuli_NC_021163.1_44534146 | Ca_kabuli_chr04    | 44534146                       | [T/A]       | 1067296859                                 |
| Ca_Kabuli_NC_021163.1_44536606 | Ca_kabuli_chr04    | 44536606                       | [A/C]       | 1067296860                                 |
| Ca_Kabuli_NC_021163.1_44558549 | Ca_kabuli_chr04    | 44558549                       | [C/T]       | 1067296861                                 |
| Ca_Kabuli_NC_021163.1_44590652 | Ca_kabuli_chr04    | 44590652                       | [C/T]       | 1067296862                                 |
| Ca_Kabuli_NC_021163.1_44590678 | Ca_kabuli_chr04    | 44590678                       | [G/A]       | 1067296863                                 |
| Ca_Kabuli_NC_021163.1_44590697 | Ca_kabuli_chr04    | 44590697                       | [A/C]       | 1067296864                                 |
| Ca_Kabuli_NC_021163.1_44591405 | Ca_kabuli_chr04    | 44591405                       | [G/T]       | 1067296865                                 |
| Ca_Kabuli_NC_021163.1_44634703 | Ca_kabuli_chr04    | 44634703                       | [G/A]       | 1067296866                                 |
| Ca_Kabuli_NC_021163.1_44655132 | Ca_kabuli_chr04    | 44655132                       | [T/G]       | 1067296867                                 |
| Ca_Kabuli_NC_021163.1_44655248 | Ca_kabuli_chr04    | 44655248                       | [C/T]       | 1067296868                                 |
| Ca_Kabuli_NC_021163.1_44731563 | Ca_kabuli_chr04    | 44731563                       | [T/C]       | 1067296869                                 |
| Ca_Kabuli_NC_021163.1_44754355 | Ca_kabuli_chr04    | 44754355                       | [C/T]       | 1067296870                                 |
| Ca_Kabuli_NC_021163.1_44754426 | Ca_kabuli_chr04    | 44754426                       | [A/C]       | 1067296871                                 |
| Ca_Kabuli_NC_021163.1_44756435 | Ca_kabuli_chr04    | 44756435                       | [T/A]       | 1067296872                                 |
| Ca_Kabuli_NC_021163.1_44802374 | Ca_kabuli_chr04    | 44802374                       | [A/G]       | 1067296873                                 |
| Ca_Kabuli_NC_021163.1_44803694 | Ca_kabuli_chr04    | 44803694                       | [T/A]       | 1067296874                                 |
| Ca_Kabuli_NC_021163.1_44811433 | Ca_kabuli_chr04    | 44811433                       | [T/C]       | 1067296875                                 |
| Ca_Kabuli_NC_021163.1_44811530 | Ca_kabuli_chr04    | 44811530                       | [T/C]       | 1067296876                                 |
| Ca_Kabuli_NC_021163.1_44811534 | Ca_kabuli_chr04    | 44811534                       | [A/C]       | 1067296877                                 |
| Ca_Kabuli_NC_021163.1_44814981 | Ca_kabuli_chr04    | 44814981                       | [T/C]       | 1067296878                                 |
| Ca_Kabuli_NC_021163.1_44814982 | Ca_kabuli_chr04    | 44814982                       | [A/G]       | 1067296879                                 |
| Ca_Kabuli_NC_021163.1_44824103 | Ca_kabuli_chr04    | 44824103                       | [T/G]       | 1067296880                                 |
| Ca_Kabuli_NC_021163.1_44824105 | Ca_kabuli_chr04    | 44824105                       | [G/T]       | 1067296881                                 |
| Ca_Kabuli_NC_021163.1_44824342 | Ca_kabuli_chr04    | 44824342                       | [A/C]       | 1067296882                                 |
| Ca_Kabuli_NC_021163.1_44824360 | Ca_kabuli_chr04    | 44824360                       | [A/G]       | 1067296883                                 |
| Ca_Kabuli_NC_021163.1_44832121 | Ca_kabuli_chr04    | 44832121                       | [G/C]       | 1067296884                                 |
| Ca_Kabuli_NC_021163.1_44832144 | Ca_kabuli_chr04    | 44832144                       | [T/C]       | 1067296885                                 |
| Ca_Kabuli_NC_021163.1_44849384 | Ca_kabuli_chr04    | 44849384                       | [G/A]       | 1067296886                                 |
| Ca_Kabuli_NC_021163.1_44871398 | Ca_kabuli_chr04    | 44871398                       | [G/A]       | 1067296887                                 |
| Ca_Kabuli_NC_021163.1_44871469 | Ca_kabuli_chr04    | 44871469                       | [A/G]       | 1067296888                                 |
| Ca_Kabuli_NC_021163.1_44871550 | Ca_kabuli_chr04    | 44871550                       | [A/C]       | 1067296889                                 |
| Ca_Kabuli_NC_021163.1_44906255 | Ca_kabuli_chr04    | 44906255                       | [A/G]       | 1067296890                                 |
| Ca_Kabuli_NC_021163.1_44952217 | Ca_kabuli_chr04    | 44952217                       | [T/C]       | 1067296891                                 |
| Ca_Kabuli_NC_021163.1_44952223 | Ca_kabuli_chr04    | 44952223                       | [C/G]       | 1067296892                                 |

| <b>SNP IDs</b>                 | <b>Chromosomes</b> | <b>Physical positions (bp)</b> | <b>SNPs</b> | <b>NCBI SNPdb accession IDs (NCBI_ss#)</b> |
|--------------------------------|--------------------|--------------------------------|-------------|--------------------------------------------|
| Ca_Kabuli_NC_021163.1_44952225 | Ca_kabuli_chr04    | 44952225                       | [A/G]       | 1067296893                                 |
| Ca_Kabuli_NC_021163.1_45019764 | Ca_kabuli_chr04    | 45019764                       | [C/T]       | 1067296894                                 |
| Ca_Kabuli_NC_021163.1_45019778 | Ca_kabuli_chr04    | 45019778                       | [C/T]       | 1067296895                                 |
| Ca_Kabuli_NC_021163.1_45019805 | Ca_kabuli_chr04    | 45019805                       | [C/A]       | 1067296896                                 |
| Ca_Kabuli_NC_021163.1_45019807 | Ca_kabuli_chr04    | 45019807                       | [C/T]       | 1067296897                                 |
| Ca_Kabuli_NC_021163.1_45019822 | Ca_kabuli_chr04    | 45019822                       | [G/A]       | 1067296898                                 |
| Ca_Kabuli_NC_021163.1_45022550 | Ca_kabuli_chr04    | 45022550                       | [A/T]       | 1067296899                                 |
| Ca_Kabuli_NC_021163.1_45022634 | Ca_kabuli_chr04    | 45022634                       | [G/C]       | 1067296900                                 |
| Ca_Kabuli_NC_021163.1_45033480 | Ca_kabuli_chr04    | 45033480                       | [C/T]       | 1067296901                                 |
| Ca_Kabuli_NC_021163.1_45035589 | Ca_kabuli_chr04    | 45035589                       | [G/T]       | 1067296902                                 |
| Ca_Kabuli_NC_021163.1_45067525 | Ca_kabuli_chr04    | 45067525                       | [A/T]       | 1067296903                                 |
| Ca_Kabuli_NC_021163.1_45089570 | Ca_kabuli_chr04    | 45089570                       | [C/T]       | 1067296904                                 |
| Ca_Kabuli_NC_021163.1_45104683 | Ca_kabuli_chr04    | 45104683                       | [A/G]       | 1067296905                                 |
| Ca_Kabuli_NC_021163.1_45104696 | Ca_kabuli_chr04    | 45104696                       | [A/G]       | 1067296906                                 |
| Ca_Kabuli_NC_021163.1_45104707 | Ca_kabuli_chr04    | 45104707                       | [T/C]       | 1067296907                                 |
| Ca_Kabuli_NC_021163.1_45104714 | Ca_kabuli_chr04    | 45104714                       | [T/C]       | 1067296908                                 |
| Ca_Kabuli_NC_021163.1_45104726 | Ca_kabuli_chr04    | 45104726                       | [A/G]       | 1067296909                                 |
| Ca_Kabuli_NC_021163.1_45104767 | Ca_kabuli_chr04    | 45104767                       | [G/A]       | 1067296910                                 |
| Ca_Kabuli_NC_021163.1_45104779 | Ca_kabuli_chr04    | 45104779                       | [C/A]       | 1067296911                                 |
| Ca_Kabuli_NC_021163.1_45109319 | Ca_kabuli_chr04    | 45109319                       | [A/G]       | 1067296912                                 |
| Ca_Kabuli_NC_021163.1_45109345 | Ca_kabuli_chr04    | 45109345                       | [T/A]       | 1067296913                                 |
| Ca_Kabuli_NC_021163.1_45125568 | Ca_kabuli_chr04    | 45125568                       | [T/A]       | 1067296914                                 |
| Ca_Kabuli_NC_021163.1_45126517 | Ca_kabuli_chr04    | 45126517                       | [A/G]       | 1067296915                                 |
| Ca_Kabuli_NC_021163.1_45135282 | Ca_kabuli_chr04    | 45135282                       | [A/T]       | 1067296916                                 |
| Ca_Kabuli_NC_021163.1_45135296 | Ca_kabuli_chr04    | 45135296                       | [T/A]       | 1067296917                                 |
| Ca_Kabuli_NC_021163.1_45136480 | Ca_kabuli_chr04    | 45136480                       | [T/C]       | 1067296918                                 |
| Ca_Kabuli_NC_021163.1_45152327 | Ca_kabuli_chr04    | 45152327                       | [G/T]       | 1067296919                                 |
| Ca_Kabuli_NC_021163.1_45152342 | Ca_kabuli_chr04    | 45152342                       | [C/A]       | 1067296920                                 |
| Ca_Kabuli_NC_021163.1_45152343 | Ca_kabuli_chr04    | 45152343                       | [T/G]       | 1067296921                                 |
| Ca_Kabuli_NC_021163.1_45152344 | Ca_kabuli_chr04    | 45152344                       | [C/A]       | 1067296922                                 |
| Ca_Kabuli_NC_021163.1_45153110 | Ca_kabuli_chr04    | 45153110                       | [C/T]       | 1067296923                                 |
| Ca_Kabuli_NC_021163.1_45158491 | Ca_kabuli_chr04    | 45158491                       | [T/C]       | 1067296924                                 |
| Ca_Kabuli_NC_021163.1_45158497 | Ca_kabuli_chr04    | 45158497                       | [T/C]       | 1067296925                                 |
| Ca_Kabuli_NC_021163.1_45159504 | Ca_kabuli_chr04    | 45159504                       | [G/A]       | 1067296926                                 |



| <b>SNP IDs</b>                 | <b>Chromosomes</b> | <b>Physical positions (bp)</b> | <b>SNPs</b> | <b>NCBI SNPdb accession IDs (NCBI_ss#)</b> |
|--------------------------------|--------------------|--------------------------------|-------------|--------------------------------------------|
| Ca_Kabuli_NC_021163.1_45165191 | Ca_kabuli_chr04    | 45165191                       | [T/C]       | 1067296927                                 |
| Ca_Kabuli_NC_021163.1_45165327 | Ca_kabuli_chr04    | 45165327                       | [T/C]       | 1067296928                                 |
| Ca_Kabuli_NC_021163.1_45165807 | Ca_kabuli_chr04    | 45165807                       | [C/T]       | 1067296929                                 |
| Ca_Kabuli_NC_021163.1_45166848 | Ca_kabuli_chr04    | 45166848                       | [A/T]       | 1067296930                                 |
| Ca_Kabuli_NC_021163.1_45200660 | Ca_kabuli_chr04    | 45200660                       | [T/C]       | 1067296931                                 |
| Ca_Kabuli_NC_021163.1_45200661 | Ca_kabuli_chr04    | 45200661                       | [G/T]       | 1067296932                                 |
| Ca_Kabuli_NC_021163.1_45204033 | Ca_kabuli_chr04    | 45204033                       | [G/A]       | 1067296933                                 |
| Ca_Kabuli_NC_021163.1_45204213 | Ca_kabuli_chr04    | 45204213                       | [A/G]       | 1067296934                                 |
| Ca_Kabuli_NC_021163.1_45206130 | Ca_kabuli_chr04    | 45206130                       | [T/G]       | 1067296935                                 |
| Ca_Kabuli_NC_021163.1_45206175 | Ca_kabuli_chr04    | 45206175                       | [C/A]       | 1067296936                                 |
| Ca_Kabuli_NC_021163.1_45206176 | Ca_kabuli_chr04    | 45206176                       | [T/G]       | 1067296937                                 |
| Ca_Kabuli_NC_021163.1_45206177 | Ca_kabuli_chr04    | 45206177                       | [T/A]       | 1067296938                                 |
| Ca_Kabuli_NC_021163.1_45220422 | Ca_kabuli_chr04    | 45220422                       | [C/T]       | 1067296939                                 |
| Ca_Kabuli_NC_021163.1_45220432 | Ca_kabuli_chr04    | 45220432                       | [T/G]       | 1067296940                                 |
| Ca_Kabuli_NC_021163.1_45220438 | Ca_kabuli_chr04    | 45220438                       | [T/G]       | 1067296941                                 |
| Ca_Kabuli_NC_021163.1_45220448 | Ca_kabuli_chr04    | 45220448                       | [G/A]       | 1067296942                                 |
| Ca_Kabuli_NC_021163.1_45220498 | Ca_kabuli_chr04    | 45220498                       | [A/C]       | 1067296943                                 |
| Ca_Kabuli_NC_021163.1_45220580 | Ca_kabuli_chr04    | 45220580                       | [A/C]       | 1067296944                                 |
| Ca_Kabuli_NC_021163.1_45220599 | Ca_kabuli_chr04    | 45220599                       | [T/G]       | 1067296945                                 |
| Ca_Kabuli_NC_021163.1_45220607 | Ca_kabuli_chr04    | 45220607                       | [A/C]       | 1067296946                                 |
| Ca_Kabuli_NC_021163.1_45220691 | Ca_kabuli_chr04    | 45220691                       | [A/G]       | 1067296947                                 |
| Ca_Kabuli_NC_021163.1_45220696 | Ca_kabuli_chr04    | 45220696                       | [A/C]       | 1067296948                                 |
| Ca_Kabuli_NC_021163.1_45220879 | Ca_kabuli_chr04    | 45220879                       | [T/C]       | 1067296949                                 |
| Ca_Kabuli_NC_021163.1_45220916 | Ca_kabuli_chr04    | 45220916                       | [T/C]       | 1067296950                                 |
| Ca_Kabuli_NC_021163.1_45225059 | Ca_kabuli_chr04    | 45225059                       | [G/A]       | 1067296951                                 |
| Ca_Kabuli_NC_021163.1_45225077 | Ca_kabuli_chr04    | 45225077                       | [A/T]       | 1067296952                                 |
| Ca_Kabuli_NC_021163.1_45225093 | Ca_kabuli_chr04    | 45225093                       | [G/A]       | 1067296953                                 |
| Ca_Kabuli_NC_021163.1_45225165 | Ca_kabuli_chr04    | 45225165                       | [T/C]       | 1067296954                                 |
| Ca_Kabuli_NC_021163.1_45231839 | Ca_kabuli_chr04    | 45231839                       | [T/C]       | 1067296955                                 |
| Ca_Kabuli_NC_021163.1_45256989 | Ca_kabuli_chr04    | 45256989                       | [A/G]       | 1067296956                                 |
| Ca_Kabuli_NC_021163.1_45335231 | Ca_kabuli_chr04    | 45335231                       | [G/A]       | 1067296957                                 |
| Ca_Kabuli_NC_021163.1_45335241 | Ca_kabuli_chr04    | 45335241                       | [T/G]       | 1067296958                                 |
| Ca_Kabuli_NC_021163.1_45347134 | Ca_kabuli_chr04    | 45347134                       | [G/C]       | 1067296959                                 |
| Ca_Kabuli_NC_021163.1_45347135 | Ca_kabuli_chr04    | 45347135                       | [G/T]       | 1067296960                                 |

| <b>SNP IDs</b>                 | <b>Chromosomes</b> | <b>Physical positions (bp)</b> | <b>SNPs</b> | <b>NCBI SNPdb accession IDs (NCBI_ss#)</b> |
|--------------------------------|--------------------|--------------------------------|-------------|--------------------------------------------|
| Ca_Kabuli_NC_021163.1_45535905 | Ca_kabuli_chr04    | 45535905                       | [T/G]       | 1067296961                                 |
| Ca_Kabuli_NC_021163.1_45612147 | Ca_kabuli_chr04    | 45612147                       | [A/G]       | 1067296962                                 |
| Ca_Kabuli_NC_021163.1_45751621 | Ca_kabuli_chr04    | 45751621                       | [T/C]       | 1067296963                                 |
| Ca_Kabuli_NC_021163.1_45751646 | Ca_kabuli_chr04    | 45751646                       | [T/C]       | 1067296964                                 |
| Ca_Kabuli_NC_021163.1_45752844 | Ca_kabuli_chr04    | 45752844                       | [G/A]       | 1067296965                                 |
| Ca_Kabuli_NC_021163.1_45752850 | Ca_kabuli_chr04    | 45752850                       | [T/G]       | 1067296966                                 |
| Ca_Kabuli_NC_021163.1_45752869 | Ca_kabuli_chr04    | 45752869                       | [G/T]       | 1067296967                                 |
| Ca_Kabuli_NC_021163.1_45752874 | Ca_kabuli_chr04    | 45752874                       | [A/T]       | 1067296968                                 |
| Ca_Kabuli_NC_021163.1_45918958 | Ca_kabuli_chr04    | 45918958                       | [A/C]       | 1067296969                                 |
| Ca_Kabuli_NC_021163.1_45935599 | Ca_kabuli_chr04    | 45935599                       | [A/C]       | 1067296970                                 |
| Ca_Kabuli_NC_021163.1_45942471 | Ca_kabuli_chr04    | 45942471                       | [C/A]       | 1067296971                                 |
| Ca_Kabuli_NC_021163.1_45942473 | Ca_kabuli_chr04    | 45942473                       | [T/C]       | 1067296972                                 |
| Ca_Kabuli_NC_021163.1_46134225 | Ca_kabuli_chr04    | 46134225                       | [T/C]       | 1067296973                                 |
| Ca_Kabuli_NC_021163.1_46134238 | Ca_kabuli_chr04    | 46134238                       | [A/G]       | 1067296974                                 |
| Ca_Kabuli_NC_021163.1_46134253 | Ca_kabuli_chr04    | 46134253                       | [T/C]       | 1067296975                                 |
| Ca_Kabuli_NC_021163.1_46134348 | Ca_kabuli_chr04    | 46134348                       | [T/C]       | 1067296976                                 |
| Ca_Kabuli_NC_021163.1_46140738 | Ca_kabuli_chr04    | 46140738                       | [A/G]       | 1067296977                                 |
| Ca_Kabuli_NC_021163.1_46150755 | Ca_kabuli_chr04    | 46150755                       | [A/C]       | 1067296978                                 |
| Ca_Kabuli_NC_021163.1_46263193 | Ca_kabuli_chr04    | 46263193                       | [T/G]       | 1067296979                                 |
| Ca_Kabuli_NC_021163.1_46263200 | Ca_kabuli_chr04    | 46263200                       | [A/T]       | 1067296980                                 |
| Ca_Kabuli_NC_021163.1_46371703 | Ca_kabuli_chr04    | 46371703                       | [A/G]       | 1067296981                                 |
| Ca_Kabuli_NC_021163.1_46371764 | Ca_kabuli_chr04    | 46371764                       | [T/C]       | 1067296982                                 |
| Ca_Kabuli_NC_021163.1_46392528 | Ca_kabuli_chr04    | 46392528                       | [T/C]       | 1067296983                                 |
| Ca_Kabuli_NC_021163.1_46392555 | Ca_kabuli_chr04    | 46392555                       | [T/G]       | 1067296984                                 |
| Ca_Kabuli_NC_021163.1_46392588 | Ca_kabuli_chr04    | 46392588                       | [G/A]       | 1067296985                                 |
| Ca_Kabuli_NC_021163.1_46402114 | Ca_kabuli_chr04    | 46402114                       | [A/C]       | 1067296986                                 |
| Ca_Kabuli_NC_021163.1_46430297 | Ca_kabuli_chr04    | 46430297                       | [A/G]       | 1067296987                                 |
| Ca_Kabuli_NC_021163.1_46430331 | Ca_kabuli_chr04    | 46430331                       | [T/G]       | 1067296988                                 |
| Ca_Kabuli_NC_021163.1_46430344 | Ca_kabuli_chr04    | 46430344                       | [T/G]       | 1067296989                                 |
| Ca_Kabuli_NC_021163.1_46434287 | Ca_kabuli_chr04    | 46434287                       | [A/C]       | 1067296990                                 |
| Ca_Kabuli_NC_021163.1_46463324 | Ca_kabuli_chr04    | 46463324                       | [T/A]       | 1067296991                                 |
| Ca_Kabuli_NC_021163.1_46521568 | Ca_kabuli_chr04    | 46521568                       | [T/G]       | 1067296992                                 |
| Ca_Kabuli_NC_021163.1_46521576 | Ca_kabuli_chr04    | 46521576                       | [A/C]       | 1067296993                                 |
| Ca_Kabuli_NC_021163.1_46521581 | Ca_kabuli_chr04    | 46521581                       | [A/C]       | 1067296994                                 |

| <b>SNP IDs</b>                 | <b>Chromosomes</b> | <b>Physical positions (bp)</b> | <b>SNPs</b> | <b>NCBI SNPdb accession IDs (NCBI_ss#)</b> |
|--------------------------------|--------------------|--------------------------------|-------------|--------------------------------------------|
| Ca_Kabuli_NC_021163.1_46521590 | Ca_kabuli_chr04    | 46521590                       | [A/C]       | 1067296995                                 |
| Ca_Kabuli_NC_021163.1_46534847 | Ca_kabuli_chr04    | 46534847                       | [T/C]       | 1067296996                                 |
| Ca_Kabuli_NC_021163.1_46534848 | Ca_kabuli_chr04    | 46534848                       | [G/T]       | 1067296997                                 |
| Ca_Kabuli_NC_021163.1_46605136 | Ca_kabuli_chr04    | 46605136                       | [A/T]       | 1067296998                                 |
| Ca_Kabuli_NC_021163.1_46605150 | Ca_kabuli_chr04    | 46605150                       | [A/G]       | 1067296999                                 |
| Ca_Kabuli_NC_021163.1_46605158 | Ca_kabuli_chr04    | 46605158                       | [T/C]       | 1067297000                                 |
| Ca_Kabuli_NC_021163.1_46612214 | Ca_kabuli_chr04    | 46612214                       | [C/T]       | 1067297001                                 |
| Ca_Kabuli_NC_021163.1_46612228 | Ca_kabuli_chr04    | 46612228                       | [A/C]       | 1067297002                                 |
| Ca_Kabuli_NC_021163.1_46612240 | Ca_kabuli_chr04    | 46612240                       | [A/C]       | 1067297003                                 |
| Ca_Kabuli_NC_021163.1_46613012 | Ca_kabuli_chr04    | 46613012                       | [A/C]       | 1067297004                                 |
| Ca_Kabuli_NC_021163.1_46613068 | Ca_kabuli_chr04    | 46613068                       | [G/T]       | 1067297005                                 |
| Ca_Kabuli_NC_021163.1_46613075 | Ca_kabuli_chr04    | 46613075                       | [A/T]       | 1067297006                                 |
| Ca_Kabuli_NC_021163.1_46613089 | Ca_kabuli_chr04    | 46613089                       | [A/G]       | 1067297007                                 |
| Ca_Kabuli_NC_021163.1_46613097 | Ca_kabuli_chr04    | 46613097                       | [T/C]       | 1067297008                                 |
| Ca_Kabuli_NC_021163.1_46613098 | Ca_kabuli_chr04    | 46613098                       | [T/C]       | 1067297009                                 |
| Ca_Kabuli_NC_021163.1_46651499 | Ca_kabuli_chr04    | 46651499                       | [A/C]       | 1067297010                                 |
| Ca_Kabuli_NC_021163.1_46713873 | Ca_kabuli_chr04    | 46713873                       | [A/G]       | 1067297011                                 |
| Ca_Kabuli_NC_021163.1_46713886 | Ca_kabuli_chr04    | 46713886                       | [T/G]       | 1067297012                                 |
| Ca_Kabuli_NC_021163.1_46713939 | Ca_kabuli_chr04    | 46713939                       | [A/T]       | 1067297013                                 |
| Ca_Kabuli_NC_021163.1_46713940 | Ca_kabuli_chr04    | 46713940                       | [A/C]       | 1067297014                                 |
| Ca_Kabuli_NC_021163.1_46713941 | Ca_kabuli_chr04    | 46713941                       | [G/T]       | 1067297015                                 |
| Ca_Kabuli_NC_021163.1_46713948 | Ca_kabuli_chr04    | 46713948                       | [T/G]       | 1067297016                                 |
| Ca_Kabuli_NC_021163.1_46714984 | Ca_kabuli_chr04    | 46714984                       | [T/G]       | 1067297017                                 |
| Ca_Kabuli_NC_021163.1_46715661 | Ca_kabuli_chr04    | 46715661                       | [T/G]       | 1067297018                                 |
| Ca_Kabuli_NC_021163.1_46717150 | Ca_kabuli_chr04    | 46717150                       | [A/G]       | 1067297019                                 |
| Ca_Kabuli_NC_021163.1_46717170 | Ca_kabuli_chr04    | 46717170                       | [A/G]       | 1067297020                                 |
| Ca_Kabuli_NC_021163.1_46717200 | Ca_kabuli_chr04    | 46717200                       | [C/T]       | 1067297021                                 |
| Ca_Kabuli_NC_021163.1_46733965 | Ca_kabuli_chr04    | 46733965                       | [A/G]       | 1067297022                                 |
| Ca_Kabuli_NC_021163.1_47223533 | Ca_kabuli_chr04    | 47223533                       | [T/A]       | 1067297023                                 |
| Ca_Kabuli_NC_021163.1_47223627 | Ca_kabuli_chr04    | 47223627                       | [C/G]       | 1067297024                                 |
| Ca_Kabuli_NC_021163.1_47223630 | Ca_kabuli_chr04    | 47223630                       | [A/G]       | 1067297025                                 |
| Ca_Kabuli_NC_021163.1_47223646 | Ca_kabuli_chr04    | 47223646                       | [T/C]       | 1067297026                                 |
| Ca_Kabuli_NC_021163.1_47223674 | Ca_kabuli_chr04    | 47223674                       | [A/C]       | 1067297027                                 |
| Ca_Kabuli_NC_021163.1_47296161 | Ca_kabuli_chr04    | 47296161                       | [G/A]       | 1067297028                                 |

| <b>SNP IDs</b>                 | <b>Chromosomes</b> | <b>Physical positions (bp)</b> | <b>SNPs</b> | <b>NCBI SNPdb accession IDs (NCBI_ss#)</b> |
|--------------------------------|--------------------|--------------------------------|-------------|--------------------------------------------|
| Ca_Kabuli_NC_021163.1_47296163 | Ca_kabuli_chr04    | 47296163                       | [G/A]       | 1067297029                                 |
| Ca_Kabuli_NC_021163.1_47296164 | Ca_kabuli_chr04    | 47296164                       | [A/G]       | 1067297030                                 |
| Ca_Kabuli_NC_021163.1_47345557 | Ca_kabuli_chr04    | 47345557                       | [T/A]       | 1067297031                                 |
| Ca_Kabuli_NC_021163.1_47427865 | Ca_kabuli_chr04    | 47427865                       | [A/C]       | 1067297032                                 |
| Ca_Kabuli_NC_021163.1_47446366 | Ca_kabuli_chr04    | 47446366                       | [A/T]       | 1067297033                                 |
| Ca_Kabuli_NC_021163.1_47505073 | Ca_kabuli_chr04    | 47505073                       | [A/C]       | 1067297034                                 |
| Ca_Kabuli_NC_021163.1_47592455 | Ca_kabuli_chr04    | 47592455                       | [T/C]       | 1067297035                                 |
| Ca_Kabuli_NC_021163.1_47612353 | Ca_kabuli_chr04    | 47612353                       | [T/C]       | 1067297036                                 |
| Ca_Kabuli_NC_021163.1_47612384 | Ca_kabuli_chr04    | 47612384                       | [T/G]       | 1067297037                                 |
| Ca_Kabuli_NC_021163.1_47612455 | Ca_kabuli_chr04    | 47612455                       | [A/C]       | 1067297038                                 |
| Ca_Kabuli_NC_021163.1_47622133 | Ca_kabuli_chr04    | 47622133                       | [A/G]       | 1067297039                                 |
| Ca_Kabuli_NC_021163.1_47622154 | Ca_kabuli_chr04    | 47622154                       | [T/G]       | 1067297040                                 |
| Ca_Kabuli_NC_021163.1_47675390 | Ca_kabuli_chr04    | 47675390                       | [A/C]       | 1067297041                                 |
| Ca_Kabuli_NC_021163.1_47675686 | Ca_kabuli_chr04    | 47675686                       | [A/C]       | 1067297042                                 |
| Ca_Kabuli_NC_021163.1_47675839 | Ca_kabuli_chr04    | 47675839                       | [T/C]       | 1067297043                                 |
| Ca_Kabuli_NC_021163.1_47675845 | Ca_kabuli_chr04    | 47675845                       | [A/G]       | 1067297044                                 |
| Ca_Kabuli_NC_021163.1_47675867 | Ca_kabuli_chr04    | 47675867                       | [A/G]       | 1067297045                                 |
| Ca_Kabuli_NC_021163.1_47675880 | Ca_kabuli_chr04    | 47675880                       | [C/A]       | 1067297046                                 |
| Ca_Kabuli_NC_021163.1_47697192 | Ca_kabuli_chr04    | 47697192                       | [A/G]       | 1067297047                                 |
| Ca_Kabuli_NC_021163.1_47697195 | Ca_kabuli_chr04    | 47697195                       | [T/C]       | 1067297048                                 |
| Ca_Kabuli_NC_021163.1_47697219 | Ca_kabuli_chr04    | 47697219                       | [T/G]       | 1067297049                                 |
| Ca_Kabuli_NC_021163.1_47798598 | Ca_kabuli_chr04    | 47798598                       | [A/C]       | 1067297050                                 |
| Ca_Kabuli_NC_021163.1_47798604 | Ca_kabuli_chr04    | 47798604                       | [A/C]       | 1067297051                                 |
| Ca_Kabuli_NC_021163.1_47899055 | Ca_kabuli_chr04    | 47899055                       | [T/G]       | 1067297052                                 |
| Ca_Kabuli_NC_021163.1_48011333 | Ca_kabuli_chr04    | 48011333                       | [A/C]       | 1067297053                                 |
| Ca_Kabuli_NC_021163.1_48011418 | Ca_kabuli_chr04    | 48011418                       | [T/C]       | 1067297054                                 |
| Ca_Kabuli_NC_021163.1_48011422 | Ca_kabuli_chr04    | 48011422                       | [T/C]       | 1067297055                                 |
| Ca_Kabuli_NC_021163.1_48011440 | Ca_kabuli_chr04    | 48011440                       | [T/A]       | 1067297056                                 |
| Ca_Kabuli_NC_021163.1_48011455 | Ca_kabuli_chr04    | 48011455                       | [A/G]       | 1067297057                                 |
| Ca_Kabuli_NC_021163.1_48097268 | Ca_kabuli_chr04    | 48097268                       | [G/A]       | 1067297058                                 |
| Ca_Kabuli_NC_021163.1_48097271 | Ca_kabuli_chr04    | 48097271                       | [A/C]       | 1067297059                                 |
| Ca_Kabuli_NC_021163.1_48103174 | Ca_kabuli_chr04    | 48103174                       | [C/G]       | 1067297060                                 |
| Ca_Kabuli_NC_021163.1_48103176 | Ca_kabuli_chr04    | 48103176                       | [G/C]       | 1067297061                                 |
| Ca_Kabuli_NC_021163.1_48123659 | Ca_kabuli_chr04    | 48123659                       | [T/G]       | 1067297062                                 |

| <b>SNP IDs</b>                 | <b>Chromosomes</b> | <b>Physical positions (bp)</b> | <b>SNPs</b> | <b>NCBI SNPdb accession IDs (NCBI_ss#)</b> |
|--------------------------------|--------------------|--------------------------------|-------------|--------------------------------------------|
| Ca_Kabuli_NC_021163.1_48228110 | Ca_kabuli_chr04    | 48228110                       | [C/A]       | 1067297063                                 |
| Ca_Kabuli_NC_021163.1_48238802 | Ca_kabuli_chr04    | 48238802                       | [T/C]       | 1067297064                                 |
| Ca_Kabuli_NC_021163.1_48238836 | Ca_kabuli_chr04    | 48238836                       | [T/C]       | 1067297065                                 |
| Ca_Kabuli_NC_021163.1_48248272 | Ca_kabuli_chr04    | 48248272                       | [C/T]       | 1067297066                                 |
| Ca_Kabuli_NC_021163.1_48248286 | Ca_kabuli_chr04    | 48248286                       | [G/A]       | 1067297067                                 |
| Ca_Kabuli_NC_021163.1_48248319 | Ca_kabuli_chr04    | 48248319                       | [T/G]       | 1067297068                                 |
| Ca_Kabuli_NC_021163.1_48248663 | Ca_kabuli_chr04    | 48248663                       | [A/G]       | 1067297069                                 |
| Ca_Kabuli_NC_021163.1_48263603 | Ca_kabuli_chr04    | 48263603                       | [A/G]       | 1067297070                                 |
| Ca_Kabuli_NC_021163.1_48267662 | Ca_kabuli_chr04    | 48267662                       | [C/T]       | 1067297071                                 |
| Ca_Kabuli_NC_021163.1_48268253 | Ca_kabuli_chr04    | 48268253                       | [T/C]       | 1067297072                                 |
| Ca_Kabuli_NC_021163.1_48268316 | Ca_kabuli_chr04    | 48268316                       | [A/C]       | 1067297073                                 |
| Ca_Kabuli_NC_021163.1_48268319 | Ca_kabuli_chr04    | 48268319                       | [A/C]       | 1067297074                                 |
| Ca_Kabuli_NC_021163.1_48301151 | Ca_kabuli_chr04    | 48301151                       | [T/C]       | 1067297075                                 |
| Ca_Kabuli_NC_021163.1_48305147 | Ca_kabuli_chr04    | 48305147                       | [C/G]       | 1067297076                                 |
| Ca_Kabuli_NC_021163.1_48322502 | Ca_kabuli_chr04    | 48322502                       | [T/C]       | 1067297077                                 |
| Ca_Kabuli_NC_021163.1_48345604 | Ca_kabuli_chr04    | 48345604                       | [G/A]       | 1067297078                                 |
| Ca_Kabuli_NC_021163.1_48345608 | Ca_kabuli_chr04    | 48345608                       | [T/G]       | 1067297079                                 |
| Ca_Kabuli_NC_021163.1_48355358 | Ca_kabuli_chr04    | 48355358                       | [T/A]       | 1067297080                                 |
| Ca_Kabuli_NC_021163.1_48355468 | Ca_kabuli_chr04    | 48355468                       | [T/G]       | 1067297081                                 |
| Ca_Kabuli_NC_021163.1_48358019 | Ca_kabuli_chr04    | 48358019                       | [T/G]       | 1067297082                                 |
| Ca_Kabuli_NC_021163.1_48360127 | Ca_kabuli_chr04    | 48360127                       | [C/G]       | 1067297083                                 |
| Ca_Kabuli_NC_021163.1_48361612 | Ca_kabuli_chr04    | 48361612                       | [G/T]       | 1067297084                                 |
| Ca_Kabuli_NC_021163.1_48363106 | Ca_kabuli_chr04    | 48363106                       | [T/C]       | 1067297085                                 |
| Ca_Kabuli_NC_021163.1_48366219 | Ca_kabuli_chr04    | 48366219                       | [G/A]       | 1067297086                                 |
| Ca_Kabuli_NC_021163.1_48382603 | Ca_kabuli_chr04    | 48382603                       | [C/T]       | 1067297087                                 |
| Ca_Kabuli_NC_021163.1_48382666 | Ca_kabuli_chr04    | 48382666                       | [C/G]       | 1067297088                                 |
| Ca_Kabuli_NC_021163.1_48384226 | Ca_kabuli_chr04    | 48384226                       | [T/C]       | 1067297089                                 |
| Ca_Kabuli_NC_021163.1_48384244 | Ca_kabuli_chr04    | 48384244                       | [A/G]       | 1067297090                                 |
| Ca_Kabuli_NC_021163.1_48384246 | Ca_kabuli_chr04    | 48384246                       | [T/A]       | 1067297091                                 |
| Ca_Kabuli_NC_021163.1_48384247 | Ca_kabuli_chr04    | 48384247                       | [A/C]       | 1067297092                                 |
| Ca_Kabuli_NC_021163.1_48454970 | Ca_kabuli_chr04    | 48454970                       | [A/G]       | 1067297093                                 |
| Ca_Kabuli_NC_021163.1_48454986 | Ca_kabuli_chr04    | 48454986                       | [T/A]       | 1067297094                                 |
| Ca_Kabuli_NC_021163.1_48454989 | Ca_kabuli_chr04    | 48454989                       | [A/G]       | 1067297095                                 |
| Ca_Kabuli_NC_021163.1_48455002 | Ca_kabuli_chr04    | 48455002                       | [A/G]       | 1067297096                                 |

| <b>SNP IDs</b>                 | <b>Chromosomes</b> | <b>Physical positions (bp)</b> | <b>SNPs</b> | <b>NCBI SNPdb accession IDs (NCBI_ss#)</b> |
|--------------------------------|--------------------|--------------------------------|-------------|--------------------------------------------|
| Ca_Kabuli_NC_021163.1_48455054 | Ca_kabuli_chr04    | 48455054                       | [A/T]       | 1067297097                                 |
| Ca_Kabuli_NC_021163.1_48455326 | Ca_kabuli_chr04    | 48455326                       | [T/C]       | 1067297098                                 |
| Ca_Kabuli_NC_021163.1_48455626 | Ca_kabuli_chr04    | 48455626                       | [T/G]       | 1067297099                                 |
| Ca_Kabuli_NC_021163.1_48455657 | Ca_kabuli_chr04    | 48455657                       | [T/G]       | 1067297100                                 |
| Ca_Kabuli_NC_021163.1_48455692 | Ca_kabuli_chr04    | 48455692                       | [A/T]       | 1067297101                                 |
| Ca_Kabuli_NC_021163.1_48457876 | Ca_kabuli_chr04    | 48457876                       | [C/T]       | 1067297102                                 |
| Ca_Kabuli_NC_021163.1_48464448 | Ca_kabuli_chr04    | 48464448                       | [T/G]       | 1067297103                                 |
| Ca_Kabuli_NC_021163.1_48465107 | Ca_kabuli_chr04    | 48465107                       | [A/G]       | 1067297104                                 |
| Ca_Kabuli_NC_021163.1_48470477 | Ca_kabuli_chr04    | 48470477                       | [G/A]       | 1067297105                                 |
| Ca_Kabuli_NC_021163.1_48475447 | Ca_kabuli_chr04    | 48475447                       | [C/T]       | 1067297106                                 |
| Ca_Kabuli_NC_021163.1_48475461 | Ca_kabuli_chr04    | 48475461                       | [G/A]       | 1067297107                                 |
| Ca_Kabuli_NC_021163.1_48477876 | Ca_kabuli_chr04    | 48477876                       | [T/A]       | 1067297108                                 |
| Ca_Kabuli_NC_021163.1_48478018 | Ca_kabuli_chr04    | 48478018                       | [G/A]       | 1067297109                                 |
| Ca_Kabuli_NC_021163.1_48478058 | Ca_kabuli_chr04    | 48478058                       | [T/C]       | 1067297110                                 |
| Ca_Kabuli_NC_021163.1_48478444 | Ca_kabuli_chr04    | 48478444                       | [A/C]       | 1067297111                                 |
| Ca_Kabuli_NC_021163.1_48484455 | Ca_kabuli_chr04    | 48484455                       | [A/G]       | 1067297112                                 |
| Ca_Kabuli_NC_021163.1_48496892 | Ca_kabuli_chr04    | 48496892                       | [A/G]       | 1067297113                                 |
| Ca_Kabuli_NC_021163.1_48496921 | Ca_kabuli_chr04    | 48496921                       | [A/G]       | 1067297114                                 |
| Ca_Kabuli_NC_021163.1_48496922 | Ca_kabuli_chr04    | 48496922                       | [G/A]       | 1067297115                                 |
| Ca_Kabuli_NC_021163.1_48496923 | Ca_kabuli_chr04    | 48496923                       | [A/G]       | 1067297116                                 |
| Ca_Kabuli_NC_021163.1_48497704 | Ca_kabuli_chr04    | 48497704                       | [A/C]       | 1067297117                                 |
| Ca_Kabuli_NC_021163.1_48497710 | Ca_kabuli_chr04    | 48497710                       | [T/G]       | 1067297118                                 |
| Ca_Kabuli_NC_021163.1_48497718 | Ca_kabuli_chr04    | 48497718                       | [T/A]       | 1067297119                                 |
| Ca_Kabuli_NC_021163.1_48497722 | Ca_kabuli_chr04    | 48497722                       | [T/C]       | 1067297120                                 |
| Ca_Kabuli_NC_021163.1_48497839 | Ca_kabuli_chr04    | 48497839                       | [A/G]       | 1067297121                                 |
| Ca_Kabuli_NC_021163.1_48497926 | Ca_kabuli_chr04    | 48497926                       | [A/T]       | 1067297122                                 |
| Ca_Kabuli_NC_021163.1_48498133 | Ca_kabuli_chr04    | 48498133                       | [C/T]       | 1067297123                                 |
| Ca_Kabuli_NC_021163.1_48498166 | Ca_kabuli_chr04    | 48498166                       | [A/G]       | 1067297124                                 |
| Ca_Kabuli_NC_021163.1_48498181 | Ca_kabuli_chr04    | 48498181                       | [G/C]       | 1067297125                                 |
| Ca_Kabuli_NC_021163.1_48498334 | Ca_kabuli_chr04    | 48498334                       | [G/T]       | 1067297126                                 |
| Ca_Kabuli_NC_021163.1_48498368 | Ca_kabuli_chr04    | 48498368                       | [C/T]       | 1067297127                                 |
| Ca_Kabuli_NC_021163.1_48501021 | Ca_kabuli_chr04    | 48501021                       | [A/T]       | 1067297128                                 |
| Ca_Kabuli_NC_021163.1_48501484 | Ca_kabuli_chr04    | 48501484                       | [G/T]       | 1067297129                                 |
| Ca_Kabuli_NC_021163.1_48501662 | Ca_kabuli_chr04    | 48501662                       | [A/T]       | 1067297130                                 |

| <b>SNP IDs</b>                 | <b>Chromosomes</b> | <b>Physical positions (bp)</b> | <b>SNPs</b> | <b>NCBI SNPdb accession IDs (NCBI_ss#)</b> |
|--------------------------------|--------------------|--------------------------------|-------------|--------------------------------------------|
| Ca_Kabuli_NC_021163.1_48502687 | Ca_kabuli_chr04    | 48502687                       | [A/G]       | 1067297131                                 |
| Ca_Kabuli_NC_021163.1_48502714 | Ca_kabuli_chr04    | 48502714                       | [C/T]       | 1067297132                                 |
| Ca_Kabuli_NC_021163.1_48502718 | Ca_kabuli_chr04    | 48502718                       | [C/G]       | 1067297133                                 |
| Ca_Kabuli_NC_021163.1_48644169 | Ca_kabuli_chr04    | 48644169                       | [T/G]       | 1067297134                                 |
| Ca_Kabuli_NC_021163.1_48644179 | Ca_kabuli_chr04    | 48644179                       | [T/G]       | 1067297135                                 |
| Ca_Kabuli_NC_021163.1_48644216 | Ca_kabuli_chr04    | 48644216                       | [A/T]       | 1067297136                                 |
| Ca_Kabuli_NC_021163.1_48678293 | Ca_kabuli_chr04    | 48678293                       | [A/G]       | 1067297137                                 |
| Ca_Kabuli_NC_021163.1_48678296 | Ca_kabuli_chr04    | 48678296                       | [T/C]       | 1067297138                                 |
| Ca_Kabuli_NC_021163.1_48678302 | Ca_kabuli_chr04    | 48678302                       | [A/G]       | 1067297139                                 |
| Ca_Kabuli_NC_021163.1_48678319 | Ca_kabuli_chr04    | 48678319                       | [T/C]       | 1067297140                                 |
| Ca_Kabuli_NC_021163.1_48678328 | Ca_kabuli_chr04    | 48678328                       | [A/G]       | 1067297141                                 |
| Ca_Kabuli_NC_021163.1_48678692 | Ca_kabuli_chr04    | 48678692                       | [T/C]       | 1067297142                                 |
| Ca_Kabuli_NC_021163.1_48681589 | Ca_kabuli_chr04    | 48681589                       | [T/A]       | 1067297143                                 |
| Ca_Kabuli_NC_021163.1_48702117 | Ca_kabuli_chr04    | 48702117                       | [T/G]       | 1067297144                                 |
| Ca_Kabuli_NC_021163.1_48765850 | Ca_kabuli_chr04    | 48765850                       | [A/G]       | 1067297145                                 |
| Ca_Kabuli_NC_021163.1_48765858 | Ca_kabuli_chr04    | 48765858                       | [T/A]       | 1067297146                                 |
| Ca_Kabuli_NC_021163.1_48932337 | Ca_kabuli_chr04    | 48932337                       | [A/T]       | 1067297147                                 |
| Ca_Kabuli_NC_021163.1_48936860 | Ca_kabuli_chr04    | 48936860                       | [G/C]       | 1067297148                                 |
| Ca_Kabuli_NC_021163.1_48936868 | Ca_kabuli_chr04    | 48936868                       | [T/G]       | 1067297149                                 |
| Ca_Kabuli_NC_021163.1_48936869 | Ca_kabuli_chr04    | 48936869                       | [A/T]       | 1067297150                                 |
| Ca_Kabuli_NC_021163.1_48936870 | Ca_kabuli_chr04    | 48936870                       | [T/C]       | 1067297151                                 |
| Ca_Kabuli_NC_021163.1_48936871 | Ca_kabuli_chr04    | 48936871                       | [G/T]       | 1067297152                                 |
| Ca_Kabuli_NC_021163.1_49012669 | Ca_kabuli_chr04    | 49012669                       | [T/G]       | 1067297153                                 |
| Ca_Kabuli_NC_021163.1_49012793 | Ca_kabuli_chr04    | 49012793                       | [T/G]       | 1067297154                                 |
| Ca_Kabuli_NC_021163.1_49108401 | Ca_kabuli_chr04    | 49108401                       | [T/A]       | 1067297155                                 |
| Ca_Kabuli_NC_021163.1_49108429 | Ca_kabuli_chr04    | 49108429                       | [A/C]       | 1067297156                                 |
| Ca_Kabuli_NC_021164.1_23820    | Ca_kabuli_chr05    | 23820                          | [T/G]       | 1067297157                                 |
| Ca_Kabuli_NC_021164.1_23877    | Ca_kabuli_chr05    | 23877                          | [A/C]       | 1067297158                                 |
| Ca_Kabuli_NC_021164.1_23889    | Ca_kabuli_chr05    | 23889                          | [A/C]       | 1067297159                                 |
| Ca_Kabuli_NC_021164.1_80027    | Ca_kabuli_chr05    | 80027                          | [C/A]       | 1067297160                                 |
| Ca_Kabuli_NC_021164.1_80124    | Ca_kabuli_chr05    | 80124                          | [A/C]       | 1067297161                                 |
| Ca_Kabuli_NC_021164.1_131600   | Ca_kabuli_chr05    | 131600                         | [A/T]       | 1067297162                                 |
| Ca_Kabuli_NC_021164.1_154162   | Ca_kabuli_chr05    | 154162                         | [T/C]       | 1067297163                                 |
| Ca_Kabuli_NC_021164.1_175603   | Ca_kabuli_chr05    | 175603                         | [A/G]       | 1067297164                                 |

| <b>SNP IDs</b>               | <b>Chromosomes</b> | <b>Physical positions (bp)</b> | <b>SNPs</b> | <b>NCBI SNPdb accession IDs (NCBI_ss#)</b> |
|------------------------------|--------------------|--------------------------------|-------------|--------------------------------------------|
| Ca_Kabuli_NC_021164.1_175629 | Ca_kabuli_chr05    | 175629                         | [T/A]       | 1067297165                                 |
| Ca_Kabuli_NC_021164.1_210586 | Ca_kabuli_chr05    | 210586                         | [A/T]       | 1067297166                                 |
| Ca_Kabuli_NC_021164.1_222629 | Ca_kabuli_chr05    | 222629                         | [T/G]       | 1067297167                                 |
| Ca_Kabuli_NC_021164.1_222637 | Ca_kabuli_chr05    | 222637                         | [C/T]       | 1067297168                                 |
| Ca_Kabuli_NC_021164.1_222639 | Ca_kabuli_chr05    | 222639                         | [C/T]       | 1067297169                                 |
| Ca_Kabuli_NC_021164.1_222641 | Ca_kabuli_chr05    | 222641                         | [C/T]       | 1067297170                                 |
| Ca_Kabuli_NC_021164.1_222651 | Ca_kabuli_chr05    | 222651                         | [A/C]       | 1067297171                                 |
| Ca_Kabuli_NC_021164.1_222657 | Ca_kabuli_chr05    | 222657                         | [G/A]       | 1067297172                                 |
| Ca_Kabuli_NC_021164.1_223401 | Ca_kabuli_chr05    | 223401                         | [T/A]       | 1067297173                                 |
| Ca_Kabuli_NC_021164.1_234405 | Ca_kabuli_chr05    | 234405                         | [A/G]       | 1067297174                                 |
| Ca_Kabuli_NC_021164.1_234410 | Ca_kabuli_chr05    | 234410                         | [A/C]       | 1067297175                                 |
| Ca_Kabuli_NC_021164.1_235777 | Ca_kabuli_chr05    | 235777                         | [T/C]       | 1067297176                                 |
| Ca_Kabuli_NC_021164.1_235807 | Ca_kabuli_chr05    | 235807                         | [T/G]       | 1067297177                                 |
| Ca_Kabuli_NC_021164.1_235820 | Ca_kabuli_chr05    | 235820                         | [T/G]       | 1067297178                                 |
| Ca_Kabuli_NC_021164.1_245863 | Ca_kabuli_chr05    | 245863                         | [A/T]       | 1067297179                                 |
| Ca_Kabuli_NC_021164.1_254262 | Ca_kabuli_chr05    | 254262                         | [T/C]       | 1067297180                                 |
| Ca_Kabuli_NC_021164.1_254272 | Ca_kabuli_chr05    | 254272                         | [T/C]       | 1067297181                                 |
| Ca_Kabuli_NC_021164.1_255245 | Ca_kabuli_chr05    | 255245                         | [T/G]       | 1067297182                                 |
| Ca_Kabuli_NC_021164.1_263342 | Ca_kabuli_chr05    | 263342                         | [A/G]       | 1067297183                                 |
| Ca_Kabuli_NC_021164.1_263345 | Ca_kabuli_chr05    | 263345                         | [T/C]       | 1067297184                                 |
| Ca_Kabuli_NC_021164.1_263350 | Ca_kabuli_chr05    | 263350                         | [T/C]       | 1067297185                                 |
| Ca_Kabuli_NC_021164.1_263356 | Ca_kabuli_chr05    | 263356                         | [A/G]       | 1067297186                                 |
| Ca_Kabuli_NC_021164.1_272745 | Ca_kabuli_chr05    | 272745                         | [A/C]       | 1067297187                                 |
| Ca_Kabuli_NC_021164.1_272863 | Ca_kabuli_chr05    | 272863                         | [T/A]       | 1067297188                                 |
| Ca_Kabuli_NC_021164.1_273752 | Ca_kabuli_chr05    | 273752                         | [T/A]       | 1067297189                                 |
| Ca_Kabuli_NC_021164.1_273772 | Ca_kabuli_chr05    | 273772                         | [A/C]       | 1067297190                                 |
| Ca_Kabuli_NC_021164.1_276413 | Ca_kabuli_chr05    | 276413                         | [G/A]       | 1067297191                                 |
| Ca_Kabuli_NC_021164.1_282870 | Ca_kabuli_chr05    | 282870                         | [A/C]       | 1067297192                                 |
| Ca_Kabuli_NC_021164.1_303757 | Ca_kabuli_chr05    | 303757                         | [T/C]       | 1067297193                                 |
| Ca_Kabuli_NC_021164.1_303762 | Ca_kabuli_chr05    | 303762                         | [T/C]       | 1067297194                                 |
| Ca_Kabuli_NC_021164.1_306319 | Ca_kabuli_chr05    | 306319                         | [A/T]       | 1067297195                                 |
| Ca_Kabuli_NC_021164.1_306350 | Ca_kabuli_chr05    | 306350                         | [T/A]       | 1067297196                                 |
| Ca_Kabuli_NC_021164.1_306359 | Ca_kabuli_chr05    | 306359                         | [T/A]       | 1067297197                                 |
| Ca_Kabuli_NC_021164.1_306362 | Ca_kabuli_chr05    | 306362                         | [T/G]       | 1067297198                                 |



| <b>SNP IDs</b>                | <b>Chromosomes</b> | <b>Physical positions (bp)</b> | <b>SNPs</b> | <b>NCBI SNPdb accession IDs (NCBI_ss#)</b> |
|-------------------------------|--------------------|--------------------------------|-------------|--------------------------------------------|
| Ca_Kabuli_NC_021164.1_321517  | Ca_kabuli_chr05    | 321517                         | [A/C]       | 1067297199                                 |
| Ca_Kabuli_NC_021164.1_321520  | Ca_kabuli_chr05    | 321520                         | [A/C]       | 1067297200                                 |
| Ca_Kabuli_NC_021164.1_322011  | Ca_kabuli_chr05    | 322011                         | [A/G]       | 1067297201                                 |
| Ca_Kabuli_NC_021164.1_335086  | Ca_kabuli_chr05    | 335086                         | [T/G]       | 1067297202                                 |
| Ca_Kabuli_NC_021164.1_335124  | Ca_kabuli_chr05    | 335124                         | [A/G]       | 1067297203                                 |
| Ca_Kabuli_NC_021164.1_335147  | Ca_kabuli_chr05    | 335147                         | [A/T]       | 1067297204                                 |
| Ca_Kabuli_NC_021164.1_343574  | Ca_kabuli_chr05    | 343574                         | [A/G]       | 1067297205                                 |
| Ca_Kabuli_NC_021164.1_438390  | Ca_kabuli_chr05    | 438390                         | [T/C]       | 1067297206                                 |
| Ca_Kabuli_NC_021164.1_438411  | Ca_kabuli_chr05    | 438411                         | [G/C]       | 1067297207                                 |
| Ca_Kabuli_NC_021164.1_438428  | Ca_kabuli_chr05    | 438428                         | [T/G]       | 1067297208                                 |
| Ca_Kabuli_NC_021164.1_438431  | Ca_kabuli_chr05    | 438431                         | [T/C]       | 1067297209                                 |
| Ca_Kabuli_NC_021164.1_438438  | Ca_kabuli_chr05    | 438438                         | [G/A]       | 1067297210                                 |
| Ca_Kabuli_NC_021164.1_438442  | Ca_kabuli_chr05    | 438442                         | [T/C]       | 1067297211                                 |
| Ca_Kabuli_NC_021164.1_438445  | Ca_kabuli_chr05    | 438445                         | [A/C]       | 1067297212                                 |
| Ca_Kabuli_NC_021164.1_438448  | Ca_kabuli_chr05    | 438448                         | [A/C]       | 1067297213                                 |
| Ca_Kabuli_NC_021164.1_438453  | Ca_kabuli_chr05    | 438453                         | [T/C]       | 1067297214                                 |
| Ca_Kabuli_NC_021164.1_443282  | Ca_kabuli_chr05    | 443282                         | [T/C]       | 1067297215                                 |
| Ca_Kabuli_NC_021164.1_443305  | Ca_kabuli_chr05    | 443305                         | [A/C]       | 1067297216                                 |
| Ca_Kabuli_NC_021164.1_443383  | Ca_kabuli_chr05    | 443383                         | [T/C]       | 1067297217                                 |
| Ca_Kabuli_NC_021164.1_443487  | Ca_kabuli_chr05    | 443487                         | [A/C]       | 1067297218                                 |
| Ca_Kabuli_NC_021164.1_469339  | Ca_kabuli_chr05    | 469339                         | [T/A]       | 1067297219                                 |
| Ca_Kabuli_NC_021164.1_473545  | Ca_kabuli_chr05    | 473545                         | [A/G]       | 1067297220                                 |
| Ca_Kabuli_NC_021164.1_473563  | Ca_kabuli_chr05    | 473563                         | [T/C]       | 1067297221                                 |
| Ca_Kabuli_NC_021164.1_473585  | Ca_kabuli_chr05    | 473585                         | [A/C]       | 1067297222                                 |
| Ca_Kabuli_NC_021164.1_473603  | Ca_kabuli_chr05    | 473603                         | [T/A]       | 1067297223                                 |
| Ca_Kabuli_NC_021164.1_473663  | Ca_kabuli_chr05    | 473663                         | [A/T]       | 1067297224                                 |
| Ca_Kabuli_NC_021164.1_473668  | Ca_kabuli_chr05    | 473668                         | [A/T]       | 1067297225                                 |
| Ca_Kabuli_NC_021164.1_560662  | Ca_kabuli_chr05    | 560662                         | [G/A]       | 1067297226                                 |
| Ca_Kabuli_NC_021164.1_805760  | Ca_kabuli_chr05    | 805760                         | [T/C]       | 1067297227                                 |
| Ca_Kabuli_NC_021164.1_805764  | Ca_kabuli_chr05    | 805764                         | [C/G]       | 1067297228                                 |
| Ca_Kabuli_NC_021164.1_805767  | Ca_kabuli_chr05    | 805767                         | [T/C]       | 1067297229                                 |
| Ca_Kabuli_NC_021164.1_1252328 | Ca_kabuli_chr05    | 1252328                        | [A/G]       | 1067297230                                 |
| Ca_Kabuli_NC_021164.1_1252330 | Ca_kabuli_chr05    | 1252330                        | [A/G]       | 1067297231                                 |
| Ca_Kabuli_NC_021164.1_1280977 | Ca_kabuli_chr05    | 1280977                        | [T/G]       | 1067297232                                 |

| <b>SNP IDs</b>                | <b>Chromosomes</b> | <b>Physical positions (bp)</b> | <b>SNPs</b> | <b>NCBI SNPdb accession IDs (NCBI_ss#)</b> |
|-------------------------------|--------------------|--------------------------------|-------------|--------------------------------------------|
| Ca_Kabuli_NC_021164.1_2380032 | Ca_kabuli_chr05    | 2380032                        | [C/T]       | 1067297233                                 |
| Ca_Kabuli_NC_021164.1_2613443 | Ca_kabuli_chr05    | 2613443                        | [T/C]       | 1067297234                                 |
| Ca_Kabuli_NC_021164.1_2700479 | Ca_kabuli_chr05    | 2700479                        | [T/A]       | 1067297235                                 |
| Ca_Kabuli_NC_021164.1_2700484 | Ca_kabuli_chr05    | 2700484                        | [A/C]       | 1067297236                                 |
| Ca_Kabuli_NC_021164.1_2839097 | Ca_kabuli_chr05    | 2839097                        | [A/C]       | 1067297237                                 |
| Ca_Kabuli_NC_021164.1_2855067 | Ca_kabuli_chr05    | 2855067                        | [T/G]       | 1067297238                                 |
| Ca_Kabuli_NC_021164.1_2948530 | Ca_kabuli_chr05    | 2948530                        | [G/T]       | 1067297239                                 |
| Ca_Kabuli_NC_021164.1_2948531 | Ca_kabuli_chr05    | 2948531                        | [T/C]       | 1067297240                                 |
| Ca_Kabuli_NC_021164.1_2948616 | Ca_kabuli_chr05    | 2948616                        | [G/A]       | 1067297241                                 |
| Ca_Kabuli_NC_021164.1_2948618 | Ca_kabuli_chr05    | 2948618                        | [C/T]       | 1067297242                                 |
| Ca_Kabuli_NC_021164.1_3040267 | Ca_kabuli_chr05    | 3040267                        | [T/G]       | 1067297243                                 |
| Ca_Kabuli_NC_021164.1_3040277 | Ca_kabuli_chr05    | 3040277                        | [T/G]       | 1067297244                                 |
| Ca_Kabuli_NC_021164.1_3040328 | Ca_kabuli_chr05    | 3040328                        | [G/A]       | 1067297245                                 |
| Ca_Kabuli_NC_021164.1_3040334 | Ca_kabuli_chr05    | 3040334                        | [A/T]       | 1067297246                                 |
| Ca_Kabuli_NC_021164.1_3043038 | Ca_kabuli_chr05    | 3043038                        | [A/C]       | 1067297247                                 |
| Ca_Kabuli_NC_021164.1_3043039 | Ca_kabuli_chr05    | 3043039                        | [T/G]       | 1067297248                                 |
| Ca_Kabuli_NC_021164.1_3043042 | Ca_kabuli_chr05    | 3043042                        | [T/C]       | 1067297249                                 |
| Ca_Kabuli_NC_021164.1_3043043 | Ca_kabuli_chr05    | 3043043                        | [G/T]       | 1067297250                                 |
| Ca_Kabuli_NC_021164.1_3137441 | Ca_kabuli_chr05    | 3137441                        | [A/G]       | 1067297251                                 |
| Ca_Kabuli_NC_021164.1_3137454 | Ca_kabuli_chr05    | 3137454                        | [T/C]       | 1067297252                                 |
| Ca_Kabuli_NC_021164.1_3137466 | Ca_kabuli_chr05    | 3137466                        | [T/C]       | 1067297253                                 |
| Ca_Kabuli_NC_021164.1_3137480 | Ca_kabuli_chr05    | 3137480                        | [A/C]       | 1067297254                                 |
| Ca_Kabuli_NC_021164.1_3276362 | Ca_kabuli_chr05    | 3276362                        | [G/A]       | 1067297255                                 |
| Ca_Kabuli_NC_021164.1_3365078 | Ca_kabuli_chr05    | 3365078                        | [T/A]       | 1067297256                                 |
| Ca_Kabuli_NC_021164.1_3481146 | Ca_kabuli_chr05    | 3481146                        | [T/A]       | 1067297257                                 |
| Ca_Kabuli_NC_021164.1_3481151 | Ca_kabuli_chr05    | 3481151                        | [G/A]       | 1067297258                                 |
| Ca_Kabuli_NC_021164.1_3643160 | Ca_kabuli_chr05    | 3643160                        | [C/T]       | 1067297259                                 |
| Ca_Kabuli_NC_021164.1_3654489 | Ca_kabuli_chr05    | 3654489                        | [A/C]       | 1067297260                                 |
| Ca_Kabuli_NC_021164.1_3965094 | Ca_kabuli_chr05    | 3965094                        | [T/C]       | 1067297261                                 |
| Ca_Kabuli_NC_021164.1_3965136 | Ca_kabuli_chr05    | 3965136                        | [T/G]       | 1067297262                                 |
| Ca_Kabuli_NC_021164.1_3965148 | Ca_kabuli_chr05    | 3965148                        | [A/G]       | 1067297263                                 |
| Ca_Kabuli_NC_021164.1_3965169 | Ca_kabuli_chr05    | 3965169                        | [A/C]       | 1067297264                                 |
| Ca_Kabuli_NC_021164.1_4200281 | Ca_kabuli_chr05    | 4200281                        | [T/G]       | 1067297265                                 |
| Ca_Kabuli_NC_021164.1_4890586 | Ca_kabuli_chr05    | 4890586                        | [G/A]       | 1067297266                                 |

| <b>SNP IDs</b>                | <b>Chromosomes</b> | <b>Physical positions (bp)</b> | <b>SNPs</b> | <b>NCBI SNPdb accession IDs (NCBI_ss#)</b> |
|-------------------------------|--------------------|--------------------------------|-------------|--------------------------------------------|
| Ca_Kabuli_NC_021164.1_4990103 | Ca_kabuli_chr05    | 4990103                        | [G/T]       | 1067297267                                 |
| Ca_Kabuli_NC_021164.1_5053307 | Ca_kabuli_chr05    | 5053307                        | [A/G]       | 1067297268                                 |
| Ca_Kabuli_NC_021164.1_5131288 | Ca_kabuli_chr05    | 5131288                        | [T/A]       | 1067297269                                 |
| Ca_Kabuli_NC_021164.1_5145576 | Ca_kabuli_chr05    | 5145576                        | [A/C]       | 1067297270                                 |
| Ca_Kabuli_NC_021164.1_5145586 | Ca_kabuli_chr05    | 5145586                        | [A/G]       | 1067297271                                 |
| Ca_Kabuli_NC_021164.1_5404185 | Ca_kabuli_chr05    | 5404185                        | [A/C]       | 1067297272                                 |
| Ca_Kabuli_NC_021164.1_5404195 | Ca_kabuli_chr05    | 5404195                        | [A/G]       | 1067297273                                 |
| Ca_Kabuli_NC_021164.1_5404199 | Ca_kabuli_chr05    | 5404199                        | [T/C]       | 1067297274                                 |
| Ca_Kabuli_NC_021164.1_5404239 | Ca_kabuli_chr05    | 5404239                        | [A/G]       | 1067297275                                 |
| Ca_Kabuli_NC_021164.1_6300288 | Ca_kabuli_chr05    | 6300288                        | [A/G]       | 1067297276                                 |
| Ca_Kabuli_NC_021164.1_6300317 | Ca_kabuli_chr05    | 6300317                        | [A/G]       | 1067297277                                 |
| Ca_Kabuli_NC_021164.1_6316813 | Ca_kabuli_chr05    | 6316813                        | [A/C]       | 1067297278                                 |
| Ca_Kabuli_NC_021164.1_6442437 | Ca_kabuli_chr05    | 6442437                        | [A/C]       | 1067297279                                 |
| Ca_Kabuli_NC_021164.1_6740218 | Ca_kabuli_chr05    | 6740218                        | [G/T]       | 1067297280                                 |
| Ca_Kabuli_NC_021164.1_7047168 | Ca_kabuli_chr05    | 7047168                        | [T/C]       | 1067297281                                 |
| Ca_Kabuli_NC_021164.1_7047186 | Ca_kabuli_chr05    | 7047186                        | [A/G]       | 1067297282                                 |
| Ca_Kabuli_NC_021164.1_7047194 | Ca_kabuli_chr05    | 7047194                        | [T/C]       | 1067297283                                 |
| Ca_Kabuli_NC_021164.1_7047246 | Ca_kabuli_chr05    | 7047246                        | [A/G]       | 1067297284                                 |
| Ca_Kabuli_NC_021164.1_7130712 | Ca_kabuli_chr05    | 7130712                        | [A/G]       | 1067297285                                 |
| Ca_Kabuli_NC_021164.1_7274305 | Ca_kabuli_chr05    | 7274305                        | [T/G]       | 1067297286                                 |
| Ca_Kabuli_NC_021164.1_7335132 | Ca_kabuli_chr05    | 7335132                        | [T/C]       | 1067297287                                 |
| Ca_Kabuli_NC_021164.1_7335168 | Ca_kabuli_chr05    | 7335168                        | [A/G]       | 1067297288                                 |
| Ca_Kabuli_NC_021164.1_7467768 | Ca_kabuli_chr05    | 7467768                        | [A/C]       | 1067297289                                 |
| Ca_Kabuli_NC_021164.1_7467769 | Ca_kabuli_chr05    | 7467769                        | [G/T]       | 1067297290                                 |
| Ca_Kabuli_NC_021164.1_7471749 | Ca_kabuli_chr05    | 7471749                        | [T/C]       | 1067297291                                 |
| Ca_Kabuli_NC_021164.1_7471751 | Ca_kabuli_chr05    | 7471751                        | [T/C]       | 1067297292                                 |
| Ca_Kabuli_NC_021164.1_7638130 | Ca_kabuli_chr05    | 7638130                        | [A/C]       | 1067297293                                 |
| Ca_Kabuli_NC_021164.1_7775298 | Ca_kabuli_chr05    | 7775298                        | [A/T]       | 1067297294                                 |
| Ca_Kabuli_NC_021164.1_7775497 | Ca_kabuli_chr05    | 7775497                        | [G/C]       | 1067297295                                 |
| Ca_Kabuli_NC_021164.1_7775516 | Ca_kabuli_chr05    | 7775516                        | [A/G]       | 1067297296                                 |
| Ca_Kabuli_NC_021164.1_7788986 | Ca_kabuli_chr05    | 7788986                        | [T/G]       | 1067297297                                 |
| Ca_Kabuli_NC_021164.1_7848643 | Ca_kabuli_chr05    | 7848643                        | [A/T]       | 1067297298                                 |
| Ca_Kabuli_NC_021164.1_7848672 | Ca_kabuli_chr05    | 7848672                        | [T/C]       | 1067297299                                 |
| Ca_Kabuli_NC_021164.1_8020717 | Ca_kabuli_chr05    | 8020717                        | [A/G]       | 1067297300                                 |

| <b>SNP IDs</b>                 | <b>Chromosomes</b> | <b>Physical positions (bp)</b> | <b>SNPs</b> | <b>NCBI SNPdb accession IDs (NCBI_ss#)</b> |
|--------------------------------|--------------------|--------------------------------|-------------|--------------------------------------------|
| Ca_Kabuli_NC_021164.1_8020741  | Ca_kabuli_chr05    | 8020741                        | [T/A]       | 1067297301                                 |
| Ca_Kabuli_NC_021164.1_8535592  | Ca_kabuli_chr05    | 8535592                        | [A/C]       | 1067297302                                 |
| Ca_Kabuli_NC_021164.1_8535619  | Ca_kabuli_chr05    | 8535619                        | [A/C]       | 1067297303                                 |
| Ca_Kabuli_NC_021164.1_8944478  | Ca_kabuli_chr05    | 8944478                        | [T/C]       | 1067297304                                 |
| Ca_Kabuli_NC_021164.1_8944488  | Ca_kabuli_chr05    | 8944488                        | [T/G]       | 1067297305                                 |
| Ca_Kabuli_NC_021164.1_8944508  | Ca_kabuli_chr05    | 8944508                        | [A/G]       | 1067297306                                 |
| Ca_Kabuli_NC_021164.1_8946173  | Ca_kabuli_chr05    | 8946173                        | [T/G]       | 1067297307                                 |
| Ca_Kabuli_NC_021164.1_9077441  | Ca_kabuli_chr05    | 9077441                        | [A/T]       | 1067297308                                 |
| Ca_Kabuli_NC_021164.1_9077447  | Ca_kabuli_chr05    | 9077447                        | [A/G]       | 1067297309                                 |
| Ca_Kabuli_NC_021164.1_9077481  | Ca_kabuli_chr05    | 9077481                        | [G/A]       | 1067297310                                 |
| Ca_Kabuli_NC_021164.1_9077499  | Ca_kabuli_chr05    | 9077499                        | [T/A]       | 1067297311                                 |
| Ca_Kabuli_NC_021164.1_9120091  | Ca_kabuli_chr05    | 9120091                        | [T/G]       | 1067297312                                 |
| Ca_Kabuli_NC_021164.1_9121639  | Ca_kabuli_chr05    | 9121639                        | [T/C]       | 1067297313                                 |
| Ca_Kabuli_NC_021164.1_9127099  | Ca_kabuli_chr05    | 9127099                        | [A/C]       | 1067297314                                 |
| Ca_Kabuli_NC_021164.1_9127126  | Ca_kabuli_chr05    | 9127126                        | [A/T]       | 1067297315                                 |
| Ca_Kabuli_NC_021164.1_9444595  | Ca_kabuli_chr05    | 9444595                        | [T/G]       | 1067297316                                 |
| Ca_Kabuli_NC_021164.1_9483764  | Ca_kabuli_chr05    | 9483764                        | [A/C]       | 1067297317                                 |
| Ca_Kabuli_NC_021164.1_9483785  | Ca_kabuli_chr05    | 9483785                        | [T/A]       | 1067297318                                 |
| Ca_Kabuli_NC_021164.1_9519382  | Ca_kabuli_chr05    | 9519382                        | [C/A]       | 1067297319                                 |
| Ca_Kabuli_NC_021164.1_9609752  | Ca_kabuli_chr05    | 9609752                        | [T/A]       | 1067297320                                 |
| Ca_Kabuli_NC_021164.1_9611022  | Ca_kabuli_chr05    | 9611022                        | [A/C]       | 1067297321                                 |
| Ca_Kabuli_NC_021164.1_9639391  | Ca_kabuli_chr05    | 9639391                        | [A/C]       | 1067297322                                 |
| Ca_Kabuli_NC_021164.1_9783650  | Ca_kabuli_chr05    | 9783650                        | [T/G]       | 1067297323                                 |
| Ca_Kabuli_NC_021164.1_9851952  | Ca_kabuli_chr05    | 9851952                        | [C/A]       | 1067297324                                 |
| Ca_Kabuli_NC_021164.1_9868969  | Ca_kabuli_chr05    | 9868969                        | [C/G]       | 1067297325                                 |
| Ca_Kabuli_NC_021164.1_9869001  | Ca_kabuli_chr05    | 9869001                        | [A/G]       | 1067297326                                 |
| Ca_Kabuli_NC_021164.1_10004421 | Ca_kabuli_chr05    | 10004421                       | [T/G]       | 1067297327                                 |
| Ca_Kabuli_NC_021164.1_10004424 | Ca_kabuli_chr05    | 10004424                       | [T/G]       | 1067297328                                 |
| Ca_Kabuli_NC_021164.1_10004427 | Ca_kabuli_chr05    | 10004427                       | [G/T]       | 1067297329                                 |
| Ca_Kabuli_NC_021164.1_10004430 | Ca_kabuli_chr05    | 10004430                       | [T/G]       | 1067297330                                 |
| Ca_Kabuli_NC_021164.1_10012365 | Ca_kabuli_chr05    | 10012365                       | [A/C]       | 1067297331                                 |
| Ca_Kabuli_NC_021164.1_10293383 | Ca_kabuli_chr05    | 10293383                       | [A/T]       | 1067297332                                 |
| Ca_Kabuli_NC_021164.1_10293384 | Ca_kabuli_chr05    | 10293384                       | [T/C]       | 1067297333                                 |
| Ca_Kabuli_NC_021164.1_10293386 | Ca_kabuli_chr05    | 10293386                       | [T/C]       | 1067297334                                 |

| <b>SNP IDs</b>                 | <b>Chromosomes</b> | <b>Physical positions (bp)</b> | <b>SNPs</b> | <b>NCBI SNPdb accession IDs (NCBI_ss#)</b> |
|--------------------------------|--------------------|--------------------------------|-------------|--------------------------------------------|
| Ca_Kabuli_NC_021164.1_10293388 | Ca_kabuli_chr05    | 10293388                       | [A/T]       | 1067297335                                 |
| Ca_Kabuli_NC_021164.1_10293434 | Ca_kabuli_chr05    | 10293434                       | [T/C]       | 1067297336                                 |
| Ca_Kabuli_NC_021164.1_10293445 | Ca_kabuli_chr05    | 10293445                       | [T/A]       | 1067297337                                 |
| Ca_Kabuli_NC_021164.1_10318805 | Ca_kabuli_chr05    | 10318805                       | [A/T]       | 1067297338                                 |
| Ca_Kabuli_NC_021164.1_10510124 | Ca_kabuli_chr05    | 10510124                       | [T/G]       | 1067297339                                 |
| Ca_Kabuli_NC_021164.1_10510126 | Ca_kabuli_chr05    | 10510126                       | [T/G]       | 1067297340                                 |
| Ca_Kabuli_NC_021164.1_10544854 | Ca_kabuli_chr05    | 10544854                       | [T/A]       | 1067297341                                 |
| Ca_Kabuli_NC_021164.1_10919414 | Ca_kabuli_chr05    | 10919414                       | [C/A]       | 1067297342                                 |
| Ca_Kabuli_NC_021164.1_10919423 | Ca_kabuli_chr05    | 10919423                       | [G/A]       | 1067297343                                 |
| Ca_Kabuli_NC_021164.1_10919431 | Ca_kabuli_chr05    | 10919431                       | [G/A]       | 1067297344                                 |
| Ca_Kabuli_NC_021164.1_10919455 | Ca_kabuli_chr05    | 10919455                       | [A/T]       | 1067297345                                 |
| Ca_Kabuli_NC_021164.1_10928968 | Ca_kabuli_chr05    | 10928968                       | [T/G]       | 1067297346                                 |
| Ca_Kabuli_NC_021164.1_10929610 | Ca_kabuli_chr05    | 10929610                       | [T/G]       | 1067297347                                 |
| Ca_Kabuli_NC_021164.1_11110859 | Ca_kabuli_chr05    | 11110859                       | [T/C]       | 1067297348                                 |
| Ca_Kabuli_NC_021164.1_11112101 | Ca_kabuli_chr05    | 11112101                       | [T/G]       | 1067297349                                 |
| Ca_Kabuli_NC_021164.1_11208382 | Ca_kabuli_chr05    | 11208382                       | [G/A]       | 1067297350                                 |
| Ca_Kabuli_NC_021164.1_11208390 | Ca_kabuli_chr05    | 11208390                       | [C/A]       | 1067297351                                 |
| Ca_Kabuli_NC_021164.1_11356511 | Ca_kabuli_chr05    | 11356511                       | [G/A]       | 1067297352                                 |
| Ca_Kabuli_NC_021164.1_11385791 | Ca_kabuli_chr05    | 11385791                       | [T/A]       | 1067297353                                 |
| Ca_Kabuli_NC_021164.1_11385793 | Ca_kabuli_chr05    | 11385793                       | [A/G]       | 1067297354                                 |
| Ca_Kabuli_NC_021164.1_11484424 | Ca_kabuli_chr05    | 11484424                       | [A/G]       | 1067297355                                 |
| Ca_Kabuli_NC_021164.1_11614171 | Ca_kabuli_chr05    | 11614171                       | [T/C]       | 1067297356                                 |
| Ca_Kabuli_NC_021164.1_11614191 | Ca_kabuli_chr05    | 11614191                       | [T/C]       | 1067297357                                 |
| Ca_Kabuli_NC_021164.1_11614193 | Ca_kabuli_chr05    | 11614193                       | [T/C]       | 1067297358                                 |
| Ca_Kabuli_NC_021164.1_11614203 | Ca_kabuli_chr05    | 11614203                       | [A/T]       | 1067297359                                 |
| Ca_Kabuli_NC_021164.1_11614206 | Ca_kabuli_chr05    | 11614206                       | [T/C]       | 1067297360                                 |
| Ca_Kabuli_NC_021164.1_11614211 | Ca_kabuli_chr05    | 11614211                       | [T/C]       | 1067297361                                 |
| Ca_Kabuli_NC_021164.1_11699180 | Ca_kabuli_chr05    | 11699180                       | [A/C]       | 1067297362                                 |
| Ca_Kabuli_NC_021164.1_11745910 | Ca_kabuli_chr05    | 11745910                       | [G/A]       | 1067297363                                 |
| Ca_Kabuli_NC_021164.1_11745911 | Ca_kabuli_chr05    | 11745911                       | [T/A]       | 1067297364                                 |
| Ca_Kabuli_NC_021164.1_11745916 | Ca_kabuli_chr05    | 11745916                       | [A/G]       | 1067297365                                 |
| Ca_Kabuli_NC_021164.1_11745922 | Ca_kabuli_chr05    | 11745922                       | [A/G]       | 1067297366                                 |
| Ca_Kabuli_NC_021164.1_11779651 | Ca_kabuli_chr05    | 11779651                       | [A/G]       | 1067297367                                 |
| Ca_Kabuli_NC_021164.1_11779703 | Ca_kabuli_chr05    | 11779703                       | [A/G]       | 1067297368                                 |

| <b>SNP IDs</b>                 | <b>Chromosomes</b> | <b>Physical positions (bp)</b> | <b>SNPs</b> | <b>NCBI SNPdb accession IDs (NCBI_ss#)</b> |
|--------------------------------|--------------------|--------------------------------|-------------|--------------------------------------------|
| Ca_Kabuli_NC_021164.1_11845508 | Ca_kabuli_chr05    | 11845508                       | [A/G]       | 1067297369                                 |
| Ca_Kabuli_NC_021164.1_11845514 | Ca_kabuli_chr05    | 11845514                       | [A/C]       | 1067297370                                 |
| Ca_Kabuli_NC_021164.1_11847809 | Ca_kabuli_chr05    | 11847809                       | [T/A]       | 1067297371                                 |
| Ca_Kabuli_NC_021164.1_11847835 | Ca_kabuli_chr05    | 11847835                       | [T/G]       | 1067297372                                 |
| Ca_Kabuli_NC_021164.1_11848040 | Ca_kabuli_chr05    | 11848040                       | [A/G]       | 1067297373                                 |
| Ca_Kabuli_NC_021164.1_11848092 | Ca_kabuli_chr05    | 11848092                       | [A/T]       | 1067297374                                 |
| Ca_Kabuli_NC_021164.1_11864912 | Ca_kabuli_chr05    | 11864912                       | [A/C]       | 1067297375                                 |
| Ca_Kabuli_NC_021164.1_11870832 | Ca_kabuli_chr05    | 11870832                       | [T/C]       | 1067297376                                 |
| Ca_Kabuli_NC_021164.1_11870849 | Ca_kabuli_chr05    | 11870849                       | [A/G]       | 1067297377                                 |
| Ca_Kabuli_NC_021164.1_11983308 | Ca_kabuli_chr05    | 11983308                       | [T/G]       | 1067297378                                 |
| Ca_Kabuli_NC_021164.1_11996101 | Ca_kabuli_chr05    | 11996101                       | [A/C]       | 1067297379                                 |
| Ca_Kabuli_NC_021164.1_12082036 | Ca_kabuli_chr05    | 12082036                       | [A/G]       | 1067297380                                 |
| Ca_Kabuli_NC_021164.1_12082066 | Ca_kabuli_chr05    | 12082066                       | [A/G]       | 1067297381                                 |
| Ca_Kabuli_NC_021164.1_12162166 | Ca_kabuli_chr05    | 12162166                       | [G/T]       | 1067297382                                 |
| Ca_Kabuli_NC_021164.1_12410192 | Ca_kabuli_chr05    | 12410192                       | [T/C]       | 1067297383                                 |
| Ca_Kabuli_NC_021164.1_12427951 | Ca_kabuli_chr05    | 12427951                       | [A/T]       | 1067297384                                 |
| Ca_Kabuli_NC_021164.1_12435649 | Ca_kabuli_chr05    | 12435649                       | [C/A]       | 1067297385                                 |
| Ca_Kabuli_NC_021164.1_12435650 | Ca_kabuli_chr05    | 12435650                       | [T/G]       | 1067297386                                 |
| Ca_Kabuli_NC_021164.1_12435651 | Ca_kabuli_chr05    | 12435651                       | [T/A]       | 1067297387                                 |
| Ca_Kabuli_NC_021164.1_12485979 | Ca_kabuli_chr05    | 12485979                       | [T/A]       | 1067297388                                 |
| Ca_Kabuli_NC_021164.1_12553443 | Ca_kabuli_chr05    | 12553443                       | [A/C]       | 1067297389                                 |
| Ca_Kabuli_NC_021164.1_12553623 | Ca_kabuli_chr05    | 12553623                       | [A/C]       | 1067297390                                 |
| Ca_Kabuli_NC_021164.1_12553701 | Ca_kabuli_chr05    | 12553701                       | [A/G]       | 1067297391                                 |
| Ca_Kabuli_NC_021164.1_12553723 | Ca_kabuli_chr05    | 12553723                       | [A/G]       | 1067297392                                 |
| Ca_Kabuli_NC_021164.1_12590478 | Ca_kabuli_chr05    | 12590478                       | [C/T]       | 1067297393                                 |
| Ca_Kabuli_NC_021164.1_12590512 | Ca_kabuli_chr05    | 12590512                       | [G/A]       | 1067297394                                 |
| Ca_Kabuli_NC_021164.1_13981962 | Ca_kabuli_chr05    | 13981962                       | [T/G]       | 1067297395                                 |
| Ca_Kabuli_NC_021164.1_14168818 | Ca_kabuli_chr05    | 14168818                       | [T/G]       | 1067297396                                 |
| Ca_Kabuli_NC_021164.1_15401236 | Ca_kabuli_chr05    | 15401236                       | [T/C]       | 1067297397                                 |
| Ca_Kabuli_NC_021164.1_15476287 | Ca_kabuli_chr05    | 15476287                       | [T/G]       | 1067297398                                 |
| Ca_Kabuli_NC_021164.1_15476661 | Ca_kabuli_chr05    | 15476661                       | [T/G]       | 1067297399                                 |
| Ca_Kabuli_NC_021164.1_15500774 | Ca_kabuli_chr05    | 15500774                       | [T/G]       | 1067297400                                 |
| Ca_Kabuli_NC_021164.1_15500785 | Ca_kabuli_chr05    | 15500785                       | [T/A]       | 1067297401                                 |
| Ca_Kabuli_NC_021164.1_15777671 | Ca_kabuli_chr05    | 15777671                       | [T/C]       | 1067297402                                 |

| <b>SNP IDs</b>                 | <b>Chromosomes</b> | <b>Physical positions (bp)</b> | <b>SNPs</b> | <b>NCBI SNPdb accession IDs (NCBI_ss#)</b> |
|--------------------------------|--------------------|--------------------------------|-------------|--------------------------------------------|
| Ca_Kabuli_NC_021164.1_15777675 | Ca_kabuli_chr05    | 15777675                       | [A/G]       | 1067297403                                 |
| Ca_Kabuli_NC_021164.1_15777680 | Ca_kabuli_chr05    | 15777680                       | [A/C]       | 1067297404                                 |
| Ca_Kabuli_NC_021164.1_15777696 | Ca_kabuli_chr05    | 15777696                       | [A/G]       | 1067297405                                 |
| Ca_Kabuli_NC_021164.1_15777707 | Ca_kabuli_chr05    | 15777707                       | [A/G]       | 1067297406                                 |
| Ca_Kabuli_NC_021164.1_15777723 | Ca_kabuli_chr05    | 15777723                       | [T/G]       | 1067297407                                 |
| Ca_Kabuli_NC_021164.1_15777729 | Ca_kabuli_chr05    | 15777729                       | [A/G]       | 1067297408                                 |
| Ca_Kabuli_NC_021164.1_15777737 | Ca_kabuli_chr05    | 15777737                       | [A/G]       | 1067297409                                 |
| Ca_Kabuli_NC_021164.1_16353372 | Ca_kabuli_chr05    | 16353372                       | [T/G]       | 1067297410                                 |
| Ca_Kabuli_NC_021164.1_16591550 | Ca_kabuli_chr05    | 16591550                       | [A/C]       | 1067297411                                 |
| Ca_Kabuli_NC_021164.1_16594090 | Ca_kabuli_chr05    | 16594090                       | [T/C]       | 1067297412                                 |
| Ca_Kabuli_NC_021164.1_16594092 | Ca_kabuli_chr05    | 16594092                       | [A/G]       | 1067297413                                 |
| Ca_Kabuli_NC_021164.1_16676418 | Ca_kabuli_chr05    | 16676418                       | [T/G]       | 1067297414                                 |
| Ca_Kabuli_NC_021164.1_16676438 | Ca_kabuli_chr05    | 16676438                       | [T/C]       | 1067297415                                 |
| Ca_Kabuli_NC_021164.1_16767050 | Ca_kabuli_chr05    | 16767050                       | [T/A]       | 1067297416                                 |
| Ca_Kabuli_NC_021164.1_16772243 | Ca_kabuli_chr05    | 16772243                       | [A/G]       | 1067297417                                 |
| Ca_Kabuli_NC_021164.1_16929891 | Ca_kabuli_chr05    | 16929891                       | [T/G]       | 1067297418                                 |
| Ca_Kabuli_NC_021164.1_16929894 | Ca_kabuli_chr05    | 16929894                       | [C/G]       | 1067297419                                 |
| Ca_Kabuli_NC_021164.1_16929896 | Ca_kabuli_chr05    | 16929896                       | [A/G]       | 1067297420                                 |
| Ca_Kabuli_NC_021164.1_16929897 | Ca_kabuli_chr05    | 16929897                       | [A/G]       | 1067297421                                 |
| Ca_Kabuli_NC_021164.1_16929903 | Ca_kabuli_chr05    | 16929903                       | [C/G]       | 1067297422                                 |
| Ca_Kabuli_NC_021164.1_17043790 | Ca_kabuli_chr05    | 17043790                       | [A/T]       | 1067297423                                 |
| Ca_Kabuli_NC_021164.1_17043811 | Ca_kabuli_chr05    | 17043811                       | [G/C]       | 1067297424                                 |
| Ca_Kabuli_NC_021164.1_17043824 | Ca_kabuli_chr05    | 17043824                       | [A/T]       | 1067297425                                 |
| Ca_Kabuli_NC_021164.1_17043827 | Ca_kabuli_chr05    | 17043827                       | [G/T]       | 1067297426                                 |
| Ca_Kabuli_NC_021164.1_17494697 | Ca_kabuli_chr05    | 17494697                       | [C/T]       | 1067297427                                 |
| Ca_Kabuli_NC_021164.1_17494699 | Ca_kabuli_chr05    | 17494699                       | [C/A]       | 1067297428                                 |
| Ca_Kabuli_NC_021164.1_17494700 | Ca_kabuli_chr05    | 17494700                       | [T/C]       | 1067297429                                 |
| Ca_Kabuli_NC_021164.1_17494702 | Ca_kabuli_chr05    | 17494702                       | [G/A]       | 1067297430                                 |
| Ca_Kabuli_NC_021164.1_17494705 | Ca_kabuli_chr05    | 17494705                       | [A/T]       | 1067297431                                 |
| Ca_Kabuli_NC_021164.1_17494710 | Ca_kabuli_chr05    | 17494710                       | [C/T]       | 1067297432                                 |
| Ca_Kabuli_NC_021164.1_17494714 | Ca_kabuli_chr05    | 17494714                       | [A/G]       | 1067297433                                 |
| Ca_Kabuli_NC_021164.1_17494725 | Ca_kabuli_chr05    | 17494725                       | [C/T]       | 1067297434                                 |
| Ca_Kabuli_NC_021164.1_18149854 | Ca_kabuli_chr05    | 18149854                       | [T/A]       | 1067297435                                 |
| Ca_Kabuli_NC_021164.1_18150640 | Ca_kabuli_chr05    | 18150640                       | [A/T]       | 1067297436                                 |

| <b>SNP IDs</b>                 | <b>Chromosomes</b> | <b>Physical positions (bp)</b> | <b>SNPs</b> | <b>NCBI SNPdb accession IDs (NCBI_ss#)</b> |
|--------------------------------|--------------------|--------------------------------|-------------|--------------------------------------------|
| Ca_Kabuli_NC_021164.1_18150658 | Ca_kabuli_chr05    | 18150658                       | [A/G]       | 1067297437                                 |
| Ca_Kabuli_NC_021164.1_18296460 | Ca_kabuli_chr05    | 18296460                       | [A/C]       | 1067297438                                 |
| Ca_Kabuli_NC_021164.1_18543600 | Ca_kabuli_chr05    | 18543600                       | [A/T]       | 1067297439                                 |
| Ca_Kabuli_NC_021164.1_18543616 | Ca_kabuli_chr05    | 18543616                       | [A/G]       | 1067297440                                 |
| Ca_Kabuli_NC_021164.1_18732773 | Ca_kabuli_chr05    | 18732773                       | [A/C]       | 1067297441                                 |
| Ca_Kabuli_NC_021164.1_18889146 | Ca_kabuli_chr05    | 18889146                       | [G/T]       | 1067297442                                 |
| Ca_Kabuli_NC_021164.1_18971088 | Ca_kabuli_chr05    | 18971088                       | [C/A]       | 1067297443                                 |
| Ca_Kabuli_NC_021164.1_18971091 | Ca_kabuli_chr05    | 18971091                       | [T/G]       | 1067297444                                 |
| Ca_Kabuli_NC_021164.1_19716362 | Ca_kabuli_chr05    | 19716362                       | [G/A]       | 1067297445                                 |
| Ca_Kabuli_NC_021164.1_19719893 | Ca_kabuli_chr05    | 19719893                       | [T/C]       | 1067297446                                 |
| Ca_Kabuli_NC_021164.1_19720404 | Ca_kabuli_chr05    | 19720404                       | [C/T]       | 1067297447                                 |
| Ca_Kabuli_NC_021164.1_19859837 | Ca_kabuli_chr05    | 19859837                       | [T/G]       | 1067297448                                 |
| Ca_Kabuli_NC_021164.1_19886380 | Ca_kabuli_chr05    | 19886380                       | [G/C]       | 1067297449                                 |
| Ca_Kabuli_NC_021164.1_19886396 | Ca_kabuli_chr05    | 19886396                       | [A/C]       | 1067297450                                 |
| Ca_Kabuli_NC_021164.1_19886405 | Ca_kabuli_chr05    | 19886405                       | [T/C]       | 1067297451                                 |
| Ca_Kabuli_NC_021164.1_19886414 | Ca_kabuli_chr05    | 19886414                       | [A/C]       | 1067297452                                 |
| Ca_Kabuli_NC_021164.1_19886958 | Ca_kabuli_chr05    | 19886958                       | [T/C]       | 1067297453                                 |
| Ca_Kabuli_NC_021164.1_19886967 | Ca_kabuli_chr05    | 19886967                       | [A/G]       | 1067297454                                 |
| Ca_Kabuli_NC_021164.1_19886970 | Ca_kabuli_chr05    | 19886970                       | [T/C]       | 1067297455                                 |
| Ca_Kabuli_NC_021164.1_19886973 | Ca_kabuli_chr05    | 19886973                       | [A/T]       | 1067297456                                 |
| Ca_Kabuli_NC_021164.1_20354222 | Ca_kabuli_chr05    | 20354222                       | [A/T]       | 1067297457                                 |
| Ca_Kabuli_NC_021164.1_20354249 | Ca_kabuli_chr05    | 20354249                       | [A/G]       | 1067297458                                 |
| Ca_Kabuli_NC_021164.1_20354258 | Ca_kabuli_chr05    | 20354258                       | [T/A]       | 1067297459                                 |
| Ca_Kabuli_NC_021164.1_20370644 | Ca_kabuli_chr05    | 20370644                       | [G/C]       | 1067297460                                 |
| Ca_Kabuli_NC_021164.1_20443993 | Ca_kabuli_chr05    | 20443993                       | [A/G]       | 1067297461                                 |
| Ca_Kabuli_NC_021164.1_20443995 | Ca_kabuli_chr05    | 20443995                       | [A/G]       | 1067297462                                 |
| Ca_Kabuli_NC_021164.1_20443996 | Ca_kabuli_chr05    | 20443996                       | [A/C]       | 1067297463                                 |
| Ca_Kabuli_NC_021164.1_20460859 | Ca_kabuli_chr05    | 20460859                       | [T/G]       | 1067297464                                 |
| Ca_Kabuli_NC_021164.1_20460873 | Ca_kabuli_chr05    | 20460873                       | [A/G]       | 1067297465                                 |
| Ca_Kabuli_NC_021164.1_20460882 | Ca_kabuli_chr05    | 20460882                       | [A/G]       | 1067297466                                 |
| Ca_Kabuli_NC_021164.1_20546402 | Ca_kabuli_chr05    | 20546402                       | [T/G]       | 1067297467                                 |
| Ca_Kabuli_NC_021164.1_20645027 | Ca_kabuli_chr05    | 20645027                       | [A/G]       | 1067297468                                 |
| Ca_Kabuli_NC_021164.1_20645036 | Ca_kabuli_chr05    | 20645036                       | [A/G]       | 1067297469                                 |
| Ca_Kabuli_NC_021164.1_21033841 | Ca_kabuli_chr05    | 21033841                       | [A/C]       | 1067297470                                 |



| <b>SNP IDs</b>                 | <b>Chromosomes</b> | <b>Physical positions (bp)</b> | <b>SNPs</b> | <b>NCBI SNPdb accession IDs (NCBI_ss#)</b> |
|--------------------------------|--------------------|--------------------------------|-------------|--------------------------------------------|
| Ca_Kabuli_NC_021164.1_21033852 | Ca_kabuli_chr05    | 21033852                       | [A/G]       | 1067297471                                 |
| Ca_Kabuli_NC_021164.1_21033919 | Ca_kabuli_chr05    | 21033919                       | [A/C]       | 1067297472                                 |
| Ca_Kabuli_NC_021164.1_21033922 | Ca_kabuli_chr05    | 21033922                       | [C/T]       | 1067297473                                 |
| Ca_Kabuli_NC_021164.1_21033923 | Ca_kabuli_chr05    | 21033923                       | [C/T]       | 1067297474                                 |
| Ca_Kabuli_NC_021164.1_21033926 | Ca_kabuli_chr05    | 21033926                       | [C/T]       | 1067297475                                 |
| Ca_Kabuli_NC_021164.1_21033969 | Ca_kabuli_chr05    | 21033969                       | [A/C]       | 1067297476                                 |
| Ca_Kabuli_NC_021164.1_21095660 | Ca_kabuli_chr05    | 21095660                       | [T/C]       | 1067297477                                 |
| Ca_Kabuli_NC_021164.1_21163371 | Ca_kabuli_chr05    | 21163371                       | [A/G]       | 1067297478                                 |
| Ca_Kabuli_NC_021164.1_21163435 | Ca_kabuli_chr05    | 21163435                       | [A/G]       | 1067297479                                 |
| Ca_Kabuli_NC_021164.1_21163447 | Ca_kabuli_chr05    | 21163447                       | [A/C]       | 1067297480                                 |
| Ca_Kabuli_NC_021164.1_21163453 | Ca_kabuli_chr05    | 21163453                       | [A/T]       | 1067297481                                 |
| Ca_Kabuli_NC_021164.1_21166082 | Ca_kabuli_chr05    | 21166082                       | [A/T]       | 1067297482                                 |
| Ca_Kabuli_NC_021164.1_21188830 | Ca_kabuli_chr05    | 21188830                       | [T/A]       | 1067297483                                 |
| Ca_Kabuli_NC_021164.1_21231054 | Ca_kabuli_chr05    | 21231054                       | [G/C]       | 1067297484                                 |
| Ca_Kabuli_NC_021164.1_21231055 | Ca_kabuli_chr05    | 21231055                       | [G/T]       | 1067297485                                 |
| Ca_Kabuli_NC_021164.1_21495508 | Ca_kabuli_chr05    | 21495508                       | [G/A]       | 1067297486                                 |
| Ca_Kabuli_NC_021164.1_21770485 | Ca_kabuli_chr05    | 21770485                       | [T/C]       | 1067297487                                 |
| Ca_Kabuli_NC_021164.1_21770503 | Ca_kabuli_chr05    | 21770503                       | [T/C]       | 1067297488                                 |
| Ca_Kabuli_NC_021164.1_21933944 | Ca_kabuli_chr05    | 21933944                       | [A/C]       | 1067297489                                 |
| Ca_Kabuli_NC_021164.1_21933954 | Ca_kabuli_chr05    | 21933954                       | [A/C]       | 1067297490                                 |
| Ca_Kabuli_NC_021164.1_21933957 | Ca_kabuli_chr05    | 21933957                       | [G/C]       | 1067297491                                 |
| Ca_Kabuli_NC_021164.1_22046195 | Ca_kabuli_chr05    | 22046195                       | [A/C]       | 1067297492                                 |
| Ca_Kabuli_NC_021164.1_22065859 | Ca_kabuli_chr05    | 22065859                       | [G/A]       | 1067297493                                 |
| Ca_Kabuli_NC_021164.1_22116956 | Ca_kabuli_chr05    | 22116956                       | [T/G]       | 1067297494                                 |
| Ca_Kabuli_NC_021164.1_22116961 | Ca_kabuli_chr05    | 22116961                       | [T/G]       | 1067297495                                 |
| Ca_Kabuli_NC_021164.1_22296799 | Ca_kabuli_chr05    | 22296799                       | [G/A]       | 1067297496                                 |
| Ca_Kabuli_NC_021164.1_22373590 | Ca_kabuli_chr05    | 22373590                       | [T/G]       | 1067297497                                 |
| Ca_Kabuli_NC_021164.1_22430965 | Ca_kabuli_chr05    | 22430965                       | [A/G]       | 1067297498                                 |
| Ca_Kabuli_NC_021164.1_22430967 | Ca_kabuli_chr05    | 22430967                       | [A/G]       | 1067297499                                 |
| Ca_Kabuli_NC_021164.1_22431041 | Ca_kabuli_chr05    | 22431041                       | [T/G]       | 1067297500                                 |
| Ca_Kabuli_NC_021164.1_22446077 | Ca_kabuli_chr05    | 22446077                       | [A/C]       | 1067297501                                 |
| Ca_Kabuli_NC_021164.1_22484728 | Ca_kabuli_chr05    | 22484728                       | [T/G]       | 1067297502                                 |
| Ca_Kabuli_NC_021164.1_22627341 | Ca_kabuli_chr05    | 22627341                       | [A/C]       | 1067297503                                 |
| Ca_Kabuli_NC_021164.1_22695359 | Ca_kabuli_chr05    | 22695359                       | [T/G]       | 1067297504                                 |

| <b>SNP IDs</b>                 | <b>Chromosomes</b> | <b>Physical positions (bp)</b> | <b>SNPs</b> | <b>NCBI SNPdb accession IDs (NCBI_ss#)</b> |
|--------------------------------|--------------------|--------------------------------|-------------|--------------------------------------------|
| Ca_Kabuli_NC_021164.1_22695584 | Ca_kabuli_chr05    | 22695584                       | [A/C]       | 1067297505                                 |
| Ca_Kabuli_NC_021164.1_22695590 | Ca_kabuli_chr05    | 22695590                       | [C/T]       | 1067297506                                 |
| Ca_Kabuli_NC_021164.1_22695666 | Ca_kabuli_chr05    | 22695666                       | [G/T]       | 1067297507                                 |
| Ca_Kabuli_NC_021164.1_22763707 | Ca_kabuli_chr05    | 22763707                       | [A/G]       | 1067297508                                 |
| Ca_Kabuli_NC_021164.1_22763708 | Ca_kabuli_chr05    | 22763708                       | [T/C]       | 1067297509                                 |
| Ca_Kabuli_NC_021164.1_22763710 | Ca_kabuli_chr05    | 22763710                       | [A/G]       | 1067297510                                 |
| Ca_Kabuli_NC_021164.1_22763712 | Ca_kabuli_chr05    | 22763712                       | [A/C]       | 1067297511                                 |
| Ca_Kabuli_NC_021164.1_22763716 | Ca_kabuli_chr05    | 22763716                       | [A/C]       | 1067297512                                 |
| Ca_Kabuli_NC_021164.1_22763726 | Ca_kabuli_chr05    | 22763726                       | [T/C]       | 1067297513                                 |
| Ca_Kabuli_NC_021164.1_23063384 | Ca_kabuli_chr05    | 23063384                       | [T/C]       | 1067297514                                 |
| Ca_Kabuli_NC_021164.1_23151994 | Ca_kabuli_chr05    | 23151994                       | [A/C]       | 1067297515                                 |
| Ca_Kabuli_NC_021164.1_23152020 | Ca_kabuli_chr05    | 23152020                       | [T/A]       | 1067297516                                 |
| Ca_Kabuli_NC_021164.1_23157944 | Ca_kabuli_chr05    | 23157944                       | [A/C]       | 1067297517                                 |
| Ca_Kabuli_NC_021164.1_23161972 | Ca_kabuli_chr05    | 23161972                       | [T/G]       | 1067297518                                 |
| Ca_Kabuli_NC_021164.1_23161993 | Ca_kabuli_chr05    | 23161993                       | [T/C]       | 1067297519                                 |
| Ca_Kabuli_NC_021164.1_23318702 | Ca_kabuli_chr05    | 23318702                       | [T/A]       | 1067297520                                 |
| Ca_Kabuli_NC_021164.1_23440279 | Ca_kabuli_chr05    | 23440279                       | [A/G]       | 1067297521                                 |
| Ca_Kabuli_NC_021164.1_23440287 | Ca_kabuli_chr05    | 23440287                       | [T/G]       | 1067297522                                 |
| Ca_Kabuli_NC_021164.1_23449134 | Ca_kabuli_chr05    | 23449134                       | [A/C]       | 1067297523                                 |
| Ca_Kabuli_NC_021164.1_23661904 | Ca_kabuli_chr05    | 23661904                       | [G/C]       | 1067297524                                 |
| Ca_Kabuli_NC_021164.1_23663999 | Ca_kabuli_chr05    | 23663999                       | [A/C]       | 1067297525                                 |
| Ca_Kabuli_NC_021164.1_23669836 | Ca_kabuli_chr05    | 23669836                       | [G/T]       | 1067297526                                 |
| Ca_Kabuli_NC_021164.1_23673391 | Ca_kabuli_chr05    | 23673391                       | [T/C]       | 1067297527                                 |
| Ca_Kabuli_NC_021164.1_23673912 | Ca_kabuli_chr05    | 23673912                       | [T/C]       | 1067297528                                 |
| Ca_Kabuli_NC_021164.1_23674378 | Ca_kabuli_chr05    | 23674378                       | [T/A]       | 1067297529                                 |
| Ca_Kabuli_NC_021164.1_23674385 | Ca_kabuli_chr05    | 23674385                       | [C/A]       | 1067297530                                 |
| Ca_Kabuli_NC_021164.1_23674574 | Ca_kabuli_chr05    | 23674574                       | [A/G]       | 1067297531                                 |
| Ca_Kabuli_NC_021164.1_23674577 | Ca_kabuli_chr05    | 23674577                       | [A/C]       | 1067297532                                 |
| Ca_Kabuli_NC_021164.1_23674580 | Ca_kabuli_chr05    | 23674580                       | [A/C]       | 1067297533                                 |
| Ca_Kabuli_NC_021164.1_23683507 | Ca_kabuli_chr05    | 23683507                       | [A/C]       | 1067297534                                 |
| Ca_Kabuli_NC_021164.1_23896621 | Ca_kabuli_chr05    | 23896621                       | [G/C]       | 1067297535                                 |
| Ca_Kabuli_NC_021164.1_23896642 | Ca_kabuli_chr05    | 23896642                       | [T/C]       | 1067297536                                 |
| Ca_Kabuli_NC_021164.1_23896645 | Ca_kabuli_chr05    | 23896645                       | [A/G]       | 1067297537                                 |
| Ca_Kabuli_NC_021164.1_23896648 | Ca_kabuli_chr05    | 23896648                       | [A/G]       | 1067297538                                 |

| <b>SNP IDs</b>                 | <b>Chromosomes</b> | <b>Physical positions (bp)</b> | <b>SNPs</b> | <b>NCBI SNPdb accession IDs (NCBI_ss#)</b> |
|--------------------------------|--------------------|--------------------------------|-------------|--------------------------------------------|
| Ca_Kabuli_NC_021164.1_23896654 | Ca_kabuli_chr05    | 23896654                       | [A/G]       | 1067297539                                 |
| Ca_Kabuli_NC_021164.1_23896659 | Ca_kabuli_chr05    | 23896659                       | [A/G]       | 1067297540                                 |
| Ca_Kabuli_NC_021164.1_23900520 | Ca_kabuli_chr05    | 23900520                       | [T/G]       | 1067297541                                 |
| Ca_Kabuli_NC_021164.1_23930960 | Ca_kabuli_chr05    | 23930960                       | [T/A]       | 1067297542                                 |
| Ca_Kabuli_NC_021164.1_24090523 | Ca_kabuli_chr05    | 24090523                       | [A/C]       | 1067297543                                 |
| Ca_Kabuli_NC_021164.1_24346246 | Ca_kabuli_chr05    | 24346246                       | [C/A]       | 1067297544                                 |
| Ca_Kabuli_NC_021164.1_24346247 | Ca_kabuli_chr05    | 24346247                       | [C/T]       | 1067297545                                 |
| Ca_Kabuli_NC_021164.1_24346248 | Ca_kabuli_chr05    | 24346248                       | [A/C]       | 1067297546                                 |
| Ca_Kabuli_NC_021164.1_24346249 | Ca_kabuli_chr05    | 24346249                       | [G/T]       | 1067297547                                 |
| Ca_Kabuli_NC_021164.1_24453018 | Ca_kabuli_chr05    | 24453018                       | [T/C]       | 1067297548                                 |
| Ca_Kabuli_NC_021164.1_24453047 | Ca_kabuli_chr05    | 24453047                       | [T/C]       | 1067297549                                 |
| Ca_Kabuli_NC_021164.1_24455862 | Ca_kabuli_chr05    | 24455862                       | [T/C]       | 1067297550                                 |
| Ca_Kabuli_NC_021164.1_24456308 | Ca_kabuli_chr05    | 24456308                       | [A/C]       | 1067297551                                 |
| Ca_Kabuli_NC_021164.1_24487926 | Ca_kabuli_chr05    | 24487926                       | [T/G]       | 1067297552                                 |
| Ca_Kabuli_NC_021164.1_24497690 | Ca_kabuli_chr05    | 24497690                       | [T/G]       | 1067297553                                 |
| Ca_Kabuli_NC_021164.1_24500906 | Ca_kabuli_chr05    | 24500906                       | [T/C]       | 1067297554                                 |
| Ca_Kabuli_NC_021164.1_24539412 | Ca_kabuli_chr05    | 24539412                       | [A/T]       | 1067297555                                 |
| Ca_Kabuli_NC_021164.1_24596240 | Ca_kabuli_chr05    | 24596240                       | [T/G]       | 1067297556                                 |
| Ca_Kabuli_NC_021164.1_24596258 | Ca_kabuli_chr05    | 24596258                       | [A/G]       | 1067297557                                 |
| Ca_Kabuli_NC_021164.1_24811305 | Ca_kabuli_chr05    | 24811305                       | [T/G]       | 1067297558                                 |
| Ca_Kabuli_NC_021164.1_24822626 | Ca_kabuli_chr05    | 24822626                       | [A/C]       | 1067297559                                 |
| Ca_Kabuli_NC_021164.1_24822630 | Ca_kabuli_chr05    | 24822630                       | [A/C]       | 1067297560                                 |
| Ca_Kabuli_NC_021164.1_24822635 | Ca_kabuli_chr05    | 24822635                       | [A/C]       | 1067297561                                 |
| Ca_Kabuli_NC_021164.1_24822644 | Ca_kabuli_chr05    | 24822644                       | [T/C]       | 1067297562                                 |
| Ca_Kabuli_NC_021164.1_24822651 | Ca_kabuli_chr05    | 24822651                       | [T/G]       | 1067297563                                 |
| Ca_Kabuli_NC_021164.1_24822652 | Ca_kabuli_chr05    | 24822652                       | [T/C]       | 1067297564                                 |
| Ca_Kabuli_NC_021164.1_24822654 | Ca_kabuli_chr05    | 24822654                       | [C/T]       | 1067297565                                 |
| Ca_Kabuli_NC_021164.1_24822656 | Ca_kabuli_chr05    | 24822656                       | [C/T]       | 1067297566                                 |
| Ca_Kabuli_NC_021164.1_24822660 | Ca_kabuli_chr05    | 24822660                       | [C/T]       | 1067297567                                 |
| Ca_Kabuli_NC_021164.1_24822664 | Ca_kabuli_chr05    | 24822664                       | [C/T]       | 1067297568                                 |
| Ca_Kabuli_NC_021164.1_24843049 | Ca_kabuli_chr05    | 24843049                       | [A/C]       | 1067297569                                 |
| Ca_Kabuli_NC_021164.1_24843053 | Ca_kabuli_chr05    | 24843053                       | [A/T]       | 1067297570                                 |
| Ca_Kabuli_NC_021164.1_24843085 | Ca_kabuli_chr05    | 24843085                       | [A/T]       | 1067297571                                 |
| Ca_Kabuli_NC_021164.1_24985735 | Ca_kabuli_chr05    | 24985735                       | [T/G]       | 1067297572                                 |

| <b>SNP IDs</b>                 | <b>Chromosomes</b> | <b>Physical positions (bp)</b> | <b>SNPs</b> | <b>NCBI SNPdb accession IDs (NCBI_ss#)</b> |
|--------------------------------|--------------------|--------------------------------|-------------|--------------------------------------------|
| Ca_Kabuli_NC_021164.1_24985904 | Ca_kabuli_chr05    | 24985904                       | [T/G]       | 1067297573                                 |
| Ca_Kabuli_NC_021164.1_25006128 | Ca_kabuli_chr05    | 25006128                       | [T/G]       | 1067297574                                 |
| Ca_Kabuli_NC_021164.1_25006227 | Ca_kabuli_chr05    | 25006227                       | [A/C]       | 1067297575                                 |
| Ca_Kabuli_NC_021164.1_25120905 | Ca_kabuli_chr05    | 25120905                       | [T/A]       | 1067297576                                 |
| Ca_Kabuli_NC_021164.1_25120950 | Ca_kabuli_chr05    | 25120950                       | [A/C]       | 1067297577                                 |
| Ca_Kabuli_NC_021164.1_25333468 | Ca_kabuli_chr05    | 25333468                       | [T/A]       | 1067297578                                 |
| Ca_Kabuli_NC_021164.1_25400510 | Ca_kabuli_chr05    | 25400510                       | [T/C]       | 1067297579                                 |
| Ca_Kabuli_NC_021164.1_25400568 | Ca_kabuli_chr05    | 25400568                       | [A/G]       | 1067297580                                 |
| Ca_Kabuli_NC_021164.1_25435023 | Ca_kabuli_chr05    | 25435023                       | [A/T]       | 1067297581                                 |
| Ca_Kabuli_NC_021164.1_25437861 | Ca_kabuli_chr05    | 25437861                       | [T/A]       | 1067297582                                 |
| Ca_Kabuli_NC_021164.1_25437871 | Ca_kabuli_chr05    | 25437871                       | [A/G]       | 1067297583                                 |
| Ca_Kabuli_NC_021164.1_25437888 | Ca_kabuli_chr05    | 25437888                       | [A/G]       | 1067297584                                 |
| Ca_Kabuli_NC_021164.1_25457957 | Ca_kabuli_chr05    | 25457957                       | [T/G]       | 1067297585                                 |
| Ca_Kabuli_NC_021164.1_25679023 | Ca_kabuli_chr05    | 25679023                       | [C/T]       | 1067297586                                 |
| Ca_Kabuli_NC_021164.1_25679048 | Ca_kabuli_chr05    | 25679048                       | [T/C]       | 1067297587                                 |
| Ca_Kabuli_NC_021164.1_25697491 | Ca_kabuli_chr05    | 25697491                       | [G/A]       | 1067297588                                 |
| Ca_Kabuli_NC_021164.1_25697492 | Ca_kabuli_chr05    | 25697492                       | [A/C]       | 1067297589                                 |
| Ca_Kabuli_NC_021164.1_25697494 | Ca_kabuli_chr05    | 25697494                       | [G/A]       | 1067297590                                 |
| Ca_Kabuli_NC_021164.1_25697512 | Ca_kabuli_chr05    | 25697512                       | [T/C]       | 1067297591                                 |
| Ca_Kabuli_NC_021164.1_25747850 | Ca_kabuli_chr05    | 25747850                       | [T/A]       | 1067297592                                 |
| Ca_Kabuli_NC_021164.1_26095637 | Ca_kabuli_chr05    | 26095637                       | [T/A]       | 1067297593                                 |
| Ca_Kabuli_NC_021164.1_26095693 | Ca_kabuli_chr05    | 26095693                       | [A/C]       | 1067297594                                 |
| Ca_Kabuli_NC_021164.1_26124304 | Ca_kabuli_chr05    | 26124304                       | [A/G]       | 1067297595                                 |
| Ca_Kabuli_NC_021164.1_26201244 | Ca_kabuli_chr05    | 26201244                       | [T/C]       | 1067297596                                 |
| Ca_Kabuli_NC_021164.1_26290961 | Ca_kabuli_chr05    | 26290961                       | [T/G]       | 1067297597                                 |
| Ca_Kabuli_NC_021164.1_26290999 | Ca_kabuli_chr05    | 26290999                       | [T/G]       | 1067297598                                 |
| Ca_Kabuli_NC_021164.1_26319766 | Ca_kabuli_chr05    | 26319766                       | [T/G]       | 1067297599                                 |
| Ca_Kabuli_NC_021164.1_26325980 | Ca_kabuli_chr05    | 26325980                       | [A/C]       | 1067297600                                 |
| Ca_Kabuli_NC_021164.1_26384675 | Ca_kabuli_chr05    | 26384675                       | [A/C]       | 1067297601                                 |
| Ca_Kabuli_NC_021164.1_26474873 | Ca_kabuli_chr05    | 26474873                       | [A/C]       | 1067297602                                 |
| Ca_Kabuli_NC_021164.1_26474935 | Ca_kabuli_chr05    | 26474935                       | [T/G]       | 1067297603                                 |
| Ca_Kabuli_NC_021164.1_26474963 | Ca_kabuli_chr05    | 26474963                       | [C/T]       | 1067297604                                 |
| Ca_Kabuli_NC_021164.1_26474966 | Ca_kabuli_chr05    | 26474966                       | [G/A]       | 1067297605                                 |
| Ca_Kabuli_NC_021164.1_26474971 | Ca_kabuli_chr05    | 26474971                       | [A/C]       | 1067297606                                 |

| <b>SNP IDs</b>                 | <b>Chromosomes</b> | <b>Physical positions (bp)</b> | <b>SNPs</b> | <b>NCBI SNPdb accession IDs (NCBI_ss#)</b> |
|--------------------------------|--------------------|--------------------------------|-------------|--------------------------------------------|
| Ca_Kabuli_NC_021164.1_26475111 | Ca_kabuli_chr05    | 26475111                       | [A/C]       | 1067297607                                 |
| Ca_Kabuli_NC_021164.1_26569427 | Ca_kabuli_chr05    | 26569427                       | [A/G]       | 1067297608                                 |
| Ca_Kabuli_NC_021164.1_26605894 | Ca_kabuli_chr05    | 26605894                       | [T/G]       | 1067297609                                 |
| Ca_Kabuli_NC_021164.1_26605966 | Ca_kabuli_chr05    | 26605966                       | [A/G]       | 1067297610                                 |
| Ca_Kabuli_NC_021164.1_26626832 | Ca_kabuli_chr05    | 26626832                       | [T/G]       | 1067297611                                 |
| Ca_Kabuli_NC_021164.1_26626855 | Ca_kabuli_chr05    | 26626855                       | [T/A]       | 1067297612                                 |
| Ca_Kabuli_NC_021164.1_26696323 | Ca_kabuli_chr05    | 26696323                       | [T/C]       | 1067297613                                 |
| Ca_Kabuli_NC_021164.1_26696378 | Ca_kabuli_chr05    | 26696378                       | [A/G]       | 1067297614                                 |
| Ca_Kabuli_NC_021164.1_26696533 | Ca_kabuli_chr05    | 26696533                       | [C/T]       | 1067297615                                 |
| Ca_Kabuli_NC_021164.1_26987679 | Ca_kabuli_chr05    | 26987679                       | [G/A]       | 1067297616                                 |
| Ca_Kabuli_NC_021164.1_26987707 | Ca_kabuli_chr05    | 26987707                       | [C/T]       | 1067297617                                 |
| Ca_Kabuli_NC_021164.1_26997313 | Ca_kabuli_chr05    | 26997313                       | [T/C]       | 1067297618                                 |
| Ca_Kabuli_NC_021164.1_26997335 | Ca_kabuli_chr05    | 26997335                       | [T/G]       | 1067297619                                 |
| Ca_Kabuli_NC_021164.1_26997539 | Ca_kabuli_chr05    | 26997539                       | [A/C]       | 1067297620                                 |
| Ca_Kabuli_NC_021164.1_26997543 | Ca_kabuli_chr05    | 26997543                       | [A/T]       | 1067297621                                 |
| Ca_Kabuli_NC_021164.1_26999390 | Ca_kabuli_chr05    | 26999390                       | [A/C]       | 1067297622                                 |
| Ca_Kabuli_NC_021164.1_26999761 | Ca_kabuli_chr05    | 26999761                       | [T/C]       | 1067297623                                 |
| Ca_Kabuli_NC_021164.1_27000075 | Ca_kabuli_chr05    | 27000075                       | [A/G]       | 1067297624                                 |
| Ca_Kabuli_NC_021164.1_27000090 | Ca_kabuli_chr05    | 27000090                       | [A/G]       | 1067297625                                 |
| Ca_Kabuli_NC_021164.1_27000227 | Ca_kabuli_chr05    | 27000227                       | [A/C]       | 1067297626                                 |
| Ca_Kabuli_NC_021164.1_27000258 | Ca_kabuli_chr05    | 27000258                       | [G/A]       | 1067297627                                 |
| Ca_Kabuli_NC_021164.1_27000259 | Ca_kabuli_chr05    | 27000259                       | [G/A]       | 1067297628                                 |
| Ca_Kabuli_NC_021164.1_27000994 | Ca_kabuli_chr05    | 27000994                       | [A/T]       | 1067297629                                 |
| Ca_Kabuli_NC_021164.1_27001020 | Ca_kabuli_chr05    | 27001020                       | [A/C]       | 1067297630                                 |
| Ca_Kabuli_NC_021164.1_27012109 | Ca_kabuli_chr05    | 27012109                       | [A/T]       | 1067297631                                 |
| Ca_Kabuli_NC_021164.1_27150310 | Ca_kabuli_chr05    | 27150310                       | [A/C]       | 1067297632                                 |
| Ca_Kabuli_NC_021164.1_27150550 | Ca_kabuli_chr05    | 27150550                       | [G/A]       | 1067297633                                 |
| Ca_Kabuli_NC_021164.1_27181850 | Ca_kabuli_chr05    | 27181850                       | [A/T]       | 1067297634                                 |
| Ca_Kabuli_NC_021164.1_27181851 | Ca_kabuli_chr05    | 27181851                       | [T/C]       | 1067297635                                 |
| Ca_Kabuli_NC_021164.1_27282826 | Ca_kabuli_chr05    | 27282826                       | [A/G]       | 1067297636                                 |
| Ca_Kabuli_NC_021164.1_27282828 | Ca_kabuli_chr05    | 27282828                       | [G/T]       | 1067297637                                 |
| Ca_Kabuli_NC_021164.1_27333995 | Ca_kabuli_chr05    | 27333995                       | [A/G]       | 1067297638                                 |
| Ca_Kabuli_NC_021164.1_27334054 | Ca_kabuli_chr05    | 27334054                       | [A/T]       | 1067297639                                 |
| Ca_Kabuli_NC_021164.1_27334057 | Ca_kabuli_chr05    | 27334057                       | [G/C]       | 1067297640                                 |

| <b>SNP IDs</b>                 | <b>Chromosomes</b> | <b>Physical positions (bp)</b> | <b>SNPs</b> | <b>NCBI SNPdb accession IDs (NCBI_ss#)</b> |
|--------------------------------|--------------------|--------------------------------|-------------|--------------------------------------------|
| Ca_Kabuli_NC_021164.1_27361511 | Ca_kabuli_chr05    | 27361511                       | [A/C]       | 1067297641                                 |
| Ca_Kabuli_NC_021164.1_27361517 | Ca_kabuli_chr05    | 27361517                       | [A/C]       | 1067297642                                 |
| Ca_Kabuli_NC_021164.1_27361523 | Ca_kabuli_chr05    | 27361523                       | [A/C]       | 1067297643                                 |
| Ca_Kabuli_NC_021164.1_27361526 | Ca_kabuli_chr05    | 27361526                       | [C/T]       | 1067297644                                 |
| Ca_Kabuli_NC_021164.1_27361530 | Ca_kabuli_chr05    | 27361530                       | [A/C]       | 1067297645                                 |
| Ca_Kabuli_NC_021164.1_27361534 | Ca_kabuli_chr05    | 27361534                       | [T/C]       | 1067297646                                 |
| Ca_Kabuli_NC_021164.1_27361540 | Ca_kabuli_chr05    | 27361540                       | [A/C]       | 1067297647                                 |
| Ca_Kabuli_NC_021164.1_27361581 | Ca_kabuli_chr05    | 27361581                       | [A/T]       | 1067297648                                 |
| Ca_Kabuli_NC_021164.1_27361584 | Ca_kabuli_chr05    | 27361584                       | [G/C]       | 1067297649                                 |
| Ca_Kabuli_NC_021164.1_27361587 | Ca_kabuli_chr05    | 27361587                       | [G/T]       | 1067297650                                 |
| Ca_Kabuli_NC_021164.1_27361605 | Ca_kabuli_chr05    | 27361605                       | [A/T]       | 1067297651                                 |
| Ca_Kabuli_NC_021164.1_27361668 | Ca_kabuli_chr05    | 27361668                       | [T/G]       | 1067297652                                 |
| Ca_Kabuli_NC_021164.1_27362312 | Ca_kabuli_chr05    | 27362312                       | [A/G]       | 1067297653                                 |
| Ca_Kabuli_NC_021164.1_27362537 | Ca_kabuli_chr05    | 27362537                       | [T/C]       | 1067297654                                 |
| Ca_Kabuli_NC_021164.1_27362547 | Ca_kabuli_chr05    | 27362547                       | [A/C]       | 1067297655                                 |
| Ca_Kabuli_NC_021164.1_27362562 | Ca_kabuli_chr05    | 27362562                       | [A/G]       | 1067297656                                 |
| Ca_Kabuli_NC_021164.1_27362645 | Ca_kabuli_chr05    | 27362645                       | [T/G]       | 1067297657                                 |
| Ca_Kabuli_NC_021164.1_27555618 | Ca_kabuli_chr05    | 27555618                       | [T/G]       | 1067297658                                 |
| Ca_Kabuli_NC_021164.1_27555710 | Ca_kabuli_chr05    | 27555710                       | [G/A]       | 1067297659                                 |
| Ca_Kabuli_NC_021164.1_27555713 | Ca_kabuli_chr05    | 27555713                       | [T/G]       | 1067297660                                 |
| Ca_Kabuli_NC_021164.1_27626966 | Ca_kabuli_chr05    | 27626966                       | [T/C]       | 1067297661                                 |
| Ca_Kabuli_NC_021164.1_27626978 | Ca_kabuli_chr05    | 27626978                       | [T/A]       | 1067297662                                 |
| Ca_Kabuli_NC_021164.1_27686976 | Ca_kabuli_chr05    | 27686976                       | [T/G]       | 1067297663                                 |
| Ca_Kabuli_NC_021164.1_27692771 | Ca_kabuli_chr05    | 27692771                       | [A/C]       | 1067297664                                 |
| Ca_Kabuli_NC_021164.1_27692802 | Ca_kabuli_chr05    | 27692802                       | [C/T]       | 1067297665                                 |
| Ca_Kabuli_NC_021164.1_27692804 | Ca_kabuli_chr05    | 27692804                       | [C/T]       | 1067297666                                 |
| Ca_Kabuli_NC_021164.1_27694255 | Ca_kabuli_chr05    | 27694255                       | [A/C]       | 1067297667                                 |
| Ca_Kabuli_NC_021164.1_27749043 | Ca_kabuli_chr05    | 27749043                       | [T/C]       | 1067297668                                 |
| Ca_Kabuli_NC_021164.1_27749044 | Ca_kabuli_chr05    | 27749044                       | [C/G]       | 1067297669                                 |
| Ca_Kabuli_NC_021164.1_27749080 | Ca_kabuli_chr05    | 27749080                       | [A/G]       | 1067297670                                 |
| Ca_Kabuli_NC_021164.1_27749082 | Ca_kabuli_chr05    | 27749082                       | [T/C]       | 1067297671                                 |
| Ca_Kabuli_NC_021164.1_27750009 | Ca_kabuli_chr05    | 27750009                       | [T/G]       | 1067297672                                 |
| Ca_Kabuli_NC_021164.1_27750191 | Ca_kabuli_chr05    | 27750191                       | [A/G]       | 1067297673                                 |
| Ca_Kabuli_NC_021164.1_27750231 | Ca_kabuli_chr05    | 27750231                       | [T/G]       | 1067297674                                 |

| <b>SNP IDs</b>                 | <b>Chromosomes</b> | <b>Physical positions (bp)</b> | <b>SNPs</b> | <b>NCBI SNPdb accession IDs (NCBI_ss#)</b> |
|--------------------------------|--------------------|--------------------------------|-------------|--------------------------------------------|
| Ca_Kabuli_NC_021164.1_27850742 | Ca_kabuli_chr05    | 27850742                       | [A/G]       | 1067297675                                 |
| Ca_Kabuli_NC_021164.1_27874379 | Ca_kabuli_chr05    | 27874379                       | [A/G]       | 1067297676                                 |
| Ca_Kabuli_NC_021164.1_27875320 | Ca_kabuli_chr05    | 27875320                       | [A/C]       | 1067297677                                 |
| Ca_Kabuli_NC_021164.1_27884193 | Ca_kabuli_chr05    | 27884193                       | [C/A]       | 1067297678                                 |
| Ca_Kabuli_NC_021164.1_27884194 | Ca_kabuli_chr05    | 27884194                       | [T/G]       | 1067297679                                 |
| Ca_Kabuli_NC_021164.1_27884195 | Ca_kabuli_chr05    | 27884195                       | [C/A]       | 1067297680                                 |
| Ca_Kabuli_NC_021164.1_27884196 | Ca_kabuli_chr05    | 27884196                       | [C/T]       | 1067297681                                 |
| Ca_Kabuli_NC_021164.1_27884877 | Ca_kabuli_chr05    | 27884877                       | [T/G]       | 1067297682                                 |
| Ca_Kabuli_NC_021164.1_27884979 | Ca_kabuli_chr05    | 27884979                       | [T/G]       | 1067297683                                 |
| Ca_Kabuli_NC_021164.1_27932008 | Ca_kabuli_chr05    | 27932008                       | [C/G]       | 1067297684                                 |
| Ca_Kabuli_NC_021164.1_27932017 | Ca_kabuli_chr05    | 27932017                       | [G/A]       | 1067297685                                 |
| Ca_Kabuli_NC_021164.1_27932030 | Ca_kabuli_chr05    | 27932030                       | [A/C]       | 1067297686                                 |
| Ca_Kabuli_NC_021164.1_27974642 | Ca_kabuli_chr05    | 27974642                       | [T/C]       | 1067297687                                 |
| Ca_Kabuli_NC_021164.1_27974679 | Ca_kabuli_chr05    | 27974679                       | [A/G]       | 1067297688                                 |
| Ca_Kabuli_NC_021164.1_28116898 | Ca_kabuli_chr05    | 28116898                       | [A/G]       | 1067297689                                 |
| Ca_Kabuli_NC_021164.1_28162044 | Ca_kabuli_chr05    | 28162044                       | [T/G]       | 1067297690                                 |
| Ca_Kabuli_NC_021164.1_28162046 | Ca_kabuli_chr05    | 28162046                       | [A/G]       | 1067297691                                 |
| Ca_Kabuli_NC_021164.1_28239522 | Ca_kabuli_chr05    | 28239522                       | [A/G]       | 1067297692                                 |
| Ca_Kabuli_NC_021164.1_28239791 | Ca_kabuli_chr05    | 28239791                       | [T/C]       | 1067297693                                 |
| Ca_Kabuli_NC_021164.1_28335375 | Ca_kabuli_chr05    | 28335375                       | [T/C]       | 1067297694                                 |
| Ca_Kabuli_NC_021164.1_28335434 | Ca_kabuli_chr05    | 28335434                       | [A/C]       | 1067297695                                 |
| Ca_Kabuli_NC_021164.1_28335436 | Ca_kabuli_chr05    | 28335436                       | [C/A]       | 1067297696                                 |
| Ca_Kabuli_NC_021164.1_28335440 | Ca_kabuli_chr05    | 28335440                       | [A/G]       | 1067297697                                 |
| Ca_Kabuli_NC_021164.1_28335447 | Ca_kabuli_chr05    | 28335447                       | [A/C]       | 1067297698                                 |
| Ca_Kabuli_NC_021164.1_28335455 | Ca_kabuli_chr05    | 28335455                       | [A/C]       | 1067297699                                 |
| Ca_Kabuli_NC_021164.1_28360495 | Ca_kabuli_chr05    | 28360495                       | [T/C]       | 1067297700                                 |
| Ca_Kabuli_NC_021164.1_28360722 | Ca_kabuli_chr05    | 28360722                       | [T/C]       | 1067297701                                 |
| Ca_Kabuli_NC_021164.1_28376836 | Ca_kabuli_chr05    | 28376836                       | [C/G]       | 1067297702                                 |
| Ca_Kabuli_NC_021164.1_28541649 | Ca_kabuli_chr05    | 28541649                       | [A/C]       | 1067297703                                 |
| Ca_Kabuli_NC_021164.1_28541690 | Ca_kabuli_chr05    | 28541690                       | [T/C]       | 1067297704                                 |
| Ca_Kabuli_NC_021164.1_28559836 | Ca_kabuli_chr05    | 28559836                       | [T/G]       | 1067297705                                 |
| Ca_Kabuli_NC_021164.1_28559861 | Ca_kabuli_chr05    | 28559861                       | [T/A]       | 1067297706                                 |
| Ca_Kabuli_NC_021164.1_28562767 | Ca_kabuli_chr05    | 28562767                       | [T/C]       | 1067297707                                 |
| Ca_Kabuli_NC_021164.1_28581814 | Ca_kabuli_chr05    | 28581814                       | [G/A]       | 1067297708                                 |

| <b>SNP IDs</b>                 | <b>Chromosomes</b> | <b>Physical positions (bp)</b> | <b>SNPs</b> | <b>NCBI SNPdb accession IDs (NCBI_ss#)</b> |
|--------------------------------|--------------------|--------------------------------|-------------|--------------------------------------------|
| Ca_Kabuli_NC_021164.1_28581815 | Ca_kabuli_chr05    | 28581815                       | [G/C]       | 1067297709                                 |
| Ca_Kabuli_NC_021164.1_28581827 | Ca_kabuli_chr05    | 28581827                       | [C/T]       | 1067297710                                 |
| Ca_Kabuli_NC_021164.1_28582763 | Ca_kabuli_chr05    | 28582763                       | [G/A]       | 1067297711                                 |
| Ca_Kabuli_NC_021164.1_28582806 | Ca_kabuli_chr05    | 28582806                       | [C/T]       | 1067297712                                 |
| Ca_Kabuli_NC_021164.1_28690037 | Ca_kabuli_chr05    | 28690037                       | [T/G]       | 1067297713                                 |
| Ca_Kabuli_NC_021164.1_28717362 | Ca_kabuli_chr05    | 28717362                       | [T/C]       | 1067297714                                 |
| Ca_Kabuli_NC_021164.1_28717384 | Ca_kabuli_chr05    | 28717384                       | [T/C]       | 1067297715                                 |
| Ca_Kabuli_NC_021164.1_28721236 | Ca_kabuli_chr05    | 28721236                       | [T/C]       | 1067297716                                 |
| Ca_Kabuli_NC_021164.1_28721237 | Ca_kabuli_chr05    | 28721237                       | [G/A]       | 1067297717                                 |
| Ca_Kabuli_NC_021164.1_28721383 | Ca_kabuli_chr05    | 28721383                       | [A/C]       | 1067297718                                 |
| Ca_Kabuli_NC_021164.1_28721386 | Ca_kabuli_chr05    | 28721386                       | [T/C]       | 1067297719                                 |
| Ca_Kabuli_NC_021164.1_28721761 | Ca_kabuli_chr05    | 28721761                       | [T/C]       | 1067297720                                 |
| Ca_Kabuli_NC_021164.1_28721764 | Ca_kabuli_chr05    | 28721764                       | [C/A]       | 1067297721                                 |
| Ca_Kabuli_NC_021164.1_28746115 | Ca_kabuli_chr05    | 28746115                       | [A/T]       | 1067297722                                 |
| Ca_Kabuli_NC_021164.1_28746139 | Ca_kabuli_chr05    | 28746139                       | [A/C]       | 1067297723                                 |
| Ca_Kabuli_NC_021164.1_28746142 | Ca_kabuli_chr05    | 28746142                       | [A/C]       | 1067297724                                 |
| Ca_Kabuli_NC_021164.1_28748061 | Ca_kabuli_chr05    | 28748061                       | [T/C]       | 1067297725                                 |
| Ca_Kabuli_NC_021164.1_28757467 | Ca_kabuli_chr05    | 28757467                       | [T/A]       | 1067297726                                 |
| Ca_Kabuli_NC_021164.1_28757485 | Ca_kabuli_chr05    | 28757485                       | [C/A]       | 1067297727                                 |
| Ca_Kabuli_NC_021164.1_28757498 | Ca_kabuli_chr05    | 28757498                       | [T/A]       | 1067297728                                 |
| Ca_Kabuli_NC_021164.1_28757507 | Ca_kabuli_chr05    | 28757507                       | [T/A]       | 1067297729                                 |
| Ca_Kabuli_NC_021164.1_28757939 | Ca_kabuli_chr05    | 28757939                       | [T/A]       | 1067297730                                 |
| Ca_Kabuli_NC_021164.1_28757959 | Ca_kabuli_chr05    | 28757959                       | [A/G]       | 1067297731                                 |
| Ca_Kabuli_NC_021164.1_28758723 | Ca_kabuli_chr05    | 28758723                       | [G/A]       | 1067297732                                 |
| Ca_Kabuli_NC_021164.1_28813280 | Ca_kabuli_chr05    | 28813280                       | [T/A]       | 1067297733                                 |
| Ca_Kabuli_NC_021164.1_28817832 | Ca_kabuli_chr05    | 28817832                       | [G/A]       | 1067297734                                 |
| Ca_Kabuli_NC_021164.1_28842766 | Ca_kabuli_chr05    | 28842766                       | [T/G]       | 1067297735                                 |
| Ca_Kabuli_NC_021164.1_28854006 | Ca_kabuli_chr05    | 28854006                       | [A/G]       | 1067297736                                 |
| Ca_Kabuli_NC_021164.1_28854486 | Ca_kabuli_chr05    | 28854486                       | [T/C]       | 1067297737                                 |
| Ca_Kabuli_NC_021164.1_29007876 | Ca_kabuli_chr05    | 29007876                       | [T/A]       | 1067297738                                 |
| Ca_Kabuli_NC_021164.1_29007879 | Ca_kabuli_chr05    | 29007879                       | [T/C]       | 1067297739                                 |
| Ca_Kabuli_NC_021164.1_29007882 | Ca_kabuli_chr05    | 29007882                       | [A/C]       | 1067297740                                 |
| Ca_Kabuli_NC_021164.1_29007884 | Ca_kabuli_chr05    | 29007884                       | [A/C]       | 1067297741                                 |
| Ca_Kabuli_NC_021164.1_29007886 | Ca_kabuli_chr05    | 29007886                       | [A/C]       | 1067297742                                 |



| <b>SNP IDs</b>                 | <b>Chromosomes</b> | <b>Physical positions (bp)</b> | <b>SNPs</b> | <b>NCBI SNPdb accession IDs (NCBI_ss#)</b> |
|--------------------------------|--------------------|--------------------------------|-------------|--------------------------------------------|
| Ca_Kabuli_NC_021164.1_29079813 | Ca_kabuli_chr05    | 29079813                       | [T/G]       | 1067297743                                 |
| Ca_Kabuli_NC_021164.1_29079958 | Ca_kabuli_chr05    | 29079958                       | [T/G]       | 1067297744                                 |
| Ca_Kabuli_NC_021164.1_29084345 | Ca_kabuli_chr05    | 29084345                       | [T/C]       | 1067297745                                 |
| Ca_Kabuli_NC_021164.1_29222560 | Ca_kabuli_chr05    | 29222560                       | [A/C]       | 1067297746                                 |
| Ca_Kabuli_NC_021164.1_29262600 | Ca_kabuli_chr05    | 29262600                       | [A/C]       | 1067297747                                 |
| Ca_Kabuli_NC_021164.1_29272193 | Ca_kabuli_chr05    | 29272193                       | [T/A]       | 1067297748                                 |
| Ca_Kabuli_NC_021164.1_29274443 | Ca_kabuli_chr05    | 29274443                       | [T/C]       | 1067297749                                 |
| Ca_Kabuli_NC_021164.1_29274461 | Ca_kabuli_chr05    | 29274461                       | [T/C]       | 1067297750                                 |
| Ca_Kabuli_NC_021164.1_29274518 | Ca_kabuli_chr05    | 29274518                       | [A/G]       | 1067297751                                 |
| Ca_Kabuli_NC_021164.1_29274520 | Ca_kabuli_chr05    | 29274520                       | [A/C]       | 1067297752                                 |
| Ca_Kabuli_NC_021164.1_29437139 | Ca_kabuli_chr05    | 29437139                       | [T/C]       | 1067297753                                 |
| Ca_Kabuli_NC_021164.1_29437146 | Ca_kabuli_chr05    | 29437146                       | [C/A]       | 1067297754                                 |
| Ca_Kabuli_NC_021164.1_29437162 | Ca_kabuli_chr05    | 29437162                       | [C/A]       | 1067297755                                 |
| Ca_Kabuli_NC_021164.1_29437166 | Ca_kabuli_chr05    | 29437166                       | [T/C]       | 1067297756                                 |
| Ca_Kabuli_NC_021164.1_29437171 | Ca_kabuli_chr05    | 29437171                       | [T/A]       | 1067297757                                 |
| Ca_Kabuli_NC_021164.1_29531093 | Ca_kabuli_chr05    | 29531093                       | [T/C]       | 1067297758                                 |
| Ca_Kabuli_NC_021164.1_29531158 | Ca_kabuli_chr05    | 29531158                       | [A/C]       | 1067297759                                 |
| Ca_Kabuli_NC_021164.1_29608675 | Ca_kabuli_chr05    | 29608675                       | [A/C]       | 1067297760                                 |
| Ca_Kabuli_NC_021164.1_29641509 | Ca_kabuli_chr05    | 29641509                       | [A/G]       | 1067297761                                 |
| Ca_Kabuli_NC_021164.1_29641606 | Ca_kabuli_chr05    | 29641606                       | [T/C]       | 1067297762                                 |
| Ca_Kabuli_NC_021164.1_29641621 | Ca_kabuli_chr05    | 29641621                       | [A/C]       | 1067297763                                 |
| Ca_Kabuli_NC_021164.1_29641644 | Ca_kabuli_chr05    | 29641644                       | [A/G]       | 1067297764                                 |
| Ca_Kabuli_NC_021164.1_29658220 | Ca_kabuli_chr05    | 29658220                       | [T/C]       | 1067297765                                 |
| Ca_Kabuli_NC_021164.1_29658239 | Ca_kabuli_chr05    | 29658239                       | [A/C]       | 1067297766                                 |
| Ca_Kabuli_NC_021164.1_29772723 | Ca_kabuli_chr05    | 29772723                       | [T/A]       | 1067297767                                 |
| Ca_Kabuli_NC_021164.1_29772735 | Ca_kabuli_chr05    | 29772735                       | [A/C]       | 1067297768                                 |
| Ca_Kabuli_NC_021164.1_29792542 | Ca_kabuli_chr05    | 29792542                       | [T/C]       | 1067297769                                 |
| Ca_Kabuli_NC_021164.1_29792610 | Ca_kabuli_chr05    | 29792610                       | [A/G]       | 1067297770                                 |
| Ca_Kabuli_NC_021164.1_29795513 | Ca_kabuli_chr05    | 29795513                       | [T/G]       | 1067297771                                 |
| Ca_Kabuli_NC_021164.1_29809678 | Ca_kabuli_chr05    | 29809678                       | [A/G]       | 1067297772                                 |
| Ca_Kabuli_NC_021164.1_29809734 | Ca_kabuli_chr05    | 29809734                       | [A/C]       | 1067297773                                 |
| Ca_Kabuli_NC_021164.1_29886174 | Ca_kabuli_chr05    | 29886174                       | [G/A]       | 1067297774                                 |
| Ca_Kabuli_NC_021164.1_29886177 | Ca_kabuli_chr05    | 29886177                       | [G/A]       | 1067297775                                 |
| Ca_Kabuli_NC_021164.1_29886203 | Ca_kabuli_chr05    | 29886203                       | [T/A]       | 1067297776                                 |

| <b>SNP IDs</b>                 | <b>Chromosomes</b> | <b>Physical positions (bp)</b> | <b>SNPs</b> | <b>NCBI SNPdb accession IDs (NCBI_ss#)</b> |
|--------------------------------|--------------------|--------------------------------|-------------|--------------------------------------------|
| Ca_Kabuli_NC_021164.1_29968829 | Ca_kabuli_chr05    | 29968829                       | [A/G]       | 1067297777                                 |
| Ca_Kabuli_NC_021164.1_29968837 | Ca_kabuli_chr05    | 29968837                       | [A/G]       | 1067297778                                 |
| Ca_Kabuli_NC_021164.1_29974494 | Ca_kabuli_chr05    | 29974494                       | [T/G]       | 1067297779                                 |
| Ca_Kabuli_NC_021164.1_29974583 | Ca_kabuli_chr05    | 29974583                       | [G/T]       | 1067297780                                 |
| Ca_Kabuli_NC_021164.1_29989693 | Ca_kabuli_chr05    | 29989693                       | [C/A]       | 1067297781                                 |
| Ca_Kabuli_NC_021164.1_29989694 | Ca_kabuli_chr05    | 29989694                       | [C/G]       | 1067297782                                 |
| Ca_Kabuli_NC_021164.1_29989696 | Ca_kabuli_chr05    | 29989696                       | [A/T]       | 1067297783                                 |
| Ca_Kabuli_NC_021164.1_29999465 | Ca_kabuli_chr05    | 29999465                       | [G/T]       | 1067297784                                 |
| Ca_Kabuli_NC_021164.1_30035763 | Ca_kabuli_chr05    | 30035763                       | [A/C]       | 1067297785                                 |
| Ca_Kabuli_NC_021164.1_30053486 | Ca_kabuli_chr05    | 30053486                       | [A/T]       | 1067297786                                 |
| Ca_Kabuli_NC_021164.1_30124077 | Ca_kabuli_chr05    | 30124077                       | [G/C]       | 1067297787                                 |
| Ca_Kabuli_NC_021164.1_30124086 | Ca_kabuli_chr05    | 30124086                       | [C/G]       | 1067297788                                 |
| Ca_Kabuli_NC_021164.1_30138508 | Ca_kabuli_chr05    | 30138508                       | [T/A]       | 1067297789                                 |
| Ca_Kabuli_NC_021164.1_30179608 | Ca_kabuli_chr05    | 30179608                       | [A/C]       | 1067297790                                 |
| Ca_Kabuli_NC_021164.1_30191349 | Ca_kabuli_chr05    | 30191349                       | [T/G]       | 1067297791                                 |
| Ca_Kabuli_NC_021164.1_30286879 | Ca_kabuli_chr05    | 30286879                       | [A/C]       | 1067297792                                 |
| Ca_Kabuli_NC_021164.1_30286888 | Ca_kabuli_chr05    | 30286888                       | [T/C]       | 1067297793                                 |
| Ca_Kabuli_NC_021164.1_30286894 | Ca_kabuli_chr05    | 30286894                       | [T/A]       | 1067297794                                 |
| Ca_Kabuli_NC_021164.1_30286913 | Ca_kabuli_chr05    | 30286913                       | [T/C]       | 1067297795                                 |
| Ca_Kabuli_NC_021164.1_30358986 | Ca_kabuli_chr05    | 30358986                       | [A/G]       | 1067297796                                 |
| Ca_Kabuli_NC_021164.1_30359007 | Ca_kabuli_chr05    | 30359007                       | [T/C]       | 1067297797                                 |
| Ca_Kabuli_NC_021164.1_30359016 | Ca_kabuli_chr05    | 30359016                       | [T/C]       | 1067297798                                 |
| Ca_Kabuli_NC_021164.1_30359040 | Ca_kabuli_chr05    | 30359040                       | [A/C]       | 1067297799                                 |
| Ca_Kabuli_NC_021164.1_30359044 | Ca_kabuli_chr05    | 30359044                       | [A/G]       | 1067297800                                 |
| Ca_Kabuli_NC_021164.1_30366765 | Ca_kabuli_chr05    | 30366765                       | [A/G]       | 1067297801                                 |
| Ca_Kabuli_NC_021164.1_30366771 | Ca_kabuli_chr05    | 30366771                       | [A/T]       | 1067297802                                 |
| Ca_Kabuli_NC_021164.1_30366787 | Ca_kabuli_chr05    | 30366787                       | [A/C]       | 1067297803                                 |
| Ca_Kabuli_NC_021164.1_30366796 | Ca_kabuli_chr05    | 30366796                       | [C/A]       | 1067297804                                 |
| Ca_Kabuli_NC_021164.1_30366836 | Ca_kabuli_chr05    | 30366836                       | [A/G]       | 1067297805                                 |
| Ca_Kabuli_NC_021164.1_30367691 | Ca_kabuli_chr05    | 30367691                       | [A/C]       | 1067297806                                 |
| Ca_Kabuli_NC_021164.1_30367710 | Ca_kabuli_chr05    | 30367710                       | [T/G]       | 1067297807                                 |
| Ca_Kabuli_NC_021164.1_30373415 | Ca_kabuli_chr05    | 30373415                       | [T/C]       | 1067297808                                 |
| Ca_Kabuli_NC_021164.1_30373837 | Ca_kabuli_chr05    | 30373837                       | [A/C]       | 1067297809                                 |
| Ca_Kabuli_NC_021164.1_30376781 | Ca_kabuli_chr05    | 30376781                       | [A/G]       | 1067297810                                 |

| <b>SNP IDs</b>                 | <b>Chromosomes</b> | <b>Physical positions (bp)</b> | <b>SNPs</b> | <b>NCBI SNPdb accession IDs (NCBI_ss#)</b> |
|--------------------------------|--------------------|--------------------------------|-------------|--------------------------------------------|
| Ca_Kabuli_NC_021164.1_30377476 | Ca_kabuli_chr05    | 30377476                       | [A/G]       | 1067297811                                 |
| Ca_Kabuli_NC_021164.1_30378223 | Ca_kabuli_chr05    | 30378223                       | [T/C]       | 1067297812                                 |
| Ca_Kabuli_NC_021164.1_30420884 | Ca_kabuli_chr05    | 30420884                       | [T/A]       | 1067297813                                 |
| Ca_Kabuli_NC_021164.1_30420906 | Ca_kabuli_chr05    | 30420906                       | [T/C]       | 1067297814                                 |
| Ca_Kabuli_NC_021164.1_30420912 | Ca_kabuli_chr05    | 30420912                       | [A/G]       | 1067297815                                 |
| Ca_Kabuli_NC_021164.1_30422331 | Ca_kabuli_chr05    | 30422331                       | [G/T]       | 1067297816                                 |
| Ca_Kabuli_NC_021164.1_30438909 | Ca_kabuli_chr05    | 30438909                       | [A/C]       | 1067297817                                 |
| Ca_Kabuli_NC_021164.1_30438950 | Ca_kabuli_chr05    | 30438950                       | [T/A]       | 1067297818                                 |
| Ca_Kabuli_NC_021164.1_30627756 | Ca_kabuli_chr05    | 30627756                       | [G/T]       | 1067297819                                 |
| Ca_Kabuli_NC_021164.1_30635500 | Ca_kabuli_chr05    | 30635500                       | [A/C]       | 1067297820                                 |
| Ca_Kabuli_NC_021164.1_30635525 | Ca_kabuli_chr05    | 30635525                       | [T/C]       | 1067297821                                 |
| Ca_Kabuli_NC_021164.1_30635537 | Ca_kabuli_chr05    | 30635537                       | [A/G]       | 1067297822                                 |
| Ca_Kabuli_NC_021164.1_30690864 | Ca_kabuli_chr05    | 30690864                       | [T/C]       | 1067297823                                 |
| Ca_Kabuli_NC_021164.1_30745585 | Ca_kabuli_chr05    | 30745585                       | [T/G]       | 1067297824                                 |
| Ca_Kabuli_NC_021164.1_30748790 | Ca_kabuli_chr05    | 30748790                       | [A/T]       | 1067297825                                 |
| Ca_Kabuli_NC_021164.1_30748799 | Ca_kabuli_chr05    | 30748799                       | [A/T]       | 1067297826                                 |
| Ca_Kabuli_NC_021164.1_30811243 | Ca_kabuli_chr05    | 30811243                       | [G/C]       | 1067297827                                 |
| Ca_Kabuli_NC_021164.1_30811244 | Ca_kabuli_chr05    | 30811244                       | [T/A]       | 1067297828                                 |
| Ca_Kabuli_NC_021164.1_30811245 | Ca_kabuli_chr05    | 30811245                       | [C/T]       | 1067297829                                 |
| Ca_Kabuli_NC_021164.1_30816644 | Ca_kabuli_chr05    | 30816644                       | [T/G]       | 1067297830                                 |
| Ca_Kabuli_NC_021164.1_30863959 | Ca_kabuli_chr05    | 30863959                       | [T/G]       | 1067297831                                 |
| Ca_Kabuli_NC_021164.1_30863984 | Ca_kabuli_chr05    | 30863984                       | [A/C]       | 1067297832                                 |
| Ca_Kabuli_NC_021164.1_30890443 | Ca_kabuli_chr05    | 30890443                       | [A/G]       | 1067297833                                 |
| Ca_Kabuli_NC_021164.1_30890446 | Ca_kabuli_chr05    | 30890446                       | [T/C]       | 1067297834                                 |
| Ca_Kabuli_NC_021164.1_30890472 | Ca_kabuli_chr05    | 30890472                       | [A/T]       | 1067297835                                 |
| Ca_Kabuli_NC_021164.1_30894313 | Ca_kabuli_chr05    | 30894313                       | [A/G]       | 1067297836                                 |
| Ca_Kabuli_NC_021164.1_30903096 | Ca_kabuli_chr05    | 30903096                       | [A/C]       | 1067297837                                 |
| Ca_Kabuli_NC_021164.1_30903110 | Ca_kabuli_chr05    | 30903110                       | [T/G]       | 1067297838                                 |
| Ca_Kabuli_NC_021164.1_30903128 | Ca_kabuli_chr05    | 30903128                       | [A/G]       | 1067297839                                 |
| Ca_Kabuli_NC_021164.1_30903134 | Ca_kabuli_chr05    | 30903134                       | [A/G]       | 1067297840                                 |
| Ca_Kabuli_NC_021164.1_30939087 | Ca_kabuli_chr05    | 30939087                       | [A/G]       | 1067297841                                 |
| Ca_Kabuli_NC_021164.1_30939325 | Ca_kabuli_chr05    | 30939325                       | [G/T]       | 1067297842                                 |
| Ca_Kabuli_NC_021164.1_30976615 | Ca_kabuli_chr05    | 30976615                       | [A/T]       | 1067297843                                 |
| Ca_Kabuli_NC_021164.1_30976616 | Ca_kabuli_chr05    | 30976616                       | [T/C]       | 1067297844                                 |

| <b>SNP IDs</b>                 | <b>Chromosomes</b> | <b>Physical positions (bp)</b> | <b>SNPs</b> | <b>NCBI SNPdb accession IDs (NCBI_ss#)</b> |
|--------------------------------|--------------------|--------------------------------|-------------|--------------------------------------------|
| Ca_Kabuli_NC_021164.1_30976617 | Ca_kabuli_chr05    | 30976617                       | [G/T]       | 1067297845                                 |
| Ca_Kabuli_NC_021164.1_30976732 | Ca_kabuli_chr05    | 30976732                       | [A/C]       | 1067297846                                 |
| Ca_Kabuli_NC_021164.1_30993661 | Ca_kabuli_chr05    | 30993661                       | [A/T]       | 1067297847                                 |
| Ca_Kabuli_NC_021164.1_30993664 | Ca_kabuli_chr05    | 30993664                       | [A/G]       | 1067297848                                 |
| Ca_Kabuli_NC_021164.1_30993670 | Ca_kabuli_chr05    | 30993670                       | [A/G]       | 1067297849                                 |
| Ca_Kabuli_NC_021164.1_30993679 | Ca_kabuli_chr05    | 30993679                       | [T/A]       | 1067297850                                 |
| Ca_Kabuli_NC_021164.1_30993682 | Ca_kabuli_chr05    | 30993682                       | [G/A]       | 1067297851                                 |
| Ca_Kabuli_NC_021164.1_30993711 | Ca_kabuli_chr05    | 30993711                       | [A/G]       | 1067297852                                 |
| Ca_Kabuli_NC_021164.1_31036716 | Ca_kabuli_chr05    | 31036716                       | [T/A]       | 1067297853                                 |
| Ca_Kabuli_NC_021164.1_31036742 | Ca_kabuli_chr05    | 31036742                       | [A/G]       | 1067297854                                 |
| Ca_Kabuli_NC_021164.1_31036760 | Ca_kabuli_chr05    | 31036760                       | [G/T]       | 1067297855                                 |
| Ca_Kabuli_NC_021164.1_31036770 | Ca_kabuli_chr05    | 31036770                       | [A/T]       | 1067297856                                 |
| Ca_Kabuli_NC_021164.1_31057528 | Ca_kabuli_chr05    | 31057528                       | [T/G]       | 1067297857                                 |
| Ca_Kabuli_NC_021164.1_31064311 | Ca_kabuli_chr05    | 31064311                       | [A/G]       | 1067297858                                 |
| Ca_Kabuli_NC_021164.1_31064326 | Ca_kabuli_chr05    | 31064326                       | [T/G]       | 1067297859                                 |
| Ca_Kabuli_NC_021164.1_31082143 | Ca_kabuli_chr05    | 31082143                       | [T/A]       | 1067297860                                 |
| Ca_Kabuli_NC_021164.1_31082144 | Ca_kabuli_chr05    | 31082144                       | [C/T]       | 1067297861                                 |
| Ca_Kabuli_NC_021164.1_31082145 | Ca_kabuli_chr05    | 31082145                       | [G/C]       | 1067297862                                 |
| Ca_Kabuli_NC_021164.1_31082146 | Ca_kabuli_chr05    | 31082146                       | [G/T]       | 1067297863                                 |
| Ca_Kabuli_NC_021164.1_31131830 | Ca_kabuli_chr05    | 31131830                       | [T/C]       | 1067297864                                 |
| Ca_Kabuli_NC_021164.1_31132450 | Ca_kabuli_chr05    | 31132450                       | [T/A]       | 1067297865                                 |
| Ca_Kabuli_NC_021164.1_31138669 | Ca_kabuli_chr05    | 31138669                       | [C/G]       | 1067297866                                 |
| Ca_Kabuli_NC_021164.1_31141664 | Ca_kabuli_chr05    | 31141664                       | [A/C]       | 1067297867                                 |
| Ca_Kabuli_NC_021164.1_31141695 | Ca_kabuli_chr05    | 31141695                       | [A/C]       | 1067297868                                 |
| Ca_Kabuli_NC_021164.1_31165033 | Ca_kabuli_chr05    | 31165033                       | [A/C]       | 1067297869                                 |
| Ca_Kabuli_NC_021164.1_31171529 | Ca_kabuli_chr05    | 31171529                       | [T/C]       | 1067297870                                 |
| Ca_Kabuli_NC_021164.1_31171533 | Ca_kabuli_chr05    | 31171533                       | [A/C]       | 1067297871                                 |
| Ca_Kabuli_NC_021164.1_31176695 | Ca_kabuli_chr05    | 31176695                       | [T/C]       | 1067297872                                 |
| Ca_Kabuli_NC_021164.1_31176697 | Ca_kabuli_chr05    | 31176697                       | [T/C]       | 1067297873                                 |
| Ca_Kabuli_NC_021164.1_31176731 | Ca_kabuli_chr05    | 31176731                       | [A/G]       | 1067297874                                 |
| Ca_Kabuli_NC_021164.1_31176750 | Ca_kabuli_chr05    | 31176750                       | [T/C]       | 1067297875                                 |
| Ca_Kabuli_NC_021164.1_31176817 | Ca_kabuli_chr05    | 31176817                       | [T/A]       | 1067297876                                 |
| Ca_Kabuli_NC_021164.1_31181392 | Ca_kabuli_chr05    | 31181392                       | [T/G]       | 1067297877                                 |
| Ca_Kabuli_NC_021164.1_31192391 | Ca_kabuli_chr05    | 31192391                       | [A/T]       | 1067297878                                 |

| <b>SNP IDs</b>                 | <b>Chromosomes</b> | <b>Physical positions (bp)</b> | <b>SNPs</b> | <b>NCBI SNPdb accession IDs (NCBI_ss#)</b> |
|--------------------------------|--------------------|--------------------------------|-------------|--------------------------------------------|
| Ca_Kabuli_NC_021164.1_31192429 | Ca_kabuli_chr05    | 31192429                       | [T/C]       | 1067297879                                 |
| Ca_Kabuli_NC_021164.1_31192432 | Ca_kabuli_chr05    | 31192432                       | [T/C]       | 1067297880                                 |
| Ca_Kabuli_NC_021164.1_31215125 | Ca_kabuli_chr05    | 31215125                       | [A/G]       | 1067297881                                 |
| Ca_Kabuli_NC_021164.1_31303773 | Ca_kabuli_chr05    | 31303773                       | [T/G]       | 1067297882                                 |
| Ca_Kabuli_NC_021164.1_31306171 | Ca_kabuli_chr05    | 31306171                       | [C/A]       | 1067297883                                 |
| Ca_Kabuli_NC_021164.1_31306172 | Ca_kabuli_chr05    | 31306172                       | [A/G]       | 1067297884                                 |
| Ca_Kabuli_NC_021164.1_31313858 | Ca_kabuli_chr05    | 31313858                       | [T/G]       | 1067297885                                 |
| Ca_Kabuli_NC_021164.1_31314012 | Ca_kabuli_chr05    | 31314012                       | [A/C]       | 1067297886                                 |
| Ca_Kabuli_NC_021164.1_31330704 | Ca_kabuli_chr05    | 31330704                       | [T/A]       | 1067297887                                 |
| Ca_Kabuli_NC_021164.1_31330710 | Ca_kabuli_chr05    | 31330710                       | [A/G]       | 1067297888                                 |
| Ca_Kabuli_NC_021164.1_31330757 | Ca_kabuli_chr05    | 31330757                       | [A/G]       | 1067297889                                 |
| Ca_Kabuli_NC_021164.1_31371625 | Ca_kabuli_chr05    | 31371625                       | [C/A]       | 1067297890                                 |
| Ca_Kabuli_NC_021164.1_31371626 | Ca_kabuli_chr05    | 31371626                       | [T/G]       | 1067297891                                 |
| Ca_Kabuli_NC_021164.1_31403645 | Ca_kabuli_chr05    | 31403645                       | [G/A]       | 1067297892                                 |
| Ca_Kabuli_NC_021164.1_31403647 | Ca_kabuli_chr05    | 31403647                       | [G/A]       | 1067297893                                 |
| Ca_Kabuli_NC_021164.1_31403655 | Ca_kabuli_chr05    | 31403655                       | [T/G]       | 1067297894                                 |
| Ca_Kabuli_NC_021164.1_31403667 | Ca_kabuli_chr05    | 31403667                       | [T/G]       | 1067297895                                 |
| Ca_Kabuli_NC_021164.1_31521962 | Ca_kabuli_chr05    | 31521962                       | [T/A]       | 1067297896                                 |
| Ca_Kabuli_NC_021164.1_31622168 | Ca_kabuli_chr05    | 31622168                       | [T/C]       | 1067297897                                 |
| Ca_Kabuli_NC_021164.1_31622185 | Ca_kabuli_chr05    | 31622185                       | [A/G]       | 1067297898                                 |
| Ca_Kabuli_NC_021164.1_31683378 | Ca_kabuli_chr05    | 31683378                       | [A/C]       | 1067297899                                 |
| Ca_Kabuli_NC_021164.1_31687858 | Ca_kabuli_chr05    | 31687858                       | [T/C]       | 1067297900                                 |
| Ca_Kabuli_NC_021164.1_31696257 | Ca_kabuli_chr05    | 31696257                       | [T/G]       | 1067297901                                 |
| Ca_Kabuli_NC_021164.1_31708574 | Ca_kabuli_chr05    | 31708574                       | [T/C]       | 1067297902                                 |
| Ca_Kabuli_NC_021164.1_31708618 | Ca_kabuli_chr05    | 31708618                       | [A/G]       | 1067297903                                 |
| Ca_Kabuli_NC_021164.1_31710625 | Ca_kabuli_chr05    | 31710625                       | [T/G]       | 1067297904                                 |
| Ca_Kabuli_NC_021164.1_31756559 | Ca_kabuli_chr05    | 31756559                       | [T/G]       | 1067297905                                 |
| Ca_Kabuli_NC_021164.1_31864516 | Ca_kabuli_chr05    | 31864516                       | [A/G]       | 1067297906                                 |
| Ca_Kabuli_NC_021164.1_31864519 | Ca_kabuli_chr05    | 31864519                       | [T/C]       | 1067297907                                 |
| Ca_Kabuli_NC_021164.1_31864523 | Ca_kabuli_chr05    | 31864523                       | [A/G]       | 1067297908                                 |
| Ca_Kabuli_NC_021164.1_31880926 | Ca_kabuli_chr05    | 31880926                       | [T/C]       | 1067297909                                 |
| Ca_Kabuli_NC_021164.1_31935643 | Ca_kabuli_chr05    | 31935643                       | [T/C]       | 1067297910                                 |
| Ca_Kabuli_NC_021164.1_31935709 | Ca_kabuli_chr05    | 31935709                       | [A/C]       | 1067297911                                 |
| Ca_Kabuli_NC_021164.1_32000346 | Ca_kabuli_chr05    | 32000346                       | [T/G]       | 1067297912                                 |

| <b>SNP IDs</b>                 | <b>Chromosomes</b> | <b>Physical positions (bp)</b> | <b>SNPs</b> | <b>NCBI SNPdb accession IDs (NCBI_ss#)</b> |
|--------------------------------|--------------------|--------------------------------|-------------|--------------------------------------------|
| Ca_Kabuli_NC_021164.1_32011769 | Ca_kabuli_chr05    | 32011769                       | [A/G]       | 1067297913                                 |
| Ca_Kabuli_NC_021164.1_32011781 | Ca_kabuli_chr05    | 32011781                       | [T/G]       | 1067297914                                 |
| Ca_Kabuli_NC_021164.1_32011792 | Ca_kabuli_chr05    | 32011792                       | [T/G]       | 1067297915                                 |
| Ca_Kabuli_NC_021164.1_32015983 | Ca_kabuli_chr05    | 32015983                       | [A/T]       | 1067297916                                 |
| Ca_Kabuli_NC_021164.1_32067558 | Ca_kabuli_chr05    | 32067558                       | [C/T]       | 1067297917                                 |
| Ca_Kabuli_NC_021164.1_32149964 | Ca_kabuli_chr05    | 32149964                       | [C/T]       | 1067297918                                 |
| Ca_Kabuli_NC_021164.1_32149976 | Ca_kabuli_chr05    | 32149976                       | [G/A]       | 1067297919                                 |
| Ca_Kabuli_NC_021164.1_32149978 | Ca_kabuli_chr05    | 32149978                       | [T/C]       | 1067297920                                 |
| Ca_Kabuli_NC_021164.1_32149981 | Ca_kabuli_chr05    | 32149981                       | [C/A]       | 1067297921                                 |
| Ca_Kabuli_NC_021164.1_32171616 | Ca_kabuli_chr05    | 32171616                       | [T/G]       | 1067297922                                 |
| Ca_Kabuli_NC_021164.1_32171618 | Ca_kabuli_chr05    | 32171618                       | [T/G]       | 1067297923                                 |
| Ca_Kabuli_NC_021164.1_32171632 | Ca_kabuli_chr05    | 32171632                       | [G/A]       | 1067297924                                 |
| Ca_Kabuli_NC_021164.1_32188164 | Ca_kabuli_chr05    | 32188164                       | [A/T]       | 1067297925                                 |
| Ca_Kabuli_NC_021164.1_32188177 | Ca_kabuli_chr05    | 32188177                       | [A/T]       | 1067297926                                 |
| Ca_Kabuli_NC_021164.1_32188182 | Ca_kabuli_chr05    | 32188182                       | [A/C]       | 1067297927                                 |
| Ca_Kabuli_NC_021164.1_32193751 | Ca_kabuli_chr05    | 32193751                       | [A/G]       | 1067297928                                 |
| Ca_Kabuli_NC_021164.1_32204865 | Ca_kabuli_chr05    | 32204865                       | [A/T]       | 1067297929                                 |
| Ca_Kabuli_NC_021164.1_32204898 | Ca_kabuli_chr05    | 32204898                       | [T/G]       | 1067297930                                 |
| Ca_Kabuli_NC_021164.1_32204907 | Ca_kabuli_chr05    | 32204907                       | [T/C]       | 1067297931                                 |
| Ca_Kabuli_NC_021164.1_32229542 | Ca_kabuli_chr05    | 32229542                       | [A/C]       | 1067297932                                 |
| Ca_Kabuli_NC_021164.1_32346662 | Ca_kabuli_chr05    | 32346662                       | [T/A]       | 1067297933                                 |
| Ca_Kabuli_NC_021164.1_32362334 | Ca_kabuli_chr05    | 32362334                       | [A/G]       | 1067297934                                 |
| Ca_Kabuli_NC_021164.1_32362361 | Ca_kabuli_chr05    | 32362361                       | [A/T]       | 1067297935                                 |
| Ca_Kabuli_NC_021164.1_32368469 | Ca_kabuli_chr05    | 32368469                       | [T/G]       | 1067297936                                 |
| Ca_Kabuli_NC_021164.1_32383734 | Ca_kabuli_chr05    | 32383734                       | [T/G]       | 1067297937                                 |
| Ca_Kabuli_NC_021164.1_32383735 | Ca_kabuli_chr05    | 32383735                       | [T/C]       | 1067297938                                 |
| Ca_Kabuli_NC_021164.1_32383737 | Ca_kabuli_chr05    | 32383737                       | [T/C]       | 1067297939                                 |
| Ca_Kabuli_NC_021164.1_32399307 | Ca_kabuli_chr05    | 32399307                       | [A/T]       | 1067297940                                 |
| Ca_Kabuli_NC_021164.1_32459857 | Ca_kabuli_chr05    | 32459857                       | [A/T]       | 1067297941                                 |
| Ca_Kabuli_NC_021164.1_32481257 | Ca_kabuli_chr05    | 32481257                       | [T/C]       | 1067297942                                 |
| Ca_Kabuli_NC_021164.1_32554169 | Ca_kabuli_chr05    | 32554169                       | [T/G]       | 1067297943                                 |
| Ca_Kabuli_NC_021164.1_32598189 | Ca_kabuli_chr05    | 32598189                       | [A/G]       | 1067297944                                 |
| Ca_Kabuli_NC_021164.1_32598217 | Ca_kabuli_chr05    | 32598217                       | [T/C]       | 1067297945                                 |
| Ca_Kabuli_NC_021164.1_32794257 | Ca_kabuli_chr05    | 32794257                       | [A/C]       | 1067297946                                 |

| <b>SNP IDs</b>                 | <b>Chromosomes</b> | <b>Physical positions (bp)</b> | <b>SNPs</b> | <b>NCBI SNPdb accession IDs (NCBI_ss#)</b> |
|--------------------------------|--------------------|--------------------------------|-------------|--------------------------------------------|
| Ca_Kabuli_NC_021164.1_32794266 | Ca_kabuli_chr05    | 32794266                       | [T/C]       | 1067297947                                 |
| Ca_Kabuli_NC_021164.1_32839329 | Ca_kabuli_chr05    | 32839329                       | [A/C]       | 1067297948                                 |
| Ca_Kabuli_NC_021164.1_32839356 | Ca_kabuli_chr05    | 32839356                       | [A/G]       | 1067297949                                 |
| Ca_Kabuli_NC_021164.1_32840541 | Ca_kabuli_chr05    | 32840541                       | [T/G]       | 1067297950                                 |
| Ca_Kabuli_NC_021164.1_32968793 | Ca_kabuli_chr05    | 32968793                       | [A/C]       | 1067297951                                 |
| Ca_Kabuli_NC_021164.1_32978975 | Ca_kabuli_chr05    | 32978975                       | [A/C]       | 1067297952                                 |
| Ca_Kabuli_NC_021164.1_32998113 | Ca_kabuli_chr05    | 32998113                       | [G/A]       | 1067297953                                 |
| Ca_Kabuli_NC_021164.1_32998127 | Ca_kabuli_chr05    | 32998127                       | [A/C]       | 1067297954                                 |
| Ca_Kabuli_NC_021164.1_32998133 | Ca_kabuli_chr05    | 32998133                       | [A/G]       | 1067297955                                 |
| Ca_Kabuli_NC_021164.1_33107719 | Ca_kabuli_chr05    | 33107719                       | [T/C]       | 1067297956                                 |
| Ca_Kabuli_NC_021164.1_33142987 | Ca_kabuli_chr05    | 33142987                       | [A/C]       | 1067297957                                 |
| Ca_Kabuli_NC_021164.1_33143008 | Ca_kabuli_chr05    | 33143008                       | [A/T]       | 1067297958                                 |
| Ca_Kabuli_NC_021164.1_33255835 | Ca_kabuli_chr05    | 33255835                       | [A/G]       | 1067297959                                 |
| Ca_Kabuli_NC_021164.1_33255848 | Ca_kabuli_chr05    | 33255848                       | [A/G]       | 1067297960                                 |
| Ca_Kabuli_NC_021164.1_33256200 | Ca_kabuli_chr05    | 33256200                       | [T/A]       | 1067297961                                 |
| Ca_Kabuli_NC_021164.1_33256287 | Ca_kabuli_chr05    | 33256287                       | [T/G]       | 1067297962                                 |
| Ca_Kabuli_NC_021164.1_33256367 | Ca_kabuli_chr05    | 33256367                       | [A/C]       | 1067297963                                 |
| Ca_Kabuli_NC_021164.1_33256447 | Ca_kabuli_chr05    | 33256447                       | [A/G]       | 1067297964                                 |
| Ca_Kabuli_NC_021164.1_33256468 | Ca_kabuli_chr05    | 33256468                       | [T/C]       | 1067297965                                 |
| Ca_Kabuli_NC_021164.1_33431968 | Ca_kabuli_chr05    | 33431968                       | [T/C]       | 1067297966                                 |
| Ca_Kabuli_NC_021164.1_33432041 | Ca_kabuli_chr05    | 33432041                       | [A/C]       | 1067297967                                 |
| Ca_Kabuli_NC_021164.1_33578410 | Ca_kabuli_chr05    | 33578410                       | [T/C]       | 1067297968                                 |
| Ca_Kabuli_NC_021164.1_33578415 | Ca_kabuli_chr05    | 33578415                       | [T/C]       | 1067297969                                 |
| Ca_Kabuli_NC_021164.1_33578455 | Ca_kabuli_chr05    | 33578455                       | [A/G]       | 1067297970                                 |
| Ca_Kabuli_NC_021164.1_33600199 | Ca_kabuli_chr05    | 33600199                       | [A/C]       | 1067297971                                 |
| Ca_Kabuli_NC_021164.1_33600232 | Ca_kabuli_chr05    | 33600232                       | [A/T]       | 1067297972                                 |
| Ca_Kabuli_NC_021164.1_33600234 | Ca_kabuli_chr05    | 33600234                       | [A/C]       | 1067297973                                 |
| Ca_Kabuli_NC_021164.1_33600274 | Ca_kabuli_chr05    | 33600274                       | [C/A]       | 1067297974                                 |
| Ca_Kabuli_NC_021164.1_33600774 | Ca_kabuli_chr05    | 33600774                       | [A/C]       | 1067297975                                 |
| Ca_Kabuli_NC_021164.1_33704718 | Ca_kabuli_chr05    | 33704718                       | [G/T]       | 1067297976                                 |
| Ca_Kabuli_NC_021164.1_33752912 | Ca_kabuli_chr05    | 33752912                       | [A/G]       | 1067297977                                 |
| Ca_Kabuli_NC_021164.1_33754233 | Ca_kabuli_chr05    | 33754233                       | [G/T]       | 1067297978                                 |
| Ca_Kabuli_NC_021164.1_33754236 | Ca_kabuli_chr05    | 33754236                       | [A/G]       | 1067297979                                 |
| Ca_Kabuli_NC_021164.1_33754240 | Ca_kabuli_chr05    | 33754240                       | [A/G]       | 1067297980                                 |

| <b>SNP IDs</b>                 | <b>Chromosomes</b> | <b>Physical positions (bp)</b> | <b>SNPs</b> | <b>NCBI SNPdb accession IDs (NCBI_ss#)</b> |
|--------------------------------|--------------------|--------------------------------|-------------|--------------------------------------------|
| Ca_Kabuli_NC_021164.1_33754245 | Ca_kabuli_chr05    | 33754245                       | [C/T]       | 1067297981                                 |
| Ca_Kabuli_NC_021164.1_33754246 | Ca_kabuli_chr05    | 33754246                       | [A/C]       | 1067297982                                 |
| Ca_Kabuli_NC_021164.1_33754384 | Ca_kabuli_chr05    | 33754384                       | [T/C]       | 1067297983                                 |
| Ca_Kabuli_NC_021164.1_33754427 | Ca_kabuli_chr05    | 33754427                       | [T/C]       | 1067297984                                 |
| Ca_Kabuli_NC_021164.1_33754441 | Ca_kabuli_chr05    | 33754441                       | [T/C]       | 1067297985                                 |
| Ca_Kabuli_NC_021164.1_33812176 | Ca_kabuli_chr05    | 33812176                       | [A/G]       | 1067297986                                 |
| Ca_Kabuli_NC_021164.1_33812187 | Ca_kabuli_chr05    | 33812187                       | [A/G]       | 1067297987                                 |
| Ca_Kabuli_NC_021164.1_33812200 | Ca_kabuli_chr05    | 33812200                       | [G/A]       | 1067297988                                 |
| Ca_Kabuli_NC_021164.1_33937365 | Ca_kabuli_chr05    | 33937365                       | [A/G]       | 1067297989                                 |
| Ca_Kabuli_NC_021164.1_33949406 | Ca_kabuli_chr05    | 33949406                       | [A/C]       | 1067297990                                 |
| Ca_Kabuli_NC_021164.1_33949411 | Ca_kabuli_chr05    | 33949411                       | [A/G]       | 1067297991                                 |
| Ca_Kabuli_NC_021164.1_33949424 | Ca_kabuli_chr05    | 33949424                       | [A/C]       | 1067297992                                 |
| Ca_Kabuli_NC_021164.1_33985810 | Ca_kabuli_chr05    | 33985810                       | [A/C]       | 1067297993                                 |
| Ca_Kabuli_NC_021164.1_33986108 | Ca_kabuli_chr05    | 33986108                       | [A/C]       | 1067297994                                 |
| Ca_Kabuli_NC_021164.1_33986111 | Ca_kabuli_chr05    | 33986111                       | [A/T]       | 1067297995                                 |
| Ca_Kabuli_NC_021164.1_33986115 | Ca_kabuli_chr05    | 33986115                       | [T/G]       | 1067297996                                 |
| Ca_Kabuli_NC_021164.1_33986184 | Ca_kabuli_chr05    | 33986184                       | [T/A]       | 1067297997                                 |
| Ca_Kabuli_NC_021164.1_33986237 | Ca_kabuli_chr05    | 33986237                       | [A/G]       | 1067297998                                 |
| Ca_Kabuli_NC_021164.1_33986240 | Ca_kabuli_chr05    | 33986240                       | [A/T]       | 1067297999                                 |
| Ca_Kabuli_NC_021164.1_33990236 | Ca_kabuli_chr05    | 33990236                       | [T/G]       | 1067298000                                 |
| Ca_Kabuli_NC_021164.1_33990241 | Ca_kabuli_chr05    | 33990241                       | [A/C]       | 1067298001                                 |
| Ca_Kabuli_NC_021164.1_33996555 | Ca_kabuli_chr05    | 33996555                       | [T/C]       | 1067298002                                 |
| Ca_Kabuli_NC_021164.1_33996559 | Ca_kabuli_chr05    | 33996559                       | [A/G]       | 1067298003                                 |
| Ca_Kabuli_NC_021164.1_33996588 | Ca_kabuli_chr05    | 33996588                       | [A/G]       | 1067298004                                 |
| Ca_Kabuli_NC_021164.1_33996606 | Ca_kabuli_chr05    | 33996606                       | [G/A]       | 1067298005                                 |
| Ca_Kabuli_NC_021164.1_34022356 | Ca_kabuli_chr05    | 34022356                       | [T/G]       | 1067298006                                 |
| Ca_Kabuli_NC_021164.1_34041827 | Ca_kabuli_chr05    | 34041827                       | [A/C]       | 1067298007                                 |
| Ca_Kabuli_NC_021164.1_34041947 | Ca_kabuli_chr05    | 34041947                       | [A/C]       | 1067298008                                 |
| Ca_Kabuli_NC_021164.1_34073361 | Ca_kabuli_chr05    | 34073361                       | [A/C]       | 1067298009                                 |
| Ca_Kabuli_NC_021164.1_34108161 | Ca_kabuli_chr05    | 34108161                       | [T/C]       | 1067298010                                 |
| Ca_Kabuli_NC_021164.1_34126909 | Ca_kabuli_chr05    | 34126909                       | [A/C]       | 1067298011                                 |
| Ca_Kabuli_NC_021164.1_34126915 | Ca_kabuli_chr05    | 34126915                       | [A/C]       | 1067298012                                 |
| Ca_Kabuli_NC_021164.1_34189654 | Ca_kabuli_chr05    | 34189654                       | [A/C]       | 1067298013                                 |
| Ca_Kabuli_NC_021164.1_34189660 | Ca_kabuli_chr05    | 34189660                       | [A/G]       | 1067298014                                 |



| <b>SNP IDs</b>                 | <b>Chromosomes</b> | <b>Physical positions (bp)</b> | <b>SNPs</b> | <b>NCBI SNPdb accession IDs (NCBI_ss#)</b> |
|--------------------------------|--------------------|--------------------------------|-------------|--------------------------------------------|
| Ca_Kabuli_NC_021164.1_34201939 | Ca_kabuli_chr05    | 34201939                       | [A/G]       | 1067298015                                 |
| Ca_Kabuli_NC_021164.1_34201947 | Ca_kabuli_chr05    | 34201947                       | [T/G]       | 1067298016                                 |
| Ca_Kabuli_NC_021164.1_34202000 | Ca_kabuli_chr05    | 34202000                       | [T/C]       | 1067298017                                 |
| Ca_Kabuli_NC_021164.1_34240610 | Ca_kabuli_chr05    | 34240610                       | [A/C]       | 1067298018                                 |
| Ca_Kabuli_NC_021164.1_34241341 | Ca_kabuli_chr05    | 34241341                       | [A/C]       | 1067298019                                 |
| Ca_Kabuli_NC_021164.1_34243816 | Ca_kabuli_chr05    | 34243816                       | [A/C]       | 1067298020                                 |
| Ca_Kabuli_NC_021164.1_34243842 | Ca_kabuli_chr05    | 34243842                       | [A/G]       | 1067298021                                 |
| Ca_Kabuli_NC_021164.1_34243881 | Ca_kabuli_chr05    | 34243881                       | [T/G]       | 1067298022                                 |
| Ca_Kabuli_NC_021164.1_34244774 | Ca_kabuli_chr05    | 34244774                       | [T/C]       | 1067298023                                 |
| Ca_Kabuli_NC_021164.1_34244775 | Ca_kabuli_chr05    | 34244775                       | [G/T]       | 1067298024                                 |
| Ca_Kabuli_NC_021164.1_34246019 | Ca_kabuli_chr05    | 34246019                       | [T/A]       | 1067298025                                 |
| Ca_Kabuli_NC_021164.1_34246020 | Ca_kabuli_chr05    | 34246020                       | [C/A]       | 1067298026                                 |
| Ca_Kabuli_NC_021164.1_34246021 | Ca_kabuli_chr05    | 34246021                       | [T/G]       | 1067298027                                 |
| Ca_Kabuli_NC_021164.1_34279544 | Ca_kabuli_chr05    | 34279544                       | [A/G]       | 1067298028                                 |
| Ca_Kabuli_NC_021164.1_34289094 | Ca_kabuli_chr05    | 34289094                       | [T/G]       | 1067298029                                 |
| Ca_Kabuli_NC_021164.1_34413128 | Ca_kabuli_chr05    | 34413128                       | [A/G]       | 1067298030                                 |
| Ca_Kabuli_NC_021164.1_34413135 | Ca_kabuli_chr05    | 34413135                       | [A/C]       | 1067298031                                 |
| Ca_Kabuli_NC_021164.1_34438983 | Ca_kabuli_chr05    | 34438983                       | [T/G]       | 1067298032                                 |
| Ca_Kabuli_NC_021164.1_34441597 | Ca_kabuli_chr05    | 34441597                       | [T/C]       | 1067298033                                 |
| Ca_Kabuli_NC_021164.1_34486754 | Ca_kabuli_chr05    | 34486754                       | [T/C]       | 1067298034                                 |
| Ca_Kabuli_NC_021164.1_34510722 | Ca_kabuli_chr05    | 34510722                       | [A/G]       | 1067298035                                 |
| Ca_Kabuli_NC_021164.1_34511338 | Ca_kabuli_chr05    | 34511338                       | [T/G]       | 1067298036                                 |
| Ca_Kabuli_NC_021164.1_34511353 | Ca_kabuli_chr05    | 34511353                       | [A/C]       | 1067298037                                 |
| Ca_Kabuli_NC_021164.1_34511645 | Ca_kabuli_chr05    | 34511645                       | [T/C]       | 1067298038                                 |
| Ca_Kabuli_NC_021164.1_34511657 | Ca_kabuli_chr05    | 34511657                       | [T/C]       | 1067298039                                 |
| Ca_Kabuli_NC_021164.1_34511691 | Ca_kabuli_chr05    | 34511691                       | [T/A]       | 1067298040                                 |
| Ca_Kabuli_NC_021164.1_34521694 | Ca_kabuli_chr05    | 34521694                       | [A/G]       | 1067298041                                 |
| Ca_Kabuli_NC_021164.1_34527336 | Ca_kabuli_chr05    | 34527336                       | [A/G]       | 1067298042                                 |
| Ca_Kabuli_NC_021164.1_34527366 | Ca_kabuli_chr05    | 34527366                       | [T/G]       | 1067298043                                 |
| Ca_Kabuli_NC_021164.1_34530237 | Ca_kabuli_chr05    | 34530237                       | [T/G]       | 1067298044                                 |
| Ca_Kabuli_NC_021164.1_34530367 | Ca_kabuli_chr05    | 34530367                       | [C/A]       | 1067298045                                 |
| Ca_Kabuli_NC_021164.1_34531127 | Ca_kabuli_chr05    | 34531127                       | [A/T]       | 1067298046                                 |
| Ca_Kabuli_NC_021164.1_34531150 | Ca_kabuli_chr05    | 34531150                       | [A/G]       | 1067298047                                 |
| Ca_Kabuli_NC_021164.1_34572312 | Ca_kabuli_chr05    | 34572312                       | [A/G]       | 1067298048                                 |

| <b>SNP IDs</b>                 | <b>Chromosomes</b> | <b>Physical positions (bp)</b> | <b>SNPs</b> | <b>NCBI SNPdb accession IDs (NCBI_ss#)</b> |
|--------------------------------|--------------------|--------------------------------|-------------|--------------------------------------------|
| Ca_Kabuli_NC_021164.1_34578038 | Ca_kabuli_chr05    | 34578038                       | [T/G]       | 1067298049                                 |
| Ca_Kabuli_NC_021164.1_34578053 | Ca_kabuli_chr05    | 34578053                       | [A/C]       | 1067298050                                 |
| Ca_Kabuli_NC_021164.1_34578057 | Ca_kabuli_chr05    | 34578057                       | [T/C]       | 1067298051                                 |
| Ca_Kabuli_NC_021164.1_34578635 | Ca_kabuli_chr05    | 34578635                       | [T/A]       | 1067298052                                 |
| Ca_Kabuli_NC_021164.1_34629032 | Ca_kabuli_chr05    | 34629032                       | [T/G]       | 1067298053                                 |
| Ca_Kabuli_NC_021164.1_34688480 | Ca_kabuli_chr05    | 34688480                       | [T/G]       | 1067298054                                 |
| Ca_Kabuli_NC_021164.1_34688489 | Ca_kabuli_chr05    | 34688489                       | [A/C]       | 1067298055                                 |
| Ca_Kabuli_NC_021164.1_34691434 | Ca_kabuli_chr05    | 34691434                       | [T/C]       | 1067298056                                 |
| Ca_Kabuli_NC_021164.1_34699658 | Ca_kabuli_chr05    | 34699658                       | [A/C]       | 1067298057                                 |
| Ca_Kabuli_NC_021164.1_34732777 | Ca_kabuli_chr05    | 34732777                       | [A/C]       | 1067298058                                 |
| Ca_Kabuli_NC_021164.1_34806999 | Ca_kabuli_chr05    | 34806999                       | [A/G]       | 1067298059                                 |
| Ca_Kabuli_NC_021164.1_34845399 | Ca_kabuli_chr05    | 34845399                       | [G/T]       | 1067298060                                 |
| Ca_Kabuli_NC_021164.1_34845467 | Ca_kabuli_chr05    | 34845467                       | [A/G]       | 1067298061                                 |
| Ca_Kabuli_NC_021164.1_34845479 | Ca_kabuli_chr05    | 34845479                       | [T/G]       | 1067298062                                 |
| Ca_Kabuli_NC_021164.1_34845512 | Ca_kabuli_chr05    | 34845512                       | [A/C]       | 1067298063                                 |
| Ca_Kabuli_NC_021164.1_34845521 | Ca_kabuli_chr05    | 34845521                       | [A/C]       | 1067298064                                 |
| Ca_Kabuli_NC_021164.1_34845530 | Ca_kabuli_chr05    | 34845530                       | [A/G]       | 1067298065                                 |
| Ca_Kabuli_NC_021164.1_34857308 | Ca_kabuli_chr05    | 34857308                       | [G/T]       | 1067298066                                 |
| Ca_Kabuli_NC_021164.1_34882224 | Ca_kabuli_chr05    | 34882224                       | [T/G]       | 1067298067                                 |
| Ca_Kabuli_NC_021164.1_34882230 | Ca_kabuli_chr05    | 34882230                       | [T/G]       | 1067298068                                 |
| Ca_Kabuli_NC_021164.1_34932304 | Ca_kabuli_chr05    | 34932304                       | [A/G]       | 1067298069                                 |
| Ca_Kabuli_NC_021164.1_34975470 | Ca_kabuli_chr05    | 34975470                       | [T/C]       | 1067298070                                 |
| Ca_Kabuli_NC_021164.1_34989692 | Ca_kabuli_chr05    | 34989692                       | [A/G]       | 1067298071                                 |
| Ca_Kabuli_NC_021164.1_35126956 | Ca_kabuli_chr05    | 35126956                       | [T/A]       | 1067298072                                 |
| Ca_Kabuli_NC_021164.1_35126957 | Ca_kabuli_chr05    | 35126957                       | [A/T]       | 1067298073                                 |
| Ca_Kabuli_NC_021164.1_35126977 | Ca_kabuli_chr05    | 35126977                       | [A/C]       | 1067298074                                 |
| Ca_Kabuli_NC_021164.1_35209505 | Ca_kabuli_chr05    | 35209505                       | [T/G]       | 1067298075                                 |
| Ca_Kabuli_NC_021164.1_35226127 | Ca_kabuli_chr05    | 35226127                       | [A/C]       | 1067298076                                 |
| Ca_Kabuli_NC_021164.1_35226132 | Ca_kabuli_chr05    | 35226132                       | [A/C]       | 1067298077                                 |
| Ca_Kabuli_NC_021164.1_35240014 | Ca_kabuli_chr05    | 35240014                       | [A/C]       | 1067298078                                 |
| Ca_Kabuli_NC_021164.1_35296146 | Ca_kabuli_chr05    | 35296146                       | [T/C]       | 1067298079                                 |
| Ca_Kabuli_NC_021164.1_35317721 | Ca_kabuli_chr05    | 35317721                       | [A/C]       | 1067298080                                 |
| Ca_Kabuli_NC_021164.1_35340062 | Ca_kabuli_chr05    | 35340062                       | [A/G]       | 1067298081                                 |
| Ca_Kabuli_NC_021164.1_35431496 | Ca_kabuli_chr05    | 35431496                       | [A/C]       | 1067298082                                 |

| <b>SNP IDs</b>                 | <b>Chromosomes</b> | <b>Physical positions (bp)</b> | <b>SNPs</b> | <b>NCBI SNPdb accession IDs (NCBI_ss#)</b> |
|--------------------------------|--------------------|--------------------------------|-------------|--------------------------------------------|
| Ca_Kabuli_NC_021164.1_35475543 | Ca_kabuli_chr05    | 35475543                       | [A/G]       | 1067298083                                 |
| Ca_Kabuli_NC_021164.1_35525244 | Ca_kabuli_chr05    | 35525244                       | [T/G]       | 1067298084                                 |
| Ca_Kabuli_NC_021164.1_35536233 | Ca_kabuli_chr05    | 35536233                       | [A/G]       | 1067298085                                 |
| Ca_Kabuli_NC_021164.1_35540350 | Ca_kabuli_chr05    | 35540350                       | [A/G]       | 1067298086                                 |
| Ca_Kabuli_NC_021164.1_35554377 | Ca_kabuli_chr05    | 35554377                       | [T/A]       | 1067298087                                 |
| Ca_Kabuli_NC_021164.1_35688754 | Ca_kabuli_chr05    | 35688754                       | [T/G]       | 1067298088                                 |
| Ca_Kabuli_NC_021164.1_35715560 | Ca_kabuli_chr05    | 35715560                       | [A/G]       | 1067298089                                 |
| Ca_Kabuli_NC_021164.1_35715571 | Ca_kabuli_chr05    | 35715571                       | [A/C]       | 1067298090                                 |
| Ca_Kabuli_NC_021164.1_35773032 | Ca_kabuli_chr05    | 35773032                       | [T/G]       | 1067298091                                 |
| Ca_Kabuli_NC_021164.1_35773034 | Ca_kabuli_chr05    | 35773034                       | [A/T]       | 1067298092                                 |
| Ca_Kabuli_NC_021164.1_35773044 | Ca_kabuli_chr05    | 35773044                       | [A/G]       | 1067298093                                 |
| Ca_Kabuli_NC_021164.1_35773046 | Ca_kabuli_chr05    | 35773046                       | [A/G]       | 1067298094                                 |
| Ca_Kabuli_NC_021164.1_35789265 | Ca_kabuli_chr05    | 35789265                       | [T/C]       | 1067298095                                 |
| Ca_Kabuli_NC_021164.1_35845092 | Ca_kabuli_chr05    | 35845092                       | [A/G]       | 1067298096                                 |
| Ca_Kabuli_NC_021164.1_35845097 | Ca_kabuli_chr05    | 35845097                       | [G/T]       | 1067298097                                 |
| Ca_Kabuli_NC_021164.1_35845099 | Ca_kabuli_chr05    | 35845099                       | [C/T]       | 1067298098                                 |
| Ca_Kabuli_NC_021164.1_35846367 | Ca_kabuli_chr05    | 35846367                       | [A/C]       | 1067298099                                 |
| Ca_Kabuli_NC_021164.1_35868836 | Ca_kabuli_chr05    | 35868836                       | [A/G]       | 1067298100                                 |
| Ca_Kabuli_NC_021164.1_35868859 | Ca_kabuli_chr05    | 35868859                       | [A/G]       | 1067298101                                 |
| Ca_Kabuli_NC_021164.1_35877446 | Ca_kabuli_chr05    | 35877446                       | [T/A]       | 1067298102                                 |
| Ca_Kabuli_NC_021164.1_35877448 | Ca_kabuli_chr05    | 35877448                       | [A/T]       | 1067298103                                 |
| Ca_Kabuli_NC_021164.1_35877479 | Ca_kabuli_chr05    | 35877479                       | [T/A]       | 1067298104                                 |
| Ca_Kabuli_NC_021164.1_35877482 | Ca_kabuli_chr05    | 35877482                       | [A/G]       | 1067298105                                 |
| Ca_Kabuli_NC_021164.1_35877502 | Ca_kabuli_chr05    | 35877502                       | [A/G]       | 1067298106                                 |
| Ca_Kabuli_NC_021164.1_35889383 | Ca_kabuli_chr05    | 35889383                       | [T/C]       | 1067298107                                 |
| Ca_Kabuli_NC_021164.1_35937861 | Ca_kabuli_chr05    | 35937861                       | [C/A]       | 1067298108                                 |
| Ca_Kabuli_NC_021164.1_35937882 | Ca_kabuli_chr05    | 35937882                       | [A/G]       | 1067298109                                 |
| Ca_Kabuli_NC_021164.1_35937883 | Ca_kabuli_chr05    | 35937883                       | [T/A]       | 1067298110                                 |
| Ca_Kabuli_NC_021164.1_35937886 | Ca_kabuli_chr05    | 35937886                       | [A/G]       | 1067298111                                 |
| Ca_Kabuli_NC_021164.1_35951837 | Ca_kabuli_chr05    | 35951837                       | [A/G]       | 1067298112                                 |
| Ca_Kabuli_NC_021164.1_35951855 | Ca_kabuli_chr05    | 35951855                       | [A/G]       | 1067298113                                 |
| Ca_Kabuli_NC_021164.1_35951893 | Ca_kabuli_chr05    | 35951893                       | [A/G]       | 1067298114                                 |
| Ca_Kabuli_NC_021164.1_35956521 | Ca_kabuli_chr05    | 35956521                       | [T/G]       | 1067298115                                 |
| Ca_Kabuli_NC_021164.1_36012677 | Ca_kabuli_chr05    | 36012677                       | [T/C]       | 1067298116                                 |

| <b>SNP IDs</b>                 | <b>Chromosomes</b> | <b>Physical positions (bp)</b> | <b>SNPs</b> | <b>NCBI SNPdb accession IDs (NCBI_ss#)</b> |
|--------------------------------|--------------------|--------------------------------|-------------|--------------------------------------------|
| Ca_Kabuli_NC_021164.1_36039387 | Ca_kabuli_chr05    | 36039387                       | [A/C]       | 1067298117                                 |
| Ca_Kabuli_NC_021164.1_36039430 | Ca_kabuli_chr05    | 36039430                       | [T/C]       | 1067298118                                 |
| Ca_Kabuli_NC_021164.1_36201080 | Ca_kabuli_chr05    | 36201080                       | [G/A]       | 1067298119                                 |
| Ca_Kabuli_NC_021164.1_36201823 | Ca_kabuli_chr05    | 36201823                       | [C/A]       | 1067298120                                 |
| Ca_Kabuli_NC_021164.1_36201842 | Ca_kabuli_chr05    | 36201842                       | [A/G]       | 1067298121                                 |
| Ca_Kabuli_NC_021164.1_36217832 | Ca_kabuli_chr05    | 36217832                       | [T/C]       | 1067298122                                 |
| Ca_Kabuli_NC_021164.1_36217838 | Ca_kabuli_chr05    | 36217838                       | [G/C]       | 1067298123                                 |
| Ca_Kabuli_NC_021164.1_36225904 | Ca_kabuli_chr05    | 36225904                       | [T/C]       | 1067298124                                 |
| Ca_Kabuli_NC_021164.1_36292584 | Ca_kabuli_chr05    | 36292584                       | [T/G]       | 1067298125                                 |
| Ca_Kabuli_NC_021164.1_36295956 | Ca_kabuli_chr05    | 36295956                       | [T/A]       | 1067298126                                 |
| Ca_Kabuli_NC_021164.1_36397258 | Ca_kabuli_chr05    | 36397258                       | [T/G]       | 1067298127                                 |
| Ca_Kabuli_NC_021164.1_36407458 | Ca_kabuli_chr05    | 36407458                       | [A/G]       | 1067298128                                 |
| Ca_Kabuli_NC_021164.1_36407481 | Ca_kabuli_chr05    | 36407481                       | [A/C]       | 1067298129                                 |
| Ca_Kabuli_NC_021164.1_36408734 | Ca_kabuli_chr05    | 36408734                       | [A/C]       | 1067298130                                 |
| Ca_Kabuli_NC_021164.1_36408745 | Ca_kabuli_chr05    | 36408745                       | [A/C]       | 1067298131                                 |
| Ca_Kabuli_NC_021164.1_36427186 | Ca_kabuli_chr05    | 36427186                       | [A/G]       | 1067298132                                 |
| Ca_Kabuli_NC_021164.1_36430731 | Ca_kabuli_chr05    | 36430731                       | [A/C]       | 1067298133                                 |
| Ca_Kabuli_NC_021164.1_36440951 | Ca_kabuli_chr05    | 36440951                       | [A/C]       | 1067298134                                 |
| Ca_Kabuli_NC_021164.1_36440954 | Ca_kabuli_chr05    | 36440954                       | [A/C]       | 1067298135                                 |
| Ca_Kabuli_NC_021164.1_36440984 | Ca_kabuli_chr05    | 36440984                       | [A/C]       | 1067298136                                 |
| Ca_Kabuli_NC_021164.1_36441067 | Ca_kabuli_chr05    | 36441067                       | [A/C]       | 1067298137                                 |
| Ca_Kabuli_NC_021164.1_36441113 | Ca_kabuli_chr05    | 36441113                       | [A/G]       | 1067298138                                 |
| Ca_Kabuli_NC_021164.1_36566265 | Ca_kabuli_chr05    | 36566265                       | [A/C]       | 1067298139                                 |
| Ca_Kabuli_NC_021164.1_36613606 | Ca_kabuli_chr05    | 36613606                       | [T/G]       | 1067298140                                 |
| Ca_Kabuli_NC_021164.1_36613688 | Ca_kabuli_chr05    | 36613688                       | [G/A]       | 1067298141                                 |
| Ca_Kabuli_NC_021164.1_36619876 | Ca_kabuli_chr05    | 36619876                       | [A/G]       | 1067298142                                 |
| Ca_Kabuli_NC_021164.1_36671454 | Ca_kabuli_chr05    | 36671454                       | [T/G]       | 1067298143                                 |
| Ca_Kabuli_NC_021164.1_36671524 | Ca_kabuli_chr05    | 36671524                       | [C/G]       | 1067298144                                 |
| Ca_Kabuli_NC_021164.1_36672025 | Ca_kabuli_chr05    | 36672025                       | [T/G]       | 1067298145                                 |
| Ca_Kabuli_NC_021164.1_36673942 | Ca_kabuli_chr05    | 36673942                       | [T/G]       | 1067298146                                 |
| Ca_Kabuli_NC_021164.1_36751851 | Ca_kabuli_chr05    | 36751851                       | [A/T]       | 1067298147                                 |
| Ca_Kabuli_NC_021164.1_36757372 | Ca_kabuli_chr05    | 36757372                       | [T/C]       | 1067298148                                 |
| Ca_Kabuli_NC_021164.1_36757432 | Ca_kabuli_chr05    | 36757432                       | [A/G]       | 1067298149                                 |
| Ca_Kabuli_NC_021164.1_36757434 | Ca_kabuli_chr05    | 36757434                       | [T/C]       | 1067298150                                 |

| <b>SNP IDs</b>                 | <b>Chromosomes</b> | <b>Physical positions (bp)</b> | <b>SNPs</b> | <b>NCBI SNPdb accession IDs (NCBI_ss#)</b> |
|--------------------------------|--------------------|--------------------------------|-------------|--------------------------------------------|
| Ca_Kabuli_NC_021164.1_36793966 | Ca_kabuli_chr05    | 36793966                       | [T/C]       | 1067298151                                 |
| Ca_Kabuli_NC_021164.1_36793979 | Ca_kabuli_chr05    | 36793979                       | [A/T]       | 1067298152                                 |
| Ca_Kabuli_NC_021164.1_36799793 | Ca_kabuli_chr05    | 36799793                       | [A/C]       | 1067298153                                 |
| Ca_Kabuli_NC_021164.1_36799795 | Ca_kabuli_chr05    | 36799795                       | [C/G]       | 1067298154                                 |
| Ca_Kabuli_NC_021164.1_36799801 | Ca_kabuli_chr05    | 36799801                       | [A/T]       | 1067298155                                 |
| Ca_Kabuli_NC_021164.1_36799839 | Ca_kabuli_chr05    | 36799839                       | [A/G]       | 1067298156                                 |
| Ca_Kabuli_NC_021164.1_36800094 | Ca_kabuli_chr05    | 36800094                       | [T/C]       | 1067298157                                 |
| Ca_Kabuli_NC_021164.1_36800095 | Ca_kabuli_chr05    | 36800095                       | [A/C]       | 1067298158                                 |
| Ca_Kabuli_NC_021164.1_36802444 | Ca_kabuli_chr05    | 36802444                       | [T/C]       | 1067298159                                 |
| Ca_Kabuli_NC_021164.1_36802465 | Ca_kabuli_chr05    | 36802465                       | [A/G]       | 1067298160                                 |
| Ca_Kabuli_NC_021164.1_36908355 | Ca_kabuli_chr05    | 36908355                       | [T/G]       | 1067298161                                 |
| Ca_Kabuli_NC_021164.1_36908363 | Ca_kabuli_chr05    | 36908363                       | [A/G]       | 1067298162                                 |
| Ca_Kabuli_NC_021164.1_36978251 | Ca_kabuli_chr05    | 36978251                       | [A/G]       | 1067298163                                 |
| Ca_Kabuli_NC_021164.1_36978252 | Ca_kabuli_chr05    | 36978252                       | [G/A]       | 1067298164                                 |
| Ca_Kabuli_NC_021164.1_36990631 | Ca_kabuli_chr05    | 36990631                       | [T/A]       | 1067298165                                 |
| Ca_Kabuli_NC_021164.1_36999074 | Ca_kabuli_chr05    | 36999074                       | [G/C]       | 1067298166                                 |
| Ca_Kabuli_NC_021164.1_37004113 | Ca_kabuli_chr05    | 37004113                       | [T/G]       | 1067298167                                 |
| Ca_Kabuli_NC_021164.1_37012135 | Ca_kabuli_chr05    | 37012135                       | [T/C]       | 1067298168                                 |
| Ca_Kabuli_NC_021164.1_37012147 | Ca_kabuli_chr05    | 37012147                       | [T/C]       | 1067298169                                 |
| Ca_Kabuli_NC_021164.1_37012168 | Ca_kabuli_chr05    | 37012168                       | [C/T]       | 1067298170                                 |
| Ca_Kabuli_NC_021164.1_37012371 | Ca_kabuli_chr05    | 37012371                       | [A/T]       | 1067298171                                 |
| Ca_Kabuli_NC_021164.1_37016833 | Ca_kabuli_chr05    | 37016833                       | [C/T]       | 1067298172                                 |
| Ca_Kabuli_NC_021164.1_37039246 | Ca_kabuli_chr05    | 37039246                       | [A/T]       | 1067298173                                 |
| Ca_Kabuli_NC_021164.1_37039531 | Ca_kabuli_chr05    | 37039531                       | [A/C]       | 1067298174                                 |
| Ca_Kabuli_NC_021164.1_37040045 | Ca_kabuli_chr05    | 37040045                       | [G/A]       | 1067298175                                 |
| Ca_Kabuli_NC_021164.1_37042470 | Ca_kabuli_chr05    | 37042470                       | [C/T]       | 1067298176                                 |
| Ca_Kabuli_NC_021164.1_37067293 | Ca_kabuli_chr05    | 37067293                       | [A/T]       | 1067298177                                 |
| Ca_Kabuli_NC_021164.1_37082797 | Ca_kabuli_chr05    | 37082797                       | [G/T]       | 1067298178                                 |
| Ca_Kabuli_NC_021164.1_37083275 | Ca_kabuli_chr05    | 37083275                       | [G/T]       | 1067298179                                 |
| Ca_Kabuli_NC_021164.1_37083276 | Ca_kabuli_chr05    | 37083276                       | [T/G]       | 1067298180                                 |
| Ca_Kabuli_NC_021164.1_37113106 | Ca_kabuli_chr05    | 37113106                       | [T/C]       | 1067298181                                 |
| Ca_Kabuli_NC_021164.1_37113154 | Ca_kabuli_chr05    | 37113154                       | [A/T]       | 1067298182                                 |
| Ca_Kabuli_NC_021164.1_37147247 | Ca_kabuli_chr05    | 37147247                       | [T/G]       | 1067298183                                 |
| Ca_Kabuli_NC_021164.1_37147250 | Ca_kabuli_chr05    | 37147250                       | [T/C]       | 1067298184                                 |

| <b>SNP IDs</b>                 | <b>Chromosomes</b> | <b>Physical positions (bp)</b> | <b>SNPs</b> | <b>NCBI SNPdb accession IDs (NCBI_ss#)</b> |
|--------------------------------|--------------------|--------------------------------|-------------|--------------------------------------------|
| Ca_Kabuli_NC_021164.1_37147300 | Ca_kabuli_chr05    | 37147300                       | [A/C]       | 1067298185                                 |
| Ca_Kabuli_NC_021164.1_37147373 | Ca_kabuli_chr05    | 37147373                       | [A/C]       | 1067298186                                 |
| Ca_Kabuli_NC_021164.1_37147439 | Ca_kabuli_chr05    | 37147439                       | [T/G]       | 1067298187                                 |
| Ca_Kabuli_NC_021164.1_37147447 | Ca_kabuli_chr05    | 37147447                       | [C/A]       | 1067298188                                 |
| Ca_Kabuli_NC_021164.1_37147486 | Ca_kabuli_chr05    | 37147486                       | [A/C]       | 1067298189                                 |
| Ca_Kabuli_NC_021164.1_37147616 | Ca_kabuli_chr05    | 37147616                       | [A/G]       | 1067298190                                 |
| Ca_Kabuli_NC_021164.1_37147631 | Ca_kabuli_chr05    | 37147631                       | [T/G]       | 1067298191                                 |
| Ca_Kabuli_NC_021164.1_37147697 | Ca_kabuli_chr05    | 37147697                       | [T/G]       | 1067298192                                 |
| Ca_Kabuli_NC_021164.1_37167100 | Ca_kabuli_chr05    | 37167100                       | [A/C]       | 1067298193                                 |
| Ca_Kabuli_NC_021164.1_37172184 | Ca_kabuli_chr05    | 37172184                       | [T/A]       | 1067298194                                 |
| Ca_Kabuli_NC_021164.1_37172188 | Ca_kabuli_chr05    | 37172188                       | [T/G]       | 1067298195                                 |
| Ca_Kabuli_NC_021164.1_37172189 | Ca_kabuli_chr05    | 37172189                       | [T/C]       | 1067298196                                 |
| Ca_Kabuli_NC_021164.1_37174786 | Ca_kabuli_chr05    | 37174786                       | [T/C]       | 1067298197                                 |
| Ca_Kabuli_NC_021164.1_37176168 | Ca_kabuli_chr05    | 37176168                       | [T/G]       | 1067298198                                 |
| Ca_Kabuli_NC_021164.1_37176215 | Ca_kabuli_chr05    | 37176215                       | [A/G]       | 1067298199                                 |
| Ca_Kabuli_NC_021164.1_37197258 | Ca_kabuli_chr05    | 37197258                       | [A/G]       | 1067298200                                 |
| Ca_Kabuli_NC_021164.1_37197281 | Ca_kabuli_chr05    | 37197281                       | [A/C]       | 1067298201                                 |
| Ca_Kabuli_NC_021164.1_37207839 | Ca_kabuli_chr05    | 37207839                       | [T/G]       | 1067298202                                 |
| Ca_Kabuli_NC_021164.1_37207841 | Ca_kabuli_chr05    | 37207841                       | [T/C]       | 1067298203                                 |
| Ca_Kabuli_NC_021164.1_37207850 | Ca_kabuli_chr05    | 37207850                       | [C/G]       | 1067298204                                 |
| Ca_Kabuli_NC_021164.1_37207855 | Ca_kabuli_chr05    | 37207855                       | [G/T]       | 1067298205                                 |
| Ca_Kabuli_NC_021164.1_37207856 | Ca_kabuli_chr05    | 37207856                       | [T/G]       | 1067298206                                 |
| Ca_Kabuli_NC_021164.1_37207857 | Ca_kabuli_chr05    | 37207857                       | [T/C]       | 1067298207                                 |
| Ca_Kabuli_NC_021164.1_37207864 | Ca_kabuli_chr05    | 37207864                       | [A/C]       | 1067298208                                 |
| Ca_Kabuli_NC_021164.1_37207892 | Ca_kabuli_chr05    | 37207892                       | [A/T]       | 1067298209                                 |
| Ca_Kabuli_NC_021164.1_37274550 | Ca_kabuli_chr05    | 37274550                       | [T/C]       | 1067298210                                 |
| Ca_Kabuli_NC_021164.1_37274583 | Ca_kabuli_chr05    | 37274583                       | [C/T]       | 1067298211                                 |
| Ca_Kabuli_NC_021164.1_37310070 | Ca_kabuli_chr05    | 37310070                       | [T/C]       | 1067298212                                 |
| Ca_Kabuli_NC_021164.1_37332182 | Ca_kabuli_chr05    | 37332182                       | [G/A]       | 1067298213                                 |
| Ca_Kabuli_NC_021164.1_37332467 | Ca_kabuli_chr05    | 37332467                       | [T/C]       | 1067298214                                 |
| Ca_Kabuli_NC_021164.1_37363511 | Ca_kabuli_chr05    | 37363511                       | [T/C]       | 1067298215                                 |
| Ca_Kabuli_NC_021164.1_37462538 | Ca_kabuli_chr05    | 37462538                       | [T/C]       | 1067298216                                 |
| Ca_Kabuli_NC_021164.1_37462550 | Ca_kabuli_chr05    | 37462550                       | [T/C]       | 1067298217                                 |
| Ca_Kabuli_NC_021164.1_37579009 | Ca_kabuli_chr05    | 37579009                       | [T/G]       | 1067298218                                 |

| <b>SNP IDs</b>                 | <b>Chromosomes</b> | <b>Physical positions (bp)</b> | <b>SNPs</b> | <b>NCBI SNPdb accession IDs (NCBI_ss#)</b> |
|--------------------------------|--------------------|--------------------------------|-------------|--------------------------------------------|
| Ca_Kabuli_NC_021164.1_37594911 | Ca_kabuli_chr05    | 37594911                       | [A/T]       | 1067298219                                 |
| Ca_Kabuli_NC_021164.1_37834567 | Ca_kabuli_chr05    | 37834567                       | [A/G]       | 1067298220                                 |
| Ca_Kabuli_NC_021164.1_37869762 | Ca_kabuli_chr05    | 37869762                       | [A/G]       | 1067298221                                 |
| Ca_Kabuli_NC_021164.1_37886452 | Ca_kabuli_chr05    | 37886452                       | [A/C]       | 1067298222                                 |
| Ca_Kabuli_NC_021164.1_37911668 | Ca_kabuli_chr05    | 37911668                       | [A/C]       | 1067298223                                 |
| Ca_Kabuli_NC_021164.1_37911750 | Ca_kabuli_chr05    | 37911750                       | [T/G]       | 1067298224                                 |
| Ca_Kabuli_NC_021164.1_37911759 | Ca_kabuli_chr05    | 37911759                       | [T/C]       | 1067298225                                 |
| Ca_Kabuli_NC_021164.1_37911765 | Ca_kabuli_chr05    | 37911765                       | [A/G]       | 1067298226                                 |
| Ca_Kabuli_NC_021164.1_37911827 | Ca_kabuli_chr05    | 37911827                       | [A/G]       | 1067298227                                 |
| Ca_Kabuli_NC_021164.1_37911839 | Ca_kabuli_chr05    | 37911839                       | [T/G]       | 1067298228                                 |
| Ca_Kabuli_NC_021164.1_37922171 | Ca_kabuli_chr05    | 37922171                       | [A/C]       | 1067298229                                 |
| Ca_Kabuli_NC_021164.1_37980181 | Ca_kabuli_chr05    | 37980181                       | [T/A]       | 1067298230                                 |
| Ca_Kabuli_NC_021164.1_37980227 | Ca_kabuli_chr05    | 37980227                       | [A/C]       | 1067298231                                 |
| Ca_Kabuli_NC_021164.1_38057581 | Ca_kabuli_chr05    | 38057581                       | [A/G]       | 1067298232                                 |
| Ca_Kabuli_NC_021164.1_38080355 | Ca_kabuli_chr05    | 38080355                       | [A/G]       | 1067298233                                 |
| Ca_Kabuli_NC_021164.1_38110217 | Ca_kabuli_chr05    | 38110217                       | [A/T]       | 1067298234                                 |
| Ca_Kabuli_NC_021164.1_38113821 | Ca_kabuli_chr05    | 38113821                       | [T/A]       | 1067298235                                 |
| Ca_Kabuli_NC_021164.1_38180943 | Ca_kabuli_chr05    | 38180943                       | [T/G]       | 1067298236                                 |
| Ca_Kabuli_NC_021164.1_38180987 | Ca_kabuli_chr05    | 38180987                       | [A/C]       | 1067298237                                 |
| Ca_Kabuli_NC_021164.1_38180999 | Ca_kabuli_chr05    | 38180999                       | [A/C]       | 1067298238                                 |
| Ca_Kabuli_NC_021164.1_38182372 | Ca_kabuli_chr05    | 38182372                       | [T/A]       | 1067298239                                 |
| Ca_Kabuli_NC_021164.1_38248865 | Ca_kabuli_chr05    | 38248865                       | [A/T]       | 1067298240                                 |
| Ca_Kabuli_NC_021164.1_38248881 | Ca_kabuli_chr05    | 38248881                       | [T/A]       | 1067298241                                 |
| Ca_Kabuli_NC_021164.1_38248889 | Ca_kabuli_chr05    | 38248889                       | [T/C]       | 1067298242                                 |
| Ca_Kabuli_NC_021164.1_38288096 | Ca_kabuli_chr05    | 38288096                       | [A/G]       | 1067298243                                 |
| Ca_Kabuli_NC_021164.1_38288136 | Ca_kabuli_chr05    | 38288136                       | [A/G]       | 1067298244                                 |
| Ca_Kabuli_NC_021164.1_38288156 | Ca_kabuli_chr05    | 38288156                       | [T/A]       | 1067298245                                 |
| Ca_Kabuli_NC_021164.1_38307037 | Ca_kabuli_chr05    | 38307037                       | [T/C]       | 1067298246                                 |
| Ca_Kabuli_NC_021164.1_38307090 | Ca_kabuli_chr05    | 38307090                       | [A/C]       | 1067298247                                 |
| Ca_Kabuli_NC_021164.1_38307107 | Ca_kabuli_chr05    | 38307107                       | [A/T]       | 1067298248                                 |
| Ca_Kabuli_NC_021164.1_38335108 | Ca_kabuli_chr05    | 38335108                       | [A/G]       | 1067298249                                 |
| Ca_Kabuli_NC_021164.1_38347184 | Ca_kabuli_chr05    | 38347184                       | [T/G]       | 1067298250                                 |
| Ca_Kabuli_NC_021164.1_38362659 | Ca_kabuli_chr05    | 38362659                       | [T/G]       | 1067298251                                 |
| Ca_Kabuli_NC_021164.1_38362774 | Ca_kabuli_chr05    | 38362774                       | [A/C]       | 1067298252                                 |

| <b>SNP IDs</b>                 | <b>Chromosomes</b> | <b>Physical positions (bp)</b> | <b>SNPs</b> | <b>NCBI SNPdb accession IDs (NCBI_ss#)</b> |
|--------------------------------|--------------------|--------------------------------|-------------|--------------------------------------------|
| Ca_Kabuli_NC_021164.1_38367973 | Ca_kabuli_chr05    | 38367973                       | [A/G]       | 1067298253                                 |
| Ca_Kabuli_NC_021164.1_38453278 | Ca_kabuli_chr05    | 38453278                       | [G/T]       | 1067298254                                 |
| Ca_Kabuli_NC_021164.1_38458823 | Ca_kabuli_chr05    | 38458823                       | [A/T]       | 1067298255                                 |
| Ca_Kabuli_NC_021164.1_38483382 | Ca_kabuli_chr05    | 38483382                       | [G/T]       | 1067298256                                 |
| Ca_Kabuli_NC_021164.1_38483386 | Ca_kabuli_chr05    | 38483386                       | [T/G]       | 1067298257                                 |
| Ca_Kabuli_NC_021164.1_38483396 | Ca_kabuli_chr05    | 38483396                       | [G/T]       | 1067298258                                 |
| Ca_Kabuli_NC_021164.1_38509657 | Ca_kabuli_chr05    | 38509657                       | [A/C]       | 1067298259                                 |
| Ca_Kabuli_NC_021164.1_38538823 | Ca_kabuli_chr05    | 38538823                       | [T/G]       | 1067298260                                 |
| Ca_Kabuli_NC_021164.1_38540373 | Ca_kabuli_chr05    | 38540373                       | [T/G]       | 1067298261                                 |
| Ca_Kabuli_NC_021164.1_38540400 | Ca_kabuli_chr05    | 38540400                       | [T/C]       | 1067298262                                 |
| Ca_Kabuli_NC_021164.1_38551427 | Ca_kabuli_chr05    | 38551427                       | [A/G]       | 1067298263                                 |
| Ca_Kabuli_NC_021164.1_38558828 | Ca_kabuli_chr05    | 38558828                       | [T/C]       | 1067298264                                 |
| Ca_Kabuli_NC_021164.1_38559028 | Ca_kabuli_chr05    | 38559028                       | [A/C]       | 1067298265                                 |
| Ca_Kabuli_NC_021164.1_38559048 | Ca_kabuli_chr05    | 38559048                       | [A/T]       | 1067298266                                 |
| Ca_Kabuli_NC_021164.1_38559049 | Ca_kabuli_chr05    | 38559049                       | [T/C]       | 1067298267                                 |
| Ca_Kabuli_NC_021164.1_38559051 | Ca_kabuli_chr05    | 38559051                       | [T/C]       | 1067298268                                 |
| Ca_Kabuli_NC_021164.1_38559053 | Ca_kabuli_chr05    | 38559053                       | [A/G]       | 1067298269                                 |
| Ca_Kabuli_NC_021164.1_38559084 | Ca_kabuli_chr05    | 38559084                       | [T/C]       | 1067298270                                 |
| Ca_Kabuli_NC_021164.1_38559088 | Ca_kabuli_chr05    | 38559088                       | [T/C]       | 1067298271                                 |
| Ca_Kabuli_NC_021164.1_38559110 | Ca_kabuli_chr05    | 38559110                       | [T/C]       | 1067298272                                 |
| Ca_Kabuli_NC_021164.1_38559115 | Ca_kabuli_chr05    | 38559115                       | [T/C]       | 1067298273                                 |
| Ca_Kabuli_NC_021164.1_38590941 | Ca_kabuli_chr05    | 38590941                       | [C/A]       | 1067298274                                 |
| Ca_Kabuli_NC_021164.1_38591095 | Ca_kabuli_chr05    | 38591095                       | [T/C]       | 1067298275                                 |
| Ca_Kabuli_NC_021164.1_38737288 | Ca_kabuli_chr05    | 38737288                       | [T/G]       | 1067298276                                 |
| Ca_Kabuli_NC_021164.1_38783604 | Ca_kabuli_chr05    | 38783604                       | [C/A]       | 1067298277                                 |
| Ca_Kabuli_NC_021164.1_38783651 | Ca_kabuli_chr05    | 38783651                       | [A/G]       | 1067298278                                 |
| Ca_Kabuli_NC_021164.1_38783858 | Ca_kabuli_chr05    | 38783858                       | [A/C]       | 1067298279                                 |
| Ca_Kabuli_NC_021164.1_38783952 | Ca_kabuli_chr05    | 38783952                       | [T/A]       | 1067298280                                 |
| Ca_Kabuli_NC_021164.1_38783964 | Ca_kabuli_chr05    | 38783964                       | [A/C]       | 1067298281                                 |
| Ca_Kabuli_NC_021164.1_38783990 | Ca_kabuli_chr05    | 38783990                       | [A/G]       | 1067298282                                 |
| Ca_Kabuli_NC_021164.1_38784144 | Ca_kabuli_chr05    | 38784144                       | [T/G]       | 1067298283                                 |
| Ca_Kabuli_NC_021164.1_38820117 | Ca_kabuli_chr05    | 38820117                       | [A/T]       | 1067298284                                 |
| Ca_Kabuli_NC_021164.1_38820152 | Ca_kabuli_chr05    | 38820152                       | [T/G]       | 1067298285                                 |
| Ca_Kabuli_NC_021164.1_38857770 | Ca_kabuli_chr05    | 38857770                       | [G/A]       | 1067298286                                 |



| <b>SNP IDs</b>                 | <b>Chromosomes</b> | <b>Physical positions (bp)</b> | <b>SNPs</b> | <b>NCBI SNPdb accession IDs (NCBI_ss#)</b> |
|--------------------------------|--------------------|--------------------------------|-------------|--------------------------------------------|
| Ca_Kabuli_NC_021164.1_38863750 | Ca_kabuli_chr05    | 38863750                       | [T/C]       | 1067298287                                 |
| Ca_Kabuli_NC_021164.1_38878823 | Ca_kabuli_chr05    | 38878823                       | [T/C]       | 1067298288                                 |
| Ca_Kabuli_NC_021164.1_38878843 | Ca_kabuli_chr05    | 38878843                       | [T/C]       | 1067298289                                 |
| Ca_Kabuli_NC_021164.1_38878870 | Ca_kabuli_chr05    | 38878870                       | [A/G]       | 1067298290                                 |
| Ca_Kabuli_NC_021164.1_38878890 | Ca_kabuli_chr05    | 38878890                       | [A/G]       | 1067298291                                 |
| Ca_Kabuli_NC_021164.1_38898933 | Ca_kabuli_chr05    | 38898933                       | [T/C]       | 1067298292                                 |
| Ca_Kabuli_NC_021164.1_38909711 | Ca_kabuli_chr05    | 38909711                       | [T/G]       | 1067298293                                 |
| Ca_Kabuli_NC_021164.1_38909720 | Ca_kabuli_chr05    | 38909720                       | [T/C]       | 1067298294                                 |
| Ca_Kabuli_NC_021164.1_38984704 | Ca_kabuli_chr05    | 38984704                       | [A/G]       | 1067298295                                 |
| Ca_Kabuli_NC_021164.1_38984707 | Ca_kabuli_chr05    | 38984707                       | [T/A]       | 1067298296                                 |
| Ca_Kabuli_NC_021164.1_38984743 | Ca_kabuli_chr05    | 38984743                       | [A/G]       | 1067298297                                 |
| Ca_Kabuli_NC_021164.1_38984746 | Ca_kabuli_chr05    | 38984746                       | [A/G]       | 1067298298                                 |
| Ca_Kabuli_NC_021164.1_39038254 | Ca_kabuli_chr05    | 39038254                       | [A/T]       | 1067298299                                 |
| Ca_Kabuli_NC_021164.1_39038305 | Ca_kabuli_chr05    | 39038305                       | [T/A]       | 1067298300                                 |
| Ca_Kabuli_NC_021164.1_39038327 | Ca_kabuli_chr05    | 39038327                       | [A/G]       | 1067298301                                 |
| Ca_Kabuli_NC_021164.1_39038357 | Ca_kabuli_chr05    | 39038357                       | [T/C]       | 1067298302                                 |
| Ca_Kabuli_NC_021164.1_39134875 | Ca_kabuli_chr05    | 39134875                       | [T/G]       | 1067298303                                 |
| Ca_Kabuli_NC_021164.1_39137124 | Ca_kabuli_chr05    | 39137124                       | [A/G]       | 1067298304                                 |
| Ca_Kabuli_NC_021164.1_39137135 | Ca_kabuli_chr05    | 39137135                       | [T/G]       | 1067298305                                 |
| Ca_Kabuli_NC_021164.1_39137174 | Ca_kabuli_chr05    | 39137174                       | [A/C]       | 1067298306                                 |
| Ca_Kabuli_NC_021164.1_39137175 | Ca_kabuli_chr05    | 39137175                       | [G/T]       | 1067298307                                 |
| Ca_Kabuli_NC_021164.1_39175009 | Ca_kabuli_chr05    | 39175009                       | [A/T]       | 1067298308                                 |
| Ca_Kabuli_NC_021164.1_39176406 | Ca_kabuli_chr05    | 39176406                       | [A/C]       | 1067298309                                 |
| Ca_Kabuli_NC_021164.1_39194838 | Ca_kabuli_chr05    | 39194838                       | [T/G]       | 1067298310                                 |
| Ca_Kabuli_NC_021164.1_39243641 | Ca_kabuli_chr05    | 39243641                       | [A/T]       | 1067298311                                 |
| Ca_Kabuli_NC_021164.1_39243661 | Ca_kabuli_chr05    | 39243661                       | [A/G]       | 1067298312                                 |
| Ca_Kabuli_NC_021164.1_39282613 | Ca_kabuli_chr05    | 39282613                       | [A/G]       | 1067298313                                 |
| Ca_Kabuli_NC_021164.1_39282658 | Ca_kabuli_chr05    | 39282658                       | [A/C]       | 1067298314                                 |
| Ca_Kabuli_NC_021164.1_39364695 | Ca_kabuli_chr05    | 39364695                       | [A/C]       | 1067298315                                 |
| Ca_Kabuli_NC_021164.1_39364706 | Ca_kabuli_chr05    | 39364706                       | [T/A]       | 1067298316                                 |
| Ca_Kabuli_NC_021164.1_39364717 | Ca_kabuli_chr05    | 39364717                       | [T/A]       | 1067298317                                 |
| Ca_Kabuli_NC_021164.1_39410329 | Ca_kabuli_chr05    | 39410329                       | [T/G]       | 1067298318                                 |
| Ca_Kabuli_NC_021164.1_39417681 | Ca_kabuli_chr05    | 39417681                       | [T/G]       | 1067298319                                 |
| Ca_Kabuli_NC_021164.1_39477227 | Ca_kabuli_chr05    | 39477227                       | [A/T]       | 1067298320                                 |

| <b>SNP IDs</b>                 | <b>Chromosomes</b> | <b>Physical positions (bp)</b> | <b>SNPs</b> | <b>NCBI SNPdb accession IDs (NCBI_ss#)</b> |
|--------------------------------|--------------------|--------------------------------|-------------|--------------------------------------------|
| Ca_Kabuli_NC_021164.1_39477231 | Ca_kabuli_chr05    | 39477231                       | [A/G]       | 1067298321                                 |
| Ca_Kabuli_NC_021164.1_39477243 | Ca_kabuli_chr05    | 39477243                       | [A/G]       | 1067298322                                 |
| Ca_Kabuli_NC_021164.1_39477264 | Ca_kabuli_chr05    | 39477264                       | [T/C]       | 1067298323                                 |
| Ca_Kabuli_NC_021164.1_39547858 | Ca_kabuli_chr05    | 39547858                       | [T/G]       | 1067298324                                 |
| Ca_Kabuli_NC_021164.1_39585358 | Ca_kabuli_chr05    | 39585358                       | [C/G]       | 1067298325                                 |
| Ca_Kabuli_NC_021164.1_39597565 | Ca_kabuli_chr05    | 39597565                       | [C/A]       | 1067298326                                 |
| Ca_Kabuli_NC_021164.1_39597605 | Ca_kabuli_chr05    | 39597605                       | [A/C]       | 1067298327                                 |
| Ca_Kabuli_NC_021164.1_39608135 | Ca_kabuli_chr05    | 39608135                       | [T/C]       | 1067298328                                 |
| Ca_Kabuli_NC_021164.1_39616068 | Ca_kabuli_chr05    | 39616068                       | [A/G]       | 1067298329                                 |
| Ca_Kabuli_NC_021164.1_39616109 | Ca_kabuli_chr05    | 39616109                       | [A/G]       | 1067298330                                 |
| Ca_Kabuli_NC_021164.1_39661648 | Ca_kabuli_chr05    | 39661648                       | [A/G]       | 1067298331                                 |
| Ca_Kabuli_NC_021164.1_39661686 | Ca_kabuli_chr05    | 39661686                       | [A/G]       | 1067298332                                 |
| Ca_Kabuli_NC_021164.1_39661715 | Ca_kabuli_chr05    | 39661715                       | [T/C]       | 1067298333                                 |
| Ca_Kabuli_NC_021164.1_39794784 | Ca_kabuli_chr05    | 39794784                       | [T/A]       | 1067298334                                 |
| Ca_Kabuli_NC_021164.1_39794915 | Ca_kabuli_chr05    | 39794915                       | [A/G]       | 1067298335                                 |
| Ca_Kabuli_NC_021164.1_39831580 | Ca_kabuli_chr05    | 39831580                       | [A/G]       | 1067298336                                 |
| Ca_Kabuli_NC_021164.1_39869372 | Ca_kabuli_chr05    | 39869372                       | [A/T]       | 1067298337                                 |
| Ca_Kabuli_NC_021164.1_39869373 | Ca_kabuli_chr05    | 39869373                       | [T/C]       | 1067298338                                 |
| Ca_Kabuli_NC_021164.1_39869380 | Ca_kabuli_chr05    | 39869380                       | [A/C]       | 1067298339                                 |
| Ca_Kabuli_NC_021164.1_39869389 | Ca_kabuli_chr05    | 39869389                       | [A/C]       | 1067298340                                 |
| Ca_Kabuli_NC_021164.1_39869413 | Ca_kabuli_chr05    | 39869413                       | [T/C]       | 1067298341                                 |
| Ca_Kabuli_NC_021164.1_39906735 | Ca_kabuli_chr05    | 39906735                       | [A/C]       | 1067298342                                 |
| Ca_Kabuli_NC_021164.1_39943298 | Ca_kabuli_chr05    | 39943298                       | [T/C]       | 1067298343                                 |
| Ca_Kabuli_NC_021164.1_39964231 | Ca_kabuli_chr05    | 39964231                       | [T/C]       | 1067298344                                 |
| Ca_Kabuli_NC_021164.1_39984988 | Ca_kabuli_chr05    | 39984988                       | [T/C]       | 1067298345                                 |
| Ca_Kabuli_NC_021164.1_40018205 | Ca_kabuli_chr05    | 40018205                       | [A/G]       | 1067298346                                 |
| Ca_Kabuli_NC_021164.1_40018223 | Ca_kabuli_chr05    | 40018223                       | [T/G]       | 1067298347                                 |
| Ca_Kabuli_NC_021164.1_40018278 | Ca_kabuli_chr05    | 40018278                       | [A/G]       | 1067298348                                 |
| Ca_Kabuli_NC_021164.1_40018357 | Ca_kabuli_chr05    | 40018357                       | [A/T]       | 1067298349                                 |
| Ca_Kabuli_NC_021164.1_40018377 | Ca_kabuli_chr05    | 40018377                       | [T/C]       | 1067298350                                 |
| Ca_Kabuli_NC_021164.1_40025273 | Ca_kabuli_chr05    | 40025273                       | [T/C]       | 1067298351                                 |
| Ca_Kabuli_NC_021164.1_40025286 | Ca_kabuli_chr05    | 40025286                       | [T/G]       | 1067298352                                 |
| Ca_Kabuli_NC_021164.1_40025377 | Ca_kabuli_chr05    | 40025377                       | [A/T]       | 1067298353                                 |
| Ca_Kabuli_NC_021164.1_40076969 | Ca_kabuli_chr05    | 40076969                       | [T/G]       | 1067298354                                 |

| <b>SNP IDs</b>                 | <b>Chromosomes</b> | <b>Physical positions (bp)</b> | <b>SNPs</b> | <b>NCBI SNPdb accession IDs (NCBI_ss#)</b> |
|--------------------------------|--------------------|--------------------------------|-------------|--------------------------------------------|
| Ca_Kabuli_NC_021164.1_40077026 | Ca_kabuli_chr05    | 40077026                       | [A/C]       | 1067298355                                 |
| Ca_Kabuli_NC_021164.1_40177096 | Ca_kabuli_chr05    | 40177096                       | [A/G]       | 1067298356                                 |
| Ca_Kabuli_NC_021164.1_40194063 | Ca_kabuli_chr05    | 40194063                       | [G/C]       | 1067298357                                 |
| Ca_Kabuli_NC_021164.1_40194065 | Ca_kabuli_chr05    | 40194065                       | [T/A]       | 1067298358                                 |
| Ca_Kabuli_NC_021164.1_40194187 | Ca_kabuli_chr05    | 40194187                       | [C/A]       | 1067298359                                 |
| Ca_Kabuli_NC_021164.1_40225151 | Ca_kabuli_chr05    | 40225151                       | [T/G]       | 1067298360                                 |
| Ca_Kabuli_NC_021164.1_40225325 | Ca_kabuli_chr05    | 40225325                       | [T/C]       | 1067298361                                 |
| Ca_Kabuli_NC_021164.1_40225427 | Ca_kabuli_chr05    | 40225427                       | [A/G]       | 1067298362                                 |
| Ca_Kabuli_NC_021164.1_40231832 | Ca_kabuli_chr05    | 40231832                       | [A/C]       | 1067298363                                 |
| Ca_Kabuli_NC_021164.1_40239326 | Ca_kabuli_chr05    | 40239326                       | [T/C]       | 1067298364                                 |
| Ca_Kabuli_NC_021164.1_40359446 | Ca_kabuli_chr05    | 40359446                       | [G/A]       | 1067298365                                 |
| Ca_Kabuli_NC_021164.1_40359447 | Ca_kabuli_chr05    | 40359447                       | [T/C]       | 1067298366                                 |
| Ca_Kabuli_NC_021164.1_40359449 | Ca_kabuli_chr05    | 40359449                       | [T/G]       | 1067298367                                 |
| Ca_Kabuli_NC_021164.1_40359451 | Ca_kabuli_chr05    | 40359451                       | [C/A]       | 1067298368                                 |
| Ca_Kabuli_NC_021164.1_40465368 | Ca_kabuli_chr05    | 40465368                       | [T/G]       | 1067298369                                 |
| Ca_Kabuli_NC_021164.1_40507145 | Ca_kabuli_chr05    | 40507145                       | [A/C]       | 1067298370                                 |
| Ca_Kabuli_NC_021164.1_40507180 | Ca_kabuli_chr05    | 40507180                       | [A/T]       | 1067298371                                 |
| Ca_Kabuli_NC_021164.1_40507611 | Ca_kabuli_chr05    | 40507611                       | [A/G]       | 1067298372                                 |
| Ca_Kabuli_NC_021164.1_40507633 | Ca_kabuli_chr05    | 40507633                       | [T/C]       | 1067298373                                 |
| Ca_Kabuli_NC_021164.1_40507636 | Ca_kabuli_chr05    | 40507636                       | [T/C]       | 1067298374                                 |
| Ca_Kabuli_NC_021164.1_40507646 | Ca_kabuli_chr05    | 40507646                       | [A/G]       | 1067298375                                 |
| Ca_Kabuli_NC_021164.1_40507648 | Ca_kabuli_chr05    | 40507648                       | [A/G]       | 1067298376                                 |
| Ca_Kabuli_NC_021164.1_40507650 | Ca_kabuli_chr05    | 40507650                       | [T/G]       | 1067298377                                 |
| Ca_Kabuli_NC_021164.1_40507681 | Ca_kabuli_chr05    | 40507681                       | [A/C]       | 1067298378                                 |
| Ca_Kabuli_NC_021164.1_40507690 | Ca_kabuli_chr05    | 40507690                       | [A/G]       | 1067298379                                 |
| Ca_Kabuli_NC_021164.1_40522458 | Ca_kabuli_chr05    | 40522458                       | [C/A]       | 1067298380                                 |
| Ca_Kabuli_NC_021164.1_40522459 | Ca_kabuli_chr05    | 40522459                       | [C/G]       | 1067298381                                 |
| Ca_Kabuli_NC_021164.1_40522461 | Ca_kabuli_chr05    | 40522461                       | [A/T]       | 1067298382                                 |
| Ca_Kabuli_NC_021164.1_40532395 | Ca_kabuli_chr05    | 40532395                       | [T/G]       | 1067298383                                 |
| Ca_Kabuli_NC_021164.1_40555173 | Ca_kabuli_chr05    | 40555173                       | [A/C]       | 1067298384                                 |
| Ca_Kabuli_NC_021164.1_40581463 | Ca_kabuli_chr05    | 40581463                       | [T/G]       | 1067298385                                 |
| Ca_Kabuli_NC_021164.1_40632784 | Ca_kabuli_chr05    | 40632784                       | [T/G]       | 1067298386                                 |
| Ca_Kabuli_NC_021164.1_40632786 | Ca_kabuli_chr05    | 40632786                       | [A/G]       | 1067298387                                 |
| Ca_Kabuli_NC_021164.1_40632788 | Ca_kabuli_chr05    | 40632788                       | [C/T]       | 1067298388                                 |

| <b>SNP IDs</b>                 | <b>Chromosomes</b> | <b>Physical positions (bp)</b> | <b>SNPs</b> | <b>NCBI SNPdb accession IDs (NCBI_ss#)</b> |
|--------------------------------|--------------------|--------------------------------|-------------|--------------------------------------------|
| Ca_Kabuli_NC_021164.1_40645183 | Ca_kabuli_chr05    | 40645183                       | [A/C]       | 1067298389                                 |
| Ca_Kabuli_NC_021164.1_40645186 | Ca_kabuli_chr05    | 40645186                       | [A/C]       | 1067298390                                 |
| Ca_Kabuli_NC_021164.1_40700278 | Ca_kabuli_chr05    | 40700278                       | [C/G]       | 1067298391                                 |
| Ca_Kabuli_NC_021164.1_40700290 | Ca_kabuli_chr05    | 40700290                       | [C/A]       | 1067298392                                 |
| Ca_Kabuli_NC_021164.1_40700301 | Ca_kabuli_chr05    | 40700301                       | [A/G]       | 1067298393                                 |
| Ca_Kabuli_NC_021164.1_40700304 | Ca_kabuli_chr05    | 40700304                       | [A/C]       | 1067298394                                 |
| Ca_Kabuli_NC_021164.1_40700712 | Ca_kabuli_chr05    | 40700712                       | [T/G]       | 1067298395                                 |
| Ca_Kabuli_NC_021164.1_40700728 | Ca_kabuli_chr05    | 40700728                       | [A/T]       | 1067298396                                 |
| Ca_Kabuli_NC_021164.1_40710814 | Ca_kabuli_chr05    | 40710814                       | [T/C]       | 1067298397                                 |
| Ca_Kabuli_NC_021164.1_40710821 | Ca_kabuli_chr05    | 40710821                       | [T/C]       | 1067298398                                 |
| Ca_Kabuli_NC_021164.1_40736291 | Ca_kabuli_chr05    | 40736291                       | [C/G]       | 1067298399                                 |
| Ca_Kabuli_NC_021164.1_40812162 | Ca_kabuli_chr05    | 40812162                       | [C/G]       | 1067298400                                 |
| Ca_Kabuli_NC_021164.1_40828502 | Ca_kabuli_chr05    | 40828502                       | [T/C]       | 1067298401                                 |
| Ca_Kabuli_NC_021164.1_40828504 | Ca_kabuli_chr05    | 40828504                       | [A/G]       | 1067298402                                 |
| Ca_Kabuli_NC_021164.1_40828518 | Ca_kabuli_chr05    | 40828518                       | [A/G]       | 1067298403                                 |
| Ca_Kabuli_NC_021164.1_40828525 | Ca_kabuli_chr05    | 40828525                       | [A/C]       | 1067298404                                 |
| Ca_Kabuli_NC_021164.1_40828566 | Ca_kabuli_chr05    | 40828566                       | [A/G]       | 1067298405                                 |
| Ca_Kabuli_NC_021164.1_40874321 | Ca_kabuli_chr05    | 40874321                       | [T/A]       | 1067298406                                 |
| Ca_Kabuli_NC_021164.1_40883389 | Ca_kabuli_chr05    | 40883389                       | [A/T]       | 1067298407                                 |
| Ca_Kabuli_NC_021164.1_40883421 | Ca_kabuli_chr05    | 40883421                       | [T/G]       | 1067298408                                 |
| Ca_Kabuli_NC_021164.1_40883426 | Ca_kabuli_chr05    | 40883426                       | [A/G]       | 1067298409                                 |
| Ca_Kabuli_NC_021164.1_40883428 | Ca_kabuli_chr05    | 40883428                       | [A/G]       | 1067298410                                 |
| Ca_Kabuli_NC_021164.1_40883432 | Ca_kabuli_chr05    | 40883432                       | [T/G]       | 1067298411                                 |
| Ca_Kabuli_NC_021164.1_40953332 | Ca_kabuli_chr05    | 40953332                       | [A/G]       | 1067298412                                 |
| Ca_Kabuli_NC_021164.1_40953339 | Ca_kabuli_chr05    | 40953339                       | [A/G]       | 1067298413                                 |
| Ca_Kabuli_NC_021164.1_40966162 | Ca_kabuli_chr05    | 40966162                       | [C/A]       | 1067298414                                 |
| Ca_Kabuli_NC_021164.1_40966164 | Ca_kabuli_chr05    | 40966164                       | [T/A]       | 1067298415                                 |
| Ca_Kabuli_NC_021164.1_40966165 | Ca_kabuli_chr05    | 40966165                       | [C/T]       | 1067298416                                 |
| Ca_Kabuli_NC_021164.1_40981244 | Ca_kabuli_chr05    | 40981244                       | [A/G]       | 1067298417                                 |
| Ca_Kabuli_NC_021164.1_40981277 | Ca_kabuli_chr05    | 40981277                       | [C/A]       | 1067298418                                 |
| Ca_Kabuli_NC_021164.1_41024097 | Ca_kabuli_chr05    | 41024097                       | [A/G]       | 1067298419                                 |
| Ca_Kabuli_NC_021164.1_41024107 | Ca_kabuli_chr05    | 41024107                       | [T/G]       | 1067298420                                 |
| Ca_Kabuli_NC_021164.1_41054515 | Ca_kabuli_chr05    | 41054515                       | [C/T]       | 1067298421                                 |
| Ca_Kabuli_NC_021164.1_41054551 | Ca_kabuli_chr05    | 41054551                       | [A/C]       | 1067298422                                 |

| <b>SNP IDs</b>                 | <b>Chromosomes</b> | <b>Physical positions (bp)</b> | <b>SNPs</b> | <b>NCBI SNPdb accession IDs (NCBI_ss#)</b> |
|--------------------------------|--------------------|--------------------------------|-------------|--------------------------------------------|
| Ca_Kabuli_NC_021164.1_41054591 | Ca_kabuli_chr05    | 41054591                       | [A/G]       | 1067298423                                 |
| Ca_Kabuli_NC_021164.1_41073398 | Ca_kabuli_chr05    | 41073398                       | [T/G]       | 1067298424                                 |
| Ca_Kabuli_NC_021164.1_41073515 | Ca_kabuli_chr05    | 41073515                       | [T/G]       | 1067298425                                 |
| Ca_Kabuli_NC_021164.1_41073554 | Ca_kabuli_chr05    | 41073554                       | [A/G]       | 1067298426                                 |
| Ca_Kabuli_NC_021164.1_41074286 | Ca_kabuli_chr05    | 41074286                       | [T/G]       | 1067298427                                 |
| Ca_Kabuli_NC_021164.1_41211612 | Ca_kabuli_chr05    | 41211612                       | [T/G]       | 1067298428                                 |
| Ca_Kabuli_NC_021164.1_41282783 | Ca_kabuli_chr05    | 41282783                       | [A/C]       | 1067298429                                 |
| Ca_Kabuli_NC_021164.1_41282784 | Ca_kabuli_chr05    | 41282784                       | [G/T]       | 1067298430                                 |
| Ca_Kabuli_NC_021164.1_41282785 | Ca_kabuli_chr05    | 41282785                       | [A/T]       | 1067298431                                 |
| Ca_Kabuli_NC_021164.1_41282786 | Ca_kabuli_chr05    | 41282786                       | [T/G]       | 1067298432                                 |
| Ca_Kabuli_NC_021164.1_41283153 | Ca_kabuli_chr05    | 41283153                       | [G/T]       | 1067298433                                 |
| Ca_Kabuli_NC_021164.1_41283314 | Ca_kabuli_chr05    | 41283314                       | [T/G]       | 1067298434                                 |
| Ca_Kabuli_NC_021164.1_41283453 | Ca_kabuli_chr05    | 41283453                       | [A/C]       | 1067298435                                 |
| Ca_Kabuli_NC_021164.1_41285170 | Ca_kabuli_chr05    | 41285170                       | [T/C]       | 1067298436                                 |
| Ca_Kabuli_NC_021164.1_41285171 | Ca_kabuli_chr05    | 41285171                       | [G/T]       | 1067298437                                 |
| Ca_Kabuli_NC_021164.1_41301110 | Ca_kabuli_chr05    | 41301110                       | [T/C]       | 1067298438                                 |
| Ca_Kabuli_NC_021164.1_41301124 | Ca_kabuli_chr05    | 41301124                       | [A/T]       | 1067298439                                 |
| Ca_Kabuli_NC_021164.1_41301172 | Ca_kabuli_chr05    | 41301172                       | [T/C]       | 1067298440                                 |
| Ca_Kabuli_NC_021164.1_41301209 | Ca_kabuli_chr05    | 41301209                       | [T/A]       | 1067298441                                 |
| Ca_Kabuli_NC_021164.1_41301215 | Ca_kabuli_chr05    | 41301215                       | [A/T]       | 1067298442                                 |
| Ca_Kabuli_NC_021164.1_41301231 | Ca_kabuli_chr05    | 41301231                       | [A/T]       | 1067298443                                 |
| Ca_Kabuli_NC_021164.1_41464556 | Ca_kabuli_chr05    | 41464556                       | [A/T]       | 1067298444                                 |
| Ca_Kabuli_NC_021164.1_41464576 | Ca_kabuli_chr05    | 41464576                       | [A/T]       | 1067298445                                 |
| Ca_Kabuli_NC_021164.1_41524246 | Ca_kabuli_chr05    | 41524246                       | [T/G]       | 1067298446                                 |
| Ca_Kabuli_NC_021164.1_41525956 | Ca_kabuli_chr05    | 41525956                       | [C/G]       | 1067298447                                 |
| Ca_Kabuli_NC_021164.1_41525957 | Ca_kabuli_chr05    | 41525957                       | [T/A]       | 1067298448                                 |
| Ca_Kabuli_NC_021164.1_41525961 | Ca_kabuli_chr05    | 41525961                       | [T/G]       | 1067298449                                 |
| Ca_Kabuli_NC_021164.1_41635235 | Ca_kabuli_chr05    | 41635235                       | [T/A]       | 1067298450                                 |
| Ca_Kabuli_NC_021164.1_41635256 | Ca_kabuli_chr05    | 41635256                       | [A/C]       | 1067298451                                 |
| Ca_Kabuli_NC_021164.1_41635335 | Ca_kabuli_chr05    | 41635335                       | [A/G]       | 1067298452                                 |
| Ca_Kabuli_NC_021164.1_41635373 | Ca_kabuli_chr05    | 41635373                       | [A/G]       | 1067298453                                 |
| Ca_Kabuli_NC_021164.1_41635375 | Ca_kabuli_chr05    | 41635375                       | [A/G]       | 1067298454                                 |
| Ca_Kabuli_NC_021164.1_41678072 | Ca_kabuli_chr05    | 41678072                       | [T/A]       | 1067298455                                 |
| Ca_Kabuli_NC_021164.1_41696457 | Ca_kabuli_chr05    | 41696457                       | [T/G]       | 1067298456                                 |

| <b>SNP IDs</b>                 | <b>Chromosomes</b> | <b>Physical positions (bp)</b> | <b>SNPs</b> | <b>NCBI SNPdb accession IDs (NCBI_ss#)</b> |
|--------------------------------|--------------------|--------------------------------|-------------|--------------------------------------------|
| Ca_Kabuli_NC_021164.1_41710180 | Ca_kabuli_chr05    | 41710180                       | [T/C]       | 1067298457                                 |
| Ca_Kabuli_NC_021164.1_41711642 | Ca_kabuli_chr05    | 41711642                       | [G/A]       | 1067298458                                 |
| Ca_Kabuli_NC_021164.1_41711654 | Ca_kabuli_chr05    | 41711654                       | [T/C]       | 1067298459                                 |
| Ca_Kabuli_NC_021164.1_41834116 | Ca_kabuli_chr05    | 41834116                       | [G/T]       | 1067298460                                 |
| Ca_Kabuli_NC_021164.1_41837465 | Ca_kabuli_chr05    | 41837465                       | [A/C]       | 1067298461                                 |
| Ca_Kabuli_NC_021164.1_41837505 | Ca_kabuli_chr05    | 41837505                       | [A/C]       | 1067298462                                 |
| Ca_Kabuli_NC_021164.1_41849742 | Ca_kabuli_chr05    | 41849742                       | [A/G]       | 1067298463                                 |
| Ca_Kabuli_NC_021164.1_41863613 | Ca_kabuli_chr05    | 41863613                       | [A/G]       | 1067298464                                 |
| Ca_Kabuli_NC_021164.1_41863617 | Ca_kabuli_chr05    | 41863617                       | [T/C]       | 1067298465                                 |
| Ca_Kabuli_NC_021164.1_41863621 | Ca_kabuli_chr05    | 41863621                       | [T/A]       | 1067298466                                 |
| Ca_Kabuli_NC_021164.1_41863693 | Ca_kabuli_chr05    | 41863693                       | [A/C]       | 1067298467                                 |
| Ca_Kabuli_NC_021164.1_41863824 | Ca_kabuli_chr05    | 41863824                       | [A/C]       | 1067298468                                 |
| Ca_Kabuli_NC_021164.1_41996791 | Ca_kabuli_chr05    | 41996791                       | [A/G]       | 1067298469                                 |
| Ca_Kabuli_NC_021164.1_41996869 | Ca_kabuli_chr05    | 41996869                       | [T/C]       | 1067298470                                 |
| Ca_Kabuli_NC_021164.1_41996873 | Ca_kabuli_chr05    | 41996873                       | [A/C]       | 1067298471                                 |
| Ca_Kabuli_NC_021164.1_41996876 | Ca_kabuli_chr05    | 41996876                       | [T/C]       | 1067298472                                 |
| Ca_Kabuli_NC_021164.1_41996888 | Ca_kabuli_chr05    | 41996888                       | [T/C]       | 1067298473                                 |
| Ca_Kabuli_NC_021164.1_41996906 | Ca_kabuli_chr05    | 41996906                       | [A/C]       | 1067298474                                 |
| Ca_Kabuli_NC_021164.1_42004600 | Ca_kabuli_chr05    | 42004600                       | [T/G]       | 1067298475                                 |
| Ca_Kabuli_NC_021164.1_42004602 | Ca_kabuli_chr05    | 42004602                       | [A/G]       | 1067298476                                 |
| Ca_Kabuli_NC_021164.1_42004606 | Ca_kabuli_chr05    | 42004606                       | [C/T]       | 1067298477                                 |
| Ca_Kabuli_NC_021164.1_42011170 | Ca_kabuli_chr05    | 42011170                       | [T/C]       | 1067298478                                 |
| Ca_Kabuli_NC_021164.1_42011171 | Ca_kabuli_chr05    | 42011171                       | [C/T]       | 1067298479                                 |
| Ca_Kabuli_NC_021164.1_42011172 | Ca_kabuli_chr05    | 42011172                       | [T/C]       | 1067298480                                 |
| Ca_Kabuli_NC_021164.1_42013006 | Ca_kabuli_chr05    | 42013006                       | [A/G]       | 1067298481                                 |
| Ca_Kabuli_NC_021164.1_42013021 | Ca_kabuli_chr05    | 42013021                       | [A/G]       | 1067298482                                 |
| Ca_Kabuli_NC_021164.1_42013039 | Ca_kabuli_chr05    | 42013039                       | [A/G]       | 1067298483                                 |
| Ca_Kabuli_NC_021164.1_42028103 | Ca_kabuli_chr05    | 42028103                       | [T/G]       | 1067298484                                 |
| Ca_Kabuli_NC_021164.1_42052317 | Ca_kabuli_chr05    | 42052317                       | [C/T]       | 1067298485                                 |
| Ca_Kabuli_NC_021164.1_42052318 | Ca_kabuli_chr05    | 42052318                       | [T/C]       | 1067298486                                 |
| Ca_Kabuli_NC_021164.1_42052319 | Ca_kabuli_chr05    | 42052319                       | [G/T]       | 1067298487                                 |
| Ca_Kabuli_NC_021164.1_42120694 | Ca_kabuli_chr05    | 42120694                       | [A/G]       | 1067298488                                 |
| Ca_Kabuli_NC_021164.1_42120710 | Ca_kabuli_chr05    | 42120710                       | [T/C]       | 1067298489                                 |
| Ca_Kabuli_NC_021164.1_42120718 | Ca_kabuli_chr05    | 42120718                       | [A/G]       | 1067298490                                 |

| <b>SNP IDs</b>                 | <b>Chromosomes</b> | <b>Physical positions (bp)</b> | <b>SNPs</b> | <b>NCBI SNPdb accession IDs (NCBI_ss#)</b> |
|--------------------------------|--------------------|--------------------------------|-------------|--------------------------------------------|
| Ca_Kabuli_NC_021164.1_42120734 | Ca_kabuli_chr05    | 42120734                       | [T/A]       | 1067298491                                 |
| Ca_Kabuli_NC_021164.1_42225601 | Ca_kabuli_chr05    | 42225601                       | [T/C]       | 1067298492                                 |
| Ca_Kabuli_NC_021164.1_42275529 | Ca_kabuli_chr05    | 42275529                       | [A/C]       | 1067298493                                 |
| Ca_Kabuli_NC_021164.1_42351849 | Ca_kabuli_chr05    | 42351849                       | [A/G]       | 1067298494                                 |
| Ca_Kabuli_NC_021164.1_42351864 | Ca_kabuli_chr05    | 42351864                       | [T/A]       | 1067298495                                 |
| Ca_Kabuli_NC_021164.1_42351886 | Ca_kabuli_chr05    | 42351886                       | [T/C]       | 1067298496                                 |
| Ca_Kabuli_NC_021164.1_42376126 | Ca_kabuli_chr05    | 42376126                       | [A/C]       | 1067298497                                 |
| Ca_Kabuli_NC_021164.1_42376150 | Ca_kabuli_chr05    | 42376150                       | [T/A]       | 1067298498                                 |
| Ca_Kabuli_NC_021164.1_42397886 | Ca_kabuli_chr05    | 42397886                       | [T/G]       | 1067298499                                 |
| Ca_Kabuli_NC_021164.1_42397895 | Ca_kabuli_chr05    | 42397895                       | [T/G]       | 1067298500                                 |
| Ca_Kabuli_NC_021164.1_42397909 | Ca_kabuli_chr05    | 42397909                       | [A/C]       | 1067298501                                 |
| Ca_Kabuli_NC_021164.1_42397921 | Ca_kabuli_chr05    | 42397921                       | [A/G]       | 1067298502                                 |
| Ca_Kabuli_NC_021164.1_42397937 | Ca_kabuli_chr05    | 42397937                       | [A/G]       | 1067298503                                 |
| Ca_Kabuli_NC_021164.1_42412760 | Ca_kabuli_chr05    | 42412760                       | [T/G]       | 1067298504                                 |
| Ca_Kabuli_NC_021164.1_42422965 | Ca_kabuli_chr05    | 42422965                       | [A/G]       | 1067298505                                 |
| Ca_Kabuli_NC_021164.1_42435224 | Ca_kabuli_chr05    | 42435224                       | [T/C]       | 1067298506                                 |
| Ca_Kabuli_NC_021164.1_42443752 | Ca_kabuli_chr05    | 42443752                       | [A/C]       | 1067298507                                 |
| Ca_Kabuli_NC_021164.1_42465328 | Ca_kabuli_chr05    | 42465328                       | [T/A]       | 1067298508                                 |
| Ca_Kabuli_NC_021164.1_42465333 | Ca_kabuli_chr05    | 42465333                       | [T/G]       | 1067298509                                 |
| Ca_Kabuli_NC_021164.1_42465340 | Ca_kabuli_chr05    | 42465340                       | [T/C]       | 1067298510                                 |
| Ca_Kabuli_NC_021164.1_42499612 | Ca_kabuli_chr05    | 42499612                       | [T/C]       | 1067298511                                 |
| Ca_Kabuli_NC_021164.1_42499694 | Ca_kabuli_chr05    | 42499694                       | [A/G]       | 1067298512                                 |
| Ca_Kabuli_NC_021164.1_42499697 | Ca_kabuli_chr05    | 42499697                       | [A/C]       | 1067298513                                 |
| Ca_Kabuli_NC_021164.1_42528648 | Ca_kabuli_chr05    | 42528648                       | [T/G]       | 1067298514                                 |
| Ca_Kabuli_NC_021164.1_42528650 | Ca_kabuli_chr05    | 42528650                       | [A/G]       | 1067298515                                 |
| Ca_Kabuli_NC_021164.1_42528679 | Ca_kabuli_chr05    | 42528679                       | [T/C]       | 1067298516                                 |
| Ca_Kabuli_NC_021164.1_42528744 | Ca_kabuli_chr05    | 42528744                       | [T/G]       | 1067298517                                 |
| Ca_Kabuli_NC_021164.1_42528923 | Ca_kabuli_chr05    | 42528923                       | [G/T]       | 1067298518                                 |
| Ca_Kabuli_NC_021164.1_42528925 | Ca_kabuli_chr05    | 42528925                       | [T/G]       | 1067298519                                 |
| Ca_Kabuli_NC_021164.1_42528926 | Ca_kabuli_chr05    | 42528926                       | [G/C]       | 1067298520                                 |
| Ca_Kabuli_NC_021164.1_42528929 | Ca_kabuli_chr05    | 42528929                       | [C/G]       | 1067298521                                 |
| Ca_Kabuli_NC_021164.1_42528931 | Ca_kabuli_chr05    | 42528931                       | [G/A]       | 1067298522                                 |
| Ca_Kabuli_NC_021164.1_42528934 | Ca_kabuli_chr05    | 42528934                       | [A/C]       | 1067298523                                 |
| Ca_Kabuli_NC_021164.1_42528935 | Ca_kabuli_chr05    | 42528935                       | [C/A]       | 1067298524                                 |

| <b>SNP IDs</b>                 | <b>Chromosomes</b> | <b>Physical positions (bp)</b> | <b>SNPs</b> | <b>NCBI SNPdb accession IDs (NCBI_ss#)</b> |
|--------------------------------|--------------------|--------------------------------|-------------|--------------------------------------------|
| Ca_Kabuli_NC_021164.1_42528949 | Ca_kabuli_chr05    | 42528949                       | [T/C]       | 1067298525                                 |
| Ca_Kabuli_NC_021164.1_42528985 | Ca_kabuli_chr05    | 42528985                       | [T/A]       | 1067298526                                 |
| Ca_Kabuli_NC_021164.1_42528987 | Ca_kabuli_chr05    | 42528987                       | [A/T]       | 1067298527                                 |
| Ca_Kabuli_NC_021164.1_42615551 | Ca_kabuli_chr05    | 42615551                       | [A/G]       | 1067298528                                 |
| Ca_Kabuli_NC_021164.1_42655065 | Ca_kabuli_chr05    | 42655065                       | [T/G]       | 1067298529                                 |
| Ca_Kabuli_NC_021164.1_42655183 | Ca_kabuli_chr05    | 42655183                       | [A/T]       | 1067298530                                 |
| Ca_Kabuli_NC_021164.1_42655187 | Ca_kabuli_chr05    | 42655187                       | [T/C]       | 1067298531                                 |
| Ca_Kabuli_NC_021164.1_42655218 | Ca_kabuli_chr05    | 42655218                       | [A/G]       | 1067298532                                 |
| Ca_Kabuli_NC_021164.1_42791062 | Ca_kabuli_chr05    | 42791062                       | [A/G]       | 1067298533                                 |
| Ca_Kabuli_NC_021164.1_42791087 | Ca_kabuli_chr05    | 42791087                       | [A/T]       | 1067298534                                 |
| Ca_Kabuli_NC_021164.1_42791118 | Ca_kabuli_chr05    | 42791118                       | [A/G]       | 1067298535                                 |
| Ca_Kabuli_NC_021164.1_42792617 | Ca_kabuli_chr05    | 42792617                       | [T/G]       | 1067298536                                 |
| Ca_Kabuli_NC_021164.1_42811405 | Ca_kabuli_chr05    | 42811405                       | [T/G]       | 1067298537                                 |
| Ca_Kabuli_NC_021164.1_42856743 | Ca_kabuli_chr05    | 42856743                       | [A/C]       | 1067298538                                 |
| Ca_Kabuli_NC_021164.1_42863372 | Ca_kabuli_chr05    | 42863372                       | [A/T]       | 1067298539                                 |
| Ca_Kabuli_NC_021164.1_42882741 | Ca_kabuli_chr05    | 42882741                       | [A/C]       | 1067298540                                 |
| Ca_Kabuli_NC_021164.1_42882762 | Ca_kabuli_chr05    | 42882762                       | [A/C]       | 1067298541                                 |
| Ca_Kabuli_NC_021164.1_42882853 | Ca_kabuli_chr05    | 42882853                       | [A/C]       | 1067298542                                 |
| Ca_Kabuli_NC_021164.1_42882933 | Ca_kabuli_chr05    | 42882933                       | [T/A]       | 1067298543                                 |
| Ca_Kabuli_NC_021164.1_42882964 | Ca_kabuli_chr05    | 42882964                       | [A/C]       | 1067298544                                 |
| Ca_Kabuli_NC_021164.1_42882969 | Ca_kabuli_chr05    | 42882969                       | [A/C]       | 1067298545                                 |
| Ca_Kabuli_NC_021164.1_42910653 | Ca_kabuli_chr05    | 42910653                       | [A/C]       | 1067298546                                 |
| Ca_Kabuli_NC_021164.1_42928950 | Ca_kabuli_chr05    | 42928950                       | [C/G]       | 1067298547                                 |
| Ca_Kabuli_NC_021164.1_42928969 | Ca_kabuli_chr05    | 42928969                       | [T/G]       | 1067298548                                 |
| Ca_Kabuli_NC_021164.1_42928974 | Ca_kabuli_chr05    | 42928974                       | [T/G]       | 1067298549                                 |
| Ca_Kabuli_NC_021164.1_42929055 | Ca_kabuli_chr05    | 42929055                       | [A/G]       | 1067298550                                 |
| Ca_Kabuli_NC_021164.1_43012119 | Ca_kabuli_chr05    | 43012119                       | [A/C]       | 1067298551                                 |
| Ca_Kabuli_NC_021164.1_43022588 | Ca_kabuli_chr05    | 43022588                       | [A/C]       | 1067298552                                 |
| Ca_Kabuli_NC_021164.1_43035015 | Ca_kabuli_chr05    | 43035015                       | [A/G]       | 1067298553                                 |
| Ca_Kabuli_NC_021164.1_43035039 | Ca_kabuli_chr05    | 43035039                       | [G/T]       | 1067298554                                 |
| Ca_Kabuli_NC_021164.1_43035049 | Ca_kabuli_chr05    | 43035049                       | [A/G]       | 1067298555                                 |
| Ca_Kabuli_NC_021164.1_43037858 | Ca_kabuli_chr05    | 43037858                       | [A/C]       | 1067298556                                 |
| Ca_Kabuli_NC_021164.1_43059960 | Ca_kabuli_chr05    | 43059960                       | [G/C]       | 1067298557                                 |
| Ca_Kabuli_NC_021164.1_43060040 | Ca_kabuli_chr05    | 43060040                       | [A/C]       | 1067298558                                 |



| <b>SNP IDs</b>                 | <b>Chromosomes</b> | <b>Physical positions (bp)</b> | <b>SNPs</b> | <b>NCBI SNPdb accession IDs (NCBI_ss#)</b> |
|--------------------------------|--------------------|--------------------------------|-------------|--------------------------------------------|
| Ca_Kabuli_NC_021164.1_43060061 | Ca_kabuli_chr05    | 43060061                       | [A/C]       | 1067298559                                 |
| Ca_Kabuli_NC_021164.1_43060223 | Ca_kabuli_chr05    | 43060223                       | [A/C]       | 1067298560                                 |
| Ca_Kabuli_NC_021164.1_43080452 | Ca_kabuli_chr05    | 43080452                       | [A/T]       | 1067298561                                 |
| Ca_Kabuli_NC_021164.1_43080501 | Ca_kabuli_chr05    | 43080501                       | [T/A]       | 1067298562                                 |
| Ca_Kabuli_NC_021164.1_43081728 | Ca_kabuli_chr05    | 43081728                       | [T/C]       | 1067298563                                 |
| Ca_Kabuli_NC_021164.1_43081737 | Ca_kabuli_chr05    | 43081737                       | [A/G]       | 1067298564                                 |
| Ca_Kabuli_NC_021164.1_43081768 | Ca_kabuli_chr05    | 43081768                       | [A/G]       | 1067298565                                 |
| Ca_Kabuli_NC_021164.1_43101150 | Ca_kabuli_chr05    | 43101150                       | [T/C]       | 1067298566                                 |
| Ca_Kabuli_NC_021164.1_43167941 | Ca_kabuli_chr05    | 43167941                       | [A/C]       | 1067298567                                 |
| Ca_Kabuli_NC_021164.1_43175941 | Ca_kabuli_chr05    | 43175941                       | [T/G]       | 1067298568                                 |
| Ca_Kabuli_NC_021164.1_43188858 | Ca_kabuli_chr05    | 43188858                       | [C/A]       | 1067298569                                 |
| Ca_Kabuli_NC_021164.1_43188864 | Ca_kabuli_chr05    | 43188864                       | [C/A]       | 1067298570                                 |
| Ca_Kabuli_NC_021164.1_43188867 | Ca_kabuli_chr05    | 43188867                       | [C/G]       | 1067298571                                 |
| Ca_Kabuli_NC_021164.1_43188880 | Ca_kabuli_chr05    | 43188880                       | [T/C]       | 1067298572                                 |
| Ca_Kabuli_NC_021164.1_43188882 | Ca_kabuli_chr05    | 43188882                       | [T/C]       | 1067298573                                 |
| Ca_Kabuli_NC_021164.1_43188888 | Ca_kabuli_chr05    | 43188888                       | [C/T]       | 1067298574                                 |
| Ca_Kabuli_NC_021164.1_43206862 | Ca_kabuli_chr05    | 43206862                       | [A/T]       | 1067298575                                 |
| Ca_Kabuli_NC_021164.1_43212064 | Ca_kabuli_chr05    | 43212064                       | [A/C]       | 1067298576                                 |
| Ca_Kabuli_NC_021164.1_43212076 | Ca_kabuli_chr05    | 43212076                       | [T/A]       | 1067298577                                 |
| Ca_Kabuli_NC_021164.1_43212081 | Ca_kabuli_chr05    | 43212081                       | [A/C]       | 1067298578                                 |
| Ca_Kabuli_NC_021164.1_43221060 | Ca_kabuli_chr05    | 43221060                       | [T/G]       | 1067298579                                 |
| Ca_Kabuli_NC_021164.1_43253654 | Ca_kabuli_chr05    | 43253654                       | [A/T]       | 1067298580                                 |
| Ca_Kabuli_NC_021164.1_43262643 | Ca_kabuli_chr05    | 43262643                       | [T/C]       | 1067298581                                 |
| Ca_Kabuli_NC_021164.1_43307596 | Ca_kabuli_chr05    | 43307596                       | [T/C]       | 1067298582                                 |
| Ca_Kabuli_NC_021164.1_43307647 | Ca_kabuli_chr05    | 43307647                       | [T/C]       | 1067298583                                 |
| Ca_Kabuli_NC_021164.1_43307720 | Ca_kabuli_chr05    | 43307720                       | [T/C]       | 1067298584                                 |
| Ca_Kabuli_NC_021164.1_43307726 | Ca_kabuli_chr05    | 43307726                       | [A/G]       | 1067298585                                 |
| Ca_Kabuli_NC_021164.1_43326670 | Ca_kabuli_chr05    | 43326670                       | [T/C]       | 1067298586                                 |
| Ca_Kabuli_NC_021164.1_43388057 | Ca_kabuli_chr05    | 43388057                       | [A/G]       | 1067298587                                 |
| Ca_Kabuli_NC_021164.1_43407702 | Ca_kabuli_chr05    | 43407702                       | [T/G]       | 1067298588                                 |
| Ca_Kabuli_NC_021164.1_43410316 | Ca_kabuli_chr05    | 43410316                       | [A/T]       | 1067298589                                 |
| Ca_Kabuli_NC_021164.1_43423931 | Ca_kabuli_chr05    | 43423931                       | [C/A]       | 1067298590                                 |
| Ca_Kabuli_NC_021164.1_43512090 | Ca_kabuli_chr05    | 43512090                       | [A/G]       | 1067298591                                 |
| Ca_Kabuli_NC_021164.1_43512116 | Ca_kabuli_chr05    | 43512116                       | [T/A]       | 1067298592                                 |

| <b>SNP IDs</b>                 | <b>Chromosomes</b> | <b>Physical positions (bp)</b> | <b>SNPs</b> | <b>NCBI SNPdb accession IDs (NCBI_ss#)</b> |
|--------------------------------|--------------------|--------------------------------|-------------|--------------------------------------------|
| Ca_Kabuli_NC_021164.1_43512129 | Ca_kabuli_chr05    | 43512129                       | [A/T]       | 1067298593                                 |
| Ca_Kabuli_NC_021164.1_43521823 | Ca_kabuli_chr05    | 43521823                       | [A/G]       | 1067298594                                 |
| Ca_Kabuli_NC_021164.1_43523430 | Ca_kabuli_chr05    | 43523430                       | [T/C]       | 1067298595                                 |
| Ca_Kabuli_NC_021164.1_43523520 | Ca_kabuli_chr05    | 43523520                       | [T/G]       | 1067298596                                 |
| Ca_Kabuli_NC_021164.1_43530592 | Ca_kabuli_chr05    | 43530592                       | [T/G]       | 1067298597                                 |
| Ca_Kabuli_NC_021164.1_43632408 | Ca_kabuli_chr05    | 43632408                       | [T/A]       | 1067298598                                 |
| Ca_Kabuli_NC_021164.1_43698024 | Ca_kabuli_chr05    | 43698024                       | [T/G]       | 1067298599                                 |
| Ca_Kabuli_NC_021164.1_43698051 | Ca_kabuli_chr05    | 43698051                       | [T/C]       | 1067298600                                 |
| Ca_Kabuli_NC_021164.1_43731650 | Ca_kabuli_chr05    | 43731650                       | [T/C]       | 1067298601                                 |
| Ca_Kabuli_NC_021164.1_43754083 | Ca_kabuli_chr05    | 43754083                       | [T/C]       | 1067298602                                 |
| Ca_Kabuli_NC_021164.1_43754814 | Ca_kabuli_chr05    | 43754814                       | [A/T]       | 1067298603                                 |
| Ca_Kabuli_NC_021164.1_43754815 | Ca_kabuli_chr05    | 43754815                       | [A/C]       | 1067298604                                 |
| Ca_Kabuli_NC_021164.1_43754816 | Ca_kabuli_chr05    | 43754816                       | [G/T]       | 1067298605                                 |
| Ca_Kabuli_NC_021164.1_43754867 | Ca_kabuli_chr05    | 43754867                       | [A/C]       | 1067298606                                 |
| Ca_Kabuli_NC_021164.1_43755039 | Ca_kabuli_chr05    | 43755039                       | [A/G]       | 1067298607                                 |
| Ca_Kabuli_NC_021164.1_43755135 | Ca_kabuli_chr05    | 43755135                       | [A/T]       | 1067298608                                 |
| Ca_Kabuli_NC_021164.1_43758818 | Ca_kabuli_chr05    | 43758818                       | [A/G]       | 1067298609                                 |
| Ca_Kabuli_NC_021164.1_43758846 | Ca_kabuli_chr05    | 43758846                       | [A/C]       | 1067298610                                 |
| Ca_Kabuli_NC_021164.1_43759076 | Ca_kabuli_chr05    | 43759076                       | [A/G]       | 1067298611                                 |
| Ca_Kabuli_NC_021164.1_43759082 | Ca_kabuli_chr05    | 43759082                       | [A/T]       | 1067298612                                 |
| Ca_Kabuli_NC_021164.1_43759098 | Ca_kabuli_chr05    | 43759098                       | [T/C]       | 1067298613                                 |
| Ca_Kabuli_NC_021164.1_43779141 | Ca_kabuli_chr05    | 43779141                       | [T/C]       | 1067298614                                 |
| Ca_Kabuli_NC_021164.1_43779147 | Ca_kabuli_chr05    | 43779147                       | [G/A]       | 1067298615                                 |
| Ca_Kabuli_NC_021164.1_43779156 | Ca_kabuli_chr05    | 43779156                       | [A/G]       | 1067298616                                 |
| Ca_Kabuli_NC_021164.1_43779181 | Ca_kabuli_chr05    | 43779181                       | [A/G]       | 1067298617                                 |
| Ca_Kabuli_NC_021164.1_43789851 | Ca_kabuli_chr05    | 43789851                       | [T/C]       | 1067298618                                 |
| Ca_Kabuli_NC_021164.1_43789863 | Ca_kabuli_chr05    | 43789863                       | [A/T]       | 1067298619                                 |
| Ca_Kabuli_NC_021164.1_43789872 | Ca_kabuli_chr05    | 43789872                       | [T/C]       | 1067298620                                 |
| Ca_Kabuli_NC_021164.1_43790691 | Ca_kabuli_chr05    | 43790691                       | [C/A]       | 1067298621                                 |
| Ca_Kabuli_NC_021164.1_43790692 | Ca_kabuli_chr05    | 43790692                       | [C/G]       | 1067298622                                 |
| Ca_Kabuli_NC_021164.1_43790693 | Ca_kabuli_chr05    | 43790693                       | [T/A]       | 1067298623                                 |
| Ca_Kabuli_NC_021164.1_43790694 | Ca_kabuli_chr05    | 43790694                       | [A/T]       | 1067298624                                 |
| Ca_Kabuli_NC_021164.1_43834723 | Ca_kabuli_chr05    | 43834723                       | [A/G]       | 1067298625                                 |
| Ca_Kabuli_NC_021164.1_43834789 | Ca_kabuli_chr05    | 43834789                       | [A/G]       | 1067298626                                 |

| <b>SNP IDs</b>                 | <b>Chromosomes</b> | <b>Physical positions (bp)</b> | <b>SNPs</b> | <b>NCBI SNPdb accession IDs (NCBI_ss#)</b> |
|--------------------------------|--------------------|--------------------------------|-------------|--------------------------------------------|
| Ca_Kabuli_NC_021164.1_43855705 | Ca_kabuli_chr05    | 43855705                       | [T/A]       | 1067298627                                 |
| Ca_Kabuli_NC_021164.1_43892480 | Ca_kabuli_chr05    | 43892480                       | [A/G]       | 1067298628                                 |
| Ca_Kabuli_NC_021164.1_43892493 | Ca_kabuli_chr05    | 43892493                       | [T/A]       | 1067298629                                 |
| Ca_Kabuli_NC_021164.1_43904482 | Ca_kabuli_chr05    | 43904482                       | [A/T]       | 1067298630                                 |
| Ca_Kabuli_NC_021164.1_43904515 | Ca_kabuli_chr05    | 43904515                       | [A/C]       | 1067298631                                 |
| Ca_Kabuli_NC_021164.1_43919009 | Ca_kabuli_chr05    | 43919009                       | [C/T]       | 1067298632                                 |
| Ca_Kabuli_NC_021164.1_43919017 | Ca_kabuli_chr05    | 43919017                       | [T/G]       | 1067298633                                 |
| Ca_Kabuli_NC_021164.1_43919022 | Ca_kabuli_chr05    | 43919022                       | [G/C]       | 1067298634                                 |
| Ca_Kabuli_NC_021164.1_43919028 | Ca_kabuli_chr05    | 43919028                       | [A/G]       | 1067298635                                 |
| Ca_Kabuli_NC_021164.1_43919137 | Ca_kabuli_chr05    | 43919137                       | [T/G]       | 1067298636                                 |
| Ca_Kabuli_NC_021164.1_43982988 | Ca_kabuli_chr05    | 43982988                       | [C/G]       | 1067298637                                 |
| Ca_Kabuli_NC_021164.1_43982996 | Ca_kabuli_chr05    | 43982996                       | [G/A]       | 1067298638                                 |
| Ca_Kabuli_NC_021164.1_44019121 | Ca_kabuli_chr05    | 44019121                       | [C/A]       | 1067298639                                 |
| Ca_Kabuli_NC_021164.1_44019122 | Ca_kabuli_chr05    | 44019122                       | [C/T]       | 1067298640                                 |
| Ca_Kabuli_NC_021164.1_44019123 | Ca_kabuli_chr05    | 44019123                       | [A/C]       | 1067298641                                 |
| Ca_Kabuli_NC_021164.1_44019124 | Ca_kabuli_chr05    | 44019124                       | [G/T]       | 1067298642                                 |
| Ca_Kabuli_NC_021164.1_44060628 | Ca_kabuli_chr05    | 44060628                       | [T/G]       | 1067298643                                 |
| Ca_Kabuli_NC_021164.1_44060636 | Ca_kabuli_chr05    | 44060636                       | [T/C]       | 1067298644                                 |
| Ca_Kabuli_NC_021164.1_44060646 | Ca_kabuli_chr05    | 44060646                       | [T/C]       | 1067298645                                 |
| Ca_Kabuli_NC_021164.1_44060651 | Ca_kabuli_chr05    | 44060651                       | [C/A]       | 1067298646                                 |
| Ca_Kabuli_NC_021164.1_44060695 | Ca_kabuli_chr05    | 44060695                       | [A/G]       | 1067298647                                 |
| Ca_Kabuli_NC_021164.1_44080525 | Ca_kabuli_chr05    | 44080525                       | [A/C]       | 1067298648                                 |
| Ca_Kabuli_NC_021164.1_44101983 | Ca_kabuli_chr05    | 44101983                       | [C/A]       | 1067298649                                 |
| Ca_Kabuli_NC_021164.1_44101984 | Ca_kabuli_chr05    | 44101984                       | [A/G]       | 1067298650                                 |
| Ca_Kabuli_NC_021164.1_44101985 | Ca_kabuli_chr05    | 44101985                       | [T/A]       | 1067298651                                 |
| Ca_Kabuli_NC_021164.1_44101986 | Ca_kabuli_chr05    | 44101986                       | [C/T]       | 1067298652                                 |
| Ca_Kabuli_NC_021164.1_44101990 | Ca_kabuli_chr05    | 44101990                       | [T/A]       | 1067298653                                 |
| Ca_Kabuli_NC_021164.1_44109266 | Ca_kabuli_chr05    | 44109266                       | [C/T]       | 1067298654                                 |
| Ca_Kabuli_NC_021164.1_44109279 | Ca_kabuli_chr05    | 44109279                       | [C/T]       | 1067298655                                 |
| Ca_Kabuli_NC_021164.1_44159226 | Ca_kabuli_chr05    | 44159226                       | [T/G]       | 1067298656                                 |
| Ca_Kabuli_NC_021164.1_44159238 | Ca_kabuli_chr05    | 44159238                       | [A/C]       | 1067298657                                 |
| Ca_Kabuli_NC_021164.1_44215966 | Ca_kabuli_chr05    | 44215966                       | [A/T]       | 1067298658                                 |
| Ca_Kabuli_NC_021164.1_44244118 | Ca_kabuli_chr05    | 44244118                       | [T/A]       | 1067298659                                 |
| Ca_Kabuli_NC_021164.1_44275605 | Ca_kabuli_chr05    | 44275605                       | [A/G]       | 1067298660                                 |

| <b>SNP IDs</b>                 | <b>Chromosomes</b> | <b>Physical positions (bp)</b> | <b>SNPs</b> | <b>NCBI SNPdb accession IDs (NCBI_ss#)</b> |
|--------------------------------|--------------------|--------------------------------|-------------|--------------------------------------------|
| Ca_Kabuli_NC_021164.1_44300026 | Ca_kabuli_chr05    | 44300026                       | [A/C]       | 1067298661                                 |
| Ca_Kabuli_NC_021164.1_44308560 | Ca_kabuli_chr05    | 44308560                       | [A/C]       | 1067298662                                 |
| Ca_Kabuli_NC_021164.1_44308576 | Ca_kabuli_chr05    | 44308576                       | [A/G]       | 1067298663                                 |
| Ca_Kabuli_NC_021164.1_44334269 | Ca_kabuli_chr05    | 44334269                       | [A/G]       | 1067298664                                 |
| Ca_Kabuli_NC_021164.1_44334742 | Ca_kabuli_chr05    | 44334742                       | [A/G]       | 1067298665                                 |
| Ca_Kabuli_NC_021164.1_44334747 | Ca_kabuli_chr05    | 44334747                       | [T/C]       | 1067298666                                 |
| Ca_Kabuli_NC_021164.1_44334780 | Ca_kabuli_chr05    | 44334780                       | [A/C]       | 1067298667                                 |
| Ca_Kabuli_NC_021164.1_44334830 | Ca_kabuli_chr05    | 44334830                       | [T/G]       | 1067298668                                 |
| Ca_Kabuli_NC_021164.1_44334854 | Ca_kabuli_chr05    | 44334854                       | [A/G]       | 1067298669                                 |
| Ca_Kabuli_NC_021164.1_44422686 | Ca_kabuli_chr05    | 44422686                       | [C/A]       | 1067298670                                 |
| Ca_Kabuli_NC_021164.1_44422721 | Ca_kabuli_chr05    | 44422721                       | [T/C]       | 1067298671                                 |
| Ca_Kabuli_NC_021164.1_44428939 | Ca_kabuli_chr05    | 44428939                       | [A/T]       | 1067298672                                 |
| Ca_Kabuli_NC_021164.1_44428960 | Ca_kabuli_chr05    | 44428960                       | [T/A]       | 1067298673                                 |
| Ca_Kabuli_NC_021164.1_44428962 | Ca_kabuli_chr05    | 44428962                       | [G/A]       | 1067298674                                 |
| Ca_Kabuli_NC_021164.1_44555842 | Ca_kabuli_chr05    | 44555842                       | [T/C]       | 1067298675                                 |
| Ca_Kabuli_NC_021164.1_44555845 | Ca_kabuli_chr05    | 44555845                       | [T/C]       | 1067298676                                 |
| Ca_Kabuli_NC_021164.1_44555908 | Ca_kabuli_chr05    | 44555908                       | [A/G]       | 1067298677                                 |
| Ca_Kabuli_NC_021164.1_44561112 | Ca_kabuli_chr05    | 44561112                       | [A/C]       | 1067298678                                 |
| Ca_Kabuli_NC_021164.1_44561114 | Ca_kabuli_chr05    | 44561114                       | [C/T]       | 1067298679                                 |
| Ca_Kabuli_NC_021164.1_44656882 | Ca_kabuli_chr05    | 44656882                       | [T/G]       | 1067298680                                 |
| Ca_Kabuli_NC_021164.1_44760376 | Ca_kabuli_chr05    | 44760376                       | [T/A]       | 1067298681                                 |
| Ca_Kabuli_NC_021164.1_44760406 | Ca_kabuli_chr05    | 44760406                       | [A/T]       | 1067298682                                 |
| Ca_Kabuli_NC_021164.1_44768955 | Ca_kabuli_chr05    | 44768955                       | [A/C]       | 1067298683                                 |
| Ca_Kabuli_NC_021164.1_44769484 | Ca_kabuli_chr05    | 44769484                       | [T/C]       | 1067298684                                 |
| Ca_Kabuli_NC_021164.1_44769485 | Ca_kabuli_chr05    | 44769485                       | [C/T]       | 1067298685                                 |
| Ca_Kabuli_NC_021164.1_44772368 | Ca_kabuli_chr05    | 44772368                       | [T/G]       | 1067298686                                 |
| Ca_Kabuli_NC_021164.1_44772494 | Ca_kabuli_chr05    | 44772494                       | [T/C]       | 1067298687                                 |
| Ca_Kabuli_NC_021164.1_44772503 | Ca_kabuli_chr05    | 44772503                       | [A/C]       | 1067298688                                 |
| Ca_Kabuli_NC_021164.1_44822311 | Ca_kabuli_chr05    | 44822311                       | [G/A]       | 1067298689                                 |
| Ca_Kabuli_NC_021164.1_44822351 | Ca_kabuli_chr05    | 44822351                       | [T/G]       | 1067298690                                 |
| Ca_Kabuli_NC_021164.1_44824496 | Ca_kabuli_chr05    | 44824496                       | [C/T]       | 1067298691                                 |
| Ca_Kabuli_NC_021164.1_44824747 | Ca_kabuli_chr05    | 44824747                       | [C/G]       | 1067298692                                 |
| Ca_Kabuli_NC_021164.1_44832042 | Ca_kabuli_chr05    | 44832042                       | [C/A]       | 1067298693                                 |
| Ca_Kabuli_NC_021164.1_44832051 | Ca_kabuli_chr05    | 44832051                       | [T/C]       | 1067298694                                 |

| <b>SNP IDs</b>                 | <b>Chromosomes</b> | <b>Physical positions (bp)</b> | <b>SNPs</b> | <b>NCBI SNPdb accession IDs (NCBI_ss#)</b> |
|--------------------------------|--------------------|--------------------------------|-------------|--------------------------------------------|
| Ca_Kabuli_NC_021164.1_44875928 | Ca_kabuli_chr05    | 44875928                       | [T/G]       | 1067298695                                 |
| Ca_Kabuli_NC_021164.1_44887020 | Ca_kabuli_chr05    | 44887020                       | [T/C]       | 1067298696                                 |
| Ca_Kabuli_NC_021164.1_44890500 | Ca_kabuli_chr05    | 44890500                       | [A/G]       | 1067298697                                 |
| Ca_Kabuli_NC_021164.1_44895493 | Ca_kabuli_chr05    | 44895493                       | [A/C]       | 1067298698                                 |
| Ca_Kabuli_NC_021164.1_44895508 | Ca_kabuli_chr05    | 44895508                       | [A/G]       | 1067298699                                 |
| Ca_Kabuli_NC_021164.1_44895515 | Ca_kabuli_chr05    | 44895515                       | [T/C]       | 1067298700                                 |
| Ca_Kabuli_NC_021164.1_44895532 | Ca_kabuli_chr05    | 44895532                       | [G/A]       | 1067298701                                 |
| Ca_Kabuli_NC_021164.1_44911842 | Ca_kabuli_chr05    | 44911842                       | [C/T]       | 1067298702                                 |
| Ca_Kabuli_NC_021164.1_44918177 | Ca_kabuli_chr05    | 44918177                       | [T/G]       | 1067298703                                 |
| Ca_Kabuli_NC_021164.1_44918198 | Ca_kabuli_chr05    | 44918198                       | [A/G]       | 1067298704                                 |
| Ca_Kabuli_NC_021164.1_44938814 | Ca_kabuli_chr05    | 44938814                       | [A/T]       | 1067298705                                 |
| Ca_Kabuli_NC_021164.1_44972133 | Ca_kabuli_chr05    | 44972133                       | [T/G]       | 1067298706                                 |
| Ca_Kabuli_NC_021164.1_44975251 | Ca_kabuli_chr05    | 44975251                       | [A/C]       | 1067298707                                 |
| Ca_Kabuli_NC_021164.1_45219235 | Ca_kabuli_chr05    | 45219235                       | [A/G]       | 1067298708                                 |
| Ca_Kabuli_NC_021164.1_45219308 | Ca_kabuli_chr05    | 45219308                       | [T/C]       | 1067298709                                 |
| Ca_Kabuli_NC_021164.1_45219353 | Ca_kabuli_chr05    | 45219353                       | [A/G]       | 1067298710                                 |
| Ca_Kabuli_NC_021164.1_45254112 | Ca_kabuli_chr05    | 45254112                       | [T/G]       | 1067298711                                 |
| Ca_Kabuli_NC_021164.1_45301813 | Ca_kabuli_chr05    | 45301813                       | [A/T]       | 1067298712                                 |
| Ca_Kabuli_NC_021164.1_45312719 | Ca_kabuli_chr05    | 45312719                       | [T/C]       | 1067298713                                 |
| Ca_Kabuli_NC_021164.1_45337308 | Ca_kabuli_chr05    | 45337308                       | [A/G]       | 1067298714                                 |
| Ca_Kabuli_NC_021164.1_45337327 | Ca_kabuli_chr05    | 45337327                       | [A/G]       | 1067298715                                 |
| Ca_Kabuli_NC_021164.1_45337494 | Ca_kabuli_chr05    | 45337494                       | [A/C]       | 1067298716                                 |
| Ca_Kabuli_NC_021164.1_45337512 | Ca_kabuli_chr05    | 45337512                       | [A/C]       | 1067298717                                 |
| Ca_Kabuli_NC_021164.1_45407044 | Ca_kabuli_chr05    | 45407044                       | [A/C]       | 1067298718                                 |
| Ca_Kabuli_NC_021164.1_45413935 | Ca_kabuli_chr05    | 45413935                       | [T/A]       | 1067298719                                 |
| Ca_Kabuli_NC_021164.1_45418344 | Ca_kabuli_chr05    | 45418344                       | [T/G]       | 1067298720                                 |
| Ca_Kabuli_NC_021164.1_45418365 | Ca_kabuli_chr05    | 45418365                       | [T/C]       | 1067298721                                 |
| Ca_Kabuli_NC_021164.1_45478398 | Ca_kabuli_chr05    | 45478398                       | [G/T]       | 1067298722                                 |
| Ca_Kabuli_NC_021164.1_45480153 | Ca_kabuli_chr05    | 45480153                       | [G/T]       | 1067298723                                 |
| Ca_Kabuli_NC_021164.1_45480160 | Ca_kabuli_chr05    | 45480160                       | [A/G]       | 1067298724                                 |
| Ca_Kabuli_NC_021164.1_45480229 | Ca_kabuli_chr05    | 45480229                       | [T/C]       | 1067298725                                 |
| Ca_Kabuli_NC_021164.1_45480274 | Ca_kabuli_chr05    | 45480274                       | [T/C]       | 1067298726                                 |
| Ca_Kabuli_NC_021164.1_45506164 | Ca_kabuli_chr05    | 45506164                       | [T/C]       | 1067298727                                 |
| Ca_Kabuli_NC_021164.1_45607828 | Ca_kabuli_chr05    | 45607828                       | [A/G]       | 1067298728                                 |

| <b>SNP IDs</b>                 | <b>Chromosomes</b> | <b>Physical positions (bp)</b> | <b>SNPs</b> | <b>NCBI SNPdb accession IDs (NCBI_ss#)</b> |
|--------------------------------|--------------------|--------------------------------|-------------|--------------------------------------------|
| Ca_Kabuli_NC_021164.1_45642319 | Ca_kabuli_chr05    | 45642319                       | [T/G]       | 1067298729                                 |
| Ca_Kabuli_NC_021164.1_45642691 | Ca_kabuli_chr05    | 45642691                       | [A/C]       | 1067298730                                 |
| Ca_Kabuli_NC_021164.1_45646616 | Ca_kabuli_chr05    | 45646616                       | [T/C]       | 1067298731                                 |
| Ca_Kabuli_NC_021164.1_45646656 | Ca_kabuli_chr05    | 45646656                       | [A/G]       | 1067298732                                 |
| Ca_Kabuli_NC_021164.1_45646706 | Ca_kabuli_chr05    | 45646706                       | [T/C]       | 1067298733                                 |
| Ca_Kabuli_NC_021164.1_45647057 | Ca_kabuli_chr05    | 45647057                       | [T/C]       | 1067298734                                 |
| Ca_Kabuli_NC_021164.1_45649181 | Ca_kabuli_chr05    | 45649181                       | [T/G]       | 1067298735                                 |
| Ca_Kabuli_NC_021164.1_45649184 | Ca_kabuli_chr05    | 45649184                       | [T/G]       | 1067298736                                 |
| Ca_Kabuli_NC_021164.1_45694488 | Ca_kabuli_chr05    | 45694488                       | [A/G]       | 1067298737                                 |
| Ca_Kabuli_NC_021164.1_45694524 | Ca_kabuli_chr05    | 45694524                       | [A/G]       | 1067298738                                 |
| Ca_Kabuli_NC_021164.1_45704236 | Ca_kabuli_chr05    | 45704236                       | [A/G]       | 1067298739                                 |
| Ca_Kabuli_NC_021164.1_45704247 | Ca_kabuli_chr05    | 45704247                       | [T/C]       | 1067298740                                 |
| Ca_Kabuli_NC_021164.1_45704250 | Ca_kabuli_chr05    | 45704250                       | [T/C]       | 1067298741                                 |
| Ca_Kabuli_NC_021164.1_45704265 | Ca_kabuli_chr05    | 45704265                       | [A/G]       | 1067298742                                 |
| Ca_Kabuli_NC_021164.1_45704281 | Ca_kabuli_chr05    | 45704281                       | [A/G]       | 1067298743                                 |
| Ca_Kabuli_NC_021164.1_45710509 | Ca_kabuli_chr05    | 45710509                       | [A/G]       | 1067298744                                 |
| Ca_Kabuli_NC_021164.1_45710519 | Ca_kabuli_chr05    | 45710519                       | [A/G]       | 1067298745                                 |
| Ca_Kabuli_NC_021164.1_45731608 | Ca_kabuli_chr05    | 45731608                       | [T/G]       | 1067298746                                 |
| Ca_Kabuli_NC_021164.1_45731819 | Ca_kabuli_chr05    | 45731819                       | [A/C]       | 1067298747                                 |
| Ca_Kabuli_NC_021164.1_45732662 | Ca_kabuli_chr05    | 45732662                       | [A/G]       | 1067298748                                 |
| Ca_Kabuli_NC_021164.1_45841033 | Ca_kabuli_chr05    | 45841033                       | [T/G]       | 1067298749                                 |
| Ca_Kabuli_NC_021164.1_45841041 | Ca_kabuli_chr05    | 45841041                       | [T/C]       | 1067298750                                 |
| Ca_Kabuli_NC_021164.1_45841046 | Ca_kabuli_chr05    | 45841046                       | [T/G]       | 1067298751                                 |
| Ca_Kabuli_NC_021164.1_45841050 | Ca_kabuli_chr05    | 45841050                       | [T/C]       | 1067298752                                 |
| Ca_Kabuli_NC_021164.1_45848012 | Ca_kabuli_chr05    | 45848012                       | [T/A]       | 1067298753                                 |
| Ca_Kabuli_NC_021164.1_45924025 | Ca_kabuli_chr05    | 45924025                       | [A/T]       | 1067298754                                 |
| Ca_Kabuli_NC_021164.1_45924039 | Ca_kabuli_chr05    | 45924039                       | [T/C]       | 1067298755                                 |
| Ca_Kabuli_NC_021164.1_45924056 | Ca_kabuli_chr05    | 45924056                       | [A/G]       | 1067298756                                 |
| Ca_Kabuli_NC_021164.1_45952828 | Ca_kabuli_chr05    | 45952828                       | [T/G]       | 1067298757                                 |
| Ca_Kabuli_NC_021164.1_45952833 | Ca_kabuli_chr05    | 45952833                       | [T/G]       | 1067298758                                 |
| Ca_Kabuli_NC_021164.1_45994690 | Ca_kabuli_chr05    | 45994690                       | [A/T]       | 1067298759                                 |
| Ca_Kabuli_NC_021164.1_45994731 | Ca_kabuli_chr05    | 45994731                       | [A/G]       | 1067298760                                 |
| Ca_Kabuli_NC_021164.1_46019035 | Ca_kabuli_chr05    | 46019035                       | [T/G]       | 1067298761                                 |
| Ca_Kabuli_NC_021164.1_46019049 | Ca_kabuli_chr05    | 46019049                       | [A/G]       | 1067298762                                 |

| <b>SNP IDs</b>                 | <b>Chromosomes</b> | <b>Physical positions (bp)</b> | <b>SNPs</b> | <b>NCBI SNPdb accession IDs (NCBI_ss#)</b> |
|--------------------------------|--------------------|--------------------------------|-------------|--------------------------------------------|
| Ca_Kabuli_NC_021164.1_46077325 | Ca_kabuli_chr05    | 46077325                       | [G/T]       | 1067298763                                 |
| Ca_Kabuli_NC_021164.1_46119152 | Ca_kabuli_chr05    | 46119152                       | [T/C]       | 1067298764                                 |
| Ca_Kabuli_NC_021164.1_46130217 | Ca_kabuli_chr05    | 46130217                       | [T/G]       | 1067298765                                 |
| Ca_Kabuli_NC_021164.1_46156202 | Ca_kabuli_chr05    | 46156202                       | [T/C]       | 1067298766                                 |
| Ca_Kabuli_NC_021164.1_46156815 | Ca_kabuli_chr05    | 46156815                       | [A/T]       | 1067298767                                 |
| Ca_Kabuli_NC_021164.1_46156816 | Ca_kabuli_chr05    | 46156816                       | [G/C]       | 1067298768                                 |
| Ca_Kabuli_NC_021164.1_46156817 | Ca_kabuli_chr05    | 46156817                       | [G/T]       | 1067298769                                 |
| Ca_Kabuli_NC_021164.1_46196699 | Ca_kabuli_chr05    | 46196699                       | [A/C]       | 1067298770                                 |
| Ca_Kabuli_NC_021164.1_46225026 | Ca_kabuli_chr05    | 46225026                       | [G/T]       | 1067298771                                 |
| Ca_Kabuli_NC_021164.1_46260786 | Ca_kabuli_chr05    | 46260786                       | [T/G]       | 1067298772                                 |
| Ca_Kabuli_NC_021164.1_46260798 | Ca_kabuli_chr05    | 46260798                       | [T/G]       | 1067298773                                 |
| Ca_Kabuli_NC_021164.1_46260810 | Ca_kabuli_chr05    | 46260810                       | [T/A]       | 1067298774                                 |
| Ca_Kabuli_NC_021164.1_46260811 | Ca_kabuli_chr05    | 46260811                       | [A/C]       | 1067298775                                 |
| Ca_Kabuli_NC_021164.1_46260817 | Ca_kabuli_chr05    | 46260817                       | [A/C]       | 1067298776                                 |
| Ca_Kabuli_NC_021164.1_46260828 | Ca_kabuli_chr05    | 46260828                       | [A/C]       | 1067298777                                 |
| Ca_Kabuli_NC_021164.1_46260846 | Ca_kabuli_chr05    | 46260846                       | [A/C]       | 1067298778                                 |
| Ca_Kabuli_NC_021164.1_46263316 | Ca_kabuli_chr05    | 46263316                       | [T/G]       | 1067298779                                 |
| Ca_Kabuli_NC_021164.1_46263320 | Ca_kabuli_chr05    | 46263320                       | [T/G]       | 1067298780                                 |
| Ca_Kabuli_NC_021164.1_46272277 | Ca_kabuli_chr05    | 46272277                       | [A/T]       | 1067298781                                 |
| Ca_Kabuli_NC_021164.1_46272308 | Ca_kabuli_chr05    | 46272308                       | [A/G]       | 1067298782                                 |
| Ca_Kabuli_NC_021164.1_46301639 | Ca_kabuli_chr05    | 46301639                       | [G/A]       | 1067298783                                 |
| Ca_Kabuli_NC_021164.1_46310743 | Ca_kabuli_chr05    | 46310743                       | [A/C]       | 1067298784                                 |
| Ca_Kabuli_NC_021164.1_46328623 | Ca_kabuli_chr05    | 46328623                       | [A/G]       | 1067298785                                 |
| Ca_Kabuli_NC_021164.1_46328640 | Ca_kabuli_chr05    | 46328640                       | [A/T]       | 1067298786                                 |
| Ca_Kabuli_NC_021164.1_46344104 | Ca_kabuli_chr05    | 46344104                       | [G/A]       | 1067298787                                 |
| Ca_Kabuli_NC_021164.1_46491556 | Ca_kabuli_chr05    | 46491556                       | [T/G]       | 1067298788                                 |
| Ca_Kabuli_NC_021164.1_46513842 | Ca_kabuli_chr05    | 46513842                       | [A/C]       | 1067298789                                 |
| Ca_Kabuli_NC_021164.1_46535489 | Ca_kabuli_chr05    | 46535489                       | [T/C]       | 1067298790                                 |
| Ca_Kabuli_NC_021164.1_46535552 | Ca_kabuli_chr05    | 46535552                       | [A/C]       | 1067298791                                 |
| Ca_Kabuli_NC_021164.1_46535559 | Ca_kabuli_chr05    | 46535559                       | [A/G]       | 1067298792                                 |
| Ca_Kabuli_NC_021164.1_46592120 | Ca_kabuli_chr05    | 46592120                       | [A/G]       | 1067298793                                 |
| Ca_Kabuli_NC_021164.1_46592129 | Ca_kabuli_chr05    | 46592129                       | [A/G]       | 1067298794                                 |
| Ca_Kabuli_NC_021164.1_46607686 | Ca_kabuli_chr05    | 46607686                       | [T/A]       | 1067298795                                 |
| Ca_Kabuli_NC_021164.1_46611196 | Ca_kabuli_chr05    | 46611196                       | [G/T]       | 1067298796                                 |

| <b>SNP IDs</b>                 | <b>Chromosomes</b> | <b>Physical positions (bp)</b> | <b>SNPs</b> | <b>NCBI SNPdb accession IDs (NCBI_ss#)</b> |
|--------------------------------|--------------------|--------------------------------|-------------|--------------------------------------------|
| Ca_Kabuli_NC_021164.1_46611317 | Ca_kabuli_chr05    | 46611317                       | [T/G]       | 1067298797                                 |
| Ca_Kabuli_NC_021164.1_46611338 | Ca_kabuli_chr05    | 46611338                       | [A/G]       | 1067298798                                 |
| Ca_Kabuli_NC_021164.1_46621403 | Ca_kabuli_chr05    | 46621403                       | [T/C]       | 1067298799                                 |
| Ca_Kabuli_NC_021164.1_46703151 | Ca_kabuli_chr05    | 46703151                       | [T/A]       | 1067298800                                 |
| Ca_Kabuli_NC_021164.1_46703154 | Ca_kabuli_chr05    | 46703154                       | [C/T]       | 1067298801                                 |
| Ca_Kabuli_NC_021164.1_46703157 | Ca_kabuli_chr05    | 46703157                       | [C/T]       | 1067298802                                 |
| Ca_Kabuli_NC_021164.1_46723685 | Ca_kabuli_chr05    | 46723685                       | [A/C]       | 1067298803                                 |
| Ca_Kabuli_NC_021164.1_46771485 | Ca_kabuli_chr05    | 46771485                       | [T/G]       | 1067298804                                 |
| Ca_Kabuli_NC_021164.1_46792245 | Ca_kabuli_chr05    | 46792245                       | [T/C]       | 1067298805                                 |
| Ca_Kabuli_NC_021164.1_46799540 | Ca_kabuli_chr05    | 46799540                       | [A/T]       | 1067298806                                 |
| Ca_Kabuli_NC_021164.1_46799553 | Ca_kabuli_chr05    | 46799553                       | [T/C]       | 1067298807                                 |
| Ca_Kabuli_NC_021164.1_46799573 | Ca_kabuli_chr05    | 46799573                       | [T/C]       | 1067298808                                 |
| Ca_Kabuli_NC_021164.1_46799574 | Ca_kabuli_chr05    | 46799574                       | [C/T]       | 1067298809                                 |
| Ca_Kabuli_NC_021164.1_46799578 | Ca_kabuli_chr05    | 46799578                       | [T/C]       | 1067298810                                 |
| Ca_Kabuli_NC_021164.1_46799580 | Ca_kabuli_chr05    | 46799580                       | [C/T]       | 1067298811                                 |
| Ca_Kabuli_NC_021164.1_46945902 | Ca_kabuli_chr05    | 46945902                       | [T/C]       | 1067298812                                 |
| Ca_Kabuli_NC_021164.1_46962537 | Ca_kabuli_chr05    | 46962537                       | [A/T]       | 1067298813                                 |
| Ca_Kabuli_NC_021164.1_47060326 | Ca_kabuli_chr05    | 47060326                       | [T/C]       | 1067298814                                 |
| Ca_Kabuli_NC_021164.1_47060342 | Ca_kabuli_chr05    | 47060342                       | [A/G]       | 1067298815                                 |
| Ca_Kabuli_NC_021164.1_47060378 | Ca_kabuli_chr05    | 47060378                       | [A/G]       | 1067298816                                 |
| Ca_Kabuli_NC_021164.1_47061536 | Ca_kabuli_chr05    | 47061536                       | [A/G]       | 1067298817                                 |
| Ca_Kabuli_NC_021164.1_47068191 | Ca_kabuli_chr05    | 47068191                       | [A/C]       | 1067298818                                 |
| Ca_Kabuli_NC_021164.1_47068192 | Ca_kabuli_chr05    | 47068192                       | [G/T]       | 1067298819                                 |
| Ca_Kabuli_NC_021164.1_47068193 | Ca_kabuli_chr05    | 47068193                       | [A/C]       | 1067298820                                 |
| Ca_Kabuli_NC_021164.1_47068194 | Ca_kabuli_chr05    | 47068194                       | [T/C]       | 1067298821                                 |
| Ca_Kabuli_NC_021164.1_47073047 | Ca_kabuli_chr05    | 47073047                       | [G/A]       | 1067298822                                 |
| Ca_Kabuli_NC_021164.1_47073048 | Ca_kabuli_chr05    | 47073048                       | [A/T]       | 1067298823                                 |
| Ca_Kabuli_NC_021164.1_47073049 | Ca_kabuli_chr05    | 47073049                       | [A/C]       | 1067298824                                 |
| Ca_Kabuli_NC_021164.1_47073050 | Ca_kabuli_chr05    | 47073050                       | [G/T]       | 1067298825                                 |
| Ca_Kabuli_NC_021164.1_47091545 | Ca_kabuli_chr05    | 47091545                       | [T/C]       | 1067298826                                 |
| Ca_Kabuli_NC_021164.1_47165304 | Ca_kabuli_chr05    | 47165304                       | [A/G]       | 1067298827                                 |
| Ca_Kabuli_NC_021164.1_47165317 | Ca_kabuli_chr05    | 47165317                       | [C/G]       | 1067298828                                 |
| Ca_Kabuli_NC_021164.1_47165332 | Ca_kabuli_chr05    | 47165332                       | [A/G]       | 1067298829                                 |
| Ca_Kabuli_NC_021164.1_47165339 | Ca_kabuli_chr05    | 47165339                       | [A/G]       | 1067298830                                 |



| <b>SNP IDs</b>                 | <b>Chromosomes</b> | <b>Physical positions (bp)</b> | <b>SNPs</b> | <b>NCBI SNPdb accession IDs (NCBI_ss#)</b> |
|--------------------------------|--------------------|--------------------------------|-------------|--------------------------------------------|
| Ca_Kabuli_NC_021164.1_47165343 | Ca_kabuli_chr05    | 47165343                       | [A/G]       | 1067298831                                 |
| Ca_Kabuli_NC_021164.1_47207516 | Ca_kabuli_chr05    | 47207516                       | [T/G]       | 1067298832                                 |
| Ca_Kabuli_NC_021164.1_47211543 | Ca_kabuli_chr05    | 47211543                       | [T/G]       | 1067298833                                 |
| Ca_Kabuli_NC_021164.1_47211554 | Ca_kabuli_chr05    | 47211554                       | [T/C]       | 1067298834                                 |
| Ca_Kabuli_NC_021164.1_47223720 | Ca_kabuli_chr05    | 47223720                       | [A/T]       | 1067298835                                 |
| Ca_Kabuli_NC_021164.1_47286134 | Ca_kabuli_chr05    | 47286134                       | [A/G]       | 1067298836                                 |
| Ca_Kabuli_NC_021164.1_47286181 | Ca_kabuli_chr05    | 47286181                       | [T/A]       | 1067298837                                 |
| Ca_Kabuli_NC_021164.1_47329851 | Ca_kabuli_chr05    | 47329851                       | [A/G]       | 1067298838                                 |
| Ca_Kabuli_NC_021164.1_47329856 | Ca_kabuli_chr05    | 47329856                       | [T/C]       | 1067298839                                 |
| Ca_Kabuli_NC_021164.1_47357594 | Ca_kabuli_chr05    | 47357594                       | [A/C]       | 1067298840                                 |
| Ca_Kabuli_NC_021164.1_47364477 | Ca_kabuli_chr05    | 47364477                       | [A/T]       | 1067298841                                 |
| Ca_Kabuli_NC_021164.1_47364485 | Ca_kabuli_chr05    | 47364485                       | [T/C]       | 1067298842                                 |
| Ca_Kabuli_NC_021164.1_47364489 | Ca_kabuli_chr05    | 47364489                       | [T/C]       | 1067298843                                 |
| Ca_Kabuli_NC_021164.1_47422568 | Ca_kabuli_chr05    | 47422568                       | [T/G]       | 1067298844                                 |
| Ca_Kabuli_NC_021164.1_47534245 | Ca_kabuli_chr05    | 47534245                       | [T/G]       | 1067298845                                 |
| Ca_Kabuli_NC_021164.1_47534262 | Ca_kabuli_chr05    | 47534262                       | [T/C]       | 1067298846                                 |
| Ca_Kabuli_NC_021164.1_47641432 | Ca_kabuli_chr05    | 47641432                       | [A/G]       | 1067298847                                 |
| Ca_Kabuli_NC_021164.1_47641456 | Ca_kabuli_chr05    | 47641456                       | [T/G]       | 1067298848                                 |
| Ca_Kabuli_NC_021164.1_47669142 | Ca_kabuli_chr05    | 47669142                       | [T/G]       | 1067298849                                 |
| Ca_Kabuli_NC_021164.1_47669152 | Ca_kabuli_chr05    | 47669152                       | [A/G]       | 1067298850                                 |
| Ca_Kabuli_NC_021164.1_47669158 | Ca_kabuli_chr05    | 47669158                       | [T/A]       | 1067298851                                 |
| Ca_Kabuli_NC_021164.1_47669173 | Ca_kabuli_chr05    | 47669173                       | [T/A]       | 1067298852                                 |
| Ca_Kabuli_NC_021164.1_47669226 | Ca_kabuli_chr05    | 47669226                       | [A/C]       | 1067298853                                 |
| Ca_Kabuli_NC_021164.1_47669247 | Ca_kabuli_chr05    | 47669247                       | [A/G]       | 1067298854                                 |
| Ca_Kabuli_NC_021164.1_47702984 | Ca_kabuli_chr05    | 47702984                       | [T/G]       | 1067298855                                 |
| Ca_Kabuli_NC_021164.1_47811985 | Ca_kabuli_chr05    | 47811985                       | [T/G]       | 1067298856                                 |
| Ca_Kabuli_NC_021164.1_47829224 | Ca_kabuli_chr05    | 47829224                       | [T/C]       | 1067298857                                 |
| Ca_Kabuli_NC_021164.1_47877158 | Ca_kabuli_chr05    | 47877158                       | [A/C]       | 1067298858                                 |
| Ca_Kabuli_NC_021164.1_47881979 | Ca_kabuli_chr05    | 47881979                       | [A/C]       | 1067298859                                 |
| Ca_Kabuli_NC_021164.1_47901038 | Ca_kabuli_chr05    | 47901038                       | [A/C]       | 1067298860                                 |
| Ca_Kabuli_NC_021164.1_47931558 | Ca_kabuli_chr05    | 47931558                       | [A/C]       | 1067298861                                 |
| Ca_Kabuli_NC_021164.1_47931564 | Ca_kabuli_chr05    | 47931564                       | [A/C]       | 1067298862                                 |
| Ca_Kabuli_NC_021164.1_47931577 | Ca_kabuli_chr05    | 47931577                       | [A/G]       | 1067298863                                 |
| Ca_Kabuli_NC_021164.1_47941753 | Ca_kabuli_chr05    | 47941753                       | [T/G]       | 1067298864                                 |

| <b>SNP IDs</b>                 | <b>Chromosomes</b> | <b>Physical positions (bp)</b> | <b>SNPs</b> | <b>NCBI SNPdb accession IDs (NCBI_ss#)</b> |
|--------------------------------|--------------------|--------------------------------|-------------|--------------------------------------------|
| Ca_Kabuli_NC_021164.1_47943704 | Ca_kabuli_chr05    | 47943704                       | [T/G]       | 1067298865                                 |
| Ca_Kabuli_NC_021164.1_47951932 | Ca_kabuli_chr05    | 47951932                       | [T/A]       | 1067298866                                 |
| Ca_Kabuli_NC_021164.1_48005082 | Ca_kabuli_chr05    | 48005082                       | [T/C]       | 1067298867                                 |
| Ca_Kabuli_NC_021164.1_48005102 | Ca_kabuli_chr05    | 48005102                       | [A/G]       | 1067298868                                 |
| Ca_Kabuli_NC_021164.1_48005110 | Ca_kabuli_chr05    | 48005110                       | [T/C]       | 1067298869                                 |
| Ca_Kabuli_NC_021164.1_48019807 | Ca_kabuli_chr05    | 48019807                       | [A/T]       | 1067298870                                 |
| Ca_Kabuli_NC_021164.1_48034090 | Ca_kabuli_chr05    | 48034090                       | [A/C]       | 1067298871                                 |
| Ca_Kabuli_NC_021164.1_48042058 | Ca_kabuli_chr05    | 48042058                       | [A/G]       | 1067298872                                 |
| Ca_Kabuli_NC_021164.1_48042065 | Ca_kabuli_chr05    | 48042065                       | [T/A]       | 1067298873                                 |
| Ca_Kabuli_NC_021164.1_48042067 | Ca_kabuli_chr05    | 48042067                       | [T/C]       | 1067298874                                 |
| Ca_Kabuli_NC_021164.1_48042089 | Ca_kabuli_chr05    | 48042089                       | [A/C]       | 1067298875                                 |
| Ca_Kabuli_NC_021164.1_48046828 | Ca_kabuli_chr05    | 48046828                       | [A/G]       | 1067298876                                 |
| Ca_Kabuli_NC_021164.1_48046847 | Ca_kabuli_chr05    | 48046847                       | [A/G]       | 1067298877                                 |
| Ca_Kabuli_NC_021164.1_48046855 | Ca_kabuli_chr05    | 48046855                       | [A/G]       | 1067298878                                 |
| Ca_Kabuli_NC_021164.1_48058414 | Ca_kabuli_chr05    | 48058414                       | [T/G]       | 1067298879                                 |
| Ca_Kabuli_NC_021164.1_48058423 | Ca_kabuli_chr05    | 48058423                       | [T/C]       | 1067298880                                 |
| Ca_Kabuli_NC_021164.1_48069859 | Ca_kabuli_chr05    | 48069859                       | [A/G]       | 1067298881                                 |
| Ca_Kabuli_NC_021164.1_48111894 | Ca_kabuli_chr05    | 48111894                       | [G/T]       | 1067298882                                 |
| Ca_Kabuli_NC_021164.1_48111896 | Ca_kabuli_chr05    | 48111896                       | [T/G]       | 1067298883                                 |
| Ca_Kabuli_NC_021164.1_48111922 | Ca_kabuli_chr05    | 48111922                       | [T/C]       | 1067298884                                 |
| Ca_Kabuli_NC_021164.1_48111930 | Ca_kabuli_chr05    | 48111930                       | [A/G]       | 1067298885                                 |
| Ca_Kabuli_NC_021164.1_48112820 | Ca_kabuli_chr05    | 48112820                       | [T/G]       | 1067298886                                 |
| Ca_Kabuli_NC_021164.1_48113397 | Ca_kabuli_chr05    | 48113397                       | [A/T]       | 1067298887                                 |
| Ca_Kabuli_NC_021164.1_48113417 | Ca_kabuli_chr05    | 48113417                       | [A/C]       | 1067298888                                 |
| Ca_Kabuli_NC_021164.1_48115101 | Ca_kabuli_chr05    | 48115101                       | [T/A]       | 1067298889                                 |
| Ca_Kabuli_NC_021164.1_48115165 | Ca_kabuli_chr05    | 48115165                       | [A/G]       | 1067298890                                 |
| Ca_Kabuli_NC_021164.1_48128396 | Ca_kabuli_chr05    | 48128396                       | [T/G]       | 1067298891                                 |
| Ca_Kabuli_NC_021165.1_152519   | Ca_kabuli_chr06    | 152519                         | [T/G]       | 1067298892                                 |
| Ca_Kabuli_NC_021165.1_152520   | Ca_kabuli_chr06    | 152520                         | [G/C]       | 1067298893                                 |
| Ca_Kabuli_NC_021165.1_152529   | Ca_kabuli_chr06    | 152529                         | [T/C]       | 1067298894                                 |
| Ca_Kabuli_NC_021165.1_158938   | Ca_kabuli_chr06    | 158938                         | [T/A]       | 1067298895                                 |
| Ca_Kabuli_NC_021165.1_210513   | Ca_kabuli_chr06    | 210513                         | [T/C]       | 1067298896                                 |
| Ca_Kabuli_NC_021165.1_210527   | Ca_kabuli_chr06    | 210527                         | [T/A]       | 1067298897                                 |
| Ca_Kabuli_NC_021165.1_269296   | Ca_kabuli_chr06    | 269296                         | [A/G]       | 1067298898                                 |

| <b>SNP IDs</b>                | <b>Chromosomes</b> | <b>Physical positions (bp)</b> | <b>SNPs</b> | <b>NCBI SNPdb accession IDs (NCBI_ss#)</b> |
|-------------------------------|--------------------|--------------------------------|-------------|--------------------------------------------|
| Ca_Kabuli_NC_021165.1_277061  | Ca_kabuli_chr06    | 277061                         | [A/T]       | 1067298899                                 |
| Ca_Kabuli_NC_021165.1_486952  | Ca_kabuli_chr06    | 486952                         | [C/A]       | 1067298900                                 |
| Ca_Kabuli_NC_021165.1_504936  | Ca_kabuli_chr06    | 504936                         | [A/G]       | 1067298901                                 |
| Ca_Kabuli_NC_021165.1_580515  | Ca_kabuli_chr06    | 580515                         | [T/C]       | 1067298902                                 |
| Ca_Kabuli_NC_021165.1_580521  | Ca_kabuli_chr06    | 580521                         | [A/G]       | 1067298903                                 |
| Ca_Kabuli_NC_021165.1_587169  | Ca_kabuli_chr06    | 587169                         | [T/G]       | 1067298904                                 |
| Ca_Kabuli_NC_021165.1_587221  | Ca_kabuli_chr06    | 587221                         | [A/C]       | 1067298905                                 |
| Ca_Kabuli_NC_021165.1_587235  | Ca_kabuli_chr06    | 587235                         | [T/A]       | 1067298906                                 |
| Ca_Kabuli_NC_021165.1_587236  | Ca_kabuli_chr06    | 587236                         | [A/T]       | 1067298907                                 |
| Ca_Kabuli_NC_021165.1_587251  | Ca_kabuli_chr06    | 587251                         | [A/G]       | 1067298908                                 |
| Ca_Kabuli_NC_021165.1_587256  | Ca_kabuli_chr06    | 587256                         | [T/C]       | 1067298909                                 |
| Ca_Kabuli_NC_021165.1_611246  | Ca_kabuli_chr06    | 611246                         | [T/C]       | 1067298910                                 |
| Ca_Kabuli_NC_021165.1_611280  | Ca_kabuli_chr06    | 611280                         | [T/C]       | 1067298911                                 |
| Ca_Kabuli_NC_021165.1_611293  | Ca_kabuli_chr06    | 611293                         | [A/C]       | 1067298912                                 |
| Ca_Kabuli_NC_021165.1_611300  | Ca_kabuli_chr06    | 611300                         | [T/C]       | 1067298913                                 |
| Ca_Kabuli_NC_021165.1_638961  | Ca_kabuli_chr06    | 638961                         | [T/G]       | 1067298914                                 |
| Ca_Kabuli_NC_021165.1_647270  | Ca_kabuli_chr06    | 647270                         | [T/A]       | 1067298915                                 |
| Ca_Kabuli_NC_021165.1_647322  | Ca_kabuli_chr06    | 647322                         | [A/C]       | 1067298916                                 |
| Ca_Kabuli_NC_021165.1_647329  | Ca_kabuli_chr06    | 647329                         | [A/C]       | 1067298917                                 |
| Ca_Kabuli_NC_021165.1_894893  | Ca_kabuli_chr06    | 894893                         | [T/C]       | 1067298918                                 |
| Ca_Kabuli_NC_021165.1_902445  | Ca_kabuli_chr06    | 902445                         | [A/G]       | 1067298919                                 |
| Ca_Kabuli_NC_021165.1_902495  | Ca_kabuli_chr06    | 902495                         | [A/T]       | 1067298920                                 |
| Ca_Kabuli_NC_021165.1_915496  | Ca_kabuli_chr06    | 915496                         | [A/C]       | 1067298921                                 |
| Ca_Kabuli_NC_021165.1_998581  | Ca_kabuli_chr06    | 998581                         | [T/C]       | 1067298922                                 |
| Ca_Kabuli_NC_021165.1_998582  | Ca_kabuli_chr06    | 998582                         | [C/G]       | 1067298923                                 |
| Ca_Kabuli_NC_021165.1_998583  | Ca_kabuli_chr06    | 998583                         | [T/G]       | 1067298924                                 |
| Ca_Kabuli_NC_021165.1_1005273 | Ca_kabuli_chr06    | 1005273                        | [C/G]       | 1067298925                                 |
| Ca_Kabuli_NC_021165.1_1116951 | Ca_kabuli_chr06    | 1116951                        | [T/G]       | 1067298926                                 |
| Ca_Kabuli_NC_021165.1_1117010 | Ca_kabuli_chr06    | 1117010                        | [A/C]       | 1067298927                                 |
| Ca_Kabuli_NC_021165.1_1130098 | Ca_kabuli_chr06    | 1130098                        | [A/G]       | 1067298928                                 |
| Ca_Kabuli_NC_021165.1_1181733 | Ca_kabuli_chr06    | 1181733                        | [A/C]       | 1067298929                                 |
| Ca_Kabuli_NC_021165.1_1181739 | Ca_kabuli_chr06    | 1181739                        | [A/G]       | 1067298930                                 |
| Ca_Kabuli_NC_021165.1_1193776 | Ca_kabuli_chr06    | 1193776                        | [T/G]       | 1067298931                                 |
| Ca_Kabuli_NC_021165.1_1212875 | Ca_kabuli_chr06    | 1212875                        | [T/G]       | 1067298932                                 |

| <b>SNP IDs</b>                | <b>Chromosomes</b> | <b>Physical positions (bp)</b> | <b>SNPs</b> | <b>NCBI SNPdb accession IDs (NCBI_ss#)</b> |
|-------------------------------|--------------------|--------------------------------|-------------|--------------------------------------------|
| Ca_Kabuli_NC_021165.1_1214374 | Ca_kabuli_chr06    | 1214374                        | [C/T]       | 1067298933                                 |
| Ca_Kabuli_NC_021165.1_1220523 | Ca_kabuli_chr06    | 1220523                        | [C/T]       | 1067298934                                 |
| Ca_Kabuli_NC_021165.1_1236070 | Ca_kabuli_chr06    | 1236070                        | [T/C]       | 1067298935                                 |
| Ca_Kabuli_NC_021165.1_1236107 | Ca_kabuli_chr06    | 1236107                        | [T/C]       | 1067298936                                 |
| Ca_Kabuli_NC_021165.1_1236129 | Ca_kabuli_chr06    | 1236129                        | [A/G]       | 1067298937                                 |
| Ca_Kabuli_NC_021165.1_1236136 | Ca_kabuli_chr06    | 1236136                        | [A/C]       | 1067298938                                 |
| Ca_Kabuli_NC_021165.1_1274668 | Ca_kabuli_chr06    | 1274668                        | [A/G]       | 1067298939                                 |
| Ca_Kabuli_NC_021165.1_1276388 | Ca_kabuli_chr06    | 1276388                        | [A/T]       | 1067298940                                 |
| Ca_Kabuli_NC_021165.1_1362497 | Ca_kabuli_chr06    | 1362497                        | [G/A]       | 1067298941                                 |
| Ca_Kabuli_NC_021165.1_1362520 | Ca_kabuli_chr06    | 1362520                        | [T/A]       | 1067298942                                 |
| Ca_Kabuli_NC_021165.1_1362535 | Ca_kabuli_chr06    | 1362535                        | [A/G]       | 1067298943                                 |
| Ca_Kabuli_NC_021165.1_1643856 | Ca_kabuli_chr06    | 1643856                        | [T/G]       | 1067298944                                 |
| Ca_Kabuli_NC_021165.1_1643874 | Ca_kabuli_chr06    | 1643874                        | [A/G]       | 1067298945                                 |
| Ca_Kabuli_NC_021165.1_1811162 | Ca_kabuli_chr06    | 1811162                        | [G/A]       | 1067298946                                 |
| Ca_Kabuli_NC_021165.1_1811671 | Ca_kabuli_chr06    | 1811671                        | [A/C]       | 1067298947                                 |
| Ca_Kabuli_NC_021165.1_1815245 | Ca_kabuli_chr06    | 1815245                        | [C/T]       | 1067298948                                 |
| Ca_Kabuli_NC_021165.1_1815278 | Ca_kabuli_chr06    | 1815278                        | [A/G]       | 1067298949                                 |
| Ca_Kabuli_NC_021165.1_1817599 | Ca_kabuli_chr06    | 1817599                        | [C/T]       | 1067298950                                 |
| Ca_Kabuli_NC_021165.1_1817774 | Ca_kabuli_chr06    | 1817774                        | [A/G]       | 1067298951                                 |
| Ca_Kabuli_NC_021165.1_1817775 | Ca_kabuli_chr06    | 1817775                        | [G/A]       | 1067298952                                 |
| Ca_Kabuli_NC_021165.1_1817776 | Ca_kabuli_chr06    | 1817776                        | [A/G]       | 1067298953                                 |
| Ca_Kabuli_NC_021165.1_1817786 | Ca_kabuli_chr06    | 1817786                        | [A/G]       | 1067298954                                 |
| Ca_Kabuli_NC_021165.1_1818234 | Ca_kabuli_chr06    | 1818234                        | [C/T]       | 1067298955                                 |
| Ca_Kabuli_NC_021165.1_1843341 | Ca_kabuli_chr06    | 1843341                        | [G/A]       | 1067298956                                 |
| Ca_Kabuli_NC_021165.1_1843376 | Ca_kabuli_chr06    | 1843376                        | [C/T]       | 1067298957                                 |
| Ca_Kabuli_NC_021165.1_1867519 | Ca_kabuli_chr06    | 1867519                        | [A/T]       | 1067298958                                 |
| Ca_Kabuli_NC_021165.1_1867530 | Ca_kabuli_chr06    | 1867530                        | [A/T]       | 1067298959                                 |
| Ca_Kabuli_NC_021165.1_1979887 | Ca_kabuli_chr06    | 1979887                        | [G/T]       | 1067298960                                 |
| Ca_Kabuli_NC_021165.1_2001887 | Ca_kabuli_chr06    | 2001887                        | [T/C]       | 1067298961                                 |
| Ca_Kabuli_NC_021165.1_2001898 | Ca_kabuli_chr06    | 2001898                        | [C/T]       | 1067298962                                 |
| Ca_Kabuli_NC_021165.1_2001909 | Ca_kabuli_chr06    | 2001909                        | [T/G]       | 1067298963                                 |
| Ca_Kabuli_NC_021165.1_2001921 | Ca_kabuli_chr06    | 2001921                        | [A/G]       | 1067298964                                 |
| Ca_Kabuli_NC_021165.1_2001925 | Ca_kabuli_chr06    | 2001925                        | [A/G]       | 1067298965                                 |
| Ca_Kabuli_NC_021165.1_2001933 | Ca_kabuli_chr06    | 2001933                        | [T/G]       | 1067298966                                 |

| <b>SNP IDs</b>                | <b>Chromosomes</b> | <b>Physical positions (bp)</b> | <b>SNPs</b> | <b>NCBI SNPdb accession IDs (NCBI_ss#)</b> |
|-------------------------------|--------------------|--------------------------------|-------------|--------------------------------------------|
| Ca_Kabuli_NC_021165.1_2001938 | Ca_kabuli_chr06    | 2001938                        | [C/T]       | 1067298967                                 |
| Ca_Kabuli_NC_021165.1_2037620 | Ca_kabuli_chr06    | 2037620                        | [T/G]       | 1067298968                                 |
| Ca_Kabuli_NC_021165.1_2037623 | Ca_kabuli_chr06    | 2037623                        | [T/G]       | 1067298969                                 |
| Ca_Kabuli_NC_021165.1_2079137 | Ca_kabuli_chr06    | 2079137                        | [T/G]       | 1067298970                                 |
| Ca_Kabuli_NC_021165.1_2140393 | Ca_kabuli_chr06    | 2140393                        | [A/T]       | 1067298971                                 |
| Ca_Kabuli_NC_021165.1_2140399 | Ca_kabuli_chr06    | 2140399                        | [T/C]       | 1067298972                                 |
| Ca_Kabuli_NC_021165.1_2140403 | Ca_kabuli_chr06    | 2140403                        | [A/G]       | 1067298973                                 |
| Ca_Kabuli_NC_021165.1_2156740 | Ca_kabuli_chr06    | 2156740                        | [T/G]       | 1067298974                                 |
| Ca_Kabuli_NC_021165.1_2171761 | Ca_kabuli_chr06    | 2171761                        | [T/G]       | 1067298975                                 |
| Ca_Kabuli_NC_021165.1_2172210 | Ca_kabuli_chr06    | 2172210                        | [T/G]       | 1067298976                                 |
| Ca_Kabuli_NC_021165.1_2172258 | Ca_kabuli_chr06    | 2172258                        | [A/G]       | 1067298977                                 |
| Ca_Kabuli_NC_021165.1_2175751 | Ca_kabuli_chr06    | 2175751                        | [T/G]       | 1067298978                                 |
| Ca_Kabuli_NC_021165.1_2175766 | Ca_kabuli_chr06    | 2175766                        | [A/C]       | 1067298979                                 |
| Ca_Kabuli_NC_021165.1_2175768 | Ca_kabuli_chr06    | 2175768                        | [A/C]       | 1067298980                                 |
| Ca_Kabuli_NC_021165.1_2244901 | Ca_kabuli_chr06    | 2244901                        | [A/C]       | 1067298981                                 |
| Ca_Kabuli_NC_021165.1_2286209 | Ca_kabuli_chr06    | 2286209                        | [A/T]       | 1067298982                                 |
| Ca_Kabuli_NC_021165.1_2286237 | Ca_kabuli_chr06    | 2286237                        | [C/T]       | 1067298983                                 |
| Ca_Kabuli_NC_021165.1_2299629 | Ca_kabuli_chr06    | 2299629                        | [A/C]       | 1067298984                                 |
| Ca_Kabuli_NC_021165.1_2326797 | Ca_kabuli_chr06    | 2326797                        | [A/G]       | 1067298985                                 |
| Ca_Kabuli_NC_021165.1_2326809 | Ca_kabuli_chr06    | 2326809                        | [T/A]       | 1067298986                                 |
| Ca_Kabuli_NC_021165.1_2327832 | Ca_kabuli_chr06    | 2327832                        | [A/G]       | 1067298987                                 |
| Ca_Kabuli_NC_021165.1_2408338 | Ca_kabuli_chr06    | 2408338                        | [A/G]       | 1067298988                                 |
| Ca_Kabuli_NC_021165.1_2414990 | Ca_kabuli_chr06    | 2414990                        | [T/C]       | 1067298989                                 |
| Ca_Kabuli_NC_021165.1_2448861 | Ca_kabuli_chr06    | 2448861                        | [A/G]       | 1067298990                                 |
| Ca_Kabuli_NC_021165.1_2467454 | Ca_kabuli_chr06    | 2467454                        | [A/G]       | 1067298991                                 |
| Ca_Kabuli_NC_021165.1_2484322 | Ca_kabuli_chr06    | 2484322                        | [T/A]       | 1067298992                                 |
| Ca_Kabuli_NC_021165.1_2484342 | Ca_kabuli_chr06    | 2484342                        | [A/C]       | 1067298993                                 |
| Ca_Kabuli_NC_021165.1_2527768 | Ca_kabuli_chr06    | 2527768                        | [A/G]       | 1067298994                                 |
| Ca_Kabuli_NC_021165.1_2540711 | Ca_kabuli_chr06    | 2540711                        | [C/T]       | 1067298995                                 |
| Ca_Kabuli_NC_021165.1_2540749 | Ca_kabuli_chr06    | 2540749                        | [C/T]       | 1067298996                                 |
| Ca_Kabuli_NC_021165.1_2541088 | Ca_kabuli_chr06    | 2541088                        | [T/A]       | 1067298997                                 |
| Ca_Kabuli_NC_021165.1_2542942 | Ca_kabuli_chr06    | 2542942                        | [T/A]       | 1067298998                                 |
| Ca_Kabuli_NC_021165.1_2542981 | Ca_kabuli_chr06    | 2542981                        | [C/T]       | 1067298999                                 |
| Ca_Kabuli_NC_021165.1_2543096 | Ca_kabuli_chr06    | 2543096                        | [C/T]       | 1067299000                                 |

| <b>SNP IDs</b>                | <b>Chromosomes</b> | <b>Physical positions (bp)</b> | <b>SNPs</b> | <b>NCBI SNPdb accession IDs (NCBI_ss#)</b> |
|-------------------------------|--------------------|--------------------------------|-------------|--------------------------------------------|
| Ca_Kabuli_NC_021165.1_2550007 | Ca_kabuli_chr06    | 2550007                        | [A/C]       | 1067299001                                 |
| Ca_Kabuli_NC_021165.1_2550022 | Ca_kabuli_chr06    | 2550022                        | [A/C]       | 1067299002                                 |
| Ca_Kabuli_NC_021165.1_2550101 | Ca_kabuli_chr06    | 2550101                        | [T/G]       | 1067299003                                 |
| Ca_Kabuli_NC_021165.1_2592593 | Ca_kabuli_chr06    | 2592593                        | [G/A]       | 1067299004                                 |
| Ca_Kabuli_NC_021165.1_2592607 | Ca_kabuli_chr06    | 2592607                        | [T/G]       | 1067299005                                 |
| Ca_Kabuli_NC_021165.1_2592625 | Ca_kabuli_chr06    | 2592625                        | [T/A]       | 1067299006                                 |
| Ca_Kabuli_NC_021165.1_2604913 | Ca_kabuli_chr06    | 2604913                        | [T/G]       | 1067299007                                 |
| Ca_Kabuli_NC_021165.1_2604933 | Ca_kabuli_chr06    | 2604933                        | [A/G]       | 1067299008                                 |
| Ca_Kabuli_NC_021165.1_2623360 | Ca_kabuli_chr06    | 2623360                        | [T/C]       | 1067299009                                 |
| Ca_Kabuli_NC_021165.1_2636832 | Ca_kabuli_chr06    | 2636832                        | [T/G]       | 1067299010                                 |
| Ca_Kabuli_NC_021165.1_2636837 | Ca_kabuli_chr06    | 2636837                        | [A/G]       | 1067299011                                 |
| Ca_Kabuli_NC_021165.1_2676658 | Ca_kabuli_chr06    | 2676658                        | [A/C]       | 1067299012                                 |
| Ca_Kabuli_NC_021165.1_2715014 | Ca_kabuli_chr06    | 2715014                        | [T/A]       | 1067299013                                 |
| Ca_Kabuli_NC_021165.1_2719217 | Ca_kabuli_chr06    | 2719217                        | [T/A]       | 1067299014                                 |
| Ca_Kabuli_NC_021165.1_2740777 | Ca_kabuli_chr06    | 2740777                        | [A/T]       | 1067299015                                 |
| Ca_Kabuli_NC_021165.1_2740885 | Ca_kabuli_chr06    | 2740885                        | [A/C]       | 1067299016                                 |
| Ca_Kabuli_NC_021165.1_2802938 | Ca_kabuli_chr06    | 2802938                        | [A/G]       | 1067299017                                 |
| Ca_Kabuli_NC_021165.1_2802940 | Ca_kabuli_chr06    | 2802940                        | [G/C]       | 1067299018                                 |
| Ca_Kabuli_NC_021165.1_2802958 | Ca_kabuli_chr06    | 2802958                        | [T/C]       | 1067299019                                 |
| Ca_Kabuli_NC_021165.1_2802984 | Ca_kabuli_chr06    | 2802984                        | [A/C]       | 1067299020                                 |
| Ca_Kabuli_NC_021165.1_2802996 | Ca_kabuli_chr06    | 2802996                        | [A/G]       | 1067299021                                 |
| Ca_Kabuli_NC_021165.1_2812736 | Ca_kabuli_chr06    | 2812736                        | [A/G]       | 1067299022                                 |
| Ca_Kabuli_NC_021165.1_2812773 | Ca_kabuli_chr06    | 2812773                        | [T/G]       | 1067299023                                 |
| Ca_Kabuli_NC_021165.1_2812776 | Ca_kabuli_chr06    | 2812776                        | [T/C]       | 1067299024                                 |
| Ca_Kabuli_NC_021165.1_2812792 | Ca_kabuli_chr06    | 2812792                        | [A/G]       | 1067299025                                 |
| Ca_Kabuli_NC_021165.1_2823107 | Ca_kabuli_chr06    | 2823107                        | [G/T]       | 1067299026                                 |
| Ca_Kabuli_NC_021165.1_2823119 | Ca_kabuli_chr06    | 2823119                        | [C/T]       | 1067299027                                 |
| Ca_Kabuli_NC_021165.1_2927253 | Ca_kabuli_chr06    | 2927253                        | [A/C]       | 1067299028                                 |
| Ca_Kabuli_NC_021165.1_2927265 | Ca_kabuli_chr06    | 2927265                        | [T/C]       | 1067299029                                 |
| Ca_Kabuli_NC_021165.1_2927328 | Ca_kabuli_chr06    | 2927328                        | [T/G]       | 1067299030                                 |
| Ca_Kabuli_NC_021165.1_2927361 | Ca_kabuli_chr06    | 2927361                        | [T/G]       | 1067299031                                 |
| Ca_Kabuli_NC_021165.1_2927391 | Ca_kabuli_chr06    | 2927391                        | [A/G]       | 1067299032                                 |
| Ca_Kabuli_NC_021165.1_2929405 | Ca_kabuli_chr06    | 2929405                        | [A/C]       | 1067299033                                 |
| Ca_Kabuli_NC_021165.1_2930419 | Ca_kabuli_chr06    | 2930419                        | [T/C]       | 1067299034                                 |

| <b>SNP IDs</b>                | <b>Chromosomes</b> | <b>Physical positions (bp)</b> | <b>SNPs</b> | <b>NCBI SNPdb accession IDs (NCBI_ss#)</b> |
|-------------------------------|--------------------|--------------------------------|-------------|--------------------------------------------|
| Ca_Kabuli_NC_021165.1_2930460 | Ca_kabuli_chr06    | 2930460                        | [A/C]       | 1067299035                                 |
| Ca_Kabuli_NC_021165.1_2930493 | Ca_kabuli_chr06    | 2930493                        | [A/G]       | 1067299036                                 |
| Ca_Kabuli_NC_021165.1_2930510 | Ca_kabuli_chr06    | 2930510                        | [A/C]       | 1067299037                                 |
| Ca_Kabuli_NC_021165.1_2930542 | Ca_kabuli_chr06    | 2930542                        | [A/C]       | 1067299038                                 |
| Ca_Kabuli_NC_021165.1_2931289 | Ca_kabuli_chr06    | 2931289                        | [T/G]       | 1067299039                                 |
| Ca_Kabuli_NC_021165.1_2931314 | Ca_kabuli_chr06    | 2931314                        | [T/C]       | 1067299040                                 |
| Ca_Kabuli_NC_021165.1_2931329 | Ca_kabuli_chr06    | 2931329                        | [A/G]       | 1067299041                                 |
| Ca_Kabuli_NC_021165.1_2973756 | Ca_kabuli_chr06    | 2973756                        | [A/C]       | 1067299042                                 |
| Ca_Kabuli_NC_021165.1_2973759 | Ca_kabuli_chr06    | 2973759                        | [T/C]       | 1067299043                                 |
| Ca_Kabuli_NC_021165.1_3213956 | Ca_kabuli_chr06    | 3213956                        | [T/G]       | 1067299044                                 |
| Ca_Kabuli_NC_021165.1_3213966 | Ca_kabuli_chr06    | 3213966                        | [T/G]       | 1067299045                                 |
| Ca_Kabuli_NC_021165.1_3213987 | Ca_kabuli_chr06    | 3213987                        | [T/C]       | 1067299046                                 |
| Ca_Kabuli_NC_021165.1_3273804 | Ca_kabuli_chr06    | 3273804                        | [T/C]       | 1067299047                                 |
| Ca_Kabuli_NC_021165.1_3273842 | Ca_kabuli_chr06    | 3273842                        | [T/G]       | 1067299048                                 |
| Ca_Kabuli_NC_021165.1_3276789 | Ca_kabuli_chr06    | 3276789                        | [A/T]       | 1067299049                                 |
| Ca_Kabuli_NC_021165.1_3280601 | Ca_kabuli_chr06    | 3280601                        | [A/T]       | 1067299050                                 |
| Ca_Kabuli_NC_021165.1_3288447 | Ca_kabuli_chr06    | 3288447                        | [G/T]       | 1067299051                                 |
| Ca_Kabuli_NC_021165.1_3288458 | Ca_kabuli_chr06    | 3288458                        | [A/C]       | 1067299052                                 |
| Ca_Kabuli_NC_021165.1_3288466 | Ca_kabuli_chr06    | 3288466                        | [C/A]       | 1067299053                                 |
| Ca_Kabuli_NC_021165.1_3288468 | Ca_kabuli_chr06    | 3288468                        | [T/C]       | 1067299054                                 |
| Ca_Kabuli_NC_021165.1_3288474 | Ca_kabuli_chr06    | 3288474                        | [T/C]       | 1067299055                                 |
| Ca_Kabuli_NC_021165.1_3288483 | Ca_kabuli_chr06    | 3288483                        | [T/C]       | 1067299056                                 |
| Ca_Kabuli_NC_021165.1_3288487 | Ca_kabuli_chr06    | 3288487                        | [T/C]       | 1067299057                                 |
| Ca_Kabuli_NC_021165.1_3288489 | Ca_kabuli_chr06    | 3288489                        | [G/C]       | 1067299058                                 |
| Ca_Kabuli_NC_021165.1_3288496 | Ca_kabuli_chr06    | 3288496                        | [G/A]       | 1067299059                                 |
| Ca_Kabuli_NC_021165.1_3321597 | Ca_kabuli_chr06    | 3321597                        | [T/A]       | 1067299060                                 |
| Ca_Kabuli_NC_021165.1_3321738 | Ca_kabuli_chr06    | 3321738                        | [A/C]       | 1067299061                                 |
| Ca_Kabuli_NC_021165.1_3394747 | Ca_kabuli_chr06    | 3394747                        | [T/C]       | 1067299062                                 |
| Ca_Kabuli_NC_021165.1_3394774 | Ca_kabuli_chr06    | 3394774                        | [C/T]       | 1067299063                                 |
| Ca_Kabuli_NC_021165.1_3394784 | Ca_kabuli_chr06    | 3394784                        | [C/G]       | 1067299064                                 |
| Ca_Kabuli_NC_021165.1_3394876 | Ca_kabuli_chr06    | 3394876                        | [G/A]       | 1067299065                                 |
| Ca_Kabuli_NC_021165.1_3394898 | Ca_kabuli_chr06    | 3394898                        | [T/A]       | 1067299066                                 |
| Ca_Kabuli_NC_021165.1_3394908 | Ca_kabuli_chr06    | 3394908                        | [G/T]       | 1067299067                                 |
| Ca_Kabuli_NC_021165.1_3394921 | Ca_kabuli_chr06    | 3394921                        | [A/G]       | 1067299068                                 |

| <b>SNP IDs</b>                | <b>Chromosomes</b> | <b>Physical positions (bp)</b> | <b>SNPs</b> | <b>NCBI SNPdb accession IDs (NCBI_ss#)</b> |
|-------------------------------|--------------------|--------------------------------|-------------|--------------------------------------------|
| Ca_Kabuli_NC_021165.1_3396791 | Ca_kabuli_chr06    | 3396791                        | [T/C]       | 1067299069                                 |
| Ca_Kabuli_NC_021165.1_3396803 | Ca_kabuli_chr06    | 3396803                        | [A/C]       | 1067299070                                 |
| Ca_Kabuli_NC_021165.1_3396810 | Ca_kabuli_chr06    | 3396810                        | [A/G]       | 1067299071                                 |
| Ca_Kabuli_NC_021165.1_3396813 | Ca_kabuli_chr06    | 3396813                        | [T/C]       | 1067299072                                 |
| Ca_Kabuli_NC_021165.1_3507742 | Ca_kabuli_chr06    | 3507742                        | [A/C]       | 1067299073                                 |
| Ca_Kabuli_NC_021165.1_3654778 | Ca_kabuli_chr06    | 3654778                        | [A/G]       | 1067299074                                 |
| Ca_Kabuli_NC_021165.1_3654789 | Ca_kabuli_chr06    | 3654789                        | [A/G]       | 1067299075                                 |
| Ca_Kabuli_NC_021165.1_3720789 | Ca_kabuli_chr06    | 3720789                        | [A/G]       | 1067299076                                 |
| Ca_Kabuli_NC_021165.1_3722816 | Ca_kabuli_chr06    | 3722816                        | [A/G]       | 1067299077                                 |
| Ca_Kabuli_NC_021165.1_3722829 | Ca_kabuli_chr06    | 3722829                        | [T/C]       | 1067299078                                 |
| Ca_Kabuli_NC_021165.1_3722840 | Ca_kabuli_chr06    | 3722840                        | [T/G]       | 1067299079                                 |
| Ca_Kabuli_NC_021165.1_3733800 | Ca_kabuli_chr06    | 3733800                        | [T/G]       | 1067299080                                 |
| Ca_Kabuli_NC_021165.1_3733808 | Ca_kabuli_chr06    | 3733808                        | [A/G]       | 1067299081                                 |
| Ca_Kabuli_NC_021165.1_3733812 | Ca_kabuli_chr06    | 3733812                        | [A/C]       | 1067299082                                 |
| Ca_Kabuli_NC_021165.1_3745388 | Ca_kabuli_chr06    | 3745388                        | [A/C]       | 1067299083                                 |
| Ca_Kabuli_NC_021165.1_3761493 | Ca_kabuli_chr06    | 3761493                        | [A/G]       | 1067299084                                 |
| Ca_Kabuli_NC_021165.1_3765131 | Ca_kabuli_chr06    | 3765131                        | [T/G]       | 1067299085                                 |
| Ca_Kabuli_NC_021165.1_3786815 | Ca_kabuli_chr06    | 3786815                        | [A/T]       | 1067299086                                 |
| Ca_Kabuli_NC_021165.1_3787086 | Ca_kabuli_chr06    | 3787086                        | [T/C]       | 1067299087                                 |
| Ca_Kabuli_NC_021165.1_3803660 | Ca_kabuli_chr06    | 3803660                        | [T/C]       | 1067299088                                 |
| Ca_Kabuli_NC_021165.1_3803672 | Ca_kabuli_chr06    | 3803672                        | [A/T]       | 1067299089                                 |
| Ca_Kabuli_NC_021165.1_3803776 | Ca_kabuli_chr06    | 3803776                        | [G/T]       | 1067299090                                 |
| Ca_Kabuli_NC_021165.1_3803788 | Ca_kabuli_chr06    | 3803788                        | [A/C]       | 1067299091                                 |
| Ca_Kabuli_NC_021165.1_3803791 | Ca_kabuli_chr06    | 3803791                        | [A/G]       | 1067299092                                 |
| Ca_Kabuli_NC_021165.1_3803817 | Ca_kabuli_chr06    | 3803817                        | [T/G]       | 1067299093                                 |
| Ca_Kabuli_NC_021165.1_3829022 | Ca_kabuli_chr06    | 3829022                        | [T/G]       | 1067299094                                 |
| Ca_Kabuli_NC_021165.1_3829043 | Ca_kabuli_chr06    | 3829043                        | [A/T]       | 1067299095                                 |
| Ca_Kabuli_NC_021165.1_3960991 | Ca_kabuli_chr06    | 3960991                        | [T/G]       | 1067299096                                 |
| Ca_Kabuli_NC_021165.1_3962394 | Ca_kabuli_chr06    | 3962394                        | [T/G]       | 1067299097                                 |
| Ca_Kabuli_NC_021165.1_3962416 | Ca_kabuli_chr06    | 3962416                        | [A/C]       | 1067299098                                 |
| Ca_Kabuli_NC_021165.1_3962420 | Ca_kabuli_chr06    | 3962420                        | [A/C]       | 1067299099                                 |
| Ca_Kabuli_NC_021165.1_3962444 | Ca_kabuli_chr06    | 3962444                        | [A/C]       | 1067299100                                 |
| Ca_Kabuli_NC_021165.1_3962488 | Ca_kabuli_chr06    | 3962488                        | [A/T]       | 1067299101                                 |
| Ca_Kabuli_NC_021165.1_3965379 | Ca_kabuli_chr06    | 3965379                        | [A/G]       | 1067299102                                 |



| <b>SNP IDs</b>                | <b>Chromosomes</b> | <b>Physical positions (bp)</b> | <b>SNPs</b> | <b>NCBI SNPdb accession IDs (NCBI_ss#)</b> |
|-------------------------------|--------------------|--------------------------------|-------------|--------------------------------------------|
| Ca_Kabuli_NC_021165.1_3965380 | Ca_kabuli_chr06    | 3965380                        | [G/T]       | 1067299103                                 |
| Ca_Kabuli_NC_021165.1_3965381 | Ca_kabuli_chr06    | 3965381                        | [A/G]       | 1067299104                                 |
| Ca_Kabuli_NC_021165.1_3965383 | Ca_kabuli_chr06    | 3965383                        | [A/G]       | 1067299105                                 |
| Ca_Kabuli_NC_021165.1_3965384 | Ca_kabuli_chr06    | 3965384                        | [T/C]       | 1067299106                                 |
| Ca_Kabuli_NC_021165.1_3965411 | Ca_kabuli_chr06    | 3965411                        | [A/G]       | 1067299107                                 |
| Ca_Kabuli_NC_021165.1_3965412 | Ca_kabuli_chr06    | 3965412                        | [T/C]       | 1067299108                                 |
| Ca_Kabuli_NC_021165.1_3965414 | Ca_kabuli_chr06    | 3965414                        | [T/C]       | 1067299109                                 |
| Ca_Kabuli_NC_021165.1_3965416 | Ca_kabuli_chr06    | 3965416                        | [A/G]       | 1067299110                                 |
| Ca_Kabuli_NC_021165.1_3985519 | Ca_kabuli_chr06    | 3985519                        | [A/G]       | 1067299111                                 |
| Ca_Kabuli_NC_021165.1_3990963 | Ca_kabuli_chr06    | 3990963                        | [A/G]       | 1067299112                                 |
| Ca_Kabuli_NC_021165.1_3992451 | Ca_kabuli_chr06    | 3992451                        | [T/G]       | 1067299113                                 |
| Ca_Kabuli_NC_021165.1_3992500 | Ca_kabuli_chr06    | 3992500                        | [A/T]       | 1067299114                                 |
| Ca_Kabuli_NC_021165.1_4093800 | Ca_kabuli_chr06    | 4093800                        | [A/G]       | 1067299115                                 |
| Ca_Kabuli_NC_021165.1_4120753 | Ca_kabuli_chr06    | 4120753                        | [T/A]       | 1067299116                                 |
| Ca_Kabuli_NC_021165.1_4120766 | Ca_kabuli_chr06    | 4120766                        | [G/A]       | 1067299117                                 |
| Ca_Kabuli_NC_021165.1_4120769 | Ca_kabuli_chr06    | 4120769                        | [T/G]       | 1067299118                                 |
| Ca_Kabuli_NC_021165.1_4216726 | Ca_kabuli_chr06    | 4216726                        | [A/T]       | 1067299119                                 |
| Ca_Kabuli_NC_021165.1_4348586 | Ca_kabuli_chr06    | 4348586                        | [T/C]       | 1067299120                                 |
| Ca_Kabuli_NC_021165.1_4348610 | Ca_kabuli_chr06    | 4348610                        | [A/C]       | 1067299121                                 |
| Ca_Kabuli_NC_021165.1_4350822 | Ca_kabuli_chr06    | 4350822                        | [A/C]       | 1067299122                                 |
| Ca_Kabuli_NC_021165.1_4362848 | Ca_kabuli_chr06    | 4362848                        | [T/C]       | 1067299123                                 |
| Ca_Kabuli_NC_021165.1_4362850 | Ca_kabuli_chr06    | 4362850                        | [A/C]       | 1067299124                                 |
| Ca_Kabuli_NC_021165.1_4362860 | Ca_kabuli_chr06    | 4362860                        | [T/C]       | 1067299125                                 |
| Ca_Kabuli_NC_021165.1_4487606 | Ca_kabuli_chr06    | 4487606                        | [T/G]       | 1067299126                                 |
| Ca_Kabuli_NC_021165.1_4496565 | Ca_kabuli_chr06    | 4496565                        | [T/G]       | 1067299127                                 |
| Ca_Kabuli_NC_021165.1_4496725 | Ca_kabuli_chr06    | 4496725                        | [T/C]       | 1067299128                                 |
| Ca_Kabuli_NC_021165.1_4508927 | Ca_kabuli_chr06    | 4508927                        | [T/C]       | 1067299129                                 |
| Ca_Kabuli_NC_021165.1_4508962 | Ca_kabuli_chr06    | 4508962                        | [T/C]       | 1067299130                                 |
| Ca_Kabuli_NC_021165.1_4510074 | Ca_kabuli_chr06    | 4510074                        | [A/T]       | 1067299131                                 |
| Ca_Kabuli_NC_021165.1_4520531 | Ca_kabuli_chr06    | 4520531                        | [A/G]       | 1067299132                                 |
| Ca_Kabuli_NC_021165.1_4525125 | Ca_kabuli_chr06    | 4525125                        | [T/C]       | 1067299133                                 |
| Ca_Kabuli_NC_021165.1_4562151 | Ca_kabuli_chr06    | 4562151                        | [T/A]       | 1067299134                                 |
| Ca_Kabuli_NC_021165.1_4562172 | Ca_kabuli_chr06    | 4562172                        | [A/G]       | 1067299135                                 |
| Ca_Kabuli_NC_021165.1_4562174 | Ca_kabuli_chr06    | 4562174                        | [A/G]       | 1067299136                                 |

| <b>SNP IDs</b>                | <b>Chromosomes</b> | <b>Physical positions (bp)</b> | <b>SNPs</b> | <b>NCBI SNPdb accession IDs (NCBI_ss#)</b> |
|-------------------------------|--------------------|--------------------------------|-------------|--------------------------------------------|
| Ca_Kabuli_NC_021165.1_4562175 | Ca_kabuli_chr06    | 4562175                        | [G/A]       | 1067299137                                 |
| Ca_Kabuli_NC_021165.1_4562186 | Ca_kabuli_chr06    | 4562186                        | [G/A]       | 1067299138                                 |
| Ca_Kabuli_NC_021165.1_4576344 | Ca_kabuli_chr06    | 4576344                        | [A/C]       | 1067299139                                 |
| Ca_Kabuli_NC_021165.1_4576371 | Ca_kabuli_chr06    | 4576371                        | [T/G]       | 1067299140                                 |
| Ca_Kabuli_NC_021165.1_4593905 | Ca_kabuli_chr06    | 4593905                        | [T/A]       | 1067299141                                 |
| Ca_Kabuli_NC_021165.1_4593921 | Ca_kabuli_chr06    | 4593921                        | [T/A]       | 1067299142                                 |
| Ca_Kabuli_NC_021165.1_4593930 | Ca_kabuli_chr06    | 4593930                        | [T/G]       | 1067299143                                 |
| Ca_Kabuli_NC_021165.1_4658996 | Ca_kabuli_chr06    | 4658996                        | [T/G]       | 1067299144                                 |
| Ca_Kabuli_NC_021165.1_4659002 | Ca_kabuli_chr06    | 4659002                        | [C/T]       | 1067299145                                 |
| Ca_Kabuli_NC_021165.1_4659008 | Ca_kabuli_chr06    | 4659008                        | [G/T]       | 1067299146                                 |
| Ca_Kabuli_NC_021165.1_4678491 | Ca_kabuli_chr06    | 4678491                        | [T/C]       | 1067299147                                 |
| Ca_Kabuli_NC_021165.1_4678502 | Ca_kabuli_chr06    | 4678502                        | [A/G]       | 1067299148                                 |
| Ca_Kabuli_NC_021165.1_4678942 | Ca_kabuli_chr06    | 4678942                        | [T/G]       | 1067299149                                 |
| Ca_Kabuli_NC_021165.1_4678947 | Ca_kabuli_chr06    | 4678947                        | [T/G]       | 1067299150                                 |
| Ca_Kabuli_NC_021165.1_4726103 | Ca_kabuli_chr06    | 4726103                        | [A/C]       | 1067299151                                 |
| Ca_Kabuli_NC_021165.1_4804666 | Ca_kabuli_chr06    | 4804666                        | [T/C]       | 1067299152                                 |
| Ca_Kabuli_NC_021165.1_4807163 | Ca_kabuli_chr06    | 4807163                        | [T/C]       | 1067299153                                 |
| Ca_Kabuli_NC_021165.1_4807166 | Ca_kabuli_chr06    | 4807166                        | [T/G]       | 1067299154                                 |
| Ca_Kabuli_NC_021165.1_4807194 | Ca_kabuli_chr06    | 4807194                        | [T/A]       | 1067299155                                 |
| Ca_Kabuli_NC_021165.1_4807215 | Ca_kabuli_chr06    | 4807215                        | [A/G]       | 1067299156                                 |
| Ca_Kabuli_NC_021165.1_4898411 | Ca_kabuli_chr06    | 4898411                        | [T/G]       | 1067299157                                 |
| Ca_Kabuli_NC_021165.1_4979994 | Ca_kabuli_chr06    | 4979994                        | [T/G]       | 1067299158                                 |
| Ca_Kabuli_NC_021165.1_4980479 | Ca_kabuli_chr06    | 4980479                        | [T/C]       | 1067299159                                 |
| Ca_Kabuli_NC_021165.1_4980518 | Ca_kabuli_chr06    | 4980518                        | [A/G]       | 1067299160                                 |
| Ca_Kabuli_NC_021165.1_4994824 | Ca_kabuli_chr06    | 4994824                        | [A/C]       | 1067299161                                 |
| Ca_Kabuli_NC_021165.1_4994825 | Ca_kabuli_chr06    | 4994825                        | [T/G]       | 1067299162                                 |
| Ca_Kabuli_NC_021165.1_4994827 | Ca_kabuli_chr06    | 4994827                        | [A/T]       | 1067299163                                 |
| Ca_Kabuli_NC_021165.1_4994828 | Ca_kabuli_chr06    | 4994828                        | [T/C]       | 1067299164                                 |
| Ca_Kabuli_NC_021165.1_4994829 | Ca_kabuli_chr06    | 4994829                        | [G/T]       | 1067299165                                 |
| Ca_Kabuli_NC_021165.1_4994876 | Ca_kabuli_chr06    | 4994876                        | [T/A]       | 1067299166                                 |
| Ca_Kabuli_NC_021165.1_4996586 | Ca_kabuli_chr06    | 4996586                        | [T/C]       | 1067299167                                 |
| Ca_Kabuli_NC_021165.1_5024302 | Ca_kabuli_chr06    | 5024302                        | [G/T]       | 1067299168                                 |
| Ca_Kabuli_NC_021165.1_5185380 | Ca_kabuli_chr06    | 5185380                        | [A/G]       | 1067299169                                 |
| Ca_Kabuli_NC_021165.1_5189488 | Ca_kabuli_chr06    | 5189488                        | [A/G]       | 1067299170                                 |

| <b>SNP IDs</b>                | <b>Chromosomes</b> | <b>Physical positions (bp)</b> | <b>SNPs</b> | <b>NCBI SNPdb accession IDs (NCBI_ss#)</b> |
|-------------------------------|--------------------|--------------------------------|-------------|--------------------------------------------|
| Ca_Kabuli_NC_021165.1_5189493 | Ca_kabuli_chr06    | 5189493                        | [A/C]       | 1067299171                                 |
| Ca_Kabuli_NC_021165.1_5338765 | Ca_kabuli_chr06    | 5338765                        | [T/C]       | 1067299172                                 |
| Ca_Kabuli_NC_021165.1_5341298 | Ca_kabuli_chr06    | 5341298                        | [T/C]       | 1067299173                                 |
| Ca_Kabuli_NC_021165.1_5341300 | Ca_kabuli_chr06    | 5341300                        | [A/C]       | 1067299174                                 |
| Ca_Kabuli_NC_021165.1_5341307 | Ca_kabuli_chr06    | 5341307                        | [T/G]       | 1067299175                                 |
| Ca_Kabuli_NC_021165.1_5366182 | Ca_kabuli_chr06    | 5366182                        | [A/C]       | 1067299176                                 |
| Ca_Kabuli_NC_021165.1_5392089 | Ca_kabuli_chr06    | 5392089                        | [T/G]       | 1067299177                                 |
| Ca_Kabuli_NC_021165.1_5392115 | Ca_kabuli_chr06    | 5392115                        | [A/G]       | 1067299178                                 |
| Ca_Kabuli_NC_021165.1_5392208 | Ca_kabuli_chr06    | 5392208                        | [T/G]       | 1067299179                                 |
| Ca_Kabuli_NC_021165.1_5396422 | Ca_kabuli_chr06    | 5396422                        | [A/G]       | 1067299180                                 |
| Ca_Kabuli_NC_021165.1_5396432 | Ca_kabuli_chr06    | 5396432                        | [T/G]       | 1067299181                                 |
| Ca_Kabuli_NC_021165.1_5396461 | Ca_kabuli_chr06    | 5396461                        | [T/A]       | 1067299182                                 |
| Ca_Kabuli_NC_021165.1_5396481 | Ca_kabuli_chr06    | 5396481                        | [T/A]       | 1067299183                                 |
| Ca_Kabuli_NC_021165.1_5396888 | Ca_kabuli_chr06    | 5396888                        | [T/G]       | 1067299184                                 |
| Ca_Kabuli_NC_021165.1_5396890 | Ca_kabuli_chr06    | 5396890                        | [T/G]       | 1067299185                                 |
| Ca_Kabuli_NC_021165.1_5396905 | Ca_kabuli_chr06    | 5396905                        | [C/T]       | 1067299186                                 |
| Ca_Kabuli_NC_021165.1_5401573 | Ca_kabuli_chr06    | 5401573                        | [A/C]       | 1067299187                                 |
| Ca_Kabuli_NC_021165.1_5401607 | Ca_kabuli_chr06    | 5401607                        | [T/G]       | 1067299188                                 |
| Ca_Kabuli_NC_021165.1_5401618 | Ca_kabuli_chr06    | 5401618                        | [A/G]       | 1067299189                                 |
| Ca_Kabuli_NC_021165.1_5492542 | Ca_kabuli_chr06    | 5492542                        | [A/C]       | 1067299190                                 |
| Ca_Kabuli_NC_021165.1_5492552 | Ca_kabuli_chr06    | 5492552                        | [A/T]       | 1067299191                                 |
| Ca_Kabuli_NC_021165.1_5497981 | Ca_kabuli_chr06    | 5497981                        | [G/A]       | 1067299192                                 |
| Ca_Kabuli_NC_021165.1_5497982 | Ca_kabuli_chr06    | 5497982                        | [A/T]       | 1067299193                                 |
| Ca_Kabuli_NC_021165.1_5497983 | Ca_kabuli_chr06    | 5497983                        | [A/C]       | 1067299194                                 |
| Ca_Kabuli_NC_021165.1_5497984 | Ca_kabuli_chr06    | 5497984                        | [G/T]       | 1067299195                                 |
| Ca_Kabuli_NC_021165.1_5498794 | Ca_kabuli_chr06    | 5498794                        | [T/A]       | 1067299196                                 |
| Ca_Kabuli_NC_021165.1_5498820 | Ca_kabuli_chr06    | 5498820                        | [A/G]       | 1067299197                                 |
| Ca_Kabuli_NC_021165.1_5498831 | Ca_kabuli_chr06    | 5498831                        | [T/G]       | 1067299198                                 |
| Ca_Kabuli_NC_021165.1_5498896 | Ca_kabuli_chr06    | 5498896                        | [A/C]       | 1067299199                                 |
| Ca_Kabuli_NC_021165.1_5508581 | Ca_kabuli_chr06    | 5508581                        | [A/C]       | 1067299200                                 |
| Ca_Kabuli_NC_021165.1_5508582 | Ca_kabuli_chr06    | 5508582                        | [G/T]       | 1067299201                                 |
| Ca_Kabuli_NC_021165.1_5508583 | Ca_kabuli_chr06    | 5508583                        | [A/C]       | 1067299202                                 |
| Ca_Kabuli_NC_021165.1_5508586 | Ca_kabuli_chr06    | 5508586                        | [G/T]       | 1067299203                                 |
| Ca_Kabuli_NC_021165.1_5533491 | Ca_kabuli_chr06    | 5533491                        | [T/G]       | 1067299204                                 |

| <b>SNP IDs</b>                | <b>Chromosomes</b> | <b>Physical positions (bp)</b> | <b>SNPs</b> | <b>NCBI SNPdb accession IDs (NCBI_ss#)</b> |
|-------------------------------|--------------------|--------------------------------|-------------|--------------------------------------------|
| Ca_Kabuli_NC_021165.1_5534436 | Ca_kabuli_chr06    | 5534436                        | [A/C]       | 1067299205                                 |
| Ca_Kabuli_NC_021165.1_5566408 | Ca_kabuli_chr06    | 5566408                        | [A/G]       | 1067299206                                 |
| Ca_Kabuli_NC_021165.1_5566434 | Ca_kabuli_chr06    | 5566434                        | [A/G]       | 1067299207                                 |
| Ca_Kabuli_NC_021165.1_5566468 | Ca_kabuli_chr06    | 5566468                        | [A/G]       | 1067299208                                 |
| Ca_Kabuli_NC_021165.1_5566480 | Ca_kabuli_chr06    | 5566480                        | [T/C]       | 1067299209                                 |
| Ca_Kabuli_NC_021165.1_5567391 | Ca_kabuli_chr06    | 5567391                        | [A/G]       | 1067299210                                 |
| Ca_Kabuli_NC_021165.1_5567393 | Ca_kabuli_chr06    | 5567393                        | [A/G]       | 1067299211                                 |
| Ca_Kabuli_NC_021165.1_5567396 | Ca_kabuli_chr06    | 5567396                        | [T/G]       | 1067299212                                 |
| Ca_Kabuli_NC_021165.1_5567688 | Ca_kabuli_chr06    | 5567688                        | [T/G]       | 1067299213                                 |
| Ca_Kabuli_NC_021165.1_5590003 | Ca_kabuli_chr06    | 5590003                        | [T/C]       | 1067299214                                 |
| Ca_Kabuli_NC_021165.1_5590085 | Ca_kabuli_chr06    | 5590085                        | [A/G]       | 1067299215                                 |
| Ca_Kabuli_NC_021165.1_5628956 | Ca_kabuli_chr06    | 5628956                        | [T/G]       | 1067299216                                 |
| Ca_Kabuli_NC_021165.1_5694428 | Ca_kabuli_chr06    | 5694428                        | [T/G]       | 1067299217                                 |
| Ca_Kabuli_NC_021165.1_5702553 | Ca_kabuli_chr06    | 5702553                        | [A/C]       | 1067299218                                 |
| Ca_Kabuli_NC_021165.1_5702554 | Ca_kabuli_chr06    | 5702554                        | [C/A]       | 1067299219                                 |
| Ca_Kabuli_NC_021165.1_5725111 | Ca_kabuli_chr06    | 5725111                        | [A/C]       | 1067299220                                 |
| Ca_Kabuli_NC_021165.1_5745485 | Ca_kabuli_chr06    | 5745485                        | [T/A]       | 1067299221                                 |
| Ca_Kabuli_NC_021165.1_5745495 | Ca_kabuli_chr06    | 5745495                        | [A/C]       | 1067299222                                 |
| Ca_Kabuli_NC_021165.1_5745527 | Ca_kabuli_chr06    | 5745527                        | [T/C]       | 1067299223                                 |
| Ca_Kabuli_NC_021165.1_5871503 | Ca_kabuli_chr06    | 5871503                        | [C/A]       | 1067299224                                 |
| Ca_Kabuli_NC_021165.1_6028793 | Ca_kabuli_chr06    | 6028793                        | [T/G]       | 1067299225                                 |
| Ca_Kabuli_NC_021165.1_6028806 | Ca_kabuli_chr06    | 6028806                        | [A/C]       | 1067299226                                 |
| Ca_Kabuli_NC_021165.1_6028837 | Ca_kabuli_chr06    | 6028837                        | [A/T]       | 1067299227                                 |
| Ca_Kabuli_NC_021165.1_6092493 | Ca_kabuli_chr06    | 6092493                        | [A/C]       | 1067299228                                 |
| Ca_Kabuli_NC_021165.1_6119560 | Ca_kabuli_chr06    | 6119560                        | [A/G]       | 1067299229                                 |
| Ca_Kabuli_NC_021165.1_6169085 | Ca_kabuli_chr06    | 6169085                        | [T/C]       | 1067299230                                 |
| Ca_Kabuli_NC_021165.1_6227880 | Ca_kabuli_chr06    | 6227880                        | [T/G]       | 1067299231                                 |
| Ca_Kabuli_NC_021165.1_6240817 | Ca_kabuli_chr06    | 6240817                        | [T/G]       | 1067299232                                 |
| Ca_Kabuli_NC_021165.1_6248218 | Ca_kabuli_chr06    | 6248218                        | [G/A]       | 1067299233                                 |
| Ca_Kabuli_NC_021165.1_6248221 | Ca_kabuli_chr06    | 6248221                        | [T/A]       | 1067299234                                 |
| Ca_Kabuli_NC_021165.1_6259498 | Ca_kabuli_chr06    | 6259498                        | [T/G]       | 1067299235                                 |
| Ca_Kabuli_NC_021165.1_6260546 | Ca_kabuli_chr06    | 6260546                        | [T/C]       | 1067299236                                 |
| Ca_Kabuli_NC_021165.1_6444243 | Ca_kabuli_chr06    | 6444243                        | [G/A]       | 1067299237                                 |
| Ca_Kabuli_NC_021165.1_6444250 | Ca_kabuli_chr06    | 6444250                        | [G/A]       | 1067299238                                 |

| <b>SNP IDs</b>                | <b>Chromosomes</b> | <b>Physical positions (bp)</b> | <b>SNPs</b> | <b>NCBI SNPdb accession IDs (NCBI_ss#)</b> |
|-------------------------------|--------------------|--------------------------------|-------------|--------------------------------------------|
| Ca_Kabuli_NC_021165.1_6517785 | Ca_kabuli_chr06    | 6517785                        | [T/C]       | 1067299239                                 |
| Ca_Kabuli_NC_021165.1_6538136 | Ca_kabuli_chr06    | 6538136                        | [T/C]       | 1067299240                                 |
| Ca_Kabuli_NC_021165.1_6538159 | Ca_kabuli_chr06    | 6538159                        | [A/T]       | 1067299241                                 |
| Ca_Kabuli_NC_021165.1_6604682 | Ca_kabuli_chr06    | 6604682                        | [A/G]       | 1067299242                                 |
| Ca_Kabuli_NC_021165.1_6604812 | Ca_kabuli_chr06    | 6604812                        | [T/C]       | 1067299243                                 |
| Ca_Kabuli_NC_021165.1_6604850 | Ca_kabuli_chr06    | 6604850                        | [T/G]       | 1067299244                                 |
| Ca_Kabuli_NC_021165.1_6607771 | Ca_kabuli_chr06    | 6607771                        | [T/C]       | 1067299245                                 |
| Ca_Kabuli_NC_021165.1_6607781 | Ca_kabuli_chr06    | 6607781                        | [A/G]       | 1067299246                                 |
| Ca_Kabuli_NC_021165.1_6607784 | Ca_kabuli_chr06    | 6607784                        | [A/G]       | 1067299247                                 |
| Ca_Kabuli_NC_021165.1_6607809 | Ca_kabuli_chr06    | 6607809                        | [T/C]       | 1067299248                                 |
| Ca_Kabuli_NC_021165.1_6607829 | Ca_kabuli_chr06    | 6607829                        | [T/C]       | 1067299249                                 |
| Ca_Kabuli_NC_021165.1_6607831 | Ca_kabuli_chr06    | 6607831                        | [A/G]       | 1067299250                                 |
| Ca_Kabuli_NC_021165.1_6617106 | Ca_kabuli_chr06    | 6617106                        | [T/C]       | 1067299251                                 |
| Ca_Kabuli_NC_021165.1_6631245 | Ca_kabuli_chr06    | 6631245                        | [A/G]       | 1067299252                                 |
| Ca_Kabuli_NC_021165.1_6654880 | Ca_kabuli_chr06    | 6654880                        | [T/G]       | 1067299253                                 |
| Ca_Kabuli_NC_021165.1_6654975 | Ca_kabuli_chr06    | 6654975                        | [A/T]       | 1067299254                                 |
| Ca_Kabuli_NC_021165.1_6654977 | Ca_kabuli_chr06    | 6654977                        | [A/C]       | 1067299255                                 |
| Ca_Kabuli_NC_021165.1_6684780 | Ca_kabuli_chr06    | 6684780                        | [T/C]       | 1067299256                                 |
| Ca_Kabuli_NC_021165.1_6684814 | Ca_kabuli_chr06    | 6684814                        | [T/C]       | 1067299257                                 |
| Ca_Kabuli_NC_021165.1_6778820 | Ca_kabuli_chr06    | 6778820                        | [T/G]       | 1067299258                                 |
| Ca_Kabuli_NC_021165.1_6779173 | Ca_kabuli_chr06    | 6779173                        | [A/G]       | 1067299259                                 |
| Ca_Kabuli_NC_021165.1_6802386 | Ca_kabuli_chr06    | 6802386                        | [T/G]       | 1067299260                                 |
| Ca_Kabuli_NC_021165.1_6803494 | Ca_kabuli_chr06    | 6803494                        | [A/G]       | 1067299261                                 |
| Ca_Kabuli_NC_021165.1_6814989 | Ca_kabuli_chr06    | 6814989                        | [T/A]       | 1067299262                                 |
| Ca_Kabuli_NC_021165.1_6815001 | Ca_kabuli_chr06    | 6815001                        | [T/G]       | 1067299263                                 |
| Ca_Kabuli_NC_021165.1_6815006 | Ca_kabuli_chr06    | 6815006                        | [G/T]       | 1067299264                                 |
| Ca_Kabuli_NC_021165.1_6817431 | Ca_kabuli_chr06    | 6817431                        | [A/C]       | 1067299265                                 |
| Ca_Kabuli_NC_021165.1_6817441 | Ca_kabuli_chr06    | 6817441                        | [A/C]       | 1067299266                                 |
| Ca_Kabuli_NC_021165.1_6876986 | Ca_kabuli_chr06    | 6876986                        | [T/C]       | 1067299267                                 |
| Ca_Kabuli_NC_021165.1_6877248 | Ca_kabuli_chr06    | 6877248                        | [A/T]       | 1067299268                                 |
| Ca_Kabuli_NC_021165.1_6877291 | Ca_kabuli_chr06    | 6877291                        | [A/T]       | 1067299269                                 |
| Ca_Kabuli_NC_021165.1_6877419 | Ca_kabuli_chr06    | 6877419                        | [A/G]       | 1067299270                                 |
| Ca_Kabuli_NC_021165.1_6905533 | Ca_kabuli_chr06    | 6905533                        | [A/C]       | 1067299271                                 |
| Ca_Kabuli_NC_021165.1_6905578 | Ca_kabuli_chr06    | 6905578                        | [A/T]       | 1067299272                                 |

| <b>SNP IDs</b>                | <b>Chromosomes</b> | <b>Physical positions (bp)</b> | <b>SNPs</b> | <b>NCBI SNPdb accession IDs (NCBI_ss#)</b> |
|-------------------------------|--------------------|--------------------------------|-------------|--------------------------------------------|
| Ca_Kabuli_NC_021165.1_6905583 | Ca_kabuli_chr06    | 6905583                        | [T/C]       | 1067299273                                 |
| Ca_Kabuli_NC_021165.1_6913622 | Ca_kabuli_chr06    | 6913622                        | [A/C]       | 1067299274                                 |
| Ca_Kabuli_NC_021165.1_6933439 | Ca_kabuli_chr06    | 6933439                        | [A/C]       | 1067299275                                 |
| Ca_Kabuli_NC_021165.1_6933440 | Ca_kabuli_chr06    | 6933440                        | [G/T]       | 1067299276                                 |
| Ca_Kabuli_NC_021165.1_7034418 | Ca_kabuli_chr06    | 7034418                        | [A/T]       | 1067299277                                 |
| Ca_Kabuli_NC_021165.1_7040294 | Ca_kabuli_chr06    | 7040294                        | [A/T]       | 1067299278                                 |
| Ca_Kabuli_NC_021165.1_7054087 | Ca_kabuli_chr06    | 7054087                        | [T/G]       | 1067299279                                 |
| Ca_Kabuli_NC_021165.1_7054098 | Ca_kabuli_chr06    | 7054098                        | [A/C]       | 1067299280                                 |
| Ca_Kabuli_NC_021165.1_7054111 | Ca_kabuli_chr06    | 7054111                        | [A/G]       | 1067299281                                 |
| Ca_Kabuli_NC_021165.1_7126660 | Ca_kabuli_chr06    | 7126660                        | [A/G]       | 1067299282                                 |
| Ca_Kabuli_NC_021165.1_7138432 | Ca_kabuli_chr06    | 7138432                        | [T/G]       | 1067299283                                 |
| Ca_Kabuli_NC_021165.1_7185677 | Ca_kabuli_chr06    | 7185677                        | [A/C]       | 1067299284                                 |
| Ca_Kabuli_NC_021165.1_7187867 | Ca_kabuli_chr06    | 7187867                        | [C/T]       | 1067299285                                 |
| Ca_Kabuli_NC_021165.1_7262413 | Ca_kabuli_chr06    | 7262413                        | [A/T]       | 1067299286                                 |
| Ca_Kabuli_NC_021165.1_7262414 | Ca_kabuli_chr06    | 7262414                        | [T/C]       | 1067299287                                 |
| Ca_Kabuli_NC_021165.1_7349517 | Ca_kabuli_chr06    | 7349517                        | [A/C]       | 1067299288                                 |
| Ca_Kabuli_NC_021165.1_7414196 | Ca_kabuli_chr06    | 7414196                        | [T/G]       | 1067299289                                 |
| Ca_Kabuli_NC_021165.1_7414302 | Ca_kabuli_chr06    | 7414302                        | [A/G]       | 1067299290                                 |
| Ca_Kabuli_NC_021165.1_7532384 | Ca_kabuli_chr06    | 7532384                        | [A/G]       | 1067299291                                 |
| Ca_Kabuli_NC_021165.1_7559211 | Ca_kabuli_chr06    | 7559211                        | [A/G]       | 1067299292                                 |
| Ca_Kabuli_NC_021165.1_7575124 | Ca_kabuli_chr06    | 7575124                        | [T/C]       | 1067299293                                 |
| Ca_Kabuli_NC_021165.1_7576773 | Ca_kabuli_chr06    | 7576773                        | [T/G]       | 1067299294                                 |
| Ca_Kabuli_NC_021165.1_7581799 | Ca_kabuli_chr06    | 7581799                        | [C/T]       | 1067299295                                 |
| Ca_Kabuli_NC_021165.1_7581956 | Ca_kabuli_chr06    | 7581956                        | [C/G]       | 1067299296                                 |
| Ca_Kabuli_NC_021165.1_7582726 | Ca_kabuli_chr06    | 7582726                        | [G/T]       | 1067299297                                 |
| Ca_Kabuli_NC_021165.1_7609380 | Ca_kabuli_chr06    | 7609380                        | [G/A]       | 1067299298                                 |
| Ca_Kabuli_NC_021165.1_7609573 | Ca_kabuli_chr06    | 7609573                        | [A/G]       | 1067299299                                 |
| Ca_Kabuli_NC_021165.1_7618280 | Ca_kabuli_chr06    | 7618280                        | [A/C]       | 1067299300                                 |
| Ca_Kabuli_NC_021165.1_7630374 | Ca_kabuli_chr06    | 7630374                        | [G/C]       | 1067299301                                 |
| Ca_Kabuli_NC_021165.1_7647916 | Ca_kabuli_chr06    | 7647916                        | [T/G]       | 1067299302                                 |
| Ca_Kabuli_NC_021165.1_7661924 | Ca_kabuli_chr06    | 7661924                        | [C/T]       | 1067299303                                 |
| Ca_Kabuli_NC_021165.1_7661930 | Ca_kabuli_chr06    | 7661930                        | [G/T]       | 1067299304                                 |
| Ca_Kabuli_NC_021165.1_7667301 | Ca_kabuli_chr06    | 7667301                        | [T/C]       | 1067299305                                 |
| Ca_Kabuli_NC_021165.1_7667328 | Ca_kabuli_chr06    | 7667328                        | [A/T]       | 1067299306                                 |

| <b>SNP IDs</b>                | <b>Chromosomes</b> | <b>Physical positions (bp)</b> | <b>SNPs</b> | <b>NCBI SNPdb accession IDs (NCBI_ss#)</b> |
|-------------------------------|--------------------|--------------------------------|-------------|--------------------------------------------|
| Ca_Kabuli_NC_021165.1_7694594 | Ca_kabuli_chr06    | 7694594                        | [G/T]       | 1067299307                                 |
| Ca_Kabuli_NC_021165.1_7694597 | Ca_kabuli_chr06    | 7694597                        | [T/C]       | 1067299308                                 |
| Ca_Kabuli_NC_021165.1_7694599 | Ca_kabuli_chr06    | 7694599                        | [T/C]       | 1067299309                                 |
| Ca_Kabuli_NC_021165.1_7719829 | Ca_kabuli_chr06    | 7719829                        | [C/T]       | 1067299310                                 |
| Ca_Kabuli_NC_021165.1_7719857 | Ca_kabuli_chr06    | 7719857                        | [G/T]       | 1067299311                                 |
| Ca_Kabuli_NC_021165.1_7719877 | Ca_kabuli_chr06    | 7719877                        | [T/C]       | 1067299312                                 |
| Ca_Kabuli_NC_021165.1_7744730 | Ca_kabuli_chr06    | 7744730                        | [G/A]       | 1067299313                                 |
| Ca_Kabuli_NC_021165.1_7745344 | Ca_kabuli_chr06    | 7745344                        | [T/A]       | 1067299314                                 |
| Ca_Kabuli_NC_021165.1_7745377 | Ca_kabuli_chr06    | 7745377                        | [C/T]       | 1067299315                                 |
| Ca_Kabuli_NC_021165.1_7745923 | Ca_kabuli_chr06    | 7745923                        | [T/A]       | 1067299316                                 |
| Ca_Kabuli_NC_021165.1_7745942 | Ca_kabuli_chr06    | 7745942                        | [T/G]       | 1067299317                                 |
| Ca_Kabuli_NC_021165.1_7747254 | Ca_kabuli_chr06    | 7747254                        | [A/G]       | 1067299318                                 |
| Ca_Kabuli_NC_021165.1_7753341 | Ca_kabuli_chr06    | 7753341                        | [T/A]       | 1067299319                                 |
| Ca_Kabuli_NC_021165.1_7765050 | Ca_kabuli_chr06    | 7765050                        | [T/C]       | 1067299320                                 |
| Ca_Kabuli_NC_021165.1_7765068 | Ca_kabuli_chr06    | 7765068                        | [A/C]       | 1067299321                                 |
| Ca_Kabuli_NC_021165.1_7765091 | Ca_kabuli_chr06    | 7765091                        | [A/G]       | 1067299322                                 |
| Ca_Kabuli_NC_021165.1_7770357 | Ca_kabuli_chr06    | 7770357                        | [C/T]       | 1067299323                                 |
| Ca_Kabuli_NC_021165.1_7810893 | Ca_kabuli_chr06    | 7810893                        | [A/G]       | 1067299324                                 |
| Ca_Kabuli_NC_021165.1_7810902 | Ca_kabuli_chr06    | 7810902                        | [A/G]       | 1067299325                                 |
| Ca_Kabuli_NC_021165.1_7810923 | Ca_kabuli_chr06    | 7810923                        | [T/C]       | 1067299326                                 |
| Ca_Kabuli_NC_021165.1_7819313 | Ca_kabuli_chr06    | 7819313                        | [C/G]       | 1067299327                                 |
| Ca_Kabuli_NC_021165.1_7819348 | Ca_kabuli_chr06    | 7819348                        | [C/T]       | 1067299328                                 |
| Ca_Kabuli_NC_021165.1_7820481 | Ca_kabuli_chr06    | 7820481                        | [C/T]       | 1067299329                                 |
| Ca_Kabuli_NC_021165.1_7820807 | Ca_kabuli_chr06    | 7820807                        | [A/G]       | 1067299330                                 |
| Ca_Kabuli_NC_021165.1_7829272 | Ca_kabuli_chr06    | 7829272                        | [T/C]       | 1067299331                                 |
| Ca_Kabuli_NC_021165.1_7829471 | Ca_kabuli_chr06    | 7829471                        | [C/A]       | 1067299332                                 |
| Ca_Kabuli_NC_021165.1_7829472 | Ca_kabuli_chr06    | 7829472                        | [A/T]       | 1067299333                                 |
| Ca_Kabuli_NC_021165.1_7829473 | Ca_kabuli_chr06    | 7829473                        | [A/C]       | 1067299334                                 |
| Ca_Kabuli_NC_021165.1_7829474 | Ca_kabuli_chr06    | 7829474                        | [G/T]       | 1067299335                                 |
| Ca_Kabuli_NC_021165.1_7829485 | Ca_kabuli_chr06    | 7829485                        | [G/A]       | 1067299336                                 |
| Ca_Kabuli_NC_021165.1_7829577 | Ca_kabuli_chr06    | 7829577                        | [T/G]       | 1067299337                                 |
| Ca_Kabuli_NC_021165.1_7829627 | Ca_kabuli_chr06    | 7829627                        | [T/G]       | 1067299338                                 |
| Ca_Kabuli_NC_021165.1_7831123 | Ca_kabuli_chr06    | 7831123                        | [T/G]       | 1067299339                                 |
| Ca_Kabuli_NC_021165.1_7831334 | Ca_kabuli_chr06    | 7831334                        | [T/C]       | 1067299340                                 |

| <b>SNP IDs</b>                | <b>Chromosomes</b> | <b>Physical positions (bp)</b> | <b>SNPs</b> | <b>NCBI SNPdb accession IDs (NCBI_ss#)</b> |
|-------------------------------|--------------------|--------------------------------|-------------|--------------------------------------------|
| Ca_Kabuli_NC_021165.1_7831409 | Ca_kabuli_chr06    | 7831409                        | [C/T]       | 1067299341                                 |
| Ca_Kabuli_NC_021165.1_7831874 | Ca_kabuli_chr06    | 7831874                        | [A/G]       | 1067299342                                 |
| Ca_Kabuli_NC_021165.1_7831899 | Ca_kabuli_chr06    | 7831899                        | [A/G]       | 1067299343                                 |
| Ca_Kabuli_NC_021165.1_7832023 | Ca_kabuli_chr06    | 7832023                        | [C/T]       | 1067299344                                 |
| Ca_Kabuli_NC_021165.1_7832029 | Ca_kabuli_chr06    | 7832029                        | [C/T]       | 1067299345                                 |
| Ca_Kabuli_NC_021165.1_7834154 | Ca_kabuli_chr06    | 7834154                        | [T/A]       | 1067299346                                 |
| Ca_Kabuli_NC_021165.1_7834595 | Ca_kabuli_chr06    | 7834595                        | [C/T]       | 1067299347                                 |
| Ca_Kabuli_NC_021165.1_7834866 | Ca_kabuli_chr06    | 7834866                        | [T/G]       | 1067299348                                 |
| Ca_Kabuli_NC_021165.1_7834895 | Ca_kabuli_chr06    | 7834895                        | [G/T]       | 1067299349                                 |
| Ca_Kabuli_NC_021165.1_7834922 | Ca_kabuli_chr06    | 7834922                        | [A/G]       | 1067299350                                 |
| Ca_Kabuli_NC_021165.1_7835024 | Ca_kabuli_chr06    | 7835024                        | [T/A]       | 1067299351                                 |
| Ca_Kabuli_NC_021165.1_7835510 | Ca_kabuli_chr06    | 7835510                        | [G/A]       | 1067299352                                 |
| Ca_Kabuli_NC_021165.1_7835619 | Ca_kabuli_chr06    | 7835619                        | [C/A]       | 1067299353                                 |
| Ca_Kabuli_NC_021165.1_7835620 | Ca_kabuli_chr06    | 7835620                        | [A/G]       | 1067299354                                 |
| Ca_Kabuli_NC_021165.1_7835759 | Ca_kabuli_chr06    | 7835759                        | [A/G]       | 1067299355                                 |
| Ca_Kabuli_NC_021165.1_7835984 | Ca_kabuli_chr06    | 7835984                        | [T/A]       | 1067299356                                 |
| Ca_Kabuli_NC_021165.1_7836879 | Ca_kabuli_chr06    | 7836879                        | [T/C]       | 1067299357                                 |
| Ca_Kabuli_NC_021165.1_7846231 | Ca_kabuli_chr06    | 7846231                        | [T/G]       | 1067299358                                 |
| Ca_Kabuli_NC_021165.1_7846335 | Ca_kabuli_chr06    | 7846335                        | [C/G]       | 1067299359                                 |
| Ca_Kabuli_NC_021165.1_7849200 | Ca_kabuli_chr06    | 7849200                        | [T/C]       | 1067299360                                 |
| Ca_Kabuli_NC_021165.1_7851000 | Ca_kabuli_chr06    | 7851000                        | [C/G]       | 1067299361                                 |
| Ca_Kabuli_NC_021165.1_7851697 | Ca_kabuli_chr06    | 7851697                        | [T/G]       | 1067299362                                 |
| Ca_Kabuli_NC_021165.1_7852481 | Ca_kabuli_chr06    | 7852481                        | [G/A]       | 1067299363                                 |
| Ca_Kabuli_NC_021165.1_7876049 | Ca_kabuli_chr06    | 7876049                        | [A/C]       | 1067299364                                 |
| Ca_Kabuli_NC_021165.1_7878258 | Ca_kabuli_chr06    | 7878258                        | [T/C]       | 1067299365                                 |
| Ca_Kabuli_NC_021165.1_7879124 | Ca_kabuli_chr06    | 7879124                        | [A/C]       | 1067299366                                 |
| Ca_Kabuli_NC_021165.1_7879153 | Ca_kabuli_chr06    | 7879153                        | [A/C]       | 1067299367                                 |
| Ca_Kabuli_NC_021165.1_7879165 | Ca_kabuli_chr06    | 7879165                        | [A/G]       | 1067299368                                 |
| Ca_Kabuli_NC_021165.1_7879171 | Ca_kabuli_chr06    | 7879171                        | [T/A]       | 1067299369                                 |
| Ca_Kabuli_NC_021165.1_7884965 | Ca_kabuli_chr06    | 7884965                        | [G/C]       | 1067299370                                 |
| Ca_Kabuli_NC_021165.1_7926416 | Ca_kabuli_chr06    | 7926416                        | [C/A]       | 1067299371                                 |
| Ca_Kabuli_NC_021165.1_7926482 | Ca_kabuli_chr06    | 7926482                        | [T/C]       | 1067299372                                 |
| Ca_Kabuli_NC_021165.1_7926534 | Ca_kabuli_chr06    | 7926534                        | [G/A]       | 1067299373                                 |
| Ca_Kabuli_NC_021165.1_7928743 | Ca_kabuli_chr06    | 7928743                        | [C/T]       | 1067299374                                 |



| <b>SNP IDs</b>                | <b>Chromosomes</b> | <b>Physical positions (bp)</b> | <b>SNPs</b> | <b>NCBI SNPdb accession IDs (NCBI_ss#)</b> |
|-------------------------------|--------------------|--------------------------------|-------------|--------------------------------------------|
| Ca_Kabuli_NC_021165.1_7929080 | Ca_kabuli_chr06    | 7929080                        | [G/A]       | 1067299375                                 |
| Ca_Kabuli_NC_021165.1_7929238 | Ca_kabuli_chr06    | 7929238                        | [T/G]       | 1067299376                                 |
| Ca_Kabuli_NC_021165.1_7929338 | Ca_kabuli_chr06    | 7929338                        | [C/T]       | 1067299377                                 |
| Ca_Kabuli_NC_021165.1_7929339 | Ca_kabuli_chr06    | 7929339                        | [A/G]       | 1067299378                                 |
| Ca_Kabuli_NC_021165.1_7929348 | Ca_kabuli_chr06    | 7929348                        | [T/C]       | 1067299379                                 |
| Ca_Kabuli_NC_021165.1_7929607 | Ca_kabuli_chr06    | 7929607                        | [A/C]       | 1067299380                                 |
| Ca_Kabuli_NC_021165.1_7929628 | Ca_kabuli_chr06    | 7929628                        | [C/T]       | 1067299381                                 |
| Ca_Kabuli_NC_021165.1_7929647 | Ca_kabuli_chr06    | 7929647                        | [C/A]       | 1067299382                                 |
| Ca_Kabuli_NC_021165.1_7939281 | Ca_kabuli_chr06    | 7939281                        | [T/G]       | 1067299383                                 |
| Ca_Kabuli_NC_021165.1_7943491 | Ca_kabuli_chr06    | 7943491                        | [T/G]       | 1067299384                                 |
| Ca_Kabuli_NC_021165.1_7961572 | Ca_kabuli_chr06    | 7961572                        | [T/C]       | 1067299385                                 |
| Ca_Kabuli_NC_021165.1_7961598 | Ca_kabuli_chr06    | 7961598                        | [T/C]       | 1067299386                                 |
| Ca_Kabuli_NC_021165.1_7994732 | Ca_kabuli_chr06    | 7994732                        | [G/T]       | 1067299387                                 |
| Ca_Kabuli_NC_021165.1_8006682 | Ca_kabuli_chr06    | 8006682                        | [C/T]       | 1067299388                                 |
| Ca_Kabuli_NC_021165.1_8006701 | Ca_kabuli_chr06    | 8006701                        | [A/T]       | 1067299389                                 |
| Ca_Kabuli_NC_021165.1_8006721 | Ca_kabuli_chr06    | 8006721                        | [A/T]       | 1067299390                                 |
| Ca_Kabuli_NC_021165.1_8011735 | Ca_kabuli_chr06    | 8011735                        | [T/C]       | 1067299391                                 |
| Ca_Kabuli_NC_021165.1_8028646 | Ca_kabuli_chr06    | 8028646                        | [C/T]       | 1067299392                                 |
| Ca_Kabuli_NC_021165.1_8029210 | Ca_kabuli_chr06    | 8029210                        | [T/A]       | 1067299393                                 |
| Ca_Kabuli_NC_021165.1_8029226 | Ca_kabuli_chr06    | 8029226                        | [C/T]       | 1067299394                                 |
| Ca_Kabuli_NC_021165.1_8029310 | Ca_kabuli_chr06    | 8029310                        | [G/C]       | 1067299395                                 |
| Ca_Kabuli_NC_021165.1_8052624 | Ca_kabuli_chr06    | 8052624                        | [G/C]       | 1067299396                                 |
| Ca_Kabuli_NC_021165.1_8070427 | Ca_kabuli_chr06    | 8070427                        | [C/T]       | 1067299397                                 |
| Ca_Kabuli_NC_021165.1_8076394 | Ca_kabuli_chr06    | 8076394                        | [T/C]       | 1067299398                                 |
| Ca_Kabuli_NC_021165.1_8076448 | Ca_kabuli_chr06    | 8076448                        | [A/G]       | 1067299399                                 |
| Ca_Kabuli_NC_021165.1_8084950 | Ca_kabuli_chr06    | 8084950                        | [T/A]       | 1067299400                                 |
| Ca_Kabuli_NC_021165.1_8090739 | Ca_kabuli_chr06    | 8090739                        | [T/A]       | 1067299401                                 |
| Ca_Kabuli_NC_021165.1_8091050 | Ca_kabuli_chr06    | 8091050                        | [A/G]       | 1067299402                                 |
| Ca_Kabuli_NC_021165.1_8091193 | Ca_kabuli_chr06    | 8091193                        | [A/G]       | 1067299403                                 |
| Ca_Kabuli_NC_021165.1_8091210 | Ca_kabuli_chr06    | 8091210                        | [T/C]       | 1067299404                                 |
| Ca_Kabuli_NC_021165.1_8091218 | Ca_kabuli_chr06    | 8091218                        | [A/C]       | 1067299405                                 |
| Ca_Kabuli_NC_021165.1_8091225 | Ca_kabuli_chr06    | 8091225                        | [G/T]       | 1067299406                                 |
| Ca_Kabuli_NC_021165.1_8091232 | Ca_kabuli_chr06    | 8091232                        | [C/T]       | 1067299407                                 |
| Ca_Kabuli_NC_021165.1_8134381 | Ca_kabuli_chr06    | 8134381                        | [T/C]       | 1067299408                                 |

| <b>SNP IDs</b>                | <b>Chromosomes</b> | <b>Physical positions (bp)</b> | <b>SNPs</b> | <b>NCBI SNPdb accession IDs (NCBI_ss#)</b> |
|-------------------------------|--------------------|--------------------------------|-------------|--------------------------------------------|
| Ca_Kabuli_NC_021165.1_8139446 | Ca_kabuli_chr06    | 8139446                        | [C/A]       | 1067299409                                 |
| Ca_Kabuli_NC_021165.1_8161366 | Ca_kabuli_chr06    | 8161366                        | [T/C]       | 1067299410                                 |
| Ca_Kabuli_NC_021165.1_8161368 | Ca_kabuli_chr06    | 8161368                        | [G/T]       | 1067299411                                 |
| Ca_Kabuli_NC_021165.1_8166339 | Ca_kabuli_chr06    | 8166339                        | [T/C]       | 1067299412                                 |
| Ca_Kabuli_NC_021165.1_8166435 | Ca_kabuli_chr06    | 8166435                        | [A/G]       | 1067299413                                 |
| Ca_Kabuli_NC_021165.1_8168203 | Ca_kabuli_chr06    | 8168203                        | [C/T]       | 1067299414                                 |
| Ca_Kabuli_NC_021165.1_8170170 | Ca_kabuli_chr06    | 8170170                        | [A/C]       | 1067299415                                 |
| Ca_Kabuli_NC_021165.1_8170583 | Ca_kabuli_chr06    | 8170583                        | [C/T]       | 1067299416                                 |
| Ca_Kabuli_NC_021165.1_8170633 | Ca_kabuli_chr06    | 8170633                        | [A/G]       | 1067299417                                 |
| Ca_Kabuli_NC_021165.1_8222675 | Ca_kabuli_chr06    | 8222675                        | [A/T]       | 1067299418                                 |
| Ca_Kabuli_NC_021165.1_8246205 | Ca_kabuli_chr06    | 8246205                        | [A/G]       | 1067299419                                 |
| Ca_Kabuli_NC_021165.1_8246210 | Ca_kabuli_chr06    | 8246210                        | [C/A]       | 1067299420                                 |
| Ca_Kabuli_NC_021165.1_8246313 | Ca_kabuli_chr06    | 8246313                        | [T/G]       | 1067299421                                 |
| Ca_Kabuli_NC_021165.1_8589290 | Ca_kabuli_chr06    | 8589290                        | [A/C]       | 1067299422                                 |
| Ca_Kabuli_NC_021165.1_8592849 | Ca_kabuli_chr06    | 8592849                        | [A/C]       | 1067299423                                 |
| Ca_Kabuli_NC_021165.1_8592850 | Ca_kabuli_chr06    | 8592850                        | [G/A]       | 1067299424                                 |
| Ca_Kabuli_NC_021165.1_8592851 | Ca_kabuli_chr06    | 8592851                        | [A/C]       | 1067299425                                 |
| Ca_Kabuli_NC_021165.1_8633221 | Ca_kabuli_chr06    | 8633221                        | [A/C]       | 1067299426                                 |
| Ca_Kabuli_NC_021165.1_8634276 | Ca_kabuli_chr06    | 8634276                        | [T/C]       | 1067299427                                 |
| Ca_Kabuli_NC_021165.1_8634285 | Ca_kabuli_chr06    | 8634285                        | [T/C]       | 1067299428                                 |
| Ca_Kabuli_NC_021165.1_8635559 | Ca_kabuli_chr06    | 8635559                        | [A/G]       | 1067299429                                 |
| Ca_Kabuli_NC_021165.1_8655304 | Ca_kabuli_chr06    | 8655304                        | [A/C]       | 1067299430                                 |
| Ca_Kabuli_NC_021165.1_8655363 | Ca_kabuli_chr06    | 8655363                        | [A/G]       | 1067299431                                 |
| Ca_Kabuli_NC_021165.1_8655382 | Ca_kabuli_chr06    | 8655382                        | [A/T]       | 1067299432                                 |
| Ca_Kabuli_NC_021165.1_8655664 | Ca_kabuli_chr06    | 8655664                        | [T/G]       | 1067299433                                 |
| Ca_Kabuli_NC_021165.1_8655742 | Ca_kabuli_chr06    | 8655742                        | [A/C]       | 1067299434                                 |
| Ca_Kabuli_NC_021165.1_8657846 | Ca_kabuli_chr06    | 8657846                        | [A/C]       | 1067299435                                 |
| Ca_Kabuli_NC_021165.1_8657849 | Ca_kabuli_chr06    | 8657849                        | [A/G]       | 1067299436                                 |
| Ca_Kabuli_NC_021165.1_8706400 | Ca_kabuli_chr06    | 8706400                        | [A/T]       | 1067299437                                 |
| Ca_Kabuli_NC_021165.1_8706439 | Ca_kabuli_chr06    | 8706439                        | [T/G]       | 1067299438                                 |
| Ca_Kabuli_NC_021165.1_8711674 | Ca_kabuli_chr06    | 8711674                        | [A/C]       | 1067299439                                 |
| Ca_Kabuli_NC_021165.1_8711678 | Ca_kabuli_chr06    | 8711678                        | [A/G]       | 1067299440                                 |
| Ca_Kabuli_NC_021165.1_8711694 | Ca_kabuli_chr06    | 8711694                        | [T/C]       | 1067299441                                 |
| Ca_Kabuli_NC_021165.1_8738094 | Ca_kabuli_chr06    | 8738094                        | [A/C]       | 1067299442                                 |

| <b>SNP IDs</b>                | <b>Chromosomes</b> | <b>Physical positions (bp)</b> | <b>SNPs</b> | <b>NCBI SNPdb accession IDs (NCBI_ss#)</b> |
|-------------------------------|--------------------|--------------------------------|-------------|--------------------------------------------|
| Ca_Kabuli_NC_021165.1_8749010 | Ca_kabuli_chr06    | 8749010                        | [A/C]       | 1067299443                                 |
| Ca_Kabuli_NC_021165.1_8787401 | Ca_kabuli_chr06    | 8787401                        | [C/A]       | 1067299444                                 |
| Ca_Kabuli_NC_021165.1_8787557 | Ca_kabuli_chr06    | 8787557                        | [T/C]       | 1067299445                                 |
| Ca_Kabuli_NC_021165.1_8787559 | Ca_kabuli_chr06    | 8787559                        | [A/T]       | 1067299446                                 |
| Ca_Kabuli_NC_021165.1_8958549 | Ca_kabuli_chr06    | 8958549                        | [T/G]       | 1067299447                                 |
| Ca_Kabuli_NC_021165.1_9088140 | Ca_kabuli_chr06    | 9088140                        | [T/C]       | 1067299448                                 |
| Ca_Kabuli_NC_021165.1_9088224 | Ca_kabuli_chr06    | 9088224                        | [A/C]       | 1067299449                                 |
| Ca_Kabuli_NC_021165.1_9109120 | Ca_kabuli_chr06    | 9109120                        | [T/G]       | 1067299450                                 |
| Ca_Kabuli_NC_021165.1_9133666 | Ca_kabuli_chr06    | 9133666                        | [A/G]       | 1067299451                                 |
| Ca_Kabuli_NC_021165.1_9133668 | Ca_kabuli_chr06    | 9133668                        | [C/A]       | 1067299452                                 |
| Ca_Kabuli_NC_021165.1_9133677 | Ca_kabuli_chr06    | 9133677                        | [A/C]       | 1067299453                                 |
| Ca_Kabuli_NC_021165.1_9133694 | Ca_kabuli_chr06    | 9133694                        | [T/C]       | 1067299454                                 |
| Ca_Kabuli_NC_021165.1_9133718 | Ca_kabuli_chr06    | 9133718                        | [A/G]       | 1067299455                                 |
| Ca_Kabuli_NC_021165.1_9150251 | Ca_kabuli_chr06    | 9150251                        | [A/G]       | 1067299456                                 |
| Ca_Kabuli_NC_021165.1_9150253 | Ca_kabuli_chr06    | 9150253                        | [C/A]       | 1067299457                                 |
| Ca_Kabuli_NC_021165.1_9191586 | Ca_kabuli_chr06    | 9191586                        | [A/G]       | 1067299458                                 |
| Ca_Kabuli_NC_021165.1_9191619 | Ca_kabuli_chr06    | 9191619                        | [A/G]       | 1067299459                                 |
| Ca_Kabuli_NC_021165.1_9196080 | Ca_kabuli_chr06    | 9196080                        | [C/A]       | 1067299460                                 |
| Ca_Kabuli_NC_021165.1_9196081 | Ca_kabuli_chr06    | 9196081                        | [A/G]       | 1067299461                                 |
| Ca_Kabuli_NC_021165.1_9196082 | Ca_kabuli_chr06    | 9196082                        | [C/A]       | 1067299462                                 |
| Ca_Kabuli_NC_021165.1_9205251 | Ca_kabuli_chr06    | 9205251                        | [A/C]       | 1067299463                                 |
| Ca_Kabuli_NC_021165.1_9205279 | Ca_kabuli_chr06    | 9205279                        | [T/A]       | 1067299464                                 |
| Ca_Kabuli_NC_021165.1_9213875 | Ca_kabuli_chr06    | 9213875                        | [A/G]       | 1067299465                                 |
| Ca_Kabuli_NC_021165.1_9223004 | Ca_kabuli_chr06    | 9223004                        | [T/G]       | 1067299466                                 |
| Ca_Kabuli_NC_021165.1_9227975 | Ca_kabuli_chr06    | 9227975                        | [A/C]       | 1067299467                                 |
| Ca_Kabuli_NC_021165.1_9227978 | Ca_kabuli_chr06    | 9227978                        | [A/T]       | 1067299468                                 |
| Ca_Kabuli_NC_021165.1_9227984 | Ca_kabuli_chr06    | 9227984                        | [T/C]       | 1067299469                                 |
| Ca_Kabuli_NC_021165.1_9227994 | Ca_kabuli_chr06    | 9227994                        | [T/G]       | 1067299470                                 |
| Ca_Kabuli_NC_021165.1_9292292 | Ca_kabuli_chr06    | 9292292                        | [T/A]       | 1067299471                                 |
| Ca_Kabuli_NC_021165.1_9338839 | Ca_kabuli_chr06    | 9338839                        | [A/C]       | 1067299472                                 |
| Ca_Kabuli_NC_021165.1_9338901 | Ca_kabuli_chr06    | 9338901                        | [T/C]       | 1067299473                                 |
| Ca_Kabuli_NC_021165.1_9340828 | Ca_kabuli_chr06    | 9340828                        | [G/T]       | 1067299474                                 |
| Ca_Kabuli_NC_021165.1_9341262 | Ca_kabuli_chr06    | 9341262                        | [A/G]       | 1067299475                                 |
| Ca_Kabuli_NC_021165.1_9341275 | Ca_kabuli_chr06    | 9341275                        | [C/T]       | 1067299476                                 |

| <b>SNP IDs</b>                 | <b>Chromosomes</b> | <b>Physical positions (bp)</b> | <b>SNPs</b> | <b>NCBI SNPdb accession IDs (NCBI_ss#)</b> |
|--------------------------------|--------------------|--------------------------------|-------------|--------------------------------------------|
| Ca_Kabuli_NC_021165.1_9341277  | Ca_kabuli_chr06    | 9341277                        | [C/T]       | 1067299477                                 |
| Ca_Kabuli_NC_021165.1_9372825  | Ca_kabuli_chr06    | 9372825                        | [T/C]       | 1067299478                                 |
| Ca_Kabuli_NC_021165.1_9382102  | Ca_kabuli_chr06    | 9382102                        | [A/T]       | 1067299479                                 |
| Ca_Kabuli_NC_021165.1_9409159  | Ca_kabuli_chr06    | 9409159                        | [A/G]       | 1067299480                                 |
| Ca_Kabuli_NC_021165.1_9409172  | Ca_kabuli_chr06    | 9409172                        | [T/A]       | 1067299481                                 |
| Ca_Kabuli_NC_021165.1_9409185  | Ca_kabuli_chr06    | 9409185                        | [A/G]       | 1067299482                                 |
| Ca_Kabuli_NC_021165.1_9423194  | Ca_kabuli_chr06    | 9423194                        | [T/C]       | 1067299483                                 |
| Ca_Kabuli_NC_021165.1_9423213  | Ca_kabuli_chr06    | 9423213                        | [A/G]       | 1067299484                                 |
| Ca_Kabuli_NC_021165.1_9423239  | Ca_kabuli_chr06    | 9423239                        | [T/C]       | 1067299485                                 |
| Ca_Kabuli_NC_021165.1_9428548  | Ca_kabuli_chr06    | 9428548                        | [T/G]       | 1067299486                                 |
| Ca_Kabuli_NC_021165.1_9428753  | Ca_kabuli_chr06    | 9428753                        | [A/C]       | 1067299487                                 |
| Ca_Kabuli_NC_021165.1_9430204  | Ca_kabuli_chr06    | 9430204                        | [G/T]       | 1067299488                                 |
| Ca_Kabuli_NC_021165.1_9430205  | Ca_kabuli_chr06    | 9430205                        | [T/G]       | 1067299489                                 |
| Ca_Kabuli_NC_021165.1_9520222  | Ca_kabuli_chr06    | 9520222                        | [T/C]       | 1067299490                                 |
| Ca_Kabuli_NC_021165.1_9544096  | Ca_kabuli_chr06    | 9544096                        | [T/A]       | 1067299491                                 |
| Ca_Kabuli_NC_021165.1_9562800  | Ca_kabuli_chr06    | 9562800                        | [G/A]       | 1067299492                                 |
| Ca_Kabuli_NC_021165.1_9562803  | Ca_kabuli_chr06    | 9562803                        | [A/G]       | 1067299493                                 |
| Ca_Kabuli_NC_021165.1_9565638  | Ca_kabuli_chr06    | 9565638                        | [A/C]       | 1067299494                                 |
| Ca_Kabuli_NC_021165.1_9565873  | Ca_kabuli_chr06    | 9565873                        | [T/A]       | 1067299495                                 |
| Ca_Kabuli_NC_021165.1_9568341  | Ca_kabuli_chr06    | 9568341                        | [A/G]       | 1067299496                                 |
| Ca_Kabuli_NC_021165.1_9574433  | Ca_kabuli_chr06    | 9574433                        | [A/G]       | 1067299497                                 |
| Ca_Kabuli_NC_021165.1_9574457  | Ca_kabuli_chr06    | 9574457                        | [A/T]       | 1067299498                                 |
| Ca_Kabuli_NC_021165.1_9689425  | Ca_kabuli_chr06    | 9689425                        | [G/T]       | 1067299499                                 |
| Ca_Kabuli_NC_021165.1_9831549  | Ca_kabuli_chr06    | 9831549                        | [T/G]       | 1067299500                                 |
| Ca_Kabuli_NC_021165.1_9831555  | Ca_kabuli_chr06    | 9831555                        | [A/G]       | 1067299501                                 |
| Ca_Kabuli_NC_021165.1_9831559  | Ca_kabuli_chr06    | 9831559                        | [T/G]       | 1067299502                                 |
| Ca_Kabuli_NC_021165.1_9834198  | Ca_kabuli_chr06    | 9834198                        | [C/A]       | 1067299503                                 |
| Ca_Kabuli_NC_021165.1_9834199  | Ca_kabuli_chr06    | 9834199                        | [T/C]       | 1067299504                                 |
| Ca_Kabuli_NC_021165.1_9834208  | Ca_kabuli_chr06    | 9834208                        | [A/G]       | 1067299505                                 |
| Ca_Kabuli_NC_021165.1_9845102  | Ca_kabuli_chr06    | 9845102                        | [T/G]       | 1067299506                                 |
| Ca_Kabuli_NC_021165.1_9959681  | Ca_kabuli_chr06    | 9959681                        | [A/G]       | 1067299507                                 |
| Ca_Kabuli_NC_021165.1_10027025 | Ca_kabuli_chr06    | 10027025                       | [A/C]       | 1067299508                                 |
| Ca_Kabuli_NC_021165.1_10029464 | Ca_kabuli_chr06    | 10029464                       | [T/C]       | 1067299509                                 |
| Ca_Kabuli_NC_021165.1_10089004 | Ca_kabuli_chr06    | 10089004                       | [T/C]       | 1067299510                                 |

| <b>SNP IDs</b>                 | <b>Chromosomes</b> | <b>Physical positions (bp)</b> | <b>SNPs</b> | <b>NCBI SNPdb accession IDs (NCBI_ss#)</b> |
|--------------------------------|--------------------|--------------------------------|-------------|--------------------------------------------|
| Ca_Kabuli_NC_021165.1_10089025 | Ca_kabuli_chr06    | 10089025                       | [A/G]       | 1067299511                                 |
| Ca_Kabuli_NC_021165.1_10111452 | Ca_kabuli_chr06    | 10111452                       | [T/G]       | 1067299512                                 |
| Ca_Kabuli_NC_021165.1_10136888 | Ca_kabuli_chr06    | 10136888                       | [C/T]       | 1067299513                                 |
| Ca_Kabuli_NC_021165.1_10136905 | Ca_kabuli_chr06    | 10136905                       | [A/G]       | 1067299514                                 |
| Ca_Kabuli_NC_021165.1_10177838 | Ca_kabuli_chr06    | 10177838                       | [T/G]       | 1067299515                                 |
| Ca_Kabuli_NC_021165.1_10177859 | Ca_kabuli_chr06    | 10177859                       | [T/G]       | 1067299516                                 |
| Ca_Kabuli_NC_021165.1_10231032 | Ca_kabuli_chr06    | 10231032                       | [T/C]       | 1067299517                                 |
| Ca_Kabuli_NC_021165.1_10231088 | Ca_kabuli_chr06    | 10231088                       | [T/G]       | 1067299518                                 |
| Ca_Kabuli_NC_021165.1_10231089 | Ca_kabuli_chr06    | 10231089                       | [T/G]       | 1067299519                                 |
| Ca_Kabuli_NC_021165.1_10231120 | Ca_kabuli_chr06    | 10231120                       | [A/G]       | 1067299520                                 |
| Ca_Kabuli_NC_021165.1_10231141 | Ca_kabuli_chr06    | 10231141                       | [A/G]       | 1067299521                                 |
| Ca_Kabuli_NC_021165.1_10234386 | Ca_kabuli_chr06    | 10234386                       | [A/C]       | 1067299522                                 |
| Ca_Kabuli_NC_021165.1_10234387 | Ca_kabuli_chr06    | 10234387                       | [G/C]       | 1067299523                                 |
| Ca_Kabuli_NC_021165.1_10234389 | Ca_kabuli_chr06    | 10234389                       | [T/A]       | 1067299524                                 |
| Ca_Kabuli_NC_021165.1_10234390 | Ca_kabuli_chr06    | 10234390                       | [C/A]       | 1067299525                                 |
| Ca_Kabuli_NC_021165.1_10259627 | Ca_kabuli_chr06    | 10259627                       | [A/C]       | 1067299526                                 |
| Ca_Kabuli_NC_021165.1_10259643 | Ca_kabuli_chr06    | 10259643                       | [A/C]       | 1067299527                                 |
| Ca_Kabuli_NC_021165.1_10259652 | Ca_kabuli_chr06    | 10259652                       | [A/G]       | 1067299528                                 |
| Ca_Kabuli_NC_021165.1_10259663 | Ca_kabuli_chr06    | 10259663                       | [T/C]       | 1067299529                                 |
| Ca_Kabuli_NC_021165.1_10260274 | Ca_kabuli_chr06    | 10260274                       | [C/T]       | 1067299530                                 |
| Ca_Kabuli_NC_021165.1_10315009 | Ca_kabuli_chr06    | 10315009                       | [A/T]       | 1067299531                                 |
| Ca_Kabuli_NC_021165.1_10395273 | Ca_kabuli_chr06    | 10395273                       | [T/G]       | 1067299532                                 |
| Ca_Kabuli_NC_021165.1_10395281 | Ca_kabuli_chr06    | 10395281                       | [C/T]       | 1067299533                                 |
| Ca_Kabuli_NC_021165.1_10441728 | Ca_kabuli_chr06    | 10441728                       | [G/C]       | 1067299534                                 |
| Ca_Kabuli_NC_021165.1_10441740 | Ca_kabuli_chr06    | 10441740                       | [T/C]       | 1067299535                                 |
| Ca_Kabuli_NC_021165.1_10441742 | Ca_kabuli_chr06    | 10441742                       | [A/C]       | 1067299536                                 |
| Ca_Kabuli_NC_021165.1_10441753 | Ca_kabuli_chr06    | 10441753                       | [G/C]       | 1067299537                                 |
| Ca_Kabuli_NC_021165.1_10448786 | Ca_kabuli_chr06    | 10448786                       | [T/C]       | 1067299538                                 |
| Ca_Kabuli_NC_021165.1_10457025 | Ca_kabuli_chr06    | 10457025                       | [A/C]       | 1067299539                                 |
| Ca_Kabuli_NC_021165.1_10502431 | Ca_kabuli_chr06    | 10502431                       | [A/C]       | 1067299540                                 |
| Ca_Kabuli_NC_021165.1_10627884 | Ca_kabuli_chr06    | 10627884                       | [T/A]       | 1067299541                                 |
| Ca_Kabuli_NC_021165.1_10627885 | Ca_kabuli_chr06    | 10627885                       | [A/G]       | 1067299542                                 |
| Ca_Kabuli_NC_021165.1_10670366 | Ca_kabuli_chr06    | 10670366                       | [T/G]       | 1067299543                                 |
| Ca_Kabuli_NC_021165.1_10670656 | Ca_kabuli_chr06    | 10670656                       | [A/G]       | 1067299544                                 |

| <b>SNP IDs</b>                 | <b>Chromosomes</b> | <b>Physical positions (bp)</b> | <b>SNPs</b> | <b>NCBI SNPdb accession IDs (NCBI_ss#)</b> |
|--------------------------------|--------------------|--------------------------------|-------------|--------------------------------------------|
| Ca_Kabuli_NC_021165.1_10670721 | Ca_kabuli_chr06    | 10670721                       | [A/G]       | 1067299545                                 |
| Ca_Kabuli_NC_021165.1_10670729 | Ca_kabuli_chr06    | 10670729                       | [T/G]       | 1067299546                                 |
| Ca_Kabuli_NC_021165.1_10670739 | Ca_kabuli_chr06    | 10670739                       | [T/G]       | 1067299547                                 |
| Ca_Kabuli_NC_021165.1_10670750 | Ca_kabuli_chr06    | 10670750                       | [T/G]       | 1067299548                                 |
| Ca_Kabuli_NC_021165.1_10670756 | Ca_kabuli_chr06    | 10670756                       | [A/G]       | 1067299549                                 |
| Ca_Kabuli_NC_021165.1_10671148 | Ca_kabuli_chr06    | 10671148                       | [T/A]       | 1067299550                                 |
| Ca_Kabuli_NC_021165.1_10672040 | Ca_kabuli_chr06    | 10672040                       | [C/A]       | 1067299551                                 |
| Ca_Kabuli_NC_021165.1_10672383 | Ca_kabuli_chr06    | 10672383                       | [T/C]       | 1067299552                                 |
| Ca_Kabuli_NC_021165.1_10677472 | Ca_kabuli_chr06    | 10677472                       | [A/T]       | 1067299553                                 |
| Ca_Kabuli_NC_021165.1_10677483 | Ca_kabuli_chr06    | 10677483                       | [A/T]       | 1067299554                                 |
| Ca_Kabuli_NC_021165.1_10682135 | Ca_kabuli_chr06    | 10682135                       | [T/C]       | 1067299555                                 |
| Ca_Kabuli_NC_021165.1_10684697 | Ca_kabuli_chr06    | 10684697                       | [T/G]       | 1067299556                                 |
| Ca_Kabuli_NC_021165.1_10684708 | Ca_kabuli_chr06    | 10684708                       | [T/A]       | 1067299557                                 |
| Ca_Kabuli_NC_021165.1_10684760 | Ca_kabuli_chr06    | 10684760                       | [A/T]       | 1067299558                                 |
| Ca_Kabuli_NC_021165.1_10698770 | Ca_kabuli_chr06    | 10698770                       | [A/C]       | 1067299559                                 |
| Ca_Kabuli_NC_021165.1_10698775 | Ca_kabuli_chr06    | 10698775                       | [A/C]       | 1067299560                                 |
| Ca_Kabuli_NC_021165.1_10698787 | Ca_kabuli_chr06    | 10698787                       | [A/C]       | 1067299561                                 |
| Ca_Kabuli_NC_021165.1_10698795 | Ca_kabuli_chr06    | 10698795                       | [T/C]       | 1067299562                                 |
| Ca_Kabuli_NC_021165.1_10698802 | Ca_kabuli_chr06    | 10698802                       | [A/C]       | 1067299563                                 |
| Ca_Kabuli_NC_021165.1_10716949 | Ca_kabuli_chr06    | 10716949                       | [T/C]       | 1067299564                                 |
| Ca_Kabuli_NC_021165.1_10716960 | Ca_kabuli_chr06    | 10716960                       | [T/C]       | 1067299565                                 |
| Ca_Kabuli_NC_021165.1_10717005 | Ca_kabuli_chr06    | 10717005                       | [A/G]       | 1067299566                                 |
| Ca_Kabuli_NC_021165.1_10743996 | Ca_kabuli_chr06    | 10743996                       | [A/T]       | 1067299567                                 |
| Ca_Kabuli_NC_021165.1_10744029 | Ca_kabuli_chr06    | 10744029                       | [C/A]       | 1067299568                                 |
| Ca_Kabuli_NC_021165.1_10748661 | Ca_kabuli_chr06    | 10748661                       | [A/C]       | 1067299569                                 |
| Ca_Kabuli_NC_021165.1_10748746 | Ca_kabuli_chr06    | 10748746                       | [A/T]       | 1067299570                                 |
| Ca_Kabuli_NC_021165.1_10748766 | Ca_kabuli_chr06    | 10748766                       | [T/C]       | 1067299571                                 |
| Ca_Kabuli_NC_021165.1_10778519 | Ca_kabuli_chr06    | 10778519                       | [T/C]       | 1067299572                                 |
| Ca_Kabuli_NC_021165.1_10779344 | Ca_kabuli_chr06    | 10779344                       | [T/G]       | 1067299573                                 |
| Ca_Kabuli_NC_021165.1_10779545 | Ca_kabuli_chr06    | 10779545                       | [T/A]       | 1067299574                                 |
| Ca_Kabuli_NC_021165.1_10779837 | Ca_kabuli_chr06    | 10779837                       | [G/A]       | 1067299575                                 |
| Ca_Kabuli_NC_021165.1_10780228 | Ca_kabuli_chr06    | 10780228                       | [C/T]       | 1067299576                                 |
| Ca_Kabuli_NC_021165.1_10780240 | Ca_kabuli_chr06    | 10780240                       | [T/C]       | 1067299577                                 |
| Ca_Kabuli_NC_021165.1_10781242 | Ca_kabuli_chr06    | 10781242                       | [C/T]       | 1067299578                                 |

| <b>SNP IDs</b>                 | <b>Chromosomes</b> | <b>Physical positions (bp)</b> | <b>SNPs</b> | <b>NCBI SNPdb accession IDs (NCBI_ss#)</b> |
|--------------------------------|--------------------|--------------------------------|-------------|--------------------------------------------|
| Ca_Kabuli_NC_021165.1_10781281 | Ca_kabuli_chr06    | 10781281                       | [T/C]       | 1067299579                                 |
| Ca_Kabuli_NC_021165.1_10781522 | Ca_kabuli_chr06    | 10781522                       | [G/T]       | 1067299580                                 |
| Ca_Kabuli_NC_021165.1_10785458 | Ca_kabuli_chr06    | 10785458                       | [T/A]       | 1067299581                                 |
| Ca_Kabuli_NC_021165.1_10785459 | Ca_kabuli_chr06    | 10785459                       | [G/A]       | 1067299582                                 |
| Ca_Kabuli_NC_021165.1_10785480 | Ca_kabuli_chr06    | 10785480                       | [T/G]       | 1067299583                                 |
| Ca_Kabuli_NC_021165.1_10790133 | Ca_kabuli_chr06    | 10790133                       | [G/T]       | 1067299584                                 |
| Ca_Kabuli_NC_021165.1_10806974 | Ca_kabuli_chr06    | 10806974                       | [A/G]       | 1067299585                                 |
| Ca_Kabuli_NC_021165.1_10806982 | Ca_kabuli_chr06    | 10806982                       | [C/A]       | 1067299586                                 |
| Ca_Kabuli_NC_021165.1_10870187 | Ca_kabuli_chr06    | 10870187                       | [T/G]       | 1067299587                                 |
| Ca_Kabuli_NC_021165.1_10888513 | Ca_kabuli_chr06    | 10888513                       | [A/C]       | 1067299588                                 |
| Ca_Kabuli_NC_021165.1_10888520 | Ca_kabuli_chr06    | 10888520                       | [A/G]       | 1067299589                                 |
| Ca_Kabuli_NC_021165.1_10991654 | Ca_kabuli_chr06    | 10991654                       | [A/G]       | 1067299590                                 |
| Ca_Kabuli_NC_021165.1_10991658 | Ca_kabuli_chr06    | 10991658                       | [T/C]       | 1067299591                                 |
| Ca_Kabuli_NC_021165.1_10991667 | Ca_kabuli_chr06    | 10991667                       | [T/C]       | 1067299592                                 |
| Ca_Kabuli_NC_021165.1_10991717 | Ca_kabuli_chr06    | 10991717                       | [T/A]       | 1067299593                                 |
| Ca_Kabuli_NC_021165.1_11011835 | Ca_kabuli_chr06    | 11011835                       | [A/G]       | 1067299594                                 |
| Ca_Kabuli_NC_021165.1_11011859 | Ca_kabuli_chr06    | 11011859                       | [A/G]       | 1067299595                                 |
| Ca_Kabuli_NC_021165.1_11038020 | Ca_kabuli_chr06    | 11038020                       | [T/C]       | 1067299596                                 |
| Ca_Kabuli_NC_021165.1_11064134 | Ca_kabuli_chr06    | 11064134                       | [G/A]       | 1067299597                                 |
| Ca_Kabuli_NC_021165.1_11069554 | Ca_kabuli_chr06    | 11069554                       | [C/T]       | 1067299598                                 |
| Ca_Kabuli_NC_021165.1_11098001 | Ca_kabuli_chr06    | 11098001                       | [G/A]       | 1067299599                                 |
| Ca_Kabuli_NC_021165.1_11105367 | Ca_kabuli_chr06    | 11105367                       | [G/A]       | 1067299600                                 |
| Ca_Kabuli_NC_021165.1_11106776 | Ca_kabuli_chr06    | 11106776                       | [C/G]       | 1067299601                                 |
| Ca_Kabuli_NC_021165.1_11128164 | Ca_kabuli_chr06    | 11128164                       | [G/T]       | 1067299602                                 |
| Ca_Kabuli_NC_021165.1_11131010 | Ca_kabuli_chr06    | 11131010                       | [T/A]       | 1067299603                                 |
| Ca_Kabuli_NC_021165.1_11131020 | Ca_kabuli_chr06    | 11131020                       | [A/G]       | 1067299604                                 |
| Ca_Kabuli_NC_021165.1_11163679 | Ca_kabuli_chr06    | 11163679                       | [T/C]       | 1067299605                                 |
| Ca_Kabuli_NC_021165.1_11163693 | Ca_kabuli_chr06    | 11163693                       | [A/G]       | 1067299606                                 |
| Ca_Kabuli_NC_021165.1_11163698 | Ca_kabuli_chr06    | 11163698                       | [T/C]       | 1067299607                                 |
| Ca_Kabuli_NC_021165.1_11163711 | Ca_kabuli_chr06    | 11163711                       | [T/G]       | 1067299608                                 |
| Ca_Kabuli_NC_021165.1_11163717 | Ca_kabuli_chr06    | 11163717                       | [T/A]       | 1067299609                                 |
| Ca_Kabuli_NC_021165.1_11163847 | Ca_kabuli_chr06    | 11163847                       | [A/C]       | 1067299610                                 |
| Ca_Kabuli_NC_021165.1_11180702 | Ca_kabuli_chr06    | 11180702                       | [G/A]       | 1067299611                                 |
| Ca_Kabuli_NC_021165.1_11185980 | Ca_kabuli_chr06    | 11185980                       | [T/C]       | 1067299612                                 |

| <b>SNP IDs</b>                 | <b>Chromosomes</b> | <b>Physical positions (bp)</b> | <b>SNPs</b> | <b>NCBI SNPdb accession IDs (NCBI_ss#)</b> |
|--------------------------------|--------------------|--------------------------------|-------------|--------------------------------------------|
| Ca_Kabuli_NC_021165.1_11188781 | Ca_kabuli_chr06    | 11188781                       | [T/G]       | 1067299613                                 |
| Ca_Kabuli_NC_021165.1_11188803 | Ca_kabuli_chr06    | 11188803                       | [G/A]       | 1067299614                                 |
| Ca_Kabuli_NC_021165.1_11189051 | Ca_kabuli_chr06    | 11189051                       | [A/G]       | 1067299615                                 |
| Ca_Kabuli_NC_021165.1_11191321 | Ca_kabuli_chr06    | 11191321                       | [T/C]       | 1067299616                                 |
| Ca_Kabuli_NC_021165.1_11191339 | Ca_kabuli_chr06    | 11191339                       | [A/G]       | 1067299617                                 |
| Ca_Kabuli_NC_021165.1_11285914 | Ca_kabuli_chr06    | 11285914                       | [A/C]       | 1067299618                                 |
| Ca_Kabuli_NC_021165.1_11302033 | Ca_kabuli_chr06    | 11302033                       | [T/C]       | 1067299619                                 |
| Ca_Kabuli_NC_021165.1_11302037 | Ca_kabuli_chr06    | 11302037                       | [A/C]       | 1067299620                                 |
| Ca_Kabuli_NC_021165.1_11302041 | Ca_kabuli_chr06    | 11302041                       | [T/C]       | 1067299621                                 |
| Ca_Kabuli_NC_021165.1_11302061 | Ca_kabuli_chr06    | 11302061                       | [T/C]       | 1067299622                                 |
| Ca_Kabuli_NC_021165.1_11354898 | Ca_kabuli_chr06    | 11354898                       | [A/C]       | 1067299623                                 |
| Ca_Kabuli_NC_021165.1_11394801 | Ca_kabuli_chr06    | 11394801                       | [T/G]       | 1067299624                                 |
| Ca_Kabuli_NC_021165.1_11399318 | Ca_kabuli_chr06    | 11399318                       | [T/C]       | 1067299625                                 |
| Ca_Kabuli_NC_021165.1_11508824 | Ca_kabuli_chr06    | 11508824                       | [T/G]       | 1067299626                                 |
| Ca_Kabuli_NC_021165.1_11508970 | Ca_kabuli_chr06    | 11508970                       | [G/A]       | 1067299627                                 |
| Ca_Kabuli_NC_021165.1_11508975 | Ca_kabuli_chr06    | 11508975                       | [A/C]       | 1067299628                                 |
| Ca_Kabuli_NC_021165.1_11543618 | Ca_kabuli_chr06    | 11543618                       | [T/G]       | 1067299629                                 |
| Ca_Kabuli_NC_021165.1_11659814 | Ca_kabuli_chr06    | 11659814                       | [G/A]       | 1067299630                                 |
| Ca_Kabuli_NC_021165.1_11659981 | Ca_kabuli_chr06    | 11659981                       | [G/A]       | 1067299631                                 |
| Ca_Kabuli_NC_021165.1_11665233 | Ca_kabuli_chr06    | 11665233                       | [A/G]       | 1067299632                                 |
| Ca_Kabuli_NC_021165.1_11665262 | Ca_kabuli_chr06    | 11665262                       | [T/G]       | 1067299633                                 |
| Ca_Kabuli_NC_021165.1_11665268 | Ca_kabuli_chr06    | 11665268                       | [T/G]       | 1067299634                                 |
| Ca_Kabuli_NC_021165.1_11665329 | Ca_kabuli_chr06    | 11665329                       | [T/G]       | 1067299635                                 |
| Ca_Kabuli_NC_021165.1_11665338 | Ca_kabuli_chr06    | 11665338                       | [T/G]       | 1067299636                                 |
| Ca_Kabuli_NC_021165.1_11668281 | Ca_kabuli_chr06    | 11668281                       | [T/C]       | 1067299637                                 |
| Ca_Kabuli_NC_021165.1_12035683 | Ca_kabuli_chr06    | 12035683                       | [A/G]       | 1067299638                                 |
| Ca_Kabuli_NC_021165.1_12035718 | Ca_kabuli_chr06    | 12035718                       | [T/G]       | 1067299639                                 |
| Ca_Kabuli_NC_021165.1_12435077 | Ca_kabuli_chr06    | 12435077                       | [A/C]       | 1067299640                                 |
| Ca_Kabuli_NC_021165.1_12436984 | Ca_kabuli_chr06    | 12436984                       | [A/G]       | 1067299641                                 |
| Ca_Kabuli_NC_021165.1_12437022 | Ca_kabuli_chr06    | 12437022                       | [A/C]       | 1067299642                                 |
| Ca_Kabuli_NC_021165.1_12437029 | Ca_kabuli_chr06    | 12437029                       | [A/T]       | 1067299643                                 |
| Ca_Kabuli_NC_021165.1_12437088 | Ca_kabuli_chr06    | 12437088                       | [A/C]       | 1067299644                                 |
| Ca_Kabuli_NC_021165.1_12437132 | Ca_kabuli_chr06    | 12437132                       | [A/C]       | 1067299645                                 |
| Ca_Kabuli_NC_021165.1_12448511 | Ca_kabuli_chr06    | 12448511                       | [A/C]       | 1067299646                                 |



| <b>SNP IDs</b>                 | <b>Chromosomes</b> | <b>Physical positions (bp)</b> | <b>SNPs</b> | <b>NCBI SNPdb accession IDs (NCBI_ss#)</b> |
|--------------------------------|--------------------|--------------------------------|-------------|--------------------------------------------|
| Ca_Kabuli_NC_021165.1_12448541 | Ca_kabuli_chr06    | 12448541                       | [A/G]       | 1067299647                                 |
| Ca_Kabuli_NC_021165.1_12490145 | Ca_kabuli_chr06    | 12490145                       | [A/T]       | 1067299648                                 |
| Ca_Kabuli_NC_021165.1_12535717 | Ca_kabuli_chr06    | 12535717                       | [T/G]       | 1067299649                                 |
| Ca_Kabuli_NC_021165.1_12535741 | Ca_kabuli_chr06    | 12535741                       | [A/G]       | 1067299650                                 |
| Ca_Kabuli_NC_021165.1_12775930 | Ca_kabuli_chr06    | 12775930                       | [T/C]       | 1067299651                                 |
| Ca_Kabuli_NC_021165.1_12775985 | Ca_kabuli_chr06    | 12775985                       | [A/C]       | 1067299652                                 |
| Ca_Kabuli_NC_021165.1_12799817 | Ca_kabuli_chr06    | 12799817                       | [T/A]       | 1067299653                                 |
| Ca_Kabuli_NC_021165.1_12799894 | Ca_kabuli_chr06    | 12799894                       | [G/A]       | 1067299654                                 |
| Ca_Kabuli_NC_021165.1_12799931 | Ca_kabuli_chr06    | 12799931                       | [A/G]       | 1067299655                                 |
| Ca_Kabuli_NC_021165.1_12804358 | Ca_kabuli_chr06    | 12804358                       | [T/G]       | 1067299656                                 |
| Ca_Kabuli_NC_021165.1_12810876 | Ca_kabuli_chr06    | 12810876                       | [C/A]       | 1067299657                                 |
| Ca_Kabuli_NC_021165.1_12810877 | Ca_kabuli_chr06    | 12810877                       | [T/G]       | 1067299658                                 |
| Ca_Kabuli_NC_021165.1_12817997 | Ca_kabuli_chr06    | 12817997                       | [A/G]       | 1067299659                                 |
| Ca_Kabuli_NC_021165.1_12818032 | Ca_kabuli_chr06    | 12818032                       | [A/T]       | 1067299660                                 |
| Ca_Kabuli_NC_021165.1_12844592 | Ca_kabuli_chr06    | 12844592                       | [T/G]       | 1067299661                                 |
| Ca_Kabuli_NC_021165.1_12882524 | Ca_kabuli_chr06    | 12882524                       | [A/G]       | 1067299662                                 |
| Ca_Kabuli_NC_021165.1_12939911 | Ca_kabuli_chr06    | 12939911                       | [T/A]       | 1067299663                                 |
| Ca_Kabuli_NC_021165.1_12939913 | Ca_kabuli_chr06    | 12939913                       | [A/G]       | 1067299664                                 |
| Ca_Kabuli_NC_021165.1_12939937 | Ca_kabuli_chr06    | 12939937                       | [T/C]       | 1067299665                                 |
| Ca_Kabuli_NC_021165.1_12939946 | Ca_kabuli_chr06    | 12939946                       | [A/G]       | 1067299666                                 |
| Ca_Kabuli_NC_021165.1_12939964 | Ca_kabuli_chr06    | 12939964                       | [T/C]       | 1067299667                                 |
| Ca_Kabuli_NC_021165.1_12941023 | Ca_kabuli_chr06    | 12941023                       | [T/C]       | 1067299668                                 |
| Ca_Kabuli_NC_021165.1_12976242 | Ca_kabuli_chr06    | 12976242                       | [T/C]       | 1067299669                                 |
| Ca_Kabuli_NC_021165.1_12985910 | Ca_kabuli_chr06    | 12985910                       | [C/T]       | 1067299670                                 |
| Ca_Kabuli_NC_021165.1_12986826 | Ca_kabuli_chr06    | 12986826                       | [G/A]       | 1067299671                                 |
| Ca_Kabuli_NC_021165.1_12986829 | Ca_kabuli_chr06    | 12986829                       | [T/G]       | 1067299672                                 |
| Ca_Kabuli_NC_021165.1_12986833 | Ca_kabuli_chr06    | 12986833                       | [A/T]       | 1067299673                                 |
| Ca_Kabuli_NC_021165.1_13073096 | Ca_kabuli_chr06    | 13073096                       | [T/G]       | 1067299674                                 |
| Ca_Kabuli_NC_021165.1_13107254 | Ca_kabuli_chr06    | 13107254                       | [T/C]       | 1067299675                                 |
| Ca_Kabuli_NC_021165.1_13107256 | Ca_kabuli_chr06    | 13107256                       | [T/C]       | 1067299676                                 |
| Ca_Kabuli_NC_021165.1_13107278 | Ca_kabuli_chr06    | 13107278                       | [T/A]       | 1067299677                                 |
| Ca_Kabuli_NC_021165.1_13107289 | Ca_kabuli_chr06    | 13107289                       | [T/C]       | 1067299678                                 |
| Ca_Kabuli_NC_021165.1_13107293 | Ca_kabuli_chr06    | 13107293                       | [T/C]       | 1067299679                                 |
| Ca_Kabuli_NC_021165.1_13107304 | Ca_kabuli_chr06    | 13107304                       | [T/C]       | 1067299680                                 |

| <b>SNP IDs</b>                 | <b>Chromosomes</b> | <b>Physical positions (bp)</b> | <b>SNPs</b> | <b>NCBI SNPdb accession IDs (NCBI_ss#)</b> |
|--------------------------------|--------------------|--------------------------------|-------------|--------------------------------------------|
| Ca_Kabuli_NC_021165.1_13123074 | Ca_kabuli_chr06    | 13123074                       | [A/C]       | 1067299681                                 |
| Ca_Kabuli_NC_021165.1_13131578 | Ca_kabuli_chr06    | 13131578                       | [C/A]       | 1067299682                                 |
| Ca_Kabuli_NC_021165.1_13136818 | Ca_kabuli_chr06    | 13136818                       | [T/C]       | 1067299683                                 |
| Ca_Kabuli_NC_021165.1_13136830 | Ca_kabuli_chr06    | 13136830                       | [T/C]       | 1067299684                                 |
| Ca_Kabuli_NC_021165.1_13192458 | Ca_kabuli_chr06    | 13192458                       | [T/G]       | 1067299685                                 |
| Ca_Kabuli_NC_021165.1_13201407 | Ca_kabuli_chr06    | 13201407                       | [T/A]       | 1067299686                                 |
| Ca_Kabuli_NC_021165.1_13221837 | Ca_kabuli_chr06    | 13221837                       | [T/A]       | 1067299687                                 |
| Ca_Kabuli_NC_021165.1_13221861 | Ca_kabuli_chr06    | 13221861                       | [T/A]       | 1067299688                                 |
| Ca_Kabuli_NC_021165.1_13221873 | Ca_kabuli_chr06    | 13221873                       | [T/G]       | 1067299689                                 |
| Ca_Kabuli_NC_021165.1_13222255 | Ca_kabuli_chr06    | 13222255                       | [G/T]       | 1067299690                                 |
| Ca_Kabuli_NC_021165.1_13222256 | Ca_kabuli_chr06    | 13222256                       | [T/C]       | 1067299691                                 |
| Ca_Kabuli_NC_021165.1_13222257 | Ca_kabuli_chr06    | 13222257                       | [G/T]       | 1067299692                                 |
| Ca_Kabuli_NC_021165.1_13244666 | Ca_kabuli_chr06    | 13244666                       | [A/G]       | 1067299693                                 |
| Ca_Kabuli_NC_021165.1_13244668 | Ca_kabuli_chr06    | 13244668                       | [C/G]       | 1067299694                                 |
| Ca_Kabuli_NC_021165.1_13244680 | Ca_kabuli_chr06    | 13244680                       | [T/G]       | 1067299695                                 |
| Ca_Kabuli_NC_021165.1_13296123 | Ca_kabuli_chr06    | 13296123                       | [A/G]       | 1067299696                                 |
| Ca_Kabuli_NC_021165.1_13300383 | Ca_kabuli_chr06    | 13300383                       | [A/G]       | 1067299697                                 |
| Ca_Kabuli_NC_021165.1_13340791 | Ca_kabuli_chr06    | 13340791                       | [T/A]       | 1067299698                                 |
| Ca_Kabuli_NC_021165.1_13483860 | Ca_kabuli_chr06    | 13483860                       | [T/C]       | 1067299699                                 |
| Ca_Kabuli_NC_021165.1_13483911 | Ca_kabuli_chr06    | 13483911                       | [A/G]       | 1067299700                                 |
| Ca_Kabuli_NC_021165.1_13569263 | Ca_kabuli_chr06    | 13569263                       | [A/T]       | 1067299701                                 |
| Ca_Kabuli_NC_021165.1_13569291 | Ca_kabuli_chr06    | 13569291                       | [A/C]       | 1067299702                                 |
| Ca_Kabuli_NC_021165.1_13572221 | Ca_kabuli_chr06    | 13572221                       | [A/C]       | 1067299703                                 |
| Ca_Kabuli_NC_021165.1_13575227 | Ca_kabuli_chr06    | 13575227                       | [T/A]       | 1067299704                                 |
| Ca_Kabuli_NC_021165.1_13628325 | Ca_kabuli_chr06    | 13628325                       | [A/C]       | 1067299705                                 |
| Ca_Kabuli_NC_021165.1_13628328 | Ca_kabuli_chr06    | 13628328                       | [A/C]       | 1067299706                                 |
| Ca_Kabuli_NC_021165.1_13628426 | Ca_kabuli_chr06    | 13628426                       | [T/C]       | 1067299707                                 |
| Ca_Kabuli_NC_021165.1_13628532 | Ca_kabuli_chr06    | 13628532                       | [A/C]       | 1067299708                                 |
| Ca_Kabuli_NC_021165.1_13637388 | Ca_kabuli_chr06    | 13637388                       | [A/C]       | 1067299709                                 |
| Ca_Kabuli_NC_021165.1_13637392 | Ca_kabuli_chr06    | 13637392                       | [A/C]       | 1067299710                                 |
| Ca_Kabuli_NC_021165.1_13639434 | Ca_kabuli_chr06    | 13639434                       | [T/G]       | 1067299711                                 |
| Ca_Kabuli_NC_021165.1_13685747 | Ca_kabuli_chr06    | 13685747                       | [T/C]       | 1067299712                                 |
| Ca_Kabuli_NC_021165.1_13714842 | Ca_kabuli_chr06    | 13714842                       | [T/G]       | 1067299713                                 |
| Ca_Kabuli_NC_021165.1_13714893 | Ca_kabuli_chr06    | 13714893                       | [A/G]       | 1067299714                                 |

| <b>SNP IDs</b>                 | <b>Chromosomes</b> | <b>Physical positions (bp)</b> | <b>SNPs</b> | <b>NCBI SNPdb accession IDs (NCBI_ss#)</b> |
|--------------------------------|--------------------|--------------------------------|-------------|--------------------------------------------|
| Ca_Kabuli_NC_021165.1_13826905 | Ca_kabuli_chr06    | 13826905                       | [T/G]       | 1067299715                                 |
| Ca_Kabuli_NC_021165.1_13913516 | Ca_kabuli_chr06    | 13913516                       | [A/T]       | 1067299716                                 |
| Ca_Kabuli_NC_021165.1_13917083 | Ca_kabuli_chr06    | 13917083                       | [T/C]       | 1067299717                                 |
| Ca_Kabuli_NC_021165.1_13921926 | Ca_kabuli_chr06    | 13921926                       | [T/G]       | 1067299718                                 |
| Ca_Kabuli_NC_021165.1_13921954 | Ca_kabuli_chr06    | 13921954                       | [A/C]       | 1067299719                                 |
| Ca_Kabuli_NC_021165.1_13936416 | Ca_kabuli_chr06    | 13936416                       | [T/C]       | 1067299720                                 |
| Ca_Kabuli_NC_021165.1_13936517 | Ca_kabuli_chr06    | 13936517                       | [A/C]       | 1067299721                                 |
| Ca_Kabuli_NC_021165.1_13948739 | Ca_kabuli_chr06    | 13948739                       | [G/A]       | 1067299722                                 |
| Ca_Kabuli_NC_021165.1_13948742 | Ca_kabuli_chr06    | 13948742                       | [T/G]       | 1067299723                                 |
| Ca_Kabuli_NC_021165.1_13986526 | Ca_kabuli_chr06    | 13986526                       | [T/G]       | 1067299724                                 |
| Ca_Kabuli_NC_021165.1_14094683 | Ca_kabuli_chr06    | 14094683                       | [C/G]       | 1067299725                                 |
| Ca_Kabuli_NC_021165.1_14107024 | Ca_kabuli_chr06    | 14107024                       | [C/G]       | 1067299726                                 |
| Ca_Kabuli_NC_021165.1_14107039 | Ca_kabuli_chr06    | 14107039                       | [T/G]       | 1067299727                                 |
| Ca_Kabuli_NC_021165.1_14107066 | Ca_kabuli_chr06    | 14107066                       | [A/G]       | 1067299728                                 |
| Ca_Kabuli_NC_021165.1_14107082 | Ca_kabuli_chr06    | 14107082                       | [T/C]       | 1067299729                                 |
| Ca_Kabuli_NC_021165.1_14107089 | Ca_kabuli_chr06    | 14107089                       | [G/C]       | 1067299730                                 |
| Ca_Kabuli_NC_021165.1_14141852 | Ca_kabuli_chr06    | 14141852                       | [C/A]       | 1067299731                                 |
| Ca_Kabuli_NC_021165.1_14141855 | Ca_kabuli_chr06    | 14141855                       | [T/C]       | 1067299732                                 |
| Ca_Kabuli_NC_021165.1_14141858 | Ca_kabuli_chr06    | 14141858                       | [C/T]       | 1067299733                                 |
| Ca_Kabuli_NC_021165.1_14148742 | Ca_kabuli_chr06    | 14148742                       | [T/G]       | 1067299734                                 |
| Ca_Kabuli_NC_021165.1_14160308 | Ca_kabuli_chr06    | 14160308                       | [A/C]       | 1067299735                                 |
| Ca_Kabuli_NC_021165.1_14160310 | Ca_kabuli_chr06    | 14160310                       | [A/C]       | 1067299736                                 |
| Ca_Kabuli_NC_021165.1_14200976 | Ca_kabuli_chr06    | 14200976                       | [C/A]       | 1067299737                                 |
| Ca_Kabuli_NC_021165.1_14200999 | Ca_kabuli_chr06    | 14200999                       | [T/A]       | 1067299738                                 |
| Ca_Kabuli_NC_021165.1_14255107 | Ca_kabuli_chr06    | 14255107                       | [A/C]       | 1067299739                                 |
| Ca_Kabuli_NC_021165.1_14309365 | Ca_kabuli_chr06    | 14309365                       | [T/C]       | 1067299740                                 |
| Ca_Kabuli_NC_021165.1_14309390 | Ca_kabuli_chr06    | 14309390                       | [C/G]       | 1067299741                                 |
| Ca_Kabuli_NC_021165.1_14309393 | Ca_kabuli_chr06    | 14309393                       | [A/G]       | 1067299742                                 |
| Ca_Kabuli_NC_021165.1_14332018 | Ca_kabuli_chr06    | 14332018                       | [A/C]       | 1067299743                                 |
| Ca_Kabuli_NC_021165.1_14353624 | Ca_kabuli_chr06    | 14353624                       | [G/A]       | 1067299744                                 |
| Ca_Kabuli_NC_021165.1_14371549 | Ca_kabuli_chr06    | 14371549                       | [C/A]       | 1067299745                                 |
| Ca_Kabuli_NC_021165.1_14371811 | Ca_kabuli_chr06    | 14371811                       | [T/G]       | 1067299746                                 |
| Ca_Kabuli_NC_021165.1_14371814 | Ca_kabuli_chr06    | 14371814                       | [T/C]       | 1067299747                                 |
| Ca_Kabuli_NC_021165.1_14371900 | Ca_kabuli_chr06    | 14371900                       | [T/C]       | 1067299748                                 |

| <b>SNP IDs</b>                 | <b>Chromosomes</b> | <b>Physical positions (bp)</b> | <b>SNPs</b> | <b>NCBI SNPdb accession IDs (NCBI_ss#)</b> |
|--------------------------------|--------------------|--------------------------------|-------------|--------------------------------------------|
| Ca_Kabuli_NC_021165.1_14416997 | Ca_kabuli_chr06    | 14416997                       | [A/T]       | 1067299749                                 |
| Ca_Kabuli_NC_021165.1_14419837 | Ca_kabuli_chr06    | 14419837                       | [T/C]       | 1067299750                                 |
| Ca_Kabuli_NC_021165.1_14419867 | Ca_kabuli_chr06    | 14419867                       | [A/G]       | 1067299751                                 |
| Ca_Kabuli_NC_021165.1_14419875 | Ca_kabuli_chr06    | 14419875                       | [A/C]       | 1067299752                                 |
| Ca_Kabuli_NC_021165.1_14419877 | Ca_kabuli_chr06    | 14419877                       | [A/C]       | 1067299753                                 |
| Ca_Kabuli_NC_021165.1_14421756 | Ca_kabuli_chr06    | 14421756                       | [A/T]       | 1067299754                                 |
| Ca_Kabuli_NC_021165.1_14421787 | Ca_kabuli_chr06    | 14421787                       | [T/C]       | 1067299755                                 |
| Ca_Kabuli_NC_021165.1_14421816 | Ca_kabuli_chr06    | 14421816                       | [T/A]       | 1067299756                                 |
| Ca_Kabuli_NC_021165.1_14526395 | Ca_kabuli_chr06    | 14526395                       | [T/G]       | 1067299757                                 |
| Ca_Kabuli_NC_021165.1_14606892 | Ca_kabuli_chr06    | 14606892                       | [A/C]       | 1067299758                                 |
| Ca_Kabuli_NC_021165.1_14606941 | Ca_kabuli_chr06    | 14606941                       | [A/T]       | 1067299759                                 |
| Ca_Kabuli_NC_021165.1_14606945 | Ca_kabuli_chr06    | 14606945                       | [A/G]       | 1067299760                                 |
| Ca_Kabuli_NC_021165.1_14630065 | Ca_kabuli_chr06    | 14630065                       | [A/G]       | 1067299761                                 |
| Ca_Kabuli_NC_021165.1_14630076 | Ca_kabuli_chr06    | 14630076                       | [A/T]       | 1067299762                                 |
| Ca_Kabuli_NC_021165.1_14630632 | Ca_kabuli_chr06    | 14630632                       | [A/C]       | 1067299763                                 |
| Ca_Kabuli_NC_021165.1_14691728 | Ca_kabuli_chr06    | 14691728                       | [T/A]       | 1067299764                                 |
| Ca_Kabuli_NC_021165.1_14719712 | Ca_kabuli_chr06    | 14719712                       | [A/C]       | 1067299765                                 |
| Ca_Kabuli_NC_021165.1_14719713 | Ca_kabuli_chr06    | 14719713                       | [C/A]       | 1067299766                                 |
| Ca_Kabuli_NC_021165.1_14719715 | Ca_kabuli_chr06    | 14719715                       | [T/G]       | 1067299767                                 |
| Ca_Kabuli_NC_021165.1_14719725 | Ca_kabuli_chr06    | 14719725                       | [A/G]       | 1067299768                                 |
| Ca_Kabuli_NC_021165.1_14719734 | Ca_kabuli_chr06    | 14719734                       | [T/G]       | 1067299769                                 |
| Ca_Kabuli_NC_021165.1_14719909 | Ca_kabuli_chr06    | 14719909                       | [T/C]       | 1067299770                                 |
| Ca_Kabuli_NC_021165.1_14719910 | Ca_kabuli_chr06    | 14719910                       | [G/T]       | 1067299771                                 |
| Ca_Kabuli_NC_021165.1_14769691 | Ca_kabuli_chr06    | 14769691                       | [A/C]       | 1067299772                                 |
| Ca_Kabuli_NC_021165.1_14769694 | Ca_kabuli_chr06    | 14769694                       | [T/C]       | 1067299773                                 |
| Ca_Kabuli_NC_021165.1_14769697 | Ca_kabuli_chr06    | 14769697                       | [A/C]       | 1067299774                                 |
| Ca_Kabuli_NC_021165.1_14769709 | Ca_kabuli_chr06    | 14769709                       | [A/T]       | 1067299775                                 |
| Ca_Kabuli_NC_021165.1_14771602 | Ca_kabuli_chr06    | 14771602                       | [T/G]       | 1067299776                                 |
| Ca_Kabuli_NC_021165.1_14857680 | Ca_kabuli_chr06    | 14857680                       | [G/A]       | 1067299777                                 |
| Ca_Kabuli_NC_021165.1_14971493 | Ca_kabuli_chr06    | 14971493                       | [A/G]       | 1067299778                                 |
| Ca_Kabuli_NC_021165.1_14971517 | Ca_kabuli_chr06    | 14971517                       | [A/G]       | 1067299779                                 |
| Ca_Kabuli_NC_021165.1_14991776 | Ca_kabuli_chr06    | 14991776                       | [A/C]       | 1067299780                                 |
| Ca_Kabuli_NC_021165.1_15019327 | Ca_kabuli_chr06    | 15019327                       | [A/C]       | 1067299781                                 |
| Ca_Kabuli_NC_021165.1_15024869 | Ca_kabuli_chr06    | 15024869                       | [T/C]       | 1067299782                                 |

| <b>SNP IDs</b>                 | <b>Chromosomes</b> | <b>Physical positions (bp)</b> | <b>SNPs</b> | <b>NCBI SNPdb accession IDs (NCBI_ss#)</b> |
|--------------------------------|--------------------|--------------------------------|-------------|--------------------------------------------|
| Ca_Kabuli_NC_021165.1_15024875 | Ca_kabuli_chr06    | 15024875                       | [T/C]       | 1067299783                                 |
| Ca_Kabuli_NC_021165.1_15024910 | Ca_kabuli_chr06    | 15024910                       | [A/T]       | 1067299784                                 |
| Ca_Kabuli_NC_021165.1_15024946 | Ca_kabuli_chr06    | 15024946                       | [T/C]       | 1067299785                                 |
| Ca_Kabuli_NC_021165.1_15056600 | Ca_kabuli_chr06    | 15056600                       | [T/G]       | 1067299786                                 |
| Ca_Kabuli_NC_021165.1_15056615 | Ca_kabuli_chr06    | 15056615                       | [A/G]       | 1067299787                                 |
| Ca_Kabuli_NC_021165.1_15061714 | Ca_kabuli_chr06    | 15061714                       | [T/C]       | 1067299788                                 |
| Ca_Kabuli_NC_021165.1_15061743 | Ca_kabuli_chr06    | 15061743                       | [A/C]       | 1067299789                                 |
| Ca_Kabuli_NC_021165.1_15061763 | Ca_kabuli_chr06    | 15061763                       | [T/C]       | 1067299790                                 |
| Ca_Kabuli_NC_021165.1_15093578 | Ca_kabuli_chr06    | 15093578                       | [T/G]       | 1067299791                                 |
| Ca_Kabuli_NC_021165.1_15123030 | Ca_kabuli_chr06    | 15123030                       | [T/A]       | 1067299792                                 |
| Ca_Kabuli_NC_021165.1_15123033 | Ca_kabuli_chr06    | 15123033                       | [C/T]       | 1067299793                                 |
| Ca_Kabuli_NC_021165.1_15123051 | Ca_kabuli_chr06    | 15123051                       | [C/T]       | 1067299794                                 |
| Ca_Kabuli_NC_021165.1_15123074 | Ca_kabuli_chr06    | 15123074                       | [G/A]       | 1067299795                                 |
| Ca_Kabuli_NC_021165.1_15123962 | Ca_kabuli_chr06    | 15123962                       | [A/G]       | 1067299796                                 |
| Ca_Kabuli_NC_021165.1_15133403 | Ca_kabuli_chr06    | 15133403                       | [G/T]       | 1067299797                                 |
| Ca_Kabuli_NC_021165.1_15133404 | Ca_kabuli_chr06    | 15133404                       | [G/C]       | 1067299798                                 |
| Ca_Kabuli_NC_021165.1_15133405 | Ca_kabuli_chr06    | 15133405                       | [G/T]       | 1067299799                                 |
| Ca_Kabuli_NC_021165.1_15168831 | Ca_kabuli_chr06    | 15168831                       | [A/C]       | 1067299800                                 |
| Ca_Kabuli_NC_021165.1_15204941 | Ca_kabuli_chr06    | 15204941                       | [A/G]       | 1067299801                                 |
| Ca_Kabuli_NC_021165.1_15235612 | Ca_kabuli_chr06    | 15235612                       | [A/C]       | 1067299802                                 |
| Ca_Kabuli_NC_021165.1_15301275 | Ca_kabuli_chr06    | 15301275                       | [A/C]       | 1067299803                                 |
| Ca_Kabuli_NC_021165.1_15306139 | Ca_kabuli_chr06    | 15306139                       | [A/C]       | 1067299804                                 |
| Ca_Kabuli_NC_021165.1_15306142 | Ca_kabuli_chr06    | 15306142                       | [A/C]       | 1067299805                                 |
| Ca_Kabuli_NC_021165.1_15313640 | Ca_kabuli_chr06    | 15313640                       | [A/G]       | 1067299806                                 |
| Ca_Kabuli_NC_021165.1_15386963 | Ca_kabuli_chr06    | 15386963                       | [G/A]       | 1067299807                                 |
| Ca_Kabuli_NC_021165.1_15451994 | Ca_kabuli_chr06    | 15451994                       | [T/G]       | 1067299808                                 |
| Ca_Kabuli_NC_021165.1_15463331 | Ca_kabuli_chr06    | 15463331                       | [A/C]       | 1067299809                                 |
| Ca_Kabuli_NC_021165.1_15463340 | Ca_kabuli_chr06    | 15463340                       | [A/T]       | 1067299810                                 |
| Ca_Kabuli_NC_021165.1_15463354 | Ca_kabuli_chr06    | 15463354                       | [T/C]       | 1067299811                                 |
| Ca_Kabuli_NC_021165.1_15537918 | Ca_kabuli_chr06    | 15537918                       | [T/G]       | 1067299812                                 |
| Ca_Kabuli_NC_021165.1_15537931 | Ca_kabuli_chr06    | 15537931                       | [T/G]       | 1067299813                                 |
| Ca_Kabuli_NC_021165.1_15543348 | Ca_kabuli_chr06    | 15543348                       | [T/C]       | 1067299814                                 |
| Ca_Kabuli_NC_021165.1_15544732 | Ca_kabuli_chr06    | 15544732                       | [A/T]       | 1067299815                                 |
| Ca_Kabuli_NC_021165.1_15589539 | Ca_kabuli_chr06    | 15589539                       | [A/T]       | 1067299816                                 |

| <b>SNP IDs</b>                 | <b>Chromosomes</b> | <b>Physical positions (bp)</b> | <b>SNPs</b> | <b>NCBI SNPdb accession IDs (NCBI_ss#)</b> |
|--------------------------------|--------------------|--------------------------------|-------------|--------------------------------------------|
| Ca_Kabuli_NC_021165.1_15749754 | Ca_kabuli_chr06    | 15749754                       | [T/C]       | 1067299817                                 |
| Ca_Kabuli_NC_021165.1_15749817 | Ca_kabuli_chr06    | 15749817                       | [A/G]       | 1067299818                                 |
| Ca_Kabuli_NC_021165.1_15845370 | Ca_kabuli_chr06    | 15845370                       | [A/C]       | 1067299819                                 |
| Ca_Kabuli_NC_021165.1_15846166 | Ca_kabuli_chr06    | 15846166                       | [G/C]       | 1067299820                                 |
| Ca_Kabuli_NC_021165.1_15857715 | Ca_kabuli_chr06    | 15857715                       | [A/G]       | 1067299821                                 |
| Ca_Kabuli_NC_021165.1_15861316 | Ca_kabuli_chr06    | 15861316                       | [A/C]       | 1067299822                                 |
| Ca_Kabuli_NC_021165.1_15876779 | Ca_kabuli_chr06    | 15876779                       | [A/G]       | 1067299823                                 |
| Ca_Kabuli_NC_021165.1_15879528 | Ca_kabuli_chr06    | 15879528                       | [A/G]       | 1067299824                                 |
| Ca_Kabuli_NC_021165.1_15879535 | Ca_kabuli_chr06    | 15879535                       | [C/G]       | 1067299825                                 |
| Ca_Kabuli_NC_021165.1_16174874 | Ca_kabuli_chr06    | 16174874                       | [T/C]       | 1067299826                                 |
| Ca_Kabuli_NC_021165.1_16175122 | Ca_kabuli_chr06    | 16175122                       | [T/C]       | 1067299827                                 |
| Ca_Kabuli_NC_021165.1_16175139 | Ca_kabuli_chr06    | 16175139                       | [T/A]       | 1067299828                                 |
| Ca_Kabuli_NC_021165.1_16175140 | Ca_kabuli_chr06    | 16175140                       | [A/G]       | 1067299829                                 |
| Ca_Kabuli_NC_021165.1_16175142 | Ca_kabuli_chr06    | 16175142                       | [A/G]       | 1067299830                                 |
| Ca_Kabuli_NC_021165.1_16189675 | Ca_kabuli_chr06    | 16189675                       | [T/G]       | 1067299831                                 |
| Ca_Kabuli_NC_021165.1_16189678 | Ca_kabuli_chr06    | 16189678                       | [T/G]       | 1067299832                                 |
| Ca_Kabuli_NC_021165.1_16196469 | Ca_kabuli_chr06    | 16196469                       | [T/A]       | 1067299833                                 |
| Ca_Kabuli_NC_021165.1_16196531 | Ca_kabuli_chr06    | 16196531                       | [T/C]       | 1067299834                                 |
| Ca_Kabuli_NC_021165.1_16196548 | Ca_kabuli_chr06    | 16196548                       | [T/G]       | 1067299835                                 |
| Ca_Kabuli_NC_021165.1_16196555 | Ca_kabuli_chr06    | 16196555                       | [T/G]       | 1067299836                                 |
| Ca_Kabuli_NC_021165.1_16203377 | Ca_kabuli_chr06    | 16203377                       | [A/G]       | 1067299837                                 |
| Ca_Kabuli_NC_021165.1_16321782 | Ca_kabuli_chr06    | 16321782                       | [A/C]       | 1067299838                                 |
| Ca_Kabuli_NC_021165.1_16460477 | Ca_kabuli_chr06    | 16460477                       | [A/G]       | 1067299839                                 |
| Ca_Kabuli_NC_021165.1_16460507 | Ca_kabuli_chr06    | 16460507                       | [A/C]       | 1067299840                                 |
| Ca_Kabuli_NC_021165.1_16460511 | Ca_kabuli_chr06    | 16460511                       | [T/C]       | 1067299841                                 |
| Ca_Kabuli_NC_021165.1_16463615 | Ca_kabuli_chr06    | 16463615                       | [T/G]       | 1067299842                                 |
| Ca_Kabuli_NC_021165.1_16463629 | Ca_kabuli_chr06    | 16463629                       | [T/G]       | 1067299843                                 |
| Ca_Kabuli_NC_021165.1_16549005 | Ca_kabuli_chr06    | 16549005                       | [A/C]       | 1067299844                                 |
| Ca_Kabuli_NC_021165.1_16549022 | Ca_kabuli_chr06    | 16549022                       | [A/G]       | 1067299845                                 |
| Ca_Kabuli_NC_021165.1_16549027 | Ca_kabuli_chr06    | 16549027                       | [T/C]       | 1067299846                                 |
| Ca_Kabuli_NC_021165.1_16549038 | Ca_kabuli_chr06    | 16549038                       | [A/C]       | 1067299847                                 |
| Ca_Kabuli_NC_021165.1_16560733 | Ca_kabuli_chr06    | 16560733                       | [A/C]       | 1067299848                                 |
| Ca_Kabuli_NC_021165.1_16560778 | Ca_kabuli_chr06    | 16560778                       | [A/T]       | 1067299849                                 |
| Ca_Kabuli_NC_021165.1_16560817 | Ca_kabuli_chr06    | 16560817                       | [T/A]       | 1067299850                                 |

| <b>SNP IDs</b>                 | <b>Chromosomes</b> | <b>Physical positions (bp)</b> | <b>SNPs</b> | <b>NCBI SNPdb accession IDs (NCBI_ss#)</b> |
|--------------------------------|--------------------|--------------------------------|-------------|--------------------------------------------|
| Ca_Kabuli_NC_021165.1_16560818 | Ca_kabuli_chr06    | 16560818                       | [A/T]       | 1067299851                                 |
| Ca_Kabuli_NC_021165.1_16633519 | Ca_kabuli_chr06    | 16633519                       | [A/T]       | 1067299852                                 |
| Ca_Kabuli_NC_021165.1_16633566 | Ca_kabuli_chr06    | 16633566                       | [A/G]       | 1067299853                                 |
| Ca_Kabuli_NC_021165.1_16637868 | Ca_kabuli_chr06    | 16637868                       | [A/G]       | 1067299854                                 |
| Ca_Kabuli_NC_021165.1_16646741 | Ca_kabuli_chr06    | 16646741                       | [A/G]       | 1067299855                                 |
| Ca_Kabuli_NC_021165.1_16646748 | Ca_kabuli_chr06    | 16646748                       | [A/G]       | 1067299856                                 |
| Ca_Kabuli_NC_021165.1_16646750 | Ca_kabuli_chr06    | 16646750                       | [A/T]       | 1067299857                                 |
| Ca_Kabuli_NC_021165.1_16646752 | Ca_kabuli_chr06    | 16646752                       | [T/C]       | 1067299858                                 |
| Ca_Kabuli_NC_021165.1_16646771 | Ca_kabuli_chr06    | 16646771                       | [A/G]       | 1067299859                                 |
| Ca_Kabuli_NC_021165.1_16646772 | Ca_kabuli_chr06    | 16646772                       | [T/A]       | 1067299860                                 |
| Ca_Kabuli_NC_021165.1_16646786 | Ca_kabuli_chr06    | 16646786                       | [A/G]       | 1067299861                                 |
| Ca_Kabuli_NC_021165.1_16670020 | Ca_kabuli_chr06    | 16670020                       | [T/C]       | 1067299862                                 |
| Ca_Kabuli_NC_021165.1_16685801 | Ca_kabuli_chr06    | 16685801                       | [C/A]       | 1067299863                                 |
| Ca_Kabuli_NC_021165.1_16685802 | Ca_kabuli_chr06    | 16685802                       | [T/G]       | 1067299864                                 |
| Ca_Kabuli_NC_021165.1_16685803 | Ca_kabuli_chr06    | 16685803                       | [G/A]       | 1067299865                                 |
| Ca_Kabuli_NC_021165.1_16685804 | Ca_kabuli_chr06    | 16685804                       | [A/T]       | 1067299866                                 |
| Ca_Kabuli_NC_021165.1_16707137 | Ca_kabuli_chr06    | 16707137                       | [T/C]       | 1067299867                                 |
| Ca_Kabuli_NC_021165.1_16715751 | Ca_kabuli_chr06    | 16715751                       | [A/C]       | 1067299868                                 |
| Ca_Kabuli_NC_021165.1_16715828 | Ca_kabuli_chr06    | 16715828                       | [A/C]       | 1067299869                                 |
| Ca_Kabuli_NC_021165.1_16715836 | Ca_kabuli_chr06    | 16715836                       | [A/C]       | 1067299870                                 |
| Ca_Kabuli_NC_021165.1_16719881 | Ca_kabuli_chr06    | 16719881                       | [A/C]       | 1067299871                                 |
| Ca_Kabuli_NC_021165.1_16719892 | Ca_kabuli_chr06    | 16719892                       | [A/T]       | 1067299872                                 |
| Ca_Kabuli_NC_021165.1_16748597 | Ca_kabuli_chr06    | 16748597                       | [G/T]       | 1067299873                                 |
| Ca_Kabuli_NC_021165.1_16748605 | Ca_kabuli_chr06    | 16748605                       | [T/C]       | 1067299874                                 |
| Ca_Kabuli_NC_021165.1_16823947 | Ca_kabuli_chr06    | 16823947                       | [G/A]       | 1067299875                                 |
| Ca_Kabuli_NC_021165.1_17007475 | Ca_kabuli_chr06    | 17007475                       | [A/G]       | 1067299876                                 |
| Ca_Kabuli_NC_021165.1_17007478 | Ca_kabuli_chr06    | 17007478                       | [A/T]       | 1067299877                                 |
| Ca_Kabuli_NC_021165.1_17007488 | Ca_kabuli_chr06    | 17007488                       | [T/C]       | 1067299878                                 |
| Ca_Kabuli_NC_021165.1_17007516 | Ca_kabuli_chr06    | 17007516                       | [A/G]       | 1067299879                                 |
| Ca_Kabuli_NC_021165.1_17007518 | Ca_kabuli_chr06    | 17007518                       | [A/G]       | 1067299880                                 |
| Ca_Kabuli_NC_021165.1_17026983 | Ca_kabuli_chr06    | 17026983                       | [A/T]       | 1067299881                                 |
| Ca_Kabuli_NC_021165.1_17027023 | Ca_kabuli_chr06    | 17027023                       | [G/T]       | 1067299882                                 |
| Ca_Kabuli_NC_021165.1_17141426 | Ca_kabuli_chr06    | 17141426                       | [A/G]       | 1067299883                                 |
| Ca_Kabuli_NC_021165.1_17141440 | Ca_kabuli_chr06    | 17141440                       | [A/C]       | 1067299884                                 |

| <b>SNP IDs</b>                 | <b>Chromosomes</b> | <b>Physical positions (bp)</b> | <b>SNPs</b> | <b>NCBI SNPdb accession IDs (NCBI_ss#)</b> |
|--------------------------------|--------------------|--------------------------------|-------------|--------------------------------------------|
| Ca_Kabuli_NC_021165.1_17263206 | Ca_kabuli_chr06    | 17263206                       | [T/C]       | 1067299885                                 |
| Ca_Kabuli_NC_021165.1_17263231 | Ca_kabuli_chr06    | 17263231                       | [T/G]       | 1067299886                                 |
| Ca_Kabuli_NC_021165.1_17307671 | Ca_kabuli_chr06    | 17307671                       | [A/T]       | 1067299887                                 |
| Ca_Kabuli_NC_021165.1_17307672 | Ca_kabuli_chr06    | 17307672                       | [T/C]       | 1067299888                                 |
| Ca_Kabuli_NC_021165.1_17307673 | Ca_kabuli_chr06    | 17307673                       | [G/T]       | 1067299889                                 |
| Ca_Kabuli_NC_021165.1_17353399 | Ca_kabuli_chr06    | 17353399                       | [T/A]       | 1067299890                                 |
| Ca_Kabuli_NC_021165.1_17353443 | Ca_kabuli_chr06    | 17353443                       | [A/C]       | 1067299891                                 |
| Ca_Kabuli_NC_021165.1_17369636 | Ca_kabuli_chr06    | 17369636                       | [T/G]       | 1067299892                                 |
| Ca_Kabuli_NC_021165.1_17369736 | Ca_kabuli_chr06    | 17369736                       | [A/C]       | 1067299893                                 |
| Ca_Kabuli_NC_021165.1_17477859 | Ca_kabuli_chr06    | 17477859                       | [T/G]       | 1067299894                                 |
| Ca_Kabuli_NC_021165.1_17481233 | Ca_kabuli_chr06    | 17481233                       | [A/T]       | 1067299895                                 |
| Ca_Kabuli_NC_021165.1_17541154 | Ca_kabuli_chr06    | 17541154                       | [A/C]       | 1067299896                                 |
| Ca_Kabuli_NC_021165.1_17541155 | Ca_kabuli_chr06    | 17541155                       | [G/C]       | 1067299897                                 |
| Ca_Kabuli_NC_021165.1_17561109 | Ca_kabuli_chr06    | 17561109                       | [T/G]       | 1067299898                                 |
| Ca_Kabuli_NC_021165.1_17573300 | Ca_kabuli_chr06    | 17573300                       | [T/G]       | 1067299899                                 |
| Ca_Kabuli_NC_021165.1_17588691 | Ca_kabuli_chr06    | 17588691                       | [A/G]       | 1067299900                                 |
| Ca_Kabuli_NC_021165.1_17588706 | Ca_kabuli_chr06    | 17588706                       | [A/C]       | 1067299901                                 |
| Ca_Kabuli_NC_021165.1_17658997 | Ca_kabuli_chr06    | 17658997                       | [A/C]       | 1067299902                                 |
| Ca_Kabuli_NC_021165.1_17659019 | Ca_kabuli_chr06    | 17659019                       | [A/C]       | 1067299903                                 |
| Ca_Kabuli_NC_021165.1_17725440 | Ca_kabuli_chr06    | 17725440                       | [T/G]       | 1067299904                                 |
| Ca_Kabuli_NC_021165.1_17725485 | Ca_kabuli_chr06    | 17725485                       | [T/C]       | 1067299905                                 |
| Ca_Kabuli_NC_021165.1_17726649 | Ca_kabuli_chr06    | 17726649                       | [A/G]       | 1067299906                                 |
| Ca_Kabuli_NC_021165.1_17727172 | Ca_kabuli_chr06    | 17727172                       | [T/C]       | 1067299907                                 |
| Ca_Kabuli_NC_021165.1_17730756 | Ca_kabuli_chr06    | 17730756                       | [T/G]       | 1067299908                                 |
| Ca_Kabuli_NC_021165.1_17730758 | Ca_kabuli_chr06    | 17730758                       | [T/C]       | 1067299909                                 |
| Ca_Kabuli_NC_021165.1_17730766 | Ca_kabuli_chr06    | 17730766                       | [A/G]       | 1067299910                                 |
| Ca_Kabuli_NC_021165.1_17730834 | Ca_kabuli_chr06    | 17730834                       | [T/A]       | 1067299911                                 |
| Ca_Kabuli_NC_021165.1_17730843 | Ca_kabuli_chr06    | 17730843                       | [A/T]       | 1067299912                                 |
| Ca_Kabuli_NC_021165.1_17735235 | Ca_kabuli_chr06    | 17735235                       | [T/C]       | 1067299913                                 |
| Ca_Kabuli_NC_021165.1_17740978 | Ca_kabuli_chr06    | 17740978                       | [T/C]       | 1067299914                                 |
| Ca_Kabuli_NC_021165.1_17741048 | Ca_kabuli_chr06    | 17741048                       | [A/C]       | 1067299915                                 |
| Ca_Kabuli_NC_021165.1_17741054 | Ca_kabuli_chr06    | 17741054                       | [A/G]       | 1067299916                                 |
| Ca_Kabuli_NC_021165.1_17741070 | Ca_kabuli_chr06    | 17741070                       | [A/G]       | 1067299917                                 |
| Ca_Kabuli_NC_021165.1_17751394 | Ca_kabuli_chr06    | 17751394                       | [A/G]       | 1067299918                                 |



| <b>SNP IDs</b>                 | <b>Chromosomes</b> | <b>Physical positions (bp)</b> | <b>SNPs</b> | <b>NCBI SNPdb accession IDs (NCBI_ss#)</b> |
|--------------------------------|--------------------|--------------------------------|-------------|--------------------------------------------|
| Ca_Kabuli_NC_021165.1_17751410 | Ca_kabuli_chr06    | 17751410                       | [T/G]       | 1067299919                                 |
| Ca_Kabuli_NC_021165.1_17787977 | Ca_kabuli_chr06    | 17787977                       | [T/G]       | 1067299920                                 |
| Ca_Kabuli_NC_021165.1_17788028 | Ca_kabuli_chr06    | 17788028                       | [T/C]       | 1067299921                                 |
| Ca_Kabuli_NC_021165.1_17788032 | Ca_kabuli_chr06    | 17788032                       | [A/G]       | 1067299922                                 |
| Ca_Kabuli_NC_021165.1_17788567 | Ca_kabuli_chr06    | 17788567                       | [A/C]       | 1067299923                                 |
| Ca_Kabuli_NC_021165.1_17788616 | Ca_kabuli_chr06    | 17788616                       | [T/G]       | 1067299924                                 |
| Ca_Kabuli_NC_021165.1_17788618 | Ca_kabuli_chr06    | 17788618                       | [A/T]       | 1067299925                                 |
| Ca_Kabuli_NC_021165.1_17788626 | Ca_kabuli_chr06    | 17788626                       | [T/G]       | 1067299926                                 |
| Ca_Kabuli_NC_021165.1_17788701 | Ca_kabuli_chr06    | 17788701                       | [T/C]       | 1067299927                                 |
| Ca_Kabuli_NC_021165.1_17863974 | Ca_kabuli_chr06    | 17863974                       | [T/C]       | 1067299928                                 |
| Ca_Kabuli_NC_021165.1_17897931 | Ca_kabuli_chr06    | 17897931                       | [G/A]       | 1067299929                                 |
| Ca_Kabuli_NC_021165.1_17897932 | Ca_kabuli_chr06    | 17897932                       | [A/T]       | 1067299930                                 |
| Ca_Kabuli_NC_021165.1_17897933 | Ca_kabuli_chr06    | 17897933                       | [G/C]       | 1067299931                                 |
| Ca_Kabuli_NC_021165.1_17897934 | Ca_kabuli_chr06    | 17897934                       | [G/T]       | 1067299932                                 |
| Ca_Kabuli_NC_021165.1_17985440 | Ca_kabuli_chr06    | 17985440                       | [A/G]       | 1067299933                                 |
| Ca_Kabuli_NC_021165.1_17985446 | Ca_kabuli_chr06    | 17985446                       | [C/T]       | 1067299934                                 |
| Ca_Kabuli_NC_021165.1_18026451 | Ca_kabuli_chr06    | 18026451                       | [A/G]       | 1067299935                                 |
| Ca_Kabuli_NC_021165.1_18026522 | Ca_kabuli_chr06    | 18026522                       | [T/C]       | 1067299936                                 |
| Ca_Kabuli_NC_021165.1_18026542 | Ca_kabuli_chr06    | 18026542                       | [T/C]       | 1067299937                                 |
| Ca_Kabuli_NC_021165.1_18094667 | Ca_kabuli_chr06    | 18094667                       | [A/G]       | 1067299938                                 |
| Ca_Kabuli_NC_021165.1_18125425 | Ca_kabuli_chr06    | 18125425                       | [T/G]       | 1067299939                                 |
| Ca_Kabuli_NC_021165.1_18125434 | Ca_kabuli_chr06    | 18125434                       | [T/G]       | 1067299940                                 |
| Ca_Kabuli_NC_021165.1_18125483 | Ca_kabuli_chr06    | 18125483                       | [G/T]       | 1067299941                                 |
| Ca_Kabuli_NC_021165.1_18233441 | Ca_kabuli_chr06    | 18233441                       | [G/A]       | 1067299942                                 |
| Ca_Kabuli_NC_021165.1_18233443 | Ca_kabuli_chr06    | 18233443                       | [T/G]       | 1067299943                                 |
| Ca_Kabuli_NC_021165.1_18264779 | Ca_kabuli_chr06    | 18264779                       | [A/G]       | 1067299944                                 |
| Ca_Kabuli_NC_021165.1_18389693 | Ca_kabuli_chr06    | 18389693                       | [A/T]       | 1067299945                                 |
| Ca_Kabuli_NC_021165.1_18389699 | Ca_kabuli_chr06    | 18389699                       | [T/C]       | 1067299946                                 |
| Ca_Kabuli_NC_021165.1_18389704 | Ca_kabuli_chr06    | 18389704                       | [T/G]       | 1067299947                                 |
| Ca_Kabuli_NC_021165.1_18629872 | Ca_kabuli_chr06    | 18629872                       | [A/G]       | 1067299948                                 |
| Ca_Kabuli_NC_021165.1_18747181 | Ca_kabuli_chr06    | 18747181                       | [A/G]       | 1067299949                                 |
| Ca_Kabuli_NC_021165.1_18747182 | Ca_kabuli_chr06    | 18747182                       | [T/A]       | 1067299950                                 |
| Ca_Kabuli_NC_021165.1_18747196 | Ca_kabuli_chr06    | 18747196                       | [A/C]       | 1067299951                                 |
| Ca_Kabuli_NC_021165.1_18747200 | Ca_kabuli_chr06    | 18747200                       | [T/C]       | 1067299952                                 |

| <b>SNP IDs</b>                 | <b>Chromosomes</b> | <b>Physical positions (bp)</b> | <b>SNPs</b> | <b>NCBI SNPdb accession IDs (NCBI_ss#)</b> |
|--------------------------------|--------------------|--------------------------------|-------------|--------------------------------------------|
| Ca_Kabuli_NC_021165.1_18768201 | Ca_kabuli_chr06    | 18768201                       | [A/G]       | 1067299953                                 |
| Ca_Kabuli_NC_021165.1_18771108 | Ca_kabuli_chr06    | 18771108                       | [T/G]       | 1067299954                                 |
| Ca_Kabuli_NC_021165.1_18772103 | Ca_kabuli_chr06    | 18772103                       | [A/C]       | 1067299955                                 |
| Ca_Kabuli_NC_021165.1_18852815 | Ca_kabuli_chr06    | 18852815                       | [T/C]       | 1067299956                                 |
| Ca_Kabuli_NC_021165.1_18852818 | Ca_kabuli_chr06    | 18852818                       | [C/A]       | 1067299957                                 |
| Ca_Kabuli_NC_021165.1_18852819 | Ca_kabuli_chr06    | 18852819                       | [T/G]       | 1067299958                                 |
| Ca_Kabuli_NC_021165.1_18852820 | Ca_kabuli_chr06    | 18852820                       | [G/A]       | 1067299959                                 |
| Ca_Kabuli_NC_021165.1_18852821 | Ca_kabuli_chr06    | 18852821                       | [A/G]       | 1067299960                                 |
| Ca_Kabuli_NC_021165.1_18852822 | Ca_kabuli_chr06    | 18852822                       | [G/T]       | 1067299961                                 |
| Ca_Kabuli_NC_021165.1_18852823 | Ca_kabuli_chr06    | 18852823                       | [A/T]       | 1067299962                                 |
| Ca_Kabuli_NC_021165.1_18852836 | Ca_kabuli_chr06    | 18852836                       | [A/C]       | 1067299963                                 |
| Ca_Kabuli_NC_021165.1_18852847 | Ca_kabuli_chr06    | 18852847                       | [A/C]       | 1067299964                                 |
| Ca_Kabuli_NC_021165.1_18916598 | Ca_kabuli_chr06    | 18916598                       | [A/C]       | 1067299965                                 |
| Ca_Kabuli_NC_021165.1_18916606 | Ca_kabuli_chr06    | 18916606                       | [A/C]       | 1067299966                                 |
| Ca_Kabuli_NC_021165.1_18922040 | Ca_kabuli_chr06    | 18922040                       | [A/C]       | 1067299967                                 |
| Ca_Kabuli_NC_021165.1_18924954 | Ca_kabuli_chr06    | 18924954                       | [A/G]       | 1067299968                                 |
| Ca_Kabuli_NC_021165.1_18924996 | Ca_kabuli_chr06    | 18924996                       | [A/T]       | 1067299969                                 |
| Ca_Kabuli_NC_021165.1_18938475 | Ca_kabuli_chr06    | 18938475                       | [A/G]       | 1067299970                                 |
| Ca_Kabuli_NC_021165.1_18938492 | Ca_kabuli_chr06    | 18938492                       | [T/G]       | 1067299971                                 |
| Ca_Kabuli_NC_021165.1_18953205 | Ca_kabuli_chr06    | 18953205                       | [T/A]       | 1067299972                                 |
| Ca_Kabuli_NC_021165.1_18953206 | Ca_kabuli_chr06    | 18953206                       | [A/T]       | 1067299973                                 |
| Ca_Kabuli_NC_021165.1_18953207 | Ca_kabuli_chr06    | 18953207                       | [A/T]       | 1067299974                                 |
| Ca_Kabuli_NC_021165.1_18953208 | Ca_kabuli_chr06    | 18953208                       | [T/A]       | 1067299975                                 |
| Ca_Kabuli_NC_021165.1_18953209 | Ca_kabuli_chr06    | 18953209                       | [A/T]       | 1067299976                                 |
| Ca_Kabuli_NC_021165.1_18987257 | Ca_kabuli_chr06    | 18987257                       | [A/G]       | 1067299977                                 |
| Ca_Kabuli_NC_021165.1_19000012 | Ca_kabuli_chr06    | 19000012                       | [A/G]       | 1067299978                                 |
| Ca_Kabuli_NC_021165.1_19114054 | Ca_kabuli_chr06    | 19114054                       | [A/C]       | 1067299979                                 |
| Ca_Kabuli_NC_021165.1_19143537 | Ca_kabuli_chr06    | 19143537                       | [C/A]       | 1067299980                                 |
| Ca_Kabuli_NC_021165.1_19178265 | Ca_kabuli_chr06    | 19178265                       | [A/C]       | 1067299981                                 |
| Ca_Kabuli_NC_021165.1_19247966 | Ca_kabuli_chr06    | 19247966                       | [T/G]       | 1067299982                                 |
| Ca_Kabuli_NC_021165.1_19307105 | Ca_kabuli_chr06    | 19307105                       | [A/T]       | 1067299983                                 |
| Ca_Kabuli_NC_021165.1_19394497 | Ca_kabuli_chr06    | 19394497                       | [T/C]       | 1067299984                                 |
| Ca_Kabuli_NC_021165.1_19394518 | Ca_kabuli_chr06    | 19394518                       | [A/G]       | 1067299985                                 |
| Ca_Kabuli_NC_021165.1_19394545 | Ca_kabuli_chr06    | 19394545                       | [T/C]       | 1067299986                                 |

| <b>SNP IDs</b>                 | <b>Chromosomes</b> | <b>Physical positions (bp)</b> | <b>SNPs</b> | <b>NCBI SNPdb accession IDs (NCBI_ss#)</b> |
|--------------------------------|--------------------|--------------------------------|-------------|--------------------------------------------|
| Ca_Kabuli_NC_021165.1_19433512 | Ca_kabuli_chr06    | 19433512                       | [C/A]       | 1067299987                                 |
| Ca_Kabuli_NC_021165.1_19433513 | Ca_kabuli_chr06    | 19433513                       | [A/G]       | 1067299988                                 |
| Ca_Kabuli_NC_021165.1_19433514 | Ca_kabuli_chr06    | 19433514                       | [T/A]       | 1067299989                                 |
| Ca_Kabuli_NC_021165.1_19433516 | Ca_kabuli_chr06    | 19433516                       | [A/C]       | 1067299990                                 |
| Ca_Kabuli_NC_021165.1_19433517 | Ca_kabuli_chr06    | 19433517                       | [T/G]       | 1067299991                                 |
| Ca_Kabuli_NC_021165.1_19433556 | Ca_kabuli_chr06    | 19433556                       | [T/A]       | 1067299992                                 |
| Ca_Kabuli_NC_021165.1_19437013 | Ca_kabuli_chr06    | 19437013                       | [A/C]       | 1067299993                                 |
| Ca_Kabuli_NC_021165.1_19474577 | Ca_kabuli_chr06    | 19474577                       | [A/G]       | 1067299994                                 |
| Ca_Kabuli_NC_021165.1_19474599 | Ca_kabuli_chr06    | 19474599                       | [A/C]       | 1067299995                                 |
| Ca_Kabuli_NC_021165.1_19474621 | Ca_kabuli_chr06    | 19474621                       | [T/A]       | 1067299996                                 |
| Ca_Kabuli_NC_021165.1_19474629 | Ca_kabuli_chr06    | 19474629                       | [T/C]       | 1067299997                                 |
| Ca_Kabuli_NC_021165.1_19478512 | Ca_kabuli_chr06    | 19478512                       | [T/G]       | 1067299998                                 |
| Ca_Kabuli_NC_021165.1_19478543 | Ca_kabuli_chr06    | 19478543                       | [G/A]       | 1067299999                                 |
| Ca_Kabuli_NC_021165.1_19478545 | Ca_kabuli_chr06    | 19478545                       | [A/G]       | 1067300000                                 |
| Ca_Kabuli_NC_021165.1_19478546 | Ca_kabuli_chr06    | 19478546                       | [G/C]       | 1067300001                                 |
| Ca_Kabuli_NC_021165.1_19502691 | Ca_kabuli_chr06    | 19502691                       | [A/G]       | 1067300002                                 |
| Ca_Kabuli_NC_021165.1_19502700 | Ca_kabuli_chr06    | 19502700                       | [T/C]       | 1067300003                                 |
| Ca_Kabuli_NC_021165.1_19653654 | Ca_kabuli_chr06    | 19653654                       | [C/T]       | 1067300004                                 |
| Ca_Kabuli_NC_021165.1_19674561 | Ca_kabuli_chr06    | 19674561                       | [A/C]       | 1067300005                                 |
| Ca_Kabuli_NC_021165.1_19709914 | Ca_kabuli_chr06    | 19709914                       | [A/T]       | 1067300006                                 |
| Ca_Kabuli_NC_021165.1_19713192 | Ca_kabuli_chr06    | 19713192                       | [A/G]       | 1067300007                                 |
| Ca_Kabuli_NC_021165.1_19713228 | Ca_kabuli_chr06    | 19713228                       | [T/A]       | 1067300008                                 |
| Ca_Kabuli_NC_021165.1_19726254 | Ca_kabuli_chr06    | 19726254                       | [T/G]       | 1067300009                                 |
| Ca_Kabuli_NC_021165.1_19735965 | Ca_kabuli_chr06    | 19735965                       | [T/G]       | 1067300010                                 |
| Ca_Kabuli_NC_021165.1_19735992 | Ca_kabuli_chr06    | 19735992                       | [A/C]       | 1067300011                                 |
| Ca_Kabuli_NC_021165.1_20505038 | Ca_kabuli_chr06    | 20505038                       | [C/T]       | 1067300012                                 |
| Ca_Kabuli_NC_021165.1_20660795 | Ca_kabuli_chr06    | 20660795                       | [T/C]       | 1067300013                                 |
| Ca_Kabuli_NC_021165.1_20660832 | Ca_kabuli_chr06    | 20660832                       | [A/C]       | 1067300014                                 |
| Ca_Kabuli_NC_021165.1_20667254 | Ca_kabuli_chr06    | 20667254                       | [A/C]       | 1067300015                                 |
| Ca_Kabuli_NC_021165.1_20671055 | Ca_kabuli_chr06    | 20671055                       | [A/T]       | 1067300016                                 |
| Ca_Kabuli_NC_021165.1_20679788 | Ca_kabuli_chr06    | 20679788                       | [T/G]       | 1067300017                                 |
| Ca_Kabuli_NC_021165.1_20679803 | Ca_kabuli_chr06    | 20679803                       | [C/T]       | 1067300018                                 |
| Ca_Kabuli_NC_021165.1_20679807 | Ca_kabuli_chr06    | 20679807                       | [A/C]       | 1067300019                                 |
| Ca_Kabuli_NC_021165.1_20679819 | Ca_kabuli_chr06    | 20679819                       | [T/C]       | 1067300020                                 |

| <b>SNP IDs</b>                 | <b>Chromosomes</b> | <b>Physical positions (bp)</b> | <b>SNPs</b> | <b>NCBI SNPdb accession IDs (NCBI_ss#)</b> |
|--------------------------------|--------------------|--------------------------------|-------------|--------------------------------------------|
| Ca_Kabuli_NC_021165.1_20679821 | Ca_kabuli_chr06    | 20679821                       | [T/C]       | 1067300021                                 |
| Ca_Kabuli_NC_021165.1_20679823 | Ca_kabuli_chr06    | 20679823                       | [C/T]       | 1067300022                                 |
| Ca_Kabuli_NC_021165.1_20679826 | Ca_kabuli_chr06    | 20679826                       | [C/T]       | 1067300023                                 |
| Ca_Kabuli_NC_021165.1_20693828 | Ca_kabuli_chr06    | 20693828                       | [C/G]       | 1067300024                                 |
| Ca_Kabuli_NC_021165.1_20738712 | Ca_kabuli_chr06    | 20738712                       | [A/G]       | 1067300025                                 |
| Ca_Kabuli_NC_021165.1_20738721 | Ca_kabuli_chr06    | 20738721                       | [T/G]       | 1067300026                                 |
| Ca_Kabuli_NC_021165.1_20738730 | Ca_kabuli_chr06    | 20738730                       | [A/G]       | 1067300027                                 |
| Ca_Kabuli_NC_021165.1_20766355 | Ca_kabuli_chr06    | 20766355                       | [A/C]       | 1067300028                                 |
| Ca_Kabuli_NC_021165.1_20766375 | Ca_kabuli_chr06    | 20766375                       | [T/A]       | 1067300029                                 |
| Ca_Kabuli_NC_021165.1_20766462 | Ca_kabuli_chr06    | 20766462                       | [A/G]       | 1067300030                                 |
| Ca_Kabuli_NC_021165.1_20780999 | Ca_kabuli_chr06    | 20780999                       | [G/C]       | 1067300031                                 |
| Ca_Kabuli_NC_021165.1_20781000 | Ca_kabuli_chr06    | 20781000                       | [G/T]       | 1067300032                                 |
| Ca_Kabuli_NC_021165.1_20786070 | Ca_kabuli_chr06    | 20786070                       | [G/C]       | 1067300033                                 |
| Ca_Kabuli_NC_021165.1_20786071 | Ca_kabuli_chr06    | 20786071                       | [G/T]       | 1067300034                                 |
| Ca_Kabuli_NC_021165.1_20802748 | Ca_kabuli_chr06    | 20802748                       | [T/A]       | 1067300035                                 |
| Ca_Kabuli_NC_021165.1_20802761 | Ca_kabuli_chr06    | 20802761                       | [A/T]       | 1067300036                                 |
| Ca_Kabuli_NC_021165.1_20889681 | Ca_kabuli_chr06    | 20889681                       | [T/A]       | 1067300037                                 |
| Ca_Kabuli_NC_021165.1_20890710 | Ca_kabuli_chr06    | 20890710                       | [A/C]       | 1067300038                                 |
| Ca_Kabuli_NC_021165.1_20917619 | Ca_kabuli_chr06    | 20917619                       | [T/C]       | 1067300039                                 |
| Ca_Kabuli_NC_021165.1_20917621 | Ca_kabuli_chr06    | 20917621                       | [A/T]       | 1067300040                                 |
| Ca_Kabuli_NC_021165.1_20917684 | Ca_kabuli_chr06    | 20917684                       | [A/C]       | 1067300041                                 |
| Ca_Kabuli_NC_021165.1_20917713 | Ca_kabuli_chr06    | 20917713                       | [A/C]       | 1067300042                                 |
| Ca_Kabuli_NC_021165.1_20935369 | Ca_kabuli_chr06    | 20935369                       | [A/C]       | 1067300043                                 |
| Ca_Kabuli_NC_021165.1_20935397 | Ca_kabuli_chr06    | 20935397                       | [T/G]       | 1067300044                                 |
| Ca_Kabuli_NC_021165.1_20935894 | Ca_kabuli_chr06    | 20935894                       | [T/C]       | 1067300045                                 |
| Ca_Kabuli_NC_021165.1_20966992 | Ca_kabuli_chr06    | 20966992                       | [T/G]       | 1067300046                                 |
| Ca_Kabuli_NC_021165.1_20998904 | Ca_kabuli_chr06    | 20998904                       | [C/G]       | 1067300047                                 |
| Ca_Kabuli_NC_021165.1_20998905 | Ca_kabuli_chr06    | 20998905                       | [T/G]       | 1067300048                                 |
| Ca_Kabuli_NC_021165.1_21045734 | Ca_kabuli_chr06    | 21045734                       | [T/C]       | 1067300049                                 |
| Ca_Kabuli_NC_021165.1_21045737 | Ca_kabuli_chr06    | 21045737                       | [A/C]       | 1067300050                                 |
| Ca_Kabuli_NC_021165.1_21058265 | Ca_kabuli_chr06    | 21058265                       | [T/A]       | 1067300051                                 |
| Ca_Kabuli_NC_021165.1_21061365 | Ca_kabuli_chr06    | 21061365                       | [T/G]       | 1067300052                                 |
| Ca_Kabuli_NC_021165.1_21170334 | Ca_kabuli_chr06    | 21170334                       | [T/A]       | 1067300053                                 |
| Ca_Kabuli_NC_021165.1_21176033 | Ca_kabuli_chr06    | 21176033                       | [T/G]       | 1067300054                                 |

| <b>SNP IDs</b>                 | <b>Chromosomes</b> | <b>Physical positions (bp)</b> | <b>SNPs</b> | <b>NCBI SNPdb accession IDs (NCBI_ss#)</b> |
|--------------------------------|--------------------|--------------------------------|-------------|--------------------------------------------|
| Ca_Kabuli_NC_021165.1_21237686 | Ca_kabuli_chr06    | 21237686                       | [A/C]       | 1067300055                                 |
| Ca_Kabuli_NC_021165.1_21238051 | Ca_kabuli_chr06    | 21238051                       | [T/C]       | 1067300056                                 |
| Ca_Kabuli_NC_021165.1_21238081 | Ca_kabuli_chr06    | 21238081                       | [A/G]       | 1067300057                                 |
| Ca_Kabuli_NC_021165.1_21238138 | Ca_kabuli_chr06    | 21238138                       | [A/C]       | 1067300058                                 |
| Ca_Kabuli_NC_021165.1_21238178 | Ca_kabuli_chr06    | 21238178                       | [A/G]       | 1067300059                                 |
| Ca_Kabuli_NC_021165.1_21238721 | Ca_kabuli_chr06    | 21238721                       | [T/A]       | 1067300060                                 |
| Ca_Kabuli_NC_021165.1_21238728 | Ca_kabuli_chr06    | 21238728                       | [T/C]       | 1067300061                                 |
| Ca_Kabuli_NC_021165.1_21238731 | Ca_kabuli_chr06    | 21238731                       | [T/G]       | 1067300062                                 |
| Ca_Kabuli_NC_021165.1_21238743 | Ca_kabuli_chr06    | 21238743                       | [T/G]       | 1067300063                                 |
| Ca_Kabuli_NC_021165.1_21238768 | Ca_kabuli_chr06    | 21238768                       | [T/G]       | 1067300064                                 |
| Ca_Kabuli_NC_021165.1_21322836 | Ca_kabuli_chr06    | 21322836                       | [C/T]       | 1067300065                                 |
| Ca_Kabuli_NC_021165.1_21322854 | Ca_kabuli_chr06    | 21322854                       | [G/A]       | 1067300066                                 |
| Ca_Kabuli_NC_021165.1_21322875 | Ca_kabuli_chr06    | 21322875                       | [T/C]       | 1067300067                                 |
| Ca_Kabuli_NC_021165.1_21322884 | Ca_kabuli_chr06    | 21322884                       | [A/G]       | 1067300068                                 |
| Ca_Kabuli_NC_021165.1_21324520 | Ca_kabuli_chr06    | 21324520                       | [T/C]       | 1067300069                                 |
| Ca_Kabuli_NC_021165.1_21324597 | Ca_kabuli_chr06    | 21324597                       | [T/G]       | 1067300070                                 |
| Ca_Kabuli_NC_021165.1_21324640 | Ca_kabuli_chr06    | 21324640                       | [A/C]       | 1067300071                                 |
| Ca_Kabuli_NC_021165.1_21326252 | Ca_kabuli_chr06    | 21326252                       | [A/C]       | 1067300072                                 |
| Ca_Kabuli_NC_021165.1_21326272 | Ca_kabuli_chr06    | 21326272                       | [T/C]       | 1067300073                                 |
| Ca_Kabuli_NC_021165.1_21326282 | Ca_kabuli_chr06    | 21326282                       | [A/T]       | 1067300074                                 |
| Ca_Kabuli_NC_021165.1_21477001 | Ca_kabuli_chr06    | 21477001                       | [A/G]       | 1067300075                                 |
| Ca_Kabuli_NC_021165.1_21478564 | Ca_kabuli_chr06    | 21478564                       | [T/C]       | 1067300076                                 |
| Ca_Kabuli_NC_021165.1_21478607 | Ca_kabuli_chr06    | 21478607                       | [T/G]       | 1067300077                                 |
| Ca_Kabuli_NC_021165.1_21479690 | Ca_kabuli_chr06    | 21479690                       | [T/G]       | 1067300078                                 |
| Ca_Kabuli_NC_021165.1_21489039 | Ca_kabuli_chr06    | 21489039                       | [T/G]       | 1067300079                                 |
| Ca_Kabuli_NC_021165.1_21489040 | Ca_kabuli_chr06    | 21489040                       | [G/C]       | 1067300080                                 |
| Ca_Kabuli_NC_021165.1_21489042 | Ca_kabuli_chr06    | 21489042                       | [T/C]       | 1067300081                                 |
| Ca_Kabuli_NC_021165.1_21489049 | Ca_kabuli_chr06    | 21489049                       | [A/C]       | 1067300082                                 |
| Ca_Kabuli_NC_021165.1_21489060 | Ca_kabuli_chr06    | 21489060                       | [T/C]       | 1067300083                                 |
| Ca_Kabuli_NC_021165.1_21497487 | Ca_kabuli_chr06    | 21497487                       | [A/G]       | 1067300084                                 |
| Ca_Kabuli_NC_021165.1_21506176 | Ca_kabuli_chr06    | 21506176                       | [A/G]       | 1067300085                                 |
| Ca_Kabuli_NC_021165.1_21506184 | Ca_kabuli_chr06    | 21506184                       | [T/C]       | 1067300086                                 |
| Ca_Kabuli_NC_021165.1_21506246 | Ca_kabuli_chr06    | 21506246                       | [T/C]       | 1067300087                                 |
| Ca_Kabuli_NC_021165.1_21506288 | Ca_kabuli_chr06    | 21506288                       | [T/G]       | 1067300088                                 |

| <b>SNP IDs</b>                 | <b>Chromosomes</b> | <b>Physical positions (bp)</b> | <b>SNPs</b> | <b>NCBI SNPdb accession IDs (NCBI_ss#)</b> |
|--------------------------------|--------------------|--------------------------------|-------------|--------------------------------------------|
| Ca_Kabuli_NC_021165.1_21506372 | Ca_kabuli_chr06    | 21506372                       | [T/C]       | 1067300089                                 |
| Ca_Kabuli_NC_021165.1_21506392 | Ca_kabuli_chr06    | 21506392                       | [T/G]       | 1067300090                                 |
| Ca_Kabuli_NC_021165.1_21548490 | Ca_kabuli_chr06    | 21548490                       | [T/A]       | 1067300091                                 |
| Ca_Kabuli_NC_021165.1_21576795 | Ca_kabuli_chr06    | 21576795                       | [A/G]       | 1067300092                                 |
| Ca_Kabuli_NC_021165.1_21601413 | Ca_kabuli_chr06    | 21601413                       | [A/T]       | 1067300093                                 |
| Ca_Kabuli_NC_021165.1_21601419 | Ca_kabuli_chr06    | 21601419                       | [A/C]       | 1067300094                                 |
| Ca_Kabuli_NC_021165.1_21601435 | Ca_kabuli_chr06    | 21601435                       | [A/C]       | 1067300095                                 |
| Ca_Kabuli_NC_021165.1_21603167 | Ca_kabuli_chr06    | 21603167                       | [A/C]       | 1067300096                                 |
| Ca_Kabuli_NC_021165.1_21675741 | Ca_kabuli_chr06    | 21675741                       | [T/G]       | 1067300097                                 |
| Ca_Kabuli_NC_021165.1_21675839 | Ca_kabuli_chr06    | 21675839                       | [A/T]       | 1067300098                                 |
| Ca_Kabuli_NC_021165.1_21683880 | Ca_kabuli_chr06    | 21683880                       | [A/C]       | 1067300099                                 |
| Ca_Kabuli_NC_021165.1_21718696 | Ca_kabuli_chr06    | 21718696                       | [A/C]       | 1067300100                                 |
| Ca_Kabuli_NC_021165.1_21718891 | Ca_kabuli_chr06    | 21718891                       | [A/C]       | 1067300101                                 |
| Ca_Kabuli_NC_021165.1_21809707 | Ca_kabuli_chr06    | 21809707                       | [T/C]       | 1067300102                                 |
| Ca_Kabuli_NC_021165.1_21809727 | Ca_kabuli_chr06    | 21809727                       | [T/A]       | 1067300103                                 |
| Ca_Kabuli_NC_021165.1_21809746 | Ca_kabuli_chr06    | 21809746                       | [A/T]       | 1067300104                                 |
| Ca_Kabuli_NC_021165.1_21865952 | Ca_kabuli_chr06    | 21865952                       | [A/G]       | 1067300105                                 |
| Ca_Kabuli_NC_021165.1_21914401 | Ca_kabuli_chr06    | 21914401                       | [T/C]       | 1067300106                                 |
| Ca_Kabuli_NC_021165.1_21914411 | Ca_kabuli_chr06    | 21914411                       | [T/C]       | 1067300107                                 |
| Ca_Kabuli_NC_021165.1_21914418 | Ca_kabuli_chr06    | 21914418                       | [A/G]       | 1067300108                                 |
| Ca_Kabuli_NC_021165.1_21917906 | Ca_kabuli_chr06    | 21917906                       | [T/A]       | 1067300109                                 |
| Ca_Kabuli_NC_021165.1_21917910 | Ca_kabuli_chr06    | 21917910                       | [T/G]       | 1067300110                                 |
| Ca_Kabuli_NC_021165.1_22016054 | Ca_kabuli_chr06    | 22016054                       | [T/C]       | 1067300111                                 |
| Ca_Kabuli_NC_021165.1_22017276 | Ca_kabuli_chr06    | 22017276                       | [A/C]       | 1067300112                                 |
| Ca_Kabuli_NC_021165.1_22017280 | Ca_kabuli_chr06    | 22017280                       | [A/C]       | 1067300113                                 |
| Ca_Kabuli_NC_021165.1_22017312 | Ca_kabuli_chr06    | 22017312                       | [A/C]       | 1067300114                                 |
| Ca_Kabuli_NC_021165.1_22019758 | Ca_kabuli_chr06    | 22019758                       | [A/C]       | 1067300115                                 |
| Ca_Kabuli_NC_021165.1_22019762 | Ca_kabuli_chr06    | 22019762                       | [T/C]       | 1067300116                                 |
| Ca_Kabuli_NC_021165.1_22019764 | Ca_kabuli_chr06    | 22019764                       | [G/T]       | 1067300117                                 |
| Ca_Kabuli_NC_021165.1_22071718 | Ca_kabuli_chr06    | 22071718                       | [T/C]       | 1067300118                                 |
| Ca_Kabuli_NC_021165.1_22071762 | Ca_kabuli_chr06    | 22071762                       | [A/C]       | 1067300119                                 |
| Ca_Kabuli_NC_021165.1_22074776 | Ca_kabuli_chr06    | 22074776                       | [T/C]       | 1067300120                                 |
| Ca_Kabuli_NC_021165.1_22074780 | Ca_kabuli_chr06    | 22074780                       | [A/G]       | 1067300121                                 |
| Ca_Kabuli_NC_021165.1_22074812 | Ca_kabuli_chr06    | 22074812                       | [T/G]       | 1067300122                                 |

| <b>SNP IDs</b>                 | <b>Chromosomes</b> | <b>Physical positions (bp)</b> | <b>SNPs</b> | <b>NCBI SNPdb accession IDs (NCBI_ss#)</b> |
|--------------------------------|--------------------|--------------------------------|-------------|--------------------------------------------|
| Ca_Kabuli_NC_021165.1_22074818 | Ca_kabuli_chr06    | 22074818                       | [A/C]       | 1067300123                                 |
| Ca_Kabuli_NC_021165.1_22074828 | Ca_kabuli_chr06    | 22074828                       | [A/G]       | 1067300124                                 |
| Ca_Kabuli_NC_021165.1_22074836 | Ca_kabuli_chr06    | 22074836                       | [T/A]       | 1067300125                                 |
| Ca_Kabuli_NC_021165.1_22079140 | Ca_kabuli_chr06    | 22079140                       | [A/G]       | 1067300126                                 |
| Ca_Kabuli_NC_021165.1_22120904 | Ca_kabuli_chr06    | 22120904                       | [A/T]       | 1067300127                                 |
| Ca_Kabuli_NC_021165.1_22137481 | Ca_kabuli_chr06    | 22137481                       | [A/T]       | 1067300128                                 |
| Ca_Kabuli_NC_021165.1_22192498 | Ca_kabuli_chr06    | 22192498                       | [A/C]       | 1067300129                                 |
| Ca_Kabuli_NC_021165.1_22194363 | Ca_kabuli_chr06    | 22194363                       | [T/G]       | 1067300130                                 |
| Ca_Kabuli_NC_021165.1_22201184 | Ca_kabuli_chr06    | 22201184                       | [A/T]       | 1067300131                                 |
| Ca_Kabuli_NC_021165.1_22201672 | Ca_kabuli_chr06    | 22201672                       | [A/T]       | 1067300132                                 |
| Ca_Kabuli_NC_021165.1_22201696 | Ca_kabuli_chr06    | 22201696                       | [A/C]       | 1067300133                                 |
| Ca_Kabuli_NC_021165.1_22201699 | Ca_kabuli_chr06    | 22201699                       | [G/T]       | 1067300134                                 |
| Ca_Kabuli_NC_021165.1_22208093 | Ca_kabuli_chr06    | 22208093                       | [G/A]       | 1067300135                                 |
| Ca_Kabuli_NC_021165.1_22208126 | Ca_kabuli_chr06    | 22208126                       | [T/G]       | 1067300136                                 |
| Ca_Kabuli_NC_021165.1_22208136 | Ca_kabuli_chr06    | 22208136                       | [A/G]       | 1067300137                                 |
| Ca_Kabuli_NC_021165.1_22208617 | Ca_kabuli_chr06    | 22208617                       | [A/T]       | 1067300138                                 |
| Ca_Kabuli_NC_021165.1_22208644 | Ca_kabuli_chr06    | 22208644                       | [G/T]       | 1067300139                                 |
| Ca_Kabuli_NC_021165.1_22208645 | Ca_kabuli_chr06    | 22208645                       | [T/C]       | 1067300140                                 |
| Ca_Kabuli_NC_021165.1_22213998 | Ca_kabuli_chr06    | 22213998                       | [A/G]       | 1067300141                                 |
| Ca_Kabuli_NC_021165.1_22214020 | Ca_kabuli_chr06    | 22214020                       | [T/A]       | 1067300142                                 |
| Ca_Kabuli_NC_021165.1_22230125 | Ca_kabuli_chr06    | 22230125                       | [T/G]       | 1067300143                                 |
| Ca_Kabuli_NC_021165.1_22267268 | Ca_kabuli_chr06    | 22267268                       | [A/G]       | 1067300144                                 |
| Ca_Kabuli_NC_021165.1_22267284 | Ca_kabuli_chr06    | 22267284                       | [T/C]       | 1067300145                                 |
| Ca_Kabuli_NC_021165.1_22278433 | Ca_kabuli_chr06    | 22278433                       | [T/G]       | 1067300146                                 |
| Ca_Kabuli_NC_021165.1_22278486 | Ca_kabuli_chr06    | 22278486                       | [A/C]       | 1067300147                                 |
| Ca_Kabuli_NC_021165.1_22278509 | Ca_kabuli_chr06    | 22278509                       | [A/T]       | 1067300148                                 |
| Ca_Kabuli_NC_021165.1_22295809 | Ca_kabuli_chr06    | 22295809                       | [T/C]       | 1067300149                                 |
| Ca_Kabuli_NC_021165.1_22334099 | Ca_kabuli_chr06    | 22334099                       | [A/C]       | 1067300150                                 |
| Ca_Kabuli_NC_021165.1_22334620 | Ca_kabuli_chr06    | 22334620                       | [A/G]       | 1067300151                                 |
| Ca_Kabuli_NC_021165.1_22334625 | Ca_kabuli_chr06    | 22334625                       | [A/G]       | 1067300152                                 |
| Ca_Kabuli_NC_021165.1_22334895 | Ca_kabuli_chr06    | 22334895                       | [A/C]       | 1067300153                                 |
| Ca_Kabuli_NC_021165.1_22334937 | Ca_kabuli_chr06    | 22334937                       | [A/G]       | 1067300154                                 |
| Ca_Kabuli_NC_021165.1_22354677 | Ca_kabuli_chr06    | 22354677                       | [T/C]       | 1067300155                                 |
| Ca_Kabuli_NC_021165.1_22372330 | Ca_kabuli_chr06    | 22372330                       | [A/G]       | 1067300156                                 |

| <b>SNP IDs</b>                 | <b>Chromosomes</b> | <b>Physical positions (bp)</b> | <b>SNPs</b> | <b>NCBI SNPdb accession IDs (NCBI_ss#)</b> |
|--------------------------------|--------------------|--------------------------------|-------------|--------------------------------------------|
| Ca_Kabuli_NC_021165.1_22951295 | Ca_kabuli_chr06    | 22951295                       | [A/G]       | 1067300157                                 |
| Ca_Kabuli_NC_021165.1_22951298 | Ca_kabuli_chr06    | 22951298                       | [A/T]       | 1067300158                                 |
| Ca_Kabuli_NC_021165.1_22951337 | Ca_kabuli_chr06    | 22951337                       | [T/G]       | 1067300159                                 |
| Ca_Kabuli_NC_021165.1_22951342 | Ca_kabuli_chr06    | 22951342                       | [G/A]       | 1067300160                                 |
| Ca_Kabuli_NC_021165.1_22965837 | Ca_kabuli_chr06    | 22965837                       | [T/G]       | 1067300161                                 |
| Ca_Kabuli_NC_021165.1_22965838 | Ca_kabuli_chr06    | 22965838                       | [A/T]       | 1067300162                                 |
| Ca_Kabuli_NC_021165.1_23010554 | Ca_kabuli_chr06    | 23010554                       | [A/C]       | 1067300163                                 |
| Ca_Kabuli_NC_021165.1_23010560 | Ca_kabuli_chr06    | 23010560                       | [T/C]       | 1067300164                                 |
| Ca_Kabuli_NC_021165.1_23014707 | Ca_kabuli_chr06    | 23014707                       | [A/G]       | 1067300165                                 |
| Ca_Kabuli_NC_021165.1_23014711 | Ca_kabuli_chr06    | 23014711                       | [A/T]       | 1067300166                                 |
| Ca_Kabuli_NC_021165.1_23014716 | Ca_kabuli_chr06    | 23014716                       | [A/T]       | 1067300167                                 |
| Ca_Kabuli_NC_021165.1_23014721 | Ca_kabuli_chr06    | 23014721                       | [T/C]       | 1067300168                                 |
| Ca_Kabuli_NC_021165.1_23023346 | Ca_kabuli_chr06    | 23023346                       | [C/A]       | 1067300169                                 |
| Ca_Kabuli_NC_021165.1_23039459 | Ca_kabuli_chr06    | 23039459                       | [C/T]       | 1067300170                                 |
| Ca_Kabuli_NC_021165.1_23128543 | Ca_kabuli_chr06    | 23128543                       | [T/G]       | 1067300171                                 |
| Ca_Kabuli_NC_021165.1_23139867 | Ca_kabuli_chr06    | 23139867                       | [A/G]       | 1067300172                                 |
| Ca_Kabuli_NC_021165.1_23139881 | Ca_kabuli_chr06    | 23139881                       | [T/C]       | 1067300173                                 |
| Ca_Kabuli_NC_021165.1_23145612 | Ca_kabuli_chr06    | 23145612                       | [A/T]       | 1067300174                                 |
| Ca_Kabuli_NC_021165.1_23145617 | Ca_kabuli_chr06    | 23145617                       | [A/T]       | 1067300175                                 |
| Ca_Kabuli_NC_021165.1_23145621 | Ca_kabuli_chr06    | 23145621                       | [T/G]       | 1067300176                                 |
| Ca_Kabuli_NC_021165.1_23145625 | Ca_kabuli_chr06    | 23145625                       | [A/C]       | 1067300177                                 |
| Ca_Kabuli_NC_021165.1_23166428 | Ca_kabuli_chr06    | 23166428                       | [A/T]       | 1067300178                                 |
| Ca_Kabuli_NC_021165.1_23199360 | Ca_kabuli_chr06    | 23199360                       | [T/C]       | 1067300179                                 |
| Ca_Kabuli_NC_021165.1_23254618 | Ca_kabuli_chr06    | 23254618                       | [T/A]       | 1067300180                                 |
| Ca_Kabuli_NC_021165.1_23284951 | Ca_kabuli_chr06    | 23284951                       | [A/G]       | 1067300181                                 |
| Ca_Kabuli_NC_021165.1_23284956 | Ca_kabuli_chr06    | 23284956                       | [A/G]       | 1067300182                                 |
| Ca_Kabuli_NC_021165.1_23284957 | Ca_kabuli_chr06    | 23284957                       | [A/G]       | 1067300183                                 |
| Ca_Kabuli_NC_021165.1_23284978 | Ca_kabuli_chr06    | 23284978                       | [T/C]       | 1067300184                                 |
| Ca_Kabuli_NC_021165.1_23298861 | Ca_kabuli_chr06    | 23298861                       | [A/T]       | 1067300185                                 |
| Ca_Kabuli_NC_021165.1_23298877 | Ca_kabuli_chr06    | 23298877                       | [T/C]       | 1067300186                                 |
| Ca_Kabuli_NC_021165.1_23380701 | Ca_kabuli_chr06    | 23380701                       | [T/G]       | 1067300187                                 |
| Ca_Kabuli_NC_021165.1_23380886 | Ca_kabuli_chr06    | 23380886                       | [A/G]       | 1067300188                                 |
| Ca_Kabuli_NC_021165.1_23405638 | Ca_kabuli_chr06    | 23405638                       | [A/G]       | 1067300189                                 |
| Ca_Kabuli_NC_021165.1_23423091 | Ca_kabuli_chr06    | 23423091                       | [T/C]       | 1067300190                                 |



| <b>SNP IDs</b>                 | <b>Chromosomes</b> | <b>Physical positions (bp)</b> | <b>SNPs</b> | <b>NCBI SNPdb accession IDs (NCBI_ss#)</b> |
|--------------------------------|--------------------|--------------------------------|-------------|--------------------------------------------|
| Ca_Kabuli_NC_021165.1_23423096 | Ca_kabuli_chr06    | 23423096                       | [T/G]       | 1067300191                                 |
| Ca_Kabuli_NC_021165.1_23426437 | Ca_kabuli_chr06    | 23426437                       | [T/A]       | 1067300192                                 |
| Ca_Kabuli_NC_021165.1_23426440 | Ca_kabuli_chr06    | 23426440                       | [T/C]       | 1067300193                                 |
| Ca_Kabuli_NC_021165.1_23435814 | Ca_kabuli_chr06    | 23435814                       | [T/C]       | 1067300194                                 |
| Ca_Kabuli_NC_021165.1_23461650 | Ca_kabuli_chr06    | 23461650                       | [C/T]       | 1067300195                                 |
| Ca_Kabuli_NC_021165.1_23478806 | Ca_kabuli_chr06    | 23478806                       | [A/C]       | 1067300196                                 |
| Ca_Kabuli_NC_021165.1_23478807 | Ca_kabuli_chr06    | 23478807                       | [G/C]       | 1067300197                                 |
| Ca_Kabuli_NC_021165.1_23478808 | Ca_kabuli_chr06    | 23478808                       | [A/T]       | 1067300198                                 |
| Ca_Kabuli_NC_021165.1_23478809 | Ca_kabuli_chr06    | 23478809                       | [T/G]       | 1067300199                                 |
| Ca_Kabuli_NC_021165.1_23483861 | Ca_kabuli_chr06    | 23483861                       | [A/G]       | 1067300200                                 |
| Ca_Kabuli_NC_021165.1_23483863 | Ca_kabuli_chr06    | 23483863                       | [A/G]       | 1067300201                                 |
| Ca_Kabuli_NC_021165.1_23483878 | Ca_kabuli_chr06    | 23483878                       | [A/C]       | 1067300202                                 |
| Ca_Kabuli_NC_021165.1_23483880 | Ca_kabuli_chr06    | 23483880                       | [T/C]       | 1067300203                                 |
| Ca_Kabuli_NC_021165.1_23507024 | Ca_kabuli_chr06    | 23507024                       | [A/C]       | 1067300204                                 |
| Ca_Kabuli_NC_021165.1_23549267 | Ca_kabuli_chr06    | 23549267                       | [G/T]       | 1067300205                                 |
| Ca_Kabuli_NC_021165.1_23611565 | Ca_kabuli_chr06    | 23611565                       | [T/C]       | 1067300206                                 |
| Ca_Kabuli_NC_021165.1_23611584 | Ca_kabuli_chr06    | 23611584                       | [A/G]       | 1067300207                                 |
| Ca_Kabuli_NC_021165.1_23629137 | Ca_kabuli_chr06    | 23629137                       | [T/G]       | 1067300208                                 |
| Ca_Kabuli_NC_021165.1_23629152 | Ca_kabuli_chr06    | 23629152                       | [T/G]       | 1067300209                                 |
| Ca_Kabuli_NC_021165.1_23629160 | Ca_kabuli_chr06    | 23629160                       | [A/C]       | 1067300210                                 |
| Ca_Kabuli_NC_021165.1_23638374 | Ca_kabuli_chr06    | 23638374                       | [T/C]       | 1067300211                                 |
| Ca_Kabuli_NC_021165.1_23638386 | Ca_kabuli_chr06    | 23638386                       | [A/G]       | 1067300212                                 |
| Ca_Kabuli_NC_021165.1_23638403 | Ca_kabuli_chr06    | 23638403                       | [G/A]       | 1067300213                                 |
| Ca_Kabuli_NC_021165.1_23638405 | Ca_kabuli_chr06    | 23638405                       | [G/T]       | 1067300214                                 |
| Ca_Kabuli_NC_021165.1_23638414 | Ca_kabuli_chr06    | 23638414                       | [T/G]       | 1067300215                                 |
| Ca_Kabuli_NC_021165.1_23638429 | Ca_kabuli_chr06    | 23638429                       | [T/G]       | 1067300216                                 |
| Ca_Kabuli_NC_021165.1_23638858 | Ca_kabuli_chr06    | 23638858                       | [A/C]       | 1067300217                                 |
| Ca_Kabuli_NC_021165.1_23638861 | Ca_kabuli_chr06    | 23638861                       | [A/G]       | 1067300218                                 |
| Ca_Kabuli_NC_021165.1_23638891 | Ca_kabuli_chr06    | 23638891                       | [A/G]       | 1067300219                                 |
| Ca_Kabuli_NC_021165.1_23694398 | Ca_kabuli_chr06    | 23694398                       | [T/G]       | 1067300220                                 |
| Ca_Kabuli_NC_021165.1_23696788 | Ca_kabuli_chr06    | 23696788                       | [C/A]       | 1067300221                                 |
| Ca_Kabuli_NC_021165.1_23696789 | Ca_kabuli_chr06    | 23696789                       | [T/G]       | 1067300222                                 |
| Ca_Kabuli_NC_021165.1_23725184 | Ca_kabuli_chr06    | 23725184                       | [T/C]       | 1067300223                                 |
| Ca_Kabuli_NC_021165.1_23725223 | Ca_kabuli_chr06    | 23725223                       | [A/G]       | 1067300224                                 |

| <b>SNP IDs</b>                 | <b>Chromosomes</b> | <b>Physical positions (bp)</b> | <b>SNPs</b> | <b>NCBI SNPdb accession IDs (NCBI_ss#)</b> |
|--------------------------------|--------------------|--------------------------------|-------------|--------------------------------------------|
| Ca_Kabuli_NC_021165.1_23767671 | Ca_kabuli_chr06    | 23767671                       | [T/A]       | 1067300225                                 |
| Ca_Kabuli_NC_021165.1_23776635 | Ca_kabuli_chr06    | 23776635                       | [A/G]       | 1067300226                                 |
| Ca_Kabuli_NC_021165.1_23776650 | Ca_kabuli_chr06    | 23776650                       | [G/C]       | 1067300227                                 |
| Ca_Kabuli_NC_021165.1_23776668 | Ca_kabuli_chr06    | 23776668                       | [C/T]       | 1067300228                                 |
| Ca_Kabuli_NC_021165.1_23803958 | Ca_kabuli_chr06    | 23803958                       | [C/A]       | 1067300229                                 |
| Ca_Kabuli_NC_021165.1_23803959 | Ca_kabuli_chr06    | 23803959                       | [T/G]       | 1067300230                                 |
| Ca_Kabuli_NC_021165.1_23803961 | Ca_kabuli_chr06    | 23803961                       | [A/T]       | 1067300231                                 |
| Ca_Kabuli_NC_021165.1_23809138 | Ca_kabuli_chr06    | 23809138                       | [T/C]       | 1067300232                                 |
| Ca_Kabuli_NC_021165.1_23809163 | Ca_kabuli_chr06    | 23809163                       | [A/T]       | 1067300233                                 |
| Ca_Kabuli_NC_021165.1_23811391 | Ca_kabuli_chr06    | 23811391                       | [T/C]       | 1067300234                                 |
| Ca_Kabuli_NC_021165.1_23845403 | Ca_kabuli_chr06    | 23845403                       | [A/T]       | 1067300235                                 |
| Ca_Kabuli_NC_021165.1_23853493 | Ca_kabuli_chr06    | 23853493                       | [A/C]       | 1067300236                                 |
| Ca_Kabuli_NC_021165.1_23884409 | Ca_kabuli_chr06    | 23884409                       | [A/C]       | 1067300237                                 |
| Ca_Kabuli_NC_021165.1_23884429 | Ca_kabuli_chr06    | 23884429                       | [A/T]       | 1067300238                                 |
| Ca_Kabuli_NC_021165.1_23884437 | Ca_kabuli_chr06    | 23884437                       | [A/T]       | 1067300239                                 |
| Ca_Kabuli_NC_021165.1_23890859 | Ca_kabuli_chr06    | 23890859                       | [T/C]       | 1067300240                                 |
| Ca_Kabuli_NC_021165.1_23890863 | Ca_kabuli_chr06    | 23890863                       | [A/C]       | 1067300241                                 |
| Ca_Kabuli_NC_021165.1_23891044 | Ca_kabuli_chr06    | 23891044                       | [G/T]       | 1067300242                                 |
| Ca_Kabuli_NC_021165.1_23953716 | Ca_kabuli_chr06    | 23953716                       | [A/C]       | 1067300243                                 |
| Ca_Kabuli_NC_021165.1_23953735 | Ca_kabuli_chr06    | 23953735                       | [A/C]       | 1067300244                                 |
| Ca_Kabuli_NC_021165.1_23978583 | Ca_kabuli_chr06    | 23978583                       | [A/T]       | 1067300245                                 |
| Ca_Kabuli_NC_021165.1_23989568 | Ca_kabuli_chr06    | 23989568                       | [A/G]       | 1067300246                                 |
| Ca_Kabuli_NC_021165.1_24085806 | Ca_kabuli_chr06    | 24085806                       | [A/G]       | 1067300247                                 |
| Ca_Kabuli_NC_021165.1_24174935 | Ca_kabuli_chr06    | 24174935                       | [A/C]       | 1067300248                                 |
| Ca_Kabuli_NC_021165.1_24174943 | Ca_kabuli_chr06    | 24174943                       | [T/C]       | 1067300249                                 |
| Ca_Kabuli_NC_021165.1_24176032 | Ca_kabuli_chr06    | 24176032                       | [A/T]       | 1067300250                                 |
| Ca_Kabuli_NC_021165.1_24235632 | Ca_kabuli_chr06    | 24235632                       | [C/T]       | 1067300251                                 |
| Ca_Kabuli_NC_021165.1_24235675 | Ca_kabuli_chr06    | 24235675                       | [C/T]       | 1067300252                                 |
| Ca_Kabuli_NC_021165.1_24255403 | Ca_kabuli_chr06    | 24255403                       | [A/C]       | 1067300253                                 |
| Ca_Kabuli_NC_021165.1_24260542 | Ca_kabuli_chr06    | 24260542                       | [A/C]       | 1067300254                                 |
| Ca_Kabuli_NC_021165.1_24302301 | Ca_kabuli_chr06    | 24302301                       | [T/C]       | 1067300255                                 |
| Ca_Kabuli_NC_021165.1_24302326 | Ca_kabuli_chr06    | 24302326                       | [A/T]       | 1067300256                                 |
| Ca_Kabuli_NC_021165.1_24315209 | Ca_kabuli_chr06    | 24315209                       | [T/A]       | 1067300257                                 |
| Ca_Kabuli_NC_021165.1_24315210 | Ca_kabuli_chr06    | 24315210                       | [A/T]       | 1067300258                                 |

| <b>SNP IDs</b>                 | <b>Chromosomes</b> | <b>Physical positions (bp)</b> | <b>SNPs</b> | <b>NCBI SNPdb accession IDs (NCBI_ss#)</b> |
|--------------------------------|--------------------|--------------------------------|-------------|--------------------------------------------|
| Ca_Kabuli_NC_021165.1_24413576 | Ca_kabuli_chr06    | 24413576                       | [A/C]       | 1067300259                                 |
| Ca_Kabuli_NC_021165.1_24413584 | Ca_kabuli_chr06    | 24413584                       | [T/A]       | 1067300260                                 |
| Ca_Kabuli_NC_021165.1_24413658 | Ca_kabuli_chr06    | 24413658                       | [T/G]       | 1067300261                                 |
| Ca_Kabuli_NC_021165.1_24413663 | Ca_kabuli_chr06    | 24413663                       | [T/G]       | 1067300262                                 |
| Ca_Kabuli_NC_021165.1_24413715 | Ca_kabuli_chr06    | 24413715                       | [T/G]       | 1067300263                                 |
| Ca_Kabuli_NC_021165.1_24414475 | Ca_kabuli_chr06    | 24414475                       | [T/C]       | 1067300264                                 |
| Ca_Kabuli_NC_021165.1_24414518 | Ca_kabuli_chr06    | 24414518                       | [A/G]       | 1067300265                                 |
| Ca_Kabuli_NC_021165.1_24479389 | Ca_kabuli_chr06    | 24479389                       | [G/T]       | 1067300266                                 |
| Ca_Kabuli_NC_021165.1_24480359 | Ca_kabuli_chr06    | 24480359                       | [C/A]       | 1067300267                                 |
| Ca_Kabuli_NC_021165.1_24482001 | Ca_kabuli_chr06    | 24482001                       | [A/G]       | 1067300268                                 |
| Ca_Kabuli_NC_021165.1_24482026 | Ca_kabuli_chr06    | 24482026                       | [T/C]       | 1067300269                                 |
| Ca_Kabuli_NC_021165.1_24482112 | Ca_kabuli_chr06    | 24482112                       | [T/G]       | 1067300270                                 |
| Ca_Kabuli_NC_021165.1_24482886 | Ca_kabuli_chr06    | 24482886                       | [T/C]       | 1067300271                                 |
| Ca_Kabuli_NC_021165.1_24482903 | Ca_kabuli_chr06    | 24482903                       | [A/G]       | 1067300272                                 |
| Ca_Kabuli_NC_021165.1_24482930 | Ca_kabuli_chr06    | 24482930                       | [A/G]       | 1067300273                                 |
| Ca_Kabuli_NC_021165.1_24498895 | Ca_kabuli_chr06    | 24498895                       | [C/A]       | 1067300274                                 |
| Ca_Kabuli_NC_021165.1_24498913 | Ca_kabuli_chr06    | 24498913                       | [T/C]       | 1067300275                                 |
| Ca_Kabuli_NC_021165.1_24498915 | Ca_kabuli_chr06    | 24498915                       | [T/C]       | 1067300276                                 |
| Ca_Kabuli_NC_021165.1_24498923 | Ca_kabuli_chr06    | 24498923                       | [G/A]       | 1067300277                                 |
| Ca_Kabuli_NC_021165.1_24516532 | Ca_kabuli_chr06    | 24516532                       | [T/C]       | 1067300278                                 |
| Ca_Kabuli_NC_021165.1_24547068 | Ca_kabuli_chr06    | 24547068                       | [T/C]       | 1067300279                                 |
| Ca_Kabuli_NC_021165.1_24547091 | Ca_kabuli_chr06    | 24547091                       | [A/G]       | 1067300280                                 |
| Ca_Kabuli_NC_021165.1_24586211 | Ca_kabuli_chr06    | 24586211                       | [T/C]       | 1067300281                                 |
| Ca_Kabuli_NC_021165.1_24587441 | Ca_kabuli_chr06    | 24587441                       | [T/G]       | 1067300282                                 |
| Ca_Kabuli_NC_021165.1_24587450 | Ca_kabuli_chr06    | 24587450                       | [A/C]       | 1067300283                                 |
| Ca_Kabuli_NC_021165.1_24591538 | Ca_kabuli_chr06    | 24591538                       | [A/C]       | 1067300284                                 |
| Ca_Kabuli_NC_021165.1_24626243 | Ca_kabuli_chr06    | 24626243                       | [T/G]       | 1067300285                                 |
| Ca_Kabuli_NC_021165.1_24641070 | Ca_kabuli_chr06    | 24641070                       | [T/A]       | 1067300286                                 |
| Ca_Kabuli_NC_021165.1_24644774 | Ca_kabuli_chr06    | 24644774                       | [A/T]       | 1067300287                                 |
| Ca_Kabuli_NC_021165.1_24644801 | Ca_kabuli_chr06    | 24644801                       | [T/C]       | 1067300288                                 |
| Ca_Kabuli_NC_021165.1_24662651 | Ca_kabuli_chr06    | 24662651                       | [C/A]       | 1067300289                                 |
| Ca_Kabuli_NC_021165.1_24662663 | Ca_kabuli_chr06    | 24662663                       | [T/A]       | 1067300290                                 |
| Ca_Kabuli_NC_021165.1_24665173 | Ca_kabuli_chr06    | 24665173                       | [A/T]       | 1067300291                                 |
| Ca_Kabuli_NC_021165.1_25105495 | Ca_kabuli_chr06    | 25105495                       | [A/G]       | 1067300292                                 |

| <b>SNP IDs</b>                 | <b>Chromosomes</b> | <b>Physical positions (bp)</b> | <b>SNPs</b> | <b>NCBI SNPdb accession IDs (NCBI_ss#)</b> |
|--------------------------------|--------------------|--------------------------------|-------------|--------------------------------------------|
| Ca_Kabuli_NC_021165.1_25351913 | Ca_kabuli_chr06    | 25351913                       | [G/A]       | 1067300293                                 |
| Ca_Kabuli_NC_021165.1_25351931 | Ca_kabuli_chr06    | 25351931                       | [G/A]       | 1067300294                                 |
| Ca_Kabuli_NC_021165.1_25351956 | Ca_kabuli_chr06    | 25351956                       | [G/A]       | 1067300295                                 |
| Ca_Kabuli_NC_021165.1_25574922 | Ca_kabuli_chr06    | 25574922                       | [C/T]       | 1067300296                                 |
| Ca_Kabuli_NC_021165.1_25574923 | Ca_kabuli_chr06    | 25574923                       | [C/T]       | 1067300297                                 |
| Ca_Kabuli_NC_021165.1_25575045 | Ca_kabuli_chr06    | 25575045                       | [C/A]       | 1067300298                                 |
| Ca_Kabuli_NC_021165.1_25626711 | Ca_kabuli_chr06    | 25626711                       | [C/T]       | 1067300299                                 |
| Ca_Kabuli_NC_021165.1_25853851 | Ca_kabuli_chr06    | 25853851                       | [A/C]       | 1067300300                                 |
| Ca_Kabuli_NC_021165.1_26151459 | Ca_kabuli_chr06    | 26151459                       | [G/T]       | 1067300301                                 |
| Ca_Kabuli_NC_021165.1_26151464 | Ca_kabuli_chr06    | 26151464                       | [T/C]       | 1067300302                                 |
| Ca_Kabuli_NC_021165.1_26151466 | Ca_kabuli_chr06    | 26151466                       | [A/C]       | 1067300303                                 |
| Ca_Kabuli_NC_021165.1_26345328 | Ca_kabuli_chr06    | 26345328                       | [A/G]       | 1067300304                                 |
| Ca_Kabuli_NC_021165.1_26345343 | Ca_kabuli_chr06    | 26345343                       | [C/T]       | 1067300305                                 |
| Ca_Kabuli_NC_021165.1_26353512 | Ca_kabuli_chr06    | 26353512                       | [C/T]       | 1067300306                                 |
| Ca_Kabuli_NC_021165.1_26353559 | Ca_kabuli_chr06    | 26353559                       | [C/A]       | 1067300307                                 |
| Ca_Kabuli_NC_021165.1_26353560 | Ca_kabuli_chr06    | 26353560                       | [A/G]       | 1067300308                                 |
| Ca_Kabuli_NC_021165.1_26353740 | Ca_kabuli_chr06    | 26353740                       | [G/C]       | 1067300309                                 |
| Ca_Kabuli_NC_021165.1_26357454 | Ca_kabuli_chr06    | 26357454                       | [A/G]       | 1067300310                                 |
| Ca_Kabuli_NC_021165.1_26360358 | Ca_kabuli_chr06    | 26360358                       | [T/C]       | 1067300311                                 |
| Ca_Kabuli_NC_021165.1_26383500 | Ca_kabuli_chr06    | 26383500                       | [C/G]       | 1067300312                                 |
| Ca_Kabuli_NC_021165.1_26427048 | Ca_kabuli_chr06    | 26427048                       | [T/C]       | 1067300313                                 |
| Ca_Kabuli_NC_021165.1_26551633 | Ca_kabuli_chr06    | 26551633                       | [T/C]       | 1067300314                                 |
| Ca_Kabuli_NC_021165.1_26655933 | Ca_kabuli_chr06    | 26655933                       | [T/G]       | 1067300315                                 |
| Ca_Kabuli_NC_021165.1_26655963 | Ca_kabuli_chr06    | 26655963                       | [T/G]       | 1067300316                                 |
| Ca_Kabuli_NC_021165.1_26701813 | Ca_kabuli_chr06    | 26701813                       | [T/C]       | 1067300317                                 |
| Ca_Kabuli_NC_021165.1_26769041 | Ca_kabuli_chr06    | 26769041                       | [A/C]       | 1067300318                                 |
| Ca_Kabuli_NC_021165.1_26769051 | Ca_kabuli_chr06    | 26769051                       | [T/C]       | 1067300319                                 |
| Ca_Kabuli_NC_021165.1_26769079 | Ca_kabuli_chr06    | 26769079                       | [A/G]       | 1067300320                                 |
| Ca_Kabuli_NC_021165.1_26769085 | Ca_kabuli_chr06    | 26769085                       | [T/A]       | 1067300321                                 |
| Ca_Kabuli_NC_021165.1_27053199 | Ca_kabuli_chr06    | 27053199                       | [G/A]       | 1067300322                                 |
| Ca_Kabuli_NC_021165.1_27053229 | Ca_kabuli_chr06    | 27053229                       | [A/C]       | 1067300323                                 |
| Ca_Kabuli_NC_021165.1_27053289 | Ca_kabuli_chr06    | 27053289                       | [T/G]       | 1067300324                                 |
| Ca_Kabuli_NC_021165.1_27053301 | Ca_kabuli_chr06    | 27053301                       | [T/G]       | 1067300325                                 |
| Ca_Kabuli_NC_021165.1_27053349 | Ca_kabuli_chr06    | 27053349                       | [A/T]       | 1067300326                                 |

| <b>SNP IDs</b>                 | <b>Chromosomes</b> | <b>Physical positions (bp)</b> | <b>SNPs</b> | <b>NCBI SNPdb accession IDs (NCBI_ss#)</b> |
|--------------------------------|--------------------|--------------------------------|-------------|--------------------------------------------|
| Ca_Kabuli_NC_021165.1_27091881 | Ca_kabuli_chr06    | 27091881                       | [C/A]       | 1067300327                                 |
| Ca_Kabuli_NC_021165.1_27091882 | Ca_kabuli_chr06    | 27091882                       | [A/G]       | 1067300328                                 |
| Ca_Kabuli_NC_021165.1_27091883 | Ca_kabuli_chr06    | 27091883                       | [G/A]       | 1067300329                                 |
| Ca_Kabuli_NC_021165.1_27091920 | Ca_kabuli_chr06    | 27091920                       | [A/C]       | 1067300330                                 |
| Ca_Kabuli_NC_021165.1_27091988 | Ca_kabuli_chr06    | 27091988                       | [A/C]       | 1067300331                                 |
| Ca_Kabuli_NC_021165.1_27122415 | Ca_kabuli_chr06    | 27122415                       | [T/C]       | 1067300332                                 |
| Ca_Kabuli_NC_021165.1_27122451 | Ca_kabuli_chr06    | 27122451                       | [A/G]       | 1067300333                                 |
| Ca_Kabuli_NC_021165.1_27192605 | Ca_kabuli_chr06    | 27192605                       | [T/G]       | 1067300334                                 |
| Ca_Kabuli_NC_021165.1_27223303 | Ca_kabuli_chr06    | 27223303                       | [T/C]       | 1067300335                                 |
| Ca_Kabuli_NC_021165.1_27223327 | Ca_kabuli_chr06    | 27223327                       | [A/G]       | 1067300336                                 |
| Ca_Kabuli_NC_021165.1_27223329 | Ca_kabuli_chr06    | 27223329                       | [T/C]       | 1067300337                                 |
| Ca_Kabuli_NC_021165.1_27223336 | Ca_kabuli_chr06    | 27223336                       | [T/G]       | 1067300338                                 |
| Ca_Kabuli_NC_021165.1_27229201 | Ca_kabuli_chr06    | 27229201                       | [T/C]       | 1067300339                                 |
| Ca_Kabuli_NC_021165.1_27229202 | Ca_kabuli_chr06    | 27229202                       | [G/T]       | 1067300340                                 |
| Ca_Kabuli_NC_021165.1_27310343 | Ca_kabuli_chr06    | 27310343                       | [T/A]       | 1067300341                                 |
| Ca_Kabuli_NC_021165.1_27310344 | Ca_kabuli_chr06    | 27310344                       | [T/A]       | 1067300342                                 |
| Ca_Kabuli_NC_021165.1_27326400 | Ca_kabuli_chr06    | 27326400                       | [A/C]       | 1067300343                                 |
| Ca_Kabuli_NC_021165.1_27330069 | Ca_kabuli_chr06    | 27330069                       | [T/A]       | 1067300344                                 |
| Ca_Kabuli_NC_021165.1_27331151 | Ca_kabuli_chr06    | 27331151                       | [C/G]       | 1067300345                                 |
| Ca_Kabuli_NC_021165.1_27331154 | Ca_kabuli_chr06    | 27331154                       | [A/G]       | 1067300346                                 |
| Ca_Kabuli_NC_021165.1_27331816 | Ca_kabuli_chr06    | 27331816                       | [T/G]       | 1067300347                                 |
| Ca_Kabuli_NC_021165.1_27331818 | Ca_kabuli_chr06    | 27331818                       | [A/T]       | 1067300348                                 |
| Ca_Kabuli_NC_021165.1_27331819 | Ca_kabuli_chr06    | 27331819                       | [A/C]       | 1067300349                                 |
| Ca_Kabuli_NC_021165.1_27331820 | Ca_kabuli_chr06    | 27331820                       | [G/T]       | 1067300350                                 |
| Ca_Kabuli_NC_021165.1_27332632 | Ca_kabuli_chr06    | 27332632                       | [A/G]       | 1067300351                                 |
| Ca_Kabuli_NC_021165.1_27332651 | Ca_kabuli_chr06    | 27332651                       | [A/C]       | 1067300352                                 |
| Ca_Kabuli_NC_021165.1_27332663 | Ca_kabuli_chr06    | 27332663                       | [A/T]       | 1067300353                                 |
| Ca_Kabuli_NC_021165.1_27383733 | Ca_kabuli_chr06    | 27383733                       | [T/C]       | 1067300354                                 |
| Ca_Kabuli_NC_021165.1_27383744 | Ca_kabuli_chr06    | 27383744                       | [T/G]       | 1067300355                                 |
| Ca_Kabuli_NC_021165.1_27383745 | Ca_kabuli_chr06    | 27383745                       | [T/G]       | 1067300356                                 |
| Ca_Kabuli_NC_021165.1_27383746 | Ca_kabuli_chr06    | 27383746                       | [T/A]       | 1067300357                                 |
| Ca_Kabuli_NC_021165.1_27383748 | Ca_kabuli_chr06    | 27383748                       | [A/G]       | 1067300358                                 |
| Ca_Kabuli_NC_021165.1_27385025 | Ca_kabuli_chr06    | 27385025                       | [A/G]       | 1067300359                                 |
| Ca_Kabuli_NC_021165.1_27515293 | Ca_kabuli_chr06    | 27515293                       | [A/G]       | 1067300360                                 |

| <b>SNP IDs</b>                 | <b>Chromosomes</b> | <b>Physical positions (bp)</b> | <b>SNPs</b> | <b>NCBI SNPdb accession IDs (NCBI_ss#)</b> |
|--------------------------------|--------------------|--------------------------------|-------------|--------------------------------------------|
| Ca_Kabuli_NC_021165.1_27591765 | Ca_kabuli_chr06    | 27591765                       | [C/A]       | 1067300361                                 |
| Ca_Kabuli_NC_021165.1_27607252 | Ca_kabuli_chr06    | 27607252                       | [T/C]       | 1067300362                                 |
| Ca_Kabuli_NC_021165.1_27621978 | Ca_kabuli_chr06    | 27621978                       | [A/T]       | 1067300363                                 |
| Ca_Kabuli_NC_021165.1_27621992 | Ca_kabuli_chr06    | 27621992                       | [T/C]       | 1067300364                                 |
| Ca_Kabuli_NC_021165.1_27622022 | Ca_kabuli_chr06    | 27622022                       | [T/A]       | 1067300365                                 |
| Ca_Kabuli_NC_021165.1_27622044 | Ca_kabuli_chr06    | 27622044                       | [T/A]       | 1067300366                                 |
| Ca_Kabuli_NC_021165.1_27710490 | Ca_kabuli_chr06    | 27710490                       | [G/C]       | 1067300367                                 |
| Ca_Kabuli_NC_021165.1_27710496 | Ca_kabuli_chr06    | 27710496                       | [G/C]       | 1067300368                                 |
| Ca_Kabuli_NC_021165.1_27710498 | Ca_kabuli_chr06    | 27710498                       | [T/C]       | 1067300369                                 |
| Ca_Kabuli_NC_021165.1_27710509 | Ca_kabuli_chr06    | 27710509                       | [T/A]       | 1067300370                                 |
| Ca_Kabuli_NC_021165.1_27787753 | Ca_kabuli_chr06    | 27787753                       | [A/C]       | 1067300371                                 |
| Ca_Kabuli_NC_021165.1_27787764 | Ca_kabuli_chr06    | 27787764                       | [A/G]       | 1067300372                                 |
| Ca_Kabuli_NC_021165.1_27932027 | Ca_kabuli_chr06    | 27932027                       | [A/T]       | 1067300373                                 |
| Ca_Kabuli_NC_021165.1_27986981 | Ca_kabuli_chr06    | 27986981                       | [T/G]       | 1067300374                                 |
| Ca_Kabuli_NC_021165.1_27987009 | Ca_kabuli_chr06    | 27987009                       | [T/G]       | 1067300375                                 |
| Ca_Kabuli_NC_021165.1_27987027 | Ca_kabuli_chr06    | 27987027                       | [C/G]       | 1067300376                                 |
| Ca_Kabuli_NC_021165.1_28044768 | Ca_kabuli_chr06    | 28044768                       | [A/G]       | 1067300377                                 |
| Ca_Kabuli_NC_021165.1_28044805 | Ca_kabuli_chr06    | 28044805                       | [A/T]       | 1067300378                                 |
| Ca_Kabuli_NC_021165.1_28044828 | Ca_kabuli_chr06    | 28044828                       | [T/C]       | 1067300379                                 |
| Ca_Kabuli_NC_021165.1_28045047 | Ca_kabuli_chr06    | 28045047                       | [G/T]       | 1067300380                                 |
| Ca_Kabuli_NC_021165.1_28052463 | Ca_kabuli_chr06    | 28052463                       | [T/G]       | 1067300381                                 |
| Ca_Kabuli_NC_021165.1_28074358 | Ca_kabuli_chr06    | 28074358                       | [T/G]       | 1067300382                                 |
| Ca_Kabuli_NC_021165.1_28076458 | Ca_kabuli_chr06    | 28076458                       | [A/G]       | 1067300383                                 |
| Ca_Kabuli_NC_021165.1_28077304 | Ca_kabuli_chr06    | 28077304                       | [A/T]       | 1067300384                                 |
| Ca_Kabuli_NC_021165.1_28077319 | Ca_kabuli_chr06    | 28077319                       | [T/C]       | 1067300385                                 |
| Ca_Kabuli_NC_021165.1_28077420 | Ca_kabuli_chr06    | 28077420                       | [C/A]       | 1067300386                                 |
| Ca_Kabuli_NC_021165.1_28077421 | Ca_kabuli_chr06    | 28077421                       | [T/G]       | 1067300387                                 |
| Ca_Kabuli_NC_021165.1_28077422 | Ca_kabuli_chr06    | 28077422                       | [G/A]       | 1067300388                                 |
| Ca_Kabuli_NC_021165.1_28177371 | Ca_kabuli_chr06    | 28177371                       | [T/G]       | 1067300389                                 |
| Ca_Kabuli_NC_021165.1_28177388 | Ca_kabuli_chr06    | 28177388                       | [A/C]       | 1067300390                                 |
| Ca_Kabuli_NC_021165.1_28177397 | Ca_kabuli_chr06    | 28177397                       | [A/C]       | 1067300391                                 |
| Ca_Kabuli_NC_021165.1_28177400 | Ca_kabuli_chr06    | 28177400                       | [T/C]       | 1067300392                                 |
| Ca_Kabuli_NC_021165.1_28177429 | Ca_kabuli_chr06    | 28177429                       | [A/C]       | 1067300393                                 |
| Ca_Kabuli_NC_021165.1_28177469 | Ca_kabuli_chr06    | 28177469                       | [T/C]       | 1067300394                                 |

| <b>SNP IDs</b>                 | <b>Chromosomes</b> | <b>Physical positions (bp)</b> | <b>SNPs</b> | <b>NCBI SNPdb accession IDs (NCBI_ss#)</b> |
|--------------------------------|--------------------|--------------------------------|-------------|--------------------------------------------|
| Ca_Kabuli_NC_021165.1_28177481 | Ca_kabuli_chr06    | 28177481                       | [A/T]       | 1067300395                                 |
| Ca_Kabuli_NC_021165.1_28284375 | Ca_kabuli_chr06    | 28284375                       | [T/C]       | 1067300396                                 |
| Ca_Kabuli_NC_021165.1_28325435 | Ca_kabuli_chr06    | 28325435                       | [A/C]       | 1067300397                                 |
| Ca_Kabuli_NC_021165.1_28325513 | Ca_kabuli_chr06    | 28325513                       | [T/C]       | 1067300398                                 |
| Ca_Kabuli_NC_021165.1_28325519 | Ca_kabuli_chr06    | 28325519                       | [T/C]       | 1067300399                                 |
| Ca_Kabuli_NC_021165.1_28325531 | Ca_kabuli_chr06    | 28325531                       | [A/G]       | 1067300400                                 |
| Ca_Kabuli_NC_021165.1_28325568 | Ca_kabuli_chr06    | 28325568                       | [A/G]       | 1067300401                                 |
| Ca_Kabuli_NC_021165.1_28325574 | Ca_kabuli_chr06    | 28325574                       | [A/G]       | 1067300402                                 |
| Ca_Kabuli_NC_021165.1_28325585 | Ca_kabuli_chr06    | 28325585                       | [A/G]       | 1067300403                                 |
| Ca_Kabuli_NC_021165.1_28325590 | Ca_kabuli_chr06    | 28325590                       | [A/G]       | 1067300404                                 |
| Ca_Kabuli_NC_021165.1_28453063 | Ca_kabuli_chr06    | 28453063                       | [G/A]       | 1067300405                                 |
| Ca_Kabuli_NC_021165.1_28575488 | Ca_kabuli_chr06    | 28575488                       | [A/G]       | 1067300406                                 |
| Ca_Kabuli_NC_021165.1_28575493 | Ca_kabuli_chr06    | 28575493                       | [T/C]       | 1067300407                                 |
| Ca_Kabuli_NC_021165.1_28575532 | Ca_kabuli_chr06    | 28575532                       | [T/C]       | 1067300408                                 |
| Ca_Kabuli_NC_021165.1_28612887 | Ca_kabuli_chr06    | 28612887                       | [T/G]       | 1067300409                                 |
| Ca_Kabuli_NC_021165.1_28612933 | Ca_kabuli_chr06    | 28612933                       | [A/G]       | 1067300410                                 |
| Ca_Kabuli_NC_021165.1_28727489 | Ca_kabuli_chr06    | 28727489                       | [A/G]       | 1067300411                                 |
| Ca_Kabuli_NC_021165.1_28727524 | Ca_kabuli_chr06    | 28727524                       | [A/G]       | 1067300412                                 |
| Ca_Kabuli_NC_021165.1_28893384 | Ca_kabuli_chr06    | 28893384                       | [A/T]       | 1067300413                                 |
| Ca_Kabuli_NC_021165.1_28893404 | Ca_kabuli_chr06    | 28893404                       | [A/C]       | 1067300414                                 |
| Ca_Kabuli_NC_021165.1_28893408 | Ca_kabuli_chr06    | 28893408                       | [A/G]       | 1067300415                                 |
| Ca_Kabuli_NC_021165.1_28893432 | Ca_kabuli_chr06    | 28893432                       | [C/A]       | 1067300416                                 |
| Ca_Kabuli_NC_021165.1_28893435 | Ca_kabuli_chr06    | 28893435                       | [A/C]       | 1067300417                                 |
| Ca_Kabuli_NC_021165.1_28893442 | Ca_kabuli_chr06    | 28893442                       | [G/C]       | 1067300418                                 |
| Ca_Kabuli_NC_021165.1_28893444 | Ca_kabuli_chr06    | 28893444                       | [A/C]       | 1067300419                                 |
| Ca_Kabuli_NC_021165.1_28893446 | Ca_kabuli_chr06    | 28893446                       | [A/G]       | 1067300420                                 |
| Ca_Kabuli_NC_021165.1_28916024 | Ca_kabuli_chr06    | 28916024                       | [A/C]       | 1067300421                                 |
| Ca_Kabuli_NC_021165.1_28916035 | Ca_kabuli_chr06    | 28916035                       | [A/C]       | 1067300422                                 |
| Ca_Kabuli_NC_021165.1_28917802 | Ca_kabuli_chr06    | 28917802                       | [C/A]       | 1067300423                                 |
| Ca_Kabuli_NC_021165.1_28917803 | Ca_kabuli_chr06    | 28917803                       | [T/G]       | 1067300424                                 |
| Ca_Kabuli_NC_021165.1_28917804 | Ca_kabuli_chr06    | 28917804                       | [T/A]       | 1067300425                                 |
| Ca_Kabuli_NC_021165.1_28917805 | Ca_kabuli_chr06    | 28917805                       | [C/T]       | 1067300426                                 |
| Ca_Kabuli_NC_021165.1_28990255 | Ca_kabuli_chr06    | 28990255                       | [C/A]       | 1067300427                                 |
| Ca_Kabuli_NC_021165.1_28990256 | Ca_kabuli_chr06    | 28990256                       | [T/G]       | 1067300428                                 |

| <b>SNP IDs</b>                 | <b>Chromosomes</b> | <b>Physical positions (bp)</b> | <b>SNPs</b> | <b>NCBI SNPdb accession IDs (NCBI_ss#)</b> |
|--------------------------------|--------------------|--------------------------------|-------------|--------------------------------------------|
| Ca_Kabuli_NC_021165.1_28990257 | Ca_kabuli_chr06    | 28990257                       | [T/A]       | 1067300429                                 |
| Ca_Kabuli_NC_021165.1_29163022 | Ca_kabuli_chr06    | 29163022                       | [C/G]       | 1067300430                                 |
| Ca_Kabuli_NC_021165.1_29163667 | Ca_kabuli_chr06    | 29163667                       | [C/A]       | 1067300431                                 |
| Ca_Kabuli_NC_021165.1_29203213 | Ca_kabuli_chr06    | 29203213                       | [A/T]       | 1067300432                                 |
| Ca_Kabuli_NC_021165.1_29203225 | Ca_kabuli_chr06    | 29203225                       | [T/A]       | 1067300433                                 |
| Ca_Kabuli_NC_021165.1_29203239 | Ca_kabuli_chr06    | 29203239                       | [A/C]       | 1067300434                                 |
| Ca_Kabuli_NC_021165.1_29203250 | Ca_kabuli_chr06    | 29203250                       | [T/C]       | 1067300435                                 |
| Ca_Kabuli_NC_021165.1_29205940 | Ca_kabuli_chr06    | 29205940                       | [A/G]       | 1067300436                                 |
| Ca_Kabuli_NC_021165.1_29277100 | Ca_kabuli_chr06    | 29277100                       | [A/C]       | 1067300437                                 |
| Ca_Kabuli_NC_021165.1_29277101 | Ca_kabuli_chr06    | 29277101                       | [G/C]       | 1067300438                                 |
| Ca_Kabuli_NC_021165.1_29338811 | Ca_kabuli_chr06    | 29338811                       | [A/C]       | 1067300439                                 |
| Ca_Kabuli_NC_021165.1_29498817 | Ca_kabuli_chr06    | 29498817                       | [G/C]       | 1067300440                                 |
| Ca_Kabuli_NC_021165.1_29689562 | Ca_kabuli_chr06    | 29689562                       | [C/T]       | 1067300441                                 |
| Ca_Kabuli_NC_021165.1_29870004 | Ca_kabuli_chr06    | 29870004                       | [T/C]       | 1067300442                                 |
| Ca_Kabuli_NC_021165.1_29870058 | Ca_kabuli_chr06    | 29870058                       | [A/G]       | 1067300443                                 |
| Ca_Kabuli_NC_021165.1_30087460 | Ca_kabuli_chr06    | 30087460                       | [A/T]       | 1067300444                                 |
| Ca_Kabuli_NC_021165.1_30087491 | Ca_kabuli_chr06    | 30087491                       | [T/C]       | 1067300445                                 |
| Ca_Kabuli_NC_021165.1_30090242 | Ca_kabuli_chr06    | 30090242                       | [A/G]       | 1067300446                                 |
| Ca_Kabuli_NC_021165.1_30127756 | Ca_kabuli_chr06    | 30127756                       | [T/G]       | 1067300447                                 |
| Ca_Kabuli_NC_021165.1_30127759 | Ca_kabuli_chr06    | 30127759                       | [T/G]       | 1067300448                                 |
| Ca_Kabuli_NC_021165.1_30417343 | Ca_kabuli_chr06    | 30417343                       | [T/C]       | 1067300449                                 |
| Ca_Kabuli_NC_021165.1_30417345 | Ca_kabuli_chr06    | 30417345                       | [A/T]       | 1067300450                                 |
| Ca_Kabuli_NC_021165.1_30417405 | Ca_kabuli_chr06    | 30417405                       | [T/A]       | 1067300451                                 |
| Ca_Kabuli_NC_021165.1_30417407 | Ca_kabuli_chr06    | 30417407                       | [A/T]       | 1067300452                                 |
| Ca_Kabuli_NC_021165.1_30674025 | Ca_kabuli_chr06    | 30674025                       | [A/G]       | 1067300453                                 |
| Ca_Kabuli_NC_021165.1_30674057 | Ca_kabuli_chr06    | 30674057                       | [A/G]       | 1067300454                                 |
| Ca_Kabuli_NC_021165.1_30674068 | Ca_kabuli_chr06    | 30674068                       | [A/C]       | 1067300455                                 |
| Ca_Kabuli_NC_021165.1_30676075 | Ca_kabuli_chr06    | 30676075                       | [A/C]       | 1067300456                                 |
| Ca_Kabuli_NC_021165.1_30730608 | Ca_kabuli_chr06    | 30730608                       | [G/T]       | 1067300457                                 |
| Ca_Kabuli_NC_021165.1_30927228 | Ca_kabuli_chr06    | 30927228                       | [T/A]       | 1067300458                                 |
| Ca_Kabuli_NC_021165.1_30927240 | Ca_kabuli_chr06    | 30927240                       | [T/C]       | 1067300459                                 |
| Ca_Kabuli_NC_021165.1_31011646 | Ca_kabuli_chr06    | 31011646                       | [A/T]       | 1067300460                                 |
| Ca_Kabuli_NC_021165.1_31042117 | Ca_kabuli_chr06    | 31042117                       | [T/C]       | 1067300461                                 |
| Ca_Kabuli_NC_021165.1_31049113 | Ca_kabuli_chr06    | 31049113                       | [T/A]       | 1067300462                                 |



| <b>SNP IDs</b>                 | <b>Chromosomes</b> | <b>Physical positions (bp)</b> | <b>SNPs</b> | <b>NCBI SNPdb accession IDs (NCBI_ss#)</b> |
|--------------------------------|--------------------|--------------------------------|-------------|--------------------------------------------|
| Ca_Kabuli_NC_021165.1_31057806 | Ca_kabuli_chr06    | 31057806                       | [C/T]       | 1067300463                                 |
| Ca_Kabuli_NC_021165.1_31250732 | Ca_kabuli_chr06    | 31250732                       | [A/C]       | 1067300464                                 |
| Ca_Kabuli_NC_021165.1_31250840 | Ca_kabuli_chr06    | 31250840                       | [C/A]       | 1067300465                                 |
| Ca_Kabuli_NC_021165.1_31250841 | Ca_kabuli_chr06    | 31250841                       | [A/G]       | 1067300466                                 |
| Ca_Kabuli_NC_021165.1_31250843 | Ca_kabuli_chr06    | 31250843                       | [A/T]       | 1067300467                                 |
| Ca_Kabuli_NC_021165.1_31250844 | Ca_kabuli_chr06    | 31250844                       | [T/C]       | 1067300468                                 |
| Ca_Kabuli_NC_021165.1_31294555 | Ca_kabuli_chr06    | 31294555                       | [T/C]       | 1067300469                                 |
| Ca_Kabuli_NC_021165.1_31324962 | Ca_kabuli_chr06    | 31324962                       | [A/C]       | 1067300470                                 |
| Ca_Kabuli_NC_021165.1_31324976 | Ca_kabuli_chr06    | 31324976                       | [A/G]       | 1067300471                                 |
| Ca_Kabuli_NC_021165.1_31898794 | Ca_kabuli_chr06    | 31898794                       | [A/T]       | 1067300472                                 |
| Ca_Kabuli_NC_021165.1_31900733 | Ca_kabuli_chr06    | 31900733                       | [A/G]       | 1067300473                                 |
| Ca_Kabuli_NC_021165.1_31900738 | Ca_kabuli_chr06    | 31900738                       | [T/A]       | 1067300474                                 |
| Ca_Kabuli_NC_021165.1_31900757 | Ca_kabuli_chr06    | 31900757                       | [A/G]       | 1067300475                                 |
| Ca_Kabuli_NC_021165.1_31900768 | Ca_kabuli_chr06    | 31900768                       | [A/C]       | 1067300476                                 |
| Ca_Kabuli_NC_021165.1_31902048 | Ca_kabuli_chr06    | 31902048                       | [A/C]       | 1067300477                                 |
| Ca_Kabuli_NC_021165.1_31902111 | Ca_kabuli_chr06    | 31902111                       | [A/G]       | 1067300478                                 |
| Ca_Kabuli_NC_021165.1_31902122 | Ca_kabuli_chr06    | 31902122                       | [A/C]       | 1067300479                                 |
| Ca_Kabuli_NC_021165.1_31902127 | Ca_kabuli_chr06    | 31902127                       | [A/G]       | 1067300480                                 |
| Ca_Kabuli_NC_021165.1_31902147 | Ca_kabuli_chr06    | 31902147                       | [T/A]       | 1067300481                                 |
| Ca_Kabuli_NC_021165.1_31902165 | Ca_kabuli_chr06    | 31902165                       | [A/T]       | 1067300482                                 |
| Ca_Kabuli_NC_021165.1_31910391 | Ca_kabuli_chr06    | 31910391                       | [T/C]       | 1067300483                                 |
| Ca_Kabuli_NC_021165.1_31990438 | Ca_kabuli_chr06    | 31990438                       | [C/T]       | 1067300484                                 |
| Ca_Kabuli_NC_021165.1_32012370 | Ca_kabuli_chr06    | 32012370                       | [T/C]       | 1067300485                                 |
| Ca_Kabuli_NC_021165.1_32035932 | Ca_kabuli_chr06    | 32035932                       | [C/A]       | 1067300486                                 |
| Ca_Kabuli_NC_021165.1_32035933 | Ca_kabuli_chr06    | 32035933                       | [T/G]       | 1067300487                                 |
| Ca_Kabuli_NC_021165.1_32035934 | Ca_kabuli_chr06    | 32035934                       | [G/A]       | 1067300488                                 |
| Ca_Kabuli_NC_021165.1_32149994 | Ca_kabuli_chr06    | 32149994                       | [A/G]       | 1067300489                                 |
| Ca_Kabuli_NC_021165.1_32149996 | Ca_kabuli_chr06    | 32149996                       | [A/T]       | 1067300490                                 |
| Ca_Kabuli_NC_021165.1_32201431 | Ca_kabuli_chr06    | 32201431                       | [A/G]       | 1067300491                                 |
| Ca_Kabuli_NC_021165.1_32201432 | Ca_kabuli_chr06    | 32201432                       | [G/C]       | 1067300492                                 |
| Ca_Kabuli_NC_021165.1_32262837 | Ca_kabuli_chr06    | 32262837                       | [T/A]       | 1067300493                                 |
| Ca_Kabuli_NC_021165.1_32717450 | Ca_kabuli_chr06    | 32717450                       | [A/G]       | 1067300494                                 |
| Ca_Kabuli_NC_021165.1_32718707 | Ca_kabuli_chr06    | 32718707                       | [A/T]       | 1067300495                                 |
| Ca_Kabuli_NC_021165.1_32718749 | Ca_kabuli_chr06    | 32718749                       | [A/C]       | 1067300496                                 |

| <b>SNP IDs</b>                 | <b>Chromosomes</b> | <b>Physical positions (bp)</b> | <b>SNPs</b> | <b>NCBI SNPdb accession IDs (NCBI_ss#)</b> |
|--------------------------------|--------------------|--------------------------------|-------------|--------------------------------------------|
| Ca_Kabuli_NC_021165.1_32798167 | Ca_kabuli_chr06    | 32798167                       | [T/C]       | 1067300497                                 |
| Ca_Kabuli_NC_021165.1_33168758 | Ca_kabuli_chr06    | 33168758                       | [A/T]       | 1067300498                                 |
| Ca_Kabuli_NC_021165.1_33495705 | Ca_kabuli_chr06    | 33495705                       | [G/T]       | 1067300499                                 |
| Ca_Kabuli_NC_021165.1_33495707 | Ca_kabuli_chr06    | 33495707                       | [G/A]       | 1067300500                                 |
| Ca_Kabuli_NC_021165.1_33495711 | Ca_kabuli_chr06    | 33495711                       | [C/T]       | 1067300501                                 |
| Ca_Kabuli_NC_021165.1_33495714 | Ca_kabuli_chr06    | 33495714                       | [A/G]       | 1067300502                                 |
| Ca_Kabuli_NC_021165.1_33495716 | Ca_kabuli_chr06    | 33495716                       | [G/C]       | 1067300503                                 |
| Ca_Kabuli_NC_021165.1_33733242 | Ca_kabuli_chr06    | 33733242                       | [A/G]       | 1067300504                                 |
| Ca_Kabuli_NC_021165.1_33734198 | Ca_kabuli_chr06    | 33734198                       | [T/G]       | 1067300505                                 |
| Ca_Kabuli_NC_021165.1_33759054 | Ca_kabuli_chr06    | 33759054                       | [T/G]       | 1067300506                                 |
| Ca_Kabuli_NC_021165.1_33759903 | Ca_kabuli_chr06    | 33759903                       | [A/C]       | 1067300507                                 |
| Ca_Kabuli_NC_021165.1_34222034 | Ca_kabuli_chr06    | 34222034                       | [G/A]       | 1067300508                                 |
| Ca_Kabuli_NC_021165.1_34231196 | Ca_kabuli_chr06    | 34231196                       | [C/A]       | 1067300509                                 |
| Ca_Kabuli_NC_021165.1_34235488 | Ca_kabuli_chr06    | 34235488                       | [T/G]       | 1067300510                                 |
| Ca_Kabuli_NC_021165.1_34235592 | Ca_kabuli_chr06    | 34235592                       | [G/A]       | 1067300511                                 |
| Ca_Kabuli_NC_021165.1_34235593 | Ca_kabuli_chr06    | 34235593                       | [T/A]       | 1067300512                                 |
| Ca_Kabuli_NC_021165.1_34367857 | Ca_kabuli_chr06    | 34367857                       | [A/C]       | 1067300513                                 |
| Ca_Kabuli_NC_021165.1_34481203 | Ca_kabuli_chr06    | 34481203                       | [T/A]       | 1067300514                                 |
| Ca_Kabuli_NC_021165.1_34580525 | Ca_kabuli_chr06    | 34580525                       | [G/C]       | 1067300515                                 |
| Ca_Kabuli_NC_021165.1_34633673 | Ca_kabuli_chr06    | 34633673                       | [T/C]       | 1067300516                                 |
| Ca_Kabuli_NC_021165.1_34633741 | Ca_kabuli_chr06    | 34633741                       | [T/G]       | 1067300517                                 |
| Ca_Kabuli_NC_021165.1_34651998 | Ca_kabuli_chr06    | 34651998                       | [T/G]       | 1067300518                                 |
| Ca_Kabuli_NC_021165.1_34652026 | Ca_kabuli_chr06    | 34652026                       | [A/T]       | 1067300519                                 |
| Ca_Kabuli_NC_021165.1_34771240 | Ca_kabuli_chr06    | 34771240                       | [T/C]       | 1067300520                                 |
| Ca_Kabuli_NC_021165.1_34771284 | Ca_kabuli_chr06    | 34771284                       | [T/A]       | 1067300521                                 |
| Ca_Kabuli_NC_021165.1_34771294 | Ca_kabuli_chr06    | 34771294                       | [G/A]       | 1067300522                                 |
| Ca_Kabuli_NC_021165.1_34771296 | Ca_kabuli_chr06    | 34771296                       | [G/A]       | 1067300523                                 |
| Ca_Kabuli_NC_021165.1_35053206 | Ca_kabuli_chr06    | 35053206                       | [T/C]       | 1067300524                                 |
| Ca_Kabuli_NC_021165.1_35126241 | Ca_kabuli_chr06    | 35126241                       | [T/G]       | 1067300525                                 |
| Ca_Kabuli_NC_021165.1_35126359 | Ca_kabuli_chr06    | 35126359                       | [C/A]       | 1067300526                                 |
| Ca_Kabuli_NC_021165.1_35337971 | Ca_kabuli_chr06    | 35337971                       | [A/G]       | 1067300527                                 |
| Ca_Kabuli_NC_021165.1_35337974 | Ca_kabuli_chr06    | 35337974                       | [A/C]       | 1067300528                                 |
| Ca_Kabuli_NC_021165.1_35337983 | Ca_kabuli_chr06    | 35337983                       | [A/G]       | 1067300529                                 |
| Ca_Kabuli_NC_021165.1_35337990 | Ca_kabuli_chr06    | 35337990                       | [T/A]       | 1067300530                                 |

| <b>SNP IDs</b>                 | <b>Chromosomes</b> | <b>Physical positions (bp)</b> | <b>SNPs</b> | <b>NCBI SNPdb accession IDs (NCBI_ss#)</b> |
|--------------------------------|--------------------|--------------------------------|-------------|--------------------------------------------|
| Ca_Kabuli_NC_021165.1_35338014 | Ca_kabuli_chr06    | 35338014                       | [T/G]       | 1067300531                                 |
| Ca_Kabuli_NC_021165.1_35596295 | Ca_kabuli_chr06    | 35596295                       | [A/G]       | 1067300532                                 |
| Ca_Kabuli_NC_021165.1_35630149 | Ca_kabuli_chr06    | 35630149                       | [A/G]       | 1067300533                                 |
| Ca_Kabuli_NC_021165.1_35719930 | Ca_kabuli_chr06    | 35719930                       | [A/G]       | 1067300534                                 |
| Ca_Kabuli_NC_021165.1_35719986 | Ca_kabuli_chr06    | 35719986                       | [T/C]       | 1067300535                                 |
| Ca_Kabuli_NC_021165.1_35719999 | Ca_kabuli_chr06    | 35719999                       | [A/G]       | 1067300536                                 |
| Ca_Kabuli_NC_021165.1_35750935 | Ca_kabuli_chr06    | 35750935                       | [G/A]       | 1067300537                                 |
| Ca_Kabuli_NC_021165.1_35750946 | Ca_kabuli_chr06    | 35750946                       | [G/T]       | 1067300538                                 |
| Ca_Kabuli_NC_021165.1_35750948 | Ca_kabuli_chr06    | 35750948                       | [C/A]       | 1067300539                                 |
| Ca_Kabuli_NC_021165.1_35750951 | Ca_kabuli_chr06    | 35750951                       | [A/G]       | 1067300540                                 |
| Ca_Kabuli_NC_021165.1_35750955 | Ca_kabuli_chr06    | 35750955                       | [T/C]       | 1067300541                                 |
| Ca_Kabuli_NC_021165.1_35796236 | Ca_kabuli_chr06    | 35796236                       | [T/C]       | 1067300542                                 |
| Ca_Kabuli_NC_021165.1_36082910 | Ca_kabuli_chr06    | 36082910                       | [G/C]       | 1067300543                                 |
| Ca_Kabuli_NC_021165.1_36082922 | Ca_kabuli_chr06    | 36082922                       | [T/C]       | 1067300544                                 |
| Ca_Kabuli_NC_021165.1_36082937 | Ca_kabuli_chr06    | 36082937                       | [C/T]       | 1067300545                                 |
| Ca_Kabuli_NC_021165.1_36082950 | Ca_kabuli_chr06    | 36082950                       | [T/C]       | 1067300546                                 |
| Ca_Kabuli_NC_021165.1_36227451 | Ca_kabuli_chr06    | 36227451                       | [T/C]       | 1067300547                                 |
| Ca_Kabuli_NC_021165.1_36227461 | Ca_kabuli_chr06    | 36227461                       | [A/C]       | 1067300548                                 |
| Ca_Kabuli_NC_021165.1_36227464 | Ca_kabuli_chr06    | 36227464                       | [A/C]       | 1067300549                                 |
| Ca_Kabuli_NC_021165.1_36246972 | Ca_kabuli_chr06    | 36246972                       | [C/T]       | 1067300550                                 |
| Ca_Kabuli_NC_021165.1_36247018 | Ca_kabuli_chr06    | 36247018                       | [A/T]       | 1067300551                                 |
| Ca_Kabuli_NC_021165.1_36309173 | Ca_kabuli_chr06    | 36309173                       | [T/G]       | 1067300552                                 |
| Ca_Kabuli_NC_021165.1_36309183 | Ca_kabuli_chr06    | 36309183                       | [T/G]       | 1067300553                                 |
| Ca_Kabuli_NC_021165.1_36309198 | Ca_kabuli_chr06    | 36309198                       | [A/G]       | 1067300554                                 |
| Ca_Kabuli_NC_021165.1_36580491 | Ca_kabuli_chr06    | 36580491                       | [A/G]       | 1067300555                                 |
| Ca_Kabuli_NC_021165.1_36689020 | Ca_kabuli_chr06    | 36689020                       | [T/C]       | 1067300556                                 |
| Ca_Kabuli_NC_021165.1_36689027 | Ca_kabuli_chr06    | 36689027                       | [T/C]       | 1067300557                                 |
| Ca_Kabuli_NC_021165.1_36689043 | Ca_kabuli_chr06    | 36689043                       | [C/T]       | 1067300558                                 |
| Ca_Kabuli_NC_021165.1_36689052 | Ca_kabuli_chr06    | 36689052                       | [A/G]       | 1067300559                                 |
| Ca_Kabuli_NC_021165.1_36689055 | Ca_kabuli_chr06    | 36689055                       | [A/T]       | 1067300560                                 |
| Ca_Kabuli_NC_021165.1_36699170 | Ca_kabuli_chr06    | 36699170                       | [A/G]       | 1067300561                                 |
| Ca_Kabuli_NC_021165.1_36861457 | Ca_kabuli_chr06    | 36861457                       | [C/A]       | 1067300562                                 |
| Ca_Kabuli_NC_021165.1_36861458 | Ca_kabuli_chr06    | 36861458                       | [T/G]       | 1067300563                                 |
| Ca_Kabuli_NC_021165.1_36861459 | Ca_kabuli_chr06    | 36861459                       | [T/A]       | 1067300564                                 |

| <b>SNP IDs</b>                 | <b>Chromosomes</b> | <b>Physical positions (bp)</b> | <b>SNPs</b> | <b>NCBI SNPdb accession IDs (NCBI_ss#)</b> |
|--------------------------------|--------------------|--------------------------------|-------------|--------------------------------------------|
| Ca_Kabuli_NC_021165.1_36861462 | Ca_kabuli_chr06    | 36861462                       | [T/G]       | 1067300565                                 |
| Ca_Kabuli_NC_021165.1_36895302 | Ca_kabuli_chr06    | 36895302                       | [G/C]       | 1067300566                                 |
| Ca_Kabuli_NC_021165.1_36901748 | Ca_kabuli_chr06    | 36901748                       | [A/C]       | 1067300567                                 |
| Ca_Kabuli_NC_021165.1_36985216 | Ca_kabuli_chr06    | 36985216                       | [G/C]       | 1067300568                                 |
| Ca_Kabuli_NC_021165.1_36985252 | Ca_kabuli_chr06    | 36985252                       | [C/T]       | 1067300569                                 |
| Ca_Kabuli_NC_021165.1_37139557 | Ca_kabuli_chr06    | 37139557                       | [A/C]       | 1067300570                                 |
| Ca_Kabuli_NC_021165.1_37280074 | Ca_kabuli_chr06    | 37280074                       | [A/C]       | 1067300571                                 |
| Ca_Kabuli_NC_021165.1_37280178 | Ca_kabuli_chr06    | 37280178                       | [T/C]       | 1067300572                                 |
| Ca_Kabuli_NC_021165.1_37490114 | Ca_kabuli_chr06    | 37490114                       | [A/G]       | 1067300573                                 |
| Ca_Kabuli_NC_021165.1_37491353 | Ca_kabuli_chr06    | 37491353                       | [T/G]       | 1067300574                                 |
| Ca_Kabuli_NC_021165.1_37491367 | Ca_kabuli_chr06    | 37491367                       | [T/A]       | 1067300575                                 |
| Ca_Kabuli_NC_021165.1_37491424 | Ca_kabuli_chr06    | 37491424                       | [A/G]       | 1067300576                                 |
| Ca_Kabuli_NC_021165.1_37491450 | Ca_kabuli_chr06    | 37491450                       | [T/G]       | 1067300577                                 |
| Ca_Kabuli_NC_021165.1_37545930 | Ca_kabuli_chr06    | 37545930                       | [T/G]       | 1067300578                                 |
| Ca_Kabuli_NC_021165.1_37545952 | Ca_kabuli_chr06    | 37545952                       | [A/G]       | 1067300579                                 |
| Ca_Kabuli_NC_021165.1_37943905 | Ca_kabuli_chr06    | 37943905                       | [C/T]       | 1067300580                                 |
| Ca_Kabuli_NC_021165.1_38106825 | Ca_kabuli_chr06    | 38106825                       | [T/C]       | 1067300581                                 |
| Ca_Kabuli_NC_021165.1_38313733 | Ca_kabuli_chr06    | 38313733                       | [A/C]       | 1067300582                                 |
| Ca_Kabuli_NC_021165.1_38333209 | Ca_kabuli_chr06    | 38333209                       | [A/C]       | 1067300583                                 |
| Ca_Kabuli_NC_021165.1_38363668 | Ca_kabuli_chr06    | 38363668                       | [T/A]       | 1067300584                                 |
| Ca_Kabuli_NC_021165.1_38499752 | Ca_kabuli_chr06    | 38499752                       | [C/T]       | 1067300585                                 |
| Ca_Kabuli_NC_021165.1_38499762 | Ca_kabuli_chr06    | 38499762                       | [C/T]       | 1067300586                                 |
| Ca_Kabuli_NC_021165.1_38514126 | Ca_kabuli_chr06    | 38514126                       | [G/T]       | 1067300587                                 |
| Ca_Kabuli_NC_021165.1_38514165 | Ca_kabuli_chr06    | 38514165                       | [G/A]       | 1067300588                                 |
| Ca_Kabuli_NC_021165.1_38514168 | Ca_kabuli_chr06    | 38514168                       | [G/A]       | 1067300589                                 |
| Ca_Kabuli_NC_021165.1_38563881 | Ca_kabuli_chr06    | 38563881                       | [T/A]       | 1067300590                                 |
| Ca_Kabuli_NC_021165.1_38563888 | Ca_kabuli_chr06    | 38563888                       | [G/T]       | 1067300591                                 |
| Ca_Kabuli_NC_021165.1_38563895 | Ca_kabuli_chr06    | 38563895                       | [T/G]       | 1067300592                                 |
| Ca_Kabuli_NC_021165.1_38563902 | Ca_kabuli_chr06    | 38563902                       | [G/T]       | 1067300593                                 |
| Ca_Kabuli_NC_021165.1_38810458 | Ca_kabuli_chr06    | 38810458                       | [T/C]       | 1067300594                                 |
| Ca_Kabuli_NC_021165.1_38814616 | Ca_kabuli_chr06    | 38814616                       | [A/C]       | 1067300595                                 |
| Ca_Kabuli_NC_021165.1_38814637 | Ca_kabuli_chr06    | 38814637                       | [T/A]       | 1067300596                                 |
| Ca_Kabuli_NC_021165.1_38816366 | Ca_kabuli_chr06    | 38816366                       | [T/A]       | 1067300597                                 |
| Ca_Kabuli_NC_021165.1_38816452 | Ca_kabuli_chr06    | 38816452                       | [A/C]       | 1067300598                                 |

| <b>SNP IDs</b>                 | <b>Chromosomes</b> | <b>Physical positions (bp)</b> | <b>SNPs</b> | <b>NCBI SNPdb accession IDs (NCBI_ss#)</b> |
|--------------------------------|--------------------|--------------------------------|-------------|--------------------------------------------|
| Ca_Kabuli_NC_021165.1_38838254 | Ca_kabuli_chr06    | 38838254                       | [T/G]       | 1067300599                                 |
| Ca_Kabuli_NC_021165.1_39028626 | Ca_kabuli_chr06    | 39028626                       | [C/T]       | 1067300600                                 |
| Ca_Kabuli_NC_021165.1_39049958 | Ca_kabuli_chr06    | 39049958                       | [G/T]       | 1067300601                                 |
| Ca_Kabuli_NC_021165.1_39049967 | Ca_kabuli_chr06    | 39049967                       | [T/C]       | 1067300602                                 |
| Ca_Kabuli_NC_021165.1_39184066 | Ca_kabuli_chr06    | 39184066                       | [A/G]       | 1067300603                                 |
| Ca_Kabuli_NC_021165.1_39382231 | Ca_kabuli_chr06    | 39382231                       | [G/A]       | 1067300604                                 |
| Ca_Kabuli_NC_021165.1_39382240 | Ca_kabuli_chr06    | 39382240                       | [T/A]       | 1067300605                                 |
| Ca_Kabuli_NC_021165.1_39382244 | Ca_kabuli_chr06    | 39382244                       | [T/A]       | 1067300606                                 |
| Ca_Kabuli_NC_021165.1_39382248 | Ca_kabuli_chr06    | 39382248                       | [G/A]       | 1067300607                                 |
| Ca_Kabuli_NC_021165.1_39724016 | Ca_kabuli_chr06    | 39724016                       | [A/C]       | 1067300608                                 |
| Ca_Kabuli_NC_021165.1_39724022 | Ca_kabuli_chr06    | 39724022                       | [A/G]       | 1067300609                                 |
| Ca_Kabuli_NC_021165.1_39908312 | Ca_kabuli_chr06    | 39908312                       | [A/G]       | 1067300610                                 |
| Ca_Kabuli_NC_021165.1_39908314 | Ca_kabuli_chr06    | 39908314                       | [T/G]       | 1067300611                                 |
| Ca_Kabuli_NC_021165.1_39998978 | Ca_kabuli_chr06    | 39998978                       | [T/G]       | 1067300612                                 |
| Ca_Kabuli_NC_021165.1_40128644 | Ca_kabuli_chr06    | 40128644                       | [T/A]       | 1067300613                                 |
| Ca_Kabuli_NC_021165.1_40128882 | Ca_kabuli_chr06    | 40128882                       | [A/C]       | 1067300614                                 |
| Ca_Kabuli_NC_021165.1_40128885 | Ca_kabuli_chr06    | 40128885                       | [A/C]       | 1067300615                                 |
| Ca_Kabuli_NC_021165.1_40468352 | Ca_kabuli_chr06    | 40468352                       | [A/G]       | 1067300616                                 |
| Ca_Kabuli_NC_021165.1_40549244 | Ca_kabuli_chr06    | 40549244                       | [T/C]       | 1067300617                                 |
| Ca_Kabuli_NC_021165.1_40549247 | Ca_kabuli_chr06    | 40549247                       | [A/G]       | 1067300618                                 |
| Ca_Kabuli_NC_021165.1_40549286 | Ca_kabuli_chr06    | 40549286                       | [T/C]       | 1067300619                                 |
| Ca_Kabuli_NC_021165.1_40657640 | Ca_kabuli_chr06    | 40657640                       | [A/G]       | 1067300620                                 |
| Ca_Kabuli_NC_021165.1_40657667 | Ca_kabuli_chr06    | 40657667                       | [T/G]       | 1067300621                                 |
| Ca_Kabuli_NC_021165.1_40658958 | Ca_kabuli_chr06    | 40658958                       | [A/T]       | 1067300622                                 |
| Ca_Kabuli_NC_021165.1_40663891 | Ca_kabuli_chr06    | 40663891                       | [T/G]       | 1067300623                                 |
| Ca_Kabuli_NC_021165.1_40735314 | Ca_kabuli_chr06    | 40735314                       | [T/G]       | 1067300624                                 |
| Ca_Kabuli_NC_021165.1_40741517 | Ca_kabuli_chr06    | 40741517                       | [A/G]       | 1067300625                                 |
| Ca_Kabuli_NC_021165.1_40741531 | Ca_kabuli_chr06    | 40741531                       | [A/G]       | 1067300626                                 |
| Ca_Kabuli_NC_021165.1_40772661 | Ca_kabuli_chr06    | 40772661                       | [T/C]       | 1067300627                                 |
| Ca_Kabuli_NC_021165.1_40772680 | Ca_kabuli_chr06    | 40772680                       | [C/T]       | 1067300628                                 |
| Ca_Kabuli_NC_021165.1_40772683 | Ca_kabuli_chr06    | 40772683                       | [A/T]       | 1067300629                                 |
| Ca_Kabuli_NC_021165.1_40772700 | Ca_kabuli_chr06    | 40772700                       | [T/C]       | 1067300630                                 |
| Ca_Kabuli_NC_021165.1_40822859 | Ca_kabuli_chr06    | 40822859                       | [T/A]       | 1067300631                                 |
| Ca_Kabuli_NC_021165.1_40823945 | Ca_kabuli_chr06    | 40823945                       | [T/G]       | 1067300632                                 |

| <b>SNP IDs</b>                 | <b>Chromosomes</b> | <b>Physical positions (bp)</b> | <b>SNPs</b> | <b>NCBI SNPdb accession IDs (NCBI_ss#)</b> |
|--------------------------------|--------------------|--------------------------------|-------------|--------------------------------------------|
| Ca_Kabuli_NC_021165.1_40851410 | Ca_kabuli_chr06    | 40851410                       | [T/C]       | 1067300633                                 |
| Ca_Kabuli_NC_021165.1_40851438 | Ca_kabuli_chr06    | 40851438                       | [A/G]       | 1067300634                                 |
| Ca_Kabuli_NC_021165.1_40935002 | Ca_kabuli_chr06    | 40935002                       | [G/A]       | 1067300635                                 |
| Ca_Kabuli_NC_021165.1_40942535 | Ca_kabuli_chr06    | 40942535                       | [G/C]       | 1067300636                                 |
| Ca_Kabuli_NC_021165.1_40942536 | Ca_kabuli_chr06    | 40942536                       | [A/G]       | 1067300637                                 |
| Ca_Kabuli_NC_021165.1_41128736 | Ca_kabuli_chr06    | 41128736                       | [C/T]       | 1067300638                                 |
| Ca_Kabuli_NC_021165.1_41363527 | Ca_kabuli_chr06    | 41363527                       | [T/A]       | 1067300639                                 |
| Ca_Kabuli_NC_021165.1_41363528 | Ca_kabuli_chr06    | 41363528                       | [A/T]       | 1067300640                                 |
| Ca_Kabuli_NC_021165.1_41420912 | Ca_kabuli_chr06    | 41420912                       | [A/C]       | 1067300641                                 |
| Ca_Kabuli_NC_021165.1_41516043 | Ca_kabuli_chr06    | 41516043                       | [A/T]       | 1067300642                                 |
| Ca_Kabuli_NC_021165.1_41682896 | Ca_kabuli_chr06    | 41682896                       | [A/C]       | 1067300643                                 |
| Ca_Kabuli_NC_021165.1_41682971 | Ca_kabuli_chr06    | 41682971                       | [T/C]       | 1067300644                                 |
| Ca_Kabuli_NC_021165.1_41682983 | Ca_kabuli_chr06    | 41682983                       | [T/C]       | 1067300645                                 |
| Ca_Kabuli_NC_021165.1_41682989 | Ca_kabuli_chr06    | 41682989                       | [T/C]       | 1067300646                                 |
| Ca_Kabuli_NC_021165.1_41682991 | Ca_kabuli_chr06    | 41682991                       | [T/C]       | 1067300647                                 |
| Ca_Kabuli_NC_021165.1_41699062 | Ca_kabuli_chr06    | 41699062                       | [T/C]       | 1067300648                                 |
| Ca_Kabuli_NC_021165.1_41699132 | Ca_kabuli_chr06    | 41699132                       | [A/G]       | 1067300649                                 |
| Ca_Kabuli_NC_021165.1_41699134 | Ca_kabuli_chr06    | 41699134                       | [A/C]       | 1067300650                                 |
| Ca_Kabuli_NC_021165.1_41699148 | Ca_kabuli_chr06    | 41699148                       | [T/C]       | 1067300651                                 |
| Ca_Kabuli_NC_021165.1_41699151 | Ca_kabuli_chr06    | 41699151                       | [T/G]       | 1067300652                                 |
| Ca_Kabuli_NC_021165.1_41699168 | Ca_kabuli_chr06    | 41699168                       | [T/C]       | 1067300653                                 |
| Ca_Kabuli_NC_021165.1_41708169 | Ca_kabuli_chr06    | 41708169                       | [G/T]       | 1067300654                                 |
| Ca_Kabuli_NC_021165.1_41708170 | Ca_kabuli_chr06    | 41708170                       | [C/G]       | 1067300655                                 |
| Ca_Kabuli_NC_021165.1_41708171 | Ca_kabuli_chr06    | 41708171                       | [A/C]       | 1067300656                                 |
| Ca_Kabuli_NC_021165.1_41709034 | Ca_kabuli_chr06    | 41709034                       | [A/T]       | 1067300657                                 |
| Ca_Kabuli_NC_021165.1_41709036 | Ca_kabuli_chr06    | 41709036                       | [T/C]       | 1067300658                                 |
| Ca_Kabuli_NC_021165.1_41709077 | Ca_kabuli_chr06    | 41709077                       | [T/C]       | 1067300659                                 |
| Ca_Kabuli_NC_021165.1_41711538 | Ca_kabuli_chr06    | 41711538                       | [A/G]       | 1067300660                                 |
| Ca_Kabuli_NC_021165.1_42004789 | Ca_kabuli_chr06    | 42004789                       | [T/G]       | 1067300661                                 |
| Ca_Kabuli_NC_021165.1_42161902 | Ca_kabuli_chr06    | 42161902                       | [A/G]       | 1067300662                                 |
| Ca_Kabuli_NC_021165.1_42507557 | Ca_kabuli_chr06    | 42507557                       | [A/C]       | 1067300663                                 |
| Ca_Kabuli_NC_021165.1_42521161 | Ca_kabuli_chr06    | 42521161                       | [T/G]       | 1067300664                                 |
| Ca_Kabuli_NC_021165.1_42521252 | Ca_kabuli_chr06    | 42521252                       | [A/C]       | 1067300665                                 |
| Ca_Kabuli_NC_021165.1_42923879 | Ca_kabuli_chr06    | 42923879                       | [T/G]       | 1067300666                                 |

| <b>SNP IDs</b>                 | <b>Chromosomes</b> | <b>Physical positions (bp)</b> | <b>SNPs</b> | <b>NCBI SNPdb accession IDs (NCBI_ss#)</b> |
|--------------------------------|--------------------|--------------------------------|-------------|--------------------------------------------|
| Ca_Kabuli_NC_021165.1_42923920 | Ca_kabuli_chr06    | 42923920                       | [T/G]       | 1067300667                                 |
| Ca_Kabuli_NC_021165.1_43682714 | Ca_kabuli_chr06    | 43682714                       | [T/C]       | 1067300668                                 |
| Ca_Kabuli_NC_021165.1_43682734 | Ca_kabuli_chr06    | 43682734                       | [T/C]       | 1067300669                                 |
| Ca_Kabuli_NC_021165.1_43878859 | Ca_kabuli_chr06    | 43878859                       | [G/C]       | 1067300670                                 |
| Ca_Kabuli_NC_021165.1_44022221 | Ca_kabuli_chr06    | 44022221                       | [A/C]       | 1067300671                                 |
| Ca_Kabuli_NC_021165.1_44385520 | Ca_kabuli_chr06    | 44385520                       | [T/G]       | 1067300672                                 |
| Ca_Kabuli_NC_021165.1_44385534 | Ca_kabuli_chr06    | 44385534                       | [T/A]       | 1067300673                                 |
| Ca_Kabuli_NC_021165.1_44385550 | Ca_kabuli_chr06    | 44385550                       | [C/T]       | 1067300674                                 |
| Ca_Kabuli_NC_021165.1_44395072 | Ca_kabuli_chr06    | 44395072                       | [A/C]       | 1067300675                                 |
| Ca_Kabuli_NC_021165.1_44530868 | Ca_kabuli_chr06    | 44530868                       | [A/G]       | 1067300676                                 |
| Ca_Kabuli_NC_021165.1_44711166 | Ca_kabuli_chr06    | 44711166                       | [A/G]       | 1067300677                                 |
| Ca_Kabuli_NC_021165.1_44944937 | Ca_kabuli_chr06    | 44944937                       | [T/C]       | 1067300678                                 |
| Ca_Kabuli_NC_021165.1_44944965 | Ca_kabuli_chr06    | 44944965                       | [T/C]       | 1067300679                                 |
| Ca_Kabuli_NC_021165.1_45096150 | Ca_kabuli_chr06    | 45096150                       | [A/T]       | 1067300680                                 |
| Ca_Kabuli_NC_021165.1_45131334 | Ca_kabuli_chr06    | 45131334                       | [A/C]       | 1067300681                                 |
| Ca_Kabuli_NC_021165.1_45132447 | Ca_kabuli_chr06    | 45132447                       | [T/G]       | 1067300682                                 |
| Ca_Kabuli_NC_021165.1_45239883 | Ca_kabuli_chr06    | 45239883                       | [T/G]       | 1067300683                                 |
| Ca_Kabuli_NC_021165.1_45293271 | Ca_kabuli_chr06    | 45293271                       | [T/C]       | 1067300684                                 |
| Ca_Kabuli_NC_021165.1_45345875 | Ca_kabuli_chr06    | 45345875                       | [A/T]       | 1067300685                                 |
| Ca_Kabuli_NC_021165.1_45419172 | Ca_kabuli_chr06    | 45419172                       | [T/A]       | 1067300686                                 |
| Ca_Kabuli_NC_021165.1_45500859 | Ca_kabuli_chr06    | 45500859                       | [T/G]       | 1067300687                                 |
| Ca_Kabuli_NC_021165.1_45500898 | Ca_kabuli_chr06    | 45500898                       | [A/G]       | 1067300688                                 |
| Ca_Kabuli_NC_021165.1_45519697 | Ca_kabuli_chr06    | 45519697                       | [A/G]       | 1067300689                                 |
| Ca_Kabuli_NC_021165.1_45549997 | Ca_kabuli_chr06    | 45549997                       | [A/G]       | 1067300690                                 |
| Ca_Kabuli_NC_021165.1_45553955 | Ca_kabuli_chr06    | 45553955                       | [A/C]       | 1067300691                                 |
| Ca_Kabuli_NC_021165.1_45553961 | Ca_kabuli_chr06    | 45553961                       | [T/C]       | 1067300692                                 |
| Ca_Kabuli_NC_021165.1_45553975 | Ca_kabuli_chr06    | 45553975                       | [T/C]       | 1067300693                                 |
| Ca_Kabuli_NC_021165.1_45554034 | Ca_kabuli_chr06    | 45554034                       | [A/G]       | 1067300694                                 |
| Ca_Kabuli_NC_021165.1_45554061 | Ca_kabuli_chr06    | 45554061                       | [A/C]       | 1067300695                                 |
| Ca_Kabuli_NC_021165.1_45554694 | Ca_kabuli_chr06    | 45554694                       | [T/C]       | 1067300696                                 |
| Ca_Kabuli_NC_021165.1_45614058 | Ca_kabuli_chr06    | 45614058                       | [A/C]       | 1067300697                                 |
| Ca_Kabuli_NC_021165.1_45614095 | Ca_kabuli_chr06    | 45614095                       | [A/C]       | 1067300698                                 |
| Ca_Kabuli_NC_021165.1_45706389 | Ca_kabuli_chr06    | 45706389                       | [A/T]       | 1067300699                                 |
| Ca_Kabuli_NC_021165.1_45706413 | Ca_kabuli_chr06    | 45706413                       | [A/G]       | 1067300700                                 |

| <b>SNP IDs</b>                 | <b>Chromosomes</b> | <b>Physical positions (bp)</b> | <b>SNPs</b> | <b>NCBI SNPdb accession IDs (NCBI_ss#)</b> |
|--------------------------------|--------------------|--------------------------------|-------------|--------------------------------------------|
| Ca_Kabuli_NC_021165.1_45773324 | Ca_kabuli_chr06    | 45773324                       | [T/G]       | 1067300701                                 |
| Ca_Kabuli_NC_021165.1_45773603 | Ca_kabuli_chr06    | 45773603                       | [A/C]       | 1067300702                                 |
| Ca_Kabuli_NC_021165.1_45841032 | Ca_kabuli_chr06    | 45841032                       | [G/T]       | 1067300703                                 |
| Ca_Kabuli_NC_021165.1_46158378 | Ca_kabuli_chr06    | 46158378                       | [A/C]       | 1067300704                                 |
| Ca_Kabuli_NC_021165.1_46160997 | Ca_kabuli_chr06    | 46160997                       | [T/C]       | 1067300705                                 |
| Ca_Kabuli_NC_021165.1_46537515 | Ca_kabuli_chr06    | 46537515                       | [T/G]       | 1067300706                                 |
| Ca_Kabuli_NC_021165.1_46734665 | Ca_kabuli_chr06    | 46734665                       | [C/T]       | 1067300707                                 |
| Ca_Kabuli_NC_021165.1_46734675 | Ca_kabuli_chr06    | 46734675                       | [T/C]       | 1067300708                                 |
| Ca_Kabuli_NC_021165.1_46734678 | Ca_kabuli_chr06    | 46734678                       | [A/T]       | 1067300709                                 |
| Ca_Kabuli_NC_021165.1_46734682 | Ca_kabuli_chr06    | 46734682                       | [T/A]       | 1067300710                                 |
| Ca_Kabuli_NC_021165.1_46734687 | Ca_kabuli_chr06    | 46734687                       | [G/T]       | 1067300711                                 |
| Ca_Kabuli_NC_021165.1_46734706 | Ca_kabuli_chr06    | 46734706                       | [C/G]       | 1067300712                                 |
| Ca_Kabuli_NC_021165.1_46734717 | Ca_kabuli_chr06    | 46734717                       | [A/G]       | 1067300713                                 |
| Ca_Kabuli_NC_021165.1_46765671 | Ca_kabuli_chr06    | 46765671                       | [C/A]       | 1067300714                                 |
| Ca_Kabuli_NC_021165.1_46896938 | Ca_kabuli_chr06    | 46896938                       | [G/C]       | 1067300715                                 |
| Ca_Kabuli_NC_021165.1_46896958 | Ca_kabuli_chr06    | 46896958                       | [C/T]       | 1067300716                                 |
| Ca_Kabuli_NC_021165.1_46898699 | Ca_kabuli_chr06    | 46898699                       | [G/T]       | 1067300717                                 |
| Ca_Kabuli_NC_021165.1_46898751 | Ca_kabuli_chr06    | 46898751                       | [A/T]       | 1067300718                                 |
| Ca_Kabuli_NC_021165.1_46898792 | Ca_kabuli_chr06    | 46898792                       | [A/T]       | 1067300719                                 |
| Ca_Kabuli_NC_021165.1_46898828 | Ca_kabuli_chr06    | 46898828                       | [C/T]       | 1067300720                                 |
| Ca_Kabuli_NC_021165.1_46899073 | Ca_kabuli_chr06    | 46899073                       | [T/C]       | 1067300721                                 |
| Ca_Kabuli_NC_021165.1_46899078 | Ca_kabuli_chr06    | 46899078                       | [A/T]       | 1067300722                                 |
| Ca_Kabuli_NC_021165.1_46899631 | Ca_kabuli_chr06    | 46899631                       | [G/A]       | 1067300723                                 |
| Ca_Kabuli_NC_021165.1_46906116 | Ca_kabuli_chr06    | 46906116                       | [A/G]       | 1067300724                                 |
| Ca_Kabuli_NC_021165.1_46943899 | Ca_kabuli_chr06    | 46943899                       | [T/C]       | 1067300725                                 |
| Ca_Kabuli_NC_021165.1_46943919 | Ca_kabuli_chr06    | 46943919                       | [T/C]       | 1067300726                                 |
| Ca_Kabuli_NC_021165.1_46943933 | Ca_kabuli_chr06    | 46943933                       | [A/G]       | 1067300727                                 |
| Ca_Kabuli_NC_021165.1_46943937 | Ca_kabuli_chr06    | 46943937                       | [C/G]       | 1067300728                                 |
| Ca_Kabuli_NC_021165.1_46943942 | Ca_kabuli_chr06    | 46943942                       | [A/C]       | 1067300729                                 |
| Ca_Kabuli_NC_021165.1_46952750 | Ca_kabuli_chr06    | 46952750                       | [A/G]       | 1067300730                                 |
| Ca_Kabuli_NC_021165.1_46972676 | Ca_kabuli_chr06    | 46972676                       | [A/C]       | 1067300731                                 |
| Ca_Kabuli_NC_021165.1_46979196 | Ca_kabuli_chr06    | 46979196                       | [A/G]       | 1067300732                                 |
| Ca_Kabuli_NC_021165.1_46979210 | Ca_kabuli_chr06    | 46979210                       | [A/G]       | 1067300733                                 |
| Ca_Kabuli_NC_021165.1_46979213 | Ca_kabuli_chr06    | 46979213                       | [T/G]       | 1067300734                                 |



| <b>SNP IDs</b>                 | <b>Chromosomes</b> | <b>Physical positions (bp)</b> | <b>SNPs</b> | <b>NCBI SNPdb accession IDs (NCBI_ss#)</b> |
|--------------------------------|--------------------|--------------------------------|-------------|--------------------------------------------|
| Ca_Kabuli_NC_021165.1_46979216 | Ca_kabuli_chr06    | 46979216                       | [C/G]       | 1067300735                                 |
| Ca_Kabuli_NC_021165.1_46979234 | Ca_kabuli_chr06    | 46979234                       | [G/A]       | 1067300736                                 |
| Ca_Kabuli_NC_021165.1_47116476 | Ca_kabuli_chr06    | 47116476                       | [T/C]       | 1067300737                                 |
| Ca_Kabuli_NC_021165.1_47116504 | Ca_kabuli_chr06    | 47116504                       | [A/G]       | 1067300738                                 |
| Ca_Kabuli_NC_021165.1_47367057 | Ca_kabuli_chr06    | 47367057                       | [T/A]       | 1067300739                                 |
| Ca_Kabuli_NC_021165.1_47810677 | Ca_kabuli_chr06    | 47810677                       | [A/C]       | 1067300740                                 |
| Ca_Kabuli_NC_021165.1_47859599 | Ca_kabuli_chr06    | 47859599                       | [T/A]       | 1067300741                                 |
| Ca_Kabuli_NC_021165.1_47859601 | Ca_kabuli_chr06    | 47859601                       | [G/C]       | 1067300742                                 |
| Ca_Kabuli_NC_021165.1_47859602 | Ca_kabuli_chr06    | 47859602                       | [G/T]       | 1067300743                                 |
| Ca_Kabuli_NC_021165.1_48255531 | Ca_kabuli_chr06    | 48255531                       | [T/C]       | 1067300744                                 |
| Ca_Kabuli_NC_021165.1_48255538 | Ca_kabuli_chr06    | 48255538                       | [G/A]       | 1067300745                                 |
| Ca_Kabuli_NC_021165.1_48255558 | Ca_kabuli_chr06    | 48255558                       | [C/T]       | 1067300746                                 |
| Ca_Kabuli_NC_021165.1_48255559 | Ca_kabuli_chr06    | 48255559                       | [A/G]       | 1067300747                                 |
| Ca_Kabuli_NC_021165.1_48255568 | Ca_kabuli_chr06    | 48255568                       | [G/A]       | 1067300748                                 |
| Ca_Kabuli_NC_021165.1_48314834 | Ca_kabuli_chr06    | 48314834                       | [C/A]       | 1067300749                                 |
| Ca_Kabuli_NC_021165.1_48314841 | Ca_kabuli_chr06    | 48314841                       | [T/G]       | 1067300750                                 |
| Ca_Kabuli_NC_021165.1_48315220 | Ca_kabuli_chr06    | 48315220                       | [G/C]       | 1067300751                                 |
| Ca_Kabuli_NC_021165.1_48315232 | Ca_kabuli_chr06    | 48315232                       | [A/C]       | 1067300752                                 |
| Ca_Kabuli_NC_021165.1_48315289 | Ca_kabuli_chr06    | 48315289                       | [A/T]       | 1067300753                                 |
| Ca_Kabuli_NC_021165.1_48315293 | Ca_kabuli_chr06    | 48315293                       | [G/T]       | 1067300754                                 |
| Ca_Kabuli_NC_021165.1_48315958 | Ca_kabuli_chr06    | 48315958                       | [A/C]       | 1067300755                                 |
| Ca_Kabuli_NC_021165.1_48316046 | Ca_kabuli_chr06    | 48316046                       | [A/G]       | 1067300756                                 |
| Ca_Kabuli_NC_021165.1_48694554 | Ca_kabuli_chr06    | 48694554                       | [A/T]       | 1067300757                                 |
| Ca_Kabuli_NC_021165.1_48694559 | Ca_kabuli_chr06    | 48694559                       | [T/C]       | 1067300758                                 |
| Ca_Kabuli_NC_021165.1_48869512 | Ca_kabuli_chr06    | 48869512                       | [C/G]       | 1067300759                                 |
| Ca_Kabuli_NC_021165.1_49044794 | Ca_kabuli_chr06    | 49044794                       | [T/A]       | 1067300760                                 |
| Ca_Kabuli_NC_021165.1_49044802 | Ca_kabuli_chr06    | 49044802                       | [C/T]       | 1067300761                                 |
| Ca_Kabuli_NC_021165.1_49044805 | Ca_kabuli_chr06    | 49044805                       | [A/G]       | 1067300762                                 |
| Ca_Kabuli_NC_021165.1_49044814 | Ca_kabuli_chr06    | 49044814                       | [G/T]       | 1067300763                                 |
| Ca_Kabuli_NC_021165.1_49100642 | Ca_kabuli_chr06    | 49100642                       | [A/G]       | 1067300764                                 |
| Ca_Kabuli_NC_021165.1_49100644 | Ca_kabuli_chr06    | 49100644                       | [A/G]       | 1067300765                                 |
| Ca_Kabuli_NC_021165.1_49100649 | Ca_kabuli_chr06    | 49100649                       | [A/G]       | 1067300766                                 |
| Ca_Kabuli_NC_021165.1_49100673 | Ca_kabuli_chr06    | 49100673                       | [T/G]       | 1067300767                                 |
| Ca_Kabuli_NC_021165.1_49101898 | Ca_kabuli_chr06    | 49101898                       | [A/G]       | 1067300768                                 |

| <b>SNP IDs</b>                 | <b>Chromosomes</b> | <b>Physical positions (bp)</b> | <b>SNPs</b> | <b>NCBI SNPdb accession IDs (NCBI_ss#)</b> |
|--------------------------------|--------------------|--------------------------------|-------------|--------------------------------------------|
| Ca_Kabuli_NC_021165.1_49167362 | Ca_kabuli_chr06    | 49167362                       | [A/C]       | 1067300769                                 |
| Ca_Kabuli_NC_021165.1_49167389 | Ca_kabuli_chr06    | 49167389                       | [A/G]       | 1067300770                                 |
| Ca_Kabuli_NC_021165.1_49222290 | Ca_kabuli_chr06    | 49222290                       | [C/T]       | 1067300771                                 |
| Ca_Kabuli_NC_021165.1_49222291 | Ca_kabuli_chr06    | 49222291                       | [G/A]       | 1067300772                                 |
| Ca_Kabuli_NC_021165.1_49377275 | Ca_kabuli_chr06    | 49377275                       | [G/A]       | 1067300773                                 |
| Ca_Kabuli_NC_021165.1_49377336 | Ca_kabuli_chr06    | 49377336                       | [G/A]       | 1067300774                                 |
| Ca_Kabuli_NC_021165.1_49377339 | Ca_kabuli_chr06    | 49377339                       | [T/G]       | 1067300775                                 |
| Ca_Kabuli_NC_021165.1_49379106 | Ca_kabuli_chr06    | 49379106                       | [A/C]       | 1067300776                                 |
| Ca_Kabuli_NC_021165.1_49555020 | Ca_kabuli_chr06    | 49555020                       | [G/T]       | 1067300777                                 |
| Ca_Kabuli_NC_021165.1_49557927 | Ca_kabuli_chr06    | 49557927                       | [T/A]       | 1067300778                                 |
| Ca_Kabuli_NC_021165.1_49588009 | Ca_kabuli_chr06    | 49588009                       | [T/G]       | 1067300779                                 |
| Ca_Kabuli_NC_021165.1_49629674 | Ca_kabuli_chr06    | 49629674                       | [A/G]       | 1067300780                                 |
| Ca_Kabuli_NC_021165.1_49830362 | Ca_kabuli_chr06    | 49830362                       | [T/G]       | 1067300781                                 |
| Ca_Kabuli_NC_021165.1_49830429 | Ca_kabuli_chr06    | 49830429                       | [T/G]       | 1067300782                                 |
| Ca_Kabuli_NC_021165.1_49833240 | Ca_kabuli_chr06    | 49833240                       | [T/G]       | 1067300783                                 |
| Ca_Kabuli_NC_021165.1_49833848 | Ca_kabuli_chr06    | 49833848                       | [T/C]       | 1067300784                                 |
| Ca_Kabuli_NC_021165.1_49833857 | Ca_kabuli_chr06    | 49833857                       | [A/C]       | 1067300785                                 |
| Ca_Kabuli_NC_021165.1_49833860 | Ca_kabuli_chr06    | 49833860                       | [A/C]       | 1067300786                                 |
| Ca_Kabuli_NC_021165.1_49833864 | Ca_kabuli_chr06    | 49833864                       | [A/C]       | 1067300787                                 |
| Ca_Kabuli_NC_021165.1_49843847 | Ca_kabuli_chr06    | 49843847                       | [T/G]       | 1067300788                                 |
| Ca_Kabuli_NC_021165.1_49843850 | Ca_kabuli_chr06    | 49843850                       | [T/G]       | 1067300789                                 |
| Ca_Kabuli_NC_021165.1_49843855 | Ca_kabuli_chr06    | 49843855                       | [A/G]       | 1067300790                                 |
| Ca_Kabuli_NC_021165.1_49846303 | Ca_kabuli_chr06    | 49846303                       | [T/G]       | 1067300791                                 |
| Ca_Kabuli_NC_021165.1_49847543 | Ca_kabuli_chr06    | 49847543                       | [T/C]       | 1067300792                                 |
| Ca_Kabuli_NC_021165.1_49847559 | Ca_kabuli_chr06    | 49847559                       | [A/C]       | 1067300793                                 |
| Ca_Kabuli_NC_021165.1_49847576 | Ca_kabuli_chr06    | 49847576                       | [T/G]       | 1067300794                                 |
| Ca_Kabuli_NC_021165.1_49931910 | Ca_kabuli_chr06    | 49931910                       | [A/G]       | 1067300795                                 |
| Ca_Kabuli_NC_021165.1_49932955 | Ca_kabuli_chr06    | 49932955                       | [T/A]       | 1067300796                                 |
| Ca_Kabuli_NC_021165.1_49940580 | Ca_kabuli_chr06    | 49940580                       | [A/C]       | 1067300797                                 |
| Ca_Kabuli_NC_021165.1_50071948 | Ca_kabuli_chr06    | 50071948                       | [T/G]       | 1067300798                                 |
| Ca_Kabuli_NC_021165.1_50378387 | Ca_kabuli_chr06    | 50378387                       | [A/C]       | 1067300799                                 |
| Ca_Kabuli_NC_021165.1_50378388 | Ca_kabuli_chr06    | 50378388                       | [G/T]       | 1067300800                                 |
| Ca_Kabuli_NC_021165.1_50378389 | Ca_kabuli_chr06    | 50378389                       | [A/T]       | 1067300801                                 |
| Ca_Kabuli_NC_021165.1_50384166 | Ca_kabuli_chr06    | 50384166                       | [A/C]       | 1067300802                                 |

| <b>SNP IDs</b>                 | <b>Chromosomes</b> | <b>Physical positions (bp)</b> | <b>SNPs</b> | <b>NCBI SNPdb accession IDs (NCBI_ss#)</b> |
|--------------------------------|--------------------|--------------------------------|-------------|--------------------------------------------|
| Ca_Kabuli_NC_021165.1_50476698 | Ca_kabuli_chr06    | 50476698                       | [T/C]       | 1067300803                                 |
| Ca_Kabuli_NC_021165.1_50476785 | Ca_kabuli_chr06    | 50476785                       | [T/A]       | 1067300804                                 |
| Ca_Kabuli_NC_021165.1_50476844 | Ca_kabuli_chr06    | 50476844                       | [A/C]       | 1067300805                                 |
| Ca_Kabuli_NC_021165.1_50477669 | Ca_kabuli_chr06    | 50477669                       | [G/A]       | 1067300806                                 |
| Ca_Kabuli_NC_021165.1_50477676 | Ca_kabuli_chr06    | 50477676                       | [A/C]       | 1067300807                                 |
| Ca_Kabuli_NC_021165.1_50857740 | Ca_kabuli_chr06    | 50857740                       | [A/G]       | 1067300808                                 |
| Ca_Kabuli_NC_021165.1_50857798 | Ca_kabuli_chr06    | 50857798                       | [T/G]       | 1067300809                                 |
| Ca_Kabuli_NC_021165.1_51062466 | Ca_kabuli_chr06    | 51062466                       | [A/C]       | 1067300810                                 |
| Ca_Kabuli_NC_021165.1_51089783 | Ca_kabuli_chr06    | 51089783                       | [T/A]       | 1067300811                                 |
| Ca_Kabuli_NC_021165.1_51240949 | Ca_kabuli_chr06    | 51240949                       | [A/C]       | 1067300812                                 |
| Ca_Kabuli_NC_021165.1_51240950 | Ca_kabuli_chr06    | 51240950                       | [G/C]       | 1067300813                                 |
| Ca_Kabuli_NC_021165.1_51240951 | Ca_kabuli_chr06    | 51240951                       | [A/G]       | 1067300814                                 |
| Ca_Kabuli_NC_021165.1_51240952 | Ca_kabuli_chr06    | 51240952                       | [T/A]       | 1067300815                                 |
| Ca_Kabuli_NC_021165.1_51281239 | Ca_kabuli_chr06    | 51281239                       | [A/G]       | 1067300816                                 |
| Ca_Kabuli_NC_021165.1_51345504 | Ca_kabuli_chr06    | 51345504                       | [A/G]       | 1067300817                                 |
| Ca_Kabuli_NC_021165.1_51444290 | Ca_kabuli_chr06    | 51444290                       | [C/T]       | 1067300818                                 |
| Ca_Kabuli_NC_021165.1_51444301 | Ca_kabuli_chr06    | 51444301                       | [C/T]       | 1067300819                                 |
| Ca_Kabuli_NC_021165.1_51444314 | Ca_kabuli_chr06    | 51444314                       | [T/G]       | 1067300820                                 |
| Ca_Kabuli_NC_021165.1_51470212 | Ca_kabuli_chr06    | 51470212                       | [G/C]       | 1067300821                                 |
| Ca_Kabuli_NC_021165.1_51470213 | Ca_kabuli_chr06    | 51470213                       | [G/T]       | 1067300822                                 |
| Ca_Kabuli_NC_021165.1_51471558 | Ca_kabuli_chr06    | 51471558                       | [T/C]       | 1067300823                                 |
| Ca_Kabuli_NC_021165.1_51476913 | Ca_kabuli_chr06    | 51476913                       | [T/C]       | 1067300824                                 |
| Ca_Kabuli_NC_021165.1_51477123 | Ca_kabuli_chr06    | 51477123                       | [T/C]       | 1067300825                                 |
| Ca_Kabuli_NC_021165.1_51477378 | Ca_kabuli_chr06    | 51477378                       | [T/G]       | 1067300826                                 |
| Ca_Kabuli_NC_021165.1_51477380 | Ca_kabuli_chr06    | 51477380                       | [T/C]       | 1067300827                                 |
| Ca_Kabuli_NC_021165.1_51509329 | Ca_kabuli_chr06    | 51509329                       | [G/A]       | 1067300828                                 |
| Ca_Kabuli_NC_021165.1_51509360 | Ca_kabuli_chr06    | 51509360                       | [A/G]       | 1067300829                                 |
| Ca_Kabuli_NC_021165.1_52164520 | Ca_kabuli_chr06    | 52164520                       | [T/A]       | 1067300830                                 |
| Ca_Kabuli_NC_021165.1_52164537 | Ca_kabuli_chr06    | 52164537                       | [T/C]       | 1067300831                                 |
| Ca_Kabuli_NC_021165.1_52220143 | Ca_kabuli_chr06    | 52220143                       | [A/T]       | 1067300832                                 |
| Ca_Kabuli_NC_021165.1_52220165 | Ca_kabuli_chr06    | 52220165                       | [T/C]       | 1067300833                                 |
| Ca_Kabuli_NC_021165.1_52285978 | Ca_kabuli_chr06    | 52285978                       | [T/G]       | 1067300834                                 |
| Ca_Kabuli_NC_021165.1_52379657 | Ca_kabuli_chr06    | 52379657                       | [A/G]       | 1067300835                                 |
| Ca_Kabuli_NC_021165.1_52417728 | Ca_kabuli_chr06    | 52417728                       | [T/A]       | 1067300836                                 |

| <b>SNP IDs</b>                 | <b>Chromosomes</b> | <b>Physical positions (bp)</b> | <b>SNPs</b> | <b>NCBI SNPdb accession IDs (NCBI_ss#)</b> |
|--------------------------------|--------------------|--------------------------------|-------------|--------------------------------------------|
| Ca_Kabuli_NC_021165.1_52436255 | Ca_kabuli_chr06    | 52436255                       | [A/C]       | 1067300837                                 |
| Ca_Kabuli_NC_021165.1_52618262 | Ca_kabuli_chr06    | 52618262                       | [A/C]       | 1067300838                                 |
| Ca_Kabuli_NC_021165.1_52618264 | Ca_kabuli_chr06    | 52618264                       | [A/G]       | 1067300839                                 |
| Ca_Kabuli_NC_021165.1_52618275 | Ca_kabuli_chr06    | 52618275                       | [T/G]       | 1067300840                                 |
| Ca_Kabuli_NC_021165.1_52630806 | Ca_kabuli_chr06    | 52630806                       | [A/C]       | 1067300841                                 |
| Ca_Kabuli_NC_021165.1_53084230 | Ca_kabuli_chr06    | 53084230                       | [G/C]       | 1067300842                                 |
| Ca_Kabuli_NC_021165.1_53084235 | Ca_kabuli_chr06    | 53084235                       | [C/T]       | 1067300843                                 |
| Ca_Kabuli_NC_021165.1_53084258 | Ca_kabuli_chr06    | 53084258                       | [A/G]       | 1067300844                                 |
| Ca_Kabuli_NC_021165.1_53097365 | Ca_kabuli_chr06    | 53097365                       | [T/G]       | 1067300845                                 |
| Ca_Kabuli_NC_021165.1_53124142 | Ca_kabuli_chr06    | 53124142                       | [G/T]       | 1067300846                                 |
| Ca_Kabuli_NC_021165.1_53168793 | Ca_kabuli_chr06    | 53168793                       | [A/T]       | 1067300847                                 |
| Ca_Kabuli_NC_021165.1_53222941 | Ca_kabuli_chr06    | 53222941                       | [T/G]       | 1067300848                                 |
| Ca_Kabuli_NC_021165.1_53349021 | Ca_kabuli_chr06    | 53349021                       | [T/A]       | 1067300849                                 |
| Ca_Kabuli_NC_021165.1_53349026 | Ca_kabuli_chr06    | 53349026                       | [T/G]       | 1067300850                                 |
| Ca_Kabuli_NC_021165.1_53349075 | Ca_kabuli_chr06    | 53349075                       | [A/G]       | 1067300851                                 |
| Ca_Kabuli_NC_021165.1_53350648 | Ca_kabuli_chr06    | 53350648                       | [A/C]       | 1067300852                                 |
| Ca_Kabuli_NC_021165.1_53350651 | Ca_kabuli_chr06    | 53350651                       | [A/T]       | 1067300853                                 |
| Ca_Kabuli_NC_021165.1_53350681 | Ca_kabuli_chr06    | 53350681                       | [T/G]       | 1067300854                                 |
| Ca_Kabuli_NC_021165.1_53382954 | Ca_kabuli_chr06    | 53382954                       | [T/G]       | 1067300855                                 |
| Ca_Kabuli_NC_021165.1_53390086 | Ca_kabuli_chr06    | 53390086                       | [A/C]       | 1067300856                                 |
| Ca_Kabuli_NC_021165.1_53499267 | Ca_kabuli_chr06    | 53499267                       | [A/G]       | 1067300857                                 |
| Ca_Kabuli_NC_021165.1_53499295 | Ca_kabuli_chr06    | 53499295                       | [A/G]       | 1067300858                                 |
| Ca_Kabuli_NC_021165.1_53558419 | Ca_kabuli_chr06    | 53558419                       | [T/C]       | 1067300859                                 |
| Ca_Kabuli_NC_021165.1_53558950 | Ca_kabuli_chr06    | 53558950                       | [T/C]       | 1067300860                                 |
| Ca_Kabuli_NC_021165.1_53558972 | Ca_kabuli_chr06    | 53558972                       | [T/C]       | 1067300861                                 |
| Ca_Kabuli_NC_021165.1_53558982 | Ca_kabuli_chr06    | 53558982                       | [A/G]       | 1067300862                                 |
| Ca_Kabuli_NC_021165.1_53566431 | Ca_kabuli_chr06    | 53566431                       | [T/G]       | 1067300863                                 |
| Ca_Kabuli_NC_021165.1_53625215 | Ca_kabuli_chr06    | 53625215                       | [A/G]       | 1067300864                                 |
| Ca_Kabuli_NC_021165.1_53625232 | Ca_kabuli_chr06    | 53625232                       | [A/G]       | 1067300865                                 |
| Ca_Kabuli_NC_021165.1_53654093 | Ca_kabuli_chr06    | 53654093                       | [A/G]       | 1067300866                                 |
| Ca_Kabuli_NC_021165.1_53654134 | Ca_kabuli_chr06    | 53654134                       | [A/G]       | 1067300867                                 |
| Ca_Kabuli_NC_021165.1_53654153 | Ca_kabuli_chr06    | 53654153                       | [A/G]       | 1067300868                                 |
| Ca_Kabuli_NC_021165.1_53654155 | Ca_kabuli_chr06    | 53654155                       | [A/G]       | 1067300869                                 |
| Ca_Kabuli_NC_021165.1_53683766 | Ca_kabuli_chr06    | 53683766                       | [C/T]       | 1067300870                                 |

| <b>SNP IDs</b>                 | <b>Chromosomes</b> | <b>Physical positions (bp)</b> | <b>SNPs</b> | <b>NCBI SNPdb accession IDs (NCBI_ss#)</b> |
|--------------------------------|--------------------|--------------------------------|-------------|--------------------------------------------|
| Ca_Kabuli_NC_021165.1_53783296 | Ca_kabuli_chr06    | 53783296                       | [T/G]       | 1067300871                                 |
| Ca_Kabuli_NC_021165.1_53783304 | Ca_kabuli_chr06    | 53783304                       | [A/T]       | 1067300872                                 |
| Ca_Kabuli_NC_021165.1_54208252 | Ca_kabuli_chr06    | 54208252                       | [A/G]       | 1067300873                                 |
| Ca_Kabuli_NC_021165.1_54237701 | Ca_kabuli_chr06    | 54237701                       | [T/C]       | 1067300874                                 |
| Ca_Kabuli_NC_021165.1_54237761 | Ca_kabuli_chr06    | 54237761                       | [A/C]       | 1067300875                                 |
| Ca_Kabuli_NC_021165.1_54237764 | Ca_kabuli_chr06    | 54237764                       | [A/C]       | 1067300876                                 |
| Ca_Kabuli_NC_021165.1_54237824 | Ca_kabuli_chr06    | 54237824                       | [T/C]       | 1067300877                                 |
| Ca_Kabuli_NC_021165.1_54237837 | Ca_kabuli_chr06    | 54237837                       | [A/T]       | 1067300878                                 |
| Ca_Kabuli_NC_021165.1_54250124 | Ca_kabuli_chr06    | 54250124                       | [A/C]       | 1067300879                                 |
| Ca_Kabuli_NC_021165.1_54333329 | Ca_kabuli_chr06    | 54333329                       | [A/G]       | 1067300880                                 |
| Ca_Kabuli_NC_021165.1_54335013 | Ca_kabuli_chr06    | 54335013                       | [A/T]       | 1067300881                                 |
| Ca_Kabuli_NC_021165.1_54335725 | Ca_kabuli_chr06    | 54335725                       | [A/G]       | 1067300882                                 |
| Ca_Kabuli_NC_021165.1_54335736 | Ca_kabuli_chr06    | 54335736                       | [A/G]       | 1067300883                                 |
| Ca_Kabuli_NC_021165.1_54335769 | Ca_kabuli_chr06    | 54335769                       | [A/G]       | 1067300884                                 |
| Ca_Kabuli_NC_021165.1_54337370 | Ca_kabuli_chr06    | 54337370                       | [T/C]       | 1067300885                                 |
| Ca_Kabuli_NC_021165.1_54337390 | Ca_kabuli_chr06    | 54337390                       | [T/G]       | 1067300886                                 |
| Ca_Kabuli_NC_021165.1_54337402 | Ca_kabuli_chr06    | 54337402                       | [T/G]       | 1067300887                                 |
| Ca_Kabuli_NC_021165.1_54337415 | Ca_kabuli_chr06    | 54337415                       | [T/C]       | 1067300888                                 |
| Ca_Kabuli_NC_021165.1_54337422 | Ca_kabuli_chr06    | 54337422                       | [A/G]       | 1067300889                                 |
| Ca_Kabuli_NC_021165.1_54358852 | Ca_kabuli_chr06    | 54358852                       | [G/A]       | 1067300890                                 |
| Ca_Kabuli_NC_021165.1_54997486 | Ca_kabuli_chr06    | 54997486                       | [T/A]       | 1067300891                                 |
| Ca_Kabuli_NC_021165.1_55024140 | Ca_kabuli_chr06    | 55024140                       | [G/A]       | 1067300892                                 |
| Ca_Kabuli_NC_021165.1_55024146 | Ca_kabuli_chr06    | 55024146                       | [C/T]       | 1067300893                                 |
| Ca_Kabuli_NC_021165.1_55119038 | Ca_kabuli_chr06    | 55119038                       | [T/G]       | 1067300894                                 |
| Ca_Kabuli_NC_021165.1_55119053 | Ca_kabuli_chr06    | 55119053                       | [T/C]       | 1067300895                                 |
| Ca_Kabuli_NC_021165.1_55119075 | Ca_kabuli_chr06    | 55119075                       | [A/G]       | 1067300896                                 |
| Ca_Kabuli_NC_021165.1_55332477 | Ca_kabuli_chr06    | 55332477                       | [A/C]       | 1067300897                                 |
| Ca_Kabuli_NC_021165.1_55575106 | Ca_kabuli_chr06    | 55575106                       | [A/G]       | 1067300898                                 |
| Ca_Kabuli_NC_021165.1_55575116 | Ca_kabuli_chr06    | 55575116                       | [T/C]       | 1067300899                                 |
| Ca_Kabuli_NC_021165.1_55618607 | Ca_kabuli_chr06    | 55618607                       | [T/G]       | 1067300900                                 |
| Ca_Kabuli_NC_021165.1_55633279 | Ca_kabuli_chr06    | 55633279                       | [T/C]       | 1067300901                                 |
| Ca_Kabuli_NC_021165.1_55711680 | Ca_kabuli_chr06    | 55711680                       | [T/G]       | 1067300902                                 |
| Ca_Kabuli_NC_021165.1_55711785 | Ca_kabuli_chr06    | 55711785                       | [T/G]       | 1067300903                                 |
| Ca_Kabuli_NC_021165.1_56025841 | Ca_kabuli_chr06    | 56025841                       | [T/C]       | 1067300904                                 |

| <b>SNP IDs</b>                 | <b>Chromosomes</b> | <b>Physical positions (bp)</b> | <b>SNPs</b> | <b>NCBI SNPdb accession IDs (NCBI_ss#)</b> |
|--------------------------------|--------------------|--------------------------------|-------------|--------------------------------------------|
| Ca_Kabuli_NC_021165.1_56025859 | Ca_kabuli_chr06    | 56025859                       | [T/G]       | 1067300905                                 |
| Ca_Kabuli_NC_021165.1_56303217 | Ca_kabuli_chr06    | 56303217                       | [T/C]       | 1067300906                                 |
| Ca_Kabuli_NC_021165.1_56553864 | Ca_kabuli_chr06    | 56553864                       | [T/C]       | 1067300907                                 |
| Ca_Kabuli_NC_021165.1_56553903 | Ca_kabuli_chr06    | 56553903                       | [A/G]       | 1067300908                                 |
| Ca_Kabuli_NC_021165.1_56593129 | Ca_kabuli_chr06    | 56593129                       | [A/C]       | 1067300909                                 |
| Ca_Kabuli_NC_021165.1_56706537 | Ca_kabuli_chr06    | 56706537                       | [T/A]       | 1067300910                                 |
| Ca_Kabuli_NC_021165.1_56706550 | Ca_kabuli_chr06    | 56706550                       | [T/C]       | 1067300911                                 |
| Ca_Kabuli_NC_021165.1_56765545 | Ca_kabuli_chr06    | 56765545                       | [A/C]       | 1067300912                                 |
| Ca_Kabuli_NC_021165.1_56793039 | Ca_kabuli_chr06    | 56793039                       | [T/A]       | 1067300913                                 |
| Ca_Kabuli_NC_021165.1_56793044 | Ca_kabuli_chr06    | 56793044                       | [T/A]       | 1067300914                                 |
| Ca_Kabuli_NC_021165.1_56793083 | Ca_kabuli_chr06    | 56793083                       | [A/G]       | 1067300915                                 |
| Ca_Kabuli_NC_021165.1_56839995 | Ca_kabuli_chr06    | 56839995                       | [T/G]       | 1067300916                                 |
| Ca_Kabuli_NC_021165.1_56854753 | Ca_kabuli_chr06    | 56854753                       | [C/T]       | 1067300917                                 |
| Ca_Kabuli_NC_021165.1_56854906 | Ca_kabuli_chr06    | 56854906                       | [T/A]       | 1067300918                                 |
| Ca_Kabuli_NC_021165.1_56854914 | Ca_kabuli_chr06    | 56854914                       | [A/C]       | 1067300919                                 |
| Ca_Kabuli_NC_021165.1_56860665 | Ca_kabuli_chr06    | 56860665                       | [C/A]       | 1067300920                                 |
| Ca_Kabuli_NC_021165.1_56860666 | Ca_kabuli_chr06    | 56860666                       | [C/G]       | 1067300921                                 |
| Ca_Kabuli_NC_021165.1_56860667 | Ca_kabuli_chr06    | 56860667                       | [C/A]       | 1067300922                                 |
| Ca_Kabuli_NC_021165.1_56860696 | Ca_kabuli_chr06    | 56860696                       | [A/C]       | 1067300923                                 |
| Ca_Kabuli_NC_021165.1_56860703 | Ca_kabuli_chr06    | 56860703                       | [A/G]       | 1067300924                                 |
| Ca_Kabuli_NC_021165.1_57044799 | Ca_kabuli_chr06    | 57044799                       | [T/C]       | 1067300925                                 |
| Ca_Kabuli_NC_021165.1_57173684 | Ca_kabuli_chr06    | 57173684                       | [A/G]       | 1067300926                                 |
| Ca_Kabuli_NC_021165.1_57173688 | Ca_kabuli_chr06    | 57173688                       | [A/C]       | 1067300927                                 |
| Ca_Kabuli_NC_021165.1_57173695 | Ca_kabuli_chr06    | 57173695                       | [A/G]       | 1067300928                                 |
| Ca_Kabuli_NC_021165.1_57344969 | Ca_kabuli_chr06    | 57344969                       | [T/G]       | 1067300929                                 |
| Ca_Kabuli_NC_021165.1_57382778 | Ca_kabuli_chr06    | 57382778                       | [G/T]       | 1067300930                                 |
| Ca_Kabuli_NC_021165.1_57425496 | Ca_kabuli_chr06    | 57425496                       | [C/T]       | 1067300931                                 |
| Ca_Kabuli_NC_021165.1_57434831 | Ca_kabuli_chr06    | 57434831                       | [A/C]       | 1067300932                                 |
| Ca_Kabuli_NC_021165.1_57436104 | Ca_kabuli_chr06    | 57436104                       | [T/C]       | 1067300933                                 |
| Ca_Kabuli_NC_021165.1_57437932 | Ca_kabuli_chr06    | 57437932                       | [T/C]       | 1067300934                                 |
| Ca_Kabuli_NC_021165.1_57437940 | Ca_kabuli_chr06    | 57437940                       | [A/C]       | 1067300935                                 |
| Ca_Kabuli_NC_021165.1_57437944 | Ca_kabuli_chr06    | 57437944                       | [T/A]       | 1067300936                                 |
| Ca_Kabuli_NC_021165.1_57533088 | Ca_kabuli_chr06    | 57533088                       | [T/C]       | 1067300937                                 |
| Ca_Kabuli_NC_021165.1_57533105 | Ca_kabuli_chr06    | 57533105                       | [G/T]       | 1067300938                                 |

| <b>SNP IDs</b>                 | <b>Chromosomes</b> | <b>Physical positions (bp)</b> | <b>SNPs</b> | <b>NCBI SNPdb accession IDs (NCBI_ss#)</b> |
|--------------------------------|--------------------|--------------------------------|-------------|--------------------------------------------|
| Ca_Kabuli_NC_021165.1_57533111 | Ca_kabuli_chr06    | 57533111                       | [T/C]       | 1067300939                                 |
| Ca_Kabuli_NC_021165.1_57533116 | Ca_kabuli_chr06    | 57533116                       | [T/G]       | 1067300940                                 |
| Ca_Kabuli_NC_021165.1_57533121 | Ca_kabuli_chr06    | 57533121                       | [C/T]       | 1067300941                                 |
| Ca_Kabuli_NC_021165.1_57579767 | Ca_kabuli_chr06    | 57579767                       | [A/C]       | 1067300942                                 |
| Ca_Kabuli_NC_021165.1_57579807 | Ca_kabuli_chr06    | 57579807                       | [A/G]       | 1067300943                                 |
| Ca_Kabuli_NC_021165.1_57625134 | Ca_kabuli_chr06    | 57625134                       | [G/A]       | 1067300944                                 |
| Ca_Kabuli_NC_021165.1_57625320 | Ca_kabuli_chr06    | 57625320                       | [G/A]       | 1067300945                                 |
| Ca_Kabuli_NC_021165.1_57631772 | Ca_kabuli_chr06    | 57631772                       | [T/C]       | 1067300946                                 |
| Ca_Kabuli_NC_021165.1_57631963 | Ca_kabuli_chr06    | 57631963                       | [T/G]       | 1067300947                                 |
| Ca_Kabuli_NC_021165.1_57632374 | Ca_kabuli_chr06    | 57632374                       | [C/T]       | 1067300948                                 |
| Ca_Kabuli_NC_021165.1_57632385 | Ca_kabuli_chr06    | 57632385                       | [A/C]       | 1067300949                                 |
| Ca_Kabuli_NC_021165.1_57634425 | Ca_kabuli_chr06    | 57634425                       | [A/C]       | 1067300950                                 |
| Ca_Kabuli_NC_021165.1_57640124 | Ca_kabuli_chr06    | 57640124                       | [A/G]       | 1067300951                                 |
| Ca_Kabuli_NC_021165.1_57640186 | Ca_kabuli_chr06    | 57640186                       | [G/T]       | 1067300952                                 |
| Ca_Kabuli_NC_021165.1_57640197 | Ca_kabuli_chr06    | 57640197                       | [A/G]       | 1067300953                                 |
| Ca_Kabuli_NC_021165.1_57640220 | Ca_kabuli_chr06    | 57640220                       | [A/C]       | 1067300954                                 |
| Ca_Kabuli_NC_021165.1_57644429 | Ca_kabuli_chr06    | 57644429                       | [A/G]       | 1067300955                                 |
| Ca_Kabuli_NC_021165.1_57703958 | Ca_kabuli_chr06    | 57703958                       | [T/C]       | 1067300956                                 |
| Ca_Kabuli_NC_021165.1_57703979 | Ca_kabuli_chr06    | 57703979                       | [T/C]       | 1067300957                                 |
| Ca_Kabuli_NC_021165.1_57703989 | Ca_kabuli_chr06    | 57703989                       | [G/C]       | 1067300958                                 |
| Ca_Kabuli_NC_021165.1_57703998 | Ca_kabuli_chr06    | 57703998                       | [G/A]       | 1067300959                                 |
| Ca_Kabuli_NC_021165.1_57704001 | Ca_kabuli_chr06    | 57704001                       | [C/A]       | 1067300960                                 |
| Ca_Kabuli_NC_021165.1_57704013 | Ca_kabuli_chr06    | 57704013                       | [A/C]       | 1067300961                                 |
| Ca_Kabuli_NC_021165.1_57704018 | Ca_kabuli_chr06    | 57704018                       | [T/C]       | 1067300962                                 |
| Ca_Kabuli_NC_021165.1_57704057 | Ca_kabuli_chr06    | 57704057                       | [C/T]       | 1067300963                                 |
| Ca_Kabuli_NC_021165.1_57704216 | Ca_kabuli_chr06    | 57704216                       | [T/G]       | 1067300964                                 |
| Ca_Kabuli_NC_021165.1_57704220 | Ca_kabuli_chr06    | 57704220                       | [A/T]       | 1067300965                                 |
| Ca_Kabuli_NC_021165.1_57704802 | Ca_kabuli_chr06    | 57704802                       | [T/C]       | 1067300966                                 |
| Ca_Kabuli_NC_021165.1_57705111 | Ca_kabuli_chr06    | 57705111                       | [C/T]       | 1067300967                                 |
| Ca_Kabuli_NC_021165.1_57705113 | Ca_kabuli_chr06    | 57705113                       | [A/G]       | 1067300968                                 |
| Ca_Kabuli_NC_021165.1_57707716 | Ca_kabuli_chr06    | 57707716                       | [C/T]       | 1067300969                                 |
| Ca_Kabuli_NC_021165.1_57707724 | Ca_kabuli_chr06    | 57707724                       | [A/C]       | 1067300970                                 |
| Ca_Kabuli_NC_021165.1_57707727 | Ca_kabuli_chr06    | 57707727                       | [T/G]       | 1067300971                                 |
| Ca_Kabuli_NC_021165.1_57707734 | Ca_kabuli_chr06    | 57707734                       | [T/C]       | 1067300972                                 |

| <b>SNP IDs</b>                 | <b>Chromosomes</b> | <b>Physical positions (bp)</b> | <b>SNPs</b> | <b>NCBI SNPdb accession IDs (NCBI_ss#)</b> |
|--------------------------------|--------------------|--------------------------------|-------------|--------------------------------------------|
| Ca_Kabuli_NC_021165.1_57707737 | Ca_kabuli_chr06    | 57707737                       | [C/T]       | 1067300973                                 |
| Ca_Kabuli_NC_021165.1_57707846 | Ca_kabuli_chr06    | 57707846                       | [G/A]       | 1067300974                                 |
| Ca_Kabuli_NC_021165.1_57707848 | Ca_kabuli_chr06    | 57707848                       | [A/G]       | 1067300975                                 |
| Ca_Kabuli_NC_021165.1_57707902 | Ca_kabuli_chr06    | 57707902                       | [T/G]       | 1067300976                                 |
| Ca_Kabuli_NC_021165.1_57707912 | Ca_kabuli_chr06    | 57707912                       | [G/C]       | 1067300977                                 |
| Ca_Kabuli_NC_021165.1_57707919 | Ca_kabuli_chr06    | 57707919                       | [T/A]       | 1067300978                                 |
| Ca_Kabuli_NC_021165.1_57707954 | Ca_kabuli_chr06    | 57707954                       | [A/T]       | 1067300979                                 |
| Ca_Kabuli_NC_021165.1_57707959 | Ca_kabuli_chr06    | 57707959                       | [A/C]       | 1067300980                                 |
| Ca_Kabuli_NC_021165.1_57708101 | Ca_kabuli_chr06    | 57708101                       | [T/G]       | 1067300981                                 |
| Ca_Kabuli_NC_021165.1_57708130 | Ca_kabuli_chr06    | 57708130                       | [T/C]       | 1067300982                                 |
| Ca_Kabuli_NC_021165.1_57710133 | Ca_kabuli_chr06    | 57710133                       | [C/G]       | 1067300983                                 |
| Ca_Kabuli_NC_021165.1_57720161 | Ca_kabuli_chr06    | 57720161                       | [A/T]       | 1067300984                                 |
| Ca_Kabuli_NC_021165.1_57720446 | Ca_kabuli_chr06    | 57720446                       | [T/C]       | 1067300985                                 |
| Ca_Kabuli_NC_021165.1_57720708 | Ca_kabuli_chr06    | 57720708                       | [T/G]       | 1067300986                                 |
| Ca_Kabuli_NC_021165.1_57720820 | Ca_kabuli_chr06    | 57720820                       | [A/G]       | 1067300987                                 |
| Ca_Kabuli_NC_021165.1_57720831 | Ca_kabuli_chr06    | 57720831                       | [T/C]       | 1067300988                                 |
| Ca_Kabuli_NC_021165.1_57720909 | Ca_kabuli_chr06    | 57720909                       | [C/T]       | 1067300989                                 |
| Ca_Kabuli_NC_021165.1_57747859 | Ca_kabuli_chr06    | 57747859                       | [A/G]       | 1067300990                                 |
| Ca_Kabuli_NC_021165.1_57747866 | Ca_kabuli_chr06    | 57747866                       | [T/G]       | 1067300991                                 |
| Ca_Kabuli_NC_021165.1_57748565 | Ca_kabuli_chr06    | 57748565                       | [A/G]       | 1067300992                                 |
| Ca_Kabuli_NC_021165.1_57750418 | Ca_kabuli_chr06    | 57750418                       | [A/C]       | 1067300993                                 |
| Ca_Kabuli_NC_021165.1_57750900 | Ca_kabuli_chr06    | 57750900                       | [G/A]       | 1067300994                                 |
| Ca_Kabuli_NC_021165.1_57753076 | Ca_kabuli_chr06    | 57753076                       | [T/C]       | 1067300995                                 |
| Ca_Kabuli_NC_021165.1_57753193 | Ca_kabuli_chr06    | 57753193                       | [T/C]       | 1067300996                                 |
| Ca_Kabuli_NC_021165.1_57756355 | Ca_kabuli_chr06    | 57756355                       | [T/G]       | 1067300997                                 |
| Ca_Kabuli_NC_021165.1_57756699 | Ca_kabuli_chr06    | 57756699                       | [G/A]       | 1067300998                                 |
| Ca_Kabuli_NC_021165.1_57759548 | Ca_kabuli_chr06    | 57759548                       | [C/T]       | 1067300999                                 |
| Ca_Kabuli_NC_021165.1_57760104 | Ca_kabuli_chr06    | 57760104                       | [T/C]       | 1067301000                                 |
| Ca_Kabuli_NC_021165.1_57761758 | Ca_kabuli_chr06    | 57761758                       | [G/A]       | 1067301001                                 |
| Ca_Kabuli_NC_021165.1_57765391 | Ca_kabuli_chr06    | 57765391                       | [G/T]       | 1067301002                                 |
| Ca_Kabuli_NC_021165.1_57765418 | Ca_kabuli_chr06    | 57765418                       | [G/C]       | 1067301003                                 |
| Ca_Kabuli_NC_021165.1_57765423 | Ca_kabuli_chr06    | 57765423                       | [T/A]       | 1067301004                                 |
| Ca_Kabuli_NC_021165.1_57769819 | Ca_kabuli_chr06    | 57769819                       | [G/A]       | 1067301005                                 |
| Ca_Kabuli_NC_021165.1_57831061 | Ca_kabuli_chr06    | 57831061                       | [T/G]       | 1067301006                                 |



| <b>SNP IDs</b>                 | <b>Chromosomes</b> | <b>Physical positions (bp)</b> | <b>SNPs</b> | <b>NCBI SNPdb accession IDs (NCBI_ss#)</b> |
|--------------------------------|--------------------|--------------------------------|-------------|--------------------------------------------|
| Ca_Kabuli_NC_021165.1_57835093 | Ca_kabuli_chr06    | 57835093                       | [T/A]       | 1067301007                                 |
| Ca_Kabuli_NC_021165.1_57835120 | Ca_kabuli_chr06    | 57835120                       | [G/A]       | 1067301008                                 |
| Ca_Kabuli_NC_021165.1_57835335 | Ca_kabuli_chr06    | 57835335                       | [A/G]       | 1067301009                                 |
| Ca_Kabuli_NC_021165.1_57835899 | Ca_kabuli_chr06    | 57835899                       | [C/T]       | 1067301010                                 |
| Ca_Kabuli_NC_021165.1_57836237 | Ca_kabuli_chr06    | 57836237                       | [A/G]       | 1067301011                                 |
| Ca_Kabuli_NC_021165.1_57836296 | Ca_kabuli_chr06    | 57836296                       | [A/T]       | 1067301012                                 |
| Ca_Kabuli_NC_021165.1_57853458 | Ca_kabuli_chr06    | 57853458                       | [C/T]       | 1067301013                                 |
| Ca_Kabuli_NC_021165.1_57854068 | Ca_kabuli_chr06    | 57854068                       | [G/C]       | 1067301014                                 |
| Ca_Kabuli_NC_021165.1_57854946 | Ca_kabuli_chr06    | 57854946                       | [G/A]       | 1067301015                                 |
| Ca_Kabuli_NC_021165.1_57856890 | Ca_kabuli_chr06    | 57856890                       | [C/T]       | 1067301016                                 |
| Ca_Kabuli_NC_021165.1_57870893 | Ca_kabuli_chr06    | 57870893                       | [C/A]       | 1067301017                                 |
| Ca_Kabuli_NC_021165.1_57882773 | Ca_kabuli_chr06    | 57882773                       | [G/T]       | 1067301018                                 |
| Ca_Kabuli_NC_021165.1_57891716 | Ca_kabuli_chr06    | 57891716                       | [A/T]       | 1067301019                                 |
| Ca_Kabuli_NC_021165.1_57894263 | Ca_kabuli_chr06    | 57894263                       | [T/A]       | 1067301020                                 |
| Ca_Kabuli_NC_021165.1_57894264 | Ca_kabuli_chr06    | 57894264                       | [G/T]       | 1067301021                                 |
| Ca_Kabuli_NC_021165.1_57894377 | Ca_kabuli_chr06    | 57894377                       | [A/G]       | 1067301022                                 |
| Ca_Kabuli_NC_021165.1_57894585 | Ca_kabuli_chr06    | 57894585                       | [T/G]       | 1067301023                                 |
| Ca_Kabuli_NC_021165.1_57894590 | Ca_kabuli_chr06    | 57894590                       | [G/C]       | 1067301024                                 |
| Ca_Kabuli_NC_021165.1_57898786 | Ca_kabuli_chr06    | 57898786                       | [A/C]       | 1067301025                                 |
| Ca_Kabuli_NC_021165.1_57899764 | Ca_kabuli_chr06    | 57899764                       | [T/A]       | 1067301026                                 |
| Ca_Kabuli_NC_021165.1_57900328 | Ca_kabuli_chr06    | 57900328                       | [T/G]       | 1067301027                                 |
| Ca_Kabuli_NC_021165.1_57931382 | Ca_kabuli_chr06    | 57931382                       | [A/T]       | 1067301028                                 |
| Ca_Kabuli_NC_021165.1_57931563 | Ca_kabuli_chr06    | 57931563                       | [A/C]       | 1067301029                                 |
| Ca_Kabuli_NC_021165.1_57937638 | Ca_kabuli_chr06    | 57937638                       | [T/A]       | 1067301030                                 |
| Ca_Kabuli_NC_021165.1_57937642 | Ca_kabuli_chr06    | 57937642                       | [A/G]       | 1067301031                                 |
| Ca_Kabuli_NC_021165.1_57937657 | Ca_kabuli_chr06    | 57937657                       | [A/G]       | 1067301032                                 |
| Ca_Kabuli_NC_021165.1_57942502 | Ca_kabuli_chr06    | 57942502                       | [T/A]       | 1067301033                                 |
| Ca_Kabuli_NC_021165.1_57948587 | Ca_kabuli_chr06    | 57948587                       | [G/A]       | 1067301034                                 |
| Ca_Kabuli_NC_021165.1_57960875 | Ca_kabuli_chr06    | 57960875                       | [A/G]       | 1067301035                                 |
| Ca_Kabuli_NC_021165.1_57960878 | Ca_kabuli_chr06    | 57960878                       | [A/G]       | 1067301036                                 |
| Ca_Kabuli_NC_021165.1_58028663 | Ca_kabuli_chr06    | 58028663                       | [A/T]       | 1067301037                                 |
| Ca_Kabuli_NC_021165.1_58028664 | Ca_kabuli_chr06    | 58028664                       | [G/C]       | 1067301038                                 |
| Ca_Kabuli_NC_021165.1_58028665 | Ca_kabuli_chr06    | 58028665                       | [A/C]       | 1067301039                                 |
| Ca_Kabuli_NC_021165.1_58053878 | Ca_kabuli_chr06    | 58053878                       | [T/A]       | 1067301040                                 |

| <b>SNP IDs</b>                 | <b>Chromosomes</b> | <b>Physical positions (bp)</b> | <b>SNPs</b> | <b>NCBI SNPdb accession IDs (NCBI_ss#)</b> |
|--------------------------------|--------------------|--------------------------------|-------------|--------------------------------------------|
| Ca_Kabuli_NC_021165.1_58110605 | Ca_kabuli_chr06    | 58110605                       | [C/T]       | 1067301041                                 |
| Ca_Kabuli_NC_021165.1_58161736 | Ca_kabuli_chr06    | 58161736                       | [A/C]       | 1067301042                                 |
| Ca_Kabuli_NC_021165.1_58161748 | Ca_kabuli_chr06    | 58161748                       | [A/C]       | 1067301043                                 |
| Ca_Kabuli_NC_021165.1_58165739 | Ca_kabuli_chr06    | 58165739                       | [T/A]       | 1067301044                                 |
| Ca_Kabuli_NC_021165.1_58175060 | Ca_kabuli_chr06    | 58175060                       | [G/A]       | 1067301045                                 |
| Ca_Kabuli_NC_021165.1_58187980 | Ca_kabuli_chr06    | 58187980                       | [A/G]       | 1067301046                                 |
| Ca_Kabuli_NC_021165.1_58190722 | Ca_kabuli_chr06    | 58190722                       | [A/G]       | 1067301047                                 |
| Ca_Kabuli_NC_021165.1_58190723 | Ca_kabuli_chr06    | 58190723                       | [G/A]       | 1067301048                                 |
| Ca_Kabuli_NC_021165.1_58190724 | Ca_kabuli_chr06    | 58190724                       | [A/G]       | 1067301049                                 |
| Ca_Kabuli_NC_021165.1_58191028 | Ca_kabuli_chr06    | 58191028                       | [A/G]       | 1067301050                                 |
| Ca_Kabuli_NC_021165.1_58191054 | Ca_kabuli_chr06    | 58191054                       | [T/G]       | 1067301051                                 |
| Ca_Kabuli_NC_021165.1_58191065 | Ca_kabuli_chr06    | 58191065                       | [A/C]       | 1067301052                                 |
| Ca_Kabuli_NC_021165.1_58191073 | Ca_kabuli_chr06    | 58191073                       | [A/C]       | 1067301053                                 |
| Ca_Kabuli_NC_021165.1_58201715 | Ca_kabuli_chr06    | 58201715                       | [T/G]       | 1067301054                                 |
| Ca_Kabuli_NC_021165.1_58223959 | Ca_kabuli_chr06    | 58223959                       | [A/G]       | 1067301055                                 |
| Ca_Kabuli_NC_021165.1_58224049 | Ca_kabuli_chr06    | 58224049                       | [A/C]       | 1067301056                                 |
| Ca_Kabuli_NC_021165.1_58224069 | Ca_kabuli_chr06    | 58224069                       | [A/C]       | 1067301057                                 |
| Ca_Kabuli_NC_021165.1_58233856 | Ca_kabuli_chr06    | 58233856                       | [T/C]       | 1067301058                                 |
| Ca_Kabuli_NC_021165.1_58233858 | Ca_kabuli_chr06    | 58233858                       | [T/C]       | 1067301059                                 |
| Ca_Kabuli_NC_021165.1_58233916 | Ca_kabuli_chr06    | 58233916                       | [T/A]       | 1067301060                                 |
| Ca_Kabuli_NC_021165.1_58244019 | Ca_kabuli_chr06    | 58244019                       | [G/A]       | 1067301061                                 |
| Ca_Kabuli_NC_021165.1_58244128 | Ca_kabuli_chr06    | 58244128                       | [T/C]       | 1067301062                                 |
| Ca_Kabuli_NC_021165.1_58244129 | Ca_kabuli_chr06    | 58244129                       | [G/A]       | 1067301063                                 |
| Ca_Kabuli_NC_021165.1_58326313 | Ca_kabuli_chr06    | 58326313                       | [A/T]       | 1067301064                                 |
| Ca_Kabuli_NC_021165.1_58326368 | Ca_kabuli_chr06    | 58326368                       | [A/G]       | 1067301065                                 |
| Ca_Kabuli_NC_021165.1_58401640 | Ca_kabuli_chr06    | 58401640                       | [G/A]       | 1067301066                                 |
| Ca_Kabuli_NC_021165.1_58434180 | Ca_kabuli_chr06    | 58434180                       | [T/A]       | 1067301067                                 |
| Ca_Kabuli_NC_021165.1_58434202 | Ca_kabuli_chr06    | 58434202                       | [T/C]       | 1067301068                                 |
| Ca_Kabuli_NC_021165.1_58434208 | Ca_kabuli_chr06    | 58434208                       | [T/C]       | 1067301069                                 |
| Ca_Kabuli_NC_021165.1_58452890 | Ca_kabuli_chr06    | 58452890                       | [T/C]       | 1067301070                                 |
| Ca_Kabuli_NC_021165.1_58569649 | Ca_kabuli_chr06    | 58569649                       | [A/G]       | 1067301071                                 |
| Ca_Kabuli_NC_021165.1_58571594 | Ca_kabuli_chr06    | 58571594                       | [T/C]       | 1067301072                                 |
| Ca_Kabuli_NC_021165.1_58571615 | Ca_kabuli_chr06    | 58571615                       | [T/G]       | 1067301073                                 |
| Ca_Kabuli_NC_021165.1_58571658 | Ca_kabuli_chr06    | 58571658                       | [A/T]       | 1067301074                                 |

| <b>SNP IDs</b>                 | <b>Chromosomes</b> | <b>Physical positions (bp)</b> | <b>SNPs</b> | <b>NCBI SNPdb accession IDs (NCBI_ss#)</b> |
|--------------------------------|--------------------|--------------------------------|-------------|--------------------------------------------|
| Ca_Kabuli_NC_021165.1_58571680 | Ca_kabuli_chr06    | 58571680                       | [A/T]       | 1067301075                                 |
| Ca_Kabuli_NC_021165.1_58618631 | Ca_kabuli_chr06    | 58618631                       | [A/C]       | 1067301076                                 |
| Ca_Kabuli_NC_021165.1_58650318 | Ca_kabuli_chr06    | 58650318                       | [A/C]       | 1067301077                                 |
| Ca_Kabuli_NC_021165.1_58650412 | Ca_kabuli_chr06    | 58650412                       | [T/C]       | 1067301078                                 |
| Ca_Kabuli_NC_021165.1_58650426 | Ca_kabuli_chr06    | 58650426                       | [A/T]       | 1067301079                                 |
| Ca_Kabuli_NC_021165.1_58652851 | Ca_kabuli_chr06    | 58652851                       | [T/C]       | 1067301080                                 |
| Ca_Kabuli_NC_021165.1_58676515 | Ca_kabuli_chr06    | 58676515                       | [T/C]       | 1067301081                                 |
| Ca_Kabuli_NC_021165.1_58676520 | Ca_kabuli_chr06    | 58676520                       | [T/C]       | 1067301082                                 |
| Ca_Kabuli_NC_021165.1_58682397 | Ca_kabuli_chr06    | 58682397                       | [G/A]       | 1067301083                                 |
| Ca_Kabuli_NC_021165.1_58682398 | Ca_kabuli_chr06    | 58682398                       | [T/A]       | 1067301084                                 |
| Ca_Kabuli_NC_021165.1_58746193 | Ca_kabuli_chr06    | 58746193                       | [T/G]       | 1067301085                                 |
| Ca_Kabuli_NC_021165.1_58746209 | Ca_kabuli_chr06    | 58746209                       | [A/C]       | 1067301086                                 |
| Ca_Kabuli_NC_021165.1_58753226 | Ca_kabuli_chr06    | 58753226                       | [T/A]       | 1067301087                                 |
| Ca_Kabuli_NC_021165.1_58820562 | Ca_kabuli_chr06    | 58820562                       | [T/G]       | 1067301088                                 |
| Ca_Kabuli_NC_021165.1_58832691 | Ca_kabuli_chr06    | 58832691                       | [T/G]       | 1067301089                                 |
| Ca_Kabuli_NC_021165.1_58832732 | Ca_kabuli_chr06    | 58832732                       | [A/T]       | 1067301090                                 |
| Ca_Kabuli_NC_021165.1_58864558 | Ca_kabuli_chr06    | 58864558                       | [A/G]       | 1067301091                                 |
| Ca_Kabuli_NC_021165.1_58864584 | Ca_kabuli_chr06    | 58864584                       | [T/A]       | 1067301092                                 |
| Ca_Kabuli_NC_021165.1_58879219 | Ca_kabuli_chr06    | 58879219                       | [T/G]       | 1067301093                                 |
| Ca_Kabuli_NC_021165.1_58879616 | Ca_kabuli_chr06    | 58879616                       | [T/A]       | 1067301094                                 |
| Ca_Kabuli_NC_021165.1_58897252 | Ca_kabuli_chr06    | 58897252                       | [C/T]       | 1067301095                                 |
| Ca_Kabuli_NC_021165.1_58908024 | Ca_kabuli_chr06    | 58908024                       | [G/A]       | 1067301096                                 |
| Ca_Kabuli_NC_021165.1_58911575 | Ca_kabuli_chr06    | 58911575                       | [T/G]       | 1067301097                                 |
| Ca_Kabuli_NC_021165.1_58911693 | Ca_kabuli_chr06    | 58911693                       | [A/C]       | 1067301098                                 |
| Ca_Kabuli_NC_021165.1_58951144 | Ca_kabuli_chr06    | 58951144                       | [T/C]       | 1067301099                                 |
| Ca_Kabuli_NC_021165.1_58984062 | Ca_kabuli_chr06    | 58984062                       | [A/T]       | 1067301100                                 |
| Ca_Kabuli_NC_021165.1_58984063 | Ca_kabuli_chr06    | 58984063                       | [T/C]       | 1067301101                                 |
| Ca_Kabuli_NC_021165.1_58984064 | Ca_kabuli_chr06    | 58984064                       | [G/T]       | 1067301102                                 |
| Ca_Kabuli_NC_021165.1_58993813 | Ca_kabuli_chr06    | 58993813                       | [T/C]       | 1067301103                                 |
| Ca_Kabuli_NC_021165.1_59000599 | Ca_kabuli_chr06    | 59000599                       | [A/C]       | 1067301104                                 |
| Ca_Kabuli_NC_021165.1_59010430 | Ca_kabuli_chr06    | 59010430                       | [T/A]       | 1067301105                                 |
| Ca_Kabuli_NC_021165.1_59010513 | Ca_kabuli_chr06    | 59010513                       | [C/T]       | 1067301106                                 |
| Ca_Kabuli_NC_021165.1_59010536 | Ca_kabuli_chr06    | 59010536                       | [T/C]       | 1067301107                                 |
| Ca_Kabuli_NC_021165.1_59064814 | Ca_kabuli_chr06    | 59064814                       | [A/G]       | 1067301108                                 |

| <b>SNP IDs</b>                 | <b>Chromosomes</b> | <b>Physical positions (bp)</b> | <b>SNPs</b> | <b>NCBI SNPdb accession IDs (NCBI_ss#)</b> |
|--------------------------------|--------------------|--------------------------------|-------------|--------------------------------------------|
| Ca_Kabuli_NC_021165.1_59081169 | Ca_kabuli_chr06    | 59081169                       | [T/C]       | 1067301109                                 |
| Ca_Kabuli_NC_021165.1_59095529 | Ca_kabuli_chr06    | 59095529                       | [T/G]       | 1067301110                                 |
| Ca_Kabuli_NC_021165.1_59102165 | Ca_kabuli_chr06    | 59102165                       | [T/C]       | 1067301111                                 |
| Ca_Kabuli_NC_021165.1_59135935 | Ca_kabuli_chr06    | 59135935                       | [T/G]       | 1067301112                                 |
| Ca_Kabuli_NC_021165.1_59219116 | Ca_kabuli_chr06    | 59219116                       | [T/G]       | 1067301113                                 |
| Ca_Kabuli_NC_021165.1_59304548 | Ca_kabuli_chr06    | 59304548                       | [T/G]       | 1067301114                                 |
| Ca_Kabuli_NC_021165.1_59367115 | Ca_kabuli_chr06    | 59367115                       | [C/A]       | 1067301115                                 |
| Ca_Kabuli_NC_021165.1_59367116 | Ca_kabuli_chr06    | 59367116                       | [T/G]       | 1067301116                                 |
| Ca_Kabuli_NC_021165.1_59367117 | Ca_kabuli_chr06    | 59367117                       | [G/A]       | 1067301117                                 |
| Ca_Kabuli_NC_021165.1_59367118 | Ca_kabuli_chr06    | 59367118                       | [G/T]       | 1067301118                                 |
| Ca_Kabuli_NC_021165.1_59417909 | Ca_kabuli_chr06    | 59417909                       | [A/C]       | 1067301119                                 |
| Ca_Kabuli_NC_021165.1_59417915 | Ca_kabuli_chr06    | 59417915                       | [A/G]       | 1067301120                                 |
| Ca_Kabuli_NC_021166.1_16589    | Ca_kabuli_chr07    | 16589                          | [T/C]       | 1067301121                                 |
| Ca_Kabuli_NC_021166.1_16881    | Ca_kabuli_chr07    | 16881                          | [A/C]       | 1067301122                                 |
| Ca_Kabuli_NC_021166.1_31121    | Ca_kabuli_chr07    | 31121                          | [T/C]       | 1067301123                                 |
| Ca_Kabuli_NC_021166.1_31129    | Ca_kabuli_chr07    | 31129                          | [A/G]       | 1067301124                                 |
| Ca_Kabuli_NC_021166.1_31137    | Ca_kabuli_chr07    | 31137                          | [A/G]       | 1067301125                                 |
| Ca_Kabuli_NC_021166.1_31139    | Ca_kabuli_chr07    | 31139                          | [A/G]       | 1067301126                                 |
| Ca_Kabuli_NC_021166.1_32278    | Ca_kabuli_chr07    | 32278                          | [A/C]       | 1067301127                                 |
| Ca_Kabuli_NC_021166.1_39091    | Ca_kabuli_chr07    | 39091                          | [A/C]       | 1067301128                                 |
| Ca_Kabuli_NC_021166.1_42032    | Ca_kabuli_chr07    | 42032                          | [A/C]       | 1067301129                                 |
| Ca_Kabuli_NC_021166.1_122600   | Ca_kabuli_chr07    | 122600                         | [T/G]       | 1067301130                                 |
| Ca_Kabuli_NC_021166.1_128956   | Ca_kabuli_chr07    | 128956                         | [A/T]       | 1067301131                                 |
| Ca_Kabuli_NC_021166.1_208851   | Ca_kabuli_chr07    | 208851                         | [A/C]       | 1067301132                                 |
| Ca_Kabuli_NC_021166.1_218330   | Ca_kabuli_chr07    | 218330                         | [A/G]       | 1067301133                                 |
| Ca_Kabuli_NC_021166.1_234618   | Ca_kabuli_chr07    | 234618                         | [T/C]       | 1067301134                                 |
| Ca_Kabuli_NC_021166.1_234624   | Ca_kabuli_chr07    | 234624                         | [A/G]       | 1067301135                                 |
| Ca_Kabuli_NC_021166.1_234648   | Ca_kabuli_chr07    | 234648                         | [A/G]       | 1067301136                                 |
| Ca_Kabuli_NC_021166.1_319218   | Ca_kabuli_chr07    | 319218                         | [A/C]       | 1067301137                                 |
| Ca_Kabuli_NC_021166.1_343628   | Ca_kabuli_chr07    | 343628                         | [A/G]       | 1067301138                                 |
| Ca_Kabuli_NC_021166.1_343919   | Ca_kabuli_chr07    | 343919                         | [A/C]       | 1067301139                                 |
| Ca_Kabuli_NC_021166.1_610723   | Ca_kabuli_chr07    | 610723                         | [G/T]       | 1067301140                                 |
| Ca_Kabuli_NC_021166.1_610737   | Ca_kabuli_chr07    | 610737                         | [C/A]       | 1067301141                                 |
| Ca_Kabuli_NC_021166.1_610741   | Ca_kabuli_chr07    | 610741                         | [G/A]       | 1067301142                                 |

| <b>SNP IDs</b>               | <b>Chromosomes</b> | <b>Physical positions (bp)</b> | <b>SNPs</b> | <b>NCBI SNPdb accession IDs (NCBI_ss#)</b> |
|------------------------------|--------------------|--------------------------------|-------------|--------------------------------------------|
| Ca_Kabuli_NC_021166.1_670596 | Ca_kabuli_chr07    | 670596                         | [A/G]       | 1067301143                                 |
| Ca_Kabuli_NC_021166.1_670605 | Ca_kabuli_chr07    | 670605                         | [T/C]       | 1067301144                                 |
| Ca_Kabuli_NC_021166.1_674764 | Ca_kabuli_chr07    | 674764                         | [T/C]       | 1067301145                                 |
| Ca_Kabuli_NC_021166.1_676748 | Ca_kabuli_chr07    | 676748                         | [A/C]       | 1067301146                                 |
| Ca_Kabuli_NC_021166.1_676759 | Ca_kabuli_chr07    | 676759                         | [C/T]       | 1067301147                                 |
| Ca_Kabuli_NC_021166.1_729733 | Ca_kabuli_chr07    | 729733                         | [A/G]       | 1067301148                                 |
| Ca_Kabuli_NC_021166.1_767739 | Ca_kabuli_chr07    | 767739                         | [A/C]       | 1067301149                                 |
| Ca_Kabuli_NC_021166.1_767896 | Ca_kabuli_chr07    | 767896                         | [A/C]       | 1067301150                                 |
| Ca_Kabuli_NC_021166.1_780997 | Ca_kabuli_chr07    | 780997                         | [A/C]       | 1067301151                                 |
| Ca_Kabuli_NC_021166.1_780998 | Ca_kabuli_chr07    | 780998                         | [G/T]       | 1067301152                                 |
| Ca_Kabuli_NC_021166.1_781341 | Ca_kabuli_chr07    | 781341                         | [T/G]       | 1067301153                                 |
| Ca_Kabuli_NC_021166.1_801799 | Ca_kabuli_chr07    | 801799                         | [G/T]       | 1067301154                                 |
| Ca_Kabuli_NC_021166.1_801802 | Ca_kabuli_chr07    | 801802                         | [A/C]       | 1067301155                                 |
| Ca_Kabuli_NC_021166.1_802085 | Ca_kabuli_chr07    | 802085                         | [T/G]       | 1067301156                                 |
| Ca_Kabuli_NC_021166.1_815447 | Ca_kabuli_chr07    | 815447                         | [T/G]       | 1067301157                                 |
| Ca_Kabuli_NC_021166.1_815452 | Ca_kabuli_chr07    | 815452                         | [T/G]       | 1067301158                                 |
| Ca_Kabuli_NC_021166.1_815466 | Ca_kabuli_chr07    | 815466                         | [T/G]       | 1067301159                                 |
| Ca_Kabuli_NC_021166.1_815471 | Ca_kabuli_chr07    | 815471                         | [T/G]       | 1067301160                                 |
| Ca_Kabuli_NC_021166.1_815504 | Ca_kabuli_chr07    | 815504                         | [G/T]       | 1067301161                                 |
| Ca_Kabuli_NC_021166.1_815505 | Ca_kabuli_chr07    | 815505                         | [A/G]       | 1067301162                                 |
| Ca_Kabuli_NC_021166.1_815506 | Ca_kabuli_chr07    | 815506                         | [G/T]       | 1067301163                                 |
| Ca_Kabuli_NC_021166.1_827475 | Ca_kabuli_chr07    | 827475                         | [T/C]       | 1067301164                                 |
| Ca_Kabuli_NC_021166.1_827495 | Ca_kabuli_chr07    | 827495                         | [T/C]       | 1067301165                                 |
| Ca_Kabuli_NC_021166.1_827514 | Ca_kabuli_chr07    | 827514                         | [T/C]       | 1067301166                                 |
| Ca_Kabuli_NC_021166.1_842109 | Ca_kabuli_chr07    | 842109                         | [T/A]       | 1067301167                                 |
| Ca_Kabuli_NC_021166.1_843870 | Ca_kabuli_chr07    | 843870                         | [T/G]       | 1067301168                                 |
| Ca_Kabuli_NC_021166.1_843871 | Ca_kabuli_chr07    | 843871                         | [T/A]       | 1067301169                                 |
| Ca_Kabuli_NC_021166.1_843873 | Ca_kabuli_chr07    | 843873                         | [T/C]       | 1067301170                                 |
| Ca_Kabuli_NC_021166.1_843874 | Ca_kabuli_chr07    | 843874                         | [G/T]       | 1067301171                                 |
| Ca_Kabuli_NC_021166.1_845430 | Ca_kabuli_chr07    | 845430                         | [T/C]       | 1067301172                                 |
| Ca_Kabuli_NC_021166.1_845475 | Ca_kabuli_chr07    | 845475                         | [T/G]       | 1067301173                                 |
| Ca_Kabuli_NC_021166.1_845482 | Ca_kabuli_chr07    | 845482                         | [A/G]       | 1067301174                                 |
| Ca_Kabuli_NC_021166.1_845492 | Ca_kabuli_chr07    | 845492                         | [A/G]       | 1067301175                                 |
| Ca_Kabuli_NC_021166.1_857952 | Ca_kabuli_chr07    | 857952                         | [A/C]       | 1067301176                                 |

| <b>SNP IDs</b>                | <b>Chromosomes</b> | <b>Physical positions (bp)</b> | <b>SNPs</b> | <b>NCBI SNPdb accession IDs (NCBI_ss#)</b> |
|-------------------------------|--------------------|--------------------------------|-------------|--------------------------------------------|
| Ca_Kabuli_NC_021166.1_888948  | Ca_kabuli_chr07    | 888948                         | [A/C]       | 1067301177                                 |
| Ca_Kabuli_NC_021166.1_888954  | Ca_kabuli_chr07    | 888954                         | [A/C]       | 1067301178                                 |
| Ca_Kabuli_NC_021166.1_888957  | Ca_kabuli_chr07    | 888957                         | [A/C]       | 1067301179                                 |
| Ca_Kabuli_NC_021166.1_888979  | Ca_kabuli_chr07    | 888979                         | [A/G]       | 1067301180                                 |
| Ca_Kabuli_NC_021166.1_888982  | Ca_kabuli_chr07    | 888982                         | [A/C]       | 1067301181                                 |
| Ca_Kabuli_NC_021166.1_934378  | Ca_kabuli_chr07    | 934378                         | [T/G]       | 1067301182                                 |
| Ca_Kabuli_NC_021166.1_934384  | Ca_kabuli_chr07    | 934384                         | [T/C]       | 1067301183                                 |
| Ca_Kabuli_NC_021166.1_934418  | Ca_kabuli_chr07    | 934418                         | [A/C]       | 1067301184                                 |
| Ca_Kabuli_NC_021166.1_944687  | Ca_kabuli_chr07    | 944687                         | [T/G]       | 1067301185                                 |
| Ca_Kabuli_NC_021166.1_944696  | Ca_kabuli_chr07    | 944696                         | [T/C]       | 1067301186                                 |
| Ca_Kabuli_NC_021166.1_944702  | Ca_kabuli_chr07    | 944702                         | [A/T]       | 1067301187                                 |
| Ca_Kabuli_NC_021166.1_945251  | Ca_kabuli_chr07    | 945251                         | [T/A]       | 1067301188                                 |
| Ca_Kabuli_NC_021166.1_975248  | Ca_kabuli_chr07    | 975248                         | [T/G]       | 1067301189                                 |
| Ca_Kabuli_NC_021166.1_975255  | Ca_kabuli_chr07    | 975255                         | [T/G]       | 1067301190                                 |
| Ca_Kabuli_NC_021166.1_975262  | Ca_kabuli_chr07    | 975262                         | [A/G]       | 1067301191                                 |
| Ca_Kabuli_NC_021166.1_979745  | Ca_kabuli_chr07    | 979745                         | [A/G]       | 1067301192                                 |
| Ca_Kabuli_NC_021166.1_979748  | Ca_kabuli_chr07    | 979748                         | [A/C]       | 1067301193                                 |
| Ca_Kabuli_NC_021166.1_1023086 | Ca_kabuli_chr07    | 1023086                        | [A/T]       | 1067301194                                 |
| Ca_Kabuli_NC_021166.1_1023092 | Ca_kabuli_chr07    | 1023092                        | [A/C]       | 1067301195                                 |
| Ca_Kabuli_NC_021166.1_1044375 | Ca_kabuli_chr07    | 1044375                        | [T/C]       | 1067301196                                 |
| Ca_Kabuli_NC_021166.1_1086941 | Ca_kabuli_chr07    | 1086941                        | [T/G]       | 1067301197                                 |
| Ca_Kabuli_NC_021166.1_1108985 | Ca_kabuli_chr07    | 1108985                        | [T/G]       | 1067301198                                 |
| Ca_Kabuli_NC_021166.1_1109051 | Ca_kabuli_chr07    | 1109051                        | [A/G]       | 1067301199                                 |
| Ca_Kabuli_NC_021166.1_1120977 | Ca_kabuli_chr07    | 1120977                        | [A/C]       | 1067301200                                 |
| Ca_Kabuli_NC_021166.1_1127710 | Ca_kabuli_chr07    | 1127710                        | [T/G]       | 1067301201                                 |
| Ca_Kabuli_NC_021166.1_1153230 | Ca_kabuli_chr07    | 1153230                        | [A/C]       | 1067301202                                 |
| Ca_Kabuli_NC_021166.1_1153232 | Ca_kabuli_chr07    | 1153232                        | [C/T]       | 1067301203                                 |
| Ca_Kabuli_NC_021166.1_1178312 | Ca_kabuli_chr07    | 1178312                        | [A/C]       | 1067301204                                 |
| Ca_Kabuli_NC_021166.1_1178335 | Ca_kabuli_chr07    | 1178335                        | [A/C]       | 1067301205                                 |
| Ca_Kabuli_NC_021166.1_1210467 | Ca_kabuli_chr07    | 1210467                        | [A/C]       | 1067301206                                 |
| Ca_Kabuli_NC_021166.1_1261345 | Ca_kabuli_chr07    | 1261345                        | [A/T]       | 1067301207                                 |
| Ca_Kabuli_NC_021166.1_1261355 | Ca_kabuli_chr07    | 1261355                        | [T/A]       | 1067301208                                 |
| Ca_Kabuli_NC_021166.1_1261372 | Ca_kabuli_chr07    | 1261372                        | [A/T]       | 1067301209                                 |
| Ca_Kabuli_NC_021166.1_1261380 | Ca_kabuli_chr07    | 1261380                        | [A/G]       | 1067301210                                 |

| <b>SNP IDs</b>                | <b>Chromosomes</b> | <b>Physical positions (bp)</b> | <b>SNPs</b> | <b>NCBI SNPdb accession IDs (NCBI_ss#)</b> |
|-------------------------------|--------------------|--------------------------------|-------------|--------------------------------------------|
| Ca_Kabuli_NC_021166.1_1261405 | Ca_kabuli_chr07    | 1261405                        | [T/C]       | 1067301211                                 |
| Ca_Kabuli_NC_021166.1_1278577 | Ca_kabuli_chr07    | 1278577                        | [A/G]       | 1067301212                                 |
| Ca_Kabuli_NC_021166.1_1278590 | Ca_kabuli_chr07    | 1278590                        | [A/G]       | 1067301213                                 |
| Ca_Kabuli_NC_021166.1_1278598 | Ca_kabuli_chr07    | 1278598                        | [T/C]       | 1067301214                                 |
| Ca_Kabuli_NC_021166.1_1293601 | Ca_kabuli_chr07    | 1293601                        | [C/G]       | 1067301215                                 |
| Ca_Kabuli_NC_021166.1_1317991 | Ca_kabuli_chr07    | 1317991                        | [T/A]       | 1067301216                                 |
| Ca_Kabuli_NC_021166.1_1350841 | Ca_kabuli_chr07    | 1350841                        | [T/A]       | 1067301217                                 |
| Ca_Kabuli_NC_021166.1_1350851 | Ca_kabuli_chr07    | 1350851                        | [A/T]       | 1067301218                                 |
| Ca_Kabuli_NC_021166.1_1350879 | Ca_kabuli_chr07    | 1350879                        | [T/G]       | 1067301219                                 |
| Ca_Kabuli_NC_021166.1_1392884 | Ca_kabuli_chr07    | 1392884                        | [T/G]       | 1067301220                                 |
| Ca_Kabuli_NC_021166.1_1392901 | Ca_kabuli_chr07    | 1392901                        | [A/C]       | 1067301221                                 |
| Ca_Kabuli_NC_021166.1_1436365 | Ca_kabuli_chr07    | 1436365                        | [T/C]       | 1067301222                                 |
| Ca_Kabuli_NC_021166.1_1461463 | Ca_kabuli_chr07    | 1461463                        | [T/G]       | 1067301223                                 |
| Ca_Kabuli_NC_021166.1_1461481 | Ca_kabuli_chr07    | 1461481                        | [T/C]       | 1067301224                                 |
| Ca_Kabuli_NC_021166.1_1461485 | Ca_kabuli_chr07    | 1461485                        | [T/A]       | 1067301225                                 |
| Ca_Kabuli_NC_021166.1_1473431 | Ca_kabuli_chr07    | 1473431                        | [A/G]       | 1067301226                                 |
| Ca_Kabuli_NC_021166.1_1505488 | Ca_kabuli_chr07    | 1505488                        | [T/G]       | 1067301227                                 |
| Ca_Kabuli_NC_021166.1_1510868 | Ca_kabuli_chr07    | 1510868                        | [A/G]       | 1067301228                                 |
| Ca_Kabuli_NC_021166.1_1542686 | Ca_kabuli_chr07    | 1542686                        | [T/G]       | 1067301229                                 |
| Ca_Kabuli_NC_021166.1_1542711 | Ca_kabuli_chr07    | 1542711                        | [A/C]       | 1067301230                                 |
| Ca_Kabuli_NC_021166.1_1655087 | Ca_kabuli_chr07    | 1655087                        | [C/A]       | 1067301231                                 |
| Ca_Kabuli_NC_021166.1_1668139 | Ca_kabuli_chr07    | 1668139                        | [T/C]       | 1067301232                                 |
| Ca_Kabuli_NC_021166.1_1668197 | Ca_kabuli_chr07    | 1668197                        | [A/G]       | 1067301233                                 |
| Ca_Kabuli_NC_021166.1_1690930 | Ca_kabuli_chr07    | 1690930                        | [T/C]       | 1067301234                                 |
| Ca_Kabuli_NC_021166.1_1704808 | Ca_kabuli_chr07    | 1704808                        | [G/A]       | 1067301235                                 |
| Ca_Kabuli_NC_021166.1_1704814 | Ca_kabuli_chr07    | 1704814                        | [T/C]       | 1067301236                                 |
| Ca_Kabuli_NC_021166.1_1787368 | Ca_kabuli_chr07    | 1787368                        | [T/C]       | 1067301237                                 |
| Ca_Kabuli_NC_021166.1_1813421 | Ca_kabuli_chr07    | 1813421                        | [T/A]       | 1067301238                                 |
| Ca_Kabuli_NC_021166.1_1818008 | Ca_kabuli_chr07    | 1818008                        | [T/C]       | 1067301239                                 |
| Ca_Kabuli_NC_021166.1_1818016 | Ca_kabuli_chr07    | 1818016                        | [T/A]       | 1067301240                                 |
| Ca_Kabuli_NC_021166.1_1962779 | Ca_kabuli_chr07    | 1962779                        | [A/C]       | 1067301241                                 |
| Ca_Kabuli_NC_021166.1_2012887 | Ca_kabuli_chr07    | 2012887                        | [A/T]       | 1067301242                                 |
| Ca_Kabuli_NC_021166.1_2075524 | Ca_kabuli_chr07    | 2075524                        | [A/G]       | 1067301243                                 |
| Ca_Kabuli_NC_021166.1_2076232 | Ca_kabuli_chr07    | 2076232                        | [A/C]       | 1067301244                                 |

| <b>SNP IDs</b>                | <b>Chromosomes</b> | <b>Physical positions (bp)</b> | <b>SNPs</b> | <b>NCBI SNPdb accession IDs (NCBI_ss#)</b> |
|-------------------------------|--------------------|--------------------------------|-------------|--------------------------------------------|
| Ca_Kabuli_NC_021166.1_2078173 | Ca_kabuli_chr07    | 2078173                        | [T/G]       | 1067301245                                 |
| Ca_Kabuli_NC_021166.1_2078199 | Ca_kabuli_chr07    | 2078199                        | [A/C]       | 1067301246                                 |
| Ca_Kabuli_NC_021166.1_2078242 | Ca_kabuli_chr07    | 2078242                        | [A/T]       | 1067301247                                 |
| Ca_Kabuli_NC_021166.1_2082069 | Ca_kabuli_chr07    | 2082069                        | [T/G]       | 1067301248                                 |
| Ca_Kabuli_NC_021166.1_2086339 | Ca_kabuli_chr07    | 2086339                        | [T/G]       | 1067301249                                 |
| Ca_Kabuli_NC_021166.1_2086352 | Ca_kabuli_chr07    | 2086352                        | [T/G]       | 1067301250                                 |
| Ca_Kabuli_NC_021166.1_2106917 | Ca_kabuli_chr07    | 2106917                        | [A/G]       | 1067301251                                 |
| Ca_Kabuli_NC_021166.1_2167473 | Ca_kabuli_chr07    | 2167473                        | [T/A]       | 1067301252                                 |
| Ca_Kabuli_NC_021166.1_2167499 | Ca_kabuli_chr07    | 2167499                        | [A/G]       | 1067301253                                 |
| Ca_Kabuli_NC_021166.1_2167530 | Ca_kabuli_chr07    | 2167530                        | [T/C]       | 1067301254                                 |
| Ca_Kabuli_NC_021166.1_2211895 | Ca_kabuli_chr07    | 2211895                        | [A/G]       | 1067301255                                 |
| Ca_Kabuli_NC_021166.1_2211898 | Ca_kabuli_chr07    | 2211898                        | [T/C]       | 1067301256                                 |
| Ca_Kabuli_NC_021166.1_2211905 | Ca_kabuli_chr07    | 2211905                        | [T/C]       | 1067301257                                 |
| Ca_Kabuli_NC_021166.1_2213655 | Ca_kabuli_chr07    | 2213655                        | [T/A]       | 1067301258                                 |
| Ca_Kabuli_NC_021166.1_2230358 | Ca_kabuli_chr07    | 2230358                        | [T/G]       | 1067301259                                 |
| Ca_Kabuli_NC_021166.1_2259629 | Ca_kabuli_chr07    | 2259629                        | [T/C]       | 1067301260                                 |
| Ca_Kabuli_NC_021166.1_2259664 | Ca_kabuli_chr07    | 2259664                        | [A/T]       | 1067301261                                 |
| Ca_Kabuli_NC_021166.1_2262889 | Ca_kabuli_chr07    | 2262889                        | [A/C]       | 1067301262                                 |
| Ca_Kabuli_NC_021166.1_2262896 | Ca_kabuli_chr07    | 2262896                        | [A/C]       | 1067301263                                 |
| Ca_Kabuli_NC_021166.1_2391350 | Ca_kabuli_chr07    | 2391350                        | [T/G]       | 1067301264                                 |
| Ca_Kabuli_NC_021166.1_2453653 | Ca_kabuli_chr07    | 2453653                        | [T/G]       | 1067301265                                 |
| Ca_Kabuli_NC_021166.1_2487540 | Ca_kabuli_chr07    | 2487540                        | [C/A]       | 1067301266                                 |
| Ca_Kabuli_NC_021166.1_2487542 | Ca_kabuli_chr07    | 2487542                        | [G/A]       | 1067301267                                 |
| Ca_Kabuli_NC_021166.1_2522738 | Ca_kabuli_chr07    | 2522738                        | [A/C]       | 1067301268                                 |
| Ca_Kabuli_NC_021166.1_2522739 | Ca_kabuli_chr07    | 2522739                        | [G/C]       | 1067301269                                 |
| Ca_Kabuli_NC_021166.1_2549728 | Ca_kabuli_chr07    | 2549728                        | [C/T]       | 1067301270                                 |
| Ca_Kabuli_NC_021166.1_2549729 | Ca_kabuli_chr07    | 2549729                        | [T/G]       | 1067301271                                 |
| Ca_Kabuli_NC_021166.1_2554390 | Ca_kabuli_chr07    | 2554390                        | [C/A]       | 1067301272                                 |
| Ca_Kabuli_NC_021166.1_2554391 | Ca_kabuli_chr07    | 2554391                        | [C/G]       | 1067301273                                 |
| Ca_Kabuli_NC_021166.1_2554392 | Ca_kabuli_chr07    | 2554392                        | [T/A]       | 1067301274                                 |
| Ca_Kabuli_NC_021166.1_2554393 | Ca_kabuli_chr07    | 2554393                        | [G/T]       | 1067301275                                 |
| Ca_Kabuli_NC_021166.1_2609796 | Ca_kabuli_chr07    | 2609796                        | [A/G]       | 1067301276                                 |
| Ca_Kabuli_NC_021166.1_2639959 | Ca_kabuli_chr07    | 2639959                        | [A/G]       | 1067301277                                 |
| Ca_Kabuli_NC_021166.1_2639984 | Ca_kabuli_chr07    | 2639984                        | [T/G]       | 1067301278                                 |



| <b>SNP IDs</b>                | <b>Chromosomes</b> | <b>Physical positions (bp)</b> | <b>SNPs</b> | <b>NCBI SNPdb accession IDs (NCBI_ss#)</b> |
|-------------------------------|--------------------|--------------------------------|-------------|--------------------------------------------|
| Ca_Kabuli_NC_021166.1_2654446 | Ca_kabuli_chr07    | 2654446                        | [A/T]       | 1067301279                                 |
| Ca_Kabuli_NC_021166.1_2740954 | Ca_kabuli_chr07    | 2740954                        | [T/C]       | 1067301280                                 |
| Ca_Kabuli_NC_021166.1_2740961 | Ca_kabuli_chr07    | 2740961                        | [T/C]       | 1067301281                                 |
| Ca_Kabuli_NC_021166.1_2745693 | Ca_kabuli_chr07    | 2745693                        | [A/C]       | 1067301282                                 |
| Ca_Kabuli_NC_021166.1_2745699 | Ca_kabuli_chr07    | 2745699                        | [T/C]       | 1067301283                                 |
| Ca_Kabuli_NC_021166.1_2793055 | Ca_kabuli_chr07    | 2793055                        | [T/G]       | 1067301284                                 |
| Ca_Kabuli_NC_021166.1_2881228 | Ca_kabuli_chr07    | 2881228                        | [A/T]       | 1067301285                                 |
| Ca_Kabuli_NC_021166.1_2881229 | Ca_kabuli_chr07    | 2881229                        | [T/A]       | 1067301286                                 |
| Ca_Kabuli_NC_021166.1_2881230 | Ca_kabuli_chr07    | 2881230                        | [A/T]       | 1067301287                                 |
| Ca_Kabuli_NC_021166.1_2881234 | Ca_kabuli_chr07    | 2881234                        | [A/G]       | 1067301288                                 |
| Ca_Kabuli_NC_021166.1_2881235 | Ca_kabuli_chr07    | 2881235                        | [G/A]       | 1067301289                                 |
| Ca_Kabuli_NC_021166.1_2881236 | Ca_kabuli_chr07    | 2881236                        | [A/G]       | 1067301290                                 |
| Ca_Kabuli_NC_021166.1_3012247 | Ca_kabuli_chr07    | 3012247                        | [T/G]       | 1067301291                                 |
| Ca_Kabuli_NC_021166.1_3012253 | Ca_kabuli_chr07    | 3012253                        | [A/G]       | 1067301292                                 |
| Ca_Kabuli_NC_021166.1_3022874 | Ca_kabuli_chr07    | 3022874                        | [T/A]       | 1067301293                                 |
| Ca_Kabuli_NC_021166.1_3022929 | Ca_kabuli_chr07    | 3022929                        | [A/T]       | 1067301294                                 |
| Ca_Kabuli_NC_021166.1_3024940 | Ca_kabuli_chr07    | 3024940                        | [A/G]       | 1067301295                                 |
| Ca_Kabuli_NC_021166.1_3029708 | Ca_kabuli_chr07    | 3029708                        | [T/G]       | 1067301296                                 |
| Ca_Kabuli_NC_021166.1_3029735 | Ca_kabuli_chr07    | 3029735                        | [T/G]       | 1067301297                                 |
| Ca_Kabuli_NC_021166.1_3070518 | Ca_kabuli_chr07    | 3070518                        | [A/C]       | 1067301298                                 |
| Ca_Kabuli_NC_021166.1_3070531 | Ca_kabuli_chr07    | 3070531                        | [A/C]       | 1067301299                                 |
| Ca_Kabuli_NC_021166.1_3089276 | Ca_kabuli_chr07    | 3089276                        | [A/T]       | 1067301300                                 |
| Ca_Kabuli_NC_021166.1_3093502 | Ca_kabuli_chr07    | 3093502                        | [T/C]       | 1067301301                                 |
| Ca_Kabuli_NC_021166.1_3186295 | Ca_kabuli_chr07    | 3186295                        | [A/G]       | 1067301302                                 |
| Ca_Kabuli_NC_021166.1_3198209 | Ca_kabuli_chr07    | 3198209                        | [T/A]       | 1067301303                                 |
| Ca_Kabuli_NC_021166.1_3198280 | Ca_kabuli_chr07    | 3198280                        | [A/C]       | 1067301304                                 |
| Ca_Kabuli_NC_021166.1_3265807 | Ca_kabuli_chr07    | 3265807                        | [A/T]       | 1067301305                                 |
| Ca_Kabuli_NC_021166.1_3265844 | Ca_kabuli_chr07    | 3265844                        | [A/T]       | 1067301306                                 |
| Ca_Kabuli_NC_021166.1_3336763 | Ca_kabuli_chr07    | 3336763                        | [T/G]       | 1067301307                                 |
| Ca_Kabuli_NC_021166.1_3336766 | Ca_kabuli_chr07    | 3336766                        | [A/G]       | 1067301308                                 |
| Ca_Kabuli_NC_021166.1_3350846 | Ca_kabuli_chr07    | 3350846                        | [T/C]       | 1067301309                                 |
| Ca_Kabuli_NC_021166.1_3353136 | Ca_kabuli_chr07    | 3353136                        | [A/C]       | 1067301310                                 |
| Ca_Kabuli_NC_021166.1_3354249 | Ca_kabuli_chr07    | 3354249                        | [A/T]       | 1067301311                                 |
| Ca_Kabuli_NC_021166.1_3355562 | Ca_kabuli_chr07    | 3355562                        | [T/A]       | 1067301312                                 |

| <b>SNP IDs</b>                | <b>Chromosomes</b> | <b>Physical positions (bp)</b> | <b>SNPs</b> | <b>NCBI SNPdb accession IDs (NCBI_ss#)</b> |
|-------------------------------|--------------------|--------------------------------|-------------|--------------------------------------------|
| Ca_Kabuli_NC_021166.1_3355581 | Ca_kabuli_chr07    | 3355581                        | [T/G]       | 1067301313                                 |
| Ca_Kabuli_NC_021166.1_3355585 | Ca_kabuli_chr07    | 3355585                        | [T/G]       | 1067301314                                 |
| Ca_Kabuli_NC_021166.1_3355627 | Ca_kabuli_chr07    | 3355627                        | [A/G]       | 1067301315                                 |
| Ca_Kabuli_NC_021166.1_3356062 | Ca_kabuli_chr07    | 3356062                        | [G/T]       | 1067301316                                 |
| Ca_Kabuli_NC_021166.1_3356147 | Ca_kabuli_chr07    | 3356147                        | [T/C]       | 1067301317                                 |
| Ca_Kabuli_NC_021166.1_3356155 | Ca_kabuli_chr07    | 3356155                        | [T/C]       | 1067301318                                 |
| Ca_Kabuli_NC_021166.1_3356159 | Ca_kabuli_chr07    | 3356159                        | [T/G]       | 1067301319                                 |
| Ca_Kabuli_NC_021166.1_3469213 | Ca_kabuli_chr07    | 3469213                        | [A/C]       | 1067301320                                 |
| Ca_Kabuli_NC_021166.1_3511221 | Ca_kabuli_chr07    | 3511221                        | [T/A]       | 1067301321                                 |
| Ca_Kabuli_NC_021166.1_3511237 | Ca_kabuli_chr07    | 3511237                        | [T/G]       | 1067301322                                 |
| Ca_Kabuli_NC_021166.1_3519701 | Ca_kabuli_chr07    | 3519701                        | [A/C]       | 1067301323                                 |
| Ca_Kabuli_NC_021166.1_3521112 | Ca_kabuli_chr07    | 3521112                        | [T/G]       | 1067301324                                 |
| Ca_Kabuli_NC_021166.1_3521257 | Ca_kabuli_chr07    | 3521257                        | [G/A]       | 1067301325                                 |
| Ca_Kabuli_NC_021166.1_3521862 | Ca_kabuli_chr07    | 3521862                        | [T/C]       | 1067301326                                 |
| Ca_Kabuli_NC_021166.1_3540487 | Ca_kabuli_chr07    | 3540487                        | [T/C]       | 1067301327                                 |
| Ca_Kabuli_NC_021166.1_3540504 | Ca_kabuli_chr07    | 3540504                        | [T/A]       | 1067301328                                 |
| Ca_Kabuli_NC_021166.1_3555127 | Ca_kabuli_chr07    | 3555127                        | [A/T]       | 1067301329                                 |
| Ca_Kabuli_NC_021166.1_3555132 | Ca_kabuli_chr07    | 3555132                        | [T/C]       | 1067301330                                 |
| Ca_Kabuli_NC_021166.1_3555258 | Ca_kabuli_chr07    | 3555258                        | [G/C]       | 1067301331                                 |
| Ca_Kabuli_NC_021166.1_3560232 | Ca_kabuli_chr07    | 3560232                        | [T/C]       | 1067301332                                 |
| Ca_Kabuli_NC_021166.1_3582271 | Ca_kabuli_chr07    | 3582271                        | [A/C]       | 1067301333                                 |
| Ca_Kabuli_NC_021166.1_3596509 | Ca_kabuli_chr07    | 3596509                        | [T/A]       | 1067301334                                 |
| Ca_Kabuli_NC_021166.1_3600826 | Ca_kabuli_chr07    | 3600826                        | [C/T]       | 1067301335                                 |
| Ca_Kabuli_NC_021166.1_3600833 | Ca_kabuli_chr07    | 3600833                        | [T/G]       | 1067301336                                 |
| Ca_Kabuli_NC_021166.1_3600987 | Ca_kabuli_chr07    | 3600987                        | [A/C]       | 1067301337                                 |
| Ca_Kabuli_NC_021166.1_3606381 | Ca_kabuli_chr07    | 3606381                        | [T/C]       | 1067301338                                 |
| Ca_Kabuli_NC_021166.1_3606389 | Ca_kabuli_chr07    | 3606389                        | [T/C]       | 1067301339                                 |
| Ca_Kabuli_NC_021166.1_3606394 | Ca_kabuli_chr07    | 3606394                        | [A/T]       | 1067301340                                 |
| Ca_Kabuli_NC_021166.1_3665648 | Ca_kabuli_chr07    | 3665648                        | [G/T]       | 1067301341                                 |
| Ca_Kabuli_NC_021166.1_3665649 | Ca_kabuli_chr07    | 3665649                        | [T/C]       | 1067301342                                 |
| Ca_Kabuli_NC_021166.1_3665686 | Ca_kabuli_chr07    | 3665686                        | [C/T]       | 1067301343                                 |
| Ca_Kabuli_NC_021166.1_3672192 | Ca_kabuli_chr07    | 3672192                        | [T/C]       | 1067301344                                 |
| Ca_Kabuli_NC_021166.1_3672236 | Ca_kabuli_chr07    | 3672236                        | [G/A]       | 1067301345                                 |
| Ca_Kabuli_NC_021166.1_3734068 | Ca_kabuli_chr07    | 3734068                        | [A/G]       | 1067301346                                 |

| <b>SNP IDs</b>                | <b>Chromosomes</b> | <b>Physical positions (bp)</b> | <b>SNPs</b> | <b>NCBI SNPdb accession IDs (NCBI_ss#)</b> |
|-------------------------------|--------------------|--------------------------------|-------------|--------------------------------------------|
| Ca_Kabuli_NC_021166.1_3746446 | Ca_kabuli_chr07    | 3746446                        | [A/C]       | 1067301347                                 |
| Ca_Kabuli_NC_021166.1_3792833 | Ca_kabuli_chr07    | 3792833                        | [T/C]       | 1067301348                                 |
| Ca_Kabuli_NC_021166.1_3803144 | Ca_kabuli_chr07    | 3803144                        | [A/C]       | 1067301349                                 |
| Ca_Kabuli_NC_021166.1_3828459 | Ca_kabuli_chr07    | 3828459                        | [T/A]       | 1067301350                                 |
| Ca_Kabuli_NC_021166.1_3828460 | Ca_kabuli_chr07    | 3828460                        | [A/T]       | 1067301351                                 |
| Ca_Kabuli_NC_021166.1_3828467 | Ca_kabuli_chr07    | 3828467                        | [A/G]       | 1067301352                                 |
| Ca_Kabuli_NC_021166.1_3829182 | Ca_kabuli_chr07    | 3829182                        | [A/G]       | 1067301353                                 |
| Ca_Kabuli_NC_021166.1_3843124 | Ca_kabuli_chr07    | 3843124                        | [G/T]       | 1067301354                                 |
| Ca_Kabuli_NC_021166.1_3867048 | Ca_kabuli_chr07    | 3867048                        | [T/G]       | 1067301355                                 |
| Ca_Kabuli_NC_021166.1_3884997 | Ca_kabuli_chr07    | 3884997                        | [A/G]       | 1067301356                                 |
| Ca_Kabuli_NC_021166.1_3922042 | Ca_kabuli_chr07    | 3922042                        | [T/A]       | 1067301357                                 |
| Ca_Kabuli_NC_021166.1_3922049 | Ca_kabuli_chr07    | 3922049                        | [A/G]       | 1067301358                                 |
| Ca_Kabuli_NC_021166.1_3924982 | Ca_kabuli_chr07    | 3924982                        | [A/C]       | 1067301359                                 |
| Ca_Kabuli_NC_021166.1_3925004 | Ca_kabuli_chr07    | 3925004                        | [A/G]       | 1067301360                                 |
| Ca_Kabuli_NC_021166.1_3971250 | Ca_kabuli_chr07    | 3971250                        | [T/C]       | 1067301361                                 |
| Ca_Kabuli_NC_021166.1_3982609 | Ca_kabuli_chr07    | 3982609                        | [C/A]       | 1067301362                                 |
| Ca_Kabuli_NC_021166.1_3982616 | Ca_kabuli_chr07    | 3982616                        | [T/C]       | 1067301363                                 |
| Ca_Kabuli_NC_021166.1_4017869 | Ca_kabuli_chr07    | 4017869                        | [G/T]       | 1067301364                                 |
| Ca_Kabuli_NC_021166.1_4017874 | Ca_kabuli_chr07    | 4017874                        | [A/C]       | 1067301365                                 |
| Ca_Kabuli_NC_021166.1_4073827 | Ca_kabuli_chr07    | 4073827                        | [A/C]       | 1067301366                                 |
| Ca_Kabuli_NC_021166.1_4073844 | Ca_kabuli_chr07    | 4073844                        | [T/C]       | 1067301367                                 |
| Ca_Kabuli_NC_021166.1_4079212 | Ca_kabuli_chr07    | 4079212                        | [T/C]       | 1067301368                                 |
| Ca_Kabuli_NC_021166.1_4080841 | Ca_kabuli_chr07    | 4080841                        | [T/A]       | 1067301369                                 |
| Ca_Kabuli_NC_021166.1_4080868 | Ca_kabuli_chr07    | 4080868                        | [T/A]       | 1067301370                                 |
| Ca_Kabuli_NC_021166.1_4106134 | Ca_kabuli_chr07    | 4106134                        | [T/G]       | 1067301371                                 |
| Ca_Kabuli_NC_021166.1_4183185 | Ca_kabuli_chr07    | 4183185                        | [G/A]       | 1067301372                                 |
| Ca_Kabuli_NC_021166.1_4194848 | Ca_kabuli_chr07    | 4194848                        | [C/T]       | 1067301373                                 |
| Ca_Kabuli_NC_021166.1_4194852 | Ca_kabuli_chr07    | 4194852                        | [A/C]       | 1067301374                                 |
| Ca_Kabuli_NC_021166.1_4194854 | Ca_kabuli_chr07    | 4194854                        | [T/C]       | 1067301375                                 |
| Ca_Kabuli_NC_021166.1_4198812 | Ca_kabuli_chr07    | 4198812                        | [A/C]       | 1067301376                                 |
| Ca_Kabuli_NC_021166.1_4198838 | Ca_kabuli_chr07    | 4198838                        | [A/C]       | 1067301377                                 |
| Ca_Kabuli_NC_021166.1_4200958 | Ca_kabuli_chr07    | 4200958                        | [T/G]       | 1067301378                                 |
| Ca_Kabuli_NC_021166.1_4209424 | Ca_kabuli_chr07    | 4209424                        | [A/C]       | 1067301379                                 |
| Ca_Kabuli_NC_021166.1_4225282 | Ca_kabuli_chr07    | 4225282                        | [T/G]       | 1067301380                                 |

| <b>SNP IDs</b>                | <b>Chromosomes</b> | <b>Physical positions (bp)</b> | <b>SNPs</b> | <b>NCBI SNPdb accession IDs (NCBI_ss#)</b> |
|-------------------------------|--------------------|--------------------------------|-------------|--------------------------------------------|
| Ca_Kabuli_NC_021166.1_4225285 | Ca_kabuli_chr07    | 4225285                        | [T/G]       | 1067301381                                 |
| Ca_Kabuli_NC_021166.1_4225294 | Ca_kabuli_chr07    | 4225294                        | [A/G]       | 1067301382                                 |
| Ca_Kabuli_NC_021166.1_4225298 | Ca_kabuli_chr07    | 4225298                        | [A/G]       | 1067301383                                 |
| Ca_Kabuli_NC_021166.1_4225305 | Ca_kabuli_chr07    | 4225305                        | [T/C]       | 1067301384                                 |
| Ca_Kabuli_NC_021166.1_4240704 | Ca_kabuli_chr07    | 4240704                        | [A/C]       | 1067301385                                 |
| Ca_Kabuli_NC_021166.1_4240784 | Ca_kabuli_chr07    | 4240784                        | [T/G]       | 1067301386                                 |
| Ca_Kabuli_NC_021166.1_4240787 | Ca_kabuli_chr07    | 4240787                        | [A/G]       | 1067301387                                 |
| Ca_Kabuli_NC_021166.1_4240790 | Ca_kabuli_chr07    | 4240790                        | [T/C]       | 1067301388                                 |
| Ca_Kabuli_NC_021166.1_4240796 | Ca_kabuli_chr07    | 4240796                        | [A/G]       | 1067301389                                 |
| Ca_Kabuli_NC_021166.1_4240799 | Ca_kabuli_chr07    | 4240799                        | [T/G]       | 1067301390                                 |
| Ca_Kabuli_NC_021166.1_4284506 | Ca_kabuli_chr07    | 4284506                        | [T/C]       | 1067301391                                 |
| Ca_Kabuli_NC_021166.1_4284510 | Ca_kabuli_chr07    | 4284510                        | [T/C]       | 1067301392                                 |
| Ca_Kabuli_NC_021166.1_4345128 | Ca_kabuli_chr07    | 4345128                        | [T/G]       | 1067301393                                 |
| Ca_Kabuli_NC_021166.1_4345339 | Ca_kabuli_chr07    | 4345339                        | [T/C]       | 1067301394                                 |
| Ca_Kabuli_NC_021166.1_4358380 | Ca_kabuli_chr07    | 4358380                        | [C/T]       | 1067301395                                 |
| Ca_Kabuli_NC_021166.1_4470279 | Ca_kabuli_chr07    | 4470279                        | [A/C]       | 1067301396                                 |
| Ca_Kabuli_NC_021166.1_4495064 | Ca_kabuli_chr07    | 4495064                        | [T/G]       | 1067301397                                 |
| Ca_Kabuli_NC_021166.1_4495075 | Ca_kabuli_chr07    | 4495075                        | [A/T]       | 1067301398                                 |
| Ca_Kabuli_NC_021166.1_4552596 | Ca_kabuli_chr07    | 4552596                        | [A/G]       | 1067301399                                 |
| Ca_Kabuli_NC_021166.1_4552623 | Ca_kabuli_chr07    | 4552623                        | [A/G]       | 1067301400                                 |
| Ca_Kabuli_NC_021166.1_4552740 | Ca_kabuli_chr07    | 4552740                        | [A/C]       | 1067301401                                 |
| Ca_Kabuli_NC_021166.1_4552745 | Ca_kabuli_chr07    | 4552745                        | [A/G]       | 1067301402                                 |
| Ca_Kabuli_NC_021166.1_4552751 | Ca_kabuli_chr07    | 4552751                        | [T/C]       | 1067301403                                 |
| Ca_Kabuli_NC_021166.1_4553487 | Ca_kabuli_chr07    | 4553487                        | [A/C]       | 1067301404                                 |
| Ca_Kabuli_NC_021166.1_4573210 | Ca_kabuli_chr07    | 4573210                        | [T/C]       | 1067301405                                 |
| Ca_Kabuli_NC_021166.1_4625723 | Ca_kabuli_chr07    | 4625723                        | [T/C]       | 1067301406                                 |
| Ca_Kabuli_NC_021166.1_4625737 | Ca_kabuli_chr07    | 4625737                        | [T/C]       | 1067301407                                 |
| Ca_Kabuli_NC_021166.1_4625757 | Ca_kabuli_chr07    | 4625757                        | [A/G]       | 1067301408                                 |
| Ca_Kabuli_NC_021166.1_4653114 | Ca_kabuli_chr07    | 4653114                        | [T/G]       | 1067301409                                 |
| Ca_Kabuli_NC_021166.1_4653200 | Ca_kabuli_chr07    | 4653200                        | [G/T]       | 1067301410                                 |
| Ca_Kabuli_NC_021166.1_4653201 | Ca_kabuli_chr07    | 4653201                        | [T/G]       | 1067301411                                 |
| Ca_Kabuli_NC_021166.1_4653207 | Ca_kabuli_chr07    | 4653207                        | [T/G]       | 1067301412                                 |
| Ca_Kabuli_NC_021166.1_4705772 | Ca_kabuli_chr07    | 4705772                        | [T/G]       | 1067301413                                 |
| Ca_Kabuli_NC_021166.1_4705803 | Ca_kabuli_chr07    | 4705803                        | [A/C]       | 1067301414                                 |

| <b>SNP IDs</b>                | <b>Chromosomes</b> | <b>Physical positions (bp)</b> | <b>SNPs</b> | <b>NCBI SNPdb accession IDs (NCBI_ss#)</b> |
|-------------------------------|--------------------|--------------------------------|-------------|--------------------------------------------|
| Ca_Kabuli_NC_021166.1_4726635 | Ca_kabuli_chr07    | 4726635                        | [T/C]       | 1067301415                                 |
| Ca_Kabuli_NC_021166.1_4726662 | Ca_kabuli_chr07    | 4726662                        | [A/C]       | 1067301416                                 |
| Ca_Kabuli_NC_021166.1_4726667 | Ca_kabuli_chr07    | 4726667                        | [A/G]       | 1067301417                                 |
| Ca_Kabuli_NC_021166.1_4726676 | Ca_kabuli_chr07    | 4726676                        | [T/A]       | 1067301418                                 |
| Ca_Kabuli_NC_021166.1_4749212 | Ca_kabuli_chr07    | 4749212                        | [T/G]       | 1067301419                                 |
| Ca_Kabuli_NC_021166.1_4749260 | Ca_kabuli_chr07    | 4749260                        | [A/C]       | 1067301420                                 |
| Ca_Kabuli_NC_021166.1_4749275 | Ca_kabuli_chr07    | 4749275                        | [A/C]       | 1067301421                                 |
| Ca_Kabuli_NC_021166.1_4752718 | Ca_kabuli_chr07    | 4752718                        | [A/G]       | 1067301422                                 |
| Ca_Kabuli_NC_021166.1_4752720 | Ca_kabuli_chr07    | 4752720                        | [C/G]       | 1067301423                                 |
| Ca_Kabuli_NC_021166.1_4752721 | Ca_kabuli_chr07    | 4752721                        | [T/G]       | 1067301424                                 |
| Ca_Kabuli_NC_021166.1_4756302 | Ca_kabuli_chr07    | 4756302                        | [T/C]       | 1067301425                                 |
| Ca_Kabuli_NC_021166.1_4772488 | Ca_kabuli_chr07    | 4772488                        | [T/G]       | 1067301426                                 |
| Ca_Kabuli_NC_021166.1_4772494 | Ca_kabuli_chr07    | 4772494                        | [T/G]       | 1067301427                                 |
| Ca_Kabuli_NC_021166.1_4772506 | Ca_kabuli_chr07    | 4772506                        | [A/G]       | 1067301428                                 |
| Ca_Kabuli_NC_021166.1_4772517 | Ca_kabuli_chr07    | 4772517                        | [A/G]       | 1067301429                                 |
| Ca_Kabuli_NC_021166.1_4772529 | Ca_kabuli_chr07    | 4772529                        | [A/G]       | 1067301430                                 |
| Ca_Kabuli_NC_021166.1_4772534 | Ca_kabuli_chr07    | 4772534                        | [A/G]       | 1067301431                                 |
| Ca_Kabuli_NC_021166.1_4872404 | Ca_kabuli_chr07    | 4872404                        | [T/C]       | 1067301432                                 |
| Ca_Kabuli_NC_021166.1_4884236 | Ca_kabuli_chr07    | 4884236                        | [C/A]       | 1067301433                                 |
| Ca_Kabuli_NC_021166.1_4946036 | Ca_kabuli_chr07    | 4946036                        | [T/G]       | 1067301434                                 |
| Ca_Kabuli_NC_021166.1_5167444 | Ca_kabuli_chr07    | 5167444                        | [G/A]       | 1067301435                                 |
| Ca_Kabuli_NC_021166.1_5258830 | Ca_kabuli_chr07    | 5258830                        | [T/C]       | 1067301436                                 |
| Ca_Kabuli_NC_021166.1_5310202 | Ca_kabuli_chr07    | 5310202                        | [T/C]       | 1067301437                                 |
| Ca_Kabuli_NC_021166.1_5310277 | Ca_kabuli_chr07    | 5310277                        | [A/T]       | 1067301438                                 |
| Ca_Kabuli_NC_021166.1_5314496 | Ca_kabuli_chr07    | 5314496                        | [A/C]       | 1067301439                                 |
| Ca_Kabuli_NC_021166.1_5335404 | Ca_kabuli_chr07    | 5335404                        | [A/T]       | 1067301440                                 |
| Ca_Kabuli_NC_021166.1_5335413 | Ca_kabuli_chr07    | 5335413                        | [T/A]       | 1067301441                                 |
| Ca_Kabuli_NC_021166.1_5335427 | Ca_kabuli_chr07    | 5335427                        | [A/G]       | 1067301442                                 |
| Ca_Kabuli_NC_021166.1_5338685 | Ca_kabuli_chr07    | 5338685                        | [C/A]       | 1067301443                                 |
| Ca_Kabuli_NC_021166.1_5361519 | Ca_kabuli_chr07    | 5361519                        | [A/C]       | 1067301444                                 |
| Ca_Kabuli_NC_021166.1_5361550 | Ca_kabuli_chr07    | 5361550                        | [T/G]       | 1067301445                                 |
| Ca_Kabuli_NC_021166.1_5379203 | Ca_kabuli_chr07    | 5379203                        | [T/A]       | 1067301446                                 |
| Ca_Kabuli_NC_021166.1_5383562 | Ca_kabuli_chr07    | 5383562                        | [A/G]       | 1067301447                                 |
| Ca_Kabuli_NC_021166.1_5383570 | Ca_kabuli_chr07    | 5383570                        | [T/C]       | 1067301448                                 |

| <b>SNP IDs</b>                | <b>Chromosomes</b> | <b>Physical positions (bp)</b> | <b>SNPs</b> | <b>NCBI SNPdb accession IDs (NCBI_ss#)</b> |
|-------------------------------|--------------------|--------------------------------|-------------|--------------------------------------------|
| Ca_Kabuli_NC_021166.1_5383671 | Ca_kabuli_chr07    | 5383671                        | [T/G]       | 1067301449                                 |
| Ca_Kabuli_NC_021166.1_5383683 | Ca_kabuli_chr07    | 5383683                        | [C/A]       | 1067301450                                 |
| Ca_Kabuli_NC_021166.1_5383695 | Ca_kabuli_chr07    | 5383695                        | [G/T]       | 1067301451                                 |
| Ca_Kabuli_NC_021166.1_5383767 | Ca_kabuli_chr07    | 5383767                        | [A/G]       | 1067301452                                 |
| Ca_Kabuli_NC_021166.1_5384422 | Ca_kabuli_chr07    | 5384422                        | [T/C]       | 1067301453                                 |
| Ca_Kabuli_NC_021166.1_5406524 | Ca_kabuli_chr07    | 5406524                        | [G/T]       | 1067301454                                 |
| Ca_Kabuli_NC_021166.1_5421642 | Ca_kabuli_chr07    | 5421642                        | [G/C]       | 1067301455                                 |
| Ca_Kabuli_NC_021166.1_5421733 | Ca_kabuli_chr07    | 5421733                        | [C/T]       | 1067301456                                 |
| Ca_Kabuli_NC_021166.1_5447889 | Ca_kabuli_chr07    | 5447889                        | [T/A]       | 1067301457                                 |
| Ca_Kabuli_NC_021166.1_5464904 | Ca_kabuli_chr07    | 5464904                        | [T/G]       | 1067301458                                 |
| Ca_Kabuli_NC_021166.1_5466193 | Ca_kabuli_chr07    | 5466193                        | [A/T]       | 1067301459                                 |
| Ca_Kabuli_NC_021166.1_5467296 | Ca_kabuli_chr07    | 5467296                        | [A/T]       | 1067301460                                 |
| Ca_Kabuli_NC_021166.1_5467645 | Ca_kabuli_chr07    | 5467645                        | [A/G]       | 1067301461                                 |
| Ca_Kabuli_NC_021166.1_5467677 | Ca_kabuli_chr07    | 5467677                        | [T/C]       | 1067301462                                 |
| Ca_Kabuli_NC_021166.1_5467703 | Ca_kabuli_chr07    | 5467703                        | [A/G]       | 1067301463                                 |
| Ca_Kabuli_NC_021166.1_5467744 | Ca_kabuli_chr07    | 5467744                        | [C/G]       | 1067301464                                 |
| Ca_Kabuli_NC_021166.1_5474255 | Ca_kabuli_chr07    | 5474255                        | [C/T]       | 1067301465                                 |
| Ca_Kabuli_NC_021166.1_5477139 | Ca_kabuli_chr07    | 5477139                        | [C/A]       | 1067301466                                 |
| Ca_Kabuli_NC_021166.1_5504454 | Ca_kabuli_chr07    | 5504454                        | [C/T]       | 1067301467                                 |
| Ca_Kabuli_NC_021166.1_5508045 | Ca_kabuli_chr07    | 5508045                        | [A/C]       | 1067301468                                 |
| Ca_Kabuli_NC_021166.1_5508097 | Ca_kabuli_chr07    | 5508097                        | [A/G]       | 1067301469                                 |
| Ca_Kabuli_NC_021166.1_5508120 | Ca_kabuli_chr07    | 5508120                        | [A/G]       | 1067301470                                 |
| Ca_Kabuli_NC_021166.1_5508146 | Ca_kabuli_chr07    | 5508146                        | [T/C]       | 1067301471                                 |
| Ca_Kabuli_NC_021166.1_5508157 | Ca_kabuli_chr07    | 5508157                        | [A/C]       | 1067301472                                 |
| Ca_Kabuli_NC_021166.1_5508159 | Ca_kabuli_chr07    | 5508159                        | [A/C]       | 1067301473                                 |
| Ca_Kabuli_NC_021166.1_5508162 | Ca_kabuli_chr07    | 5508162                        | [A/C]       | 1067301474                                 |
| Ca_Kabuli_NC_021166.1_5510004 | Ca_kabuli_chr07    | 5510004                        | [T/C]       | 1067301475                                 |
| Ca_Kabuli_NC_021166.1_5510013 | Ca_kabuli_chr07    | 5510013                        | [T/A]       | 1067301476                                 |
| Ca_Kabuli_NC_021166.1_5510015 | Ca_kabuli_chr07    | 5510015                        | [T/G]       | 1067301477                                 |
| Ca_Kabuli_NC_021166.1_5513267 | Ca_kabuli_chr07    | 5513267                        | [T/C]       | 1067301478                                 |
| Ca_Kabuli_NC_021166.1_5520720 | Ca_kabuli_chr07    | 5520720                        | [G/T]       | 1067301479                                 |
| Ca_Kabuli_NC_021166.1_5521466 | Ca_kabuli_chr07    | 5521466                        | [T/G]       | 1067301480                                 |
| Ca_Kabuli_NC_021166.1_5521501 | Ca_kabuli_chr07    | 5521501                        | [A/G]       | 1067301481                                 |
| Ca_Kabuli_NC_021166.1_5521659 | Ca_kabuli_chr07    | 5521659                        | [T/G]       | 1067301482                                 |

| <b>SNP IDs</b>                | <b>Chromosomes</b> | <b>Physical positions (bp)</b> | <b>SNPs</b> | <b>NCBI SNPdb accession IDs (NCBI_ss#)</b> |
|-------------------------------|--------------------|--------------------------------|-------------|--------------------------------------------|
| Ca_Kabuli_NC_021166.1_5529517 | Ca_kabuli_chr07    | 5529517                        | [T/C]       | 1067301483                                 |
| Ca_Kabuli_NC_021166.1_5529531 | Ca_kabuli_chr07    | 5529531                        | [T/C]       | 1067301484                                 |
| Ca_Kabuli_NC_021166.1_5529548 | Ca_kabuli_chr07    | 5529548                        | [A/G]       | 1067301485                                 |
| Ca_Kabuli_NC_021166.1_5529567 | Ca_kabuli_chr07    | 5529567                        | [A/C]       | 1067301486                                 |
| Ca_Kabuli_NC_021166.1_5529607 | Ca_kabuli_chr07    | 5529607                        | [A/T]       | 1067301487                                 |
| Ca_Kabuli_NC_021166.1_5529640 | Ca_kabuli_chr07    | 5529640                        | [T/G]       | 1067301488                                 |
| Ca_Kabuli_NC_021166.1_5529888 | Ca_kabuli_chr07    | 5529888                        | [G/A]       | 1067301489                                 |
| Ca_Kabuli_NC_021166.1_5537851 | Ca_kabuli_chr07    | 5537851                        | [C/G]       | 1067301490                                 |
| Ca_Kabuli_NC_021166.1_5537880 | Ca_kabuli_chr07    | 5537880                        | [T/G]       | 1067301491                                 |
| Ca_Kabuli_NC_021166.1_5542515 | Ca_kabuli_chr07    | 5542515                        | [C/T]       | 1067301492                                 |
| Ca_Kabuli_NC_021166.1_5542812 | Ca_kabuli_chr07    | 5542812                        | [A/C]       | 1067301493                                 |
| Ca_Kabuli_NC_021166.1_5549428 | Ca_kabuli_chr07    | 5549428                        | [T/C]       | 1067301494                                 |
| Ca_Kabuli_NC_021166.1_5549545 | Ca_kabuli_chr07    | 5549545                        | [A/T]       | 1067301495                                 |
| Ca_Kabuli_NC_021166.1_5554807 | Ca_kabuli_chr07    | 5554807                        | [C/G]       | 1067301496                                 |
| Ca_Kabuli_NC_021166.1_5554841 | Ca_kabuli_chr07    | 5554841                        | [G/T]       | 1067301497                                 |
| Ca_Kabuli_NC_021166.1_5560122 | Ca_kabuli_chr07    | 5560122                        | [T/C]       | 1067301498                                 |
| Ca_Kabuli_NC_021166.1_5577258 | Ca_kabuli_chr07    | 5577258                        | [G/T]       | 1067301499                                 |
| Ca_Kabuli_NC_021166.1_5577298 | Ca_kabuli_chr07    | 5577298                        | [A/C]       | 1067301500                                 |
| Ca_Kabuli_NC_021166.1_5577310 | Ca_kabuli_chr07    | 5577310                        | [A/C]       | 1067301501                                 |
| Ca_Kabuli_NC_021166.1_5577311 | Ca_kabuli_chr07    | 5577311                        | [C/T]       | 1067301502                                 |
| Ca_Kabuli_NC_021166.1_5577320 | Ca_kabuli_chr07    | 5577320                        | [A/C]       | 1067301503                                 |
| Ca_Kabuli_NC_021166.1_5577321 | Ca_kabuli_chr07    | 5577321                        | [A/C]       | 1067301504                                 |
| Ca_Kabuli_NC_021166.1_5577329 | Ca_kabuli_chr07    | 5577329                        | [A/C]       | 1067301505                                 |
| Ca_Kabuli_NC_021166.1_5593731 | Ca_kabuli_chr07    | 5593731                        | [A/C]       | 1067301506                                 |
| Ca_Kabuli_NC_021166.1_5631304 | Ca_kabuli_chr07    | 5631304                        | [T/C]       | 1067301507                                 |
| Ca_Kabuli_NC_021166.1_5662888 | Ca_kabuli_chr07    | 5662888                        | [C/T]       | 1067301508                                 |
| Ca_Kabuli_NC_021166.1_5662910 | Ca_kabuli_chr07    | 5662910                        | [G/A]       | 1067301509                                 |
| Ca_Kabuli_NC_021166.1_5668592 | Ca_kabuli_chr07    | 5668592                        | [A/C]       | 1067301510                                 |
| Ca_Kabuli_NC_021166.1_5671912 | Ca_kabuli_chr07    | 5671912                        | [T/G]       | 1067301511                                 |
| Ca_Kabuli_NC_021166.1_5671987 | Ca_kabuli_chr07    | 5671987                        | [A/C]       | 1067301512                                 |
| Ca_Kabuli_NC_021166.1_5672156 | Ca_kabuli_chr07    | 5672156                        | [C/T]       | 1067301513                                 |
| Ca_Kabuli_NC_021166.1_5672245 | Ca_kabuli_chr07    | 5672245                        | [A/C]       | 1067301514                                 |
| Ca_Kabuli_NC_021166.1_5672729 | Ca_kabuli_chr07    | 5672729                        | [T/G]       | 1067301515                                 |
| Ca_Kabuli_NC_021166.1_5678659 | Ca_kabuli_chr07    | 5678659                        | [G/A]       | 1067301516                                 |

| <b>SNP IDs</b>                | <b>Chromosomes</b> | <b>Physical positions (bp)</b> | <b>SNPs</b> | <b>NCBI SNPdb accession IDs (NCBI_ss#)</b> |
|-------------------------------|--------------------|--------------------------------|-------------|--------------------------------------------|
| Ca_Kabuli_NC_021166.1_5678992 | Ca_kabuli_chr07    | 5678992                        | [C/T]       | 1067301517                                 |
| Ca_Kabuli_NC_021166.1_5694937 | Ca_kabuli_chr07    | 5694937                        | [G/A]       | 1067301518                                 |
| Ca_Kabuli_NC_021166.1_5694979 | Ca_kabuli_chr07    | 5694979                        | [A/C]       | 1067301519                                 |
| Ca_Kabuli_NC_021166.1_5694980 | Ca_kabuli_chr07    | 5694980                        | [C/T]       | 1067301520                                 |
| Ca_Kabuli_NC_021166.1_5713977 | Ca_kabuli_chr07    | 5713977                        | [C/T]       | 1067301521                                 |
| Ca_Kabuli_NC_021166.1_5714130 | Ca_kabuli_chr07    | 5714130                        | [A/G]       | 1067301522                                 |
| Ca_Kabuli_NC_021166.1_5728543 | Ca_kabuli_chr07    | 5728543                        | [C/G]       | 1067301523                                 |
| Ca_Kabuli_NC_021166.1_5730386 | Ca_kabuli_chr07    | 5730386                        | [C/G]       | 1067301524                                 |
| Ca_Kabuli_NC_021166.1_5731803 | Ca_kabuli_chr07    | 5731803                        | [T/C]       | 1067301525                                 |
| Ca_Kabuli_NC_021166.1_5731817 | Ca_kabuli_chr07    | 5731817                        | [G/C]       | 1067301526                                 |
| Ca_Kabuli_NC_021166.1_5735448 | Ca_kabuli_chr07    | 5735448                        | [A/C]       | 1067301527                                 |
| Ca_Kabuli_NC_021166.1_5735456 | Ca_kabuli_chr07    | 5735456                        | [A/C]       | 1067301528                                 |
| Ca_Kabuli_NC_021166.1_5735461 | Ca_kabuli_chr07    | 5735461                        | [A/C]       | 1067301529                                 |
| Ca_Kabuli_NC_021166.1_5735893 | Ca_kabuli_chr07    | 5735893                        | [C/G]       | 1067301530                                 |
| Ca_Kabuli_NC_021166.1_5735906 | Ca_kabuli_chr07    | 5735906                        | [G/T]       | 1067301531                                 |
| Ca_Kabuli_NC_021166.1_5737401 | Ca_kabuli_chr07    | 5737401                        | [T/G]       | 1067301532                                 |
| Ca_Kabuli_NC_021166.1_5737422 | Ca_kabuli_chr07    | 5737422                        | [T/G]       | 1067301533                                 |
| Ca_Kabuli_NC_021166.1_5756269 | Ca_kabuli_chr07    | 5756269                        | [T/C]       | 1067301534                                 |
| Ca_Kabuli_NC_021166.1_5769036 | Ca_kabuli_chr07    | 5769036                        | [C/A]       | 1067301535                                 |
| Ca_Kabuli_NC_021166.1_5772892 | Ca_kabuli_chr07    | 5772892                        | [T/G]       | 1067301536                                 |
| Ca_Kabuli_NC_021166.1_5774221 | Ca_kabuli_chr07    | 5774221                        | [A/T]       | 1067301537                                 |
| Ca_Kabuli_NC_021166.1_5774325 | Ca_kabuli_chr07    | 5774325                        | [G/C]       | 1067301538                                 |
| Ca_Kabuli_NC_021166.1_5774327 | Ca_kabuli_chr07    | 5774327                        | [G/T]       | 1067301539                                 |
| Ca_Kabuli_NC_021166.1_5774328 | Ca_kabuli_chr07    | 5774328                        | [A/T]       | 1067301540                                 |
| Ca_Kabuli_NC_021166.1_5774329 | Ca_kabuli_chr07    | 5774329                        | [A/G]       | 1067301541                                 |
| Ca_Kabuli_NC_021166.1_5802607 | Ca_kabuli_chr07    | 5802607                        | [G/T]       | 1067301542                                 |
| Ca_Kabuli_NC_021166.1_5834024 | Ca_kabuli_chr07    | 5834024                        | [T/C]       | 1067301543                                 |
| Ca_Kabuli_NC_021166.1_5836421 | Ca_kabuli_chr07    | 5836421                        | [T/A]       | 1067301544                                 |
| Ca_Kabuli_NC_021166.1_5846477 | Ca_kabuli_chr07    | 5846477                        | [G/A]       | 1067301545                                 |
| Ca_Kabuli_NC_021166.1_5849877 | Ca_kabuli_chr07    | 5849877                        | [G/C]       | 1067301546                                 |
| Ca_Kabuli_NC_021166.1_5849892 | Ca_kabuli_chr07    | 5849892                        | [G/A]       | 1067301547                                 |
| Ca_Kabuli_NC_021166.1_5849946 | Ca_kabuli_chr07    | 5849946                        | [A/G]       | 1067301548                                 |
| Ca_Kabuli_NC_021166.1_5849960 | Ca_kabuli_chr07    | 5849960                        | [T/G]       | 1067301549                                 |
| Ca_Kabuli_NC_021166.1_5852913 | Ca_kabuli_chr07    | 5852913                        | [G/T]       | 1067301550                                 |



| <b>SNP IDs</b>                | <b>Chromosomes</b> | <b>Physical positions (bp)</b> | <b>SNPs</b> | <b>NCBI SNPdb accession IDs (NCBI_ss#)</b> |
|-------------------------------|--------------------|--------------------------------|-------------|--------------------------------------------|
| Ca_Kabuli_NC_021166.1_5854575 | Ca_kabuli_chr07    | 5854575                        | [G/T]       | 1067301551                                 |
| Ca_Kabuli_NC_021166.1_5854576 | Ca_kabuli_chr07    | 5854576                        | [A/C]       | 1067301552                                 |
| Ca_Kabuli_NC_021166.1_5854577 | Ca_kabuli_chr07    | 5854577                        | [G/T]       | 1067301553                                 |
| Ca_Kabuli_NC_021166.1_5854578 | Ca_kabuli_chr07    | 5854578                        | [T/G]       | 1067301554                                 |
| Ca_Kabuli_NC_021166.1_5854598 | Ca_kabuli_chr07    | 5854598                        | [T/C]       | 1067301555                                 |
| Ca_Kabuli_NC_021166.1_5916920 | Ca_kabuli_chr07    | 5916920                        | [A/C]       | 1067301556                                 |
| Ca_Kabuli_NC_021166.1_5916936 | Ca_kabuli_chr07    | 5916936                        | [A/G]       | 1067301557                                 |
| Ca_Kabuli_NC_021166.1_5916941 | Ca_kabuli_chr07    | 5916941                        | [T/A]       | 1067301558                                 |
| Ca_Kabuli_NC_021166.1_5925751 | Ca_kabuli_chr07    | 5925751                        | [C/T]       | 1067301559                                 |
| Ca_Kabuli_NC_021166.1_5933629 | Ca_kabuli_chr07    | 5933629                        | [C/T]       | 1067301560                                 |
| Ca_Kabuli_NC_021166.1_5946536 | Ca_kabuli_chr07    | 5946536                        | [C/G]       | 1067301561                                 |
| Ca_Kabuli_NC_021166.1_5950260 | Ca_kabuli_chr07    | 5950260                        | [T/C]       | 1067301562                                 |
| Ca_Kabuli_NC_021166.1_5950275 | Ca_kabuli_chr07    | 5950275                        | [A/T]       | 1067301563                                 |
| Ca_Kabuli_NC_021166.1_5950352 | Ca_kabuli_chr07    | 5950352                        | [A/T]       | 1067301564                                 |
| Ca_Kabuli_NC_021166.1_5951374 | Ca_kabuli_chr07    | 5951374                        | [A/G]       | 1067301565                                 |
| Ca_Kabuli_NC_021166.1_5957696 | Ca_kabuli_chr07    | 5957696                        | [C/T]       | 1067301566                                 |
| Ca_Kabuli_NC_021166.1_5957736 | Ca_kabuli_chr07    | 5957736                        | [A/T]       | 1067301567                                 |
| Ca_Kabuli_NC_021166.1_5963576 | Ca_kabuli_chr07    | 5963576                        | [A/G]       | 1067301568                                 |
| Ca_Kabuli_NC_021166.1_5963581 | Ca_kabuli_chr07    | 5963581                        | [T/G]       | 1067301569                                 |
| Ca_Kabuli_NC_021166.1_5963588 | Ca_kabuli_chr07    | 5963588                        | [T/G]       | 1067301570                                 |
| Ca_Kabuli_NC_021166.1_5963603 | Ca_kabuli_chr07    | 5963603                        | [T/G]       | 1067301571                                 |
| Ca_Kabuli_NC_021166.1_6012477 | Ca_kabuli_chr07    | 6012477                        | [A/C]       | 1067301572                                 |
| Ca_Kabuli_NC_021166.1_6012561 | Ca_kabuli_chr07    | 6012561                        | [A/C]       | 1067301573                                 |
| Ca_Kabuli_NC_021166.1_6029883 | Ca_kabuli_chr07    | 6029883                        | [A/T]       | 1067301574                                 |
| Ca_Kabuli_NC_021166.1_6029965 | Ca_kabuli_chr07    | 6029965                        | [A/G]       | 1067301575                                 |
| Ca_Kabuli_NC_021166.1_6029968 | Ca_kabuli_chr07    | 6029968                        | [A/G]       | 1067301576                                 |
| Ca_Kabuli_NC_021166.1_6029985 | Ca_kabuli_chr07    | 6029985                        | [T/G]       | 1067301577                                 |
| Ca_Kabuli_NC_021166.1_6040435 | Ca_kabuli_chr07    | 6040435                        | [A/G]       | 1067301578                                 |
| Ca_Kabuli_NC_021166.1_6066322 | Ca_kabuli_chr07    | 6066322                        | [A/G]       | 1067301579                                 |
| Ca_Kabuli_NC_021166.1_6069979 | Ca_kabuli_chr07    | 6069979                        | [C/T]       | 1067301580                                 |
| Ca_Kabuli_NC_021166.1_6070645 | Ca_kabuli_chr07    | 6070645                        | [G/A]       | 1067301581                                 |
| Ca_Kabuli_NC_021166.1_6096227 | Ca_kabuli_chr07    | 6096227                        | [A/C]       | 1067301582                                 |
| Ca_Kabuli_NC_021166.1_6096238 | Ca_kabuli_chr07    | 6096238                        | [A/C]       | 1067301583                                 |
| Ca_Kabuli_NC_021166.1_6108535 | Ca_kabuli_chr07    | 6108535                        | [T/G]       | 1067301584                                 |

| <b>SNP IDs</b>                | <b>Chromosomes</b> | <b>Physical positions (bp)</b> | <b>SNPs</b> | <b>NCBI SNPdb accession IDs (NCBI_ss#)</b> |
|-------------------------------|--------------------|--------------------------------|-------------|--------------------------------------------|
| Ca_Kabuli_NC_021166.1_6108843 | Ca_kabuli_chr07    | 6108843                        | [T/G]       | 1067301585                                 |
| Ca_Kabuli_NC_021166.1_6108853 | Ca_kabuli_chr07    | 6108853                        | [T/A]       | 1067301586                                 |
| Ca_Kabuli_NC_021166.1_6109635 | Ca_kabuli_chr07    | 6109635                        | [T/C]       | 1067301587                                 |
| Ca_Kabuli_NC_021166.1_6109652 | Ca_kabuli_chr07    | 6109652                        | [A/G]       | 1067301588                                 |
| Ca_Kabuli_NC_021166.1_6110019 | Ca_kabuli_chr07    | 6110019                        | [C/T]       | 1067301589                                 |
| Ca_Kabuli_NC_021166.1_6110033 | Ca_kabuli_chr07    | 6110033                        | [C/A]       | 1067301590                                 |
| Ca_Kabuli_NC_021166.1_6110067 | Ca_kabuli_chr07    | 6110067                        | [A/T]       | 1067301591                                 |
| Ca_Kabuli_NC_021166.1_6111778 | Ca_kabuli_chr07    | 6111778                        | [C/T]       | 1067301592                                 |
| Ca_Kabuli_NC_021166.1_6136615 | Ca_kabuli_chr07    | 6136615                        | [C/T]       | 1067301593                                 |
| Ca_Kabuli_NC_021166.1_6195286 | Ca_kabuli_chr07    | 6195286                        | [T/G]       | 1067301594                                 |
| Ca_Kabuli_NC_021166.1_6213546 | Ca_kabuli_chr07    | 6213546                        | [C/A]       | 1067301595                                 |
| Ca_Kabuli_NC_021166.1_6213547 | Ca_kabuli_chr07    | 6213547                        | [T/G]       | 1067301596                                 |
| Ca_Kabuli_NC_021166.1_6325498 | Ca_kabuli_chr07    | 6325498                        | [G/A]       | 1067301597                                 |
| Ca_Kabuli_NC_021166.1_6372045 | Ca_kabuli_chr07    | 6372045                        | [A/G]       | 1067301598                                 |
| Ca_Kabuli_NC_021166.1_6372048 | Ca_kabuli_chr07    | 6372048                        | [A/G]       | 1067301599                                 |
| Ca_Kabuli_NC_021166.1_6372050 | Ca_kabuli_chr07    | 6372050                        | [T/G]       | 1067301600                                 |
| Ca_Kabuli_NC_021166.1_6393368 | Ca_kabuli_chr07    | 6393368                        | [T/G]       | 1067301601                                 |
| Ca_Kabuli_NC_021166.1_6410077 | Ca_kabuli_chr07    | 6410077                        | [T/C]       | 1067301602                                 |
| Ca_Kabuli_NC_021166.1_6492495 | Ca_kabuli_chr07    | 6492495                        | [T/G]       | 1067301603                                 |
| Ca_Kabuli_NC_021166.1_6539116 | Ca_kabuli_chr07    | 6539116                        | [G/C]       | 1067301604                                 |
| Ca_Kabuli_NC_021166.1_6539146 | Ca_kabuli_chr07    | 6539146                        | [A/C]       | 1067301605                                 |
| Ca_Kabuli_NC_021166.1_6540624 | Ca_kabuli_chr07    | 6540624                        | [G/A]       | 1067301606                                 |
| Ca_Kabuli_NC_021166.1_6559538 | Ca_kabuli_chr07    | 6559538                        | [T/G]       | 1067301607                                 |
| Ca_Kabuli_NC_021166.1_6559540 | Ca_kabuli_chr07    | 6559540                        | [T/C]       | 1067301608                                 |
| Ca_Kabuli_NC_021166.1_6559542 | Ca_kabuli_chr07    | 6559542                        | [A/G]       | 1067301609                                 |
| Ca_Kabuli_NC_021166.1_6559580 | Ca_kabuli_chr07    | 6559580                        | [A/G]       | 1067301610                                 |
| Ca_Kabuli_NC_021166.1_6559583 | Ca_kabuli_chr07    | 6559583                        | [T/A]       | 1067301611                                 |
| Ca_Kabuli_NC_021166.1_6559587 | Ca_kabuli_chr07    | 6559587                        | [T/C]       | 1067301612                                 |
| Ca_Kabuli_NC_021166.1_6559600 | Ca_kabuli_chr07    | 6559600                        | [A/T]       | 1067301613                                 |
| Ca_Kabuli_NC_021166.1_6559604 | Ca_kabuli_chr07    | 6559604                        | [A/G]       | 1067301614                                 |
| Ca_Kabuli_NC_021166.1_6565518 | Ca_kabuli_chr07    | 6565518                        | [T/C]       | 1067301615                                 |
| Ca_Kabuli_NC_021166.1_6566303 | Ca_kabuli_chr07    | 6566303                        | [T/A]       | 1067301616                                 |
| Ca_Kabuli_NC_021166.1_6581696 | Ca_kabuli_chr07    | 6581696                        | [T/A]       | 1067301617                                 |
| Ca_Kabuli_NC_021166.1_6581698 | Ca_kabuli_chr07    | 6581698                        | [G/T]       | 1067301618                                 |

| <b>SNP IDs</b>                | <b>Chromosomes</b> | <b>Physical positions (bp)</b> | <b>SNPs</b> | <b>NCBI SNPdb accession IDs (NCBI_ss#)</b> |
|-------------------------------|--------------------|--------------------------------|-------------|--------------------------------------------|
| Ca_Kabuli_NC_021166.1_6648414 | Ca_kabuli_chr07    | 6648414                        | [C/A]       | 1067301619                                 |
| Ca_Kabuli_NC_021166.1_6654620 | Ca_kabuli_chr07    | 6654620                        | [A/T]       | 1067301620                                 |
| Ca_Kabuli_NC_021166.1_6654630 | Ca_kabuli_chr07    | 6654630                        | [T/C]       | 1067301621                                 |
| Ca_Kabuli_NC_021166.1_6654646 | Ca_kabuli_chr07    | 6654646                        | [A/C]       | 1067301622                                 |
| Ca_Kabuli_NC_021166.1_6681019 | Ca_kabuli_chr07    | 6681019                        | [A/C]       | 1067301623                                 |
| Ca_Kabuli_NC_021166.1_6681023 | Ca_kabuli_chr07    | 6681023                        | [A/G]       | 1067301624                                 |
| Ca_Kabuli_NC_021166.1_6703849 | Ca_kabuli_chr07    | 6703849                        | [G/T]       | 1067301625                                 |
| Ca_Kabuli_NC_021166.1_6721629 | Ca_kabuli_chr07    | 6721629                        | [A/G]       | 1067301626                                 |
| Ca_Kabuli_NC_021166.1_6721679 | Ca_kabuli_chr07    | 6721679                        | [A/G]       | 1067301627                                 |
| Ca_Kabuli_NC_021166.1_6721684 | Ca_kabuli_chr07    | 6721684                        | [A/G]       | 1067301628                                 |
| Ca_Kabuli_NC_021166.1_6721732 | Ca_kabuli_chr07    | 6721732                        | [A/G]       | 1067301629                                 |
| Ca_Kabuli_NC_021166.1_6721769 | Ca_kabuli_chr07    | 6721769                        | [T/G]       | 1067301630                                 |
| Ca_Kabuli_NC_021166.1_6726521 | Ca_kabuli_chr07    | 6726521                        | [A/G]       | 1067301631                                 |
| Ca_Kabuli_NC_021166.1_6742476 | Ca_kabuli_chr07    | 6742476                        | [A/C]       | 1067301632                                 |
| Ca_Kabuli_NC_021166.1_6769706 | Ca_kabuli_chr07    | 6769706                        | [T/G]       | 1067301633                                 |
| Ca_Kabuli_NC_021166.1_6769723 | Ca_kabuli_chr07    | 6769723                        | [A/G]       | 1067301634                                 |
| Ca_Kabuli_NC_021166.1_6780547 | Ca_kabuli_chr07    | 6780547                        | [C/A]       | 1067301635                                 |
| Ca_Kabuli_NC_021166.1_6780773 | Ca_kabuli_chr07    | 6780773                        | [T/C]       | 1067301636                                 |
| Ca_Kabuli_NC_021166.1_6788869 | Ca_kabuli_chr07    | 6788869                        | [C/A]       | 1067301637                                 |
| Ca_Kabuli_NC_021166.1_6792321 | Ca_kabuli_chr07    | 6792321                        | [A/C]       | 1067301638                                 |
| Ca_Kabuli_NC_021166.1_6792563 | Ca_kabuli_chr07    | 6792563                        | [G/C]       | 1067301639                                 |
| Ca_Kabuli_NC_021166.1_6792566 | Ca_kabuli_chr07    | 6792566                        | [A/C]       | 1067301640                                 |
| Ca_Kabuli_NC_021166.1_6792568 | Ca_kabuli_chr07    | 6792568                        | [T/G]       | 1067301641                                 |
| Ca_Kabuli_NC_021166.1_6807839 | Ca_kabuli_chr07    | 6807839                        | [T/G]       | 1067301642                                 |
| Ca_Kabuli_NC_021166.1_6807907 | Ca_kabuli_chr07    | 6807907                        | [A/T]       | 1067301643                                 |
| Ca_Kabuli_NC_021166.1_6826211 | Ca_kabuli_chr07    | 6826211                        | [A/G]       | 1067301644                                 |
| Ca_Kabuli_NC_021166.1_6826869 | Ca_kabuli_chr07    | 6826869                        | [C/T]       | 1067301645                                 |
| Ca_Kabuli_NC_021166.1_6826870 | Ca_kabuli_chr07    | 6826870                        | [T/G]       | 1067301646                                 |
| Ca_Kabuli_NC_021166.1_6865060 | Ca_kabuli_chr07    | 6865060                        | [T/A]       | 1067301647                                 |
| Ca_Kabuli_NC_021166.1_6865061 | Ca_kabuli_chr07    | 6865061                        | [C/T]       | 1067301648                                 |
| Ca_Kabuli_NC_021166.1_6865062 | Ca_kabuli_chr07    | 6865062                        | [A/C]       | 1067301649                                 |
| Ca_Kabuli_NC_021166.1_6865063 | Ca_kabuli_chr07    | 6865063                        | [G/T]       | 1067301650                                 |
| Ca_Kabuli_NC_021166.1_6923632 | Ca_kabuli_chr07    | 6923632                        | [T/C]       | 1067301651                                 |
| Ca_Kabuli_NC_021166.1_6923652 | Ca_kabuli_chr07    | 6923652                        | [T/G]       | 1067301652                                 |

| <b>SNP IDs</b>                | <b>Chromosomes</b> | <b>Physical positions (bp)</b> | <b>SNPs</b> | <b>NCBI SNPdb accession IDs (NCBI_ss#)</b> |
|-------------------------------|--------------------|--------------------------------|-------------|--------------------------------------------|
| Ca_Kabuli_NC_021166.1_6970678 | Ca_kabuli_chr07    | 6970678                        | [T/C]       | 1067301653                                 |
| Ca_Kabuli_NC_021166.1_6970704 | Ca_kabuli_chr07    | 6970704                        | [A/C]       | 1067301654                                 |
| Ca_Kabuli_NC_021166.1_6979661 | Ca_kabuli_chr07    | 6979661                        | [A/C]       | 1067301655                                 |
| Ca_Kabuli_NC_021166.1_7008352 | Ca_kabuli_chr07    | 7008352                        | [A/G]       | 1067301656                                 |
| Ca_Kabuli_NC_021166.1_7043352 | Ca_kabuli_chr07    | 7043352                        | [A/G]       | 1067301657                                 |
| Ca_Kabuli_NC_021166.1_7043832 | Ca_kabuli_chr07    | 7043832                        | [A/G]       | 1067301658                                 |
| Ca_Kabuli_NC_021166.1_7059582 | Ca_kabuli_chr07    | 7059582                        | [T/G]       | 1067301659                                 |
| Ca_Kabuli_NC_021166.1_7089263 | Ca_kabuli_chr07    | 7089263                        | [T/A]       | 1067301660                                 |
| Ca_Kabuli_NC_021166.1_7089333 | Ca_kabuli_chr07    | 7089333                        | [A/G]       | 1067301661                                 |
| Ca_Kabuli_NC_021166.1_7089359 | Ca_kabuli_chr07    | 7089359                        | [A/C]       | 1067301662                                 |
| Ca_Kabuli_NC_021166.1_7127510 | Ca_kabuli_chr07    | 7127510                        | [A/C]       | 1067301663                                 |
| Ca_Kabuli_NC_021166.1_7127511 | Ca_kabuli_chr07    | 7127511                        | [G/T]       | 1067301664                                 |
| Ca_Kabuli_NC_021166.1_7139175 | Ca_kabuli_chr07    | 7139175                        | [A/C]       | 1067301665                                 |
| Ca_Kabuli_NC_021166.1_7139176 | Ca_kabuli_chr07    | 7139176                        | [G/C]       | 1067301666                                 |
| Ca_Kabuli_NC_021166.1_7139178 | Ca_kabuli_chr07    | 7139178                        | [T/A]       | 1067301667                                 |
| Ca_Kabuli_NC_021166.1_7146159 | Ca_kabuli_chr07    | 7146159                        | [G/C]       | 1067301668                                 |
| Ca_Kabuli_NC_021166.1_7234446 | Ca_kabuli_chr07    | 7234446                        | [T/C]       | 1067301669                                 |
| Ca_Kabuli_NC_021166.1_7234489 | Ca_kabuli_chr07    | 7234489                        | [A/G]       | 1067301670                                 |
| Ca_Kabuli_NC_021166.1_7261768 | Ca_kabuli_chr07    | 7261768                        | [T/G]       | 1067301671                                 |
| Ca_Kabuli_NC_021166.1_7279735 | Ca_kabuli_chr07    | 7279735                        | [C/A]       | 1067301672                                 |
| Ca_Kabuli_NC_021166.1_7279877 | Ca_kabuli_chr07    | 7279877                        | [A/C]       | 1067301673                                 |
| Ca_Kabuli_NC_021166.1_7304617 | Ca_kabuli_chr07    | 7304617                        | [T/G]       | 1067301674                                 |
| Ca_Kabuli_NC_021166.1_7304695 | Ca_kabuli_chr07    | 7304695                        | [A/C]       | 1067301675                                 |
| Ca_Kabuli_NC_021166.1_7327933 | Ca_kabuli_chr07    | 7327933                        | [C/A]       | 1067301676                                 |
| Ca_Kabuli_NC_021166.1_7327934 | Ca_kabuli_chr07    | 7327934                        | [T/G]       | 1067301677                                 |
| Ca_Kabuli_NC_021166.1_7391559 | Ca_kabuli_chr07    | 7391559                        | [T/C]       | 1067301678                                 |
| Ca_Kabuli_NC_021166.1_7391563 | Ca_kabuli_chr07    | 7391563                        | [A/G]       | 1067301679                                 |
| Ca_Kabuli_NC_021166.1_7391570 | Ca_kabuli_chr07    | 7391570                        | [A/G]       | 1067301680                                 |
| Ca_Kabuli_NC_021166.1_7423307 | Ca_kabuli_chr07    | 7423307                        | [A/C]       | 1067301681                                 |
| Ca_Kabuli_NC_021166.1_7423364 | Ca_kabuli_chr07    | 7423364                        | [T/C]       | 1067301682                                 |
| Ca_Kabuli_NC_021166.1_7423378 | Ca_kabuli_chr07    | 7423378                        | [A/G]       | 1067301683                                 |
| Ca_Kabuli_NC_021166.1_7423407 | Ca_kabuli_chr07    | 7423407                        | [A/G]       | 1067301684                                 |
| Ca_Kabuli_NC_021166.1_7429966 | Ca_kabuli_chr07    | 7429966                        | [A/G]       | 1067301685                                 |
| Ca_Kabuli_NC_021166.1_7433486 | Ca_kabuli_chr07    | 7433486                        | [T/C]       | 1067301686                                 |

| <b>SNP IDs</b>                | <b>Chromosomes</b> | <b>Physical positions (bp)</b> | <b>SNPs</b> | <b>NCBI SNPdb accession IDs (NCBI_ss#)</b> |
|-------------------------------|--------------------|--------------------------------|-------------|--------------------------------------------|
| Ca_Kabuli_NC_021166.1_7433488 | Ca_kabuli_chr07    | 7433488                        | [A/G]       | 1067301687                                 |
| Ca_Kabuli_NC_021166.1_7433524 | Ca_kabuli_chr07    | 7433524                        | [T/A]       | 1067301688                                 |
| Ca_Kabuli_NC_021166.1_7433527 | Ca_kabuli_chr07    | 7433527                        | [A/G]       | 1067301689                                 |
| Ca_Kabuli_NC_021166.1_7433548 | Ca_kabuli_chr07    | 7433548                        | [T/A]       | 1067301690                                 |
| Ca_Kabuli_NC_021166.1_7433662 | Ca_kabuli_chr07    | 7433662                        | [A/G]       | 1067301691                                 |
| Ca_Kabuli_NC_021166.1_7433666 | Ca_kabuli_chr07    | 7433666                        | [G/A]       | 1067301692                                 |
| Ca_Kabuli_NC_021166.1_7433827 | Ca_kabuli_chr07    | 7433827                        | [A/C]       | 1067301693                                 |
| Ca_Kabuli_NC_021166.1_7435418 | Ca_kabuli_chr07    | 7435418                        | [C/T]       | 1067301694                                 |
| Ca_Kabuli_NC_021166.1_7435420 | Ca_kabuli_chr07    | 7435420                        | [A/G]       | 1067301695                                 |
| Ca_Kabuli_NC_021166.1_7435434 | Ca_kabuli_chr07    | 7435434                        | [T/A]       | 1067301696                                 |
| Ca_Kabuli_NC_021166.1_7435456 | Ca_kabuli_chr07    | 7435456                        | [T/C]       | 1067301697                                 |
| Ca_Kabuli_NC_021166.1_7435462 | Ca_kabuli_chr07    | 7435462                        | [T/C]       | 1067301698                                 |
| Ca_Kabuli_NC_021166.1_7441872 | Ca_kabuli_chr07    | 7441872                        | [A/T]       | 1067301699                                 |
| Ca_Kabuli_NC_021166.1_7462028 | Ca_kabuli_chr07    | 7462028                        | [A/T]       | 1067301700                                 |
| Ca_Kabuli_NC_021166.1_7462499 | Ca_kabuli_chr07    | 7462499                        | [A/C]       | 1067301701                                 |
| Ca_Kabuli_NC_021166.1_7528873 | Ca_kabuli_chr07    | 7528873                        | [T/C]       | 1067301702                                 |
| Ca_Kabuli_NC_021166.1_7528916 | Ca_kabuli_chr07    | 7528916                        | [A/C]       | 1067301703                                 |
| Ca_Kabuli_NC_021166.1_7579579 | Ca_kabuli_chr07    | 7579579                        | [A/C]       | 1067301704                                 |
| Ca_Kabuli_NC_021166.1_7580147 | Ca_kabuli_chr07    | 7580147                        | [C/T]       | 1067301705                                 |
| Ca_Kabuli_NC_021166.1_7580165 | Ca_kabuli_chr07    | 7580165                        | [A/G]       | 1067301706                                 |
| Ca_Kabuli_NC_021166.1_7580175 | Ca_kabuli_chr07    | 7580175                        | [T/C]       | 1067301707                                 |
| Ca_Kabuli_NC_021166.1_7585001 | Ca_kabuli_chr07    | 7585001                        | [G/T]       | 1067301708                                 |
| Ca_Kabuli_NC_021166.1_7586244 | Ca_kabuli_chr07    | 7586244                        | [A/C]       | 1067301709                                 |
| Ca_Kabuli_NC_021166.1_7586245 | Ca_kabuli_chr07    | 7586245                        | [C/T]       | 1067301710                                 |
| Ca_Kabuli_NC_021166.1_7586408 | Ca_kabuli_chr07    | 7586408                        | [T/C]       | 1067301711                                 |
| Ca_Kabuli_NC_021166.1_7586487 | Ca_kabuli_chr07    | 7586487                        | [A/C]       | 1067301712                                 |
| Ca_Kabuli_NC_021166.1_7591606 | Ca_kabuli_chr07    | 7591606                        | [A/T]       | 1067301713                                 |
| Ca_Kabuli_NC_021166.1_7591628 | Ca_kabuli_chr07    | 7591628                        | [A/G]       | 1067301714                                 |
| Ca_Kabuli_NC_021166.1_7602554 | Ca_kabuli_chr07    | 7602554                        | [T/C]       | 1067301715                                 |
| Ca_Kabuli_NC_021166.1_7602564 | Ca_kabuli_chr07    | 7602564                        | [T/A]       | 1067301716                                 |
| Ca_Kabuli_NC_021166.1_7625185 | Ca_kabuli_chr07    | 7625185                        | [T/C]       | 1067301717                                 |
| Ca_Kabuli_NC_021166.1_7625252 | Ca_kabuli_chr07    | 7625252                        | [A/G]       | 1067301718                                 |
| Ca_Kabuli_NC_021166.1_7625255 | Ca_kabuli_chr07    | 7625255                        | [A/C]       | 1067301719                                 |
| Ca_Kabuli_NC_021166.1_7625258 | Ca_kabuli_chr07    | 7625258                        | [A/G]       | 1067301720                                 |

| <b>SNP IDs</b>                | <b>Chromosomes</b> | <b>Physical positions (bp)</b> | <b>SNPs</b> | <b>NCBI SNPdb accession IDs (NCBI_ss#)</b> |
|-------------------------------|--------------------|--------------------------------|-------------|--------------------------------------------|
| Ca_Kabuli_NC_021166.1_7647175 | Ca_kabuli_chr07    | 7647175                        | [A/G]       | 1067301721                                 |
| Ca_Kabuli_NC_021166.1_7665938 | Ca_kabuli_chr07    | 7665938                        | [T/C]       | 1067301722                                 |
| Ca_Kabuli_NC_021166.1_7697092 | Ca_kabuli_chr07    | 7697092                        | [A/C]       | 1067301723                                 |
| Ca_Kabuli_NC_021166.1_7737688 | Ca_kabuli_chr07    | 7737688                        | [C/A]       | 1067301724                                 |
| Ca_Kabuli_NC_021166.1_7737689 | Ca_kabuli_chr07    | 7737689                        | [T/G]       | 1067301725                                 |
| Ca_Kabuli_NC_021166.1_7737899 | Ca_kabuli_chr07    | 7737899                        | [C/T]       | 1067301726                                 |
| Ca_Kabuli_NC_021166.1_7756487 | Ca_kabuli_chr07    | 7756487                        | [G/A]       | 1067301727                                 |
| Ca_Kabuli_NC_021166.1_7756513 | Ca_kabuli_chr07    | 7756513                        | [A/G]       | 1067301728                                 |
| Ca_Kabuli_NC_021166.1_7756517 | Ca_kabuli_chr07    | 7756517                        | [A/G]       | 1067301729                                 |
| Ca_Kabuli_NC_021166.1_7756553 | Ca_kabuli_chr07    | 7756553                        | [T/C]       | 1067301730                                 |
| Ca_Kabuli_NC_021166.1_7792711 | Ca_kabuli_chr07    | 7792711                        | [A/G]       | 1067301731                                 |
| Ca_Kabuli_NC_021166.1_7792722 | Ca_kabuli_chr07    | 7792722                        | [A/C]       | 1067301732                                 |
| Ca_Kabuli_NC_021166.1_7792748 | Ca_kabuli_chr07    | 7792748                        | [T/G]       | 1067301733                                 |
| Ca_Kabuli_NC_021166.1_7809179 | Ca_kabuli_chr07    | 7809179                        | [T/G]       | 1067301734                                 |
| Ca_Kabuli_NC_021166.1_7982985 | Ca_kabuli_chr07    | 7982985                        | [T/C]       | 1067301735                                 |
| Ca_Kabuli_NC_021166.1_7983630 | Ca_kabuli_chr07    | 7983630                        | [C/A]       | 1067301736                                 |
| Ca_Kabuli_NC_021166.1_7983631 | Ca_kabuli_chr07    | 7983631                        | [T/G]       | 1067301737                                 |
| Ca_Kabuli_NC_021166.1_7983632 | Ca_kabuli_chr07    | 7983632                        | [T/A]       | 1067301738                                 |
| Ca_Kabuli_NC_021166.1_7983786 | Ca_kabuli_chr07    | 7983786                        | [T/C]       | 1067301739                                 |
| Ca_Kabuli_NC_021166.1_7983793 | Ca_kabuli_chr07    | 7983793                        | [T/C]       | 1067301740                                 |
| Ca_Kabuli_NC_021166.1_7983794 | Ca_kabuli_chr07    | 7983794                        | [G/T]       | 1067301741                                 |
| Ca_Kabuli_NC_021166.1_8007992 | Ca_kabuli_chr07    | 8007992                        | [G/T]       | 1067301742                                 |
| Ca_Kabuli_NC_021166.1_8008582 | Ca_kabuli_chr07    | 8008582                        | [T/A]       | 1067301743                                 |
| Ca_Kabuli_NC_021166.1_8008612 | Ca_kabuli_chr07    | 8008612                        | [T/G]       | 1067301744                                 |
| Ca_Kabuli_NC_021166.1_8041480 | Ca_kabuli_chr07    | 8041480                        | [T/G]       | 1067301745                                 |
| Ca_Kabuli_NC_021166.1_8111699 | Ca_kabuli_chr07    | 8111699                        | [T/G]       | 1067301746                                 |
| Ca_Kabuli_NC_021166.1_8111705 | Ca_kabuli_chr07    | 8111705                        | [T/G]       | 1067301747                                 |
| Ca_Kabuli_NC_021166.1_8126245 | Ca_kabuli_chr07    | 8126245                        | [T/G]       | 1067301748                                 |
| Ca_Kabuli_NC_021166.1_8144402 | Ca_kabuli_chr07    | 8144402                        | [A/G]       | 1067301749                                 |
| Ca_Kabuli_NC_021166.1_8179346 | Ca_kabuli_chr07    | 8179346                        | [T/A]       | 1067301750                                 |
| Ca_Kabuli_NC_021166.1_8209773 | Ca_kabuli_chr07    | 8209773                        | [T/A]       | 1067301751                                 |
| Ca_Kabuli_NC_021166.1_8249753 | Ca_kabuli_chr07    | 8249753                        | [T/A]       | 1067301752                                 |
| Ca_Kabuli_NC_021166.1_8287879 | Ca_kabuli_chr07    | 8287879                        | [T/C]       | 1067301753                                 |
| Ca_Kabuli_NC_021166.1_8312550 | Ca_kabuli_chr07    | 8312550                        | [A/C]       | 1067301754                                 |

| <b>SNP IDs</b>                | <b>Chromosomes</b> | <b>Physical positions (bp)</b> | <b>SNPs</b> | <b>NCBI SNPdb accession IDs (NCBI_ss#)</b> |
|-------------------------------|--------------------|--------------------------------|-------------|--------------------------------------------|
| Ca_Kabuli_NC_021166.1_8312551 | Ca_kabuli_chr07    | 8312551                        | [G/T]       | 1067301755                                 |
| Ca_Kabuli_NC_021166.1_8312552 | Ca_kabuli_chr07    | 8312552                        | [A/C]       | 1067301756                                 |
| Ca_Kabuli_NC_021166.1_8415797 | Ca_kabuli_chr07    | 8415797                        | [T/C]       | 1067301757                                 |
| Ca_Kabuli_NC_021166.1_8415821 | Ca_kabuli_chr07    | 8415821                        | [A/G]       | 1067301758                                 |
| Ca_Kabuli_NC_021166.1_8415830 | Ca_kabuli_chr07    | 8415830                        | [T/G]       | 1067301759                                 |
| Ca_Kabuli_NC_021166.1_8415911 | Ca_kabuli_chr07    | 8415911                        | [T/C]       | 1067301760                                 |
| Ca_Kabuli_NC_021166.1_8448598 | Ca_kabuli_chr07    | 8448598                        | [A/C]       | 1067301761                                 |
| Ca_Kabuli_NC_021166.1_8448607 | Ca_kabuli_chr07    | 8448607                        | [A/C]       | 1067301762                                 |
| Ca_Kabuli_NC_021166.1_8448609 | Ca_kabuli_chr07    | 8448609                        | [T/C]       | 1067301763                                 |
| Ca_Kabuli_NC_021166.1_8514954 | Ca_kabuli_chr07    | 8514954                        | [A/C]       | 1067301764                                 |
| Ca_Kabuli_NC_021166.1_8514973 | Ca_kabuli_chr07    | 8514973                        | [A/G]       | 1067301765                                 |
| Ca_Kabuli_NC_021166.1_8626887 | Ca_kabuli_chr07    | 8626887                        | [A/G]       | 1067301766                                 |
| Ca_Kabuli_NC_021166.1_8742898 | Ca_kabuli_chr07    | 8742898                        | [C/A]       | 1067301767                                 |
| Ca_Kabuli_NC_021166.1_8742899 | Ca_kabuli_chr07    | 8742899                        | [T/G]       | 1067301768                                 |
| Ca_Kabuli_NC_021166.1_8770624 | Ca_kabuli_chr07    | 8770624                        | [T/G]       | 1067301769                                 |
| Ca_Kabuli_NC_021166.1_8770649 | Ca_kabuli_chr07    | 8770649                        | [T/G]       | 1067301770                                 |
| Ca_Kabuli_NC_021166.1_8786830 | Ca_kabuli_chr07    | 8786830                        | [T/G]       | 1067301771                                 |
| Ca_Kabuli_NC_021166.1_8795201 | Ca_kabuli_chr07    | 8795201                        | [A/C]       | 1067301772                                 |
| Ca_Kabuli_NC_021166.1_8795202 | Ca_kabuli_chr07    | 8795202                        | [G/T]       | 1067301773                                 |
| Ca_Kabuli_NC_021166.1_8795203 | Ca_kabuli_chr07    | 8795203                        | [A/T]       | 1067301774                                 |
| Ca_Kabuli_NC_021166.1_8795204 | Ca_kabuli_chr07    | 8795204                        | [T/G]       | 1067301775                                 |
| Ca_Kabuli_NC_021166.1_8802374 | Ca_kabuli_chr07    | 8802374                        | [A/C]       | 1067301776                                 |
| Ca_Kabuli_NC_021166.1_8802395 | Ca_kabuli_chr07    | 8802395                        | [T/C]       | 1067301777                                 |
| Ca_Kabuli_NC_021166.1_8802419 | Ca_kabuli_chr07    | 8802419                        | [A/C]       | 1067301778                                 |
| Ca_Kabuli_NC_021166.1_8815968 | Ca_kabuli_chr07    | 8815968                        | [A/T]       | 1067301779                                 |
| Ca_Kabuli_NC_021166.1_8829226 | Ca_kabuli_chr07    | 8829226                        | [A/G]       | 1067301780                                 |
| Ca_Kabuli_NC_021166.1_8829228 | Ca_kabuli_chr07    | 8829228                        | [A/G]       | 1067301781                                 |
| Ca_Kabuli_NC_021166.1_8829241 | Ca_kabuli_chr07    | 8829241                        | [A/G]       | 1067301782                                 |
| Ca_Kabuli_NC_021166.1_8830831 | Ca_kabuli_chr07    | 8830831                        | [C/A]       | 1067301783                                 |
| Ca_Kabuli_NC_021166.1_8831068 | Ca_kabuli_chr07    | 8831068                        | [A/C]       | 1067301784                                 |
| Ca_Kabuli_NC_021166.1_8835757 | Ca_kabuli_chr07    | 8835757                        | [C/T]       | 1067301785                                 |
| Ca_Kabuli_NC_021166.1_8848919 | Ca_kabuli_chr07    | 8848919                        | [C/A]       | 1067301786                                 |
| Ca_Kabuli_NC_021166.1_8848940 | Ca_kabuli_chr07    | 8848940                        | [A/C]       | 1067301787                                 |
| Ca_Kabuli_NC_021166.1_8894281 | Ca_kabuli_chr07    | 8894281                        | [T/G]       | 1067301788                                 |

| <b>SNP IDs</b>                | <b>Chromosomes</b> | <b>Physical positions (bp)</b> | <b>SNPs</b> | <b>NCBI SNPdb accession IDs (NCBI_ss#)</b> |
|-------------------------------|--------------------|--------------------------------|-------------|--------------------------------------------|
| Ca_Kabuli_NC_021166.1_8895101 | Ca_kabuli_chr07    | 8895101                        | [A/G]       | 1067301789                                 |
| Ca_Kabuli_NC_021166.1_8895504 | Ca_kabuli_chr07    | 8895504                        | [T/C]       | 1067301790                                 |
| Ca_Kabuli_NC_021166.1_8908908 | Ca_kabuli_chr07    | 8908908                        | [A/G]       | 1067301791                                 |
| Ca_Kabuli_NC_021166.1_8908962 | Ca_kabuli_chr07    | 8908962                        | [T/G]       | 1067301792                                 |
| Ca_Kabuli_NC_021166.1_8909006 | Ca_kabuli_chr07    | 8909006                        | [A/C]       | 1067301793                                 |
| Ca_Kabuli_NC_021166.1_8909018 | Ca_kabuli_chr07    | 8909018                        | [A/G]       | 1067301794                                 |
| Ca_Kabuli_NC_021166.1_8937279 | Ca_kabuli_chr07    | 8937279                        | [T/A]       | 1067301795                                 |
| Ca_Kabuli_NC_021166.1_8937338 | Ca_kabuli_chr07    | 8937338                        | [G/A]       | 1067301796                                 |
| Ca_Kabuli_NC_021166.1_8937339 | Ca_kabuli_chr07    | 8937339                        | [G/T]       | 1067301797                                 |
| Ca_Kabuli_NC_021166.1_8937340 | Ca_kabuli_chr07    | 8937340                        | [T/C]       | 1067301798                                 |
| Ca_Kabuli_NC_021166.1_8937341 | Ca_kabuli_chr07    | 8937341                        | [G/T]       | 1067301799                                 |
| Ca_Kabuli_NC_021166.1_8937376 | Ca_kabuli_chr07    | 8937376                        | [A/C]       | 1067301800                                 |
| Ca_Kabuli_NC_021166.1_9099718 | Ca_kabuli_chr07    | 9099718                        | [T/C]       | 1067301801                                 |
| Ca_Kabuli_NC_021166.1_9230842 | Ca_kabuli_chr07    | 9230842                        | [T/G]       | 1067301802                                 |
| Ca_Kabuli_NC_021166.1_9281257 | Ca_kabuli_chr07    | 9281257                        | [G/T]       | 1067301803                                 |
| Ca_Kabuli_NC_021166.1_9301828 | Ca_kabuli_chr07    | 9301828                        | [T/G]       | 1067301804                                 |
| Ca_Kabuli_NC_021166.1_9348417 | Ca_kabuli_chr07    | 9348417                        | [A/T]       | 1067301805                                 |
| Ca_Kabuli_NC_021166.1_9416921 | Ca_kabuli_chr07    | 9416921                        | [A/G]       | 1067301806                                 |
| Ca_Kabuli_NC_021166.1_9497129 | Ca_kabuli_chr07    | 9497129                        | [T/G]       | 1067301807                                 |
| Ca_Kabuli_NC_021166.1_9535837 | Ca_kabuli_chr07    | 9535837                        | [T/C]       | 1067301808                                 |
| Ca_Kabuli_NC_021166.1_9535839 | Ca_kabuli_chr07    | 9535839                        | [T/C]       | 1067301809                                 |
| Ca_Kabuli_NC_021166.1_9535841 | Ca_kabuli_chr07    | 9535841                        | [A/G]       | 1067301810                                 |
| Ca_Kabuli_NC_021166.1_9535854 | Ca_kabuli_chr07    | 9535854                        | [T/C]       | 1067301811                                 |
| Ca_Kabuli_NC_021166.1_9535903 | Ca_kabuli_chr07    | 9535903                        | [A/C]       | 1067301812                                 |
| Ca_Kabuli_NC_021166.1_9535946 | Ca_kabuli_chr07    | 9535946                        | [T/G]       | 1067301813                                 |
| Ca_Kabuli_NC_021166.1_9549867 | Ca_kabuli_chr07    | 9549867                        | [T/G]       | 1067301814                                 |
| Ca_Kabuli_NC_021166.1_9550255 | Ca_kabuli_chr07    | 9550255                        | [A/G]       | 1067301815                                 |
| Ca_Kabuli_NC_021166.1_9555286 | Ca_kabuli_chr07    | 9555286                        | [T/G]       | 1067301816                                 |
| Ca_Kabuli_NC_021166.1_9555334 | Ca_kabuli_chr07    | 9555334                        | [A/T]       | 1067301817                                 |
| Ca_Kabuli_NC_021166.1_9593632 | Ca_kabuli_chr07    | 9593632                        | [A/C]       | 1067301818                                 |
| Ca_Kabuli_NC_021166.1_9593662 | Ca_kabuli_chr07    | 9593662                        | [T/C]       | 1067301819                                 |
| Ca_Kabuli_NC_021166.1_9593670 | Ca_kabuli_chr07    | 9593670                        | [T/A]       | 1067301820                                 |
| Ca_Kabuli_NC_021166.1_9762903 | Ca_kabuli_chr07    | 9762903                        | [A/C]       | 1067301821                                 |
| Ca_Kabuli_NC_021166.1_9762943 | Ca_kabuli_chr07    | 9762943                        | [T/C]       | 1067301822                                 |



| <b>SNP IDs</b>                 | <b>Chromosomes</b> | <b>Physical positions (bp)</b> | <b>SNPs</b> | <b>NCBI SNPdb accession IDs (NCBI_ss#)</b> |
|--------------------------------|--------------------|--------------------------------|-------------|--------------------------------------------|
| Ca_Kabuli_NC_021166.1_9888225  | Ca_kabuli_chr07    | 9888225                        | [T/A]       | 1067301823                                 |
| Ca_Kabuli_NC_021166.1_9888238  | Ca_kabuli_chr07    | 9888238                        | [C/G]       | 1067301824                                 |
| Ca_Kabuli_NC_021166.1_9888271  | Ca_kabuli_chr07    | 9888271                        | [T/C]       | 1067301825                                 |
| Ca_Kabuli_NC_021166.1_9888279  | Ca_kabuli_chr07    | 9888279                        | [T/C]       | 1067301826                                 |
| Ca_Kabuli_NC_021166.1_9909949  | Ca_kabuli_chr07    | 9909949                        | [C/A]       | 1067301827                                 |
| Ca_Kabuli_NC_021166.1_9909951  | Ca_kabuli_chr07    | 9909951                        | [G/A]       | 1067301828                                 |
| Ca_Kabuli_NC_021166.1_9909952  | Ca_kabuli_chr07    | 9909952                        | [G/T]       | 1067301829                                 |
| Ca_Kabuli_NC_021166.1_9936686  | Ca_kabuli_chr07    | 9936686                        | [G/T]       | 1067301830                                 |
| Ca_Kabuli_NC_021166.1_9939036  | Ca_kabuli_chr07    | 9939036                        | [A/C]       | 1067301831                                 |
| Ca_Kabuli_NC_021166.1_10000171 | Ca_kabuli_chr07    | 10000171                       | [A/C]       | 1067301832                                 |
| Ca_Kabuli_NC_021166.1_10001046 | Ca_kabuli_chr07    | 10001046                       | [A/C]       | 1067301833                                 |
| Ca_Kabuli_NC_021166.1_10001047 | Ca_kabuli_chr07    | 10001047                       | [G/T]       | 1067301834                                 |
| Ca_Kabuli_NC_021166.1_10049906 | Ca_kabuli_chr07    | 10049906                       | [T/G]       | 1067301835                                 |
| Ca_Kabuli_NC_021166.1_10137794 | Ca_kabuli_chr07    | 10137794                       | [T/G]       | 1067301836                                 |
| Ca_Kabuli_NC_021166.1_10137810 | Ca_kabuli_chr07    | 10137810                       | [T/G]       | 1067301837                                 |
| Ca_Kabuli_NC_021166.1_10137826 | Ca_kabuli_chr07    | 10137826                       | [C/A]       | 1067301838                                 |
| Ca_Kabuli_NC_021166.1_10180649 | Ca_kabuli_chr07    | 10180649                       | [A/G]       | 1067301839                                 |
| Ca_Kabuli_NC_021166.1_10208210 | Ca_kabuli_chr07    | 10208210                       | [T/C]       | 1067301840                                 |
| Ca_Kabuli_NC_021166.1_10208218 | Ca_kabuli_chr07    | 10208218                       | [T/C]       | 1067301841                                 |
| Ca_Kabuli_NC_021166.1_10216898 | Ca_kabuli_chr07    | 10216898                       | [A/C]       | 1067301842                                 |
| Ca_Kabuli_NC_021166.1_10223027 | Ca_kabuli_chr07    | 10223027                       | [T/G]       | 1067301843                                 |
| Ca_Kabuli_NC_021166.1_10223034 | Ca_kabuli_chr07    | 10223034                       | [T/G]       | 1067301844                                 |
| Ca_Kabuli_NC_021166.1_10223040 | Ca_kabuli_chr07    | 10223040                       | [A/T]       | 1067301845                                 |
| Ca_Kabuli_NC_021166.1_10223047 | Ca_kabuli_chr07    | 10223047                       | [A/C]       | 1067301846                                 |
| Ca_Kabuli_NC_021166.1_10231988 | Ca_kabuli_chr07    | 10231988                       | [T/G]       | 1067301847                                 |
| Ca_Kabuli_NC_021166.1_10232074 | Ca_kabuli_chr07    | 10232074                       | [A/G]       | 1067301848                                 |
| Ca_Kabuli_NC_021166.1_10251052 | Ca_kabuli_chr07    | 10251052                       | [T/G]       | 1067301849                                 |
| Ca_Kabuli_NC_021166.1_10328467 | Ca_kabuli_chr07    | 10328467                       | [T/G]       | 1067301850                                 |
| Ca_Kabuli_NC_021166.1_10328470 | Ca_kabuli_chr07    | 10328470                       | [T/G]       | 1067301851                                 |
| Ca_Kabuli_NC_021166.1_10328516 | Ca_kabuli_chr07    | 10328516                       | [T/C]       | 1067301852                                 |
| Ca_Kabuli_NC_021166.1_10328520 | Ca_kabuli_chr07    | 10328520                       | [A/C]       | 1067301853                                 |
| Ca_Kabuli_NC_021166.1_10328525 | Ca_kabuli_chr07    | 10328525                       | [A/G]       | 1067301854                                 |
| Ca_Kabuli_NC_021166.1_10333895 | Ca_kabuli_chr07    | 10333895                       | [T/G]       | 1067301855                                 |
| Ca_Kabuli_NC_021166.1_10429474 | Ca_kabuli_chr07    | 10429474                       | [T/G]       | 1067301856                                 |

| <b>SNP IDs</b>                 | <b>Chromosomes</b> | <b>Physical positions (bp)</b> | <b>SNPs</b> | <b>NCBI SNPdb accession IDs (NCBI_ss#)</b> |
|--------------------------------|--------------------|--------------------------------|-------------|--------------------------------------------|
| Ca_Kabuli_NC_021166.1_10465150 | Ca_kabuli_chr07    | 10465150                       | [T/C]       | 1067301857                                 |
| Ca_Kabuli_NC_021166.1_10473639 | Ca_kabuli_chr07    | 10473639                       | [T/C]       | 1067301858                                 |
| Ca_Kabuli_NC_021166.1_10483907 | Ca_kabuli_chr07    | 10483907                       | [T/C]       | 1067301859                                 |
| Ca_Kabuli_NC_021166.1_10485397 | Ca_kabuli_chr07    | 10485397                       | [C/G]       | 1067301860                                 |
| Ca_Kabuli_NC_021166.1_10521343 | Ca_kabuli_chr07    | 10521343                       | [T/C]       | 1067301861                                 |
| Ca_Kabuli_NC_021166.1_10521358 | Ca_kabuli_chr07    | 10521358                       | [T/C]       | 1067301862                                 |
| Ca_Kabuli_NC_021166.1_10521387 | Ca_kabuli_chr07    | 10521387                       | [A/T]       | 1067301863                                 |
| Ca_Kabuli_NC_021166.1_10521395 | Ca_kabuli_chr07    | 10521395                       | [T/A]       | 1067301864                                 |
| Ca_Kabuli_NC_021166.1_10521397 | Ca_kabuli_chr07    | 10521397                       | [A/G]       | 1067301865                                 |
| Ca_Kabuli_NC_021166.1_10521401 | Ca_kabuli_chr07    | 10521401                       | [T/G]       | 1067301866                                 |
| Ca_Kabuli_NC_021166.1_10521419 | Ca_kabuli_chr07    | 10521419                       | [A/G]       | 1067301867                                 |
| Ca_Kabuli_NC_021166.1_10521425 | Ca_kabuli_chr07    | 10521425                       | [G/A]       | 1067301868                                 |
| Ca_Kabuli_NC_021166.1_10521431 | Ca_kabuli_chr07    | 10521431                       | [G/C]       | 1067301869                                 |
| Ca_Kabuli_NC_021166.1_10521438 | Ca_kabuli_chr07    | 10521438                       | [T/C]       | 1067301870                                 |
| Ca_Kabuli_NC_021166.1_10521447 | Ca_kabuli_chr07    | 10521447                       | [A/G]       | 1067301871                                 |
| Ca_Kabuli_NC_021166.1_10521448 | Ca_kabuli_chr07    | 10521448                       | [G/A]       | 1067301872                                 |
| Ca_Kabuli_NC_021166.1_10568128 | Ca_kabuli_chr07    | 10568128                       | [G/A]       | 1067301873                                 |
| Ca_Kabuli_NC_021166.1_10568241 | Ca_kabuli_chr07    | 10568241                       | [G/C]       | 1067301874                                 |
| Ca_Kabuli_NC_021166.1_10614161 | Ca_kabuli_chr07    | 10614161                       | [T/C]       | 1067301875                                 |
| Ca_Kabuli_NC_021166.1_10614177 | Ca_kabuli_chr07    | 10614177                       | [T/G]       | 1067301876                                 |
| Ca_Kabuli_NC_021166.1_10641854 | Ca_kabuli_chr07    | 10641854                       | [T/C]       | 1067301877                                 |
| Ca_Kabuli_NC_021166.1_10649594 | Ca_kabuli_chr07    | 10649594                       | [T/G]       | 1067301878                                 |
| Ca_Kabuli_NC_021166.1_10649622 | Ca_kabuli_chr07    | 10649622                       | [C/A]       | 1067301879                                 |
| Ca_Kabuli_NC_021166.1_10649623 | Ca_kabuli_chr07    | 10649623                       | [G/C]       | 1067301880                                 |
| Ca_Kabuli_NC_021166.1_10720696 | Ca_kabuli_chr07    | 10720696                       | [A/G]       | 1067301881                                 |
| Ca_Kabuli_NC_021166.1_10795939 | Ca_kabuli_chr07    | 10795939                       | [A/C]       | 1067301882                                 |
| Ca_Kabuli_NC_021166.1_10812569 | Ca_kabuli_chr07    | 10812569                       | [T/G]       | 1067301883                                 |
| Ca_Kabuli_NC_021166.1_10816523 | Ca_kabuli_chr07    | 10816523                       | [T/G]       | 1067301884                                 |
| Ca_Kabuli_NC_021166.1_10900762 | Ca_kabuli_chr07    | 10900762                       | [C/G]       | 1067301885                                 |
| Ca_Kabuli_NC_021166.1_10900767 | Ca_kabuli_chr07    | 10900767                       | [T/C]       | 1067301886                                 |
| Ca_Kabuli_NC_021166.1_11033768 | Ca_kabuli_chr07    | 11033768                       | [T/C]       | 1067301887                                 |
| Ca_Kabuli_NC_021166.1_11033771 | Ca_kabuli_chr07    | 11033771                       | [T/C]       | 1067301888                                 |
| Ca_Kabuli_NC_021166.1_11192688 | Ca_kabuli_chr07    | 11192688                       | [A/C]       | 1067301889                                 |
| Ca_Kabuli_NC_021166.1_11192691 | Ca_kabuli_chr07    | 11192691                       | [A/C]       | 1067301890                                 |

| <b>SNP IDs</b>                 | <b>Chromosomes</b> | <b>Physical positions (bp)</b> | <b>SNPs</b> | <b>NCBI SNPdb accession IDs (NCBI_ss#)</b> |
|--------------------------------|--------------------|--------------------------------|-------------|--------------------------------------------|
| Ca_Kabuli_NC_021166.1_11192694 | Ca_kabuli_chr07    | 11192694                       | [A/C]       | 1067301891                                 |
| Ca_Kabuli_NC_021166.1_11192703 | Ca_kabuli_chr07    | 11192703                       | [A/C]       | 1067301892                                 |
| Ca_Kabuli_NC_021166.1_11192706 | Ca_kabuli_chr07    | 11192706                       | [A/C]       | 1067301893                                 |
| Ca_Kabuli_NC_021166.1_11383745 | Ca_kabuli_chr07    | 11383745                       | [T/G]       | 1067301894                                 |
| Ca_Kabuli_NC_021166.1_11383746 | Ca_kabuli_chr07    | 11383746                       | [G/T]       | 1067301895                                 |
| Ca_Kabuli_NC_021166.1_11383747 | Ca_kabuli_chr07    | 11383747                       | [T/G]       | 1067301896                                 |
| Ca_Kabuli_NC_021166.1_11383749 | Ca_kabuli_chr07    | 11383749                       | [T/G]       | 1067301897                                 |
| Ca_Kabuli_NC_021166.1_11383752 | Ca_kabuli_chr07    | 11383752                       | [T/G]       | 1067301898                                 |
| Ca_Kabuli_NC_021166.1_11417659 | Ca_kabuli_chr07    | 11417659                       | [A/T]       | 1067301899                                 |
| Ca_Kabuli_NC_021166.1_11468374 | Ca_kabuli_chr07    | 11468374                       | [A/G]       | 1067301900                                 |
| Ca_Kabuli_NC_021166.1_11521683 | Ca_kabuli_chr07    | 11521683                       | [A/T]       | 1067301901                                 |
| Ca_Kabuli_NC_021166.1_11521711 | Ca_kabuli_chr07    | 11521711                       | [A/T]       | 1067301902                                 |
| Ca_Kabuli_NC_021166.1_11545804 | Ca_kabuli_chr07    | 11545804                       | [T/C]       | 1067301903                                 |
| Ca_Kabuli_NC_021166.1_11545835 | Ca_kabuli_chr07    | 11545835                       | [T/G]       | 1067301904                                 |
| Ca_Kabuli_NC_021166.1_11545870 | Ca_kabuli_chr07    | 11545870                       | [A/G]       | 1067301905                                 |
| Ca_Kabuli_NC_021166.1_11545877 | Ca_kabuli_chr07    | 11545877                       | [A/G]       | 1067301906                                 |
| Ca_Kabuli_NC_021166.1_11630434 | Ca_kabuli_chr07    | 11630434                       | [T/C]       | 1067301907                                 |
| Ca_Kabuli_NC_021166.1_11630463 | Ca_kabuli_chr07    | 11630463                       | [G/A]       | 1067301908                                 |
| Ca_Kabuli_NC_021166.1_11630465 | Ca_kabuli_chr07    | 11630465                       | [A/G]       | 1067301909                                 |
| Ca_Kabuli_NC_021166.1_11638847 | Ca_kabuli_chr07    | 11638847                       | [A/C]       | 1067301910                                 |
| Ca_Kabuli_NC_021166.1_11685190 | Ca_kabuli_chr07    | 11685190                       | [C/A]       | 1067301911                                 |
| Ca_Kabuli_NC_021166.1_11685194 | Ca_kabuli_chr07    | 11685194                       | [T/G]       | 1067301912                                 |
| Ca_Kabuli_NC_021166.1_11686223 | Ca_kabuli_chr07    | 11686223                       | [T/G]       | 1067301913                                 |
| Ca_Kabuli_NC_021166.1_11725595 | Ca_kabuli_chr07    | 11725595                       | [C/T]       | 1067301914                                 |
| Ca_Kabuli_NC_021166.1_11734856 | Ca_kabuli_chr07    | 11734856                       | [A/G]       | 1067301915                                 |
| Ca_Kabuli_NC_021166.1_11734862 | Ca_kabuli_chr07    | 11734862                       | [A/G]       | 1067301916                                 |
| Ca_Kabuli_NC_021166.1_11734873 | Ca_kabuli_chr07    | 11734873                       | [T/A]       | 1067301917                                 |
| Ca_Kabuli_NC_021166.1_11734891 | Ca_kabuli_chr07    | 11734891                       | [A/C]       | 1067301918                                 |
| Ca_Kabuli_NC_021166.1_11734893 | Ca_kabuli_chr07    | 11734893                       | [T/C]       | 1067301919                                 |
| Ca_Kabuli_NC_021166.1_11734905 | Ca_kabuli_chr07    | 11734905                       | [A/T]       | 1067301920                                 |
| Ca_Kabuli_NC_021166.1_11734917 | Ca_kabuli_chr07    | 11734917                       | [T/A]       | 1067301921                                 |
| Ca_Kabuli_NC_021166.1_11736066 | Ca_kabuli_chr07    | 11736066                       | [A/G]       | 1067301922                                 |
| Ca_Kabuli_NC_021166.1_11791921 | Ca_kabuli_chr07    | 11791921                       | [T/C]       | 1067301923                                 |
| Ca_Kabuli_NC_021166.1_11812468 | Ca_kabuli_chr07    | 11812468                       | [A/C]       | 1067301924                                 |

| <b>SNP IDs</b>                 | <b>Chromosomes</b> | <b>Physical positions (bp)</b> | <b>SNPs</b> | <b>NCBI SNPdb accession IDs (NCBI_ss#)</b> |
|--------------------------------|--------------------|--------------------------------|-------------|--------------------------------------------|
| Ca_Kabuli_NC_021166.1_12067234 | Ca_kabuli_chr07    | 12067234                       | [C/T]       | 1067301925                                 |
| Ca_Kabuli_NC_021166.1_12071674 | Ca_kabuli_chr07    | 12071674                       | [C/T]       | 1067301926                                 |
| Ca_Kabuli_NC_021166.1_12071679 | Ca_kabuli_chr07    | 12071679                       | [A/C]       | 1067301927                                 |
| Ca_Kabuli_NC_021166.1_12073249 | Ca_kabuli_chr07    | 12073249                       | [C/A]       | 1067301928                                 |
| Ca_Kabuli_NC_021166.1_12073250 | Ca_kabuli_chr07    | 12073250                       | [T/G]       | 1067301929                                 |
| Ca_Kabuli_NC_021166.1_12073251 | Ca_kabuli_chr07    | 12073251                       | [G/A]       | 1067301930                                 |
| Ca_Kabuli_NC_021166.1_12073252 | Ca_kabuli_chr07    | 12073252                       | [A/T]       | 1067301931                                 |
| Ca_Kabuli_NC_021166.1_12124282 | Ca_kabuli_chr07    | 12124282                       | [T/C]       | 1067301932                                 |
| Ca_Kabuli_NC_021166.1_12158807 | Ca_kabuli_chr07    | 12158807                       | [T/A]       | 1067301933                                 |
| Ca_Kabuli_NC_021166.1_12161451 | Ca_kabuli_chr07    | 12161451                       | [G/A]       | 1067301934                                 |
| Ca_Kabuli_NC_021166.1_12333200 | Ca_kabuli_chr07    | 12333200                       | [T/G]       | 1067301935                                 |
| Ca_Kabuli_NC_021166.1_12366703 | Ca_kabuli_chr07    | 12366703                       | [T/C]       | 1067301936                                 |
| Ca_Kabuli_NC_021166.1_12366732 | Ca_kabuli_chr07    | 12366732                       | [A/G]       | 1067301937                                 |
| Ca_Kabuli_NC_021166.1_12384067 | Ca_kabuli_chr07    | 12384067                       | [T/C]       | 1067301938                                 |
| Ca_Kabuli_NC_021166.1_12390754 | Ca_kabuli_chr07    | 12390754                       | [C/T]       | 1067301939                                 |
| Ca_Kabuli_NC_021166.1_12390774 | Ca_kabuli_chr07    | 12390774                       | [A/G]       | 1067301940                                 |
| Ca_Kabuli_NC_021166.1_12429249 | Ca_kabuli_chr07    | 12429249                       | [T/G]       | 1067301941                                 |
| Ca_Kabuli_NC_021166.1_12474009 | Ca_kabuli_chr07    | 12474009                       | [T/G]       | 1067301942                                 |
| Ca_Kabuli_NC_021166.1_12482742 | Ca_kabuli_chr07    | 12482742                       | [A/T]       | 1067301943                                 |
| Ca_Kabuli_NC_021166.1_12483195 | Ca_kabuli_chr07    | 12483195                       | [G/T]       | 1067301944                                 |
| Ca_Kabuli_NC_021166.1_12492059 | Ca_kabuli_chr07    | 12492059                       | [A/G]       | 1067301945                                 |
| Ca_Kabuli_NC_021166.1_12492062 | Ca_kabuli_chr07    | 12492062                       | [C/G]       | 1067301946                                 |
| Ca_Kabuli_NC_021166.1_12492063 | Ca_kabuli_chr07    | 12492063                       | [C/A]       | 1067301947                                 |
| Ca_Kabuli_NC_021166.1_12492064 | Ca_kabuli_chr07    | 12492064                       | [A/G]       | 1067301948                                 |
| Ca_Kabuli_NC_021166.1_12492065 | Ca_kabuli_chr07    | 12492065                       | [C/G]       | 1067301949                                 |
| Ca_Kabuli_NC_021166.1_12492074 | Ca_kabuli_chr07    | 12492074                       | [T/C]       | 1067301950                                 |
| Ca_Kabuli_NC_021166.1_12492082 | Ca_kabuli_chr07    | 12492082                       | [T/C]       | 1067301951                                 |
| Ca_Kabuli_NC_021166.1_12590541 | Ca_kabuli_chr07    | 12590541                       | [T/C]       | 1067301952                                 |
| Ca_Kabuli_NC_021166.1_12614558 | Ca_kabuli_chr07    | 12614558                       | [T/G]       | 1067301953                                 |
| Ca_Kabuli_NC_021166.1_12628067 | Ca_kabuli_chr07    | 12628067                       | [T/C]       | 1067301954                                 |
| Ca_Kabuli_NC_021166.1_12628071 | Ca_kabuli_chr07    | 12628071                       | [A/C]       | 1067301955                                 |
| Ca_Kabuli_NC_021166.1_12628072 | Ca_kabuli_chr07    | 12628072                       | [G/T]       | 1067301956                                 |
| Ca_Kabuli_NC_021166.1_12629944 | Ca_kabuli_chr07    | 12629944                       | [A/C]       | 1067301957                                 |
| Ca_Kabuli_NC_021166.1_12635956 | Ca_kabuli_chr07    | 12635956                       | [A/C]       | 1067301958                                 |

| <b>SNP IDs</b>                 | <b>Chromosomes</b> | <b>Physical positions (bp)</b> | <b>SNPs</b> | <b>NCBI SNPdb accession IDs (NCBI_ss#)</b> |
|--------------------------------|--------------------|--------------------------------|-------------|--------------------------------------------|
| Ca_Kabuli_NC_021166.1_12681460 | Ca_kabuli_chr07    | 12681460                       | [A/G]       | 1067301959                                 |
| Ca_Kabuli_NC_021166.1_12681484 | Ca_kabuli_chr07    | 12681484                       | [T/A]       | 1067301960                                 |
| Ca_Kabuli_NC_021166.1_12681494 | Ca_kabuli_chr07    | 12681494                       | [A/T]       | 1067301961                                 |
| Ca_Kabuli_NC_021166.1_12681506 | Ca_kabuli_chr07    | 12681506                       | [A/G]       | 1067301962                                 |
| Ca_Kabuli_NC_021166.1_12692636 | Ca_kabuli_chr07    | 12692636                       | [G/T]       | 1067301963                                 |
| Ca_Kabuli_NC_021166.1_12730576 | Ca_kabuli_chr07    | 12730576                       | [T/A]       | 1067301964                                 |
| Ca_Kabuli_NC_021166.1_12764977 | Ca_kabuli_chr07    | 12764977                       | [T/C]       | 1067301965                                 |
| Ca_Kabuli_NC_021166.1_12765048 | Ca_kabuli_chr07    | 12765048                       | [A/G]       | 1067301966                                 |
| Ca_Kabuli_NC_021166.1_12847806 | Ca_kabuli_chr07    | 12847806                       | [G/A]       | 1067301967                                 |
| Ca_Kabuli_NC_021166.1_12892797 | Ca_kabuli_chr07    | 12892797                       | [T/G]       | 1067301968                                 |
| Ca_Kabuli_NC_021166.1_13021492 | Ca_kabuli_chr07    | 13021492                       | [T/G]       | 1067301969                                 |
| Ca_Kabuli_NC_021166.1_13021528 | Ca_kabuli_chr07    | 13021528                       | [A/T]       | 1067301970                                 |
| Ca_Kabuli_NC_021166.1_13046694 | Ca_kabuli_chr07    | 13046694                       | [T/C]       | 1067301971                                 |
| Ca_Kabuli_NC_021166.1_13046697 | Ca_kabuli_chr07    | 13046697                       | [T/C]       | 1067301972                                 |
| Ca_Kabuli_NC_021166.1_13059684 | Ca_kabuli_chr07    | 13059684                       | [T/G]       | 1067301973                                 |
| Ca_Kabuli_NC_021166.1_13059757 | Ca_kabuli_chr07    | 13059757                       | [T/G]       | 1067301974                                 |
| Ca_Kabuli_NC_021166.1_13059857 | Ca_kabuli_chr07    | 13059857                       | [T/G]       | 1067301975                                 |
| Ca_Kabuli_NC_021166.1_13069803 | Ca_kabuli_chr07    | 13069803                       | [T/G]       | 1067301976                                 |
| Ca_Kabuli_NC_021166.1_13180380 | Ca_kabuli_chr07    | 13180380                       | [A/G]       | 1067301977                                 |
| Ca_Kabuli_NC_021166.1_13215942 | Ca_kabuli_chr07    | 13215942                       | [T/G]       | 1067301978                                 |
| Ca_Kabuli_NC_021166.1_13220226 | Ca_kabuli_chr07    | 13220226                       | [A/C]       | 1067301979                                 |
| Ca_Kabuli_NC_021166.1_13220242 | Ca_kabuli_chr07    | 13220242                       | [T/A]       | 1067301980                                 |
| Ca_Kabuli_NC_021166.1_13220460 | Ca_kabuli_chr07    | 13220460                       | [A/T]       | 1067301981                                 |
| Ca_Kabuli_NC_021166.1_13288666 | Ca_kabuli_chr07    | 13288666                       | [T/C]       | 1067301982                                 |
| Ca_Kabuli_NC_021166.1_13288777 | Ca_kabuli_chr07    | 13288777                       | [T/G]       | 1067301983                                 |
| Ca_Kabuli_NC_021166.1_13319895 | Ca_kabuli_chr07    | 13319895                       | [A/T]       | 1067301984                                 |
| Ca_Kabuli_NC_021166.1_13481929 | Ca_kabuli_chr07    | 13481929                       | [T/G]       | 1067301985                                 |
| Ca_Kabuli_NC_021166.1_13514061 | Ca_kabuli_chr07    | 13514061                       | [A/C]       | 1067301986                                 |
| Ca_Kabuli_NC_021166.1_13514076 | Ca_kabuli_chr07    | 13514076                       | [A/G]       | 1067301987                                 |
| Ca_Kabuli_NC_021166.1_13514220 | Ca_kabuli_chr07    | 13514220                       | [A/G]       | 1067301988                                 |
| Ca_Kabuli_NC_021166.1_13514244 | Ca_kabuli_chr07    | 13514244                       | [T/C]       | 1067301989                                 |
| Ca_Kabuli_NC_021166.1_13580931 | Ca_kabuli_chr07    | 13580931                       | [A/C]       | 1067301990                                 |
| Ca_Kabuli_NC_021166.1_13580932 | Ca_kabuli_chr07    | 13580932                       | [G/C]       | 1067301991                                 |
| Ca_Kabuli_NC_021166.1_13580933 | Ca_kabuli_chr07    | 13580933                       | [A/T]       | 1067301992                                 |

| <b>SNP IDs</b>                 | <b>Chromosomes</b> | <b>Physical positions (bp)</b> | <b>SNPs</b> | <b>NCBI SNPdb accession IDs (NCBI_ss#)</b> |
|--------------------------------|--------------------|--------------------------------|-------------|--------------------------------------------|
| Ca_Kabuli_NC_021166.1_13580934 | Ca_kabuli_chr07    | 13580934                       | [T/G]       | 1067301993                                 |
| Ca_Kabuli_NC_021166.1_13581138 | Ca_kabuli_chr07    | 13581138                       | [A/C]       | 1067301994                                 |
| Ca_Kabuli_NC_021166.1_13581140 | Ca_kabuli_chr07    | 13581140                       | [T/C]       | 1067301995                                 |
| Ca_Kabuli_NC_021166.1_13581160 | Ca_kabuli_chr07    | 13581160                       | [A/G]       | 1067301996                                 |
| Ca_Kabuli_NC_021166.1_13581215 | Ca_kabuli_chr07    | 13581215                       | [A/G]       | 1067301997                                 |
| Ca_Kabuli_NC_021166.1_13581218 | Ca_kabuli_chr07    | 13581218                       | [A/C]       | 1067301998                                 |
| Ca_Kabuli_NC_021166.1_13581221 | Ca_kabuli_chr07    | 13581221                       | [A/G]       | 1067301999                                 |
| Ca_Kabuli_NC_021166.1_13581223 | Ca_kabuli_chr07    | 13581223                       | [A/G]       | 1067302000                                 |
| Ca_Kabuli_NC_021166.1_13581231 | Ca_kabuli_chr07    | 13581231                       | [T/A]       | 1067302001                                 |
| Ca_Kabuli_NC_021166.1_13581821 | Ca_kabuli_chr07    | 13581821                       | [T/C]       | 1067302002                                 |
| Ca_Kabuli_NC_021166.1_13581823 | Ca_kabuli_chr07    | 13581823                       | [A/T]       | 1067302003                                 |
| Ca_Kabuli_NC_021166.1_13605194 | Ca_kabuli_chr07    | 13605194                       | [A/C]       | 1067302004                                 |
| Ca_Kabuli_NC_021166.1_13605197 | Ca_kabuli_chr07    | 13605197                       | [A/C]       | 1067302005                                 |
| Ca_Kabuli_NC_021166.1_13605200 | Ca_kabuli_chr07    | 13605200                       | [A/C]       | 1067302006                                 |
| Ca_Kabuli_NC_021166.1_13605208 | Ca_kabuli_chr07    | 13605208                       | [T/A]       | 1067302007                                 |
| Ca_Kabuli_NC_021166.1_13605221 | Ca_kabuli_chr07    | 13605221                       | [T/C]       | 1067302008                                 |
| Ca_Kabuli_NC_021166.1_13667264 | Ca_kabuli_chr07    | 13667264                       | [T/G]       | 1067302009                                 |
| Ca_Kabuli_NC_021166.1_13760302 | Ca_kabuli_chr07    | 13760302                       | [T/C]       | 1067302010                                 |
| Ca_Kabuli_NC_021166.1_13760331 | Ca_kabuli_chr07    | 13760331                       | [A/G]       | 1067302011                                 |
| Ca_Kabuli_NC_021166.1_13776058 | Ca_kabuli_chr07    | 13776058                       | [T/C]       | 1067302012                                 |
| Ca_Kabuli_NC_021166.1_13776107 | Ca_kabuli_chr07    | 13776107                       | [A/G]       | 1067302013                                 |
| Ca_Kabuli_NC_021166.1_13776113 | Ca_kabuli_chr07    | 13776113                       | [C/G]       | 1067302014                                 |
| Ca_Kabuli_NC_021166.1_13781796 | Ca_kabuli_chr07    | 13781796                       | [T/C]       | 1067302015                                 |
| Ca_Kabuli_NC_021166.1_13781799 | Ca_kabuli_chr07    | 13781799                       | [T/G]       | 1067302016                                 |
| Ca_Kabuli_NC_021166.1_13781824 | Ca_kabuli_chr07    | 13781824                       | [T/C]       | 1067302017                                 |
| Ca_Kabuli_NC_021166.1_13819456 | Ca_kabuli_chr07    | 13819456                       | [T/A]       | 1067302018                                 |
| Ca_Kabuli_NC_021166.1_13860705 | Ca_kabuli_chr07    | 13860705                       | [T/C]       | 1067302019                                 |
| Ca_Kabuli_NC_021166.1_13860754 | Ca_kabuli_chr07    | 13860754                       | [A/C]       | 1067302020                                 |
| Ca_Kabuli_NC_021166.1_13904188 | Ca_kabuli_chr07    | 13904188                       | [T/C]       | 1067302021                                 |
| Ca_Kabuli_NC_021166.1_13949259 | Ca_kabuli_chr07    | 13949259                       | [G/A]       | 1067302022                                 |
| Ca_Kabuli_NC_021166.1_13951804 | Ca_kabuli_chr07    | 13951804                       | [A/G]       | 1067302023                                 |
| Ca_Kabuli_NC_021166.1_14133830 | Ca_kabuli_chr07    | 14133830                       | [G/A]       | 1067302024                                 |
| Ca_Kabuli_NC_021166.1_14171041 | Ca_kabuli_chr07    | 14171041                       | [T/G]       | 1067302025                                 |
| Ca_Kabuli_NC_021166.1_14198250 | Ca_kabuli_chr07    | 14198250                       | [G/C]       | 1067302026                                 |

| <b>SNP IDs</b>                 | <b>Chromosomes</b> | <b>Physical positions (bp)</b> | <b>SNPs</b> | <b>NCBI SNPdb accession IDs (NCBI_ss#)</b> |
|--------------------------------|--------------------|--------------------------------|-------------|--------------------------------------------|
| Ca_Kabuli_NC_021166.1_14198251 | Ca_kabuli_chr07    | 14198251                       | [A/T]       | 1067302027                                 |
| Ca_Kabuli_NC_021166.1_14199535 | Ca_kabuli_chr07    | 14199535                       | [T/G]       | 1067302028                                 |
| Ca_Kabuli_NC_021166.1_14199554 | Ca_kabuli_chr07    | 14199554                       | [T/G]       | 1067302029                                 |
| Ca_Kabuli_NC_021166.1_14282061 | Ca_kabuli_chr07    | 14282061                       | [A/G]       | 1067302030                                 |
| Ca_Kabuli_NC_021166.1_14282154 | Ca_kabuli_chr07    | 14282154                       | [T/G]       | 1067302031                                 |
| Ca_Kabuli_NC_021166.1_14325903 | Ca_kabuli_chr07    | 14325903                       | [T/A]       | 1067302032                                 |
| Ca_Kabuli_NC_021166.1_14325936 | Ca_kabuli_chr07    | 14325936                       | [T/C]       | 1067302033                                 |
| Ca_Kabuli_NC_021166.1_14325948 | Ca_kabuli_chr07    | 14325948                       | [A/G]       | 1067302034                                 |
| Ca_Kabuli_NC_021166.1_14470488 | Ca_kabuli_chr07    | 14470488                       | [C/G]       | 1067302035                                 |
| Ca_Kabuli_NC_021166.1_14470491 | Ca_kabuli_chr07    | 14470491                       | [A/G]       | 1067302036                                 |
| Ca_Kabuli_NC_021166.1_14492362 | Ca_kabuli_chr07    | 14492362                       | [C/T]       | 1067302037                                 |
| Ca_Kabuli_NC_021166.1_14552465 | Ca_kabuli_chr07    | 14552465                       | [T/C]       | 1067302038                                 |
| Ca_Kabuli_NC_021166.1_14556361 | Ca_kabuli_chr07    | 14556361                       | [T/A]       | 1067302039                                 |
| Ca_Kabuli_NC_021166.1_14558899 | Ca_kabuli_chr07    | 14558899                       | [T/A]       | 1067302040                                 |
| Ca_Kabuli_NC_021166.1_14558900 | Ca_kabuli_chr07    | 14558900                       | [A/C]       | 1067302041                                 |
| Ca_Kabuli_NC_021166.1_14685017 | Ca_kabuli_chr07    | 14685017                       | [C/T]       | 1067302042                                 |
| Ca_Kabuli_NC_021166.1_14685023 | Ca_kabuli_chr07    | 14685023                       | [G/T]       | 1067302043                                 |
| Ca_Kabuli_NC_021166.1_14685024 | Ca_kabuli_chr07    | 14685024                       | [A/G]       | 1067302044                                 |
| Ca_Kabuli_NC_021166.1_14776018 | Ca_kabuli_chr07    | 14776018                       | [T/G]       | 1067302045                                 |
| Ca_Kabuli_NC_021166.1_14776041 | Ca_kabuli_chr07    | 14776041                       | [T/G]       | 1067302046                                 |
| Ca_Kabuli_NC_021166.1_14782472 | Ca_kabuli_chr07    | 14782472                       | [T/G]       | 1067302047                                 |
| Ca_Kabuli_NC_021166.1_14782508 | Ca_kabuli_chr07    | 14782508                       | [A/C]       | 1067302048                                 |
| Ca_Kabuli_NC_021166.1_14782512 | Ca_kabuli_chr07    | 14782512                       | [T/C]       | 1067302049                                 |
| Ca_Kabuli_NC_021166.1_14782519 | Ca_kabuli_chr07    | 14782519                       | [T/C]       | 1067302050                                 |
| Ca_Kabuli_NC_021166.1_14782557 | Ca_kabuli_chr07    | 14782557                       | [T/C]       | 1067302051                                 |
| Ca_Kabuli_NC_021166.1_14782559 | Ca_kabuli_chr07    | 14782559                       | [T/C]       | 1067302052                                 |
| Ca_Kabuli_NC_021166.1_14782565 | Ca_kabuli_chr07    | 14782565                       | [A/T]       | 1067302053                                 |
| Ca_Kabuli_NC_021166.1_14782623 | Ca_kabuli_chr07    | 14782623                       | [A/G]       | 1067302054                                 |
| Ca_Kabuli_NC_021166.1_14866783 | Ca_kabuli_chr07    | 14866783                       | [A/C]       | 1067302055                                 |
| Ca_Kabuli_NC_021166.1_14866797 | Ca_kabuli_chr07    | 14866797                       | [A/G]       | 1067302056                                 |
| Ca_Kabuli_NC_021166.1_14899176 | Ca_kabuli_chr07    | 14899176                       | [T/G]       | 1067302057                                 |
| Ca_Kabuli_NC_021166.1_14902205 | Ca_kabuli_chr07    | 14902205                       | [T/G]       | 1067302058                                 |
| Ca_Kabuli_NC_021166.1_14933301 | Ca_kabuli_chr07    | 14933301                       | [T/C]       | 1067302059                                 |
| Ca_Kabuli_NC_021166.1_14933306 | Ca_kabuli_chr07    | 14933306                       | [A/G]       | 1067302060                                 |

| <b>SNP IDs</b>                 | <b>Chromosomes</b> | <b>Physical positions (bp)</b> | <b>SNPs</b> | <b>NCBI SNPdb accession IDs (NCBI_ss#)</b> |
|--------------------------------|--------------------|--------------------------------|-------------|--------------------------------------------|
| Ca_Kabuli_NC_021166.1_14949948 | Ca_kabuli_chr07    | 14949948                       | [A/C]       | 1067302061                                 |
| Ca_Kabuli_NC_021166.1_15013576 | Ca_kabuli_chr07    | 15013576                       | [A/C]       | 1067302062                                 |
| Ca_Kabuli_NC_021166.1_15013577 | Ca_kabuli_chr07    | 15013577                       | [G/A]       | 1067302063                                 |
| Ca_Kabuli_NC_021166.1_15021703 | Ca_kabuli_chr07    | 15021703                       | [G/T]       | 1067302064                                 |
| Ca_Kabuli_NC_021166.1_15039606 | Ca_kabuli_chr07    | 15039606                       | [T/A]       | 1067302065                                 |
| Ca_Kabuli_NC_021166.1_15097437 | Ca_kabuli_chr07    | 15097437                       | [A/C]       | 1067302066                                 |
| Ca_Kabuli_NC_021166.1_15100152 | Ca_kabuli_chr07    | 15100152                       | [C/A]       | 1067302067                                 |
| Ca_Kabuli_NC_021166.1_15125608 | Ca_kabuli_chr07    | 15125608                       | [T/A]       | 1067302068                                 |
| Ca_Kabuli_NC_021166.1_15125636 | Ca_kabuli_chr07    | 15125636                       | [T/G]       | 1067302069                                 |
| Ca_Kabuli_NC_021166.1_15129131 | Ca_kabuli_chr07    | 15129131                       | [C/A]       | 1067302070                                 |
| Ca_Kabuli_NC_021166.1_15201852 | Ca_kabuli_chr07    | 15201852                       | [A/T]       | 1067302071                                 |
| Ca_Kabuli_NC_021166.1_15233487 | Ca_kabuli_chr07    | 15233487                       | [T/G]       | 1067302072                                 |
| Ca_Kabuli_NC_021166.1_15283180 | Ca_kabuli_chr07    | 15283180                       | [T/A]       | 1067302073                                 |
| Ca_Kabuli_NC_021166.1_15283183 | Ca_kabuli_chr07    | 15283183                       | [T/A]       | 1067302074                                 |
| Ca_Kabuli_NC_021166.1_15309117 | Ca_kabuli_chr07    | 15309117                       | [A/C]       | 1067302075                                 |
| Ca_Kabuli_NC_021166.1_15309177 | Ca_kabuli_chr07    | 15309177                       | [A/G]       | 1067302076                                 |
| Ca_Kabuli_NC_021166.1_15309179 | Ca_kabuli_chr07    | 15309179                       | [A/C]       | 1067302077                                 |
| Ca_Kabuli_NC_021166.1_15621480 | Ca_kabuli_chr07    | 15621480                       | [T/C]       | 1067302078                                 |
| Ca_Kabuli_NC_021166.1_15621499 | Ca_kabuli_chr07    | 15621499                       | [A/G]       | 1067302079                                 |
| Ca_Kabuli_NC_021166.1_15621504 | Ca_kabuli_chr07    | 15621504                       | [T/G]       | 1067302080                                 |
| Ca_Kabuli_NC_021166.1_15621507 | Ca_kabuli_chr07    | 15621507                       | [T/G]       | 1067302081                                 |
| Ca_Kabuli_NC_021166.1_15624675 | Ca_kabuli_chr07    | 15624675                       | [A/G]       | 1067302082                                 |
| Ca_Kabuli_NC_021166.1_15701608 | Ca_kabuli_chr07    | 15701608                       | [A/G]       | 1067302083                                 |
| Ca_Kabuli_NC_021166.1_15740777 | Ca_kabuli_chr07    | 15740777                       | [A/C]       | 1067302084                                 |
| Ca_Kabuli_NC_021166.1_15779226 | Ca_kabuli_chr07    | 15779226                       | [C/T]       | 1067302085                                 |
| Ca_Kabuli_NC_021166.1_15814624 | Ca_kabuli_chr07    | 15814624                       | [A/C]       | 1067302086                                 |
| Ca_Kabuli_NC_021166.1_15887950 | Ca_kabuli_chr07    | 15887950                       | [C/A]       | 1067302087                                 |
| Ca_Kabuli_NC_021166.1_15887951 | Ca_kabuli_chr07    | 15887951                       | [T/G]       | 1067302088                                 |
| Ca_Kabuli_NC_021166.1_15887954 | Ca_kabuli_chr07    | 15887954                       | [T/G]       | 1067302089                                 |
| Ca_Kabuli_NC_021166.1_15918309 | Ca_kabuli_chr07    | 15918309                       | [A/G]       | 1067302090                                 |
| Ca_Kabuli_NC_021166.1_15918336 | Ca_kabuli_chr07    | 15918336                       | [C/T]       | 1067302091                                 |
| Ca_Kabuli_NC_021166.1_15918341 | Ca_kabuli_chr07    | 15918341                       | [C/T]       | 1067302092                                 |
| Ca_Kabuli_NC_021166.1_15918343 | Ca_kabuli_chr07    | 15918343                       | [A/G]       | 1067302093                                 |
| Ca_Kabuli_NC_021166.1_15966666 | Ca_kabuli_chr07    | 15966666                       | [T/C]       | 1067302094                                 |



| <b>SNP IDs</b>                 | <b>Chromosomes</b> | <b>Physical positions (bp)</b> | <b>SNPs</b> | <b>NCBI SNPdb accession IDs (NCBI_ss#)</b> |
|--------------------------------|--------------------|--------------------------------|-------------|--------------------------------------------|
| Ca_Kabuli_NC_021166.1_15966700 | Ca_kabuli_chr07    | 15966700                       | [G/T]       | 1067302095                                 |
| Ca_Kabuli_NC_021166.1_15966701 | Ca_kabuli_chr07    | 15966701                       | [A/T]       | 1067302096                                 |
| Ca_Kabuli_NC_021166.1_15966762 | Ca_kabuli_chr07    | 15966762                       | [G/A]       | 1067302097                                 |
| Ca_Kabuli_NC_021166.1_15966770 | Ca_kabuli_chr07    | 15966770                       | [A/T]       | 1067302098                                 |
| Ca_Kabuli_NC_021166.1_15966805 | Ca_kabuli_chr07    | 15966805                       | [C/T]       | 1067302099                                 |
| Ca_Kabuli_NC_021166.1_16178928 | Ca_kabuli_chr07    | 16178928                       | [C/T]       | 1067302100                                 |
| Ca_Kabuli_NC_021166.1_16178935 | Ca_kabuli_chr07    | 16178935                       | [G/T]       | 1067302101                                 |
| Ca_Kabuli_NC_021166.1_16268352 | Ca_kabuli_chr07    | 16268352                       | [G/T]       | 1067302102                                 |
| Ca_Kabuli_NC_021166.1_16282987 | Ca_kabuli_chr07    | 16282987                       | [C/A]       | 1067302103                                 |
| Ca_Kabuli_NC_021166.1_16282988 | Ca_kabuli_chr07    | 16282988                       | [A/G]       | 1067302104                                 |
| Ca_Kabuli_NC_021166.1_16282990 | Ca_kabuli_chr07    | 16282990                       | [C/T]       | 1067302105                                 |
| Ca_Kabuli_NC_021166.1_16282991 | Ca_kabuli_chr07    | 16282991                       | [T/C]       | 1067302106                                 |
| Ca_Kabuli_NC_021166.1_16289801 | Ca_kabuli_chr07    | 16289801                       | [A/C]       | 1067302107                                 |
| Ca_Kabuli_NC_021166.1_16381651 | Ca_kabuli_chr07    | 16381651                       | [A/T]       | 1067302108                                 |
| Ca_Kabuli_NC_021166.1_16381880 | Ca_kabuli_chr07    | 16381880                       | [T/C]       | 1067302109                                 |
| Ca_Kabuli_NC_021166.1_16381896 | Ca_kabuli_chr07    | 16381896                       | [A/G]       | 1067302110                                 |
| Ca_Kabuli_NC_021166.1_16466564 | Ca_kabuli_chr07    | 16466564                       | [C/A]       | 1067302111                                 |
| Ca_Kabuli_NC_021166.1_16624827 | Ca_kabuli_chr07    | 16624827                       | [A/C]       | 1067302112                                 |
| Ca_Kabuli_NC_021166.1_16626047 | Ca_kabuli_chr07    | 16626047                       | [T/G]       | 1067302113                                 |
| Ca_Kabuli_NC_021166.1_16626713 | Ca_kabuli_chr07    | 16626713                       | [T/C]       | 1067302114                                 |
| Ca_Kabuli_NC_021166.1_16651454 | Ca_kabuli_chr07    | 16651454                       | [C/T]       | 1067302115                                 |
| Ca_Kabuli_NC_021166.1_16725171 | Ca_kabuli_chr07    | 16725171                       | [T/C]       | 1067302116                                 |
| Ca_Kabuli_NC_021166.1_16725180 | Ca_kabuli_chr07    | 16725180                       | [T/A]       | 1067302117                                 |
| Ca_Kabuli_NC_021166.1_16735401 | Ca_kabuli_chr07    | 16735401                       | [T/C]       | 1067302118                                 |
| Ca_Kabuli_NC_021166.1_16735433 | Ca_kabuli_chr07    | 16735433                       | [A/G]       | 1067302119                                 |
| Ca_Kabuli_NC_021166.1_16735437 | Ca_kabuli_chr07    | 16735437                       | [G/A]       | 1067302120                                 |
| Ca_Kabuli_NC_021166.1_16816263 | Ca_kabuli_chr07    | 16816263                       | [A/T]       | 1067302121                                 |
| Ca_Kabuli_NC_021166.1_16816276 | Ca_kabuli_chr07    | 16816276                       | [G/A]       | 1067302122                                 |
| Ca_Kabuli_NC_021166.1_16816277 | Ca_kabuli_chr07    | 16816277                       | [A/G]       | 1067302123                                 |
| Ca_Kabuli_NC_021166.1_16816308 | Ca_kabuli_chr07    | 16816308                       | [T/A]       | 1067302124                                 |
| Ca_Kabuli_NC_021166.1_16821331 | Ca_kabuli_chr07    | 16821331                       | [A/G]       | 1067302125                                 |
| Ca_Kabuli_NC_021166.1_16821335 | Ca_kabuli_chr07    | 16821335                       | [A/G]       | 1067302126                                 |
| Ca_Kabuli_NC_021166.1_16919612 | Ca_kabuli_chr07    | 16919612                       | [A/T]       | 1067302127                                 |
| Ca_Kabuli_NC_021166.1_16936123 | Ca_kabuli_chr07    | 16936123                       | [C/A]       | 1067302128                                 |

| <b>SNP IDs</b>                 | <b>Chromosomes</b> | <b>Physical positions (bp)</b> | <b>SNPs</b> | <b>NCBI SNPdb accession IDs (NCBI_ss#)</b> |
|--------------------------------|--------------------|--------------------------------|-------------|--------------------------------------------|
| Ca_Kabuli_NC_021166.1_16936124 | Ca_kabuli_chr07    | 16936124                       | [T/A]       | 1067302129                                 |
| Ca_Kabuli_NC_021166.1_16936139 | Ca_kabuli_chr07    | 16936139                       | [G/T]       | 1067302130                                 |
| Ca_Kabuli_NC_021166.1_17063559 | Ca_kabuli_chr07    | 17063559                       | [A/C]       | 1067302131                                 |
| Ca_Kabuli_NC_021166.1_17063560 | Ca_kabuli_chr07    | 17063560                       | [G/T]       | 1067302132                                 |
| Ca_Kabuli_NC_021166.1_17063561 | Ca_kabuli_chr07    | 17063561                       | [A/C]       | 1067302133                                 |
| Ca_Kabuli_NC_021166.1_17063562 | Ca_kabuli_chr07    | 17063562                       | [T/C]       | 1067302134                                 |
| Ca_Kabuli_NC_021166.1_17064935 | Ca_kabuli_chr07    | 17064935                       | [A/T]       | 1067302135                                 |
| Ca_Kabuli_NC_021166.1_17064945 | Ca_kabuli_chr07    | 17064945                       | [A/G]       | 1067302136                                 |
| Ca_Kabuli_NC_021166.1_17064989 | Ca_kabuli_chr07    | 17064989                       | [T/A]       | 1067302137                                 |
| Ca_Kabuli_NC_021166.1_17133036 | Ca_kabuli_chr07    | 17133036                       | [C/T]       | 1067302138                                 |
| Ca_Kabuli_NC_021166.1_17133041 | Ca_kabuli_chr07    | 17133041                       | [G/A]       | 1067302139                                 |
| Ca_Kabuli_NC_021166.1_17133042 | Ca_kabuli_chr07    | 17133042                       | [T/A]       | 1067302140                                 |
| Ca_Kabuli_NC_021166.1_17133046 | Ca_kabuli_chr07    | 17133046                       | [T/G]       | 1067302141                                 |
| Ca_Kabuli_NC_021166.1_17140656 | Ca_kabuli_chr07    | 17140656                       | [C/A]       | 1067302142                                 |
| Ca_Kabuli_NC_021166.1_17140659 | Ca_kabuli_chr07    | 17140659                       | [A/G]       | 1067302143                                 |
| Ca_Kabuli_NC_021166.1_17140682 | Ca_kabuli_chr07    | 17140682                       | [T/C]       | 1067302144                                 |
| Ca_Kabuli_NC_021166.1_17140684 | Ca_kabuli_chr07    | 17140684                       | [A/C]       | 1067302145                                 |
| Ca_Kabuli_NC_021166.1_17222165 | Ca_kabuli_chr07    | 17222165                       | [A/C]       | 1067302146                                 |
| Ca_Kabuli_NC_021166.1_17222192 | Ca_kabuli_chr07    | 17222192                       | [A/C]       | 1067302147                                 |
| Ca_Kabuli_NC_021166.1_17304408 | Ca_kabuli_chr07    | 17304408                       | [A/C]       | 1067302148                                 |
| Ca_Kabuli_NC_021166.1_17304409 | Ca_kabuli_chr07    | 17304409                       | [G/T]       | 1067302149                                 |
| Ca_Kabuli_NC_021166.1_17304410 | Ca_kabuli_chr07    | 17304410                       | [A/T]       | 1067302150                                 |
| Ca_Kabuli_NC_021166.1_17304411 | Ca_kabuli_chr07    | 17304411                       | [T/G]       | 1067302151                                 |
| Ca_Kabuli_NC_021166.1_17559707 | Ca_kabuli_chr07    | 17559707                       | [T/C]       | 1067302152                                 |
| Ca_Kabuli_NC_021166.1_17559753 | Ca_kabuli_chr07    | 17559753                       | [T/C]       | 1067302153                                 |
| Ca_Kabuli_NC_021166.1_17588267 | Ca_kabuli_chr07    | 17588267                       | [A/C]       | 1067302154                                 |
| Ca_Kabuli_NC_021166.1_17595584 | Ca_kabuli_chr07    | 17595584                       | [A/T]       | 1067302155                                 |
| Ca_Kabuli_NC_021166.1_17595590 | Ca_kabuli_chr07    | 17595590                       | [A/T]       | 1067302156                                 |
| Ca_Kabuli_NC_021166.1_17597367 | Ca_kabuli_chr07    | 17597367                       | [T/G]       | 1067302157                                 |
| Ca_Kabuli_NC_021166.1_17620142 | Ca_kabuli_chr07    | 17620142                       | [A/T]       | 1067302158                                 |
| Ca_Kabuli_NC_021166.1_17620146 | Ca_kabuli_chr07    | 17620146                       | [C/T]       | 1067302159                                 |
| Ca_Kabuli_NC_021166.1_17662183 | Ca_kabuli_chr07    | 17662183                       | [T/A]       | 1067302160                                 |
| Ca_Kabuli_NC_021166.1_17662190 | Ca_kabuli_chr07    | 17662190                       | [T/A]       | 1067302161                                 |
| Ca_Kabuli_NC_021166.1_17662191 | Ca_kabuli_chr07    | 17662191                       | [C/A]       | 1067302162                                 |

| <b>SNP IDs</b>                 | <b>Chromosomes</b> | <b>Physical positions (bp)</b> | <b>SNPs</b> | <b>NCBI SNPdb accession IDs (NCBI_ss#)</b> |
|--------------------------------|--------------------|--------------------------------|-------------|--------------------------------------------|
| Ca_Kabuli_NC_021166.1_17757808 | Ca_kabuli_chr07    | 17757808                       | [T/C]       | 1067302163                                 |
| Ca_Kabuli_NC_021166.1_17757852 | Ca_kabuli_chr07    | 17757852                       | [A/G]       | 1067302164                                 |
| Ca_Kabuli_NC_021166.1_17757870 | Ca_kabuli_chr07    | 17757870                       | [T/A]       | 1067302165                                 |
| Ca_Kabuli_NC_021166.1_17757872 | Ca_kabuli_chr07    | 17757872                       | [A/G]       | 1067302166                                 |
| Ca_Kabuli_NC_021166.1_17775266 | Ca_kabuli_chr07    | 17775266                       | [A/C]       | 1067302167                                 |
| Ca_Kabuli_NC_021166.1_17779388 | Ca_kabuli_chr07    | 17779388                       | [T/A]       | 1067302168                                 |
| Ca_Kabuli_NC_021166.1_17779398 | Ca_kabuli_chr07    | 17779398                       | [A/C]       | 1067302169                                 |
| Ca_Kabuli_NC_021166.1_17779575 | Ca_kabuli_chr07    | 17779575                       | [A/G]       | 1067302170                                 |
| Ca_Kabuli_NC_021166.1_17779594 | Ca_kabuli_chr07    | 17779594                       | [T/G]       | 1067302171                                 |
| Ca_Kabuli_NC_021166.1_17779720 | Ca_kabuli_chr07    | 17779720                       | [T/G]       | 1067302172                                 |
| Ca_Kabuli_NC_021166.1_17779746 | Ca_kabuli_chr07    | 17779746                       | [A/G]       | 1067302173                                 |
| Ca_Kabuli_NC_021166.1_17789596 | Ca_kabuli_chr07    | 17789596                       | [T/G]       | 1067302174                                 |
| Ca_Kabuli_NC_021166.1_17789599 | Ca_kabuli_chr07    | 17789599                       | [A/C]       | 1067302175                                 |
| Ca_Kabuli_NC_021166.1_17789611 | Ca_kabuli_chr07    | 17789611                       | [A/C]       | 1067302176                                 |
| Ca_Kabuli_NC_021166.1_17789612 | Ca_kabuli_chr07    | 17789612                       | [C/A]       | 1067302177                                 |
| Ca_Kabuli_NC_021166.1_17789624 | Ca_kabuli_chr07    | 17789624                       | [G/A]       | 1067302178                                 |
| Ca_Kabuli_NC_021166.1_17789644 | Ca_kabuli_chr07    | 17789644                       | [T/C]       | 1067302179                                 |
| Ca_Kabuli_NC_021166.1_17862656 | Ca_kabuli_chr07    | 17862656                       | [T/A]       | 1067302180                                 |
| Ca_Kabuli_NC_021166.1_17862658 | Ca_kabuli_chr07    | 17862658                       | [T/G]       | 1067302181                                 |
| Ca_Kabuli_NC_021166.1_17862691 | Ca_kabuli_chr07    | 17862691                       | [A/T]       | 1067302182                                 |
| Ca_Kabuli_NC_021166.1_17862696 | Ca_kabuli_chr07    | 17862696                       | [A/C]       | 1067302183                                 |
| Ca_Kabuli_NC_021166.1_18319022 | Ca_kabuli_chr07    | 18319022                       | [A/T]       | 1067302184                                 |
| Ca_Kabuli_NC_021166.1_18319824 | Ca_kabuli_chr07    | 18319824                       | [T/C]       | 1067302185                                 |
| Ca_Kabuli_NC_021166.1_18462652 | Ca_kabuli_chr07    | 18462652                       | [C/A]       | 1067302186                                 |
| Ca_Kabuli_NC_021166.1_18462653 | Ca_kabuli_chr07    | 18462653                       | [C/G]       | 1067302187                                 |
| Ca_Kabuli_NC_021166.1_18462654 | Ca_kabuli_chr07    | 18462654                       | [T/A]       | 1067302188                                 |
| Ca_Kabuli_NC_021166.1_18527968 | Ca_kabuli_chr07    | 18527968                       | [T/C]       | 1067302189                                 |
| Ca_Kabuli_NC_021166.1_18642417 | Ca_kabuli_chr07    | 18642417                       | [T/C]       | 1067302190                                 |
| Ca_Kabuli_NC_021166.1_18642486 | Ca_kabuli_chr07    | 18642486                       | [T/C]       | 1067302191                                 |
| Ca_Kabuli_NC_021166.1_18656219 | Ca_kabuli_chr07    | 18656219                       | [A/C]       | 1067302192                                 |
| Ca_Kabuli_NC_021166.1_18658595 | Ca_kabuli_chr07    | 18658595                       | [A/C]       | 1067302193                                 |
| Ca_Kabuli_NC_021166.1_18697880 | Ca_kabuli_chr07    | 18697880                       | [A/T]       | 1067302194                                 |
| Ca_Kabuli_NC_021166.1_18697881 | Ca_kabuli_chr07    | 18697881                       | [T/C]       | 1067302195                                 |
| Ca_Kabuli_NC_021166.1_18697882 | Ca_kabuli_chr07    | 18697882                       | [C/G]       | 1067302196                                 |

| <b>SNP IDs</b>                 | <b>Chromosomes</b> | <b>Physical positions (bp)</b> | <b>SNPs</b> | <b>NCBI SNPdb accession IDs (NCBI_ss#)</b> |
|--------------------------------|--------------------|--------------------------------|-------------|--------------------------------------------|
| Ca_Kabuli_NC_021166.1_18697883 | Ca_kabuli_chr07    | 18697883                       | [T/G]       | 1067302197                                 |
| Ca_Kabuli_NC_021166.1_18719807 | Ca_kabuli_chr07    | 18719807                       | [T/G]       | 1067302198                                 |
| Ca_Kabuli_NC_021166.1_18719820 | Ca_kabuli_chr07    | 18719820                       | [T/G]       | 1067302199                                 |
| Ca_Kabuli_NC_021166.1_18946700 | Ca_kabuli_chr07    | 18946700                       | [T/C]       | 1067302200                                 |
| Ca_Kabuli_NC_021166.1_18946748 | Ca_kabuli_chr07    | 18946748                       | [A/C]       | 1067302201                                 |
| Ca_Kabuli_NC_021166.1_18946792 | Ca_kabuli_chr07    | 18946792                       | [C/A]       | 1067302202                                 |
| Ca_Kabuli_NC_021166.1_19002735 | Ca_kabuli_chr07    | 19002735                       | [A/G]       | 1067302203                                 |
| Ca_Kabuli_NC_021166.1_19042218 | Ca_kabuli_chr07    | 19042218                       | [T/C]       | 1067302204                                 |
| Ca_Kabuli_NC_021166.1_19081722 | Ca_kabuli_chr07    | 19081722                       | [T/G]       | 1067302205                                 |
| Ca_Kabuli_NC_021166.1_19081724 | Ca_kabuli_chr07    | 19081724                       | [A/G]       | 1067302206                                 |
| Ca_Kabuli_NC_021166.1_19081728 | Ca_kabuli_chr07    | 19081728                       | [C/T]       | 1067302207                                 |
| Ca_Kabuli_NC_021166.1_19081731 | Ca_kabuli_chr07    | 19081731                       | [A/G]       | 1067302208                                 |
| Ca_Kabuli_NC_021166.1_19217473 | Ca_kabuli_chr07    | 19217473                       | [T/C]       | 1067302209                                 |
| Ca_Kabuli_NC_021166.1_19217496 | Ca_kabuli_chr07    | 19217496                       | [A/G]       | 1067302210                                 |
| Ca_Kabuli_NC_021166.1_19233130 | Ca_kabuli_chr07    | 19233130                       | [A/C]       | 1067302211                                 |
| Ca_Kabuli_NC_021166.1_19233146 | Ca_kabuli_chr07    | 19233146                       | [A/C]       | 1067302212                                 |
| Ca_Kabuli_NC_021166.1_19233153 | Ca_kabuli_chr07    | 19233153                       | [A/C]       | 1067302213                                 |
| Ca_Kabuli_NC_021166.1_19233163 | Ca_kabuli_chr07    | 19233163                       | [A/C]       | 1067302214                                 |
| Ca_Kabuli_NC_021166.1_19523982 | Ca_kabuli_chr07    | 19523982                       | [A/G]       | 1067302215                                 |
| Ca_Kabuli_NC_021166.1_19523991 | Ca_kabuli_chr07    | 19523991                       | [A/G]       | 1067302216                                 |
| Ca_Kabuli_NC_021166.1_19523996 | Ca_kabuli_chr07    | 19523996                       | [C/G]       | 1067302217                                 |
| Ca_Kabuli_NC_021166.1_19523999 | Ca_kabuli_chr07    | 19523999                       | [T/C]       | 1067302218                                 |
| Ca_Kabuli_NC_021166.1_19524001 | Ca_kabuli_chr07    | 19524001                       | [A/G]       | 1067302219                                 |
| Ca_Kabuli_NC_021166.1_19549600 | Ca_kabuli_chr07    | 19549600                       | [A/C]       | 1067302220                                 |
| Ca_Kabuli_NC_021166.1_19549678 | Ca_kabuli_chr07    | 19549678                       | [T/C]       | 1067302221                                 |
| Ca_Kabuli_NC_021166.1_19549690 | Ca_kabuli_chr07    | 19549690                       | [T/G]       | 1067302222                                 |
| Ca_Kabuli_NC_021166.1_19549713 | Ca_kabuli_chr07    | 19549713                       | [T/C]       | 1067302223                                 |
| Ca_Kabuli_NC_021166.1_19620340 | Ca_kabuli_chr07    | 19620340                       | [A/G]       | 1067302224                                 |
| Ca_Kabuli_NC_021166.1_19707901 | Ca_kabuli_chr07    | 19707901                       | [A/C]       | 1067302225                                 |
| Ca_Kabuli_NC_021166.1_19988607 | Ca_kabuli_chr07    | 19988607                       | [A/C]       | 1067302226                                 |
| Ca_Kabuli_NC_021166.1_19988626 | Ca_kabuli_chr07    | 19988626                       | [T/G]       | 1067302227                                 |
| Ca_Kabuli_NC_021166.1_20082879 | Ca_kabuli_chr07    | 20082879                       | [T/C]       | 1067302228                                 |
| Ca_Kabuli_NC_021166.1_20083015 | Ca_kabuli_chr07    | 20083015                       | [A/G]       | 1067302229                                 |
| Ca_Kabuli_NC_021166.1_20099351 | Ca_kabuli_chr07    | 20099351                       | [T/G]       | 1067302230                                 |

| <b>SNP IDs</b>                 | <b>Chromosomes</b> | <b>Physical positions (bp)</b> | <b>SNPs</b> | <b>NCBI SNPdb accession IDs (NCBI_ss#)</b> |
|--------------------------------|--------------------|--------------------------------|-------------|--------------------------------------------|
| Ca_Kabuli_NC_021166.1_20099357 | Ca_kabuli_chr07    | 20099357                       | [A/G]       | 1067302231                                 |
| Ca_Kabuli_NC_021166.1_20111036 | Ca_kabuli_chr07    | 20111036                       | [T/A]       | 1067302232                                 |
| Ca_Kabuli_NC_021166.1_20111132 | Ca_kabuli_chr07    | 20111132                       | [A/C]       | 1067302233                                 |
| Ca_Kabuli_NC_021166.1_20111151 | Ca_kabuli_chr07    | 20111151                       | [A/T]       | 1067302234                                 |
| Ca_Kabuli_NC_021166.1_20111175 | Ca_kabuli_chr07    | 20111175                       | [C/A]       | 1067302235                                 |
| Ca_Kabuli_NC_021166.1_20111213 | Ca_kabuli_chr07    | 20111213                       | [T/C]       | 1067302236                                 |
| Ca_Kabuli_NC_021166.1_20143920 | Ca_kabuli_chr07    | 20143920                       | [T/G]       | 1067302237                                 |
| Ca_Kabuli_NC_021166.1_20175675 | Ca_kabuli_chr07    | 20175675                       | [G/A]       | 1067302238                                 |
| Ca_Kabuli_NC_021166.1_20175676 | Ca_kabuli_chr07    | 20175676                       | [G/C]       | 1067302239                                 |
| Ca_Kabuli_NC_021166.1_20175680 | Ca_kabuli_chr07    | 20175680                       | [G/T]       | 1067302240                                 |
| Ca_Kabuli_NC_021166.1_20218289 | Ca_kabuli_chr07    | 20218289                       | [A/G]       | 1067302241                                 |
| Ca_Kabuli_NC_021166.1_20218300 | Ca_kabuli_chr07    | 20218300                       | [C/T]       | 1067302242                                 |
| Ca_Kabuli_NC_021166.1_20234537 | Ca_kabuli_chr07    | 20234537                       | [A/C]       | 1067302243                                 |
| Ca_Kabuli_NC_021166.1_20253424 | Ca_kabuli_chr07    | 20253424                       | [G/A]       | 1067302244                                 |
| Ca_Kabuli_NC_021166.1_20293669 | Ca_kabuli_chr07    | 20293669                       | [A/C]       | 1067302245                                 |
| Ca_Kabuli_NC_021166.1_20293736 | Ca_kabuli_chr07    | 20293736                       | [C/T]       | 1067302246                                 |
| Ca_Kabuli_NC_021166.1_20373645 | Ca_kabuli_chr07    | 20373645                       | [A/C]       | 1067302247                                 |
| Ca_Kabuli_NC_021166.1_20373656 | Ca_kabuli_chr07    | 20373656                       | [A/C]       | 1067302248                                 |
| Ca_Kabuli_NC_021166.1_20373666 | Ca_kabuli_chr07    | 20373666                       | [A/G]       | 1067302249                                 |
| Ca_Kabuli_NC_021166.1_20373673 | Ca_kabuli_chr07    | 20373673                       | [A/T]       | 1067302250                                 |
| Ca_Kabuli_NC_021166.1_20412700 | Ca_kabuli_chr07    | 20412700                       | [A/C]       | 1067302251                                 |
| Ca_Kabuli_NC_021166.1_20412701 | Ca_kabuli_chr07    | 20412701                       | [G/T]       | 1067302252                                 |
| Ca_Kabuli_NC_021166.1_20412702 | Ca_kabuli_chr07    | 20412702                       | [A/T]       | 1067302253                                 |
| Ca_Kabuli_NC_021166.1_20412703 | Ca_kabuli_chr07    | 20412703                       | [T/A]       | 1067302254                                 |
| Ca_Kabuli_NC_021166.1_20419509 | Ca_kabuli_chr07    | 20419509                       | [T/A]       | 1067302255                                 |
| Ca_Kabuli_NC_021166.1_20419524 | Ca_kabuli_chr07    | 20419524                       | [T/C]       | 1067302256                                 |
| Ca_Kabuli_NC_021166.1_20452200 | Ca_kabuli_chr07    | 20452200                       | [C/T]       | 1067302257                                 |
| Ca_Kabuli_NC_021166.1_20452201 | Ca_kabuli_chr07    | 20452201                       | [A/C]       | 1067302258                                 |
| Ca_Kabuli_NC_021166.1_20452202 | Ca_kabuli_chr07    | 20452202                       | [G/T]       | 1067302259                                 |
| Ca_Kabuli_NC_021166.1_20452278 | Ca_kabuli_chr07    | 20452278                       | [G/A]       | 1067302260                                 |
| Ca_Kabuli_NC_021166.1_20452457 | Ca_kabuli_chr07    | 20452457                       | [G/A]       | 1067302261                                 |
| Ca_Kabuli_NC_021166.1_20496072 | Ca_kabuli_chr07    | 20496072                       | [T/G]       | 1067302262                                 |
| Ca_Kabuli_NC_021166.1_20496104 | Ca_kabuli_chr07    | 20496104                       | [T/G]       | 1067302263                                 |
| Ca_Kabuli_NC_021166.1_20496303 | Ca_kabuli_chr07    | 20496303                       | [T/C]       | 1067302264                                 |

| <b>SNP IDs</b>                 | <b>Chromosomes</b> | <b>Physical positions (bp)</b> | <b>SNPs</b> | <b>NCBI SNPdb accession IDs (NCBI_ss#)</b> |
|--------------------------------|--------------------|--------------------------------|-------------|--------------------------------------------|
| Ca_Kabuli_NC_021166.1_20496319 | Ca_kabuli_chr07    | 20496319                       | [T/C]       | 1067302265                                 |
| Ca_Kabuli_NC_021166.1_20496320 | Ca_kabuli_chr07    | 20496320                       | [G/T]       | 1067302266                                 |
| Ca_Kabuli_NC_021166.1_20496405 | Ca_kabuli_chr07    | 20496405                       | [C/T]       | 1067302267                                 |
| Ca_Kabuli_NC_021166.1_20496421 | Ca_kabuli_chr07    | 20496421                       | [A/C]       | 1067302268                                 |
| Ca_Kabuli_NC_021166.1_20498552 | Ca_kabuli_chr07    | 20498552                       | [C/T]       | 1067302269                                 |
| Ca_Kabuli_NC_021166.1_20498626 | Ca_kabuli_chr07    | 20498626                       | [G/T]       | 1067302270                                 |
| Ca_Kabuli_NC_021166.1_20538485 | Ca_kabuli_chr07    | 20538485                       | [A/G]       | 1067302271                                 |
| Ca_Kabuli_NC_021166.1_20543112 | Ca_kabuli_chr07    | 20543112                       | [C/T]       | 1067302272                                 |
| Ca_Kabuli_NC_021166.1_20543119 | Ca_kabuli_chr07    | 20543119                       | [T/C]       | 1067302273                                 |
| Ca_Kabuli_NC_021166.1_20543181 | Ca_kabuli_chr07    | 20543181                       | [A/C]       | 1067302274                                 |
| Ca_Kabuli_NC_021166.1_20556466 | Ca_kabuli_chr07    | 20556466                       | [G/C]       | 1067302275                                 |
| Ca_Kabuli_NC_021166.1_20564024 | Ca_kabuli_chr07    | 20564024                       | [G/A]       | 1067302276                                 |
| Ca_Kabuli_NC_021166.1_20564088 | Ca_kabuli_chr07    | 20564088                       | [A/G]       | 1067302277                                 |
| Ca_Kabuli_NC_021166.1_20564297 | Ca_kabuli_chr07    | 20564297                       | [A/G]       | 1067302278                                 |
| Ca_Kabuli_NC_021166.1_20586113 | Ca_kabuli_chr07    | 20586113                       | [G/A]       | 1067302279                                 |
| Ca_Kabuli_NC_021166.1_20603334 | Ca_kabuli_chr07    | 20603334                       | [C/T]       | 1067302280                                 |
| Ca_Kabuli_NC_021166.1_20606378 | Ca_kabuli_chr07    | 20606378                       | [T/G]       | 1067302281                                 |
| Ca_Kabuli_NC_021166.1_20606383 | Ca_kabuli_chr07    | 20606383                       | [T/G]       | 1067302282                                 |
| Ca_Kabuli_NC_021166.1_20607926 | Ca_kabuli_chr07    | 20607926                       | [T/G]       | 1067302283                                 |
| Ca_Kabuli_NC_021166.1_20610549 | Ca_kabuli_chr07    | 20610549                       | [T/A]       | 1067302284                                 |
| Ca_Kabuli_NC_021166.1_20613547 | Ca_kabuli_chr07    | 20613547                       | [A/G]       | 1067302285                                 |
| Ca_Kabuli_NC_021166.1_20613718 | Ca_kabuli_chr07    | 20613718                       | [C/T]       | 1067302286                                 |
| Ca_Kabuli_NC_021166.1_20637257 | Ca_kabuli_chr07    | 20637257                       | [T/G]       | 1067302287                                 |
| Ca_Kabuli_NC_021166.1_20637361 | Ca_kabuli_chr07    | 20637361                       | [T/G]       | 1067302288                                 |
| Ca_Kabuli_NC_021166.1_20637373 | Ca_kabuli_chr07    | 20637373                       | [T/A]       | 1067302289                                 |
| Ca_Kabuli_NC_021166.1_20637410 | Ca_kabuli_chr07    | 20637410                       | [A/C]       | 1067302290                                 |
| Ca_Kabuli_NC_021166.1_20637431 | Ca_kabuli_chr07    | 20637431                       | [A/G]       | 1067302291                                 |
| Ca_Kabuli_NC_021166.1_20921484 | Ca_kabuli_chr07    | 20921484                       | [C/A]       | 1067302292                                 |
| Ca_Kabuli_NC_021166.1_20921497 | Ca_kabuli_chr07    | 20921497                       | [T/G]       | 1067302293                                 |
| Ca_Kabuli_NC_021166.1_20921517 | Ca_kabuli_chr07    | 20921517                       | [T/G]       | 1067302294                                 |
| Ca_Kabuli_NC_021166.1_20921527 | Ca_kabuli_chr07    | 20921527                       | [T/G]       | 1067302295                                 |
| Ca_Kabuli_NC_021166.1_20921532 | Ca_kabuli_chr07    | 20921532                       | [T/A]       | 1067302296                                 |
| Ca_Kabuli_NC_021166.1_21073366 | Ca_kabuli_chr07    | 21073366                       | [A/C]       | 1067302297                                 |
| Ca_Kabuli_NC_021166.1_21073385 | Ca_kabuli_chr07    | 21073385                       | [A/C]       | 1067302298                                 |

| <b>SNP IDs</b>                 | <b>Chromosomes</b> | <b>Physical positions (bp)</b> | <b>SNPs</b> | <b>NCBI SNPdb accession IDs (NCBI_ss#)</b> |
|--------------------------------|--------------------|--------------------------------|-------------|--------------------------------------------|
| Ca_Kabuli_NC_021166.1_21404133 | Ca_kabuli_chr07    | 21404133                       | [A/G]       | 1067302299                                 |
| Ca_Kabuli_NC_021166.1_21511596 | Ca_kabuli_chr07    | 21511596                       | [A/C]       | 1067302300                                 |
| Ca_Kabuli_NC_021166.1_21580134 | Ca_kabuli_chr07    | 21580134                       | [A/T]       | 1067302301                                 |
| Ca_Kabuli_NC_021166.1_21592597 | Ca_kabuli_chr07    | 21592597                       | [A/G]       | 1067302302                                 |
| Ca_Kabuli_NC_021166.1_21595473 | Ca_kabuli_chr07    | 21595473                       | [T/A]       | 1067302303                                 |
| Ca_Kabuli_NC_021166.1_21595478 | Ca_kabuli_chr07    | 21595478                       | [T/G]       | 1067302304                                 |
| Ca_Kabuli_NC_021166.1_21595491 | Ca_kabuli_chr07    | 21595491                       | [T/C]       | 1067302305                                 |
| Ca_Kabuli_NC_021166.1_21595499 | Ca_kabuli_chr07    | 21595499                       | [A/T]       | 1067302306                                 |
| Ca_Kabuli_NC_021166.1_21616285 | Ca_kabuli_chr07    | 21616285                       | [A/G]       | 1067302307                                 |
| Ca_Kabuli_NC_021166.1_21616287 | Ca_kabuli_chr07    | 21616287                       | [T/G]       | 1067302308                                 |
| Ca_Kabuli_NC_021166.1_21616294 | Ca_kabuli_chr07    | 21616294                       | [T/G]       | 1067302309                                 |
| Ca_Kabuli_NC_021166.1_21616296 | Ca_kabuli_chr07    | 21616296                       | [A/G]       | 1067302310                                 |
| Ca_Kabuli_NC_021166.1_21633183 | Ca_kabuli_chr07    | 21633183                       | [A/C]       | 1067302311                                 |
| Ca_Kabuli_NC_021166.1_21639234 | Ca_kabuli_chr07    | 21639234                       | [G/A]       | 1067302312                                 |
| Ca_Kabuli_NC_021166.1_21639238 | Ca_kabuli_chr07    | 21639238                       | [G/A]       | 1067302313                                 |
| Ca_Kabuli_NC_021166.1_21639241 | Ca_kabuli_chr07    | 21639241                       | [T/A]       | 1067302314                                 |
| Ca_Kabuli_NC_021166.1_21639244 | Ca_kabuli_chr07    | 21639244                       | [T/G]       | 1067302315                                 |
| Ca_Kabuli_NC_021166.1_21639347 | Ca_kabuli_chr07    | 21639347                       | [T/G]       | 1067302316                                 |
| Ca_Kabuli_NC_021166.1_21644319 | Ca_kabuli_chr07    | 21644319                       | [A/T]       | 1067302317                                 |
| Ca_Kabuli_NC_021166.1_21644342 | Ca_kabuli_chr07    | 21644342                       | [G/A]       | 1067302318                                 |
| Ca_Kabuli_NC_021166.1_21736778 | Ca_kabuli_chr07    | 21736778                       | [G/A]       | 1067302319                                 |
| Ca_Kabuli_NC_021166.1_21744514 | Ca_kabuli_chr07    | 21744514                       | [T/C]       | 1067302320                                 |
| Ca_Kabuli_NC_021166.1_21809119 | Ca_kabuli_chr07    | 21809119                       | [C/A]       | 1067302321                                 |
| Ca_Kabuli_NC_021166.1_21809120 | Ca_kabuli_chr07    | 21809120                       | [A/G]       | 1067302322                                 |
| Ca_Kabuli_NC_021166.1_21814575 | Ca_kabuli_chr07    | 21814575                       | [C/A]       | 1067302323                                 |
| Ca_Kabuli_NC_021166.1_21814576 | Ca_kabuli_chr07    | 21814576                       | [A/G]       | 1067302324                                 |
| Ca_Kabuli_NC_021166.1_21814577 | Ca_kabuli_chr07    | 21814577                       | [T/A]       | 1067302325                                 |
| Ca_Kabuli_NC_021166.1_21814578 | Ca_kabuli_chr07    | 21814578                       | [G/T]       | 1067302326                                 |
| Ca_Kabuli_NC_021166.1_21814580 | Ca_kabuli_chr07    | 21814580                       | [C/G]       | 1067302327                                 |
| Ca_Kabuli_NC_021166.1_22236552 | Ca_kabuli_chr07    | 22236552                       | [A/C]       | 1067302328                                 |
| Ca_Kabuli_NC_021166.1_22496764 | Ca_kabuli_chr07    | 22496764                       | [C/A]       | 1067302329                                 |
| Ca_Kabuli_NC_021166.1_22707313 | Ca_kabuli_chr07    | 22707313                       | [G/A]       | 1067302330                                 |
| Ca_Kabuli_NC_021166.1_22707344 | Ca_kabuli_chr07    | 22707344                       | [T/C]       | 1067302331                                 |
| Ca_Kabuli_NC_021166.1_22721398 | Ca_kabuli_chr07    | 22721398                       | [T/G]       | 1067302332                                 |

| <b>SNP IDs</b>                 | <b>Chromosomes</b> | <b>Physical positions (bp)</b> | <b>SNPs</b> | <b>NCBI SNPdb accession IDs (NCBI_ss#)</b> |
|--------------------------------|--------------------|--------------------------------|-------------|--------------------------------------------|
| Ca_Kabuli_NC_021166.1_22723179 | Ca_kabuli_chr07    | 22723179                       | [A/T]       | 1067302333                                 |
| Ca_Kabuli_NC_021166.1_22731265 | Ca_kabuli_chr07    | 22731265                       | [T/A]       | 1067302334                                 |
| Ca_Kabuli_NC_021166.1_22731293 | Ca_kabuli_chr07    | 22731293                       | [T/G]       | 1067302335                                 |
| Ca_Kabuli_NC_021166.1_22731322 | Ca_kabuli_chr07    | 22731322                       | [A/G]       | 1067302336                                 |
| Ca_Kabuli_NC_021166.1_22731364 | Ca_kabuli_chr07    | 22731364                       | [T/C]       | 1067302337                                 |
| Ca_Kabuli_NC_021166.1_22731388 | Ca_kabuli_chr07    | 22731388                       | [T/C]       | 1067302338                                 |
| Ca_Kabuli_NC_021166.1_22731398 | Ca_kabuli_chr07    | 22731398                       | [A/G]       | 1067302339                                 |
| Ca_Kabuli_NC_021166.1_22731403 | Ca_kabuli_chr07    | 22731403                       | [A/G]       | 1067302340                                 |
| Ca_Kabuli_NC_021166.1_22731410 | Ca_kabuli_chr07    | 22731410                       | [A/G]       | 1067302341                                 |
| Ca_Kabuli_NC_021166.1_22731413 | Ca_kabuli_chr07    | 22731413                       | [A/G]       | 1067302342                                 |
| Ca_Kabuli_NC_021166.1_22750211 | Ca_kabuli_chr07    | 22750211                       | [T/A]       | 1067302343                                 |
| Ca_Kabuli_NC_021166.1_22750241 | Ca_kabuli_chr07    | 22750241                       | [T/G]       | 1067302344                                 |
| Ca_Kabuli_NC_021166.1_22750264 | Ca_kabuli_chr07    | 22750264                       | [T/G]       | 1067302345                                 |
| Ca_Kabuli_NC_021166.1_22750348 | Ca_kabuli_chr07    | 22750348                       | [A/G]       | 1067302346                                 |
| Ca_Kabuli_NC_021166.1_22803876 | Ca_kabuli_chr07    | 22803876                       | [C/A]       | 1067302347                                 |
| Ca_Kabuli_NC_021166.1_22803877 | Ca_kabuli_chr07    | 22803877                       | [C/T]       | 1067302348                                 |
| Ca_Kabuli_NC_021166.1_22803878 | Ca_kabuli_chr07    | 22803878                       | [G/C]       | 1067302349                                 |
| Ca_Kabuli_NC_021166.1_22803879 | Ca_kabuli_chr07    | 22803879                       | [G/T]       | 1067302350                                 |
| Ca_Kabuli_NC_021166.1_22839776 | Ca_kabuli_chr07    | 22839776                       | [G/A]       | 1067302351                                 |
| Ca_Kabuli_NC_021166.1_22893125 | Ca_kabuli_chr07    | 22893125                       | [T/C]       | 1067302352                                 |
| Ca_Kabuli_NC_021166.1_22893135 | Ca_kabuli_chr07    | 22893135                       | [T/C]       | 1067302353                                 |
| Ca_Kabuli_NC_021166.1_22893191 | Ca_kabuli_chr07    | 22893191                       | [A/G]       | 1067302354                                 |
| Ca_Kabuli_NC_021166.1_22958199 | Ca_kabuli_chr07    | 22958199                       | [G/A]       | 1067302355                                 |
| Ca_Kabuli_NC_021166.1_22987819 | Ca_kabuli_chr07    | 22987819                       | [A/G]       | 1067302356                                 |
| Ca_Kabuli_NC_021166.1_22987832 | Ca_kabuli_chr07    | 22987832                       | [G/C]       | 1067302357                                 |
| Ca_Kabuli_NC_021166.1_22987838 | Ca_kabuli_chr07    | 22987838                       | [A/G]       | 1067302358                                 |
| Ca_Kabuli_NC_021166.1_23103084 | Ca_kabuli_chr07    | 23103084                       | [C/T]       | 1067302359                                 |
| Ca_Kabuli_NC_021166.1_23115511 | Ca_kabuli_chr07    | 23115511                       | [T/C]       | 1067302360                                 |
| Ca_Kabuli_NC_021166.1_23115575 | Ca_kabuli_chr07    | 23115575                       | [A/C]       | 1067302361                                 |
| Ca_Kabuli_NC_021166.1_23439178 | Ca_kabuli_chr07    | 23439178                       | [A/C]       | 1067302362                                 |
| Ca_Kabuli_NC_021166.1_23439199 | Ca_kabuli_chr07    | 23439199                       | [A/C]       | 1067302363                                 |
| Ca_Kabuli_NC_021166.1_23574181 | Ca_kabuli_chr07    | 23574181                       | [C/T]       | 1067302364                                 |
| Ca_Kabuli_NC_021166.1_23574187 | Ca_kabuli_chr07    | 23574187                       | [T/C]       | 1067302365                                 |
| Ca_Kabuli_NC_021166.1_23574823 | Ca_kabuli_chr07    | 23574823                       | [C/T]       | 1067302366                                 |



| <b>SNP IDs</b>                 | <b>Chromosomes</b> | <b>Physical positions (bp)</b> | <b>SNPs</b> | <b>NCBI SNPdb accession IDs (NCBI_ss#)</b> |
|--------------------------------|--------------------|--------------------------------|-------------|--------------------------------------------|
| Ca_Kabuli_NC_021166.1_23575633 | Ca_kabuli_chr07    | 23575633                       | [T/G]       | 1067302367                                 |
| Ca_Kabuli_NC_021166.1_23615942 | Ca_kabuli_chr07    | 23615942                       | [T/G]       | 1067302368                                 |
| Ca_Kabuli_NC_021166.1_23615944 | Ca_kabuli_chr07    | 23615944                       | [T/C]       | 1067302369                                 |
| Ca_Kabuli_NC_021166.1_23615946 | Ca_kabuli_chr07    | 23615946                       | [T/C]       | 1067302370                                 |
| Ca_Kabuli_NC_021166.1_23615960 | Ca_kabuli_chr07    | 23615960                       | [A/G]       | 1067302371                                 |
| Ca_Kabuli_NC_021166.1_23615984 | Ca_kabuli_chr07    | 23615984                       | [A/G]       | 1067302372                                 |
| Ca_Kabuli_NC_021166.1_23616003 | Ca_kabuli_chr07    | 23616003                       | [A/G]       | 1067302373                                 |
| Ca_Kabuli_NC_021166.1_23616014 | Ca_kabuli_chr07    | 23616014                       | [A/G]       | 1067302374                                 |
| Ca_Kabuli_NC_021166.1_23616063 | Ca_kabuli_chr07    | 23616063                       | [A/T]       | 1067302375                                 |
| Ca_Kabuli_NC_021166.1_23664610 | Ca_kabuli_chr07    | 23664610                       | [A/C]       | 1067302376                                 |
| Ca_Kabuli_NC_021166.1_23664646 | Ca_kabuli_chr07    | 23664646                       | [G/T]       | 1067302377                                 |
| Ca_Kabuli_NC_021166.1_24021658 | Ca_kabuli_chr07    | 24021658                       | [T/C]       | 1067302378                                 |
| Ca_Kabuli_NC_021166.1_24021667 | Ca_kabuli_chr07    | 24021667                       | [T/G]       | 1067302379                                 |
| Ca_Kabuli_NC_021166.1_24021683 | Ca_kabuli_chr07    | 24021683                       | [G/A]       | 1067302380                                 |
| Ca_Kabuli_NC_021166.1_24021690 | Ca_kabuli_chr07    | 24021690                       | [T/G]       | 1067302381                                 |
| Ca_Kabuli_NC_021166.1_24021691 | Ca_kabuli_chr07    | 24021691                       | [T/C]       | 1067302382                                 |
| Ca_Kabuli_NC_021166.1_24181315 | Ca_kabuli_chr07    | 24181315                       | [A/G]       | 1067302383                                 |
| Ca_Kabuli_NC_021166.1_24181322 | Ca_kabuli_chr07    | 24181322                       | [C/A]       | 1067302384                                 |
| Ca_Kabuli_NC_021166.1_24181331 | Ca_kabuli_chr07    | 24181331                       | [T/C]       | 1067302385                                 |
| Ca_Kabuli_NC_021166.1_24181341 | Ca_kabuli_chr07    | 24181341                       | [T/G]       | 1067302386                                 |
| Ca_Kabuli_NC_021166.1_24415813 | Ca_kabuli_chr07    | 24415813                       | [T/A]       | 1067302387                                 |
| Ca_Kabuli_NC_021166.1_24415854 | Ca_kabuli_chr07    | 24415854                       | [A/G]       | 1067302388                                 |
| Ca_Kabuli_NC_021166.1_24415873 | Ca_kabuli_chr07    | 24415873                       | [A/G]       | 1067302389                                 |
| Ca_Kabuli_NC_021166.1_24415895 | Ca_kabuli_chr07    | 24415895                       | [A/T]       | 1067302390                                 |
| Ca_Kabuli_NC_021166.1_24543018 | Ca_kabuli_chr07    | 24543018                       | [A/T]       | 1067302391                                 |
| Ca_Kabuli_NC_021166.1_24543026 | Ca_kabuli_chr07    | 24543026                       | [G/C]       | 1067302392                                 |
| Ca_Kabuli_NC_021166.1_24543030 | Ca_kabuli_chr07    | 24543030                       | [A/G]       | 1067302393                                 |
| Ca_Kabuli_NC_021166.1_24544547 | Ca_kabuli_chr07    | 24544547                       | [T/C]       | 1067302394                                 |
| Ca_Kabuli_NC_021166.1_24544567 | Ca_kabuli_chr07    | 24544567                       | [A/C]       | 1067302395                                 |
| Ca_Kabuli_NC_021166.1_24882282 | Ca_kabuli_chr07    | 24882282                       | [A/G]       | 1067302396                                 |
| Ca_Kabuli_NC_021166.1_24882332 | Ca_kabuli_chr07    | 24882332                       | [T/A]       | 1067302397                                 |
| Ca_Kabuli_NC_021166.1_25194703 | Ca_kabuli_chr07    | 25194703                       | [T/A]       | 1067302398                                 |
| Ca_Kabuli_NC_021166.1_25218318 | Ca_kabuli_chr07    | 25218318                       | [A/C]       | 1067302399                                 |
| Ca_Kabuli_NC_021166.1_25218387 | Ca_kabuli_chr07    | 25218387                       | [A/C]       | 1067302400                                 |

| <b>SNP IDs</b>                 | <b>Chromosomes</b> | <b>Physical positions (bp)</b> | <b>SNPs</b> | <b>NCBI SNPdb accession IDs (NCBI_ss#)</b> |
|--------------------------------|--------------------|--------------------------------|-------------|--------------------------------------------|
| Ca_Kabuli_NC_021166.1_25304081 | Ca_kabuli_chr07    | 25304081                       | [G/C]       | 1067302401                                 |
| Ca_Kabuli_NC_021166.1_25428660 | Ca_kabuli_chr07    | 25428660                       | [G/A]       | 1067302402                                 |
| Ca_Kabuli_NC_021166.1_25581054 | Ca_kabuli_chr07    | 25581054                       | [A/G]       | 1067302403                                 |
| Ca_Kabuli_NC_021166.1_25581056 | Ca_kabuli_chr07    | 25581056                       | [A/C]       | 1067302404                                 |
| Ca_Kabuli_NC_021166.1_26144164 | Ca_kabuli_chr07    | 26144164                       | [T/C]       | 1067302405                                 |
| Ca_Kabuli_NC_021166.1_26144172 | Ca_kabuli_chr07    | 26144172                       | [T/C]       | 1067302406                                 |
| Ca_Kabuli_NC_021166.1_26149441 | Ca_kabuli_chr07    | 26149441                       | [A/C]       | 1067302407                                 |
| Ca_Kabuli_NC_021166.1_26149451 | Ca_kabuli_chr07    | 26149451                       | [A/C]       | 1067302408                                 |
| Ca_Kabuli_NC_021166.1_26161030 | Ca_kabuli_chr07    | 26161030                       | [C/T]       | 1067302409                                 |
| Ca_Kabuli_NC_021166.1_26226146 | Ca_kabuli_chr07    | 26226146                       | [C/G]       | 1067302410                                 |
| Ca_Kabuli_NC_021166.1_26226151 | Ca_kabuli_chr07    | 26226151                       | [T/C]       | 1067302411                                 |
| Ca_Kabuli_NC_021166.1_26226177 | Ca_kabuli_chr07    | 26226177                       | [T/A]       | 1067302412                                 |
| Ca_Kabuli_NC_021166.1_26580139 | Ca_kabuli_chr07    | 26580139                       | [A/C]       | 1067302413                                 |
| Ca_Kabuli_NC_021166.1_26692131 | Ca_kabuli_chr07    | 26692131                       | [T/C]       | 1067302414                                 |
| Ca_Kabuli_NC_021166.1_26692194 | Ca_kabuli_chr07    | 26692194                       | [A/T]       | 1067302415                                 |
| Ca_Kabuli_NC_021166.1_26692195 | Ca_kabuli_chr07    | 26692195                       | [G/C]       | 1067302416                                 |
| Ca_Kabuli_NC_021166.1_26694546 | Ca_kabuli_chr07    | 26694546                       | [T/A]       | 1067302417                                 |
| Ca_Kabuli_NC_021166.1_26700368 | Ca_kabuli_chr07    | 26700368                       | [A/G]       | 1067302418                                 |
| Ca_Kabuli_NC_021166.1_26700373 | Ca_kabuli_chr07    | 26700373                       | [C/T]       | 1067302419                                 |
| Ca_Kabuli_NC_021166.1_26701540 | Ca_kabuli_chr07    | 26701540                       | [T/G]       | 1067302420                                 |
| Ca_Kabuli_NC_021166.1_26701552 | Ca_kabuli_chr07    | 26701552                       | [G/A]       | 1067302421                                 |
| Ca_Kabuli_NC_021166.1_26701557 | Ca_kabuli_chr07    | 26701557                       | [A/T]       | 1067302422                                 |
| Ca_Kabuli_NC_021166.1_26701563 | Ca_kabuli_chr07    | 26701563                       | [A/T]       | 1067302423                                 |
| Ca_Kabuli_NC_021166.1_26701573 | Ca_kabuli_chr07    | 26701573                       | [G/C]       | 1067302424                                 |
| Ca_Kabuli_NC_021166.1_26701603 | Ca_kabuli_chr07    | 26701603                       | [A/C]       | 1067302425                                 |
| Ca_Kabuli_NC_021166.1_26701625 | Ca_kabuli_chr07    | 26701625                       | [A/C]       | 1067302426                                 |
| Ca_Kabuli_NC_021166.1_26701628 | Ca_kabuli_chr07    | 26701628                       | [A/G]       | 1067302427                                 |
| Ca_Kabuli_NC_021166.1_26701643 | Ca_kabuli_chr07    | 26701643                       | [T/G]       | 1067302428                                 |
| Ca_Kabuli_NC_021166.1_26761639 | Ca_kabuli_chr07    | 26761639                       | [A/T]       | 1067302429                                 |
| Ca_Kabuli_NC_021166.1_26882849 | Ca_kabuli_chr07    | 26882849                       | [T/C]       | 1067302430                                 |
| Ca_Kabuli_NC_021166.1_26940696 | Ca_kabuli_chr07    | 26940696                       | [T/A]       | 1067302431                                 |
| Ca_Kabuli_NC_021166.1_26940789 | Ca_kabuli_chr07    | 26940789                       | [A/G]       | 1067302432                                 |
| Ca_Kabuli_NC_021166.1_26940817 | Ca_kabuli_chr07    | 26940817                       | [T/C]       | 1067302433                                 |
| Ca_Kabuli_NC_021166.1_26940823 | Ca_kabuli_chr07    | 26940823                       | [A/G]       | 1067302434                                 |

| <b>SNP IDs</b>                 | <b>Chromosomes</b> | <b>Physical positions (bp)</b> | <b>SNPs</b> | <b>NCBI SNPdb accession IDs (NCBI_ss#)</b> |
|--------------------------------|--------------------|--------------------------------|-------------|--------------------------------------------|
| Ca_Kabuli_NC_021166.1_26940829 | Ca_kabuli_chr07    | 26940829                       | [T/G]       | 1067302435                                 |
| Ca_Kabuli_NC_021166.1_26940859 | Ca_kabuli_chr07    | 26940859                       | [A/T]       | 1067302436                                 |
| Ca_Kabuli_NC_021166.1_26940896 | Ca_kabuli_chr07    | 26940896                       | [G/A]       | 1067302437                                 |
| Ca_Kabuli_NC_021166.1_26940934 | Ca_kabuli_chr07    | 26940934                       | [A/G]       | 1067302438                                 |
| Ca_Kabuli_NC_021166.1_26940939 | Ca_kabuli_chr07    | 26940939                       | [T/G]       | 1067302439                                 |
| Ca_Kabuli_NC_021166.1_26940955 | Ca_kabuli_chr07    | 26940955                       | [T/G]       | 1067302440                                 |
| Ca_Kabuli_NC_021166.1_27051386 | Ca_kabuli_chr07    | 27051386                       | [T/C]       | 1067302441                                 |
| Ca_Kabuli_NC_021166.1_27051399 | Ca_kabuli_chr07    | 27051399                       | [A/G]       | 1067302442                                 |
| Ca_Kabuli_NC_021166.1_27051410 | Ca_kabuli_chr07    | 27051410                       | [T/G]       | 1067302443                                 |
| Ca_Kabuli_NC_021166.1_27051446 | Ca_kabuli_chr07    | 27051446                       | [A/G]       | 1067302444                                 |
| Ca_Kabuli_NC_021166.1_27051468 | Ca_kabuli_chr07    | 27051468                       | [A/C]       | 1067302445                                 |
| Ca_Kabuli_NC_021166.1_27051760 | Ca_kabuli_chr07    | 27051760                       | [A/C]       | 1067302446                                 |
| Ca_Kabuli_NC_021166.1_27070626 | Ca_kabuli_chr07    | 27070626                       | [G/C]       | 1067302447                                 |
| Ca_Kabuli_NC_021166.1_27070630 | Ca_kabuli_chr07    | 27070630                       | [A/C]       | 1067302448                                 |
| Ca_Kabuli_NC_021166.1_27070632 | Ca_kabuli_chr07    | 27070632                       | [G/T]       | 1067302449                                 |
| Ca_Kabuli_NC_021166.1_27070635 | Ca_kabuli_chr07    | 27070635                       | [A/G]       | 1067302450                                 |
| Ca_Kabuli_NC_021166.1_27157236 | Ca_kabuli_chr07    | 27157236                       | [C/A]       | 1067302451                                 |
| Ca_Kabuli_NC_021166.1_27176416 | Ca_kabuli_chr07    | 27176416                       | [T/C]       | 1067302452                                 |
| Ca_Kabuli_NC_021166.1_27210871 | Ca_kabuli_chr07    | 27210871                       | [C/A]       | 1067302453                                 |
| Ca_Kabuli_NC_021166.1_27210881 | Ca_kabuli_chr07    | 27210881                       | [C/T]       | 1067302454                                 |
| Ca_Kabuli_NC_021166.1_27210894 | Ca_kabuli_chr07    | 27210894                       | [T/C]       | 1067302455                                 |
| Ca_Kabuli_NC_021166.1_27210919 | Ca_kabuli_chr07    | 27210919                       | [C/T]       | 1067302456                                 |
| Ca_Kabuli_NC_021166.1_27350854 | Ca_kabuli_chr07    | 27350854                       | [T/A]       | 1067302457                                 |
| Ca_Kabuli_NC_021166.1_27419275 | Ca_kabuli_chr07    | 27419275                       | [A/C]       | 1067302458                                 |
| Ca_Kabuli_NC_021166.1_27419283 | Ca_kabuli_chr07    | 27419283                       | [A/G]       | 1067302459                                 |
| Ca_Kabuli_NC_021166.1_27420157 | Ca_kabuli_chr07    | 27420157                       | [T/A]       | 1067302460                                 |
| Ca_Kabuli_NC_021166.1_27633716 | Ca_kabuli_chr07    | 27633716                       | [A/G]       | 1067302461                                 |
| Ca_Kabuli_NC_021166.1_27633725 | Ca_kabuli_chr07    | 27633725                       | [A/G]       | 1067302462                                 |
| Ca_Kabuli_NC_021166.1_27633730 | Ca_kabuli_chr07    | 27633730                       | [T/C]       | 1067302463                                 |
| Ca_Kabuli_NC_021166.1_27633762 | Ca_kabuli_chr07    | 27633762                       | [T/G]       | 1067302464                                 |
| Ca_Kabuli_NC_021166.1_27633888 | Ca_kabuli_chr07    | 27633888                       | [T/C]       | 1067302465                                 |
| Ca_Kabuli_NC_021166.1_27869721 | Ca_kabuli_chr07    | 27869721                       | [A/C]       | 1067302466                                 |
| Ca_Kabuli_NC_021166.1_28343865 | Ca_kabuli_chr07    | 28343865                       | [T/C]       | 1067302467                                 |
| Ca_Kabuli_NC_021166.1_28442530 | Ca_kabuli_chr07    | 28442530                       | [T/G]       | 1067302468                                 |

| <b>SNP IDs</b>                 | <b>Chromosomes</b> | <b>Physical positions (bp)</b> | <b>SNPs</b> | <b>NCBI SNPdb accession IDs (NCBI_ss#)</b> |
|--------------------------------|--------------------|--------------------------------|-------------|--------------------------------------------|
| Ca_Kabuli_NC_021166.1_28442542 | Ca_kabuli_chr07    | 28442542                       | [T/G]       | 1067302469                                 |
| Ca_Kabuli_NC_021166.1_28442557 | Ca_kabuli_chr07    | 28442557                       | [T/A]       | 1067302470                                 |
| Ca_Kabuli_NC_021166.1_28442628 | Ca_kabuli_chr07    | 28442628                       | [T/C]       | 1067302471                                 |
| Ca_Kabuli_NC_021166.1_28443148 | Ca_kabuli_chr07    | 28443148                       | [A/C]       | 1067302472                                 |
| Ca_Kabuli_NC_021166.1_28443153 | Ca_kabuli_chr07    | 28443153                       | [A/C]       | 1067302473                                 |
| Ca_Kabuli_NC_021166.1_28467688 | Ca_kabuli_chr07    | 28467688                       | [G/T]       | 1067302474                                 |
| Ca_Kabuli_NC_021166.1_28520385 | Ca_kabuli_chr07    | 28520385                       | [A/C]       | 1067302475                                 |
| Ca_Kabuli_NC_021166.1_28549319 | Ca_kabuli_chr07    | 28549319                       | [T/G]       | 1067302476                                 |
| Ca_Kabuli_NC_021166.1_28577904 | Ca_kabuli_chr07    | 28577904                       | [A/C]       | 1067302477                                 |
| Ca_Kabuli_NC_021166.1_28598478 | Ca_kabuli_chr07    | 28598478                       | [T/G]       | 1067302478                                 |
| Ca_Kabuli_NC_021166.1_28613958 | Ca_kabuli_chr07    | 28613958                       | [A/T]       | 1067302479                                 |
| Ca_Kabuli_NC_021166.1_28620851 | Ca_kabuli_chr07    | 28620851                       | [C/T]       | 1067302480                                 |
| Ca_Kabuli_NC_021166.1_28655421 | Ca_kabuli_chr07    | 28655421                       | [T/C]       | 1067302481                                 |
| Ca_Kabuli_NC_021166.1_28675595 | Ca_kabuli_chr07    | 28675595                       | [A/T]       | 1067302482                                 |
| Ca_Kabuli_NC_021166.1_28931206 | Ca_kabuli_chr07    | 28931206                       | [A/C]       | 1067302483                                 |
| Ca_Kabuli_NC_021166.1_28931222 | Ca_kabuli_chr07    | 28931222                       | [T/A]       | 1067302484                                 |
| Ca_Kabuli_NC_021166.1_28931223 | Ca_kabuli_chr07    | 28931223                       | [C/A]       | 1067302485                                 |
| Ca_Kabuli_NC_021166.1_28931229 | Ca_kabuli_chr07    | 28931229                       | [C/G]       | 1067302486                                 |
| Ca_Kabuli_NC_021166.1_29109721 | Ca_kabuli_chr07    | 29109721                       | [A/C]       | 1067302487                                 |
| Ca_Kabuli_NC_021166.1_29139477 | Ca_kabuli_chr07    | 29139477                       | [T/C]       | 1067302488                                 |
| Ca_Kabuli_NC_021166.1_29139673 | Ca_kabuli_chr07    | 29139673                       | [A/G]       | 1067302489                                 |
| Ca_Kabuli_NC_021166.1_29139691 | Ca_kabuli_chr07    | 29139691                       | [T/G]       | 1067302490                                 |
| Ca_Kabuli_NC_021166.1_29148371 | Ca_kabuli_chr07    | 29148371                       | [A/C]       | 1067302491                                 |
| Ca_Kabuli_NC_021166.1_29148373 | Ca_kabuli_chr07    | 29148373                       | [C/G]       | 1067302492                                 |
| Ca_Kabuli_NC_021166.1_29150904 | Ca_kabuli_chr07    | 29150904                       | [T/G]       | 1067302493                                 |
| Ca_Kabuli_NC_021166.1_29153971 | Ca_kabuli_chr07    | 29153971                       | [A/G]       | 1067302494                                 |
| Ca_Kabuli_NC_021166.1_29154016 | Ca_kabuli_chr07    | 29154016                       | [C/T]       | 1067302495                                 |
| Ca_Kabuli_NC_021166.1_29154032 | Ca_kabuli_chr07    | 29154032                       | [T/A]       | 1067302496                                 |
| Ca_Kabuli_NC_021166.1_29190642 | Ca_kabuli_chr07    | 29190642                       | [C/T]       | 1067302497                                 |
| Ca_Kabuli_NC_021166.1_29190643 | Ca_kabuli_chr07    | 29190643                       | [C/T]       | 1067302498                                 |
| Ca_Kabuli_NC_021166.1_29190657 | Ca_kabuli_chr07    | 29190657                       | [T/C]       | 1067302499                                 |
| Ca_Kabuli_NC_021166.1_29190693 | Ca_kabuli_chr07    | 29190693                       | [T/C]       | 1067302500                                 |
| Ca_Kabuli_NC_021166.1_29190702 | Ca_kabuli_chr07    | 29190702                       | [T/A]       | 1067302501                                 |
| Ca_Kabuli_NC_021166.1_29221789 | Ca_kabuli_chr07    | 29221789                       | [T/C]       | 1067302502                                 |

| <b>SNP IDs</b>                 | <b>Chromosomes</b> | <b>Physical positions (bp)</b> | <b>SNPs</b> | <b>NCBI SNPdb accession IDs (NCBI_ss#)</b> |
|--------------------------------|--------------------|--------------------------------|-------------|--------------------------------------------|
| Ca_Kabuli_NC_021166.1_29223788 | Ca_kabuli_chr07    | 29223788                       | [A/T]       | 1067302503                                 |
| Ca_Kabuli_NC_021166.1_29225395 | Ca_kabuli_chr07    | 29225395                       | [T/C]       | 1067302504                                 |
| Ca_Kabuli_NC_021166.1_29313239 | Ca_kabuli_chr07    | 29313239                       | [C/T]       | 1067302505                                 |
| Ca_Kabuli_NC_021166.1_29313273 | Ca_kabuli_chr07    | 29313273                       | [G/A]       | 1067302506                                 |
| Ca_Kabuli_NC_021166.1_29313283 | Ca_kabuli_chr07    | 29313283                       | [T/C]       | 1067302507                                 |
| Ca_Kabuli_NC_021166.1_29473962 | Ca_kabuli_chr07    | 29473962                       | [T/G]       | 1067302508                                 |
| Ca_Kabuli_NC_021166.1_29796495 | Ca_kabuli_chr07    | 29796495                       | [T/G]       | 1067302509                                 |
| Ca_Kabuli_NC_021166.1_29798563 | Ca_kabuli_chr07    | 29798563                       | [A/G]       | 1067302510                                 |
| Ca_Kabuli_NC_021166.1_29837039 | Ca_kabuli_chr07    | 29837039                       | [T/G]       | 1067302511                                 |
| Ca_Kabuli_NC_021166.1_29841758 | Ca_kabuli_chr07    | 29841758                       | [A/G]       | 1067302512                                 |
| Ca_Kabuli_NC_021166.1_29848397 | Ca_kabuli_chr07    | 29848397                       | [T/G]       | 1067302513                                 |
| Ca_Kabuli_NC_021166.1_29849514 | Ca_kabuli_chr07    | 29849514                       | [A/C]       | 1067302514                                 |
| Ca_Kabuli_NC_021166.1_29884734 | Ca_kabuli_chr07    | 29884734                       | [T/C]       | 1067302515                                 |
| Ca_Kabuli_NC_021166.1_29884758 | Ca_kabuli_chr07    | 29884758                       | [T/C]       | 1067302516                                 |
| Ca_Kabuli_NC_021166.1_29884785 | Ca_kabuli_chr07    | 29884785                       | [A/G]       | 1067302517                                 |
| Ca_Kabuli_NC_021166.1_29884788 | Ca_kabuli_chr07    | 29884788                       | [A/T]       | 1067302518                                 |
| Ca_Kabuli_NC_021166.1_29902065 | Ca_kabuli_chr07    | 29902065                       | [T/G]       | 1067302519                                 |
| Ca_Kabuli_NC_021166.1_29924747 | Ca_kabuli_chr07    | 29924747                       | [G/A]       | 1067302520                                 |
| Ca_Kabuli_NC_021166.1_30060254 | Ca_kabuli_chr07    | 30060254                       | [T/C]       | 1067302521                                 |
| Ca_Kabuli_NC_021166.1_30060455 | Ca_kabuli_chr07    | 30060455                       | [A/G]       | 1067302522                                 |
| Ca_Kabuli_NC_021166.1_30060473 | Ca_kabuli_chr07    | 30060473                       | [T/C]       | 1067302523                                 |
| Ca_Kabuli_NC_021166.1_30114687 | Ca_kabuli_chr07    | 30114687                       | [A/C]       | 1067302524                                 |
| Ca_Kabuli_NC_021166.1_30114688 | Ca_kabuli_chr07    | 30114688                       | [G/C]       | 1067302525                                 |
| Ca_Kabuli_NC_021166.1_30118054 | Ca_kabuli_chr07    | 30118054                       | [A/G]       | 1067302526                                 |
| Ca_Kabuli_NC_021166.1_30283345 | Ca_kabuli_chr07    | 30283345                       | [A/C]       | 1067302527                                 |
| Ca_Kabuli_NC_021166.1_30340422 | Ca_kabuli_chr07    | 30340422                       | [T/A]       | 1067302528                                 |
| Ca_Kabuli_NC_021166.1_30398790 | Ca_kabuli_chr07    | 30398790                       | [C/A]       | 1067302529                                 |
| Ca_Kabuli_NC_021166.1_30691318 | Ca_kabuli_chr07    | 30691318                       | [A/C]       | 1067302530                                 |
| Ca_Kabuli_NC_021166.1_30691324 | Ca_kabuli_chr07    | 30691324                       | [A/C]       | 1067302531                                 |
| Ca_Kabuli_NC_021166.1_30810082 | Ca_kabuli_chr07    | 30810082                       | [A/C]       | 1067302532                                 |
| Ca_Kabuli_NC_021166.1_30837174 | Ca_kabuli_chr07    | 30837174                       | [G/C]       | 1067302533                                 |
| Ca_Kabuli_NC_021166.1_30837177 | Ca_kabuli_chr07    | 30837177                       | [T/C]       | 1067302534                                 |
| Ca_Kabuli_NC_021166.1_30837208 | Ca_kabuli_chr07    | 30837208                       | [A/C]       | 1067302535                                 |
| Ca_Kabuli_NC_021166.1_30850853 | Ca_kabuli_chr07    | 30850853                       | [A/C]       | 1067302536                                 |

| <b>SNP IDs</b>                 | <b>Chromosomes</b> | <b>Physical positions (bp)</b> | <b>SNPs</b> | <b>NCBI SNPdb accession IDs (NCBI_ss#)</b> |
|--------------------------------|--------------------|--------------------------------|-------------|--------------------------------------------|
| Ca_Kabuli_NC_021166.1_30850938 | Ca_kabuli_chr07    | 30850938                       | [T/G]       | 1067302537                                 |
| Ca_Kabuli_NC_021166.1_30850941 | Ca_kabuli_chr07    | 30850941                       | [T/A]       | 1067302538                                 |
| Ca_Kabuli_NC_021166.1_30850944 | Ca_kabuli_chr07    | 30850944                       | [T/G]       | 1067302539                                 |
| Ca_Kabuli_NC_021166.1_30850948 | Ca_kabuli_chr07    | 30850948                       | [T/C]       | 1067302540                                 |
| Ca_Kabuli_NC_021166.1_30850950 | Ca_kabuli_chr07    | 30850950                       | [A/G]       | 1067302541                                 |
| Ca_Kabuli_NC_021166.1_30865517 | Ca_kabuli_chr07    | 30865517                       | [A/G]       | 1067302542                                 |
| Ca_Kabuli_NC_021166.1_31125100 | Ca_kabuli_chr07    | 31125100                       | [A/G]       | 1067302543                                 |
| Ca_Kabuli_NC_021166.1_31189885 | Ca_kabuli_chr07    | 31189885                       | [A/C]       | 1067302544                                 |
| Ca_Kabuli_NC_021166.1_31190189 | Ca_kabuli_chr07    | 31190189                       | [A/G]       | 1067302545                                 |
| Ca_Kabuli_NC_021166.1_31193759 | Ca_kabuli_chr07    | 31193759                       | [T/A]       | 1067302546                                 |
| Ca_Kabuli_NC_021166.1_31193786 | Ca_kabuli_chr07    | 31193786                       | [T/G]       | 1067302547                                 |
| Ca_Kabuli_NC_021166.1_31223945 | Ca_kabuli_chr07    | 31223945                       | [A/C]       | 1067302548                                 |
| Ca_Kabuli_NC_021166.1_31223950 | Ca_kabuli_chr07    | 31223950                       | [A/C]       | 1067302549                                 |
| Ca_Kabuli_NC_021166.1_31223962 | Ca_kabuli_chr07    | 31223962                       | [A/G]       | 1067302550                                 |
| Ca_Kabuli_NC_021166.1_31223969 | Ca_kabuli_chr07    | 31223969                       | [T/A]       | 1067302551                                 |
| Ca_Kabuli_NC_021166.1_31223972 | Ca_kabuli_chr07    | 31223972                       | [T/C]       | 1067302552                                 |
| Ca_Kabuli_NC_021166.1_31254234 | Ca_kabuli_chr07    | 31254234                       | [T/G]       | 1067302553                                 |
| Ca_Kabuli_NC_021166.1_31314360 | Ca_kabuli_chr07    | 31314360                       | [T/G]       | 1067302554                                 |
| Ca_Kabuli_NC_021166.1_31314421 | Ca_kabuli_chr07    | 31314421                       | [T/A]       | 1067302555                                 |
| Ca_Kabuli_NC_021166.1_31318704 | Ca_kabuli_chr07    | 31318704                       | [A/T]       | 1067302556                                 |
| Ca_Kabuli_NC_021166.1_31318716 | Ca_kabuli_chr07    | 31318716                       | [A/C]       | 1067302557                                 |
| Ca_Kabuli_NC_021166.1_31364838 | Ca_kabuli_chr07    | 31364838                       | [A/C]       | 1067302558                                 |
| Ca_Kabuli_NC_021166.1_31364947 | Ca_kabuli_chr07    | 31364947                       | [A/G]       | 1067302559                                 |
| Ca_Kabuli_NC_021166.1_31455929 | Ca_kabuli_chr07    | 31455929                       | [A/C]       | 1067302560                                 |
| Ca_Kabuli_NC_021166.1_31457384 | Ca_kabuli_chr07    | 31457384                       | [T/G]       | 1067302561                                 |
| Ca_Kabuli_NC_021166.1_31612869 | Ca_kabuli_chr07    | 31612869                       | [A/C]       | 1067302562                                 |
| Ca_Kabuli_NC_021166.1_31635342 | Ca_kabuli_chr07    | 31635342                       | [T/A]       | 1067302563                                 |
| Ca_Kabuli_NC_021166.1_31639713 | Ca_kabuli_chr07    | 31639713                       | [A/T]       | 1067302564                                 |
| Ca_Kabuli_NC_021166.1_31759065 | Ca_kabuli_chr07    | 31759065                       | [C/T]       | 1067302565                                 |
| Ca_Kabuli_NC_021166.1_31759066 | Ca_kabuli_chr07    | 31759066                       | [T/C]       | 1067302566                                 |
| Ca_Kabuli_NC_021166.1_31804031 | Ca_kabuli_chr07    | 31804031                       | [T/C]       | 1067302567                                 |
| Ca_Kabuli_NC_021166.1_31806328 | Ca_kabuli_chr07    | 31806328                       | [T/G]       | 1067302568                                 |
| Ca_Kabuli_NC_021166.1_31825708 | Ca_kabuli_chr07    | 31825708                       | [A/T]       | 1067302569                                 |
| Ca_Kabuli_NC_021166.1_31825725 | Ca_kabuli_chr07    | 31825725                       | [T/G]       | 1067302570                                 |

| <b>SNP IDs</b>                 | <b>Chromosomes</b> | <b>Physical positions (bp)</b> | <b>SNPs</b> | <b>NCBI SNPdb accession IDs (NCBI_ss#)</b> |
|--------------------------------|--------------------|--------------------------------|-------------|--------------------------------------------|
| Ca_Kabuli_NC_021166.1_31825733 | Ca_kabuli_chr07    | 31825733                       | [A/G]       | 1067302571                                 |
| Ca_Kabuli_NC_021166.1_31825735 | Ca_kabuli_chr07    | 31825735                       | [A/G]       | 1067302572                                 |
| Ca_Kabuli_NC_021166.1_31851053 | Ca_kabuli_chr07    | 31851053                       | [T/G]       | 1067302573                                 |
| Ca_Kabuli_NC_021166.1_31851073 | Ca_kabuli_chr07    | 31851073                       | [A/C]       | 1067302574                                 |
| Ca_Kabuli_NC_021166.1_31867530 | Ca_kabuli_chr07    | 31867530                       | [T/A]       | 1067302575                                 |
| Ca_Kabuli_NC_021166.1_31867539 | Ca_kabuli_chr07    | 31867539                       | [T/C]       | 1067302576                                 |
| Ca_Kabuli_NC_021166.1_31867563 | Ca_kabuli_chr07    | 31867563                       | [A/T]       | 1067302577                                 |
| Ca_Kabuli_NC_021166.1_31873070 | Ca_kabuli_chr07    | 31873070                       | [C/T]       | 1067302578                                 |
| Ca_Kabuli_NC_021166.1_31873091 | Ca_kabuli_chr07    | 31873091                       | [G/A]       | 1067302579                                 |
| Ca_Kabuli_NC_021166.1_31881426 | Ca_kabuli_chr07    | 31881426                       | [T/G]       | 1067302580                                 |
| Ca_Kabuli_NC_021166.1_31934109 | Ca_kabuli_chr07    | 31934109                       | [A/C]       | 1067302581                                 |
| Ca_Kabuli_NC_021166.1_31960453 | Ca_kabuli_chr07    | 31960453                       | [C/A]       | 1067302582                                 |
| Ca_Kabuli_NC_021166.1_31994751 | Ca_kabuli_chr07    | 31994751                       | [T/G]       | 1067302583                                 |
| Ca_Kabuli_NC_021166.1_32242973 | Ca_kabuli_chr07    | 32242973                       | [A/T]       | 1067302584                                 |
| Ca_Kabuli_NC_021166.1_32242987 | Ca_kabuli_chr07    | 32242987                       | [T/C]       | 1067302585                                 |
| Ca_Kabuli_NC_021166.1_32271017 | Ca_kabuli_chr07    | 32271017                       | [T/C]       | 1067302586                                 |
| Ca_Kabuli_NC_021166.1_32271030 | Ca_kabuli_chr07    | 32271030                       | [A/C]       | 1067302587                                 |
| Ca_Kabuli_NC_021166.1_32274245 | Ca_kabuli_chr07    | 32274245                       | [T/G]       | 1067302588                                 |
| Ca_Kabuli_NC_021166.1_32288770 | Ca_kabuli_chr07    | 32288770                       | [A/T]       | 1067302589                                 |
| Ca_Kabuli_NC_021166.1_32309392 | Ca_kabuli_chr07    | 32309392                       | [G/T]       | 1067302590                                 |
| Ca_Kabuli_NC_021166.1_32309394 | Ca_kabuli_chr07    | 32309394                       | [A/T]       | 1067302591                                 |
| Ca_Kabuli_NC_021166.1_32309397 | Ca_kabuli_chr07    | 32309397                       | [T/A]       | 1067302592                                 |
| Ca_Kabuli_NC_021166.1_32373621 | Ca_kabuli_chr07    | 32373621                       | [T/A]       | 1067302593                                 |
| Ca_Kabuli_NC_021166.1_32373720 | Ca_kabuli_chr07    | 32373720                       | [T/A]       | 1067302594                                 |
| Ca_Kabuli_NC_021166.1_32374194 | Ca_kabuli_chr07    | 32374194                       | [T/G]       | 1067302595                                 |
| Ca_Kabuli_NC_021166.1_32382954 | Ca_kabuli_chr07    | 32382954                       | [T/A]       | 1067302596                                 |
| Ca_Kabuli_NC_021166.1_32406152 | Ca_kabuli_chr07    | 32406152                       | [C/A]       | 1067302597                                 |
| Ca_Kabuli_NC_021166.1_32406153 | Ca_kabuli_chr07    | 32406153                       | [T/G]       | 1067302598                                 |
| Ca_Kabuli_NC_021166.1_32406154 | Ca_kabuli_chr07    | 32406154                       | [T/A]       | 1067302599                                 |
| Ca_Kabuli_NC_021166.1_32406155 | Ca_kabuli_chr07    | 32406155                       | [C/T]       | 1067302600                                 |
| Ca_Kabuli_NC_021166.1_32448458 | Ca_kabuli_chr07    | 32448458                       | [T/C]       | 1067302601                                 |
| Ca_Kabuli_NC_021166.1_32448477 | Ca_kabuli_chr07    | 32448477                       | [A/G]       | 1067302602                                 |
| Ca_Kabuli_NC_021166.1_32522201 | Ca_kabuli_chr07    | 32522201                       | [A/G]       | 1067302603                                 |
| Ca_Kabuli_NC_021166.1_32522203 | Ca_kabuli_chr07    | 32522203                       | [A/G]       | 1067302604                                 |

| <b>SNP IDs</b>                 | <b>Chromosomes</b> | <b>Physical positions (bp)</b> | <b>SNPs</b> | <b>NCBI SNPdb accession IDs (NCBI_ss#)</b> |
|--------------------------------|--------------------|--------------------------------|-------------|--------------------------------------------|
| Ca_Kabuli_NC_021166.1_32522207 | Ca_kabuli_chr07    | 32522207                       | [T/G]       | 1067302605                                 |
| Ca_Kabuli_NC_021166.1_32522213 | Ca_kabuli_chr07    | 32522213                       | [A/G]       | 1067302606                                 |
| Ca_Kabuli_NC_021166.1_32522225 | Ca_kabuli_chr07    | 32522225                       | [C/A]       | 1067302607                                 |
| Ca_Kabuli_NC_021166.1_32522230 | Ca_kabuli_chr07    | 32522230                       | [T/G]       | 1067302608                                 |
| Ca_Kabuli_NC_021166.1_32522286 | Ca_kabuli_chr07    | 32522286                       | [G/A]       | 1067302609                                 |
| Ca_Kabuli_NC_021166.1_32522288 | Ca_kabuli_chr07    | 32522288                       | [T/A]       | 1067302610                                 |
| Ca_Kabuli_NC_021166.1_32753333 | Ca_kabuli_chr07    | 32753333                       | [A/C]       | 1067302611                                 |
| Ca_Kabuli_NC_021166.1_32754651 | Ca_kabuli_chr07    | 32754651                       | [T/G]       | 1067302612                                 |
| Ca_Kabuli_NC_021166.1_32755197 | Ca_kabuli_chr07    | 32755197                       | [T/C]       | 1067302613                                 |
| Ca_Kabuli_NC_021166.1_32755204 | Ca_kabuli_chr07    | 32755204                       | [A/T]       | 1067302614                                 |
| Ca_Kabuli_NC_021166.1_32755652 | Ca_kabuli_chr07    | 32755652                       | [A/T]       | 1067302615                                 |
| Ca_Kabuli_NC_021166.1_32758678 | Ca_kabuli_chr07    | 32758678                       | [A/C]       | 1067302616                                 |
| Ca_Kabuli_NC_021166.1_32782151 | Ca_kabuli_chr07    | 32782151                       | [C/A]       | 1067302617                                 |
| Ca_Kabuli_NC_021166.1_32782823 | Ca_kabuli_chr07    | 32782823                       | [G/A]       | 1067302618                                 |
| Ca_Kabuli_NC_021166.1_32784679 | Ca_kabuli_chr07    | 32784679                       | [A/C]       | 1067302619                                 |
| Ca_Kabuli_NC_021166.1_32784845 | Ca_kabuli_chr07    | 32784845                       | [A/T]       | 1067302620                                 |
| Ca_Kabuli_NC_021166.1_32784867 | Ca_kabuli_chr07    | 32784867                       | [A/C]       | 1067302621                                 |
| Ca_Kabuli_NC_021166.1_32784883 | Ca_kabuli_chr07    | 32784883                       | [T/C]       | 1067302622                                 |
| Ca_Kabuli_NC_021166.1_32784908 | Ca_kabuli_chr07    | 32784908                       | [C/A]       | 1067302623                                 |
| Ca_Kabuli_NC_021166.1_32784911 | Ca_kabuli_chr07    | 32784911                       | [A/T]       | 1067302624                                 |
| Ca_Kabuli_NC_021166.1_32784913 | Ca_kabuli_chr07    | 32784913                       | [G/C]       | 1067302625                                 |
| Ca_Kabuli_NC_021166.1_32784916 | Ca_kabuli_chr07    | 32784916                       | [A/C]       | 1067302626                                 |
| Ca_Kabuli_NC_021166.1_32784919 | Ca_kabuli_chr07    | 32784919                       | [G/C]       | 1067302627                                 |
| Ca_Kabuli_NC_021166.1_32784921 | Ca_kabuli_chr07    | 32784921                       | [A/T]       | 1067302628                                 |
| Ca_Kabuli_NC_021166.1_32784948 | Ca_kabuli_chr07    | 32784948                       | [T/G]       | 1067302629                                 |
| Ca_Kabuli_NC_021166.1_32785429 | Ca_kabuli_chr07    | 32785429                       | [G/A]       | 1067302630                                 |
| Ca_Kabuli_NC_021166.1_32785432 | Ca_kabuli_chr07    | 32785432                       | [C/T]       | 1067302631                                 |
| Ca_Kabuli_NC_021166.1_32840275 | Ca_kabuli_chr07    | 32840275                       | [C/A]       | 1067302632                                 |
| Ca_Kabuli_NC_021166.1_32875845 | Ca_kabuli_chr07    | 32875845                       | [A/G]       | 1067302633                                 |
| Ca_Kabuli_NC_021166.1_32875857 | Ca_kabuli_chr07    | 32875857                       | [A/G]       | 1067302634                                 |
| Ca_Kabuli_NC_021166.1_32875896 | Ca_kabuli_chr07    | 32875896                       | [T/C]       | 1067302635                                 |
| Ca_Kabuli_NC_021166.1_32875905 | Ca_kabuli_chr07    | 32875905                       | [T/C]       | 1067302636                                 |
| Ca_Kabuli_NC_021166.1_32942234 | Ca_kabuli_chr07    | 32942234                       | [T/C]       | 1067302637                                 |
| Ca_Kabuli_NC_021166.1_32942252 | Ca_kabuli_chr07    | 32942252                       | [T/C]       | 1067302638                                 |



| <b>SNP IDs</b>                 | <b>Chromosomes</b> | <b>Physical positions (bp)</b> | <b>SNPs</b> | <b>NCBI SNPdb accession IDs (NCBI_ss#)</b> |
|--------------------------------|--------------------|--------------------------------|-------------|--------------------------------------------|
| Ca_Kabuli_NC_021166.1_32942961 | Ca_kabuli_chr07    | 32942961                       | [A/G]       | 1067302639                                 |
| Ca_Kabuli_NC_021166.1_32942980 | Ca_kabuli_chr07    | 32942980                       | [T/G]       | 1067302640                                 |
| Ca_Kabuli_NC_021166.1_32943082 | Ca_kabuli_chr07    | 32943082                       | [T/G]       | 1067302641                                 |
| Ca_Kabuli_NC_021166.1_32943085 | Ca_kabuli_chr07    | 32943085                       | [A/G]       | 1067302642                                 |
| Ca_Kabuli_NC_021166.1_32943087 | Ca_kabuli_chr07    | 32943087                       | [T/G]       | 1067302643                                 |
| Ca_Kabuli_NC_021166.1_32943099 | Ca_kabuli_chr07    | 32943099                       | [T/G]       | 1067302644                                 |
| Ca_Kabuli_NC_021166.1_32989796 | Ca_kabuli_chr07    | 32989796                       | [A/T]       | 1067302645                                 |
| Ca_Kabuli_NC_021166.1_32989838 | Ca_kabuli_chr07    | 32989838                       | [T/C]       | 1067302646                                 |
| Ca_Kabuli_NC_021166.1_32989902 | Ca_kabuli_chr07    | 32989902                       | [A/C]       | 1067302647                                 |
| Ca_Kabuli_NC_021166.1_32989903 | Ca_kabuli_chr07    | 32989903                       | [G/A]       | 1067302648                                 |
| Ca_Kabuli_NC_021166.1_33006955 | Ca_kabuli_chr07    | 33006955                       | [C/T]       | 1067302649                                 |
| Ca_Kabuli_NC_021166.1_33026150 | Ca_kabuli_chr07    | 33026150                       | [G/T]       | 1067302650                                 |
| Ca_Kabuli_NC_021166.1_33065610 | Ca_kabuli_chr07    | 33065610                       | [A/C]       | 1067302651                                 |
| Ca_Kabuli_NC_021166.1_33099276 | Ca_kabuli_chr07    | 33099276                       | [C/A]       | 1067302652                                 |
| Ca_Kabuli_NC_021166.1_33099299 | Ca_kabuli_chr07    | 33099299                       | [T/C]       | 1067302653                                 |
| Ca_Kabuli_NC_021166.1_33099304 | Ca_kabuli_chr07    | 33099304                       | [C/T]       | 1067302654                                 |
| Ca_Kabuli_NC_021166.1_33099313 | Ca_kabuli_chr07    | 33099313                       | [A/G]       | 1067302655                                 |
| Ca_Kabuli_NC_021166.1_33099315 | Ca_kabuli_chr07    | 33099315                       | [C/T]       | 1067302656                                 |
| Ca_Kabuli_NC_021166.1_33121657 | Ca_kabuli_chr07    | 33121657                       | [T/G]       | 1067302657                                 |
| Ca_Kabuli_NC_021166.1_33121696 | Ca_kabuli_chr07    | 33121696                       | [A/C]       | 1067302658                                 |
| Ca_Kabuli_NC_021166.1_33121705 | Ca_kabuli_chr07    | 33121705                       | [A/G]       | 1067302659                                 |
| Ca_Kabuli_NC_021166.1_33122490 | Ca_kabuli_chr07    | 33122490                       | [G/A]       | 1067302660                                 |
| Ca_Kabuli_NC_021166.1_33122549 | Ca_kabuli_chr07    | 33122549                       | [A/G]       | 1067302661                                 |
| Ca_Kabuli_NC_021166.1_33140097 | Ca_kabuli_chr07    | 33140097                       | [C/T]       | 1067302662                                 |
| Ca_Kabuli_NC_021166.1_33182852 | Ca_kabuli_chr07    | 33182852                       | [T/G]       | 1067302663                                 |
| Ca_Kabuli_NC_021166.1_33182945 | Ca_kabuli_chr07    | 33182945                       | [A/T]       | 1067302664                                 |
| Ca_Kabuli_NC_021166.1_33184628 | Ca_kabuli_chr07    | 33184628                       | [A/G]       | 1067302665                                 |
| Ca_Kabuli_NC_021166.1_33184633 | Ca_kabuli_chr07    | 33184633                       | [T/A]       | 1067302666                                 |
| Ca_Kabuli_NC_021166.1_33184651 | Ca_kabuli_chr07    | 33184651                       | [A/C]       | 1067302667                                 |
| Ca_Kabuli_NC_021166.1_33184662 | Ca_kabuli_chr07    | 33184662                       | [T/C]       | 1067302668                                 |
| Ca_Kabuli_NC_021166.1_33225199 | Ca_kabuli_chr07    | 33225199                       | [T/G]       | 1067302669                                 |
| Ca_Kabuli_NC_021166.1_33262993 | Ca_kabuli_chr07    | 33262993                       | [G/A]       | 1067302670                                 |
| Ca_Kabuli_NC_021166.1_33267485 | Ca_kabuli_chr07    | 33267485                       | [C/T]       | 1067302671                                 |
| Ca_Kabuli_NC_021166.1_33267496 | Ca_kabuli_chr07    | 33267496                       | [A/T]       | 1067302672                                 |

| <b>SNP IDs</b>                 | <b>Chromosomes</b> | <b>Physical positions (bp)</b> | <b>SNPs</b> | <b>NCBI SNPdb accession IDs (NCBI_ss#)</b> |
|--------------------------------|--------------------|--------------------------------|-------------|--------------------------------------------|
| Ca_Kabuli_NC_021166.1_33336015 | Ca_kabuli_chr07    | 33336015                       | [C/T]       | 1067302673                                 |
| Ca_Kabuli_NC_021166.1_33349798 | Ca_kabuli_chr07    | 33349798                       | [G/A]       | 1067302674                                 |
| Ca_Kabuli_NC_021166.1_33358925 | Ca_kabuli_chr07    | 33358925                       | [T/C]       | 1067302675                                 |
| Ca_Kabuli_NC_021166.1_33359436 | Ca_kabuli_chr07    | 33359436                       | [T/C]       | 1067302676                                 |
| Ca_Kabuli_NC_021166.1_33359628 | Ca_kabuli_chr07    | 33359628                       | [C/G]       | 1067302677                                 |
| Ca_Kabuli_NC_021166.1_33359629 | Ca_kabuli_chr07    | 33359629                       | [A/G]       | 1067302678                                 |
| Ca_Kabuli_NC_021166.1_33364354 | Ca_kabuli_chr07    | 33364354                       | [A/G]       | 1067302679                                 |
| Ca_Kabuli_NC_021166.1_33376787 | Ca_kabuli_chr07    | 33376787                       | [T/C]       | 1067302680                                 |
| Ca_Kabuli_NC_021166.1_33376820 | Ca_kabuli_chr07    | 33376820                       | [A/G]       | 1067302681                                 |
| Ca_Kabuli_NC_021166.1_33377387 | Ca_kabuli_chr07    | 33377387                       | [T/G]       | 1067302682                                 |
| Ca_Kabuli_NC_021166.1_33377388 | Ca_kabuli_chr07    | 33377388                       | [A/T]       | 1067302683                                 |
| Ca_Kabuli_NC_021166.1_33377408 | Ca_kabuli_chr07    | 33377408                       | [T/G]       | 1067302684                                 |
| Ca_Kabuli_NC_021166.1_33378427 | Ca_kabuli_chr07    | 33378427                       | [T/C]       | 1067302685                                 |
| Ca_Kabuli_NC_021166.1_33379819 | Ca_kabuli_chr07    | 33379819                       | [T/C]       | 1067302686                                 |
| Ca_Kabuli_NC_021166.1_33379831 | Ca_kabuli_chr07    | 33379831                       | [T/C]       | 1067302687                                 |
| Ca_Kabuli_NC_021166.1_33380558 | Ca_kabuli_chr07    | 33380558                       | [T/C]       | 1067302688                                 |
| Ca_Kabuli_NC_021166.1_33380570 | Ca_kabuli_chr07    | 33380570                       | [A/C]       | 1067302689                                 |
| Ca_Kabuli_NC_021166.1_33380647 | Ca_kabuli_chr07    | 33380647                       | [A/C]       | 1067302690                                 |
| Ca_Kabuli_NC_021166.1_33380650 | Ca_kabuli_chr07    | 33380650                       | [A/C]       | 1067302691                                 |
| Ca_Kabuli_NC_021166.1_33411746 | Ca_kabuli_chr07    | 33411746                       | [A/C]       | 1067302692                                 |
| Ca_Kabuli_NC_021166.1_33460918 | Ca_kabuli_chr07    | 33460918                       | [A/G]       | 1067302693                                 |
| Ca_Kabuli_NC_021166.1_33461168 | Ca_kabuli_chr07    | 33461168                       | [C/A]       | 1067302694                                 |
| Ca_Kabuli_NC_021166.1_33463300 | Ca_kabuli_chr07    | 33463300                       | [G/C]       | 1067302695                                 |
| Ca_Kabuli_NC_021166.1_33464385 | Ca_kabuli_chr07    | 33464385                       | [A/C]       | 1067302696                                 |
| Ca_Kabuli_NC_021166.1_33465798 | Ca_kabuli_chr07    | 33465798                       | [A/G]       | 1067302697                                 |
| Ca_Kabuli_NC_021166.1_33465843 | Ca_kabuli_chr07    | 33465843                       | [T/A]       | 1067302698                                 |
| Ca_Kabuli_NC_021166.1_33468732 | Ca_kabuli_chr07    | 33468732                       | [A/G]       | 1067302699                                 |
| Ca_Kabuli_NC_021166.1_33471186 | Ca_kabuli_chr07    | 33471186                       | [C/A]       | 1067302700                                 |
| Ca_Kabuli_NC_021166.1_33480940 | Ca_kabuli_chr07    | 33480940                       | [T/C]       | 1067302701                                 |
| Ca_Kabuli_NC_021166.1_33481106 | Ca_kabuli_chr07    | 33481106                       | [A/C]       | 1067302702                                 |
| Ca_Kabuli_NC_021166.1_33481135 | Ca_kabuli_chr07    | 33481135                       | [G/C]       | 1067302703                                 |
| Ca_Kabuli_NC_021166.1_33518396 | Ca_kabuli_chr07    | 33518396                       | [A/C]       | 1067302704                                 |
| Ca_Kabuli_NC_021166.1_33573605 | Ca_kabuli_chr07    | 33573605                       | [C/T]       | 1067302705                                 |
| Ca_Kabuli_NC_021166.1_33573655 | Ca_kabuli_chr07    | 33573655                       | [A/C]       | 1067302706                                 |

| <b>SNP IDs</b>                 | <b>Chromosomes</b> | <b>Physical positions (bp)</b> | <b>SNPs</b> | <b>NCBI SNPdb accession IDs (NCBI_ss#)</b> |
|--------------------------------|--------------------|--------------------------------|-------------|--------------------------------------------|
| Ca_Kabuli_NC_021166.1_33586461 | Ca_kabuli_chr07    | 33586461                       | [A/G]       | 1067302707                                 |
| Ca_Kabuli_NC_021166.1_33586618 | Ca_kabuli_chr07    | 33586618                       | [A/G]       | 1067302708                                 |
| Ca_Kabuli_NC_021166.1_33641675 | Ca_kabuli_chr07    | 33641675                       | [A/G]       | 1067302709                                 |
| Ca_Kabuli_NC_021166.1_33641689 | Ca_kabuli_chr07    | 33641689                       | [T/C]       | 1067302710                                 |
| Ca_Kabuli_NC_021166.1_33641728 | Ca_kabuli_chr07    | 33641728                       | [T/C]       | 1067302711                                 |
| Ca_Kabuli_NC_021166.1_33641799 | Ca_kabuli_chr07    | 33641799                       | [T/G]       | 1067302712                                 |
| Ca_Kabuli_NC_021166.1_33641882 | Ca_kabuli_chr07    | 33641882                       | [A/T]       | 1067302713                                 |
| Ca_Kabuli_NC_021166.1_33674454 | Ca_kabuli_chr07    | 33674454                       | [C/T]       | 1067302714                                 |
| Ca_Kabuli_NC_021166.1_33674838 | Ca_kabuli_chr07    | 33674838                       | [C/T]       | 1067302715                                 |
| Ca_Kabuli_NC_021166.1_33740809 | Ca_kabuli_chr07    | 33740809                       | [A/G]       | 1067302716                                 |
| Ca_Kabuli_NC_021166.1_33750773 | Ca_kabuli_chr07    | 33750773                       | [A/T]       | 1067302717                                 |
| Ca_Kabuli_NC_021166.1_33751162 | Ca_kabuli_chr07    | 33751162                       | [T/A]       | 1067302718                                 |
| Ca_Kabuli_NC_021166.1_33753917 | Ca_kabuli_chr07    | 33753917                       | [A/G]       | 1067302719                                 |
| Ca_Kabuli_NC_021166.1_33761944 | Ca_kabuli_chr07    | 33761944                       | [A/G]       | 1067302720                                 |
| Ca_Kabuli_NC_021166.1_33762053 | Ca_kabuli_chr07    | 33762053                       | [T/G]       | 1067302721                                 |
| Ca_Kabuli_NC_021166.1_33809459 | Ca_kabuli_chr07    | 33809459                       | [A/G]       | 1067302722                                 |
| Ca_Kabuli_NC_021166.1_33835856 | Ca_kabuli_chr07    | 33835856                       | [G/A]       | 1067302723                                 |
| Ca_Kabuli_NC_021166.1_33865589 | Ca_kabuli_chr07    | 33865589                       | [C/G]       | 1067302724                                 |
| Ca_Kabuli_NC_021166.1_33867334 | Ca_kabuli_chr07    | 33867334                       | [C/T]       | 1067302725                                 |
| Ca_Kabuli_NC_021166.1_33867491 | Ca_kabuli_chr07    | 33867491                       | [T/C]       | 1067302726                                 |
| Ca_Kabuli_NC_021166.1_33867674 | Ca_kabuli_chr07    | 33867674                       | [T/C]       | 1067302727                                 |
| Ca_Kabuli_NC_021166.1_33868148 | Ca_kabuli_chr07    | 33868148                       | [C/T]       | 1067302728                                 |
| Ca_Kabuli_NC_021166.1_33869361 | Ca_kabuli_chr07    | 33869361                       | [A/G]       | 1067302729                                 |
| Ca_Kabuli_NC_021166.1_33869373 | Ca_kabuli_chr07    | 33869373                       | [A/C]       | 1067302730                                 |
| Ca_Kabuli_NC_021166.1_33869399 | Ca_kabuli_chr07    | 33869399                       | [A/G]       | 1067302731                                 |
| Ca_Kabuli_NC_021166.1_33869402 | Ca_kabuli_chr07    | 33869402                       | [G/T]       | 1067302732                                 |
| Ca_Kabuli_NC_021166.1_33869404 | Ca_kabuli_chr07    | 33869404                       | [T/C]       | 1067302733                                 |
| Ca_Kabuli_NC_021166.1_33869412 | Ca_kabuli_chr07    | 33869412                       | [A/G]       | 1067302734                                 |
| Ca_Kabuli_NC_021166.1_33869423 | Ca_kabuli_chr07    | 33869423                       | [T/C]       | 1067302735                                 |
| Ca_Kabuli_NC_021166.1_33879017 | Ca_kabuli_chr07    | 33879017                       | [T/A]       | 1067302736                                 |
| Ca_Kabuli_NC_021166.1_33890956 | Ca_kabuli_chr07    | 33890956                       | [A/C]       | 1067302737                                 |
| Ca_Kabuli_NC_021166.1_33910873 | Ca_kabuli_chr07    | 33910873                       | [A/G]       | 1067302738                                 |
| Ca_Kabuli_NC_021166.1_33910883 | Ca_kabuli_chr07    | 33910883                       | [A/T]       | 1067302739                                 |
| Ca_Kabuli_NC_021166.1_33910925 | Ca_kabuli_chr07    | 33910925                       | [A/G]       | 1067302740                                 |

| <b>SNP IDs</b>                 | <b>Chromosomes</b> | <b>Physical positions (bp)</b> | <b>SNPs</b> | <b>NCBI SNPdb accession IDs (NCBI_ss#)</b> |
|--------------------------------|--------------------|--------------------------------|-------------|--------------------------------------------|
| Ca_Kabuli_NC_021166.1_33912866 | Ca_kabuli_chr07    | 33912866                       | [C/T]       | 1067302741                                 |
| Ca_Kabuli_NC_021166.1_33912884 | Ca_kabuli_chr07    | 33912884                       | [C/A]       | 1067302742                                 |
| Ca_Kabuli_NC_021166.1_33912896 | Ca_kabuli_chr07    | 33912896                       | [T/A]       | 1067302743                                 |
| Ca_Kabuli_NC_021166.1_33912899 | Ca_kabuli_chr07    | 33912899                       | [A/T]       | 1067302744                                 |
| Ca_Kabuli_NC_021166.1_33912902 | Ca_kabuli_chr07    | 33912902                       | [A/T]       | 1067302745                                 |
| Ca_Kabuli_NC_021166.1_33912913 | Ca_kabuli_chr07    | 33912913                       | [A/T]       | 1067302746                                 |
| Ca_Kabuli_NC_021166.1_33912916 | Ca_kabuli_chr07    | 33912916                       | [G/T]       | 1067302747                                 |
| Ca_Kabuli_NC_021166.1_33912921 | Ca_kabuli_chr07    | 33912921                       | [T/G]       | 1067302748                                 |
| Ca_Kabuli_NC_021166.1_34139693 | Ca_kabuli_chr07    | 34139693                       | [T/C]       | 1067302749                                 |
| Ca_Kabuli_NC_021166.1_34145280 | Ca_kabuli_chr07    | 34145280                       | [T/G]       | 1067302750                                 |
| Ca_Kabuli_NC_021166.1_34146467 | Ca_kabuli_chr07    | 34146467                       | [C/A]       | 1067302751                                 |
| Ca_Kabuli_NC_021166.1_34146468 | Ca_kabuli_chr07    | 34146468                       | [A/G]       | 1067302752                                 |
| Ca_Kabuli_NC_021166.1_34146469 | Ca_kabuli_chr07    | 34146469                       | [T/A]       | 1067302753                                 |
| Ca_Kabuli_NC_021166.1_34146471 | Ca_kabuli_chr07    | 34146471                       | [A/C]       | 1067302754                                 |
| Ca_Kabuli_NC_021166.1_34146873 | Ca_kabuli_chr07    | 34146873                       | [A/G]       | 1067302755                                 |
| Ca_Kabuli_NC_021166.1_34146935 | Ca_kabuli_chr07    | 34146935                       | [T/C]       | 1067302756                                 |
| Ca_Kabuli_NC_021166.1_34147313 | Ca_kabuli_chr07    | 34147313                       | [T/G]       | 1067302757                                 |
| Ca_Kabuli_NC_021166.1_34152655 | Ca_kabuli_chr07    | 34152655                       | [G/C]       | 1067302758                                 |
| Ca_Kabuli_NC_021166.1_34152720 | Ca_kabuli_chr07    | 34152720                       | [G/T]       | 1067302759                                 |
| Ca_Kabuli_NC_021166.1_34193321 | Ca_kabuli_chr07    | 34193321                       | [A/C]       | 1067302760                                 |
| Ca_Kabuli_NC_021166.1_34196923 | Ca_kabuli_chr07    | 34196923                       | [T/G]       | 1067302761                                 |
| Ca_Kabuli_NC_021166.1_34196938 | Ca_kabuli_chr07    | 34196938                       | [T/A]       | 1067302762                                 |
| Ca_Kabuli_NC_021166.1_34208319 | Ca_kabuli_chr07    | 34208319                       | [A/G]       | 1067302763                                 |
| Ca_Kabuli_NC_021166.1_34235506 | Ca_kabuli_chr07    | 34235506                       | [C/A]       | 1067302764                                 |
| Ca_Kabuli_NC_021166.1_34235530 | Ca_kabuli_chr07    | 34235530                       | [G/C]       | 1067302765                                 |
| Ca_Kabuli_NC_021166.1_34277010 | Ca_kabuli_chr07    | 34277010                       | [A/G]       | 1067302766                                 |
| Ca_Kabuli_NC_021166.1_34277014 | Ca_kabuli_chr07    | 34277014                       | [G/T]       | 1067302767                                 |
| Ca_Kabuli_NC_021166.1_34279357 | Ca_kabuli_chr07    | 34279357                       | [T/G]       | 1067302768                                 |
| Ca_Kabuli_NC_021166.1_34279715 | Ca_kabuli_chr07    | 34279715                       | [C/A]       | 1067302769                                 |
| Ca_Kabuli_NC_021166.1_34279725 | Ca_kabuli_chr07    | 34279725                       | [G/A]       | 1067302770                                 |
| Ca_Kabuli_NC_021166.1_34318860 | Ca_kabuli_chr07    | 34318860                       | [T/C]       | 1067302771                                 |
| Ca_Kabuli_NC_021166.1_34318862 | Ca_kabuli_chr07    | 34318862                       | [G/A]       | 1067302772                                 |
| Ca_Kabuli_NC_021166.1_34376080 | Ca_kabuli_chr07    | 34376080                       | [T/A]       | 1067302773                                 |
| Ca_Kabuli_NC_021166.1_34474614 | Ca_kabuli_chr07    | 34474614                       | [A/C]       | 1067302774                                 |

| <b>SNP IDs</b>                 | <b>Chromosomes</b> | <b>Physical positions (bp)</b> | <b>SNPs</b> | <b>NCBI SNPdb accession IDs (NCBI_ss#)</b> |
|--------------------------------|--------------------|--------------------------------|-------------|--------------------------------------------|
| Ca_Kabuli_NC_021166.1_34474627 | Ca_kabuli_chr07    | 34474627                       | [A/C]       | 1067302775                                 |
| Ca_Kabuli_NC_021166.1_34808498 | Ca_kabuli_chr07    | 34808498                       | [G/A]       | 1067302776                                 |
| Ca_Kabuli_NC_021166.1_34857654 | Ca_kabuli_chr07    | 34857654                       | [G/T]       | 1067302777                                 |
| Ca_Kabuli_NC_021166.1_34875605 | Ca_kabuli_chr07    | 34875605                       | [A/T]       | 1067302778                                 |
| Ca_Kabuli_NC_021166.1_34875630 | Ca_kabuli_chr07    | 34875630                       | [A/T]       | 1067302779                                 |
| Ca_Kabuli_NC_021166.1_34894278 | Ca_kabuli_chr07    | 34894278                       | [A/C]       | 1067302780                                 |
| Ca_Kabuli_NC_021166.1_34947544 | Ca_kabuli_chr07    | 34947544                       | [A/C]       | 1067302781                                 |
| Ca_Kabuli_NC_021166.1_34947545 | Ca_kabuli_chr07    | 34947545                       | [C/A]       | 1067302782                                 |
| Ca_Kabuli_NC_021166.1_35037530 | Ca_kabuli_chr07    | 35037530                       | [T/C]       | 1067302783                                 |
| Ca_Kabuli_NC_021166.1_35037583 | Ca_kabuli_chr07    | 35037583                       | [A/T]       | 1067302784                                 |
| Ca_Kabuli_NC_021166.1_35037616 | Ca_kabuli_chr07    | 35037616                       | [A/G]       | 1067302785                                 |
| Ca_Kabuli_NC_021166.1_35037644 | Ca_kabuli_chr07    | 35037644                       | [C/T]       | 1067302786                                 |
| Ca_Kabuli_NC_021166.1_35038242 | Ca_kabuli_chr07    | 35038242                       | [T/C]       | 1067302787                                 |
| Ca_Kabuli_NC_021166.1_35038263 | Ca_kabuli_chr07    | 35038263                       | [A/C]       | 1067302788                                 |
| Ca_Kabuli_NC_021166.1_35057540 | Ca_kabuli_chr07    | 35057540                       | [A/G]       | 1067302789                                 |
| Ca_Kabuli_NC_021166.1_35112785 | Ca_kabuli_chr07    | 35112785                       | [C/T]       | 1067302790                                 |
| Ca_Kabuli_NC_021166.1_35112935 | Ca_kabuli_chr07    | 35112935                       | [A/C]       | 1067302791                                 |
| Ca_Kabuli_NC_021166.1_35114075 | Ca_kabuli_chr07    | 35114075                       | [A/C]       | 1067302792                                 |
| Ca_Kabuli_NC_021166.1_35134752 | Ca_kabuli_chr07    | 35134752                       | [A/C]       | 1067302793                                 |
| Ca_Kabuli_NC_021166.1_35134809 | Ca_kabuli_chr07    | 35134809                       | [A/C]       | 1067302794                                 |
| Ca_Kabuli_NC_021166.1_35134816 | Ca_kabuli_chr07    | 35134816                       | [A/C]       | 1067302795                                 |
| Ca_Kabuli_NC_021166.1_35134868 | Ca_kabuli_chr07    | 35134868                       | [A/G]       | 1067302796                                 |
| Ca_Kabuli_NC_021166.1_35134887 | Ca_kabuli_chr07    | 35134887                       | [T/A]       | 1067302797                                 |
| Ca_Kabuli_NC_021166.1_35134894 | Ca_kabuli_chr07    | 35134894                       | [T/G]       | 1067302798                                 |
| Ca_Kabuli_NC_021166.1_35181514 | Ca_kabuli_chr07    | 35181514                       | [A/T]       | 1067302799                                 |
| Ca_Kabuli_NC_021166.1_35181660 | Ca_kabuli_chr07    | 35181660                       | [A/G]       | 1067302800                                 |
| Ca_Kabuli_NC_021166.1_35181661 | Ca_kabuli_chr07    | 35181661                       | [C/T]       | 1067302801                                 |
| Ca_Kabuli_NC_021166.1_35181884 | Ca_kabuli_chr07    | 35181884                       | [G/A]       | 1067302802                                 |
| Ca_Kabuli_NC_021166.1_35220113 | Ca_kabuli_chr07    | 35220113                       | [C/A]       | 1067302803                                 |
| Ca_Kabuli_NC_021166.1_35227794 | Ca_kabuli_chr07    | 35227794                       | [C/A]       | 1067302804                                 |
| Ca_Kabuli_NC_021166.1_35239021 | Ca_kabuli_chr07    | 35239021                       | [A/G]       | 1067302805                                 |
| Ca_Kabuli_NC_021166.1_35239116 | Ca_kabuli_chr07    | 35239116                       | [C/T]       | 1067302806                                 |
| Ca_Kabuli_NC_021166.1_35239702 | Ca_kabuli_chr07    | 35239702                       | [T/C]       | 1067302807                                 |
| Ca_Kabuli_NC_021166.1_35241171 | Ca_kabuli_chr07    | 35241171                       | [A/T]       | 1067302808                                 |

| <b>SNP IDs</b>                 | <b>Chromosomes</b> | <b>Physical positions (bp)</b> | <b>SNPs</b> | <b>NCBI SNPdb accession IDs (NCBI_ss#)</b> |
|--------------------------------|--------------------|--------------------------------|-------------|--------------------------------------------|
| Ca_Kabuli_NC_021166.1_35258029 | Ca_kabuli_chr07    | 35258029                       | [T/G]       | 1067302809                                 |
| Ca_Kabuli_NC_021166.1_35263678 | Ca_kabuli_chr07    | 35263678                       | [T/G]       | 1067302810                                 |
| Ca_Kabuli_NC_021166.1_35263711 | Ca_kabuli_chr07    | 35263711                       | [A/T]       | 1067302811                                 |
| Ca_Kabuli_NC_021166.1_35263712 | Ca_kabuli_chr07    | 35263712                       | [G/T]       | 1067302812                                 |
| Ca_Kabuli_NC_021166.1_35263736 | Ca_kabuli_chr07    | 35263736                       | [C/G]       | 1067302813                                 |
| Ca_Kabuli_NC_021166.1_35263758 | Ca_kabuli_chr07    | 35263758                       | [A/G]       | 1067302814                                 |
| Ca_Kabuli_NC_021166.1_35274680 | Ca_kabuli_chr07    | 35274680                       | [A/G]       | 1067302815                                 |
| Ca_Kabuli_NC_021166.1_35274858 | Ca_kabuli_chr07    | 35274858                       | [A/G]       | 1067302816                                 |
| Ca_Kabuli_NC_021166.1_35274859 | Ca_kabuli_chr07    | 35274859                       | [G/T]       | 1067302817                                 |
| Ca_Kabuli_NC_021166.1_35278840 | Ca_kabuli_chr07    | 35278840                       | [T/C]       | 1067302818                                 |
| Ca_Kabuli_NC_021166.1_35280018 | Ca_kabuli_chr07    | 35280018                       | [C/A]       | 1067302819                                 |
| Ca_Kabuli_NC_021166.1_35280031 | Ca_kabuli_chr07    | 35280031                       | [A/C]       | 1067302820                                 |
| Ca_Kabuli_NC_021166.1_35280174 | Ca_kabuli_chr07    | 35280174                       | [T/G]       | 1067302821                                 |
| Ca_Kabuli_NC_021166.1_35337101 | Ca_kabuli_chr07    | 35337101                       | [A/T]       | 1067302822                                 |
| Ca_Kabuli_NC_021166.1_35339078 | Ca_kabuli_chr07    | 35339078                       | [C/T]       | 1067302823                                 |
| Ca_Kabuli_NC_021166.1_35340960 | Ca_kabuli_chr07    | 35340960                       | [A/G]       | 1067302824                                 |
| Ca_Kabuli_NC_021166.1_35342149 | Ca_kabuli_chr07    | 35342149                       | [T/C]       | 1067302825                                 |
| Ca_Kabuli_NC_021166.1_35342151 | Ca_kabuli_chr07    | 35342151                       | [A/G]       | 1067302826                                 |
| Ca_Kabuli_NC_021166.1_35342159 | Ca_kabuli_chr07    | 35342159                       | [A/C]       | 1067302827                                 |
| Ca_Kabuli_NC_021166.1_35342174 | Ca_kabuli_chr07    | 35342174                       | [A/C]       | 1067302828                                 |
| Ca_Kabuli_NC_021166.1_35342193 | Ca_kabuli_chr07    | 35342193                       | [T/C]       | 1067302829                                 |
| Ca_Kabuli_NC_021166.1_35342258 | Ca_kabuli_chr07    | 35342258                       | [C/A]       | 1067302830                                 |
| Ca_Kabuli_NC_021166.1_35518089 | Ca_kabuli_chr07    | 35518089                       | [T/C]       | 1067302831                                 |
| Ca_Kabuli_NC_021166.1_35518091 | Ca_kabuli_chr07    | 35518091                       | [T/C]       | 1067302832                                 |
| Ca_Kabuli_NC_021166.1_35518120 | Ca_kabuli_chr07    | 35518120                       | [T/C]       | 1067302833                                 |
| Ca_Kabuli_NC_021166.1_35611764 | Ca_kabuli_chr07    | 35611764                       | [A/C]       | 1067302834                                 |
| Ca_Kabuli_NC_021166.1_35679419 | Ca_kabuli_chr07    | 35679419                       | [A/G]       | 1067302835                                 |
| Ca_Kabuli_NC_021166.1_35679425 | Ca_kabuli_chr07    | 35679425                       | [T/C]       | 1067302836                                 |
| Ca_Kabuli_NC_021166.1_35680423 | Ca_kabuli_chr07    | 35680423                       | [A/C]       | 1067302837                                 |
| Ca_Kabuli_NC_021166.1_35680438 | Ca_kabuli_chr07    | 35680438                       | [A/T]       | 1067302838                                 |
| Ca_Kabuli_NC_021166.1_35796837 | Ca_kabuli_chr07    | 35796837                       | [T/A]       | 1067302839                                 |
| Ca_Kabuli_NC_021166.1_35812930 | Ca_kabuli_chr07    | 35812930                       | [A/T]       | 1067302840                                 |
| Ca_Kabuli_NC_021166.1_35812973 | Ca_kabuli_chr07    | 35812973                       | [A/G]       | 1067302841                                 |
| Ca_Kabuli_NC_021166.1_35812980 | Ca_kabuli_chr07    | 35812980                       | [T/C]       | 1067302842                                 |

| <b>SNP IDs</b>                 | <b>Chromosomes</b> | <b>Physical positions (bp)</b> | <b>SNPs</b> | <b>NCBI SNPdb accession IDs (NCBI_ss#)</b> |
|--------------------------------|--------------------|--------------------------------|-------------|--------------------------------------------|
| Ca_Kabuli_NC_021166.1_35871940 | Ca_kabuli_chr07    | 35871940                       | [G/A]       | 1067302843                                 |
| Ca_Kabuli_NC_021166.1_35871942 | Ca_kabuli_chr07    | 35871942                       | [T/G]       | 1067302844                                 |
| Ca_Kabuli_NC_021166.1_35871945 | Ca_kabuli_chr07    | 35871945                       | [G/A]       | 1067302845                                 |
| Ca_Kabuli_NC_021166.1_35871946 | Ca_kabuli_chr07    | 35871946                       | [G/A]       | 1067302846                                 |
| Ca_Kabuli_NC_021166.1_35882441 | Ca_kabuli_chr07    | 35882441                       | [A/C]       | 1067302847                                 |
| Ca_Kabuli_NC_021166.1_35906524 | Ca_kabuli_chr07    | 35906524                       | [A/G]       | 1067302848                                 |
| Ca_Kabuli_NC_021166.1_35911617 | Ca_kabuli_chr07    | 35911617                       | [A/T]       | 1067302849                                 |
| Ca_Kabuli_NC_021166.1_35911618 | Ca_kabuli_chr07    | 35911618                       | [T/C]       | 1067302850                                 |
| Ca_Kabuli_NC_021166.1_35911640 | Ca_kabuli_chr07    | 35911640                       | [C/T]       | 1067302851                                 |
| Ca_Kabuli_NC_021166.1_35936571 | Ca_kabuli_chr07    | 35936571                       | [A/T]       | 1067302852                                 |
| Ca_Kabuli_NC_021166.1_36003795 | Ca_kabuli_chr07    | 36003795                       | [T/C]       | 1067302853                                 |
| Ca_Kabuli_NC_021166.1_36100165 | Ca_kabuli_chr07    | 36100165                       | [A/G]       | 1067302854                                 |
| Ca_Kabuli_NC_021166.1_36217274 | Ca_kabuli_chr07    | 36217274                       | [T/C]       | 1067302855                                 |
| Ca_Kabuli_NC_021166.1_36410034 | Ca_kabuli_chr07    | 36410034                       | [A/G]       | 1067302856                                 |
| Ca_Kabuli_NC_021166.1_36410038 | Ca_kabuli_chr07    | 36410038                       | [A/C]       | 1067302857                                 |
| Ca_Kabuli_NC_021166.1_36550294 | Ca_kabuli_chr07    | 36550294                       | [A/C]       | 1067302858                                 |
| Ca_Kabuli_NC_021166.1_36709445 | Ca_kabuli_chr07    | 36709445                       | [A/G]       | 1067302859                                 |
| Ca_Kabuli_NC_021166.1_36709493 | Ca_kabuli_chr07    | 36709493                       | [C/T]       | 1067302860                                 |
| Ca_Kabuli_NC_021166.1_36709495 | Ca_kabuli_chr07    | 36709495                       | [T/C]       | 1067302861                                 |
| Ca_Kabuli_NC_021166.1_36709527 | Ca_kabuli_chr07    | 36709527                       | [A/T]       | 1067302862                                 |
| Ca_Kabuli_NC_021166.1_36709533 | Ca_kabuli_chr07    | 36709533                       | [T/C]       | 1067302863                                 |
| Ca_Kabuli_NC_021166.1_36710055 | Ca_kabuli_chr07    | 36710055                       | [T/C]       | 1067302864                                 |
| Ca_Kabuli_NC_021166.1_36710085 | Ca_kabuli_chr07    | 36710085                       | [T/G]       | 1067302865                                 |
| Ca_Kabuli_NC_021166.1_36711807 | Ca_kabuli_chr07    | 36711807                       | [T/G]       | 1067302866                                 |
| Ca_Kabuli_NC_021166.1_36711935 | Ca_kabuli_chr07    | 36711935                       | [T/C]       | 1067302867                                 |
| Ca_Kabuli_NC_021166.1_36713848 | Ca_kabuli_chr07    | 36713848                       | [C/A]       | 1067302868                                 |
| Ca_Kabuli_NC_021166.1_36713851 | Ca_kabuli_chr07    | 36713851                       | [A/T]       | 1067302869                                 |
| Ca_Kabuli_NC_021166.1_36713871 | Ca_kabuli_chr07    | 36713871                       | [A/G]       | 1067302870                                 |
| Ca_Kabuli_NC_021166.1_36713875 | Ca_kabuli_chr07    | 36713875                       | [A/G]       | 1067302871                                 |
| Ca_Kabuli_NC_021166.1_36713913 | Ca_kabuli_chr07    | 36713913                       | [G/T]       | 1067302872                                 |
| Ca_Kabuli_NC_021166.1_36788364 | Ca_kabuli_chr07    | 36788364                       | [A/G]       | 1067302873                                 |
| Ca_Kabuli_NC_021166.1_36810534 | Ca_kabuli_chr07    | 36810534                       | [A/C]       | 1067302874                                 |
| Ca_Kabuli_NC_021166.1_36855845 | Ca_kabuli_chr07    | 36855845                       | [T/A]       | 1067302875                                 |
| Ca_Kabuli_NC_021166.1_36855926 | Ca_kabuli_chr07    | 36855926                       | [A/G]       | 1067302876                                 |

| <b>SNP IDs</b>                 | <b>Chromosomes</b> | <b>Physical positions (bp)</b> | <b>SNPs</b> | <b>NCBI SNPdb accession IDs (NCBI_ss#)</b> |
|--------------------------------|--------------------|--------------------------------|-------------|--------------------------------------------|
| Ca_Kabuli_NC_021166.1_36915494 | Ca_kabuli_chr07    | 36915494                       | [A/T]       | 1067302877                                 |
| Ca_Kabuli_NC_021166.1_36915515 | Ca_kabuli_chr07    | 36915515                       | [T/G]       | 1067302878                                 |
| Ca_Kabuli_NC_021166.1_36922219 | Ca_kabuli_chr07    | 36922219                       | [T/G]       | 1067302879                                 |
| Ca_Kabuli_NC_021166.1_36935003 | Ca_kabuli_chr07    | 36935003                       | [C/G]       | 1067302880                                 |
| Ca_Kabuli_NC_021166.1_36998096 | Ca_kabuli_chr07    | 36998096                       | [T/C]       | 1067302881                                 |
| Ca_Kabuli_NC_021166.1_37025057 | Ca_kabuli_chr07    | 37025057                       | [T/G]       | 1067302882                                 |
| Ca_Kabuli_NC_021166.1_37058940 | Ca_kabuli_chr07    | 37058940                       | [T/A]       | 1067302883                                 |
| Ca_Kabuli_NC_021166.1_37059029 | Ca_kabuli_chr07    | 37059029                       | [A/C]       | 1067302884                                 |
| Ca_Kabuli_NC_021166.1_37626805 | Ca_kabuli_chr07    | 37626805                       | [A/G]       | 1067302885                                 |
| Ca_Kabuli_NC_021166.1_37626809 | Ca_kabuli_chr07    | 37626809                       | [T/A]       | 1067302886                                 |
| Ca_Kabuli_NC_021166.1_37672200 | Ca_kabuli_chr07    | 37672200                       | [T/C]       | 1067302887                                 |
| Ca_Kabuli_NC_021166.1_37672202 | Ca_kabuli_chr07    | 37672202                       | [T/C]       | 1067302888                                 |
| Ca_Kabuli_NC_021166.1_37672209 | Ca_kabuli_chr07    | 37672209                       | [T/C]       | 1067302889                                 |
| Ca_Kabuli_NC_021166.1_37672245 | Ca_kabuli_chr07    | 37672245                       | [T/C]       | 1067302890                                 |
| Ca_Kabuli_NC_021166.1_37684396 | Ca_kabuli_chr07    | 37684396                       | [C/A]       | 1067302891                                 |
| Ca_Kabuli_NC_021166.1_37687101 | Ca_kabuli_chr07    | 37687101                       | [T/G]       | 1067302892                                 |
| Ca_Kabuli_NC_021166.1_37886451 | Ca_kabuli_chr07    | 37886451                       | [A/T]       | 1067302893                                 |
| Ca_Kabuli_NC_021166.1_37965743 | Ca_kabuli_chr07    | 37965743                       | [A/C]       | 1067302894                                 |
| Ca_Kabuli_NC_021166.1_38001887 | Ca_kabuli_chr07    | 38001887                       | [T/C]       | 1067302895                                 |
| Ca_Kabuli_NC_021166.1_38001896 | Ca_kabuli_chr07    | 38001896                       | [A/G]       | 1067302896                                 |
| Ca_Kabuli_NC_021166.1_38001929 | Ca_kabuli_chr07    | 38001929                       | [A/G]       | 1067302897                                 |
| Ca_Kabuli_NC_021166.1_38135360 | Ca_kabuli_chr07    | 38135360                       | [A/C]       | 1067302898                                 |
| Ca_Kabuli_NC_021166.1_38143361 | Ca_kabuli_chr07    | 38143361                       | [G/A]       | 1067302899                                 |
| Ca_Kabuli_NC_021166.1_38143524 | Ca_kabuli_chr07    | 38143524                       | [T/A]       | 1067302900                                 |
| Ca_Kabuli_NC_021166.1_38150928 | Ca_kabuli_chr07    | 38150928                       | [A/G]       | 1067302901                                 |
| Ca_Kabuli_NC_021166.1_38238608 | Ca_kabuli_chr07    | 38238608                       | [T/G]       | 1067302902                                 |
| Ca_Kabuli_NC_021166.1_38283909 | Ca_kabuli_chr07    | 38283909                       | [C/T]       | 1067302903                                 |
| Ca_Kabuli_NC_021166.1_38409102 | Ca_kabuli_chr07    | 38409102                       | [A/T]       | 1067302904                                 |
| Ca_Kabuli_NC_021166.1_38431504 | Ca_kabuli_chr07    | 38431504                       | [T/A]       | 1067302905                                 |
| Ca_Kabuli_NC_021166.1_38592283 | Ca_kabuli_chr07    | 38592283                       | [G/C]       | 1067302906                                 |
| Ca_Kabuli_NC_021166.1_38592284 | Ca_kabuli_chr07    | 38592284                       | [G/T]       | 1067302907                                 |
| Ca_Kabuli_NC_021166.1_38772627 | Ca_kabuli_chr07    | 38772627                       | [G/T]       | 1067302908                                 |
| Ca_Kabuli_NC_021166.1_38821803 | Ca_kabuli_chr07    | 38821803                       | [G/T]       | 1067302909                                 |
| Ca_Kabuli_NC_021166.1_38821812 | Ca_kabuli_chr07    | 38821812                       | [T/G]       | 1067302910                                 |



| <b>SNP IDs</b>                 | <b>Chromosomes</b> | <b>Physical positions (bp)</b> | <b>SNPs</b> | <b>NCBI SNPdb accession IDs (NCBI_ss#)</b> |
|--------------------------------|--------------------|--------------------------------|-------------|--------------------------------------------|
| Ca_Kabuli_NC_021166.1_39095458 | Ca_kabuli_chr07    | 39095458                       | [A/G]       | 1067302911                                 |
| Ca_Kabuli_NC_021166.1_39095466 | Ca_kabuli_chr07    | 39095466                       | [A/C]       | 1067302912                                 |
| Ca_Kabuli_NC_021166.1_39182533 | Ca_kabuli_chr07    | 39182533                       | [T/G]       | 1067302913                                 |
| Ca_Kabuli_NC_021166.1_39185403 | Ca_kabuli_chr07    | 39185403                       | [T/G]       | 1067302914                                 |
| Ca_Kabuli_NC_021166.1_39214268 | Ca_kabuli_chr07    | 39214268                       | [C/A]       | 1067302915                                 |
| Ca_Kabuli_NC_021166.1_39214269 | Ca_kabuli_chr07    | 39214269                       | [T/G]       | 1067302916                                 |
| Ca_Kabuli_NC_021166.1_39214270 | Ca_kabuli_chr07    | 39214270                       | [G/A]       | 1067302917                                 |
| Ca_Kabuli_NC_021166.1_39214271 | Ca_kabuli_chr07    | 39214271                       | [A/T]       | 1067302918                                 |
| Ca_Kabuli_NC_021166.1_39214272 | Ca_kabuli_chr07    | 39214272                       | [T/C]       | 1067302919                                 |
| Ca_Kabuli_NC_021166.1_39215293 | Ca_kabuli_chr07    | 39215293                       | [A/C]       | 1067302920                                 |
| Ca_Kabuli_NC_021166.1_39218870 | Ca_kabuli_chr07    | 39218870                       | [T/G]       | 1067302921                                 |
| Ca_Kabuli_NC_021166.1_39218902 | Ca_kabuli_chr07    | 39218902                       | [A/G]       | 1067302922                                 |
| Ca_Kabuli_NC_021166.1_39235233 | Ca_kabuli_chr07    | 39235233                       | [A/G]       | 1067302923                                 |
| Ca_Kabuli_NC_021166.1_39235256 | Ca_kabuli_chr07    | 39235256                       | [A/C]       | 1067302924                                 |
| Ca_Kabuli_NC_021166.1_39235259 | Ca_kabuli_chr07    | 39235259                       | [T/C]       | 1067302925                                 |
| Ca_Kabuli_NC_021166.1_39235271 | Ca_kabuli_chr07    | 39235271                       | [A/C]       | 1067302926                                 |
| Ca_Kabuli_NC_021166.1_39235277 | Ca_kabuli_chr07    | 39235277                       | [T/A]       | 1067302927                                 |
| Ca_Kabuli_NC_021166.1_39235283 | Ca_kabuli_chr07    | 39235283                       | [T/C]       | 1067302928                                 |
| Ca_Kabuli_NC_021166.1_39339502 | Ca_kabuli_chr07    | 39339502                       | [C/A]       | 1067302929                                 |
| Ca_Kabuli_NC_021166.1_39339508 | Ca_kabuli_chr07    | 39339508                       | [G/A]       | 1067302930                                 |
| Ca_Kabuli_NC_021166.1_39467351 | Ca_kabuli_chr07    | 39467351                       | [A/T]       | 1067302931                                 |
| Ca_Kabuli_NC_021166.1_39467361 | Ca_kabuli_chr07    | 39467361                       | [A/C]       | 1067302932                                 |
| Ca_Kabuli_NC_021166.1_39467392 | Ca_kabuli_chr07    | 39467392                       | [A/T]       | 1067302933                                 |
| Ca_Kabuli_NC_021166.1_39470615 | Ca_kabuli_chr07    | 39470615                       | [A/C]       | 1067302934                                 |
| Ca_Kabuli_NC_021166.1_39470653 | Ca_kabuli_chr07    | 39470653                       | [T/C]       | 1067302935                                 |
| Ca_Kabuli_NC_021166.1_39534514 | Ca_kabuli_chr07    | 39534514                       | [T/C]       | 1067302936                                 |
| Ca_Kabuli_NC_021166.1_39543936 | Ca_kabuli_chr07    | 39543936                       | [A/T]       | 1067302937                                 |
| Ca_Kabuli_NC_021166.1_39680148 | Ca_kabuli_chr07    | 39680148                       | [T/C]       | 1067302938                                 |
| Ca_Kabuli_NC_021166.1_39680167 | Ca_kabuli_chr07    | 39680167                       | [A/G]       | 1067302939                                 |
| Ca_Kabuli_NC_021166.1_39768140 | Ca_kabuli_chr07    | 39768140                       | [A/C]       | 1067302940                                 |
| Ca_Kabuli_NC_021166.1_39768188 | Ca_kabuli_chr07    | 39768188                       | [A/C]       | 1067302941                                 |
| Ca_Kabuli_NC_021166.1_39944409 | Ca_kabuli_chr07    | 39944409                       | [A/T]       | 1067302942                                 |
| Ca_Kabuli_NC_021166.1_39944414 | Ca_kabuli_chr07    | 39944414                       | [A/G]       | 1067302943                                 |
| Ca_Kabuli_NC_021166.1_39944417 | Ca_kabuli_chr07    | 39944417                       | [T/C]       | 1067302944                                 |

| <b>SNP IDs</b>                 | <b>Chromosomes</b> | <b>Physical positions (bp)</b> | <b>SNPs</b> | <b>NCBI SNPdb accession IDs (NCBI_ss#)</b> |
|--------------------------------|--------------------|--------------------------------|-------------|--------------------------------------------|
| Ca_Kabuli_NC_021166.1_39944446 | Ca_kabuli_chr07    | 39944446                       | [A/G]       | 1067302945                                 |
| Ca_Kabuli_NC_021166.1_39944462 | Ca_kabuli_chr07    | 39944462                       | [A/G]       | 1067302946                                 |
| Ca_Kabuli_NC_021166.1_39944471 | Ca_kabuli_chr07    | 39944471                       | [T/C]       | 1067302947                                 |
| Ca_Kabuli_NC_021166.1_39944892 | Ca_kabuli_chr07    | 39944892                       | [T/C]       | 1067302948                                 |
| Ca_Kabuli_NC_021166.1_39944915 | Ca_kabuli_chr07    | 39944915                       | [A/T]       | 1067302949                                 |
| Ca_Kabuli_NC_021166.1_39944935 | Ca_kabuli_chr07    | 39944935                       | [A/G]       | 1067302950                                 |
| Ca_Kabuli_NC_021166.1_40170381 | Ca_kabuli_chr07    | 40170381                       | [T/C]       | 1067302951                                 |
| Ca_Kabuli_NC_021166.1_40183398 | Ca_kabuli_chr07    | 40183398                       | [A/G]       | 1067302952                                 |
| Ca_Kabuli_NC_021166.1_40241660 | Ca_kabuli_chr07    | 40241660                       | [T/G]       | 1067302953                                 |
| Ca_Kabuli_NC_021166.1_40243859 | Ca_kabuli_chr07    | 40243859                       | [A/G]       | 1067302954                                 |
| Ca_Kabuli_NC_021166.1_40287221 | Ca_kabuli_chr07    | 40287221                       | [A/G]       | 1067302955                                 |
| Ca_Kabuli_NC_021166.1_40288114 | Ca_kabuli_chr07    | 40288114                       | [A/G]       | 1067302956                                 |
| Ca_Kabuli_NC_021166.1_40305146 | Ca_kabuli_chr07    | 40305146                       | [T/G]       | 1067302957                                 |
| Ca_Kabuli_NC_021166.1_40340134 | Ca_kabuli_chr07    | 40340134                       | [C/T]       | 1067302958                                 |
| Ca_Kabuli_NC_021166.1_40482387 | Ca_kabuli_chr07    | 40482387                       | [A/G]       | 1067302959                                 |
| Ca_Kabuli_NC_021166.1_40482415 | Ca_kabuli_chr07    | 40482415                       | [A/C]       | 1067302960                                 |
| Ca_Kabuli_NC_021166.1_40544297 | Ca_kabuli_chr07    | 40544297                       | [T/C]       | 1067302961                                 |
| Ca_Kabuli_NC_021166.1_40594867 | Ca_kabuli_chr07    | 40594867                       | [T/G]       | 1067302962                                 |
| Ca_Kabuli_NC_021166.1_40692817 | Ca_kabuli_chr07    | 40692817                       | [C/G]       | 1067302963                                 |
| Ca_Kabuli_NC_021166.1_40692822 | Ca_kabuli_chr07    | 40692822                       | [T/G]       | 1067302964                                 |
| Ca_Kabuli_NC_021166.1_41219359 | Ca_kabuli_chr07    | 41219359                       | [T/G]       | 1067302965                                 |
| Ca_Kabuli_NC_021166.1_41325463 | Ca_kabuli_chr07    | 41325463                       | [A/C]       | 1067302966                                 |
| Ca_Kabuli_NC_021166.1_41339710 | Ca_kabuli_chr07    | 41339710                       | [T/G]       | 1067302967                                 |
| Ca_Kabuli_NC_021166.1_41387499 | Ca_kabuli_chr07    | 41387499                       | [T/C]       | 1067302968                                 |
| Ca_Kabuli_NC_021166.1_41387502 | Ca_kabuli_chr07    | 41387502                       | [A/C]       | 1067302969                                 |
| Ca_Kabuli_NC_021166.1_41425049 | Ca_kabuli_chr07    | 41425049                       | [A/G]       | 1067302970                                 |
| Ca_Kabuli_NC_021166.1_41657052 | Ca_kabuli_chr07    | 41657052                       | [A/C]       | 1067302971                                 |
| Ca_Kabuli_NC_021166.1_41658915 | Ca_kabuli_chr07    | 41658915                       | [A/C]       | 1067302972                                 |
| Ca_Kabuli_NC_021166.1_41673164 | Ca_kabuli_chr07    | 41673164                       | [T/G]       | 1067302973                                 |
| Ca_Kabuli_NC_021166.1_41673203 | Ca_kabuli_chr07    | 41673203                       | [A/G]       | 1067302974                                 |
| Ca_Kabuli_NC_021166.1_41673207 | Ca_kabuli_chr07    | 41673207                       | [T/G]       | 1067302975                                 |
| Ca_Kabuli_NC_021166.1_41890361 | Ca_kabuli_chr07    | 41890361                       | [T/G]       | 1067302976                                 |
| Ca_Kabuli_NC_021166.1_41890404 | Ca_kabuli_chr07    | 41890404                       | [G/A]       | 1067302977                                 |
| Ca_Kabuli_NC_021166.1_41936373 | Ca_kabuli_chr07    | 41936373                       | [T/A]       | 1067302978                                 |

| <b>SNP IDs</b>                 | <b>Chromosomes</b> | <b>Physical positions (bp)</b> | <b>SNPs</b> | <b>NCBI SNPdb accession IDs (NCBI_ss#)</b> |
|--------------------------------|--------------------|--------------------------------|-------------|--------------------------------------------|
| Ca_Kabuli_NC_021166.1_42094505 | Ca_kabuli_chr07    | 42094505                       | [G/T]       | 1067302979                                 |
| Ca_Kabuli_NC_021166.1_42106185 | Ca_kabuli_chr07    | 42106185                       | [C/T]       | 1067302980                                 |
| Ca_Kabuli_NC_021166.1_42106186 | Ca_kabuli_chr07    | 42106186                       | [C/T]       | 1067302981                                 |
| Ca_Kabuli_NC_021166.1_42106190 | Ca_kabuli_chr07    | 42106190                       | [T/G]       | 1067302982                                 |
| Ca_Kabuli_NC_021166.1_42272740 | Ca_kabuli_chr07    | 42272740                       | [T/G]       | 1067302983                                 |
| Ca_Kabuli_NC_021166.1_42272939 | Ca_kabuli_chr07    | 42272939                       | [G/C]       | 1067302984                                 |
| Ca_Kabuli_NC_021166.1_42915851 | Ca_kabuli_chr07    | 42915851                       | [A/G]       | 1067302985                                 |
| Ca_Kabuli_NC_021166.1_42915997 | Ca_kabuli_chr07    | 42915997                       | [G/T]       | 1067302986                                 |
| Ca_Kabuli_NC_021166.1_42916031 | Ca_kabuli_chr07    | 42916031                       | [T/G]       | 1067302987                                 |
| Ca_Kabuli_NC_021166.1_42949489 | Ca_kabuli_chr07    | 42949489                       | [A/G]       | 1067302988                                 |
| Ca_Kabuli_NC_021166.1_42949492 | Ca_kabuli_chr07    | 42949492                       | [A/G]       | 1067302989                                 |
| Ca_Kabuli_NC_021166.1_42949497 | Ca_kabuli_chr07    | 42949497                       | [T/G]       | 1067302990                                 |
| Ca_Kabuli_NC_021166.1_42949509 | Ca_kabuli_chr07    | 42949509                       | [T/G]       | 1067302991                                 |
| Ca_Kabuli_NC_021166.1_42964218 | Ca_kabuli_chr07    | 42964218                       | [T/C]       | 1067302992                                 |
| Ca_Kabuli_NC_021166.1_43119052 | Ca_kabuli_chr07    | 43119052                       | [G/A]       | 1067302993                                 |
| Ca_Kabuli_NC_021166.1_43119070 | Ca_kabuli_chr07    | 43119070                       | [T/G]       | 1067302994                                 |
| Ca_Kabuli_NC_021166.1_43119085 | Ca_kabuli_chr07    | 43119085                       | [T/C]       | 1067302995                                 |
| Ca_Kabuli_NC_021166.1_43210967 | Ca_kabuli_chr07    | 43210967                       | [T/C]       | 1067302996                                 |
| Ca_Kabuli_NC_021166.1_43646121 | Ca_kabuli_chr07    | 43646121                       | [A/G]       | 1067302997                                 |
| Ca_Kabuli_NC_021166.1_43743219 | Ca_kabuli_chr07    | 43743219                       | [T/G]       | 1067302998                                 |
| Ca_Kabuli_NC_021166.1_43999700 | Ca_kabuli_chr07    | 43999700                       | [T/C]       | 1067302999                                 |
| Ca_Kabuli_NC_021166.1_44148347 | Ca_kabuli_chr07    | 44148347                       | [A/G]       | 1067303000                                 |
| Ca_Kabuli_NC_021166.1_44148409 | Ca_kabuli_chr07    | 44148409                       | [A/G]       | 1067303001                                 |
| Ca_Kabuli_NC_021166.1_44149783 | Ca_kabuli_chr07    | 44149783                       | [T/G]       | 1067303002                                 |
| Ca_Kabuli_NC_021166.1_44149794 | Ca_kabuli_chr07    | 44149794                       | [T/G]       | 1067303003                                 |
| Ca_Kabuli_NC_021166.1_44149803 | Ca_kabuli_chr07    | 44149803                       | [T/G]       | 1067303004                                 |
| Ca_Kabuli_NC_021166.1_44232220 | Ca_kabuli_chr07    | 44232220                       | [G/A]       | 1067303005                                 |
| Ca_Kabuli_NC_021166.1_44232221 | Ca_kabuli_chr07    | 44232221                       | [T/C]       | 1067303006                                 |
| Ca_Kabuli_NC_021166.1_44232225 | Ca_kabuli_chr07    | 44232225                       | [T/C]       | 1067303007                                 |
| Ca_Kabuli_NC_021166.1_44232228 | Ca_kabuli_chr07    | 44232228                       | [A/T]       | 1067303008                                 |
| Ca_Kabuli_NC_021166.1_44232231 | Ca_kabuli_chr07    | 44232231                       | [A/C]       | 1067303009                                 |
| Ca_Kabuli_NC_021166.1_44758351 | Ca_kabuli_chr07    | 44758351                       | [A/C]       | 1067303010                                 |
| Ca_Kabuli_NC_021166.1_44877300 | Ca_kabuli_chr07    | 44877300                       | [T/G]       | 1067303011                                 |
| Ca_Kabuli_NC_021166.1_44889401 | Ca_kabuli_chr07    | 44889401                       | [C/A]       | 1067303012                                 |

| <b>SNP IDs</b>                 | <b>Chromosomes</b> | <b>Physical positions (bp)</b> | <b>SNPs</b> | <b>NCBI SNPdb accession IDs (NCBI_ss#)</b> |
|--------------------------------|--------------------|--------------------------------|-------------|--------------------------------------------|
| Ca_Kabuli_NC_021166.1_44889402 | Ca_kabuli_chr07    | 44889402                       | [C/G]       | 1067303013                                 |
| Ca_Kabuli_NC_021166.1_44889403 | Ca_kabuli_chr07    | 44889403                       | [T/A]       | 1067303014                                 |
| Ca_Kabuli_NC_021166.1_44889404 | Ca_kabuli_chr07    | 44889404                       | [C/T]       | 1067303015                                 |
| Ca_Kabuli_NC_021166.1_44889532 | Ca_kabuli_chr07    | 44889532                       | [T/G]       | 1067303016                                 |
| Ca_Kabuli_NC_021166.1_44899440 | Ca_kabuli_chr07    | 44899440                       | [A/C]       | 1067303017                                 |
| Ca_Kabuli_NC_021166.1_44958134 | Ca_kabuli_chr07    | 44958134                       | [T/C]       | 1067303018                                 |
| Ca_Kabuli_NC_021166.1_44958148 | Ca_kabuli_chr07    | 44958148                       | [T/C]       | 1067303019                                 |
| Ca_Kabuli_NC_021166.1_45034281 | Ca_kabuli_chr07    | 45034281                       | [T/C]       | 1067303020                                 |
| Ca_Kabuli_NC_021166.1_45057710 | Ca_kabuli_chr07    | 45057710                       | [A/C]       | 1067303021                                 |
| Ca_Kabuli_NC_021166.1_45077803 | Ca_kabuli_chr07    | 45077803                       | [T/G]       | 1067303022                                 |
| Ca_Kabuli_NC_021166.1_45077815 | Ca_kabuli_chr07    | 45077815                       | [A/C]       | 1067303023                                 |
| Ca_Kabuli_NC_021166.1_45197476 | Ca_kabuli_chr07    | 45197476                       | [T/G]       | 1067303024                                 |
| Ca_Kabuli_NC_021166.1_45308355 | Ca_kabuli_chr07    | 45308355                       | [G/T]       | 1067303025                                 |
| Ca_Kabuli_NC_021166.1_45383082 | Ca_kabuli_chr07    | 45383082                       | [A/T]       | 1067303026                                 |
| Ca_Kabuli_NC_021166.1_45383165 | Ca_kabuli_chr07    | 45383165                       | [T/A]       | 1067303027                                 |
| Ca_Kabuli_NC_021166.1_45936523 | Ca_kabuli_chr07    | 45936523                       | [T/C]       | 1067303028                                 |
| Ca_Kabuli_NC_021166.1_45936538 | Ca_kabuli_chr07    | 45936538                       | [T/G]       | 1067303029                                 |
| Ca_Kabuli_NC_021166.1_45936571 | Ca_kabuli_chr07    | 45936571                       | [A/G]       | 1067303030                                 |
| Ca_Kabuli_NC_021166.1_45940417 | Ca_kabuli_chr07    | 45940417                       | [A/C]       | 1067303031                                 |
| Ca_Kabuli_NC_021166.1_46485934 | Ca_kabuli_chr07    | 46485934                       | [G/A]       | 1067303032                                 |
| Ca_Kabuli_NC_021166.1_46823544 | Ca_kabuli_chr07    | 46823544                       | [A/C]       | 1067303033                                 |
| Ca_Kabuli_NC_021166.1_46823641 | Ca_kabuli_chr07    | 46823641                       | [C/A]       | 1067303034                                 |
| Ca_Kabuli_NC_021166.1_46823642 | Ca_kabuli_chr07    | 46823642                       | [A/G]       | 1067303035                                 |
| Ca_Kabuli_NC_021166.1_46823644 | Ca_kabuli_chr07    | 46823644                       | [A/T]       | 1067303036                                 |
| Ca_Kabuli_NC_021166.1_46823929 | Ca_kabuli_chr07    | 46823929                       | [T/C]       | 1067303037                                 |
| Ca_Kabuli_NC_021166.1_46875624 | Ca_kabuli_chr07    | 46875624                       | [T/A]       | 1067303038                                 |
| Ca_Kabuli_NC_021166.1_46875629 | Ca_kabuli_chr07    | 46875629                       | [A/T]       | 1067303039                                 |
| Ca_Kabuli_NC_021166.1_46875657 | Ca_kabuli_chr07    | 46875657                       | [T/A]       | 1067303040                                 |
| Ca_Kabuli_NC_021166.1_46875675 | Ca_kabuli_chr07    | 46875675                       | [A/G]       | 1067303041                                 |
| Ca_Kabuli_NC_021166.1_47130817 | Ca_kabuli_chr07    | 47130817                       | [T/G]       | 1067303042                                 |
| Ca_Kabuli_NC_021166.1_47205637 | Ca_kabuli_chr07    | 47205637                       | [T/A]       | 1067303043                                 |
| Ca_Kabuli_NC_021166.1_47335940 | Ca_kabuli_chr07    | 47335940                       | [G/A]       | 1067303044                                 |
| Ca_Kabuli_NC_021166.1_47395540 | Ca_kabuli_chr07    | 47395540                       | [C/T]       | 1067303045                                 |
| Ca_Kabuli_NC_021166.1_47694704 | Ca_kabuli_chr07    | 47694704                       | [T/C]       | 1067303046                                 |

| <b>SNP IDs</b>                 | <b>Chromosomes</b> | <b>Physical positions (bp)</b> | <b>SNPs</b> | <b>NCBI SNPdb accession IDs (NCBI_ss#)</b> |
|--------------------------------|--------------------|--------------------------------|-------------|--------------------------------------------|
| Ca_Kabuli_NC_021166.1_47840107 | Ca_kabuli_chr07    | 47840107                       | [A/C]       | 1067303047                                 |
| Ca_Kabuli_NC_021166.1_47840111 | Ca_kabuli_chr07    | 47840111                       | [A/C]       | 1067303048                                 |
| Ca_Kabuli_NC_021166.1_47840119 | Ca_kabuli_chr07    | 47840119                       | [A/C]       | 1067303049                                 |
| Ca_Kabuli_NC_021166.1_47840123 | Ca_kabuli_chr07    | 47840123                       | [T/C]       | 1067303050                                 |
| Ca_Kabuli_NC_021166.1_48251532 | Ca_kabuli_chr07    | 48251532                       | [C/T]       | 1067303051                                 |
| Ca_Kabuli_NC_021167.1_41355    | Ca_kabuli_chr08    | 41355                          | [T/G]       | 1067303052                                 |
| Ca_Kabuli_NC_021167.1_54128    | Ca_kabuli_chr08    | 54128                          | [T/G]       | 1067303053                                 |
| Ca_Kabuli_NC_021167.1_54147    | Ca_kabuli_chr08    | 54147                          | [T/C]       | 1067303054                                 |
| Ca_Kabuli_NC_021167.1_54166    | Ca_kabuli_chr08    | 54166                          | [A/G]       | 1067303055                                 |
| Ca_Kabuli_NC_021167.1_90353    | Ca_kabuli_chr08    | 90353                          | [T/G]       | 1067303056                                 |
| Ca_Kabuli_NC_021167.1_120838   | Ca_kabuli_chr08    | 120838                         | [T/G]       | 1067303057                                 |
| Ca_Kabuli_NC_021167.1_132517   | Ca_kabuli_chr08    | 132517                         | [A/G]       | 1067303058                                 |
| Ca_Kabuli_NC_021167.1_177453   | Ca_kabuli_chr08    | 177453                         | [T/C]       | 1067303059                                 |
| Ca_Kabuli_NC_021167.1_177456   | Ca_kabuli_chr08    | 177456                         | [A/T]       | 1067303060                                 |
| Ca_Kabuli_NC_021167.1_178228   | Ca_kabuli_chr08    | 178228                         | [G/T]       | 1067303061                                 |
| Ca_Kabuli_NC_021167.1_184409   | Ca_kabuli_chr08    | 184409                         | [C/T]       | 1067303062                                 |
| Ca_Kabuli_NC_021167.1_218917   | Ca_kabuli_chr08    | 218917                         | [A/G]       | 1067303063                                 |
| Ca_Kabuli_NC_021167.1_218950   | Ca_kabuli_chr08    | 218950                         | [A/G]       | 1067303064                                 |
| Ca_Kabuli_NC_021167.1_253604   | Ca_kabuli_chr08    | 253604                         | [T/C]       | 1067303065                                 |
| Ca_Kabuli_NC_021167.1_253622   | Ca_kabuli_chr08    | 253622                         | [T/A]       | 1067303066                                 |
| Ca_Kabuli_NC_021167.1_253650   | Ca_kabuli_chr08    | 253650                         | [A/C]       | 1067303067                                 |
| Ca_Kabuli_NC_021167.1_253661   | Ca_kabuli_chr08    | 253661                         | [T/C]       | 1067303068                                 |
| Ca_Kabuli_NC_021167.1_253675   | Ca_kabuli_chr08    | 253675                         | [A/G]       | 1067303069                                 |
| Ca_Kabuli_NC_021167.1_253685   | Ca_kabuli_chr08    | 253685                         | [A/G]       | 1067303070                                 |
| Ca_Kabuli_NC_021167.1_258729   | Ca_kabuli_chr08    | 258729                         | [T/C]       | 1067303071                                 |
| Ca_Kabuli_NC_021167.1_258735   | Ca_kabuli_chr08    | 258735                         | [T/C]       | 1067303072                                 |
| Ca_Kabuli_NC_021167.1_281566   | Ca_kabuli_chr08    | 281566                         | [T/C]       | 1067303073                                 |
| Ca_Kabuli_NC_021167.1_281579   | Ca_kabuli_chr08    | 281579                         | [A/G]       | 1067303074                                 |
| Ca_Kabuli_NC_021167.1_281622   | Ca_kabuli_chr08    | 281622                         | [G/A]       | 1067303075                                 |
| Ca_Kabuli_NC_021167.1_283444   | Ca_kabuli_chr08    | 283444                         | [T/C]       | 1067303076                                 |
| Ca_Kabuli_NC_021167.1_306458   | Ca_kabuli_chr08    | 306458                         | [A/C]       | 1067303077                                 |
| Ca_Kabuli_NC_021167.1_306477   | Ca_kabuli_chr08    | 306477                         | [A/C]       | 1067303078                                 |
| Ca_Kabuli_NC_021167.1_310107   | Ca_kabuli_chr08    | 310107                         | [T/C]       | 1067303079                                 |
| Ca_Kabuli_NC_021167.1_310131   | Ca_kabuli_chr08    | 310131                         | [A/C]       | 1067303080                                 |

| <b>SNP IDs</b>               | <b>Chromosomes</b> | <b>Physical positions (bp)</b> | <b>SNPs</b> | <b>NCBI SNPdb accession IDs (NCBI_ss#)</b> |
|------------------------------|--------------------|--------------------------------|-------------|--------------------------------------------|
| Ca_Kabuli_NC_021167.1_353470 | Ca_kabuli_chr08    | 353470                         | [A/C]       | 1067303081                                 |
| Ca_Kabuli_NC_021167.1_353535 | Ca_kabuli_chr08    | 353535                         | [A/C]       | 1067303082                                 |
| Ca_Kabuli_NC_021167.1_447550 | Ca_kabuli_chr08    | 447550                         | [T/C]       | 1067303083                                 |
| Ca_Kabuli_NC_021167.1_499873 | Ca_kabuli_chr08    | 499873                         | [A/C]       | 1067303084                                 |
| Ca_Kabuli_NC_021167.1_499876 | Ca_kabuli_chr08    | 499876                         | [A/C]       | 1067303085                                 |
| Ca_Kabuli_NC_021167.1_499879 | Ca_kabuli_chr08    | 499879                         | [A/C]       | 1067303086                                 |
| Ca_Kabuli_NC_021167.1_510851 | Ca_kabuli_chr08    | 510851                         | [A/G]       | 1067303087                                 |
| Ca_Kabuli_NC_021167.1_535892 | Ca_kabuli_chr08    | 535892                         | [A/G]       | 1067303088                                 |
| Ca_Kabuli_NC_021167.1_535903 | Ca_kabuli_chr08    | 535903                         | [T/C]       | 1067303089                                 |
| Ca_Kabuli_NC_021167.1_560472 | Ca_kabuli_chr08    | 560472                         | [A/G]       | 1067303090                                 |
| Ca_Kabuli_NC_021167.1_560484 | Ca_kabuli_chr08    | 560484                         | [T/G]       | 1067303091                                 |
| Ca_Kabuli_NC_021167.1_560740 | Ca_kabuli_chr08    | 560740                         | [T/G]       | 1067303092                                 |
| Ca_Kabuli_NC_021167.1_634819 | Ca_kabuli_chr08    | 634819                         | [T/G]       | 1067303093                                 |
| Ca_Kabuli_NC_021167.1_634853 | Ca_kabuli_chr08    | 634853                         | [T/G]       | 1067303094                                 |
| Ca_Kabuli_NC_021167.1_634913 | Ca_kabuli_chr08    | 634913                         | [G/C]       | 1067303095                                 |
| Ca_Kabuli_NC_021167.1_634932 | Ca_kabuli_chr08    | 634932                         | [A/G]       | 1067303096                                 |
| Ca_Kabuli_NC_021167.1_634936 | Ca_kabuli_chr08    | 634936                         | [A/G]       | 1067303097                                 |
| Ca_Kabuli_NC_021167.1_634945 | Ca_kabuli_chr08    | 634945                         | [T/C]       | 1067303098                                 |
| Ca_Kabuli_NC_021167.1_637223 | Ca_kabuli_chr08    | 637223                         | [T/G]       | 1067303099                                 |
| Ca_Kabuli_NC_021167.1_637253 | Ca_kabuli_chr08    | 637253                         | [T/G]       | 1067303100                                 |
| Ca_Kabuli_NC_021167.1_637257 | Ca_kabuli_chr08    | 637257                         | [T/G]       | 1067303101                                 |
| Ca_Kabuli_NC_021167.1_637261 | Ca_kabuli_chr08    | 637261                         | [T/C]       | 1067303102                                 |
| Ca_Kabuli_NC_021167.1_637308 | Ca_kabuli_chr08    | 637308                         | [T/C]       | 1067303103                                 |
| Ca_Kabuli_NC_021167.1_637309 | Ca_kabuli_chr08    | 637309                         | [C/T]       | 1067303104                                 |
| Ca_Kabuli_NC_021167.1_637317 | Ca_kabuli_chr08    | 637317                         | [G/C]       | 1067303105                                 |
| Ca_Kabuli_NC_021167.1_637322 | Ca_kabuli_chr08    | 637322                         | [T/C]       | 1067303106                                 |
| Ca_Kabuli_NC_021167.1_637335 | Ca_kabuli_chr08    | 637335                         | [A/T]       | 1067303107                                 |
| Ca_Kabuli_NC_021167.1_649502 | Ca_kabuli_chr08    | 649502                         | [T/G]       | 1067303108                                 |
| Ca_Kabuli_NC_021167.1_659335 | Ca_kabuli_chr08    | 659335                         | [A/C]       | 1067303109                                 |
| Ca_Kabuli_NC_021167.1_690131 | Ca_kabuli_chr08    | 690131                         | [T/G]       | 1067303110                                 |
| Ca_Kabuli_NC_021167.1_709105 | Ca_kabuli_chr08    | 709105                         | [T/G]       | 1067303111                                 |
| Ca_Kabuli_NC_021167.1_777765 | Ca_kabuli_chr08    | 777765                         | [T/G]       | 1067303112                                 |
| Ca_Kabuli_NC_021167.1_779659 | Ca_kabuli_chr08    | 779659                         | [A/G]       | 1067303113                                 |
| Ca_Kabuli_NC_021167.1_822850 | Ca_kabuli_chr08    | 822850                         | [A/C]       | 1067303114                                 |

| <b>SNP IDs</b>                | <b>Chromosomes</b> | <b>Physical positions (bp)</b> | <b>SNPs</b> | <b>NCBI SNPdb accession IDs (NCBI_ss#)</b> |
|-------------------------------|--------------------|--------------------------------|-------------|--------------------------------------------|
| Ca_Kabuli_NC_021167.1_822853  | Ca_kabuli_chr08    | 822853                         | [C/A]       | 1067303115                                 |
| Ca_Kabuli_NC_021167.1_840012  | Ca_kabuli_chr08    | 840012                         | [T/G]       | 1067303116                                 |
| Ca_Kabuli_NC_021167.1_840015  | Ca_kabuli_chr08    | 840015                         | [T/G]       | 1067303117                                 |
| Ca_Kabuli_NC_021167.1_840041  | Ca_kabuli_chr08    | 840041                         | [T/G]       | 1067303118                                 |
| Ca_Kabuli_NC_021167.1_840075  | Ca_kabuli_chr08    | 840075                         | [A/G]       | 1067303119                                 |
| Ca_Kabuli_NC_021167.1_875236  | Ca_kabuli_chr08    | 875236                         | [T/G]       | 1067303120                                 |
| Ca_Kabuli_NC_021167.1_883520  | Ca_kabuli_chr08    | 883520                         | [T/G]       | 1067303121                                 |
| Ca_Kabuli_NC_021167.1_884757  | Ca_kabuli_chr08    | 884757                         | [T/C]       | 1067303122                                 |
| Ca_Kabuli_NC_021167.1_897400  | Ca_kabuli_chr08    | 897400                         | [T/G]       | 1067303123                                 |
| Ca_Kabuli_NC_021167.1_897465  | Ca_kabuli_chr08    | 897465                         | [A/G]       | 1067303124                                 |
| Ca_Kabuli_NC_021167.1_910687  | Ca_kabuli_chr08    | 910687                         | [A/C]       | 1067303125                                 |
| Ca_Kabuli_NC_021167.1_910716  | Ca_kabuli_chr08    | 910716                         | [A/G]       | 1067303126                                 |
| Ca_Kabuli_NC_021167.1_910719  | Ca_kabuli_chr08    | 910719                         | [T/G]       | 1067303127                                 |
| Ca_Kabuli_NC_021167.1_924661  | Ca_kabuli_chr08    | 924661                         | [T/C]       | 1067303128                                 |
| Ca_Kabuli_NC_021167.1_924715  | Ca_kabuli_chr08    | 924715                         | [A/G]       | 1067303129                                 |
| Ca_Kabuli_NC_021167.1_995091  | Ca_kabuli_chr08    | 995091                         | [T/A]       | 1067303130                                 |
| Ca_Kabuli_NC_021167.1_995092  | Ca_kabuli_chr08    | 995092                         | [A/G]       | 1067303131                                 |
| Ca_Kabuli_NC_021167.1_995138  | Ca_kabuli_chr08    | 995138                         | [A/T]       | 1067303132                                 |
| Ca_Kabuli_NC_021167.1_1011362 | Ca_kabuli_chr08    | 1011362                        | [T/C]       | 1067303133                                 |
| Ca_Kabuli_NC_021167.1_1108533 | Ca_kabuli_chr08    | 1108533                        | [T/C]       | 1067303134                                 |
| Ca_Kabuli_NC_021167.1_1131183 | Ca_kabuli_chr08    | 1131183                        | [T/G]       | 1067303135                                 |
| Ca_Kabuli_NC_021167.1_1131202 | Ca_kabuli_chr08    | 1131202                        | [T/C]       | 1067303136                                 |
| Ca_Kabuli_NC_021167.1_1194886 | Ca_kabuli_chr08    | 1194886                        | [G/A]       | 1067303137                                 |
| Ca_Kabuli_NC_021167.1_1262555 | Ca_kabuli_chr08    | 1262555                        | [T/C]       | 1067303138                                 |
| Ca_Kabuli_NC_021167.1_1262583 | Ca_kabuli_chr08    | 1262583                        | [T/A]       | 1067303139                                 |
| Ca_Kabuli_NC_021167.1_1265506 | Ca_kabuli_chr08    | 1265506                        | [T/A]       | 1067303140                                 |
| Ca_Kabuli_NC_021167.1_1265508 | Ca_kabuli_chr08    | 1265508                        | [T/G]       | 1067303141                                 |
| Ca_Kabuli_NC_021167.1_1265509 | Ca_kabuli_chr08    | 1265509                        | [T/A]       | 1067303142                                 |
| Ca_Kabuli_NC_021167.1_1265603 | Ca_kabuli_chr08    | 1265603                        | [A/G]       | 1067303143                                 |
| Ca_Kabuli_NC_021167.1_1276472 | Ca_kabuli_chr08    | 1276472                        | [A/G]       | 1067303144                                 |
| Ca_Kabuli_NC_021167.1_1290371 | Ca_kabuli_chr08    | 1290371                        | [A/C]       | 1067303145                                 |
| Ca_Kabuli_NC_021167.1_1290386 | Ca_kabuli_chr08    | 1290386                        | [T/C]       | 1067303146                                 |
| Ca_Kabuli_NC_021167.1_1325152 | Ca_kabuli_chr08    | 1325152                        | [A/C]       | 1067303147                                 |
| Ca_Kabuli_NC_021167.1_1362659 | Ca_kabuli_chr08    | 1362659                        | [A/G]       | 1067303148                                 |

| <b>SNP IDs</b>                | <b>Chromosomes</b> | <b>Physical positions (bp)</b> | <b>SNPs</b> | <b>NCBI SNPdb accession IDs (NCBI_ss#)</b> |
|-------------------------------|--------------------|--------------------------------|-------------|--------------------------------------------|
| Ca_Kabuli_NC_021167.1_1362673 | Ca_kabuli_chr08    | 1362673                        | [A/C]       | 1067303149                                 |
| Ca_Kabuli_NC_021167.1_1363721 | Ca_kabuli_chr08    | 1363721                        | [T/G]       | 1067303150                                 |
| Ca_Kabuli_NC_021167.1_1363755 | Ca_kabuli_chr08    | 1363755                        | [A/C]       | 1067303151                                 |
| Ca_Kabuli_NC_021167.1_1370295 | Ca_kabuli_chr08    | 1370295                        | [A/C]       | 1067303152                                 |
| Ca_Kabuli_NC_021167.1_1465284 | Ca_kabuli_chr08    | 1465284                        | [A/T]       | 1067303153                                 |
| Ca_Kabuli_NC_021167.1_1475872 | Ca_kabuli_chr08    | 1475872                        | [G/T]       | 1067303154                                 |
| Ca_Kabuli_NC_021167.1_1475873 | Ca_kabuli_chr08    | 1475873                        | [A/C]       | 1067303155                                 |
| Ca_Kabuli_NC_021167.1_1475874 | Ca_kabuli_chr08    | 1475874                        | [G/T]       | 1067303156                                 |
| Ca_Kabuli_NC_021167.1_1507766 | Ca_kabuli_chr08    | 1507766                        | [G/A]       | 1067303157                                 |
| Ca_Kabuli_NC_021167.1_1554893 | Ca_kabuli_chr08    | 1554893                        | [T/A]       | 1067303158                                 |
| Ca_Kabuli_NC_021167.1_1555159 | Ca_kabuli_chr08    | 1555159                        | [A/G]       | 1067303159                                 |
| Ca_Kabuli_NC_021167.1_1612186 | Ca_kabuli_chr08    | 1612186                        | [T/A]       | 1067303160                                 |
| Ca_Kabuli_NC_021167.1_1675894 | Ca_kabuli_chr08    | 1675894                        | [A/T]       | 1067303161                                 |
| Ca_Kabuli_NC_021167.1_1675917 | Ca_kabuli_chr08    | 1675917                        | [T/C]       | 1067303162                                 |
| Ca_Kabuli_NC_021167.1_1708730 | Ca_kabuli_chr08    | 1708730                        | [T/G]       | 1067303163                                 |
| Ca_Kabuli_NC_021167.1_1708895 | Ca_kabuli_chr08    | 1708895                        | [A/G]       | 1067303164                                 |
| Ca_Kabuli_NC_021167.1_1711439 | Ca_kabuli_chr08    | 1711439                        | [A/G]       | 1067303165                                 |
| Ca_Kabuli_NC_021167.1_1718014 | Ca_kabuli_chr08    | 1718014                        | [T/C]       | 1067303166                                 |
| Ca_Kabuli_NC_021167.1_1718018 | Ca_kabuli_chr08    | 1718018                        | [A/G]       | 1067303167                                 |
| Ca_Kabuli_NC_021167.1_1718031 | Ca_kabuli_chr08    | 1718031                        | [A/C]       | 1067303168                                 |
| Ca_Kabuli_NC_021167.1_1723577 | Ca_kabuli_chr08    | 1723577                        | [T/A]       | 1067303169                                 |
| Ca_Kabuli_NC_021167.1_1742958 | Ca_kabuli_chr08    | 1742958                        | [G/T]       | 1067303170                                 |
| Ca_Kabuli_NC_021167.1_1742959 | Ca_kabuli_chr08    | 1742959                        | [G/C]       | 1067303171                                 |
| Ca_Kabuli_NC_021167.1_1742960 | Ca_kabuli_chr08    | 1742960                        | [G/T]       | 1067303172                                 |
| Ca_Kabuli_NC_021167.1_1747528 | Ca_kabuli_chr08    | 1747528                        | [A/T]       | 1067303173                                 |
| Ca_Kabuli_NC_021167.1_1782034 | Ca_kabuli_chr08    | 1782034                        | [C/G]       | 1067303174                                 |
| Ca_Kabuli_NC_021167.1_1794696 | Ca_kabuli_chr08    | 1794696                        | [A/G]       | 1067303175                                 |
| Ca_Kabuli_NC_021167.1_1794714 | Ca_kabuli_chr08    | 1794714                        | [T/G]       | 1067303176                                 |
| Ca_Kabuli_NC_021167.1_1794717 | Ca_kabuli_chr08    | 1794717                        | [T/A]       | 1067303177                                 |
| Ca_Kabuli_NC_021167.1_1794745 | Ca_kabuli_chr08    | 1794745                        | [A/G]       | 1067303178                                 |
| Ca_Kabuli_NC_021167.1_1794804 | Ca_kabuli_chr08    | 1794804                        | [G/T]       | 1067303179                                 |
| Ca_Kabuli_NC_021167.1_1794812 | Ca_kabuli_chr08    | 1794812                        | [G/C]       | 1067303180                                 |
| Ca_Kabuli_NC_021167.1_1794813 | Ca_kabuli_chr08    | 1794813                        | [T/G]       | 1067303181                                 |
| Ca_Kabuli_NC_021167.1_1794814 | Ca_kabuli_chr08    | 1794814                        | [G/T]       | 1067303182                                 |



| <b>SNP IDs</b>                | <b>Chromosomes</b> | <b>Physical positions (bp)</b> | <b>SNPs</b> | <b>NCBI SNPdb accession IDs (NCBI_ss#)</b> |
|-------------------------------|--------------------|--------------------------------|-------------|--------------------------------------------|
| Ca_Kabuli_NC_021167.1_1794815 | Ca_kabuli_chr08    | 1794815                        | [A/C]       | 1067303183                                 |
| Ca_Kabuli_NC_021167.1_1794915 | Ca_kabuli_chr08    | 1794915                        | [A/G]       | 1067303184                                 |
| Ca_Kabuli_NC_021167.1_1829515 | Ca_kabuli_chr08    | 1829515                        | [A/G]       | 1067303185                                 |
| Ca_Kabuli_NC_021167.1_1880101 | Ca_kabuli_chr08    | 1880101                        | [T/C]       | 1067303186                                 |
| Ca_Kabuli_NC_021167.1_1880113 | Ca_kabuli_chr08    | 1880113                        | [A/G]       | 1067303187                                 |
| Ca_Kabuli_NC_021167.1_1880158 | Ca_kabuli_chr08    | 1880158                        | [T/C]       | 1067303188                                 |
| Ca_Kabuli_NC_021167.1_1883131 | Ca_kabuli_chr08    | 1883131                        | [T/G]       | 1067303189                                 |
| Ca_Kabuli_NC_021167.1_1958409 | Ca_kabuli_chr08    | 1958409                        | [T/G]       | 1067303190                                 |
| Ca_Kabuli_NC_021167.1_1963543 | Ca_kabuli_chr08    | 1963543                        | [T/G]       | 1067303191                                 |
| Ca_Kabuli_NC_021167.1_1970309 | Ca_kabuli_chr08    | 1970309                        | [A/C]       | 1067303192                                 |
| Ca_Kabuli_NC_021167.1_1989467 | Ca_kabuli_chr08    | 1989467                        | [T/G]       | 1067303193                                 |
| Ca_Kabuli_NC_021167.1_2029411 | Ca_kabuli_chr08    | 2029411                        | [A/G]       | 1067303194                                 |
| Ca_Kabuli_NC_021167.1_2032659 | Ca_kabuli_chr08    | 2032659                        | [T/C]       | 1067303195                                 |
| Ca_Kabuli_NC_021167.1_2073741 | Ca_kabuli_chr08    | 2073741                        | [T/C]       | 1067303196                                 |
| Ca_Kabuli_NC_021167.1_2073782 | Ca_kabuli_chr08    | 2073782                        | [T/C]       | 1067303197                                 |
| Ca_Kabuli_NC_021167.1_2073806 | Ca_kabuli_chr08    | 2073806                        | [A/T]       | 1067303198                                 |
| Ca_Kabuli_NC_021167.1_2074562 | Ca_kabuli_chr08    | 2074562                        | [A/C]       | 1067303199                                 |
| Ca_Kabuli_NC_021167.1_2074685 | Ca_kabuli_chr08    | 2074685                        | [A/C]       | 1067303200                                 |
| Ca_Kabuli_NC_021167.1_2074706 | Ca_kabuli_chr08    | 2074706                        | [A/C]       | 1067303201                                 |
| Ca_Kabuli_NC_021167.1_2075260 | Ca_kabuli_chr08    | 2075260                        | [A/T]       | 1067303202                                 |
| Ca_Kabuli_NC_021167.1_2075276 | Ca_kabuli_chr08    | 2075276                        | [A/T]       | 1067303203                                 |
| Ca_Kabuli_NC_021167.1_2079734 | Ca_kabuli_chr08    | 2079734                        | [A/G]       | 1067303204                                 |
| Ca_Kabuli_NC_021167.1_2079765 | Ca_kabuli_chr08    | 2079765                        | [T/C]       | 1067303205                                 |
| Ca_Kabuli_NC_021167.1_2079787 | Ca_kabuli_chr08    | 2079787                        | [A/G]       | 1067303206                                 |
| Ca_Kabuli_NC_021167.1_2080545 | Ca_kabuli_chr08    | 2080545                        | [A/C]       | 1067303207                                 |
| Ca_Kabuli_NC_021167.1_2080621 | Ca_kabuli_chr08    | 2080621                        | [A/G]       | 1067303208                                 |
| Ca_Kabuli_NC_021167.1_2088903 | Ca_kabuli_chr08    | 2088903                        | [T/G]       | 1067303209                                 |
| Ca_Kabuli_NC_021167.1_2088919 | Ca_kabuli_chr08    | 2088919                        | [A/G]       | 1067303210                                 |
| Ca_Kabuli_NC_021167.1_2088944 | Ca_kabuli_chr08    | 2088944                        | [T/C]       | 1067303211                                 |
| Ca_Kabuli_NC_021167.1_2088965 | Ca_kabuli_chr08    | 2088965                        | [A/T]       | 1067303212                                 |
| Ca_Kabuli_NC_021167.1_2089009 | Ca_kabuli_chr08    | 2089009                        | [A/T]       | 1067303213                                 |
| Ca_Kabuli_NC_021167.1_2093176 | Ca_kabuli_chr08    | 2093176                        | [A/G]       | 1067303214                                 |
| Ca_Kabuli_NC_021167.1_2093212 | Ca_kabuli_chr08    | 2093212                        | [A/C]       | 1067303215                                 |
| Ca_Kabuli_NC_021167.1_2093214 | Ca_kabuli_chr08    | 2093214                        | [T/G]       | 1067303216                                 |

| <b>SNP IDs</b>                | <b>Chromosomes</b> | <b>Physical positions (bp)</b> | <b>SNPs</b> | <b>NCBI SNPdb accession IDs (NCBI_ss#)</b> |
|-------------------------------|--------------------|--------------------------------|-------------|--------------------------------------------|
| Ca_Kabuli_NC_021167.1_2093224 | Ca_kabuli_chr08    | 2093224                        | [A/G]       | 1067303217                                 |
| Ca_Kabuli_NC_021167.1_2093226 | Ca_kabuli_chr08    | 2093226                        | [T/G]       | 1067303218                                 |
| Ca_Kabuli_NC_021167.1_2109980 | Ca_kabuli_chr08    | 2109980                        | [A/C]       | 1067303219                                 |
| Ca_Kabuli_NC_021167.1_2136222 | Ca_kabuli_chr08    | 2136222                        | [T/C]       | 1067303220                                 |
| Ca_Kabuli_NC_021167.1_2136229 | Ca_kabuli_chr08    | 2136229                        | [T/G]       | 1067303221                                 |
| Ca_Kabuli_NC_021167.1_2136243 | Ca_kabuli_chr08    | 2136243                        | [T/G]       | 1067303222                                 |
| Ca_Kabuli_NC_021167.1_2136282 | Ca_kabuli_chr08    | 2136282                        | [T/G]       | 1067303223                                 |
| Ca_Kabuli_NC_021167.1_2186379 | Ca_kabuli_chr08    | 2186379                        | [A/T]       | 1067303224                                 |
| Ca_Kabuli_NC_021167.1_2186380 | Ca_kabuli_chr08    | 2186380                        | [T/A]       | 1067303225                                 |
| Ca_Kabuli_NC_021167.1_2190581 | Ca_kabuli_chr08    | 2190581                        | [C/T]       | 1067303226                                 |
| Ca_Kabuli_NC_021167.1_2194871 | Ca_kabuli_chr08    | 2194871                        | [T/C]       | 1067303227                                 |
| Ca_Kabuli_NC_021167.1_2264188 | Ca_kabuli_chr08    | 2264188                        | [T/C]       | 1067303228                                 |
| Ca_Kabuli_NC_021167.1_2281792 | Ca_kabuli_chr08    | 2281792                        | [T/C]       | 1067303229                                 |
| Ca_Kabuli_NC_021167.1_2281799 | Ca_kabuli_chr08    | 2281799                        | [T/C]       | 1067303230                                 |
| Ca_Kabuli_NC_021167.1_2281814 | Ca_kabuli_chr08    | 2281814                        | [A/G]       | 1067303231                                 |
| Ca_Kabuli_NC_021167.1_2417216 | Ca_kabuli_chr08    | 2417216                        | [T/G]       | 1067303232                                 |
| Ca_Kabuli_NC_021167.1_2417233 | Ca_kabuli_chr08    | 2417233                        | [T/G]       | 1067303233                                 |
| Ca_Kabuli_NC_021167.1_2452031 | Ca_kabuli_chr08    | 2452031                        | [A/G]       | 1067303234                                 |
| Ca_Kabuli_NC_021167.1_2459578 | Ca_kabuli_chr08    | 2459578                        | [T/A]       | 1067303235                                 |
| Ca_Kabuli_NC_021167.1_2463102 | Ca_kabuli_chr08    | 2463102                        | [A/C]       | 1067303236                                 |
| Ca_Kabuli_NC_021167.1_2463549 | Ca_kabuli_chr08    | 2463549                        | [A/G]       | 1067303237                                 |
| Ca_Kabuli_NC_021167.1_2464356 | Ca_kabuli_chr08    | 2464356                        | [T/C]       | 1067303238                                 |
| Ca_Kabuli_NC_021167.1_2482765 | Ca_kabuli_chr08    | 2482765                        | [T/C]       | 1067303239                                 |
| Ca_Kabuli_NC_021167.1_2482798 | Ca_kabuli_chr08    | 2482798                        | [A/G]       | 1067303240                                 |
| Ca_Kabuli_NC_021167.1_2483120 | Ca_kabuli_chr08    | 2483120                        | [A/T]       | 1067303241                                 |
| Ca_Kabuli_NC_021167.1_2524150 | Ca_kabuli_chr08    | 2524150                        | [T/G]       | 1067303242                                 |
| Ca_Kabuli_NC_021167.1_2524153 | Ca_kabuli_chr08    | 2524153                        | [T/G]       | 1067303243                                 |
| Ca_Kabuli_NC_021167.1_2524166 | Ca_kabuli_chr08    | 2524166                        | [A/G]       | 1067303244                                 |
| Ca_Kabuli_NC_021167.1_2529535 | Ca_kabuli_chr08    | 2529535                        | [T/C]       | 1067303245                                 |
| Ca_Kabuli_NC_021167.1_2529563 | Ca_kabuli_chr08    | 2529563                        | [T/A]       | 1067303246                                 |
| Ca_Kabuli_NC_021167.1_2540613 | Ca_kabuli_chr08    | 2540613                        | [T/G]       | 1067303247                                 |
| Ca_Kabuli_NC_021167.1_2543145 | Ca_kabuli_chr08    | 2543145                        | [T/A]       | 1067303248                                 |
| Ca_Kabuli_NC_021167.1_2543151 | Ca_kabuli_chr08    | 2543151                        | [A/C]       | 1067303249                                 |
| Ca_Kabuli_NC_021167.1_2545208 | Ca_kabuli_chr08    | 2545208                        | [A/T]       | 1067303250                                 |

| <b>SNP IDs</b>                | <b>Chromosomes</b> | <b>Physical positions (bp)</b> | <b>SNPs</b> | <b>NCBI SNPdb accession IDs (NCBI_ss#)</b> |
|-------------------------------|--------------------|--------------------------------|-------------|--------------------------------------------|
| Ca_Kabuli_NC_021167.1_2545211 | Ca_kabuli_chr08    | 2545211                        | [T/C]       | 1067303251                                 |
| Ca_Kabuli_NC_021167.1_2580092 | Ca_kabuli_chr08    | 2580092                        | [T/G]       | 1067303252                                 |
| Ca_Kabuli_NC_021167.1_2580170 | Ca_kabuli_chr08    | 2580170                        | [A/G]       | 1067303253                                 |
| Ca_Kabuli_NC_021167.1_2580194 | Ca_kabuli_chr08    | 2580194                        | [T/G]       | 1067303254                                 |
| Ca_Kabuli_NC_021167.1_2580273 | Ca_kabuli_chr08    | 2580273                        | [A/G]       | 1067303255                                 |
| Ca_Kabuli_NC_021167.1_2617595 | Ca_kabuli_chr08    | 2617595                        | [T/A]       | 1067303256                                 |
| Ca_Kabuli_NC_021167.1_2622008 | Ca_kabuli_chr08    | 2622008                        | [T/G]       | 1067303257                                 |
| Ca_Kabuli_NC_021167.1_2623534 | Ca_kabuli_chr08    | 2623534                        | [T/C]       | 1067303258                                 |
| Ca_Kabuli_NC_021167.1_2623544 | Ca_kabuli_chr08    | 2623544                        | [T/A]       | 1067303259                                 |
| Ca_Kabuli_NC_021167.1_2623545 | Ca_kabuli_chr08    | 2623545                        | [A/T]       | 1067303260                                 |
| Ca_Kabuli_NC_021167.1_2651888 | Ca_kabuli_chr08    | 2651888                        | [T/A]       | 1067303261                                 |
| Ca_Kabuli_NC_021167.1_2651889 | Ca_kabuli_chr08    | 2651889                        | [A/C]       | 1067303262                                 |
| Ca_Kabuli_NC_021167.1_2651895 | Ca_kabuli_chr08    | 2651895                        | [A/T]       | 1067303263                                 |
| Ca_Kabuli_NC_021167.1_2651902 | Ca_kabuli_chr08    | 2651902                        | [T/G]       | 1067303264                                 |
| Ca_Kabuli_NC_021167.1_2651925 | Ca_kabuli_chr08    | 2651925                        | [C/G]       | 1067303265                                 |
| Ca_Kabuli_NC_021167.1_2686597 | Ca_kabuli_chr08    | 2686597                        | [A/C]       | 1067303266                                 |
| Ca_Kabuli_NC_021167.1_2686610 | Ca_kabuli_chr08    | 2686610                        | [A/C]       | 1067303267                                 |
| Ca_Kabuli_NC_021167.1_2686615 | Ca_kabuli_chr08    | 2686615                        | [A/T]       | 1067303268                                 |
| Ca_Kabuli_NC_021167.1_2722647 | Ca_kabuli_chr08    | 2722647                        | [T/C]       | 1067303269                                 |
| Ca_Kabuli_NC_021167.1_2722660 | Ca_kabuli_chr08    | 2722660                        | [T/G]       | 1067303270                                 |
| Ca_Kabuli_NC_021167.1_2722664 | Ca_kabuli_chr08    | 2722664                        | [A/G]       | 1067303271                                 |
| Ca_Kabuli_NC_021167.1_2729806 | Ca_kabuli_chr08    | 2729806                        | [A/T]       | 1067303272                                 |
| Ca_Kabuli_NC_021167.1_2729827 | Ca_kabuli_chr08    | 2729827                        | [A/G]       | 1067303273                                 |
| Ca_Kabuli_NC_021167.1_2827779 | Ca_kabuli_chr08    | 2827779                        | [T/C]       | 1067303274                                 |
| Ca_Kabuli_NC_021167.1_2827781 | Ca_kabuli_chr08    | 2827781                        | [G/A]       | 1067303275                                 |
| Ca_Kabuli_NC_021167.1_2827820 | Ca_kabuli_chr08    | 2827820                        | [A/G]       | 1067303276                                 |
| Ca_Kabuli_NC_021167.1_2827832 | Ca_kabuli_chr08    | 2827832                        | [T/A]       | 1067303277                                 |
| Ca_Kabuli_NC_021167.1_2859885 | Ca_kabuli_chr08    | 2859885                        | [T/C]       | 1067303278                                 |
| Ca_Kabuli_NC_021167.1_2889430 | Ca_kabuli_chr08    | 2889430                        | [T/A]       | 1067303279                                 |
| Ca_Kabuli_NC_021167.1_2889717 | Ca_kabuli_chr08    | 2889717                        | [T/C]       | 1067303280                                 |
| Ca_Kabuli_NC_021167.1_2889720 | Ca_kabuli_chr08    | 2889720                        | [T/C]       | 1067303281                                 |
| Ca_Kabuli_NC_021167.1_2889747 | Ca_kabuli_chr08    | 2889747                        | [T/C]       | 1067303282                                 |
| Ca_Kabuli_NC_021167.1_2943660 | Ca_kabuli_chr08    | 2943660                        | [A/G]       | 1067303283                                 |
| Ca_Kabuli_NC_021167.1_2947511 | Ca_kabuli_chr08    | 2947511                        | [A/G]       | 1067303284                                 |

| <b>SNP IDs</b>                | <b>Chromosomes</b> | <b>Physical positions (bp)</b> | <b>SNPs</b> | <b>NCBI SNPdb accession IDs (NCBI_ss#)</b> |
|-------------------------------|--------------------|--------------------------------|-------------|--------------------------------------------|
| Ca_Kabuli_NC_021167.1_2955532 | Ca_kabuli_chr08    | 2955532                        | [A/C]       | 1067303285                                 |
| Ca_Kabuli_NC_021167.1_2974555 | Ca_kabuli_chr08    | 2974555                        | [A/C]       | 1067303286                                 |
| Ca_Kabuli_NC_021167.1_3013920 | Ca_kabuli_chr08    | 3013920                        | [T/C]       | 1067303287                                 |
| Ca_Kabuli_NC_021167.1_3017548 | Ca_kabuli_chr08    | 3017548                        | [G/T]       | 1067303288                                 |
| Ca_Kabuli_NC_021167.1_3017550 | Ca_kabuli_chr08    | 3017550                        | [G/T]       | 1067303289                                 |
| Ca_Kabuli_NC_021167.1_3020987 | Ca_kabuli_chr08    | 3020987                        | [A/T]       | 1067303290                                 |
| Ca_Kabuli_NC_021167.1_3021000 | Ca_kabuli_chr08    | 3021000                        | [T/G]       | 1067303291                                 |
| Ca_Kabuli_NC_021167.1_3021006 | Ca_kabuli_chr08    | 3021006                        | [T/G]       | 1067303292                                 |
| Ca_Kabuli_NC_021167.1_3021007 | Ca_kabuli_chr08    | 3021007                        | [A/C]       | 1067303293                                 |
| Ca_Kabuli_NC_021167.1_3041872 | Ca_kabuli_chr08    | 3041872                        | [A/C]       | 1067303294                                 |
| Ca_Kabuli_NC_021167.1_3171296 | Ca_kabuli_chr08    | 3171296                        | [A/G]       | 1067303295                                 |
| Ca_Kabuli_NC_021167.1_3171321 | Ca_kabuli_chr08    | 3171321                        | [A/G]       | 1067303296                                 |
| Ca_Kabuli_NC_021167.1_3179618 | Ca_kabuli_chr08    | 3179618                        | [C/T]       | 1067303297                                 |
| Ca_Kabuli_NC_021167.1_3269063 | Ca_kabuli_chr08    | 3269063                        | [T/G]       | 1067303298                                 |
| Ca_Kabuli_NC_021167.1_3269085 | Ca_kabuli_chr08    | 3269085                        | [A/C]       | 1067303299                                 |
| Ca_Kabuli_NC_021167.1_3269088 | Ca_kabuli_chr08    | 3269088                        | [A/C]       | 1067303300                                 |
| Ca_Kabuli_NC_021167.1_3394738 | Ca_kabuli_chr08    | 3394738                        | [T/G]       | 1067303301                                 |
| Ca_Kabuli_NC_021167.1_3396787 | Ca_kabuli_chr08    | 3396787                        | [T/C]       | 1067303302                                 |
| Ca_Kabuli_NC_021167.1_3396797 | Ca_kabuli_chr08    | 3396797                        | [T/A]       | 1067303303                                 |
| Ca_Kabuli_NC_021167.1_3396849 | Ca_kabuli_chr08    | 3396849                        | [T/C]       | 1067303304                                 |
| Ca_Kabuli_NC_021167.1_3498977 | Ca_kabuli_chr08    | 3498977                        | [T/G]       | 1067303305                                 |
| Ca_Kabuli_NC_021167.1_3499001 | Ca_kabuli_chr08    | 3499001                        | [A/G]       | 1067303306                                 |
| Ca_Kabuli_NC_021167.1_3499013 | Ca_kabuli_chr08    | 3499013                        | [T/G]       | 1067303307                                 |
| Ca_Kabuli_NC_021167.1_3499016 | Ca_kabuli_chr08    | 3499016                        | [A/C]       | 1067303308                                 |
| Ca_Kabuli_NC_021167.1_3530213 | Ca_kabuli_chr08    | 3530213                        | [A/G]       | 1067303309                                 |
| Ca_Kabuli_NC_021167.1_3533284 | Ca_kabuli_chr08    | 3533284                        | [T/G]       | 1067303310                                 |
| Ca_Kabuli_NC_021167.1_3533306 | Ca_kabuli_chr08    | 3533306                        | [A/T]       | 1067303311                                 |
| Ca_Kabuli_NC_021167.1_3541771 | Ca_kabuli_chr08    | 3541771                        | [C/A]       | 1067303312                                 |
| Ca_Kabuli_NC_021167.1_3541773 | Ca_kabuli_chr08    | 3541773                        | [C/A]       | 1067303313                                 |
| Ca_Kabuli_NC_021167.1_3541774 | Ca_kabuli_chr08    | 3541774                        | [C/T]       | 1067303314                                 |
| Ca_Kabuli_NC_021167.1_3571098 | Ca_kabuli_chr08    | 3571098                        | [A/C]       | 1067303315                                 |
| Ca_Kabuli_NC_021167.1_3601540 | Ca_kabuli_chr08    | 3601540                        | [T/G]       | 1067303316                                 |
| Ca_Kabuli_NC_021167.1_3665577 | Ca_kabuli_chr08    | 3665577                        | [T/G]       | 1067303317                                 |
| Ca_Kabuli_NC_021167.1_3709184 | Ca_kabuli_chr08    | 3709184                        | [C/G]       | 1067303318                                 |

| <b>SNP IDs</b>                | <b>Chromosomes</b> | <b>Physical positions (bp)</b> | <b>SNPs</b> | <b>NCBI SNPdb accession IDs (NCBI_ss#)</b> |
|-------------------------------|--------------------|--------------------------------|-------------|--------------------------------------------|
| Ca_Kabuli_NC_021167.1_3709185 | Ca_kabuli_chr08    | 3709185                        | [G/A]       | 1067303319                                 |
| Ca_Kabuli_NC_021167.1_3709187 | Ca_kabuli_chr08    | 3709187                        | [T/C]       | 1067303320                                 |
| Ca_Kabuli_NC_021167.1_3709188 | Ca_kabuli_chr08    | 3709188                        | [G/T]       | 1067303321                                 |
| Ca_Kabuli_NC_021167.1_3730339 | Ca_kabuli_chr08    | 3730339                        | [T/G]       | 1067303322                                 |
| Ca_Kabuli_NC_021167.1_3775861 | Ca_kabuli_chr08    | 3775861                        | [A/C]       | 1067303323                                 |
| Ca_Kabuli_NC_021167.1_3813951 | Ca_kabuli_chr08    | 3813951                        | [A/C]       | 1067303324                                 |
| Ca_Kabuli_NC_021167.1_3829581 | Ca_kabuli_chr08    | 3829581                        | [T/G]       | 1067303325                                 |
| Ca_Kabuli_NC_021167.1_3829646 | Ca_kabuli_chr08    | 3829646                        | [A/G]       | 1067303326                                 |
| Ca_Kabuli_NC_021167.1_4006216 | Ca_kabuli_chr08    | 4006216                        | [A/G]       | 1067303327                                 |
| Ca_Kabuli_NC_021167.1_4023040 | Ca_kabuli_chr08    | 4023040                        | [T/C]       | 1067303328                                 |
| Ca_Kabuli_NC_021167.1_4023049 | Ca_kabuli_chr08    | 4023049                        | [T/G]       | 1067303329                                 |
| Ca_Kabuli_NC_021167.1_4023103 | Ca_kabuli_chr08    | 4023103                        | [A/C]       | 1067303330                                 |
| Ca_Kabuli_NC_021167.1_4023148 | Ca_kabuli_chr08    | 4023148                        | [A/C]       | 1067303331                                 |
| Ca_Kabuli_NC_021167.1_4073076 | Ca_kabuli_chr08    | 4073076                        | [A/T]       | 1067303332                                 |
| Ca_Kabuli_NC_021167.1_4073077 | Ca_kabuli_chr08    | 4073077                        | [A/C]       | 1067303333                                 |
| Ca_Kabuli_NC_021167.1_4091923 | Ca_kabuli_chr08    | 4091923                        | [A/C]       | 1067303334                                 |
| Ca_Kabuli_NC_021167.1_4091927 | Ca_kabuli_chr08    | 4091927                        | [A/C]       | 1067303335                                 |
| Ca_Kabuli_NC_021167.1_4091944 | Ca_kabuli_chr08    | 4091944                        | [T/C]       | 1067303336                                 |
| Ca_Kabuli_NC_021167.1_4102954 | Ca_kabuli_chr08    | 4102954                        | [T/G]       | 1067303337                                 |
| Ca_Kabuli_NC_021167.1_4102960 | Ca_kabuli_chr08    | 4102960                        | [A/C]       | 1067303338                                 |
| Ca_Kabuli_NC_021167.1_4172244 | Ca_kabuli_chr08    | 4172244                        | [T/A]       | 1067303339                                 |
| Ca_Kabuli_NC_021167.1_4172245 | Ca_kabuli_chr08    | 4172245                        | [A/T]       | 1067303340                                 |
| Ca_Kabuli_NC_021167.1_4172257 | Ca_kabuli_chr08    | 4172257                        | [T/G]       | 1067303341                                 |
| Ca_Kabuli_NC_021167.1_4172269 | Ca_kabuli_chr08    | 4172269                        | [T/G]       | 1067303342                                 |
| Ca_Kabuli_NC_021167.1_4172306 | Ca_kabuli_chr08    | 4172306                        | [T/C]       | 1067303343                                 |
| Ca_Kabuli_NC_021167.1_4172313 | Ca_kabuli_chr08    | 4172313                        | [T/G]       | 1067303344                                 |
| Ca_Kabuli_NC_021167.1_4172357 | Ca_kabuli_chr08    | 4172357                        | [C/A]       | 1067303345                                 |
| Ca_Kabuli_NC_021167.1_4172368 | Ca_kabuli_chr08    | 4172368                        | [T/G]       | 1067303346                                 |
| Ca_Kabuli_NC_021167.1_4198240 | Ca_kabuli_chr08    | 4198240                        | [A/G]       | 1067303347                                 |
| Ca_Kabuli_NC_021167.1_4198242 | Ca_kabuli_chr08    | 4198242                        | [C/T]       | 1067303348                                 |
| Ca_Kabuli_NC_021167.1_4198246 | Ca_kabuli_chr08    | 4198246                        | [T/C]       | 1067303349                                 |
| Ca_Kabuli_NC_021167.1_4203698 | Ca_kabuli_chr08    | 4203698                        | [A/T]       | 1067303350                                 |
| Ca_Kabuli_NC_021167.1_4203727 | Ca_kabuli_chr08    | 4203727                        | [A/C]       | 1067303351                                 |
| Ca_Kabuli_NC_021167.1_4203752 | Ca_kabuli_chr08    | 4203752                        | [T/A]       | 1067303352                                 |

| <b>SNP IDs</b>                | <b>Chromosomes</b> | <b>Physical positions (bp)</b> | <b>SNPs</b> | <b>NCBI SNPdb accession IDs (NCBI_ss#)</b> |
|-------------------------------|--------------------|--------------------------------|-------------|--------------------------------------------|
| Ca_Kabuli_NC_021167.1_4271533 | Ca_kabuli_chr08    | 4271533                        | [T/C]       | 1067303353                                 |
| Ca_Kabuli_NC_021167.1_4271563 | Ca_kabuli_chr08    | 4271563                        | [T/C]       | 1067303354                                 |
| Ca_Kabuli_NC_021167.1_4271597 | Ca_kabuli_chr08    | 4271597                        | [A/C]       | 1067303355                                 |
| Ca_Kabuli_NC_021167.1_4280008 | Ca_kabuli_chr08    | 4280008                        | [T/C]       | 1067303356                                 |
| Ca_Kabuli_NC_021167.1_4280009 | Ca_kabuli_chr08    | 4280009                        | [C/G]       | 1067303357                                 |
| Ca_Kabuli_NC_021167.1_4290671 | Ca_kabuli_chr08    | 4290671                        | [A/T]       | 1067303358                                 |
| Ca_Kabuli_NC_021167.1_4290706 | Ca_kabuli_chr08    | 4290706                        | [T/C]       | 1067303359                                 |
| Ca_Kabuli_NC_021167.1_4290707 | Ca_kabuli_chr08    | 4290707                        | [C/G]       | 1067303360                                 |
| Ca_Kabuli_NC_021167.1_4346497 | Ca_kabuli_chr08    | 4346497                        | [G/T]       | 1067303361                                 |
| Ca_Kabuli_NC_021167.1_4346706 | Ca_kabuli_chr08    | 4346706                        | [T/A]       | 1067303362                                 |
| Ca_Kabuli_NC_021167.1_4346724 | Ca_kabuli_chr08    | 4346724                        | [A/G]       | 1067303363                                 |
| Ca_Kabuli_NC_021167.1_4346765 | Ca_kabuli_chr08    | 4346765                        | [A/G]       | 1067303364                                 |
| Ca_Kabuli_NC_021167.1_4346803 | Ca_kabuli_chr08    | 4346803                        | [A/C]       | 1067303365                                 |
| Ca_Kabuli_NC_021167.1_4346860 | Ca_kabuli_chr08    | 4346860                        | [A/C]       | 1067303366                                 |
| Ca_Kabuli_NC_021167.1_4346890 | Ca_kabuli_chr08    | 4346890                        | [A/G]       | 1067303367                                 |
| Ca_Kabuli_NC_021167.1_4347532 | Ca_kabuli_chr08    | 4347532                        | [A/C]       | 1067303368                                 |
| Ca_Kabuli_NC_021167.1_4347535 | Ca_kabuli_chr08    | 4347535                        | [A/C]       | 1067303369                                 |
| Ca_Kabuli_NC_021167.1_4356492 | Ca_kabuli_chr08    | 4356492                        | [T/G]       | 1067303370                                 |
| Ca_Kabuli_NC_021167.1_4363714 | Ca_kabuli_chr08    | 4363714                        | [A/G]       | 1067303371                                 |
| Ca_Kabuli_NC_021167.1_4363715 | Ca_kabuli_chr08    | 4363715                        | [A/G]       | 1067303372                                 |
| Ca_Kabuli_NC_021167.1_4363716 | Ca_kabuli_chr08    | 4363716                        | [A/G]       | 1067303373                                 |
| Ca_Kabuli_NC_021167.1_4395606 | Ca_kabuli_chr08    | 4395606                        | [C/A]       | 1067303374                                 |
| Ca_Kabuli_NC_021167.1_4406956 | Ca_kabuli_chr08    | 4406956                        | [C/G]       | 1067303375                                 |
| Ca_Kabuli_NC_021167.1_4421422 | Ca_kabuli_chr08    | 4421422                        | [T/C]       | 1067303376                                 |
| Ca_Kabuli_NC_021167.1_4421563 | Ca_kabuli_chr08    | 4421563                        | [T/G]       | 1067303377                                 |
| Ca_Kabuli_NC_021167.1_4421593 | Ca_kabuli_chr08    | 4421593                        | [T/C]       | 1067303378                                 |
| Ca_Kabuli_NC_021167.1_4421719 | Ca_kabuli_chr08    | 4421719                        | [A/C]       | 1067303379                                 |
| Ca_Kabuli_NC_021167.1_4430537 | Ca_kabuli_chr08    | 4430537                        | [A/T]       | 1067303380                                 |
| Ca_Kabuli_NC_021167.1_4476229 | Ca_kabuli_chr08    | 4476229                        | [A/C]       | 1067303381                                 |
| Ca_Kabuli_NC_021167.1_4483402 | Ca_kabuli_chr08    | 4483402                        | [T/G]       | 1067303382                                 |
| Ca_Kabuli_NC_021167.1_4484606 | Ca_kabuli_chr08    | 4484606                        | [T/G]       | 1067303383                                 |
| Ca_Kabuli_NC_021167.1_4512293 | Ca_kabuli_chr08    | 4512293                        | [A/T]       | 1067303384                                 |
| Ca_Kabuli_NC_021167.1_4512490 | Ca_kabuli_chr08    | 4512490                        | [A/C]       | 1067303385                                 |
| Ca_Kabuli_NC_021167.1_4542365 | Ca_kabuli_chr08    | 4542365                        | [A/C]       | 1067303386                                 |

| <b>SNP IDs</b>                | <b>Chromosomes</b> | <b>Physical positions (bp)</b> | <b>SNPs</b> | <b>NCBI SNPdb accession IDs (NCBI_ss#)</b> |
|-------------------------------|--------------------|--------------------------------|-------------|--------------------------------------------|
| Ca_Kabuli_NC_021167.1_4555825 | Ca_kabuli_chr08    | 4555825                        | [T/C]       | 1067303387                                 |
| Ca_Kabuli_NC_021167.1_4556684 | Ca_kabuli_chr08    | 4556684                        | [G/T]       | 1067303388                                 |
| Ca_Kabuli_NC_021167.1_4565731 | Ca_kabuli_chr08    | 4565731                        | [T/G]       | 1067303389                                 |
| Ca_Kabuli_NC_021167.1_4580453 | Ca_kabuli_chr08    | 4580453                        | [A/C]       | 1067303390                                 |
| Ca_Kabuli_NC_021167.1_4611043 | Ca_kabuli_chr08    | 4611043                        | [A/G]       | 1067303391                                 |
| Ca_Kabuli_NC_021167.1_4611125 | Ca_kabuli_chr08    | 4611125                        | [T/C]       | 1067303392                                 |
| Ca_Kabuli_NC_021167.1_4611893 | Ca_kabuli_chr08    | 4611893                        | [A/T]       | 1067303393                                 |
| Ca_Kabuli_NC_021167.1_4614681 | Ca_kabuli_chr08    | 4614681                        | [G/T]       | 1067303394                                 |
| Ca_Kabuli_NC_021167.1_4714590 | Ca_kabuli_chr08    | 4714590                        | [T/G]       | 1067303395                                 |
| Ca_Kabuli_NC_021167.1_4764559 | Ca_kabuli_chr08    | 4764559                        | [A/C]       | 1067303396                                 |
| Ca_Kabuli_NC_021167.1_4773207 | Ca_kabuli_chr08    | 4773207                        | [A/G]       | 1067303397                                 |
| Ca_Kabuli_NC_021167.1_4807080 | Ca_kabuli_chr08    | 4807080                        | [G/T]       | 1067303398                                 |
| Ca_Kabuli_NC_021167.1_4807088 | Ca_kabuli_chr08    | 4807088                        | [T/G]       | 1067303399                                 |
| Ca_Kabuli_NC_021167.1_4807090 | Ca_kabuli_chr08    | 4807090                        | [C/T]       | 1067303400                                 |
| Ca_Kabuli_NC_021167.1_4807094 | Ca_kabuli_chr08    | 4807094                        | [A/G]       | 1067303401                                 |
| Ca_Kabuli_NC_021167.1_4807099 | Ca_kabuli_chr08    | 4807099                        | [A/C]       | 1067303402                                 |
| Ca_Kabuli_NC_021167.1_4807106 | Ca_kabuli_chr08    | 4807106                        | [G/A]       | 1067303403                                 |
| Ca_Kabuli_NC_021167.1_4810601 | Ca_kabuli_chr08    | 4810601                        | [A/T]       | 1067303404                                 |
| Ca_Kabuli_NC_021167.1_4895122 | Ca_kabuli_chr08    | 4895122                        | [A/C]       | 1067303405                                 |
| Ca_Kabuli_NC_021167.1_4895123 | Ca_kabuli_chr08    | 4895123                        | [G/T]       | 1067303406                                 |
| Ca_Kabuli_NC_021167.1_5196989 | Ca_kabuli_chr08    | 5196989                        | [T/C]       | 1067303407                                 |
| Ca_Kabuli_NC_021167.1_5196992 | Ca_kabuli_chr08    | 5196992                        | [T/A]       | 1067303408                                 |
| Ca_Kabuli_NC_021167.1_5197033 | Ca_kabuli_chr08    | 5197033                        | [A/G]       | 1067303409                                 |
| Ca_Kabuli_NC_021167.1_5197035 | Ca_kabuli_chr08    | 5197035                        | [A/C]       | 1067303410                                 |
| Ca_Kabuli_NC_021167.1_5197287 | Ca_kabuli_chr08    | 5197287                        | [A/G]       | 1067303411                                 |
| Ca_Kabuli_NC_021167.1_5233627 | Ca_kabuli_chr08    | 5233627                        | [T/C]       | 1067303412                                 |
| Ca_Kabuli_NC_021167.1_5233635 | Ca_kabuli_chr08    | 5233635                        | [T/C]       | 1067303413                                 |
| Ca_Kabuli_NC_021167.1_5233668 | Ca_kabuli_chr08    | 5233668                        | [A/T]       | 1067303414                                 |
| Ca_Kabuli_NC_021167.1_5238280 | Ca_kabuli_chr08    | 5238280                        | [A/C]       | 1067303415                                 |
| Ca_Kabuli_NC_021167.1_5238282 | Ca_kabuli_chr08    | 5238282                        | [T/C]       | 1067303416                                 |
| Ca_Kabuli_NC_021167.1_5238284 | Ca_kabuli_chr08    | 5238284                        | [T/A]       | 1067303417                                 |
| Ca_Kabuli_NC_021167.1_5238288 | Ca_kabuli_chr08    | 5238288                        | [A/C]       | 1067303418                                 |
| Ca_Kabuli_NC_021167.1_5238308 | Ca_kabuli_chr08    | 5238308                        | [A/G]       | 1067303419                                 |
| Ca_Kabuli_NC_021167.1_5352588 | Ca_kabuli_chr08    | 5352588                        | [A/G]       | 1067303420                                 |

| <b>SNP IDs</b>                | <b>Chromosomes</b> | <b>Physical positions (bp)</b> | <b>SNPs</b> | <b>NCBI SNPdb accession IDs (NCBI_ss#)</b> |
|-------------------------------|--------------------|--------------------------------|-------------|--------------------------------------------|
| Ca_Kabuli_NC_021167.1_5395004 | Ca_kabuli_chr08    | 5395004                        | [A/C]       | 1067303421                                 |
| Ca_Kabuli_NC_021167.1_5399553 | Ca_kabuli_chr08    | 5399553                        | [A/C]       | 1067303422                                 |
| Ca_Kabuli_NC_021167.1_5399562 | Ca_kabuli_chr08    | 5399562                        | [T/G]       | 1067303423                                 |
| Ca_Kabuli_NC_021167.1_5487879 | Ca_kabuli_chr08    | 5487879                        | [A/G]       | 1067303424                                 |
| Ca_Kabuli_NC_021167.1_5487890 | Ca_kabuli_chr08    | 5487890                        | [A/G]       | 1067303425                                 |
| Ca_Kabuli_NC_021167.1_5536327 | Ca_kabuli_chr08    | 5536327                        | [T/G]       | 1067303426                                 |
| Ca_Kabuli_NC_021167.1_5539039 | Ca_kabuli_chr08    | 5539039                        | [A/C]       | 1067303427                                 |
| Ca_Kabuli_NC_021167.1_5539042 | Ca_kabuli_chr08    | 5539042                        | [A/C]       | 1067303428                                 |
| Ca_Kabuli_NC_021167.1_5568446 | Ca_kabuli_chr08    | 5568446                        | [A/C]       | 1067303429                                 |
| Ca_Kabuli_NC_021167.1_5586096 | Ca_kabuli_chr08    | 5586096                        | [A/T]       | 1067303430                                 |
| Ca_Kabuli_NC_021167.1_5795614 | Ca_kabuli_chr08    | 5795614                        | [C/A]       | 1067303431                                 |
| Ca_Kabuli_NC_021167.1_5798565 | Ca_kabuli_chr08    | 5798565                        | [A/C]       | 1067303432                                 |
| Ca_Kabuli_NC_021167.1_5804741 | Ca_kabuli_chr08    | 5804741                        | [A/C]       | 1067303433                                 |
| Ca_Kabuli_NC_021167.1_5811121 | Ca_kabuli_chr08    | 5811121                        | [T/G]       | 1067303434                                 |
| Ca_Kabuli_NC_021167.1_5816919 | Ca_kabuli_chr08    | 5816919                        | [T/C]       | 1067303435                                 |
| Ca_Kabuli_NC_021167.1_5816940 | Ca_kabuli_chr08    | 5816940                        | [T/A]       | 1067303436                                 |
| Ca_Kabuli_NC_021167.1_5819130 | Ca_kabuli_chr08    | 5819130                        | [T/C]       | 1067303437                                 |
| Ca_Kabuli_NC_021167.1_5819186 | Ca_kabuli_chr08    | 5819186                        | [A/G]       | 1067303438                                 |
| Ca_Kabuli_NC_021167.1_5870503 | Ca_kabuli_chr08    | 5870503                        | [A/C]       | 1067303439                                 |
| Ca_Kabuli_NC_021167.1_5870589 | Ca_kabuli_chr08    | 5870589                        | [A/G]       | 1067303440                                 |
| Ca_Kabuli_NC_021167.1_5870616 | Ca_kabuli_chr08    | 5870616                        | [T/C]       | 1067303441                                 |
| Ca_Kabuli_NC_021167.1_5870619 | Ca_kabuli_chr08    | 5870619                        | [T/A]       | 1067303442                                 |
| Ca_Kabuli_NC_021167.1_5870626 | Ca_kabuli_chr08    | 5870626                        | [T/C]       | 1067303443                                 |
| Ca_Kabuli_NC_021167.1_5870634 | Ca_kabuli_chr08    | 5870634                        | [A/C]       | 1067303444                                 |
| Ca_Kabuli_NC_021167.1_5870646 | Ca_kabuli_chr08    | 5870646                        | [A/G]       | 1067303445                                 |
| Ca_Kabuli_NC_021167.1_5870664 | Ca_kabuli_chr08    | 5870664                        | [T/C]       | 1067303446                                 |
| Ca_Kabuli_NC_021167.1_5870747 | Ca_kabuli_chr08    | 5870747                        | [T/C]       | 1067303447                                 |
| Ca_Kabuli_NC_021167.1_5871361 | Ca_kabuli_chr08    | 5871361                        | [T/G]       | 1067303448                                 |
| Ca_Kabuli_NC_021167.1_5871364 | Ca_kabuli_chr08    | 5871364                        | [T/G]       | 1067303449                                 |
| Ca_Kabuli_NC_021167.1_5871367 | Ca_kabuli_chr08    | 5871367                        | [T/G]       | 1067303450                                 |
| Ca_Kabuli_NC_021167.1_5928093 | Ca_kabuli_chr08    | 5928093                        | [C/A]       | 1067303451                                 |
| Ca_Kabuli_NC_021167.1_5928094 | Ca_kabuli_chr08    | 5928094                        | [A/G]       | 1067303452                                 |
| Ca_Kabuli_NC_021167.1_5928096 | Ca_kabuli_chr08    | 5928096                        | [A/T]       | 1067303453                                 |
| Ca_Kabuli_NC_021167.1_5928097 | Ca_kabuli_chr08    | 5928097                        | [G/C]       | 1067303454                                 |



| <b>SNP IDs</b>                | <b>Chromosomes</b> | <b>Physical positions (bp)</b> | <b>SNPs</b> | <b>NCBI SNPdb accession IDs (NCBI_ss#)</b> |
|-------------------------------|--------------------|--------------------------------|-------------|--------------------------------------------|
| Ca_Kabuli_NC_021167.1_5928610 | Ca_kabuli_chr08    | 5928610                        | [T/C]       | 1067303455                                 |
| Ca_Kabuli_NC_021167.1_5935392 | Ca_kabuli_chr08    | 5935392                        | [A/G]       | 1067303456                                 |
| Ca_Kabuli_NC_021167.1_5935430 | Ca_kabuli_chr08    | 5935430                        | [T/G]       | 1067303457                                 |
| Ca_Kabuli_NC_021167.1_5940320 | Ca_kabuli_chr08    | 5940320                        | [T/G]       | 1067303458                                 |
| Ca_Kabuli_NC_021167.1_5940336 | Ca_kabuli_chr08    | 5940336                        | [A/C]       | 1067303459                                 |
| Ca_Kabuli_NC_021167.1_6019988 | Ca_kabuli_chr08    | 6019988                        | [T/A]       | 1067303460                                 |
| Ca_Kabuli_NC_021167.1_6026487 | Ca_kabuli_chr08    | 6026487                        | [T/G]       | 1067303461                                 |
| Ca_Kabuli_NC_021167.1_6030777 | Ca_kabuli_chr08    | 6030777                        | [A/C]       | 1067303462                                 |
| Ca_Kabuli_NC_021167.1_6192937 | Ca_kabuli_chr08    | 6192937                        | [A/G]       | 1067303463                                 |
| Ca_Kabuli_NC_021167.1_6192944 | Ca_kabuli_chr08    | 6192944                        | [T/G]       | 1067303464                                 |
| Ca_Kabuli_NC_021167.1_6192949 | Ca_kabuli_chr08    | 6192949                        | [T/A]       | 1067303465                                 |
| Ca_Kabuli_NC_021167.1_6193075 | Ca_kabuli_chr08    | 6193075                        | [G/A]       | 1067303466                                 |
| Ca_Kabuli_NC_021167.1_6193078 | Ca_kabuli_chr08    | 6193078                        | [G/A]       | 1067303467                                 |
| Ca_Kabuli_NC_021167.1_6261325 | Ca_kabuli_chr08    | 6261325                        | [A/C]       | 1067303468                                 |
| Ca_Kabuli_NC_021167.1_6266307 | Ca_kabuli_chr08    | 6266307                        | [C/T]       | 1067303469                                 |
| Ca_Kabuli_NC_021167.1_6266308 | Ca_kabuli_chr08    | 6266308                        | [T/C]       | 1067303470                                 |
| Ca_Kabuli_NC_021167.1_6278623 | Ca_kabuli_chr08    | 6278623                        | [A/G]       | 1067303471                                 |
| Ca_Kabuli_NC_021167.1_6302023 | Ca_kabuli_chr08    | 6302023                        | [T/C]       | 1067303472                                 |
| Ca_Kabuli_NC_021167.1_6477772 | Ca_kabuli_chr08    | 6477772                        | [G/T]       | 1067303473                                 |
| Ca_Kabuli_NC_021167.1_6477775 | Ca_kabuli_chr08    | 6477775                        | [T/G]       | 1067303474                                 |
| Ca_Kabuli_NC_021167.1_6477777 | Ca_kabuli_chr08    | 6477777                        | [C/T]       | 1067303475                                 |
| Ca_Kabuli_NC_021167.1_6544246 | Ca_kabuli_chr08    | 6544246                        | [G/T]       | 1067303476                                 |
| Ca_Kabuli_NC_021167.1_6549053 | Ca_kabuli_chr08    | 6549053                        | [T/G]       | 1067303477                                 |
| Ca_Kabuli_NC_021167.1_6600793 | Ca_kabuli_chr08    | 6600793                        | [A/G]       | 1067303478                                 |
| Ca_Kabuli_NC_021167.1_6600810 | Ca_kabuli_chr08    | 6600810                        | [T/G]       | 1067303479                                 |
| Ca_Kabuli_NC_021167.1_6600820 | Ca_kabuli_chr08    | 6600820                        | [T/G]       | 1067303480                                 |
| Ca_Kabuli_NC_021167.1_6600838 | Ca_kabuli_chr08    | 6600838                        | [T/G]       | 1067303481                                 |
| Ca_Kabuli_NC_021167.1_6630623 | Ca_kabuli_chr08    | 6630623                        | [A/T]       | 1067303482                                 |
| Ca_Kabuli_NC_021167.1_6630627 | Ca_kabuli_chr08    | 6630627                        | [A/G]       | 1067303483                                 |
| Ca_Kabuli_NC_021167.1_6630666 | Ca_kabuli_chr08    | 6630666                        | [T/C]       | 1067303484                                 |
| Ca_Kabuli_NC_021167.1_6630675 | Ca_kabuli_chr08    | 6630675                        | [T/A]       | 1067303485                                 |
| Ca_Kabuli_NC_021167.1_6677430 | Ca_kabuli_chr08    | 6677430                        | [T/C]       | 1067303486                                 |
| Ca_Kabuli_NC_021167.1_6677471 | Ca_kabuli_chr08    | 6677471                        | [A/G]       | 1067303487                                 |
| Ca_Kabuli_NC_021167.1_6708909 | Ca_kabuli_chr08    | 6708909                        | [T/G]       | 1067303488                                 |

| <b>SNP IDs</b>                | <b>Chromosomes</b> | <b>Physical positions (bp)</b> | <b>SNPs</b> | <b>NCBI SNPdb accession IDs (NCBI_ss#)</b> |
|-------------------------------|--------------------|--------------------------------|-------------|--------------------------------------------|
| Ca_Kabuli_NC_021167.1_6737822 | Ca_kabuli_chr08    | 6737822                        | [T/C]       | 1067303489                                 |
| Ca_Kabuli_NC_021167.1_6737842 | Ca_kabuli_chr08    | 6737842                        | [G/C]       | 1067303490                                 |
| Ca_Kabuli_NC_021167.1_6737848 | Ca_kabuli_chr08    | 6737848                        | [T/C]       | 1067303491                                 |
| Ca_Kabuli_NC_021167.1_6737867 | Ca_kabuli_chr08    | 6737867                        | [A/G]       | 1067303492                                 |
| Ca_Kabuli_NC_021167.1_6747753 | Ca_kabuli_chr08    | 6747753                        | [T/A]       | 1067303493                                 |
| Ca_Kabuli_NC_021167.1_6747755 | Ca_kabuli_chr08    | 6747755                        | [A/C]       | 1067303494                                 |
| Ca_Kabuli_NC_021167.1_6747756 | Ca_kabuli_chr08    | 6747756                        | [G/T]       | 1067303495                                 |
| Ca_Kabuli_NC_021167.1_6748252 | Ca_kabuli_chr08    | 6748252                        | [T/A]       | 1067303496                                 |
| Ca_Kabuli_NC_021167.1_6748253 | Ca_kabuli_chr08    | 6748253                        | [A/T]       | 1067303497                                 |
| Ca_Kabuli_NC_021167.1_6794586 | Ca_kabuli_chr08    | 6794586                        | [T/G]       | 1067303498                                 |
| Ca_Kabuli_NC_021167.1_6941567 | Ca_kabuli_chr08    | 6941567                        | [A/C]       | 1067303499                                 |
| Ca_Kabuli_NC_021167.1_6968084 | Ca_kabuli_chr08    | 6968084                        | [T/C]       | 1067303500                                 |
| Ca_Kabuli_NC_021167.1_6986280 | Ca_kabuli_chr08    | 6986280                        | [A/C]       | 1067303501                                 |
| Ca_Kabuli_NC_021167.1_6987551 | Ca_kabuli_chr08    | 6987551                        | [T/C]       | 1067303502                                 |
| Ca_Kabuli_NC_021167.1_6989447 | Ca_kabuli_chr08    | 6989447                        | [A/C]       | 1067303503                                 |
| Ca_Kabuli_NC_021167.1_7037845 | Ca_kabuli_chr08    | 7037845                        | [T/C]       | 1067303504                                 |
| Ca_Kabuli_NC_021167.1_7037855 | Ca_kabuli_chr08    | 7037855                        | [C/G]       | 1067303505                                 |
| Ca_Kabuli_NC_021167.1_7041792 | Ca_kabuli_chr08    | 7041792                        | [T/C]       | 1067303506                                 |
| Ca_Kabuli_NC_021167.1_7041823 | Ca_kabuli_chr08    | 7041823                        | [A/G]       | 1067303507                                 |
| Ca_Kabuli_NC_021167.1_7099572 | Ca_kabuli_chr08    | 7099572                        | [A/C]       | 1067303508                                 |
| Ca_Kabuli_NC_021167.1_7165021 | Ca_kabuli_chr08    | 7165021                        | [A/T]       | 1067303509                                 |
| Ca_Kabuli_NC_021167.1_7165063 | Ca_kabuli_chr08    | 7165063                        | [A/T]       | 1067303510                                 |
| Ca_Kabuli_NC_021167.1_7165070 | Ca_kabuli_chr08    | 7165070                        | [A/G]       | 1067303511                                 |
| Ca_Kabuli_NC_021167.1_7174094 | Ca_kabuli_chr08    | 7174094                        | [T/A]       | 1067303512                                 |
| Ca_Kabuli_NC_021167.1_7191898 | Ca_kabuli_chr08    | 7191898                        | [G/A]       | 1067303513                                 |
| Ca_Kabuli_NC_021167.1_7191904 | Ca_kabuli_chr08    | 7191904                        | [C/A]       | 1067303514                                 |
| Ca_Kabuli_NC_021167.1_7191930 | Ca_kabuli_chr08    | 7191930                        | [T/C]       | 1067303515                                 |
| Ca_Kabuli_NC_021167.1_7419447 | Ca_kabuli_chr08    | 7419447                        | [T/C]       | 1067303516                                 |
| Ca_Kabuli_NC_021167.1_7475051 | Ca_kabuli_chr08    | 7475051                        | [A/C]       | 1067303517                                 |
| Ca_Kabuli_NC_021167.1_7475187 | Ca_kabuli_chr08    | 7475187                        | [A/C]       | 1067303518                                 |
| Ca_Kabuli_NC_021167.1_7475192 | Ca_kabuli_chr08    | 7475192                        | [A/G]       | 1067303519                                 |
| Ca_Kabuli_NC_021167.1_7475249 | Ca_kabuli_chr08    | 7475249                        | [T/A]       | 1067303520                                 |
| Ca_Kabuli_NC_021167.1_7506032 | Ca_kabuli_chr08    | 7506032                        | [T/C]       | 1067303521                                 |
| Ca_Kabuli_NC_021167.1_7506042 | Ca_kabuli_chr08    | 7506042                        | [A/C]       | 1067303522                                 |

| <b>SNP IDs</b>                | <b>Chromosomes</b> | <b>Physical positions (bp)</b> | <b>SNPs</b> | <b>NCBI SNPdb accession IDs (NCBI_ss#)</b> |
|-------------------------------|--------------------|--------------------------------|-------------|--------------------------------------------|
| Ca_Kabuli_NC_021167.1_7563373 | Ca_kabuli_chr08    | 7563373                        | [T/A]       | 1067303523                                 |
| Ca_Kabuli_NC_021167.1_7563378 | Ca_kabuli_chr08    | 7563378                        | [T/A]       | 1067303524                                 |
| Ca_Kabuli_NC_021167.1_7563382 | Ca_kabuli_chr08    | 7563382                        | [C/G]       | 1067303525                                 |
| Ca_Kabuli_NC_021167.1_7563387 | Ca_kabuli_chr08    | 7563387                        | [T/A]       | 1067303526                                 |
| Ca_Kabuli_NC_021167.1_7563650 | Ca_kabuli_chr08    | 7563650                        | [A/C]       | 1067303527                                 |
| Ca_Kabuli_NC_021167.1_7566603 | Ca_kabuli_chr08    | 7566603                        | [A/T]       | 1067303528                                 |
| Ca_Kabuli_NC_021167.1_7613558 | Ca_kabuli_chr08    | 7613558                        | [A/G]       | 1067303529                                 |
| Ca_Kabuli_NC_021167.1_7614314 | Ca_kabuli_chr08    | 7614314                        | [A/C]       | 1067303530                                 |
| Ca_Kabuli_NC_021167.1_7614319 | Ca_kabuli_chr08    | 7614319                        | [T/C]       | 1067303531                                 |
| Ca_Kabuli_NC_021167.1_7628694 | Ca_kabuli_chr08    | 7628694                        | [A/G]       | 1067303532                                 |
| Ca_Kabuli_NC_021167.1_7694692 | Ca_kabuli_chr08    | 7694692                        | [A/C]       | 1067303533                                 |
| Ca_Kabuli_NC_021167.1_7694771 | Ca_kabuli_chr08    | 7694771                        | [T/G]       | 1067303534                                 |
| Ca_Kabuli_NC_021167.1_7696107 | Ca_kabuli_chr08    | 7696107                        | [T/A]       | 1067303535                                 |
| Ca_Kabuli_NC_021167.1_7696112 | Ca_kabuli_chr08    | 7696112                        | [T/G]       | 1067303536                                 |
| Ca_Kabuli_NC_021167.1_7696220 | Ca_kabuli_chr08    | 7696220                        | [A/T]       | 1067303537                                 |
| Ca_Kabuli_NC_021167.1_7699161 | Ca_kabuli_chr08    | 7699161                        | [T/G]       | 1067303538                                 |
| Ca_Kabuli_NC_021167.1_7699179 | Ca_kabuli_chr08    | 7699179                        | [A/T]       | 1067303539                                 |
| Ca_Kabuli_NC_021167.1_7699194 | Ca_kabuli_chr08    | 7699194                        | [T/C]       | 1067303540                                 |
| Ca_Kabuli_NC_021167.1_7733604 | Ca_kabuli_chr08    | 7733604                        | [T/A]       | 1067303541                                 |
| Ca_Kabuli_NC_021167.1_7733620 | Ca_kabuli_chr08    | 7733620                        | [A/T]       | 1067303542                                 |
| Ca_Kabuli_NC_021167.1_7733671 | Ca_kabuli_chr08    | 7733671                        | [T/C]       | 1067303543                                 |
| Ca_Kabuli_NC_021167.1_7734545 | Ca_kabuli_chr08    | 7734545                        | [T/G]       | 1067303544                                 |
| Ca_Kabuli_NC_021167.1_7771232 | Ca_kabuli_chr08    | 7771232                        | [A/T]       | 1067303545                                 |
| Ca_Kabuli_NC_021167.1_7775908 | Ca_kabuli_chr08    | 7775908                        | [G/T]       | 1067303546                                 |
| Ca_Kabuli_NC_021167.1_7776897 | Ca_kabuli_chr08    | 7776897                        | [A/T]       | 1067303547                                 |
| Ca_Kabuli_NC_021167.1_7977246 | Ca_kabuli_chr08    | 7977246                        | [C/G]       | 1067303548                                 |
| Ca_Kabuli_NC_021167.1_7977260 | Ca_kabuli_chr08    | 7977260                        | [A/C]       | 1067303549                                 |
| Ca_Kabuli_NC_021167.1_7977306 | Ca_kabuli_chr08    | 7977306                        | [T/C]       | 1067303550                                 |
| Ca_Kabuli_NC_021167.1_7977314 | Ca_kabuli_chr08    | 7977314                        | [T/G]       | 1067303551                                 |
| Ca_Kabuli_NC_021167.1_7978219 | Ca_kabuli_chr08    | 7978219                        | [A/G]       | 1067303552                                 |
| Ca_Kabuli_NC_021167.1_8029278 | Ca_kabuli_chr08    | 8029278                        | [A/C]       | 1067303553                                 |
| Ca_Kabuli_NC_021167.1_8029289 | Ca_kabuli_chr08    | 8029289                        | [T/C]       | 1067303554                                 |
| Ca_Kabuli_NC_021167.1_8059901 | Ca_kabuli_chr08    | 8059901                        | [A/T]       | 1067303555                                 |
| Ca_Kabuli_NC_021167.1_8066006 | Ca_kabuli_chr08    | 8066006                        | [A/C]       | 1067303556                                 |

| <b>SNP IDs</b>                | <b>Chromosomes</b> | <b>Physical positions (bp)</b> | <b>SNPs</b> | <b>NCBI SNPdb accession IDs (NCBI_ss#)</b> |
|-------------------------------|--------------------|--------------------------------|-------------|--------------------------------------------|
| Ca_Kabuli_NC_021167.1_8096681 | Ca_kabuli_chr08    | 8096681                        | [T/G]       | 1067303557                                 |
| Ca_Kabuli_NC_021167.1_8194268 | Ca_kabuli_chr08    | 8194268                        | [T/G]       | 1067303558                                 |
| Ca_Kabuli_NC_021167.1_8194279 | Ca_kabuli_chr08    | 8194279                        | [C/T]       | 1067303559                                 |
| Ca_Kabuli_NC_021167.1_8202723 | Ca_kabuli_chr08    | 8202723                        | [T/C]       | 1067303560                                 |
| Ca_Kabuli_NC_021167.1_8232428 | Ca_kabuli_chr08    | 8232428                        | [T/C]       | 1067303561                                 |
| Ca_Kabuli_NC_021167.1_8232469 | Ca_kabuli_chr08    | 8232469                        | [A/C]       | 1067303562                                 |
| Ca_Kabuli_NC_021167.1_8232488 | Ca_kabuli_chr08    | 8232488                        | [A/T]       | 1067303563                                 |
| Ca_Kabuli_NC_021167.1_8270652 | Ca_kabuli_chr08    | 8270652                        | [A/C]       | 1067303564                                 |
| Ca_Kabuli_NC_021167.1_8389108 | Ca_kabuli_chr08    | 8389108                        | [A/C]       | 1067303565                                 |
| Ca_Kabuli_NC_021167.1_8452457 | Ca_kabuli_chr08    | 8452457                        | [T/C]       | 1067303566                                 |
| Ca_Kabuli_NC_021167.1_8509462 | Ca_kabuli_chr08    | 8509462                        | [C/T]       | 1067303567                                 |
| Ca_Kabuli_NC_021167.1_8509469 | Ca_kabuli_chr08    | 8509469                        | [C/T]       | 1067303568                                 |
| Ca_Kabuli_NC_021167.1_8509493 | Ca_kabuli_chr08    | 8509493                        | [A/G]       | 1067303569                                 |
| Ca_Kabuli_NC_021167.1_8509497 | Ca_kabuli_chr08    | 8509497                        | [A/G]       | 1067303570                                 |
| Ca_Kabuli_NC_021167.1_8533479 | Ca_kabuli_chr08    | 8533479                        | [G/T]       | 1067303571                                 |
| Ca_Kabuli_NC_021167.1_8533481 | Ca_kabuli_chr08    | 8533481                        | [C/G]       | 1067303572                                 |
| Ca_Kabuli_NC_021167.1_8560271 | Ca_kabuli_chr08    | 8560271                        | [A/C]       | 1067303573                                 |
| Ca_Kabuli_NC_021167.1_8560283 | Ca_kabuli_chr08    | 8560283                        | [A/C]       | 1067303574                                 |
| Ca_Kabuli_NC_021167.1_8560313 | Ca_kabuli_chr08    | 8560313                        | [A/T]       | 1067303575                                 |
| Ca_Kabuli_NC_021167.1_8560315 | Ca_kabuli_chr08    | 8560315                        | [C/T]       | 1067303576                                 |
| Ca_Kabuli_NC_021167.1_8560328 | Ca_kabuli_chr08    | 8560328                        | [T/C]       | 1067303577                                 |
| Ca_Kabuli_NC_021167.1_8560334 | Ca_kabuli_chr08    | 8560334                        | [C/T]       | 1067303578                                 |
| Ca_Kabuli_NC_021167.1_8560337 | Ca_kabuli_chr08    | 8560337                        | [T/C]       | 1067303579                                 |
| Ca_Kabuli_NC_021167.1_8560341 | Ca_kabuli_chr08    | 8560341                        | [C/T]       | 1067303580                                 |
| Ca_Kabuli_NC_021167.1_8560360 | Ca_kabuli_chr08    | 8560360                        | [T/C]       | 1067303581                                 |
| Ca_Kabuli_NC_021167.1_8560362 | Ca_kabuli_chr08    | 8560362                        | [T/C]       | 1067303582                                 |
| Ca_Kabuli_NC_021167.1_8560378 | Ca_kabuli_chr08    | 8560378                        | [T/C]       | 1067303583                                 |
| Ca_Kabuli_NC_021167.1_8661236 | Ca_kabuli_chr08    | 8661236                        | [T/C]       | 1067303584                                 |
| Ca_Kabuli_NC_021167.1_8661255 | Ca_kabuli_chr08    | 8661255                        | [T/C]       | 1067303585                                 |
| Ca_Kabuli_NC_021167.1_8661315 | Ca_kabuli_chr08    | 8661315                        | [T/A]       | 1067303586                                 |
| Ca_Kabuli_NC_021167.1_8842341 | Ca_kabuli_chr08    | 8842341                        | [T/G]       | 1067303587                                 |
| Ca_Kabuli_NC_021167.1_8842365 | Ca_kabuli_chr08    | 8842365                        | [T/G]       | 1067303588                                 |
| Ca_Kabuli_NC_021167.1_8842409 | Ca_kabuli_chr08    | 8842409                        | [C/T]       | 1067303589                                 |
| Ca_Kabuli_NC_021167.1_8842418 | Ca_kabuli_chr08    | 8842418                        | [A/G]       | 1067303590                                 |

| <b>SNP IDs</b>                | <b>Chromosomes</b> | <b>Physical positions (bp)</b> | <b>SNPs</b> | <b>NCBI SNPdb accession IDs (NCBI_ss#)</b> |
|-------------------------------|--------------------|--------------------------------|-------------|--------------------------------------------|
| Ca_Kabuli_NC_021167.1_8887172 | Ca_kabuli_chr08    | 8887172                        | [A/G]       | 1067303591                                 |
| Ca_Kabuli_NC_021167.1_8888718 | Ca_kabuli_chr08    | 8888718                        | [A/G]       | 1067303592                                 |
| Ca_Kabuli_NC_021167.1_8888748 | Ca_kabuli_chr08    | 8888748                        | [T/C]       | 1067303593                                 |
| Ca_Kabuli_NC_021167.1_8902939 | Ca_kabuli_chr08    | 8902939                        | [C/T]       | 1067303594                                 |
| Ca_Kabuli_NC_021167.1_8902962 | Ca_kabuli_chr08    | 8902962                        | [A/G]       | 1067303595                                 |
| Ca_Kabuli_NC_021167.1_8904365 | Ca_kabuli_chr08    | 8904365                        | [T/A]       | 1067303596                                 |
| Ca_Kabuli_NC_021167.1_8904366 | Ca_kabuli_chr08    | 8904366                        | [A/G]       | 1067303597                                 |
| Ca_Kabuli_NC_021167.1_8911466 | Ca_kabuli_chr08    | 8911466                        | [G/A]       | 1067303598                                 |
| Ca_Kabuli_NC_021167.1_9064683 | Ca_kabuli_chr08    | 9064683                        | [A/T]       | 1067303599                                 |
| Ca_Kabuli_NC_021167.1_9064805 | Ca_kabuli_chr08    | 9064805                        | [A/G]       | 1067303600                                 |
| Ca_Kabuli_NC_021167.1_9064924 | Ca_kabuli_chr08    | 9064924                        | [T/A]       | 1067303601                                 |
| Ca_Kabuli_NC_021167.1_9097271 | Ca_kabuli_chr08    | 9097271                        | [A/T]       | 1067303602                                 |
| Ca_Kabuli_NC_021167.1_9097297 | Ca_kabuli_chr08    | 9097297                        | [C/A]       | 1067303603                                 |
| Ca_Kabuli_NC_021167.1_9097300 | Ca_kabuli_chr08    | 9097300                        | [G/C]       | 1067303604                                 |
| Ca_Kabuli_NC_021167.1_9097585 | Ca_kabuli_chr08    | 9097585                        | [A/C]       | 1067303605                                 |
| Ca_Kabuli_NC_021167.1_9099798 | Ca_kabuli_chr08    | 9099798                        | [G/T]       | 1067303606                                 |
| Ca_Kabuli_NC_021167.1_9099900 | Ca_kabuli_chr08    | 9099900                        | [T/G]       | 1067303607                                 |
| Ca_Kabuli_NC_021167.1_9099901 | Ca_kabuli_chr08    | 9099901                        | [G/C]       | 1067303608                                 |
| Ca_Kabuli_NC_021167.1_9100111 | Ca_kabuli_chr08    | 9100111                        | [C/T]       | 1067303609                                 |
| Ca_Kabuli_NC_021167.1_9100160 | Ca_kabuli_chr08    | 9100160                        | [T/C]       | 1067303610                                 |
| Ca_Kabuli_NC_021167.1_9110059 | Ca_kabuli_chr08    | 9110059                        | [A/G]       | 1067303611                                 |
| Ca_Kabuli_NC_021167.1_9112109 | Ca_kabuli_chr08    | 9112109                        | [A/C]       | 1067303612                                 |
| Ca_Kabuli_NC_021167.1_9112112 | Ca_kabuli_chr08    | 9112112                        | [A/C]       | 1067303613                                 |
| Ca_Kabuli_NC_021167.1_9112117 | Ca_kabuli_chr08    | 9112117                        | [A/C]       | 1067303614                                 |
| Ca_Kabuli_NC_021167.1_9112169 | Ca_kabuli_chr08    | 9112169                        | [A/C]       | 1067303615                                 |
| Ca_Kabuli_NC_021167.1_9112172 | Ca_kabuli_chr08    | 9112172                        | [A/C]       | 1067303616                                 |
| Ca_Kabuli_NC_021167.1_9112184 | Ca_kabuli_chr08    | 9112184                        | [A/C]       | 1067303617                                 |
| Ca_Kabuli_NC_021167.1_9112190 | Ca_kabuli_chr08    | 9112190                        | [C/T]       | 1067303618                                 |
| Ca_Kabuli_NC_021167.1_9112199 | Ca_kabuli_chr08    | 9112199                        | [A/C]       | 1067303619                                 |
| Ca_Kabuli_NC_021167.1_9118255 | Ca_kabuli_chr08    | 9118255                        | [A/C]       | 1067303620                                 |
| Ca_Kabuli_NC_021167.1_9118582 | Ca_kabuli_chr08    | 9118582                        | [C/T]       | 1067303621                                 |
| Ca_Kabuli_NC_021167.1_9129997 | Ca_kabuli_chr08    | 9129997                        | [A/G]       | 1067303622                                 |
| Ca_Kabuli_NC_021167.1_9130000 | Ca_kabuli_chr08    | 9130000                        | [T/G]       | 1067303623                                 |
| Ca_Kabuli_NC_021167.1_9352700 | Ca_kabuli_chr08    | 9352700                        | [G/A]       | 1067303624                                 |

| <b>SNP IDs</b>                 | <b>Chromosomes</b> | <b>Physical positions (bp)</b> | <b>SNPs</b> | <b>NCBI SNPdb accession IDs (NCBI_ss#)</b> |
|--------------------------------|--------------------|--------------------------------|-------------|--------------------------------------------|
| Ca_Kabuli_NC_021167.1_9366845  | Ca_kabuli_chr08    | 9366845                        | [T/A]       | 1067303625                                 |
| Ca_Kabuli_NC_021167.1_9371383  | Ca_kabuli_chr08    | 9371383                        | [A/G]       | 1067303626                                 |
| Ca_Kabuli_NC_021167.1_9371396  | Ca_kabuli_chr08    | 9371396                        | [A/G]       | 1067303627                                 |
| Ca_Kabuli_NC_021167.1_9371402  | Ca_kabuli_chr08    | 9371402                        | [T/C]       | 1067303628                                 |
| Ca_Kabuli_NC_021167.1_9383023  | Ca_kabuli_chr08    | 9383023                        | [C/A]       | 1067303629                                 |
| Ca_Kabuli_NC_021167.1_9386614  | Ca_kabuli_chr08    | 9386614                        | [T/G]       | 1067303630                                 |
| Ca_Kabuli_NC_021167.1_9386626  | Ca_kabuli_chr08    | 9386626                        | [A/T]       | 1067303631                                 |
| Ca_Kabuli_NC_021167.1_9386678  | Ca_kabuli_chr08    | 9386678                        | [C/T]       | 1067303632                                 |
| Ca_Kabuli_NC_021167.1_9386682  | Ca_kabuli_chr08    | 9386682                        | [C/T]       | 1067303633                                 |
| Ca_Kabuli_NC_021167.1_9386685  | Ca_kabuli_chr08    | 9386685                        | [C/A]       | 1067303634                                 |
| Ca_Kabuli_NC_021167.1_9386686  | Ca_kabuli_chr08    | 9386686                        | [A/C]       | 1067303635                                 |
| Ca_Kabuli_NC_021167.1_9386701  | Ca_kabuli_chr08    | 9386701                        | [A/C]       | 1067303636                                 |
| Ca_Kabuli_NC_021167.1_9386722  | Ca_kabuli_chr08    | 9386722                        | [A/G]       | 1067303637                                 |
| Ca_Kabuli_NC_021167.1_9387656  | Ca_kabuli_chr08    | 9387656                        | [G/T]       | 1067303638                                 |
| Ca_Kabuli_NC_021167.1_9387668  | Ca_kabuli_chr08    | 9387668                        | [T/C]       | 1067303639                                 |
| Ca_Kabuli_NC_021167.1_9387680  | Ca_kabuli_chr08    | 9387680                        | [A/C]       | 1067303640                                 |
| Ca_Kabuli_NC_021167.1_9388734  | Ca_kabuli_chr08    | 9388734                        | [A/T]       | 1067303641                                 |
| Ca_Kabuli_NC_021167.1_10004054 | Ca_kabuli_chr08    | 10004054                       | [T/G]       | 1067303642                                 |
| Ca_Kabuli_NC_021167.1_10004490 | Ca_kabuli_chr08    | 10004490                       | [A/T]       | 1067303643                                 |
| Ca_Kabuli_NC_021167.1_10080270 | Ca_kabuli_chr08    | 10080270                       | [G/T]       | 1067303644                                 |
| Ca_Kabuli_NC_021167.1_10080287 | Ca_kabuli_chr08    | 10080287                       | [A/G]       | 1067303645                                 |
| Ca_Kabuli_NC_021167.1_10080319 | Ca_kabuli_chr08    | 10080319                       | [A/G]       | 1067303646                                 |
| Ca_Kabuli_NC_021167.1_10080348 | Ca_kabuli_chr08    | 10080348                       | [T/G]       | 1067303647                                 |
| Ca_Kabuli_NC_021167.1_10080361 | Ca_kabuli_chr08    | 10080361                       | [T/G]       | 1067303648                                 |
| Ca_Kabuli_NC_021167.1_10147041 | Ca_kabuli_chr08    | 10147041                       | [A/G]       | 1067303649                                 |
| Ca_Kabuli_NC_021167.1_10155981 | Ca_kabuli_chr08    | 10155981                       | [A/G]       | 1067303650                                 |
| Ca_Kabuli_NC_021167.1_10257576 | Ca_kabuli_chr08    | 10257576                       | [T/G]       | 1067303651                                 |
| Ca_Kabuli_NC_021167.1_10257577 | Ca_kabuli_chr08    | 10257577                       | [A/T]       | 1067303652                                 |
| Ca_Kabuli_NC_021167.1_10257601 | Ca_kabuli_chr08    | 10257601                       | [A/G]       | 1067303653                                 |
| Ca_Kabuli_NC_021167.1_10257640 | Ca_kabuli_chr08    | 10257640                       | [A/G]       | 1067303654                                 |
| Ca_Kabuli_NC_021167.1_10257647 | Ca_kabuli_chr08    | 10257647                       | [C/T]       | 1067303655                                 |
| Ca_Kabuli_NC_021167.1_10258920 | Ca_kabuli_chr08    | 10258920                       | [T/G]       | 1067303656                                 |
| Ca_Kabuli_NC_021167.1_10258924 | Ca_kabuli_chr08    | 10258924                       | [A/G]       | 1067303657                                 |
| Ca_Kabuli_NC_021167.1_10261903 | Ca_kabuli_chr08    | 10261903                       | [T/G]       | 1067303658                                 |

| <b>SNP IDs</b>                 | <b>Chromosomes</b> | <b>Physical positions (bp)</b> | <b>SNPs</b> | <b>NCBI SNPdb accession IDs (NCBI_ss#)</b> |
|--------------------------------|--------------------|--------------------------------|-------------|--------------------------------------------|
| Ca_Kabuli_NC_021167.1_10261981 | Ca_kabuli_chr08    | 10261981                       | [T/C]       | 1067303659                                 |
| Ca_Kabuli_NC_021167.1_10354329 | Ca_kabuli_chr08    | 10354329                       | [A/G]       | 1067303660                                 |
| Ca_Kabuli_NC_021167.1_10354334 | Ca_kabuli_chr08    | 10354334                       | [T/G]       | 1067303661                                 |
| Ca_Kabuli_NC_021167.1_10354348 | Ca_kabuli_chr08    | 10354348                       | [A/G]       | 1067303662                                 |
| Ca_Kabuli_NC_021167.1_10434008 | Ca_kabuli_chr08    | 10434008                       | [A/C]       | 1067303663                                 |
| Ca_Kabuli_NC_021167.1_10436667 | Ca_kabuli_chr08    | 10436667                       | [A/C]       | 1067303664                                 |
| Ca_Kabuli_NC_021167.1_10452098 | Ca_kabuli_chr08    | 10452098                       | [A/T]       | 1067303665                                 |
| Ca_Kabuli_NC_021167.1_10452101 | Ca_kabuli_chr08    | 10452101                       | [A/G]       | 1067303666                                 |
| Ca_Kabuli_NC_021167.1_10452982 | Ca_kabuli_chr08    | 10452982                       | [A/C]       | 1067303667                                 |
| Ca_Kabuli_NC_021167.1_10556112 | Ca_kabuli_chr08    | 10556112                       | [A/C]       | 1067303668                                 |
| Ca_Kabuli_NC_021167.1_10786843 | Ca_kabuli_chr08    | 10786843                       | [C/A]       | 1067303669                                 |
| Ca_Kabuli_NC_021167.1_10815888 | Ca_kabuli_chr08    | 10815888                       | [A/G]       | 1067303670                                 |
| Ca_Kabuli_NC_021167.1_10815904 | Ca_kabuli_chr08    | 10815904                       | [T/A]       | 1067303671                                 |
| Ca_Kabuli_NC_021167.1_10822123 | Ca_kabuli_chr08    | 10822123                       | [A/G]       | 1067303672                                 |
| Ca_Kabuli_NC_021167.1_10887267 | Ca_kabuli_chr08    | 10887267                       | [T/A]       | 1067303673                                 |
| Ca_Kabuli_NC_021167.1_10887272 | Ca_kabuli_chr08    | 10887272                       | [T/A]       | 1067303674                                 |
| Ca_Kabuli_NC_021167.1_10887292 | Ca_kabuli_chr08    | 10887292                       | [C/T]       | 1067303675                                 |
| Ca_Kabuli_NC_021167.1_10887296 | Ca_kabuli_chr08    | 10887296                       | [C/T]       | 1067303676                                 |
| Ca_Kabuli_NC_021167.1_10887558 | Ca_kabuli_chr08    | 10887558                       | [T/G]       | 1067303677                                 |
| Ca_Kabuli_NC_021167.1_10887580 | Ca_kabuli_chr08    | 10887580                       | [C/T]       | 1067303678                                 |
| Ca_Kabuli_NC_021167.1_10887602 | Ca_kabuli_chr08    | 10887602                       | [G/T]       | 1067303679                                 |
| Ca_Kabuli_NC_021167.1_10915747 | Ca_kabuli_chr08    | 10915747                       | [C/T]       | 1067303680                                 |
| Ca_Kabuli_NC_021167.1_11066644 | Ca_kabuli_chr08    | 11066644                       | [C/T]       | 1067303681                                 |
| Ca_Kabuli_NC_021167.1_11066728 | Ca_kabuli_chr08    | 11066728                       | [G/A]       | 1067303682                                 |
| Ca_Kabuli_NC_021167.1_11066975 | Ca_kabuli_chr08    | 11066975                       | [T/C]       | 1067303683                                 |
| Ca_Kabuli_NC_021167.1_11067014 | Ca_kabuli_chr08    | 11067014                       | [G/A]       | 1067303684                                 |
| Ca_Kabuli_NC_021167.1_11067090 | Ca_kabuli_chr08    | 11067090                       | [C/T]       | 1067303685                                 |
| Ca_Kabuli_NC_021167.1_11072880 | Ca_kabuli_chr08    | 11072880                       | [G/A]       | 1067303686                                 |
| Ca_Kabuli_NC_021167.1_11072896 | Ca_kabuli_chr08    | 11072896                       | [C/T]       | 1067303687                                 |
| Ca_Kabuli_NC_021167.1_11072914 | Ca_kabuli_chr08    | 11072914                       | [T/C]       | 1067303688                                 |
| Ca_Kabuli_NC_021167.1_11072923 | Ca_kabuli_chr08    | 11072923                       | [G/A]       | 1067303689                                 |
| Ca_Kabuli_NC_021167.1_11087123 | Ca_kabuli_chr08    | 11087123                       | [C/T]       | 1067303690                                 |
| Ca_Kabuli_NC_021167.1_11087143 | Ca_kabuli_chr08    | 11087143                       | [A/G]       | 1067303691                                 |
| Ca_Kabuli_NC_021167.1_11087302 | Ca_kabuli_chr08    | 11087302                       | [A/T]       | 1067303692                                 |

| <b>SNP IDs</b>                 | <b>Chromosomes</b> | <b>Physical positions (bp)</b> | <b>SNPs</b> | <b>NCBI SNPdb accession IDs (NCBI_ss#)</b> |
|--------------------------------|--------------------|--------------------------------|-------------|--------------------------------------------|
| Ca_Kabuli_NC_021167.1_11102884 | Ca_kabuli_chr08    | 11102884                       | [T/G]       | 1067303693                                 |
| Ca_Kabuli_NC_021167.1_11102892 | Ca_kabuli_chr08    | 11102892                       | [T/A]       | 1067303694                                 |
| Ca_Kabuli_NC_021167.1_11121469 | Ca_kabuli_chr08    | 11121469                       | [A/C]       | 1067303695                                 |
| Ca_Kabuli_NC_021167.1_11121777 | Ca_kabuli_chr08    | 11121777                       | [G/A]       | 1067303696                                 |
| Ca_Kabuli_NC_021167.1_11128030 | Ca_kabuli_chr08    | 11128030                       | [T/A]       | 1067303697                                 |
| Ca_Kabuli_NC_021167.1_11176583 | Ca_kabuli_chr08    | 11176583                       | [G/T]       | 1067303698                                 |
| Ca_Kabuli_NC_021167.1_11231820 | Ca_kabuli_chr08    | 11231820                       | [A/G]       | 1067303699                                 |
| Ca_Kabuli_NC_021167.1_11231834 | Ca_kabuli_chr08    | 11231834                       | [A/G]       | 1067303700                                 |
| Ca_Kabuli_NC_021167.1_11231837 | Ca_kabuli_chr08    | 11231837                       | [A/G]       | 1067303701                                 |
| Ca_Kabuli_NC_021167.1_11240205 | Ca_kabuli_chr08    | 11240205                       | [T/G]       | 1067303702                                 |
| Ca_Kabuli_NC_021167.1_11240211 | Ca_kabuli_chr08    | 11240211                       | [T/G]       | 1067303703                                 |
| Ca_Kabuli_NC_021167.1_11240212 | Ca_kabuli_chr08    | 11240212                       | [A/T]       | 1067303704                                 |
| Ca_Kabuli_NC_021167.1_11240234 | Ca_kabuli_chr08    | 11240234                       | [A/G]       | 1067303705                                 |
| Ca_Kabuli_NC_021167.1_11240258 | Ca_kabuli_chr08    | 11240258                       | [A/G]       | 1067303706                                 |
| Ca_Kabuli_NC_021167.1_11240408 | Ca_kabuli_chr08    | 11240408                       | [T/G]       | 1067303707                                 |
| Ca_Kabuli_NC_021167.1_11243243 | Ca_kabuli_chr08    | 11243243                       | [T/C]       | 1067303708                                 |
| Ca_Kabuli_NC_021167.1_11243256 | Ca_kabuli_chr08    | 11243256                       | [A/C]       | 1067303709                                 |
| Ca_Kabuli_NC_021167.1_11243263 | Ca_kabuli_chr08    | 11243263                       | [A/C]       | 1067303710                                 |
| Ca_Kabuli_NC_021167.1_11332970 | Ca_kabuli_chr08    | 11332970                       | [T/A]       | 1067303711                                 |
| Ca_Kabuli_NC_021167.1_11377770 | Ca_kabuli_chr08    | 11377770                       | [T/G]       | 1067303712                                 |
| Ca_Kabuli_NC_021167.1_11403805 | Ca_kabuli_chr08    | 11403805                       | [A/G]       | 1067303713                                 |
| Ca_Kabuli_NC_021167.1_11548440 | Ca_kabuli_chr08    | 11548440                       | [T/G]       | 1067303714                                 |
| Ca_Kabuli_NC_021167.1_11629709 | Ca_kabuli_chr08    | 11629709                       | [T/C]       | 1067303715                                 |
| Ca_Kabuli_NC_021167.1_11630126 | Ca_kabuli_chr08    | 11630126                       | [A/C]       | 1067303716                                 |
| Ca_Kabuli_NC_021167.1_11631807 | Ca_kabuli_chr08    | 11631807                       | [T/G]       | 1067303717                                 |
| Ca_Kabuli_NC_021167.1_11632814 | Ca_kabuli_chr08    | 11632814                       | [A/G]       | 1067303718                                 |
| Ca_Kabuli_NC_021167.1_11696117 | Ca_kabuli_chr08    | 11696117                       | [A/G]       | 1067303719                                 |
| Ca_Kabuli_NC_021167.1_11696123 | Ca_kabuli_chr08    | 11696123                       | [A/C]       | 1067303720                                 |
| Ca_Kabuli_NC_021167.1_11722520 | Ca_kabuli_chr08    | 11722520                       | [T/A]       | 1067303721                                 |
| Ca_Kabuli_NC_021167.1_11722522 | Ca_kabuli_chr08    | 11722522                       | [A/T]       | 1067303722                                 |
| Ca_Kabuli_NC_021167.1_11751059 | Ca_kabuli_chr08    | 11751059                       | [A/T]       | 1067303723                                 |
| Ca_Kabuli_NC_021167.1_11751065 | Ca_kabuli_chr08    | 11751065                       | [A/G]       | 1067303724                                 |
| Ca_Kabuli_NC_021167.1_11751093 | Ca_kabuli_chr08    | 11751093                       | [T/G]       | 1067303725                                 |
| Ca_Kabuli_NC_021167.1_11843704 | Ca_kabuli_chr08    | 11843704                       | [G/T]       | 1067303726                                 |



| <b>SNP IDs</b>                 | <b>Chromosomes</b> | <b>Physical positions (bp)</b> | <b>SNPs</b> | <b>NCBI SNPdb accession IDs (NCBI_ss#)</b> |
|--------------------------------|--------------------|--------------------------------|-------------|--------------------------------------------|
| Ca_Kabuli_NC_021167.1_11906090 | Ca_kabuli_chr08    | 11906090                       | [T/G]       | 1067303727                                 |
| Ca_Kabuli_NC_021167.1_11906095 | Ca_kabuli_chr08    | 11906095                       | [T/G]       | 1067303728                                 |
| Ca_Kabuli_NC_021167.1_12857978 | Ca_kabuli_chr08    | 12857978                       | [A/C]       | 1067303729                                 |
| Ca_Kabuli_NC_021167.1_12865268 | Ca_kabuli_chr08    | 12865268                       | [T/A]       | 1067303730                                 |
| Ca_Kabuli_NC_021167.1_13057906 | Ca_kabuli_chr08    | 13057906                       | [A/T]       | 1067303731                                 |
| Ca_Kabuli_NC_021167.1_13057957 | Ca_kabuli_chr08    | 13057957                       | [A/G]       | 1067303732                                 |
| Ca_Kabuli_NC_021167.1_13058012 | Ca_kabuli_chr08    | 13058012                       | [A/T]       | 1067303733                                 |
| Ca_Kabuli_NC_021167.1_13058018 | Ca_kabuli_chr08    | 13058018                       | [A/T]       | 1067303734                                 |
| Ca_Kabuli_NC_021167.1_13134787 | Ca_kabuli_chr08    | 13134787                       | [T/G]       | 1067303735                                 |
| Ca_Kabuli_NC_021167.1_13134791 | Ca_kabuli_chr08    | 13134791                       | [T/G]       | 1067303736                                 |
| Ca_Kabuli_NC_021167.1_13248268 | Ca_kabuli_chr08    | 13248268                       | [T/C]       | 1067303737                                 |
| Ca_Kabuli_NC_021167.1_13830326 | Ca_kabuli_chr08    | 13830326                       | [T/G]       | 1067303738                                 |
| Ca_Kabuli_NC_021167.1_13830332 | Ca_kabuli_chr08    | 13830332                       | [A/G]       | 1067303739                                 |
| Ca_Kabuli_NC_021167.1_13830341 | Ca_kabuli_chr08    | 13830341                       | [A/G]       | 1067303740                                 |
| Ca_Kabuli_NC_021167.1_13840715 | Ca_kabuli_chr08    | 13840715                       | [G/A]       | 1067303741                                 |
| Ca_Kabuli_NC_021167.1_13840721 | Ca_kabuli_chr08    | 13840721                       | [T/C]       | 1067303742                                 |
| Ca_Kabuli_NC_021167.1_13840741 | Ca_kabuli_chr08    | 13840741                       | [G/C]       | 1067303743                                 |
| Ca_Kabuli_NC_021167.1_13968426 | Ca_kabuli_chr08    | 13968426                       | [A/G]       | 1067303744                                 |
| Ca_Kabuli_NC_021167.1_13982906 | Ca_kabuli_chr08    | 13982906                       | [T/A]       | 1067303745                                 |
| Ca_Kabuli_NC_021167.1_13982907 | Ca_kabuli_chr08    | 13982907                       | [C/A]       | 1067303746                                 |
| Ca_Kabuli_NC_021167.1_13982908 | Ca_kabuli_chr08    | 13982908                       | [T/G]       | 1067303747                                 |
| Ca_Kabuli_NC_021167.1_14007360 | Ca_kabuli_chr08    | 14007360                       | [A/T]       | 1067303748                                 |
| Ca_Kabuli_NC_021167.1_14124588 | Ca_kabuli_chr08    | 14124588                       | [C/A]       | 1067303749                                 |
| Ca_Kabuli_NC_021167.1_14253920 | Ca_kabuli_chr08    | 14253920                       | [G/A]       | 1067303750                                 |
| Ca_Kabuli_NC_021167.1_14260970 | Ca_kabuli_chr08    | 14260970                       | [G/T]       | 1067303751                                 |
| Ca_Kabuli_NC_021167.1_14320494 | Ca_kabuli_chr08    | 14320494                       | [T/A]       | 1067303752                                 |
| Ca_Kabuli_NC_021167.1_14320512 | Ca_kabuli_chr08    | 14320512                       | [A/C]       | 1067303753                                 |
| Ca_Kabuli_NC_021167.1_14320523 | Ca_kabuli_chr08    | 14320523                       | [A/G]       | 1067303754                                 |
| Ca_Kabuli_NC_021167.1_14324155 | Ca_kabuli_chr08    | 14324155                       | [A/C]       | 1067303755                                 |
| Ca_Kabuli_NC_021167.1_14324185 | Ca_kabuli_chr08    | 14324185                       | [T/A]       | 1067303756                                 |
| Ca_Kabuli_NC_021167.1_14325980 | Ca_kabuli_chr08    | 14325980                       | [C/A]       | 1067303757                                 |
| Ca_Kabuli_NC_021167.1_14347844 | Ca_kabuli_chr08    | 14347844                       | [A/G]       | 1067303758                                 |
| Ca_Kabuli_NC_021167.1_14444375 | Ca_kabuli_chr08    | 14444375                       | [T/G]       | 1067303759                                 |
| Ca_Kabuli_NC_021167.1_14468477 | Ca_kabuli_chr08    | 14468477                       | [T/C]       | 1067303760                                 |

| <b>SNP IDs</b>                 | <b>Chromosomes</b> | <b>Physical positions (bp)</b> | <b>SNPs</b> | <b>NCBI SNPdb accession IDs (NCBI_ss#)</b> |
|--------------------------------|--------------------|--------------------------------|-------------|--------------------------------------------|
| Ca_Kabuli_NC_021167.1_14528882 | Ca_kabuli_chr08    | 14528882                       | [T/G]       | 1067303761                                 |
| Ca_Kabuli_NC_021167.1_14640805 | Ca_kabuli_chr08    | 14640805                       | [T/G]       | 1067303762                                 |
| Ca_Kabuli_NC_021167.1_14640878 | Ca_kabuli_chr08    | 14640878                       | [T/G]       | 1067303763                                 |
| Ca_Kabuli_NC_021167.1_14640943 | Ca_kabuli_chr08    | 14640943                       | [T/C]       | 1067303764                                 |
| Ca_Kabuli_NC_021167.1_14640967 | Ca_kabuli_chr08    | 14640967                       | [A/C]       | 1067303765                                 |
| Ca_Kabuli_NC_021167.1_14715490 | Ca_kabuli_chr08    | 14715490                       | [T/G]       | 1067303766                                 |
| Ca_Kabuli_NC_021167.1_14715495 | Ca_kabuli_chr08    | 14715495                       | [T/G]       | 1067303767                                 |
| Ca_Kabuli_NC_021167.1_14718763 | Ca_kabuli_chr08    | 14718763                       | [A/T]       | 1067303768                                 |
| Ca_Kabuli_NC_021167.1_14749076 | Ca_kabuli_chr08    | 14749076                       | [T/G]       | 1067303769                                 |
| Ca_Kabuli_NC_021167.1_14753542 | Ca_kabuli_chr08    | 14753542                       | [T/G]       | 1067303770                                 |
| Ca_Kabuli_NC_021167.1_14760860 | Ca_kabuli_chr08    | 14760860                       | [T/C]       | 1067303771                                 |
| Ca_Kabuli_NC_021167.1_14803020 | Ca_kabuli_chr08    | 14803020                       | [A/C]       | 1067303772                                 |
| Ca_Kabuli_NC_021167.1_14803048 | Ca_kabuli_chr08    | 14803048                       | [T/G]       | 1067303773                                 |
| Ca_Kabuli_NC_021167.1_14821416 | Ca_kabuli_chr08    | 14821416                       | [G/A]       | 1067303774                                 |
| Ca_Kabuli_NC_021167.1_14821979 | Ca_kabuli_chr08    | 14821979                       | [G/A]       | 1067303775                                 |
| Ca_Kabuli_NC_021167.1_14822011 | Ca_kabuli_chr08    | 14822011                       | [C/T]       | 1067303776                                 |
| Ca_Kabuli_NC_021167.1_14862045 | Ca_kabuli_chr08    | 14862045                       | [T/C]       | 1067303777                                 |
| Ca_Kabuli_NC_021167.1_14862048 | Ca_kabuli_chr08    | 14862048                       | [T/C]       | 1067303778                                 |
| Ca_Kabuli_NC_021167.1_14862189 | Ca_kabuli_chr08    | 14862189                       | [T/G]       | 1067303779                                 |
| Ca_Kabuli_NC_021167.1_14970630 | Ca_kabuli_chr08    | 14970630                       | [T/A]       | 1067303780                                 |
| Ca_Kabuli_NC_021167.1_14986504 | Ca_kabuli_chr08    | 14986504                       | [A/G]       | 1067303781                                 |
| Ca_Kabuli_NC_021167.1_15131125 | Ca_kabuli_chr08    | 15131125                       | [T/A]       | 1067303782                                 |
| Ca_Kabuli_NC_021167.1_15131129 | Ca_kabuli_chr08    | 15131129                       | [T/G]       | 1067303783                                 |
| Ca_Kabuli_NC_021167.1_15131151 | Ca_kabuli_chr08    | 15131151                       | [A/C]       | 1067303784                                 |
| Ca_Kabuli_NC_021167.1_15131175 | Ca_kabuli_chr08    | 15131175                       | [G/A]       | 1067303785                                 |
| Ca_Kabuli_NC_021167.1_15219937 | Ca_kabuli_chr08    | 15219937                       | [A/T]       | 1067303786                                 |
| Ca_Kabuli_NC_021167.1_15321476 | Ca_kabuli_chr08    | 15321476                       | [G/A]       | 1067303787                                 |
| Ca_Kabuli_NC_021167.1_15375254 | Ca_kabuli_chr08    | 15375254                       | [A/C]       | 1067303788                                 |
| Ca_Kabuli_NC_021167.1_15380024 | Ca_kabuli_chr08    | 15380024                       | [A/T]       | 1067303789                                 |
| Ca_Kabuli_NC_021167.1_15479341 | Ca_kabuli_chr08    | 15479341                       | [T/G]       | 1067303790                                 |
| Ca_Kabuli_NC_021167.1_15482079 | Ca_kabuli_chr08    | 15482079                       | [G/T]       | 1067303791                                 |
| Ca_Kabuli_NC_021167.1_15482534 | Ca_kabuli_chr08    | 15482534                       | [A/C]       | 1067303792                                 |
| Ca_Kabuli_NC_021167.1_15484031 | Ca_kabuli_chr08    | 15484031                       | [A/T]       | 1067303793                                 |
| Ca_Kabuli_NC_021167.1_15484046 | Ca_kabuli_chr08    | 15484046                       | [T/G]       | 1067303794                                 |

| <b>SNP IDs</b>                 | <b>Chromosomes</b> | <b>Physical positions (bp)</b> | <b>SNPs</b> | <b>NCBI SNPdb accession IDs (NCBI_ss#)</b> |
|--------------------------------|--------------------|--------------------------------|-------------|--------------------------------------------|
| Ca_Kabuli_NC_021167.1_15532056 | Ca_kabuli_chr08    | 15532056                       | [T/C]       | 1067303795                                 |
| Ca_Kabuli_NC_021167.1_15555742 | Ca_kabuli_chr08    | 15555742                       | [A/G]       | 1067303796                                 |
| Ca_Kabuli_NC_021167.1_15590280 | Ca_kabuli_chr08    | 15590280                       | [A/C]       | 1067303797                                 |
| Ca_Kabuli_NC_021167.1_15638443 | Ca_kabuli_chr08    | 15638443                       | [A/C]       | 1067303798                                 |
| Ca_Kabuli_NC_021167.1_15692070 | Ca_kabuli_chr08    | 15692070                       | [G/A]       | 1067303799                                 |
| Ca_Kabuli_NC_021167.1_15695815 | Ca_kabuli_chr08    | 15695815                       | [A/G]       | 1067303800                                 |
| Ca_Kabuli_NC_021167.1_15764837 | Ca_kabuli_chr08    | 15764837                       | [A/G]       | 1067303801                                 |
| Ca_Kabuli_NC_021167.1_15764865 | Ca_kabuli_chr08    | 15764865                       | [A/G]       | 1067303802                                 |
| Ca_Kabuli_NC_021167.1_15764899 | Ca_kabuli_chr08    | 15764899                       | [T/C]       | 1067303803                                 |
| Ca_Kabuli_NC_021167.1_15771041 | Ca_kabuli_chr08    | 15771041                       | [A/G]       | 1067303804                                 |
| Ca_Kabuli_NC_021167.1_15812581 | Ca_kabuli_chr08    | 15812581                       | [A/G]       | 1067303805                                 |
| Ca_Kabuli_NC_021167.1_15812587 | Ca_kabuli_chr08    | 15812587                       | [T/C]       | 1067303806                                 |
| Ca_Kabuli_NC_021167.1_15826107 | Ca_kabuli_chr08    | 15826107                       | [T/G]       | 1067303807                                 |
| Ca_Kabuli_NC_021167.1_15828286 | Ca_kabuli_chr08    | 15828286                       | [A/T]       | 1067303808                                 |
| Ca_Kabuli_NC_021167.1_15828325 | Ca_kabuli_chr08    | 15828325                       | [T/A]       | 1067303809                                 |
| Ca_Kabuli_NC_021167.1_15863470 | Ca_kabuli_chr08    | 15863470                       | [A/G]       | 1067303810                                 |
| Ca_Kabuli_NC_021167.1_15868952 | Ca_kabuli_chr08    | 15868952                       | [T/C]       | 1067303811                                 |
| Ca_Kabuli_NC_021167.1_15873044 | Ca_kabuli_chr08    | 15873044                       | [A/C]       | 1067303812                                 |
| Ca_Kabuli_NC_021167.1_15935288 | Ca_kabuli_chr08    | 15935288                       | [A/G]       | 1067303813                                 |
| Ca_Kabuli_NC_021167.1_15935314 | Ca_kabuli_chr08    | 15935314                       | [A/C]       | 1067303814                                 |
| Ca_Kabuli_NC_021167.1_16022432 | Ca_kabuli_chr08    | 16022432                       | [C/T]       | 1067303815                                 |
| Ca_Kabuli_NC_021167.1_16022511 | Ca_kabuli_chr08    | 16022511                       | [T/C]       | 1067303816                                 |
| Ca_Kabuli_NC_021167.1_16076156 | Ca_kabuli_chr08    | 16076156                       | [A/C]       | 1067303817                                 |
| Ca_Kabuli_NC_021167.1_16076220 | Ca_kabuli_chr08    | 16076220                       | [T/C]       | 1067303818                                 |
| Ca_Kabuli_NC_021167.1_16076223 | Ca_kabuli_chr08    | 16076223                       | [A/T]       | 1067303819                                 |
| Ca_Kabuli_NC_021167.1_16076255 | Ca_kabuli_chr08    | 16076255                       | [A/C]       | 1067303820                                 |
| Ca_Kabuli_NC_021167.1_16102356 | Ca_kabuli_chr08    | 16102356                       | [G/T]       | 1067303821                                 |
| Ca_Kabuli_NC_021167.1_16129739 | Ca_kabuli_chr08    | 16129739                       | [T/G]       | 1067303822                                 |
| Ca_Kabuli_NC_021167.1_16129741 | Ca_kabuli_chr08    | 16129741                       | [T/A]       | 1067303823                                 |
| Ca_Kabuli_NC_021167.1_16129767 | Ca_kabuli_chr08    | 16129767                       | [A/G]       | 1067303824                                 |
| Ca_Kabuli_NC_021167.1_16151176 | Ca_kabuli_chr08    | 16151176                       | [C/A]       | 1067303825                                 |
| Ca_Kabuli_NC_021167.1_16151177 | Ca_kabuli_chr08    | 16151177                       | [A/T]       | 1067303826                                 |
| Ca_Kabuli_NC_021167.1_16151178 | Ca_kabuli_chr08    | 16151178                       | [A/C]       | 1067303827                                 |
| Ca_Kabuli_NC_021167.1_16151179 | Ca_kabuli_chr08    | 16151179                       | [G/T]       | 1067303828                                 |

| <b>SNP IDs</b>                 | <b>Chromosomes</b> | <b>Physical positions (bp)</b> | <b>SNPs</b> | <b>NCBI SNPdb accession IDs (NCBI_ss#)</b> |
|--------------------------------|--------------------|--------------------------------|-------------|--------------------------------------------|
| Ca_Kabuli_NC_021167.1_16222056 | Ca_kabuli_chr08    | 16222056                       | [T/A]       | 1067303829                                 |
| Ca_Kabuli_NC_021167.1_16264262 | Ca_kabuli_chr08    | 16264262                       | [T/G]       | 1067303830                                 |
| Ca_Kabuli_NC_021167.1_16284238 | Ca_kabuli_chr08    | 16284238                       | [C/T]       | 1067303831                                 |
| Ca_Kabuli_NC_021167.1_16326539 | Ca_kabuli_chr08    | 16326539                       | [A/C]       | 1067303832                                 |
| Ca_Kabuli_NC_021167.1_16333842 | Ca_kabuli_chr08    | 16333842                       | [T/C]       | 1067303833                                 |
| Ca_Kabuli_NC_021167.1_16411504 | Ca_kabuli_chr08    | 16411504                       | [T/C]       | 1067303834                                 |
| Ca_Kabuli_NC_021167.1_16412539 | Ca_kabuli_chr08    | 16412539                       | [T/C]       | 1067303835                                 |
| Ca_Kabuli_NC_021167.1_16413199 | Ca_kabuli_chr08    | 16413199                       | [T/G]       | 1067303836                                 |
| Ca_Kabuli_NC_021167.1_16421377 | Ca_kabuli_chr08    | 16421377                       | [A/G]       | 1067303837                                 |
| Ca_Kabuli_NC_021167.1_16421410 | Ca_kabuli_chr08    | 16421410                       | [A/T]       | 1067303838                                 |
| Ca_Kabuli_NC_021167.1_16421487 | Ca_kabuli_chr08    | 16421487                       | [T/C]       | 1067303839                                 |
| Ca_Kabuli_NC_021167.1_16421534 | Ca_kabuli_chr08    | 16421534                       | [T/G]       | 1067303840                                 |
| Ca_Kabuli_NC_021167.1_16421549 | Ca_kabuli_chr08    | 16421549                       | [T/C]       | 1067303841                                 |
| Ca_Kabuli_NC_021167.1_16421551 | Ca_kabuli_chr08    | 16421551                       | [A/G]       | 1067303842                                 |
| Ca_Kabuli_NC_021167.1_16421613 | Ca_kabuli_chr08    | 16421613                       | [A/G]       | 1067303843                                 |
| Ca_Kabuli_NC_021167.1_16421629 | Ca_kabuli_chr08    | 16421629                       | [T/C]       | 1067303844                                 |
| Ca_Kabuli_NC_021167.1_16432863 | Ca_kabuli_chr08    | 16432863                       | [A/G]       | 1067303845                                 |
| Ca_Kabuli_NC_021167.1_16432866 | Ca_kabuli_chr08    | 16432866                       | [T/A]       | 1067303846                                 |
| Ca_Kabuli_NW_004515636.1_4014  | Ca_kabuli_scaffold | 4014                           | [T/C]       | 1067303847                                 |
| Ca_Kabuli_NW_004515636.1_4065  | Ca_kabuli_scaffold | 4065                           | [T/C]       | 1067303848                                 |
| Ca_Kabuli_NW_004515636.1_5063  | Ca_kabuli_scaffold | 5063                           | [A/G]       | 1067303849                                 |
| Ca_Kabuli_NW_004515636.1_5064  | Ca_kabuli_scaffold | 5064                           | [G/A]       | 1067303850                                 |
| Ca_Kabuli_NW_004515636.1_5065  | Ca_kabuli_scaffold | 5065                           | [C/T]       | 1067303851                                 |
| Ca_Kabuli_NW_004515636.1_5143  | Ca_kabuli_scaffold | 5143                           | [C/A]       | 1067303852                                 |
| Ca_Kabuli_NW_004515636.1_5145  | Ca_kabuli_scaffold | 5145                           | [T/C]       | 1067303853                                 |
| Ca_Kabuli_NW_004515636.1_5149  | Ca_kabuli_scaffold | 5149                           | [C/A]       | 1067303854                                 |
| Ca_Kabuli_NW_004515636.1_5550  | Ca_kabuli_scaffold | 5550                           | [T/C]       | 1067303855                                 |
| Ca_Kabuli_NW_004515636.1_5811  | Ca_kabuli_scaffold | 5811                           | [T/C]       | 1067303856                                 |
| Ca_Kabuli_NW_004515636.1_6264  | Ca_kabuli_scaffold | 6264                           | [G/A]       | 1067303857                                 |
| Ca_Kabuli_NW_004515636.1_6265  | Ca_kabuli_scaffold | 6265                           | [C/T]       | 1067303858                                 |
| Ca_Kabuli_NW_004515636.1_6268  | Ca_kabuli_scaffold | 6268                           | [T/C]       | 1067303859                                 |
| Ca_Kabuli_NW_004515636.1_6322  | Ca_kabuli_scaffold | 6322                           | [A/G]       | 1067303860                                 |
| Ca_Kabuli_NW_004515636.1_6325  | Ca_kabuli_scaffold | 6325                           | [A/T]       | 1067303861                                 |
| Ca_Kabuli_NW_004515636.1_6326  | Ca_kabuli_scaffold | 6326                           | [T/G]       | 1067303862                                 |

| <b>SNP IDs</b>                 | <b>Chromosomes</b> | <b>Physical positions (bp)</b> | <b>SNPs</b> | <b>NCBI SNPdb accession IDs (NCBI_ss#)</b> |
|--------------------------------|--------------------|--------------------------------|-------------|--------------------------------------------|
| Ca_Kabuli_NW_004515636.1_19605 | Ca_kabuli_scaffold | 19605                          | [C/T]       | 1067303863                                 |
| Ca_Kabuli_NW_004515636.1_19615 | Ca_kabuli_scaffold | 19615                          | [C/T]       | 1067303864                                 |
| Ca_Kabuli_NW_004515636.1_19624 | Ca_kabuli_scaffold | 19624                          | [G/A]       | 1067303865                                 |
| Ca_Kabuli_NW_004515636.1_19659 | Ca_kabuli_scaffold | 19659                          | [G/A]       | 1067303866                                 |
| Ca_Kabuli_NW_004515636.1_19662 | Ca_kabuli_scaffold | 19662                          | [G/A]       | 1067303867                                 |
| Ca_Kabuli_NW_004515636.1_19669 | Ca_kabuli_scaffold | 19669                          | [G/A]       | 1067303868                                 |
| Ca_Kabuli_NW_004515636.1_19686 | Ca_kabuli_scaffold | 19686                          | [A/T]       | 1067303869                                 |
| Ca_Kabuli_NW_004515636.1_20193 | Ca_kabuli_scaffold | 20193                          | [A/G]       | 1067303870                                 |
| Ca_Kabuli_NW_004515636.1_20198 | Ca_kabuli_scaffold | 20198                          | [A/G]       | 1067303871                                 |
| Ca_Kabuli_NW_004515636.1_20306 | Ca_kabuli_scaffold | 20306                          | [T/A]       | 1067303872                                 |
| Ca_Kabuli_NW_004515636.1_23439 | Ca_kabuli_scaffold | 23439                          | [A/C]       | 1067303873                                 |
| Ca_Kabuli_NW_004515636.1_25828 | Ca_kabuli_scaffold | 25828                          | [T/C]       | 1067303874                                 |
| Ca_Kabuli_NW_004515636.1_25829 | Ca_kabuli_scaffold | 25829                          | [G/A]       | 1067303875                                 |
| Ca_Kabuli_NW_004515636.1_25830 | Ca_kabuli_scaffold | 25830                          | [C/T]       | 1067303876                                 |
| Ca_Kabuli_NW_004515636.1_27212 | Ca_kabuli_scaffold | 27212                          | [A/G]       | 1067303877                                 |
| Ca_Kabuli_NW_004515636.1_27588 | Ca_kabuli_scaffold | 27588                          | [A/C]       | 1067303878                                 |
| Ca_Kabuli_NW_004515636.1_27603 | Ca_kabuli_scaffold | 27603                          | [T/G]       | 1067303879                                 |
| Ca_Kabuli_NW_004515636.1_27605 | Ca_kabuli_scaffold | 27605                          | [C/A]       | 1067303880                                 |
| Ca_Kabuli_NW_004515636.1_27622 | Ca_kabuli_scaffold | 27622                          | [A/G]       | 1067303881                                 |
| Ca_Kabuli_NW_004515636.1_27768 | Ca_kabuli_scaffold | 27768                          | [A/T]       | 1067303882                                 |
| Ca_Kabuli_NW_004515636.1_46448 | Ca_kabuli_scaffold | 46448                          | [G/A]       | 1067303883                                 |
| Ca_Kabuli_NW_004515636.1_46449 | Ca_kabuli_scaffold | 46449                          | [C/T]       | 1067303884                                 |
| Ca_Kabuli_NW_004515636.1_46450 | Ca_kabuli_scaffold | 46450                          | [C/T]       | 1067303885                                 |
| Ca_Kabuli_NW_004515636.1_47700 | Ca_kabuli_scaffold | 47700                          | [G/A]       | 1067303886                                 |
| Ca_Kabuli_NW_004515636.1_47701 | Ca_kabuli_scaffold | 47701                          | [C/T]       | 1067303887                                 |
| Ca_Kabuli_NW_004515636.1_47706 | Ca_kabuli_scaffold | 47706                          | [T/G]       | 1067303888                                 |
| Ca_Kabuli_NW_004515636.1_47744 | Ca_kabuli_scaffold | 47744                          | [T/G]       | 1067303889                                 |
| Ca_Kabuli_NW_004515636.1_47756 | Ca_kabuli_scaffold | 47756                          | [T/A]       | 1067303890                                 |
| Ca_Kabuli_NW_004515636.1_47760 | Ca_kabuli_scaffold | 47760                          | [G/C]       | 1067303891                                 |
| Ca_Kabuli_NW_004515636.1_47761 | Ca_kabuli_scaffold | 47761                          | [G/T]       | 1067303892                                 |
| Ca_Kabuli_NW_004515636.1_47762 | Ca_kabuli_scaffold | 47762                          | [A/G]       | 1067303893                                 |
| Ca_Kabuli_NW_004515636.1_47783 | Ca_kabuli_scaffold | 47783                          | [A/G]       | 1067303894                                 |
| Ca_Kabuli_NW_004515636.1_47789 | Ca_kabuli_scaffold | 47789                          | [A/G]       | 1067303895                                 |
| Ca_Kabuli_NW_004515636.1_50492 | Ca_kabuli_scaffold | 50492                          | [T/C]       | 1067303896                                 |

| <b>SNP IDs</b>                  | <b>Chromosomes</b> | <b>Physical positions (bp)</b> | <b>SNPs</b> | <b>NCBI SNPdb accession IDs (NCBI_ss#)</b> |
|---------------------------------|--------------------|--------------------------------|-------------|--------------------------------------------|
| Ca_Kabuli_NW_004515636.1_83152  | Ca_kabuli_scaffold | 83152                          | [T/G]       | 1067303897                                 |
| Ca_Kabuli_NW_004515636.1_113771 | Ca_kabuli_scaffold | 113771                         | [A/G]       | 1067303898                                 |
| Ca_Kabuli_NW_004515636.1_113829 | Ca_kabuli_scaffold | 113829                         | [G/A]       | 1067303899                                 |
| Ca_Kabuli_NW_004515636.1_113830 | Ca_kabuli_scaffold | 113830                         | [C/G]       | 1067303900                                 |
| Ca_Kabuli_NW_004515636.1_113831 | Ca_kabuli_scaffold | 113831                         | [T/G]       | 1067303901                                 |
| Ca_Kabuli_NW_004515636.1_117587 | Ca_kabuli_scaffold | 117587                         | [A/T]       | 1067303902                                 |
| Ca_Kabuli_NW_004515636.1_117594 | Ca_kabuli_scaffold | 117594                         | [T/C]       | 1067303903                                 |
| Ca_Kabuli_NW_004515636.1_123633 | Ca_kabuli_scaffold | 123633                         | [A/T]       | 1067303904                                 |
| Ca_Kabuli_NW_004515636.1_123649 | Ca_kabuli_scaffold | 123649                         | [T/C]       | 1067303905                                 |
| Ca_Kabuli_NW_004515636.1_123700 | Ca_kabuli_scaffold | 123700                         | [T/C]       | 1067303906                                 |
| Ca_Kabuli_NW_004515636.1_123726 | Ca_kabuli_scaffold | 123726                         | [T/C]       | 1067303907                                 |
| Ca_Kabuli_NW_004515638.1_137309 | Ca_kabuli_scaffold | 137309                         | [T/G]       | 1067303908                                 |
| Ca_Kabuli_NW_004515638.1_137415 | Ca_kabuli_scaffold | 137415                         | [G/T]       | 1067303909                                 |
| Ca_Kabuli_NW_004515638.1_137430 | Ca_kabuli_scaffold | 137430                         | [T/G]       | 1067303910                                 |
| Ca_Kabuli_NW_004515638.1_345193 | Ca_kabuli_scaffold | 345193                         | [A/G]       | 1067303911                                 |
| Ca_Kabuli_NW_004515642.1_48870  | Ca_kabuli_scaffold | 48870                          | [C/G]       | 1067303912                                 |
| Ca_Kabuli_NW_004515642.1_48871  | Ca_kabuli_scaffold | 48871                          | [C/A]       | 1067303913                                 |
| Ca_Kabuli_NW_004515642.1_48874  | Ca_kabuli_scaffold | 48874                          | [G/T]       | 1067303914                                 |
| Ca_Kabuli_NW_004515644.1_95     | Ca_kabuli_scaffold | 95                             | [G/A]       | 1067303915                                 |
| Ca_Kabuli_NW_004515644.1_134    | Ca_kabuli_scaffold | 134                            | [T/C]       | 1067303916                                 |
| Ca_Kabuli_NW_004515644.1_136    | Ca_kabuli_scaffold | 136                            | [A/G]       | 1067303917                                 |
| Ca_Kabuli_NW_004515644.1_140    | Ca_kabuli_scaffold | 140                            | [C/A]       | 1067303918                                 |
| Ca_Kabuli_NW_004515644.1_230    | Ca_kabuli_scaffold | 230                            | [C/T]       | 1067303919                                 |
| Ca_Kabuli_NW_004515644.1_249    | Ca_kabuli_scaffold | 249                            | [T/C]       | 1067303920                                 |
| Ca_Kabuli_NW_004515644.1_200563 | Ca_kabuli_scaffold | 200563                         | [A/G]       | 1067303921                                 |
| Ca_Kabuli_NW_004515644.1_332963 | Ca_kabuli_scaffold | 332963                         | [C/T]       | 1067303922                                 |
| Ca_Kabuli_NW_004515645.1_94025  | Ca_kabuli_scaffold | 94025                          | [T/C]       | 1067303923                                 |
| Ca_Kabuli_NW_004515645.1_94054  | Ca_kabuli_scaffold | 94054                          | [A/G]       | 1067303924                                 |
| Ca_Kabuli_NW_004515645.1_94076  | Ca_kabuli_scaffold | 94076                          | [A/T]       | 1067303925                                 |
| Ca_Kabuli_NW_004515645.1_94087  | Ca_kabuli_scaffold | 94087                          | [T/C]       | 1067303926                                 |
| Ca_Kabuli_NW_004515645.1_94089  | Ca_kabuli_scaffold | 94089                          | [A/T]       | 1067303927                                 |
| Ca_Kabuli_NW_004515646.1_113532 | Ca_kabuli_scaffold | 113532                         | [A/G]       | 1067303928                                 |
| Ca_Kabuli_NW_004515646.1_113582 | Ca_kabuli_scaffold | 113582                         | [G/C]       | 1067303929                                 |
| Ca_Kabuli_NW_004515646.1_113584 | Ca_kabuli_scaffold | 113584                         | [G/A]       | 1067303930                                 |

| <b>SNP IDs</b>                   | <b>Chromosomes</b> | <b>Physical positions (bp)</b> | <b>SNPs</b> | <b>NCBI SNPdb accession IDs (NCBI_ss#)</b> |
|----------------------------------|--------------------|--------------------------------|-------------|--------------------------------------------|
| Ca_Kabuli_NW_004515651.1_449103  | Ca_kabuli_scaffold | 449103                         | [A/G]       | 1067303931                                 |
| Ca_Kabuli_NW_004515651.1_495572  | Ca_kabuli_scaffold | 495572                         | [G/A]       | 1067303932                                 |
| Ca_Kabuli_NW_004515651.1_495579  | Ca_kabuli_scaffold | 495579                         | [A/G]       | 1067303933                                 |
| Ca_Kabuli_NW_004515651.1_495584  | Ca_kabuli_scaffold | 495584                         | [G/A]       | 1067303934                                 |
| Ca_Kabuli_NW_004515651.1_495604  | Ca_kabuli_scaffold | 495604                         | [A/G]       | 1067303935                                 |
| Ca_Kabuli_NW_004515651.1_501445  | Ca_kabuli_scaffold | 501445                         | [G/A]       | 1067303936                                 |
| Ca_Kabuli_NW_004515653.1_43725   | Ca_kabuli_scaffold | 43725                          | [G/A]       | 1067303937                                 |
| Ca_Kabuli_NW_004515653.1_43769   | Ca_kabuli_scaffold | 43769                          | [T/A]       | 1067303938                                 |
| Ca_Kabuli_NW_004515656.1_413691  | Ca_kabuli_scaffold | 413691                         | [G/A]       | 1067303939                                 |
| Ca_Kabuli_NW_004515656.1_413713  | Ca_kabuli_scaffold | 413713                         | [A/C]       | 1067303940                                 |
| Ca_Kabuli_NW_004515656.1_413719  | Ca_kabuli_scaffold | 413719                         | [G/A]       | 1067303941                                 |
| Ca_Kabuli_NW_004515656.1_457416  | Ca_kabuli_scaffold | 457416                         | [A/G]       | 1067303942                                 |
| Ca_Kabuli_NW_004515656.1_457455  | Ca_kabuli_scaffold | 457455                         | [A/G]       | 1067303943                                 |
| Ca_Kabuli_NW_004515656.1_480520  | Ca_kabuli_scaffold | 480520                         | [A/C]       | 1067303944                                 |
| Ca_Kabuli_NW_004515656.1_520311  | Ca_kabuli_scaffold | 520311                         | [A/G]       | 1067303945                                 |
| Ca_Kabuli_NW_004515656.1_541373  | Ca_kabuli_scaffold | 541373                         | [G/T]       | 1067303946                                 |
| Ca_Kabuli_NW_004515658.1_378128  | Ca_kabuli_scaffold | 378128                         | [A/C]       | 1067303947                                 |
| Ca_Kabuli_NW_004515658.1_548610  | Ca_kabuli_scaffold | 548610                         | [T/G]       | 1067303948                                 |
| Ca_Kabuli_NW_004515658.1_563568  | Ca_kabuli_scaffold | 563568                         | [A/C]       | 1067303949                                 |
| Ca_Kabuli_NW_004515658.1_871280  | Ca_kabuli_scaffold | 871280                         | [A/G]       | 1067303950                                 |
| Ca_Kabuli_NW_004515658.1_871346  | Ca_kabuli_scaffold | 871346                         | [A/G]       | 1067303951                                 |
| Ca_Kabuli_NW_004515658.1_911602  | Ca_kabuli_scaffold | 911602                         | [G/T]       | 1067303952                                 |
| Ca_Kabuli_NW_004515658.1_961089  | Ca_kabuli_scaffold | 961089                         | [A/G]       | 1067303953                                 |
| Ca_Kabuli_NW_004515658.1_962807  | Ca_kabuli_scaffold | 962807                         | [T/A]       | 1067303954                                 |
| Ca_Kabuli_NW_004515658.1_992528  | Ca_kabuli_scaffold | 992528                         | [T/C]       | 1067303955                                 |
| Ca_Kabuli_NW_004515658.1_992544  | Ca_kabuli_scaffold | 992544                         | [A/G]       | 1067303956                                 |
| Ca_Kabuli_NW_004515658.1_992549  | Ca_kabuli_scaffold | 992549                         | [T/G]       | 1067303957                                 |
| Ca_Kabuli_NW_004515658.1_992635  | Ca_kabuli_scaffold | 992635                         | [T/G]       | 1067303958                                 |
| Ca_Kabuli_NW_004515658.1_997950  | Ca_kabuli_scaffold | 997950                         | [A/C]       | 1067303959                                 |
| Ca_Kabuli_NW_004515658.1_1002666 | Ca_kabuli_scaffold | 1002666                        | [T/G]       | 1067303960                                 |
| Ca_Kabuli_NW_004515658.1_1002673 | Ca_kabuli_scaffold | 1002673                        | [T/G]       | 1067303961                                 |
| Ca_Kabuli_NW_004515658.1_1002679 | Ca_kabuli_scaffold | 1002679                        | [G/T]       | 1067303962                                 |
| Ca_Kabuli_NW_004515658.1_1002680 | Ca_kabuli_scaffold | 1002680                        | [T/G]       | 1067303963                                 |
| Ca_Kabuli_NW_004515658.1_1002765 | Ca_kabuli_scaffold | 1002765                        | [C/G]       | 1067303964                                 |

| <b>SNP IDs</b>                   | <b>Chromosomes</b> | <b>Physical positions (bp)</b> | <b>SNPs</b> | <b>NCBI SNPdb accession IDs (NCBI_ss#)</b> |
|----------------------------------|--------------------|--------------------------------|-------------|--------------------------------------------|
| Ca_Kabuli_NW_004515658.1_1020708 | Ca_kabuli_scaffold | 1020708                        | [A/T]       | 1067303965                                 |
| Ca_Kabuli_NW_004515658.1_1039242 | Ca_kabuli_scaffold | 1039242                        | [A/C]       | 1067303966                                 |
| Ca_Kabuli_NW_004515658.1_1049122 | Ca_kabuli_scaffold | 1049122                        | [A/G]       | 1067303967                                 |
| Ca_Kabuli_NW_004515658.1_1049135 | Ca_kabuli_scaffold | 1049135                        | [C/A]       | 1067303968                                 |
| Ca_Kabuli_NW_004515658.1_1049702 | Ca_kabuli_scaffold | 1049702                        | [T/C]       | 1067303969                                 |
| Ca_Kabuli_NW_004515658.1_1050164 | Ca_kabuli_scaffold | 1050164                        | [T/C]       | 1067303970                                 |
| Ca_Kabuli_NW_004515658.1_1052918 | Ca_kabuli_scaffold | 1052918                        | [T/G]       | 1067303971                                 |
| Ca_Kabuli_NW_004515658.1_1052919 | Ca_kabuli_scaffold | 1052919                        | [C/G]       | 1067303972                                 |
| Ca_Kabuli_NW_004515658.1_1052920 | Ca_kabuli_scaffold | 1052920                        | [T/C]       | 1067303973                                 |
| Ca_Kabuli_NW_004515658.1_1052921 | Ca_kabuli_scaffold | 1052921                        | [T/C]       | 1067303974                                 |
| Ca_Kabuli_NW_004515658.1_1052922 | Ca_kabuli_scaffold | 1052922                        | [T/A]       | 1067303975                                 |
| Ca_Kabuli_NW_004515658.1_1052923 | Ca_kabuli_scaffold | 1052923                        | [A/T]       | 1067303976                                 |
| Ca_Kabuli_NW_004515658.1_1052983 | Ca_kabuli_scaffold | 1052983                        | [A/G]       | 1067303977                                 |
| Ca_Kabuli_NW_004515658.1_1053185 | Ca_kabuli_scaffold | 1053185                        | [T/G]       | 1067303978                                 |
| Ca_Kabuli_NW_004515658.1_1053215 | Ca_kabuli_scaffold | 1053215                        | [A/G]       | 1067303979                                 |
| Ca_Kabuli_NW_004515658.1_1053247 | Ca_kabuli_scaffold | 1053247                        | [A/G]       | 1067303980                                 |
| Ca_Kabuli_NW_004515658.1_1053261 | Ca_kabuli_scaffold | 1053261                        | [C/T]       | 1067303981                                 |
| Ca_Kabuli_NW_004515659.1_137462  | Ca_kabuli_scaffold | 137462                         | [G/A]       | 1067303982                                 |
| Ca_Kabuli_NW_004515662.1_39438   | Ca_kabuli_scaffold | 39438                          | [C/A]       | 1067303983                                 |
| Ca_Kabuli_NW_004515662.1_39470   | Ca_kabuli_scaffold | 39470                          | [C/T]       | 1067303984                                 |
| Ca_Kabuli_NW_004515663.1_74704   | Ca_kabuli_scaffold | 74704                          | [T/C]       | 1067303985                                 |
| Ca_Kabuli_NW_004515663.1_74707   | Ca_kabuli_scaffold | 74707                          | [T/C]       | 1067303986                                 |
| Ca_Kabuli_NW_004515663.1_74710   | Ca_kabuli_scaffold | 74710                          | [T/A]       | 1067303987                                 |
| Ca_Kabuli_NW_004515663.1_74714   | Ca_kabuli_scaffold | 74714                          | [C/A]       | 1067303988                                 |
| Ca_Kabuli_NW_004515663.1_74722   | Ca_kabuli_scaffold | 74722                          | [T/C]       | 1067303989                                 |
| Ca_Kabuli_NW_004515663.1_74743   | Ca_kabuli_scaffold | 74743                          | [G/A]       | 1067303990                                 |
| Ca_Kabuli_NW_004515663.1_74749   | Ca_kabuli_scaffold | 74749                          | [G/A]       | 1067303991                                 |
| Ca_Kabuli_NW_004515663.1_224738  | Ca_kabuli_scaffold | 224738                         | [T/C]       | 1067303992                                 |
| Ca_Kabuli_NW_004515665.1_78661   | Ca_kabuli_scaffold | 78661                          | [T/C]       | 1067303993                                 |
| Ca_Kabuli_NW_004515665.1_151898  | Ca_kabuli_scaffold | 151898                         | [A/C]       | 1067303994                                 |
| Ca_Kabuli_NW_004515665.1_191558  | Ca_kabuli_scaffold | 191558                         | [T/G]       | 1067303995                                 |
| Ca_Kabuli_NW_004515665.1_192020  | Ca_kabuli_scaffold | 192020                         | [T/G]       | 1067303996                                 |
| Ca_Kabuli_NW_004515665.1_192023  | Ca_kabuli_scaffold | 192023                         | [A/G]       | 1067303997                                 |
| Ca_Kabuli_NW_004515665.1_192061  | Ca_kabuli_scaffold | 192061                         | [A/T]       | 1067303998                                 |



| <b>SNP IDs</b>                  | <b>Chromosomes</b> | <b>Physical positions (bp)</b> | <b>SNPs</b> | <b>NCBI SNPdb accession IDs (NCBI_ss#)</b> |
|---------------------------------|--------------------|--------------------------------|-------------|--------------------------------------------|
| Ca_Kabuli_NW_004515665.1_192163 | Ca_kabuli_scaffold | 192163                         | [T/G]       | 1067303999                                 |
| Ca_Kabuli_NW_004515665.1_195831 | Ca_kabuli_scaffold | 195831                         | [T/C]       | 1067304000                                 |
| Ca_Kabuli_NW_004515665.1_195897 | Ca_kabuli_scaffold | 195897                         | [A/C]       | 1067304001                                 |
| Ca_Kabuli_NW_004515665.1_196116 | Ca_kabuli_scaffold | 196116                         | [T/C]       | 1067304002                                 |
| Ca_Kabuli_NW_004515665.1_448978 | Ca_kabuli_scaffold | 448978                         | [C/A]       | 1067304003                                 |
| Ca_Kabuli_NW_004515665.1_448980 | Ca_kabuli_scaffold | 448980                         | [T/C]       | 1067304004                                 |
| Ca_Kabuli_NW_004515665.1_449023 | Ca_kabuli_scaffold | 449023                         | [A/C]       | 1067304005                                 |
| Ca_Kabuli_NW_004515665.1_449041 | Ca_kabuli_scaffold | 449041                         | [A/G]       | 1067304006                                 |
| Ca_Kabuli_NW_004515666.1_35900  | Ca_kabuli_scaffold | 35900                          | [T/C]       | 1067304007                                 |
| Ca_Kabuli_NW_004515666.1_47641  | Ca_kabuli_scaffold | 47641                          | [A/T]       | 1067304008                                 |
| Ca_Kabuli_NW_004515666.1_47663  | Ca_kabuli_scaffold | 47663                          | [A/T]       | 1067304009                                 |
| Ca_Kabuli_NW_004515666.1_47687  | Ca_kabuli_scaffold | 47687                          | [T/C]       | 1067304010                                 |
| Ca_Kabuli_NW_004515666.1_47696  | Ca_kabuli_scaffold | 47696                          | [T/A]       | 1067304011                                 |
| Ca_Kabuli_NW_004515666.1_49282  | Ca_kabuli_scaffold | 49282                          | [T/G]       | 1067304012                                 |
| Ca_Kabuli_NW_004515666.1_49429  | Ca_kabuli_scaffold | 49429                          | [T/A]       | 1067304013                                 |
| Ca_Kabuli_NW_004515666.1_125185 | Ca_kabuli_scaffold | 125185                         | [T/G]       | 1067304014                                 |
| Ca_Kabuli_NW_004515673.1_34108  | Ca_kabuli_scaffold | 34108                          | [C/T]       | 1067304015                                 |
| Ca_Kabuli_NW_004515673.1_34111  | Ca_kabuli_scaffold | 34111                          | [C/A]       | 1067304016                                 |
| Ca_Kabuli_NW_004515677.1_376643 | Ca_kabuli_scaffold | 376643                         | [C/A]       | 1067304017                                 |
| Ca_Kabuli_NW_004515677.1_420436 | Ca_kabuli_scaffold | 420436                         | [T/C]       | 1067304018                                 |
| Ca_Kabuli_NW_004515677.1_420439 | Ca_kabuli_scaffold | 420439                         | [T/G]       | 1067304019                                 |
| Ca_Kabuli_NW_004515677.1_420443 | Ca_kabuli_scaffold | 420443                         | [T/G]       | 1067304020                                 |
| Ca_Kabuli_NW_004515677.1_420447 | Ca_kabuli_scaffold | 420447                         | [A/G]       | 1067304021                                 |
| Ca_Kabuli_NW_004515677.1_420451 | Ca_kabuli_scaffold | 420451                         | [A/G]       | 1067304022                                 |
| Ca_Kabuli_NW_004515677.1_420473 | Ca_kabuli_scaffold | 420473                         | [T/G]       | 1067304023                                 |
| Ca_Kabuli_NW_004515677.1_420480 | Ca_kabuli_scaffold | 420480                         | [T/C]       | 1067304024                                 |
| Ca_Kabuli_NW_004515677.1_420499 | Ca_kabuli_scaffold | 420499                         | [A/C]       | 1067304025                                 |
| Ca_Kabuli_NW_004515677.1_433404 | Ca_kabuli_scaffold | 433404                         | [T/C]       | 1067304026                                 |
| Ca_Kabuli_NW_004515677.1_433419 | Ca_kabuli_scaffold | 433419                         | [T/C]       | 1067304027                                 |
| Ca_Kabuli_NW_004515677.1_433441 | Ca_kabuli_scaffold | 433441                         | [T/C]       | 1067304028                                 |
| Ca_Kabuli_NW_004515677.1_433467 | Ca_kabuli_scaffold | 433467                         | [A/G]       | 1067304029                                 |
| Ca_Kabuli_NW_004515677.1_437526 | Ca_kabuli_scaffold | 437526                         | [A/G]       | 1067304030                                 |
| Ca_Kabuli_NW_004515677.1_437554 | Ca_kabuli_scaffold | 437554                         | [A/G]       | 1067304031                                 |
| Ca_Kabuli_NW_004515677.1_437970 | Ca_kabuli_scaffold | 437970                         | [A/T]       | 1067304032                                 |

| <b>SNP IDs</b>                  | <b>Chromosomes</b> | <b>Physical positions (bp)</b> | <b>SNPs</b> | <b>NCBI SNPdb accession IDs (NCBI_ss#)</b> |
|---------------------------------|--------------------|--------------------------------|-------------|--------------------------------------------|
| Ca_Kabuli_NW_004515677.1_437974 | Ca_kabuli_scaffold | 437974                         | [T/C]       | 1067304033                                 |
| Ca_Kabuli_NW_004515677.1_437979 | Ca_kabuli_scaffold | 437979                         | [A/C]       | 1067304034                                 |
| Ca_Kabuli_NW_004515677.1_438016 | Ca_kabuli_scaffold | 438016                         | [T/C]       | 1067304035                                 |
| Ca_Kabuli_NW_004515677.1_438130 | Ca_kabuli_scaffold | 438130                         | [A/G]       | 1067304036                                 |
| Ca_Kabuli_NW_004515678.1_73626  | Ca_kabuli_scaffold | 73626                          | [A/G]       | 1067304037                                 |
| Ca_Kabuli_NW_004515678.1_77955  | Ca_kabuli_scaffold | 77955                          | [A/G]       | 1067304038                                 |
| Ca_Kabuli_NW_004515683.1_271596 | Ca_kabuli_scaffold | 271596                         | [A/T]       | 1067304039                                 |
| Ca_Kabuli_NW_004515683.1_271597 | Ca_kabuli_scaffold | 271597                         | [G/C]       | 1067304040                                 |
| Ca_Kabuli_NW_004515683.1_271598 | Ca_kabuli_scaffold | 271598                         | [G/T]       | 1067304041                                 |
| Ca_Kabuli_NW_004515684.1_4256   | Ca_kabuli_scaffold | 4256                           | [C/G]       | 1067304042                                 |
| Ca_Kabuli_NW_004515684.1_4268   | Ca_kabuli_scaffold | 4268                           | [T/C]       | 1067304043                                 |
| Ca_Kabuli_NW_004515684.1_4273   | Ca_kabuli_scaffold | 4273                           | [C/G]       | 1067304044                                 |
| Ca_Kabuli_NW_004515684.1_4299   | Ca_kabuli_scaffold | 4299                           | [A/G]       | 1067304045                                 |
| Ca_Kabuli_NW_004515684.1_16344  | Ca_kabuli_scaffold | 16344                          | [A/G]       | 1067304046                                 |
| Ca_Kabuli_NW_004515684.1_16354  | Ca_kabuli_scaffold | 16354                          | [T/C]       | 1067304047                                 |
| Ca_Kabuli_NW_004515684.1_16380  | Ca_kabuli_scaffold | 16380                          | [T/G]       | 1067304048                                 |
| Ca_Kabuli_NW_004515684.1_16401  | Ca_kabuli_scaffold | 16401                          | [T/G]       | 1067304049                                 |
| Ca_Kabuli_NW_004515684.1_16414  | Ca_kabuli_scaffold | 16414                          | [A/G]       | 1067304050                                 |
| Ca_Kabuli_NW_004515684.1_29934  | Ca_kabuli_scaffold | 29934                          | [A/T]       | 1067304051                                 |
| Ca_Kabuli_NW_004515684.1_110948 | Ca_kabuli_scaffold | 110948                         | [T/C]       | 1067304052                                 |
| Ca_Kabuli_NW_004515684.1_110960 | Ca_kabuli_scaffold | 110960                         | [A/G]       | 1067304053                                 |
| Ca_Kabuli_NW_004515684.1_110972 | Ca_kabuli_scaffold | 110972                         | [A/G]       | 1067304054                                 |
| Ca_Kabuli_NW_004515684.1_174790 | Ca_kabuli_scaffold | 174790                         | [C/A]       | 1067304055                                 |
| Ca_Kabuli_NW_004515684.1_174791 | Ca_kabuli_scaffold | 174791                         | [T/G]       | 1067304056                                 |
| Ca_Kabuli_NW_004515684.1_174792 | Ca_kabuli_scaffold | 174792                         | [C/A]       | 1067304057                                 |
| Ca_Kabuli_NW_004515684.1_253574 | Ca_kabuli_scaffold | 253574                         | [T/C]       | 1067304058                                 |
| Ca_Kabuli_NW_004515684.1_253596 | Ca_kabuli_scaffold | 253596                         | [G/A]       | 1067304059                                 |
| Ca_Kabuli_NW_004515684.1_257023 | Ca_kabuli_scaffold | 257023                         | [A/G]       | 1067304060                                 |
| Ca_Kabuli_NW_004515684.1_257344 | Ca_kabuli_scaffold | 257344                         | [C/T]       | 1067304061                                 |
| Ca_Kabuli_NW_004515684.1_257376 | Ca_kabuli_scaffold | 257376                         | [T/A]       | 1067304062                                 |
| Ca_Kabuli_NW_004515684.1_258573 | Ca_kabuli_scaffold | 258573                         | [A/G]       | 1067304063                                 |
| Ca_Kabuli_NW_004515685.1_128324 | Ca_kabuli_scaffold | 128324                         | [C/A]       | 1067304064                                 |
| Ca_Kabuli_NW_004515685.1_128328 | Ca_kabuli_scaffold | 128328                         | [A/C]       | 1067304065                                 |
| Ca_Kabuli_NW_004515687.1_578164 | Ca_kabuli_scaffold | 578164                         | [T/G]       | 1067304066                                 |

| <b>SNP IDs</b>                  | <b>Chromosomes</b> | <b>Physical positions (bp)</b> | <b>SNPs</b> | <b>NCBI SNPdb accession IDs (NCBI_ss#)</b> |
|---------------------------------|--------------------|--------------------------------|-------------|--------------------------------------------|
| Ca_Kabuli_NW_004515687.1_647366 | Ca_kabuli_scaffold | 647366                         | [T/C]       | 1067304067                                 |
| Ca_Kabuli_NW_004515688.1_27925  | Ca_kabuli_scaffold | 27925                          | [T/G]       | 1067304068                                 |
| Ca_Kabuli_NW_004515688.1_27928  | Ca_kabuli_scaffold | 27928                          | [T/G]       | 1067304069                                 |
| Ca_Kabuli_NW_004515688.1_28967  | Ca_kabuli_scaffold | 28967                          | [A/T]       | 1067304070                                 |
| Ca_Kabuli_NW_004515688.1_28979  | Ca_kabuli_scaffold | 28979                          | [C/T]       | 1067304071                                 |
| Ca_Kabuli_NW_004515688.1_294455 | Ca_kabuli_scaffold | 294455                         | [T/G]       | 1067304072                                 |
| Ca_Kabuli_NW_004515688.1_294487 | Ca_kabuli_scaffold | 294487                         | [T/G]       | 1067304073                                 |
| Ca_Kabuli_NW_004515688.1_294493 | Ca_kabuli_scaffold | 294493                         | [A/T]       | 1067304074                                 |
| Ca_Kabuli_NW_004515688.1_294505 | Ca_kabuli_scaffold | 294505                         | [A/G]       | 1067304075                                 |
| Ca_Kabuli_NW_004515689.1_287933 | Ca_kabuli_scaffold | 287933                         | [T/C]       | 1067304076                                 |
| Ca_Kabuli_NW_004515689.1_399800 | Ca_kabuli_scaffold | 399800                         | [T/G]       | 1067304077                                 |
| Ca_Kabuli_NW_004515689.1_406183 | Ca_kabuli_scaffold | 406183                         | [A/T]       | 1067304078                                 |
| Ca_Kabuli_NW_004515689.1_562990 | Ca_kabuli_scaffold | 562990                         | [T/G]       | 1067304079                                 |
| Ca_Kabuli_NW_004515689.1_563004 | Ca_kabuli_scaffold | 563004                         | [T/A]       | 1067304080                                 |
| Ca_Kabuli_NW_004515689.1_568164 | Ca_kabuli_scaffold | 568164                         | [T/C]       | 1067304081                                 |
| Ca_Kabuli_NW_004515689.1_568237 | Ca_kabuli_scaffold | 568237                         | [T/C]       | 1067304082                                 |
| Ca_Kabuli_NW_004515689.1_606105 | Ca_kabuli_scaffold | 606105                         | [A/C]       | 1067304083                                 |
| Ca_Kabuli_NW_004515695.1_226164 | Ca_kabuli_scaffold | 226164                         | [A/C]       | 1067304084                                 |
| Ca_Kabuli_NW_004515695.1_226165 | Ca_kabuli_scaffold | 226165                         | [G/T]       | 1067304085                                 |
| Ca_Kabuli_NW_004515695.1_226166 | Ca_kabuli_scaffold | 226166                         | [A/T]       | 1067304086                                 |
| Ca_Kabuli_NW_004515695.1_226167 | Ca_kabuli_scaffold | 226167                         | [T/A]       | 1067304087                                 |
| Ca_Kabuli_NW_004515695.1_303176 | Ca_kabuli_scaffold | 303176                         | [T/G]       | 1067304088                                 |
| Ca_Kabuli_NW_004515695.1_303187 | Ca_kabuli_scaffold | 303187                         | [T/G]       | 1067304089                                 |
| Ca_Kabuli_NW_004515695.1_305323 | Ca_kabuli_scaffold | 305323                         | [A/C]       | 1067304090                                 |
| Ca_Kabuli_NW_004515695.1_337216 | Ca_kabuli_scaffold | 337216                         | [T/G]       | 1067304091                                 |
| Ca_Kabuli_NW_004515695.1_441589 | Ca_kabuli_scaffold | 441589                         | [T/G]       | 1067304092                                 |
| Ca_Kabuli_NW_004515695.1_450197 | Ca_kabuli_scaffold | 450197                         | [T/G]       | 1067304093                                 |
| Ca_Kabuli_NW_004515695.1_586229 | Ca_kabuli_scaffold | 586229                         | [T/G]       | 1067304094                                 |
| Ca_Kabuli_NW_004515695.1_586256 | Ca_kabuli_scaffold | 586256                         | [T/C]       | 1067304095                                 |
| Ca_Kabuli_NW_004515695.1_586257 | Ca_kabuli_scaffold | 586257                         | [G/T]       | 1067304096                                 |
| Ca_Kabuli_NW_004515695.1_588208 | Ca_kabuli_scaffold | 588208                         | [A/C]       | 1067304097                                 |
| Ca_Kabuli_NW_004515695.1_588211 | Ca_kabuli_scaffold | 588211                         | [T/C]       | 1067304098                                 |
| Ca_Kabuli_NW_004515695.1_696869 | Ca_kabuli_scaffold | 696869                         | [A/C]       | 1067304099                                 |
| Ca_Kabuli_NW_004515695.1_705958 | Ca_kabuli_scaffold | 705958                         | [A/G]       | 1067304100                                 |

| <b>SNP IDs</b>                  | <b>Chromosomes</b> | <b>Physical positions (bp)</b> | <b>SNPs</b> | <b>NCBI SNPdb accession IDs (NCBI_ss#)</b> |
|---------------------------------|--------------------|--------------------------------|-------------|--------------------------------------------|
| Ca_Kabuli_NW_004515695.1_707956 | Ca_kabuli_scaffold | 707956                         | [A/C]       | 1067304101                                 |
| Ca_Kabuli_NW_004515695.1_779324 | Ca_kabuli_scaffold | 779324                         | [G/A]       | 1067304102                                 |
| Ca_Kabuli_NW_004515701.1_113829 | Ca_kabuli_scaffold | 113829                         | [C/T]       | 1067304103                                 |
| Ca_Kabuli_NW_004515701.1_299931 | Ca_kabuli_scaffold | 299931                         | [T/G]       | 1067304104                                 |
| Ca_Kabuli_NW_004515701.1_299939 | Ca_kabuli_scaffold | 299939                         | [A/G]       | 1067304105                                 |
| Ca_Kabuli_NW_004515701.1_303730 | Ca_kabuli_scaffold | 303730                         | [A/G]       | 1067304106                                 |
| Ca_Kabuli_NW_004515701.1_303743 | Ca_kabuli_scaffold | 303743                         | [T/C]       | 1067304107                                 |
| Ca_Kabuli_NW_004515701.1_303772 | Ca_kabuli_scaffold | 303772                         | [A/G]       | 1067304108                                 |
| Ca_Kabuli_NW_004515701.1_303776 | Ca_kabuli_scaffold | 303776                         | [T/C]       | 1067304109                                 |
| Ca_Kabuli_NW_004515701.1_303782 | Ca_kabuli_scaffold | 303782                         | [T/C]       | 1067304110                                 |
| Ca_Kabuli_NW_004515701.1_303787 | Ca_kabuli_scaffold | 303787                         | [T/A]       | 1067304111                                 |
| Ca_Kabuli_NW_004515701.1_307253 | Ca_kabuli_scaffold | 307253                         | [A/T]       | 1067304112                                 |
| Ca_Kabuli_NW_004515701.1_332667 | Ca_kabuli_scaffold | 332667                         | [T/G]       | 1067304113                                 |
| Ca_Kabuli_NW_004515701.1_332673 | Ca_kabuli_scaffold | 332673                         | [C/A]       | 1067304114                                 |
| Ca_Kabuli_NW_004515701.1_349187 | Ca_kabuli_scaffold | 349187                         | [A/C]       | 1067304115                                 |
| Ca_Kabuli_NW_004515701.1_349196 | Ca_kabuli_scaffold | 349196                         | [A/T]       | 1067304116                                 |
| Ca_Kabuli_NW_004515704.1_314312 | Ca_kabuli_scaffold | 314312                         | [A/G]       | 1067304117                                 |
| Ca_Kabuli_NW_004515704.1_314314 | Ca_kabuli_scaffold | 314314                         | [A/C]       | 1067304118                                 |
| Ca_Kabuli_NW_004515708.1_266134 | Ca_kabuli_scaffold | 266134                         | [T/C]       | 1067304119                                 |
| Ca_Kabuli_NW_004515708.1_317302 | Ca_kabuli_scaffold | 317302                         | [T/C]       | 1067304120                                 |
| Ca_Kabuli_NW_004515708.1_317339 | Ca_kabuli_scaffold | 317339                         | [T/G]       | 1067304121                                 |
| Ca_Kabuli_NW_004515708.1_320914 | Ca_kabuli_scaffold | 320914                         | [A/C]       | 1067304122                                 |
| Ca_Kabuli_NW_004515708.1_461668 | Ca_kabuli_scaffold | 461668                         | [A/T]       | 1067304123                                 |
| Ca_Kabuli_NW_004515708.1_860788 | Ca_kabuli_scaffold | 860788                         | [G/C]       | 1067304124                                 |
| Ca_Kabuli_NW_004515712.1_218244 | Ca_kabuli_scaffold | 218244                         | [T/G]       | 1067304125                                 |
| Ca_Kabuli_NW_004515712.1_218321 | Ca_kabuli_scaffold | 218321                         | [T/G]       | 1067304126                                 |
| Ca_Kabuli_NW_004515712.1_218336 | Ca_kabuli_scaffold | 218336                         | [T/G]       | 1067304127                                 |
| Ca_Kabuli_NW_004515712.1_218352 | Ca_kabuli_scaffold | 218352                         | [T/G]       | 1067304128                                 |
| Ca_Kabuli_NW_004515712.1_218359 | Ca_kabuli_scaffold | 218359                         | [T/G]       | 1067304129                                 |
| Ca_Kabuli_NW_004515712.1_223513 | Ca_kabuli_scaffold | 223513                         | [A/C]       | 1067304130                                 |
| Ca_Kabuli_NW_004515712.1_233039 | Ca_kabuli_scaffold | 233039                         | [A/C]       | 1067304131                                 |
| Ca_Kabuli_NW_004515712.1_369512 | Ca_kabuli_scaffold | 369512                         | [T/C]       | 1067304132                                 |
| Ca_Kabuli_NW_004515712.1_409583 | Ca_kabuli_scaffold | 409583                         | [A/T]       | 1067304133                                 |
| Ca_Kabuli_NW_004515717.1_14442  | Ca_kabuli_scaffold | 14442                          | [T/C]       | 1067304134                                 |

| <b>SNP IDs</b>                  | <b>Chromosomes</b> | <b>Physical positions (bp)</b> | <b>SNPs</b> | <b>NCBI SNPdb accession IDs (NCBI_ss#)</b> |
|---------------------------------|--------------------|--------------------------------|-------------|--------------------------------------------|
| Ca_Kabuli_NW_004515717.1_14555  | Ca_kabuli_scaffold | 14555                          | [G/A]       | 1067304135                                 |
| Ca_Kabuli_NW_004515717.1_14618  | Ca_kabuli_scaffold | 14618                          | [G/A]       | 1067304136                                 |
| Ca_Kabuli_NW_004515719.1_33482  | Ca_kabuli_scaffold | 33482                          | [T/G]       | 1067304137                                 |
| Ca_Kabuli_NW_004515719.1_33504  | Ca_kabuli_scaffold | 33504                          | [T/G]       | 1067304138                                 |
| Ca_Kabuli_NW_004515723.1_193172 | Ca_kabuli_scaffold | 193172                         | [G/C]       | 1067304139                                 |
| Ca_Kabuli_NW_004515723.1_193174 | Ca_kabuli_scaffold | 193174                         | [G/A]       | 1067304140                                 |
| Ca_Kabuli_NW_004515723.1_193175 | Ca_kabuli_scaffold | 193175                         | [T/G]       | 1067304141                                 |
| Ca_Kabuli_NW_004515723.1_229653 | Ca_kabuli_scaffold | 229653                         | [A/C]       | 1067304142                                 |
| Ca_Kabuli_NW_004515723.1_245866 | Ca_kabuli_scaffold | 245866                         | [C/A]       | 1067304143                                 |
| Ca_Kabuli_NW_004515723.1_267060 | Ca_kabuli_scaffold | 267060                         | [T/G]       | 1067304144                                 |
| Ca_Kabuli_NW_004515723.1_267064 | Ca_kabuli_scaffold | 267064                         | [T/G]       | 1067304145                                 |
| Ca_Kabuli_NW_004515723.1_267092 | Ca_kabuli_scaffold | 267092                         | [T/G]       | 1067304146                                 |
| Ca_Kabuli_NW_004515723.1_275838 | Ca_kabuli_scaffold | 275838                         | [A/T]       | 1067304147                                 |
| Ca_Kabuli_NW_004515726.1_100149 | Ca_kabuli_scaffold | 100149                         | [C/T]       | 1067304148                                 |
| Ca_Kabuli_NW_004515726.1_100228 | Ca_kabuli_scaffold | 100228                         | [A/G]       | 1067304149                                 |
| Ca_Kabuli_NW_004515726.1_100276 | Ca_kabuli_scaffold | 100276                         | [A/C]       | 1067304150                                 |
| Ca_Kabuli_NW_004515726.1_100529 | Ca_kabuli_scaffold | 100529                         | [T/C]       | 1067304151                                 |
| Ca_Kabuli_NW_004515726.1_103027 | Ca_kabuli_scaffold | 103027                         | [C/T]       | 1067304152                                 |
| Ca_Kabuli_NW_004515726.1_103741 | Ca_kabuli_scaffold | 103741                         | [G/C]       | 1067304153                                 |
| Ca_Kabuli_NW_004515726.1_106331 | Ca_kabuli_scaffold | 106331                         | [G/A]       | 1067304154                                 |
| Ca_Kabuli_NW_004515726.1_106349 | Ca_kabuli_scaffold | 106349                         | [C/T]       | 1067304155                                 |
| Ca_Kabuli_NW_004515726.1_121260 | Ca_kabuli_scaffold | 121260                         | [G/T]       | 1067304156                                 |
| Ca_Kabuli_NW_004515726.1_121293 | Ca_kabuli_scaffold | 121293                         | [T/C]       | 1067304157                                 |
| Ca_Kabuli_NW_004515726.1_133596 | Ca_kabuli_scaffold | 133596                         | [A/C]       | 1067304158                                 |
| Ca_Kabuli_NW_004515726.1_142843 | Ca_kabuli_scaffold | 142843                         | [C/T]       | 1067304159                                 |
| Ca_Kabuli_NW_004515726.1_151081 | Ca_kabuli_scaffold | 151081                         | [G/A]       | 1067304160                                 |
| Ca_Kabuli_NW_004515726.1_151197 | Ca_kabuli_scaffold | 151197                         | [T/G]       | 1067304161                                 |
| Ca_Kabuli_NW_004515726.1_151747 | Ca_kabuli_scaffold | 151747                         | [A/G]       | 1067304162                                 |
| Ca_Kabuli_NW_004515726.1_151777 | Ca_kabuli_scaffold | 151777                         | [T/C]       | 1067304163                                 |
| Ca_Kabuli_NW_004515726.1_213404 | Ca_kabuli_scaffold | 213404                         | [G/T]       | 1067304164                                 |
| Ca_Kabuli_NW_004515726.1_213518 | Ca_kabuli_scaffold | 213518                         | [C/T]       | 1067304165                                 |
| Ca_Kabuli_NW_004515726.1_214188 | Ca_kabuli_scaffold | 214188                         | [A/T]       | 1067304166                                 |
| Ca_Kabuli_NW_004515726.1_237825 | Ca_kabuli_scaffold | 237825                         | [G/A]       | 1067304167                                 |
| Ca_Kabuli_NW_004515726.1_352747 | Ca_kabuli_scaffold | 352747                         | [T/C]       | 1067304168                                 |

| <b>SNP IDs</b>                  | <b>Chromosomes</b> | <b>Physical positions (bp)</b> | <b>SNPs</b> | <b>NCBI SNPdb accession IDs (NCBI_ss#)</b> |
|---------------------------------|--------------------|--------------------------------|-------------|--------------------------------------------|
| Ca_Kabuli_NW_004515726.1_355222 | Ca_kabuli_scaffold | 355222                         | [G/A]       | 1067304169                                 |
| Ca_Kabuli_NW_004515726.1_469137 | Ca_kabuli_scaffold | 469137                         | [A/G]       | 1067304170                                 |
| Ca_Kabuli_NW_004515726.1_469173 | Ca_kabuli_scaffold | 469173                         | [T/G]       | 1067304171                                 |
| Ca_Kabuli_NW_004515726.1_469176 | Ca_kabuli_scaffold | 469176                         | [T/G]       | 1067304172                                 |
| Ca_Kabuli_NW_004515730.1_239649 | Ca_kabuli_scaffold | 239649                         | [T/A]       | 1067304173                                 |
| Ca_Kabuli_NW_004515732.1_115111 | Ca_kabuli_scaffold | 115111                         | [A/C]       | 1067304174                                 |
| Ca_Kabuli_NW_004515732.1_115114 | Ca_kabuli_scaffold | 115114                         | [A/C]       | 1067304175                                 |
| Ca_Kabuli_NW_004515732.1_115133 | Ca_kabuli_scaffold | 115133                         | [A/G]       | 1067304176                                 |
| Ca_Kabuli_NW_004515732.1_115151 | Ca_kabuli_scaffold | 115151                         | [A/G]       | 1067304177                                 |
| Ca_Kabuli_NW_004515732.1_155666 | Ca_kabuli_scaffold | 155666                         | [A/G]       | 1067304178                                 |
| Ca_Kabuli_NW_004515732.1_160974 | Ca_kabuli_scaffold | 160974                         | [T/C]       | 1067304179                                 |
| Ca_Kabuli_NW_004515732.1_160980 | Ca_kabuli_scaffold | 160980                         | [T/C]       | 1067304180                                 |
| Ca_Kabuli_NW_004515732.1_186119 | Ca_kabuli_scaffold | 186119                         | [T/C]       | 1067304181                                 |
| Ca_Kabuli_NW_004515732.1_186149 | Ca_kabuli_scaffold | 186149                         | [A/C]       | 1067304182                                 |
| Ca_Kabuli_NW_004515732.1_186155 | Ca_kabuli_scaffold | 186155                         | [A/G]       | 1067304183                                 |
| Ca_Kabuli_NW_004515732.1_186158 | Ca_kabuli_scaffold | 186158                         | [A/G]       | 1067304184                                 |
| Ca_Kabuli_NW_004515732.1_207939 | Ca_kabuli_scaffold | 207939                         | [T/A]       | 1067304185                                 |
| Ca_Kabuli_NW_004515734.1_17756  | Ca_kabuli_scaffold | 17756                          | [T/A]       | 1067304186                                 |
| Ca_Kabuli_NW_004515734.1_17761  | Ca_kabuli_scaffold | 17761                          | [A/C]       | 1067304187                                 |
| Ca_Kabuli_NW_004515734.1_243844 | Ca_kabuli_scaffold | 243844                         | [T/C]       | 1067304188                                 |
| Ca_Kabuli_NW_004515734.1_263899 | Ca_kabuli_scaffold | 263899                         | [G/A]       | 1067304189                                 |
| Ca_Kabuli_NW_004515734.1_457634 | Ca_kabuli_scaffold | 457634                         | [T/A]       | 1067304190                                 |
| Ca_Kabuli_NW_004515734.1_457813 | Ca_kabuli_scaffold | 457813                         | [T/G]       | 1067304191                                 |
| Ca_Kabuli_NW_004515734.1_458099 | Ca_kabuli_scaffold | 458099                         | [A/C]       | 1067304192                                 |
| Ca_Kabuli_NW_004515739.1_11965  | Ca_kabuli_scaffold | 11965                          | [A/C]       | 1067304193                                 |
| Ca_Kabuli_NW_004515739.1_168489 | Ca_kabuli_scaffold | 168489                         | [T/A]       | 1067304194                                 |
| Ca_Kabuli_NW_004515739.1_168517 | Ca_kabuli_scaffold | 168517                         | [T/C]       | 1067304195                                 |
| Ca_Kabuli_NW_004515739.1_173329 | Ca_kabuli_scaffold | 173329                         | [T/C]       | 1067304196                                 |
| Ca_Kabuli_NW_004515739.1_173375 | Ca_kabuli_scaffold | 173375                         | [T/A]       | 1067304197                                 |
| Ca_Kabuli_NW_004515739.1_280023 | Ca_kabuli_scaffold | 280023                         | [T/C]       | 1067304198                                 |
| Ca_Kabuli_NW_004515739.1_280035 | Ca_kabuli_scaffold | 280035                         | [A/C]       | 1067304199                                 |
| Ca_Kabuli_NW_004515739.1_280047 | Ca_kabuli_scaffold | 280047                         | [G/A]       | 1067304200                                 |
| Ca_Kabuli_NW_004515739.1_280062 | Ca_kabuli_scaffold | 280062                         | [C/T]       | 1067304201                                 |
| Ca_Kabuli_NW_004515741.1_48869  | Ca_kabuli_scaffold | 48869                          | [T/G]       | 1067304202                                 |

| <b>SNP IDs</b>                  | <b>Chromosomes</b> | <b>Physical positions (bp)</b> | <b>SNPs</b> | <b>NCBI SNPdb accession IDs (NCBI_ss#)</b> |
|---------------------------------|--------------------|--------------------------------|-------------|--------------------------------------------|
| Ca_Kabuli_NW_004515741.1_132016 | Ca_kabuli_scaffold | 132016                         | [A/G]       | 1067304203                                 |
| Ca_Kabuli_NW_004515741.1_244722 | Ca_kabuli_scaffold | 244722                         | [T/G]       | 1067304204                                 |
| Ca_Kabuli_NW_004515741.1_244732 | Ca_kabuli_scaffold | 244732                         | [G/A]       | 1067304205                                 |
| Ca_Kabuli_NW_004515741.1_244735 | Ca_kabuli_scaffold | 244735                         | [T/G]       | 1067304206                                 |
| Ca_Kabuli_NW_004515745.1_145511 | Ca_kabuli_scaffold | 145511                         | [T/C]       | 1067304207                                 |
| Ca_Kabuli_NW_004515745.1_145544 | Ca_kabuli_scaffold | 145544                         | [A/G]       | 1067304208                                 |
| Ca_Kabuli_NW_004515745.1_145577 | Ca_kabuli_scaffold | 145577                         | [A/G]       | 1067304209                                 |
| Ca_Kabuli_NW_004515745.1_145591 | Ca_kabuli_scaffold | 145591                         | [T/C]       | 1067304210                                 |
| Ca_Kabuli_NW_004515745.1_145596 | Ca_kabuli_scaffold | 145596                         | [T/C]       | 1067304211                                 |
| Ca_Kabuli_NW_004515745.1_166626 | Ca_kabuli_scaffold | 166626                         | [T/C]       | 1067304212                                 |
| Ca_Kabuli_NW_004515745.1_166630 | Ca_kabuli_scaffold | 166630                         | [T/A]       | 1067304213                                 |
| Ca_Kabuli_NW_004515745.1_166678 | Ca_kabuli_scaffold | 166678                         | [A/G]       | 1067304214                                 |
| Ca_Kabuli_NW_004515745.1_424522 | Ca_kabuli_scaffold | 424522                         | [T/C]       | 1067304215                                 |
| Ca_Kabuli_NW_004515745.1_546706 | Ca_kabuli_scaffold | 546706                         | [T/C]       | 1067304216                                 |
| Ca_Kabuli_NW_004515745.1_546722 | Ca_kabuli_scaffold | 546722                         | [T/C]       | 1067304217                                 |
| Ca_Kabuli_NW_004515745.1_586052 | Ca_kabuli_scaffold | 586052                         | [A/G]       | 1067304218                                 |
| Ca_Kabuli_NW_004515747.1_108985 | Ca_kabuli_scaffold | 108985                         | [G/T]       | 1067304219                                 |
| Ca_Kabuli_NW_004515748.1_96363  | Ca_kabuli_scaffold | 96363                          | [T/G]       | 1067304220                                 |
| Ca_Kabuli_NW_004515748.1_96394  | Ca_kabuli_scaffold | 96394                          | [T/A]       | 1067304221                                 |
| Ca_Kabuli_NW_004515748.1_96397  | Ca_kabuli_scaffold | 96397                          | [G/A]       | 1067304222                                 |
| Ca_Kabuli_NW_004515748.1_96420  | Ca_kabuli_scaffold | 96420                          | [C/A]       | 1067304223                                 |
| Ca_Kabuli_NW_004515748.1_96435  | Ca_kabuli_scaffold | 96435                          | [A/G]       | 1067304224                                 |
| Ca_Kabuli_NW_004515748.1_96444  | Ca_kabuli_scaffold | 96444                          | [A/G]       | 1067304225                                 |
| Ca_Kabuli_NW_004515748.1_96456  | Ca_kabuli_scaffold | 96456                          | [C/T]       | 1067304226                                 |
| Ca_Kabuli_NW_004515748.1_96464  | Ca_kabuli_scaffold | 96464                          | [T/G]       | 1067304227                                 |
| Ca_Kabuli_NW_004515748.1_96474  | Ca_kabuli_scaffold | 96474                          | [T/G]       | 1067304228                                 |
| Ca_Kabuli_NW_004515748.1_96532  | Ca_kabuli_scaffold | 96532                          | [G/T]       | 1067304229                                 |
| Ca_Kabuli_NW_004515748.1_96580  | Ca_kabuli_scaffold | 96580                          | [G/T]       | 1067304230                                 |
| Ca_Kabuli_NW_004515748.1_96589  | Ca_kabuli_scaffold | 96589                          | [A/T]       | 1067304231                                 |
| Ca_Kabuli_NW_004515748.1_98426  | Ca_kabuli_scaffold | 98426                          | [C/G]       | 1067304232                                 |
| Ca_Kabuli_NW_004515748.1_99086  | Ca_kabuli_scaffold | 99086                          | [A/C]       | 1067304233                                 |
| Ca_Kabuli_NW_004515748.1_99116  | Ca_kabuli_scaffold | 99116                          | [A/C]       | 1067304234                                 |
| Ca_Kabuli_NW_004515748.1_99121  | Ca_kabuli_scaffold | 99121                          | [T/C]       | 1067304235                                 |
| Ca_Kabuli_NW_004515748.1_99157  | Ca_kabuli_scaffold | 99157                          | [T/C]       | 1067304236                                 |

| <b>SNP IDs</b>                  | <b>Chromosomes</b> | <b>Physical positions (bp)</b> | <b>SNPs</b> | <b>NCBI SNPdb accession IDs (NCBI_ss#)</b> |
|---------------------------------|--------------------|--------------------------------|-------------|--------------------------------------------|
| Ca_Kabuli_NW_004515748.1_99161  | Ca_kabuli_scaffold | 99161                          | [T/C]       | 1067304237                                 |
| Ca_Kabuli_NW_004515750.1_143426 | Ca_kabuli_scaffold | 143426                         | [C/T]       | 1067304238                                 |
| Ca_Kabuli_NW_004515750.1_143434 | Ca_kabuli_scaffold | 143434                         | [A/T]       | 1067304239                                 |
| Ca_Kabuli_NW_004515753.1_65276  | Ca_kabuli_scaffold | 65276                          | [A/C]       | 1067304240                                 |
| Ca_Kabuli_NW_004515755.1_550    | Ca_kabuli_scaffold | 550                            | [C/T]       | 1067304241                                 |
| Ca_Kabuli_NW_004515755.1_553    | Ca_kabuli_scaffold | 553                            | [T/A]       | 1067304242                                 |
| Ca_Kabuli_NW_004515755.1_578    | Ca_kabuli_scaffold | 578                            | [C/A]       | 1067304243                                 |
| Ca_Kabuli_NW_004515755.1_355232 | Ca_kabuli_scaffold | 355232                         | [A/G]       | 1067304244                                 |
| Ca_Kabuli_NW_004515755.1_355282 | Ca_kabuli_scaffold | 355282                         | [T/C]       | 1067304245                                 |
| Ca_Kabuli_NW_004515755.1_355750 | Ca_kabuli_scaffold | 355750                         | [C/G]       | 1067304246                                 |
| Ca_Kabuli_NW_004515755.1_355771 | Ca_kabuli_scaffold | 355771                         | [A/T]       | 1067304247                                 |
| Ca_Kabuli_NW_004515755.1_355791 | Ca_kabuli_scaffold | 355791                         | [A/T]       | 1067304248                                 |
| Ca_Kabuli_NW_004515755.1_517803 | Ca_kabuli_scaffold | 517803                         | [A/C]       | 1067304249                                 |
| Ca_Kabuli_NW_004515755.1_517853 | Ca_kabuli_scaffold | 517853                         | [A/T]       | 1067304250                                 |
| Ca_Kabuli_NW_004515762.1_52213  | Ca_kabuli_scaffold | 52213                          | [A/C]       | 1067304251                                 |
| Ca_Kabuli_NW_004515762.1_53621  | Ca_kabuli_scaffold | 53621                          | [T/G]       | 1067304252                                 |
| Ca_Kabuli_NW_004515762.1_53633  | Ca_kabuli_scaffold | 53633                          | [A/C]       | 1067304253                                 |
| Ca_Kabuli_NW_004515762.1_131228 | Ca_kabuli_scaffold | 131228                         | [T/C]       | 1067304254                                 |
| Ca_Kabuli_NW_004515770.1_101376 | Ca_kabuli_scaffold | 101376                         | [C/T]       | 1067304255                                 |
| Ca_Kabuli_NW_004515770.1_101382 | Ca_kabuli_scaffold | 101382                         | [T/C]       | 1067304256                                 |
| Ca_Kabuli_NW_004515770.1_101411 | Ca_kabuli_scaffold | 101411                         | [A/G]       | 1067304257                                 |
| Ca_Kabuli_NW_004515774.1_30857  | Ca_kabuli_scaffold | 30857                          | [A/G]       | 1067304258                                 |
| Ca_Kabuli_NW_004515776.1_58689  | Ca_kabuli_scaffold | 58689                          | [T/A]       | 1067304259                                 |
| Ca_Kabuli_NW_004515776.1_432685 | Ca_kabuli_scaffold | 432685                         | [T/G]       | 1067304260                                 |
| Ca_Kabuli_NW_004515781.1_38302  | Ca_kabuli_scaffold | 38302                          | [A/C]       | 1067304261                                 |
| Ca_Kabuli_NW_004515785.1_25861  | Ca_kabuli_scaffold | 25861                          | [A/G]       | 1067304262                                 |
| Ca_Kabuli_NW_004515785.1_25865  | Ca_kabuli_scaffold | 25865                          | [A/G]       | 1067304263                                 |
| Ca_Kabuli_NW_004515785.1_25888  | Ca_kabuli_scaffold | 25888                          | [T/C]       | 1067304264                                 |
| Ca_Kabuli_NW_004515785.1_25896  | Ca_kabuli_scaffold | 25896                          | [T/C]       | 1067304265                                 |
| Ca_Kabuli_NW_004515787.1_226793 | Ca_kabuli_scaffold | 226793                         | [T/C]       | 1067304266                                 |
| Ca_Kabuli_NW_004515792.1_3151   | Ca_kabuli_scaffold | 3151                           | [G/T]       | 1067304267                                 |
| Ca_Kabuli_NW_004515792.1_3158   | Ca_kabuli_scaffold | 3158                           | [C/G]       | 1067304268                                 |
| Ca_Kabuli_NW_004515794.1_192327 | Ca_kabuli_scaffold | 192327                         | [G/A]       | 1067304269                                 |
| Ca_Kabuli_NW_004515794.1_204040 | Ca_kabuli_scaffold | 204040                         | [A/G]       | 1067304270                                 |



| <b>SNP IDs</b>                  | <b>Chromosomes</b> | <b>Physical positions (bp)</b> | <b>SNPs</b> | <b>NCBI SNPdb accession IDs (NCBI_ss#)</b> |
|---------------------------------|--------------------|--------------------------------|-------------|--------------------------------------------|
| Ca_Kabuli_NW_004515794.1_204041 | Ca_kabuli_scaffold | 204041                         | [T/A]       | 1067304271                                 |
| Ca_Kabuli_NW_004515794.1_205536 | Ca_kabuli_scaffold | 205536                         | [T/G]       | 1067304272                                 |
| Ca_Kabuli_NW_004515794.1_205637 | Ca_kabuli_scaffold | 205637                         | [T/A]       | 1067304273                                 |
| Ca_Kabuli_NW_004515795.1_208768 | Ca_kabuli_scaffold | 208768                         | [G/A]       | 1067304274                                 |
| Ca_Kabuli_NW_004515795.1_208780 | Ca_kabuli_scaffold | 208780                         | [A/C]       | 1067304275                                 |
| Ca_Kabuli_NW_004515795.1_208785 | Ca_kabuli_scaffold | 208785                         | [T/A]       | 1067304276                                 |
| Ca_Kabuli_NW_004515795.1_208786 | Ca_kabuli_scaffold | 208786                         | [G/C]       | 1067304277                                 |
| Ca_Kabuli_NW_004515795.1_208788 | Ca_kabuli_scaffold | 208788                         | [C/T]       | 1067304278                                 |
| Ca_Kabuli_NW_004515795.1_208789 | Ca_kabuli_scaffold | 208789                         | [A/C]       | 1067304279                                 |
| Ca_Kabuli_NW_004515795.1_208793 | Ca_kabuli_scaffold | 208793                         | [G/C]       | 1067304280                                 |
| Ca_Kabuli_NW_004515795.1_208932 | Ca_kabuli_scaffold | 208932                         | [G/T]       | 1067304281                                 |
| Ca_Kabuli_NW_004515795.1_208939 | Ca_kabuli_scaffold | 208939                         | [G/A]       | 1067304282                                 |
| Ca_Kabuli_NW_004515795.1_208957 | Ca_kabuli_scaffold | 208957                         | [C/T]       | 1067304283                                 |
| Ca_Kabuli_NW_004515795.1_208958 | Ca_kabuli_scaffold | 208958                         | [C/T]       | 1067304284                                 |
| Ca_Kabuli_NW_004515795.1_208981 | Ca_kabuli_scaffold | 208981                         | [G/T]       | 1067304285                                 |
| Ca_Kabuli_NW_004515795.1_404479 | Ca_kabuli_scaffold | 404479                         | [C/A]       | 1067304286                                 |
| Ca_Kabuli_NW_004515797.1_72469  | Ca_kabuli_scaffold | 72469                          | [A/G]       | 1067304287                                 |
| Ca_Kabuli_NW_004515797.1_72491  | Ca_kabuli_scaffold | 72491                          | [T/C]       | 1067304288                                 |
| Ca_Kabuli_NW_004515797.1_72495  | Ca_kabuli_scaffold | 72495                          | [G/A]       | 1067304289                                 |
| Ca_Kabuli_NW_004515798.1_108082 | Ca_kabuli_scaffold | 108082                         | [T/G]       | 1067304290                                 |
| Ca_Kabuli_NW_004515798.1_108110 | Ca_kabuli_scaffold | 108110                         | [T/A]       | 1067304291                                 |
| Ca_Kabuli_NW_004515798.1_112349 | Ca_kabuli_scaffold | 112349                         | [T/C]       | 1067304292                                 |
| Ca_Kabuli_NW_004515798.1_118812 | Ca_kabuli_scaffold | 118812                         | [A/C]       | 1067304293                                 |
| Ca_Kabuli_NW_004515798.1_118821 | Ca_kabuli_scaffold | 118821                         | [G/C]       | 1067304294                                 |
| Ca_Kabuli_NW_004515798.1_118838 | Ca_kabuli_scaffold | 118838                         | [A/T]       | 1067304295                                 |
| Ca_Kabuli_NW_004515798.1_118839 | Ca_kabuli_scaffold | 118839                         | [A/G]       | 1067304296                                 |
| Ca_Kabuli_NW_004515798.1_118840 | Ca_kabuli_scaffold | 118840                         | [G/A]       | 1067304297                                 |
| Ca_Kabuli_NW_004515799.1_26658  | Ca_kabuli_scaffold | 26658                          | [G/A]       | 1067304298                                 |
| Ca_Kabuli_NW_004515802.1_640348 | Ca_kabuli_scaffold | 640348                         | [C/T]       | 1067304299                                 |
| Ca_Kabuli_NW_004515802.1_640349 | Ca_kabuli_scaffold | 640349                         | [G/C]       | 1067304300                                 |
| Ca_Kabuli_NW_004515802.1_640350 | Ca_kabuli_scaffold | 640350                         | [G/T]       | 1067304301                                 |
| Ca_Kabuli_NW_004515802.1_640351 | Ca_kabuli_scaffold | 640351                         | [T/G]       | 1067304302                                 |
| Ca_Kabuli_NW_004515802.1_640364 | Ca_kabuli_scaffold | 640364                         | [T/G]       | 1067304303                                 |
| Ca_Kabuli_NW_004515802.1_654534 | Ca_kabuli_scaffold | 654534                         | [T/G]       | 1067304304                                 |

| <b>SNP IDs</b>                  | <b>Chromosomes</b> | <b>Physical positions (bp)</b> | <b>SNPs</b> | <b>NCBI SNPdb accession IDs (NCBI_ss#)</b> |
|---------------------------------|--------------------|--------------------------------|-------------|--------------------------------------------|
| Ca_Kabuli_NW_004515802.1_654573 | Ca_kabuli_scaffold | 654573                         | [A/C]       | 1067304305                                 |
| Ca_Kabuli_NW_004515802.1_654611 | Ca_kabuli_scaffold | 654611                         | [A/G]       | 1067304306                                 |
| Ca_Kabuli_NW_004515802.1_728756 | Ca_kabuli_scaffold | 728756                         | [C/T]       | 1067304307                                 |
| Ca_Kabuli_NW_004515802.1_728793 | Ca_kabuli_scaffold | 728793                         | [C/T]       | 1067304308                                 |
| Ca_Kabuli_NW_004515802.1_728809 | Ca_kabuli_scaffold | 728809                         | [A/T]       | 1067304309                                 |
| Ca_Kabuli_NW_004515802.1_728812 | Ca_kabuli_scaffold | 728812                         | [A/G]       | 1067304310                                 |
| Ca_Kabuli_NW_004515804.1_18913  | Ca_kabuli_scaffold | 18913                          | [T/C]       | 1067304311                                 |
| Ca_Kabuli_NW_004515804.1_18915  | Ca_kabuli_scaffold | 18915                          | [G/T]       | 1067304312                                 |
| Ca_Kabuli_NW_004515804.1_18916  | Ca_kabuli_scaffold | 18916                          | [C/T]       | 1067304313                                 |
| Ca_Kabuli_NW_004515804.1_163581 | Ca_kabuli_scaffold | 163581                         | [T/C]       | 1067304314                                 |
| Ca_Kabuli_NW_004515806.1_84042  | Ca_kabuli_scaffold | 84042                          | [T/C]       | 1067304315                                 |
| Ca_Kabuli_NW_004515806.1_123585 | Ca_kabuli_scaffold | 123585                         | [C/G]       | 1067304316                                 |
| Ca_Kabuli_NW_004515806.1_242468 | Ca_kabuli_scaffold | 242468                         | [T/C]       | 1067304317                                 |
| Ca_Kabuli_NW_004515806.1_251371 | Ca_kabuli_scaffold | 251371                         | [A/G]       | 1067304318                                 |
| Ca_Kabuli_NW_004515806.1_251412 | Ca_kabuli_scaffold | 251412                         | [G/A]       | 1067304319                                 |
| Ca_Kabuli_NW_004515806.1_251415 | Ca_kabuli_scaffold | 251415                         | [G/A]       | 1067304320                                 |
| Ca_Kabuli_NW_004515806.1_438803 | Ca_kabuli_scaffold | 438803                         | [A/C]       | 1067304321                                 |
| Ca_Kabuli_NW_004515806.1_438866 | Ca_kabuli_scaffold | 438866                         | [T/C]       | 1067304322                                 |
| Ca_Kabuli_NW_004515806.1_449803 | Ca_kabuli_scaffold | 449803                         | [T/G]       | 1067304323                                 |
| Ca_Kabuli_NW_004515806.1_449806 | Ca_kabuli_scaffold | 449806                         | [T/G]       | 1067304324                                 |
| Ca_Kabuli_NW_004515806.1_626620 | Ca_kabuli_scaffold | 626620                         | [C/A]       | 1067304325                                 |
| Ca_Kabuli_NW_004515806.1_631375 | Ca_kabuli_scaffold | 631375                         | [G/A]       | 1067304326                                 |
| Ca_Kabuli_NW_004515806.1_636641 | Ca_kabuli_scaffold | 636641                         | [T/C]       | 1067304327                                 |
| Ca_Kabuli_NW_004515806.1_636672 | Ca_kabuli_scaffold | 636672                         | [A/G]       | 1067304328                                 |
| Ca_Kabuli_NW_004515806.1_711220 | Ca_kabuli_scaffold | 711220                         | [G/A]       | 1067304329                                 |
| Ca_Kabuli_NW_004515806.1_800084 | Ca_kabuli_scaffold | 800084                         | [A/G]       | 1067304330                                 |
| Ca_Kabuli_NW_004515806.1_853235 | Ca_kabuli_scaffold | 853235                         | [C/A]       | 1067304331                                 |
| Ca_Kabuli_NW_004515810.1_56331  | Ca_kabuli_scaffold | 56331                          | [A/G]       | 1067304332                                 |
| Ca_Kabuli_NW_004515810.1_59807  | Ca_kabuli_scaffold | 59807                          | [A/C]       | 1067304333                                 |
| Ca_Kabuli_NW_004515810.1_361586 | Ca_kabuli_scaffold | 361586                         | [T/G]       | 1067304334                                 |
| Ca_Kabuli_NW_004515810.1_361598 | Ca_kabuli_scaffold | 361598                         | [T/G]       | 1067304335                                 |
| Ca_Kabuli_NW_004515810.1_474335 | Ca_kabuli_scaffold | 474335                         | [T/G]       | 1067304336                                 |
| Ca_Kabuli_NW_004515810.1_474371 | Ca_kabuli_scaffold | 474371                         | [A/G]       | 1067304337                                 |
| Ca_Kabuli_NW_004515810.1_477263 | Ca_kabuli_scaffold | 477263                         | [A/G]       | 1067304338                                 |

| <b>SNP IDs</b>                  | <b>Chromosomes</b> | <b>Physical positions (bp)</b> | <b>SNPs</b> | <b>NCBI SNPdb accession IDs (NCBI_ss#)</b> |
|---------------------------------|--------------------|--------------------------------|-------------|--------------------------------------------|
| Ca_Kabuli_NW_004515810.1_477274 | Ca_kabuli_scaffold | 477274                         | [A/C]       | 1067304339                                 |
| Ca_Kabuli_NW_004515810.1_477276 | Ca_kabuli_scaffold | 477276                         | [A/G]       | 1067304340                                 |
| Ca_Kabuli_NW_004515810.1_478337 | Ca_kabuli_scaffold | 478337                         | [A/G]       | 1067304341                                 |
| Ca_Kabuli_NW_004515811.1_150147 | Ca_kabuli_scaffold | 150147                         | [C/G]       | 1067304342                                 |
| Ca_Kabuli_NW_004515811.1_150172 | Ca_kabuli_scaffold | 150172                         | [T/G]       | 1067304343                                 |
| Ca_Kabuli_NW_004515811.1_150181 | Ca_kabuli_scaffold | 150181                         | [A/G]       | 1067304344                                 |
| Ca_Kabuli_NW_004515813.1_111933 | Ca_kabuli_scaffold | 111933                         | [C/T]       | 1067304345                                 |
| Ca_Kabuli_NW_004515813.1_111936 | Ca_kabuli_scaffold | 111936                         | [C/A]       | 1067304346                                 |
| Ca_Kabuli_NW_004515817.1_49253  | Ca_kabuli_scaffold | 49253                          | [G/T]       | 1067304347                                 |
| Ca_Kabuli_NW_004515817.1_49263  | Ca_kabuli_scaffold | 49263                          | [G/A]       | 1067304348                                 |
| Ca_Kabuli_NW_004515817.1_49265  | Ca_kabuli_scaffold | 49265                          | [G/A]       | 1067304349                                 |
| Ca_Kabuli_NW_004515817.1_49266  | Ca_kabuli_scaffold | 49266                          | [T/G]       | 1067304350                                 |
| Ca_Kabuli_NW_004515817.1_49268  | Ca_kabuli_scaffold | 49268                          | [C/G]       | 1067304351                                 |
| Ca_Kabuli_NW_004515817.1_49272  | Ca_kabuli_scaffold | 49272                          | [A/C]       | 1067304352                                 |
| Ca_Kabuli_NW_004515817.1_117071 | Ca_kabuli_scaffold | 117071                         | [A/G]       | 1067304353                                 |
| Ca_Kabuli_NW_004515817.1_138929 | Ca_kabuli_scaffold | 138929                         | [G/A]       | 1067304354                                 |
| Ca_Kabuli_NW_004515817.1_194998 | Ca_kabuli_scaffold | 194998                         | [A/C]       | 1067304355                                 |
| Ca_Kabuli_NW_004515817.1_195000 | Ca_kabuli_scaffold | 195000                         | [C/T]       | 1067304356                                 |
| Ca_Kabuli_NW_004515818.1_15529  | Ca_kabuli_scaffold | 15529                          | [A/T]       | 1067304357                                 |
| Ca_Kabuli_NW_004515818.1_15548  | Ca_kabuli_scaffold | 15548                          | [A/C]       | 1067304358                                 |
| Ca_Kabuli_NW_004515818.1_19215  | Ca_kabuli_scaffold | 19215                          | [C/A]       | 1067304359                                 |
| Ca_Kabuli_NW_004515818.1_28542  | Ca_kabuli_scaffold | 28542                          | [T/G]       | 1067304360                                 |
| Ca_Kabuli_NW_004515818.1_28559  | Ca_kabuli_scaffold | 28559                          | [T/G]       | 1067304361                                 |
| Ca_Kabuli_NW_004515818.1_33267  | Ca_kabuli_scaffold | 33267                          | [A/C]       | 1067304362                                 |
| Ca_Kabuli_NW_004515818.1_221374 | Ca_kabuli_scaffold | 221374                         | [G/A]       | 1067304363                                 |
| Ca_Kabuli_NW_004515818.1_221375 | Ca_kabuli_scaffold | 221375                         | [G/C]       | 1067304364                                 |
| Ca_Kabuli_NW_004515818.1_221376 | Ca_kabuli_scaffold | 221376                         | [A/C]       | 1067304365                                 |
| Ca_Kabuli_NW_004515818.1_410571 | Ca_kabuli_scaffold | 410571                         | [C/A]       | 1067304366                                 |
| Ca_Kabuli_NW_004515819.1_143867 | Ca_kabuli_scaffold | 143867                         | [C/T]       | 1067304367                                 |
| Ca_Kabuli_NW_004515819.1_143910 | Ca_kabuli_scaffold | 143910                         | [T/C]       | 1067304368                                 |
| Ca_Kabuli_NW_004515819.1_144276 | Ca_kabuli_scaffold | 144276                         | [T/G]       | 1067304369                                 |
| Ca_Kabuli_NW_004515819.1_144316 | Ca_kabuli_scaffold | 144316                         | [A/G]       | 1067304370                                 |
| Ca_Kabuli_NW_004515819.1_144320 | Ca_kabuli_scaffold | 144320                         | [T/C]       | 1067304371                                 |
| Ca_Kabuli_NW_004515819.1_144365 | Ca_kabuli_scaffold | 144365                         | [T/C]       | 1067304372                                 |

| <b>SNP IDs</b>                  | <b>Chromosomes</b> | <b>Physical positions (bp)</b> | <b>SNPs</b> | <b>NCBI SNPdb accession IDs (NCBI_ss#)</b> |
|---------------------------------|--------------------|--------------------------------|-------------|--------------------------------------------|
| Ca_Kabuli_NW_004515819.1_144385 | Ca_kabuli_scaffold | 144385                         | [T/C]       | 1067304373                                 |
| Ca_Kabuli_NW_004515819.1_144402 | Ca_kabuli_scaffold | 144402                         | [T/G]       | 1067304374                                 |
| Ca_Kabuli_NW_004515819.1_144405 | Ca_kabuli_scaffold | 144405                         | [T/G]       | 1067304375                                 |
| Ca_Kabuli_NW_004515819.1_144465 | Ca_kabuli_scaffold | 144465                         | [T/G]       | 1067304376                                 |
| Ca_Kabuli_NW_004515819.1_152512 | Ca_kabuli_scaffold | 152512                         | [T/G]       | 1067304377                                 |
| Ca_Kabuli_NW_004515819.1_283227 | Ca_kabuli_scaffold | 283227                         | [T/G]       | 1067304378                                 |
| Ca_Kabuli_NW_004515821.1_3546   | Ca_kabuli_scaffold | 3546                           | [A/C]       | 1067304379                                 |
| Ca_Kabuli_NW_004515824.1_432431 | Ca_kabuli_scaffold | 432431                         | [A/C]       | 1067304380                                 |
| Ca_Kabuli_NW_004515824.1_494593 | Ca_kabuli_scaffold | 494593                         | [A/C]       | 1067304381                                 |
| Ca_Kabuli_NW_004515824.1_494604 | Ca_kabuli_scaffold | 494604                         | [A/G]       | 1067304382                                 |
| Ca_Kabuli_NW_004515824.1_494607 | Ca_kabuli_scaffold | 494607                         | [T/A]       | 1067304383                                 |
| Ca_Kabuli_NW_004515824.1_494636 | Ca_kabuli_scaffold | 494636                         | [T/A]       | 1067304384                                 |
| Ca_Kabuli_NW_004515824.1_535289 | Ca_kabuli_scaffold | 535289                         | [A/C]       | 1067304385                                 |
| Ca_Kabuli_NW_004515824.1_620942 | Ca_kabuli_scaffold | 620942                         | [T/C]       | 1067304386                                 |
| Ca_Kabuli_NW_004515824.1_620957 | Ca_kabuli_scaffold | 620957                         | [T/C]       | 1067304387                                 |
| Ca_Kabuli_NW_004515824.1_620965 | Ca_kabuli_scaffold | 620965                         | [T/C]       | 1067304388                                 |
| Ca_Kabuli_NW_004515826.1_34409  | Ca_kabuli_scaffold | 34409                          | [T/A]       | 1067304389                                 |
| Ca_Kabuli_NW_004515826.1_34468  | Ca_kabuli_scaffold | 34468                          | [A/T]       | 1067304390                                 |
| Ca_Kabuli_NW_004515828.1_72799  | Ca_kabuli_scaffold | 72799                          | [A/T]       | 1067304391                                 |
| Ca_Kabuli_NW_004515831.1_15590  | Ca_kabuli_scaffold | 15590                          | [G/T]       | 1067304392                                 |
| Ca_Kabuli_NW_004515838.1_215096 | Ca_kabuli_scaffold | 215096                         | [A/G]       | 1067304393                                 |
| Ca_Kabuli_NW_004515838.1_215099 | Ca_kabuli_scaffold | 215099                         | [G/T]       | 1067304394                                 |
| Ca_Kabuli_NW_004515838.1_218577 | Ca_kabuli_scaffold | 218577                         | [A/G]       | 1067304395                                 |
| Ca_Kabuli_NW_004515838.1_218580 | Ca_kabuli_scaffold | 218580                         | [G/T]       | 1067304396                                 |
| Ca_Kabuli_NW_004515841.1_60842  | Ca_kabuli_scaffold | 60842                          | [A/G]       | 1067304397                                 |
| Ca_Kabuli_NW_004515841.1_60856  | Ca_kabuli_scaffold | 60856                          | [T/C]       | 1067304398                                 |
| Ca_Kabuli_NW_004515841.1_60859  | Ca_kabuli_scaffold | 60859                          | [A/G]       | 1067304399                                 |
| Ca_Kabuli_NW_004515841.1_60923  | Ca_kabuli_scaffold | 60923                          | [T/G]       | 1067304400                                 |
| Ca_Kabuli_NW_004515841.1_60932  | Ca_kabuli_scaffold | 60932                          | [T/G]       | 1067304401                                 |
| Ca_Kabuli_NW_004515841.1_60934  | Ca_kabuli_scaffold | 60934                          | [A/G]       | 1067304402                                 |
| Ca_Kabuli_NW_004515841.1_60949  | Ca_kabuli_scaffold | 60949                          | [T/C]       | 1067304403                                 |
| Ca_Kabuli_NW_004515841.1_60950  | Ca_kabuli_scaffold | 60950                          | [T/C]       | 1067304404                                 |
| Ca_Kabuli_NW_004515841.1_136077 | Ca_kabuli_scaffold | 136077                         | [C/G]       | 1067304405                                 |
| Ca_Kabuli_NW_004515841.1_136096 | Ca_kabuli_scaffold | 136096                         | [T/C]       | 1067304406                                 |

| <b>SNP IDs</b>                  | <b>Chromosomes</b> | <b>Physical positions (bp)</b> | <b>SNPs</b> | <b>NCBI SNPdb accession IDs (NCBI_ss#)</b> |
|---------------------------------|--------------------|--------------------------------|-------------|--------------------------------------------|
| Ca_Kabuli_NW_004515841.1_136106 | Ca_kabuli_scaffold | 136106                         | [G/A]       | 1067304407                                 |
| Ca_Kabuli_NW_004515842.1_172132 | Ca_kabuli_scaffold | 172132                         | [T/G]       | 1067304408                                 |
| Ca_Kabuli_NW_004515842.1_172190 | Ca_kabuli_scaffold | 172190                         | [A/G]       | 1067304409                                 |
| Ca_Kabuli_NW_004515842.1_636950 | Ca_kabuli_scaffold | 636950                         | [A/C]       | 1067304410                                 |
| Ca_Kabuli_NW_004515843.1_8242   | Ca_kabuli_scaffold | 8242                           | [G/T]       | 1067304411                                 |
| Ca_Kabuli_NW_004515843.1_14642  | Ca_kabuli_scaffold | 14642                          | [T/G]       | 1067304412                                 |
| Ca_Kabuli_NW_004515843.1_14654  | Ca_kabuli_scaffold | 14654                          | [T/G]       | 1067304413                                 |
| Ca_Kabuli_NW_004515844.1_172829 | Ca_kabuli_scaffold | 172829                         | [A/C]       | 1067304414                                 |
| Ca_Kabuli_NW_004515846.1_359400 | Ca_kabuli_scaffold | 359400                         | [T/G]       | 1067304415                                 |
| Ca_Kabuli_NW_004515850.1_62780  | Ca_kabuli_scaffold | 62780                          | [C/A]       | 1067304416                                 |
| Ca_Kabuli_NW_004515850.1_71326  | Ca_kabuli_scaffold | 71326                          | [A/G]       | 1067304417                                 |
| Ca_Kabuli_NW_004515853.1_30224  | Ca_kabuli_scaffold | 30224                          | [G/A]       | 1067304418                                 |
| Ca_Kabuli_NW_004515853.1_30252  | Ca_kabuli_scaffold | 30252                          | [C/T]       | 1067304419                                 |
| Ca_Kabuli_NW_004515853.1_107892 | Ca_kabuli_scaffold | 107892                         | [A/G]       | 1067304420                                 |
| Ca_Kabuli_NW_004515853.1_107896 | Ca_kabuli_scaffold | 107896                         | [G/A]       | 1067304421                                 |
| Ca_Kabuli_NW_004515853.1_107897 | Ca_kabuli_scaffold | 107897                         | [T/C]       | 1067304422                                 |
| Ca_Kabuli_NW_004515853.1_107908 | Ca_kabuli_scaffold | 107908                         | [C/T]       | 1067304423                                 |
| Ca_Kabuli_NW_004515853.1_188959 | Ca_kabuli_scaffold | 188959                         | [T/G]       | 1067304424                                 |
| Ca_Kabuli_NW_004515859.1_165014 | Ca_kabuli_scaffold | 165014                         | [A/G]       | 1067304425                                 |
| Ca_Kabuli_NW_004515859.1_165818 | Ca_kabuli_scaffold | 165818                         | [G/A]       | 1067304426                                 |
| Ca_Kabuli_NW_004515865.1_182405 | Ca_kabuli_scaffold | 182405                         | [C/T]       | 1067304427                                 |
| Ca_Kabuli_NW_004515866.1_7549   | Ca_kabuli_scaffold | 7549                           | [G/C]       | 1067304428                                 |
| Ca_Kabuli_NW_004515867.1_54627  | Ca_kabuli_scaffold | 54627                          | [C/T]       | 1067304429                                 |
| Ca_Kabuli_NW_004515867.1_132873 | Ca_kabuli_scaffold | 132873                         | [A/G]       | 1067304430                                 |
| Ca_Kabuli_NW_004515867.1_132896 | Ca_kabuli_scaffold | 132896                         | [T/C]       | 1067304431                                 |
| Ca_Kabuli_NW_004515867.1_132907 | Ca_kabuli_scaffold | 132907                         | [A/C]       | 1067304432                                 |
| Ca_Kabuli_NW_004515870.1_65676  | Ca_kabuli_scaffold | 65676                          | [T/G]       | 1067304433                                 |
| Ca_Kabuli_NW_004515870.1_177270 | Ca_kabuli_scaffold | 177270                         | [T/C]       | 1067304434                                 |
| Ca_Kabuli_NW_004515870.1_177314 | Ca_kabuli_scaffold | 177314                         | [T/A]       | 1067304435                                 |
| Ca_Kabuli_NW_004515870.1_177323 | Ca_kabuli_scaffold | 177323                         | [G/A]       | 1067304436                                 |
| Ca_Kabuli_NW_004515870.1_227601 | Ca_kabuli_scaffold | 227601                         | [C/T]       | 1067304437                                 |
| Ca_Kabuli_NW_004515870.1_227604 | Ca_kabuli_scaffold | 227604                         | [C/A]       | 1067304438                                 |
| Ca_Kabuli_NW_004515870.1_227606 | Ca_kabuli_scaffold | 227606                         | [T/A]       | 1067304439                                 |
| Ca_Kabuli_NW_004515870.1_227608 | Ca_kabuli_scaffold | 227608                         | [A/T]       | 1067304440                                 |

| <b>SNP IDs</b>                  | <b>Chromosomes</b> | <b>Physical positions (bp)</b> | <b>SNPs</b> | <b>NCBI SNPdb accession IDs (NCBI_ss#)</b> |
|---------------------------------|--------------------|--------------------------------|-------------|--------------------------------------------|
| Ca_Kabuli_NW_004515870.1_227646 | Ca_kabuli_scaffold | 227646                         | [C/T]       | 1067304441                                 |
| Ca_Kabuli_NW_004515874.1_3175   | Ca_kabuli_scaffold | 3175                           | [A/G]       | 1067304442                                 |
| Ca_Kabuli_NW_004515874.1_3221   | Ca_kabuli_scaffold | 3221                           | [A/C]       | 1067304443                                 |
| Ca_Kabuli_NW_004515874.1_3263   | Ca_kabuli_scaffold | 3263                           | [A/G]       | 1067304444                                 |
| Ca_Kabuli_NW_004515881.1_121690 | Ca_kabuli_scaffold | 121690                         | [T/G]       | 1067304445                                 |
| Ca_Kabuli_NW_004515881.1_297345 | Ca_kabuli_scaffold | 297345                         | [A/C]       | 1067304446                                 |
| Ca_Kabuli_NW_004515882.1_385384 | Ca_kabuli_scaffold | 385384                         | [G/C]       | 1067304447                                 |
| Ca_Kabuli_NW_004515883.1_46734  | Ca_kabuli_scaffold | 46734                          | [A/G]       | 1067304448                                 |
| Ca_Kabuli_NW_004515883.1_271846 | Ca_kabuli_scaffold | 271846                         | [A/C]       | 1067304449                                 |
| Ca_Kabuli_NW_004515883.1_272994 | Ca_kabuli_scaffold | 272994                         | [A/G]       | 1067304450                                 |
| Ca_Kabuli_NW_004515883.1_273007 | Ca_kabuli_scaffold | 273007                         | [T/C]       | 1067304451                                 |
| Ca_Kabuli_NW_004515883.1_273016 | Ca_kabuli_scaffold | 273016                         | [A/G]       | 1067304452                                 |
| Ca_Kabuli_NW_004515883.1_273054 | Ca_kabuli_scaffold | 273054                         | [T/C]       | 1067304453                                 |
| Ca_Kabuli_NW_004515883.1_299009 | Ca_kabuli_scaffold | 299009                         | [A/C]       | 1067304454                                 |
| Ca_Kabuli_NW_004515883.1_299010 | Ca_kabuli_scaffold | 299010                         | [G/T]       | 1067304455                                 |
| Ca_Kabuli_NW_004515883.1_441561 | Ca_kabuli_scaffold | 441561                         | [A/C]       | 1067304456                                 |
| Ca_Kabuli_NW_004515883.1_441566 | Ca_kabuli_scaffold | 441566                         | [T/C]       | 1067304457                                 |
| Ca_Kabuli_NW_004515883.1_441589 | Ca_kabuli_scaffold | 441589                         | [T/C]       | 1067304458                                 |
| Ca_Kabuli_NW_004515883.1_441592 | Ca_kabuli_scaffold | 441592                         | [T/C]       | 1067304459                                 |
| Ca_Kabuli_NW_004515883.1_441609 | Ca_kabuli_scaffold | 441609                         | [A/T]       | 1067304460                                 |
| Ca_Kabuli_NW_004515887.1_340219 | Ca_kabuli_scaffold | 340219                         | [A/G]       | 1067304461                                 |
| Ca_Kabuli_NW_004515887.1_340240 | Ca_kabuli_scaffold | 340240                         | [A/C]       | 1067304462                                 |
| Ca_Kabuli_NW_004515894.1_100139 | Ca_kabuli_scaffold | 100139                         | [A/G]       | 1067304463                                 |
| Ca_Kabuli_NW_004515895.1_16423  | Ca_kabuli_scaffold | 16423                          | [C/T]       | 1067304464                                 |
| Ca_Kabuli_NW_004515895.1_158827 | Ca_kabuli_scaffold | 158827                         | [T/C]       | 1067304465                                 |
| Ca_Kabuli_NW_004515895.1_158877 | Ca_kabuli_scaffold | 158877                         | [A/C]       | 1067304466                                 |
| Ca_Kabuli_NW_004515895.1_158880 | Ca_kabuli_scaffold | 158880                         | [A/G]       | 1067304467                                 |
| Ca_Kabuli_NW_004515895.1_160613 | Ca_kabuli_scaffold | 160613                         | [T/C]       | 1067304468                                 |
| Ca_Kabuli_NW_004515895.1_160626 | Ca_kabuli_scaffold | 160626                         | [A/C]       | 1067304469                                 |
| Ca_Kabuli_NW_004515895.1_160630 | Ca_kabuli_scaffold | 160630                         | [A/G]       | 1067304470                                 |
| Ca_Kabuli_NW_004515895.1_201875 | Ca_kabuli_scaffold | 201875                         | [T/G]       | 1067304471                                 |
| Ca_Kabuli_NW_004515896.1_34058  | Ca_kabuli_scaffold | 34058                          | [T/A]       | 1067304472                                 |
| Ca_Kabuli_NW_004515896.1_34060  | Ca_kabuli_scaffold | 34060                          | [A/G]       | 1067304473                                 |
| Ca_Kabuli_NW_004515896.1_34105  | Ca_kabuli_scaffold | 34105                          | [A/T]       | 1067304474                                 |

| <b>SNP IDs</b>                  | <b>Chromosomes</b> | <b>Physical positions (bp)</b> | <b>SNPs</b> | <b>NCBI SNPdb accession IDs (NCBI_ss#)</b> |
|---------------------------------|--------------------|--------------------------------|-------------|--------------------------------------------|
| Ca_Kabuli_NW_004515896.1_34118  | Ca_kabuli_scaffold | 34118                          | [T/A]       | 1067304475                                 |
| Ca_Kabuli_NW_004515896.1_34175  | Ca_kabuli_scaffold | 34175                          | [T/G]       | 1067304476                                 |
| Ca_Kabuli_NW_004515896.1_34178  | Ca_kabuli_scaffold | 34178                          | [T/G]       | 1067304477                                 |
| Ca_Kabuli_NW_004515896.1_34202  | Ca_kabuli_scaffold | 34202                          | [A/C]       | 1067304478                                 |
| Ca_Kabuli_NW_004515896.1_42506  | Ca_kabuli_scaffold | 42506                          | [A/C]       | 1067304479                                 |
| Ca_Kabuli_NW_004515896.1_42563  | Ca_kabuli_scaffold | 42563                          | [T/C]       | 1067304480                                 |
| Ca_Kabuli_NW_004515896.1_43153  | Ca_kabuli_scaffold | 43153                          | [A/T]       | 1067304481                                 |
| Ca_Kabuli_NW_004515896.1_43158  | Ca_kabuli_scaffold | 43158                          | [C/A]       | 1067304482                                 |
| Ca_Kabuli_NW_004515896.1_43170  | Ca_kabuli_scaffold | 43170                          | [A/T]       | 1067304483                                 |
| Ca_Kabuli_NW_004515896.1_43179  | Ca_kabuli_scaffold | 43179                          | [A/C]       | 1067304484                                 |
| Ca_Kabuli_NW_004515896.1_43265  | Ca_kabuli_scaffold | 43265                          | [T/C]       | 1067304485                                 |
| Ca_Kabuli_NW_004515896.1_43299  | Ca_kabuli_scaffold | 43299                          | [C/A]       | 1067304486                                 |
| Ca_Kabuli_NW_004515896.1_43300  | Ca_kabuli_scaffold | 43300                          | [C/G]       | 1067304487                                 |
| Ca_Kabuli_NW_004515896.1_43301  | Ca_kabuli_scaffold | 43301                          | [T/A]       | 1067304488                                 |
| Ca_Kabuli_NW_004515896.1_43302  | Ca_kabuli_scaffold | 43302                          | [G/T]       | 1067304489                                 |
| Ca_Kabuli_NW_004515896.1_43360  | Ca_kabuli_scaffold | 43360                          | [A/G]       | 1067304490                                 |
| Ca_Kabuli_NW_004515896.1_44391  | Ca_kabuli_scaffold | 44391                          | [C/T]       | 1067304491                                 |
| Ca_Kabuli_NW_004515896.1_44392  | Ca_kabuli_scaffold | 44392                          | [A/C]       | 1067304492                                 |
| Ca_Kabuli_NW_004515896.1_44393  | Ca_kabuli_scaffold | 44393                          | [G/T]       | 1067304493                                 |
| Ca_Kabuli_NW_004515896.1_254902 | Ca_kabuli_scaffold | 254902                         | [A/G]       | 1067304494                                 |
| Ca_Kabuli_NW_004515897.1_33465  | Ca_kabuli_scaffold | 33465                          | [T/G]       | 1067304495                                 |
| Ca_Kabuli_NW_004515897.1_33475  | Ca_kabuli_scaffold | 33475                          | [T/G]       | 1067304496                                 |
| Ca_Kabuli_NW_004515897.1_33479  | Ca_kabuli_scaffold | 33479                          | [A/C]       | 1067304497                                 |
| Ca_Kabuli_NW_004515897.1_33494  | Ca_kabuli_scaffold | 33494                          | [T/G]       | 1067304498                                 |
| Ca_Kabuli_NW_004515897.1_35788  | Ca_kabuli_scaffold | 35788                          | [A/G]       | 1067304499                                 |
| Ca_Kabuli_NW_004515897.1_340974 | Ca_kabuli_scaffold | 340974                         | [T/G]       | 1067304500                                 |
| Ca_Kabuli_NW_004515897.1_341102 | Ca_kabuli_scaffold | 341102                         | [A/G]       | 1067304501                                 |
| Ca_Kabuli_NW_004515897.1_341124 | Ca_kabuli_scaffold | 341124                         | [T/G]       | 1067304502                                 |
| Ca_Kabuli_NW_004515898.1_25528  | Ca_kabuli_scaffold | 25528                          | [A/C]       | 1067304503                                 |
| Ca_Kabuli_NW_004515898.1_81750  | Ca_kabuli_scaffold | 81750                          | [G/A]       | 1067304504                                 |
| Ca_Kabuli_NW_004515898.1_81751  | Ca_kabuli_scaffold | 81751                          | [G/T]       | 1067304505                                 |
| Ca_Kabuli_NW_004515898.1_81752  | Ca_kabuli_scaffold | 81752                          | [A/C]       | 1067304506                                 |
| Ca_Kabuli_NW_004515898.1_81753  | Ca_kabuli_scaffold | 81753                          | [G/T]       | 1067304507                                 |
| Ca_Kabuli_NW_004515909.1_122032 | Ca_kabuli_scaffold | 122032                         | [T/C]       | 1067304508                                 |

| <b>SNP IDs</b>                  | <b>Chromosomes</b> | <b>Physical positions (bp)</b> | <b>SNPs</b> | <b>NCBI SNPdb accession IDs (NCBI_ss#)</b> |
|---------------------------------|--------------------|--------------------------------|-------------|--------------------------------------------|
| Ca_Kabuli_NW_004515912.1_1297   | Ca_kabuli_scaffold | 1297                           | [T/C]       | 1067304509                                 |
| Ca_Kabuli_NW_004515918.1_41902  | Ca_kabuli_scaffold | 41902                          | [A/T]       | 1067304510                                 |
| Ca_Kabuli_NW_004515918.1_197253 | Ca_kabuli_scaffold | 197253                         | [A/T]       | 1067304511                                 |
| Ca_Kabuli_NW_004515918.1_197258 | Ca_kabuli_scaffold | 197258                         | [T/G]       | 1067304512                                 |
| Ca_Kabuli_NW_004515918.1_250140 | Ca_kabuli_scaffold | 250140                         | [A/G]       | 1067304513                                 |
| Ca_Kabuli_NW_004515918.1_275479 | Ca_kabuli_scaffold | 275479                         | [A/G]       | 1067304514                                 |
| Ca_Kabuli_NW_004515918.1_275488 | Ca_kabuli_scaffold | 275488                         | [A/C]       | 1067304515                                 |
| Ca_Kabuli_NW_004515918.1_275497 | Ca_kabuli_scaffold | 275497                         | [T/C]       | 1067304516                                 |
| Ca_Kabuli_NW_004515918.1_275511 | Ca_kabuli_scaffold | 275511                         | [A/T]       | 1067304517                                 |
| Ca_Kabuli_NW_004515918.1_275517 | Ca_kabuli_scaffold | 275517                         | [T/A]       | 1067304518                                 |
| Ca_Kabuli_NW_004515918.1_275519 | Ca_kabuli_scaffold | 275519                         | [T/C]       | 1067304519                                 |
| Ca_Kabuli_NW_004515918.1_275532 | Ca_kabuli_scaffold | 275532                         | [T/C]       | 1067304520                                 |
| Ca_Kabuli_NW_004515918.1_369299 | Ca_kabuli_scaffold | 369299                         | [C/T]       | 1067304521                                 |
| Ca_Kabuli_NW_004515918.1_430673 | Ca_kabuli_scaffold | 430673                         | [A/C]       | 1067304522                                 |
| Ca_Kabuli_NW_004515919.1_103596 | Ca_kabuli_scaffold | 103596                         | [A/G]       | 1067304523                                 |
| Ca_Kabuli_NW_004515919.1_128379 | Ca_kabuli_scaffold | 128379                         | [A/C]       | 1067304524                                 |
| Ca_Kabuli_NW_004515919.1_128380 | Ca_kabuli_scaffold | 128380                         | [G/T]       | 1067304525                                 |
| Ca_Kabuli_NW_004515919.1_226673 | Ca_kabuli_scaffold | 226673                         | [C/A]       | 1067304526                                 |
| Ca_Kabuli_NW_004515919.1_428338 | Ca_kabuli_scaffold | 428338                         | [A/G]       | 1067304527                                 |
| Ca_Kabuli_NW_004515919.1_428393 | Ca_kabuli_scaffold | 428393                         | [T/C]       | 1067304528                                 |
| Ca_Kabuli_NW_004515919.1_493576 | Ca_kabuli_scaffold | 493576                         | [T/G]       | 1067304529                                 |
| Ca_Kabuli_NW_004515919.1_493596 | Ca_kabuli_scaffold | 493596                         | [G/A]       | 1067304530                                 |
| Ca_Kabuli_NW_004515921.1_43504  | Ca_kabuli_scaffold | 43504                          | [A/C]       | 1067304531                                 |
| Ca_Kabuli_NW_004515921.1_45345  | Ca_kabuli_scaffold | 45345                          | [A/G]       | 1067304532                                 |
| Ca_Kabuli_NW_004515921.1_154415 | Ca_kabuli_scaffold | 154415                         | [T/C]       | 1067304533                                 |
| Ca_Kabuli_NW_004515921.1_154475 | Ca_kabuli_scaffold | 154475                         | [A/G]       | 1067304534                                 |
| Ca_Kabuli_NW_004515921.1_478760 | Ca_kabuli_scaffold | 478760                         | [G/T]       | 1067304535                                 |
| Ca_Kabuli_NW_004515921.1_478761 | Ca_kabuli_scaffold | 478761                         | [C/G]       | 1067304536                                 |
| Ca_Kabuli_NW_004515921.1_478807 | Ca_kabuli_scaffold | 478807                         | [A/C]       | 1067304537                                 |
| Ca_Kabuli_NW_004515921.1_478826 | Ca_kabuli_scaffold | 478826                         | [A/C]       | 1067304538                                 |
| Ca_Kabuli_NW_004515931.1_32026  | Ca_kabuli_scaffold | 32026                          | [C/T]       | 1067304539                                 |
| Ca_Kabuli_NW_004515934.1_129869 | Ca_kabuli_scaffold | 129869                         | [A/C]       | 1067304540                                 |
| Ca_Kabuli_NW_004515934.1_215946 | Ca_kabuli_scaffold | 215946                         | [T/G]       | 1067304541                                 |
| Ca_Kabuli_NW_004515934.1_215949 | Ca_kabuli_scaffold | 215949                         | [A/C]       | 1067304542                                 |



| <b>SNP IDs</b>                  | <b>Chromosomes</b> | <b>Physical positions (bp)</b> | <b>SNPs</b> | <b>NCBI SNPdb accession IDs (NCBI_ss#)</b> |
|---------------------------------|--------------------|--------------------------------|-------------|--------------------------------------------|
| Ca_Kabuli_NW_004515934.1_215950 | Ca_kabuli_scaffold | 215950                         | [G/C]       | 1067304543                                 |
| Ca_Kabuli_NW_004515934.1_215952 | Ca_kabuli_scaffold | 215952                         | [C/A]       | 1067304544                                 |
| Ca_Kabuli_NW_004515937.1_136806 | Ca_kabuli_scaffold | 136806                         | [G/T]       | 1067304545                                 |
| Ca_Kabuli_NW_004515937.1_136822 | Ca_kabuli_scaffold | 136822                         | [A/G]       | 1067304546                                 |
| Ca_Kabuli_NW_004515939.1_8270   | Ca_kabuli_scaffold | 8270                           | [T/C]       | 1067304547                                 |
| Ca_Kabuli_NW_004515939.1_8303   | Ca_kabuli_scaffold | 8303                           | [A/G]       | 1067304548                                 |
| Ca_Kabuli_NW_004515942.1_64422  | Ca_kabuli_scaffold | 64422                          | [A/T]       | 1067304549                                 |
| Ca_Kabuli_NW_004515942.1_64446  | Ca_kabuli_scaffold | 64446                          | [A/C]       | 1067304550                                 |
| Ca_Kabuli_NW_004515942.1_64448  | Ca_kabuli_scaffold | 64448                          | [A/C]       | 1067304551                                 |
| Ca_Kabuli_NW_004515942.1_64460  | Ca_kabuli_scaffold | 64460                          | [A/G]       | 1067304552                                 |
| Ca_Kabuli_NW_004515945.1_203830 | Ca_kabuli_scaffold | 203830                         | [T/A]       | 1067304553                                 |
| Ca_Kabuli_NW_004515945.1_203879 | Ca_kabuli_scaffold | 203879                         | [T/G]       | 1067304554                                 |
| Ca_Kabuli_NW_004515945.1_203973 | Ca_kabuli_scaffold | 203973                         | [T/A]       | 1067304555                                 |
| Ca_Kabuli_NW_004515945.1_209730 | Ca_kabuli_scaffold | 209730                         | [A/G]       | 1067304556                                 |
| Ca_Kabuli_NW_004515945.1_209746 | Ca_kabuli_scaffold | 209746                         | [A/G]       | 1067304557                                 |
| Ca_Kabuli_NW_004515945.1_209762 | Ca_kabuli_scaffold | 209762                         | [A/C]       | 1067304558                                 |
| Ca_Kabuli_NW_004515945.1_432229 | Ca_kabuli_scaffold | 432229                         | [A/C]       | 1067304559                                 |
| Ca_Kabuli_NW_004515945.1_660749 | Ca_kabuli_scaffold | 660749                         | [G/C]       | 1067304560                                 |
| Ca_Kabuli_NW_004515945.1_660796 | Ca_kabuli_scaffold | 660796                         | [A/C]       | 1067304561                                 |
| Ca_Kabuli_NW_004515945.1_660816 | Ca_kabuli_scaffold | 660816                         | [A/G]       | 1067304562                                 |
| Ca_Kabuli_NW_004515945.1_660826 | Ca_kabuli_scaffold | 660826                         | [A/C]       | 1067304563                                 |
| Ca_Kabuli_NW_004515953.1_77778  | Ca_kabuli_scaffold | 77778                          | [A/T]       | 1067304564                                 |
| Ca_Kabuli_NW_004515954.1_111894 | Ca_kabuli_scaffold | 111894                         | [A/T]       | 1067304565                                 |
| Ca_Kabuli_NW_004515954.1_131751 | Ca_kabuli_scaffold | 131751                         | [G/C]       | 1067304566                                 |
| Ca_Kabuli_NW_004515954.1_133397 | Ca_kabuli_scaffold | 133397                         | [G/T]       | 1067304567                                 |
| Ca_Kabuli_NW_004515957.1_148622 | Ca_kabuli_scaffold | 148622                         | [A/C]       | 1067304568                                 |
| Ca_Kabuli_NW_004515963.1_78149  | Ca_kabuli_scaffold | 78149                          | [C/T]       | 1067304569                                 |
| Ca_Kabuli_NW_004515963.1_78156  | Ca_kabuli_scaffold | 78156                          | [T/C]       | 1067304570                                 |
| Ca_Kabuli_NW_004515965.1_172269 | Ca_kabuli_scaffold | 172269                         | [A/G]       | 1067304571                                 |
| Ca_Kabuli_NW_004515965.1_172296 | Ca_kabuli_scaffold | 172296                         | [A/G]       | 1067304572                                 |
| Ca_Kabuli_NW_004515965.1_172302 | Ca_kabuli_scaffold | 172302                         | [T/C]       | 1067304573                                 |
| Ca_Kabuli_NW_004515965.1_172304 | Ca_kabuli_scaffold | 172304                         | [A/G]       | 1067304574                                 |
| Ca_Kabuli_NW_004515965.1_173404 | Ca_kabuli_scaffold | 173404                         | [A/C]       | 1067304575                                 |
| Ca_Kabuli_NW_004515967.1_7241   | Ca_kabuli_scaffold | 7241                           | [T/C]       | 1067304576                                 |

| <b>SNP IDs</b>                  | <b>Chromosomes</b> | <b>Physical positions (bp)</b> | <b>SNPs</b> | <b>NCBI SNPdb accession IDs (NCBI_ss#)</b> |
|---------------------------------|--------------------|--------------------------------|-------------|--------------------------------------------|
| Ca_Kabuli_NW_004515967.1_7260   | Ca_kabuli_scaffold | 7260                           | [A/C]       | 1067304577                                 |
| Ca_Kabuli_NW_004515973.1_690    | Ca_kabuli_scaffold | 690                            | [G/A]       | 1067304578                                 |
| Ca_Kabuli_NW_004515973.1_721    | Ca_kabuli_scaffold | 721                            | [C/T]       | 1067304579                                 |
| Ca_Kabuli_NW_004515974.1_191705 | Ca_kabuli_scaffold | 191705                         | [A/T]       | 1067304580                                 |
| Ca_Kabuli_NW_004515974.1_191723 | Ca_kabuli_scaffold | 191723                         | [A/T]       | 1067304581                                 |
| Ca_Kabuli_NW_004515974.1_191929 | Ca_kabuli_scaffold | 191929                         | [C/T]       | 1067304582                                 |
| Ca_Kabuli_NW_004515974.1_191973 | Ca_kabuli_scaffold | 191973                         | [A/T]       | 1067304583                                 |
| Ca_Kabuli_NW_004515974.1_247948 | Ca_kabuli_scaffold | 247948                         | [T/A]       | 1067304584                                 |
| Ca_Kabuli_NW_004515974.1_247957 | Ca_kabuli_scaffold | 247957                         | [T/G]       | 1067304585                                 |
| Ca_Kabuli_NW_004515974.1_265942 | Ca_kabuli_scaffold | 265942                         | [T/G]       | 1067304586                                 |
| Ca_Kabuli_NW_004515976.1_83032  | Ca_kabuli_scaffold | 83032                          | [A/G]       | 1067304587                                 |
| Ca_Kabuli_NW_004515976.1_83033  | Ca_kabuli_scaffold | 83033                          | [G/A]       | 1067304588                                 |
| Ca_Kabuli_NW_004515976.1_83034  | Ca_kabuli_scaffold | 83034                          | [C/T]       | 1067304589                                 |
| Ca_Kabuli_NW_004515976.1_83036  | Ca_kabuli_scaffold | 83036                          | [G/T]       | 1067304590                                 |
| Ca_Kabuli_NW_004515976.1_83094  | Ca_kabuli_scaffold | 83094                          | [A/T]       | 1067304591                                 |
| Ca_Kabuli_NW_004515976.1_112095 | Ca_kabuli_scaffold | 112095                         | [T/C]       | 1067304592                                 |
| Ca_Kabuli_NW_004515976.1_112121 | Ca_kabuli_scaffold | 112121                         | [T/A]       | 1067304593                                 |
| Ca_Kabuli_NW_004515976.1_112130 | Ca_kabuli_scaffold | 112130                         | [A/C]       | 1067304594                                 |
| Ca_Kabuli_NW_004515976.1_118571 | Ca_kabuli_scaffold | 118571                         | [T/A]       | 1067304595                                 |
| Ca_Kabuli_NW_004515976.1_118613 | Ca_kabuli_scaffold | 118613                         | [A/G]       | 1067304596                                 |
| Ca_Kabuli_NW_004515976.1_184646 | Ca_kabuli_scaffold | 184646                         | [A/G]       | 1067304597                                 |
| Ca_Kabuli_NW_004515979.1_139569 | Ca_kabuli_scaffold | 139569                         | [A/C]       | 1067304598                                 |
| Ca_Kabuli_NW_004515981.1_207045 | Ca_kabuli_scaffold | 207045                         | [A/T]       | 1067304599                                 |
| Ca_Kabuli_NW_004515981.1_207048 | Ca_kabuli_scaffold | 207048                         | [T/C]       | 1067304600                                 |
| Ca_Kabuli_NW_004515981.1_207094 | Ca_kabuli_scaffold | 207094                         | [G/T]       | 1067304601                                 |
| Ca_Kabuli_NW_004515981.1_207105 | Ca_kabuli_scaffold | 207105                         | [T/C]       | 1067304602                                 |
| Ca_Kabuli_NW_004515981.1_207107 | Ca_kabuli_scaffold | 207107                         | [A/G]       | 1067304603                                 |
| Ca_Kabuli_NW_004515981.1_220119 | Ca_kabuli_scaffold | 220119                         | [T/C]       | 1067304604                                 |
| Ca_Kabuli_NW_004515981.1_220160 | Ca_kabuli_scaffold | 220160                         | [T/A]       | 1067304605                                 |
| Ca_Kabuli_NW_004515981.1_220166 | Ca_kabuli_scaffold | 220166                         | [T/A]       | 1067304606                                 |
| Ca_Kabuli_NW_004515981.1_222163 | Ca_kabuli_scaffold | 222163                         | [A/G]       | 1067304607                                 |
| Ca_Kabuli_NW_004515981.1_222173 | Ca_kabuli_scaffold | 222173                         | [T/A]       | 1067304608                                 |
| Ca_Kabuli_NW_004515981.1_222175 | Ca_kabuli_scaffold | 222175                         | [T/C]       | 1067304609                                 |
| Ca_Kabuli_NW_004515981.1_222176 | Ca_kabuli_scaffold | 222176                         | [T/G]       | 1067304610                                 |

| <b>SNP IDs</b>                  | <b>Chromosomes</b> | <b>Physical positions (bp)</b> | <b>SNPs</b> | <b>NCBI SNPdb accession IDs (NCBI_ss#)</b> |
|---------------------------------|--------------------|--------------------------------|-------------|--------------------------------------------|
| Ca_Kabuli_NW_004515981.1_223137 | Ca_kabuli_scaffold | 223137                         | [A/T]       | 1067304611                                 |
| Ca_Kabuli_NW_004515981.1_238192 | Ca_kabuli_scaffold | 238192                         | [A/C]       | 1067304612                                 |
| Ca_Kabuli_NW_004515981.1_238193 | Ca_kabuli_scaffold | 238193                         | [G/T]       | 1067304613                                 |
| Ca_Kabuli_NW_004515984.1_3401   | Ca_kabuli_scaffold | 3401                           | [T/A]       | 1067304614                                 |
| Ca_Kabuli_NW_004515984.1_20980  | Ca_kabuli_scaffold | 20980                          | [T/G]       | 1067304615                                 |
| Ca_Kabuli_NW_004515984.1_74806  | Ca_kabuli_scaffold | 74806                          | [T/G]       | 1067304616                                 |
| Ca_Kabuli_NW_004515984.1_74828  | Ca_kabuli_scaffold | 74828                          | [A/G]       | 1067304617                                 |
| Ca_Kabuli_NW_004515984.1_74833  | Ca_kabuli_scaffold | 74833                          | [C/G]       | 1067304618                                 |
| Ca_Kabuli_NW_004515984.1_266729 | Ca_kabuli_scaffold | 266729                         | [A/C]       | 1067304619                                 |
| Ca_Kabuli_NW_004515984.1_266741 | Ca_kabuli_scaffold | 266741                         | [A/C]       | 1067304620                                 |
| Ca_Kabuli_NW_004515984.1_266761 | Ca_kabuli_scaffold | 266761                         | [A/G]       | 1067304621                                 |
| Ca_Kabuli_NW_004515984.1_266820 | Ca_kabuli_scaffold | 266820                         | [C/G]       | 1067304622                                 |
| Ca_Kabuli_NW_004515984.1_266822 | Ca_kabuli_scaffold | 266822                         | [T/C]       | 1067304623                                 |
| Ca_Kabuli_NW_004515984.1_266847 | Ca_kabuli_scaffold | 266847                         | [A/G]       | 1067304624                                 |
| Ca_Kabuli_NW_004515984.1_266848 | Ca_kabuli_scaffold | 266848                         | [A/C]       | 1067304625                                 |
| Ca_Kabuli_NW_004515984.1_266852 | Ca_kabuli_scaffold | 266852                         | [T/C]       | 1067304626                                 |
| Ca_Kabuli_NW_004515984.1_266866 | Ca_kabuli_scaffold | 266866                         | [A/C]       | 1067304627                                 |
| Ca_Kabuli_NW_004515984.1_266871 | Ca_kabuli_scaffold | 266871                         | [A/C]       | 1067304628                                 |
| Ca_Kabuli_NW_004515985.1_53632  | Ca_kabuli_scaffold | 53632                          | [G/T]       | 1067304629                                 |
| Ca_Kabuli_NW_004515986.1_11292  | Ca_kabuli_scaffold | 11292                          | [C/T]       | 1067304630                                 |
| Ca_Kabuli_NW_004515986.1_83402  | Ca_kabuli_scaffold | 83402                          | [A/C]       | 1067304631                                 |
| Ca_Kabuli_NW_004515986.1_83406  | Ca_kabuli_scaffold | 83406                          | [A/C]       | 1067304632                                 |
| Ca_Kabuli_NW_004515986.1_83449  | Ca_kabuli_scaffold | 83449                          | [A/G]       | 1067304633                                 |
| Ca_Kabuli_NW_004515986.1_83503  | Ca_kabuli_scaffold | 83503                          | [A/G]       | 1067304634                                 |
| Ca_Kabuli_NW_004515986.1_138914 | Ca_kabuli_scaffold | 138914                         | [T/G]       | 1067304635                                 |
| Ca_Kabuli_NW_004515986.1_147568 | Ca_kabuli_scaffold | 147568                         | [T/G]       | 1067304636                                 |
| Ca_Kabuli_NW_004515986.1_218699 | Ca_kabuli_scaffold | 218699                         | [A/C]       | 1067304637                                 |
| Ca_Kabuli_NW_004515986.1_227149 | Ca_kabuli_scaffold | 227149                         | [T/C]       | 1067304638                                 |
| Ca_Kabuli_NW_004515986.1_227166 | Ca_kabuli_scaffold | 227166                         | [T/C]       | 1067304639                                 |
| Ca_Kabuli_NW_004515986.1_227169 | Ca_kabuli_scaffold | 227169                         | [A/G]       | 1067304640                                 |
| Ca_Kabuli_NW_004515986.1_227192 | Ca_kabuli_scaffold | 227192                         | [G/A]       | 1067304641                                 |
| Ca_Kabuli_NW_004515986.1_227203 | Ca_kabuli_scaffold | 227203                         | [A/G]       | 1067304642                                 |
| Ca_Kabuli_NW_004515986.1_227205 | Ca_kabuli_scaffold | 227205                         | [A/G]       | 1067304643                                 |
| Ca_Kabuli_NW_004515986.1_227213 | Ca_kabuli_scaffold | 227213                         | [T/C]       | 1067304644                                 |

| <b>SNP IDs</b>                  | <b>Chromosomes</b> | <b>Physical positions (bp)</b> | <b>SNPs</b> | <b>NCBI SNPdb accession IDs (NCBI_ss#)</b> |
|---------------------------------|--------------------|--------------------------------|-------------|--------------------------------------------|
| Ca_Kabuli_NW_004515989.1_17488  | Ca_kabuli_scaffold | 17488                          | [A/C]       | 1067304645                                 |
| Ca_Kabuli_NW_004515989.1_648290 | Ca_kabuli_scaffold | 648290                         | [A/G]       | 1067304646                                 |
| Ca_Kabuli_NW_004515989.1_648351 | Ca_kabuli_scaffold | 648351                         | [T/G]       | 1067304647                                 |
| Ca_Kabuli_NW_004515992.1_235181 | Ca_kabuli_scaffold | 235181                         | [T/A]       | 1067304648                                 |
| Ca_Kabuli_NW_004515992.1_235191 | Ca_kabuli_scaffold | 235191                         | [T/G]       | 1067304649                                 |
| Ca_Kabuli_NW_004515992.1_235227 | Ca_kabuli_scaffold | 235227                         | [A/T]       | 1067304650                                 |
| Ca_Kabuli_NW_004515992.1_235362 | Ca_kabuli_scaffold | 235362                         | [T/A]       | 1067304651                                 |
| Ca_Kabuli_NW_004515992.1_291235 | Ca_kabuli_scaffold | 291235                         | [A/C]       | 1067304652                                 |
| Ca_Kabuli_NW_004515992.1_401898 | Ca_kabuli_scaffold | 401898                         | [T/A]       | 1067304653                                 |
| Ca_Kabuli_NW_004515992.1_401904 | Ca_kabuli_scaffold | 401904                         | [T/C]       | 1067304654                                 |
| Ca_Kabuli_NW_004515992.1_401905 | Ca_kabuli_scaffold | 401905                         | [A/T]       | 1067304655                                 |
| Ca_Kabuli_NW_004515992.1_401923 | Ca_kabuli_scaffold | 401923                         | [T/G]       | 1067304656                                 |
| Ca_Kabuli_NW_004515992.1_401947 | Ca_kabuli_scaffold | 401947                         | [T/C]       | 1067304657                                 |
| Ca_Kabuli_NW_004515992.1_402658 | Ca_kabuli_scaffold | 402658                         | [A/T]       | 1067304658                                 |
| Ca_Kabuli_NW_004515992.1_402663 | Ca_kabuli_scaffold | 402663                         | [A/C]       | 1067304659                                 |
| Ca_Kabuli_NW_004515992.1_442094 | Ca_kabuli_scaffold | 442094                         | [T/C]       | 1067304660                                 |
| Ca_Kabuli_NW_004515992.1_442114 | Ca_kabuli_scaffold | 442114                         | [A/G]       | 1067304661                                 |
| Ca_Kabuli_NW_004515992.1_443299 | Ca_kabuli_scaffold | 443299                         | [A/C]       | 1067304662                                 |
| Ca_Kabuli_NW_004515992.1_607428 | Ca_kabuli_scaffold | 607428                         | [T/A]       | 1067304663                                 |
| Ca_Kabuli_NW_004515992.1_607596 | Ca_kabuli_scaffold | 607596                         | [T/A]       | 1067304664                                 |
| Ca_Kabuli_NW_004515992.1_607657 | Ca_kabuli_scaffold | 607657                         | [A/G]       | 1067304665                                 |
| Ca_Kabuli_NW_004515992.1_608668 | Ca_kabuli_scaffold | 608668                         | [A/G]       | 1067304666                                 |
| Ca_Kabuli_NW_004515992.1_715934 | Ca_kabuli_scaffold | 715934                         | [A/C]       | 1067304667                                 |
| Ca_Kabuli_NW_004515992.1_793782 | Ca_kabuli_scaffold | 793782                         | [A/G]       | 1067304668                                 |
| Ca_Kabuli_NW_004515992.1_793807 | Ca_kabuli_scaffold | 793807                         | [A/G]       | 1067304669                                 |
| Ca_Kabuli_NW_004515992.1_794403 | Ca_kabuli_scaffold | 794403                         | [T/A]       | 1067304670                                 |
| Ca_Kabuli_NW_004515992.1_795669 | Ca_kabuli_scaffold | 795669                         | [C/A]       | 1067304671                                 |
| Ca_Kabuli_NW_004515998.1_49143  | Ca_kabuli_scaffold | 49143                          | [T/C]       | 1067304672                                 |
| Ca_Kabuli_NW_004515998.1_49173  | Ca_kabuli_scaffold | 49173                          | [A/G]       | 1067304673                                 |
| Ca_Kabuli_NW_004515998.1_87361  | Ca_kabuli_scaffold | 87361                          | [G/T]       | 1067304674                                 |
| Ca_Kabuli_NW_004515998.1_116793 | Ca_kabuli_scaffold | 116793                         | [G/T]       | 1067304675                                 |
| Ca_Kabuli_NW_004515999.1_221770 | Ca_kabuli_scaffold | 221770                         | [C/A]       | 1067304676                                 |
| Ca_Kabuli_NW_004515999.1_221778 | Ca_kabuli_scaffold | 221778                         | [G/A]       | 1067304677                                 |
| Ca_Kabuli_NW_004515999.1_221789 | Ca_kabuli_scaffold | 221789                         | [T/C]       | 1067304678                                 |

| <b>SNP IDs</b>                  | <b>Chromosomes</b> | <b>Physical positions (bp)</b> | <b>SNPs</b> | <b>NCBI SNPdb accession IDs (NCBI_ss#)</b> |
|---------------------------------|--------------------|--------------------------------|-------------|--------------------------------------------|
| Ca_Kabuli_NW_004515999.1_221792 | Ca_kabuli_scaffold | 221792                         | [C/A]       | 1067304679                                 |
| Ca_Kabuli_NW_004516009.1_85858  | Ca_kabuli_scaffold | 85858                          | [C/A]       | 1067304680                                 |
| Ca_Kabuli_NW_004516009.1_85866  | Ca_kabuli_scaffold | 85866                          | [C/T]       | 1067304681                                 |
| Ca_Kabuli_NW_004516009.1_96389  | Ca_kabuli_scaffold | 96389                          | [T/G]       | 1067304682                                 |
| Ca_Kabuli_NW_004516009.1_99047  | Ca_kabuli_scaffold | 99047                          | [G/T]       | 1067304683                                 |
| Ca_Kabuli_NW_004516009.1_99050  | Ca_kabuli_scaffold | 99050                          | [C/G]       | 1067304684                                 |
| Ca_Kabuli_NW_004516009.1_99059  | Ca_kabuli_scaffold | 99059                          | [G/T]       | 1067304685                                 |
| Ca_Kabuli_NW_004516009.1_99065  | Ca_kabuli_scaffold | 99065                          | [A/G]       | 1067304686                                 |
| Ca_Kabuli_NW_004516009.1_99068  | Ca_kabuli_scaffold | 99068                          | [G/T]       | 1067304687                                 |
| Ca_Kabuli_NW_004516009.1_102713 | Ca_kabuli_scaffold | 102713                         | [C/T]       | 1067304688                                 |
| Ca_Kabuli_NW_004516009.1_102725 | Ca_kabuli_scaffold | 102725                         | [T/A]       | 1067304689                                 |
| Ca_Kabuli_NW_004516009.1_102731 | Ca_kabuli_scaffold | 102731                         | [C/T]       | 1067304690                                 |
| Ca_Kabuli_NW_004516009.1_110278 | Ca_kabuli_scaffold | 110278                         | [T/C]       | 1067304691                                 |
| Ca_Kabuli_NW_004516009.1_110299 | Ca_kabuli_scaffold | 110299                         | [A/G]       | 1067304692                                 |
| Ca_Kabuli_NW_004516009.1_110301 | Ca_kabuli_scaffold | 110301                         | [T/C]       | 1067304693                                 |
| Ca_Kabuli_NW_004516009.1_110753 | Ca_kabuli_scaffold | 110753                         | [G/A]       | 1067304694                                 |
| Ca_Kabuli_NW_004516009.1_110757 | Ca_kabuli_scaffold | 110757                         | [T/C]       | 1067304695                                 |
| Ca_Kabuli_NW_004516009.1_110759 | Ca_kabuli_scaffold | 110759                         | [C/T]       | 1067304696                                 |
| Ca_Kabuli_NW_004516009.1_110765 | Ca_kabuli_scaffold | 110765                         | [C/T]       | 1067304697                                 |
| Ca_Kabuli_NW_004516009.1_110772 | Ca_kabuli_scaffold | 110772                         | [G/T]       | 1067304698                                 |
| Ca_Kabuli_NW_004516009.1_110785 | Ca_kabuli_scaffold | 110785                         | [C/T]       | 1067304699                                 |
| Ca_Kabuli_NW_004516009.1_112053 | Ca_kabuli_scaffold | 112053                         | [A/C]       | 1067304700                                 |
| Ca_Kabuli_NW_004516009.1_112071 | Ca_kabuli_scaffold | 112071                         | [A/T]       | 1067304701                                 |
| Ca_Kabuli_NW_004516009.1_112079 | Ca_kabuli_scaffold | 112079                         | [A/G]       | 1067304702                                 |
| Ca_Kabuli_NW_004516009.1_112373 | Ca_kabuli_scaffold | 112373                         | [A/G]       | 1067304703                                 |
| Ca_Kabuli_NW_004516009.1_112384 | Ca_kabuli_scaffold | 112384                         | [A/C]       | 1067304704                                 |
| Ca_Kabuli_NW_004516009.1_112432 | Ca_kabuli_scaffold | 112432                         | [G/A]       | 1067304705                                 |
| Ca_Kabuli_NW_004516009.1_112433 | Ca_kabuli_scaffold | 112433                         | [G/A]       | 1067304706                                 |
| Ca_Kabuli_NW_004516009.1_112434 | Ca_kabuli_scaffold | 112434                         | [C/T]       | 1067304707                                 |
| Ca_Kabuli_NW_004516009.1_112479 | Ca_kabuli_scaffold | 112479                         | [A/G]       | 1067304708                                 |
| Ca_Kabuli_NW_004516009.1_112488 | Ca_kabuli_scaffold | 112488                         | [A/G]       | 1067304709                                 |
| Ca_Kabuli_NW_004516009.1_112495 | Ca_kabuli_scaffold | 112495                         | [T/C]       | 1067304710                                 |
| Ca_Kabuli_NW_004516009.1_112497 | Ca_kabuli_scaffold | 112497                         | [T/C]       | 1067304711                                 |
| Ca_Kabuli_NW_004516009.1_112585 | Ca_kabuli_scaffold | 112585                         | [A/C]       | 1067304712                                 |

| <b>SNP IDs</b>                  | <b>Chromosomes</b> | <b>Physical positions (bp)</b> | <b>SNPs</b> | <b>NCBI SNPdb accession IDs (NCBI_ss#)</b> |
|---------------------------------|--------------------|--------------------------------|-------------|--------------------------------------------|
| Ca_Kabuli_NW_004516009.1_112607 | Ca_kabuli_scaffold | 112607                         | [A/G]       | 1067304713                                 |
| Ca_Kabuli_NW_004516009.1_113780 | Ca_kabuli_scaffold | 113780                         | [T/A]       | 1067304714                                 |
| Ca_Kabuli_NW_004516009.1_113823 | Ca_kabuli_scaffold | 113823                         | [A/C]       | 1067304715                                 |
| Ca_Kabuli_NW_004516014.1_88419  | Ca_kabuli_scaffold | 88419                          | [A/G]       | 1067304716                                 |
| Ca_Kabuli_NW_004516015.1_150202 | Ca_kabuli_scaffold | 150202                         | [G/A]       | 1067304717                                 |
| Ca_Kabuli_NW_004516015.1_150215 | Ca_kabuli_scaffold | 150215                         | [G/A]       | 1067304718                                 |
| Ca_Kabuli_NW_004516015.1_150232 | Ca_kabuli_scaffold | 150232                         | [G/A]       | 1067304719                                 |
| Ca_Kabuli_NW_004516015.1_150237 | Ca_kabuli_scaffold | 150237                         | [C/T]       | 1067304720                                 |
| Ca_Kabuli_NW_004516029.1_102993 | Ca_kabuli_scaffold | 102993                         | [A/G]       | 1067304721                                 |
| Ca_Kabuli_NW_004516029.1_102998 | Ca_kabuli_scaffold | 102998                         | [T/G]       | 1067304722                                 |
| Ca_Kabuli_NW_004516029.1_137196 | Ca_kabuli_scaffold | 137196                         | [G/T]       | 1067304723                                 |
| Ca_Kabuli_NW_004516029.1_161754 | Ca_kabuli_scaffold | 161754                         | [T/C]       | 1067304724                                 |
| Ca_Kabuli_NW_004516029.1_300921 | Ca_kabuli_scaffold | 300921                         | [A/C]       | 1067304725                                 |
| Ca_Kabuli_NW_004516029.1_300944 | Ca_kabuli_scaffold | 300944                         | [T/C]       | 1067304726                                 |
| Ca_Kabuli_NW_004516029.1_300957 | Ca_kabuli_scaffold | 300957                         | [T/G]       | 1067304727                                 |
| Ca_Kabuli_NW_004516029.1_300960 | Ca_kabuli_scaffold | 300960                         | [C/T]       | 1067304728                                 |
| Ca_Kabuli_NW_004516029.1_300966 | Ca_kabuli_scaffold | 300966                         | [A/T]       | 1067304729                                 |
| Ca_Kabuli_NW_004516029.1_300967 | Ca_kabuli_scaffold | 300967                         | [G/T]       | 1067304730                                 |
| Ca_Kabuli_NW_004516029.1_300972 | Ca_kabuli_scaffold | 300972                         | [G/T]       | 1067304731                                 |
| Ca_Kabuli_NW_004516029.1_390787 | Ca_kabuli_scaffold | 390787                         | [A/C]       | 1067304732                                 |
| Ca_Kabuli_NW_004516029.1_404045 | Ca_kabuli_scaffold | 404045                         | [T/A]       | 1067304733                                 |
| Ca_Kabuli_NW_004516029.1_404364 | Ca_kabuli_scaffold | 404364                         | [T/C]       | 1067304734                                 |
| Ca_Kabuli_NW_004516029.1_410447 | Ca_kabuli_scaffold | 410447                         | [A/T]       | 1067304735                                 |
| Ca_Kabuli_NW_004516030.1_110316 | Ca_kabuli_scaffold | 110316                         | [T/C]       | 1067304736                                 |
| Ca_Kabuli_NW_004516030.1_240474 | Ca_kabuli_scaffold | 240474                         | [A/T]       | 1067304737                                 |
| Ca_Kabuli_NW_004516030.1_294438 | Ca_kabuli_scaffold | 294438                         | [G/A]       | 1067304738                                 |
| Ca_Kabuli_NW_004516031.1_71998  | Ca_kabuli_scaffold | 71998                          | [A/T]       | 1067304739                                 |
| Ca_Kabuli_NW_004516031.1_72041  | Ca_kabuli_scaffold | 72041                          | [A/C]       | 1067304740                                 |
| Ca_Kabuli_NW_004516031.1_110896 | Ca_kabuli_scaffold | 110896                         | [C/A]       | 1067304741                                 |
| Ca_Kabuli_NW_004516031.1_110898 | Ca_kabuli_scaffold | 110898                         | [A/T]       | 1067304742                                 |
| Ca_Kabuli_NW_004516031.1_110909 | Ca_kabuli_scaffold | 110909                         | [A/T]       | 1067304743                                 |
| Ca_Kabuli_NW_004516043.1_62540  | Ca_kabuli_scaffold | 62540                          | [A/G]       | 1067304744                                 |
| Ca_Kabuli_NW_004516043.1_93984  | Ca_kabuli_scaffold | 93984                          | [G/A]       | 1067304745                                 |
| Ca_Kabuli_NW_004516048.1_87982  | Ca_kabuli_scaffold | 87982                          | [T/G]       | 1067304746                                 |

| <b>SNP IDs</b>                  | <b>Chromosomes</b> | <b>Physical positions (bp)</b> | <b>SNPs</b> | <b>NCBI SNPdb accession IDs (NCBI_ss#)</b> |
|---------------------------------|--------------------|--------------------------------|-------------|--------------------------------------------|
| Ca_Kabuli_NW_004516050.1_343389 | Ca_kabuli_scaffold | 343389                         | [A/G]       | 1067304747                                 |
| Ca_Kabuli_NW_004516050.1_343407 | Ca_kabuli_scaffold | 343407                         | [A/T]       | 1067304748                                 |
| Ca_Kabuli_NW_004516050.1_343411 | Ca_kabuli_scaffold | 343411                         | [A/G]       | 1067304749                                 |
| Ca_Kabuli_NW_004516058.1_31412  | Ca_kabuli_scaffold | 31412                          | [A/G]       | 1067304750                                 |
| Ca_Kabuli_NW_004516058.1_31470  | Ca_kabuli_scaffold | 31470                          | [T/C]       | 1067304751                                 |
| Ca_Kabuli_NW_004516058.1_31480  | Ca_kabuli_scaffold | 31480                          | [A/C]       | 1067304752                                 |
| Ca_Kabuli_NW_004516058.1_107549 | Ca_kabuli_scaffold | 107549                         | [A/G]       | 1067304753                                 |
| Ca_Kabuli_NW_004516058.1_107605 | Ca_kabuli_scaffold | 107605                         | [T/C]       | 1067304754                                 |
| Ca_Kabuli_NW_004516058.1_107612 | Ca_kabuli_scaffold | 107612                         | [T/A]       | 1067304755                                 |
| Ca_Kabuli_NW_004516058.1_107618 | Ca_kabuli_scaffold | 107618                         | [T/C]       | 1067304756                                 |
| Ca_Kabuli_NW_004516058.1_107623 | Ca_kabuli_scaffold | 107623                         | [G/A]       | 1067304757                                 |
| Ca_Kabuli_NW_004516058.1_107625 | Ca_kabuli_scaffold | 107625                         | [T/C]       | 1067304758                                 |
| Ca_Kabuli_NW_004516059.1_190652 | Ca_kabuli_scaffold | 190652                         | [T/C]       | 1067304759                                 |
| Ca_Kabuli_NW_004516061.1_7306   | Ca_kabuli_scaffold | 7306                           | [T/G]       | 1067304760                                 |
| Ca_Kabuli_NW_004516061.1_44096  | Ca_kabuli_scaffold | 44096                          | [T/C]       | 1067304761                                 |
| Ca_Kabuli_NW_004516061.1_48008  | Ca_kabuli_scaffold | 48008                          | [A/G]       | 1067304762                                 |
| Ca_Kabuli_NW_004516061.1_145557 | Ca_kabuli_scaffold | 145557                         | [A/C]       | 1067304763                                 |
| Ca_Kabuli_NW_004516061.1_145559 | Ca_kabuli_scaffold | 145559                         | [C/G]       | 1067304764                                 |
| Ca_Kabuli_NW_004516061.1_145560 | Ca_kabuli_scaffold | 145560                         | [T/G]       | 1067304765                                 |
| Ca_Kabuli_NW_004516061.1_572432 | Ca_kabuli_scaffold | 572432                         | [A/G]       | 1067304766                                 |
| Ca_Kabuli_NW_004516061.1_572434 | Ca_kabuli_scaffold | 572434                         | [A/G]       | 1067304767                                 |
| Ca_Kabuli_NW_004516061.1_572444 | Ca_kabuli_scaffold | 572444                         | [A/G]       | 1067304768                                 |
| Ca_Kabuli_NW_004516061.1_572459 | Ca_kabuli_scaffold | 572459                         | [T/C]       | 1067304769                                 |
| Ca_Kabuli_NW_004516061.1_614966 | Ca_kabuli_scaffold | 614966                         | [T/C]       | 1067304770                                 |
| Ca_Kabuli_NW_004516061.1_614968 | Ca_kabuli_scaffold | 614968                         | [T/C]       | 1067304771                                 |
| Ca_Kabuli_NW_004516061.1_614970 | Ca_kabuli_scaffold | 614970                         | [G/T]       | 1067304772                                 |
| Ca_Kabuli_NW_004516062.1_18115  | Ca_kabuli_scaffold | 18115                          | [A/G]       | 1067304773                                 |
| Ca_Kabuli_NW_004516063.1_176958 | Ca_kabuli_scaffold | 176958                         | [A/T]       | 1067304774                                 |
| Ca_Kabuli_NW_004516063.1_214380 | Ca_kabuli_scaffold | 214380                         | [A/C]       | 1067304775                                 |
| Ca_Kabuli_NW_004516063.1_214409 | Ca_kabuli_scaffold | 214409                         | [T/A]       | 1067304776                                 |
| Ca_Kabuli_NW_004516063.1_239854 | Ca_kabuli_scaffold | 239854                         | [A/G]       | 1067304777                                 |
| Ca_Kabuli_NW_004516063.1_245029 | Ca_kabuli_scaffold | 245029                         | [T/A]       | 1067304778                                 |
| Ca_Kabuli_NW_004516063.1_245034 | Ca_kabuli_scaffold | 245034                         | [C/T]       | 1067304779                                 |
| Ca_Kabuli_NW_004516063.1_245036 | Ca_kabuli_scaffold | 245036                         | [T/A]       | 1067304780                                 |

| <b>SNP IDs</b>                  | <b>Chromosomes</b> | <b>Physical positions (bp)</b> | <b>SNPs</b> | <b>NCBI SNPdb accession IDs (NCBI_ss#)</b> |
|---------------------------------|--------------------|--------------------------------|-------------|--------------------------------------------|
| Ca_Kabuli_NW_004516070.1_53912  | Ca_kabuli_scaffold | 53912                          | [T/A]       | 1067304781                                 |
| Ca_Kabuli_NW_004516070.1_53913  | Ca_kabuli_scaffold | 53913                          | [C/A]       | 1067304782                                 |
| Ca_Kabuli_NW_004516070.1_53914  | Ca_kabuli_scaffold | 53914                          | [T/G]       | 1067304783                                 |
| Ca_Kabuli_NW_004516070.1_142907 | Ca_kabuli_scaffold | 142907                         | [A/C]       | 1067304784                                 |
| Ca_Kabuli_NW_004516070.1_176821 | Ca_kabuli_scaffold | 176821                         | [T/A]       | 1067304785                                 |
| Ca_Kabuli_NW_004516070.1_183054 | Ca_kabuli_scaffold | 183054                         | [T/C]       | 1067304786                                 |
| Ca_Kabuli_NW_004516070.1_183063 | Ca_kabuli_scaffold | 183063                         | [G/A]       | 1067304787                                 |
| Ca_Kabuli_NW_004516070.1_191740 | Ca_kabuli_scaffold | 191740                         | [T/C]       | 1067304788                                 |
| Ca_Kabuli_NW_004516070.1_191748 | Ca_kabuli_scaffold | 191748                         | [T/A]       | 1067304789                                 |
| Ca_Kabuli_NW_004516076.1_159222 | Ca_kabuli_scaffold | 159222                         | [C/A]       | 1067304790                                 |
| Ca_Kabuli_NW_004516076.1_159223 | Ca_kabuli_scaffold | 159223                         | [T/G]       | 1067304791                                 |
| Ca_Kabuli_NW_004516076.1_311139 | Ca_kabuli_scaffold | 311139                         | [G/T]       | 1067304792                                 |
| Ca_Kabuli_NW_004516076.1_350644 | Ca_kabuli_scaffold | 350644                         | [T/G]       | 1067304793                                 |
| Ca_Kabuli_NW_004516076.1_350659 | Ca_kabuli_scaffold | 350659                         | [A/C]       | 1067304794                                 |
| Ca_Kabuli_NW_004516076.1_472607 | Ca_kabuli_scaffold | 472607                         | [A/T]       | 1067304795                                 |
| Ca_Kabuli_NW_004516076.1_472614 | Ca_kabuli_scaffold | 472614                         | [T/A]       | 1067304796                                 |
| Ca_Kabuli_NW_004516078.1_156608 | Ca_kabuli_scaffold | 156608                         | [T/G]       | 1067304797                                 |
| Ca_Kabuli_NW_004516078.1_156624 | Ca_kabuli_scaffold | 156624                         | [T/G]       | 1067304798                                 |
| Ca_Kabuli_NW_004516078.1_156630 | Ca_kabuli_scaffold | 156630                         | [T/G]       | 1067304799                                 |
| Ca_Kabuli_NW_004516088.1_136995 | Ca_kabuli_scaffold | 136995                         | [C/A]       | 1067304800                                 |
| Ca_Kabuli_NW_004516088.1_265998 | Ca_kabuli_scaffold | 265998                         | [A/C]       | 1067304801                                 |
| Ca_Kabuli_NW_004516088.1_309725 | Ca_kabuli_scaffold | 309725                         | [C/T]       | 1067304802                                 |
| Ca_Kabuli_NW_004516088.1_582040 | Ca_kabuli_scaffold | 582040                         | [T/G]       | 1067304803                                 |
| Ca_Kabuli_NW_004516088.1_582047 | Ca_kabuli_scaffold | 582047                         | [A/C]       | 1067304804                                 |
| Ca_Kabuli_NW_004516088.1_608617 | Ca_kabuli_scaffold | 608617                         | [T/G]       | 1067304805                                 |
| Ca_Kabuli_NW_004516088.1_608619 | Ca_kabuli_scaffold | 608619                         | [G/T]       | 1067304806                                 |
| Ca_Kabuli_NW_004516088.1_608620 | Ca_kabuli_scaffold | 608620                         | [C/G]       | 1067304807                                 |
| Ca_Kabuli_NW_004516088.1_608623 | Ca_kabuli_scaffold | 608623                         | [T/G]       | 1067304808                                 |
| Ca_Kabuli_NW_004516088.1_608627 | Ca_kabuli_scaffold | 608627                         | [A/T]       | 1067304809                                 |
| Ca_Kabuli_NW_004516088.1_608630 | Ca_kabuli_scaffold | 608630                         | [G/A]       | 1067304810                                 |
| Ca_Kabuli_NW_004516088.1_608632 | Ca_kabuli_scaffold | 608632                         | [A/C]       | 1067304811                                 |
| Ca_Kabuli_NW_004516088.1_608633 | Ca_kabuli_scaffold | 608633                         | [C/A]       | 1067304812                                 |
| Ca_Kabuli_NW_004516088.1_635370 | Ca_kabuli_scaffold | 635370                         | [G/T]       | 1067304813                                 |
| Ca_Kabuli_NW_004516088.1_637666 | Ca_kabuli_scaffold | 637666                         | [A/T]       | 1067304814                                 |



| <b>SNP IDs</b>                  | <b>Chromosomes</b> | <b>Physical positions (bp)</b> | <b>SNPs</b> | <b>NCBI SNPdb accession IDs (NCBI_ss#)</b> |
|---------------------------------|--------------------|--------------------------------|-------------|--------------------------------------------|
| Ca_Kabuli_NW_004516088.1_652539 | Ca_kabuli_scaffold | 652539                         | [A/C]       | 1067304815                                 |
| Ca_Kabuli_NW_004516088.1_662223 | Ca_kabuli_scaffold | 662223                         | [A/T]       | 1067304816                                 |
| Ca_Kabuli_NW_004516088.1_770252 | Ca_kabuli_scaffold | 770252                         | [A/G]       | 1067304817                                 |
| Ca_Kabuli_NW_004516095.1_149789 | Ca_kabuli_scaffold | 149789                         | [G/T]       | 1067304818                                 |
| Ca_Kabuli_NW_004516095.1_156744 | Ca_kabuli_scaffold | 156744                         | [A/C]       | 1067304819                                 |
| Ca_Kabuli_NW_004516095.1_156786 | Ca_kabuli_scaffold | 156786                         | [T/A]       | 1067304820                                 |
| Ca_Kabuli_NW_004516095.1_238439 | Ca_kabuli_scaffold | 238439                         | [T/G]       | 1067304821                                 |
| Ca_Kabuli_NW_004516095.1_541994 | Ca_kabuli_scaffold | 541994                         | [A/T]       | 1067304822                                 |
| Ca_Kabuli_NW_004516095.1_542034 | Ca_kabuli_scaffold | 542034                         | [A/G]       | 1067304823                                 |
| Ca_Kabuli_NW_004516095.1_542039 | Ca_kabuli_scaffold | 542039                         | [A/G]       | 1067304824                                 |
| Ca_Kabuli_NW_004516095.1_542055 | Ca_kabuli_scaffold | 542055                         | [T/C]       | 1067304825                                 |
| Ca_Kabuli_NW_004516097.1_78842  | Ca_kabuli_scaffold | 78842                          | [G/A]       | 1067304826                                 |
| Ca_Kabuli_NW_004516097.1_78864  | Ca_kabuli_scaffold | 78864                          | [C/T]       | 1067304827                                 |
| Ca_Kabuli_NW_004516097.1_78871  | Ca_kabuli_scaffold | 78871                          | [C/G]       | 1067304828                                 |
| Ca_Kabuli_NW_004516097.1_78883  | Ca_kabuli_scaffold | 78883                          | [T/G]       | 1067304829                                 |
| Ca_Kabuli_NW_004516099.1_220971 | Ca_kabuli_scaffold | 220971                         | [G/A]       | 1067304830                                 |
| Ca_Kabuli_NW_004516109.1_22949  | Ca_kabuli_scaffold | 22949                          | [A/C]       | 1067304831                                 |
| Ca_Kabuli_NW_004516109.1_247526 | Ca_kabuli_scaffold | 247526                         | [A/C]       | 1067304832                                 |
| Ca_Kabuli_NW_004516114.1_137132 | Ca_kabuli_scaffold | 137132                         | [C/A]       | 1067304833                                 |
| Ca_Kabuli_NW_004516114.1_137133 | Ca_kabuli_scaffold | 137133                         | [A/G]       | 1067304834                                 |
| Ca_Kabuli_NW_004516114.1_137134 | Ca_kabuli_scaffold | 137134                         | [T/A]       | 1067304835                                 |
| Ca_Kabuli_NW_004516114.1_138239 | Ca_kabuli_scaffold | 138239                         | [A/C]       | 1067304836                                 |
| Ca_Kabuli_NW_004516117.1_183276 | Ca_kabuli_scaffold | 183276                         | [C/T]       | 1067304837                                 |
| Ca_Kabuli_NW_004516119.1_52611  | Ca_kabuli_scaffold | 52611                          | [T/G]       | 1067304838                                 |
| Ca_Kabuli_NW_004516120.1_130103 | Ca_kabuli_scaffold | 130103                         | [T/C]       | 1067304839                                 |
| Ca_Kabuli_NW_004516120.1_196956 | Ca_kabuli_scaffold | 196956                         | [T/G]       | 1067304840                                 |
| Ca_Kabuli_NW_004516120.1_370374 | Ca_kabuli_scaffold | 370374                         | [C/T]       | 1067304841                                 |
| Ca_Kabuli_NW_004516120.1_370559 | Ca_kabuli_scaffold | 370559                         | [C/G]       | 1067304842                                 |
| Ca_Kabuli_NW_004516120.1_370635 | Ca_kabuli_scaffold | 370635                         | [A/G]       | 1067304843                                 |
| Ca_Kabuli_NW_004516120.1_370637 | Ca_kabuli_scaffold | 370637                         | [T/C]       | 1067304844                                 |
| Ca_Kabuli_NW_004516120.1_370639 | Ca_kabuli_scaffold | 370639                         | [T/A]       | 1067304845                                 |
| Ca_Kabuli_NW_004516120.1_370650 | Ca_kabuli_scaffold | 370650                         | [A/C]       | 1067304846                                 |
| Ca_Kabuli_NW_004516123.1_25019  | Ca_kabuli_scaffold | 25019                          | [A/G]       | 1067304847                                 |
| Ca_Kabuli_NW_004516126.1_106230 | Ca_kabuli_scaffold | 106230                         | [A/G]       | 1067304848                                 |

| <b>SNP IDs</b>                  | <b>Chromosomes</b> | <b>Physical positions (bp)</b> | <b>SNPs</b> | <b>NCBI SNPdb accession IDs (NCBI_ss#)</b> |
|---------------------------------|--------------------|--------------------------------|-------------|--------------------------------------------|
| Ca_Kabuli_NW_004516126.1_362149 | Ca_kabuli_scaffold | 362149                         | [G/A]       | 1067304849                                 |
| Ca_Kabuli_NW_004516126.1_362158 | Ca_kabuli_scaffold | 362158                         | [A/G]       | 1067304850                                 |
| Ca_Kabuli_NW_004516126.1_362178 | Ca_kabuli_scaffold | 362178                         | [A/C]       | 1067304851                                 |
| Ca_Kabuli_NW_004516126.1_372294 | Ca_kabuli_scaffold | 372294                         | [T/C]       | 1067304852                                 |
| Ca_Kabuli_NW_004516126.1_372313 | Ca_kabuli_scaffold | 372313                         | [T/G]       | 1067304853                                 |
| Ca_Kabuli_NW_004516126.1_372318 | Ca_kabuli_scaffold | 372318                         | [A/G]       | 1067304854                                 |
| Ca_Kabuli_NW_004516126.1_372982 | Ca_kabuli_scaffold | 372982                         | [A/C]       | 1067304855                                 |
| Ca_Kabuli_NW_004516141.1_2830   | Ca_kabuli_scaffold | 2830                           | [G/A]       | 1067304856                                 |
| Ca_Kabuli_NW_004516141.1_382255 | Ca_kabuli_scaffold | 382255                         | [T/A]       | 1067304857                                 |
| Ca_Kabuli_NW_004516141.1_382388 | Ca_kabuli_scaffold | 382388                         | [G/A]       | 1067304858                                 |
| Ca_Kabuli_NW_004516142.1_7429   | Ca_kabuli_scaffold | 7429                           | [A/T]       | 1067304859                                 |
| Ca_Kabuli_NW_004516145.1_72913  | Ca_kabuli_scaffold | 72913                          | [G/A]       | 1067304860                                 |
| Ca_Kabuli_NW_004516145.1_72918  | Ca_kabuli_scaffold | 72918                          | [C/T]       | 1067304861                                 |
| Ca_Kabuli_NW_004516145.1_72928  | Ca_kabuli_scaffold | 72928                          | [G/C]       | 1067304862                                 |
| Ca_Kabuli_NW_004516145.1_72939  | Ca_kabuli_scaffold | 72939                          | [A/C]       | 1067304863                                 |
| Ca_Kabuli_NW_004516145.1_72953  | Ca_kabuli_scaffold | 72953                          | [A/T]       | 1067304864                                 |
| Ca_Kabuli_NW_004516152.1_16087  | Ca_kabuli_scaffold | 16087                          | [G/A]       | 1067304865                                 |
| Ca_Kabuli_NW_004516152.1_16095  | Ca_kabuli_scaffold | 16095                          | [T/G]       | 1067304866                                 |
| Ca_Kabuli_NW_004516155.1_14191  | Ca_kabuli_scaffold | 14191                          | [A/G]       | 1067304867                                 |
| Ca_Kabuli_NW_004516155.1_14228  | Ca_kabuli_scaffold | 14228                          | [C/T]       | 1067304868                                 |
| Ca_Kabuli_NW_004516156.1_108823 | Ca_kabuli_scaffold | 108823                         | [G/A]       | 1067304869                                 |
| Ca_Kabuli_NW_004516156.1_108825 | Ca_kabuli_scaffold | 108825                         | [C/T]       | 1067304870                                 |
| Ca_Kabuli_NW_004516157.1_31290  | Ca_kabuli_scaffold | 31290                          | [G/A]       | 1067304871                                 |
| Ca_Kabuli_NW_004516157.1_69442  | Ca_kabuli_scaffold | 69442                          | [A/G]       | 1067304872                                 |
| Ca_Kabuli_NW_004516157.1_69445  | Ca_kabuli_scaffold | 69445                          | [A/G]       | 1067304873                                 |
| Ca_Kabuli_NW_004516157.1_231759 | Ca_kabuli_scaffold | 231759                         | [A/C]       | 1067304874                                 |
| Ca_Kabuli_NW_004516157.1_231827 | Ca_kabuli_scaffold | 231827                         | [C/T]       | 1067304875                                 |
| Ca_Kabuli_NW_004516159.1_223453 | Ca_kabuli_scaffold | 223453                         | [A/G]       | 1067304876                                 |
| Ca_Kabuli_NW_004516159.1_279987 | Ca_kabuli_scaffold | 279987                         | [A/G]       | 1067304877                                 |
| Ca_Kabuli_NW_004516159.1_356052 | Ca_kabuli_scaffold | 356052                         | [G/T]       | 1067304878                                 |
| Ca_Kabuli_NW_004516159.1_356092 | Ca_kabuli_scaffold | 356092                         | [A/G]       | 1067304879                                 |
| Ca_Kabuli_NW_004516159.1_356109 | Ca_kabuli_scaffold | 356109                         | [T/C]       | 1067304880                                 |
| Ca_Kabuli_NW_004516160.1_41384  | Ca_kabuli_scaffold | 41384                          | [G/T]       | 1067304881                                 |
| Ca_Kabuli_NW_004516162.1_3037   | Ca_kabuli_scaffold | 3037                           | [G/T]       | 1067304882                                 |

| <b>SNP IDs</b>                  | <b>Chromosomes</b> | <b>Physical positions (bp)</b> | <b>SNPs</b> | <b>NCBI SNPdb accession IDs (NCBI_ss#)</b> |
|---------------------------------|--------------------|--------------------------------|-------------|--------------------------------------------|
| Ca_Kabuli_NW_004516162.1_3055   | Ca_kabuli_scaffold | 3055                           | [A/G]       | 1067304883                                 |
| Ca_Kabuli_NW_004516165.1_102949 | Ca_kabuli_scaffold | 102949                         | [C/A]       | 1067304884                                 |
| Ca_Kabuli_NW_004516165.1_259304 | Ca_kabuli_scaffold | 259304                         | [T/G]       | 1067304885                                 |
| Ca_Kabuli_NW_004516165.1_259396 | Ca_kabuli_scaffold | 259396                         | [G/T]       | 1067304886                                 |
| Ca_Kabuli_NW_004516169.1_360756 | Ca_kabuli_scaffold | 360756                         | [T/C]       | 1067304887                                 |
| Ca_Kabuli_NW_004516171.1_52221  | Ca_kabuli_scaffold | 52221                          | [A/C]       | 1067304888                                 |
| Ca_Kabuli_NW_004516179.1_110755 | Ca_kabuli_scaffold | 110755                         | [T/A]       | 1067304889                                 |
| Ca_Kabuli_NW_004516179.1_110758 | Ca_kabuli_scaffold | 110758                         | [A/G]       | 1067304890                                 |
| Ca_Kabuli_NW_004516179.1_110781 | Ca_kabuli_scaffold | 110781                         | [A/G]       | 1067304891                                 |
| Ca_Kabuli_NW_004516179.1_153720 | Ca_kabuli_scaffold | 153720                         | [A/T]       | 1067304892                                 |
| Ca_Kabuli_NW_004516182.1_129263 | Ca_kabuli_scaffold | 129263                         | [A/G]       | 1067304893                                 |
| Ca_Kabuli_NW_004516182.1_129265 | Ca_kabuli_scaffold | 129265                         | [G/T]       | 1067304894                                 |
| Ca_Kabuli_NW_004516185.1_19878  | Ca_kabuli_scaffold | 19878                          | [A/C]       | 1067304895                                 |
| Ca_Kabuli_NW_004516185.1_19904  | Ca_kabuli_scaffold | 19904                          | [A/G]       | 1067304896                                 |
| Ca_Kabuli_NW_004516185.1_29415  | Ca_kabuli_scaffold | 29415                          | [T/G]       | 1067304897                                 |
| Ca_Kabuli_NW_004516185.1_29432  | Ca_kabuli_scaffold | 29432                          | [A/C]       | 1067304898                                 |
| Ca_Kabuli_NW_004516185.1_81392  | Ca_kabuli_scaffold | 81392                          | [T/G]       | 1067304899                                 |
| Ca_Kabuli_NW_004516185.1_81402  | Ca_kabuli_scaffold | 81402                          | [T/G]       | 1067304900                                 |
| Ca_Kabuli_NW_004516185.1_81445  | Ca_kabuli_scaffold | 81445                          | [A/G]       | 1067304901                                 |
| Ca_Kabuli_NW_004516186.1_34684  | Ca_kabuli_scaffold | 34684                          | [G/A]       | 1067304902                                 |
| Ca_Kabuli_NW_004516186.1_34700  | Ca_kabuli_scaffold | 34700                          | [A/C]       | 1067304903                                 |
| Ca_Kabuli_NW_004516186.1_34708  | Ca_kabuli_scaffold | 34708                          | [G/T]       | 1067304904                                 |
| Ca_Kabuli_NW_004516186.1_197437 | Ca_kabuli_scaffold | 197437                         | [G/T]       | 1067304905                                 |
| Ca_Kabuli_NW_004516186.1_197499 | Ca_kabuli_scaffold | 197499                         | [A/T]       | 1067304906                                 |
| Ca_Kabuli_NW_004516186.1_197525 | Ca_kabuli_scaffold | 197525                         | [G/A]       | 1067304907                                 |
| Ca_Kabuli_NW_004516186.1_197537 | Ca_kabuli_scaffold | 197537                         | [T/A]       | 1067304908                                 |
| Ca_Kabuli_NW_004516186.1_246201 | Ca_kabuli_scaffold | 246201                         | [A/C]       | 1067304909                                 |
| Ca_Kabuli_NW_004516186.1_396019 | Ca_kabuli_scaffold | 396019                         | [T/G]       | 1067304910                                 |
| Ca_Kabuli_NW_004516186.1_465704 | Ca_kabuli_scaffold | 465704                         | [T/C]       | 1067304911                                 |
| Ca_Kabuli_NW_004516186.1_465714 | Ca_kabuli_scaffold | 465714                         | [G/T]       | 1067304912                                 |
| Ca_Kabuli_NW_004516186.1_465722 | Ca_kabuli_scaffold | 465722                         | [G/T]       | 1067304913                                 |
| Ca_Kabuli_NW_004516211.1_28172  | Ca_kabuli_scaffold | 28172                          | [T/G]       | 1067304914                                 |
| Ca_Kabuli_NW_004516211.1_67951  | Ca_kabuli_scaffold | 67951                          | [A/T]       | 1067304915                                 |
| Ca_Kabuli_NW_004516211.1_67961  | Ca_kabuli_scaffold | 67961                          | [C/T]       | 1067304916                                 |

| <b>SNP IDs</b>                  | <b>Chromosomes</b> | <b>Physical positions (bp)</b> | <b>SNPs</b> | <b>NCBI SNPdb accession IDs (NCBI_ss#)</b> |
|---------------------------------|--------------------|--------------------------------|-------------|--------------------------------------------|
| Ca_Kabuli_NW_004516211.1_68001  | Ca_kabuli_scaffold | 68001                          | [A/T]       | 1067304917                                 |
| Ca_Kabuli_NW_004516211.1_68328  | Ca_kabuli_scaffold | 68328                          | [G/A]       | 1067304918                                 |
| Ca_Kabuli_NW_004516211.1_78956  | Ca_kabuli_scaffold | 78956                          | [G/A]       | 1067304919                                 |
| Ca_Kabuli_NW_004516211.1_129326 | Ca_kabuli_scaffold | 129326                         | [G/C]       | 1067304920                                 |
| Ca_Kabuli_NW_004516211.1_138081 | Ca_kabuli_scaffold | 138081                         | [A/C]       | 1067304921                                 |
| Ca_Kabuli_NW_004516211.1_138401 | Ca_kabuli_scaffold | 138401                         | [A/C]       | 1067304922                                 |
| Ca_Kabuli_NW_004516211.1_144585 | Ca_kabuli_scaffold | 144585                         | [A/C]       | 1067304923                                 |
| Ca_Kabuli_NW_004516211.1_174105 | Ca_kabuli_scaffold | 174105                         | [G/T]       | 1067304924                                 |
| Ca_Kabuli_NW_004516211.1_185332 | Ca_kabuli_scaffold | 185332                         | [T/G]       | 1067304925                                 |
| Ca_Kabuli_NW_004516211.1_185425 | Ca_kabuli_scaffold | 185425                         | [T/A]       | 1067304926                                 |
| Ca_Kabuli_NW_004516211.1_205964 | Ca_kabuli_scaffold | 205964                         | [A/C]       | 1067304927                                 |
| Ca_Kabuli_NW_004516211.1_206579 | Ca_kabuli_scaffold | 206579                         | [A/C]       | 1067304928                                 |
| Ca_Kabuli_NW_004516211.1_206672 | Ca_kabuli_scaffold | 206672                         | [A/G]       | 1067304929                                 |
| Ca_Kabuli_NW_004516212.1_100282 | Ca_kabuli_scaffold | 100282                         | [T/G]       | 1067304930                                 |
| Ca_Kabuli_NW_004516212.1_100329 | Ca_kabuli_scaffold | 100329                         | [A/T]       | 1067304931                                 |
| Ca_Kabuli_NW_004516212.1_100375 | Ca_kabuli_scaffold | 100375                         | [T/C]       | 1067304932                                 |
| Ca_Kabuli_NW_004516212.1_100457 | Ca_kabuli_scaffold | 100457                         | [A/G]       | 1067304933                                 |
| Ca_Kabuli_NW_004516212.1_107969 | Ca_kabuli_scaffold | 107969                         | [T/G]       | 1067304934                                 |
| Ca_Kabuli_NW_004516212.1_108825 | Ca_kabuli_scaffold | 108825                         | [T/A]       | 1067304935                                 |
| Ca_Kabuli_NW_004516212.1_108908 | Ca_kabuli_scaffold | 108908                         | [G/T]       | 1067304936                                 |
| Ca_Kabuli_NW_004516212.1_111061 | Ca_kabuli_scaffold | 111061                         | [T/C]       | 1067304937                                 |
| Ca_Kabuli_NW_004516212.1_111084 | Ca_kabuli_scaffold | 111084                         | [A/C]       | 1067304938                                 |
| Ca_Kabuli_NW_004516213.1_39870  | Ca_kabuli_scaffold | 39870                          | [A/C]       | 1067304939                                 |
| Ca_Kabuli_NW_004516213.1_39934  | Ca_kabuli_scaffold | 39934                          | [T/G]       | 1067304940                                 |
| Ca_Kabuli_NW_004516213.1_39943  | Ca_kabuli_scaffold | 39943                          | [C/T]       | 1067304941                                 |
| Ca_Kabuli_NW_004516213.1_86055  | Ca_kabuli_scaffold | 86055                          | [A/C]       | 1067304942                                 |
| Ca_Kabuli_NW_004516213.1_86085  | Ca_kabuli_scaffold | 86085                          | [T/C]       | 1067304943                                 |
| Ca_Kabuli_NW_004516213.1_90401  | Ca_kabuli_scaffold | 90401                          | [C/A]       | 1067304944                                 |
| Ca_Kabuli_NW_004516213.1_90407  | Ca_kabuli_scaffold | 90407                          | [A/T]       | 1067304945                                 |
| Ca_Kabuli_NW_004516213.1_90416  | Ca_kabuli_scaffold | 90416                          | [C/A]       | 1067304946                                 |
| Ca_Kabuli_NW_004516213.1_155289 | Ca_kabuli_scaffold | 155289                         | [G/A]       | 1067304947                                 |
| Ca_Kabuli_NW_004516227.1_295823 | Ca_kabuli_scaffold | 295823                         | [C/T]       | 1067304948                                 |
| Ca_Kabuli_NW_004516230.1_71697  | Ca_kabuli_scaffold | 71697                          | [T/G]       | 1067304949                                 |
| Ca_Kabuli_NW_004516231.1_131705 | Ca_kabuli_scaffold | 131705                         | [A/G]       | 1067304950                                 |

| <b>SNP IDs</b>                  | <b>Chromosomes</b> | <b>Physical positions (bp)</b> | <b>SNPs</b> | <b>NCBI SNPdb accession IDs (NCBI_ss#)</b> |
|---------------------------------|--------------------|--------------------------------|-------------|--------------------------------------------|
| Ca_Kabuli_NW_004516234.1_188769 | Ca_kabuli_scaffold | 188769                         | [C/T]       | 1067304951                                 |
| Ca_Kabuli_NW_004516234.1_265247 | Ca_kabuli_scaffold | 265247                         | [A/C]       | 1067304952                                 |
| Ca_Kabuli_NW_004516235.1_51703  | Ca_kabuli_scaffold | 51703                          | [C/G]       | 1067304953                                 |
| Ca_Kabuli_NW_004516235.1_52687  | Ca_kabuli_scaffold | 52687                          | [C/A]       | 1067304954                                 |
| Ca_Kabuli_NW_004516235.1_52688  | Ca_kabuli_scaffold | 52688                          | [T/G]       | 1067304955                                 |
| Ca_Kabuli_NW_004516235.1_52689  | Ca_kabuli_scaffold | 52689                          | [T/A]       | 1067304956                                 |
| Ca_Kabuli_NW_004516235.1_52707  | Ca_kabuli_scaffold | 52707                          | [A/G]       | 1067304957                                 |
| Ca_Kabuli_NW_004516235.1_62660  | Ca_kabuli_scaffold | 62660                          | [C/T]       | 1067304958                                 |
| Ca_Kabuli_NW_004516240.1_23282  | Ca_kabuli_scaffold | 23282                          | [A/C]       | 1067304959                                 |
| Ca_Kabuli_NW_004516240.1_358416 | Ca_kabuli_scaffold | 358416                         | [T/C]       | 1067304960                                 |
| Ca_Kabuli_NW_004516240.1_358430 | Ca_kabuli_scaffold | 358430                         | [T/C]       | 1067304961                                 |
| Ca_Kabuli_NW_004516243.1_62868  | Ca_kabuli_scaffold | 62868                          | [A/G]       | 1067304962                                 |
| Ca_Kabuli_NW_004516243.1_69495  | Ca_kabuli_scaffold | 69495                          | [G/T]       | 1067304963                                 |
| Ca_Kabuli_NW_004516243.1_114062 | Ca_kabuli_scaffold | 114062                         | [A/G]       | 1067304964                                 |
| Ca_Kabuli_NW_004516244.1_26108  | Ca_kabuli_scaffold | 26108                          | [G/T]       | 1067304965                                 |
| Ca_Kabuli_NW_004516244.1_26113  | Ca_kabuli_scaffold | 26113                          | [C/T]       | 1067304966                                 |
| Ca_Kabuli_NW_004516244.1_26121  | Ca_kabuli_scaffold | 26121                          | [A/C]       | 1067304967                                 |
| Ca_Kabuli_NW_004516244.1_26134  | Ca_kabuli_scaffold | 26134                          | [C/A]       | 1067304968                                 |
| Ca_Kabuli_NW_004516244.1_52694  | Ca_kabuli_scaffold | 52694                          | [A/G]       | 1067304969                                 |
| Ca_Kabuli_NW_004516244.1_52725  | Ca_kabuli_scaffold | 52725                          | [T/C]       | 1067304970                                 |
| Ca_Kabuli_NW_004516244.1_52740  | Ca_kabuli_scaffold | 52740                          | [T/C]       | 1067304971                                 |
| Ca_Kabuli_NW_004516244.1_138204 | Ca_kabuli_scaffold | 138204                         | [T/G]       | 1067304972                                 |
| Ca_Kabuli_NW_004516244.1_144885 | Ca_kabuli_scaffold | 144885                         | [C/T]       | 1067304973                                 |
| Ca_Kabuli_NW_004516244.1_161061 | Ca_kabuli_scaffold | 161061                         | [T/C]       | 1067304974                                 |
| Ca_Kabuli_NW_004516251.1_18559  | Ca_kabuli_scaffold | 18559                          | [T/A]       | 1067304975                                 |
| Ca_Kabuli_NW_004516251.1_40849  | Ca_kabuli_scaffold | 40849                          | [A/C]       | 1067304976                                 |
| Ca_Kabuli_NW_004516257.1_15425  | Ca_kabuli_scaffold | 15425                          | [A/G]       | 1067304977                                 |
| Ca_Kabuli_NW_004516257.1_15429  | Ca_kabuli_scaffold | 15429                          | [C/T]       | 1067304978                                 |
| Ca_Kabuli_NW_004516264.1_11776  | Ca_kabuli_scaffold | 11776                          | [C/T]       | 1067304979                                 |
| Ca_Kabuli_NW_004516264.1_11787  | Ca_kabuli_scaffold | 11787                          | [G/A]       | 1067304980                                 |
| Ca_Kabuli_NW_004516264.1_11819  | Ca_kabuli_scaffold | 11819                          | [C/T]       | 1067304981                                 |
| Ca_Kabuli_NW_004516265.1_165122 | Ca_kabuli_scaffold | 165122                         | [T/C]       | 1067304982                                 |
| Ca_Kabuli_NW_004516266.1_81377  | Ca_kabuli_scaffold | 81377                          | [A/G]       | 1067304983                                 |
| Ca_Kabuli_NW_004516267.1_192902 | Ca_kabuli_scaffold | 192902                         | [T/G]       | 1067304984                                 |

| <b>SNP IDs</b>                  | <b>Chromosomes</b> | <b>Physical positions (bp)</b> | <b>SNPs</b> | <b>NCBI SNPdb accession IDs (NCBI_ss#)</b> |
|---------------------------------|--------------------|--------------------------------|-------------|--------------------------------------------|
| Ca_Kabuli_NW_004516267.1_205028 | Ca_kabuli_scaffold | 205028                         | [T/C]       | 1067304985                                 |
| Ca_Kabuli_NW_004516267.1_205033 | Ca_kabuli_scaffold | 205033                         | [T/G]       | 1067304986                                 |
| Ca_Kabuli_NW_004516267.1_205958 | Ca_kabuli_scaffold | 205958                         | [T/A]       | 1067304987                                 |
| Ca_Kabuli_NW_004516267.1_206008 | Ca_kabuli_scaffold | 206008                         | [A/T]       | 1067304988                                 |
| Ca_Kabuli_NW_004516267.1_206040 | Ca_kabuli_scaffold | 206040                         | [A/G]       | 1067304989                                 |
| Ca_Kabuli_NW_004516267.1_206058 | Ca_kabuli_scaffold | 206058                         | [A/G]       | 1067304990                                 |
| Ca_Kabuli_NW_004516267.1_206060 | Ca_kabuli_scaffold | 206060                         | [T/G]       | 1067304991                                 |
| Ca_Kabuli_NW_004516267.1_275489 | Ca_kabuli_scaffold | 275489                         | [G/T]       | 1067304992                                 |
| Ca_Kabuli_NW_004516267.1_275493 | Ca_kabuli_scaffold | 275493                         | [A/T]       | 1067304993                                 |
| Ca_Kabuli_NW_004516267.1_295864 | Ca_kabuli_scaffold | 295864                         | [G/T]       | 1067304994                                 |
| Ca_Kabuli_NW_004516267.1_453871 | Ca_kabuli_scaffold | 453871                         | [T/C]       | 1067304995                                 |
| Ca_Kabuli_NW_004516267.1_466233 | Ca_kabuli_scaffold | 466233                         | [A/G]       | 1067304996                                 |
| Ca_Kabuli_NW_004516267.1_466262 | Ca_kabuli_scaffold | 466262                         | [A/T]       | 1067304997                                 |
| Ca_Kabuli_NW_004516267.1_466354 | Ca_kabuli_scaffold | 466354                         | [A/G]       | 1067304998                                 |
| Ca_Kabuli_NW_004516267.1_471762 | Ca_kabuli_scaffold | 471762                         | [A/C]       | 1067304999                                 |
| Ca_Kabuli_NW_004516267.1_471801 | Ca_kabuli_scaffold | 471801                         | [C/G]       | 1067305000                                 |
| Ca_Kabuli_NW_004516267.1_471808 | Ca_kabuli_scaffold | 471808                         | [A/T]       | 1067305001                                 |
| Ca_Kabuli_NW_004516270.1_317391 | Ca_kabuli_scaffold | 317391                         | [G/A]       | 1067305002                                 |
| Ca_Kabuli_NW_004516270.1_456454 | Ca_kabuli_scaffold | 456454                         | [G/A]       | 1067305003                                 |
| Ca_Kabuli_NW_004516277.1_235785 | Ca_kabuli_scaffold | 235785                         | [A/G]       | 1067305004                                 |
| Ca_Kabuli_NW_004516280.1_129166 | Ca_kabuli_scaffold | 129166                         | [T/C]       | 1067305005                                 |
| Ca_Kabuli_NW_004516280.1_134737 | Ca_kabuli_scaffold | 134737                         | [A/C]       | 1067305006                                 |
| Ca_Kabuli_NW_004516284.1_212420 | Ca_kabuli_scaffold | 212420                         | [A/C]       | 1067305007                                 |
| Ca_Kabuli_NW_004516284.1_212423 | Ca_kabuli_scaffold | 212423                         | [A/C]       | 1067305008                                 |
| Ca_Kabuli_NW_004516288.1_21076  | Ca_kabuli_scaffold | 21076                          | [T/C]       | 1067305009                                 |
| Ca_Kabuli_NW_004516288.1_21087  | Ca_kabuli_scaffold | 21087                          | [T/G]       | 1067305010                                 |
| Ca_Kabuli_NW_004516293.1_42329  | Ca_kabuli_scaffold | 42329                          | [T/C]       | 1067305011                                 |
| Ca_Kabuli_NW_004516296.1_20765  | Ca_kabuli_scaffold | 20765                          | [G/T]       | 1067305012                                 |
| Ca_Kabuli_NW_004516296.1_21718  | Ca_kabuli_scaffold | 21718                          | [T/C]       | 1067305013                                 |
| Ca_Kabuli_NW_004516296.1_21742  | Ca_kabuli_scaffold | 21742                          | [A/T]       | 1067305014                                 |
| Ca_Kabuli_NW_004516296.1_21951  | Ca_kabuli_scaffold | 21951                          | [T/G]       | 1067305015                                 |
| Ca_Kabuli_NW_004516296.1_22585  | Ca_kabuli_scaffold | 22585                          | [T/G]       | 1067305016                                 |
| Ca_Kabuli_NW_004516296.1_22590  | Ca_kabuli_scaffold | 22590                          | [T/G]       | 1067305017                                 |
| Ca_Kabuli_NW_004516296.1_22732  | Ca_kabuli_scaffold | 22732                          | [G/T]       | 1067305018                                 |

| <b>SNP IDs</b>                  | <b>Chromosomes</b> | <b>Physical positions (bp)</b> | <b>SNPs</b> | <b>NCBI SNPdb accession IDs (NCBI_ss#)</b> |
|---------------------------------|--------------------|--------------------------------|-------------|--------------------------------------------|
| Ca_Kabuli_NW_004516296.1_23613  | Ca_kabuli_scaffold | 23613                          | [A/T]       | 1067305019                                 |
| Ca_Kabuli_NW_004516296.1_23646  | Ca_kabuli_scaffold | 23646                          | [A/G]       | 1067305020                                 |
| Ca_Kabuli_NW_004516296.1_28461  | Ca_kabuli_scaffold | 28461                          | [C/T]       | 1067305021                                 |
| Ca_Kabuli_NW_004516300.1_97230  | Ca_kabuli_scaffold | 97230                          | [A/C]       | 1067305022                                 |
| Ca_Kabuli_NW_004516300.1_97243  | Ca_kabuli_scaffold | 97243                          | [A/T]       | 1067305023                                 |
| Ca_Kabuli_NW_004516300.1_97290  | Ca_kabuli_scaffold | 97290                          | [T/G]       | 1067305024                                 |
| Ca_Kabuli_NW_004516300.1_97310  | Ca_kabuli_scaffold | 97310                          | [A/C]       | 1067305025                                 |
| Ca_Kabuli_NW_004516300.1_97323  | Ca_kabuli_scaffold | 97323                          | [A/G]       | 1067305026                                 |
| Ca_Kabuli_NW_004516300.1_98645  | Ca_kabuli_scaffold | 98645                          | [C/T]       | 1067305027                                 |
| Ca_Kabuli_NW_004516300.1_106864 | Ca_kabuli_scaffold | 106864                         | [T/G]       | 1067305028                                 |
| Ca_Kabuli_NW_004516300.1_106865 | Ca_kabuli_scaffold | 106865                         | [G/T]       | 1067305029                                 |
| Ca_Kabuli_NW_004516300.1_106866 | Ca_kabuli_scaffold | 106866                         | [G/C]       | 1067305030                                 |
| Ca_Kabuli_NW_004516300.1_106867 | Ca_kabuli_scaffold | 106867                         | [C/T]       | 1067305031                                 |
| Ca_Kabuli_NW_004516300.1_106868 | Ca_kabuli_scaffold | 106868                         | [C/T]       | 1067305032                                 |
| Ca_Kabuli_NW_004516302.1_77084  | Ca_kabuli_scaffold | 77084                          | [T/G]       | 1067305033                                 |
| Ca_Kabuli_NW_004516309.1_18523  | Ca_kabuli_scaffold | 18523                          | [C/G]       | 1067305034                                 |
| Ca_Kabuli_NW_004516312.1_3364   | Ca_kabuli_scaffold | 3364                           | [G/T]       | 1067305035                                 |
| Ca_Kabuli_NW_004516312.1_3397   | Ca_kabuli_scaffold | 3397                           | [G/A]       | 1067305036                                 |
| Ca_Kabuli_NW_004516316.1_165968 | Ca_kabuli_scaffold | 165968                         | [T/C]       | 1067305037                                 |
| Ca_Kabuli_NW_004516316.1_165974 | Ca_kabuli_scaffold | 165974                         | [T/C]       | 1067305038                                 |
| Ca_Kabuli_NW_004516316.1_224151 | Ca_kabuli_scaffold | 224151                         | [A/C]       | 1067305039                                 |
| Ca_Kabuli_NW_004516330.1_169260 | Ca_kabuli_scaffold | 169260                         | [T/C]       | 1067305040                                 |
| Ca_Kabuli_NW_004516330.1_235258 | Ca_kabuli_scaffold | 235258                         | [T/G]       | 1067305041                                 |
| Ca_Kabuli_NW_004516330.1_436930 | Ca_kabuli_scaffold | 436930                         | [A/C]       | 1067305042                                 |
| Ca_Kabuli_NW_004516330.1_491166 | Ca_kabuli_scaffold | 491166                         | [T/C]       | 1067305043                                 |
| Ca_Kabuli_NW_004516330.1_491172 | Ca_kabuli_scaffold | 491172                         | [T/G]       | 1067305044                                 |
| Ca_Kabuli_NW_004516330.1_491190 | Ca_kabuli_scaffold | 491190                         | [A/C]       | 1067305045                                 |
| Ca_Kabuli_NW_004516330.1_491204 | Ca_kabuli_scaffold | 491204                         | [C/G]       | 1067305046                                 |
| Ca_Kabuli_NW_004516330.1_492368 | Ca_kabuli_scaffold | 492368                         | [T/C]       | 1067305047                                 |
| Ca_Kabuli_NW_004516330.1_492384 | Ca_kabuli_scaffold | 492384                         | [A/G]       | 1067305048                                 |
| Ca_Kabuli_NW_004516330.1_492398 | Ca_kabuli_scaffold | 492398                         | [A/C]       | 1067305049                                 |
| Ca_Kabuli_NW_004516330.1_497212 | Ca_kabuli_scaffold | 497212                         | [T/C]       | 1067305050                                 |
| Ca_Kabuli_NW_004516330.1_497269 | Ca_kabuli_scaffold | 497269                         | [A/C]       | 1067305051                                 |
| Ca_Kabuli_NW_004516330.1_642807 | Ca_kabuli_scaffold | 642807                         | [T/C]       | 1067305052                                 |

| <b>SNP IDs</b>                  | <b>Chromosomes</b> | <b>Physical positions (bp)</b> | <b>SNPs</b> | <b>NCBI SNPdb accession IDs (NCBI_ss#)</b> |
|---------------------------------|--------------------|--------------------------------|-------------|--------------------------------------------|
| Ca_Kabuli_NW_004516330.1_642850 | Ca_kabuli_scaffold | 642850                         | [A/C]       | 1067305053                                 |
| Ca_Kabuli_NW_004516330.1_642859 | Ca_kabuli_scaffold | 642859                         | [A/C]       | 1067305054                                 |
| Ca_Kabuli_NW_004516330.1_644893 | Ca_kabuli_scaffold | 644893                         | [A/C]       | 1067305055                                 |
| Ca_Kabuli_NW_004516344.1_251996 | Ca_kabuli_scaffold | 251996                         | [A/G]       | 1067305056                                 |
| Ca_Kabuli_NW_004516344.1_251998 | Ca_kabuli_scaffold | 251998                         | [A/G]       | 1067305057                                 |
| Ca_Kabuli_NW_004516344.1_252044 | Ca_kabuli_scaffold | 252044                         | [A/C]       | 1067305058                                 |
| Ca_Kabuli_NW_004516344.1_252629 | Ca_kabuli_scaffold | 252629                         | [T/G]       | 1067305059                                 |
| Ca_Kabuli_NW_004516344.1_252652 | Ca_kabuli_scaffold | 252652                         | [A/G]       | 1067305060                                 |
| Ca_Kabuli_NW_004516344.1_252659 | Ca_kabuli_scaffold | 252659                         | [T/G]       | 1067305061                                 |
| Ca_Kabuli_NW_004516344.1_254068 | Ca_kabuli_scaffold | 254068                         | [A/G]       | 1067305062                                 |
| Ca_Kabuli_NW_004516344.1_254074 | Ca_kabuli_scaffold | 254074                         | [A/C]       | 1067305063                                 |
| Ca_Kabuli_NW_004516344.1_254096 | Ca_kabuli_scaffold | 254096                         | [A/G]       | 1067305064                                 |
| Ca_Kabuli_NW_004516344.1_256575 | Ca_kabuli_scaffold | 256575                         | [C/A]       | 1067305065                                 |
| Ca_Kabuli_NW_004516344.1_256577 | Ca_kabuli_scaffold | 256577                         | [G/A]       | 1067305066                                 |
| Ca_Kabuli_NW_004516344.1_256589 | Ca_kabuli_scaffold | 256589                         | [C/T]       | 1067305067                                 |
| Ca_Kabuli_NW_004516354.1_16355  | Ca_kabuli_scaffold | 16355                          | [T/A]       | 1067305068                                 |
| Ca_Kabuli_NW_004516354.1_90013  | Ca_kabuli_scaffold | 90013                          | [G/T]       | 1067305069                                 |
| Ca_Kabuli_NW_004516358.1_51557  | Ca_kabuli_scaffold | 51557                          | [T/A]       | 1067305070                                 |
| Ca_Kabuli_NW_004516358.1_51573  | Ca_kabuli_scaffold | 51573                          | [T/A]       | 1067305071                                 |
| Ca_Kabuli_NW_004516358.1_89948  | Ca_kabuli_scaffold | 89948                          | [T/G]       | 1067305072                                 |
| Ca_Kabuli_NW_004516358.1_92991  | Ca_kabuli_scaffold | 92991                          | [A/C]       | 1067305073                                 |
| Ca_Kabuli_NW_004516358.1_113321 | Ca_kabuli_scaffold | 113321                         | [T/G]       | 1067305074                                 |
| Ca_Kabuli_NW_004516358.1_303408 | Ca_kabuli_scaffold | 303408                         | [A/G]       | 1067305075                                 |
| Ca_Kabuli_NW_004516358.1_303409 | Ca_kabuli_scaffold | 303409                         | [C/T]       | 1067305076                                 |
| Ca_Kabuli_NW_004516358.1_303410 | Ca_kabuli_scaffold | 303410                         | [C/A]       | 1067305077                                 |
| Ca_Kabuli_NW_004516358.1_342717 | Ca_kabuli_scaffold | 342717                         | [C/G]       | 1067305078                                 |
| Ca_Kabuli_NW_004516358.1_342718 | Ca_kabuli_scaffold | 342718                         | [T/A]       | 1067305079                                 |
| Ca_Kabuli_NW_004516358.1_406705 | Ca_kabuli_scaffold | 406705                         | [C/A]       | 1067305080                                 |
| Ca_Kabuli_NW_004516358.1_406706 | Ca_kabuli_scaffold | 406706                         | [T/G]       | 1067305081                                 |
| Ca_Kabuli_NW_004516358.1_430362 | Ca_kabuli_scaffold | 430362                         | [A/C]       | 1067305082                                 |
| Ca_Kabuli_NW_004516358.1_430408 | Ca_kabuli_scaffold | 430408                         | [A/G]       | 1067305083                                 |
| Ca_Kabuli_NW_004516358.1_430426 | Ca_kabuli_scaffold | 430426                         | [A/G]       | 1067305084                                 |
| Ca_Kabuli_NW_004516358.1_430431 | Ca_kabuli_scaffold | 430431                         | [T/G]       | 1067305085                                 |
| Ca_Kabuli_NW_004516358.1_439402 | Ca_kabuli_scaffold | 439402                         | [T/A]       | 1067305086                                 |



| <b>SNP IDs</b>                  | <b>Chromosomes</b> | <b>Physical positions (bp)</b> | <b>SNPs</b> | <b>NCBI SNPdb accession IDs (NCBI_ss#)</b> |
|---------------------------------|--------------------|--------------------------------|-------------|--------------------------------------------|
| Ca_Kabuli_NW_004516358.1_457913 | Ca_kabuli_scaffold | 457913                         | [A/C]       | 1067305087                                 |
| Ca_Kabuli_NW_004516358.1_577902 | Ca_kabuli_scaffold | 577902                         | [T/G]       | 1067305088                                 |
| Ca_Kabuli_NW_004516360.1_70241  | Ca_kabuli_scaffold | 70241                          | [T/A]       | 1067305089                                 |
| Ca_Kabuli_NW_004516361.1_128669 | Ca_kabuli_scaffold | 128669                         | [T/G]       | 1067305090                                 |
| Ca_Kabuli_NW_004516363.1_131866 | Ca_kabuli_scaffold | 131866                         | [C/T]       | 1067305091                                 |
| Ca_Kabuli_NW_004516365.1_318328 | Ca_kabuli_scaffold | 318328                         | [C/A]       | 1067305092                                 |
| Ca_Kabuli_NW_004516366.1_173366 | Ca_kabuli_scaffold | 173366                         | [A/T]       | 1067305093                                 |
| Ca_Kabuli_NW_004516366.1_174360 | Ca_kabuli_scaffold | 174360                         | [A/G]       | 1067305094                                 |
| Ca_Kabuli_NW_004516370.1_141233 | Ca_kabuli_scaffold | 141233                         | [C/T]       | 1067305095                                 |
| Ca_Kabuli_NW_004516370.1_141254 | Ca_kabuli_scaffold | 141254                         | [A/G]       | 1067305096                                 |
| Ca_Kabuli_NW_004516371.1_63620  | Ca_kabuli_scaffold | 63620                          | [C/T]       | 1067305097                                 |
| Ca_Kabuli_NW_004516371.1_63662  | Ca_kabuli_scaffold | 63662                          | [T/G]       | 1067305098                                 |
| Ca_Kabuli_NW_004516371.1_63669  | Ca_kabuli_scaffold | 63669                          | [C/T]       | 1067305099                                 |
| Ca_Kabuli_NW_004516371.1_63671  | Ca_kabuli_scaffold | 63671                          | [C/T]       | 1067305100                                 |
| Ca_Kabuli_NW_004516371.1_63703  | Ca_kabuli_scaffold | 63703                          | [T/C]       | 1067305101                                 |
| Ca_Kabuli_NW_004516373.1_142671 | Ca_kabuli_scaffold | 142671                         | [T/G]       | 1067305102                                 |
| Ca_Kabuli_NW_004516373.1_144885 | Ca_kabuli_scaffold | 144885                         | [C/A]       | 1067305103                                 |
| Ca_Kabuli_NW_004516373.1_147299 | Ca_kabuli_scaffold | 147299                         | [T/G]       | 1067305104                                 |
| Ca_Kabuli_NW_004516373.1_147319 | Ca_kabuli_scaffold | 147319                         | [T/G]       | 1067305105                                 |
| Ca_Kabuli_NW_004516373.1_147324 | Ca_kabuli_scaffold | 147324                         | [A/C]       | 1067305106                                 |
| Ca_Kabuli_NW_004516373.1_148636 | Ca_kabuli_scaffold | 148636                         | [A/C]       | 1067305107                                 |
| Ca_Kabuli_NW_004516373.1_148947 | Ca_kabuli_scaffold | 148947                         | [G/T]       | 1067305108                                 |
| Ca_Kabuli_NW_004516373.1_152195 | Ca_kabuli_scaffold | 152195                         | [T/C]       | 1067305109                                 |
| Ca_Kabuli_NW_004516373.1_152233 | Ca_kabuli_scaffold | 152233                         | [A/G]       | 1067305110                                 |
| Ca_Kabuli_NW_004516373.1_152265 | Ca_kabuli_scaffold | 152265                         | [T/C]       | 1067305111                                 |
| Ca_Kabuli_NW_004516373.1_152307 | Ca_kabuli_scaffold | 152307                         | [T/A]       | 1067305112                                 |
| Ca_Kabuli_NW_004516375.1_70680  | Ca_kabuli_scaffold | 70680                          | [T/C]       | 1067305113                                 |
| Ca_Kabuli_NW_004516375.1_70714  | Ca_kabuli_scaffold | 70714                          | [A/G]       | 1067305114                                 |
| Ca_Kabuli_NW_004516375.1_70731  | Ca_kabuli_scaffold | 70731                          | [T/C]       | 1067305115                                 |
| Ca_Kabuli_NW_004516375.1_214087 | Ca_kabuli_scaffold | 214087                         | [T/G]       | 1067305116                                 |
| Ca_Kabuli_NW_004516375.1_214191 | Ca_kabuli_scaffold | 214191                         | [T/G]       | 1067305117                                 |
| Ca_Kabuli_NW_004516375.1_214208 | Ca_kabuli_scaffold | 214208                         | [A/G]       | 1067305118                                 |
| Ca_Kabuli_NW_004516375.1_214283 | Ca_kabuli_scaffold | 214283                         | [A/G]       | 1067305119                                 |
| Ca_Kabuli_NW_004516375.1_221952 | Ca_kabuli_scaffold | 221952                         | [C/A]       | 1067305120                                 |

| <b>SNP IDs</b>                  | <b>Chromosomes</b> | <b>Physical positions (bp)</b> | <b>SNPs</b> | <b>NCBI SNPdb accession IDs (NCBI_ss#)</b> |
|---------------------------------|--------------------|--------------------------------|-------------|--------------------------------------------|
| Ca_Kabuli_NW_004516375.1_221984 | Ca_kabuli_scaffold | 221984                         | [A/C]       | 1067305121                                 |
| Ca_Kabuli_NW_004516375.1_222535 | Ca_kabuli_scaffold | 222535                         | [A/C]       | 1067305122                                 |
| Ca_Kabuli_NW_004516375.1_240787 | Ca_kabuli_scaffold | 240787                         | [A/G]       | 1067305123                                 |
| Ca_Kabuli_NW_004516375.1_240798 | Ca_kabuli_scaffold | 240798                         | [T/C]       | 1067305124                                 |
| Ca_Kabuli_NW_004516375.1_270720 | Ca_kabuli_scaffold | 270720                         | [T/A]       | 1067305125                                 |
| Ca_Kabuli_NW_004516375.1_270749 | Ca_kabuli_scaffold | 270749                         | [T/C]       | 1067305126                                 |
| Ca_Kabuli_NW_004516391.1_11099  | Ca_kabuli_scaffold | 11099                          | [C/A]       | 1067305127                                 |
| Ca_Kabuli_NW_004516391.1_11108  | Ca_kabuli_scaffold | 11108                          | [C/A]       | 1067305128                                 |
| Ca_Kabuli_NW_004516391.1_11115  | Ca_kabuli_scaffold | 11115                          | [G/T]       | 1067305129                                 |
| Ca_Kabuli_NW_004516391.1_11144  | Ca_kabuli_scaffold | 11144                          | [T/A]       | 1067305130                                 |
| Ca_Kabuli_NW_004516391.1_33746  | Ca_kabuli_scaffold | 33746                          | [A/T]       | 1067305131                                 |
| Ca_Kabuli_NW_004516398.1_1650   | Ca_kabuli_scaffold | 1650                           | [A/G]       | 1067305132                                 |
| Ca_Kabuli_NW_004516399.1_6852   | Ca_kabuli_scaffold | 6852                           | [C/T]       | 1067305133                                 |
| Ca_Kabuli_NW_004516402.1_58074  | Ca_kabuli_scaffold | 58074                          | [T/C]       | 1067305134                                 |
| Ca_Kabuli_NW_004516409.1_6197   | Ca_kabuli_scaffold | 6197                           | [T/C]       | 1067305135                                 |
| Ca_Kabuli_NW_004516409.1_6199   | Ca_kabuli_scaffold | 6199                           | [A/G]       | 1067305136                                 |
| Ca_Kabuli_NW_004516409.1_6208   | Ca_kabuli_scaffold | 6208                           | [T/G]       | 1067305137                                 |
| Ca_Kabuli_NW_004516409.1_6211   | Ca_kabuli_scaffold | 6211                           | [T/G]       | 1067305138                                 |
| Ca_Kabuli_NW_004516409.1_6229   | Ca_kabuli_scaffold | 6229                           | [A/C]       | 1067305139                                 |
| Ca_Kabuli_NW_004516409.1_6271   | Ca_kabuli_scaffold | 6271                           | [A/G]       | 1067305140                                 |
| Ca_Kabuli_NW_004516409.1_87275  | Ca_kabuli_scaffold | 87275                          | [G/A]       | 1067305141                                 |
| Ca_Kabuli_NW_004516409.1_99910  | Ca_kabuli_scaffold | 99910                          | [A/C]       | 1067305142                                 |
| Ca_Kabuli_NW_004516409.1_100684 | Ca_kabuli_scaffold | 100684                         | [T/C]       | 1067305143                                 |
| Ca_Kabuli_NW_004516411.1_7624   | Ca_kabuli_scaffold | 7624                           | [T/C]       | 1067305144                                 |
| Ca_Kabuli_NW_004516417.1_341416 | Ca_kabuli_scaffold | 341416                         | [T/A]       | 1067305145                                 |
| Ca_Kabuli_NW_004516417.1_360480 | Ca_kabuli_scaffold | 360480                         | [T/A]       | 1067305146                                 |
| Ca_Kabuli_NW_004516417.1_360483 | Ca_kabuli_scaffold | 360483                         | [T/C]       | 1067305147                                 |
| Ca_Kabuli_NW_004516417.1_360521 | Ca_kabuli_scaffold | 360521                         | [T/C]       | 1067305148                                 |
| Ca_Kabuli_NW_004516417.1_360532 | Ca_kabuli_scaffold | 360532                         | [A/T]       | 1067305149                                 |
| Ca_Kabuli_NW_004516417.1_360585 | Ca_kabuli_scaffold | 360585                         | [A/G]       | 1067305150                                 |
| Ca_Kabuli_NW_004516417.1_374016 | Ca_kabuli_scaffold | 374016                         | [A/T]       | 1067305151                                 |
| Ca_Kabuli_NW_004516417.1_374058 | Ca_kabuli_scaffold | 374058                         | [A/C]       | 1067305152                                 |
| Ca_Kabuli_NW_004516417.1_374099 | Ca_kabuli_scaffold | 374099                         | [T/C]       | 1067305153                                 |
| Ca_Kabuli_NW_004516417.1_374105 | Ca_kabuli_scaffold | 374105                         | [A/G]       | 1067305154                                 |

| <b>SNP IDs</b>                  | <b>Chromosomes</b> | <b>Physical positions (bp)</b> | <b>SNPs</b> | <b>NCBI SNPdb accession IDs (NCBI_ss#)</b> |
|---------------------------------|--------------------|--------------------------------|-------------|--------------------------------------------|
| Ca_Kabuli_NW_004516422.1_4502   | Ca_kabuli_scaffold | 4502                           | [A/T]       | 1067305155                                 |
| Ca_Kabuli_NW_004516423.1_55085  | Ca_kabuli_scaffold | 55085                          | [A/G]       | 1067305156                                 |
| Ca_Kabuli_NW_004516435.1_128537 | Ca_kabuli_scaffold | 128537                         | [T/A]       | 1067305157                                 |
| Ca_Kabuli_NW_004516455.1_52161  | Ca_kabuli_scaffold | 52161                          | [C/A]       | 1067305158                                 |
| Ca_Kabuli_NW_004516455.1_96321  | Ca_kabuli_scaffold | 96321                          | [T/A]       | 1067305159                                 |
| Ca_Kabuli_NW_004516455.1_96322  | Ca_kabuli_scaffold | 96322                          | [C/T]       | 1067305160                                 |
| Ca_Kabuli_NW_004516455.1_96323  | Ca_kabuli_scaffold | 96323                          | [G/C]       | 1067305161                                 |
| Ca_Kabuli_NW_004516455.1_96324  | Ca_kabuli_scaffold | 96324                          | [G/T]       | 1067305162                                 |
| Ca_Kabuli_NW_004516455.1_178179 | Ca_kabuli_scaffold | 178179                         | [T/A]       | 1067305163                                 |
| Ca_Kabuli_NW_004516455.1_178248 | Ca_kabuli_scaffold | 178248                         | [A/G]       | 1067305164                                 |
| Ca_Kabuli_NW_004516455.1_324304 | Ca_kabuli_scaffold | 324304                         | [G/A]       | 1067305165                                 |
| Ca_Kabuli_NW_004516455.1_330789 | Ca_kabuli_scaffold | 330789                         | [A/T]       | 1067305166                                 |
| Ca_Kabuli_NW_004516455.1_330827 | Ca_kabuli_scaffold | 330827                         | [A/T]       | 1067305167                                 |
| Ca_Kabuli_NW_004516459.1_32523  | Ca_kabuli_scaffold | 32523                          | [T/A]       | 1067305168                                 |
| Ca_Kabuli_NW_004516459.1_32535  | Ca_kabuli_scaffold | 32535                          | [T/A]       | 1067305169                                 |
| Ca_Kabuli_NW_004516459.1_32769  | Ca_kabuli_scaffold | 32769                          | [T/C]       | 1067305170                                 |
| Ca_Kabuli_NW_004516459.1_33582  | Ca_kabuli_scaffold | 33582                          | [T/A]       | 1067305171                                 |
| Ca_Kabuli_NW_004516461.1_5322   | Ca_kabuli_scaffold | 5322                           | [C/T]       | 1067305172                                 |
| Ca_Kabuli_NW_004516463.1_1014   | Ca_kabuli_scaffold | 1014                           | [A/C]       | 1067305173                                 |
| Ca_Kabuli_NW_004516471.1_70503  | Ca_kabuli_scaffold | 70503                          | [C/A]       | 1067305174                                 |
| Ca_Kabuli_NW_004516471.1_70506  | Ca_kabuli_scaffold | 70506                          | [G/A]       | 1067305175                                 |
| Ca_Kabuli_NW_004516471.1_70526  | Ca_kabuli_scaffold | 70526                          | [T/C]       | 1067305176                                 |
| Ca_Kabuli_NW_004516471.1_70535  | Ca_kabuli_scaffold | 70535                          | [G/A]       | 1067305177                                 |
| Ca_Kabuli_NW_004516471.1_70544  | Ca_kabuli_scaffold | 70544                          | [T/A]       | 1067305178                                 |
| Ca_Kabuli_NW_004516471.1_70549  | Ca_kabuli_scaffold | 70549                          | [G/A]       | 1067305179                                 |
| Ca_Kabuli_NW_004516472.1_453069 | Ca_kabuli_scaffold | 453069                         | [A/C]       | 1067305180                                 |
| Ca_Kabuli_NW_004516474.1_46904  | Ca_kabuli_scaffold | 46904                          | [T/C]       | 1067305181                                 |
| Ca_Kabuli_NW_004516474.1_46923  | Ca_kabuli_scaffold | 46923                          | [A/C]       | 1067305182                                 |
| Ca_Kabuli_NW_004516474.1_86949  | Ca_kabuli_scaffold | 86949                          | [T/C]       | 1067305183                                 |
| Ca_Kabuli_NW_004516474.1_86981  | Ca_kabuli_scaffold | 86981                          | [G/A]       | 1067305184                                 |
| Ca_Kabuli_NW_004516474.1_87137  | Ca_kabuli_scaffold | 87137                          | [G/T]       | 1067305185                                 |
| Ca_Kabuli_NW_004516483.1_85047  | Ca_kabuli_scaffold | 85047                          | [T/C]       | 1067305186                                 |
| Ca_Kabuli_NW_004516483.1_89990  | Ca_kabuli_scaffold | 89990                          | [T/C]       | 1067305187                                 |
| Ca_Kabuli_NW_004516483.1_90027  | Ca_kabuli_scaffold | 90027                          | [A/G]       | 1067305188                                 |

| <b>SNP IDs</b>                  | <b>Chromosomes</b> | <b>Physical positions (bp)</b> | <b>SNPs</b> | <b>NCBI SNPdb accession IDs (NCBI_ss#)</b> |
|---------------------------------|--------------------|--------------------------------|-------------|--------------------------------------------|
| Ca_Kabuli_NW_004516485.1_7846   | Ca_kabuli_scaffold | 7846                           | [A/C]       | 1067305189                                 |
| Ca_Kabuli_NW_004516514.1_71597  | Ca_kabuli_scaffold | 71597                          | [A/T]       | 1067305190                                 |
| Ca_Kabuli_NW_004516514.1_71620  | Ca_kabuli_scaffold | 71620                          | [T/A]       | 1067305191                                 |
| Ca_Kabuli_NW_004516514.1_75766  | Ca_kabuli_scaffold | 75766                          | [T/A]       | 1067305192                                 |
| Ca_Kabuli_NW_004516514.1_75785  | Ca_kabuli_scaffold | 75785                          | [A/G]       | 1067305193                                 |
| Ca_Kabuli_NW_004516521.1_62751  | Ca_kabuli_scaffold | 62751                          | [C/T]       | 1067305194                                 |
| Ca_Kabuli_NW_004516521.1_62775  | Ca_kabuli_scaffold | 62775                          | [T/C]       | 1067305195                                 |
| Ca_Kabuli_NW_004516521.1_62778  | Ca_kabuli_scaffold | 62778                          | [T/A]       | 1067305196                                 |
| Ca_Kabuli_NW_004516521.1_133056 | Ca_kabuli_scaffold | 133056                         | [A/G]       | 1067305197                                 |
| Ca_Kabuli_NW_004516521.1_133107 | Ca_kabuli_scaffold | 133107                         | [C/T]       | 1067305198                                 |
| Ca_Kabuli_NW_004516525.1_615    | Ca_kabuli_scaffold | 615                            | [A/T]       | 1067305199                                 |
| Ca_Kabuli_NW_004516525.1_618    | Ca_kabuli_scaffold | 618                            | [G/A]       | 1067305200                                 |
| Ca_Kabuli_NW_004516525.1_623    | Ca_kabuli_scaffold | 623                            | [T/C]       | 1067305201                                 |
| Ca_Kabuli_NW_004516526.1_63185  | Ca_kabuli_scaffold | 63185                          | [G/A]       | 1067305202                                 |
| Ca_Kabuli_NW_004516526.1_63237  | Ca_kabuli_scaffold | 63237                          | [T/C]       | 1067305203                                 |
| Ca_Kabuli_NW_004516528.1_55699  | Ca_kabuli_scaffold | 55699                          | [A/C]       | 1067305204                                 |
| Ca_Kabuli_NW_004516528.1_211511 | Ca_kabuli_scaffold | 211511                         | [T/C]       | 1067305205                                 |
| Ca_Kabuli_NW_004516528.1_211512 | Ca_kabuli_scaffold | 211512                         | [G/T]       | 1067305206                                 |
| Ca_Kabuli_NW_004516528.1_211548 | Ca_kabuli_scaffold | 211548                         | [A/C]       | 1067305207                                 |
| Ca_Kabuli_NW_004516528.1_244118 | Ca_kabuli_scaffold | 244118                         | [T/C]       | 1067305208                                 |
| Ca_Kabuli_NW_004516528.1_315994 | Ca_kabuli_scaffold | 315994                         | [A/C]       | 1067305209                                 |
| Ca_Kabuli_NW_004516528.1_316037 | Ca_kabuli_scaffold | 316037                         | [G/A]       | 1067305210                                 |
| Ca_Kabuli_NW_004516528.1_398892 | Ca_kabuli_scaffold | 398892                         | [T/C]       | 1067305211                                 |
| Ca_Kabuli_NW_004516528.1_398950 | Ca_kabuli_scaffold | 398950                         | [A/G]       | 1067305212                                 |
| Ca_Kabuli_NW_004516528.1_398960 | Ca_kabuli_scaffold | 398960                         | [A/G]       | 1067305213                                 |
| Ca_Kabuli_NW_004516528.1_404196 | Ca_kabuli_scaffold | 404196                         | [G/A]       | 1067305214                                 |
| Ca_Kabuli_NW_004516528.1_408211 | Ca_kabuli_scaffold | 408211                         | [A/C]       | 1067305215                                 |
| Ca_Kabuli_NW_004516528.1_409760 | Ca_kabuli_scaffold | 409760                         | [C/A]       | 1067305216                                 |
| Ca_Kabuli_NW_004516528.1_409761 | Ca_kabuli_scaffold | 409761                         | [A/G]       | 1067305217                                 |
| Ca_Kabuli_NW_004516528.1_409762 | Ca_kabuli_scaffold | 409762                         | [T/A]       | 1067305218                                 |
| Ca_Kabuli_NW_004516528.1_409763 | Ca_kabuli_scaffold | 409763                         | [C/T]       | 1067305219                                 |
| Ca_Kabuli_NW_004516528.1_463286 | Ca_kabuli_scaffold | 463286                         | [C/T]       | 1067305220                                 |
| Ca_Kabuli_NW_004516530.1_68225  | Ca_kabuli_scaffold | 68225                          | [T/A]       | 1067305221                                 |
| Ca_Kabuli_NW_004516530.1_192108 | Ca_kabuli_scaffold | 192108                         | [A/C]       | 1067305222                                 |

| <b>SNP IDs</b>                  | <b>Chromosomes</b> | <b>Physical positions (bp)</b> | <b>SNPs</b> | <b>NCBI SNPdb accession IDs (NCBI_ss#)</b> |
|---------------------------------|--------------------|--------------------------------|-------------|--------------------------------------------|
| Ca_Kabuli_NW_004516530.1_294949 | Ca_kabuli_scaffold | 294949                         | [T/A]       | 1067305223                                 |
| Ca_Kabuli_NW_004516539.1_45813  | Ca_kabuli_scaffold | 45813                          | [G/C]       | 1067305224                                 |
| Ca_Kabuli_NW_004516539.1_45814  | Ca_kabuli_scaffold | 45814                          | [G/T]       | 1067305225                                 |
| Ca_Kabuli_NW_004516539.1_86925  | Ca_kabuli_scaffold | 86925                          | [T/G]       | 1067305226                                 |
| Ca_Kabuli_NW_004516539.1_86939  | Ca_kabuli_scaffold | 86939                          | [A/C]       | 1067305227                                 |
| Ca_Kabuli_NW_004516539.1_152304 | Ca_kabuli_scaffold | 152304                         | [T/G]       | 1067305228                                 |
| Ca_Kabuli_NW_004516539.1_157317 | Ca_kabuli_scaffold | 157317                         | [T/G]       | 1067305229                                 |
| Ca_Kabuli_NW_004516539.1_158551 | Ca_kabuli_scaffold | 158551                         | [A/G]       | 1067305230                                 |
| Ca_Kabuli_NW_004516539.1_188401 | Ca_kabuli_scaffold | 188401                         | [A/C]       | 1067305231                                 |
| Ca_Kabuli_NW_004516539.1_188407 | Ca_kabuli_scaffold | 188407                         | [A/C]       | 1067305232                                 |
| Ca_Kabuli_NW_004516539.1_253742 | Ca_kabuli_scaffold | 253742                         | [A/C]       | 1067305233                                 |
| Ca_Kabuli_NW_004516551.1_115808 | Ca_kabuli_scaffold | 115808                         | [C/T]       | 1067305234                                 |
| Ca_Kabuli_NW_004516559.1_7296   | Ca_kabuli_scaffold | 7296                           | [A/T]       | 1067305235                                 |
| Ca_Kabuli_NW_004516559.1_7306   | Ca_kabuli_scaffold | 7306                           | [G/A]       | 1067305236                                 |
| Ca_Kabuli_NW_004516559.1_138230 | Ca_kabuli_scaffold | 138230                         | [A/G]       | 1067305237                                 |
| Ca_Kabuli_NW_004516559.1_138304 | Ca_kabuli_scaffold | 138304                         | [C/A]       | 1067305238                                 |
| Ca_Kabuli_NW_004516559.1_138407 | Ca_kabuli_scaffold | 138407                         | [T/C]       | 1067305239                                 |
| Ca_Kabuli_NW_004516559.1_138411 | Ca_kabuli_scaffold | 138411                         | [G/T]       | 1067305240                                 |
| Ca_Kabuli_NW_004516559.1_228328 | Ca_kabuli_scaffold | 228328                         | [G/T]       | 1067305241                                 |
| Ca_Kabuli_NW_004516559.1_228459 | Ca_kabuli_scaffold | 228459                         | [T/A]       | 1067305242                                 |
| Ca_Kabuli_NW_004516559.1_228679 | Ca_kabuli_scaffold | 228679                         | [G/A]       | 1067305243                                 |
| Ca_Kabuli_NW_004516559.1_228753 | Ca_kabuli_scaffold | 228753                         | [A/C]       | 1067305244                                 |
| Ca_Kabuli_NW_004516559.1_241569 | Ca_kabuli_scaffold | 241569                         | [C/T]       | 1067305245                                 |
| Ca_Kabuli_NW_004516559.1_648030 | Ca_kabuli_scaffold | 648030                         | [A/C]       | 1067305246                                 |
| Ca_Kabuli_NW_004516559.1_648031 | Ca_kabuli_scaffold | 648031                         | [G/T]       | 1067305247                                 |
| Ca_Kabuli_NW_004516564.1_32927  | Ca_kabuli_scaffold | 32927                          | [A/C]       | 1067305248                                 |
| Ca_Kabuli_NW_004516564.1_32941  | Ca_kabuli_scaffold | 32941                          | [A/T]       | 1067305249                                 |
| Ca_Kabuli_NW_004516564.1_32967  | Ca_kabuli_scaffold | 32967                          | [T/G]       | 1067305250                                 |
| Ca_Kabuli_NW_004516575.1_151274 | Ca_kabuli_scaffold | 151274                         | [A/C]       | 1067305251                                 |
| Ca_Kabuli_NW_004516575.1_212085 | Ca_kabuli_scaffold | 212085                         | [T/G]       | 1067305252                                 |
| Ca_Kabuli_NW_004516575.1_216064 | Ca_kabuli_scaffold | 216064                         | [A/C]       | 1067305253                                 |
| Ca_Kabuli_NW_004516575.1_261512 | Ca_kabuli_scaffold | 261512                         | [A/C]       | 1067305254                                 |
| Ca_Kabuli_NW_004516575.1_290943 | Ca_kabuli_scaffold | 290943                         | [A/G]       | 1067305255                                 |
| Ca_Kabuli_NW_004516575.1_300406 | Ca_kabuli_scaffold | 300406                         | [A/T]       | 1067305256                                 |

| <b>SNP IDs</b>                  | <b>Chromosomes</b> | <b>Physical positions (bp)</b> | <b>SNPs</b> | <b>NCBI SNPdb accession IDs (NCBI_ss#)</b> |
|---------------------------------|--------------------|--------------------------------|-------------|--------------------------------------------|
| Ca_Kabuli_NW_004516575.1_300449 | Ca_kabuli_scaffold | 300449                         | [A/G]       | 1067305257                                 |
| Ca_Kabuli_NW_004516575.1_300459 | Ca_kabuli_scaffold | 300459                         | [T/A]       | 1067305258                                 |
| Ca_Kabuli_NW_004516575.1_322151 | Ca_kabuli_scaffold | 322151                         | [A/T]       | 1067305259                                 |
| Ca_Kabuli_NW_004516575.1_373027 | Ca_kabuli_scaffold | 373027                         | [A/G]       | 1067305260                                 |
| Ca_Kabuli_NW_004516575.1_373032 | Ca_kabuli_scaffold | 373032                         | [A/T]       | 1067305261                                 |
| Ca_Kabuli_NW_004516575.1_373091 | Ca_kabuli_scaffold | 373091                         | [A/G]       | 1067305262                                 |
| Ca_Kabuli_NW_004516575.1_451962 | Ca_kabuli_scaffold | 451962                         | [T/G]       | 1067305263                                 |
| Ca_Kabuli_NW_004516575.1_451964 | Ca_kabuli_scaffold | 451964                         | [A/C]       | 1067305264                                 |
| Ca_Kabuli_NW_004516575.1_451968 | Ca_kabuli_scaffold | 451968                         | [A/C]       | 1067305265                                 |
| Ca_Kabuli_NW_004516575.1_451971 | Ca_kabuli_scaffold | 451971                         | [A/G]       | 1067305266                                 |
| Ca_Kabuli_NW_004516575.1_451981 | Ca_kabuli_scaffold | 451981                         | [A/C]       | 1067305267                                 |
| Ca_Kabuli_NW_004516575.1_451989 | Ca_kabuli_scaffold | 451989                         | [A/G]       | 1067305268                                 |
| Ca_Kabuli_NW_004516575.1_471152 | Ca_kabuli_scaffold | 471152                         | [A/C]       | 1067305269                                 |
| Ca_Kabuli_NW_004516575.1_499216 | Ca_kabuli_scaffold | 499216                         | [T/C]       | 1067305270                                 |
| Ca_Kabuli_NW_004516575.1_499225 | Ca_kabuli_scaffold | 499225                         | [A/T]       | 1067305271                                 |
| Ca_Kabuli_NW_004516575.1_499843 | Ca_kabuli_scaffold | 499843                         | [A/G]       | 1067305272                                 |
| Ca_Kabuli_NW_004516575.1_500601 | Ca_kabuli_scaffold | 500601                         | [T/C]       | 1067305273                                 |
| Ca_Kabuli_NW_004516575.1_500640 | Ca_kabuli_scaffold | 500640                         | [T/A]       | 1067305274                                 |
| Ca_Kabuli_NW_004516575.1_506478 | Ca_kabuli_scaffold | 506478                         | [T/G]       | 1067305275                                 |
| Ca_Kabuli_NW_004516575.1_533198 | Ca_kabuli_scaffold | 533198                         | [A/G]       | 1067305276                                 |
| Ca_Kabuli_NW_004516575.1_679013 | Ca_kabuli_scaffold | 679013                         | [A/G]       | 1067305277                                 |
| Ca_Kabuli_NW_004516575.1_679022 | Ca_kabuli_scaffold | 679022                         | [T/C]       | 1067305278                                 |
| Ca_Kabuli_NW_004516575.1_679037 | Ca_kabuli_scaffold | 679037                         | [T/C]       | 1067305279                                 |
| Ca_Kabuli_NW_004516575.1_709177 | Ca_kabuli_scaffold | 709177                         | [T/C]       | 1067305280                                 |
| Ca_Kabuli_NW_004516575.1_709191 | Ca_kabuli_scaffold | 709191                         | [T/A]       | 1067305281                                 |
| Ca_Kabuli_NW_004516575.1_730109 | Ca_kabuli_scaffold | 730109                         | [T/G]       | 1067305282                                 |
| Ca_Kabuli_NW_004516575.1_730126 | Ca_kabuli_scaffold | 730126                         | [A/C]       | 1067305283                                 |
| Ca_Kabuli_NW_004516575.1_730137 | Ca_kabuli_scaffold | 730137                         | [A/T]       | 1067305284                                 |
| Ca_Kabuli_NW_004516575.1_730142 | Ca_kabuli_scaffold | 730142                         | [A/G]       | 1067305285                                 |
| Ca_Kabuli_NW_004516575.1_732450 | Ca_kabuli_scaffold | 732450                         | [A/C]       | 1067305286                                 |
| Ca_Kabuli_NW_004516575.1_732454 | Ca_kabuli_scaffold | 732454                         | [T/G]       | 1067305287                                 |
| Ca_Kabuli_NW_004516575.1_732463 | Ca_kabuli_scaffold | 732463                         | [G/T]       | 1067305288                                 |
| Ca_Kabuli_NW_004516575.1_735834 | Ca_kabuli_scaffold | 735834                         | [A/T]       | 1067305289                                 |
| Ca_Kabuli_NW_004516575.1_745915 | Ca_kabuli_scaffold | 745915                         | [T/C]       | 1067305290                                 |

| <b>SNP IDs</b>                   | <b>Chromosomes</b> | <b>Physical positions (bp)</b> | <b>SNPs</b> | <b>NCBI SNPdb accession IDs (NCBI_ss#)</b> |
|----------------------------------|--------------------|--------------------------------|-------------|--------------------------------------------|
| Ca_Kabuli_NW_004516575.1_750149  | Ca_kabuli_scaffold | 750149                         | [T/C]       | 1067305291                                 |
| Ca_Kabuli_NW_004516575.1_750153  | Ca_kabuli_scaffold | 750153                         | [A/T]       | 1067305292                                 |
| Ca_Kabuli_NW_004516575.1_750157  | Ca_kabuli_scaffold | 750157                         | [A/C]       | 1067305293                                 |
| Ca_Kabuli_NW_004516575.1_750167  | Ca_kabuli_scaffold | 750167                         | [A/C]       | 1067305294                                 |
| Ca_Kabuli_NW_004516575.1_750215  | Ca_kabuli_scaffold | 750215                         | [A/G]       | 1067305295                                 |
| Ca_Kabuli_NW_004516575.1_771024  | Ca_kabuli_scaffold | 771024                         | [A/G]       | 1067305296                                 |
| Ca_Kabuli_NW_004516575.1_771036  | Ca_kabuli_scaffold | 771036                         | [A/C]       | 1067305297                                 |
| Ca_Kabuli_NW_004516575.1_800500  | Ca_kabuli_scaffold | 800500                         | [C/T]       | 1067305298                                 |
| Ca_Kabuli_NW_004516575.1_871632  | Ca_kabuli_scaffold | 871632                         | [G/A]       | 1067305299                                 |
| Ca_Kabuli_NW_004516575.1_871634  | Ca_kabuli_scaffold | 871634                         | [A/G]       | 1067305300                                 |
| Ca_Kabuli_NW_004516575.1_871635  | Ca_kabuli_scaffold | 871635                         | [A/C]       | 1067305301                                 |
| Ca_Kabuli_NW_004516575.1_909909  | Ca_kabuli_scaffold | 909909                         | [A/C]       | 1067305302                                 |
| Ca_Kabuli_NW_004516575.1_923881  | Ca_kabuli_scaffold | 923881                         | [T/A]       | 1067305303                                 |
| Ca_Kabuli_NW_004516575.1_923907  | Ca_kabuli_scaffold | 923907                         | [A/C]       | 1067305304                                 |
| Ca_Kabuli_NW_004516575.1_923936  | Ca_kabuli_scaffold | 923936                         | [A/C]       | 1067305305                                 |
| Ca_Kabuli_NW_004516575.1_923939  | Ca_kabuli_scaffold | 923939                         | [A/C]       | 1067305306                                 |
| Ca_Kabuli_NW_004516575.1_924154  | Ca_kabuli_scaffold | 924154                         | [T/G]       | 1067305307                                 |
| Ca_Kabuli_NW_004516575.1_971191  | Ca_kabuli_scaffold | 971191                         | [A/C]       | 1067305308                                 |
| Ca_Kabuli_NW_004516575.1_971230  | Ca_kabuli_scaffold | 971230                         | [A/G]       | 1067305309                                 |
| Ca_Kabuli_NW_004516575.1_971232  | Ca_kabuli_scaffold | 971232                         | [C/A]       | 1067305310                                 |
| Ca_Kabuli_NW_004516575.1_971237  | Ca_kabuli_scaffold | 971237                         | [A/G]       | 1067305311                                 |
| Ca_Kabuli_NW_004516575.1_971261  | Ca_kabuli_scaffold | 971261                         | [T/C]       | 1067305312                                 |
| Ca_Kabuli_NW_004516575.1_971281  | Ca_kabuli_scaffold | 971281                         | [T/G]       | 1067305313                                 |
| Ca_Kabuli_NW_004516575.1_971284  | Ca_kabuli_scaffold | 971284                         | [T/C]       | 1067305314                                 |
| Ca_Kabuli_NW_004516575.1_971292  | Ca_kabuli_scaffold | 971292                         | [T/C]       | 1067305315                                 |
| Ca_Kabuli_NW_004516575.1_1066731 | Ca_kabuli_scaffold | 1066731                        | [A/C]       | 1067305316                                 |
| Ca_Kabuli_NW_004516575.1_1072750 | Ca_kabuli_scaffold | 1072750                        | [T/C]       | 1067305317                                 |
| Ca_Kabuli_NW_004516575.1_1072970 | Ca_kabuli_scaffold | 1072970                        | [T/G]       | 1067305318                                 |
| Ca_Kabuli_NW_004516575.1_1073115 | Ca_kabuli_scaffold | 1073115                        | [T/G]       | 1067305319                                 |
| Ca_Kabuli_NW_004516575.1_1172634 | Ca_kabuli_scaffold | 1172634                        | [T/C]       | 1067305320                                 |
| Ca_Kabuli_NW_004516575.1_1207416 | Ca_kabuli_scaffold | 1207416                        | [T/G]       | 1067305321                                 |
| Ca_Kabuli_NW_004516575.1_1234641 | Ca_kabuli_scaffold | 1234641                        | [T/G]       | 1067305322                                 |
| Ca_Kabuli_NW_004516575.1_1234662 | Ca_kabuli_scaffold | 1234662                        | [A/G]       | 1067305323                                 |
| Ca_Kabuli_NW_004516575.1_1263414 | Ca_kabuli_scaffold | 1263414                        | [T/C]       | 1067305324                                 |

| <b>SNP IDs</b>                   | <b>Chromosomes</b> | <b>Physical positions (bp)</b> | <b>SNPs</b> | <b>NCBI SNPdb accession IDs (NCBI_ss#)</b> |
|----------------------------------|--------------------|--------------------------------|-------------|--------------------------------------------|
| Ca_Kabuli_NW_004516575.1_1263442 | Ca_kabuli_scaffold | 1263442                        | [T/C]       | 1067305325                                 |
| Ca_Kabuli_NW_004516575.1_1263455 | Ca_kabuli_scaffold | 1263455                        | [C/A]       | 1067305326                                 |
| Ca_Kabuli_NW_004516575.1_1263457 | Ca_kabuli_scaffold | 1263457                        | [C/A]       | 1067305327                                 |
| Ca_Kabuli_NW_004516575.1_1263469 | Ca_kabuli_scaffold | 1263469                        | [A/G]       | 1067305328                                 |
| Ca_Kabuli_NW_004516575.1_1263503 | Ca_kabuli_scaffold | 1263503                        | [A/G]       | 1067305329                                 |
| Ca_Kabuli_NW_004516575.1_1263537 | Ca_kabuli_scaffold | 1263537                        | [T/C]       | 1067305330                                 |
| Ca_Kabuli_NW_004516575.1_1265627 | Ca_kabuli_scaffold | 1265627                        | [C/T]       | 1067305331                                 |
| Ca_Kabuli_NW_004516575.1_1265638 | Ca_kabuli_scaffold | 1265638                        | [T/G]       | 1067305332                                 |
| Ca_Kabuli_NW_004516575.1_1285272 | Ca_kabuli_scaffold | 1285272                        | [T/G]       | 1067305333                                 |
| Ca_Kabuli_NW_004516575.1_1285275 | Ca_kabuli_scaffold | 1285275                        | [T/G]       | 1067305334                                 |
| Ca_Kabuli_NW_004516575.1_1287875 | Ca_kabuli_scaffold | 1287875                        | [T/G]       | 1067305335                                 |
| Ca_Kabuli_NW_004516575.1_1287887 | Ca_kabuli_scaffold | 1287887                        | [T/G]       | 1067305336                                 |
| Ca_Kabuli_NW_004516575.1_1288404 | Ca_kabuli_scaffold | 1288404                        | [T/C]       | 1067305337                                 |
| Ca_Kabuli_NW_004516575.1_1288428 | Ca_kabuli_scaffold | 1288428                        | [A/T]       | 1067305338                                 |
| Ca_Kabuli_NW_004516575.1_1288440 | Ca_kabuli_scaffold | 1288440                        | [T/G]       | 1067305339                                 |
| Ca_Kabuli_NW_004516577.1_137295  | Ca_kabuli_scaffold | 137295                         | [A/C]       | 1067305340                                 |
| Ca_Kabuli_NW_004516577.1_137296  | Ca_kabuli_scaffold | 137296                         | [G/T]       | 1067305341                                 |
| Ca_Kabuli_NW_004516577.1_137297  | Ca_kabuli_scaffold | 137297                         | [A/C]       | 1067305342                                 |
| Ca_Kabuli_NW_004516577.1_204629  | Ca_kabuli_scaffold | 204629                         | [C/A]       | 1067305343                                 |
| Ca_Kabuli_NW_004516577.1_204633  | Ca_kabuli_scaffold | 204633                         | [T/A]       | 1067305344                                 |
| Ca_Kabuli_NW_004516577.1_204642  | Ca_kabuli_scaffold | 204642                         | [T/A]       | 1067305345                                 |
| Ca_Kabuli_NW_004516577.1_272771  | Ca_kabuli_scaffold | 272771                         | [A/G]       | 1067305346                                 |
| Ca_Kabuli_NW_004516593.1_8010    | Ca_kabuli_scaffold | 8010                           | [A/T]       | 1067305347                                 |
| Ca_Kabuli_NW_004516593.1_8058    | Ca_kabuli_scaffold | 8058                           | [A/G]       | 1067305348                                 |
| Ca_Kabuli_NW_004516593.1_8086    | Ca_kabuli_scaffold | 8086                           | [T/G]       | 1067305349                                 |
| Ca_Kabuli_NW_004516593.1_8115    | Ca_kabuli_scaffold | 8115                           | [T/G]       | 1067305350                                 |
| Ca_Kabuli_NW_004516593.1_8211    | Ca_kabuli_scaffold | 8211                           | [A/G]       | 1067305351                                 |
| Ca_Kabuli_NW_004516593.1_8315    | Ca_kabuli_scaffold | 8315                           | [T/G]       | 1067305352                                 |
| Ca_Kabuli_NW_004516593.1_8336    | Ca_kabuli_scaffold | 8336                           | [A/G]       | 1067305353                                 |
| Ca_Kabuli_NW_004516593.1_20569   | Ca_kabuli_scaffold | 20569                          | [T/G]       | 1067305354                                 |
| Ca_Kabuli_NW_004516593.1_20683   | Ca_kabuli_scaffold | 20683                          | [T/G]       | 1067305355                                 |
| Ca_Kabuli_NW_004516593.1_31000   | Ca_kabuli_scaffold | 31000                          | [A/G]       | 1067305356                                 |
| Ca_Kabuli_NW_004516593.1_31044   | Ca_kabuli_scaffold | 31044                          | [T/G]       | 1067305357                                 |
| Ca_Kabuli_NW_004516593.1_33034   | Ca_kabuli_scaffold | 33034                          | [T/C]       | 1067305358                                 |



| <b>SNP IDs</b>                  | <b>Chromosomes</b> | <b>Physical positions (bp)</b> | <b>SNPs</b> | <b>NCBI SNPdb accession IDs (NCBI_ss#)</b> |
|---------------------------------|--------------------|--------------------------------|-------------|--------------------------------------------|
| Ca_Kabuli_NW_004516593.1_104453 | Ca_kabuli_scaffold | 104453                         | [T/C]       | 1067305359                                 |
| Ca_Kabuli_NW_004516595.1_85314  | Ca_kabuli_scaffold | 85314                          | [A/G]       | 1067305360                                 |
| Ca_Kabuli_NW_004516595.1_85315  | Ca_kabuli_scaffold | 85315                          | [A/G]       | 1067305361                                 |
| Ca_Kabuli_NW_004516602.1_186361 | Ca_kabuli_scaffold | 186361                         | [A/C]       | 1067305362                                 |
| Ca_Kabuli_NW_004516623.1_47161  | Ca_kabuli_scaffold | 47161                          | [C/T]       | 1067305363                                 |
| Ca_Kabuli_NW_004516628.1_76597  | Ca_kabuli_scaffold | 76597                          | [A/C]       | 1067305364                                 |
| Ca_Kabuli_NW_004516628.1_76623  | Ca_kabuli_scaffold | 76623                          | [C/T]       | 1067305365                                 |
| Ca_Kabuli_NW_004516628.1_76627  | Ca_kabuli_scaffold | 76627                          | [A/C]       | 1067305366                                 |
| Ca_Kabuli_NW_004516628.1_131551 | Ca_kabuli_scaffold | 131551                         | [A/C]       | 1067305367                                 |
| Ca_Kabuli_NW_004516628.1_257812 | Ca_kabuli_scaffold | 257812                         | [A/C]       | 1067305368                                 |
| Ca_Kabuli_NW_004516628.1_257858 | Ca_kabuli_scaffold | 257858                         | [A/C]       | 1067305369                                 |
| Ca_Kabuli_NW_004516629.1_96216  | Ca_kabuli_scaffold | 96216                          | [T/C]       | 1067305370                                 |
| Ca_Kabuli_NW_004516630.1_25681  | Ca_kabuli_scaffold | 25681                          | [C/G]       | 1067305371                                 |
| Ca_Kabuli_NW_004516641.1_1723   | Ca_kabuli_scaffold | 1723                           | [C/T]       | 1067305372                                 |
| Ca_Kabuli_NW_004516643.1_242575 | Ca_kabuli_scaffold | 242575                         | [T/G]       | 1067305373                                 |
| Ca_Kabuli_NW_004516650.1_48447  | Ca_kabuli_scaffold | 48447                          | [T/C]       | 1067305374                                 |
| Ca_Kabuli_NW_004516650.1_70424  | Ca_kabuli_scaffold | 70424                          | [G/A]       | 1067305375                                 |
| Ca_Kabuli_NW_004516650.1_74434  | Ca_kabuli_scaffold | 74434                          | [C/T]       | 1067305376                                 |
| Ca_Kabuli_NW_004516650.1_74436  | Ca_kabuli_scaffold | 74436                          | [C/T]       | 1067305377                                 |
| Ca_Kabuli_NW_004516650.1_74521  | Ca_kabuli_scaffold | 74521                          | [A/C]       | 1067305378                                 |
| Ca_Kabuli_NW_004516652.1_11017  | Ca_kabuli_scaffold | 11017                          | [A/G]       | 1067305379                                 |
| Ca_Kabuli_NW_004516654.1_3592   | Ca_kabuli_scaffold | 3592                           | [A/T]       | 1067305380                                 |
| Ca_Kabuli_NW_004516654.1_3606   | Ca_kabuli_scaffold | 3606                           | [T/C]       | 1067305381                                 |
| Ca_Kabuli_NW_004516654.1_3758   | Ca_kabuli_scaffold | 3758                           | [T/G]       | 1067305382                                 |
| Ca_Kabuli_NW_004516654.1_3764   | Ca_kabuli_scaffold | 3764                           | [G/T]       | 1067305383                                 |
| Ca_Kabuli_NW_004516654.1_3793   | Ca_kabuli_scaffold | 3793                           | [G/A]       | 1067305384                                 |
| Ca_Kabuli_NW_004516654.1_3800   | Ca_kabuli_scaffold | 3800                           | [T/G]       | 1067305385                                 |
| Ca_Kabuli_NW_004516666.1_86018  | Ca_kabuli_scaffold | 86018                          | [C/T]       | 1067305386                                 |
| Ca_Kabuli_NW_004516666.1_86049  | Ca_kabuli_scaffold | 86049                          | [G/A]       | 1067305387                                 |
| Ca_Kabuli_NW_004516666.1_322287 | Ca_kabuli_scaffold | 322287                         | [G/A]       | 1067305388                                 |
| Ca_Kabuli_NW_004516666.1_322315 | Ca_kabuli_scaffold | 322315                         | [G/T]       | 1067305389                                 |
| Ca_Kabuli_NW_004516666.1_365902 | Ca_kabuli_scaffold | 365902                         | [A/C]       | 1067305390                                 |
| Ca_Kabuli_NW_004516666.1_365910 | Ca_kabuli_scaffold | 365910                         | [A/C]       | 1067305391                                 |
| Ca_Kabuli_NW_004516677.1_4751   | Ca_kabuli_scaffold | 4751                           | [A/T]       | 1067305392                                 |

| <b>SNP IDs</b>                  | <b>Chromosomes</b> | <b>Physical positions (bp)</b> | <b>SNPs</b> | <b>NCBI SNPdb accession IDs (NCBI_ss#)</b> |
|---------------------------------|--------------------|--------------------------------|-------------|--------------------------------------------|
| Ca_Kabuli_NW_004516687.1_81765  | Ca_kabuli_scaffold | 81765                          | [C/A]       | 1067305393                                 |
| Ca_Kabuli_NW_004516687.1_81779  | Ca_kabuli_scaffold | 81779                          | [A/C]       | 1067305394                                 |
| Ca_Kabuli_NW_004516690.1_113837 | Ca_kabuli_scaffold | 113837                         | [A/G]       | 1067305395                                 |
| Ca_Kabuli_NW_004516690.1_113840 | Ca_kabuli_scaffold | 113840                         | [A/G]       | 1067305396                                 |
| Ca_Kabuli_NW_004516690.1_113857 | Ca_kabuli_scaffold | 113857                         | [T/G]       | 1067305397                                 |
| Ca_Kabuli_NW_004516690.1_113871 | Ca_kabuli_scaffold | 113871                         | [T/C]       | 1067305398                                 |
| Ca_Kabuli_NW_004516690.1_113877 | Ca_kabuli_scaffold | 113877                         | [A/G]       | 1067305399                                 |
| Ca_Kabuli_NW_004516690.1_113887 | Ca_kabuli_scaffold | 113887                         | [T/A]       | 1067305400                                 |
| Ca_Kabuli_NW_004516690.1_289997 | Ca_kabuli_scaffold | 289997                         | [G/T]       | 1067305401                                 |
| Ca_Kabuli_NW_004516695.1_160749 | Ca_kabuli_scaffold | 160749                         | [T/C]       | 1067305402                                 |
| Ca_Kabuli_NW_004516695.1_189700 | Ca_kabuli_scaffold | 189700                         | [A/G]       | 1067305403                                 |
| Ca_Kabuli_NW_004516695.1_197789 | Ca_kabuli_scaffold | 197789                         | [G/A]       | 1067305404                                 |
| Ca_Kabuli_NW_004516695.1_197790 | Ca_kabuli_scaffold | 197790                         | [G/A]       | 1067305405                                 |
| Ca_Kabuli_NW_004516695.1_197819 | Ca_kabuli_scaffold | 197819                         | [T/G]       | 1067305406                                 |
| Ca_Kabuli_NW_004516696.1_33121  | Ca_kabuli_scaffold | 33121                          | [A/C]       | 1067305407                                 |
| Ca_Kabuli_NW_004516696.1_33165  | Ca_kabuli_scaffold | 33165                          | [A/C]       | 1067305408                                 |
| Ca_Kabuli_NW_004516696.1_33188  | Ca_kabuli_scaffold | 33188                          | [A/C]       | 1067305409                                 |
| Ca_Kabuli_NW_004516696.1_33955  | Ca_kabuli_scaffold | 33955                          | [T/G]       | 1067305410                                 |
| Ca_Kabuli_NW_004516701.1_92106  | Ca_kabuli_scaffold | 92106                          | [C/G]       | 1067305411                                 |
| Ca_Kabuli_NW_004516701.1_98231  | Ca_kabuli_scaffold | 98231                          | [A/G]       | 1067305412                                 |
| Ca_Kabuli_NW_004516709.1_20734  | Ca_kabuli_scaffold | 20734                          | [A/C]       | 1067305413                                 |
| Ca_Kabuli_NW_004516717.1_10495  | Ca_kabuli_scaffold | 10495                          | [C/G]       | 1067305414                                 |
| Ca_Kabuli_NW_004516718.1_65715  | Ca_kabuli_scaffold | 65715                          | [G/A]       | 1067305415                                 |
| Ca_Kabuli_NW_004516724.1_81468  | Ca_kabuli_scaffold | 81468                          | [G/C]       | 1067305416                                 |
| Ca_Kabuli_NW_004516724.1_81521  | Ca_kabuli_scaffold | 81521                          | [G/A]       | 1067305417                                 |
| Ca_Kabuli_NW_004516724.1_111497 | Ca_kabuli_scaffold | 111497                         | [T/A]       | 1067305418                                 |
| Ca_Kabuli_NW_004516724.1_113100 | Ca_kabuli_scaffold | 113100                         | [T/G]       | 1067305419                                 |
| Ca_Kabuli_NW_004516724.1_113104 | Ca_kabuli_scaffold | 113104                         | [T/A]       | 1067305420                                 |
| Ca_Kabuli_NW_004516724.1_113109 | Ca_kabuli_scaffold | 113109                         | [A/C]       | 1067305421                                 |
| Ca_Kabuli_NW_004516724.1_113125 | Ca_kabuli_scaffold | 113125                         | [A/T]       | 1067305422                                 |
| Ca_Kabuli_NW_004516724.1_113137 | Ca_kabuli_scaffold | 113137                         | [A/C]       | 1067305423                                 |
| Ca_Kabuli_NW_004516724.1_137569 | Ca_kabuli_scaffold | 137569                         | [T/C]       | 1067305424                                 |
| Ca_Kabuli_NW_004516724.1_233503 | Ca_kabuli_scaffold | 233503                         | [A/G]       | 1067305425                                 |
| Ca_Kabuli_NW_004516724.1_233606 | Ca_kabuli_scaffold | 233606                         | [A/T]       | 1067305426                                 |

| <b>SNP IDs</b>                  | <b>Chromosomes</b> | <b>Physical positions (bp)</b> | <b>SNPs</b> | <b>NCBI SNPdb accession IDs (NCBI_ss#)</b> |
|---------------------------------|--------------------|--------------------------------|-------------|--------------------------------------------|
| Ca_Kabuli_NW_004516724.1_233613 | Ca_kabuli_scaffold | 233613                         | [A/C]       | 1067305427                                 |
| Ca_Kabuli_NW_004516724.1_253847 | Ca_kabuli_scaffold | 253847                         | [A/G]       | 1067305428                                 |
| Ca_Kabuli_NW_004516724.1_310664 | Ca_kabuli_scaffold | 310664                         | [A/T]       | 1067305429                                 |
| Ca_Kabuli_NW_004516724.1_312266 | Ca_kabuli_scaffold | 312266                         | [T/G]       | 1067305430                                 |
| Ca_Kabuli_NW_004516724.1_312284 | Ca_kabuli_scaffold | 312284                         | [A/T]       | 1067305431                                 |
| Ca_Kabuli_NW_004516754.1_23431  | Ca_kabuli_scaffold | 23431                          | [G/T]       | 1067305432                                 |
| Ca_Kabuli_NW_004516754.1_23433  | Ca_kabuli_scaffold | 23433                          | [T/C]       | 1067305433                                 |
| Ca_Kabuli_NW_004516754.1_23440  | Ca_kabuli_scaffold | 23440                          | [A/T]       | 1067305434                                 |
| Ca_Kabuli_NW_004516754.1_24156  | Ca_kabuli_scaffold | 24156                          | [A/C]       | 1067305435                                 |
| Ca_Kabuli_NW_004516754.1_119677 | Ca_kabuli_scaffold | 119677                         | [C/T]       | 1067305436                                 |
| Ca_Kabuli_NW_004516754.1_119694 | Ca_kabuli_scaffold | 119694                         | [T/G]       | 1067305437                                 |
| Ca_Kabuli_NW_004516754.1_119720 | Ca_kabuli_scaffold | 119720                         | [C/A]       | 1067305438                                 |
| Ca_Kabuli_NW_004516754.1_119721 | Ca_kabuli_scaffold | 119721                         | [C/G]       | 1067305439                                 |
| Ca_Kabuli_NW_004516754.1_152072 | Ca_kabuli_scaffold | 152072                         | [A/C]       | 1067305440                                 |
| Ca_Kabuli_NW_004516754.1_188914 | Ca_kabuli_scaffold | 188914                         | [A/C]       | 1067305441                                 |
| Ca_Kabuli_NW_004516780.1_23445  | Ca_kabuli_scaffold | 23445                          | [A/C]       | 1067305442                                 |
| Ca_Kabuli_NW_004516783.1_31589  | Ca_kabuli_scaffold | 31589                          | [T/C]       | 1067305443                                 |
| Ca_Kabuli_NW_004516783.1_202430 | Ca_kabuli_scaffold | 202430                         | [A/C]       | 1067305444                                 |
| Ca_Kabuli_NW_004516800.1_26433  | Ca_kabuli_scaffold | 26433                          | [T/A]       | 1067305445                                 |
| Ca_Kabuli_NW_004516804.1_332198 | Ca_kabuli_scaffold | 332198                         | [A/C]       | 1067305446                                 |
| Ca_Kabuli_NW_004516804.1_332369 | Ca_kabuli_scaffold | 332369                         | [C/T]       | 1067305447                                 |
| Ca_Kabuli_NW_004516806.1_70487  | Ca_kabuli_scaffold | 70487                          | [A/C]       | 1067305448                                 |
| Ca_Kabuli_NW_004516808.1_146315 | Ca_kabuli_scaffold | 146315                         | [A/C]       | 1067305449                                 |
| Ca_Kabuli_NW_004516808.1_150281 | Ca_kabuli_scaffold | 150281                         | [G/T]       | 1067305450                                 |
| Ca_Kabuli_NW_004516823.1_82859  | Ca_kabuli_scaffold | 82859                          | [A/T]       | 1067305451                                 |
| Ca_Kabuli_NW_004516823.1_82935  | Ca_kabuli_scaffold | 82935                          | [A/C]       | 1067305452                                 |
| Ca_Kabuli_NW_004516823.1_82971  | Ca_kabuli_scaffold | 82971                          | [T/A]       | 1067305453                                 |
| Ca_Kabuli_NW_004516823.1_82974  | Ca_kabuli_scaffold | 82974                          | [T/A]       | 1067305454                                 |
| Ca_Kabuli_NW_004516834.1_29477  | Ca_kabuli_scaffold | 29477                          | [G/A]       | 1067305455                                 |
| Ca_Kabuli_NW_004516834.1_29481  | Ca_kabuli_scaffold | 29481                          | [T/A]       | 1067305456                                 |
| Ca_Kabuli_NW_004516834.1_29483  | Ca_kabuli_scaffold | 29483                          | [G/A]       | 1067305457                                 |
| Ca_Kabuli_NW_004516834.1_29511  | Ca_kabuli_scaffold | 29511                          | [G/A]       | 1067305458                                 |
| Ca_Kabuli_NW_004516834.1_29514  | Ca_kabuli_scaffold | 29514                          | [C/T]       | 1067305459                                 |
| Ca_Kabuli_NW_004516834.1_73620  | Ca_kabuli_scaffold | 73620                          | [A/C]       | 1067305460                                 |

| <b>SNP IDs</b>                  | <b>Chromosomes</b> | <b>Physical positions (bp)</b> | <b>SNPs</b> | <b>NCBI SNPdb accession IDs (NCBI_ss#)</b> |
|---------------------------------|--------------------|--------------------------------|-------------|--------------------------------------------|
| Ca_Kabuli_NW_004516836.1_146622 | Ca_kabuli_scaffold | 146622                         | [T/G]       | 1067305461                                 |
| Ca_Kabuli_NW_004516836.1_146630 | Ca_kabuli_scaffold | 146630                         | [T/G]       | 1067305462                                 |
| Ca_Kabuli_NW_004516838.1_87052  | Ca_kabuli_scaffold | 87052                          | [T/G]       | 1067305463                                 |
| Ca_Kabuli_NW_004516838.1_87053  | Ca_kabuli_scaffold | 87053                          | [C/A]       | 1067305464                                 |
| Ca_Kabuli_NW_004516838.1_87054  | Ca_kabuli_scaffold | 87054                          | [T/G]       | 1067305465                                 |
| Ca_Kabuli_NW_004516842.1_70605  | Ca_kabuli_scaffold | 70605                          | [T/G]       | 1067305466                                 |
| Ca_Kabuli_NW_004516847.1_207    | Ca_kabuli_scaffold | 207                            | [G/A]       | 1067305467                                 |
| Ca_Kabuli_NW_004516850.1_133488 | Ca_kabuli_scaffold | 133488                         | [T/C]       | 1067305468                                 |
| Ca_Kabuli_NW_004516850.1_133489 | Ca_kabuli_scaffold | 133489                         | [G/A]       | 1067305469                                 |
| Ca_Kabuli_NW_004516852.1_22370  | Ca_kabuli_scaffold | 22370                          | [T/A]       | 1067305470                                 |
| Ca_Kabuli_NW_004516863.1_9003   | Ca_kabuli_scaffold | 9003                           | [G/A]       | 1067305471                                 |
| Ca_Kabuli_NW_004516863.1_9015   | Ca_kabuli_scaffold | 9015                           | [C/T]       | 1067305472                                 |
| Ca_Kabuli_NW_004516872.1_86066  | Ca_kabuli_scaffold | 86066                          | [C/A]       | 1067305473                                 |
| Ca_Kabuli_NW_004516872.1_86077  | Ca_kabuli_scaffold | 86077                          | [G/A]       | 1067305474                                 |
| Ca_Kabuli_NW_004516872.1_86078  | Ca_kabuli_scaffold | 86078                          | [G/A]       | 1067305475                                 |
| Ca_Kabuli_NW_004516872.1_86084  | Ca_kabuli_scaffold | 86084                          | [C/T]       | 1067305476                                 |
| Ca_Kabuli_NW_004516872.1_192399 | Ca_kabuli_scaffold | 192399                         | [A/C]       | 1067305477                                 |
| Ca_Kabuli_NW_004516872.1_192417 | Ca_kabuli_scaffold | 192417                         | [C/A]       | 1067305478                                 |
| Ca_Kabuli_NW_004516872.1_192713 | Ca_kabuli_scaffold | 192713                         | [G/T]       | 1067305479                                 |
| Ca_Kabuli_NW_004516872.1_193519 | Ca_kabuli_scaffold | 193519                         | [A/T]       | 1067305480                                 |
| Ca_Kabuli_NW_004516872.1_194345 | Ca_kabuli_scaffold | 194345                         | [C/G]       | 1067305481                                 |
| Ca_Kabuli_NW_004516872.1_266559 | Ca_kabuli_scaffold | 266559                         | [C/T]       | 1067305482                                 |
| Ca_Kabuli_NW_004516872.1_401085 | Ca_kabuli_scaffold | 401085                         | [A/T]       | 1067305483                                 |
| Ca_Kabuli_NW_004516872.1_502015 | Ca_kabuli_scaffold | 502015                         | [A/T]       | 1067305484                                 |
| Ca_Kabuli_NW_004516872.1_528896 | Ca_kabuli_scaffold | 528896                         | [A/C]       | 1067305485                                 |
| Ca_Kabuli_NW_004516872.1_625332 | Ca_kabuli_scaffold | 625332                         | [A/C]       | 1067305486                                 |
| Ca_Kabuli_NW_004516872.1_625336 | Ca_kabuli_scaffold | 625336                         | [A/G]       | 1067305487                                 |
| Ca_Kabuli_NW_004516872.1_625365 | Ca_kabuli_scaffold | 625365                         | [T/C]       | 1067305488                                 |
| Ca_Kabuli_NW_004516872.1_625388 | Ca_kabuli_scaffold | 625388                         | [C/T]       | 1067305489                                 |
| Ca_Kabuli_NW_004516890.1_120037 | Ca_kabuli_scaffold | 120037                         | [A/G]       | 1067305490                                 |
| Ca_Kabuli_NW_004516890.1_120040 | Ca_kabuli_scaffold | 120040                         | [T/C]       | 1067305491                                 |
| Ca_Kabuli_NW_004516890.1_120084 | Ca_kabuli_scaffold | 120084                         | [A/G]       | 1067305492                                 |
| Ca_Kabuli_NW_004516890.1_120090 | Ca_kabuli_scaffold | 120090                         | [T/C]       | 1067305493                                 |
| Ca_Kabuli_NW_004516890.1_121557 | Ca_kabuli_scaffold | 121557                         | [A/G]       | 1067305494                                 |

| <b>SNP IDs</b>                  | <b>Chromosomes</b> | <b>Physical positions (bp)</b> | <b>SNPs</b> | <b>NCBI SNPdb accession IDs (NCBI_ss#)</b> |
|---------------------------------|--------------------|--------------------------------|-------------|--------------------------------------------|
| Ca_Kabuli_NW_004516890.1_121565 | Ca_kabuli_scaffold | 121565                         | [T/G]       | 1067305495                                 |
| Ca_Kabuli_NW_004516890.1_164730 | Ca_kabuli_scaffold | 164730                         | [T/G]       | 1067305496                                 |
| Ca_Kabuli_NW_004516890.1_164769 | Ca_kabuli_scaffold | 164769                         | [C/T]       | 1067305497                                 |
| Ca_Kabuli_NW_004516890.1_164771 | Ca_kabuli_scaffold | 164771                         | [T/C]       | 1067305498                                 |
| Ca_Kabuli_NW_004516890.1_281901 | Ca_kabuli_scaffold | 281901                         | [T/C]       | 1067305499                                 |
| Ca_Kabuli_NW_004516890.1_281915 | Ca_kabuli_scaffold | 281915                         | [A/G]       | 1067305500                                 |
| Ca_Kabuli_NW_004516914.1_84756  | Ca_kabuli_scaffold | 84756                          | [T/G]       | 1067305501                                 |
| Ca_Kabuli_NW_004516932.1_7165   | Ca_kabuli_scaffold | 7165                           | [G/A]       | 1067305502                                 |
| Ca_Kabuli_NW_004516932.1_9398   | Ca_kabuli_scaffold | 9398                           | [C/A]       | 1067305503                                 |
| Ca_Kabuli_NW_004516932.1_10541  | Ca_kabuli_scaffold | 10541                          | [C/G]       | 1067305504                                 |
| Ca_Kabuli_NW_004516932.1_10563  | Ca_kabuli_scaffold | 10563                          | [T/C]       | 1067305505                                 |
| Ca_Kabuli_NW_004516932.1_10925  | Ca_kabuli_scaffold | 10925                          | [A/C]       | 1067305506                                 |
| Ca_Kabuli_NW_004516932.1_10926  | Ca_kabuli_scaffold | 10926                          | [G/T]       | 1067305507                                 |
| Ca_Kabuli_NW_004516932.1_10945  | Ca_kabuli_scaffold | 10945                          | [T/C]       | 1067305508                                 |
| Ca_Kabuli_NW_004516932.1_10950  | Ca_kabuli_scaffold | 10950                          | [T/C]       | 1067305509                                 |
| Ca_Kabuli_NW_004516932.1_10978  | Ca_kabuli_scaffold | 10978                          | [T/C]       | 1067305510                                 |
| Ca_Kabuli_NW_004516932.1_10980  | Ca_kabuli_scaffold | 10980                          | [A/G]       | 1067305511                                 |
| Ca_Kabuli_NW_004516938.1_69848  | Ca_kabuli_scaffold | 69848                          | [A/T]       | 1067305512                                 |
| Ca_Kabuli_NW_004516939.1_96488  | Ca_kabuli_scaffold | 96488                          | [A/G]       | 1067305513                                 |
| Ca_Kabuli_NW_004516939.1_101253 | Ca_kabuli_scaffold | 101253                         | [A/G]       | 1067305514                                 |
| Ca_Kabuli_NW_004516956.1_106332 | Ca_kabuli_scaffold | 106332                         | [T/C]       | 1067305515                                 |
| Ca_Kabuli_NW_004516957.1_339103 | Ca_kabuli_scaffold | 339103                         | [C/A]       | 1067305516                                 |
| Ca_Kabuli_NW_004516968.1_40085  | Ca_kabuli_scaffold | 40085                          | [C/G]       | 1067305517                                 |
| Ca_Kabuli_NW_004516968.1_40089  | Ca_kabuli_scaffold | 40089                          | [C/T]       | 1067305518                                 |
| Ca_Kabuli_NW_004516995.1_237807 | Ca_kabuli_scaffold | 237807                         | [C/T]       | 1067305519                                 |
| Ca_Kabuli_NW_004517006.1_50192  | Ca_kabuli_scaffold | 50192                          | [C/A]       | 1067305520                                 |
| Ca_Kabuli_NW_004517017.1_343519 | Ca_kabuli_scaffold | 343519                         | [G/A]       | 1067305521                                 |
| Ca_Kabuli_NW_004517017.1_343553 | Ca_kabuli_scaffold | 343553                         | [A/G]       | 1067305522                                 |
| Ca_Kabuli_NW_004517017.1_349282 | Ca_kabuli_scaffold | 349282                         | [A/G]       | 1067305523                                 |
| Ca_Kabuli_NW_004517017.1_349284 | Ca_kabuli_scaffold | 349284                         | [T/C]       | 1067305524                                 |
| Ca_Kabuli_NW_004517030.1_83810  | Ca_kabuli_scaffold | 83810                          | [G/A]       | 1067305525                                 |
| Ca_Kabuli_NW_004517035.1_127148 | Ca_kabuli_scaffold | 127148                         | [A/C]       | 1067305526                                 |
| Ca_Kabuli_NW_004517046.1_517    | Ca_kabuli_scaffold | 517                            | [G/A]       | 1067305527                                 |
| Ca_Kabuli_NW_004517046.1_535    | Ca_kabuli_scaffold | 535                            | [T/C]       | 1067305528                                 |

| <b>SNP IDs</b>                  | <b>Chromosomes</b> | <b>Physical positions (bp)</b> | <b>SNPs</b> | <b>NCBI SNPdb accession IDs (NCBI_ss#)</b> |
|---------------------------------|--------------------|--------------------------------|-------------|--------------------------------------------|
| Ca_Kabuli_NW_004517046.1_537    | Ca_kabuli_scaffold | 537                            | [T/G]       | 1067305529                                 |
| Ca_Kabuli_NW_004517046.1_545    | Ca_kabuli_scaffold | 545                            | [C/T]       | 1067305530                                 |
| Ca_Kabuli_NW_004517047.1_139066 | Ca_kabuli_scaffold | 139066                         | [T/C]       | 1067305531                                 |
| Ca_Kabuli_NW_004517047.1_192469 | Ca_kabuli_scaffold | 192469                         | [A/G]       | 1067305532                                 |
| Ca_Kabuli_NW_004517047.1_241618 | Ca_kabuli_scaffold | 241618                         | [T/C]       | 1067305533                                 |
| Ca_Kabuli_NW_004517047.1_241697 | Ca_kabuli_scaffold | 241697                         | [T/C]       | 1067305534                                 |
| Ca_Kabuli_NW_004517047.1_241701 | Ca_kabuli_scaffold | 241701                         | [T/C]       | 1067305535                                 |
| Ca_Kabuli_NW_004517047.1_241708 | Ca_kabuli_scaffold | 241708                         | [T/C]       | 1067305536                                 |
| Ca_Kabuli_NW_004517047.1_241754 | Ca_kabuli_scaffold | 241754                         | [A/T]       | 1067305537                                 |
| Ca_Kabuli_NW_004517047.1_269891 | Ca_kabuli_scaffold | 269891                         | [G/T]       | 1067305538                                 |
| Ca_Kabuli_NW_004517047.1_328575 | Ca_kabuli_scaffold | 328575                         | [A/C]       | 1067305539                                 |
| Ca_Kabuli_NW_004517047.1_328816 | Ca_kabuli_scaffold | 328816                         | [T/A]       | 1067305540                                 |
| Ca_Kabuli_NW_004517047.1_328817 | Ca_kabuli_scaffold | 328817                         | [T/G]       | 1067305541                                 |
| Ca_Kabuli_NW_004517047.1_328823 | Ca_kabuli_scaffold | 328823                         | [T/A]       | 1067305542                                 |
| Ca_Kabuli_NW_004517047.1_328828 | Ca_kabuli_scaffold | 328828                         | [T/A]       | 1067305543                                 |
| Ca_Kabuli_NW_004517047.1_380574 | Ca_kabuli_scaffold | 380574                         | [C/A]       | 1067305544                                 |
| Ca_Kabuli_NW_004517047.1_380575 | Ca_kabuli_scaffold | 380575                         | [A/G]       | 1067305545                                 |
| Ca_Kabuli_NW_004517047.1_380576 | Ca_kabuli_scaffold | 380576                         | [G/A]       | 1067305546                                 |
| Ca_Kabuli_NW_004517047.1_382520 | Ca_kabuli_scaffold | 382520                         | [A/G]       | 1067305547                                 |
| Ca_Kabuli_NW_004517047.1_384780 | Ca_kabuli_scaffold | 384780                         | [T/C]       | 1067305548                                 |
| Ca_Kabuli_NW_004517047.1_384837 | Ca_kabuli_scaffold | 384837                         | [T/A]       | 1067305549                                 |
| Ca_Kabuli_NW_004517047.1_390797 | Ca_kabuli_scaffold | 390797                         | [A/C]       | 1067305550                                 |
| Ca_Kabuli_NW_004517047.1_390807 | Ca_kabuli_scaffold | 390807                         | [C/T]       | 1067305551                                 |
| Ca_Kabuli_NW_004517050.1_106    | Ca_kabuli_scaffold | 106                            | [T/C]       | 1067305552                                 |
| Ca_Kabuli_NW_004517050.1_5648   | Ca_kabuli_scaffold | 5648                           | [G/A]       | 1067305553                                 |
| Ca_Kabuli_NW_004517050.1_212015 | Ca_kabuli_scaffold | 212015                         | [G/A]       | 1067305554                                 |
| Ca_Kabuli_NW_004517050.1_215894 | Ca_kabuli_scaffold | 215894                         | [T/C]       | 1067305555                                 |
| Ca_Kabuli_NW_004517050.1_215903 | Ca_kabuli_scaffold | 215903                         | [T/C]       | 1067305556                                 |
| Ca_Kabuli_NW_004517050.1_215929 | Ca_kabuli_scaffold | 215929                         | [A/G]       | 1067305557                                 |
| Ca_Kabuli_NW_004517050.1_215931 | Ca_kabuli_scaffold | 215931                         | [A/G]       | 1067305558                                 |
| Ca_Kabuli_NW_004517050.1_215942 | Ca_kabuli_scaffold | 215942                         | [A/G]       | 1067305559                                 |
| Ca_Kabuli_NW_004517088.1_70567  | Ca_kabuli_scaffold | 70567                          | [T/C]       | 1067305560                                 |
| Ca_Kabuli_NW_004517088.1_71580  | Ca_kabuli_scaffold | 71580                          | [C/A]       | 1067305561                                 |
| Ca_Kabuli_NW_004517088.1_71581  | Ca_kabuli_scaffold | 71581                          | [T/G]       | 1067305562                                 |

| <b>SNP IDs</b>                  | <b>Chromosomes</b> | <b>Physical positions (bp)</b> | <b>SNPs</b> | <b>NCBI SNPdb accession IDs (NCBI_ss#)</b> |
|---------------------------------|--------------------|--------------------------------|-------------|--------------------------------------------|
| Ca_Kabuli_NW_004517088.1_71582  | Ca_kabuli_scaffold | 71582                          | [T/A]       | 1067305563                                 |
| Ca_Kabuli_NW_004517088.1_111576 | Ca_kabuli_scaffold | 111576                         | [A/C]       | 1067305564                                 |
| Ca_Kabuli_NW_004517088.1_111596 | Ca_kabuli_scaffold | 111596                         | [T/C]       | 1067305565                                 |
| Ca_Kabuli_NW_004517088.1_111612 | Ca_kabuli_scaffold | 111612                         | [A/G]       | 1067305566                                 |
| Ca_Kabuli_NW_004517088.1_111614 | Ca_kabuli_scaffold | 111614                         | [A/G]       | 1067305567                                 |
| Ca_Kabuli_NW_004517088.1_113856 | Ca_kabuli_scaffold | 113856                         | [G/T]       | 1067305568                                 |
| Ca_Kabuli_NW_004517093.1_50241  | Ca_kabuli_scaffold | 50241                          | [A/G]       | 1067305569                                 |
| Ca_Kabuli_NW_004517093.1_122512 | Ca_kabuli_scaffold | 122512                         | [T/G]       | 1067305570                                 |
| Ca_Kabuli_NW_004517093.1_122526 | Ca_kabuli_scaffold | 122526                         | [A/G]       | 1067305571                                 |
| Ca_Kabuli_NW_004517093.1_132140 | Ca_kabuli_scaffold | 132140                         | [T/C]       | 1067305572                                 |
| Ca_Kabuli_NW_004517093.1_132153 | Ca_kabuli_scaffold | 132153                         | [T/A]       | 1067305573                                 |
| Ca_Kabuli_NW_004517093.1_132165 | Ca_kabuli_scaffold | 132165                         | [T/G]       | 1067305574                                 |
| Ca_Kabuli_NW_004517093.1_134659 | Ca_kabuli_scaffold | 134659                         | [A/T]       | 1067305575                                 |
| Ca_Kabuli_NW_004517093.1_134667 | Ca_kabuli_scaffold | 134667                         | [T/G]       | 1067305576                                 |
| Ca_Kabuli_NW_004517093.1_134670 | Ca_kabuli_scaffold | 134670                         | [T/G]       | 1067305577                                 |
| Ca_Kabuli_NW_004517096.1_93240  | Ca_kabuli_scaffold | 93240                          | [A/G]       | 1067305578                                 |
| Ca_Kabuli_NW_004517096.1_226138 | Ca_kabuli_scaffold | 226138                         | [T/C]       | 1067305579                                 |
| Ca_Kabuli_NW_004517099.1_72632  | Ca_kabuli_scaffold | 72632                          | [C/T]       | 1067305580                                 |
| Ca_Kabuli_NW_004517099.1_179754 | Ca_kabuli_scaffold | 179754                         | [A/G]       | 1067305581                                 |
| Ca_Kabuli_NW_004517099.1_179759 | Ca_kabuli_scaffold | 179759                         | [T/G]       | 1067305582                                 |
| Ca_Kabuli_NW_004517106.1_163331 | Ca_kabuli_scaffold | 163331                         | [A/G]       | 1067305583                                 |
| Ca_Kabuli_NW_004517141.1_26870  | Ca_kabuli_scaffold | 26870                          | [G/A]       | 1067305584                                 |
| Ca_Kabuli_NW_004517141.1_26880  | Ca_kabuli_scaffold | 26880                          | [C/T]       | 1067305585                                 |
| Ca_Kabuli_NW_004517141.1_154212 | Ca_kabuli_scaffold | 154212                         | [T/G]       | 1067305586                                 |
| Ca_Kabuli_NW_004517142.1_61653  | Ca_kabuli_scaffold | 61653                          | [A/C]       | 1067305587                                 |
| Ca_Kabuli_NW_004517156.1_14932  | Ca_kabuli_scaffold | 14932                          | [A/C]       | 1067305588                                 |
| Ca_Kabuli_NW_004517176.1_249375 | Ca_kabuli_scaffold | 249375                         | [G/A]       | 1067305589                                 |
| Ca_Kabuli_NW_004517182.1_226179 | Ca_kabuli_scaffold | 226179                         | [C/A]       | 1067305590                                 |
| Ca_Kabuli_NW_004517185.1_68292  | Ca_kabuli_scaffold | 68292                          | [G/A]       | 1067305591                                 |
| Ca_Kabuli_NW_004517185.1_209695 | Ca_kabuli_scaffold | 209695                         | [A/G]       | 1067305592                                 |
| Ca_Kabuli_NW_004517185.1_209719 | Ca_kabuli_scaffold | 209719                         | [A/C]       | 1067305593                                 |
| Ca_Kabuli_NW_004517185.1_209730 | Ca_kabuli_scaffold | 209730                         | [A/C]       | 1067305594                                 |
| Ca_Kabuli_NW_004517185.1_209757 | Ca_kabuli_scaffold | 209757                         | [A/G]       | 1067305595                                 |
| Ca_Kabuli_NW_004517185.1_229209 | Ca_kabuli_scaffold | 229209                         | [T/C]       | 1067305596                                 |

| <b>SNP IDs</b>                  | <b>Chromosomes</b> | <b>Physical positions (bp)</b> | <b>SNPs</b> | <b>NCBI SNPdb accession IDs (NCBI_ss#)</b> |
|---------------------------------|--------------------|--------------------------------|-------------|--------------------------------------------|
| Ca_Kabuli_NW_004517185.1_229228 | Ca_kabuli_scaffold | 229228                         | [T/G]       | 1067305597                                 |
| Ca_Kabuli_NW_004517185.1_229235 | Ca_kabuli_scaffold | 229235                         | [A/G]       | 1067305598                                 |
| Ca_Kabuli_NW_004517188.1_4821   | Ca_kabuli_scaffold | 4821                           | [G/A]       | 1067305599                                 |
| Ca_Kabuli_NW_004517206.1_35180  | Ca_kabuli_scaffold | 35180                          | [T/A]       | 1067305600                                 |
| Ca_Kabuli_NW_004517206.1_199116 | Ca_kabuli_scaffold | 199116                         | [G/T]       | 1067305601                                 |
| Ca_Kabuli_NW_004517206.1_199117 | Ca_kabuli_scaffold | 199117                         | [C/G]       | 1067305602                                 |
| Ca_Kabuli_NW_004517206.1_199118 | Ca_kabuli_scaffold | 199118                         | [T/C]       | 1067305603                                 |
| Ca_Kabuli_NW_004517206.1_199119 | Ca_kabuli_scaffold | 199119                         | [T/G]       | 1067305604                                 |
| Ca_Kabuli_NW_004517206.1_199120 | Ca_kabuli_scaffold | 199120                         | [C/A]       | 1067305605                                 |
| Ca_Kabuli_NW_004517206.1_199129 | Ca_kabuli_scaffold | 199129                         | [T/C]       | 1067305606                                 |
| Ca_Kabuli_NW_004517206.1_199169 | Ca_kabuli_scaffold | 199169                         | [G/T]       | 1067305607                                 |
| Ca_Kabuli_NW_004517206.1_212519 | Ca_kabuli_scaffold | 212519                         | [T/A]       | 1067305608                                 |
| Ca_Kabuli_NW_004517249.1_5538   | Ca_kabuli_scaffold | 5538                           | [A/T]       | 1067305609                                 |
| Ca_Kabuli_NW_004517249.1_5562   | Ca_kabuli_scaffold | 5562                           | [C/T]       | 1067305610                                 |
| Ca_Kabuli_NW_004517249.1_5570   | Ca_kabuli_scaffold | 5570                           | [C/T]       | 1067305611                                 |
| Ca_Kabuli_NW_004517250.1_4502   | Ca_kabuli_scaffold | 4502                           | [A/C]       | 1067305612                                 |
| Ca_Kabuli_NW_004517250.1_4510   | Ca_kabuli_scaffold | 4510                           | [A/C]       | 1067305613                                 |
| Ca_Kabuli_NW_004517264.1_125981 | Ca_kabuli_scaffold | 125981                         | [T/G]       | 1067305614                                 |
| Ca_Kabuli_NW_004517264.1_125991 | Ca_kabuli_scaffold | 125991                         | [A/C]       | 1067305615                                 |
| Ca_Kabuli_NW_004517264.1_125997 | Ca_kabuli_scaffold | 125997                         | [A/G]       | 1067305616                                 |
| Ca_Kabuli_NW_004517264.1_126006 | Ca_kabuli_scaffold | 126006                         | [T/C]       | 1067305617                                 |
| Ca_Kabuli_NW_004517264.1_126011 | Ca_kabuli_scaffold | 126011                         | [T/A]       | 1067305618                                 |
| Ca_Kabuli_NW_004517303.1_185    | Ca_kabuli_scaffold | 185                            | [C/A]       | 1067305619                                 |
| Ca_Kabuli_NW_004517303.1_50671  | Ca_kabuli_scaffold | 50671                          | [A/G]       | 1067305620                                 |
| Ca_Kabuli_NW_004517303.1_50680  | Ca_kabuli_scaffold | 50680                          | [A/C]       | 1067305621                                 |
| Ca_Kabuli_NW_004517303.1_50701  | Ca_kabuli_scaffold | 50701                          | [T/A]       | 1067305622                                 |
| Ca_Kabuli_NW_004517303.1_50704  | Ca_kabuli_scaffold | 50704                          | [A/T]       | 1067305623                                 |
| Ca_Kabuli_NW_004517303.1_50707  | Ca_kabuli_scaffold | 50707                          | [G/A]       | 1067305624                                 |
| Ca_Kabuli_NW_004517303.1_50722  | Ca_kabuli_scaffold | 50722                          | [A/G]       | 1067305625                                 |
| Ca_Kabuli_NW_004517306.1_55438  | Ca_kabuli_scaffold | 55438                          | [G/T]       | 1067305626                                 |
| Ca_Kabuli_NW_004517306.1_55455  | Ca_kabuli_scaffold | 55455                          | [A/C]       | 1067305627                                 |
| Ca_Kabuli_NW_004517306.1_65551  | Ca_kabuli_scaffold | 65551                          | [T/C]       | 1067305628                                 |
| Ca_Kabuli_NW_004517306.1_83254  | Ca_kabuli_scaffold | 83254                          | [T/G]       | 1067305629                                 |
| Ca_Kabuli_NW_004517320.1_132563 | Ca_kabuli_scaffold | 132563                         | [A/C]       | 1067305630                                 |



| <b>SNP IDs</b>                  | <b>Chromosomes</b> | <b>Physical positions (bp)</b> | <b>SNPs</b> | <b>NCBI SNPdb accession IDs (NCBI_ss#)</b> |
|---------------------------------|--------------------|--------------------------------|-------------|--------------------------------------------|
| Ca_Kabuli_NW_004517320.1_132564 | Ca_kabuli_scaffold | 132564                         | [G/T]       | 1067305631                                 |
| Ca_Kabuli_NW_004517320.1_132568 | Ca_kabuli_scaffold | 132568                         | [G/C]       | 1067305632                                 |
| Ca_Kabuli_NW_004517320.1_132569 | Ca_kabuli_scaffold | 132569                         | [G/A]       | 1067305633                                 |
| Ca_Kabuli_NW_004517327.1_124871 | Ca_kabuli_scaffold | 124871                         | [A/C]       | 1067305634                                 |
| Ca_Kabuli_NW_004517327.1_222808 | Ca_kabuli_scaffold | 222808                         | [T/A]       | 1067305635                                 |
| Ca_Kabuli_NW_004517327.1_222846 | Ca_kabuli_scaffold | 222846                         | [G/A]       | 1067305636                                 |
| Ca_Kabuli_NW_004517334.1_30844  | Ca_kabuli_scaffold | 30844                          | [G/C]       | 1067305637                                 |
| Ca_Kabuli_NW_004517339.1_63215  | Ca_kabuli_scaffold | 63215                          | [A/C]       | 1067305638                                 |
| Ca_Kabuli_NW_004517339.1_271529 | Ca_kabuli_scaffold | 271529                         | [A/C]       | 1067305639                                 |
| Ca_Kabuli_NW_004517339.1_321631 | Ca_kabuli_scaffold | 321631                         | [A/C]       | 1067305640                                 |
| Ca_Kabuli_NW_004517339.1_321637 | Ca_kabuli_scaffold | 321637                         | [T/C]       | 1067305641                                 |
| Ca_Kabuli_NW_004517341.1_3923   | Ca_kabuli_scaffold | 3923                           | [T/C]       | 1067305642                                 |
| Ca_Kabuli_NW_004517341.1_3936   | Ca_kabuli_scaffold | 3936                           | [A/G]       | 1067305643                                 |
| Ca_Kabuli_NW_004517352.1_63722  | Ca_kabuli_scaffold | 63722                          | [A/C]       | 1067305644                                 |
| Ca_Kabuli_NW_004517356.1_30492  | Ca_kabuli_scaffold | 30492                          | [T/A]       | 1067305645                                 |
| Ca_Kabuli_NW_004517356.1_30494  | Ca_kabuli_scaffold | 30494                          | [A/T]       | 1067305646                                 |
| Ca_Kabuli_NW_004517356.1_30529  | Ca_kabuli_scaffold | 30529                          | [T/C]       | 1067305647                                 |
| Ca_Kabuli_NW_004517356.1_30540  | Ca_kabuli_scaffold | 30540                          | [A/G]       | 1067305648                                 |
| Ca_Kabuli_NW_004517356.1_33370  | Ca_kabuli_scaffold | 33370                          | [A/T]       | 1067305649                                 |
| Ca_Kabuli_NW_004517356.1_33413  | Ca_kabuli_scaffold | 33413                          | [T/A]       | 1067305650                                 |
| Ca_Kabuli_NW_004517356.1_340785 | Ca_kabuli_scaffold | 340785                         | [A/G]       | 1067305651                                 |
| Ca_Kabuli_NW_004517356.1_340797 | Ca_kabuli_scaffold | 340797                         | [T/C]       | 1067305652                                 |
| Ca_Kabuli_NW_004517356.1_340801 | Ca_kabuli_scaffold | 340801                         | [A/G]       | 1067305653                                 |
| Ca_Kabuli_NW_004517356.1_340803 | Ca_kabuli_scaffold | 340803                         | [T/G]       | 1067305654                                 |
| Ca_Kabuli_NW_004517356.1_340815 | Ca_kabuli_scaffold | 340815                         | [T/A]       | 1067305655                                 |
| Ca_Kabuli_NW_004517402.1_28507  | Ca_kabuli_scaffold | 28507                          | [A/G]       | 1067305656                                 |
| Ca_Kabuli_NW_004517402.1_28529  | Ca_kabuli_scaffold | 28529                          | [A/C]       | 1067305657                                 |
| Ca_Kabuli_NW_004517402.1_28547  | Ca_kabuli_scaffold | 28547                          | [G/A]       | 1067305658                                 |
| Ca_Kabuli_NW_004517443.1_41511  | Ca_kabuli_scaffold | 41511                          | [T/C]       | 1067305659                                 |
| Ca_Kabuli_NW_004517447.1_67840  | Ca_kabuli_scaffold | 67840                          | [T/G]       | 1067305660                                 |
| Ca_Kabuli_NW_004517457.1_37063  | Ca_kabuli_scaffold | 37063                          | [T/A]       | 1067305661                                 |
| Ca_Kabuli_NW_004517481.1_58079  | Ca_kabuli_scaffold | 58079                          | [T/G]       | 1067305662                                 |
| Ca_Kabuli_NW_004517481.1_58106  | Ca_kabuli_scaffold | 58106                          | [A/C]       | 1067305663                                 |
| Ca_Kabuli_NW_004517481.1_88514  | Ca_kabuli_scaffold | 88514                          | [A/G]       | 1067305664                                 |

| <b>SNP IDs</b>                  | <b>Chromosomes</b> | <b>Physical positions (bp)</b> | <b>SNPs</b> | <b>NCBI SNPdb accession IDs (NCBI_ss#)</b> |
|---------------------------------|--------------------|--------------------------------|-------------|--------------------------------------------|
| Ca_Kabuli_NW_004517481.1_88521  | Ca_kabuli_scaffold | 88521                          | [A/G]       | 1067305665                                 |
| Ca_Kabuli_NW_004517481.1_88522  | Ca_kabuli_scaffold | 88522                          | [G/A]       | 1067305666                                 |
| Ca_Kabuli_NW_004517487.1_58701  | Ca_kabuli_scaffold | 58701                          | [A/G]       | 1067305667                                 |
| Ca_Kabuli_NW_004517487.1_58707  | Ca_kabuli_scaffold | 58707                          | [T/G]       | 1067305668                                 |
| Ca_Kabuli_NW_004517487.1_58714  | Ca_kabuli_scaffold | 58714                          | [T/G]       | 1067305669                                 |
| Ca_Kabuli_NW_004517487.1_58750  | Ca_kabuli_scaffold | 58750                          | [T/G]       | 1067305670                                 |
| Ca_Kabuli_NW_004517487.1_60138  | Ca_kabuli_scaffold | 60138                          | [T/G]       | 1067305671                                 |
| Ca_Kabuli_NW_004517487.1_60164  | Ca_kabuli_scaffold | 60164                          | [T/G]       | 1067305672                                 |
| Ca_Kabuli_NW_004517487.1_101197 | Ca_kabuli_scaffold | 101197                         | [A/C]       | 1067305673                                 |
| Ca_Kabuli_NW_004517487.1_129934 | Ca_kabuli_scaffold | 129934                         | [C/A]       | 1067305674                                 |
| Ca_Kabuli_NW_004517487.1_129937 | Ca_kabuli_scaffold | 129937                         | [G/C]       | 1067305675                                 |
| Ca_Kabuli_NW_004517487.1_129944 | Ca_kabuli_scaffold | 129944                         | [T/C]       | 1067305676                                 |
| Ca_Kabuli_NW_004517487.1_129950 | Ca_kabuli_scaffold | 129950                         | [T/C]       | 1067305677                                 |
| Ca_Kabuli_NW_004517487.1_129952 | Ca_kabuli_scaffold | 129952                         | [T/G]       | 1067305678                                 |
| Ca_Kabuli_NW_004517487.1_129956 | Ca_kabuli_scaffold | 129956                         | [T/A]       | 1067305679                                 |
| Ca_Kabuli_NW_004517487.1_129963 | Ca_kabuli_scaffold | 129963                         | [C/G]       | 1067305680                                 |
| Ca_Kabuli_NW_004517520.1_175212 | Ca_kabuli_scaffold | 175212                         | [A/G]       | 1067305681                                 |
| Ca_Kabuli_NW_004517520.1_463271 | Ca_kabuli_scaffold | 463271                         | [T/C]       | 1067305682                                 |
| Ca_Kabuli_NW_004517520.1_482352 | Ca_kabuli_scaffold | 482352                         | [T/A]       | 1067305683                                 |
| Ca_Kabuli_NW_004517520.1_482401 | Ca_kabuli_scaffold | 482401                         | [A/C]       | 1067305684                                 |
| Ca_Kabuli_NW_004517591.1_180056 | Ca_kabuli_scaffold | 180056                         | [A/C]       | 1067305685                                 |
| Ca_Kabuli_NW_004517591.1_180060 | Ca_kabuli_scaffold | 180060                         | [A/T]       | 1067305686                                 |
| Ca_Kabuli_NW_004517592.1_75477  | Ca_kabuli_scaffold | 75477                          | [T/G]       | 1067305687                                 |
| Ca_Kabuli_NW_004517592.1_75546  | Ca_kabuli_scaffold | 75546                          | [T/G]       | 1067305688                                 |
| Ca_Kabuli_NW_004517592.1_75593  | Ca_kabuli_scaffold | 75593                          | [T/G]       | 1067305689                                 |
| Ca_Kabuli_NW_004517592.1_75598  | Ca_kabuli_scaffold | 75598                          | [T/G]       | 1067305690                                 |
| Ca_Kabuli_NW_004517592.1_75616  | Ca_kabuli_scaffold | 75616                          | [T/G]       | 1067305691                                 |
| Ca_Kabuli_NW_004517597.1_966    | Ca_kabuli_scaffold | 966                            | [A/C]       | 1067305692                                 |
| Ca_Kabuli_NW_004517597.1_1172   | Ca_kabuli_scaffold | 1172                           | [T/C]       | 1067305693                                 |
| Ca_Kabuli_NW_004517624.1_21347  | Ca_kabuli_scaffold | 21347                          | [A/C]       | 1067305694                                 |
| Ca_Kabuli_NW_004517624.1_24466  | Ca_kabuli_scaffold | 24466                          | [T/G]       | 1067305695                                 |
| Ca_Kabuli_NW_004517624.1_30420  | Ca_kabuli_scaffold | 30420                          | [A/G]       | 1067305696                                 |
| Ca_Kabuli_NW_004517624.1_42786  | Ca_kabuli_scaffold | 42786                          | [A/G]       | 1067305697                                 |
| Ca_Kabuli_NW_004517624.1_43325  | Ca_kabuli_scaffold | 43325                          | [A/G]       | 1067305698                                 |

| <b>SNP IDs</b>                  | <b>Chromosomes</b> | <b>Physical positions (bp)</b> | <b>SNPs</b> | <b>NCBI SNPdb accession IDs (NCBI_ss#)</b> |
|---------------------------------|--------------------|--------------------------------|-------------|--------------------------------------------|
| Ca_Kabuli_NW_004517624.1_49533  | Ca_kabuli_scaffold | 49533                          | [T/A]       | 1067305699                                 |
| Ca_Kabuli_NW_004517624.1_49622  | Ca_kabuli_scaffold | 49622                          | [T/G]       | 1067305700                                 |
| Ca_Kabuli_NW_004517624.1_49700  | Ca_kabuli_scaffold | 49700                          | [G/A]       | 1067305701                                 |
| Ca_Kabuli_NW_004517624.1_82199  | Ca_kabuli_scaffold | 82199                          | [T/C]       | 1067305702                                 |
| Ca_Kabuli_NW_004517624.1_82208  | Ca_kabuli_scaffold | 82208                          | [T/C]       | 1067305703                                 |
| Ca_Kabuli_NW_004517624.1_82266  | Ca_kabuli_scaffold | 82266                          | [A/C]       | 1067305704                                 |
| Ca_Kabuli_NW_004517624.1_82284  | Ca_kabuli_scaffold | 82284                          | [A/C]       | 1067305705                                 |
| Ca_Kabuli_NW_004517624.1_82319  | Ca_kabuli_scaffold | 82319                          | [T/C]       | 1067305706                                 |
| Ca_Kabuli_NW_004517624.1_82328  | Ca_kabuli_scaffold | 82328                          | [A/G]       | 1067305707                                 |
| Ca_Kabuli_NW_004517624.1_82342  | Ca_kabuli_scaffold | 82342                          | [C/T]       | 1067305708                                 |
| Ca_Kabuli_NW_004517624.1_82369  | Ca_kabuli_scaffold | 82369                          | [G/A]       | 1067305709                                 |
| Ca_Kabuli_NW_004517624.1_82397  | Ca_kabuli_scaffold | 82397                          | [T/C]       | 1067305710                                 |
| Ca_Kabuli_NW_004517624.1_82417  | Ca_kabuli_scaffold | 82417                          | [C/T]       | 1067305711                                 |
| Ca_Kabuli_NW_004517624.1_93769  | Ca_kabuli_scaffold | 93769                          | [T/C]       | 1067305712                                 |
| Ca_Kabuli_NW_004517624.1_94085  | Ca_kabuli_scaffold | 94085                          | [C/A]       | 1067305713                                 |
| Ca_Kabuli_NW_004517624.1_94245  | Ca_kabuli_scaffold | 94245                          | [C/T]       | 1067305714                                 |
| Ca_Kabuli_NW_004517624.1_94277  | Ca_kabuli_scaffold | 94277                          | [T/C]       | 1067305715                                 |
| Ca_Kabuli_NW_004517624.1_96526  | Ca_kabuli_scaffold | 96526                          | [T/C]       | 1067305716                                 |
| Ca_Kabuli_NW_004517624.1_99364  | Ca_kabuli_scaffold | 99364                          | [A/G]       | 1067305717                                 |
| Ca_Kabuli_NW_004517624.1_99477  | Ca_kabuli_scaffold | 99477                          | [T/A]       | 1067305718                                 |
| Ca_Kabuli_NW_004517624.1_99533  | Ca_kabuli_scaffold | 99533                          | [T/G]       | 1067305719                                 |
| Ca_Kabuli_NW_004517624.1_99544  | Ca_kabuli_scaffold | 99544                          | [A/T]       | 1067305720                                 |
| Ca_Kabuli_NW_004517624.1_101084 | Ca_kabuli_scaffold | 101084                         | [A/C]       | 1067305721                                 |
| Ca_Kabuli_NW_004517624.1_101448 | Ca_kabuli_scaffold | 101448                         | [A/T]       | 1067305722                                 |
| Ca_Kabuli_NW_004517624.1_101490 | Ca_kabuli_scaffold | 101490                         | [C/T]       | 1067305723                                 |
| Ca_Kabuli_NW_004517624.1_104391 | Ca_kabuli_scaffold | 104391                         | [T/G]       | 1067305724                                 |
| Ca_Kabuli_NW_004517624.1_104549 | Ca_kabuli_scaffold | 104549                         | [C/G]       | 1067305725                                 |
| Ca_Kabuli_NW_004517624.1_105126 | Ca_kabuli_scaffold | 105126                         | [T/C]       | 1067305726                                 |
| Ca_Kabuli_NW_004517624.1_105170 | Ca_kabuli_scaffold | 105170                         | [T/C]       | 1067305727                                 |
| Ca_Kabuli_NW_004517624.1_106920 | Ca_kabuli_scaffold | 106920                         | [T/C]       | 1067305728                                 |
| Ca_Kabuli_NW_004517624.1_106936 | Ca_kabuli_scaffold | 106936                         | [G/A]       | 1067305729                                 |
| Ca_Kabuli_NW_004517624.1_106974 | Ca_kabuli_scaffold | 106974                         | [T/C]       | 1067305730                                 |
| Ca_Kabuli_NW_004517624.1_107087 | Ca_kabuli_scaffold | 107087                         | [G/A]       | 1067305731                                 |
| Ca_Kabuli_NW_004517624.1_107311 | Ca_kabuli_scaffold | 107311                         | [A/T]       | 1067305732                                 |

| <b>SNP IDs</b>                  | <b>Chromosomes</b> | <b>Physical positions (bp)</b> | <b>SNPs</b> | <b>NCBI SNPdb accession IDs (NCBI_ss#)</b> |
|---------------------------------|--------------------|--------------------------------|-------------|--------------------------------------------|
| Ca_Kabuli_NW_004517624.1_107314 | Ca_kabuli_scaffold | 107314                         | [A/C]       | 1067305733                                 |
| Ca_Kabuli_NW_004517624.1_107325 | Ca_kabuli_scaffold | 107325                         | [A/G]       | 1067305734                                 |
| Ca_Kabuli_NW_004517624.1_107345 | Ca_kabuli_scaffold | 107345                         | [T/G]       | 1067305735                                 |
| Ca_Kabuli_NW_004517624.1_107347 | Ca_kabuli_scaffold | 107347                         | [G/T]       | 1067305736                                 |
| Ca_Kabuli_NW_004517624.1_107355 | Ca_kabuli_scaffold | 107355                         | [G/A]       | 1067305737                                 |
| Ca_Kabuli_NW_004517624.1_107376 | Ca_kabuli_scaffold | 107376                         | [C/T]       | 1067305738                                 |
| Ca_Kabuli_NW_004517624.1_107413 | Ca_kabuli_scaffold | 107413                         | [A/G]       | 1067305739                                 |
| Ca_Kabuli_NW_004517624.1_107437 | Ca_kabuli_scaffold | 107437                         | [T/C]       | 1067305740                                 |
| Ca_Kabuli_NW_004517624.1_107486 | Ca_kabuli_scaffold | 107486                         | [T/C]       | 1067305741                                 |
| Ca_Kabuli_NW_004517624.1_107488 | Ca_kabuli_scaffold | 107488                         | [T/C]       | 1067305742                                 |
| Ca_Kabuli_NW_004517624.1_108560 | Ca_kabuli_scaffold | 108560                         | [T/G]       | 1067305743                                 |
| Ca_Kabuli_NW_004517624.1_108599 | Ca_kabuli_scaffold | 108599                         | [T/A]       | 1067305744                                 |
| Ca_Kabuli_NW_004517624.1_108763 | Ca_kabuli_scaffold | 108763                         | [T/G]       | 1067305745                                 |
| Ca_Kabuli_NW_004517624.1_112346 | Ca_kabuli_scaffold | 112346                         | [T/C]       | 1067305746                                 |
| Ca_Kabuli_NW_004517624.1_112359 | Ca_kabuli_scaffold | 112359                         | [T/G]       | 1067305747                                 |
| Ca_Kabuli_NW_004517624.1_112382 | Ca_kabuli_scaffold | 112382                         | [A/C]       | 1067305748                                 |
| Ca_Kabuli_NW_004517624.1_112836 | Ca_kabuli_scaffold | 112836                         | [C/T]       | 1067305749                                 |
| Ca_Kabuli_NW_004517624.1_125716 | Ca_kabuli_scaffold | 125716                         | [T/C]       | 1067305750                                 |
| Ca_Kabuli_NW_004517624.1_128027 | Ca_kabuli_scaffold | 128027                         | [G/A]       | 1067305751                                 |
| Ca_Kabuli_NW_004517624.1_133462 | Ca_kabuli_scaffold | 133462                         | [G/A]       | 1067305752                                 |
| Ca_Kabuli_NW_004517718.1_56358  | Ca_kabuli_scaffold | 56358                          | [T/G]       | 1067305753                                 |
| Ca_Kabuli_NW_004517746.1_248    | Ca_kabuli_scaffold | 248                            | [A/G]       | 1067305754                                 |
| Ca_Kabuli_NW_004517746.1_253    | Ca_kabuli_scaffold | 253                            | [C/T]       | 1067305755                                 |
| Ca_Kabuli_NW_004517746.1_272    | Ca_kabuli_scaffold | 272                            | [C/T]       | 1067305756                                 |
| Ca_Kabuli_NW_004517766.1_33631  | Ca_kabuli_scaffold | 33631                          | [A/G]       | 1067305757                                 |
| Ca_Kabuli_NW_004517766.1_33632  | Ca_kabuli_scaffold | 33632                          | [G/T]       | 1067305758                                 |
| Ca_Kabuli_NW_004517766.1_33655  | Ca_kabuli_scaffold | 33655                          | [A/G]       | 1067305759                                 |
| Ca_Kabuli_NW_004517767.1_77     | Ca_kabuli_scaffold | 77                             | [G/C]       | 1067305760                                 |
| Ca_Kabuli_NW_004517767.1_88     | Ca_kabuli_scaffold | 88                             | [C/T]       | 1067305761                                 |
| Ca_Kabuli_NW_004517767.1_119    | Ca_kabuli_scaffold | 119                            | [A/T]       | 1067305762                                 |
| Ca_Kabuli_NW_004517767.1_129    | Ca_kabuli_scaffold | 129                            | [C/G]       | 1067305763                                 |
| Ca_Kabuli_NW_004517773.1_7348   | Ca_kabuli_scaffold | 7348                           | [G/A]       | 1067305764                                 |
| Ca_Kabuli_NW_004517773.1_7364   | Ca_kabuli_scaffold | 7364                           | [C/A]       | 1067305765                                 |
| Ca_Kabuli_NW_004517773.1_7377   | Ca_kabuli_scaffold | 7377                           | [A/G]       | 1067305766                                 |

| <b>SNP IDs</b>                  | <b>Chromosomes</b> | <b>Physical positions (bp)</b> | <b>SNPs</b> | <b>NCBI SNPdb accession IDs (NCBI_ss#)</b> |
|---------------------------------|--------------------|--------------------------------|-------------|--------------------------------------------|
| Ca_Kabuli_NW_004517815.1_21636  | Ca_kabuli_scaffold | 21636                          | [A/C]       | 1067305767                                 |
| Ca_Kabuli_NW_004517815.1_33530  | Ca_kabuli_scaffold | 33530                          | [G/T]       | 1067305768                                 |
| Ca_Kabuli_NW_004517815.1_33532  | Ca_kabuli_scaffold | 33532                          | [C/A]       | 1067305769                                 |
| Ca_Kabuli_NW_004517815.1_64310  | Ca_kabuli_scaffold | 64310                          | [T/G]       | 1067305770                                 |
| Ca_Kabuli_NW_004517815.1_64316  | Ca_kabuli_scaffold | 64316                          | [T/A]       | 1067305771                                 |
| Ca_Kabuli_NW_004517903.1_75955  | Ca_kabuli_scaffold | 75955                          | [C/T]       | 1067305772                                 |
| Ca_Kabuli_NW_004517917.1_888    | Ca_kabuli_scaffold | 888                            | [C/G]       | 1067305773                                 |
| Ca_Kabuli_NW_004517917.1_896    | Ca_kabuli_scaffold | 896                            | [G/T]       | 1067305774                                 |
| Ca_Kabuli_NW_004517917.1_904    | Ca_kabuli_scaffold | 904                            | [A/T]       | 1067305775                                 |
| Ca_Kabuli_NW_004517929.1_77463  | Ca_kabuli_scaffold | 77463                          | [T/C]       | 1067305776                                 |
| Ca_Kabuli_NW_004517929.1_146047 | Ca_kabuli_scaffold | 146047                         | [T/C]       | 1067305777                                 |
| Ca_Kabuli_NW_004517976.1_947    | Ca_kabuli_scaffold | 947                            | [C/T]       | 1067305778                                 |
| Ca_Kabuli_NW_004517976.1_961    | Ca_kabuli_scaffold | 961                            | [C/T]       | 1067305779                                 |
| Ca_Kabuli_NW_004517976.1_977    | Ca_kabuli_scaffold | 977                            | [C/A]       | 1067305780                                 |
| Ca_Kabuli_NW_004517998.1_28221  | Ca_kabuli_scaffold | 28221                          | [A/G]       | 1067305781                                 |
| Ca_Kabuli_NW_004517998.1_28231  | Ca_kabuli_scaffold | 28231                          | [A/G]       | 1067305782                                 |
| Ca_Kabuli_NW_004517998.1_28240  | Ca_kabuli_scaffold | 28240                          | [A/C]       | 1067305783                                 |
| Ca_Kabuli_NW_004517998.1_46413  | Ca_kabuli_scaffold | 46413                          | [T/G]       | 1067305784                                 |
| Ca_Kabuli_NW_004517998.1_186175 | Ca_kabuli_scaffold | 186175                         | [T/A]       | 1067305785                                 |
| Ca_Kabuli_NW_004517998.1_186185 | Ca_kabuli_scaffold | 186185                         | [A/G]       | 1067305786                                 |
| Ca_Kabuli_NW_004517998.1_186189 | Ca_kabuli_scaffold | 186189                         | [T/G]       | 1067305787                                 |
| Ca_Kabuli_NW_004517998.1_249521 | Ca_kabuli_scaffold | 249521                         | [A/T]       | 1067305788                                 |
| Ca_Kabuli_NW_004518044.1_17930  | Ca_kabuli_scaffold | 17930                          | [T/G]       | 1067305789                                 |
| Ca_Kabuli_NW_004518104.1_38566  | Ca_kabuli_scaffold | 38566                          | [T/G]       | 1067305790                                 |
| Ca_Kabuli_NW_004518104.1_60525  | Ca_kabuli_scaffold | 60525                          | [T/C]       | 1067305791                                 |
| Ca_Kabuli_NW_004518104.1_60545  | Ca_kabuli_scaffold | 60545                          | [T/C]       | 1067305792                                 |
| Ca_Kabuli_NW_004518104.1_62768  | Ca_kabuli_scaffold | 62768                          | [G/A]       | 1067305793                                 |
| Ca_Kabuli_NW_004518104.1_106137 | Ca_kabuli_scaffold | 106137                         | [G/A]       | 1067305794                                 |
| Ca_Kabuli_NW_004518104.1_106142 | Ca_kabuli_scaffold | 106142                         | [C/T]       | 1067305795                                 |
| Ca_Kabuli_NW_004518104.1_106174 | Ca_kabuli_scaffold | 106174                         | [A/T]       | 1067305796                                 |
| Ca_Kabuli_NW_004518104.1_106187 | Ca_kabuli_scaffold | 106187                         | [A/T]       | 1067305797                                 |
| Ca_Kabuli_NW_004518120.1_93003  | Ca_kabuli_scaffold | 93003                          | [A/G]       | 1067305798                                 |
| Ca_Kabuli_NW_004518183.1_2902   | Ca_kabuli_scaffold | 2902                           | [T/G]       | 1067305799                                 |
| Ca_Kabuli_NW_004518201.1_1431   | Ca_kabuli_scaffold | 1431                           | [G/A]       | 1067305800                                 |

| <b>SNP IDs</b>                 | <b>Chromosomes</b> | <b>Physical positions (bp)</b> | <b>SNPs</b> | <b>NCBI SNPdb accession IDs (NCBI_ss#)</b> |
|--------------------------------|--------------------|--------------------------------|-------------|--------------------------------------------|
| Ca_Kabuli_NW_004518201.1_1550  | Ca_kabuli_scaffold | 1550                           | [T/G]       | 1067305801                                 |
| Ca_Kabuli_NW_004518237.1_1651  | Ca_kabuli_scaffold | 1651                           | [G/A]       | 1067305802                                 |
| Ca_Kabuli_NW_004518354.1_66073 | Ca_kabuli_scaffold | 66073                          | [T/C]       | 1067305803                                 |
| Ca_Kabuli_NW_004518416.1_5372  | Ca_kabuli_scaffold | 5372                           | [G/T]       | 1067305804                                 |
| Ca_Kabuli_NW_004518416.1_5385  | Ca_kabuli_scaffold | 5385                           | [G/C]       | 1067305805                                 |
| Ca_Kabuli_NW_004518445.1_12209 | Ca_kabuli_scaffold | 12209                          | [C/G]       | 1067305806                                 |
| Ca_Kabuli_NW_004518445.1_12210 | Ca_kabuli_scaffold | 12210                          | [C/A]       | 1067305807                                 |
| Ca_Kabuli_NW_004518445.1_12212 | Ca_kabuli_scaffold | 12212                          | [G/C]       | 1067305808                                 |
| Ca_Kabuli_NW_004518445.1_12213 | Ca_kabuli_scaffold | 12213                          | [G/T]       | 1067305809                                 |
| Ca_Kabuli_NW_004518445.1_65004 | Ca_kabuli_scaffold | 65004                          | [G/C]       | 1067305810                                 |
| Ca_Kabuli_NW_004518452.1_25070 | Ca_kabuli_scaffold | 25070                          | [C/T]       | 1067305811                                 |
| Ca_Kabuli_NW_004518483.1_7314  | Ca_kabuli_scaffold | 7314                           | [T/C]       | 1067305812                                 |
| Ca_Kabuli_NW_004518485.1_2222  | Ca_kabuli_scaffold | 2222                           | [A/G]       | 1067305813                                 |
| Ca_Kabuli_NW_004518498.1_17198 | Ca_kabuli_scaffold | 17198                          | [C/T]       | 1067305814                                 |
| Ca_Kabuli_NW_004518498.1_17199 | Ca_kabuli_scaffold | 17199                          | [A/G]       | 1067305815                                 |
| Ca_Kabuli_NW_004518508.1_1192  | Ca_kabuli_scaffold | 1192                           | [G/C]       | 1067305816                                 |
| Ca_Kabuli_NW_004518508.1_1194  | Ca_kabuli_scaffold | 1194                           | [A/T]       | 1067305817                                 |
| Ca_Kabuli_NW_004518508.1_1196  | Ca_kabuli_scaffold | 1196                           | [C/T]       | 1067305818                                 |
| Ca_Kabuli_NW_004518508.1_1198  | Ca_kabuli_scaffold | 1198                           | [C/G]       | 1067305819                                 |
| Ca_Kabuli_NW_004518508.1_1201  | Ca_kabuli_scaffold | 1201                           | [G/T]       | 1067305820                                 |
| Ca_Kabuli_NW_004518508.1_1206  | Ca_kabuli_scaffold | 1206                           | [A/C]       | 1067305821                                 |
| Ca_Kabuli_NW_004518508.1_1208  | Ca_kabuli_scaffold | 1208                           | [A/G]       | 1067305822                                 |
| Ca_Kabuli_NW_004518508.1_1214  | Ca_kabuli_scaffold | 1214                           | [G/C]       | 1067305823                                 |
| Ca_Kabuli_NW_004518508.1_3349  | Ca_kabuli_scaffold | 3349                           | [T/G]       | 1067305824                                 |
| Ca_Kabuli_NW_004518508.1_3694  | Ca_kabuli_scaffold | 3694                           | [A/T]       | 1067305825                                 |
| Ca_Kabuli_NW_004518508.1_3716  | Ca_kabuli_scaffold | 3716                           | [A/G]       | 1067305826                                 |
| Ca_Kabuli_NW_004518508.1_3751  | Ca_kabuli_scaffold | 3751                           | [T/A]       | 1067305827                                 |
| Ca_Kabuli_NW_004518508.1_3752  | Ca_kabuli_scaffold | 3752                           | [G/T]       | 1067305828                                 |
| Ca_Kabuli_NW_004518508.1_3753  | Ca_kabuli_scaffold | 3753                           | [A/C]       | 1067305829                                 |
| Ca_Kabuli_NW_004518508.1_3754  | Ca_kabuli_scaffold | 3754                           | [G/T]       | 1067305830                                 |
| Ca_Kabuli_NW_004518508.1_3806  | Ca_kabuli_scaffold | 3806                           | [C/G]       | 1067305831                                 |
| Ca_Kabuli_NW_004518508.1_3807  | Ca_kabuli_scaffold | 3807                           | [T/A]       | 1067305832                                 |
| Ca_Kabuli_NW_004518508.1_3808  | Ca_kabuli_scaffold | 3808                           | [G/T]       | 1067305833                                 |
| Ca_Kabuli_NW_004518508.1_3809  | Ca_kabuli_scaffold | 3809                           | [T/C]       | 1067305834                                 |

| <b>SNP IDs</b>                  | <b>Chromosomes</b> | <b>Physical positions (bp)</b> | <b>SNPs</b> | <b>NCBI SNPdb accession IDs (NCBI_ss#)</b> |
|---------------------------------|--------------------|--------------------------------|-------------|--------------------------------------------|
| Ca_Kabuli_NW_004518508.1_3810   | Ca_kabuli_scaffold | 3810                           | [G/T]       | 1067305835                                 |
| Ca_Kabuli_NW_004518508.1_4630   | Ca_kabuli_scaffold | 4630                           | [T/G]       | 1067305836                                 |
| Ca_Kabuli_NW_004518508.1_6749   | Ca_kabuli_scaffold | 6749                           | [A/G]       | 1067305837                                 |
| Ca_Kabuli_NW_004518508.1_6776   | Ca_kabuli_scaffold | 6776                           | [A/G]       | 1067305838                                 |
| Ca_Kabuli_NW_004518508.1_6791   | Ca_kabuli_scaffold | 6791                           | [T/A]       | 1067305839                                 |
| Ca_Kabuli_NW_004518508.1_6802   | Ca_kabuli_scaffold | 6802                           | [G/A]       | 1067305840                                 |
| Ca_Kabuli_NW_004518508.1_7058   | Ca_kabuli_scaffold | 7058                           | [A/G]       | 1067305841                                 |
| Ca_Kabuli_NW_004518508.1_7062   | Ca_kabuli_scaffold | 7062                           | [C/T]       | 1067305842                                 |
| Ca_Kabuli_NW_004518508.1_7068   | Ca_kabuli_scaffold | 7068                           | [T/C]       | 1067305843                                 |
| Ca_Kabuli_NW_004518508.1_7088   | Ca_kabuli_scaffold | 7088                           | [A/G]       | 1067305844                                 |
| Ca_Kabuli_NW_004518508.1_7310   | Ca_kabuli_scaffold | 7310                           | [T/G]       | 1067305845                                 |
| Ca_Kabuli_NW_004518508.1_7345   | Ca_kabuli_scaffold | 7345                           | [G/A]       | 1067305846                                 |
| Ca_Kabuli_NW_004518508.1_7346   | Ca_kabuli_scaffold | 7346                           | [C/T]       | 1067305847                                 |
| Ca_Kabuli_NW_004518508.1_7347   | Ca_kabuli_scaffold | 7347                           | [G/A]       | 1067305848                                 |
| Ca_Kabuli_NW_004518508.1_7367   | Ca_kabuli_scaffold | 7367                           | [T/C]       | 1067305849                                 |
| Ca_Kabuli_NW_004518508.1_7375   | Ca_kabuli_scaffold | 7375                           | [A/C]       | 1067305850                                 |
| Ca_Kabuli_NW_004518508.1_7378   | Ca_kabuli_scaffold | 7378                           | [T/C]       | 1067305851                                 |
| Ca_Kabuli_NW_004518508.1_11968  | Ca_kabuli_scaffold | 11968                          | [C/A]       | 1067305852                                 |
| Ca_Kabuli_NW_004518508.1_12034  | Ca_kabuli_scaffold | 12034                          | [T/C]       | 1067305853                                 |
| Ca_Kabuli_NW_004518508.1_12063  | Ca_kabuli_scaffold | 12063                          | [T/G]       | 1067305854                                 |
| Ca_Kabuli_NW_004518508.1_12218  | Ca_kabuli_scaffold | 12218                          | [A/C]       | 1067305855                                 |
| Ca_Kabuli_NW_004518508.1_12231  | Ca_kabuli_scaffold | 12231                          | [A/T]       | 1067305856                                 |
| Ca_Kabuli_NW_004518508.1_13773  | Ca_kabuli_scaffold | 13773                          | [C/T]       | 1067305857                                 |
| Ca_Kabuli_NW_004518508.1_13810  | Ca_kabuli_scaffold | 13810                          | [G/T]       | 1067305858                                 |
| Ca_Kabuli_NW_004518508.1_13811  | Ca_kabuli_scaffold | 13811                          | [C/T]       | 1067305859                                 |
| Ca_Kabuli_NW_004518508.1_15064  | Ca_kabuli_scaffold | 15064                          | [T/G]       | 1067305860                                 |
| Ca_Kabuli_NW_004518508.1_15067  | Ca_kabuli_scaffold | 15067                          | [T/G]       | 1067305861                                 |
| Ca_Kabuli_NW_004518508.1_16936  | Ca_kabuli_scaffold | 16936                          | [G/A]       | 1067305862                                 |
| Ca_Kabuli_NW_004518508.1_16937  | Ca_kabuli_scaffold | 16937                          | [C/A]       | 1067305863                                 |
| Ca_Kabuli_NW_004518508.1_16938  | Ca_kabuli_scaffold | 16938                          | [C/T]       | 1067305864                                 |
| Ca_Kabuli_NW_004518558.1_96007  | Ca_kabuli_scaffold | 96007                          | [A/G]       | 1067305865                                 |
| Ca_Kabuli_NW_004518558.1_96223  | Ca_kabuli_scaffold | 96223                          | [C/G]       | 1067305866                                 |
| Ca_Kabuli_NW_004518558.1_148921 | Ca_kabuli_scaffold | 148921                         | [A/C]       | 1067305867                                 |
| Ca_Kabuli_NW_004518579.1_33391  | Ca_kabuli_scaffold | 33391                          | [T/A]       | 1067305868                                 |

| <b>SNP IDs</b>                  | <b>Chromosomes</b> | <b>Physical positions (bp)</b> | <b>SNPs</b> | <b>NCBI SNPdb accession IDs (NCBI_ss#)</b> |
|---------------------------------|--------------------|--------------------------------|-------------|--------------------------------------------|
| Ca_Kabuli_NW_004518589.1_16508  | Ca_kabuli_scaffold | 16508                          | [T/G]       | 1067305869                                 |
| Ca_Kabuli_NW_004518682.1_13135  | Ca_kabuli_scaffold | 13135                          | [C/T]       | 1067305870                                 |
| Ca_Kabuli_NW_004518682.1_13153  | Ca_kabuli_scaffold | 13153                          | [T/A]       | 1067305871                                 |
| Ca_Kabuli_NW_004518682.1_13169  | Ca_kabuli_scaffold | 13169                          | [A/C]       | 1067305872                                 |
| Ca_Kabuli_NW_004518682.1_13180  | Ca_kabuli_scaffold | 13180                          | [T/C]       | 1067305873                                 |
| Ca_Kabuli_NW_004518704.1_53441  | Ca_kabuli_scaffold | 53441                          | [C/A]       | 1067305874                                 |
| Ca_Kabuli_NW_004518704.1_53448  | Ca_kabuli_scaffold | 53448                          | [T/C]       | 1067305875                                 |
| Ca_Kabuli_NW_004518732.1_7222   | Ca_kabuli_scaffold | 7222                           | [A/C]       | 1067305876                                 |
| Ca_Kabuli_NW_004518732.1_7237   | Ca_kabuli_scaffold | 7237                           | [C/A]       | 1067305877                                 |
| Ca_Kabuli_NW_004518732.1_7251   | Ca_kabuli_scaffold | 7251                           | [A/G]       | 1067305878                                 |
| Ca_Kabuli_NW_004518732.1_7255   | Ca_kabuli_scaffold | 7255                           | [T/A]       | 1067305879                                 |
| Ca_Kabuli_NW_004518732.1_10304  | Ca_kabuli_scaffold | 10304                          | [A/T]       | 1067305880                                 |
| Ca_Kabuli_NW_004518830.1_276    | Ca_kabuli_scaffold | 276                            | [C/T]       | 1067305881                                 |
| Ca_Kabuli_NW_004518856.1_36723  | Ca_kabuli_scaffold | 36723                          | [T/A]       | 1067305882                                 |
| Ca_Kabuli_NW_004518856.1_36727  | Ca_kabuli_scaffold | 36727                          | [A/G]       | 1067305883                                 |
| Ca_Kabuli_NW_004518897.1_23636  | Ca_kabuli_scaffold | 23636                          | [A/G]       | 1067305884                                 |
| Ca_Kabuli_NW_004519037.1_1026   | Ca_kabuli_scaffold | 1026                           | [C/A]       | 1067305885                                 |
| Ca_Kabuli_NW_004519077.1_16211  | Ca_kabuli_scaffold | 16211                          | [T/G]       | 1067305886                                 |
| Ca_Kabuli_NW_004519077.1_55292  | Ca_kabuli_scaffold | 55292                          | [T/A]       | 1067305887                                 |
| Ca_Kabuli_NW_004519077.1_55347  | Ca_kabuli_scaffold | 55347                          | [T/G]       | 1067305888                                 |
| Ca_Kabuli_NW_004519077.1_64377  | Ca_kabuli_scaffold | 64377                          | [A/C]       | 1067305889                                 |
| Ca_Kabuli_NW_004519077.1_71640  | Ca_kabuli_scaffold | 71640                          | [T/A]       | 1067305890                                 |
| Ca_Kabuli_NW_004519077.1_72655  | Ca_kabuli_scaffold | 72655                          | [A/C]       | 1067305891                                 |
| Ca_Kabuli_NW_004519077.1_106016 | Ca_kabuli_scaffold | 106016                         | [A/G]       | 1067305892                                 |
| Ca_Kabuli_NW_004519077.1_111989 | Ca_kabuli_scaffold | 111989                         | [T/A]       | 1067305893                                 |
| Ca_Kabuli_NW_004519081.1_1404   | Ca_kabuli_scaffold | 1404                           | [C/A]       | 1067305894                                 |
| Ca_Kabuli_NW_004519117.1_6666   | Ca_kabuli_scaffold | 6666                           | [C/G]       | 1067305895                                 |
| Ca_Kabuli_NW_004519117.1_6693   | Ca_kabuli_scaffold | 6693                           | [T/C]       | 1067305896                                 |
| Ca_Kabuli_NW_004519117.1_6722   | Ca_kabuli_scaffold | 6722                           | [A/C]       | 1067305897                                 |
| Ca_Kabuli_NW_004519117.1_6736   | Ca_kabuli_scaffold | 6736                           | [G/A]       | 1067305898                                 |
| Ca_Kabuli_NW_004519365.1_5908   | Ca_kabuli_scaffold | 5908                           | [T/C]       | 1067305899                                 |
| Ca_Kabuli_NW_004519449.1_1115   | Ca_kabuli_scaffold | 1115                           | [A/T]       | 1067305900                                 |
| Ca_Kabuli_NW_004519694.1_15766  | Ca_kabuli_scaffold | 15766                          | [T/G]       | 1067305901                                 |
| Ca_Kabuli_NW_004519694.1_36309  | Ca_kabuli_scaffold | 36309                          | [T/G]       | 1067305902                                 |



| <b>SNP IDs</b>                 | <b>Chromosomes</b> | <b>Physical positions (bp)</b> | <b>SNPs</b> | <b>NCBI SNPdb accession IDs (NCBI_ss#)</b> |
|--------------------------------|--------------------|--------------------------------|-------------|--------------------------------------------|
| Ca_Kabuli_NW_004519694.1_36336 | Ca_kabuli_scaffold | 36336                          | [T/G]       | 1067305903                                 |
| Ca_Kabuli_NW_004519694.1_36338 | Ca_kabuli_scaffold | 36338                          | [T/G]       | 1067305904                                 |
| Ca_Kabuli_NW_004519694.1_36368 | Ca_kabuli_scaffold | 36368                          | [A/G]       | 1067305905                                 |
| Ca_Kabuli_NW_004519745.1_65184 | Ca_kabuli_scaffold | 65184                          | [A/G]       | 1067305906                                 |
| Ca_Kabuli_NW_004519745.1_65186 | Ca_kabuli_scaffold | 65186                          | [T/G]       | 1067305907                                 |
| Ca_Kabuli_NW_004519745.1_65198 | Ca_kabuli_scaffold | 65198                          | [C/T]       | 1067305908                                 |
| Ca_Kabuli_NW_004519745.1_86405 | Ca_kabuli_scaffold | 86405                          | [T/G]       | 1067305909                                 |
| Ca_Kabuli_NW_004519745.1_86597 | Ca_kabuli_scaffold | 86597                          | [A/T]       | 1067305910                                 |
| Ca_Kabuli_NW_004519863.1_1146  | Ca_kabuli_scaffold | 1146                           | [T/G]       | 1067305911                                 |
| Ca_Kabuli_NW_004519863.1_1165  | Ca_kabuli_scaffold | 1165                           | [T/C]       | 1067305912                                 |
| Ca_Kabuli_NW_004519863.1_1205  | Ca_kabuli_scaffold | 1205                           | [T/C]       | 1067305913                                 |
| Ca_Kabuli_NW_004519863.1_1214  | Ca_kabuli_scaffold | 1214                           | [A/G]       | 1067305914                                 |
| Ca_Kabuli_NW_004519863.1_1218  | Ca_kabuli_scaffold | 1218                           | [T/C]       | 1067305915                                 |
| Ca_Kabuli_NW_004519863.1_1270  | Ca_kabuli_scaffold | 1270                           | [C/T]       | 1067305916                                 |
| Ca_Kabuli_NW_004519863.1_1284  | Ca_kabuli_scaffold | 1284                           | [T/C]       | 1067305917                                 |
| Ca_Kabuli_NW_004519863.1_1294  | Ca_kabuli_scaffold | 1294                           | [T/C]       | 1067305918                                 |
| Ca_Kabuli_NW_004519890.1_697   | Ca_kabuli_scaffold | 697                            | [T/C]       | 1067305919                                 |
| Ca_Kabuli_NW_004519890.1_725   | Ca_kabuli_scaffold | 725                            | [A/C]       | 1067305920                                 |
| Ca_Kabuli_NW_004519913.1_8190  | Ca_kabuli_scaffold | 8190                           | [T/G]       | 1067305921                                 |
| Ca_Kabuli_NW_004519944.1_1007  | Ca_kabuli_scaffold | 1007                           | [G/T]       | 1067305922                                 |
| Ca_Kabuli_NW_004519944.1_1010  | Ca_kabuli_scaffold | 1010                           | [C/T]       | 1067305923                                 |
| Ca_Kabuli_NW_004519944.1_1034  | Ca_kabuli_scaffold | 1034                           | [C/T]       | 1067305924                                 |
| Ca_Kabuli_NW_004519944.1_1038  | Ca_kabuli_scaffold | 1038                           | [G/T]       | 1067305925                                 |
| Ca_Kabuli_NW_004519971.1_2114  | Ca_kabuli_scaffold | 2114                           | [A/T]       | 1067305926                                 |
| Ca_Kabuli_NW_004520065.1_542   | Ca_kabuli_scaffold | 542                            | [G/A]       | 1067305927                                 |
| Ca_Kabuli_NW_004520065.1_567   | Ca_kabuli_scaffold | 567                            | [A/T]       | 1067305928                                 |
| Ca_Kabuli_NW_004520065.1_576   | Ca_kabuli_scaffold | 576                            | [T/C]       | 1067305929                                 |
| Ca_Kabuli_NW_004520127.1_6819  | Ca_kabuli_scaffold | 6819                           | [A/G]       | 1067305930                                 |
| Ca_Kabuli_NW_004520127.1_25710 | Ca_kabuli_scaffold | 25710                          | [T/G]       | 1067305931                                 |
| Ca_Kabuli_NW_004520127.1_25740 | Ca_kabuli_scaffold | 25740                          | [A/C]       | 1067305932                                 |
| Ca_Kabuli_NW_004520466.1_195   | Ca_kabuli_scaffold | 195                            | [C/T]       | 1067305933                                 |
| Ca_Kabuli_NW_004520497.1_23645 | Ca_kabuli_scaffold | 23645                          | [T/A]       | 1067305934                                 |
| Ca_Kabuli_NW_004520497.1_23661 | Ca_kabuli_scaffold | 23661                          | [T/G]       | 1067305935                                 |
| Ca_Kabuli_NW_004520497.1_23694 | Ca_kabuli_scaffold | 23694                          | [A/G]       | 1067305936                                 |

| <b>SNP IDs</b>                 | <b>Chromosomes</b> | <b>Physical positions (bp)</b> | <b>SNPs</b> | <b>NCBI SNPdb accession IDs (NCBI_ss#)</b> |
|--------------------------------|--------------------|--------------------------------|-------------|--------------------------------------------|
| Ca_Kabuli_NW_004520497.1_43433 | Ca_kabuli_scaffold | 43433                          | [A/C]       | 1067305937                                 |
| Ca_Kabuli_NW_004520747.1_1686  | Ca_kabuli_scaffold | 1686                           | [G/C]       | 1067305938                                 |
| Ca_Kabuli_NW_004520754.1_9558  | Ca_kabuli_scaffold | 9558                           | [A/G]       | 1067305939                                 |
| Ca_Kabuli_NW_004520754.1_9563  | Ca_kabuli_scaffold | 9563                           | [A/G]       | 1067305940                                 |
| Ca_Kabuli_NW_004520942.1_503   | Ca_kabuli_scaffold | 503                            | [C/T]       | 1067305941                                 |
| Ca_Kabuli_NW_004520942.1_549   | Ca_kabuli_scaffold | 549                            | [G/A]       | 1067305942                                 |
| Ca_Kabuli_NW_004520987.1_2577  | Ca_kabuli_scaffold | 2577                           | [T/A]       | 1067305943                                 |
| Ca_Kabuli_NW_004520987.1_2579  | Ca_kabuli_scaffold | 2579                           | [C/T]       | 1067305944                                 |
| Ca_Kabuli_NW_004520987.1_2583  | Ca_kabuli_scaffold | 2583                           | [C/G]       | 1067305945                                 |
| Ca_Kabuli_NW_004520987.1_2625  | Ca_kabuli_scaffold | 2625                           | [G/A]       | 1067305946                                 |
| Ca_Kabuli_NW_004520988.1_695   | Ca_kabuli_scaffold | 695                            | [C/A]       | 1067305947                                 |
| Ca_Kabuli_NW_004520988.1_707   | Ca_kabuli_scaffold | 707                            | [G/A]       | 1067305948                                 |
| Ca_Kabuli_NW_004521072.1_3305  | Ca_kabuli_scaffold | 3305                           | [C/T]       | 1067305949                                 |
| Ca_Kabuli_NW_004521105.1_287   | Ca_kabuli_scaffold | 287                            | [A/G]       | 1067305950                                 |
| Ca_Kabuli_NW_004521105.1_323   | Ca_kabuli_scaffold | 323                            | [G/T]       | 1067305951                                 |
| Ca_Kabuli_NW_004521184.1_6564  | Ca_kabuli_scaffold | 6564                           | [G/A]       | 1067305952                                 |
| Ca_Kabuli_NW_004521184.1_21590 | Ca_kabuli_scaffold | 21590                          | [T/C]       | 1067305953                                 |
| Ca_Kabuli_NW_004521184.1_21592 | Ca_kabuli_scaffold | 21592                          | [G/T]       | 1067305954                                 |
| Ca_Kabuli_NW_004521184.1_21624 | Ca_kabuli_scaffold | 21624                          | [G/A]       | 1067305955                                 |
| Ca_Kabuli_NW_004521184.1_21649 | Ca_kabuli_scaffold | 21649                          | [T/C]       | 1067305956                                 |
| Ca_Kabuli_NW_004521204.1_938   | Ca_kabuli_scaffold | 938                            | [G/C]       | 1067305957                                 |
| Ca_Kabuli_NW_004521340.1_1592  | Ca_kabuli_scaffold | 1592                           | [G/A]       | 1067305958                                 |
| Ca_Kabuli_NW_004521363.1_4415  | Ca_kabuli_scaffold | 4415                           | [A/G]       | 1067305959                                 |
| Ca_Kabuli_NW_004521393.1_2056  | Ca_kabuli_scaffold | 2056                           | [A/T]       | 1067305960                                 |
| Ca_Kabuli_NW_004521407.1_761   | Ca_kabuli_scaffold | 761                            | [G/T]       | 1067305961                                 |
| Ca_Kabuli_NW_004521407.1_763   | Ca_kabuli_scaffold | 763                            | [G/A]       | 1067305962                                 |
| Ca_Kabuli_NW_004521679.1_1167  | Ca_kabuli_scaffold | 1167                           | [C/T]       | 1067305963                                 |
| Ca_Kabuli_NW_004521679.1_1205  | Ca_kabuli_scaffold | 1205                           | [A/G]       | 1067305964                                 |
| Ca_Kabuli_NW_004521839.1_402   | Ca_kabuli_scaffold | 402                            | [G/A]       | 1067305965                                 |
| Ca_Kabuli_NW_004521839.1_575   | Ca_kabuli_scaffold | 575                            | [C/T]       | 1067305966                                 |
| Ca_Kabuli_NW_004521839.1_595   | Ca_kabuli_scaffold | 595                            | [T/A]       | 1067305967                                 |
| Ca_Kabuli_NW_004521903.1_110   | Ca_kabuli_scaffold | 110                            | [T/G]       | 1067305968                                 |
| Ca_Kabuli_NW_004521998.1_373   | Ca_kabuli_scaffold | 373                            | [T/C]       | 1067305969                                 |
| Ca_Kabuli_NW_004521998.1_375   | Ca_kabuli_scaffold | 375                            | [G/C]       | 1067305970                                 |

| <b>SNP IDs</b>                 | <b>Chromosomes</b> | <b>Physical positions (bp)</b> | <b>SNPs</b> | <b>NCBI SNPdb accession IDs (NCBI_ss#)</b> |
|--------------------------------|--------------------|--------------------------------|-------------|--------------------------------------------|
| Ca_Kabuli_NW_004521998.1_386   | Ca_kabuli_scaffold | 386                            | [G/T]       | 1067305971                                 |
| Ca_Kabuli_NW_004521998.1_392   | Ca_kabuli_scaffold | 392                            | [T/G]       | 1067305972                                 |
| Ca_Kabuli_NW_004521998.1_397   | Ca_kabuli_scaffold | 397                            | [G/T]       | 1067305973                                 |
| Ca_Kabuli_NW_004521998.1_400   | Ca_kabuli_scaffold | 400                            | [C/T]       | 1067305974                                 |
| Ca_Kabuli_NW_004521998.1_410   | Ca_kabuli_scaffold | 410                            | [A/C]       | 1067305975                                 |
| Ca_Kabuli_NW_004521998.1_575   | Ca_kabuli_scaffold | 575                            | [A/G]       | 1067305976                                 |
| Ca_Kabuli_NW_004522063.1_5406  | Ca_kabuli_scaffold | 5406                           | [A/G]       | 1067305977                                 |
| Ca_Kabuli_NW_004522064.1_23738 | Ca_kabuli_scaffold | 23738                          | [T/G]       | 1067305978                                 |
| Ca_Kabuli_NW_004522064.1_23912 | Ca_kabuli_scaffold | 23912                          | [T/C]       | 1067305979                                 |
| Ca_Kabuli_NW_004522064.1_24906 | Ca_kabuli_scaffold | 24906                          | [A/T]       | 1067305980                                 |
| Ca_Kabuli_NW_004522064.1_31506 | Ca_kabuli_scaffold | 31506                          | [T/A]       | 1067305981                                 |
| Ca_Kabuli_NW_004522064.1_31520 | Ca_kabuli_scaffold | 31520                          | [T/G]       | 1067305982                                 |
| Ca_Kabuli_NW_004522064.1_31785 | Ca_kabuli_scaffold | 31785                          | [T/C]       | 1067305983                                 |
| Ca_Kabuli_NW_004522064.1_31820 | Ca_kabuli_scaffold | 31820                          | [T/C]       | 1067305984                                 |
| Ca_Kabuli_NW_004522064.1_31823 | Ca_kabuli_scaffold | 31823                          | [A/G]       | 1067305985                                 |
| Ca_Kabuli_NW_004522102.1_858   | Ca_kabuli_scaffold | 858                            | [A/G]       | 1067305986                                 |
| Ca_Kabuli_NW_004522102.1_859   | Ca_kabuli_scaffold | 859                            | [C/A]       | 1067305987                                 |
| Ca_Kabuli_NW_004522102.1_860   | Ca_kabuli_scaffold | 860                            | [G/T]       | 1067305988                                 |
| Ca_Kabuli_NW_004522102.1_862   | Ca_kabuli_scaffold | 862                            | [G/T]       | 1067305989                                 |
| Ca_Kabuli_NW_004522170.1_106   | Ca_kabuli_scaffold | 106                            | [T/C]       | 1067305990                                 |
| Ca_Kabuli_NW_004522170.1_117   | Ca_kabuli_scaffold | 117                            | [T/C]       | 1067305991                                 |
| Ca_Kabuli_NW_004522170.1_137   | Ca_kabuli_scaffold | 137                            | [A/G]       | 1067305992                                 |
| Ca_Kabuli_NW_004522170.1_274   | Ca_kabuli_scaffold | 274                            | [T/C]       | 1067305993                                 |
| Ca_Kabuli_NW_004522206.1_372   | Ca_kabuli_scaffold | 372                            | [T/G]       | 1067305994                                 |
| Ca_Kabuli_NW_004522236.1_79    | Ca_kabuli_scaffold | 79                             | [T/A]       | 1067305995                                 |
| Ca_Kabuli_NW_004522241.1_870   | Ca_kabuli_scaffold | 870                            | [A/G]       | 1067305996                                 |
| Ca_Kabuli_NW_004522315.1_41    | Ca_kabuli_scaffold | 41                             | [A/C]       | 1067305997                                 |
| Ca_Kabuli_NW_004522315.1_67    | Ca_kabuli_scaffold | 67                             | [A/T]       | 1067305998                                 |
| Ca_Kabuli_NW_004522315.1_269   | Ca_kabuli_scaffold | 269                            | [T/G]       | 1067305999                                 |
| Ca_Kabuli_NW_004522315.1_874   | Ca_kabuli_scaffold | 874                            | [T/A]       | 1067306000                                 |
| Ca_Kabuli_NW_004522315.1_881   | Ca_kabuli_scaffold | 881                            | [T/C]       | 1067306001                                 |
| Ca_Kabuli_NW_004522315.1_896   | Ca_kabuli_scaffold | 896                            | [C/A]       | 1067306002                                 |
| Ca_Kabuli_NW_004522315.1_897   | Ca_kabuli_scaffold | 897                            | [C/G]       | 1067306003                                 |
| Ca_Kabuli_NW_004522315.1_898   | Ca_kabuli_scaffold | 898                            | [T/A]       | 1067306004                                 |

| <b>SNP IDs</b>                | <b>Chromosomes</b> | <b>Physical positions (bp)</b> | <b>SNPs</b> | <b>NCBI SNPdb accession IDs (NCBI_ss#)</b> |
|-------------------------------|--------------------|--------------------------------|-------------|--------------------------------------------|
| Ca_Kabuli_NW_004522315.1_899  | Ca_kabuli_scaffold | 899                            | [A/T]       | 1067306005                                 |
| Ca_Kabuli_NW_004522315.1_1242 | Ca_kabuli_scaffold | 1242                           | [A/G]       | 1067306006                                 |
| Ca_Kabuli_NW_004522315.1_1257 | Ca_kabuli_scaffold | 1257                           | [A/C]       | 1067306007                                 |
| Ca_Kabuli_NW_004522315.1_1261 | Ca_kabuli_scaffold | 1261                           | [T/C]       | 1067306008                                 |
| Ca_Kabuli_NW_004522315.1_1267 | Ca_kabuli_scaffold | 1267                           | [A/C]       | 1067306009                                 |
| Ca_Kabuli_NW_004522325.1_616  | Ca_kabuli_scaffold | 616                            | [G/T]       | 1067306010                                 |
| Ca_Kabuli_NW_004522325.1_618  | Ca_kabuli_scaffold | 618                            | [A/G]       | 1067306011                                 |
| Ca_Kabuli_NW_004522394.1_1080 | Ca_kabuli_scaffold | 1080                           | [A/T]       | 1067306012                                 |
| Ca_Kabuli_NW_004522394.1_1122 | Ca_kabuli_scaffold | 1122                           | [A/G]       | 1067306013                                 |
| Ca_Kabuli_NW_004522394.1_1137 | Ca_kabuli_scaffold | 1137                           | [T/C]       | 1067306014                                 |
| Ca_Kabuli_NW_004522394.1_1174 | Ca_kabuli_scaffold | 1174                           | [T/C]       | 1067306015                                 |
| Ca_Kabuli_NW_004522394.1_1178 | Ca_kabuli_scaffold | 1178                           | [T/C]       | 1067306016                                 |
| Ca_Kabuli_NW_004522394.1_1184 | Ca_kabuli_scaffold | 1184                           | [A/G]       | 1067306017                                 |
| Ca_Kabuli_NW_004522394.1_1325 | Ca_kabuli_scaffold | 1325                           | [T/C]       | 1067306018                                 |
| Ca_Kabuli_NW_004522394.1_1332 | Ca_kabuli_scaffold | 1332                           | [T/C]       | 1067306019                                 |
| Ca_Kabuli_NW_004522394.1_1405 | Ca_kabuli_scaffold | 1405                           | [T/G]       | 1067306020                                 |
| Ca_Kabuli_NW_004522396.1_789  | Ca_kabuli_scaffold | 789                            | [T/C]       | 1067306021                                 |
| Ca_Kabuli_NW_004522396.1_856  | Ca_kabuli_scaffold | 856                            | [T/C]       | 1067306022                                 |
| Ca_Kabuli_NW_004522401.1_1550 | Ca_kabuli_scaffold | 1550                           | [T/G]       | 1067306023                                 |
| Ca_Kabuli_NW_004522401.1_1561 | Ca_kabuli_scaffold | 1561                           | [G/A]       | 1067306024                                 |
| Ca_Kabuli_NW_004522401.1_1562 | Ca_kabuli_scaffold | 1562                           | [C/T]       | 1067306025                                 |
| Ca_Kabuli_NW_004522401.1_1563 | Ca_kabuli_scaffold | 1563                           | [C/T]       | 1067306026                                 |
| Ca_Kabuli_NW_004522502.1_1008 | Ca_kabuli_scaffold | 1008                           | [A/C]       | 1067306027                                 |
| Ca_Kabuli_NW_004522695.1_737  | Ca_kabuli_scaffold | 737                            | [T/A]       | 1067306028                                 |
| Ca_Kabuli_NW_004522695.1_798  | Ca_kabuli_scaffold | 798                            | [A/T]       | 1067306029                                 |
| Ca_Kabuli_NW_004522695.1_818  | Ca_kabuli_scaffold | 818                            | [A/T]       | 1067306030                                 |
| Ca_Kabuli_NW_004522695.1_831  | Ca_kabuli_scaffold | 831                            | [A/G]       | 1067306031                                 |
| Ca_Kabuli_NW_004522695.1_2088 | Ca_kabuli_scaffold | 2088                           | [G/C]       | 1067306032                                 |
| Ca_Kabuli_NW_004522695.1_2152 | Ca_kabuli_scaffold | 2152                           | [G/C]       | 1067306033                                 |
| Ca_Kabuli_NW_004522695.1_2169 | Ca_kabuli_scaffold | 2169                           | [T/A]       | 1067306034                                 |
| Ca_Kabuli_NW_004522717.1_3414 | Ca_kabuli_scaffold | 3414                           | [A/C]       | 1067306035                                 |
| Ca_Kabuli_NW_004522717.1_3417 | Ca_kabuli_scaffold | 3417                           | [T/G]       | 1067306036                                 |
| Ca_Kabuli_NW_004522739.1_1677 | Ca_kabuli_scaffold | 1677                           | [A/T]       | 1067306037                                 |
| Ca_Kabuli_NW_004522739.1_1681 | Ca_kabuli_scaffold | 1681                           | [C/G]       | 1067306038                                 |

| <b>SNP IDs</b>                | <b>Chromosomes</b> | <b>Physical positions (bp)</b> | <b>SNPs</b> | <b>NCBI SNPdb accession IDs (NCBI_ss#)</b> |
|-------------------------------|--------------------|--------------------------------|-------------|--------------------------------------------|
| Ca_Kabuli_NW_004522739.1_1683 | Ca_kabuli_scaffold | 1683                           | [G/A]       | 1067306039                                 |
| Ca_Kabuli_NW_004522739.1_1684 | Ca_kabuli_scaffold | 1684                           | [G/C]       | 1067306040                                 |
| Ca_Kabuli_NW_004522739.1_1685 | Ca_kabuli_scaffold | 1685                           | [T/C]       | 1067306041                                 |
| Ca_Kabuli_NW_004522739.1_1709 | Ca_kabuli_scaffold | 1709                           | [A/G]       | 1067306042                                 |
| Ca_Kabuli_NW_004522739.1_1712 | Ca_kabuli_scaffold | 1712                           | [A/G]       | 1067306043                                 |
| Ca_Kabuli_NW_004522739.1_1718 | Ca_kabuli_scaffold | 1718                           | [A/G]       | 1067306044                                 |
| Ca_Kabuli_NW_004522743.1_964  | Ca_kabuli_scaffold | 964                            | [C/A]       | 1067306045                                 |
| Ca_Kabuli_NW_004522743.1_965  | Ca_kabuli_scaffold | 965                            | [T/G]       | 1067306046                                 |
| Ca_Kabuli_NW_004522743.1_966  | Ca_kabuli_scaffold | 966                            | [C/A]       | 1067306047                                 |
| Ca_Kabuli_NW_004522749.1_6261 | Ca_kabuli_scaffold | 6261                           | [T/A]       | 1067306048                                 |
| Ca_Kabuli_NW_004522749.1_6266 | Ca_kabuli_scaffold | 6266                           | [T/C]       | 1067306049                                 |
| Ca_Kabuli_NW_004522749.1_7714 | Ca_kabuli_scaffold | 7714                           | [T/A]       | 1067306050                                 |
| Ca_Kabuli_NW_004522749.1_7716 | Ca_kabuli_scaffold | 7716                           | [A/C]       | 1067306051                                 |
| Ca_Kabuli_NW_004522749.1_7748 | Ca_kabuli_scaffold | 7748                           | [A/T]       | 1067306052                                 |
| Ca_Kabuli_NW_004522751.1_8303 | Ca_kabuli_scaffold | 8303                           | [T/G]       | 1067306053                                 |
| Ca_Kabuli_NW_004522751.1_8326 | Ca_kabuli_scaffold | 8326                           | [T/G]       | 1067306054                                 |
| Ca_Kabuli_NW_004522751.1_8348 | Ca_kabuli_scaffold | 8348                           | [A/T]       | 1067306055                                 |
| Ca_Kabuli_NW_004522751.1_8351 | Ca_kabuli_scaffold | 8351                           | [A/C]       | 1067306056                                 |
| Ca_Desi_Chr_1_27204           | Ca_desi_chr01      | 27204                          | [C/T]       | NA                                         |
| Ca_Desi_Chr_1_152666          | Ca_desi_chr01      | 152666                         | [A/G]       | NA                                         |
| Ca_Desi_Chr_1_179175          | Ca_desi_chr01      | 179175                         | [A/C]       | NA                                         |
| Ca_Desi_Chr_1_179181          | Ca_desi_chr01      | 179181                         | [T/C]       | NA                                         |
| Ca_Desi_Chr_1_179192          | Ca_desi_chr01      | 179192                         | [T/C]       | NA                                         |
| Ca_Desi_Chr_1_179214          | Ca_desi_chr01      | 179214                         | [A/C]       | NA                                         |
| Ca_Desi_Chr_1_179225          | Ca_desi_chr01      | 179225                         | [A/G]       | NA                                         |
| Ca_Desi_Chr_1_404101          | Ca_desi_chr01      | 404101                         | [A/C]       | NA                                         |
| Ca_Desi_Chr_1_436795          | Ca_desi_chr01      | 436795                         | [T/C]       | NA                                         |
| Ca_Desi_Chr_1_436816          | Ca_desi_chr01      | 436816                         | [T/G]       | NA                                         |
| Ca_Desi_Chr_1_436819          | Ca_desi_chr01      | 436819                         | [A/G]       | NA                                         |
| Ca_Desi_Chr_1_436822          | Ca_desi_chr01      | 436822                         | [T/G]       | NA                                         |
| Ca_Desi_Chr_1_436847          | Ca_desi_chr01      | 436847                         | [T/C]       | NA                                         |
| Ca_Desi_Chr_1_436854          | Ca_desi_chr01      | 436854                         | [A/C]       | NA                                         |
| Ca_Desi_Chr_1_436856          | Ca_desi_chr01      | 436856                         | [T/G]       | NA                                         |
| Ca_Desi_Chr_1_436875          | Ca_desi_chr01      | 436875                         | [C/A]       | NA                                         |

| <b>SNP IDs</b>         | <b>Chromosomes</b> | <b>Physical positions (bp)</b> | <b>SNPs</b> | <b>NCBI SNPdb accession IDs (NCBI_ss#)</b> |
|------------------------|--------------------|--------------------------------|-------------|--------------------------------------------|
| Ca_Desi_Chrom_1_436895 | Ca_desi_chr01      | 436895                         | [A/C]       | NA                                         |
| Ca_Desi_Chrom_1_453497 | Ca_desi_chr01      | 453497                         | [A/G]       | NA                                         |
| Ca_Desi_Chrom_1_498877 | Ca_desi_chr01      | 498877                         | [T/A]       | NA                                         |
| Ca_Desi_Chrom_1_498901 | Ca_desi_chr01      | 498901                         | [A/C]       | NA                                         |
| Ca_Desi_Chrom_1_503863 | Ca_desi_chr01      | 503863                         | [A/C]       | NA                                         |
| Ca_Desi_Chrom_1_503871 | Ca_desi_chr01      | 503871                         | [A/C]       | NA                                         |
| Ca_Desi_Chrom_1_527113 | Ca_desi_chr01      | 527113                         | [T/G]       | NA                                         |
| Ca_Desi_Chrom_1_527114 | Ca_desi_chr01      | 527114                         | [G/T]       | NA                                         |
| Ca_Desi_Chrom_1_527115 | Ca_desi_chr01      | 527115                         | [T/G]       | NA                                         |
| Ca_Desi_Chrom_1_531575 | Ca_desi_chr01      | 531575                         | [C/A]       | NA                                         |
| Ca_Desi_Chrom_1_537971 | Ca_desi_chr01      | 537971                         | [A/C]       | NA                                         |
| Ca_Desi_Chrom_1_537978 | Ca_desi_chr01      | 537978                         | [A/C]       | NA                                         |
| Ca_Desi_Chrom_1_548146 | Ca_desi_chr01      | 548146                         | [A/G]       | NA                                         |
| Ca_Desi_Chrom_1_548150 | Ca_desi_chr01      | 548150                         | [A/G]       | NA                                         |
| Ca_Desi_Chrom_1_548152 | Ca_desi_chr01      | 548152                         | [T/G]       | NA                                         |
| Ca_Desi_Chrom_1_548179 | Ca_desi_chr01      | 548179                         | [A/G]       | NA                                         |
| Ca_Desi_Chrom_1_548182 | Ca_desi_chr01      | 548182                         | [T/C]       | NA                                         |
| Ca_Desi_Chrom_1_548186 | Ca_desi_chr01      | 548186                         | [A/G]       | NA                                         |
| Ca_Desi_Chrom_1_548188 | Ca_desi_chr01      | 548188                         | [A/G]       | NA                                         |
| Ca_Desi_Chrom_1_548200 | Ca_desi_chr01      | 548200                         | [T/C]       | NA                                         |
| Ca_Desi_Chrom_1_548203 | Ca_desi_chr01      | 548203                         | [C/T]       | NA                                         |
| Ca_Desi_Chrom_1_551543 | Ca_desi_chr01      | 551543                         | [A/G]       | NA                                         |
| Ca_Desi_Chrom_1_551545 | Ca_desi_chr01      | 551545                         | [A/G]       | NA                                         |
| Ca_Desi_Chrom_1_551557 | Ca_desi_chr01      | 551557                         | [T/C]       | NA                                         |
| Ca_Desi_Chrom_1_558467 | Ca_desi_chr01      | 558467                         | [A/G]       | NA                                         |
| Ca_Desi_Chrom_1_592872 | Ca_desi_chr01      | 592872                         | [A/C]       | NA                                         |
| Ca_Desi_Chrom_1_608899 | Ca_desi_chr01      | 608899                         | [A/C]       | NA                                         |
| Ca_Desi_Chrom_1_643785 | Ca_desi_chr01      | 643785                         | [A/C]       | NA                                         |
| Ca_Desi_Chrom_1_664764 | Ca_desi_chr01      | 664764                         | [G/A]       | NA                                         |
| Ca_Desi_Chrom_1_664769 | Ca_desi_chr01      | 664769                         | [A/G]       | NA                                         |
| Ca_Desi_Chrom_1_674805 | Ca_desi_chr01      | 674805                         | [A/C]       | NA                                         |
| Ca_Desi_Chrom_1_674920 | Ca_desi_chr01      | 674920                         | [T/G]       | NA                                         |
| Ca_Desi_Chrom_1_674965 | Ca_desi_chr01      | 674965                         | [A/G]       | NA                                         |
| Ca_Desi_Chrom_1_675131 | Ca_desi_chr01      | 675131                         | [A/G]       | NA                                         |

| <b>SNP IDs</b>         | <b>Chromosomes</b> | <b>Physical positions (bp)</b> | <b>SNPs</b> | <b>NCBI SNPdb accession IDs (NCBI_ss#)</b> |
|------------------------|--------------------|--------------------------------|-------------|--------------------------------------------|
| Ca_Desi_Chrom_1_685529 | Ca_desi_chr01      | 685529                         | [T/A]       | NA                                         |
| Ca_Desi_Chrom_1_740370 | Ca_desi_chr01      | 740370                         | [T/C]       | NA                                         |
| Ca_Desi_Chrom_1_757585 | Ca_desi_chr01      | 757585                         | [A/G]       | NA                                         |
| Ca_Desi_Chrom_1_757618 | Ca_desi_chr01      | 757618                         | [T/G]       | NA                                         |
| Ca_Desi_Chrom_1_757623 | Ca_desi_chr01      | 757623                         | [T/G]       | NA                                         |
| Ca_Desi_Chrom_1_766156 | Ca_desi_chr01      | 766156                         | [T/G]       | NA                                         |
| Ca_Desi_Chrom_1_780860 | Ca_desi_chr01      | 780860                         | [A/G]       | NA                                         |
| Ca_Desi_Chrom_1_780869 | Ca_desi_chr01      | 780869                         | [A/G]       | NA                                         |
| Ca_Desi_Chrom_1_780879 | Ca_desi_chr01      | 780879                         | [T/C]       | NA                                         |
| Ca_Desi_Chrom_1_780894 | Ca_desi_chr01      | 780894                         | [A/G]       | NA                                         |
| Ca_Desi_Chrom_1_780898 | Ca_desi_chr01      | 780898                         | [A/G]       | NA                                         |
| Ca_Desi_Chrom_1_780903 | Ca_desi_chr01      | 780903                         | [T/G]       | NA                                         |
| Ca_Desi_Chrom_1_780905 | Ca_desi_chr01      | 780905                         | [T/C]       | NA                                         |
| Ca_Desi_Chrom_1_792132 | Ca_desi_chr01      | 792132                         | [T/G]       | NA                                         |
| Ca_Desi_Chrom_1_799321 | Ca_desi_chr01      | 799321                         | [T/C]       | NA                                         |
| Ca_Desi_Chrom_1_801385 | Ca_desi_chr01      | 801385                         | [T/G]       | NA                                         |
| Ca_Desi_Chrom_1_801409 | Ca_desi_chr01      | 801409                         | [T/A]       | NA                                         |
| Ca_Desi_Chrom_1_815397 | Ca_desi_chr01      | 815397                         | [G/T]       | NA                                         |
| Ca_Desi_Chrom_1_836330 | Ca_desi_chr01      | 836330                         | [T/G]       | NA                                         |
| Ca_Desi_Chrom_1_836351 | Ca_desi_chr01      | 836351                         | [C/T]       | NA                                         |
| Ca_Desi_Chrom_1_836842 | Ca_desi_chr01      | 836842                         | [T/G]       | NA                                         |
| Ca_Desi_Chrom_1_836849 | Ca_desi_chr01      | 836849                         | [T/G]       | NA                                         |
| Ca_Desi_Chrom_1_836859 | Ca_desi_chr01      | 836859                         | [G/A]       | NA                                         |
| Ca_Desi_Chrom_1_840912 | Ca_desi_chr01      | 840912                         | [T/C]       | NA                                         |
| Ca_Desi_Chrom_1_845508 | Ca_desi_chr01      | 845508                         | [C/T]       | NA                                         |
| Ca_Desi_Chrom_1_872247 | Ca_desi_chr01      | 872247                         | [G/A]       | NA                                         |
| Ca_Desi_Chrom_1_872280 | Ca_desi_chr01      | 872280                         | [C/T]       | NA                                         |
| Ca_Desi_Chrom_1_872563 | Ca_desi_chr01      | 872563                         | [C/G]       | NA                                         |
| Ca_Desi_Chrom_1_872564 | Ca_desi_chr01      | 872564                         | [T/G]       | NA                                         |
| Ca_Desi_Chrom_1_886339 | Ca_desi_chr01      | 886339                         | [G/T]       | NA                                         |
| Ca_Desi_Chrom_1_968338 | Ca_desi_chr01      | 968338                         | [T/G]       | NA                                         |
| Ca_Desi_Chrom_1_968392 | Ca_desi_chr01      | 968392                         | [A/C]       | NA                                         |
| Ca_Desi_Chrom_1_973829 | Ca_desi_chr01      | 973829                         | [T/G]       | NA                                         |
| Ca_Desi_Chrom_1_973840 | Ca_desi_chr01      | 973840                         | [T/G]       | NA                                         |

| <b>SNP IDs</b>          | <b>Chromosomes</b> | <b>Physical positions (bp)</b> | <b>SNPs</b> | <b>NCBI SNPdb accession IDs (NCBI_ss#)</b> |
|-------------------------|--------------------|--------------------------------|-------------|--------------------------------------------|
| Ca_Desi_Chrom_1_973854  | Ca_desi_chr01      | 973854                         | [T/G]       | NA                                         |
| Ca_Desi_Chrom_1_973874  | Ca_desi_chr01      | 973874                         | [A/T]       | NA                                         |
| Ca_Desi_Chrom_1_973881  | Ca_desi_chr01      | 973881                         | [A/G]       | NA                                         |
| Ca_Desi_Chrom_1_982879  | Ca_desi_chr01      | 982879                         | [T/G]       | NA                                         |
| Ca_Desi_Chrom_1_982984  | Ca_desi_chr01      | 982984                         | [T/G]       | NA                                         |
| Ca_Desi_Chrom_1_982991  | Ca_desi_chr01      | 982991                         | [T/G]       | NA                                         |
| Ca_Desi_Chrom_1_983014  | Ca_desi_chr01      | 983014                         | [T/G]       | NA                                         |
| Ca_Desi_Chrom_1_983067  | Ca_desi_chr01      | 983067                         | [T/A]       | NA                                         |
| Ca_Desi_Chrom_1_983103  | Ca_desi_chr01      | 983103                         | [C/A]       | NA                                         |
| Ca_Desi_Chrom_1_983241  | Ca_desi_chr01      | 983241                         | [A/G]       | NA                                         |
| Ca_Desi_Chrom_1_999785  | Ca_desi_chr01      | 999785                         | [T/A]       | NA                                         |
| Ca_Desi_Chrom_1_999823  | Ca_desi_chr01      | 999823                         | [A/T]       | NA                                         |
| Ca_Desi_Chrom_1_1025489 | Ca_desi_chr01      | 1025489                        | [A/C]       | NA                                         |
| Ca_Desi_Chrom_1_1025542 | Ca_desi_chr01      | 1025542                        | [A/G]       | NA                                         |
| Ca_Desi_Chrom_1_1025585 | Ca_desi_chr01      | 1025585                        | [T/C]       | NA                                         |
| Ca_Desi_Chrom_1_1025590 | Ca_desi_chr01      | 1025590                        | [A/G]       | NA                                         |
| Ca_Desi_Chrom_1_1025593 | Ca_desi_chr01      | 1025593                        | [C/A]       | NA                                         |
| Ca_Desi_Chrom_1_1069245 | Ca_desi_chr01      | 1069245                        | [C/T]       | NA                                         |
| Ca_Desi_Chrom_1_1069295 | Ca_desi_chr01      | 1069295                        | [A/C]       | NA                                         |
| Ca_Desi_Chrom_1_1069425 | Ca_desi_chr01      | 1069425                        | [A/C]       | NA                                         |
| Ca_Desi_Chrom_1_1069436 | Ca_desi_chr01      | 1069436                        | [G/A]       | NA                                         |
| Ca_Desi_Chrom_1_1072415 | Ca_desi_chr01      | 1072415                        | [T/C]       | NA                                         |
| Ca_Desi_Chrom_1_1072623 | Ca_desi_chr01      | 1072623                        | [G/A]       | NA                                         |
| Ca_Desi_Chrom_1_1072906 | Ca_desi_chr01      | 1072906                        | [C/T]       | NA                                         |
| Ca_Desi_Chrom_1_1072930 | Ca_desi_chr01      | 1072930                        | [A/G]       | NA                                         |
| Ca_Desi_Chrom_1_1072955 | Ca_desi_chr01      | 1072955                        | [A/G]       | NA                                         |
| Ca_Desi_Chrom_1_1072971 | Ca_desi_chr01      | 1072971                        | [T/G]       | NA                                         |
| Ca_Desi_Chrom_1_1072973 | Ca_desi_chr01      | 1072973                        | [T/C]       | NA                                         |
| Ca_Desi_Chrom_1_1072976 | Ca_desi_chr01      | 1072976                        | [A/G]       | NA                                         |
| Ca_Desi_Chrom_1_1105109 | Ca_desi_chr01      | 1105109                        | [C/T]       | NA                                         |
| Ca_Desi_Chrom_1_1146211 | Ca_desi_chr01      | 1146211                        | [C/T]       | NA                                         |
| Ca_Desi_Chrom_1_1146659 | Ca_desi_chr01      | 1146659                        | [C/T]       | NA                                         |
| Ca_Desi_Chrom_1_1158279 | Ca_desi_chr01      | 1158279                        | [T/G]       | NA                                         |
| Ca_Desi_Chrom_1_1158316 | Ca_desi_chr01      | 1158316                        | [A/G]       | NA                                         |



| <b>SNP IDs</b>          | <b>Chromosomes</b> | <b>Physical positions (bp)</b> | <b>SNPs</b> | <b>NCBI SNPdb accession IDs (NCBI_ss#)</b> |
|-------------------------|--------------------|--------------------------------|-------------|--------------------------------------------|
| Ca_Desi_Chrom_1_1276048 | Ca_desi_chr01      | 1276048                        | [A/G]       | NA                                         |
| Ca_Desi_Chrom_1_1276059 | Ca_desi_chr01      | 1276059                        | [A/G]       | NA                                         |
| Ca_Desi_Chrom_1_1276070 | Ca_desi_chr01      | 1276070                        | [A/G]       | NA                                         |
| Ca_Desi_Chrom_1_1374791 | Ca_desi_chr01      | 1374791                        | [A/G]       | NA                                         |
| Ca_Desi_Chrom_1_1375912 | Ca_desi_chr01      | 1375912                        | [T/G]       | NA                                         |
| Ca_Desi_Chrom_1_1375969 | Ca_desi_chr01      | 1375969                        | [A/C]       | NA                                         |
| Ca_Desi_Chrom_1_1375985 | Ca_desi_chr01      | 1375985                        | [A/C]       | NA                                         |
| Ca_Desi_Chrom_1_1375997 | Ca_desi_chr01      | 1375997                        | [A/C]       | NA                                         |
| Ca_Desi_Chrom_1_1389951 | Ca_desi_chr01      | 1389951                        | [T/C]       | NA                                         |
| Ca_Desi_Chrom_1_1390763 | Ca_desi_chr01      | 1390763                        | [T/C]       | NA                                         |
| Ca_Desi_Chrom_1_1390853 | Ca_desi_chr01      | 1390853                        | [A/G]       | NA                                         |
| Ca_Desi_Chrom_1_1451028 | Ca_desi_chr01      | 1451028                        | [A/C]       | NA                                         |
| Ca_Desi_Chrom_1_1463196 | Ca_desi_chr01      | 1463196                        | [A/G]       | NA                                         |
| Ca_Desi_Chrom_1_1463211 | Ca_desi_chr01      | 1463211                        | [T/G]       | NA                                         |
| Ca_Desi_Chrom_1_1463229 | Ca_desi_chr01      | 1463229                        | [A/C]       | NA                                         |
| Ca_Desi_Chrom_1_1463371 | Ca_desi_chr01      | 1463371                        | [A/C]       | NA                                         |
| Ca_Desi_Chrom_1_1479584 | Ca_desi_chr01      | 1479584                        | [A/G]       | NA                                         |
| Ca_Desi_Chrom_1_1479595 | Ca_desi_chr01      | 1479595                        | [A/C]       | NA                                         |
| Ca_Desi_Chrom_1_1484126 | Ca_desi_chr01      | 1484126                        | [T/C]       | NA                                         |
| Ca_Desi_Chrom_1_1486022 | Ca_desi_chr01      | 1486022                        | [T/C]       | NA                                         |
| Ca_Desi_Chrom_1_1486040 | Ca_desi_chr01      | 1486040                        | [T/C]       | NA                                         |
| Ca_Desi_Chrom_1_1486042 | Ca_desi_chr01      | 1486042                        | [A/G]       | NA                                         |
| Ca_Desi_Chrom_1_1486052 | Ca_desi_chr01      | 1486052                        | [A/G]       | NA                                         |
| Ca_Desi_Chrom_1_1486054 | Ca_desi_chr01      | 1486054                        | [T/G]       | NA                                         |
| Ca_Desi_Chrom_1_1486055 | Ca_desi_chr01      | 1486055                        | [G/A]       | NA                                         |
| Ca_Desi_Chrom_1_1486073 | Ca_desi_chr01      | 1486073                        | [C/A]       | NA                                         |
| Ca_Desi_Chrom_1_1486074 | Ca_desi_chr01      | 1486074                        | [T/G]       | NA                                         |
| Ca_Desi_Chrom_1_1553309 | Ca_desi_chr01      | 1553309                        | [A/G]       | NA                                         |
| Ca_Desi_Chrom_1_1553325 | Ca_desi_chr01      | 1553325                        | [T/C]       | NA                                         |
| Ca_Desi_Chrom_1_1600018 | Ca_desi_chr01      | 1600018                        | [T/G]       | NA                                         |
| Ca_Desi_Chrom_1_1600031 | Ca_desi_chr01      | 1600031                        | [A/T]       | NA                                         |
| Ca_Desi_Chrom_1_1600034 | Ca_desi_chr01      | 1600034                        | [A/G]       | NA                                         |
| Ca_Desi_Chrom_1_1600071 | Ca_desi_chr01      | 1600071                        | [T/C]       | NA                                         |
| Ca_Desi_Chrom_1_1600086 | Ca_desi_chr01      | 1600086                        | [T/A]       | NA                                         |

| <b>SNP IDs</b>          | <b>Chromosomes</b> | <b>Physical positions (bp)</b> | <b>SNPs</b> | <b>NCBI SNPdb accession IDs (NCBI_ss#)</b> |
|-------------------------|--------------------|--------------------------------|-------------|--------------------------------------------|
| Ca_Desi_Chrom_1_1601983 | Ca_desi_chr01      | 1601983                        | [A/G]       | NA                                         |
| Ca_Desi_Chrom_1_1601991 | Ca_desi_chr01      | 1601991                        | [T/C]       | NA                                         |
| Ca_Desi_Chrom_1_1602055 | Ca_desi_chr01      | 1602055                        | [A/C]       | NA                                         |
| Ca_Desi_Chrom_1_1609624 | Ca_desi_chr01      | 1609624                        | [A/G]       | NA                                         |
| Ca_Desi_Chrom_1_1609647 | Ca_desi_chr01      | 1609647                        | [C/A]       | NA                                         |
| Ca_Desi_Chrom_1_1632918 | Ca_desi_chr01      | 1632918                        | [T/G]       | NA                                         |
| Ca_Desi_Chrom_1_1632937 | Ca_desi_chr01      | 1632937                        | [A/G]       | NA                                         |
| Ca_Desi_Chrom_1_1632985 | Ca_desi_chr01      | 1632985                        | [A/C]       | NA                                         |
| Ca_Desi_Chrom_1_1712381 | Ca_desi_chr01      | 1712381                        | [T/G]       | NA                                         |
| Ca_Desi_Chrom_1_1727816 | Ca_desi_chr01      | 1727816                        | [T/C]       | NA                                         |
| Ca_Desi_Chrom_1_1727983 | Ca_desi_chr01      | 1727983                        | [A/C]       | NA                                         |
| Ca_Desi_Chrom_1_1746825 | Ca_desi_chr01      | 1746825                        | [A/G]       | NA                                         |
| Ca_Desi_Chrom_1_1746848 | Ca_desi_chr01      | 1746848                        | [A/C]       | NA                                         |
| Ca_Desi_Chrom_1_1746855 | Ca_desi_chr01      | 1746855                        | [T/C]       | NA                                         |
| Ca_Desi_Chrom_1_1746868 | Ca_desi_chr01      | 1746868                        | [T/G]       | NA                                         |
| Ca_Desi_Chrom_1_1746884 | Ca_desi_chr01      | 1746884                        | [T/C]       | NA                                         |
| Ca_Desi_Chrom_1_1746933 | Ca_desi_chr01      | 1746933                        | [T/G]       | NA                                         |
| Ca_Desi_Chrom_1_1747393 | Ca_desi_chr01      | 1747393                        | [A/C]       | NA                                         |
| Ca_Desi_Chrom_1_1815576 | Ca_desi_chr01      | 1815576                        | [G/T]       | NA                                         |
| Ca_Desi_Chrom_1_1826964 | Ca_desi_chr01      | 1826964                        | [A/C]       | NA                                         |
| Ca_Desi_Chrom_1_1838101 | Ca_desi_chr01      | 1838101                        | [A/G]       | NA                                         |
| Ca_Desi_Chrom_1_1838107 | Ca_desi_chr01      | 1838107                        | [T/C]       | NA                                         |
| Ca_Desi_Chrom_1_1838117 | Ca_desi_chr01      | 1838117                        | [A/G]       | NA                                         |
| Ca_Desi_Chrom_1_1838148 | Ca_desi_chr01      | 1838148                        | [A/G]       | NA                                         |
| Ca_Desi_Chrom_1_1838154 | Ca_desi_chr01      | 1838154                        | [T/A]       | NA                                         |
| Ca_Desi_Chrom_1_1842530 | Ca_desi_chr01      | 1842530                        | [T/G]       | NA                                         |
| Ca_Desi_Chrom_1_1842546 | Ca_desi_chr01      | 1842546                        | [A/G]       | NA                                         |
| Ca_Desi_Chrom_1_1845185 | Ca_desi_chr01      | 1845185                        | [A/G]       | NA                                         |
| Ca_Desi_Chrom_1_1906324 | Ca_desi_chr01      | 1906324                        | [A/C]       | NA                                         |
| Ca_Desi_Chrom_1_1906333 | Ca_desi_chr01      | 1906333                        | [A/C]       | NA                                         |
| Ca_Desi_Chrom_1_1906392 | Ca_desi_chr01      | 1906392                        | [A/T]       | NA                                         |
| Ca_Desi_Chrom_1_1913803 | Ca_desi_chr01      | 1913803                        | [A/T]       | NA                                         |
| Ca_Desi_Chrom_1_1913810 | Ca_desi_chr01      | 1913810                        | [T/C]       | NA                                         |
| Ca_Desi_Chrom_1_1913811 | Ca_desi_chr01      | 1913811                        | [C/T]       | NA                                         |

| <b>SNP IDs</b>          | <b>Chromosomes</b> | <b>Physical positions (bp)</b> | <b>SNPs</b> | <b>NCBI SNPdb accession IDs (NCBI_ss#)</b> |
|-------------------------|--------------------|--------------------------------|-------------|--------------------------------------------|
| Ca_Desi_Chrom_1_1913882 | Ca_desi_chr01      | 1913882                        | [A/C]       | NA                                         |
| Ca_Desi_Chrom_1_1931718 | Ca_desi_chr01      | 1931718                        | [T/C]       | NA                                         |
| Ca_Desi_Chrom_1_1931745 | Ca_desi_chr01      | 1931745                        | [T/G]       | NA                                         |
| Ca_Desi_Chrom_1_1931750 | Ca_desi_chr01      | 1931750                        | [A/G]       | NA                                         |
| Ca_Desi_Chrom_1_1936668 | Ca_desi_chr01      | 1936668                        | [A/C]       | NA                                         |
| Ca_Desi_Chrom_1_1936733 | Ca_desi_chr01      | 1936733                        | [A/G]       | NA                                         |
| Ca_Desi_Chrom_1_1937320 | Ca_desi_chr01      | 1937320                        | [A/C]       | NA                                         |
| Ca_Desi_Chrom_1_1937326 | Ca_desi_chr01      | 1937326                        | [T/C]       | NA                                         |
| Ca_Desi_Chrom_1_1937359 | Ca_desi_chr01      | 1937359                        | [A/G]       | NA                                         |
| Ca_Desi_Chrom_1_1938752 | Ca_desi_chr01      | 1938752                        | [G/T]       | NA                                         |
| Ca_Desi_Chrom_1_1938758 | Ca_desi_chr01      | 1938758                        | [G/T]       | NA                                         |
| Ca_Desi_Chrom_1_1938761 | Ca_desi_chr01      | 1938761                        | [T/G]       | NA                                         |
| Ca_Desi_Chrom_1_1938763 | Ca_desi_chr01      | 1938763                        | [G/A]       | NA                                         |
| Ca_Desi_Chrom_1_1938766 | Ca_desi_chr01      | 1938766                        | [A/G]       | NA                                         |
| Ca_Desi_Chrom_1_1938769 | Ca_desi_chr01      | 1938769                        | [C/G]       | NA                                         |
| Ca_Desi_Chrom_1_1938940 | Ca_desi_chr01      | 1938940                        | [T/G]       | NA                                         |
| Ca_Desi_Chrom_1_1960791 | Ca_desi_chr01      | 1960791                        | [T/C]       | NA                                         |
| Ca_Desi_Chrom_1_1960845 | Ca_desi_chr01      | 1960845                        | [A/G]       | NA                                         |
| Ca_Desi_Chrom_1_1960854 | Ca_desi_chr01      | 1960854                        | [A/G]       | NA                                         |
| Ca_Desi_Chrom_1_1960888 | Ca_desi_chr01      | 1960888                        | [T/A]       | NA                                         |
| Ca_Desi_Chrom_1_1960896 | Ca_desi_chr01      | 1960896                        | [A/C]       | NA                                         |
| Ca_Desi_Chrom_1_1961533 | Ca_desi_chr01      | 1961533                        | [A/C]       | NA                                         |
| Ca_Desi_Chrom_1_1971574 | Ca_desi_chr01      | 1971574                        | [A/C]       | NA                                         |
| Ca_Desi_Chrom_1_1971598 | Ca_desi_chr01      | 1971598                        | [A/C]       | NA                                         |
| Ca_Desi_Chrom_1_1982256 | Ca_desi_chr01      | 1982256                        | [T/C]       | NA                                         |
| Ca_Desi_Chrom_1_1982277 | Ca_desi_chr01      | 1982277                        | [A/C]       | NA                                         |
| Ca_Desi_Chrom_1_1982349 | Ca_desi_chr01      | 1982349                        | [T/C]       | NA                                         |
| Ca_Desi_Chrom_1_1982380 | Ca_desi_chr01      | 1982380                        | [A/G]       | NA                                         |
| Ca_Desi_Chrom_1_1982390 | Ca_desi_chr01      | 1982390                        | [A/G]       | NA                                         |
| Ca_Desi_Chrom_1_2021757 | Ca_desi_chr01      | 2021757                        | [T/C]       | NA                                         |
| Ca_Desi_Chrom_1_2021761 | Ca_desi_chr01      | 2021761                        | [A/G]       | NA                                         |
| Ca_Desi_Chrom_1_2021767 | Ca_desi_chr01      | 2021767                        | [T/C]       | NA                                         |
| Ca_Desi_Chrom_1_2021772 | Ca_desi_chr01      | 2021772                        | [T/G]       | NA                                         |
| Ca_Desi_Chrom_1_2021774 | Ca_desi_chr01      | 2021774                        | [T/C]       | NA                                         |

| <b>SNP IDs</b>          | <b>Chromosomes</b> | <b>Physical positions (bp)</b> | <b>SNPs</b> | <b>NCBI SNPdb accession IDs (NCBI_ss#)</b> |
|-------------------------|--------------------|--------------------------------|-------------|--------------------------------------------|
| Ca_Desi_Chrom_1_2021780 | Ca_desi_chr01      | 2021780                        | [A/G]       | NA                                         |
| Ca_Desi_Chrom_1_2021792 | Ca_desi_chr01      | 2021792                        | [A/G]       | NA                                         |
| Ca_Desi_Chrom_1_2021793 | Ca_desi_chr01      | 2021793                        | [T/C]       | NA                                         |
| Ca_Desi_Chrom_1_2021813 | Ca_desi_chr01      | 2021813                        | [A/G]       | NA                                         |
| Ca_Desi_Chrom_1_2021818 | Ca_desi_chr01      | 2021818                        | [T/C]       | NA                                         |
| Ca_Desi_Chrom_1_2021819 | Ca_desi_chr01      | 2021819                        | [G/A]       | NA                                         |
| Ca_Desi_Chrom_1_2067261 | Ca_desi_chr01      | 2067261                        | [A/C]       | NA                                         |
| Ca_Desi_Chrom_1_2084407 | Ca_desi_chr01      | 2084407                        | [T/C]       | NA                                         |
| Ca_Desi_Chrom_1_2084421 | Ca_desi_chr01      | 2084421                        | [T/G]       | NA                                         |
| Ca_Desi_Chrom_1_2084438 | Ca_desi_chr01      | 2084438                        | [A/C]       | NA                                         |
| Ca_Desi_Chrom_1_2084454 | Ca_desi_chr01      | 2084454                        | [A/G]       | NA                                         |
| Ca_Desi_Chrom_1_2084465 | Ca_desi_chr01      | 2084465                        | [A/G]       | NA                                         |
| Ca_Desi_Chrom_1_2084498 | Ca_desi_chr01      | 2084498                        | [T/G]       | NA                                         |
| Ca_Desi_Chrom_1_2084578 | Ca_desi_chr01      | 2084578                        | [T/C]       | NA                                         |
| Ca_Desi_Chrom_1_2084631 | Ca_desi_chr01      | 2084631                        | [T/A]       | NA                                         |
| Ca_Desi_Chrom_1_2084656 | Ca_desi_chr01      | 2084656                        | [T/C]       | NA                                         |
| Ca_Desi_Chrom_1_2084658 | Ca_desi_chr01      | 2084658                        | [T/C]       | NA                                         |
| Ca_Desi_Chrom_1_2184928 | Ca_desi_chr01      | 2184928                        | [A/T]       | NA                                         |
| Ca_Desi_Chrom_1_2184950 | Ca_desi_chr01      | 2184950                        | [A/T]       | NA                                         |
| Ca_Desi_Chrom_1_2184992 | Ca_desi_chr01      | 2184992                        | [A/C]       | NA                                         |
| Ca_Desi_Chrom_1_2184997 | Ca_desi_chr01      | 2184997                        | [C/T]       | NA                                         |
| Ca_Desi_Chrom_1_2184999 | Ca_desi_chr01      | 2184999                        | [A/T]       | NA                                         |
| Ca_Desi_Chrom_1_2185002 | Ca_desi_chr01      | 2185002                        | [G/T]       | NA                                         |
| Ca_Desi_Chrom_1_2185003 | Ca_desi_chr01      | 2185003                        | [C/T]       | NA                                         |
| Ca_Desi_Chrom_1_2185007 | Ca_desi_chr01      | 2185007                        | [C/A]       | NA                                         |
| Ca_Desi_Chrom_1_2185016 | Ca_desi_chr01      | 2185016                        | [A/G]       | NA                                         |
| Ca_Desi_Chrom_1_2188015 | Ca_desi_chr01      | 2188015                        | [A/C]       | NA                                         |
| Ca_Desi_Chrom_1_2188625 | Ca_desi_chr01      | 2188625                        | [A/G]       | NA                                         |
| Ca_Desi_Chrom_1_2213631 | Ca_desi_chr01      | 2213631                        | [T/C]       | NA                                         |
| Ca_Desi_Chrom_1_2213652 | Ca_desi_chr01      | 2213652                        | [A/G]       | NA                                         |
| Ca_Desi_Chrom_1_2213674 | Ca_desi_chr01      | 2213674                        | [T/C]       | NA                                         |
| Ca_Desi_Chrom_1_2216699 | Ca_desi_chr01      | 2216699                        | [T/G]       | NA                                         |
| Ca_Desi_Chrom_1_2216718 | Ca_desi_chr01      | 2216718                        | [A/T]       | NA                                         |
| Ca_Desi_Chrom_1_2241298 | Ca_desi_chr01      | 2241298                        | [T/A]       | NA                                         |

| <b>SNP IDs</b>          | <b>Chromosomes</b> | <b>Physical positions (bp)</b> | <b>SNPs</b> | <b>NCBI SNPdb accession IDs (NCBI_ss#)</b> |
|-------------------------|--------------------|--------------------------------|-------------|--------------------------------------------|
| Ca_Desi_Chrom_1_2249232 | Ca_desi_chr01      | 2249232                        | [A/G]       | NA                                         |
| Ca_Desi_Chrom_1_2263530 | Ca_desi_chr01      | 2263530                        | [A/G]       | NA                                         |
| Ca_Desi_Chrom_1_2263557 | Ca_desi_chr01      | 2263557                        | [T/G]       | NA                                         |
| Ca_Desi_Chrom_1_2269248 | Ca_desi_chr01      | 2269248                        | [C/G]       | NA                                         |
| Ca_Desi_Chrom_1_2281497 | Ca_desi_chr01      | 2281497                        | [T/G]       | NA                                         |
| Ca_Desi_Chrom_1_2281498 | Ca_desi_chr01      | 2281498                        | [T/G]       | NA                                         |
| Ca_Desi_Chrom_1_2281499 | Ca_desi_chr01      | 2281499                        | [G/T]       | NA                                         |
| Ca_Desi_Chrom_1_2281552 | Ca_desi_chr01      | 2281552                        | [T/C]       | NA                                         |
| Ca_Desi_Chrom_1_2281554 | Ca_desi_chr01      | 2281554                        | [C/T]       | NA                                         |
| Ca_Desi_Chrom_1_2320790 | Ca_desi_chr01      | 2320790                        | [C/T]       | NA                                         |
| Ca_Desi_Chrom_1_2322967 | Ca_desi_chr01      | 2322967                        | [G/T]       | NA                                         |
| Ca_Desi_Chrom_1_2327449 | Ca_desi_chr01      | 2327449                        | [T/A]       | NA                                         |
| Ca_Desi_Chrom_1_2335377 | Ca_desi_chr01      | 2335377                        | [T/G]       | NA                                         |
| Ca_Desi_Chrom_1_2335392 | Ca_desi_chr01      | 2335392                        | [T/G]       | NA                                         |
| Ca_Desi_Chrom_1_2335395 | Ca_desi_chr01      | 2335395                        | [A/G]       | NA                                         |
| Ca_Desi_Chrom_1_2349688 | Ca_desi_chr01      | 2349688                        | [A/C]       | NA                                         |
| Ca_Desi_Chrom_1_2356930 | Ca_desi_chr01      | 2356930                        | [T/C]       | NA                                         |
| Ca_Desi_Chrom_1_2356959 | Ca_desi_chr01      | 2356959                        | [T/G]       | NA                                         |
| Ca_Desi_Chrom_1_2410385 | Ca_desi_chr01      | 2410385                        | [T/C]       | NA                                         |
| Ca_Desi_Chrom_1_2417658 | Ca_desi_chr01      | 2417658                        | [A/G]       | NA                                         |
| Ca_Desi_Chrom_1_2417675 | Ca_desi_chr01      | 2417675                        | [G/A]       | NA                                         |
| Ca_Desi_Chrom_1_2417996 | Ca_desi_chr01      | 2417996                        | [C/T]       | NA                                         |
| Ca_Desi_Chrom_1_2418161 | Ca_desi_chr01      | 2418161                        | [C/A]       | NA                                         |
| Ca_Desi_Chrom_1_2418212 | Ca_desi_chr01      | 2418212                        | [T/A]       | NA                                         |
| Ca_Desi_Chrom_1_2418521 | Ca_desi_chr01      | 2418521                        | [G/A]       | NA                                         |
| Ca_Desi_Chrom_1_2418752 | Ca_desi_chr01      | 2418752                        | [A/T]       | NA                                         |
| Ca_Desi_Chrom_1_2418782 | Ca_desi_chr01      | 2418782                        | [A/C]       | NA                                         |
| Ca_Desi_Chrom_1_2436035 | Ca_desi_chr01      | 2436035                        | [T/C]       | NA                                         |
| Ca_Desi_Chrom_1_2437920 | Ca_desi_chr01      | 2437920                        | [A/C]       | NA                                         |
| Ca_Desi_Chrom_1_2437941 | Ca_desi_chr01      | 2437941                        | [T/G]       | NA                                         |
| Ca_Desi_Chrom_1_2437946 | Ca_desi_chr01      | 2437946                        | [A/G]       | NA                                         |
| Ca_Desi_Chrom_1_2437948 | Ca_desi_chr01      | 2437948                        | [T/G]       | NA                                         |
| Ca_Desi_Chrom_1_2438688 | Ca_desi_chr01      | 2438688                        | [A/T]       | NA                                         |
| Ca_Desi_Chrom_1_2438692 | Ca_desi_chr01      | 2438692                        | [A/G]       | NA                                         |

| <b>SNP IDs</b>          | <b>Chromosomes</b> | <b>Physical positions (bp)</b> | <b>SNPs</b> | <b>NCBI SNPdb accession IDs (NCBI_ss#)</b> |
|-------------------------|--------------------|--------------------------------|-------------|--------------------------------------------|
| Ca_Desi_Chrom_1_2438694 | Ca_desi_chr01      | 2438694                        | [T/C]       | NA                                         |
| Ca_Desi_Chrom_1_2438700 | Ca_desi_chr01      | 2438700                        | [G/T]       | NA                                         |
| Ca_Desi_Chrom_1_2438706 | Ca_desi_chr01      | 2438706                        | [A/G]       | NA                                         |
| Ca_Desi_Chrom_1_2438711 | Ca_desi_chr01      | 2438711                        | [A/G]       | NA                                         |
| Ca_Desi_Chrom_1_2438716 | Ca_desi_chr01      | 2438716                        | [A/C]       | NA                                         |
| Ca_Desi_Chrom_1_2438719 | Ca_desi_chr01      | 2438719                        | [T/A]       | NA                                         |
| Ca_Desi_Chrom_1_2438722 | Ca_desi_chr01      | 2438722                        | [T/C]       | NA                                         |
| Ca_Desi_Chrom_1_2438726 | Ca_desi_chr01      | 2438726                        | [A/G]       | NA                                         |
| Ca_Desi_Chrom_1_2438730 | Ca_desi_chr01      | 2438730                        | [A/G]       | NA                                         |
| Ca_Desi_Chrom_1_2438732 | Ca_desi_chr01      | 2438732                        | [A/G]       | NA                                         |
| Ca_Desi_Chrom_1_2438733 | Ca_desi_chr01      | 2438733                        | [T/A]       | NA                                         |
| Ca_Desi_Chrom_1_2438736 | Ca_desi_chr01      | 2438736                        | [A/T]       | NA                                         |
| Ca_Desi_Chrom_1_2449527 | Ca_desi_chr01      | 2449527                        | [G/A]       | NA                                         |
| Ca_Desi_Chrom_1_2471793 | Ca_desi_chr01      | 2471793                        | [C/T]       | NA                                         |
| Ca_Desi_Chrom_1_2471996 | Ca_desi_chr01      | 2471996                        | [G/A]       | NA                                         |
| Ca_Desi_Chrom_1_2491480 | Ca_desi_chr01      | 2491480                        | [A/T]       | NA                                         |
| Ca_Desi_Chrom_1_2491481 | Ca_desi_chr01      | 2491481                        | [A/C]       | NA                                         |
| Ca_Desi_Chrom_1_2491483 | Ca_desi_chr01      | 2491483                        | [T/A]       | NA                                         |
| Ca_Desi_Chrom_1_2491484 | Ca_desi_chr01      | 2491484                        | [T/A]       | NA                                         |
| Ca_Desi_Chrom_1_2504132 | Ca_desi_chr01      | 2504132                        | [G/A]       | NA                                         |
| Ca_Desi_Chrom_1_2536767 | Ca_desi_chr01      | 2536767                        | [T/C]       | NA                                         |
| Ca_Desi_Chrom_1_2536826 | Ca_desi_chr01      | 2536826                        | [A/C]       | NA                                         |
| Ca_Desi_Chrom_1_2546433 | Ca_desi_chr01      | 2546433                        | [A/C]       | NA                                         |
| Ca_Desi_Chrom_1_2546434 | Ca_desi_chr01      | 2546434                        | [G/T]       | NA                                         |
| Ca_Desi_Chrom_1_2619204 | Ca_desi_chr01      | 2619204                        | [C/T]       | NA                                         |
| Ca_Desi_Chrom_1_2637647 | Ca_desi_chr01      | 2637647                        | [C/G]       | NA                                         |
| Ca_Desi_Chrom_1_2637849 | Ca_desi_chr01      | 2637849                        | [C/T]       | NA                                         |
| Ca_Desi_Chrom_1_2637890 | Ca_desi_chr01      | 2637890                        | [G/C]       | NA                                         |
| Ca_Desi_Chrom_1_2824561 | Ca_desi_chr01      | 2824561                        | [C/A]       | NA                                         |
| Ca_Desi_Chrom_1_2824588 | Ca_desi_chr01      | 2824588                        | [T/C]       | NA                                         |
| Ca_Desi_Chrom_1_2824628 | Ca_desi_chr01      | 2824628                        | [A/C]       | NA                                         |
| Ca_Desi_Chrom_1_2888339 | Ca_desi_chr01      | 2888339                        | [A/G]       | NA                                         |
| Ca_Desi_Chrom_1_2888351 | Ca_desi_chr01      | 2888351                        | [T/C]       | NA                                         |
| Ca_Desi_Chrom_1_2958061 | Ca_desi_chr01      | 2958061                        | [G/A]       | NA                                         |

| <b>SNP IDs</b>          | <b>Chromosomes</b> | <b>Physical positions (bp)</b> | <b>SNPs</b> | <b>NCBI SNPdb accession IDs (NCBI_ss#)</b> |
|-------------------------|--------------------|--------------------------------|-------------|--------------------------------------------|
| Ca_Desi_Chrom_1_2961157 | Ca_desi_chr01      | 2961157                        | [T/G]       | NA                                         |
| Ca_Desi_Chrom_1_2961169 | Ca_desi_chr01      | 2961169                        | [A/G]       | NA                                         |
| Ca_Desi_Chrom_1_2965413 | Ca_desi_chr01      | 2965413                        | [T/A]       | NA                                         |
| Ca_Desi_Chrom_1_3038901 | Ca_desi_chr01      | 3038901                        | [C/A]       | NA                                         |
| Ca_Desi_Chrom_1_3083142 | Ca_desi_chr01      | 3083142                        | [A/G]       | NA                                         |
| Ca_Desi_Chrom_1_3098844 | Ca_desi_chr01      | 3098844                        | [A/G]       | NA                                         |
| Ca_Desi_Chrom_1_3099404 | Ca_desi_chr01      | 3099404                        | [C/G]       | NA                                         |
| Ca_Desi_Chrom_1_3151844 | Ca_desi_chr01      | 3151844                        | [A/T]       | NA                                         |
| Ca_Desi_Chrom_1_3151866 | Ca_desi_chr01      | 3151866                        | [A/C]       | NA                                         |
| Ca_Desi_Chrom_1_3151955 | Ca_desi_chr01      | 3151955                        | [T/G]       | NA                                         |
| Ca_Desi_Chrom_1_3152052 | Ca_desi_chr01      | 3152052                        | [A/T]       | NA                                         |
| Ca_Desi_Chrom_1_3191486 | Ca_desi_chr01      | 3191486                        | [T/C]       | NA                                         |
| Ca_Desi_Chrom_1_3191487 | Ca_desi_chr01      | 3191487                        | [T/C]       | NA                                         |
| Ca_Desi_Chrom_1_3191496 | Ca_desi_chr01      | 3191496                        | [G/T]       | NA                                         |
| Ca_Desi_Chrom_1_3191499 | Ca_desi_chr01      | 3191499                        | [C/T]       | NA                                         |
| Ca_Desi_Chrom_1_3216071 | Ca_desi_chr01      | 3216071                        | [A/T]       | NA                                         |
| Ca_Desi_Chrom_1_3216095 | Ca_desi_chr01      | 3216095                        | [T/G]       | NA                                         |
| Ca_Desi_Chrom_1_3220988 | Ca_desi_chr01      | 3220988                        | [T/A]       | NA                                         |
| Ca_Desi_Chrom_1_3307455 | Ca_desi_chr01      | 3307455                        | [T/A]       | NA                                         |
| Ca_Desi_Chrom_1_3328457 | Ca_desi_chr01      | 3328457                        | [C/A]       | NA                                         |
| Ca_Desi_Chrom_1_3328510 | Ca_desi_chr01      | 3328510                        | [C/A]       | NA                                         |
| Ca_Desi_Chrom_1_3328583 | Ca_desi_chr01      | 3328583                        | [A/C]       | NA                                         |
| Ca_Desi_Chrom_1_3328660 | Ca_desi_chr01      | 3328660                        | [T/C]       | NA                                         |
| Ca_Desi_Chrom_1_3328682 | Ca_desi_chr01      | 3328682                        | [T/G]       | NA                                         |
| Ca_Desi_Chrom_1_3328695 | Ca_desi_chr01      | 3328695                        | [A/C]       | NA                                         |
| Ca_Desi_Chrom_1_3328700 | Ca_desi_chr01      | 3328700                        | [A/T]       | NA                                         |
| Ca_Desi_Chrom_1_3370457 | Ca_desi_chr01      | 3370457                        | [T/C]       | NA                                         |
| Ca_Desi_Chrom_1_3370481 | Ca_desi_chr01      | 3370481                        | [T/A]       | NA                                         |
| Ca_Desi_Chrom_1_3370815 | Ca_desi_chr01      | 3370815                        | [A/C]       | NA                                         |
| Ca_Desi_Chrom_1_3370833 | Ca_desi_chr01      | 3370833                        | [T/C]       | NA                                         |
| Ca_Desi_Chrom_1_3370852 | Ca_desi_chr01      | 3370852                        | [A/G]       | NA                                         |
| Ca_Desi_Chrom_1_3372364 | Ca_desi_chr01      | 3372364                        | [C/T]       | NA                                         |
| Ca_Desi_Chrom_1_3372365 | Ca_desi_chr01      | 3372365                        | [G/C]       | NA                                         |
| Ca_Desi_Chrom_1_3372366 | Ca_desi_chr01      | 3372366                        | [G/T]       | NA                                         |

| <b>SNP IDs</b>          | <b>Chromosomes</b> | <b>Physical positions (bp)</b> | <b>SNPs</b> | <b>NCBI SNPdb accession IDs (NCBI_ss#)</b> |
|-------------------------|--------------------|--------------------------------|-------------|--------------------------------------------|
| Ca_Desi_Chrom_1_3425903 | Ca_desi_chr01      | 3425903                        | [T/G]       | NA                                         |
| Ca_Desi_Chrom_1_3436819 | Ca_desi_chr01      | 3436819                        | [A/G]       | NA                                         |
| Ca_Desi_Chrom_1_3440874 | Ca_desi_chr01      | 3440874                        | [A/G]       | NA                                         |
| Ca_Desi_Chrom_1_3545305 | Ca_desi_chr01      | 3545305                        | [T/G]       | NA                                         |
| Ca_Desi_Chrom_1_3545307 | Ca_desi_chr01      | 3545307                        | [A/G]       | NA                                         |
| Ca_Desi_Chrom_1_3545317 | Ca_desi_chr01      | 3545317                        | [T/A]       | NA                                         |
| Ca_Desi_Chrom_1_3545323 | Ca_desi_chr01      | 3545323                        | [T/G]       | NA                                         |
| Ca_Desi_Chrom_1_3545332 | Ca_desi_chr01      | 3545332                        | [T/G]       | NA                                         |
| Ca_Desi_Chrom_1_3545358 | Ca_desi_chr01      | 3545358                        | [A/C]       | NA                                         |
| Ca_Desi_Chrom_1_3570664 | Ca_desi_chr01      | 3570664                        | [G/A]       | NA                                         |
| Ca_Desi_Chrom_1_3570667 | Ca_desi_chr01      | 3570667                        | [G/A]       | NA                                         |
| Ca_Desi_Chrom_1_3570670 | Ca_desi_chr01      | 3570670                        | [T/A]       | NA                                         |
| Ca_Desi_Chrom_1_3570671 | Ca_desi_chr01      | 3570671                        | [T/G]       | NA                                         |
| Ca_Desi_Chrom_1_3674643 | Ca_desi_chr01      | 3674643                        | [A/G]       | NA                                         |
| Ca_Desi_Chrom_1_3674649 | Ca_desi_chr01      | 3674649                        | [T/C]       | NA                                         |
| Ca_Desi_Chrom_1_3674669 | Ca_desi_chr01      | 3674669                        | [T/C]       | NA                                         |
| Ca_Desi_Chrom_1_3675565 | Ca_desi_chr01      | 3675565                        | [A/C]       | NA                                         |
| Ca_Desi_Chrom_1_3675568 | Ca_desi_chr01      | 3675568                        | [A/G]       | NA                                         |
| Ca_Desi_Chrom_1_3675770 | Ca_desi_chr01      | 3675770                        | [T/C]       | NA                                         |
| Ca_Desi_Chrom_1_3675775 | Ca_desi_chr01      | 3675775                        | [T/G]       | NA                                         |
| Ca_Desi_Chrom_1_3675840 | Ca_desi_chr01      | 3675840                        | [A/G]       | NA                                         |
| Ca_Desi_Chrom_1_3675925 | Ca_desi_chr01      | 3675925                        | [T/C]       | NA                                         |
| Ca_Desi_Chrom_1_3740980 | Ca_desi_chr01      | 3740980                        | [A/G]       | NA                                         |
| Ca_Desi_Chrom_1_3742716 | Ca_desi_chr01      | 3742716                        | [T/G]       | NA                                         |
| Ca_Desi_Chrom_1_3742739 | Ca_desi_chr01      | 3742739                        | [A/G]       | NA                                         |
| Ca_Desi_Chrom_1_3742966 | Ca_desi_chr01      | 3742966                        | [T/C]       | NA                                         |
| Ca_Desi_Chrom_1_3742969 | Ca_desi_chr01      | 3742969                        | [T/G]       | NA                                         |
| Ca_Desi_Chrom_1_3742987 | Ca_desi_chr01      | 3742987                        | [T/C]       | NA                                         |
| Ca_Desi_Chrom_1_3743002 | Ca_desi_chr01      | 3743002                        | [T/C]       | NA                                         |
| Ca_Desi_Chrom_1_3743013 | Ca_desi_chr01      | 3743013                        | [A/G]       | NA                                         |
| Ca_Desi_Chrom_1_3743017 | Ca_desi_chr01      | 3743017                        | [A/G]       | NA                                         |
| Ca_Desi_Chrom_1_3758449 | Ca_desi_chr01      | 3758449                        | [A/G]       | NA                                         |
| Ca_Desi_Chrom_1_3771480 | Ca_desi_chr01      | 3771480                        | [T/G]       | NA                                         |
| Ca_Desi_Chrom_1_3771639 | Ca_desi_chr01      | 3771639                        | [T/A]       | NA                                         |



| <b>SNP IDs</b>          | <b>Chromosomes</b> | <b>Physical positions (bp)</b> | <b>SNPs</b> | <b>NCBI SNPdb accession IDs (NCBI_ss#)</b> |
|-------------------------|--------------------|--------------------------------|-------------|--------------------------------------------|
| Ca_Desi_Chrom_1_3771641 | Ca_desi_chr01      | 3771641                        | [T/C]       | NA                                         |
| Ca_Desi_Chrom_1_3771642 | Ca_desi_chr01      | 3771642                        | [G/T]       | NA                                         |
| Ca_Desi_Chrom_1_3783294 | Ca_desi_chr01      | 3783294                        | [T/G]       | NA                                         |
| Ca_Desi_Chrom_1_3783321 | Ca_desi_chr01      | 3783321                        | [T/G]       | NA                                         |
| Ca_Desi_Chrom_1_3804309 | Ca_desi_chr01      | 3804309                        | [A/C]       | NA                                         |
| Ca_Desi_Chrom_1_3844870 | Ca_desi_chr01      | 3844870                        | [A/T]       | NA                                         |
| Ca_Desi_Chrom_1_3844883 | Ca_desi_chr01      | 3844883                        | [T/G]       | NA                                         |
| Ca_Desi_Chrom_1_3859118 | Ca_desi_chr01      | 3859118                        | [A/C]       | NA                                         |
| Ca_Desi_Chrom_1_3887816 | Ca_desi_chr01      | 3887816                        | [C/A]       | NA                                         |
| Ca_Desi_Chrom_1_3887817 | Ca_desi_chr01      | 3887817                        | [C/G]       | NA                                         |
| Ca_Desi_Chrom_1_3996817 | Ca_desi_chr01      | 3996817                        | [T/G]       | NA                                         |
| Ca_Desi_Chrom_1_3996909 | Ca_desi_chr01      | 3996909                        | [T/G]       | NA                                         |
| Ca_Desi_Chrom_1_3996922 | Ca_desi_chr01      | 3996922                        | [T/G]       | NA                                         |
| Ca_Desi_Chrom_1_4001436 | Ca_desi_chr01      | 4001436                        | [A/T]       | NA                                         |
| Ca_Desi_Chrom_1_4002049 | Ca_desi_chr01      | 4002049                        | [T/A]       | NA                                         |
| Ca_Desi_Chrom_1_5004855 | Ca_desi_chr01      | 5004855                        | [C/A]       | NA                                         |
| Ca_Desi_Chrom_1_5004857 | Ca_desi_chr01      | 5004857                        | [C/G]       | NA                                         |
| Ca_Desi_Chrom_1_5014318 | Ca_desi_chr01      | 5014318                        | [G/T]       | NA                                         |
| Ca_Desi_Chrom_1_5022262 | Ca_desi_chr01      | 5022262                        | [T/G]       | NA                                         |
| Ca_Desi_Chrom_1_5050016 | Ca_desi_chr01      | 5050016                        | [C/T]       | NA                                         |
| Ca_Desi_Chrom_1_5050028 | Ca_desi_chr01      | 5050028                        | [T/G]       | NA                                         |
| Ca_Desi_Chrom_1_5050172 | Ca_desi_chr01      | 5050172                        | [T/C]       | NA                                         |
| Ca_Desi_Chrom_1_5056212 | Ca_desi_chr01      | 5056212                        | [C/T]       | NA                                         |
| Ca_Desi_Chrom_1_5059318 | Ca_desi_chr01      | 5059318                        | [A/T]       | NA                                         |
| Ca_Desi_Chrom_1_5059365 | Ca_desi_chr01      | 5059365                        | [C/A]       | NA                                         |
| Ca_Desi_Chrom_1_5059752 | Ca_desi_chr01      | 5059752                        | [G/A]       | NA                                         |
| Ca_Desi_Chrom_1_5061066 | Ca_desi_chr01      | 5061066                        | [A/T]       | NA                                         |
| Ca_Desi_Chrom_1_5061125 | Ca_desi_chr01      | 5061125                        | [C/G]       | NA                                         |
| Ca_Desi_Chrom_1_5061196 | Ca_desi_chr01      | 5061196                        | [A/G]       | NA                                         |
| Ca_Desi_Chrom_1_5094752 | Ca_desi_chr01      | 5094752                        | [A/G]       | NA                                         |
| Ca_Desi_Chrom_1_5094757 | Ca_desi_chr01      | 5094757                        | [C/G]       | NA                                         |
| Ca_Desi_Chrom_1_5138356 | Ca_desi_chr01      | 5138356                        | [A/C]       | NA                                         |
| Ca_Desi_Chrom_1_5138369 | Ca_desi_chr01      | 5138369                        | [A/C]       | NA                                         |
| Ca_Desi_Chrom_1_5161176 | Ca_desi_chr01      | 5161176                        | [A/C]       | NA                                         |

| <b>SNP IDs</b>          | <b>Chromosomes</b> | <b>Physical positions (bp)</b> | <b>SNPs</b> | <b>NCBI SNPdb accession IDs (NCBI_ss#)</b> |
|-------------------------|--------------------|--------------------------------|-------------|--------------------------------------------|
| Ca_Desi_Chrom_1_5161177 | Ca_desi_chr01      | 5161177                        | [G/C]       | NA                                         |
| Ca_Desi_Chrom_1_5161178 | Ca_desi_chr01      | 5161178                        | [A/G]       | NA                                         |
| Ca_Desi_Chrom_1_5161179 | Ca_desi_chr01      | 5161179                        | [T/A]       | NA                                         |
| Ca_Desi_Chrom_1_5161805 | Ca_desi_chr01      | 5161805                        | [T/G]       | NA                                         |
| Ca_Desi_Chrom_1_5197089 | Ca_desi_chr01      | 5197089                        | [T/C]       | NA                                         |
| Ca_Desi_Chrom_1_5197101 | Ca_desi_chr01      | 5197101                        | [T/C]       | NA                                         |
| Ca_Desi_Chrom_1_5197119 | Ca_desi_chr01      | 5197119                        | [A/G]       | NA                                         |
| Ca_Desi_Chrom_1_5197138 | Ca_desi_chr01      | 5197138                        | [A/G]       | NA                                         |
| Ca_Desi_Chrom_1_5197206 | Ca_desi_chr01      | 5197206                        | [C/A]       | NA                                         |
| Ca_Desi_Chrom_1_5197352 | Ca_desi_chr01      | 5197352                        | [A/T]       | NA                                         |
| Ca_Desi_Chrom_1_5197392 | Ca_desi_chr01      | 5197392                        | [A/T]       | NA                                         |
| Ca_Desi_Chrom_1_5197399 | Ca_desi_chr01      | 5197399                        | [A/G]       | NA                                         |
| Ca_Desi_Chrom_1_5197414 | Ca_desi_chr01      | 5197414                        | [A/C]       | NA                                         |
| Ca_Desi_Chrom_1_5197417 | Ca_desi_chr01      | 5197417                        | [A/C]       | NA                                         |
| Ca_Desi_Chrom_1_5197426 | Ca_desi_chr01      | 5197426                        | [A/G]       | NA                                         |
| Ca_Desi_Chrom_1_5197431 | Ca_desi_chr01      | 5197431                        | [A/G]       | NA                                         |
| Ca_Desi_Chrom_1_5197439 | Ca_desi_chr01      | 5197439                        | [A/G]       | NA                                         |
| Ca_Desi_Chrom_1_5207859 | Ca_desi_chr01      | 5207859                        | [A/C]       | NA                                         |
| Ca_Desi_Chrom_1_5207882 | Ca_desi_chr01      | 5207882                        | [A/T]       | NA                                         |
| Ca_Desi_Chrom_1_5207897 | Ca_desi_chr01      | 5207897                        | [A/T]       | NA                                         |
| Ca_Desi_Chrom_1_5238574 | Ca_desi_chr01      | 5238574                        | [A/G]       | NA                                         |
| Ca_Desi_Chrom_1_5270448 | Ca_desi_chr01      | 5270448                        | [A/G]       | NA                                         |
| Ca_Desi_Chrom_1_5270491 | Ca_desi_chr01      | 5270491                        | [T/A]       | NA                                         |
| Ca_Desi_Chrom_1_5270502 | Ca_desi_chr01      | 5270502                        | [A/G]       | NA                                         |
| Ca_Desi_Chrom_1_5292727 | Ca_desi_chr01      | 5292727                        | [T/G]       | NA                                         |
| Ca_Desi_Chrom_1_5325657 | Ca_desi_chr01      | 5325657                        | [A/T]       | NA                                         |
| Ca_Desi_Chrom_1_5325658 | Ca_desi_chr01      | 5325658                        | [T/C]       | NA                                         |
| Ca_Desi_Chrom_1_5325659 | Ca_desi_chr01      | 5325659                        | [G/T]       | NA                                         |
| Ca_Desi_Chrom_1_5418081 | Ca_desi_chr01      | 5418081                        | [T/C]       | NA                                         |
| Ca_Desi_Chrom_1_5428987 | Ca_desi_chr01      | 5428987                        | [A/C]       | NA                                         |
| Ca_Desi_Chrom_1_5428991 | Ca_desi_chr01      | 5428991                        | [T/G]       | NA                                         |
| Ca_Desi_Chrom_1_5428996 | Ca_desi_chr01      | 5428996                        | [T/C]       | NA                                         |
| Ca_Desi_Chrom_1_5429008 | Ca_desi_chr01      | 5429008                        | [T/G]       | NA                                         |
| Ca_Desi_Chrom_1_5429017 | Ca_desi_chr01      | 5429017                        | [A/G]       | NA                                         |

| <b>SNP IDs</b>          | <b>Chromosomes</b> | <b>Physical positions (bp)</b> | <b>SNPs</b> | <b>NCBI SNPdb accession IDs (NCBI_ss#)</b> |
|-------------------------|--------------------|--------------------------------|-------------|--------------------------------------------|
| Ca_Desi_Chrom_1_5446600 | Ca_desi_chr01      | 5446600                        | [T/A]       | NA                                         |
| Ca_Desi_Chrom_1_5498897 | Ca_desi_chr01      | 5498897                        | [G/A]       | NA                                         |
| Ca_Desi_Chrom_1_5498926 | Ca_desi_chr01      | 5498926                        | [G/A]       | NA                                         |
| Ca_Desi_Chrom_1_5536536 | Ca_desi_chr01      | 5536536                        | [T/C]       | NA                                         |
| Ca_Desi_Chrom_1_5537397 | Ca_desi_chr01      | 5537397                        | [T/A]       | NA                                         |
| Ca_Desi_Chrom_1_5605853 | Ca_desi_chr01      | 5605853                        | [A/G]       | NA                                         |
| Ca_Desi_Chrom_1_5605857 | Ca_desi_chr01      | 5605857                        | [T/G]       | NA                                         |
| Ca_Desi_Chrom_1_5605878 | Ca_desi_chr01      | 5605878                        | [A/G]       | NA                                         |
| Ca_Desi_Chrom_1_5605898 | Ca_desi_chr01      | 5605898                        | [A/T]       | NA                                         |
| Ca_Desi_Chrom_1_5605932 | Ca_desi_chr01      | 5605932                        | [T/G]       | NA                                         |
| Ca_Desi_Chrom_1_5631421 | Ca_desi_chr01      | 5631421                        | [T/C]       | NA                                         |
| Ca_Desi_Chrom_1_5631425 | Ca_desi_chr01      | 5631425                        | [T/G]       | NA                                         |
| Ca_Desi_Chrom_1_5631427 | Ca_desi_chr01      | 5631427                        | [T/G]       | NA                                         |
| Ca_Desi_Chrom_1_5631434 | Ca_desi_chr01      | 5631434                        | [G/A]       | NA                                         |
| Ca_Desi_Chrom_1_5645008 | Ca_desi_chr01      | 5645008                        | [A/C]       | NA                                         |
| Ca_Desi_Chrom_1_5645440 | Ca_desi_chr01      | 5645440                        | [A/G]       | NA                                         |
| Ca_Desi_Chrom_1_5645458 | Ca_desi_chr01      | 5645458                        | [A/G]       | NA                                         |
| Ca_Desi_Chrom_1_5676625 | Ca_desi_chr01      | 5676625                        | [T/G]       | NA                                         |
| Ca_Desi_Chrom_1_5704266 | Ca_desi_chr01      | 5704266                        | [A/C]       | NA                                         |
| Ca_Desi_Chrom_1_5745978 | Ca_desi_chr01      | 5745978                        | [A/G]       | NA                                         |
| Ca_Desi_Chrom_1_5775874 | Ca_desi_chr01      | 5775874                        | [T/C]       | NA                                         |
| Ca_Desi_Chrom_1_5776295 | Ca_desi_chr01      | 5776295                        | [A/G]       | NA                                         |
| Ca_Desi_Chrom_1_5776303 | Ca_desi_chr01      | 5776303                        | [T/A]       | NA                                         |
| Ca_Desi_Chrom_1_5776357 | Ca_desi_chr01      | 5776357                        | [T/C]       | NA                                         |
| Ca_Desi_Chrom_1_5776375 | Ca_desi_chr01      | 5776375                        | [T/G]       | NA                                         |
| Ca_Desi_Chrom_1_5778049 | Ca_desi_chr01      | 5778049                        | [T/G]       | NA                                         |
| Ca_Desi_Chrom_1_5778100 | Ca_desi_chr01      | 5778100                        | [A/G]       | NA                                         |
| Ca_Desi_Chrom_1_5807563 | Ca_desi_chr01      | 5807563                        | [A/G]       | NA                                         |
| Ca_Desi_Chrom_1_5807567 | Ca_desi_chr01      | 5807567                        | [C/G]       | NA                                         |
| Ca_Desi_Chrom_1_5807568 | Ca_desi_chr01      | 5807568                        | [A/G]       | NA                                         |
| Ca_Desi_Chrom_1_5808524 | Ca_desi_chr01      | 5808524                        | [T/G]       | NA                                         |
| Ca_Desi_Chrom_1_5854367 | Ca_desi_chr01      | 5854367                        | [A/G]       | NA                                         |
| Ca_Desi_Chrom_1_5854372 | Ca_desi_chr01      | 5854372                        | [T/C]       | NA                                         |
| Ca_Desi_Chrom_1_5854373 | Ca_desi_chr01      | 5854373                        | [C/T]       | NA                                         |

| <b>SNP IDs</b>          | <b>Chromosomes</b> | <b>Physical positions (bp)</b> | <b>SNPs</b> | <b>NCBI SNPdb accession IDs (NCBI_ss#)</b> |
|-------------------------|--------------------|--------------------------------|-------------|--------------------------------------------|
| Ca_Desi_Chrom_1_5897095 | Ca_desi_chr01      | 5897095                        | [G/T]       | NA                                         |
| Ca_Desi_Chrom_1_5923406 | Ca_desi_chr01      | 5923406                        | [A/G]       | NA                                         |
| Ca_Desi_Chrom_1_5923417 | Ca_desi_chr01      | 5923417                        | [T/C]       | NA                                         |
| Ca_Desi_Chrom_1_6037738 | Ca_desi_chr01      | 6037738                        | [T/G]       | NA                                         |
| Ca_Desi_Chrom_1_6037741 | Ca_desi_chr01      | 6037741                        | [T/G]       | NA                                         |
| Ca_Desi_Chrom_1_6037760 | Ca_desi_chr01      | 6037760                        | [A/G]       | NA                                         |
| Ca_Desi_Chrom_1_6085137 | Ca_desi_chr01      | 6085137                        | [T/C]       | NA                                         |
| Ca_Desi_Chrom_1_6107956 | Ca_desi_chr01      | 6107956                        | [T/C]       | NA                                         |
| Ca_Desi_Chrom_1_6107959 | Ca_desi_chr01      | 6107959                        | [T/A]       | NA                                         |
| Ca_Desi_Chrom_1_6107975 | Ca_desi_chr01      | 6107975                        | [T/C]       | NA                                         |
| Ca_Desi_Chrom_1_6107977 | Ca_desi_chr01      | 6107977                        | [T/C]       | NA                                         |
| Ca_Desi_Chrom_1_6107986 | Ca_desi_chr01      | 6107986                        | [A/G]       | NA                                         |
| Ca_Desi_Chrom_1_6107993 | Ca_desi_chr01      | 6107993                        | [A/C]       | NA                                         |
| Ca_Desi_Chrom_1_6108002 | Ca_desi_chr01      | 6108002                        | [A/T]       | NA                                         |
| Ca_Desi_Chrom_1_6108125 | Ca_desi_chr01      | 6108125                        | [T/C]       | NA                                         |
| Ca_Desi_Chrom_1_6108144 | Ca_desi_chr01      | 6108144                        | [A/C]       | NA                                         |
| Ca_Desi_Chrom_1_6108149 | Ca_desi_chr01      | 6108149                        | [A/C]       | NA                                         |
| Ca_Desi_Chrom_1_6108153 | Ca_desi_chr01      | 6108153                        | [T/C]       | NA                                         |
| Ca_Desi_Chrom_1_6108171 | Ca_desi_chr01      | 6108171                        | [A/G]       | NA                                         |
| Ca_Desi_Chrom_1_6112183 | Ca_desi_chr01      | 6112183                        | [T/C]       | NA                                         |
| Ca_Desi_Chrom_1_6112215 | Ca_desi_chr01      | 6112215                        | [T/C]       | NA                                         |
| Ca_Desi_Chrom_1_6112231 | Ca_desi_chr01      | 6112231                        | [C/A]       | NA                                         |
| Ca_Desi_Chrom_1_6141126 | Ca_desi_chr01      | 6141126                        | [A/C]       | NA                                         |
| Ca_Desi_Chrom_1_6141133 | Ca_desi_chr01      | 6141133                        | [A/C]       | NA                                         |
| Ca_Desi_Chrom_1_6149342 | Ca_desi_chr01      | 6149342                        | [T/G]       | NA                                         |
| Ca_Desi_Chrom_1_6149351 | Ca_desi_chr01      | 6149351                        | [T/G]       | NA                                         |
| Ca_Desi_Chrom_1_6151735 | Ca_desi_chr01      | 6151735                        | [T/C]       | NA                                         |
| Ca_Desi_Chrom_1_6152480 | Ca_desi_chr01      | 6152480                        | [C/T]       | NA                                         |
| Ca_Desi_Chrom_1_6255031 | Ca_desi_chr01      | 6255031                        | [A/C]       | NA                                         |
| Ca_Desi_Chrom_1_6255122 | Ca_desi_chr01      | 6255122                        | [G/C]       | NA                                         |
| Ca_Desi_Chrom_1_6265874 | Ca_desi_chr01      | 6265874                        | [T/C]       | NA                                         |
| Ca_Desi_Chrom_1_6265884 | Ca_desi_chr01      | 6265884                        | [T/C]       | NA                                         |
| Ca_Desi_Chrom_1_6265895 | Ca_desi_chr01      | 6265895                        | [T/G]       | NA                                         |
| Ca_Desi_Chrom_1_6265914 | Ca_desi_chr01      | 6265914                        | [T/G]       | NA                                         |

| <b>SNP IDs</b>          | <b>Chromosomes</b> | <b>Physical positions (bp)</b> | <b>SNPs</b> | <b>NCBI SNPdb accession IDs (NCBI_ss#)</b> |
|-------------------------|--------------------|--------------------------------|-------------|--------------------------------------------|
| Ca_Desi_Chrom_1_6309686 | Ca_desi_chr01      | 6309686                        | [A/G]       | NA                                         |
| Ca_Desi_Chrom_1_6309699 | Ca_desi_chr01      | 6309699                        | [T/A]       | NA                                         |
| Ca_Desi_Chrom_1_6314614 | Ca_desi_chr01      | 6314614                        | [A/T]       | NA                                         |
| Ca_Desi_Chrom_1_6314619 | Ca_desi_chr01      | 6314619                        | [A/G]       | NA                                         |
| Ca_Desi_Chrom_1_6314632 | Ca_desi_chr01      | 6314632                        | [T/C]       | NA                                         |
| Ca_Desi_Chrom_1_6314655 | Ca_desi_chr01      | 6314655                        | [T/G]       | NA                                         |
| Ca_Desi_Chrom_1_6314660 | Ca_desi_chr01      | 6314660                        | [T/G]       | NA                                         |
| Ca_Desi_Chrom_1_6318909 | Ca_desi_chr01      | 6318909                        | [A/G]       | NA                                         |
| Ca_Desi_Chrom_1_6319020 | Ca_desi_chr01      | 6319020                        | [C/T]       | NA                                         |
| Ca_Desi_Chrom_1_6319021 | Ca_desi_chr01      | 6319021                        | [G/C]       | NA                                         |
| Ca_Desi_Chrom_1_6319022 | Ca_desi_chr01      | 6319022                        | [G/T]       | NA                                         |
| Ca_Desi_Chrom_1_6319039 | Ca_desi_chr01      | 6319039                        | [A/C]       | NA                                         |
| Ca_Desi_Chrom_1_6319042 | Ca_desi_chr01      | 6319042                        | [A/C]       | NA                                         |
| Ca_Desi_Chrom_1_6333298 | Ca_desi_chr01      | 6333298                        | [A/C]       | NA                                         |
| Ca_Desi_Chrom_1_6333313 | Ca_desi_chr01      | 6333313                        | [T/C]       | NA                                         |
| Ca_Desi_Chrom_1_6333321 | Ca_desi_chr01      | 6333321                        | [T/C]       | NA                                         |
| Ca_Desi_Chrom_1_6333325 | Ca_desi_chr01      | 6333325                        | [A/G]       | NA                                         |
| Ca_Desi_Chrom_1_6333411 | Ca_desi_chr01      | 6333411                        | [A/C]       | NA                                         |
| Ca_Desi_Chrom_1_6333416 | Ca_desi_chr01      | 6333416                        | [T/G]       | NA                                         |
| Ca_Desi_Chrom_1_6333439 | Ca_desi_chr01      | 6333439                        | [A/C]       | NA                                         |
| Ca_Desi_Chrom_1_6379006 | Ca_desi_chr01      | 6379006                        | [A/G]       | NA                                         |
| Ca_Desi_Chrom_1_6379018 | Ca_desi_chr01      | 6379018                        | [T/C]       | NA                                         |
| Ca_Desi_Chrom_1_6379037 | Ca_desi_chr01      | 6379037                        | [A/G]       | NA                                         |
| Ca_Desi_Chrom_1_6379981 | Ca_desi_chr01      | 6379981                        | [T/G]       | NA                                         |
| Ca_Desi_Chrom_1_6733205 | Ca_desi_chr01      | 6733205                        | [A/C]       | NA                                         |
| Ca_Desi_Chrom_1_6747889 | Ca_desi_chr01      | 6747889                        | [T/C]       | NA                                         |
| Ca_Desi_Chrom_1_6747891 | Ca_desi_chr01      | 6747891                        | [T/C]       | NA                                         |
| Ca_Desi_Chrom_1_6750106 | Ca_desi_chr01      | 6750106                        | [T/C]       | NA                                         |
| Ca_Desi_Chrom_1_6752118 | Ca_desi_chr01      | 6752118                        | [T/C]       | NA                                         |
| Ca_Desi_Chrom_1_6798203 | Ca_desi_chr01      | 6798203                        | [T/C]       | NA                                         |
| Ca_Desi_Chrom_1_6798225 | Ca_desi_chr01      | 6798225                        | [A/G]       | NA                                         |
| Ca_Desi_Chrom_1_6835265 | Ca_desi_chr01      | 6835265                        | [G/T]       | NA                                         |
| Ca_Desi_Chrom_1_6835266 | Ca_desi_chr01      | 6835266                        | [T/C]       | NA                                         |
| Ca_Desi_Chrom_1_6835267 | Ca_desi_chr01      | 6835267                        | [G/T]       | NA                                         |

| <b>SNP IDs</b>          | <b>Chromosomes</b> | <b>Physical positions (bp)</b> | <b>SNPs</b> | <b>NCBI SNPdb accession IDs (NCBI_ss#)</b> |
|-------------------------|--------------------|--------------------------------|-------------|--------------------------------------------|
| Ca_Desi_Chrom_1_6836135 | Ca_desi_chr01      | 6836135                        | [A/T]       | NA                                         |
| Ca_Desi_Chrom_1_6859622 | Ca_desi_chr01      | 6859622                        | [A/G]       | NA                                         |
| Ca_Desi_Chrom_1_6859628 | Ca_desi_chr01      | 6859628                        | [G/A]       | NA                                         |
| Ca_Desi_Chrom_1_6859634 | Ca_desi_chr01      | 6859634                        | [T/C]       | NA                                         |
| Ca_Desi_Chrom_1_6859661 | Ca_desi_chr01      | 6859661                        | [C/A]       | NA                                         |
| Ca_Desi_Chrom_1_6862924 | Ca_desi_chr01      | 6862924                        | [A/C]       | NA                                         |
| Ca_Desi_Chrom_1_6918766 | Ca_desi_chr01      | 6918766                        | [T/A]       | NA                                         |
| Ca_Desi_Chrom_1_6918782 | Ca_desi_chr01      | 6918782                        | [G/T]       | NA                                         |
| Ca_Desi_Chrom_1_6918819 | Ca_desi_chr01      | 6918819                        | [T/A]       | NA                                         |
| Ca_Desi_Chrom_1_6945781 | Ca_desi_chr01      | 6945781                        | [T/C]       | NA                                         |
| Ca_Desi_Chrom_1_6945783 | Ca_desi_chr01      | 6945783                        | [T/C]       | NA                                         |
| Ca_Desi_Chrom_1_6945792 | Ca_desi_chr01      | 6945792                        | [T/C]       | NA                                         |
| Ca_Desi_Chrom_1_6945801 | Ca_desi_chr01      | 6945801                        | [A/C]       | NA                                         |
| Ca_Desi_Chrom_1_6945816 | Ca_desi_chr01      | 6945816                        | [A/G]       | NA                                         |
| Ca_Desi_Chrom_1_6945818 | Ca_desi_chr01      | 6945818                        | [T/C]       | NA                                         |
| Ca_Desi_Chrom_1_6945819 | Ca_desi_chr01      | 6945819                        | [G/T]       | NA                                         |
| Ca_Desi_Chrom_1_6945822 | Ca_desi_chr01      | 6945822                        | [C/T]       | NA                                         |
| Ca_Desi_Chrom_1_6946116 | Ca_desi_chr01      | 6946116                        | [A/T]       | NA                                         |
| Ca_Desi_Chrom_1_6956513 | Ca_desi_chr01      | 6956513                        | [G/A]       | NA                                         |
| Ca_Desi_Chrom_1_7013165 | Ca_desi_chr01      | 7013165                        | [A/G]       | NA                                         |
| Ca_Desi_Chrom_1_7013172 | Ca_desi_chr01      | 7013172                        | [A/G]       | NA                                         |
| Ca_Desi_Chrom_1_7013184 | Ca_desi_chr01      | 7013184                        | [A/G]       | NA                                         |
| Ca_Desi_Chrom_1_7013204 | Ca_desi_chr01      | 7013204                        | [T/G]       | NA                                         |
| Ca_Desi_Chrom_1_7013222 | Ca_desi_chr01      | 7013222                        | [A/G]       | NA                                         |
| Ca_Desi_Chrom_1_7013225 | Ca_desi_chr01      | 7013225                        | [A/T]       | NA                                         |
| Ca_Desi_Chrom_1_7143434 | Ca_desi_chr01      | 7143434                        | [T/C]       | NA                                         |
| Ca_Desi_Chrom_1_7194317 | Ca_desi_chr01      | 7194317                        | [T/C]       | NA                                         |
| Ca_Desi_Chrom_1_7194320 | Ca_desi_chr01      | 7194320                        | [A/G]       | NA                                         |
| Ca_Desi_Chrom_1_7194328 | Ca_desi_chr01      | 7194328                        | [T/G]       | NA                                         |
| Ca_Desi_Chrom_1_7194346 | Ca_desi_chr01      | 7194346                        | [A/T]       | NA                                         |
| Ca_Desi_Chrom_1_7253375 | Ca_desi_chr01      | 7253375                        | [T/G]       | NA                                         |
| Ca_Desi_Chrom_1_7253386 | Ca_desi_chr01      | 7253386                        | [T/G]       | NA                                         |
| Ca_Desi_Chrom_1_7255522 | Ca_desi_chr01      | 7255522                        | [A/C]       | NA                                         |
| Ca_Desi_Chrom_1_7282698 | Ca_desi_chr01      | 7282698                        | [A/G]       | NA                                         |

| <b>SNP IDs</b>          | <b>Chromosomes</b> | <b>Physical positions (bp)</b> | <b>SNPs</b> | <b>NCBI SNPdb accession IDs (NCBI_ss#)</b> |
|-------------------------|--------------------|--------------------------------|-------------|--------------------------------------------|
| Ca_Desi_Chrom_1_7282703 | Ca_desi_chr01      | 7282703                        | [T/G]       | NA                                         |
| Ca_Desi_Chrom_1_7383248 | Ca_desi_chr01      | 7383248                        | [T/G]       | NA                                         |
| Ca_Desi_Chrom_1_7383770 | Ca_desi_chr01      | 7383770                        | [T/G]       | NA                                         |
| Ca_Desi_Chrom_1_7383784 | Ca_desi_chr01      | 7383784                        | [A/G]       | NA                                         |
| Ca_Desi_Chrom_1_7452534 | Ca_desi_chr01      | 7452534                        | [A/T]       | NA                                         |
| Ca_Desi_Chrom_1_7452535 | Ca_desi_chr01      | 7452535                        | [T/A]       | NA                                         |
| Ca_Desi_Chrom_1_7452536 | Ca_desi_chr01      | 7452536                        | [C/A]       | NA                                         |
| Ca_Desi_Chrom_1_7452537 | Ca_desi_chr01      | 7452537                        | [T/G]       | NA                                         |
| Ca_Desi_Chrom_1_7489471 | Ca_desi_chr01      | 7489471                        | [T/A]       | NA                                         |
| Ca_Desi_Chrom_1_7489492 | Ca_desi_chr01      | 7489492                        | [T/A]       | NA                                         |
| Ca_Desi_Chrom_1_7489519 | Ca_desi_chr01      | 7489519                        | [T/A]       | NA                                         |
| Ca_Desi_Chrom_1_7606885 | Ca_desi_chr01      | 7606885                        | [C/G]       | NA                                         |
| Ca_Desi_Chrom_1_7606933 | Ca_desi_chr01      | 7606933                        | [C/T]       | NA                                         |
| Ca_Desi_Chrom_1_7632274 | Ca_desi_chr01      | 7632274                        | [G/T]       | NA                                         |
| Ca_Desi_Chrom_1_7632275 | Ca_desi_chr01      | 7632275                        | [T/A]       | NA                                         |
| Ca_Desi_Chrom_1_7632307 | Ca_desi_chr01      | 7632307                        | [A/G]       | NA                                         |
| Ca_Desi_Chrom_1_7632356 | Ca_desi_chr01      | 7632356                        | [C/T]       | NA                                         |
| Ca_Desi_Chrom_1_7665478 | Ca_desi_chr01      | 7665478                        | [T/A]       | NA                                         |
| Ca_Desi_Chrom_1_7669587 | Ca_desi_chr01      | 7669587                        | [A/G]       | NA                                         |
| Ca_Desi_Chrom_1_7674913 | Ca_desi_chr01      | 7674913                        | [T/C]       | NA                                         |
| Ca_Desi_Chrom_1_7674926 | Ca_desi_chr01      | 7674926                        | [T/G]       | NA                                         |
| Ca_Desi_Chrom_1_7712731 | Ca_desi_chr01      | 7712731                        | [T/C]       | NA                                         |
| Ca_Desi_Chrom_1_7712744 | Ca_desi_chr01      | 7712744                        | [A/T]       | NA                                         |
| Ca_Desi_Chrom_1_7917190 | Ca_desi_chr01      | 7917190                        | [A/T]       | NA                                         |
| Ca_Desi_Chrom_1_7940077 | Ca_desi_chr01      | 7940077                        | [T/A]       | NA                                         |
| Ca_Desi_Chrom_1_7940088 | Ca_desi_chr01      | 7940088                        | [A/C]       | NA                                         |
| Ca_Desi_Chrom_1_7940111 | Ca_desi_chr01      | 7940111                        | [T/G]       | NA                                         |
| Ca_Desi_Chrom_1_8219724 | Ca_desi_chr01      | 8219724                        | [C/T]       | NA                                         |
| Ca_Desi_Chrom_1_8221010 | Ca_desi_chr01      | 8221010                        | [A/C]       | NA                                         |
| Ca_Desi_Chrom_1_8232979 | Ca_desi_chr01      | 8232979                        | [A/G]       | NA                                         |
| Ca_Desi_Chrom_1_8232988 | Ca_desi_chr01      | 8232988                        | [A/G]       | NA                                         |
| Ca_Desi_Chrom_1_8232993 | Ca_desi_chr01      | 8232993                        | [A/G]       | NA                                         |
| Ca_Desi_Chrom_1_8232998 | Ca_desi_chr01      | 8232998                        | [T/G]       | NA                                         |
| Ca_Desi_Chrom_1_8233002 | Ca_desi_chr01      | 8233002                        | [T/A]       | NA                                         |

| <b>SNP IDs</b>          | <b>Chromosomes</b> | <b>Physical positions (bp)</b> | <b>SNPs</b> | <b>NCBI SNPdb accession IDs (NCBI_ss#)</b> |
|-------------------------|--------------------|--------------------------------|-------------|--------------------------------------------|
| Ca_Desi_Chrom_1_8233006 | Ca_desi_chr01      | 8233006                        | [T/C]       | NA                                         |
| Ca_Desi_Chrom_1_8276418 | Ca_desi_chr01      | 8276418                        | [T/C]       | NA                                         |
| Ca_Desi_Chrom_1_8276422 | Ca_desi_chr01      | 8276422                        | [T/C]       | NA                                         |
| Ca_Desi_Chrom_1_8276424 | Ca_desi_chr01      | 8276424                        | [A/G]       | NA                                         |
| Ca_Desi_Chrom_1_8276426 | Ca_desi_chr01      | 8276426                        | [T/G]       | NA                                         |
| Ca_Desi_Chrom_1_8276440 | Ca_desi_chr01      | 8276440                        | [A/G]       | NA                                         |
| Ca_Desi_Chrom_1_8276478 | Ca_desi_chr01      | 8276478                        | [A/G]       | NA                                         |
| Ca_Desi_Chrom_1_8318581 | Ca_desi_chr01      | 8318581                        | [T/G]       | NA                                         |
| Ca_Desi_Chrom_1_8351754 | Ca_desi_chr01      | 8351754                        | [A/G]       | NA                                         |
| Ca_Desi_Chrom_1_8351766 | Ca_desi_chr01      | 8351766                        | [A/C]       | NA                                         |
| Ca_Desi_Chrom_1_8351802 | Ca_desi_chr01      | 8351802                        | [A/G]       | NA                                         |
| Ca_Desi_Chrom_1_8351809 | Ca_desi_chr01      | 8351809                        | [A/G]       | NA                                         |
| Ca_Desi_Chrom_1_8365693 | Ca_desi_chr01      | 8365693                        | [T/A]       | NA                                         |
| Ca_Desi_Chrom_1_8372866 | Ca_desi_chr01      | 8372866                        | [A/C]       | NA                                         |
| Ca_Desi_Chrom_1_8375608 | Ca_desi_chr01      | 8375608                        | [A/G]       | NA                                         |
| Ca_Desi_Chrom_1_8375630 | Ca_desi_chr01      | 8375630                        | [T/G]       | NA                                         |
| Ca_Desi_Chrom_1_8390584 | Ca_desi_chr01      | 8390584                        | [A/C]       | NA                                         |
| Ca_Desi_Chrom_1_8398205 | Ca_desi_chr01      | 8398205                        | [A/C]       | NA                                         |
| Ca_Desi_Chrom_1_8416742 | Ca_desi_chr01      | 8416742                        | [T/C]       | NA                                         |
| Ca_Desi_Chrom_1_8416760 | Ca_desi_chr01      | 8416760                        | [A/C]       | NA                                         |
| Ca_Desi_Chrom_1_8738253 | Ca_desi_chr01      | 8738253                        | [T/G]       | NA                                         |
| Ca_Desi_Chrom_1_8785536 | Ca_desi_chr01      | 8785536                        | [A/G]       | NA                                         |
| Ca_Desi_Chrom_1_8786915 | Ca_desi_chr01      | 8786915                        | [T/G]       | NA                                         |
| Ca_Desi_Chrom_1_8871880 | Ca_desi_chr01      | 8871880                        | [T/C]       | NA                                         |
| Ca_Desi_Chrom_1_8871912 | Ca_desi_chr01      | 8871912                        | [T/G]       | NA                                         |
| Ca_Desi_Chrom_1_8902146 | Ca_desi_chr01      | 8902146                        | [C/A]       | NA                                         |
| Ca_Desi_Chrom_1_8902154 | Ca_desi_chr01      | 8902154                        | [C/T]       | NA                                         |
| Ca_Desi_Chrom_1_8934250 | Ca_desi_chr01      | 8934250                        | [T/C]       | NA                                         |
| Ca_Desi_Chrom_1_8973166 | Ca_desi_chr01      | 8973166                        | [T/C]       | NA                                         |
| Ca_Desi_Chrom_1_8988073 | Ca_desi_chr01      | 8988073                        | [G/A]       | NA                                         |
| Ca_Desi_Chrom_1_8988083 | Ca_desi_chr01      | 8988083                        | [C/T]       | NA                                         |
| Ca_Desi_Chrom_1_8988088 | Ca_desi_chr01      | 8988088                        | [A/C]       | NA                                         |
| Ca_Desi_Chrom_1_8988091 | Ca_desi_chr01      | 8988091                        | [G/C]       | NA                                         |
| Ca_Desi_Chrom_1_8988092 | Ca_desi_chr01      | 8988092                        | [T/C]       | NA                                         |



| <b>SNP IDs</b>          | <b>Chromosomes</b> | <b>Physical positions (bp)</b> | <b>SNPs</b> | <b>NCBI SNPdb accession IDs (NCBI_ss#)</b> |
|-------------------------|--------------------|--------------------------------|-------------|--------------------------------------------|
| Ca_Desi_Chrom_1_9022980 | Ca_desi_chr01      | 9022980                        | [T/C]       | NA                                         |
| Ca_Desi_Chrom_1_9022983 | Ca_desi_chr01      | 9022983                        | [A/G]       | NA                                         |
| Ca_Desi_Chrom_1_9022987 | Ca_desi_chr01      | 9022987                        | [T/C]       | NA                                         |
| Ca_Desi_Chrom_1_9023008 | Ca_desi_chr01      | 9023008                        | [T/C]       | NA                                         |
| Ca_Desi_Chrom_1_9023018 | Ca_desi_chr01      | 9023018                        | [A/G]       | NA                                         |
| Ca_Desi_Chrom_1_9023283 | Ca_desi_chr01      | 9023283                        | [A/C]       | NA                                         |
| Ca_Desi_Chrom_1_9028906 | Ca_desi_chr01      | 9028906                        | [A/T]       | NA                                         |
| Ca_Desi_Chrom_1_9029900 | Ca_desi_chr01      | 9029900                        | [A/G]       | NA                                         |
| Ca_Desi_Chrom_1_9030074 | Ca_desi_chr01      | 9030074                        | [A/C]       | NA                                         |
| Ca_Desi_Chrom_1_9193853 | Ca_desi_chr01      | 9193853                        | [A/G]       | NA                                         |
| Ca_Desi_Chrom_1_9193872 | Ca_desi_chr01      | 9193872                        | [T/G]       | NA                                         |
| Ca_Desi_Chrom_1_9193878 | Ca_desi_chr01      | 9193878                        | [T/G]       | NA                                         |
| Ca_Desi_Chrom_1_9216572 | Ca_desi_chr01      | 9216572                        | [T/C]       | NA                                         |
| Ca_Desi_Chrom_1_9216596 | Ca_desi_chr01      | 9216596                        | [A/C]       | NA                                         |
| Ca_Desi_Chrom_1_9216611 | Ca_desi_chr01      | 9216611                        | [A/C]       | NA                                         |
| Ca_Desi_Chrom_1_9217172 | Ca_desi_chr01      | 9217172                        | [A/G]       | NA                                         |
| Ca_Desi_Chrom_1_9217272 | Ca_desi_chr01      | 9217272                        | [A/C]       | NA                                         |
| Ca_Desi_Chrom_1_9217363 | Ca_desi_chr01      | 9217363                        | [C/A]       | NA                                         |
| Ca_Desi_Chrom_1_9217425 | Ca_desi_chr01      | 9217425                        | [A/C]       | NA                                         |
| Ca_Desi_Chrom_1_9217558 | Ca_desi_chr01      | 9217558                        | [A/C]       | NA                                         |
| Ca_Desi_Chrom_1_9217567 | Ca_desi_chr01      | 9217567                        | [A/C]       | NA                                         |
| Ca_Desi_Chrom_1_9217931 | Ca_desi_chr01      | 9217931                        | [A/C]       | NA                                         |
| Ca_Desi_Chrom_1_9217933 | Ca_desi_chr01      | 9217933                        | [A/G]       | NA                                         |
| Ca_Desi_Chrom_1_9218868 | Ca_desi_chr01      | 9218868                        | [A/G]       | NA                                         |
| Ca_Desi_Chrom_1_9242309 | Ca_desi_chr01      | 9242309                        | [T/A]       | NA                                         |
| Ca_Desi_Chrom_1_9265798 | Ca_desi_chr01      | 9265798                        | [G/T]       | NA                                         |
| Ca_Desi_Chrom_1_9297444 | Ca_desi_chr01      | 9297444                        | [T/G]       | NA                                         |
| Ca_Desi_Chrom_1_9297467 | Ca_desi_chr01      | 9297467                        | [G/T]       | NA                                         |
| Ca_Desi_Chrom_1_9350681 | Ca_desi_chr01      | 9350681                        | [A/C]       | NA                                         |
| Ca_Desi_Chrom_1_9356038 | Ca_desi_chr01      | 9356038                        | [A/C]       | NA                                         |
| Ca_Desi_Chrom_1_9356060 | Ca_desi_chr01      | 9356060                        | [T/A]       | NA                                         |
| Ca_Desi_Chrom_1_9361622 | Ca_desi_chr01      | 9361622                        | [T/C]       | NA                                         |
| Ca_Desi_Chrom_1_9362439 | Ca_desi_chr01      | 9362439                        | [A/C]       | NA                                         |
| Ca_Desi_Chrom_1_9362450 | Ca_desi_chr01      | 9362450                        | [A/C]       | NA                                         |

| <b>SNP IDs</b>           | <b>Chromosomes</b> | <b>Physical positions (bp)</b> | <b>SNPs</b> | <b>NCBI SNPdb accession IDs (NCBI_ss#)</b> |
|--------------------------|--------------------|--------------------------------|-------------|--------------------------------------------|
| Ca_Desi_Chrom_1_9362470  | Ca_desi_chr01      | 9362470                        | [A/C]       | NA                                         |
| Ca_Desi_Chrom_1_9743611  | Ca_desi_chr01      | 9743611                        | [G/T]       | NA                                         |
| Ca_Desi_Chrom_1_9808324  | Ca_desi_chr01      | 9808324                        | [C/A]       | NA                                         |
| Ca_Desi_Chrom_1_9808325  | Ca_desi_chr01      | 9808325                        | [C/G]       | NA                                         |
| Ca_Desi_Chrom_1_9808326  | Ca_desi_chr01      | 9808326                        | [T/A]       | NA                                         |
| Ca_Desi_Chrom_1_10012838 | Ca_desi_chr01      | 10012838                       | [A/C]       | NA                                         |
| Ca_Desi_Chrom_1_10039233 | Ca_desi_chr01      | 10039233                       | [T/C]       | NA                                         |
| Ca_Desi_Chrom_1_10039245 | Ca_desi_chr01      | 10039245                       | [A/C]       | NA                                         |
| Ca_Desi_Chrom_1_10076230 | Ca_desi_chr01      | 10076230                       | [C/A]       | NA                                         |
| Ca_Desi_Chrom_1_10076231 | Ca_desi_chr01      | 10076231                       | [C/T]       | NA                                         |
| Ca_Desi_Chrom_1_10076232 | Ca_desi_chr01      | 10076232                       | [G/C]       | NA                                         |
| Ca_Desi_Chrom_1_10076233 | Ca_desi_chr01      | 10076233                       | [G/T]       | NA                                         |
| Ca_Desi_Chrom_1_10102257 | Ca_desi_chr01      | 10102257                       | [A/C]       | NA                                         |
| Ca_Desi_Chrom_1_10150162 | Ca_desi_chr01      | 10150162                       | [C/T]       | NA                                         |
| Ca_Desi_Chrom_1_10197211 | Ca_desi_chr01      | 10197211                       | [C/A]       | NA                                         |
| Ca_Desi_Chrom_1_10197212 | Ca_desi_chr01      | 10197212                       | [A/G]       | NA                                         |
| Ca_Desi_Chrom_1_10209832 | Ca_desi_chr01      | 10209832                       | [A/C]       | NA                                         |
| Ca_Desi_Chrom_1_10288683 | Ca_desi_chr01      | 10288683                       | [T/G]       | NA                                         |
| Ca_Desi_Chrom_1_10292762 | Ca_desi_chr01      | 10292762                       | [T/A]       | NA                                         |
| Ca_Desi_Chrom_1_10326430 | Ca_desi_chr01      | 10326430                       | [T/G]       | NA                                         |
| Ca_Desi_Chrom_1_10329721 | Ca_desi_chr01      | 10329721                       | [A/G]       | NA                                         |
| Ca_Desi_Chrom_1_10329749 | Ca_desi_chr01      | 10329749                       | [A/C]       | NA                                         |
| Ca_Desi_Chrom_1_10329754 | Ca_desi_chr01      | 10329754                       | [G/A]       | NA                                         |
| Ca_Desi_Chrom_1_10329756 | Ca_desi_chr01      | 10329756                       | [T/C]       | NA                                         |
| Ca_Desi_Chrom_1_10331523 | Ca_desi_chr01      | 10331523                       | [A/G]       | NA                                         |
| Ca_Desi_Chrom_1_10331526 | Ca_desi_chr01      | 10331526                       | [A/G]       | NA                                         |
| Ca_Desi_Chrom_1_10331535 | Ca_desi_chr01      | 10331535                       | [A/G]       | NA                                         |
| Ca_Desi_Chrom_1_10331538 | Ca_desi_chr01      | 10331538                       | [T/C]       | NA                                         |
| Ca_Desi_Chrom_1_10331541 | Ca_desi_chr01      | 10331541                       | [T/C]       | NA                                         |
| Ca_Desi_Chrom_1_10331548 | Ca_desi_chr01      | 10331548                       | [A/G]       | NA                                         |
| Ca_Desi_Chrom_1_10331553 | Ca_desi_chr01      | 10331553                       | [A/G]       | NA                                         |
| Ca_Desi_Chrom_1_10331562 | Ca_desi_chr01      | 10331562                       | [A/G]       | NA                                         |
| Ca_Desi_Chrom_1_10339620 | Ca_desi_chr01      | 10339620                       | [T/G]       | NA                                         |
| Ca_Desi_Chrom_1_10366520 | Ca_desi_chr01      | 10366520                       | [T/C]       | NA                                         |

| <b>SNP IDs</b>           | <b>Chromosomes</b> | <b>Physical positions (bp)</b> | <b>SNPs</b> | <b>NCBI SNPdb accession IDs (NCBI_ss#)</b> |
|--------------------------|--------------------|--------------------------------|-------------|--------------------------------------------|
| Ca_Desi_Chrom_1_10371008 | Ca_desi_chr01      | 10371008                       | [A/T]       | NA                                         |
| Ca_Desi_Chrom_1_10371022 | Ca_desi_chr01      | 10371022                       | [T/A]       | NA                                         |
| Ca_Desi_Chrom_1_10371032 | Ca_desi_chr01      | 10371032                       | [A/G]       | NA                                         |
| Ca_Desi_Chrom_1_10441613 | Ca_desi_chr01      | 10441613                       | [G/A]       | NA                                         |
| Ca_Desi_Chrom_1_10441631 | Ca_desi_chr01      | 10441631                       | [A/T]       | NA                                         |
| Ca_Desi_Chrom_1_10441640 | Ca_desi_chr01      | 10441640                       | [A/G]       | NA                                         |
| Ca_Desi_Chrom_1_10441697 | Ca_desi_chr01      | 10441697                       | [C/A]       | NA                                         |
| Ca_Desi_Chrom_1_10441699 | Ca_desi_chr01      | 10441699                       | [A/G]       | NA                                         |
| Ca_Desi_Chrom_1_10441719 | Ca_desi_chr01      | 10441719                       | [G/A]       | NA                                         |
| Ca_Desi_Chrom_1_10441750 | Ca_desi_chr01      | 10441750                       | [T/C]       | NA                                         |
| Ca_Desi_Chrom_1_10441806 | Ca_desi_chr01      | 10441806                       | [A/C]       | NA                                         |
| Ca_Desi_Chrom_1_10441837 | Ca_desi_chr01      | 10441837                       | [A/G]       | NA                                         |
| Ca_Desi_Chrom_1_10525376 | Ca_desi_chr01      | 10525376                       | [A/G]       | NA                                         |
| Ca_Desi_Chrom_1_10525418 | Ca_desi_chr01      | 10525418                       | [T/G]       | NA                                         |
| Ca_Desi_Chrom_1_10525426 | Ca_desi_chr01      | 10525426                       | [T/A]       | NA                                         |
| Ca_Desi_Chrom_1_10525507 | Ca_desi_chr01      | 10525507                       | [T/A]       | NA                                         |
| Ca_Desi_Chrom_1_10525509 | Ca_desi_chr01      | 10525509                       | [G/T]       | NA                                         |
| Ca_Desi_Chrom_1_10525544 | Ca_desi_chr01      | 10525544                       | [A/C]       | NA                                         |
| Ca_Desi_Chrom_1_10530998 | Ca_desi_chr01      | 10530998                       | [C/T]       | NA                                         |
| Ca_Desi_Chrom_1_10530999 | Ca_desi_chr01      | 10530999                       | [T/C]       | NA                                         |
| Ca_Desi_Chrom_1_10531007 | Ca_desi_chr01      | 10531007                       | [T/G]       | NA                                         |
| Ca_Desi_Chrom_1_10539706 | Ca_desi_chr01      | 10539706                       | [T/C]       | NA                                         |
| Ca_Desi_Chrom_1_10539735 | Ca_desi_chr01      | 10539735                       | [A/C]       | NA                                         |
| Ca_Desi_Chrom_1_10723310 | Ca_desi_chr01      | 10723310                       | [A/G]       | NA                                         |
| Ca_Desi_Chrom_1_10723320 | Ca_desi_chr01      | 10723320                       | [T/G]       | NA                                         |
| Ca_Desi_Chrom_1_10726182 | Ca_desi_chr01      | 10726182                       | [T/C]       | NA                                         |
| Ca_Desi_Chrom_1_10741072 | Ca_desi_chr01      | 10741072                       | [A/C]       | NA                                         |
| Ca_Desi_Chrom_1_10763967 | Ca_desi_chr01      | 10763967                       | [A/G]       | NA                                         |
| Ca_Desi_Chrom_1_10763991 | Ca_desi_chr01      | 10763991                       | [A/G]       | NA                                         |
| Ca_Desi_Chrom_1_10763995 | Ca_desi_chr01      | 10763995                       | [A/G]       | NA                                         |
| Ca_Desi_Chrom_1_10764000 | Ca_desi_chr01      | 10764000                       | [A/G]       | NA                                         |
| Ca_Desi_Chrom_1_10778822 | Ca_desi_chr01      | 10778822                       | [A/C]       | NA                                         |
| Ca_Desi_Chrom_1_10778823 | Ca_desi_chr01      | 10778823                       | [G/T]       | NA                                         |
| Ca_Desi_Chrom_1_10778824 | Ca_desi_chr01      | 10778824                       | [A/C]       | NA                                         |

| <b>SNP IDs</b>           | <b>Chromosomes</b> | <b>Physical positions (bp)</b> | <b>SNPs</b> | <b>NCBI SNPdb accession IDs (NCBI_ss#)</b> |
|--------------------------|--------------------|--------------------------------|-------------|--------------------------------------------|
| Ca_Desi_Chrom_1_10778825 | Ca_desi_chr01      | 10778825                       | [T/A]       | NA                                         |
| Ca_Desi_Chrom_1_10873943 | Ca_desi_chr01      | 10873943                       | [C/A]       | NA                                         |
| Ca_Desi_Chrom_1_10873944 | Ca_desi_chr01      | 10873944                       | [T/G]       | NA                                         |
| Ca_Desi_Chrom_1_10873945 | Ca_desi_chr01      | 10873945                       | [T/A]       | NA                                         |
| Ca_Desi_Chrom_1_10873946 | Ca_desi_chr01      | 10873946                       | [A/T]       | NA                                         |
| Ca_Desi_Chrom_1_10888834 | Ca_desi_chr01      | 10888834                       | [C/A]       | NA                                         |
| Ca_Desi_Chrom_1_10891980 | Ca_desi_chr01      | 10891980                       | [A/C]       | NA                                         |
| Ca_Desi_Chrom_1_10892013 | Ca_desi_chr01      | 10892013                       | [A/C]       | NA                                         |
| Ca_Desi_Chrom_1_10892555 | Ca_desi_chr01      | 10892555                       | [A/C]       | NA                                         |
| Ca_Desi_Chrom_1_10893257 | Ca_desi_chr01      | 10893257                       | [T/C]       | NA                                         |
| Ca_Desi_Chrom_1_10893270 | Ca_desi_chr01      | 10893270                       | [T/C]       | NA                                         |
| Ca_Desi_Chrom_1_10893917 | Ca_desi_chr01      | 10893917                       | [T/G]       | NA                                         |
| Ca_Desi_Chrom_1_10893921 | Ca_desi_chr01      | 10893921                       | [T/G]       | NA                                         |
| Ca_Desi_Chrom_1_10893923 | Ca_desi_chr01      | 10893923                       | [A/T]       | NA                                         |
| Ca_Desi_Chrom_1_10893939 | Ca_desi_chr01      | 10893939                       | [T/A]       | NA                                         |
| Ca_Desi_Chrom_1_10970320 | Ca_desi_chr01      | 10970320                       | [C/A]       | NA                                         |
| Ca_Desi_Chrom_1_10970322 | Ca_desi_chr01      | 10970322                       | [T/A]       | NA                                         |
| Ca_Desi_Chrom_1_10970324 | Ca_desi_chr01      | 10970324                       | [A/C]       | NA                                         |
| Ca_Desi_Chrom_1_10970326 | Ca_desi_chr01      | 10970326                       | [T/G]       | NA                                         |
| Ca_Desi_Chrom_1_11071982 | Ca_desi_chr01      | 11071982                       | [A/C]       | NA                                         |
| Ca_Desi_Chrom_1_11109217 | Ca_desi_chr01      | 11109217                       | [A/C]       | NA                                         |
| Ca_Desi_Chrom_1_11109229 | Ca_desi_chr01      | 11109229                       | [A/G]       | NA                                         |
| Ca_Desi_Chrom_1_11203460 | Ca_desi_chr01      | 11203460                       | [T/G]       | NA                                         |
| Ca_Desi_Chrom_1_11208230 | Ca_desi_chr01      | 11208230                       | [T/G]       | NA                                         |
| Ca_Desi_Chrom_1_11208245 | Ca_desi_chr01      | 11208245                       | [A/C]       | NA                                         |
| Ca_Desi_Chrom_1_11255584 | Ca_desi_chr01      | 11255584                       | [T/G]       | NA                                         |
| Ca_Desi_Chrom_1_11305633 | Ca_desi_chr01      | 11305633                       | [T/G]       | NA                                         |
| Ca_Desi_Chrom_1_11403246 | Ca_desi_chr01      | 11403246                       | [T/C]       | NA                                         |
| Ca_Desi_Chrom_1_11403267 | Ca_desi_chr01      | 11403267                       | [A/G]       | NA                                         |
| Ca_Desi_Chrom_1_11442093 | Ca_desi_chr01      | 11442093                       | [A/G]       | NA                                         |
| Ca_Desi_Chrom_1_11442116 | Ca_desi_chr01      | 11442116                       | [T/A]       | NA                                         |
| Ca_Desi_Chrom_1_11457196 | Ca_desi_chr01      | 11457196                       | [T/C]       | NA                                         |
| Ca_Desi_Chrom_1_11470507 | Ca_desi_chr01      | 11470507                       | [A/C]       | NA                                         |
| Ca_Desi_Chrom_1_11521599 | Ca_desi_chr01      | 11521599                       | [A/C]       | NA                                         |

| <b>SNP IDs</b>          | <b>Chromosomes</b> | <b>Physical positions (bp)</b> | <b>SNPs</b> | <b>NCBI SNPdb accession IDs (NCBI_ss#)</b> |
|-------------------------|--------------------|--------------------------------|-------------|--------------------------------------------|
| Ca_Desig_Chr_1_11521627 | Ca_desig_chr01     | 11521627                       | [T/C]       | NA                                         |
| Ca_Desig_Chr_1_11521638 | Ca_desig_chr01     | 11521638                       | [T/C]       | NA                                         |
| Ca_Desig_Chr_1_11521732 | Ca_desig_chr01     | 11521732                       | [G/T]       | NA                                         |
| Ca_Desig_Chr_1_11522463 | Ca_desig_chr01     | 11522463                       | [A/C]       | NA                                         |
| Ca_Desig_Chr_1_11523137 | Ca_desig_chr01     | 11523137                       | [T/A]       | NA                                         |
| Ca_Desig_Chr_1_11523158 | Ca_desig_chr01     | 11523158                       | [A/C]       | NA                                         |
| Ca_Desig_Chr_1_11569811 | Ca_desig_chr01     | 11569811                       | [A/C]       | NA                                         |
| Ca_Desig_Chr_1_11586936 | Ca_desig_chr01     | 11586936                       | [T/C]       | NA                                         |
| Ca_Desig_Chr_1_11587001 | Ca_desig_chr01     | 11587001                       | [A/G]       | NA                                         |
| Ca_Desig_Chr_1_11909488 | Ca_desig_chr01     | 11909488                       | [A/G]       | NA                                         |
| Ca_Desig_Chr_1_11909509 | Ca_desig_chr01     | 11909509                       | [T/C]       | NA                                         |
| Ca_Desig_Chr_1_11909533 | Ca_desig_chr01     | 11909533                       | [T/G]       | NA                                         |
| Ca_Desig_Chr_1_11929981 | Ca_desig_chr01     | 11929981                       | [C/T]       | NA                                         |
| Ca_Desig_Chr_1_11940120 | Ca_desig_chr01     | 11940120                       | [T/G]       | NA                                         |
| Ca_Desig_Chr_1_11968306 | Ca_desig_chr01     | 11968306                       | [A/G]       | NA                                         |
| Ca_Desig_Chr_1_12086680 | Ca_desig_chr01     | 12086680                       | [T/A]       | NA                                         |
| Ca_Desig_Chr_1_12137403 | Ca_desig_chr01     | 12137403                       | [T/G]       | NA                                         |
| Ca_Desig_Chr_1_12137406 | Ca_desig_chr01     | 12137406                       | [T/G]       | NA                                         |
| Ca_Desig_Chr_1_12141258 | Ca_desig_chr01     | 12141258                       | [A/G]       | NA                                         |
| Ca_Desig_Chr_1_12155910 | Ca_desig_chr01     | 12155910                       | [T/G]       | NA                                         |
| Ca_Desig_Chr_1_12155983 | Ca_desig_chr01     | 12155983                       | [G/T]       | NA                                         |
| Ca_Desig_Chr_1_12162733 | Ca_desig_chr01     | 12162733                       | [A/T]       | NA                                         |
| Ca_Desig_Chr_1_12162779 | Ca_desig_chr01     | 12162779                       | [T/C]       | NA                                         |
| Ca_Desig_Chr_1_12162855 | Ca_desig_chr01     | 12162855                       | [A/C]       | NA                                         |
| Ca_Desig_Chr_1_12189288 | Ca_desig_chr01     | 12189288                       | [A/C]       | NA                                         |
| Ca_Desig_Chr_1_12192033 | Ca_desig_chr01     | 12192033                       | [T/G]       | NA                                         |
| Ca_Desig_Chr_1_12192083 | Ca_desig_chr01     | 12192083                       | [T/C]       | NA                                         |
| Ca_Desig_Chr_1_12192100 | Ca_desig_chr01     | 12192100                       | [T/C]       | NA                                         |
| Ca_Desig_Chr_1_12192102 | Ca_desig_chr01     | 12192102                       | [A/G]       | NA                                         |
| Ca_Desig_Chr_1_12192120 | Ca_desig_chr01     | 12192120                       | [A/G]       | NA                                         |
| Ca_Desig_Chr_1_13584259 | Ca_desig_chr01     | 13584259                       | [A/G]       | NA                                         |
| Ca_Desig_Chr_1_13590315 | Ca_desig_chr01     | 13590315                       | [A/G]       | NA                                         |
| Ca_Desig_Chr_1_13590326 | Ca_desig_chr01     | 13590326                       | [T/C]       | NA                                         |
| Ca_Desig_Chr_1_13590364 | Ca_desig_chr01     | 13590364                       | [A/G]       | NA                                         |

| <b>SNP IDs</b>           | <b>Chromosomes</b> | <b>Physical positions (bp)</b> | <b>SNPs</b> | <b>NCBI SNPdb accession IDs (NCBI_ss#)</b> |
|--------------------------|--------------------|--------------------------------|-------------|--------------------------------------------|
| Ca_Desi_Chrom_1_13590369 | Ca_desi_chrom01    | 13590369                       | [A/G]       | NA                                         |
| Ca_Desi_Chrom_1_13592155 | Ca_desi_chrom01    | 13592155                       | [T/G]       | NA                                         |
| Ca_Desi_Chrom_1_13592851 | Ca_desi_chrom01    | 13592851                       | [A/C]       | NA                                         |
| Ca_Desi_Chrom_1_13598225 | Ca_desi_chrom01    | 13598225                       | [A/C]       | NA                                         |
| Ca_Desi_Chrom_1_13602414 | Ca_desi_chrom01    | 13602414                       | [A/G]       | NA                                         |
| Ca_Desi_Chrom_1_13602415 | Ca_desi_chrom01    | 13602415                       | [C/T]       | NA                                         |
| Ca_Desi_Chrom_1_13602470 | Ca_desi_chrom01    | 13602470                       | [A/C]       | NA                                         |
| Ca_Desi_Chrom_1_13620061 | Ca_desi_chrom01    | 13620061                       | [A/T]       | NA                                         |
| Ca_Desi_Chrom_1_13641365 | Ca_desi_chrom01    | 13641365                       | [T/G]       | NA                                         |
| Ca_Desi_Chrom_1_13641423 | Ca_desi_chrom01    | 13641423                       | [A/T]       | NA                                         |
| Ca_Desi_Chrom_1_13645462 | Ca_desi_chrom01    | 13645462                       | [A/C]       | NA                                         |
| Ca_Desi_Chrom_1_13653278 | Ca_desi_chrom01    | 13653278                       | [T/C]       | NA                                         |
| Ca_Desi_Chrom_1_13653279 | Ca_desi_chrom01    | 13653279                       | [G/T]       | NA                                         |
| Ca_Desi_Chrom_1_13692588 | Ca_desi_chrom01    | 13692588                       | [T/C]       | NA                                         |
| Ca_Desi_Chrom_1_13692615 | Ca_desi_chrom01    | 13692615                       | [T/C]       | NA                                         |
| Ca_Desi_Chrom_1_13692633 | Ca_desi_chrom01    | 13692633                       | [T/C]       | NA                                         |
| Ca_Desi_Chrom_1_13692635 | Ca_desi_chrom01    | 13692635                       | [A/C]       | NA                                         |
| Ca_Desi_Chrom_1_13692646 | Ca_desi_chrom01    | 13692646                       | [A/G]       | NA                                         |
| Ca_Desi_Chrom_1_13692649 | Ca_desi_chrom01    | 13692649                       | [A/C]       | NA                                         |
| Ca_Desi_Chrom_1_13692664 | Ca_desi_chrom01    | 13692664                       | [A/G]       | NA                                         |
| Ca_Desi_Chrom_1_13692681 | Ca_desi_chrom01    | 13692681                       | [T/G]       | NA                                         |
| Ca_Desi_Chrom_1_13692705 | Ca_desi_chrom01    | 13692705                       | [G/A]       | NA                                         |
| Ca_Desi_Chrom_1_13692716 | Ca_desi_chrom01    | 13692716                       | [T/C]       | NA                                         |
| Ca_Desi_Chrom_1_13692721 | Ca_desi_chrom01    | 13692721                       | [A/C]       | NA                                         |
| Ca_Desi_Chrom_1_13692724 | Ca_desi_chrom01    | 13692724                       | [A/C]       | NA                                         |
| Ca_Desi_Chrom_1_13692727 | Ca_desi_chrom01    | 13692727                       | [A/C]       | NA                                         |
| Ca_Desi_Chrom_1_13798747 | Ca_desi_chrom01    | 13798747                       | [A/G]       | NA                                         |
| Ca_Desi_Chrom_1_13798784 | Ca_desi_chrom01    | 13798784                       | [A/T]       | NA                                         |
| Ca_Desi_Chrom_1_13805553 | Ca_desi_chrom01    | 13805553                       | [A/C]       | NA                                         |
| Ca_Desi_Chrom_1_13805554 | Ca_desi_chrom01    | 13805554                       | [G/T]       | NA                                         |
| Ca_Desi_Chrom_1_13831773 | Ca_desi_chrom01    | 13831773                       | [T/G]       | NA                                         |
| Ca_Desi_Chrom_1_13831799 | Ca_desi_chrom01    | 13831799                       | [T/C]       | NA                                         |
| Ca_Desi_Chrom_1_13864931 | Ca_desi_chrom01    | 13864931                       | [T/C]       | NA                                         |
| Ca_Desi_Chrom_1_13865960 | Ca_desi_chrom01    | 13865960                       | [T/G]       | NA                                         |

| <b>SNP IDs</b>           | <b>Chromosomes</b> | <b>Physical positions (bp)</b> | <b>SNPs</b> | <b>NCBI SNPdb accession IDs (NCBI_ss#)</b> |
|--------------------------|--------------------|--------------------------------|-------------|--------------------------------------------|
| Ca_Desi_Chrom_1_13903458 | Ca_desi_chr01      | 13903458                       | [T/G]       | NA                                         |
| Ca_Desi_Chrom_1_13903477 | Ca_desi_chr01      | 13903477                       | [A/G]       | NA                                         |
| Ca_Desi_Chrom_1_13906207 | Ca_desi_chr01      | 13906207                       | [A/C]       | NA                                         |
| Ca_Desi_Chrom_1_13906208 | Ca_desi_chr01      | 13906208                       | [G/T]       | NA                                         |
| Ca_Desi_Chrom_1_13906209 | Ca_desi_chr01      | 13906209                       | [A/T]       | NA                                         |
| Ca_Desi_Chrom_1_13919264 | Ca_desi_chr01      | 13919264                       | [A/G]       | NA                                         |
| Ca_Desi_Chrom_1_13935560 | Ca_desi_chr01      | 13935560                       | [G/A]       | NA                                         |
| Ca_Desi_Chrom_1_13935569 | Ca_desi_chr01      | 13935569                       | [T/C]       | NA                                         |
| Ca_Desi_Chrom_1_13969540 | Ca_desi_chr01      | 13969540                       | [C/T]       | NA                                         |
| Ca_Desi_Chrom_1_14019371 | Ca_desi_chr01      | 14019371                       | [T/A]       | NA                                         |
| Ca_Desi_Chrom_1_14019442 | Ca_desi_chr01      | 14019442                       | [A/G]       | NA                                         |
| Ca_Desi_Chrom_1_14093167 | Ca_desi_chr01      | 14093167                       | [A/G]       | NA                                         |
| Ca_Desi_Chrom_1_14113496 | Ca_desi_chr01      | 14113496                       | [T/C]       | NA                                         |
| Ca_Desi_Chrom_1_14113554 | Ca_desi_chr01      | 14113554                       | [T/C]       | NA                                         |
| Ca_Desi_Chrom_1_14113558 | Ca_desi_chr01      | 14113558                       | [A/G]       | NA                                         |
| Ca_Desi_Chrom_1_14113571 | Ca_desi_chr01      | 14113571                       | [T/A]       | NA                                         |
| Ca_Desi_Chrom_1_14113588 | Ca_desi_chr01      | 14113588                       | [A/C]       | NA                                         |
| Ca_Desi_Chrom_1_14127376 | Ca_desi_chr01      | 14127376                       | [C/T]       | NA                                         |
| Ca_Desi_Chrom_1_14127778 | Ca_desi_chr01      | 14127778                       | [T/G]       | NA                                         |
| Ca_Desi_Chrom_1_14127804 | Ca_desi_chr01      | 14127804                       | [A/T]       | NA                                         |
| Ca_Desi_Chrom_1_14127815 | Ca_desi_chr01      | 14127815                       | [A/C]       | NA                                         |
| Ca_Desi_Chrom_1_14142347 | Ca_desi_chr01      | 14142347                       | [A/G]       | NA                                         |
| Ca_Desi_Chrom_1_14169398 | Ca_desi_chr01      | 14169398                       | [T/C]       | NA                                         |
| Ca_Desi_Chrom_1_14169409 | Ca_desi_chr01      | 14169409                       | [C/T]       | NA                                         |
| Ca_Desi_Chrom_1_14169421 | Ca_desi_chr01      | 14169421                       | [A/G]       | NA                                         |
| Ca_Desi_Chrom_1_14170600 | Ca_desi_chr01      | 14170600                       | [T/G]       | NA                                         |
| Ca_Desi_Chrom_1_14190369 | Ca_desi_chr01      | 14190369                       | [C/T]       | NA                                         |
| Ca_Desi_Chrom_2_16455    | Ca_desi_chr02      | 16455                          | [T/C]       | NA                                         |
| Ca_Desi_Chrom_2_16457    | Ca_desi_chr02      | 16457                          | [T/C]       | NA                                         |
| Ca_Desi_Chrom_2_16482    | Ca_desi_chr02      | 16482                          | [T/G]       | NA                                         |
| Ca_Desi_Chrom_2_16485    | Ca_desi_chr02      | 16485                          | [A/G]       | NA                                         |
| Ca_Desi_Chrom_2_16492    | Ca_desi_chr02      | 16492                          | [A/G]       | NA                                         |
| Ca_Desi_Chrom_2_82639    | Ca_desi_chr02      | 82639                          | [T/C]       | NA                                         |
| Ca_Desi_Chrom_2_83864    | Ca_desi_chr02      | 83864                          | [A/C]       | NA                                         |

| <b>SNP IDs</b>         | <b>Chromosomes</b> | <b>Physical positions (bp)</b> | <b>SNPs</b> | <b>NCBI SNPdb accession IDs (NCBI_ss#)</b> |
|------------------------|--------------------|--------------------------------|-------------|--------------------------------------------|
| Ca_Desi_Chrom_2_83884  | Ca_desi_chr02      | 83884                          | [A/C]       | NA                                         |
| Ca_Desi_Chrom_2_83888  | Ca_desi_chr02      | 83888                          | [T/C]       | NA                                         |
| Ca_Desi_Chrom_2_83893  | Ca_desi_chr02      | 83893                          | [T/G]       | NA                                         |
| Ca_Desi_Chrom_2_83895  | Ca_desi_chr02      | 83895                          | [T/C]       | NA                                         |
| Ca_Desi_Chrom_2_201886 | Ca_desi_chr02      | 201886                         | [T/G]       | NA                                         |
| Ca_Desi_Chrom_2_278031 | Ca_desi_chr02      | 278031                         | [C/T]       | NA                                         |
| Ca_Desi_Chrom_2_278283 | Ca_desi_chr02      | 278283                         | [T/A]       | NA                                         |
| Ca_Desi_Chrom_2_279234 | Ca_desi_chr02      | 279234                         | [T/C]       | NA                                         |
| Ca_Desi_Chrom_2_279239 | Ca_desi_chr02      | 279239                         | [A/G]       | NA                                         |
| Ca_Desi_Chrom_2_279241 | Ca_desi_chr02      | 279241                         | [T/G]       | NA                                         |
| Ca_Desi_Chrom_2_279256 | Ca_desi_chr02      | 279256                         | [T/G]       | NA                                         |
| Ca_Desi_Chrom_2_281905 | Ca_desi_chr02      | 281905                         | [T/C]       | NA                                         |
| Ca_Desi_Chrom_2_308828 | Ca_desi_chr02      | 308828                         | [C/T]       | NA                                         |
| Ca_Desi_Chrom_2_314070 | Ca_desi_chr02      | 314070                         | [A/G]       | NA                                         |
| Ca_Desi_Chrom_2_318397 | Ca_desi_chr02      | 318397                         | [A/C]       | NA                                         |
| Ca_Desi_Chrom_2_318541 | Ca_desi_chr02      | 318541                         | [T/G]       | NA                                         |
| Ca_Desi_Chrom_2_326926 | Ca_desi_chr02      | 326926                         | [G/T]       | NA                                         |
| Ca_Desi_Chrom_2_327450 | Ca_desi_chr02      | 327450                         | [G/C]       | NA                                         |
| Ca_Desi_Chrom_2_327691 | Ca_desi_chr02      | 327691                         | [C/G]       | NA                                         |
| Ca_Desi_Chrom_2_327712 | Ca_desi_chr02      | 327712                         | [T/C]       | NA                                         |
| Ca_Desi_Chrom_2_412581 | Ca_desi_chr02      | 412581                         | [C/G]       | NA                                         |
| Ca_Desi_Chrom_2_412583 | Ca_desi_chr02      | 412583                         | [G/T]       | NA                                         |
| Ca_Desi_Chrom_2_412587 | Ca_desi_chr02      | 412587                         | [A/G]       | NA                                         |
| Ca_Desi_Chrom_2_412594 | Ca_desi_chr02      | 412594                         | [T/G]       | NA                                         |
| Ca_Desi_Chrom_2_412597 | Ca_desi_chr02      | 412597                         | [T/G]       | NA                                         |
| Ca_Desi_Chrom_2_412608 | Ca_desi_chr02      | 412608                         | [T/C]       | NA                                         |
| Ca_Desi_Chrom_2_429417 | Ca_desi_chr02      | 429417                         | [T/C]       | NA                                         |
| Ca_Desi_Chrom_2_429459 | Ca_desi_chr02      | 429459                         | [A/T]       | NA                                         |
| Ca_Desi_Chrom_2_430152 | Ca_desi_chr02      | 430152                         | [C/G]       | NA                                         |
| Ca_Desi_Chrom_2_437401 | Ca_desi_chr02      | 437401                         | [C/T]       | NA                                         |
| Ca_Desi_Chrom_2_437438 | Ca_desi_chr02      | 437438                         | [T/C]       | NA                                         |
| Ca_Desi_Chrom_2_437445 | Ca_desi_chr02      | 437445                         | [T/C]       | NA                                         |
| Ca_Desi_Chrom_2_437646 | Ca_desi_chr02      | 437646                         | [T/G]       | NA                                         |
| Ca_Desi_Chrom_2_437745 | Ca_desi_chr02      | 437745                         | [T/C]       | NA                                         |



| <b>SNP IDs</b>         | <b>Chromosomes</b> | <b>Physical positions (bp)</b> | <b>SNPs</b> | <b>NCBI SNPdb accession IDs (NCBI_ss#)</b> |
|------------------------|--------------------|--------------------------------|-------------|--------------------------------------------|
| Ca_Desi_Chrom_2_437750 | Ca_desi_chr02      | 437750                         | [A/C]       | NA                                         |
| Ca_Desi_Chrom_2_440424 | Ca_desi_chr02      | 440424                         | [G/T]       | NA                                         |
| Ca_Desi_Chrom_2_440724 | Ca_desi_chr02      | 440724                         | [T/C]       | NA                                         |
| Ca_Desi_Chrom_2_440754 | Ca_desi_chr02      | 440754                         | [A/T]       | NA                                         |
| Ca_Desi_Chrom_2_527061 | Ca_desi_chr02      | 527061                         | [G/A]       | NA                                         |
| Ca_Desi_Chrom_2_527074 | Ca_desi_chr02      | 527074                         | [C/T]       | NA                                         |
| Ca_Desi_Chrom_2_527083 | Ca_desi_chr02      | 527083                         | [C/T]       | NA                                         |
| Ca_Desi_Chrom_2_527084 | Ca_desi_chr02      | 527084                         | [G/A]       | NA                                         |
| Ca_Desi_Chrom_2_527631 | Ca_desi_chr02      | 527631                         | [T/C]       | NA                                         |
| Ca_Desi_Chrom_2_527633 | Ca_desi_chr02      | 527633                         | [A/T]       | NA                                         |
| Ca_Desi_Chrom_2_527634 | Ca_desi_chr02      | 527634                         | [A/C]       | NA                                         |
| Ca_Desi_Chrom_2_527635 | Ca_desi_chr02      | 527635                         | [A/C]       | NA                                         |
| Ca_Desi_Chrom_2_527646 | Ca_desi_chr02      | 527646                         | [A/G]       | NA                                         |
| Ca_Desi_Chrom_2_527670 | Ca_desi_chr02      | 527670                         | [A/G]       | NA                                         |
| Ca_Desi_Chrom_2_527684 | Ca_desi_chr02      | 527684                         | [A/G]       | NA                                         |
| Ca_Desi_Chrom_2_574020 | Ca_desi_chr02      | 574020                         | [T/G]       | NA                                         |
| Ca_Desi_Chrom_2_574032 | Ca_desi_chr02      | 574032                         | [T/G]       | NA                                         |
| Ca_Desi_Chrom_2_574042 | Ca_desi_chr02      | 574042                         | [T/G]       | NA                                         |
| Ca_Desi_Chrom_2_574051 | Ca_desi_chr02      | 574051                         | [T/C]       | NA                                         |
| Ca_Desi_Chrom_2_574061 | Ca_desi_chr02      | 574061                         | [A/G]       | NA                                         |
| Ca_Desi_Chrom_2_574863 | Ca_desi_chr02      | 574863                         | [C/A]       | NA                                         |
| Ca_Desi_Chrom_2_574864 | Ca_desi_chr02      | 574864                         | [T/G]       | NA                                         |
| Ca_Desi_Chrom_2_574865 | Ca_desi_chr02      | 574865                         | [T/A]       | NA                                         |
| Ca_Desi_Chrom_2_574867 | Ca_desi_chr02      | 574867                         | [A/C]       | NA                                         |
| Ca_Desi_Chrom_2_575529 | Ca_desi_chr02      | 575529                         | [T/C]       | NA                                         |
| Ca_Desi_Chrom_2_575532 | Ca_desi_chr02      | 575532                         | [G/C]       | NA                                         |
| Ca_Desi_Chrom_2_576614 | Ca_desi_chr02      | 576614                         | [A/T]       | NA                                         |
| Ca_Desi_Chrom_2_580283 | Ca_desi_chr02      | 580283                         | [T/G]       | NA                                         |
| Ca_Desi_Chrom_2_595835 | Ca_desi_chr02      | 595835                         | [A/T]       | NA                                         |
| Ca_Desi_Chrom_2_595836 | Ca_desi_chr02      | 595836                         | [A/T]       | NA                                         |
| Ca_Desi_Chrom_2_694565 | Ca_desi_chr02      | 694565                         | [T/A]       | NA                                         |
| Ca_Desi_Chrom_2_694574 | Ca_desi_chr02      | 694574                         | [T/G]       | NA                                         |
| Ca_Desi_Chrom_2_709390 | Ca_desi_chr02      | 709390                         | [G/T]       | NA                                         |
| Ca_Desi_Chrom_2_760163 | Ca_desi_chr02      | 760163                         | [T/C]       | NA                                         |

| <b>SNP IDs</b>          | <b>Chromosomes</b> | <b>Physical positions (bp)</b> | <b>SNPs</b> | <b>NCBI SNPdb accession IDs (NCBI_ss#)</b> |
|-------------------------|--------------------|--------------------------------|-------------|--------------------------------------------|
| Ca_Desi_Chrom_2_760175  | Ca_desi_chrom02    | 760175                         | [T/C]       | NA                                         |
| Ca_Desi_Chrom_2_760179  | Ca_desi_chrom02    | 760179                         | [T/C]       | NA                                         |
| Ca_Desi_Chrom_2_760183  | Ca_desi_chrom02    | 760183                         | [A/G]       | NA                                         |
| Ca_Desi_Chrom_2_760194  | Ca_desi_chrom02    | 760194                         | [A/G]       | NA                                         |
| Ca_Desi_Chrom_2_760214  | Ca_desi_chrom02    | 760214                         | [A/G]       | NA                                         |
| Ca_Desi_Chrom_2_941677  | Ca_desi_chrom02    | 941677                         | [T/A]       | NA                                         |
| Ca_Desi_Chrom_2_941690  | Ca_desi_chrom02    | 941690                         | [T/C]       | NA                                         |
| Ca_Desi_Chrom_2_992313  | Ca_desi_chrom02    | 992313                         | [A/C]       | NA                                         |
| Ca_Desi_Chrom_2_1019710 | Ca_desi_chrom02    | 1019710                        | [T/A]       | NA                                         |
| Ca_Desi_Chrom_2_1019712 | Ca_desi_chrom02    | 1019712                        | [A/G]       | NA                                         |
| Ca_Desi_Chrom_2_1019715 | Ca_desi_chrom02    | 1019715                        | [T/A]       | NA                                         |
| Ca_Desi_Chrom_2_1019724 | Ca_desi_chrom02    | 1019724                        | [A/G]       | NA                                         |
| Ca_Desi_Chrom_2_1019754 | Ca_desi_chrom02    | 1019754                        | [A/G]       | NA                                         |
| Ca_Desi_Chrom_2_1066604 | Ca_desi_chrom02    | 1066604                        | [T/G]       | NA                                         |
| Ca_Desi_Chrom_2_1081581 | Ca_desi_chrom02    | 1081581                        | [C/T]       | NA                                         |
| Ca_Desi_Chrom_2_1081734 | Ca_desi_chrom02    | 1081734                        | [T/A]       | NA                                         |
| Ca_Desi_Chrom_2_1081742 | Ca_desi_chrom02    | 1081742                        | [A/C]       | NA                                         |
| Ca_Desi_Chrom_2_1089512 | Ca_desi_chrom02    | 1089512                        | [C/A]       | NA                                         |
| Ca_Desi_Chrom_2_1089513 | Ca_desi_chrom02    | 1089513                        | [C/G]       | NA                                         |
| Ca_Desi_Chrom_2_1089514 | Ca_desi_chrom02    | 1089514                        | [C/A]       | NA                                         |
| Ca_Desi_Chrom_2_1089543 | Ca_desi_chrom02    | 1089543                        | [A/C]       | NA                                         |
| Ca_Desi_Chrom_2_1089550 | Ca_desi_chrom02    | 1089550                        | [A/G]       | NA                                         |
| Ca_Desi_Chrom_2_1210268 | Ca_desi_chrom02    | 1210268                        | [T/C]       | NA                                         |
| Ca_Desi_Chrom_2_1210294 | Ca_desi_chrom02    | 1210294                        | [T/G]       | NA                                         |
| Ca_Desi_Chrom_2_1210298 | Ca_desi_chrom02    | 1210298                        | [A/C]       | NA                                         |
| Ca_Desi_Chrom_2_1210310 | Ca_desi_chrom02    | 1210310                        | [A/T]       | NA                                         |
| Ca_Desi_Chrom_2_1216751 | Ca_desi_chrom02    | 1216751                        | [T/G]       | NA                                         |
| Ca_Desi_Chrom_2_1216760 | Ca_desi_chrom02    | 1216760                        | [A/T]       | NA                                         |
| Ca_Desi_Chrom_2_1216786 | Ca_desi_chrom02    | 1216786                        | [A/C]       | NA                                         |
| Ca_Desi_Chrom_2_1245288 | Ca_desi_chrom02    | 1245288                        | [T/C]       | NA                                         |
| Ca_Desi_Chrom_2_1245292 | Ca_desi_chrom02    | 1245292                        | [A/G]       | NA                                         |
| Ca_Desi_Chrom_2_1245302 | Ca_desi_chrom02    | 1245302                        | [C/G]       | NA                                         |
| Ca_Desi_Chrom_2_1245305 | Ca_desi_chrom02    | 1245305                        | [T/A]       | NA                                         |
| Ca_Desi_Chrom_2_1245363 | Ca_desi_chrom02    | 1245363                        | [C/A]       | NA                                         |

| <b>SNP IDs</b>          | <b>Chromosomes</b> | <b>Physical positions (bp)</b> | <b>SNPs</b> | <b>NCBI SNPdb accession IDs (NCBI_ss#)</b> |
|-------------------------|--------------------|--------------------------------|-------------|--------------------------------------------|
| Ca_Desi_Chrom_2_1245365 | Ca_desi_chrom02    | 1245365                        | [G/A]       | NA                                         |
| Ca_Desi_Chrom_2_1245366 | Ca_desi_chrom02    | 1245366                        | [C/T]       | NA                                         |
| Ca_Desi_Chrom_2_1245367 | Ca_desi_chrom02    | 1245367                        | [T/C]       | NA                                         |
| Ca_Desi_Chrom_2_1312276 | Ca_desi_chrom02    | 1312276                        | [A/G]       | NA                                         |
| Ca_Desi_Chrom_2_1312332 | Ca_desi_chrom02    | 1312332                        | [A/G]       | NA                                         |
| Ca_Desi_Chrom_2_1341643 | Ca_desi_chrom02    | 1341643                        | [C/A]       | NA                                         |
| Ca_Desi_Chrom_2_1521874 | Ca_desi_chrom02    | 1521874                        | [A/T]       | NA                                         |
| Ca_Desi_Chrom_2_1553220 | Ca_desi_chrom02    | 1553220                        | [A/G]       | NA                                         |
| Ca_Desi_Chrom_2_1603397 | Ca_desi_chrom02    | 1603397                        | [G/A]       | NA                                         |
| Ca_Desi_Chrom_2_1603398 | Ca_desi_chrom02    | 1603398                        | [G/A]       | NA                                         |
| Ca_Desi_Chrom_2_1603415 | Ca_desi_chrom02    | 1603415                        | [T/A]       | NA                                         |
| Ca_Desi_Chrom_2_1621777 | Ca_desi_chrom02    | 1621777                        | [T/G]       | NA                                         |
| Ca_Desi_Chrom_2_1621788 | Ca_desi_chrom02    | 1621788                        | [G/A]       | NA                                         |
| Ca_Desi_Chrom_2_1710080 | Ca_desi_chrom02    | 1710080                        | [G/A]       | NA                                         |
| Ca_Desi_Chrom_2_1727785 | Ca_desi_chrom02    | 1727785                        | [A/C]       | NA                                         |
| Ca_Desi_Chrom_2_1749427 | Ca_desi_chrom02    | 1749427                        | [T/C]       | NA                                         |
| Ca_Desi_Chrom_2_1823564 | Ca_desi_chrom02    | 1823564                        | [A/G]       | NA                                         |
| Ca_Desi_Chrom_2_1857292 | Ca_desi_chrom02    | 1857292                        | [A/C]       | NA                                         |
| Ca_Desi_Chrom_2_1861404 | Ca_desi_chrom02    | 1861404                        | [G/C]       | NA                                         |
| Ca_Desi_Chrom_2_1861410 | Ca_desi_chrom02    | 1861410                        | [A/C]       | NA                                         |
| Ca_Desi_Chrom_2_1867952 | Ca_desi_chrom02    | 1867952                        | [T/C]       | NA                                         |
| Ca_Desi_Chrom_2_1867957 | Ca_desi_chrom02    | 1867957                        | [A/C]       | NA                                         |
| Ca_Desi_Chrom_2_1867962 | Ca_desi_chrom02    | 1867962                        | [T/C]       | NA                                         |
| Ca_Desi_Chrom_2_1867963 | Ca_desi_chrom02    | 1867963                        | [A/G]       | NA                                         |
| Ca_Desi_Chrom_2_1867968 | Ca_desi_chrom02    | 1867968                        | [T/C]       | NA                                         |
| Ca_Desi_Chrom_2_1867975 | Ca_desi_chrom02    | 1867975                        | [A/G]       | NA                                         |
| Ca_Desi_Chrom_2_1868831 | Ca_desi_chrom02    | 1868831                        | [T/C]       | NA                                         |
| Ca_Desi_Chrom_2_1868845 | Ca_desi_chrom02    | 1868845                        | [A/C]       | NA                                         |
| Ca_Desi_Chrom_2_1868860 | Ca_desi_chrom02    | 1868860                        | [A/C]       | NA                                         |
| Ca_Desi_Chrom_2_1883086 | Ca_desi_chrom02    | 1883086                        | [T/C]       | NA                                         |
| Ca_Desi_Chrom_2_1883106 | Ca_desi_chrom02    | 1883106                        | [T/A]       | NA                                         |
| Ca_Desi_Chrom_2_1883127 | Ca_desi_chrom02    | 1883127                        | [A/G]       | NA                                         |
| Ca_Desi_Chrom_2_1894071 | Ca_desi_chrom02    | 1894071                        | [A/T]       | NA                                         |
| Ca_Desi_Chrom_2_1894072 | Ca_desi_chrom02    | 1894072                        | [G/A]       | NA                                         |

| <b>SNP IDs</b>          | <b>Chromosomes</b> | <b>Physical positions (bp)</b> | <b>SNPs</b> | <b>NCBI SNPdb accession IDs (NCBI_ss#)</b> |
|-------------------------|--------------------|--------------------------------|-------------|--------------------------------------------|
| Ca_Desi_Chrom_2_1894073 | Ca_desi_chr02      | 1894073                        | [T/G]       | NA                                         |
| Ca_Desi_Chrom_2_2056877 | Ca_desi_chr02      | 2056877                        | [A/G]       | NA                                         |
| Ca_Desi_Chrom_2_2056883 | Ca_desi_chr02      | 2056883                        | [T/G]       | NA                                         |
| Ca_Desi_Chrom_2_2056890 | Ca_desi_chr02      | 2056890                        | [T/G]       | NA                                         |
| Ca_Desi_Chrom_2_2056926 | Ca_desi_chr02      | 2056926                        | [T/G]       | NA                                         |
| Ca_Desi_Chrom_2_2058314 | Ca_desi_chr02      | 2058314                        | [T/G]       | NA                                         |
| Ca_Desi_Chrom_2_2058340 | Ca_desi_chr02      | 2058340                        | [T/G]       | NA                                         |
| Ca_Desi_Chrom_2_2100204 | Ca_desi_chr02      | 2100204                        | [A/C]       | NA                                         |
| Ca_Desi_Chrom_2_2100219 | Ca_desi_chr02      | 2100219                        | [A/G]       | NA                                         |
| Ca_Desi_Chrom_2_2100223 | Ca_desi_chr02      | 2100223                        | [T/C]       | NA                                         |
| Ca_Desi_Chrom_2_2124915 | Ca_desi_chr02      | 2124915                        | [C/A]       | NA                                         |
| Ca_Desi_Chrom_2_2124918 | Ca_desi_chr02      | 2124918                        | [G/C]       | NA                                         |
| Ca_Desi_Chrom_2_2124925 | Ca_desi_chr02      | 2124925                        | [T/C]       | NA                                         |
| Ca_Desi_Chrom_2_2124928 | Ca_desi_chr02      | 2124928                        | [C/A]       | NA                                         |
| Ca_Desi_Chrom_2_2124931 | Ca_desi_chr02      | 2124931                        | [T/C]       | NA                                         |
| Ca_Desi_Chrom_2_2124933 | Ca_desi_chr02      | 2124933                        | [T/G]       | NA                                         |
| Ca_Desi_Chrom_2_2124937 | Ca_desi_chr02      | 2124937                        | [T/A]       | NA                                         |
| Ca_Desi_Chrom_2_2124940 | Ca_desi_chr02      | 2124940                        | [A/G]       | NA                                         |
| Ca_Desi_Chrom_2_2124944 | Ca_desi_chr02      | 2124944                        | [C/G]       | NA                                         |
| Ca_Desi_Chrom_2_2257840 | Ca_desi_chr02      | 2257840                        | [A/G]       | NA                                         |
| Ca_Desi_Chrom_2_2257849 | Ca_desi_chr02      | 2257849                        | [T/C]       | NA                                         |
| Ca_Desi_Chrom_2_2257855 | Ca_desi_chr02      | 2257855                        | [T/C]       | NA                                         |
| Ca_Desi_Chrom_2_2402200 | Ca_desi_chr02      | 2402200                        | [T/G]       | NA                                         |
| Ca_Desi_Chrom_2_2449580 | Ca_desi_chr02      | 2449580                        | [T/G]       | NA                                         |
| Ca_Desi_Chrom_2_2527594 | Ca_desi_chr02      | 2527594                        | [T/G]       | NA                                         |
| Ca_Desi_Chrom_2_2563476 | Ca_desi_chr02      | 2563476                        | [T/G]       | NA                                         |
| Ca_Desi_Chrom_2_2574523 | Ca_desi_chr02      | 2574523                        | [T/G]       | NA                                         |
| Ca_Desi_Chrom_2_2589893 | Ca_desi_chr02      | 2589893                        | [G/T]       | NA                                         |
| Ca_Desi_Chrom_2_2607993 | Ca_desi_chr02      | 2607993                        | [A/G]       | NA                                         |
| Ca_Desi_Chrom_2_2608996 | Ca_desi_chr02      | 2608996                        | [C/A]       | NA                                         |
| Ca_Desi_Chrom_2_2608997 | Ca_desi_chr02      | 2608997                        | [T/G]       | NA                                         |
| Ca_Desi_Chrom_2_2664631 | Ca_desi_chr02      | 2664631                        | [T/A]       | NA                                         |
| Ca_Desi_Chrom_2_2664651 | Ca_desi_chr02      | 2664651                        | [A/C]       | NA                                         |
| Ca_Desi_Chrom_2_2664685 | Ca_desi_chr02      | 2664685                        | [A/G]       | NA                                         |

| <b>SNP IDs</b>          | <b>Chromosomes</b> | <b>Physical positions (bp)</b> | <b>SNPs</b> | <b>NCBI SNPdb accession IDs (NCBI_ss#)</b> |
|-------------------------|--------------------|--------------------------------|-------------|--------------------------------------------|
| Ca_Desi_Chrom_2_2664707 | Ca_desi_chr02      | 2664707                        | [T/G]       | NA                                         |
| Ca_Desi_Chrom_2_2764678 | Ca_desi_chr02      | 2764678                        | [A/T]       | NA                                         |
| Ca_Desi_Chrom_2_2798801 | Ca_desi_chr02      | 2798801                        | [A/G]       | NA                                         |
| Ca_Desi_Chrom_2_2889652 | Ca_desi_chr02      | 2889652                        | [A/T]       | NA                                         |
| Ca_Desi_Chrom_2_2938053 | Ca_desi_chr02      | 2938053                        | [T/C]       | NA                                         |
| Ca_Desi_Chrom_2_2938058 | Ca_desi_chr02      | 2938058                        | [T/C]       | NA                                         |
| Ca_Desi_Chrom_2_2955638 | Ca_desi_chr02      | 2955638                        | [T/C]       | NA                                         |
| Ca_Desi_Chrom_2_3153816 | Ca_desi_chr02      | 3153816                        | [A/G]       | NA                                         |
| Ca_Desi_Chrom_2_3153827 | Ca_desi_chr02      | 3153827                        | [A/G]       | NA                                         |
| Ca_Desi_Chrom_2_3154549 | Ca_desi_chr02      | 3154549                        | [A/G]       | NA                                         |
| Ca_Desi_Chrom_2_3154581 | Ca_desi_chr02      | 3154581                        | [A/G]       | NA                                         |
| Ca_Desi_Chrom_2_3154589 | Ca_desi_chr02      | 3154589                        | [T/G]       | NA                                         |
| Ca_Desi_Chrom_2_3155845 | Ca_desi_chr02      | 3155845                        | [A/C]       | NA                                         |
| Ca_Desi_Chrom_2_3155866 | Ca_desi_chr02      | 3155866                        | [T/C]       | NA                                         |
| Ca_Desi_Chrom_2_3157430 | Ca_desi_chr02      | 3157430                        | [A/C]       | NA                                         |
| Ca_Desi_Chrom_2_3567723 | Ca_desi_chr02      | 3567723                        | [T/G]       | NA                                         |
| Ca_Desi_Chrom_2_3567744 | Ca_desi_chr02      | 3567744                        | [A/C]       | NA                                         |
| Ca_Desi_Chrom_2_3567747 | Ca_desi_chr02      | 3567747                        | [A/C]       | NA                                         |
| Ca_Desi_Chrom_2_3567834 | Ca_desi_chr02      | 3567834                        | [T/G]       | NA                                         |
| Ca_Desi_Chrom_2_3567843 | Ca_desi_chr02      | 3567843                        | [A/G]       | NA                                         |
| Ca_Desi_Chrom_2_3567848 | Ca_desi_chr02      | 3567848                        | [T/C]       | NA                                         |
| Ca_Desi_Chrom_2_3567863 | Ca_desi_chr02      | 3567863                        | [A/G]       | NA                                         |
| Ca_Desi_Chrom_2_3571890 | Ca_desi_chr02      | 3571890                        | [G/T]       | NA                                         |
| Ca_Desi_Chrom_2_3571894 | Ca_desi_chr02      | 3571894                        | [C/A]       | NA                                         |
| Ca_Desi_Chrom_2_3604350 | Ca_desi_chr02      | 3604350                        | [A/C]       | NA                                         |
| Ca_Desi_Chrom_2_3722082 | Ca_desi_chr02      | 3722082                        | [T/G]       | NA                                         |
| Ca_Desi_Chrom_2_3722112 | Ca_desi_chr02      | 3722112                        | [T/C]       | NA                                         |
| Ca_Desi_Chrom_2_3722146 | Ca_desi_chr02      | 3722146                        | [A/G]       | NA                                         |
| Ca_Desi_Chrom_2_3722164 | Ca_desi_chr02      | 3722164                        | [T/A]       | NA                                         |
| Ca_Desi_Chrom_2_3775127 | Ca_desi_chr02      | 3775127                        | [A/C]       | NA                                         |
| Ca_Desi_Chrom_2_3794000 | Ca_desi_chr02      | 3794000                        | [A/T]       | NA                                         |
| Ca_Desi_Chrom_2_3794024 | Ca_desi_chr02      | 3794024                        | [A/G]       | NA                                         |
| Ca_Desi_Chrom_2_3808702 | Ca_desi_chr02      | 3808702                        | [T/G]       | NA                                         |
| Ca_Desi_Chrom_2_3808720 | Ca_desi_chr02      | 3808720                        | [A/G]       | NA                                         |

| <b>SNP IDs</b>          | <b>Chromosomes</b> | <b>Physical positions (bp)</b> | <b>SNPs</b> | <b>NCBI SNPdb accession IDs (NCBI_ss#)</b> |
|-------------------------|--------------------|--------------------------------|-------------|--------------------------------------------|
| Ca_Desi_Chrom_2_3808724 | Ca_desi_chr02      | 3808724                        | [A/C]       | NA                                         |
| Ca_Desi_Chrom_2_3808952 | Ca_desi_chr02      | 3808952                        | [A/G]       | NA                                         |
| Ca_Desi_Chrom_2_3808962 | Ca_desi_chr02      | 3808962                        | [A/G]       | NA                                         |
| Ca_Desi_Chrom_2_3808969 | Ca_desi_chr02      | 3808969                        | [A/C]       | NA                                         |
| Ca_Desi_Chrom_2_3808983 | Ca_desi_chr02      | 3808983                        | [T/C]       | NA                                         |
| Ca_Desi_Chrom_2_3808988 | Ca_desi_chr02      | 3808988                        | [T/C]       | NA                                         |
| Ca_Desi_Chrom_2_4041343 | Ca_desi_chr02      | 4041343                        | [A/C]       | NA                                         |
| Ca_Desi_Chrom_2_4041362 | Ca_desi_chr02      | 4041362                        | [A/C]       | NA                                         |
| Ca_Desi_Chrom_2_4058389 | Ca_desi_chr02      | 4058389                        | [G/A]       | NA                                         |
| Ca_Desi_Chrom_2_4238236 | Ca_desi_chr02      | 4238236                        | [A/C]       | NA                                         |
| Ca_Desi_Chrom_2_4238244 | Ca_desi_chr02      | 4238244                        | [A/G]       | NA                                         |
| Ca_Desi_Chrom_2_4238256 | Ca_desi_chr02      | 4238256                        | [T/C]       | NA                                         |
| Ca_Desi_Chrom_2_4238258 | Ca_desi_chr02      | 4238258                        | [T/C]       | NA                                         |
| Ca_Desi_Chrom_2_4238264 | Ca_desi_chr02      | 4238264                        | [A/C]       | NA                                         |
| Ca_Desi_Chrom_2_4238266 | Ca_desi_chr02      | 4238266                        | [A/C]       | NA                                         |
| Ca_Desi_Chrom_2_4238269 | Ca_desi_chr02      | 4238269                        | [T/C]       | NA                                         |
| Ca_Desi_Chrom_2_4238275 | Ca_desi_chr02      | 4238275                        | [T/C]       | NA                                         |
| Ca_Desi_Chrom_2_4259547 | Ca_desi_chr02      | 4259547                        | [A/C]       | NA                                         |
| Ca_Desi_Chrom_2_4259580 | Ca_desi_chr02      | 4259580                        | [A/C]       | NA                                         |
| Ca_Desi_Chrom_2_4318111 | Ca_desi_chr02      | 4318111                        | [A/T]       | NA                                         |
| Ca_Desi_Chrom_2_4539973 | Ca_desi_chr02      | 4539973                        | [T/A]       | NA                                         |
| Ca_Desi_Chrom_2_4539997 | Ca_desi_chr02      | 4539997                        | [T/C]       | NA                                         |
| Ca_Desi_Chrom_2_4540012 | Ca_desi_chr02      | 4540012                        | [T/C]       | NA                                         |
| Ca_Desi_Chrom_2_4540029 | Ca_desi_chr02      | 4540029                        | [A/C]       | NA                                         |
| Ca_Desi_Chrom_2_4541895 | Ca_desi_chr02      | 4541895                        | [G/T]       | NA                                         |
| Ca_Desi_Chrom_2_4552083 | Ca_desi_chr02      | 4552083                        | [A/G]       | NA                                         |
| Ca_Desi_Chrom_2_4552112 | Ca_desi_chr02      | 4552112                        | [C/T]       | NA                                         |
| Ca_Desi_Chrom_2_4552121 | Ca_desi_chr02      | 4552121                        | [T/C]       | NA                                         |
| Ca_Desi_Chrom_2_4800835 | Ca_desi_chr02      | 4800835                        | [A/C]       | NA                                         |
| Ca_Desi_Chrom_2_4801057 | Ca_desi_chr02      | 4801057                        | [T/G]       | NA                                         |
| Ca_Desi_Chrom_2_4816390 | Ca_desi_chr02      | 4816390                        | [T/C]       | NA                                         |
| Ca_Desi_Chrom_2_4816421 | Ca_desi_chr02      | 4816421                        | [A/G]       | NA                                         |
| Ca_Desi_Chrom_2_4816424 | Ca_desi_chr02      | 4816424                        | [A/G]       | NA                                         |
| Ca_Desi_Chrom_2_5124304 | Ca_desi_chr02      | 5124304                        | [T/G]       | NA                                         |

| <b>SNP IDs</b>          | <b>Chromosomes</b> | <b>Physical positions (bp)</b> | <b>SNPs</b> | <b>NCBI SNPdb accession IDs (NCBI_ss#)</b> |
|-------------------------|--------------------|--------------------------------|-------------|--------------------------------------------|
| Ca_Desi_Chrom_2_5168624 | Ca_desi_chr02      | 5168624                        | [A/C]       | NA                                         |
| Ca_Desi_Chrom_2_5168625 | Ca_desi_chr02      | 5168625                        | [C/A]       | NA                                         |
| Ca_Desi_Chrom_2_5176013 | Ca_desi_chr02      | 5176013                        | [C/A]       | NA                                         |
| Ca_Desi_Chrom_2_5176014 | Ca_desi_chr02      | 5176014                        | [T/G]       | NA                                         |
| Ca_Desi_Chrom_2_5176015 | Ca_desi_chr02      | 5176015                        | [G/A]       | NA                                         |
| Ca_Desi_Chrom_2_5176016 | Ca_desi_chr02      | 5176016                        | [G/T]       | NA                                         |
| Ca_Desi_Chrom_2_5223368 | Ca_desi_chr02      | 5223368                        | [A/C]       | NA                                         |
| Ca_Desi_Chrom_2_5223374 | Ca_desi_chr02      | 5223374                        | [A/G]       | NA                                         |
| Ca_Desi_Chrom_2_5273243 | Ca_desi_chr02      | 5273243                        | [T/C]       | NA                                         |
| Ca_Desi_Chrom_2_5402731 | Ca_desi_chr02      | 5402731                        | [A/C]       | NA                                         |
| Ca_Desi_Chrom_2_5402734 | Ca_desi_chr02      | 5402734                        | [T/G]       | NA                                         |
| Ca_Desi_Chrom_2_5500858 | Ca_desi_chr02      | 5500858                        | [A/T]       | NA                                         |
| Ca_Desi_Chrom_2_5503405 | Ca_desi_chr02      | 5503405                        | [T/A]       | NA                                         |
| Ca_Desi_Chrom_2_5503406 | Ca_desi_chr02      | 5503406                        | [G/T]       | NA                                         |
| Ca_Desi_Chrom_2_5503507 | Ca_desi_chr02      | 5503507                        | [C/A]       | NA                                         |
| Ca_Desi_Chrom_2_5503509 | Ca_desi_chr02      | 5503509                        | [A/G]       | NA                                         |
| Ca_Desi_Chrom_2_5503519 | Ca_desi_chr02      | 5503519                        | [G/A]       | NA                                         |
| Ca_Desi_Chrom_2_5503727 | Ca_desi_chr02      | 5503727                        | [T/G]       | NA                                         |
| Ca_Desi_Chrom_2_5503732 | Ca_desi_chr02      | 5503732                        | [G/C]       | NA                                         |
| Ca_Desi_Chrom_2_5507928 | Ca_desi_chr02      | 5507928                        | [A/C]       | NA                                         |
| Ca_Desi_Chrom_2_5508906 | Ca_desi_chr02      | 5508906                        | [T/A]       | NA                                         |
| Ca_Desi_Chrom_2_5509470 | Ca_desi_chr02      | 5509470                        | [T/G]       | NA                                         |
| Ca_Desi_Chrom_2_5537769 | Ca_desi_chr02      | 5537769                        | [A/T]       | NA                                         |
| Ca_Desi_Chrom_2_5537950 | Ca_desi_chr02      | 5537950                        | [A/C]       | NA                                         |
| Ca_Desi_Chrom_2_5544027 | Ca_desi_chr02      | 5544027                        | [A/G]       | NA                                         |
| Ca_Desi_Chrom_2_5544042 | Ca_desi_chr02      | 5544042                        | [A/G]       | NA                                         |
| Ca_Desi_Chrom_2_5548807 | Ca_desi_chr02      | 5548807                        | [C/G]       | NA                                         |
| Ca_Desi_Chrom_2_5548819 | Ca_desi_chr02      | 5548819                        | [G/A]       | NA                                         |
| Ca_Desi_Chrom_2_5548885 | Ca_desi_chr02      | 5548885                        | [T/A]       | NA                                         |
| Ca_Desi_Chrom_2_5553723 | Ca_desi_chr02      | 5553723                        | [G/A]       | NA                                         |
| Ca_Desi_Chrom_2_5565953 | Ca_desi_chr02      | 5565953                        | [A/G]       | NA                                         |
| Ca_Desi_Chrom_2_5565956 | Ca_desi_chr02      | 5565956                        | [A/G]       | NA                                         |
| Ca_Desi_Chrom_2_5577178 | Ca_desi_chr02      | 5577178                        | [T/A]       | NA                                         |
| Ca_Desi_Chrom_2_5632020 | Ca_desi_chr02      | 5632020                        | [T/G]       | NA                                         |

| <b>SNP IDs</b>          | <b>Chromosomes</b> | <b>Physical positions (bp)</b> | <b>SNPs</b> | <b>NCBI SNPdb accession IDs (NCBI_ss#)</b> |
|-------------------------|--------------------|--------------------------------|-------------|--------------------------------------------|
| Ca_Desi_Chrom_2_5632028 | Ca_desi_chr02      | 5632028                        | [T/G]       | NA                                         |
| Ca_Desi_Chrom_2_5632039 | Ca_desi_chr02      | 5632039                        | [A/C]       | NA                                         |
| Ca_Desi_Chrom_2_5632049 | Ca_desi_chr02      | 5632049                        | [T/G]       | NA                                         |
| Ca_Desi_Chrom_2_5632065 | Ca_desi_chr02      | 5632065                        | [T/C]       | NA                                         |
| Ca_Desi_Chrom_2_5632369 | Ca_desi_chr02      | 5632369                        | [T/C]       | NA                                         |
| Ca_Desi_Chrom_2_5632370 | Ca_desi_chr02      | 5632370                        | [C/T]       | NA                                         |
| Ca_Desi_Chrom_2_5632371 | Ca_desi_chr02      | 5632371                        | [T/C]       | NA                                         |
| Ca_Desi_Chrom_2_5635057 | Ca_desi_chr02      | 5635057                        | [T/G]       | NA                                         |
| Ca_Desi_Chrom_2_5648192 | Ca_desi_chr02      | 5648192                        | [C/T]       | NA                                         |
| Ca_Desi_Chrom_2_5657507 | Ca_desi_chr02      | 5657507                        | [A/T]       | NA                                         |
| Ca_Desi_Chrom_2_5661445 | Ca_desi_chr02      | 5661445                        | [T/G]       | NA                                         |
| Ca_Desi_Chrom_2_5661457 | Ca_desi_chr02      | 5661457                        | [T/G]       | NA                                         |
| Ca_Desi_Chrom_2_5694139 | Ca_desi_chr02      | 5694139                        | [T/G]       | NA                                         |
| Ca_Desi_Chrom_2_5698170 | Ca_desi_chr02      | 5698170                        | [T/A]       | NA                                         |
| Ca_Desi_Chrom_2_5698197 | Ca_desi_chr02      | 5698197                        | [G/A]       | NA                                         |
| Ca_Desi_Chrom_2_5698412 | Ca_desi_chr02      | 5698412                        | [A/G]       | NA                                         |
| Ca_Desi_Chrom_2_5698976 | Ca_desi_chr02      | 5698976                        | [C/T]       | NA                                         |
| Ca_Desi_Chrom_2_5699314 | Ca_desi_chr02      | 5699314                        | [A/G]       | NA                                         |
| Ca_Desi_Chrom_2_5699404 | Ca_desi_chr02      | 5699404                        | [T/C]       | NA                                         |
| Ca_Desi_Chrom_2_5699406 | Ca_desi_chr02      | 5699406                        | [A/C]       | NA                                         |
| Ca_Desi_Chrom_2_5716475 | Ca_desi_chr02      | 5716475                        | [C/T]       | NA                                         |
| Ca_Desi_Chrom_2_5717021 | Ca_desi_chr02      | 5717021                        | [G/C]       | NA                                         |
| Ca_Desi_Chrom_2_5717899 | Ca_desi_chr02      | 5717899                        | [G/A]       | NA                                         |
| Ca_Desi_Chrom_2_5719843 | Ca_desi_chr02      | 5719843                        | [C/T]       | NA                                         |
| Ca_Desi_Chrom_2_5733756 | Ca_desi_chr02      | 5733756                        | [C/A]       | NA                                         |
| Ca_Desi_Chrom_2_5740309 | Ca_desi_chr02      | 5740309                        | [C/A]       | NA                                         |
| Ca_Desi_Chrom_2_5745551 | Ca_desi_chr02      | 5745551                        | [G/T]       | NA                                         |
| Ca_Desi_Chrom_2_5917903 | Ca_desi_chr02      | 5917903                        | [T/C]       | NA                                         |
| Ca_Desi_Chrom_2_5917920 | Ca_desi_chr02      | 5917920                        | [G/T]       | NA                                         |
| Ca_Desi_Chrom_2_5917931 | Ca_desi_chr02      | 5917931                        | [T/G]       | NA                                         |
| Ca_Desi_Chrom_2_5917936 | Ca_desi_chr02      | 5917936                        | [C/T]       | NA                                         |
| Ca_Desi_Chrom_2_5917946 | Ca_desi_chr02      | 5917946                        | [T/A]       | NA                                         |
| Ca_Desi_Chrom_2_5965390 | Ca_desi_chr02      | 5965390                        | [A/C]       | NA                                         |
| Ca_Desi_Chrom_2_5965398 | Ca_desi_chr02      | 5965398                        | [T/G]       | NA                                         |



| <b>SNP IDs</b>          | <b>Chromosomes</b> | <b>Physical positions (bp)</b> | <b>SNPs</b> | <b>NCBI SNPdb accession IDs (NCBI_ss#)</b> |
|-------------------------|--------------------|--------------------------------|-------------|--------------------------------------------|
| Ca_Desi_Chrom_2_5965430 | Ca_desi_chr02      | 5965430                        | [A/G]       | NA                                         |
| Ca_Desi_Chrom_2_6010840 | Ca_desi_chr02      | 6010840                        | [G/A]       | NA                                         |
| Ca_Desi_Chrom_2_6011026 | Ca_desi_chr02      | 6011026                        | [G/A]       | NA                                         |
| Ca_Desi_Chrom_2_6017319 | Ca_desi_chr02      | 6017319                        | [T/C]       | NA                                         |
| Ca_Desi_Chrom_2_6017510 | Ca_desi_chr02      | 6017510                        | [T/G]       | NA                                         |
| Ca_Desi_Chrom_2_6017921 | Ca_desi_chr02      | 6017921                        | [C/T]       | NA                                         |
| Ca_Desi_Chrom_2_6017932 | Ca_desi_chr02      | 6017932                        | [A/C]       | NA                                         |
| Ca_Desi_Chrom_2_6018033 | Ca_desi_chr02      | 6018033                        | [C/T]       | NA                                         |
| Ca_Desi_Chrom_2_6019972 | Ca_desi_chr02      | 6019972                        | [A/G]       | NA                                         |
| Ca_Desi_Chrom_2_6025668 | Ca_desi_chr02      | 6025668                        | [A/G]       | NA                                         |
| Ca_Desi_Chrom_2_6025730 | Ca_desi_chr02      | 6025730                        | [G/T]       | NA                                         |
| Ca_Desi_Chrom_2_6025741 | Ca_desi_chr02      | 6025741                        | [A/G]       | NA                                         |
| Ca_Desi_Chrom_2_6025764 | Ca_desi_chr02      | 6025764                        | [A/C]       | NA                                         |
| Ca_Desi_Chrom_2_6029971 | Ca_desi_chr02      | 6029971                        | [A/G]       | NA                                         |
| Ca_Desi_Chrom_2_6088205 | Ca_desi_chr02      | 6088205                        | [T/C]       | NA                                         |
| Ca_Desi_Chrom_2_6088226 | Ca_desi_chr02      | 6088226                        | [T/C]       | NA                                         |
| Ca_Desi_Chrom_2_6088236 | Ca_desi_chr02      | 6088236                        | [G/C]       | NA                                         |
| Ca_Desi_Chrom_2_6088245 | Ca_desi_chr02      | 6088245                        | [G/A]       | NA                                         |
| Ca_Desi_Chrom_2_6088248 | Ca_desi_chr02      | 6088248                        | [C/A]       | NA                                         |
| Ca_Desi_Chrom_2_6088252 | Ca_desi_chr02      | 6088252                        | [A/G]       | NA                                         |
| Ca_Desi_Chrom_2_6088260 | Ca_desi_chr02      | 6088260                        | [A/C]       | NA                                         |
| Ca_Desi_Chrom_2_6088265 | Ca_desi_chr02      | 6088265                        | [T/C]       | NA                                         |
| Ca_Desi_Chrom_2_6088304 | Ca_desi_chr02      | 6088304                        | [C/T]       | NA                                         |
| Ca_Desi_Chrom_2_6088443 | Ca_desi_chr02      | 6088443                        | [A/G]       | NA                                         |
| Ca_Desi_Chrom_2_6088463 | Ca_desi_chr02      | 6088463                        | [T/G]       | NA                                         |
| Ca_Desi_Chrom_2_6088467 | Ca_desi_chr02      | 6088467                        | [A/T]       | NA                                         |
| Ca_Desi_Chrom_2_6089048 | Ca_desi_chr02      | 6089048                        | [T/C]       | NA                                         |
| Ca_Desi_Chrom_2_6089357 | Ca_desi_chr02      | 6089357                        | [C/T]       | NA                                         |
| Ca_Desi_Chrom_2_6089359 | Ca_desi_chr02      | 6089359                        | [A/G]       | NA                                         |
| Ca_Desi_Chrom_2_6091962 | Ca_desi_chr02      | 6091962                        | [C/T]       | NA                                         |
| Ca_Desi_Chrom_2_6091970 | Ca_desi_chr02      | 6091970                        | [A/C]       | NA                                         |
| Ca_Desi_Chrom_2_6091973 | Ca_desi_chr02      | 6091973                        | [T/G]       | NA                                         |
| Ca_Desi_Chrom_2_6091980 | Ca_desi_chr02      | 6091980                        | [T/C]       | NA                                         |
| Ca_Desi_Chrom_2_6091983 | Ca_desi_chr02      | 6091983                        | [C/T]       | NA                                         |

| <b>SNP IDs</b>          | <b>Chromosomes</b> | <b>Physical positions (bp)</b> | <b>SNPs</b> | <b>NCBI SNPdb accession IDs (NCBI_ss#)</b> |
|-------------------------|--------------------|--------------------------------|-------------|--------------------------------------------|
| Ca_Desi_Chrom_2_6092092 | Ca_desi_chrom02    | 6092092                        | [G/A]       | NA                                         |
| Ca_Desi_Chrom_2_6092094 | Ca_desi_chrom02    | 6092094                        | [A/G]       | NA                                         |
| Ca_Desi_Chrom_2_6092148 | Ca_desi_chrom02    | 6092148                        | [T/G]       | NA                                         |
| Ca_Desi_Chrom_2_6092158 | Ca_desi_chrom02    | 6092158                        | [G/C]       | NA                                         |
| Ca_Desi_Chrom_2_6092165 | Ca_desi_chrom02    | 6092165                        | [T/G]       | NA                                         |
| Ca_Desi_Chrom_2_6092200 | Ca_desi_chrom02    | 6092200                        | [A/C]       | NA                                         |
| Ca_Desi_Chrom_2_6092205 | Ca_desi_chrom02    | 6092205                        | [A/C]       | NA                                         |
| Ca_Desi_Chrom_2_6092347 | Ca_desi_chrom02    | 6092347                        | [T/G]       | NA                                         |
| Ca_Desi_Chrom_2_6092376 | Ca_desi_chrom02    | 6092376                        | [T/C]       | NA                                         |
| Ca_Desi_Chrom_2_6094379 | Ca_desi_chrom02    | 6094379                        | [C/G]       | NA                                         |
| Ca_Desi_Chrom_2_6103617 | Ca_desi_chrom02    | 6103617                        | [A/T]       | NA                                         |
| Ca_Desi_Chrom_2_6103902 | Ca_desi_chrom02    | 6103902                        | [T/C]       | NA                                         |
| Ca_Desi_Chrom_2_6104164 | Ca_desi_chrom02    | 6104164                        | [T/G]       | NA                                         |
| Ca_Desi_Chrom_2_6104305 | Ca_desi_chrom02    | 6104305                        | [A/G]       | NA                                         |
| Ca_Desi_Chrom_2_6104365 | Ca_desi_chrom02    | 6104365                        | [C/T]       | NA                                         |
| Ca_Desi_Chrom_2_6107404 | Ca_desi_chrom02    | 6107404                        | [T/A]       | NA                                         |
| Ca_Desi_Chrom_2_6107474 | Ca_desi_chrom02    | 6107474                        | [T/G]       | NA                                         |
| Ca_Desi_Chrom_2_6107483 | Ca_desi_chrom02    | 6107483                        | [T/G]       | NA                                         |
| Ca_Desi_Chrom_2_6107492 | Ca_desi_chrom02    | 6107492                        | [T/G]       | NA                                         |
| Ca_Desi_Chrom_2_6107519 | Ca_desi_chrom02    | 6107519                        | [A/C]       | NA                                         |
| Ca_Desi_Chrom_2_6107526 | Ca_desi_chrom02    | 6107526                        | [A/G]       | NA                                         |
| Ca_Desi_Chrom_2_6107530 | Ca_desi_chrom02    | 6107530                        | [T/C]       | NA                                         |
| Ca_Desi_Chrom_2_6131587 | Ca_desi_chrom02    | 6131587                        | [T/C]       | NA                                         |
| Ca_Desi_Chrom_2_6131704 | Ca_desi_chrom02    | 6131704                        | [T/C]       | NA                                         |
| Ca_Desi_Chrom_2_6134866 | Ca_desi_chrom02    | 6134866                        | [T/G]       | NA                                         |
| Ca_Desi_Chrom_2_6135210 | Ca_desi_chrom02    | 6135210                        | [G/A]       | NA                                         |
| Ca_Desi_Chrom_2_6138059 | Ca_desi_chrom02    | 6138059                        | [C/T]       | NA                                         |
| Ca_Desi_Chrom_2_6138789 | Ca_desi_chrom02    | 6138789                        | [T/C]       | NA                                         |
| Ca_Desi_Chrom_2_6140423 | Ca_desi_chrom02    | 6140423                        | [G/A]       | NA                                         |
| Ca_Desi_Chrom_2_6142753 | Ca_desi_chrom02    | 6142753                        | [T/G]       | NA                                         |
| Ca_Desi_Chrom_2_6144056 | Ca_desi_chrom02    | 6144056                        | [G/T]       | NA                                         |
| Ca_Desi_Chrom_2_6144083 | Ca_desi_chrom02    | 6144083                        | [G/C]       | NA                                         |
| Ca_Desi_Chrom_2_6144088 | Ca_desi_chrom02    | 6144088                        | [T/A]       | NA                                         |
| Ca_Desi_Chrom_2_6148501 | Ca_desi_chrom02    | 6148501                        | [G/A]       | NA                                         |

| <b>SNP IDs</b>          | <b>Chromosomes</b> | <b>Physical positions (bp)</b> | <b>SNPs</b> | <b>NCBI SNPdb accession IDs (NCBI_ss#)</b> |
|-------------------------|--------------------|--------------------------------|-------------|--------------------------------------------|
| Ca_Desi_Chrom_2_6267621 | Ca_desi_chr02      | 6267621                        | [T/C]       | NA                                         |
| Ca_Desi_Chrom_2_6270242 | Ca_desi_chr02      | 6270242                        | [T/G]       | NA                                         |
| Ca_Desi_Chrom_2_6270265 | Ca_desi_chr02      | 6270265                        | [T/G]       | NA                                         |
| Ca_Desi_Chrom_2_6436332 | Ca_desi_chr02      | 6436332                        | [A/T]       | NA                                         |
| Ca_Desi_Chrom_2_6437145 | Ca_desi_chr02      | 6437145                        | [C/T]       | NA                                         |
| Ca_Desi_Chrom_2_6440301 | Ca_desi_chr02      | 6440301                        | [C/T]       | NA                                         |
| Ca_Desi_Chrom_2_6440323 | Ca_desi_chr02      | 6440323                        | [T/C]       | NA                                         |
| Ca_Desi_Chrom_2_6440324 | Ca_desi_chr02      | 6440324                        | [G/A]       | NA                                         |
| Ca_Desi_Chrom_2_6532976 | Ca_desi_chr02      | 6532976                        | [T/G]       | NA                                         |
| Ca_Desi_Chrom_2_6533732 | Ca_desi_chr02      | 6533732                        | [C/T]       | NA                                         |
| Ca_Desi_Chrom_2_6557277 | Ca_desi_chr02      | 6557277                        | [T/G]       | NA                                         |
| Ca_Desi_Chrom_2_6684226 | Ca_desi_chr02      | 6684226                        | [T/C]       | NA                                         |
| Ca_Desi_Chrom_2_6695692 | Ca_desi_chr02      | 6695692                        | [A/C]       | NA                                         |
| Ca_Desi_Chrom_2_6697269 | Ca_desi_chr02      | 6697269                        | [T/A]       | NA                                         |
| Ca_Desi_Chrom_2_6711737 | Ca_desi_chr02      | 6711737                        | [C/A]       | NA                                         |
| Ca_Desi_Chrom_2_6711738 | Ca_desi_chr02      | 6711738                        | [T/G]       | NA                                         |
| Ca_Desi_Chrom_2_6711829 | Ca_desi_chr02      | 6711829                        | [T/G]       | NA                                         |
| Ca_Desi_Chrom_2_6796974 | Ca_desi_chr02      | 6796974                        | [T/C]       | NA                                         |
| Ca_Desi_Chrom_2_6841451 | Ca_desi_chr02      | 6841451                        | [T/G]       | NA                                         |
| Ca_Desi_Chrom_2_6869453 | Ca_desi_chr02      | 6869453                        | [A/G]       | NA                                         |
| Ca_Desi_Chrom_2_6869512 | Ca_desi_chr02      | 6869512                        | [A/G]       | NA                                         |
| Ca_Desi_Chrom_2_6908937 | Ca_desi_chr02      | 6908937                        | [A/G]       | NA                                         |
| Ca_Desi_Chrom_2_6909024 | Ca_desi_chr02      | 6909024                        | [A/C]       | NA                                         |
| Ca_Desi_Chrom_2_6968271 | Ca_desi_chr02      | 6968271                        | [C/G]       | NA                                         |
| Ca_Desi_Chrom_2_6968273 | Ca_desi_chr02      | 6968273                        | [T/G]       | NA                                         |
| Ca_Desi_Chrom_2_6968275 | Ca_desi_chr02      | 6968275                        | [C/T]       | NA                                         |
| Ca_Desi_Chrom_2_6968279 | Ca_desi_chr02      | 6968279                        | [G/C]       | NA                                         |
| Ca_Desi_Chrom_2_7029728 | Ca_desi_chr02      | 7029728                        | [A/G]       | NA                                         |
| Ca_Desi_Chrom_2_7059768 | Ca_desi_chr02      | 7059768                        | [A/C]       | NA                                         |
| Ca_Desi_Chrom_2_7062008 | Ca_desi_chr02      | 7062008                        | [T/G]       | NA                                         |
| Ca_Desi_Chrom_2_7062016 | Ca_desi_chr02      | 7062016                        | [A/C]       | NA                                         |
| Ca_Desi_Chrom_2_7062076 | Ca_desi_chr02      | 7062076                        | [T/C]       | NA                                         |
| Ca_Desi_Chrom_2_7062082 | Ca_desi_chr02      | 7062082                        | [T/A]       | NA                                         |
| Ca_Desi_Chrom_2_7062151 | Ca_desi_chr02      | 7062151                        | [A/C]       | NA                                         |

| <b>SNP IDs</b>          | <b>Chromosomes</b> | <b>Physical positions (bp)</b> | <b>SNPs</b> | <b>NCBI SNPdb accession IDs (NCBI_ss#)</b> |
|-------------------------|--------------------|--------------------------------|-------------|--------------------------------------------|
| Ca_Desi_Chrom_2_7082410 | Ca_desi_chrom02    | 7082410                        | [T/C]       | NA                                         |
| Ca_Desi_Chrom_2_7082448 | Ca_desi_chrom02    | 7082448                        | [T/A]       | NA                                         |
| Ca_Desi_Chrom_2_7241488 | Ca_desi_chrom02    | 7241488                        | [A/G]       | NA                                         |
| Ca_Desi_Chrom_2_7241492 | Ca_desi_chrom02    | 7241492                        | [T/A]       | NA                                         |
| Ca_Desi_Chrom_2_7241496 | Ca_desi_chrom02    | 7241496                        | [A/G]       | NA                                         |
| Ca_Desi_Chrom_2_7241508 | Ca_desi_chrom02    | 7241508                        | [T/C]       | NA                                         |
| Ca_Desi_Chrom_2_7241512 | Ca_desi_chrom02    | 7241512                        | [T/C]       | NA                                         |
| Ca_Desi_Chrom_2_7241513 | Ca_desi_chrom02    | 7241513                        | [T/C]       | NA                                         |
| Ca_Desi_Chrom_2_7241529 | Ca_desi_chrom02    | 7241529                        | [T/C]       | NA                                         |
| Ca_Desi_Chrom_2_7241538 | Ca_desi_chrom02    | 7241538                        | [T/A]       | NA                                         |
| Ca_Desi_Chrom_2_7241736 | Ca_desi_chrom02    | 7241736                        | [T/C]       | NA                                         |
| Ca_Desi_Chrom_2_7241742 | Ca_desi_chrom02    | 7241742                        | [A/G]       | NA                                         |
| Ca_Desi_Chrom_2_7241760 | Ca_desi_chrom02    | 7241760                        | [A/G]       | NA                                         |
| Ca_Desi_Chrom_2_7241761 | Ca_desi_chrom02    | 7241761                        | [A/C]       | NA                                         |
| Ca_Desi_Chrom_2_7241762 | Ca_desi_chrom02    | 7241762                        | [C/A]       | NA                                         |
| Ca_Desi_Chrom_2_7241764 | Ca_desi_chrom02    | 7241764                        | [T/C]       | NA                                         |
| Ca_Desi_Chrom_2_7241765 | Ca_desi_chrom02    | 7241765                        | [G/T]       | NA                                         |
| Ca_Desi_Chrom_2_7241767 | Ca_desi_chrom02    | 7241767                        | [T/C]       | NA                                         |
| Ca_Desi_Chrom_2_7241770 | Ca_desi_chrom02    | 7241770                        | [G/T]       | NA                                         |
| Ca_Desi_Chrom_2_7241771 | Ca_desi_chrom02    | 7241771                        | [C/G]       | NA                                         |
| Ca_Desi_Chrom_2_7241776 | Ca_desi_chrom02    | 7241776                        | [G/T]       | NA                                         |
| Ca_Desi_Chrom_2_7241782 | Ca_desi_chrom02    | 7241782                        | [G/T]       | NA                                         |
| Ca_Desi_Chrom_2_7241783 | Ca_desi_chrom02    | 7241783                        | [C/G]       | NA                                         |
| Ca_Desi_Chrom_2_7241793 | Ca_desi_chrom02    | 7241793                        | [A/G]       | NA                                         |
| Ca_Desi_Chrom_2_7242012 | Ca_desi_chrom02    | 7242012                        | [T/G]       | NA                                         |
| Ca_Desi_Chrom_2_7242138 | Ca_desi_chrom02    | 7242138                        | [T/G]       | NA                                         |
| Ca_Desi_Chrom_2_7242197 | Ca_desi_chrom02    | 7242197                        | [T/G]       | NA                                         |
| Ca_Desi_Chrom_2_7242231 | Ca_desi_chrom02    | 7242231                        | [T/G]       | NA                                         |
| Ca_Desi_Chrom_2_7242933 | Ca_desi_chrom02    | 7242933                        | [A/C]       | NA                                         |
| Ca_Desi_Chrom_2_7314336 | Ca_desi_chrom02    | 7314336                        | [A/C]       | NA                                         |
| Ca_Desi_Chrom_2_7394649 | Ca_desi_chrom02    | 7394649                        | [T/C]       | NA                                         |
| Ca_Desi_Chrom_2_7430532 | Ca_desi_chrom02    | 7430532                        | [G/C]       | NA                                         |
| Ca_Desi_Chrom_2_7458498 | Ca_desi_chrom02    | 7458498                        | [A/C]       | NA                                         |
| Ca_Desi_Chrom_2_7459213 | Ca_desi_chrom02    | 7459213                        | [A/G]       | NA                                         |

| <b>SNP IDs</b>          | <b>Chromosomes</b> | <b>Physical positions (bp)</b> | <b>SNPs</b> | <b>NCBI SNPdb accession IDs (NCBI_ss#)</b> |
|-------------------------|--------------------|--------------------------------|-------------|--------------------------------------------|
| Ca_Desi_Chrom_2_7459421 | Ca_desi_chr02      | 7459421                        | [A/C]       | NA                                         |
| Ca_Desi_Chrom_2_7462045 | Ca_desi_chr02      | 7462045                        | [A/G]       | NA                                         |
| Ca_Desi_Chrom_2_7462049 | Ca_desi_chr02      | 7462049                        | [A/C]       | NA                                         |
| Ca_Desi_Chrom_2_7462051 | Ca_desi_chr02      | 7462051                        | [A/C]       | NA                                         |
| Ca_Desi_Chrom_2_7462054 | Ca_desi_chr02      | 7462054                        | [A/G]       | NA                                         |
| Ca_Desi_Chrom_2_7462059 | Ca_desi_chr02      | 7462059                        | [T/C]       | NA                                         |
| Ca_Desi_Chrom_2_7462073 | Ca_desi_chr02      | 7462073                        | [A/G]       | NA                                         |
| Ca_Desi_Chrom_2_7462092 | Ca_desi_chr02      | 7462092                        | [T/C]       | NA                                         |
| Ca_Desi_Chrom_2_7462100 | Ca_desi_chr02      | 7462100                        | [T/A]       | NA                                         |
| Ca_Desi_Chrom_2_7610218 | Ca_desi_chr02      | 7610218                        | [T/G]       | NA                                         |
| Ca_Desi_Chrom_2_7630495 | Ca_desi_chr02      | 7630495                        | [T/G]       | NA                                         |
| Ca_Desi_Chrom_2_7630506 | Ca_desi_chr02      | 7630506                        | [A/G]       | NA                                         |
| Ca_Desi_Chrom_2_7630508 | Ca_desi_chr02      | 7630508                        | [T/G]       | NA                                         |
| Ca_Desi_Chrom_2_7699780 | Ca_desi_chr02      | 7699780                        | [C/A]       | NA                                         |
| Ca_Desi_Chrom_2_7699781 | Ca_desi_chr02      | 7699781                        | [T/G]       | NA                                         |
| Ca_Desi_Chrom_2_7699782 | Ca_desi_chr02      | 7699782                        | [T/A]       | NA                                         |
| Ca_Desi_Chrom_2_7699783 | Ca_desi_chr02      | 7699783                        | [C/T]       | NA                                         |
| Ca_Desi_Chrom_2_7708750 | Ca_desi_chr02      | 7708750                        | [T/C]       | NA                                         |
| Ca_Desi_Chrom_2_7708754 | Ca_desi_chr02      | 7708754                        | [T/C]       | NA                                         |
| Ca_Desi_Chrom_2_7708756 | Ca_desi_chr02      | 7708756                        | [A/G]       | NA                                         |
| Ca_Desi_Chrom_2_7708765 | Ca_desi_chr02      | 7708765                        | [A/C]       | NA                                         |
| Ca_Desi_Chrom_2_7708773 | Ca_desi_chr02      | 7708773                        | [T/C]       | NA                                         |
| Ca_Desi_Chrom_2_7708776 | Ca_desi_chr02      | 7708776                        | [T/C]       | NA                                         |
| Ca_Desi_Chrom_2_7708788 | Ca_desi_chr02      | 7708788                        | [A/G]       | NA                                         |
| Ca_Desi_Chrom_2_7708797 | Ca_desi_chr02      | 7708797                        | [A/G]       | NA                                         |
| Ca_Desi_Chrom_2_7708799 | Ca_desi_chr02      | 7708799                        | [T/C]       | NA                                         |
| Ca_Desi_Chrom_2_7709713 | Ca_desi_chr02      | 7709713                        | [A/T]       | NA                                         |
| Ca_Desi_Chrom_2_7726210 | Ca_desi_chr02      | 7726210                        | [A/C]       | NA                                         |
| Ca_Desi_Chrom_2_7732284 | Ca_desi_chr02      | 7732284                        | [T/G]       | NA                                         |
| Ca_Desi_Chrom_2_7732319 | Ca_desi_chr02      | 7732319                        | [A/C]       | NA                                         |
| Ca_Desi_Chrom_2_7810363 | Ca_desi_chr02      | 7810363                        | [T/C]       | NA                                         |
| Ca_Desi_Chrom_2_7810373 | Ca_desi_chr02      | 7810373                        | [T/G]       | NA                                         |
| Ca_Desi_Chrom_2_7813832 | Ca_desi_chr02      | 7813832                        | [T/G]       | NA                                         |
| Ca_Desi_Chrom_2_7814065 | Ca_desi_chr02      | 7814065                        | [T/G]       | NA                                         |

| <b>SNP IDs</b>          | <b>Chromosomes</b> | <b>Physical positions (bp)</b> | <b>SNPs</b> | <b>NCBI SNPdb accession IDs (NCBI_ss#)</b> |
|-------------------------|--------------------|--------------------------------|-------------|--------------------------------------------|
| Ca_Desi_Chrom_2_7814069 | Ca_desi_chr02      | 7814069                        | [G/T]       | NA                                         |
| Ca_Desi_Chrom_2_7814090 | Ca_desi_chr02      | 7814090                        | [A/G]       | NA                                         |
| Ca_Desi_Chrom_2_7814097 | Ca_desi_chr02      | 7814097                        | [A/G]       | NA                                         |
| Ca_Desi_Chrom_2_7814101 | Ca_desi_chr02      | 7814101                        | [T/C]       | NA                                         |
| Ca_Desi_Chrom_2_7814103 | Ca_desi_chr02      | 7814103                        | [T/G]       | NA                                         |
| Ca_Desi_Chrom_2_7814115 | Ca_desi_chr02      | 7814115                        | [T/C]       | NA                                         |
| Ca_Desi_Chrom_2_7886723 | Ca_desi_chr02      | 7886723                        | [C/T]       | NA                                         |
| Ca_Desi_Chrom_2_7894131 | Ca_desi_chr02      | 7894131                        | [A/C]       | NA                                         |
| Ca_Desi_Chrom_2_7894150 | Ca_desi_chr02      | 7894150                        | [A/C]       | NA                                         |
| Ca_Desi_Chrom_2_7897881 | Ca_desi_chr02      | 7897881                        | [C/A]       | NA                                         |
| Ca_Desi_Chrom_2_7907189 | Ca_desi_chr02      | 7907189                        | [T/G]       | NA                                         |
| Ca_Desi_Chrom_2_7907191 | Ca_desi_chr02      | 7907191                        | [T/C]       | NA                                         |
| Ca_Desi_Chrom_2_7907198 | Ca_desi_chr02      | 7907198                        | [T/G]       | NA                                         |
| Ca_Desi_Chrom_2_7907215 | Ca_desi_chr02      | 7907215                        | [T/G]       | NA                                         |
| Ca_Desi_Chrom_2_7908862 | Ca_desi_chr02      | 7908862                        | [G/T]       | NA                                         |
| Ca_Desi_Chrom_2_7911889 | Ca_desi_chr02      | 7911889                        | [A/C]       | NA                                         |
| Ca_Desi_Chrom_2_7956698 | Ca_desi_chr02      | 7956698                        | [A/T]       | NA                                         |
| Ca_Desi_Chrom_2_7956702 | Ca_desi_chr02      | 7956702                        | [T/G]       | NA                                         |
| Ca_Desi_Chrom_2_7956710 | Ca_desi_chr02      | 7956710                        | [A/G]       | NA                                         |
| Ca_Desi_Chrom_2_7958537 | Ca_desi_chr02      | 7958537                        | [A/G]       | NA                                         |
| Ca_Desi_Chrom_2_7959810 | Ca_desi_chr02      | 7959810                        | [T/G]       | NA                                         |
| Ca_Desi_Chrom_2_7980007 | Ca_desi_chr02      | 7980007                        | [T/G]       | NA                                         |
| Ca_Desi_Chrom_2_7980010 | Ca_desi_chr02      | 7980010                        | [T/G]       | NA                                         |
| Ca_Desi_Chrom_2_8012689 | Ca_desi_chr02      | 8012689                        | [C/A]       | NA                                         |
| Ca_Desi_Chrom_2_8013247 | Ca_desi_chr02      | 8013247                        | [T/C]       | NA                                         |
| Ca_Desi_Chrom_2_8037205 | Ca_desi_chr02      | 8037205                        | [A/C]       | NA                                         |
| Ca_Desi_Chrom_2_8065947 | Ca_desi_chr02      | 8065947                        | [A/T]       | NA                                         |
| Ca_Desi_Chrom_2_8065976 | Ca_desi_chr02      | 8065976                        | [T/C]       | NA                                         |
| Ca_Desi_Chrom_2_8113708 | Ca_desi_chr02      | 8113708                        | [T/G]       | NA                                         |
| Ca_Desi_Chrom_2_8113723 | Ca_desi_chr02      | 8113723                        | [C/T]       | NA                                         |
| Ca_Desi_Chrom_2_8113738 | Ca_desi_chr02      | 8113738                        | [C/T]       | NA                                         |
| Ca_Desi_Chrom_2_8149819 | Ca_desi_chr02      | 8149819                        | [T/C]       | NA                                         |
| Ca_Desi_Chrom_2_8160750 | Ca_desi_chr02      | 8160750                        | [A/G]       | NA                                         |
| Ca_Desi_Chrom_2_8167139 | Ca_desi_chr02      | 8167139                        | [T/C]       | NA                                         |

| <b>SNP IDs</b>          | <b>Chromosomes</b> | <b>Physical positions (bp)</b> | <b>SNPs</b> | <b>NCBI SNPdb accession IDs (NCBI_ss#)</b> |
|-------------------------|--------------------|--------------------------------|-------------|--------------------------------------------|
| Ca_Desi_Chrom_2_8167166 | Ca_desi_chr02      | 8167166                        | [T/C]       | NA                                         |
| Ca_Desi_Chrom_2_8167697 | Ca_desi_chr02      | 8167697                        | [T/C]       | NA                                         |
| Ca_Desi_Chrom_2_8167719 | Ca_desi_chr02      | 8167719                        | [T/C]       | NA                                         |
| Ca_Desi_Chrom_2_8167729 | Ca_desi_chr02      | 8167729                        | [A/G]       | NA                                         |
| Ca_Desi_Chrom_2_8167781 | Ca_desi_chr02      | 8167781                        | [T/G]       | NA                                         |
| Ca_Desi_Chrom_2_8174383 | Ca_desi_chr02      | 8174383                        | [T/G]       | NA                                         |
| Ca_Desi_Chrom_2_8234036 | Ca_desi_chr02      | 8234036                        | [T/C]       | NA                                         |
| Ca_Desi_Chrom_2_8234042 | Ca_desi_chr02      | 8234042                        | [A/G]       | NA                                         |
| Ca_Desi_Chrom_2_8234047 | Ca_desi_chr02      | 8234047                        | [A/G]       | NA                                         |
| Ca_Desi_Chrom_2_8234048 | Ca_desi_chr02      | 8234048                        | [A/G]       | NA                                         |
| Ca_Desi_Chrom_2_8234050 | Ca_desi_chr02      | 8234050                        | [A/G]       | NA                                         |
| Ca_Desi_Chrom_2_8234059 | Ca_desi_chr02      | 8234059                        | [T/C]       | NA                                         |
| Ca_Desi_Chrom_2_8234067 | Ca_desi_chr02      | 8234067                        | [A/G]       | NA                                         |
| Ca_Desi_Chrom_2_8234071 | Ca_desi_chr02      | 8234071                        | [A/G]       | NA                                         |
| Ca_Desi_Chrom_2_8234076 | Ca_desi_chr02      | 8234076                        | [T/C]       | NA                                         |
| Ca_Desi_Chrom_2_8234078 | Ca_desi_chr02      | 8234078                        | [A/G]       | NA                                         |
| Ca_Desi_Chrom_2_8234083 | Ca_desi_chr02      | 8234083                        | [A/G]       | NA                                         |
| Ca_Desi_Chrom_2_8264499 | Ca_desi_chr02      | 8264499                        | [A/G]       | NA                                         |
| Ca_Desi_Chrom_2_8264509 | Ca_desi_chr02      | 8264509                        | [T/C]       | NA                                         |
| Ca_Desi_Chrom_2_8264540 | Ca_desi_chr02      | 8264540                        | [A/G]       | NA                                         |
| Ca_Desi_Chrom_2_8294596 | Ca_desi_chr02      | 8294596                        | [C/T]       | NA                                         |
| Ca_Desi_Chrom_2_8322715 | Ca_desi_chr02      | 8322715                        | [A/G]       | NA                                         |
| Ca_Desi_Chrom_2_8322717 | Ca_desi_chr02      | 8322717                        | [A/G]       | NA                                         |
| Ca_Desi_Chrom_2_8322723 | Ca_desi_chr02      | 8322723                        | [A/G]       | NA                                         |
| Ca_Desi_Chrom_2_8322735 | Ca_desi_chr02      | 8322735                        | [A/G]       | NA                                         |
| Ca_Desi_Chrom_2_8322810 | Ca_desi_chr02      | 8322810                        | [T/G]       | NA                                         |
| Ca_Desi_Chrom_2_8397866 | Ca_desi_chr02      | 8397866                        | [G/A]       | NA                                         |
| Ca_Desi_Chrom_2_8397883 | Ca_desi_chr02      | 8397883                        | [A/G]       | NA                                         |
| Ca_Desi_Chrom_2_8397896 | Ca_desi_chr02      | 8397896                        | [A/C]       | NA                                         |
| Ca_Desi_Chrom_2_8397956 | Ca_desi_chr02      | 8397956                        | [T/G]       | NA                                         |
| Ca_Desi_Chrom_2_8397968 | Ca_desi_chr02      | 8397968                        | [T/G]       | NA                                         |
| Ca_Desi_Chrom_2_8398016 | Ca_desi_chr02      | 8398016                        | [A/T]       | NA                                         |
| Ca_Desi_Chrom_2_8436239 | Ca_desi_chr02      | 8436239                        | [C/A]       | NA                                         |
| Ca_Desi_Chrom_2_8436240 | Ca_desi_chr02      | 8436240                        | [A/G]       | NA                                         |

| <b>SNP IDs</b>          | <b>Chromosomes</b> | <b>Physical positions (bp)</b> | <b>SNPs</b> | <b>NCBI SNPdb accession IDs (NCBI_ss#)</b> |
|-------------------------|--------------------|--------------------------------|-------------|--------------------------------------------|
| Ca_Desig_Chr_2_8436241  | Ca_desig_chr02     | 8436241                        | [G/A]       | NA                                         |
| Ca_Desig_Chr_2_8436278  | Ca_desig_chr02     | 8436278                        | [A/C]       | NA                                         |
| Ca_Desig_Chr_2_8436331  | Ca_desig_chr02     | 8436331                        | [T/C]       | NA                                         |
| Ca_Desig_Chr_2_8436346  | Ca_desig_chr02     | 8436346                        | [A/C]       | NA                                         |
| Ca_Desig_Chr_2_8436354  | Ca_desig_chr02     | 8436354                        | [A/C]       | NA                                         |
| Ca_Desig_Chr_2_8465571  | Ca_desig_chr02     | 8465571                        | [T/C]       | NA                                         |
| Ca_Desig_Chr_2_8465607  | Ca_desig_chr02     | 8465607                        | [A/G]       | NA                                         |
| Ca_Desig_Chr_2_8495240  | Ca_desig_chr02     | 8495240                        | [T/G]       | NA                                         |
| Ca_Desig_Chr_2_8510313  | Ca_desig_chr02     | 8510313                        | [C/T]       | NA                                         |
| Ca_Desig_Chr_2_8530697  | Ca_desig_chr02     | 8530697                        | [T/G]       | NA                                         |
| Ca_Desig_Chr_2_8562610  | Ca_desig_chr02     | 8562610                        | [T/C]       | NA                                         |
| Ca_Desig_Chr_2_8562634  | Ca_desig_chr02     | 8562634                        | [A/G]       | NA                                         |
| Ca_Desig_Chr_2_8562636  | Ca_desig_chr02     | 8562636                        | [T/C]       | NA                                         |
| Ca_Desig_Chr_2_8562643  | Ca_desig_chr02     | 8562643                        | [T/G]       | NA                                         |
| Ca_Desig_Chr_2_8568490  | Ca_desig_chr02     | 8568490                        | [C/T]       | NA                                         |
| Ca_Desig_Chr_2_8568507  | Ca_desig_chr02     | 8568507                        | [T/C]       | NA                                         |
| Ca_Desig_Chr_2_8568508  | Ca_desig_chr02     | 8568508                        | [G/T]       | NA                                         |
| Ca_Desig_Chr_2_9844991  | Ca_desig_chr02     | 9844991                        | [A/C]       | NA                                         |
| Ca_Desig_Chr_2_9873040  | Ca_desig_chr02     | 9873040                        | [T/C]       | NA                                         |
| Ca_Desig_Chr_2_9873100  | Ca_desig_chr02     | 9873100                        | [A/C]       | NA                                         |
| Ca_Desig_Chr_2_9873103  | Ca_desig_chr02     | 9873103                        | [A/C]       | NA                                         |
| Ca_Desig_Chr_2_9873163  | Ca_desig_chr02     | 9873163                        | [T/C]       | NA                                         |
| Ca_Desig_Chr_2_9873176  | Ca_desig_chr02     | 9873176                        | [A/T]       | NA                                         |
| Ca_Desig_Chr_2_9885462  | Ca_desig_chr02     | 9885462                        | [A/C]       | NA                                         |
| Ca_Desig_Chr_2_10370225 | Ca_desig_chr02     | 10370225                       | [T/C]       | NA                                         |
| Ca_Desig_Chr_2_10436496 | Ca_desig_chr02     | 10436496                       | [T/G]       | NA                                         |
| Ca_Desig_Chr_2_10436512 | Ca_desig_chr02     | 10436512                       | [T/C]       | NA                                         |
| Ca_Desig_Chr_2_10436614 | Ca_desig_chr02     | 10436614                       | [C/A]       | NA                                         |
| Ca_Desig_Chr_2_10776571 | Ca_desig_chr02     | 10776571                       | [A/C]       | NA                                         |
| Ca_Desig_Chr_2_10864698 | Ca_desig_chr02     | 10864698                       | [A/G]       | NA                                         |
| Ca_Desig_Chr_2_10864699 | Ca_desig_chr02     | 10864699                       | [G/A]       | NA                                         |
| Ca_Desig_Chr_2_10864722 | Ca_desig_chr02     | 10864722                       | [T/C]       | NA                                         |
| Ca_Desig_Chr_2_10864728 | Ca_desig_chr02     | 10864728                       | [C/A]       | NA                                         |
| Ca_Desig_Chr_2_11084623 | Ca_desig_chr02     | 11084623                       | [C/T]       | NA                                         |



| <b>SNP IDs</b>           | <b>Chromosomes</b> | <b>Physical positions (bp)</b> | <b>SNPs</b> | <b>NCBI SNPdb accession IDs (NCBI_ss#)</b> |
|--------------------------|--------------------|--------------------------------|-------------|--------------------------------------------|
| Ca_Desi_Chrom_2_11110656 | Ca_desi_chrom02    | 11110656                       | [T/G]       | NA                                         |
| Ca_Desi_Chrom_2_11170287 | Ca_desi_chrom02    | 11170287                       | [T/A]       | NA                                         |
| Ca_Desi_Chrom_2_11170288 | Ca_desi_chrom02    | 11170288                       | [A/T]       | NA                                         |
| Ca_Desi_Chrom_2_11276117 | Ca_desi_chrom02    | 11276117                       | [T/C]       | NA                                         |
| Ca_Desi_Chrom_2_11366639 | Ca_desi_chrom02    | 11366639                       | [C/G]       | NA                                         |
| Ca_Desi_Chrom_2_11366670 | Ca_desi_chrom02    | 11366670                       | [A/T]       | NA                                         |
| Ca_Desi_Chrom_2_11393824 | Ca_desi_chrom02    | 11393824                       | [C/T]       | NA                                         |
| Ca_Desi_Chrom_2_11393862 | Ca_desi_chrom02    | 11393862                       | [C/G]       | NA                                         |
| Ca_Desi_Chrom_2_11394066 | Ca_desi_chrom02    | 11394066                       | [A/G]       | NA                                         |
| Ca_Desi_Chrom_2_11394075 | Ca_desi_chrom02    | 11394075                       | [G/A]       | NA                                         |
| Ca_Desi_Chrom_2_11394153 | Ca_desi_chrom02    | 11394153                       | [C/T]       | NA                                         |
| Ca_Desi_Chrom_2_11403656 | Ca_desi_chrom02    | 11403656                       | [C/T]       | NA                                         |
| Ca_Desi_Chrom_2_11403678 | Ca_desi_chrom02    | 11403678                       | [C/T]       | NA                                         |
| Ca_Desi_Chrom_2_11403821 | Ca_desi_chrom02    | 11403821                       | [T/A]       | NA                                         |
| Ca_Desi_Chrom_2_11403828 | Ca_desi_chrom02    | 11403828                       | [C/T]       | NA                                         |
| Ca_Desi_Chrom_2_11403900 | Ca_desi_chrom02    | 11403900                       | [C/A]       | NA                                         |
| Ca_Desi_Chrom_2_11422719 | Ca_desi_chrom02    | 11422719                       | [G/T]       | NA                                         |
| Ca_Desi_Chrom_2_11422759 | Ca_desi_chrom02    | 11422759                       | [T/A]       | NA                                         |
| Ca_Desi_Chrom_2_11423000 | Ca_desi_chrom02    | 11423000                       | [C/A]       | NA                                         |
| Ca_Desi_Chrom_2_11423022 | Ca_desi_chrom02    | 11423022                       | [C/T]       | NA                                         |
| Ca_Desi_Chrom_2_11423145 | Ca_desi_chrom02    | 11423145                       | [G/A]       | NA                                         |
| Ca_Desi_Chrom_2_11423165 | Ca_desi_chrom02    | 11423165                       | [T/A]       | NA                                         |
| Ca_Desi_Chrom_2_11634542 | Ca_desi_chrom02    | 11634542                       | [A/C]       | NA                                         |
| Ca_Desi_Chrom_2_11680277 | Ca_desi_chrom02    | 11680277                       | [T/C]       | NA                                         |
| Ca_Desi_Chrom_2_11853713 | Ca_desi_chrom02    | 11853713                       | [A/G]       | NA                                         |
| Ca_Desi_Chrom_2_11979951 | Ca_desi_chrom02    | 11979951                       | [A/C]       | NA                                         |
| Ca_Desi_Chrom_2_11979952 | Ca_desi_chrom02    | 11979952                       | [G/T]       | NA                                         |
| Ca_Desi_Chrom_2_11979953 | Ca_desi_chrom02    | 11979953                       | [A/T]       | NA                                         |
| Ca_Desi_Chrom_2_11985730 | Ca_desi_chrom02    | 11985730                       | [A/C]       | NA                                         |
| Ca_Desi_Chrom_2_12071136 | Ca_desi_chrom02    | 12071136                       | [T/C]       | NA                                         |
| Ca_Desi_Chrom_2_12071223 | Ca_desi_chrom02    | 12071223                       | [T/A]       | NA                                         |
| Ca_Desi_Chrom_2_12071282 | Ca_desi_chrom02    | 12071282                       | [A/C]       | NA                                         |
| Ca_Desi_Chrom_2_12072107 | Ca_desi_chrom02    | 12072107                       | [G/A]       | NA                                         |
| Ca_Desi_Chrom_2_12072114 | Ca_desi_chrom02    | 12072114                       | [A/C]       | NA                                         |

| <b>SNP IDs</b>           | <b>Chromosomes</b> | <b>Physical positions (bp)</b> | <b>SNPs</b> | <b>NCBI SNPdb accession IDs (NCBI_ss#)</b> |
|--------------------------|--------------------|--------------------------------|-------------|--------------------------------------------|
| Ca_Desi_Chrom_2_12271439 | Ca_desi_chr02      | 12271439                       | [T/G]       | NA                                         |
| Ca_Desi_Chrom_2_12280233 | Ca_desi_chr02      | 12280233                       | [G/A]       | NA                                         |
| Ca_Desi_Chrom_2_12280249 | Ca_desi_chr02      | 12280249                       | [A/T]       | NA                                         |
| Ca_Desi_Chrom_2_12280263 | Ca_desi_chr02      | 12280263                       | [A/C]       | NA                                         |
| Ca_Desi_Chrom_2_12311555 | Ca_desi_chr02      | 12311555                       | [A/C]       | NA                                         |
| Ca_Desi_Chrom_2_12417990 | Ca_desi_chr02      | 12417990                       | [A/G]       | NA                                         |
| Ca_Desi_Chrom_2_12418007 | Ca_desi_chr02      | 12418007                       | [A/C]       | NA                                         |
| Ca_Desi_Chrom_2_12478434 | Ca_desi_chr02      | 12478434                       | [A/G]       | NA                                         |
| Ca_Desi_Chrom_2_12478439 | Ca_desi_chr02      | 12478439                       | [G/C]       | NA                                         |
| Ca_Desi_Chrom_2_12478444 | Ca_desi_chr02      | 12478444                       | [C/T]       | NA                                         |
| Ca_Desi_Chrom_2_12478467 | Ca_desi_chr02      | 12478467                       | [A/G]       | NA                                         |
| Ca_Desi_Chrom_2_12489642 | Ca_desi_chr02      | 12489642                       | [T/G]       | NA                                         |
| Ca_Desi_Chrom_2_12518481 | Ca_desi_chr02      | 12518481                       | [G/T]       | NA                                         |
| Ca_Desi_Chrom_2_12560867 | Ca_desi_chr02      | 12560867                       | [A/T]       | NA                                         |
| Ca_Desi_Chrom_2_12609758 | Ca_desi_chr02      | 12609758                       | [T/G]       | NA                                         |
| Ca_Desi_Chrom_2_12729592 | Ca_desi_chr02      | 12729592                       | [A/C]       | NA                                         |
| Ca_Desi_Chrom_2_12729595 | Ca_desi_chr02      | 12729595                       | [A/C]       | NA                                         |
| Ca_Desi_Chrom_2_12729864 | Ca_desi_chr02      | 12729864                       | [A/G]       | NA                                         |
| Ca_Desi_Chrom_2_12729870 | Ca_desi_chr02      | 12729870                       | [T/A]       | NA                                         |
| Ca_Desi_Chrom_2_12729884 | Ca_desi_chr02      | 12729884                       | [G/A]       | NA                                         |
| Ca_Desi_Chrom_2_12729885 | Ca_desi_chr02      | 12729885                       | [T/A]       | NA                                         |
| Ca_Desi_Chrom_2_12796796 | Ca_desi_chr02      | 12796796                       | [T/A]       | NA                                         |
| Ca_Desi_Chrom_2_12796811 | Ca_desi_chr02      | 12796811                       | [A/T]       | NA                                         |
| Ca_Desi_Chrom_2_12796832 | Ca_desi_chr02      | 12796832                       | [T/C]       | NA                                         |
| Ca_Desi_Chrom_2_12796839 | Ca_desi_chr02      | 12796839                       | [A/G]       | NA                                         |
| Ca_Desi_Chrom_2_12796843 | Ca_desi_chr02      | 12796843                       | [T/C]       | NA                                         |
| Ca_Desi_Chrom_2_12796858 | Ca_desi_chr02      | 12796858                       | [T/C]       | NA                                         |
| Ca_Desi_Chrom_2_12796865 | Ca_desi_chr02      | 12796865                       | [T/G]       | NA                                         |
| Ca_Desi_Chrom_2_12796868 | Ca_desi_chr02      | 12796868                       | [A/G]       | NA                                         |
| Ca_Desi_Chrom_2_12796870 | Ca_desi_chr02      | 12796870                       | [A/G]       | NA                                         |
| Ca_Desi_Chrom_2_12796876 | Ca_desi_chr02      | 12796876                       | [T/C]       | NA                                         |
| Ca_Desi_Chrom_2_12796878 | Ca_desi_chr02      | 12796878                       | [G/T]       | NA                                         |
| Ca_Desi_Chrom_2_12796882 | Ca_desi_chr02      | 12796882                       | [T/G]       | NA                                         |
| Ca_Desi_Chrom_2_12796886 | Ca_desi_chr02      | 12796886                       | [A/T]       | NA                                         |

| <b>SNP IDs</b>           | <b>Chromosomes</b> | <b>Physical positions (bp)</b> | <b>SNPs</b> | <b>NCBI SNPdb accession IDs (NCBI_ss#)</b> |
|--------------------------|--------------------|--------------------------------|-------------|--------------------------------------------|
| Ca_Desi_Chrom_2_12797598 | Ca_desi_chrom02    | 12797598                       | [G/A]       | NA                                         |
| Ca_Desi_Chrom_2_12797640 | Ca_desi_chrom02    | 12797640                       | [G/A]       | NA                                         |
| Ca_Desi_Chrom_2_12833383 | Ca_desi_chrom02    | 12833383                       | [T/G]       | NA                                         |
| Ca_Desi_Chrom_2_12835773 | Ca_desi_chrom02    | 12835773                       | [C/A]       | NA                                         |
| Ca_Desi_Chrom_2_12835774 | Ca_desi_chrom02    | 12835774                       | [T/G]       | NA                                         |
| Ca_Desi_Chrom_2_12863996 | Ca_desi_chrom02    | 12863996                       | [T/A]       | NA                                         |
| Ca_Desi_Chrom_2_12864035 | Ca_desi_chrom02    | 12864035                       | [A/G]       | NA                                         |
| Ca_Desi_Chrom_2_12985136 | Ca_desi_chrom02    | 12985136                       | [G/A]       | NA                                         |
| Ca_Desi_Chrom_2_13002878 | Ca_desi_chrom02    | 13002878                       | [A/G]       | NA                                         |
| Ca_Desi_Chrom_2_13002894 | Ca_desi_chrom02    | 13002894                       | [T/A]       | NA                                         |
| Ca_Desi_Chrom_2_13002923 | Ca_desi_chrom02    | 13002923                       | [T/G]       | NA                                         |
| Ca_Desi_Chrom_2_13016783 | Ca_desi_chrom02    | 13016783                       | [A/G]       | NA                                         |
| Ca_Desi_Chrom_2_13016804 | Ca_desi_chrom02    | 13016804                       | [T/C]       | NA                                         |
| Ca_Desi_Chrom_2_13016805 | Ca_desi_chrom02    | 13016805                       | [T/C]       | NA                                         |
| Ca_Desi_Chrom_2_13016810 | Ca_desi_chrom02    | 13016810                       | [T/C]       | NA                                         |
| Ca_Desi_Chrom_2_13016833 | Ca_desi_chrom02    | 13016833                       | [A/G]       | NA                                         |
| Ca_Desi_Chrom_2_13038360 | Ca_desi_chrom02    | 13038360                       | [A/T]       | NA                                         |
| Ca_Desi_Chrom_2_13039224 | Ca_desi_chrom02    | 13039224                       | [A/T]       | NA                                         |
| Ca_Desi_Chrom_2_13122853 | Ca_desi_chrom02    | 13122853                       | [T/G]       | NA                                         |
| Ca_Desi_Chrom_2_13127040 | Ca_desi_chrom02    | 13127040                       | [T/A]       | NA                                         |
| Ca_Desi_Chrom_2_13147111 | Ca_desi_chrom02    | 13147111                       | [T/G]       | NA                                         |
| Ca_Desi_Chrom_2_13147119 | Ca_desi_chrom02    | 13147119                       | [A/T]       | NA                                         |
| Ca_Desi_Chrom_2_13152854 | Ca_desi_chrom02    | 13152854                       | [A/G]       | NA                                         |
| Ca_Desi_Chrom_2_13152868 | Ca_desi_chrom02    | 13152868                       | [T/C]       | NA                                         |
| Ca_Desi_Chrom_2_13163809 | Ca_desi_chrom02    | 13163809                       | [A/C]       | NA                                         |
| Ca_Desi_Chrom_2_13260498 | Ca_desi_chrom02    | 13260498                       | [G/A]       | NA                                         |
| Ca_Desi_Chrom_2_13260559 | Ca_desi_chrom02    | 13260559                       | [G/A]       | NA                                         |
| Ca_Desi_Chrom_2_13260562 | Ca_desi_chrom02    | 13260562                       | [T/G]       | NA                                         |
| Ca_Desi_Chrom_2_13262329 | Ca_desi_chrom02    | 13262329                       | [A/C]       | NA                                         |
| Ca_Desi_Chrom_2_13410457 | Ca_desi_chrom02    | 13410457                       | [G/T]       | NA                                         |
| Ca_Desi_Chrom_2_13413397 | Ca_desi_chrom02    | 13413397                       | [T/C]       | NA                                         |
| Ca_Desi_Chrom_2_13443269 | Ca_desi_chrom02    | 13443269                       | [T/G]       | NA                                         |
| Ca_Desi_Chrom_2_13536762 | Ca_desi_chrom02    | 13536762                       | [A/C]       | NA                                         |
| Ca_Desi_Chrom_2_13900388 | Ca_desi_chrom02    | 13900388                       | [A/C]       | NA                                         |

| <b>SNP IDs</b>          | <b>Chromosomes</b> | <b>Physical positions (bp)</b> | <b>SNPs</b> | <b>NCBI SNPdb accession IDs (NCBI_ss#)</b> |
|-------------------------|--------------------|--------------------------------|-------------|--------------------------------------------|
| Ca_Desig_Chr_2_13924504 | Ca_desig_chr02     | 13924504                       | [T/C]       | NA                                         |
| Ca_Desig_Chr_2_13924506 | Ca_desig_chr02     | 13924506                       | [A/T]       | NA                                         |
| Ca_Desig_Chr_2_13924569 | Ca_desig_chr02     | 13924569                       | [A/C]       | NA                                         |
| Ca_Desig_Chr_2_13924598 | Ca_desig_chr02     | 13924598                       | [A/C]       | NA                                         |
| Ca_Desig_Chr_2_13941805 | Ca_desig_chr02     | 13941805                       | [A/C]       | NA                                         |
| Ca_Desig_Chr_2_13941833 | Ca_desig_chr02     | 13941833                       | [T/G]       | NA                                         |
| Ca_Desig_Chr_2_13941844 | Ca_desig_chr02     | 13941844                       | [C/G]       | NA                                         |
| Ca_Desig_Chr_2_13942330 | Ca_desig_chr02     | 13942330                       | [T/C]       | NA                                         |
| Ca_Desig_Chr_2_13980480 | Ca_desig_chr02     | 13980480                       | [T/G]       | NA                                         |
| Ca_Desig_Chr_2_14007286 | Ca_desig_chr02     | 14007286                       | [C/G]       | NA                                         |
| Ca_Desig_Chr_2_14007287 | Ca_desig_chr02     | 14007287                       | [T/G]       | NA                                         |
| Ca_Desig_Chr_2_14051746 | Ca_desig_chr02     | 14051746                       | [T/C]       | NA                                         |
| Ca_Desig_Chr_2_14051749 | Ca_desig_chr02     | 14051749                       | [A/C]       | NA                                         |
| Ca_Desig_Chr_2_14064974 | Ca_desig_chr02     | 14064974                       | [T/A]       | NA                                         |
| Ca_Desig_Chr_2_14068074 | Ca_desig_chr02     | 14068074                       | [T/G]       | NA                                         |
| Ca_Desig_Chr_2_14068088 | Ca_desig_chr02     | 14068088                       | [T/G]       | NA                                         |
| Ca_Desig_Chr_2_14124391 | Ca_desig_chr02     | 14124391                       | [A/C]       | NA                                         |
| Ca_Desig_Chr_2_14124411 | Ca_desig_chr02     | 14124411                       | [T/C]       | NA                                         |
| Ca_Desig_Chr_2_14124416 | Ca_desig_chr02     | 14124416                       | [A/G]       | NA                                         |
| Ca_Desig_Chr_2_14124419 | Ca_desig_chr02     | 14124419                       | [A/G]       | NA                                         |
| Ca_Desig_Chr_2_14124421 | Ca_desig_chr02     | 14124421                       | [A/C]       | NA                                         |
| Ca_Desig_Chr_2_14160600 | Ca_desig_chr02     | 14160600                       | [A/G]       | NA                                         |
| Ca_Desig_Chr_2_14163542 | Ca_desig_chr02     | 14163542                       | [A/C]       | NA                                         |
| Ca_Desig_Chr_2_14163551 | Ca_desig_chr02     | 14163551                       | [A/C]       | NA                                         |
| Ca_Desig_Chr_2_14163612 | Ca_desig_chr02     | 14163612                       | [A/C]       | NA                                         |
| Ca_Desig_Chr_2_14163618 | Ca_desig_chr02     | 14163618                       | [A/C]       | NA                                         |
| Ca_Desig_Chr_2_14163647 | Ca_desig_chr02     | 14163647                       | [C/T]       | NA                                         |
| Ca_Desig_Chr_2_14169133 | Ca_desig_chr02     | 14169133                       | [C/T]       | NA                                         |
| Ca_Desig_Chr_2_14169300 | Ca_desig_chr02     | 14169300                       | [C/T]       | NA                                         |
| Ca_Desig_Chr_2_14209948 | Ca_desig_chr02     | 14209948                       | [A/C]       | NA                                         |
| Ca_Desig_Chr_2_14209949 | Ca_desig_chr02     | 14209949                       | [A/G]       | NA                                         |
| Ca_Desig_Chr_2_14209951 | Ca_desig_chr02     | 14209951                       | [A/T]       | NA                                         |
| Ca_Desig_Chr_2_14209961 | Ca_desig_chr02     | 14209961                       | [T/C]       | NA                                         |
| Ca_Desig_Chr_2_14211958 | Ca_desig_chr02     | 14211958                       | [A/T]       | NA                                         |

| <b>SNP IDs</b>           | <b>Chromosomes</b> | <b>Physical positions (bp)</b> | <b>SNPs</b> | <b>NCBI SNPdb accession IDs (NCBI_ss#)</b> |
|--------------------------|--------------------|--------------------------------|-------------|--------------------------------------------|
| Ca_Desi_Chrom_2_14212005 | Ca_desi_chr02      | 14212005                       | [A/G]       | NA                                         |
| Ca_Desi_Chrom_2_14225002 | Ca_desi_chr02      | 14225002                       | [A/G]       | NA                                         |
| Ca_Desi_Chrom_2_14225008 | Ca_desi_chr02      | 14225008                       | [A/G]       | NA                                         |
| Ca_Desi_Chrom_2_14225009 | Ca_desi_chr02      | 14225009                       | [G/T]       | NA                                         |
| Ca_Desi_Chrom_2_14225010 | Ca_desi_chr02      | 14225010                       | [T/C]       | NA                                         |
| Ca_Desi_Chrom_2_14225012 | Ca_desi_chr02      | 14225012                       | [T/C]       | NA                                         |
| Ca_Desi_Chrom_2_14225013 | Ca_desi_chr02      | 14225013                       | [C/A]       | NA                                         |
| Ca_Desi_Chrom_2_14225016 | Ca_desi_chr02      | 14225016                       | [A/G]       | NA                                         |
| Ca_Desi_Chrom_2_14225017 | Ca_desi_chr02      | 14225017                       | [G/C]       | NA                                         |
| Ca_Desi_Chrom_2_14225019 | Ca_desi_chr02      | 14225019                       | [C/A]       | NA                                         |
| Ca_Desi_Chrom_2_14225020 | Ca_desi_chr02      | 14225020                       | [A/G]       | NA                                         |
| Ca_Desi_Chrom_2_14225033 | Ca_desi_chr02      | 14225033                       | [A/G]       | NA                                         |
| Ca_Desi_Chrom_2_14225038 | Ca_desi_chr02      | 14225038                       | [C/A]       | NA                                         |
| Ca_Desi_Chrom_2_14225039 | Ca_desi_chr02      | 14225039                       | [T/C]       | NA                                         |
| Ca_Desi_Chrom_2_14225056 | Ca_desi_chr02      | 14225056                       | [T/A]       | NA                                         |
| Ca_Desi_Chrom_2_14225059 | Ca_desi_chr02      | 14225059                       | [A/G]       | NA                                         |
| Ca_Desi_Chrom_2_14225062 | Ca_desi_chr02      | 14225062                       | [T/A]       | NA                                         |
| Ca_Desi_Chrom_2_14406592 | Ca_desi_chr02      | 14406592                       | [T/C]       | NA                                         |
| Ca_Desi_Chrom_2_14406613 | Ca_desi_chr02      | 14406613                       | [A/G]       | NA                                         |
| Ca_Desi_Chrom_2_14406640 | Ca_desi_chr02      | 14406640                       | [T/C]       | NA                                         |
| Ca_Desi_Chrom_2_14445991 | Ca_desi_chr02      | 14445991                       | [C/A]       | NA                                         |
| Ca_Desi_Chrom_2_14445992 | Ca_desi_chr02      | 14445992                       | [A/G]       | NA                                         |
| Ca_Desi_Chrom_2_14445993 | Ca_desi_chr02      | 14445993                       | [T/A]       | NA                                         |
| Ca_Desi_Chrom_2_14445995 | Ca_desi_chr02      | 14445995                       | [A/C]       | NA                                         |
| Ca_Desi_Chrom_2_14445996 | Ca_desi_chr02      | 14445996                       | [T/G]       | NA                                         |
| Ca_Desi_Chrom_2_14446035 | Ca_desi_chr02      | 14446035                       | [T/A]       | NA                                         |
| Ca_Desi_Chrom_2_14449492 | Ca_desi_chr02      | 14449492                       | [A/C]       | NA                                         |
| Ca_Desi_Chrom_2_14449506 | Ca_desi_chr02      | 14449506                       | [A/C]       | NA                                         |
| Ca_Desi_Chrom_2_14489890 | Ca_desi_chr02      | 14489890                       | [A/C]       | NA                                         |
| Ca_Desi_Chrom_2_14489912 | Ca_desi_chr02      | 14489912                       | [T/A]       | NA                                         |
| Ca_Desi_Chrom_2_14489920 | Ca_desi_chr02      | 14489920                       | [T/C]       | NA                                         |
| Ca_Desi_Chrom_2_14493800 | Ca_desi_chr02      | 14493800                       | [T/G]       | NA                                         |
| Ca_Desi_Chrom_2_14493803 | Ca_desi_chr02      | 14493803                       | [T/G]       | NA                                         |
| Ca_Desi_Chrom_2_14493808 | Ca_desi_chr02      | 14493808                       | [T/G]       | NA                                         |

| <b>SNP IDs</b>          | <b>Chromosomes</b> | <b>Physical positions (bp)</b> | <b>SNPs</b> | <b>NCBI SNPdb accession IDs (NCBI_ss#)</b> |
|-------------------------|--------------------|--------------------------------|-------------|--------------------------------------------|
| Ca_Desig_Chr_2_14493834 | Ca_desig_chr02     | 14493834                       | [G/A]       | NA                                         |
| Ca_Desig_Chr_2_14493836 | Ca_desig_chr02     | 14493836                       | [A/G]       | NA                                         |
| Ca_Desig_Chr_2_14493837 | Ca_desig_chr02     | 14493837                       | [G/A]       | NA                                         |
| Ca_Desig_Chr_2_14493838 | Ca_desig_chr02     | 14493838                       | [C/A]       | NA                                         |
| Ca_Desig_Chr_2_14493840 | Ca_desig_chr02     | 14493840                       | [A/G]       | NA                                         |
| Ca_Desig_Chr_2_14518598 | Ca_desig_chr02     | 14518598                       | [A/G]       | NA                                         |
| Ca_Desig_Chr_2_14518607 | Ca_desig_chr02     | 14518607                       | [T/C]       | NA                                         |
| Ca_Desig_Chr_2_14660979 | Ca_desig_chr02     | 14660979                       | [C/T]       | NA                                         |
| Ca_Desig_Chr_2_14682646 | Ca_desig_chr02     | 14682646                       | [A/C]       | NA                                         |
| Ca_Desig_Chr_2_14713714 | Ca_desig_chr02     | 14713714                       | [A/T]       | NA                                         |
| Ca_Desig_Chr_2_14716976 | Ca_desig_chr02     | 14716976                       | [T/C]       | NA                                         |
| Ca_Desig_Chr_2_14716991 | Ca_desig_chr02     | 14716991                       | [A/G]       | NA                                         |
| Ca_Desig_Chr_2_14717018 | Ca_desig_chr02     | 14717018                       | [A/G]       | NA                                         |
| Ca_Desig_Chr_2_14730254 | Ca_desig_chr02     | 14730254                       | [T/G]       | NA                                         |
| Ca_Desig_Chr_2_14739960 | Ca_desig_chr02     | 14739960                       | [T/G]       | NA                                         |
| Ca_Desig_Chr_2_14739987 | Ca_desig_chr02     | 14739987                       | [A/C]       | NA                                         |
| Ca_Desig_Chr_2_14756579 | Ca_desig_chr02     | 14756579                       | [G/T]       | NA                                         |
| Ca_Desig_Chr_2_14756596 | Ca_desig_chr02     | 14756596                       | [A/C]       | NA                                         |
| Ca_Desig_Chr_2_14766621 | Ca_desig_chr02     | 14766621                       | [T/C]       | NA                                         |
| Ca_Desig_Chr_2_14766627 | Ca_desig_chr02     | 14766627                       | [T/C]       | NA                                         |
| Ca_Desig_Chr_2_14766632 | Ca_desig_chr02     | 14766632                       | [A/G]       | NA                                         |
| Ca_Desig_Chr_2_14766636 | Ca_desig_chr02     | 14766636                       | [T/G]       | NA                                         |
| Ca_Desig_Chr_2_14766648 | Ca_desig_chr02     | 14766648                       | [A/G]       | NA                                         |
| Ca_Desig_Chr_2_14766672 | Ca_desig_chr02     | 14766672                       | [T/C]       | NA                                         |
| Ca_Desig_Chr_2_14766675 | Ca_desig_chr02     | 14766675                       | [T/C]       | NA                                         |
| Ca_Desig_Chr_2_14766681 | Ca_desig_chr02     | 14766681                       | [T/C]       | NA                                         |
| Ca_Desig_Chr_2_14766683 | Ca_desig_chr02     | 14766683                       | [T/C]       | NA                                         |
| Ca_Desig_Chr_2_14784385 | Ca_desig_chr02     | 14784385                       | [T/G]       | NA                                         |
| Ca_Desig_Chr_2_14861116 | Ca_desig_chr02     | 14861116                       | [A/C]       | NA                                         |
| Ca_Desig_Chr_2_14861121 | Ca_desig_chr02     | 14861121                       | [A/G]       | NA                                         |
| Ca_Desig_Chr_2_14861127 | Ca_desig_chr02     | 14861127                       | [T/A]       | NA                                         |
| Ca_Desig_Chr_2_14982834 | Ca_desig_chr02     | 14982834                       | [T/C]       | NA                                         |
| Ca_Desig_Chr_2_15006769 | Ca_desig_chr02     | 15006769                       | [A/G]       | NA                                         |
| Ca_Desig_Chr_2_15006778 | Ca_desig_chr02     | 15006778                       | [A/C]       | NA                                         |

| <b>SNP IDs</b>          | <b>Chromosomes</b> | <b>Physical positions (bp)</b> | <b>SNPs</b> | <b>NCBI SNPdb accession IDs (NCBI_ss#)</b> |
|-------------------------|--------------------|--------------------------------|-------------|--------------------------------------------|
| Ca_Desig_Chr_2_15006797 | Ca_desig_chr02     | 15006797                       | [T/C]       | NA                                         |
| Ca_Desig_Chr_2_15006809 | Ca_desig_chr02     | 15006809                       | [T/G]       | NA                                         |
| Ca_Desig_Chr_2_15006815 | Ca_desig_chr02     | 15006815                       | [A/G]       | NA                                         |
| Ca_Desig_Chr_2_15014175 | Ca_desig_chr02     | 15014175                       | [A/C]       | NA                                         |
| Ca_Desig_Chr_2_15014177 | Ca_desig_chr02     | 15014177                       | [C/T]       | NA                                         |
| Ca_Desig_Chr_2_15121017 | Ca_desig_chr02     | 15121017                       | [C/A]       | NA                                         |
| Ca_Desig_Chr_2_15121066 | Ca_desig_chr02     | 15121066                       | [A/C]       | NA                                         |
| Ca_Desig_Chr_2_15121075 | Ca_desig_chr02     | 15121075                       | [A/C]       | NA                                         |
| Ca_Desig_Chr_2_15152269 | Ca_desig_chr02     | 15152269                       | [T/C]       | NA                                         |
| Ca_Desig_Chr_2_15223689 | Ca_desig_chr02     | 15223689                       | [T/C]       | NA                                         |
| Ca_Desig_Chr_2_15223697 | Ca_desig_chr02     | 15223697                       | [T/C]       | NA                                         |
| Ca_Desig_Chr_2_15223701 | Ca_desig_chr02     | 15223701                       | [A/G]       | NA                                         |
| Ca_Desig_Chr_2_15223705 | Ca_desig_chr02     | 15223705                       | [A/G]       | NA                                         |
| Ca_Desig_Chr_2_15223707 | Ca_desig_chr02     | 15223707                       | [A/G]       | NA                                         |
| Ca_Desig_Chr_2_15223713 | Ca_desig_chr02     | 15223713                       | [A/G]       | NA                                         |
| Ca_Desig_Chr_2_15223716 | Ca_desig_chr02     | 15223716                       | [A/G]       | NA                                         |
| Ca_Desig_Chr_2_15223718 | Ca_desig_chr02     | 15223718                       | [A/G]       | NA                                         |
| Ca_Desig_Chr_2_15223721 | Ca_desig_chr02     | 15223721                       | [A/G]       | NA                                         |
| Ca_Desig_Chr_2_15223724 | Ca_desig_chr02     | 15223724                       | [A/G]       | NA                                         |
| Ca_Desig_Chr_2_15223725 | Ca_desig_chr02     | 15223725                       | [A/G]       | NA                                         |
| Ca_Desig_Chr_2_15223726 | Ca_desig_chr02     | 15223726                       | [A/C]       | NA                                         |
| Ca_Desig_Chr_2_15223728 | Ca_desig_chr02     | 15223728                       | [T/C]       | NA                                         |
| Ca_Desig_Chr_2_15223796 | Ca_desig_chr02     | 15223796                       | [T/C]       | NA                                         |
| Ca_Desig_Chr_2_15270725 | Ca_desig_chr02     | 15270725                       | [T/G]       | NA                                         |
| Ca_Desig_Chr_2_15299666 | Ca_desig_chr02     | 15299666                       | [G/T]       | NA                                         |
| Ca_Desig_Chr_2_15304940 | Ca_desig_chr02     | 15304940                       | [T/G]       | NA                                         |
| Ca_Desig_Chr_2_15329581 | Ca_desig_chr02     | 15329581                       | [T/G]       | NA                                         |
| Ca_Desig_Chr_2_15427040 | Ca_desig_chr02     | 15427040                       | [T/C]       | NA                                         |
| Ca_Desig_Chr_2_15438696 | Ca_desig_chr02     | 15438696                       | [T/C]       | NA                                         |
| Ca_Desig_Chr_2_15438711 | Ca_desig_chr02     | 15438711                       | [T/C]       | NA                                         |
| Ca_Desig_Chr_2_15473629 | Ca_desig_chr02     | 15473629                       | [T/A]       | NA                                         |
| Ca_Desig_Chr_2_15473630 | Ca_desig_chr02     | 15473630                       | [A/T]       | NA                                         |
| Ca_Desig_Chr_2_15473631 | Ca_desig_chr02     | 15473631                       | [T/A]       | NA                                         |
| Ca_Desig_Chr_2_15473632 | Ca_desig_chr02     | 15473632                       | [T/A]       | NA                                         |

| <b>SNP IDs</b>           | <b>Chromosomes</b> | <b>Physical positions (bp)</b> | <b>SNPs</b> | <b>NCBI SNPdb accession IDs (NCBI_ss#)</b> |
|--------------------------|--------------------|--------------------------------|-------------|--------------------------------------------|
| Ca_Desi_Chrom_2_15473633 | Ca_desi_chrom02    | 15473633                       | [A/T]       | NA                                         |
| Ca_Desi_Chrom_2_15488573 | Ca_desi_chrom02    | 15488573                       | [A/C]       | NA                                         |
| Ca_Desi_Chrom_2_15488590 | Ca_desi_chrom02    | 15488590                       | [T/C]       | NA                                         |
| Ca_Desi_Chrom_2_15502299 | Ca_desi_chrom02    | 15502299                       | [T/A]       | NA                                         |
| Ca_Desi_Chrom_2_15502341 | Ca_desi_chrom02    | 15502341                       | [T/C]       | NA                                         |
| Ca_Desi_Chrom_2_15505255 | Ca_desi_chrom02    | 15505255                       | [T/G]       | NA                                         |
| Ca_Desi_Chrom_2_15505286 | Ca_desi_chrom02    | 15505286                       | [A/G]       | NA                                         |
| Ca_Desi_Chrom_2_15510688 | Ca_desi_chrom02    | 15510688                       | [T/G]       | NA                                         |
| Ca_Desi_Chrom_2_15510696 | Ca_desi_chrom02    | 15510696                       | [T/G]       | NA                                         |
| Ca_Desi_Chrom_2_15575100 | Ca_desi_chrom02    | 15575100                       | [T/G]       | NA                                         |
| Ca_Desi_Chrom_2_15575111 | Ca_desi_chrom02    | 15575111                       | [T/G]       | NA                                         |
| Ca_Desi_Chrom_2_15575124 | Ca_desi_chrom02    | 15575124                       | [T/A]       | NA                                         |
| Ca_Desi_Chrom_2_15575125 | Ca_desi_chrom02    | 15575125                       | [C/A]       | NA                                         |
| Ca_Desi_Chrom_2_15575126 | Ca_desi_chrom02    | 15575126                       | [T/C]       | NA                                         |
| Ca_Desi_Chrom_2_15575127 | Ca_desi_chrom02    | 15575127                       | [C/T]       | NA                                         |
| Ca_Desi_Chrom_2_15575128 | Ca_desi_chrom02    | 15575128                       | [A/C]       | NA                                         |
| Ca_Desi_Chrom_2_15575129 | Ca_desi_chrom02    | 15575129                       | [G/T]       | NA                                         |
| Ca_Desi_Chrom_2_15575132 | Ca_desi_chrom02    | 15575132                       | [A/G]       | NA                                         |
| Ca_Desi_Chrom_2_15652498 | Ca_desi_chrom02    | 15652498                       | [T/G]       | NA                                         |
| Ca_Desi_Chrom_2_15653200 | Ca_desi_chrom02    | 15653200                       | [A/C]       | NA                                         |
| Ca_Desi_Chrom_2_15656107 | Ca_desi_chrom02    | 15656107                       | [T/C]       | NA                                         |
| Ca_Desi_Chrom_2_15677613 | Ca_desi_chrom02    | 15677613                       | [T/C]       | NA                                         |
| Ca_Desi_Chrom_2_15677616 | Ca_desi_chrom02    | 15677616                       | [T/C]       | NA                                         |
| Ca_Desi_Chrom_2_15677632 | Ca_desi_chrom02    | 15677632                       | [A/G]       | NA                                         |
| Ca_Desi_Chrom_2_15677646 | Ca_desi_chrom02    | 15677646                       | [A/G]       | NA                                         |
| Ca_Desi_Chrom_2_15677650 | Ca_desi_chrom02    | 15677650                       | [T/G]       | NA                                         |
| Ca_Desi_Chrom_2_15822308 | Ca_desi_chrom02    | 15822308                       | [A/G]       | NA                                         |
| Ca_Desi_Chrom_2_15822318 | Ca_desi_chrom02    | 15822318                       | [A/G]       | NA                                         |
| Ca_Desi_Chrom_2_15822346 | Ca_desi_chrom02    | 15822346                       | [T/G]       | NA                                         |
| Ca_Desi_Chrom_2_15876643 | Ca_desi_chrom02    | 15876643                       | [A/T]       | NA                                         |
| Ca_Desi_Chrom_2_15878389 | Ca_desi_chrom02    | 15878389                       | [T/C]       | NA                                         |
| Ca_Desi_Chrom_2_15878476 | Ca_desi_chrom02    | 15878476                       | [A/T]       | NA                                         |
| Ca_Desi_Chrom_2_15878496 | Ca_desi_chrom02    | 15878496                       | [T/G]       | NA                                         |
| Ca_Desi_Chrom_2_15905877 | Ca_desi_chrom02    | 15905877                       | [A/C]       | NA                                         |



| <b>SNP IDs</b>           | <b>Chromosomes</b> | <b>Physical positions (bp)</b> | <b>SNPs</b> | <b>NCBI SNPdb accession IDs (NCBI_ss#)</b> |
|--------------------------|--------------------|--------------------------------|-------------|--------------------------------------------|
| Ca_Desi_Chrom_2_15905883 | Ca_desi_chrom02    | 15905883                       | [T/C]       | NA                                         |
| Ca_Desi_Chrom_2_15905898 | Ca_desi_chrom02    | 15905898                       | [T/C]       | NA                                         |
| Ca_Desi_Chrom_2_15905916 | Ca_desi_chrom02    | 15905916                       | [T/C]       | NA                                         |
| Ca_Desi_Chrom_2_15905919 | Ca_desi_chrom02    | 15905919                       | [T/G]       | NA                                         |
| Ca_Desi_Chrom_2_15905925 | Ca_desi_chrom02    | 15905925                       | [A/C]       | NA                                         |
| Ca_Desi_Chrom_2_15905931 | Ca_desi_chrom02    | 15905931                       | [T/C]       | NA                                         |
| Ca_Desi_Chrom_2_15905934 | Ca_desi_chrom02    | 15905934                       | [T/C]       | NA                                         |
| Ca_Desi_Chrom_2_15926923 | Ca_desi_chrom02    | 15926923                       | [C/T]       | NA                                         |
| Ca_Desi_Chrom_2_15937203 | Ca_desi_chrom02    | 15937203                       | [T/C]       | NA                                         |
| Ca_Desi_Chrom_2_15937209 | Ca_desi_chrom02    | 15937209                       | [T/C]       | NA                                         |
| Ca_Desi_Chrom_2_15937214 | Ca_desi_chrom02    | 15937214                       | [G/C]       | NA                                         |
| Ca_Desi_Chrom_2_15937217 | Ca_desi_chrom02    | 15937217                       | [T/C]       | NA                                         |
| Ca_Desi_Chrom_2_15937221 | Ca_desi_chrom02    | 15937221                       | [T/C]       | NA                                         |
| Ca_Desi_Chrom_2_15937224 | Ca_desi_chrom02    | 15937224                       | [T/C]       | NA                                         |
| Ca_Desi_Chrom_2_15937226 | Ca_desi_chrom02    | 15937226                       | [G/C]       | NA                                         |
| Ca_Desi_Chrom_2_15937229 | Ca_desi_chrom02    | 15937229                       | [A/C]       | NA                                         |
| Ca_Desi_Chrom_2_15937231 | Ca_desi_chrom02    | 15937231                       | [A/G]       | NA                                         |
| Ca_Desi_Chrom_2_15937232 | Ca_desi_chrom02    | 15937232                       | [G/A]       | NA                                         |
| Ca_Desi_Chrom_2_15937233 | Ca_desi_chrom02    | 15937233                       | [A/G]       | NA                                         |
| Ca_Desi_Chrom_2_15937238 | Ca_desi_chrom02    | 15937238                       | [G/C]       | NA                                         |
| Ca_Desi_Chrom_2_15937243 | Ca_desi_chrom02    | 15937243                       | [T/G]       | NA                                         |
| Ca_Desi_Chrom_2_15937247 | Ca_desi_chrom02    | 15937247                       | [T/C]       | NA                                         |
| Ca_Desi_Chrom_2_15937249 | Ca_desi_chrom02    | 15937249                       | [A/C]       | NA                                         |
| Ca_Desi_Chrom_2_15937258 | Ca_desi_chrom02    | 15937258                       | [C/G]       | NA                                         |
| Ca_Desi_Chrom_2_15951042 | Ca_desi_chrom02    | 15951042                       | [T/G]       | NA                                         |
| Ca_Desi_Chrom_2_15951050 | Ca_desi_chrom02    | 15951050                       | [T/G]       | NA                                         |
| Ca_Desi_Chrom_2_15951058 | Ca_desi_chrom02    | 15951058                       | [A/G]       | NA                                         |
| Ca_Desi_Chrom_2_15951060 | Ca_desi_chrom02    | 15951060                       | [A/G]       | NA                                         |
| Ca_Desi_Chrom_2_15951065 | Ca_desi_chrom02    | 15951065                       | [G/A]       | NA                                         |
| Ca_Desi_Chrom_2_15951067 | Ca_desi_chrom02    | 15951067                       | [G/A]       | NA                                         |
| Ca_Desi_Chrom_2_15951069 | Ca_desi_chrom02    | 15951069                       | [A/G]       | NA                                         |
| Ca_Desi_Chrom_2_15951070 | Ca_desi_chrom02    | 15951070                       | [G/A]       | NA                                         |
| Ca_Desi_Chrom_2_15951072 | Ca_desi_chrom02    | 15951072                       | [A/G]       | NA                                         |
| Ca_Desi_Chrom_2_15951073 | Ca_desi_chrom02    | 15951073                       | [G/A]       | NA                                         |

| <b>SNP IDs</b>           | <b>Chromosomes</b> | <b>Physical positions (bp)</b> | <b>SNPs</b> | <b>NCBI SNPdb accession IDs (NCBI_ss#)</b> |
|--------------------------|--------------------|--------------------------------|-------------|--------------------------------------------|
| Ca_Desi_Chrom_2_15951077 | Ca_desi_chrom02    | 15951077                       | [T/G]       | NA                                         |
| Ca_Desi_Chrom_2_15951086 | Ca_desi_chrom02    | 15951086                       | [T/G]       | NA                                         |
| Ca_Desi_Chrom_2_15951090 | Ca_desi_chrom02    | 15951090                       | [G/A]       | NA                                         |
| Ca_Desi_Chrom_2_15951105 | Ca_desi_chrom02    | 15951105                       | [A/C]       | NA                                         |
| Ca_Desi_Chrom_2_15959845 | Ca_desi_chrom02    | 15959845                       | [T/A]       | NA                                         |
| Ca_Desi_Chrom_2_15963642 | Ca_desi_chrom02    | 15963642                       | [T/G]       | NA                                         |
| Ca_Desi_Chrom_2_15970064 | Ca_desi_chrom02    | 15970064                       | [T/G]       | NA                                         |
| Ca_Desi_Chrom_2_15970101 | Ca_desi_chrom02    | 15970101                       | [A/G]       | NA                                         |
| Ca_Desi_Chrom_2_16114811 | Ca_desi_chrom02    | 16114811                       | [A/T]       | NA                                         |
| Ca_Desi_Chrom_2_16136668 | Ca_desi_chrom02    | 16136668                       | [C/T]       | NA                                         |
| Ca_Desi_Chrom_2_16138961 | Ca_desi_chrom02    | 16138961                       | [A/G]       | NA                                         |
| Ca_Desi_Chrom_2_16138966 | Ca_desi_chrom02    | 16138966                       | [C/A]       | NA                                         |
| Ca_Desi_Chrom_2_16139069 | Ca_desi_chrom02    | 16139069                       | [T/G]       | NA                                         |
| Ca_Desi_Chrom_2_16216850 | Ca_desi_chrom02    | 16216850                       | [A/C]       | NA                                         |
| Ca_Desi_Chrom_2_16216857 | Ca_desi_chrom02    | 16216857                       | [C/T]       | NA                                         |
| Ca_Desi_Chrom_2_16216861 | Ca_desi_chrom02    | 16216861                       | [A/C]       | NA                                         |
| Ca_Desi_Chrom_2_16676201 | Ca_desi_chrom02    | 16676201                       | [C/A]       | NA                                         |
| Ca_Desi_Chrom_2_16683365 | Ca_desi_chrom02    | 16683365                       | [G/C]       | NA                                         |
| Ca_Desi_Chrom_2_16706522 | Ca_desi_chrom02    | 16706522                       | [T/C]       | NA                                         |
| Ca_Desi_Chrom_2_16714762 | Ca_desi_chrom02    | 16714762                       | [A/G]       | NA                                         |
| Ca_Desi_Chrom_2_16716541 | Ca_desi_chrom02    | 16716541                       | [T/G]       | NA                                         |
| Ca_Desi_Chrom_2_16741187 | Ca_desi_chrom02    | 16741187                       | [C/T]       | NA                                         |
| Ca_Desi_Chrom_2_16741261 | Ca_desi_chrom02    | 16741261                       | [T/C]       | NA                                         |
| Ca_Desi_Chrom_2_16741272 | Ca_desi_chrom02    | 16741272                       | [A/C]       | NA                                         |
| Ca_Desi_Chrom_2_16741302 | Ca_desi_chrom02    | 16741302                       | [C/T]       | NA                                         |
| Ca_Desi_Chrom_2_16748554 | Ca_desi_chrom02    | 16748554                       | [G/T]       | NA                                         |
| Ca_Desi_Chrom_2_16748556 | Ca_desi_chrom02    | 16748556                       | [T/G]       | NA                                         |
| Ca_Desi_Chrom_2_16748679 | Ca_desi_chrom02    | 16748679                       | [T/A]       | NA                                         |
| Ca_Desi_Chrom_2_16748700 | Ca_desi_chrom02    | 16748700                       | [G/A]       | NA                                         |
| Ca_Desi_Chrom_2_16748726 | Ca_desi_chrom02    | 16748726                       | [T/A]       | NA                                         |
| Ca_Desi_Chrom_2_16748779 | Ca_desi_chrom02    | 16748779                       | [T/A]       | NA                                         |
| Ca_Desi_Chrom_2_16753289 | Ca_desi_chrom02    | 16753289                       | [T/C]       | NA                                         |
| Ca_Desi_Chrom_2_16757057 | Ca_desi_chrom02    | 16757057                       | [T/G]       | NA                                         |
| Ca_Desi_Chrom_2_16757086 | Ca_desi_chrom02    | 16757086                       | [T/C]       | NA                                         |

| <b>SNP IDs</b>           | <b>Chromosomes</b> | <b>Physical positions (bp)</b> | <b>SNPs</b> | <b>NCBI SNPdb accession IDs (NCBI_ss#)</b> |
|--------------------------|--------------------|--------------------------------|-------------|--------------------------------------------|
| Ca_Desi_Chrom_2_16757108 | Ca_desi_chr02      | 16757108                       | [A/G]       | NA                                         |
| Ca_Desi_Chrom_2_16838408 | Ca_desi_chr02      | 16838408                       | [T/G]       | NA                                         |
| Ca_Desi_Chrom_2_16838430 | Ca_desi_chr02      | 16838430                       | [T/C]       | NA                                         |
| Ca_Desi_Chrom_2_16838436 | Ca_desi_chr02      | 16838436                       | [T/C]       | NA                                         |
| Ca_Desi_Chrom_2_16856375 | Ca_desi_chr02      | 16856375                       | [C/T]       | NA                                         |
| Ca_Desi_Chrom_2_16856387 | Ca_desi_chr02      | 16856387                       | [T/A]       | NA                                         |
| Ca_Desi_Chrom_2_16856404 | Ca_desi_chr02      | 16856404                       | [T/C]       | NA                                         |
| Ca_Desi_Chrom_2_16856406 | Ca_desi_chr02      | 16856406                       | [G/C]       | NA                                         |
| Ca_Desi_Chrom_2_16856409 | Ca_desi_chr02      | 16856409                       | [T/G]       | NA                                         |
| Ca_Desi_Chrom_2_16954879 | Ca_desi_chr02      | 16954879                       | [A/G]       | NA                                         |
| Ca_Desi_Chrom_2_16992629 | Ca_desi_chr02      | 16992629                       | [A/G]       | NA                                         |
| Ca_Desi_Chrom_2_16992640 | Ca_desi_chr02      | 16992640                       | [T/G]       | NA                                         |
| Ca_Desi_Chrom_2_16992666 | Ca_desi_chr02      | 16992666                       | [T/C]       | NA                                         |
| Ca_Desi_Chrom_2_16992676 | Ca_desi_chr02      | 16992676                       | [T/C]       | NA                                         |
| Ca_Desi_Chrom_2_16992678 | Ca_desi_chr02      | 16992678                       | [T/C]       | NA                                         |
| Ca_Desi_Chrom_2_17048232 | Ca_desi_chr02      | 17048232                       | [G/T]       | NA                                         |
| Ca_Desi_Chrom_2_17048276 | Ca_desi_chr02      | 17048276                       | [T/A]       | NA                                         |
| Ca_Desi_Chrom_2_17048306 | Ca_desi_chr02      | 17048306                       | [A/G]       | NA                                         |
| Ca_Desi_Chrom_2_17048324 | Ca_desi_chr02      | 17048324                       | [A/G]       | NA                                         |
| Ca_Desi_Chrom_2_17187204 | Ca_desi_chr02      | 17187204                       | [A/G]       | NA                                         |
| Ca_Desi_Chrom_2_17187220 | Ca_desi_chr02      | 17187220                       | [T/C]       | NA                                         |
| Ca_Desi_Chrom_2_17187228 | Ca_desi_chr02      | 17187228                       | [A/G]       | NA                                         |
| Ca_Desi_Chrom_2_17187244 | Ca_desi_chr02      | 17187244                       | [T/A]       | NA                                         |
| Ca_Desi_Chrom_2_17230663 | Ca_desi_chr02      | 17230663                       | [A/G]       | NA                                         |
| Ca_Desi_Chrom_3_126478   | Ca_desi_chr03      | 126478                         | [A/G]       | NA                                         |
| Ca_Desi_Chrom_3_126485   | Ca_desi_chr03      | 126485                         | [T/G]       | NA                                         |
| Ca_Desi_Chrom_3_126490   | Ca_desi_chr03      | 126490                         | [T/A]       | NA                                         |
| Ca_Desi_Chrom_3_126616   | Ca_desi_chr03      | 126616                         | [G/A]       | NA                                         |
| Ca_Desi_Chrom_3_126619   | Ca_desi_chr03      | 126619                         | [G/A]       | NA                                         |
| Ca_Desi_Chrom_3_234208   | Ca_desi_chr03      | 234208                         | [A/T]       | NA                                         |
| Ca_Desi_Chrom_3_234219   | Ca_desi_chr03      | 234219                         | [A/T]       | NA                                         |
| Ca_Desi_Chrom_3_347881   | Ca_desi_chr03      | 347881                         | [T/G]       | NA                                         |
| Ca_Desi_Chrom_3_348960   | Ca_desi_chr03      | 348960                         | [G/T]       | NA                                         |
| Ca_Desi_Chrom_3_644787   | Ca_desi_chr03      | 644787                         | [G/A]       | NA                                         |

| <b>SNP IDs</b>         | <b>Chromosomes</b> | <b>Physical positions (bp)</b> | <b>SNPs</b> | <b>NCBI SNPdb accession IDs (NCBI_ss#)</b> |
|------------------------|--------------------|--------------------------------|-------------|--------------------------------------------|
| Ca_Desi_Chrom_3_644790 | Ca_desi_chr03      | 644790                         | [C/A]       | NA                                         |
| Ca_Desi_Chrom_3_644806 | Ca_desi_chr03      | 644806                         | [C/A]       | NA                                         |
| Ca_Desi_Chrom_3_644808 | Ca_desi_chr03      | 644808                         | [C/T]       | NA                                         |
| Ca_Desi_Chrom_3_644812 | Ca_desi_chr03      | 644812                         | [G/T]       | NA                                         |
| Ca_Desi_Chrom_3_645024 | Ca_desi_chr03      | 645024                         | [A/C]       | NA                                         |
| Ca_Desi_Chrom_3_668396 | Ca_desi_chr03      | 668396                         | [A/G]       | NA                                         |
| Ca_Desi_Chrom_3_669328 | Ca_desi_chr03      | 669328                         | [A/T]       | NA                                         |
| Ca_Desi_Chrom_3_684390 | Ca_desi_chr03      | 684390                         | [A/G]       | NA                                         |
| Ca_Desi_Chrom_3_691462 | Ca_desi_chr03      | 691462                         | [A/G]       | NA                                         |
| Ca_Desi_Chrom_3_691479 | Ca_desi_chr03      | 691479                         | [T/A]       | NA                                         |
| Ca_Desi_Chrom_3_691509 | Ca_desi_chr03      | 691509                         | [A/C]       | NA                                         |
| Ca_Desi_Chrom_3_691519 | Ca_desi_chr03      | 691519                         | [T/G]       | NA                                         |
| Ca_Desi_Chrom_3_697924 | Ca_desi_chr03      | 697924                         | [T/G]       | NA                                         |
| Ca_Desi_Chrom_3_698163 | Ca_desi_chr03      | 698163                         | [T/A]       | NA                                         |
| Ca_Desi_Chrom_3_698170 | Ca_desi_chr03      | 698170                         | [T/A]       | NA                                         |
| Ca_Desi_Chrom_3_762890 | Ca_desi_chr03      | 762890                         | [A/C]       | NA                                         |
| Ca_Desi_Chrom_3_764477 | Ca_desi_chr03      | 764477                         | [A/C]       | NA                                         |
| Ca_Desi_Chrom_3_764593 | Ca_desi_chr03      | 764593                         | [A/C]       | NA                                         |
| Ca_Desi_Chrom_3_782913 | Ca_desi_chr03      | 782913                         | [T/G]       | NA                                         |
| Ca_Desi_Chrom_3_783054 | Ca_desi_chr03      | 783054                         | [T/G]       | NA                                         |
| Ca_Desi_Chrom_3_783093 | Ca_desi_chr03      | 783093                         | [A/C]       | NA                                         |
| Ca_Desi_Chrom_3_783107 | Ca_desi_chr03      | 783107                         | [A/G]       | NA                                         |
| Ca_Desi_Chrom_3_839877 | Ca_desi_chr03      | 839877                         | [T/G]       | NA                                         |
| Ca_Desi_Chrom_3_841817 | Ca_desi_chr03      | 841817                         | [C/A]       | NA                                         |
| Ca_Desi_Chrom_3_841818 | Ca_desi_chr03      | 841818                         | [A/G]       | NA                                         |
| Ca_Desi_Chrom_3_841819 | Ca_desi_chr03      | 841819                         | [T/A]       | NA                                         |
| Ca_Desi_Chrom_3_854698 | Ca_desi_chr03      | 854698                         | [C/T]       | NA                                         |
| Ca_Desi_Chrom_3_867821 | Ca_desi_chr03      | 867821                         | [A/G]       | NA                                         |
| Ca_Desi_Chrom_3_869249 | Ca_desi_chr03      | 869249                         | [C/T]       | NA                                         |
| Ca_Desi_Chrom_3_870904 | Ca_desi_chr03      | 870904                         | [T/C]       | NA                                         |
| Ca_Desi_Chrom_3_930269 | Ca_desi_chr03      | 930269                         | [T/G]       | NA                                         |
| Ca_Desi_Chrom_3_987408 | Ca_desi_chr03      | 987408                         | [A/G]       | NA                                         |
| Ca_Desi_Chrom_3_987412 | Ca_desi_chr03      | 987412                         | [T/G]       | NA                                         |
| Ca_Desi_Chrom_3_987450 | Ca_desi_chr03      | 987450                         | [A/G]       | NA                                         |

| <b>SNP IDs</b>         | <b>Chromosomes</b> | <b>Physical positions (bp)</b> | <b>SNPs</b> | <b>NCBI SNPdb accession IDs (NCBI_ss#)</b> |
|------------------------|--------------------|--------------------------------|-------------|--------------------------------------------|
| Ca_Desi_Chrr_3_987453  | Ca_desi_chrr03     | 987453                         | [T/G]       | NA                                         |
| Ca_Desi_Chrr_3_993124  | Ca_desi_chrr03     | 993124                         | [A/C]       | NA                                         |
| Ca_Desi_Chrr_3_993125  | Ca_desi_chrr03     | 993125                         | [C/A]       | NA                                         |
| Ca_Desi_Chrr_3_993126  | Ca_desi_chrr03     | 993126                         | [A/G]       | NA                                         |
| Ca_Desi_Chrr_3_993127  | Ca_desi_chrr03     | 993127                         | [G/C]       | NA                                         |
| Ca_Desi_Chrr_3_995109  | Ca_desi_chrr03     | 995109                         | [A/C]       | NA                                         |
| Ca_Desi_Chrr_3_995118  | Ca_desi_chrr03     | 995118                         | [T/C]       | NA                                         |
| Ca_Desi_Chrr_3_1000504 | Ca_desi_chrr03     | 1000504                        | [T/C]       | NA                                         |
| Ca_Desi_Chrr_3_1006248 | Ca_desi_chrr03     | 1006248                        | [T/C]       | NA                                         |
| Ca_Desi_Chrr_3_1006273 | Ca_desi_chrr03     | 1006273                        | [A/G]       | NA                                         |
| Ca_Desi_Chrr_3_1006284 | Ca_desi_chrr03     | 1006284                        | [A/T]       | NA                                         |
| Ca_Desi_Chrr_3_1011960 | Ca_desi_chrr03     | 1011960                        | [T/C]       | NA                                         |
| Ca_Desi_Chrr_3_1039492 | Ca_desi_chrr03     | 1039492                        | [G/T]       | NA                                         |
| Ca_Desi_Chrr_3_1040662 | Ca_desi_chrr03     | 1040662                        | [A/C]       | NA                                         |
| Ca_Desi_Chrr_3_1040685 | Ca_desi_chrr03     | 1040685                        | [G/T]       | NA                                         |
| Ca_Desi_Chrr_3_1040786 | Ca_desi_chrr03     | 1040786                        | [T/A]       | NA                                         |
| Ca_Desi_Chrr_3_1125469 | Ca_desi_chrr03     | 1125469                        | [A/G]       | NA                                         |
| Ca_Desi_Chrr_3_1125503 | Ca_desi_chrr03     | 1125503                        | [T/A]       | NA                                         |
| Ca_Desi_Chrr_3_1142171 | Ca_desi_chrr03     | 1142171                        | [T/C]       | NA                                         |
| Ca_Desi_Chrr_3_1142311 | Ca_desi_chrr03     | 1142311                        | [T/C]       | NA                                         |
| Ca_Desi_Chrr_3_1142320 | Ca_desi_chrr03     | 1142320                        | [T/G]       | NA                                         |
| Ca_Desi_Chrr_3_1147159 | Ca_desi_chrr03     | 1147159                        | [A/T]       | NA                                         |
| Ca_Desi_Chrr_3_1147168 | Ca_desi_chrr03     | 1147168                        | [A/G]       | NA                                         |
| Ca_Desi_Chrr_3_1147179 | Ca_desi_chrr03     | 1147179                        | [A/G]       | NA                                         |
| Ca_Desi_Chrr_3_1147185 | Ca_desi_chrr03     | 1147185                        | [T/C]       | NA                                         |
| Ca_Desi_Chrr_3_1147188 | Ca_desi_chrr03     | 1147188                        | [A/G]       | NA                                         |
| Ca_Desi_Chrr_3_1147191 | Ca_desi_chrr03     | 1147191                        | [A/G]       | NA                                         |
| Ca_Desi_Chrr_3_1147194 | Ca_desi_chrr03     | 1147194                        | [T/C]       | NA                                         |
| Ca_Desi_Chrr_3_1147210 | Ca_desi_chrr03     | 1147210                        | [T/C]       | NA                                         |
| Ca_Desi_Chrr_3_1147213 | Ca_desi_chrr03     | 1147213                        | [A/C]       | NA                                         |
| Ca_Desi_Chrr_3_1147216 | Ca_desi_chrr03     | 1147216                        | [T/C]       | NA                                         |
| Ca_Desi_Chrr_3_1147219 | Ca_desi_chrr03     | 1147219                        | [T/C]       | NA                                         |
| Ca_Desi_Chrr_3_1298323 | Ca_desi_chrr03     | 1298323                        | [A/C]       | NA                                         |
| Ca_Desi_Chrr_3_1298325 | Ca_desi_chrr03     | 1298325                        | [G/A]       | NA                                         |

| <b>SNP IDs</b>          | <b>Chromosomes</b> | <b>Physical positions (bp)</b> | <b>SNPs</b> | <b>NCBI SNPdb accession IDs (NCBI_ss#)</b> |
|-------------------------|--------------------|--------------------------------|-------------|--------------------------------------------|
| Ca_Desi_Chrom_3_1298346 | Ca_desi_chr03      | 1298346                        | [A/G]       | NA                                         |
| Ca_Desi_Chrom_3_1298497 | Ca_desi_chr03      | 1298497                        | [C/T]       | NA                                         |
| Ca_Desi_Chrom_3_1298524 | Ca_desi_chr03      | 1298524                        | [G/A]       | NA                                         |
| Ca_Desi_Chrom_3_1322765 | Ca_desi_chr03      | 1322765                        | [T/G]       | NA                                         |
| Ca_Desi_Chrom_3_1351568 | Ca_desi_chr03      | 1351568                        | [C/A]       | NA                                         |
| Ca_Desi_Chrom_3_1351569 | Ca_desi_chr03      | 1351569                        | [C/G]       | NA                                         |
| Ca_Desi_Chrom_3_1351570 | Ca_desi_chr03      | 1351570                        | [T/A]       | NA                                         |
| Ca_Desi_Chrom_3_1351571 | Ca_desi_chr03      | 1351571                        | [A/T]       | NA                                         |
| Ca_Desi_Chrom_3_1404591 | Ca_desi_chr03      | 1404591                        | [T/G]       | NA                                         |
| Ca_Desi_Chrom_3_1404643 | Ca_desi_chr03      | 1404643                        | [A/G]       | NA                                         |
| Ca_Desi_Chrom_3_1415294 | Ca_desi_chr03      | 1415294                        | [T/G]       | NA                                         |
| Ca_Desi_Chrom_3_1415304 | Ca_desi_chr03      | 1415304                        | [T/G]       | NA                                         |
| Ca_Desi_Chrom_3_1416895 | Ca_desi_chr03      | 1416895                        | [A/T]       | NA                                         |
| Ca_Desi_Chrom_3_1416904 | Ca_desi_chr03      | 1416904                        | [A/T]       | NA                                         |
| Ca_Desi_Chrom_3_1416907 | Ca_desi_chr03      | 1416907                        | [T/C]       | NA                                         |
| Ca_Desi_Chrom_3_1416913 | Ca_desi_chr03      | 1416913                        | [A/G]       | NA                                         |
| Ca_Desi_Chrom_3_1416922 | Ca_desi_chr03      | 1416922                        | [A/G]       | NA                                         |
| Ca_Desi_Chrom_3_1416925 | Ca_desi_chr03      | 1416925                        | [C/T]       | NA                                         |
| Ca_Desi_Chrom_3_1416929 | Ca_desi_chr03      | 1416929                        | [A/G]       | NA                                         |
| Ca_Desi_Chrom_3_1416934 | Ca_desi_chr03      | 1416934                        | [T/C]       | NA                                         |
| Ca_Desi_Chrom_3_1416939 | Ca_desi_chr03      | 1416939                        | [T/C]       | NA                                         |
| Ca_Desi_Chrom_3_1416940 | Ca_desi_chr03      | 1416940                        | [G/A]       | NA                                         |
| Ca_Desi_Chrom_3_1416942 | Ca_desi_chr03      | 1416942                        | [T/A]       | NA                                         |
| Ca_Desi_Chrom_3_1416943 | Ca_desi_chr03      | 1416943                        | [A/G]       | NA                                         |
| Ca_Desi_Chrom_3_1416947 | Ca_desi_chr03      | 1416947                        | [T/C]       | NA                                         |
| Ca_Desi_Chrom_3_1416949 | Ca_desi_chr03      | 1416949                        | [A/G]       | NA                                         |
| Ca_Desi_Chrom_3_1416951 | Ca_desi_chr03      | 1416951                        | [T/C]       | NA                                         |
| Ca_Desi_Chrom_3_1416960 | Ca_desi_chr03      | 1416960                        | [T/C]       | NA                                         |
| Ca_Desi_Chrom_3_1417037 | Ca_desi_chr03      | 1417037                        | [A/T]       | NA                                         |
| Ca_Desi_Chrom_3_1427049 | Ca_desi_chr03      | 1427049                        | [T/G]       | NA                                         |
| Ca_Desi_Chrom_3_1463002 | Ca_desi_chr03      | 1463002                        | [A/G]       | NA                                         |
| Ca_Desi_Chrom_3_1471389 | Ca_desi_chr03      | 1471389                        | [T/G]       | NA                                         |
| Ca_Desi_Chrom_3_1471416 | Ca_desi_chr03      | 1471416                        | [A/G]       | NA                                         |
| Ca_Desi_Chrom_3_1471436 | Ca_desi_chr03      | 1471436                        | [A/G]       | NA                                         |

| <b>SNP IDs</b>          | <b>Chromosomes</b> | <b>Physical positions (bp)</b> | <b>SNPs</b> | <b>NCBI SNPdb accession IDs (NCBI_ss#)</b> |
|-------------------------|--------------------|--------------------------------|-------------|--------------------------------------------|
| Ca_Desi_Chrom_3_1532210 | Ca_desi_chr03      | 1532210                        | [T/G]       | NA                                         |
| Ca_Desi_Chrom_3_1532213 | Ca_desi_chr03      | 1532213                        | [T/G]       | NA                                         |
| Ca_Desi_Chrom_3_1532309 | Ca_desi_chr03      | 1532309                        | [A/C]       | NA                                         |
| Ca_Desi_Chrom_3_1533752 | Ca_desi_chr03      | 1533752                        | [T/C]       | NA                                         |
| Ca_Desi_Chrom_3_1533802 | Ca_desi_chr03      | 1533802                        | [T/C]       | NA                                         |
| Ca_Desi_Chrom_3_1533815 | Ca_desi_chr03      | 1533815                        | [A/C]       | NA                                         |
| Ca_Desi_Chrom_3_1533817 | Ca_desi_chr03      | 1533817                        | [T/C]       | NA                                         |
| Ca_Desi_Chrom_3_1533828 | Ca_desi_chr03      | 1533828                        | [A/G]       | NA                                         |
| Ca_Desi_Chrom_3_1533889 | Ca_desi_chr03      | 1533889                        | [T/A]       | NA                                         |
| Ca_Desi_Chrom_3_1533903 | Ca_desi_chr03      | 1533903                        | [T/G]       | NA                                         |
| Ca_Desi_Chrom_3_1536599 | Ca_desi_chr03      | 1536599                        | [T/C]       | NA                                         |
| Ca_Desi_Chrom_3_1536637 | Ca_desi_chr03      | 1536637                        | [A/G]       | NA                                         |
| Ca_Desi_Chrom_3_1536728 | Ca_desi_chr03      | 1536728                        | [T/C]       | NA                                         |
| Ca_Desi_Chrom_3_1536741 | Ca_desi_chr03      | 1536741                        | [T/G]       | NA                                         |
| Ca_Desi_Chrom_3_1554451 | Ca_desi_chr03      | 1554451                        | [T/C]       | NA                                         |
| Ca_Desi_Chrom_3_1619028 | Ca_desi_chr03      | 1619028                        | [T/A]       | NA                                         |
| Ca_Desi_Chrom_3_1633019 | Ca_desi_chr03      | 1633019                        | [T/C]       | NA                                         |
| Ca_Desi_Chrom_3_1633071 | Ca_desi_chr03      | 1633071                        | [T/C]       | NA                                         |
| Ca_Desi_Chrom_3_1642870 | Ca_desi_chr03      | 1642870                        | [A/C]       | NA                                         |
| Ca_Desi_Chrom_3_1666335 | Ca_desi_chr03      | 1666335                        | [T/C]       | NA                                         |
| Ca_Desi_Chrom_3_1666355 | Ca_desi_chr03      | 1666355                        | [T/C]       | NA                                         |
| Ca_Desi_Chrom_3_1667608 | Ca_desi_chr03      | 1667608                        | [A/C]       | NA                                         |
| Ca_Desi_Chrom_3_1686916 | Ca_desi_chr03      | 1686916                        | [T/G]       | NA                                         |
| Ca_Desi_Chrom_3_1687065 | Ca_desi_chr03      | 1687065                        | [T/G]       | NA                                         |
| Ca_Desi_Chrom_3_1690793 | Ca_desi_chr03      | 1690793                        | [A/C]       | NA                                         |
| Ca_Desi_Chrom_3_1690825 | Ca_desi_chr03      | 1690825                        | [T/C]       | NA                                         |
| Ca_Desi_Chrom_3_1701505 | Ca_desi_chr03      | 1701505                        | [T/G]       | NA                                         |
| Ca_Desi_Chrom_3_1701592 | Ca_desi_chr03      | 1701592                        | [A/G]       | NA                                         |
| Ca_Desi_Chrom_3_1705565 | Ca_desi_chr03      | 1705565                        | [T/G]       | NA                                         |
| Ca_Desi_Chrom_3_1922630 | Ca_desi_chr03      | 1922630                        | [A/C]       | NA                                         |
| Ca_Desi_Chrom_3_1923782 | Ca_desi_chr03      | 1923782                        | [A/G]       | NA                                         |
| Ca_Desi_Chrom_3_1923788 | Ca_desi_chr03      | 1923788                        | [T/C]       | NA                                         |
| Ca_Desi_Chrom_3_1923792 | Ca_desi_chr03      | 1923792                        | [A/G]       | NA                                         |
| Ca_Desi_Chrom_3_1923795 | Ca_desi_chr03      | 1923795                        | [T/C]       | NA                                         |

| <b>SNP IDs</b>          | <b>Chromosomes</b> | <b>Physical positions (bp)</b> | <b>SNPs</b> | <b>NCBI SNPdb accession IDs (NCBI_ss#)</b> |
|-------------------------|--------------------|--------------------------------|-------------|--------------------------------------------|
| Ca_Desi_Chrom_3_1923802 | Ca_desi_chr03      | 1923802                        | [A/C]       | NA                                         |
| Ca_Desi_Chrom_3_1923804 | Ca_desi_chr03      | 1923804                        | [A/G]       | NA                                         |
| Ca_Desi_Chrom_3_1923832 | Ca_desi_chr03      | 1923832                        | [T/C]       | NA                                         |
| Ca_Desi_Chrom_3_1923842 | Ca_desi_chr03      | 1923842                        | [T/C]       | NA                                         |
| Ca_Desi_Chrom_3_2672487 | Ca_desi_chr03      | 2672487                        | [A/C]       | NA                                         |
| Ca_Desi_Chrom_3_2672507 | Ca_desi_chr03      | 2672507                        | [T/C]       | NA                                         |
| Ca_Desi_Chrom_3_2672511 | Ca_desi_chr03      | 2672511                        | [T/C]       | NA                                         |
| Ca_Desi_Chrom_3_2674392 | Ca_desi_chr03      | 2674392                        | [A/G]       | NA                                         |
| Ca_Desi_Chrom_3_2674393 | Ca_desi_chr03      | 2674393                        | [G/A]       | NA                                         |
| Ca_Desi_Chrom_3_2679441 | Ca_desi_chr03      | 2679441                        | [A/C]       | NA                                         |
| Ca_Desi_Chrom_3_2679446 | Ca_desi_chr03      | 2679446                        | [T/C]       | NA                                         |
| Ca_Desi_Chrom_3_2679455 | Ca_desi_chr03      | 2679455                        | [A/G]       | NA                                         |
| Ca_Desi_Chrom_3_2679464 | Ca_desi_chr03      | 2679464                        | [T/C]       | NA                                         |
| Ca_Desi_Chrom_3_2679467 | Ca_desi_chr03      | 2679467                        | [T/C]       | NA                                         |
| Ca_Desi_Chrom_3_2679475 | Ca_desi_chr03      | 2679475                        | [T/G]       | NA                                         |
| Ca_Desi_Chrom_3_2693543 | Ca_desi_chr03      | 2693543                        | [T/G]       | NA                                         |
| Ca_Desi_Chrom_3_2698420 | Ca_desi_chr03      | 2698420                        | [T/C]       | NA                                         |
| Ca_Desi_Chrom_3_2698433 | Ca_desi_chr03      | 2698433                        | [A/G]       | NA                                         |
| Ca_Desi_Chrom_3_2700887 | Ca_desi_chr03      | 2700887                        | [T/C]       | NA                                         |
| Ca_Desi_Chrom_3_2716534 | Ca_desi_chr03      | 2716534                        | [T/G]       | NA                                         |
| Ca_Desi_Chrom_3_2716539 | Ca_desi_chr03      | 2716539                        | [T/G]       | NA                                         |
| Ca_Desi_Chrom_3_2725582 | Ca_desi_chr03      | 2725582                        | [T/G]       | NA                                         |
| Ca_Desi_Chrom_3_2725700 | Ca_desi_chr03      | 2725700                        | [A/C]       | NA                                         |
| Ca_Desi_Chrom_3_2725715 | Ca_desi_chr03      | 2725715                        | [T/G]       | NA                                         |
| Ca_Desi_Chrom_3_2729419 | Ca_desi_chr03      | 2729419                        | [T/C]       | NA                                         |
| Ca_Desi_Chrom_3_2729454 | Ca_desi_chr03      | 2729454                        | [A/G]       | NA                                         |
| Ca_Desi_Chrom_3_2729462 | Ca_desi_chr03      | 2729462                        | [T/A]       | NA                                         |
| Ca_Desi_Chrom_3_2729464 | Ca_desi_chr03      | 2729464                        | [T/A]       | NA                                         |
| Ca_Desi_Chrom_3_2758003 | Ca_desi_chr03      | 2758003                        | [C/A]       | NA                                         |
| Ca_Desi_Chrom_3_2758011 | Ca_desi_chr03      | 2758011                        | [T/G]       | NA                                         |
| Ca_Desi_Chrom_3_2787341 | Ca_desi_chr03      | 2787341                        | [A/G]       | NA                                         |
| Ca_Desi_Chrom_3_2787348 | Ca_desi_chr03      | 2787348                        | [T/C]       | NA                                         |
| Ca_Desi_Chrom_3_2787364 | Ca_desi_chr03      | 2787364                        | [A/G]       | NA                                         |
| Ca_Desi_Chrom_3_2787382 | Ca_desi_chr03      | 2787382                        | [A/G]       | NA                                         |



| <b>SNP IDs</b>          | <b>Chromosomes</b> | <b>Physical positions (bp)</b> | <b>SNPs</b> | <b>NCBI SNPdb accession IDs (NCBI_ss#)</b> |
|-------------------------|--------------------|--------------------------------|-------------|--------------------------------------------|
| Ca_Desi_Chrom_3_2787384 | Ca_desi_chr03      | 2787384                        | [A/G]       | NA                                         |
| Ca_Desi_Chrom_3_2787386 | Ca_desi_chr03      | 2787386                        | [A/G]       | NA                                         |
| Ca_Desi_Chrom_3_2787402 | Ca_desi_chr03      | 2787402                        | [T/C]       | NA                                         |
| Ca_Desi_Chrom_3_2787477 | Ca_desi_chr03      | 2787477                        | [T/G]       | NA                                         |
| Ca_Desi_Chrom_3_2791740 | Ca_desi_chr03      | 2791740                        | [T/C]       | NA                                         |
| Ca_Desi_Chrom_3_2796304 | Ca_desi_chr03      | 2796304                        | [A/G]       | NA                                         |
| Ca_Desi_Chrom_3_2803734 | Ca_desi_chr03      | 2803734                        | [T/C]       | NA                                         |
| Ca_Desi_Chrom_3_2803750 | Ca_desi_chr03      | 2803750                        | [A/G]       | NA                                         |
| Ca_Desi_Chrom_3_2803764 | Ca_desi_chr03      | 2803764                        | [A/C]       | NA                                         |
| Ca_Desi_Chrom_3_2803768 | Ca_desi_chr03      | 2803768                        | [T/G]       | NA                                         |
| Ca_Desi_Chrom_3_2812004 | Ca_desi_chr03      | 2812004                        | [A/G]       | NA                                         |
| Ca_Desi_Chrom_3_2842049 | Ca_desi_chr03      | 2842049                        | [T/A]       | NA                                         |
| Ca_Desi_Chrom_3_2915510 | Ca_desi_chr03      | 2915510                        | [C/T]       | NA                                         |
| Ca_Desi_Chrom_3_2920357 | Ca_desi_chr03      | 2920357                        | [A/T]       | NA                                         |
| Ca_Desi_Chrom_3_2920360 | Ca_desi_chr03      | 2920360                        | [C/A]       | NA                                         |
| Ca_Desi_Chrom_3_2920363 | Ca_desi_chr03      | 2920363                        | [A/C]       | NA                                         |
| Ca_Desi_Chrom_3_2920376 | Ca_desi_chr03      | 2920376                        | [G/A]       | NA                                         |
| Ca_Desi_Chrom_3_2940815 | Ca_desi_chr03      | 2940815                        | [A/C]       | NA                                         |
| Ca_Desi_Chrom_3_2940824 | Ca_desi_chr03      | 2940824                        | [A/G]       | NA                                         |
| Ca_Desi_Chrom_3_2952449 | Ca_desi_chr03      | 2952449                        | [T/A]       | NA                                         |
| Ca_Desi_Chrom_3_2952484 | Ca_desi_chr03      | 2952484                        | [G/A]       | NA                                         |
| Ca_Desi_Chrom_3_2952498 | Ca_desi_chr03      | 2952498                        | [A/T]       | NA                                         |
| Ca_Desi_Chrom_3_2953042 | Ca_desi_chr03      | 2953042                        | [T/C]       | NA                                         |
| Ca_Desi_Chrom_3_2953045 | Ca_desi_chr03      | 2953045                        | [A/C]       | NA                                         |
| Ca_Desi_Chrom_3_2972597 | Ca_desi_chr03      | 2972597                        | [A/G]       | NA                                         |
| Ca_Desi_Chrom_3_3002455 | Ca_desi_chr03      | 3002455                        | [A/C]       | NA                                         |
| Ca_Desi_Chrom_3_3112966 | Ca_desi_chr03      | 3112966                        | [A/G]       | NA                                         |
| Ca_Desi_Chrom_3_3130747 | Ca_desi_chr03      | 3130747                        | [A/T]       | NA                                         |
| Ca_Desi_Chrom_3_3130769 | Ca_desi_chr03      | 3130769                        | [A/C]       | NA                                         |
| Ca_Desi_Chrom_3_3130786 | Ca_desi_chr03      | 3130786                        | [T/G]       | NA                                         |
| Ca_Desi_Chrom_3_3187922 | Ca_desi_chr03      | 3187922                        | [T/C]       | NA                                         |
| Ca_Desi_Chrom_3_3209764 | Ca_desi_chr03      | 3209764                        | [T/C]       | NA                                         |
| Ca_Desi_Chrom_3_3209766 | Ca_desi_chr03      | 3209766                        | [A/G]       | NA                                         |
| Ca_Desi_Chrom_3_3212024 | Ca_desi_chr03      | 3212024                        | [T/G]       | NA                                         |

| <b>SNP IDs</b>          | <b>Chromosomes</b> | <b>Physical positions (bp)</b> | <b>SNPs</b> | <b>NCBI SNPdb accession IDs (NCBI_ss#)</b> |
|-------------------------|--------------------|--------------------------------|-------------|--------------------------------------------|
| Ca_Desi_Chrom_3_3212040 | Ca_desi_chr03      | 3212040                        | [A/G]       | NA                                         |
| Ca_Desi_Chrom_3_3224426 | Ca_desi_chr03      | 3224426                        | [A/G]       | NA                                         |
| Ca_Desi_Chrom_3_3224434 | Ca_desi_chr03      | 3224434                        | [A/T]       | NA                                         |
| Ca_Desi_Chrom_3_3224437 | Ca_desi_chr03      | 3224437                        | [A/C]       | NA                                         |
| Ca_Desi_Chrom_3_3224442 | Ca_desi_chr03      | 3224442                        | [T/G]       | NA                                         |
| Ca_Desi_Chrom_3_3224451 | Ca_desi_chr03      | 3224451                        | [T/C]       | NA                                         |
| Ca_Desi_Chrom_3_3224452 | Ca_desi_chr03      | 3224452                        | [C/T]       | NA                                         |
| Ca_Desi_Chrom_3_3224453 | Ca_desi_chr03      | 3224453                        | [T/C]       | NA                                         |
| Ca_Desi_Chrom_3_3224457 | Ca_desi_chr03      | 3224457                        | [C/T]       | NA                                         |
| Ca_Desi_Chrom_3_3224459 | Ca_desi_chr03      | 3224459                        | [T/C]       | NA                                         |
| Ca_Desi_Chrom_3_3224466 | Ca_desi_chr03      | 3224466                        | [T/G]       | NA                                         |
| Ca_Desi_Chrom_3_3224480 | Ca_desi_chr03      | 3224480                        | [T/C]       | NA                                         |
| Ca_Desi_Chrom_3_3255048 | Ca_desi_chr03      | 3255048                        | [T/G]       | NA                                         |
| Ca_Desi_Chrom_3_3259228 | Ca_desi_chr03      | 3259228                        | [A/G]       | NA                                         |
| Ca_Desi_Chrom_3_3259256 | Ca_desi_chr03      | 3259256                        | [C/T]       | NA                                         |
| Ca_Desi_Chrom_3_3259263 | Ca_desi_chr03      | 3259263                        | [A/G]       | NA                                         |
| Ca_Desi_Chrom_3_3259274 | Ca_desi_chr03      | 3259274                        | [A/G]       | NA                                         |
| Ca_Desi_Chrom_3_3259276 | Ca_desi_chr03      | 3259276                        | [T/C]       | NA                                         |
| Ca_Desi_Chrom_3_3267977 | Ca_desi_chr03      | 3267977                        | [T/G]       | NA                                         |
| Ca_Desi_Chrom_3_3270139 | Ca_desi_chr03      | 3270139                        | [T/C]       | NA                                         |
| Ca_Desi_Chrom_3_3296028 | Ca_desi_chr03      | 3296028                        | [A/G]       | NA                                         |
| Ca_Desi_Chrom_3_3296055 | Ca_desi_chr03      | 3296055                        | [T/G]       | NA                                         |
| Ca_Desi_Chrom_3_3296064 | Ca_desi_chr03      | 3296064                        | [A/G]       | NA                                         |
| Ca_Desi_Chrom_3_3318519 | Ca_desi_chr03      | 3318519                        | [T/C]       | NA                                         |
| Ca_Desi_Chrom_3_3339758 | Ca_desi_chr03      | 3339758                        | [T/G]       | NA                                         |
| Ca_Desi_Chrom_3_3404161 | Ca_desi_chr03      | 3404161                        | [T/G]       | NA                                         |
| Ca_Desi_Chrom_3_3427232 | Ca_desi_chr03      | 3427232                        | [T/C]       | NA                                         |
| Ca_Desi_Chrom_3_3427257 | Ca_desi_chr03      | 3427257                        | [T/C]       | NA                                         |
| Ca_Desi_Chrom_3_3427275 | Ca_desi_chr03      | 3427275                        | [T/C]       | NA                                         |
| Ca_Desi_Chrom_3_3478951 | Ca_desi_chr03      | 3478951                        | [T/C]       | NA                                         |
| Ca_Desi_Chrom_3_3493826 | Ca_desi_chr03      | 3493826                        | [C/T]       | NA                                         |
| Ca_Desi_Chrom_3_3493840 | Ca_desi_chr03      | 3493840                        | [G/C]       | NA                                         |
| Ca_Desi_Chrom_3_3495485 | Ca_desi_chr03      | 3495485                        | [A/C]       | NA                                         |
| Ca_Desi_Chrom_3_3495509 | Ca_desi_chr03      | 3495509                        | [T/C]       | NA                                         |

| <b>SNP IDs</b>          | <b>Chromosomes</b> | <b>Physical positions (bp)</b> | <b>SNPs</b> | <b>NCBI SNPdb accession IDs (NCBI_ss#)</b> |
|-------------------------|--------------------|--------------------------------|-------------|--------------------------------------------|
| Ca_Desi_Chrom_3_3495521 | Ca_desi_chr03      | 3495521                        | [A/C]       | NA                                         |
| Ca_Desi_Chrom_3_3495585 | Ca_desi_chr03      | 3495585                        | [A/C]       | NA                                         |
| Ca_Desi_Chrom_3_3495610 | Ca_desi_chr03      | 3495610                        | [A/C]       | NA                                         |
| Ca_Desi_Chrom_3_3500165 | Ca_desi_chr03      | 3500165                        | [T/A]       | NA                                         |
| Ca_Desi_Chrom_3_3504436 | Ca_desi_chr03      | 3504436                        | [A/G]       | NA                                         |
| Ca_Desi_Chrom_3_3509590 | Ca_desi_chr03      | 3509590                        | [C/G]       | NA                                         |
| Ca_Desi_Chrom_3_3509602 | Ca_desi_chr03      | 3509602                        | [G/T]       | NA                                         |
| Ca_Desi_Chrom_3_3509612 | Ca_desi_chr03      | 3509612                        | [T/A]       | NA                                         |
| Ca_Desi_Chrom_3_3509623 | Ca_desi_chr03      | 3509623                        | [T/C]       | NA                                         |
| Ca_Desi_Chrom_3_3512869 | Ca_desi_chr03      | 3512869                        | [A/G]       | NA                                         |
| Ca_Desi_Chrom_3_3514344 | Ca_desi_chr03      | 3514344                        | [A/C]       | NA                                         |
| Ca_Desi_Chrom_3_3518795 | Ca_desi_chr03      | 3518795                        | [G/C]       | NA                                         |
| Ca_Desi_Chrom_3_3519589 | Ca_desi_chr03      | 3519589                        | [T/C]       | NA                                         |
| Ca_Desi_Chrom_3_3522928 | Ca_desi_chr03      | 3522928                        | [C/A]       | NA                                         |
| Ca_Desi_Chrom_3_3523403 | Ca_desi_chr03      | 3523403                        | [T/C]       | NA                                         |
| Ca_Desi_Chrom_3_3524914 | Ca_desi_chr03      | 3524914                        | [A/G]       | NA                                         |
| Ca_Desi_Chrom_3_3538547 | Ca_desi_chr03      | 3538547                        | [C/A]       | NA                                         |
| Ca_Desi_Chrom_3_3540716 | Ca_desi_chr03      | 3540716                        | [T/C]       | NA                                         |
| Ca_Desi_Chrom_3_3540720 | Ca_desi_chr03      | 3540720                        | [A/G]       | NA                                         |
| Ca_Desi_Chrom_3_3540727 | Ca_desi_chr03      | 3540727                        | [A/G]       | NA                                         |
| Ca_Desi_Chrom_3_3540732 | Ca_desi_chr03      | 3540732                        | [T/G]       | NA                                         |
| Ca_Desi_Chrom_3_3540734 | Ca_desi_chr03      | 3540734                        | [T/G]       | NA                                         |
| Ca_Desi_Chrom_3_3540737 | Ca_desi_chr03      | 3540737                        | [T/C]       | NA                                         |
| Ca_Desi_Chrom_3_3540746 | Ca_desi_chr03      | 3540746                        | [A/G]       | NA                                         |
| Ca_Desi_Chrom_3_3552607 | Ca_desi_chr03      | 3552607                        | [A/C]       | NA                                         |
| Ca_Desi_Chrom_3_3567286 | Ca_desi_chr03      | 3567286                        | [T/G]       | NA                                         |
| Ca_Desi_Chrom_3_3567287 | Ca_desi_chr03      | 3567287                        | [T/G]       | NA                                         |
| Ca_Desi_Chrom_3_3567288 | Ca_desi_chr03      | 3567288                        | [T/A]       | NA                                         |
| Ca_Desi_Chrom_3_3567289 | Ca_desi_chr03      | 3567289                        | [T/G]       | NA                                         |
| Ca_Desi_Chrom_3_3567295 | Ca_desi_chr03      | 3567295                        | [T/C]       | NA                                         |
| Ca_Desi_Chrom_3_3567444 | Ca_desi_chr03      | 3567444                        | [C/T]       | NA                                         |
| Ca_Desi_Chrom_3_3576516 | Ca_desi_chr03      | 3576516                        | [C/T]       | NA                                         |
| Ca_Desi_Chrom_3_3576517 | Ca_desi_chr03      | 3576517                        | [T/C]       | NA                                         |
| Ca_Desi_Chrom_3_3576686 | Ca_desi_chr03      | 3576686                        | [A/G]       | NA                                         |

| <b>SNP IDs</b>          | <b>Chromosomes</b> | <b>Physical positions (bp)</b> | <b>SNPs</b> | <b>NCBI SNPdb accession IDs (NCBI_ss#)</b> |
|-------------------------|--------------------|--------------------------------|-------------|--------------------------------------------|
| Ca_Desi_Chrom_3_3579279 | Ca_desi_chr03      | 3579279                        | [A/T]       | NA                                         |
| Ca_Desi_Chrom_3_3580883 | Ca_desi_chr03      | 3580883                        | [C/T]       | NA                                         |
| Ca_Desi_Chrom_3_3581298 | Ca_desi_chr03      | 3581298                        | [G/A]       | NA                                         |
| Ca_Desi_Chrom_3_3581299 | Ca_desi_chr03      | 3581299                        | [A/C]       | NA                                         |
| Ca_Desi_Chrom_3_3582913 | Ca_desi_chr03      | 3582913                        | [T/C]       | NA                                         |
| Ca_Desi_Chrom_3_3582918 | Ca_desi_chr03      | 3582918                        | [T/G]       | NA                                         |
| Ca_Desi_Chrom_3_3582950 | Ca_desi_chr03      | 3582950                        | [T/G]       | NA                                         |
| Ca_Desi_Chrom_3_3590707 | Ca_desi_chr03      | 3590707                        | [C/T]       | NA                                         |
| Ca_Desi_Chrom_3_3593776 | Ca_desi_chr03      | 3593776                        | [A/G]       | NA                                         |
| Ca_Desi_Chrom_3_3609578 | Ca_desi_chr03      | 3609578                        | [T/C]       | NA                                         |
| Ca_Desi_Chrom_3_3612217 | Ca_desi_chr03      | 3612217                        | [T/C]       | NA                                         |
| Ca_Desi_Chrom_3_3631276 | Ca_desi_chr03      | 3631276                        | [C/T]       | NA                                         |
| Ca_Desi_Chrom_3_3631358 | Ca_desi_chr03      | 3631358                        | [A/C]       | NA                                         |
| Ca_Desi_Chrom_3_3631402 | Ca_desi_chr03      | 3631402                        | [A/G]       | NA                                         |
| Ca_Desi_Chrom_3_3632461 | Ca_desi_chr03      | 3632461                        | [T/A]       | NA                                         |
| Ca_Desi_Chrom_3_3632483 | Ca_desi_chr03      | 3632483                        | [T/C]       | NA                                         |
| Ca_Desi_Chrom_3_3633582 | Ca_desi_chr03      | 3633582                        | [A/G]       | NA                                         |
| Ca_Desi_Chrom_3_3633583 | Ca_desi_chr03      | 3633583                        | [T/G]       | NA                                         |
| Ca_Desi_Chrom_3_3635915 | Ca_desi_chr03      | 3635915                        | [A/G]       | NA                                         |
| Ca_Desi_Chrom_3_3635965 | Ca_desi_chr03      | 3635965                        | [T/C]       | NA                                         |
| Ca_Desi_Chrom_3_3635966 | Ca_desi_chr03      | 3635966                        | [A/C]       | NA                                         |
| Ca_Desi_Chrom_3_3635967 | Ca_desi_chr03      | 3635967                        | [G/A]       | NA                                         |
| Ca_Desi_Chrom_3_3636468 | Ca_desi_chr03      | 3636468                        | [C/A]       | NA                                         |
| Ca_Desi_Chrom_3_3680723 | Ca_desi_chr03      | 3680723                        | [T/G]       | NA                                         |
| Ca_Desi_Chrom_3_3680780 | Ca_desi_chr03      | 3680780                        | [A/C]       | NA                                         |
| Ca_Desi_Chrom_3_3680792 | Ca_desi_chr03      | 3680792                        | [A/C]       | NA                                         |
| Ca_Desi_Chrom_3_3773958 | Ca_desi_chr03      | 3773958                        | [A/C]       | NA                                         |
| Ca_Desi_Chrom_3_3773990 | Ca_desi_chr03      | 3773990                        | [A/C]       | NA                                         |
| Ca_Desi_Chrom_3_3790820 | Ca_desi_chr03      | 3790820                        | [A/G]       | NA                                         |
| Ca_Desi_Chrom_3_3794394 | Ca_desi_chr03      | 3794394                        | [T/C]       | NA                                         |
| Ca_Desi_Chrom_3_3794401 | Ca_desi_chr03      | 3794401                        | [G/C]       | NA                                         |
| Ca_Desi_Chrom_3_3794410 | Ca_desi_chr03      | 3794410                        | [T/C]       | NA                                         |
| Ca_Desi_Chrom_3_3794414 | Ca_desi_chr03      | 3794414                        | [T/C]       | NA                                         |
| Ca_Desi_Chrom_3_3794446 | Ca_desi_chr03      | 3794446                        | [T/C]       | NA                                         |

| <b>SNP IDs</b>          | <b>Chromosomes</b> | <b>Physical positions (bp)</b> | <b>SNPs</b> | <b>NCBI SNPdb accession IDs (NCBI_ss#)</b> |
|-------------------------|--------------------|--------------------------------|-------------|--------------------------------------------|
| Ca_Desi_Chrom_3_3818254 | Ca_desi_chr03      | 3818254                        | [A/C]       | NA                                         |
| Ca_Desi_Chrom_3_3818304 | Ca_desi_chr03      | 3818304                        | [T/A]       | NA                                         |
| Ca_Desi_Chrom_3_3818414 | Ca_desi_chr03      | 3818414                        | [T/C]       | NA                                         |
| Ca_Desi_Chrom_3_3818437 | Ca_desi_chr03      | 3818437                        | [A/G]       | NA                                         |
| Ca_Desi_Chrom_3_3818447 | Ca_desi_chr03      | 3818447                        | [T/G]       | NA                                         |
| Ca_Desi_Chrom_3_3860402 | Ca_desi_chr03      | 3860402                        | [T/C]       | NA                                         |
| Ca_Desi_Chrom_3_3860697 | Ca_desi_chr03      | 3860697                        | [A/C]       | NA                                         |
| Ca_Desi_Chrom_3_3860703 | Ca_desi_chr03      | 3860703                        | [A/C]       | NA                                         |
| Ca_Desi_Chrom_3_3884552 | Ca_desi_chr03      | 3884552                        | [T/C]       | NA                                         |
| Ca_Desi_Chrom_3_3884585 | Ca_desi_chr03      | 3884585                        | [T/G]       | NA                                         |
| Ca_Desi_Chrom_3_3891391 | Ca_desi_chr03      | 3891391                        | [T/C]       | NA                                         |
| Ca_Desi_Chrom_3_3891433 | Ca_desi_chr03      | 3891433                        | [A/G]       | NA                                         |
| Ca_Desi_Chrom_3_3891482 | Ca_desi_chr03      | 3891482                        | [T/G]       | NA                                         |
| Ca_Desi_Chrom_3_3946457 | Ca_desi_chr03      | 3946457                        | [G/T]       | NA                                         |
| Ca_Desi_Chrom_3_3946535 | Ca_desi_chr03      | 3946535                        | [T/C]       | NA                                         |
| Ca_Desi_Chrom_3_3967388 | Ca_desi_chr03      | 3967388                        | [A/G]       | NA                                         |
| Ca_Desi_Chrom_3_3973381 | Ca_desi_chr03      | 3973381                        | [G/A]       | NA                                         |
| Ca_Desi_Chrom_3_3978527 | Ca_desi_chr03      | 3978527                        | [G/C]       | NA                                         |
| Ca_Desi_Chrom_3_4003568 | Ca_desi_chr03      | 4003568                        | [C/A]       | NA                                         |
| Ca_Desi_Chrom_3_4004966 | Ca_desi_chr03      | 4004966                        | [G/C]       | NA                                         |
| Ca_Desi_Chrom_3_4004974 | Ca_desi_chr03      | 4004974                        | [T/A]       | NA                                         |
| Ca_Desi_Chrom_3_4004986 | Ca_desi_chr03      | 4004986                        | [G/A]       | NA                                         |
| Ca_Desi_Chrom_3_4007763 | Ca_desi_chr03      | 4007763                        | [T/C]       | NA                                         |
| Ca_Desi_Chrom_3_4016065 | Ca_desi_chr03      | 4016065                        | [A/C]       | NA                                         |
| Ca_Desi_Chrom_3_4016154 | Ca_desi_chr03      | 4016154                        | [T/C]       | NA                                         |
| Ca_Desi_Chrom_3_4016157 | Ca_desi_chr03      | 4016157                        | [A/C]       | NA                                         |
| Ca_Desi_Chrom_3_4016158 | Ca_desi_chr03      | 4016158                        | [C/G]       | NA                                         |
| Ca_Desi_Chrom_3_4016163 | Ca_desi_chr03      | 4016163                        | [A/C]       | NA                                         |
| Ca_Desi_Chrom_3_4016170 | Ca_desi_chr03      | 4016170                        | [T/C]       | NA                                         |
| Ca_Desi_Chrom_3_4016171 | Ca_desi_chr03      | 4016171                        | [C/T]       | NA                                         |
| Ca_Desi_Chrom_3_4016176 | Ca_desi_chr03      | 4016176                        | [A/C]       | NA                                         |
| Ca_Desi_Chrom_3_4016179 | Ca_desi_chr03      | 4016179                        | [T/C]       | NA                                         |
| Ca_Desi_Chrom_3_4016181 | Ca_desi_chr03      | 4016181                        | [A/C]       | NA                                         |
| Ca_Desi_Chrom_3_4016186 | Ca_desi_chr03      | 4016186                        | [C/T]       | NA                                         |

| <b>SNP IDs</b>          | <b>Chromosomes</b> | <b>Physical positions (bp)</b> | <b>SNPs</b> | <b>NCBI SNPdb accession IDs (NCBI_ss#)</b> |
|-------------------------|--------------------|--------------------------------|-------------|--------------------------------------------|
| Ca_Desi_Chrom_3_4019445 | Ca_desi_chr03      | 4019445                        | [G/T]       | NA                                         |
| Ca_Desi_Chrom_3_4019505 | Ca_desi_chr03      | 4019505                        | [C/T]       | NA                                         |
| Ca_Desi_Chrom_3_4029005 | Ca_desi_chr03      | 4029005                        | [T/G]       | NA                                         |
| Ca_Desi_Chrom_3_4029036 | Ca_desi_chr03      | 4029036                        | [A/C]       | NA                                         |
| Ca_Desi_Chrom_3_4034617 | Ca_desi_chr03      | 4034617                        | [T/G]       | NA                                         |
| Ca_Desi_Chrom_3_4034689 | Ca_desi_chr03      | 4034689                        | [C/T]       | NA                                         |
| Ca_Desi_Chrom_3_4038954 | Ca_desi_chr03      | 4038954                        | [C/G]       | NA                                         |
| Ca_Desi_Chrom_3_4039042 | Ca_desi_chr03      | 4039042                        | [G/A]       | NA                                         |
| Ca_Desi_Chrom_3_4040430 | Ca_desi_chr03      | 4040430                        | [A/G]       | NA                                         |
| Ca_Desi_Chrom_3_4053024 | Ca_desi_chr03      | 4053024                        | [A/G]       | NA                                         |
| Ca_Desi_Chrom_3_4053071 | Ca_desi_chr03      | 4053071                        | [A/C]       | NA                                         |
| Ca_Desi_Chrom_3_4053086 | Ca_desi_chr03      | 4053086                        | [G/T]       | NA                                         |
| Ca_Desi_Chrom_3_4086443 | Ca_desi_chr03      | 4086443                        | [C/T]       | NA                                         |
| Ca_Desi_Chrom_3_4086479 | Ca_desi_chr03      | 4086479                        | [T/C]       | NA                                         |
| Ca_Desi_Chrom_3_4100562 | Ca_desi_chr03      | 4100562                        | [A/G]       | NA                                         |
| Ca_Desi_Chrom_3_4100572 | Ca_desi_chr03      | 4100572                        | [T/C]       | NA                                         |
| Ca_Desi_Chrom_3_4100597 | Ca_desi_chr03      | 4100597                        | [T/C]       | NA                                         |
| Ca_Desi_Chrom_3_4100603 | Ca_desi_chr03      | 4100603                        | [A/G]       | NA                                         |
| Ca_Desi_Chrom_3_4100616 | Ca_desi_chr03      | 4100616                        | [T/G]       | NA                                         |
| Ca_Desi_Chrom_3_4100725 | Ca_desi_chr03      | 4100725                        | [T/A]       | NA                                         |
| Ca_Desi_Chrom_3_4100741 | Ca_desi_chr03      | 4100741                        | [A/G]       | NA                                         |
| Ca_Desi_Chrom_3_4100757 | Ca_desi_chr03      | 4100757                        | [G/T]       | NA                                         |
| Ca_Desi_Chrom_3_4118888 | Ca_desi_chr03      | 4118888                        | [A/G]       | NA                                         |
| Ca_Desi_Chrom_3_4146675 | Ca_desi_chr03      | 4146675                        | [A/G]       | NA                                         |
| Ca_Desi_Chrom_3_4162921 | Ca_desi_chr03      | 4162921                        | [G/C]       | NA                                         |
| Ca_Desi_Chrom_3_4174824 | Ca_desi_chr03      | 4174824                        | [G/T]       | NA                                         |
| Ca_Desi_Chrom_3_4174837 | Ca_desi_chr03      | 4174837                        | [G/A]       | NA                                         |
| Ca_Desi_Chrom_3_4174863 | Ca_desi_chr03      | 4174863                        | [G/A]       | NA                                         |
| Ca_Desi_Chrom_3_4175057 | Ca_desi_chr03      | 4175057                        | [A/G]       | NA                                         |
| Ca_Desi_Chrom_3_4175066 | Ca_desi_chr03      | 4175066                        | [T/C]       | NA                                         |
| Ca_Desi_Chrom_3_4175622 | Ca_desi_chr03      | 4175622                        | [C/A]       | NA                                         |
| Ca_Desi_Chrom_3_4182356 | Ca_desi_chr03      | 4182356                        | [T/A]       | NA                                         |
| Ca_Desi_Chrom_3_4197023 | Ca_desi_chr03      | 4197023                        | [T/A]       | NA                                         |
| Ca_Desi_Chrom_3_4197024 | Ca_desi_chr03      | 4197024                        | [T/A]       | NA                                         |

| <b>SNP IDs</b>          | <b>Chromosomes</b> | <b>Physical positions (bp)</b> | <b>SNPs</b> | <b>NCBI SNPdb accession IDs (NCBI_ss#)</b> |
|-------------------------|--------------------|--------------------------------|-------------|--------------------------------------------|
| Ca_Desi_Chrom_3_4197306 | Ca_desi_chr03      | 4197306                        | [A/G]       | NA                                         |
| Ca_Desi_Chrom_3_4197393 | Ca_desi_chr03      | 4197393                        | [G/T]       | NA                                         |
| Ca_Desi_Chrom_3_4197395 | Ca_desi_chr03      | 4197395                        | [T/G]       | NA                                         |
| Ca_Desi_Chrom_3_4197482 | Ca_desi_chr03      | 4197482                        | [T/A]       | NA                                         |
| Ca_Desi_Chrom_3_4197503 | Ca_desi_chr03      | 4197503                        | [A/G]       | NA                                         |
| Ca_Desi_Chrom_3_4211443 | Ca_desi_chr03      | 4211443                        | [A/T]       | NA                                         |
| Ca_Desi_Chrom_3_4211452 | Ca_desi_chr03      | 4211452                        | [A/G]       | NA                                         |
| Ca_Desi_Chrom_3_4211455 | Ca_desi_chr03      | 4211455                        | [C/T]       | NA                                         |
| Ca_Desi_Chrom_3_4211456 | Ca_desi_chr03      | 4211456                        | [T/C]       | NA                                         |
| Ca_Desi_Chrom_3_4211470 | Ca_desi_chr03      | 4211470                        | [T/C]       | NA                                         |
| Ca_Desi_Chrom_3_4211474 | Ca_desi_chr03      | 4211474                        | [T/C]       | NA                                         |
| Ca_Desi_Chrom_3_4211476 | Ca_desi_chr03      | 4211476                        | [T/C]       | NA                                         |
| Ca_Desi_Chrom_3_4211480 | Ca_desi_chr03      | 4211480                        | [A/G]       | NA                                         |
| Ca_Desi_Chrom_3_4211495 | Ca_desi_chr03      | 4211495                        | [T/A]       | NA                                         |
| Ca_Desi_Chrom_3_4216738 | Ca_desi_chr03      | 4216738                        | [T/C]       | NA                                         |
| Ca_Desi_Chrom_3_4229793 | Ca_desi_chr03      | 4229793                        | [A/G]       | NA                                         |
| Ca_Desi_Chrom_3_4250039 | Ca_desi_chr03      | 4250039                        | [T/A]       | NA                                         |
| Ca_Desi_Chrom_3_4250042 | Ca_desi_chr03      | 4250042                        | [T/G]       | NA                                         |
| Ca_Desi_Chrom_3_4250045 | Ca_desi_chr03      | 4250045                        | [T/G]       | NA                                         |
| Ca_Desi_Chrom_3_4250048 | Ca_desi_chr03      | 4250048                        | [T/G]       | NA                                         |
| Ca_Desi_Chrom_3_4250059 | Ca_desi_chr03      | 4250059                        | [A/T]       | NA                                         |
| Ca_Desi_Chrom_3_4250077 | Ca_desi_chr03      | 4250077                        | [A/G]       | NA                                         |
| Ca_Desi_Chrom_3_4261374 | Ca_desi_chr03      | 4261374                        | [A/G]       | NA                                         |
| Ca_Desi_Chrom_3_4261482 | Ca_desi_chr03      | 4261482                        | [T/C]       | NA                                         |
| Ca_Desi_Chrom_3_4300111 | Ca_desi_chr03      | 4300111                        | [T/C]       | NA                                         |
| Ca_Desi_Chrom_3_4303915 | Ca_desi_chr03      | 4303915                        | [A/G]       | NA                                         |
| Ca_Desi_Chrom_3_4303961 | Ca_desi_chr03      | 4303961                        | [T/G]       | NA                                         |
| Ca_Desi_Chrom_3_4330756 | Ca_desi_chr03      | 4330756                        | [C/T]       | NA                                         |
| Ca_Desi_Chrom_3_4347515 | Ca_desi_chr03      | 4347515                        | [G/T]       | NA                                         |
| Ca_Desi_Chrom_3_4349644 | Ca_desi_chr03      | 4349644                        | [G/A]       | NA                                         |
| Ca_Desi_Chrom_3_4356981 | Ca_desi_chr03      | 4356981                        | [T/C]       | NA                                         |
| Ca_Desi_Chrom_3_4376815 | Ca_desi_chr03      | 4376815                        | [G/A]       | NA                                         |
| Ca_Desi_Chrom_3_4387022 | Ca_desi_chr03      | 4387022                        | [G/A]       | NA                                         |
| Ca_Desi_Chrom_3_4387126 | Ca_desi_chr03      | 4387126                        | [A/C]       | NA                                         |

| <b>SNP IDs</b>          | <b>Chromosomes</b> | <b>Physical positions (bp)</b> | <b>SNPs</b> | <b>NCBI SNPdb accession IDs (NCBI_ss#)</b> |
|-------------------------|--------------------|--------------------------------|-------------|--------------------------------------------|
| Ca_Desi_Chrom_3_4401074 | Ca_desi_chr03      | 4401074                        | [G/A]       | NA                                         |
| Ca_Desi_Chrom_3_4409758 | Ca_desi_chr03      | 4409758                        | [A/G]       | NA                                         |
| Ca_Desi_Chrom_3_4409776 | Ca_desi_chr03      | 4409776                        | [T/A]       | NA                                         |
| Ca_Desi_Chrom_3_4409777 | Ca_desi_chr03      | 4409777                        | [G/A]       | NA                                         |
| Ca_Desi_Chrom_3_4409778 | Ca_desi_chr03      | 4409778                        | [T/C]       | NA                                         |
| Ca_Desi_Chrom_3_4415709 | Ca_desi_chr03      | 4415709                        | [C/T]       | NA                                         |
| Ca_Desi_Chrom_3_4431197 | Ca_desi_chr03      | 4431197                        | [A/T]       | NA                                         |
| Ca_Desi_Chrom_3_4518693 | Ca_desi_chr03      | 4518693                        | [A/C]       | NA                                         |
| Ca_Desi_Chrom_3_4518697 | Ca_desi_chr03      | 4518697                        | [A/C]       | NA                                         |
| Ca_Desi_Chrom_3_4518740 | Ca_desi_chr03      | 4518740                        | [A/G]       | NA                                         |
| Ca_Desi_Chrom_3_4518794 | Ca_desi_chr03      | 4518794                        | [A/G]       | NA                                         |
| Ca_Desi_Chrom_3_4573017 | Ca_desi_chr03      | 4573017                        | [T/G]       | NA                                         |
| Ca_Desi_Chrom_3_4581079 | Ca_desi_chr03      | 4581079                        | [T/G]       | NA                                         |
| Ca_Desi_Chrom_3_4656390 | Ca_desi_chr03      | 4656390                        | [A/C]       | NA                                         |
| Ca_Desi_Chrom_3_4664841 | Ca_desi_chr03      | 4664841                        | [T/C]       | NA                                         |
| Ca_Desi_Chrom_3_4664858 | Ca_desi_chr03      | 4664858                        | [T/G]       | NA                                         |
| Ca_Desi_Chrom_3_4664861 | Ca_desi_chr03      | 4664861                        | [A/G]       | NA                                         |
| Ca_Desi_Chrom_3_4664863 | Ca_desi_chr03      | 4664863                        | [T/G]       | NA                                         |
| Ca_Desi_Chrom_3_4664877 | Ca_desi_chr03      | 4664877                        | [T/C]       | NA                                         |
| Ca_Desi_Chrom_3_4664884 | Ca_desi_chr03      | 4664884                        | [G/A]       | NA                                         |
| Ca_Desi_Chrom_3_4664895 | Ca_desi_chr03      | 4664895                        | [A/G]       | NA                                         |
| Ca_Desi_Chrom_3_4664897 | Ca_desi_chr03      | 4664897                        | [A/G]       | NA                                         |
| Ca_Desi_Chrom_3_4664905 | Ca_desi_chr03      | 4664905                        | [T/C]       | NA                                         |
| Ca_Desi_Chrom_3_4787268 | Ca_desi_chr03      | 4787268                        | [T/G]       | NA                                         |
| Ca_Desi_Chrom_3_4787305 | Ca_desi_chr03      | 4787305                        | [T/C]       | NA                                         |
| Ca_Desi_Chrom_3_4787347 | Ca_desi_chr03      | 4787347                        | [T/C]       | NA                                         |
| Ca_Desi_Chrom_3_4787351 | Ca_desi_chr03      | 4787351                        | [A/C]       | NA                                         |
| Ca_Desi_Chrom_3_4788785 | Ca_desi_chr03      | 4788785                        | [T/C]       | NA                                         |
| Ca_Desi_Chrom_3_4790674 | Ca_desi_chr03      | 4790674                        | [A/G]       | NA                                         |
| Ca_Desi_Chrom_3_4790712 | Ca_desi_chr03      | 4790712                        | [T/G]       | NA                                         |
| Ca_Desi_Chrom_3_4801073 | Ca_desi_chr03      | 4801073                        | [A/C]       | NA                                         |
| Ca_Desi_Chrom_3_4801676 | Ca_desi_chr03      | 4801676                        | [T/G]       | NA                                         |
| Ca_Desi_Chrom_3_4801690 | Ca_desi_chr03      | 4801690                        | [T/C]       | NA                                         |
| Ca_Desi_Chrom_3_4850722 | Ca_desi_chr03      | 4850722                        | [T/C]       | NA                                         |



| <b>SNP IDs</b>          | <b>Chromosomes</b> | <b>Physical positions (bp)</b> | <b>SNPs</b> | <b>NCBI SNPdb accession IDs (NCBI_ss#)</b> |
|-------------------------|--------------------|--------------------------------|-------------|--------------------------------------------|
| Ca_Desi_Chrom_3_4850735 | Ca_desi_chr03      | 4850735                        | [T/G]       | NA                                         |
| Ca_Desi_Chrom_3_4850763 | Ca_desi_chr03      | 4850763                        | [T/A]       | NA                                         |
| Ca_Desi_Chrom_3_4850764 | Ca_desi_chr03      | 4850764                        | [A/G]       | NA                                         |
| Ca_Desi_Chrom_3_4850767 | Ca_desi_chr03      | 4850767                        | [A/G]       | NA                                         |
| Ca_Desi_Chrom_3_4850770 | Ca_desi_chr03      | 4850770                        | [T/C]       | NA                                         |
| Ca_Desi_Chrom_3_5804656 | Ca_desi_chr03      | 5804656                        | [A/G]       | NA                                         |
| Ca_Desi_Chrom_3_5804673 | Ca_desi_chr03      | 5804673                        | [T/C]       | NA                                         |
| Ca_Desi_Chrom_3_5804690 | Ca_desi_chr03      | 5804690                        | [A/G]       | NA                                         |
| Ca_Desi_Chrom_3_5804696 | Ca_desi_chr03      | 5804696                        | [A/C]       | NA                                         |
| Ca_Desi_Chrom_3_5804704 | Ca_desi_chr03      | 5804704                        | [T/C]       | NA                                         |
| Ca_Desi_Chrom_3_5804708 | Ca_desi_chr03      | 5804708                        | [A/C]       | NA                                         |
| Ca_Desi_Chrom_3_5804745 | Ca_desi_chr03      | 5804745                        | [C/G]       | NA                                         |
| Ca_Desi_Chrom_3_5819987 | Ca_desi_chr03      | 5819987                        | [T/G]       | NA                                         |
| Ca_Desi_Chrom_3_5820012 | Ca_desi_chr03      | 5820012                        | [A/C]       | NA                                         |
| Ca_Desi_Chrom_3_5820035 | Ca_desi_chr03      | 5820035                        | [A/C]       | NA                                         |
| Ca_Desi_Chrom_3_5955064 | Ca_desi_chr03      | 5955064                        | [A/G]       | NA                                         |
| Ca_Desi_Chrom_3_6011843 | Ca_desi_chr03      | 6011843                        | [A/G]       | NA                                         |
| Ca_Desi_Chrom_3_6011856 | Ca_desi_chr03      | 6011856                        | [A/G]       | NA                                         |
| Ca_Desi_Chrom_3_6011861 | Ca_desi_chr03      | 6011861                        | [T/C]       | NA                                         |
| Ca_Desi_Chrom_3_6012086 | Ca_desi_chr03      | 6012086                        | [T/G]       | NA                                         |
| Ca_Desi_Chrom_3_6055661 | Ca_desi_chr03      | 6055661                        | [T/A]       | NA                                         |
| Ca_Desi_Chrom_3_6078517 | Ca_desi_chr03      | 6078517                        | [T/C]       | NA                                         |
| Ca_Desi_Chrom_3_6078534 | Ca_desi_chr03      | 6078534                        | [T/C]       | NA                                         |
| Ca_Desi_Chrom_3_6078559 | Ca_desi_chr03      | 6078559                        | [A/G]       | NA                                         |
| Ca_Desi_Chrom_3_6108989 | Ca_desi_chr03      | 6108989                        | [A/C]       | NA                                         |
| Ca_Desi_Chrom_3_6120642 | Ca_desi_chr03      | 6120642                        | [A/G]       | NA                                         |
| Ca_Desi_Chrom_3_6120754 | Ca_desi_chr03      | 6120754                        | [T/C]       | NA                                         |
| Ca_Desi_Chrom_3_6120883 | Ca_desi_chr03      | 6120883                        | [T/C]       | NA                                         |
| Ca_Desi_Chrom_3_6120918 | Ca_desi_chr03      | 6120918                        | [A/G]       | NA                                         |
| Ca_Desi_Chrom_3_6149264 | Ca_desi_chr03      | 6149264                        | [A/C]       | NA                                         |
| Ca_Desi_Chrom_3_6149274 | Ca_desi_chr03      | 6149274                        | [A/C]       | NA                                         |
| Ca_Desi_Chrom_3_6149280 | Ca_desi_chr03      | 6149280                        | [T/C]       | NA                                         |
| Ca_Desi_Chrom_3_6149794 | Ca_desi_chr03      | 6149794                        | [A/T]       | NA                                         |
| Ca_Desi_Chrom_3_6149808 | Ca_desi_chr03      | 6149808                        | [C/T]       | NA                                         |

| <b>SNP IDs</b>          | <b>Chromosomes</b> | <b>Physical positions (bp)</b> | <b>SNPs</b> | <b>NCBI SNPdb accession IDs (NCBI_ss#)</b> |
|-------------------------|--------------------|--------------------------------|-------------|--------------------------------------------|
| Ca_Desi_Chrom_3_6149814 | Ca_desi_chr03      | 6149814                        | [T/C]       | NA                                         |
| Ca_Desi_Chrom_3_6149822 | Ca_desi_chr03      | 6149822                        | [A/C]       | NA                                         |
| Ca_Desi_Chrom_3_6149827 | Ca_desi_chr03      | 6149827                        | [A/G]       | NA                                         |
| Ca_Desi_Chrom_3_6149832 | Ca_desi_chr03      | 6149832                        | [A/C]       | NA                                         |
| Ca_Desi_Chrom_3_6149838 | Ca_desi_chr03      | 6149838                        | [T/C]       | NA                                         |
| Ca_Desi_Chrom_3_6149847 | Ca_desi_chr03      | 6149847                        | [T/A]       | NA                                         |
| Ca_Desi_Chrom_3_6172170 | Ca_desi_chr03      | 6172170                        | [G/A]       | NA                                         |
| Ca_Desi_Chrom_3_6172185 | Ca_desi_chr03      | 6172185                        | [A/G]       | NA                                         |
| Ca_Desi_Chrom_3_6172225 | Ca_desi_chr03      | 6172225                        | [T/A]       | NA                                         |
| Ca_Desi_Chrom_3_6173806 | Ca_desi_chr03      | 6173806                        | [T/C]       | NA                                         |
| Ca_Desi_Chrom_3_6173819 | Ca_desi_chr03      | 6173819                        | [T/G]       | NA                                         |
| Ca_Desi_Chrom_3_6173833 | Ca_desi_chr03      | 6173833                        | [A/C]       | NA                                         |
| Ca_Desi_Chrom_3_6234271 | Ca_desi_chr03      | 6234271                        | [T/G]       | NA                                         |
| Ca_Desi_Chrom_3_6234275 | Ca_desi_chr03      | 6234275                        | [T/G]       | NA                                         |
| Ca_Desi_Chrom_3_6258573 | Ca_desi_chr03      | 6258573                        | [A/G]       | NA                                         |
| Ca_Desi_Chrom_3_6258596 | Ca_desi_chr03      | 6258596                        | [T/C]       | NA                                         |
| Ca_Desi_Chrom_3_6295067 | Ca_desi_chr03      | 6295067                        | [A/C]       | NA                                         |
| Ca_Desi_Chrom_3_6295076 | Ca_desi_chr03      | 6295076                        | [A/C]       | NA                                         |
| Ca_Desi_Chrom_3_6324004 | Ca_desi_chr03      | 6324004                        | [T/C]       | NA                                         |
| Ca_Desi_Chrom_3_6324015 | Ca_desi_chr03      | 6324015                        | [T/G]       | NA                                         |
| Ca_Desi_Chrom_3_6352904 | Ca_desi_chr03      | 6352904                        | [A/T]       | NA                                         |
| Ca_Desi_Chrom_3_6357520 | Ca_desi_chr03      | 6357520                        | [A/C]       | NA                                         |
| Ca_Desi_Chrom_3_6357533 | Ca_desi_chr03      | 6357533                        | [T/C]       | NA                                         |
| Ca_Desi_Chrom_3_6357547 | Ca_desi_chr03      | 6357547                        | [T/G]       | NA                                         |
| Ca_Desi_Chrom_3_6357559 | Ca_desi_chr03      | 6357559                        | [T/G]       | NA                                         |
| Ca_Desi_Chrom_3_6390861 | Ca_desi_chr03      | 6390861                        | [G/A]       | NA                                         |
| Ca_Desi_Chrom_3_6423021 | Ca_desi_chr03      | 6423021                        | [T/G]       | NA                                         |
| Ca_Desi_Chrom_3_6423031 | Ca_desi_chr03      | 6423031                        | [G/T]       | NA                                         |
| Ca_Desi_Chrom_3_6423039 | Ca_desi_chr03      | 6423039                        | [T/C]       | NA                                         |
| Ca_Desi_Chrom_3_6426438 | Ca_desi_chr03      | 6426438                        | [A/G]       | NA                                         |
| Ca_Desi_Chrom_3_6426450 | Ca_desi_chr03      | 6426450                        | [T/G]       | NA                                         |
| Ca_Desi_Chrom_3_6426464 | Ca_desi_chr03      | 6426464                        | [A/C]       | NA                                         |
| Ca_Desi_Chrom_3_6430332 | Ca_desi_chr03      | 6430332                        | [T/C]       | NA                                         |
| Ca_Desi_Chrom_3_6430353 | Ca_desi_chr03      | 6430353                        | [T/C]       | NA                                         |

| <b>SNP IDs</b>          | <b>Chromosomes</b> | <b>Physical positions (bp)</b> | <b>SNPs</b> | <b>NCBI SNPdb accession IDs (NCBI_ss#)</b> |
|-------------------------|--------------------|--------------------------------|-------------|--------------------------------------------|
| Ca_Desi_Chrom_3_6434304 | Ca_desi_chr03      | 6434304                        | [G/T]       | NA                                         |
| Ca_Desi_Chrom_3_6434644 | Ca_desi_chr03      | 6434644                        | [C/T]       | NA                                         |
| Ca_Desi_Chrom_3_6434961 | Ca_desi_chr03      | 6434961                        | [T/A]       | NA                                         |
| Ca_Desi_Chrom_3_6435004 | Ca_desi_chr03      | 6435004                        | [T/G]       | NA                                         |
| Ca_Desi_Chrom_3_6435914 | Ca_desi_chr03      | 6435914                        | [C/A]       | NA                                         |
| Ca_Desi_Chrom_3_6435997 | Ca_desi_chr03      | 6435997                        | [G/A]       | NA                                         |
| Ca_Desi_Chrom_3_6436024 | Ca_desi_chr03      | 6436024                        | [A/G]       | NA                                         |
| Ca_Desi_Chrom_3_6436047 | Ca_desi_chr03      | 6436047                        | [A/G]       | NA                                         |
| Ca_Desi_Chrom_3_6436085 | Ca_desi_chr03      | 6436085                        | [A/G]       | NA                                         |
| Ca_Desi_Chrom_3_6436108 | Ca_desi_chr03      | 6436108                        | [C/A]       | NA                                         |
| Ca_Desi_Chrom_3_6449885 | Ca_desi_chr03      | 6449885                        | [G/T]       | NA                                         |
| Ca_Desi_Chrom_3_6449886 | Ca_desi_chr03      | 6449886                        | [T/G]       | NA                                         |
| Ca_Desi_Chrom_3_6490965 | Ca_desi_chr03      | 6490965                        | [T/C]       | NA                                         |
| Ca_Desi_Chrom_3_6499735 | Ca_desi_chr03      | 6499735                        | [C/A]       | NA                                         |
| Ca_Desi_Chrom_3_6499738 | Ca_desi_chr03      | 6499738                        | [A/C]       | NA                                         |
| Ca_Desi_Chrom_3_6499775 | Ca_desi_chr03      | 6499775                        | [A/G]       | NA                                         |
| Ca_Desi_Chrom_3_6531280 | Ca_desi_chr03      | 6531280                        | [A/C]       | NA                                         |
| Ca_Desi_Chrom_3_6531284 | Ca_desi_chr03      | 6531284                        | [A/C]       | NA                                         |
| Ca_Desi_Chrom_3_6531306 | Ca_desi_chr03      | 6531306                        | [A/G]       | NA                                         |
| Ca_Desi_Chrom_3_6539810 | Ca_desi_chr03      | 6539810                        | [C/T]       | NA                                         |
| Ca_Desi_Chrom_3_6543089 | Ca_desi_chr03      | 6543089                        | [T/A]       | NA                                         |
| Ca_Desi_Chrom_3_6543102 | Ca_desi_chr03      | 6543102                        | [G/A]       | NA                                         |
| Ca_Desi_Chrom_3_6543338 | Ca_desi_chr03      | 6543338                        | [C/A]       | NA                                         |
| Ca_Desi_Chrom_3_6543339 | Ca_desi_chr03      | 6543339                        | [T/A]       | NA                                         |
| Ca_Desi_Chrom_3_6543340 | Ca_desi_chr03      | 6543340                        | [A/T]       | NA                                         |
| Ca_Desi_Chrom_3_6543406 | Ca_desi_chr03      | 6543406                        | [T/C]       | NA                                         |
| Ca_Desi_Chrom_3_6544021 | Ca_desi_chr03      | 6544021                        | [A/T]       | NA                                         |
| Ca_Desi_Chrom_3_6544048 | Ca_desi_chr03      | 6544048                        | [T/C]       | NA                                         |
| Ca_Desi_Chrom_3_6544126 | Ca_desi_chr03      | 6544126                        | [A/G]       | NA                                         |
| Ca_Desi_Chrom_3_6544365 | Ca_desi_chr03      | 6544365                        | [A/G]       | NA                                         |
| Ca_Desi_Chrom_3_6547078 | Ca_desi_chr03      | 6547078                        | [C/T]       | NA                                         |
| Ca_Desi_Chrom_3_6547513 | Ca_desi_chr03      | 6547513                        | [G/A]       | NA                                         |
| Ca_Desi_Chrom_3_6547617 | Ca_desi_chr03      | 6547617                        | [A/C]       | NA                                         |
| Ca_Desi_Chrom_3_6585721 | Ca_desi_chr03      | 6585721                        | [C/A]       | NA                                         |

| <b>SNP IDs</b>          | <b>Chromosomes</b> | <b>Physical positions (bp)</b> | <b>SNPs</b> | <b>NCBI SNPdb accession IDs (NCBI_ss#)</b> |
|-------------------------|--------------------|--------------------------------|-------------|--------------------------------------------|
| Ca_Desi_Chrom_3_6593404 | Ca_desi_chr03      | 6593404                        | [A/G]       | NA                                         |
| Ca_Desi_Chrom_3_6593488 | Ca_desi_chr03      | 6593488                        | [C/T]       | NA                                         |
| Ca_Desi_Chrom_3_6593914 | Ca_desi_chr03      | 6593914                        | [A/G]       | NA                                         |
| Ca_Desi_Chrom_3_6616912 | Ca_desi_chr03      | 6616912                        | [A/G]       | NA                                         |
| Ca_Desi_Chrom_3_6635977 | Ca_desi_chr03      | 6635977                        | [T/C]       | NA                                         |
| Ca_Desi_Chrom_3_6636009 | Ca_desi_chr03      | 6636009                        | [T/G]       | NA                                         |
| Ca_Desi_Chrom_3_6636054 | Ca_desi_chr03      | 6636054                        | [A/C]       | NA                                         |
| Ca_Desi_Chrom_3_6641323 | Ca_desi_chr03      | 6641323                        | [A/G]       | NA                                         |
| Ca_Desi_Chrom_3_6659003 | Ca_desi_chr03      | 6659003                        | [A/C]       | NA                                         |
| Ca_Desi_Chrom_3_6660661 | Ca_desi_chr03      | 6660661                        | [A/C]       | NA                                         |
| Ca_Desi_Chrom_3_6660873 | Ca_desi_chr03      | 6660873                        | [T/C]       | NA                                         |
| Ca_Desi_Chrom_3_6662460 | Ca_desi_chr03      | 6662460                        | [A/C]       | NA                                         |
| Ca_Desi_Chrom_3_6717275 | Ca_desi_chr03      | 6717275                        | [T/G]       | NA                                         |
| Ca_Desi_Chrom_3_6720703 | Ca_desi_chr03      | 6720703                        | [A/C]       | NA                                         |
| Ca_Desi_Chrom_3_6721108 | Ca_desi_chr03      | 6721108                        | [C/G]       | NA                                         |
| Ca_Desi_Chrom_3_6721110 | Ca_desi_chr03      | 6721110                        | [C/A]       | NA                                         |
| Ca_Desi_Chrom_3_6721112 | Ca_desi_chr03      | 6721112                        | [A/C]       | NA                                         |
| Ca_Desi_Chrom_3_6723814 | Ca_desi_chr03      | 6723814                        | [A/G]       | NA                                         |
| Ca_Desi_Chrom_3_6723839 | Ca_desi_chr03      | 6723839                        | [G/A]       | NA                                         |
| Ca_Desi_Chrom_3_6723852 | Ca_desi_chr03      | 6723852                        | [C/G]       | NA                                         |
| Ca_Desi_Chrom_3_6738310 | Ca_desi_chr03      | 6738310                        | [T/C]       | NA                                         |
| Ca_Desi_Chrom_3_6738325 | Ca_desi_chr03      | 6738325                        | [T/G]       | NA                                         |
| Ca_Desi_Chrom_3_6738954 | Ca_desi_chr03      | 6738954                        | [A/G]       | NA                                         |
| Ca_Desi_Chrom_3_6738958 | Ca_desi_chr03      | 6738958                        | [A/G]       | NA                                         |
| Ca_Desi_Chrom_3_6738968 | Ca_desi_chr03      | 6738968                        | [T/G]       | NA                                         |
| Ca_Desi_Chrom_3_6738992 | Ca_desi_chr03      | 6738992                        | [A/G]       | NA                                         |
| Ca_Desi_Chrom_3_6738997 | Ca_desi_chr03      | 6738997                        | [T/A]       | NA                                         |
| Ca_Desi_Chrom_3_6738999 | Ca_desi_chr03      | 6738999                        | [T/C]       | NA                                         |
| Ca_Desi_Chrom_3_6748500 | Ca_desi_chr03      | 6748500                        | [T/C]       | NA                                         |
| Ca_Desi_Chrom_3_6757836 | Ca_desi_chr03      | 6757836                        | [G/A]       | NA                                         |
| Ca_Desi_Chrom_3_6757904 | Ca_desi_chr03      | 6757904                        | [A/G]       | NA                                         |
| Ca_Desi_Chrom_3_6758225 | Ca_desi_chr03      | 6758225                        | [G/A]       | NA                                         |
| Ca_Desi_Chrom_3_6758227 | Ca_desi_chr03      | 6758227                        | [T/C]       | NA                                         |
| Ca_Desi_Chrom_3_6758332 | Ca_desi_chr03      | 6758332                        | [G/A]       | NA                                         |

| <b>SNP IDs</b>         | <b>Chromosomes</b> | <b>Physical positions (bp)</b> | <b>SNPs</b> | <b>NCBI SNPdb accession IDs (NCBI_ss#)</b> |
|------------------------|--------------------|--------------------------------|-------------|--------------------------------------------|
| Ca_Desig_Chr_3_6758362 | Ca_desig_chr03     | 6758362                        | [T/C]       | NA                                         |
| Ca_Desig_Chr_3_6758389 | Ca_desig_chr03     | 6758389                        | [C/T]       | NA                                         |
| Ca_Desig_Chr_3_6758514 | Ca_desig_chr03     | 6758514                        | [C/T]       | NA                                         |
| Ca_Desig_Chr_3_6776131 | Ca_desig_chr03     | 6776131                        | [T/C]       | NA                                         |
| Ca_Desig_Chr_3_6776192 | Ca_desig_chr03     | 6776192                        | [G/A]       | NA                                         |
| Ca_Desig_Chr_3_6776547 | Ca_desig_chr03     | 6776547                        | [C/T]       | NA                                         |
| Ca_Desig_Chr_3_6790176 | Ca_desig_chr03     | 6790176                        | [A/C]       | NA                                         |
| Ca_Desig_Chr_3_6790184 | Ca_desig_chr03     | 6790184                        | [A/G]       | NA                                         |
| Ca_Desig_Chr_3_6790193 | Ca_desig_chr03     | 6790193                        | [A/G]       | NA                                         |
| Ca_Desig_Chr_3_6799092 | Ca_desig_chr03     | 6799092                        | [T/A]       | NA                                         |
| Ca_Desig_Chr_3_6799102 | Ca_desig_chr03     | 6799102                        | [T/C]       | NA                                         |
| Ca_Desig_Chr_3_6799103 | Ca_desig_chr03     | 6799103                        | [T/C]       | NA                                         |
| Ca_Desig_Chr_3_6812090 | Ca_desig_chr03     | 6812090                        | [C/T]       | NA                                         |
| Ca_Desig_Chr_3_6812095 | Ca_desig_chr03     | 6812095                        | [T/C]       | NA                                         |
| Ca_Desig_Chr_3_6812106 | Ca_desig_chr03     | 6812106                        | [A/G]       | NA                                         |
| Ca_Desig_Chr_3_6812111 | Ca_desig_chr03     | 6812111                        | [A/G]       | NA                                         |
| Ca_Desig_Chr_3_6812169 | Ca_desig_chr03     | 6812169                        | [A/G]       | NA                                         |
| Ca_Desig_Chr_3_6812183 | Ca_desig_chr03     | 6812183                        | [G/C]       | NA                                         |
| Ca_Desig_Chr_3_6812195 | Ca_desig_chr03     | 6812195                        | [C/T]       | NA                                         |
| Ca_Desig_Chr_3_6833926 | Ca_desig_chr03     | 6833926                        | [A/C]       | NA                                         |
| Ca_Desig_Chr_3_6833932 | Ca_desig_chr03     | 6833932                        | [C/G]       | NA                                         |
| Ca_Desig_Chr_3_6833975 | Ca_desig_chr03     | 6833975                        | [T/C]       | NA                                         |
| Ca_Desig_Chr_3_6877283 | Ca_desig_chr03     | 6877283                        | [A/T]       | NA                                         |
| Ca_Desig_Chr_3_6877311 | Ca_desig_chr03     | 6877311                        | [T/C]       | NA                                         |
| Ca_Desig_Chr_3_6877359 | Ca_desig_chr03     | 6877359                        | [A/G]       | NA                                         |
| Ca_Desig_Chr_3_6963249 | Ca_desig_chr03     | 6963249                        | [T/G]       | NA                                         |
| Ca_Desig_Chr_3_6963252 | Ca_desig_chr03     | 6963252                        | [A/G]       | NA                                         |
| Ca_Desig_Chr_3_7059071 | Ca_desig_chr03     | 7059071                        | [A/G]       | NA                                         |
| Ca_Desig_Chr_3_7059191 | Ca_desig_chr03     | 7059191                        | [T/C]       | NA                                         |
| Ca_Desig_Chr_3_7059195 | Ca_desig_chr03     | 7059195                        | [T/C]       | NA                                         |
| Ca_Desig_Chr_3_7059225 | Ca_desig_chr03     | 7059225                        | [T/C]       | NA                                         |
| Ca_Desig_Chr_3_7059324 | Ca_desig_chr03     | 7059324                        | [C/T]       | NA                                         |
| Ca_Desig_Chr_3_7059357 | Ca_desig_chr03     | 7059357                        | [A/C]       | NA                                         |
| Ca_Desig_Chr_3_7104060 | Ca_desig_chr03     | 7104060                        | [G/A]       | NA                                         |

| <b>SNP IDs</b>          | <b>Chromosomes</b> | <b>Physical positions (bp)</b> | <b>SNPs</b> | <b>NCBI SNPdb accession IDs (NCBI_ss#)</b> |
|-------------------------|--------------------|--------------------------------|-------------|--------------------------------------------|
| Ca_Desi_Chrom_3_7105481 | Ca_desi_chr03      | 7105481                        | [A/C]       | NA                                         |
| Ca_Desi_Chrom_3_7105495 | Ca_desi_chr03      | 7105495                        | [A/C]       | NA                                         |
| Ca_Desi_Chrom_3_7105497 | Ca_desi_chr03      | 7105497                        | [T/C]       | NA                                         |
| Ca_Desi_Chrom_3_7139294 | Ca_desi_chr03      | 7139294                        | [T/G]       | NA                                         |
| Ca_Desi_Chrom_3_7218323 | Ca_desi_chr03      | 7218323                        | [T/G]       | NA                                         |
| Ca_Desi_Chrom_3_7221607 | Ca_desi_chr03      | 7221607                        | [T/C]       | NA                                         |
| Ca_Desi_Chrom_3_7221632 | Ca_desi_chr03      | 7221632                        | [A/C]       | NA                                         |
| Ca_Desi_Chrom_3_7221635 | Ca_desi_chr03      | 7221635                        | [G/C]       | NA                                         |
| Ca_Desi_Chrom_3_7221640 | Ca_desi_chr03      | 7221640                        | [A/C]       | NA                                         |
| Ca_Desi_Chrom_3_7221650 | Ca_desi_chr03      | 7221650                        | [A/T]       | NA                                         |
| Ca_Desi_Chrom_3_7226963 | Ca_desi_chr03      | 7226963                        | [A/G]       | NA                                         |
| Ca_Desi_Chrom_3_7226964 | Ca_desi_chr03      | 7226964                        | [G/T]       | NA                                         |
| Ca_Desi_Chrom_3_7226966 | Ca_desi_chr03      | 7226966                        | [T/A]       | NA                                         |
| Ca_Desi_Chrom_3_8448964 | Ca_desi_chr03      | 8448964                        | [T/G]       | NA                                         |
| Ca_Desi_Chrom_3_8454758 | Ca_desi_chr03      | 8454758                        | [A/C]       | NA                                         |
| Ca_Desi_Chrom_3_8454789 | Ca_desi_chr03      | 8454789                        | [C/T]       | NA                                         |
| Ca_Desi_Chrom_3_8454791 | Ca_desi_chr03      | 8454791                        | [C/T]       | NA                                         |
| Ca_Desi_Chrom_3_8456436 | Ca_desi_chr03      | 8456436                        | [A/C]       | NA                                         |
| Ca_Desi_Chrom_3_8498709 | Ca_desi_chr03      | 8498709                        | [T/C]       | NA                                         |
| Ca_Desi_Chrom_3_8498710 | Ca_desi_chr03      | 8498710                        | [C/G]       | NA                                         |
| Ca_Desi_Chrom_3_8498746 | Ca_desi_chr03      | 8498746                        | [A/G]       | NA                                         |
| Ca_Desi_Chrom_3_8498748 | Ca_desi_chr03      | 8498748                        | [T/C]       | NA                                         |
| Ca_Desi_Chrom_3_8499543 | Ca_desi_chr03      | 8499543                        | [T/G]       | NA                                         |
| Ca_Desi_Chrom_3_8499725 | Ca_desi_chr03      | 8499725                        | [A/G]       | NA                                         |
| Ca_Desi_Chrom_3_8499765 | Ca_desi_chr03      | 8499765                        | [T/G]       | NA                                         |
| Ca_Desi_Chrom_3_8540832 | Ca_desi_chr03      | 8540832                        | [T/A]       | NA                                         |
| Ca_Desi_Chrom_3_8556843 | Ca_desi_chr03      | 8556843                        | [A/T]       | NA                                         |
| Ca_Desi_Chrom_3_8556851 | Ca_desi_chr03      | 8556851                        | [A/G]       | NA                                         |
| Ca_Desi_Chrom_3_8556866 | Ca_desi_chr03      | 8556866                        | [C/T]       | NA                                         |
| Ca_Desi_Chrom_3_8556888 | Ca_desi_chr03      | 8556888                        | [A/T]       | NA                                         |
| Ca_Desi_Chrom_3_8556914 | Ca_desi_chr03      | 8556914                        | [A/C]       | NA                                         |
| Ca_Desi_Chrom_3_8556941 | Ca_desi_chr03      | 8556941                        | [A/G]       | NA                                         |
| Ca_Desi_Chrom_3_8576619 | Ca_desi_chr03      | 8576619                        | [T/G]       | NA                                         |
| Ca_Desi_Chrom_3_8583785 | Ca_desi_chr03      | 8583785                        | [T/G]       | NA                                         |

| <b>SNP IDs</b>          | <b>Chromosomes</b> | <b>Physical positions (bp)</b> | <b>SNPs</b> | <b>NCBI SNPdb accession IDs (NCBI_ss#)</b> |
|-------------------------|--------------------|--------------------------------|-------------|--------------------------------------------|
| Ca_Desi_Chrr_3_8814644  | Ca_desi_chr03      | 8814644                        | [A/G]       | NA                                         |
| Ca_Desi_Chrr_3_8824939  | Ca_desi_chr03      | 8824939                        | [T/C]       | NA                                         |
| Ca_Desi_Chrr_3_8844825  | Ca_desi_chr03      | 8844825                        | [A/T]       | NA                                         |
| Ca_Desi_Chrr_3_8844832  | Ca_desi_chr03      | 8844832                        | [G/C]       | NA                                         |
| Ca_Desi_Chrr_3_8844834  | Ca_desi_chr03      | 8844834                        | [T/G]       | NA                                         |
| Ca_Desi_Chrr_3_8844836  | Ca_desi_chr03      | 8844836                        | [A/C]       | NA                                         |
| Ca_Desi_Chrr_3_8894544  | Ca_desi_chr03      | 8894544                        | [G/A]       | NA                                         |
| Ca_Desi_Chrr_3_8894554  | Ca_desi_chr03      | 8894554                        | [T/C]       | NA                                         |
| Ca_Desi_Chrr_3_8894991  | Ca_desi_chr03      | 8894991                        | [A/C]       | NA                                         |
| Ca_Desi_Chrr_3_8907485  | Ca_desi_chr03      | 8907485                        | [A/T]       | NA                                         |
| Ca_Desi_Chrr_3_8974956  | Ca_desi_chr03      | 8974956                        | [T/G]       | NA                                         |
| Ca_Desi_Chrr_3_9852567  | Ca_desi_chr03      | 9852567                        | [T/C]       | NA                                         |
| Ca_Desi_Chrr_3_9852588  | Ca_desi_chr03      | 9852588                        | [G/A]       | NA                                         |
| Ca_Desi_Chrr_3_9852607  | Ca_desi_chr03      | 9852607                        | [T/G]       | NA                                         |
| Ca_Desi_Chrr_3_9929365  | Ca_desi_chr03      | 9929365                        | [T/C]       | NA                                         |
| Ca_Desi_Chrr_3_9929366  | Ca_desi_chr03      | 9929366                        | [T/C]       | NA                                         |
| Ca_Desi_Chrr_3_9932975  | Ca_desi_chr03      | 9932975                        | [T/G]       | NA                                         |
| Ca_Desi_Chrr_3_9932979  | Ca_desi_chr03      | 9932979                        | [T/G]       | NA                                         |
| Ca_Desi_Chrr_3_9933051  | Ca_desi_chr03      | 9933051                        | [A/T]       | NA                                         |
| Ca_Desi_Chrr_3_9933054  | Ca_desi_chr03      | 9933054                        | [A/G]       | NA                                         |
| Ca_Desi_Chrr_3_9938057  | Ca_desi_chr03      | 9938057                        | [A/C]       | NA                                         |
| Ca_Desi_Chrr_3_9951202  | Ca_desi_chr03      | 9951202                        | [A/T]       | NA                                         |
| Ca_Desi_Chrr_3_9951203  | Ca_desi_chr03      | 9951203                        | [C/T]       | NA                                         |
| Ca_Desi_Chrr_3_9951222  | Ca_desi_chr03      | 9951222                        | [A/C]       | NA                                         |
| Ca_Desi_Chrr_3_10078354 | Ca_desi_chr03      | 10078354                       | [A/C]       | NA                                         |
| Ca_Desi_Chrr_3_10078357 | Ca_desi_chr03      | 10078357                       | [A/C]       | NA                                         |
| Ca_Desi_Chrr_3_10078375 | Ca_desi_chr03      | 10078375                       | [A/G]       | NA                                         |
| Ca_Desi_Chrr_3_10078392 | Ca_desi_chr03      | 10078392                       | [A/G]       | NA                                         |
| Ca_Desi_Chrr_3_10157456 | Ca_desi_chr03      | 10157456                       | [T/A]       | NA                                         |
| Ca_Desi_Chrr_3_10175589 | Ca_desi_chr03      | 10175589                       | [T/C]       | NA                                         |
| Ca_Desi_Chrr_3_10175600 | Ca_desi_chr03      | 10175600                       | [A/G]       | NA                                         |
| Ca_Desi_Chrr_3_10175607 | Ca_desi_chr03      | 10175607                       | [T/G]       | NA                                         |
| Ca_Desi_Chrr_3_10175622 | Ca_desi_chr03      | 10175622                       | [T/C]       | NA                                         |
| Ca_Desi_Chrr_3_10233609 | Ca_desi_chr03      | 10233609                       | [T/C]       | NA                                         |

| <b>SNP IDs</b>           | <b>Chromosomes</b> | <b>Physical positions (bp)</b> | <b>SNPs</b> | <b>NCBI SNPdb accession IDs (NCBI_ss#)</b> |
|--------------------------|--------------------|--------------------------------|-------------|--------------------------------------------|
| Ca_Desi_Chrom_3_10233610 | Ca_desi_chr03      | 10233610                       | [T/G]       | NA                                         |
| Ca_Desi_Chrom_3_10233615 | Ca_desi_chr03      | 10233615                       | [C/A]       | NA                                         |
| Ca_Desi_Chrom_3_10233646 | Ca_desi_chr03      | 10233646                       | [A/C]       | NA                                         |
| Ca_Desi_Chrom_3_10290850 | Ca_desi_chr03      | 10290850                       | [A/C]       | NA                                         |
| Ca_Desi_Chrom_3_10308956 | Ca_desi_chr03      | 10308956                       | [A/C]       | NA                                         |
| Ca_Desi_Chrom_3_10350068 | Ca_desi_chr03      | 10350068                       | [T/G]       | NA                                         |
| Ca_Desi_Chrom_3_10350155 | Ca_desi_chr03      | 10350155                       | [A/G]       | NA                                         |
| Ca_Desi_Chrom_3_10387947 | Ca_desi_chr03      | 10387947                       | [A/C]       | NA                                         |
| Ca_Desi_Chrom_3_10388055 | Ca_desi_chr03      | 10388055                       | [A/C]       | NA                                         |
| Ca_Desi_Chrom_3_10446502 | Ca_desi_chr03      | 10446502                       | [T/C]       | NA                                         |
| Ca_Desi_Chrom_3_10446531 | Ca_desi_chr03      | 10446531                       | [A/G]       | NA                                         |
| Ca_Desi_Chrom_3_10468060 | Ca_desi_chr03      | 10468060                       | [A/T]       | NA                                         |
| Ca_Desi_Chrom_3_10509349 | Ca_desi_chr03      | 10509349                       | [A/C]       | NA                                         |
| Ca_Desi_Chrom_3_10509908 | Ca_desi_chr03      | 10509908                       | [T/G]       | NA                                         |
| Ca_Desi_Chrom_3_10509917 | Ca_desi_chr03      | 10509917                       | [T/G]       | NA                                         |
| Ca_Desi_Chrom_3_10535686 | Ca_desi_chr03      | 10535686                       | [T/A]       | NA                                         |
| Ca_Desi_Chrom_3_10535735 | Ca_desi_chr03      | 10535735                       | [A/C]       | NA                                         |
| Ca_Desi_Chrom_3_10535765 | Ca_desi_chr03      | 10535765                       | [A/C]       | NA                                         |
| Ca_Desi_Chrom_3_10535777 | Ca_desi_chr03      | 10535777                       | [A/C]       | NA                                         |
| Ca_Desi_Chrom_3_10598646 | Ca_desi_chr03      | 10598646                       | [A/T]       | NA                                         |
| Ca_Desi_Chrom_3_10598647 | Ca_desi_chr03      | 10598647                       | [T/C]       | NA                                         |
| Ca_Desi_Chrom_3_10598648 | Ca_desi_chr03      | 10598648                       | [C/G]       | NA                                         |
| Ca_Desi_Chrom_3_10598649 | Ca_desi_chr03      | 10598649                       | [T/G]       | NA                                         |
| Ca_Desi_Chrom_3_10656870 | Ca_desi_chr03      | 10656870                       | [T/C]       | NA                                         |
| Ca_Desi_Chrom_3_10656878 | Ca_desi_chr03      | 10656878                       | [T/C]       | NA                                         |
| Ca_Desi_Chrom_3_10676528 | Ca_desi_chr03      | 10676528                       | [T/A]       | NA                                         |
| Ca_Desi_Chrom_3_10676573 | Ca_desi_chr03      | 10676573                       | [A/G]       | NA                                         |
| Ca_Desi_Chrom_3_10676579 | Ca_desi_chr03      | 10676579                       | [A/G]       | NA                                         |
| Ca_Desi_Chrom_3_10811646 | Ca_desi_chr03      | 10811646                       | [T/G]       | NA                                         |
| Ca_Desi_Chrom_3_10812132 | Ca_desi_chr03      | 10812132                       | [T/C]       | NA                                         |
| Ca_Desi_Chrom_3_10881091 | Ca_desi_chr03      | 10881091                       | [A/G]       | NA                                         |
| Ca_Desi_Chrom_3_11018969 | Ca_desi_chr03      | 11018969                       | [A/G]       | NA                                         |
| Ca_Desi_Chrom_3_11018974 | Ca_desi_chr03      | 11018974                       | [T/C]       | NA                                         |
| Ca_Desi_Chrom_3_11018981 | Ca_desi_chr03      | 11018981                       | [T/C]       | NA                                         |



| <b>SNP IDs</b>          | <b>Chromosomes</b> | <b>Physical positions (bp)</b> | <b>SNPs</b> | <b>NCBI SNPdb accession IDs (NCBI_ss#)</b> |
|-------------------------|--------------------|--------------------------------|-------------|--------------------------------------------|
| Ca_Desig_Chr_3_11018982 | Ca_desig_chr03     | 11018982                       | [C/T]       | NA                                         |
| Ca_Desig_Chr_3_11018990 | Ca_desig_chr03     | 11018990                       | [T/G]       | NA                                         |
| Ca_Desig_Chr_3_11018998 | Ca_desig_chr03     | 11018998                       | [A/C]       | NA                                         |
| Ca_Desig_Chr_3_11019001 | Ca_desig_chr03     | 11019001                       | [T/C]       | NA                                         |
| Ca_Desig_Chr_3_11019823 | Ca_desig_chr03     | 11019823                       | [T/G]       | NA                                         |
| Ca_Desig_Chr_3_11019824 | Ca_desig_chr03     | 11019824                       | [A/G]       | NA                                         |
| Ca_Desig_Chr_3_11051027 | Ca_desig_chr03     | 11051027                       | [G/A]       | NA                                         |
| Ca_Desig_Chr_3_11051028 | Ca_desig_chr03     | 11051028                       | [A/T]       | NA                                         |
| Ca_Desig_Chr_3_11051029 | Ca_desig_chr03     | 11051029                       | [G/C]       | NA                                         |
| Ca_Desig_Chr_3_11051030 | Ca_desig_chr03     | 11051030                       | [G/T]       | NA                                         |
| Ca_Desig_Chr_3_11064390 | Ca_desig_chr03     | 11064390                       | [A/G]       | NA                                         |
| Ca_Desig_Chr_3_11071524 | Ca_desig_chr03     | 11071524                       | [C/T]       | NA                                         |
| Ca_Desig_Chr_3_11071527 | Ca_desig_chr03     | 11071527                       | [C/T]       | NA                                         |
| Ca_Desig_Chr_3_11071530 | Ca_desig_chr03     | 11071530                       | [A/T]       | NA                                         |
| Ca_Desig_Chr_3_11071533 | Ca_desig_chr03     | 11071533                       | [C/T]       | NA                                         |
| Ca_Desig_Chr_3_11071541 | Ca_desig_chr03     | 11071541                       | [A/C]       | NA                                         |
| Ca_Desig_Chr_3_11071549 | Ca_desig_chr03     | 11071549                       | [A/G]       | NA                                         |
| Ca_Desig_Chr_3_11072965 | Ca_desig_chr03     | 11072965                       | [A/G]       | NA                                         |
| Ca_Desig_Chr_3_11115658 | Ca_desig_chr03     | 11115658                       | [A/G]       | NA                                         |
| Ca_Desig_Chr_3_11146467 | Ca_desig_chr03     | 11146467                       | [A/C]       | NA                                         |
| Ca_Desig_Chr_3_11146473 | Ca_desig_chr03     | 11146473                       | [A/C]       | NA                                         |
| Ca_Desig_Chr_3_11146477 | Ca_desig_chr03     | 11146477                       | [T/C]       | NA                                         |
| Ca_Desig_Chr_3_11146483 | Ca_desig_chr03     | 11146483                       | [T/C]       | NA                                         |
| Ca_Desig_Chr_3_11146484 | Ca_desig_chr03     | 11146484                       | [A/C]       | NA                                         |
| Ca_Desig_Chr_3_11146590 | Ca_desig_chr03     | 11146590                       | [C/A]       | NA                                         |
| Ca_Desig_Chr_3_11146591 | Ca_desig_chr03     | 11146591                       | [T/G]       | NA                                         |
| Ca_Desig_Chr_3_11147755 | Ca_desig_chr03     | 11147755                       | [A/G]       | NA                                         |
| Ca_Desig_Chr_3_11148303 | Ca_desig_chr03     | 11148303                       | [T/C]       | NA                                         |
| Ca_Desig_Chr_3_11191033 | Ca_desig_chr03     | 11191033                       | [A/G]       | NA                                         |
| Ca_Desig_Chr_3_11209903 | Ca_desig_chr03     | 11209903                       | [A/T]       | NA                                         |
| Ca_Desig_Chr_3_11209929 | Ca_desig_chr03     | 11209929                       | [T/G]       | NA                                         |
| Ca_Desig_Chr_3_11209934 | Ca_desig_chr03     | 11209934                       | [T/C]       | NA                                         |
| Ca_Desig_Chr_3_11295878 | Ca_desig_chr03     | 11295878                       | [T/C]       | NA                                         |
| Ca_Desig_Chr_3_11329775 | Ca_desig_chr03     | 11329775                       | [A/T]       | NA                                         |

| <b>SNP IDs</b>           | <b>Chromosomes</b> | <b>Physical positions (bp)</b> | <b>SNPs</b> | <b>NCBI SNPdb accession IDs (NCBI_ss#)</b> |
|--------------------------|--------------------|--------------------------------|-------------|--------------------------------------------|
| Ca_Desi_Chrom_3_11329776 | Ca_desi_chr03      | 11329776                       | [T/G]       | NA                                         |
| Ca_Desi_Chrom_3_11329777 | Ca_desi_chr03      | 11329777                       | [C/T]       | NA                                         |
| Ca_Desi_Chrom_3_11329778 | Ca_desi_chr03      | 11329778                       | [T/G]       | NA                                         |
| Ca_Desi_Chrom_3_11390981 | Ca_desi_chr03      | 11390981                       | [T/C]       | NA                                         |
| Ca_Desi_Chrom_3_11390985 | Ca_desi_chr03      | 11390985                       | [A/G]       | NA                                         |
| Ca_Desi_Chrom_3_11391277 | Ca_desi_chr03      | 11391277                       | [T/G]       | NA                                         |
| Ca_Desi_Chrom_3_11391310 | Ca_desi_chr03      | 11391310                       | [A/G]       | NA                                         |
| Ca_Desi_Chrom_3_11391311 | Ca_desi_chr03      | 11391311                       | [A/G]       | NA                                         |
| Ca_Desi_Chrom_3_11391312 | Ca_desi_chr03      | 11391312                       | [A/G]       | NA                                         |
| Ca_Desi_Chrom_3_11391313 | Ca_desi_chr03      | 11391313                       | [A/G]       | NA                                         |
| Ca_Desi_Chrom_3_11391314 | Ca_desi_chr03      | 11391314                       | [A/G]       | NA                                         |
| Ca_Desi_Chrom_3_11391315 | Ca_desi_chr03      | 11391315                       | [A/G]       | NA                                         |
| Ca_Desi_Chrom_3_11392020 | Ca_desi_chr03      | 11392020                       | [T/C]       | NA                                         |
| Ca_Desi_Chrom_3_11426559 | Ca_desi_chr03      | 11426559                       | [T/C]       | NA                                         |
| Ca_Desi_Chrom_3_11427980 | Ca_desi_chr03      | 11427980                       | [T/G]       | NA                                         |
| Ca_Desi_Chrom_3_11430507 | Ca_desi_chr03      | 11430507                       | [T/C]       | NA                                         |
| Ca_Desi_Chrom_3_11432250 | Ca_desi_chr03      | 11432250                       | [C/A]       | NA                                         |
| Ca_Desi_Chrom_3_11432510 | Ca_desi_chr03      | 11432510                       | [T/C]       | NA                                         |
| Ca_Desi_Chrom_3_11432514 | Ca_desi_chr03      | 11432514                       | [T/G]       | NA                                         |
| Ca_Desi_Chrom_3_11432519 | Ca_desi_chr03      | 11432519                       | [T/C]       | NA                                         |
| Ca_Desi_Chrom_3_11432534 | Ca_desi_chr03      | 11432534                       | [T/C]       | NA                                         |
| Ca_Desi_Chrom_3_11432572 | Ca_desi_chr03      | 11432572                       | [G/T]       | NA                                         |
| Ca_Desi_Chrom_3_11432577 | Ca_desi_chr03      | 11432577                       | [A/G]       | NA                                         |
| Ca_Desi_Chrom_3_11434575 | Ca_desi_chr03      | 11434575                       | [A/C]       | NA                                         |
| Ca_Desi_Chrom_3_11436131 | Ca_desi_chr03      | 11436131                       | [A/C]       | NA                                         |
| Ca_Desi_Chrom_3_11436133 | Ca_desi_chr03      | 11436133                       | [A/C]       | NA                                         |
| Ca_Desi_Chrom_3_11436135 | Ca_desi_chr03      | 11436135                       | [A/G]       | NA                                         |
| Ca_Desi_Chrom_3_11436165 | Ca_desi_chr03      | 11436165                       | [T/C]       | NA                                         |
| Ca_Desi_Chrom_3_11444578 | Ca_desi_chr03      | 11444578                       | [T/C]       | NA                                         |
| Ca_Desi_Chrom_3_11444582 | Ca_desi_chr03      | 11444582                       | [A/C]       | NA                                         |
| Ca_Desi_Chrom_3_11444586 | Ca_desi_chr03      | 11444586                       | [T/A]       | NA                                         |
| Ca_Desi_Chrom_3_11444596 | Ca_desi_chr03      | 11444596                       | [A/C]       | NA                                         |
| Ca_Desi_Chrom_3_11444599 | Ca_desi_chr03      | 11444599                       | [G/C]       | NA                                         |
| Ca_Desi_Chrom_3_11457601 | Ca_desi_chr03      | 11457601                       | [T/C]       | NA                                         |

| <b>SNP IDs</b>           | <b>Chromosomes</b> | <b>Physical positions (bp)</b> | <b>SNPs</b> | <b>NCBI SNPdb accession IDs (NCBI_ss#)</b> |
|--------------------------|--------------------|--------------------------------|-------------|--------------------------------------------|
| Ca_Desi_Chrom_3_11457608 | Ca_desi_chr03      | 11457608                       | [T/G]       | NA                                         |
| Ca_Desi_Chrom_3_11457620 | Ca_desi_chr03      | 11457620                       | [T/C]       | NA                                         |
| Ca_Desi_Chrom_3_11457628 | Ca_desi_chr03      | 11457628                       | [T/C]       | NA                                         |
| Ca_Desi_Chrom_3_11457633 | Ca_desi_chr03      | 11457633                       | [C/G]       | NA                                         |
| Ca_Desi_Chrom_3_11457635 | Ca_desi_chr03      | 11457635                       | [A/G]       | NA                                         |
| Ca_Desi_Chrom_3_11490712 | Ca_desi_chr03      | 11490712                       | [C/G]       | NA                                         |
| Ca_Desi_Chrom_3_11533440 | Ca_desi_chr03      | 11533440                       | [A/T]       | NA                                         |
| Ca_Desi_Chrom_3_11543200 | Ca_desi_chr03      | 11543200                       | [T/G]       | NA                                         |
| Ca_Desi_Chrom_3_11543223 | Ca_desi_chr03      | 11543223                       | [T/G]       | NA                                         |
| Ca_Desi_Chrom_3_11544159 | Ca_desi_chr03      | 11544159                       | [A/G]       | NA                                         |
| Ca_Desi_Chrom_3_11588299 | Ca_desi_chr03      | 11588299                       | [A/C]       | NA                                         |
| Ca_Desi_Chrom_3_11588324 | Ca_desi_chr03      | 11588324                       | [A/C]       | NA                                         |
| Ca_Desi_Chrom_3_11624201 | Ca_desi_chr03      | 11624201                       | [A/C]       | NA                                         |
| Ca_Desi_Chrom_3_11631332 | Ca_desi_chr03      | 11631332                       | [A/C]       | NA                                         |
| Ca_Desi_Chrom_3_11633970 | Ca_desi_chr03      | 11633970                       | [A/T]       | NA                                         |
| Ca_Desi_Chrom_3_11656929 | Ca_desi_chr03      | 11656929                       | [T/C]       | NA                                         |
| Ca_Desi_Chrom_3_11656937 | Ca_desi_chr03      | 11656937                       | [A/G]       | NA                                         |
| Ca_Desi_Chrom_3_11656942 | Ca_desi_chr03      | 11656942                       | [G/T]       | NA                                         |
| Ca_Desi_Chrom_3_11656944 | Ca_desi_chr03      | 11656944                       | [T/C]       | NA                                         |
| Ca_Desi_Chrom_3_11656947 | Ca_desi_chr03      | 11656947                       | [A/G]       | NA                                         |
| Ca_Desi_Chrom_3_11656952 | Ca_desi_chr03      | 11656952                       | [T/G]       | NA                                         |
| Ca_Desi_Chrom_3_11656958 | Ca_desi_chr03      | 11656958                       | [A/G]       | NA                                         |
| Ca_Desi_Chrom_3_11656968 | Ca_desi_chr03      | 11656968                       | [A/G]       | NA                                         |
| Ca_Desi_Chrom_3_11656970 | Ca_desi_chr03      | 11656970                       | [T/C]       | NA                                         |
| Ca_Desi_Chrom_3_11656981 | Ca_desi_chr03      | 11656981                       | [A/G]       | NA                                         |
| Ca_Desi_Chrom_3_11656989 | Ca_desi_chr03      | 11656989                       | [T/C]       | NA                                         |
| Ca_Desi_Chrom_3_11656997 | Ca_desi_chr03      | 11656997                       | [A/G]       | NA                                         |
| Ca_Desi_Chrom_3_11667188 | Ca_desi_chr03      | 11667188                       | [T/C]       | NA                                         |
| Ca_Desi_Chrom_3_11667230 | Ca_desi_chr03      | 11667230                       | [T/C]       | NA                                         |
| Ca_Desi_Chrom_3_11668974 | Ca_desi_chr03      | 11668974                       | [T/C]       | NA                                         |
| Ca_Desi_Chrom_3_11668989 | Ca_desi_chr03      | 11668989                       | [T/C]       | NA                                         |
| Ca_Desi_Chrom_3_11669023 | Ca_desi_chr03      | 11669023                       | [A/G]       | NA                                         |
| Ca_Desi_Chrom_3_11669956 | Ca_desi_chr03      | 11669956                       | [T/C]       | NA                                         |
| Ca_Desi_Chrom_3_11669959 | Ca_desi_chr03      | 11669959                       | [T/C]       | NA                                         |

| <b>SNP IDs</b>         | <b>Chromosomes</b> | <b>Physical positions (bp)</b> | <b>SNPs</b> | <b>NCBI SNPdb accession IDs (NCBI_ss#)</b> |
|------------------------|--------------------|--------------------------------|-------------|--------------------------------------------|
| Ca_Desi_Chr_3_11669967 | Ca_desi_chr03      | 11669967                       | [T/C]       | NA                                         |
| Ca_Desi_Chr_3_11669983 | Ca_desi_chr03      | 11669983                       | [A/C]       | NA                                         |
| Ca_Desi_Chr_3_11722008 | Ca_desi_chr03      | 11722008                       | [T/G]       | NA                                         |
| Ca_Desi_Chr_3_11722095 | Ca_desi_chr03      | 11722095                       | [T/G]       | NA                                         |
| Ca_Desi_Chr_3_11722125 | Ca_desi_chr03      | 11722125                       | [T/G]       | NA                                         |
| Ca_Desi_Chr_3_11740564 | Ca_desi_chr03      | 11740564                       | [T/C]       | NA                                         |
| Ca_Desi_Chr_3_11740588 | Ca_desi_chr03      | 11740588                       | [A/G]       | NA                                         |
| Ca_Desi_Chr_3_11740660 | Ca_desi_chr03      | 11740660                       | [T/C]       | NA                                         |
| Ca_Desi_Chr_3_11740671 | Ca_desi_chr03      | 11740671                       | [A/G]       | NA                                         |
| Ca_Desi_Chr_3_11750910 | Ca_desi_chr03      | 11750910                       | [C/A]       | NA                                         |
| Ca_Desi_Chr_3_11750911 | Ca_desi_chr03      | 11750911                       | [A/G]       | NA                                         |
| Ca_Desi_Chr_3_11781905 | Ca_desi_chr03      | 11781905                       | [T/G]       | NA                                         |
| Ca_Desi_Chr_3_11782791 | Ca_desi_chr03      | 11782791                       | [A/T]       | NA                                         |
| Ca_Desi_Chr_3_11782818 | Ca_desi_chr03      | 11782818                       | [T/A]       | NA                                         |
| Ca_Desi_Chr_3_11783339 | Ca_desi_chr03      | 11783339                       | [A/T]       | NA                                         |
| Ca_Desi_Chr_3_11783341 | Ca_desi_chr03      | 11783341                       | [C/A]       | NA                                         |
| Ca_Desi_Chr_3_11783344 | Ca_desi_chr03      | 11783344                       | [G/A]       | NA                                         |
| Ca_Desi_Chr_3_11783353 | Ca_desi_chr03      | 11783353                       | [A/G]       | NA                                         |
| Ca_Desi_Chr_3_11783359 | Ca_desi_chr03      | 11783359                       | [T/C]       | NA                                         |
| Ca_Desi_Chr_3_11795727 | Ca_desi_chr03      | 11795727                       | [A/G]       | NA                                         |
| Ca_Desi_Chr_3_11795733 | Ca_desi_chr03      | 11795733                       | [T/C]       | NA                                         |
| Ca_Desi_Chr_3_11795758 | Ca_desi_chr03      | 11795758                       | [A/G]       | NA                                         |
| Ca_Desi_Chr_3_11795771 | Ca_desi_chr03      | 11795771                       | [T/G]       | NA                                         |
| Ca_Desi_Chr_3_11951018 | Ca_desi_chr03      | 11951018                       | [T/G]       | NA                                         |
| Ca_Desi_Chr_3_11952326 | Ca_desi_chr03      | 11952326                       | [T/G]       | NA                                         |
| Ca_Desi_Chr_3_11952338 | Ca_desi_chr03      | 11952338                       | [T/G]       | NA                                         |
| Ca_Desi_Chr_3_11952353 | Ca_desi_chr03      | 11952353                       | [T/G]       | NA                                         |
| Ca_Desi_Chr_3_11952371 | Ca_desi_chr03      | 11952371                       | [A/G]       | NA                                         |
| Ca_Desi_Chr_3_11952374 | Ca_desi_chr03      | 11952374                       | [A/G]       | NA                                         |
| Ca_Desi_Chr_3_11952416 | Ca_desi_chr03      | 11952416                       | [A/T]       | NA                                         |
| Ca_Desi_Chr_3_11952431 | Ca_desi_chr03      | 11952431                       | [A/G]       | NA                                         |
| Ca_Desi_Chr_3_11952440 | Ca_desi_chr03      | 11952440                       | [T/G]       | NA                                         |
| Ca_Desi_Chr_3_11952443 | Ca_desi_chr03      | 11952443                       | [T/G]       | NA                                         |
| Ca_Desi_Chr_3_11952463 | Ca_desi_chr03      | 11952463                       | [A/G]       | NA                                         |

| <b>SNP IDs</b>           | <b>Chromosomes</b> | <b>Physical positions (bp)</b> | <b>SNPs</b> | <b>NCBI SNPdb accession IDs (NCBI_ss#)</b> |
|--------------------------|--------------------|--------------------------------|-------------|--------------------------------------------|
| Ca_Desi_Chrom_3_11952492 | Ca_desi_chr03      | 11952492                       | [T/G]       | NA                                         |
| Ca_Desi_Chrom_3_11952517 | Ca_desi_chr03      | 11952517                       | [A/C]       | NA                                         |
| Ca_Desi_Chrom_3_11965650 | Ca_desi_chr03      | 11965650                       | [T/G]       | NA                                         |
| Ca_Desi_Chrom_3_11965669 | Ca_desi_chr03      | 11965669                       | [T/A]       | NA                                         |
| Ca_Desi_Chrom_3_12096021 | Ca_desi_chr03      | 12096021                       | [A/T]       | NA                                         |
| Ca_Desi_Chrom_3_12096051 | Ca_desi_chr03      | 12096051                       | [A/G]       | NA                                         |
| Ca_Desi_Chrom_3_12163289 | Ca_desi_chr03      | 12163289                       | [A/C]       | NA                                         |
| Ca_Desi_Chrom_3_12341044 | Ca_desi_chr03      | 12341044                       | [A/G]       | NA                                         |
| Ca_Desi_Chrom_3_12341064 | Ca_desi_chr03      | 12341064                       | [T/C]       | NA                                         |
| Ca_Desi_Chrom_3_12342074 | Ca_desi_chr03      | 12342074                       | [T/G]       | NA                                         |
| Ca_Desi_Chrom_3_12385705 | Ca_desi_chr03      | 12385705                       | [T/C]       | NA                                         |
| Ca_Desi_Chrom_3_12385707 | Ca_desi_chr03      | 12385707                       | [A/C]       | NA                                         |
| Ca_Desi_Chrom_3_12385723 | Ca_desi_chr03      | 12385723                       | [T/C]       | NA                                         |
| Ca_Desi_Chrom_3_12387388 | Ca_desi_chr03      | 12387388                       | [A/C]       | NA                                         |
| Ca_Desi_Chrom_3_12506621 | Ca_desi_chr03      | 12506621                       | [T/C]       | NA                                         |
| Ca_Desi_Chrom_3_12513130 | Ca_desi_chr03      | 12513130                       | [A/T]       | NA                                         |
| Ca_Desi_Chrom_3_12534470 | Ca_desi_chr03      | 12534470                       | [T/C]       | NA                                         |
| Ca_Desi_Chrom_3_12534491 | Ca_desi_chr03      | 12534491                       | [T/G]       | NA                                         |
| Ca_Desi_Chrom_3_12536000 | Ca_desi_chr03      | 12536000                       | [C/A]       | NA                                         |
| Ca_Desi_Chrom_3_12536003 | Ca_desi_chr03      | 12536003                       | [A/C]       | NA                                         |
| Ca_Desi_Chrom_3_12536005 | Ca_desi_chr03      | 12536005                       | [T/G]       | NA                                         |
| Ca_Desi_Chrom_3_12543780 | Ca_desi_chr03      | 12543780                       | [T/C]       | NA                                         |
| Ca_Desi_Chrom_3_12543781 | Ca_desi_chr03      | 12543781                       | [T/C]       | NA                                         |
| Ca_Desi_Chrom_3_12543812 | Ca_desi_chr03      | 12543812                       | [A/G]       | NA                                         |
| Ca_Desi_Chrom_3_12543826 | Ca_desi_chr03      | 12543826                       | [T/C]       | NA                                         |
| Ca_Desi_Chrom_3_12547098 | Ca_desi_chr03      | 12547098                       | [T/G]       | NA                                         |
| Ca_Desi_Chrom_3_12846630 | Ca_desi_chr03      | 12846630                       | [C/T]       | NA                                         |
| Ca_Desi_Chrom_3_12846631 | Ca_desi_chr03      | 12846631                       | [T/C]       | NA                                         |
| Ca_Desi_Chrom_3_12846632 | Ca_desi_chr03      | 12846632                       | [T/C]       | NA                                         |
| Ca_Desi_Chrom_3_12863760 | Ca_desi_chr03      | 12863760                       | [G/A]       | NA                                         |
| Ca_Desi_Chrom_3_12863764 | Ca_desi_chr03      | 12863764                       | [C/T]       | NA                                         |
| Ca_Desi_Chrom_3_12863779 | Ca_desi_chr03      | 12863779                       | [T/C]       | NA                                         |
| Ca_Desi_Chrom_3_12863789 | Ca_desi_chr03      | 12863789                       | [C/A]       | NA                                         |
| Ca_Desi_Chrom_3_12863810 | Ca_desi_chr03      | 12863810                       | [C/T]       | NA                                         |

| <b>SNP IDs</b>          | <b>Chromosomes</b> | <b>Physical positions (bp)</b> | <b>SNPs</b> | <b>NCBI SNPdb accession IDs (NCBI_ss#)</b> |
|-------------------------|--------------------|--------------------------------|-------------|--------------------------------------------|
| Ca_Desig_Chr_3_12863812 | Ca_desig_chr03     | 12863812                       | [C/T]       | NA                                         |
| Ca_Desig_Chr_3_12896089 | Ca_desig_chr03     | 12896089                       | [T/C]       | NA                                         |
| Ca_Desig_Chr_3_12896100 | Ca_desig_chr03     | 12896100                       | [A/G]       | NA                                         |
| Ca_Desig_Chr_3_12897384 | Ca_desig_chr03     | 12897384                       | [G/T]       | NA                                         |
| Ca_Desig_Chr_3_12897498 | Ca_desig_chr03     | 12897498                       | [T/C]       | NA                                         |
| Ca_Desig_Chr_3_12899996 | Ca_desig_chr03     | 12899996                       | [T/A]       | NA                                         |
| Ca_Desig_Chr_3_12900039 | Ca_desig_chr03     | 12900039                       | [A/C]       | NA                                         |
| Ca_Desig_Chr_3_13015032 | Ca_desig_chr03     | 13015032                       | [A/G]       | NA                                         |
| Ca_Desig_Chr_3_13015036 | Ca_desig_chr03     | 13015036                       | [T/C]       | NA                                         |
| Ca_Desig_Chr_3_13015045 | Ca_desig_chr03     | 13015045                       | [T/C]       | NA                                         |
| Ca_Desig_Chr_3_13015076 | Ca_desig_chr03     | 13015076                       | [A/T]       | NA                                         |
| Ca_Desig_Chr_3_13207072 | Ca_desig_chr03     | 13207072                       | [T/G]       | NA                                         |
| Ca_Desig_Chr_3_13353108 | Ca_desig_chr03     | 13353108                       | [T/C]       | NA                                         |
| Ca_Desig_Chr_3_13353122 | Ca_desig_chr03     | 13353122                       | [A/G]       | NA                                         |
| Ca_Desig_Chr_3_13423139 | Ca_desig_chr03     | 13423139                       | [A/T]       | NA                                         |
| Ca_Desig_Chr_3_13423147 | Ca_desig_chr03     | 13423147                       | [T/C]       | NA                                         |
| Ca_Desig_Chr_3_13423161 | Ca_desig_chr03     | 13423161                       | [T/A]       | NA                                         |
| Ca_Desig_Chr_3_13423162 | Ca_desig_chr03     | 13423162                       | [A/T]       | NA                                         |
| Ca_Desig_Chr_3_13423164 | Ca_desig_chr03     | 13423164                       | [T/C]       | NA                                         |
| Ca_Desig_Chr_3_13423175 | Ca_desig_chr03     | 13423175                       | [T/C]       | NA                                         |
| Ca_Desig_Chr_3_13518038 | Ca_desig_chr03     | 13518038                       | [A/C]       | NA                                         |
| Ca_Desig_Chr_3_13533180 | Ca_desig_chr03     | 13533180                       | [T/C]       | NA                                         |
| Ca_Desig_Chr_3_13533191 | Ca_desig_chr03     | 13533191                       | [T/C]       | NA                                         |
| Ca_Desig_Chr_3_13533219 | Ca_desig_chr03     | 13533219                       | [T/G]       | NA                                         |
| Ca_Desig_Chr_3_13533221 | Ca_desig_chr03     | 13533221                       | [T/G]       | NA                                         |
| Ca_Desig_Chr_3_13533224 | Ca_desig_chr03     | 13533224                       | [T/G]       | NA                                         |
| Ca_Desig_Chr_3_13533234 | Ca_desig_chr03     | 13533234                       | [T/C]       | NA                                         |
| Ca_Desig_Chr_3_13535547 | Ca_desig_chr03     | 13535547                       | [A/T]       | NA                                         |
| Ca_Desig_Chr_3_13535548 | Ca_desig_chr03     | 13535548                       | [T/G]       | NA                                         |
| Ca_Desig_Chr_3_13535549 | Ca_desig_chr03     | 13535549                       | [C/T]       | NA                                         |
| Ca_Desig_Chr_3_13535550 | Ca_desig_chr03     | 13535550                       | [T/G]       | NA                                         |
| Ca_Desig_Chr_3_13535696 | Ca_desig_chr03     | 13535696                       | [A/G]       | NA                                         |
| Ca_Desig_Chr_3_13535715 | Ca_desig_chr03     | 13535715                       | [A/C]       | NA                                         |
| Ca_Desig_Chr_3_13538576 | Ca_desig_chr03     | 13538576                       | [A/C]       | NA                                         |

| <b>SNP IDs</b>           | <b>Chromosomes</b> | <b>Physical positions (bp)</b> | <b>SNPs</b> | <b>NCBI SNPdb accession IDs (NCBI_ss#)</b> |
|--------------------------|--------------------|--------------------------------|-------------|--------------------------------------------|
| Ca_Desi_Chrom_3_13578505 | Ca_desi_chr03      | 13578505                       | [T/G]       | NA                                         |
| Ca_Desi_Chrom_3_13664230 | Ca_desi_chr03      | 13664230                       | [T/C]       | NA                                         |
| Ca_Desi_Chrom_3_13761986 | Ca_desi_chr03      | 13761986                       | [A/G]       | NA                                         |
| Ca_Desi_Chrom_3_13762005 | Ca_desi_chr03      | 13762005                       | [A/G]       | NA                                         |
| Ca_Desi_Chrom_3_13762011 | Ca_desi_chr03      | 13762011                       | [A/G]       | NA                                         |
| Ca_Desi_Chrom_3_13762031 | Ca_desi_chr03      | 13762031                       | [A/G]       | NA                                         |
| Ca_Desi_Chrom_3_13762033 | Ca_desi_chr03      | 13762033                       | [A/G]       | NA                                         |
| Ca_Desi_Chrom_3_13762041 | Ca_desi_chr03      | 13762041                       | [T/C]       | NA                                         |
| Ca_Desi_Chrom_3_13762042 | Ca_desi_chr03      | 13762042                       | [A/G]       | NA                                         |
| Ca_Desi_Chrom_3_13823885 | Ca_desi_chr03      | 13823885                       | [T/C]       | NA                                         |
| Ca_Desi_Chrom_3_13825432 | Ca_desi_chr03      | 13825432                       | [T/G]       | NA                                         |
| Ca_Desi_Chrom_3_13829504 | Ca_desi_chr03      | 13829504                       | [T/C]       | NA                                         |
| Ca_Desi_Chrom_3_13829505 | Ca_desi_chr03      | 13829505                       | [G/T]       | NA                                         |
| Ca_Desi_Chrom_3_13841844 | Ca_desi_chr03      | 13841844                       | [T/C]       | NA                                         |
| Ca_Desi_Chrom_3_13841848 | Ca_desi_chr03      | 13841848                       | [T/C]       | NA                                         |
| Ca_Desi_Chrom_3_13841860 | Ca_desi_chr03      | 13841860                       | [T/C]       | NA                                         |
| Ca_Desi_Chrom_3_13841862 | Ca_desi_chr03      | 13841862                       | [A/C]       | NA                                         |
| Ca_Desi_Chrom_3_13841866 | Ca_desi_chr03      | 13841866                       | [T/C]       | NA                                         |
| Ca_Desi_Chrom_3_13841868 | Ca_desi_chr03      | 13841868                       | [A/C]       | NA                                         |
| Ca_Desi_Chrom_3_13892233 | Ca_desi_chr03      | 13892233                       | [A/C]       | NA                                         |
| Ca_Desi_Chrom_3_13892255 | Ca_desi_chr03      | 13892255                       | [T/C]       | NA                                         |
| Ca_Desi_Chrom_3_13892260 | Ca_desi_chr03      | 13892260                       | [T/C]       | NA                                         |
| Ca_Desi_Chrom_3_13894609 | Ca_desi_chr03      | 13894609                       | [T/G]       | NA                                         |
| Ca_Desi_Chrom_3_13993896 | Ca_desi_chr03      | 13993896                       | [T/C]       | NA                                         |
| Ca_Desi_Chrom_3_14005543 | Ca_desi_chr03      | 14005543                       | [G/C]       | NA                                         |
| Ca_Desi_Chrom_3_14006868 | Ca_desi_chr03      | 14006868                       | [G/A]       | NA                                         |
| Ca_Desi_Chrom_3_14137865 | Ca_desi_chr03      | 14137865                       | [C/A]       | NA                                         |
| Ca_Desi_Chrom_3_14172683 | Ca_desi_chr03      | 14172683                       | [T/G]       | NA                                         |
| Ca_Desi_Chrom_3_14172702 | Ca_desi_chr03      | 14172702                       | [A/G]       | NA                                         |
| Ca_Desi_Chrom_3_14619693 | Ca_desi_chr03      | 14619693                       | [A/G]       | NA                                         |
| Ca_Desi_Chrom_3_14732868 | Ca_desi_chr03      | 14732868                       | [A/T]       | NA                                         |
| Ca_Desi_Chrom_3_14733058 | Ca_desi_chr03      | 14733058                       | [T/C]       | NA                                         |
| Ca_Desi_Chrom_3_14817890 | Ca_desi_chr03      | 14817890                       | [A/C]       | NA                                         |
| Ca_Desi_Chrom_3_14860658 | Ca_desi_chr03      | 14860658                       | [A/C]       | NA                                         |

| <b>SNP IDs</b>           | <b>Chromosomes</b> | <b>Physical positions (bp)</b> | <b>SNPs</b> | <b>NCBI SNPdb accession IDs (NCBI_ss#)</b> |
|--------------------------|--------------------|--------------------------------|-------------|--------------------------------------------|
| Ca_Desi_Chrom_3_14927117 | Ca_desi_chr03      | 14927117                       | [A/G]       | NA                                         |
| Ca_Desi_Chrom_3_14927170 | Ca_desi_chr03      | 14927170                       | [C/G]       | NA                                         |
| Ca_Desi_Chrom_3_14933824 | Ca_desi_chr03      | 14933824                       | [T/C]       | NA                                         |
| Ca_Desi_Chrom_3_14933842 | Ca_desi_chr03      | 14933842                       | [A/G]       | NA                                         |
| Ca_Desi_Chrom_3_14933844 | Ca_desi_chr03      | 14933844                       | [T/G]       | NA                                         |
| Ca_Desi_Chrom_3_14936353 | Ca_desi_chr03      | 14936353                       | [A/G]       | NA                                         |
| Ca_Desi_Chrom_3_15070440 | Ca_desi_chr03      | 15070440                       | [T/G]       | NA                                         |
| Ca_Desi_Chrom_3_15070457 | Ca_desi_chr03      | 15070457                       | [T/G]       | NA                                         |
| Ca_Desi_Chrom_3_15103597 | Ca_desi_chr03      | 15103597                       | [A/G]       | NA                                         |
| Ca_Desi_Chrom_3_15111143 | Ca_desi_chr03      | 15111143                       | [T/A]       | NA                                         |
| Ca_Desi_Chrom_3_15114667 | Ca_desi_chr03      | 15114667                       | [A/C]       | NA                                         |
| Ca_Desi_Chrom_3_15115114 | Ca_desi_chr03      | 15115114                       | [A/G]       | NA                                         |
| Ca_Desi_Chrom_3_15115921 | Ca_desi_chr03      | 15115921                       | [T/G]       | NA                                         |
| Ca_Desi_Chrom_3_15134443 | Ca_desi_chr03      | 15134443                       | [T/C]       | NA                                         |
| Ca_Desi_Chrom_3_15134476 | Ca_desi_chr03      | 15134476                       | [A/C]       | NA                                         |
| Ca_Desi_Chrom_3_15134798 | Ca_desi_chr03      | 15134798                       | [A/T]       | NA                                         |
| Ca_Desi_Chrom_3_15280200 | Ca_desi_chr03      | 15280200                       | [T/G]       | NA                                         |
| Ca_Desi_Chrom_3_15280210 | Ca_desi_chr03      | 15280210                       | [A/T]       | NA                                         |
| Ca_Desi_Chrom_3_15281781 | Ca_desi_chr03      | 15281781                       | [T/C]       | NA                                         |
| Ca_Desi_Chrom_3_15332029 | Ca_desi_chr03      | 15332029                       | [T/A]       | NA                                         |
| Ca_Desi_Chrom_3_15332140 | Ca_desi_chr03      | 15332140                       | [G/A]       | NA                                         |
| Ca_Desi_Chrom_3_15332490 | Ca_desi_chr03      | 15332490                       | [C/G]       | NA                                         |
| Ca_Desi_Chrom_3_15332493 | Ca_desi_chr03      | 15332493                       | [C/A]       | NA                                         |
| Ca_Desi_Chrom_3_15332497 | Ca_desi_chr03      | 15332497                       | [C/T]       | NA                                         |
| Ca_Desi_Chrom_3_15332593 | Ca_desi_chr03      | 15332593                       | [A/G]       | NA                                         |
| Ca_Desi_Chrom_3_15376333 | Ca_desi_chr03      | 15376333                       | [A/C]       | NA                                         |
| Ca_Desi_Chrom_3_15386028 | Ca_desi_chr03      | 15386028                       | [C/A]       | NA                                         |
| Ca_Desi_Chrom_3_15386029 | Ca_desi_chr03      | 15386029                       | [A/G]       | NA                                         |
| Ca_Desi_Chrom_3_15386093 | Ca_desi_chr03      | 15386093                       | [A/C]       | NA                                         |
| Ca_Desi_Chrom_3_15399290 | Ca_desi_chr03      | 15399290                       | [A/G]       | NA                                         |
| Ca_Desi_Chrom_3_15446493 | Ca_desi_chr03      | 15446493                       | [T/A]       | NA                                         |
| Ca_Desi_Chrom_3_15449371 | Ca_desi_chr03      | 15449371                       | [A/G]       | NA                                         |
| Ca_Desi_Chrom_3_15449374 | Ca_desi_chr03      | 15449374                       | [A/T]       | NA                                         |
| Ca_Desi_Chrom_3_15459723 | Ca_desi_chr03      | 15459723                       | [A/C]       | NA                                         |



| <b>SNP IDs</b>          | <b>Chromosomes</b> | <b>Physical positions (bp)</b> | <b>SNPs</b> | <b>NCBI SNPdb accession IDs (NCBI_ss#)</b> |
|-------------------------|--------------------|--------------------------------|-------------|--------------------------------------------|
| Ca_Desi_Chrr_3_15459742 | Ca_desi_chrr03     | 15459742                       | [A/T]       | NA                                         |
| Ca_Desi_Chrr_3_15459759 | Ca_desi_chrr03     | 15459759                       | [A/C]       | NA                                         |
| Ca_Desi_Chrr_3_15497381 | Ca_desi_chrr03     | 15497381                       | [A/C]       | NA                                         |
| Ca_Desi_Chrr_3_15497425 | Ca_desi_chrr03     | 15497425                       | [A/G]       | NA                                         |
| Ca_Desi_Chrr_3_15497431 | Ca_desi_chrr03     | 15497431                       | [A/C]       | NA                                         |
| Ca_Desi_Chrr_3_15502436 | Ca_desi_chrr03     | 15502436                       | [T/C]       | NA                                         |
| Ca_Desi_Chrr_3_15502457 | Ca_desi_chrr03     | 15502457                       | [T/C]       | NA                                         |
| Ca_Desi_Chrr_3_15502468 | Ca_desi_chrr03     | 15502468                       | [T/C]       | NA                                         |
| Ca_Desi_Chrr_3_15502478 | Ca_desi_chrr03     | 15502478                       | [A/C]       | NA                                         |
| Ca_Desi_Chrr_3_15502480 | Ca_desi_chrr03     | 15502480                       | [T/C]       | NA                                         |
| Ca_Desi_Chrr_3_15502487 | Ca_desi_chrr03     | 15502487                       | [T/C]       | NA                                         |
| Ca_Desi_Chrr_3_15875169 | Ca_desi_chrr03     | 15875169                       | [A/G]       | NA                                         |
| Ca_Desi_Chrr_3_15875193 | Ca_desi_chrr03     | 15875193                       | [T/C]       | NA                                         |
| Ca_Desi_Chrr_3_15875221 | Ca_desi_chrr03     | 15875221                       | [A/C]       | NA                                         |
| Ca_Desi_Chrr_3_15875231 | Ca_desi_chrr03     | 15875231                       | [A/G]       | NA                                         |
| Ca_Desi_Chrr_3_15877280 | Ca_desi_chrr03     | 15877280                       | [A/C]       | NA                                         |
| Ca_Desi_Chrr_3_15991384 | Ca_desi_chrr03     | 15991384                       | [T/C]       | NA                                         |
| Ca_Desi_Chrr_3_15991386 | Ca_desi_chrr03     | 15991386                       | [G/A]       | NA                                         |
| Ca_Desi_Chrr_3_15991400 | Ca_desi_chrr03     | 15991400                       | [A/G]       | NA                                         |
| Ca_Desi_Chrr_3_15991425 | Ca_desi_chrr03     | 15991425                       | [A/G]       | NA                                         |
| Ca_Desi_Chrr_3_15991437 | Ca_desi_chrr03     | 15991437                       | [T/A]       | NA                                         |
| Ca_Desi_Chrr_3_16022419 | Ca_desi_chrr03     | 16022419                       | [T/C]       | NA                                         |
| Ca_Desi_Chrr_3_16050997 | Ca_desi_chrr03     | 16050997                       | [T/C]       | NA                                         |
| Ca_Desi_Chrr_3_16051042 | Ca_desi_chrr03     | 16051042                       | [T/C]       | NA                                         |
| Ca_Desi_Chrr_3_16051284 | Ca_desi_chrr03     | 16051284                       | [T/C]       | NA                                         |
| Ca_Desi_Chrr_3_16051287 | Ca_desi_chrr03     | 16051287                       | [T/C]       | NA                                         |
| Ca_Desi_Chrr_3_16051314 | Ca_desi_chrr03     | 16051314                       | [T/C]       | NA                                         |
| Ca_Desi_Chrr_3_16051338 | Ca_desi_chrr03     | 16051338                       | [T/C]       | NA                                         |
| Ca_Desi_Chrr_3_16104847 | Ca_desi_chrr03     | 16104847                       | [T/A]       | NA                                         |
| Ca_Desi_Chrr_3_16104854 | Ca_desi_chrr03     | 16104854                       | [A/G]       | NA                                         |
| Ca_Desi_Chrr_3_16104860 | Ca_desi_chrr03     | 16104860                       | [T/C]       | NA                                         |
| Ca_Desi_Chrr_3_16108704 | Ca_desi_chrr03     | 16108704                       | [A/G]       | NA                                         |
| Ca_Desi_Chrr_3_16116725 | Ca_desi_chrr03     | 16116725                       | [A/C]       | NA                                         |
| Ca_Desi_Chrr_3_16136964 | Ca_desi_chrr03     | 16136964                       | [A/C]       | NA                                         |

| <b>SNP IDs</b>         | <b>Chromosomes</b> | <b>Physical positions (bp)</b> | <b>SNPs</b> | <b>NCBI SNPdb accession IDs (NCBI_ss#)</b> |
|------------------------|--------------------|--------------------------------|-------------|--------------------------------------------|
| Ca_Desi_Chr_3_16181581 | Ca_desi_chr03      | 16181581                       | [T/C]       | NA                                         |
| Ca_Desi_Chr_3_16185209 | Ca_desi_chr03      | 16185209                       | [G/T]       | NA                                         |
| Ca_Desi_Chr_3_16185211 | Ca_desi_chr03      | 16185211                       | [G/T]       | NA                                         |
| Ca_Desi_Chr_3_16188628 | Ca_desi_chr03      | 16188628                       | [A/G]       | NA                                         |
| Ca_Desi_Chr_3_16188642 | Ca_desi_chr03      | 16188642                       | [T/C]       | NA                                         |
| Ca_Desi_Chr_3_16188647 | Ca_desi_chr03      | 16188647                       | [A/T]       | NA                                         |
| Ca_Desi_Chr_3_16188660 | Ca_desi_chr03      | 16188660                       | [T/G]       | NA                                         |
| Ca_Desi_Chr_3_16188666 | Ca_desi_chr03      | 16188666                       | [T/G]       | NA                                         |
| Ca_Desi_Chr_3_16188667 | Ca_desi_chr03      | 16188667                       | [A/C]       | NA                                         |
| Ca_Desi_Chr_3_16209367 | Ca_desi_chr03      | 16209367                       | [A/T]       | NA                                         |
| Ca_Desi_Chr_3_16209405 | Ca_desi_chr03      | 16209405                       | [A/T]       | NA                                         |
| Ca_Desi_Chr_3_16209416 | Ca_desi_chr03      | 16209416                       | [A/G]       | NA                                         |
| Ca_Desi_Chr_3_16209423 | Ca_desi_chr03      | 16209423                       | [A/C]       | NA                                         |
| Ca_Desi_Chr_3_16209429 | Ca_desi_chr03      | 16209429                       | [T/C]       | NA                                         |
| Ca_Desi_Chr_3_16209436 | Ca_desi_chr03      | 16209436                       | [T/C]       | NA                                         |
| Ca_Desi_Chr_3_16258540 | Ca_desi_chr03      | 16258540                       | [T/C]       | NA                                         |
| Ca_Desi_Chr_3_16337223 | Ca_desi_chr03      | 16337223                       | [A/G]       | NA                                         |
| Ca_Desi_Chr_3_16337248 | Ca_desi_chr03      | 16337248                       | [A/G]       | NA                                         |
| Ca_Desi_Chr_3_16346395 | Ca_desi_chr03      | 16346395                       | [C/T]       | NA                                         |
| Ca_Desi_Chr_3_16429235 | Ca_desi_chr03      | 16429235                       | [T/G]       | NA                                         |
| Ca_Desi_Chr_3_16429257 | Ca_desi_chr03      | 16429257                       | [A/C]       | NA                                         |
| Ca_Desi_Chr_3_16429260 | Ca_desi_chr03      | 16429260                       | [A/C]       | NA                                         |
| Ca_Desi_Chr_3_16546869 | Ca_desi_chr03      | 16546869                       | [T/G]       | NA                                         |
| Ca_Desi_Chr_3_16546893 | Ca_desi_chr03      | 16546893                       | [A/G]       | NA                                         |
| Ca_Desi_Chr_3_16546905 | Ca_desi_chr03      | 16546905                       | [T/G]       | NA                                         |
| Ca_Desi_Chr_3_16546908 | Ca_desi_chr03      | 16546908                       | [A/C]       | NA                                         |
| Ca_Desi_Chr_3_16579001 | Ca_desi_chr03      | 16579001                       | [A/T]       | NA                                         |
| Ca_Desi_Chr_3_16579024 | Ca_desi_chr03      | 16579024                       | [A/G]       | NA                                         |
| Ca_Desi_Chr_3_16582095 | Ca_desi_chr03      | 16582095                       | [T/G]       | NA                                         |
| Ca_Desi_Chr_3_16582117 | Ca_desi_chr03      | 16582117                       | [A/T]       | NA                                         |
| Ca_Desi_Chr_3_16590579 | Ca_desi_chr03      | 16590579                       | [C/A]       | NA                                         |
| Ca_Desi_Chr_3_16590581 | Ca_desi_chr03      | 16590581                       | [C/A]       | NA                                         |
| Ca_Desi_Chr_3_16590582 | Ca_desi_chr03      | 16590582                       | [C/T]       | NA                                         |
| Ca_Desi_Chr_3_16620455 | Ca_desi_chr03      | 16620455                       | [A/C]       | NA                                         |

| <b>SNP IDs</b>           | <b>Chromosomes</b> | <b>Physical positions (bp)</b> | <b>SNPs</b> | <b>NCBI SNPdb accession IDs (NCBI_ss#)</b> |
|--------------------------|--------------------|--------------------------------|-------------|--------------------------------------------|
| Ca_Desi_Chrom_3_16650411 | Ca_desi_chr03      | 16650411                       | [T/G]       | NA                                         |
| Ca_Desi_Chrom_3_16712047 | Ca_desi_chr03      | 16712047                       | [T/G]       | NA                                         |
| Ca_Desi_Chrom_3_16765694 | Ca_desi_chr03      | 16765694                       | [C/G]       | NA                                         |
| Ca_Desi_Chrom_3_16765695 | Ca_desi_chr03      | 16765695                       | [G/A]       | NA                                         |
| Ca_Desi_Chrom_3_16765697 | Ca_desi_chr03      | 16765697                       | [T/C]       | NA                                         |
| Ca_Desi_Chrom_3_16765698 | Ca_desi_chr03      | 16765698                       | [G/T]       | NA                                         |
| Ca_Desi_Chrom_3_16786497 | Ca_desi_chr03      | 16786497                       | [T/G]       | NA                                         |
| Ca_Desi_Chrom_3_16829075 | Ca_desi_chr03      | 16829075                       | [G/C]       | NA                                         |
| Ca_Desi_Chrom_3_16829079 | Ca_desi_chr03      | 16829079                       | [T/A]       | NA                                         |
| Ca_Desi_Chrom_3_16829122 | Ca_desi_chr03      | 16829122                       | [C/G]       | NA                                         |
| Ca_Desi_Chrom_3_16829185 | Ca_desi_chr03      | 16829185                       | [A/C]       | NA                                         |
| Ca_Desi_Chrom_3_16868994 | Ca_desi_chr03      | 16868994                       | [A/C]       | NA                                         |
| Ca_Desi_Chrom_3_16885690 | Ca_desi_chr03      | 16885690                       | [T/G]       | NA                                         |
| Ca_Desi_Chrom_3_16885755 | Ca_desi_chr03      | 16885755                       | [A/G]       | NA                                         |
| Ca_Desi_Chrom_3_16925658 | Ca_desi_chr03      | 16925658                       | [A/G]       | NA                                         |
| Ca_Desi_Chrom_3_16925687 | Ca_desi_chr03      | 16925687                       | [A/C]       | NA                                         |
| Ca_Desi_Chrom_3_16925701 | Ca_desi_chr03      | 16925701                       | [T/C]       | NA                                         |
| Ca_Desi_Chrom_3_17011085 | Ca_desi_chr03      | 17011085                       | [T/C]       | NA                                         |
| Ca_Desi_Chrom_3_17065579 | Ca_desi_chr03      | 17065579                       | [A/G]       | NA                                         |
| Ca_Desi_Chrom_3_17065582 | Ca_desi_chr03      | 17065582                       | [T/G]       | NA                                         |
| Ca_Desi_Chrom_3_17065613 | Ca_desi_chr03      | 17065613                       | [A/G]       | NA                                         |
| Ca_Desi_Chrom_3_17065616 | Ca_desi_chr03      | 17065616                       | [T/G]       | NA                                         |
| Ca_Desi_Chrom_3_17065622 | Ca_desi_chr03      | 17065622                       | [A/G]       | NA                                         |
| Ca_Desi_Chrom_3_17088304 | Ca_desi_chr03      | 17088304                       | [T/A]       | NA                                         |
| Ca_Desi_Chrom_3_17088308 | Ca_desi_chr03      | 17088308                       | [T/C]       | NA                                         |
| Ca_Desi_Chrom_3_17088317 | Ca_desi_chr03      | 17088317                       | [A/G]       | NA                                         |
| Ca_Desi_Chrom_3_17088323 | Ca_desi_chr03      | 17088323                       | [A/G]       | NA                                         |
| Ca_Desi_Chrom_3_17088325 | Ca_desi_chr03      | 17088325                       | [A/G]       | NA                                         |
| Ca_Desi_Chrom_3_17088328 | Ca_desi_chr03      | 17088328                       | [A/G]       | NA                                         |
| Ca_Desi_Chrom_3_17088349 | Ca_desi_chr03      | 17088349                       | [T/A]       | NA                                         |
| Ca_Desi_Chrom_3_17096871 | Ca_desi_chr03      | 17096871                       | [A/G]       | NA                                         |
| Ca_Desi_Chrom_3_17135033 | Ca_desi_chr03      | 17135033                       | [A/C]       | NA                                         |
| Ca_Desi_Chrom_3_17135048 | Ca_desi_chr03      | 17135048                       | [A/G]       | NA                                         |
| Ca_Desi_Chrom_3_17138109 | Ca_desi_chr03      | 17138109                       | [C/A]       | NA                                         |

| <b>SNP IDs</b>          | <b>Chromosomes</b> | <b>Physical positions (bp)</b> | <b>SNPs</b> | <b>NCBI SNPdb accession IDs (NCBI_ss#)</b> |
|-------------------------|--------------------|--------------------------------|-------------|--------------------------------------------|
| Ca_Desig_Chr_3_17138110 | Ca_desig_chr03     | 17138110                       | [T/G]       | NA                                         |
| Ca_Desig_Chr_3_17138111 | Ca_desig_chr03     | 17138111                       | [T/A]       | NA                                         |
| Ca_Desig_Chr_3_17138112 | Ca_desig_chr03     | 17138112                       | [G/T]       | NA                                         |
| Ca_Desig_Chr_3_17227479 | Ca_desig_chr03     | 17227479                       | [A/G]       | NA                                         |
| Ca_Desig_Chr_3_17227518 | Ca_desig_chr03     | 17227518                       | [A/C]       | NA                                         |
| Ca_Desig_Chr_3_17227520 | Ca_desig_chr03     | 17227520                       | [A/C]       | NA                                         |
| Ca_Desig_Chr_3_17227527 | Ca_desig_chr03     | 17227527                       | [A/G]       | NA                                         |
| Ca_Desig_Chr_3_17296688 | Ca_desig_chr03     | 17296688                       | [T/C]       | NA                                         |
| Ca_Desig_Chr_3_17296711 | Ca_desig_chr03     | 17296711                       | [G/A]       | NA                                         |
| Ca_Desig_Chr_3_17646522 | Ca_desig_chr03     | 17646522                       | [T/C]       | NA                                         |
| Ca_Desig_Chr_3_17646527 | Ca_desig_chr03     | 17646527                       | [T/C]       | NA                                         |
| Ca_Desig_Chr_3_17646542 | Ca_desig_chr03     | 17646542                       | [A/G]       | NA                                         |
| Ca_Desig_Chr_3_17646549 | Ca_desig_chr03     | 17646549                       | [A/G]       | NA                                         |
| Ca_Desig_Chr_3_17664144 | Ca_desig_chr03     | 17664144                       | [A/G]       | NA                                         |
| Ca_Desig_Chr_3_17732927 | Ca_desig_chr03     | 17732927                       | [A/G]       | NA                                         |
| Ca_Desig_Chr_3_17737216 | Ca_desig_chr03     | 17737216                       | [G/A]       | NA                                         |
| Ca_Desig_Chr_3_17741417 | Ca_desig_chr03     | 17741417                       | [A/T]       | NA                                         |
| Ca_Desig_Chr_3_17741418 | Ca_desig_chr03     | 17741418                       | [T/A]       | NA                                         |
| Ca_Desig_Chr_3_17792610 | Ca_desig_chr03     | 17792610                       | [A/C]       | NA                                         |
| Ca_Desig_Chr_3_17792649 | Ca_desig_chr03     | 17792649                       | [A/C]       | NA                                         |
| Ca_Desig_Chr_3_17792663 | Ca_desig_chr03     | 17792663                       | [A/C]       | NA                                         |
| Ca_Desig_Chr_3_17818902 | Ca_desig_chr03     | 17818902                       | [T/G]       | NA                                         |
| Ca_Desig_Chr_3_17818917 | Ca_desig_chr03     | 17818917                       | [T/G]       | NA                                         |
| Ca_Desig_Chr_3_17835717 | Ca_desig_chr03     | 17835717                       | [A/C]       | NA                                         |
| Ca_Desig_Chr_3_17835719 | Ca_desig_chr03     | 17835719                       | [T/C]       | NA                                         |
| Ca_Desig_Chr_3_17835724 | Ca_desig_chr03     | 17835724                       | [T/C]       | NA                                         |
| Ca_Desig_Chr_3_17835729 | Ca_desig_chr03     | 17835729                       | [A/C]       | NA                                         |
| Ca_Desig_Chr_3_17835731 | Ca_desig_chr03     | 17835731                       | [T/G]       | NA                                         |
| Ca_Desig_Chr_3_17835767 | Ca_desig_chr03     | 17835767                       | [T/C]       | NA                                         |
| Ca_Desig_Chr_3_17839934 | Ca_desig_chr03     | 17839934                       | [T/A]       | NA                                         |
| Ca_Desig_Chr_3_17839978 | Ca_desig_chr03     | 17839978                       | [T/A]       | NA                                         |
| Ca_Desig_Chr_3_17839999 | Ca_desig_chr03     | 17839999                       | [A/G]       | NA                                         |
| Ca_Desig_Chr_3_17840024 | Ca_desig_chr03     | 17840024                       | [T/C]       | NA                                         |
| Ca_Desig_Chr_3_17840040 | Ca_desig_chr03     | 17840040                       | [A/C]       | NA                                         |

| <b>SNP IDs</b>           | <b>Chromosomes</b> | <b>Physical positions (bp)</b> | <b>SNPs</b> | <b>NCBI SNPdb accession IDs (NCBI_ss#)</b> |
|--------------------------|--------------------|--------------------------------|-------------|--------------------------------------------|
| Ca_Desi_Chrom_3_17840042 | Ca_desi_chr03      | 17840042                       | [T/C]       | NA                                         |
| Ca_Desi_Chrom_3_17840054 | Ca_desi_chr03      | 17840054                       | [T/C]       | NA                                         |
| Ca_Desi_Chrom_3_17840063 | Ca_desi_chr03      | 17840063                       | [A/G]       | NA                                         |
| Ca_Desi_Chrom_3_17840066 | Ca_desi_chr03      | 17840066                       | [T/C]       | NA                                         |
| Ca_Desi_Chrom_3_17848319 | Ca_desi_chr03      | 17848319                       | [T/C]       | NA                                         |
| Ca_Desi_Chrom_3_17848395 | Ca_desi_chr03      | 17848395                       | [T/G]       | NA                                         |
| Ca_Desi_Chrom_3_17848919 | Ca_desi_chr03      | 17848919                       | [A/G]       | NA                                         |
| Ca_Desi_Chrom_3_17848950 | Ca_desi_chr03      | 17848950                       | [T/C]       | NA                                         |
| Ca_Desi_Chrom_3_17853432 | Ca_desi_chr03      | 17853432                       | [T/A]       | NA                                         |
| Ca_Desi_Chrom_3_17853448 | Ca_desi_chr03      | 17853448                       | [T/A]       | NA                                         |
| Ca_Desi_Chrom_3_17854002 | Ca_desi_chr03      | 17854002                       | [T/G]       | NA                                         |
| Ca_Desi_Chrom_3_17854023 | Ca_desi_chr03      | 17854023                       | [T/G]       | NA                                         |
| Ca_Desi_Chrom_3_17854146 | Ca_desi_chr03      | 17854146                       | [T/G]       | NA                                         |
| Ca_Desi_Chrom_3_17855204 | Ca_desi_chr03      | 17855204                       | [A/G]       | NA                                         |
| Ca_Desi_Chrom_3_17855245 | Ca_desi_chr03      | 17855245                       | [A/G]       | NA                                         |
| Ca_Desi_Chrom_3_17895424 | Ca_desi_chr03      | 17895424                       | [T/C]       | NA                                         |
| Ca_Desi_Chrom_3_17952334 | Ca_desi_chr03      | 17952334                       | [T/G]       | NA                                         |
| Ca_Desi_Chrom_3_17952564 | Ca_desi_chr03      | 17952564                       | [T/C]       | NA                                         |
| Ca_Desi_Chrom_3_17966694 | Ca_desi_chr03      | 17966694                       | [A/C]       | NA                                         |
| Ca_Desi_Chrom_3_17975273 | Ca_desi_chr03      | 17975273                       | [C/A]       | NA                                         |
| Ca_Desi_Chrom_3_17976107 | Ca_desi_chr03      | 17976107                       | [T/G]       | NA                                         |
| Ca_Desi_Chrom_3_17976111 | Ca_desi_chr03      | 17976111                       | [T/C]       | NA                                         |
| Ca_Desi_Chrom_3_17976132 | Ca_desi_chr03      | 17976132                       | [A/G]       | NA                                         |
| Ca_Desi_Chrom_3_17989589 | Ca_desi_chr03      | 17989589                       | [T/G]       | NA                                         |
| Ca_Desi_Chrom_3_18017147 | Ca_desi_chr03      | 18017147                       | [T/G]       | NA                                         |
| Ca_Desi_Chrom_3_18017151 | Ca_desi_chr03      | 18017151                       | [A/C]       | NA                                         |
| Ca_Desi_Chrom_3_18017344 | Ca_desi_chr03      | 18017344                       | [T/A]       | NA                                         |
| Ca_Desi_Chrom_3_18045434 | Ca_desi_chr03      | 18045434                       | [A/C]       | NA                                         |
| Ca_Desi_Chrom_3_18046638 | Ca_desi_chr03      | 18046638                       | [A/C]       | NA                                         |
| Ca_Desi_Chrom_3_18053804 | Ca_desi_chr03      | 18053804                       | [T/G]       | NA                                         |
| Ca_Desi_Chrom_3_18101790 | Ca_desi_chr03      | 18101790                       | [T/G]       | NA                                         |
| Ca_Desi_Chrom_3_18101916 | Ca_desi_chr03      | 18101916                       | [A/G]       | NA                                         |
| Ca_Desi_Chrom_3_18101946 | Ca_desi_chr03      | 18101946                       | [A/C]       | NA                                         |
| Ca_Desi_Chrom_3_18102043 | Ca_desi_chr03      | 18102043                       | [T/C]       | NA                                         |

| <b>SNP IDs</b>          | <b>Chromosomes</b> | <b>Physical positions (bp)</b> | <b>SNPs</b> | <b>NCBI SNPdb accession IDs (NCBI_ss#)</b> |
|-------------------------|--------------------|--------------------------------|-------------|--------------------------------------------|
| Ca_Desig_Chr_3_18102072 | Ca_desig_chr03     | 18102072                       | [T/G]       | NA                                         |
| Ca_Desig_Chr_3_18102085 | Ca_desig_chr03     | 18102085                       | [T/C]       | NA                                         |
| Ca_Desig_Chr_3_18102087 | Ca_desig_chr03     | 18102087                       | [A/G]       | NA                                         |
| Ca_Desig_Chr_3_18121201 | Ca_desig_chr03     | 18121201                       | [T/C]       | NA                                         |
| Ca_Desig_Chr_3_18121210 | Ca_desig_chr03     | 18121210                       | [T/G]       | NA                                         |
| Ca_Desig_Chr_3_18121247 | Ca_desig_chr03     | 18121247                       | [T/A]       | NA                                         |
| Ca_Desig_Chr_3_18121264 | Ca_desig_chr03     | 18121264                       | [A/C]       | NA                                         |
| Ca_Desig_Chr_3_18121309 | Ca_desig_chr03     | 18121309                       | [A/C]       | NA                                         |
| Ca_Desig_Chr_3_18171145 | Ca_desig_chr03     | 18171145                       | [A/T]       | NA                                         |
| Ca_Desig_Chr_3_18171146 | Ca_desig_chr03     | 18171146                       | [A/C]       | NA                                         |
| Ca_Desig_Chr_3_18192692 | Ca_desig_chr03     | 18192692                       | [A/C]       | NA                                         |
| Ca_Desig_Chr_3_18192696 | Ca_desig_chr03     | 18192696                       | [A/C]       | NA                                         |
| Ca_Desig_Chr_3_18192713 | Ca_desig_chr03     | 18192713                       | [T/C]       | NA                                         |
| Ca_Desig_Chr_3_18203721 | Ca_desig_chr03     | 18203721                       | [T/G]       | NA                                         |
| Ca_Desig_Chr_3_18203727 | Ca_desig_chr03     | 18203727                       | [A/C]       | NA                                         |
| Ca_Desig_Chr_3_18272990 | Ca_desig_chr03     | 18272990                       | [T/A]       | NA                                         |
| Ca_Desig_Chr_3_18272991 | Ca_desig_chr03     | 18272991                       | [A/T]       | NA                                         |
| Ca_Desig_Chr_3_18273003 | Ca_desig_chr03     | 18273003                       | [T/G]       | NA                                         |
| Ca_Desig_Chr_3_18273006 | Ca_desig_chr03     | 18273006                       | [A/G]       | NA                                         |
| Ca_Desig_Chr_3_18273015 | Ca_desig_chr03     | 18273015                       | [T/G]       | NA                                         |
| Ca_Desig_Chr_3_18273023 | Ca_desig_chr03     | 18273023                       | [T/G]       | NA                                         |
| Ca_Desig_Chr_3_18273059 | Ca_desig_chr03     | 18273059                       | [T/G]       | NA                                         |
| Ca_Desig_Chr_3_18273103 | Ca_desig_chr03     | 18273103                       | [C/A]       | NA                                         |
| Ca_Desig_Chr_3_18273114 | Ca_desig_chr03     | 18273114                       | [T/G]       | NA                                         |
| Ca_Desig_Chr_3_18299751 | Ca_desig_chr03     | 18299751                       | [A/G]       | NA                                         |
| Ca_Desig_Chr_3_18299753 | Ca_desig_chr03     | 18299753                       | [C/T]       | NA                                         |
| Ca_Desig_Chr_3_18299757 | Ca_desig_chr03     | 18299757                       | [T/C]       | NA                                         |
| Ca_Desig_Chr_3_18305209 | Ca_desig_chr03     | 18305209                       | [A/T]       | NA                                         |
| Ca_Desig_Chr_3_18305215 | Ca_desig_chr03     | 18305215                       | [T/C]       | NA                                         |
| Ca_Desig_Chr_3_18305219 | Ca_desig_chr03     | 18305219                       | [T/C]       | NA                                         |
| Ca_Desig_Chr_3_18305230 | Ca_desig_chr03     | 18305230                       | [A/G]       | NA                                         |
| Ca_Desig_Chr_3_18305257 | Ca_desig_chr03     | 18305257                       | [A/G]       | NA                                         |
| Ca_Desig_Chr_3_18305259 | Ca_desig_chr03     | 18305259                       | [T/C]       | NA                                         |
| Ca_Desig_Chr_3_18305263 | Ca_desig_chr03     | 18305263                       | [T/A]       | NA                                         |

| <b>SNP IDs</b>          | <b>Chromosomes</b> | <b>Physical positions (bp)</b> | <b>SNPs</b> | <b>NCBI SNPdb accession IDs (NCBI_ss#)</b> |
|-------------------------|--------------------|--------------------------------|-------------|--------------------------------------------|
| Ca_Desig_Chr_3_18370545 | Ca_desig_chr03     | 18370545                       | [T/C]       | NA                                         |
| Ca_Desig_Chr_3_18370575 | Ca_desig_chr03     | 18370575                       | [T/C]       | NA                                         |
| Ca_Desig_Chr_3_18370609 | Ca_desig_chr03     | 18370609                       | [A/C]       | NA                                         |
| Ca_Desig_Chr_3_18378861 | Ca_desig_chr03     | 18378861                       | [T/C]       | NA                                         |
| Ca_Desig_Chr_3_18378862 | Ca_desig_chr03     | 18378862                       | [C/G]       | NA                                         |
| Ca_Desig_Chr_3_18439917 | Ca_desig_chr03     | 18439917                       | [G/T]       | NA                                         |
| Ca_Desig_Chr_3_18440126 | Ca_desig_chr03     | 18440126                       | [T/A]       | NA                                         |
| Ca_Desig_Chr_3_18440144 | Ca_desig_chr03     | 18440144                       | [A/G]       | NA                                         |
| Ca_Desig_Chr_3_18440185 | Ca_desig_chr03     | 18440185                       | [A/G]       | NA                                         |
| Ca_Desig_Chr_3_18440223 | Ca_desig_chr03     | 18440223                       | [A/C]       | NA                                         |
| Ca_Desig_Chr_3_18440280 | Ca_desig_chr03     | 18440280                       | [A/C]       | NA                                         |
| Ca_Desig_Chr_3_18440310 | Ca_desig_chr03     | 18440310                       | [A/G]       | NA                                         |
| Ca_Desig_Chr_3_18440952 | Ca_desig_chr03     | 18440952                       | [A/C]       | NA                                         |
| Ca_Desig_Chr_3_18440955 | Ca_desig_chr03     | 18440955                       | [A/C]       | NA                                         |
| Ca_Desig_Chr_3_18448780 | Ca_desig_chr03     | 18448780                       | [A/C]       | NA                                         |
| Ca_Desig_Chr_3_18449839 | Ca_desig_chr03     | 18449839                       | [T/G]       | NA                                         |
| Ca_Desig_Chr_3_18457058 | Ca_desig_chr03     | 18457058                       | [A/G]       | NA                                         |
| Ca_Desig_Chr_3_18457059 | Ca_desig_chr03     | 18457059                       | [A/G]       | NA                                         |
| Ca_Desig_Chr_3_18457060 | Ca_desig_chr03     | 18457060                       | [A/G]       | NA                                         |
| Ca_Desig_Chr_3_18489032 | Ca_desig_chr03     | 18489032                       | [C/A]       | NA                                         |
| Ca_Desig_Chr_3_18500277 | Ca_desig_chr03     | 18500277                       | [C/G]       | NA                                         |
| Ca_Desig_Chr_3_18530331 | Ca_desig_chr03     | 18530331                       | [A/T]       | NA                                         |
| Ca_Desig_Chr_3_18530349 | Ca_desig_chr03     | 18530349                       | [A/C]       | NA                                         |
| Ca_Desig_Chr_3_18530555 | Ca_desig_chr03     | 18530555                       | [C/T]       | NA                                         |
| Ca_Desig_Chr_3_18530599 | Ca_desig_chr03     | 18530599                       | [A/T]       | NA                                         |
| Ca_Desig_Chr_3_18543482 | Ca_desig_chr03     | 18543482                       | [C/T]       | NA                                         |
| Ca_Desig_Chr_3_18543500 | Ca_desig_chr03     | 18543500                       | [G/T]       | NA                                         |
| Ca_Desig_Chr_3_18594788 | Ca_desig_chr03     | 18594788                       | [T/A]       | NA                                         |
| Ca_Desig_Chr_3_18594797 | Ca_desig_chr03     | 18594797                       | [T/G]       | NA                                         |
| Ca_Desig_Chr_3_18612095 | Ca_desig_chr03     | 18612095                       | [T/G]       | NA                                         |
| Ca_Desig_Chr_3_18668485 | Ca_desig_chr03     | 18668485                       | [T/C]       | NA                                         |
| Ca_Desig_Chr_3_18702849 | Ca_desig_chr03     | 18702849                       | [T/C]       | NA                                         |
| Ca_Desig_Chr_3_18702949 | Ca_desig_chr03     | 18702949                       | [T/G]       | NA                                         |
| Ca_Desig_Chr_3_18702950 | Ca_desig_chr03     | 18702950                       | [C/A]       | NA                                         |

| <b>SNP IDs</b>          | <b>Chromosomes</b> | <b>Physical positions (bp)</b> | <b>SNPs</b> | <b>NCBI SNPdb accession IDs (NCBI_ss#)</b> |
|-------------------------|--------------------|--------------------------------|-------------|--------------------------------------------|
| Ca_Desig_Chr_3_18702951 | Ca_desig_chr03     | 18702951                       | [A/C]       | NA                                         |
| Ca_Desig_Chr_3_18702952 | Ca_desig_chr03     | 18702952                       | [C/G]       | NA                                         |
| Ca_Desig_Chr_3_18702960 | Ca_desig_chr03     | 18702960                       | [C/A]       | NA                                         |
| Ca_Desig_Chr_3_18703047 | Ca_desig_chr03     | 18703047                       | [A/T]       | NA                                         |
| Ca_Desig_Chr_3_18703050 | Ca_desig_chr03     | 18703050                       | [A/C]       | NA                                         |
| Ca_Desig_Chr_3_18703068 | Ca_desig_chr03     | 18703068                       | [T/C]       | NA                                         |
| Ca_Desig_Chr_3_18715729 | Ca_desig_chr03     | 18715729                       | [G/C]       | NA                                         |
| Ca_Desig_Chr_3_18823826 | Ca_desig_chr03     | 18823826                       | [C/A]       | NA                                         |
| Ca_Desig_Chr_3_18823827 | Ca_desig_chr03     | 18823827                       | [T/G]       | NA                                         |
| Ca_Desig_Chr_3_18935406 | Ca_desig_chr03     | 18935406                       | [T/C]       | NA                                         |
| Ca_Desig_Chr_3_18935413 | Ca_desig_chr03     | 18935413                       | [A/G]       | NA                                         |
| Ca_Desig_Chr_3_18935426 | Ca_desig_chr03     | 18935426                       | [T/G]       | NA                                         |
| Ca_Desig_Chr_3_18935432 | Ca_desig_chr03     | 18935432                       | [A/G]       | NA                                         |
| Ca_Desig_Chr_3_18935434 | Ca_desig_chr03     | 18935434                       | [T/G]       | NA                                         |
| Ca_Desig_Chr_3_18940044 | Ca_desig_chr03     | 18940044                       | [T/A]       | NA                                         |
| Ca_Desig_Chr_3_18940077 | Ca_desig_chr03     | 18940077                       | [A/G]       | NA                                         |
| Ca_Desig_Chr_3_18940085 | Ca_desig_chr03     | 18940085                       | [A/G]       | NA                                         |
| Ca_Desig_Chr_3_18976026 | Ca_desig_chr03     | 18976026                       | [T/C]       | NA                                         |
| Ca_Desig_Chr_3_18976029 | Ca_desig_chr03     | 18976029                       | [A/C]       | NA                                         |
| Ca_Desig_Chr_3_18976267 | Ca_desig_chr03     | 18976267                       | [A/G]       | NA                                         |
| Ca_Desig_Chr_3_18976278 | Ca_desig_chr03     | 18976278                       | [T/G]       | NA                                         |
| Ca_Desig_Chr_3_18976280 | Ca_desig_chr03     | 18976280                       | [T/C]       | NA                                         |
| Ca_Desig_Chr_3_18976287 | Ca_desig_chr03     | 18976287                       | [T/C]       | NA                                         |
| Ca_Desig_Chr_3_18976321 | Ca_desig_chr03     | 18976321                       | [A/T]       | NA                                         |
| Ca_Desig_Chr_3_18976324 | Ca_desig_chr03     | 18976324                       | [A/G]       | NA                                         |
| Ca_Desig_Chr_3_19038579 | Ca_desig_chr03     | 19038579                       | [C/A]       | NA                                         |
| Ca_Desig_Chr_3_19041530 | Ca_desig_chr03     | 19041530                       | [A/C]       | NA                                         |
| Ca_Desig_Chr_3_19041854 | Ca_desig_chr03     | 19041854                       | [T/C]       | NA                                         |
| Ca_Desig_Chr_3_19041856 | Ca_desig_chr03     | 19041856                       | [T/C]       | NA                                         |
| Ca_Desig_Chr_3_19041868 | Ca_desig_chr03     | 19041868                       | [T/G]       | NA                                         |
| Ca_Desig_Chr_3_19047706 | Ca_desig_chr03     | 19047706                       | [A/C]       | NA                                         |
| Ca_Desig_Chr_3_19054086 | Ca_desig_chr03     | 19054086                       | [T/G]       | NA                                         |
| Ca_Desig_Chr_3_19059884 | Ca_desig_chr03     | 19059884                       | [T/C]       | NA                                         |
| Ca_Desig_Chr_3_19059895 | Ca_desig_chr03     | 19059895                       | [T/C]       | NA                                         |



| <b>SNP IDs</b>           | <b>Chromosomes</b> | <b>Physical positions (bp)</b> | <b>SNPs</b> | <b>NCBI SNPdb accession IDs (NCBI_ss#)</b> |
|--------------------------|--------------------|--------------------------------|-------------|--------------------------------------------|
| Ca_Desi_Chrom_3_19059902 | Ca_desi_chr03      | 19059902                       | [A/G]       | NA                                         |
| Ca_Desi_Chrom_3_19059905 | Ca_desi_chr03      | 19059905                       | [T/G]       | NA                                         |
| Ca_Desi_Chrom_3_19059915 | Ca_desi_chr03      | 19059915                       | [A/C]       | NA                                         |
| Ca_Desi_Chrom_3_19062095 | Ca_desi_chr03      | 19062095                       | [T/C]       | NA                                         |
| Ca_Desi_Chrom_3_19062134 | Ca_desi_chr03      | 19062134                       | [T/C]       | NA                                         |
| Ca_Desi_Chrom_3_19062151 | Ca_desi_chr03      | 19062151                       | [A/G]       | NA                                         |
| Ca_Desi_Chrom_3_19113242 | Ca_desi_chr03      | 19113242                       | [A/C]       | NA                                         |
| Ca_Desi_Chrom_3_19113328 | Ca_desi_chr03      | 19113328                       | [A/G]       | NA                                         |
| Ca_Desi_Chrom_3_19113355 | Ca_desi_chr03      | 19113355                       | [T/C]       | NA                                         |
| Ca_Desi_Chrom_3_19113358 | Ca_desi_chr03      | 19113358                       | [T/A]       | NA                                         |
| Ca_Desi_Chrom_3_19113365 | Ca_desi_chr03      | 19113365                       | [T/C]       | NA                                         |
| Ca_Desi_Chrom_3_19113373 | Ca_desi_chr03      | 19113373                       | [A/C]       | NA                                         |
| Ca_Desi_Chrom_3_19113385 | Ca_desi_chr03      | 19113385                       | [A/G]       | NA                                         |
| Ca_Desi_Chrom_3_19113403 | Ca_desi_chr03      | 19113403                       | [T/C]       | NA                                         |
| Ca_Desi_Chrom_3_19113486 | Ca_desi_chr03      | 19113486                       | [T/C]       | NA                                         |
| Ca_Desi_Chrom_3_19114100 | Ca_desi_chr03      | 19114100                       | [T/G]       | NA                                         |
| Ca_Desi_Chrom_3_19114103 | Ca_desi_chr03      | 19114103                       | [T/G]       | NA                                         |
| Ca_Desi_Chrom_3_19114106 | Ca_desi_chr03      | 19114106                       | [T/G]       | NA                                         |
| Ca_Desi_Chrom_3_19166628 | Ca_desi_chr03      | 19166628                       | [C/A]       | NA                                         |
| Ca_Desi_Chrom_3_19166629 | Ca_desi_chr03      | 19166629                       | [A/G]       | NA                                         |
| Ca_Desi_Chrom_3_19166631 | Ca_desi_chr03      | 19166631                       | [A/T]       | NA                                         |
| Ca_Desi_Chrom_3_19166632 | Ca_desi_chr03      | 19166632                       | [G/C]       | NA                                         |
| Ca_Desi_Chrom_3_19167145 | Ca_desi_chr03      | 19167145                       | [T/G]       | NA                                         |
| Ca_Desi_Chrom_3_19172948 | Ca_desi_chr03      | 19172948                       | [A/G]       | NA                                         |
| Ca_Desi_Chrom_3_19172975 | Ca_desi_chr03      | 19172975                       | [T/A]       | NA                                         |
| Ca_Desi_Chrom_3_19172986 | Ca_desi_chr03      | 19172986                       | [T/G]       | NA                                         |
| Ca_Desi_Chrom_3_19177878 | Ca_desi_chr03      | 19177878                       | [T/G]       | NA                                         |
| Ca_Desi_Chrom_3_19177894 | Ca_desi_chr03      | 19177894                       | [A/C]       | NA                                         |
| Ca_Desi_Chrom_3_19472702 | Ca_desi_chr03      | 19472702                       | [T/G]       | NA                                         |
| Ca_Desi_Chrom_3_19476992 | Ca_desi_chr03      | 19476992                       | [A/C]       | NA                                         |
| Ca_Desi_Chrom_3_19476996 | Ca_desi_chr03      | 19476996                       | [A/C]       | NA                                         |
| Ca_Desi_Chrom_3_19483576 | Ca_desi_chr03      | 19483576                       | [T/A]       | NA                                         |
| Ca_Desi_Chrom_3_19483577 | Ca_desi_chr03      | 19483577                       | [A/C]       | NA                                         |
| Ca_Desi_Chrom_3_19538135 | Ca_desi_chr03      | 19538135                       | [A/G]       | NA                                         |

| <b>SNP IDs</b>          | <b>Chromosomes</b> | <b>Physical positions (bp)</b> | <b>SNPs</b> | <b>NCBI SNPdb accession IDs (NCBI_ss#)</b> |
|-------------------------|--------------------|--------------------------------|-------------|--------------------------------------------|
| Ca_Desi_Chrr_3_19538150 | Ca_desi_chrr03     | 19538150                       | [T/C]       | NA                                         |
| Ca_Desi_Chrr_3_19538163 | Ca_desi_chrr03     | 19538163                       | [A/G]       | NA                                         |
| Ca_Desi_Chrr_3_19538167 | Ca_desi_chrr03     | 19538167                       | [A/G]       | NA                                         |
| Ca_Desi_Chrr_3_19538176 | Ca_desi_chrr03     | 19538176                       | [A/C]       | NA                                         |
| Ca_Desi_Chrr_3_19538180 | Ca_desi_chrr03     | 19538180                       | [T/C]       | NA                                         |
| Ca_Desi_Chrr_3_19538186 | Ca_desi_chrr03     | 19538186                       | [T/C]       | NA                                         |
| Ca_Desi_Chrr_3_19562100 | Ca_desi_chrr03     | 19562100                       | [A/G]       | NA                                         |
| Ca_Desi_Chrr_3_19562112 | Ca_desi_chrr03     | 19562112                       | [T/G]       | NA                                         |
| Ca_Desi_Chrr_3_19562368 | Ca_desi_chrr03     | 19562368                       | [T/G]       | NA                                         |
| Ca_Desi_Chrr_3_19634516 | Ca_desi_chrr03     | 19634516                       | [T/G]       | NA                                         |
| Ca_Desi_Chrr_3_19634546 | Ca_desi_chrr03     | 19634546                       | [T/G]       | NA                                         |
| Ca_Desi_Chrr_3_19634550 | Ca_desi_chrr03     | 19634550                       | [T/G]       | NA                                         |
| Ca_Desi_Chrr_3_19634610 | Ca_desi_chrr03     | 19634610                       | [G/C]       | NA                                         |
| Ca_Desi_Chrr_3_19634629 | Ca_desi_chrr03     | 19634629                       | [A/G]       | NA                                         |
| Ca_Desi_Chrr_3_19634633 | Ca_desi_chrr03     | 19634633                       | [A/G]       | NA                                         |
| Ca_Desi_Chrr_3_19634642 | Ca_desi_chrr03     | 19634642                       | [T/C]       | NA                                         |
| Ca_Desi_Chrr_3_19636920 | Ca_desi_chrr03     | 19636920                       | [T/G]       | NA                                         |
| Ca_Desi_Chrr_3_19636940 | Ca_desi_chrr03     | 19636940                       | [T/G]       | NA                                         |
| Ca_Desi_Chrr_3_19636950 | Ca_desi_chrr03     | 19636950                       | [T/G]       | NA                                         |
| Ca_Desi_Chrr_3_19636954 | Ca_desi_chrr03     | 19636954                       | [T/G]       | NA                                         |
| Ca_Desi_Chrr_3_19636958 | Ca_desi_chrr03     | 19636958                       | [T/C]       | NA                                         |
| Ca_Desi_Chrr_3_19636997 | Ca_desi_chrr03     | 19636997                       | [T/C]       | NA                                         |
| Ca_Desi_Chrr_3_19637005 | Ca_desi_chrr03     | 19637005                       | [T/C]       | NA                                         |
| Ca_Desi_Chrr_3_19637006 | Ca_desi_chrr03     | 19637006                       | [C/T]       | NA                                         |
| Ca_Desi_Chrr_3_19637012 | Ca_desi_chrr03     | 19637012                       | [G/C]       | NA                                         |
| Ca_Desi_Chrr_3_19637014 | Ca_desi_chrr03     | 19637014                       | [G/C]       | NA                                         |
| Ca_Desi_Chrr_3_19637019 | Ca_desi_chrr03     | 19637019                       | [T/C]       | NA                                         |
| Ca_Desi_Chrr_3_19637032 | Ca_desi_chrr03     | 19637032                       | [A/G]       | NA                                         |
| Ca_Desi_Chrr_3_19637036 | Ca_desi_chrr03     | 19637036                       | [A/C]       | NA                                         |
| Ca_Desi_Chrr_3_19649188 | Ca_desi_chrr03     | 19649188                       | [T/G]       | NA                                         |
| Ca_Desi_Chrr_3_19659019 | Ca_desi_chrr03     | 19659019                       | [A/C]       | NA                                         |
| Ca_Desi_Chrr_3_19690042 | Ca_desi_chrr03     | 19690042                       | [T/C]       | NA                                         |
| Ca_Desi_Chrr_3_19690052 | Ca_desi_chrr03     | 19690052                       | [T/C]       | NA                                         |
| Ca_Desi_Chrr_3_19690074 | Ca_desi_chrr03     | 19690074                       | [A/G]       | NA                                         |

| <b>SNP IDs</b>           | <b>Chromosomes</b> | <b>Physical positions (bp)</b> | <b>SNPs</b> | <b>NCBI SNPdb accession IDs (NCBI_ss#)</b> |
|--------------------------|--------------------|--------------------------------|-------------|--------------------------------------------|
| Ca_Desi_Chrom_3_19690078 | Ca_desi_chr03      | 19690078                       | [T/G]       | NA                                         |
| Ca_Desi_Chrom_3_19710047 | Ca_desi_chr03      | 19710047                       | [T/G]       | NA                                         |
| Ca_Desi_Chrom_3_19779281 | Ca_desi_chr03      | 19779281                       | [T/G]       | NA                                         |
| Ca_Desi_Chrom_3_19781175 | Ca_desi_chr03      | 19781175                       | [A/G]       | NA                                         |
| Ca_Desi_Chrom_3_19827447 | Ca_desi_chr03      | 19827447                       | [A/C]       | NA                                         |
| Ca_Desi_Chrom_3_19827450 | Ca_desi_chr03      | 19827450                       | [C/A]       | NA                                         |
| Ca_Desi_Chrom_3_19844603 | Ca_desi_chr03      | 19844603                       | [T/G]       | NA                                         |
| Ca_Desi_Chrom_3_19844606 | Ca_desi_chr03      | 19844606                       | [T/G]       | NA                                         |
| Ca_Desi_Chrom_3_19844632 | Ca_desi_chr03      | 19844632                       | [T/G]       | NA                                         |
| Ca_Desi_Chrom_3_19844666 | Ca_desi_chr03      | 19844666                       | [A/C]       | NA                                         |
| Ca_Desi_Chrom_3_19877477 | Ca_desi_chr03      | 19877477                       | [T/G]       | NA                                         |
| Ca_Desi_Chrom_3_19884972 | Ca_desi_chr03      | 19884972                       | [T/G]       | NA                                         |
| Ca_Desi_Chrom_3_19886207 | Ca_desi_chr03      | 19886207                       | [T/C]       | NA                                         |
| Ca_Desi_Chrom_3_19886210 | Ca_desi_chr03      | 19886210                       | [A/G]       | NA                                         |
| Ca_Desi_Chrom_3_19898847 | Ca_desi_chr03      | 19898847                       | [T/G]       | NA                                         |
| Ca_Desi_Chrom_3_19898912 | Ca_desi_chr03      | 19898912                       | [A/C]       | NA                                         |
| Ca_Desi_Chrom_3_19912158 | Ca_desi_chr03      | 19912158                       | [A/G]       | NA                                         |
| Ca_Desi_Chrom_3_19912161 | Ca_desi_chr03      | 19912161                       | [T/G]       | NA                                         |
| Ca_Desi_Chrom_3_19912164 | Ca_desi_chr03      | 19912164                       | [A/C]       | NA                                         |
| Ca_Desi_Chrom_3_19925874 | Ca_desi_chr03      | 19925874                       | [T/C]       | NA                                         |
| Ca_Desi_Chrom_3_19925928 | Ca_desi_chr03      | 19925928                       | [A/G]       | NA                                         |
| Ca_Desi_Chrom_3_19962321 | Ca_desi_chr03      | 19962321                       | [A/G]       | NA                                         |
| Ca_Desi_Chrom_3_19962333 | Ca_desi_chr03      | 19962333                       | [A/G]       | NA                                         |
| Ca_Desi_Chrom_3_19986924 | Ca_desi_chr03      | 19986924                       | [T/A]       | NA                                         |
| Ca_Desi_Chrom_3_19986925 | Ca_desi_chr03      | 19986925                       | [A/G]       | NA                                         |
| Ca_Desi_Chrom_3_20002675 | Ca_desi_chr03      | 20002675                       | [T/C]       | NA                                         |
| Ca_Desi_Chrom_3_20002678 | Ca_desi_chr03      | 20002678                       | [A/C]       | NA                                         |
| Ca_Desi_Chrom_3_20002698 | Ca_desi_chr03      | 20002698                       | [T/C]       | NA                                         |
| Ca_Desi_Chrom_3_20002708 | Ca_desi_chr03      | 20002708                       | [T/C]       | NA                                         |
| Ca_Desi_Chrom_3_20040729 | Ca_desi_chr03      | 20040729                       | [A/T]       | NA                                         |
| Ca_Desi_Chrom_3_20040743 | Ca_desi_chr03      | 20040743                       | [T/C]       | NA                                         |
| Ca_Desi_Chrom_3_20040765 | Ca_desi_chr03      | 20040765                       | [T/C]       | NA                                         |
| Ca_Desi_Chrom_3_20074748 | Ca_desi_chr03      | 20074748                       | [T/C]       | NA                                         |
| Ca_Desi_Chrom_3_20096073 | Ca_desi_chr03      | 20096073                       | [T/G]       | NA                                         |

| <b>SNP IDs</b>           | <b>Chromosomes</b> | <b>Physical positions (bp)</b> | <b>SNPs</b> | <b>NCBI SNPdb accession IDs (NCBI_ss#)</b> |
|--------------------------|--------------------|--------------------------------|-------------|--------------------------------------------|
| Ca_Desi_Chrom_3_20096092 | Ca_desi_chr03      | 20096092                       | [T/C]       | NA                                         |
| Ca_Desi_Chrom_3_20161445 | Ca_desi_chr03      | 20161445                       | [G/A]       | NA                                         |
| Ca_Desi_Chrom_3_20229567 | Ca_desi_chr03      | 20229567                       | [T/C]       | NA                                         |
| Ca_Desi_Chrom_3_20229573 | Ca_desi_chr03      | 20229573                       | [A/G]       | NA                                         |
| Ca_Desi_Chrom_3_20229596 | Ca_desi_chr03      | 20229596                       | [A/G]       | NA                                         |
| Ca_Desi_Chrom_3_20240165 | Ca_desi_chr03      | 20240165                       | [G/T]       | NA                                         |
| Ca_Desi_Chrom_3_20240166 | Ca_desi_chr03      | 20240166                       | [A/C]       | NA                                         |
| Ca_Desi_Chrom_3_20240167 | Ca_desi_chr03      | 20240167                       | [G/T]       | NA                                         |
| Ca_Desi_Chrom_3_20267301 | Ca_desi_chr03      | 20267301                       | [G/A]       | NA                                         |
| Ca_Desi_Chrom_3_20316673 | Ca_desi_chr03      | 20316673                       | [T/A]       | NA                                         |
| Ca_Desi_Chrom_3_20316939 | Ca_desi_chr03      | 20316939                       | [A/G]       | NA                                         |
| Ca_Desi_Chrom_3_20372696 | Ca_desi_chr03      | 20372696                       | [T/A]       | NA                                         |
| Ca_Desi_Chrom_3_20603580 | Ca_desi_chr03      | 20603580                       | [T/C]       | NA                                         |
| Ca_Desi_Chrom_3_20614553 | Ca_desi_chr03      | 20614553                       | [T/G]       | NA                                         |
| Ca_Desi_Chrom_3_20614556 | Ca_desi_chr03      | 20614556                       | [T/G]       | NA                                         |
| Ca_Desi_Chrom_3_20614559 | Ca_desi_chr03      | 20614559                       | [T/G]       | NA                                         |
| Ca_Desi_Chrom_3_21054191 | Ca_desi_chr03      | 21054191                       | [A/T]       | NA                                         |
| Ca_Desi_Chrom_3_21054198 | Ca_desi_chr03      | 21054198                       | [C/G]       | NA                                         |
| Ca_Desi_Chrom_3_21054199 | Ca_desi_chr03      | 21054199                       | [T/C]       | NA                                         |
| Ca_Desi_Chrom_3_21054201 | Ca_desi_chr03      | 21054201                       | [T/C]       | NA                                         |
| Ca_Desi_Chrom_3_21058099 | Ca_desi_chr03      | 21058099                       | [T/C]       | NA                                         |
| Ca_Desi_Chrom_3_21058103 | Ca_desi_chr03      | 21058103                       | [T/C]       | NA                                         |
| Ca_Desi_Chrom_3_21058105 | Ca_desi_chr03      | 21058105                       | [T/C]       | NA                                         |
| Ca_Desi_Chrom_3_21058111 | Ca_desi_chr03      | 21058111                       | [A/G]       | NA                                         |
| Ca_Desi_Chrom_3_21058117 | Ca_desi_chr03      | 21058117                       | [T/C]       | NA                                         |
| Ca_Desi_Chrom_3_21058130 | Ca_desi_chr03      | 21058130                       | [T/C]       | NA                                         |
| Ca_Desi_Chrom_3_21058131 | Ca_desi_chr03      | 21058131                       | [T/C]       | NA                                         |
| Ca_Desi_Chrom_3_21058134 | Ca_desi_chr03      | 21058134                       | [T/C]       | NA                                         |
| Ca_Desi_Chrom_3_21058136 | Ca_desi_chr03      | 21058136                       | [T/C]       | NA                                         |
| Ca_Desi_Chrom_3_21058138 | Ca_desi_chr03      | 21058138                       | [A/C]       | NA                                         |
| Ca_Desi_Chrom_3_21058142 | Ca_desi_chr03      | 21058142                       | [T/C]       | NA                                         |
| Ca_Desi_Chrom_3_21058143 | Ca_desi_chr03      | 21058143                       | [T/C]       | NA                                         |
| Ca_Desi_Chrom_3_21058147 | Ca_desi_chr03      | 21058147                       | [A/G]       | NA                                         |
| Ca_Desi_Chrom_3_21058165 | Ca_desi_chr03      | 21058165                       | [A/G]       | NA                                         |

| <b>SNP IDs</b>           | <b>Chromosomes</b> | <b>Physical positions (bp)</b> | <b>SNPs</b> | <b>NCBI SNPdb accession IDs (NCBI_ss#)</b> |
|--------------------------|--------------------|--------------------------------|-------------|--------------------------------------------|
| Ca_Desi_Chrom_3_21114954 | Ca_desi_chr03      | 21114954                       | [A/C]       | NA                                         |
| Ca_Desi_Chrom_3_21182936 | Ca_desi_chr03      | 21182936                       | [A/T]       | NA                                         |
| Ca_Desi_Chrom_3_21182978 | Ca_desi_chr03      | 21182978                       | [A/T]       | NA                                         |
| Ca_Desi_Chrom_3_21182981 | Ca_desi_chr03      | 21182981                       | [T/C]       | NA                                         |
| Ca_Desi_Chrom_3_21182985 | Ca_desi_chr03      | 21182985                       | [A/G]       | NA                                         |
| Ca_Desi_Chrom_3_21182989 | Ca_desi_chr03      | 21182989                       | [A/G]       | NA                                         |
| Ca_Desi_Chrom_3_21182995 | Ca_desi_chr03      | 21182995                       | [T/G]       | NA                                         |
| Ca_Desi_Chrom_3_21183003 | Ca_desi_chr03      | 21183003                       | [T/C]       | NA                                         |
| Ca_Desi_Chrom_3_21183011 | Ca_desi_chr03      | 21183011                       | [T/C]       | NA                                         |
| Ca_Desi_Chrom_3_21183015 | Ca_desi_chr03      | 21183015                       | [T/C]       | NA                                         |
| Ca_Desi_Chrom_3_21192011 | Ca_desi_chr03      | 21192011                       | [T/A]       | NA                                         |
| Ca_Desi_Chrom_3_21209794 | Ca_desi_chr03      | 21209794                       | [G/A]       | NA                                         |
| Ca_Desi_Chrom_3_21209800 | Ca_desi_chr03      | 21209800                       | [C/A]       | NA                                         |
| Ca_Desi_Chrom_3_21209826 | Ca_desi_chr03      | 21209826                       | [T/C]       | NA                                         |
| Ca_Desi_Chrom_3_21437812 | Ca_desi_chr03      | 21437812                       | [T/C]       | NA                                         |
| Ca_Desi_Chrom_3_21550846 | Ca_desi_chr03      | 21550846                       | [G/A]       | NA                                         |
| Ca_Desi_Chrom_3_21550970 | Ca_desi_chr03      | 21550970                       | [T/A]       | NA                                         |
| Ca_Desi_Chrom_3_21552409 | Ca_desi_chr03      | 21552409                       | [A/G]       | NA                                         |
| Ca_Desi_Chrom_3_21552416 | Ca_desi_chr03      | 21552416                       | [G/A]       | NA                                         |
| Ca_Desi_Chrom_3_21552417 | Ca_desi_chr03      | 21552417                       | [A/G]       | NA                                         |
| Ca_Desi_Chrom_3_21552418 | Ca_desi_chr03      | 21552418                       | [T/G]       | NA                                         |
| Ca_Desi_Chrom_3_21552427 | Ca_desi_chr03      | 21552427                       | [A/G]       | NA                                         |
| Ca_Desi_Chrom_3_21552431 | Ca_desi_chr03      | 21552431                       | [A/G]       | NA                                         |
| Ca_Desi_Chrom_3_21552432 | Ca_desi_chr03      | 21552432                       | [A/G]       | NA                                         |
| Ca_Desi_Chrom_3_21552438 | Ca_desi_chr03      | 21552438                       | [A/G]       | NA                                         |
| Ca_Desi_Chrom_3_21552439 | Ca_desi_chr03      | 21552439                       | [A/G]       | NA                                         |
| Ca_Desi_Chrom_3_21552441 | Ca_desi_chr03      | 21552441                       | [A/G]       | NA                                         |
| Ca_Desi_Chrom_3_21552453 | Ca_desi_chr03      | 21552453                       | [T/C]       | NA                                         |
| Ca_Desi_Chrom_3_21552455 | Ca_desi_chr03      | 21552455                       | [T/C]       | NA                                         |
| Ca_Desi_Chrom_3_21552462 | Ca_desi_chr03      | 21552462                       | [T/C]       | NA                                         |
| Ca_Desi_Chrom_3_21587264 | Ca_desi_chr03      | 21587264                       | [A/C]       | NA                                         |
| Ca_Desi_Chrom_3_21588107 | Ca_desi_chr03      | 21588107                       | [A/G]       | NA                                         |
| Ca_Desi_Chrom_3_21588117 | Ca_desi_chr03      | 21588117                       | [A/G]       | NA                                         |
| Ca_Desi_Chrom_3_21588138 | Ca_desi_chr03      | 21588138                       | [A/G]       | NA                                         |

| <b>SNP IDs</b>           | <b>Chromosomes</b> | <b>Physical positions (bp)</b> | <b>SNPs</b> | <b>NCBI SNPdb accession IDs (NCBI_ss#)</b> |
|--------------------------|--------------------|--------------------------------|-------------|--------------------------------------------|
| Ca_Desi_Chrom_3_21588189 | Ca_desi_chr03      | 21588189                       | [T/A]       | NA                                         |
| Ca_Desi_Chrom_3_21588205 | Ca_desi_chr03      | 21588205                       | [A/C]       | NA                                         |
| Ca_Desi_Chrom_3_21588215 | Ca_desi_chr03      | 21588215                       | [A/C]       | NA                                         |
| Ca_Desi_Chrom_3_21592386 | Ca_desi_chr03      | 21592386                       | [T/C]       | NA                                         |
| Ca_Desi_Chrom_3_21592405 | Ca_desi_chr03      | 21592405                       | [T/C]       | NA                                         |
| Ca_Desi_Chrom_3_21592409 | Ca_desi_chr03      | 21592409                       | [A/G]       | NA                                         |
| Ca_Desi_Chrom_3_21592410 | Ca_desi_chr03      | 21592410                       | [T/G]       | NA                                         |
| Ca_Desi_Chrom_3_21592439 | Ca_desi_chr03      | 21592439                       | [A/G]       | NA                                         |
| Ca_Desi_Chrom_3_21621191 | Ca_desi_chr03      | 21621191                       | [A/G]       | NA                                         |
| Ca_Desi_Chrom_3_21621224 | Ca_desi_chr03      | 21621224                       | [A/C]       | NA                                         |
| Ca_Desi_Chrom_3_21624166 | Ca_desi_chr03      | 21624166                       | [T/C]       | NA                                         |
| Ca_Desi_Chrom_3_21624170 | Ca_desi_chr03      | 21624170                       | [A/T]       | NA                                         |
| Ca_Desi_Chrom_3_21624274 | Ca_desi_chr03      | 21624274                       | [A/C]       | NA                                         |
| Ca_Desi_Chrom_3_21624279 | Ca_desi_chr03      | 21624279                       | [A/T]       | NA                                         |
| Ca_Desi_Chrom_3_21625614 | Ca_desi_chr03      | 21625614                       | [A/C]       | NA                                         |
| Ca_Desi_Chrom_3_21625693 | Ca_desi_chr03      | 21625693                       | [T/G]       | NA                                         |
| Ca_Desi_Chrom_3_21675730 | Ca_desi_chr03      | 21675730                       | [T/C]       | NA                                         |
| Ca_Desi_Chrom_3_21747046 | Ca_desi_chr03      | 21747046                       | [T/G]       | NA                                         |
| Ca_Desi_Chrom_3_21747048 | Ca_desi_chr03      | 21747048                       | [T/A]       | NA                                         |
| Ca_Desi_Chrom_3_21747074 | Ca_desi_chr03      | 21747074                       | [A/G]       | NA                                         |
| Ca_Desi_Chrom_3_21768472 | Ca_desi_chr03      | 21768472                       | [C/A]       | NA                                         |
| Ca_Desi_Chrom_3_21768473 | Ca_desi_chr03      | 21768473                       | [A/T]       | NA                                         |
| Ca_Desi_Chrom_3_21768474 | Ca_desi_chr03      | 21768474                       | [A/C]       | NA                                         |
| Ca_Desi_Chrom_3_21768475 | Ca_desi_chr03      | 21768475                       | [G/T]       | NA                                         |
| Ca_Desi_Chrom_3_21774427 | Ca_desi_chr03      | 21774427                       | [A/C]       | NA                                         |
| Ca_Desi_Chrom_3_21835284 | Ca_desi_chr03      | 21835284                       | [T/A]       | NA                                         |
| Ca_Desi_Chrom_3_21867107 | Ca_desi_chr03      | 21867107                       | [T/G]       | NA                                         |
| Ca_Desi_Chrom_3_21920964 | Ca_desi_chr03      | 21920964                       | [T/G]       | NA                                         |
| Ca_Desi_Chrom_3_21935578 | Ca_desi_chr03      | 21935578                       | [A/C]       | NA                                         |
| Ca_Desi_Chrom_3_21942881 | Ca_desi_chr03      | 21942881                       | [T/C]       | NA                                         |
| Ca_Desi_Chrom_3_22003665 | Ca_desi_chr03      | 22003665                       | [T/C]       | NA                                         |
| Ca_Desi_Chrom_3_22004700 | Ca_desi_chr03      | 22004700                       | [T/C]       | NA                                         |
| Ca_Desi_Chrom_3_22005360 | Ca_desi_chr03      | 22005360                       | [T/G]       | NA                                         |
| Ca_Desi_Chrom_3_22023130 | Ca_desi_chr03      | 22023130                       | [A/G]       | NA                                         |

| <b>SNP IDs</b>          | <b>Chromosomes</b> | <b>Physical positions (bp)</b> | <b>SNPs</b> | <b>NCBI SNPdb accession IDs (NCBI_ss#)</b> |
|-------------------------|--------------------|--------------------------------|-------------|--------------------------------------------|
| Ca_Desig_Chr_3_22023133 | Ca_desig_chr03     | 22023133                       | [T/A]       | NA                                         |
| Ca_Desig_Chr_3_22571755 | Ca_desig_chr03     | 22571755                       | [T/G]       | NA                                         |
| Ca_Desig_Chr_3_22581329 | Ca_desig_chr03     | 22581329                       | [T/C]       | NA                                         |
| Ca_Desig_Chr_3_22618251 | Ca_desig_chr03     | 22618251                       | [A/G]       | NA                                         |
| Ca_Desig_Chr_3_22618265 | Ca_desig_chr03     | 22618265                       | [T/C]       | NA                                         |
| Ca_Desig_Chr_3_22618284 | Ca_desig_chr03     | 22618284                       | [A/G]       | NA                                         |
| Ca_Desig_Chr_3_22618310 | Ca_desig_chr03     | 22618310                       | [A/C]       | NA                                         |
| Ca_Desig_Chr_3_22687823 | Ca_desig_chr03     | 22687823                       | [C/T]       | NA                                         |
| Ca_Desig_Chr_3_22687902 | Ca_desig_chr03     | 22687902                       | [T/C]       | NA                                         |
| Ca_Desig_Chr_3_22737849 | Ca_desig_chr03     | 22737849                       | [T/C]       | NA                                         |
| Ca_Desig_Chr_3_22737873 | Ca_desig_chr03     | 22737873                       | [A/T]       | NA                                         |
| Ca_Desig_Chr_3_22737951 | Ca_desig_chr03     | 22737951                       | [A/C]       | NA                                         |
| Ca_Desig_Chr_3_22737981 | Ca_desig_chr03     | 22737981                       | [A/G]       | NA                                         |
| Ca_Desig_Chr_3_22830261 | Ca_desig_chr03     | 22830261                       | [G/A]       | NA                                         |
| Ca_Desig_Chr_3_22834176 | Ca_desig_chr03     | 22834176                       | [T/C]       | NA                                         |
| Ca_Desig_Chr_3_22834208 | Ca_desig_chr03     | 22834208                       | [A/G]       | NA                                         |
| Ca_Desig_Chr_3_22903655 | Ca_desig_chr03     | 22903655                       | [A/G]       | NA                                         |
| Ca_Desig_Chr_3_22903659 | Ca_desig_chr03     | 22903659                       | [A/G]       | NA                                         |
| Ca_Desig_Chr_3_22903680 | Ca_desig_chr03     | 22903680                       | [T/G]       | NA                                         |
| Ca_Desig_Chr_3_22903689 | Ca_desig_chr03     | 22903689                       | [T/C]       | NA                                         |
| Ca_Desig_Chr_3_22909826 | Ca_desig_chr03     | 22909826                       | [A/G]       | NA                                         |
| Ca_Desig_Chr_3_22954634 | Ca_desig_chr03     | 22954634                       | [A/G]       | NA                                         |
| Ca_Desig_Chr_3_22954640 | Ca_desig_chr03     | 22954640                       | [T/C]       | NA                                         |
| Ca_Desig_Chr_3_22967778 | Ca_desig_chr03     | 22967778                       | [T/G]       | NA                                         |
| Ca_Desig_Chr_3_22969949 | Ca_desig_chr03     | 22969949                       | [A/G]       | NA                                         |
| Ca_Desig_Chr_3_22969957 | Ca_desig_chr03     | 22969957                       | [A/T]       | NA                                         |
| Ca_Desig_Chr_3_22969964 | Ca_desig_chr03     | 22969964                       | [T/C]       | NA                                         |
| Ca_Desig_Chr_3_22969980 | Ca_desig_chr03     | 22969980                       | [A/C]       | NA                                         |
| Ca_Desig_Chr_3_22969991 | Ca_desig_chr03     | 22969991                       | [A/G]       | NA                                         |
| Ca_Desig_Chr_3_22969996 | Ca_desig_chr03     | 22969996                       | [T/A]       | NA                                         |
| Ca_Desig_Chr_3_22969998 | Ca_desig_chr03     | 22969998                       | [A/G]       | NA                                         |
| Ca_Desig_Chr_3_22973066 | Ca_desig_chr03     | 22973066                       | [C/T]       | NA                                         |
| Ca_Desig_Chr_3_22973073 | Ca_desig_chr03     | 22973073                       | [T/C]       | NA                                         |
| Ca_Desig_Chr_3_22973135 | Ca_desig_chr03     | 22973135                       | [A/C]       | NA                                         |

| <b>SNP IDs</b>           | <b>Chromosomes</b> | <b>Physical positions (bp)</b> | <b>SNPs</b> | <b>NCBI SNPdb accession IDs (NCBI_ss#)</b> |
|--------------------------|--------------------|--------------------------------|-------------|--------------------------------------------|
| Ca_Desi_Chrom_3_22980522 | Ca_desi_chr03      | 22980522                       | [A/G]       | NA                                         |
| Ca_Desi_Chrom_3_22980534 | Ca_desi_chr03      | 22980534                       | [G/C]       | NA                                         |
| Ca_Desi_Chrom_3_22984947 | Ca_desi_chr03      | 22984947                       | [G/C]       | NA                                         |
| Ca_Desi_Chrom_3_22992410 | Ca_desi_chr03      | 22992410                       | [G/A]       | NA                                         |
| Ca_Desi_Chrom_3_22992503 | Ca_desi_chr03      | 22992503                       | [G/A]       | NA                                         |
| Ca_Desi_Chrom_3_22992567 | Ca_desi_chr03      | 22992567                       | [A/G]       | NA                                         |
| Ca_Desi_Chrom_3_22992776 | Ca_desi_chr03      | 22992776                       | [A/G]       | NA                                         |
| Ca_Desi_Chrom_3_23022149 | Ca_desi_chr03      | 23022149                       | [C/T]       | NA                                         |
| Ca_Desi_Chrom_3_23024193 | Ca_desi_chr03      | 23024193                       | [C/A]       | NA                                         |
| Ca_Desi_Chrom_3_23024242 | Ca_desi_chr03      | 23024242                       | [G/T]       | NA                                         |
| Ca_Desi_Chrom_3_23025194 | Ca_desi_chr03      | 23025194                       | [T/G]       | NA                                         |
| Ca_Desi_Chrom_3_23025199 | Ca_desi_chr03      | 23025199                       | [T/G]       | NA                                         |
| Ca_Desi_Chrom_3_23026742 | Ca_desi_chr03      | 23026742                       | [T/G]       | NA                                         |
| Ca_Desi_Chrom_3_23029365 | Ca_desi_chr03      | 23029365                       | [T/A]       | NA                                         |
| Ca_Desi_Chrom_3_23032363 | Ca_desi_chr03      | 23032363                       | [A/G]       | NA                                         |
| Ca_Desi_Chrom_3_23032534 | Ca_desi_chr03      | 23032534                       | [C/T]       | NA                                         |
| Ca_Desi_Chrom_3_23056479 | Ca_desi_chr03      | 23056479                       | [T/G]       | NA                                         |
| Ca_Desi_Chrom_3_23056583 | Ca_desi_chr03      | 23056583                       | [T/G]       | NA                                         |
| Ca_Desi_Chrom_3_23056595 | Ca_desi_chr03      | 23056595                       | [T/A]       | NA                                         |
| Ca_Desi_Chrom_3_23056632 | Ca_desi_chr03      | 23056632                       | [A/C]       | NA                                         |
| Ca_Desi_Chrom_3_23056653 | Ca_desi_chr03      | 23056653                       | [A/G]       | NA                                         |
| Ca_Desi_Chrom_3_23096441 | Ca_desi_chr03      | 23096441                       | [T/G]       | NA                                         |
| Ca_Desi_Chrom_3_23096465 | Ca_desi_chr03      | 23096465                       | [T/G]       | NA                                         |
| Ca_Desi_Chrom_3_23096509 | Ca_desi_chr03      | 23096509                       | [C/T]       | NA                                         |
| Ca_Desi_Chrom_3_23096518 | Ca_desi_chr03      | 23096518                       | [A/G]       | NA                                         |
| Ca_Desi_Chrom_3_23142943 | Ca_desi_chr03      | 23142943                       | [A/G]       | NA                                         |
| Ca_Desi_Chrom_3_23144500 | Ca_desi_chr03      | 23144500                       | [T/C]       | NA                                         |
| Ca_Desi_Chrom_3_23144512 | Ca_desi_chr03      | 23144512                       | [A/T]       | NA                                         |
| Ca_Desi_Chrom_3_23144519 | Ca_desi_chr03      | 23144519                       | [T/C]       | NA                                         |
| Ca_Desi_Chrom_3_23156234 | Ca_desi_chr03      | 23156234                       | [C/T]       | NA                                         |
| Ca_Desi_Chrom_3_23156257 | Ca_desi_chr03      | 23156257                       | [A/G]       | NA                                         |
| Ca_Desi_Chrom_3_23157660 | Ca_desi_chr03      | 23157660                       | [T/A]       | NA                                         |
| Ca_Desi_Chrom_3_23157661 | Ca_desi_chr03      | 23157661                       | [A/G]       | NA                                         |
| Ca_Desi_Chrom_3_23164356 | Ca_desi_chr03      | 23164356                       | [T/C]       | NA                                         |



| <b>SNP IDs</b>           | <b>Chromosomes</b> | <b>Physical positions (bp)</b> | <b>SNPs</b> | <b>NCBI SNPdb accession IDs (NCBI_ss#)</b> |
|--------------------------|--------------------|--------------------------------|-------------|--------------------------------------------|
| Ca_Desi_Chrom_3_23164542 | Ca_desi_chr03      | 23164542                       | [T/C]       | NA                                         |
| Ca_Desi_Chrom_3_23164549 | Ca_desi_chr03      | 23164549                       | [C/A]       | NA                                         |
| Ca_Desi_Chrom_3_23164625 | Ca_desi_chr03      | 23164625                       | [G/A]       | NA                                         |
| Ca_Desi_Chrom_3_23164937 | Ca_desi_chr03      | 23164937                       | [A/G]       | NA                                         |
| Ca_Desi_Chrom_3_23164953 | Ca_desi_chr03      | 23164953                       | [T/C]       | NA                                         |
| Ca_Desi_Chrom_3_23164983 | Ca_desi_chr03      | 23164983                       | [C/T]       | NA                                         |
| Ca_Desi_Chrom_3_23235399 | Ca_desi_chr03      | 23235399                       | [A/G]       | NA                                         |
| Ca_Desi_Chrom_3_23325891 | Ca_desi_chr03      | 23325891                       | [C/A]       | NA                                         |
| Ca_Desi_Chrom_4_7882     | Ca_desi_chr04      | 7882                           | [T/G]       | NA                                         |
| Ca_Desi_Chrom_4_40641    | Ca_desi_chr04      | 40641                          | [A/G]       | NA                                         |
| Ca_Desi_Chrom_4_112110   | Ca_desi_chr04      | 112110                         | [C/A]       | NA                                         |
| Ca_Desi_Chrom_4_122800   | Ca_desi_chr04      | 122800                         | [T/C]       | NA                                         |
| Ca_Desi_Chrom_4_122834   | Ca_desi_chr04      | 122834                         | [T/C]       | NA                                         |
| Ca_Desi_Chrom_4_123046   | Ca_desi_chr04      | 123046                         | [G/A]       | NA                                         |
| Ca_Desi_Chrom_4_130836   | Ca_desi_chr04      | 130836                         | [C/T]       | NA                                         |
| Ca_Desi_Chrom_4_130850   | Ca_desi_chr04      | 130850                         | [G/A]       | NA                                         |
| Ca_Desi_Chrom_4_130883   | Ca_desi_chr04      | 130883                         | [T/G]       | NA                                         |
| Ca_Desi_Chrom_4_131227   | Ca_desi_chr04      | 131227                         | [A/G]       | NA                                         |
| Ca_Desi_Chrom_4_133375   | Ca_desi_chr04      | 133375                         | [C/A]       | NA                                         |
| Ca_Desi_Chrom_4_145927   | Ca_desi_chr04      | 145927                         | [A/G]       | NA                                         |
| Ca_Desi_Chrom_4_149986   | Ca_desi_chr04      | 149986                         | [T/C]       | NA                                         |
| Ca_Desi_Chrom_4_150577   | Ca_desi_chr04      | 150577                         | [T/C]       | NA                                         |
| Ca_Desi_Chrom_4_150640   | Ca_desi_chr04      | 150640                         | [A/C]       | NA                                         |
| Ca_Desi_Chrom_4_150643   | Ca_desi_chr04      | 150643                         | [A/C]       | NA                                         |
| Ca_Desi_Chrom_4_151462   | Ca_desi_chr04      | 151462                         | [G/C]       | NA                                         |
| Ca_Desi_Chrom_4_181954   | Ca_desi_chr04      | 181954                         | [C/G]       | NA                                         |
| Ca_Desi_Chrom_4_198665   | Ca_desi_chr04      | 198665                         | [T/C]       | NA                                         |
| Ca_Desi_Chrom_4_223008   | Ca_desi_chr04      | 223008                         | [G/A]       | NA                                         |
| Ca_Desi_Chrom_4_223012   | Ca_desi_chr04      | 223012                         | [T/G]       | NA                                         |
| Ca_Desi_Chrom_4_232316   | Ca_desi_chr04      | 232316                         | [T/A]       | NA                                         |
| Ca_Desi_Chrom_4_232426   | Ca_desi_chr04      | 232426                         | [T/G]       | NA                                         |
| Ca_Desi_Chrom_4_234977   | Ca_desi_chr04      | 234977                         | [T/G]       | NA                                         |
| Ca_Desi_Chrom_4_237082   | Ca_desi_chr04      | 237082                         | [C/G]       | NA                                         |
| Ca_Desi_Chrom_4_238567   | Ca_desi_chr04      | 238567                         | [G/T]       | NA                                         |

| <b>SNP IDs</b>         | <b>Chromosomes</b> | <b>Physical positions (bp)</b> | <b>SNPs</b> | <b>NCBI SNPdb accession IDs (NCBI_ss#)</b> |
|------------------------|--------------------|--------------------------------|-------------|--------------------------------------------|
| Ca_Desi_Chrom_4_240061 | Ca_desi_chr04      | 240061                         | [T/C]       | NA                                         |
| Ca_Desi_Chrom_4_240109 | Ca_desi_chr04      | 240109                         | [A/C]       | NA                                         |
| Ca_Desi_Chrom_4_241125 | Ca_desi_chr04      | 241125                         | [A/G]       | NA                                         |
| Ca_Desi_Chrom_4_243174 | Ca_desi_chr04      | 243174                         | [G/A]       | NA                                         |
| Ca_Desi_Chrom_4_256283 | Ca_desi_chr04      | 256283                         | [C/T]       | NA                                         |
| Ca_Desi_Chrom_4_256346 | Ca_desi_chr04      | 256346                         | [C/G]       | NA                                         |
| Ca_Desi_Chrom_4_257906 | Ca_desi_chr04      | 257906                         | [T/C]       | NA                                         |
| Ca_Desi_Chrom_4_257924 | Ca_desi_chr04      | 257924                         | [A/G]       | NA                                         |
| Ca_Desi_Chrom_4_257926 | Ca_desi_chr04      | 257926                         | [T/A]       | NA                                         |
| Ca_Desi_Chrom_4_257927 | Ca_desi_chr04      | 257927                         | [A/C]       | NA                                         |
| Ca_Desi_Chrom_4_325326 | Ca_desi_chr04      | 325326                         | [A/G]       | NA                                         |
| Ca_Desi_Chrom_4_325342 | Ca_desi_chr04      | 325342                         | [T/A]       | NA                                         |
| Ca_Desi_Chrom_4_325345 | Ca_desi_chr04      | 325345                         | [A/G]       | NA                                         |
| Ca_Desi_Chrom_4_325358 | Ca_desi_chr04      | 325358                         | [A/G]       | NA                                         |
| Ca_Desi_Chrom_4_325410 | Ca_desi_chr04      | 325410                         | [A/T]       | NA                                         |
| Ca_Desi_Chrom_4_325682 | Ca_desi_chr04      | 325682                         | [T/C]       | NA                                         |
| Ca_Desi_Chrom_4_325982 | Ca_desi_chr04      | 325982                         | [T/G]       | NA                                         |
| Ca_Desi_Chrom_4_326013 | Ca_desi_chr04      | 326013                         | [T/G]       | NA                                         |
| Ca_Desi_Chrom_4_326048 | Ca_desi_chr04      | 326048                         | [A/T]       | NA                                         |
| Ca_Desi_Chrom_4_328232 | Ca_desi_chr04      | 328232                         | [C/T]       | NA                                         |
| Ca_Desi_Chrom_4_334803 | Ca_desi_chr04      | 334803                         | [T/G]       | NA                                         |
| Ca_Desi_Chrom_4_335462 | Ca_desi_chr04      | 335462                         | [A/G]       | NA                                         |
| Ca_Desi_Chrom_4_340829 | Ca_desi_chr04      | 340829                         | [G/A]       | NA                                         |
| Ca_Desi_Chrom_4_345799 | Ca_desi_chr04      | 345799                         | [C/T]       | NA                                         |
| Ca_Desi_Chrom_4_345813 | Ca_desi_chr04      | 345813                         | [G/A]       | NA                                         |
| Ca_Desi_Chrom_4_348202 | Ca_desi_chr04      | 348202                         | [T/A]       | NA                                         |
| Ca_Desi_Chrom_4_348344 | Ca_desi_chr04      | 348344                         | [A/G]       | NA                                         |
| Ca_Desi_Chrom_4_348384 | Ca_desi_chr04      | 348384                         | [T/C]       | NA                                         |
| Ca_Desi_Chrom_4_348770 | Ca_desi_chr04      | 348770                         | [A/C]       | NA                                         |
| Ca_Desi_Chrom_4_354152 | Ca_desi_chr04      | 354152                         | [A/G]       | NA                                         |
| Ca_Desi_Chrom_4_366996 | Ca_desi_chr04      | 366996                         | [A/G]       | NA                                         |
| Ca_Desi_Chrom_4_367014 | Ca_desi_chr04      | 367014                         | [A/G]       | NA                                         |
| Ca_Desi_Chrom_4_367025 | Ca_desi_chr04      | 367025                         | [A/G]       | NA                                         |
| Ca_Desi_Chrom_4_367026 | Ca_desi_chr04      | 367026                         | [G/A]       | NA                                         |

| <b>SNP IDs</b>         | <b>Chromosomes</b> | <b>Physical positions (bp)</b> | <b>SNPs</b> | <b>NCBI SNPdb accession IDs (NCBI_ss#)</b> |
|------------------------|--------------------|--------------------------------|-------------|--------------------------------------------|
| Ca_Desi_Chrom_4_367027 | Ca_desi_chr04      | 367027                         | [A/G]       | NA                                         |
| Ca_Desi_Chrom_4_367801 | Ca_desi_chr04      | 367801                         | [A/T]       | NA                                         |
| Ca_Desi_Chrom_4_367804 | Ca_desi_chr04      | 367804                         | [A/G]       | NA                                         |
| Ca_Desi_Chrom_4_367805 | Ca_desi_chr04      | 367805                         | [A/C]       | NA                                         |
| Ca_Desi_Chrom_4_367808 | Ca_desi_chr04      | 367808                         | [A/C]       | NA                                         |
| Ca_Desi_Chrom_4_367811 | Ca_desi_chr04      | 367811                         | [A/G]       | NA                                         |
| Ca_Desi_Chrom_4_367814 | Ca_desi_chr04      | 367814                         | [T/G]       | NA                                         |
| Ca_Desi_Chrom_4_367816 | Ca_desi_chr04      | 367816                         | [T/G]       | NA                                         |
| Ca_Desi_Chrom_4_367818 | Ca_desi_chr04      | 367818                         | [A/G]       | NA                                         |
| Ca_Desi_Chrom_4_367821 | Ca_desi_chr04      | 367821                         | [G/T]       | NA                                         |
| Ca_Desi_Chrom_4_367822 | Ca_desi_chr04      | 367822                         | [T/G]       | NA                                         |
| Ca_Desi_Chrom_4_367825 | Ca_desi_chr04      | 367825                         | [G/T]       | NA                                         |
| Ca_Desi_Chrom_4_367826 | Ca_desi_chr04      | 367826                         | [T/C]       | NA                                         |
| Ca_Desi_Chrom_4_367827 | Ca_desi_chr04      | 367827                         | [C/A]       | NA                                         |
| Ca_Desi_Chrom_4_367829 | Ca_desi_chr04      | 367829                         | [A/C]       | NA                                         |
| Ca_Desi_Chrom_4_367832 | Ca_desi_chr04      | 367832                         | [T/C]       | NA                                         |
| Ca_Desi_Chrom_4_367833 | Ca_desi_chr04      | 367833                         | [G/C]       | NA                                         |
| Ca_Desi_Chrom_4_367835 | Ca_desi_chr04      | 367835                         | [A/C]       | NA                                         |
| Ca_Desi_Chrom_4_367838 | Ca_desi_chr04      | 367838                         | [T/C]       | NA                                         |
| Ca_Desi_Chrom_4_367844 | Ca_desi_chr04      | 367844                         | [T/C]       | NA                                         |
| Ca_Desi_Chrom_4_367943 | Ca_desi_chr04      | 367943                         | [A/G]       | NA                                         |
| Ca_Desi_Chrom_4_368030 | Ca_desi_chr04      | 368030                         | [A/T]       | NA                                         |
| Ca_Desi_Chrom_4_368270 | Ca_desi_chr04      | 368270                         | [A/G]       | NA                                         |
| Ca_Desi_Chrom_4_368285 | Ca_desi_chr04      | 368285                         | [G/C]       | NA                                         |
| Ca_Desi_Chrom_4_368438 | Ca_desi_chr04      | 368438                         | [G/T]       | NA                                         |
| Ca_Desi_Chrom_4_368472 | Ca_desi_chr04      | 368472                         | [C/T]       | NA                                         |
| Ca_Desi_Chrom_4_371113 | Ca_desi_chr04      | 371113                         | [A/T]       | NA                                         |
| Ca_Desi_Chrom_4_371576 | Ca_desi_chr04      | 371576                         | [G/T]       | NA                                         |
| Ca_Desi_Chrom_4_371754 | Ca_desi_chr04      | 371754                         | [A/T]       | NA                                         |
| Ca_Desi_Chrom_4_372779 | Ca_desi_chr04      | 372779                         | [A/G]       | NA                                         |
| Ca_Desi_Chrom_4_372806 | Ca_desi_chr04      | 372806                         | [C/T]       | NA                                         |
| Ca_Desi_Chrom_4_372810 | Ca_desi_chr04      | 372810                         | [C/G]       | NA                                         |
| Ca_Desi_Chrom_4_454624 | Ca_desi_chr04      | 454624                         | [T/G]       | NA                                         |
| Ca_Desi_Chrom_4_454634 | Ca_desi_chr04      | 454634                         | [T/G]       | NA                                         |

| <b>SNP IDs</b>         | <b>Chromosomes</b> | <b>Physical positions (bp)</b> | <b>SNPs</b> | <b>NCBI SNPdb accession IDs (NCBI_ss#)</b> |
|------------------------|--------------------|--------------------------------|-------------|--------------------------------------------|
| Ca_Desi_Chrom_4_454671 | Ca_desi_chr04      | 454671                         | [A/C]       | NA                                         |
| Ca_Desi_Chrom_4_600659 | Ca_desi_chr04      | 600659                         | [T/C]       | NA                                         |
| Ca_Desi_Chrom_4_600687 | Ca_desi_chr04      | 600687                         | [T/G]       | NA                                         |
| Ca_Desi_Chrom_4_600743 | Ca_desi_chr04      | 600743                         | [T/G]       | NA                                         |
| Ca_Desi_Chrom_4_600805 | Ca_desi_chr04      | 600805                         | [T/G]       | NA                                         |
| Ca_Desi_Chrom_4_677279 | Ca_desi_chr04      | 677279                         | [A/C]       | NA                                         |
| Ca_Desi_Chrom_4_677289 | Ca_desi_chr04      | 677289                         | [A/C]       | NA                                         |
| Ca_Desi_Chrom_4_677300 | Ca_desi_chr04      | 677300                         | [T/C]       | NA                                         |
| Ca_Desi_Chrom_4_686239 | Ca_desi_chr04      | 686239                         | [T/G]       | NA                                         |
| Ca_Desi_Chrom_4_686310 | Ca_desi_chr04      | 686310                         | [A/C]       | NA                                         |
| Ca_Desi_Chrom_4_686313 | Ca_desi_chr04      | 686313                         | [T/C]       | NA                                         |
| Ca_Desi_Chrom_4_686341 | Ca_desi_chr04      | 686341                         | [A/G]       | NA                                         |
| Ca_Desi_Chrom_4_686343 | Ca_desi_chr04      | 686343                         | [T/C]       | NA                                         |
| Ca_Desi_Chrom_4_686346 | Ca_desi_chr04      | 686346                         | [T/C]       | NA                                         |
| Ca_Desi_Chrom_4_686358 | Ca_desi_chr04      | 686358                         | [T/A]       | NA                                         |
| Ca_Desi_Chrom_4_705227 | Ca_desi_chr04      | 705227                         | [A/G]       | NA                                         |
| Ca_Desi_Chrom_4_748189 | Ca_desi_chr04      | 748189                         | [A/C]       | NA                                         |
| Ca_Desi_Chrom_4_748485 | Ca_desi_chr04      | 748485                         | [A/C]       | NA                                         |
| Ca_Desi_Chrom_4_748638 | Ca_desi_chr04      | 748638                         | [T/C]       | NA                                         |
| Ca_Desi_Chrom_4_748644 | Ca_desi_chr04      | 748644                         | [A/G]       | NA                                         |
| Ca_Desi_Chrom_4_748653 | Ca_desi_chr04      | 748653                         | [T/C]       | NA                                         |
| Ca_Desi_Chrom_4_748660 | Ca_desi_chr04      | 748660                         | [T/C]       | NA                                         |
| Ca_Desi_Chrom_4_748666 | Ca_desi_chr04      | 748666                         | [A/G]       | NA                                         |
| Ca_Desi_Chrom_4_748679 | Ca_desi_chr04      | 748679                         | [C/A]       | NA                                         |
| Ca_Desi_Chrom_4_771278 | Ca_desi_chr04      | 771278                         | [A/G]       | NA                                         |
| Ca_Desi_Chrom_4_771281 | Ca_desi_chr04      | 771281                         | [T/C]       | NA                                         |
| Ca_Desi_Chrom_4_771305 | Ca_desi_chr04      | 771305                         | [T/G]       | NA                                         |
| Ca_Desi_Chrom_4_878326 | Ca_desi_chr04      | 878326                         | [T/C]       | NA                                         |
| Ca_Desi_Chrom_4_889511 | Ca_desi_chr04      | 889511                         | [T/G]       | NA                                         |
| Ca_Desi_Chrom_4_889512 | Ca_desi_chr04      | 889512                         | [A/C]       | NA                                         |
| Ca_Desi_Chrom_4_889522 | Ca_desi_chr04      | 889522                         | [T/G]       | NA                                         |
| Ca_Desi_Chrom_4_889535 | Ca_desi_chr04      | 889535                         | [C/G]       | NA                                         |
| Ca_Desi_Chrom_4_889538 | Ca_desi_chr04      | 889538                         | [T/C]       | NA                                         |
| Ca_Desi_Chrom_4_908522 | Ca_desi_chr04      | 908522                         | [A/G]       | NA                                         |

| <b>SNP IDs</b>          | <b>Chromosomes</b> | <b>Physical positions (bp)</b> | <b>SNPs</b> | <b>NCBI SNPdb accession IDs (NCBI_ss#)</b> |
|-------------------------|--------------------|--------------------------------|-------------|--------------------------------------------|
| Ca_Desi_Chrom_4_937980  | Ca_desi_chr04      | 937980                         | [A/T]       | NA                                         |
| Ca_Desi_Chrom_4_988768  | Ca_desi_chr04      | 988768                         | [T/C]       | NA                                         |
| Ca_Desi_Chrom_4_988774  | Ca_desi_chr04      | 988774                         | [A/C]       | NA                                         |
| Ca_Desi_Chrom_4_1018475 | Ca_desi_chr04      | 1018475                        | [A/G]       | NA                                         |
| Ca_Desi_Chrom_4_1022130 | Ca_desi_chr04      | 1022130                        | [T/C]       | NA                                         |
| Ca_Desi_Chrom_4_1022131 | Ca_desi_chr04      | 1022131                        | [G/T]       | NA                                         |
| Ca_Desi_Chrom_4_1104662 | Ca_desi_chr04      | 1104662                        | [A/G]       | NA                                         |
| Ca_Desi_Chrom_4_1104670 | Ca_desi_chr04      | 1104670                        | [T/C]       | NA                                         |
| Ca_Desi_Chrom_4_1104677 | Ca_desi_chr04      | 1104677                        | [T/G]       | NA                                         |
| Ca_Desi_Chrom_4_1104683 | Ca_desi_chr04      | 1104683                        | [A/C]       | NA                                         |
| Ca_Desi_Chrom_4_1104692 | Ca_desi_chr04      | 1104692                        | [T/C]       | NA                                         |
| Ca_Desi_Chrom_4_1104703 | Ca_desi_chr04      | 1104703                        | [T/C]       | NA                                         |
| Ca_Desi_Chrom_4_1104705 | Ca_desi_chr04      | 1104705                        | [A/G]       | NA                                         |
| Ca_Desi_Chrom_4_1104721 | Ca_desi_chr04      | 1104721                        | [T/C]       | NA                                         |
| Ca_Desi_Chrom_4_1104818 | Ca_desi_chr04      | 1104818                        | [A/T]       | NA                                         |
| Ca_Desi_Chrom_4_1213556 | Ca_desi_chr04      | 1213556                        | [C/T]       | NA                                         |
| Ca_Desi_Chrom_4_1224856 | Ca_desi_chr04      | 1224856                        | [C/T]       | NA                                         |
| Ca_Desi_Chrom_4_1225164 | Ca_desi_chr04      | 1225164                        | [G/A]       | NA                                         |
| Ca_Desi_Chrom_4_1225194 | Ca_desi_chr04      | 1225194                        | [T/C]       | NA                                         |
| Ca_Desi_Chrom_4_1225198 | Ca_desi_chr04      | 1225198                        | [A/T]       | NA                                         |
| Ca_Desi_Chrom_4_1225209 | Ca_desi_chr04      | 1225209                        | [A/C]       | NA                                         |
| Ca_Desi_Chrom_4_1225214 | Ca_desi_chr04      | 1225214                        | [T/G]       | NA                                         |
| Ca_Desi_Chrom_4_1226703 | Ca_desi_chr04      | 1226703                        | [A/C]       | NA                                         |
| Ca_Desi_Chrom_4_1227379 | Ca_desi_chr04      | 1227379                        | [A/C]       | NA                                         |
| Ca_Desi_Chrom_4_1228415 | Ca_desi_chr04      | 1228415                        | [A/C]       | NA                                         |
| Ca_Desi_Chrom_4_1228422 | Ca_desi_chr04      | 1228422                        | [C/A]       | NA                                         |
| Ca_Desi_Chrom_4_1228423 | Ca_desi_chr04      | 1228423                        | [T/G]       | NA                                         |
| Ca_Desi_Chrom_4_1228424 | Ca_desi_chr04      | 1228424                        | [T/A]       | NA                                         |
| Ca_Desi_Chrom_4_1228477 | Ca_desi_chr04      | 1228477                        | [A/C]       | NA                                         |
| Ca_Desi_Chrom_4_1228490 | Ca_desi_chr04      | 1228490                        | [T/C]       | NA                                         |
| Ca_Desi_Chrom_4_1228507 | Ca_desi_chr04      | 1228507                        | [A/G]       | NA                                         |
| Ca_Desi_Chrom_4_1291858 | Ca_desi_chr04      | 1291858                        | [T/G]       | NA                                         |
| Ca_Desi_Chrom_4_1323272 | Ca_desi_chr04      | 1323272                        | [A/G]       | NA                                         |
| Ca_Desi_Chrom_4_1323273 | Ca_desi_chr04      | 1323273                        | [A/G]       | NA                                         |

| <b>SNP IDs</b>          | <b>Chromosomes</b> | <b>Physical positions (bp)</b> | <b>SNPs</b> | <b>NCBI SNPdb accession IDs (NCBI_ss#)</b> |
|-------------------------|--------------------|--------------------------------|-------------|--------------------------------------------|
| Ca_Desi_Chrom_4_1323281 | Ca_desi_chr04      | 1323281                        | [T/C]       | NA                                         |
| Ca_Desi_Chrom_4_1323295 | Ca_desi_chr04      | 1323295                        | [T/A]       | NA                                         |
| Ca_Desi_Chrom_4_1323302 | Ca_desi_chr04      | 1323302                        | [C/A]       | NA                                         |
| Ca_Desi_Chrom_4_1323358 | Ca_desi_chr04      | 1323358                        | [T/G]       | NA                                         |
| Ca_Desi_Chrom_4_1324130 | Ca_desi_chr04      | 1324130                        | [T/G]       | NA                                         |
| Ca_Desi_Chrom_4_1324142 | Ca_desi_chr04      | 1324142                        | [T/G]       | NA                                         |
| Ca_Desi_Chrom_4_1324156 | Ca_desi_chr04      | 1324156                        | [G/A]       | NA                                         |
| Ca_Desi_Chrom_4_1400955 | Ca_desi_chr04      | 1400955                        | [C/A]       | NA                                         |
| Ca_Desi_Chrom_4_1400956 | Ca_desi_chr04      | 1400956                        | [A/G]       | NA                                         |
| Ca_Desi_Chrom_4_1414209 | Ca_desi_chr04      | 1414209                        | [T/G]       | NA                                         |
| Ca_Desi_Chrom_4_1414218 | Ca_desi_chr04      | 1414218                        | [T/G]       | NA                                         |
| Ca_Desi_Chrom_4_1414223 | Ca_desi_chr04      | 1414223                        | [T/G]       | NA                                         |
| Ca_Desi_Chrom_4_1414231 | Ca_desi_chr04      | 1414231                        | [A/C]       | NA                                         |
| Ca_Desi_Chrom_4_1770546 | Ca_desi_chr04      | 1770546                        | [A/C]       | NA                                         |
| Ca_Desi_Chrom_4_1798668 | Ca_desi_chr04      | 1798668                        | [T/G]       | NA                                         |
| Ca_Desi_Chrom_4_1826373 | Ca_desi_chr04      | 1826373                        | [G/T]       | NA                                         |
| Ca_Desi_Chrom_4_1929722 | Ca_desi_chr04      | 1929722                        | [A/C]       | NA                                         |
| Ca_Desi_Chrom_4_2040754 | Ca_desi_chr04      | 2040754                        | [T/G]       | NA                                         |
| Ca_Desi_Chrom_4_2051124 | Ca_desi_chr04      | 2051124                        | [T/C]       | NA                                         |
| Ca_Desi_Chrom_4_2057214 | Ca_desi_chr04      | 2057214                        | [A/G]       | NA                                         |
| Ca_Desi_Chrom_4_2057278 | Ca_desi_chr04      | 2057278                        | [T/C]       | NA                                         |
| Ca_Desi_Chrom_4_2057299 | Ca_desi_chr04      | 2057299                        | [T/C]       | NA                                         |
| Ca_Desi_Chrom_4_2057309 | Ca_desi_chr04      | 2057309                        | [A/G]       | NA                                         |
| Ca_Desi_Chrom_4_2057324 | Ca_desi_chr04      | 2057324                        | [T/C]       | NA                                         |
| Ca_Desi_Chrom_4_2057337 | Ca_desi_chr04      | 2057337                        | [A/G]       | NA                                         |
| Ca_Desi_Chrom_4_2172640 | Ca_desi_chr04      | 2172640                        | [C/T]       | NA                                         |
| Ca_Desi_Chrom_4_2172655 | Ca_desi_chr04      | 2172655                        | [G/A]       | NA                                         |
| Ca_Desi_Chrom_4_2174884 | Ca_desi_chr04      | 2174884                        | [A/G]       | NA                                         |
| Ca_Desi_Chrom_4_2174886 | Ca_desi_chr04      | 2174886                        | [G/T]       | NA                                         |
| Ca_Desi_Chrom_4_2181555 | Ca_desi_chr04      | 2181555                        | [C/T]       | NA                                         |
| Ca_Desi_Chrom_4_2181568 | Ca_desi_chr04      | 2181568                        | [G/A]       | NA                                         |
| Ca_Desi_Chrom_4_2181583 | Ca_desi_chr04      | 2181583                        | [T/C]       | NA                                         |
| Ca_Desi_Chrom_4_2181587 | Ca_desi_chr04      | 2181587                        | [G/A]       | NA                                         |
| Ca_Desi_Chrom_4_2363586 | Ca_desi_chr04      | 2363586                        | [T/G]       | NA                                         |

| <b>SNP IDs</b>          | <b>Chromosomes</b> | <b>Physical positions (bp)</b> | <b>SNPs</b> | <b>NCBI SNPdb accession IDs (NCBI_ss#)</b> |
|-------------------------|--------------------|--------------------------------|-------------|--------------------------------------------|
| Ca_Desi_Chrom_4_2391174 | Ca_desi_chr04      | 2391174                        | [A/G]       | NA                                         |
| Ca_Desi_Chrom_4_2391280 | Ca_desi_chr04      | 2391280                        | [C/T]       | NA                                         |
| Ca_Desi_Chrom_4_2391300 | Ca_desi_chr04      | 2391300                        | [A/C]       | NA                                         |
| Ca_Desi_Chrom_4_2396211 | Ca_desi_chr04      | 2396211                        | [A/G]       | NA                                         |
| Ca_Desi_Chrom_4_2396248 | Ca_desi_chr04      | 2396248                        | [A/G]       | NA                                         |
| Ca_Desi_Chrom_4_2396431 | Ca_desi_chr04      | 2396431                        | [T/G]       | NA                                         |
| Ca_Desi_Chrom_4_2396436 | Ca_desi_chr04      | 2396436                        | [T/C]       | NA                                         |
| Ca_Desi_Chrom_4_2396520 | Ca_desi_chr04      | 2396520                        | [T/G]       | NA                                         |
| Ca_Desi_Chrom_4_2396528 | Ca_desi_chr04      | 2396528                        | [A/C]       | NA                                         |
| Ca_Desi_Chrom_4_2396547 | Ca_desi_chr04      | 2396547                        | [T/G]       | NA                                         |
| Ca_Desi_Chrom_4_2396629 | Ca_desi_chr04      | 2396629                        | [T/G]       | NA                                         |
| Ca_Desi_Chrom_4_2396679 | Ca_desi_chr04      | 2396679                        | [C/T]       | NA                                         |
| Ca_Desi_Chrom_4_2396689 | Ca_desi_chr04      | 2396689                        | [A/C]       | NA                                         |
| Ca_Desi_Chrom_4_2396695 | Ca_desi_chr04      | 2396695                        | [A/C]       | NA                                         |
| Ca_Desi_Chrom_4_2396705 | Ca_desi_chr04      | 2396705                        | [G/A]       | NA                                         |
| Ca_Desi_Chrom_4_2397043 | Ca_desi_chr04      | 2397043                        | [C/A]       | NA                                         |
| Ca_Desi_Chrom_4_2410917 | Ca_desi_chr04      | 2410917                        | [G/C]       | NA                                         |
| Ca_Desi_Chrom_4_2410949 | Ca_desi_chr04      | 2410949                        | [A/T]       | NA                                         |
| Ca_Desi_Chrom_4_2410950 | Ca_desi_chr04      | 2410950                        | [A/C]       | NA                                         |
| Ca_Desi_Chrom_4_2410951 | Ca_desi_chr04      | 2410951                        | [G/T]       | NA                                         |
| Ca_Desi_Chrom_4_2410996 | Ca_desi_chr04      | 2410996                        | [A/C]       | NA                                         |
| Ca_Desi_Chrom_4_2412911 | Ca_desi_chr04      | 2412911                        | [T/C]       | NA                                         |
| Ca_Desi_Chrom_4_2413091 | Ca_desi_chr04      | 2413091                        | [C/T]       | NA                                         |
| Ca_Desi_Chrom_4_2416463 | Ca_desi_chr04      | 2416463                        | [C/A]       | NA                                         |
| Ca_Desi_Chrom_4_2416464 | Ca_desi_chr04      | 2416464                        | [A/G]       | NA                                         |
| Ca_Desi_Chrom_4_2449602 | Ca_desi_chr04      | 2449602                        | [T/A]       | NA                                         |
| Ca_Desi_Chrom_4_2450642 | Ca_desi_chr04      | 2450642                        | [G/A]       | NA                                         |
| Ca_Desi_Chrom_4_2451122 | Ca_desi_chr04      | 2451122                        | [A/G]       | NA                                         |
| Ca_Desi_Chrom_4_2451258 | Ca_desi_chr04      | 2451258                        | [A/G]       | NA                                         |
| Ca_Desi_Chrom_4_2456945 | Ca_desi_chr04      | 2456945                        | [C/T]       | NA                                         |
| Ca_Desi_Chrom_4_2457952 | Ca_desi_chr04      | 2457952                        | [A/G]       | NA                                         |
| Ca_Desi_Chrom_4_2457958 | Ca_desi_chr04      | 2457958                        | [A/C]       | NA                                         |
| Ca_Desi_Chrom_4_2457985 | Ca_desi_chr04      | 2457985                        | [A/C]       | NA                                         |
| Ca_Desi_Chrom_4_2463339 | Ca_desi_chr04      | 2463339                        | [G/A]       | NA                                         |

| <b>SNP IDs</b>          | <b>Chromosomes</b> | <b>Physical positions (bp)</b> | <b>SNPs</b> | <b>NCBI SNPdb accession IDs (NCBI_ss#)</b> |
|-------------------------|--------------------|--------------------------------|-------------|--------------------------------------------|
| Ca_Desi_Chrom_4_2464105 | Ca_desi_chr04      | 2464105                        | [G/T]       | NA                                         |
| Ca_Desi_Chrom_4_2464106 | Ca_desi_chr04      | 2464106                        | [A/C]       | NA                                         |
| Ca_Desi_Chrom_4_2464107 | Ca_desi_chr04      | 2464107                        | [G/T]       | NA                                         |
| Ca_Desi_Chrom_4_2464122 | Ca_desi_chr04      | 2464122                        | [C/A]       | NA                                         |
| Ca_Desi_Chrom_4_2479967 | Ca_desi_chr04      | 2479967                        | [A/G]       | NA                                         |
| Ca_Desi_Chrom_4_2481151 | Ca_desi_chr04      | 2481151                        | [A/T]       | NA                                         |
| Ca_Desi_Chrom_4_2481165 | Ca_desi_chr04      | 2481165                        | [T/A]       | NA                                         |
| Ca_Desi_Chrom_4_2489929 | Ca_desi_chr04      | 2489929                        | [T/C]       | NA                                         |
| Ca_Desi_Chrom_4_2490877 | Ca_desi_chr04      | 2490877                        | [A/T]       | NA                                         |
| Ca_Desi_Chrom_4_2507278 | Ca_desi_chr04      | 2507278                        | [A/T]       | NA                                         |
| Ca_Desi_Chrom_4_2507304 | Ca_desi_chr04      | 2507304                        | [T/C]       | NA                                         |
| Ca_Desi_Chrom_4_2511841 | Ca_desi_chr04      | 2511841                        | [G/T]       | NA                                         |
| Ca_Desi_Chrom_4_2511853 | Ca_desi_chr04      | 2511853                        | [C/T]       | NA                                         |
| Ca_Desi_Chrom_4_2511894 | Ca_desi_chr04      | 2511894                        | [T/C]       | NA                                         |
| Ca_Desi_Chrom_4_2511901 | Ca_desi_chr04      | 2511901                        | [A/G]       | NA                                         |
| Ca_Desi_Chrom_4_2511906 | Ca_desi_chr04      | 2511906                        | [A/G]       | NA                                         |
| Ca_Desi_Chrom_4_2511911 | Ca_desi_chr04      | 2511911                        | [A/G]       | NA                                         |
| Ca_Desi_Chrom_4_2511913 | Ca_desi_chr04      | 2511913                        | [A/G]       | NA                                         |
| Ca_Desi_Chrom_4_2511924 | Ca_desi_chr04      | 2511924                        | [T/G]       | NA                                         |
| Ca_Desi_Chrom_4_2511932 | Ca_desi_chr04      | 2511932                        | [A/G]       | NA                                         |
| Ca_Desi_Chrom_4_2511937 | Ca_desi_chr04      | 2511937                        | [T/C]       | NA                                         |
| Ca_Desi_Chrom_4_2527581 | Ca_desi_chr04      | 2527581                        | [G/A]       | NA                                         |
| Ca_Desi_Chrom_4_2547432 | Ca_desi_chr04      | 2547432                        | [T/C]       | NA                                         |
| Ca_Desi_Chrom_4_2548472 | Ca_desi_chr04      | 2548472                        | [T/A]       | NA                                         |
| Ca_Desi_Chrom_4_2609258 | Ca_desi_chr04      | 2609258                        | [T/G]       | NA                                         |
| Ca_Desi_Chrom_4_2620933 | Ca_desi_chr04      | 2620933                        | [T/A]       | NA                                         |
| Ca_Desi_Chrom_4_2620965 | Ca_desi_chr04      | 2620965                        | [T/G]       | NA                                         |
| Ca_Desi_Chrom_4_2620974 | Ca_desi_chr04      | 2620974                        | [A/G]       | NA                                         |
| Ca_Desi_Chrom_4_2692233 | Ca_desi_chr04      | 2692233                        | [C/A]       | NA                                         |
| Ca_Desi_Chrom_4_2692234 | Ca_desi_chr04      | 2692234                        | [T/G]       | NA                                         |
| Ca_Desi_Chrom_4_2692243 | Ca_desi_chr04      | 2692243                        | [T/A]       | NA                                         |
| Ca_Desi_Chrom_4_2694573 | Ca_desi_chr04      | 2694573                        | [A/C]       | NA                                         |
| Ca_Desi_Chrom_4_2750818 | Ca_desi_chr04      | 2750818                        | [C/T]       | NA                                         |
| Ca_Desi_Chrom_4_2750844 | Ca_desi_chr04      | 2750844                        | [G/A]       | NA                                         |



| <b>SNP IDs</b>          | <b>Chromosomes</b> | <b>Physical positions (bp)</b> | <b>SNPs</b> | <b>NCBI SNPdb accession IDs (NCBI_ss#)</b> |
|-------------------------|--------------------|--------------------------------|-------------|--------------------------------------------|
| Ca_Desi_Chrom_4_2750863 | Ca_desi_chr04      | 2750863                        | [A/C]       | NA                                         |
| Ca_Desi_Chrom_4_2751571 | Ca_desi_chr04      | 2751571                        | [G/T]       | NA                                         |
| Ca_Desi_Chrom_4_2761588 | Ca_desi_chr04      | 2761588                        | [C/T]       | NA                                         |
| Ca_Desi_Chrom_4_2761592 | Ca_desi_chr04      | 2761592                        | [G/A]       | NA                                         |
| Ca_Desi_Chrom_4_2761601 | Ca_desi_chr04      | 2761601                        | [A/G]       | NA                                         |
| Ca_Desi_Chrom_4_2793481 | Ca_desi_chr04      | 2793481                        | [G/A]       | NA                                         |
| Ca_Desi_Chrom_4_2812659 | Ca_desi_chr04      | 2812659                        | [T/G]       | NA                                         |
| Ca_Desi_Chrom_4_2812775 | Ca_desi_chr04      | 2812775                        | [C/T]       | NA                                         |
| Ca_Desi_Chrom_4_2873185 | Ca_desi_chr04      | 2873185                        | [C/T]       | NA                                         |
| Ca_Desi_Chrom_4_2882614 | Ca_desi_chr04      | 2882614                        | [T/A]       | NA                                         |
| Ca_Desi_Chrom_4_2882615 | Ca_desi_chr04      | 2882615                        | [A/C]       | NA                                         |
| Ca_Desi_Chrom_4_2906536 | Ca_desi_chr04      | 2906536                        | [A/T]       | NA                                         |
| Ca_Desi_Chrom_4_2977378 | Ca_desi_chr04      | 2977378                        | [C/T]       | NA                                         |
| Ca_Desi_Chrom_4_2978413 | Ca_desi_chr04      | 2978413                        | [T/C]       | NA                                         |
| Ca_Desi_Chrom_4_2978459 | Ca_desi_chr04      | 2978459                        | [A/T]       | NA                                         |
| Ca_Desi_Chrom_4_2987115 | Ca_desi_chr04      | 2987115                        | [A/T]       | NA                                         |
| Ca_Desi_Chrom_4_2990741 | Ca_desi_chr04      | 2990741                        | [T/A]       | NA                                         |
| Ca_Desi_Chrom_4_2991777 | Ca_desi_chr04      | 2991777                        | [A/C]       | NA                                         |
| Ca_Desi_Chrom_4_2991804 | Ca_desi_chr04      | 2991804                        | [C/A]       | NA                                         |
| Ca_Desi_Chrom_4_2997005 | Ca_desi_chr04      | 2997005                        | [C/T]       | NA                                         |
| Ca_Desi_Chrom_4_2997017 | Ca_desi_chr04      | 2997017                        | [C/T]       | NA                                         |
| Ca_Desi_Chrom_4_2997039 | Ca_desi_chr04      | 2997039                        | [G/C]       | NA                                         |
| Ca_Desi_Chrom_4_2997431 | Ca_desi_chr04      | 2997431                        | [C/T]       | NA                                         |
| Ca_Desi_Chrom_4_3009470 | Ca_desi_chr04      | 3009470                        | [A/G]       | NA                                         |
| Ca_Desi_Chrom_4_3009471 | Ca_desi_chr04      | 3009471                        | [C/T]       | NA                                         |
| Ca_Desi_Chrom_4_3010593 | Ca_desi_chr04      | 3010593                        | [A/G]       | NA                                         |
| Ca_Desi_Chrom_4_3012464 | Ca_desi_chr04      | 3012464                        | [G/C]       | NA                                         |
| Ca_Desi_Chrom_4_3035000 | Ca_desi_chr04      | 3035000                        | [A/T]       | NA                                         |
| Ca_Desi_Chrom_4_3035085 | Ca_desi_chr04      | 3035085                        | [C/T]       | NA                                         |
| Ca_Desi_Chrom_4_3035131 | Ca_desi_chr04      | 3035131                        | [G/C]       | NA                                         |
| Ca_Desi_Chrom_4_3055686 | Ca_desi_chr04      | 3055686                        | [A/C]       | NA                                         |
| Ca_Desi_Chrom_4_3055803 | Ca_desi_chr04      | 3055803                        | [T/C]       | NA                                         |
| Ca_Desi_Chrom_4_3055868 | Ca_desi_chr04      | 3055868                        | [T/C]       | NA                                         |
| Ca_Desi_Chrom_4_3057462 | Ca_desi_chr04      | 3057462                        | [A/G]       | NA                                         |

| <b>SNP IDs</b>          | <b>Chromosomes</b> | <b>Physical positions (bp)</b> | <b>SNPs</b> | <b>NCBI SNPdb accession IDs (NCBI_ss#)</b> |
|-------------------------|--------------------|--------------------------------|-------------|--------------------------------------------|
| Ca_Desi_Chrom_4_3063851 | Ca_desi_chr04      | 3063851                        | [G/T]       | NA                                         |
| Ca_Desi_Chrom_4_3063929 | Ca_desi_chr04      | 3063929                        | [C/T]       | NA                                         |
| Ca_Desi_Chrom_4_3070931 | Ca_desi_chr04      | 3070931                        | [G/A]       | NA                                         |
| Ca_Desi_Chrom_4_3076119 | Ca_desi_chr04      | 3076119                        | [G/A]       | NA                                         |
| Ca_Desi_Chrom_4_3077529 | Ca_desi_chr04      | 3077529                        | [C/A]       | NA                                         |
| Ca_Desi_Chrom_4_3077536 | Ca_desi_chr04      | 3077536                        | [A/G]       | NA                                         |
| Ca_Desi_Chrom_4_3077546 | Ca_desi_chr04      | 3077546                        | [A/G]       | NA                                         |
| Ca_Desi_Chrom_4_3077547 | Ca_desi_chr04      | 3077547                        | [A/G]       | NA                                         |
| Ca_Desi_Chrom_4_3077570 | Ca_desi_chr04      | 3077570                        | [A/G]       | NA                                         |
| Ca_Desi_Chrom_4_3081906 | Ca_desi_chr04      | 3081906                        | [T/C]       | NA                                         |
| Ca_Desi_Chrom_4_3123418 | Ca_desi_chr04      | 3123418                        | [C/T]       | NA                                         |
| Ca_Desi_Chrom_4_3147919 | Ca_desi_chr04      | 3147919                        | [A/G]       | NA                                         |
| Ca_Desi_Chrom_4_3147921 | Ca_desi_chr04      | 3147921                        | [A/C]       | NA                                         |
| Ca_Desi_Chrom_4_3147922 | Ca_desi_chr04      | 3147922                        | [C/A]       | NA                                         |
| Ca_Desi_Chrom_4_3147925 | Ca_desi_chr04      | 3147925                        | [T/C]       | NA                                         |
| Ca_Desi_Chrom_4_3147933 | Ca_desi_chr04      | 3147933                        | [A/C]       | NA                                         |
| Ca_Desi_Chrom_4_3147939 | Ca_desi_chr04      | 3147939                        | [A/G]       | NA                                         |
| Ca_Desi_Chrom_4_3147959 | Ca_desi_chr04      | 3147959                        | [T/C]       | NA                                         |
| Ca_Desi_Chrom_4_3152370 | Ca_desi_chr04      | 3152370                        | [A/C]       | NA                                         |
| Ca_Desi_Chrom_4_3152371 | Ca_desi_chr04      | 3152371                        | [G/C]       | NA                                         |
| Ca_Desi_Chrom_4_3163412 | Ca_desi_chr04      | 3163412                        | [A/G]       | NA                                         |
| Ca_Desi_Chrom_4_3163422 | Ca_desi_chr04      | 3163422                        | [A/G]       | NA                                         |
| Ca_Desi_Chrom_4_3163432 | Ca_desi_chr04      | 3163432                        | [A/C]       | NA                                         |
| Ca_Desi_Chrom_4_3163449 | Ca_desi_chr04      | 3163449                        | [T/G]       | NA                                         |
| Ca_Desi_Chrom_4_3163451 | Ca_desi_chr04      | 3163451                        | [T/C]       | NA                                         |
| Ca_Desi_Chrom_4_3248622 | Ca_desi_chr04      | 3248622                        | [A/G]       | NA                                         |
| Ca_Desi_Chrom_4_3248640 | Ca_desi_chr04      | 3248640                        | [T/A]       | NA                                         |
| Ca_Desi_Chrom_4_3248802 | Ca_desi_chr04      | 3248802                        | [T/G]       | NA                                         |
| Ca_Desi_Chrom_4_3248832 | Ca_desi_chr04      | 3248832                        | [T/G]       | NA                                         |
| Ca_Desi_Chrom_4_3326279 | Ca_desi_chr04      | 3326279                        | [G/A]       | NA                                         |
| Ca_Desi_Chrom_4_3326281 | Ca_desi_chr04      | 3326281                        | [T/G]       | NA                                         |
| Ca_Desi_Chrom_4_3326283 | Ca_desi_chr04      | 3326283                        | [A/G]       | NA                                         |
| Ca_Desi_Chrom_4_3326298 | Ca_desi_chr04      | 3326298                        | [T/G]       | NA                                         |
| Ca_Desi_Chrom_4_3343775 | Ca_desi_chr04      | 3343775                        | [T/C]       | NA                                         |

| <b>SNP IDs</b>          | <b>Chromosomes</b> | <b>Physical positions (bp)</b> | <b>SNPs</b> | <b>NCBI SNPdb accession IDs (NCBI_ss#)</b> |
|-------------------------|--------------------|--------------------------------|-------------|--------------------------------------------|
| Ca_Desi_Chrom_4_3367557 | Ca_desi_chr04      | 3367557                        | [A/G]       | NA                                         |
| Ca_Desi_Chrom_4_3369431 | Ca_desi_chr04      | 3369431                        | [T/G]       | NA                                         |
| Ca_Desi_Chrom_4_3379061 | Ca_desi_chr04      | 3379061                        | [G/A]       | NA                                         |
| Ca_Desi_Chrom_4_3379084 | Ca_desi_chr04      | 3379084                        | [T/C]       | NA                                         |
| Ca_Desi_Chrom_4_3412898 | Ca_desi_chr04      | 3412898                        | [A/C]       | NA                                         |
| Ca_Desi_Chrom_4_3412921 | Ca_desi_chr04      | 3412921                        | [A/G]       | NA                                         |
| Ca_Desi_Chrom_4_3414893 | Ca_desi_chr04      | 3414893                        | [T/G]       | NA                                         |
| Ca_Desi_Chrom_4_3505903 | Ca_desi_chr04      | 3505903                        | [T/G]       | NA                                         |
| Ca_Desi_Chrom_4_3521277 | Ca_desi_chr04      | 3521277                        | [A/G]       | NA                                         |
| Ca_Desi_Chrom_4_3530482 | Ca_desi_chr04      | 3530482                        | [A/G]       | NA                                         |
| Ca_Desi_Chrom_4_3530510 | Ca_desi_chr04      | 3530510                        | [A/C]       | NA                                         |
| Ca_Desi_Chrom_4_3530522 | Ca_desi_chr04      | 3530522                        | [A/C]       | NA                                         |
| Ca_Desi_Chrom_4_3530532 | Ca_desi_chr04      | 3530532                        | [A/G]       | NA                                         |
| Ca_Desi_Chrom_4_3530535 | Ca_desi_chr04      | 3530535                        | [T/C]       | NA                                         |
| Ca_Desi_Chrom_4_3530537 | Ca_desi_chr04      | 3530537                        | [T/A]       | NA                                         |
| Ca_Desi_Chrom_4_3530546 | Ca_desi_chr04      | 3530546                        | [T/C]       | NA                                         |
| Ca_Desi_Chrom_4_3530549 | Ca_desi_chr04      | 3530549                        | [T/A]       | NA                                         |
| Ca_Desi_Chrom_4_3859413 | Ca_desi_chr04      | 3859413                        | [T/C]       | NA                                         |
| Ca_Desi_Chrom_4_3871014 | Ca_desi_chr04      | 3871014                        | [A/C]       | NA                                         |
| Ca_Desi_Chrom_4_3871024 | Ca_desi_chr04      | 3871024                        | [A/G]       | NA                                         |
| Ca_Desi_Chrom_4_3875097 | Ca_desi_chr04      | 3875097                        | [T/C]       | NA                                         |
| Ca_Desi_Chrom_4_3875100 | Ca_desi_chr04      | 3875100                        | [C/A]       | NA                                         |
| Ca_Desi_Chrom_4_3875312 | Ca_desi_chr04      | 3875312                        | [A/C]       | NA                                         |
| Ca_Desi_Chrom_4_3875332 | Ca_desi_chr04      | 3875332                        | [G/A]       | NA                                         |
| Ca_Desi_Chrom_4_3882524 | Ca_desi_chr04      | 3882524                        | [T/C]       | NA                                         |
| Ca_Desi_Chrom_4_3904046 | Ca_desi_chr04      | 3904046                        | [T/G]       | NA                                         |
| Ca_Desi_Chrom_4_3954836 | Ca_desi_chr04      | 3954836                        | [G/A]       | NA                                         |
| Ca_Desi_Chrom_4_3955413 | Ca_desi_chr04      | 3955413                        | [T/G]       | NA                                         |
| Ca_Desi_Chrom_4_3977839 | Ca_desi_chr04      | 3977839                        | [A/C]       | NA                                         |
| Ca_Desi_Chrom_4_3977996 | Ca_desi_chr04      | 3977996                        | [C/T]       | NA                                         |
| Ca_Desi_Chrom_4_3978024 | Ca_desi_chr04      | 3978024                        | [T/C]       | NA                                         |
| Ca_Desi_Chrom_4_3978121 | Ca_desi_chr04      | 3978121                        | [C/G]       | NA                                         |
| Ca_Desi_Chrom_4_4013763 | Ca_desi_chr04      | 4013763                        | [A/T]       | NA                                         |
| Ca_Desi_Chrom_4_4018921 | Ca_desi_chr04      | 4018921                        | [G/A]       | NA                                         |

| <b>SNP IDs</b>          | <b>Chromosomes</b> | <b>Physical positions (bp)</b> | <b>SNPs</b> | <b>NCBI SNPdb accession IDs (NCBI_ss#)</b> |
|-------------------------|--------------------|--------------------------------|-------------|--------------------------------------------|
| Ca_Desi_Chrom_4_4018931 | Ca_desi_chr04      | 4018931                        | [A/G]       | NA                                         |
| Ca_Desi_Chrom_4_4018936 | Ca_desi_chr04      | 4018936                        | [A/G]       | NA                                         |
| Ca_Desi_Chrom_4_4028415 | Ca_desi_chr04      | 4028415                        | [A/G]       | NA                                         |
| Ca_Desi_Chrom_4_4028417 | Ca_desi_chr04      | 4028417                        | [A/G]       | NA                                         |
| Ca_Desi_Chrom_4_4053275 | Ca_desi_chr04      | 4053275                        | [T/C]       | NA                                         |
| Ca_Desi_Chrom_4_4053375 | Ca_desi_chr04      | 4053375                        | [C/A]       | NA                                         |
| Ca_Desi_Chrom_4_4053376 | Ca_desi_chr04      | 4053376                        | [T/G]       | NA                                         |
| Ca_Desi_Chrom_4_4087180 | Ca_desi_chr04      | 4087180                        | [A/G]       | NA                                         |
| Ca_Desi_Chrom_4_4087191 | Ca_desi_chr04      | 4087191                        | [A/G]       | NA                                         |
| Ca_Desi_Chrom_4_4087209 | Ca_desi_chr04      | 4087209                        | [C/T]       | NA                                         |
| Ca_Desi_Chrom_4_4087248 | Ca_desi_chr04      | 4087248                        | [T/G]       | NA                                         |
| Ca_Desi_Chrom_4_4087269 | Ca_desi_chr04      | 4087269                        | [C/T]       | NA                                         |
| Ca_Desi_Chrom_4_4087272 | Ca_desi_chr04      | 4087272                        | [C/T]       | NA                                         |
| Ca_Desi_Chrom_4_4102802 | Ca_desi_chr04      | 4102802                        | [C/T]       | NA                                         |
| Ca_Desi_Chrom_4_4116022 | Ca_desi_chr04      | 4116022                        | [T/C]       | NA                                         |
| Ca_Desi_Chrom_4_4116300 | Ca_desi_chr04      | 4116300                        | [A/G]       | NA                                         |
| Ca_Desi_Chrom_4_4219005 | Ca_desi_chr04      | 4219005                        | [A/C]       | NA                                         |
| Ca_Desi_Chrom_4_4219027 | Ca_desi_chr04      | 4219027                        | [A/C]       | NA                                         |
| Ca_Desi_Chrom_4_4219042 | Ca_desi_chr04      | 4219042                        | [A/C]       | NA                                         |
| Ca_Desi_Chrom_4_4273941 | Ca_desi_chr04      | 4273941                        | [A/C]       | NA                                         |
| Ca_Desi_Chrom_4_4492198 | Ca_desi_chr04      | 4492198                        | [A/C]       | NA                                         |
| Ca_Desi_Chrom_4_4531349 | Ca_desi_chr04      | 4531349                        | [T/G]       | NA                                         |
| Ca_Desi_Chrom_4_4531357 | Ca_desi_chr04      | 4531357                        | [A/G]       | NA                                         |
| Ca_Desi_Chrom_4_4592740 | Ca_desi_chr04      | 4592740                        | [T/A]       | NA                                         |
| Ca_Desi_Chrom_4_4592803 | Ca_desi_chr04      | 4592803                        | [A/T]       | NA                                         |
| Ca_Desi_Chrom_4_4592814 | Ca_desi_chr04      | 4592814                        | [T/G]       | NA                                         |
| Ca_Desi_Chrom_4_4592822 | Ca_desi_chr04      | 4592822                        | [T/C]       | NA                                         |
| Ca_Desi_Chrom_4_4601772 | Ca_desi_chr04      | 4601772                        | [A/T]       | NA                                         |
| Ca_Desi_Chrom_4_4606607 | Ca_desi_chr04      | 4606607                        | [A/G]       | NA                                         |
| Ca_Desi_Chrom_4_4606612 | Ca_desi_chr04      | 4606612                        | [A/G]       | NA                                         |
| Ca_Desi_Chrom_4_4606617 | Ca_desi_chr04      | 4606617                        | [A/G]       | NA                                         |
| Ca_Desi_Chrom_4_4606623 | Ca_desi_chr04      | 4606623                        | [T/G]       | NA                                         |
| Ca_Desi_Chrom_4_4606631 | Ca_desi_chr04      | 4606631                        | [A/C]       | NA                                         |
| Ca_Desi_Chrom_4_4606650 | Ca_desi_chr04      | 4606650                        | [A/C]       | NA                                         |

| <b>SNP IDs</b>          | <b>Chromosomes</b> | <b>Physical positions (bp)</b> | <b>SNPs</b> | <b>NCBI SNPdb accession IDs (NCBI_ss#)</b> |
|-------------------------|--------------------|--------------------------------|-------------|--------------------------------------------|
| Ca_Desi_Chrom_4_4606668 | Ca_desi_chr04      | 4606668                        | [T/C]       | NA                                         |
| Ca_Desi_Chrom_4_4613305 | Ca_desi_chr04      | 4613305                        | [A/G]       | NA                                         |
| Ca_Desi_Chrom_4_4613309 | Ca_desi_chr04      | 4613309                        | [T/C]       | NA                                         |
| Ca_Desi_Chrom_4_4613333 | Ca_desi_chr04      | 4613333                        | [T/C]       | NA                                         |
| Ca_Desi_Chrom_4_4613619 | Ca_desi_chr04      | 4613619                        | [A/C]       | NA                                         |
| Ca_Desi_Chrom_4_4613639 | Ca_desi_chr04      | 4613639                        | [A/C]       | NA                                         |
| Ca_Desi_Chrom_4_4613648 | Ca_desi_chr04      | 4613648                        | [A/C]       | NA                                         |
| Ca_Desi_Chrom_4_4652989 | Ca_desi_chr04      | 4652989                        | [A/G]       | NA                                         |
| Ca_Desi_Chrom_4_4653036 | Ca_desi_chr04      | 4653036                        | [A/C]       | NA                                         |
| Ca_Desi_Chrom_4_4656183 | Ca_desi_chr04      | 4656183                        | [C/A]       | NA                                         |
| Ca_Desi_Chrom_4_4687385 | Ca_desi_chr04      | 4687385                        | [T/C]       | NA                                         |
| Ca_Desi_Chrom_4_4687388 | Ca_desi_chr04      | 4687388                        | [C/G]       | NA                                         |
| Ca_Desi_Chrom_4_4690429 | Ca_desi_chr04      | 4690429                        | [T/G]       | NA                                         |
| Ca_Desi_Chrom_4_4701443 | Ca_desi_chr04      | 4701443                        | [T/A]       | NA                                         |
| Ca_Desi_Chrom_4_4701545 | Ca_desi_chr04      | 4701545                        | [C/G]       | NA                                         |
| Ca_Desi_Chrom_4_4714619 | Ca_desi_chr04      | 4714619                        | [A/C]       | NA                                         |
| Ca_Desi_Chrom_4_4765059 | Ca_desi_chr04      | 4765059                        | [A/T]       | NA                                         |
| Ca_Desi_Chrom_4_4765096 | Ca_desi_chr04      | 4765096                        | [C/G]       | NA                                         |
| Ca_Desi_Chrom_4_4768275 | Ca_desi_chr04      | 4768275                        | [T/G]       | NA                                         |
| Ca_Desi_Chrom_4_4768373 | Ca_desi_chr04      | 4768373                        | [T/C]       | NA                                         |
| Ca_Desi_Chrom_4_4768397 | Ca_desi_chr04      | 4768397                        | [C/A]       | NA                                         |
| Ca_Desi_Chrom_4_4768614 | Ca_desi_chr04      | 4768614                        | [G/A]       | NA                                         |
| Ca_Desi_Chrom_4_4769567 | Ca_desi_chr04      | 4769567                        | [G/A]       | NA                                         |
| Ca_Desi_Chrom_4_4769570 | Ca_desi_chr04      | 4769570                        | [G/A]       | NA                                         |
| Ca_Desi_Chrom_4_4771448 | Ca_desi_chr04      | 4771448                        | [T/C]       | NA                                         |
| Ca_Desi_Chrom_4_4771473 | Ca_desi_chr04      | 4771473                        | [T/A]       | NA                                         |
| Ca_Desi_Chrom_4_4771490 | Ca_desi_chr04      | 4771490                        | [C/T]       | NA                                         |
| Ca_Desi_Chrom_4_4771528 | Ca_desi_chr04      | 4771528                        | [G/T]       | NA                                         |
| Ca_Desi_Chrom_4_4771544 | Ca_desi_chr04      | 4771544                        | [A/C]       | NA                                         |
| Ca_Desi_Chrom_4_4771545 | Ca_desi_chr04      | 4771545                        | [C/A]       | NA                                         |
| Ca_Desi_Chrom_4_4771546 | Ca_desi_chr04      | 4771546                        | [A/C]       | NA                                         |
| Ca_Desi_Chrom_4_4771548 | Ca_desi_chr04      | 4771548                        | [A/T]       | NA                                         |
| Ca_Desi_Chrom_4_4771549 | Ca_desi_chr04      | 4771549                        | [T/A]       | NA                                         |
| Ca_Desi_Chrom_4_4771738 | Ca_desi_chr04      | 4771738                        | [T/C]       | NA                                         |

| <b>SNP IDs</b>          | <b>Chromosomes</b> | <b>Physical positions (bp)</b> | <b>SNPs</b> | <b>NCBI SNPdb accession IDs (NCBI_ss#)</b> |
|-------------------------|--------------------|--------------------------------|-------------|--------------------------------------------|
| Ca_Desi_Chrom_4_4817421 | Ca_desi_chr04      | 4817421                        | [T/C]       | NA                                         |
| Ca_Desi_Chrom_4_4817433 | Ca_desi_chr04      | 4817433                        | [C/G]       | NA                                         |
| Ca_Desi_Chrom_4_4817578 | Ca_desi_chr04      | 4817578                        | [T/G]       | NA                                         |
| Ca_Desi_Chrom_4_4817638 | Ca_desi_chr04      | 4817638                        | [T/C]       | NA                                         |
| Ca_Desi_Chrom_4_4837373 | Ca_desi_chr04      | 4837373                        | [T/G]       | NA                                         |
| Ca_Desi_Chrom_4_4837602 | Ca_desi_chr04      | 4837602                        | [A/G]       | NA                                         |
| Ca_Desi_Chrom_4_4837616 | Ca_desi_chr04      | 4837616                        | [A/G]       | NA                                         |
| Ca_Desi_Chrom_4_4848482 | Ca_desi_chr04      | 4848482                        | [A/T]       | NA                                         |
| Ca_Desi_Chrom_4_4848730 | Ca_desi_chr04      | 4848730                        | [G/A]       | NA                                         |
| Ca_Desi_Chrom_4_4848762 | Ca_desi_chr04      | 4848762                        | [G/A]       | NA                                         |
| Ca_Desi_Chrom_4_4878419 | Ca_desi_chr04      | 4878419                        | [C/T]       | NA                                         |
| Ca_Desi_Chrom_4_4878479 | Ca_desi_chr04      | 4878479                        | [G/A]       | NA                                         |
| Ca_Desi_Chrom_4_4884064 | Ca_desi_chr04      | 4884064                        | [T/C]       | NA                                         |
| Ca_Desi_Chrom_4_4905849 | Ca_desi_chr04      | 4905849                        | [G/A]       | NA                                         |
| Ca_Desi_Chrom_4_4909312 | Ca_desi_chr04      | 4909312                        | [C/A]       | NA                                         |
| Ca_Desi_Chrom_4_4913686 | Ca_desi_chr04      | 4913686                        | [C/G]       | NA                                         |
| Ca_Desi_Chrom_4_4936836 | Ca_desi_chr04      | 4936836                        | [G/A]       | NA                                         |
| Ca_Desi_Chrom_4_4939952 | Ca_desi_chr04      | 4939952                        | [C/T]       | NA                                         |
| Ca_Desi_Chrom_4_4955046 | Ca_desi_chr04      | 4955046                        | [C/G]       | NA                                         |
| Ca_Desi_Chrom_4_4955066 | Ca_desi_chr04      | 4955066                        | [A/G]       | NA                                         |
| Ca_Desi_Chrom_4_4955282 | Ca_desi_chr04      | 4955282                        | [T/A]       | NA                                         |
| Ca_Desi_Chrom_4_5027928 | Ca_desi_chr04      | 5027928                        | [C/T]       | NA                                         |
| Ca_Desi_Chrom_4_5028184 | Ca_desi_chr04      | 5028184                        | [C/T]       | NA                                         |
| Ca_Desi_Chrom_4_5096410 | Ca_desi_chr04      | 5096410                        | [A/G]       | NA                                         |
| Ca_Desi_Chrom_4_5096422 | Ca_desi_chr04      | 5096422                        | [T/A]       | NA                                         |
| Ca_Desi_Chrom_4_5097092 | Ca_desi_chr04      | 5097092                        | [G/A]       | NA                                         |
| Ca_Desi_Chrom_4_5097206 | Ca_desi_chr04      | 5097206                        | [C/A]       | NA                                         |
| Ca_Desi_Chrom_4_5183254 | Ca_desi_chr04      | 5183254                        | [A/G]       | NA                                         |
| Ca_Desi_Chrom_4_5407138 | Ca_desi_chr04      | 5407138                        | [A/G]       | NA                                         |
| Ca_Desi_Chrom_4_5407150 | Ca_desi_chr04      | 5407150                        | [T/A]       | NA                                         |
| Ca_Desi_Chrom_4_5408655 | Ca_desi_chr04      | 5408655                        | [C/T]       | NA                                         |
| Ca_Desi_Chrom_4_5408962 | Ca_desi_chr04      | 5408962                        | [C/T]       | NA                                         |
| Ca_Desi_Chrom_4_5410884 | Ca_desi_chr04      | 5410884                        | [C/T]       | NA                                         |
| Ca_Desi_Chrom_4_5533565 | Ca_desi_chr04      | 5533565                        | [A/T]       | NA                                         |

| <b>SNP IDs</b>         | <b>Chromosomes</b> | <b>Physical positions (bp)</b> | <b>SNPs</b> | <b>NCBI SNPdb accession IDs (NCBI_ss#)</b> |
|------------------------|--------------------|--------------------------------|-------------|--------------------------------------------|
| Ca_Desig_Chr_4_5533572 | Ca_desig_chr04     | 5533572                        | [A/C]       | NA                                         |
| Ca_Desig_Chr_4_5533601 | Ca_desig_chr04     | 5533601                        | [A/T]       | NA                                         |
| Ca_Desig_Chr_4_5571122 | Ca_desig_chr04     | 5571122                        | [T/C]       | NA                                         |
| Ca_Desig_Chr_4_5571123 | Ca_desig_chr04     | 5571123                        | [T/C]       | NA                                         |
| Ca_Desig_Chr_4_5571135 | Ca_desig_chr04     | 5571135                        | [A/G]       | NA                                         |
| Ca_Desig_Chr_4_5571162 | Ca_desig_chr04     | 5571162                        | [T/G]       | NA                                         |
| Ca_Desig_Chr_4_5571170 | Ca_desig_chr04     | 5571170                        | [A/G]       | NA                                         |
| Ca_Desig_Chr_4_5610460 | Ca_desig_chr04     | 5610460                        | [A/C]       | NA                                         |
| Ca_Desig_Chr_4_5610468 | Ca_desig_chr04     | 5610468                        | [G/T]       | NA                                         |
| Ca_Desig_Chr_4_5610487 | Ca_desig_chr04     | 5610487                        | [C/T]       | NA                                         |
| Ca_Desig_Chr_4_5610496 | Ca_desig_chr04     | 5610496                        | [A/G]       | NA                                         |
| Ca_Desig_Chr_4_5678555 | Ca_desig_chr04     | 5678555                        | [T/A]       | NA                                         |
| Ca_Desig_Chr_4_5678597 | Ca_desig_chr04     | 5678597                        | [A/G]       | NA                                         |
| Ca_Desig_Chr_4_5678668 | Ca_desig_chr04     | 5678668                        | [A/G]       | NA                                         |
| Ca_Desig_Chr_4_5678675 | Ca_desig_chr04     | 5678675                        | [T/C]       | NA                                         |
| Ca_Desig_Chr_4_5678686 | Ca_desig_chr04     | 5678686                        | [G/C]       | NA                                         |
| Ca_Desig_Chr_4_5678688 | Ca_desig_chr04     | 5678688                        | [A/G]       | NA                                         |
| Ca_Desig_Chr_4_5678690 | Ca_desig_chr04     | 5678690                        | [C/G]       | NA                                         |
| Ca_Desig_Chr_4_5678693 | Ca_desig_chr04     | 5678693                        | [T/G]       | NA                                         |
| Ca_Desig_Chr_4_5678699 | Ca_desig_chr04     | 5678699                        | [T/G]       | NA                                         |
| Ca_Desig_Chr_4_5678700 | Ca_desig_chr04     | 5678700                        | [G/T]       | NA                                         |
| Ca_Desig_Chr_4_5678708 | Ca_desig_chr04     | 5678708                        | [T/A]       | NA                                         |
| Ca_Desig_Chr_4_5755799 | Ca_desig_chr04     | 5755799                        | [T/C]       | NA                                         |
| Ca_Desig_Chr_4_5755812 | Ca_desig_chr04     | 5755812                        | [C/T]       | NA                                         |
| Ca_Desig_Chr_4_5755819 | Ca_desig_chr04     | 5755819                        | [A/G]       | NA                                         |
| Ca_Desig_Chr_4_5755829 | Ca_desig_chr04     | 5755829                        | [A/C]       | NA                                         |
| Ca_Desig_Chr_4_5782799 | Ca_desig_chr04     | 5782799                        | [G/C]       | NA                                         |
| Ca_Desig_Chr_4_5798390 | Ca_desig_chr04     | 5798390                        | [T/G]       | NA                                         |
| Ca_Desig_Chr_4_5800667 | Ca_desig_chr04     | 5800667                        | [A/G]       | NA                                         |
| Ca_Desig_Chr_4_5800696 | Ca_desig_chr04     | 5800696                        | [A/G]       | NA                                         |
| Ca_Desig_Chr_4_5854578 | Ca_desig_chr04     | 5854578                        | [T/G]       | NA                                         |
| Ca_Desig_Chr_4_5854587 | Ca_desig_chr04     | 5854587                        | [A/G]       | NA                                         |
| Ca_Desig_Chr_4_5854618 | Ca_desig_chr04     | 5854618                        | [A/C]       | NA                                         |
| Ca_Desig_Chr_4_6008650 | Ca_desig_chr04     | 6008650                        | [T/G]       | NA                                         |

| <b>SNP IDs</b>          | <b>Chromosomes</b> | <b>Physical positions (bp)</b> | <b>SNPs</b> | <b>NCBI SNPdb accession IDs (NCBI_ss#)</b> |
|-------------------------|--------------------|--------------------------------|-------------|--------------------------------------------|
| Ca_Desi_Chrom_4_6017239 | Ca_desi_chr04      | 6017239                        | [A/G]       | NA                                         |
| Ca_Desi_Chrom_4_6017285 | Ca_desi_chr04      | 6017285                        | [A/G]       | NA                                         |
| Ca_Desi_Chrom_4_6020659 | Ca_desi_chr04      | 6020659                        | [A/G]       | NA                                         |
| Ca_Desi_Chrom_4_6110371 | Ca_desi_chr04      | 6110371                        | [A/G]       | NA                                         |
| Ca_Desi_Chrom_4_6145876 | Ca_desi_chr04      | 6145876                        | [A/G]       | NA                                         |
| Ca_Desi_Chrom_4_6278532 | Ca_desi_chr04      | 6278532                        | [T/C]       | NA                                         |
| Ca_Desi_Chrom_4_6278534 | Ca_desi_chr04      | 6278534                        | [A/G]       | NA                                         |
| Ca_Desi_Chrom_4_6278538 | Ca_desi_chr04      | 6278538                        | [A/T]       | NA                                         |
| Ca_Desi_Chrom_4_6278542 | Ca_desi_chr04      | 6278542                        | [T/C]       | NA                                         |
| Ca_Desi_Chrom_4_6278576 | Ca_desi_chr04      | 6278576                        | [T/C]       | NA                                         |
| Ca_Desi_Chrom_4_6278587 | Ca_desi_chr04      | 6278587                        | [C/A]       | NA                                         |
| Ca_Desi_Chrom_4_6318869 | Ca_desi_chr04      | 6318869                        | [T/G]       | NA                                         |
| Ca_Desi_Chrom_4_6325212 | Ca_desi_chr04      | 6325212                        | [T/C]       | NA                                         |
| Ca_Desi_Chrom_4_6325213 | Ca_desi_chr04      | 6325213                        | [C/T]       | NA                                         |
| Ca_Desi_Chrom_4_6325277 | Ca_desi_chr04      | 6325277                        | [G/T]       | NA                                         |
| Ca_Desi_Chrom_4_6507283 | Ca_desi_chr04      | 6507283                        | [T/G]       | NA                                         |
| Ca_Desi_Chrom_4_6511894 | Ca_desi_chr04      | 6511894                        | [A/G]       | NA                                         |
| Ca_Desi_Chrom_4_6511920 | Ca_desi_chr04      | 6511920                        | [T/A]       | NA                                         |
| Ca_Desi_Chrom_4_6511927 | Ca_desi_chr04      | 6511927                        | [A/G]       | NA                                         |
| Ca_Desi_Chrom_4_6512146 | Ca_desi_chr04      | 6512146                        | [A/C]       | NA                                         |
| Ca_Desi_Chrom_4_6512153 | Ca_desi_chr04      | 6512153                        | [A/G]       | NA                                         |
| Ca_Desi_Chrom_4_6512163 | Ca_desi_chr04      | 6512163                        | [A/C]       | NA                                         |
| Ca_Desi_Chrom_4_6512183 | Ca_desi_chr04      | 6512183                        | [C/G]       | NA                                         |
| Ca_Desi_Chrom_4_6512185 | Ca_desi_chr04      | 6512185                        | [A/G]       | NA                                         |
| Ca_Desi_Chrom_4_6512187 | Ca_desi_chr04      | 6512187                        | [T/C]       | NA                                         |
| Ca_Desi_Chrom_4_6521261 | Ca_desi_chr04      | 6521261                        | [T/G]       | NA                                         |
| Ca_Desi_Chrom_4_6521349 | Ca_desi_chr04      | 6521349                        | [T/C]       | NA                                         |
| Ca_Desi_Chrom_4_6521359 | Ca_desi_chr04      | 6521359                        | [T/A]       | NA                                         |
| Ca_Desi_Chrom_4_6798716 | Ca_desi_chr04      | 6798716                        | [T/G]       | NA                                         |
| Ca_Desi_Chrom_4_6935117 | Ca_desi_chr04      | 6935117                        | [G/A]       | NA                                         |
| Ca_Desi_Chrom_4_6935151 | Ca_desi_chr04      | 6935151                        | [A/G]       | NA                                         |
| Ca_Desi_Chrom_4_6935214 | Ca_desi_chr04      | 6935214                        | [T/C]       | NA                                         |
| Ca_Desi_Chrom_4_6940879 | Ca_desi_chr04      | 6940879                        | [A/G]       | NA                                         |
| Ca_Desi_Chrom_4_6940881 | Ca_desi_chr04      | 6940881                        | [T/C]       | NA                                         |



| <b>SNP IDs</b>          | <b>Chromosomes</b> | <b>Physical positions (bp)</b> | <b>SNPs</b> | <b>NCBI SNPdb accession IDs (NCBI_ss#)</b> |
|-------------------------|--------------------|--------------------------------|-------------|--------------------------------------------|
| Ca_Desi_Chrom_4_7035560 | Ca_desi_chr04      | 7035560                        | [A/C]       | NA                                         |
| Ca_Desi_Chrom_4_7035565 | Ca_desi_chr04      | 7035565                        | [A/G]       | NA                                         |
| Ca_Desi_Chrom_4_7035566 | Ca_desi_chr04      | 7035566                        | [C/T]       | NA                                         |
| Ca_Desi_Chrom_4_7153280 | Ca_desi_chr04      | 7153280                        | [A/G]       | NA                                         |
| Ca_Desi_Chrom_4_7153308 | Ca_desi_chr04      | 7153308                        | [G/T]       | NA                                         |
| Ca_Desi_Chrom_4_7153309 | Ca_desi_chr04      | 7153309                        | [T/G]       | NA                                         |
| Ca_Desi_Chrom_4_7156704 | Ca_desi_chr04      | 7156704                        | [A/G]       | NA                                         |
| Ca_Desi_Chrom_4_7218308 | Ca_desi_chr04      | 7218308                        | [T/C]       | NA                                         |
| Ca_Desi_Chrom_4_7218328 | Ca_desi_chr04      | 7218328                        | [A/G]       | NA                                         |
| Ca_Desi_Chrom_4_7218347 | Ca_desi_chr04      | 7218347                        | [A/G]       | NA                                         |
| Ca_Desi_Chrom_4_7218357 | Ca_desi_chr04      | 7218357                        | [A/G]       | NA                                         |
| Ca_Desi_Chrom_4_7225087 | Ca_desi_chr04      | 7225087                        | [T/A]       | NA                                         |
| Ca_Desi_Chrom_4_7225109 | Ca_desi_chr04      | 7225109                        | [A/C]       | NA                                         |
| Ca_Desi_Chrom_4_7225116 | Ca_desi_chr04      | 7225116                        | [T/G]       | NA                                         |
| Ca_Desi_Chrom_4_7262111 | Ca_desi_chr04      | 7262111                        | [T/A]       | NA                                         |
| Ca_Desi_Chrom_4_7267078 | Ca_desi_chr04      | 7267078                        | [T/G]       | NA                                         |
| Ca_Desi_Chrom_4_7267110 | Ca_desi_chr04      | 7267110                        | [T/G]       | NA                                         |
| Ca_Desi_Chrom_4_7347313 | Ca_desi_chr04      | 7347313                        | [A/G]       | NA                                         |
| Ca_Desi_Chrom_4_7353061 | Ca_desi_chr04      | 7353061                        | [A/T]       | NA                                         |
| Ca_Desi_Chrom_4_7353066 | Ca_desi_chr04      | 7353066                        | [G/T]       | NA                                         |
| Ca_Desi_Chrom_4_7356849 | Ca_desi_chr04      | 7356849                        | [A/C]       | NA                                         |
| Ca_Desi_Chrom_4_7395723 | Ca_desi_chr04      | 7395723                        | [T/C]       | NA                                         |
| Ca_Desi_Chrom_4_7406408 | Ca_desi_chr04      | 7406408                        | [G/C]       | NA                                         |
| Ca_Desi_Chrom_4_7411622 | Ca_desi_chr04      | 7411622                        | [A/C]       | NA                                         |
| Ca_Desi_Chrom_4_7411626 | Ca_desi_chr04      | 7411626                        | [T/A]       | NA                                         |
| Ca_Desi_Chrom_4_7411629 | Ca_desi_chr04      | 7411629                        | [A/G]       | NA                                         |
| Ca_Desi_Chrom_4_7411730 | Ca_desi_chr04      | 7411730                        | [A/C]       | NA                                         |
| Ca_Desi_Chrom_4_7411732 | Ca_desi_chr04      | 7411732                        | [T/C]       | NA                                         |
| Ca_Desi_Chrom_4_7411736 | Ca_desi_chr04      | 7411736                        | [T/C]       | NA                                         |
| Ca_Desi_Chrom_4_7411738 | Ca_desi_chr04      | 7411738                        | [A/G]       | NA                                         |
| Ca_Desi_Chrom_4_7411741 | Ca_desi_chr04      | 7411741                        | [A/G]       | NA                                         |
| Ca_Desi_Chrom_4_7411743 | Ca_desi_chr04      | 7411743                        | [G/A]       | NA                                         |
| Ca_Desi_Chrom_4_7411744 | Ca_desi_chr04      | 7411744                        | [A/G]       | NA                                         |
| Ca_Desi_Chrom_4_7411750 | Ca_desi_chr04      | 7411750                        | [T/C]       | NA                                         |

| <b>SNP IDs</b>          | <b>Chromosomes</b> | <b>Physical positions (bp)</b> | <b>SNPs</b> | <b>NCBI SNPdb accession IDs (NCBI_ss#)</b> |
|-------------------------|--------------------|--------------------------------|-------------|--------------------------------------------|
| Ca_Desi_Chrom_4_7411755 | Ca_desi_chr04      | 7411755                        | [A/G]       | NA                                         |
| Ca_Desi_Chrom_4_7411761 | Ca_desi_chr04      | 7411761                        | [A/G]       | NA                                         |
| Ca_Desi_Chrom_4_7491358 | Ca_desi_chr04      | 7491358                        | [C/A]       | NA                                         |
| Ca_Desi_Chrom_4_7509507 | Ca_desi_chr04      | 7509507                        | [A/G]       | NA                                         |
| Ca_Desi_Chrom_4_7509510 | Ca_desi_chr04      | 7509510                        | [A/G]       | NA                                         |
| Ca_Desi_Chrom_4_7519141 | Ca_desi_chr04      | 7519141                        | [A/C]       | NA                                         |
| Ca_Desi_Chrom_4_7575953 | Ca_desi_chr04      | 7575953                        | [T/G]       | NA                                         |
| Ca_Desi_Chrom_4_7580290 | Ca_desi_chr04      | 7580290                        | [C/A]       | NA                                         |
| Ca_Desi_Chrom_4_7580291 | Ca_desi_chr04      | 7580291                        | [C/G]       | NA                                         |
| Ca_Desi_Chrom_4_7580292 | Ca_desi_chr04      | 7580292                        | [G/A]       | NA                                         |
| Ca_Desi_Chrom_4_7580293 | Ca_desi_chr04      | 7580293                        | [C/T]       | NA                                         |
| Ca_Desi_Chrom_4_7580307 | Ca_desi_chr04      | 7580307                        | [A/T]       | NA                                         |
| Ca_Desi_Chrom_4_7580319 | Ca_desi_chr04      | 7580319                        | [T/G]       | NA                                         |
| Ca_Desi_Chrom_4_7601426 | Ca_desi_chr04      | 7601426                        | [G/T]       | NA                                         |
| Ca_Desi_Chrom_4_7601513 | Ca_desi_chr04      | 7601513                        | [T/C]       | NA                                         |
| Ca_Desi_Chrom_4_7601528 | Ca_desi_chr04      | 7601528                        | [T/G]       | NA                                         |
| Ca_Desi_Chrom_4_7601616 | Ca_desi_chr04      | 7601616                        | [G/A]       | NA                                         |
| Ca_Desi_Chrom_4_7601652 | Ca_desi_chr04      | 7601652                        | [C/G]       | NA                                         |
| Ca_Desi_Chrom_4_7601659 | Ca_desi_chr04      | 7601659                        | [A/G]       | NA                                         |
| Ca_Desi_Chrom_4_7601661 | Ca_desi_chr04      | 7601661                        | [A/G]       | NA                                         |
| Ca_Desi_Chrom_4_7601671 | Ca_desi_chr04      | 7601671                        | [A/G]       | NA                                         |
| Ca_Desi_Chrom_4_7601672 | Ca_desi_chr04      | 7601672                        | [G/A]       | NA                                         |
| Ca_Desi_Chrom_4_7601673 | Ca_desi_chr04      | 7601673                        | [A/G]       | NA                                         |
| Ca_Desi_Chrom_4_7601679 | Ca_desi_chr04      | 7601679                        | [T/G]       | NA                                         |
| Ca_Desi_Chrom_4_7623385 | Ca_desi_chr04      | 7623385                        | [A/C]       | NA                                         |
| Ca_Desi_Chrom_4_7625428 | Ca_desi_chr04      | 7625428                        | [A/G]       | NA                                         |
| Ca_Desi_Chrom_4_7625450 | Ca_desi_chr04      | 7625450                        | [T/A]       | NA                                         |
| Ca_Desi_Chrom_4_7630664 | Ca_desi_chr04      | 7630664                        | [A/C]       | NA                                         |
| Ca_Desi_Chrom_4_7647658 | Ca_desi_chr04      | 7647658                        | [G/T]       | NA                                         |
| Ca_Desi_Chrom_4_7649928 | Ca_desi_chr04      | 7649928                        | [A/C]       | NA                                         |
| Ca_Desi_Chrom_4_7649941 | Ca_desi_chr04      | 7649941                        | [A/C]       | NA                                         |
| Ca_Desi_Chrom_4_7649960 | Ca_desi_chr04      | 7649960                        | [A/G]       | NA                                         |
| Ca_Desi_Chrom_4_7666026 | Ca_desi_chr04      | 7666026                        | [T/C]       | NA                                         |
| Ca_Desi_Chrom_4_7674762 | Ca_desi_chr04      | 7674762                        | [A/C]       | NA                                         |

| <b>SNP IDs</b>          | <b>Chromosomes</b> | <b>Physical positions (bp)</b> | <b>SNPs</b> | <b>NCBI SNPdb accession IDs (NCBI_ss#)</b> |
|-------------------------|--------------------|--------------------------------|-------------|--------------------------------------------|
| Ca_Desi_Chrom_4_7680251 | Ca_desi_chr04      | 7680251                        | [A/C]       | NA                                         |
| Ca_Desi_Chrom_4_7730453 | Ca_desi_chr04      | 7730453                        | [A/T]       | NA                                         |
| Ca_Desi_Chrom_4_7778309 | Ca_desi_chr04      | 7778309                        | [G/A]       | NA                                         |
| Ca_Desi_Chrom_4_7778310 | Ca_desi_chr04      | 7778310                        | [T/G]       | NA                                         |
| Ca_Desi_Chrom_4_7780206 | Ca_desi_chr04      | 7780206                        | [T/A]       | NA                                         |
| Ca_Desi_Chrom_4_7780208 | Ca_desi_chr04      | 7780208                        | [C/A]       | NA                                         |
| Ca_Desi_Chrom_4_7781961 | Ca_desi_chr04      | 7781961                        | [T/C]       | NA                                         |
| Ca_Desi_Chrom_4_7781965 | Ca_desi_chr04      | 7781965                        | [T/C]       | NA                                         |
| Ca_Desi_Chrom_4_7781974 | Ca_desi_chr04      | 7781974                        | [T/C]       | NA                                         |
| Ca_Desi_Chrom_4_7781980 | Ca_desi_chr04      | 7781980                        | [A/G]       | NA                                         |
| Ca_Desi_Chrom_4_7782109 | Ca_desi_chr04      | 7782109                        | [A/C]       | NA                                         |
| Ca_Desi_Chrom_4_7783322 | Ca_desi_chr04      | 7783322                        | [T/G]       | NA                                         |
| Ca_Desi_Chrom_4_7809791 | Ca_desi_chr04      | 7809791                        | [A/G]       | NA                                         |
| Ca_Desi_Chrom_4_7809793 | Ca_desi_chr04      | 7809793                        | [G/A]       | NA                                         |
| Ca_Desi_Chrom_4_7812668 | Ca_desi_chr04      | 7812668                        | [A/G]       | NA                                         |
| Ca_Desi_Chrom_4_7813621 | Ca_desi_chr04      | 7813621                        | [T/C]       | NA                                         |
| Ca_Desi_Chrom_4_7813648 | Ca_desi_chr04      | 7813648                        | [T/C]       | NA                                         |
| Ca_Desi_Chrom_4_7813664 | Ca_desi_chr04      | 7813664                        | [A/G]       | NA                                         |
| Ca_Desi_Chrom_4_7823729 | Ca_desi_chr04      | 7823729                        | [G/T]       | NA                                         |
| Ca_Desi_Chrom_4_7860994 | Ca_desi_chr04      | 7860994                        | [T/A]       | NA                                         |
| Ca_Desi_Chrom_4_7861017 | Ca_desi_chr04      | 7861017                        | [A/G]       | NA                                         |
| Ca_Desi_Chrom_4_7885258 | Ca_desi_chr04      | 7885258                        | [A/G]       | NA                                         |
| Ca_Desi_Chrom_4_7885263 | Ca_desi_chr04      | 7885263                        | [T/G]       | NA                                         |
| Ca_Desi_Chrom_4_7885266 | Ca_desi_chr04      | 7885266                        | [T/G]       | NA                                         |
| Ca_Desi_Chrom_4_7886657 | Ca_desi_chr04      | 7886657                        | [T/C]       | NA                                         |
| Ca_Desi_Chrom_4_7886664 | Ca_desi_chr04      | 7886664                        | [T/A]       | NA                                         |
| Ca_Desi_Chrom_4_7886670 | Ca_desi_chr04      | 7886670                        | [A/G]       | NA                                         |
| Ca_Desi_Chrom_4_7886677 | Ca_desi_chr04      | 7886677                        | [T/C]       | NA                                         |
| Ca_Desi_Chrom_4_7886695 | Ca_desi_chr04      | 7886695                        | [T/C]       | NA                                         |
| Ca_Desi_Chrom_4_7886707 | Ca_desi_chr04      | 7886707                        | [A/G]       | NA                                         |
| Ca_Desi_Chrom_4_7886711 | Ca_desi_chr04      | 7886711                        | [A/T]       | NA                                         |
| Ca_Desi_Chrom_4_7934811 | Ca_desi_chr04      | 7934811                        | [C/A]       | NA                                         |
| Ca_Desi_Chrom_4_7934812 | Ca_desi_chr04      | 7934812                        | [C/G]       | NA                                         |
| Ca_Desi_Chrom_4_7934814 | Ca_desi_chr04      | 7934814                        | [G/T]       | NA                                         |

| <b>SNP IDs</b>          | <b>Chromosomes</b> | <b>Physical positions (bp)</b> | <b>SNPs</b> | <b>NCBI SNPdb accession IDs (NCBI_ss#)</b> |
|-------------------------|--------------------|--------------------------------|-------------|--------------------------------------------|
| Ca_Desi_Chrom_4_7934815 | Ca_desi_chr04      | 7934815                        | [G/C]       | NA                                         |
| Ca_Desi_Chrom_4_7983047 | Ca_desi_chr04      | 7983047                        | [T/A]       | NA                                         |
| Ca_Desi_Chrom_4_8009915 | Ca_desi_chr04      | 8009915                        | [T/C]       | NA                                         |
| Ca_Desi_Chrom_4_8038003 | Ca_desi_chr04      | 8038003                        | [A/G]       | NA                                         |
| Ca_Desi_Chrom_4_8038010 | Ca_desi_chr04      | 8038010                        | [A/C]       | NA                                         |
| Ca_Desi_Chrom_4_8063854 | Ca_desi_chr04      | 8063854                        | [T/G]       | NA                                         |
| Ca_Desi_Chrom_4_8066412 | Ca_desi_chr04      | 8066412                        | [A/G]       | NA                                         |
| Ca_Desi_Chrom_4_8066455 | Ca_desi_chr04      | 8066455                        | [A/G]       | NA                                         |
| Ca_Desi_Chrom_4_8066464 | Ca_desi_chr04      | 8066464                        | [T/C]       | NA                                         |
| Ca_Desi_Chrom_4_8066468 | Ca_desi_chr04      | 8066468                        | [T/C]       | NA                                         |
| Ca_Desi_Chrom_4_8108885 | Ca_desi_chr04      | 8108885                        | [T/C]       | NA                                         |
| Ca_Desi_Chrom_4_8130436 | Ca_desi_chr04      | 8130436                        | [A/G]       | NA                                         |
| Ca_Desi_Chrom_4_8131032 | Ca_desi_chr04      | 8131032                        | [T/G]       | NA                                         |
| Ca_Desi_Chrom_4_8131044 | Ca_desi_chr04      | 8131044                        | [T/G]       | NA                                         |
| Ca_Desi_Chrom_4_8131052 | Ca_desi_chr04      | 8131052                        | [T/G]       | NA                                         |
| Ca_Desi_Chrom_4_8131067 | Ca_desi_chr04      | 8131067                        | [A/C]       | NA                                         |
| Ca_Desi_Chrom_4_8131353 | Ca_desi_chr04      | 8131353                        | [T/G]       | NA                                         |
| Ca_Desi_Chrom_4_8131359 | Ca_desi_chr04      | 8131359                        | [T/C]       | NA                                         |
| Ca_Desi_Chrom_4_8131371 | Ca_desi_chr04      | 8131371                        | [T/C]       | NA                                         |
| Ca_Desi_Chrom_4_8131375 | Ca_desi_chr04      | 8131375                        | [T/C]       | NA                                         |
| Ca_Desi_Chrom_4_8131384 | Ca_desi_chr04      | 8131384                        | [T/G]       | NA                                         |
| Ca_Desi_Chrom_4_8131395 | Ca_desi_chr04      | 8131395                        | [T/C]       | NA                                         |
| Ca_Desi_Chrom_4_8131398 | Ca_desi_chr04      | 8131398                        | [C/G]       | NA                                         |
| Ca_Desi_Chrom_4_8131401 | Ca_desi_chr04      | 8131401                        | [G/C]       | NA                                         |
| Ca_Desi_Chrom_4_8141384 | Ca_desi_chr04      | 8141384                        | [A/G]       | NA                                         |
| Ca_Desi_Chrom_4_8146783 | Ca_desi_chr04      | 8146783                        | [A/G]       | NA                                         |
| Ca_Desi_Chrom_4_8146813 | Ca_desi_chr04      | 8146813                        | [T/G]       | NA                                         |
| Ca_Desi_Chrom_4_8149684 | Ca_desi_chr04      | 8149684                        | [T/G]       | NA                                         |
| Ca_Desi_Chrom_4_8149814 | Ca_desi_chr04      | 8149814                        | [C/A]       | NA                                         |
| Ca_Desi_Chrom_4_8150574 | Ca_desi_chr04      | 8150574                        | [A/T]       | NA                                         |
| Ca_Desi_Chrom_4_8150597 | Ca_desi_chr04      | 8150597                        | [A/G]       | NA                                         |
| Ca_Desi_Chrom_4_8192799 | Ca_desi_chr04      | 8192799                        | [A/G]       | NA                                         |
| Ca_Desi_Chrom_4_8198525 | Ca_desi_chr04      | 8198525                        | [T/G]       | NA                                         |
| Ca_Desi_Chrom_4_8198540 | Ca_desi_chr04      | 8198540                        | [A/C]       | NA                                         |

| <b>SNP IDs</b>          | <b>Chromosomes</b> | <b>Physical positions (bp)</b> | <b>SNPs</b> | <b>NCBI SNPdb accession IDs (NCBI_ss#)</b> |
|-------------------------|--------------------|--------------------------------|-------------|--------------------------------------------|
| Ca_Desi_Chrom_4_8198544 | Ca_desi_chr04      | 8198544                        | [T/C]       | NA                                         |
| Ca_Desi_Chrom_4_8199122 | Ca_desi_chr04      | 8199122                        | [T/A]       | NA                                         |
| Ca_Desi_Chrom_4_8311192 | Ca_desi_chr04      | 8311192                        | [T/G]       | NA                                         |
| Ca_Desi_Chrom_4_8311201 | Ca_desi_chr04      | 8311201                        | [A/C]       | NA                                         |
| Ca_Desi_Chrom_4_8314144 | Ca_desi_chr04      | 8314144                        | [T/C]       | NA                                         |
| Ca_Desi_Chrom_4_8323074 | Ca_desi_chr04      | 8323074                        | [A/C]       | NA                                         |
| Ca_Desi_Chrom_4_8363099 | Ca_desi_chr04      | 8363099                        | [A/C]       | NA                                         |
| Ca_Desi_Chrom_4_8393192 | Ca_desi_chr04      | 8393192                        | [T/G]       | NA                                         |
| Ca_Desi_Chrom_4_8413938 | Ca_desi_chr04      | 8413938                        | [T/G]       | NA                                         |
| Ca_Desi_Chrom_4_8413940 | Ca_desi_chr04      | 8413940                        | [T/A]       | NA                                         |
| Ca_Desi_Chrom_4_8536781 | Ca_desi_chr04      | 8536781                        | [G/A]       | NA                                         |
| Ca_Desi_Chrom_4_8536783 | Ca_desi_chr04      | 8536783                        | [T/A]       | NA                                         |
| Ca_Desi_Chrom_4_8848071 | Ca_desi_chr04      | 8848071                        | [T/C]       | NA                                         |
| Ca_Desi_Chrom_4_8848274 | Ca_desi_chr04      | 8848274                        | [C/T]       | NA                                         |
| Ca_Desi_Chrom_4_8848318 | Ca_desi_chr04      | 8848318                        | [T/G]       | NA                                         |
| Ca_Desi_Chrom_4_8866108 | Ca_desi_chr04      | 8866108                        | [G/A]       | NA                                         |
| Ca_Desi_Chrom_4_8876149 | Ca_desi_chr04      | 8876149                        | [G/A]       | NA                                         |
| Ca_Desi_Chrom_4_8884356 | Ca_desi_chr04      | 8884356                        | [G/A]       | NA                                         |
| Ca_Desi_Chrom_4_8884501 | Ca_desi_chr04      | 8884501                        | [T/A]       | NA                                         |
| Ca_Desi_Chrom_4_8884795 | Ca_desi_chr04      | 8884795                        | [G/T]       | NA                                         |
| Ca_Desi_Chrom_4_8891953 | Ca_desi_chr04      | 8891953                        | [A/G]       | NA                                         |
| Ca_Desi_Chrom_4_8892359 | Ca_desi_chr04      | 8892359                        | [A/G]       | NA                                         |
| Ca_Desi_Chrom_4_8892369 | Ca_desi_chr04      | 8892369                        | [T/C]       | NA                                         |
| Ca_Desi_Chrom_4_8892411 | Ca_desi_chr04      | 8892411                        | [A/C]       | NA                                         |
| Ca_Desi_Chrom_4_8908491 | Ca_desi_chr04      | 8908491                        | [A/T]       | NA                                         |
| Ca_Desi_Chrom_4_8913646 | Ca_desi_chr04      | 8913646                        | [A/G]       | NA                                         |
| Ca_Desi_Chrom_4_8914102 | Ca_desi_chr04      | 8914102                        | [G/A]       | NA                                         |
| Ca_Desi_Chrom_4_9004327 | Ca_desi_chr04      | 9004327                        | [A/G]       | NA                                         |
| Ca_Desi_Chrom_4_9009754 | Ca_desi_chr04      | 9009754                        | [T/G]       | NA                                         |
| Ca_Desi_Chrom_4_9009757 | Ca_desi_chr04      | 9009757                        | [T/G]       | NA                                         |
| Ca_Desi_Chrom_4_9098900 | Ca_desi_chr04      | 9098900                        | [T/G]       | NA                                         |
| Ca_Desi_Chrom_4_9109103 | Ca_desi_chr04      | 9109103                        | [T/C]       | NA                                         |
| Ca_Desi_Chrom_4_9179824 | Ca_desi_chr04      | 9179824                        | [T/G]       | NA                                         |
| Ca_Desi_Chrom_4_9179853 | Ca_desi_chr04      | 9179853                        | [A/C]       | NA                                         |

| <b>SNP IDs</b>          | <b>Chromosomes</b> | <b>Physical positions (bp)</b> | <b>SNPs</b> | <b>NCBI SNPdb accession IDs (NCBI_ss#)</b> |
|-------------------------|--------------------|--------------------------------|-------------|--------------------------------------------|
| Ca_Desi_Chrom_4_9181097 | Ca_desi_chr04      | 9181097                        | [T/A]       | NA                                         |
| Ca_Desi_Chrom_4_9181115 | Ca_desi_chr04      | 9181115                        | [A/G]       | NA                                         |
| Ca_Desi_Chrom_4_9219351 | Ca_desi_chr04      | 9219351                        | [T/A]       | NA                                         |
| Ca_Desi_Chrom_4_9222551 | Ca_desi_chr04      | 9222551                        | [T/A]       | NA                                         |
| Ca_Desi_Chrom_4_9224483 | Ca_desi_chr04      | 9224483                        | [T/G]       | NA                                         |
| Ca_Desi_Chrom_4_9224606 | Ca_desi_chr04      | 9224606                        | [A/G]       | NA                                         |
| Ca_Desi_Chrom_4_9224613 | Ca_desi_chr04      | 9224613                        | [A/C]       | NA                                         |
| Ca_Desi_Chrom_4_9225020 | Ca_desi_chr04      | 9225020                        | [T/G]       | NA                                         |
| Ca_Desi_Chrom_4_9225407 | Ca_desi_chr04      | 9225407                        | [T/C]       | NA                                         |
| Ca_Desi_Chrom_4_9225412 | Ca_desi_chr04      | 9225412                        | [T/G]       | NA                                         |
| Ca_Desi_Chrom_4_9225421 | Ca_desi_chr04      | 9225421                        | [T/G]       | NA                                         |
| Ca_Desi_Chrom_4_9225429 | Ca_desi_chr04      | 9225429                        | [T/G]       | NA                                         |
| Ca_Desi_Chrom_4_9225679 | Ca_desi_chr04      | 9225679                        | [T/C]       | NA                                         |
| Ca_Desi_Chrom_4_9225700 | Ca_desi_chr04      | 9225700                        | [T/G]       | NA                                         |
| Ca_Desi_Chrom_4_9225706 | Ca_desi_chr04      | 9225706                        | [T/G]       | NA                                         |
| Ca_Desi_Chrom_4_9225745 | Ca_desi_chr04      | 9225745                        | [A/G]       | NA                                         |
| Ca_Desi_Chrom_4_9270773 | Ca_desi_chr04      | 9270773                        | [G/T]       | NA                                         |
| Ca_Desi_Chrom_4_9338194 | Ca_desi_chr04      | 9338194                        | [A/C]       | NA                                         |
| Ca_Desi_Chrom_4_9338211 | Ca_desi_chr04      | 9338211                        | [A/C]       | NA                                         |
| Ca_Desi_Chrom_4_9345303 | Ca_desi_chr04      | 9345303                        | [A/G]       | NA                                         |
| Ca_Desi_Chrom_4_9345307 | Ca_desi_chr04      | 9345307                        | [A/G]       | NA                                         |
| Ca_Desi_Chrom_4_9345338 | Ca_desi_chr04      | 9345338                        | [T/G]       | NA                                         |
| Ca_Desi_Chrom_4_9345340 | Ca_desi_chr04      | 9345340                        | [G/T]       | NA                                         |
| Ca_Desi_Chrom_4_9345834 | Ca_desi_chr04      | 9345834                        | [A/T]       | NA                                         |
| Ca_Desi_Chrom_4_9358122 | Ca_desi_chr04      | 9358122                        | [T/G]       | NA                                         |
| Ca_Desi_Chrom_4_9358135 | Ca_desi_chr04      | 9358135                        | [T/G]       | NA                                         |
| Ca_Desi_Chrom_4_9385944 | Ca_desi_chr04      | 9385944                        | [T/C]       | NA                                         |
| Ca_Desi_Chrom_4_9387412 | Ca_desi_chr04      | 9387412                        | [C/A]       | NA                                         |
| Ca_Desi_Chrom_4_9387413 | Ca_desi_chr04      | 9387413                        | [C/G]       | NA                                         |
| Ca_Desi_Chrom_4_9387414 | Ca_desi_chr04      | 9387414                        | [C/A]       | NA                                         |
| Ca_Desi_Chrom_4_9484411 | Ca_desi_chr04      | 9484411                        | [T/G]       | NA                                         |
| Ca_Desi_Chrom_4_9484426 | Ca_desi_chr04      | 9484426                        | [G/T]       | NA                                         |
| Ca_Desi_Chrom_4_9484435 | Ca_desi_chr04      | 9484435                        | [G/T]       | NA                                         |
| Ca_Desi_Chrom_4_9494437 | Ca_desi_chr04      | 9494437                        | [T/G]       | NA                                         |

| <b>SNP IDs</b>          | <b>Chromosomes</b> | <b>Physical positions (bp)</b> | <b>SNPs</b> | <b>NCBI SNPdb accession IDs (NCBI_ss#)</b> |
|-------------------------|--------------------|--------------------------------|-------------|--------------------------------------------|
| Ca_Desi_Chrom_4_9513616 | Ca_desi_chr04      | 9513616                        | [T/G]       | NA                                         |
| Ca_Desi_Chrom_4_9561753 | Ca_desi_chr04      | 9561753                        | [G/T]       | NA                                         |
| Ca_Desi_Chrom_4_9561761 | Ca_desi_chr04      | 9561761                        | [A/T]       | NA                                         |
| Ca_Desi_Chrom_4_9594025 | Ca_desi_chr04      | 9594025                        | [A/C]       | NA                                         |
| Ca_Desi_Chrom_4_9594080 | Ca_desi_chr04      | 9594080                        | [T/C]       | NA                                         |
| Ca_Desi_Chrom_4_9594151 | Ca_desi_chr04      | 9594151                        | [A/T]       | NA                                         |
| Ca_Desi_Chrom_4_9637313 | Ca_desi_chr04      | 9637313                        | [A/C]       | NA                                         |
| Ca_Desi_Chrom_4_9637318 | Ca_desi_chr04      | 9637318                        | [T/G]       | NA                                         |
| Ca_Desi_Chrom_4_9726645 | Ca_desi_chr04      | 9726645                        | [A/G]       | NA                                         |
| Ca_Desi_Chrom_4_9726657 | Ca_desi_chr04      | 9726657                        | [T/G]       | NA                                         |
| Ca_Desi_Chrom_4_9726673 | Ca_desi_chr04      | 9726673                        | [T/C]       | NA                                         |
| Ca_Desi_Chrom_4_9726697 | Ca_desi_chr04      | 9726697                        | [A/T]       | NA                                         |
| Ca_Desi_Chrom_4_9735919 | Ca_desi_chr04      | 9735919                        | [T/C]       | NA                                         |
| Ca_Desi_Chrom_4_9747994 | Ca_desi_chr04      | 9747994                        | [G/A]       | NA                                         |
| Ca_Desi_Chrom_4_9756394 | Ca_desi_chr04      | 9756394                        | [A/G]       | NA                                         |
| Ca_Desi_Chrom_4_9756398 | Ca_desi_chr04      | 9756398                        | [A/G]       | NA                                         |
| Ca_Desi_Chrom_4_9756400 | Ca_desi_chr04      | 9756400                        | [T/A]       | NA                                         |
| Ca_Desi_Chrom_4_9756414 | Ca_desi_chr04      | 9756414                        | [G/T]       | NA                                         |
| Ca_Desi_Chrom_4_9756420 | Ca_desi_chr04      | 9756420                        | [T/C]       | NA                                         |
| Ca_Desi_Chrom_4_9756428 | Ca_desi_chr04      | 9756428                        | [A/G]       | NA                                         |
| Ca_Desi_Chrom_4_9756437 | Ca_desi_chr04      | 9756437                        | [A/G]       | NA                                         |
| Ca_Desi_Chrom_4_9756443 | Ca_desi_chr04      | 9756443                        | [A/G]       | NA                                         |
| Ca_Desi_Chrom_4_9809512 | Ca_desi_chr04      | 9809512                        | [A/C]       | NA                                         |
| Ca_Desi_Chrom_4_9820705 | Ca_desi_chr04      | 9820705                        | [T/C]       | NA                                         |
| Ca_Desi_Chrom_4_9820711 | Ca_desi_chr04      | 9820711                        | [T/C]       | NA                                         |
| Ca_Desi_Chrom_4_9834884 | Ca_desi_chr04      | 9834884                        | [C/T]       | NA                                         |
| Ca_Desi_Chrom_4_9851330 | Ca_desi_chr04      | 9851330                        | [T/A]       | NA                                         |
| Ca_Desi_Chrom_4_9851366 | Ca_desi_chr04      | 9851366                        | [G/T]       | NA                                         |
| Ca_Desi_Chrom_4_9851385 | Ca_desi_chr04      | 9851385                        | [G/T]       | NA                                         |
| Ca_Desi_Chrom_4_9851424 | Ca_desi_chr04      | 9851424                        | [A/T]       | NA                                         |
| Ca_Desi_Chrom_4_9855664 | Ca_desi_chr04      | 9855664                        | [A/C]       | NA                                         |
| Ca_Desi_Chrom_4_9855725 | Ca_desi_chr04      | 9855725                        | [T/G]       | NA                                         |
| Ca_Desi_Chrom_4_9856520 | Ca_desi_chr04      | 9856520                        | [G/A]       | NA                                         |
| Ca_Desi_Chrom_4_9856716 | Ca_desi_chr04      | 9856716                        | [T/C]       | NA                                         |

| <b>SNP IDs</b>           | <b>Chromosomes</b> | <b>Physical positions (bp)</b> | <b>SNPs</b> | <b>NCBI SNPdb accession IDs (NCBI_ss#)</b> |
|--------------------------|--------------------|--------------------------------|-------------|--------------------------------------------|
| Ca_Desi_Chrom_4_9856753  | Ca_desi_chrom04    | 9856753                        | [C/T]       | NA                                         |
| Ca_Desi_Chrom_4_9856760  | Ca_desi_chrom04    | 9856760                        | [T/C]       | NA                                         |
| Ca_Desi_Chrom_4_9856771  | Ca_desi_chrom04    | 9856771                        | [T/C]       | NA                                         |
| Ca_Desi_Chrom_4_9856774  | Ca_desi_chrom04    | 9856774                        | [A/C]       | NA                                         |
| Ca_Desi_Chrom_4_9856777  | Ca_desi_chrom04    | 9856777                        | [T/G]       | NA                                         |
| Ca_Desi_Chrom_4_9856813  | Ca_desi_chrom04    | 9856813                        | [T/A]       | NA                                         |
| Ca_Desi_Chrom_4_9857066  | Ca_desi_chrom04    | 9857066                        | [A/T]       | NA                                         |
| Ca_Desi_Chrom_4_9857069  | Ca_desi_chrom04    | 9857069                        | [A/C]       | NA                                         |
| Ca_Desi_Chrom_4_9857164  | Ca_desi_chrom04    | 9857164                        | [T/G]       | NA                                         |
| Ca_Desi_Chrom_4_9857179  | Ca_desi_chrom04    | 9857179                        | [T/G]       | NA                                         |
| Ca_Desi_Chrom_4_9857200  | Ca_desi_chrom04    | 9857200                        | [A/C]       | NA                                         |
| Ca_Desi_Chrom_4_9857710  | Ca_desi_chrom04    | 9857710                        | [C/T]       | NA                                         |
| Ca_Desi_Chrom_4_9857716  | Ca_desi_chrom04    | 9857716                        | [T/C]       | NA                                         |
| Ca_Desi_Chrom_4_9858208  | Ca_desi_chrom04    | 9858208                        | [C/T]       | NA                                         |
| Ca_Desi_Chrom_4_9858220  | Ca_desi_chrom04    | 9858220                        | [A/C]       | NA                                         |
| Ca_Desi_Chrom_4_9858348  | Ca_desi_chrom04    | 9858348                        | [T/G]       | NA                                         |
| Ca_Desi_Chrom_4_9858379  | Ca_desi_chrom04    | 9858379                        | [A/G]       | NA                                         |
| Ca_Desi_Chrom_4_9858726  | Ca_desi_chrom04    | 9858726                        | [A/C]       | NA                                         |
| Ca_Desi_Chrom_4_9858764  | Ca_desi_chrom04    | 9858764                        | [A/C]       | NA                                         |
| Ca_Desi_Chrom_4_9858782  | Ca_desi_chrom04    | 9858782                        | [T/C]       | NA                                         |
| Ca_Desi_Chrom_4_9858822  | Ca_desi_chrom04    | 9858822                        | [A/G]       | NA                                         |
| Ca_Desi_Chrom_4_9858832  | Ca_desi_chrom04    | 9858832                        | [T/G]       | NA                                         |
| Ca_Desi_Chrom_4_9858878  | Ca_desi_chrom04    | 9858878                        | [A/C]       | NA                                         |
| Ca_Desi_Chrom_4_9858889  | Ca_desi_chrom04    | 9858889                        | [A/G]       | NA                                         |
| Ca_Desi_Chrom_4_9909450  | Ca_desi_chrom04    | 9909450                        | [G/A]       | NA                                         |
| Ca_Desi_Chrom_4_9923241  | Ca_desi_chrom04    | 9923241                        | [A/G]       | NA                                         |
| Ca_Desi_Chrom_4_9923245  | Ca_desi_chrom04    | 9923245                        | [T/C]       | NA                                         |
| Ca_Desi_Chrom_4_9938517  | Ca_desi_chrom04    | 9938517                        | [A/T]       | NA                                         |
| Ca_Desi_Chrom_4_9989761  | Ca_desi_chrom04    | 9989761                        | [A/C]       | NA                                         |
| Ca_Desi_Chrom_4_9989766  | Ca_desi_chrom04    | 9989766                        | [A/C]       | NA                                         |
| Ca_Desi_Chrom_4_9998058  | Ca_desi_chrom04    | 9998058                        | [T/C]       | NA                                         |
| Ca_Desi_Chrom_4_9998061  | Ca_desi_chrom04    | 9998061                        | [T/A]       | NA                                         |
| Ca_Desi_Chrom_4_10003273 | Ca_desi_chrom04    | 10003273                       | [T/C]       | NA                                         |
| Ca_Desi_Chrom_4_10003279 | Ca_desi_chrom04    | 10003279                       | [T/C]       | NA                                         |



| <b>SNP IDs</b>           | <b>Chromosomes</b> | <b>Physical positions (bp)</b> | <b>SNPs</b> | <b>NCBI SNPdb accession IDs (NCBI_ss#)</b> |
|--------------------------|--------------------|--------------------------------|-------------|--------------------------------------------|
| Ca_Desi_Chrom_4_10003290 | Ca_desi_chr04      | 10003290                       | [A/G]       | NA                                         |
| Ca_Desi_Chrom_4_10003304 | Ca_desi_chr04      | 10003304                       | [A/G]       | NA                                         |
| Ca_Desi_Chrom_4_10003316 | Ca_desi_chr04      | 10003316                       | [A/G]       | NA                                         |
| Ca_Desi_Chrom_4_10036008 | Ca_desi_chr04      | 10036008                       | [G/A]       | NA                                         |
| Ca_Desi_Chrom_4_10036010 | Ca_desi_chr04      | 10036010                       | [A/G]       | NA                                         |
| Ca_Desi_Chrom_4_10081995 | Ca_desi_chr04      | 10081995                       | [A/C]       | NA                                         |
| Ca_Desi_Chrom_4_10162745 | Ca_desi_chr04      | 10162745                       | [A/C]       | NA                                         |
| Ca_Desi_Chrom_4_10162751 | Ca_desi_chr04      | 10162751                       | [C/T]       | NA                                         |
| Ca_Desi_Chrom_4_10162917 | Ca_desi_chr04      | 10162917                       | [A/C]       | NA                                         |
| Ca_Desi_Chrom_4_10162918 | Ca_desi_chr04      | 10162918                       | [G/C]       | NA                                         |
| Ca_Desi_Chrom_4_10162919 | Ca_desi_chr04      | 10162919                       | [A/C]       | NA                                         |
| Ca_Desi_Chrom_4_10229405 | Ca_desi_chr04      | 10229405                       | [G/C]       | NA                                         |
| Ca_Desi_Chrom_4_10229406 | Ca_desi_chr04      | 10229406                       | [G/T]       | NA                                         |
| Ca_Desi_Chrom_4_10248282 | Ca_desi_chr04      | 10248282                       | [G/T]       | NA                                         |
| Ca_Desi_Chrom_4_10249171 | Ca_desi_chr04      | 10249171                       | [T/G]       | NA                                         |
| Ca_Desi_Chrom_4_10249225 | Ca_desi_chr04      | 10249225                       | [C/T]       | NA                                         |
| Ca_Desi_Chrom_4_10249247 | Ca_desi_chr04      | 10249247                       | [A/T]       | NA                                         |
| Ca_Desi_Chrom_4_10249248 | Ca_desi_chr04      | 10249248                       | [T/C]       | NA                                         |
| Ca_Desi_Chrom_4_10249249 | Ca_desi_chr04      | 10249249                       | [G/T]       | NA                                         |
| Ca_Desi_Chrom_4_10249253 | Ca_desi_chr04      | 10249253                       | [T/C]       | NA                                         |
| Ca_Desi_Chrom_4_10249319 | Ca_desi_chr04      | 10249319                       | [A/G]       | NA                                         |
| Ca_Desi_Chrom_4_10249331 | Ca_desi_chr04      | 10249331                       | [T/C]       | NA                                         |
| Ca_Desi_Chrom_4_10249367 | Ca_desi_chr04      | 10249367                       | [T/C]       | NA                                         |
| Ca_Desi_Chrom_4_10291941 | Ca_desi_chr04      | 10291941                       | [A/C]       | NA                                         |
| Ca_Desi_Chrom_4_10294037 | Ca_desi_chr04      | 10294037                       | [A/G]       | NA                                         |
| Ca_Desi_Chrom_4_10297381 | Ca_desi_chr04      | 10297381                       | [A/C]       | NA                                         |
| Ca_Desi_Chrom_4_10297440 | Ca_desi_chr04      | 10297440                       | [T/G]       | NA                                         |
| Ca_Desi_Chrom_4_10297454 | Ca_desi_chr04      | 10297454                       | [A/G]       | NA                                         |
| Ca_Desi_Chrom_4_10297457 | Ca_desi_chr04      | 10297457                       | [A/C]       | NA                                         |
| Ca_Desi_Chrom_4_10297463 | Ca_desi_chr04      | 10297463                       | [A/G]       | NA                                         |
| Ca_Desi_Chrom_4_10297464 | Ca_desi_chr04      | 10297464                       | [T/C]       | NA                                         |
| Ca_Desi_Chrom_4_10297474 | Ca_desi_chr04      | 10297474                       | [A/G]       | NA                                         |
| Ca_Desi_Chrom_4_10311544 | Ca_desi_chr04      | 10311544                       | [A/G]       | NA                                         |
| Ca_Desi_Chrom_4_10339397 | Ca_desi_chr04      | 10339397                       | [A/G]       | NA                                         |

| <b>SNP IDs</b>           | <b>Chromosomes</b> | <b>Physical positions (bp)</b> | <b>SNPs</b> | <b>NCBI SNPdb accession IDs (NCBI_ss#)</b> |
|--------------------------|--------------------|--------------------------------|-------------|--------------------------------------------|
| Ca_Desi_Chrom_4_10339669 | Ca_desi_chr04      | 10339669                       | [T/C]       | NA                                         |
| Ca_Desi_Chrom_4_10349823 | Ca_desi_chr04      | 10349823                       | [A/T]       | NA                                         |
| Ca_Desi_Chrom_4_10349826 | Ca_desi_chr04      | 10349826                       | [G/A]       | NA                                         |
| Ca_Desi_Chrom_4_10349867 | Ca_desi_chr04      | 10349867                       | [T/A]       | NA                                         |
| Ca_Desi_Chrom_4_10351636 | Ca_desi_chr04      | 10351636                       | [A/G]       | NA                                         |
| Ca_Desi_Chrom_4_10354408 | Ca_desi_chr04      | 10354408                       | [G/A]       | NA                                         |
| Ca_Desi_Chrom_4_10354585 | Ca_desi_chr04      | 10354585                       | [A/G]       | NA                                         |
| Ca_Desi_Chrom_4_10356296 | Ca_desi_chr04      | 10356296                       | [A/G]       | NA                                         |
| Ca_Desi_Chrom_4_10365321 | Ca_desi_chr04      | 10365321                       | [G/T]       | NA                                         |
| Ca_Desi_Chrom_4_10369201 | Ca_desi_chr04      | 10369201                       | [G/A]       | NA                                         |
| Ca_Desi_Chrom_4_10376604 | Ca_desi_chr04      | 10376604                       | [C/G]       | NA                                         |
| Ca_Desi_Chrom_4_10378656 | Ca_desi_chr04      | 10378656                       | [T/G]       | NA                                         |
| Ca_Desi_Chrom_4_10577049 | Ca_desi_chr04      | 10577049                       | [T/G]       | NA                                         |
| Ca_Desi_Chrom_4_10613217 | Ca_desi_chr04      | 10613217                       | [T/G]       | NA                                         |
| Ca_Desi_Chrom_4_10618306 | Ca_desi_chr04      | 10618306                       | [T/C]       | NA                                         |
| Ca_Desi_Chrom_4_10618316 | Ca_desi_chr04      | 10618316                       | [T/G]       | NA                                         |
| Ca_Desi_Chrom_4_10618335 | Ca_desi_chr04      | 10618335                       | [T/G]       | NA                                         |
| Ca_Desi_Chrom_4_10618342 | Ca_desi_chr04      | 10618342                       | [A/G]       | NA                                         |
| Ca_Desi_Chrom_4_10685259 | Ca_desi_chr04      | 10685259                       | [A/C]       | NA                                         |
| Ca_Desi_Chrom_4_10685279 | Ca_desi_chr04      | 10685279                       | [T/A]       | NA                                         |
| Ca_Desi_Chrom_4_10721599 | Ca_desi_chr04      | 10721599                       | [T/G]       | NA                                         |
| Ca_Desi_Chrom_4_10721635 | Ca_desi_chr04      | 10721635                       | [T/C]       | NA                                         |
| Ca_Desi_Chrom_4_10735683 | Ca_desi_chr04      | 10735683                       | [A/T]       | NA                                         |
| Ca_Desi_Chrom_4_10746478 | Ca_desi_chr04      | 10746478                       | [T/G]       | NA                                         |
| Ca_Desi_Chrom_4_10746501 | Ca_desi_chr04      | 10746501                       | [T/G]       | NA                                         |
| Ca_Desi_Chrom_4_10746537 | Ca_desi_chr04      | 10746537                       | [A/C]       | NA                                         |
| Ca_Desi_Chrom_4_10817293 | Ca_desi_chr04      | 10817293                       | [A/G]       | NA                                         |
| Ca_Desi_Chrom_4_10840283 | Ca_desi_chr04      | 10840283                       | [A/T]       | NA                                         |
| Ca_Desi_Chrom_4_10840291 | Ca_desi_chr04      | 10840291                       | [A/G]       | NA                                         |
| Ca_Desi_Chrom_4_10840302 | Ca_desi_chr04      | 10840302                       | [A/G]       | NA                                         |
| Ca_Desi_Chrom_4_10840305 | Ca_desi_chr04      | 10840305                       | [T/G]       | NA                                         |
| Ca_Desi_Chrom_4_10840308 | Ca_desi_chr04      | 10840308                       | [A/G]       | NA                                         |
| Ca_Desi_Chrom_4_10840320 | Ca_desi_chr04      | 10840320                       | [A/G]       | NA                                         |
| Ca_Desi_Chrom_4_10840333 | Ca_desi_chr04      | 10840333                       | [T/G]       | NA                                         |

| <b>SNP IDs</b>           | <b>Chromosomes</b> | <b>Physical positions (bp)</b> | <b>SNPs</b> | <b>NCBI SNPdb accession IDs (NCBI_ss#)</b> |
|--------------------------|--------------------|--------------------------------|-------------|--------------------------------------------|
| Ca_Desi_Chrom_4_10840336 | Ca_desi_chr04      | 10840336                       | [T/C]       | NA                                         |
| Ca_Desi_Chrom_4_10840340 | Ca_desi_chr04      | 10840340                       | [T/C]       | NA                                         |
| Ca_Desi_Chrom_4_10911544 | Ca_desi_chr04      | 10911544                       | [T/G]       | NA                                         |
| Ca_Desi_Chrom_4_11013040 | Ca_desi_chr04      | 11013040                       | [G/C]       | NA                                         |
| Ca_Desi_Chrom_4_11038188 | Ca_desi_chr04      | 11038188                       | [T/G]       | NA                                         |
| Ca_Desi_Chrom_4_11038463 | Ca_desi_chr04      | 11038463                       | [T/C]       | NA                                         |
| Ca_Desi_Chrom_4_11038479 | Ca_desi_chr04      | 11038479                       | [A/C]       | NA                                         |
| Ca_Desi_Chrom_4_11072007 | Ca_desi_chr04      | 11072007                       | [A/C]       | NA                                         |
| Ca_Desi_Chrom_4_11072222 | Ca_desi_chr04      | 11072222                       | [T/C]       | NA                                         |
| Ca_Desi_Chrom_4_11072259 | Ca_desi_chr04      | 11072259                       | [T/C]       | NA                                         |
| Ca_Desi_Chrom_4_11072266 | Ca_desi_chr04      | 11072266                       | [A/G]       | NA                                         |
| Ca_Desi_Chrom_4_11089936 | Ca_desi_chr04      | 11089936                       | [A/C]       | NA                                         |
| Ca_Desi_Chrom_4_11089940 | Ca_desi_chr04      | 11089940                       | [C/T]       | NA                                         |
| Ca_Desi_Chrom_4_11182579 | Ca_desi_chr04      | 11182579                       | [A/T]       | NA                                         |
| Ca_Desi_Chrom_4_11229015 | Ca_desi_chr04      | 11229015                       | [T/C]       | NA                                         |
| Ca_Desi_Chrom_4_11229016 | Ca_desi_chr04      | 11229016                       | [C/T]       | NA                                         |
| Ca_Desi_Chrom_4_11229018 | Ca_desi_chr04      | 11229018                       | [C/T]       | NA                                         |
| Ca_Desi_Chrom_4_11387821 | Ca_desi_chr04      | 11387821                       | [T/C]       | NA                                         |
| Ca_Desi_Chrom_4_11387845 | Ca_desi_chr04      | 11387845                       | [T/G]       | NA                                         |
| Ca_Desi_Chrom_4_11389484 | Ca_desi_chr04      | 11389484                       | [A/G]       | NA                                         |
| Ca_Desi_Chrom_4_11389492 | Ca_desi_chr04      | 11389492                       | [T/C]       | NA                                         |
| Ca_Desi_Chrom_4_11389523 | Ca_desi_chr04      | 11389523                       | [T/C]       | NA                                         |
| Ca_Desi_Chrom_4_11399082 | Ca_desi_chr04      | 11399082                       | [A/C]       | NA                                         |
| Ca_Desi_Chrom_4_11399086 | Ca_desi_chr04      | 11399086                       | [T/C]       | NA                                         |
| Ca_Desi_Chrom_4_11399098 | Ca_desi_chr04      | 11399098                       | [A/G]       | NA                                         |
| Ca_Desi_Chrom_4_11399105 | Ca_desi_chr04      | 11399105                       | [A/C]       | NA                                         |
| Ca_Desi_Chrom_4_11399117 | Ca_desi_chr04      | 11399117                       | [A/C]       | NA                                         |
| Ca_Desi_Chrom_4_11407191 | Ca_desi_chr04      | 11407191                       | [T/G]       | NA                                         |
| Ca_Desi_Chrom_4_11457370 | Ca_desi_chr04      | 11457370                       | [T/G]       | NA                                         |
| Ca_Desi_Chrom_4_11457402 | Ca_desi_chr04      | 11457402                       | [T/G]       | NA                                         |
| Ca_Desi_Chrom_4_11458944 | Ca_desi_chr04      | 11458944                       | [T/G]       | NA                                         |
| Ca_Desi_Chrom_4_11458965 | Ca_desi_chr04      | 11458965                       | [G/T]       | NA                                         |
| Ca_Desi_Chrom_4_11459978 | Ca_desi_chr04      | 11459978                       | [T/C]       | NA                                         |
| Ca_Desi_Chrom_4_11491065 | Ca_desi_chr04      | 11491065                       | [A/C]       | NA                                         |

| <b>SNP IDs</b>          | <b>Chromosomes</b> | <b>Physical positions (bp)</b> | <b>SNPs</b> | <b>NCBI SNPdb accession IDs (NCBI_ss#)</b> |
|-------------------------|--------------------|--------------------------------|-------------|--------------------------------------------|
| Ca_Desig_Chr_4_11538965 | Ca_desig_chr04     | 11538965                       | [G/C]       | NA                                         |
| Ca_Desig_Chr_4_11539026 | Ca_desig_chr04     | 11539026                       | [A/G]       | NA                                         |
| Ca_Desig_Chr_4_11539401 | Ca_desig_chr04     | 11539401                       | [C/T]       | NA                                         |
| Ca_Desig_Chr_4_11540055 | Ca_desig_chr04     | 11540055                       | [G/A]       | NA                                         |
| Ca_Desig_Chr_4_11540126 | Ca_desig_chr04     | 11540126                       | [G/C]       | NA                                         |
| Ca_Desig_Chr_4_11540314 | Ca_desig_chr04     | 11540314                       | [A/G]       | NA                                         |
| Ca_Desig_Chr_4_11540353 | Ca_desig_chr04     | 11540353                       | [A/G]       | NA                                         |
| Ca_Desig_Chr_4_11540373 | Ca_desig_chr04     | 11540373                       | [T/C]       | NA                                         |
| Ca_Desig_Chr_4_11540399 | Ca_desig_chr04     | 11540399                       | [T/C]       | NA                                         |
| Ca_Desig_Chr_4_11542258 | Ca_desig_chr04     | 11542258                       | [G/A]       | NA                                         |
| Ca_Desig_Chr_4_11543134 | Ca_desig_chr04     | 11543134                       | [A/T]       | NA                                         |
| Ca_Desig_Chr_4_11543211 | Ca_desig_chr04     | 11543211                       | [A/G]       | NA                                         |
| Ca_Desig_Chr_4_11543635 | Ca_desig_chr04     | 11543635                       | [G/T]       | NA                                         |
| Ca_Desig_Chr_4_11543651 | Ca_desig_chr04     | 11543651                       | [G/A]       | NA                                         |
| Ca_Desig_Chr_4_11558941 | Ca_desig_chr04     | 11558941                       | [G/A]       | NA                                         |
| Ca_Desig_Chr_4_11567921 | Ca_desig_chr04     | 11567921                       | [T/A]       | NA                                         |
| Ca_Desig_Chr_4_11570353 | Ca_desig_chr04     | 11570353                       | [A/G]       | NA                                         |
| Ca_Desig_Chr_4_11570362 | Ca_desig_chr04     | 11570362                       | [T/C]       | NA                                         |
| Ca_Desig_Chr_4_11570433 | Ca_desig_chr04     | 11570433                       | [T/C]       | NA                                         |
| Ca_Desig_Chr_4_11572131 | Ca_desig_chr04     | 11572131                       | [A/C]       | NA                                         |
| Ca_Desig_Chr_4_11572192 | Ca_desig_chr04     | 11572192                       | [C/A]       | NA                                         |
| Ca_Desig_Chr_4_11572638 | Ca_desig_chr04     | 11572638                       | [C/T]       | NA                                         |
| Ca_Desig_Chr_4_11572654 | Ca_desig_chr04     | 11572654                       | [A/G]       | NA                                         |
| Ca_Desig_Chr_4_11585262 | Ca_desig_chr04     | 11585262                       | [A/G]       | NA                                         |
| Ca_Desig_Chr_4_11585285 | Ca_desig_chr04     | 11585285                       | [T/C]       | NA                                         |
| Ca_Desig_Chr_4_11585305 | Ca_desig_chr04     | 11585305                       | [C/T]       | NA                                         |
| Ca_Desig_Chr_4_11585310 | Ca_desig_chr04     | 11585310                       | [C/T]       | NA                                         |
| Ca_Desig_Chr_4_11585312 | Ca_desig_chr04     | 11585312                       | [A/G]       | NA                                         |
| Ca_Desig_Chr_4_11585316 | Ca_desig_chr04     | 11585316                       | [T/C]       | NA                                         |
| Ca_Desig_Chr_4_11585318 | Ca_desig_chr04     | 11585318                       | [A/G]       | NA                                         |
| Ca_Desig_Chr_4_11585360 | Ca_desig_chr04     | 11585360                       | [A/G]       | NA                                         |
| Ca_Desig_Chr_4_11585368 | Ca_desig_chr04     | 11585368                       | [T/C]       | NA                                         |
| Ca_Desig_Chr_4_11585391 | Ca_desig_chr04     | 11585391                       | [A/G]       | NA                                         |
| Ca_Desig_Chr_4_11586003 | Ca_desig_chr04     | 11586003                       | [T/C]       | NA                                         |

| <b>SNP IDs</b>           | <b>Chromosomes</b> | <b>Physical positions (bp)</b> | <b>SNPs</b> | <b>NCBI SNPdb accession IDs (NCBI_ss#)</b> |
|--------------------------|--------------------|--------------------------------|-------------|--------------------------------------------|
| Ca_Desi_Chrom_4_11586015 | Ca_desi_chr04      | 11586015                       | [T/G]       | NA                                         |
| Ca_Desi_Chrom_4_11586059 | Ca_desi_chr04      | 11586059                       | [T/G]       | NA                                         |
| Ca_Desi_Chrom_4_11586074 | Ca_desi_chr04      | 11586074                       | [T/G]       | NA                                         |
| Ca_Desi_Chrom_4_11603349 | Ca_desi_chr04      | 11603349                       | [G/A]       | NA                                         |
| Ca_Desi_Chrom_4_11603546 | Ca_desi_chr04      | 11603546                       | [A/G]       | NA                                         |
| Ca_Desi_Chrom_4_11618946 | Ca_desi_chr04      | 11618946                       | [T/G]       | NA                                         |
| Ca_Desi_Chrom_4_11663437 | Ca_desi_chr04      | 11663437                       | [T/C]       | NA                                         |
| Ca_Desi_Chrom_4_11664283 | Ca_desi_chr04      | 11664283                       | [A/G]       | NA                                         |
| Ca_Desi_Chrom_4_11664297 | Ca_desi_chr04      | 11664297                       | [T/C]       | NA                                         |
| Ca_Desi_Chrom_4_11664301 | Ca_desi_chr04      | 11664301                       | [A/G]       | NA                                         |
| Ca_Desi_Chrom_4_11666412 | Ca_desi_chr04      | 11666412                       | [T/C]       | NA                                         |
| Ca_Desi_Chrom_4_11666417 | Ca_desi_chr04      | 11666417                       | [T/C]       | NA                                         |
| Ca_Desi_Chrom_4_11674004 | Ca_desi_chr04      | 11674004                       | [G/C]       | NA                                         |
| Ca_Desi_Chrom_4_11674038 | Ca_desi_chr04      | 11674038                       | [A/G]       | NA                                         |
| Ca_Desi_Chrom_4_11674058 | Ca_desi_chr04      | 11674058                       | [A/G]       | NA                                         |
| Ca_Desi_Chrom_4_11674107 | Ca_desi_chr04      | 11674107                       | [A/G]       | NA                                         |
| Ca_Desi_Chrom_4_11674195 | Ca_desi_chr04      | 11674195                       | [A/G]       | NA                                         |
| Ca_Desi_Chrom_4_11674605 | Ca_desi_chr04      | 11674605                       | [G/A]       | NA                                         |
| Ca_Desi_Chrom_4_11674615 | Ca_desi_chr04      | 11674615                       | [C/A]       | NA                                         |
| Ca_Desi_Chrom_4_11674619 | Ca_desi_chr04      | 11674619                       | [A/C]       | NA                                         |
| Ca_Desi_Chrom_4_11674624 | Ca_desi_chr04      | 11674624                       | [A/C]       | NA                                         |
| Ca_Desi_Chrom_4_11679016 | Ca_desi_chr04      | 11679016                       | [T/A]       | NA                                         |
| Ca_Desi_Chrom_4_11714449 | Ca_desi_chr04      | 11714449                       | [A/T]       | NA                                         |
| Ca_Desi_Chrom_4_11714450 | Ca_desi_chr04      | 11714450                       | [A/C]       | NA                                         |
| Ca_Desi_Chrom_4_11714451 | Ca_desi_chr04      | 11714451                       | [G/T]       | NA                                         |
| Ca_Desi_Chrom_4_11784964 | Ca_desi_chr04      | 11784964                       | [A/T]       | NA                                         |
| Ca_Desi_Chrom_4_11784979 | Ca_desi_chr04      | 11784979                       | [T/C]       | NA                                         |
| Ca_Desi_Chrom_4_11784986 | Ca_desi_chr04      | 11784986                       | [A/T]       | NA                                         |
| Ca_Desi_Chrom_4_11784996 | Ca_desi_chr04      | 11784996                       | [T/G]       | NA                                         |
| Ca_Desi_Chrom_4_11832110 | Ca_desi_chr04      | 11832110                       | [A/C]       | NA                                         |
| Ca_Desi_Chrom_4_11832118 | Ca_desi_chr04      | 11832118                       | [A/C]       | NA                                         |
| Ca_Desi_Chrom_4_11837366 | Ca_desi_chr04      | 11837366                       | [A/C]       | NA                                         |
| Ca_Desi_Chrom_4_11933382 | Ca_desi_chr04      | 11933382                       | [T/G]       | NA                                         |
| Ca_Desi_Chrom_4_11933384 | Ca_desi_chr04      | 11933384                       | [T/A]       | NA                                         |

| <b>SNP IDs</b>         | <b>Chromosomes</b> | <b>Physical positions (bp)</b> | <b>SNPs</b> | <b>NCBI SNPdb accession IDs (NCBI_ss#)</b> |
|------------------------|--------------------|--------------------------------|-------------|--------------------------------------------|
| Ca_Desi_Chr_4_11933404 | Ca_desi_chr04      | 11933404                       | [A/T]       | NA                                         |
| Ca_Desi_Chr_4_11933417 | Ca_desi_chr04      | 11933417                       | [T/A]       | NA                                         |
| Ca_Desi_Chr_4_11933440 | Ca_desi_chr04      | 11933440                       | [A/G]       | NA                                         |
| Ca_Desi_Chr_4_11984997 | Ca_desi_chr04      | 11984997                       | [T/G]       | NA                                         |
| Ca_Desi_Chr_4_11985017 | Ca_desi_chr04      | 11985017                       | [A/T]       | NA                                         |
| Ca_Desi_Chr_4_12098589 | Ca_desi_chr04      | 12098589                       | [C/T]       | NA                                         |
| Ca_Desi_Chr_4_12098592 | Ca_desi_chr04      | 12098592                       | [C/T]       | NA                                         |
| Ca_Desi_Chr_4_12118440 | Ca_desi_chr04      | 12118440                       | [T/C]       | NA                                         |
| Ca_Desi_Chr_4_12119463 | Ca_desi_chr04      | 12119463                       | [A/G]       | NA                                         |
| Ca_Desi_Chr_4_12119500 | Ca_desi_chr04      | 12119500                       | [T/C]       | NA                                         |
| Ca_Desi_Chr_4_12119513 | Ca_desi_chr04      | 12119513                       | [T/A]       | NA                                         |
| Ca_Desi_Chr_4_12135273 | Ca_desi_chr04      | 12135273                       | [T/C]       | NA                                         |
| Ca_Desi_Chr_4_12204368 | Ca_desi_chr04      | 12204368                       | [A/T]       | NA                                         |
| Ca_Desi_Chr_4_12204413 | Ca_desi_chr04      | 12204413                       | [A/T]       | NA                                         |
| Ca_Desi_Chr_4_12204460 | Ca_desi_chr04      | 12204460                       | [T/G]       | NA                                         |
| Ca_Desi_Chr_4_12204644 | Ca_desi_chr04      | 12204644                       | [T/C]       | NA                                         |
| Ca_Desi_Chr_4_12204653 | Ca_desi_chr04      | 12204653                       | [T/C]       | NA                                         |
| Ca_Desi_Chr_4_12204669 | Ca_desi_chr04      | 12204669                       | [A/G]       | NA                                         |
| Ca_Desi_Chr_4_12204700 | Ca_desi_chr04      | 12204700                       | [A/G]       | NA                                         |
| Ca_Desi_Chr_4_12204710 | Ca_desi_chr04      | 12204710                       | [A/G]       | NA                                         |
| Ca_Desi_Chr_4_12271895 | Ca_desi_chr04      | 12271895                       | [A/G]       | NA                                         |
| Ca_Desi_Chr_4_12276816 | Ca_desi_chr04      | 12276816                       | [A/G]       | NA                                         |
| Ca_Desi_Chr_4_12276826 | Ca_desi_chr04      | 12276826                       | [A/G]       | NA                                         |
| Ca_Desi_Chr_4_12276828 | Ca_desi_chr04      | 12276828                       | [A/C]       | NA                                         |
| Ca_Desi_Chr_4_12276839 | Ca_desi_chr04      | 12276839                       | [T/A]       | NA                                         |
| Ca_Desi_Chr_4_12276848 | Ca_desi_chr04      | 12276848                       | [A/G]       | NA                                         |
| Ca_Desi_Chr_4_12298981 | Ca_desi_chr04      | 12298981                       | [T/C]       | NA                                         |
| Ca_Desi_Chr_4_12298984 | Ca_desi_chr04      | 12298984                       | [A/G]       | NA                                         |
| Ca_Desi_Chr_4_12299002 | Ca_desi_chr04      | 12299002                       | [A/C]       | NA                                         |
| Ca_Desi_Chr_4_12299004 | Ca_desi_chr04      | 12299004                       | [A/C]       | NA                                         |
| Ca_Desi_Chr_4_12299032 | Ca_desi_chr04      | 12299032                       | [T/A]       | NA                                         |
| Ca_Desi_Chr_4_12315915 | Ca_desi_chr04      | 12315915                       | [T/A]       | NA                                         |
| Ca_Desi_Chr_4_12315954 | Ca_desi_chr04      | 12315954                       | [A/G]       | NA                                         |
| Ca_Desi_Chr_4_12318263 | Ca_desi_chr04      | 12318263                       | [A/C]       | NA                                         |

| <b>SNP IDs</b>          | <b>Chromosomes</b> | <b>Physical positions (bp)</b> | <b>SNPs</b> | <b>NCBI SNPdb accession IDs (NCBI_ss#)</b> |
|-------------------------|--------------------|--------------------------------|-------------|--------------------------------------------|
| Ca_Desig_Chr_4_12318282 | Ca_desig_chr04     | 12318282                       | [A/G]       | NA                                         |
| Ca_Desig_Chr_4_12335457 | Ca_desig_chr04     | 12335457                       | [T/C]       | NA                                         |
| Ca_Desig_Chr_4_12335461 | Ca_desig_chr04     | 12335461                       | [A/C]       | NA                                         |
| Ca_Desig_Chr_4_12335473 | Ca_desig_chr04     | 12335473                       | [A/C]       | NA                                         |
| Ca_Desig_Chr_4_12335490 | Ca_desig_chr04     | 12335490                       | [A/G]       | NA                                         |
| Ca_Desig_Chr_4_12339437 | Ca_desig_chr04     | 12339437                       | [A/T]       | NA                                         |
| Ca_Desig_Chr_4_12339438 | Ca_desig_chr04     | 12339438                       | [G/C]       | NA                                         |
| Ca_Desig_Chr_4_12339439 | Ca_desig_chr04     | 12339439                       | [G/T]       | NA                                         |
| Ca_Desig_Chr_4_12366200 | Ca_desig_chr04     | 12366200                       | [T/C]       | NA                                         |
| Ca_Desig_Chr_4_12415487 | Ca_desig_chr04     | 12415487                       | [A/G]       | NA                                         |
| Ca_Desig_Chr_4_12415495 | Ca_desig_chr04     | 12415495                       | [A/G]       | NA                                         |
| Ca_Desig_Chr_4_12415500 | Ca_desig_chr04     | 12415500                       | [T/C]       | NA                                         |
| Ca_Desig_Chr_4_12415509 | Ca_desig_chr04     | 12415509                       | [A/G]       | NA                                         |
| Ca_Desig_Chr_4_12415511 | Ca_desig_chr04     | 12415511                       | [T/C]       | NA                                         |
| Ca_Desig_Chr_4_12415516 | Ca_desig_chr04     | 12415516                       | [G/A]       | NA                                         |
| Ca_Desig_Chr_4_12415530 | Ca_desig_chr04     | 12415530                       | [T/C]       | NA                                         |
| Ca_Desig_Chr_4_12415532 | Ca_desig_chr04     | 12415532                       | [A/G]       | NA                                         |
| Ca_Desig_Chr_4_12415539 | Ca_desig_chr04     | 12415539                       | [C/A]       | NA                                         |
| Ca_Desig_Chr_4_12415656 | Ca_desig_chr04     | 12415656                       | [A/G]       | NA                                         |
| Ca_Desig_Chr_4_12483075 | Ca_desig_chr04     | 12483075                       | [T/C]       | NA                                         |
| Ca_Desig_Chr_4_12483136 | Ca_desig_chr04     | 12483136                       | [A/G]       | NA                                         |
| Ca_Desig_Chr_4_12483371 | Ca_desig_chr04     | 12483371                       | [A/G]       | NA                                         |
| Ca_Desig_Chr_4_12499443 | Ca_desig_chr04     | 12499443                       | [A/C]       | NA                                         |
| Ca_Desig_Chr_4_12501779 | Ca_desig_chr04     | 12501779                       | [T/G]       | NA                                         |
| Ca_Desig_Chr_4_12574293 | Ca_desig_chr04     | 12574293                       | [A/T]       | NA                                         |
| Ca_Desig_Chr_4_12662712 | Ca_desig_chr04     | 12662712                       | [T/C]       | NA                                         |
| Ca_Desig_Chr_4_12662782 | Ca_desig_chr04     | 12662782                       | [T/A]       | NA                                         |
| Ca_Desig_Chr_4_12662784 | Ca_desig_chr04     | 12662784                       | [A/G]       | NA                                         |
| Ca_Desig_Chr_4_12662818 | Ca_desig_chr04     | 12662818                       | [A/G]       | NA                                         |
| Ca_Desig_Chr_4_12705809 | Ca_desig_chr04     | 12705809                       | [A/C]       | NA                                         |
| Ca_Desig_Chr_4_12705814 | Ca_desig_chr04     | 12705814                       | [A/C]       | NA                                         |
| Ca_Desig_Chr_4_12705829 | Ca_desig_chr04     | 12705829                       | [T/G]       | NA                                         |
| Ca_Desig_Chr_4_12748482 | Ca_desig_chr04     | 12748482                       | [G/A]       | NA                                         |
| Ca_Desig_Chr_4_12748483 | Ca_desig_chr04     | 12748483                       | [T/G]       | NA                                         |

| <b>SNP IDs</b>           | <b>Chromosomes</b> | <b>Physical positions (bp)</b> | <b>SNPs</b> | <b>NCBI SNPdb accession IDs (NCBI_ss#)</b> |
|--------------------------|--------------------|--------------------------------|-------------|--------------------------------------------|
| Ca_Desi_Chrom_4_12750219 | Ca_desi_chr04      | 12750219                       | [A/C]       | NA                                         |
| Ca_Desi_Chrom_4_12750227 | Ca_desi_chr04      | 12750227                       | [A/G]       | NA                                         |
| Ca_Desi_Chrom_4_12750232 | Ca_desi_chr04      | 12750232                       | [A/C]       | NA                                         |
| Ca_Desi_Chrom_4_12791207 | Ca_desi_chr04      | 12791207                       | [A/C]       | NA                                         |
| Ca_Desi_Chrom_4_12791217 | Ca_desi_chr04      | 12791217                       | [A/T]       | NA                                         |
| Ca_Desi_Chrom_4_12837386 | Ca_desi_chr04      | 12837386                       | [T/G]       | NA                                         |
| Ca_Desi_Chrom_4_12915143 | Ca_desi_chr04      | 12915143                       | [A/T]       | NA                                         |
| Ca_Desi_Chrom_4_12915144 | Ca_desi_chr04      | 12915144                       | [T/A]       | NA                                         |
| Ca_Desi_Chrom_4_12921723 | Ca_desi_chr04      | 12921723                       | [A/G]       | NA                                         |
| Ca_Desi_Chrom_4_12921734 | Ca_desi_chr04      | 12921734                       | [T/G]       | NA                                         |
| Ca_Desi_Chrom_4_12921757 | Ca_desi_chr04      | 12921757                       | [A/T]       | NA                                         |
| Ca_Desi_Chrom_4_12998000 | Ca_desi_chr04      | 12998000                       | [T/G]       | NA                                         |
| Ca_Desi_Chrom_4_12998008 | Ca_desi_chr04      | 12998008                       | [T/C]       | NA                                         |
| Ca_Desi_Chrom_4_13005176 | Ca_desi_chr04      | 13005176                       | [T/G]       | NA                                         |
| Ca_Desi_Chrom_4_13005197 | Ca_desi_chr04      | 13005197                       | [T/G]       | NA                                         |
| Ca_Desi_Chrom_4_15813359 | Ca_desi_chr04      | 15813359                       | [T/G]       | NA                                         |
| Ca_Desi_Chrom_4_15874744 | Ca_desi_chr04      | 15874744                       | [T/C]       | NA                                         |
| Ca_Desi_Chrom_4_15874913 | Ca_desi_chr04      | 15874913                       | [G/T]       | NA                                         |
| Ca_Desi_Chrom_4_15874914 | Ca_desi_chr04      | 15874914                       | [T/G]       | NA                                         |
| Ca_Desi_Chrom_4_15874915 | Ca_desi_chr04      | 15874915                       | [T/A]       | NA                                         |
| Ca_Desi_Chrom_4_15907269 | Ca_desi_chr04      | 15907269                       | [T/G]       | NA                                         |
| Ca_Desi_Chrom_4_15949386 | Ca_desi_chr04      | 15949386                       | [A/C]       | NA                                         |
| Ca_Desi_Chrom_4_15949396 | Ca_desi_chr04      | 15949396                       | [A/T]       | NA                                         |
| Ca_Desi_Chrom_4_15957911 | Ca_desi_chr04      | 15957911                       | [T/A]       | NA                                         |
| Ca_Desi_Chrom_4_15957917 | Ca_desi_chr04      | 15957917                       | [A/G]       | NA                                         |
| Ca_Desi_Chrom_4_15957923 | Ca_desi_chr04      | 15957923                       | [C/A]       | NA                                         |
| Ca_Desi_Chrom_4_15957925 | Ca_desi_chr04      | 15957925                       | [G/A]       | NA                                         |
| Ca_Desi_Chrom_4_15957928 | Ca_desi_chr04      | 15957928                       | [G/A]       | NA                                         |
| Ca_Desi_Chrom_4_15957942 | Ca_desi_chr04      | 15957942                       | [G/A]       | NA                                         |
| Ca_Desi_Chrom_4_16009843 | Ca_desi_chr04      | 16009843                       | [T/C]       | NA                                         |
| Ca_Desi_Chrom_4_16009846 | Ca_desi_chr04      | 16009846                       | [A/C]       | NA                                         |
| Ca_Desi_Chrom_4_16009850 | Ca_desi_chr04      | 16009850                       | [A/G]       | NA                                         |
| Ca_Desi_Chrom_4_16009855 | Ca_desi_chr04      | 16009855                       | [T/C]       | NA                                         |
| Ca_Desi_Chrom_4_16009858 | Ca_desi_chr04      | 16009858                       | [A/C]       | NA                                         |



| <b>SNP IDs</b>          | <b>Chromosomes</b> | <b>Physical positions (bp)</b> | <b>SNPs</b> | <b>NCBI SNPdb accession IDs (NCBI_ss#)</b> |
|-------------------------|--------------------|--------------------------------|-------------|--------------------------------------------|
| Ca_Desig_Chr_4_16009861 | Ca_desig_chr04     | 16009861                       | [A/C]       | NA                                         |
| Ca_Desig_Chr_4_16009868 | Ca_desig_chr04     | 16009868                       | [T/C]       | NA                                         |
| Ca_Desig_Chr_4_16043495 | Ca_desig_chr04     | 16043495                       | [T/C]       | NA                                         |
| Ca_Desig_Chr_4_16061775 | Ca_desig_chr04     | 16061775                       | [T/C]       | NA                                         |
| Ca_Desig_Chr_4_16061787 | Ca_desig_chr04     | 16061787                       | [T/G]       | NA                                         |
| Ca_Desig_Chr_4_16079978 | Ca_desig_chr04     | 16079978                       | [T/A]       | NA                                         |
| Ca_Desig_Chr_4_16080709 | Ca_desig_chr04     | 16080709                       | [T/A]       | NA                                         |
| Ca_Desig_Chr_4_16140061 | Ca_desig_chr04     | 16140061                       | [T/C]       | NA                                         |
| Ca_Desig_Chr_4_16150551 | Ca_desig_chr04     | 16150551                       | [A/G]       | NA                                         |
| Ca_Desig_Chr_4_16150553 | Ca_desig_chr04     | 16150553                       | [T/A]       | NA                                         |
| Ca_Desig_Chr_4_16150576 | Ca_desig_chr04     | 16150576                       | [A/G]       | NA                                         |
| Ca_Desig_Chr_4_16150578 | Ca_desig_chr04     | 16150578                       | [A/G]       | NA                                         |
| Ca_Desig_Chr_4_16150587 | Ca_desig_chr04     | 16150587                       | [T/C]       | NA                                         |
| Ca_Desig_Chr_4_16150599 | Ca_desig_chr04     | 16150599                       | [T/C]       | NA                                         |
| Ca_Desig_Chr_4_16174574 | Ca_desig_chr04     | 16174574                       | [T/A]       | NA                                         |
| Ca_Desig_Chr_4_16176556 | Ca_desig_chr04     | 16176556                       | [A/C]       | NA                                         |
| Ca_Desig_Chr_4_16176557 | Ca_desig_chr04     | 16176557                       | [G/T]       | NA                                         |
| Ca_Desig_Chr_4_16206300 | Ca_desig_chr04     | 16206300                       | [A/T]       | NA                                         |
| Ca_Desig_Chr_4_16206301 | Ca_desig_chr04     | 16206301                       | [A/C]       | NA                                         |
| Ca_Desig_Chr_4_16206302 | Ca_desig_chr04     | 16206302                       | [G/T]       | NA                                         |
| Ca_Desig_Chr_4_16206544 | Ca_desig_chr04     | 16206544                       | [T/G]       | NA                                         |
| Ca_Desig_Chr_4_16206693 | Ca_desig_chr04     | 16206693                       | [T/G]       | NA                                         |
| Ca_Desig_Chr_4_16219656 | Ca_desig_chr04     | 16219656                       | [A/G]       | NA                                         |
| Ca_Desig_Chr_4_16219684 | Ca_desig_chr04     | 16219684                       | [G/A]       | NA                                         |
| Ca_Desig_Chr_4_16219688 | Ca_desig_chr04     | 16219688                       | [T/C]       | NA                                         |
| Ca_Desig_Chr_4_16219795 | Ca_desig_chr04     | 16219795                       | [A/C]       | NA                                         |
| Ca_Desig_Chr_4_16230591 | Ca_desig_chr04     | 16230591                       | [T/G]       | NA                                         |
| Ca_Desig_Chr_4_16230610 | Ca_desig_chr04     | 16230610                       | [T/G]       | NA                                         |
| Ca_Desig_Chr_4_16235291 | Ca_desig_chr04     | 16235291                       | [T/G]       | NA                                         |
| Ca_Desig_Chr_4_16235463 | Ca_desig_chr04     | 16235463                       | [A/C]       | NA                                         |
| Ca_Desig_Chr_4_16237454 | Ca_desig_chr04     | 16237454                       | [A/C]       | NA                                         |
| Ca_Desig_Chr_4_16289101 | Ca_desig_chr04     | 16289101                       | [A/G]       | NA                                         |
| Ca_Desig_Chr_4_16318794 | Ca_desig_chr04     | 16318794                       | [C/T]       | NA                                         |
| Ca_Desig_Chr_4_16318820 | Ca_desig_chr04     | 16318820                       | [G/A]       | NA                                         |

| <b>SNP IDs</b>          | <b>Chromosomes</b> | <b>Physical positions (bp)</b> | <b>SNPs</b> | <b>NCBI SNPdb accession IDs (NCBI_ss#)</b> |
|-------------------------|--------------------|--------------------------------|-------------|--------------------------------------------|
| Ca_Desig_Chr_4_16362421 | Ca_desig_chr04     | 16362421                       | [T/G]       | NA                                         |
| Ca_Desig_Chr_4_16362424 | Ca_desig_chr04     | 16362424                       | [T/G]       | NA                                         |
| Ca_Desig_Chr_4_16362429 | Ca_desig_chr04     | 16362429                       | [A/G]       | NA                                         |
| Ca_Desig_Chr_4_16551106 | Ca_desig_chr04     | 16551106                       | [A/G]       | NA                                         |
| Ca_Desig_Chr_4_16551129 | Ca_desig_chr04     | 16551129                       | [T/C]       | NA                                         |
| Ca_Desig_Chr_4_16557296 | Ca_desig_chr04     | 16557296                       | [A/G]       | NA                                         |
| Ca_Desig_Chr_4_16557304 | Ca_desig_chr04     | 16557304                       | [A/T]       | NA                                         |
| Ca_Desig_Chr_4_16557332 | Ca_desig_chr04     | 16557332                       | [A/G]       | NA                                         |
| Ca_Desig_Chr_4_16591976 | Ca_desig_chr04     | 16591976                       | [A/C]       | NA                                         |
| Ca_Desig_Chr_4_16674009 | Ca_desig_chr04     | 16674009                       | [T/C]       | NA                                         |
| Ca_Desig_Chr_4_16674012 | Ca_desig_chr04     | 16674012                       | [T/C]       | NA                                         |
| Ca_Desig_Chr_4_16674017 | Ca_desig_chr04     | 16674017                       | [T/C]       | NA                                         |
| Ca_Desig_Chr_4_16674023 | Ca_desig_chr04     | 16674023                       | [T/C]       | NA                                         |
| Ca_Desig_Chr_4_16674028 | Ca_desig_chr04     | 16674028                       | [T/C]       | NA                                         |
| Ca_Desig_Chr_4_16674030 | Ca_desig_chr04     | 16674030                       | [T/C]       | NA                                         |
| Ca_Desig_Chr_4_16674032 | Ca_desig_chr04     | 16674032                       | [A/G]       | NA                                         |
| Ca_Desig_Chr_4_16674037 | Ca_desig_chr04     | 16674037                       | [A/G]       | NA                                         |
| Ca_Desig_Chr_4_16674040 | Ca_desig_chr04     | 16674040                       | [T/C]       | NA                                         |
| Ca_Desig_Chr_4_16674041 | Ca_desig_chr04     | 16674041                       | [C/T]       | NA                                         |
| Ca_Desig_Chr_4_16674042 | Ca_desig_chr04     | 16674042                       | [T/C]       | NA                                         |
| Ca_Desig_Chr_4_16674047 | Ca_desig_chr04     | 16674047                       | [T/C]       | NA                                         |
| Ca_Desig_Chr_4_16674050 | Ca_desig_chr04     | 16674050                       | [T/C]       | NA                                         |
| Ca_Desig_Chr_4_16674052 | Ca_desig_chr04     | 16674052                       | [T/C]       | NA                                         |
| Ca_Desig_Chr_4_16676187 | Ca_desig_chr04     | 16676187                       | [A/C]       | NA                                         |
| Ca_Desig_Chr_4_16676201 | Ca_desig_chr04     | 16676201                       | [A/G]       | NA                                         |
| Ca_Desig_Chr_4_16706739 | Ca_desig_chr04     | 16706739                       | [A/C]       | NA                                         |
| Ca_Desig_Chr_4_16724916 | Ca_desig_chr04     | 16724916                       | [A/C]       | NA                                         |
| Ca_Desig_Chr_4_16730046 | Ca_desig_chr04     | 16730046                       | [A/T]       | NA                                         |
| Ca_Desig_Chr_4_16741314 | Ca_desig_chr04     | 16741314                       | [A/G]       | NA                                         |
| Ca_Desig_Chr_4_16741317 | Ca_desig_chr04     | 16741317                       | [A/G]       | NA                                         |
| Ca_Desig_Chr_4_16741327 | Ca_desig_chr04     | 16741327                       | [A/T]       | NA                                         |
| Ca_Desig_Chr_4_16741344 | Ca_desig_chr04     | 16741344                       | [A/G]       | NA                                         |
| Ca_Desig_Chr_4_16741350 | Ca_desig_chr04     | 16741350                       | [A/G]       | NA                                         |
| Ca_Desig_Chr_4_16741368 | Ca_desig_chr04     | 16741368                       | [T/A]       | NA                                         |

| <b>SNP IDs</b>           | <b>Chromosomes</b> | <b>Physical positions (bp)</b> | <b>SNPs</b> | <b>NCBI SNPdb accession IDs (NCBI_ss#)</b> |
|--------------------------|--------------------|--------------------------------|-------------|--------------------------------------------|
| Ca_Desi_Chrom_4_16741428 | Ca_desi_chr04      | 16741428                       | [A/T]       | NA                                         |
| Ca_Desi_Chrom_4_16741429 | Ca_desi_chr04      | 16741429                       | [T/A]       | NA                                         |
| Ca_Desi_Chrom_4_16741430 | Ca_desi_chr04      | 16741430                       | [T/C]       | NA                                         |
| Ca_Desi_Chrom_4_16744614 | Ca_desi_chr04      | 16744614                       | [T/C]       | NA                                         |
| Ca_Desi_Chrom_4_16744617 | Ca_desi_chr04      | 16744617                       | [A/G]       | NA                                         |
| Ca_Desi_Chrom_4_16744629 | Ca_desi_chr04      | 16744629                       | [A/G]       | NA                                         |
| Ca_Desi_Chrom_4_16744634 | Ca_desi_chr04      | 16744634                       | [A/G]       | NA                                         |
| Ca_Desi_Chrom_4_16744648 | Ca_desi_chr04      | 16744648                       | [T/C]       | NA                                         |
| Ca_Desi_Chrom_4_16744665 | Ca_desi_chr04      | 16744665                       | [T/C]       | NA                                         |
| Ca_Desi_Chrom_4_16744669 | Ca_desi_chr04      | 16744669                       | [A/G]       | NA                                         |
| Ca_Desi_Chrom_4_16744676 | Ca_desi_chr04      | 16744676                       | [T/C]       | NA                                         |
| Ca_Desi_Chrom_4_16744678 | Ca_desi_chr04      | 16744678                       | [T/C]       | NA                                         |
| Ca_Desi_Chrom_4_16744683 | Ca_desi_chr04      | 16744683                       | [A/G]       | NA                                         |
| Ca_Desi_Chrom_4_16770730 | Ca_desi_chr04      | 16770730                       | [A/G]       | NA                                         |
| Ca_Desi_Chrom_4_16791446 | Ca_desi_chr04      | 16791446                       | [A/C]       | NA                                         |
| Ca_Desi_Chrom_4_16791504 | Ca_desi_chr04      | 16791504                       | [T/A]       | NA                                         |
| Ca_Desi_Chrom_4_16791513 | Ca_desi_chr04      | 16791513                       | [A/G]       | NA                                         |
| Ca_Desi_Chrom_4_16791541 | Ca_desi_chr04      | 16791541                       | [A/C]       | NA                                         |
| Ca_Desi_Chrom_4_16791666 | Ca_desi_chr04      | 16791666                       | [A/C]       | NA                                         |
| Ca_Desi_Chrom_4_16795332 | Ca_desi_chr04      | 16795332                       | [A/C]       | NA                                         |
| Ca_Desi_Chrom_4_16795366 | Ca_desi_chr04      | 16795366                       | [A/C]       | NA                                         |
| Ca_Desi_Chrom_4_16795500 | Ca_desi_chr04      | 16795500                       | [G/T]       | NA                                         |
| Ca_Desi_Chrom_4_16795501 | Ca_desi_chr04      | 16795501                       | [A/C]       | NA                                         |
| Ca_Desi_Chrom_4_16795502 | Ca_desi_chr04      | 16795502                       | [G/T]       | NA                                         |
| Ca_Desi_Chrom_4_16802460 | Ca_desi_chr04      | 16802460                       | [C/G]       | NA                                         |
| Ca_Desi_Chrom_4_16818312 | Ca_desi_chr04      | 16818312                       | [T/A]       | NA                                         |
| Ca_Desi_Chrom_4_16827801 | Ca_desi_chr04      | 16827801                       | [A/C]       | NA                                         |
| Ca_Desi_Chrom_4_16827824 | Ca_desi_chr04      | 16827824                       | [T/G]       | NA                                         |
| Ca_Desi_Chrom_4_16827840 | Ca_desi_chr04      | 16827840                       | [A/T]       | NA                                         |
| Ca_Desi_Chrom_4_16894642 | Ca_desi_chr04      | 16894642                       | [A/C]       | NA                                         |
| Ca_Desi_Chrom_4_16900160 | Ca_desi_chr04      | 16900160                       | [T/C]       | NA                                         |
| Ca_Desi_Chrom_4_16900349 | Ca_desi_chr04      | 16900349                       | [A/G]       | NA                                         |
| Ca_Desi_Chrom_4_16907164 | Ca_desi_chr04      | 16907164                       | [A/C]       | NA                                         |
| Ca_Desi_Chrom_4_16949996 | Ca_desi_chr04      | 16949996                       | [A/C]       | NA                                         |

| <b>SNP IDs</b>           | <b>Chromosomes</b> | <b>Physical positions (bp)</b> | <b>SNPs</b> | <b>NCBI SNPdb accession IDs (NCBI_ss#)</b> |
|--------------------------|--------------------|--------------------------------|-------------|--------------------------------------------|
| Ca_Desi_Chrom_4_16949999 | Ca_desi_chr04      | 16949999                       | [A/G]       | NA                                         |
| Ca_Desi_Chrom_4_16950003 | Ca_desi_chr04      | 16950003                       | [T/C]       | NA                                         |
| Ca_Desi_Chrom_4_16950004 | Ca_desi_chr04      | 16950004                       | [C/T]       | NA                                         |
| Ca_Desi_Chrom_4_16950056 | Ca_desi_chr04      | 16950056                       | [C/T]       | NA                                         |
| Ca_Desi_Chrom_4_17016503 | Ca_desi_chr04      | 17016503                       | [T/C]       | NA                                         |
| Ca_Desi_Chrom_4_17016536 | Ca_desi_chr04      | 17016536                       | [T/C]       | NA                                         |
| Ca_Desi_Chrom_4_17026018 | Ca_desi_chr04      | 17026018                       | [T/G]       | NA                                         |
| Ca_Desi_Chrom_4_17026051 | Ca_desi_chr04      | 17026051                       | [A/T]       | NA                                         |
| Ca_Desi_Chrom_4_17026071 | Ca_desi_chr04      | 17026071                       | [A/T]       | NA                                         |
| Ca_Desi_Chrom_4_18043880 | Ca_desi_chr04      | 18043880                       | [A/C]       | NA                                         |
| Ca_Desi_Chrom_4_18043884 | Ca_desi_chr04      | 18043884                       | [A/C]       | NA                                         |
| Ca_Desi_Chrom_4_18043974 | Ca_desi_chr04      | 18043974                       | [A/G]       | NA                                         |
| Ca_Desi_Chrom_4_18043980 | Ca_desi_chr04      | 18043980                       | [A/G]       | NA                                         |
| Ca_Desi_Chrom_4_18043989 | Ca_desi_chr04      | 18043989                       | [A/C]       | NA                                         |
| Ca_Desi_Chrom_4_18044043 | Ca_desi_chr04      | 18044043                       | [A/G]       | NA                                         |
| Ca_Desi_Chrom_4_18044067 | Ca_desi_chr04      | 18044067                       | [A/G]       | NA                                         |
| Ca_Desi_Chrom_4_18063839 | Ca_desi_chr04      | 18063839                       | [A/G]       | NA                                         |
| Ca_Desi_Chrom_4_18064756 | Ca_desi_chr04      | 18064756                       | [A/G]       | NA                                         |
| Ca_Desi_Chrom_4_18064758 | Ca_desi_chr04      | 18064758                       | [G/T]       | NA                                         |
| Ca_Desi_Chrom_4_18064759 | Ca_desi_chr04      | 18064759                       | [A/C]       | NA                                         |
| Ca_Desi_Chrom_4_18064760 | Ca_desi_chr04      | 18064760                       | [G/T]       | NA                                         |
| Ca_Desi_Chrom_4_18064793 | Ca_desi_chr04      | 18064793                       | [A/G]       | NA                                         |
| Ca_Desi_Chrom_4_18064806 | Ca_desi_chr04      | 18064806                       | [A/G]       | NA                                         |
| Ca_Desi_Chrom_4_18117934 | Ca_desi_chr04      | 18117934                       | [A/G]       | NA                                         |
| Ca_Desi_Chrom_4_18148828 | Ca_desi_chr04      | 18148828                       | [T/A]       | NA                                         |
| Ca_Desi_Chrom_4_18198384 | Ca_desi_chr04      | 18198384                       | [A/G]       | NA                                         |
| Ca_Desi_Chrom_4_18198406 | Ca_desi_chr04      | 18198406                       | [A/G]       | NA                                         |
| Ca_Desi_Chrom_4_18198419 | Ca_desi_chr04      | 18198419                       | [G/A]       | NA                                         |
| Ca_Desi_Chrom_4_18198420 | Ca_desi_chr04      | 18198420                       | [A/G]       | NA                                         |
| Ca_Desi_Chrom_4_18198434 | Ca_desi_chr04      | 18198434                       | [T/C]       | NA                                         |
| Ca_Desi_Chrom_4_18198440 | Ca_desi_chr04      | 18198440                       | [T/C]       | NA                                         |
| Ca_Desi_Chrom_4_18240126 | Ca_desi_chr04      | 18240126                       | [A/T]       | NA                                         |
| Ca_Desi_Chrom_4_18280158 | Ca_desi_chr04      | 18280158                       | [A/C]       | NA                                         |
| Ca_Desi_Chrom_4_18291886 | Ca_desi_chr04      | 18291886                       | [A/C]       | NA                                         |

| <b>SNP IDs</b>          | <b>Chromosomes</b> | <b>Physical positions (bp)</b> | <b>SNPs</b> | <b>NCBI SNPdb accession IDs (NCBI_ss#)</b> |
|-------------------------|--------------------|--------------------------------|-------------|--------------------------------------------|
| Ca_Desig_Chr_4_18319776 | Ca_desig_chr04     | 18319776                       | [A/C]       | NA                                         |
| Ca_Desig_Chr_4_18319783 | Ca_desig_chr04     | 18319783                       | [A/G]       | NA                                         |
| Ca_Desig_Chr_4_18319792 | Ca_desig_chr04     | 18319792                       | [T/C]       | NA                                         |
| Ca_Desig_Chr_4_18319797 | Ca_desig_chr04     | 18319797                       | [T/C]       | NA                                         |
| Ca_Desig_Chr_4_18319809 | Ca_desig_chr04     | 18319809                       | [T/A]       | NA                                         |
| Ca_Desig_Chr_4_18321956 | Ca_desig_chr04     | 18321956                       | [T/A]       | NA                                         |
| Ca_Desig_Chr_4_18322603 | Ca_desig_chr04     | 18322603                       | [A/G]       | NA                                         |
| Ca_Desig_Chr_4_18351480 | Ca_desig_chr04     | 18351480                       | [T/G]       | NA                                         |
| Ca_Desig_Chr_4_18487120 | Ca_desig_chr04     | 18487120                       | [T/C]       | NA                                         |
| Ca_Desig_Chr_4_18487130 | Ca_desig_chr04     | 18487130                       | [A/T]       | NA                                         |
| Ca_Desig_Chr_4_18487141 | Ca_desig_chr04     | 18487141                       | [T/G]       | NA                                         |
| Ca_Desig_Chr_4_18522023 | Ca_desig_chr04     | 18522023                       | [T/G]       | NA                                         |
| Ca_Desig_Chr_4_18632703 | Ca_desig_chr04     | 18632703                       | [T/G]       | NA                                         |
| Ca_Desig_Chr_4_18643701 | Ca_desig_chr04     | 18643701                       | [A/G]       | NA                                         |
| Ca_Desig_Chr_4_18643704 | Ca_desig_chr04     | 18643704                       | [T/C]       | NA                                         |
| Ca_Desig_Chr_4_18643718 | Ca_desig_chr04     | 18643718                       | [T/C]       | NA                                         |
| Ca_Desig_Chr_4_18645215 | Ca_desig_chr04     | 18645215                       | [A/G]       | NA                                         |
| Ca_Desig_Chr_4_18661657 | Ca_desig_chr04     | 18661657                       | [A/G]       | NA                                         |
| Ca_Desig_Chr_4_18663062 | Ca_desig_chr04     | 18663062                       | [T/C]       | NA                                         |
| Ca_Desig_Chr_4_18663080 | Ca_desig_chr04     | 18663080                       | [T/C]       | NA                                         |
| Ca_Desig_Chr_4_18687613 | Ca_desig_chr04     | 18687613                       | [T/G]       | NA                                         |
| Ca_Desig_Chr_4_18778202 | Ca_desig_chr04     | 18778202                       | [A/C]       | NA                                         |
| Ca_Desig_Chr_4_18778215 | Ca_desig_chr04     | 18778215                       | [T/A]       | NA                                         |
| Ca_Desig_Chr_4_18790760 | Ca_desig_chr04     | 18790760                       | [G/A]       | NA                                         |
| Ca_Desig_Chr_4_18798562 | Ca_desig_chr04     | 18798562                       | [C/A]       | NA                                         |
| Ca_Desig_Chr_4_18798674 | Ca_desig_chr04     | 18798674                       | [A/C]       | NA                                         |
| Ca_Desig_Chr_4_18821576 | Ca_desig_chr04     | 18821576                       | [T/G]       | NA                                         |
| Ca_Desig_Chr_4_18846803 | Ca_desig_chr04     | 18846803                       | [A/C]       | NA                                         |
| Ca_Desig_Chr_4_18847969 | Ca_desig_chr04     | 18847969                       | [A/G]       | NA                                         |
| Ca_Desig_Chr_4_18847971 | Ca_desig_chr04     | 18847971                       | [T/C]       | NA                                         |
| Ca_Desig_Chr_4_18847981 | Ca_desig_chr04     | 18847981                       | [A/T]       | NA                                         |
| Ca_Desig_Chr_4_18848005 | Ca_desig_chr04     | 18848005                       | [A/T]       | NA                                         |
| Ca_Desig_Chr_4_18855469 | Ca_desig_chr04     | 18855469                       | [T/G]       | NA                                         |
| Ca_Desig_Chr_4_18876605 | Ca_desig_chr04     | 18876605                       | [A/C]       | NA                                         |

| <b>SNP IDs</b>           | <b>Chromosomes</b> | <b>Physical positions (bp)</b> | <b>SNPs</b> | <b>NCBI SNPdb accession IDs (NCBI_ss#)</b> |
|--------------------------|--------------------|--------------------------------|-------------|--------------------------------------------|
| Ca_Desi_Chrom_4_18921404 | Ca_desi_chr04      | 18921404                       | [A/C]       | NA                                         |
| Ca_Desi_Chrom_4_18925847 | Ca_desi_chr04      | 18925847                       | [T/C]       | NA                                         |
| Ca_Desi_Chrom_4_18925851 | Ca_desi_chr04      | 18925851                       | [T/C]       | NA                                         |
| Ca_Desi_Chrom_4_18925861 | Ca_desi_chr04      | 18925861                       | [T/C]       | NA                                         |
| Ca_Desi_Chrom_4_18925866 | Ca_desi_chr04      | 18925866                       | [A/G]       | NA                                         |
| Ca_Desi_Chrom_4_18925873 | Ca_desi_chr04      | 18925873                       | [A/G]       | NA                                         |
| Ca_Desi_Chrom_4_18925879 | Ca_desi_chr04      | 18925879                       | [T/C]       | NA                                         |
| Ca_Desi_Chrom_4_18925881 | Ca_desi_chr04      | 18925881                       | [T/C]       | NA                                         |
| Ca_Desi_Chrom_4_18925905 | Ca_desi_chr04      | 18925905                       | [T/C]       | NA                                         |
| Ca_Desi_Chrom_4_18929073 | Ca_desi_chr04      | 18929073                       | [T/G]       | NA                                         |
| Ca_Desi_Chrom_4_18929079 | Ca_desi_chr04      | 18929079                       | [T/G]       | NA                                         |
| Ca_Desi_Chrom_4_18929106 | Ca_desi_chr04      | 18929106                       | [T/C]       | NA                                         |
| Ca_Desi_Chrom_4_18929115 | Ca_desi_chr04      | 18929115                       | [T/G]       | NA                                         |
| Ca_Desi_Chrom_4_18929121 | Ca_desi_chr04      | 18929121                       | [A/G]       | NA                                         |
| Ca_Desi_Chrom_4_19026642 | Ca_desi_chr04      | 19026642                       | [C/A]       | NA                                         |
| Ca_Desi_Chrom_4_19026644 | Ca_desi_chr04      | 19026644                       | [C/A]       | NA                                         |
| Ca_Desi_Chrom_4_19026645 | Ca_desi_chr04      | 19026645                       | [C/T]       | NA                                         |
| Ca_Desi_Chrom_4_20306540 | Ca_desi_chr04      | 20306540                       | [A/T]       | NA                                         |
| Ca_Desi_Chrom_4_20306561 | Ca_desi_chr04      | 20306561                       | [T/G]       | NA                                         |
| Ca_Desi_Chrom_4_20306564 | Ca_desi_chr04      | 20306564                       | [A/C]       | NA                                         |
| Ca_Desi_Chrom_4_20317283 | Ca_desi_chr04      | 20317283                       | [T/G]       | NA                                         |
| Ca_Desi_Chrom_4_20331123 | Ca_desi_chr04      | 20331123                       | [T/C]       | NA                                         |
| Ca_Desi_Chrom_4_20331138 | Ca_desi_chr04      | 20331138                       | [A/C]       | NA                                         |
| Ca_Desi_Chrom_4_20331175 | Ca_desi_chr04      | 20331175                       | [G/C]       | NA                                         |
| Ca_Desi_Chrom_4_20331211 | Ca_desi_chr04      | 20331211                       | [A/C]       | NA                                         |
| Ca_Desi_Chrom_4_20331255 | Ca_desi_chr04      | 20331255                       | [A/G]       | NA                                         |
| Ca_Desi_Chrom_4_20360811 | Ca_desi_chr04      | 20360811                       | [T/G]       | NA                                         |
| Ca_Desi_Chrom_4_20360852 | Ca_desi_chr04      | 20360852                       | [T/C]       | NA                                         |
| Ca_Desi_Chrom_4_20386426 | Ca_desi_chr04      | 20386426                       | [T/G]       | NA                                         |
| Ca_Desi_Chrom_4_20386458 | Ca_desi_chr04      | 20386458                       | [C/A]       | NA                                         |
| Ca_Desi_Chrom_4_20386459 | Ca_desi_chr04      | 20386459                       | [A/C]       | NA                                         |
| Ca_Desi_Chrom_4_20386460 | Ca_desi_chr04      | 20386460                       | [A/G]       | NA                                         |
| Ca_Desi_Chrom_4_20386465 | Ca_desi_chr04      | 20386465                       | [G/A]       | NA                                         |
| Ca_Desi_Chrom_4_20386548 | Ca_desi_chr04      | 20386548                       | [A/G]       | NA                                         |

| <b>SNP IDs</b>           | <b>Chromosomes</b> | <b>Physical positions (bp)</b> | <b>SNPs</b> | <b>NCBI SNPdb accession IDs (NCBI_ss#)</b> |
|--------------------------|--------------------|--------------------------------|-------------|--------------------------------------------|
| Ca_Desi_Chrom_4_20386550 | Ca_desi_chr04      | 20386550                       | [T/G]       | NA                                         |
| Ca_Desi_Chrom_4_20388102 | Ca_desi_chr04      | 20388102                       | [T/G]       | NA                                         |
| Ca_Desi_Chrom_4_20397473 | Ca_desi_chr04      | 20397473                       | [A/C]       | NA                                         |
| Ca_Desi_Chrom_4_20397475 | Ca_desi_chr04      | 20397475                       | [C/T]       | NA                                         |
| Ca_Desi_Chrom_4_20412433 | Ca_desi_chr04      | 20412433                       | [A/T]       | NA                                         |
| Ca_Desi_Chrom_4_20412441 | Ca_desi_chr04      | 20412441                       | [T/G]       | NA                                         |
| Ca_Desi_Chrom_4_20430508 | Ca_desi_chr04      | 20430508                       | [C/T]       | NA                                         |
| Ca_Desi_Chrom_4_20507409 | Ca_desi_chr04      | 20507409                       | [A/G]       | NA                                         |
| Ca_Desi_Chrom_4_20507419 | Ca_desi_chr04      | 20507419                       | [T/C]       | NA                                         |
| Ca_Desi_Chrom_4_20507431 | Ca_desi_chr04      | 20507431                       | [T/C]       | NA                                         |
| Ca_Desi_Chrom_4_20507436 | Ca_desi_chr04      | 20507436                       | [A/G]       | NA                                         |
| Ca_Desi_Chrom_4_20507439 | Ca_desi_chr04      | 20507439                       | [T/C]       | NA                                         |
| Ca_Desi_Chrom_4_20507457 | Ca_desi_chr04      | 20507457                       | [T/C]       | NA                                         |
| Ca_Desi_Chrom_4_20507459 | Ca_desi_chr04      | 20507459                       | [C/T]       | NA                                         |
| Ca_Desi_Chrom_4_20507462 | Ca_desi_chr04      | 20507462                       | [T/C]       | NA                                         |
| Ca_Desi_Chrom_4_20507477 | Ca_desi_chr04      | 20507477                       | [A/G]       | NA                                         |
| Ca_Desi_Chrom_4_20557113 | Ca_desi_chr04      | 20557113                       | [A/G]       | NA                                         |
| Ca_Desi_Chrom_4_20557160 | Ca_desi_chr04      | 20557160                       | [A/C]       | NA                                         |
| Ca_Desi_Chrom_4_20557215 | Ca_desi_chr04      | 20557215                       | [A/G]       | NA                                         |
| Ca_Desi_Chrom_4_20557218 | Ca_desi_chr04      | 20557218                       | [T/G]       | NA                                         |
| Ca_Desi_Chrom_4_20557281 | Ca_desi_chr04      | 20557281                       | [A/T]       | NA                                         |
| Ca_Desi_Chrom_4_20574069 | Ca_desi_chr04      | 20574069                       | [T/C]       | NA                                         |
| Ca_Desi_Chrom_4_20574072 | Ca_desi_chr04      | 20574072                       | [A/C]       | NA                                         |
| Ca_Desi_Chrom_4_20585908 | Ca_desi_chr04      | 20585908                       | [T/C]       | NA                                         |
| Ca_Desi_Chrom_4_20585933 | Ca_desi_chr04      | 20585933                       | [T/C]       | NA                                         |
| Ca_Desi_Chrom_4_20585942 | Ca_desi_chr04      | 20585942                       | [T/C]       | NA                                         |
| Ca_Desi_Chrom_4_20587971 | Ca_desi_chr04      | 20587971                       | [T/G]       | NA                                         |
| Ca_Desi_Chrom_4_20588491 | Ca_desi_chr04      | 20588491                       | [T/G]       | NA                                         |
| Ca_Desi_Chrom_4_20588528 | Ca_desi_chr04      | 20588528                       | [A/C]       | NA                                         |
| Ca_Desi_Chrom_4_20633483 | Ca_desi_chr04      | 20633483                       | [A/C]       | NA                                         |
| Ca_Desi_Chrom_4_20643346 | Ca_desi_chr04      | 20643346                       | [T/C]       | NA                                         |
| Ca_Desi_Chrom_4_20643353 | Ca_desi_chr04      | 20643353                       | [T/C]       | NA                                         |
| Ca_Desi_Chrom_4_20643378 | Ca_desi_chr04      | 20643378                       | [A/C]       | NA                                         |
| Ca_Desi_Chrom_4_20757296 | Ca_desi_chr04      | 20757296                       | [A/C]       | NA                                         |

| <b>SNP IDs</b>           | <b>Chromosomes</b> | <b>Physical positions (bp)</b> | <b>SNPs</b> | <b>NCBI SNPdb accession IDs (NCBI_ss#)</b> |
|--------------------------|--------------------|--------------------------------|-------------|--------------------------------------------|
| Ca_Desi_Chrom_4_20776317 | Ca_desi_chrom04    | 20776317                       | [T/C]       | NA                                         |
| Ca_Desi_Chrom_4_20833510 | Ca_desi_chrom04    | 20833510                       | [T/C]       | NA                                         |
| Ca_Desi_Chrom_4_20839259 | Ca_desi_chrom04    | 20839259                       | [A/G]       | NA                                         |
| Ca_Desi_Chrom_4_20841182 | Ca_desi_chrom04    | 20841182                       | [A/C]       | NA                                         |
| Ca_Desi_Chrom_4_20855255 | Ca_desi_chrom04    | 20855255                       | [T/C]       | NA                                         |
| Ca_Desi_Chrom_4_20855302 | Ca_desi_chrom04    | 20855302                       | [T/C]       | NA                                         |
| Ca_Desi_Chrom_4_20855332 | Ca_desi_chrom04    | 20855332                       | [A/C]       | NA                                         |
| Ca_Desi_Chrom_4_20855381 | Ca_desi_chrom04    | 20855381                       | [A/G]       | NA                                         |
| Ca_Desi_Chrom_4_20870761 | Ca_desi_chrom04    | 20870761                       | [T/C]       | NA                                         |
| Ca_Desi_Chrom_4_20870767 | Ca_desi_chrom04    | 20870767                       | [A/T]       | NA                                         |
| Ca_Desi_Chrom_4_20878436 | Ca_desi_chrom04    | 20878436                       | [A/G]       | NA                                         |
| Ca_Desi_Chrom_4_20878440 | Ca_desi_chrom04    | 20878440                       | [T/G]       | NA                                         |
| Ca_Desi_Chrom_4_20878441 | Ca_desi_chrom04    | 20878441                       | [A/C]       | NA                                         |
| Ca_Desi_Chrom_4_20878459 | Ca_desi_chrom04    | 20878459                       | [A/T]       | NA                                         |
| Ca_Desi_Chrom_4_20878471 | Ca_desi_chrom04    | 20878471                       | [T/C]       | NA                                         |
| Ca_Desi_Chrom_4_20879043 | Ca_desi_chrom04    | 20879043                       | [T/C]       | NA                                         |
| Ca_Desi_Chrom_4_20879049 | Ca_desi_chrom04    | 20879049                       | [A/T]       | NA                                         |
| Ca_Desi_Chrom_4_20905526 | Ca_desi_chrom04    | 20905526                       | [A/G]       | NA                                         |
| Ca_Desi_Chrom_4_20905539 | Ca_desi_chrom04    | 20905539                       | [G/C]       | NA                                         |
| Ca_Desi_Chrom_4_20905544 | Ca_desi_chrom04    | 20905544                       | [G/C]       | NA                                         |
| Ca_Desi_Chrom_4_20905555 | Ca_desi_chrom04    | 20905555                       | [A/C]       | NA                                         |
| Ca_Desi_Chrom_4_20907952 | Ca_desi_chrom04    | 20907952                       | [T/G]       | NA                                         |
| Ca_Desi_Chrom_4_20907973 | Ca_desi_chrom04    | 20907973                       | [T/G]       | NA                                         |
| Ca_Desi_Chrom_4_20908040 | Ca_desi_chrom04    | 20908040                       | [A/G]       | NA                                         |
| Ca_Desi_Chrom_4_20908047 | Ca_desi_chrom04    | 20908047                       | [A/C]       | NA                                         |
| Ca_Desi_Chrom_4_20975702 | Ca_desi_chrom04    | 20975702                       | [A/C]       | NA                                         |
| Ca_Desi_Chrom_4_20975750 | Ca_desi_chrom04    | 20975750                       | [T/C]       | NA                                         |
| Ca_Desi_Chrom_4_20975760 | Ca_desi_chrom04    | 20975760                       | [A/G]       | NA                                         |
| Ca_Desi_Chrom_4_20975772 | Ca_desi_chrom04    | 20975772                       | [A/G]       | NA                                         |
| Ca_Desi_Chrom_4_20975774 | Ca_desi_chrom04    | 20975774                       | [G/C]       | NA                                         |
| Ca_Desi_Chrom_4_20975800 | Ca_desi_chrom04    | 20975800                       | [T/C]       | NA                                         |
| Ca_Desi_Chrom_4_20975802 | Ca_desi_chrom04    | 20975802                       | [A/G]       | NA                                         |
| Ca_Desi_Chrom_4_20975803 | Ca_desi_chrom04    | 20975803                       | [A/G]       | NA                                         |
| Ca_Desi_Chrom_4_20975804 | Ca_desi_chrom04    | 20975804                       | [A/C]       | NA                                         |



| <b>SNP IDs</b>          | <b>Chromosomes</b> | <b>Physical positions (bp)</b> | <b>SNPs</b> | <b>NCBI SNPdb accession IDs (NCBI_ss#)</b> |
|-------------------------|--------------------|--------------------------------|-------------|--------------------------------------------|
| Ca_Desig_Chr_4_20975815 | Ca_desig_chr04     | 20975815                       | [T/C]       | NA                                         |
| Ca_Desig_Chr_4_21045582 | Ca_desig_chr04     | 21045582                       | [T/C]       | NA                                         |
| Ca_Desig_Chr_4_21045586 | Ca_desig_chr04     | 21045586                       | [A/C]       | NA                                         |
| Ca_Desig_Chr_4_21045613 | Ca_desig_chr04     | 21045613                       | [A/G]       | NA                                         |
| Ca_Desig_Chr_4_21045617 | Ca_desig_chr04     | 21045617                       | [A/G]       | NA                                         |
| Ca_Desig_Chr_4_21045624 | Ca_desig_chr04     | 21045624                       | [T/C]       | NA                                         |
| Ca_Desig_Chr_4_21051249 | Ca_desig_chr04     | 21051249                       | [C/A]       | NA                                         |
| Ca_Desig_Chr_4_21060603 | Ca_desig_chr04     | 21060603                       | [A/G]       | NA                                         |
| Ca_Desig_Chr_4_21113561 | Ca_desig_chr04     | 21113561                       | [A/C]       | NA                                         |
| Ca_Desig_Chr_4_21113571 | Ca_desig_chr04     | 21113571                       | [A/G]       | NA                                         |
| Ca_Desig_Chr_4_21113576 | Ca_desig_chr04     | 21113576                       | [T/C]       | NA                                         |
| Ca_Desig_Chr_4_21144274 | Ca_desig_chr04     | 21144274                       | [T/C]       | NA                                         |
| Ca_Desig_Chr_4_21144276 | Ca_desig_chr04     | 21144276                       | [A/G]       | NA                                         |
| Ca_Desig_Chr_4_21144278 | Ca_desig_chr04     | 21144278                       | [T/C]       | NA                                         |
| Ca_Desig_Chr_4_21144287 | Ca_desig_chr04     | 21144287                       | [A/G]       | NA                                         |
| Ca_Desig_Chr_4_21166975 | Ca_desig_chr04     | 21166975                       | [T/G]       | NA                                         |
| Ca_Desig_Chr_4_21166978 | Ca_desig_chr04     | 21166978                       | [A/G]       | NA                                         |
| Ca_Desig_Chr_4_21166981 | Ca_desig_chr04     | 21166981                       | [T/G]       | NA                                         |
| Ca_Desig_Chr_4_21166991 | Ca_desig_chr04     | 21166991                       | [A/G]       | NA                                         |
| Ca_Desig_Chr_4_21166994 | Ca_desig_chr04     | 21166994                       | [A/G]       | NA                                         |
| Ca_Desig_Chr_4_21166998 | Ca_desig_chr04     | 21166998                       | [A/G]       | NA                                         |
| Ca_Desig_Chr_4_21167003 | Ca_desig_chr04     | 21167003                       | [T/C]       | NA                                         |
| Ca_Desig_Chr_4_21182020 | Ca_desig_chr04     | 21182020                       | [A/T]       | NA                                         |
| Ca_Desig_Chr_4_21191220 | Ca_desig_chr04     | 21191220                       | [T/A]       | NA                                         |
| Ca_Desig_Chr_4_21191250 | Ca_desig_chr04     | 21191250                       | [C/A]       | NA                                         |
| Ca_Desig_Chr_4_21191251 | Ca_desig_chr04     | 21191251                       | [G/C]       | NA                                         |
| Ca_Desig_Chr_4_21191258 | Ca_desig_chr04     | 21191258                       | [A/C]       | NA                                         |
| Ca_Desig_Chr_4_21191260 | Ca_desig_chr04     | 21191260                       | [T/C]       | NA                                         |
| Ca_Desig_Chr_4_21192467 | Ca_desig_chr04     | 21192467                       | [A/C]       | NA                                         |
| Ca_Desig_Chr_4_21192468 | Ca_desig_chr04     | 21192468                       | [C/A]       | NA                                         |
| Ca_Desig_Chr_4_21192494 | Ca_desig_chr04     | 21192494                       | [A/T]       | NA                                         |
| Ca_Desig_Chr_4_21192547 | Ca_desig_chr04     | 21192547                       | [A/C]       | NA                                         |
| Ca_Desig_Chr_4_21192578 | Ca_desig_chr04     | 21192578                       | [T/C]       | NA                                         |
| Ca_Desig_Chr_4_21229885 | Ca_desig_chr04     | 21229885                       | [A/C]       | NA                                         |

| <b>SNP IDs</b>           | <b>Chromosomes</b> | <b>Physical positions (bp)</b> | <b>SNPs</b> | <b>NCBI SNPdb accession IDs (NCBI_ss#)</b> |
|--------------------------|--------------------|--------------------------------|-------------|--------------------------------------------|
| Ca_Desi_Chrom_4_21231303 | Ca_desi_chr04      | 21231303                       | [T/C]       | NA                                         |
| Ca_Desi_Chrom_4_21238813 | Ca_desi_chr04      | 21238813                       | [A/C]       | NA                                         |
| Ca_Desi_Chrom_4_21254265 | Ca_desi_chr04      | 21254265                       | [C/G]       | NA                                         |
| Ca_Desi_Chrom_4_21254266 | Ca_desi_chr04      | 21254266                       | [T/G]       | NA                                         |
| Ca_Desi_Chrom_4_21380333 | Ca_desi_chr04      | 21380333                       | [A/G]       | NA                                         |
| Ca_Desi_Chrom_4_21380344 | Ca_desi_chr04      | 21380344                       | [T/G]       | NA                                         |
| Ca_Desi_Chrom_4_21380380 | Ca_desi_chr04      | 21380380                       | [A/G]       | NA                                         |
| Ca_Desi_Chrom_4_21382192 | Ca_desi_chr04      | 21382192                       | [T/C]       | NA                                         |
| Ca_Desi_Chrom_4_21385594 | Ca_desi_chr04      | 21385594                       | [T/G]       | NA                                         |
| Ca_Desi_Chrom_4_21385596 | Ca_desi_chr04      | 21385596                       | [A/G]       | NA                                         |
| Ca_Desi_Chrom_4_21385604 | Ca_desi_chr04      | 21385604                       | [T/C]       | NA                                         |
| Ca_Desi_Chrom_4_21385607 | Ca_desi_chr04      | 21385607                       | [T/C]       | NA                                         |
| Ca_Desi_Chrom_4_21385613 | Ca_desi_chr04      | 21385613                       | [A/G]       | NA                                         |
| Ca_Desi_Chrom_4_21385616 | Ca_desi_chr04      | 21385616                       | [A/G]       | NA                                         |
| Ca_Desi_Chrom_4_21385628 | Ca_desi_chr04      | 21385628                       | [T/C]       | NA                                         |
| Ca_Desi_Chrom_4_21385631 | Ca_desi_chr04      | 21385631                       | [T/C]       | NA                                         |
| Ca_Desi_Chrom_4_21385654 | Ca_desi_chr04      | 21385654                       | [A/G]       | NA                                         |
| Ca_Desi_Chrom_4_21385688 | Ca_desi_chr04      | 21385688                       | [T/C]       | NA                                         |
| Ca_Desi_Chrom_4_21387958 | Ca_desi_chr04      | 21387958                       | [T/C]       | NA                                         |
| Ca_Desi_Chrom_4_21650367 | Ca_desi_chr04      | 21650367                       | [T/C]       | NA                                         |
| Ca_Desi_Chrom_4_21654440 | Ca_desi_chr04      | 21654440                       | [A/C]       | NA                                         |
| Ca_Desi_Chrom_4_21678248 | Ca_desi_chr04      | 21678248                       | [T/A]       | NA                                         |
| Ca_Desi_Chrom_4_21746585 | Ca_desi_chr04      | 21746585                       | [G/A]       | NA                                         |
| Ca_Desi_Chrom_4_21746588 | Ca_desi_chr04      | 21746588                       | [T/G]       | NA                                         |
| Ca_Desi_Chrom_4_21747380 | Ca_desi_chr04      | 21747380                       | [A/C]       | NA                                         |
| Ca_Desi_Chrom_4_21752105 | Ca_desi_chr04      | 21752105                       | [T/C]       | NA                                         |
| Ca_Desi_Chrom_4_21752109 | Ca_desi_chr04      | 21752109                       | [A/G]       | NA                                         |
| Ca_Desi_Chrom_4_21752165 | Ca_desi_chr04      | 21752165                       | [A/G]       | NA                                         |
| Ca_Desi_Chrom_4_21752213 | Ca_desi_chr04      | 21752213                       | [A/G]       | NA                                         |
| Ca_Desi_Chrom_4_21752228 | Ca_desi_chr04      | 21752228                       | [A/G]       | NA                                         |
| Ca_Desi_Chrom_4_21752234 | Ca_desi_chr04      | 21752234                       | [A/G]       | NA                                         |
| Ca_Desi_Chrom_4_21752237 | Ca_desi_chr04      | 21752237                       | [A/G]       | NA                                         |
| Ca_Desi_Chrom_4_21752246 | Ca_desi_chr04      | 21752246                       | [T/G]       | NA                                         |
| Ca_Desi_Chrom_4_21752255 | Ca_desi_chr04      | 21752255                       | [T/G]       | NA                                         |

| <b>SNP IDs</b>           | <b>Chromosomes</b> | <b>Physical positions (bp)</b> | <b>SNPs</b> | <b>NCBI SNPdb accession IDs (NCBI_ss#)</b> |
|--------------------------|--------------------|--------------------------------|-------------|--------------------------------------------|
| Ca_Desi_Chrom_4_21752258 | Ca_desi_chr04      | 21752258                       | [T/C]       | NA                                         |
| Ca_Desi_Chrom_4_21752270 | Ca_desi_chr04      | 21752270                       | [T/C]       | NA                                         |
| Ca_Desi_Chrom_4_21788204 | Ca_desi_chr04      | 21788204                       | [A/T]       | NA                                         |
| Ca_Desi_Chrom_4_21806082 | Ca_desi_chr04      | 21806082                       | [A/C]       | NA                                         |
| Ca_Desi_Chrom_4_21811973 | Ca_desi_chr04      | 21811973                       | [A/C]       | NA                                         |
| Ca_Desi_Chrom_4_21829118 | Ca_desi_chr04      | 21829118                       | [A/G]       | NA                                         |
| Ca_Desi_Chrom_4_21829146 | Ca_desi_chr04      | 21829146                       | [T/C]       | NA                                         |
| Ca_Desi_Chrom_4_21829160 | Ca_desi_chr04      | 21829160                       | [T/G]       | NA                                         |
| Ca_Desi_Chrom_4_21829165 | Ca_desi_chr04      | 21829165                       | [T/G]       | NA                                         |
| Ca_Desi_Chrom_4_21830583 | Ca_desi_chr04      | 21830583                       | [T/A]       | NA                                         |
| Ca_Desi_Chrom_4_21846456 | Ca_desi_chr04      | 21846456                       | [A/G]       | NA                                         |
| Ca_Desi_Chrom_4_21846482 | Ca_desi_chr04      | 21846482                       | [T/A]       | NA                                         |
| Ca_Desi_Chrom_4_21846507 | Ca_desi_chr04      | 21846507                       | [A/C]       | NA                                         |
| Ca_Desi_Chrom_4_21887275 | Ca_desi_chr04      | 21887275                       | [C/A]       | NA                                         |
| Ca_Desi_Chrom_4_21887293 | Ca_desi_chr04      | 21887293                       | [A/C]       | NA                                         |
| Ca_Desi_Chrom_4_21887299 | Ca_desi_chr04      | 21887299                       | [A/C]       | NA                                         |
| Ca_Desi_Chrom_4_21887305 | Ca_desi_chr04      | 21887305                       | [A/C]       | NA                                         |
| Ca_Desi_Chrom_4_21895581 | Ca_desi_chr04      | 21895581                       | [T/G]       | NA                                         |
| Ca_Desi_Chrom_4_21896088 | Ca_desi_chr04      | 21896088                       | [G/T]       | NA                                         |
| Ca_Desi_Chrom_4_21906328 | Ca_desi_chr04      | 21906328                       | [T/G]       | NA                                         |
| Ca_Desi_Chrom_4_21924957 | Ca_desi_chr04      | 21924957                       | [G/T]       | NA                                         |
| Ca_Desi_Chrom_4_21928532 | Ca_desi_chr04      | 21928532                       | [C/T]       | NA                                         |
| Ca_Desi_Chrom_4_21928536 | Ca_desi_chr04      | 21928536                       | [C/T]       | NA                                         |
| Ca_Desi_Chrom_4_21967908 | Ca_desi_chr04      | 21967908                       | [T/C]       | NA                                         |
| Ca_Desi_Chrom_4_21981995 | Ca_desi_chr04      | 21981995                       | [T/G]       | NA                                         |
| Ca_Desi_Chrom_4_21987497 | Ca_desi_chr04      | 21987497                       | [T/C]       | NA                                         |
| Ca_Desi_Chrom_4_21987510 | Ca_desi_chr04      | 21987510                       | [A/C]       | NA                                         |
| Ca_Desi_Chrom_4_21987524 | Ca_desi_chr04      | 21987524                       | [T/C]       | NA                                         |
| Ca_Desi_Chrom_4_21987527 | Ca_desi_chr04      | 21987527                       | [A/G]       | NA                                         |
| Ca_Desi_Chrom_4_21987529 | Ca_desi_chr04      | 21987529                       | [T/C]       | NA                                         |
| Ca_Desi_Chrom_4_22000319 | Ca_desi_chr04      | 22000319                       | [T/G]       | NA                                         |
| Ca_Desi_Chrom_4_22000353 | Ca_desi_chr04      | 22000353                       | [T/C]       | NA                                         |
| Ca_Desi_Chrom_4_22000417 | Ca_desi_chr04      | 22000417                       | [T/C]       | NA                                         |
| Ca_Desi_Chrom_4_22000430 | Ca_desi_chr04      | 22000430                       | [A/C]       | NA                                         |

| <b>SNP IDs</b>           | <b>Chromosomes</b> | <b>Physical positions (bp)</b> | <b>SNPs</b> | <b>NCBI SNPdb accession IDs (NCBI_ss#)</b> |
|--------------------------|--------------------|--------------------------------|-------------|--------------------------------------------|
| Ca_Desi_Chrom_4_22000431 | Ca_desi_chr04      | 22000431                       | [G/T]       | NA                                         |
| Ca_Desi_Chrom_4_22000435 | Ca_desi_chr04      | 22000435                       | [T/C]       | NA                                         |
| Ca_Desi_Chrom_4_22000449 | Ca_desi_chr04      | 22000449                       | [T/C]       | NA                                         |
| Ca_Desi_Chrom_4_22035738 | Ca_desi_chr04      | 22035738                       | [C/G]       | NA                                         |
| Ca_Desi_Chrom_4_22035742 | Ca_desi_chr04      | 22035742                       | [G/A]       | NA                                         |
| Ca_Desi_Chrom_4_22035744 | Ca_desi_chr04      | 22035744                       | [A/G]       | NA                                         |
| Ca_Desi_Chrom_4_22035746 | Ca_desi_chr04      | 22035746                       | [C/A]       | NA                                         |
| Ca_Desi_Chrom_4_22037164 | Ca_desi_chr04      | 22037164                       | [A/G]       | NA                                         |
| Ca_Desi_Chrom_4_22037167 | Ca_desi_chr04      | 22037167                       | [A/G]       | NA                                         |
| Ca_Desi_Chrom_4_22037171 | Ca_desi_chr04      | 22037171                       | [G/A]       | NA                                         |
| Ca_Desi_Chrom_4_22037173 | Ca_desi_chr04      | 22037173                       | [G/A]       | NA                                         |
| Ca_Desi_Chrom_4_22037195 | Ca_desi_chr04      | 22037195                       | [T/A]       | NA                                         |
| Ca_Desi_Chrom_4_22037304 | Ca_desi_chr04      | 22037304                       | [A/G]       | NA                                         |
| Ca_Desi_Chrom_4_22037306 | Ca_desi_chr04      | 22037306                       | [C/G]       | NA                                         |
| Ca_Desi_Chrom_5_36933    | Ca_desi_chr05      | 36933                          | [T/G]       | NA                                         |
| Ca_Desi_Chrom_5_36972    | Ca_desi_chr05      | 36972                          | [A/G]       | NA                                         |
| Ca_Desi_Chrom_5_64605    | Ca_desi_chr05      | 64605                          | [A/G]       | NA                                         |
| Ca_Desi_Chrom_5_96270    | Ca_desi_chr05      | 96270                          | [A/G]       | NA                                         |
| Ca_Desi_Chrom_5_96281    | Ca_desi_chr05      | 96281                          | [A/G]       | NA                                         |
| Ca_Desi_Chrom_5_100208   | Ca_desi_chr05      | 100208                         | [T/C]       | NA                                         |
| Ca_Desi_Chrom_5_100228   | Ca_desi_chr05      | 100228                         | [A/C]       | NA                                         |
| Ca_Desi_Chrom_5_100234   | Ca_desi_chr05      | 100234                         | [T/C]       | NA                                         |
| Ca_Desi_Chrom_5_100239   | Ca_desi_chr05      | 100239                         | [A/G]       | NA                                         |
| Ca_Desi_Chrom_5_100248   | Ca_desi_chr05      | 100248                         | [T/C]       | NA                                         |
| Ca_Desi_Chrom_5_100249   | Ca_desi_chr05      | 100249                         | [A/G]       | NA                                         |
| Ca_Desi_Chrom_5_100307   | Ca_desi_chr05      | 100307                         | [A/G]       | NA                                         |
| Ca_Desi_Chrom_5_100330   | Ca_desi_chr05      | 100330                         | [A/G]       | NA                                         |
| Ca_Desi_Chrom_5_100334   | Ca_desi_chr05      | 100334                         | [A/C]       | NA                                         |
| Ca_Desi_Chrom_5_100967   | Ca_desi_chr05      | 100967                         | [T/C]       | NA                                         |
| Ca_Desi_Chrom_5_154275   | Ca_desi_chr05      | 154275                         | [A/C]       | NA                                         |
| Ca_Desi_Chrom_5_154312   | Ca_desi_chr05      | 154312                         | [A/C]       | NA                                         |
| Ca_Desi_Chrom_5_264254   | Ca_desi_chr05      | 264254                         | [C/T]       | NA                                         |
| Ca_Desi_Chrom_5_452391   | Ca_desi_chr05      | 452391                         | [A/G]       | NA                                         |
| Ca_Desi_Chrom_5_452406   | Ca_desi_chr05      | 452406                         | [A/G]       | NA                                         |

| <b>SNP IDs</b>          | <b>Chromosomes</b> | <b>Physical positions (bp)</b> | <b>SNPs</b> | <b>NCBI SNPdb accession IDs (NCBI_ss#)</b> |
|-------------------------|--------------------|--------------------------------|-------------|--------------------------------------------|
| Ca_Desi_Chrom_5_452416  | Ca_desi_chr05      | 452416                         | [A/G]       | NA                                         |
| Ca_Desi_Chrom_5_452425  | Ca_desi_chr05      | 452425                         | [T/G]       | NA                                         |
| Ca_Desi_Chrom_5_546601  | Ca_desi_chr05      | 546601                         | [A/C]       | NA                                         |
| Ca_Desi_Chrom_5_558115  | Ca_desi_chr05      | 558115                         | [T/G]       | NA                                         |
| Ca_Desi_Chrom_5_558133  | Ca_desi_chr05      | 558133                         | [T/G]       | NA                                         |
| Ca_Desi_Chrom_5_600687  | Ca_desi_chr05      | 600687                         | [A/T]       | NA                                         |
| Ca_Desi_Chrom_5_601816  | Ca_desi_chr05      | 601816                         | [T/C]       | NA                                         |
| Ca_Desi_Chrom_5_601827  | Ca_desi_chr05      | 601827                         | [T/G]       | NA                                         |
| Ca_Desi_Chrom_5_601838  | Ca_desi_chr05      | 601838                         | [T/G]       | NA                                         |
| Ca_Desi_Chrom_5_671968  | Ca_desi_chr05      | 671968                         | [A/G]       | NA                                         |
| Ca_Desi_Chrom_5_671985  | Ca_desi_chr05      | 671985                         | [T/A]       | NA                                         |
| Ca_Desi_Chrom_5_689741  | Ca_desi_chr05      | 689741                         | [T/A]       | NA                                         |
| Ca_Desi_Chrom_5_1291893 | Ca_desi_chr05      | 1291893                        | [T/G]       | NA                                         |
| Ca_Desi_Chrom_5_1291903 | Ca_desi_chr05      | 1291903                        | [C/A]       | NA                                         |
| Ca_Desi_Chrom_5_1291921 | Ca_desi_chr05      | 1291921                        | [T/C]       | NA                                         |
| Ca_Desi_Chrom_5_1291939 | Ca_desi_chr05      | 1291939                        | [A/G]       | NA                                         |
| Ca_Desi_Chrom_5_1291944 | Ca_desi_chr05      | 1291944                        | [A/G]       | NA                                         |
| Ca_Desi_Chrom_5_1291947 | Ca_desi_chr05      | 1291947                        | [A/T]       | NA                                         |
| Ca_Desi_Chrom_5_1333612 | Ca_desi_chr05      | 1333612                        | [T/C]       | NA                                         |
| Ca_Desi_Chrom_5_1333641 | Ca_desi_chr05      | 1333641                        | [C/T]       | NA                                         |
| Ca_Desi_Chrom_5_1333643 | Ca_desi_chr05      | 1333643                        | [A/G]       | NA                                         |
| Ca_Desi_Chrom_5_1333644 | Ca_desi_chr05      | 1333644                        | [A/G]       | NA                                         |
| Ca_Desi_Chrom_5_1333659 | Ca_desi_chr05      | 1333659                        | [T/C]       | NA                                         |
| Ca_Desi_Chrom_5_1333662 | Ca_desi_chr05      | 1333662                        | [T/A]       | NA                                         |
| Ca_Desi_Chrom_5_1361879 | Ca_desi_chr05      | 1361879                        | [T/G]       | NA                                         |
| Ca_Desi_Chrom_5_1385612 | Ca_desi_chr05      | 1385612                        | [T/A]       | NA                                         |
| Ca_Desi_Chrom_5_1385613 | Ca_desi_chr05      | 1385613                        | [C/T]       | NA                                         |
| Ca_Desi_Chrom_5_1385614 | Ca_desi_chr05      | 1385614                        | [G/C]       | NA                                         |
| Ca_Desi_Chrom_5_1385615 | Ca_desi_chr05      | 1385615                        | [G/T]       | NA                                         |
| Ca_Desi_Chrom_5_1398738 | Ca_desi_chr05      | 1398738                        | [C/T]       | NA                                         |
| Ca_Desi_Chrom_5_1434852 | Ca_desi_chr05      | 1434852                        | [T/C]       | NA                                         |
| Ca_Desi_Chrom_5_1435472 | Ca_desi_chr05      | 1435472                        | [T/A]       | NA                                         |
| Ca_Desi_Chrom_5_1440852 | Ca_desi_chr05      | 1440852                        | [A/G]       | NA                                         |
| Ca_Desi_Chrom_5_1440857 | Ca_desi_chr05      | 1440857                        | [T/G]       | NA                                         |

| <b>SNP IDs</b>          | <b>Chromosomes</b> | <b>Physical positions (bp)</b> | <b>SNPs</b> | <b>NCBI SNPdb accession IDs (NCBI_ss#)</b> |
|-------------------------|--------------------|--------------------------------|-------------|--------------------------------------------|
| Ca_Desi_Chrom_5_1440868 | Ca_desi_chr05      | 1440868                        | [T/G]       | NA                                         |
| Ca_Desi_Chrom_5_1440870 | Ca_desi_chr05      | 1440870                        | [T/C]       | NA                                         |
| Ca_Desi_Chrom_5_1440886 | Ca_desi_chr05      | 1440886                        | [T/C]       | NA                                         |
| Ca_Desi_Chrom_5_1440891 | Ca_desi_chr05      | 1440891                        | [T/C]       | NA                                         |
| Ca_Desi_Chrom_5_1440893 | Ca_desi_chr05      | 1440893                        | [A/G]       | NA                                         |
| Ca_Desi_Chrom_5_1440898 | Ca_desi_chr05      | 1440898                        | [C/G]       | NA                                         |
| Ca_Desi_Chrom_5_1443892 | Ca_desi_chr05      | 1443892                        | [A/C]       | NA                                         |
| Ca_Desi_Chrom_5_1443923 | Ca_desi_chr05      | 1443923                        | [A/C]       | NA                                         |
| Ca_Desi_Chrom_5_1471621 | Ca_desi_chr05      | 1471621                        | [A/C]       | NA                                         |
| Ca_Desi_Chrom_5_1478118 | Ca_desi_chr05      | 1478118                        | [T/C]       | NA                                         |
| Ca_Desi_Chrom_5_1478122 | Ca_desi_chr05      | 1478122                        | [A/C]       | NA                                         |
| Ca_Desi_Chrom_5_1483283 | Ca_desi_chr05      | 1483283                        | [T/C]       | NA                                         |
| Ca_Desi_Chrom_5_1483285 | Ca_desi_chr05      | 1483285                        | [T/C]       | NA                                         |
| Ca_Desi_Chrom_5_1483303 | Ca_desi_chr05      | 1483303                        | [A/G]       | NA                                         |
| Ca_Desi_Chrom_5_1483315 | Ca_desi_chr05      | 1483315                        | [T/C]       | NA                                         |
| Ca_Desi_Chrom_5_1483319 | Ca_desi_chr05      | 1483319                        | [A/C]       | NA                                         |
| Ca_Desi_Chrom_5_1483338 | Ca_desi_chr05      | 1483338                        | [T/C]       | NA                                         |
| Ca_Desi_Chrom_5_1483405 | Ca_desi_chr05      | 1483405                        | [T/A]       | NA                                         |
| Ca_Desi_Chrom_5_1487902 | Ca_desi_chr05      | 1487902                        | [T/G]       | NA                                         |
| Ca_Desi_Chrom_5_1498889 | Ca_desi_chr05      | 1498889                        | [A/T]       | NA                                         |
| Ca_Desi_Chrom_5_1498901 | Ca_desi_chr05      | 1498901                        | [T/C]       | NA                                         |
| Ca_Desi_Chrom_5_1498905 | Ca_desi_chr05      | 1498905                        | [A/G]       | NA                                         |
| Ca_Desi_Chrom_5_1498912 | Ca_desi_chr05      | 1498912                        | [A/G]       | NA                                         |
| Ca_Desi_Chrom_5_1498927 | Ca_desi_chr05      | 1498927                        | [T/C]       | NA                                         |
| Ca_Desi_Chrom_5_1498930 | Ca_desi_chr05      | 1498930                        | [T/C]       | NA                                         |
| Ca_Desi_Chrom_5_1498936 | Ca_desi_chr05      | 1498936                        | [A/C]       | NA                                         |
| Ca_Desi_Chrom_5_1520349 | Ca_desi_chr05      | 1520349                        | [A/C]       | NA                                         |
| Ca_Desi_Chrom_5_1605735 | Ca_desi_chr05      | 1605735                        | [T/G]       | NA                                         |
| Ca_Desi_Chrom_5_1605755 | Ca_desi_chr05      | 1605755                        | [T/G]       | NA                                         |
| Ca_Desi_Chrom_5_1608133 | Ca_desi_chr05      | 1608133                        | [C/A]       | NA                                         |
| Ca_Desi_Chrom_5_1608134 | Ca_desi_chr05      | 1608134                        | [A/G]       | NA                                         |
| Ca_Desi_Chrom_5_1615818 | Ca_desi_chr05      | 1615818                        | [T/G]       | NA                                         |
| Ca_Desi_Chrom_5_1615972 | Ca_desi_chr05      | 1615972                        | [A/C]       | NA                                         |
| Ca_Desi_Chrom_5_1631169 | Ca_desi_chr05      | 1631169                        | [A/G]       | NA                                         |

| <b>SNP IDs</b>          | <b>Chromosomes</b> | <b>Physical positions (bp)</b> | <b>SNPs</b> | <b>NCBI SNPdb accession IDs (NCBI_ss#)</b> |
|-------------------------|--------------------|--------------------------------|-------------|--------------------------------------------|
| Ca_Desi_Chrom_5_1631216 | Ca_desi_chr05      | 1631216                        | [A/G]       | NA                                         |
| Ca_Desi_Chrom_5_1671297 | Ca_desi_chr05      | 1671297                        | [C/A]       | NA                                         |
| Ca_Desi_Chrom_5_1671298 | Ca_desi_chr05      | 1671298                        | [T/G]       | NA                                         |
| Ca_Desi_Chrom_5_1702543 | Ca_desi_chr05      | 1702543                        | [A/G]       | NA                                         |
| Ca_Desi_Chrom_5_1702549 | Ca_desi_chr05      | 1702549                        | [G/A]       | NA                                         |
| Ca_Desi_Chrom_5_1702550 | Ca_desi_chr05      | 1702550                        | [A/G]       | NA                                         |
| Ca_Desi_Chrom_5_1702551 | Ca_desi_chr05      | 1702551                        | [G/A]       | NA                                         |
| Ca_Desi_Chrom_5_1702553 | Ca_desi_chr05      | 1702553                        | [G/A]       | NA                                         |
| Ca_Desi_Chrom_5_1702571 | Ca_desi_chr05      | 1702571                        | [T/G]       | NA                                         |
| Ca_Desi_Chrom_5_1815460 | Ca_desi_chr05      | 1815460                        | [T/A]       | NA                                         |
| Ca_Desi_Chrom_5_1914996 | Ca_desi_chr05      | 1914996                        | [T/C]       | NA                                         |
| Ca_Desi_Chrom_5_1915013 | Ca_desi_chr05      | 1915013                        | [A/G]       | NA                                         |
| Ca_Desi_Chrom_5_1976226 | Ca_desi_chr05      | 1976226                        | [A/C]       | NA                                         |
| Ca_Desi_Chrom_5_1980703 | Ca_desi_chr05      | 1980703                        | [T/C]       | NA                                         |
| Ca_Desi_Chrom_5_1991320 | Ca_desi_chr05      | 1991320                        | [T/C]       | NA                                         |
| Ca_Desi_Chrom_5_1991364 | Ca_desi_chr05      | 1991364                        | [A/G]       | NA                                         |
| Ca_Desi_Chrom_5_1993371 | Ca_desi_chr05      | 1993371                        | [T/G]       | NA                                         |
| Ca_Desi_Chrom_5_2036697 | Ca_desi_chr05      | 2036697                        | [T/G]       | NA                                         |
| Ca_Desi_Chrom_5_2303670 | Ca_desi_chr05      | 2303670                        | [T/A]       | NA                                         |
| Ca_Desi_Chrom_5_2319345 | Ca_desi_chr05      | 2319345                        | [A/G]       | NA                                         |
| Ca_Desi_Chrom_5_2319372 | Ca_desi_chr05      | 2319372                        | [A/T]       | NA                                         |
| Ca_Desi_Chrom_5_2325476 | Ca_desi_chr05      | 2325476                        | [T/G]       | NA                                         |
| Ca_Desi_Chrom_5_2340832 | Ca_desi_chr05      | 2340832                        | [T/G]       | NA                                         |
| Ca_Desi_Chrom_5_2340833 | Ca_desi_chr05      | 2340833                        | [T/C]       | NA                                         |
| Ca_Desi_Chrom_5_2340835 | Ca_desi_chr05      | 2340835                        | [T/C]       | NA                                         |
| Ca_Desi_Chrom_5_2357765 | Ca_desi_chr05      | 2357765                        | [A/T]       | NA                                         |
| Ca_Desi_Chrom_5_2418371 | Ca_desi_chr05      | 2418371                        | [A/T]       | NA                                         |
| Ca_Desi_Chrom_5_2439381 | Ca_desi_chr05      | 2439381                        | [T/C]       | NA                                         |
| Ca_Desi_Chrom_5_2524127 | Ca_desi_chr05      | 2524127                        | [T/G]       | NA                                         |
| Ca_Desi_Chrom_5_2562484 | Ca_desi_chr05      | 2562484                        | [T/C]       | NA                                         |
| Ca_Desi_Chrom_5_2562488 | Ca_desi_chr05      | 2562488                        | [A/C]       | NA                                         |
| Ca_Desi_Chrom_5_2562493 | Ca_desi_chr05      | 2562493                        | [A/G]       | NA                                         |
| Ca_Desi_Chrom_5_2562500 | Ca_desi_chr05      | 2562500                        | [T/C]       | NA                                         |
| Ca_Desi_Chrom_5_2562505 | Ca_desi_chr05      | 2562505                        | [A/C]       | NA                                         |

| <b>SNP IDs</b>          | <b>Chromosomes</b> | <b>Physical positions (bp)</b> | <b>SNPs</b> | <b>NCBI SNPdb accession IDs (NCBI_ss#)</b> |
|-------------------------|--------------------|--------------------------------|-------------|--------------------------------------------|
| Ca_Desi_Chrom_5_2562518 | Ca_desi_chr05      | 2562518                        | [A/T]       | NA                                         |
| Ca_Desi_Chrom_5_2562538 | Ca_desi_chr05      | 2562538                        | [A/G]       | NA                                         |
| Ca_Desi_Chrom_5_2562573 | Ca_desi_chr05      | 2562573                        | [A/G]       | NA                                         |
| Ca_Desi_Chrom_5_2562575 | Ca_desi_chr05      | 2562575                        | [A/G]       | NA                                         |
| Ca_Desi_Chrom_5_2562578 | Ca_desi_chr05      | 2562578                        | [A/G]       | NA                                         |
| Ca_Desi_Chrom_5_2701081 | Ca_desi_chr05      | 2701081                        | [A/C]       | NA                                         |
| Ca_Desi_Chrom_5_2701090 | Ca_desi_chr05      | 2701090                        | [T/C]       | NA                                         |
| Ca_Desi_Chrom_5_2743851 | Ca_desi_chr05      | 2743851                        | [A/C]       | NA                                         |
| Ca_Desi_Chrom_5_2743878 | Ca_desi_chr05      | 2743878                        | [A/G]       | NA                                         |
| Ca_Desi_Chrom_5_2745071 | Ca_desi_chr05      | 2745071                        | [T/G]       | NA                                         |
| Ca_Desi_Chrom_5_2875172 | Ca_desi_chr05      | 2875172                        | [A/C]       | NA                                         |
| Ca_Desi_Chrom_5_2885352 | Ca_desi_chr05      | 2885352                        | [A/C]       | NA                                         |
| Ca_Desi_Chrom_5_2904483 | Ca_desi_chr05      | 2904483                        | [G/A]       | NA                                         |
| Ca_Desi_Chrom_5_2904497 | Ca_desi_chr05      | 2904497                        | [A/C]       | NA                                         |
| Ca_Desi_Chrom_5_2904503 | Ca_desi_chr05      | 2904503                        | [A/G]       | NA                                         |
| Ca_Desi_Chrom_5_2983562 | Ca_desi_chr05      | 2983562                        | [T/C]       | NA                                         |
| Ca_Desi_Chrom_5_2983574 | Ca_desi_chr05      | 2983574                        | [T/C]       | NA                                         |
| Ca_Desi_Chrom_5_3046643 | Ca_desi_chr05      | 3046643                        | [A/G]       | NA                                         |
| Ca_Desi_Chrom_5_3046656 | Ca_desi_chr05      | 3046656                        | [A/G]       | NA                                         |
| Ca_Desi_Chrom_5_3047008 | Ca_desi_chr05      | 3047008                        | [T/A]       | NA                                         |
| Ca_Desi_Chrom_5_3047095 | Ca_desi_chr05      | 3047095                        | [T/G]       | NA                                         |
| Ca_Desi_Chrom_5_3047175 | Ca_desi_chr05      | 3047175                        | [A/C]       | NA                                         |
| Ca_Desi_Chrom_5_3047247 | Ca_desi_chr05      | 3047247                        | [A/G]       | NA                                         |
| Ca_Desi_Chrom_5_3047255 | Ca_desi_chr05      | 3047255                        | [A/G]       | NA                                         |
| Ca_Desi_Chrom_5_3047265 | Ca_desi_chr05      | 3047265                        | [A/G]       | NA                                         |
| Ca_Desi_Chrom_5_3047269 | Ca_desi_chr05      | 3047269                        | [A/G]       | NA                                         |
| Ca_Desi_Chrom_5_3047272 | Ca_desi_chr05      | 3047272                        | [A/G]       | NA                                         |
| Ca_Desi_Chrom_5_3047276 | Ca_desi_chr05      | 3047276                        | [T/C]       | NA                                         |
| Ca_Desi_Chrom_5_3047283 | Ca_desi_chr05      | 3047283                        | [C/T]       | NA                                         |
| Ca_Desi_Chrom_5_3047284 | Ca_desi_chr05      | 3047284                        | [A/G]       | NA                                         |
| Ca_Desi_Chrom_5_3068414 | Ca_desi_chr05      | 3068414                        | [T/A]       | NA                                         |
| Ca_Desi_Chrom_5_3068419 | Ca_desi_chr05      | 3068419                        | [T/C]       | NA                                         |
| Ca_Desi_Chrom_5_3068421 | Ca_desi_chr05      | 3068421                        | [A/C]       | NA                                         |
| Ca_Desi_Chrom_5_3068436 | Ca_desi_chr05      | 3068436                        | [A/C]       | NA                                         |



| <b>SNP IDs</b>          | <b>Chromosomes</b> | <b>Physical positions (bp)</b> | <b>SNPs</b> | <b>NCBI SNPdb accession IDs (NCBI_ss#)</b> |
|-------------------------|--------------------|--------------------------------|-------------|--------------------------------------------|
| Ca_Desi_Chrom_5_3069867 | Ca_desi_chr05      | 3069867                        | [T/A]       | NA                                         |
| Ca_Desi_Chrom_5_3069869 | Ca_desi_chr05      | 3069869                        | [A/C]       | NA                                         |
| Ca_Desi_Chrom_5_3164617 | Ca_desi_chr05      | 3164617                        | [A/C]       | NA                                         |
| Ca_Desi_Chrom_5_3164623 | Ca_desi_chr05      | 3164623                        | [A/G]       | NA                                         |
| Ca_Desi_Chrom_5_3177238 | Ca_desi_chr05      | 3177238                        | [A/G]       | NA                                         |
| Ca_Desi_Chrom_5_3177243 | Ca_desi_chr05      | 3177243                        | [T/G]       | NA                                         |
| Ca_Desi_Chrom_5_3177246 | Ca_desi_chr05      | 3177246                        | [T/G]       | NA                                         |
| Ca_Desi_Chrom_5_3177252 | Ca_desi_chr05      | 3177252                        | [A/G]       | NA                                         |
| Ca_Desi_Chrom_5_3177253 | Ca_desi_chr05      | 3177253                        | [G/A]       | NA                                         |
| Ca_Desi_Chrom_5_3177257 | Ca_desi_chr05      | 3177257                        | [A/G]       | NA                                         |
| Ca_Desi_Chrom_5_3177259 | Ca_desi_chr05      | 3177259                        | [T/C]       | NA                                         |
| Ca_Desi_Chrom_5_3177279 | Ca_desi_chr05      | 3177279                        | [A/G]       | NA                                         |
| Ca_Desi_Chrom_5_3177299 | Ca_desi_chr05      | 3177299                        | [T/C]       | NA                                         |
| Ca_Desi_Chrom_5_3214910 | Ca_desi_chr05      | 3214910                        | [A/C]       | NA                                         |
| Ca_Desi_Chrom_5_3215641 | Ca_desi_chr05      | 3215641                        | [A/C]       | NA                                         |
| Ca_Desi_Chrom_5_3218116 | Ca_desi_chr05      | 3218116                        | [A/C]       | NA                                         |
| Ca_Desi_Chrom_5_3218123 | Ca_desi_chr05      | 3218123                        | [A/G]       | NA                                         |
| Ca_Desi_Chrom_5_3218134 | Ca_desi_chr05      | 3218134                        | [T/G]       | NA                                         |
| Ca_Desi_Chrom_5_3218138 | Ca_desi_chr05      | 3218138                        | [T/G]       | NA                                         |
| Ca_Desi_Chrom_5_3218142 | Ca_desi_chr05      | 3218142                        | [A/G]       | NA                                         |
| Ca_Desi_Chrom_5_3218181 | Ca_desi_chr05      | 3218181                        | [T/G]       | NA                                         |
| Ca_Desi_Chrom_5_3219073 | Ca_desi_chr05      | 3219073                        | [T/C]       | NA                                         |
| Ca_Desi_Chrom_5_3219074 | Ca_desi_chr05      | 3219074                        | [G/T]       | NA                                         |
| Ca_Desi_Chrom_5_3220318 | Ca_desi_chr05      | 3220318                        | [T/A]       | NA                                         |
| Ca_Desi_Chrom_5_3220319 | Ca_desi_chr05      | 3220319                        | [C/A]       | NA                                         |
| Ca_Desi_Chrom_5_3220320 | Ca_desi_chr05      | 3220320                        | [T/G]       | NA                                         |
| Ca_Desi_Chrom_5_3253211 | Ca_desi_chr05      | 3253211                        | [A/G]       | NA                                         |
| Ca_Desi_Chrom_5_3262387 | Ca_desi_chr05      | 3262387                        | [T/G]       | NA                                         |
| Ca_Desi_Chrom_5_3264562 | Ca_desi_chr05      | 3264562                        | [A/G]       | NA                                         |
| Ca_Desi_Chrom_5_3264605 | Ca_desi_chr05      | 3264605                        | [T/G]       | NA                                         |
| Ca_Desi_Chrom_5_3373975 | Ca_desi_chr05      | 3373975                        | [A/C]       | NA                                         |
| Ca_Desi_Chrom_5_3373980 | Ca_desi_chr05      | 3373980                        | [A/G]       | NA                                         |
| Ca_Desi_Chrom_5_3373993 | Ca_desi_chr05      | 3373993                        | [A/C]       | NA                                         |
| Ca_Desi_Chrom_5_3405272 | Ca_desi_chr05      | 3405272                        | [A/C]       | NA                                         |

| <b>SNP IDs</b>         | <b>Chromosomes</b> | <b>Physical positions (bp)</b> | <b>SNPs</b> | <b>NCBI SNPdb accession IDs (NCBI_ss#)</b> |
|------------------------|--------------------|--------------------------------|-------------|--------------------------------------------|
| Ca_Desig_Chr_5_3405577 | Ca_desig_chr05     | 3405577                        | [T/G]       | NA                                         |
| Ca_Desig_Chr_5_3405646 | Ca_desig_chr05     | 3405646                        | [T/A]       | NA                                         |
| Ca_Desig_Chr_5_3405699 | Ca_desig_chr05     | 3405699                        | [A/G]       | NA                                         |
| Ca_Desig_Chr_5_3405702 | Ca_desig_chr05     | 3405702                        | [A/G]       | NA                                         |
| Ca_Desig_Chr_5_3409699 | Ca_desig_chr05     | 3409699                        | [T/G]       | NA                                         |
| Ca_Desig_Chr_5_3409704 | Ca_desig_chr05     | 3409704                        | [A/C]       | NA                                         |
| Ca_Desig_Chr_5_3416021 | Ca_desig_chr05     | 3416021                        | [A/G]       | NA                                         |
| Ca_Desig_Chr_5_3416039 | Ca_desig_chr05     | 3416039                        | [A/G]       | NA                                         |
| Ca_Desig_Chr_5_3416043 | Ca_desig_chr05     | 3416043                        | [T/G]       | NA                                         |
| Ca_Desig_Chr_5_3416049 | Ca_desig_chr05     | 3416049                        | [T/G]       | NA                                         |
| Ca_Desig_Chr_5_3416055 | Ca_desig_chr05     | 3416055                        | [T/C]       | NA                                         |
| Ca_Desig_Chr_5_3416058 | Ca_desig_chr05     | 3416058                        | [T/C]       | NA                                         |
| Ca_Desig_Chr_5_3416068 | Ca_desig_chr05     | 3416068                        | [G/A]       | NA                                         |
| Ca_Desig_Chr_5_3416072 | Ca_desig_chr05     | 3416072                        | [A/G]       | NA                                         |
| Ca_Desig_Chr_5_3416076 | Ca_desig_chr05     | 3416076                        | [T/C]       | NA                                         |
| Ca_Desig_Chr_5_3416079 | Ca_desig_chr05     | 3416079                        | [T/C]       | NA                                         |
| Ca_Desig_Chr_5_3441989 | Ca_desig_chr05     | 3441989                        | [T/G]       | NA                                         |
| Ca_Desig_Chr_5_3459994 | Ca_desig_chr05     | 3459994                        | [A/C]       | NA                                         |
| Ca_Desig_Chr_5_3460114 | Ca_desig_chr05     | 3460114                        | [A/C]       | NA                                         |
| Ca_Desig_Chr_5_3490281 | Ca_desig_chr05     | 3490281                        | [A/C]       | NA                                         |
| Ca_Desig_Chr_5_3524310 | Ca_desig_chr05     | 3524310                        | [T/C]       | NA                                         |
| Ca_Desig_Chr_5_3541986 | Ca_desig_chr05     | 3541986                        | [A/C]       | NA                                         |
| Ca_Desig_Chr_5_3541992 | Ca_desig_chr05     | 3541992                        | [A/C]       | NA                                         |
| Ca_Desig_Chr_5_4413238 | Ca_desig_chr05     | 4413238                        | [G/A]       | NA                                         |
| Ca_Desig_Chr_5_4413259 | Ca_desig_chr05     | 4413259                        | [T/A]       | NA                                         |
| Ca_Desig_Chr_5_4413292 | Ca_desig_chr05     | 4413292                        | [C/A]       | NA                                         |
| Ca_Desig_Chr_5_4413294 | Ca_desig_chr05     | 4413294                        | [A/G]       | NA                                         |
| Ca_Desig_Chr_5_4413316 | Ca_desig_chr05     | 4413316                        | [T/G]       | NA                                         |
| Ca_Desig_Chr_5_4413334 | Ca_desig_chr05     | 4413334                        | [G/A]       | NA                                         |
| Ca_Desig_Chr_5_4413370 | Ca_desig_chr05     | 4413370                        | [T/C]       | NA                                         |
| Ca_Desig_Chr_5_4413859 | Ca_desig_chr05     | 4413859                        | [T/C]       | NA                                         |
| Ca_Desig_Chr_5_4414372 | Ca_desig_chr05     | 4414372                        | [A/T]       | NA                                         |
| Ca_Desig_Chr_5_4414378 | Ca_desig_chr05     | 4414378                        | [C/A]       | NA                                         |
| Ca_Desig_Chr_5_4414399 | Ca_desig_chr05     | 4414399                        | [T/A]       | NA                                         |

| <b>SNP IDs</b>          | <b>Chromosomes</b> | <b>Physical positions (bp)</b> | <b>SNPs</b> | <b>NCBI SNPdb accession IDs (NCBI_ss#)</b> |
|-------------------------|--------------------|--------------------------------|-------------|--------------------------------------------|
| Ca_Desi_Chrom_5_4431412 | Ca_desi_chr05      | 4431412                        | [T/A]       | NA                                         |
| Ca_Desi_Chrom_5_4431415 | Ca_desi_chr05      | 4431415                        | [T/G]       | NA                                         |
| Ca_Desi_Chrom_5_4447507 | Ca_desi_chr05      | 4447507                        | [A/C]       | NA                                         |
| Ca_Desi_Chrom_5_4447512 | Ca_desi_chr05      | 4447512                        | [A/C]       | NA                                         |
| Ca_Desi_Chrom_5_4462169 | Ca_desi_chr05      | 4462169                        | [A/C]       | NA                                         |
| Ca_Desi_Chrom_5_4519775 | Ca_desi_chr05      | 4519775                        | [T/C]       | NA                                         |
| Ca_Desi_Chrom_5_4540829 | Ca_desi_chr05      | 4540829                        | [A/C]       | NA                                         |
| Ca_Desi_Chrom_5_4563108 | Ca_desi_chr05      | 4563108                        | [A/G]       | NA                                         |
| Ca_Desi_Chrom_5_4563120 | Ca_desi_chr05      | 4563120                        | [A/G]       | NA                                         |
| Ca_Desi_Chrom_5_4703801 | Ca_desi_chr05      | 4703801                        | [T/C]       | NA                                         |
| Ca_Desi_Chrom_5_4703804 | Ca_desi_chr05      | 4703804                        | [A/G]       | NA                                         |
| Ca_Desi_Chrom_5_4703824 | Ca_desi_chr05      | 4703824                        | [A/G]       | NA                                         |
| Ca_Desi_Chrom_5_4753041 | Ca_desi_chr05      | 4753041                        | [T/G]       | NA                                         |
| Ca_Desi_Chrom_5_4779900 | Ca_desi_chr05      | 4779900                        | [A/G]       | NA                                         |
| Ca_Desi_Chrom_5_4779911 | Ca_desi_chr05      | 4779911                        | [A/C]       | NA                                         |
| Ca_Desi_Chrom_5_4837584 | Ca_desi_chr05      | 4837584                        | [G/T]       | NA                                         |
| Ca_Desi_Chrom_5_4837586 | Ca_desi_chr05      | 4837586                        | [T/G]       | NA                                         |
| Ca_Desi_Chrom_5_4837588 | Ca_desi_chr05      | 4837588                        | [A/T]       | NA                                         |
| Ca_Desi_Chrom_5_4837595 | Ca_desi_chr05      | 4837595                        | [G/C]       | NA                                         |
| Ca_Desi_Chrom_5_4837598 | Ca_desi_chr05      | 4837598                        | [A/G]       | NA                                         |
| Ca_Desi_Chrom_5_4837600 | Ca_desi_chr05      | 4837600                        | [A/G]       | NA                                         |
| Ca_Desi_Chrom_5_4837608 | Ca_desi_chr05      | 4837608                        | [A/T]       | NA                                         |
| Ca_Desi_Chrom_5_4853671 | Ca_desi_chr05      | 4853671                        | [T/C]       | NA                                         |
| Ca_Desi_Chrom_5_4909331 | Ca_desi_chr05      | 4909331                        | [A/G]       | NA                                         |
| Ca_Desi_Chrom_5_4909336 | Ca_desi_chr05      | 4909336                        | [G/T]       | NA                                         |
| Ca_Desi_Chrom_5_4909338 | Ca_desi_chr05      | 4909338                        | [C/T]       | NA                                         |
| Ca_Desi_Chrom_5_4910606 | Ca_desi_chr05      | 4910606                        | [A/C]       | NA                                         |
| Ca_Desi_Chrom_5_4931928 | Ca_desi_chr05      | 4931928                        | [A/C]       | NA                                         |
| Ca_Desi_Chrom_5_4931951 | Ca_desi_chr05      | 4931951                        | [A/G]       | NA                                         |
| Ca_Desi_Chrom_5_4939697 | Ca_desi_chr05      | 4939697                        | [A/G]       | NA                                         |
| Ca_Desi_Chrom_5_4939708 | Ca_desi_chr05      | 4939708                        | [T/G]       | NA                                         |
| Ca_Desi_Chrom_5_4939710 | Ca_desi_chr05      | 4939710                        | [T/G]       | NA                                         |
| Ca_Desi_Chrom_5_4939716 | Ca_desi_chr05      | 4939716                        | [A/G]       | NA                                         |
| Ca_Desi_Chrom_5_4939722 | Ca_desi_chr05      | 4939722                        | [A/G]       | NA                                         |

| <b>SNP IDs</b>          | <b>Chromosomes</b> | <b>Physical positions (bp)</b> | <b>SNPs</b> | <b>NCBI SNPdb accession IDs (NCBI_ss#)</b> |
|-------------------------|--------------------|--------------------------------|-------------|--------------------------------------------|
| Ca_Desi_Chrom_5_4939728 | Ca_desi_chr05      | 4939728                        | [T/G]       | NA                                         |
| Ca_Desi_Chrom_5_4939731 | Ca_desi_chr05      | 4939731                        | [A/G]       | NA                                         |
| Ca_Desi_Chrom_5_4939735 | Ca_desi_chr05      | 4939735                        | [A/G]       | NA                                         |
| Ca_Desi_Chrom_5_4939737 | Ca_desi_chr05      | 4939737                        | [A/G]       | NA                                         |
| Ca_Desi_Chrom_5_4939742 | Ca_desi_chr05      | 4939742                        | [T/G]       | NA                                         |
| Ca_Desi_Chrom_5_4939750 | Ca_desi_chr05      | 4939750                        | [A/G]       | NA                                         |
| Ca_Desi_Chrom_5_4939751 | Ca_desi_chr05      | 4939751                        | [A/G]       | NA                                         |
| Ca_Desi_Chrom_5_4939754 | Ca_desi_chr05      | 4939754                        | [T/C]       | NA                                         |
| Ca_Desi_Chrom_5_4951632 | Ca_desi_chr05      | 4951632                        | [T/C]       | NA                                         |
| Ca_Desi_Chrom_5_5045259 | Ca_desi_chr05      | 5045259                        | [A/T]       | NA                                         |
| Ca_Desi_Chrom_5_5048631 | Ca_desi_chr05      | 5048631                        | [A/C]       | NA                                         |
| Ca_Desi_Chrom_5_5115215 | Ca_desi_chr05      | 5115215                        | [A/G]       | NA                                         |
| Ca_Desi_Chrom_5_5115250 | Ca_desi_chr05      | 5115250                        | [A/G]       | NA                                         |
| Ca_Desi_Chrom_5_5123280 | Ca_desi_chr05      | 5123280                        | [C/G]       | NA                                         |
| Ca_Desi_Chrom_5_5123286 | Ca_desi_chr05      | 5123286                        | [A/G]       | NA                                         |
| Ca_Desi_Chrom_5_5123295 | Ca_desi_chr05      | 5123295                        | [T/G]       | NA                                         |
| Ca_Desi_Chrom_5_5123297 | Ca_desi_chr05      | 5123297                        | [T/G]       | NA                                         |
| Ca_Desi_Chrom_5_5209349 | Ca_desi_chr05      | 5209349                        | [T/C]       | NA                                         |
| Ca_Desi_Chrom_5_5209361 | Ca_desi_chr05      | 5209361                        | [T/C]       | NA                                         |
| Ca_Desi_Chrom_5_5328665 | Ca_desi_chr05      | 5328665                        | [A/C]       | NA                                         |
| Ca_Desi_Chrom_5_5361327 | Ca_desi_chr05      | 5361327                        | [A/G]       | NA                                         |
| Ca_Desi_Chrom_5_5361612 | Ca_desi_chr05      | 5361612                        | [C/T]       | NA                                         |
| Ca_Desi_Chrom_5_5385395 | Ca_desi_chr05      | 5385395                        | [A/G]       | NA                                         |
| Ca_Desi_Chrom_5_5495882 | Ca_desi_chr05      | 5495882                        | [T/A]       | NA                                         |
| Ca_Desi_Chrom_5_5495910 | Ca_desi_chr05      | 5495910                        | [T/G]       | NA                                         |
| Ca_Desi_Chrom_5_5495913 | Ca_desi_chr05      | 5495913                        | [C/G]       | NA                                         |
| Ca_Desi_Chrom_5_5495917 | Ca_desi_chr05      | 5495917                        | [A/G]       | NA                                         |
| Ca_Desi_Chrom_5_5495919 | Ca_desi_chr05      | 5495919                        | [A/C]       | NA                                         |
| Ca_Desi_Chrom_5_5495922 | Ca_desi_chr05      | 5495922                        | [C/A]       | NA                                         |
| Ca_Desi_Chrom_5_5495924 | Ca_desi_chr05      | 5495924                        | [G/C]       | NA                                         |
| Ca_Desi_Chrom_5_5495933 | Ca_desi_chr05      | 5495933                        | [A/G]       | NA                                         |
| Ca_Desi_Chrom_5_5495935 | Ca_desi_chr05      | 5495935                        | [A/C]       | NA                                         |
| Ca_Desi_Chrom_5_5506488 | Ca_desi_chr05      | 5506488                        | [T/G]       | NA                                         |
| Ca_Desi_Chrom_5_5506511 | Ca_desi_chr05      | 5506511                        | [T/C]       | NA                                         |

| <b>SNP IDs</b>          | <b>Chromosomes</b> | <b>Physical positions (bp)</b> | <b>SNPs</b> | <b>NCBI SNPdb accession IDs (NCBI_ss#)</b> |
|-------------------------|--------------------|--------------------------------|-------------|--------------------------------------------|
| Ca_Desi_Chrom_5_5527369 | Ca_desi_chr05      | 5527369                        | [T/C]       | NA                                         |
| Ca_Desi_Chrom_5_5527416 | Ca_desi_chr05      | 5527416                        | [A/C]       | NA                                         |
| Ca_Desi_Chrom_5_5528798 | Ca_desi_chr05      | 5528798                        | [A/G]       | NA                                         |
| Ca_Desi_Chrom_5_5531395 | Ca_desi_chr05      | 5531395                        | [A/G]       | NA                                         |
| Ca_Desi_Chrom_5_5531396 | Ca_desi_chr05      | 5531396                        | [A/C]       | NA                                         |
| Ca_Desi_Chrom_5_5531400 | Ca_desi_chr05      | 5531400                        | [A/T]       | NA                                         |
| Ca_Desi_Chrom_5_5536484 | Ca_desi_chr05      | 5536484                        | [T/G]       | NA                                         |
| Ca_Desi_Chrom_5_5556030 | Ca_desi_chr05      | 5556030                        | [A/C]       | NA                                         |
| Ca_Desi_Chrom_5_5556096 | Ca_desi_chr05      | 5556096                        | [A/C]       | NA                                         |
| Ca_Desi_Chrom_5_5556111 | Ca_desi_chr05      | 5556111                        | [T/C]       | NA                                         |
| Ca_Desi_Chrom_5_5556241 | Ca_desi_chr05      | 5556241                        | [T/G]       | NA                                         |
| Ca_Desi_Chrom_5_5556280 | Ca_desi_chr05      | 5556280                        | [G/T]       | NA                                         |
| Ca_Desi_Chrom_5_5556288 | Ca_desi_chr05      | 5556288                        | [A/C]       | NA                                         |
| Ca_Desi_Chrom_5_5556354 | Ca_desi_chr05      | 5556354                        | [T/G]       | NA                                         |
| Ca_Desi_Chrom_5_5556427 | Ca_desi_chr05      | 5556427                        | [T/G]       | NA                                         |
| Ca_Desi_Chrom_5_5556477 | Ca_desi_chr05      | 5556477                        | [A/G]       | NA                                         |
| Ca_Desi_Chrom_5_5556480 | Ca_desi_chr05      | 5556480                        | [A/C]       | NA                                         |
| Ca_Desi_Chrom_5_5617812 | Ca_desi_chr05      | 5617812                        | [T/G]       | NA                                         |
| Ca_Desi_Chrom_5_5650591 | Ca_desi_chr05      | 5650591                        | [A/T]       | NA                                         |
| Ca_Desi_Chrom_5_5656111 | Ca_desi_chr05      | 5656111                        | [T/C]       | NA                                         |
| Ca_Desi_Chrom_5_5656112 | Ca_desi_chr05      | 5656112                        | [T/C]       | NA                                         |
| Ca_Desi_Chrom_5_5656126 | Ca_desi_chr05      | 5656126                        | [T/C]       | NA                                         |
| Ca_Desi_Chrom_5_5656153 | Ca_desi_chr05      | 5656153                        | [T/C]       | NA                                         |
| Ca_Desi_Chrom_5_5656155 | Ca_desi_chr05      | 5656155                        | [T/C]       | NA                                         |
| Ca_Desi_Chrom_5_5656162 | Ca_desi_chr05      | 5656162                        | [T/C]       | NA                                         |
| Ca_Desi_Chrom_5_5656171 | Ca_desi_chr05      | 5656171                        | [A/G]       | NA                                         |
| Ca_Desi_Chrom_5_5656173 | Ca_desi_chr05      | 5656173                        | [T/C]       | NA                                         |
| Ca_Desi_Chrom_5_5694190 | Ca_desi_chr05      | 5694190                        | [T/C]       | NA                                         |
| Ca_Desi_Chrom_5_5694203 | Ca_desi_chr05      | 5694203                        | [A/T]       | NA                                         |
| Ca_Desi_Chrom_5_5700017 | Ca_desi_chr05      | 5700017                        | [A/C]       | NA                                         |
| Ca_Desi_Chrom_5_5700019 | Ca_desi_chr05      | 5700019                        | [C/T]       | NA                                         |
| Ca_Desi_Chrom_5_5700025 | Ca_desi_chr05      | 5700025                        | [A/T]       | NA                                         |
| Ca_Desi_Chrom_5_5700063 | Ca_desi_chr05      | 5700063                        | [A/C]       | NA                                         |
| Ca_Desi_Chrom_5_5700318 | Ca_desi_chr05      | 5700318                        | [T/C]       | NA                                         |

| <b>SNP IDs</b>          | <b>Chromosomes</b> | <b>Physical positions (bp)</b> | <b>SNPs</b> | <b>NCBI SNPdb accession IDs (NCBI_ss#)</b> |
|-------------------------|--------------------|--------------------------------|-------------|--------------------------------------------|
| Ca_Desi_Chrom_5_5700319 | Ca_desi_chr05      | 5700319                        | [A/C]       | NA                                         |
| Ca_Desi_Chrom_5_5702668 | Ca_desi_chr05      | 5702668                        | [T/G]       | NA                                         |
| Ca_Desi_Chrom_5_5702689 | Ca_desi_chr05      | 5702689                        | [A/G]       | NA                                         |
| Ca_Desi_Chrom_5_5797279 | Ca_desi_chr05      | 5797279                        | [T/C]       | NA                                         |
| Ca_Desi_Chrom_5_5821472 | Ca_desi_chr05      | 5821472                        | [T/G]       | NA                                         |
| Ca_Desi_Chrom_5_5902984 | Ca_desi_chr05      | 5902984                        | [T/G]       | NA                                         |
| Ca_Desi_Chrom_5_5902987 | Ca_desi_chr05      | 5902987                        | [T/G]       | NA                                         |
| Ca_Desi_Chrom_5_5903030 | Ca_desi_chr05      | 5903030                        | [A/T]       | NA                                         |
| Ca_Desi_Chrom_5_5963186 | Ca_desi_chr05      | 5963186                        | [T/G]       | NA                                         |
| Ca_Desi_Chrom_5_5973516 | Ca_desi_chr05      | 5973516                        | [A/C]       | NA                                         |
| Ca_Desi_Chrom_5_5973528 | Ca_desi_chr05      | 5973528                        | [T/C]       | NA                                         |
| Ca_Desi_Chrom_5_5973590 | Ca_desi_chr05      | 5973590                        | [T/C]       | NA                                         |
| Ca_Desi_Chrom_5_5973596 | Ca_desi_chr05      | 5973596                        | [A/G]       | NA                                         |
| Ca_Desi_Chrom_5_5973605 | Ca_desi_chr05      | 5973605                        | [A/C]       | NA                                         |
| Ca_Desi_Chrom_5_5973639 | Ca_desi_chr05      | 5973639                        | [T/C]       | NA                                         |
| Ca_Desi_Chrom_5_5973649 | Ca_desi_chr05      | 5973649                        | [A/G]       | NA                                         |
| Ca_Desi_Chrom_5_5973687 | Ca_desi_chr05      | 5973687                        | [T/G]       | NA                                         |
| Ca_Desi_Chrom_5_5973689 | Ca_desi_chr05      | 5973689                        | [G/A]       | NA                                         |
| Ca_Desi_Chrom_5_5999500 | Ca_desi_chr05      | 5999500                        | [T/G]       | NA                                         |
| Ca_Desi_Chrom_5_6051569 | Ca_desi_chr05      | 6051569                        | [T/C]       | NA                                         |
| Ca_Desi_Chrom_5_6088875 | Ca_desi_chr05      | 6088875                        | [T/G]       | NA                                         |
| Ca_Desi_Chrom_5_6088877 | Ca_desi_chr05      | 6088877                        | [T/C]       | NA                                         |
| Ca_Desi_Chrom_5_6088881 | Ca_desi_chr05      | 6088881                        | [T/G]       | NA                                         |
| Ca_Desi_Chrom_5_6088883 | Ca_desi_chr05      | 6088883                        | [A/G]       | NA                                         |
| Ca_Desi_Chrom_5_6088884 | Ca_desi_chr05      | 6088884                        | [T/A]       | NA                                         |
| Ca_Desi_Chrom_5_6088894 | Ca_desi_chr05      | 6088894                        | [G/C]       | NA                                         |
| Ca_Desi_Chrom_5_6088904 | Ca_desi_chr05      | 6088904                        | [A/G]       | NA                                         |
| Ca_Desi_Chrom_5_6088910 | Ca_desi_chr05      | 6088910                        | [T/G]       | NA                                         |
| Ca_Desi_Chrom_5_6203237 | Ca_desi_chr05      | 6203237                        | [A/T]       | NA                                         |
| Ca_Desi_Chrom_5_6204610 | Ca_desi_chr05      | 6204610                        | [T/G]       | NA                                         |
| Ca_Desi_Chrom_5_6204613 | Ca_desi_chr05      | 6204613                        | [A/G]       | NA                                         |
| Ca_Desi_Chrom_5_6204615 | Ca_desi_chr05      | 6204615                        | [A/G]       | NA                                         |
| Ca_Desi_Chrom_5_6204622 | Ca_desi_chr05      | 6204622                        | [T/G]       | NA                                         |
| Ca_Desi_Chrom_5_6204628 | Ca_desi_chr05      | 6204628                        | [T/G]       | NA                                         |

| <b>SNP IDs</b>          | <b>Chromosomes</b> | <b>Physical positions (bp)</b> | <b>SNPs</b> | <b>NCBI SNPdb accession IDs (NCBI_ss#)</b> |
|-------------------------|--------------------|--------------------------------|-------------|--------------------------------------------|
| Ca_Desi_Chrom_5_6204641 | Ca_desi_chr05      | 6204641                        | [T/G]       | NA                                         |
| Ca_Desi_Chrom_5_6204661 | Ca_desi_chr05      | 6204661                        | [A/G]       | NA                                         |
| Ca_Desi_Chrom_5_6204666 | Ca_desi_chr05      | 6204666                        | [A/C]       | NA                                         |
| Ca_Desi_Chrom_5_6264933 | Ca_desi_chr05      | 6264933                        | [A/T]       | NA                                         |
| Ca_Desi_Chrom_5_6268419 | Ca_desi_chr05      | 6268419                        | [T/A]       | NA                                         |
| Ca_Desi_Chrom_5_6321306 | Ca_desi_chr05      | 6321306                        | [T/G]       | NA                                         |
| Ca_Desi_Chrom_5_6321363 | Ca_desi_chr05      | 6321363                        | [A/G]       | NA                                         |
| Ca_Desi_Chrom_5_6371514 | Ca_desi_chr05      | 6371514                        | [A/G]       | NA                                         |
| Ca_Desi_Chrom_5_6376546 | Ca_desi_chr05      | 6376546                        | [T/A]       | NA                                         |
| Ca_Desi_Chrom_5_6376637 | Ca_desi_chr05      | 6376637                        | [A/C]       | NA                                         |
| Ca_Desi_Chrom_5_6376650 | Ca_desi_chr05      | 6376650                        | [A/G]       | NA                                         |
| Ca_Desi_Chrom_5_6383542 | Ca_desi_chr05      | 6383542                        | [A/G]       | NA                                         |
| Ca_Desi_Chrom_5_6383562 | Ca_desi_chr05      | 6383562                        | [T/A]       | NA                                         |
| Ca_Desi_Chrom_5_6383641 | Ca_desi_chr05      | 6383641                        | [T/C]       | NA                                         |
| Ca_Desi_Chrom_5_6383696 | Ca_desi_chr05      | 6383696                        | [A/C]       | NA                                         |
| Ca_Desi_Chrom_5_6383714 | Ca_desi_chr05      | 6383714                        | [T/C]       | NA                                         |
| Ca_Desi_Chrom_5_6416789 | Ca_desi_chr05      | 6416789                        | [A/G]       | NA                                         |
| Ca_Desi_Chrom_5_6437385 | Ca_desi_chr05      | 6437385                        | [A/G]       | NA                                         |
| Ca_Desi_Chrom_5_6458466 | Ca_desi_chr05      | 6458466                        | [A/G]       | NA                                         |
| Ca_Desi_Chrom_5_6509675 | Ca_desi_chr05      | 6509675                        | [T/C]       | NA                                         |
| Ca_Desi_Chrom_5_6509718 | Ca_desi_chr05      | 6509718                        | [T/G]       | NA                                         |
| Ca_Desi_Chrom_5_6547174 | Ca_desi_chr05      | 6547174                        | [A/C]       | NA                                         |
| Ca_Desi_Chrom_5_6547198 | Ca_desi_chr05      | 6547198                        | [T/G]       | NA                                         |
| Ca_Desi_Chrom_5_6547205 | Ca_desi_chr05      | 6547205                        | [G/T]       | NA                                         |
| Ca_Desi_Chrom_5_6547207 | Ca_desi_chr05      | 6547207                        | [T/G]       | NA                                         |
| Ca_Desi_Chrom_5_6547210 | Ca_desi_chr05      | 6547210                        | [A/G]       | NA                                         |
| Ca_Desi_Chrom_5_6585073 | Ca_desi_chr05      | 6585073                        | [T/C]       | NA                                         |
| Ca_Desi_Chrom_5_6621480 | Ca_desi_chr05      | 6621480                        | [T/C]       | NA                                         |
| Ca_Desi_Chrom_5_6621511 | Ca_desi_chr05      | 6621511                        | [A/G]       | NA                                         |
| Ca_Desi_Chrom_5_6621611 | Ca_desi_chr05      | 6621611                        | [A/T]       | NA                                         |
| Ca_Desi_Chrom_5_6748718 | Ca_desi_chr05      | 6748718                        | [A/G]       | NA                                         |
| Ca_Desi_Chrom_5_6748747 | Ca_desi_chr05      | 6748747                        | [T/C]       | NA                                         |
| Ca_Desi_Chrom_5_6748769 | Ca_desi_chr05      | 6748769                        | [A/G]       | NA                                         |
| Ca_Desi_Chrom_5_6748785 | Ca_desi_chr05      | 6748785                        | [T/C]       | NA                                         |

| <b>SNP IDs</b>         | <b>Chromosomes</b> | <b>Physical positions (bp)</b> | <b>SNPs</b> | <b>NCBI SNPdb accession IDs (NCBI_ss#)</b> |
|------------------------|--------------------|--------------------------------|-------------|--------------------------------------------|
| Ca_Desig_Chr_5_6789739 | Ca_desig_chr05     | 6789739                        | [T/C]       | NA                                         |
| Ca_Desig_Chr_5_6789780 | Ca_desig_chr05     | 6789780                        | [T/C]       | NA                                         |
| Ca_Desig_Chr_5_6810969 | Ca_desig_chr05     | 6810969                        | [T/G]       | NA                                         |
| Ca_Desig_Chr_5_6836746 | Ca_desig_chr05     | 6836746                        | [T/G]       | NA                                         |
| Ca_Desig_Chr_5_6885427 | Ca_desig_chr05     | 6885427                        | [A/T]       | NA                                         |
| Ca_Desig_Chr_5_6902602 | Ca_desig_chr05     | 6902602                        | [A/C]       | NA                                         |
| Ca_Desig_Chr_5_7007017 | Ca_desig_chr05     | 7007017                        | [A/G]       | NA                                         |
| Ca_Desig_Chr_5_7036529 | Ca_desig_chr05     | 7036529                        | [T/C]       | NA                                         |
| Ca_Desig_Chr_5_7036550 | Ca_desig_chr05     | 7036550                        | [T/G]       | NA                                         |
| Ca_Desig_Chr_5_7036603 | Ca_desig_chr05     | 7036603                        | [A/T]       | NA                                         |
| Ca_Desig_Chr_5_7036618 | Ca_desig_chr05     | 7036618                        | [A/T]       | NA                                         |
| Ca_Desig_Chr_5_7036634 | Ca_desig_chr05     | 7036634                        | [A/C]       | NA                                         |
| Ca_Desig_Chr_5_7064545 | Ca_desig_chr05     | 7064545                        | [A/C]       | NA                                         |
| Ca_Desig_Chr_5_7064569 | Ca_desig_chr05     | 7064569                        | [T/C]       | NA                                         |
| Ca_Desig_Chr_5_7175827 | Ca_desig_chr05     | 7175827                        | [T/G]       | NA                                         |
| Ca_Desig_Chr_5_7175834 | Ca_desig_chr05     | 7175834                        | [A/G]       | NA                                         |
| Ca_Desig_Chr_5_7175836 | Ca_desig_chr05     | 7175836                        | [A/G]       | NA                                         |
| Ca_Desig_Chr_5_7175838 | Ca_desig_chr05     | 7175838                        | [A/G]       | NA                                         |
| Ca_Desig_Chr_5_7175855 | Ca_desig_chr05     | 7175855                        | [A/C]       | NA                                         |
| Ca_Desig_Chr_5_7266466 | Ca_desig_chr05     | 7266466                        | [A/G]       | NA                                         |
| Ca_Desig_Chr_5_7266471 | Ca_desig_chr05     | 7266471                        | [T/C]       | NA                                         |
| Ca_Desig_Chr_5_7293797 | Ca_desig_chr05     | 7293797                        | [A/C]       | NA                                         |
| Ca_Desig_Chr_5_7300680 | Ca_desig_chr05     | 7300680                        | [A/T]       | NA                                         |
| Ca_Desig_Chr_5_7300688 | Ca_desig_chr05     | 7300688                        | [T/C]       | NA                                         |
| Ca_Desig_Chr_5_7300692 | Ca_desig_chr05     | 7300692                        | [T/C]       | NA                                         |
| Ca_Desig_Chr_5_7357370 | Ca_desig_chr05     | 7357370                        | [T/G]       | NA                                         |
| Ca_Desig_Chr_5_7567944 | Ca_desig_chr05     | 7567944                        | [A/G]       | NA                                         |
| Ca_Desig_Chr_5_7567969 | Ca_desig_chr05     | 7567969                        | [A/T]       | NA                                         |
| Ca_Desig_Chr_5_7569499 | Ca_desig_chr05     | 7569499                        | [T/G]       | NA                                         |
| Ca_Desig_Chr_5_7582801 | Ca_desig_chr05     | 7582801                        | [T/G]       | NA                                         |
| Ca_Desig_Chr_5_7622349 | Ca_desig_chr05     | 7622349                        | [A/C]       | NA                                         |
| Ca_Desig_Chr_5_7628971 | Ca_desig_chr05     | 7628971                        | [A/T]       | NA                                         |
| Ca_Desig_Chr_5_7648219 | Ca_desig_chr05     | 7648219                        | [A/C]       | NA                                         |
| Ca_Desig_Chr_5_7648240 | Ca_desig_chr05     | 7648240                        | [A/C]       | NA                                         |



| <b>SNP IDs</b>          | <b>Chromosomes</b> | <b>Physical positions (bp)</b> | <b>SNPs</b> | <b>NCBI SNPdb accession IDs (NCBI_ss#)</b> |
|-------------------------|--------------------|--------------------------------|-------------|--------------------------------------------|
| Ca_Desi_Chrom_5_7648331 | Ca_desi_chr05      | 7648331                        | [A/C]       | NA                                         |
| Ca_Desi_Chrom_5_7648411 | Ca_desi_chr05      | 7648411                        | [T/A]       | NA                                         |
| Ca_Desi_Chrom_5_7648442 | Ca_desi_chr05      | 7648442                        | [A/C]       | NA                                         |
| Ca_Desi_Chrom_5_7648447 | Ca_desi_chr05      | 7648447                        | [A/C]       | NA                                         |
| Ca_Desi_Chrom_5_7681731 | Ca_desi_chr05      | 7681731                        | [A/T]       | NA                                         |
| Ca_Desi_Chrom_5_7699220 | Ca_desi_chr05      | 7699220                        | [C/G]       | NA                                         |
| Ca_Desi_Chrom_5_7699223 | Ca_desi_chr05      | 7699223                        | [T/C]       | NA                                         |
| Ca_Desi_Chrom_5_7699239 | Ca_desi_chr05      | 7699239                        | [T/G]       | NA                                         |
| Ca_Desi_Chrom_5_7699244 | Ca_desi_chr05      | 7699244                        | [T/G]       | NA                                         |
| Ca_Desi_Chrom_5_7699325 | Ca_desi_chr05      | 7699325                        | [A/G]       | NA                                         |
| Ca_Desi_Chrom_5_7781390 | Ca_desi_chr05      | 7781390                        | [A/C]       | NA                                         |
| Ca_Desi_Chrom_5_7791001 | Ca_desi_chr05      | 7791001                        | [A/C]       | NA                                         |
| Ca_Desi_Chrom_5_7803996 | Ca_desi_chr05      | 7803996                        | [A/G]       | NA                                         |
| Ca_Desi_Chrom_5_7804020 | Ca_desi_chr05      | 7804020                        | [G/T]       | NA                                         |
| Ca_Desi_Chrom_5_7804030 | Ca_desi_chr05      | 7804030                        | [A/G]       | NA                                         |
| Ca_Desi_Chrom_5_7806838 | Ca_desi_chr05      | 7806838                        | [A/C]       | NA                                         |
| Ca_Desi_Chrom_5_7827564 | Ca_desi_chr05      | 7827564                        | [G/A]       | NA                                         |
| Ca_Desi_Chrom_5_7827569 | Ca_desi_chr05      | 7827569                        | [T/G]       | NA                                         |
| Ca_Desi_Chrom_5_7827576 | Ca_desi_chr05      | 7827576                        | [A/C]       | NA                                         |
| Ca_Desi_Chrom_5_7827644 | Ca_desi_chr05      | 7827644                        | [A/C]       | NA                                         |
| Ca_Desi_Chrom_5_7827665 | Ca_desi_chr05      | 7827665                        | [A/C]       | NA                                         |
| Ca_Desi_Chrom_5_7827827 | Ca_desi_chr05      | 7827827                        | [A/C]       | NA                                         |
| Ca_Desi_Chrom_5_7835454 | Ca_desi_chr05      | 7835454                        | [T/A]       | NA                                         |
| Ca_Desi_Chrom_5_7835466 | Ca_desi_chr05      | 7835466                        | [T/G]       | NA                                         |
| Ca_Desi_Chrom_5_7863792 | Ca_desi_chr05      | 7863792                        | [T/C]       | NA                                         |
| Ca_Desi_Chrom_5_7863803 | Ca_desi_chr05      | 7863803                        | [A/C]       | NA                                         |
| Ca_Desi_Chrom_5_7863817 | Ca_desi_chr05      | 7863817                        | [A/G]       | NA                                         |
| Ca_Desi_Chrom_5_7910722 | Ca_desi_chr05      | 7910722                        | [A/C]       | NA                                         |
| Ca_Desi_Chrom_5_7918717 | Ca_desi_chr05      | 7918717                        | [T/G]       | NA                                         |
| Ca_Desi_Chrom_5_7932501 | Ca_desi_chr05      | 7932501                        | [C/A]       | NA                                         |
| Ca_Desi_Chrom_5_7932506 | Ca_desi_chr05      | 7932506                        | [G/C]       | NA                                         |
| Ca_Desi_Chrom_5_7932507 | Ca_desi_chr05      | 7932507                        | [C/A]       | NA                                         |
| Ca_Desi_Chrom_5_7932509 | Ca_desi_chr05      | 7932509                        | [A/C]       | NA                                         |
| Ca_Desi_Chrom_5_7932510 | Ca_desi_chr05      | 7932510                        | [C/G]       | NA                                         |

| <b>SNP IDs</b>          | <b>Chromosomes</b> | <b>Physical positions (bp)</b> | <b>SNPs</b> | <b>NCBI SNPdb accession IDs (NCBI_ss#)</b> |
|-------------------------|--------------------|--------------------------------|-------------|--------------------------------------------|
| Ca_Desi_Chrom_5_7932523 | Ca_desi_chr05      | 7932523                        | [T/C]       | NA                                         |
| Ca_Desi_Chrom_5_7932525 | Ca_desi_chr05      | 7932525                        | [T/C]       | NA                                         |
| Ca_Desi_Chrom_5_7932531 | Ca_desi_chr05      | 7932531                        | [C/T]       | NA                                         |
| Ca_Desi_Chrom_5_7932532 | Ca_desi_chr05      | 7932532                        | [T/C]       | NA                                         |
| Ca_Desi_Chrom_5_7948554 | Ca_desi_chr05      | 7948554                        | [A/C]       | NA                                         |
| Ca_Desi_Chrom_5_7953753 | Ca_desi_chr05      | 7953753                        | [A/C]       | NA                                         |
| Ca_Desi_Chrom_5_7953765 | Ca_desi_chr05      | 7953765                        | [T/A]       | NA                                         |
| Ca_Desi_Chrom_5_7953770 | Ca_desi_chr05      | 7953770                        | [A/C]       | NA                                         |
| Ca_Desi_Chrom_5_7962748 | Ca_desi_chr05      | 7962748                        | [T/G]       | NA                                         |
| Ca_Desi_Chrom_5_7995495 | Ca_desi_chr05      | 7995495                        | [A/T]       | NA                                         |
| Ca_Desi_Chrom_5_8004788 | Ca_desi_chr05      | 8004788                        | [T/C]       | NA                                         |
| Ca_Desi_Chrom_5_8050041 | Ca_desi_chr05      | 8050041                        | [T/C]       | NA                                         |
| Ca_Desi_Chrom_5_8050092 | Ca_desi_chr05      | 8050092                        | [T/C]       | NA                                         |
| Ca_Desi_Chrom_5_8050165 | Ca_desi_chr05      | 8050165                        | [T/C]       | NA                                         |
| Ca_Desi_Chrom_5_8050171 | Ca_desi_chr05      | 8050171                        | [A/G]       | NA                                         |
| Ca_Desi_Chrom_5_8069445 | Ca_desi_chr05      | 8069445                        | [T/C]       | NA                                         |
| Ca_Desi_Chrom_5_8131674 | Ca_desi_chr05      | 8131674                        | [A/G]       | NA                                         |
| Ca_Desi_Chrom_5_8151149 | Ca_desi_chr05      | 8151149                        | [T/G]       | NA                                         |
| Ca_Desi_Chrom_5_8153763 | Ca_desi_chr05      | 8153763                        | [A/T]       | NA                                         |
| Ca_Desi_Chrom_5_8168421 | Ca_desi_chr05      | 8168421                        | [C/A]       | NA                                         |
| Ca_Desi_Chrom_5_8256887 | Ca_desi_chr05      | 8256887                        | [A/G]       | NA                                         |
| Ca_Desi_Chrom_5_8256913 | Ca_desi_chr05      | 8256913                        | [T/A]       | NA                                         |
| Ca_Desi_Chrom_5_8256925 | Ca_desi_chr05      | 8256925                        | [T/C]       | NA                                         |
| Ca_Desi_Chrom_5_8256926 | Ca_desi_chr05      | 8256926                        | [A/G]       | NA                                         |
| Ca_Desi_Chrom_5_8266612 | Ca_desi_chr05      | 8266612                        | [A/G]       | NA                                         |
| Ca_Desi_Chrom_5_8268219 | Ca_desi_chr05      | 8268219                        | [T/C]       | NA                                         |
| Ca_Desi_Chrom_5_8268309 | Ca_desi_chr05      | 8268309                        | [T/G]       | NA                                         |
| Ca_Desi_Chrom_5_8275380 | Ca_desi_chr05      | 8275380                        | [T/G]       | NA                                         |
| Ca_Desi_Chrom_5_8389017 | Ca_desi_chr05      | 8389017                        | [T/C]       | NA                                         |
| Ca_Desi_Chrom_5_8389029 | Ca_desi_chr05      | 8389029                        | [T/G]       | NA                                         |
| Ca_Desi_Chrom_5_8454486 | Ca_desi_chr05      | 8454486                        | [T/C]       | NA                                         |
| Ca_Desi_Chrom_5_8454497 | Ca_desi_chr05      | 8454497                        | [A/G]       | NA                                         |
| Ca_Desi_Chrom_5_8454501 | Ca_desi_chr05      | 8454501                        | [T/G]       | NA                                         |
| Ca_Desi_Chrom_5_8454507 | Ca_desi_chr05      | 8454507                        | [T/G]       | NA                                         |

| <b>SNP IDs</b>          | <b>Chromosomes</b> | <b>Physical positions (bp)</b> | <b>SNPs</b> | <b>NCBI SNPdb accession IDs (NCBI_ss#)</b> |
|-------------------------|--------------------|--------------------------------|-------------|--------------------------------------------|
| Ca_Desi_Chrom_5_8454509 | Ca_desi_chr05      | 8454509                        | [T/G]       | NA                                         |
| Ca_Desi_Chrom_5_8454514 | Ca_desi_chr05      | 8454514                        | [T/G]       | NA                                         |
| Ca_Desi_Chrom_5_8454517 | Ca_desi_chr05      | 8454517                        | [C/G]       | NA                                         |
| Ca_Desi_Chrom_5_8454541 | Ca_desi_chr05      | 8454541                        | [T/C]       | NA                                         |
| Ca_Desi_Chrom_5_8488000 | Ca_desi_chr05      | 8488000                        | [T/C]       | NA                                         |
| Ca_Desi_Chrom_5_8510520 | Ca_desi_chr05      | 8510520                        | [T/C]       | NA                                         |
| Ca_Desi_Chrom_5_8511251 | Ca_desi_chr05      | 8511251                        | [A/T]       | NA                                         |
| Ca_Desi_Chrom_5_8511252 | Ca_desi_chr05      | 8511252                        | [A/C]       | NA                                         |
| Ca_Desi_Chrom_5_8511253 | Ca_desi_chr05      | 8511253                        | [G/T]       | NA                                         |
| Ca_Desi_Chrom_5_8511304 | Ca_desi_chr05      | 8511304                        | [A/C]       | NA                                         |
| Ca_Desi_Chrom_5_8511476 | Ca_desi_chr05      | 8511476                        | [A/G]       | NA                                         |
| Ca_Desi_Chrom_5_8511572 | Ca_desi_chr05      | 8511572                        | [A/T]       | NA                                         |
| Ca_Desi_Chrom_5_8515255 | Ca_desi_chr05      | 8515255                        | [A/G]       | NA                                         |
| Ca_Desi_Chrom_5_8515283 | Ca_desi_chr05      | 8515283                        | [A/C]       | NA                                         |
| Ca_Desi_Chrom_5_8515513 | Ca_desi_chr05      | 8515513                        | [A/G]       | NA                                         |
| Ca_Desi_Chrom_5_8515519 | Ca_desi_chr05      | 8515519                        | [A/T]       | NA                                         |
| Ca_Desi_Chrom_5_8534414 | Ca_desi_chr05      | 8534414                        | [T/C]       | NA                                         |
| Ca_Desi_Chrom_5_8534420 | Ca_desi_chr05      | 8534420                        | [G/A]       | NA                                         |
| Ca_Desi_Chrom_5_8534429 | Ca_desi_chr05      | 8534429                        | [A/G]       | NA                                         |
| Ca_Desi_Chrom_5_8534454 | Ca_desi_chr05      | 8534454                        | [A/G]       | NA                                         |
| Ca_Desi_Chrom_5_8545122 | Ca_desi_chr05      | 8545122                        | [T/C]       | NA                                         |
| Ca_Desi_Chrom_5_8545134 | Ca_desi_chr05      | 8545134                        | [A/C]       | NA                                         |
| Ca_Desi_Chrom_5_8545143 | Ca_desi_chr05      | 8545143                        | [T/C]       | NA                                         |
| Ca_Desi_Chrom_5_8545962 | Ca_desi_chr05      | 8545962                        | [C/A]       | NA                                         |
| Ca_Desi_Chrom_5_8545963 | Ca_desi_chr05      | 8545963                        | [C/G]       | NA                                         |
| Ca_Desi_Chrom_5_8545964 | Ca_desi_chr05      | 8545964                        | [T/A]       | NA                                         |
| Ca_Desi_Chrom_5_8545965 | Ca_desi_chr05      | 8545965                        | [A/T]       | NA                                         |
| Ca_Desi_Chrom_5_8564546 | Ca_desi_chr05      | 8564546                        | [G/T]       | NA                                         |
| Ca_Desi_Chrom_5_8600365 | Ca_desi_chr05      | 8600365                        | [A/T]       | NA                                         |
| Ca_Desi_Chrom_5_8600386 | Ca_desi_chr05      | 8600386                        | [A/G]       | NA                                         |
| Ca_Desi_Chrom_5_8600406 | Ca_desi_chr05      | 8600406                        | [A/G]       | NA                                         |
| Ca_Desi_Chrom_5_8600425 | Ca_desi_chr05      | 8600425                        | [T/C]       | NA                                         |
| Ca_Desi_Chrom_5_8627437 | Ca_desi_chr05      | 8627437                        | [A/T]       | NA                                         |
| Ca_Desi_Chrom_5_8681049 | Ca_desi_chr05      | 8681049                        | [G/T]       | NA                                         |

| <b>SNP IDs</b>          | <b>Chromosomes</b> | <b>Physical positions (bp)</b> | <b>SNPs</b> | <b>NCBI SNPdb accession IDs (NCBI_ss#)</b> |
|-------------------------|--------------------|--------------------------------|-------------|--------------------------------------------|
| Ca_Desi_Chrom_5_8728734 | Ca_desi_chr05      | 8728734                        | [T/G]       | NA                                         |
| Ca_Desi_Chrom_5_8738931 | Ca_desi_chr05      | 8738931                        | [T/G]       | NA                                         |
| Ca_Desi_Chrom_5_8764866 | Ca_desi_chr05      | 8764866                        | [T/C]       | NA                                         |
| Ca_Desi_Chrom_5_8765479 | Ca_desi_chr05      | 8765479                        | [A/T]       | NA                                         |
| Ca_Desi_Chrom_5_8765480 | Ca_desi_chr05      | 8765480                        | [G/C]       | NA                                         |
| Ca_Desi_Chrom_5_8765481 | Ca_desi_chr05      | 8765481                        | [G/T]       | NA                                         |
| Ca_Desi_Chrom_5_8804721 | Ca_desi_chr05      | 8804721                        | [A/C]       | NA                                         |
| Ca_Desi_Chrom_5_8813565 | Ca_desi_chr05      | 8813565                        | [A/T]       | NA                                         |
| Ca_Desi_Chrom_5_8813569 | Ca_desi_chr05      | 8813569                        | [A/C]       | NA                                         |
| Ca_Desi_Chrom_5_8813596 | Ca_desi_chr05      | 8813596                        | [A/G]       | NA                                         |
| Ca_Desi_Chrom_5_8813608 | Ca_desi_chr05      | 8813608                        | [A/G]       | NA                                         |
| Ca_Desi_Chrom_5_8839849 | Ca_desi_chr05      | 8839849                        | [T/G]       | NA                                         |
| Ca_Desi_Chrom_5_8839851 | Ca_desi_chr05      | 8839851                        | [T/C]       | NA                                         |
| Ca_Desi_Chrom_5_8839857 | Ca_desi_chr05      | 8839857                        | [T/C]       | NA                                         |
| Ca_Desi_Chrom_5_8842551 | Ca_desi_chr05      | 8842551                        | [G/A]       | NA                                         |
| Ca_Desi_Chrom_5_8851732 | Ca_desi_chr05      | 8851732                        | [A/C]       | NA                                         |
| Ca_Desi_Chrom_5_8868697 | Ca_desi_chr05      | 8868697                        | [A/G]       | NA                                         |
| Ca_Desi_Chrom_5_8868714 | Ca_desi_chr05      | 8868714                        | [A/T]       | NA                                         |
| Ca_Desi_Chrom_5_9033610 | Ca_desi_chr05      | 9033610                        | [T/G]       | NA                                         |
| Ca_Desi_Chrom_5_9051729 | Ca_desi_chr05      | 9051729                        | [A/C]       | NA                                         |
| Ca_Desi_Chrom_5_9065183 | Ca_desi_chr05      | 9065183                        | [T/C]       | NA                                         |
| Ca_Desi_Chrom_5_9073799 | Ca_desi_chr05      | 9073799                        | [T/C]       | NA                                         |
| Ca_Desi_Chrom_5_9073862 | Ca_desi_chr05      | 9073862                        | [A/C]       | NA                                         |
| Ca_Desi_Chrom_5_9073869 | Ca_desi_chr05      | 9073869                        | [A/G]       | NA                                         |
| Ca_Desi_Chrom_5_9130735 | Ca_desi_chr05      | 9130735                        | [T/A]       | NA                                         |
| Ca_Desi_Chrom_5_9130736 | Ca_desi_chr05      | 9130736                        | [A/G]       | NA                                         |
| Ca_Desi_Chrom_5_9130745 | Ca_desi_chr05      | 9130745                        | [A/G]       | NA                                         |
| Ca_Desi_Chrom_5_9146295 | Ca_desi_chr05      | 9146295                        | [T/A]       | NA                                         |
| Ca_Desi_Chrom_5_9149804 | Ca_desi_chr05      | 9149804                        | [G/T]       | NA                                         |
| Ca_Desi_Chrom_5_9149908 | Ca_desi_chr05      | 9149908                        | [T/C]       | NA                                         |
| Ca_Desi_Chrom_5_9149925 | Ca_desi_chr05      | 9149925                        | [T/G]       | NA                                         |
| Ca_Desi_Chrom_5_9149946 | Ca_desi_chr05      | 9149946                        | [A/G]       | NA                                         |
| Ca_Desi_Chrom_5_9159865 | Ca_desi_chr05      | 9159865                        | [T/C]       | NA                                         |
| Ca_Desi_Chrom_5_9242586 | Ca_desi_chr05      | 9242586                        | [T/A]       | NA                                         |

| <b>SNP IDs</b>          | <b>Chromosomes</b> | <b>Physical positions (bp)</b> | <b>SNPs</b> | <b>NCBI SNPdb accession IDs (NCBI_ss#)</b> |
|-------------------------|--------------------|--------------------------------|-------------|--------------------------------------------|
| Ca_Desi_Chrom_5_9242589 | Ca_desi_chr05      | 9242589                        | [C/T]       | NA                                         |
| Ca_Desi_Chrom_5_9242592 | Ca_desi_chr05      | 9242592                        | [C/T]       | NA                                         |
| Ca_Desi_Chrom_5_9252432 | Ca_desi_chr05      | 9252432                        | [T/C]       | NA                                         |
| Ca_Desi_Chrom_5_9252447 | Ca_desi_chr05      | 9252447                        | [T/C]       | NA                                         |
| Ca_Desi_Chrom_5_9252450 | Ca_desi_chr05      | 9252450                        | [A/C]       | NA                                         |
| Ca_Desi_Chrom_5_9252468 | Ca_desi_chr05      | 9252468                        | [A/G]       | NA                                         |
| Ca_Desi_Chrom_5_9252471 | Ca_desi_chr05      | 9252471                        | [T/C]       | NA                                         |
| Ca_Desi_Chrom_5_9262321 | Ca_desi_chr05      | 9262321                        | [A/C]       | NA                                         |
| Ca_Desi_Chrom_5_9276300 | Ca_desi_chr05      | 9276300                        | [T/C]       | NA                                         |
| Ca_Desi_Chrom_5_9306310 | Ca_desi_chr05      | 9306310                        | [T/G]       | NA                                         |
| Ca_Desi_Chrom_5_9327067 | Ca_desi_chr05      | 9327067                        | [T/C]       | NA                                         |
| Ca_Desi_Chrom_5_9334354 | Ca_desi_chr05      | 9334354                        | [A/T]       | NA                                         |
| Ca_Desi_Chrom_5_9334367 | Ca_desi_chr05      | 9334367                        | [T/C]       | NA                                         |
| Ca_Desi_Chrom_5_9334376 | Ca_desi_chr05      | 9334376                        | [T/G]       | NA                                         |
| Ca_Desi_Chrom_5_9334379 | Ca_desi_chr05      | 9334379                        | [T/C]       | NA                                         |
| Ca_Desi_Chrom_5_9334384 | Ca_desi_chr05      | 9334384                        | [T/C]       | NA                                         |
| Ca_Desi_Chrom_5_9334387 | Ca_desi_chr05      | 9334387                        | [T/C]       | NA                                         |
| Ca_Desi_Chrom_5_9334388 | Ca_desi_chr05      | 9334388                        | [C/T]       | NA                                         |
| Ca_Desi_Chrom_5_9334392 | Ca_desi_chr05      | 9334392                        | [T/C]       | NA                                         |
| Ca_Desi_Chrom_5_9334394 | Ca_desi_chr05      | 9334394                        | [C/T]       | NA                                         |
| Ca_Desi_Chrom_5_9334396 | Ca_desi_chr05      | 9334396                        | [T/C]       | NA                                         |
| Ca_Desi_Chrom_5_9334402 | Ca_desi_chr05      | 9334402                        | [T/A]       | NA                                         |
| Ca_Desi_Chrom_5_9404637 | Ca_desi_chr05      | 9404637                        | [A/G]       | NA                                         |
| Ca_Desi_Chrom_5_9404673 | Ca_desi_chr05      | 9404673                        | [A/G]       | NA                                         |
| Ca_Desi_Chrom_5_9414382 | Ca_desi_chr05      | 9414382                        | [A/G]       | NA                                         |
| Ca_Desi_Chrom_5_9414393 | Ca_desi_chr05      | 9414393                        | [T/C]       | NA                                         |
| Ca_Desi_Chrom_5_9414396 | Ca_desi_chr05      | 9414396                        | [T/C]       | NA                                         |
| Ca_Desi_Chrom_5_9414411 | Ca_desi_chr05      | 9414411                        | [A/G]       | NA                                         |
| Ca_Desi_Chrom_5_9414427 | Ca_desi_chr05      | 9414427                        | [A/G]       | NA                                         |
| Ca_Desi_Chrom_5_9443377 | Ca_desi_chr05      | 9443377                        | [T/G]       | NA                                         |
| Ca_Desi_Chrom_5_9443588 | Ca_desi_chr05      | 9443588                        | [A/C]       | NA                                         |
| Ca_Desi_Chrom_5_9444431 | Ca_desi_chr05      | 9444431                        | [A/G]       | NA                                         |
| Ca_Desi_Chrom_5_9558483 | Ca_desi_chr05      | 9558483                        | [T/G]       | NA                                         |
| Ca_Desi_Chrom_5_9558491 | Ca_desi_chr05      | 9558491                        | [T/C]       | NA                                         |

| <b>SNP IDs</b>           | <b>Chromosomes</b> | <b>Physical positions (bp)</b> | <b>SNPs</b> | <b>NCBI SNPdb accession IDs (NCBI_ss#)</b> |
|--------------------------|--------------------|--------------------------------|-------------|--------------------------------------------|
| Ca_Desi_Chrom_5_9558496  | Ca_desi_chr05      | 9558496                        | [T/G]       | NA                                         |
| Ca_Desi_Chrom_5_9558500  | Ca_desi_chr05      | 9558500                        | [T/C]       | NA                                         |
| Ca_Desi_Chrom_5_9564890  | Ca_desi_chr05      | 9564890                        | [T/A]       | NA                                         |
| Ca_Desi_Chrom_5_9637797  | Ca_desi_chr05      | 9637797                        | [A/T]       | NA                                         |
| Ca_Desi_Chrom_5_9637811  | Ca_desi_chr05      | 9637811                        | [T/C]       | NA                                         |
| Ca_Desi_Chrom_5_9637828  | Ca_desi_chr05      | 9637828                        | [A/G]       | NA                                         |
| Ca_Desi_Chrom_5_9666137  | Ca_desi_chr05      | 9666137                        | [T/G]       | NA                                         |
| Ca_Desi_Chrom_5_9666142  | Ca_desi_chr05      | 9666142                        | [T/G]       | NA                                         |
| Ca_Desi_Chrom_5_9724592  | Ca_desi_chr05      | 9724592                        | [T/G]       | NA                                         |
| Ca_Desi_Chrom_5_9772984  | Ca_desi_chr05      | 9772984                        | [A/T]       | NA                                         |
| Ca_Desi_Chrom_5_9783887  | Ca_desi_chr05      | 9783887                        | [T/C]       | NA                                         |
| Ca_Desi_Chrom_5_9783919  | Ca_desi_chr05      | 9783919                        | [T/G]       | NA                                         |
| Ca_Desi_Chrom_5_9806434  | Ca_desi_chr05      | 9806434                        | [A/G]       | NA                                         |
| Ca_Desi_Chrom_5_9806620  | Ca_desi_chr05      | 9806620                        | [A/C]       | NA                                         |
| Ca_Desi_Chrom_5_9806638  | Ca_desi_chr05      | 9806638                        | [A/C]       | NA                                         |
| Ca_Desi_Chrom_5_9872975  | Ca_desi_chr05      | 9872975                        | [A/C]       | NA                                         |
| Ca_Desi_Chrom_5_9881537  | Ca_desi_chr05      | 9881537                        | [T/G]       | NA                                         |
| Ca_Desi_Chrom_5_9885946  | Ca_desi_chr05      | 9885946                        | [T/G]       | NA                                         |
| Ca_Desi_Chrom_5_9885955  | Ca_desi_chr05      | 9885955                        | [A/G]       | NA                                         |
| Ca_Desi_Chrom_5_9885967  | Ca_desi_chr05      | 9885967                        | [T/C]       | NA                                         |
| Ca_Desi_Chrom_5_9885970  | Ca_desi_chr05      | 9885970                        | [T/C]       | NA                                         |
| Ca_Desi_Chrom_5_9895834  | Ca_desi_chr05      | 9895834                        | [T/G]       | NA                                         |
| Ca_Desi_Chrom_5_9945176  | Ca_desi_chr05      | 9945176                        | [G/T]       | NA                                         |
| Ca_Desi_Chrom_5_9946931  | Ca_desi_chr05      | 9946931                        | [G/T]       | NA                                         |
| Ca_Desi_Chrom_5_9946938  | Ca_desi_chr05      | 9946938                        | [A/G]       | NA                                         |
| Ca_Desi_Chrom_5_9947007  | Ca_desi_chr05      | 9947007                        | [T/C]       | NA                                         |
| Ca_Desi_Chrom_5_9947052  | Ca_desi_chr05      | 9947052                        | [T/C]       | NA                                         |
| Ca_Desi_Chrom_5_9962810  | Ca_desi_chr05      | 9962810                        | [A/C]       | NA                                         |
| Ca_Desi_Chrom_5_9972166  | Ca_desi_chr05      | 9972166                        | [T/A]       | NA                                         |
| Ca_Desi_Chrom_5_10077108 | Ca_desi_chr05      | 10077108                       | [T/G]       | NA                                         |
| Ca_Desi_Chrom_5_10077114 | Ca_desi_chr05      | 10077114                       | [A/G]       | NA                                         |
| Ca_Desi_Chrom_5_10105094 | Ca_desi_chr05      | 10105094                       | [T/G]       | NA                                         |
| Ca_Desi_Chrom_5_10105466 | Ca_desi_chr05      | 10105466                       | [A/C]       | NA                                         |
| Ca_Desi_Chrom_5_10109391 | Ca_desi_chr05      | 10109391                       | [T/C]       | NA                                         |

| <b>SNP IDs</b>           | <b>Chromosomes</b> | <b>Physical positions (bp)</b> | <b>SNPs</b> | <b>NCBI SNPdb accession IDs (NCBI_ss#)</b> |
|--------------------------|--------------------|--------------------------------|-------------|--------------------------------------------|
| Ca_Desi_Chrom_5_10109431 | Ca_desi_chr05      | 10109431                       | [A/G]       | NA                                         |
| Ca_Desi_Chrom_5_10109481 | Ca_desi_chr05      | 10109481                       | [T/C]       | NA                                         |
| Ca_Desi_Chrom_5_10109832 | Ca_desi_chr05      | 10109832                       | [T/C]       | NA                                         |
| Ca_Desi_Chrom_5_10109834 | Ca_desi_chr05      | 10109834                       | [A/G]       | NA                                         |
| Ca_Desi_Chrom_5_10109867 | Ca_desi_chr05      | 10109867                       | [T/C]       | NA                                         |
| Ca_Desi_Chrom_5_10109872 | Ca_desi_chr05      | 10109872                       | [T/C]       | NA                                         |
| Ca_Desi_Chrom_5_10111956 | Ca_desi_chr05      | 10111956                       | [T/G]       | NA                                         |
| Ca_Desi_Chrom_5_10111959 | Ca_desi_chr05      | 10111959                       | [T/G]       | NA                                         |
| Ca_Desi_Chrom_5_10595054 | Ca_desi_chr05      | 10595054                       | [G/T]       | NA                                         |
| Ca_Desi_Chrom_5_10598483 | Ca_desi_chr05      | 10598483                       | [A/T]       | NA                                         |
| Ca_Desi_Chrom_5_10598523 | Ca_desi_chr05      | 10598523                       | [A/C]       | NA                                         |
| Ca_Desi_Chrom_5_10610760 | Ca_desi_chr05      | 10610760                       | [A/G]       | NA                                         |
| Ca_Desi_Chrom_5_10625145 | Ca_desi_chr05      | 10625145                       | [A/G]       | NA                                         |
| Ca_Desi_Chrom_5_10625149 | Ca_desi_chr05      | 10625149                       | [T/C]       | NA                                         |
| Ca_Desi_Chrom_5_10625153 | Ca_desi_chr05      | 10625153                       | [T/A]       | NA                                         |
| Ca_Desi_Chrom_5_10625168 | Ca_desi_chr05      | 10625168                       | [T/G]       | NA                                         |
| Ca_Desi_Chrom_5_10625181 | Ca_desi_chr05      | 10625181                       | [T/G]       | NA                                         |
| Ca_Desi_Chrom_5_10625225 | Ca_desi_chr05      | 10625225                       | [A/C]       | NA                                         |
| Ca_Desi_Chrom_5_10625356 | Ca_desi_chr05      | 10625356                       | [A/C]       | NA                                         |
| Ca_Desi_Chrom_5_10743453 | Ca_desi_chr05      | 10743453                       | [A/C]       | NA                                         |
| Ca_Desi_Chrom_5_10744185 | Ca_desi_chr05      | 10744185                       | [T/C]       | NA                                         |
| Ca_Desi_Chrom_5_10744224 | Ca_desi_chr05      | 10744224                       | [A/C]       | NA                                         |
| Ca_Desi_Chrom_5_10744341 | Ca_desi_chr05      | 10744341                       | [A/C]       | NA                                         |
| Ca_Desi_Chrom_5_10763827 | Ca_desi_chr05      | 10763827                       | [T/C]       | NA                                         |
| Ca_Desi_Chrom_5_10763867 | Ca_desi_chr05      | 10763867                       | [T/G]       | NA                                         |
| Ca_Desi_Chrom_5_10763903 | Ca_desi_chr05      | 10763903                       | [G/A]       | NA                                         |
| Ca_Desi_Chrom_5_10793641 | Ca_desi_chr05      | 10793641                       | [A/C]       | NA                                         |
| Ca_Desi_Chrom_5_10793651 | Ca_desi_chr05      | 10793651                       | [T/C]       | NA                                         |
| Ca_Desi_Chrom_5_10836604 | Ca_desi_chr05      | 10836604                       | [G/T]       | NA                                         |
| Ca_Desi_Chrom_5_10836623 | Ca_desi_chr05      | 10836623                       | [A/C]       | NA                                         |
| Ca_Desi_Chrom_5_10836637 | Ca_desi_chr05      | 10836637                       | [T/C]       | NA                                         |
| Ca_Desi_Chrom_5_10852928 | Ca_desi_chr05      | 10852928                       | [G/A]       | NA                                         |
| Ca_Desi_Chrom_5_10852929 | Ca_desi_chr05      | 10852929                       | [A/T]       | NA                                         |
| Ca_Desi_Chrom_5_10852931 | Ca_desi_chr05      | 10852931                       | [G/T]       | NA                                         |

| <b>SNP IDs</b>           | <b>Chromosomes</b> | <b>Physical positions (bp)</b> | <b>SNPs</b> | <b>NCBI SNPdb accession IDs (NCBI_ss#)</b> |
|--------------------------|--------------------|--------------------------------|-------------|--------------------------------------------|
| Ca_Desi_Chrom_5_10865753 | Ca_desi_chr05      | 10865753                       | [T/C]       | NA                                         |
| Ca_Desi_Chrom_5_10865760 | Ca_desi_chr05      | 10865760                       | [T/C]       | NA                                         |
| Ca_Desi_Chrom_5_10888364 | Ca_desi_chr05      | 10888364                       | [A/C]       | NA                                         |
| Ca_Desi_Chrom_5_10914643 | Ca_desi_chr05      | 10914643                       | [T/G]       | NA                                         |
| Ca_Desi_Chrom_5_10960809 | Ca_desi_chr05      | 10960809                       | [T/G]       | NA                                         |
| Ca_Desi_Chrom_5_10960811 | Ca_desi_chr05      | 10960811                       | [A/G]       | NA                                         |
| Ca_Desi_Chrom_5_10960813 | Ca_desi_chr05      | 10960813                       | [C/T]       | NA                                         |
| Ca_Desi_Chrom_5_10973116 | Ca_desi_chr05      | 10973116                       | [A/C]       | NA                                         |
| Ca_Desi_Chrom_5_10973119 | Ca_desi_chr05      | 10973119                       | [A/C]       | NA                                         |
| Ca_Desi_Chrom_5_11028658 | Ca_desi_chr05      | 11028658                       | [C/G]       | NA                                         |
| Ca_Desi_Chrom_5_11028670 | Ca_desi_chr05      | 11028670                       | [C/A]       | NA                                         |
| Ca_Desi_Chrom_5_11028684 | Ca_desi_chr05      | 11028684                       | [A/C]       | NA                                         |
| Ca_Desi_Chrom_5_11029092 | Ca_desi_chr05      | 11029092                       | [T/G]       | NA                                         |
| Ca_Desi_Chrom_5_11029108 | Ca_desi_chr05      | 11029108                       | [A/T]       | NA                                         |
| Ca_Desi_Chrom_5_11038446 | Ca_desi_chr05      | 11038446                       | [T/C]       | NA                                         |
| Ca_Desi_Chrom_5_11038453 | Ca_desi_chr05      | 11038453                       | [T/C]       | NA                                         |
| Ca_Desi_Chrom_5_11063910 | Ca_desi_chr05      | 11063910                       | [C/G]       | NA                                         |
| Ca_Desi_Chrom_5_11143975 | Ca_desi_chr05      | 11143975                       | [C/T]       | NA                                         |
| Ca_Desi_Chrom_5_11160609 | Ca_desi_chr05      | 11160609                       | [A/G]       | NA                                         |
| Ca_Desi_Chrom_5_11160614 | Ca_desi_chr05      | 11160614                       | [T/C]       | NA                                         |
| Ca_Desi_Chrom_5_11160620 | Ca_desi_chr05      | 11160620                       | [C/G]       | NA                                         |
| Ca_Desi_Chrom_5_11160623 | Ca_desi_chr05      | 11160623                       | [A/G]       | NA                                         |
| Ca_Desi_Chrom_5_11160626 | Ca_desi_chr05      | 11160626                       | [T/C]       | NA                                         |
| Ca_Desi_Chrom_5_11160633 | Ca_desi_chr05      | 11160633                       | [T/C]       | NA                                         |
| Ca_Desi_Chrom_5_11160638 | Ca_desi_chr05      | 11160638                       | [T/C]       | NA                                         |
| Ca_Desi_Chrom_5_11160641 | Ca_desi_chr05      | 11160641                       | [A/G]       | NA                                         |
| Ca_Desi_Chrom_5_11160652 | Ca_desi_chr05      | 11160652                       | [T/C]       | NA                                         |
| Ca_Desi_Chrom_5_11160656 | Ca_desi_chr05      | 11160656                       | [T/C]       | NA                                         |
| Ca_Desi_Chrom_5_11160660 | Ca_desi_chr05      | 11160660                       | [T/C]       | NA                                         |
| Ca_Desi_Chrom_5_11160669 | Ca_desi_chr05      | 11160669                       | [T/C]       | NA                                         |
| Ca_Desi_Chrom_5_11205333 | Ca_desi_chr05      | 11205333                       | [T/A]       | NA                                         |
| Ca_Desi_Chrom_5_11214425 | Ca_desi_chr05      | 11214425                       | [A/G]       | NA                                         |
| Ca_Desi_Chrom_5_11214446 | Ca_desi_chr05      | 11214446                       | [T/G]       | NA                                         |
| Ca_Desi_Chrom_5_11214451 | Ca_desi_chr05      | 11214451                       | [A/G]       | NA                                         |



| <b>SNP IDs</b>          | <b>Chromosomes</b> | <b>Physical positions (bp)</b> | <b>SNPs</b> | <b>NCBI SNPdb accession IDs (NCBI_ss#)</b> |
|-------------------------|--------------------|--------------------------------|-------------|--------------------------------------------|
| Ca_Desig_Chr_5_11214453 | Ca_desig_chr05     | 11214453                       | [A/G]       | NA                                         |
| Ca_Desig_Chr_5_11214457 | Ca_desig_chr05     | 11214457                       | [T/G]       | NA                                         |
| Ca_Desig_Chr_5_11392894 | Ca_desig_chr05     | 11392894                       | [A/G]       | NA                                         |
| Ca_Desig_Chr_5_11400385 | Ca_desig_chr05     | 11400385                       | [T/G]       | NA                                         |
| Ca_Desig_Chr_5_11406738 | Ca_desig_chr05     | 11406738                       | [T/C]       | NA                                         |
| Ca_Desig_Chr_5_11406771 | Ca_desig_chr05     | 11406771                       | [T/C]       | NA                                         |
| Ca_Desig_Chr_5_11406840 | Ca_desig_chr05     | 11406840                       | [A/G]       | NA                                         |
| Ca_Desig_Chr_5_11407014 | Ca_desig_chr05     | 11407014                       | [A/C]       | NA                                         |
| Ca_Desig_Chr_5_11437653 | Ca_desig_chr05     | 11437653                       | [G/T]       | NA                                         |
| Ca_Desig_Chr_5_11437775 | Ca_desig_chr05     | 11437775                       | [A/T]       | NA                                         |
| Ca_Desig_Chr_5_11437777 | Ca_desig_chr05     | 11437777                       | [C/G]       | NA                                         |
| Ca_Desig_Chr_5_11514037 | Ca_desig_chr05     | 11514037                       | [A/T]       | NA                                         |
| Ca_Desig_Chr_5_11514041 | Ca_desig_chr05     | 11514041                       | [A/C]       | NA                                         |
| Ca_Desig_Chr_5_11514043 | Ca_desig_chr05     | 11514043                       | [A/C]       | NA                                         |
| Ca_Desig_Chr_5_11514053 | Ca_desig_chr05     | 11514053                       | [A/G]       | NA                                         |
| Ca_Desig_Chr_5_11514057 | Ca_desig_chr05     | 11514057                       | [T/C]       | NA                                         |
| Ca_Desig_Chr_5_11514074 | Ca_desig_chr05     | 11514074                       | [T/C]       | NA                                         |
| Ca_Desig_Chr_5_11514078 | Ca_desig_chr05     | 11514078                       | [T/C]       | NA                                         |
| Ca_Desig_Chr_5_11589918 | Ca_desig_chr05     | 11589918                       | [T/G]       | NA                                         |
| Ca_Desig_Chr_5_11604545 | Ca_desig_chr05     | 11604545                       | [T/G]       | NA                                         |
| Ca_Desig_Chr_5_11604585 | Ca_desig_chr05     | 11604585                       | [G/T]       | NA                                         |
| Ca_Desig_Chr_5_11604659 | Ca_desig_chr05     | 11604659                       | [T/C]       | NA                                         |
| Ca_Desig_Chr_5_11604679 | Ca_desig_chr05     | 11604679                       | [T/G]       | NA                                         |
| Ca_Desig_Chr_5_11604681 | Ca_desig_chr05     | 11604681                       | [T/G]       | NA                                         |
| Ca_Desig_Chr_5_11604691 | Ca_desig_chr05     | 11604691                       | [A/G]       | NA                                         |
| Ca_Desig_Chr_5_11604698 | Ca_desig_chr05     | 11604698                       | [T/C]       | NA                                         |
| Ca_Desig_Chr_5_11609169 | Ca_desig_chr05     | 11609169                       | [G/T]       | NA                                         |
| Ca_Desig_Chr_5_11609170 | Ca_desig_chr05     | 11609170                       | [A/T]       | NA                                         |
| Ca_Desig_Chr_5_11616547 | Ca_desig_chr05     | 11616547                       | [G/C]       | NA                                         |
| Ca_Desig_Chr_5_11656990 | Ca_desig_chr05     | 11656990                       | [T/G]       | NA                                         |
| Ca_Desig_Chr_5_11657030 | Ca_desig_chr05     | 11657030                       | [T/C]       | NA                                         |
| Ca_Desig_Chr_5_11657035 | Ca_desig_chr05     | 11657035                       | [T/C]       | NA                                         |
| Ca_Desig_Chr_5_11685392 | Ca_desig_chr05     | 11685392                       | [T/C]       | NA                                         |
| Ca_Desig_Chr_5_11685412 | Ca_desig_chr05     | 11685412                       | [T/A]       | NA                                         |

| <b>SNP IDs</b>           | <b>Chromosomes</b> | <b>Physical positions (bp)</b> | <b>SNPs</b> | <b>NCBI SNPdb accession IDs (NCBI_ss#)</b> |
|--------------------------|--------------------|--------------------------------|-------------|--------------------------------------------|
| Ca_Desi_Chrom_5_11685416 | Ca_desi_chr05      | 11685416                       | [T/C]       | NA                                         |
| Ca_Desi_Chrom_5_11685421 | Ca_desi_chr05      | 11685421                       | [A/G]       | NA                                         |
| Ca_Desi_Chrom_5_11733909 | Ca_desi_chr05      | 11733909                       | [A/C]       | NA                                         |
| Ca_Desi_Chrom_5_11752359 | Ca_desi_chr05      | 11752359                       | [T/G]       | NA                                         |
| Ca_Desi_Chrom_5_11753756 | Ca_desi_chr05      | 11753756                       | [T/A]       | NA                                         |
| Ca_Desi_Chrom_5_11793251 | Ca_desi_chr05      | 11793251                       | [C/A]       | NA                                         |
| Ca_Desi_Chrom_5_11793252 | Ca_desi_chr05      | 11793252                       | [T/G]       | NA                                         |
| Ca_Desi_Chrom_5_11793291 | Ca_desi_chr05      | 11793291                       | [A/C]       | NA                                         |
| Ca_Desi_Chrom_5_11793302 | Ca_desi_chr05      | 11793302                       | [T/C]       | NA                                         |
| Ca_Desi_Chrom_5_11795551 | Ca_desi_chr05      | 11795551                       | [A/C]       | NA                                         |
| Ca_Desi_Chrom_5_11868634 | Ca_desi_chr05      | 11868634                       | [A/C]       | NA                                         |
| Ca_Desi_Chrom_5_11868638 | Ca_desi_chr05      | 11868638                       | [A/T]       | NA                                         |
| Ca_Desi_Chrom_5_11868639 | Ca_desi_chr05      | 11868639                       | [G/C]       | NA                                         |
| Ca_Desi_Chrom_5_11870348 | Ca_desi_chr05      | 11870348                       | [A/C]       | NA                                         |
| Ca_Desi_Chrom_5_11973730 | Ca_desi_chr05      | 11973730                       | [T/G]       | NA                                         |
| Ca_Desi_Chrom_5_11973786 | Ca_desi_chr05      | 11973786                       | [T/C]       | NA                                         |
| Ca_Desi_Chrom_5_11987499 | Ca_desi_chr05      | 11987499                       | [A/C]       | NA                                         |
| Ca_Desi_Chrom_5_11989946 | Ca_desi_chr05      | 11989946                       | [T/C]       | NA                                         |
| Ca_Desi_Chrom_5_11990014 | Ca_desi_chr05      | 11990014                       | [A/G]       | NA                                         |
| Ca_Desi_Chrom_5_12010099 | Ca_desi_chr05      | 12010099                       | [A/G]       | NA                                         |
| Ca_Desi_Chrom_5_12010101 | Ca_desi_chr05      | 12010101                       | [T/G]       | NA                                         |
| Ca_Desi_Chrom_5_12029705 | Ca_desi_chr05      | 12029705                       | [T/G]       | NA                                         |
| Ca_Desi_Chrom_5_12036244 | Ca_desi_chr05      | 12036244                       | [T/G]       | NA                                         |
| Ca_Desi_Chrom_5_12036278 | Ca_desi_chr05      | 12036278                       | [A/C]       | NA                                         |
| Ca_Desi_Chrom_5_12037326 | Ca_desi_chr05      | 12037326                       | [T/G]       | NA                                         |
| Ca_Desi_Chrom_5_12037340 | Ca_desi_chr05      | 12037340                       | [T/C]       | NA                                         |
| Ca_Desi_Chrom_5_12079134 | Ca_desi_chr05      | 12079134                       | [T/G]       | NA                                         |
| Ca_Desi_Chrom_5_12107002 | Ca_desi_chr05      | 12107002                       | [A/G]       | NA                                         |
| Ca_Desi_Chrom_5_12112980 | Ca_desi_chr05      | 12112980                       | [C/T]       | NA                                         |
| Ca_Desi_Chrom_5_12148739 | Ca_desi_chr05      | 12148739                       | [A/C]       | NA                                         |
| Ca_Desi_Chrom_5_12148774 | Ca_desi_chr05      | 12148774                       | [T/A]       | NA                                         |
| Ca_Desi_Chrom_5_12225476 | Ca_desi_chr05      | 12225476                       | [A/C]       | NA                                         |
| Ca_Desi_Chrom_5_12361818 | Ca_desi_chr05      | 12361818                       | [A/G]       | NA                                         |
| Ca_Desi_Chrom_5_12361972 | Ca_desi_chr05      | 12361972                       | [G/T]       | NA                                         |

| <b>SNP IDs</b>           | <b>Chromosomes</b> | <b>Physical positions (bp)</b> | <b>SNPs</b> | <b>NCBI SNPdb accession IDs (NCBI_ss#)</b> |
|--------------------------|--------------------|--------------------------------|-------------|--------------------------------------------|
| Ca_Desi_Chrom_5_12393527 | Ca_desi_chr05      | 12393527                       | [A/G]       | NA                                         |
| Ca_Desi_Chrom_5_12393547 | Ca_desi_chr05      | 12393547                       | [T/C]       | NA                                         |
| Ca_Desi_Chrom_5_12393549 | Ca_desi_chr05      | 12393549                       | [A/G]       | NA                                         |
| Ca_Desi_Chrom_5_12393553 | Ca_desi_chr05      | 12393553                       | [A/G]       | NA                                         |
| Ca_Desi_Chrom_5_12393557 | Ca_desi_chr05      | 12393557                       | [A/G]       | NA                                         |
| Ca_Desi_Chrom_5_12393562 | Ca_desi_chr05      | 12393562                       | [T/G]       | NA                                         |
| Ca_Desi_Chrom_5_12393571 | Ca_desi_chr05      | 12393571                       | [T/C]       | NA                                         |
| Ca_Desi_Chrom_5_12393573 | Ca_desi_chr05      | 12393573                       | [C/G]       | NA                                         |
| Ca_Desi_Chrom_5_12393584 | Ca_desi_chr05      | 12393584                       | [T/C]       | NA                                         |
| Ca_Desi_Chrom_5_12393609 | Ca_desi_chr05      | 12393609                       | [T/G]       | NA                                         |
| Ca_Desi_Chrom_5_12393792 | Ca_desi_chr05      | 12393792                       | [T/C]       | NA                                         |
| Ca_Desi_Chrom_5_12393793 | Ca_desi_chr05      | 12393793                       | [T/G]       | NA                                         |
| Ca_Desi_Chrom_5_12393808 | Ca_desi_chr05      | 12393808                       | [A/G]       | NA                                         |
| Ca_Desi_Chrom_5_12396987 | Ca_desi_chr05      | 12396987                       | [G/A]       | NA                                         |
| Ca_Desi_Chrom_5_12404859 | Ca_desi_chr05      | 12404859                       | [A/T]       | NA                                         |
| Ca_Desi_Chrom_5_12404871 | Ca_desi_chr05      | 12404871                       | [A/G]       | NA                                         |
| Ca_Desi_Chrom_5_12404876 | Ca_desi_chr05      | 12404876                       | [C/A]       | NA                                         |
| Ca_Desi_Chrom_5_12404880 | Ca_desi_chr05      | 12404880                       | [A/G]       | NA                                         |
| Ca_Desi_Chrom_5_12404890 | Ca_desi_chr05      | 12404890                       | [T/C]       | NA                                         |
| Ca_Desi_Chrom_5_12404898 | Ca_desi_chr05      | 12404898                       | [A/C]       | NA                                         |
| Ca_Desi_Chrom_5_12404902 | Ca_desi_chr05      | 12404902                       | [A/G]       | NA                                         |
| Ca_Desi_Chrom_5_12404904 | Ca_desi_chr05      | 12404904                       | [A/G]       | NA                                         |
| Ca_Desi_Chrom_5_12406448 | Ca_desi_chr05      | 12406448                       | [A/C]       | NA                                         |
| Ca_Desi_Chrom_5_12434400 | Ca_desi_chr05      | 12434400                       | [T/G]       | NA                                         |
| Ca_Desi_Chrom_5_12461772 | Ca_desi_chr05      | 12461772                       | [C/A]       | NA                                         |
| Ca_Desi_Chrom_5_12461782 | Ca_desi_chr05      | 12461782                       | [A/C]       | NA                                         |
| Ca_Desi_Chrom_5_12461786 | Ca_desi_chr05      | 12461786                       | [C/A]       | NA                                         |
| Ca_Desi_Chrom_5_12467135 | Ca_desi_chr05      | 12467135                       | [T/C]       | NA                                         |
| Ca_Desi_Chrom_5_12467236 | Ca_desi_chr05      | 12467236                       | [G/T]       | NA                                         |
| Ca_Desi_Chrom_5_12467266 | Ca_desi_chr05      | 12467266                       | [A/G]       | NA                                         |
| Ca_Desi_Chrom_5_12467268 | Ca_desi_chr05      | 12467268                       | [C/T]       | NA                                         |
| Ca_Desi_Chrom_5_12467275 | Ca_desi_chr05      | 12467275                       | [T/G]       | NA                                         |
| Ca_Desi_Chrom_5_12467279 | Ca_desi_chr05      | 12467279                       | [T/C]       | NA                                         |
| Ca_Desi_Chrom_5_12467282 | Ca_desi_chr05      | 12467282                       | [C/A]       | NA                                         |

| <b>SNP IDs</b>           | <b>Chromosomes</b> | <b>Physical positions (bp)</b> | <b>SNPs</b> | <b>NCBI SNPdb accession IDs (NCBI_ss#)</b> |
|--------------------------|--------------------|--------------------------------|-------------|--------------------------------------------|
| Ca_Desi_Chrom_5_12467283 | Ca_desi_chr05      | 12467283                       | [A/G]       | NA                                         |
| Ca_Desi_Chrom_5_12467284 | Ca_desi_chr05      | 12467284                       | [A/G]       | NA                                         |
| Ca_Desi_Chrom_5_12467285 | Ca_desi_chr05      | 12467285                       | [A/G]       | NA                                         |
| Ca_Desi_Chrom_5_12485019 | Ca_desi_chr05      | 12485019                       | [A/C]       | NA                                         |
| Ca_Desi_Chrom_5_12485024 | Ca_desi_chr05      | 12485024                       | [A/G]       | NA                                         |
| Ca_Desi_Chrom_5_12485026 | Ca_desi_chr05      | 12485026                       | [T/A]       | NA                                         |
| Ca_Desi_Chrom_5_12485034 | Ca_desi_chr05      | 12485034                       | [T/C]       | NA                                         |
| Ca_Desi_Chrom_5_12485036 | Ca_desi_chr05      | 12485036                       | [A/G]       | NA                                         |
| Ca_Desi_Chrom_5_12485049 | Ca_desi_chr05      | 12485049                       | [T/C]       | NA                                         |
| Ca_Desi_Chrom_5_12487417 | Ca_desi_chr05      | 12487417                       | [A/T]       | NA                                         |
| Ca_Desi_Chrom_5_12490013 | Ca_desi_chr05      | 12490013                       | [C/A]       | NA                                         |
| Ca_Desi_Chrom_5_12539353 | Ca_desi_chr05      | 12539353                       | [C/A]       | NA                                         |
| Ca_Desi_Chrom_5_12539354 | Ca_desi_chr05      | 12539354                       | [C/G]       | NA                                         |
| Ca_Desi_Chrom_5_12600166 | Ca_desi_chr05      | 12600166                       | [T/G]       | NA                                         |
| Ca_Desi_Chrom_5_12605174 | Ca_desi_chr05      | 12605174                       | [T/G]       | NA                                         |
| Ca_Desi_Chrom_5_12606408 | Ca_desi_chr05      | 12606408                       | [A/G]       | NA                                         |
| Ca_Desi_Chrom_5_12636617 | Ca_desi_chr05      | 12636617                       | [A/C]       | NA                                         |
| Ca_Desi_Chrom_5_12636623 | Ca_desi_chr05      | 12636623                       | [A/C]       | NA                                         |
| Ca_Desi_Chrom_5_12701963 | Ca_desi_chr05      | 12701963                       | [A/C]       | NA                                         |
| Ca_Desi_Chrom_5_12759422 | Ca_desi_chr05      | 12759422                       | [T/G]       | NA                                         |
| Ca_Desi_Chrom_5_12759567 | Ca_desi_chr05      | 12759567                       | [T/G]       | NA                                         |
| Ca_Desi_Chrom_5_12763953 | Ca_desi_chr05      | 12763953                       | [T/C]       | NA                                         |
| Ca_Desi_Chrom_5_12955174 | Ca_desi_chr05      | 12955174                       | [T/C]       | NA                                         |
| Ca_Desi_Chrom_5_12955233 | Ca_desi_chr05      | 12955233                       | [A/C]       | NA                                         |
| Ca_Desi_Chrom_5_12955235 | Ca_desi_chr05      | 12955235                       | [C/A]       | NA                                         |
| Ca_Desi_Chrom_5_12955239 | Ca_desi_chr05      | 12955239                       | [A/G]       | NA                                         |
| Ca_Desi_Chrom_5_12955246 | Ca_desi_chr05      | 12955246                       | [A/C]       | NA                                         |
| Ca_Desi_Chrom_5_12955254 | Ca_desi_chr05      | 12955254                       | [A/C]       | NA                                         |
| Ca_Desi_Chrom_5_12979164 | Ca_desi_chr05      | 12979164                       | [T/C]       | NA                                         |
| Ca_Desi_Chrom_5_12979391 | Ca_desi_chr05      | 12979391                       | [T/C]       | NA                                         |
| Ca_Desi_Chrom_5_12979407 | Ca_desi_chr05      | 12979407                       | [T/C]       | NA                                         |
| Ca_Desi_Chrom_5_12992831 | Ca_desi_chr05      | 12992831                       | [C/G]       | NA                                         |
| Ca_Desi_Chrom_5_13004532 | Ca_desi_chr05      | 13004532                       | [C/T]       | NA                                         |
| Ca_Desi_Chrom_5_13004548 | Ca_desi_chr05      | 13004548                       | [A/C]       | NA                                         |

| <b>SNP IDs</b>          | <b>Chromosomes</b> | <b>Physical positions (bp)</b> | <b>SNPs</b> | <b>NCBI SNPdb accession IDs (NCBI_ss#)</b> |
|-------------------------|--------------------|--------------------------------|-------------|--------------------------------------------|
| Ca_Desig_Chr_5_13004551 | Ca_desig_chr05     | 13004551                       | [A/G]       | NA                                         |
| Ca_Desig_Chr_5_13004552 | Ca_desig_chr05     | 13004552                       | [A/T]       | NA                                         |
| Ca_Desig_Chr_5_13152770 | Ca_desig_chr05     | 13152770                       | [A/C]       | NA                                         |
| Ca_Desig_Chr_5_13152811 | Ca_desig_chr05     | 13152811                       | [T/C]       | NA                                         |
| Ca_Desig_Chr_5_13170683 | Ca_desig_chr05     | 13170683                       | [T/C]       | NA                                         |
| Ca_Desig_Chr_5_13170686 | Ca_desig_chr05     | 13170686                       | [A/G]       | NA                                         |
| Ca_Desig_Chr_5_13170698 | Ca_desig_chr05     | 13170698                       | [T/G]       | NA                                         |
| Ca_Desig_Chr_5_13170708 | Ca_desig_chr05     | 13170708                       | [T/A]       | NA                                         |
| Ca_Desig_Chr_5_13173580 | Ca_desig_chr05     | 13173580                       | [A/G]       | NA                                         |
| Ca_Desig_Chr_5_13173613 | Ca_desig_chr05     | 13173613                       | [T/C]       | NA                                         |
| Ca_Desig_Chr_5_13190974 | Ca_desig_chr05     | 13190974                       | [G/A]       | NA                                         |
| Ca_Desig_Chr_5_13190975 | Ca_desig_chr05     | 13190975                       | [G/C]       | NA                                         |
| Ca_Desig_Chr_5_13190987 | Ca_desig_chr05     | 13190987                       | [C/T]       | NA                                         |
| Ca_Desig_Chr_5_13191923 | Ca_desig_chr05     | 13191923                       | [G/A]       | NA                                         |
| Ca_Desig_Chr_5_13191966 | Ca_desig_chr05     | 13191966                       | [C/T]       | NA                                         |
| Ca_Desig_Chr_5_13815426 | Ca_desig_chr05     | 13815426                       | [T/G]       | NA                                         |
| Ca_Desig_Chr_5_13838359 | Ca_desig_chr05     | 13838359                       | [T/G]       | NA                                         |
| Ca_Desig_Chr_5_13850044 | Ca_desig_chr05     | 13850044                       | [T/G]       | NA                                         |
| Ca_Desig_Chr_5_13882651 | Ca_desig_chr05     | 13882651                       | [G/C]       | NA                                         |
| Ca_Desig_Chr_5_13882652 | Ca_desig_chr05     | 13882652                       | [G/T]       | NA                                         |
| Ca_Desig_Chr_5_13882678 | Ca_desig_chr05     | 13882678                       | [A/C]       | NA                                         |
| Ca_Desig_Chr_5_13882695 | Ca_desig_chr05     | 13882695                       | [G/A]       | NA                                         |
| Ca_Desig_Chr_5_13929239 | Ca_desig_chr05     | 13929239                       | [A/G]       | NA                                         |
| Ca_Desig_Chr_5_14015931 | Ca_desig_chr05     | 14015931                       | [T/C]       | NA                                         |
| Ca_Desig_Chr_5_14086022 | Ca_desig_chr05     | 14086022                       | [T/A]       | NA                                         |
| Ca_Desig_Chr_5_14154057 | Ca_desig_chr05     | 14154057                       | [T/C]       | NA                                         |
| Ca_Desig_Chr_5_14154083 | Ca_desig_chr05     | 14154083                       | [T/G]       | NA                                         |
| Ca_Desig_Chr_5_14154088 | Ca_desig_chr05     | 14154088                       | [A/G]       | NA                                         |
| Ca_Desig_Chr_5_14154115 | Ca_desig_chr05     | 14154115                       | [A/G]       | NA                                         |
| Ca_Desig_Chr_5_14242265 | Ca_desig_chr05     | 14242265                       | [G/A]       | NA                                         |
| Ca_Desig_Chr_5_14242294 | Ca_desig_chr05     | 14242294                       | [T/C]       | NA                                         |
| Ca_Desig_Chr_5_14242311 | Ca_desig_chr05     | 14242311                       | [G/A]       | NA                                         |
| Ca_Desig_Chr_5_14317110 | Ca_desig_chr05     | 14317110                       | [T/G]       | NA                                         |
| Ca_Desig_Chr_5_14341079 | Ca_desig_chr05     | 14341079                       | [A/C]       | NA                                         |

| <b>SNP IDs</b>           | <b>Chromosomes</b> | <b>Physical positions (bp)</b> | <b>SNPs</b> | <b>NCBI SNPdb accession IDs (NCBI_ss#)</b> |
|--------------------------|--------------------|--------------------------------|-------------|--------------------------------------------|
| Ca_Desi_Chrom_5_14341106 | Ca_desi_chr05      | 14341106                       | [A/G]       | NA                                         |
| Ca_Desi_Chrom_5_14343497 | Ca_desi_chr05      | 14343497                       | [G/T]       | NA                                         |
| Ca_Desi_Chrom_5_14343498 | Ca_desi_chr05      | 14343498                       | [G/C]       | NA                                         |
| Ca_Desi_Chrom_5_14343499 | Ca_desi_chr05      | 14343499                       | [T/C]       | NA                                         |
| Ca_Desi_Chrom_5_14343506 | Ca_desi_chr05      | 14343506                       | [A/G]       | NA                                         |
| Ca_Desi_Chrom_5_14343509 | Ca_desi_chr05      | 14343509                       | [A/G]       | NA                                         |
| Ca_Desi_Chrom_5_14343512 | Ca_desi_chr05      | 14343512                       | [T/C]       | NA                                         |
| Ca_Desi_Chrom_5_14343514 | Ca_desi_chr05      | 14343514                       | [A/C]       | NA                                         |
| Ca_Desi_Chrom_5_14343527 | Ca_desi_chr05      | 14343527                       | [T/C]       | NA                                         |
| Ca_Desi_Chrom_5_14343530 | Ca_desi_chr05      | 14343530                       | [A/G]       | NA                                         |
| Ca_Desi_Chrom_5_14343536 | Ca_desi_chr05      | 14343536                       | [T/C]       | NA                                         |
| Ca_Desi_Chrom_5_14343542 | Ca_desi_chr05      | 14343542                       | [T/C]       | NA                                         |
| Ca_Desi_Chrom_5_14343547 | Ca_desi_chr05      | 14343547                       | [A/G]       | NA                                         |
| Ca_Desi_Chrom_5_14343551 | Ca_desi_chr05      | 14343551                       | [A/G]       | NA                                         |
| Ca_Desi_Chrom_5_14344076 | Ca_desi_chr05      | 14344076                       | [T/C]       | NA                                         |
| Ca_Desi_Chrom_5_14344085 | Ca_desi_chr05      | 14344085                       | [A/G]       | NA                                         |
| Ca_Desi_Chrom_5_14344088 | Ca_desi_chr05      | 14344088                       | [T/C]       | NA                                         |
| Ca_Desi_Chrom_5_14344091 | Ca_desi_chr05      | 14344091                       | [A/T]       | NA                                         |
| Ca_Desi_Chrom_5_14344094 | Ca_desi_chr05      | 14344094                       | [T/G]       | NA                                         |
| Ca_Desi_Chrom_5_14344101 | Ca_desi_chr05      | 14344101                       | [A/G]       | NA                                         |
| Ca_Desi_Chrom_5_14344111 | Ca_desi_chr05      | 14344111                       | [A/G]       | NA                                         |
| Ca_Desi_Chrom_5_14344115 | Ca_desi_chr05      | 14344115                       | [A/G]       | NA                                         |
| Ca_Desi_Chrom_5_14344117 | Ca_desi_chr05      | 14344117                       | [T/C]       | NA                                         |
| Ca_Desi_Chrom_5_14344125 | Ca_desi_chr05      | 14344125                       | [T/C]       | NA                                         |
| Ca_Desi_Chrom_5_14431431 | Ca_desi_chr05      | 14431431                       | [A/C]       | NA                                         |
| Ca_Desi_Chrom_5_14622404 | Ca_desi_chr05      | 14622404                       | [A/C]       | NA                                         |
| Ca_Desi_Chrom_5_14622415 | Ca_desi_chr05      | 14622415                       | [T/C]       | NA                                         |
| Ca_Desi_Chrom_5_14622433 | Ca_desi_chr05      | 14622433                       | [T/C]       | NA                                         |
| Ca_Desi_Chrom_5_14869781 | Ca_desi_chr05      | 14869781                       | [T/C]       | NA                                         |
| Ca_Desi_Chrom_5_15196890 | Ca_desi_chr05      | 15196890                       | [A/G]       | NA                                         |
| Ca_Desi_Chrom_5_15197106 | Ca_desi_chr05      | 15197106                       | [C/G]       | NA                                         |
| Ca_Desi_Chrom_5_15239781 | Ca_desi_chr05      | 15239781                       | [G/C]       | NA                                         |
| Ca_Desi_Chrom_5_15239787 | Ca_desi_chr05      | 15239787                       | [T/C]       | NA                                         |
| Ca_Desi_Chrom_5_15239788 | Ca_desi_chr05      | 15239788                       | [T/C]       | NA                                         |

| <b>SNP IDs</b>           | <b>Chromosomes</b> | <b>Physical positions (bp)</b> | <b>SNPs</b> | <b>NCBI SNPdb accession IDs (NCBI_ss#)</b> |
|--------------------------|--------------------|--------------------------------|-------------|--------------------------------------------|
| Ca_Desi_Chrom_5_15239790 | Ca_desi_chr05      | 15239790                       | [G/C]       | NA                                         |
| Ca_Desi_Chrom_5_15239793 | Ca_desi_chr05      | 15239793                       | [A/C]       | NA                                         |
| Ca_Desi_Chrom_5_15284586 | Ca_desi_chr05      | 15284586                       | [A/T]       | NA                                         |
| Ca_Desi_Chrom_5_15284589 | Ca_desi_chr05      | 15284589                       | [A/G]       | NA                                         |
| Ca_Desi_Chrom_5_15284591 | Ca_desi_chr05      | 15284591                       | [C/T]       | NA                                         |
| Ca_Desi_Chrom_5_15284592 | Ca_desi_chr05      | 15284592                       | [G/T]       | NA                                         |
| Ca_Desi_Chrom_5_15284594 | Ca_desi_chr05      | 15284594                       | [T/C]       | NA                                         |
| Ca_Desi_Chrom_5_15284599 | Ca_desi_chr05      | 15284599                       | [A/G]       | NA                                         |
| Ca_Desi_Chrom_5_15284602 | Ca_desi_chr05      | 15284602                       | [A/G]       | NA                                         |
| Ca_Desi_Chrom_5_15284605 | Ca_desi_chr05      | 15284605                       | [A/G]       | NA                                         |
| Ca_Desi_Chrom_5_15284608 | Ca_desi_chr05      | 15284608                       | [G/C]       | NA                                         |
| Ca_Desi_Chrom_5_15284611 | Ca_desi_chr05      | 15284611                       | [A/G]       | NA                                         |
| Ca_Desi_Chrom_5_15284613 | Ca_desi_chr05      | 15284613                       | [A/C]       | NA                                         |
| Ca_Desi_Chrom_5_15284617 | Ca_desi_chr05      | 15284617                       | [T/C]       | NA                                         |
| Ca_Desi_Chrom_5_15284621 | Ca_desi_chr05      | 15284621                       | [T/C]       | NA                                         |
| Ca_Desi_Chrom_5_15284624 | Ca_desi_chr05      | 15284624                       | [T/C]       | NA                                         |
| Ca_Desi_Chrom_5_15284625 | Ca_desi_chr05      | 15284625                       | [G/T]       | NA                                         |
| Ca_Desi_Chrom_5_15284637 | Ca_desi_chr05      | 15284637                       | [T/A]       | NA                                         |
| Ca_Desi_Chrom_5_15301225 | Ca_desi_chr05      | 15301225                       | [G/T]       | NA                                         |
| Ca_Desi_Chrom_5_15369158 | Ca_desi_chr05      | 15369158                       | [A/C]       | NA                                         |
| Ca_Desi_Chrom_5_15476922 | Ca_desi_chr05      | 15476922                       | [T/G]       | NA                                         |
| Ca_Desi_Chrom_5_15507393 | Ca_desi_chr05      | 15507393                       | [T/G]       | NA                                         |
| Ca_Desi_Chrom_5_15508663 | Ca_desi_chr05      | 15508663                       | [A/T]       | NA                                         |
| Ca_Desi_Chrom_5_15608973 | Ca_desi_chr05      | 15608973                       | [T/A]       | NA                                         |
| Ca_Desi_Chrom_5_15608977 | Ca_desi_chr05      | 15608977                       | [A/G]       | NA                                         |
| Ca_Desi_Chrom_5_15608985 | Ca_desi_chr05      | 15608985                       | [A/G]       | NA                                         |
| Ca_Desi_Chrom_5_15609025 | Ca_desi_chr05      | 15609025                       | [T/G]       | NA                                         |
| Ca_Desi_Chrom_5_15609054 | Ca_desi_chr05      | 15609054                       | [A/G]       | NA                                         |
| Ca_Desi_Chrom_5_15609057 | Ca_desi_chr05      | 15609057                       | [T/G]       | NA                                         |
| Ca_Desi_Chrom_5_15609066 | Ca_desi_chr05      | 15609066                       | [T/G]       | NA                                         |
| Ca_Desi_Chrom_5_15609083 | Ca_desi_chr05      | 15609083                       | [A/C]       | NA                                         |
| Ca_Desi_Chrom_5_15952944 | Ca_desi_chr05      | 15952944                       | [A/C]       | NA                                         |
| Ca_Desi_Chrom_5_16078290 | Ca_desi_chr05      | 16078290                       | [T/A]       | NA                                         |
| Ca_Desi_Chrom_5_16078300 | Ca_desi_chr05      | 16078300                       | [T/G]       | NA                                         |

| <b>SNP IDs</b>           | <b>Chromosomes</b> | <b>Physical positions (bp)</b> | <b>SNPs</b> | <b>NCBI SNPdb accession IDs (NCBI_ss#)</b> |
|--------------------------|--------------------|--------------------------------|-------------|--------------------------------------------|
| Ca_Desi_Chrom_5_16078351 | Ca_desi_chr05      | 16078351                       | [G/A]       | NA                                         |
| Ca_Desi_Chrom_5_16078357 | Ca_desi_chr05      | 16078357                       | [A/T]       | NA                                         |
| Ca_Desi_Chrom_5_16081057 | Ca_desi_chr05      | 16081057                       | [A/C]       | NA                                         |
| Ca_Desi_Chrom_5_16081058 | Ca_desi_chr05      | 16081058                       | [T/G]       | NA                                         |
| Ca_Desi_Chrom_5_16081061 | Ca_desi_chr05      | 16081061                       | [T/C]       | NA                                         |
| Ca_Desi_Chrom_5_16081062 | Ca_desi_chr05      | 16081062                       | [G/T]       | NA                                         |
| Ca_Desi_Chrom_5_16117325 | Ca_desi_chr05      | 16117325                       | [G/T]       | NA                                         |
| Ca_Desi_Chrom_5_16137743 | Ca_desi_chr05      | 16137743                       | [T/C]       | NA                                         |
| Ca_Desi_Chrom_5_16137753 | Ca_desi_chr05      | 16137753                       | [G/A]       | NA                                         |
| Ca_Desi_Chrom_5_16170834 | Ca_desi_chr05      | 16170834                       | [T/G]       | NA                                         |
| Ca_Desi_Chrom_5_16170915 | Ca_desi_chr05      | 16170915                       | [G/T]       | NA                                         |
| Ca_Desi_Chrom_6_641359   | Ca_desi_chr06      | 641359                         | [G/C]       | NA                                         |
| Ca_Desi_Chrom_6_641361   | Ca_desi_chr06      | 641361                         | [C/A]       | NA                                         |
| Ca_Desi_Chrom_6_641362   | Ca_desi_chr06      | 641362                         | [A/T]       | NA                                         |
| Ca_Desi_Chrom_6_641363   | Ca_desi_chr06      | 641363                         | [T/C]       | NA                                         |
| Ca_Desi_Chrom_6_641364   | Ca_desi_chr06      | 641364                         | [G/T]       | NA                                         |
| Ca_Desi_Chrom_6_646756   | Ca_desi_chr06      | 646756                         | [T/C]       | NA                                         |
| Ca_Desi_Chrom_6_646757   | Ca_desi_chr06      | 646757                         | [G/T]       | NA                                         |
| Ca_Desi_Chrom_6_711791   | Ca_desi_chr06      | 711791                         | [A/G]       | NA                                         |
| Ca_Desi_Chrom_6_760524   | Ca_desi_chr06      | 760524                         | [T/G]       | NA                                         |
| Ca_Desi_Chrom_6_767007   | Ca_desi_chr06      | 767007                         | [A/C]       | NA                                         |
| Ca_Desi_Chrom_6_767012   | Ca_desi_chr06      | 767012                         | [T/C]       | NA                                         |
| Ca_Desi_Chrom_6_767025   | Ca_desi_chr06      | 767025                         | [A/C]       | NA                                         |
| Ca_Desi_Chrom_6_767035   | Ca_desi_chr06      | 767035                         | [A/C]       | NA                                         |
| Ca_Desi_Chrom_6_785472   | Ca_desi_chr06      | 785472                         | [A/C]       | NA                                         |
| Ca_Desi_Chrom_6_785478   | Ca_desi_chr06      | 785478                         | [A/C]       | NA                                         |
| Ca_Desi_Chrom_6_785489   | Ca_desi_chr06      | 785489                         | [T/C]       | NA                                         |
| Ca_Desi_Chrom_6_785496   | Ca_desi_chr06      | 785496                         | [A/G]       | NA                                         |
| Ca_Desi_Chrom_6_785500   | Ca_desi_chr06      | 785500                         | [T/G]       | NA                                         |
| Ca_Desi_Chrom_6_785531   | Ca_desi_chr06      | 785531                         | [A/C]       | NA                                         |
| Ca_Desi_Chrom_6_809545   | Ca_desi_chr06      | 809545                         | [A/C]       | NA                                         |
| Ca_Desi_Chrom_6_816746   | Ca_desi_chr06      | 816746                         | [T/G]       | NA                                         |
| Ca_Desi_Chrom_6_816823   | Ca_desi_chr06      | 816823                         | [A/C]       | NA                                         |
| Ca_Desi_Chrom_6_834820   | Ca_desi_chr06      | 834820                         | [A/C]       | NA                                         |



| <b>SNP IDs</b>          | <b>Chromosomes</b> | <b>Physical positions (bp)</b> | <b>SNPs</b> | <b>NCBI SNPdb accession IDs (NCBI_ss#)</b> |
|-------------------------|--------------------|--------------------------------|-------------|--------------------------------------------|
| Ca_Desi_Chrom_6_834839  | Ca_desi_chr06      | 834839                         | [T/G]       | NA                                         |
| Ca_Desi_Chrom_6_837890  | Ca_desi_chr06      | 837890                         | [A/G]       | NA                                         |
| Ca_Desi_Chrom_6_837921  | Ca_desi_chr06      | 837921                         | [G/A]       | NA                                         |
| Ca_Desi_Chrom_6_872308  | Ca_desi_chr06      | 872308                         | [T/A]       | NA                                         |
| Ca_Desi_Chrom_6_1353076 | Ca_desi_chr06      | 1353076                        | [T/G]       | NA                                         |
| Ca_Desi_Chrom_6_1385751 | Ca_desi_chr06      | 1385751                        | [T/C]       | NA                                         |
| Ca_Desi_Chrom_6_1385759 | Ca_desi_chr06      | 1385759                        | [G/A]       | NA                                         |
| Ca_Desi_Chrom_6_1399383 | Ca_desi_chr06      | 1399383                        | [A/C]       | NA                                         |
| Ca_Desi_Chrom_6_1400111 | Ca_desi_chr06      | 1400111                        | [T/C]       | NA                                         |
| Ca_Desi_Chrom_6_1400124 | Ca_desi_chr06      | 1400124                        | [T/C]       | NA                                         |
| Ca_Desi_Chrom_6_1400152 | Ca_desi_chr06      | 1400152                        | [A/G]       | NA                                         |
| Ca_Desi_Chrom_6_1404688 | Ca_desi_chr06      | 1404688                        | [T/C]       | NA                                         |
| Ca_Desi_Chrom_6_1404695 | Ca_desi_chr06      | 1404695                        | [A/G]       | NA                                         |
| Ca_Desi_Chrom_6_1404699 | Ca_desi_chr06      | 1404699                        | [T/C]       | NA                                         |
| Ca_Desi_Chrom_6_1404721 | Ca_desi_chr06      | 1404721                        | [A/G]       | NA                                         |
| Ca_Desi_Chrom_6_1404723 | Ca_desi_chr06      | 1404723                        | [A/G]       | NA                                         |
| Ca_Desi_Chrom_6_1404734 | Ca_desi_chr06      | 1404734                        | [A/G]       | NA                                         |
| Ca_Desi_Chrom_6_1428933 | Ca_desi_chr06      | 1428933                        | [T/G]       | NA                                         |
| Ca_Desi_Chrom_6_1428953 | Ca_desi_chr06      | 1428953                        | [A/C]       | NA                                         |
| Ca_Desi_Chrom_6_1498051 | Ca_desi_chr06      | 1498051                        | [T/G]       | NA                                         |
| Ca_Desi_Chrom_6_1530870 | Ca_desi_chr06      | 1530870                        | [A/T]       | NA                                         |
| Ca_Desi_Chrom_6_1530874 | Ca_desi_chr06      | 1530874                        | [T/C]       | NA                                         |
| Ca_Desi_Chrom_6_1530883 | Ca_desi_chr06      | 1530883                        | [T/C]       | NA                                         |
| Ca_Desi_Chrom_6_1530895 | Ca_desi_chr06      | 1530895                        | [T/G]       | NA                                         |
| Ca_Desi_Chrom_6_1530897 | Ca_desi_chr06      | 1530897                        | [A/C]       | NA                                         |
| Ca_Desi_Chrom_6_1530910 | Ca_desi_chr06      | 1530910                        | [T/C]       | NA                                         |
| Ca_Desi_Chrom_6_1608546 | Ca_desi_chr06      | 1608546                        | [T/G]       | NA                                         |
| Ca_Desi_Chrom_6_1608564 | Ca_desi_chr06      | 1608564                        | [A/G]       | NA                                         |
| Ca_Desi_Chrom_6_1608570 | Ca_desi_chr06      | 1608570                        | [T/C]       | NA                                         |
| Ca_Desi_Chrom_6_1608584 | Ca_desi_chr06      | 1608584                        | [T/A]       | NA                                         |
| Ca_Desi_Chrom_6_1671674 | Ca_desi_chr06      | 1671674                        | [A/G]       | NA                                         |
| Ca_Desi_Chrom_6_1677536 | Ca_desi_chr06      | 1677536                        | [A/C]       | NA                                         |
| Ca_Desi_Chrom_6_1677550 | Ca_desi_chr06      | 1677550                        | [A/C]       | NA                                         |
| Ca_Desi_Chrom_6_1719311 | Ca_desi_chr06      | 1719311                        | [T/G]       | NA                                         |

| <b>SNP IDs</b>          | <b>Chromosomes</b> | <b>Physical positions (bp)</b> | <b>SNPs</b> | <b>NCBI SNPdb accession IDs (NCBI_ss#)</b> |
|-------------------------|--------------------|--------------------------------|-------------|--------------------------------------------|
| Ca_Desi_Chrom_6_1878679 | Ca_desi_chr06      | 1878679                        | [T/C]       | NA                                         |
| Ca_Desi_Chrom_6_1890600 | Ca_desi_chr06      | 1890600                        | [C/A]       | NA                                         |
| Ca_Desi_Chrom_6_1908568 | Ca_desi_chr06      | 1908568                        | [A/G]       | NA                                         |
| Ca_Desi_Chrom_6_1981937 | Ca_desi_chr06      | 1981937                        | [T/C]       | NA                                         |
| Ca_Desi_Chrom_6_1981943 | Ca_desi_chr06      | 1981943                        | [A/G]       | NA                                         |
| Ca_Desi_Chrom_6_1988583 | Ca_desi_chr06      | 1988583                        | [T/G]       | NA                                         |
| Ca_Desi_Chrom_6_1988635 | Ca_desi_chr06      | 1988635                        | [A/C]       | NA                                         |
| Ca_Desi_Chrom_6_1988649 | Ca_desi_chr06      | 1988649                        | [T/G]       | NA                                         |
| Ca_Desi_Chrom_6_1988650 | Ca_desi_chr06      | 1988650                        | [A/T]       | NA                                         |
| Ca_Desi_Chrom_6_1988665 | Ca_desi_chr06      | 1988665                        | [A/G]       | NA                                         |
| Ca_Desi_Chrom_6_2012657 | Ca_desi_chr06      | 2012657                        | [T/C]       | NA                                         |
| Ca_Desi_Chrom_6_2012663 | Ca_desi_chr06      | 2012663                        | [T/C]       | NA                                         |
| Ca_Desi_Chrom_6_2012691 | Ca_desi_chr06      | 2012691                        | [T/C]       | NA                                         |
| Ca_Desi_Chrom_6_2012704 | Ca_desi_chr06      | 2012704                        | [A/C]       | NA                                         |
| Ca_Desi_Chrom_6_2012711 | Ca_desi_chr06      | 2012711                        | [T/C]       | NA                                         |
| Ca_Desi_Chrom_6_2046940 | Ca_desi_chr06      | 2046940                        | [T/G]       | NA                                         |
| Ca_Desi_Chrom_6_2054992 | Ca_desi_chr06      | 2054992                        | [T/G]       | NA                                         |
| Ca_Desi_Chrom_6_2055044 | Ca_desi_chr06      | 2055044                        | [A/C]       | NA                                         |
| Ca_Desi_Chrom_6_2055051 | Ca_desi_chr06      | 2055051                        | [A/C]       | NA                                         |
| Ca_Desi_Chrom_6_2128596 | Ca_desi_chr06      | 2128596                        | [T/C]       | NA                                         |
| Ca_Desi_Chrom_6_2128602 | Ca_desi_chr06      | 2128602                        | [T/G]       | NA                                         |
| Ca_Desi_Chrom_6_2182019 | Ca_desi_chr06      | 2182019                        | [T/C]       | NA                                         |
| Ca_Desi_Chrom_6_2187070 | Ca_desi_chr06      | 2187070                        | [T/A]       | NA                                         |
| Ca_Desi_Chrom_6_2187091 | Ca_desi_chr06      | 2187091                        | [A/C]       | NA                                         |
| Ca_Desi_Chrom_6_2187115 | Ca_desi_chr06      | 2187115                        | [T/C]       | NA                                         |
| Ca_Desi_Chrom_6_2297822 | Ca_desi_chr06      | 2297822                        | [T/C]       | NA                                         |
| Ca_Desi_Chrom_6_2297831 | Ca_desi_chr06      | 2297831                        | [T/C]       | NA                                         |
| Ca_Desi_Chrom_6_2297835 | Ca_desi_chr06      | 2297835                        | [G/C]       | NA                                         |
| Ca_Desi_Chrom_6_2297853 | Ca_desi_chr06      | 2297853                        | [T/C]       | NA                                         |
| Ca_Desi_Chrom_6_2297861 | Ca_desi_chr06      | 2297861                        | [A/G]       | NA                                         |
| Ca_Desi_Chrom_6_2304316 | Ca_desi_chr06      | 2304316                        | [A/C]       | NA                                         |
| Ca_Desi_Chrom_6_2304317 | Ca_desi_chr06      | 2304317                        | [G/C]       | NA                                         |
| Ca_Desi_Chrom_6_2304318 | Ca_desi_chr06      | 2304318                        | [A/G]       | NA                                         |
| Ca_Desi_Chrom_6_2387723 | Ca_desi_chr06      | 2387723                        | [T/G]       | NA                                         |

| <b>SNP IDs</b>          | <b>Chromosomes</b> | <b>Physical positions (bp)</b> | <b>SNPs</b> | <b>NCBI SNPdb accession IDs (NCBI_ss#)</b> |
|-------------------------|--------------------|--------------------------------|-------------|--------------------------------------------|
| Ca_Desi_Chrom_6_2401739 | Ca_desi_chr06      | 2401739                        | [T/A]       | NA                                         |
| Ca_Desi_Chrom_6_2401789 | Ca_desi_chr06      | 2401789                        | [T/G]       | NA                                         |
| Ca_Desi_Chrom_6_2409341 | Ca_desi_chr06      | 2409341                        | [A/G]       | NA                                         |
| Ca_Desi_Chrom_6_2615000 | Ca_desi_chr06      | 2615000                        | [C/T]       | NA                                         |
| Ca_Desi_Chrom_6_2615001 | Ca_desi_chr06      | 2615001                        | [T/C]       | NA                                         |
| Ca_Desi_Chrom_6_2694591 | Ca_desi_chr06      | 2694591                        | [A/G]       | NA                                         |
| Ca_Desi_Chrom_6_2694596 | Ca_desi_chr06      | 2694596                        | [A/G]       | NA                                         |
| Ca_Desi_Chrom_6_2694630 | Ca_desi_chr06      | 2694630                        | [T/G]       | NA                                         |
| Ca_Desi_Chrom_6_2708655 | Ca_desi_chr06      | 2708655                        | [A/T]       | NA                                         |
| Ca_Desi_Chrom_6_2708683 | Ca_desi_chr06      | 2708683                        | [C/T]       | NA                                         |
| Ca_Desi_Chrom_6_2712681 | Ca_desi_chr06      | 2712681                        | [A/C]       | NA                                         |
| Ca_Desi_Chrom_6_2721172 | Ca_desi_chr06      | 2721172                        | [A/G]       | NA                                         |
| Ca_Desi_Chrom_6_2721181 | Ca_desi_chr06      | 2721181                        | [C/A]       | NA                                         |
| Ca_Desi_Chrom_6_2721251 | Ca_desi_chr06      | 2721251                        | [A/C]       | NA                                         |
| Ca_Desi_Chrom_6_2840091 | Ca_desi_chr06      | 2840091                        | [T/C]       | NA                                         |
| Ca_Desi_Chrom_6_2841114 | Ca_desi_chr06      | 2841114                        | [A/T]       | NA                                         |
| Ca_Desi_Chrom_6_2841126 | Ca_desi_chr06      | 2841126                        | [T/C]       | NA                                         |
| Ca_Desi_Chrom_6_2841130 | Ca_desi_chr06      | 2841130                        | [A/G]       | NA                                         |
| Ca_Desi_Chrom_6_2841153 | Ca_desi_chr06      | 2841153                        | [T/C]       | NA                                         |
| Ca_Desi_Chrom_6_2852350 | Ca_desi_chr06      | 2852350                        | [A/G]       | NA                                         |
| Ca_Desi_Chrom_6_2852369 | Ca_desi_chr06      | 2852369                        | [T/C]       | NA                                         |
| Ca_Desi_Chrom_6_2955294 | Ca_desi_chr06      | 2955294                        | [A/C]       | NA                                         |
| Ca_Desi_Chrom_6_2955297 | Ca_desi_chr06      | 2955297                        | [C/T]       | NA                                         |
| Ca_Desi_Chrom_6_2955308 | Ca_desi_chr06      | 2955308                        | [T/A]       | NA                                         |
| Ca_Desi_Chrom_6_2955310 | Ca_desi_chr06      | 2955310                        | [A/T]       | NA                                         |
| Ca_Desi_Chrom_6_2982105 | Ca_desi_chr06      | 2982105                        | [T/C]       | NA                                         |
| Ca_Desi_Chrom_6_3293123 | Ca_desi_chr06      | 3293123                        | [T/C]       | NA                                         |
| Ca_Desi_Chrom_6_3293147 | Ca_desi_chr06      | 3293147                        | [A/C]       | NA                                         |
| Ca_Desi_Chrom_6_3295359 | Ca_desi_chr06      | 3295359                        | [A/C]       | NA                                         |
| Ca_Desi_Chrom_6_3307383 | Ca_desi_chr06      | 3307383                        | [T/C]       | NA                                         |
| Ca_Desi_Chrom_6_3307385 | Ca_desi_chr06      | 3307385                        | [A/C]       | NA                                         |
| Ca_Desi_Chrom_6_3307395 | Ca_desi_chr06      | 3307395                        | [T/G]       | NA                                         |
| Ca_Desi_Chrom_6_3358488 | Ca_desi_chr06      | 3358488                        | [T/G]       | NA                                         |
| Ca_Desi_Chrom_6_3358575 | Ca_desi_chr06      | 3358575                        | [T/G]       | NA                                         |

| <b>SNP IDs</b>          | <b>Chromosomes</b> | <b>Physical positions (bp)</b> | <b>SNPs</b> | <b>NCBI SNPdb accession IDs (NCBI_ss#)</b> |
|-------------------------|--------------------|--------------------------------|-------------|--------------------------------------------|
| Ca_Desi_Chrom_6_3359184 | Ca_desi_chr06      | 3359184                        | [T/C]       | NA                                         |
| Ca_Desi_Chrom_6_3359206 | Ca_desi_chr06      | 3359206                        | [A/C]       | NA                                         |
| Ca_Desi_Chrom_6_3377407 | Ca_desi_chr06      | 3377407                        | [T/G]       | NA                                         |
| Ca_Desi_Chrom_6_3385734 | Ca_desi_chr06      | 3385734                        | [T/A]       | NA                                         |
| Ca_Desi_Chrom_6_3385743 | Ca_desi_chr06      | 3385743                        | [T/G]       | NA                                         |
| Ca_Desi_Chrom_6_3385756 | Ca_desi_chr06      | 3385756                        | [T/G]       | NA                                         |
| Ca_Desi_Chrom_6_3385770 | Ca_desi_chr06      | 3385770                        | [A/G]       | NA                                         |
| Ca_Desi_Chrom_6_3385772 | Ca_desi_chr06      | 3385772                        | [T/G]       | NA                                         |
| Ca_Desi_Chrom_6_3385798 | Ca_desi_chr06      | 3385798                        | [A/T]       | NA                                         |
| Ca_Desi_Chrom_6_3420559 | Ca_desi_chr06      | 3420559                        | [T/C]       | NA                                         |
| Ca_Desi_Chrom_6_3420684 | Ca_desi_chr06      | 3420684                        | [A/G]       | NA                                         |
| Ca_Desi_Chrom_6_3437528 | Ca_desi_chr06      | 3437528                        | [T/A]       | NA                                         |
| Ca_Desi_Chrom_6_3437537 | Ca_desi_chr06      | 3437537                        | [T/G]       | NA                                         |
| Ca_Desi_Chrom_6_3439456 | Ca_desi_chr06      | 3439456                        | [T/G]       | NA                                         |
| Ca_Desi_Chrom_6_3439480 | Ca_desi_chr06      | 3439480                        | [T/C]       | NA                                         |
| Ca_Desi_Chrom_6_3439501 | Ca_desi_chr06      | 3439501                        | [T/C]       | NA                                         |
| Ca_Desi_Chrom_6_3439510 | Ca_desi_chr06      | 3439510                        | [T/G]       | NA                                         |
| Ca_Desi_Chrom_6_3439522 | Ca_desi_chr06      | 3439522                        | [A/G]       | NA                                         |
| Ca_Desi_Chrom_6_3439525 | Ca_desi_chr06      | 3439525                        | [A/G]       | NA                                         |
| Ca_Desi_Chrom_6_3439531 | Ca_desi_chr06      | 3439531                        | [T/G]       | NA                                         |
| Ca_Desi_Chrom_6_3439534 | Ca_desi_chr06      | 3439534                        | [A/G]       | NA                                         |
| Ca_Desi_Chrom_6_3439550 | Ca_desi_chr06      | 3439550                        | [A/G]       | NA                                         |
| Ca_Desi_Chrom_6_3439555 | Ca_desi_chr06      | 3439555                        | [A/G]       | NA                                         |
| Ca_Desi_Chrom_6_3456474 | Ca_desi_chr06      | 3456474                        | [A/T]       | NA                                         |
| Ca_Desi_Chrom_6_3509278 | Ca_desi_chr06      | 3509278                        | [A/G]       | NA                                         |
| Ca_Desi_Chrom_6_3556652 | Ca_desi_chr06      | 3556652                        | [T/C]       | NA                                         |
| Ca_Desi_Chrom_6_3556692 | Ca_desi_chr06      | 3556692                        | [A/G]       | NA                                         |
| Ca_Desi_Chrom_6_3629315 | Ca_desi_chr06      | 3629315                        | [T/A]       | NA                                         |
| Ca_Desi_Chrom_6_3630697 | Ca_desi_chr06      | 3630697                        | [A/G]       | NA                                         |
| Ca_Desi_Chrom_6_3630704 | Ca_desi_chr06      | 3630704                        | [A/G]       | NA                                         |
| Ca_Desi_Chrom_6_3630726 | Ca_desi_chr06      | 3630726                        | [A/G]       | NA                                         |
| Ca_Desi_Chrom_6_3630748 | Ca_desi_chr06      | 3630748                        | [T/G]       | NA                                         |
| Ca_Desi_Chrom_6_3630750 | Ca_desi_chr06      | 3630750                        | [T/A]       | NA                                         |
| Ca_Desi_Chrom_6_3630753 | Ca_desi_chr06      | 3630753                        | [A/G]       | NA                                         |

| <b>SNP IDs</b>          | <b>Chromosomes</b> | <b>Physical positions (bp)</b> | <b>SNPs</b> | <b>NCBI SNPdb accession IDs (NCBI_ss#)</b> |
|-------------------------|--------------------|--------------------------------|-------------|--------------------------------------------|
| Ca_Desi_Chrom_6_3630805 | Ca_desi_chr06      | 3630805                        | [T/G]       | NA                                         |
| Ca_Desi_Chrom_6_3630810 | Ca_desi_chr06      | 3630810                        | [T/G]       | NA                                         |
| Ca_Desi_Chrom_6_3635393 | Ca_desi_chr06      | 3635393                        | [T/C]       | NA                                         |
| Ca_Desi_Chrom_6_3635445 | Ca_desi_chr06      | 3635445                        | [T/A]       | NA                                         |
| Ca_Desi_Chrom_6_3636833 | Ca_desi_chr06      | 3636833                        | [T/G]       | NA                                         |
| Ca_Desi_Chrom_6_3778024 | Ca_desi_chr06      | 3778024                        | [A/G]       | NA                                         |
| Ca_Desi_Chrom_6_3778078 | Ca_desi_chr06      | 3778078                        | [T/C]       | NA                                         |
| Ca_Desi_Chrom_6_3912449 | Ca_desi_chr06      | 3912449                        | [A/G]       | NA                                         |
| Ca_Desi_Chrom_6_3912452 | Ca_desi_chr06      | 3912452                        | [T/G]       | NA                                         |
| Ca_Desi_Chrom_6_3954796 | Ca_desi_chr06      | 3954796                        | [T/C]       | NA                                         |
| Ca_Desi_Chrom_6_3954808 | Ca_desi_chr06      | 3954808                        | [T/C]       | NA                                         |
| Ca_Desi_Chrom_6_3954811 | Ca_desi_chr06      | 3954811                        | [A/G]       | NA                                         |
| Ca_Desi_Chrom_6_3954826 | Ca_desi_chr06      | 3954826                        | [T/C]       | NA                                         |
| Ca_Desi_Chrom_6_3954829 | Ca_desi_chr06      | 3954829                        | [A/G]       | NA                                         |
| Ca_Desi_Chrom_6_3954836 | Ca_desi_chr06      | 3954836                        | [A/C]       | NA                                         |
| Ca_Desi_Chrom_6_3955583 | Ca_desi_chr06      | 3955583                        | [T/G]       | NA                                         |
| Ca_Desi_Chrom_6_3955615 | Ca_desi_chr06      | 3955615                        | [T/G]       | NA                                         |
| Ca_Desi_Chrom_6_3955632 | Ca_desi_chr06      | 3955632                        | [T/C]       | NA                                         |
| Ca_Desi_Chrom_6_3955665 | Ca_desi_chr06      | 3955665                        | [T/G]       | NA                                         |
| Ca_Desi_Chrom_6_3955706 | Ca_desi_chr06      | 3955706                        | [A/G]       | NA                                         |
| Ca_Desi_Chrom_6_3956720 | Ca_desi_chr06      | 3956720                        | [T/G]       | NA                                         |
| Ca_Desi_Chrom_6_3958734 | Ca_desi_chr06      | 3958734                        | [T/C]       | NA                                         |
| Ca_Desi_Chrom_6_3958754 | Ca_desi_chr06      | 3958754                        | [T/G]       | NA                                         |
| Ca_Desi_Chrom_6_3958764 | Ca_desi_chr06      | 3958764                        | [A/C]       | NA                                         |
| Ca_Desi_Chrom_6_3958797 | Ca_desi_chr06      | 3958797                        | [A/C]       | NA                                         |
| Ca_Desi_Chrom_6_3958860 | Ca_desi_chr06      | 3958860                        | [A/G]       | NA                                         |
| Ca_Desi_Chrom_6_3958872 | Ca_desi_chr06      | 3958872                        | [T/G]       | NA                                         |
| Ca_Desi_Chrom_6_4062416 | Ca_desi_chr06      | 4062416                        | [G/A]       | NA                                         |
| Ca_Desi_Chrom_6_4062428 | Ca_desi_chr06      | 4062428                        | [C/A]       | NA                                         |
| Ca_Desi_Chrom_6_4072744 | Ca_desi_chr06      | 4072744                        | [T/C]       | NA                                         |
| Ca_Desi_Chrom_6_4072760 | Ca_desi_chr06      | 4072760                        | [A/G]       | NA                                         |
| Ca_Desi_Chrom_6_4072763 | Ca_desi_chr06      | 4072763                        | [A/C]       | NA                                         |
| Ca_Desi_Chrom_6_4072775 | Ca_desi_chr06      | 4072775                        | [T/C]       | NA                                         |
| Ca_Desi_Chrom_6_4072793 | Ca_desi_chr06      | 4072793                        | [T/C]       | NA                                         |

| <b>SNP IDs</b>          | <b>Chromosomes</b> | <b>Physical positions (bp)</b> | <b>SNPs</b> | <b>NCBI SNPdb accession IDs (NCBI_ss#)</b> |
|-------------------------|--------------------|--------------------------------|-------------|--------------------------------------------|
| Ca_Desi_Chrom_6_4072800 | Ca_desi_chr06      | 4072800                        | [T/C]       | NA                                         |
| Ca_Desi_Chrom_6_4082183 | Ca_desi_chr06      | 4082183                        | [T/C]       | NA                                         |
| Ca_Desi_Chrom_6_4082195 | Ca_desi_chr06      | 4082195                        | [T/G]       | NA                                         |
| Ca_Desi_Chrom_6_4082209 | Ca_desi_chr06      | 4082209                        | [T/G]       | NA                                         |
| Ca_Desi_Chrom_6_4082221 | Ca_desi_chr06      | 4082221                        | [A/G]       | NA                                         |
| Ca_Desi_Chrom_6_4082239 | Ca_desi_chr06      | 4082239                        | [C/G]       | NA                                         |
| Ca_Desi_Chrom_6_4082241 | Ca_desi_chr06      | 4082241                        | [T/C]       | NA                                         |
| Ca_Desi_Chrom_6_4142557 | Ca_desi_chr06      | 4142557                        | [T/G]       | NA                                         |
| Ca_Desi_Chrom_6_4142665 | Ca_desi_chr06      | 4142665                        | [T/A]       | NA                                         |
| Ca_Desi_Chrom_6_4231783 | Ca_desi_chr06      | 4231783                        | [A/C]       | NA                                         |
| Ca_Desi_Chrom_6_4240873 | Ca_desi_chr06      | 4240873                        | [A/G]       | NA                                         |
| Ca_Desi_Chrom_6_4240884 | Ca_desi_chr06      | 4240884                        | [T/G]       | NA                                         |
| Ca_Desi_Chrom_6_4273801 | Ca_desi_chr06      | 4273801                        | [A/G]       | NA                                         |
| Ca_Desi_Chrom_6_4344336 | Ca_desi_chr06      | 4344336                        | [T/G]       | NA                                         |
| Ca_Desi_Chrom_6_4358576 | Ca_desi_chr06      | 4358576                        | [A/G]       | NA                                         |
| Ca_Desi_Chrom_6_4384783 | Ca_desi_chr06      | 4384783                        | [T/C]       | NA                                         |
| Ca_Desi_Chrom_6_4384784 | Ca_desi_chr06      | 4384784                        | [G/T]       | NA                                         |
| Ca_Desi_Chrom_6_4384803 | Ca_desi_chr06      | 4384803                        | [A/C]       | NA                                         |
| Ca_Desi_Chrom_6_4395405 | Ca_desi_chr06      | 4395405                        | [A/G]       | NA                                         |
| Ca_Desi_Chrom_6_4403586 | Ca_desi_chr06      | 4403586                        | [A/G]       | NA                                         |
| Ca_Desi_Chrom_6_4403587 | Ca_desi_chr06      | 4403587                        | [T/G]       | NA                                         |
| Ca_Desi_Chrom_6_4403588 | Ca_desi_chr06      | 4403588                        | [C/T]       | NA                                         |
| Ca_Desi_Chrom_6_4403589 | Ca_desi_chr06      | 4403589                        | [T/G]       | NA                                         |
| Ca_Desi_Chrom_6_4464430 | Ca_desi_chr06      | 4464430                        | [T/G]       | NA                                         |
| Ca_Desi_Chrom_6_4464525 | Ca_desi_chr06      | 4464525                        | [A/T]       | NA                                         |
| Ca_Desi_Chrom_6_4464527 | Ca_desi_chr06      | 4464527                        | [A/C]       | NA                                         |
| Ca_Desi_Chrom_6_4553112 | Ca_desi_chr06      | 4553112                        | [T/G]       | NA                                         |
| Ca_Desi_Chrom_6_4553440 | Ca_desi_chr06      | 4553440                        | [A/G]       | NA                                         |
| Ca_Desi_Chrom_6_4553465 | Ca_desi_chr06      | 4553465                        | [A/G]       | NA                                         |
| Ca_Desi_Chrom_6_4553475 | Ca_desi_chr06      | 4553475                        | [T/C]       | NA                                         |
| Ca_Desi_Chrom_6_4641663 | Ca_desi_chr06      | 4641663                        | [T/C]       | NA                                         |
| Ca_Desi_Chrom_6_4641674 | Ca_desi_chr06      | 4641674                        | [A/C]       | NA                                         |
| Ca_Desi_Chrom_6_4641708 | Ca_desi_chr06      | 4641708                        | [T/G]       | NA                                         |
| Ca_Desi_Chrom_6_4646376 | Ca_desi_chr06      | 4646376                        | [G/A]       | NA                                         |

| <b>SNP IDs</b>          | <b>Chromosomes</b> | <b>Physical positions (bp)</b> | <b>SNPs</b> | <b>NCBI SNPdb accession IDs (NCBI_ss#)</b> |
|-------------------------|--------------------|--------------------------------|-------------|--------------------------------------------|
| Ca_Desi_Chrom_6_4646391 | Ca_desi_chr06      | 4646391                        | [A/C]       | NA                                         |
| Ca_Desi_Chrom_6_4646393 | Ca_desi_chr06      | 4646393                        | [A/C]       | NA                                         |
| Ca_Desi_Chrom_6_4646799 | Ca_desi_chr06      | 4646799                        | [A/T]       | NA                                         |
| Ca_Desi_Chrom_6_4646807 | Ca_desi_chr06      | 4646807                        | [A/G]       | NA                                         |
| Ca_Desi_Chrom_6_4646819 | Ca_desi_chr06      | 4646819                        | [A/T]       | NA                                         |
| Ca_Desi_Chrom_6_4646848 | Ca_desi_chr06      | 4646848                        | [A/C]       | NA                                         |
| Ca_Desi_Chrom_6_4646858 | Ca_desi_chr06      | 4646858                        | [T/C]       | NA                                         |
| Ca_Desi_Chrom_6_4651071 | Ca_desi_chr06      | 4651071                        | [A/C]       | NA                                         |
| Ca_Desi_Chrom_6_4651164 | Ca_desi_chr06      | 4651164                        | [T/C]       | NA                                         |
| Ca_Desi_Chrom_6_4651190 | Ca_desi_chr06      | 4651190                        | [A/C]       | NA                                         |
| Ca_Desi_Chrom_6_4672196 | Ca_desi_chr06      | 4672196                        | [T/G]       | NA                                         |
| Ca_Desi_Chrom_6_4697911 | Ca_desi_chr06      | 4697911                        | [T/G]       | NA                                         |
| Ca_Desi_Chrom_6_4698856 | Ca_desi_chr06      | 4698856                        | [A/C]       | NA                                         |
| Ca_Desi_Chrom_6_4723758 | Ca_desi_chr06      | 4723758                        | [C/A]       | NA                                         |
| Ca_Desi_Chrom_6_4723761 | Ca_desi_chr06      | 4723761                        | [T/G]       | NA                                         |
| Ca_Desi_Chrom_6_4723762 | Ca_desi_chr06      | 4723762                        | [C/A]       | NA                                         |
| Ca_Desi_Chrom_6_4723763 | Ca_desi_chr06      | 4723763                        | [T/G]       | NA                                         |
| Ca_Desi_Chrom_6_4733449 | Ca_desi_chr06      | 4733449                        | [T/G]       | NA                                         |
| Ca_Desi_Chrom_6_4733514 | Ca_desi_chr06      | 4733514                        | [A/C]       | NA                                         |
| Ca_Desi_Chrom_6_4733525 | Ca_desi_chr06      | 4733525                        | [T/C]       | NA                                         |
| Ca_Desi_Chrom_6_4733551 | Ca_desi_chr06      | 4733551                        | [A/C]       | NA                                         |
| Ca_Desi_Chrom_6_4734361 | Ca_desi_chr06      | 4734361                        | [C/A]       | NA                                         |
| Ca_Desi_Chrom_6_4734362 | Ca_desi_chr06      | 4734362                        | [T/G]       | NA                                         |
| Ca_Desi_Chrom_6_4734363 | Ca_desi_chr06      | 4734363                        | [T/A]       | NA                                         |
| Ca_Desi_Chrom_6_4734364 | Ca_desi_chr06      | 4734364                        | [C/T]       | NA                                         |
| Ca_Desi_Chrom_6_4739968 | Ca_desi_chr06      | 4739968                        | [T/A]       | NA                                         |
| Ca_Desi_Chrom_6_4739978 | Ca_desi_chr06      | 4739978                        | [T/G]       | NA                                         |
| Ca_Desi_Chrom_6_4761059 | Ca_desi_chr06      | 4761059                        | [T/A]       | NA                                         |
| Ca_Desi_Chrom_6_4761060 | Ca_desi_chr06      | 4761060                        | [A/G]       | NA                                         |
| Ca_Desi_Chrom_6_4792757 | Ca_desi_chr06      | 4792757                        | [T/G]       | NA                                         |
| Ca_Desi_Chrom_6_4793027 | Ca_desi_chr06      | 4793027                        | [A/G]       | NA                                         |
| Ca_Desi_Chrom_6_4793035 | Ca_desi_chr06      | 4793035                        | [A/G]       | NA                                         |
| Ca_Desi_Chrom_6_4793041 | Ca_desi_chr06      | 4793041                        | [A/G]       | NA                                         |
| Ca_Desi_Chrom_6_4793047 | Ca_desi_chr06      | 4793047                        | [A/G]       | NA                                         |

| <b>SNP IDs</b>         | <b>Chromosomes</b> | <b>Physical positions (bp)</b> | <b>SNPs</b> | <b>NCBI SNPdb accession IDs (NCBI_ss#)</b> |
|------------------------|--------------------|--------------------------------|-------------|--------------------------------------------|
| Ca_Desig_Chr_6_4793051 | Ca_desig_chr06     | 4793051                        | [A/C]       | NA                                         |
| Ca_Desig_Chr_6_4793056 | Ca_desig_chr06     | 4793056                        | [A/G]       | NA                                         |
| Ca_Desig_Chr_6_4793062 | Ca_desig_chr06     | 4793062                        | [T/C]       | NA                                         |
| Ca_Desig_Chr_6_4793064 | Ca_desig_chr06     | 4793064                        | [T/C]       | NA                                         |
| Ca_Desig_Chr_6_4793084 | Ca_desig_chr06     | 4793084                        | [A/G]       | NA                                         |
| Ca_Desig_Chr_6_4793088 | Ca_desig_chr06     | 4793088                        | [T/A]       | NA                                         |
| Ca_Desig_Chr_6_4793106 | Ca_desig_chr06     | 4793106                        | [T/C]       | NA                                         |
| Ca_Desig_Chr_6_4793120 | Ca_desig_chr06     | 4793120                        | [T/G]       | NA                                         |
| Ca_Desig_Chr_6_4793124 | Ca_desig_chr06     | 4793124                        | [A/G]       | NA                                         |
| Ca_Desig_Chr_6_4793126 | Ca_desig_chr06     | 4793126                        | [A/G]       | NA                                         |
| Ca_Desig_Chr_6_4793128 | Ca_desig_chr06     | 4793128                        | [A/G]       | NA                                         |
| Ca_Desig_Chr_6_4793130 | Ca_desig_chr06     | 4793130                        | [T/G]       | NA                                         |
| Ca_Desig_Chr_6_4793137 | Ca_desig_chr06     | 4793137                        | [A/G]       | NA                                         |
| Ca_Desig_Chr_6_4793141 | Ca_desig_chr06     | 4793141                        | [T/G]       | NA                                         |
| Ca_Desig_Chr_6_4793145 | Ca_desig_chr06     | 4793145                        | [T/C]       | NA                                         |
| Ca_Desig_Chr_6_4793538 | Ca_desig_chr06     | 4793538                        | [T/A]       | NA                                         |
| Ca_Desig_Chr_6_4794434 | Ca_desig_chr06     | 4794434                        | [C/A]       | NA                                         |
| Ca_Desig_Chr_6_4794780 | Ca_desig_chr06     | 4794780                        | [T/C]       | NA                                         |
| Ca_Desig_Chr_6_4794803 | Ca_desig_chr06     | 4794803                        | [T/C]       | NA                                         |
| Ca_Desig_Chr_6_4799876 | Ca_desig_chr06     | 4799876                        | [A/T]       | NA                                         |
| Ca_Desig_Chr_6_4799887 | Ca_desig_chr06     | 4799887                        | [A/T]       | NA                                         |
| Ca_Desig_Chr_6_4804469 | Ca_desig_chr06     | 4804469                        | [T/C]       | NA                                         |
| Ca_Desig_Chr_6_4807031 | Ca_desig_chr06     | 4807031                        | [T/G]       | NA                                         |
| Ca_Desig_Chr_6_4807042 | Ca_desig_chr06     | 4807042                        | [T/A]       | NA                                         |
| Ca_Desig_Chr_6_4807094 | Ca_desig_chr06     | 4807094                        | [A/T]       | NA                                         |
| Ca_Desig_Chr_6_4820438 | Ca_desig_chr06     | 4820438                        | [T/C]       | NA                                         |
| Ca_Desig_Chr_6_4820440 | Ca_desig_chr06     | 4820440                        | [A/C]       | NA                                         |
| Ca_Desig_Chr_6_4820445 | Ca_desig_chr06     | 4820445                        | [A/C]       | NA                                         |
| Ca_Desig_Chr_6_4820457 | Ca_desig_chr06     | 4820457                        | [A/C]       | NA                                         |
| Ca_Desig_Chr_6_4820463 | Ca_desig_chr06     | 4820463                        | [T/C]       | NA                                         |
| Ca_Desig_Chr_6_4820465 | Ca_desig_chr06     | 4820465                        | [T/C]       | NA                                         |
| Ca_Desig_Chr_6_4820472 | Ca_desig_chr06     | 4820472                        | [A/C]       | NA                                         |
| Ca_Desig_Chr_6_4820478 | Ca_desig_chr06     | 4820478                        | [T/C]       | NA                                         |
| Ca_Desig_Chr_6_4836612 | Ca_desig_chr06     | 4836612                        | [T/C]       | NA                                         |



| <b>SNP IDs</b>          | <b>Chromosomes</b> | <b>Physical positions (bp)</b> | <b>SNPs</b> | <b>NCBI SNPdb accession IDs (NCBI_ss#)</b> |
|-------------------------|--------------------|--------------------------------|-------------|--------------------------------------------|
| Ca_Desi_Chrom_6_4836614 | Ca_desi_chr06      | 4836614                        | [A/C]       | NA                                         |
| Ca_Desi_Chrom_6_4836623 | Ca_desi_chr06      | 4836623                        | [T/C]       | NA                                         |
| Ca_Desi_Chrom_6_4836631 | Ca_desi_chr06      | 4836631                        | [A/G]       | NA                                         |
| Ca_Desi_Chrom_6_4836649 | Ca_desi_chr06      | 4836649                        | [A/G]       | NA                                         |
| Ca_Desi_Chrom_6_4836668 | Ca_desi_chr06      | 4836668                        | [A/G]       | NA                                         |
| Ca_Desi_Chrom_6_4863652 | Ca_desi_chr06      | 4863652                        | [A/T]       | NA                                         |
| Ca_Desi_Chrom_6_4863685 | Ca_desi_chr06      | 4863685                        | [C/A]       | NA                                         |
| Ca_Desi_Chrom_6_4868317 | Ca_desi_chr06      | 4868317                        | [A/C]       | NA                                         |
| Ca_Desi_Chrom_6_4868402 | Ca_desi_chr06      | 4868402                        | [A/T]       | NA                                         |
| Ca_Desi_Chrom_6_4868416 | Ca_desi_chr06      | 4868416                        | [T/G]       | NA                                         |
| Ca_Desi_Chrom_6_4868422 | Ca_desi_chr06      | 4868422                        | [T/C]       | NA                                         |
| Ca_Desi_Chrom_6_4908422 | Ca_desi_chr06      | 4908422                        | [T/C]       | NA                                         |
| Ca_Desi_Chrom_6_4909247 | Ca_desi_chr06      | 4909247                        | [T/G]       | NA                                         |
| Ca_Desi_Chrom_6_4910031 | Ca_desi_chr06      | 4910031                        | [G/A]       | NA                                         |
| Ca_Desi_Chrom_6_4910422 | Ca_desi_chr06      | 4910422                        | [C/T]       | NA                                         |
| Ca_Desi_Chrom_6_4910434 | Ca_desi_chr06      | 4910434                        | [T/C]       | NA                                         |
| Ca_Desi_Chrom_6_4911436 | Ca_desi_chr06      | 4911436                        | [C/T]       | NA                                         |
| Ca_Desi_Chrom_6_4911475 | Ca_desi_chr06      | 4911475                        | [T/C]       | NA                                         |
| Ca_Desi_Chrom_6_4911716 | Ca_desi_chr06      | 4911716                        | [G/T]       | NA                                         |
| Ca_Desi_Chrom_6_4915651 | Ca_desi_chr06      | 4915651                        | [T/A]       | NA                                         |
| Ca_Desi_Chrom_6_4915652 | Ca_desi_chr06      | 4915652                        | [G/A]       | NA                                         |
| Ca_Desi_Chrom_6_4915673 | Ca_desi_chr06      | 4915673                        | [T/G]       | NA                                         |
| Ca_Desi_Chrom_6_4920326 | Ca_desi_chr06      | 4920326                        | [G/T]       | NA                                         |
| Ca_Desi_Chrom_6_4939703 | Ca_desi_chr06      | 4939703                        | [A/G]       | NA                                         |
| Ca_Desi_Chrom_6_4939711 | Ca_desi_chr06      | 4939711                        | [C/T]       | NA                                         |
| Ca_Desi_Chrom_6_4999533 | Ca_desi_chr06      | 4999533                        | [T/G]       | NA                                         |
| Ca_Desi_Chrom_6_5017058 | Ca_desi_chr06      | 5017058                        | [A/C]       | NA                                         |
| Ca_Desi_Chrom_6_5017065 | Ca_desi_chr06      | 5017065                        | [A/G]       | NA                                         |
| Ca_Desi_Chrom_6_5552713 | Ca_desi_chr06      | 5552713                        | [C/G]       | NA                                         |
| Ca_Desi_Chrom_6_5565255 | Ca_desi_chr06      | 5565255                        | [A/T]       | NA                                         |
| Ca_Desi_Chrom_6_5565258 | Ca_desi_chr06      | 5565258                        | [G/C]       | NA                                         |
| Ca_Desi_Chrom_6_5565294 | Ca_desi_chr06      | 5565294                        | [T/G]       | NA                                         |
| Ca_Desi_Chrom_6_5573898 | Ca_desi_chr06      | 5573898                        | [T/C]       | NA                                         |
| Ca_Desi_Chrom_6_5574091 | Ca_desi_chr06      | 5574091                        | [C/T]       | NA                                         |

| <b>SNP IDs</b>          | <b>Chromosomes</b> | <b>Physical positions (bp)</b> | <b>SNPs</b> | <b>NCBI SNPdb accession IDs (NCBI_ss#)</b> |
|-------------------------|--------------------|--------------------------------|-------------|--------------------------------------------|
| Ca_Desi_Chrom_6_5582291 | Ca_desi_chr06      | 5582291                        | [T/C]       | NA                                         |
| Ca_Desi_Chrom_6_5600377 | Ca_desi_chr06      | 5600377                        | [C/A]       | NA                                         |
| Ca_Desi_Chrom_6_5601147 | Ca_desi_chr06      | 5601147                        | [G/C]       | NA                                         |
| Ca_Desi_Chrom_6_5601304 | Ca_desi_chr06      | 5601304                        | [G/A]       | NA                                         |
| Ca_Desi_Chrom_6_5606330 | Ca_desi_chr06      | 5606330                        | [A/C]       | NA                                         |
| Ca_Desi_Chrom_6_5607979 | Ca_desi_chr06      | 5607979                        | [A/G]       | NA                                         |
| Ca_Desi_Chrom_6_5623892 | Ca_desi_chr06      | 5623892                        | [T/C]       | NA                                         |
| Ca_Desi_Chrom_6_5644572 | Ca_desi_chr06      | 5644572                        | [T/C]       | NA                                         |
| Ca_Desi_Chrom_6_5765527 | Ca_desi_chr06      | 5765527                        | [T/G]       | NA                                         |
| Ca_Desi_Chrom_6_5765536 | Ca_desi_chr06      | 5765536                        | [T/G]       | NA                                         |
| Ca_Desi_Chrom_6_5765551 | Ca_desi_chr06      | 5765551                        | [G/A]       | NA                                         |
| Ca_Desi_Chrom_6_5793661 | Ca_desi_chr06      | 5793661                        | [T/C]       | NA                                         |
| Ca_Desi_Chrom_6_5793689 | Ca_desi_chr06      | 5793689                        | [A/C]       | NA                                         |
| Ca_Desi_Chrom_6_5805145 | Ca_desi_chr06      | 5805145                        | [G/T]       | NA                                         |
| Ca_Desi_Chrom_6_5805148 | Ca_desi_chr06      | 5805148                        | [T/C]       | NA                                         |
| Ca_Desi_Chrom_6_5805150 | Ca_desi_chr06      | 5805150                        | [T/C]       | NA                                         |
| Ca_Desi_Chrom_6_5830309 | Ca_desi_chr06      | 5830309                        | [C/T]       | NA                                         |
| Ca_Desi_Chrom_6_5830337 | Ca_desi_chr06      | 5830337                        | [G/T]       | NA                                         |
| Ca_Desi_Chrom_6_5830357 | Ca_desi_chr06      | 5830357                        | [T/C]       | NA                                         |
| Ca_Desi_Chrom_6_5855179 | Ca_desi_chr06      | 5855179                        | [G/A]       | NA                                         |
| Ca_Desi_Chrom_6_5855793 | Ca_desi_chr06      | 5855793                        | [T/A]       | NA                                         |
| Ca_Desi_Chrom_6_5855826 | Ca_desi_chr06      | 5855826                        | [C/T]       | NA                                         |
| Ca_Desi_Chrom_6_5856372 | Ca_desi_chr06      | 5856372                        | [T/A]       | NA                                         |
| Ca_Desi_Chrom_6_5856391 | Ca_desi_chr06      | 5856391                        | [T/G]       | NA                                         |
| Ca_Desi_Chrom_6_5857703 | Ca_desi_chr06      | 5857703                        | [A/G]       | NA                                         |
| Ca_Desi_Chrom_6_5863791 | Ca_desi_chr06      | 5863791                        | [T/G]       | NA                                         |
| Ca_Desi_Chrom_6_5875894 | Ca_desi_chr06      | 5875894                        | [T/C]       | NA                                         |
| Ca_Desi_Chrom_6_5875912 | Ca_desi_chr06      | 5875912                        | [A/C]       | NA                                         |
| Ca_Desi_Chrom_6_5875935 | Ca_desi_chr06      | 5875935                        | [A/G]       | NA                                         |
| Ca_Desi_Chrom_6_5881201 | Ca_desi_chr06      | 5881201                        | [C/T]       | NA                                         |
| Ca_Desi_Chrom_6_5923519 | Ca_desi_chr06      | 5923519                        | [T/C]       | NA                                         |
| Ca_Desi_Chrom_6_5923536 | Ca_desi_chr06      | 5923536                        | [A/G]       | NA                                         |
| Ca_Desi_Chrom_6_5923545 | Ca_desi_chr06      | 5923545                        | [A/G]       | NA                                         |
| Ca_Desi_Chrom_6_5923566 | Ca_desi_chr06      | 5923566                        | [T/C]       | NA                                         |

| <b>SNP IDs</b>          | <b>Chromosomes</b> | <b>Physical positions (bp)</b> | <b>SNPs</b> | <b>NCBI SNPdb accession IDs (NCBI_ss#)</b> |
|-------------------------|--------------------|--------------------------------|-------------|--------------------------------------------|
| Ca_Desi_Chrom_6_5931952 | Ca_desi_chr06      | 5931952                        | [C/G]       | NA                                         |
| Ca_Desi_Chrom_6_5931987 | Ca_desi_chr06      | 5931987                        | [C/T]       | NA                                         |
| Ca_Desi_Chrom_6_5933120 | Ca_desi_chr06      | 5933120                        | [C/T]       | NA                                         |
| Ca_Desi_Chrom_6_5933446 | Ca_desi_chr06      | 5933446                        | [A/G]       | NA                                         |
| Ca_Desi_Chrom_6_5941908 | Ca_desi_chr06      | 5941908                        | [T/C]       | NA                                         |
| Ca_Desi_Chrom_6_5942035 | Ca_desi_chr06      | 5942035                        | [T/C]       | NA                                         |
| Ca_Desi_Chrom_6_5942107 | Ca_desi_chr06      | 5942107                        | [C/A]       | NA                                         |
| Ca_Desi_Chrom_6_5942108 | Ca_desi_chr06      | 5942108                        | [A/T]       | NA                                         |
| Ca_Desi_Chrom_6_5942109 | Ca_desi_chr06      | 5942109                        | [A/C]       | NA                                         |
| Ca_Desi_Chrom_6_5942110 | Ca_desi_chr06      | 5942110                        | [G/T]       | NA                                         |
| Ca_Desi_Chrom_6_5942121 | Ca_desi_chr06      | 5942121                        | [G/A]       | NA                                         |
| Ca_Desi_Chrom_6_5942213 | Ca_desi_chr06      | 5942213                        | [T/G]       | NA                                         |
| Ca_Desi_Chrom_6_5942263 | Ca_desi_chr06      | 5942263                        | [T/G]       | NA                                         |
| Ca_Desi_Chrom_6_5943258 | Ca_desi_chr06      | 5943258                        | [A/T]       | NA                                         |
| Ca_Desi_Chrom_6_5943278 | Ca_desi_chr06      | 5943278                        | [T/G]       | NA                                         |
| Ca_Desi_Chrom_6_5943369 | Ca_desi_chr06      | 5943369                        | [C/T]       | NA                                         |
| Ca_Desi_Chrom_6_5943489 | Ca_desi_chr06      | 5943489                        | [T/C]       | NA                                         |
| Ca_Desi_Chrom_6_5943564 | Ca_desi_chr06      | 5943564                        | [C/T]       | NA                                         |
| Ca_Desi_Chrom_6_5944029 | Ca_desi_chr06      | 5944029                        | [A/G]       | NA                                         |
| Ca_Desi_Chrom_6_5944054 | Ca_desi_chr06      | 5944054                        | [A/G]       | NA                                         |
| Ca_Desi_Chrom_6_5944178 | Ca_desi_chr06      | 5944178                        | [C/T]       | NA                                         |
| Ca_Desi_Chrom_6_5944184 | Ca_desi_chr06      | 5944184                        | [C/T]       | NA                                         |
| Ca_Desi_Chrom_6_5946300 | Ca_desi_chr06      | 5946300                        | [T/C]       | NA                                         |
| Ca_Desi_Chrom_6_5946308 | Ca_desi_chr06      | 5946308                        | [T/C]       | NA                                         |
| Ca_Desi_Chrom_6_5946749 | Ca_desi_chr06      | 5946749                        | [C/T]       | NA                                         |
| Ca_Desi_Chrom_6_5946974 | Ca_desi_chr06      | 5946974                        | [T/C]       | NA                                         |
| Ca_Desi_Chrom_6_5947020 | Ca_desi_chr06      | 5947020                        | [T/G]       | NA                                         |
| Ca_Desi_Chrom_6_5947049 | Ca_desi_chr06      | 5947049                        | [G/T]       | NA                                         |
| Ca_Desi_Chrom_6_5947076 | Ca_desi_chr06      | 5947076                        | [A/G]       | NA                                         |
| Ca_Desi_Chrom_6_5947130 | Ca_desi_chr06      | 5947130                        | [G/A]       | NA                                         |
| Ca_Desi_Chrom_6_5947178 | Ca_desi_chr06      | 5947178                        | [T/A]       | NA                                         |
| Ca_Desi_Chrom_6_5947488 | Ca_desi_chr06      | 5947488                        | [A/C]       | NA                                         |
| Ca_Desi_Chrom_6_5947664 | Ca_desi_chr06      | 5947664                        | [G/A]       | NA                                         |
| Ca_Desi_Chrom_6_5947773 | Ca_desi_chr06      | 5947773                        | [C/A]       | NA                                         |

| <b>SNP IDs</b>          | <b>Chromosomes</b> | <b>Physical positions (bp)</b> | <b>SNPs</b> | <b>NCBI SNPdb accession IDs (NCBI_ss#)</b> |
|-------------------------|--------------------|--------------------------------|-------------|--------------------------------------------|
| Ca_Desi_Chrom_6_5947774 | Ca_desi_chr06      | 5947774                        | [A/G]       | NA                                         |
| Ca_Desi_Chrom_6_5947913 | Ca_desi_chr06      | 5947913                        | [A/G]       | NA                                         |
| Ca_Desi_Chrom_6_5948138 | Ca_desi_chr06      | 5948138                        | [T/A]       | NA                                         |
| Ca_Desi_Chrom_6_5948987 | Ca_desi_chr06      | 5948987                        | [T/G]       | NA                                         |
| Ca_Desi_Chrom_6_5949006 | Ca_desi_chr06      | 5949006                        | [T/C]       | NA                                         |
| Ca_Desi_Chrom_6_5949037 | Ca_desi_chr06      | 5949037                        | [C/T]       | NA                                         |
| Ca_Desi_Chrom_6_5960706 | Ca_desi_chr06      | 5960706                        | [T/G]       | NA                                         |
| Ca_Desi_Chrom_6_5960810 | Ca_desi_chr06      | 5960810                        | [C/G]       | NA                                         |
| Ca_Desi_Chrom_6_5963675 | Ca_desi_chr06      | 5963675                        | [T/C]       | NA                                         |
| Ca_Desi_Chrom_6_5967285 | Ca_desi_chr06      | 5967285                        | [C/G]       | NA                                         |
| Ca_Desi_Chrom_6_5967982 | Ca_desi_chr06      | 5967982                        | [T/G]       | NA                                         |
| Ca_Desi_Chrom_6_5968766 | Ca_desi_chr06      | 5968766                        | [G/A]       | NA                                         |
| Ca_Desi_Chrom_6_5992325 | Ca_desi_chr06      | 5992325                        | [A/C]       | NA                                         |
| Ca_Desi_Chrom_6_5994534 | Ca_desi_chr06      | 5994534                        | [T/C]       | NA                                         |
| Ca_Desi_Chrom_6_5995400 | Ca_desi_chr06      | 5995400                        | [A/C]       | NA                                         |
| Ca_Desi_Chrom_6_5995429 | Ca_desi_chr06      | 5995429                        | [A/C]       | NA                                         |
| Ca_Desi_Chrom_6_5995441 | Ca_desi_chr06      | 5995441                        | [A/G]       | NA                                         |
| Ca_Desi_Chrom_6_5995447 | Ca_desi_chr06      | 5995447                        | [T/A]       | NA                                         |
| Ca_Desi_Chrom_6_6004431 | Ca_desi_chr06      | 6004431                        | [G/C]       | NA                                         |
| Ca_Desi_Chrom_6_6045978 | Ca_desi_chr06      | 6045978                        | [C/A]       | NA                                         |
| Ca_Desi_Chrom_6_6046044 | Ca_desi_chr06      | 6046044                        | [T/C]       | NA                                         |
| Ca_Desi_Chrom_6_6046096 | Ca_desi_chr06      | 6046096                        | [G/A]       | NA                                         |
| Ca_Desi_Chrom_6_6048304 | Ca_desi_chr06      | 6048304                        | [C/T]       | NA                                         |
| Ca_Desi_Chrom_6_6048641 | Ca_desi_chr06      | 6048641                        | [G/A]       | NA                                         |
| Ca_Desi_Chrom_6_6048799 | Ca_desi_chr06      | 6048799                        | [T/G]       | NA                                         |
| Ca_Desi_Chrom_6_6048824 | Ca_desi_chr06      | 6048824                        | [C/T]       | NA                                         |
| Ca_Desi_Chrom_6_6048899 | Ca_desi_chr06      | 6048899                        | [C/T]       | NA                                         |
| Ca_Desi_Chrom_6_6048900 | Ca_desi_chr06      | 6048900                        | [A/G]       | NA                                         |
| Ca_Desi_Chrom_6_6048909 | Ca_desi_chr06      | 6048909                        | [T/C]       | NA                                         |
| Ca_Desi_Chrom_6_6049168 | Ca_desi_chr06      | 6049168                        | [A/C]       | NA                                         |
| Ca_Desi_Chrom_6_6049189 | Ca_desi_chr06      | 6049189                        | [C/T]       | NA                                         |
| Ca_Desi_Chrom_6_6049208 | Ca_desi_chr06      | 6049208                        | [C/A]       | NA                                         |
| Ca_Desi_Chrom_6_6058595 | Ca_desi_chr06      | 6058595                        | [T/G]       | NA                                         |
| Ca_Desi_Chrom_6_6062805 | Ca_desi_chr06      | 6062805                        | [T/G]       | NA                                         |

| <b>SNP IDs</b>          | <b>Chromosomes</b> | <b>Physical positions (bp)</b> | <b>SNPs</b> | <b>NCBI SNPdb accession IDs (NCBI_ss#)</b> |
|-------------------------|--------------------|--------------------------------|-------------|--------------------------------------------|
| Ca_Desi_Chrom_6_6103720 | Ca_desi_chr06      | 6103720                        | [G/T]       | NA                                         |
| Ca_Desi_Chrom_6_6115682 | Ca_desi_chr06      | 6115682                        | [C/T]       | NA                                         |
| Ca_Desi_Chrom_6_6115721 | Ca_desi_chr06      | 6115721                        | [A/T]       | NA                                         |
| Ca_Desi_Chrom_6_6118896 | Ca_desi_chr06      | 6118896                        | [C/T]       | NA                                         |
| Ca_Desi_Chrom_6_6119010 | Ca_desi_chr06      | 6119010                        | [T/C]       | NA                                         |
| Ca_Desi_Chrom_6_6119042 | Ca_desi_chr06      | 6119042                        | [A/C]       | NA                                         |
| Ca_Desi_Chrom_6_6119060 | Ca_desi_chr06      | 6119060                        | [A/G]       | NA                                         |
| Ca_Desi_Chrom_6_6119061 | Ca_desi_chr06      | 6119061                        | [A/G]       | NA                                         |
| Ca_Desi_Chrom_6_6156756 | Ca_desi_chr06      | 6156756                        | [T/G]       | NA                                         |
| Ca_Desi_Chrom_6_6156757 | Ca_desi_chr06      | 6156757                        | [C/T]       | NA                                         |
| Ca_Desi_Chrom_6_6156758 | Ca_desi_chr06      | 6156758                        | [T/G]       | NA                                         |
| Ca_Desi_Chrom_6_6160317 | Ca_desi_chr06      | 6160317                        | [T/G]       | NA                                         |
| Ca_Desi_Chrom_6_6339018 | Ca_desi_chr06      | 6339018                        | [A/C]       | NA                                         |
| Ca_Desi_Chrom_6_6339058 | Ca_desi_chr06      | 6339058                        | [A/T]       | NA                                         |
| Ca_Desi_Chrom_6_6339065 | Ca_desi_chr06      | 6339065                        | [A/G]       | NA                                         |
| Ca_Desi_Chrom_6_6339067 | Ca_desi_chr06      | 6339067                        | [A/G]       | NA                                         |
| Ca_Desi_Chrom_6_6339069 | Ca_desi_chr06      | 6339069                        | [T/C]       | NA                                         |
| Ca_Desi_Chrom_6_6339071 | Ca_desi_chr06      | 6339071                        | [C/T]       | NA                                         |
| Ca_Desi_Chrom_6_6339077 | Ca_desi_chr06      | 6339077                        | [T/C]       | NA                                         |
| Ca_Desi_Chrom_6_6339080 | Ca_desi_chr06      | 6339080                        | [T/C]       | NA                                         |
| Ca_Desi_Chrom_6_6339092 | Ca_desi_chr06      | 6339092                        | [T/C]       | NA                                         |
| Ca_Desi_Chrom_6_6339098 | Ca_desi_chr06      | 6339098                        | [T/C]       | NA                                         |
| Ca_Desi_Chrom_6_6339107 | Ca_desi_chr06      | 6339107                        | [A/G]       | NA                                         |
| Ca_Desi_Chrom_6_6639714 | Ca_desi_chr06      | 6639714                        | [G/T]       | NA                                         |
| Ca_Desi_Chrom_6_6790124 | Ca_desi_chr06      | 6790124                        | [T/G]       | NA                                         |
| Ca_Desi_Chrom_6_6790130 | Ca_desi_chr06      | 6790130                        | [A/G]       | NA                                         |
| Ca_Desi_Chrom_6_6790134 | Ca_desi_chr06      | 6790134                        | [T/G]       | NA                                         |
| Ca_Desi_Chrom_6_6792785 | Ca_desi_chr06      | 6792785                        | [C/A]       | NA                                         |
| Ca_Desi_Chrom_6_6792786 | Ca_desi_chr06      | 6792786                        | [T/C]       | NA                                         |
| Ca_Desi_Chrom_6_6792795 | Ca_desi_chr06      | 6792795                        | [A/G]       | NA                                         |
| Ca_Desi_Chrom_6_6803689 | Ca_desi_chr06      | 6803689                        | [T/G]       | NA                                         |
| Ca_Desi_Chrom_6_6873851 | Ca_desi_chr06      | 6873851                        | [C/T]       | NA                                         |
| Ca_Desi_Chrom_6_6873868 | Ca_desi_chr06      | 6873868                        | [A/G]       | NA                                         |
| Ca_Desi_Chrom_6_6873877 | Ca_desi_chr06      | 6873877                        | [A/G]       | NA                                         |

| <b>SNP IDs</b>          | <b>Chromosomes</b> | <b>Physical positions (bp)</b> | <b>SNPs</b> | <b>NCBI SNPdb accession IDs (NCBI_ss#)</b> |
|-------------------------|--------------------|--------------------------------|-------------|--------------------------------------------|
| Ca_Desi_Chrom_6_6915571 | Ca_desi_chr06      | 6915571                        | [T/G]       | NA                                         |
| Ca_Desi_Chrom_6_6915580 | Ca_desi_chr06      | 6915580                        | [C/G]       | NA                                         |
| Ca_Desi_Chrom_6_6915583 | Ca_desi_chr06      | 6915583                        | [A/G]       | NA                                         |
| Ca_Desi_Chrom_6_6915592 | Ca_desi_chr06      | 6915592                        | [T/G]       | NA                                         |
| Ca_Desi_Chrom_6_6915595 | Ca_desi_chr06      | 6915595                        | [T/C]       | NA                                         |
| Ca_Desi_Chrom_6_6967871 | Ca_desi_chr06      | 6967871                        | [T/C]       | NA                                         |
| Ca_Desi_Chrom_6_6967897 | Ca_desi_chr06      | 6967897                        | [T/C]       | NA                                         |
| Ca_Desi_Chrom_6_6967906 | Ca_desi_chr06      | 6967906                        | [A/C]       | NA                                         |
| Ca_Desi_Chrom_6_6967913 | Ca_desi_chr06      | 6967913                        | [A/T]       | NA                                         |
| Ca_Desi_Chrom_6_6968565 | Ca_desi_chr06      | 6968565                        | [T/C]       | NA                                         |
| Ca_Desi_Chrom_6_6968621 | Ca_desi_chr06      | 6968621                        | [T/G]       | NA                                         |
| Ca_Desi_Chrom_6_6968622 | Ca_desi_chr06      | 6968622                        | [T/G]       | NA                                         |
| Ca_Desi_Chrom_6_6968653 | Ca_desi_chr06      | 6968653                        | [A/G]       | NA                                         |
| Ca_Desi_Chrom_6_6968674 | Ca_desi_chr06      | 6968674                        | [A/G]       | NA                                         |
| Ca_Desi_Chrom_6_6971912 | Ca_desi_chr06      | 6971912                        | [A/C]       | NA                                         |
| Ca_Desi_Chrom_6_6971913 | Ca_desi_chr06      | 6971913                        | [G/C]       | NA                                         |
| Ca_Desi_Chrom_6_6971915 | Ca_desi_chr06      | 6971915                        | [T/A]       | NA                                         |
| Ca_Desi_Chrom_6_6971916 | Ca_desi_chr06      | 6971916                        | [C/A]       | NA                                         |
| Ca_Desi_Chrom_6_6995741 | Ca_desi_chr06      | 6995741                        | [T/C]       | NA                                         |
| Ca_Desi_Chrom_6_6995761 | Ca_desi_chr06      | 6995761                        | [A/C]       | NA                                         |
| Ca_Desi_Chrom_6_6995777 | Ca_desi_chr06      | 6995777                        | [A/C]       | NA                                         |
| Ca_Desi_Chrom_6_6995786 | Ca_desi_chr06      | 6995786                        | [A/G]       | NA                                         |
| Ca_Desi_Chrom_6_6995797 | Ca_desi_chr06      | 6995797                        | [T/C]       | NA                                         |
| Ca_Desi_Chrom_6_7013550 | Ca_desi_chr06      | 7013550                        | [T/G]       | NA                                         |
| Ca_Desi_Chrom_6_7014087 | Ca_desi_chr06      | 7014087                        | [A/C]       | NA                                         |
| Ca_Desi_Chrom_6_7014121 | Ca_desi_chr06      | 7014121                        | [T/C]       | NA                                         |
| Ca_Desi_Chrom_6_7014125 | Ca_desi_chr06      | 7014125                        | [A/G]       | NA                                         |
| Ca_Desi_Chrom_6_7231208 | Ca_desi_chr06      | 7231208                        | [T/C]       | NA                                         |
| Ca_Desi_Chrom_6_7231232 | Ca_desi_chr06      | 7231232                        | [A/C]       | NA                                         |
| Ca_Desi_Chrom_6_7285638 | Ca_desi_chr06      | 7285638                        | [T/A]       | NA                                         |
| Ca_Desi_Chrom_6_7326383 | Ca_desi_chr06      | 7326383                        | [T/C]       | NA                                         |
| Ca_Desi_Chrom_6_7326401 | Ca_desi_chr06      | 7326401                        | [T/C]       | NA                                         |
| Ca_Desi_Chrom_6_7326410 | Ca_desi_chr06      | 7326410                        | [A/G]       | NA                                         |
| Ca_Desi_Chrom_6_7326413 | Ca_desi_chr06      | 7326413                        | [T/G]       | NA                                         |

| <b>SNP IDs</b>          | <b>Chromosomes</b> | <b>Physical positions (bp)</b> | <b>SNPs</b> | <b>NCBI SNPdb accession IDs (NCBI_ss#)</b> |
|-------------------------|--------------------|--------------------------------|-------------|--------------------------------------------|
| Ca_Desi_Chrom_6_7326416 | Ca_desi_chr06      | 7326416                        | [A/G]       | NA                                         |
| Ca_Desi_Chrom_6_7337712 | Ca_desi_chr06      | 7337712                        | [T/G]       | NA                                         |
| Ca_Desi_Chrom_6_7337756 | Ca_desi_chr06      | 7337756                        | [T/G]       | NA                                         |
| Ca_Desi_Chrom_6_7337815 | Ca_desi_chr06      | 7337815                        | [T/A]       | NA                                         |
| Ca_Desi_Chrom_6_7337822 | Ca_desi_chr06      | 7337822                        | [T/G]       | NA                                         |
| Ca_Desi_Chrom_6_7337860 | Ca_desi_chr06      | 7337860                        | [T/C]       | NA                                         |
| Ca_Desi_Chrom_6_7339767 | Ca_desi_chr06      | 7339767                        | [T/G]       | NA                                         |
| Ca_Desi_Chrom_6_7414765 | Ca_desi_chr06      | 7414765                        | [A/G]       | NA                                         |
| Ca_Desi_Chrom_6_7414789 | Ca_desi_chr06      | 7414789                        | [A/G]       | NA                                         |
| Ca_Desi_Chrom_6_7441444 | Ca_desi_chr06      | 7441444                        | [T/C]       | NA                                         |
| Ca_Desi_Chrom_6_7450018 | Ca_desi_chr06      | 7450018                        | [G/A]       | NA                                         |
| Ca_Desi_Chrom_6_7472934 | Ca_desi_chr06      | 7472934                        | [C/T]       | NA                                         |
| Ca_Desi_Chrom_6_7478424 | Ca_desi_chr06      | 7478424                        | [T/C]       | NA                                         |
| Ca_Desi_Chrom_6_7502284 | Ca_desi_chr06      | 7502284                        | [G/A]       | NA                                         |
| Ca_Desi_Chrom_6_7509650 | Ca_desi_chr06      | 7509650                        | [G/A]       | NA                                         |
| Ca_Desi_Chrom_6_7511058 | Ca_desi_chr06      | 7511058                        | [C/G]       | NA                                         |
| Ca_Desi_Chrom_6_7537055 | Ca_desi_chr06      | 7537055                        | [G/T]       | NA                                         |
| Ca_Desi_Chrom_6_7539901 | Ca_desi_chr06      | 7539901                        | [T/A]       | NA                                         |
| Ca_Desi_Chrom_6_7539911 | Ca_desi_chr06      | 7539911                        | [A/G]       | NA                                         |
| Ca_Desi_Chrom_6_7572539 | Ca_desi_chr06      | 7572539                        | [T/C]       | NA                                         |
| Ca_Desi_Chrom_6_7572553 | Ca_desi_chr06      | 7572553                        | [A/G]       | NA                                         |
| Ca_Desi_Chrom_6_7572558 | Ca_desi_chr06      | 7572558                        | [T/C]       | NA                                         |
| Ca_Desi_Chrom_6_7572571 | Ca_desi_chr06      | 7572571                        | [T/G]       | NA                                         |
| Ca_Desi_Chrom_6_7572577 | Ca_desi_chr06      | 7572577                        | [T/A]       | NA                                         |
| Ca_Desi_Chrom_6_7572600 | Ca_desi_chr06      | 7572600                        | [A/C]       | NA                                         |
| Ca_Desi_Chrom_6_7572619 | Ca_desi_chr06      | 7572619                        | [A/T]       | NA                                         |
| Ca_Desi_Chrom_6_7572707 | Ca_desi_chr06      | 7572707                        | [A/C]       | NA                                         |
| Ca_Desi_Chrom_6_7589557 | Ca_desi_chr06      | 7589557                        | [G/A]       | NA                                         |
| Ca_Desi_Chrom_6_7594832 | Ca_desi_chr06      | 7594832                        | [T/C]       | NA                                         |
| Ca_Desi_Chrom_6_7597632 | Ca_desi_chr06      | 7597632                        | [T/G]       | NA                                         |
| Ca_Desi_Chrom_6_7597654 | Ca_desi_chr06      | 7597654                        | [G/A]       | NA                                         |
| Ca_Desi_Chrom_6_7597902 | Ca_desi_chr06      | 7597902                        | [A/G]       | NA                                         |
| Ca_Desi_Chrom_6_7600172 | Ca_desi_chr06      | 7600172                        | [T/C]       | NA                                         |
| Ca_Desi_Chrom_6_7600182 | Ca_desi_chr06      | 7600182                        | [T/C]       | NA                                         |

| <b>SNP IDs</b>          | <b>Chromosomes</b> | <b>Physical positions (bp)</b> | <b>SNPs</b> | <b>NCBI SNPdb accession IDs (NCBI_ss#)</b> |
|-------------------------|--------------------|--------------------------------|-------------|--------------------------------------------|
| Ca_Desi_Chrom_6_7600190 | Ca_desi_chr06      | 7600190                        | [A/G]       | NA                                         |
| Ca_Desi_Chrom_6_7692170 | Ca_desi_chr06      | 7692170                        | [A/C]       | NA                                         |
| Ca_Desi_Chrom_6_7708553 | Ca_desi_chr06      | 7708553                        | [T/C]       | NA                                         |
| Ca_Desi_Chrom_6_7708557 | Ca_desi_chr06      | 7708557                        | [A/C]       | NA                                         |
| Ca_Desi_Chrom_6_7708561 | Ca_desi_chr06      | 7708561                        | [T/C]       | NA                                         |
| Ca_Desi_Chrom_6_7708581 | Ca_desi_chr06      | 7708581                        | [T/C]       | NA                                         |
| Ca_Desi_Chrom_6_7773260 | Ca_desi_chr06      | 7773260                        | [T/C]       | NA                                         |
| Ca_Desi_Chrom_6_7773315 | Ca_desi_chr06      | 7773315                        | [A/C]       | NA                                         |
| Ca_Desi_Chrom_6_7789032 | Ca_desi_chr06      | 7789032                        | [G/T]       | NA                                         |
| Ca_Desi_Chrom_6_7789059 | Ca_desi_chr06      | 7789059                        | [G/A]       | NA                                         |
| Ca_Desi_Chrom_6_7793211 | Ca_desi_chr06      | 7793211                        | [T/A]       | NA                                         |
| Ca_Desi_Chrom_6_7793288 | Ca_desi_chr06      | 7793288                        | [G/A]       | NA                                         |
| Ca_Desi_Chrom_6_7793325 | Ca_desi_chr06      | 7793325                        | [A/G]       | NA                                         |
| Ca_Desi_Chrom_6_7797752 | Ca_desi_chr06      | 7797752                        | [T/G]       | NA                                         |
| Ca_Desi_Chrom_6_7803317 | Ca_desi_chr06      | 7803317                        | [C/A]       | NA                                         |
| Ca_Desi_Chrom_6_7803318 | Ca_desi_chr06      | 7803318                        | [T/G]       | NA                                         |
| Ca_Desi_Chrom_6_7810436 | Ca_desi_chr06      | 7810436                        | [A/G]       | NA                                         |
| Ca_Desi_Chrom_6_7810471 | Ca_desi_chr06      | 7810471                        | [A/T]       | NA                                         |
| Ca_Desi_Chrom_6_7837771 | Ca_desi_chr06      | 7837771                        | [T/G]       | NA                                         |
| Ca_Desi_Chrom_6_7870799 | Ca_desi_chr06      | 7870799                        | [A/G]       | NA                                         |
| Ca_Desi_Chrom_6_7870804 | Ca_desi_chr06      | 7870804                        | [T/G]       | NA                                         |
| Ca_Desi_Chrom_6_7870807 | Ca_desi_chr06      | 7870807                        | [T/G]       | NA                                         |
| Ca_Desi_Chrom_6_7881974 | Ca_desi_chr06      | 7881974                        | [C/T]       | NA                                         |
| Ca_Desi_Chrom_6_7883724 | Ca_desi_chr06      | 7883724                        | [T/C]       | NA                                         |
| Ca_Desi_Chrom_6_7883744 | Ca_desi_chr06      | 7883744                        | [T/G]       | NA                                         |
| Ca_Desi_Chrom_6_7883764 | Ca_desi_chr06      | 7883764                        | [G/A]       | NA                                         |
| Ca_Desi_Chrom_6_7922447 | Ca_desi_chr06      | 7922447                        | [A/G]       | NA                                         |
| Ca_Desi_Chrom_6_7922471 | Ca_desi_chr06      | 7922471                        | [T/C]       | NA                                         |
| Ca_Desi_Chrom_6_7922480 | Ca_desi_chr06      | 7922480                        | [A/G]       | NA                                         |
| Ca_Desi_Chrom_6_7922498 | Ca_desi_chr06      | 7922498                        | [T/C]       | NA                                         |
| Ca_Desi_Chrom_6_7923548 | Ca_desi_chr06      | 7923548                        | [T/C]       | NA                                         |
| Ca_Desi_Chrom_6_7959093 | Ca_desi_chr06      | 7959093                        | [T/C]       | NA                                         |
| Ca_Desi_Chrom_6_7968802 | Ca_desi_chr06      | 7968802                        | [C/T]       | NA                                         |
| Ca_Desi_Chrom_6_7969718 | Ca_desi_chr06      | 7969718                        | [G/A]       | NA                                         |



| <b>SNP IDs</b>          | <b>Chromosomes</b> | <b>Physical positions (bp)</b> | <b>SNPs</b> | <b>NCBI SNPdb accession IDs (NCBI_ss#)</b> |
|-------------------------|--------------------|--------------------------------|-------------|--------------------------------------------|
| Ca_Desi_Chrom_6_7969721 | Ca_desi_chr06      | 7969721                        | [T/G]       | NA                                         |
| Ca_Desi_Chrom_6_7969725 | Ca_desi_chr06      | 7969725                        | [A/T]       | NA                                         |
| Ca_Desi_Chrom_6_8018663 | Ca_desi_chr06      | 8018663                        | [A/C]       | NA                                         |
| Ca_Desi_Chrom_6_8079590 | Ca_desi_chr06      | 8079590                        | [G/T]       | NA                                         |
| Ca_Desi_Chrom_6_8088093 | Ca_desi_chr06      | 8088093                        | [T/G]       | NA                                         |
| Ca_Desi_Chrom_6_8103858 | Ca_desi_chr06      | 8103858                        | [A/G]       | NA                                         |
| Ca_Desi_Chrom_6_8103869 | Ca_desi_chr06      | 8103869                        | [A/G]       | NA                                         |
| Ca_Desi_Chrom_6_8103873 | Ca_desi_chr06      | 8103873                        | [A/C]       | NA                                         |
| Ca_Desi_Chrom_6_8103884 | Ca_desi_chr06      | 8103884                        | [A/C]       | NA                                         |
| Ca_Desi_Chrom_6_8103906 | Ca_desi_chr06      | 8103906                        | [A/G]       | NA                                         |
| Ca_Desi_Chrom_6_8103908 | Ca_desi_chr06      | 8103908                        | [A/G]       | NA                                         |
| Ca_Desi_Chrom_6_8137948 | Ca_desi_chr06      | 8137948                        | [A/C]       | NA                                         |
| Ca_Desi_Chrom_6_8378481 | Ca_desi_chr06      | 8378481                        | [T/G]       | NA                                         |
| Ca_Desi_Chrom_6_8432509 | Ca_desi_chr06      | 8432509                        | [A/C]       | NA                                         |
| Ca_Desi_Chrom_6_8432517 | Ca_desi_chr06      | 8432517                        | [T/C]       | NA                                         |
| Ca_Desi_Chrom_6_8559933 | Ca_desi_chr06      | 8559933                        | [A/C]       | NA                                         |
| Ca_Desi_Chrom_6_8559941 | Ca_desi_chr06      | 8559941                        | [A/G]       | NA                                         |
| Ca_Desi_Chrom_6_8614241 | Ca_desi_chr06      | 8614241                        | [A/C]       | NA                                         |
| Ca_Desi_Chrom_6_8616283 | Ca_desi_chr06      | 8616283                        | [T/G]       | NA                                         |
| Ca_Desi_Chrom_6_8616287 | Ca_desi_chr06      | 8616287                        | [T/G]       | NA                                         |
| Ca_Desi_Chrom_6_8616299 | Ca_desi_chr06      | 8616299                        | [T/G]       | NA                                         |
| Ca_Desi_Chrom_6_8625356 | Ca_desi_chr06      | 8625356                        | [T/G]       | NA                                         |
| Ca_Desi_Chrom_6_8625462 | Ca_desi_chr06      | 8625462                        | [A/G]       | NA                                         |
| Ca_Desi_Chrom_6_8625560 | Ca_desi_chr06      | 8625560                        | [T/G]       | NA                                         |
| Ca_Desi_Chrom_6_8625563 | Ca_desi_chr06      | 8625563                        | [T/G]       | NA                                         |
| Ca_Desi_Chrom_6_8654704 | Ca_desi_chr06      | 8654704                        | [T/C]       | NA                                         |
| Ca_Desi_Chrom_6_8654755 | Ca_desi_chr06      | 8654755                        | [A/G]       | NA                                         |
| Ca_Desi_Chrom_6_8731132 | Ca_desi_chr06      | 8731132                        | [T/G]       | NA                                         |
| Ca_Desi_Chrom_6_8731136 | Ca_desi_chr06      | 8731136                        | [C/T]       | NA                                         |
| Ca_Desi_Chrom_6_8731142 | Ca_desi_chr06      | 8731142                        | [C/T]       | NA                                         |
| Ca_Desi_Chrom_6_8732387 | Ca_desi_chr06      | 8732387                        | [G/A]       | NA                                         |
| Ca_Desi_Chrom_6_8734991 | Ca_desi_chr06      | 8734991                        | [A/T]       | NA                                         |
| Ca_Desi_Chrom_6_8735019 | Ca_desi_chr06      | 8735019                        | [A/C]       | NA                                         |
| Ca_Desi_Chrom_6_8737776 | Ca_desi_chr06      | 8737776                        | [A/C]       | NA                                         |

| <b>SNP IDs</b>          | <b>Chromosomes</b> | <b>Physical positions (bp)</b> | <b>SNPs</b> | <b>NCBI SNPdb accession IDs (NCBI_ss#)</b> |
|-------------------------|--------------------|--------------------------------|-------------|--------------------------------------------|
| Ca_Desi_Chrom_6_8740748 | Ca_desi_chr06      | 8740748                        | [T/A]       | NA                                         |
| Ca_Desi_Chrom_6_8811914 | Ca_desi_chr06      | 8811914                        | [C/A]       | NA                                         |
| Ca_Desi_Chrom_6_8811915 | Ca_desi_chr06      | 8811915                        | [C/G]       | NA                                         |
| Ca_Desi_Chrom_6_8811916 | Ca_desi_chr06      | 8811916                        | [T/A]       | NA                                         |
| Ca_Desi_Chrom_6_9172228 | Ca_desi_chr06      | 9172228                        | [T/G]       | NA                                         |
| Ca_Desi_Chrom_6_9216531 | Ca_desi_chr06      | 9216531                        | [A/C]       | NA                                         |
| Ca_Desi_Chrom_6_9216534 | Ca_desi_chr06      | 9216534                        | [C/T]       | NA                                         |
| Ca_Desi_Chrom_6_9228751 | Ca_desi_chr06      | 9228751                        | [T/G]       | NA                                         |
| Ca_Desi_Chrom_6_9228852 | Ca_desi_chr06      | 9228852                        | [A/T]       | NA                                         |
| Ca_Desi_Chrom_6_9245293 | Ca_desi_chr06      | 9245293                        | [T/G]       | NA                                         |
| Ca_Desi_Chrom_6_9245317 | Ca_desi_chr06      | 9245317                        | [T/G]       | NA                                         |
| Ca_Desi_Chrom_6_9245321 | Ca_desi_chr06      | 9245321                        | [A/C]       | NA                                         |
| Ca_Desi_Chrom_6_9250216 | Ca_desi_chr06      | 9250216                        | [A/G]       | NA                                         |
| Ca_Desi_Chrom_6_9253782 | Ca_desi_chr06      | 9253782                        | [T/A]       | NA                                         |
| Ca_Desi_Chrom_6_9340323 | Ca_desi_chr06      | 9340323                        | [A/C]       | NA                                         |
| Ca_Desi_Chrom_6_9379394 | Ca_desi_chr06      | 9379394                        | [A/C]       | NA                                         |
| Ca_Desi_Chrom_6_9384087 | Ca_desi_chr06      | 9384087                        | [A/C]       | NA                                         |
| Ca_Desi_Chrom_6_9384090 | Ca_desi_chr06      | 9384090                        | [A/C]       | NA                                         |
| Ca_Desi_Chrom_6_9391584 | Ca_desi_chr06      | 9391584                        | [A/G]       | NA                                         |
| Ca_Desi_Chrom_6_9463915 | Ca_desi_chr06      | 9463915                        | [G/A]       | NA                                         |
| Ca_Desi_Chrom_6_9463929 | Ca_desi_chr06      | 9463929                        | [G/A]       | NA                                         |
| Ca_Desi_Chrom_6_9463931 | Ca_desi_chr06      | 9463931                        | [A/G]       | NA                                         |
| Ca_Desi_Chrom_6_9507956 | Ca_desi_chr06      | 9507956                        | [T/C]       | NA                                         |
| Ca_Desi_Chrom_6_9507961 | Ca_desi_chr06      | 9507961                        | [G/A]       | NA                                         |
| Ca_Desi_Chrom_6_9507965 | Ca_desi_chr06      | 9507965                        | [T/C]       | NA                                         |
| Ca_Desi_Chrom_6_9507984 | Ca_desi_chr06      | 9507984                        | [A/T]       | NA                                         |
| Ca_Desi_Chrom_6_9507988 | Ca_desi_chr06      | 9507988                        | [T/C]       | NA                                         |
| Ca_Desi_Chrom_6_9507994 | Ca_desi_chr06      | 9507994                        | [T/C]       | NA                                         |
| Ca_Desi_Chrom_6_9508004 | Ca_desi_chr06      | 9508004                        | [A/G]       | NA                                         |
| Ca_Desi_Chrom_6_9522938 | Ca_desi_chr06      | 9522938                        | [A/C]       | NA                                         |
| Ca_Desi_Chrom_6_9522973 | Ca_desi_chr06      | 9522973                        | [A/C]       | NA                                         |
| Ca_Desi_Chrom_6_9523000 | Ca_desi_chr06      | 9523000                        | [A/T]       | NA                                         |
| Ca_Desi_Chrom_6_9523032 | Ca_desi_chr06      | 9523032                        | [T/C]       | NA                                         |
| Ca_Desi_Chrom_6_9523046 | Ca_desi_chr06      | 9523046                        | [T/C]       | NA                                         |

| <b>SNP IDs</b>          | <b>Chromosomes</b> | <b>Physical positions (bp)</b> | <b>SNPs</b> | <b>NCBI SNPdb accession IDs (NCBI_ss#)</b> |
|-------------------------|--------------------|--------------------------------|-------------|--------------------------------------------|
| Ca_Desi_Chrom_6_9619281 | Ca_desi_chr06      | 9619281                        | [C/A]       | NA                                         |
| Ca_Desi_Chrom_6_9619282 | Ca_desi_chr06      | 9619282                        | [C/G]       | NA                                         |
| Ca_Desi_Chrom_6_9619283 | Ca_desi_chr06      | 9619283                        | [C/A]       | NA                                         |
| Ca_Desi_Chrom_6_9628721 | Ca_desi_chr06      | 9628721                        | [T/C]       | NA                                         |
| Ca_Desi_Chrom_6_9663889 | Ca_desi_chr06      | 9663889                        | [A/C]       | NA                                         |
| Ca_Desi_Chrom_6_9691297 | Ca_desi_chr06      | 9691297                        | [A/G]       | NA                                         |
| Ca_Desi_Chrom_6_9691307 | Ca_desi_chr06      | 9691307                        | [A/G]       | NA                                         |
| Ca_Desi_Chrom_6_9691317 | Ca_desi_chr06      | 9691317                        | [T/G]       | NA                                         |
| Ca_Desi_Chrom_6_9691346 | Ca_desi_chr06      | 9691346                        | [A/G]       | NA                                         |
| Ca_Desi_Chrom_6_9691349 | Ca_desi_chr06      | 9691349                        | [T/G]       | NA                                         |
| Ca_Desi_Chrom_6_9696444 | Ca_desi_chr06      | 9696444                        | [T/C]       | NA                                         |
| Ca_Desi_Chrom_6_9696459 | Ca_desi_chr06      | 9696459                        | [A/C]       | NA                                         |
| Ca_Desi_Chrom_6_9728076 | Ca_desi_chr06      | 9728076                        | [A/G]       | NA                                         |
| Ca_Desi_Chrom_6_9728107 | Ca_desi_chr06      | 9728107                        | [A/G]       | NA                                         |
| Ca_Desi_Chrom_6_9728112 | Ca_desi_chr06      | 9728112                        | [T/G]       | NA                                         |
| Ca_Desi_Chrom_6_9728119 | Ca_desi_chr06      | 9728119                        | [A/G]       | NA                                         |
| Ca_Desi_Chrom_6_9728131 | Ca_desi_chr06      | 9728131                        | [A/G]       | NA                                         |
| Ca_Desi_Chrom_6_9728137 | Ca_desi_chr06      | 9728137                        | [A/G]       | NA                                         |
| Ca_Desi_Chrom_6_9728147 | Ca_desi_chr06      | 9728147                        | [A/G]       | NA                                         |
| Ca_Desi_Chrom_6_9728153 | Ca_desi_chr06      | 9728153                        | [A/G]       | NA                                         |
| Ca_Desi_Chrom_6_9733693 | Ca_desi_chr06      | 9733693                        | [T/G]       | NA                                         |
| Ca_Desi_Chrom_6_9761314 | Ca_desi_chr06      | 9761314                        | [T/G]       | NA                                         |
| Ca_Desi_Chrom_6_9781707 | Ca_desi_chr06      | 9781707                        | [A/G]       | NA                                         |
| Ca_Desi_Chrom_6_9781713 | Ca_desi_chr06      | 9781713                        | [T/C]       | NA                                         |
| Ca_Desi_Chrom_6_9781724 | Ca_desi_chr06      | 9781724                        | [T/C]       | NA                                         |
| Ca_Desi_Chrom_6_9781737 | Ca_desi_chr06      | 9781737                        | [T/C]       | NA                                         |
| Ca_Desi_Chrom_6_9781748 | Ca_desi_chr06      | 9781748                        | [T/C]       | NA                                         |
| Ca_Desi_Chrom_6_9781757 | Ca_desi_chr06      | 9781757                        | [A/G]       | NA                                         |
| Ca_Desi_Chrom_6_9781761 | Ca_desi_chr06      | 9781761                        | [T/C]       | NA                                         |
| Ca_Desi_Chrom_6_9781778 | Ca_desi_chr06      | 9781778                        | [T/C]       | NA                                         |
| Ca_Desi_Chrom_6_9897705 | Ca_desi_chr06      | 9897705                        | [T/A]       | NA                                         |
| Ca_Desi_Chrom_6_9899089 | Ca_desi_chr06      | 9899089                        | [A/G]       | NA                                         |
| Ca_Desi_Chrom_6_9904506 | Ca_desi_chr06      | 9904506                        | [A/C]       | NA                                         |
| Ca_Desi_Chrom_6_9904514 | Ca_desi_chr06      | 9904514                        | [G/T]       | NA                                         |

| <b>SNP IDs</b>          | <b>Chromosomes</b> | <b>Physical positions (bp)</b> | <b>SNPs</b> | <b>NCBI SNPdb accession IDs (NCBI_ss#)</b> |
|-------------------------|--------------------|--------------------------------|-------------|--------------------------------------------|
| Ca_Desig_Chr_6_9904519  | Ca_desig_chr06     | 9904519                        | [A/C]       | NA                                         |
| Ca_Desig_Chr_6_9904522  | Ca_desig_chr06     | 9904522                        | [T/C]       | NA                                         |
| Ca_Desig_Chr_6_9904525  | Ca_desig_chr06     | 9904525                        | [C/T]       | NA                                         |
| Ca_Desig_Chr_6_9904526  | Ca_desig_chr06     | 9904526                        | [A/C]       | NA                                         |
| Ca_Desig_Chr_6_9904529  | Ca_desig_chr06     | 9904529                        | [G/T]       | NA                                         |
| Ca_Desig_Chr_6_9904537  | Ca_desig_chr06     | 9904537                        | [G/T]       | NA                                         |
| Ca_Desig_Chr_6_9904548  | Ca_desig_chr06     | 9904548                        | [A/G]       | NA                                         |
| Ca_Desig_Chr_6_9980886  | Ca_desig_chr06     | 9980886                        | [A/G]       | NA                                         |
| Ca_Desig_Chr_6_9980900  | Ca_desig_chr06     | 9980900                        | [T/A]       | NA                                         |
| Ca_Desig_Chr_6_9980909  | Ca_desig_chr06     | 9980909                        | [T/G]       | NA                                         |
| Ca_Desig_Chr_6_9992247  | Ca_desig_chr06     | 9992247                        | [A/C]       | NA                                         |
| Ca_Desig_Chr_6_10095710 | Ca_desig_chr06     | 10095710                       | [T/G]       | NA                                         |
| Ca_Desig_Chr_6_10123319 | Ca_desig_chr06     | 10123319                       | [A/C]       | NA                                         |
| Ca_Desig_Chr_6_10125156 | Ca_desig_chr06     | 10125156                       | [A/G]       | NA                                         |
| Ca_Desig_Chr_6_10167624 | Ca_desig_chr06     | 10167624                       | [T/G]       | NA                                         |
| Ca_Desig_Chr_6_10167633 | Ca_desig_chr06     | 10167633                       | [A/C]       | NA                                         |
| Ca_Desig_Chr_6_10167658 | Ca_desig_chr06     | 10167658                       | [A/G]       | NA                                         |
| Ca_Desig_Chr_6_10253611 | Ca_desig_chr06     | 10253611                       | [A/G]       | NA                                         |
| Ca_Desig_Chr_6_10266783 | Ca_desig_chr06     | 10266783                       | [A/G]       | NA                                         |
| Ca_Desig_Chr_6_10266790 | Ca_desig_chr06     | 10266790                       | [A/G]       | NA                                         |
| Ca_Desig_Chr_6_10266792 | Ca_desig_chr06     | 10266792                       | [A/C]       | NA                                         |
| Ca_Desig_Chr_6_10266794 | Ca_desig_chr06     | 10266794                       | [T/C]       | NA                                         |
| Ca_Desig_Chr_6_10266813 | Ca_desig_chr06     | 10266813                       | [A/G]       | NA                                         |
| Ca_Desig_Chr_6_10266814 | Ca_desig_chr06     | 10266814                       | [T/A]       | NA                                         |
| Ca_Desig_Chr_6_10266828 | Ca_desig_chr06     | 10266828                       | [A/G]       | NA                                         |
| Ca_Desig_Chr_6_10269558 | Ca_desig_chr06     | 10269558                       | [A/G]       | NA                                         |
| Ca_Desig_Chr_6_10269568 | Ca_desig_chr06     | 10269568                       | [A/G]       | NA                                         |
| Ca_Desig_Chr_6_10269573 | Ca_desig_chr06     | 10269573                       | [A/C]       | NA                                         |
| Ca_Desig_Chr_6_10269582 | Ca_desig_chr06     | 10269582                       | [A/G]       | NA                                         |
| Ca_Desig_Chr_6_10269591 | Ca_desig_chr06     | 10269591                       | [A/G]       | NA                                         |
| Ca_Desig_Chr_6_10269598 | Ca_desig_chr06     | 10269598                       | [A/G]       | NA                                         |
| Ca_Desig_Chr_6_10289062 | Ca_desig_chr06     | 10289062                       | [T/C]       | NA                                         |
| Ca_Desig_Chr_6_10304722 | Ca_desig_chr06     | 10304722                       | [C/A]       | NA                                         |
| Ca_Desig_Chr_6_10304723 | Ca_desig_chr06     | 10304723                       | [T/G]       | NA                                         |

| <b>SNP IDs</b>           | <b>Chromosomes</b> | <b>Physical positions (bp)</b> | <b>SNPs</b> | <b>NCBI SNPdb accession IDs (NCBI_ss#)</b> |
|--------------------------|--------------------|--------------------------------|-------------|--------------------------------------------|
| Ca_Desi_Chrom_6_10304724 | Ca_desi_chr06      | 10304724                       | [G/A]       | NA                                         |
| Ca_Desi_Chrom_6_10304725 | Ca_desi_chr06      | 10304725                       | [A/T]       | NA                                         |
| Ca_Desi_Chrom_6_10326027 | Ca_desi_chr06      | 10326027                       | [T/C]       | NA                                         |
| Ca_Desi_Chrom_6_10334639 | Ca_desi_chr06      | 10334639                       | [A/C]       | NA                                         |
| Ca_Desi_Chrom_6_10334716 | Ca_desi_chr06      | 10334716                       | [A/C]       | NA                                         |
| Ca_Desi_Chrom_6_10334724 | Ca_desi_chr06      | 10334724                       | [A/C]       | NA                                         |
| Ca_Desi_Chrom_6_10338751 | Ca_desi_chr06      | 10338751                       | [T/C]       | NA                                         |
| Ca_Desi_Chrom_6_10338768 | Ca_desi_chr06      | 10338768                       | [A/C]       | NA                                         |
| Ca_Desi_Chrom_6_10338779 | Ca_desi_chr06      | 10338779                       | [A/T]       | NA                                         |
| Ca_Desi_Chrom_6_10358300 | Ca_desi_chr06      | 10358300                       | [G/A]       | NA                                         |
| Ca_Desi_Chrom_6_10358317 | Ca_desi_chr06      | 10358317                       | [A/G]       | NA                                         |
| Ca_Desi_Chrom_6_10358319 | Ca_desi_chr06      | 10358319                       | [G/T]       | NA                                         |
| Ca_Desi_Chrom_6_10358320 | Ca_desi_chr06      | 10358320                       | [A/G]       | NA                                         |
| Ca_Desi_Chrom_6_10358350 | Ca_desi_chr06      | 10358350                       | [G/A]       | NA                                         |
| Ca_Desi_Chrom_6_10366655 | Ca_desi_chr06      | 10366655                       | [G/T]       | NA                                         |
| Ca_Desi_Chrom_6_10366663 | Ca_desi_chr06      | 10366663                       | [T/C]       | NA                                         |
| Ca_Desi_Chrom_6_10461640 | Ca_desi_chr06      | 10461640                       | [A/T]       | NA                                         |
| Ca_Desi_Chrom_6_10461644 | Ca_desi_chr06      | 10461644                       | [A/G]       | NA                                         |
| Ca_Desi_Chrom_6_10461649 | Ca_desi_chr06      | 10461649                       | [A/G]       | NA                                         |
| Ca_Desi_Chrom_6_10461651 | Ca_desi_chr06      | 10461651                       | [T/G]       | NA                                         |
| Ca_Desi_Chrom_6_10461656 | Ca_desi_chr06      | 10461656                       | [T/G]       | NA                                         |
| Ca_Desi_Chrom_6_10461657 | Ca_desi_chr06      | 10461657                       | [A/C]       | NA                                         |
| Ca_Desi_Chrom_6_10461666 | Ca_desi_chr06      | 10461666                       | [T/C]       | NA                                         |
| Ca_Desi_Chrom_6_10461673 | Ca_desi_chr06      | 10461673                       | [T/C]       | NA                                         |
| Ca_Desi_Chrom_6_10461678 | Ca_desi_chr06      | 10461678                       | [T/C]       | NA                                         |
| Ca_Desi_Chrom_6_10461680 | Ca_desi_chr06      | 10461680                       | [T/C]       | NA                                         |
| Ca_Desi_Chrom_6_10461683 | Ca_desi_chr06      | 10461683                       | [T/C]       | NA                                         |
| Ca_Desi_Chrom_6_10461693 | Ca_desi_chr06      | 10461693                       | [C/G]       | NA                                         |
| Ca_Desi_Chrom_6_10461696 | Ca_desi_chr06      | 10461696                       | [T/A]       | NA                                         |
| Ca_Desi_Chrom_6_10461741 | Ca_desi_chr06      | 10461741                       | [T/G]       | NA                                         |
| Ca_Desi_Chrom_6_10461749 | Ca_desi_chr06      | 10461749                       | [T/G]       | NA                                         |
| Ca_Desi_Chrom_6_10461760 | Ca_desi_chr06      | 10461760                       | [A/G]       | NA                                         |
| Ca_Desi_Chrom_6_10473079 | Ca_desi_chr06      | 10473079                       | [T/G]       | NA                                         |
| Ca_Desi_Chrom_6_10473090 | Ca_desi_chr06      | 10473090                       | [A/G]       | NA                                         |

| <b>SNP IDs</b>           | <b>Chromosomes</b> | <b>Physical positions (bp)</b> | <b>SNPs</b> | <b>NCBI SNPdb accession IDs (NCBI_ss#)</b> |
|--------------------------|--------------------|--------------------------------|-------------|--------------------------------------------|
| Ca_Desi_Chrom_6_10473095 | Ca_desi_chr06      | 10473095                       | [T/G]       | NA                                         |
| Ca_Desi_Chrom_6_10473106 | Ca_desi_chr06      | 10473106                       | [A/G]       | NA                                         |
| Ca_Desi_Chrom_6_10473110 | Ca_desi_chr06      | 10473110                       | [T/G]       | NA                                         |
| Ca_Desi_Chrom_6_10473112 | Ca_desi_chr06      | 10473112                       | [T/G]       | NA                                         |
| Ca_Desi_Chrom_6_10509047 | Ca_desi_chr06      | 10509047                       | [A/T]       | NA                                         |
| Ca_Desi_Chrom_6_10574749 | Ca_desi_chr06      | 10574749                       | [T/G]       | NA                                         |
| Ca_Desi_Chrom_6_10575305 | Ca_desi_chr06      | 10575305                       | [T/A]       | NA                                         |
| Ca_Desi_Chrom_6_10575316 | Ca_desi_chr06      | 10575316                       | [T/C]       | NA                                         |
| Ca_Desi_Chrom_6_10596426 | Ca_desi_chr06      | 10596426                       | [A/G]       | NA                                         |
| Ca_Desi_Chrom_6_10596432 | Ca_desi_chr06      | 10596432                       | [A/C]       | NA                                         |
| Ca_Desi_Chrom_6_10596451 | Ca_desi_chr06      | 10596451                       | [T/C]       | NA                                         |
| Ca_Desi_Chrom_6_10596455 | Ca_desi_chr06      | 10596455                       | [T/A]       | NA                                         |
| Ca_Desi_Chrom_6_10596504 | Ca_desi_chr06      | 10596504                       | [T/G]       | NA                                         |
| Ca_Desi_Chrom_6_10662694 | Ca_desi_chr06      | 10662694                       | [A/C]       | NA                                         |
| Ca_Desi_Chrom_6_10662695 | Ca_desi_chr06      | 10662695                       | [C/A]       | NA                                         |
| Ca_Desi_Chrom_6_10662697 | Ca_desi_chr06      | 10662697                       | [T/G]       | NA                                         |
| Ca_Desi_Chrom_6_10662707 | Ca_desi_chr06      | 10662707                       | [A/G]       | NA                                         |
| Ca_Desi_Chrom_6_10662716 | Ca_desi_chr06      | 10662716                       | [T/C]       | NA                                         |
| Ca_Desi_Chrom_6_10662891 | Ca_desi_chr06      | 10662891                       | [T/C]       | NA                                         |
| Ca_Desi_Chrom_6_10662892 | Ca_desi_chr06      | 10662892                       | [G/T]       | NA                                         |
| Ca_Desi_Chrom_6_10710378 | Ca_desi_chr06      | 10710378                       | [A/C]       | NA                                         |
| Ca_Desi_Chrom_6_10710381 | Ca_desi_chr06      | 10710381                       | [T/C]       | NA                                         |
| Ca_Desi_Chrom_6_10710384 | Ca_desi_chr06      | 10710384                       | [A/C]       | NA                                         |
| Ca_Desi_Chrom_6_10710396 | Ca_desi_chr06      | 10710396                       | [A/T]       | NA                                         |
| Ca_Desi_Chrom_6_10712288 | Ca_desi_chr06      | 10712288                       | [T/G]       | NA                                         |
| Ca_Desi_Chrom_6_10778151 | Ca_desi_chr06      | 10778151                       | [A/G]       | NA                                         |
| Ca_Desi_Chrom_6_10830011 | Ca_desi_chr06      | 10830011                       | [A/C]       | NA                                         |
| Ca_Desi_Chrom_6_10888437 | Ca_desi_chr06      | 10888437                       | [A/G]       | NA                                         |
| Ca_Desi_Chrom_6_10940503 | Ca_desi_chr06      | 10940503                       | [T/C]       | NA                                         |
| Ca_Desi_Chrom_6_10967359 | Ca_desi_chr06      | 10967359                       | [T/G]       | NA                                         |
| Ca_Desi_Chrom_6_11029177 | Ca_desi_chr06      | 11029177                       | [A/G]       | NA                                         |
| Ca_Desi_Chrom_6_11029213 | Ca_desi_chr06      | 11029213                       | [T/A]       | NA                                         |
| Ca_Desi_Chrom_6_11029244 | Ca_desi_chr06      | 11029244                       | [T/G]       | NA                                         |
| Ca_Desi_Chrom_6_11029257 | Ca_desi_chr06      | 11029257                       | [A/C]       | NA                                         |

| <b>SNP IDs</b>           | <b>Chromosomes</b> | <b>Physical positions (bp)</b> | <b>SNPs</b> | <b>NCBI SNPdb accession IDs (NCBI_ss#)</b> |
|--------------------------|--------------------|--------------------------------|-------------|--------------------------------------------|
| Ca_Desi_Chrom_6_11176033 | Ca_desi_chr06      | 11176033                       | [A/T]       | NA                                         |
| Ca_Desi_Chrom_6_11299905 | Ca_desi_chr06      | 11299905                       | [A/G]       | NA                                         |
| Ca_Desi_Chrom_6_11299919 | Ca_desi_chr06      | 11299919                       | [T/C]       | NA                                         |
| Ca_Desi_Chrom_6_11299937 | Ca_desi_chr06      | 11299937                       | [T/G]       | NA                                         |
| Ca_Desi_Chrom_6_11299947 | Ca_desi_chr06      | 11299947                       | [A/T]       | NA                                         |
| Ca_Desi_Chrom_6_11319790 | Ca_desi_chr06      | 11319790                       | [T/G]       | NA                                         |
| Ca_Desi_Chrom_6_11341974 | Ca_desi_chr06      | 11341974                       | [G/T]       | NA                                         |
| Ca_Desi_Chrom_6_11341975 | Ca_desi_chr06      | 11341975                       | [T/G]       | NA                                         |
| Ca_Desi_Chrom_6_11350097 | Ca_desi_chr06      | 11350097                       | [A/C]       | NA                                         |
| Ca_Desi_Chrom_6_11414655 | Ca_desi_chr06      | 11414655                       | [A/C]       | NA                                         |
| Ca_Desi_Chrom_6_11453287 | Ca_desi_chr06      | 11453287                       | [T/C]       | NA                                         |
| Ca_Desi_Chrom_6_11453341 | Ca_desi_chr06      | 11453341                       | [T/G]       | NA                                         |
| Ca_Desi_Chrom_6_11453369 | Ca_desi_chr06      | 11453369                       | [A/G]       | NA                                         |
| Ca_Desi_Chrom_6_11476473 | Ca_desi_chr06      | 11476473                       | [A/C]       | NA                                         |
| Ca_Desi_Chrom_6_11476765 | Ca_desi_chr06      | 11476765                       | [A/C]       | NA                                         |
| Ca_Desi_Chrom_6_11476768 | Ca_desi_chr06      | 11476768                       | [T/C]       | NA                                         |
| Ca_Desi_Chrom_6_11476770 | Ca_desi_chr06      | 11476770                       | [T/C]       | NA                                         |
| Ca_Desi_Chrom_6_11477655 | Ca_desi_chr06      | 11477655                       | [A/G]       | NA                                         |
| Ca_Desi_Chrom_6_11477693 | Ca_desi_chr06      | 11477693                       | [T/C]       | NA                                         |
| Ca_Desi_Chrom_6_11477727 | Ca_desi_chr06      | 11477727                       | [T/C]       | NA                                         |
| Ca_Desi_Chrom_6_11477753 | Ca_desi_chr06      | 11477753                       | [T/C]       | NA                                         |
| Ca_Desi_Chrom_7_2258     | Ca_desi_chr07      | 2258                           | [T/G]       | NA                                         |
| Ca_Desi_Chrom_7_62005    | Ca_desi_chr07      | 62005                          | [T/C]       | NA                                         |
| Ca_Desi_Chrom_7_62011    | Ca_desi_chr07      | 62011                          | [A/C]       | NA                                         |
| Ca_Desi_Chrom_7_62027    | Ca_desi_chr07      | 62027                          | [T/C]       | NA                                         |
| Ca_Desi_Chrom_7_62038    | Ca_desi_chr07      | 62038                          | [T/C]       | NA                                         |
| Ca_Desi_Chrom_7_62045    | Ca_desi_chr07      | 62045                          | [A/G]       | NA                                         |
| Ca_Desi_Chrom_7_62054    | Ca_desi_chr07      | 62054                          | [T/G]       | NA                                         |
| Ca_Desi_Chrom_7_62059    | Ca_desi_chr07      | 62059                          | [T/C]       | NA                                         |
| Ca_Desi_Chrom_7_174177   | Ca_desi_chr07      | 174177                         | [T/C]       | NA                                         |
| Ca_Desi_Chrom_7_174182   | Ca_desi_chr07      | 174182                         | [T/C]       | NA                                         |
| Ca_Desi_Chrom_7_174191   | Ca_desi_chr07      | 174191                         | [T/C]       | NA                                         |
| Ca_Desi_Chrom_7_174201   | Ca_desi_chr07      | 174201                         | [A/G]       | NA                                         |
| Ca_Desi_Chrom_7_174203   | Ca_desi_chr07      | 174203                         | [C/G]       | NA                                         |

| <b>SNP IDs</b>         | <b>Chromosomes</b> | <b>Physical positions (bp)</b> | <b>SNPs</b> | <b>NCBI SNPdb accession IDs (NCBI_ss#)</b> |
|------------------------|--------------------|--------------------------------|-------------|--------------------------------------------|
| Ca_Desi_Chrom_7_174205 | Ca_desi_chr07      | 174205                         | [T/A]       | NA                                         |
| Ca_Desi_Chrom_7_174207 | Ca_desi_chr07      | 174207                         | [G/T]       | NA                                         |
| Ca_Desi_Chrom_7_174208 | Ca_desi_chr07      | 174208                         | [C/G]       | NA                                         |
| Ca_Desi_Chrom_7_174211 | Ca_desi_chr07      | 174211                         | [A/G]       | NA                                         |
| Ca_Desi_Chrom_7_174213 | Ca_desi_chr07      | 174213                         | [T/C]       | NA                                         |
| Ca_Desi_Chrom_7_174215 | Ca_desi_chr07      | 174215                         | [G/T]       | NA                                         |
| Ca_Desi_Chrom_7_174216 | Ca_desi_chr07      | 174216                         | [A/G]       | NA                                         |
| Ca_Desi_Chrom_7_174218 | Ca_desi_chr07      | 174218                         | [T/C]       | NA                                         |
| Ca_Desi_Chrom_7_174222 | Ca_desi_chr07      | 174222                         | [A/G]       | NA                                         |
| Ca_Desi_Chrom_7_174235 | Ca_desi_chr07      | 174235                         | [A/G]       | NA                                         |
| Ca_Desi_Chrom_7_174237 | Ca_desi_chr07      | 174237                         | [A/G]       | NA                                         |
| Ca_Desi_Chrom_7_174245 | Ca_desi_chr07      | 174245                         | [A/G]       | NA                                         |
| Ca_Desi_Chrom_7_174247 | Ca_desi_chr07      | 174247                         | [A/G]       | NA                                         |
| Ca_Desi_Chrom_7_175030 | Ca_desi_chr07      | 175030                         | [A/G]       | NA                                         |
| Ca_Desi_Chrom_7_175101 | Ca_desi_chr07      | 175101                         | [A/C]       | NA                                         |
| Ca_Desi_Chrom_7_178592 | Ca_desi_chr07      | 178592                         | [A/C]       | NA                                         |
| Ca_Desi_Chrom_7_182411 | Ca_desi_chr07      | 182411                         | [T/C]       | NA                                         |
| Ca_Desi_Chrom_7_182440 | Ca_desi_chr07      | 182440                         | [T/G]       | NA                                         |
| Ca_Desi_Chrom_7_218804 | Ca_desi_chr07      | 218804                         | [A/G]       | NA                                         |
| Ca_Desi_Chrom_7_327863 | Ca_desi_chr07      | 327863                         | [T/C]       | NA                                         |
| Ca_Desi_Chrom_7_339816 | Ca_desi_chr07      | 339816                         | [A/C]       | NA                                         |
| Ca_Desi_Chrom_7_339857 | Ca_desi_chr07      | 339857                         | [T/G]       | NA                                         |
| Ca_Desi_Chrom_7_350165 | Ca_desi_chr07      | 350165                         | [A/C]       | NA                                         |
| Ca_Desi_Chrom_7_360893 | Ca_desi_chr07      | 360893                         | [A/C]       | NA                                         |
| Ca_Desi_Chrom_7_386824 | Ca_desi_chr07      | 386824                         | [A/C]       | NA                                         |
| Ca_Desi_Chrom_7_398327 | Ca_desi_chr07      | 398327                         | [G/T]       | NA                                         |
| Ca_Desi_Chrom_7_413090 | Ca_desi_chr07      | 413090                         | [A/C]       | NA                                         |
| Ca_Desi_Chrom_7_428174 | Ca_desi_chr07      | 428174                         | [A/T]       | NA                                         |
| Ca_Desi_Chrom_7_428191 | Ca_desi_chr07      | 428191                         | [G/A]       | NA                                         |
| Ca_Desi_Chrom_7_429544 | Ca_desi_chr07      | 429544                         | [A/C]       | NA                                         |
| Ca_Desi_Chrom_7_463991 | Ca_desi_chr07      | 463991                         | [G/A]       | NA                                         |
| Ca_Desi_Chrom_7_463993 | Ca_desi_chr07      | 463993                         | [A/C]       | NA                                         |
| Ca_Desi_Chrom_7_463994 | Ca_desi_chr07      | 463994                         | [G/T]       | NA                                         |
| Ca_Desi_Chrom_7_575957 | Ca_desi_chr07      | 575957                         | [T/A]       | NA                                         |



| <b>SNP IDs</b>          | <b>Chromosomes</b> | <b>Physical positions (bp)</b> | <b>SNPs</b> | <b>NCBI SNPdb accession IDs (NCBI_ss#)</b> |
|-------------------------|--------------------|--------------------------------|-------------|--------------------------------------------|
| Ca_Desi_Chrom_7_640083  | Ca_desi_chr07      | 640083                         | [T/G]       | NA                                         |
| Ca_Desi_Chrom_7_694652  | Ca_desi_chr07      | 694652                         | [A/T]       | NA                                         |
| Ca_Desi_Chrom_7_694675  | Ca_desi_chr07      | 694675                         | [G/T]       | NA                                         |
| Ca_Desi_Chrom_7_735745  | Ca_desi_chr07      | 735745                         | [T/G]       | NA                                         |
| Ca_Desi_Chrom_7_735747  | Ca_desi_chr07      | 735747                         | [T/G]       | NA                                         |
| Ca_Desi_Chrom_7_747310  | Ca_desi_chr07      | 747310                         | [A/C]       | NA                                         |
| Ca_Desi_Chrom_7_754195  | Ca_desi_chr07      | 754195                         | [G/A]       | NA                                         |
| Ca_Desi_Chrom_7_754198  | Ca_desi_chr07      | 754198                         | [A/G]       | NA                                         |
| Ca_Desi_Chrom_7_754201  | Ca_desi_chr07      | 754201                         | [G/T]       | NA                                         |
| Ca_Desi_Chrom_7_770276  | Ca_desi_chr07      | 770276                         | [A/G]       | NA                                         |
| Ca_Desi_Chrom_7_770323  | Ca_desi_chr07      | 770323                         | [C/G]       | NA                                         |
| Ca_Desi_Chrom_7_789702  | Ca_desi_chr07      | 789702                         | [A/G]       | NA                                         |
| Ca_Desi_Chrom_7_789707  | Ca_desi_chr07      | 789707                         | [A/G]       | NA                                         |
| Ca_Desi_Chrom_7_789718  | Ca_desi_chr07      | 789718                         | [T/G]       | NA                                         |
| Ca_Desi_Chrom_7_789737  | Ca_desi_chr07      | 789737                         | [A/G]       | NA                                         |
| Ca_Desi_Chrom_7_789741  | Ca_desi_chr07      | 789741                         | [T/C]       | NA                                         |
| Ca_Desi_Chrom_7_789745  | Ca_desi_chr07      | 789745                         | [A/C]       | NA                                         |
| Ca_Desi_Chrom_7_802095  | Ca_desi_chr07      | 802095                         | [G/C]       | NA                                         |
| Ca_Desi_Chrom_7_984620  | Ca_desi_chr07      | 984620                         | [A/C]       | NA                                         |
| Ca_Desi_Chrom_7_984634  | Ca_desi_chr07      | 984634                         | [T/C]       | NA                                         |
| Ca_Desi_Chrom_7_1012489 | Ca_desi_chr07      | 1012489                        | [T/C]       | NA                                         |
| Ca_Desi_Chrom_7_1012502 | Ca_desi_chr07      | 1012502                        | [A/C]       | NA                                         |
| Ca_Desi_Chrom_7_1015717 | Ca_desi_chr07      | 1015717                        | [T/G]       | NA                                         |
| Ca_Desi_Chrom_7_1029913 | Ca_desi_chr07      | 1029913                        | [A/T]       | NA                                         |
| Ca_Desi_Chrom_7_1050537 | Ca_desi_chr07      | 1050537                        | [G/T]       | NA                                         |
| Ca_Desi_Chrom_7_1050538 | Ca_desi_chr07      | 1050538                        | [C/T]       | NA                                         |
| Ca_Desi_Chrom_7_1050539 | Ca_desi_chr07      | 1050539                        | [A/T]       | NA                                         |
| Ca_Desi_Chrom_7_1050542 | Ca_desi_chr07      | 1050542                        | [A/T]       | NA                                         |
| Ca_Desi_Chrom_7_1413096 | Ca_desi_chr07      | 1413096                        | [A/C]       | NA                                         |
| Ca_Desi_Chrom_7_1414414 | Ca_desi_chr07      | 1414414                        | [T/G]       | NA                                         |
| Ca_Desi_Chrom_7_1414430 | Ca_desi_chr07      | 1414430                        | [A/C]       | NA                                         |
| Ca_Desi_Chrom_7_1414960 | Ca_desi_chr07      | 1414960                        | [T/C]       | NA                                         |
| Ca_Desi_Chrom_7_1415415 | Ca_desi_chr07      | 1415415                        | [A/T]       | NA                                         |
| Ca_Desi_Chrom_7_1418438 | Ca_desi_chr07      | 1418438                        | [A/C]       | NA                                         |

| <b>SNP IDs</b>          | <b>Chromosomes</b> | <b>Physical positions (bp)</b> | <b>SNPs</b> | <b>NCBI SNPdb accession IDs (NCBI_ss#)</b> |
|-------------------------|--------------------|--------------------------------|-------------|--------------------------------------------|
| Ca_Desi_Chrom_7_1418441 | Ca_desi_chr07      | 1418441                        | [A/C]       | NA                                         |
| Ca_Desi_Chrom_7_1418447 | Ca_desi_chr07      | 1418447                        | [T/C]       | NA                                         |
| Ca_Desi_Chrom_7_1441106 | Ca_desi_chr07      | 1441106                        | [C/A]       | NA                                         |
| Ca_Desi_Chrom_7_1441778 | Ca_desi_chr07      | 1441778                        | [G/A]       | NA                                         |
| Ca_Desi_Chrom_7_1443635 | Ca_desi_chr07      | 1443635                        | [A/C]       | NA                                         |
| Ca_Desi_Chrom_7_1443656 | Ca_desi_chr07      | 1443656                        | [T/C]       | NA                                         |
| Ca_Desi_Chrom_7_1443801 | Ca_desi_chr07      | 1443801                        | [A/T]       | NA                                         |
| Ca_Desi_Chrom_7_1443823 | Ca_desi_chr07      | 1443823                        | [A/G]       | NA                                         |
| Ca_Desi_Chrom_7_1443839 | Ca_desi_chr07      | 1443839                        | [T/C]       | NA                                         |
| Ca_Desi_Chrom_7_1443864 | Ca_desi_chr07      | 1443864                        | [C/A]       | NA                                         |
| Ca_Desi_Chrom_7_1443867 | Ca_desi_chr07      | 1443867                        | [A/T]       | NA                                         |
| Ca_Desi_Chrom_7_1443869 | Ca_desi_chr07      | 1443869                        | [G/C]       | NA                                         |
| Ca_Desi_Chrom_7_1443872 | Ca_desi_chr07      | 1443872                        | [A/C]       | NA                                         |
| Ca_Desi_Chrom_7_1443875 | Ca_desi_chr07      | 1443875                        | [G/C]       | NA                                         |
| Ca_Desi_Chrom_7_1443877 | Ca_desi_chr07      | 1443877                        | [A/T]       | NA                                         |
| Ca_Desi_Chrom_7_1443880 | Ca_desi_chr07      | 1443880                        | [T/G]       | NA                                         |
| Ca_Desi_Chrom_7_1443882 | Ca_desi_chr07      | 1443882                        | [G/C]       | NA                                         |
| Ca_Desi_Chrom_7_1443904 | Ca_desi_chr07      | 1443904                        | [T/G]       | NA                                         |
| Ca_Desi_Chrom_7_1443906 | Ca_desi_chr07      | 1443906                        | [C/T]       | NA                                         |
| Ca_Desi_Chrom_7_1444385 | Ca_desi_chr07      | 1444385                        | [G/A]       | NA                                         |
| Ca_Desi_Chrom_7_1444388 | Ca_desi_chr07      | 1444388                        | [C/T]       | NA                                         |
| Ca_Desi_Chrom_7_1508084 | Ca_desi_chr07      | 1508084                        | [T/C]       | NA                                         |
| Ca_Desi_Chrom_7_1530481 | Ca_desi_chr07      | 1530481                        | [A/C]       | NA                                         |
| Ca_Desi_Chrom_7_1541580 | Ca_desi_chr07      | 1541580                        | [A/T]       | NA                                         |
| Ca_Desi_Chrom_7_1541639 | Ca_desi_chr07      | 1541639                        | [T/G]       | NA                                         |
| Ca_Desi_Chrom_7_1541646 | Ca_desi_chr07      | 1541646                        | [C/G]       | NA                                         |
| Ca_Desi_Chrom_7_1558730 | Ca_desi_chr07      | 1558730                        | [T/G]       | NA                                         |
| Ca_Desi_Chrom_7_1558732 | Ca_desi_chr07      | 1558732                        | [T/G]       | NA                                         |
| Ca_Desi_Chrom_7_1558734 | Ca_desi_chr07      | 1558734                        | [T/G]       | NA                                         |
| Ca_Desi_Chrom_7_1558737 | Ca_desi_chr07      | 1558737                        | [T/A]       | NA                                         |
| Ca_Desi_Chrom_7_1558739 | Ca_desi_chr07      | 1558739                        | [A/T]       | NA                                         |
| Ca_Desi_Chrom_7_1558747 | Ca_desi_chr07      | 1558747                        | [T/G]       | NA                                         |
| Ca_Desi_Chrom_7_1566076 | Ca_desi_chr07      | 1566076                        | [T/G]       | NA                                         |
| Ca_Desi_Chrom_7_1573638 | Ca_desi_chr07      | 1573638                        | [T/C]       | NA                                         |

| <b>SNP IDs</b>          | <b>Chromosomes</b> | <b>Physical positions (bp)</b> | <b>SNPs</b> | <b>NCBI SNPdb accession IDs (NCBI_ss#)</b> |
|-------------------------|--------------------|--------------------------------|-------------|--------------------------------------------|
| Ca_Desi_Chrom_7_1573654 | Ca_desi_chr07      | 1573654                        | [A/G]       | NA                                         |
| Ca_Desi_Chrom_7_1573659 | Ca_desi_chr07      | 1573659                        | [T/G]       | NA                                         |
| Ca_Desi_Chrom_7_1573745 | Ca_desi_chr07      | 1573745                        | [T/G]       | NA                                         |
| Ca_Desi_Chrom_7_1579057 | Ca_desi_chr07      | 1579057                        | [A/C]       | NA                                         |
| Ca_Desi_Chrom_7_1583764 | Ca_desi_chr07      | 1583764                        | [T/C]       | NA                                         |
| Ca_Desi_Chrom_7_1583771 | Ca_desi_chr07      | 1583771                        | [T/G]       | NA                                         |
| Ca_Desi_Chrom_7_1583778 | Ca_desi_chr07      | 1583778                        | [T/G]       | NA                                         |
| Ca_Desi_Chrom_7_1619995 | Ca_desi_chr07      | 1619995                        | [A/C]       | NA                                         |
| Ca_Desi_Chrom_7_1630848 | Ca_desi_chr07      | 1630848                        | [A/G]       | NA                                         |
| Ca_Desi_Chrom_7_1630861 | Ca_desi_chr07      | 1630861                        | [C/A]       | NA                                         |
| Ca_Desi_Chrom_7_1631320 | Ca_desi_chr07      | 1631320                        | [G/A]       | NA                                         |
| Ca_Desi_Chrom_7_1631428 | Ca_desi_chr07      | 1631428                        | [T/C]       | NA                                         |
| Ca_Desi_Chrom_7_1631890 | Ca_desi_chr07      | 1631890                        | [T/C]       | NA                                         |
| Ca_Desi_Chrom_7_1634725 | Ca_desi_chr07      | 1634725                        | [T/G]       | NA                                         |
| Ca_Desi_Chrom_7_1634726 | Ca_desi_chr07      | 1634726                        | [C/G]       | NA                                         |
| Ca_Desi_Chrom_7_1634727 | Ca_desi_chr07      | 1634727                        | [T/C]       | NA                                         |
| Ca_Desi_Chrom_7_1634728 | Ca_desi_chr07      | 1634728                        | [T/C]       | NA                                         |
| Ca_Desi_Chrom_7_1634729 | Ca_desi_chr07      | 1634729                        | [T/A]       | NA                                         |
| Ca_Desi_Chrom_7_1634730 | Ca_desi_chr07      | 1634730                        | [A/T]       | NA                                         |
| Ca_Desi_Chrom_7_1634790 | Ca_desi_chr07      | 1634790                        | [A/G]       | NA                                         |
| Ca_Desi_Chrom_7_1634992 | Ca_desi_chr07      | 1634992                        | [T/G]       | NA                                         |
| Ca_Desi_Chrom_7_1635022 | Ca_desi_chr07      | 1635022                        | [A/G]       | NA                                         |
| Ca_Desi_Chrom_7_1635054 | Ca_desi_chr07      | 1635054                        | [A/G]       | NA                                         |
| Ca_Desi_Chrom_7_1635068 | Ca_desi_chr07      | 1635068                        | [C/T]       | NA                                         |
| Ca_Desi_Chrom_7_1668089 | Ca_desi_chr07      | 1668089                        | [T/C]       | NA                                         |
| Ca_Desi_Chrom_7_1668112 | Ca_desi_chr07      | 1668112                        | [C/T]       | NA                                         |
| Ca_Desi_Chrom_7_1744061 | Ca_desi_chr07      | 1744061                        | [A/C]       | NA                                         |
| Ca_Desi_Chrom_7_1760104 | Ca_desi_chr07      | 1760104                        | [T/G]       | NA                                         |
| Ca_Desi_Chrom_7_1760157 | Ca_desi_chr07      | 1760157                        | [A/G]       | NA                                         |
| Ca_Desi_Chrom_7_1761375 | Ca_desi_chr07      | 1761375                        | [G/A]       | NA                                         |
| Ca_Desi_Chrom_7_1761414 | Ca_desi_chr07      | 1761414                        | [G/A]       | NA                                         |
| Ca_Desi_Chrom_7_1763162 | Ca_desi_chr07      | 1763162                        | [A/C]       | NA                                         |
| Ca_Desi_Chrom_7_1828880 | Ca_desi_chr07      | 1828880                        | [T/G]       | NA                                         |
| Ca_Desi_Chrom_7_1828967 | Ca_desi_chr07      | 1828967                        | [A/T]       | NA                                         |

| <b>SNP IDs</b>          | <b>Chromosomes</b> | <b>Physical positions (bp)</b> | <b>SNPs</b> | <b>NCBI SNPdb accession IDs (NCBI_ss#)</b> |
|-------------------------|--------------------|--------------------------------|-------------|--------------------------------------------|
| Ca_Desi_Chrom_7_1829019 | Ca_desi_chr07      | 1829019                        | [A/T]       | NA                                         |
| Ca_Desi_Chrom_7_1829034 | Ca_desi_chr07      | 1829034                        | [T/C]       | NA                                         |
| Ca_Desi_Chrom_7_1829055 | Ca_desi_chr07      | 1829055                        | [A/G]       | NA                                         |
| Ca_Desi_Chrom_7_1829061 | Ca_desi_chr07      | 1829061                        | [A/G]       | NA                                         |
| Ca_Desi_Chrom_7_1832858 | Ca_desi_chr07      | 1832858                        | [A/T]       | NA                                         |
| Ca_Desi_Chrom_7_1875982 | Ca_desi_chr07      | 1875982                        | [T/G]       | NA                                         |
| Ca_Desi_Chrom_7_1875998 | Ca_desi_chr07      | 1875998                        | [A/C]       | NA                                         |
| Ca_Desi_Chrom_7_1883010 | Ca_desi_chr07      | 1883010                        | [T/A]       | NA                                         |
| Ca_Desi_Chrom_7_2000373 | Ca_desi_chr07      | 2000373                        | [A/G]       | NA                                         |
| Ca_Desi_Chrom_7_2000399 | Ca_desi_chr07      | 2000399                        | [T/G]       | NA                                         |
| Ca_Desi_Chrom_7_2018106 | Ca_desi_chr07      | 2018106                        | [T/C]       | NA                                         |
| Ca_Desi_Chrom_7_2018747 | Ca_desi_chr07      | 2018747                        | [T/G]       | NA                                         |
| Ca_Desi_Chrom_7_2019144 | Ca_desi_chr07      | 2019144                        | [T/A]       | NA                                         |
| Ca_Desi_Chrom_7_2036771 | Ca_desi_chr07      | 2036771                        | [C/T]       | NA                                         |
| Ca_Desi_Chrom_7_2047543 | Ca_desi_chr07      | 2047543                        | [G/A]       | NA                                         |
| Ca_Desi_Chrom_7_2051090 | Ca_desi_chr07      | 2051090                        | [T/G]       | NA                                         |
| Ca_Desi_Chrom_7_2051208 | Ca_desi_chr07      | 2051208                        | [A/C]       | NA                                         |
| Ca_Desi_Chrom_7_2127195 | Ca_desi_chr07      | 2127195                        | [C/A]       | NA                                         |
| Ca_Desi_Chrom_7_2127196 | Ca_desi_chr07      | 2127196                        | [C/G]       | NA                                         |
| Ca_Desi_Chrom_7_2127197 | Ca_desi_chr07      | 2127197                        | [G/A]       | NA                                         |
| Ca_Desi_Chrom_7_2127198 | Ca_desi_chr07      | 2127198                        | [G/T]       | NA                                         |
| Ca_Desi_Chrom_7_2183490 | Ca_desi_chr07      | 2183490                        | [T/C]       | NA                                         |
| Ca_Desi_Chrom_7_2183574 | Ca_desi_chr07      | 2183574                        | [A/C]       | NA                                         |
| Ca_Desi_Chrom_7_2183597 | Ca_desi_chr07      | 2183597                        | [A/C]       | NA                                         |
| Ca_Desi_Chrom_7_2183627 | Ca_desi_chr07      | 2183627                        | [A/T]       | NA                                         |
| Ca_Desi_Chrom_7_2195618 | Ca_desi_chr07      | 2195618                        | [T/C]       | NA                                         |
| Ca_Desi_Chrom_7_2195622 | Ca_desi_chr07      | 2195622                        | [G/A]       | NA                                         |
| Ca_Desi_Chrom_7_2195623 | Ca_desi_chr07      | 2195623                        | [G/T]       | NA                                         |
| Ca_Desi_Chrom_7_2195792 | Ca_desi_chr07      | 2195792                        | [A/G]       | NA                                         |
| Ca_Desi_Chrom_7_2196288 | Ca_desi_chr07      | 2196288                        | [T/A]       | NA                                         |
| Ca_Desi_Chrom_7_2196542 | Ca_desi_chr07      | 2196542                        | [T/C]       | NA                                         |
| Ca_Desi_Chrom_7_2196580 | Ca_desi_chr07      | 2196580                        | [A/G]       | NA                                         |
| Ca_Desi_Chrom_7_2197057 | Ca_desi_chr07      | 2197057                        | [G/A]       | NA                                         |
| Ca_Desi_Chrom_7_2203200 | Ca_desi_chr07      | 2203200                        | [T/C]       | NA                                         |

| <b>SNP IDs</b>          | <b>Chromosomes</b> | <b>Physical positions (bp)</b> | <b>SNPs</b> | <b>NCBI SNPdb accession IDs (NCBI_ss#)</b> |
|-------------------------|--------------------|--------------------------------|-------------|--------------------------------------------|
| Ca_Desi_Chrom_7_2203203 | Ca_desi_chr07      | 2203203                        | [T/C]       | NA                                         |
| Ca_Desi_Chrom_7_2203210 | Ca_desi_chr07      | 2203210                        | [T/C]       | NA                                         |
| Ca_Desi_Chrom_7_2203215 | Ca_desi_chr07      | 2203215                        | [T/C]       | NA                                         |
| Ca_Desi_Chrom_7_2203225 | Ca_desi_chr07      | 2203225                        | [A/G]       | NA                                         |
| Ca_Desi_Chrom_7_2203249 | Ca_desi_chr07      | 2203249                        | [A/G]       | NA                                         |
| Ca_Desi_Chrom_7_2203291 | Ca_desi_chr07      | 2203291                        | [T/C]       | NA                                         |
| Ca_Desi_Chrom_7_2203320 | Ca_desi_chr07      | 2203320                        | [A/C]       | NA                                         |
| Ca_Desi_Chrom_7_2203348 | Ca_desi_chr07      | 2203348                        | [A/T]       | NA                                         |
| Ca_Desi_Chrom_7_2211434 | Ca_desi_chr07      | 2211434                        | [T/A]       | NA                                         |
| Ca_Desi_Chrom_7_2212373 | Ca_desi_chr07      | 2212373                        | [A/C]       | NA                                         |
| Ca_Desi_Chrom_7_2226248 | Ca_desi_chr07      | 2226248                        | [A/G]       | NA                                         |
| Ca_Desi_Chrom_7_2226279 | Ca_desi_chr07      | 2226279                        | [C/T]       | NA                                         |
| Ca_Desi_Chrom_7_2295278 | Ca_desi_chr07      | 2295278                        | [T/C]       | NA                                         |
| Ca_Desi_Chrom_7_2295281 | Ca_desi_chr07      | 2295281                        | [T/C]       | NA                                         |
| Ca_Desi_Chrom_7_2295317 | Ca_desi_chr07      | 2295317                        | [A/C]       | NA                                         |
| Ca_Desi_Chrom_7_2295320 | Ca_desi_chr07      | 2295320                        | [T/C]       | NA                                         |
| Ca_Desi_Chrom_7_2374483 | Ca_desi_chr07      | 2374483                        | [A/C]       | NA                                         |
| Ca_Desi_Chrom_7_2374492 | Ca_desi_chr07      | 2374492                        | [A/C]       | NA                                         |
| Ca_Desi_Chrom_7_2374502 | Ca_desi_chr07      | 2374502                        | [G/A]       | NA                                         |
| Ca_Desi_Chrom_7_2374524 | Ca_desi_chr07      | 2374524                        | [A/G]       | NA                                         |
| Ca_Desi_Chrom_7_2385449 | Ca_desi_chr07      | 2385449                        | [A/G]       | NA                                         |
| Ca_Desi_Chrom_7_2385453 | Ca_desi_chr07      | 2385453                        | [A/G]       | NA                                         |
| Ca_Desi_Chrom_7_2415032 | Ca_desi_chr07      | 2415032                        | [T/C]       | NA                                         |
| Ca_Desi_Chrom_7_2415035 | Ca_desi_chr07      | 2415035                        | [T/C]       | NA                                         |
| Ca_Desi_Chrom_7_2415045 | Ca_desi_chr07      | 2415045                        | [A/C]       | NA                                         |
| Ca_Desi_Chrom_7_2415050 | Ca_desi_chr07      | 2415050                        | [A/C]       | NA                                         |
| Ca_Desi_Chrom_7_2415055 | Ca_desi_chr07      | 2415055                        | [T/C]       | NA                                         |
| Ca_Desi_Chrom_7_2415067 | Ca_desi_chr07      | 2415067                        | [A/G]       | NA                                         |
| Ca_Desi_Chrom_7_2415068 | Ca_desi_chr07      | 2415068                        | [A/G]       | NA                                         |
| Ca_Desi_Chrom_7_2415070 | Ca_desi_chr07      | 2415070                        | [T/A]       | NA                                         |
| Ca_Desi_Chrom_7_2415075 | Ca_desi_chr07      | 2415075                        | [A/G]       | NA                                         |
| Ca_Desi_Chrom_7_2434160 | Ca_desi_chr07      | 2434160                        | [G/T]       | NA                                         |
| Ca_Desi_Chrom_7_2541486 | Ca_desi_chr07      | 2541486                        | [T/G]       | NA                                         |
| Ca_Desi_Chrom_7_2569346 | Ca_desi_chr07      | 2569346                        | [A/G]       | NA                                         |

| <b>SNP IDs</b>          | <b>Chromosomes</b> | <b>Physical positions (bp)</b> | <b>SNPs</b> | <b>NCBI SNPdb accession IDs (NCBI_ss#)</b> |
|-------------------------|--------------------|--------------------------------|-------------|--------------------------------------------|
| Ca_Desi_Chrom_7_2569348 | Ca_desi_chr07      | 2569348                        | [T/A]       | NA                                         |
| Ca_Desi_Chrom_7_2570445 | Ca_desi_chr07      | 2570445                        | [C/T]       | NA                                         |
| Ca_Desi_Chrom_7_2570459 | Ca_desi_chr07      | 2570459                        | [A/C]       | NA                                         |
| Ca_Desi_Chrom_7_2570483 | Ca_desi_chr07      | 2570483                        | [G/T]       | NA                                         |
| Ca_Desi_Chrom_7_2570489 | Ca_desi_chr07      | 2570489                        | [C/T]       | NA                                         |
| Ca_Desi_Chrom_7_2683264 | Ca_desi_chr07      | 2683264                        | [T/C]       | NA                                         |
| Ca_Desi_Chrom_7_2683272 | Ca_desi_chr07      | 2683272                        | [A/C]       | NA                                         |
| Ca_Desi_Chrom_7_2683275 | Ca_desi_chr07      | 2683275                        | [A/G]       | NA                                         |
| Ca_Desi_Chrom_7_2683284 | Ca_desi_chr07      | 2683284                        | [T/A]       | NA                                         |
| Ca_Desi_Chrom_7_2683308 | Ca_desi_chr07      | 2683308                        | [A/G]       | NA                                         |
| Ca_Desi_Chrom_7_2683825 | Ca_desi_chr07      | 2683825                        | [A/C]       | NA                                         |
| Ca_Desi_Chrom_7_2683837 | Ca_desi_chr07      | 2683837                        | [A/C]       | NA                                         |
| Ca_Desi_Chrom_7_2686437 | Ca_desi_chr07      | 2686437                        | [A/C]       | NA                                         |
| Ca_Desi_Chrom_7_2686440 | Ca_desi_chr07      | 2686440                        | [A/C]       | NA                                         |
| Ca_Desi_Chrom_7_2705539 | Ca_desi_chr07      | 2705539                        | [A/C]       | NA                                         |
| Ca_Desi_Chrom_7_2705542 | Ca_desi_chr07      | 2705542                        | [A/C]       | NA                                         |
| Ca_Desi_Chrom_7_2705550 | Ca_desi_chr07      | 2705550                        | [G/A]       | NA                                         |
| Ca_Desi_Chrom_7_2707626 | Ca_desi_chr07      | 2707626                        | [T/C]       | NA                                         |
| Ca_Desi_Chrom_7_2707632 | Ca_desi_chr07      | 2707632                        | [T/C]       | NA                                         |
| Ca_Desi_Chrom_7_2707637 | Ca_desi_chr07      | 2707637                        | [A/C]       | NA                                         |
| Ca_Desi_Chrom_7_2707640 | Ca_desi_chr07      | 2707640                        | [A/C]       | NA                                         |
| Ca_Desi_Chrom_7_2707647 | Ca_desi_chr07      | 2707647                        | [T/C]       | NA                                         |
| Ca_Desi_Chrom_7_2707674 | Ca_desi_chr07      | 2707674                        | [T/C]       | NA                                         |
| Ca_Desi_Chrom_7_2707708 | Ca_desi_chr07      | 2707708                        | [T/C]       | NA                                         |
| Ca_Desi_Chrom_7_2707720 | Ca_desi_chr07      | 2707720                        | [G/T]       | NA                                         |
| Ca_Desi_Chrom_7_2707722 | Ca_desi_chr07      | 2707722                        | [G/T]       | NA                                         |
| Ca_Desi_Chrom_7_2707735 | Ca_desi_chr07      | 2707735                        | [A/G]       | NA                                         |
| Ca_Desi_Chrom_7_2707763 | Ca_desi_chr07      | 2707763                        | [A/G]       | NA                                         |
| Ca_Desi_Chrom_7_2736407 | Ca_desi_chr07      | 2736407                        | [T/C]       | NA                                         |
| Ca_Desi_Chrom_7_2736428 | Ca_desi_chr07      | 2736428                        | [A/C]       | NA                                         |
| Ca_Desi_Chrom_7_2754623 | Ca_desi_chr07      | 2754623                        | [A/C]       | NA                                         |
| Ca_Desi_Chrom_7_2789427 | Ca_desi_chr07      | 2789427                        | [A/G]       | NA                                         |
| Ca_Desi_Chrom_7_2889402 | Ca_desi_chr07      | 2889402                        | [A/C]       | NA                                         |
| Ca_Desi_Chrom_7_2889547 | Ca_desi_chr07      | 2889547                        | [A/C]       | NA                                         |

| <b>SNP IDs</b>          | <b>Chromosomes</b> | <b>Physical positions (bp)</b> | <b>SNPs</b> | <b>NCBI SNPdb accession IDs (NCBI_ss#)</b> |
|-------------------------|--------------------|--------------------------------|-------------|--------------------------------------------|
| Ca_Desi_Chrom_7_2889767 | Ca_desi_chr07      | 2889767                        | [A/G]       | NA                                         |
| Ca_Desi_Chrom_7_2895784 | Ca_desi_chr07      | 2895784                        | [T/G]       | NA                                         |
| Ca_Desi_Chrom_7_2925738 | Ca_desi_chr07      | 2925738                        | [T/G]       | NA                                         |
| Ca_Desi_Chrom_7_2944464 | Ca_desi_chr07      | 2944464                        | [T/G]       | NA                                         |
| Ca_Desi_Chrom_7_2945921 | Ca_desi_chr07      | 2945921                        | [T/C]       | NA                                         |
| Ca_Desi_Chrom_7_2945963 | Ca_desi_chr07      | 2945963                        | [C/T]       | NA                                         |
| Ca_Desi_Chrom_7_2952198 | Ca_desi_chr07      | 2952198                        | [C/T]       | NA                                         |
| Ca_Desi_Chrom_7_2967020 | Ca_desi_chr07      | 2967020                        | [T/C]       | NA                                         |
| Ca_Desi_Chrom_7_2967057 | Ca_desi_chr07      | 2967057                        | [T/C]       | NA                                         |
| Ca_Desi_Chrom_7_2967079 | Ca_desi_chr07      | 2967079                        | [A/G]       | NA                                         |
| Ca_Desi_Chrom_7_2967086 | Ca_desi_chr07      | 2967086                        | [A/C]       | NA                                         |
| Ca_Desi_Chrom_7_3005751 | Ca_desi_chr07      | 3005751                        | [A/G]       | NA                                         |
| Ca_Desi_Chrom_7_3007471 | Ca_desi_chr07      | 3007471                        | [A/T]       | NA                                         |
| Ca_Desi_Chrom_7_3123550 | Ca_desi_chr07      | 3123550                        | [T/A]       | NA                                         |
| Ca_Desi_Chrom_7_3123632 | Ca_desi_chr07      | 3123632                        | [A/C]       | NA                                         |
| Ca_Desi_Chrom_7_3123729 | Ca_desi_chr07      | 3123729                        | [T/G]       | NA                                         |
| Ca_Desi_Chrom_7_3124015 | Ca_desi_chr07      | 3124015                        | [A/C]       | NA                                         |
| Ca_Desi_Chrom_7_3135128 | Ca_desi_chr07      | 3135128                        | [A/G]       | NA                                         |
| Ca_Desi_Chrom_7_3136837 | Ca_desi_chr07      | 3136837                        | [T/G]       | NA                                         |
| Ca_Desi_Chrom_7_3150114 | Ca_desi_chr07      | 3150114                        | [A/T]       | NA                                         |
| Ca_Desi_Chrom_7_3150159 | Ca_desi_chr07      | 3150159                        | [A/C]       | NA                                         |
| Ca_Desi_Chrom_7_3150165 | Ca_desi_chr07      | 3150165                        | [A/G]       | NA                                         |
| Ca_Desi_Chrom_7_3167829 | Ca_desi_chr07      | 3167829                        | [T/A]       | NA                                         |
| Ca_Desi_Chrom_7_3184049 | Ca_desi_chr07      | 3184049                        | [T/A]       | NA                                         |
| Ca_Desi_Chrom_7_3386851 | Ca_desi_chr07      | 3386851                        | [T/G]       | NA                                         |
| Ca_Desi_Chrom_7_3409216 | Ca_desi_chr07      | 3409216                        | [T/C]       | NA                                         |
| Ca_Desi_Chrom_7_3481205 | Ca_desi_chr07      | 3481205                        | [C/A]       | NA                                         |
| Ca_Desi_Chrom_7_3481220 | Ca_desi_chr07      | 3481220                        | [T/C]       | NA                                         |
| Ca_Desi_Chrom_7_3481243 | Ca_desi_chr07      | 3481243                        | [T/C]       | NA                                         |
| Ca_Desi_Chrom_7_3481247 | Ca_desi_chr07      | 3481247                        | [T/G]       | NA                                         |
| Ca_Desi_Chrom_7_3481267 | Ca_desi_chr07      | 3481267                        | [T/A]       | NA                                         |
| Ca_Desi_Chrom_7_3483183 | Ca_desi_chr07      | 3483183                        | [A/G]       | NA                                         |
| Ca_Desi_Chrom_7_3483311 | Ca_desi_chr07      | 3483311                        | [A/C]       | NA                                         |
| Ca_Desi_Chrom_7_3485064 | Ca_desi_chr07      | 3485064                        | [A/G]       | NA                                         |

| <b>SNP IDs</b>          | <b>Chromosomes</b> | <b>Physical positions (bp)</b> | <b>SNPs</b> | <b>NCBI SNPdb accession IDs (NCBI_ss#)</b> |
|-------------------------|--------------------|--------------------------------|-------------|--------------------------------------------|
| Ca_Desi_Chrom_7_3485566 | Ca_desi_chr07      | 3485566                        | [T/C]       | NA                                         |
| Ca_Desi_Chrom_7_3485583 | Ca_desi_chr07      | 3485583                        | [A/G]       | NA                                         |
| Ca_Desi_Chrom_7_3485586 | Ca_desi_chr07      | 3485586                        | [A/G]       | NA                                         |
| Ca_Desi_Chrom_7_3485592 | Ca_desi_chr07      | 3485592                        | [T/A]       | NA                                         |
| Ca_Desi_Chrom_7_3485594 | Ca_desi_chr07      | 3485594                        | [T/C]       | NA                                         |
| Ca_Desi_Chrom_7_3485626 | Ca_desi_chr07      | 3485626                        | [G/A]       | NA                                         |
| Ca_Desi_Chrom_7_3485664 | Ca_desi_chr07      | 3485664                        | [T/C]       | NA                                         |
| Ca_Desi_Chrom_7_3485666 | Ca_desi_chr07      | 3485666                        | [A/G]       | NA                                         |
| Ca_Desi_Chrom_7_3485674 | Ca_desi_chr07      | 3485674                        | [T/C]       | NA                                         |
| Ca_Desi_Chrom_7_3528194 | Ca_desi_chr07      | 3528194                        | [A/G]       | NA                                         |
| Ca_Desi_Chrom_7_3528202 | Ca_desi_chr07      | 3528202                        | [A/G]       | NA                                         |
| Ca_Desi_Chrom_7_3528208 | Ca_desi_chr07      | 3528208                        | [A/G]       | NA                                         |
| Ca_Desi_Chrom_7_3528212 | Ca_desi_chr07      | 3528212                        | [T/C]       | NA                                         |
| Ca_Desi_Chrom_7_3528229 | Ca_desi_chr07      | 3528229                        | [A/C]       | NA                                         |
| Ca_Desi_Chrom_7_3528235 | Ca_desi_chr07      | 3528235                        | [T/C]       | NA                                         |
| Ca_Desi_Chrom_7_3528237 | Ca_desi_chr07      | 3528237                        | [A/G]       | NA                                         |
| Ca_Desi_Chrom_7_3529252 | Ca_desi_chr07      | 3529252                        | [T/C]       | NA                                         |
| Ca_Desi_Chrom_7_3529337 | Ca_desi_chr07      | 3529337                        | [A/C]       | NA                                         |
| Ca_Desi_Chrom_7_3529364 | Ca_desi_chr07      | 3529364                        | [A/G]       | NA                                         |
| Ca_Desi_Chrom_7_3675235 | Ca_desi_chr07      | 3675235                        | [T/G]       | NA                                         |
| Ca_Desi_Chrom_7_3675434 | Ca_desi_chr07      | 3675434                        | [G/C]       | NA                                         |
| Ca_Desi_Chrom_7_3683741 | Ca_desi_chr07      | 3683741                        | [C/T]       | NA                                         |
| Ca_Desi_Chrom_7_3771421 | Ca_desi_chr07      | 3771421                        | [A/C]       | NA                                         |
| Ca_Desi_Chrom_7_3771425 | Ca_desi_chr07      | 3771425                        | [G/A]       | NA                                         |
| Ca_Desi_Chrom_7_3771426 | Ca_desi_chr07      | 3771426                        | [G/A]       | NA                                         |
| Ca_Desi_Chrom_7_3826692 | Ca_desi_chr07      | 3826692                        | [T/C]       | NA                                         |
| Ca_Desi_Chrom_7_3826722 | Ca_desi_chr07      | 3826722                        | [A/C]       | NA                                         |
| Ca_Desi_Chrom_7_3826724 | Ca_desi_chr07      | 3826724                        | [A/C]       | NA                                         |
| Ca_Desi_Chrom_7_3826751 | Ca_desi_chr07      | 3826751                        | [A/C]       | NA                                         |
| Ca_Desi_Chrom_7_3949766 | Ca_desi_chr07      | 3949766                        | [T/C]       | NA                                         |
| Ca_Desi_Chrom_7_3970206 | Ca_desi_chr07      | 3970206                        | [A/G]       | NA                                         |
| Ca_Desi_Chrom_7_4043690 | Ca_desi_chr07      | 4043690                        | [A/G]       | NA                                         |
| Ca_Desi_Chrom_7_4043692 | Ca_desi_chr07      | 4043692                        | [T/G]       | NA                                         |
| Ca_Desi_Chrom_7_4043704 | Ca_desi_chr07      | 4043704                        | [A/G]       | NA                                         |



| <b>SNP IDs</b>          | <b>Chromosomes</b> | <b>Physical positions (bp)</b> | <b>SNPs</b> | <b>NCBI SNPdb accession IDs (NCBI_ss#)</b> |
|-------------------------|--------------------|--------------------------------|-------------|--------------------------------------------|
| Ca_Desi_Chrom_7_4120102 | Ca_desi_chr07      | 4120102                        | [T/G]       | NA                                         |
| Ca_Desi_Chrom_7_4130618 | Ca_desi_chr07      | 4130618                        | [A/C]       | NA                                         |
| Ca_Desi_Chrom_7_4130746 | Ca_desi_chr07      | 4130746                        | [G/A]       | NA                                         |
| Ca_Desi_Chrom_7_4130747 | Ca_desi_chr07      | 4130747                        | [A/T]       | NA                                         |
| Ca_Desi_Chrom_7_4130748 | Ca_desi_chr07      | 4130748                        | [G/C]       | NA                                         |
| Ca_Desi_Chrom_7_4130749 | Ca_desi_chr07      | 4130749                        | [G/T]       | NA                                         |
| Ca_Desi_Chrom_7_4142662 | Ca_desi_chr07      | 4142662                        | [A/C]       | NA                                         |
| Ca_Desi_Chrom_7_4226398 | Ca_desi_chr07      | 4226398                        | [T/G]       | NA                                         |
| Ca_Desi_Chrom_7_4276890 | Ca_desi_chr07      | 4276890                        | [A/C]       | NA                                         |
| Ca_Desi_Chrom_7_4370417 | Ca_desi_chr07      | 4370417                        | [T/G]       | NA                                         |
| Ca_Desi_Chrom_7_4370418 | Ca_desi_chr07      | 4370418                        | [G/A]       | NA                                         |
| Ca_Desi_Chrom_7_4370420 | Ca_desi_chr07      | 4370420                        | [A/C]       | NA                                         |
| Ca_Desi_Chrom_7_4370421 | Ca_desi_chr07      | 4370421                        | [C/G]       | NA                                         |
| Ca_Desi_Chrom_7_4370423 | Ca_desi_chr07      | 4370423                        | [C/A]       | NA                                         |
| Ca_Desi_Chrom_7_4479869 | Ca_desi_chr07      | 4479869                        | [A/G]       | NA                                         |
| Ca_Desi_Chrom_7_4479871 | Ca_desi_chr07      | 4479871                        | [A/C]       | NA                                         |
| Ca_Desi_Chrom_7_4597378 | Ca_desi_chr07      | 4597378                        | [T/C]       | NA                                         |
| Ca_Desi_Chrom_7_4597380 | Ca_desi_chr07      | 4597380                        | [T/C]       | NA                                         |
| Ca_Desi_Chrom_7_4597385 | Ca_desi_chr07      | 4597385                        | [A/G]       | NA                                         |
| Ca_Desi_Chrom_7_4597392 | Ca_desi_chr07      | 4597392                        | [A/G]       | NA                                         |
| Ca_Desi_Chrom_7_4597399 | Ca_desi_chr07      | 4597399                        | [T/G]       | NA                                         |
| Ca_Desi_Chrom_7_4597406 | Ca_desi_chr07      | 4597406                        | [A/G]       | NA                                         |
| Ca_Desi_Chrom_7_4597417 | Ca_desi_chr07      | 4597417                        | [A/G]       | NA                                         |
| Ca_Desi_Chrom_7_4729239 | Ca_desi_chr07      | 4729239                        | [T/C]       | NA                                         |
| Ca_Desi_Chrom_7_4729243 | Ca_desi_chr07      | 4729243                        | [T/C]       | NA                                         |
| Ca_Desi_Chrom_7_4729251 | Ca_desi_chr07      | 4729251                        | [T/C]       | NA                                         |
| Ca_Desi_Chrom_7_4734260 | Ca_desi_chr07      | 4734260                        | [A/T]       | NA                                         |
| Ca_Desi_Chrom_7_4734264 | Ca_desi_chr07      | 4734264                        | [G/C]       | NA                                         |
| Ca_Desi_Chrom_7_4734265 | Ca_desi_chr07      | 4734265                        | [A/T]       | NA                                         |
| Ca_Desi_Chrom_7_4734268 | Ca_desi_chr07      | 4734268                        | [T/C]       | NA                                         |
| Ca_Desi_Chrom_7_4734278 | Ca_desi_chr07      | 4734278                        | [T/C]       | NA                                         |
| Ca_Desi_Chrom_7_4734291 | Ca_desi_chr07      | 4734291                        | [T/C]       | NA                                         |
| Ca_Desi_Chrom_7_4734292 | Ca_desi_chr07      | 4734292                        | [C/T]       | NA                                         |
| Ca_Desi_Chrom_7_4734296 | Ca_desi_chr07      | 4734296                        | [T/C]       | NA                                         |

| <b>SNP IDs</b>          | <b>Chromosomes</b> | <b>Physical positions (bp)</b> | <b>SNPs</b> | <b>NCBI SNPdb accession IDs (NCBI_ss#)</b> |
|-------------------------|--------------------|--------------------------------|-------------|--------------------------------------------|
| Ca_Desi_Chrom_7_4734305 | Ca_desi_chr07      | 4734305                        | [T/A]       | NA                                         |
| Ca_Desi_Chrom_7_4940454 | Ca_desi_chr07      | 4940454                        | [G/A]       | NA                                         |
| Ca_Desi_Chrom_7_4940521 | Ca_desi_chr07      | 4940521                        | [T/G]       | NA                                         |
| Ca_Desi_Chrom_7_4997761 | Ca_desi_chr07      | 4997761                        | [T/C]       | NA                                         |
| Ca_Desi_Chrom_7_4997784 | Ca_desi_chr07      | 4997784                        | [T/C]       | NA                                         |
| Ca_Desi_Chrom_7_4997800 | Ca_desi_chr07      | 4997800                        | [T/G]       | NA                                         |
| Ca_Desi_Chrom_7_4997818 | Ca_desi_chr07      | 4997818                        | [T/C]       | NA                                         |
| Ca_Desi_Chrom_7_5036733 | Ca_desi_chr07      | 5036733                        | [C/A]       | NA                                         |
| Ca_Desi_Chrom_7_5036746 | Ca_desi_chr07      | 5036746                        | [T/G]       | NA                                         |
| Ca_Desi_Chrom_7_5036756 | Ca_desi_chr07      | 5036756                        | [A/G]       | NA                                         |
| Ca_Desi_Chrom_7_5036766 | Ca_desi_chr07      | 5036766                        | [T/G]       | NA                                         |
| Ca_Desi_Chrom_7_5036769 | Ca_desi_chr07      | 5036769                        | [A/G]       | NA                                         |
| Ca_Desi_Chrom_7_5036776 | Ca_desi_chr07      | 5036776                        | [T/G]       | NA                                         |
| Ca_Desi_Chrom_7_5036781 | Ca_desi_chr07      | 5036781                        | [T/G]       | NA                                         |
| Ca_Desi_Chrom_7_5091350 | Ca_desi_chr07      | 5091350                        | [A/G]       | NA                                         |
| Ca_Desi_Chrom_7_5097661 | Ca_desi_chr07      | 5097661                        | [T/A]       | NA                                         |
| Ca_Desi_Chrom_7_5097710 | Ca_desi_chr07      | 5097710                        | [T/C]       | NA                                         |
| Ca_Desi_Chrom_7_5097721 | Ca_desi_chr07      | 5097721                        | [T/C]       | NA                                         |
| Ca_Desi_Chrom_7_5097740 | Ca_desi_chr07      | 5097740                        | [T/C]       | NA                                         |
| Ca_Desi_Chrom_7_5097753 | Ca_desi_chr07      | 5097753                        | [T/C]       | NA                                         |
| Ca_Desi_Chrom_7_5097764 | Ca_desi_chr07      | 5097764                        | [T/C]       | NA                                         |
| Ca_Desi_Chrom_7_5097778 | Ca_desi_chr07      | 5097778                        | [A/G]       | NA                                         |
| Ca_Desi_Chrom_7_5097780 | Ca_desi_chr07      | 5097780                        | [A/G]       | NA                                         |
| Ca_Desi_Chrom_7_5097782 | Ca_desi_chr07      | 5097782                        | [A/C]       | NA                                         |
| Ca_Desi_Chrom_7_5137817 | Ca_desi_chr07      | 5137817                        | [A/C]       | NA                                         |
| Ca_Desi_Chrom_7_5137821 | Ca_desi_chr07      | 5137821                        | [C/T]       | NA                                         |
| Ca_Desi_Chrom_7_5138627 | Ca_desi_chr07      | 5138627                        | [G/A]       | NA                                         |
| Ca_Desi_Chrom_7_5139249 | Ca_desi_chr07      | 5139249                        | [A/G]       | NA                                         |
| Ca_Desi_Chrom_7_5139263 | Ca_desi_chr07      | 5139263                        | [A/G]       | NA                                         |
| Ca_Desi_Chrom_7_5139269 | Ca_desi_chr07      | 5139269                        | [G/A]       | NA                                         |
| Ca_Desi_Chrom_7_5230967 | Ca_desi_chr07      | 5230967                        | [T/C]       | NA                                         |
| Ca_Desi_Chrom_7_5230983 | Ca_desi_chr07      | 5230983                        | [A/G]       | NA                                         |
| Ca_Desi_Chrom_7_5231212 | Ca_desi_chr07      | 5231212                        | [T/A]       | NA                                         |
| Ca_Desi_Chrom_7_5332132 | Ca_desi_chr07      | 5332132                        | [T/G]       | NA                                         |

| <b>SNP IDs</b>          | <b>Chromosomes</b> | <b>Physical positions (bp)</b> | <b>SNPs</b> | <b>NCBI SNPdb accession IDs (NCBI_ss#)</b> |
|-------------------------|--------------------|--------------------------------|-------------|--------------------------------------------|
| Ca_Desi_Chrom_7_5338941 | Ca_desi_chr07      | 5338941                        | [A/G]       | NA                                         |
| Ca_Desi_Chrom_7_5338942 | Ca_desi_chr07      | 5338942                        | [G/A]       | NA                                         |
| Ca_Desi_Chrom_7_5338944 | Ca_desi_chr07      | 5338944                        | [T/C]       | NA                                         |
| Ca_Desi_Chrom_7_5338945 | Ca_desi_chr07      | 5338945                        | [G/T]       | NA                                         |
| Ca_Desi_Chrom_7_5353889 | Ca_desi_chr07      | 5353889                        | [C/A]       | NA                                         |
| Ca_Desi_Chrom_7_5584192 | Ca_desi_chr07      | 5584192                        | [T/A]       | NA                                         |
| Ca_Desi_Chrom_7_5601847 | Ca_desi_chr07      | 5601847                        | [T/G]       | NA                                         |
| Ca_Desi_Chrom_7_5601857 | Ca_desi_chr07      | 5601857                        | [T/G]       | NA                                         |
| Ca_Desi_Chrom_7_5601864 | Ca_desi_chr07      | 5601864                        | [T/G]       | NA                                         |
| Ca_Desi_Chrom_7_5601880 | Ca_desi_chr07      | 5601880                        | [T/G]       | NA                                         |
| Ca_Desi_Chrom_7_5617700 | Ca_desi_chr07      | 5617700                        | [T/C]       | NA                                         |
| Ca_Desi_Chrom_7_5617723 | Ca_desi_chr07      | 5617723                        | [A/G]       | NA                                         |
| Ca_Desi_Chrom_7_5729985 | Ca_desi_chr07      | 5729985                        | [A/C]       | NA                                         |
| Ca_Desi_Chrom_7_5729987 | Ca_desi_chr07      | 5729987                        | [A/G]       | NA                                         |
| Ca_Desi_Chrom_7_5768131 | Ca_desi_chr07      | 5768131                        | [C/T]       | NA                                         |
| Ca_Desi_Chrom_7_5804084 | Ca_desi_chr07      | 5804084                        | [A/C]       | NA                                         |
| Ca_Desi_Chrom_7_5882433 | Ca_desi_chr07      | 5882433                        | [C/A]       | NA                                         |
| Ca_Desi_Chrom_7_5882434 | Ca_desi_chr07      | 5882434                        | [T/G]       | NA                                         |
| Ca_Desi_Chrom_7_5882437 | Ca_desi_chr07      | 5882437                        | [T/G]       | NA                                         |
| Ca_Desi_Chrom_7_5885434 | Ca_desi_chr07      | 5885434                        | [T/G]       | NA                                         |
| Ca_Desi_Chrom_7_5885449 | Ca_desi_chr07      | 5885449                        | [T/C]       | NA                                         |
| Ca_Desi_Chrom_7_5885453 | Ca_desi_chr07      | 5885453                        | [A/C]       | NA                                         |
| Ca_Desi_Chrom_7_5885486 | Ca_desi_chr07      | 5885486                        | [C/T]       | NA                                         |
| Ca_Desi_Chrom_7_6078085 | Ca_desi_chr07      | 6078085                        | [T/C]       | NA                                         |
| Ca_Desi_Chrom_7_6078114 | Ca_desi_chr07      | 6078114                        | [A/C]       | NA                                         |
| Ca_Desi_Chrom_7_6093837 | Ca_desi_chr07      | 6093837                        | [A/G]       | NA                                         |
| Ca_Desi_Chrom_7_6093841 | Ca_desi_chr07      | 6093841                        | [T/C]       | NA                                         |
| Ca_Desi_Chrom_7_6093852 | Ca_desi_chr07      | 6093852                        | [T/C]       | NA                                         |
| Ca_Desi_Chrom_7_6093864 | Ca_desi_chr07      | 6093864                        | [T/G]       | NA                                         |
| Ca_Desi_Chrom_7_6093868 | Ca_desi_chr07      | 6093868                        | [T/C]       | NA                                         |
| Ca_Desi_Chrom_7_6093872 | Ca_desi_chr07      | 6093872                        | [A/C]       | NA                                         |
| Ca_Desi_Chrom_7_6093873 | Ca_desi_chr07      | 6093873                        | [T/C]       | NA                                         |
| Ca_Desi_Chrom_7_6093890 | Ca_desi_chr07      | 6093890                        | [A/G]       | NA                                         |
| Ca_Desi_Chrom_7_6093896 | Ca_desi_chr07      | 6093896                        | [C/G]       | NA                                         |

| <b>SNP IDs</b>          | <b>Chromosomes</b> | <b>Physical positions (bp)</b> | <b>SNPs</b> | <b>NCBI SNPdb accession IDs (NCBI_ss#)</b> |
|-------------------------|--------------------|--------------------------------|-------------|--------------------------------------------|
| Ca_Desi_Chrom_7_6099565 | Ca_desi_chr07      | 6099565                        | [T/C]       | NA                                         |
| Ca_Desi_Chrom_7_6099577 | Ca_desi_chr07      | 6099577                        | [T/C]       | NA                                         |
| Ca_Desi_Chrom_7_6099580 | Ca_desi_chr07      | 6099580                        | [T/G]       | NA                                         |
| Ca_Desi_Chrom_7_6099586 | Ca_desi_chr07      | 6099586                        | [A/G]       | NA                                         |
| Ca_Desi_Chrom_7_6099594 | Ca_desi_chr07      | 6099594                        | [A/G]       | NA                                         |
| Ca_Desi_Chrom_7_6099600 | Ca_desi_chr07      | 6099600                        | [A/G]       | NA                                         |
| Ca_Desi_Chrom_7_6099605 | Ca_desi_chr07      | 6099605                        | [T/C]       | NA                                         |
| Ca_Desi_Chrom_7_6099611 | Ca_desi_chr07      | 6099611                        | [A/G]       | NA                                         |
| Ca_Desi_Chrom_7_6099632 | Ca_desi_chr07      | 6099632                        | [A/G]       | NA                                         |
| Ca_Desi_Chrom_7_6136674 | Ca_desi_chr07      | 6136674                        | [T/A]       | NA                                         |
| Ca_Desi_Chrom_7_6179102 | Ca_desi_chr07      | 6179102                        | [A/C]       | NA                                         |
| Ca_Desi_Chrom_7_6252936 | Ca_desi_chr07      | 6252936                        | [T/C]       | NA                                         |
| Ca_Desi_Chrom_7_6252937 | Ca_desi_chr07      | 6252937                        | [C/A]       | NA                                         |
| Ca_Desi_Chrom_7_6252943 | Ca_desi_chr07      | 6252943                        | [G/A]       | NA                                         |
| Ca_Desi_Chrom_7_6439899 | Ca_desi_chr07      | 6439899                        | [T/G]       | NA                                         |
| Ca_Desi_Chrom_7_6441048 | Ca_desi_chr07      | 6441048                        | [A/G]       | NA                                         |
| Ca_Desi_Chrom_7_6441056 | Ca_desi_chr07      | 6441056                        | [A/G]       | NA                                         |
| Ca_Desi_Chrom_7_6441060 | Ca_desi_chr07      | 6441060                        | [T/A]       | NA                                         |
| Ca_Desi_Chrom_7_6441072 | Ca_desi_chr07      | 6441072                        | [A/G]       | NA                                         |
| Ca_Desi_Chrom_7_6441074 | Ca_desi_chr07      | 6441074                        | [T/G]       | NA                                         |
| Ca_Desi_Chrom_7_6441081 | Ca_desi_chr07      | 6441081                        | [T/C]       | NA                                         |
| Ca_Desi_Chrom_7_6441099 | Ca_desi_chr07      | 6441099                        | [A/G]       | NA                                         |
| Ca_Desi_Chrom_7_6441103 | Ca_desi_chr07      | 6441103                        | [T/C]       | NA                                         |
| Ca_Desi_Chrom_7_6441109 | Ca_desi_chr07      | 6441109                        | [T/C]       | NA                                         |
| Ca_Desi_Chrom_7_6450367 | Ca_desi_chr07      | 6450367                        | [G/A]       | NA                                         |
| Ca_Desi_Chrom_7_6483361 | Ca_desi_chr07      | 6483361                        | [A/C]       | NA                                         |
| Ca_Desi_Chrom_7_6484390 | Ca_desi_chr07      | 6484390                        | [A/C]       | NA                                         |
| Ca_Desi_Chrom_7_6484394 | Ca_desi_chr07      | 6484394                        | [G/T]       | NA                                         |
| Ca_Desi_Chrom_7_6529630 | Ca_desi_chr07      | 6529630                        | [T/G]       | NA                                         |
| Ca_Desi_Chrom_7_6537171 | Ca_desi_chr07      | 6537171                        | [A/T]       | NA                                         |
| Ca_Desi_Chrom_7_6537181 | Ca_desi_chr07      | 6537181                        | [A/C]       | NA                                         |
| Ca_Desi_Chrom_7_6537183 | Ca_desi_chr07      | 6537183                        | [T/C]       | NA                                         |
| Ca_Desi_Chrom_7_6537185 | Ca_desi_chr07      | 6537185                        | [C/T]       | NA                                         |
| Ca_Desi_Chrom_7_6537200 | Ca_desi_chr07      | 6537200                        | [A/G]       | NA                                         |

| <b>SNP IDs</b>          | <b>Chromosomes</b> | <b>Physical positions (bp)</b> | <b>SNPs</b> | <b>NCBI SNPdb accession IDs (NCBI_ss#)</b> |
|-------------------------|--------------------|--------------------------------|-------------|--------------------------------------------|
| Ca_Desi_Chrom_7_6537202 | Ca_desi_chr07      | 6537202                        | [A/G]       | NA                                         |
| Ca_Desi_Chrom_7_6537214 | Ca_desi_chr07      | 6537214                        | [A/G]       | NA                                         |
| Ca_Desi_Chrom_7_6537215 | Ca_desi_chr07      | 6537215                        | [C/G]       | NA                                         |
| Ca_Desi_Chrom_7_6605141 | Ca_desi_chr07      | 6605141                        | [T/C]       | NA                                         |
| Ca_Desi_Chrom_7_6605148 | Ca_desi_chr07      | 6605148                        | [T/C]       | NA                                         |
| Ca_Desi_Chrom_7_6605183 | Ca_desi_chr07      | 6605183                        | [A/C]       | NA                                         |
| Ca_Desi_Chrom_7_6605214 | Ca_desi_chr07      | 6605214                        | [A/G]       | NA                                         |
| Ca_Desi_Chrom_7_6627849 | Ca_desi_chr07      | 6627849                        | [T/G]       | NA                                         |
| Ca_Desi_Chrom_7_6627877 | Ca_desi_chr07      | 6627877                        | [T/A]       | NA                                         |
| Ca_Desi_Chrom_7_6678171 | Ca_desi_chr07      | 6678171                        | [T/C]       | NA                                         |
| Ca_Desi_Chrom_7_6730241 | Ca_desi_chr07      | 6730241                        | [T/A]       | NA                                         |
| Ca_Desi_Chrom_7_6736128 | Ca_desi_chr07      | 6736128                        | [T/C]       | NA                                         |
| Ca_Desi_Chrom_7_6950270 | Ca_desi_chr07      | 6950270                        | [A/C]       | NA                                         |
| Ca_Desi_Chrom_7_6950273 | Ca_desi_chr07      | 6950273                        | [A/C]       | NA                                         |
| Ca_Desi_Chrom_7_6950276 | Ca_desi_chr07      | 6950276                        | [A/C]       | NA                                         |
| Ca_Desi_Chrom_7_6950285 | Ca_desi_chr07      | 6950285                        | [A/C]       | NA                                         |
| Ca_Desi_Chrom_7_6950288 | Ca_desi_chr07      | 6950288                        | [A/C]       | NA                                         |
| Ca_Desi_Chrom_7_7078062 | Ca_desi_chr07      | 7078062                        | [T/G]       | NA                                         |
| Ca_Desi_Chrom_7_7078065 | Ca_desi_chr07      | 7078065                        | [T/G]       | NA                                         |
| Ca_Desi_Chrom_7_7078111 | Ca_desi_chr07      | 7078111                        | [T/C]       | NA                                         |
| Ca_Desi_Chrom_7_7078115 | Ca_desi_chr07      | 7078115                        | [A/C]       | NA                                         |
| Ca_Desi_Chrom_7_7078120 | Ca_desi_chr07      | 7078120                        | [A/G]       | NA                                         |
| Ca_Desi_Chrom_7_7083489 | Ca_desi_chr07      | 7083489                        | [T/G]       | NA                                         |
| Ca_Desi_Chrom_7_7176145 | Ca_desi_chr07      | 7176145                        | [T/G]       | NA                                         |
| Ca_Desi_Chrom_7_7214111 | Ca_desi_chr07      | 7214111                        | [T/C]       | NA                                         |
| Ca_Desi_Chrom_7_7222600 | Ca_desi_chr07      | 7222600                        | [T/A]       | NA                                         |
| Ca_Desi_Chrom_7_7232958 | Ca_desi_chr07      | 7232958                        | [T/G]       | NA                                         |
| Ca_Desi_Chrom_7_7234448 | Ca_desi_chr07      | 7234448                        | [C/G]       | NA                                         |
| Ca_Desi_Chrom_7_7266110 | Ca_desi_chr07      | 7266110                        | [T/C]       | NA                                         |
| Ca_Desi_Chrom_7_7266125 | Ca_desi_chr07      | 7266125                        | [T/C]       | NA                                         |
| Ca_Desi_Chrom_7_7266154 | Ca_desi_chr07      | 7266154                        | [A/T]       | NA                                         |
| Ca_Desi_Chrom_7_7266160 | Ca_desi_chr07      | 7266160                        | [A/G]       | NA                                         |
| Ca_Desi_Chrom_7_7266162 | Ca_desi_chr07      | 7266162                        | [T/A]       | NA                                         |
| Ca_Desi_Chrom_7_7266164 | Ca_desi_chr07      | 7266164                        | [A/G]       | NA                                         |

| <b>SNP IDs</b>          | <b>Chromosomes</b> | <b>Physical positions (bp)</b> | <b>SNPs</b> | <b>NCBI SNPdb accession IDs (NCBI_ss#)</b> |
|-------------------------|--------------------|--------------------------------|-------------|--------------------------------------------|
| Ca_Desi_Chrom_7_7266167 | Ca_desi_chr07      | 7266167                        | [A/G]       | NA                                         |
| Ca_Desi_Chrom_7_7266168 | Ca_desi_chr07      | 7266168                        | [T/G]       | NA                                         |
| Ca_Desi_Chrom_7_7266186 | Ca_desi_chr07      | 7266186                        | [A/G]       | NA                                         |
| Ca_Desi_Chrom_7_7266189 | Ca_desi_chr07      | 7266189                        | [C/G]       | NA                                         |
| Ca_Desi_Chrom_7_7266192 | Ca_desi_chr07      | 7266192                        | [G/A]       | NA                                         |
| Ca_Desi_Chrom_7_7266193 | Ca_desi_chr07      | 7266193                        | [A/G]       | NA                                         |
| Ca_Desi_Chrom_7_7266194 | Ca_desi_chr07      | 7266194                        | [G/A]       | NA                                         |
| Ca_Desi_Chrom_7_7266198 | Ca_desi_chr07      | 7266198                        | [G/C]       | NA                                         |
| Ca_Desi_Chrom_7_7266205 | Ca_desi_chr07      | 7266205                        | [T/C]       | NA                                         |
| Ca_Desi_Chrom_7_7266207 | Ca_desi_chr07      | 7266207                        | [A/G]       | NA                                         |
| Ca_Desi_Chrom_7_7266210 | Ca_desi_chr07      | 7266210                        | [C/G]       | NA                                         |
| Ca_Desi_Chrom_7_7488833 | Ca_desi_chr07      | 7488833                        | [T/C]       | NA                                         |
| Ca_Desi_Chrom_7_7488842 | Ca_desi_chr07      | 7488842                        | [T/A]       | NA                                         |
| Ca_Desi_Chrom_7_7497833 | Ca_desi_chr07      | 7497833                        | [T/C]       | NA                                         |
| Ca_Desi_Chrom_7_7497865 | Ca_desi_chr07      | 7497865                        | [A/G]       | NA                                         |
| Ca_Desi_Chrom_7_7497869 | Ca_desi_chr07      | 7497869                        | [G/A]       | NA                                         |
| Ca_Desi_Chrom_7_7688659 | Ca_desi_chr07      | 7688659                        | [A/T]       | NA                                         |
| Ca_Desi_Chrom_7_7688705 | Ca_desi_chr07      | 7688705                        | [A/G]       | NA                                         |
| Ca_Desi_Chrom_7_7688714 | Ca_desi_chr07      | 7688714                        | [A/C]       | NA                                         |
| Ca_Desi_Chrom_7_7688717 | Ca_desi_chr07      | 7688717                        | [A/G]       | NA                                         |
| Ca_Desi_Chrom_7_7688756 | Ca_desi_chr07      | 7688756                        | [T/C]       | NA                                         |
| Ca_Desi_Chrom_7_7688758 | Ca_desi_chr07      | 7688758                        | [T/C]       | NA                                         |
| Ca_Desi_Chrom_7_7688765 | Ca_desi_chr07      | 7688765                        | [T/C]       | NA                                         |
| Ca_Desi_Chrom_7_7750219 | Ca_desi_chr07      | 7750219                        | [A/G]       | NA                                         |
| Ca_Desi_Chrom_7_7750254 | Ca_desi_chr07      | 7750254                        | [T/C]       | NA                                         |
| Ca_Desi_Chrom_7_7750272 | Ca_desi_chr07      | 7750272                        | [T/C]       | NA                                         |
| Ca_Desi_Chrom_7_7750981 | Ca_desi_chr07      | 7750981                        | [A/G]       | NA                                         |
| Ca_Desi_Chrom_7_7751000 | Ca_desi_chr07      | 7751000                        | [T/G]       | NA                                         |
| Ca_Desi_Chrom_7_7751102 | Ca_desi_chr07      | 7751102                        | [T/G]       | NA                                         |
| Ca_Desi_Chrom_7_7751105 | Ca_desi_chr07      | 7751105                        | [A/G]       | NA                                         |
| Ca_Desi_Chrom_7_7751107 | Ca_desi_chr07      | 7751107                        | [T/G]       | NA                                         |
| Ca_Desi_Chrom_7_7751119 | Ca_desi_chr07      | 7751119                        | [T/G]       | NA                                         |
| Ca_Desi_Chrom_7_7796833 | Ca_desi_chr07      | 7796833                        | [A/T]       | NA                                         |
| Ca_Desi_Chrom_7_7796875 | Ca_desi_chr07      | 7796875                        | [T/C]       | NA                                         |

| <b>SNP IDs</b>          | <b>Chromosomes</b> | <b>Physical positions (bp)</b> | <b>SNPs</b> | <b>NCBI SNPdb accession IDs (NCBI_ss#)</b> |
|-------------------------|--------------------|--------------------------------|-------------|--------------------------------------------|
| Ca_Desi_Chrom_7_7796939 | Ca_desi_chr07      | 7796939                        | [A/C]       | NA                                         |
| Ca_Desi_Chrom_7_7796940 | Ca_desi_chr07      | 7796940                        | [G/A]       | NA                                         |
| Ca_Desi_Chrom_7_7810668 | Ca_desi_chr07      | 7810668                        | [C/T]       | NA                                         |
| Ca_Desi_Chrom_7_7829116 | Ca_desi_chr07      | 7829116                        | [G/T]       | NA                                         |
| Ca_Desi_Chrom_7_7869801 | Ca_desi_chr07      | 7869801                        | [A/C]       | NA                                         |
| Ca_Desi_Chrom_7_7895111 | Ca_desi_chr07      | 7895111                        | [T/G]       | NA                                         |
| Ca_Desi_Chrom_7_7895150 | Ca_desi_chr07      | 7895150                        | [A/C]       | NA                                         |
| Ca_Desi_Chrom_7_7895159 | Ca_desi_chr07      | 7895159                        | [A/G]       | NA                                         |
| Ca_Desi_Chrom_7_7895792 | Ca_desi_chr07      | 7895792                        | [T/C]       | NA                                         |
| Ca_Desi_Chrom_7_7895806 | Ca_desi_chr07      | 7895806                        | [G/A]       | NA                                         |
| Ca_Desi_Chrom_7_7895821 | Ca_desi_chr07      | 7895821                        | [T/C]       | NA                                         |
| Ca_Desi_Chrom_7_7895840 | Ca_desi_chr07      | 7895840                        | [A/G]       | NA                                         |
| Ca_Desi_Chrom_7_7895865 | Ca_desi_chr07      | 7895865                        | [A/G]       | NA                                         |
| Ca_Desi_Chrom_7_7895868 | Ca_desi_chr07      | 7895868                        | [T/C]       | NA                                         |
| Ca_Desi_Chrom_7_7913009 | Ca_desi_chr07      | 7913009                        | [C/T]       | NA                                         |
| Ca_Desi_Chrom_7_7945493 | Ca_desi_chr07      | 7945493                        | [T/G]       | NA                                         |
| Ca_Desi_Chrom_7_7945586 | Ca_desi_chr07      | 7945586                        | [A/T]       | NA                                         |
| Ca_Desi_Chrom_7_7947269 | Ca_desi_chr07      | 7947269                        | [A/G]       | NA                                         |
| Ca_Desi_Chrom_7_7947274 | Ca_desi_chr07      | 7947274                        | [T/A]       | NA                                         |
| Ca_Desi_Chrom_7_7947292 | Ca_desi_chr07      | 7947292                        | [A/C]       | NA                                         |
| Ca_Desi_Chrom_7_7947303 | Ca_desi_chr07      | 7947303                        | [T/C]       | NA                                         |
| Ca_Desi_Chrom_7_7980565 | Ca_desi_chr07      | 7980565                        | [T/G]       | NA                                         |
| Ca_Desi_Chrom_7_8015487 | Ca_desi_chr07      | 8015487                        | [G/C]       | NA                                         |
| Ca_Desi_Chrom_7_8016944 | Ca_desi_chr07      | 8016944                        | [G/A]       | NA                                         |
| Ca_Desi_Chrom_7_8021380 | Ca_desi_chr07      | 8021380                        | [C/T]       | NA                                         |
| Ca_Desi_Chrom_7_8021391 | Ca_desi_chr07      | 8021391                        | [A/T]       | NA                                         |
| Ca_Desi_Chrom_7_8097527 | Ca_desi_chr07      | 8097527                        | [A/C]       | NA                                         |
| Ca_Desi_Chrom_7_8113292 | Ca_desi_chr07      | 8113292                        | [T/G]       | NA                                         |
| Ca_Desi_Chrom_7_8180284 | Ca_desi_chr07      | 8180284                        | [T/A]       | NA                                         |
| Ca_Desi_Chrom_7_8180333 | Ca_desi_chr07      | 8180333                        | [A/C]       | NA                                         |
| Ca_Desi_Chrom_7_8181793 | Ca_desi_chr07      | 8181793                        | [T/G]       | NA                                         |
| Ca_Desi_Chrom_7_8181801 | Ca_desi_chr07      | 8181801                        | [T/G]       | NA                                         |
| Ca_Desi_Chrom_7_8181821 | Ca_desi_chr07      | 8181821                        | [T/C]       | NA                                         |
| Ca_Desi_Chrom_7_8187265 | Ca_desi_chr07      | 8187265                        | [T/C]       | NA                                         |

| <b>SNP IDs</b>          | <b>Chromosomes</b> | <b>Physical positions (bp)</b> | <b>SNPs</b> | <b>NCBI SNPdb accession IDs (NCBI_ss#)</b> |
|-------------------------|--------------------|--------------------------------|-------------|--------------------------------------------|
| Ca_Desi_Chrom_7_8206435 | Ca_desi_chr07      | 8206435                        | [T/C]       | NA                                         |
| Ca_Desi_Chrom_7_8206437 | Ca_desi_chr07      | 8206437                        | [A/G]       | NA                                         |
| Ca_Desi_Chrom_7_8206439 | Ca_desi_chr07      | 8206439                        | [A/G]       | NA                                         |
| Ca_Desi_Chrom_7_8206440 | Ca_desi_chr07      | 8206440                        | [T/C]       | NA                                         |
| Ca_Desi_Chrom_7_8206467 | Ca_desi_chr07      | 8206467                        | [A/G]       | NA                                         |
| Ca_Desi_Chrom_7_8206468 | Ca_desi_chr07      | 8206468                        | [T/C]       | NA                                         |
| Ca_Desi_Chrom_7_8206470 | Ca_desi_chr07      | 8206470                        | [T/C]       | NA                                         |
| Ca_Desi_Chrom_7_8206471 | Ca_desi_chr07      | 8206471                        | [C/A]       | NA                                         |
| Ca_Desi_Chrom_7_8206472 | Ca_desi_chr07      | 8206472                        | [T/C]       | NA                                         |
| Ca_Desi_Chrom_7_8209362 | Ca_desi_chr07      | 8209362                        | [T/A]       | NA                                         |
| Ca_Desi_Chrom_7_8209367 | Ca_desi_chr07      | 8209367                        | [T/C]       | NA                                         |
| Ca_Desi_Chrom_7_8209406 | Ca_desi_chr07      | 8209406                        | [T/G]       | NA                                         |
| Ca_Desi_Chrom_7_8209410 | Ca_desi_chr07      | 8209410                        | [T/G]       | NA                                         |
| Ca_Desi_Chrom_7_8209428 | Ca_desi_chr07      | 8209428                        | [A/G]       | NA                                         |
| Ca_Desi_Chrom_7_8209430 | Ca_desi_chr07      | 8209430                        | [T/G]       | NA                                         |
| Ca_Desi_Chrom_7_8209434 | Ca_desi_chr07      | 8209434                        | [T/G]       | NA                                         |
| Ca_Desi_Chrom_7_8209456 | Ca_desi_chr07      | 8209456                        | [A/C]       | NA                                         |
| Ca_Desi_Chrom_7_8210859 | Ca_desi_chr07      | 8210859                        | [A/C]       | NA                                         |
| Ca_Desi_Chrom_7_8343153 | Ca_desi_chr07      | 8343153                        | [T/G]       | NA                                         |
| Ca_Desi_Chrom_7_8343174 | Ca_desi_chr07      | 8343174                        | [A/C]       | NA                                         |
| Ca_Desi_Chrom_7_8369401 | Ca_desi_chr07      | 8369401                        | [T/C]       | NA                                         |
| Ca_Desi_Chrom_7_8369407 | Ca_desi_chr07      | 8369407                        | [A/C]       | NA                                         |
| Ca_Desi_Chrom_7_8369433 | Ca_desi_chr07      | 8369433                        | [T/C]       | NA                                         |
| Ca_Desi_Chrom_7_8369436 | Ca_desi_chr07      | 8369436                        | [T/G]       | NA                                         |
| Ca_Desi_Chrom_7_8369448 | Ca_desi_chr07      | 8369448                        | [C/A]       | NA                                         |
| Ca_Desi_Chrom_7_8369552 | Ca_desi_chr07      | 8369552                        | [T/A]       | NA                                         |
| Ca_Desi_Chrom_7_8369564 | Ca_desi_chr07      | 8369564                        | [A/G]       | NA                                         |
| Ca_Desi_Chrom_7_8387214 | Ca_desi_chr07      | 8387214                        | [A/G]       | NA                                         |
| Ca_Desi_Chrom_7_8387450 | Ca_desi_chr07      | 8387450                        | [T/C]       | NA                                         |
| Ca_Desi_Chrom_7_8387455 | Ca_desi_chr07      | 8387455                        | [A/G]       | NA                                         |
| Ca_Desi_Chrom_7_8387457 | Ca_desi_chr07      | 8387457                        | [T/C]       | NA                                         |
| Ca_Desi_Chrom_7_8387460 | Ca_desi_chr07      | 8387460                        | [T/G]       | NA                                         |
| Ca_Desi_Chrom_7_8387462 | Ca_desi_chr07      | 8387462                        | [A/G]       | NA                                         |
| Ca_Desi_Chrom_7_8387485 | Ca_desi_chr07      | 8387485                        | [T/A]       | NA                                         |



| <b>SNP IDs</b>          | <b>Chromosomes</b> | <b>Physical positions (bp)</b> | <b>SNPs</b> | <b>NCBI SNPdb accession IDs (NCBI_ss#)</b> |
|-------------------------|--------------------|--------------------------------|-------------|--------------------------------------------|
| Ca_Desi_Chrom_7_8409779 | Ca_desi_chr07      | 8409779                        | [A/C]       | NA                                         |
| Ca_Desi_Chrom_7_8413417 | Ca_desi_chr07      | 8413417                        | [T/C]       | NA                                         |
| Ca_Desi_Chrom_7_8429520 | Ca_desi_chr07      | 8429520                        | [T/G]       | NA                                         |
| Ca_Desi_Chrom_7_8441794 | Ca_desi_chr07      | 8441794                        | [T/G]       | NA                                         |
| Ca_Desi_Chrom_7_8441798 | Ca_desi_chr07      | 8441798                        | [T/G]       | NA                                         |
| Ca_Desi_Chrom_7_8441806 | Ca_desi_chr07      | 8441806                        | [A/C]       | NA                                         |
| Ca_Desi_Chrom_7_8452768 | Ca_desi_chr07      | 8452768                        | [A/C]       | NA                                         |
| Ca_Desi_Chrom_7_8452792 | Ca_desi_chr07      | 8452792                        | [T/C]       | NA                                         |
| Ca_Desi_Chrom_7_8452795 | Ca_desi_chr07      | 8452795                        | [C/T]       | NA                                         |
| Ca_Desi_Chrom_7_8452801 | Ca_desi_chr07      | 8452801                        | [T/C]       | NA                                         |
| Ca_Desi_Chrom_7_8452805 | Ca_desi_chr07      | 8452805                        | [T/C]       | NA                                         |
| Ca_Desi_Chrom_7_8452815 | Ca_desi_chr07      | 8452815                        | [T/C]       | NA                                         |
| Ca_Desi_Chrom_7_8452819 | Ca_desi_chr07      | 8452819                        | [T/C]       | NA                                         |
| Ca_Desi_Chrom_7_8452822 | Ca_desi_chr07      | 8452822                        | [T/C]       | NA                                         |
| Ca_Desi_Chrom_7_8454777 | Ca_desi_chr07      | 8454777                        | [T/C]       | NA                                         |
| Ca_Desi_Chrom_7_8454791 | Ca_desi_chr07      | 8454791                        | [A/G]       | NA                                         |
| Ca_Desi_Chrom_7_8454808 | Ca_desi_chr07      | 8454808                        | [T/C]       | NA                                         |
| Ca_Desi_Chrom_7_8454812 | Ca_desi_chr07      | 8454812                        | [T/C]       | NA                                         |
| Ca_Desi_Chrom_7_8454819 | Ca_desi_chr07      | 8454819                        | [T/C]       | NA                                         |
| Ca_Desi_Chrom_8_32673   | Ca_desi_chr08      | 32673                          | [T/G]       | NA                                         |
| Ca_Desi_Chrom_8_65238   | Ca_desi_chr08      | 65238                          | [T/C]       | NA                                         |
| Ca_Desi_Chrom_8_65261   | Ca_desi_chr08      | 65261                          | [T/G]       | NA                                         |
| Ca_Desi_Chrom_8_90332   | Ca_desi_chr08      | 90332                          | [G/A]       | NA                                         |
| Ca_Desi_Chrom_8_90334   | Ca_desi_chr08      | 90334                          | [T/A]       | NA                                         |
| Ca_Desi_Chrom_8_115690  | Ca_desi_chr08      | 115690                         | [A/C]       | NA                                         |
| Ca_Desi_Chrom_8_122422  | Ca_desi_chr08      | 122422                         | [T/G]       | NA                                         |
| Ca_Desi_Chrom_8_134344  | Ca_desi_chr08      | 134344                         | [T/C]       | NA                                         |
| Ca_Desi_Chrom_8_134410  | Ca_desi_chr08      | 134410                         | [A/C]       | NA                                         |
| Ca_Desi_Chrom_8_145480  | Ca_desi_chr08      | 145480                         | [T/C]       | NA                                         |
| Ca_Desi_Chrom_8_157344  | Ca_desi_chr08      | 157344                         | [A/C]       | NA                                         |
| Ca_Desi_Chrom_8_201411  | Ca_desi_chr08      | 201411                         | [C/A]       | NA                                         |
| Ca_Desi_Chrom_8_201422  | Ca_desi_chr08      | 201422                         | [C/T]       | NA                                         |
| Ca_Desi_Chrom_8_202026  | Ca_desi_chr08      | 202026                         | [G/C]       | NA                                         |
| Ca_Desi_Chrom_8_202036  | Ca_desi_chr08      | 202036                         | [G/T]       | NA                                         |

| <b>SNP IDs</b>         | <b>Chromosomes</b> | <b>Physical positions (bp)</b> | <b>SNPs</b> | <b>NCBI SNPdb accession IDs (NCBI_ss#)</b> |
|------------------------|--------------------|--------------------------------|-------------|--------------------------------------------|
| Ca_Desi_Chrom_8_210526 | Ca_desi_chr08      | 210526                         | [C/A]       | NA                                         |
| Ca_Desi_Chrom_8_210623 | Ca_desi_chr08      | 210623                         | [A/C]       | NA                                         |
| Ca_Desi_Chrom_8_252816 | Ca_desi_chr08      | 252816                         | [A/T]       | NA                                         |
| Ca_Desi_Chrom_8_277065 | Ca_desi_chr08      | 277065                         | [T/C]       | NA                                         |
| Ca_Desi_Chrom_8_298428 | Ca_desi_chr08      | 298428                         | [A/G]       | NA                                         |
| Ca_Desi_Chrom_8_298454 | Ca_desi_chr08      | 298454                         | [T/A]       | NA                                         |
| Ca_Desi_Chrom_8_332253 | Ca_desi_chr08      | 332253                         | [A/T]       | NA                                         |
| Ca_Desi_Chrom_8_344209 | Ca_desi_chr08      | 344209                         | [T/G]       | NA                                         |
| Ca_Desi_Chrom_8_344217 | Ca_desi_chr08      | 344217                         | [C/T]       | NA                                         |
| Ca_Desi_Chrom_8_344219 | Ca_desi_chr08      | 344219                         | [C/T]       | NA                                         |
| Ca_Desi_Chrom_8_344221 | Ca_desi_chr08      | 344221                         | [C/T]       | NA                                         |
| Ca_Desi_Chrom_8_344229 | Ca_desi_chr08      | 344229                         | [C/A]       | NA                                         |
| Ca_Desi_Chrom_8_344231 | Ca_desi_chr08      | 344231                         | [A/C]       | NA                                         |
| Ca_Desi_Chrom_8_344237 | Ca_desi_chr08      | 344237                         | [G/A]       | NA                                         |
| Ca_Desi_Chrom_8_344981 | Ca_desi_chr08      | 344981                         | [T/A]       | NA                                         |
| Ca_Desi_Chrom_8_355973 | Ca_desi_chr08      | 355973                         | [A/T]       | NA                                         |
| Ca_Desi_Chrom_8_355984 | Ca_desi_chr08      | 355984                         | [A/G]       | NA                                         |
| Ca_Desi_Chrom_8_355989 | Ca_desi_chr08      | 355989                         | [A/C]       | NA                                         |
| Ca_Desi_Chrom_8_356004 | Ca_desi_chr08      | 356004                         | [T/C]       | NA                                         |
| Ca_Desi_Chrom_8_357356 | Ca_desi_chr08      | 357356                         | [T/G]       | NA                                         |
| Ca_Desi_Chrom_8_357383 | Ca_desi_chr08      | 357383                         | [T/G]       | NA                                         |
| Ca_Desi_Chrom_8_357386 | Ca_desi_chr08      | 357386                         | [T/G]       | NA                                         |
| Ca_Desi_Chrom_8_357399 | Ca_desi_chr08      | 357399                         | [T/G]       | NA                                         |
| Ca_Desi_Chrom_8_371628 | Ca_desi_chr08      | 371628                         | [A/T]       | NA                                         |
| Ca_Desi_Chrom_8_379518 | Ca_desi_chr08      | 379518                         | [T/C]       | NA                                         |
| Ca_Desi_Chrom_8_379528 | Ca_desi_chr08      | 379528                         | [T/C]       | NA                                         |
| Ca_Desi_Chrom_8_380499 | Ca_desi_chr08      | 380499                         | [T/G]       | NA                                         |
| Ca_Desi_Chrom_8_393113 | Ca_desi_chr08      | 393113                         | [T/A]       | NA                                         |
| Ca_Desi_Chrom_8_393118 | Ca_desi_chr08      | 393118                         | [T/A]       | NA                                         |
| Ca_Desi_Chrom_8_393178 | Ca_desi_chr08      | 393178                         | [A/T]       | NA                                         |
| Ca_Desi_Chrom_8_393196 | Ca_desi_chr08      | 393196                         | [T/G]       | NA                                         |
| Ca_Desi_Chrom_8_393218 | Ca_desi_chr08      | 393218                         | [A/G]       | NA                                         |
| Ca_Desi_Chrom_8_393236 | Ca_desi_chr08      | 393236                         | [T/C]       | NA                                         |
| Ca_Desi_Chrom_8_397447 | Ca_desi_chr08      | 397447                         | [A/C]       | NA                                         |

| <b>SNP IDs</b>         | <b>Chromosomes</b> | <b>Physical positions (bp)</b> | <b>SNPs</b> | <b>NCBI SNPdb accession IDs (NCBI_ss#)</b> |
|------------------------|--------------------|--------------------------------|-------------|--------------------------------------------|
| Ca_Desi_Chrom_8_421949 | Ca_desi_chr08      | 421949                         | [T/G]       | NA                                         |
| Ca_Desi_Chrom_8_422053 | Ca_desi_chr08      | 422053                         | [A/G]       | NA                                         |
| Ca_Desi_Chrom_8_422120 | Ca_desi_chr08      | 422120                         | [T/G]       | NA                                         |
| Ca_Desi_Chrom_8_422131 | Ca_desi_chr08      | 422131                         | [T/G]       | NA                                         |
| Ca_Desi_Chrom_8_422154 | Ca_desi_chr08      | 422154                         | [A/G]       | NA                                         |
| Ca_Desi_Chrom_8_427208 | Ca_desi_chr08      | 427208                         | [A/G]       | NA                                         |
| Ca_Desi_Chrom_8_427213 | Ca_desi_chr08      | 427213                         | [G/T]       | NA                                         |
| Ca_Desi_Chrom_8_427216 | Ca_desi_chr08      | 427216                         | [G/T]       | NA                                         |
| Ca_Desi_Chrom_8_427219 | Ca_desi_chr08      | 427219                         | [A/G]       | NA                                         |
| Ca_Desi_Chrom_8_427220 | Ca_desi_chr08      | 427220                         | [T/C]       | NA                                         |
| Ca_Desi_Chrom_8_427223 | Ca_desi_chr08      | 427223                         | [C/T]       | NA                                         |
| Ca_Desi_Chrom_8_427224 | Ca_desi_chr08      | 427224                         | [T/C]       | NA                                         |
| Ca_Desi_Chrom_8_427225 | Ca_desi_chr08      | 427225                         | [G/T]       | NA                                         |
| Ca_Desi_Chrom_8_427230 | Ca_desi_chr08      | 427230                         | [A/G]       | NA                                         |
| Ca_Desi_Chrom_8_427231 | Ca_desi_chr08      | 427231                         | [C/A]       | NA                                         |
| Ca_Desi_Chrom_8_427233 | Ca_desi_chr08      | 427233                         | [A/C]       | NA                                         |
| Ca_Desi_Chrom_8_427238 | Ca_desi_chr08      | 427238                         | [A/G]       | NA                                         |
| Ca_Desi_Chrom_8_427241 | Ca_desi_chr08      | 427241                         | [A/G]       | NA                                         |
| Ca_Desi_Chrom_8_427250 | Ca_desi_chr08      | 427250                         | [C/G]       | NA                                         |
| Ca_Desi_Chrom_8_427257 | Ca_desi_chr08      | 427257                         | [A/G]       | NA                                         |
| Ca_Desi_Chrom_8_427271 | Ca_desi_chr08      | 427271                         | [A/G]       | NA                                         |
| Ca_Desi_Chrom_8_517136 | Ca_desi_chr08      | 517136                         | [T/C]       | NA                                         |
| Ca_Desi_Chrom_8_525562 | Ca_desi_chr08      | 525562                         | [T/C]       | NA                                         |
| Ca_Desi_Chrom_8_525585 | Ca_desi_chr08      | 525585                         | [T/C]       | NA                                         |
| Ca_Desi_Chrom_8_525623 | Ca_desi_chr08      | 525623                         | [A/C]       | NA                                         |
| Ca_Desi_Chrom_8_527253 | Ca_desi_chr08      | 527253                         | [T/G]       | NA                                         |
| Ca_Desi_Chrom_8_527260 | Ca_desi_chr08      | 527260                         | [T/C]       | NA                                         |
| Ca_Desi_Chrom_8_527283 | Ca_desi_chr08      | 527283                         | [T/C]       | NA                                         |
| Ca_Desi_Chrom_8_538485 | Ca_desi_chr08      | 538485                         | [T/C]       | NA                                         |
| Ca_Desi_Chrom_8_538946 | Ca_desi_chr08      | 538946                         | [T/G]       | NA                                         |
| Ca_Desi_Chrom_8_538976 | Ca_desi_chr08      | 538976                         | [T/G]       | NA                                         |
| Ca_Desi_Chrom_8_538979 | Ca_desi_chr08      | 538979                         | [T/G]       | NA                                         |
| Ca_Desi_Chrom_8_553709 | Ca_desi_chr08      | 553709                         | [A/C]       | NA                                         |
| Ca_Desi_Chrom_8_553712 | Ca_desi_chr08      | 553712                         | [A/T]       | NA                                         |

| <b>SNP IDs</b>         | <b>Chromosomes</b> | <b>Physical positions (bp)</b> | <b>SNPs</b> | <b>NCBI SNPdb accession IDs (NCBI_ss#)</b> |
|------------------------|--------------------|--------------------------------|-------------|--------------------------------------------|
| Ca_Desi_Chrom_8_553714 | Ca_desi_chr08      | 553714                         | [T/C]       | NA                                         |
| Ca_Desi_Chrom_8_553721 | Ca_desi_chr08      | 553721                         | [A/C]       | NA                                         |
| Ca_Desi_Chrom_8_553742 | Ca_desi_chr08      | 553742                         | [T/G]       | NA                                         |
| Ca_Desi_Chrom_8_553752 | Ca_desi_chr08      | 553752                         | [T/A]       | NA                                         |
| Ca_Desi_Chrom_8_556309 | Ca_desi_chr08      | 556309                         | [A/G]       | NA                                         |
| Ca_Desi_Chrom_8_556313 | Ca_desi_chr08      | 556313                         | [C/T]       | NA                                         |
| Ca_Desi_Chrom_8_556314 | Ca_desi_chr08      | 556314                         | [A/G]       | NA                                         |
| Ca_Desi_Chrom_8_556326 | Ca_desi_chr08      | 556326                         | [A/G]       | NA                                         |
| Ca_Desi_Chrom_8_556330 | Ca_desi_chr08      | 556330                         | [A/G]       | NA                                         |
| Ca_Desi_Chrom_8_556338 | Ca_desi_chr08      | 556338                         | [T/C]       | NA                                         |
| Ca_Desi_Chrom_8_562208 | Ca_desi_chr08      | 562208                         | [A/G]       | NA                                         |
| Ca_Desi_Chrom_8_562209 | Ca_desi_chr08      | 562209                         | [G/A]       | NA                                         |
| Ca_Desi_Chrom_8_574607 | Ca_desi_chr08      | 574607                         | [T/A]       | NA                                         |
| Ca_Desi_Chrom_8_574899 | Ca_desi_chr08      | 574899                         | [A/T]       | NA                                         |
| Ca_Desi_Chrom_8_588730 | Ca_desi_chr08      | 588730                         | [T/C]       | NA                                         |
| Ca_Desi_Chrom_8_588738 | Ca_desi_chr08      | 588738                         | [A/G]       | NA                                         |
| Ca_Desi_Chrom_8_588746 | Ca_desi_chr08      | 588746                         | [A/G]       | NA                                         |
| Ca_Desi_Chrom_8_588748 | Ca_desi_chr08      | 588748                         | [A/G]       | NA                                         |
| Ca_Desi_Chrom_8_589887 | Ca_desi_chr08      | 589887                         | [A/C]       | NA                                         |
| Ca_Desi_Chrom_8_595440 | Ca_desi_chr08      | 595440                         | [A/C]       | NA                                         |
| Ca_Desi_Chrom_8_598381 | Ca_desi_chr08      | 598381                         | [A/C]       | NA                                         |
| Ca_Desi_Chrom_8_678765 | Ca_desi_chr08      | 678765                         | [T/G]       | NA                                         |
| Ca_Desi_Chrom_8_684980 | Ca_desi_chr08      | 684980                         | [A/T]       | NA                                         |
| Ca_Desi_Chrom_8_705748 | Ca_desi_chr08      | 705748                         | [T/C]       | NA                                         |
| Ca_Desi_Chrom_8_758815 | Ca_desi_chr08      | 758815                         | [G/A]       | NA                                         |
| Ca_Desi_Chrom_8_758826 | Ca_desi_chr08      | 758826                         | [T/G]       | NA                                         |
| Ca_Desi_Chrom_8_760810 | Ca_desi_chr08      | 760810                         | [A/G]       | NA                                         |
| Ca_Desi_Chrom_8_764969 | Ca_desi_chr08      | 764969                         | [A/G]       | NA                                         |
| Ca_Desi_Chrom_8_764978 | Ca_desi_chr08      | 764978                         | [T/C]       | NA                                         |
| Ca_Desi_Chrom_8_827352 | Ca_desi_chr08      | 827352                         | [T/C]       | NA                                         |
| Ca_Desi_Chrom_8_827358 | Ca_desi_chr08      | 827358                         | [T/C]       | NA                                         |
| Ca_Desi_Chrom_8_827371 | Ca_desi_chr08      | 827371                         | [T/G]       | NA                                         |
| Ca_Desi_Chrom_8_827389 | Ca_desi_chr08      | 827389                         | [T/C]       | NA                                         |
| Ca_Desi_Chrom_8_827393 | Ca_desi_chr08      | 827393                         | [T/A]       | NA                                         |

| <b>SNP IDs</b>          | <b>Chromosomes</b> | <b>Physical positions (bp)</b> | <b>SNPs</b> | <b>NCBI SNPdb accession IDs (NCBI_ss#)</b> |
|-------------------------|--------------------|--------------------------------|-------------|--------------------------------------------|
| Ca_Desi_Chrom_8_839314  | Ca_desi_chr08      | 839314                         | [A/G]       | NA                                         |
| Ca_Desi_Chrom_8_839333  | Ca_desi_chr08      | 839333                         | [A/G]       | NA                                         |
| Ca_Desi_Chrom_8_863059  | Ca_desi_chr08      | 863059                         | [T/G]       | NA                                         |
| Ca_Desi_Chrom_8_863067  | Ca_desi_chr08      | 863067                         | [T/G]       | NA                                         |
| Ca_Desi_Chrom_8_868438  | Ca_desi_chr08      | 868438                         | [A/G]       | NA                                         |
| Ca_Desi_Chrom_8_894731  | Ca_desi_chr08      | 894731                         | [A/G]       | NA                                         |
| Ca_Desi_Chrom_8_935366  | Ca_desi_chr08      | 935366                         | [T/G]       | NA                                         |
| Ca_Desi_Chrom_8_935383  | Ca_desi_chr08      | 935383                         | [A/C]       | NA                                         |
| Ca_Desi_Chrom_8_935388  | Ca_desi_chr08      | 935388                         | [T/C]       | NA                                         |
| Ca_Desi_Chrom_8_984898  | Ca_desi_chr08      | 984898                         | [A/C]       | NA                                         |
| Ca_Desi_Chrom_8_984926  | Ca_desi_chr08      | 984926                         | [T/A]       | NA                                         |
| Ca_Desi_Chrom_8_1017345 | Ca_desi_chr08      | 1017345                        | [A/T]       | NA                                         |
| Ca_Desi_Chrom_8_1041386 | Ca_desi_chr08      | 1041386                        | [G/C]       | NA                                         |
| Ca_Desi_Chrom_8_1056729 | Ca_desi_chr08      | 1056729                        | [A/G]       | NA                                         |
| Ca_Desi_Chrom_8_1056734 | Ca_desi_chr08      | 1056734                        | [A/C]       | NA                                         |
| Ca_Desi_Chrom_8_1056737 | Ca_desi_chr08      | 1056737                        | [T/C]       | NA                                         |
| Ca_Desi_Chrom_8_1056750 | Ca_desi_chr08      | 1056750                        | [T/C]       | NA                                         |
| Ca_Desi_Chrom_8_1073619 | Ca_desi_chr08      | 1073619                        | [A/G]       | NA                                         |
| Ca_Desi_Chrom_8_1073628 | Ca_desi_chr08      | 1073628                        | [A/G]       | NA                                         |
| Ca_Desi_Chrom_8_1073644 | Ca_desi_chr08      | 1073644                        | [T/C]       | NA                                         |
| Ca_Desi_Chrom_8_1073652 | Ca_desi_chr08      | 1073652                        | [T/A]       | NA                                         |
| Ca_Desi_Chrom_8_1073655 | Ca_desi_chr08      | 1073655                        | [T/G]       | NA                                         |
| Ca_Desi_Chrom_8_1073669 | Ca_desi_chr08      | 1073669                        | [A/T]       | NA                                         |
| Ca_Desi_Chrom_8_1073679 | Ca_desi_chr08      | 1073679                        | [T/C]       | NA                                         |
| Ca_Desi_Chrom_8_1352236 | Ca_desi_chr08      | 1352236                        | [A/C]       | NA                                         |
| Ca_Desi_Chrom_8_1352393 | Ca_desi_chr08      | 1352393                        | [A/C]       | NA                                         |
| Ca_Desi_Chrom_8_1365491 | Ca_desi_chr08      | 1365491                        | [A/C]       | NA                                         |
| Ca_Desi_Chrom_8_1365492 | Ca_desi_chr08      | 1365492                        | [G/T]       | NA                                         |
| Ca_Desi_Chrom_8_1365835 | Ca_desi_chr08      | 1365835                        | [T/G]       | NA                                         |
| Ca_Desi_Chrom_8_1386349 | Ca_desi_chr08      | 1386349                        | [G/T]       | NA                                         |
| Ca_Desi_Chrom_8_1386350 | Ca_desi_chr08      | 1386350                        | [G/A]       | NA                                         |
| Ca_Desi_Chrom_8_1386352 | Ca_desi_chr08      | 1386352                        | [A/C]       | NA                                         |
| Ca_Desi_Chrom_8_1386356 | Ca_desi_chr08      | 1386356                        | [C/A]       | NA                                         |
| Ca_Desi_Chrom_8_1386469 | Ca_desi_chr08      | 1386469                        | [T/G]       | NA                                         |

| <b>SNP IDs</b>          | <b>Chromosomes</b> | <b>Physical positions (bp)</b> | <b>SNPs</b> | <b>NCBI SNPdb accession IDs (NCBI_ss#)</b> |
|-------------------------|--------------------|--------------------------------|-------------|--------------------------------------------|
| Ca_Desi_Chrom_8_1388732 | Ca_desi_chr08      | 1388732                        | [C/T]       | NA                                         |
| Ca_Desi_Chrom_8_1388750 | Ca_desi_chr08      | 1388750                        | [G/A]       | NA                                         |
| Ca_Desi_Chrom_8_1399524 | Ca_desi_chr08      | 1399524                        | [T/G]       | NA                                         |
| Ca_Desi_Chrom_8_1399529 | Ca_desi_chr08      | 1399529                        | [T/G]       | NA                                         |
| Ca_Desi_Chrom_8_1399543 | Ca_desi_chr08      | 1399543                        | [T/G]       | NA                                         |
| Ca_Desi_Chrom_8_1399548 | Ca_desi_chr08      | 1399548                        | [T/G]       | NA                                         |
| Ca_Desi_Chrom_8_1399551 | Ca_desi_chr08      | 1399551                        | [T/G]       | NA                                         |
| Ca_Desi_Chrom_8_1399581 | Ca_desi_chr08      | 1399581                        | [G/A]       | NA                                         |
| Ca_Desi_Chrom_8_1399582 | Ca_desi_chr08      | 1399582                        | [A/G]       | NA                                         |
| Ca_Desi_Chrom_8_1399583 | Ca_desi_chr08      | 1399583                        | [G/T]       | NA                                         |
| Ca_Desi_Chrom_8_1413520 | Ca_desi_chr08      | 1413520                        | [T/C]       | NA                                         |
| Ca_Desi_Chrom_8_1413540 | Ca_desi_chr08      | 1413540                        | [T/C]       | NA                                         |
| Ca_Desi_Chrom_8_1413559 | Ca_desi_chr08      | 1413559                        | [T/C]       | NA                                         |
| Ca_Desi_Chrom_8_1428523 | Ca_desi_chr08      | 1428523                        | [T/A]       | NA                                         |
| Ca_Desi_Chrom_8_1430284 | Ca_desi_chr08      | 1430284                        | [T/G]       | NA                                         |
| Ca_Desi_Chrom_8_1430285 | Ca_desi_chr08      | 1430285                        | [T/A]       | NA                                         |
| Ca_Desi_Chrom_8_1430287 | Ca_desi_chr08      | 1430287                        | [T/C]       | NA                                         |
| Ca_Desi_Chrom_8_1430288 | Ca_desi_chr08      | 1430288                        | [G/T]       | NA                                         |
| Ca_Desi_Chrom_8_1431844 | Ca_desi_chr08      | 1431844                        | [T/C]       | NA                                         |
| Ca_Desi_Chrom_8_1431889 | Ca_desi_chr08      | 1431889                        | [T/G]       | NA                                         |
| Ca_Desi_Chrom_8_1431896 | Ca_desi_chr08      | 1431896                        | [A/G]       | NA                                         |
| Ca_Desi_Chrom_8_1431906 | Ca_desi_chr08      | 1431906                        | [A/C]       | NA                                         |
| Ca_Desi_Chrom_8_1443357 | Ca_desi_chr08      | 1443357                        | [A/C]       | NA                                         |
| Ca_Desi_Chrom_8_1474785 | Ca_desi_chr08      | 1474785                        | [A/C]       | NA                                         |
| Ca_Desi_Chrom_8_1474791 | Ca_desi_chr08      | 1474791                        | [A/C]       | NA                                         |
| Ca_Desi_Chrom_8_1474794 | Ca_desi_chr08      | 1474794                        | [A/C]       | NA                                         |
| Ca_Desi_Chrom_8_1474816 | Ca_desi_chr08      | 1474816                        | [A/C]       | NA                                         |
| Ca_Desi_Chrom_8_1474819 | Ca_desi_chr08      | 1474819                        | [A/C]       | NA                                         |
| Ca_Desi_Chrom_8_1516022 | Ca_desi_chr08      | 1516022                        | [T/G]       | NA                                         |
| Ca_Desi_Chrom_8_1516028 | Ca_desi_chr08      | 1516028                        | [T/C]       | NA                                         |
| Ca_Desi_Chrom_8_1516062 | Ca_desi_chr08      | 1516062                        | [A/C]       | NA                                         |
| Ca_Desi_Chrom_8_1526250 | Ca_desi_chr08      | 1526250                        | [T/C]       | NA                                         |
| Ca_Desi_Chrom_8_1526256 | Ca_desi_chr08      | 1526256                        | [A/T]       | NA                                         |
| Ca_Desi_Chrom_8_1526805 | Ca_desi_chr08      | 1526805                        | [T/A]       | NA                                         |

| <b>SNP IDs</b>          | <b>Chromosomes</b> | <b>Physical positions (bp)</b> | <b>SNPs</b> | <b>NCBI SNPdb accession IDs (NCBI_ss#)</b> |
|-------------------------|--------------------|--------------------------------|-------------|--------------------------------------------|
| Ca_Desi_Chrom_8_1557071 | Ca_desi_chr08      | 1557071                        | [A/G]       | NA                                         |
| Ca_Desi_Chrom_8_1557075 | Ca_desi_chr08      | 1557075                        | [A/G]       | NA                                         |
| Ca_Desi_Chrom_8_1557085 | Ca_desi_chr08      | 1557085                        | [T/G]       | NA                                         |
| Ca_Desi_Chrom_8_1557092 | Ca_desi_chr08      | 1557092                        | [T/G]       | NA                                         |
| Ca_Desi_Chrom_8_1557099 | Ca_desi_chr08      | 1557099                        | [A/G]       | NA                                         |
| Ca_Desi_Chrom_8_1561842 | Ca_desi_chr08      | 1561842                        | [A/G]       | NA                                         |
| Ca_Desi_Chrom_8_1561855 | Ca_desi_chr08      | 1561855                        | [A/C]       | NA                                         |
| Ca_Desi_Chrom_8_1575192 | Ca_desi_chr08      | 1575192                        | [A/G]       | NA                                         |
| Ca_Desi_Chrom_8_3412263 | Ca_desi_chr08      | 3412263                        | [A/G]       | NA                                         |
| Ca_Desi_Chrom_8_3482952 | Ca_desi_chr08      | 3482952                        | [T/G]       | NA                                         |
| Ca_Desi_Chrom_8_3482955 | Ca_desi_chr08      | 3482955                        | [A/G]       | NA                                         |
| Ca_Desi_Chrom_8_3495217 | Ca_desi_chr08      | 3495217                        | [T/C]       | NA                                         |
| Ca_Desi_Chrom_8_3497507 | Ca_desi_chr08      | 3497507                        | [A/C]       | NA                                         |
| Ca_Desi_Chrom_8_3498620 | Ca_desi_chr08      | 3498620                        | [A/T]       | NA                                         |
| Ca_Desi_Chrom_8_3499933 | Ca_desi_chr08      | 3499933                        | [T/G]       | NA                                         |
| Ca_Desi_Chrom_8_3499952 | Ca_desi_chr08      | 3499952                        | [T/G]       | NA                                         |
| Ca_Desi_Chrom_8_3499956 | Ca_desi_chr08      | 3499956                        | [T/G]       | NA                                         |
| Ca_Desi_Chrom_8_3500433 | Ca_desi_chr08      | 3500433                        | [G/T]       | NA                                         |
| Ca_Desi_Chrom_8_3500526 | Ca_desi_chr08      | 3500526                        | [T/C]       | NA                                         |
| Ca_Desi_Chrom_8_3500530 | Ca_desi_chr08      | 3500530                        | [T/G]       | NA                                         |
| Ca_Desi_Chrom_8_3500538 | Ca_desi_chr08      | 3500538                        | [A/G]       | NA                                         |
| Ca_Desi_Chrom_8_3607588 | Ca_desi_chr08      | 3607588                        | [A/C]       | NA                                         |
| Ca_Desi_Chrom_8_3649424 | Ca_desi_chr08      | 3649424                        | [T/C]       | NA                                         |
| Ca_Desi_Chrom_8_3649440 | Ca_desi_chr08      | 3649440                        | [T/G]       | NA                                         |
| Ca_Desi_Chrom_8_3657904 | Ca_desi_chr08      | 3657904                        | [A/C]       | NA                                         |
| Ca_Desi_Chrom_8_3659314 | Ca_desi_chr08      | 3659314                        | [T/G]       | NA                                         |
| Ca_Desi_Chrom_8_3659459 | Ca_desi_chr08      | 3659459                        | [G/A]       | NA                                         |
| Ca_Desi_Chrom_8_3660064 | Ca_desi_chr08      | 3660064                        | [T/C]       | NA                                         |
| Ca_Desi_Chrom_8_3677264 | Ca_desi_chr08      | 3677264                        | [T/C]       | NA                                         |
| Ca_Desi_Chrom_8_3677281 | Ca_desi_chr08      | 3677281                        | [T/A]       | NA                                         |
| Ca_Desi_Chrom_8_3692660 | Ca_desi_chr08      | 3692660                        | [T/C]       | NA                                         |
| Ca_Desi_Chrom_8_3692696 | Ca_desi_chr08      | 3692696                        | [A/T]       | NA                                         |
| Ca_Desi_Chrom_8_3692701 | Ca_desi_chr08      | 3692701                        | [T/C]       | NA                                         |
| Ca_Desi_Chrom_8_3692827 | Ca_desi_chr08      | 3692827                        | [G/C]       | NA                                         |

| <b>SNP IDs</b>          | <b>Chromosomes</b> | <b>Physical positions (bp)</b> | <b>SNPs</b> | <b>NCBI SNPdb accession IDs (NCBI_ss#)</b> |
|-------------------------|--------------------|--------------------------------|-------------|--------------------------------------------|
| Ca_Desi_Chrom_8_3697226 | Ca_desi_chr08      | 3697226                        | [T/C]       | NA                                         |
| Ca_Desi_Chrom_8_3719263 | Ca_desi_chr08      | 3719263                        | [A/G]       | NA                                         |
| Ca_Desi_Chrom_8_3738606 | Ca_desi_chr08      | 3738606                        | [T/A]       | NA                                         |
| Ca_Desi_Chrom_8_3741971 | Ca_desi_chr08      | 3741971                        | [C/T]       | NA                                         |
| Ca_Desi_Chrom_8_3741978 | Ca_desi_chr08      | 3741978                        | [T/G]       | NA                                         |
| Ca_Desi_Chrom_8_3742132 | Ca_desi_chr08      | 3742132                        | [A/C]       | NA                                         |
| Ca_Desi_Chrom_8_3747504 | Ca_desi_chr08      | 3747504                        | [A/C]       | NA                                         |
| Ca_Desi_Chrom_8_3747520 | Ca_desi_chr08      | 3747520                        | [T/C]       | NA                                         |
| Ca_Desi_Chrom_8_3747523 | Ca_desi_chr08      | 3747523                        | [T/C]       | NA                                         |
| Ca_Desi_Chrom_8_3747528 | Ca_desi_chr08      | 3747528                        | [T/C]       | NA                                         |
| Ca_Desi_Chrom_8_3747533 | Ca_desi_chr08      | 3747533                        | [A/T]       | NA                                         |
| Ca_Desi_Chrom_8_3804398 | Ca_desi_chr08      | 3804398                        | [G/T]       | NA                                         |
| Ca_Desi_Chrom_8_3804399 | Ca_desi_chr08      | 3804399                        | [T/C]       | NA                                         |
| Ca_Desi_Chrom_8_3804401 | Ca_desi_chr08      | 3804401                        | [G/C]       | NA                                         |
| Ca_Desi_Chrom_8_3804424 | Ca_desi_chr08      | 3804424                        | [A/C]       | NA                                         |
| Ca_Desi_Chrom_8_3804436 | Ca_desi_chr08      | 3804436                        | [C/T]       | NA                                         |
| Ca_Desi_Chrom_8_3804439 | Ca_desi_chr08      | 3804439                        | [A/G]       | NA                                         |
| Ca_Desi_Chrom_8_3810941 | Ca_desi_chr08      | 3810941                        | [T/C]       | NA                                         |
| Ca_Desi_Chrom_8_3810985 | Ca_desi_chr08      | 3810985                        | [G/A]       | NA                                         |
| Ca_Desi_Chrom_8_3877064 | Ca_desi_chr08      | 3877064                        | [A/G]       | NA                                         |
| Ca_Desi_Chrom_8_3889433 | Ca_desi_chr08      | 3889433                        | [A/G]       | NA                                         |
| Ca_Desi_Chrom_8_3936097 | Ca_desi_chr08      | 3936097                        | [T/C]       | NA                                         |
| Ca_Desi_Chrom_8_3946044 | Ca_desi_chr08      | 3946044                        | [A/C]       | NA                                         |
| Ca_Desi_Chrom_8_3959925 | Ca_desi_chr08      | 3959925                        | [C/T]       | NA                                         |
| Ca_Desi_Chrom_8_3959929 | Ca_desi_chr08      | 3959929                        | [C/T]       | NA                                         |
| Ca_Desi_Chrom_8_3959944 | Ca_desi_chr08      | 3959944                        | [G/T]       | NA                                         |
| Ca_Desi_Chrom_8_3960569 | Ca_desi_chr08      | 3960569                        | [G/T]       | NA                                         |
| Ca_Desi_Chrom_8_3960571 | Ca_desi_chr08      | 3960571                        | [A/G]       | NA                                         |
| Ca_Desi_Chrom_8_3960575 | Ca_desi_chr08      | 3960575                        | [T/G]       | NA                                         |
| Ca_Desi_Chrom_8_3972122 | Ca_desi_chr08      | 3972122                        | [T/A]       | NA                                         |
| Ca_Desi_Chrom_8_3972123 | Ca_desi_chr08      | 3972123                        | [A/G]       | NA                                         |
| Ca_Desi_Chrom_8_3972130 | Ca_desi_chr08      | 3972130                        | [A/G]       | NA                                         |
| Ca_Desi_Chrom_8_3972845 | Ca_desi_chr08      | 3972845                        | [A/G]       | NA                                         |
| Ca_Desi_Chrom_8_3986472 | Ca_desi_chr08      | 3986472                        | [G/T]       | NA                                         |



| <b>SNP IDs</b>         | <b>Chromosomes</b> | <b>Physical positions (bp)</b> | <b>SNPs</b> | <b>NCBI SNPdb accession IDs (NCBI_ss#)</b> |
|------------------------|--------------------|--------------------------------|-------------|--------------------------------------------|
| Ca_Desig_Chr_8_4010181 | Ca_desig_chr08     | 4010181                        | [A/G]       | NA                                         |
| Ca_Desig_Chr_8_4010224 | Ca_desig_chr08     | 4010224                        | [T/G]       | NA                                         |
| Ca_Desig_Chr_8_4028253 | Ca_desig_chr08     | 4028253                        | [A/G]       | NA                                         |
| Ca_Desig_Chr_8_4060876 | Ca_desig_chr08     | 4060876                        | [T/G]       | NA                                         |
| Ca_Desig_Chr_8_4066100 | Ca_desig_chr08     | 4066100                        | [A/G]       | NA                                         |
| Ca_Desig_Chr_8_4069032 | Ca_desig_chr08     | 4069032                        | [A/C]       | NA                                         |
| Ca_Desig_Chr_8_4069054 | Ca_desig_chr08     | 4069054                        | [A/G]       | NA                                         |
| Ca_Desig_Chr_8_4115400 | Ca_desig_chr08     | 4115400                        | [T/C]       | NA                                         |
| Ca_Desig_Chr_8_4126442 | Ca_desig_chr08     | 4126442                        | [G/T]       | NA                                         |
| Ca_Desig_Chr_8_4126447 | Ca_desig_chr08     | 4126447                        | [A/C]       | NA                                         |
| Ca_Desig_Chr_8_4180080 | Ca_desig_chr08     | 4180080                        | [A/C]       | NA                                         |
| Ca_Desig_Chr_8_4180097 | Ca_desig_chr08     | 4180097                        | [T/C]       | NA                                         |
| Ca_Desig_Chr_8_4185464 | Ca_desig_chr08     | 4185464                        | [T/C]       | NA                                         |
| Ca_Desig_Chr_8_4187093 | Ca_desig_chr08     | 4187093                        | [T/A]       | NA                                         |
| Ca_Desig_Chr_8_4187120 | Ca_desig_chr08     | 4187120                        | [T/A]       | NA                                         |
| Ca_Desig_Chr_8_4208540 | Ca_desig_chr08     | 4208540                        | [T/G]       | NA                                         |
| Ca_Desig_Chr_8_4299995 | Ca_desig_chr08     | 4299995                        | [A/G]       | NA                                         |
| Ca_Desig_Chr_8_4300014 | Ca_desig_chr08     | 4300014                        | [A/C]       | NA                                         |
| Ca_Desig_Chr_8_4300040 | Ca_desig_chr08     | 4300040                        | [A/C]       | NA                                         |
| Ca_Desig_Chr_8_4302163 | Ca_desig_chr08     | 4302163                        | [T/G]       | NA                                         |
| Ca_Desig_Chr_8_4310626 | Ca_desig_chr08     | 4310626                        | [A/C]       | NA                                         |
| Ca_Desig_Chr_8_4341367 | Ca_desig_chr08     | 4341367                        | [A/C]       | NA                                         |
| Ca_Desig_Chr_8_4341447 | Ca_desig_chr08     | 4341447                        | [T/G]       | NA                                         |
| Ca_Desig_Chr_8_4341450 | Ca_desig_chr08     | 4341450                        | [A/G]       | NA                                         |
| Ca_Desig_Chr_8_4341453 | Ca_desig_chr08     | 4341453                        | [T/G]       | NA                                         |
| Ca_Desig_Chr_8_4341459 | Ca_desig_chr08     | 4341459                        | [A/G]       | NA                                         |
| Ca_Desig_Chr_8_4341462 | Ca_desig_chr08     | 4341462                        | [T/G]       | NA                                         |
| Ca_Desig_Chr_8_4385556 | Ca_desig_chr08     | 4385556                        | [A/G]       | NA                                         |
| Ca_Desig_Chr_8_4385557 | Ca_desig_chr08     | 4385557                        | [T/C]       | NA                                         |
| Ca_Desig_Chr_8_4385592 | Ca_desig_chr08     | 4385592                        | [T/C]       | NA                                         |
| Ca_Desig_Chr_8_4385596 | Ca_desig_chr08     | 4385596                        | [T/C]       | NA                                         |
| Ca_Desig_Chr_8_4448684 | Ca_desig_chr08     | 4448684                        | [T/G]       | NA                                         |
| Ca_Desig_Chr_8_4448872 | Ca_desig_chr08     | 4448872                        | [A/G]       | NA                                         |
| Ca_Desig_Chr_8_4448893 | Ca_desig_chr08     | 4448893                        | [A/G]       | NA                                         |

| <b>SNP IDs</b>          | <b>Chromosomes</b> | <b>Physical positions (bp)</b> | <b>SNPs</b> | <b>NCBI SNPdb accession IDs (NCBI_ss#)</b> |
|-------------------------|--------------------|--------------------------------|-------------|--------------------------------------------|
| Ca_Desi_Chrom_8_4448895 | Ca_desi_chr08      | 4448895                        | [T/C]       | NA                                         |
| Ca_Desi_Chrom_8_4448897 | Ca_desi_chr08      | 4448897                        | [T/C]       | NA                                         |
| Ca_Desi_Chrom_8_4448917 | Ca_desi_chr08      | 4448917                        | [T/G]       | NA                                         |
| Ca_Desi_Chrom_8_4448919 | Ca_desi_chr08      | 4448919                        | [T/C]       | NA                                         |
| Ca_Desi_Chrom_8_4461931 | Ca_desi_chr08      | 4461931                        | [C/T]       | NA                                         |
| Ca_Desi_Chrom_8_4574066 | Ca_desi_chr08      | 4574066                        | [A/C]       | NA                                         |
| Ca_Desi_Chrom_8_4597741 | Ca_desi_chr08      | 4597741                        | [T/G]       | NA                                         |
| Ca_Desi_Chrom_8_4597752 | Ca_desi_chr08      | 4597752                        | [A/T]       | NA                                         |
| Ca_Desi_Chrom_8_4650466 | Ca_desi_chr08      | 4650466                        | [A/G]       | NA                                         |
| Ca_Desi_Chrom_8_4650495 | Ca_desi_chr08      | 4650495                        | [A/G]       | NA                                         |
| Ca_Desi_Chrom_8_4650612 | Ca_desi_chr08      | 4650612                        | [A/C]       | NA                                         |
| Ca_Desi_Chrom_8_4650623 | Ca_desi_chr08      | 4650623                        | [T/C]       | NA                                         |
| Ca_Desi_Chrom_8_4651359 | Ca_desi_chr08      | 4651359                        | [A/C]       | NA                                         |
| Ca_Desi_Chrom_8_4664540 | Ca_desi_chr08      | 4664540                        | [T/C]       | NA                                         |
| Ca_Desi_Chrom_8_4664543 | Ca_desi_chr08      | 4664543                        | [T/C]       | NA                                         |
| Ca_Desi_Chrom_8_4670682 | Ca_desi_chr08      | 4670682                        | [T/C]       | NA                                         |
| Ca_Desi_Chrom_8_4722955 | Ca_desi_chr08      | 4722955                        | [T/C]       | NA                                         |
| Ca_Desi_Chrom_8_4722969 | Ca_desi_chr08      | 4722969                        | [T/C]       | NA                                         |
| Ca_Desi_Chrom_8_4722989 | Ca_desi_chr08      | 4722989                        | [A/G]       | NA                                         |
| Ca_Desi_Chrom_8_4750082 | Ca_desi_chr08      | 4750082                        | [T/G]       | NA                                         |
| Ca_Desi_Chrom_8_4750168 | Ca_desi_chr08      | 4750168                        | [G/T]       | NA                                         |
| Ca_Desi_Chrom_8_4750169 | Ca_desi_chr08      | 4750169                        | [T/G]       | NA                                         |
| Ca_Desi_Chrom_8_4750175 | Ca_desi_chr08      | 4750175                        | [T/A]       | NA                                         |
| Ca_Desi_Chrom_8_4802091 | Ca_desi_chr08      | 4802091                        | [T/G]       | NA                                         |
| Ca_Desi_Chrom_8_4802122 | Ca_desi_chr08      | 4802122                        | [A/C]       | NA                                         |
| Ca_Desi_Chrom_8_4822795 | Ca_desi_chr08      | 4822795                        | [T/C]       | NA                                         |
| Ca_Desi_Chrom_8_4822822 | Ca_desi_chr08      | 4822822                        | [A/C]       | NA                                         |
| Ca_Desi_Chrom_8_4822827 | Ca_desi_chr08      | 4822827                        | [A/G]       | NA                                         |
| Ca_Desi_Chrom_8_4822836 | Ca_desi_chr08      | 4822836                        | [T/C]       | NA                                         |
| Ca_Desi_Chrom_8_4845385 | Ca_desi_chr08      | 4845385                        | [T/G]       | NA                                         |
| Ca_Desi_Chrom_8_4845433 | Ca_desi_chr08      | 4845433                        | [A/C]       | NA                                         |
| Ca_Desi_Chrom_8_4845448 | Ca_desi_chr08      | 4845448                        | [A/C]       | NA                                         |
| Ca_Desi_Chrom_8_4848496 | Ca_desi_chr08      | 4848496                        | [A/G]       | NA                                         |
| Ca_Desi_Chrom_8_4848498 | Ca_desi_chr08      | 4848498                        | [C/G]       | NA                                         |

| <b>SNP IDs</b>          | <b>Chromosomes</b> | <b>Physical positions (bp)</b> | <b>SNPs</b> | <b>NCBI SNPdb accession IDs (NCBI_ss#)</b> |
|-------------------------|--------------------|--------------------------------|-------------|--------------------------------------------|
| Ca_Desi_Chrom_8_4848499 | Ca_desi_chr08      | 4848499                        | [T/G]       | NA                                         |
| Ca_Desi_Chrom_8_4852080 | Ca_desi_chr08      | 4852080                        | [T/C]       | NA                                         |
| Ca_Desi_Chrom_8_4867801 | Ca_desi_chr08      | 4867801                        | [T/G]       | NA                                         |
| Ca_Desi_Chrom_8_4867807 | Ca_desi_chr08      | 4867807                        | [T/G]       | NA                                         |
| Ca_Desi_Chrom_8_4867819 | Ca_desi_chr08      | 4867819                        | [A/G]       | NA                                         |
| Ca_Desi_Chrom_8_4867830 | Ca_desi_chr08      | 4867830                        | [A/G]       | NA                                         |
| Ca_Desi_Chrom_8_4867842 | Ca_desi_chr08      | 4867842                        | [A/G]       | NA                                         |
| Ca_Desi_Chrom_8_4867847 | Ca_desi_chr08      | 4867847                        | [A/G]       | NA                                         |
| Ca_Desi_Chrom_8_4954441 | Ca_desi_chr08      | 4954441                        | [A/G]       | NA                                         |
| Ca_Desi_Chrom_8_4954444 | Ca_desi_chr08      | 4954444                        | [A/C]       | NA                                         |
| Ca_Desi_Chrom_8_4954449 | Ca_desi_chr08      | 4954449                        | [G/C]       | NA                                         |
| Ca_Desi_Chrom_8_4954451 | Ca_desi_chr08      | 4954451                        | [C/A]       | NA                                         |
| Ca_Desi_Chrom_8_4954457 | Ca_desi_chr08      | 4954457                        | [A/G]       | NA                                         |
| Ca_Desi_Chrom_8_4954461 | Ca_desi_chr08      | 4954461                        | [T/C]       | NA                                         |
| Ca_Desi_Chrom_8_4954474 | Ca_desi_chr08      | 4954474                        | [T/C]       | NA                                         |
| Ca_Desi_Chrom_8_4954478 | Ca_desi_chr08      | 4954478                        | [A/G]       | NA                                         |
| Ca_Desi_Chrom_8_4954480 | Ca_desi_chr08      | 4954480                        | [T/G]       | NA                                         |
| Ca_Desi_Chrom_8_4954484 | Ca_desi_chr08      | 4954484                        | [T/C]       | NA                                         |
| Ca_Desi_Chrom_8_4954493 | Ca_desi_chr08      | 4954493                        | [A/C]       | NA                                         |
| Ca_Desi_Chrom_8_4954518 | Ca_desi_chr08      | 4954518                        | [T/G]       | NA                                         |
| Ca_Desi_Chrom_8_4954521 | Ca_desi_chr08      | 4954521                        | [T/C]       | NA                                         |
| Ca_Desi_Chrom_8_4971006 | Ca_desi_chr08      | 4971006                        | [T/G]       | NA                                         |
| Ca_Desi_Chrom_8_4971053 | Ca_desi_chr08      | 4971053                        | [T/C]       | NA                                         |
| Ca_Desi_Chrom_8_4982805 | Ca_desi_chr08      | 4982805                        | [C/A]       | NA                                         |
| Ca_Desi_Chrom_8_5040587 | Ca_desi_chr08      | 5040587                        | [T/G]       | NA                                         |
| Ca_Desi_Chrom_8_5113580 | Ca_desi_chr08      | 5113580                        | [A/G]       | NA                                         |
| Ca_Desi_Chrom_8_5159223 | Ca_desi_chr08      | 5159223                        | [T/A]       | NA                                         |
| Ca_Desi_Chrom_8_5159291 | Ca_desi_chr08      | 5159291                        | [A/C]       | NA                                         |
| Ca_Desi_Chrom_8_5174546 | Ca_desi_chr08      | 5174546                        | [A/C]       | NA                                         |
| Ca_Desi_Chrom_8_5174548 | Ca_desi_chr08      | 5174548                        | [T/G]       | NA                                         |
| Ca_Desi_Chrom_8_5174551 | Ca_desi_chr08      | 5174551                        | [C/G]       | NA                                         |
| Ca_Desi_Chrom_8_5177806 | Ca_desi_chr08      | 5177806                        | [G/T]       | NA                                         |
| Ca_Desi_Chrom_8_5185902 | Ca_desi_chr08      | 5185902                        | [A/C]       | NA                                         |
| Ca_Desi_Chrom_8_5186128 | Ca_desi_chr08      | 5186128                        | [G/T]       | NA                                         |

| <b>SNP IDs</b>          | <b>Chromosomes</b> | <b>Physical positions (bp)</b> | <b>SNPs</b> | <b>NCBI SNPdb accession IDs (NCBI_ss#)</b> |
|-------------------------|--------------------|--------------------------------|-------------|--------------------------------------------|
| Ca_Desi_Chrom_8_5205654 | Ca_desi_chr08      | 5205654                        | [A/G]       | NA                                         |
| Ca_Desi_Chrom_8_5205656 | Ca_desi_chr08      | 5205656                        | [T/C]       | NA                                         |
| Ca_Desi_Chrom_8_5205673 | Ca_desi_chr08      | 5205673                        | [A/C]       | NA                                         |
| Ca_Desi_Chrom_8_5232882 | Ca_desi_chr08      | 5232882                        | [T/G]       | NA                                         |
| Ca_Desi_Chrom_8_5248835 | Ca_desi_chr08      | 5248835                        | [T/C]       | NA                                         |
| Ca_Desi_Chrom_8_5253411 | Ca_desi_chr08      | 5253411                        | [T/C]       | NA                                         |
| Ca_Desi_Chrom_8_5253422 | Ca_desi_chr08      | 5253422                        | [A/C]       | NA                                         |
| Ca_Desi_Chrom_8_5253455 | Ca_desi_chr08      | 5253455                        | [T/C]       | NA                                         |
| Ca_Desi_Chrom_8_5253507 | Ca_desi_chr08      | 5253507                        | [T/C]       | NA                                         |
| Ca_Desi_Chrom_8_5253530 | Ca_desi_chr08      | 5253530                        | [A/C]       | NA                                         |
| Ca_Desi_Chrom_8_5253562 | Ca_desi_chr08      | 5253562                        | [T/C]       | NA                                         |
| Ca_Desi_Chrom_8_5271323 | Ca_desi_chr08      | 5271323                        | [C/A]       | NA                                         |
| Ca_Desi_Chrom_8_5294107 | Ca_desi_chr08      | 5294107                        | [T/C]       | NA                                         |
| Ca_Desi_Chrom_8_5294111 | Ca_desi_chr08      | 5294111                        | [T/G]       | NA                                         |
| Ca_Desi_Chrom_8_5319656 | Ca_desi_chr08      | 5319656                        | [T/G]       | NA                                         |
| Ca_Desi_Chrom_8_5319672 | Ca_desi_chr08      | 5319672                        | [A/G]       | NA                                         |
| Ca_Desi_Chrom_8_5319682 | Ca_desi_chr08      | 5319682                        | [T/A]       | NA                                         |
| Ca_Desi_Chrom_8_5325886 | Ca_desi_chr08      | 5325886                        | [G/T]       | NA                                         |
| Ca_Desi_Chrom_8_5390674 | Ca_desi_chr08      | 5390674                        | [C/A]       | NA                                         |
| Ca_Desi_Chrom_8_5390676 | Ca_desi_chr08      | 5390676                        | [A/T]       | NA                                         |
| Ca_Desi_Chrom_8_5406458 | Ca_desi_chr08      | 5406458                        | [A/G]       | NA                                         |
| Ca_Desi_Chrom_8_5407243 | Ca_desi_chr08      | 5407243                        | [A/G]       | NA                                         |
| Ca_Desi_Chrom_8_5412174 | Ca_desi_chr08      | 5412174                        | [T/A]       | NA                                         |
| Ca_Desi_Chrom_8_5412183 | Ca_desi_chr08      | 5412183                        | [A/G]       | NA                                         |
| Ca_Desi_Chrom_8_5412187 | Ca_desi_chr08      | 5412187                        | [A/G]       | NA                                         |
| Ca_Desi_Chrom_8_5412191 | Ca_desi_chr08      | 5412191                        | [A/T]       | NA                                         |
| Ca_Desi_Chrom_8_5412194 | Ca_desi_chr08      | 5412194                        | [T/C]       | NA                                         |
| Ca_Desi_Chrom_8_5412203 | Ca_desi_chr08      | 5412203                        | [T/C]       | NA                                         |
| Ca_Desi_Chrom_8_5412208 | Ca_desi_chr08      | 5412208                        | [T/C]       | NA                                         |
| Ca_Desi_Chrom_8_5412214 | Ca_desi_chr08      | 5412214                        | [T/C]       | NA                                         |
| Ca_Desi_Chrom_8_5412232 | Ca_desi_chr08      | 5412232                        | [T/C]       | NA                                         |
| Ca_Desi_Chrom_8_5430497 | Ca_desi_chr08      | 5430497                        | [C/T]       | NA                                         |
| Ca_Desi_Chrom_8_5430519 | Ca_desi_chr08      | 5430519                        | [T/C]       | NA                                         |
| Ca_Desi_Chrom_8_5430520 | Ca_desi_chr08      | 5430520                        | [G/C]       | NA                                         |

| <b>SNP IDs</b>          | <b>Chromosomes</b> | <b>Physical positions (bp)</b> | <b>SNPs</b> | <b>NCBI SNPdb accession IDs (NCBI_ss#)</b> |
|-------------------------|--------------------|--------------------------------|-------------|--------------------------------------------|
| Ca_Desi_Chrom_8_5431975 | Ca_desi_chr08      | 5431975                        | [T/G]       | NA                                         |
| Ca_Desi_Chrom_8_5432005 | Ca_desi_chr08      | 5432005                        | [C/G]       | NA                                         |
| Ca_Desi_Chrom_8_5478976 | Ca_desi_chr08      | 5478976                        | [A/C]       | NA                                         |
| Ca_Desi_Chrom_8_5478985 | Ca_desi_chr08      | 5478985                        | [T/C]       | NA                                         |
| Ca_Desi_Chrom_8_5479023 | Ca_desi_chr08      | 5479023                        | [T/G]       | NA                                         |
| Ca_Desi_Chrom_8_5560962 | Ca_desi_chr08      | 5560962                        | [A/G]       | NA                                         |
| Ca_Desi_Chrom_8_5577324 | Ca_desi_chr08      | 5577324                        | [A/C]       | NA                                         |
| Ca_Desi_Chrom_8_5598364 | Ca_desi_chr08      | 5598364                        | [A/C]       | NA                                         |
| Ca_Desi_Chrom_8_5598366 | Ca_desi_chr08      | 5598366                        | [T/C]       | NA                                         |
| Ca_Desi_Chrom_8_5598369 | Ca_desi_chr08      | 5598369                        | [T/C]       | NA                                         |
| Ca_Desi_Chrom_8_5644307 | Ca_desi_chr08      | 5644307                        | [C/T]       | NA                                         |
| Ca_Desi_Chrom_8_5760999 | Ca_desi_chr08      | 5760999                        | [A/C]       | NA                                         |
| Ca_Desi_Chrom_8_5761000 | Ca_desi_chr08      | 5761000                        | [G/T]       | NA                                         |
| Ca_Desi_Chrom_8_5779231 | Ca_desi_chr08      | 5779231                        | [A/C]       | NA                                         |
| Ca_Desi_Chrom_8_5834461 | Ca_desi_chr08      | 5834461                        | [G/A]       | NA                                         |
| Ca_Desi_Chrom_8_5857914 | Ca_desi_chr08      | 5857914                        | [G/A]       | NA                                         |
| Ca_Desi_Chrom_8_5859625 | Ca_desi_chr08      | 5859625                        | [T/A]       | NA                                         |
| Ca_Desi_Chrom_8_5859659 | Ca_desi_chr08      | 5859659                        | [G/T]       | NA                                         |
| Ca_Desi_Chrom_8_5859673 | Ca_desi_chr08      | 5859673                        | [G/A]       | NA                                         |
| Ca_Desi_Chrom_8_5860040 | Ca_desi_chr08      | 5860040                        | [T/C]       | NA                                         |
| Ca_Desi_Chrom_8_5860057 | Ca_desi_chr08      | 5860057                        | [A/G]       | NA                                         |
| Ca_Desi_Chrom_8_5860839 | Ca_desi_chr08      | 5860839                        | [A/T]       | NA                                         |
| Ca_Desi_Chrom_8_5860849 | Ca_desi_chr08      | 5860849                        | [A/C]       | NA                                         |
| Ca_Desi_Chrom_8_5860864 | Ca_desi_chr08      | 5860864                        | [T/C]       | NA                                         |
| Ca_Desi_Chrom_8_5861157 | Ca_desi_chr08      | 5861157                        | [A/C]       | NA                                         |
| Ca_Desi_Chrom_8_5873045 | Ca_desi_chr08      | 5873045                        | [T/G]       | NA                                         |
| Ca_Desi_Chrom_8_5873056 | Ca_desi_chr08      | 5873056                        | [T/G]       | NA                                         |
| Ca_Desi_Chrom_8_5893720 | Ca_desi_chr08      | 5893720                        | [T/C]       | NA                                         |
| Ca_Desi_Chrom_8_5893729 | Ca_desi_chr08      | 5893729                        | [A/C]       | NA                                         |
| Ca_Desi_Chrom_8_5893731 | Ca_desi_chr08      | 5893731                        | [T/C]       | NA                                         |
| Ca_Desi_Chrom_8_5893744 | Ca_desi_chr08      | 5893744                        | [A/C]       | NA                                         |
| Ca_Desi_Chrom_8_5893757 | Ca_desi_chr08      | 5893757                        | [A/C]       | NA                                         |
| Ca_Desi_Chrom_8_5894433 | Ca_desi_chr08      | 5894433                        | [T/A]       | NA                                         |
| Ca_Desi_Chrom_8_5896265 | Ca_desi_chr08      | 5896265                        | [A/T]       | NA                                         |

| <b>SNP IDs</b>          | <b>Chromosomes</b> | <b>Physical positions (bp)</b> | <b>SNPs</b> | <b>NCBI SNPdb accession IDs (NCBI_ss#)</b> |
|-------------------------|--------------------|--------------------------------|-------------|--------------------------------------------|
| Ca_Desi_Chrom_8_5898197 | Ca_desi_chr08      | 5898197                        | [C/T]       | NA                                         |
| Ca_Desi_Chrom_8_5898863 | Ca_desi_chr08      | 5898863                        | [G/A]       | NA                                         |
| Ca_Desi_Chrom_8_5902520 | Ca_desi_chr08      | 5902520                        | [T/C]       | NA                                         |
| Ca_Desi_Chrom_8_5927786 | Ca_desi_chr08      | 5927786                        | [C/T]       | NA                                         |
| Ca_Desi_Chrom_8_5937879 | Ca_desi_chr08      | 5937879                        | [A/C]       | NA                                         |
| Ca_Desi_Chrom_8_5937896 | Ca_desi_chr08      | 5937896                        | [T/C]       | NA                                         |
| Ca_Desi_Chrom_8_5937899 | Ca_desi_chr08      | 5937899                        | [T/C]       | NA                                         |
| Ca_Desi_Chrom_8_5937905 | Ca_desi_chr08      | 5937905                        | [A/C]       | NA                                         |
| Ca_Desi_Chrom_8_5937930 | Ca_desi_chr08      | 5937930                        | [T/C]       | NA                                         |
| Ca_Desi_Chrom_8_5937981 | Ca_desi_chr08      | 5937981                        | [T/G]       | NA                                         |
| Ca_Desi_Chrom_8_5937986 | Ca_desi_chr08      | 5937986                        | [T/C]       | NA                                         |
| Ca_Desi_Chrom_8_5955310 | Ca_desi_chr08      | 5955310                        | [T/G]       | NA                                         |
| Ca_Desi_Chrom_8_5955394 | Ca_desi_chr08      | 5955394                        | [T/G]       | NA                                         |
| Ca_Desi_Chrom_8_5997400 | Ca_desi_chr08      | 5997400                        | [A/C]       | NA                                         |
| Ca_Desi_Chrom_8_5997410 | Ca_desi_chr08      | 5997410                        | [T/C]       | NA                                         |
| Ca_Desi_Chrom_8_5997415 | Ca_desi_chr08      | 5997415                        | [A/C]       | NA                                         |
| Ca_Desi_Chrom_8_5997422 | Ca_desi_chr08      | 5997422                        | [A/C]       | NA                                         |
| Ca_Desi_Chrom_8_5997427 | Ca_desi_chr08      | 5997427                        | [T/C]       | NA                                         |
| Ca_Desi_Chrom_8_6011013 | Ca_desi_chr08      | 6011013                        | [T/A]       | NA                                         |
| Ca_Desi_Chrom_8_6011053 | Ca_desi_chr08      | 6011053                        | [G/A]       | NA                                         |
| Ca_Desi_Chrom_8_6017379 | Ca_desi_chr08      | 6017379                        | [T/C]       | NA                                         |
| Ca_Desi_Chrom_8_6018400 | Ca_desi_chr08      | 6018400                        | [T/A]       | NA                                         |
| Ca_Desi_Chrom_8_6018477 | Ca_desi_chr08      | 6018477                        | [T/A]       | NA                                         |
| Ca_Desi_Chrom_8_6018492 | Ca_desi_chr08      | 6018492                        | [A/G]       | NA                                         |
| Ca_Desi_Chrom_8_6019979 | Ca_desi_chr08      | 6019979                        | [C/T]       | NA                                         |
| Ca_Desi_Chrom_8_6021387 | Ca_desi_chr08      | 6021387                        | [G/C]       | NA                                         |
| Ca_Desi_Chrom_8_6034557 | Ca_desi_chr08      | 6034557                        | [G/A]       | NA                                         |
| Ca_Desi_Chrom_8_6042338 | Ca_desi_chr08      | 6042338                        | [G/A]       | NA                                         |
| Ca_Desi_Chrom_8_6058202 | Ca_desi_chr08      | 6058202                        | [T/C]       | NA                                         |
| Ca_Desi_Chrom_8_6058211 | Ca_desi_chr08      | 6058211                        | [A/G]       | NA                                         |
| Ca_Desi_Chrom_8_6058218 | Ca_desi_chr08      | 6058218                        | [T/G]       | NA                                         |
| Ca_Desi_Chrom_8_6058226 | Ca_desi_chr08      | 6058226                        | [T/G]       | NA                                         |
| Ca_Desi_Chrom_8_6058228 | Ca_desi_chr08      | 6058228                        | [A/G]       | NA                                         |
| Ca_Desi_Chrom_8_6058232 | Ca_desi_chr08      | 6058232                        | [A/G]       | NA                                         |

| <b>SNP IDs</b>          | <b>Chromosomes</b> | <b>Physical positions (bp)</b> | <b>SNPs</b> | <b>NCBI SNPdb accession IDs (NCBI_ss#)</b> |
|-------------------------|--------------------|--------------------------------|-------------|--------------------------------------------|
| Ca_Desi_Chrom_8_6058235 | Ca_desi_chr08      | 6058235                        | [A/G]       | NA                                         |
| Ca_Desi_Chrom_8_6122011 | Ca_desi_chr08      | 6122011                        | [A/C]       | NA                                         |
| Ca_Desi_Chrom_8_6122025 | Ca_desi_chr08      | 6122025                        | [T/C]       | NA                                         |
| Ca_Desi_Chrom_8_6122035 | Ca_desi_chr08      | 6122035                        | [A/G]       | NA                                         |
| Ca_Desi_Chrom_8_6122050 | Ca_desi_chr08      | 6122050                        | [T/C]       | NA                                         |
| Ca_Desi_Chrom_8_6122079 | Ca_desi_chr08      | 6122079                        | [C/T]       | NA                                         |
| Ca_Desi_Chrom_8_6122094 | Ca_desi_chr08      | 6122094                        | [C/G]       | NA                                         |
| Ca_Desi_Chrom_8_6125494 | Ca_desi_chr08      | 6125494                        | [C/T]       | NA                                         |
| Ca_Desi_Chrom_8_6135840 | Ca_desi_chr08      | 6135840                        | [A/T]       | NA                                         |
| Ca_Desi_Chrom_8_6138235 | Ca_desi_chr08      | 6138235                        | [A/G]       | NA                                         |
| Ca_Desi_Chrom_8_6180472 | Ca_desi_chr08      | 6180472                        | [T/C]       | NA                                         |
| Ca_Desi_Chrom_8_6180476 | Ca_desi_chr08      | 6180476                        | [A/G]       | NA                                         |
| Ca_Desi_Chrom_8_6180483 | Ca_desi_chr08      | 6180483                        | [A/G]       | NA                                         |
| Ca_Desi_Chrom_8_6180491 | Ca_desi_chr08      | 6180491                        | [A/G]       | NA                                         |
| Ca_Desi_Chrom_8_6212269 | Ca_desi_chr08      | 6212269                        | [A/C]       | NA                                         |
| Ca_Desi_Chrom_8_6212326 | Ca_desi_chr08      | 6212326                        | [T/G]       | NA                                         |
| Ca_Desi_Chrom_8_6212366 | Ca_desi_chr08      | 6212366                        | [T/C]       | NA                                         |
| Ca_Desi_Chrom_8_6212369 | Ca_desi_chr08      | 6212369                        | [A/G]       | NA                                         |
| Ca_Desi_Chrom_8_6218931 | Ca_desi_chr08      | 6218931                        | [A/G]       | NA                                         |
| Ca_Desi_Chrom_8_6222453 | Ca_desi_chr08      | 6222453                        | [A/G]       | NA                                         |
| Ca_Desi_Chrom_8_6222489 | Ca_desi_chr08      | 6222489                        | [T/A]       | NA                                         |
| Ca_Desi_Chrom_8_6222492 | Ca_desi_chr08      | 6222492                        | [A/G]       | NA                                         |
| Ca_Desi_Chrom_8_6222513 | Ca_desi_chr08      | 6222513                        | [T/A]       | NA                                         |
| Ca_Desi_Chrom_8_6222609 | Ca_desi_chr08      | 6222609                        | [A/G]       | NA                                         |
| Ca_Desi_Chrom_8_6222627 | Ca_desi_chr08      | 6222627                        | [A/G]       | NA                                         |
| Ca_Desi_Chrom_8_6222631 | Ca_desi_chr08      | 6222631                        | [G/A]       | NA                                         |
| Ca_Desi_Chrom_8_6222792 | Ca_desi_chr08      | 6222792                        | [A/C]       | NA                                         |
| Ca_Desi_Chrom_8_6224375 | Ca_desi_chr08      | 6224375                        | [T/C]       | NA                                         |
| Ca_Desi_Chrom_8_6224381 | Ca_desi_chr08      | 6224381                        | [A/G]       | NA                                         |
| Ca_Desi_Chrom_8_6224383 | Ca_desi_chr08      | 6224383                        | [C/T]       | NA                                         |
| Ca_Desi_Chrom_8_6224385 | Ca_desi_chr08      | 6224385                        | [A/G]       | NA                                         |
| Ca_Desi_Chrom_8_6224388 | Ca_desi_chr08      | 6224388                        | [A/C]       | NA                                         |
| Ca_Desi_Chrom_8_6224399 | Ca_desi_chr08      | 6224399                        | [T/G]       | NA                                         |
| Ca_Desi_Chrom_8_6224421 | Ca_desi_chr08      | 6224421                        | [T/C]       | NA                                         |

| <b>SNP IDs</b>          | <b>Chromosomes</b> | <b>Physical positions (bp)</b> | <b>SNPs</b> | <b>NCBI SNPdb accession IDs (NCBI_ss#)</b> |
|-------------------------|--------------------|--------------------------------|-------------|--------------------------------------------|
| Ca_Desi_Chrom_8_6224427 | Ca_desi_chr08      | 6224427                        | [T/C]       | NA                                         |
| Ca_Desi_Chrom_8_6230837 | Ca_desi_chr08      | 6230837                        | [A/T]       | NA                                         |
| Ca_Desi_Chrom_8_6249690 | Ca_desi_chr08      | 6249690                        | [A/T]       | NA                                         |
| Ca_Desi_Chrom_8_6250161 | Ca_desi_chr08      | 6250161                        | [A/C]       | NA                                         |
| Ca_Desi_Chrom_8_6314625 | Ca_desi_chr08      | 6314625                        | [T/C]       | NA                                         |
| Ca_Desi_Chrom_8_6314668 | Ca_desi_chr08      | 6314668                        | [A/C]       | NA                                         |
| Ca_Desi_Chrom_8_6336263 | Ca_desi_chr08      | 6336263                        | [T/A]       | NA                                         |
| Ca_Desi_Chrom_8_6336266 | Ca_desi_chr08      | 6336266                        | [A/G]       | NA                                         |
| Ca_Desi_Chrom_8_6380728 | Ca_desi_chr08      | 6380728                        | [T/A]       | NA                                         |
| Ca_Desi_Chrom_8_6380766 | Ca_desi_chr08      | 6380766                        | [A/T]       | NA                                         |
| Ca_Desi_Chrom_8_6418608 | Ca_desi_chr08      | 6418608                        | [T/C]       | NA                                         |
| Ca_Desi_Chrom_8_6440035 | Ca_desi_chr08      | 6440035                        | [A/C]       | NA                                         |
| Ca_Desi_Chrom_8_6440036 | Ca_desi_chr08      | 6440036                        | [G/T]       | NA                                         |
| Ca_Desi_Chrom_8_6440037 | Ca_desi_chr08      | 6440037                        | [A/C]       | NA                                         |
| Ca_Desi_Chrom_8_6532020 | Ca_desi_chr08      | 6532020                        | [T/C]       | NA                                         |
| Ca_Desi_Chrom_8_6532044 | Ca_desi_chr08      | 6532044                        | [A/G]       | NA                                         |
| Ca_Desi_Chrom_8_6532053 | Ca_desi_chr08      | 6532053                        | [T/G]       | NA                                         |
| Ca_Desi_Chrom_8_6532134 | Ca_desi_chr08      | 6532134                        | [T/C]       | NA                                         |
| Ca_Desi_Chrom_8_6564946 | Ca_desi_chr08      | 6564946                        | [A/C]       | NA                                         |
| Ca_Desi_Chrom_8_6564955 | Ca_desi_chr08      | 6564955                        | [A/C]       | NA                                         |
| Ca_Desi_Chrom_8_6564957 | Ca_desi_chr08      | 6564957                        | [T/C]       | NA                                         |
| Ca_Desi_Chrom_8_6630955 | Ca_desi_chr08      | 6630955                        | [A/C]       | NA                                         |
| Ca_Desi_Chrom_8_6630974 | Ca_desi_chr08      | 6630974                        | [A/G]       | NA                                         |
| Ca_Desi_Chrom_8_6631068 | Ca_desi_chr08      | 6631068                        | [T/C]       | NA                                         |
| Ca_Desi_Chrom_8_6666017 | Ca_desi_chr08      | 6666017                        | [A/C]       | NA                                         |
| Ca_Desi_Chrom_8_6666047 | Ca_desi_chr08      | 6666047                        | [A/T]       | NA                                         |
| Ca_Desi_Chrom_8_6666637 | Ca_desi_chr08      | 6666637                        | [C/A]       | NA                                         |
| Ca_Desi_Chrom_8_6693758 | Ca_desi_chr08      | 6693758                        | [C/A]       | NA                                         |
| Ca_Desi_Chrom_8_6693759 | Ca_desi_chr08      | 6693759                        | [A/G]       | NA                                         |
| Ca_Desi_Chrom_8_6693766 | Ca_desi_chr08      | 6693766                        | [A/G]       | NA                                         |
| Ca_Desi_Chrom_8_6693920 | Ca_desi_chr08      | 6693920                        | [A/T]       | NA                                         |
| Ca_Desi_Chrom_8_6693921 | Ca_desi_chr08      | 6693921                        | [A/C]       | NA                                         |
| Ca_Desi_Chrom_8_6693922 | Ca_desi_chr08      | 6693922                        | [G/T]       | NA                                         |
| Ca_Desi_Chrom_8_6694567 | Ca_desi_chr08      | 6694567                        | [A/G]       | NA                                         |



| <b>SNP IDs</b>          | <b>Chromosomes</b> | <b>Physical positions (bp)</b> | <b>SNPs</b> | <b>NCBI SNPdb accession IDs (NCBI_ss#)</b> |
|-------------------------|--------------------|--------------------------------|-------------|--------------------------------------------|
| Ca_Desi_Chrom_8_6890396 | Ca_desi_chr08      | 6890396                        | [C/T]       | NA                                         |
| Ca_Desi_Chrom_8_6890398 | Ca_desi_chr08      | 6890398                        | [A/G]       | NA                                         |
| Ca_Desi_Chrom_8_6929295 | Ca_desi_chr08      | 6929295                        | [C/T]       | NA                                         |
| Ca_Desi_Chrom_8_6929305 | Ca_desi_chr08      | 6929305                        | [G/T]       | NA                                         |
| Ca_Desi_Chrom_8_6929663 | Ca_desi_chr08      | 6929663                        | [A/C]       | NA                                         |
| Ca_Desi_Chrom_8_6932494 | Ca_desi_chr08      | 6932494                        | [A/C]       | NA                                         |
| Ca_Desi_Chrom_8_6932498 | Ca_desi_chr08      | 6932498                        | [C/T]       | NA                                         |
| Ca_Desi_Chrom_8_6977608 | Ca_desi_chr08      | 6977608                        | [C/G]       | NA                                         |
| Ca_Desi_Chrom_8_6977632 | Ca_desi_chr08      | 6977632                        | [G/T]       | NA                                         |
| Ca_Desi_Chrom_8_7005013 | Ca_desi_chr08      | 7005013                        | [T/C]       | NA                                         |
| Ca_Desi_Chrom_8_7016393 | Ca_desi_chr08      | 7016393                        | [A/C]       | NA                                         |
| Ca_Desi_Chrom_8_7016408 | Ca_desi_chr08      | 7016408                        | [A/C]       | NA                                         |
| Ca_Desi_Chrom_8_7016422 | Ca_desi_chr08      | 7016422                        | [T/G]       | NA                                         |
| Ca_Desi_Chrom_8_7020009 | Ca_desi_chr08      | 7020009                        | [T/G]       | NA                                         |
| Ca_Desi_Chrom_8_7032885 | Ca_desi_chr08      | 7032885                        | [T/C]       | NA                                         |
| Ca_Desi_Chrom_8_7060761 | Ca_desi_chr08      | 7060761                        | [A/C]       | NA                                         |
| Ca_Desi_Chrom_8_7060826 | Ca_desi_chr08      | 7060826                        | [C/G]       | NA                                         |
| Ca_Desi_Chrom_8_7065625 | Ca_desi_chr08      | 7065625                        | [A/C]       | NA                                         |
| Ca_Desi_Chrom_8_7066003 | Ca_desi_chr08      | 7066003                        | [A/G]       | NA                                         |
| Ca_Desi_Chrom_8_7066012 | Ca_desi_chr08      | 7066012                        | [A/G]       | NA                                         |
| Ca_Desi_Chrom_8_7066018 | Ca_desi_chr08      | 7066018                        | [A/C]       | NA                                         |
| Ca_Desi_Chrom_8_7066022 | Ca_desi_chr08      | 7066022                        | [T/C]       | NA                                         |
| Ca_Desi_Chrom_8_7066025 | Ca_desi_chr08      | 7066025                        | [T/C]       | NA                                         |
| Ca_Desi_Chrom_8_7066027 | Ca_desi_chr08      | 7066027                        | [T/C]       | NA                                         |
| Ca_Desi_Chrom_8_7066031 | Ca_desi_chr08      | 7066031                        | [A/G]       | NA                                         |
| Ca_Desi_Chrom_8_7066039 | Ca_desi_chr08      | 7066039                        | [T/A]       | NA                                         |
| Ca_Desi_Chrom_8_7066048 | Ca_desi_chr08      | 7066048                        | [A/G]       | NA                                         |
| Ca_Desi_Chrom_8_7066065 | Ca_desi_chr08      | 7066065                        | [T/C]       | NA                                         |
| Ca_Desi_Chrom_8_7066467 | Ca_desi_chr08      | 7066467                        | [T/G]       | NA                                         |
| Ca_Desi_Chrom_8_7066469 | Ca_desi_chr08      | 7066469                        | [A/T]       | NA                                         |
| Ca_Desi_Chrom_8_7066470 | Ca_desi_chr08      | 7066470                        | [T/C]       | NA                                         |
| Ca_Desi_Chrom_8_7066471 | Ca_desi_chr08      | 7066471                        | [G/T]       | NA                                         |
| Ca_Desi_Chrom_8_7067658 | Ca_desi_chr08      | 7067658                        | [A/C]       | NA                                         |
| Ca_Desi_Chrom_8_7680977 | Ca_desi_chr08      | 7680977                        | [A/T]       | NA                                         |

| <b>SNP IDs</b>          | <b>Chromosomes</b> | <b>Physical positions (bp)</b> | <b>SNPs</b> | <b>NCBI SNPdb accession IDs (NCBI_ss#)</b> |
|-------------------------|--------------------|--------------------------------|-------------|--------------------------------------------|
| Ca_Desi_Chrom_8_7750373 | Ca_desi_chr08      | 7750373                        | [T/G]       | NA                                         |
| Ca_Desi_Chrom_8_7750376 | Ca_desi_chr08      | 7750376                        | [A/G]       | NA                                         |
| Ca_Desi_Chrom_8_7830062 | Ca_desi_chr08      | 7830062                        | [T/G]       | NA                                         |
| Ca_Desi_Chrom_8_7868222 | Ca_desi_chr08      | 7868222                        | [A/G]       | NA                                         |
| Ca_Desi_Chrom_8_7868232 | Ca_desi_chr08      | 7868232                        | [A/G]       | NA                                         |
| Ca_Desi_Chrom_8_7868235 | Ca_desi_chr08      | 7868235                        | [T/G]       | NA                                         |
| Ca_Desi_Chrom_8_7868237 | Ca_desi_chr08      | 7868237                        | [T/C]       | NA                                         |
| Ca_Desi_Chrom_8_7868239 | Ca_desi_chr08      | 7868239                        | [T/C]       | NA                                         |
| Ca_Desi_Chrom_8_7868243 | Ca_desi_chr08      | 7868243                        | [T/C]       | NA                                         |
| Ca_Desi_Chrom_8_7868259 | Ca_desi_chr08      | 7868259                        | [A/C]       | NA                                         |
| Ca_Desi_Chrom_8_7868263 | Ca_desi_chr08      | 7868263                        | [A/G]       | NA                                         |
| Ca_Desi_Chrom_8_7868274 | Ca_desi_chr08      | 7868274                        | [A/G]       | NA                                         |
| Ca_Desi_Chrom_8_7868277 | Ca_desi_chr08      | 7868277                        | [A/G]       | NA                                         |
| Ca_Desi_Chrom_8_7868327 | Ca_desi_chr08      | 7868327                        | [T/G]       | NA                                         |
| Ca_Desi_Chrom_8_7877654 | Ca_desi_chr08      | 7877654                        | [T/G]       | NA                                         |
| Ca_Desi_Chrom_8_7877661 | Ca_desi_chr08      | 7877661                        | [T/G]       | NA                                         |
| Ca_Desi_Chrom_8_7878042 | Ca_desi_chr08      | 7878042                        | [A/T]       | NA                                         |
| Ca_Desi_Chrom_8_7883071 | Ca_desi_chr08      | 7883071                        | [T/G]       | NA                                         |
| Ca_Desi_Chrom_8_7883119 | Ca_desi_chr08      | 7883119                        | [A/T]       | NA                                         |
| Ca_Desi_Chrom_8_7940104 | Ca_desi_chr08      | 7940104                        | [A/C]       | NA                                         |
| Ca_Desi_Chrom_8_7940144 | Ca_desi_chr08      | 7940144                        | [T/C]       | NA                                         |
| Ca_Desi_Chrom_8_8143253 | Ca_desi_chr08      | 8143253                        | [A/T]       | NA                                         |
| Ca_Desi_Chrom_8_8143261 | Ca_desi_chr08      | 8143261                        | [A/G]       | NA                                         |
| Ca_Desi_Chrom_8_8143291 | Ca_desi_chr08      | 8143291                        | [T/G]       | NA                                         |
| Ca_Desi_Chrom_8_8143293 | Ca_desi_chr08      | 8143293                        | [T/C]       | NA                                         |
| Ca_Desi_Chrom_8_8174457 | Ca_desi_chr08      | 8174457                        | [A/C]       | NA                                         |
| Ca_Desi_Chrom_8_8188429 | Ca_desi_chr08      | 8188429                        | [T/A]       | NA                                         |
| Ca_Desi_Chrom_8_8188455 | Ca_desi_chr08      | 8188455                        | [A/C]       | NA                                         |
| Ca_Desi_Chrom_8_8188484 | Ca_desi_chr08      | 8188484                        | [A/C]       | NA                                         |
| Ca_Desi_Chrom_8_8188487 | Ca_desi_chr08      | 8188487                        | [A/C]       | NA                                         |
| Ca_Desi_Chrom_8_8188702 | Ca_desi_chr08      | 8188702                        | [T/G]       | NA                                         |
| Ca_Desi_Chrom_8_8238122 | Ca_desi_chr08      | 8238122                        | [A/C]       | NA                                         |
| Ca_Desi_Chrom_8_8238161 | Ca_desi_chr08      | 8238161                        | [A/G]       | NA                                         |
| Ca_Desi_Chrom_8_8238163 | Ca_desi_chr08      | 8238163                        | [C/A]       | NA                                         |

| <b>SNP IDs</b>          | <b>Chromosomes</b> | <b>Physical positions (bp)</b> | <b>SNPs</b> | <b>NCBI SNPdb accession IDs (NCBI_ss#)</b> |
|-------------------------|--------------------|--------------------------------|-------------|--------------------------------------------|
| Ca_Desi_Chrom_8_8238165 | Ca_desi_chr08      | 8238165                        | [A/T]       | NA                                         |
| Ca_Desi_Chrom_8_8238167 | Ca_desi_chr08      | 8238167                        | [G/A]       | NA                                         |
| Ca_Desi_Chrom_8_8238168 | Ca_desi_chr08      | 8238168                        | [A/G]       | NA                                         |
| Ca_Desi_Chrom_8_8238169 | Ca_desi_chr08      | 8238169                        | [G/T]       | NA                                         |
| Ca_Desi_Chrom_8_8238173 | Ca_desi_chr08      | 8238173                        | [T/C]       | NA                                         |
| Ca_Desi_Chrom_8_8238176 | Ca_desi_chr08      | 8238176                        | [A/G]       | NA                                         |
| Ca_Desi_Chrom_8_8238192 | Ca_desi_chr08      | 8238192                        | [T/C]       | NA                                         |
| Ca_Desi_Chrom_8_8238194 | Ca_desi_chr08      | 8238194                        | [A/C]       | NA                                         |
| Ca_Desi_Chrom_8_8238212 | Ca_desi_chr08      | 8238212                        | [T/G]       | NA                                         |
| Ca_Desi_Chrom_8_8238215 | Ca_desi_chr08      | 8238215                        | [T/C]       | NA                                         |
| Ca_Desi_Chrom_8_8238223 | Ca_desi_chr08      | 8238223                        | [T/C]       | NA                                         |
| Ca_Desi_Chrom_8_8293910 | Ca_desi_chr08      | 8293910                        | [T/G]       | NA                                         |
| Ca_Desi_Chrom_8_8293911 | Ca_desi_chr08      | 8293911                        | [T/G]       | NA                                         |
| Ca_Desi_Chrom_8_8293912 | Ca_desi_chr08      | 8293912                        | [T/C]       | NA                                         |
| Ca_Desi_Chrom_8_8359117 | Ca_desi_chr08      | 8359117                        | [G/A]       | NA                                         |
| Ca_Desi_Chrom_8_8394436 | Ca_desi_chr08      | 8394436                        | [T/G]       | NA                                         |
| Ca_Desi_Chrom_8_8394448 | Ca_desi_chr08      | 8394448                        | [T/C]       | NA                                         |
| Ca_Desi_Chrom_8_8415320 | Ca_desi_chr08      | 8415320                        | [T/C]       | NA                                         |
| Ca_Desi_Chrom_8_8415323 | Ca_desi_chr08      | 8415323                        | [T/C]       | NA                                         |
| Ca_Desi_Chrom_8_8415330 | Ca_desi_chr08      | 8415330                        | [T/C]       | NA                                         |
| Ca_Desi_Chrom_8_8415349 | Ca_desi_chr08      | 8415349                        | [T/G]       | NA                                         |
| Ca_Desi_Chrom_8_8415352 | Ca_desi_chr08      | 8415352                        | [T/C]       | NA                                         |
| Ca_Desi_Chrom_8_8415359 | Ca_desi_chr08      | 8415359                        | [T/G]       | NA                                         |
| Ca_Desi_Chrom_8_8415363 | Ca_desi_chr08      | 8415363                        | [T/A]       | NA                                         |
| Ca_Desi_Chrom_8_8419600 | Ca_desi_chr08      | 8419600                        | [A/G]       | NA                                         |
| Ca_Desi_Chrom_8_8429584 | Ca_desi_chr08      | 8429584                        | [T/A]       | NA                                         |
| Ca_Desi_Chrom_8_8432955 | Ca_desi_chr08      | 8432955                        | [C/A]       | NA                                         |
| Ca_Desi_Chrom_8_8432964 | Ca_desi_chr08      | 8432964                        | [A/C]       | NA                                         |
| Ca_Desi_Chrom_8_8432968 | Ca_desi_chr08      | 8432968                        | [T/G]       | NA                                         |
| Ca_Desi_Chrom_8_8435276 | Ca_desi_chr08      | 8435276                        | [T/C]       | NA                                         |
| Ca_Desi_Chrom_8_8435281 | Ca_desi_chr08      | 8435281                        | [T/A]       | NA                                         |
| Ca_Desi_Chrom_8_8435292 | Ca_desi_chr08      | 8435292                        | [T/G]       | NA                                         |
| Ca_Desi_Chrom_8_8435309 | Ca_desi_chr08      | 8435309                        | [A/C]       | NA                                         |
| Ca_Desi_Chrom_8_8460217 | Ca_desi_chr08      | 8460217                        | [A/T]       | NA                                         |

| <b>SNP IDs</b>          | <b>Chromosomes</b> | <b>Physical positions (bp)</b> | <b>SNPs</b> | <b>NCBI SNPdb accession IDs (NCBI_ss#)</b> |
|-------------------------|--------------------|--------------------------------|-------------|--------------------------------------------|
| Ca_Desi_Chrom_8_8460231 | Ca_desi_chr08      | 8460231                        | [A/G]       | NA                                         |
| Ca_Desi_Chrom_8_8550573 | Ca_desi_chr08      | 8550573                        | [T/C]       | NA                                         |
| Ca_Desi_Chrom_8_8581168 | Ca_desi_chr08      | 8581168                        | [A/G]       | NA                                         |
| Ca_Desi_Chrom_8_8581205 | Ca_desi_chr08      | 8581205                        | [G/A]       | NA                                         |
| Ca_Desi_Chrom_8_8581207 | Ca_desi_chr08      | 8581207                        | [A/G]       | NA                                         |
| Ca_Desi_Chrom_8_8581907 | Ca_desi_chr08      | 8581907                        | [T/C]       | NA                                         |
| Ca_Desi_Chrom_8_8582525 | Ca_desi_chr08      | 8582525                        | [T/A]       | NA                                         |
| Ca_Desi_Chrom_8_8582534 | Ca_desi_chr08      | 8582534                        | [A/G]       | NA                                         |
| Ca_Desi_Chrom_8_8610609 | Ca_desi_chr08      | 8610609                        | [T/G]       | NA                                         |
| Ca_Desi_Chrom_8_8714777 | Ca_desi_chr08      | 8714777                        | [T/C]       | NA                                         |
| Ca_Desi_Chrom_8_8714793 | Ca_desi_chr08      | 8714793                        | [A/G]       | NA                                         |
| Ca_Desi_Chrom_8_8714800 | Ca_desi_chr08      | 8714800                        | [T/C]       | NA                                         |
| Ca_Desi_Chrom_8_8714808 | Ca_desi_chr08      | 8714808                        | [A/G]       | NA                                         |
| Ca_Desi_Chrom_8_8714835 | Ca_desi_chr08      | 8714835                        | [A/C]       | NA                                         |
| Ca_Desi_Chrom_8_8714868 | Ca_desi_chr08      | 8714868                        | [T/C]       | NA                                         |
| Ca_Desi_Chrom_8_8714872 | Ca_desi_chr08      | 8714872                        | [T/C]       | NA                                         |
| Ca_Desi_Chrom_8_8714887 | Ca_desi_chr08      | 8714887                        | [T/C]       | NA                                         |
| Ca_Desi_Chrom_8_8714902 | Ca_desi_chr08      | 8714902                        | [A/C]       | NA                                         |
| Ca_Desi_Chrom_8_8715048 | Ca_desi_chr08      | 8715048                        | [A/C]       | NA                                         |
| Ca_Desi_Chrom_8_8715297 | Ca_desi_chr08      | 8715297                        | [T/C]       | NA                                         |
| Ca_Desi_Chrom_8_8715312 | Ca_desi_chr08      | 8715312                        | [A/G]       | NA                                         |
| Ca_Desi_Chrom_8_8715339 | Ca_desi_chr08      | 8715339                        | [T/C]       | NA                                         |
| Ca_Desi_Chrom_8_8733053 | Ca_desi_chr08      | 8733053                        | [T/C]       | NA                                         |
| Ca_Desi_Chrom_8_8781140 | Ca_desi_chr08      | 8781140                        | [T/A]       | NA                                         |
| Ca_Desi_Chrom_8_8802713 | Ca_desi_chr08      | 8802713                        | [A/T]       | NA                                         |
| Ca_Desi_Chrom_8_8802718 | Ca_desi_chr08      | 8802718                        | [T/C]       | NA                                         |
| Ca_Desi_Chrom_8_8802723 | Ca_desi_chr08      | 8802723                        | [T/C]       | NA                                         |
| Ca_Desi_Chrom_8_8802726 | Ca_desi_chr08      | 8802726                        | [A/C]       | NA                                         |
| Ca_Desi_Chrom_8_8802735 | Ca_desi_chr08      | 8802735                        | [A/C]       | NA                                         |
| Ca_Desi_Chrom_8_8802748 | Ca_desi_chr08      | 8802748                        | [A/G]       | NA                                         |
| Ca_Desi_Chrom_8_8802766 | Ca_desi_chr08      | 8802766                        | [T/A]       | NA                                         |
| Ca_Desi_Chrom_8_8811707 | Ca_desi_chr08      | 8811707                        | [T/C]       | NA                                         |
| Ca_Desi_Chrom_8_8841733 | Ca_desi_chr08      | 8841733                        | [T/G]       | NA                                         |
| Ca_Desi_Chrom_8_8887876 | Ca_desi_chr08      | 8887876                        | [T/G]       | NA                                         |

| <b>SNP IDs</b>           | <b>Chromosomes</b> | <b>Physical positions (bp)</b> | <b>SNPs</b> | <b>NCBI SNPdb accession IDs (NCBI_ss#)</b> |
|--------------------------|--------------------|--------------------------------|-------------|--------------------------------------------|
| Ca_Desi_Chrom_8_8891652  | Ca_desi_chr08      | 8891652                        | [A/C]       | NA                                         |
| Ca_Desi_Chrom_8_8962439  | Ca_desi_chr08      | 8962439                        | [T/G]       | NA                                         |
| Ca_Desi_Chrom_8_9937772  | Ca_desi_chr08      | 9937772                        | [T/C]       | NA                                         |
| Ca_Desi_Chrom_8_9937847  | Ca_desi_chr08      | 9937847                        | [A/T]       | NA                                         |
| Ca_Desi_Chrom_8_9942062  | Ca_desi_chr08      | 9942062                        | [A/C]       | NA                                         |
| Ca_Desi_Chrom_8_9962960  | Ca_desi_chr08      | 9962960                        | [T/C]       | NA                                         |
| Ca_Desi_Chrom_8_9962965  | Ca_desi_chr08      | 9962965                        | [A/T]       | NA                                         |
| Ca_Desi_Chrom_8_9962974  | Ca_desi_chr08      | 9962974                        | [T/A]       | NA                                         |
| Ca_Desi_Chrom_8_9962985  | Ca_desi_chr08      | 9962985                        | [T/G]       | NA                                         |
| Ca_Desi_Chrom_8_9962988  | Ca_desi_chr08      | 9962988                        | [A/G]       | NA                                         |
| Ca_Desi_Chrom_8_9966244  | Ca_desi_chr08      | 9966244                        | [C/A]       | NA                                         |
| Ca_Desi_Chrom_8_9988604  | Ca_desi_chr08      | 9988604                        | [A/C]       | NA                                         |
| Ca_Desi_Chrom_8_9988635  | Ca_desi_chr08      | 9988635                        | [T/G]       | NA                                         |
| Ca_Desi_Chrom_8_10005955 | Ca_desi_chr08      | 10005955                       | [T/G]       | NA                                         |
| Ca_Desi_Chrom_8_10010313 | Ca_desi_chr08      | 10010313                       | [A/G]       | NA                                         |
| Ca_Desi_Chrom_8_10010321 | Ca_desi_chr08      | 10010321                       | [T/C]       | NA                                         |
| Ca_Desi_Chrom_8_10010422 | Ca_desi_chr08      | 10010422                       | [T/G]       | NA                                         |
| Ca_Desi_Chrom_8_10010434 | Ca_desi_chr08      | 10010434                       | [C/A]       | NA                                         |
| Ca_Desi_Chrom_8_10010446 | Ca_desi_chr08      | 10010446                       | [G/T]       | NA                                         |
| Ca_Desi_Chrom_8_10010518 | Ca_desi_chr08      | 10010518                       | [A/G]       | NA                                         |
| Ca_Desi_Chrom_8_10011173 | Ca_desi_chr08      | 10011173                       | [T/C]       | NA                                         |
| Ca_Desi_Chrom_8_10011198 | Ca_desi_chr08      | 10011198                       | [C/G]       | NA                                         |
| Ca_Desi_Chrom_8_10033171 | Ca_desi_chr08      | 10033171                       | [G/T]       | NA                                         |
| Ca_Desi_Chrom_8_10047723 | Ca_desi_chr08      | 10047723                       | [G/C]       | NA                                         |
| Ca_Desi_Chrom_8_10047814 | Ca_desi_chr08      | 10047814                       | [C/T]       | NA                                         |
| Ca_Desi_Chrom_8_10072549 | Ca_desi_chr08      | 10072549                       | [T/A]       | NA                                         |
| Ca_Desi_Chrom_8_10088187 | Ca_desi_chr08      | 10088187                       | [T/C]       | NA                                         |
| Ca_Desi_Chrom_8_10089719 | Ca_desi_chr08      | 10089719                       | [T/G]       | NA                                         |
| Ca_Desi_Chrom_8_10089756 | Ca_desi_chr08      | 10089756                       | [A/G]       | NA                                         |
| Ca_Desi_Chrom_8_10089757 | Ca_desi_chr08      | 10089757                       | [G/A]       | NA                                         |
| Ca_Desi_Chrom_8_10090996 | Ca_desi_chr08      | 10090996                       | [A/T]       | NA                                         |
| Ca_Desi_Chrom_8_10092099 | Ca_desi_chr08      | 10092099                       | [A/T]       | NA                                         |
| Ca_Desi_Chrom_8_10092448 | Ca_desi_chr08      | 10092448                       | [A/G]       | NA                                         |
| Ca_Desi_Chrom_8_10092480 | Ca_desi_chr08      | 10092480                       | [T/C]       | NA                                         |

| <b>SNP IDs</b>          | <b>Chromosomes</b> | <b>Physical positions (bp)</b> | <b>SNPs</b> | <b>NCBI SNPdb accession IDs (NCBI_ss#)</b> |
|-------------------------|--------------------|--------------------------------|-------------|--------------------------------------------|
| Ca_Desig_Chr_8_10092506 | Ca_desig_chr08     | 10092506                       | [A/G]       | NA                                         |
| Ca_Desig_Chr_8_10092547 | Ca_desig_chr08     | 10092547                       | [C/G]       | NA                                         |
| Ca_Desig_Chr_8_10099055 | Ca_desig_chr08     | 10099055                       | [C/T]       | NA                                         |
| Ca_Desig_Chr_8_10101937 | Ca_desig_chr08     | 10101937                       | [C/A]       | NA                                         |
| Ca_Desig_Chr_8_10122343 | Ca_desig_chr08     | 10122343                       | [C/T]       | NA                                         |
| Ca_Desig_Chr_8_10125933 | Ca_desig_chr08     | 10125933                       | [A/C]       | NA                                         |
| Ca_Desig_Chr_8_10125985 | Ca_desig_chr08     | 10125985                       | [A/G]       | NA                                         |
| Ca_Desig_Chr_8_10126008 | Ca_desig_chr08     | 10126008                       | [A/G]       | NA                                         |
| Ca_Desig_Chr_8_10126034 | Ca_desig_chr08     | 10126034                       | [T/C]       | NA                                         |
| Ca_Desig_Chr_8_10126045 | Ca_desig_chr08     | 10126045                       | [A/C]       | NA                                         |
| Ca_Desig_Chr_8_10126047 | Ca_desig_chr08     | 10126047                       | [A/C]       | NA                                         |
| Ca_Desig_Chr_8_10126050 | Ca_desig_chr08     | 10126050                       | [A/C]       | NA                                         |
| Ca_Desig_Chr_8_10127887 | Ca_desig_chr08     | 10127887                       | [T/C]       | NA                                         |
| Ca_Desig_Chr_8_10127892 | Ca_desig_chr08     | 10127892                       | [T/C]       | NA                                         |
| Ca_Desig_Chr_8_10127901 | Ca_desig_chr08     | 10127901                       | [T/G]       | NA                                         |
| Ca_Desig_Chr_8_10127903 | Ca_desig_chr08     | 10127903                       | [T/G]       | NA                                         |
| Ca_Desig_Chr_8_10138245 | Ca_desig_chr08     | 10138245                       | [G/T]       | NA                                         |
| Ca_Desig_Chr_8_10138991 | Ca_desig_chr08     | 10138991                       | [T/G]       | NA                                         |
| Ca_Desig_Chr_8_10139018 | Ca_desig_chr08     | 10139018                       | [T/G]       | NA                                         |
| Ca_Desig_Chr_8_10139026 | Ca_desig_chr08     | 10139026                       | [A/G]       | NA                                         |
| Ca_Desig_Chr_8_10139184 | Ca_desig_chr08     | 10139184                       | [T/G]       | NA                                         |
| Ca_Desig_Chr_8_10146725 | Ca_desig_chr08     | 10146725                       | [T/C]       | NA                                         |
| Ca_Desig_Chr_8_10146739 | Ca_desig_chr08     | 10146739                       | [T/C]       | NA                                         |
| Ca_Desig_Chr_8_10146756 | Ca_desig_chr08     | 10146756                       | [A/G]       | NA                                         |
| Ca_Desig_Chr_8_10146775 | Ca_desig_chr08     | 10146775                       | [A/C]       | NA                                         |
| Ca_Desig_Chr_8_10146815 | Ca_desig_chr08     | 10146815                       | [A/T]       | NA                                         |
| Ca_Desig_Chr_8_10146819 | Ca_desig_chr08     | 10146819                       | [T/C]       | NA                                         |
| Ca_Desig_Chr_8_10146848 | Ca_desig_chr08     | 10146848                       | [T/G]       | NA                                         |
| Ca_Desig_Chr_8_10146861 | Ca_desig_chr08     | 10146861                       | [A/G]       | NA                                         |
| Ca_Desig_Chr_8_10147096 | Ca_desig_chr08     | 10147096                       | [G/A]       | NA                                         |
| Ca_Desig_Chr_8_10156188 | Ca_desig_chr08     | 10156188                       | [C/G]       | NA                                         |
| Ca_Desig_Chr_8_10156217 | Ca_desig_chr08     | 10156217                       | [T/G]       | NA                                         |
| Ca_Desig_Chr_8_10160852 | Ca_desig_chr08     | 10160852                       | [C/T]       | NA                                         |
| Ca_Desig_Chr_8_10161149 | Ca_desig_chr08     | 10161149                       | [A/C]       | NA                                         |

| <b>SNP IDs</b>                    | <b>Chromosomes</b> | <b>Physical positions (bp)</b> | <b>SNPs</b> | <b>NCBI SNPdb accession IDs (NCBI_ss#)</b> |
|-----------------------------------|--------------------|--------------------------------|-------------|--------------------------------------------|
| Ca_Desig_Chr_8_10168029           | Ca_desig_chr08     | 10168029                       | [T/C]       | NA                                         |
| Ca_Desig_Chr_8_10168146           | Ca_desig_chr08     | 10168146                       | [A/T]       | NA                                         |
| Ca_Desig_Chr_8_10178649           | Ca_desig_chr08     | 10178649                       | [T/C]       | NA                                         |
| Ca_Desig_Chr_8_10194656           | Ca_desig_chr08     | 10194656                       | [G/T]       | NA                                         |
| Ca_Desig_Chr_8_10194696           | Ca_desig_chr08     | 10194696                       | [A/C]       | NA                                         |
| Ca_Desig_Chr_8_10194708           | Ca_desig_chr08     | 10194708                       | [A/C]       | NA                                         |
| Ca_Desig_Chr_8_10194709           | Ca_desig_chr08     | 10194709                       | [C/T]       | NA                                         |
| Ca_Desig_Chr_8_10194718           | Ca_desig_chr08     | 10194718                       | [A/C]       | NA                                         |
| Ca_Desig_Chr_8_10194719           | Ca_desig_chr08     | 10194719                       | [A/C]       | NA                                         |
| Ca_Desig_Chr_8_10194727           | Ca_desig_chr08     | 10194727                       | [A/C]       | NA                                         |
| Ca_Desig_Chr_8_10194865           | Ca_desig_chr08     | 10194865                       | [G/T]       | NA                                         |
| Ca_Desig_Chr_8_10211353           | Ca_desig_chr08     | 10211353                       | [A/G]       | NA                                         |
| Ca_Desig_Chr_8_10211357           | Ca_desig_chr08     | 10211357                       | [T/C]       | NA                                         |
| Ca_Desig_Chr_8_10211368           | Ca_desig_chr08     | 10211368                       | [A/G]       | NA                                         |
| Ca_Desig_Chr_8_10211377           | Ca_desig_chr08     | 10211377                       | [A/C]       | NA                                         |
| Ca_Desig_Chr_8_10211396           | Ca_desig_chr08     | 10211396                       | [A/C]       | NA                                         |
| Ca_Desig_Chr_8_10211398           | Ca_desig_chr08     | 10211398                       | [A/G]       | NA                                         |
| Ca_Desig_Chr_8_10211406           | Ca_desig_chr08     | 10211406                       | [T/C]       | NA                                         |
| Ca_Desig_Chr_8_10247925           | Ca_desig_chr08     | 10247925                       | [T/C]       | NA                                         |
| Ca_Desig_Chr_8_10405537           | Ca_desig_chr08     | 10405537                       | [A/G]       | NA                                         |
| Ca_Desig_Chr_8_10405543           | Ca_desig_chr08     | 10405543                       | [A/C]       | NA                                         |
| Ca_Desig_Chr_8_10431041           | Ca_desig_chr08     | 10431041                       | [T/A]       | NA                                         |
| Ca_Desig_Chr_8_10431043           | Ca_desig_chr08     | 10431043                       | [A/T]       | NA                                         |
| Ca_Desig_Chr_8_10458768           | Ca_desig_chr08     | 10458768                       | [A/T]       | NA                                         |
| Ca_Desig_Chr_8_10458771           | Ca_desig_chr08     | 10458771                       | [A/G]       | NA                                         |
| Ca_Desig_Chr_8_10458774           | Ca_desig_chr08     | 10458774                       | [A/G]       | NA                                         |
| Ca_Desig_Chr_8_10458787           | Ca_desig_chr08     | 10458787                       | [T/G]       | NA                                         |
| Ca_Desig_Chr_8_10458789           | Ca_desig_chr08     | 10458789                       | [A/G]       | NA                                         |
| Ca_Desig_Chr_8_10458802           | Ca_desig_chr08     | 10458802                       | [T/G]       | NA                                         |
| Ca_Desig_Chr_8_10458805           | Ca_desig_chr08     | 10458805                       | [T/G]       | NA                                         |
| Ca_Desig_Chr_scaffold00046_234031 | Ca_desig_scaffold  | 234031                         | [G/A]       | NA                                         |
| Ca_Desig_Chr_scaffold00046_278914 | Ca_desig_scaffold  | 278914                         | [T/G]       | NA                                         |
| Ca_Desig_Chr_scaffold00046_387030 | Ca_desig_scaffold  | 387030                         | [T/G]       | NA                                         |
| Ca_Desig_Chr_scaffold00046_387066 | Ca_desig_scaffold  | 387066                         | [A/T]       | NA                                         |

| <b>SNP IDs</b>                  | <b>Chromosomes</b> | <b>Physical positions (bp)</b> | <b>SNPs</b> | <b>NCBI SNPdb accession IDs (NCBI_ss#)</b> |
|---------------------------------|--------------------|--------------------------------|-------------|--------------------------------------------|
| Ca_Desi_Ch_scaffold00046_421202 | Ca_desi_scaffold   | 421202                         | [T/G]       | NA                                         |
| Ca_Desi_Ch_scaffold00046_421275 | Ca_desi_scaffold   | 421275                         | [T/G]       | NA                                         |
| Ca_Desi_Ch_scaffold00046_421375 | Ca_desi_scaffold   | 421375                         | [T/G]       | NA                                         |
| Ca_Desi_Ch_scaffold00046_431003 | Ca_desi_scaffold   | 431003                         | [T/G]       | NA                                         |
| Ca_Desi_Ch_scaffold00046_431004 | Ca_desi_scaffold   | 431004                         | [T/C]       | NA                                         |
| Ca_Desi_Ch_scaffold00046_522661 | Ca_desi_scaffold   | 522661                         | [T/A]       | NA                                         |
| Ca_Desi_Ch_scaffold00046_522879 | Ca_desi_scaffold   | 522879                         | [A/T]       | NA                                         |
| Ca_Desi_Ch_scaffold00046_522895 | Ca_desi_scaffold   | 522895                         | [T/G]       | NA                                         |
| Ca_Desi_Ch_scaffold00046_527179 | Ca_desi_scaffold   | 527179                         | [A/C]       | NA                                         |
| Ca_Desi_Ch_scaffold00046_562057 | Ca_desi_scaffold   | 562057                         | [T/C]       | NA                                         |
| Ca_Desi_Ch_scaffold00055_13514  | Ca_desi_scaffold   | 13514                          | [T/A]       | NA                                         |
| Ca_Desi_Ch_scaffold00055_41091  | Ca_desi_scaffold   | 41091                          | [A/T]       | NA                                         |
| Ca_Desi_Ch_scaffold00055_41095  | Ca_desi_scaffold   | 41095                          | [A/G]       | NA                                         |
| Ca_Desi_Ch_scaffold00055_41099  | Ca_desi_scaffold   | 41099                          | [A/C]       | NA                                         |
| Ca_Desi_Ch_scaffold00055_41105  | Ca_desi_scaffold   | 41105                          | [A/C]       | NA                                         |
| Ca_Desi_Ch_scaffold00055_41109  | Ca_desi_scaffold   | 41109                          | [A/G]       | NA                                         |
| Ca_Desi_Ch_scaffold00055_41113  | Ca_desi_scaffold   | 41113                          | [A/G]       | NA                                         |
| Ca_Desi_Ch_scaffold00055_41117  | Ca_desi_scaffold   | 41117                          | [A/G]       | NA                                         |
| Ca_Desi_Ch_scaffold00055_41119  | Ca_desi_scaffold   | 41119                          | [T/C]       | NA                                         |
| Ca_Desi_Ch_scaffold00055_41121  | Ca_desi_scaffold   | 41121                          | [A/G]       | NA                                         |
| Ca_Desi_Ch_scaffold00055_41125  | Ca_desi_scaffold   | 41125                          | [A/G]       | NA                                         |
| Ca_Desi_Ch_scaffold00055_41126  | Ca_desi_scaffold   | 41126                          | [G/A]       | NA                                         |
| Ca_Desi_Ch_scaffold00055_41128  | Ca_desi_scaffold   | 41128                          | [G/A]       | NA                                         |
| Ca_Desi_Ch_scaffold00055_41129  | Ca_desi_scaffold   | 41129                          | [C/G]       | NA                                         |
| Ca_Desi_Ch_scaffold00055_41136  | Ca_desi_scaffold   | 41136                          | [A/G]       | NA                                         |
| Ca_Desi_Ch_scaffold00055_41140  | Ca_desi_scaffold   | 41140                          | [C/G]       | NA                                         |
| Ca_Desi_Ch_scaffold00055_45485  | Ca_desi_scaffold   | 45485                          | [T/C]       | NA                                         |
| Ca_Desi_Ch_scaffold00055_70252  | Ca_desi_scaffold   | 70252                          | [T/G]       | NA                                         |
| Ca_Desi_Ch_scaffold00055_79611  | Ca_desi_scaffold   | 79611                          | [A/C]       | NA                                         |
| Ca_Desi_Ch_scaffold00055_79620  | Ca_desi_scaffold   | 79620                          | [C/T]       | NA                                         |
| Ca_Desi_Ch_scaffold00055_79621  | Ca_desi_scaffold   | 79621                          | [C/T]       | NA                                         |
| Ca_Desi_Ch_scaffold00055_79624  | Ca_desi_scaffold   | 79624                          | [A/C]       | NA                                         |
| Ca_Desi_Ch_scaffold00055_79626  | Ca_desi_scaffold   | 79626                          | [C/T]       | NA                                         |
| Ca_Desi_Ch_scaffold00055_135963 | Ca_desi_scaffold   | 135963                         | [A/G]       | NA                                         |



| <b>SNP IDs</b>                  | <b>Chromosomes</b> | <b>Physical positions (bp)</b> | <b>SNPs</b> | <b>NCBI SNPdb accession IDs (NCBI_ss#)</b> |
|---------------------------------|--------------------|--------------------------------|-------------|--------------------------------------------|
| Ca_Desi_Ch_scaffold00055_135970 | Ca_desi_scaffold   | 135970                         | [T/C]       | NA                                         |
| Ca_Desi_Ch_scaffold00055_135975 | Ca_desi_scaffold   | 135975                         | [A/G]       | NA                                         |
| Ca_Desi_Ch_scaffold00055_136013 | Ca_desi_scaffold   | 136013                         | [T/G]       | NA                                         |
| Ca_Desi_Ch_scaffold00055_136015 | Ca_desi_scaffold   | 136015                         | [T/C]       | NA                                         |
| Ca_Desi_Ch_scaffold00055_152101 | Ca_desi_scaffold   | 152101                         | [A/T]       | NA                                         |
| Ca_Desi_Ch_scaffold00055_275927 | Ca_desi_scaffold   | 275927                         | [T/A]       | NA                                         |
| Ca_Desi_Ch_scaffold00055_275942 | Ca_desi_scaffold   | 275942                         | [T/G]       | NA                                         |
| Ca_Desi_Ch_scaffold00055_276940 | Ca_desi_scaffold   | 276940                         | [A/G]       | NA                                         |
| Ca_Desi_Ch_scaffold00055_276946 | Ca_desi_scaffold   | 276946                         | [T/C]       | NA                                         |
| Ca_Desi_Ch_scaffold00055_317134 | Ca_desi_scaffold   | 317134                         | [T/G]       | NA                                         |
| Ca_Desi_Ch_scaffold00055_318197 | Ca_desi_scaffold   | 318197                         | [T/A]       | NA                                         |
| Ca_Desi_Ch_scaffold00055_318204 | Ca_desi_scaffold   | 318204                         | [A/C]       | NA                                         |
| Ca_Desi_Ch_scaffold00055_318214 | Ca_desi_scaffold   | 318214                         | [C/A]       | NA                                         |
| Ca_Desi_Ch_scaffold00055_320039 | Ca_desi_scaffold   | 320039                         | [A/C]       | NA                                         |
| Ca_Desi_Ch_scaffold00055_320076 | Ca_desi_scaffold   | 320076                         | [C/T]       | NA                                         |
| Ca_Desi_Ch_scaffold00055_344630 | Ca_desi_scaffold   | 344630                         | [T/G]       | NA                                         |
| Ca_Desi_Ch_scaffold00055_344641 | Ca_desi_scaffold   | 344641                         | [A/G]       | NA                                         |
| Ca_Desi_Ch_scaffold00055_373749 | Ca_desi_scaffold   | 373749                         | [T/C]       | NA                                         |
| Ca_Desi_Ch_scaffold00055_373773 | Ca_desi_scaffold   | 373773                         | [A/G]       | NA                                         |
| Ca_Desi_Ch_scaffold00055_379856 | Ca_desi_scaffold   | 379856                         | [A/C]       | NA                                         |
| Ca_Desi_Ch_scaffold03073_164898 | Ca_desi_scaffold   | 164898                         | [A/C]       | NA                                         |
| Ca_Desi_Ch_scaffold03073_166774 | Ca_desi_scaffold   | 166774                         | [A/C]       | NA                                         |
| Ca_Desi_Ch_scaffold03073_180918 | Ca_desi_scaffold   | 180918                         | [T/G]       | NA                                         |
| Ca_Desi_Ch_scaffold03073_180952 | Ca_desi_scaffold   | 180952                         | [A/G]       | NA                                         |
| Ca_Desi_Ch_scaffold03073_180957 | Ca_desi_scaffold   | 180957                         | [A/G]       | NA                                         |
| Ca_Desi_Ch_scaffold03073_180961 | Ca_desi_scaffold   | 180961                         | [T/G]       | NA                                         |
| Ca_Desi_Ch_scaffold03073_401549 | Ca_desi_scaffold   | 401549                         | [T/G]       | NA                                         |
| Ca_Desi_Ch_scaffold03073_401592 | Ca_desi_scaffold   | 401592                         | [G/A]       | NA                                         |
| Ca_Desi_Ch_scaffold03073_437759 | Ca_desi_scaffold   | 437759                         | [T/A]       | NA                                         |
| Ca_Desi_Ch_scaffold03073_520716 | Ca_desi_scaffold   | 520716                         | [T/G]       | NA                                         |
| Ca_Desi_Ch_scaffold03073_520736 | Ca_desi_scaffold   | 520736                         | [T/C]       | NA                                         |
| Ca_Desi_Ch_scaffold01574_14189  | Ca_desi_scaffold   | 14189                          | [T/G]       | NA                                         |
| Ca_Desi_Ch_scaffold00167_170463 | Ca_desi_scaffold   | 170463                         | [T/G]       | NA                                         |
| Ca_Desi_Ch_scaffold00167_170517 | Ca_desi_scaffold   | 170517                         | [A/G]       | NA                                         |

| <b>SNP IDs</b>                  | <b>Chromosomes</b> | <b>Physical positions (bp)</b> | <b>SNPs</b> | <b>NCBI SNPdb accession IDs (NCBI_ss#)</b> |
|---------------------------------|--------------------|--------------------------------|-------------|--------------------------------------------|
| Ca_Desi_Ch_scaffold00167_274104 | Ca_desi_scaffold   | 274104                         | [T/C]       | NA                                         |
| Ca_Desi_Ch_scaffold00167_274113 | Ca_desi_scaffold   | 274113                         | [T/C]       | NA                                         |
| Ca_Desi_Ch_scaffold00167_274127 | Ca_desi_scaffold   | 274127                         | [A/C]       | NA                                         |
| Ca_Desi_Ch_scaffold00185_64967  | Ca_desi_scaffold   | 64967                          | [C/A]       | NA                                         |
| Ca_Desi_Ch_scaffold00185_64986  | Ca_desi_scaffold   | 64986                          | [T/C]       | NA                                         |
| Ca_Desi_Ch_scaffold00185_65142  | Ca_desi_scaffold   | 65142                          | [T/C]       | NA                                         |
| Ca_Desi_Ch_scaffold00185_103012 | Ca_desi_scaffold   | 103012                         | [A/C]       | NA                                         |
| Ca_Desi_Ch_scaffold00185_103016 | Ca_desi_scaffold   | 103016                         | [T/G]       | NA                                         |
| Ca_Desi_Ch_scaffold00185_103019 | Ca_desi_scaffold   | 103019                         | [A/G]       | NA                                         |
| Ca_Desi_Ch_scaffold00185_103027 | Ca_desi_scaffold   | 103027                         | [A/G]       | NA                                         |
| Ca_Desi_Ch_scaffold00185_156795 | Ca_desi_scaffold   | 156795                         | [C/A]       | NA                                         |
| Ca_Desi_Ch_scaffold00185_156800 | Ca_desi_scaffold   | 156800                         | [T/A]       | NA                                         |
| Ca_Desi_Ch_scaffold00185_156804 | Ca_desi_scaffold   | 156804                         | [T/G]       | NA                                         |
| Ca_Desi_Ch_scaffold00185_156806 | Ca_desi_scaffold   | 156806                         | [C/A]       | NA                                         |
| Ca_Desi_Ch_scaffold00185_156809 | Ca_desi_scaffold   | 156809                         | [C/A]       | NA                                         |
| Ca_Desi_Ch_scaffold00185_156834 | Ca_desi_scaffold   | 156834                         | [C/A]       | NA                                         |
| Ca_Desi_Ch_scaffold00185_171830 | Ca_desi_scaffold   | 171830                         | [A/G]       | NA                                         |
| Ca_Desi_Ch_scaffold00185_178597 | Ca_desi_scaffold   | 178597                         | [T/G]       | NA                                         |
| Ca_Desi_Ch_scaffold00185_178989 | Ca_desi_scaffold   | 178989                         | [T/G]       | NA                                         |
| Ca_Desi_Ch_scaffold00185_180693 | Ca_desi_scaffold   | 180693                         | [T/G]       | NA                                         |
| Ca_Desi_Ch_scaffold00185_181449 | Ca_desi_scaffold   | 181449                         | [A/T]       | NA                                         |
| Ca_Desi_Ch_scaffold00185_192202 | Ca_desi_scaffold   | 192202                         | [T/G]       | NA                                         |
| Ca_Desi_Ch_scaffold00185_192570 | Ca_desi_scaffold   | 192570                         | [T/G]       | NA                                         |
| Ca_Desi_Ch_scaffold00185_194933 | Ca_desi_scaffold   | 194933                         | [A/C]       | NA                                         |
| Ca_Desi_Ch_scaffold00185_195026 | Ca_desi_scaffold   | 195026                         | [T/C]       | NA                                         |
| Ca_Desi_Ch_scaffold00185_297269 | Ca_desi_scaffold   | 297269                         | [A/C]       | NA                                         |
| Ca_Desi_Ch_scaffold00185_310319 | Ca_desi_scaffold   | 310319                         | [T/G]       | NA                                         |
| Ca_Desi_Ch_scaffold00211_17723  | Ca_desi_scaffold   | 17723                          | [T/G]       | NA                                         |
| Ca_Desi_Ch_scaffold00211_19270  | Ca_desi_scaffold   | 19270                          | [G/T]       | NA                                         |
| Ca_Desi_Ch_scaffold00211_45879  | Ca_desi_scaffold   | 45879                          | [A/C]       | NA                                         |
| Ca_Desi_Ch_scaffold00211_45884  | Ca_desi_scaffold   | 45884                          | [T/C]       | NA                                         |
| Ca_Desi_Ch_scaffold00211_45897  | Ca_desi_scaffold   | 45897                          | [A/G]       | NA                                         |
| Ca_Desi_Ch_scaffold00211_176925 | Ca_desi_scaffold   | 176925                         | [T/C]       | NA                                         |
| Ca_Desi_Ch_scaffold00211_242196 | Ca_desi_scaffold   | 242196                         | [A/C]       | NA                                         |

| <b>SNP IDs</b>                  | <b>Chromosomes</b> | <b>Physical positions (bp)</b> | <b>SNPs</b> | <b>NCBI SNPdb accession IDs (NCBI_ss#)</b> |
|---------------------------------|--------------------|--------------------------------|-------------|--------------------------------------------|
| Ca_Desi_Ch_scaffold00211_242645 | Ca_desi_scaffold   | 242645                         | [T/C]       | NA                                         |
| Ca_Desi_Ch_scaffold00211_242964 | Ca_desi_scaffold   | 242964                         | [A/G]       | NA                                         |
| Ca_Desi_Ch_scaffold00211_242968 | Ca_desi_scaffold   | 242968                         | [A/G]       | NA                                         |
| Ca_Desi_Ch_scaffold00211_242994 | Ca_desi_scaffold   | 242994                         | [A/C]       | NA                                         |
| Ca_Desi_Ch_scaffold00211_243025 | Ca_desi_scaffold   | 243025                         | [T/C]       | NA                                         |
| Ca_Desi_Ch_scaffold00212_220204 | Ca_desi_scaffold   | 220204                         | [T/G]       | NA                                         |
| Ca_Desi_Ch_scaffold00212_235063 | Ca_desi_scaffold   | 235063                         | [A/C]       | NA                                         |
| Ca_Desi_Ch_scaffold00215_235353 | Ca_desi_scaffold   | 235353                         | [T/C]       | NA                                         |
| Ca_Desi_Ch_scaffold00215_235379 | Ca_desi_scaffold   | 235379                         | [T/C]       | NA                                         |
| Ca_Desi_Ch_scaffold00215_235383 | Ca_desi_scaffold   | 235383                         | [A/G]       | NA                                         |
| Ca_Desi_Ch_scaffold00216_12050  | Ca_desi_scaffold   | 12050                          | [A/T]       | NA                                         |
| Ca_Desi_Ch_scaffold00216_12128  | Ca_desi_scaffold   | 12128                          | [C/A]       | NA                                         |
| Ca_Desi_Ch_scaffold00216_12141  | Ca_desi_scaffold   | 12141                          | [A/G]       | NA                                         |
| Ca_Desi_Ch_scaffold00216_12151  | Ca_desi_scaffold   | 12151                          | [T/C]       | NA                                         |
| Ca_Desi_Ch_scaffold00216_25367  | Ca_desi_scaffold   | 25367                          | [A/G]       | NA                                         |
| Ca_Desi_Ch_scaffold00216_34304  | Ca_desi_scaffold   | 34304                          | [A/G]       | NA                                         |
| Ca_Desi_Ch_scaffold00216_143659 | Ca_desi_scaffold   | 143659                         | [A/G]       | NA                                         |
| Ca_Desi_Ch_scaffold00216_143671 | Ca_desi_scaffold   | 143671                         | [T/G]       | NA                                         |
| Ca_Desi_Ch_scaffold00216_143673 | Ca_desi_scaffold   | 143673                         | [T/C]       | NA                                         |
| Ca_Desi_Ch_scaffold00216_143687 | Ca_desi_scaffold   | 143687                         | [A/G]       | NA                                         |
| Ca_Desi_Ch_scaffold00216_143688 | Ca_desi_scaffold   | 143688                         | [C/A]       | NA                                         |
| Ca_Desi_Ch_scaffold00216_143689 | Ca_desi_scaffold   | 143689                         | [A/G]       | NA                                         |
| Ca_Desi_Ch_scaffold00216_143693 | Ca_desi_scaffold   | 143693                         | [T/G]       | NA                                         |
| Ca_Desi_Ch_scaffold00216_143695 | Ca_desi_scaffold   | 143695                         | [A/G]       | NA                                         |
| Ca_Desi_Ch_scaffold00216_143701 | Ca_desi_scaffold   | 143701                         | [T/G]       | NA                                         |
| Ca_Desi_Ch_scaffold00216_143702 | Ca_desi_scaffold   | 143702                         | [A/T]       | NA                                         |
| Ca_Desi_Ch_scaffold00216_143705 | Ca_desi_scaffold   | 143705                         | [T/C]       | NA                                         |
| Ca_Desi_Ch_scaffold00216_143708 | Ca_desi_scaffold   | 143708                         | [T/C]       | NA                                         |
| Ca_Desi_Ch_scaffold00216_143710 | Ca_desi_scaffold   | 143710                         | [A/G]       | NA                                         |
| Ca_Desi_Ch_scaffold00216_143718 | Ca_desi_scaffold   | 143718                         | [A/G]       | NA                                         |
| Ca_Desi_Ch_scaffold00216_143726 | Ca_desi_scaffold   | 143726                         | [A/G]       | NA                                         |
| Ca_Desi_Ch_scaffold00216_143758 | Ca_desi_scaffold   | 143758                         | [T/G]       | NA                                         |
| Ca_Desi_Ch_scaffold00216_143760 | Ca_desi_scaffold   | 143760                         | [A/G]       | NA                                         |
| Ca_Desi_Ch_scaffold00216_143765 | Ca_desi_scaffold   | 143765                         | [A/G]       | NA                                         |

| <b>SNP IDs</b>                  | <b>Chromosomes</b> | <b>Physical positions (bp)</b> | <b>SNPs</b> | <b>NCBI SNPdb accession IDs (NCBI_ss#)</b> |
|---------------------------------|--------------------|--------------------------------|-------------|--------------------------------------------|
| Ca_Desi_Ch_scaffold00216_143772 | Ca_desi_scaffold   | 143772                         | [C/T]       | NA                                         |
| Ca_Desi_Ch_scaffold00216_143780 | Ca_desi_scaffold   | 143780                         | [T/G]       | NA                                         |
| Ca_Desi_Ch_scaffold00216_145045 | Ca_desi_scaffold   | 145045                         | [T/G]       | NA                                         |
| Ca_Desi_Ch_scaffold00216_145049 | Ca_desi_scaffold   | 145049                         | [A/G]       | NA                                         |
| Ca_Desi_Ch_scaffold00216_145077 | Ca_desi_scaffold   | 145077                         | [T/G]       | NA                                         |
| Ca_Desi_Ch_scaffold00216_148028 | Ca_desi_scaffold   | 148028                         | [T/G]       | NA                                         |
| Ca_Desi_Ch_scaffold00216_148106 | Ca_desi_scaffold   | 148106                         | [T/C]       | NA                                         |
| Ca_Desi_Ch_scaffold00216_243217 | Ca_desi_scaffold   | 243217                         | [T/G]       | NA                                         |
| Ca_Desi_Ch_scaffold00216_243231 | Ca_desi_scaffold   | 243231                         | [A/G]       | NA                                         |
| Ca_Desi_Ch_scaffold00216_299202 | Ca_desi_scaffold   | 299202                         | [A/C]       | NA                                         |
| Ca_Desi_Ch_scaffold00216_303325 | Ca_desi_scaffold   | 303325                         | [A/C]       | NA                                         |
| Ca_Desi_Ch_scaffold00216_318685 | Ca_desi_scaffold   | 318685                         | [A/C]       | NA                                         |
| Ca_Desi_Ch_scaffold00216_318688 | Ca_desi_scaffold   | 318688                         | [A/G]       | NA                                         |
| Ca_Desi_Ch_scaffold00216_319569 | Ca_desi_scaffold   | 319569                         | [A/C]       | NA                                         |
| Ca_Desi_Ch_scaffold00216_319575 | Ca_desi_scaffold   | 319575                         | [T/C]       | NA                                         |
| Ca_Desi_Ch_scaffold00216_319578 | Ca_desi_scaffold   | 319578                         | [T/C]       | NA                                         |
| Ca_Desi_Ch_scaffold05824_206620 | Ca_desi_scaffold   | 206620                         | [T/G]       | NA                                         |
| Ca_Desi_Ch_scaffold05824_206899 | Ca_desi_scaffold   | 206899                         | [A/C]       | NA                                         |
| Ca_Desi_Ch_scaffold05824_551873 | Ca_desi_scaffold   | 551873                         | [T/G]       | NA                                         |
| Ca_Desi_Ch_scaffold05824_551898 | Ca_desi_scaffold   | 551898                         | [A/C]       | NA                                         |
| Ca_Desi_Ch_scaffold05824_599543 | Ca_desi_scaffold   | 599543                         | [A/C]       | NA                                         |
| Ca_Desi_Ch_scaffold05824_609033 | Ca_desi_scaffold   | 609033                         | [A/C]       | NA                                         |
| Ca_Desi_Ch_scaffold05824_622905 | Ca_desi_scaffold   | 622905                         | [T/G]       | NA                                         |
| Ca_Desi_Ch_scaffold05824_622971 | Ca_desi_scaffold   | 622971                         | [A/G]       | NA                                         |
| Ca_Desi_Ch_scaffold05824_636446 | Ca_desi_scaffold   | 636446                         | [T/A]       | NA                                         |
| Ca_Desi_Ch_scaffold05824_637925 | Ca_desi_scaffold   | 637925                         | [T/C]       | NA                                         |
| Ca_Desi_Ch_scaffold05824_683807 | Ca_desi_scaffold   | 683807                         | [A/C]       | NA                                         |
| Ca_Desi_Ch_scaffold05824_710177 | Ca_desi_scaffold   | 710177                         | [T/G]       | NA                                         |
| Ca_Desi_Ch_scaffold05824_710197 | Ca_desi_scaffold   | 710197                         | [A/C]       | NA                                         |
| Ca_Desi_Ch_scaffold05824_710297 | Ca_desi_scaffold   | 710297                         | [A/T]       | NA                                         |
| Ca_Desi_Ch_scaffold05824_710298 | Ca_desi_scaffold   | 710298                         | [T/C]       | NA                                         |
| Ca_Desi_Ch_scaffold05824_710299 | Ca_desi_scaffold   | 710299                         | [G/T]       | NA                                         |
| Ca_Desi_Ch_scaffold05824_752140 | Ca_desi_scaffold   | 752140                         | [T/C]       | NA                                         |
| Ca_Desi_Ch_scaffold05824_752177 | Ca_desi_scaffold   | 752177                         | [A/T]       | NA                                         |

| <b>SNP IDs</b>                  | <b>Chromosomes</b> | <b>Physical positions (bp)</b> | <b>SNPs</b> | <b>NCBI SNPdb accession IDs (NCBI_ss#)</b> |
|---------------------------------|--------------------|--------------------------------|-------------|--------------------------------------------|
| Ca_Desi_Ch_scaffold00224_280540 | Ca_desi_scaffold   | 280540                         | [T/C]       | NA                                         |
| Ca_Desi_Ch_scaffold00224_280565 | Ca_desi_scaffold   | 280565                         | [A/T]       | NA                                         |
| Ca_Desi_Ch_scaffold00224_280591 | Ca_desi_scaffold   | 280591                         | [A/C]       | NA                                         |
| Ca_Desi_Ch_scaffold00233_4334   | Ca_desi_scaffold   | 4334                           | [T/G]       | NA                                         |
| Ca_Desi_Ch_scaffold00233_4529   | Ca_desi_scaffold   | 4529                           | [T/G]       | NA                                         |
| Ca_Desi_Ch_scaffold00233_22712  | Ca_desi_scaffold   | 22712                          | [A/T]       | NA                                         |
| Ca_Desi_Ch_scaffold00233_42056  | Ca_desi_scaffold   | 42056                          | [T/G]       | NA                                         |
| Ca_Desi_Ch_scaffold00233_44656  | Ca_desi_scaffold   | 44656                          | [T/G]       | NA                                         |
| Ca_Desi_Ch_scaffold00233_49948  | Ca_desi_scaffold   | 49948                          | [T/C]       | NA                                         |
| Ca_Desi_Ch_scaffold00233_49979  | Ca_desi_scaffold   | 49979                          | [T/A]       | NA                                         |
| Ca_Desi_Ch_scaffold00233_50077  | Ca_desi_scaffold   | 50077                          | [A/C]       | NA                                         |
| Ca_Desi_Ch_scaffold00233_120304 | Ca_desi_scaffold   | 120304                         | [T/G]       | NA                                         |
| Ca_Desi_Ch_scaffold00233_122036 | Ca_desi_scaffold   | 122036                         | [T/G]       | NA                                         |
| Ca_Desi_Ch_scaffold00233_122052 | Ca_desi_scaffold   | 122052                         | [T/G]       | NA                                         |
| Ca_Desi_Ch_scaffold00233_122058 | Ca_desi_scaffold   | 122058                         | [T/A]       | NA                                         |
| Ca_Desi_Ch_scaffold00233_147959 | Ca_desi_scaffold   | 147959                         | [T/C]       | NA                                         |
| Ca_Desi_Ch_scaffold00233_176179 | Ca_desi_scaffold   | 176179                         | [A/T]       | NA                                         |
| Ca_Desi_Ch_scaffold00233_215728 | Ca_desi_scaffold   | 215728                         | [A/C]       | NA                                         |
| Ca_Desi_Ch_scaffold00233_215748 | Ca_desi_scaffold   | 215748                         | [A/G]       | NA                                         |
| Ca_Desi_Ch_scaffold00233_215832 | Ca_desi_scaffold   | 215832                         | [A/C]       | NA                                         |
| Ca_Desi_Ch_scaffold00233_215936 | Ca_desi_scaffold   | 215936                         | [A/G]       | NA                                         |
| Ca_Desi_Ch_scaffold00233_215944 | Ca_desi_scaffold   | 215944                         | [T/C]       | NA                                         |
| Ca_Desi_Ch_scaffold00233_224631 | Ca_desi_scaffold   | 224631                         | [T/C]       | NA                                         |
| Ca_Desi_Ch_scaffold00233_233059 | Ca_desi_scaffold   | 233059                         | [A/G]       | NA                                         |
| Ca_Desi_Ch_scaffold00233_233070 | Ca_desi_scaffold   | 233070                         | [T/G]       | NA                                         |
| Ca_Desi_Ch_scaffold00233_233077 | Ca_desi_scaffold   | 233077                         | [A/G]       | NA                                         |
| Ca_Desi_Ch_scaffold00233_233079 | Ca_desi_scaffold   | 233079                         | [C/G]       | NA                                         |
| Ca_Desi_Ch_scaffold00233_233080 | Ca_desi_scaffold   | 233080                         | [A/G]       | NA                                         |
| Ca_Desi_Ch_scaffold00248_63570  | Ca_desi_scaffold   | 63570                          | [T/G]       | NA                                         |
| Ca_Desi_Ch_scaffold00248_70517  | Ca_desi_scaffold   | 70517                          | [T/C]       | NA                                         |
| Ca_Desi_Ch_scaffold00248_70534  | Ca_desi_scaffold   | 70534                          | [A/T]       | NA                                         |
| Ca_Desi_Ch_scaffold00248_70577  | Ca_desi_scaffold   | 70577                          | [G/C]       | NA                                         |
| Ca_Desi_Ch_scaffold00248_162554 | Ca_desi_scaffold   | 162554                         | [C/T]       | NA                                         |
| Ca_Desi_Ch_scaffold00248_162653 | Ca_desi_scaffold   | 162653                         | [A/C]       | NA                                         |

| <b>SNP IDs</b>                  | <b>Chromosomes</b> | <b>Physical positions (bp)</b> | <b>SNPs</b> | <b>NCBI SNPdb accession IDs (NCBI_ss#)</b> |
|---------------------------------|--------------------|--------------------------------|-------------|--------------------------------------------|
| Ca_Desi_Ch_scaffold00248_214559 | Ca_desi_scaffold   | 214559                         | [A/G]       | NA                                         |
| Ca_Desi_Ch_scaffold00248_214580 | Ca_desi_scaffold   | 214580                         | [T/C]       | NA                                         |
| Ca_Desi_Ch_scaffold00248_214583 | Ca_desi_scaffold   | 214583                         | [T/G]       | NA                                         |
| Ca_Desi_Ch_scaffold00248_214597 | Ca_desi_scaffold   | 214597                         | [T/C]       | NA                                         |
| Ca_Desi_Ch_scaffold00248_214614 | Ca_desi_scaffold   | 214614                         | [T/C]       | NA                                         |
| Ca_Desi_Ch_scaffold00278_26130  | Ca_desi_scaffold   | 26130                          | [A/T]       | NA                                         |
| Ca_Desi_Ch_scaffold00278_121056 | Ca_desi_scaffold   | 121056                         | [T/G]       | NA                                         |
| Ca_Desi_Ch_scaffold00278_121130 | Ca_desi_scaffold   | 121130                         | [T/C]       | NA                                         |
| Ca_Desi_Ch_scaffold00278_121138 | Ca_desi_scaffold   | 121138                         | [A/G]       | NA                                         |
| Ca_Desi_Ch_scaffold00278_121166 | Ca_desi_scaffold   | 121166                         | [A/T]       | NA                                         |
| Ca_Desi_Ch_scaffold00278_121201 | Ca_desi_scaffold   | 121201                         | [T/C]       | NA                                         |
| Ca_Desi_Ch_scaffold00278_121469 | Ca_desi_scaffold   | 121469                         | [A/C]       | NA                                         |
| Ca_Desi_Ch_scaffold00278_191165 | Ca_desi_scaffold   | 191165                         | [T/G]       | NA                                         |
| Ca_Desi_Ch_scaffold00278_240090 | Ca_desi_scaffold   | 240090                         | [C/A]       | NA                                         |
| Ca_Desi_Ch_scaffold00278_261010 | Ca_desi_scaffold   | 261010                         | [T/G]       | NA                                         |
| Ca_Desi_Ch_scaffold00278_261013 | Ca_desi_scaffold   | 261013                         | [T/C]       | NA                                         |
| Ca_Desi_Ch_scaffold00278_261019 | Ca_desi_scaffold   | 261019                         | [T/C]       | NA                                         |
| Ca_Desi_Ch_scaffold00278_261023 | Ca_desi_scaffold   | 261023                         | [A/G]       | NA                                         |
| Ca_Desi_Ch_scaffold00278_261031 | Ca_desi_scaffold   | 261031                         | [T/C]       | NA                                         |
| Ca_Desi_Ch_scaffold00278_261036 | Ca_desi_scaffold   | 261036                         | [A/G]       | NA                                         |
| Ca_Desi_Ch_scaffold00278_261037 | Ca_desi_scaffold   | 261037                         | [A/G]       | NA                                         |
| Ca_Desi_Ch_scaffold00278_261047 | Ca_desi_scaffold   | 261047                         | [A/G]       | NA                                         |
| Ca_Desi_Ch_scaffold00278_261056 | Ca_desi_scaffold   | 261056                         | [T/C]       | NA                                         |
| Ca_Desi_Ch_scaffold00278_261059 | Ca_desi_scaffold   | 261059                         | [T/C]       | NA                                         |
| Ca_Desi_Ch_scaffold00278_261063 | Ca_desi_scaffold   | 261063                         | [A/G]       | NA                                         |
| Ca_Desi_Ch_scaffold06944_83503  | Ca_desi_scaffold   | 83503                          | [T/G]       | NA                                         |
| Ca_Desi_Ch_scaffold06944_83571  | Ca_desi_scaffold   | 83571                          | [T/C]       | NA                                         |
| Ca_Desi_Ch_scaffold06944_83578  | Ca_desi_scaffold   | 83578                          | [A/C]       | NA                                         |
| Ca_Desi_Ch_scaffold06944_83584  | Ca_desi_scaffold   | 83584                          | [A/G]       | NA                                         |
| Ca_Desi_Ch_scaffold06944_83595  | Ca_desi_scaffold   | 83595                          | [T/G]       | NA                                         |
| Ca_Desi_Ch_scaffold06944_83597  | Ca_desi_scaffold   | 83597                          | [T/G]       | NA                                         |
| Ca_Desi_Ch_scaffold06944_83611  | Ca_desi_scaffold   | 83611                          | [A/G]       | NA                                         |
| Ca_Desi_Ch_scaffold06944_87350  | Ca_desi_scaffold   | 87350                          | [T/G]       | NA                                         |
| Ca_Desi_Ch_scaffold06944_89377  | Ca_desi_scaffold   | 89377                          | [T/G]       | NA                                         |

| <b>SNP IDs</b>                  | <b>Chromosomes</b> | <b>Physical positions (bp)</b> | <b>SNPs</b> | <b>NCBI SNPdb accession IDs (NCBI_ss#)</b> |
|---------------------------------|--------------------|--------------------------------|-------------|--------------------------------------------|
| Ca_Desi_Ch_scaffold06944_106256 | Ca_desi_scaffold   | 106256                         | [T/C]       | NA                                         |
| Ca_Desi_Ch_scaffold06944_151661 | Ca_desi_scaffold   | 151661                         | [A/T]       | NA                                         |
| Ca_Desi_Ch_scaffold06944_151688 | Ca_desi_scaffold   | 151688                         | [G/T]       | NA                                         |
| Ca_Desi_Ch_scaffold06944_151692 | Ca_desi_scaffold   | 151692                         | [T/G]       | NA                                         |
| Ca_Desi_Ch_scaffold06944_151695 | Ca_desi_scaffold   | 151695                         | [A/T]       | NA                                         |
| Ca_Desi_Ch_scaffold06944_151698 | Ca_desi_scaffold   | 151698                         | [T/G]       | NA                                         |
| Ca_Desi_Ch_scaffold06944_151708 | Ca_desi_scaffold   | 151708                         | [A/G]       | NA                                         |
| Ca_Desi_Ch_scaffold06944_151712 | Ca_desi_scaffold   | 151712                         | [T/G]       | NA                                         |
| Ca_Desi_Ch_scaffold06944_151725 | Ca_desi_scaffold   | 151725                         | [T/G]       | NA                                         |
| Ca_Desi_Ch_scaffold06944_151747 | Ca_desi_scaffold   | 151747                         | [G/T]       | NA                                         |
| Ca_Desi_Ch_scaffold06944_151754 | Ca_desi_scaffold   | 151754                         | [A/T]       | NA                                         |
| Ca_Desi_Ch_scaffold06944_151757 | Ca_desi_scaffold   | 151757                         | [T/G]       | NA                                         |
| Ca_Desi_Ch_scaffold06944_151771 | Ca_desi_scaffold   | 151771                         | [T/G]       | NA                                         |
| Ca_Desi_Ch_scaffold06944_151839 | Ca_desi_scaffold   | 151839                         | [C/T]       | NA                                         |
| Ca_Desi_Ch_scaffold06944_151844 | Ca_desi_scaffold   | 151844                         | [A/G]       | NA                                         |
| Ca_Desi_Ch_scaffold06944_151856 | Ca_desi_scaffold   | 151856                         | [T/G]       | NA                                         |
| Ca_Desi_Ch_scaffold06944_151873 | Ca_desi_scaffold   | 151873                         | [C/T]       | NA                                         |
| Ca_Desi_Ch_scaffold06944_151879 | Ca_desi_scaffold   | 151879                         | [A/G]       | NA                                         |
| Ca_Desi_Ch_scaffold01236_338542 | Ca_desi_scaffold   | 338542                         | [T/G]       | NA                                         |
| Ca_Desi_Ch_scaffold01236_434186 | Ca_desi_scaffold   | 434186                         | [T/G]       | NA                                         |
| Ca_Desi_Ch_scaffold01236_434197 | Ca_desi_scaffold   | 434197                         | [T/C]       | NA                                         |
| Ca_Desi_Ch_scaffold01236_434202 | Ca_desi_scaffold   | 434202                         | [T/C]       | NA                                         |
| Ca_Desi_Ch_scaffold01236_434206 | Ca_desi_scaffold   | 434206                         | [A/C]       | NA                                         |
| Ca_Desi_Ch_scaffold01236_434218 | Ca_desi_scaffold   | 434218                         | [T/C]       | NA                                         |
| Ca_Desi_Ch_scaffold01236_439975 | Ca_desi_scaffold   | 439975                         | [A/T]       | NA                                         |
| Ca_Desi_Ch_scaffold01236_439986 | Ca_desi_scaffold   | 439986                         | [T/C]       | NA                                         |
| Ca_Desi_Ch_scaffold01236_439995 | Ca_desi_scaffold   | 439995                         | [T/C]       | NA                                         |
| Ca_Desi_Ch_scaffold01236_440028 | Ca_desi_scaffold   | 440028                         | [A/G]       | NA                                         |
| Ca_Desi_Ch_scaffold01236_440069 | Ca_desi_scaffold   | 440069                         | [A/C]       | NA                                         |
| Ca_Desi_Ch_scaffold01236_440084 | Ca_desi_scaffold   | 440084                         | [T/G]       | NA                                         |
| Ca_Desi_Ch_scaffold01236_440118 | Ca_desi_scaffold   | 440118                         | [A/T]       | NA                                         |
| Ca_Desi_Ch_scaffold01236_479122 | Ca_desi_scaffold   | 479122                         | [A/T]       | NA                                         |
| Ca_Desi_Ch_scaffold02278_135130 | Ca_desi_scaffold   | 135130                         | [C/A]       | NA                                         |
| Ca_Desi_Ch_scaffold02278_253358 | Ca_desi_scaffold   | 253358                         | [T/A]       | NA                                         |

| <b>SNP IDs</b>                    | <b>Chromosomes</b> | <b>Physical positions (bp)</b> | <b>SNPs</b> | <b>NCBI SNPdb accession IDs (NCBI_ss#)</b> |
|-----------------------------------|--------------------|--------------------------------|-------------|--------------------------------------------|
| Ca_Desig_Chr_scaffold02278_253697 | Ca_desig_scaffold  | 253697                         | [C/T]       | NA                                         |
| Ca_Desig_Chr_scaffold02278_254382 | Ca_desig_scaffold  | 254382                         | [T/G]       | NA                                         |
| Ca_Desig_Chr_scaffold02278_254402 | Ca_desig_scaffold  | 254402                         | [A/G]       | NA                                         |
| Ca_Desig_Chr_scaffold02278_254688 | Ca_desig_scaffold  | 254688                         | [T/C]       | NA                                         |
| Ca_Desig_Chr_scaffold02278_255917 | Ca_desig_scaffold  | 255917                         | [A/G]       | NA                                         |
| Ca_Desig_Chr_scaffold02278_258109 | Ca_desig_scaffold  | 258109                         | [C/A]       | NA                                         |
| Ca_Desig_Chr_scaffold02278_258112 | Ca_desig_scaffold  | 258112                         | [A/G]       | NA                                         |
| Ca_Desig_Chr_scaffold02278_258121 | Ca_desig_scaffold  | 258121                         | [A/C]       | NA                                         |
| Ca_Desig_Chr_scaffold02278_258137 | Ca_desig_scaffold  | 258137                         | [T/C]       | NA                                         |
| Ca_Desig_Chr_scaffold02278_258152 | Ca_desig_scaffold  | 258152                         | [T/G]       | NA                                         |
| Ca_Desig_Chr_scaffold02278_258165 | Ca_desig_scaffold  | 258165                         | [T/A]       | NA                                         |
| Ca_Desig_Chr_scaffold02278_258212 | Ca_desig_scaffold  | 258212                         | [T/G]       | NA                                         |
| Ca_Desig_Chr_scaffold02278_282914 | Ca_desig_scaffold  | 282914                         | [G/A]       | NA                                         |
| Ca_Desig_Chr_scaffold02278_388175 | Ca_desig_scaffold  | 388175                         | [G/A]       | NA                                         |
| Ca_Desig_Chr_scaffold02278_388191 | Ca_desig_scaffold  | 388191                         | [T/C]       | NA                                         |
| Ca_Desig_Chr_scaffold00333_42155  | Ca_desig_scaffold  | 42155                          | [T/C]       | NA                                         |
| Ca_Desig_Chr_scaffold00333_130915 | Ca_desig_scaffold  | 130915                         | [T/C]       | NA                                         |
| Ca_Desig_Chr_scaffold00333_142347 | Ca_desig_scaffold  | 142347                         | [T/A]       | NA                                         |
| Ca_Desig_Chr_scaffold00333_165554 | Ca_desig_scaffold  | 165554                         | [T/G]       | NA                                         |
| Ca_Desig_Chr_scaffold00333_165573 | Ca_desig_scaffold  | 165573                         | [T/G]       | NA                                         |
| Ca_Desig_Chr_scaffold00333_206249 | Ca_desig_scaffold  | 206249                         | [A/T]       | NA                                         |
| Ca_Desig_Chr_scaffold00333_206257 | Ca_desig_scaffold  | 206257                         | [T/C]       | NA                                         |
| Ca_Desig_Chr_scaffold02564_76057  | Ca_desig_scaffold  | 76057                          | [T/G]       | NA                                         |
| Ca_Desig_Chr_scaffold02564_76064  | Ca_desig_scaffold  | 76064                          | [A/G]       | NA                                         |
| Ca_Desig_Chr_scaffold02564_76066  | Ca_desig_scaffold  | 76066                          | [T/C]       | NA                                         |
| Ca_Desig_Chr_scaffold02564_76101  | Ca_desig_scaffold  | 76101                          | [T/A]       | NA                                         |
| Ca_Desig_Chr_scaffold02564_118022 | Ca_desig_scaffold  | 118022                         | [T/C]       | NA                                         |
| Ca_Desig_Chr_scaffold00356_31433  | Ca_desig_scaffold  | 31433                          | [T/G]       | NA                                         |
| Ca_Desig_Chr_scaffold00356_34303  | Ca_desig_scaffold  | 34303                          | [T/G]       | NA                                         |
| Ca_Desig_Chr_scaffold00356_46676  | Ca_desig_scaffold  | 46676                          | [C/T]       | NA                                         |
| Ca_Desig_Chr_scaffold00356_46686  | Ca_desig_scaffold  | 46686                          | [A/G]       | NA                                         |
| Ca_Desig_Chr_scaffold00356_63211  | Ca_desig_scaffold  | 63211                          | [C/A]       | NA                                         |
| Ca_Desig_Chr_scaffold00356_63212  | Ca_desig_scaffold  | 63212                          | [T/G]       | NA                                         |
| Ca_Desig_Chr_scaffold00356_63213  | Ca_desig_scaffold  | 63213                          | [G/A]       | NA                                         |



| <b>SNP IDs</b>                    | <b>Chromosomes</b> | <b>Physical positions (bp)</b> | <b>SNPs</b> | <b>NCBI SNPdb accession IDs (NCBI_ss#)</b> |
|-----------------------------------|--------------------|--------------------------------|-------------|--------------------------------------------|
| Ca_Desig_Chr_scaffold00356_63214  | Ca_desig_scaffold  | 63214                          | [A/T]       | NA                                         |
| Ca_Desig_Chr_scaffold00356_63215  | Ca_desig_scaffold  | 63215                          | [T/C]       | NA                                         |
| Ca_Desig_Chr_scaffold00356_64236  | Ca_desig_scaffold  | 64236                          | [A/C]       | NA                                         |
| Ca_Desig_Chr_scaffold00356_67813  | Ca_desig_scaffold  | 67813                          | [T/G]       | NA                                         |
| Ca_Desig_Chr_scaffold00356_67845  | Ca_desig_scaffold  | 67845                          | [A/G]       | NA                                         |
| Ca_Desig_Chr_scaffold00356_80629  | Ca_desig_scaffold  | 80629                          | [A/G]       | NA                                         |
| Ca_Desig_Chr_scaffold00356_80652  | Ca_desig_scaffold  | 80652                          | [A/C]       | NA                                         |
| Ca_Desig_Chr_scaffold00356_80655  | Ca_desig_scaffold  | 80655                          | [T/C]       | NA                                         |
| Ca_Desig_Chr_scaffold00356_80667  | Ca_desig_scaffold  | 80667                          | [A/C]       | NA                                         |
| Ca_Desig_Chr_scaffold00356_80673  | Ca_desig_scaffold  | 80673                          | [T/C]       | NA                                         |
| Ca_Desig_Chr_scaffold00356_80679  | Ca_desig_scaffold  | 80679                          | [T/C]       | NA                                         |
| Ca_Desig_Chr_scaffold00356_176433 | Ca_desig_scaffold  | 176433                         | [C/A]       | NA                                         |
| Ca_Desig_Chr_scaffold00356_176439 | Ca_desig_scaffold  | 176439                         | [G/A]       | NA                                         |
| Ca_Desig_Chr_scaffold00356_237648 | Ca_desig_scaffold  | 237648                         | [A/G]       | NA                                         |
| Ca_Desig_Chr_scaffold00356_237674 | Ca_desig_scaffold  | 237674                         | [T/G]       | NA                                         |
| Ca_Desig_Chr_scaffold00356_237682 | Ca_desig_scaffold  | 237682                         | [T/C]       | NA                                         |
| Ca_Desig_Chr_scaffold04453_1512   | Ca_desig_scaffold  | 1512                           | [T/C]       | NA                                         |
| Ca_Desig_Chr_scaffold04453_94220  | Ca_desig_scaffold  | 94220                          | [A/G]       | NA                                         |
| Ca_Desig_Chr_scaffold04453_94228  | Ca_desig_scaffold  | 94228                          | [T/C]       | NA                                         |
| Ca_Desig_Chr_scaffold04453_94238  | Ca_desig_scaffold  | 94238                          | [T/G]       | NA                                         |
| Ca_Desig_Chr_scaffold04453_94253  | Ca_desig_scaffold  | 94253                          | [T/C]       | NA                                         |
| Ca_Desig_Chr_scaffold04453_161680 | Ca_desig_scaffold  | 161680                         | [A/C]       | NA                                         |
| Ca_Desig_Chr_scaffold04453_161720 | Ca_desig_scaffold  | 161720                         | [T/C]       | NA                                         |
| Ca_Desig_Chr_scaffold00977_78541  | Ca_desig_scaffold  | 78541                          | [T/C]       | NA                                         |
| Ca_Desig_Chr_scaffold00977_124056 | Ca_desig_scaffold  | 124056                         | [A/C]       | NA                                         |
| Ca_Desig_Chr_scaffold00977_124197 | Ca_desig_scaffold  | 124197                         | [A/G]       | NA                                         |
| Ca_Desig_Chr_scaffold00977_124203 | Ca_desig_scaffold  | 124203                         | [A/C]       | NA                                         |
| Ca_Desig_Chr_scaffold00977_124210 | Ca_desig_scaffold  | 124210                         | [A/G]       | NA                                         |
| Ca_Desig_Chr_scaffold00977_124221 | Ca_desig_scaffold  | 124221                         | [A/C]       | NA                                         |
| Ca_Desig_Chr_scaffold00977_124235 | Ca_desig_scaffold  | 124235                         | [A/G]       | NA                                         |
| Ca_Desig_Chr_scaffold00977_124239 | Ca_desig_scaffold  | 124239                         | [T/C]       | NA                                         |
| Ca_Desig_Chr_scaffold00977_124254 | Ca_desig_scaffold  | 124254                         | [T/A]       | NA                                         |
| Ca_Desig_Chr_scaffold00977_153917 | Ca_desig_scaffold  | 153917                         | [T/C]       | NA                                         |
| Ca_Desig_Chr_scaffold00977_153927 | Ca_desig_scaffold  | 153927                         | [A/C]       | NA                                         |

| <b>SNP IDs</b>                  | <b>Chromosomes</b> | <b>Physical positions (bp)</b> | <b>SNPs</b> | <b>NCBI SNPdb accession IDs (NCBI_ss#)</b> |
|---------------------------------|--------------------|--------------------------------|-------------|--------------------------------------------|
| Ca_Desi_Ch_scaffold00977_210952 | Ca_desi_scaffold   | 210952                         | [A/T]       | NA                                         |
| Ca_Desi_Ch_scaffold00977_243442 | Ca_desi_scaffold   | 243442                         | [C/T]       | NA                                         |
| Ca_Desi_Ch_scaffold00977_259014 | Ca_desi_scaffold   | 259014                         | [A/G]       | NA                                         |
| Ca_Desi_Ch_scaffold00977_259770 | Ca_desi_scaffold   | 259770                         | [A/C]       | NA                                         |
| Ca_Desi_Ch_scaffold00977_259775 | Ca_desi_scaffold   | 259775                         | [T/C]       | NA                                         |
| Ca_Desi_Ch_scaffold00977_259785 | Ca_desi_scaffold   | 259785                         | [A/C]       | NA                                         |
| Ca_Desi_Ch_scaffold00376_18827  | Ca_desi_scaffold   | 18827                          | [G/A]       | NA                                         |
| Ca_Desi_Ch_scaffold00376_63536  | Ca_desi_scaffold   | 63536                          | [A/G]       | NA                                         |
| Ca_Desi_Ch_scaffold00376_174225 | Ca_desi_scaffold   | 174225                         | [A/G]       | NA                                         |
| Ca_Desi_Ch_scaffold00390_11291  | Ca_desi_scaffold   | 11291                          | [C/T]       | NA                                         |
| Ca_Desi_Ch_scaffold00390_20811  | Ca_desi_scaffold   | 20811                          | [A/C]       | NA                                         |
| Ca_Desi_Ch_scaffold00390_57650  | Ca_desi_scaffold   | 57650                          | [A/G]       | NA                                         |
| Ca_Desi_Ch_scaffold00390_57677  | Ca_desi_scaffold   | 57677                          | [T/A]       | NA                                         |
| Ca_Desi_Ch_scaffold00390_97680  | Ca_desi_scaffold   | 97680                          | [A/C]       | NA                                         |
| Ca_Desi_Ch_scaffold00390_102769 | Ca_desi_scaffold   | 102769                         | [A/C]       | NA                                         |
| Ca_Desi_Ch_scaffold00390_102781 | Ca_desi_scaffold   | 102781                         | [A/G]       | NA                                         |
| Ca_Desi_Ch_scaffold00390_102792 | Ca_desi_scaffold   | 102792                         | [A/C]       | NA                                         |
| Ca_Desi_Ch_scaffold00390_102801 | Ca_desi_scaffold   | 102801                         | [A/G]       | NA                                         |
| Ca_Desi_Ch_scaffold00390_102807 | Ca_desi_scaffold   | 102807                         | [A/G]       | NA                                         |
| Ca_Desi_Ch_scaffold00390_127547 | Ca_desi_scaffold   | 127547                         | [T/G]       | NA                                         |
| Ca_Desi_Ch_scaffold00390_127557 | Ca_desi_scaffold   | 127557                         | [A/C]       | NA                                         |
| Ca_Desi_Ch_scaffold00390_127574 | Ca_desi_scaffold   | 127574                         | [A/G]       | NA                                         |
| Ca_Desi_Ch_scaffold00390_127583 | Ca_desi_scaffold   | 127583                         | [A/C]       | NA                                         |
| Ca_Desi_Ch_scaffold00390_128906 | Ca_desi_scaffold   | 128906                         | [A/C]       | NA                                         |
| Ca_Desi_Ch_scaffold00390_128932 | Ca_desi_scaffold   | 128932                         | [A/G]       | NA                                         |
| Ca_Desi_Ch_scaffold00390_128942 | Ca_desi_scaffold   | 128942                         | [T/C]       | NA                                         |
| Ca_Desi_Ch_scaffold00390_128951 | Ca_desi_scaffold   | 128951                         | [A/C]       | NA                                         |
| Ca_Desi_Ch_scaffold00390_156457 | Ca_desi_scaffold   | 156457                         | [T/C]       | NA                                         |
| Ca_Desi_Ch_scaffold00390_156458 | Ca_desi_scaffold   | 156458                         | [C/T]       | NA                                         |
| Ca_Desi_Ch_scaffold00390_156475 | Ca_desi_scaffold   | 156475                         | [C/T]       | NA                                         |
| Ca_Desi_Ch_scaffold00390_156476 | Ca_desi_scaffold   | 156476                         | [T/C]       | NA                                         |
| Ca_Desi_Ch_scaffold00390_156478 | Ca_desi_scaffold   | 156478                         | [G/A]       | NA                                         |
| Ca_Desi_Ch_scaffold00390_156487 | Ca_desi_scaffold   | 156487                         | [T/C]       | NA                                         |
| Ca_Desi_Ch_scaffold00390_156491 | Ca_desi_scaffold   | 156491                         | [T/C]       | NA                                         |

| <b>SNP IDs</b>                    | <b>Chromosomes</b> | <b>Physical positions (bp)</b> | <b>SNPs</b> | <b>NCBI SNPdb accession IDs (NCBI_ss#)</b> |
|-----------------------------------|--------------------|--------------------------------|-------------|--------------------------------------------|
| Ca_Desig_Chr_scaffold00390_156509 | Ca_desig_scaffold  | 156509                         | [A/G]       | NA                                         |
| Ca_Desig_Chr_scaffold00401_726    | Ca_desig_scaffold  | 726                            | [C/T]       | NA                                         |
| Ca_Desig_Chr_scaffold00401_805    | Ca_desig_scaffold  | 805                            | [C/T]       | NA                                         |
| Ca_Desig_Chr_scaffold00401_179675 | Ca_desig_scaffold  | 179675                         | [G/T]       | NA                                         |
| Ca_Desig_Chr_scaffold00401_179676 | Ca_desig_scaffold  | 179676                         | [T/G]       | NA                                         |
| Ca_Desig_Chr_scaffold00401_179678 | Ca_desig_scaffold  | 179678                         | [C/T]       | NA                                         |
| Ca_Desig_Chr_scaffold00401_179681 | Ca_desig_scaffold  | 179681                         | [T/A]       | NA                                         |
| Ca_Desig_Chr_scaffold00401_179685 | Ca_desig_scaffold  | 179685                         | [A/C]       | NA                                         |
| Ca_Desig_Chr_scaffold00401_179688 | Ca_desig_scaffold  | 179688                         | [G/C]       | NA                                         |
| Ca_Desig_Chr_scaffold00401_179689 | Ca_desig_scaffold  | 179689                         | [C/A]       | NA                                         |
| Ca_Desig_Chr_scaffold00401_179691 | Ca_desig_scaffold  | 179691                         | [A/C]       | NA                                         |
| Ca_Desig_Chr_scaffold00401_219763 | Ca_desig_scaffold  | 219763                         | [T/G]       | NA                                         |
| Ca_Desig_Chr_scaffold00401_219770 | Ca_desig_scaffold  | 219770                         | [A/C]       | NA                                         |
| Ca_Desig_Chr_scaffold00401_219797 | Ca_desig_scaffold  | 219797                         | [T/C]       | NA                                         |
| Ca_Desig_Chr_scaffold00415_19643  | Ca_desig_scaffold  | 19643                          | [T/A]       | NA                                         |
| Ca_Desig_Chr_scaffold00415_19650  | Ca_desig_scaffold  | 19650                          | [G/C]       | NA                                         |
| Ca_Desig_Chr_scaffold00415_25093  | Ca_desig_scaffold  | 25093                          | [T/C]       | NA                                         |
| Ca_Desig_Chr_scaffold00415_25185  | Ca_desig_scaffold  | 25185                          | [T/A]       | NA                                         |
| Ca_Desig_Chr_scaffold00415_25214  | Ca_desig_scaffold  | 25214                          | [T/C]       | NA                                         |
| Ca_Desig_Chr_scaffold00415_37516  | Ca_desig_scaffold  | 37516                          | [A/G]       | NA                                         |
| Ca_Desig_Chr_scaffold00415_39687  | Ca_desig_scaffold  | 39687                          | [A/G]       | NA                                         |
| Ca_Desig_Chr_scaffold00415_227544 | Ca_desig_scaffold  | 227544                         | [G/T]       | NA                                         |
| Ca_Desig_Chr_scaffold00415_227548 | Ca_desig_scaffold  | 227548                         | [A/T]       | NA                                         |
| Ca_Desig_Chr_scaffold00416_87030  | Ca_desig_scaffold  | 87030                          | [A/C]       | NA                                         |
| Ca_Desig_Chr_scaffold00416_136156 | Ca_desig_scaffold  | 136156                         | [A/C]       | NA                                         |
| Ca_Desig_Chr_scaffold11144_34007  | Ca_desig_scaffold  | 34007                          | [A/C]       | NA                                         |
| Ca_Desig_Chr_scaffold11144_34112  | Ca_desig_scaffold  | 34112                          | [T/C]       | NA                                         |
| Ca_Desig_Chr_scaffold11144_34128  | Ca_desig_scaffold  | 34128                          | [A/C]       | NA                                         |
| Ca_Desig_Chr_scaffold11144_53296  | Ca_desig_scaffold  | 53296                          | [T/C]       | NA                                         |
| Ca_Desig_Chr_scaffold11144_53300  | Ca_desig_scaffold  | 53300                          | [A/C]       | NA                                         |
| Ca_Desig_Chr_scaffold11144_53311  | Ca_desig_scaffold  | 53311                          | [A/C]       | NA                                         |
| Ca_Desig_Chr_scaffold11144_53328  | Ca_desig_scaffold  | 53328                          | [A/G]       | NA                                         |
| Ca_Desig_Chr_scaffold11144_53367  | Ca_desig_scaffold  | 53367                          | [T/G]       | NA                                         |
| Ca_Desig_Chr_scaffold11144_53503  | Ca_desig_scaffold  | 53503                          | [A/C]       | NA                                         |

| <b>SNP IDs</b>                    | <b>Chromosomes</b> | <b>Physical positions (bp)</b> | <b>SNPs</b> | <b>NCBI SNPdb accession IDs (NCBI_ss#)</b> |
|-----------------------------------|--------------------|--------------------------------|-------------|--------------------------------------------|
| Ca_Desig_Chr_scaffold11144_57614  | Ca_desig_scaffold  | 57614                          | [T/C]       | NA                                         |
| Ca_Desig_Chr_scaffold11144_57633  | Ca_desig_scaffold  | 57633                          | [T/A]       | NA                                         |
| Ca_Desig_Chr_scaffold11144_57730  | Ca_desig_scaffold  | 57730                          | [G/A]       | NA                                         |
| Ca_Desig_Chr_scaffold11144_57736  | Ca_desig_scaffold  | 57736                          | [T/G]       | NA                                         |
| Ca_Desig_Chr_scaffold11144_92342  | Ca_desig_scaffold  | 92342                          | [A/G]       | NA                                         |
| Ca_Desig_Chr_scaffold11144_92344  | Ca_desig_scaffold  | 92344                          | [T/C]       | NA                                         |
| Ca_Desig_Chr_scaffold11144_92355  | Ca_desig_scaffold  | 92355                          | [T/C]       | NA                                         |
| Ca_Desig_Chr_scaffold11144_97856  | Ca_desig_scaffold  | 97856                          | [T/C]       | NA                                         |
| Ca_Desig_Chr_scaffold11144_180066 | Ca_desig_scaffold  | 180066                         | [G/C]       | NA                                         |
| Ca_Desig_Chr_scaffold11144_180071 | Ca_desig_scaffold  | 180071                         | [T/G]       | NA                                         |
| Ca_Desig_Chr_scaffold11144_180081 | Ca_desig_scaffold  | 180081                         | [A/G]       | NA                                         |
| Ca_Desig_Chr_scaffold11144_180087 | Ca_desig_scaffold  | 180087                         | [A/G]       | NA                                         |
| Ca_Desig_Chr_scaffold00430_88344  | Ca_desig_scaffold  | 88344                          | [G/A]       | NA                                         |
| Ca_Desig_Chr_scaffold00430_88352  | Ca_desig_scaffold  | 88352                          | [C/T]       | NA                                         |
| Ca_Desig_Chr_scaffold01008_10460  | Ca_desig_scaffold  | 10460                          | [T/C]       | NA                                         |
| Ca_Desig_Chr_scaffold01008_35001  | Ca_desig_scaffold  | 35001                          | [A/C]       | NA                                         |
| Ca_Desig_Chr_scaffold00441_141648 | Ca_desig_scaffold  | 141648                         | [T/C]       | NA                                         |
| Ca_Desig_Chr_scaffold00441_141685 | Ca_desig_scaffold  | 141685                         | [A/G]       | NA                                         |
| Ca_Desig_Chr_scaffold13504_24544  | Ca_desig_scaffold  | 24544                          | [A/C]       | NA                                         |
| Ca_Desig_Chr_scaffold13504_66258  | Ca_desig_scaffold  | 66258                          | [T/C]       | NA                                         |
| Ca_Desig_Chr_scaffold13504_66278  | Ca_desig_scaffold  | 66278                          | [G/A]       | NA                                         |
| Ca_Desig_Chr_scaffold13504_72692  | Ca_desig_scaffold  | 72692                          | [A/G]       | NA                                         |
| Ca_Desig_Chr_scaffold13504_92921  | Ca_desig_scaffold  | 92921                          | [T/C]       | NA                                         |
| Ca_Desig_Chr_scaffold13504_92930  | Ca_desig_scaffold  | 92930                          | [A/G]       | NA                                         |
| Ca_Desig_Chr_scaffold13504_92936  | Ca_desig_scaffold  | 92936                          | [T/C]       | NA                                         |
| Ca_Desig_Chr_scaffold13504_92950  | Ca_desig_scaffold  | 92950                          | [A/G]       | NA                                         |
| Ca_Desig_Chr_scaffold13504_145901 | Ca_desig_scaffold  | 145901                         | [T/C]       | NA                                         |
| Ca_Desig_Chr_scaffold13504_145903 | Ca_desig_scaffold  | 145903                         | [T/C]       | NA                                         |
| Ca_Desig_Chr_scaffold13504_145905 | Ca_desig_scaffold  | 145905                         | [G/T]       | NA                                         |
| Ca_Desig_Chr_scaffold00472_22527  | Ca_desig_scaffold  | 22527                          | [A/T]       | NA                                         |
| Ca_Desig_Chr_scaffold00472_94938  | Ca_desig_scaffold  | 94938                          | [T/G]       | NA                                         |
| Ca_Desig_Chr_scaffold00472_94939  | Ca_desig_scaffold  | 94939                          | [G/A]       | NA                                         |
| Ca_Desig_Chr_scaffold00472_120402 | Ca_desig_scaffold  | 120402                         | [C/A]       | NA                                         |
| Ca_Desig_Chr_scaffold00472_120410 | Ca_desig_scaffold  | 120410                         | [T/A]       | NA                                         |

| <b>SNP IDs</b>                    | <b>Chromosomes</b> | <b>Physical positions (bp)</b> | <b>SNPs</b> | <b>NCBI SNPdb accession IDs (NCBI_ss#)</b> |
|-----------------------------------|--------------------|--------------------------------|-------------|--------------------------------------------|
| Ca_Desig_Chr_scaffold00472_120450 | Ca_desig_scaffold  | 120450                         | [T/A]       | NA                                         |
| Ca_Desig_Chr_scaffold00482_232234 | Ca_desig_scaffold  | 232234                         | [T/G]       | NA                                         |
| Ca_Desig_Chr_scaffold00482_232246 | Ca_desig_scaffold  | 232246                         | [C/A]       | NA                                         |
| Ca_Desig_Chr_scaffold00482_232247 | Ca_desig_scaffold  | 232247                         | [T/G]       | NA                                         |
| Ca_Desig_Chr_scaffold00482_232286 | Ca_desig_scaffold  | 232286                         | [A/G]       | NA                                         |
| Ca_Desig_Chr_scaffold00482_232287 | Ca_desig_scaffold  | 232287                         | [C/T]       | NA                                         |
| Ca_Desig_Chr_scaffold00482_232295 | Ca_desig_scaffold  | 232295                         | [G/A]       | NA                                         |
| Ca_Desig_Chr_scaffold00482_232319 | Ca_desig_scaffold  | 232319                         | [C/A]       | NA                                         |
| Ca_Desig_Chr_scaffold00482_232323 | Ca_desig_scaffold  | 232323                         | [C/T]       | NA                                         |
| Ca_Desig_Chr_scaffold00482_232360 | Ca_desig_scaffold  | 232360                         | [T/C]       | NA                                         |
| Ca_Desig_Chr_scaffold00482_232384 | Ca_desig_scaffold  | 232384                         | [A/C]       | NA                                         |
| Ca_Desig_Chr_scaffold00482_232410 | Ca_desig_scaffold  | 232410                         | [T/G]       | NA                                         |
| Ca_Desig_Chr_scaffold00482_232431 | Ca_desig_scaffold  | 232431                         | [T/G]       | NA                                         |
| Ca_Desig_Chr_scaffold00482_232457 | Ca_desig_scaffold  | 232457                         | [T/G]       | NA                                         |
| Ca_Desig_Chr_scaffold00482_232488 | Ca_desig_scaffold  | 232488                         | [C/G]       | NA                                         |
| Ca_Desig_Chr_scaffold00482_232539 | Ca_desig_scaffold  | 232539                         | [T/G]       | NA                                         |
| Ca_Desig_Chr_scaffold00482_232589 | Ca_desig_scaffold  | 232589                         | [A/G]       | NA                                         |
| Ca_Desig_Chr_scaffold00488_17583  | Ca_desig_scaffold  | 17583                          | [T/C]       | NA                                         |
| Ca_Desig_Chr_scaffold00488_17585  | Ca_desig_scaffold  | 17585                          | [G/C]       | NA                                         |
| Ca_Desig_Chr_scaffold00488_17591  | Ca_desig_scaffold  | 17591                          | [A/G]       | NA                                         |
| Ca_Desig_Chr_scaffold00488_64537  | Ca_desig_scaffold  | 64537                          | [T/C]       | NA                                         |
| Ca_Desig_Chr_scaffold00488_98612  | Ca_desig_scaffold  | 98612                          | [T/G]       | NA                                         |
| Ca_Desig_Chr_scaffold00488_98693  | Ca_desig_scaffold  | 98693                          | [T/C]       | NA                                         |
| Ca_Desig_Chr_scaffold00488_98764  | Ca_desig_scaffold  | 98764                          | [C/T]       | NA                                         |
| Ca_Desig_Chr_scaffold00488_120769 | Ca_desig_scaffold  | 120769                         | [C/T]       | NA                                         |
| Ca_Desig_Chr_scaffold00488_138651 | Ca_desig_scaffold  | 138651                         | [A/G]       | NA                                         |
| Ca_Desig_Chr_scaffold00488_138674 | Ca_desig_scaffold  | 138674                         | [C/G]       | NA                                         |
| Ca_Desig_Chr_scaffold00488_146435 | Ca_desig_scaffold  | 146435                         | [T/C]       | NA                                         |
| Ca_Desig_Chr_scaffold00488_146453 | Ca_desig_scaffold  | 146453                         | [T/G]       | NA                                         |
| Ca_Desig_Chr_scaffold00488_146690 | Ca_desig_scaffold  | 146690                         | [C/A]       | NA                                         |
| Ca_Desig_Chr_scaffold00488_146692 | Ca_desig_scaffold  | 146692                         | [A/C]       | NA                                         |
| Ca_Desig_Chr_scaffold00488_156236 | Ca_desig_scaffold  | 156236                         | [T/C]       | NA                                         |
| Ca_Desig_Chr_scaffold00488_156237 | Ca_desig_scaffold  | 156237                         | [A/G]       | NA                                         |
| Ca_Desig_Chr_scaffold00488_159684 | Ca_desig_scaffold  | 159684                         | [T/G]       | NA                                         |

| <b>SNP IDs</b>                    | <b>Chromosomes</b> | <b>Physical positions (bp)</b> | <b>SNPs</b> | <b>NCBI SNPdb accession IDs (NCBI_ss#)</b> |
|-----------------------------------|--------------------|--------------------------------|-------------|--------------------------------------------|
| Ca_Desig_Chr_scaffold00488_159688 | Ca_desig_scaffold  | 159688                         | [A/G]       | NA                                         |
| Ca_Desig_Chr_scaffold00488_159785 | Ca_desig_scaffold  | 159785                         | [A/G]       | NA                                         |
| Ca_Desig_Chr_scaffold00498_11332  | Ca_desig_scaffold  | 11332                          | [T/G]       | NA                                         |
| Ca_Desig_Chr_scaffold00498_12537  | Ca_desig_scaffold  | 12537                          | [A/G]       | NA                                         |
| Ca_Desig_Chr_scaffold00498_12572  | Ca_desig_scaffold  | 12572                          | [T/G]       | NA                                         |
| Ca_Desig_Chr_scaffold00498_47620  | Ca_desig_scaffold  | 47620                          | [T/G]       | NA                                         |
| Ca_Desig_Chr_scaffold00498_48336  | Ca_desig_scaffold  | 48336                          | [A/G]       | NA                                         |
| Ca_Desig_Chr_scaffold00498_48357  | Ca_desig_scaffold  | 48357                          | [T/C]       | NA                                         |
| Ca_Desig_Chr_scaffold00498_48360  | Ca_desig_scaffold  | 48360                          | [A/C]       | NA                                         |
| Ca_Desig_Chr_scaffold00498_48378  | Ca_desig_scaffold  | 48378                          | [T/A]       | NA                                         |
| Ca_Desig_Chr_scaffold00498_48379  | Ca_desig_scaffold  | 48379                          | [A/G]       | NA                                         |
| Ca_Desig_Chr_scaffold00498_48385  | Ca_desig_scaffold  | 48385                          | [A/G]       | NA                                         |
| Ca_Desig_Chr_scaffold00498_138069 | Ca_desig_scaffold  | 138069                         | [A/T]       | NA                                         |
| Ca_Desig_Chr_scaffold00498_138094 | Ca_desig_scaffold  | 138094                         | [T/C]       | NA                                         |
| Ca_Desig_Chr_scaffold00498_147441 | Ca_desig_scaffold  | 147441                         | [T/C]       | NA                                         |
| Ca_Desig_Chr_scaffold00498_147450 | Ca_desig_scaffold  | 147450                         | [A/G]       | NA                                         |
| Ca_Desig_Chr_scaffold00498_158328 | Ca_desig_scaffold  | 158328                         | [T/G]       | NA                                         |
| Ca_Desig_Chr_scaffold00498_214772 | Ca_desig_scaffold  | 214772                         | [T/G]       | NA                                         |
| Ca_Desig_Chr_scaffold00498_214782 | Ca_desig_scaffold  | 214782                         | [T/G]       | NA                                         |
| Ca_Desig_Chr_scaffold00498_214818 | Ca_desig_scaffold  | 214818                         | [A/T]       | NA                                         |
| Ca_Desig_Chr_scaffold00498_214953 | Ca_desig_scaffold  | 214953                         | [T/A]       | NA                                         |
| Ca_Desig_Chr_scaffold00500_153867 | Ca_desig_scaffold  | 153867                         | [G/T]       | NA                                         |
| Ca_Desig_Chr_scaffold00500_153892 | Ca_desig_scaffold  | 153892                         | [T/C]       | NA                                         |
| Ca_Desig_Chr_scaffold00500_153911 | Ca_desig_scaffold  | 153911                         | [C/T]       | NA                                         |
| Ca_Desig_Chr_scaffold03162_229136 | Ca_desig_scaffold  | 229136                         | [A/C]       | NA                                         |
| Ca_Desig_Chr_scaffold03162_229146 | Ca_desig_scaffold  | 229146                         | [A/C]       | NA                                         |
| Ca_Desig_Chr_scaffold03162_229153 | Ca_desig_scaffold  | 229153                         | [T/C]       | NA                                         |
| Ca_Desig_Chr_scaffold03162_229155 | Ca_desig_scaffold  | 229155                         | [G/T]       | NA                                         |
| Ca_Desig_Chr_scaffold03162_229162 | Ca_desig_scaffold  | 229162                         | [T/C]       | NA                                         |
| Ca_Desig_Chr_scaffold03162_261878 | Ca_desig_scaffold  | 261878                         | [T/C]       | NA                                         |
| Ca_Desig_Chr_scaffold03162_261897 | Ca_desig_scaffold  | 261897                         | [T/C]       | NA                                         |
| Ca_Desig_Chr_scaffold03162_261938 | Ca_desig_scaffold  | 261938                         | [A/T]       | NA                                         |
| Ca_Desig_Chr_scaffold01149_20345  | Ca_desig_scaffold  | 20345                          | [T/G]       | NA                                         |
| Ca_Desig_Chr_scaffold01149_20347  | Ca_desig_scaffold  | 20347                          | [T/G]       | NA                                         |

| <b>SNP IDs</b>                   | <b>Chromosomes</b> | <b>Physical positions (bp)</b> | <b>SNPs</b> | <b>NCBI SNPdb accession IDs (NCBI_ss#)</b> |
|----------------------------------|--------------------|--------------------------------|-------------|--------------------------------------------|
| Ca_DesigChr_scaffold01149_20356  | Ca_desig_scaffold  | 20356                          | [A/C]       | NA                                         |
| Ca_DesigChr_scaffold01149_20357  | Ca_desig_scaffold  | 20357                          | [A/G]       | NA                                         |
| Ca_DesigChr_scaffold01149_20358  | Ca_desig_scaffold  | 20358                          | [A/G]       | NA                                         |
| Ca_DesigChr_scaffold01149_22198  | Ca_desig_scaffold  | 22198                          | [A/C]       | NA                                         |
| Ca_DesigChr_scaffold01149_22209  | Ca_desig_scaffold  | 22209                          | [A/C]       | NA                                         |
| Ca_DesigChr_scaffold01149_144862 | Ca_desig_scaffold  | 144862                         | [A/G]       | NA                                         |
| Ca_DesigChr_scaffold01149_231983 | Ca_desig_scaffold  | 231983                         | [T/G]       | NA                                         |
| Ca_DesigChr_scaffold00514_66060  | Ca_desig_scaffold  | 66060                          | [T/G]       | NA                                         |
| Ca_DesigChr_scaffold00514_66075  | Ca_desig_scaffold  | 66075                          | [A/C]       | NA                                         |
| Ca_DesigChr_scaffold00514_66080  | Ca_desig_scaffold  | 66080                          | [A/G]       | NA                                         |
| Ca_DesigChr_scaffold00514_66094  | Ca_desig_scaffold  | 66094                          | [T/G]       | NA                                         |
| Ca_DesigChr_scaffold00514_66101  | Ca_desig_scaffold  | 66101                          | [T/C]       | NA                                         |
| Ca_DesigChr_scaffold00514_179182 | Ca_desig_scaffold  | 179182                         | [T/C]       | NA                                         |
| Ca_DesigChr_scaffold00514_195426 | Ca_desig_scaffold  | 195426                         | [A/G]       | NA                                         |
| Ca_DesigChr_scaffold00514_195436 | Ca_desig_scaffold  | 195436                         | [T/G]       | NA                                         |
| Ca_DesigChr_scaffold00514_195442 | Ca_desig_scaffold  | 195442                         | [A/G]       | NA                                         |
| Ca_DesigChr_scaffold00514_206739 | Ca_desig_scaffold  | 206739                         | [T/A]       | NA                                         |
| Ca_DesigChr_scaffold00514_206835 | Ca_desig_scaffold  | 206835                         | [A/C]       | NA                                         |
| Ca_DesigChr_scaffold00514_206854 | Ca_desig_scaffold  | 206854                         | [A/T]       | NA                                         |
| Ca_DesigChr_scaffold00514_206873 | Ca_desig_scaffold  | 206873                         | [T/C]       | NA                                         |
| Ca_DesigChr_scaffold00514_206878 | Ca_desig_scaffold  | 206878                         | [C/A]       | NA                                         |
| Ca_DesigChr_scaffold00514_206886 | Ca_desig_scaffold  | 206886                         | [A/G]       | NA                                         |
| Ca_DesigChr_scaffold00514_206907 | Ca_desig_scaffold  | 206907                         | [T/C]       | NA                                         |
| Ca_DesigChr_scaffold00514_206916 | Ca_desig_scaffold  | 206916                         | [T/C]       | NA                                         |
| Ca_DesigChr_scaffold00934_148429 | Ca_desig_scaffold  | 148429                         | [G/T]       | NA                                         |
| Ca_DesigChr_scaffold00934_148438 | Ca_desig_scaffold  | 148438                         | [T/A]       | NA                                         |
| Ca_DesigChr_scaffold00934_148444 | Ca_desig_scaffold  | 148444                         | [G/T]       | NA                                         |
| Ca_DesigChr_scaffold00934_152760 | Ca_desig_scaffold  | 152760                         | [A/G]       | NA                                         |
| Ca_DesigChr_scaffold00934_152790 | Ca_desig_scaffold  | 152790                         | [T/G]       | NA                                         |
| Ca_DesigChr_scaffold00934_258008 | Ca_desig_scaffold  | 258008                         | [C/G]       | NA                                         |
| Ca_DesigChr_scaffold00934_258009 | Ca_desig_scaffold  | 258009                         | [C/A]       | NA                                         |
| Ca_DesigChr_scaffold00934_258383 | Ca_desig_scaffold  | 258383                         | [T/C]       | NA                                         |
| Ca_DesigChr_scaffold00934_258386 | Ca_desig_scaffold  | 258386                         | [T/C]       | NA                                         |
| Ca_DesigChr_scaffold00934_258387 | Ca_desig_scaffold  | 258387                         | [A/G]       | NA                                         |

| <b>SNP IDs</b>                  | <b>Chromosomes</b> | <b>Physical positions (bp)</b> | <b>SNPs</b> | <b>NCBI SNPdb accession IDs (NCBI_ss#)</b> |
|---------------------------------|--------------------|--------------------------------|-------------|--------------------------------------------|
| Ca_Desi_Ch_scaffold00934_258390 | Ca_desi_scaffold   | 258390                         | [A/G]       | NA                                         |
| Ca_Desi_Ch_scaffold00934_258391 | Ca_desi_scaffold   | 258391                         | [T/C]       | NA                                         |
| Ca_Desi_Ch_scaffold00934_258393 | Ca_desi_scaffold   | 258393                         | [C/T]       | NA                                         |
| Ca_Desi_Ch_scaffold00934_258397 | Ca_desi_scaffold   | 258397                         | [T/C]       | NA                                         |
| Ca_Desi_Ch_scaffold00934_258399 | Ca_desi_scaffold   | 258399                         | [A/G]       | NA                                         |
| Ca_Desi_Ch_scaffold00934_258400 | Ca_desi_scaffold   | 258400                         | [T/C]       | NA                                         |
| Ca_Desi_Ch_scaffold00934_258403 | Ca_desi_scaffold   | 258403                         | [T/C]       | NA                                         |
| Ca_Desi_Ch_scaffold00934_258404 | Ca_desi_scaffold   | 258404                         | [C/T]       | NA                                         |
| Ca_Desi_Ch_scaffold00934_258405 | Ca_desi_scaffold   | 258405                         | [A/G]       | NA                                         |
| Ca_Desi_Ch_scaffold00934_258407 | Ca_desi_scaffold   | 258407                         | [A/G]       | NA                                         |
| Ca_Desi_Ch_scaffold00934_258409 | Ca_desi_scaffold   | 258409                         | [A/G]       | NA                                         |
| Ca_Desi_Ch_scaffold00934_258410 | Ca_desi_scaffold   | 258410                         | [T/C]       | NA                                         |
| Ca_Desi_Ch_scaffold00934_258412 | Ca_desi_scaffold   | 258412                         | [C/A]       | NA                                         |
| Ca_Desi_Ch_scaffold00934_258414 | Ca_desi_scaffold   | 258414                         | [A/G]       | NA                                         |
| Ca_Desi_Ch_scaffold00934_258415 | Ca_desi_scaffold   | 258415                         | [T/C]       | NA                                         |
| Ca_Desi_Ch_scaffold00934_258416 | Ca_desi_scaffold   | 258416                         | [G/A]       | NA                                         |
| Ca_Desi_Ch_scaffold00934_258418 | Ca_desi_scaffold   | 258418                         | [T/C]       | NA                                         |
| Ca_Desi_Ch_scaffold00934_258421 | Ca_desi_scaffold   | 258421                         | [G/A]       | NA                                         |
| Ca_Desi_Ch_scaffold00934_258424 | Ca_desi_scaffold   | 258424                         | [T/C]       | NA                                         |
| Ca_Desi_Ch_scaffold00934_258426 | Ca_desi_scaffold   | 258426                         | [C/T]       | NA                                         |
| Ca_Desi_Ch_scaffold00934_258428 | Ca_desi_scaffold   | 258428                         | [T/C]       | NA                                         |
| Ca_Desi_Ch_scaffold00934_258429 | Ca_desi_scaffold   | 258429                         | [A/G]       | NA                                         |
| Ca_Desi_Ch_scaffold00934_258430 | Ca_desi_scaffold   | 258430                         | [A/G]       | NA                                         |
| Ca_Desi_Ch_scaffold00934_258432 | Ca_desi_scaffold   | 258432                         | [A/G]       | NA                                         |
| Ca_Desi_Ch_scaffold00934_258433 | Ca_desi_scaffold   | 258433                         | [A/G]       | NA                                         |
| Ca_Desi_Ch_scaffold00934_258434 | Ca_desi_scaffold   | 258434                         | [T/C]       | NA                                         |
| Ca_Desi_Ch_scaffold00934_258436 | Ca_desi_scaffold   | 258436                         | [G/A]       | NA                                         |
| Ca_Desi_Ch_scaffold00934_258438 | Ca_desi_scaffold   | 258438                         | [T/C]       | NA                                         |
| Ca_Desi_Ch_scaffold00934_258439 | Ca_desi_scaffold   | 258439                         | [T/C]       | NA                                         |
| Ca_Desi_Ch_scaffold00934_258440 | Ca_desi_scaffold   | 258440                         | [C/T]       | NA                                         |
| Ca_Desi_Ch_scaffold00934_258441 | Ca_desi_scaffold   | 258441                         | [A/G]       | NA                                         |
| Ca_Desi_Ch_scaffold00934_258609 | Ca_desi_scaffold   | 258609                         | [C/T]       | NA                                         |
| Ca_Desi_Ch_scaffold00934_258610 | Ca_desi_scaffold   | 258610                         | [G/T]       | NA                                         |
| Ca_Desi_Ch_scaffold00934_258612 | Ca_desi_scaffold   | 258612                         | [G/C]       | NA                                         |



| <b>SNP IDs</b>                  | <b>Chromosomes</b> | <b>Physical positions (bp)</b> | <b>SNPs</b> | <b>NCBI SNPdb accession IDs (NCBI_ss#)</b> |
|---------------------------------|--------------------|--------------------------------|-------------|--------------------------------------------|
| Ca_Desi_Ch_scaffold00934_258614 | Ca_desi_scaffold   | 258614                         | [A/G]       | NA                                         |
| Ca_Desi_Ch_scaffold00934_258615 | Ca_desi_scaffold   | 258615                         | [T/C]       | NA                                         |
| Ca_Desi_Ch_scaffold00934_258617 | Ca_desi_scaffold   | 258617                         | [T/C]       | NA                                         |
| Ca_Desi_Ch_scaffold00934_258620 | Ca_desi_scaffold   | 258620                         | [A/G]       | NA                                         |
| Ca_Desi_Ch_scaffold00934_258621 | Ca_desi_scaffold   | 258621                         | [G/A]       | NA                                         |
| Ca_Desi_Ch_scaffold00934_258622 | Ca_desi_scaffold   | 258622                         | [A/G]       | NA                                         |
| Ca_Desi_Ch_scaffold00934_258623 | Ca_desi_scaffold   | 258623                         | [A/G]       | NA                                         |
| Ca_Desi_Ch_scaffold00934_258624 | Ca_desi_scaffold   | 258624                         | [G/C]       | NA                                         |
| Ca_Desi_Ch_scaffold00934_258627 | Ca_desi_scaffold   | 258627                         | [T/C]       | NA                                         |
| Ca_Desi_Ch_scaffold00934_258632 | Ca_desi_scaffold   | 258632                         | [T/G]       | NA                                         |
| Ca_Desi_Ch_scaffold00934_258637 | Ca_desi_scaffold   | 258637                         | [A/C]       | NA                                         |
| Ca_Desi_Ch_scaffold00934_258638 | Ca_desi_scaffold   | 258638                         | [C/T]       | NA                                         |
| Ca_Desi_Ch_scaffold00934_258639 | Ca_desi_scaffold   | 258639                         | [T/C]       | NA                                         |
| Ca_Desi_Ch_scaffold00934_258642 | Ca_desi_scaffold   | 258642                         | [T/C]       | NA                                         |
| Ca_Desi_Ch_scaffold00934_258645 | Ca_desi_scaffold   | 258645                         | [G/A]       | NA                                         |
| Ca_Desi_Ch_scaffold00934_258647 | Ca_desi_scaffold   | 258647                         | [C/T]       | NA                                         |
| Ca_Desi_Ch_scaffold00934_258648 | Ca_desi_scaffold   | 258648                         | [G/A]       | NA                                         |
| Ca_Desi_Ch_scaffold00934_258649 | Ca_desi_scaffold   | 258649                         | [A/G]       | NA                                         |
| Ca_Desi_Ch_scaffold00934_258652 | Ca_desi_scaffold   | 258652                         | [T/C]       | NA                                         |
| Ca_Desi_Ch_scaffold00934_258653 | Ca_desi_scaffold   | 258653                         | [T/C]       | NA                                         |
| Ca_Desi_Ch_scaffold00934_258656 | Ca_desi_scaffold   | 258656                         | [A/G]       | NA                                         |
| Ca_Desi_Ch_scaffold00934_258657 | Ca_desi_scaffold   | 258657                         | [A/G]       | NA                                         |
| Ca_Desi_Ch_scaffold00934_258660 | Ca_desi_scaffold   | 258660                         | [A/G]       | NA                                         |
| Ca_Desi_Ch_scaffold00934_258664 | Ca_desi_scaffold   | 258664                         | [C/T]       | NA                                         |
| Ca_Desi_Ch_scaffold00934_258665 | Ca_desi_scaffold   | 258665                         | [A/G]       | NA                                         |
| Ca_Desi_Ch_scaffold00934_258666 | Ca_desi_scaffold   | 258666                         | [A/G]       | NA                                         |
| Ca_Desi_Ch_scaffold00934_258668 | Ca_desi_scaffold   | 258668                         | [C/A]       | NA                                         |
| Ca_Desi_Ch_scaffold00934_258674 | Ca_desi_scaffold   | 258674                         | [T/C]       | NA                                         |
| Ca_Desi_Ch_scaffold00934_258675 | Ca_desi_scaffold   | 258675                         | [T/C]       | NA                                         |
| Ca_Desi_Ch_scaffold00934_258676 | Ca_desi_scaffold   | 258676                         | [A/G]       | NA                                         |
| Ca_Desi_Ch_scaffold00934_258677 | Ca_desi_scaffold   | 258677                         | [T/C]       | NA                                         |
| Ca_Desi_Ch_scaffold00934_258678 | Ca_desi_scaffold   | 258678                         | [C/T]       | NA                                         |
| Ca_Desi_Ch_scaffold00934_258679 | Ca_desi_scaffold   | 258679                         | [A/G]       | NA                                         |
| Ca_Desi_Ch_scaffold00934_258680 | Ca_desi_scaffold   | 258680                         | [C/T]       | NA                                         |

| <b>SNP IDs</b>                    | <b>Chromosomes</b> | <b>Physical positions (bp)</b> | <b>SNPs</b> | <b>NCBI SNPdb accession IDs (NCBI_ss#)</b> |
|-----------------------------------|--------------------|--------------------------------|-------------|--------------------------------------------|
| Ca_Desig_Chr_scaffold00934_258681 | Ca_desig_scaffold  | 258681                         | [A/G]       | NA                                         |
| Ca_Desig_Chr_scaffold00934_258682 | Ca_desig_scaffold  | 258682                         | [A/G]       | NA                                         |
| Ca_Desig_Chr_scaffold00934_258684 | Ca_desig_scaffold  | 258684                         | [C/T]       | NA                                         |
| Ca_Desig_Chr_scaffold00934_258685 | Ca_desig_scaffold  | 258685                         | [T/C]       | NA                                         |
| Ca_Desig_Chr_scaffold00934_258687 | Ca_desig_scaffold  | 258687                         | [T/C]       | NA                                         |
| Ca_Desig_Chr_scaffold00934_258688 | Ca_desig_scaffold  | 258688                         | [G/A]       | NA                                         |
| Ca_Desig_Chr_scaffold00934_258689 | Ca_desig_scaffold  | 258689                         | [G/A]       | NA                                         |
| Ca_Desig_Chr_scaffold00934_258690 | Ca_desig_scaffold  | 258690                         | [T/C]       | NA                                         |
| Ca_Desig_Chr_scaffold00934_258691 | Ca_desig_scaffold  | 258691                         | [G/A]       | NA                                         |
| Ca_Desig_Chr_scaffold00934_258692 | Ca_desig_scaffold  | 258692                         | [C/T]       | NA                                         |
| Ca_Desig_Chr_scaffold00934_258693 | Ca_desig_scaffold  | 258693                         | [C/T]       | NA                                         |
| Ca_Desig_Chr_scaffold00934_258694 | Ca_desig_scaffold  | 258694                         | [G/A]       | NA                                         |
| Ca_Desig_Chr_scaffold00934_258695 | Ca_desig_scaffold  | 258695                         | [G/A]       | NA                                         |
| Ca_Desig_Chr_scaffold00934_258697 | Ca_desig_scaffold  | 258697                         | [G/A]       | NA                                         |
| Ca_Desig_Chr_scaffold00934_258698 | Ca_desig_scaffold  | 258698                         | [G/A]       | NA                                         |
| Ca_Desig_Chr_scaffold00934_258699 | Ca_desig_scaffold  | 258699                         | [A/G]       | NA                                         |
| Ca_Desig_Chr_scaffold00934_258701 | Ca_desig_scaffold  | 258701                         | [G/A]       | NA                                         |
| Ca_Desig_Chr_scaffold00934_258703 | Ca_desig_scaffold  | 258703                         | [T/C]       | NA                                         |
| Ca_Desig_Chr_scaffold00934_258704 | Ca_desig_scaffold  | 258704                         | [T/C]       | NA                                         |
| Ca_Desig_Chr_scaffold00934_258705 | Ca_desig_scaffold  | 258705                         | [G/A]       | NA                                         |
| Ca_Desig_Chr_scaffold00934_258706 | Ca_desig_scaffold  | 258706                         | [A/G]       | NA                                         |
| Ca_Desig_Chr_scaffold00934_258707 | Ca_desig_scaffold  | 258707                         | [C/T]       | NA                                         |
| Ca_Desig_Chr_scaffold00934_258708 | Ca_desig_scaffold  | 258708                         | [C/T]       | NA                                         |
| Ca_Desig_Chr_scaffold00934_258709 | Ca_desig_scaffold  | 258709                         | [T/C]       | NA                                         |
| Ca_Desig_Chr_scaffold00934_258710 | Ca_desig_scaffold  | 258710                         | [C/T]       | NA                                         |
| Ca_Desig_Chr_scaffold00934_258711 | Ca_desig_scaffold  | 258711                         | [G/A]       | NA                                         |
| Ca_Desig_Chr_scaffold00934_258712 | Ca_desig_scaffold  | 258712                         | [G/A]       | NA                                         |
| Ca_Desig_Chr_scaffold00934_258713 | Ca_desig_scaffold  | 258713                         | [C/T]       | NA                                         |
| Ca_Desig_Chr_scaffold00934_258714 | Ca_desig_scaffold  | 258714                         | [G/A]       | NA                                         |
| Ca_Desig_Chr_scaffold00934_258716 | Ca_desig_scaffold  | 258716                         | [C/T]       | NA                                         |
| Ca_Desig_Chr_scaffold00934_258717 | Ca_desig_scaffold  | 258717                         | [G/A]       | NA                                         |
| Ca_Desig_Chr_scaffold00934_258718 | Ca_desig_scaffold  | 258718                         | [A/G]       | NA                                         |
| Ca_Desig_Chr_scaffold00934_258719 | Ca_desig_scaffold  | 258719                         | [T/C]       | NA                                         |
| Ca_Desig_Chr_scaffold00934_258721 | Ca_desig_scaffold  | 258721                         | [A/G]       | NA                                         |

| <b>SNP IDs</b>                   | <b>Chromosomes</b> | <b>Physical positions (bp)</b> | <b>SNPs</b> | <b>NCBI SNPdb accession IDs (NCBI_ss#)</b> |
|----------------------------------|--------------------|--------------------------------|-------------|--------------------------------------------|
| Ca_DesigChr_scaffold00934_258724 | Ca_desig_scaffold  | 258724                         | [A/G]       | NA                                         |
| Ca_DesigChr_scaffold00934_258725 | Ca_desig_scaffold  | 258725                         | [T/C]       | NA                                         |
| Ca_DesigChr_scaffold00934_258726 | Ca_desig_scaffold  | 258726                         | [T/C]       | NA                                         |
| Ca_DesigChr_scaffold00934_258727 | Ca_desig_scaffold  | 258727                         | [A/G]       | NA                                         |
| Ca_DesigChr_scaffold00934_258728 | Ca_desig_scaffold  | 258728                         | [A/G]       | NA                                         |
| Ca_DesigChr_scaffold00934_258730 | Ca_desig_scaffold  | 258730                         | [G/A]       | NA                                         |
| Ca_DesigChr_scaffold00934_258732 | Ca_desig_scaffold  | 258732                         | [G/A]       | NA                                         |
| Ca_DesigChr_scaffold00934_258733 | Ca_desig_scaffold  | 258733                         | [C/T]       | NA                                         |
| Ca_DesigChr_scaffold00934_258745 | Ca_desig_scaffold  | 258745                         | [C/G]       | NA                                         |
| Ca_DesigChr_scaffold00934_258746 | Ca_desig_scaffold  | 258746                         | [G/A]       | NA                                         |
| Ca_DesigChr_scaffold00934_258747 | Ca_desig_scaffold  | 258747                         | [C/T]       | NA                                         |
| Ca_DesigChr_scaffold00934_258748 | Ca_desig_scaffold  | 258748                         | [A/G]       | NA                                         |
| Ca_DesigChr_scaffold00934_258749 | Ca_desig_scaffold  | 258749                         | [A/G]       | NA                                         |
| Ca_DesigChr_scaffold00934_258750 | Ca_desig_scaffold  | 258750                         | [C/T]       | NA                                         |
| Ca_DesigChr_scaffold00934_258751 | Ca_desig_scaffold  | 258751                         | [G/A]       | NA                                         |
| Ca_DesigChr_scaffold00934_258752 | Ca_desig_scaffold  | 258752                         | [T/C]       | NA                                         |
| Ca_DesigChr_scaffold00934_258753 | Ca_desig_scaffold  | 258753                         | [C/T]       | NA                                         |
| Ca_DesigChr_scaffold00934_258754 | Ca_desig_scaffold  | 258754                         | [A/G]       | NA                                         |
| Ca_DesigChr_scaffold00934_258755 | Ca_desig_scaffold  | 258755                         | [A/G]       | NA                                         |
| Ca_DesigChr_scaffold00934_258756 | Ca_desig_scaffold  | 258756                         | [G/A]       | NA                                         |
| Ca_DesigChr_scaffold00934_258757 | Ca_desig_scaffold  | 258757                         | [A/G]       | NA                                         |
| Ca_DesigChr_scaffold00934_258758 | Ca_desig_scaffold  | 258758                         | [T/C]       | NA                                         |
| Ca_DesigChr_scaffold00934_258759 | Ca_desig_scaffold  | 258759                         | [C/T]       | NA                                         |
| Ca_DesigChr_scaffold00934_258760 | Ca_desig_scaffold  | 258760                         | [G/A]       | NA                                         |
| Ca_DesigChr_scaffold00934_258761 | Ca_desig_scaffold  | 258761                         | [T/C]       | NA                                         |
| Ca_DesigChr_scaffold00934_258762 | Ca_desig_scaffold  | 258762                         | [G/A]       | NA                                         |
| Ca_DesigChr_scaffold00934_258763 | Ca_desig_scaffold  | 258763                         | [G/A]       | NA                                         |
| Ca_DesigChr_scaffold00934_258764 | Ca_desig_scaffold  | 258764                         | [T/C]       | NA                                         |
| Ca_DesigChr_scaffold00934_258765 | Ca_desig_scaffold  | 258765                         | [G/A]       | NA                                         |
| Ca_DesigChr_scaffold00934_258766 | Ca_desig_scaffold  | 258766                         | [C/T]       | NA                                         |
| Ca_DesigChr_scaffold00934_258767 | Ca_desig_scaffold  | 258767                         | [A/G]       | NA                                         |
| Ca_DesigChr_scaffold00934_258768 | Ca_desig_scaffold  | 258768                         | [C/T]       | NA                                         |
| Ca_DesigChr_scaffold00934_258769 | Ca_desig_scaffold  | 258769                         | [A/G]       | NA                                         |
| Ca_DesigChr_scaffold00934_258770 | Ca_desig_scaffold  | 258770                         | [G/A]       | NA                                         |

| <b>SNP IDs</b>                  | <b>Chromosomes</b> | <b>Physical positions (bp)</b> | <b>SNPs</b> | <b>NCBI SNPdb accession IDs (NCBI_ss#)</b> |
|---------------------------------|--------------------|--------------------------------|-------------|--------------------------------------------|
| Ca_Desi_Ch_scaffold00934_258771 | Ca_desi_scaffold   | 258771                         | [T/C]       | NA                                         |
| Ca_Desi_Ch_scaffold00934_258772 | Ca_desi_scaffold   | 258772                         | [G/A]       | NA                                         |
| Ca_Desi_Ch_scaffold00934_258773 | Ca_desi_scaffold   | 258773                         | [T/C]       | NA                                         |
| Ca_Desi_Ch_scaffold00934_258774 | Ca_desi_scaffold   | 258774                         | [G/A]       | NA                                         |
| Ca_Desi_Ch_scaffold00934_258775 | Ca_desi_scaffold   | 258775                         | [T/C]       | NA                                         |
| Ca_Desi_Ch_scaffold00934_258776 | Ca_desi_scaffold   | 258776                         | [A/G]       | NA                                         |
| Ca_Desi_Ch_scaffold00934_258778 | Ca_desi_scaffold   | 258778                         | [T/C]       | NA                                         |
| Ca_Desi_Ch_scaffold00934_258779 | Ca_desi_scaffold   | 258779                         | [T/C]       | NA                                         |
| Ca_Desi_Ch_scaffold00934_258780 | Ca_desi_scaffold   | 258780                         | [G/T]       | NA                                         |
| Ca_Desi_Ch_scaffold00934_258781 | Ca_desi_scaffold   | 258781                         | [C/T]       | NA                                         |
| Ca_Desi_Ch_scaffold00934_258782 | Ca_desi_scaffold   | 258782                         | [C/T]       | NA                                         |
| Ca_Desi_Ch_scaffold00934_258783 | Ca_desi_scaffold   | 258783                         | [A/G]       | NA                                         |
| Ca_Desi_Ch_scaffold00934_258784 | Ca_desi_scaffold   | 258784                         | [T/C]       | NA                                         |
| Ca_Desi_Ch_scaffold00934_258785 | Ca_desi_scaffold   | 258785                         | [T/C]       | NA                                         |
| Ca_Desi_Ch_scaffold00934_258786 | Ca_desi_scaffold   | 258786                         | [T/C]       | NA                                         |
| Ca_Desi_Ch_scaffold00934_258788 | Ca_desi_scaffold   | 258788                         | [C/T]       | NA                                         |
| Ca_Desi_Ch_scaffold00934_258789 | Ca_desi_scaffold   | 258789                         | [A/G]       | NA                                         |
| Ca_Desi_Ch_scaffold00934_258790 | Ca_desi_scaffold   | 258790                         | [C/T]       | NA                                         |
| Ca_Desi_Ch_scaffold00934_258791 | Ca_desi_scaffold   | 258791                         | [A/G]       | NA                                         |
| Ca_Desi_Ch_scaffold00934_258792 | Ca_desi_scaffold   | 258792                         | [T/C]       | NA                                         |
| Ca_Desi_Ch_scaffold00934_258793 | Ca_desi_scaffold   | 258793                         | [A/G]       | NA                                         |
| Ca_Desi_Ch_scaffold00934_258794 | Ca_desi_scaffold   | 258794                         | [T/C]       | NA                                         |
| Ca_Desi_Ch_scaffold00934_258795 | Ca_desi_scaffold   | 258795                         | [T/C]       | NA                                         |
| Ca_Desi_Ch_scaffold00934_258796 | Ca_desi_scaffold   | 258796                         | [A/G]       | NA                                         |
| Ca_Desi_Ch_scaffold00934_258797 | Ca_desi_scaffold   | 258797                         | [A/G]       | NA                                         |
| Ca_Desi_Ch_scaffold00934_258798 | Ca_desi_scaffold   | 258798                         | [T/C]       | NA                                         |
| Ca_Desi_Ch_scaffold00934_258800 | Ca_desi_scaffold   | 258800                         | [C/T]       | NA                                         |
| Ca_Desi_Ch_scaffold00934_258801 | Ca_desi_scaffold   | 258801                         | [T/C]       | NA                                         |
| Ca_Desi_Ch_scaffold00934_258802 | Ca_desi_scaffold   | 258802                         | [G/A]       | NA                                         |
| Ca_Desi_Ch_scaffold00934_258803 | Ca_desi_scaffold   | 258803                         | [T/C]       | NA                                         |
| Ca_Desi_Ch_scaffold00934_258804 | Ca_desi_scaffold   | 258804                         | [G/A]       | NA                                         |
| Ca_Desi_Ch_scaffold00934_258810 | Ca_desi_scaffold   | 258810                         | [A/T]       | NA                                         |
| Ca_Desi_Ch_scaffold00934_259359 | Ca_desi_scaffold   | 259359                         | [T/G]       | NA                                         |
| Ca_Desi_Ch_scaffold00934_259414 | Ca_desi_scaffold   | 259414                         | [A/G]       | NA                                         |

| <b>SNP IDs</b>                  | <b>Chromosomes</b> | <b>Physical positions (bp)</b> | <b>SNPs</b> | <b>NCBI SNPdb accession IDs (NCBI_ss#)</b> |
|---------------------------------|--------------------|--------------------------------|-------------|--------------------------------------------|
| Ca_Desi_Ch_scaffold00934_309383 | Ca_desi_scaffold   | 309383                         | [A/T]       | NA                                         |
| Ca_Desi_Ch_scaffold00934_309386 | Ca_desi_scaffold   | 309386                         | [C/T]       | NA                                         |
| Ca_Desi_Ch_scaffold03129_75648  | Ca_desi_scaffold   | 75648                          | [T/C]       | NA                                         |
| Ca_Desi_Ch_scaffold03129_75708  | Ca_desi_scaffold   | 75708                          | [A/G]       | NA                                         |
| Ca_Desi_Ch_scaffold03129_179818 | Ca_desi_scaffold   | 179818                         | [T/C]       | NA                                         |
| Ca_Desi_Ch_scaffold03129_181659 | Ca_desi_scaffold   | 181659                         | [T/G]       | NA                                         |
| Ca_Desi_Ch_scaffold17235_225204 | Ca_desi_scaffold   | 225204                         | [A/G]       | NA                                         |
| Ca_Desi_Ch_scaffold02032_10216  | Ca_desi_scaffold   | 10216                          | [A/T]       | NA                                         |
| Ca_Desi_Ch_scaffold02032_10250  | Ca_desi_scaffold   | 10250                          | [C/T]       | NA                                         |
| Ca_Desi_Ch_scaffold02032_18604  | Ca_desi_scaffold   | 18604                          | [A/G]       | NA                                         |
| Ca_Desi_Ch_scaffold02032_19666  | Ca_desi_scaffold   | 19666                          | [T/A]       | NA                                         |
| Ca_Desi_Ch_scaffold02032_27866  | Ca_desi_scaffold   | 27866                          | [C/T]       | NA                                         |
| Ca_Desi_Ch_scaffold02032_34791  | Ca_desi_scaffold   | 34791                          | [C/A]       | NA                                         |
| Ca_Desi_Ch_scaffold02032_34923  | Ca_desi_scaffold   | 34923                          | [T/C]       | NA                                         |
| Ca_Desi_Ch_scaffold02032_97443  | Ca_desi_scaffold   | 97443                          | [T/G]       | NA                                         |
| Ca_Desi_Ch_scaffold02032_97451  | Ca_desi_scaffold   | 97451                          | [T/G]       | NA                                         |
| Ca_Desi_Ch_scaffold02032_97453  | Ca_desi_scaffold   | 97453                          | [G/T]       | NA                                         |
| Ca_Desi_Ch_scaffold02032_149959 | Ca_desi_scaffold   | 149959                         | [A/T]       | NA                                         |
| Ca_Desi_Ch_scaffold02032_151760 | Ca_desi_scaffold   | 151760                         | [T/C]       | NA                                         |
| Ca_Desi_Ch_scaffold02032_152932 | Ca_desi_scaffold   | 152932                         | [A/G]       | NA                                         |
| Ca_Desi_Ch_scaffold02032_279284 | Ca_desi_scaffold   | 279284                         | [T/G]       | NA                                         |
| Ca_Desi_Ch_scaffold02032_297800 | Ca_desi_scaffold   | 297800                         | [C/A]       | NA                                         |
| Ca_Desi_Ch_scaffold02032_299879 | Ca_desi_scaffold   | 299879                         | [A/C]       | NA                                         |
| Ca_Desi_Ch_scaffold02032_299898 | Ca_desi_scaffold   | 299898                         | [T/A]       | NA                                         |
| Ca_Desi_Ch_scaffold05105_40512  | Ca_desi_scaffold   | 40512                          | [T/G]       | NA                                         |
| Ca_Desi_Ch_scaffold05105_43989  | Ca_desi_scaffold   | 43989                          | [T/C]       | NA                                         |
| Ca_Desi_Ch_scaffold05105_44007  | Ca_desi_scaffold   | 44007                          | [T/C]       | NA                                         |
| Ca_Desi_Ch_scaffold05105_202655 | Ca_desi_scaffold   | 202655                         | [A/G]       | NA                                         |
| Ca_Desi_Ch_scaffold05105_202672 | Ca_desi_scaffold   | 202672                         | [T/G]       | NA                                         |
| Ca_Desi_Ch_scaffold05105_202684 | Ca_desi_scaffold   | 202684                         | [A/G]       | NA                                         |
| Ca_Desi_Ch_scaffold05105_202706 | Ca_desi_scaffold   | 202706                         | [A/G]       | NA                                         |
| Ca_Desi_Ch_scaffold01997_167105 | Ca_desi_scaffold   | 167105                         | [T/G]       | NA                                         |
| Ca_Desi_Ch_scaffold01997_167132 | Ca_desi_scaffold   | 167132                         | [A/T]       | NA                                         |
| Ca_Desi_Ch_scaffold01997_188716 | Ca_desi_scaffold   | 188716                         | [T/A]       | NA                                         |

| <b>SNP IDs</b>                    | <b>Chromosomes</b> | <b>Physical positions (bp)</b> | <b>SNPs</b> | <b>NCBI SNPdb accession IDs (NCBI_ss#)</b> |
|-----------------------------------|--------------------|--------------------------------|-------------|--------------------------------------------|
| Ca_Desig_Chr_scaffold03653_11005  | Ca_desig_scaffold  | 11005                          | [T/G]       | NA                                         |
| Ca_Desig_Chr_scaffold03653_11017  | Ca_desig_scaffold  | 11017                          | [A/C]       | NA                                         |
| Ca_Desig_Chr_scaffold03653_11062  | Ca_desig_scaffold  | 11062                          | [T/G]       | NA                                         |
| Ca_Desig_Chr_scaffold03653_11068  | Ca_desig_scaffold  | 11068                          | [T/C]       | NA                                         |
| Ca_Desig_Chr_scaffold03653_11078  | Ca_desig_scaffold  | 11078                          | [T/C]       | NA                                         |
| Ca_Desig_Chr_scaffold03653_11104  | Ca_desig_scaffold  | 11104                          | [T/C]       | NA                                         |
| Ca_Desig_Chr_scaffold03653_11111  | Ca_desig_scaffold  | 11111                          | [A/G]       | NA                                         |
| Ca_Desig_Chr_scaffold03653_11126  | Ca_desig_scaffold  | 11126                          | [T/C]       | NA                                         |
| Ca_Desig_Chr_scaffold03653_12022  | Ca_desig_scaffold  | 12022                          | [T/C]       | NA                                         |
| Ca_Desig_Chr_scaffold03653_12024  | Ca_desig_scaffold  | 12024                          | [A/C]       | NA                                         |
| Ca_Desig_Chr_scaffold03653_12032  | Ca_desig_scaffold  | 12032                          | [A/G]       | NA                                         |
| Ca_Desig_Chr_scaffold03653_12035  | Ca_desig_scaffold  | 12035                          | [T/C]       | NA                                         |
| Ca_Desig_Chr_scaffold03653_12050  | Ca_desig_scaffold  | 12050                          | [A/G]       | NA                                         |
| Ca_Desig_Chr_scaffold03653_12063  | Ca_desig_scaffold  | 12063                          | [A/G]       | NA                                         |
| Ca_Desig_Chr_scaffold03653_141016 | Ca_desig_scaffold  | 141016                         | [A/T]       | NA                                         |
| Ca_Desig_Chr_scaffold05945_8513   | Ca_desig_scaffold  | 8513                           | [A/T]       | NA                                         |
| Ca_Desig_Chr_scaffold05945_8516   | Ca_desig_scaffold  | 8516                           | [A/T]       | NA                                         |
| Ca_Desig_Chr_scaffold05945_8520   | Ca_desig_scaffold  | 8520                           | [T/C]       | NA                                         |
| Ca_Desig_Chr_scaffold05945_8523   | Ca_desig_scaffold  | 8523                           | [T/C]       | NA                                         |
| Ca_Desig_Chr_scaffold05945_8525   | Ca_desig_scaffold  | 8525                           | [C/T]       | NA                                         |
| Ca_Desig_Chr_scaffold05945_8526   | Ca_desig_scaffold  | 8526                           | [A/C]       | NA                                         |
| Ca_Desig_Chr_scaffold05945_8548   | Ca_desig_scaffold  | 8548                           | [A/G]       | NA                                         |
| Ca_Desig_Chr_scaffold05945_8551   | Ca_desig_scaffold  | 8551                           | [T/A]       | NA                                         |
| Ca_Desig_Chr_scaffold05945_8613   | Ca_desig_scaffold  | 8613                           | [C/A]       | NA                                         |
| Ca_Desig_Chr_scaffold05945_47208  | Ca_desig_scaffold  | 47208                          | [A/C]       | NA                                         |
| Ca_Desig_Chr_scaffold05945_184695 | Ca_desig_scaffold  | 184695                         | [C/T]       | NA                                         |
| Ca_Desig_Chr_scaffold05945_184697 | Ca_desig_scaffold  | 184697                         | [C/T]       | NA                                         |
| Ca_Desig_Chr_scaffold05945_184782 | Ca_desig_scaffold  | 184782                         | [A/T]       | NA                                         |
| Ca_Desig_Chr_scaffold09348_21203  | Ca_desig_scaffold  | 21203                          | [C/T]       | NA                                         |
| Ca_Desig_Chr_scaffold09348_218745 | Ca_desig_scaffold  | 218745                         | [G/T]       | NA                                         |
| Ca_Desig_Chr_scaffold01004_97286  | Ca_desig_scaffold  | 97286                          | [T/G]       | NA                                         |
| Ca_Desig_Chr_scaffold01004_97377  | Ca_desig_scaffold  | 97377                          | [A/C]       | NA                                         |
| Ca_Desig_Chr_scaffold01004_230903 | Ca_desig_scaffold  | 230903                         | [T/G]       | NA                                         |
| Ca_Desig_Chr_scaffold00608_95319  | Ca_desig_scaffold  | 95319                          | [G/C]       | NA                                         |

| <b>SNP IDs</b>                  | <b>Chromosomes</b> | <b>Physical positions (bp)</b> | <b>SNPs</b> | <b>NCBI SNPdb accession IDs (NCBI_ss#)</b> |
|---------------------------------|--------------------|--------------------------------|-------------|--------------------------------------------|
| Ca_Desi_Ch_scaffold00608_95326  | Ca_desi_scaffold   | 95326                          | [T/C]       | NA                                         |
| Ca_Desi_Ch_scaffold00608_98072  | Ca_desi_scaffold   | 98072                          | [T/C]       | NA                                         |
| Ca_Desi_Ch_scaffold00608_112855 | Ca_desi_scaffold   | 112855                         | [T/G]       | NA                                         |
| Ca_Desi_Ch_scaffold00608_131481 | Ca_desi_scaffold   | 131481                         | [C/G]       | NA                                         |
| Ca_Desi_Ch_scaffold00608_132277 | Ca_desi_scaffold   | 132277                         | [T/G]       | NA                                         |
| Ca_Desi_Ch_scaffold00609_82728  | Ca_desi_scaffold   | 82728                          | [C/T]       | NA                                         |
| Ca_Desi_Ch_scaffold00609_88028  | Ca_desi_scaffold   | 88028                          | [C/T]       | NA                                         |
| Ca_Desi_Ch_scaffold00609_90321  | Ca_desi_scaffold   | 90321                          | [A/G]       | NA                                         |
| Ca_Desi_Ch_scaffold00609_98741  | Ca_desi_scaffold   | 98741                          | [G/A]       | NA                                         |
| Ca_Desi_Ch_scaffold00609_103362 | Ca_desi_scaffold   | 103362                         | [G/A]       | NA                                         |
| Ca_Desi_Ch_scaffold00609_103816 | Ca_desi_scaffold   | 103816                         | [T/G]       | NA                                         |
| Ca_Desi_Ch_scaffold00609_103839 | Ca_desi_scaffold   | 103839                         | [A/C]       | NA                                         |
| Ca_Desi_Ch_scaffold00609_103852 | Ca_desi_scaffold   | 103852                         | [A/G]       | NA                                         |
| Ca_Desi_Ch_scaffold00609_107480 | Ca_desi_scaffold   | 107480                         | [A/C]       | NA                                         |
| Ca_Desi_Ch_scaffold00609_107554 | Ca_desi_scaffold   | 107554                         | [A/G]       | NA                                         |
| Ca_Desi_Ch_scaffold00609_107643 | Ca_desi_scaffold   | 107643                         | [A/T]       | NA                                         |
| Ca_Desi_Ch_scaffold00609_107682 | Ca_desi_scaffold   | 107682                         | [A/C]       | NA                                         |
| Ca_Desi_Ch_scaffold00609_108752 | Ca_desi_scaffold   | 108752                         | [A/G]       | NA                                         |
| Ca_Desi_Ch_scaffold00609_108754 | Ca_desi_scaffold   | 108754                         | [A/G]       | NA                                         |
| Ca_Desi_Ch_scaffold00609_108803 | Ca_desi_scaffold   | 108803                         | [A/G]       | NA                                         |
| Ca_Desi_Ch_scaffold00609_108824 | Ca_desi_scaffold   | 108824                         | [A/C]       | NA                                         |
| Ca_Desi_Ch_scaffold00609_108827 | Ca_desi_scaffold   | 108827                         | [T/C]       | NA                                         |
| Ca_Desi_Ch_scaffold00609_108846 | Ca_desi_scaffold   | 108846                         | [G/T]       | NA                                         |
| Ca_Desi_Ch_scaffold00609_108864 | Ca_desi_scaffold   | 108864                         | [G/A]       | NA                                         |
| Ca_Desi_Ch_scaffold00609_108885 | Ca_desi_scaffold   | 108885                         | [C/T]       | NA                                         |
| Ca_Desi_Ch_scaffold00609_108893 | Ca_desi_scaffold   | 108893                         | [C/A]       | NA                                         |
| Ca_Desi_Ch_scaffold00609_108895 | Ca_desi_scaffold   | 108895                         | [A/C]       | NA                                         |
| Ca_Desi_Ch_scaffold00609_108915 | Ca_desi_scaffold   | 108915                         | [T/C]       | NA                                         |
| Ca_Desi_Ch_scaffold00609_108926 | Ca_desi_scaffold   | 108926                         | [T/G]       | NA                                         |
| Ca_Desi_Ch_scaffold00609_108929 | Ca_desi_scaffold   | 108929                         | [T/A]       | NA                                         |
| Ca_Desi_Ch_scaffold00609_109153 | Ca_desi_scaffold   | 109153                         | [C/T]       | NA                                         |
| Ca_Desi_Ch_scaffold00609_109266 | Ca_desi_scaffold   | 109266                         | [A/G]       | NA                                         |
| Ca_Desi_Ch_scaffold00609_109304 | Ca_desi_scaffold   | 109304                         | [C/T]       | NA                                         |
| Ca_Desi_Ch_scaffold00609_109320 | Ca_desi_scaffold   | 109320                         | [A/G]       | NA                                         |

| <b>SNP IDs</b>                  | <b>Chromosomes</b> | <b>Physical positions (bp)</b> | <b>SNPs</b> | <b>NCBI SNPdb accession IDs (NCBI_ss#)</b> |
|---------------------------------|--------------------|--------------------------------|-------------|--------------------------------------------|
| Ca_Desi_Ch_scaffold00609_111070 | Ca_desi_scaffold   | 111070                         | [A/G]       | NA                                         |
| Ca_Desi_Ch_scaffold00609_111691 | Ca_desi_scaffold   | 111691                         | [G/C]       | NA                                         |
| Ca_Desi_Ch_scaffold00609_111849 | Ca_desi_scaffold   | 111849                         | [A/C]       | NA                                         |
| Ca_Desi_Ch_scaffold00609_114751 | Ca_desi_scaffold   | 114751                         | [G/A]       | NA                                         |
| Ca_Desi_Ch_scaffold00609_114793 | Ca_desi_scaffold   | 114793                         | [T/A]       | NA                                         |
| Ca_Desi_Ch_scaffold00609_115157 | Ca_desi_scaffold   | 115157                         | [T/G]       | NA                                         |
| Ca_Desi_Ch_scaffold00609_116688 | Ca_desi_scaffold   | 116688                         | [G/T]       | NA                                         |
| Ca_Desi_Ch_scaffold00609_116693 | Ca_desi_scaffold   | 116693                         | [T/A]       | NA                                         |
| Ca_Desi_Ch_scaffold00609_116704 | Ca_desi_scaffold   | 116704                         | [A/C]       | NA                                         |
| Ca_Desi_Ch_scaffold00609_116871 | Ca_desi_scaffold   | 116871                         | [T/C]       | NA                                         |
| Ca_Desi_Ch_scaffold00609_119699 | Ca_desi_scaffold   | 119699                         | [A/G]       | NA                                         |
| Ca_Desi_Ch_scaffold00609_121949 | Ca_desi_scaffold   | 121949                         | [A/G]       | NA                                         |
| Ca_Desi_Ch_scaffold00609_121981 | Ca_desi_scaffold   | 121981                         | [G/A]       | NA                                         |
| Ca_Desi_Ch_scaffold00609_122141 | Ca_desi_scaffold   | 122141                         | [G/T]       | NA                                         |
| Ca_Desi_Ch_scaffold00609_122457 | Ca_desi_scaffold   | 122457                         | [A/G]       | NA                                         |
| Ca_Desi_Ch_scaffold00612_210100 | Ca_desi_scaffold   | 210100                         | [A/C]       | NA                                         |
| Ca_Desi_Ch_scaffold00612_210107 | Ca_desi_scaffold   | 210107                         | [A/C]       | NA                                         |
| Ca_Desi_Ch_scaffold00617_19091  | Ca_desi_scaffold   | 19091                          | [G/A]       | NA                                         |
| Ca_Desi_Ch_scaffold00617_19093  | Ca_desi_scaffold   | 19093                          | [C/A]       | NA                                         |
| Ca_Desi_Ch_scaffold00617_90413  | Ca_desi_scaffold   | 90413                          | [A/C]       | NA                                         |
| Ca_Desi_Ch_scaffold00617_110147 | Ca_desi_scaffold   | 110147                         | [A/G]       | NA                                         |
| Ca_Desi_Ch_scaffold00617_110160 | Ca_desi_scaffold   | 110160                         | [T/C]       | NA                                         |
| Ca_Desi_Ch_scaffold00617_193995 | Ca_desi_scaffold   | 193995                         | [T/C]       | NA                                         |
| Ca_Desi_Ch_scaffold00618_72123  | Ca_desi_scaffold   | 72123                          | [C/T]       | NA                                         |
| Ca_Desi_Ch_scaffold00618_72156  | Ca_desi_scaffold   | 72156                          | [A/G]       | NA                                         |
| Ca_Desi_Ch_scaffold00618_72160  | Ca_desi_scaffold   | 72160                          | [G/A]       | NA                                         |
| Ca_Desi_Ch_scaffold00618_94765  | Ca_desi_scaffold   | 94765                          | [T/G]       | NA                                         |
| Ca_Desi_Ch_scaffold00618_100769 | Ca_desi_scaffold   | 100769                         | [C/T]       | NA                                         |
| Ca_Desi_Ch_scaffold00618_113570 | Ca_desi_scaffold   | 113570                         | [T/C]       | NA                                         |
| Ca_Desi_Ch_scaffold00618_113594 | Ca_desi_scaffold   | 113594                         | [T/G]       | NA                                         |
| Ca_Desi_Ch_scaffold00631_71410  | Ca_desi_scaffold   | 71410                          | [G/C]       | NA                                         |
| Ca_Desi_Ch_scaffold00631_71456  | Ca_desi_scaffold   | 71456                          | [T/C]       | NA                                         |
| Ca_Desi_Ch_scaffold00631_189516 | Ca_desi_scaffold   | 189516                         | [A/C]       | NA                                         |
| Ca_Desi_Ch_scaffold00631_189756 | Ca_desi_scaffold   | 189756                         | [G/A]       | NA                                         |



| <b>SNP IDs</b>                    | <b>Chromosomes</b> | <b>Physical positions (bp)</b> | <b>SNPs</b> | <b>NCBI SNPdb accession IDs (NCBI_ss#)</b> |
|-----------------------------------|--------------------|--------------------------------|-------------|--------------------------------------------|
| Ca_Desig_Chr_scaffold00634_107814 | Ca_desig_scaffold  | 107814                         | [G/A]       | NA                                         |
| Ca_Desig_Chr_scaffold00634_248255 | Ca_desig_scaffold  | 248255                         | [A/G]       | NA                                         |
| Ca_Desig_Chr_scaffold00643_65879  | Ca_desig_scaffold  | 65879                          | [T/G]       | NA                                         |
| Ca_Desig_Chr_scaffold00643_114744 | Ca_desig_scaffold  | 114744                         | [A/C]       | NA                                         |
| Ca_Desig_Chr_scaffold00643_114752 | Ca_desig_scaffold  | 114752                         | [T/C]       | NA                                         |
| Ca_Desig_Chr_scaffold00643_114764 | Ca_desig_scaffold  | 114764                         | [T/C]       | NA                                         |
| Ca_Desig_Chr_scaffold00643_114766 | Ca_desig_scaffold  | 114766                         | [A/G]       | NA                                         |
| Ca_Desig_Chr_scaffold00643_114772 | Ca_desig_scaffold  | 114772                         | [A/G]       | NA                                         |
| Ca_Desig_Chr_scaffold00643_114773 | Ca_desig_scaffold  | 114773                         | [T/C]       | NA                                         |
| Ca_Desig_Chr_scaffold00647_6170   | Ca_desig_scaffold  | 6170                           | [T/G]       | NA                                         |
| Ca_Desig_Chr_scaffold00647_7446   | Ca_desig_scaffold  | 7446                           | [T/C]       | NA                                         |
| Ca_Desig_Chr_scaffold00647_21984  | Ca_desig_scaffold  | 21984                          | [G/C]       | NA                                         |
| Ca_Desig_Chr_scaffold00647_28499  | Ca_desig_scaffold  | 28499                          | [A/G]       | NA                                         |
| Ca_Desig_Chr_scaffold00647_28511  | Ca_desig_scaffold  | 28511                          | [T/C]       | NA                                         |
| Ca_Desig_Chr_scaffold00647_141065 | Ca_desig_scaffold  | 141065                         | [A/T]       | NA                                         |
| Ca_Desig_Chr_scaffold00647_141103 | Ca_desig_scaffold  | 141103                         | [A/C]       | NA                                         |
| Ca_Desig_Chr_scaffold00647_141114 | Ca_desig_scaffold  | 141114                         | [T/C]       | NA                                         |
| Ca_Desig_Chr_scaffold00647_154684 | Ca_desig_scaffold  | 154684                         | [T/G]       | NA                                         |
| Ca_Desig_Chr_scaffold00647_186185 | Ca_desig_scaffold  | 186185                         | [C/A]       | NA                                         |
| Ca_Desig_Chr_scaffold00647_186197 | Ca_desig_scaffold  | 186197                         | [C/T]       | NA                                         |
| Ca_Desig_Chr_scaffold00647_186198 | Ca_desig_scaffold  | 186198                         | [A/T]       | NA                                         |
| Ca_Desig_Chr_scaffold00647_203808 | Ca_desig_scaffold  | 203808                         | [A/T]       | NA                                         |
| Ca_Desig_Chr_scaffold15702_41142  | Ca_desig_scaffold  | 41142                          | [G/C]       | NA                                         |
| Ca_Desig_Chr_scaffold15702_72420  | Ca_desig_scaffold  | 72420                          | [A/G]       | NA                                         |
| Ca_Desig_Chr_scaffold15702_114911 | Ca_desig_scaffold  | 114911                         | [A/G]       | NA                                         |
| Ca_Desig_Chr_scaffold15702_114942 | Ca_desig_scaffold  | 114942                         | [T/G]       | NA                                         |
| Ca_Desig_Chr_scaffold01842_30031  | Ca_desig_scaffold  | 30031                          | [A/G]       | NA                                         |
| Ca_Desig_Chr_scaffold01842_30048  | Ca_desig_scaffold  | 30048                          | [T/A]       | NA                                         |
| Ca_Desig_Chr_scaffold01842_30051  | Ca_desig_scaffold  | 30051                          | [G/A]       | NA                                         |
| Ca_Desig_Chr_scaffold01842_30070  | Ca_desig_scaffold  | 30070                          | [A/G]       | NA                                         |
| Ca_Desig_Chr_scaffold01842_42529  | Ca_desig_scaffold  | 42529                          | [T/C]       | NA                                         |
| Ca_Desig_Chr_scaffold01842_42543  | Ca_desig_scaffold  | 42543                          | [T/C]       | NA                                         |
| Ca_Desig_Chr_scaffold01842_48744  | Ca_desig_scaffold  | 48744                          | [A/C]       | NA                                         |
| Ca_Desig_Chr_scaffold01924_20488  | Ca_desig_scaffold  | 20488                          | [T/G]       | NA                                         |

| <b>SNP IDs</b>                  | <b>Chromosomes</b> | <b>Physical positions (bp)</b> | <b>SNPs</b> | <b>NCBI SNPdb accession IDs (NCBI_ss#)</b> |
|---------------------------------|--------------------|--------------------------------|-------------|--------------------------------------------|
| Ca_Desi_Ch_scaffold01924_20499  | Ca_desi_scaffold   | 20499                          | [T/G]       | NA                                         |
| Ca_Desi_Ch_scaffold01924_20585  | Ca_desi_scaffold   | 20585                          | [T/C]       | NA                                         |
| Ca_Desi_Ch_scaffold01924_20592  | Ca_desi_scaffold   | 20592                          | [A/C]       | NA                                         |
| Ca_Desi_Ch_scaffold01924_147494 | Ca_desi_scaffold   | 147494                         | [T/C]       | NA                                         |
| Ca_Desi_Ch_scaffold00654_32277  | Ca_desi_scaffold   | 32277                          | [T/G]       | NA                                         |
| Ca_Desi_Ch_scaffold00654_32328  | Ca_desi_scaffold   | 32328                          | [A/C]       | NA                                         |
| Ca_Desi_Ch_scaffold00654_32330  | Ca_desi_scaffold   | 32330                          | [C/T]       | NA                                         |
| Ca_Desi_Ch_scaffold00654_32331  | Ca_desi_scaffold   | 32331                          | [A/C]       | NA                                         |
| Ca_Desi_Ch_scaffold00654_32344  | Ca_desi_scaffold   | 32344                          | [C/T]       | NA                                         |
| Ca_Desi_Ch_scaffold00654_32354  | Ca_desi_scaffold   | 32354                          | [C/G]       | NA                                         |
| Ca_Desi_Ch_scaffold00654_32585  | Ca_desi_scaffold   | 32585                          | [C/T]       | NA                                         |
| Ca_Desi_Ch_scaffold00654_32631  | Ca_desi_scaffold   | 32631                          | [C/T]       | NA                                         |
| Ca_Desi_Ch_scaffold00654_75435  | Ca_desi_scaffold   | 75435                          | [T/C]       | NA                                         |
| Ca_Desi_Ch_scaffold00654_75438  | Ca_desi_scaffold   | 75438                          | [T/C]       | NA                                         |
| Ca_Desi_Ch_scaffold00654_84639  | Ca_desi_scaffold   | 84639                          | [A/C]       | NA                                         |
| Ca_Desi_Ch_scaffold00654_185609 | Ca_desi_scaffold   | 185609                         | [A/G]       | NA                                         |
| Ca_Desi_Ch_scaffold00659_7489   | Ca_desi_scaffold   | 7489                           | [T/C]       | NA                                         |
| Ca_Desi_Ch_scaffold00659_21539  | Ca_desi_scaffold   | 21539                          | [A/G]       | NA                                         |
| Ca_Desi_Ch_scaffold00659_21543  | Ca_desi_scaffold   | 21543                          | [A/C]       | NA                                         |
| Ca_Desi_Ch_scaffold00659_21546  | Ca_desi_scaffold   | 21546                          | [A/T]       | NA                                         |
| Ca_Desi_Ch_scaffold00659_21549  | Ca_desi_scaffold   | 21549                          | [A/C]       | NA                                         |
| Ca_Desi_Ch_scaffold00659_21634  | Ca_desi_scaffold   | 21634                          | [T/G]       | NA                                         |
| Ca_Desi_Ch_scaffold00659_35269  | Ca_desi_scaffold   | 35269                          | [T/G]       | NA                                         |
| Ca_Desi_Ch_scaffold00659_35300  | Ca_desi_scaffold   | 35300                          | [A/G]       | NA                                         |
| Ca_Desi_Ch_scaffold00659_35303  | Ca_desi_scaffold   | 35303                          | [C/G]       | NA                                         |
| Ca_Desi_Ch_scaffold00659_54951  | Ca_desi_scaffold   | 54951                          | [T/G]       | NA                                         |
| Ca_Desi_Ch_scaffold00659_98148  | Ca_desi_scaffold   | 98148                          | [G/T]       | NA                                         |
| Ca_Desi_Ch_scaffold00659_98164  | Ca_desi_scaffold   | 98164                          | [T/A]       | NA                                         |
| Ca_Desi_Ch_scaffold00659_98179  | Ca_desi_scaffold   | 98179                          | [A/G]       | NA                                         |
| Ca_Desi_Ch_scaffold16048_4699   | Ca_desi_scaffold   | 4699                           | [T/G]       | NA                                         |
| Ca_Desi_Ch_scaffold16048_4702   | Ca_desi_scaffold   | 4702                           | [T/G]       | NA                                         |
| Ca_Desi_Ch_scaffold03730_53888  | Ca_desi_scaffold   | 53888                          | [A/G]       | NA                                         |
| Ca_Desi_Ch_scaffold03730_53914  | Ca_desi_scaffold   | 53914                          | [A/G]       | NA                                         |
| Ca_Desi_Ch_scaffold03730_53917  | Ca_desi_scaffold   | 53917                          | [A/G]       | NA                                         |

| <b>SNP IDs</b>                  | <b>Chromosomes</b> | <b>Physical positions (bp)</b> | <b>SNPs</b> | <b>NCBI SNPdb accession IDs (NCBI_ss#)</b> |
|---------------------------------|--------------------|--------------------------------|-------------|--------------------------------------------|
| Ca_Desi_Ch_scaffold03730_70706  | Ca_desi_scaffold   | 70706                          | [A/C]       | NA                                         |
| Ca_Desi_Ch_scaffold00675_25483  | Ca_desi_scaffold   | 25483                          | [T/G]       | NA                                         |
| Ca_Desi_Ch_scaffold00675_25494  | Ca_desi_scaffold   | 25494                          | [A/G]       | NA                                         |
| Ca_Desi_Ch_scaffold00675_25498  | Ca_desi_scaffold   | 25498                          | [T/G]       | NA                                         |
| Ca_Desi_Ch_scaffold00675_25501  | Ca_desi_scaffold   | 25501                          | [T/G]       | NA                                         |
| Ca_Desi_Ch_scaffold00675_27300  | Ca_desi_scaffold   | 27300                          | [A/G]       | NA                                         |
| Ca_Desi_Ch_scaffold00675_27319  | Ca_desi_scaffold   | 27319                          | [T/G]       | NA                                         |
| Ca_Desi_Ch_scaffold00675_34139  | Ca_desi_scaffold   | 34139                          | [C/T]       | NA                                         |
| Ca_Desi_Ch_scaffold00826_78820  | Ca_desi_scaffold   | 78820                          | [A/T]       | NA                                         |
| Ca_Desi_Ch_scaffold00826_78836  | Ca_desi_scaffold   | 78836                          | [A/C]       | NA                                         |
| Ca_Desi_Ch_scaffold00826_78863  | Ca_desi_scaffold   | 78863                          | [T/C]       | NA                                         |
| Ca_Desi_Ch_scaffold00826_78871  | Ca_desi_scaffold   | 78871                          | [A/G]       | NA                                         |
| Ca_Desi_Ch_scaffold00826_78877  | Ca_desi_scaffold   | 78877                          | [A/G]       | NA                                         |
| Ca_Desi_Ch_scaffold00826_78880  | Ca_desi_scaffold   | 78880                          | [T/A]       | NA                                         |
| Ca_Desi_Ch_scaffold00826_84630  | Ca_desi_scaffold   | 84630                          | [T/C]       | NA                                         |
| Ca_Desi_Ch_scaffold00826_84644  | Ca_desi_scaffold   | 84644                          | [T/G]       | NA                                         |
| Ca_Desi_Ch_scaffold00826_84701  | Ca_desi_scaffold   | 84701                          | [T/G]       | NA                                         |
| Ca_Desi_Ch_scaffold00826_84796  | Ca_desi_scaffold   | 84796                          | [A/G]       | NA                                         |
| Ca_Desi_Ch_scaffold00826_95255  | Ca_desi_scaffold   | 95255                          | [T/C]       | NA                                         |
| Ca_Desi_Ch_scaffold00826_95290  | Ca_desi_scaffold   | 95290                          | [C/A]       | NA                                         |
| Ca_Desi_Ch_scaffold00826_95293  | Ca_desi_scaffold   | 95293                          | [G/A]       | NA                                         |
| Ca_Desi_Ch_scaffold00826_95296  | Ca_desi_scaffold   | 95296                          | [A/C]       | NA                                         |
| Ca_Desi_Ch_scaffold00826_95404  | Ca_desi_scaffold   | 95404                          | [G/A]       | NA                                         |
| Ca_Desi_Ch_scaffold00826_95409  | Ca_desi_scaffold   | 95409                          | [G/A]       | NA                                         |
| Ca_Desi_Ch_scaffold00826_95436  | Ca_desi_scaffold   | 95436                          | [T/C]       | NA                                         |
| Ca_Desi_Ch_scaffold00826_95437  | Ca_desi_scaffold   | 95437                          | [G/T]       | NA                                         |
| Ca_Desi_Ch_scaffold00877_92606  | Ca_desi_scaffold   | 92606                          | [A/T]       | NA                                         |
| Ca_Desi_Ch_scaffold00877_300376 | Ca_desi_scaffold   | 300376                         | [A/C]       | NA                                         |
| Ca_Desi_Ch_scaffold10990_36625  | Ca_desi_scaffold   | 36625                          | [T/G]       | NA                                         |
| Ca_Desi_Ch_scaffold10990_37101  | Ca_desi_scaffold   | 37101                          | [A/G]       | NA                                         |
| Ca_Desi_Ch_scaffold10990_37130  | Ca_desi_scaffold   | 37130                          | [T/G]       | NA                                         |
| Ca_Desi_Ch_scaffold10990_37132  | Ca_desi_scaffold   | 37132                          | [A/G]       | NA                                         |
| Ca_Desi_Ch_scaffold10990_37147  | Ca_desi_scaffold   | 37147                          | [A/C]       | NA                                         |
| Ca_Desi_Ch_scaffold00692_7757   | Ca_desi_scaffold   | 7757                           | [A/T]       | NA                                         |

| <b>SNP IDs</b>                  | <b>Chromosomes</b> | <b>Physical positions (bp)</b> | <b>SNPs</b> | <b>NCBI SNPdb accession IDs (NCBI_ss#)</b> |
|---------------------------------|--------------------|--------------------------------|-------------|--------------------------------------------|
| Ca_Desi_Chr_scaffold00692_7775  | Ca_desi_scaffold   | 7775                           | [T/C]       | NA                                         |
| Ca_Desi_Chr_scaffold00692_7788  | Ca_desi_scaffold   | 7788                           | [T/G]       | NA                                         |
| Ca_Desi_Chr_scaffold00692_7792  | Ca_desi_scaffold   | 7792                           | [T/G]       | NA                                         |
| Ca_Desi_Chr_scaffold00692_7803  | Ca_desi_scaffold   | 7803                           | [A/G]       | NA                                         |
| Ca_Desi_Chr_scaffold00692_10633 | Ca_desi_scaffold   | 10633                          | [A/T]       | NA                                         |
| Ca_Desi_Chr_scaffold00692_10676 | Ca_desi_scaffold   | 10676                          | [T/G]       | NA                                         |
| Ca_Desi_Chr_scaffold15021_63087 | Ca_desi_scaffold   | 63087                          | [T/A]       | NA                                         |
| Ca_Desi_Chr_scaffold15021_63111 | Ca_desi_scaffold   | 63111                          | [A/C]       | NA                                         |
| Ca_Desi_Chr_scaffold00723_28405 | Ca_desi_scaffold   | 28405                          | [A/T]       | NA                                         |
| Ca_Desi_Chr_scaffold00723_28410 | Ca_desi_scaffold   | 28410                          | [T/C]       | NA                                         |
| Ca_Desi_Chr_scaffold00723_28413 | Ca_desi_scaffold   | 28413                          | [T/C]       | NA                                         |
| Ca_Desi_Chr_scaffold00723_28434 | Ca_desi_scaffold   | 28434                          | [T/C]       | NA                                         |
| Ca_Desi_Chr_scaffold00723_28438 | Ca_desi_scaffold   | 28438                          | [C/A]       | NA                                         |
| Ca_Desi_Chr_scaffold00723_28443 | Ca_desi_scaffold   | 28443                          | [A/G]       | NA                                         |
| Ca_Desi_Chr_scaffold00723_28448 | Ca_desi_scaffold   | 28448                          | [G/A]       | NA                                         |
| Ca_Desi_Chr_scaffold00723_28451 | Ca_desi_scaffold   | 28451                          | [A/G]       | NA                                         |
| Ca_Desi_Chr_scaffold00723_37798 | Ca_desi_scaffold   | 37798                          | [C/G]       | NA                                         |
| Ca_Desi_Chr_scaffold00723_38260 | Ca_desi_scaffold   | 38260                          | [G/A]       | NA                                         |
| Ca_Desi_Chr_scaffold00723_39403 | Ca_desi_scaffold   | 39403                          | [G/A]       | NA                                         |
| Ca_Desi_Chr_scaffold00723_43134 | Ca_desi_scaffold   | 43134                          | [C/T]       | NA                                         |
| Ca_Desi_Chr_scaffold02301_12611 | Ca_desi_scaffold   | 12611                          | [A/T]       | NA                                         |
| Ca_Desi_Chr_scaffold02301_12620 | Ca_desi_scaffold   | 12620                          | [A/C]       | NA                                         |
| Ca_Desi_Chr_scaffold02301_18646 | Ca_desi_scaffold   | 18646                          | [A/C]       | NA                                         |
| Ca_Desi_Chr_scaffold02301_19317 | Ca_desi_scaffold   | 19317                          | [T/C]       | NA                                         |
| Ca_Desi_Chr_scaffold02301_19328 | Ca_desi_scaffold   | 19328                          | [T/G]       | NA                                         |
| Ca_Desi_Chr_scaffold02301_19332 | Ca_desi_scaffold   | 19332                          | [A/G]       | NA                                         |
| Ca_Desi_Chr_scaffold02301_19334 | Ca_desi_scaffold   | 19334                          | [A/G]       | NA                                         |
| Ca_Desi_Chr_scaffold02301_19345 | Ca_desi_scaffold   | 19345                          | [A/G]       | NA                                         |
| Ca_Desi_Chr_scaffold02301_19413 | Ca_desi_scaffold   | 19413                          | [T/G]       | NA                                         |
| Ca_Desi_Chr_scaffold02301_19436 | Ca_desi_scaffold   | 19436                          | [T/G]       | NA                                         |
| Ca_Desi_Chr_scaffold02301_19480 | Ca_desi_scaffold   | 19480                          | [T/G]       | NA                                         |
| Ca_Desi_Chr_scaffold02301_72994 | Ca_desi_scaffold   | 72994                          | [G/A]       | NA                                         |
| Ca_Desi_Chr_scaffold02301_74304 | Ca_desi_scaffold   | 74304                          | [C/T]       | NA                                         |
| Ca_Desi_Chr_scaffold02301_74494 | Ca_desi_scaffold   | 74494                          | [T/C]       | NA                                         |

| <b>SNP IDs</b>                  | <b>Chromosomes</b> | <b>Physical positions (bp)</b> | <b>SNPs</b> | <b>NCBI SNPdb accession IDs (NCBI_ss#)</b> |
|---------------------------------|--------------------|--------------------------------|-------------|--------------------------------------------|
| Ca_Desi_Ch_scaffold02301_91511  | Ca_desi_scaffold   | 91511                          | [T/C]       | NA                                         |
| Ca_Desi_Ch_scaffold02301_91644  | Ca_desi_scaffold   | 91644                          | [G/A]       | NA                                         |
| Ca_Desi_Ch_scaffold00994_225573 | Ca_desi_scaffold   | 225573                         | [C/T]       | NA                                         |
| Ca_Desi_Ch_scaffold00994_225580 | Ca_desi_scaffold   | 225580                         | [G/A]       | NA                                         |
| Ca_Desi_Ch_scaffold00994_225581 | Ca_desi_scaffold   | 225581                         | [A/C]       | NA                                         |
| Ca_Desi_Ch_scaffold00994_225593 | Ca_desi_scaffold   | 225593                         | [T/C]       | NA                                         |
| Ca_Desi_Ch_scaffold00994_243674 | Ca_desi_scaffold   | 243674                         | [T/G]       | NA                                         |
| Ca_Desi_Ch_scaffold00994_248460 | Ca_desi_scaffold   | 248460                         | [T/C]       | NA                                         |
| Ca_Desi_Ch_scaffold00994_248533 | Ca_desi_scaffold   | 248533                         | [T/C]       | NA                                         |
| Ca_Desi_Ch_scaffold00994_281122 | Ca_desi_scaffold   | 281122                         | [A/C]       | NA                                         |
| Ca_Desi_Ch_scaffold00994_281132 | Ca_desi_scaffold   | 281132                         | [T/C]       | NA                                         |
| Ca_Desi_Ch_scaffold00907_150704 | Ca_desi_scaffold   | 150704                         | [T/G]       | NA                                         |
| Ca_Desi_Ch_scaffold00907_150719 | Ca_desi_scaffold   | 150719                         | [T/C]       | NA                                         |
| Ca_Desi_Ch_scaffold00907_150721 | Ca_desi_scaffold   | 150721                         | [A/C]       | NA                                         |
| Ca_Desi_Ch_scaffold00907_150737 | Ca_desi_scaffold   | 150737                         | [T/G]       | NA                                         |
| Ca_Desi_Ch_scaffold00907_150741 | Ca_desi_scaffold   | 150741                         | [A/G]       | NA                                         |
| Ca_Desi_Ch_scaffold00907_193071 | Ca_desi_scaffold   | 193071                         | [T/G]       | NA                                         |
| Ca_Desi_Ch_scaffold00907_194391 | Ca_desi_scaffold   | 194391                         | [C/T]       | NA                                         |
| Ca_Desi_Ch_scaffold00907_205835 | Ca_desi_scaffold   | 205835                         | [T/G]       | NA                                         |
| Ca_Desi_Ch_scaffold00907_205854 | Ca_desi_scaffold   | 205854                         | [T/C]       | NA                                         |
| Ca_Desi_Ch_scaffold00907_205873 | Ca_desi_scaffold   | 205873                         | [A/G]       | NA                                         |
| Ca_Desi_Ch_scaffold00762_44374  | Ca_desi_scaffold   | 44374                          | [A/C]       | NA                                         |
| Ca_Desi_Ch_scaffold00762_85392  | Ca_desi_scaffold   | 85392                          | [A/C]       | NA                                         |
| Ca_Desi_Ch_scaffold00762_90063  | Ca_desi_scaffold   | 90063                          | [T/G]       | NA                                         |
| Ca_Desi_Ch_scaffold00762_90088  | Ca_desi_scaffold   | 90088                          | [A/G]       | NA                                         |
| Ca_Desi_Ch_scaffold00762_93864  | Ca_desi_scaffold   | 93864                          | [T/A]       | NA                                         |
| Ca_Desi_Ch_scaffold00762_96112  | Ca_desi_scaffold   | 96112                          | [T/G]       | NA                                         |
| Ca_Desi_Ch_scaffold00762_96130  | Ca_desi_scaffold   | 96130                          | [T/C]       | NA                                         |
| Ca_Desi_Ch_scaffold00762_96187  | Ca_desi_scaffold   | 96187                          | [A/G]       | NA                                         |
| Ca_Desi_Ch_scaffold00762_96189  | Ca_desi_scaffold   | 96189                          | [A/C]       | NA                                         |
| Ca_Desi_Ch_scaffold00762_173700 | Ca_desi_scaffold   | 173700                         | [A/T]       | NA                                         |
| Ca_Desi_Ch_scaffold00762_173703 | Ca_desi_scaffold   | 173703                         | [G/C]       | NA                                         |
| Ca_Desi_Ch_scaffold00762_173706 | Ca_desi_scaffold   | 173706                         | [A/G]       | NA                                         |
| Ca_Desi_Ch_scaffold00762_173709 | Ca_desi_scaffold   | 173709                         | [A/G]       | NA                                         |

| <b>SNP IDs</b>                  | <b>Chromosomes</b> | <b>Physical positions (bp)</b> | <b>SNPs</b> | <b>NCBI SNPdb accession IDs (NCBI_ss#)</b> |
|---------------------------------|--------------------|--------------------------------|-------------|--------------------------------------------|
| Ca_Desi_Ch_scaffold00762_173713 | Ca_desi_scaffold   | 173713                         | [A/G]       | NA                                         |
| Ca_Desi_Ch_scaffold00762_173715 | Ca_desi_scaffold   | 173715                         | [A/G]       | NA                                         |
| Ca_Desi_Ch_scaffold00762_173718 | Ca_desi_scaffold   | 173718                         | [A/G]       | NA                                         |
| Ca_Desi_Ch_scaffold00762_173720 | Ca_desi_scaffold   | 173720                         | [A/G]       | NA                                         |
| Ca_Desi_Ch_scaffold00762_173725 | Ca_desi_scaffold   | 173725                         | [T/C]       | NA                                         |
| Ca_Desi_Ch_scaffold00762_173728 | Ca_desi_scaffold   | 173728                         | [T/C]       | NA                                         |
| Ca_Desi_Ch_scaffold00762_173734 | Ca_desi_scaffold   | 173734                         | [A/G]       | NA                                         |
| Ca_Desi_Ch_scaffold00762_173738 | Ca_desi_scaffold   | 173738                         | [A/G]       | NA                                         |
| Ca_Desi_Ch_scaffold00762_173741 | Ca_desi_scaffold   | 173741                         | [G/A]       | NA                                         |
| Ca_Desi_Ch_scaffold00762_173744 | Ca_desi_scaffold   | 173744                         | [A/G]       | NA                                         |
| Ca_Desi_Ch_scaffold00762_173750 | Ca_desi_scaffold   | 173750                         | [T/A]       | NA                                         |
| Ca_Desi_Ch_scaffold07915_70849  | Ca_desi_scaffold   | 70849                          | [A/C]       | NA                                         |
| Ca_Desi_Ch_scaffold07915_142412 | Ca_desi_scaffold   | 142412                         | [T/G]       | NA                                         |
| Ca_Desi_Ch_scaffold07915_142422 | Ca_desi_scaffold   | 142422                         | [A/C]       | NA                                         |
| Ca_Desi_Ch_scaffold07915_142448 | Ca_desi_scaffold   | 142448                         | [A/G]       | NA                                         |
| Ca_Desi_Ch_scaffold00781_57626  | Ca_desi_scaffold   | 57626                          | [A/G]       | NA                                         |
| Ca_Desi_Ch_scaffold00781_96320  | Ca_desi_scaffold   | 96320                          | [G/T]       | NA                                         |
| Ca_Desi_Ch_scaffold00781_96322  | Ca_desi_scaffold   | 96322                          | [T/C]       | NA                                         |
| Ca_Desi_Ch_scaffold00781_96332  | Ca_desi_scaffold   | 96332                          | [T/C]       | NA                                         |
| Ca_Desi_Ch_scaffold00781_96337  | Ca_desi_scaffold   | 96337                          | [T/C]       | NA                                         |
| Ca_Desi_Ch_scaffold00781_96341  | Ca_desi_scaffold   | 96341                          | [T/C]       | NA                                         |
| Ca_Desi_Ch_scaffold00781_96354  | Ca_desi_scaffold   | 96354                          | [T/G]       | NA                                         |
| Ca_Desi_Ch_scaffold00781_96355  | Ca_desi_scaffold   | 96355                          | [A/T]       | NA                                         |
| Ca_Desi_Ch_scaffold00781_96364  | Ca_desi_scaffold   | 96364                          | [A/C]       | NA                                         |
| Ca_Desi_Ch_scaffold00781_96372  | Ca_desi_scaffold   | 96372                          | [A/G]       | NA                                         |
| Ca_Desi_Ch_scaffold00781_96375  | Ca_desi_scaffold   | 96375                          | [T/G]       | NA                                         |
| Ca_Desi_Ch_scaffold00781_96376  | Ca_desi_scaffold   | 96376                          | [T/C]       | NA                                         |
| Ca_Desi_Ch_scaffold00781_96391  | Ca_desi_scaffold   | 96391                          | [A/G]       | NA                                         |
| Ca_Desi_Ch_scaffold00781_96393  | Ca_desi_scaffold   | 96393                          | [T/C]       | NA                                         |
| Ca_Desi_Ch_scaffold00781_96413  | Ca_desi_scaffold   | 96413                          | [T/C]       | NA                                         |
| Ca_Desi_Ch_scaffold00781_96423  | Ca_desi_scaffold   | 96423                          | [T/C]       | NA                                         |
| Ca_Desi_Ch_scaffold00781_96427  | Ca_desi_scaffold   | 96427                          | [A/G]       | NA                                         |
| Ca_Desi_Ch_scaffold00781_96431  | Ca_desi_scaffold   | 96431                          | [C/G]       | NA                                         |
| Ca_Desi_Ch_scaffold00781_96436  | Ca_desi_scaffold   | 96436                          | [A/C]       | NA                                         |

| <b>SNP IDs</b>                 | <b>Chromosomes</b> | <b>Physical positions (bp)</b> | <b>SNPs</b> | <b>NCBI SNPdb accession IDs (NCBI_ss#)</b> |
|--------------------------------|--------------------|--------------------------------|-------------|--------------------------------------------|
| Ca_Desi_Ch_scaffold00787_47278 | Ca_desi_scaffold   | 47278                          | [T/G]       | NA                                         |
| Ca_Desi_Ch_scaffold00787_47363 | Ca_desi_scaffold   | 47363                          | [A/C]       | NA                                         |
| Ca_Desi_Ch_scaffold00787_80472 | Ca_desi_scaffold   | 80472                          | [A/G]       | NA                                         |
| Ca_Desi_Ch_scaffold00787_80484 | Ca_desi_scaffold   | 80484                          | [T/C]       | NA                                         |
| Ca_Desi_Ch_scaffold00787_80503 | Ca_desi_scaffold   | 80503                          | [T/C]       | NA                                         |
| Ca_Desi_Ch_scaffold00787_80507 | Ca_desi_scaffold   | 80507                          | [A/C]       | NA                                         |
| Ca_Desi_Ch_scaffold00787_88252 | Ca_desi_scaffold   | 88252                          | [A/G]       | NA                                         |
| Ca_Desi_Ch_scaffold02958_7175  | Ca_desi_scaffold   | 7175                           | [A/C]       | NA                                         |
| Ca_Desi_Ch_scaffold02958_7817  | Ca_desi_scaffold   | 7817                           | [A/C]       | NA                                         |
| Ca_Desi_Ch_scaffold02958_16875 | Ca_desi_scaffold   | 16875                          | [T/A]       | NA                                         |
| Ca_Desi_Ch_scaffold02958_16899 | Ca_desi_scaffold   | 16899                          | [C/T]       | NA                                         |
| Ca_Desi_Ch_scaffold02958_16907 | Ca_desi_scaffold   | 16907                          | [C/T]       | NA                                         |
| Ca_Desi_Ch_scaffold02958_16916 | Ca_desi_scaffold   | 16916                          | [G/T]       | NA                                         |
| Ca_Desi_Ch_scaffold01802_84654 | Ca_desi_scaffold   | 84654                          | [A/T]       | NA                                         |
| Ca_Desi_Ch_scaffold01802_84655 | Ca_desi_scaffold   | 84655                          | [A/C]       | NA                                         |
| Ca_Desi_Ch_scaffold01802_84656 | Ca_desi_scaffold   | 84656                          | [G/T]       | NA                                         |
| Ca_Desi_Ch_scaffold01802_85669 | Ca_desi_scaffold   | 85669                          | [A/G]       | NA                                         |
| Ca_Desi_Ch_scaffold00829_10071 | Ca_desi_scaffold   | 10071                          | [T/G]       | NA                                         |
| Ca_Desi_Ch_scaffold00829_10074 | Ca_desi_scaffold   | 10074                          | [T/G]       | NA                                         |
| Ca_Desi_Ch_scaffold00829_10077 | Ca_desi_scaffold   | 10077                          | [G/T]       | NA                                         |
| Ca_Desi_Ch_scaffold00829_10080 | Ca_desi_scaffold   | 10080                          | [T/G]       | NA                                         |
| Ca_Desi_Ch_scaffold00829_10090 | Ca_desi_scaffold   | 10090                          | [A/T]       | NA                                         |
| Ca_Desi_Ch_scaffold00829_15874 | Ca_desi_scaffold   | 15874                          | [A/C]       | NA                                         |
| Ca_Desi_Ch_scaffold16831_6397  | Ca_desi_scaffold   | 6397                           | [T/A]       | NA                                         |
| Ca_Desi_Ch_scaffold16831_6423  | Ca_desi_scaffold   | 6423                           | [A/G]       | NA                                         |
| Ca_Desi_Ch_scaffold16831_6426  | Ca_desi_scaffold   | 6426                           | [T/A]       | NA                                         |
| Ca_Desi_Ch_scaffold16831_6445  | Ca_desi_scaffold   | 6445                           | [G/A]       | NA                                         |
| Ca_Desi_Ch_scaffold16831_10762 | Ca_desi_scaffold   | 10762                          | [A/G]       | NA                                         |
| Ca_Desi_Ch_scaffold16831_10774 | Ca_desi_scaffold   | 10774                          | [T/C]       | NA                                         |
| Ca_Desi_Ch_scaffold16831_10782 | Ca_desi_scaffold   | 10782                          | [A/C]       | NA                                         |
| Ca_Desi_Ch_scaffold16831_10786 | Ca_desi_scaffold   | 10786                          | [T/C]       | NA                                         |
| Ca_Desi_Ch_scaffold16831_10804 | Ca_desi_scaffold   | 10804                          | [A/G]       | NA                                         |
| Ca_Desi_Ch_scaffold16831_31500 | Ca_desi_scaffold   | 31500                          | [A/C]       | NA                                         |
| Ca_Desi_Ch_scaffold16831_31512 | Ca_desi_scaffold   | 31512                          | [A/C]       | NA                                         |

| <b>SNP IDs</b>                  | <b>Chromosomes</b> | <b>Physical positions (bp)</b> | <b>SNPs</b> | <b>NCBI SNPdb accession IDs (NCBI_ss#)</b> |
|---------------------------------|--------------------|--------------------------------|-------------|--------------------------------------------|
| Ca_DesigChr_scaffold16831_54402 | Ca_desig_scaffold  | 54402                          | [G/T]       | NA                                         |
| Ca_DesigChr_scaffold16831_54415 | Ca_desig_scaffold  | 54415                          | [A/G]       | NA                                         |
| Ca_DesigChr_scaffold16831_54433 | Ca_desig_scaffold  | 54433                          | [A/G]       | NA                                         |
| Ca_DesigChr_scaffold16831_54438 | Ca_desig_scaffold  | 54438                          | [T/C]       | NA                                         |
| Ca_DesigChr_scaffold16831_54441 | Ca_desig_scaffold  | 54441                          | [A/G]       | NA                                         |
| Ca_DesigChr_scaffold16831_54442 | Ca_desig_scaffold  | 54442                          | [G/A]       | NA                                         |
| Ca_DesigChr_scaffold16831_54448 | Ca_desig_scaffold  | 54448                          | [A/G]       | NA                                         |
| Ca_DesigChr_scaffold16831_54450 | Ca_desig_scaffold  | 54450                          | [A/G]       | NA                                         |
| Ca_DesigChr_scaffold16831_54451 | Ca_desig_scaffold  | 54451                          | [T/C]       | NA                                         |
| Ca_DesigChr_scaffold16831_54455 | Ca_desig_scaffold  | 54455                          | [T/C]       | NA                                         |
| Ca_DesigChr_scaffold16831_54462 | Ca_desig_scaffold  | 54462                          | [A/G]       | NA                                         |
| Ca_DesigChr_scaffold16831_54472 | Ca_desig_scaffold  | 54472                          | [A/G]       | NA                                         |
| Ca_DesigChr_scaffold16831_54473 | Ca_desig_scaffold  | 54473                          | [A/G]       | NA                                         |
| Ca_DesigChr_scaffold16831_54477 | Ca_desig_scaffold  | 54477                          | [A/G]       | NA                                         |
| Ca_DesigChr_scaffold16831_54478 | Ca_desig_scaffold  | 54478                          | [A/G]       | NA                                         |
| Ca_DesigChr_scaffold16831_54493 | Ca_desig_scaffold  | 54493                          | [T/C]       | NA                                         |
| Ca_DesigChr_scaffold16831_54546 | Ca_desig_scaffold  | 54546                          | [A/C]       | NA                                         |
| Ca_DesigChr_scaffold16831_54553 | Ca_desig_scaffold  | 54553                          | [A/G]       | NA                                         |
| Ca_DesigChr_scaffold16831_57242 | Ca_desig_scaffold  | 57242                          | [T/C]       | NA                                         |
| Ca_DesigChr_scaffold16831_57251 | Ca_desig_scaffold  | 57251                          | [A/G]       | NA                                         |
| Ca_DesigChr_scaffold16831_57303 | Ca_desig_scaffold  | 57303                          | [A/C]       | NA                                         |
| Ca_DesigChr_scaffold16831_57364 | Ca_desig_scaffold  | 57364                          | [T/C]       | NA                                         |
| Ca_DesigChr_scaffold16831_57377 | Ca_desig_scaffold  | 57377                          | [T/C]       | NA                                         |
| Ca_DesigChr_scaffold16831_57394 | Ca_desig_scaffold  | 57394                          | [A/G]       | NA                                         |
| Ca_DesigChr_scaffold16831_66278 | Ca_desig_scaffold  | 66278                          | [A/C]       | NA                                         |
| Ca_DesigChr_scaffold16831_66279 | Ca_desig_scaffold  | 66279                          | [G/T]       | NA                                         |
| Ca_DesigChr_scaffold16831_66280 | Ca_desig_scaffold  | 66280                          | [A/G]       | NA                                         |
| Ca_DesigChr_scaffold00835_34505 | Ca_desig_scaffold  | 34505                          | [A/G]       | NA                                         |
| Ca_DesigChr_scaffold00835_34534 | Ca_desig_scaffold  | 34534                          | [A/G]       | NA                                         |
| Ca_DesigChr_scaffold00835_34542 | Ca_desig_scaffold  | 34542                          | [A/G]       | NA                                         |
| Ca_DesigChr_scaffold00835_34548 | Ca_desig_scaffold  | 34548                          | [T/C]       | NA                                         |
| Ca_DesigChr_scaffold00835_34565 | Ca_desig_scaffold  | 34565                          | [T/C]       | NA                                         |
| Ca_DesigChr_scaffold00835_34784 | Ca_desig_scaffold  | 34784                          | [G/T]       | NA                                         |
| Ca_DesigChr_scaffold00835_34897 | Ca_desig_scaffold  | 34897                          | [T/G]       | NA                                         |



| <b>SNP IDs</b>                    | <b>Chromosomes</b> | <b>Physical positions (bp)</b> | <b>SNPs</b> | <b>NCBI SNPdb accession IDs (NCBI_ss#)</b> |
|-----------------------------------|--------------------|--------------------------------|-------------|--------------------------------------------|
| Ca_Desig_Chr_scaffold00835_42197  | Ca_desig_scaffold  | 42197                          | [T/G]       | NA                                         |
| Ca_Desig_Chr_scaffold00835_62457  | Ca_desig_scaffold  | 62457                          | [T/C]       | NA                                         |
| Ca_Desig_Chr_scaffold00835_64558  | Ca_desig_scaffold  | 64558                          | [A/G]       | NA                                         |
| Ca_Desig_Chr_scaffold00835_65404  | Ca_desig_scaffold  | 65404                          | [A/T]       | NA                                         |
| Ca_Desig_Chr_scaffold00835_65419  | Ca_desig_scaffold  | 65419                          | [T/C]       | NA                                         |
| Ca_Desig_Chr_scaffold00835_65520  | Ca_desig_scaffold  | 65520                          | [C/A]       | NA                                         |
| Ca_Desig_Chr_scaffold00835_65521  | Ca_desig_scaffold  | 65521                          | [T/G]       | NA                                         |
| Ca_Desig_Chr_scaffold00835_65522  | Ca_desig_scaffold  | 65522                          | [G/A]       | NA                                         |
| Ca_Desig_Chr_scaffold01704_76035  | Ca_desig_scaffold  | 76035                          | [A/T]       | NA                                         |
| Ca_Desig_Chr_scaffold01704_114679 | Ca_desig_scaffold  | 114679                         | [T/G]       | NA                                         |
| Ca_Desig_Chr_scaffold01704_114684 | Ca_desig_scaffold  | 114684                         | [T/G]       | NA                                         |
| Ca_Desig_Chr_scaffold01704_117774 | Ca_desig_scaffold  | 117774                         | [A/C]       | NA                                         |
| Ca_Desig_Chr_scaffold00844_11199  | Ca_desig_scaffold  | 11199                          | [T/C]       | NA                                         |
| Ca_Desig_Chr_scaffold00844_11205  | Ca_desig_scaffold  | 11205                          | [A/G]       | NA                                         |
| Ca_Desig_Chr_scaffold00844_11215  | Ca_desig_scaffold  | 11215                          | [A/G]       | NA                                         |
| Ca_Desig_Chr_scaffold00844_11219  | Ca_desig_scaffold  | 11219                          | [A/G]       | NA                                         |
| Ca_Desig_Chr_scaffold00844_11225  | Ca_desig_scaffold  | 11225                          | [A/G]       | NA                                         |
| Ca_Desig_Chr_scaffold00844_32742  | Ca_desig_scaffold  | 32742                          | [A/T]       | NA                                         |
| Ca_Desig_Chr_scaffold00844_32757  | Ca_desig_scaffold  | 32757                          | [T/C]       | NA                                         |
| Ca_Desig_Chr_scaffold00844_32769  | Ca_desig_scaffold  | 32769                          | [T/C]       | NA                                         |
| Ca_Desig_Chr_scaffold00844_32771  | Ca_desig_scaffold  | 32771                          | [A/G]       | NA                                         |
| Ca_Desig_Chr_scaffold00844_32785  | Ca_desig_scaffold  | 32785                          | [T/G]       | NA                                         |
| Ca_Desig_Chr_scaffold00844_32791  | Ca_desig_scaffold  | 32791                          | [A/T]       | NA                                         |
| Ca_Desig_Chr_scaffold00844_100290 | Ca_desig_scaffold  | 100290                         | [T/G]       | NA                                         |
| Ca_Desig_Chr_scaffold07146_43279  | Ca_desig_scaffold  | 43279                          | [A/C]       | NA                                         |
| Ca_Desig_Chr_scaffold07146_43301  | Ca_desig_scaffold  | 43301                          | [A/G]       | NA                                         |
| Ca_Desig_Chr_scaffold07146_82149  | Ca_desig_scaffold  | 82149                          | [A/C]       | NA                                         |
| Ca_Desig_Chr_scaffold02501_110564 | Ca_desig_scaffold  | 110564                         | [T/C]       | NA                                         |
| Ca_Desig_Chr_scaffold02501_110568 | Ca_desig_scaffold  | 110568                         | [T/G]       | NA                                         |
| Ca_Desig_Chr_scaffold02501_110583 | Ca_desig_scaffold  | 110583                         | [A/G]       | NA                                         |
| Ca_Desig_Chr_scaffold02501_110611 | Ca_desig_scaffold  | 110611                         | [A/C]       | NA                                         |
| Ca_Desig_Chr_scaffold00911_25414  | Ca_desig_scaffold  | 25414                          | [T/C]       | NA                                         |
| Ca_Desig_Chr_scaffold00911_90781  | Ca_desig_scaffold  | 90781                          | [T/G]       | NA                                         |
| Ca_Desig_Chr_scaffold01949_86561  | Ca_desig_scaffold  | 86561                          | [T/A]       | NA                                         |

| <b>SNP IDs</b>                  | <b>Chromosomes</b> | <b>Physical positions (bp)</b> | <b>SNPs</b> | <b>NCBI SNPdb accession IDs (NCBI_ss#)</b> |
|---------------------------------|--------------------|--------------------------------|-------------|--------------------------------------------|
| Ca_Desi_Ch_scaffold01949_86567  | Ca_desi_scaffold   | 86567                          | [G/A]       | NA                                         |
| Ca_Desi_Ch_scaffold00876_20840  | Ca_desi_scaffold   | 20840                          | [T/G]       | NA                                         |
| Ca_Desi_Ch_scaffold00876_20859  | Ca_desi_scaffold   | 20859                          | [T/G]       | NA                                         |
| Ca_Desi_Ch_scaffold00876_42339  | Ca_desi_scaffold   | 42339                          | [T/G]       | NA                                         |
| Ca_Desi_Ch_scaffold00876_42350  | Ca_desi_scaffold   | 42350                          | [T/C]       | NA                                         |
| Ca_Desi_Ch_scaffold00883_19648  | Ca_desi_scaffold   | 19648                          | [A/G]       | NA                                         |
| Ca_Desi_Ch_scaffold00908_115704 | Ca_desi_scaffold   | 115704                         | [T/A]       | NA                                         |
| Ca_Desi_Ch_scaffold00912_82575  | Ca_desi_scaffold   | 82575                          | [A/C]       | NA                                         |
| Ca_Desi_Ch_scaffold00912_158750 | Ca_desi_scaffold   | 158750                         | [A/G]       | NA                                         |
| Ca_Desi_Ch_scaffold00912_158763 | Ca_desi_scaffold   | 158763                         | [T/C]       | NA                                         |
| Ca_Desi_Ch_scaffold00916_15751  | Ca_desi_scaffold   | 15751                          | [C/T]       | NA                                         |
| Ca_Desi_Ch_scaffold00916_15773  | Ca_desi_scaffold   | 15773                          | [T/C]       | NA                                         |
| Ca_Desi_Ch_scaffold00916_15794  | Ca_desi_scaffold   | 15794                          | [T/C]       | NA                                         |
| Ca_Desi_Ch_scaffold00916_16160  | Ca_desi_scaffold   | 16160                          | [T/G]       | NA                                         |
| Ca_Desi_Ch_scaffold00916_16200  | Ca_desi_scaffold   | 16200                          | [A/G]       | NA                                         |
| Ca_Desi_Ch_scaffold00916_16249  | Ca_desi_scaffold   | 16249                          | [T/C]       | NA                                         |
| Ca_Desi_Ch_scaffold00916_16269  | Ca_desi_scaffold   | 16269                          | [T/C]       | NA                                         |
| Ca_Desi_Ch_scaffold00916_16286  | Ca_desi_scaffold   | 16286                          | [T/G]       | NA                                         |
| Ca_Desi_Ch_scaffold00916_16289  | Ca_desi_scaffold   | 16289                          | [T/G]       | NA                                         |
| Ca_Desi_Ch_scaffold00916_16349  | Ca_desi_scaffold   | 16349                          | [T/G]       | NA                                         |
| Ca_Desi_Ch_scaffold00916_24395  | Ca_desi_scaffold   | 24395                          | [T/G]       | NA                                         |
| Ca_Desi_Ch_scaffold02835_38002  | Ca_desi_scaffold   | 38002                          | [A/T]       | NA                                         |
| Ca_Desi_Ch_scaffold02835_134699 | Ca_desi_scaffold   | 134699                         | [T/G]       | NA                                         |
| Ca_Desi_Ch_scaffold02835_134712 | Ca_desi_scaffold   | 134712                         | [A/T]       | NA                                         |
| Ca_Desi_Ch_scaffold02835_202289 | Ca_desi_scaffold   | 202289                         | [A/G]       | NA                                         |
| Ca_Desi_Ch_scaffold00945_152929 | Ca_desi_scaffold   | 152929                         | [C/T]       | NA                                         |
| Ca_Desi_Ch_scaffold00945_152932 | Ca_desi_scaffold   | 152932                         | [T/C]       | NA                                         |
| Ca_Desi_Ch_scaffold00945_152941 | Ca_desi_scaffold   | 152941                         | [A/T]       | NA                                         |
| Ca_Desi_Ch_scaffold00945_231021 | Ca_desi_scaffold   | 231021                         | [G/T]       | NA                                         |
| Ca_Desi_Ch_scaffold00931_54981  | Ca_desi_scaffold   | 54981                          | [T/C]       | NA                                         |
| Ca_Desi_Ch_scaffold00931_55002  | Ca_desi_scaffold   | 55002                          | [C/T]       | NA                                         |
| Ca_Desi_Ch_scaffold00931_55008  | Ca_desi_scaffold   | 55008                          | [T/G]       | NA                                         |
| Ca_Desi_Ch_scaffold00931_113361 | Ca_desi_scaffold   | 113361                         | [A/T]       | NA                                         |
| Ca_Desi_Ch_scaffold00931_113379 | Ca_desi_scaffold   | 113379                         | [A/G]       | NA                                         |

| <b>SNP IDs</b>                    | <b>Chromosomes</b> | <b>Physical positions (bp)</b> | <b>SNPs</b> | <b>NCBI SNPdb accession IDs (NCBI_ss#)</b> |
|-----------------------------------|--------------------|--------------------------------|-------------|--------------------------------------------|
| Ca_Desig_Chr_scaffold00931_113487 | Ca_desig_scaffold  | 113487                         | [A/C]       | NA                                         |
| Ca_Desig_Chr_scaffold00931_113529 | Ca_desig_scaffold  | 113529                         | [T/G]       | NA                                         |
| Ca_Desig_Chr_scaffold00931_113559 | Ca_desig_scaffold  | 113559                         | [C/A]       | NA                                         |
| Ca_Desig_Chr_scaffold00936_50052  | Ca_desig_scaffold  | 50052                          | [A/C]       | NA                                         |
| Ca_Desig_Chr_scaffold00936_50053  | Ca_desig_scaffold  | 50053                          | [G/T]       | NA                                         |
| Ca_Desig_Chr_scaffold00936_54718  | Ca_desig_scaffold  | 54718                          | [G/A]       | NA                                         |
| Ca_Desig_Chr_scaffold00936_54733  | Ca_desig_scaffold  | 54733                          | [G/T]       | NA                                         |
| Ca_Desig_Chr_scaffold00936_54745  | Ca_desig_scaffold  | 54745                          | [C/A]       | NA                                         |
| Ca_Desig_Chr_scaffold00936_56497  | Ca_desig_scaffold  | 56497                          | [T/G]       | NA                                         |
| Ca_Desig_Chr_scaffold00936_56512  | Ca_desig_scaffold  | 56512                          | [A/C]       | NA                                         |
| Ca_Desig_Chr_scaffold01264_42117  | Ca_desig_scaffold  | 42117                          | [C/G]       | NA                                         |
| Ca_Desig_Chr_scaffold01264_42119  | Ca_desig_scaffold  | 42119                          | [T/C]       | NA                                         |
| Ca_Desig_Chr_scaffold01264_42122  | Ca_desig_scaffold  | 42122                          | [G/A]       | NA                                         |
| Ca_Desig_Chr_scaffold01264_42126  | Ca_desig_scaffold  | 42126                          | [C/T]       | NA                                         |
| Ca_Desig_Chr_scaffold01264_42128  | Ca_desig_scaffold  | 42128                          | [C/A]       | NA                                         |
| Ca_Desig_Chr_scaffold00969_28825  | Ca_desig_scaffold  | 28825                          | [A/G]       | NA                                         |
| Ca_Desig_Chr_scaffold00969_28884  | Ca_desig_scaffold  | 28884                          | [G/C]       | NA                                         |
| Ca_Desig_Chr_scaffold00969_68743  | Ca_desig_scaffold  | 68743                          | [A/G]       | NA                                         |
| Ca_Desig_Chr_scaffold00970_32612  | Ca_desig_scaffold  | 32612                          | [T/A]       | NA                                         |
| Ca_Desig_Chr_scaffold02296_81947  | Ca_desig_scaffold  | 81947                          | [T/G]       | NA                                         |
| Ca_Desig_Chr_scaffold00982_47107  | Ca_desig_scaffold  | 47107                          | [T/G]       | NA                                         |
| Ca_Desig_Chr_scaffold00982_93636  | Ca_desig_scaffold  | 93636                          | [G/A]       | NA                                         |
| Ca_Desig_Chr_scaffold00982_93641  | Ca_desig_scaffold  | 93641                          | [A/T]       | NA                                         |
| Ca_Desig_Chr_scaffold00982_93653  | Ca_desig_scaffold  | 93653                          | [C/A]       | NA                                         |
| Ca_Desig_Chr_scaffold00982_93666  | Ca_desig_scaffold  | 93666                          | [G/A]       | NA                                         |
| Ca_Desig_Chr_scaffold00984_36823  | Ca_desig_scaffold  | 36823                          | [G/A]       | NA                                         |
| Ca_Desig_Chr_scaffold00984_48266  | Ca_desig_scaffold  | 48266                          | [T/C]       | NA                                         |
| Ca_Desig_Chr_scaffold00984_48267  | Ca_desig_scaffold  | 48267                          | [C/G]       | NA                                         |
| Ca_Desig_Chr_scaffold00984_48288  | Ca_desig_scaffold  | 48288                          | [G/A]       | NA                                         |
| Ca_Desig_Chr_scaffold00984_125412 | Ca_desig_scaffold  | 125412                         | [C/A]       | NA                                         |
| Ca_Desig_Chr_scaffold00984_130166 | Ca_desig_scaffold  | 130166                         | [G/A]       | NA                                         |
| Ca_Desig_Chr_scaffold00984_135433 | Ca_desig_scaffold  | 135433                         | [T/C]       | NA                                         |
| Ca_Desig_Chr_scaffold00991_7013   | Ca_desig_scaffold  | 7013                           | [G/A]       | NA                                         |
| Ca_Desig_Chr_scaffold00991_8222   | Ca_desig_scaffold  | 8222                           | [C/A]       | NA                                         |

| <b>SNP IDs</b>                  | <b>Chromosomes</b> | <b>Physical positions (bp)</b> | <b>SNPs</b> | <b>NCBI SNPdb accession IDs (NCBI_ss#)</b> |
|---------------------------------|--------------------|--------------------------------|-------------|--------------------------------------------|
| Ca_Desi_Ch_scaffold00991_8223   | Ca_desi_scaffold   | 8223                           | [A/G]       | NA                                         |
| Ca_Desi_Ch_scaffold00991_8224   | Ca_desi_scaffold   | 8224                           | [G/A]       | NA                                         |
| Ca_Desi_Ch_scaffold00991_43902  | Ca_desi_scaffold   | 43902                          | [A/C]       | NA                                         |
| Ca_Desi_Ch_scaffold00991_59040  | Ca_desi_scaffold   | 59040                          | [T/C]       | NA                                         |
| Ca_Desi_Ch_scaffold00991_76857  | Ca_desi_scaffold   | 76857                          | [A/C]       | NA                                         |
| Ca_Desi_Ch_scaffold00991_77662  | Ca_desi_scaffold   | 77662                          | [C/T]       | NA                                         |
| Ca_Desi_Ch_scaffold00991_77665  | Ca_desi_scaffold   | 77665                          | [T/G]       | NA                                         |
| Ca_Desi_Ch_scaffold00991_78165  | Ca_desi_scaffold   | 78165                          | [G/T]       | NA                                         |
| Ca_Desi_Ch_scaffold00991_78330  | Ca_desi_scaffold   | 78330                          | [A/C]       | NA                                         |
| Ca_Desi_Ch_scaffold00991_78402  | Ca_desi_scaffold   | 78402                          | [A/T]       | NA                                         |
| Ca_Desi_Ch_scaffold00991_78777  | Ca_desi_scaffold   | 78777                          | [A/G]       | NA                                         |
| Ca_Desi_Ch_scaffold00991_87362  | Ca_desi_scaffold   | 87362                          | [T/C]       | NA                                         |
| Ca_Desi_Ch_scaffold00991_87698  | Ca_desi_scaffold   | 87698                          | [T/C]       | NA                                         |
| Ca_Desi_Ch_scaffold00991_89365  | Ca_desi_scaffold   | 89365                          | [C/A]       | NA                                         |
| Ca_Desi_Ch_scaffold00991_89610  | Ca_desi_scaffold   | 89610                          | [C/A]       | NA                                         |
| Ca_Desi_Ch_scaffold00991_115244 | Ca_desi_scaffold   | 115244                         | [T/G]       | NA                                         |
| Ca_Desi_Ch_scaffold00991_115265 | Ca_desi_scaffold   | 115265                         | [T/C]       | NA                                         |
| Ca_Desi_Ch_scaffold00991_115504 | Ca_desi_scaffold   | 115504                         | [G/A]       | NA                                         |
| Ca_Desi_Ch_scaffold00991_115512 | Ca_desi_scaffold   | 115512                         | [T/C]       | NA                                         |
| Ca_Desi_Ch_scaffold00991_115543 | Ca_desi_scaffold   | 115543                         | [T/G]       | NA                                         |
| Ca_Desi_Ch_scaffold00992_29190  | Ca_desi_scaffold   | 29190                          | [C/A]       | NA                                         |
| Ca_Desi_Ch_scaffold00992_29280  | Ca_desi_scaffold   | 29280                          | [T/A]       | NA                                         |
| Ca_Desi_Ch_scaffold00992_29291  | Ca_desi_scaffold   | 29291                          | [G/A]       | NA                                         |
| Ca_Desi_Ch_scaffold00992_29329  | Ca_desi_scaffold   | 29329                          | [A/C]       | NA                                         |
| Ca_Desi_Ch_scaffold00992_35274  | Ca_desi_scaffold   | 35274                          | [T/C]       | NA                                         |
| Ca_Desi_Ch_scaffold00998_107442 | Ca_desi_scaffold   | 107442                         | [A/G]       | NA                                         |
| Ca_Desi_Ch_scaffold00998_107446 | Ca_desi_scaffold   | 107446                         | [T/G]       | NA                                         |
| Ca_Desi_Ch_scaffold16742_53670  | Ca_desi_scaffold   | 53670                          | [A/C]       | NA                                         |
| Ca_Desi_Ch_scaffold16742_53686  | Ca_desi_scaffold   | 53686                          | [T/C]       | NA                                         |
| Ca_Desi_Ch_scaffold16742_53689  | Ca_desi_scaffold   | 53689                          | [T/C]       | NA                                         |
| Ca_Desi_Ch_scaffold16742_53704  | Ca_desi_scaffold   | 53704                          | [T/G]       | NA                                         |
| Ca_Desi_Ch_scaffold16742_53706  | Ca_desi_scaffold   | 53706                          | [T/G]       | NA                                         |
| Ca_Desi_Ch_scaffold16742_53709  | Ca_desi_scaffold   | 53709                          | [C/T]       | NA                                         |
| Ca_Desi_Ch_scaffold16742_53711  | Ca_desi_scaffold   | 53711                          | [T/G]       | NA                                         |

| <b>SNP IDs</b>                  | <b>Chromosomes</b> | <b>Physical positions (bp)</b> | <b>SNPs</b> | <b>NCBI SNPdb accession IDs (NCBI_ss#)</b> |
|---------------------------------|--------------------|--------------------------------|-------------|--------------------------------------------|
| Ca_Desi_Ch_scaffold16742_53715  | Ca_desi_scaffold   | 53715                          | [A/T]       | NA                                         |
| Ca_Desi_Ch_scaffold16742_53716  | Ca_desi_scaffold   | 53716                          | [G/T]       | NA                                         |
| Ca_Desi_Ch_scaffold16742_53717  | Ca_desi_scaffold   | 53717                          | [T/G]       | NA                                         |
| Ca_Desi_Ch_scaffold16742_53719  | Ca_desi_scaffold   | 53719                          | [T/G]       | NA                                         |
| Ca_Desi_Ch_scaffold16742_53721  | Ca_desi_scaffold   | 53721                          | [G/T]       | NA                                         |
| Ca_Desi_Ch_scaffold16742_102362 | Ca_desi_scaffold   | 102362                         | [A/G]       | NA                                         |
| Ca_Desi_Ch_scaffold16742_102367 | Ca_desi_scaffold   | 102367                         | [T/G]       | NA                                         |
| Ca_Desi_Ch_scaffold16742_138407 | Ca_desi_scaffold   | 138407                         | [G/T]       | NA                                         |
| Ca_Desi_Ch_scaffold16742_153238 | Ca_desi_scaffold   | 153238                         | [T/C]       | NA                                         |
| Ca_Desi_Ch_scaffold01310_36418  | Ca_desi_scaffold   | 36418                          | [A/C]       | NA                                         |
| Ca_Desi_Ch_scaffold01310_36429  | Ca_desi_scaffold   | 36429                          | [T/C]       | NA                                         |
| Ca_Desi_Ch_scaffold01310_36434  | Ca_desi_scaffold   | 36434                          | [T/A]       | NA                                         |
| Ca_Desi_Ch_scaffold01310_36436  | Ca_desi_scaffold   | 36436                          | [A/C]       | NA                                         |
| Ca_Desi_Ch_scaffold01310_36451  | Ca_desi_scaffold   | 36451                          | [T/C]       | NA                                         |
| Ca_Desi_Ch_scaffold01310_38357  | Ca_desi_scaffold   | 38357                          | [A/G]       | NA                                         |
| Ca_Desi_Ch_scaffold01310_38362  | Ca_desi_scaffold   | 38362                          | [T/A]       | NA                                         |
| Ca_Desi_Ch_scaffold01310_38381  | Ca_desi_scaffold   | 38381                          | [A/G]       | NA                                         |
| Ca_Desi_Ch_scaffold01310_38392  | Ca_desi_scaffold   | 38392                          | [A/C]       | NA                                         |
| Ca_Desi_Ch_scaffold01310_39671  | Ca_desi_scaffold   | 39671                          | [A/C]       | NA                                         |
| Ca_Desi_Ch_scaffold01310_39730  | Ca_desi_scaffold   | 39730                          | [T/C]       | NA                                         |
| Ca_Desi_Ch_scaffold01310_39734  | Ca_desi_scaffold   | 39734                          | [A/G]       | NA                                         |
| Ca_Desi_Ch_scaffold01310_39745  | Ca_desi_scaffold   | 39745                          | [A/C]       | NA                                         |
| Ca_Desi_Ch_scaffold01310_39747  | Ca_desi_scaffold   | 39747                          | [T/C]       | NA                                         |
| Ca_Desi_Ch_scaffold01310_39750  | Ca_desi_scaffold   | 39750                          | [A/C]       | NA                                         |
| Ca_Desi_Ch_scaffold01310_39754  | Ca_desi_scaffold   | 39754                          | [A/G]       | NA                                         |
| Ca_Desi_Ch_scaffold01310_39764  | Ca_desi_scaffold   | 39764                          | [A/G]       | NA                                         |
| Ca_Desi_Ch_scaffold01310_39770  | Ca_desi_scaffold   | 39770                          | [T/A]       | NA                                         |
| Ca_Desi_Ch_scaffold01475_85295  | Ca_desi_scaffold   | 85295                          | [C/A]       | NA                                         |
| Ca_Desi_Ch_scaffold01475_85296  | Ca_desi_scaffold   | 85296                          | [T/G]       | NA                                         |
| Ca_Desi_Ch_scaffold01475_196371 | Ca_desi_scaffold   | 196371                         | [A/T]       | NA                                         |
| Ca_Desi_Ch_scaffold01475_196397 | Ca_desi_scaffold   | 196397                         | [C/A]       | NA                                         |
| Ca_Desi_Ch_scaffold01475_196398 | Ca_desi_scaffold   | 196398                         | [A/G]       | NA                                         |
| Ca_Desi_Ch_scaffold01023_202623 | Ca_desi_scaffold   | 202623                         | [A/T]       | NA                                         |
| Ca_Desi_Ch_scaffold01037_80211  | Ca_desi_scaffold   | 80211                          | [T/C]       | NA                                         |

| <b>SNP IDs</b>                    | <b>Chromosomes</b> | <b>Physical positions (bp)</b> | <b>SNPs</b> | <b>NCBI SNPdb accession IDs (NCBI_ss#)</b> |
|-----------------------------------|--------------------|--------------------------------|-------------|--------------------------------------------|
| Ca_Desig_Chr_scaffold01428_12147  | Ca_desig_scaffold  | 12147                          | [T/A]       | NA                                         |
| Ca_Desig_Chr_scaffold01428_12192  | Ca_desig_scaffold  | 12192                          | [A/C]       | NA                                         |
| Ca_Desig_Chr_scaffold02139_138585 | Ca_desig_scaffold  | 138585                         | [A/G]       | NA                                         |
| Ca_Desig_Chr_scaffold01056_19323  | Ca_desig_scaffold  | 19323                          | [T/G]       | NA                                         |
| Ca_Desig_Chr_scaffold01056_19327  | Ca_desig_scaffold  | 19327                          | [G/A]       | NA                                         |
| Ca_Desig_Chr_scaffold01056_20562  | Ca_desig_scaffold  | 20562                          | [T/C]       | NA                                         |
| Ca_Desig_Chr_scaffold01056_159467 | Ca_desig_scaffold  | 159467                         | [T/G]       | NA                                         |
| Ca_Desig_Chr_scaffold01056_159482 | Ca_desig_scaffold  | 159482                         | [A/G]       | NA                                         |
| Ca_Desig_Chr_scaffold01056_159491 | Ca_desig_scaffold  | 159491                         | [C/G]       | NA                                         |
| Ca_Desig_Chr_scaffold01056_159497 | Ca_desig_scaffold  | 159497                         | [A/G]       | NA                                         |
| Ca_Desig_Chr_scaffold01056_159503 | Ca_desig_scaffold  | 159503                         | [A/G]       | NA                                         |
| Ca_Desig_Chr_scaffold01056_258498 | Ca_desig_scaffold  | 258498                         | [T/A]       | NA                                         |
| Ca_Desig_Chr_scaffold01056_259963 | Ca_desig_scaffold  | 259963                         | [A/C]       | NA                                         |
| Ca_Desig_Chr_scaffold01060_33519  | Ca_desig_scaffold  | 33519                          | [A/G]       | NA                                         |
| Ca_Desig_Chr_scaffold01090_8678   | Ca_desig_scaffold  | 8678                           | [A/C]       | NA                                         |
| Ca_Desig_Chr_scaffold01090_8679   | Ca_desig_scaffold  | 8679                           | [G/A]       | NA                                         |
| Ca_Desig_Chr_scaffold01090_8680   | Ca_desig_scaffold  | 8680                           | [A/T]       | NA                                         |
| Ca_Desig_Chr_scaffold01090_8681   | Ca_desig_scaffold  | 8681                           | [T/G]       | NA                                         |
| Ca_Desig_Chr_scaffold01090_78540  | Ca_desig_scaffold  | 78540                          | [T/G]       | NA                                         |
| Ca_Desig_Chr_scaffold02975_39685  | Ca_desig_scaffold  | 39685                          | [T/C]       | NA                                         |
| Ca_Desig_Chr_scaffold02975_39695  | Ca_desig_scaffold  | 39695                          | [T/C]       | NA                                         |
| Ca_Desig_Chr_scaffold02975_39705  | Ca_desig_scaffold  | 39705                          | [A/G]       | NA                                         |
| Ca_Desig_Chr_scaffold02975_39708  | Ca_desig_scaffold  | 39708                          | [A/G]       | NA                                         |
| Ca_Desig_Chr_scaffold02975_39727  | Ca_desig_scaffold  | 39727                          | [A/C]       | NA                                         |
| Ca_Desig_Chr_scaffold02975_39735  | Ca_desig_scaffold  | 39735                          | [A/C]       | NA                                         |
| Ca_Desig_Chr_scaffold02975_39738  | Ca_desig_scaffold  | 39738                          | [A/G]       | NA                                         |
| Ca_Desig_Chr_scaffold02975_41471  | Ca_desig_scaffold  | 41471                          | [T/C]       | NA                                         |
| Ca_Desig_Chr_scaffold02975_41484  | Ca_desig_scaffold  | 41484                          | [A/C]       | NA                                         |
| Ca_Desig_Chr_scaffold02975_41488  | Ca_desig_scaffold  | 41488                          | [A/G]       | NA                                         |
| Ca_Desig_Chr_scaffold02975_92132  | Ca_desig_scaffold  | 92132                          | [T/G]       | NA                                         |
| Ca_Desig_Chr_scaffold09892_17168  | Ca_desig_scaffold  | 17168                          | [T/C]       | NA                                         |
| Ca_Desig_Chr_scaffold09892_17195  | Ca_desig_scaffold  | 17195                          | [T/G]       | NA                                         |
| Ca_Desig_Chr_scaffold09892_17207  | Ca_desig_scaffold  | 17207                          | [A/G]       | NA                                         |
| Ca_Desig_Chr_scaffold09892_17212  | Ca_desig_scaffold  | 17212                          | [T/G]       | NA                                         |

| <b>SNP IDs</b>                  | <b>Chromosomes</b> | <b>Physical positions (bp)</b> | <b>SNPs</b> | <b>NCBI SNPdb accession IDs (NCBI_ss#)</b> |
|---------------------------------|--------------------|--------------------------------|-------------|--------------------------------------------|
| Ca_Desi_Ch_scaffold09892_56240  | Ca_desi_scaffold   | 56240                          | [C/T]       | NA                                         |
| Ca_Desi_Ch_scaffold09892_56292  | Ca_desi_scaffold   | 56292                          | [C/G]       | NA                                         |
| Ca_Desi_Ch_scaffold09892_56295  | Ca_desi_scaffold   | 56295                          | [T/C]       | NA                                         |
| Ca_Desi_Ch_scaffold09892_56325  | Ca_desi_scaffold   | 56325                          | [T/A]       | NA                                         |
| Ca_Desi_Ch_scaffold09892_56344  | Ca_desi_scaffold   | 56344                          | [A/C]       | NA                                         |
| Ca_Desi_Ch_scaffold09892_56684  | Ca_desi_scaffold   | 56684                          | [G/C]       | NA                                         |
| Ca_Desi_Ch_scaffold02111_126201 | Ca_desi_scaffold   | 126201                         | [G/A]       | NA                                         |
| Ca_Desi_Ch_scaffold01129_47300  | Ca_desi_scaffold   | 47300                          | [T/G]       | NA                                         |
| Ca_Desi_Ch_scaffold01129_86637  | Ca_desi_scaffold   | 86637                          | [A/G]       | NA                                         |
| Ca_Desi_Ch_scaffold01129_86651  | Ca_desi_scaffold   | 86651                          | [T/C]       | NA                                         |
| Ca_Desi_Ch_scaffold01129_86668  | Ca_desi_scaffold   | 86668                          | [T/G]       | NA                                         |
| Ca_Desi_Ch_scaffold01129_86679  | Ca_desi_scaffold   | 86679                          | [A/G]       | NA                                         |
| Ca_Desi_Ch_scaffold01129_86718  | Ca_desi_scaffold   | 86718                          | [T/G]       | NA                                         |
| Ca_Desi_Ch_scaffold01129_86727  | Ca_desi_scaffold   | 86727                          | [T/G]       | NA                                         |
| Ca_Desi_Ch_scaffold01129_86729  | Ca_desi_scaffold   | 86729                          | [A/G]       | NA                                         |
| Ca_Desi_Ch_scaffold01129_86744  | Ca_desi_scaffold   | 86744                          | [T/C]       | NA                                         |
| Ca_Desi_Ch_scaffold01129_86745  | Ca_desi_scaffold   | 86745                          | [T/C]       | NA                                         |
| Ca_Desi_Ch_scaffold01139_12471  | Ca_desi_scaffold   | 12471                          | [T/C]       | NA                                         |
| Ca_Desi_Ch_scaffold01139_12490  | Ca_desi_scaffold   | 12490                          | [T/C]       | NA                                         |
| Ca_Desi_Ch_scaffold01139_12509  | Ca_desi_scaffold   | 12509                          | [A/G]       | NA                                         |
| Ca_Desi_Ch_scaffold01139_12515  | Ca_desi_scaffold   | 12515                          | [A/G]       | NA                                         |
| Ca_Desi_Ch_scaffold01139_12520  | Ca_desi_scaffold   | 12520                          | [A/G]       | NA                                         |
| Ca_Desi_Ch_scaffold01139_12522  | Ca_desi_scaffold   | 12522                          | [A/G]       | NA                                         |
| Ca_Desi_Ch_scaffold01139_12523  | Ca_desi_scaffold   | 12523                          | [G/A]       | NA                                         |
| Ca_Desi_Ch_scaffold01139_12526  | Ca_desi_scaffold   | 12526                          | [T/G]       | NA                                         |
| Ca_Desi_Ch_scaffold01139_112437 | Ca_desi_scaffold   | 112437                         | [T/C]       | NA                                         |
| Ca_Desi_Ch_scaffold01139_115640 | Ca_desi_scaffold   | 115640                         | [A/C]       | NA                                         |
| Ca_Desi_Ch_scaffold02589_32614  | Ca_desi_scaffold   | 32614                          | [T/C]       | NA                                         |
| Ca_Desi_Ch_scaffold02589_32649  | Ca_desi_scaffold   | 32649                          | [G/C]       | NA                                         |
| Ca_Desi_Ch_scaffold02589_32662  | Ca_desi_scaffold   | 32662                          | [A/G]       | NA                                         |
| Ca_Desi_Ch_scaffold02589_32668  | Ca_desi_scaffold   | 32668                          | [A/C]       | NA                                         |
| Ca_Desi_Ch_scaffold02589_32685  | Ca_desi_scaffold   | 32685                          | [T/G]       | NA                                         |
| Ca_Desi_Ch_scaffold02589_61095  | Ca_desi_scaffold   | 61095                          | [A/C]       | NA                                         |
| Ca_Desi_Ch_scaffold02589_61340  | Ca_desi_scaffold   | 61340                          | [G/C]       | NA                                         |

| <b>SNP IDs</b>                    | <b>Chromosomes</b> | <b>Physical positions (bp)</b> | <b>SNPs</b> | <b>NCBI SNPdb accession IDs (NCBI_ss#)</b> |
|-----------------------------------|--------------------|--------------------------------|-------------|--------------------------------------------|
| Ca_Desig_Chr_scaffold02589_61341  | Ca_desig_scaffold  | 61341                          | [C/G]       | NA                                         |
| Ca_Desig_Chr_scaffold02589_61342  | Ca_desig_scaffold  | 61342                          | [A/C]       | NA                                         |
| Ca_Desig_Chr_scaffold02589_90378  | Ca_desig_scaffold  | 90378                          | [A/G]       | NA                                         |
| Ca_Desig_Chr_scaffold02589_90384  | Ca_desig_scaffold  | 90384                          | [T/C]       | NA                                         |
| Ca_Desig_Chr_scaffold02589_90391  | Ca_desig_scaffold  | 90391                          | [A/G]       | NA                                         |
| Ca_Desig_Chr_scaffold02589_90402  | Ca_desig_scaffold  | 90402                          | [A/G]       | NA                                         |
| Ca_Desig_Chr_scaffold01333_163435 | Ca_desig_scaffold  | 163435                         | [T/A]       | NA                                         |
| Ca_Desig_Chr_scaffold01162_31566  | Ca_desig_scaffold  | 31566                          | [T/G]       | NA                                         |
| Ca_Desig_Chr_scaffold01162_32001  | Ca_desig_scaffold  | 32001                          | [A/T]       | NA                                         |
| Ca_Desig_Chr_scaffold01165_74055  | Ca_desig_scaffold  | 74055                          | [T/G]       | NA                                         |
| Ca_Desig_Chr_scaffold01165_74061  | Ca_desig_scaffold  | 74061                          | [T/C]       | NA                                         |
| Ca_Desig_Chr_scaffold01165_74065  | Ca_desig_scaffold  | 74065                          | [A/C]       | NA                                         |
| Ca_Desig_Chr_scaffold01165_74071  | Ca_desig_scaffold  | 74071                          | [A/G]       | NA                                         |
| Ca_Desig_Chr_scaffold01165_74073  | Ca_desig_scaffold  | 74073                          | [A/C]       | NA                                         |
| Ca_Desig_Chr_scaffold01165_74080  | Ca_desig_scaffold  | 74080                          | [T/C]       | NA                                         |
| Ca_Desig_Chr_scaffold01165_74085  | Ca_desig_scaffold  | 74085                          | [T/A]       | NA                                         |
| Ca_Desig_Chr_scaffold01170_41519  | Ca_desig_scaffold  | 41519                          | [A/G]       | NA                                         |
| Ca_Desig_Chr_scaffold01170_41523  | Ca_desig_scaffold  | 41523                          | [T/G]       | NA                                         |
| Ca_Desig_Chr_scaffold01170_41530  | Ca_desig_scaffold  | 41530                          | [C/T]       | NA                                         |
| Ca_Desig_Chr_scaffold01170_41553  | Ca_desig_scaffold  | 41553                          | [A/G]       | NA                                         |
| Ca_Desig_Chr_scaffold01170_46414  | Ca_desig_scaffold  | 46414                          | [A/T]       | NA                                         |
| Ca_Desig_Chr_scaffold01170_46421  | Ca_desig_scaffold  | 46421                          | [T/C]       | NA                                         |
| Ca_Desig_Chr_scaffold01170_46426  | Ca_desig_scaffold  | 46426                          | [T/C]       | NA                                         |
| Ca_Desig_Chr_scaffold01170_46429  | Ca_desig_scaffold  | 46429                          | [A/T]       | NA                                         |
| Ca_Desig_Chr_scaffold01170_46441  | Ca_desig_scaffold  | 46441                          | [T/C]       | NA                                         |
| Ca_Desig_Chr_scaffold01170_46443  | Ca_desig_scaffold  | 46443                          | [A/G]       | NA                                         |
| Ca_Desig_Chr_scaffold01170_46445  | Ca_desig_scaffold  | 46445                          | [A/G]       | NA                                         |
| Ca_Desig_Chr_scaffold01170_46446  | Ca_desig_scaffold  | 46446                          | [A/G]       | NA                                         |
| Ca_Desig_Chr_scaffold01170_46450  | Ca_desig_scaffold  | 46450                          | [A/G]       | NA                                         |
| Ca_Desig_Chr_scaffold01170_46459  | Ca_desig_scaffold  | 46459                          | [T/A]       | NA                                         |
| Ca_Desig_Chr_scaffold01170_66464  | Ca_desig_scaffold  | 66464                          | [A/T]       | NA                                         |
| Ca_Desig_Chr_scaffold01170_76389  | Ca_desig_scaffold  | 76389                          | [A/T]       | NA                                         |
| Ca_Desig_Chr_scaffold01170_76391  | Ca_desig_scaffold  | 76391                          | [T/C]       | NA                                         |
| Ca_Desig_Chr_scaffold01170_76412  | Ca_desig_scaffold  | 76412                          | [A/G]       | NA                                         |



| <b>SNP IDs</b>                  | <b>Chromosomes</b> | <b>Physical positions (bp)</b> | <b>SNPs</b> | <b>NCBI SNPdb accession IDs (NCBI_ss#)</b> |
|---------------------------------|--------------------|--------------------------------|-------------|--------------------------------------------|
| Ca_Desi_Ch_scaffold01170_76418  | Ca_desi_scaffold   | 76418                          | [A/G]       | NA                                         |
| Ca_Desi_Ch_scaffold01170_76419  | Ca_desi_scaffold   | 76419                          | [A/G]       | NA                                         |
| Ca_Desi_Ch_scaffold01170_76432  | Ca_desi_scaffold   | 76432                          | [T/C]       | NA                                         |
| Ca_Desi_Ch_scaffold01170_78811  | Ca_desi_scaffold   | 78811                          | [A/G]       | NA                                         |
| Ca_Desi_Ch_scaffold01180_14446  | Ca_desi_scaffold   | 14446                          | [T/G]       | NA                                         |
| Ca_Desi_Ch_scaffold01180_20980  | Ca_desi_scaffold   | 20980                          | [T/G]       | NA                                         |
| Ca_Desi_Ch_scaffold01194_71440  | Ca_desi_scaffold   | 71440                          | [T/C]       | NA                                         |
| Ca_Desi_Ch_scaffold01194_71444  | Ca_desi_scaffold   | 71444                          | [A/T]       | NA                                         |
| Ca_Desi_Ch_scaffold01194_71448  | Ca_desi_scaffold   | 71448                          | [A/T]       | NA                                         |
| Ca_Desi_Ch_scaffold01197_29353  | Ca_desi_scaffold   | 29353                          | [T/G]       | NA                                         |
| Ca_Desi_Ch_scaffold01208_35043  | Ca_desi_scaffold   | 35043                          | [G/T]       | NA                                         |
| Ca_Desi_Ch_scaffold01208_39821  | Ca_desi_scaffold   | 39821                          | [A/T]       | NA                                         |
| Ca_Desi_Ch_scaffold01208_40846  | Ca_desi_scaffold   | 40846                          | [A/G]       | NA                                         |
| Ca_Desi_Ch_scaffold01208_45361  | Ca_desi_scaffold   | 45361                          | [T/A]       | NA                                         |
| Ca_Desi_Ch_scaffold01208_45364  | Ca_desi_scaffold   | 45364                          | [C/T]       | NA                                         |
| Ca_Desi_Ch_scaffold01208_45380  | Ca_desi_scaffold   | 45380                          | [A/C]       | NA                                         |
| Ca_Desi_Ch_scaffold01208_48308  | Ca_desi_scaffold   | 48308                          | [T/G]       | NA                                         |
| Ca_Desi_Ch_scaffold01208_48441  | Ca_desi_scaffold   | 48441                          | [T/A]       | NA                                         |
| Ca_Desi_Ch_scaffold01208_48459  | Ca_desi_scaffold   | 48459                          | [T/C]       | NA                                         |
| Ca_Desi_Ch_scaffold01208_48479  | Ca_desi_scaffold   | 48479                          | [A/G]       | NA                                         |
| Ca_Desi_Ch_scaffold01208_48486  | Ca_desi_scaffold   | 48486                          | [A/G]       | NA                                         |
| Ca_Desi_Ch_scaffold01208_48488  | Ca_desi_scaffold   | 48488                          | [A/G]       | NA                                         |
| Ca_Desi_Ch_scaffold01858_152874 | Ca_desi_scaffold   | 152874                         | [A/G]       | NA                                         |
| Ca_Desi_Ch_scaffold01858_152999 | Ca_desi_scaffold   | 152999                         | [G/A]       | NA                                         |
| Ca_Desi_Ch_scaffold01858_157787 | Ca_desi_scaffold   | 157787                         | [T/C]       | NA                                         |
| Ca_Desi_Ch_scaffold01296_12626  | Ca_desi_scaffold   | 12626                          | [G/A]       | NA                                         |
| Ca_Desi_Ch_scaffold01296_13845  | Ca_desi_scaffold   | 13845                          | [A/G]       | NA                                         |
| Ca_Desi_Ch_scaffold01296_179500 | Ca_desi_scaffold   | 179500                         | [T/G]       | NA                                         |
| Ca_Desi_Ch_scaffold01296_190619 | Ca_desi_scaffold   | 190619                         | [T/C]       | NA                                         |
| Ca_Desi_Ch_scaffold01223_55186  | Ca_desi_scaffold   | 55186                          | [T/C]       | NA                                         |
| Ca_Desi_Ch_scaffold01223_66232  | Ca_desi_scaffold   | 66232                          | [T/A]       | NA                                         |
| Ca_Desi_Ch_scaffold01223_66235  | Ca_desi_scaffold   | 66235                          | [T/C]       | NA                                         |
| Ca_Desi_Ch_scaffold01223_66244  | Ca_desi_scaffold   | 66244                          | [G/A]       | NA                                         |
| Ca_Desi_Ch_scaffold01223_66245  | Ca_desi_scaffold   | 66245                          | [A/G]       | NA                                         |

| <b>SNP IDs</b>                    | <b>Chromosomes</b> | <b>Physical positions (bp)</b> | <b>SNPs</b> | <b>NCBI SNPdb accession IDs (NCBI_ss#)</b> |
|-----------------------------------|--------------------|--------------------------------|-------------|--------------------------------------------|
| Ca_Desig_Chr_scaffold01223_66260  | Ca_desig_scaffold  | 66260                          | [A/G]       | NA                                         |
| Ca_Desig_Chr_scaffold01223_66267  | Ca_desig_scaffold  | 66267                          | [A/G]       | NA                                         |
| Ca_Desig_Chr_scaffold01247_9911   | Ca_desig_scaffold  | 9911                           | [T/G]       | NA                                         |
| Ca_Desig_Chr_scaffold01247_9960   | Ca_desig_scaffold  | 9960                           | [A/G]       | NA                                         |
| Ca_Desig_Chr_scaffold01247_12632  | Ca_desig_scaffold  | 12632                          | [C/T]       | NA                                         |
| Ca_Desig_Chr_scaffold01247_52169  | Ca_desig_scaffold  | 52169                          | [T/C]       | NA                                         |
| Ca_Desig_Chr_scaffold01247_52172  | Ca_desig_scaffold  | 52172                          | [T/C]       | NA                                         |
| Ca_Desig_Chr_scaffold01247_52194  | Ca_desig_scaffold  | 52194                          | [A/G]       | NA                                         |
| Ca_Desig_Chr_scaffold01247_52208  | Ca_desig_scaffold  | 52208                          | [T/C]       | NA                                         |
| Ca_Desig_Chr_scaffold01247_105611 | Ca_desig_scaffold  | 105611                         | [A/C]       | NA                                         |
| Ca_Desig_Chr_scaffold01262_34830  | Ca_desig_scaffold  | 34830                          | [A/G]       | NA                                         |
| Ca_Desig_Chr_scaffold01262_34856  | Ca_desig_scaffold  | 34856                          | [C/A]       | NA                                         |
| Ca_Desig_Chr_scaffold01262_34867  | Ca_desig_scaffold  | 34867                          | [A/G]       | NA                                         |
| Ca_Desig_Chr_scaffold01262_53691  | Ca_desig_scaffold  | 53691                          | [A/C]       | NA                                         |
| Ca_Desig_Chr_scaffold01262_58420  | Ca_desig_scaffold  | 58420                          | [C/A]       | NA                                         |
| Ca_Desig_Chr_scaffold01262_58421  | Ca_desig_scaffold  | 58421                          | [A/G]       | NA                                         |
| Ca_Desig_Chr_scaffold01262_58422  | Ca_desig_scaffold  | 58422                          | [T/A]       | NA                                         |
| Ca_Desig_Chr_scaffold01287_34358  | Ca_desig_scaffold  | 34358                          | [A/G]       | NA                                         |
| Ca_Desig_Chr_scaffold01287_34369  | Ca_desig_scaffold  | 34369                          | [A/G]       | NA                                         |
| Ca_Desig_Chr_scaffold01287_34403  | Ca_desig_scaffold  | 34403                          | [T/C]       | NA                                         |
| Ca_Desig_Chr_scaffold01287_34404  | Ca_desig_scaffold  | 34404                          | [T/C]       | NA                                         |
| Ca_Desig_Chr_scaffold01287_34415  | Ca_desig_scaffold  | 34415                          | [A/C]       | NA                                         |
| Ca_Desig_Chr_scaffold01287_35794  | Ca_desig_scaffold  | 35794                          | [T/G]       | NA                                         |
| Ca_Desig_Chr_scaffold01287_35805  | Ca_desig_scaffold  | 35805                          | [T/G]       | NA                                         |
| Ca_Desig_Chr_scaffold01287_35814  | Ca_desig_scaffold  | 35814                          | [T/G]       | NA                                         |
| Ca_Desig_Chr_scaffold01281_1821   | Ca_desig_scaffold  | 1821                           | [T/C]       | NA                                         |
| Ca_Desig_Chr_scaffold01281_1871   | Ca_desig_scaffold  | 1871                           | [A/G]       | NA                                         |
| Ca_Desig_Chr_scaffold01336_28704  | Ca_desig_scaffold  | 28704                          | [A/G]       | NA                                         |
| Ca_Desig_Chr_scaffold01336_28713  | Ca_desig_scaffold  | 28713                          | [T/C]       | NA                                         |
| Ca_Desig_Chr_scaffold01336_28719  | Ca_desig_scaffold  | 28719                          | [T/G]       | NA                                         |
| Ca_Desig_Chr_scaffold01336_28722  | Ca_desig_scaffold  | 28722                          | [T/G]       | NA                                         |
| Ca_Desig_Chr_scaffold01336_28728  | Ca_desig_scaffold  | 28728                          | [T/G]       | NA                                         |
| Ca_Desig_Chr_scaffold01336_28729  | Ca_desig_scaffold  | 28729                          | [G/A]       | NA                                         |
| Ca_Desig_Chr_scaffold01336_28731  | Ca_desig_scaffold  | 28731                          | [A/G]       | NA                                         |

| <b>SNP IDs</b>                   | <b>Chromosomes</b> | <b>Physical positions (bp)</b> | <b>SNPs</b> | <b>NCBI SNPdb accession IDs (NCBI_ss#)</b> |
|----------------------------------|--------------------|--------------------------------|-------------|--------------------------------------------|
| Ca_Desig_Chr_scaffold01336_28732 | Ca_desig_scaffold  | 28732                          | [T/G]       | NA                                         |
| Ca_Desig_Chr_scaffold01336_28736 | Ca_desig_scaffold  | 28736                          | [A/G]       | NA                                         |
| Ca_Desig_Chr_scaffold01336_28739 | Ca_desig_scaffold  | 28739                          | [A/G]       | NA                                         |
| Ca_Desig_Chr_scaffold01336_28745 | Ca_desig_scaffold  | 28745                          | [A/G]       | NA                                         |
| Ca_Desig_Chr_scaffold01336_28755 | Ca_desig_scaffold  | 28755                          | [A/G]       | NA                                         |
| Ca_Desig_Chr_scaffold01336_28757 | Ca_desig_scaffold  | 28757                          | [A/G]       | NA                                         |
| Ca_Desig_Chr_scaffold01336_28758 | Ca_desig_scaffold  | 28758                          | [A/G]       | NA                                         |
| Ca_Desig_Chr_scaffold01336_28760 | Ca_desig_scaffold  | 28760                          | [A/G]       | NA                                         |
| Ca_Desig_Chr_scaffold01336_28761 | Ca_desig_scaffold  | 28761                          | [A/G]       | NA                                         |
| Ca_Desig_Chr_scaffold01344_28018 | Ca_desig_scaffold  | 28018                          | [T/G]       | NA                                         |
| Ca_Desig_Chr_scaffold01344_37677 | Ca_desig_scaffold  | 37677                          | [A/C]       | NA                                         |
| Ca_Desig_Chr_scaffold01344_37685 | Ca_desig_scaffold  | 37685                          | [T/C]       | NA                                         |
| Ca_Desig_Chr_scaffold01346_38572 | Ca_desig_scaffold  | 38572                          | [T/G]       | NA                                         |
| Ca_Desig_Chr_scaffold01347_9997  | Ca_desig_scaffold  | 9997                           | [A/T]       | NA                                         |
| Ca_Desig_Chr_scaffold01347_10005 | Ca_desig_scaffold  | 10005                          | [C/T]       | NA                                         |
| Ca_Desig_Chr_scaffold01347_10056 | Ca_desig_scaffold  | 10056                          | [A/T]       | NA                                         |
| Ca_Desig_Chr_scaffold01347_10104 | Ca_desig_scaffold  | 10104                          | [T/C]       | NA                                         |
| Ca_Desig_Chr_scaffold01347_26418 | Ca_desig_scaffold  | 26418                          | [A/C]       | NA                                         |
| Ca_Desig_Chr_scaffold01347_57864 | Ca_desig_scaffold  | 57864                          | [A/G]       | NA                                         |
| Ca_Desig_Chr_scaffold01347_57886 | Ca_desig_scaffold  | 57886                          | [T/C]       | NA                                         |
| Ca_Desig_Chr_scaffold01347_72423 | Ca_desig_scaffold  | 72423                          | [T/C]       | NA                                         |
| Ca_Desig_Chr_scaffold01347_72430 | Ca_desig_scaffold  | 72430                          | [A/G]       | NA                                         |
| Ca_Desig_Chr_scaffold01347_72438 | Ca_desig_scaffold  | 72438                          | [T/G]       | NA                                         |
| Ca_Desig_Chr_scaffold01347_72440 | Ca_desig_scaffold  | 72440                          | [A/G]       | NA                                         |
| Ca_Desig_Chr_scaffold01347_72447 | Ca_desig_scaffold  | 72447                          | [T/C]       | NA                                         |
| Ca_Desig_Chr_scaffold01347_72462 | Ca_desig_scaffold  | 72462                          | [T/C]       | NA                                         |
| Ca_Desig_Chr_scaffold01347_72465 | Ca_desig_scaffold  | 72465                          | [A/T]       | NA                                         |
| Ca_Desig_Chr_scaffold01347_72487 | Ca_desig_scaffold  | 72487                          | [T/C]       | NA                                         |
| Ca_Desig_Chr_scaffold01347_72507 | Ca_desig_scaffold  | 72507                          | [A/G]       | NA                                         |
| Ca_Desig_Chr_scaffold01353_6421  | Ca_desig_scaffold  | 6421                           | [T/C]       | NA                                         |
| Ca_Desig_Chr_scaffold01353_6535  | Ca_desig_scaffold  | 6535                           | [A/G]       | NA                                         |
| Ca_Desig_Chr_scaffold01353_6541  | Ca_desig_scaffold  | 6541                           | [T/C]       | NA                                         |
| Ca_Desig_Chr_scaffold01353_6544  | Ca_desig_scaffold  | 6544                           | [T/C]       | NA                                         |
| Ca_Desig_Chr_scaffold01353_6556  | Ca_desig_scaffold  | 6556                           | [T/C]       | NA                                         |

| <b>SNP IDs</b>                  | <b>Chromosomes</b> | <b>Physical positions (bp)</b> | <b>SNPs</b> | <b>NCBI SNPdb accession IDs (NCBI_ss#)</b> |
|---------------------------------|--------------------|--------------------------------|-------------|--------------------------------------------|
| Ca_Desi_Ch_scaffold01353_6570   | Ca_desi_scaffold   | 6570                           | [T/C]       | NA                                         |
| Ca_Desi_Ch_scaffold01353_6572   | Ca_desi_scaffold   | 6572                           | [T/G]       | NA                                         |
| Ca_Desi_Ch_scaffold01353_6577   | Ca_desi_scaffold   | 6577                           | [A/G]       | NA                                         |
| Ca_Desi_Ch_scaffold01353_6581   | Ca_desi_scaffold   | 6581                           | [T/A]       | NA                                         |
| Ca_Desi_Ch_scaffold01353_6997   | Ca_desi_scaffold   | 6997                           | [T/G]       | NA                                         |
| Ca_Desi_Ch_scaffold01353_7025   | Ca_desi_scaffold   | 7025                           | [T/C]       | NA                                         |
| Ca_Desi_Ch_scaffold01353_11083  | Ca_desi_scaffold   | 11083                          | [T/C]       | NA                                         |
| Ca_Desi_Ch_scaffold01353_11109  | Ca_desi_scaffold   | 11109                          | [A/G]       | NA                                         |
| Ca_Desi_Ch_scaffold01353_11131  | Ca_desi_scaffold   | 11131                          | [A/G]       | NA                                         |
| Ca_Desi_Ch_scaffold01353_11146  | Ca_desi_scaffold   | 11146                          | [A/G]       | NA                                         |
| Ca_Desi_Ch_scaffold01353_27222  | Ca_desi_scaffold   | 27222                          | [T/G]       | NA                                         |
| Ca_Desi_Ch_scaffold01353_27241  | Ca_desi_scaffold   | 27241                          | [A/G]       | NA                                         |
| Ca_Desi_Ch_scaffold01353_27248  | Ca_desi_scaffold   | 27248                          | [A/C]       | NA                                         |
| Ca_Desi_Ch_scaffold01353_27270  | Ca_desi_scaffold   | 27270                          | [T/C]       | NA                                         |
| Ca_Desi_Ch_scaffold01353_27274  | Ca_desi_scaffold   | 27274                          | [T/C]       | NA                                         |
| Ca_Desi_Ch_scaffold01353_27278  | Ca_desi_scaffold   | 27278                          | [A/C]       | NA                                         |
| Ca_Desi_Ch_scaffold01353_27282  | Ca_desi_scaffold   | 27282                          | [A/C]       | NA                                         |
| Ca_Desi_Ch_scaffold01355_43980  | Ca_desi_scaffold   | 43980                          | [T/G]       | NA                                         |
| Ca_Desi_Ch_scaffold01355_44028  | Ca_desi_scaffold   | 44028                          | [T/G]       | NA                                         |
| Ca_Desi_Ch_scaffold01355_67945  | Ca_desi_scaffold   | 67945                          | [T/C]       | NA                                         |
| Ca_Desi_Ch_scaffold01355_67963  | Ca_desi_scaffold   | 67963                          | [C/A]       | NA                                         |
| Ca_Desi_Ch_scaffold01355_67977  | Ca_desi_scaffold   | 67977                          | [T/C]       | NA                                         |
| Ca_Desi_Ch_scaffold01355_113059 | Ca_desi_scaffold   | 113059                         | [A/C]       | NA                                         |
| Ca_Desi_Ch_scaffold01355_130185 | Ca_desi_scaffold   | 130185                         | [T/C]       | NA                                         |
| Ca_Desi_Ch_scaffold01355_131078 | Ca_desi_scaffold   | 131078                         | [T/C]       | NA                                         |
| Ca_Desi_Ch_scaffold01362_16604  | Ca_desi_scaffold   | 16604                          | [A/C]       | NA                                         |
| Ca_Desi_Ch_scaffold01362_17473  | Ca_desi_scaffold   | 17473                          | [A/G]       | NA                                         |
| Ca_Desi_Ch_scaffold01365_70792  | Ca_desi_scaffold   | 70792                          | [T/G]       | NA                                         |
| Ca_Desi_Ch_scaffold01365_70828  | Ca_desi_scaffold   | 70828                          | [A/C]       | NA                                         |
| Ca_Desi_Ch_scaffold01365_70835  | Ca_desi_scaffold   | 70835                          | [A/C]       | NA                                         |
| Ca_Desi_Ch_scaffold02130_54443  | Ca_desi_scaffold   | 54443                          | [A/G]       | NA                                         |
| Ca_Desi_Ch_scaffold02130_58759  | Ca_desi_scaffold   | 58759                          | [A/C]       | NA                                         |
| Ca_Desi_Ch_scaffold02130_58774  | Ca_desi_scaffold   | 58774                          | [A/C]       | NA                                         |
| Ca_Desi_Ch_scaffold02130_60116  | Ca_desi_scaffold   | 60116                          | [A/G]       | NA                                         |

| <b>SNP IDs</b>                  | <b>Chromosomes</b> | <b>Physical positions (bp)</b> | <b>SNPs</b> | <b>NCBI SNPdb accession IDs (NCBI_ss#)</b> |
|---------------------------------|--------------------|--------------------------------|-------------|--------------------------------------------|
| Ca_Desi_Ch_scaffold02130_60162  | Ca_desi_scaffold   | 60162                          | [A/G]       | NA                                         |
| Ca_Desi_Ch_scaffold02761_14936  | Ca_desi_scaffold   | 14936                          | [G/T]       | NA                                         |
| Ca_Desi_Ch_scaffold02761_113671 | Ca_desi_scaffold   | 113671                         | [T/A]       | NA                                         |
| Ca_Desi_Ch_scaffold02761_113695 | Ca_desi_scaffold   | 113695                         | [C/T]       | NA                                         |
| Ca_Desi_Ch_scaffold02761_113703 | Ca_desi_scaffold   | 113703                         | [C/T]       | NA                                         |
| Ca_Desi_Ch_scaffold02761_113712 | Ca_desi_scaffold   | 113712                         | [G/T]       | NA                                         |
| Ca_Desi_Ch_scaffold01408_24105  | Ca_desi_scaffold   | 24105                          | [A/G]       | NA                                         |
| Ca_Desi_Ch_scaffold01413_6273   | Ca_desi_scaffold   | 6273                           | [G/A]       | NA                                         |
| Ca_Desi_Ch_scaffold01413_7534   | Ca_desi_scaffold   | 7534                           | [A/C]       | NA                                         |
| Ca_Desi_Ch_scaffold01413_7876   | Ca_desi_scaffold   | 7876                           | [A/C]       | NA                                         |
| Ca_Desi_Ch_scaffold01413_37194  | Ca_desi_scaffold   | 37194                          | [A/G]       | NA                                         |
| Ca_Desi_Ch_scaffold01413_37235  | Ca_desi_scaffold   | 37235                          | [A/G]       | NA                                         |
| Ca_Desi_Ch_scaffold01413_39751  | Ca_desi_scaffold   | 39751                          | [A/T]       | NA                                         |
| Ca_Desi_Ch_scaffold01413_39769  | Ca_desi_scaffold   | 39769                          | [C/T]       | NA                                         |
| Ca_Desi_Ch_scaffold01413_39770  | Ca_desi_scaffold   | 39770                          | [G/A]       | NA                                         |
| Ca_Desi_Ch_scaffold01413_39841  | Ca_desi_scaffold   | 39841                          | [C/T]       | NA                                         |
| Ca_Desi_Ch_scaffold01413_57016  | Ca_desi_scaffold   | 57016                          | [A/G]       | NA                                         |
| Ca_Desi_Ch_scaffold01413_57054  | Ca_desi_scaffold   | 57054                          | [C/A]       | NA                                         |
| Ca_Desi_Ch_scaffold02009_65888  | Ca_desi_scaffold   | 65888                          | [T/A]       | NA                                         |
| Ca_Desi_Ch_scaffold02009_65891  | Ca_desi_scaffold   | 65891                          | [T/G]       | NA                                         |
| Ca_Desi_Ch_scaffold02009_89356  | Ca_desi_scaffold   | 89356                          | [A/T]       | NA                                         |
| Ca_Desi_Ch_scaffold02009_109337 | Ca_desi_scaffold   | 109337                         | [T/A]       | NA                                         |
| Ca_Desi_Ch_scaffold01829_142603 | Ca_desi_scaffold   | 142603                         | [G/C]       | NA                                         |
| Ca_Desi_Ch_scaffold01829_142943 | Ca_desi_scaffold   | 142943                         | [C/T]       | NA                                         |
| Ca_Desi_Ch_scaffold01829_147706 | Ca_desi_scaffold   | 147706                         | [A/C]       | NA                                         |
| Ca_Desi_Ch_scaffold01829_147726 | Ca_desi_scaffold   | 147726                         | [T/A]       | NA                                         |
| Ca_Desi_Ch_scaffold01829_147727 | Ca_desi_scaffold   | 147727                         | [A/T]       | NA                                         |
| Ca_Desi_Ch_scaffold01829_147734 | Ca_desi_scaffold   | 147734                         | [T/C]       | NA                                         |
| Ca_Desi_Ch_scaffold01829_150289 | Ca_desi_scaffold   | 150289                         | [G/A]       | NA                                         |
| Ca_Desi_Ch_scaffold01432_42553  | Ca_desi_scaffold   | 42553                          | [A/G]       | NA                                         |
| Ca_Desi_Ch_scaffold01437_69716  | Ca_desi_scaffold   | 69716                          | [A/C]       | NA                                         |
| Ca_Desi_Ch_scaffold01437_69813  | Ca_desi_scaffold   | 69813                          | [A/G]       | NA                                         |
| Ca_Desi_Ch_scaffold01437_69833  | Ca_desi_scaffold   | 69833                          | [T/C]       | NA                                         |
| Ca_Desi_Ch_scaffold01445_36153  | Ca_desi_scaffold   | 36153                          | [C/A]       | NA                                         |

| <b>SNP IDs</b>                    | <b>Chromosomes</b> | <b>Physical positions (bp)</b> | <b>SNPs</b> | <b>NCBI SNPdb accession IDs (NCBI_ss#)</b> |
|-----------------------------------|--------------------|--------------------------------|-------------|--------------------------------------------|
| Ca_Desig_Chr_scaffold01445_36160  | Ca_desig_scaffold  | 36160                          | [A/C]       | NA                                         |
| Ca_Desig_Chr_scaffold01445_36167  | Ca_desig_scaffold  | 36167                          | [C/A]       | NA                                         |
| Ca_Desig_Chr_scaffold01445_36174  | Ca_desig_scaffold  | 36174                          | [A/T]       | NA                                         |
| Ca_Desig_Chr_scaffold01450_55833  | Ca_desig_scaffold  | 55833                          | [A/T]       | NA                                         |
| Ca_Desig_Chr_scaffold01451_65129  | Ca_desig_scaffold  | 65129                          | [T/A]       | NA                                         |
| Ca_Desig_Chr_scaffold02251_71840  | Ca_desig_scaffold  | 71840                          | [A/C]       | NA                                         |
| Ca_Desig_Chr_scaffold02251_71852  | Ca_desig_scaffold  | 71852                          | [A/C]       | NA                                         |
| Ca_Desig_Chr_scaffold02251_71854  | Ca_desig_scaffold  | 71854                          | [A/C]       | NA                                         |
| Ca_Desig_Chr_scaffold02251_71859  | Ca_desig_scaffold  | 71859                          | [A/C]       | NA                                         |
| Ca_Desig_Chr_scaffold02251_71872  | Ca_desig_scaffold  | 71872                          | [A/G]       | NA                                         |
| Ca_Desig_Chr_scaffold02251_71931  | Ca_desig_scaffold  | 71931                          | [C/G]       | NA                                         |
| Ca_Desig_Chr_scaffold02251_71932  | Ca_desig_scaffold  | 71932                          | [T/C]       | NA                                         |
| Ca_Desig_Chr_scaffold02251_71933  | Ca_desig_scaffold  | 71933                          | [T/C]       | NA                                         |
| Ca_Desig_Chr_scaffold02251_71948  | Ca_desig_scaffold  | 71948                          | [T/C]       | NA                                         |
| Ca_Desig_Chr_scaffold02251_71958  | Ca_desig_scaffold  | 71958                          | [A/G]       | NA                                         |
| Ca_Desig_Chr_scaffold02251_71959  | Ca_desig_scaffold  | 71959                          | [A/C]       | NA                                         |
| Ca_Desig_Chr_scaffold02251_71963  | Ca_desig_scaffold  | 71963                          | [T/C]       | NA                                         |
| Ca_Desig_Chr_scaffold02251_71977  | Ca_desig_scaffold  | 71977                          | [A/C]       | NA                                         |
| Ca_Desig_Chr_scaffold02251_71982  | Ca_desig_scaffold  | 71982                          | [A/C]       | NA                                         |
| Ca_Desig_Chr_scaffold02251_115512 | Ca_desig_scaffold  | 115512                         | [T/G]       | NA                                         |
| Ca_Desig_Chr_scaffold02251_115534 | Ca_desig_scaffold  | 115534                         | [A/C]       | NA                                         |
| Ca_Desig_Chr_scaffold02251_115539 | Ca_desig_scaffold  | 115539                         | [C/G]       | NA                                         |
| Ca_Desig_Chr_scaffold02788_154006 | Ca_desig_scaffold  | 154006                         | [T/G]       | NA                                         |
| Ca_Desig_Chr_scaffold02788_154008 | Ca_desig_scaffold  | 154008                         | [T/C]       | NA                                         |
| Ca_Desig_Chr_scaffold02788_154013 | Ca_desig_scaffold  | 154013                         | [T/G]       | NA                                         |
| Ca_Desig_Chr_scaffold02788_154017 | Ca_desig_scaffold  | 154017                         | [T/G]       | NA                                         |
| Ca_Desig_Chr_scaffold02317_103744 | Ca_desig_scaffold  | 103744                         | [T/G]       | NA                                         |
| Ca_Desig_Chr_scaffold02317_103749 | Ca_desig_scaffold  | 103749                         | [A/T]       | NA                                         |
| Ca_Desig_Chr_scaffold01473_83793  | Ca_desig_scaffold  | 83793                          | [A/G]       | NA                                         |
| Ca_Desig_Chr_scaffold01473_83797  | Ca_desig_scaffold  | 83797                          | [T/G]       | NA                                         |
| Ca_Desig_Chr_scaffold01473_83805  | Ca_desig_scaffold  | 83805                          | [T/G]       | NA                                         |
| Ca_Desig_Chr_scaffold01473_83809  | Ca_desig_scaffold  | 83809                          | [T/G]       | NA                                         |
| Ca_Desig_Chr_scaffold01473_83812  | Ca_desig_scaffold  | 83812                          | [T/C]       | NA                                         |
| Ca_Desig_Chr_scaffold11457_114502 | Ca_desig_scaffold  | 114502                         | [C/A]       | NA                                         |

| <b>SNP IDs</b>                    | <b>Chromosomes</b> | <b>Physical positions (bp)</b> | <b>SNPs</b> | <b>NCBI SNPdb accession IDs (NCBI_ss#)</b> |
|-----------------------------------|--------------------|--------------------------------|-------------|--------------------------------------------|
| Ca_Desig_Chr_scaffold11457_114505 | Ca_desig_scaffold  | 114505                         | [G/T]       | NA                                         |
| Ca_Desig_Chr_scaffold11457_114506 | Ca_desig_scaffold  | 114506                         | [G/C]       | NA                                         |
| Ca_Desig_Chr_scaffold09265_20685  | Ca_desig_scaffold  | 20685                          | [A/G]       | NA                                         |
| Ca_Desig_Chr_scaffold09265_20699  | Ca_desig_scaffold  | 20699                          | [T/C]       | NA                                         |
| Ca_Desig_Chr_scaffold09265_20706  | Ca_desig_scaffold  | 20706                          | [A/C]       | NA                                         |
| Ca_Desig_Chr_scaffold09265_20717  | Ca_desig_scaffold  | 20717                          | [A/G]       | NA                                         |
| Ca_Desig_Chr_scaffold09265_20724  | Ca_desig_scaffold  | 20724                          | [A/G]       | NA                                         |
| Ca_Desig_Chr_scaffold09265_20726  | Ca_desig_scaffold  | 20726                          | [A/G]       | NA                                         |
| Ca_Desig_Chr_scaffold09265_20736  | Ca_desig_scaffold  | 20736                          | [T/C]       | NA                                         |
| Ca_Desig_Chr_scaffold09265_20739  | Ca_desig_scaffold  | 20739                          | [A/G]       | NA                                         |
| Ca_Desig_Chr_scaffold09265_20784  | Ca_desig_scaffold  | 20784                          | [A/C]       | NA                                         |
| Ca_Desig_Chr_scaffold09265_20787  | Ca_desig_scaffold  | 20787                          | [C/T]       | NA                                         |
| Ca_Desig_Chr_scaffold09265_20788  | Ca_desig_scaffold  | 20788                          | [C/T]       | NA                                         |
| Ca_Desig_Chr_scaffold09265_20791  | Ca_desig_scaffold  | 20791                          | [C/T]       | NA                                         |
| Ca_Desig_Chr_scaffold09265_20834  | Ca_desig_scaffold  | 20834                          | [A/C]       | NA                                         |
| Ca_Desig_Chr_scaffold09265_79331  | Ca_desig_scaffold  | 79331                          | [T/C]       | NA                                         |
| Ca_Desig_Chr_scaffold01532_24806  | Ca_desig_scaffold  | 24806                          | [A/T]       | NA                                         |
| Ca_Desig_Chr_scaffold01547_43158  | Ca_desig_scaffold  | 43158                          | [T/C]       | NA                                         |
| Ca_Desig_Chr_scaffold01547_43203  | Ca_desig_scaffold  | 43203                          | [C/T]       | NA                                         |
| Ca_Desig_Chr_scaffold01547_43244  | Ca_desig_scaffold  | 43244                          | [A/T]       | NA                                         |
| Ca_Desig_Chr_scaffold01547_43266  | Ca_desig_scaffold  | 43266                          | [A/T]       | NA                                         |
| Ca_Desig_Chr_scaffold01547_43285  | Ca_desig_scaffold  | 43285                          | [T/C]       | NA                                         |
| Ca_Desig_Chr_scaffold01547_43296  | Ca_desig_scaffold  | 43296                          | [G/T]       | NA                                         |
| Ca_Desig_Chr_scaffold01564_53412  | Ca_desig_scaffold  | 53412                          | [G/A]       | NA                                         |
| Ca_Desig_Chr_scaffold01565_44746  | Ca_desig_scaffold  | 44746                          | [A/G]       | NA                                         |
| Ca_Desig_Chr_scaffold01565_44766  | Ca_desig_scaffold  | 44766                          | [A/G]       | NA                                         |
| Ca_Desig_Chr_scaffold01565_72677  | Ca_desig_scaffold  | 72677                          | [A/T]       | NA                                         |
| Ca_Desig_Chr_scaffold01565_72681  | Ca_desig_scaffold  | 72681                          | [A/T]       | NA                                         |
| Ca_Desig_Chr_scaffold01565_85158  | Ca_desig_scaffold  | 85158                          | [T/G]       | NA                                         |
| Ca_Desig_Chr_scaffold01566_43832  | Ca_desig_scaffold  | 43832                          | [T/C]       | NA                                         |
| Ca_Desig_Chr_scaffold01566_43835  | Ca_desig_scaffold  | 43835                          | [T/G]       | NA                                         |
| Ca_Desig_Chr_scaffold01566_43900  | Ca_desig_scaffold  | 43900                          | [T/G]       | NA                                         |
| Ca_Desig_Chr_scaffold01566_62330  | Ca_desig_scaffold  | 62330                          | [T/G]       | NA                                         |
| Ca_Desig_Chr_scaffold01566_62358  | Ca_desig_scaffold  | 62358                          | [A/T]       | NA                                         |

| <b>SNP IDs</b>                    | <b>Chromosomes</b> | <b>Physical positions (bp)</b> | <b>SNPs</b> | <b>NCBI SNPdb accession IDs (NCBI_ss#)</b> |
|-----------------------------------|--------------------|--------------------------------|-------------|--------------------------------------------|
| Ca_Desig_Chr_scaffold01566_157012 | Ca_desig_scaffold  | 157012                         | [C/T]       | NA                                         |
| Ca_Desig_Chr_scaffold01566_157014 | Ca_desig_scaffold  | 157014                         | [C/T]       | NA                                         |
| Ca_Desig_Chr_scaffold01566_157024 | Ca_desig_scaffold  | 157024                         | [A/T]       | NA                                         |
| Ca_Desig_Chr_scaffold01566_157068 | Ca_desig_scaffold  | 157068                         | [A/G]       | NA                                         |
| Ca_Desig_Chr_scaffold01566_157086 | Ca_desig_scaffold  | 157086                         | [A/G]       | NA                                         |
| Ca_Desig_Chr_scaffold09306_9405   | Ca_desig_scaffold  | 9405                           | [A/G]       | NA                                         |
| Ca_Desig_Chr_scaffold09306_9415   | Ca_desig_scaffold  | 9415                           | [C/A]       | NA                                         |
| Ca_Desig_Chr_scaffold09306_9418   | Ca_desig_scaffold  | 9418                           | [G/A]       | NA                                         |
| Ca_Desig_Chr_scaffold02535_90018  | Ca_desig_scaffold  | 90018                          | [G/T]       | NA                                         |
| Ca_Desig_Chr_scaffold02535_90020  | Ca_desig_scaffold  | 90020                          | [C/A]       | NA                                         |
| Ca_Desig_Chr_scaffold02535_90023  | Ca_desig_scaffold  | 90023                          | [A/C]       | NA                                         |
| Ca_Desig_Chr_scaffold02535_90027  | Ca_desig_scaffold  | 90027                          | [T/C]       | NA                                         |
| Ca_Desig_Chr_scaffold02535_95413  | Ca_desig_scaffold  | 95413                          | [A/C]       | NA                                         |
| Ca_Desig_Chr_scaffold01625_39548  | Ca_desig_scaffold  | 39548                          | [T/C]       | NA                                         |
| Ca_Desig_Chr_scaffold01625_39584  | Ca_desig_scaffold  | 39584                          | [T/C]       | NA                                         |
| Ca_Desig_Chr_scaffold01625_51497  | Ca_desig_scaffold  | 51497                          | [C/A]       | NA                                         |
| Ca_Desig_Chr_scaffold01625_54202  | Ca_desig_scaffold  | 54202                          | [T/G]       | NA                                         |
| Ca_Desig_Chr_scaffold01787_109467 | Ca_desig_scaffold  | 109467                         | [T/C]       | NA                                         |
| Ca_Desig_Chr_scaffold01787_109482 | Ca_desig_scaffold  | 109482                         | [T/G]       | NA                                         |
| Ca_Desig_Chr_scaffold01787_109502 | Ca_desig_scaffold  | 109502                         | [A/C]       | NA                                         |
| Ca_Desig_Chr_scaffold01787_109515 | Ca_desig_scaffold  | 109515                         | [A/G]       | NA                                         |
| Ca_Desig_Chr_scaffold01787_113360 | Ca_desig_scaffold  | 113360                         | [A/C]       | NA                                         |
| Ca_Desig_Chr_scaffold01652_40338  | Ca_desig_scaffold  | 40338                          | [T/G]       | NA                                         |
| Ca_Desig_Chr_scaffold01652_40712  | Ca_desig_scaffold  | 40712                          | [T/G]       | NA                                         |
| Ca_Desig_Chr_scaffold01652_65236  | Ca_desig_scaffold  | 65236                          | [T/G]       | NA                                         |
| Ca_Desig_Chr_scaffold01652_65247  | Ca_desig_scaffold  | 65247                          | [T/A]       | NA                                         |
| Ca_Desig_Chr_scaffold01675_2808   | Ca_desig_scaffold  | 2808                           | [T/G]       | NA                                         |
| Ca_Desig_Chr_scaffold01675_34021  | Ca_desig_scaffold  | 34021                          | [T/C]       | NA                                         |
| Ca_Desig_Chr_scaffold01675_34052  | Ca_desig_scaffold  | 34052                          | [A/G]       | NA                                         |
| Ca_Desig_Chr_scaffold01675_34058  | Ca_desig_scaffold  | 34058                          | [T/G]       | NA                                         |
| Ca_Desig_Chr_scaffold01675_34084  | Ca_desig_scaffold  | 34084                          | [A/G]       | NA                                         |
| Ca_Desig_Chr_scaffold01675_47736  | Ca_desig_scaffold  | 47736                          | [T/C]       | NA                                         |
| Ca_Desig_Chr_scaffold01675_47748  | Ca_desig_scaffold  | 47748                          | [T/C]       | NA                                         |
| Ca_Desig_Chr_scaffold04196_27179  | Ca_desig_scaffold  | 27179                          | [A/G]       | NA                                         |



| <b>SNP IDs</b>                    | <b>Chromosomes</b> | <b>Physical positions (bp)</b> | <b>SNPs</b> | <b>NCBI SNPdb accession IDs (NCBI_ss#)</b> |
|-----------------------------------|--------------------|--------------------------------|-------------|--------------------------------------------|
| Ca_Desig_Chr_scaffold04196_27188  | Ca_desig_scaffold  | 27188                          | [T/C]       | NA                                         |
| Ca_Desig_Chr_scaffold04196_27212  | Ca_desig_scaffold  | 27212                          | [A/G]       | NA                                         |
| Ca_Desig_Chr_scaffold04196_27221  | Ca_desig_scaffold  | 27221                          | [T/A]       | NA                                         |
| Ca_Desig_Chr_scaffold04196_28392  | Ca_desig_scaffold  | 28392                          | [A/G]       | NA                                         |
| Ca_Desig_Chr_scaffold04196_30795  | Ca_desig_scaffold  | 30795                          | [G/T]       | NA                                         |
| Ca_Desig_Chr_scaffold04196_30800  | Ca_desig_scaffold  | 30800                          | [C/A]       | NA                                         |
| Ca_Desig_Chr_scaffold04196_30855  | Ca_desig_scaffold  | 30855                          | [C/T]       | NA                                         |
| Ca_Desig_Chr_scaffold04196_35868  | Ca_desig_scaffold  | 35868                          | [A/T]       | NA                                         |
| Ca_Desig_Chr_scaffold04196_36997  | Ca_desig_scaffold  | 36997                          | [A/C]       | NA                                         |
| Ca_Desig_Chr_scaffold04196_37051  | Ca_desig_scaffold  | 37051                          | [G/A]       | NA                                         |
| Ca_Desig_Chr_scaffold04196_38022  | Ca_desig_scaffold  | 38022                          | [C/T]       | NA                                         |
| Ca_Desig_Chr_scaffold04196_38048  | Ca_desig_scaffold  | 38048                          | [A/G]       | NA                                         |
| Ca_Desig_Chr_scaffold04196_49463  | Ca_desig_scaffold  | 49463                          | [T/G]       | NA                                         |
| Ca_Desig_Chr_scaffold04196_52526  | Ca_desig_scaffold  | 52526                          | [C/A]       | NA                                         |
| Ca_Desig_Chr_scaffold04196_56603  | Ca_desig_scaffold  | 56603                          | [A/G]       | NA                                         |
| Ca_Desig_Chr_scaffold04196_59170  | Ca_desig_scaffold  | 59170                          | [G/A]       | NA                                         |
| Ca_Desig_Chr_scaffold04196_60261  | Ca_desig_scaffold  | 60261                          | [G/A]       | NA                                         |
| Ca_Desig_Chr_scaffold01722_9639   | Ca_desig_scaffold  | 9639                           | [T/G]       | NA                                         |
| Ca_Desig_Chr_scaffold01722_9649   | Ca_desig_scaffold  | 9649                           | [T/G]       | NA                                         |
| Ca_Desig_Chr_scaffold01722_14344  | Ca_desig_scaffold  | 14344                          | [G/A]       | NA                                         |
| Ca_Desig_Chr_scaffold01722_14347  | Ca_desig_scaffold  | 14347                          | [T/C]       | NA                                         |
| Ca_Desig_Chr_scaffold01722_14388  | Ca_desig_scaffold  | 14388                          | [T/G]       | NA                                         |
| Ca_Desig_Chr_scaffold01722_14900  | Ca_desig_scaffold  | 14900                          | [A/G]       | NA                                         |
| Ca_Desig_Chr_scaffold01722_14908  | Ca_desig_scaffold  | 14908                          | [A/G]       | NA                                         |
| Ca_Desig_Chr_scaffold03023_27759  | Ca_desig_scaffold  | 27759                          | [A/G]       | NA                                         |
| Ca_Desig_Chr_scaffold03023_28355  | Ca_desig_scaffold  | 28355                          | [T/G]       | NA                                         |
| Ca_Desig_Chr_scaffold03023_29618  | Ca_desig_scaffold  | 29618                          | [C/A]       | NA                                         |
| Ca_Desig_Chr_scaffold02093_69323  | Ca_desig_scaffold  | 69323                          | [A/G]       | NA                                         |
| Ca_Desig_Chr_scaffold02093_87235  | Ca_desig_scaffold  | 87235                          | [A/C]       | NA                                         |
| Ca_Desig_Chr_scaffold02093_87247  | Ca_desig_scaffold  | 87247                          | [A/C]       | NA                                         |
| Ca_Desig_Chr_scaffold02093_87252  | Ca_desig_scaffold  | 87252                          | [T/C]       | NA                                         |
| Ca_Desig_Chr_scaffold02093_87255  | Ca_desig_scaffold  | 87255                          | [T/C]       | NA                                         |
| Ca_Desig_Chr_scaffold02093_113102 | Ca_desig_scaffold  | 113102                         | [A/C]       | NA                                         |
| Ca_Desig_Chr_scaffold02093_113133 | Ca_desig_scaffold  | 113133                         | [A/T]       | NA                                         |

| <b>SNP IDs</b>                    | <b>Chromosomes</b> | <b>Physical positions (bp)</b> | <b>SNPs</b> | <b>NCBI SNPdb accession IDs (NCBI_ss#)</b> |
|-----------------------------------|--------------------|--------------------------------|-------------|--------------------------------------------|
| Ca_Desig_Chr_scaffold02093_113282 | Ca_desig_scaffold  | 113282                         | [T/C]       | NA                                         |
| Ca_Desig_Chr_scaffold01737_21739  | Ca_desig_scaffold  | 21739                          | [T/G]       | NA                                         |
| Ca_Desig_Chr_scaffold01737_45127  | Ca_desig_scaffold  | 45127                          | [T/C]       | NA                                         |
| Ca_Desig_Chr_scaffold01737_45144  | Ca_desig_scaffold  | 45144                          | [T/C]       | NA                                         |
| Ca_Desig_Chr_scaffold01737_45145  | Ca_desig_scaffold  | 45145                          | [T/C]       | NA                                         |
| Ca_Desig_Chr_scaffold01737_45150  | Ca_desig_scaffold  | 45150                          | [A/G]       | NA                                         |
| Ca_Desig_Chr_scaffold01737_45156  | Ca_desig_scaffold  | 45156                          | [A/G]       | NA                                         |
| Ca_Desig_Chr_scaffold01737_45166  | Ca_desig_scaffold  | 45166                          | [T/C]       | NA                                         |
| Ca_Desig_Chr_scaffold01737_45169  | Ca_desig_scaffold  | 45169                          | [A/G]       | NA                                         |
| Ca_Desig_Chr_scaffold01737_45175  | Ca_desig_scaffold  | 45175                          | [T/C]       | NA                                         |
| Ca_Desig_Chr_scaffold01737_45195  | Ca_desig_scaffold  | 45195                          | [A/G]       | NA                                         |
| Ca_Desig_Chr_scaffold03195_48593  | Ca_desig_scaffold  | 48593                          | [T/G]       | NA                                         |
| Ca_Desig_Chr_scaffold03195_48648  | Ca_desig_scaffold  | 48648                          | [A/C]       | NA                                         |
| Ca_Desig_Chr_scaffold01783_59177  | Ca_desig_scaffold  | 59177                          | [G/A]       | NA                                         |
| Ca_Desig_Chr_scaffold01797_2169   | Ca_desig_scaffold  | 2169                           | [T/G]       | NA                                         |
| Ca_Desig_Chr_scaffold01797_2197   | Ca_desig_scaffold  | 2197                           | [T/C]       | NA                                         |
| Ca_Desig_Chr_scaffold01797_7003   | Ca_desig_scaffold  | 7003                           | [T/C]       | NA                                         |
| Ca_Desig_Chr_scaffold01797_7009   | Ca_desig_scaffold  | 7009                           | [T/C]       | NA                                         |
| Ca_Desig_Chr_scaffold01797_7055   | Ca_desig_scaffold  | 7055                           | [T/A]       | NA                                         |
| Ca_Desig_Chr_scaffold01808_30081  | Ca_desig_scaffold  | 30081                          | [C/T]       | NA                                         |
| Ca_Desig_Chr_scaffold01808_66031  | Ca_desig_scaffold  | 66031                          | [G/C]       | NA                                         |
| Ca_Desig_Chr_scaffold01808_66035  | Ca_desig_scaffold  | 66035                          | [T/C]       | NA                                         |
| Ca_Desig_Chr_scaffold01808_66045  | Ca_desig_scaffold  | 66045                          | [A/C]       | NA                                         |
| Ca_Desig_Chr_scaffold01808_66052  | Ca_desig_scaffold  | 66052                          | [T/C]       | NA                                         |
| Ca_Desig_Chr_scaffold01808_66065  | Ca_desig_scaffold  | 66065                          | [T/C]       | NA                                         |
| Ca_Desig_Chr_scaffold01808_66076  | Ca_desig_scaffold  | 66076                          | [A/G]       | NA                                         |
| Ca_Desig_Chr_scaffold01808_66081  | Ca_desig_scaffold  | 66081                          | [T/C]       | NA                                         |
| Ca_Desig_Chr_scaffold01808_66084  | Ca_desig_scaffold  | 66084                          | [T/C]       | NA                                         |
| Ca_Desig_Chr_scaffold01808_66086  | Ca_desig_scaffold  | 66086                          | [T/C]       | NA                                         |
| Ca_Desig_Chr_scaffold01861_22099  | Ca_desig_scaffold  | 22099                          | [T/G]       | NA                                         |
| Ca_Desig_Chr_scaffold01861_58286  | Ca_desig_scaffold  | 58286                          | [T/C]       | NA                                         |
| Ca_Desig_Chr_scaffold01861_58287  | Ca_desig_scaffold  | 58287                          | [A/G]       | NA                                         |
| Ca_Desig_Chr_scaffold01861_58288  | Ca_desig_scaffold  | 58288                          | [T/C]       | NA                                         |
| Ca_Desig_Chr_scaffold01861_58294  | Ca_desig_scaffold  | 58294                          | [A/G]       | NA                                         |

| <b>SNP IDs</b>                  | <b>Chromosomes</b> | <b>Physical positions (bp)</b> | <b>SNPs</b> | <b>NCBI SNPdb accession IDs (NCBI_ss#)</b> |
|---------------------------------|--------------------|--------------------------------|-------------|--------------------------------------------|
| Ca_DesigChr_scaffold01861_58296 | Ca_desig_scaffold  | 58296                          | [T/C]       | NA                                         |
| Ca_DesigChr_scaffold01861_58298 | Ca_desig_scaffold  | 58298                          | [T/C]       | NA                                         |
| Ca_DesigChr_scaffold01861_58299 | Ca_desig_scaffold  | 58299                          | [T/C]       | NA                                         |
| Ca_DesigChr_scaffold01861_58300 | Ca_desig_scaffold  | 58300                          | [T/C]       | NA                                         |
| Ca_DesigChr_scaffold01861_58304 | Ca_desig_scaffold  | 58304                          | [A/G]       | NA                                         |
| Ca_DesigChr_scaffold01861_58306 | Ca_desig_scaffold  | 58306                          | [A/G]       | NA                                         |
| Ca_DesigChr_scaffold01861_58310 | Ca_desig_scaffold  | 58310                          | [A/G]       | NA                                         |
| Ca_DesigChr_scaffold01861_58311 | Ca_desig_scaffold  | 58311                          | [T/C]       | NA                                         |
| Ca_DesigChr_scaffold01861_58313 | Ca_desig_scaffold  | 58313                          | [A/G]       | NA                                         |
| Ca_DesigChr_scaffold01861_58314 | Ca_desig_scaffold  | 58314                          | [A/G]       | NA                                         |
| Ca_DesigChr_scaffold01861_58316 | Ca_desig_scaffold  | 58316                          | [A/G]       | NA                                         |
| Ca_DesigChr_scaffold01861_58317 | Ca_desig_scaffold  | 58317                          | [A/G]       | NA                                         |
| Ca_DesigChr_scaffold01861_58320 | Ca_desig_scaffold  | 58320                          | [A/G]       | NA                                         |
| Ca_DesigChr_scaffold01861_58323 | Ca_desig_scaffold  | 58323                          | [A/G]       | NA                                         |
| Ca_DesigChr_scaffold01861_58325 | Ca_desig_scaffold  | 58325                          | [A/G]       | NA                                         |
| Ca_DesigChr_scaffold01861_58326 | Ca_desig_scaffold  | 58326                          | [A/G]       | NA                                         |
| Ca_DesigChr_scaffold01861_58330 | Ca_desig_scaffold  | 58330                          | [G/T]       | NA                                         |
| Ca_DesigChr_scaffold01861_58333 | Ca_desig_scaffold  | 58333                          | [A/G]       | NA                                         |
| Ca_DesigChr_scaffold01861_58336 | Ca_desig_scaffold  | 58336                          | [T/C]       | NA                                         |
| Ca_DesigChr_scaffold01861_58338 | Ca_desig_scaffold  | 58338                          | [T/C]       | NA                                         |
| Ca_DesigChr_scaffold01861_58342 | Ca_desig_scaffold  | 58342                          | [T/C]       | NA                                         |
| Ca_DesigChr_scaffold01861_58344 | Ca_desig_scaffold  | 58344                          | [T/C]       | NA                                         |
| Ca_DesigChr_scaffold01861_58347 | Ca_desig_scaffold  | 58347                          | [T/C]       | NA                                         |
| Ca_DesigChr_scaffold01861_58355 | Ca_desig_scaffold  | 58355                          | [T/C]       | NA                                         |
| Ca_DesigChr_scaffold01861_58359 | Ca_desig_scaffold  | 58359                          | [T/C]       | NA                                         |
| Ca_DesigChr_scaffold01866_6076  | Ca_desig_scaffold  | 6076                           | [G/A]       | NA                                         |
| Ca_DesigChr_scaffold01866_6077  | Ca_desig_scaffold  | 6077                           | [G/A]       | NA                                         |
| Ca_DesigChr_scaffold01866_6078  | Ca_desig_scaffold  | 6078                           | [C/G]       | NA                                         |
| Ca_DesigChr_scaffold01866_6079  | Ca_desig_scaffold  | 6079                           | [C/A]       | NA                                         |
| Ca_DesigChr_scaffold01866_6080  | Ca_desig_scaffold  | 6080                           | [A/C]       | NA                                         |
| Ca_DesigChr_scaffold01866_28223 | Ca_desig_scaffold  | 28223                          | [G/A]       | NA                                         |
| Ca_DesigChr_scaffold01866_29545 | Ca_desig_scaffold  | 29545                          | [T/C]       | NA                                         |
| Ca_DesigChr_scaffold01866_29558 | Ca_desig_scaffold  | 29558                          | [T/G]       | NA                                         |
| Ca_DesigChr_scaffold01866_29578 | Ca_desig_scaffold  | 29578                          | [A/C]       | NA                                         |

| <b>SNP IDs</b>                  | <b>Chromosomes</b> | <b>Physical positions (bp)</b> | <b>SNPs</b> | <b>NCBI SNPdb accession IDs (NCBI_ss#)</b> |
|---------------------------------|--------------------|--------------------------------|-------------|--------------------------------------------|
| Ca_DesigChr_scaffold01866_29625 | Ca_desig_scaffold  | 29625                          | [T/A]       | NA                                         |
| Ca_DesigChr_scaffold01866_29638 | Ca_desig_scaffold  | 29638                          | [T/G]       | NA                                         |
| Ca_DesigChr_scaffold01947_38773 | Ca_desig_scaffold  | 38773                          | [T/G]       | NA                                         |
| Ca_DesigChr_scaffold01979_41131 | Ca_desig_scaffold  | 41131                          | [T/G]       | NA                                         |
| Ca_DesigChr_scaffold01984_4090  | Ca_desig_scaffold  | 4090                           | [G/A]       | NA                                         |
| Ca_DesigChr_scaffold01984_4159  | Ca_desig_scaffold  | 4159                           | [G/A]       | NA                                         |
| Ca_DesigChr_scaffold02000_38181 | Ca_desig_scaffold  | 38181                          | [G/T]       | NA                                         |
| Ca_DesigChr_scaffold02022_51398 | Ca_desig_scaffold  | 51398                          | [C/T]       | NA                                         |
| Ca_DesigChr_scaffold02551_41343 | Ca_desig_scaffold  | 41343                          | [G/T]       | NA                                         |
| Ca_DesigChr_scaffold02036_74445 | Ca_desig_scaffold  | 74445                          | [G/T]       | NA                                         |
| Ca_DesigChr_scaffold02036_74459 | Ca_desig_scaffold  | 74459                          | [C/A]       | NA                                         |
| Ca_DesigChr_scaffold02036_74463 | Ca_desig_scaffold  | 74463                          | [G/A]       | NA                                         |
| Ca_DesigChr_scaffold02138_36991 | Ca_desig_scaffold  | 36991                          | [A/T]       | NA                                         |
| Ca_DesigChr_scaffold02138_36992 | Ca_desig_scaffold  | 36992                          | [C/T]       | NA                                         |
| Ca_DesigChr_scaffold02138_42440 | Ca_desig_scaffold  | 42440                          | [G/T]       | NA                                         |
| Ca_DesigChr_scaffold02138_69578 | Ca_desig_scaffold  | 69578                          | [A/G]       | NA                                         |
| Ca_DesigChr_scaffold02138_69622 | Ca_desig_scaffold  | 69622                          | [A/T]       | NA                                         |
| Ca_DesigChr_scaffold02170_44845 | Ca_desig_scaffold  | 44845                          | [G/C]       | NA                                         |
| Ca_DesigChr_scaffold07988_69705 | Ca_desig_scaffold  | 69705                          | [T/G]       | NA                                         |
| Ca_DesigChr_scaffold07988_69713 | Ca_desig_scaffold  | 69713                          | [T/G]       | NA                                         |
| Ca_DesigChr_scaffold02276_12216 | Ca_desig_scaffold  | 12216                          | [A/T]       | NA                                         |
| Ca_DesigChr_scaffold02276_12232 | Ca_desig_scaffold  | 12232                          | [A/G]       | NA                                         |
| Ca_DesigChr_scaffold02308_13996 | Ca_desig_scaffold  | 13996                          | [A/G]       | NA                                         |
| Ca_DesigChr_scaffold03792_18044 | Ca_desig_scaffold  | 18044                          | [C/G]       | NA                                         |
| Ca_DesigChr_scaffold03792_19667 | Ca_desig_scaffold  | 19667                          | [G/C]       | NA                                         |
| Ca_DesigChr_scaffold03792_19681 | Ca_desig_scaffold  | 19681                          | [A/C]       | NA                                         |
| Ca_DesigChr_scaffold03792_19684 | Ca_desig_scaffold  | 19684                          | [A/C]       | NA                                         |
| Ca_DesigChr_scaffold03792_19687 | Ca_desig_scaffold  | 19687                          | [A/C]       | NA                                         |
| Ca_DesigChr_scaffold02365_19940 | Ca_desig_scaffold  | 19940                          | [C/A]       | NA                                         |
| Ca_DesigChr_scaffold02365_19941 | Ca_desig_scaffold  | 19941                          | [C/T]       | NA                                         |
| Ca_DesigChr_scaffold02365_19942 | Ca_desig_scaffold  | 19942                          | [A/C]       | NA                                         |
| Ca_DesigChr_scaffold02365_19943 | Ca_desig_scaffold  | 19943                          | [G/T]       | NA                                         |
| Ca_DesigChr_scaffold02375_37713 | Ca_desig_scaffold  | 37713                          | [A/G]       | NA                                         |
| Ca_DesigChr_scaffold02376_35838 | Ca_desig_scaffold  | 35838                          | [G/A]       | NA                                         |

| <b>SNP IDs</b>                 | <b>Chromosomes</b> | <b>Physical positions (bp)</b> | <b>SNPs</b> | <b>NCBI SNPdb accession IDs (NCBI_ss#)</b> |
|--------------------------------|--------------------|--------------------------------|-------------|--------------------------------------------|
| Ca_Desi_Ch_scaffold02376_35874 | Ca_desi_scaffold   | 35874                          | [T/C]       | NA                                         |
| Ca_Desi_Ch_scaffold02711_68748 | Ca_desi_scaffold   | 68748                          | [G/A]       | NA                                         |
| Ca_Desi_Ch_scaffold05885_6091  | Ca_desi_scaffold   | 6091                           | [T/C]       | NA                                         |
| Ca_Desi_Ch_scaffold05885_6105  | Ca_desi_scaffold   | 6105                           | [T/C]       | NA                                         |
| Ca_Desi_Ch_scaffold05885_6131  | Ca_desi_scaffold   | 6131                           | [T/G]       | NA                                         |
| Ca_Desi_Ch_scaffold05885_6135  | Ca_desi_scaffold   | 6135                           | [A/G]       | NA                                         |
| Ca_Desi_Ch_scaffold02424_32061 | Ca_desi_scaffold   | 32061                          | [G/C]       | NA                                         |
| Ca_Desi_Ch_scaffold02424_61755 | Ca_desi_scaffold   | 61755                          | [G/A]       | NA                                         |
| Ca_Desi_Ch_scaffold02424_61769 | Ca_desi_scaffold   | 61769                          | [G/A]       | NA                                         |
| Ca_Desi_Ch_scaffold02424_61775 | Ca_desi_scaffold   | 61775                          | [T/G]       | NA                                         |
| Ca_Desi_Ch_scaffold02424_61785 | Ca_desi_scaffold   | 61785                          | [T/C]       | NA                                         |
| Ca_Desi_Ch_scaffold02424_62010 | Ca_desi_scaffold   | 62010                          | [T/C]       | NA                                         |
| Ca_Desi_Ch_scaffold02424_62017 | Ca_desi_scaffold   | 62017                          | [C/T]       | NA                                         |
| Ca_Desi_Ch_scaffold02424_62037 | Ca_desi_scaffold   | 62037                          | [T/C]       | NA                                         |
| Ca_Desi_Ch_scaffold02424_75237 | Ca_desi_scaffold   | 75237                          | [T/G]       | NA                                         |
| Ca_Desi_Ch_scaffold02424_75258 | Ca_desi_scaffold   | 75258                          | [A/G]       | NA                                         |
| Ca_Desi_Ch_scaffold02424_75275 | Ca_desi_scaffold   | 75275                          | [A/G]       | NA                                         |
| Ca_Desi_Ch_scaffold02424_75276 | Ca_desi_scaffold   | 75276                          | [A/T]       | NA                                         |
| Ca_Desi_Ch_scaffold02424_75279 | Ca_desi_scaffold   | 75279                          | [C/T]       | NA                                         |
| Ca_Desi_Ch_scaffold02424_77422 | Ca_desi_scaffold   | 77422                          | [G/T]       | NA                                         |
| Ca_Desi_Ch_scaffold02424_77428 | Ca_desi_scaffold   | 77428                          | [A/G]       | NA                                         |
| Ca_Desi_Ch_scaffold02424_77488 | Ca_desi_scaffold   | 77488                          | [C/T]       | NA                                         |
| Ca_Desi_Ch_scaffold08121_61689 | Ca_desi_scaffold   | 61689                          | [A/C]       | NA                                         |
| Ca_Desi_Ch_scaffold08121_61697 | Ca_desi_scaffold   | 61697                          | [A/G]       | NA                                         |
| Ca_Desi_Ch_scaffold08121_62571 | Ca_desi_scaffold   | 62571                          | [T/A]       | NA                                         |
| Ca_Desi_Ch_scaffold02578_20032 | Ca_desi_scaffold   | 20032                          | [G/T]       | NA                                         |
| Ca_Desi_Ch_scaffold02578_67434 | Ca_desi_scaffold   | 67434                          | [A/C]       | NA                                         |
| Ca_Desi_Ch_scaffold02578_67455 | Ca_desi_scaffold   | 67455                          | [T/A]       | NA                                         |
| Ca_Desi_Ch_scaffold02645_22401 | Ca_desi_scaffold   | 22401                          | [T/G]       | NA                                         |
| Ca_Desi_Ch_scaffold02645_22402 | Ca_desi_scaffold   | 22402                          | [G/A]       | NA                                         |
| Ca_Desi_Ch_scaffold02645_22403 | Ca_desi_scaffold   | 22403                          | [C/T]       | NA                                         |
| Ca_Desi_Ch_scaffold02645_22405 | Ca_desi_scaffold   | 22405                          | [G/T]       | NA                                         |
| Ca_Desi_Ch_scaffold02650_16747 | Ca_desi_scaffold   | 16747                          | [A/G]       | NA                                         |
| Ca_Desi_Ch_scaffold02681_6799  | Ca_desi_scaffold   | 6799                           | [C/T]       | NA                                         |

| <b>SNP IDs</b>                 | <b>Chromosomes</b> | <b>Physical positions (bp)</b> | <b>SNPs</b> | <b>NCBI SNPdb accession IDs (NCBI_ss#)</b> |
|--------------------------------|--------------------|--------------------------------|-------------|--------------------------------------------|
| Ca_Desi_Ch_scaffold02753_67586 | Ca_desi_scaffold   | 67586                          | [A/T]       | NA                                         |
| Ca_Desi_Ch_scaffold02753_67619 | Ca_desi_scaffold   | 67619                          | [T/A]       | NA                                         |
| Ca_Desi_Ch_scaffold02753_67624 | Ca_desi_scaffold   | 67624                          | [A/G]       | NA                                         |
| Ca_Desi_Ch_scaffold02875_66543 | Ca_desi_scaffold   | 66543                          | [T/C]       | NA                                         |
| Ca_Desi_Ch_scaffold02908_207   | Ca_desi_scaffold   | 207                            | [G/T]       | NA                                         |
| Ca_Desi_Ch_scaffold02908_24170 | Ca_desi_scaffold   | 24170                          | [T/G]       | NA                                         |
| Ca_Desi_Ch_scaffold03463_10748 | Ca_desi_scaffold   | 10748                          | [T/G]       | NA                                         |
| Ca_Desi_Ch_scaffold03463_10877 | Ca_desi_scaffold   | 10877                          | [T/G]       | NA                                         |
| Ca_Desi_Ch_scaffold03463_10911 | Ca_desi_scaffold   | 10911                          | [A/G]       | NA                                         |
| Ca_Desi_Ch_scaffold03463_10913 | Ca_desi_scaffold   | 10913                          | [T/G]       | NA                                         |
| Ca_Desi_Ch_scaffold03463_13499 | Ca_desi_scaffold   | 13499                          | [C/T]       | NA                                         |
| Ca_Desi_Ch_scaffold03463_13504 | Ca_desi_scaffold   | 13504                          | [T/C]       | NA                                         |
| Ca_Desi_Ch_scaffold03463_13555 | Ca_desi_scaffold   | 13555                          | [C/T]       | NA                                         |
| Ca_Desi_Ch_scaffold03463_13571 | Ca_desi_scaffold   | 13571                          | [A/C]       | NA                                         |
| Ca_Desi_Ch_scaffold03463_13592 | Ca_desi_scaffold   | 13592                          | [T/C]       | NA                                         |
| Ca_Desi_Ch_scaffold03282_26864 | Ca_desi_scaffold   | 26864                          | [G/A]       | NA                                         |
| Ca_Desi_Ch_scaffold03417_15204 | Ca_desi_scaffold   | 15204                          | [A/G]       | NA                                         |
| Ca_Desi_Ch_scaffold03417_15302 | Ca_desi_scaffold   | 15302                          | [A/C]       | NA                                         |
| Ca_Desi_Ch_scaffold03772_20311 | Ca_desi_scaffold   | 20311                          | [T/C]       | NA                                         |
| Ca_Desi_Ch_scaffold03772_20356 | Ca_desi_scaffold   | 20356                          | [G/T]       | NA                                         |
| Ca_Desi_Ch_scaffold03846_1162  | Ca_desi_scaffold   | 1162                           | [G/T]       | NA                                         |
| Ca_Desi_Ch_scaffold03889_21116 | Ca_desi_scaffold   | 21116                          | [T/A]       | NA                                         |
| Ca_Desi_Ch_scaffold03971_5397  | Ca_desi_scaffold   | 5397                           | [T/G]       | NA                                         |
| Ca_Desi_Ch_scaffold03971_5420  | Ca_desi_scaffold   | 5420                           | [A/G]       | NA                                         |
| Ca_Desi_Ch_scaffold03971_7573  | Ca_desi_scaffold   | 7573                           | [C/A]       | NA                                         |
| Ca_Desi_Ch_scaffold03971_7656  | Ca_desi_scaffold   | 7656                           | [A/T]       | NA                                         |
| Ca_Desi_Ch_scaffold03971_8512  | Ca_desi_scaffold   | 8512                           | [A/C]       | NA                                         |
| Ca_Desi_Ch_scaffold03971_15886 | Ca_desi_scaffold   | 15886                          | [A/G]       | NA                                         |
| Ca_Desi_Ch_scaffold03971_15901 | Ca_desi_scaffold   | 15901                          | [T/G]       | NA                                         |
| Ca_Desi_Ch_scaffold03971_15921 | Ca_desi_scaffold   | 15921                          | [T/C]       | NA                                         |
| Ca_Desi_Ch_scaffold03971_15928 | Ca_desi_scaffold   | 15928                          | [T/A]       | NA                                         |
| Ca_Desi_Ch_scaffold03971_16024 | Ca_desi_scaffold   | 16024                          | [T/C]       | NA                                         |
| Ca_Desi_Ch_scaffold03971_16106 | Ca_desi_scaffold   | 16106                          | [A/G]       | NA                                         |
| Ca_Desi_Ch_scaffold03971_16152 | Ca_desi_scaffold   | 16152                          | [T/A]       | NA                                         |

| <b>SNP IDs</b>                   | <b>Chromosomes</b> | <b>Physical positions (bp)</b> | <b>SNPs</b> | <b>NCBI SNPdb accession IDs (NCBI_ss#)</b> |
|----------------------------------|--------------------|--------------------------------|-------------|--------------------------------------------|
| Ca_Desig_Chr_scaffold03971_16199 | Ca_desig_scaffold  | 16199                          | [A/C]       | NA                                         |
| Ca_Desig_Chr_scaffold04317_7845  | Ca_desig_scaffold  | 7845                           | [T/G]       | NA                                         |
| Ca_Desig_Chr_scaffold17167_19262 | Ca_desig_scaffold  | 19262                          | [A/G]       | NA                                         |
| Ca_Desig_Chr_scaffold17167_19265 | Ca_desig_scaffold  | 19265                          | [A/G]       | NA                                         |
| Ca_Desig_Chr_scaffold17167_19278 | Ca_desig_scaffold  | 19278                          | [A/G]       | NA                                         |
| Ca_Desig_Chr_scaffold17167_19282 | Ca_desig_scaffold  | 19282                          | [T/G]       | NA                                         |
| Ca_Desig_Chr_scaffold17167_19296 | Ca_desig_scaffold  | 19296                          | [T/G]       | NA                                         |
| Ca_Desig_Chr_scaffold17167_19302 | Ca_desig_scaffold  | 19302                          | [A/G]       | NA                                         |
| Ca_Desig_Chr_scaffold17167_19312 | Ca_desig_scaffold  | 19312                          | [T/G]       | NA                                         |
| Ca_Desig_Chr_scaffold17167_19317 | Ca_desig_scaffold  | 19317                          | [T/A]       | NA                                         |
| Ca_Desig_Chr_scaffold06934_777   | Ca_desig_scaffold  | 777                            | [T/A]       | NA                                         |
| Ca_Desig_Chr_scaffold06934_780   | Ca_desig_scaffold  | 780                            | [T/C]       | NA                                         |
| Ca_Desig_Chr_scaffold06934_781   | Ca_desig_scaffold  | 781                            | [T/C]       | NA                                         |
| Ca_Desig_Chr_scaffold06934_782   | Ca_desig_scaffold  | 782                            | [T/C]       | NA                                         |
| Ca_Desig_Chr_scaffold06934_783   | Ca_desig_scaffold  | 783                            | [A/G]       | NA                                         |
| Ca_Desig_Chr_scaffold06934_784   | Ca_desig_scaffold  | 784                            | [C/T]       | NA                                         |
| Ca_Desig_Chr_scaffold06934_785   | Ca_desig_scaffold  | 785                            | [A/G]       | NA                                         |
| Ca_Desig_Chr_scaffold06934_786   | Ca_desig_scaffold  | 786                            | [G/A]       | NA                                         |
| Ca_Desig_Chr_scaffold06934_787   | Ca_desig_scaffold  | 787                            | [T/A]       | NA                                         |
| Ca_Desig_Chr_scaffold06934_788   | Ca_desig_scaffold  | 788                            | [A/G]       | NA                                         |
| Ca_Desig_Chr_scaffold06934_790   | Ca_desig_scaffold  | 790                            | [G/A]       | NA                                         |
| Ca_Desig_Chr_scaffold06934_792   | Ca_desig_scaffold  | 792                            | [G/A]       | NA                                         |
| Ca_Desig_Chr_scaffold06934_793   | Ca_desig_scaffold  | 793                            | [T/C]       | NA                                         |
| Ca_Desig_Chr_scaffold06934_794   | Ca_desig_scaffold  | 794                            | [G/A]       | NA                                         |
| Ca_Desig_Chr_scaffold06934_795   | Ca_desig_scaffold  | 795                            | [A/G]       | NA                                         |
| Ca_Desig_Chr_scaffold06934_796   | Ca_desig_scaffold  | 796                            | [A/G]       | NA                                         |
| Ca_Desig_Chr_scaffold06934_797   | Ca_desig_scaffold  | 797                            | [A/G]       | NA                                         |
| Ca_Desig_Chr_scaffold06934_798   | Ca_desig_scaffold  | 798                            | [A/G]       | NA                                         |
| Ca_Desig_Chr_scaffold06934_799   | Ca_desig_scaffold  | 799                            | [T/C]       | NA                                         |
| Ca_Desig_Chr_scaffold06934_800   | Ca_desig_scaffold  | 800                            | [T/C]       | NA                                         |
| Ca_Desig_Chr_scaffold06934_801   | Ca_desig_scaffold  | 801                            | [G/T]       | NA                                         |
| Ca_Desig_Chr_scaffold06934_802   | Ca_desig_scaffold  | 802                            | [A/G]       | NA                                         |
| Ca_Desig_Chr_scaffold06934_804   | Ca_desig_scaffold  | 804                            | [G/A]       | NA                                         |
| Ca_Desig_Chr_scaffold06934_805   | Ca_desig_scaffold  | 805                            | [G/A]       | NA                                         |

| <b>SNP IDs</b>                 | <b>Chromosomes</b> | <b>Physical positions (bp)</b> | <b>SNPs</b> | <b>NCBI SNPdb accession IDs (NCBI_ss#)</b> |
|--------------------------------|--------------------|--------------------------------|-------------|--------------------------------------------|
| Ca_Desig_Chr_scaffold06934_807 | Ca_desig_scaffold  | 807                            | [A/G]       | NA                                         |
| Ca_Desig_Chr_scaffold06934_808 | Ca_desig_scaffold  | 808                            | [A/G]       | NA                                         |
| Ca_Desig_Chr_scaffold06934_809 | Ca_desig_scaffold  | 809                            | [T/C]       | NA                                         |
| Ca_Desig_Chr_scaffold06934_810 | Ca_desig_scaffold  | 810                            | [T/C]       | NA                                         |
| Ca_Desig_Chr_scaffold06934_811 | Ca_desig_scaffold  | 811                            | [C/T]       | NA                                         |
| Ca_Desig_Chr_scaffold06934_812 | Ca_desig_scaffold  | 812                            | [T/C]       | NA                                         |
| Ca_Desig_Chr_scaffold06934_813 | Ca_desig_scaffold  | 813                            | [A/G]       | NA                                         |
| Ca_Desig_Chr_scaffold06934_814 | Ca_desig_scaffold  | 814                            | [T/C]       | NA                                         |
| Ca_Desig_Chr_scaffold06934_815 | Ca_desig_scaffold  | 815                            | [T/C]       | NA                                         |
| Ca_Desig_Chr_scaffold06934_816 | Ca_desig_scaffold  | 816                            | [G/A]       | NA                                         |
| Ca_Desig_Chr_scaffold06934_817 | Ca_desig_scaffold  | 817                            | [G/A]       | NA                                         |
| Ca_Desig_Chr_scaffold06934_818 | Ca_desig_scaffold  | 818                            | [G/A]       | NA                                         |
| Ca_Desig_Chr_scaffold06934_820 | Ca_desig_scaffold  | 820                            | [T/C]       | NA                                         |
| Ca_Desig_Chr_scaffold06934_821 | Ca_desig_scaffold  | 821                            | [G/A]       | NA                                         |
| Ca_Desig_Chr_scaffold06934_822 | Ca_desig_scaffold  | 822                            | [A/G]       | NA                                         |
| Ca_Desig_Chr_scaffold06934_823 | Ca_desig_scaffold  | 823                            | [A/G]       | NA                                         |
| Ca_Desig_Chr_scaffold06934_825 | Ca_desig_scaffold  | 825                            | [G/A]       | NA                                         |
| Ca_Desig_Chr_scaffold06934_826 | Ca_desig_scaffold  | 826                            | [C/T]       | NA                                         |
| Ca_Desig_Chr_scaffold06934_827 | Ca_desig_scaffold  | 827                            | [A/G]       | NA                                         |
| Ca_Desig_Chr_scaffold06934_828 | Ca_desig_scaffold  | 828                            | [G/A]       | NA                                         |
| Ca_Desig_Chr_scaffold06934_829 | Ca_desig_scaffold  | 829                            | [G/A]       | NA                                         |
| Ca_Desig_Chr_scaffold06934_831 | Ca_desig_scaffold  | 831                            | [T/C]       | NA                                         |
| Ca_Desig_Chr_scaffold06934_832 | Ca_desig_scaffold  | 832                            | [A/G]       | NA                                         |
| Ca_Desig_Chr_scaffold06934_834 | Ca_desig_scaffold  | 834                            | [T/C]       | NA                                         |
| Ca_Desig_Chr_scaffold06934_835 | Ca_desig_scaffold  | 835                            | [T/C]       | NA                                         |
| Ca_Desig_Chr_scaffold06934_836 | Ca_desig_scaffold  | 836                            | [T/C]       | NA                                         |
| Ca_Desig_Chr_scaffold06934_837 | Ca_desig_scaffold  | 837                            | [G/A]       | NA                                         |
| Ca_Desig_Chr_scaffold06934_838 | Ca_desig_scaffold  | 838                            | [G/A]       | NA                                         |
| Ca_Desig_Chr_scaffold06934_839 | Ca_desig_scaffold  | 839                            | [G/A]       | NA                                         |
| Ca_Desig_Chr_scaffold06934_840 | Ca_desig_scaffold  | 840                            | [T/C]       | NA                                         |
| Ca_Desig_Chr_scaffold06934_841 | Ca_desig_scaffold  | 841                            | [T/C]       | NA                                         |
| Ca_Desig_Chr_scaffold06934_842 | Ca_desig_scaffold  | 842                            | [A/G]       | NA                                         |
| Ca_Desig_Chr_scaffold06934_843 | Ca_desig_scaffold  | 843                            | [G/A]       | NA                                         |
| Ca_Desig_Chr_scaffold06934_844 | Ca_desig_scaffold  | 844                            | [T/C]       | NA                                         |



| <b>SNP IDs</b>                | <b>Chromosomes</b> | <b>Physical positions (bp)</b> | <b>SNPs</b> | <b>NCBI SNPdb accession IDs (NCBI_ss#)</b> |
|-------------------------------|--------------------|--------------------------------|-------------|--------------------------------------------|
| Ca_Desi_Chr_scaffold06934_845 | Ca_desi_scaffold   | 845                            | [G/A]       | NA                                         |
| Ca_Desi_Chr_scaffold06934_846 | Ca_desi_scaffold   | 846                            | [T/C]       | NA                                         |
| Ca_Desi_Chr_scaffold06934_847 | Ca_desi_scaffold   | 847                            | [T/C]       | NA                                         |
| Ca_Desi_Chr_scaffold06934_848 | Ca_desi_scaffold   | 848                            | [C/T]       | NA                                         |
| Ca_Desi_Chr_scaffold06934_849 | Ca_desi_scaffold   | 849                            | [A/G]       | NA                                         |
| Ca_Desi_Chr_scaffold06934_850 | Ca_desi_scaffold   | 850                            | [G/A]       | NA                                         |
| Ca_Desi_Chr_scaffold06934_851 | Ca_desi_scaffold   | 851                            | [T/C]       | NA                                         |
| Ca_Desi_Chr_scaffold06934_852 | Ca_desi_scaffold   | 852                            | [G/A]       | NA                                         |
| Ca_Desi_Chr_scaffold06934_853 | Ca_desi_scaffold   | 853                            | [A/G]       | NA                                         |
| Ca_Desi_Chr_scaffold06934_854 | Ca_desi_scaffold   | 854                            | [C/A]       | NA                                         |
| Ca_Desi_Chr_scaffold06934_855 | Ca_desi_scaffold   | 855                            | [A/G]       | NA                                         |
| Ca_Desi_Chr_scaffold06934_856 | Ca_desi_scaffold   | 856                            | [A/G]       | NA                                         |
| Ca_Desi_Chr_scaffold06934_857 | Ca_desi_scaffold   | 857                            | [T/C]       | NA                                         |
| Ca_Desi_Chr_scaffold06934_858 | Ca_desi_scaffold   | 858                            | [G/A]       | NA                                         |
| Ca_Desi_Chr_scaffold06934_859 | Ca_desi_scaffold   | 859                            | [G/A]       | NA                                         |
| Ca_Desi_Chr_scaffold06934_860 | Ca_desi_scaffold   | 860                            | [T/C]       | NA                                         |
| Ca_Desi_Chr_scaffold06934_861 | Ca_desi_scaffold   | 861                            | [A/G]       | NA                                         |
| Ca_Desi_Chr_scaffold06934_862 | Ca_desi_scaffold   | 862                            | [G/A]       | NA                                         |
| Ca_Desi_Chr_scaffold06934_863 | Ca_desi_scaffold   | 863                            | [C/T]       | NA                                         |
| Ca_Desi_Chr_scaffold06934_864 | Ca_desi_scaffold   | 864                            | [T/C]       | NA                                         |
| Ca_Desi_Chr_scaffold06934_865 | Ca_desi_scaffold   | 865                            | [A/G]       | NA                                         |
| Ca_Desi_Chr_scaffold06934_866 | Ca_desi_scaffold   | 866                            | [A/G]       | NA                                         |
| Ca_Desi_Chr_scaffold06934_867 | Ca_desi_scaffold   | 867                            | [C/A]       | NA                                         |
| Ca_Desi_Chr_scaffold06934_868 | Ca_desi_scaffold   | 868                            | [A/G]       | NA                                         |
| Ca_Desi_Chr_scaffold06934_869 | Ca_desi_scaffold   | 869                            | [T/C]       | NA                                         |
| Ca_Desi_Chr_scaffold06934_870 | Ca_desi_scaffold   | 870                            | [T/C]       | NA                                         |
| Ca_Desi_Chr_scaffold06934_871 | Ca_desi_scaffold   | 871                            | [A/G]       | NA                                         |
| Ca_Desi_Chr_scaffold06934_872 | Ca_desi_scaffold   | 872                            | [C/T]       | NA                                         |
| Ca_Desi_Chr_scaffold06934_873 | Ca_desi_scaffold   | 873                            | [A/G]       | NA                                         |
| Ca_Desi_Chr_scaffold06934_874 | Ca_desi_scaffold   | 874                            | [T/C]       | NA                                         |
| Ca_Desi_Chr_scaffold06934_875 | Ca_desi_scaffold   | 875                            | [G/A]       | NA                                         |
| Ca_Desi_Chr_scaffold06934_876 | Ca_desi_scaffold   | 876                            | [A/G]       | NA                                         |
| Ca_Desi_Chr_scaffold06934_877 | Ca_desi_scaffold   | 877                            | [G/A]       | NA                                         |
| Ca_Desi_Chr_scaffold06934_878 | Ca_desi_scaffold   | 878                            | [A/G]       | NA                                         |

| <b>SNP IDs</b>                        | <b>Chromosomes</b> | <b>Physical positions (bp)</b> | <b>SNPs</b> | <b>NCBI SNPdb accession IDs (NCBI_ss#)</b> |
|---------------------------------------|--------------------|--------------------------------|-------------|--------------------------------------------|
| Ca_Desi_Chromosome_scaffold06934_879  | Ca_desi_scaffold   | 879                            | [T/C]       | NA                                         |
| Ca_Desi_Chromosome_scaffold06934_880  | Ca_desi_scaffold   | 880                            | [G/A]       | NA                                         |
| Ca_Desi_Chromosome_scaffold06934_881  | Ca_desi_scaffold   | 881                            | [C/T]       | NA                                         |
| Ca_Desi_Chromosome_scaffold06934_882  | Ca_desi_scaffold   | 882                            | [G/A]       | NA                                         |
| Ca_Desi_Chromosome_scaffold06934_883  | Ca_desi_scaffold   | 883                            | [G/A]       | NA                                         |
| Ca_Desi_Chromosome_scaffold06934_884  | Ca_desi_scaffold   | 884                            | [T/C]       | NA                                         |
| Ca_Desi_Chromosome_scaffold06934_885  | Ca_desi_scaffold   | 885                            | [T/C]       | NA                                         |
| Ca_Desi_Chromosome_scaffold06934_886  | Ca_desi_scaffold   | 886                            | [G/A]       | NA                                         |
| Ca_Desi_Chromosome_scaffold06934_887  | Ca_desi_scaffold   | 887                            | [G/A]       | NA                                         |
| Ca_Desi_Chromosome_scaffold06934_888  | Ca_desi_scaffold   | 888                            | [A/G]       | NA                                         |
| Ca_Desi_Chromosome_scaffold06934_889  | Ca_desi_scaffold   | 889                            | [A/G]       | NA                                         |
| Ca_Desi_Chromosome_scaffold06934_890  | Ca_desi_scaffold   | 890                            | [G/A]       | NA                                         |
| Ca_Desi_Chromosome_scaffold06934_891  | Ca_desi_scaffold   | 891                            | [C/T]       | NA                                         |
| Ca_Desi_Chromosome_scaffold06934_892  | Ca_desi_scaffold   | 892                            | [G/A]       | NA                                         |
| Ca_Desi_Chromosome_scaffold06934_893  | Ca_desi_scaffold   | 893                            | [A/G]       | NA                                         |
| Ca_Desi_Chromosome_scaffold06934_897  | Ca_desi_scaffold   | 897                            | [A/T]       | NA                                         |
| Ca_Desi_Chromosome_scaffold06934_2839 | Ca_desi_scaffold   | 2839                           | [T/G]       | NA                                         |
| Ca_Desi_Chromosome_scaffold06934_5280 | Ca_desi_scaffold   | 5280                           | [G/A]       | NA                                         |
| Ca_Desi_Chromosome_scaffold06934_5281 | Ca_desi_scaffold   | 5281                           | [G/A]       | NA                                         |
| Ca_Desi_Chromosome_scaffold06934_5282 | Ca_desi_scaffold   | 5282                           | [A/G]       | NA                                         |
| Ca_Desi_Chromosome_scaffold06934_5283 | Ca_desi_scaffold   | 5283                           | [T/C]       | NA                                         |
| Ca_Desi_Chromosome_scaffold06934_5284 | Ca_desi_scaffold   | 5284                           | [G/A]       | NA                                         |
| Ca_Desi_Chromosome_scaffold06934_5285 | Ca_desi_scaffold   | 5285                           | [A/G]       | NA                                         |
| Ca_Desi_Chromosome_scaffold06934_5286 | Ca_desi_scaffold   | 5286                           | [T/C]       | NA                                         |
| Ca_Desi_Chromosome_scaffold06934_5287 | Ca_desi_scaffold   | 5287                           | [G/A]       | NA                                         |
| Ca_Desi_Chromosome_scaffold06934_5288 | Ca_desi_scaffold   | 5288                           | [C/T]       | NA                                         |
| Ca_Desi_Chromosome_scaffold06934_5289 | Ca_desi_scaffold   | 5289                           | [G/A]       | NA                                         |
| Ca_Desi_Chromosome_scaffold06934_5290 | Ca_desi_scaffold   | 5290                           | [A/G]       | NA                                         |
| Ca_Desi_Chromosome_scaffold06934_5291 | Ca_desi_scaffold   | 5291                           | [C/T]       | NA                                         |
| Ca_Desi_Chromosome_scaffold06934_5292 | Ca_desi_scaffold   | 5292                           | [A/G]       | NA                                         |
| Ca_Desi_Chromosome_scaffold06934_5293 | Ca_desi_scaffold   | 5293                           | [A/G]       | NA                                         |
| Ca_Desi_Chromosome_scaffold06934_5294 | Ca_desi_scaffold   | 5294                           | [C/T]       | NA                                         |
| Ca_Desi_Chromosome_scaffold06934_5295 | Ca_desi_scaffold   | 5295                           | [C/T]       | NA                                         |
| Ca_Desi_Chromosome_scaffold06934_5296 | Ca_desi_scaffold   | 5296                           | [G/A]       | NA                                         |

| <b>SNP IDs</b>                | <b>Chromosomes</b> | <b>Physical positions (bp)</b> | <b>SNPs</b> | <b>NCBI SNPdb accession IDs (NCBI_ss#)</b> |
|-------------------------------|--------------------|--------------------------------|-------------|--------------------------------------------|
| Ca_Desi_Ch_scaffold06934_5297 | Ca_desi_scaffold   | 5297                           | [A/G]       | NA                                         |
| Ca_Desi_Ch_scaffold06934_5298 | Ca_desi_scaffold   | 5298                           | [T/C]       | NA                                         |
| Ca_Desi_Ch_scaffold06934_5299 | Ca_desi_scaffold   | 5299                           | [T/C]       | NA                                         |
| Ca_Desi_Ch_scaffold06934_5300 | Ca_desi_scaffold   | 5300                           | [G/T]       | NA                                         |
| Ca_Desi_Ch_scaffold06934_5301 | Ca_desi_scaffold   | 5301                           | [T/C]       | NA                                         |
| Ca_Desi_Ch_scaffold06934_5302 | Ca_desi_scaffold   | 5302                           | [G/A]       | NA                                         |
| Ca_Desi_Ch_scaffold06934_5303 | Ca_desi_scaffold   | 5303                           | [C/T]       | NA                                         |
| Ca_Desi_Ch_scaffold06934_5304 | Ca_desi_scaffold   | 5304                           | [G/A]       | NA                                         |
| Ca_Desi_Ch_scaffold06934_5305 | Ca_desi_scaffold   | 5305                           | [A/G]       | NA                                         |
| Ca_Desi_Ch_scaffold06934_5306 | Ca_desi_scaffold   | 5306                           | [C/T]       | NA                                         |
| Ca_Desi_Ch_scaffold06934_5307 | Ca_desi_scaffold   | 5307                           | [A/G]       | NA                                         |
| Ca_Desi_Ch_scaffold06934_5308 | Ca_desi_scaffold   | 5308                           | [T/C]       | NA                                         |
| Ca_Desi_Ch_scaffold06934_5309 | Ca_desi_scaffold   | 5309                           | [C/T]       | NA                                         |
| Ca_Desi_Ch_scaffold06934_5310 | Ca_desi_scaffold   | 5310                           | [T/C]       | NA                                         |
| Ca_Desi_Ch_scaffold06934_5312 | Ca_desi_scaffold   | 5312                           | [T/C]       | NA                                         |
| Ca_Desi_Ch_scaffold06934_5313 | Ca_desi_scaffold   | 5313                           | [T/C]       | NA                                         |
| Ca_Desi_Ch_scaffold06934_5315 | Ca_desi_scaffold   | 5315                           | [T/C]       | NA                                         |
| Ca_Desi_Ch_scaffold06934_5316 | Ca_desi_scaffold   | 5316                           | [A/G]       | NA                                         |
| Ca_Desi_Ch_scaffold06934_5317 | Ca_desi_scaffold   | 5317                           | [T/C]       | NA                                         |
| Ca_Desi_Ch_scaffold06934_5318 | Ca_desi_scaffold   | 5318                           | [C/T]       | NA                                         |
| Ca_Desi_Ch_scaffold06934_5319 | Ca_desi_scaffold   | 5319                           | [T/C]       | NA                                         |
| Ca_Desi_Ch_scaffold06934_5320 | Ca_desi_scaffold   | 5320                           | [A/G]       | NA                                         |
| Ca_Desi_Ch_scaffold06934_5321 | Ca_desi_scaffold   | 5321                           | [G/A]       | NA                                         |
| Ca_Desi_Ch_scaffold06934_5322 | Ca_desi_scaffold   | 5322                           | [A/G]       | NA                                         |
| Ca_Desi_Ch_scaffold06934_5323 | Ca_desi_scaffold   | 5323                           | [C/A]       | NA                                         |
| Ca_Desi_Ch_scaffold06934_5324 | Ca_desi_scaffold   | 5324                           | [A/G]       | NA                                         |
| Ca_Desi_Ch_scaffold06934_5326 | Ca_desi_scaffold   | 5326                           | [C/T]       | NA                                         |
| Ca_Desi_Ch_scaffold06934_5327 | Ca_desi_scaffold   | 5327                           | [T/C]       | NA                                         |
| Ca_Desi_Ch_scaffold06934_5328 | Ca_desi_scaffold   | 5328                           | [G/A]       | NA                                         |
| Ca_Desi_Ch_scaffold06934_5329 | Ca_desi_scaffold   | 5329                           | [C/T]       | NA                                         |
| Ca_Desi_Ch_scaffold06934_5330 | Ca_desi_scaffold   | 5330                           | [G/A]       | NA                                         |
| Ca_Desi_Ch_scaffold06934_5331 | Ca_desi_scaffold   | 5331                           | [G/A]       | NA                                         |
| Ca_Desi_Ch_scaffold06934_5332 | Ca_desi_scaffold   | 5332                           | [A/G]       | NA                                         |
| Ca_Desi_Ch_scaffold06934_5334 | Ca_desi_scaffold   | 5334                           | [T/C]       | NA                                         |

| <b>SNP IDs</b>                 | <b>Chromosomes</b> | <b>Physical positions (bp)</b> | <b>SNPs</b> | <b>NCBI SNPdb accession IDs (NCBI_ss#)</b> |
|--------------------------------|--------------------|--------------------------------|-------------|--------------------------------------------|
| Ca_DesigChr_scaffold06934_5335 | Ca_desig_scaffold  | 5335                           | [T/C]       | NA                                         |
| Ca_DesigChr_scaffold06934_5336 | Ca_desig_scaffold  | 5336                           | [G/T]       | NA                                         |
| Ca_DesigChr_scaffold06934_5337 | Ca_desig_scaffold  | 5337                           | [C/T]       | NA                                         |
| Ca_DesigChr_scaffold06934_5361 | Ca_desig_scaffold  | 5361                           | [T/C]       | NA                                         |
| Ca_DesigChr_scaffold06934_5365 | Ca_desig_scaffold  | 5365                           | [T/C]       | NA                                         |
| Ca_DesigChr_scaffold06934_5366 | Ca_desig_scaffold  | 5366                           | [C/T]       | NA                                         |
| Ca_DesigChr_scaffold06934_5367 | Ca_desig_scaffold  | 5367                           | [C/T]       | NA                                         |
| Ca_DesigChr_scaffold06934_5368 | Ca_desig_scaffold  | 5368                           | [T/C]       | NA                                         |
| Ca_DesigChr_scaffold06934_5369 | Ca_desig_scaffold  | 5369                           | [A/G]       | NA                                         |
| Ca_DesigChr_scaffold06934_5370 | Ca_desig_scaffold  | 5370                           | [T/C]       | NA                                         |
| Ca_DesigChr_scaffold06934_5372 | Ca_desig_scaffold  | 5372                           | [G/A]       | NA                                         |
| Ca_DesigChr_scaffold06934_5373 | Ca_desig_scaffold  | 5373                           | [T/C]       | NA                                         |
| Ca_DesigChr_scaffold06934_5374 | Ca_desig_scaffold  | 5374                           | [C/T]       | NA                                         |
| Ca_DesigChr_scaffold06934_5375 | Ca_desig_scaffold  | 5375                           | [T/C]       | NA                                         |
| Ca_DesigChr_scaffold06934_5376 | Ca_desig_scaffold  | 5376                           | [T/C]       | NA                                         |
| Ca_DesigChr_scaffold06934_5377 | Ca_desig_scaffold  | 5377                           | [C/T]       | NA                                         |
| Ca_DesigChr_scaffold06934_5378 | Ca_desig_scaffold  | 5378                           | [T/C]       | NA                                         |
| Ca_DesigChr_scaffold06934_5379 | Ca_desig_scaffold  | 5379                           | [T/C]       | NA                                         |
| Ca_DesigChr_scaffold06934_5380 | Ca_desig_scaffold  | 5380                           | [G/A]       | NA                                         |
| Ca_DesigChr_scaffold06934_5381 | Ca_desig_scaffold  | 5381                           | [C/T]       | NA                                         |
| Ca_DesigChr_scaffold06934_5382 | Ca_desig_scaffold  | 5382                           | [T/C]       | NA                                         |
| Ca_DesigChr_scaffold06934_5383 | Ca_desig_scaffold  | 5383                           | [A/G]       | NA                                         |
| Ca_DesigChr_scaffold06934_5386 | Ca_desig_scaffold  | 5386                           | [A/G]       | NA                                         |
| Ca_DesigChr_scaffold06934_5387 | Ca_desig_scaffold  | 5387                           | [G/A]       | NA                                         |
| Ca_DesigChr_scaffold06934_5390 | Ca_desig_scaffold  | 5390                           | [A/G]       | NA                                         |
| Ca_DesigChr_scaffold06934_5391 | Ca_desig_scaffold  | 5391                           | [A/G]       | NA                                         |
| Ca_DesigChr_scaffold06934_5392 | Ca_desig_scaffold  | 5392                           | [A/G]       | NA                                         |
| Ca_DesigChr_scaffold06934_5393 | Ca_desig_scaffold  | 5393                           | [G/A]       | NA                                         |
| Ca_DesigChr_scaffold06934_5394 | Ca_desig_scaffold  | 5394                           | [A/G]       | NA                                         |
| Ca_DesigChr_scaffold06934_5396 | Ca_desig_scaffold  | 5396                           | [C/G]       | NA                                         |
| Ca_DesigChr_scaffold06934_5397 | Ca_desig_scaffold  | 5397                           | [G/A]       | NA                                         |
| Ca_DesigChr_scaffold06934_5398 | Ca_desig_scaffold  | 5398                           | [G/A]       | NA                                         |
| Ca_DesigChr_scaffold06934_5399 | Ca_desig_scaffold  | 5399                           | [A/G]       | NA                                         |
| Ca_DesigChr_scaffold06934_5400 | Ca_desig_scaffold  | 5400                           | [T/C]       | NA                                         |

| <b>SNP IDs</b>                 | <b>Chromosomes</b> | <b>Physical positions (bp)</b> | <b>SNPs</b> | <b>NCBI SNPdb accession IDs (NCBI_ss#)</b> |
|--------------------------------|--------------------|--------------------------------|-------------|--------------------------------------------|
| Ca_DesigChr_scaffold06934_5401 | Ca_desig_scaffold  | 5401                           | [T/C]       | NA                                         |
| Ca_DesigChr_scaffold06934_5402 | Ca_desig_scaffold  | 5402                           | [G/A]       | NA                                         |
| Ca_DesigChr_scaffold06934_5403 | Ca_desig_scaffold  | 5403                           | [G/A]       | NA                                         |
| Ca_DesigChr_scaffold06934_5404 | Ca_desig_scaffold  | 5404                           | [C/T]       | NA                                         |
| Ca_DesigChr_scaffold06934_5405 | Ca_desig_scaffold  | 5405                           | [A/C]       | NA                                         |
| Ca_DesigChr_scaffold06934_5406 | Ca_desig_scaffold  | 5406                           | [C/T]       | NA                                         |
| Ca_DesigChr_scaffold06934_5407 | Ca_desig_scaffold  | 5407                           | [A/G]       | NA                                         |
| Ca_DesigChr_scaffold06934_5409 | Ca_desig_scaffold  | 5409                           | [C/T]       | NA                                         |
| Ca_DesigChr_scaffold06934_5410 | Ca_desig_scaffold  | 5410                           | [G/A]       | NA                                         |
| Ca_DesigChr_scaffold06934_5411 | Ca_desig_scaffold  | 5411                           | [A/G]       | NA                                         |
| Ca_DesigChr_scaffold06934_5412 | Ca_desig_scaffold  | 5412                           | [A/G]       | NA                                         |
| Ca_DesigChr_scaffold06934_5413 | Ca_desig_scaffold  | 5413                           | [T/C]       | NA                                         |
| Ca_DesigChr_scaffold06934_5414 | Ca_desig_scaffold  | 5414                           | [T/C]       | NA                                         |
| Ca_DesigChr_scaffold06934_5415 | Ca_desig_scaffold  | 5415                           | [C/T]       | NA                                         |
| Ca_DesigChr_scaffold06934_5416 | Ca_desig_scaffold  | 5416                           | [G/A]       | NA                                         |
| Ca_DesigChr_scaffold06934_5417 | Ca_desig_scaffold  | 5417                           | [A/G]       | NA                                         |
| Ca_DesigChr_scaffold06934_5418 | Ca_desig_scaffold  | 5418                           | [G/A]       | NA                                         |
| Ca_DesigChr_scaffold06934_5419 | Ca_desig_scaffold  | 5419                           | [A/G]       | NA                                         |
| Ca_DesigChr_scaffold06934_5618 | Ca_desig_scaffold  | 5618                           | [C/T]       | NA                                         |
| Ca_DesigChr_scaffold06934_5619 | Ca_desig_scaffold  | 5619                           | [A/G]       | NA                                         |
| Ca_DesigChr_scaffold06934_5620 | Ca_desig_scaffold  | 5620                           | [C/T]       | NA                                         |
| Ca_DesigChr_scaffold06934_5621 | Ca_desig_scaffold  | 5621                           | [G/A]       | NA                                         |
| Ca_DesigChr_scaffold06934_5622 | Ca_desig_scaffold  | 5622                           | [G/A]       | NA                                         |
| Ca_DesigChr_scaffold06934_5623 | Ca_desig_scaffold  | 5623                           | [A/G]       | NA                                         |
| Ca_DesigChr_scaffold06934_5624 | Ca_desig_scaffold  | 5624                           | [T/C]       | NA                                         |
| Ca_DesigChr_scaffold06934_5625 | Ca_desig_scaffold  | 5625                           | [C/T]       | NA                                         |
| Ca_DesigChr_scaffold06934_5626 | Ca_desig_scaffold  | 5626                           | [T/C]       | NA                                         |
| Ca_DesigChr_scaffold06934_5627 | Ca_desig_scaffold  | 5627                           | [C/T]       | NA                                         |
| Ca_DesigChr_scaffold06934_5628 | Ca_desig_scaffold  | 5628                           | [A/G]       | NA                                         |
| Ca_DesigChr_scaffold06934_5629 | Ca_desig_scaffold  | 5629                           | [A/G]       | NA                                         |
| Ca_DesigChr_scaffold06934_5630 | Ca_desig_scaffold  | 5630                           | [C/T]       | NA                                         |
| Ca_DesigChr_scaffold06934_5631 | Ca_desig_scaffold  | 5631                           | [C/T]       | NA                                         |
| Ca_DesigChr_scaffold06934_5632 | Ca_desig_scaffold  | 5632                           | [A/G]       | NA                                         |
| Ca_DesigChr_scaffold06934_5633 | Ca_desig_scaffold  | 5633                           | [C/T]       | NA                                         |

| <b>SNP IDs</b>                 | <b>Chromosomes</b> | <b>Physical positions (bp)</b> | <b>SNPs</b> | <b>NCBI SNPdb accession IDs (NCBI_ss#)</b> |
|--------------------------------|--------------------|--------------------------------|-------------|--------------------------------------------|
| Ca_DesigChr_scaffold06934_5634 | Ca_desig_scaffold  | 5634                           | [G/A]       | NA                                         |
| Ca_DesigChr_scaffold06934_5635 | Ca_desig_scaffold  | 5635                           | [A/G]       | NA                                         |
| Ca_DesigChr_scaffold06934_5636 | Ca_desig_scaffold  | 5636                           | [G/A]       | NA                                         |
| Ca_DesigChr_scaffold06934_5637 | Ca_desig_scaffold  | 5637                           | [A/G]       | NA                                         |
| Ca_DesigChr_scaffold06934_5638 | Ca_desig_scaffold  | 5638                           | [C/T]       | NA                                         |
| Ca_DesigChr_scaffold06934_5639 | Ca_desig_scaffold  | 5639                           | [T/C]       | NA                                         |
| Ca_DesigChr_scaffold06934_5640 | Ca_desig_scaffold  | 5640                           | [A/G]       | NA                                         |
| Ca_DesigChr_scaffold06934_5641 | Ca_desig_scaffold  | 5641                           | [A/G]       | NA                                         |
| Ca_DesigChr_scaffold06934_5642 | Ca_desig_scaffold  | 5642                           | [G/A]       | NA                                         |
| Ca_DesigChr_scaffold06934_5643 | Ca_desig_scaffold  | 5643                           | [A/G]       | NA                                         |
| Ca_DesigChr_scaffold06934_5644 | Ca_desig_scaffold  | 5644                           | [A/G]       | NA                                         |
| Ca_DesigChr_scaffold06934_5645 | Ca_desig_scaffold  | 5645                           | [T/C]       | NA                                         |
| Ca_DesigChr_scaffold06934_5646 | Ca_desig_scaffold  | 5646                           | [C/T]       | NA                                         |
| Ca_DesigChr_scaffold06934_5647 | Ca_desig_scaffold  | 5647                           | [A/G]       | NA                                         |
| Ca_DesigChr_scaffold06934_5648 | Ca_desig_scaffold  | 5648                           | [T/C]       | NA                                         |
| Ca_DesigChr_scaffold06934_5649 | Ca_desig_scaffold  | 5649                           | [G/A]       | NA                                         |
| Ca_DesigChr_scaffold06934_5650 | Ca_desig_scaffold  | 5650                           | [C/T]       | NA                                         |
| Ca_DesigChr_scaffold06934_5651 | Ca_desig_scaffold  | 5651                           | [T/C]       | NA                                         |
| Ca_DesigChr_scaffold06934_5652 | Ca_desig_scaffold  | 5652                           | [T/C]       | NA                                         |
| Ca_DesigChr_scaffold06934_5654 | Ca_desig_scaffold  | 5654                           | [C/T]       | NA                                         |
| Ca_DesigChr_scaffold06934_5655 | Ca_desig_scaffold  | 5655                           | [C/T]       | NA                                         |
| Ca_DesigChr_scaffold06934_5657 | Ca_desig_scaffold  | 5657                           | [C/T]       | NA                                         |
| Ca_DesigChr_scaffold06934_5658 | Ca_desig_scaffold  | 5658                           | [G/A]       | NA                                         |
| Ca_DesigChr_scaffold06934_5659 | Ca_desig_scaffold  | 5659                           | [C/T]       | NA                                         |
| Ca_DesigChr_scaffold06934_5660 | Ca_desig_scaffold  | 5660                           | [T/C]       | NA                                         |
| Ca_DesigChr_scaffold06934_5661 | Ca_desig_scaffold  | 5661                           | [A/G]       | NA                                         |
| Ca_DesigChr_scaffold06934_5662 | Ca_desig_scaffold  | 5662                           | [T/C]       | NA                                         |
| Ca_DesigChr_scaffold06934_5663 | Ca_desig_scaffold  | 5663                           | [C/T]       | NA                                         |
| Ca_DesigChr_scaffold06934_5664 | Ca_desig_scaffold  | 5664                           | [T/C]       | NA                                         |
| Ca_DesigChr_scaffold06934_5665 | Ca_desig_scaffold  | 5665                           | [C/T]       | NA                                         |
| Ca_DesigChr_scaffold06934_5666 | Ca_desig_scaffold  | 5666                           | [G/A]       | NA                                         |
| Ca_DesigChr_scaffold06934_5667 | Ca_desig_scaffold  | 5667                           | [A/G]       | NA                                         |
| Ca_DesigChr_scaffold06934_5668 | Ca_desig_scaffold  | 5668                           | [T/C]       | NA                                         |
| Ca_DesigChr_scaffold06934_5669 | Ca_desig_scaffold  | 5669                           | [C/T]       | NA                                         |

| <b>SNP IDs</b>                 | <b>Chromosomes</b> | <b>Physical positions (bp)</b> | <b>SNPs</b> | <b>NCBI SNPdb accession IDs (NCBI_ss#)</b> |
|--------------------------------|--------------------|--------------------------------|-------------|--------------------------------------------|
| Ca_DesigChr_scaffold06934_5670 | Ca_desig_scaffold  | 5670                           | [T/C]       | NA                                         |
| Ca_DesigChr_scaffold06934_5671 | Ca_desig_scaffold  | 5671                           | [C/T]       | NA                                         |
| Ca_DesigChr_scaffold06934_5672 | Ca_desig_scaffold  | 5672                           | [T/C]       | NA                                         |
| Ca_DesigChr_scaffold06934_5673 | Ca_desig_scaffold  | 5673                           | [A/G]       | NA                                         |
| Ca_DesigChr_scaffold06934_5674 | Ca_desig_scaffold  | 5674                           | [T/C]       | NA                                         |
| Ca_DesigChr_scaffold06934_5675 | Ca_desig_scaffold  | 5675                           | [T/C]       | NA                                         |
| Ca_DesigChr_scaffold06934_5676 | Ca_desig_scaffold  | 5676                           | [G/A]       | NA                                         |
| Ca_DesigChr_scaffold06934_5677 | Ca_desig_scaffold  | 5677                           | [T/C]       | NA                                         |
| Ca_DesigChr_scaffold06934_5680 | Ca_desig_scaffold  | 5680                           | [A/T]       | NA                                         |
| Ca_DesigChr_scaffold06934_6602 | Ca_desig_scaffold  | 6602                           | [C/T]       | NA                                         |
| Ca_DesigChr_scaffold06934_6603 | Ca_desig_scaffold  | 6603                           | [G/A]       | NA                                         |
| Ca_DesigChr_scaffold06934_6604 | Ca_desig_scaffold  | 6604                           | [A/G]       | NA                                         |
| Ca_DesigChr_scaffold06934_6605 | Ca_desig_scaffold  | 6605                           | [T/C]       | NA                                         |
| Ca_DesigChr_scaffold06934_6606 | Ca_desig_scaffold  | 6606                           | [T/C]       | NA                                         |
| Ca_DesigChr_scaffold06934_6607 | Ca_desig_scaffold  | 6607                           | [G/A]       | NA                                         |
| Ca_DesigChr_scaffold06934_6608 | Ca_desig_scaffold  | 6608                           | [A/G]       | NA                                         |
| Ca_DesigChr_scaffold06934_6609 | Ca_desig_scaffold  | 6609                           | [A/G]       | NA                                         |
| Ca_DesigChr_scaffold06934_6610 | Ca_desig_scaffold  | 6610                           | [A/G]       | NA                                         |
| Ca_DesigChr_scaffold06934_6611 | Ca_desig_scaffold  | 6611                           | [G/A]       | NA                                         |
| Ca_DesigChr_scaffold06934_6612 | Ca_desig_scaffold  | 6612                           | [A/G]       | NA                                         |
| Ca_DesigChr_scaffold06934_6613 | Ca_desig_scaffold  | 6613                           | [G/A]       | NA                                         |
| Ca_DesigChr_scaffold06934_6614 | Ca_desig_scaffold  | 6614                           | [A/G]       | NA                                         |
| Ca_DesigChr_scaffold06934_6615 | Ca_desig_scaffold  | 6615                           | [G/A]       | NA                                         |
| Ca_DesigChr_scaffold06934_6616 | Ca_desig_scaffold  | 6616                           | [T/G]       | NA                                         |
| Ca_DesigChr_scaffold06934_6617 | Ca_desig_scaffold  | 6617                           | [A/G]       | NA                                         |
| Ca_DesigChr_scaffold06934_6618 | Ca_desig_scaffold  | 6618                           | [G/A]       | NA                                         |
| Ca_DesigChr_scaffold06934_6619 | Ca_desig_scaffold  | 6619                           | [G/A]       | NA                                         |
| Ca_DesigChr_scaffold06934_6620 | Ca_desig_scaffold  | 6620                           | [A/G]       | NA                                         |
| Ca_DesigChr_scaffold06934_6621 | Ca_desig_scaffold  | 6621                           | [G/A]       | NA                                         |
| Ca_DesigChr_scaffold06934_6622 | Ca_desig_scaffold  | 6622                           | [C/T]       | NA                                         |
| Ca_DesigChr_scaffold06934_6623 | Ca_desig_scaffold  | 6623                           | [G/A]       | NA                                         |
| Ca_DesigChr_scaffold06934_6624 | Ca_desig_scaffold  | 6624                           | [C/T]       | NA                                         |
| Ca_DesigChr_scaffold06934_6625 | Ca_desig_scaffold  | 6625                           | [A/G]       | NA                                         |
| Ca_DesigChr_scaffold06934_6626 | Ca_desig_scaffold  | 6626                           | [T/C]       | NA                                         |

| <b>SNP IDs</b>                 | <b>Chromosomes</b> | <b>Physical positions (bp)</b> | <b>SNPs</b> | <b>NCBI SNPdb accession IDs (NCBI_ss#)</b> |
|--------------------------------|--------------------|--------------------------------|-------------|--------------------------------------------|
| Ca_DesigChr_scaffold06934_6627 | Ca_desig_scaffold  | 6627                           | [T/C]       | NA                                         |
| Ca_DesigChr_scaffold06934_6628 | Ca_desig_scaffold  | 6628                           | [C/T]       | NA                                         |
| Ca_DesigChr_scaffold06934_6629 | Ca_desig_scaffold  | 6629                           | [T/C]       | NA                                         |
| Ca_DesigChr_scaffold06934_6630 | Ca_desig_scaffold  | 6630                           | [C/T]       | NA                                         |
| Ca_DesigChr_scaffold06934_6631 | Ca_desig_scaffold  | 6631                           | [T/C]       | NA                                         |
| Ca_DesigChr_scaffold06934_6632 | Ca_desig_scaffold  | 6632                           | [C/T]       | NA                                         |
| Ca_DesigChr_scaffold06934_6633 | Ca_desig_scaffold  | 6633                           | [C/T]       | NA                                         |
| Ca_DesigChr_scaffold06934_6634 | Ca_desig_scaffold  | 6634                           | [A/G]       | NA                                         |
| Ca_DesigChr_scaffold06934_6635 | Ca_desig_scaffold  | 6635                           | [T/C]       | NA                                         |
| Ca_DesigChr_scaffold06934_6637 | Ca_desig_scaffold  | 6637                           | [T/C]       | NA                                         |
| Ca_DesigChr_scaffold06934_6638 | Ca_desig_scaffold  | 6638                           | [C/T]       | NA                                         |
| Ca_DesigChr_scaffold06934_6639 | Ca_desig_scaffold  | 6639                           | [A/G]       | NA                                         |
| Ca_DesigChr_scaffold06934_6640 | Ca_desig_scaffold  | 6640                           | [G/A]       | NA                                         |
| Ca_DesigChr_scaffold06934_6641 | Ca_desig_scaffold  | 6641                           | [T/C]       | NA                                         |
| Ca_DesigChr_scaffold06934_6642 | Ca_desig_scaffold  | 6642                           | [T/C]       | NA                                         |
| Ca_DesigChr_scaffold06934_6643 | Ca_desig_scaffold  | 6643                           | [G/A]       | NA                                         |
| Ca_DesigChr_scaffold06934_6644 | Ca_desig_scaffold  | 6644                           | [G/A]       | NA                                         |
| Ca_DesigChr_scaffold06934_6645 | Ca_desig_scaffold  | 6645                           | [A/G]       | NA                                         |
| Ca_DesigChr_scaffold06934_6646 | Ca_desig_scaffold  | 6646                           | [A/G]       | NA                                         |
| Ca_DesigChr_scaffold06934_6647 | Ca_desig_scaffold  | 6647                           | [A/G]       | NA                                         |
| Ca_DesigChr_scaffold06934_6648 | Ca_desig_scaffold  | 6648                           | [G/A]       | NA                                         |
| Ca_DesigChr_scaffold06934_6649 | Ca_desig_scaffold  | 6649                           | [T/C]       | NA                                         |
| Ca_DesigChr_scaffold06934_6650 | Ca_desig_scaffold  | 6650                           | [C/T]       | NA                                         |
| Ca_DesigChr_scaffold06934_6651 | Ca_desig_scaffold  | 6651                           | [T/C]       | NA                                         |
| Ca_DesigChr_scaffold06934_6652 | Ca_desig_scaffold  | 6652                           | [A/G]       | NA                                         |
| Ca_DesigChr_scaffold06934_6653 | Ca_desig_scaffold  | 6653                           | [T/C]       | NA                                         |
| Ca_DesigChr_scaffold06934_6654 | Ca_desig_scaffold  | 6654                           | [C/T]       | NA                                         |
| Ca_DesigChr_scaffold06934_6655 | Ca_desig_scaffold  | 6655                           | [G/A]       | NA                                         |
| Ca_DesigChr_scaffold06934_6656 | Ca_desig_scaffold  | 6656                           | [C/T]       | NA                                         |
| Ca_DesigChr_scaffold06934_6657 | Ca_desig_scaffold  | 6657                           | [T/C]       | NA                                         |
| Ca_DesigChr_scaffold06934_6658 | Ca_desig_scaffold  | 6658                           | [C/T]       | NA                                         |
| Ca_DesigChr_scaffold06934_6659 | Ca_desig_scaffold  | 6659                           | [T/C]       | NA                                         |
| Ca_DesigChr_scaffold06934_6660 | Ca_desig_scaffold  | 6660                           | [C/T]       | NA                                         |
| Ca_DesigChr_scaffold06934_6661 | Ca_desig_scaffold  | 6661                           | [A/G]       | NA                                         |



| <b>SNP IDs</b>                         | <b>Chromosomes</b> | <b>Physical positions (bp)</b> | <b>SNPs</b> | <b>NCBI SNPdb accession IDs (NCBI_ss#)</b> |
|----------------------------------------|--------------------|--------------------------------|-------------|--------------------------------------------|
| Ca_Desi_Chromosome_scaffold06934_7062  | Ca_desi_scaffold   | 7062                           | [A/G]       | NA                                         |
| Ca_Desi_Chromosome_scaffold06934_7065  | Ca_desi_scaffold   | 7065                           | [T/G]       | NA                                         |
| Ca_Desi_Chromosome_scaffold06934_7089  | Ca_desi_scaffold   | 7089                           | [T/C]       | NA                                         |
| Ca_Desi_Chromosome_scaffold06934_7194  | Ca_desi_scaffold   | 7194                           | [C/G]       | NA                                         |
| Ca_Desi_Chromosome_scaffold06934_7195  | Ca_desi_scaffold   | 7195                           | [C/A]       | NA                                         |
| Ca_Desi_Chromosome_scaffold06934_7198  | Ca_desi_scaffold   | 7198                           | [T/C]       | NA                                         |
| Ca_Desi_Chromosome_scaffold06934_7201  | Ca_desi_scaffold   | 7201                           | [A/G]       | NA                                         |
| Ca_Desi_Chromosome_scaffold06934_7214  | Ca_desi_scaffold   | 7214                           | [A/G]       | NA                                         |
| Ca_Desi_Chromosome_scaffold06934_7216  | Ca_desi_scaffold   | 7216                           | [A/G]       | NA                                         |
| Ca_Desi_Chromosome_scaffold06934_7219  | Ca_desi_scaffold   | 7219                           | [T/C]       | NA                                         |
| Ca_Desi_Chromosome_scaffold06934_7228  | Ca_desi_scaffold   | 7228                           | [A/C]       | NA                                         |
| Ca_Desi_Chromosome_scaffold06934_7232  | Ca_desi_scaffold   | 7232                           | [A/C]       | NA                                         |
| Ca_Desi_Chromosome_scaffold06934_7240  | Ca_desi_scaffold   | 7240                           | [T/C]       | NA                                         |
| Ca_Desi_Chromosome_scaffold06934_7244  | Ca_desi_scaffold   | 7244                           | [T/C]       | NA                                         |
| Ca_Desi_Chromosome_scaffold06934_7253  | Ca_desi_scaffold   | 7253                           | [A/G]       | NA                                         |
| Ca_Desi_Chromosome_scaffold06934_9653  | Ca_desi_scaffold   | 9653                           | [A/T]       | NA                                         |
| Ca_Desi_Chromosome_scaffold06934_10350 | Ca_desi_scaffold   | 10350                          | [G/C]       | NA                                         |
| Ca_Desi_Chromosome_scaffold06934_10351 | Ca_desi_scaffold   | 10351                          | [G/A]       | NA                                         |
| Ca_Desi_Chromosome_scaffold06934_10352 | Ca_desi_scaffold   | 10352                          | [A/G]       | NA                                         |
| Ca_Desi_Chromosome_scaffold06934_10353 | Ca_desi_scaffold   | 10353                          | [T/C]       | NA                                         |
| Ca_Desi_Chromosome_scaffold06934_10354 | Ca_desi_scaffold   | 10354                          | [C/T]       | NA                                         |
| Ca_Desi_Chromosome_scaffold06934_10355 | Ca_desi_scaffold   | 10355                          | [A/G]       | NA                                         |
| Ca_Desi_Chromosome_scaffold06934_10356 | Ca_desi_scaffold   | 10356                          | [A/G]       | NA                                         |
| Ca_Desi_Chromosome_scaffold06934_10357 | Ca_desi_scaffold   | 10357                          | [T/C]       | NA                                         |
| Ca_Desi_Chromosome_scaffold06934_10358 | Ca_desi_scaffold   | 10358                          | [A/G]       | NA                                         |
| Ca_Desi_Chromosome_scaffold06934_10359 | Ca_desi_scaffold   | 10359                          | [T/C]       | NA                                         |
| Ca_Desi_Chromosome_scaffold06934_10360 | Ca_desi_scaffold   | 10360                          | [C/T]       | NA                                         |
| Ca_Desi_Chromosome_scaffold06934_10361 | Ca_desi_scaffold   | 10361                          | [C/T]       | NA                                         |
| Ca_Desi_Chromosome_scaffold06934_10362 | Ca_desi_scaffold   | 10362                          | [G/A]       | NA                                         |
| Ca_Desi_Chromosome_scaffold06934_10364 | Ca_desi_scaffold   | 10364                          | [T/C]       | NA                                         |
| Ca_Desi_Chromosome_scaffold06934_10365 | Ca_desi_scaffold   | 10365                          | [G/A]       | NA                                         |
| Ca_Desi_Chromosome_scaffold06934_10366 | Ca_desi_scaffold   | 10366                          | [T/G]       | NA                                         |
| Ca_Desi_Chromosome_scaffold06934_10367 | Ca_desi_scaffold   | 10367                          | [G/A]       | NA                                         |
| Ca_Desi_Chromosome_scaffold06934_10368 | Ca_desi_scaffold   | 10368                          | [T/C]       | NA                                         |

| <b>SNP IDs</b>                  | <b>Chromosomes</b> | <b>Physical positions (bp)</b> | <b>SNPs</b> | <b>NCBI SNPdb accession IDs (NCBI_ss#)</b> |
|---------------------------------|--------------------|--------------------------------|-------------|--------------------------------------------|
| Ca_DesigChr_scaffold06934_10369 | Ca_desig_scaffold  | 10369                          | [T/C]       | NA                                         |
| Ca_DesigChr_scaffold06934_10370 | Ca_desig_scaffold  | 10370                          | [C/T]       | NA                                         |
| Ca_DesigChr_scaffold06934_10371 | Ca_desig_scaffold  | 10371                          | [A/G]       | NA                                         |
| Ca_DesigChr_scaffold06934_10372 | Ca_desig_scaffold  | 10372                          | [A/G]       | NA                                         |
| Ca_DesigChr_scaffold06934_10373 | Ca_desig_scaffold  | 10373                          | [C/T]       | NA                                         |
| Ca_DesigChr_scaffold06934_10374 | Ca_desig_scaffold  | 10374                          | [T/C]       | NA                                         |
| Ca_DesigChr_scaffold06934_10375 | Ca_desig_scaffold  | 10375                          | [C/T]       | NA                                         |
| Ca_DesigChr_scaffold06934_10376 | Ca_desig_scaffold  | 10376                          | [C/T]       | NA                                         |
| Ca_DesigChr_scaffold06934_10377 | Ca_desig_scaffold  | 10377                          | [T/C]       | NA                                         |
| Ca_DesigChr_scaffold06934_10378 | Ca_desig_scaffold  | 10378                          | [G/A]       | NA                                         |
| Ca_DesigChr_scaffold06934_10379 | Ca_desig_scaffold  | 10379                          | [C/T]       | NA                                         |
| Ca_DesigChr_scaffold06934_10380 | Ca_desig_scaffold  | 10380                          | [T/C]       | NA                                         |
| Ca_DesigChr_scaffold06934_10382 | Ca_desig_scaffold  | 10382                          | [C/T]       | NA                                         |
| Ca_DesigChr_scaffold06934_10383 | Ca_desig_scaffold  | 10383                          | [T/C]       | NA                                         |
| Ca_DesigChr_scaffold06934_10384 | Ca_desig_scaffold  | 10384                          | [G/T]       | NA                                         |
| Ca_DesigChr_scaffold06934_10385 | Ca_desig_scaffold  | 10385                          | [G/A]       | NA                                         |
| Ca_DesigChr_scaffold06934_10386 | Ca_desig_scaffold  | 10386                          | [G/A]       | NA                                         |
| Ca_DesigChr_scaffold06934_10388 | Ca_desig_scaffold  | 10388                          | [C/T]       | NA                                         |
| Ca_DesigChr_scaffold06934_10389 | Ca_desig_scaffold  | 10389                          | [A/G]       | NA                                         |
| Ca_DesigChr_scaffold06934_10390 | Ca_desig_scaffold  | 10390                          | [A/G]       | NA                                         |
| Ca_DesigChr_scaffold06934_10391 | Ca_desig_scaffold  | 10391                          | [C/T]       | NA                                         |
| Ca_DesigChr_scaffold06934_10392 | Ca_desig_scaffold  | 10392                          | [T/C]       | NA                                         |
| Ca_DesigChr_scaffold06934_10393 | Ca_desig_scaffold  | 10393                          | [C/T]       | NA                                         |
| Ca_DesigChr_scaffold06934_10394 | Ca_desig_scaffold  | 10394                          | [C/T]       | NA                                         |
| Ca_DesigChr_scaffold06934_10395 | Ca_desig_scaffold  | 10395                          | [A/G]       | NA                                         |
| Ca_DesigChr_scaffold06934_10396 | Ca_desig_scaffold  | 10396                          | [A/G]       | NA                                         |
| Ca_DesigChr_scaffold06934_10397 | Ca_desig_scaffold  | 10397                          | [A/G]       | NA                                         |
| Ca_DesigChr_scaffold06934_10399 | Ca_desig_scaffold  | 10399                          | [C/T]       | NA                                         |
| Ca_DesigChr_scaffold06934_10400 | Ca_desig_scaffold  | 10400                          | [A/G]       | NA                                         |
| Ca_DesigChr_scaffold06934_10401 | Ca_desig_scaffold  | 10401                          | [A/G]       | NA                                         |
| Ca_DesigChr_scaffold06934_10402 | Ca_desig_scaffold  | 10402                          | [C/T]       | NA                                         |
| Ca_DesigChr_scaffold06934_10403 | Ca_desig_scaffold  | 10403                          | [A/G]       | NA                                         |
| Ca_DesigChr_scaffold06934_10404 | Ca_desig_scaffold  | 10404                          | [T/C]       | NA                                         |
| Ca_DesigChr_scaffold06934_10406 | Ca_desig_scaffold  | 10406                          | [C/T]       | NA                                         |

| <b>SNP IDs</b>                 | <b>Chromosomes</b> | <b>Physical positions (bp)</b> | <b>SNPs</b> | <b>NCBI SNPdb accession IDs (NCBI_ss#)</b> |
|--------------------------------|--------------------|--------------------------------|-------------|--------------------------------------------|
| Ca_Desi_Ch_scaffold06934_10407 | Ca_desi_scaffold   | 10407                          | [G/A]       | NA                                         |
| Ca_Desi_Ch_scaffold06934_10408 | Ca_desi_scaffold   | 10408                          | [G/A]       | NA                                         |
| Ca_Desi_Ch_scaffold06934_10449 | Ca_desi_scaffold   | 10449                          | [C/T]       | NA                                         |
| Ca_Desi_Ch_scaffold06934_10451 | Ca_desi_scaffold   | 10451                          | [T/C]       | NA                                         |
| Ca_Desi_Ch_scaffold06934_10452 | Ca_desi_scaffold   | 10452                          | [T/C]       | NA                                         |
| Ca_Desi_Ch_scaffold06934_10453 | Ca_desi_scaffold   | 10453                          | [T/C]       | NA                                         |
| Ca_Desi_Ch_scaffold06934_10454 | Ca_desi_scaffold   | 10454                          | [T/C]       | NA                                         |
| Ca_Desi_Ch_scaffold06934_10455 | Ca_desi_scaffold   | 10455                          | [C/T]       | NA                                         |
| Ca_Desi_Ch_scaffold06934_10456 | Ca_desi_scaffold   | 10456                          | [A/G]       | NA                                         |
| Ca_Desi_Ch_scaffold06934_10457 | Ca_desi_scaffold   | 10457                          | [T/C]       | NA                                         |
| Ca_Desi_Ch_scaffold06934_10458 | Ca_desi_scaffold   | 10458                          | [T/C]       | NA                                         |
| Ca_Desi_Ch_scaffold06934_10460 | Ca_desi_scaffold   | 10460                          | [A/G]       | NA                                         |
| Ca_Desi_Ch_scaffold06934_10461 | Ca_desi_scaffold   | 10461                          | [T/C]       | NA                                         |
| Ca_Desi_Ch_scaffold06934_10462 | Ca_desi_scaffold   | 10462                          | [T/C]       | NA                                         |
| Ca_Desi_Ch_scaffold06934_10463 | Ca_desi_scaffold   | 10463                          | [G/A]       | NA                                         |
| Ca_Desi_Ch_scaffold06934_10464 | Ca_desi_scaffold   | 10464                          | [A/G]       | NA                                         |
| Ca_Desi_Ch_scaffold06934_10466 | Ca_desi_scaffold   | 10466                          | [T/C]       | NA                                         |
| Ca_Desi_Ch_scaffold06934_10467 | Ca_desi_scaffold   | 10467                          | [A/G]       | NA                                         |
| Ca_Desi_Ch_scaffold06934_10468 | Ca_desi_scaffold   | 10468                          | [A/G]       | NA                                         |
| Ca_Desi_Ch_scaffold06934_10469 | Ca_desi_scaffold   | 10469                          | [T/C]       | NA                                         |
| Ca_Desi_Ch_scaffold06934_10470 | Ca_desi_scaffold   | 10470                          | [G/C]       | NA                                         |
| Ca_Desi_Ch_scaffold06934_10471 | Ca_desi_scaffold   | 10471                          | [C/T]       | NA                                         |
| Ca_Desi_Ch_scaffold06934_10472 | Ca_desi_scaffold   | 10472                          | [C/T]       | NA                                         |
| Ca_Desi_Ch_scaffold06934_10473 | Ca_desi_scaffold   | 10473                          | [C/T]       | NA                                         |
| Ca_Desi_Ch_scaffold06934_10475 | Ca_desi_scaffold   | 10475                          | [T/C]       | NA                                         |
| Ca_Desi_Ch_scaffold06934_10476 | Ca_desi_scaffold   | 10476                          | [C/T]       | NA                                         |
| Ca_Desi_Ch_scaffold06934_10477 | Ca_desi_scaffold   | 10477                          | [G/A]       | NA                                         |
| Ca_Desi_Ch_scaffold06934_10478 | Ca_desi_scaffold   | 10478                          | [G/A]       | NA                                         |
| Ca_Desi_Ch_scaffold06934_10479 | Ca_desi_scaffold   | 10479                          | [T/C]       | NA                                         |
| Ca_Desi_Ch_scaffold06934_10480 | Ca_desi_scaffold   | 10480                          | [T/C]       | NA                                         |
| Ca_Desi_Ch_scaffold06934_10481 | Ca_desi_scaffold   | 10481                          | [G/A]       | NA                                         |
| Ca_Desi_Ch_scaffold06934_10482 | Ca_desi_scaffold   | 10482                          | [A/G]       | NA                                         |
| Ca_Desi_Ch_scaffold06934_10483 | Ca_desi_scaffold   | 10483                          | [A/G]       | NA                                         |
| Ca_Desi_Ch_scaffold06934_10484 | Ca_desi_scaffold   | 10484                          | [A/G]       | NA                                         |

| <b>SNP IDs</b>                   | <b>Chromosomes</b> | <b>Physical positions (bp)</b> | <b>SNPs</b> | <b>NCBI SNPdb accession IDs (NCBI_ss#)</b> |
|----------------------------------|--------------------|--------------------------------|-------------|--------------------------------------------|
| Ca_Desig_Chr_scaffold06934_10485 | Ca_desig_scaffold  | 10485                          | [G/A]       | NA                                         |
| Ca_Desig_Chr_scaffold06934_10486 | Ca_desig_scaffold  | 10486                          | [A/G]       | NA                                         |
| Ca_Desig_Chr_scaffold06934_10487 | Ca_desig_scaffold  | 10487                          | [G/A]       | NA                                         |
| Ca_Desig_Chr_scaffold06934_10488 | Ca_desig_scaffold  | 10488                          | [A/G]       | NA                                         |
| Ca_Desig_Chr_scaffold06934_10489 | Ca_desig_scaffold  | 10489                          | [A/G]       | NA                                         |
| Ca_Desig_Chr_scaffold06934_10490 | Ca_desig_scaffold  | 10490                          | [T/C]       | NA                                         |
| Ca_Desig_Chr_scaffold06934_10492 | Ca_desig_scaffold  | 10492                          | [T/C]       | NA                                         |
| Ca_Desig_Chr_scaffold06934_10493 | Ca_desig_scaffold  | 10493                          | [T/C]       | NA                                         |
| Ca_Desig_Chr_scaffold06934_10494 | Ca_desig_scaffold  | 10494                          | [T/C]       | NA                                         |
| Ca_Desig_Chr_scaffold06934_10495 | Ca_desig_scaffold  | 10495                          | [T/C]       | NA                                         |
| Ca_Desig_Chr_scaffold06934_10497 | Ca_desig_scaffold  | 10497                          | [C/T]       | NA                                         |
| Ca_Desig_Chr_scaffold06934_10498 | Ca_desig_scaffold  | 10498                          | [C/T]       | NA                                         |
| Ca_Desig_Chr_scaffold06934_10499 | Ca_desig_scaffold  | 10499                          | [G/A]       | NA                                         |
| Ca_Desig_Chr_scaffold06934_10501 | Ca_desig_scaffold  | 10501                          | [T/C]       | NA                                         |
| Ca_Desig_Chr_scaffold06934_10502 | Ca_desig_scaffold  | 10502                          | [G/A]       | NA                                         |
| Ca_Desig_Chr_scaffold06934_10503 | Ca_desig_scaffold  | 10503                          | [G/A]       | NA                                         |
| Ca_Desig_Chr_scaffold06934_10504 | Ca_desig_scaffold  | 10504                          | [A/G]       | NA                                         |
| Ca_Desig_Chr_scaffold06934_10505 | Ca_desig_scaffold  | 10505                          | [T/C]       | NA                                         |
| Ca_Desig_Chr_scaffold06934_10506 | Ca_desig_scaffold  | 10506                          | [C/T]       | NA                                         |
| Ca_Desig_Chr_scaffold06934_10507 | Ca_desig_scaffold  | 10507                          | [A/G]       | NA                                         |
| Ca_Desig_Chr_scaffold06934_12513 | Ca_desig_scaffold  | 12513                          | [A/G]       | NA                                         |
| Ca_Desig_Chr_scaffold06934_12555 | Ca_desig_scaffold  | 12555                          | [A/G]       | NA                                         |
| Ca_Desig_Chr_scaffold06934_12563 | Ca_desig_scaffold  | 12563                          | [A/G]       | NA                                         |
| Ca_Desig_Chr_scaffold06934_12570 | Ca_desig_scaffold  | 12570                          | [T/C]       | NA                                         |
| Ca_Desig_Chr_scaffold06934_12584 | Ca_desig_scaffold  | 12584                          | [A/G]       | NA                                         |
| Ca_Desig_Chr_scaffold06934_12595 | Ca_desig_scaffold  | 12595                          | [A/G]       | NA                                         |
| Ca_Desig_Chr_scaffold06934_12601 | Ca_desig_scaffold  | 12601                          | [A/G]       | NA                                         |
| Ca_Desig_Chr_scaffold06934_12607 | Ca_desig_scaffold  | 12607                          | [T/C]       | NA                                         |
| Ca_Desig_Chr_scaffold06934_12610 | Ca_desig_scaffold  | 12610                          | [C/T]       | NA                                         |
| Ca_Desig_Chr_scaffold06934_12611 | Ca_desig_scaffold  | 12611                          | [T/C]       | NA                                         |
| Ca_Desig_Chr_scaffold06934_12617 | Ca_desig_scaffold  | 12617                          | [A/G]       | NA                                         |
| Ca_Desig_Chr_scaffold06934_12618 | Ca_desig_scaffold  | 12618                          | [A/G]       | NA                                         |
| Ca_Desig_Chr_scaffold06934_12747 | Ca_desig_scaffold  | 12747                          | [T/C]       | NA                                         |
| Ca_Desig_Chr_scaffold06934_12753 | Ca_desig_scaffold  | 12753                          | [A/G]       | NA                                         |

| <b>SNP IDs</b>                 | <b>Chromosomes</b> | <b>Physical positions (bp)</b> | <b>SNPs</b> | <b>NCBI SNPdb accession IDs (NCBI_ss#)</b> |
|--------------------------------|--------------------|--------------------------------|-------------|--------------------------------------------|
| Ca_Desi_Ch_scaffold06934_12758 | Ca_desi_scaffold   | 12758                          | [T/C]       | NA                                         |
| Ca_Desi_Ch_scaffold06934_12759 | Ca_desi_scaffold   | 12759                          | [T/C]       | NA                                         |
| Ca_Desi_Ch_scaffold06934_12763 | Ca_desi_scaffold   | 12763                          | [T/C]       | NA                                         |
| Ca_Desi_Ch_scaffold06934_12765 | Ca_desi_scaffold   | 12765                          | [T/C]       | NA                                         |
| Ca_Desi_Ch_scaffold06934_12779 | Ca_desi_scaffold   | 12779                          | [A/G]       | NA                                         |
| Ca_Desi_Ch_scaffold06934_12780 | Ca_desi_scaffold   | 12780                          | [A/G]       | NA                                         |
| Ca_Desi_Ch_scaffold06934_12785 | Ca_desi_scaffold   | 12785                          | [T/C]       | NA                                         |
| Ca_Desi_Ch_scaffold06934_12786 | Ca_desi_scaffold   | 12786                          | [T/C]       | NA                                         |
| Ca_Desi_Ch_scaffold06934_12796 | Ca_desi_scaffold   | 12796                          | [T/C]       | NA                                         |
| Ca_Desi_Ch_scaffold06934_12798 | Ca_desi_scaffold   | 12798                          | [T/C]       | NA                                         |
| Ca_Desi_Ch_scaffold06934_12838 | Ca_desi_scaffold   | 12838                          | [T/G]       | NA                                         |
| Ca_Desi_Ch_scaffold06934_13042 | Ca_desi_scaffold   | 13042                          | [A/G]       | NA                                         |
| Ca_Desi_Ch_scaffold06934_13055 | Ca_desi_scaffold   | 13055                          | [T/C]       | NA                                         |
| Ca_Desi_Ch_scaffold06934_13063 | Ca_desi_scaffold   | 13063                          | [A/G]       | NA                                         |
| Ca_Desi_Ch_scaffold06934_13065 | Ca_desi_scaffold   | 13065                          | [T/C]       | NA                                         |
| Ca_Desi_Ch_scaffold06934_13068 | Ca_desi_scaffold   | 13068                          | [T/C]       | NA                                         |
| Ca_Desi_Ch_scaffold06934_13070 | Ca_desi_scaffold   | 13070                          | [A/G]       | NA                                         |
| Ca_Desi_Ch_scaffold06934_13076 | Ca_desi_scaffold   | 13076                          | [A/G]       | NA                                         |
| Ca_Desi_Ch_scaffold06934_13077 | Ca_desi_scaffold   | 13077                          | [A/G]       | NA                                         |
| Ca_Desi_Ch_scaffold06934_13078 | Ca_desi_scaffold   | 13078                          | [A/G]       | NA                                         |
| Ca_Desi_Ch_scaffold06934_13082 | Ca_desi_scaffold   | 13082                          | [A/G]       | NA                                         |
| Ca_Desi_Ch_scaffold06934_13399 | Ca_desi_scaffold   | 13399                          | [T/C]       | NA                                         |
| Ca_Desi_Ch_scaffold06934_13425 | Ca_desi_scaffold   | 13425                          | [T/C]       | NA                                         |
| Ca_Desi_Ch_scaffold06934_13427 | Ca_desi_scaffold   | 13427                          | [A/C]       | NA                                         |
| Ca_Desi_Ch_scaffold06934_16428 | Ca_desi_scaffold   | 16428                          | [T/C]       | NA                                         |
| Ca_Desi_Ch_scaffold06934_16429 | Ca_desi_scaffold   | 16429                          | [T/C]       | NA                                         |
| Ca_Desi_Ch_scaffold06934_16434 | Ca_desi_scaffold   | 16434                          | [T/C]       | NA                                         |
| Ca_Desi_Ch_scaffold06934_17179 | Ca_desi_scaffold   | 17179                          | [T/G]       | NA                                         |
| Ca_Desi_Ch_scaffold06934_17181 | Ca_desi_scaffold   | 17181                          | [C/T]       | NA                                         |
| Ca_Desi_Ch_scaffold06934_17182 | Ca_desi_scaffold   | 17182                          | [A/C]       | NA                                         |
| Ca_Desi_Ch_scaffold06934_17460 | Ca_desi_scaffold   | 17460                          | [C/G]       | NA                                         |
| Ca_Desi_Ch_scaffold06934_17461 | Ca_desi_scaffold   | 17461                          | [T/C]       | NA                                         |
| Ca_Desi_Ch_scaffold06934_17462 | Ca_desi_scaffold   | 17462                          | [T/C]       | NA                                         |
| Ca_Desi_Ch_scaffold06934_17463 | Ca_desi_scaffold   | 17463                          | [T/C]       | NA                                         |

| <b>SNP IDs</b>                  | <b>Chromosomes</b> | <b>Physical positions (bp)</b> | <b>SNPs</b> | <b>NCBI SNPdb accession IDs (NCBI_ss#)</b> |
|---------------------------------|--------------------|--------------------------------|-------------|--------------------------------------------|
| Ca_DesigChr_scaffold06934_17465 | Ca_desig_scaffold  | 17465                          | [G/A]       | NA                                         |
| Ca_DesigChr_scaffold06934_17466 | Ca_desig_scaffold  | 17466                          | [T/C]       | NA                                         |
| Ca_DesigChr_scaffold06934_17467 | Ca_desig_scaffold  | 17467                          | [A/G]       | NA                                         |
| Ca_DesigChr_scaffold06934_17469 | Ca_desig_scaffold  | 17469                          | [C/T]       | NA                                         |
| Ca_DesigChr_scaffold06934_17470 | Ca_desig_scaffold  | 17470                          | [G/A]       | NA                                         |
| Ca_DesigChr_scaffold06934_17471 | Ca_desig_scaffold  | 17471                          | [A/G]       | NA                                         |
| Ca_DesigChr_scaffold06934_17472 | Ca_desig_scaffold  | 17472                          | [A/G]       | NA                                         |
| Ca_DesigChr_scaffold06934_17475 | Ca_desig_scaffold  | 17475                          | [A/G]       | NA                                         |
| Ca_DesigChr_scaffold06934_17476 | Ca_desig_scaffold  | 17476                          | [G/A]       | NA                                         |
| Ca_DesigChr_scaffold06934_17477 | Ca_desig_scaffold  | 17477                          | [C/T]       | NA                                         |
| Ca_DesigChr_scaffold06934_17478 | Ca_desig_scaffold  | 17478                          | [T/C]       | NA                                         |
| Ca_DesigChr_scaffold06934_17480 | Ca_desig_scaffold  | 17480                          | [A/G]       | NA                                         |
| Ca_DesigChr_scaffold06934_17482 | Ca_desig_scaffold  | 17482                          | [T/C]       | NA                                         |
| Ca_DesigChr_scaffold06934_17483 | Ca_desig_scaffold  | 17483                          | [T/C]       | NA                                         |
| Ca_DesigChr_scaffold06934_17484 | Ca_desig_scaffold  | 17484                          | [G/A]       | NA                                         |
| Ca_DesigChr_scaffold06934_17485 | Ca_desig_scaffold  | 17485                          | [C/T]       | NA                                         |
| Ca_DesigChr_scaffold06934_17486 | Ca_desig_scaffold  | 17486                          | [T/C]       | NA                                         |
| Ca_DesigChr_scaffold06934_17487 | Ca_desig_scaffold  | 17487                          | [T/C]       | NA                                         |
| Ca_DesigChr_scaffold06934_17488 | Ca_desig_scaffold  | 17488                          | [G/A]       | NA                                         |
| Ca_DesigChr_scaffold06934_17490 | Ca_desig_scaffold  | 17490                          | [A/G]       | NA                                         |
| Ca_DesigChr_scaffold06934_17491 | Ca_desig_scaffold  | 17491                          | [T/C]       | NA                                         |
| Ca_DesigChr_scaffold06934_17495 | Ca_desig_scaffold  | 17495                          | [T/C]       | NA                                         |
| Ca_DesigChr_scaffold06934_17496 | Ca_desig_scaffold  | 17496                          | [T/C]       | NA                                         |
| Ca_DesigChr_scaffold06934_17497 | Ca_desig_scaffold  | 17497                          | [T/C]       | NA                                         |
| Ca_DesigChr_scaffold06934_17499 | Ca_desig_scaffold  | 17499                          | [A/G]       | NA                                         |
| Ca_DesigChr_scaffold06934_17500 | Ca_desig_scaffold  | 17500                          | [T/C]       | NA                                         |
| Ca_DesigChr_scaffold06934_17501 | Ca_desig_scaffold  | 17501                          | [T/C]       | NA                                         |
| Ca_DesigChr_scaffold06934_17504 | Ca_desig_scaffold  | 17504                          | [T/C]       | NA                                         |
| Ca_DesigChr_scaffold06934_17505 | Ca_desig_scaffold  | 17505                          | [T/C]       | NA                                         |
| Ca_DesigChr_scaffold06934_17506 | Ca_desig_scaffold  | 17506                          | [A/G]       | NA                                         |
| Ca_DesigChr_scaffold06934_17508 | Ca_desig_scaffold  | 17508                          | [T/C]       | NA                                         |
| Ca_DesigChr_scaffold06934_17510 | Ca_desig_scaffold  | 17510                          | [T/C]       | NA                                         |
| Ca_DesigChr_scaffold06934_17512 | Ca_desig_scaffold  | 17512                          | [T/C]       | NA                                         |
| Ca_DesigChr_scaffold06934_17515 | Ca_desig_scaffold  | 17515                          | [T/C]       | NA                                         |

| <b>SNP IDs</b>                    | <b>Chromosomes</b> | <b>Physical positions (bp)</b> | <b>SNPs</b> | <b>NCBI SNPdb accession IDs (NCBI_ss#)</b> |
|-----------------------------------|--------------------|--------------------------------|-------------|--------------------------------------------|
| Ca_Desig_Chr_scaffold06934_17518  | Ca_desig_scaffold  | 17518                          | [T/C]       | NA                                         |
| Ca_Desig_Chr_scaffold06934_17519  | Ca_desig_scaffold  | 17519                          | [T/C]       | NA                                         |
| Ca_Desig_Chr_scaffold00032_27021  | Ca_desig_scaffold  | 27021                          | [T/C]       | NA                                         |
| Ca_Desig_Chr_scaffold00032_27023  | Ca_desig_scaffold  | 27023                          | [A/G]       | NA                                         |
| Ca_Desig_Chr_scaffold00032_27025  | Ca_desig_scaffold  | 27025                          | [A/G]       | NA                                         |
| Ca_Desig_Chr_scaffold00032_27030  | Ca_desig_scaffold  | 27030                          | [A/G]       | NA                                         |
| Ca_Desig_Chr_scaffold00032_27032  | Ca_desig_scaffold  | 27032                          | [A/G]       | NA                                         |
| Ca_Desig_Chr_scaffold00032_27035  | Ca_desig_scaffold  | 27035                          | [T/C]       | NA                                         |
| Ca_Desig_Chr_scaffold00032_27048  | Ca_desig_scaffold  | 27048                          | [A/C]       | NA                                         |
| Ca_Desig_Chr_scaffold00032_29531  | Ca_desig_scaffold  | 29531                          | [T/C]       | NA                                         |
| Ca_Desig_Chr_scaffold00032_29534  | Ca_desig_scaffold  | 29534                          | [T/G]       | NA                                         |
| Ca_Desig_Chr_scaffold00032_29583  | Ca_desig_scaffold  | 29583                          | [A/G]       | NA                                         |
| Ca_Desig_Chr_scaffold00032_80728  | Ca_desig_scaffold  | 80728                          | [C/G]       | NA                                         |
| Ca_Desig_Chr_scaffold00032_119102 | Ca_desig_scaffold  | 119102                         | [T/G]       | NA                                         |
| Ca_Desig_Chr_scaffold00032_209348 | Ca_desig_scaffold  | 209348                         | [T/G]       | NA                                         |
| Ca_Desig_Chr_scaffold00032_209833 | Ca_desig_scaffold  | 209833                         | [T/C]       | NA                                         |
| Ca_Desig_Chr_scaffold00032_209872 | Ca_desig_scaffold  | 209872                         | [A/G]       | NA                                         |
| Ca_Desig_Chr_scaffold00032_209875 | Ca_desig_scaffold  | 209875                         | [C/A]       | NA                                         |
| Ca_Desig_Chr_scaffold00032_223946 | Ca_desig_scaffold  | 223946                         | [A/C]       | NA                                         |
| Ca_Desig_Chr_scaffold00032_223947 | Ca_desig_scaffold  | 223947                         | [T/G]       | NA                                         |
| Ca_Desig_Chr_scaffold00032_223949 | Ca_desig_scaffold  | 223949                         | [A/T]       | NA                                         |
| Ca_Desig_Chr_scaffold00032_223950 | Ca_desig_scaffold  | 223950                         | [T/C]       | NA                                         |
| Ca_Desig_Chr_scaffold00032_223951 | Ca_desig_scaffold  | 223951                         | [G/T]       | NA                                         |
| Ca_Desig_Chr_scaffold00032_223998 | Ca_desig_scaffold  | 223998                         | [T/A]       | NA                                         |
| Ca_Desig_Chr_scaffold00032_225708 | Ca_desig_scaffold  | 225708                         | [T/C]       | NA                                         |
| Ca_Desig_Chr_scaffold00032_414217 | Ca_desig_scaffold  | 414217                         | [A/G]       | NA                                         |
| Ca_Desig_Chr_scaffold00032_418320 | Ca_desig_scaffold  | 418320                         | [A/G]       | NA                                         |
| Ca_Desig_Chr_scaffold00032_418325 | Ca_desig_scaffold  | 418325                         | [A/C]       | NA                                         |
| Ca_Desig_Chr_scaffold00073_5451   | Ca_desig_scaffold  | 5451                           | [C/A]       | NA                                         |
| Ca_Desig_Chr_scaffold00073_80445  | Ca_desig_scaffold  | 80445                          | [G/A]       | NA                                         |
| Ca_Desig_Chr_scaffold00073_85482  | Ca_desig_scaffold  | 85482                          | [T/C]       | NA                                         |
| Ca_Desig_Chr_scaffold00073_85545  | Ca_desig_scaffold  | 85545                          | [A/G]       | NA                                         |
| Ca_Desig_Chr_scaffold00073_85548  | Ca_desig_scaffold  | 85548                          | [A/G]       | NA                                         |
| Ca_Desig_Chr_scaffold00073_213841 | Ca_desig_scaffold  | 213841                         | [A/C]       | NA                                         |

| <b>SNP IDs</b>                    | <b>Chromosomes</b> | <b>Physical positions (bp)</b> | <b>SNPs</b> | <b>NCBI SNPdb accession IDs (NCBI_ss#)</b> |
|-----------------------------------|--------------------|--------------------------------|-------------|--------------------------------------------|
| Ca_Desig_Chr_scaffold00073_213849 | Ca_desig_scaffold  | 213849                         | [C/T]       | NA                                         |
| Ca_Desig_Chr_scaffold00073_213851 | Ca_desig_scaffold  | 213851                         | [A/T]       | NA                                         |
| Ca_Desig_Chr_scaffold00073_213860 | Ca_desig_scaffold  | 213860                         | [A/C]       | NA                                         |
| Ca_Desig_Chr_scaffold00073_213872 | Ca_desig_scaffold  | 213872                         | [T/A]       | NA                                         |
| Ca_Desig_Chr_scaffold00073_220087 | Ca_desig_scaffold  | 220087                         | [G/C]       | NA                                         |
| Ca_Desig_Chr_scaffold00073_220089 | Ca_desig_scaffold  | 220089                         | [T/C]       | NA                                         |
| Ca_Desig_Chr_scaffold00073_220090 | Ca_desig_scaffold  | 220090                         | [A/C]       | NA                                         |
| Ca_Desig_Chr_scaffold00073_220094 | Ca_desig_scaffold  | 220094                         | [T/G]       | NA                                         |
| Ca_Desig_Chr_scaffold00073_220102 | Ca_desig_scaffold  | 220102                         | [A/G]       | NA                                         |
| Ca_Desig_Chr_scaffold00073_220105 | Ca_desig_scaffold  | 220105                         | [T/C]       | NA                                         |
| Ca_Desig_Chr_scaffold00073_220108 | Ca_desig_scaffold  | 220108                         | [T/C]       | NA                                         |
| Ca_Desig_Chr_scaffold00073_220119 | Ca_desig_scaffold  | 220119                         | [T/C]       | NA                                         |
| Ca_Desig_Chr_scaffold00073_220123 | Ca_desig_scaffold  | 220123                         | [T/C]       | NA                                         |
| Ca_Desig_Chr_scaffold00073_220125 | Ca_desig_scaffold  | 220125                         | [G/T]       | NA                                         |
| Ca_Desig_Chr_scaffold00073_220129 | Ca_desig_scaffold  | 220129                         | [T/G]       | NA                                         |
| Ca_Desig_Chr_scaffold00073_220131 | Ca_desig_scaffold  | 220131                         | [A/G]       | NA                                         |
| Ca_Desig_Chr_scaffold00073_220133 | Ca_desig_scaffold  | 220133                         | [A/G]       | NA                                         |
| Ca_Desig_Chr_scaffold00073_220142 | Ca_desig_scaffold  | 220142                         | [A/G]       | NA                                         |
| Ca_Desig_Chr_scaffold00073_300886 | Ca_desig_scaffold  | 300886                         | [T/C]       | NA                                         |
| Ca_Desig_Chr_scaffold00073_300910 | Ca_desig_scaffold  | 300910                         | [A/C]       | NA                                         |
| Ca_Desig_Chr_scaffold00073_300960 | Ca_desig_scaffold  | 300960                         | [T/G]       | NA                                         |
| Ca_Desig_Chr_scaffold00073_300993 | Ca_desig_scaffold  | 300993                         | [A/G]       | NA                                         |
| Ca_Desig_Chr_scaffold00073_300998 | Ca_desig_scaffold  | 300998                         | [T/C]       | NA                                         |
| Ca_Desig_Chr_scaffold00073_301471 | Ca_desig_scaffold  | 301471                         | [T/C]       | NA                                         |
| Ca_Desig_Chr_scaffold00073_327154 | Ca_desig_scaffold  | 327154                         | [T/C]       | NA                                         |
| Ca_Desig_Chr_scaffold00073_327170 | Ca_desig_scaffold  | 327170                         | [T/G]       | NA                                         |
| Ca_Desig_Chr_scaffold00073_335504 | Ca_desig_scaffold  | 335504                         | [T/G]       | NA                                         |
| Ca_Desig_Chr_scaffold00073_353260 | Ca_desig_scaffold  | 353260                         | [T/C]       | NA                                         |
| Ca_Desig_Chr_scaffold00077_12926  | Ca_desig_scaffold  | 12926                          | [T/C]       | NA                                         |
| Ca_Desig_Chr_scaffold00077_32762  | Ca_desig_scaffold  | 32762                          | [A/G]       | NA                                         |
| Ca_Desig_Chr_scaffold00077_32772  | Ca_desig_scaffold  | 32772                          | [T/G]       | NA                                         |
| Ca_Desig_Chr_scaffold00077_32780  | Ca_desig_scaffold  | 32780                          | [A/T]       | NA                                         |
| Ca_Desig_Chr_scaffold00077_32791  | Ca_desig_scaffold  | 32791                          | [T/C]       | NA                                         |
| Ca_Desig_Chr_scaffold00077_32796  | Ca_desig_scaffold  | 32796                          | [A/G]       | NA                                         |



| <b>SNP IDs</b>                  | <b>Chromosomes</b> | <b>Physical positions (bp)</b> | <b>SNPs</b> | <b>NCBI SNPdb accession IDs (NCBI_ss#)</b> |
|---------------------------------|--------------------|--------------------------------|-------------|--------------------------------------------|
| Ca_Desi_Ch_scaffold00077_32799  | Ca_desi_scaffold   | 32799                          | [T/C]       | NA                                         |
| Ca_Desi_Ch_scaffold00077_84901  | Ca_desi_scaffold   | 84901                          | [A/C]       | NA                                         |
| Ca_Desi_Ch_scaffold00077_138164 | Ca_desi_scaffold   | 138164                         | [T/C]       | NA                                         |
| Ca_Desi_Ch_scaffold00077_138213 | Ca_desi_scaffold   | 138213                         | [T/G]       | NA                                         |
| Ca_Desi_Ch_scaffold00077_138218 | Ca_desi_scaffold   | 138218                         | [T/G]       | NA                                         |
| Ca_Desi_Ch_scaffold00077_138242 | Ca_desi_scaffold   | 138242                         | [A/C]       | NA                                         |
| Ca_Desi_Ch_scaffold00077_138257 | Ca_desi_scaffold   | 138257                         | [T/C]       | NA                                         |
| Ca_Desi_Ch_scaffold00077_142018 | Ca_desi_scaffold   | 142018                         | [T/C]       | NA                                         |
| Ca_Desi_Ch_scaffold00077_142073 | Ca_desi_scaffold   | 142073                         | [A/C]       | NA                                         |
| Ca_Desi_Ch_scaffold00077_142091 | Ca_desi_scaffold   | 142091                         | [T/C]       | NA                                         |
| Ca_Desi_Ch_scaffold00077_142124 | Ca_desi_scaffold   | 142124                         | [T/C]       | NA                                         |
| Ca_Desi_Ch_scaffold00077_142128 | Ca_desi_scaffold   | 142128                         | [T/G]       | NA                                         |
| Ca_Desi_Ch_scaffold00077_142152 | Ca_desi_scaffold   | 142152                         | [T/C]       | NA                                         |
| Ca_Desi_Ch_scaffold00077_142166 | Ca_desi_scaffold   | 142166                         | [A/G]       | NA                                         |
| Ca_Desi_Ch_scaffold00077_142170 | Ca_desi_scaffold   | 142170                         | [T/G]       | NA                                         |
| Ca_Desi_Ch_scaffold00077_142182 | Ca_desi_scaffold   | 142182                         | [T/C]       | NA                                         |
| Ca_Desi_Ch_scaffold00077_179625 | Ca_desi_scaffold   | 179625                         | [T/G]       | NA                                         |
| Ca_Desi_Ch_scaffold00077_179642 | Ca_desi_scaffold   | 179642                         | [T/G]       | NA                                         |
| Ca_Desi_Ch_scaffold00077_179649 | Ca_desi_scaffold   | 179649                         | [T/G]       | NA                                         |
| Ca_Desi_Ch_scaffold00077_192459 | Ca_desi_scaffold   | 192459                         | [T/C]       | NA                                         |
| Ca_Desi_Ch_scaffold00077_199681 | Ca_desi_scaffold   | 199681                         | [T/C]       | NA                                         |
| Ca_Desi_Ch_scaffold00077_224310 | Ca_desi_scaffold   | 224310                         | [T/A]       | NA                                         |
| Ca_Desi_Ch_scaffold00077_225172 | Ca_desi_scaffold   | 225172                         | [A/G]       | NA                                         |
| Ca_Desi_Ch_scaffold00077_251691 | Ca_desi_scaffold   | 251691                         | [A/G]       | NA                                         |
| Ca_Desi_Ch_scaffold00077_294767 | Ca_desi_scaffold   | 294767                         | [T/G]       | NA                                         |
| Ca_Desi_Ch_scaffold00077_294770 | Ca_desi_scaffold   | 294770                         | [A/G]       | NA                                         |
| Ca_Desi_Ch_scaffold00077_294779 | Ca_desi_scaffold   | 294779                         | [T/G]       | NA                                         |
| Ca_Desi_Ch_scaffold00077_325198 | Ca_desi_scaffold   | 325198                         | [T/G]       | NA                                         |
| Ca_Desi_Ch_scaffold00077_388790 | Ca_desi_scaffold   | 388790                         | [A/C]       | NA                                         |
| Ca_Desi_Ch_scaffold00078_260759 | Ca_desi_scaffold   | 260759                         | [T/C]       | NA                                         |
| Ca_Desi_Ch_scaffold00078_260798 | Ca_desi_scaffold   | 260798                         | [A/G]       | NA                                         |
| Ca_Desi_Ch_scaffold00078_260799 | Ca_desi_scaffold   | 260799                         | [A/G]       | NA                                         |
| Ca_Desi_Ch_scaffold00078_260802 | Ca_desi_scaffold   | 260802                         | [A/C]       | NA                                         |
| Ca_Desi_Ch_scaffold00078_260805 | Ca_desi_scaffold   | 260805                         | [A/C]       | NA                                         |

| <b>SNP IDs</b>                    | <b>Chromosomes</b> | <b>Physical positions (bp)</b> | <b>SNPs</b> | <b>NCBI SNPdb accession IDs (NCBI_ss#)</b> |
|-----------------------------------|--------------------|--------------------------------|-------------|--------------------------------------------|
| Ca_Desig_Chr_scaffold00078_260814 | Ca_desig_scaffold  | 260814                         | [A/C]       | NA                                         |
| Ca_Desig_Chr_scaffold00079_14839  | Ca_desig_scaffold  | 14839                          | [A/G]       | NA                                         |
| Ca_Desig_Chr_scaffold00079_14871  | Ca_desig_scaffold  | 14871                          | [A/G]       | NA                                         |
| Ca_Desig_Chr_scaffold00079_14873  | Ca_desig_scaffold  | 14873                          | [T/G]       | NA                                         |
| Ca_Desig_Chr_scaffold00079_14882  | Ca_desig_scaffold  | 14882                          | [A/C]       | NA                                         |
| Ca_Desig_Chr_scaffold00079_14884  | Ca_desig_scaffold  | 14884                          | [A/C]       | NA                                         |
| Ca_Desig_Chr_scaffold00079_14886  | Ca_desig_scaffold  | 14886                          | [A/G]       | NA                                         |
| Ca_Desig_Chr_scaffold00079_63097  | Ca_desig_scaffold  | 63097                          | [G/T]       | NA                                         |
| Ca_Desig_Chr_scaffold00079_241961 | Ca_desig_scaffold  | 241961                         | [T/A]       | NA                                         |
| Ca_Desig_Chr_scaffold00079_241973 | Ca_desig_scaffold  | 241973                         | [T/C]       | NA                                         |
| Ca_Desig_Chr_scaffold00079_312391 | Ca_desig_scaffold  | 312391                         | [A/C]       | NA                                         |
| Ca_Desig_Chr_scaffold00079_312400 | Ca_desig_scaffold  | 312400                         | [A/C]       | NA                                         |
| Ca_Desig_Chr_scaffold00079_312418 | Ca_desig_scaffold  | 312418                         | [T/G]       | NA                                         |
| Ca_Desig_Chr_scaffold00079_312423 | Ca_desig_scaffold  | 312423                         | [T/G]       | NA                                         |
| Ca_Desig_Chr_scaffold00079_314256 | Ca_desig_scaffold  | 314256                         | [A/G]       | NA                                         |
| Ca_Desig_Chr_scaffold00079_314265 | Ca_desig_scaffold  | 314265                         | [T/C]       | NA                                         |
| Ca_Desig_Chr_scaffold00079_314267 | Ca_desig_scaffold  | 314267                         | [A/C]       | NA                                         |
| Ca_Desig_Chr_scaffold00079_314281 | Ca_desig_scaffold  | 314281                         | [A/T]       | NA                                         |
| Ca_Desig_Chr_scaffold00079_328668 | Ca_desig_scaffold  | 328668                         | [A/C]       | NA                                         |
| Ca_Desig_Chr_scaffold00079_345247 | Ca_desig_scaffold  | 345247                         | [T/C]       | NA                                         |
| Ca_Desig_Chr_scaffold00079_352671 | Ca_desig_scaffold  | 352671                         | [T/A]       | NA                                         |
| Ca_Desig_Chr_scaffold00079_363044 | Ca_desig_scaffold  | 363044                         | [C/T]       | NA                                         |
| Ca_Desig_Chr_scaffold00089_101757 | Ca_desig_scaffold  | 101757                         | [A/C]       | NA                                         |
| Ca_Desig_Chr_scaffold00089_101780 | Ca_desig_scaffold  | 101780                         | [A/G]       | NA                                         |
| Ca_Desig_Chr_scaffold00089_147457 | Ca_desig_scaffold  | 147457                         | [A/C]       | NA                                         |
| Ca_Desig_Chr_scaffold00089_147467 | Ca_desig_scaffold  | 147467                         | [T/G]       | NA                                         |
| Ca_Desig_Chr_scaffold00089_147485 | Ca_desig_scaffold  | 147485                         | [A/G]       | NA                                         |
| Ca_Desig_Chr_scaffold00089_147491 | Ca_desig_scaffold  | 147491                         | [A/C]       | NA                                         |
| Ca_Desig_Chr_scaffold00089_289402 | Ca_desig_scaffold  | 289402                         | [A/G]       | NA                                         |
| Ca_Desig_Chr_scaffold00089_296259 | Ca_desig_scaffold  | 296259                         | [T/A]       | NA                                         |
| Ca_Desig_Chr_scaffold00089_301696 | Ca_desig_scaffold  | 301696                         | [C/A]       | NA                                         |
| Ca_Desig_Chr_scaffold00089_316091 | Ca_desig_scaffold  | 316091                         | [C/A]       | NA                                         |
| Ca_Desig_Chr_scaffold00089_316095 | Ca_desig_scaffold  | 316095                         | [A/G]       | NA                                         |
| Ca_Desig_Chr_scaffold00089_316096 | Ca_desig_scaffold  | 316096                         | [C/G]       | NA                                         |

| <b>SNP IDs</b>                  | <b>Chromosomes</b> | <b>Physical positions (bp)</b> | <b>SNPs</b> | <b>NCBI SNPdb accession IDs (NCBI_ss#)</b> |
|---------------------------------|--------------------|--------------------------------|-------------|--------------------------------------------|
| Ca_Desi_Ch_scaffold00089_316582 | Ca_desi_scaffold   | 316582                         | [A/C]       | NA                                         |
| Ca_Desi_Ch_scaffold00093_21103  | Ca_desi_scaffold   | 21103                          | [T/G]       | NA                                         |
| Ca_Desi_Ch_scaffold00093_21245  | Ca_desi_scaffold   | 21245                          | [G/T]       | NA                                         |
| Ca_Desi_Ch_scaffold00093_38552  | Ca_desi_scaffold   | 38552                          | [A/C]       | NA                                         |
| Ca_Desi_Ch_scaffold00093_65867  | Ca_desi_scaffold   | 65867                          | [T/C]       | NA                                         |
| Ca_Desi_Ch_scaffold00093_65910  | Ca_desi_scaffold   | 65910                          | [A/G]       | NA                                         |
| Ca_Desi_Ch_scaffold00093_157340 | Ca_desi_scaffold   | 157340                         | [C/G]       | NA                                         |
| Ca_Desi_Ch_scaffold00093_161377 | Ca_desi_scaffold   | 161377                         | [A/G]       | NA                                         |
| Ca_Desi_Ch_scaffold00093_161416 | Ca_desi_scaffold   | 161416                         | [A/C]       | NA                                         |
| Ca_Desi_Ch_scaffold00093_164320 | Ca_desi_scaffold   | 164320                         | [A/T]       | NA                                         |
| Ca_Desi_Ch_scaffold00093_164322 | Ca_desi_scaffold   | 164322                         | [C/G]       | NA                                         |
| Ca_Desi_Ch_scaffold00093_164323 | Ca_desi_scaffold   | 164323                         | [T/G]       | NA                                         |
| Ca_Desi_Ch_scaffold00093_176782 | Ca_desi_scaffold   | 176782                         | [C/A]       | NA                                         |
| Ca_Desi_Ch_scaffold00093_176783 | Ca_desi_scaffold   | 176783                         | [T/G]       | NA                                         |
| Ca_Desi_Ch_scaffold00093_214917 | Ca_desi_scaffold   | 214917                         | [T/G]       | NA                                         |
| Ca_Desi_Ch_scaffold00093_214943 | Ca_desi_scaffold   | 214943                         | [T/C]       | NA                                         |
| Ca_Desi_Ch_scaffold00093_215013 | Ca_desi_scaffold   | 215013                         | [A/T]       | NA                                         |
| Ca_Desi_Ch_scaffold00093_245842 | Ca_desi_scaffold   | 245842                         | [A/C]       | NA                                         |
| Ca_Desi_Ch_scaffold00093_262976 | Ca_desi_scaffold   | 262976                         | [A/G]       | NA                                         |
| Ca_Desi_Ch_scaffold00093_263002 | Ca_desi_scaffold   | 263002                         | [T/C]       | NA                                         |
| Ca_Desi_Ch_scaffold00093_263482 | Ca_desi_scaffold   | 263482                         | [T/C]       | NA                                         |
| Ca_Desi_Ch_scaffold00093_301757 | Ca_desi_scaffold   | 301757                         | [T/C]       | NA                                         |
| Ca_Desi_Ch_scaffold00093_329717 | Ca_desi_scaffold   | 329717                         | [T/G]       | NA                                         |
| Ca_Desi_Ch_scaffold00093_329743 | Ca_desi_scaffold   | 329743                         | [A/G]       | NA                                         |
| Ca_Desi_Ch_scaffold00105_38079  | Ca_desi_scaffold   | 38079                          | [T/C]       | NA                                         |
| Ca_Desi_Ch_scaffold00105_38120  | Ca_desi_scaffold   | 38120                          | [A/G]       | NA                                         |
| Ca_Desi_Ch_scaffold00105_69861  | Ca_desi_scaffold   | 69861                          | [T/G]       | NA                                         |
| Ca_Desi_Ch_scaffold00105_98890  | Ca_desi_scaffold   | 98890                          | [T/C]       | NA                                         |
| Ca_Desi_Ch_scaffold00105_98910  | Ca_desi_scaffold   | 98910                          | [G/C]       | NA                                         |
| Ca_Desi_Ch_scaffold00105_98916  | Ca_desi_scaffold   | 98916                          | [T/C]       | NA                                         |
| Ca_Desi_Ch_scaffold00105_98935  | Ca_desi_scaffold   | 98935                          | [A/G]       | NA                                         |
| Ca_Desi_Ch_scaffold00105_108818 | Ca_desi_scaffold   | 108818                         | [T/A]       | NA                                         |
| Ca_Desi_Ch_scaffold00105_108820 | Ca_desi_scaffold   | 108820                         | [A/C]       | NA                                         |
| Ca_Desi_Ch_scaffold00105_108821 | Ca_desi_scaffold   | 108821                         | [G/T]       | NA                                         |

| <b>SNP IDs</b>                  | <b>Chromosomes</b> | <b>Physical positions (bp)</b> | <b>SNPs</b> | <b>NCBI SNPdb accession IDs (NCBI_ss#)</b> |
|---------------------------------|--------------------|--------------------------------|-------------|--------------------------------------------|
| Ca_Desi_Ch_scaffold00105_109317 | Ca_desi_scaffold   | 109317                         | [T/A]       | NA                                         |
| Ca_Desi_Ch_scaffold00105_109318 | Ca_desi_scaffold   | 109318                         | [A/T]       | NA                                         |
| Ca_Desi_Ch_scaffold00105_155562 | Ca_desi_scaffold   | 155562                         | [T/G]       | NA                                         |
| Ca_Desi_Ch_scaffold00105_205937 | Ca_desi_scaffold   | 205937                         | [G/T]       | NA                                         |
| Ca_Desi_Ch_scaffold00105_205959 | Ca_desi_scaffold   | 205959                         | [C/G]       | NA                                         |
| Ca_Desi_Ch_scaffold00105_206048 | Ca_desi_scaffold   | 206048                         | [A/G]       | NA                                         |
| Ca_Desi_Ch_scaffold00105_272942 | Ca_desi_scaffold   | 272942                         | [A/C]       | NA                                         |
| Ca_Desi_Ch_scaffold00105_296481 | Ca_desi_scaffold   | 296481                         | [T/C]       | NA                                         |
| Ca_Desi_Ch_scaffold00105_315101 | Ca_desi_scaffold   | 315101                         | [A/C]       | NA                                         |
| Ca_Desi_Ch_scaffold00105_316372 | Ca_desi_scaffold   | 316372                         | [T/C]       | NA                                         |
| Ca_Desi_Ch_scaffold00105_318268 | Ca_desi_scaffold   | 318268                         | [A/C]       | NA                                         |
| Ca_Desi_Ch_scaffold00105_319520 | Ca_desi_scaffold   | 319520                         | [G/T]       | NA                                         |
| Ca_Desi_Ch_scaffold00110_31634  | Ca_desi_scaffold   | 31634                          | [A/C]       | NA                                         |
| Ca_Desi_Ch_scaffold00110_31667  | Ca_desi_scaffold   | 31667                          | [A/C]       | NA                                         |
| Ca_Desi_Ch_scaffold00110_138498 | Ca_desi_scaffold   | 138498                         | [C/T]       | NA                                         |
| Ca_Desi_Ch_scaffold00110_149417 | Ca_desi_scaffold   | 149417                         | [T/G]       | NA                                         |
| Ca_Desi_Ch_scaffold00110_149435 | Ca_desi_scaffold   | 149435                         | [T/G]       | NA                                         |
| Ca_Desi_Ch_scaffold00110_149443 | Ca_desi_scaffold   | 149443                         | [G/T]       | NA                                         |
| Ca_Desi_Ch_scaffold00110_149459 | Ca_desi_scaffold   | 149459                         | [A/T]       | NA                                         |
| Ca_Desi_Ch_scaffold00110_210917 | Ca_desi_scaffold   | 210917                         | [A/C]       | NA                                         |
| Ca_Desi_Ch_scaffold00110_210984 | Ca_desi_scaffold   | 210984                         | [T/C]       | NA                                         |
| Ca_Desi_Ch_scaffold00110_211002 | Ca_desi_scaffold   | 211002                         | [A/G]       | NA                                         |
| Ca_Desi_Ch_scaffold00110_274693 | Ca_desi_scaffold   | 274693                         | [A/C]       | NA                                         |
| Ca_Desi_Ch_scaffold00110_274694 | Ca_desi_scaffold   | 274694                         | [A/T]       | NA                                         |
| Ca_Desi_Ch_scaffold00110_274696 | Ca_desi_scaffold   | 274696                         | [G/T]       | NA                                         |
| Ca_Desi_Ch_scaffold00110_279425 | Ca_desi_scaffold   | 279425                         | [A/C]       | NA                                         |
| Ca_Desi_Ch_scaffold00110_279426 | Ca_desi_scaffold   | 279426                         | [G/T]       | NA                                         |
| Ca_Desi_Ch_scaffold00110_282223 | Ca_desi_scaffold   | 282223                         | [T/C]       | NA                                         |
| Ca_Desi_Ch_scaffold00110_286971 | Ca_desi_scaffold   | 286971                         | [A/G]       | NA                                         |
| Ca_Desi_Ch_scaffold00110_286979 | Ca_desi_scaffold   | 286979                         | [A/G]       | NA                                         |
| Ca_Desi_Ch_scaffold00110_286983 | Ca_desi_scaffold   | 286983                         | [T/C]       | NA                                         |
| Ca_Desi_Ch_scaffold00110_286995 | Ca_desi_scaffold   | 286995                         | [A/G]       | NA                                         |
| Ca_Desi_Ch_scaffold00110_287009 | Ca_desi_scaffold   | 287009                         | [T/C]       | NA                                         |
| Ca_Desi_Ch_scaffold00110_291976 | Ca_desi_scaffold   | 291976                         | [A/T]       | NA                                         |

| <b>SNP IDs</b>                   | <b>Chromosomes</b> | <b>Physical positions (bp)</b> | <b>SNPs</b> | <b>NCBI SNPdb accession IDs (NCBI_ss#)</b> |
|----------------------------------|--------------------|--------------------------------|-------------|--------------------------------------------|
| Ca_DesigChr_scaffold00110_291989 | Ca_desig_scaffold  | 291989                         | [T/C]       | NA                                         |
| Ca_DesigChr_scaffold00110_291991 | Ca_desig_scaffold  | 291991                         | [A/C]       | NA                                         |
| Ca_DesigChr_scaffold00110_291995 | Ca_desig_scaffold  | 291995                         | [T/C]       | NA                                         |
| Ca_DesigChr_scaffold00110_291996 | Ca_desig_scaffold  | 291996                         | [C/T]       | NA                                         |
| Ca_DesigChr_scaffold00110_292010 | Ca_desig_scaffold  | 292010                         | [T/C]       | NA                                         |
| Ca_DesigChr_scaffold00110_292011 | Ca_desig_scaffold  | 292011                         | [T/C]       | NA                                         |
| Ca_DesigChr_scaffold00110_292013 | Ca_desig_scaffold  | 292013                         | [T/C]       | NA                                         |
| Ca_DesigChr_scaffold00110_292019 | Ca_desig_scaffold  | 292019                         | [A/G]       | NA                                         |
| Ca_DesigChr_scaffold00110_292032 | Ca_desig_scaffold  | 292032                         | [A/G]       | NA                                         |
| Ca_DesigChr_scaffold00113_66738  | Ca_desig_scaffold  | 66738                          | [C/T]       | NA                                         |
| Ca_DesigChr_scaffold00113_112847 | Ca_desig_scaffold  | 112847                         | [A/G]       | NA                                         |
| Ca_DesigChr_scaffold00113_113327 | Ca_desig_scaffold  | 113327                         | [T/C]       | NA                                         |
| Ca_DesigChr_scaffold00113_124881 | Ca_desig_scaffold  | 124881                         | [A/C]       | NA                                         |
| Ca_DesigChr_scaffold00113_140380 | Ca_desig_scaffold  | 140380                         | [C/T]       | NA                                         |
| Ca_DesigChr_scaffold00113_154538 | Ca_desig_scaffold  | 154538                         | [C/T]       | NA                                         |
| Ca_DesigChr_scaffold00113_159065 | Ca_desig_scaffold  | 159065                         | [A/T]       | NA                                         |
| Ca_DesigChr_scaffold00113_204925 | Ca_desig_scaffold  | 204925                         | [C/T]       | NA                                         |
| Ca_DesigChr_scaffold00113_205689 | Ca_desig_scaffold  | 205689                         | [T/C]       | NA                                         |
| Ca_DesigChr_scaffold00113_205709 | Ca_desig_scaffold  | 205709                         | [A/T]       | NA                                         |
| Ca_DesigChr_scaffold00113_206141 | Ca_desig_scaffold  | 206141                         | [A/T]       | NA                                         |
| Ca_DesigChr_scaffold00113_206150 | Ca_desig_scaffold  | 206150                         | [A/T]       | NA                                         |
| Ca_DesigChr_scaffold00113_206163 | Ca_desig_scaffold  | 206163                         | [G/T]       | NA                                         |
| Ca_DesigChr_scaffold00113_206181 | Ca_desig_scaffold  | 206181                         | [A/T]       | NA                                         |
| Ca_DesigChr_scaffold00113_228299 | Ca_desig_scaffold  | 228299                         | [A/G]       | NA                                         |
| Ca_DesigChr_scaffold00113_230218 | Ca_desig_scaffold  | 230218                         | [T/G]       | NA                                         |
| Ca_DesigChr_scaffold00113_230221 | Ca_desig_scaffold  | 230221                         | [T/G]       | NA                                         |
| Ca_DesigChr_scaffold00113_230245 | Ca_desig_scaffold  | 230245                         | [T/A]       | NA                                         |
| Ca_DesigChr_scaffold00113_254605 | Ca_desig_scaffold  | 254605                         | [G/T]       | NA                                         |
| Ca_DesigChr_scaffold00113_254608 | Ca_desig_scaffold  | 254608                         | [A/G]       | NA                                         |
| Ca_DesigChr_scaffold00113_254983 | Ca_desig_scaffold  | 254983                         | [A/G]       | NA                                         |
| Ca_DesigChr_scaffold00113_254986 | Ca_desig_scaffold  | 254986                         | [T/G]       | NA                                         |
| Ca_DesigChr_scaffold00113_255132 | Ca_desig_scaffold  | 255132                         | [C/T]       | NA                                         |
| Ca_DesigChr_scaffold00113_255133 | Ca_desig_scaffold  | 255133                         | [A/G]       | NA                                         |
| Ca_DesigChr_scaffold00113_257906 | Ca_desig_scaffold  | 257906                         | [A/G]       | NA                                         |

| <b>SNP IDs</b>                  | <b>Chromosomes</b> | <b>Physical positions (bp)</b> | <b>SNPs</b> | <b>NCBI SNPdb accession IDs (NCBI_ss#)</b> |
|---------------------------------|--------------------|--------------------------------|-------------|--------------------------------------------|
| Ca_Desi_Ch_scaffold00113_257928 | Ca_desi_scaffold   | 257928                         | [A/G]       | NA                                         |
| Ca_Desi_Ch_scaffold00113_285234 | Ca_desi_scaffold   | 285234                         | [A/C]       | NA                                         |
| Ca_Desi_Ch_scaffold00119_11243  | Ca_desi_scaffold   | 11243                          | [G/A]       | NA                                         |
| Ca_Desi_Ch_scaffold00119_75304  | Ca_desi_scaffold   | 75304                          | [T/A]       | NA                                         |
| Ca_Desi_Ch_scaffold00119_75322  | Ca_desi_scaffold   | 75322                          | [A/C]       | NA                                         |
| Ca_Desi_Ch_scaffold00119_75333  | Ca_desi_scaffold   | 75333                          | [A/G]       | NA                                         |
| Ca_Desi_Ch_scaffold00119_78965  | Ca_desi_scaffold   | 78965                          | [A/C]       | NA                                         |
| Ca_Desi_Ch_scaffold00119_78995  | Ca_desi_scaffold   | 78995                          | [T/A]       | NA                                         |
| Ca_Desi_Ch_scaffold00119_80789  | Ca_desi_scaffold   | 80789                          | [C/A]       | NA                                         |
| Ca_Desi_Ch_scaffold00119_104139 | Ca_desi_scaffold   | 104139                         | [A/G]       | NA                                         |
| Ca_Desi_Ch_scaffold00119_196172 | Ca_desi_scaffold   | 196172                         | [T/G]       | NA                                         |
| Ca_Desi_Ch_scaffold00119_220268 | Ca_desi_scaffold   | 220268                         | [T/C]       | NA                                         |
| Ca_Desi_Ch_scaffold00119_281181 | Ca_desi_scaffold   | 281181                         | [T/G]       | NA                                         |
| Ca_Desi_Ch_scaffold00122_45391  | Ca_desi_scaffold   | 45391                          | [T/C]       | NA                                         |
| Ca_Desi_Ch_scaffold00122_45402  | Ca_desi_scaffold   | 45402                          | [T/C]       | NA                                         |
| Ca_Desi_Ch_scaffold00122_183772 | Ca_desi_scaffold   | 183772                         | [T/G]       | NA                                         |
| Ca_Desi_Ch_scaffold00122_295450 | Ca_desi_scaffold   | 295450                         | [T/C]       | NA                                         |
| Ca_Desi_Ch_scaffold00122_295457 | Ca_desi_scaffold   | 295457                         | [T/G]       | NA                                         |
| Ca_Desi_Ch_scaffold00122_295469 | Ca_desi_scaffold   | 295469                         | [A/G]       | NA                                         |
| Ca_Desi_Ch_scaffold00126_22413  | Ca_desi_scaffold   | 22413                          | [T/G]       | NA                                         |
| Ca_Desi_Ch_scaffold00126_22480  | Ca_desi_scaffold   | 22480                          | [G/A]       | NA                                         |
| Ca_Desi_Ch_scaffold00126_22483  | Ca_desi_scaffold   | 22483                          | [G/T]       | NA                                         |
| Ca_Desi_Ch_scaffold00126_33203  | Ca_desi_scaffold   | 33203                          | [A/C]       | NA                                         |
| Ca_Desi_Ch_scaffold00126_91043  | Ca_desi_scaffold   | 91043                          | [T/G]       | NA                                         |
| Ca_Desi_Ch_scaffold00126_120329 | Ca_desi_scaffold   | 120329                         | [T/C]       | NA                                         |
| Ca_Desi_Ch_scaffold00126_120331 | Ca_desi_scaffold   | 120331                         | [T/C]       | NA                                         |
| Ca_Desi_Ch_scaffold00126_120335 | Ca_desi_scaffold   | 120335                         | [A/C]       | NA                                         |
| Ca_Desi_Ch_scaffold00126_120346 | Ca_desi_scaffold   | 120346                         | [A/G]       | NA                                         |
| Ca_Desi_Ch_scaffold00126_120786 | Ca_desi_scaffold   | 120786                         | [A/T]       | NA                                         |
| Ca_Desi_Ch_scaffold00126_121000 | Ca_desi_scaffold   | 121000                         | [G/T]       | NA                                         |
| Ca_Desi_Ch_scaffold00126_140090 | Ca_desi_scaffold   | 140090                         | [T/G]       | NA                                         |
| Ca_Desi_Ch_scaffold00126_142364 | Ca_desi_scaffold   | 142364                         | [A/C]       | NA                                         |
| Ca_Desi_Ch_scaffold00126_163868 | Ca_desi_scaffold   | 163868                         | [T/G]       | NA                                         |
| Ca_Desi_Ch_scaffold00126_167066 | Ca_desi_scaffold   | 167066                         | [A/T]       | NA                                         |

| <b>SNP IDs</b>                    | <b>Chromosomes</b> | <b>Physical positions (bp)</b> | <b>SNPs</b> | <b>NCBI SNPdb accession IDs (NCBI_ss#)</b> |
|-----------------------------------|--------------------|--------------------------------|-------------|--------------------------------------------|
| Ca_Desig_Chr_scaffold00126_175529 | Ca_desig_scaffold  | 175529                         | [A/C]       | NA                                         |
| Ca_Desig_Chr_scaffold00126_224731 | Ca_desig_scaffold  | 224731                         | [C/T]       | NA                                         |
| Ca_Desig_Chr_scaffold00126_224733 | Ca_desig_scaffold  | 224733                         | [G/T]       | NA                                         |
| Ca_Desig_Chr_scaffold00126_224736 | Ca_desig_scaffold  | 224736                         | [T/G]       | NA                                         |
| Ca_Desig_Chr_scaffold00126_224738 | Ca_desig_scaffold  | 224738                         | [G/A]       | NA                                         |
| Ca_Desig_Chr_scaffold00126_224740 | Ca_desig_scaffold  | 224740                         | [A/T]       | NA                                         |
| Ca_Desig_Chr_scaffold00126_224742 | Ca_desig_scaffold  | 224742                         | [G/T]       | NA                                         |
| Ca_Desig_Chr_scaffold00126_224743 | Ca_desig_scaffold  | 224743                         | [T/C]       | NA                                         |
| Ca_Desig_Chr_scaffold00126_224744 | Ca_desig_scaffold  | 224744                         | [T/C]       | NA                                         |
| Ca_Desig_Chr_scaffold00126_224778 | Ca_desig_scaffold  | 224778                         | [T/G]       | NA                                         |
| Ca_Desig_Chr_scaffold00126_236181 | Ca_desig_scaffold  | 236181                         | [T/G]       | NA                                         |
| Ca_Desig_Chr_scaffold00126_236184 | Ca_desig_scaffold  | 236184                         | [T/C]       | NA                                         |
| Ca_Desig_Chr_scaffold00126_236189 | Ca_desig_scaffold  | 236189                         | [T/C]       | NA                                         |
| Ca_Desig_Chr_scaffold00126_236194 | Ca_desig_scaffold  | 236194                         | [A/G]       | NA                                         |
| Ca_Desig_Chr_scaffold00126_279405 | Ca_desig_scaffold  | 279405                         | [T/G]       | NA                                         |
| Ca_Desig_Chr_scaffold00126_281337 | Ca_desig_scaffold  | 281337                         | [T/A]       | NA                                         |
| Ca_Desig_Chr_scaffold00126_281774 | Ca_desig_scaffold  | 281774                         | [T/C]       | NA                                         |
| Ca_Desig_Chr_scaffold00126_281782 | Ca_desig_scaffold  | 281782                         | [T/C]       | NA                                         |
| Ca_Desig_Chr_scaffold00126_281791 | Ca_desig_scaffold  | 281791                         | [C/G]       | NA                                         |
| Ca_Desig_Chr_scaffold00126_281792 | Ca_desig_scaffold  | 281792                         | [T/A]       | NA                                         |
| Ca_Desig_Chr_scaffold00126_282254 | Ca_desig_scaffold  | 282254                         | [A/G]       | NA                                         |
| Ca_Desig_Chr_scaffold00126_282271 | Ca_desig_scaffold  | 282271                         | [A/G]       | NA                                         |
| Ca_Desig_Chr_scaffold00126_284062 | Ca_desig_scaffold  | 284062                         | [G/T]       | NA                                         |
| Ca_Desig_Chr_scaffold00126_284063 | Ca_desig_scaffold  | 284063                         | [T/G]       | NA                                         |
| Ca_Desig_Chr_scaffold00126_284071 | Ca_desig_scaffold  | 284071                         | [A/C]       | NA                                         |
| Ca_Desig_Chr_scaffold00126_284095 | Ca_desig_scaffold  | 284095                         | [C/A]       | NA                                         |
| Ca_Desig_Chr_scaffold00126_284115 | Ca_desig_scaffold  | 284115                         | [T/C]       | NA                                         |
| Ca_Desig_Chr_scaffold00126_284116 | Ca_desig_scaffold  | 284116                         | [G/T]       | NA                                         |
| Ca_Desig_Chr_scaffold00126_284578 | Ca_desig_scaffold  | 284578                         | [C/T]       | NA                                         |
| Ca_Desig_Chr_scaffold00126_284585 | Ca_desig_scaffold  | 284585                         | [A/G]       | NA                                         |
| Ca_Desig_Chr_scaffold00126_284590 | Ca_desig_scaffold  | 284590                         | [C/G]       | NA                                         |
| Ca_Desig_Chr_scaffold00143_112410 | Ca_desig_scaffold  | 112410                         | [T/C]       | NA                                         |
| Ca_Desig_Chr_scaffold00143_115786 | Ca_desig_scaffold  | 115786                         | [C/G]       | NA                                         |
| Ca_Desig_Chr_scaffold00143_115787 | Ca_desig_scaffold  | 115787                         | [T/G]       | NA                                         |

| <b>SNP IDs</b>                    | <b>Chromosomes</b> | <b>Physical positions (bp)</b> | <b>SNPs</b> | <b>NCBI SNPdb accession IDs (NCBI_ss#)</b> |
|-----------------------------------|--------------------|--------------------------------|-------------|--------------------------------------------|
| Ca_Desig_Chr_scaffold00143_130642 | Ca_desig_scaffold  | 130642                         | [A/G]       | NA                                         |
| Ca_Desig_Chr_scaffold00143_166906 | Ca_desig_scaffold  | 166906                         | [A/G]       | NA                                         |
| Ca_Desig_Chr_scaffold00143_166924 | Ca_desig_scaffold  | 166924                         | [T/C]       | NA                                         |
| Ca_Desig_Chr_scaffold00143_166949 | Ca_desig_scaffold  | 166949                         | [T/C]       | NA                                         |
| Ca_Desig_Chr_scaffold00143_166957 | Ca_desig_scaffold  | 166957                         | [A/G]       | NA                                         |
| Ca_Desig_Chr_scaffold00143_167125 | Ca_desig_scaffold  | 167125                         | [A/G]       | NA                                         |
| Ca_Desig_Chr_scaffold00156_50002  | Ca_desig_scaffold  | 50002                          | [T/C]       | NA                                         |
| Ca_Desig_Chr_scaffold00156_50007  | Ca_desig_scaffold  | 50007                          | [A/C]       | NA                                         |
| Ca_Desig_Chr_scaffold00156_164679 | Ca_desig_scaffold  | 164679                         | [A/T]       | NA                                         |
| Ca_Desig_Chr_scaffold00156_164691 | Ca_desig_scaffold  | 164691                         | [A/T]       | NA                                         |
| Ca_Desig_Chr_scaffold00156_164730 | Ca_desig_scaffold  | 164730                         | [A/C]       | NA                                         |
| Ca_Desig_Chr_scaffold00156_164792 | Ca_desig_scaffold  | 164792                         | [T/A]       | NA                                         |
| Ca_Desig_Chr_scaffold00156_164800 | Ca_desig_scaffold  | 164800                         | [T/C]       | NA                                         |
| Ca_Desig_Chr_scaffold00156_164803 | Ca_desig_scaffold  | 164803                         | [T/C]       | NA                                         |
| Ca_Desig_Chr_scaffold00156_164806 | Ca_desig_scaffold  | 164806                         | [A/C]       | NA                                         |
| Ca_Desig_Chr_scaffold00156_164814 | Ca_desig_scaffold  | 164814                         | [A/G]       | NA                                         |
| Ca_Desig_Chr_scaffold00156_164824 | Ca_desig_scaffold  | 164824                         | [T/C]       | NA                                         |
| Ca_Desig_Chr_scaffold00156_164830 | Ca_desig_scaffold  | 164830                         | [T/A]       | NA                                         |
| Ca_Desig_Chr_scaffold00156_182274 | Ca_desig_scaffold  | 182274                         | [T/G]       | NA                                         |
| Ca_Desig_Chr_scaffold00156_189898 | Ca_desig_scaffold  | 189898                         | [A/C]       | NA                                         |
| Ca_Desig_Chr_scaffold00156_190943 | Ca_desig_scaffold  | 190943                         | [T/C]       | NA                                         |
| Ca_Desig_Chr_scaffold00156_274915 | Ca_desig_scaffold  | 274915                         | [A/C]       | NA                                         |
| Ca_Desig_Chr_scaffold00156_274923 | Ca_desig_scaffold  | 274923                         | [A/G]       | NA                                         |
| Ca_Desig_Chr_scaffold00156_274932 | Ca_desig_scaffold  | 274932                         | [T/G]       | NA                                         |
| Ca_Desig_Chr_scaffold00156_274939 | Ca_desig_scaffold  | 274939                         | [T/G]       | NA                                         |
| Ca_Desig_Chr_scaffold00156_274948 | Ca_desig_scaffold  | 274948                         | [A/G]       | NA                                         |
| Ca_Desig_Chr_scaffold00156_276187 | Ca_desig_scaffold  | 276187                         | [A/C]       | NA                                         |
| Ca_Desig_Chr_scaffold00156_278635 | Ca_desig_scaffold  | 278635                         | [T/C]       | NA                                         |
| Ca_Desig_Chr_scaffold00156_278640 | Ca_desig_scaffold  | 278640                         | [A/C]       | NA                                         |
| Ca_Desig_Chr_scaffold00156_278643 | Ca_desig_scaffold  | 278643                         | [A/C]       | NA                                         |
| Ca_Desig_Chr_scaffold00157_55164  | Ca_desig_scaffold  | 55164                          | [A/T]       | NA                                         |
| Ca_Desig_Chr_scaffold00157_55170  | Ca_desig_scaffold  | 55170                          | [T/C]       | NA                                         |
| Ca_Desig_Chr_scaffold00157_55180  | Ca_desig_scaffold  | 55180                          | [A/G]       | NA                                         |
| Ca_Desig_Chr_scaffold00157_55192  | Ca_desig_scaffold  | 55192                          | [A/G]       | NA                                         |



| <b>SNP IDs</b>                  | <b>Chromosomes</b> | <b>Physical positions (bp)</b> | <b>SNPs</b> | <b>NCBI SNPdb accession IDs (NCBI_ss#)</b> |
|---------------------------------|--------------------|--------------------------------|-------------|--------------------------------------------|
| Ca_Desi_Ch_scaffold00157_55197  | Ca_desi_scaffold   | 55197                          | [T/C]       | NA                                         |
| Ca_Desi_Ch_scaffold00157_55200  | Ca_desi_scaffold   | 55200                          | [T/G]       | NA                                         |
| Ca_Desi_Ch_scaffold00157_55210  | Ca_desi_scaffold   | 55210                          | [T/C]       | NA                                         |
| Ca_Desi_Ch_scaffold00157_108979 | Ca_desi_scaffold   | 108979                         | [A/T]       | NA                                         |
| Ca_Desi_Ch_scaffold00157_110833 | Ca_desi_scaffold   | 110833                         | [T/C]       | NA                                         |
| Ca_Desi_Ch_scaffold00157_110854 | Ca_desi_scaffold   | 110854                         | [A/C]       | NA                                         |
| Ca_Desi_Ch_scaffold00157_110859 | Ca_desi_scaffold   | 110859                         | [A/C]       | NA                                         |
| Ca_Desi_Ch_scaffold00157_110864 | Ca_desi_scaffold   | 110864                         | [A/G]       | NA                                         |
| Ca_Desi_Ch_scaffold00157_113294 | Ca_desi_scaffold   | 113294                         | [T/C]       | NA                                         |
| Ca_Desi_Ch_scaffold00157_153638 | Ca_desi_scaffold   | 153638                         | [T/A]       | NA                                         |
| Ca_Desi_Ch_scaffold00157_153658 | Ca_desi_scaffold   | 153658                         | [A/G]       | NA                                         |
| Ca_Desi_Ch_scaffold00157_153659 | Ca_desi_scaffold   | 153659                         | [T/C]       | NA                                         |
| Ca_Desi_Ch_scaffold00157_153680 | Ca_desi_scaffold   | 153680                         | [A/G]       | NA                                         |
| Ca_Desi_Ch_scaffold00157_165494 | Ca_desi_scaffold   | 165494                         | [T/G]       | NA                                         |
| Ca_Desi_Ch_scaffold00157_165514 | Ca_desi_scaffold   | 165514                         | [A/G]       | NA                                         |
| Ca_Desi_Ch_scaffold00157_165528 | Ca_desi_scaffold   | 165528                         | [A/G]       | NA                                         |
| Ca_Desi_Ch_scaffold00157_176937 | Ca_desi_scaffold   | 176937                         | [T/G]       | NA                                         |
| Ca_Desi_Ch_scaffold00157_212763 | Ca_desi_scaffold   | 212763                         | [A/C]       | NA                                         |
| Ca_Desi_Ch_scaffold00157_276478 | Ca_desi_scaffold   | 276478                         | [A/C]       | NA                                         |
| Ca_Desi_Ch_scaffold00157_276500 | Ca_desi_scaffold   | 276500                         | [A/C]       | NA                                         |
| Ca_Desi_Ch_scaffold00158_36619  | Ca_desi_scaffold   | 36619                          | [T/C]       | NA                                         |
| Ca_Desi_Ch_scaffold00158_42805  | Ca_desi_scaffold   | 42805                          | [C/T]       | NA                                         |
| Ca_Desi_Ch_scaffold00158_42887  | Ca_desi_scaffold   | 42887                          | [A/C]       | NA                                         |
| Ca_Desi_Ch_scaffold00158_89935  | Ca_desi_scaffold   | 89935                          | [T/G]       | NA                                         |
| Ca_Desi_Ch_scaffold00158_221483 | Ca_desi_scaffold   | 221483                         | [T/C]       | NA                                         |
| Ca_Desi_Ch_scaffold00158_221529 | Ca_desi_scaffold   | 221529                         | [T/G]       | NA                                         |
| Ca_Desi_Ch_scaffold00158_221612 | Ca_desi_scaffold   | 221612                         | [T/G]       | NA                                         |
| Ca_Desi_Ch_scaffold00158_221642 | Ca_desi_scaffold   | 221642                         | [T/G]       | NA                                         |
| Ca_Desi_Ch_scaffold00158_221645 | Ca_desi_scaffold   | 221645                         | [T/G]       | NA                                         |
| Ca_Desi_Ch_scaffold00158_231864 | Ca_desi_scaffold   | 231864                         | [T/G]       | NA                                         |
| Ca_Desi_Ch_scaffold00158_235411 | Ca_desi_scaffold   | 235411                         | [T/C]       | NA                                         |
| Ca_Desi_Ch_scaffold00158_253843 | Ca_desi_scaffold   | 253843                         | [T/G]       | NA                                         |
| Ca_Desi_Ch_scaffold00158_253854 | Ca_desi_scaffold   | 253854                         | [T/G]       | NA                                         |
| Ca_Desi_Ch_scaffold00158_254971 | Ca_desi_scaffold   | 254971                         | [T/C]       | NA                                         |

| <b>SNP IDs</b>                    | <b>Chromosomes</b> | <b>Physical positions (bp)</b> | <b>SNPs</b> | <b>NCBI SNPdb accession IDs (NCBI_ss#)</b> |
|-----------------------------------|--------------------|--------------------------------|-------------|--------------------------------------------|
| Ca_Desig_Chr_scaffold00158_254982 | Ca_desig_scaffold  | 254982                         | [T/G]       | NA                                         |
| Ca_Desig_Chr_scaffold00158_254999 | Ca_desig_scaffold  | 254999                         | [T/C]       | NA                                         |
| Ca_Desig_Chr_scaffold00158_255002 | Ca_desig_scaffold  | 255002                         | [T/C]       | NA                                         |
| Ca_Desig_Chr_scaffold00158_255005 | Ca_desig_scaffold  | 255005                         | [T/C]       | NA                                         |
| Ca_Desig_Chr_scaffold00158_255013 | Ca_desig_scaffold  | 255013                         | [T/G]       | NA                                         |
| Ca_Desig_Chr_scaffold00158_255015 | Ca_desig_scaffold  | 255015                         | [A/G]       | NA                                         |
| Ca_Desig_Chr_scaffold00158_255030 | Ca_desig_scaffold  | 255030                         | [T/C]       | NA                                         |
| Ca_Desig_Chr_scaffold00158_260022 | Ca_desig_scaffold  | 260022                         | [A/G]       | NA                                         |
| Ca_Desig_Chr_scaffold00158_260029 | Ca_desig_scaffold  | 260029                         | [A/G]       | NA                                         |
| Ca_Desig_Chr_scaffold00158_265184 | Ca_desig_scaffold  | 265184                         | [T/C]       | NA                                         |
| Ca_Desig_Chr_scaffold00158_265201 | Ca_desig_scaffold  | 265201                         | [A/C]       | NA                                         |
| Ca_Desig_Chr_scaffold00158_265207 | Ca_desig_scaffold  | 265207                         | [A/G]       | NA                                         |
| Ca_Desig_Chr_scaffold00159_34201  | Ca_desig_scaffold  | 34201                          | [T/A]       | NA                                         |
| Ca_Desig_Chr_scaffold00159_34434  | Ca_desig_scaffold  | 34434                          | [G/A]       | NA                                         |
| Ca_Desig_Chr_scaffold00159_81877  | Ca_desig_scaffold  | 81877                          | [T/C]       | NA                                         |
| Ca_Desig_Chr_scaffold00159_81889  | Ca_desig_scaffold  | 81889                          | [A/C]       | NA                                         |
| Ca_Desig_Chr_scaffold00159_81891  | Ca_desig_scaffold  | 81891                          | [C/A]       | NA                                         |
| Ca_Desig_Chr_scaffold00159_94650  | Ca_desig_scaffold  | 94650                          | [A/C]       | NA                                         |
| Ca_Desig_Chr_scaffold00159_100383 | Ca_desig_scaffold  | 100383                         | [A/T]       | NA                                         |
| Ca_Desig_Chr_scaffold00159_137619 | Ca_desig_scaffold  | 137619                         | [T/C]       | NA                                         |
| Ca_Desig_Chr_scaffold00159_137625 | Ca_desig_scaffold  | 137625                         | [C/T]       | NA                                         |
| Ca_Desig_Chr_scaffold00159_137633 | Ca_desig_scaffold  | 137633                         | [A/T]       | NA                                         |
| Ca_Desig_Chr_scaffold00159_137670 | Ca_desig_scaffold  | 137670                         | [A/C]       | NA                                         |
| Ca_Desig_Chr_scaffold00159_143175 | Ca_desig_scaffold  | 143175                         | [A/G]       | NA                                         |
| Ca_Desig_Chr_scaffold00159_143183 | Ca_desig_scaffold  | 143183                         | [A/G]       | NA                                         |
| Ca_Desig_Chr_scaffold00159_220494 | Ca_desig_scaffold  | 220494                         | [A/G]       | NA                                         |
| Ca_Desig_Chr_scaffold00159_228796 | Ca_desig_scaffold  | 228796                         | [C/T]       | NA                                         |
| Ca_Desig_Chr_scaffold00159_263751 | Ca_desig_scaffold  | 263751                         | [T/A]       | NA                                         |
| Ca_Desig_Chr_scaffold00159_263922 | Ca_desig_scaffold  | 263922                         | [A/T]       | NA                                         |
| Ca_Desig_Chr_scaffold00159_263952 | Ca_desig_scaffold  | 263952                         | [A/G]       | NA                                         |
| Ca_Desig_Chr_scaffold00159_264003 | Ca_desig_scaffold  | 264003                         | [G/A]       | NA                                         |
| Ca_Desig_Chr_scaffold00159_271503 | Ca_desig_scaffold  | 271503                         | [C/G]       | NA                                         |
| Ca_Desig_Chr_scaffold00160_17739  | Ca_desig_scaffold  | 17739                          | [T/G]       | NA                                         |
| Ca_Desig_Chr_scaffold00160_17741  | Ca_desig_scaffold  | 17741                          | [T/C]       | NA                                         |

| <b>SNP IDs</b>                    | <b>Chromosomes</b> | <b>Physical positions (bp)</b> | <b>SNPs</b> | <b>NCBI SNPdb accession IDs (NCBI_ss#)</b> |
|-----------------------------------|--------------------|--------------------------------|-------------|--------------------------------------------|
| Ca_Desig_Chr_scaffold00160_44051  | Ca_desig_scaffold  | 44051                          | [A/C]       | NA                                         |
| Ca_Desig_Chr_scaffold00160_66292  | Ca_desig_scaffold  | 66292                          | [T/C]       | NA                                         |
| Ca_Desig_Chr_scaffold00160_66465  | Ca_desig_scaffold  | 66465                          | [T/G]       | NA                                         |
| Ca_Desig_Chr_scaffold00160_84052  | Ca_desig_scaffold  | 84052                          | [G/T]       | NA                                         |
| Ca_Desig_Chr_scaffold00160_169196 | Ca_desig_scaffold  | 169196                         | [A/G]       | NA                                         |
| Ca_Desig_Chr_scaffold00160_204090 | Ca_desig_scaffold  | 204090                         | [T/G]       | NA                                         |
| Ca_Desig_Chr_scaffold00160_207500 | Ca_desig_scaffold  | 207500                         | [T/G]       | NA                                         |
| Ca_Desig_Chr_scaffold00160_219376 | Ca_desig_scaffold  | 219376                         | [A/T]       | NA                                         |
| Ca_Desig_Chr_scaffold00160_257521 | Ca_desig_scaffold  | 257521                         | [A/C]       | NA                                         |
| Ca_Desig_Chr_scaffold00160_258393 | Ca_desig_scaffold  | 258393                         | [G/C]       | NA                                         |
| Ca_Desig_Chr_scaffold00160_258398 | Ca_desig_scaffold  | 258398                         | [A/G]       | NA                                         |
| Ca_Desig_Chr_scaffold00160_258407 | Ca_desig_scaffold  | 258407                         | [T/G]       | NA                                         |
| Ca_Desig_Chr_scaffold00160_258409 | Ca_desig_scaffold  | 258409                         | [T/C]       | NA                                         |
| Ca_Desig_Chr_scaffold00166_6854   | Ca_desig_scaffold  | 6854                           | [A/G]       | NA                                         |
| Ca_Desig_Chr_scaffold00166_7852   | Ca_desig_scaffold  | 7852                           | [A/C]       | NA                                         |
| Ca_Desig_Chr_scaffold00166_72126  | Ca_desig_scaffold  | 72126                          | [T/A]       | NA                                         |
| Ca_Desig_Chr_scaffold00166_72136  | Ca_desig_scaffold  | 72136                          | [T/G]       | NA                                         |
| Ca_Desig_Chr_scaffold00166_149862 | Ca_desig_scaffold  | 149862                         | [A/C]       | NA                                         |
| Ca_Desig_Chr_scaffold00166_172651 | Ca_desig_scaffold  | 172651                         | [T/A]       | NA                                         |
| Ca_Desig_Chr_scaffold00166_172652 | Ca_desig_scaffold  | 172652                         | [C/A]       | NA                                         |
| Ca_Desig_Chr_scaffold00166_172653 | Ca_desig_scaffold  | 172653                         | [T/G]       | NA                                         |
| Ca_Desig_Chr_scaffold00166_188198 | Ca_desig_scaffold  | 188198                         | [T/C]       | NA                                         |
| Ca_Desig_Chr_scaffold00166_188200 | Ca_desig_scaffold  | 188200                         | [A/G]       | NA                                         |
| Ca_Desig_Chr_scaffold00166_234019 | Ca_desig_scaffold  | 234019                         | [A/G]       | NA                                         |
| Ca_Desig_Chr_scaffold00166_234029 | Ca_desig_scaffold  | 234029                         | [T/G]       | NA                                         |
| Ca_Desig_Chr_scaffold00166_245014 | Ca_desig_scaffold  | 245014                         | [T/G]       | NA                                         |
| Ca_Desig_Chr_scaffold00166_245018 | Ca_desig_scaffold  | 245018                         | [T/C]       | NA                                         |
| Ca_Desig_Chr_scaffold00173_170755 | Ca_desig_scaffold  | 170755                         | [T/G]       | NA                                         |
| Ca_Desig_Chr_scaffold00173_170756 | Ca_desig_scaffold  | 170756                         | [A/T]       | NA                                         |
| Ca_Desig_Chr_scaffold00173_215311 | Ca_desig_scaffold  | 215311                         | [A/G]       | NA                                         |
| Ca_Desig_Chr_scaffold00173_215325 | Ca_desig_scaffold  | 215325                         | [A/C]       | NA                                         |
| Ca_Desig_Chr_scaffold00173_215331 | Ca_desig_scaffold  | 215331                         | [T/C]       | NA                                         |
| Ca_Desig_Chr_scaffold00173_215338 | Ca_desig_scaffold  | 215338                         | [A/C]       | NA                                         |
| Ca_Desig_Chr_scaffold00173_215342 | Ca_desig_scaffold  | 215342                         | [T/A]       | NA                                         |

| <b>SNP IDs</b>                    | <b>Chromosomes</b> | <b>Physical positions (bp)</b> | <b>SNPs</b> | <b>NCBI SNPdb accession IDs (NCBI_ss#)</b> |
|-----------------------------------|--------------------|--------------------------------|-------------|--------------------------------------------|
| Ca_Desig_Chr_scaffold00173_215346 | Ca_desig_scaffold  | 215346                         | [T/A]       | NA                                         |
| Ca_Desig_Chr_scaffold00173_215348 | Ca_desig_scaffold  | 215348                         | [A/G]       | NA                                         |
| Ca_Desig_Chr_scaffold00173_215358 | Ca_desig_scaffold  | 215358                         | [T/C]       | NA                                         |
| Ca_Desig_Chr_scaffold00173_215364 | Ca_desig_scaffold  | 215364                         | [T/C]       | NA                                         |
| Ca_Desig_Chr_scaffold00173_219458 | Ca_desig_scaffold  | 219458                         | [A/G]       | NA                                         |
| Ca_Desig_Chr_scaffold00173_219467 | Ca_desig_scaffold  | 219467                         | [A/C]       | NA                                         |
| Ca_Desig_Chr_scaffold00173_219472 | Ca_desig_scaffold  | 219472                         | [T/C]       | NA                                         |
| Ca_Desig_Chr_scaffold00173_228438 | Ca_desig_scaffold  | 228438                         | [C/A]       | NA                                         |
| Ca_Desig_Chr_scaffold00186_33276  | Ca_desig_scaffold  | 33276                          | [A/C]       | NA                                         |
| Ca_Desig_Chr_scaffold00186_125627 | Ca_desig_scaffold  | 125627                         | [T/C]       | NA                                         |
| Ca_Desig_Chr_scaffold00186_125673 | Ca_desig_scaffold  | 125673                         | [A/C]       | NA                                         |
| Ca_Desig_Chr_scaffold00186_128700 | Ca_desig_scaffold  | 128700                         | [A/G]       | NA                                         |
| Ca_Desig_Chr_scaffold00186_128702 | Ca_desig_scaffold  | 128702                         | [A/G]       | NA                                         |
| Ca_Desig_Chr_scaffold00186_128708 | Ca_desig_scaffold  | 128708                         | [T/A]       | NA                                         |
| Ca_Desig_Chr_scaffold00186_128721 | Ca_desig_scaffold  | 128721                         | [T/C]       | NA                                         |
| Ca_Desig_Chr_scaffold00186_128729 | Ca_desig_scaffold  | 128729                         | [T/G]       | NA                                         |
| Ca_Desig_Chr_scaffold00186_139725 | Ca_desig_scaffold  | 139725                         | [A/C]       | NA                                         |
| Ca_Desig_Chr_scaffold00186_139741 | Ca_desig_scaffold  | 139741                         | [A/G]       | NA                                         |
| Ca_Desig_Chr_scaffold00186_139746 | Ca_desig_scaffold  | 139746                         | [A/G]       | NA                                         |
| Ca_Desig_Chr_scaffold00186_166884 | Ca_desig_scaffold  | 166884                         | [T/G]       | NA                                         |
| Ca_Desig_Chr_scaffold00186_167699 | Ca_desig_scaffold  | 167699                         | [T/G]       | NA                                         |
| Ca_Desig_Chr_scaffold00186_168261 | Ca_desig_scaffold  | 168261                         | [A/T]       | NA                                         |
| Ca_Desig_Chr_scaffold00186_168265 | Ca_desig_scaffold  | 168265                         | [T/C]       | NA                                         |
| Ca_Desig_Chr_scaffold00186_168270 | Ca_desig_scaffold  | 168270                         | [A/G]       | NA                                         |
| Ca_Desig_Chr_scaffold00186_168271 | Ca_desig_scaffold  | 168271                         | [T/C]       | NA                                         |
| Ca_Desig_Chr_scaffold00186_168272 | Ca_desig_scaffold  | 168272                         | [T/C]       | NA                                         |
| Ca_Desig_Chr_scaffold00186_168274 | Ca_desig_scaffold  | 168274                         | [T/C]       | NA                                         |
| Ca_Desig_Chr_scaffold00186_168275 | Ca_desig_scaffold  | 168275                         | [T/C]       | NA                                         |
| Ca_Desig_Chr_scaffold00186_168279 | Ca_desig_scaffold  | 168279                         | [T/C]       | NA                                         |
| Ca_Desig_Chr_scaffold00186_168281 | Ca_desig_scaffold  | 168281                         | [A/G]       | NA                                         |
| Ca_Desig_Chr_scaffold00186_168288 | Ca_desig_scaffold  | 168288                         | [A/G]       | NA                                         |
| Ca_Desig_Chr_scaffold00186_168294 | Ca_desig_scaffold  | 168294                         | [T/C]       | NA                                         |
| Ca_Desig_Chr_scaffold00186_168295 | Ca_desig_scaffold  | 168295                         | [T/C]       | NA                                         |
| Ca_Desig_Chr_scaffold00186_168303 | Ca_desig_scaffold  | 168303                         | [A/G]       | NA                                         |

| <b>SNP IDs</b>                    | <b>Chromosomes</b> | <b>Physical positions (bp)</b> | <b>SNPs</b> | <b>NCBI SNPdb accession IDs (NCBI_ss#)</b> |
|-----------------------------------|--------------------|--------------------------------|-------------|--------------------------------------------|
| Ca_Desig_Chr_scaffold00186_168306 | Ca_desig_scaffold  | 168306                         | [T/C]       | NA                                         |
| Ca_Desig_Chr_scaffold00186_168310 | Ca_desig_scaffold  | 168310                         | [T/A]       | NA                                         |
| Ca_Desig_Chr_scaffold00186_170164 | Ca_desig_scaffold  | 170164                         | [T/C]       | NA                                         |
| Ca_Desig_Chr_scaffold00186_170178 | Ca_desig_scaffold  | 170178                         | [C/T]       | NA                                         |
| Ca_Desig_Chr_scaffold00186_170202 | Ca_desig_scaffold  | 170202                         | [T/C]       | NA                                         |
| Ca_Desig_Chr_scaffold00186_170636 | Ca_desig_scaffold  | 170636                         | [G/A]       | NA                                         |
| Ca_Desig_Chr_scaffold00186_170856 | Ca_desig_scaffold  | 170856                         | [A/G]       | NA                                         |
| Ca_Desig_Chr_scaffold00186_171176 | Ca_desig_scaffold  | 171176                         | [G/A]       | NA                                         |
| Ca_Desig_Chr_scaffold00186_258022 | Ca_desig_scaffold  | 258022                         | [C/T]       | NA                                         |
| Ca_Desig_Chr_scaffold00186_258025 | Ca_desig_scaffold  | 258025                         | [A/G]       | NA                                         |
| Ca_Desig_Chr_scaffold00186_258027 | Ca_desig_scaffold  | 258027                         | [C/T]       | NA                                         |
| Ca_Desig_Chr_scaffold00189_21240  | Ca_desig_scaffold  | 21240                          | [T/C]       | NA                                         |
| Ca_Desig_Chr_scaffold00189_194921 | Ca_desig_scaffold  | 194921                         | [A/G]       | NA                                         |
| Ca_Desig_Chr_scaffold00189_194964 | Ca_desig_scaffold  | 194964                         | [T/G]       | NA                                         |
| Ca_Desig_Chr_scaffold00189_219129 | Ca_desig_scaffold  | 219129                         | [A/G]       | NA                                         |
| Ca_Desig_Chr_scaffold00192_3700   | Ca_desig_scaffold  | 3700                           | [A/T]       | NA                                         |
| Ca_Desig_Chr_scaffold00192_68490  | Ca_desig_scaffold  | 68490                          | [T/G]       | NA                                         |
| Ca_Desig_Chr_scaffold00192_68498  | Ca_desig_scaffold  | 68498                          | [C/T]       | NA                                         |
| Ca_Desig_Chr_scaffold00192_115483 | Ca_desig_scaffold  | 115483                         | [A/C]       | NA                                         |
| Ca_Desig_Chr_scaffold00192_115485 | Ca_desig_scaffold  | 115485                         | [G/C]       | NA                                         |
| Ca_Desig_Chr_scaffold00192_115493 | Ca_desig_scaffold  | 115493                         | [A/C]       | NA                                         |
| Ca_Desig_Chr_scaffold00192_115497 | Ca_desig_scaffold  | 115497                         | [T/C]       | NA                                         |
| Ca_Desig_Chr_scaffold00192_115499 | Ca_desig_scaffold  | 115499                         | [A/C]       | NA                                         |
| Ca_Desig_Chr_scaffold00192_115510 | Ca_desig_scaffold  | 115510                         | [G/C]       | NA                                         |
| Ca_Desig_Chr_scaffold00192_122521 | Ca_desig_scaffold  | 122521                         | [T/G]       | NA                                         |
| Ca_Desig_Chr_scaffold00192_130771 | Ca_desig_scaffold  | 130771                         | [A/C]       | NA                                         |
| Ca_Desig_Chr_scaffold00192_175517 | Ca_desig_scaffold  | 175517                         | [A/C]       | NA                                         |
| Ca_Desig_Chr_scaffold00192_192996 | Ca_desig_scaffold  | 192996                         | [T/C]       | NA                                         |
| Ca_Desig_Chr_scaffold00192_193062 | Ca_desig_scaffold  | 193062                         | [T/C]       | NA                                         |
| Ca_Desig_Chr_scaffold00192_194366 | Ca_desig_scaffold  | 194366                         | [G/C]       | NA                                         |
| Ca_Desig_Chr_scaffold00192_194368 | Ca_desig_scaffold  | 194368                         | [A/C]       | NA                                         |
| Ca_Desig_Chr_scaffold00195_31853  | Ca_desig_scaffold  | 31853                          | [T/C]       | NA                                         |
| Ca_Desig_Chr_scaffold00195_31875  | Ca_desig_scaffold  | 31875                          | [T/C]       | NA                                         |
| Ca_Desig_Chr_scaffold00195_31953  | Ca_desig_scaffold  | 31953                          | [T/G]       | NA                                         |

| <b>SNP IDs</b>                  | <b>Chromosomes</b> | <b>Physical positions (bp)</b> | <b>SNPs</b> | <b>NCBI SNPdb accession IDs (NCBI_ss#)</b> |
|---------------------------------|--------------------|--------------------------------|-------------|--------------------------------------------|
| Ca_Desi_Ch_scaffold00195_32133  | Ca_desi_scaffold   | 32133                          | [T/G]       | NA                                         |
| Ca_Desi_Ch_scaffold00195_32137  | Ca_desi_scaffold   | 32137                          | [A/G]       | NA                                         |
| Ca_Desi_Ch_scaffold00195_32151  | Ca_desi_scaffold   | 32151                          | [T/G]       | NA                                         |
| Ca_Desi_Ch_scaffold00195_102423 | Ca_desi_scaffold   | 102423                         | [A/T]       | NA                                         |
| Ca_Desi_Ch_scaffold00195_149798 | Ca_desi_scaffold   | 149798                         | [A/T]       | NA                                         |
| Ca_Desi_Ch_scaffold00195_149799 | Ca_desi_scaffold   | 149799                         | [A/C]       | NA                                         |
| Ca_Desi_Ch_scaffold00195_149800 | Ca_desi_scaffold   | 149800                         | [G/T]       | NA                                         |
| Ca_Desi_Ch_scaffold00195_157498 | Ca_desi_scaffold   | 157498                         | [T/G]       | NA                                         |
| Ca_Desi_Ch_scaffold00195_175239 | Ca_desi_scaffold   | 175239                         | [A/G]       | NA                                         |
| Ca_Desi_Ch_scaffold00197_117350 | Ca_desi_scaffold   | 117350                         | [A/T]       | NA                                         |
| Ca_Desi_Ch_scaffold00197_117360 | Ca_desi_scaffold   | 117360                         | [A/C]       | NA                                         |
| Ca_Desi_Ch_scaffold00197_117391 | Ca_desi_scaffold   | 117391                         | [A/T]       | NA                                         |
| Ca_Desi_Ch_scaffold00197_120616 | Ca_desi_scaffold   | 120616                         | [A/C]       | NA                                         |
| Ca_Desi_Ch_scaffold00197_120654 | Ca_desi_scaffold   | 120654                         | [T/C]       | NA                                         |
| Ca_Desi_Ch_scaffold00197_178542 | Ca_desi_scaffold   | 178542                         | [T/C]       | NA                                         |
| Ca_Desi_Ch_scaffold00197_178549 | Ca_desi_scaffold   | 178549                         | [A/G]       | NA                                         |
| Ca_Desi_Ch_scaffold00197_178555 | Ca_desi_scaffold   | 178555                         | [A/G]       | NA                                         |
| Ca_Desi_Ch_scaffold00197_178562 | Ca_desi_scaffold   | 178562                         | [T/C]       | NA                                         |
| Ca_Desi_Ch_scaffold00197_187759 | Ca_desi_scaffold   | 187759                         | [A/T]       | NA                                         |
| Ca_Desi_Ch_scaffold00198_15828  | Ca_desi_scaffold   | 15828                          | [T/C]       | NA                                         |
| Ca_Desi_Ch_scaffold00198_15857  | Ca_desi_scaffold   | 15857                          | [A/G]       | NA                                         |
| Ca_Desi_Ch_scaffold00198_32197  | Ca_desi_scaffold   | 32197                          | [T/C]       | NA                                         |
| Ca_Desi_Ch_scaffold00198_54604  | Ca_desi_scaffold   | 54604                          | [A/G]       | NA                                         |
| Ca_Desi_Ch_scaffold00198_56882  | Ca_desi_scaffold   | 56882                          | [T/C]       | NA                                         |
| Ca_Desi_Ch_scaffold00198_56883  | Ca_desi_scaffold   | 56883                          | [G/T]       | NA                                         |
| Ca_Desi_Ch_scaffold00198_81694  | Ca_desi_scaffold   | 81694                          | [T/A]       | NA                                         |
| Ca_Desi_Ch_scaffold00198_81739  | Ca_desi_scaffold   | 81739                          | [A/G]       | NA                                         |
| Ca_Desi_Ch_scaffold00198_84329  | Ca_desi_scaffold   | 84329                          | [G/T]       | NA                                         |
| Ca_Desi_Ch_scaffold00198_110400 | Ca_desi_scaffold   | 110400                         | [T/G]       | NA                                         |
| Ca_Desi_Ch_scaffold00198_127040 | Ca_desi_scaffold   | 127040                         | [A/C]       | NA                                         |
| Ca_Desi_Ch_scaffold00198_132838 | Ca_desi_scaffold   | 132838                         | [T/A]       | NA                                         |
| Ca_Desi_Ch_scaffold00198_132839 | Ca_desi_scaffold   | 132839                         | [A/T]       | NA                                         |
| Ca_Desi_Ch_scaffold00198_169567 | Ca_desi_scaffold   | 169567                         | [T/G]       | NA                                         |
| Ca_Desi_Ch_scaffold00198_180689 | Ca_desi_scaffold   | 180689                         | [T/A]       | NA                                         |

| <b>SNP IDs</b>                    | <b>Chromosomes</b> | <b>Physical positions (bp)</b> | <b>SNPs</b> | <b>NCBI SNPdb accession IDs (NCBI_ss#)</b> |
|-----------------------------------|--------------------|--------------------------------|-------------|--------------------------------------------|
| Ca_Desig_Chr_scaffold00198_198668 | Ca_desig_scaffold  | 198668                         | [T/C]       | NA                                         |
| Ca_Desig_Chr_scaffold00198_198734 | Ca_desig_scaffold  | 198734                         | [T/G]       | NA                                         |
| Ca_Desig_Chr_scaffold00198_221263 | Ca_desig_scaffold  | 221263                         | [T/G]       | NA                                         |
| Ca_Desig_Chr_scaffold00198_221315 | Ca_desig_scaffold  | 221315                         | [A/G]       | NA                                         |
| Ca_Desig_Chr_scaffold00198_221637 | Ca_desig_scaffold  | 221637                         | [G/T]       | NA                                         |
| Ca_Desig_Chr_scaffold00198_221642 | Ca_desig_scaffold  | 221642                         | [G/A]       | NA                                         |
| Ca_Desig_Chr_scaffold00198_221647 | Ca_desig_scaffold  | 221647                         | [C/A]       | NA                                         |
| Ca_Desig_Chr_scaffold00198_221651 | Ca_desig_scaffold  | 221651                         | [T/C]       | NA                                         |
| Ca_Desig_Chr_scaffold00198_221654 | Ca_desig_scaffold  | 221654                         | [T/G]       | NA                                         |
| Ca_Desig_Chr_scaffold00198_221656 | Ca_desig_scaffold  | 221656                         | [T/G]       | NA                                         |
| Ca_Desig_Chr_scaffold00198_221658 | Ca_desig_scaffold  | 221658                         | [C/T]       | NA                                         |
| Ca_Desig_Chr_scaffold00198_248246 | Ca_desig_scaffold  | 248246                         | [A/C]       | NA                                         |
| Ca_Desig_Chr_scaffold00198_248265 | Ca_desig_scaffold  | 248265                         | [A/G]       | NA                                         |
| Ca_Desig_Chr_scaffold00201_14683  | Ca_desig_scaffold  | 14683                          | [A/C]       | NA                                         |
| Ca_Desig_Chr_scaffold00201_14718  | Ca_desig_scaffold  | 14718                          | [A/G]       | NA                                         |
| Ca_Desig_Chr_scaffold00201_14825  | Ca_desig_scaffold  | 14825                          | [A/C]       | NA                                         |
| Ca_Desig_Chr_scaffold00201_15350  | Ca_desig_scaffold  | 15350                          | [T/G]       | NA                                         |
| Ca_Desig_Chr_scaffold00201_15359  | Ca_desig_scaffold  | 15359                          | [T/C]       | NA                                         |
| Ca_Desig_Chr_scaffold00201_15369  | Ca_desig_scaffold  | 15369                          | [T/G]       | NA                                         |
| Ca_Desig_Chr_scaffold00201_15375  | Ca_desig_scaffold  | 15375                          | [G/T]       | NA                                         |
| Ca_Desig_Chr_scaffold00201_15387  | Ca_desig_scaffold  | 15387                          | [A/G]       | NA                                         |
| Ca_Desig_Chr_scaffold00201_15391  | Ca_desig_scaffold  | 15391                          | [A/G]       | NA                                         |
| Ca_Desig_Chr_scaffold00201_15395  | Ca_desig_scaffold  | 15395                          | [A/G]       | NA                                         |
| Ca_Desig_Chr_scaffold00201_38804  | Ca_desig_scaffold  | 38804                          | [T/G]       | NA                                         |
| Ca_Desig_Chr_scaffold00201_49212  | Ca_desig_scaffold  | 49212                          | [A/G]       | NA                                         |
| Ca_Desig_Chr_scaffold00201_49231  | Ca_desig_scaffold  | 49231                          | [A/G]       | NA                                         |
| Ca_Desig_Chr_scaffold00201_49233  | Ca_desig_scaffold  | 49233                          | [A/C]       | NA                                         |
| Ca_Desig_Chr_scaffold00201_49237  | Ca_desig_scaffold  | 49237                          | [T/C]       | NA                                         |
| Ca_Desig_Chr_scaffold00201_49242  | Ca_desig_scaffold  | 49242                          | [A/G]       | NA                                         |
| Ca_Desig_Chr_scaffold00201_49244  | Ca_desig_scaffold  | 49244                          | [T/G]       | NA                                         |
| Ca_Desig_Chr_scaffold00201_49252  | Ca_desig_scaffold  | 49252                          | [A/G]       | NA                                         |
| Ca_Desig_Chr_scaffold00201_49262  | Ca_desig_scaffold  | 49262                          | [T/C]       | NA                                         |
| Ca_Desig_Chr_scaffold00201_49267  | Ca_desig_scaffold  | 49267                          | [A/G]       | NA                                         |
| Ca_Desig_Chr_scaffold00201_51730  | Ca_desig_scaffold  | 51730                          | [T/G]       | NA                                         |

| <b>SNP IDs</b>                    | <b>Chromosomes</b> | <b>Physical positions (bp)</b> | <b>SNPs</b> | <b>NCBI SNPdb accession IDs (NCBI_ss#)</b> |
|-----------------------------------|--------------------|--------------------------------|-------------|--------------------------------------------|
| Ca_Desig_Chr_scaffold00201_70920  | Ca_desig_scaffold  | 70920                          | [G/C]       | NA                                         |
| Ca_Desig_Chr_scaffold00201_70921  | Ca_desig_scaffold  | 70921                          | [G/T]       | NA                                         |
| Ca_Desig_Chr_scaffold00201_91141  | Ca_desig_scaffold  | 91141                          | [T/C]       | NA                                         |
| Ca_Desig_Chr_scaffold00201_91145  | Ca_desig_scaffold  | 91145                          | [A/G]       | NA                                         |
| Ca_Desig_Chr_scaffold00201_91148  | Ca_desig_scaffold  | 91148                          | [A/G]       | NA                                         |
| Ca_Desig_Chr_scaffold00201_91154  | Ca_desig_scaffold  | 91154                          | [T/C]       | NA                                         |
| Ca_Desig_Chr_scaffold00201_91160  | Ca_desig_scaffold  | 91160                          | [T/C]       | NA                                         |
| Ca_Desig_Chr_scaffold00201_91161  | Ca_desig_scaffold  | 91161                          | [T/C]       | NA                                         |
| Ca_Desig_Chr_scaffold00201_91163  | Ca_desig_scaffold  | 91163                          | [A/G]       | NA                                         |
| Ca_Desig_Chr_scaffold00201_91165  | Ca_desig_scaffold  | 91165                          | [A/G]       | NA                                         |
| Ca_Desig_Chr_scaffold00201_91167  | Ca_desig_scaffold  | 91167                          | [A/C]       | NA                                         |
| Ca_Desig_Chr_scaffold00201_91169  | Ca_desig_scaffold  | 91169                          | [T/C]       | NA                                         |
| Ca_Desig_Chr_scaffold00201_91170  | Ca_desig_scaffold  | 91170                          | [C/T]       | NA                                         |
| Ca_Desig_Chr_scaffold00201_91171  | Ca_desig_scaffold  | 91171                          | [T/C]       | NA                                         |
| Ca_Desig_Chr_scaffold00201_91172  | Ca_desig_scaffold  | 91172                          | [C/T]       | NA                                         |
| Ca_Desig_Chr_scaffold00201_91175  | Ca_desig_scaffold  | 91175                          | [T/C]       | NA                                         |
| Ca_Desig_Chr_scaffold00201_91176  | Ca_desig_scaffold  | 91176                          | [C/T]       | NA                                         |
| Ca_Desig_Chr_scaffold00201_91177  | Ca_desig_scaffold  | 91177                          | [T/C]       | NA                                         |
| Ca_Desig_Chr_scaffold00201_91181  | Ca_desig_scaffold  | 91181                          | [A/G]       | NA                                         |
| Ca_Desig_Chr_scaffold00201_91186  | Ca_desig_scaffold  | 91186                          | [T/C]       | NA                                         |
| Ca_Desig_Chr_scaffold00201_91190  | Ca_desig_scaffold  | 91190                          | [A/G]       | NA                                         |
| Ca_Desig_Chr_scaffold00201_91191  | Ca_desig_scaffold  | 91191                          | [A/G]       | NA                                         |
| Ca_Desig_Chr_scaffold00201_91193  | Ca_desig_scaffold  | 91193                          | [T/C]       | NA                                         |
| Ca_Desig_Chr_scaffold00201_91198  | Ca_desig_scaffold  | 91198                          | [T/C]       | NA                                         |
| Ca_Desig_Chr_scaffold00201_91199  | Ca_desig_scaffold  | 91199                          | [C/G]       | NA                                         |
| Ca_Desig_Chr_scaffold00201_91200  | Ca_desig_scaffold  | 91200                          | [A/C]       | NA                                         |
| Ca_Desig_Chr_scaffold00201_91203  | Ca_desig_scaffold  | 91203                          | [C/A]       | NA                                         |
| Ca_Desig_Chr_scaffold00201_155483 | Ca_desig_scaffold  | 155483                         | [A/C]       | NA                                         |
| Ca_Desig_Chr_scaffold00201_243261 | Ca_desig_scaffold  | 243261                         | [T/G]       | NA                                         |
| Ca_Desig_Chr_scaffold00201_243263 | Ca_desig_scaffold  | 243263                         | [T/C]       | NA                                         |
| Ca_Desig_Chr_scaffold00203_40378  | Ca_desig_scaffold  | 40378                          | [T/G]       | NA                                         |
| Ca_Desig_Chr_scaffold00203_40396  | Ca_desig_scaffold  | 40396                          | [A/G]       | NA                                         |
| Ca_Desig_Chr_scaffold00203_213541 | Ca_desig_scaffold  | 213541                         | [G/A]       | NA                                         |
| Ca_Desig_Chr_scaffold00203_214050 | Ca_desig_scaffold  | 214050                         | [A/C]       | NA                                         |



| <b>SNP IDs</b>                  | <b>Chromosomes</b> | <b>Physical positions (bp)</b> | <b>SNPs</b> | <b>NCBI SNPdb accession IDs (NCBI_ss#)</b> |
|---------------------------------|--------------------|--------------------------------|-------------|--------------------------------------------|
| Ca_Desi_Ch_scaffold00203_217142 | Ca_desi_scaffold   | 217142                         | [C/T]       | NA                                         |
| Ca_Desi_Ch_scaffold00203_217175 | Ca_desi_scaffold   | 217175                         | [A/G]       | NA                                         |
| Ca_Desi_Ch_scaffold00203_219495 | Ca_desi_scaffold   | 219495                         | [C/T]       | NA                                         |
| Ca_Desi_Ch_scaffold00203_219670 | Ca_desi_scaffold   | 219670                         | [A/G]       | NA                                         |
| Ca_Desi_Ch_scaffold00203_219671 | Ca_desi_scaffold   | 219671                         | [G/A]       | NA                                         |
| Ca_Desi_Ch_scaffold00203_219672 | Ca_desi_scaffold   | 219672                         | [A/G]       | NA                                         |
| Ca_Desi_Ch_scaffold00203_219682 | Ca_desi_scaffold   | 219682                         | [A/G]       | NA                                         |
| Ca_Desi_Ch_scaffold00203_220130 | Ca_desi_scaffold   | 220130                         | [C/T]       | NA                                         |
| Ca_Desi_Ch_scaffold00203_244409 | Ca_desi_scaffold   | 244409                         | [G/A]       | NA                                         |
| Ca_Desi_Ch_scaffold00203_244444 | Ca_desi_scaffold   | 244444                         | [C/T]       | NA                                         |
| Ca_Desi_Ch_scaffold00205_86237  | Ca_desi_scaffold   | 86237                          | [T/A]       | NA                                         |
| Ca_Desi_Ch_scaffold00205_95934  | Ca_desi_scaffold   | 95934                          | [T/A]       | NA                                         |
| Ca_Desi_Ch_scaffold00205_95940  | Ca_desi_scaffold   | 95940                          | [T/G]       | NA                                         |
| Ca_Desi_Ch_scaffold00205_95947  | Ca_desi_scaffold   | 95947                          | [A/C]       | NA                                         |
| Ca_Desi_Ch_scaffold00205_95975  | Ca_desi_scaffold   | 95975                          | [A/T]       | NA                                         |
| Ca_Desi_Ch_scaffold00205_95977  | Ca_desi_scaffold   | 95977                          | [T/C]       | NA                                         |
| Ca_Desi_Ch_scaffold00205_96001  | Ca_desi_scaffold   | 96001                          | [A/C]       | NA                                         |
| Ca_Desi_Ch_scaffold00205_96011  | Ca_desi_scaffold   | 96011                          | [T/C]       | NA                                         |
| Ca_Desi_Ch_scaffold00205_96037  | Ca_desi_scaffold   | 96037                          | [A/C]       | NA                                         |
| Ca_Desi_Ch_scaffold00205_129511 | Ca_desi_scaffold   | 129511                         | [A/T]       | NA                                         |
| Ca_Desi_Ch_scaffold00205_185674 | Ca_desi_scaffold   | 185674                         | [G/T]       | NA                                         |
| Ca_Desi_Ch_scaffold00205_228291 | Ca_desi_scaffold   | 228291                         | [T/C]       | NA                                         |
| Ca_Desi_Ch_scaffold00205_230537 | Ca_desi_scaffold   | 230537                         | [T/G]       | NA                                         |
| Ca_Desi_Ch_scaffold00205_232570 | Ca_desi_scaffold   | 232570                         | [A/G]       | NA                                         |
| Ca_Desi_Ch_scaffold00205_245858 | Ca_desi_scaffold   | 245858                         | [T/A]       | NA                                         |
| Ca_Desi_Ch_scaffold00205_245964 | Ca_desi_scaffold   | 245964                         | [A/T]       | NA                                         |
| Ca_Desi_Ch_scaffold00205_246066 | Ca_desi_scaffold   | 246066                         | [C/A]       | NA                                         |
| Ca_Desi_Ch_scaffold00205_246704 | Ca_desi_scaffold   | 246704                         | [C/T]       | NA                                         |
| Ca_Desi_Ch_scaffold00205_246728 | Ca_desi_scaffold   | 246728                         | [A/C]       | NA                                         |
| Ca_Desi_Ch_scaffold00206_187380 | Ca_desi_scaffold   | 187380                         | [T/G]       | NA                                         |
| Ca_Desi_Ch_scaffold00206_241001 | Ca_desi_scaffold   | 241001                         | [T/G]       | NA                                         |
| Ca_Desi_Ch_scaffold00207_3925   | Ca_desi_scaffold   | 3925                           | [A/C]       | NA                                         |
| Ca_Desi_Ch_scaffold00207_6862   | Ca_desi_scaffold   | 6862                           | [A/G]       | NA                                         |
| Ca_Desi_Ch_scaffold00207_19391  | Ca_desi_scaffold   | 19391                          | [T/C]       | NA                                         |

| <b>SNP IDs</b>                    | <b>Chromosomes</b> | <b>Physical positions (bp)</b> | <b>SNPs</b> | <b>NCBI SNPdb accession IDs (NCBI_ss#)</b> |
|-----------------------------------|--------------------|--------------------------------|-------------|--------------------------------------------|
| Ca_Desig_Chr_scaffold00207_19393  | Ca_desig_scaffold  | 19393                          | [A/G]       | NA                                         |
| Ca_Desig_Chr_scaffold00207_19424  | Ca_desig_scaffold  | 19424                          | [T/G]       | NA                                         |
| Ca_Desig_Chr_scaffold00207_83704  | Ca_desig_scaffold  | 83704                          | [C/G]       | NA                                         |
| Ca_Desig_Chr_scaffold00207_83706  | Ca_desig_scaffold  | 83706                          | [G/A]       | NA                                         |
| Ca_Desig_Chr_scaffold00207_83707  | Ca_desig_scaffold  | 83707                          | [G/A]       | NA                                         |
| Ca_Desig_Chr_scaffold00207_83710  | Ca_desig_scaffold  | 83710                          | [A/G]       | NA                                         |
| Ca_Desig_Chr_scaffold00207_230063 | Ca_desig_scaffold  | 230063                         | [C/T]       | NA                                         |
| Ca_Desig_Chr_scaffold00207_230069 | Ca_desig_scaffold  | 230069                         | [A/G]       | NA                                         |
| Ca_Desig_Chr_scaffold00207_230071 | Ca_desig_scaffold  | 230071                         | [T/C]       | NA                                         |
| Ca_Desig_Chr_scaffold00207_230074 | Ca_desig_scaffold  | 230074                         | [T/C]       | NA                                         |
| Ca_Desig_Chr_scaffold00207_230076 | Ca_desig_scaffold  | 230076                         | [T/C]       | NA                                         |
| Ca_Desig_Chr_scaffold00207_230078 | Ca_desig_scaffold  | 230078                         | [A/G]       | NA                                         |
| Ca_Desig_Chr_scaffold00207_230081 | Ca_desig_scaffold  | 230081                         | [T/C]       | NA                                         |
| Ca_Desig_Chr_scaffold00207_230082 | Ca_desig_scaffold  | 230082                         | [T/C]       | NA                                         |
| Ca_Desig_Chr_scaffold00207_230086 | Ca_desig_scaffold  | 230086                         | [T/C]       | NA                                         |
| Ca_Desig_Chr_scaffold00207_230091 | Ca_desig_scaffold  | 230091                         | [T/C]       | NA                                         |
| Ca_Desig_Chr_scaffold00207_230092 | Ca_desig_scaffold  | 230092                         | [T/C]       | NA                                         |
| Ca_Desig_Chr_scaffold00207_230094 | Ca_desig_scaffold  | 230094                         | [T/C]       | NA                                         |
| Ca_Desig_Chr_scaffold00207_230097 | Ca_desig_scaffold  | 230097                         | [A/G]       | NA                                         |
| Ca_Desig_Chr_scaffold00207_230104 | Ca_desig_scaffold  | 230104                         | [T/C]       | NA                                         |
| Ca_Desig_Chr_scaffold00207_230108 | Ca_desig_scaffold  | 230108                         | [T/A]       | NA                                         |
| Ca_Desig_Chr_scaffold00208_111144 | Ca_desig_scaffold  | 111144                         | [G/T]       | NA                                         |
| Ca_Desig_Chr_scaffold00208_111145 | Ca_desig_scaffold  | 111145                         | [C/T]       | NA                                         |
| Ca_Desig_Chr_scaffold00208_111181 | Ca_desig_scaffold  | 111181                         | [C/G]       | NA                                         |
| Ca_Desig_Chr_scaffold00210_22701  | Ca_desig_scaffold  | 22701                          | [C/A]       | NA                                         |
| Ca_Desig_Chr_scaffold00210_50934  | Ca_desig_scaffold  | 50934                          | [T/G]       | NA                                         |
| Ca_Desig_Chr_scaffold00210_50959  | Ca_desig_scaffold  | 50959                          | [A/T]       | NA                                         |
| Ca_Desig_Chr_scaffold00210_51651  | Ca_desig_scaffold  | 51651                          | [A/C]       | NA                                         |
| Ca_Desig_Chr_scaffold00210_55518  | Ca_desig_scaffold  | 55518                          | [A/C]       | NA                                         |
| Ca_Desig_Chr_scaffold00210_121289 | Ca_desig_scaffold  | 121289                         | [T/G]       | NA                                         |
| Ca_Desig_Chr_scaffold00210_121306 | Ca_desig_scaffold  | 121306                         | [T/C]       | NA                                         |
| Ca_Desig_Chr_scaffold00210_121309 | Ca_desig_scaffold  | 121309                         | [A/C]       | NA                                         |
| Ca_Desig_Chr_scaffold00210_121317 | Ca_desig_scaffold  | 121317                         | [A/G]       | NA                                         |
| Ca_Desig_Chr_scaffold00210_205225 | Ca_desig_scaffold  | 205225                         | [G/A]       | NA                                         |

| <b>SNP IDs</b>                    | <b>Chromosomes</b> | <b>Physical positions (bp)</b> | <b>SNPs</b> | <b>NCBI SNPdb accession IDs (NCBI_ss#)</b> |
|-----------------------------------|--------------------|--------------------------------|-------------|--------------------------------------------|
| Ca_Desi_Chrc_scaffold00210_205243 | Ca_desi_scaffold   | 205243                         | [A/C]       | NA                                         |
| Ca_Desi_Chrc_scaffold00210_205252 | Ca_desi_scaffold   | 205252                         | [G/A]       | NA                                         |
| Ca_Desi_Chrc_scaffold00210_225120 | Ca_desi_scaffold   | 225120                         | [T/A]       | NA                                         |
| Ca_Desi_Chrc_scaffold00210_225122 | Ca_desi_scaffold   | 225122                         | [A/G]       | NA                                         |
| Ca_Desi_Chrc_scaffold00210_225133 | Ca_desi_scaffold   | 225133                         | [T/A]       | NA                                         |
| Ca_Desi_Chrc_scaffold00210_225139 | Ca_desi_scaffold   | 225139                         | [T/C]       | NA                                         |
| Ca_Desi_Chrc_scaffold00210_225152 | Ca_desi_scaffold   | 225152                         | [A/G]       | NA                                         |
| Ca_Desi_Chrc_scaffold00210_225161 | Ca_desi_scaffold   | 225161                         | [A/G]       | NA                                         |
| Ca_Desi_Chrc_scaffold00210_225170 | Ca_desi_scaffold   | 225170                         | [A/G]       | NA                                         |
| Ca_Desi_Chrc_scaffold00210_225173 | Ca_desi_scaffold   | 225173                         | [A/G]       | NA                                         |
| Ca_Desi_Chrc_scaffold00225_720    | Ca_desi_scaffold   | 720                            | [T/C]       | NA                                         |
| Ca_Desi_Chrc_scaffold00225_722    | Ca_desi_scaffold   | 722                            | [T/C]       | NA                                         |
| Ca_Desi_Chrc_scaffold00225_731    | Ca_desi_scaffold   | 731                            | [T/C]       | NA                                         |
| Ca_Desi_Chrc_scaffold00225_734    | Ca_desi_scaffold   | 734                            | [A/C]       | NA                                         |
| Ca_Desi_Chrc_scaffold00225_741    | Ca_desi_scaffold   | 741                            | [A/C]       | NA                                         |
| Ca_Desi_Chrc_scaffold00225_746    | Ca_desi_scaffold   | 746                            | [C/T]       | NA                                         |
| Ca_Desi_Chrc_scaffold00225_750    | Ca_desi_scaffold   | 750                            | [T/C]       | NA                                         |
| Ca_Desi_Chrc_scaffold00225_752    | Ca_desi_scaffold   | 752                            | [T/C]       | NA                                         |
| Ca_Desi_Chrc_scaffold00225_757    | Ca_desi_scaffold   | 757                            | [T/C]       | NA                                         |
| Ca_Desi_Chrc_scaffold00225_761    | Ca_desi_scaffold   | 761                            | [T/C]       | NA                                         |
| Ca_Desi_Chrc_scaffold00225_764    | Ca_desi_scaffold   | 764                            | [A/G]       | NA                                         |
| Ca_Desi_Chrc_scaffold00225_771    | Ca_desi_scaffold   | 771                            | [T/C]       | NA                                         |
| Ca_Desi_Chrc_scaffold00225_19810  | Ca_desi_scaffold   | 19810                          | [A/G]       | NA                                         |
| Ca_Desi_Chrc_scaffold00225_19812  | Ca_desi_scaffold   | 19812                          | [A/G]       | NA                                         |
| Ca_Desi_Chrc_scaffold00225_19813  | Ca_desi_scaffold   | 19813                          | [A/C]       | NA                                         |
| Ca_Desi_Chrc_scaffold00225_19814  | Ca_desi_scaffold   | 19814                          | [A/G]       | NA                                         |
| Ca_Desi_Chrc_scaffold00225_19815  | Ca_desi_scaffold   | 19815                          | [A/G]       | NA                                         |
| Ca_Desi_Chrc_scaffold00225_19833  | Ca_desi_scaffold   | 19833                          | [T/C]       | NA                                         |
| Ca_Desi_Chrc_scaffold00225_72386  | Ca_desi_scaffold   | 72386                          | [T/A]       | NA                                         |
| Ca_Desi_Chrc_scaffold00225_130522 | Ca_desi_scaffold   | 130522                         | [A/C]       | NA                                         |
| Ca_Desi_Chrc_scaffold00225_130525 | Ca_desi_scaffold   | 130525                         | [A/C]       | NA                                         |
| Ca_Desi_Chrc_scaffold00225_141255 | Ca_desi_scaffold   | 141255                         | [G/C]       | NA                                         |
| Ca_Desi_Chrc_scaffold00225_142982 | Ca_desi_scaffold   | 142982                         | [C/T]       | NA                                         |
| Ca_Desi_Chrc_scaffold00225_143614 | Ca_desi_scaffold   | 143614                         | [C/A]       | NA                                         |

| <b>SNP IDs</b>                  | <b>Chromosomes</b> | <b>Physical positions (bp)</b> | <b>SNPs</b> | <b>NCBI SNPdb accession IDs (NCBI_ss#)</b> |
|---------------------------------|--------------------|--------------------------------|-------------|--------------------------------------------|
| Ca_Desi_Ch_scaffold00225_144076 | Ca_desi_scaffold   | 144076                         | [C/T]       | NA                                         |
| Ca_Desi_Ch_scaffold00225_144505 | Ca_desi_scaffold   | 144505                         | [T/C]       | NA                                         |
| Ca_Desi_Ch_scaffold00225_148249 | Ca_desi_scaffold   | 148249                         | [A/T]       | NA                                         |
| Ca_Desi_Ch_scaffold00225_148278 | Ca_desi_scaffold   | 148278                         | [T/C]       | NA                                         |
| Ca_Desi_Ch_scaffold00225_149185 | Ca_desi_scaffold   | 149185                         | [T/G]       | NA                                         |
| Ca_Desi_Ch_scaffold00225_151242 | Ca_desi_scaffold   | 151242                         | [A/G]       | NA                                         |
| Ca_Desi_Ch_scaffold00225_171914 | Ca_desi_scaffold   | 171914                         | [A/T]       | NA                                         |
| Ca_Desi_Ch_scaffold00225_172183 | Ca_desi_scaffold   | 172183                         | [C/T]       | NA                                         |
| Ca_Desi_Ch_scaffold00225_173201 | Ca_desi_scaffold   | 173201                         | [T/A]       | NA                                         |
| Ca_Desi_Ch_scaffold00225_175786 | Ca_desi_scaffold   | 175786                         | [T/G]       | NA                                         |
| Ca_Desi_Ch_scaffold00225_175798 | Ca_desi_scaffold   | 175798                         | [G/A]       | NA                                         |
| Ca_Desi_Ch_scaffold00225_192502 | Ca_desi_scaffold   | 192502                         | [A/T]       | NA                                         |
| Ca_Desi_Ch_scaffold00225_192508 | Ca_desi_scaffold   | 192508                         | [C/T]       | NA                                         |
| Ca_Desi_Ch_scaffold00225_192552 | Ca_desi_scaffold   | 192552                         | [A/G]       | NA                                         |
| Ca_Desi_Ch_scaffold00225_212579 | Ca_desi_scaffold   | 212579                         | [T/G]       | NA                                         |
| Ca_Desi_Ch_scaffold00225_222300 | Ca_desi_scaffold   | 222300                         | [C/T]       | NA                                         |
| Ca_Desi_Ch_scaffold00225_222302 | Ca_desi_scaffold   | 222302                         | [T/G]       | NA                                         |
| Ca_Desi_Ch_scaffold00226_34126  | Ca_desi_scaffold   | 34126                          | [A/C]       | NA                                         |
| Ca_Desi_Ch_scaffold00226_46415  | Ca_desi_scaffold   | 46415                          | [T/C]       | NA                                         |
| Ca_Desi_Ch_scaffold00226_46479  | Ca_desi_scaffold   | 46479                          | [A/C]       | NA                                         |
| Ca_Desi_Ch_scaffold00226_48163  | Ca_desi_scaffold   | 48163                          | [T/G]       | NA                                         |
| Ca_Desi_Ch_scaffold00226_48183  | Ca_desi_scaffold   | 48183                          | [T/A]       | NA                                         |
| Ca_Desi_Ch_scaffold00226_48760  | Ca_desi_scaffold   | 48760                          | [A/C]       | NA                                         |
| Ca_Desi_Ch_scaffold00226_49646  | Ca_desi_scaffold   | 49646                          | [T/C]       | NA                                         |
| Ca_Desi_Ch_scaffold00226_49654  | Ca_desi_scaffold   | 49654                          | [A/G]       | NA                                         |
| Ca_Desi_Ch_scaffold00226_49658  | Ca_desi_scaffold   | 49658                          | [A/C]       | NA                                         |
| Ca_Desi_Ch_scaffold00226_49680  | Ca_desi_scaffold   | 49680                          | [A/C]       | NA                                         |
| Ca_Desi_Ch_scaffold00226_49682  | Ca_desi_scaffold   | 49682                          | [C/A]       | NA                                         |
| Ca_Desi_Ch_scaffold00226_49692  | Ca_desi_scaffold   | 49692                          | [T/C]       | NA                                         |
| Ca_Desi_Ch_scaffold00226_92894  | Ca_desi_scaffold   | 92894                          | [T/C]       | NA                                         |
| Ca_Desi_Ch_scaffold00226_104319 | Ca_desi_scaffold   | 104319                         | [A/G]       | NA                                         |
| Ca_Desi_Ch_scaffold00226_104328 | Ca_desi_scaffold   | 104328                         | [A/C]       | NA                                         |
| Ca_Desi_Ch_scaffold00226_115884 | Ca_desi_scaffold   | 115884                         | [T/C]       | NA                                         |
| Ca_Desi_Ch_scaffold00226_115892 | Ca_desi_scaffold   | 115892                         | [T/C]       | NA                                         |

| <b>SNP IDs</b>                  | <b>Chromosomes</b> | <b>Physical positions (bp)</b> | <b>SNPs</b> | <b>NCBI SNPdb accession IDs (NCBI_ss#)</b> |
|---------------------------------|--------------------|--------------------------------|-------------|--------------------------------------------|
| Ca_Desi_Ch_scaffold00226_115911 | Ca_desi_scaffold   | 115911                         | [T/C]       | NA                                         |
| Ca_Desi_Ch_scaffold00226_115925 | Ca_desi_scaffold   | 115925                         | [T/G]       | NA                                         |
| Ca_Desi_Ch_scaffold00226_120622 | Ca_desi_scaffold   | 120622                         | [G/T]       | NA                                         |
| Ca_Desi_Ch_scaffold00226_120632 | Ca_desi_scaffold   | 120632                         | [T/C]       | NA                                         |
| Ca_Desi_Ch_scaffold00226_120641 | Ca_desi_scaffold   | 120641                         | [A/G]       | NA                                         |
| Ca_Desi_Ch_scaffold00226_120649 | Ca_desi_scaffold   | 120649                         | [G/T]       | NA                                         |
| Ca_Desi_Ch_scaffold00226_120650 | Ca_desi_scaffold   | 120650                         | [T/G]       | NA                                         |
| Ca_Desi_Ch_scaffold00226_120661 | Ca_desi_scaffold   | 120661                         | [A/G]       | NA                                         |
| Ca_Desi_Ch_scaffold00226_120662 | Ca_desi_scaffold   | 120662                         | [T/C]       | NA                                         |
| Ca_Desi_Ch_scaffold00226_120668 | Ca_desi_scaffold   | 120668                         | [T/C]       | NA                                         |
| Ca_Desi_Ch_scaffold00226_120670 | Ca_desi_scaffold   | 120670                         | [T/C]       | NA                                         |
| Ca_Desi_Ch_scaffold00226_120672 | Ca_desi_scaffold   | 120672                         | [A/G]       | NA                                         |
| Ca_Desi_Ch_scaffold00226_120674 | Ca_desi_scaffold   | 120674                         | [A/T]       | NA                                         |
| Ca_Desi_Ch_scaffold00226_120681 | Ca_desi_scaffold   | 120681                         | [T/C]       | NA                                         |
| Ca_Desi_Ch_scaffold00226_128646 | Ca_desi_scaffold   | 128646                         | [T/G]       | NA                                         |
| Ca_Desi_Ch_scaffold00226_142879 | Ca_desi_scaffold   | 142879                         | [T/A]       | NA                                         |
| Ca_Desi_Ch_scaffold00226_157603 | Ca_desi_scaffold   | 157603                         | [A/G]       | NA                                         |
| Ca_Desi_Ch_scaffold00226_157611 | Ca_desi_scaffold   | 157611                         | [T/C]       | NA                                         |
| Ca_Desi_Ch_scaffold00226_157631 | Ca_desi_scaffold   | 157631                         | [A/C]       | NA                                         |
| Ca_Desi_Ch_scaffold00226_218377 | Ca_desi_scaffold   | 218377                         | [A/C]       | NA                                         |
| Ca_Desi_Ch_scaffold00226_220328 | Ca_desi_scaffold   | 220328                         | [A/C]       | NA                                         |
| Ca_Desi_Ch_scaffold00226_230800 | Ca_desi_scaffold   | 230800                         | [T/C]       | NA                                         |
| Ca_Desi_Ch_scaffold00226_230813 | Ca_desi_scaffold   | 230813                         | [T/G]       | NA                                         |
| Ca_Desi_Ch_scaffold00226_230819 | Ca_desi_scaffold   | 230819                         | [T/G]       | NA                                         |
| Ca_Desi_Ch_scaffold00226_230832 | Ca_desi_scaffold   | 230832                         | [T/G]       | NA                                         |
| Ca_Desi_Ch_scaffold00227_63230  | Ca_desi_scaffold   | 63230                          | [A/G]       | NA                                         |
| Ca_Desi_Ch_scaffold00227_63979  | Ca_desi_scaffold   | 63979                          | [T/G]       | NA                                         |
| Ca_Desi_Ch_scaffold00227_63982  | Ca_desi_scaffold   | 63982                          | [T/C]       | NA                                         |
| Ca_Desi_Ch_scaffold00227_63987  | Ca_desi_scaffold   | 63987                          | [A/G]       | NA                                         |
| Ca_Desi_Ch_scaffold00227_64000  | Ca_desi_scaffold   | 64000                          | [A/C]       | NA                                         |
| Ca_Desi_Ch_scaffold00227_64013  | Ca_desi_scaffold   | 64013                          | [A/G]       | NA                                         |
| Ca_Desi_Ch_scaffold00227_64018  | Ca_desi_scaffold   | 64018                          | [T/G]       | NA                                         |
| Ca_Desi_Ch_scaffold00227_64021  | Ca_desi_scaffold   | 64021                          | [T/A]       | NA                                         |
| Ca_Desi_Ch_scaffold00227_64071  | Ca_desi_scaffold   | 64071                          | [T/G]       | NA                                         |

| <b>SNP IDs</b>                  | <b>Chromosomes</b> | <b>Physical positions (bp)</b> | <b>SNPs</b> | <b>NCBI SNPdb accession IDs (NCBI_ss#)</b> |
|---------------------------------|--------------------|--------------------------------|-------------|--------------------------------------------|
| Ca_Desi_Ch_scaffold00227_64079  | Ca_desi_scaffold   | 64079                          | [T/G]       | NA                                         |
| Ca_Desi_Ch_scaffold00227_64231  | Ca_desi_scaffold   | 64231                          | [G/A]       | NA                                         |
| Ca_Desi_Ch_scaffold00227_94006  | Ca_desi_scaffold   | 94006                          | [C/A]       | NA                                         |
| Ca_Desi_Ch_scaffold00227_94007  | Ca_desi_scaffold   | 94007                          | [A/G]       | NA                                         |
| Ca_Desi_Ch_scaffold00227_183182 | Ca_desi_scaffold   | 183182                         | [T/G]       | NA                                         |
| Ca_Desi_Ch_scaffold00227_183230 | Ca_desi_scaffold   | 183230                         | [A/C]       | NA                                         |
| Ca_Desi_Ch_scaffold00229_19207  | Ca_desi_scaffold   | 19207                          | [A/G]       | NA                                         |
| Ca_Desi_Ch_scaffold00229_25859  | Ca_desi_scaffold   | 25859                          | [T/C]       | NA                                         |
| Ca_Desi_Ch_scaffold00232_28461  | Ca_desi_scaffold   | 28461                          | [T/G]       | NA                                         |
| Ca_Desi_Ch_scaffold00232_31579  | Ca_desi_scaffold   | 31579                          | [A/C]       | NA                                         |
| Ca_Desi_Ch_scaffold00232_182454 | Ca_desi_scaffold   | 182454                         | [A/C]       | NA                                         |
| Ca_Desi_Ch_scaffold00232_232212 | Ca_desi_scaffold   | 232212                         | [A/C]       | NA                                         |
| Ca_Desi_Ch_scaffold00236_8220   | Ca_desi_scaffold   | 8220                           | [C/T]       | NA                                         |
| Ca_Desi_Ch_scaffold00236_27936  | Ca_desi_scaffold   | 27936                          | [A/C]       | NA                                         |
| Ca_Desi_Ch_scaffold00236_27949  | Ca_desi_scaffold   | 27949                          | [A/C]       | NA                                         |
| Ca_Desi_Ch_scaffold00236_27957  | Ca_desi_scaffold   | 27957                          | [T/A]       | NA                                         |
| Ca_Desi_Ch_scaffold00236_28083  | Ca_desi_scaffold   | 28083                          | [A/C]       | NA                                         |
| Ca_Desi_Ch_scaffold00236_29528  | Ca_desi_scaffold   | 29528                          | [C/A]       | NA                                         |
| Ca_Desi_Ch_scaffold00236_29529  | Ca_desi_scaffold   | 29529                          | [C/G]       | NA                                         |
| Ca_Desi_Ch_scaffold00236_29530  | Ca_desi_scaffold   | 29530                          | [C/A]       | NA                                         |
| Ca_Desi_Ch_scaffold00236_66064  | Ca_desi_scaffold   | 66064                          | [A/G]       | NA                                         |
| Ca_Desi_Ch_scaffold00236_66086  | Ca_desi_scaffold   | 66086                          | [A/G]       | NA                                         |
| Ca_Desi_Ch_scaffold00236_101236 | Ca_desi_scaffold   | 101236                         | [T/G]       | NA                                         |
| Ca_Desi_Ch_scaffold00236_101378 | Ca_desi_scaffold   | 101378                         | [A/G]       | NA                                         |
| Ca_Desi_Ch_scaffold00236_101394 | Ca_desi_scaffold   | 101394                         | [A/C]       | NA                                         |
| Ca_Desi_Ch_scaffold00236_101435 | Ca_desi_scaffold   | 101435                         | [A/G]       | NA                                         |
| Ca_Desi_Ch_scaffold00236_101451 | Ca_desi_scaffold   | 101451                         | [T/C]       | NA                                         |
| Ca_Desi_Ch_scaffold00236_107730 | Ca_desi_scaffold   | 107730                         | [T/G]       | NA                                         |
| Ca_Desi_Ch_scaffold00236_107750 | Ca_desi_scaffold   | 107750                         | [T/G]       | NA                                         |
| Ca_Desi_Ch_scaffold00236_107787 | Ca_desi_scaffold   | 107787                         | [A/T]       | NA                                         |
| Ca_Desi_Ch_scaffold00236_108276 | Ca_desi_scaffold   | 108276                         | [T/G]       | NA                                         |
| Ca_Desi_Ch_scaffold00236_108281 | Ca_desi_scaffold   | 108281                         | [C/T]       | NA                                         |
| Ca_Desi_Ch_scaffold00236_108288 | Ca_desi_scaffold   | 108288                         | [C/G]       | NA                                         |
| Ca_Desi_Ch_scaffold00236_108296 | Ca_desi_scaffold   | 108296                         | [A/G]       | NA                                         |

| <b>SNP IDs</b>                  | <b>Chromosomes</b> | <b>Physical positions (bp)</b> | <b>SNPs</b> | <b>NCBI SNPdb accession IDs (NCBI_ss#)</b> |
|---------------------------------|--------------------|--------------------------------|-------------|--------------------------------------------|
| Ca_Desi_Ch_scaffold00236_108299 | Ca_desi_scaffold   | 108299                         | [T/A]       | NA                                         |
| Ca_Desi_Ch_scaffold00236_134701 | Ca_desi_scaffold   | 134701                         | [T/G]       | NA                                         |
| Ca_Desi_Ch_scaffold00236_163204 | Ca_desi_scaffold   | 163204                         | [T/G]       | NA                                         |
| Ca_Desi_Ch_scaffold00236_163211 | Ca_desi_scaffold   | 163211                         | [G/A]       | NA                                         |
| Ca_Desi_Ch_scaffold00236_173224 | Ca_desi_scaffold   | 173224                         | [A/C]       | NA                                         |
| Ca_Desi_Ch_scaffold00236_183183 | Ca_desi_scaffold   | 183183                         | [T/C]       | NA                                         |
| Ca_Desi_Ch_scaffold00236_183214 | Ca_desi_scaffold   | 183214                         | [T/G]       | NA                                         |
| Ca_Desi_Ch_scaffold00245_154597 | Ca_desi_scaffold   | 154597                         | [A/C]       | NA                                         |
| Ca_Desi_Ch_scaffold00245_188228 | Ca_desi_scaffold   | 188228                         | [A/T]       | NA                                         |
| Ca_Desi_Ch_scaffold00245_188325 | Ca_desi_scaffold   | 188325                         | [T/C]       | NA                                         |
| Ca_Desi_Ch_scaffold00245_188340 | Ca_desi_scaffold   | 188340                         | [A/C]       | NA                                         |
| Ca_Desi_Ch_scaffold00245_188363 | Ca_desi_scaffold   | 188363                         | [A/G]       | NA                                         |
| Ca_Desi_Ch_scaffold00245_203943 | Ca_desi_scaffold   | 203943                         | [T/A]       | NA                                         |
| Ca_Desi_Ch_scaffold00245_203962 | Ca_desi_scaffold   | 203962                         | [A/C]       | NA                                         |
| Ca_Desi_Ch_scaffold00249_26967  | Ca_desi_scaffold   | 26967                          | [T/C]       | NA                                         |
| Ca_Desi_Ch_scaffold00249_26987  | Ca_desi_scaffold   | 26987                          | [T/G]       | NA                                         |
| Ca_Desi_Ch_scaffold00249_26991  | Ca_desi_scaffold   | 26991                          | [C/G]       | NA                                         |
| Ca_Desi_Ch_scaffold00249_26993  | Ca_desi_scaffold   | 26993                          | [T/C]       | NA                                         |
| Ca_Desi_Ch_scaffold00249_26997  | Ca_desi_scaffold   | 26997                          | [T/G]       | NA                                         |
| Ca_Desi_Ch_scaffold00249_26999  | Ca_desi_scaffold   | 26999                          | [A/G]       | NA                                         |
| Ca_Desi_Ch_scaffold00249_27013  | Ca_desi_scaffold   | 27013                          | [T/G]       | NA                                         |
| Ca_Desi_Ch_scaffold00249_27022  | Ca_desi_scaffold   | 27022                          | [T/C]       | NA                                         |
| Ca_Desi_Ch_scaffold00249_27025  | Ca_desi_scaffold   | 27025                          | [G/T]       | NA                                         |
| Ca_Desi_Ch_scaffold00249_101426 | Ca_desi_scaffold   | 101426                         | [A/T]       | NA                                         |
| Ca_Desi_Ch_scaffold00249_101438 | Ca_desi_scaffold   | 101438                         | [A/G]       | NA                                         |
| Ca_Desi_Ch_scaffold00249_101442 | Ca_desi_scaffold   | 101442                         | [T/C]       | NA                                         |
| Ca_Desi_Ch_scaffold00249_101447 | Ca_desi_scaffold   | 101447                         | [A/G]       | NA                                         |
| Ca_Desi_Ch_scaffold00249_101449 | Ca_desi_scaffold   | 101449                         | [A/C]       | NA                                         |
| Ca_Desi_Ch_scaffold00249_101453 | Ca_desi_scaffold   | 101453                         | [A/G]       | NA                                         |
| Ca_Desi_Ch_scaffold00249_101460 | Ca_desi_scaffold   | 101460                         | [A/G]       | NA                                         |
| Ca_Desi_Ch_scaffold00249_101461 | Ca_desi_scaffold   | 101461                         | [A/G]       | NA                                         |
| Ca_Desi_Ch_scaffold00249_101470 | Ca_desi_scaffold   | 101470                         | [T/C]       | NA                                         |
| Ca_Desi_Ch_scaffold00249_101473 | Ca_desi_scaffold   | 101473                         | [T/C]       | NA                                         |
| Ca_Desi_Ch_scaffold00249_101480 | Ca_desi_scaffold   | 101480                         | [T/A]       | NA                                         |

| <b>SNP IDs</b>                  | <b>Chromosomes</b> | <b>Physical positions (bp)</b> | <b>SNPs</b> | <b>NCBI SNPdb accession IDs (NCBI_ss#)</b> |
|---------------------------------|--------------------|--------------------------------|-------------|--------------------------------------------|
| Ca_Desi_Ch_scaffold00249_102853 | Ca_desi_scaffold   | 102853                         | [A/G]       | NA                                         |
| Ca_Desi_Ch_scaffold00249_102854 | Ca_desi_scaffold   | 102854                         | [T/G]       | NA                                         |
| Ca_Desi_Ch_scaffold00249_102855 | Ca_desi_scaffold   | 102855                         | [C/A]       | NA                                         |
| Ca_Desi_Ch_scaffold00249_102856 | Ca_desi_scaffold   | 102856                         | [T/G]       | NA                                         |
| Ca_Desi_Ch_scaffold00252_41046  | Ca_desi_scaffold   | 41046                          | [C/T]       | NA                                         |
| Ca_Desi_Ch_scaffold00252_41089  | Ca_desi_scaffold   | 41089                          | [T/G]       | NA                                         |
| Ca_Desi_Ch_scaffold00252_102047 | Ca_desi_scaffold   | 102047                         | [A/G]       | NA                                         |
| Ca_Desi_Ch_scaffold00252_140517 | Ca_desi_scaffold   | 140517                         | [T/G]       | NA                                         |
| Ca_Desi_Ch_scaffold00252_140553 | Ca_desi_scaffold   | 140553                         | [C/A]       | NA                                         |
| Ca_Desi_Ch_scaffold00252_140554 | Ca_desi_scaffold   | 140554                         | [A/G]       | NA                                         |
| Ca_Desi_Ch_scaffold00254_28063  | Ca_desi_scaffold   | 28063                          | [C/T]       | NA                                         |
| Ca_Desi_Ch_scaffold00254_28286  | Ca_desi_scaffold   | 28286                          | [G/A]       | NA                                         |
| Ca_Desi_Ch_scaffold00254_28287  | Ca_desi_scaffold   | 28287                          | [T/C]       | NA                                         |
| Ca_Desi_Ch_scaffold00254_28433  | Ca_desi_scaffold   | 28433                          | [T/A]       | NA                                         |
| Ca_Desi_Ch_scaffold00254_74514  | Ca_desi_scaffold   | 74514                          | [A/C]       | NA                                         |
| Ca_Desi_Ch_scaffold00254_74521  | Ca_desi_scaffold   | 74521                          | [A/C]       | NA                                         |
| Ca_Desi_Ch_scaffold00254_74540  | Ca_desi_scaffold   | 74540                          | [T/C]       | NA                                         |
| Ca_Desi_Ch_scaffold00254_74545  | Ca_desi_scaffold   | 74545                          | [G/A]       | NA                                         |
| Ca_Desi_Ch_scaffold00254_74592  | Ca_desi_scaffold   | 74592                          | [T/G]       | NA                                         |
| Ca_Desi_Ch_scaffold00254_74599  | Ca_desi_scaffold   | 74599                          | [T/G]       | NA                                         |
| Ca_Desi_Ch_scaffold00254_74656  | Ca_desi_scaffold   | 74656                          | [T/G]       | NA                                         |
| Ca_Desi_Ch_scaffold00254_95189  | Ca_desi_scaffold   | 95189                          | [T/G]       | NA                                         |
| Ca_Desi_Ch_scaffold00254_96329  | Ca_desi_scaffold   | 96329                          | [T/G]       | NA                                         |
| Ca_Desi_Ch_scaffold00254_96479  | Ca_desi_scaffold   | 96479                          | [G/A]       | NA                                         |
| Ca_Desi_Ch_scaffold00254_149572 | Ca_desi_scaffold   | 149572                         | [T/C]       | NA                                         |
| Ca_Desi_Ch_scaffold00254_149582 | Ca_desi_scaffold   | 149582                         | [T/C]       | NA                                         |
| Ca_Desi_Ch_scaffold00254_168855 | Ca_desi_scaffold   | 168855                         | [T/G]       | NA                                         |
| Ca_Desi_Ch_scaffold00254_168876 | Ca_desi_scaffold   | 168876                         | [A/G]       | NA                                         |
| Ca_Desi_Ch_scaffold00254_169474 | Ca_desi_scaffold   | 169474                         | [G/A]       | NA                                         |
| Ca_Desi_Ch_scaffold00254_169502 | Ca_desi_scaffold   | 169502                         | [T/C]       | NA                                         |
| Ca_Desi_Ch_scaffold00254_169535 | Ca_desi_scaffold   | 169535                         | [T/A]       | NA                                         |
| Ca_Desi_Ch_scaffold00254_169588 | Ca_desi_scaffold   | 169588                         | [A/G]       | NA                                         |
| Ca_Desi_Ch_scaffold00257_32401  | Ca_desi_scaffold   | 32401                          | [A/C]       | NA                                         |
| Ca_Desi_Ch_scaffold00257_32402  | Ca_desi_scaffold   | 32402                          | [C/A]       | NA                                         |



| <b>SNP IDs</b>                  | <b>Chromosomes</b> | <b>Physical positions (bp)</b> | <b>SNPs</b> | <b>NCBI SNPdb accession IDs (NCBI_ss#)</b> |
|---------------------------------|--------------------|--------------------------------|-------------|--------------------------------------------|
| Ca_Desi_Ch_scaffold00257_32406  | Ca_desi_scaffold   | 32406                          | [G/A]       | NA                                         |
| Ca_Desi_Ch_scaffold00257_81936  | Ca_desi_scaffold   | 81936                          | [T/C]       | NA                                         |
| Ca_Desi_Ch_scaffold00257_81937  | Ca_desi_scaffold   | 81937                          | [A/G]       | NA                                         |
| Ca_Desi_Ch_scaffold00257_81945  | Ca_desi_scaffold   | 81945                          | [G/A]       | NA                                         |
| Ca_Desi_Ch_scaffold00257_90801  | Ca_desi_scaffold   | 90801                          | [A/C]       | NA                                         |
| Ca_Desi_Ch_scaffold00257_100067 | Ca_desi_scaffold   | 100067                         | [A/T]       | NA                                         |
| Ca_Desi_Ch_scaffold00257_100070 | Ca_desi_scaffold   | 100070                         | [A/C]       | NA                                         |
| Ca_Desi_Ch_scaffold00257_100075 | Ca_desi_scaffold   | 100075                         | [A/G]       | NA                                         |
| Ca_Desi_Ch_scaffold00257_100089 | Ca_desi_scaffold   | 100089                         | [T/C]       | NA                                         |
| Ca_Desi_Ch_scaffold00257_100092 | Ca_desi_scaffold   | 100092                         | [T/G]       | NA                                         |
| Ca_Desi_Ch_scaffold00257_100170 | Ca_desi_scaffold   | 100170                         | [T/G]       | NA                                         |
| Ca_Desi_Ch_scaffold00257_100311 | Ca_desi_scaffold   | 100311                         | [T/A]       | NA                                         |
| Ca_Desi_Ch_scaffold00257_100345 | Ca_desi_scaffold   | 100345                         | [A/G]       | NA                                         |
| Ca_Desi_Ch_scaffold00257_101934 | Ca_desi_scaffold   | 101934                         | [A/C]       | NA                                         |
| Ca_Desi_Ch_scaffold00257_101944 | Ca_desi_scaffold   | 101944                         | [A/C]       | NA                                         |
| Ca_Desi_Ch_scaffold00257_158193 | Ca_desi_scaffold   | 158193                         | [T/C]       | NA                                         |
| Ca_Desi_Ch_scaffold00259_40085  | Ca_desi_scaffold   | 40085                          | [T/G]       | NA                                         |
| Ca_Desi_Ch_scaffold00259_56350  | Ca_desi_scaffold   | 56350                          | [T/G]       | NA                                         |
| Ca_Desi_Ch_scaffold00261_46792  | Ca_desi_scaffold   | 46792                          | [A/C]       | NA                                         |
| Ca_Desi_Ch_scaffold00261_46802  | Ca_desi_scaffold   | 46802                          | [A/G]       | NA                                         |
| Ca_Desi_Ch_scaffold00261_46808  | Ca_desi_scaffold   | 46808                          | [T/A]       | NA                                         |
| Ca_Desi_Ch_scaffold00261_46811  | Ca_desi_scaffold   | 46811                          | [T/G]       | NA                                         |
| Ca_Desi_Ch_scaffold00261_51780  | Ca_desi_scaffold   | 51780                          | [A/C]       | NA                                         |
| Ca_Desi_Ch_scaffold00261_60909  | Ca_desi_scaffold   | 60909                          | [T/G]       | NA                                         |
| Ca_Desi_Ch_scaffold00261_69505  | Ca_desi_scaffold   | 69505                          | [A/T]       | NA                                         |
| Ca_Desi_Ch_scaffold00261_69533  | Ca_desi_scaffold   | 69533                          | [T/G]       | NA                                         |
| Ca_Desi_Ch_scaffold00261_78702  | Ca_desi_scaffold   | 78702                          | [G/T]       | NA                                         |
| Ca_Desi_Ch_scaffold00261_78703  | Ca_desi_scaffold   | 78703                          | [T/C]       | NA                                         |
| Ca_Desi_Ch_scaffold00261_78704  | Ca_desi_scaffold   | 78704                          | [G/T]       | NA                                         |
| Ca_Desi_Ch_scaffold00261_83165  | Ca_desi_scaffold   | 83165                          | [T/C]       | NA                                         |
| Ca_Desi_Ch_scaffold00261_83198  | Ca_desi_scaffold   | 83198                          | [T/C]       | NA                                         |
| Ca_Desi_Ch_scaffold00261_116087 | Ca_desi_scaffold   | 116087                         | [T/C]       | NA                                         |
| Ca_Desi_Ch_scaffold00261_116102 | Ca_desi_scaffold   | 116102                         | [A/G]       | NA                                         |
| Ca_Desi_Ch_scaffold00261_116103 | Ca_desi_scaffold   | 116103                         | [A/G]       | NA                                         |

| <b>SNP IDs</b>                    | <b>Chromosomes</b> | <b>Physical positions (bp)</b> | <b>SNPs</b> | <b>NCBI SNPdb accession IDs (NCBI_ss#)</b> |
|-----------------------------------|--------------------|--------------------------------|-------------|--------------------------------------------|
| Ca_Desig_Chr_scaffold00261_116113 | Ca_desig_scaffold  | 116113                         | [C/A]       | NA                                         |
| Ca_Desig_Chr_scaffold00261_116117 | Ca_desig_scaffold  | 116117                         | [A/G]       | NA                                         |
| Ca_Desig_Chr_scaffold00261_116121 | Ca_desig_scaffold  | 116121                         | [A/G]       | NA                                         |
| Ca_Desig_Chr_scaffold00261_116124 | Ca_desig_scaffold  | 116124                         | [A/G]       | NA                                         |
| Ca_Desig_Chr_scaffold00261_116128 | Ca_desig_scaffold  | 116128                         | [T/G]       | NA                                         |
| Ca_Desig_Chr_scaffold00261_116131 | Ca_desig_scaffold  | 116131                         | [A/G]       | NA                                         |
| Ca_Desig_Chr_scaffold00261_116133 | Ca_desig_scaffold  | 116133                         | [A/G]       | NA                                         |
| Ca_Desig_Chr_scaffold00261_116137 | Ca_desig_scaffold  | 116137                         | [G/A]       | NA                                         |
| Ca_Desig_Chr_scaffold00261_116138 | Ca_desig_scaffold  | 116138                         | [T/G]       | NA                                         |
| Ca_Desig_Chr_scaffold00261_116139 | Ca_desig_scaffold  | 116139                         | [T/C]       | NA                                         |
| Ca_Desig_Chr_scaffold00261_116142 | Ca_desig_scaffold  | 116142                         | [A/G]       | NA                                         |
| Ca_Desig_Chr_scaffold00261_116146 | Ca_desig_scaffold  | 116146                         | [A/G]       | NA                                         |
| Ca_Desig_Chr_scaffold00261_143828 | Ca_desig_scaffold  | 143828                         | [A/C]       | NA                                         |
| Ca_Desig_Chr_scaffold00261_164214 | Ca_desig_scaffold  | 164214                         | [T/G]       | NA                                         |
| Ca_Desig_Chr_scaffold00261_164298 | Ca_desig_scaffold  | 164298                         | [A/G]       | NA                                         |
| Ca_Desig_Chr_scaffold00262_13787  | Ca_desig_scaffold  | 13787                          | [C/A]       | NA                                         |
| Ca_Desig_Chr_scaffold00262_13788  | Ca_desig_scaffold  | 13788                          | [C/G]       | NA                                         |
| Ca_Desig_Chr_scaffold00262_13789  | Ca_desig_scaffold  | 13789                          | [T/A]       | NA                                         |
| Ca_Desig_Chr_scaffold00262_13790  | Ca_desig_scaffold  | 13790                          | [C/T]       | NA                                         |
| Ca_Desig_Chr_scaffold00262_47220  | Ca_desig_scaffold  | 47220                          | [A/G]       | NA                                         |
| Ca_Desig_Chr_scaffold00262_127902 | Ca_desig_scaffold  | 127902                         | [A/G]       | NA                                         |
| Ca_Desig_Chr_scaffold00262_127977 | Ca_desig_scaffold  | 127977                         | [A/C]       | NA                                         |
| Ca_Desig_Chr_scaffold00262_127985 | Ca_desig_scaffold  | 127985                         | [T/C]       | NA                                         |
| Ca_Desig_Chr_scaffold00262_127987 | Ca_desig_scaffold  | 127987                         | [A/C]       | NA                                         |
| Ca_Desig_Chr_scaffold00262_128036 | Ca_desig_scaffold  | 128036                         | [T/G]       | NA                                         |
| Ca_Desig_Chr_scaffold00262_128571 | Ca_desig_scaffold  | 128571                         | [T/C]       | NA                                         |
| Ca_Desig_Chr_scaffold00262_128575 | Ca_desig_scaffold  | 128575                         | [A/G]       | NA                                         |
| Ca_Desig_Chr_scaffold00262_128619 | Ca_desig_scaffold  | 128619                         | [A/C]       | NA                                         |
| Ca_Desig_Chr_scaffold00262_128626 | Ca_desig_scaffold  | 128626                         | [A/C]       | NA                                         |
| Ca_Desig_Chr_scaffold00262_165213 | Ca_desig_scaffold  | 165213                         | [A/C]       | NA                                         |
| Ca_Desig_Chr_scaffold00262_165229 | Ca_desig_scaffold  | 165229                         | [T/C]       | NA                                         |
| Ca_Desig_Chr_scaffold00262_175672 | Ca_desig_scaffold  | 175672                         | [T/G]       | NA                                         |
| Ca_Desig_Chr_scaffold00262_175678 | Ca_desig_scaffold  | 175678                         | [T/G]       | NA                                         |
| Ca_Desig_Chr_scaffold00262_175748 | Ca_desig_scaffold  | 175748                         | [A/G]       | NA                                         |

| <b>SNP IDs</b>                  | <b>Chromosomes</b> | <b>Physical positions (bp)</b> | <b>SNPs</b> | <b>NCBI SNPdb accession IDs (NCBI_ss#)</b> |
|---------------------------------|--------------------|--------------------------------|-------------|--------------------------------------------|
| Ca_Desi_Ch_scaffold00262_181465 | Ca_desi_scaffold   | 181465                         | [T/G]       | NA                                         |
| Ca_Desi_Ch_scaffold00262_181489 | Ca_desi_scaffold   | 181489                         | [A/G]       | NA                                         |
| Ca_Desi_Ch_scaffold00262_186124 | Ca_desi_scaffold   | 186124                         | [T/A]       | NA                                         |
| Ca_Desi_Ch_scaffold00262_186133 | Ca_desi_scaffold   | 186133                         | [A/G]       | NA                                         |
| Ca_Desi_Ch_scaffold00262_186201 | Ca_desi_scaffold   | 186201                         | [T/C]       | NA                                         |
| Ca_Desi_Ch_scaffold00262_186209 | Ca_desi_scaffold   | 186209                         | [A/G]       | NA                                         |
| Ca_Desi_Ch_scaffold00262_186211 | Ca_desi_scaffold   | 186211                         | [A/C]       | NA                                         |
| Ca_Desi_Ch_scaffold00262_186219 | Ca_desi_scaffold   | 186219                         | [T/C]       | NA                                         |
| Ca_Desi_Ch_scaffold00262_189794 | Ca_desi_scaffold   | 189794                         | [A/G]       | NA                                         |
| Ca_Desi_Ch_scaffold00262_190317 | Ca_desi_scaffold   | 190317                         | [T/C]       | NA                                         |
| Ca_Desi_Ch_scaffold00262_191481 | Ca_desi_scaffold   | 191481                         | [A/G]       | NA                                         |
| Ca_Desi_Ch_scaffold00262_191526 | Ca_desi_scaffold   | 191526                         | [A/C]       | NA                                         |
| Ca_Desi_Ch_scaffold00263_36357  | Ca_desi_scaffold   | 36357                          | [T/G]       | NA                                         |
| Ca_Desi_Ch_scaffold00263_36360  | Ca_desi_scaffold   | 36360                          | [T/G]       | NA                                         |
| Ca_Desi_Ch_scaffold00263_56144  | Ca_desi_scaffold   | 56144                          | [A/G]       | NA                                         |
| Ca_Desi_Ch_scaffold00263_72658  | Ca_desi_scaffold   | 72658                          | [T/C]       | NA                                         |
| Ca_Desi_Ch_scaffold00263_78788  | Ca_desi_scaffold   | 78788                          | [T/G]       | NA                                         |
| Ca_Desi_Ch_scaffold00263_78805  | Ca_desi_scaffold   | 78805                          | [T/G]       | NA                                         |
| Ca_Desi_Ch_scaffold00263_78828  | Ca_desi_scaffold   | 78828                          | [T/G]       | NA                                         |
| Ca_Desi_Ch_scaffold00263_98572  | Ca_desi_scaffold   | 98572                          | [T/C]       | NA                                         |
| Ca_Desi_Ch_scaffold00263_98576  | Ca_desi_scaffold   | 98576                          | [T/C]       | NA                                         |
| Ca_Desi_Ch_scaffold00263_98578  | Ca_desi_scaffold   | 98578                          | [A/C]       | NA                                         |
| Ca_Desi_Ch_scaffold00263_98581  | Ca_desi_scaffold   | 98581                          | [G/T]       | NA                                         |
| Ca_Desi_Ch_scaffold00263_98584  | Ca_desi_scaffold   | 98584                          | [T/C]       | NA                                         |
| Ca_Desi_Ch_scaffold00263_98588  | Ca_desi_scaffold   | 98588                          | [T/G]       | NA                                         |
| Ca_Desi_Ch_scaffold00263_98591  | Ca_desi_scaffold   | 98591                          | [C/G]       | NA                                         |
| Ca_Desi_Ch_scaffold00263_98594  | Ca_desi_scaffold   | 98594                          | [T/G]       | NA                                         |
| Ca_Desi_Ch_scaffold00263_98596  | Ca_desi_scaffold   | 98596                          | [C/T]       | NA                                         |
| Ca_Desi_Ch_scaffold00263_98598  | Ca_desi_scaffold   | 98598                          | [G/C]       | NA                                         |
| Ca_Desi_Ch_scaffold00263_98599  | Ca_desi_scaffold   | 98599                          | [T/G]       | NA                                         |
| Ca_Desi_Ch_scaffold00263_98607  | Ca_desi_scaffold   | 98607                          | [T/C]       | NA                                         |
| Ca_Desi_Ch_scaffold00263_98609  | Ca_desi_scaffold   | 98609                          | [G/C]       | NA                                         |
| Ca_Desi_Ch_scaffold00263_98611  | Ca_desi_scaffold   | 98611                          | [T/C]       | NA                                         |
| Ca_Desi_Ch_scaffold00263_100448 | Ca_desi_scaffold   | 100448                         | [T/G]       | NA                                         |

| <b>SNP IDs</b>                  | <b>Chromosomes</b> | <b>Physical positions (bp)</b> | <b>SNPs</b> | <b>NCBI SNPdb accession IDs (NCBI_ss#)</b> |
|---------------------------------|--------------------|--------------------------------|-------------|--------------------------------------------|
| Ca_Desi_Ch_scaffold00263_100465 | Ca_desi_scaffold   | 100465                         | [T/G]       | NA                                         |
| Ca_Desi_Ch_scaffold00263_100486 | Ca_desi_scaffold   | 100486                         | [A/C]       | NA                                         |
| Ca_Desi_Ch_scaffold00263_158977 | Ca_desi_scaffold   | 158977                         | [A/C]       | NA                                         |
| Ca_Desi_Ch_scaffold00263_160119 | Ca_desi_scaffold   | 160119                         | [A/G]       | NA                                         |
| Ca_Desi_Ch_scaffold00263_160178 | Ca_desi_scaffold   | 160178                         | [T/G]       | NA                                         |
| Ca_Desi_Ch_scaffold00263_162486 | Ca_desi_scaffold   | 162486                         | [T/C]       | NA                                         |
| Ca_Desi_Ch_scaffold00263_162666 | Ca_desi_scaffold   | 162666                         | [A/T]       | NA                                         |
| Ca_Desi_Ch_scaffold00263_162675 | Ca_desi_scaffold   | 162675                         | [A/G]       | NA                                         |
| Ca_Desi_Ch_scaffold00263_162680 | Ca_desi_scaffold   | 162680                         | [A/G]       | NA                                         |
| Ca_Desi_Ch_scaffold00263_162704 | Ca_desi_scaffold   | 162704                         | [T/C]       | NA                                         |
| Ca_Desi_Ch_scaffold00263_162711 | Ca_desi_scaffold   | 162711                         | [A/G]       | NA                                         |
| Ca_Desi_Ch_scaffold00263_162713 | Ca_desi_scaffold   | 162713                         | [A/G]       | NA                                         |
| Ca_Desi_Ch_scaffold00263_162718 | Ca_desi_scaffold   | 162718                         | [T/C]       | NA                                         |
| Ca_Desi_Ch_scaffold00263_211258 | Ca_desi_scaffold   | 211258                         | [A/C]       | NA                                         |
| Ca_Desi_Ch_scaffold00264_135960 | Ca_desi_scaffold   | 135960                         | [A/C]       | NA                                         |
| Ca_Desi_Ch_scaffold00264_135961 | Ca_desi_scaffold   | 135961                         | [G/C]       | NA                                         |
| Ca_Desi_Ch_scaffold00264_135963 | Ca_desi_scaffold   | 135963                         | [T/G]       | NA                                         |
| Ca_Desi_Ch_scaffold00264_141173 | Ca_desi_scaffold   | 141173                         | [A/C]       | NA                                         |
| Ca_Desi_Ch_scaffold00264_161494 | Ca_desi_scaffold   | 161494                         | [T/G]       | NA                                         |
| Ca_Desi_Ch_scaffold00264_164536 | Ca_desi_scaffold   | 164536                         | [A/C]       | NA                                         |
| Ca_Desi_Ch_scaffold00264_202046 | Ca_desi_scaffold   | 202046                         | [A/T]       | NA                                         |
| Ca_Desi_Ch_scaffold00266_42534  | Ca_desi_scaffold   | 42534                          | [T/C]       | NA                                         |
| Ca_Desi_Ch_scaffold00266_100495 | Ca_desi_scaffold   | 100495                         | [A/C]       | NA                                         |
| Ca_Desi_Ch_scaffold00266_179610 | Ca_desi_scaffold   | 179610                         | [T/C]       | NA                                         |
| Ca_Desi_Ch_scaffold00266_179623 | Ca_desi_scaffold   | 179623                         | [A/G]       | NA                                         |
| Ca_Desi_Ch_scaffold00266_179625 | Ca_desi_scaffold   | 179625                         | [A/G]       | NA                                         |
| Ca_Desi_Ch_scaffold00270_66682  | Ca_desi_scaffold   | 66682                          | [A/G]       | NA                                         |
| Ca_Desi_Ch_scaffold00270_66755  | Ca_desi_scaffold   | 66755                          | [A/G]       | NA                                         |
| Ca_Desi_Ch_scaffold00270_70508  | Ca_desi_scaffold   | 70508                          | [T/A]       | NA                                         |
| Ca_Desi_Ch_scaffold00270_70514  | Ca_desi_scaffold   | 70514                          | [T/G]       | NA                                         |
| Ca_Desi_Ch_scaffold00270_70518  | Ca_desi_scaffold   | 70518                          | [T/G]       | NA                                         |
| Ca_Desi_Ch_scaffold00270_70526  | Ca_desi_scaffold   | 70526                          | [A/G]       | NA                                         |
| Ca_Desi_Ch_scaffold00270_70533  | Ca_desi_scaffold   | 70533                          | [G/A]       | NA                                         |
| Ca_Desi_Ch_scaffold00270_70548  | Ca_desi_scaffold   | 70548                          | [T/C]       | NA                                         |

| <b>SNP IDs</b>                    | <b>Chromosomes</b> | <b>Physical positions (bp)</b> | <b>SNPs</b> | <b>NCBI SNPdb accession IDs (NCBI_ss#)</b> |
|-----------------------------------|--------------------|--------------------------------|-------------|--------------------------------------------|
| Ca_Desig_Chr_scaffold00270_70558  | Ca_desig_scaffold  | 70558                          | [T/G]       | NA                                         |
| Ca_Desig_Chr_scaffold00270_163431 | Ca_desig_scaffold  | 163431                         | [A/T]       | NA                                         |
| Ca_Desig_Chr_scaffold00270_163434 | Ca_desig_scaffold  | 163434                         | [A/T]       | NA                                         |
| Ca_Desig_Chr_scaffold00270_163588 | Ca_desig_scaffold  | 163588                         | [A/C]       | NA                                         |
| Ca_Desig_Chr_scaffold00270_177472 | Ca_desig_scaffold  | 177472                         | [T/C]       | NA                                         |
| Ca_Desig_Chr_scaffold00270_177478 | Ca_desig_scaffold  | 177478                         | [T/G]       | NA                                         |
| Ca_Desig_Chr_scaffold00271_6101   | Ca_desig_scaffold  | 6101                           | [A/G]       | NA                                         |
| Ca_Desig_Chr_scaffold00271_6118   | Ca_desig_scaffold  | 6118                           | [T/A]       | NA                                         |
| Ca_Desig_Chr_scaffold00271_6166   | Ca_desig_scaffold  | 6166                           | [T/G]       | NA                                         |
| Ca_Desig_Chr_scaffold00271_32066  | Ca_desig_scaffold  | 32066                          | [G/T]       | NA                                         |
| Ca_Desig_Chr_scaffold00271_32909  | Ca_desig_scaffold  | 32909                          | [C/T]       | NA                                         |
| Ca_Desig_Chr_scaffold00271_33434  | Ca_desig_scaffold  | 33434                          | [C/T]       | NA                                         |
| Ca_Desig_Chr_scaffold00271_33738  | Ca_desig_scaffold  | 33738                          | [T/C]       | NA                                         |
| Ca_Desig_Chr_scaffold00271_33771  | Ca_desig_scaffold  | 33771                          | [T/C]       | NA                                         |
| Ca_Desig_Chr_scaffold00271_33775  | Ca_desig_scaffold  | 33775                          | [T/C]       | NA                                         |
| Ca_Desig_Chr_scaffold00271_33830  | Ca_desig_scaffold  | 33830                          | [A/G]       | NA                                         |
| Ca_Desig_Chr_scaffold00271_48125  | Ca_desig_scaffold  | 48125                          | [G/T]       | NA                                         |
| Ca_Desig_Chr_scaffold00271_48128  | Ca_desig_scaffold  | 48128                          | [T/C]       | NA                                         |
| Ca_Desig_Chr_scaffold00271_58847  | Ca_desig_scaffold  | 58847                          | [G/A]       | NA                                         |
| Ca_Desig_Chr_scaffold00271_58865  | Ca_desig_scaffold  | 58865                          | [C/G]       | NA                                         |
| Ca_Desig_Chr_scaffold00271_79298  | Ca_desig_scaffold  | 79298                          | [A/C]       | NA                                         |
| Ca_Desig_Chr_scaffold00271_79360  | Ca_desig_scaffold  | 79360                          | [T/C]       | NA                                         |
| Ca_Desig_Chr_scaffold00271_79429  | Ca_desig_scaffold  | 79429                          | [T/A]       | NA                                         |
| Ca_Desig_Chr_scaffold00271_80924  | Ca_desig_scaffold  | 80924                          | [A/G]       | NA                                         |
| Ca_Desig_Chr_scaffold00271_85381  | Ca_desig_scaffold  | 85381                          | [T/C]       | NA                                         |
| Ca_Desig_Chr_scaffold00271_85652  | Ca_desig_scaffold  | 85652                          | [A/G]       | NA                                         |
| Ca_Desig_Chr_scaffold00271_85777  | Ca_desig_scaffold  | 85777                          | [T/C]       | NA                                         |
| Ca_Desig_Chr_scaffold00271_85779  | Ca_desig_scaffold  | 85779                          | [C/A]       | NA                                         |
| Ca_Desig_Chr_scaffold00271_106914 | Ca_desig_scaffold  | 106914                         | [T/A]       | NA                                         |
| Ca_Desig_Chr_scaffold00271_106943 | Ca_desig_scaffold  | 106943                         | [A/G]       | NA                                         |
| Ca_Desig_Chr_scaffold00271_106949 | Ca_desig_scaffold  | 106949                         | [T/G]       | NA                                         |
| Ca_Desig_Chr_scaffold00271_106955 | Ca_desig_scaffold  | 106955                         | [T/G]       | NA                                         |
| Ca_Desig_Chr_scaffold00271_111135 | Ca_desig_scaffold  | 111135                         | [T/G]       | NA                                         |
| Ca_Desig_Chr_scaffold00271_120137 | Ca_desig_scaffold  | 120137                         | [C/T]       | NA                                         |

| <b>SNP IDs</b>                    | <b>Chromosomes</b> | <b>Physical positions (bp)</b> | <b>SNPs</b> | <b>NCBI SNPdb accession IDs (NCBI_ss#)</b> |
|-----------------------------------|--------------------|--------------------------------|-------------|--------------------------------------------|
| Ca_Desig_Chr_scaffold00271_174994 | Ca_desig_scaffold  | 174994                         | [G/A]       | NA                                         |
| Ca_Desig_Chr_scaffold00271_175021 | Ca_desig_scaffold  | 175021                         | [G/C]       | NA                                         |
| Ca_Desig_Chr_scaffold00271_184858 | Ca_desig_scaffold  | 184858                         | [C/G]       | NA                                         |
| Ca_Desig_Chr_scaffold00271_190023 | Ca_desig_scaffold  | 190023                         | [C/A]       | NA                                         |
| Ca_Desig_Chr_scaffold00271_212596 | Ca_desig_scaffold  | 212596                         | [A/T]       | NA                                         |
| Ca_Desig_Chr_scaffold00274_33204  | Ca_desig_scaffold  | 33204                          | [T/G]       | NA                                         |
| Ca_Desig_Chr_scaffold00274_114414 | Ca_desig_scaffold  | 114414                         | [T/G]       | NA                                         |
| Ca_Desig_Chr_scaffold00274_122651 | Ca_desig_scaffold  | 122651                         | [A/C]       | NA                                         |
| Ca_Desig_Chr_scaffold00274_122769 | Ca_desig_scaffold  | 122769                         | [C/A]       | NA                                         |
| Ca_Desig_Chr_scaffold00274_122885 | Ca_desig_scaffold  | 122885                         | [A/G]       | NA                                         |
| Ca_Desig_Chr_scaffold00274_122995 | Ca_desig_scaffold  | 122995                         | [A/G]       | NA                                         |
| Ca_Desig_Chr_scaffold00274_123003 | Ca_desig_scaffold  | 123003                         | [C/A]       | NA                                         |
| Ca_Desig_Chr_scaffold00274_176291 | Ca_desig_scaffold  | 176291                         | [T/C]       | NA                                         |
| Ca_Desig_Chr_scaffold00274_185761 | Ca_desig_scaffold  | 185761                         | [A/G]       | NA                                         |
| Ca_Desig_Chr_scaffold00274_185765 | Ca_desig_scaffold  | 185765                         | [T/G]       | NA                                         |
| Ca_Desig_Chr_scaffold00274_185782 | Ca_desig_scaffold  | 185782                         | [T/C]       | NA                                         |
| Ca_Desig_Chr_scaffold00274_185804 | Ca_desig_scaffold  | 185804                         | [T/C]       | NA                                         |
| Ca_Desig_Chr_scaffold00274_185816 | Ca_desig_scaffold  | 185816                         | [A/G]       | NA                                         |
| Ca_Desig_Chr_scaffold00274_185825 | Ca_desig_scaffold  | 185825                         | [A/C]       | NA                                         |
| Ca_Desig_Chr_scaffold00277_38628  | Ca_desig_scaffold  | 38628                          | [A/C]       | NA                                         |
| Ca_Desig_Chr_scaffold00277_38642  | Ca_desig_scaffold  | 38642                          | [A/C]       | NA                                         |
| Ca_Desig_Chr_scaffold00277_38646  | Ca_desig_scaffold  | 38646                          | [A/T]       | NA                                         |
| Ca_Desig_Chr_scaffold00277_42134  | Ca_desig_scaffold  | 42134                          | [T/C]       | NA                                         |
| Ca_Desig_Chr_scaffold00277_42138  | Ca_desig_scaffold  | 42138                          | [A/T]       | NA                                         |
| Ca_Desig_Chr_scaffold00277_42143  | Ca_desig_scaffold  | 42143                          | [C/T]       | NA                                         |
| Ca_Desig_Chr_scaffold00277_42149  | Ca_desig_scaffold  | 42149                          | [T/C]       | NA                                         |
| Ca_Desig_Chr_scaffold00277_42160  | Ca_desig_scaffold  | 42160                          | [A/G]       | NA                                         |
| Ca_Desig_Chr_scaffold00277_42166  | Ca_desig_scaffold  | 42166                          | [G/A]       | NA                                         |
| Ca_Desig_Chr_scaffold00277_42168  | Ca_desig_scaffold  | 42168                          | [A/G]       | NA                                         |
| Ca_Desig_Chr_scaffold00277_42180  | Ca_desig_scaffold  | 42180                          | [A/G]       | NA                                         |
| Ca_Desig_Chr_scaffold00277_42183  | Ca_desig_scaffold  | 42183                          | [A/G]       | NA                                         |
| Ca_Desig_Chr_scaffold00277_42191  | Ca_desig_scaffold  | 42191                          | [T/G]       | NA                                         |
| Ca_Desig_Chr_scaffold00277_42196  | Ca_desig_scaffold  | 42196                          | [T/C]       | NA                                         |
| Ca_Desig_Chr_scaffold00277_87460  | Ca_desig_scaffold  | 87460                          | [T/C]       | NA                                         |

| <b>SNP IDs</b>                  | <b>Chromosomes</b> | <b>Physical positions (bp)</b> | <b>SNPs</b> | <b>NCBI SNPdb accession IDs (NCBI_ss#)</b> |
|---------------------------------|--------------------|--------------------------------|-------------|--------------------------------------------|
| Ca_Desi_Ch_scaffold00277_147553 | Ca_desi_scaffold   | 147553                         | [T/A]       | NA                                         |
| Ca_Desi_Ch_scaffold00277_147572 | Ca_desi_scaffold   | 147572                         | [A/C]       | NA                                         |
| Ca_Desi_Ch_scaffold00277_147592 | Ca_desi_scaffold   | 147592                         | [A/G]       | NA                                         |
| Ca_Desi_Ch_scaffold00277_190105 | Ca_desi_scaffold   | 190105                         | [C/A]       | NA                                         |
| Ca_Desi_Ch_scaffold00277_190126 | Ca_desi_scaffold   | 190126                         | [C/A]       | NA                                         |
| Ca_Desi_Ch_scaffold00277_190152 | Ca_desi_scaffold   | 190152                         | [A/T]       | NA                                         |
| Ca_Desi_Ch_scaffold00277_190153 | Ca_desi_scaffold   | 190153                         | [A/T]       | NA                                         |
| Ca_Desi_Ch_scaffold00277_190164 | Ca_desi_scaffold   | 190164                         | [G/A]       | NA                                         |
| Ca_Desi_Ch_scaffold00279_122873 | Ca_desi_scaffold   | 122873                         | [T/C]       | NA                                         |
| Ca_Desi_Ch_scaffold00279_123121 | Ca_desi_scaffold   | 123121                         | [T/C]       | NA                                         |
| Ca_Desi_Ch_scaffold00279_123131 | Ca_desi_scaffold   | 123131                         | [T/C]       | NA                                         |
| Ca_Desi_Ch_scaffold00279_123135 | Ca_desi_scaffold   | 123135                         | [A/G]       | NA                                         |
| Ca_Desi_Ch_scaffold00279_123138 | Ca_desi_scaffold   | 123138                         | [T/C]       | NA                                         |
| Ca_Desi_Ch_scaffold00279_123139 | Ca_desi_scaffold   | 123139                         | [A/G]       | NA                                         |
| Ca_Desi_Ch_scaffold00279_123141 | Ca_desi_scaffold   | 123141                         | [A/G]       | NA                                         |
| Ca_Desi_Ch_scaffold00279_123160 | Ca_desi_scaffold   | 123160                         | [T/G]       | NA                                         |
| Ca_Desi_Ch_scaffold00279_137670 | Ca_desi_scaffold   | 137670                         | [T/G]       | NA                                         |
| Ca_Desi_Ch_scaffold00279_137673 | Ca_desi_scaffold   | 137673                         | [T/G]       | NA                                         |
| Ca_Desi_Ch_scaffold00279_144460 | Ca_desi_scaffold   | 144460                         | [T/A]       | NA                                         |
| Ca_Desi_Ch_scaffold00279_144514 | Ca_desi_scaffold   | 144514                         | [T/C]       | NA                                         |
| Ca_Desi_Ch_scaffold00279_144522 | Ca_desi_scaffold   | 144522                         | [T/C]       | NA                                         |
| Ca_Desi_Ch_scaffold00279_144539 | Ca_desi_scaffold   | 144539                         | [T/G]       | NA                                         |
| Ca_Desi_Ch_scaffold00279_144541 | Ca_desi_scaffold   | 144541                         | [A/G]       | NA                                         |
| Ca_Desi_Ch_scaffold00279_144546 | Ca_desi_scaffold   | 144546                         | [T/G]       | NA                                         |
| Ca_Desi_Ch_scaffold00279_151434 | Ca_desi_scaffold   | 151434                         | [A/G]       | NA                                         |
| Ca_Desi_Ch_scaffold00286_9852   | Ca_desi_scaffold   | 9852                           | [T/G]       | NA                                         |
| Ca_Desi_Ch_scaffold00286_11294  | Ca_desi_scaffold   | 11294                          | [A/C]       | NA                                         |
| Ca_Desi_Ch_scaffold00286_11313  | Ca_desi_scaffold   | 11313                          | [A/G]       | NA                                         |
| Ca_Desi_Ch_scaffold00286_11319  | Ca_desi_scaffold   | 11319                          | [T/G]       | NA                                         |
| Ca_Desi_Ch_scaffold00286_60255  | Ca_desi_scaffold   | 60255                          | [A/C]       | NA                                         |
| Ca_Desi_Ch_scaffold00286_77109  | Ca_desi_scaffold   | 77109                          | [T/C]       | NA                                         |
| Ca_Desi_Ch_scaffold00286_77121  | Ca_desi_scaffold   | 77121                          | [A/G]       | NA                                         |
| Ca_Desi_Ch_scaffold00286_77128  | Ca_desi_scaffold   | 77128                          | [A/G]       | NA                                         |
| Ca_Desi_Ch_scaffold00286_77131  | Ca_desi_scaffold   | 77131                          | [A/G]       | NA                                         |

| <b>SNP IDs</b>                  | <b>Chromosomes</b> | <b>Physical positions (bp)</b> | <b>SNPs</b> | <b>NCBI SNPdb accession IDs (NCBI_ss#)</b> |
|---------------------------------|--------------------|--------------------------------|-------------|--------------------------------------------|
| Ca_Desi_Ch_scaffold00286_77138  | Ca_desi_scaffold   | 77138                          | [T/G]       | NA                                         |
| Ca_Desi_Ch_scaffold00286_77146  | Ca_desi_scaffold   | 77146                          | [T/C]       | NA                                         |
| Ca_Desi_Ch_scaffold00286_77148  | Ca_desi_scaffold   | 77148                          | [T/C]       | NA                                         |
| Ca_Desi_Ch_scaffold00286_77155  | Ca_desi_scaffold   | 77155                          | [A/G]       | NA                                         |
| Ca_Desi_Ch_scaffold00286_84946  | Ca_desi_scaffold   | 84946                          | [T/C]       | NA                                         |
| Ca_Desi_Ch_scaffold00286_84971  | Ca_desi_scaffold   | 84971                          | [T/C]       | NA                                         |
| Ca_Desi_Ch_scaffold00286_84982  | Ca_desi_scaffold   | 84982                          | [T/G]       | NA                                         |
| Ca_Desi_Ch_scaffold00286_90484  | Ca_desi_scaffold   | 90484                          | [T/C]       | NA                                         |
| Ca_Desi_Ch_scaffold00286_90533  | Ca_desi_scaffold   | 90533                          | [A/T]       | NA                                         |
| Ca_Desi_Ch_scaffold00286_131799 | Ca_desi_scaffold   | 131799                         | [T/C]       | NA                                         |
| Ca_Desi_Ch_scaffold00286_131828 | Ca_desi_scaffold   | 131828                         | [A/G]       | NA                                         |
| Ca_Desi_Ch_scaffold00286_148134 | Ca_desi_scaffold   | 148134                         | [T/C]       | NA                                         |
| Ca_Desi_Ch_scaffold00286_148161 | Ca_desi_scaffold   | 148161                         | [A/G]       | NA                                         |
| Ca_Desi_Ch_scaffold00286_148193 | Ca_desi_scaffold   | 148193                         | [A/C]       | NA                                         |
| Ca_Desi_Ch_scaffold00286_164254 | Ca_desi_scaffold   | 164254                         | [T/C]       | NA                                         |
| Ca_Desi_Ch_scaffold00286_164294 | Ca_desi_scaffold   | 164294                         | [T/G]       | NA                                         |
| Ca_Desi_Ch_scaffold00288_14478  | Ca_desi_scaffold   | 14478                          | [C/A]       | NA                                         |
| Ca_Desi_Ch_scaffold00288_14480  | Ca_desi_scaffold   | 14480                          | [A/C]       | NA                                         |
| Ca_Desi_Ch_scaffold00288_14481  | Ca_desi_scaffold   | 14481                          | [G/T]       | NA                                         |
| Ca_Desi_Ch_scaffold00288_66309  | Ca_desi_scaffold   | 66309                          | [T/G]       | NA                                         |
| Ca_Desi_Ch_scaffold00288_134339 | Ca_desi_scaffold   | 134339                         | [T/C]       | NA                                         |
| Ca_Desi_Ch_scaffold00288_135155 | Ca_desi_scaffold   | 135155                         | [T/C]       | NA                                         |
| Ca_Desi_Ch_scaffold00288_135194 | Ca_desi_scaffold   | 135194                         | [A/G]       | NA                                         |
| Ca_Desi_Ch_scaffold00288_154666 | Ca_desi_scaffold   | 154666                         | [A/C]       | NA                                         |
| Ca_Desi_Ch_scaffold00288_164723 | Ca_desi_scaffold   | 164723                         | [T/G]       | NA                                         |
| Ca_Desi_Ch_scaffold00288_164732 | Ca_desi_scaffold   | 164732                         | [T/C]       | NA                                         |
| Ca_Desi_Ch_scaffold00288_192960 | Ca_desi_scaffold   | 192960                         | [T/C]       | NA                                         |
| Ca_Desi_Ch_scaffold00288_192986 | Ca_desi_scaffold   | 192986                         | [A/G]       | NA                                         |
| Ca_Desi_Ch_scaffold00288_192991 | Ca_desi_scaffold   | 192991                         | [T/G]       | NA                                         |
| Ca_Desi_Ch_scaffold00288_192998 | Ca_desi_scaffold   | 192998                         | [A/G]       | NA                                         |
| Ca_Desi_Ch_scaffold00289_134711 | Ca_desi_scaffold   | 134711                         | [G/C]       | NA                                         |
| Ca_Desi_Ch_scaffold00289_150645 | Ca_desi_scaffold   | 150645                         | [T/G]       | NA                                         |
| Ca_Desi_Ch_scaffold00289_205258 | Ca_desi_scaffold   | 205258                         | [T/G]       | NA                                         |
| Ca_Desi_Ch_scaffold00289_205270 | Ca_desi_scaffold   | 205270                         | [A/G]       | NA                                         |



| <b>SNP IDs</b>                  | <b>Chromosomes</b> | <b>Physical positions (bp)</b> | <b>SNPs</b> | <b>NCBI SNPdb accession IDs (NCBI_ss#)</b> |
|---------------------------------|--------------------|--------------------------------|-------------|--------------------------------------------|
| Ca_Desi_Ch_scaffold00289_205283 | Ca_desi_scaffold   | 205283                         | [A/G]       | NA                                         |
| Ca_Desi_Ch_scaffold00290_14598  | Ca_desi_scaffold   | 14598                          | [A/C]       | NA                                         |
| Ca_Desi_Ch_scaffold00290_67803  | Ca_desi_scaffold   | 67803                          | [C/T]       | NA                                         |
| Ca_Desi_Ch_scaffold00290_67853  | Ca_desi_scaffold   | 67853                          | [A/C]       | NA                                         |
| Ca_Desi_Ch_scaffold00290_80656  | Ca_desi_scaffold   | 80656                          | [A/G]       | NA                                         |
| Ca_Desi_Ch_scaffold00290_80813  | Ca_desi_scaffold   | 80813                          | [A/G]       | NA                                         |
| Ca_Desi_Ch_scaffold00290_141640 | Ca_desi_scaffold   | 141640                         | [A/G]       | NA                                         |
| Ca_Desi_Ch_scaffold00290_141652 | Ca_desi_scaffold   | 141652                         | [A/G]       | NA                                         |
| Ca_Desi_Ch_scaffold00290_141654 | Ca_desi_scaffold   | 141654                         | [T/C]       | NA                                         |
| Ca_Desi_Ch_scaffold00290_141693 | Ca_desi_scaffold   | 141693                         | [T/C]       | NA                                         |
| Ca_Desi_Ch_scaffold00290_141764 | Ca_desi_scaffold   | 141764                         | [G/T]       | NA                                         |
| Ca_Desi_Ch_scaffold00290_141847 | Ca_desi_scaffold   | 141847                         | [A/T]       | NA                                         |
| Ca_Desi_Ch_scaffold00290_171714 | Ca_desi_scaffold   | 171714                         | [C/T]       | NA                                         |
| Ca_Desi_Ch_scaffold00290_172098 | Ca_desi_scaffold   | 172098                         | [C/T]       | NA                                         |
| Ca_Desi_Ch_scaffold00292_11825  | Ca_desi_scaffold   | 11825                          | [T/G]       | NA                                         |
| Ca_Desi_Ch_scaffold00292_11828  | Ca_desi_scaffold   | 11828                          | [T/C]       | NA                                         |
| Ca_Desi_Ch_scaffold00292_11831  | Ca_desi_scaffold   | 11831                          | [A/C]       | NA                                         |
| Ca_Desi_Ch_scaffold00292_11840  | Ca_desi_scaffold   | 11840                          | [A/C]       | NA                                         |
| Ca_Desi_Ch_scaffold00292_23650  | Ca_desi_scaffold   | 23650                          | [G/A]       | NA                                         |
| Ca_Desi_Ch_scaffold00292_23656  | Ca_desi_scaffold   | 23656                          | [T/C]       | NA                                         |
| Ca_Desi_Ch_scaffold00292_23657  | Ca_desi_scaffold   | 23657                          | [C/A]       | NA                                         |
| Ca_Desi_Ch_scaffold00292_23676  | Ca_desi_scaffold   | 23676                          | [G/T]       | NA                                         |
| Ca_Desi_Ch_scaffold00292_149633 | Ca_desi_scaffold   | 149633                         | [A/G]       | NA                                         |
| Ca_Desi_Ch_scaffold00292_158404 | Ca_desi_scaffold   | 158404                         | [T/A]       | NA                                         |
| Ca_Desi_Ch_scaffold00292_158405 | Ca_desi_scaffold   | 158405                         | [C/A]       | NA                                         |
| Ca_Desi_Ch_scaffold00292_158406 | Ca_desi_scaffold   | 158406                         | [T/G]       | NA                                         |
| Ca_Desi_Ch_scaffold00292_207172 | Ca_desi_scaffold   | 207172                         | [T/A]       | NA                                         |
| Ca_Desi_Ch_scaffold00295_80537  | Ca_desi_scaffold   | 80537                          | [A/C]       | NA                                         |
| Ca_Desi_Ch_scaffold00295_126770 | Ca_desi_scaffold   | 126770                         | [T/C]       | NA                                         |
| Ca_Desi_Ch_scaffold00295_126811 | Ca_desi_scaffold   | 126811                         | [A/C]       | NA                                         |
| Ca_Desi_Ch_scaffold00295_130696 | Ca_desi_scaffold   | 130696                         | [T/G]       | NA                                         |
| Ca_Desi_Ch_scaffold00295_130703 | Ca_desi_scaffold   | 130703                         | [T/A]       | NA                                         |
| Ca_Desi_Ch_scaffold00295_132737 | Ca_desi_scaffold   | 132737                         | [A/C]       | NA                                         |
| Ca_Desi_Ch_scaffold00295_205320 | Ca_desi_scaffold   | 205320                         | [T/G]       | NA                                         |

| <b>SNP IDs</b>                  | <b>Chromosomes</b> | <b>Physical positions (bp)</b> | <b>SNPs</b> | <b>NCBI SNPdb accession IDs (NCBI_ss#)</b> |
|---------------------------------|--------------------|--------------------------------|-------------|--------------------------------------------|
| Ca_Desi_Ch_scaffold00295_205330 | Ca_desi_scaffold   | 205330                         | [A/G]       | NA                                         |
| Ca_Desi_Ch_scaffold00295_205722 | Ca_desi_scaffold   | 205722                         | [A/G]       | NA                                         |
| Ca_Desi_Ch_scaffold00295_205727 | Ca_desi_scaffold   | 205727                         | [A/G]       | NA                                         |
| Ca_Desi_Ch_scaffold00295_205743 | Ca_desi_scaffold   | 205743                         | [A/C]       | NA                                         |
| Ca_Desi_Ch_scaffold00295_205746 | Ca_desi_scaffold   | 205746                         | [A/C]       | NA                                         |
| Ca_Desi_Ch_scaffold00295_205774 | Ca_desi_scaffold   | 205774                         | [T/C]       | NA                                         |
| Ca_Desi_Ch_scaffold00295_205776 | Ca_desi_scaffold   | 205776                         | [A/G]       | NA                                         |
| Ca_Desi_Ch_scaffold00296_78258  | Ca_desi_scaffold   | 78258                          | [A/C]       | NA                                         |
| Ca_Desi_Ch_scaffold00296_83396  | Ca_desi_scaffold   | 83396                          | [A/C]       | NA                                         |
| Ca_Desi_Ch_scaffold00296_120048 | Ca_desi_scaffold   | 120048                         | [T/C]       | NA                                         |
| Ca_Desi_Ch_scaffold00296_120073 | Ca_desi_scaffold   | 120073                         | [A/T]       | NA                                         |
| Ca_Desi_Ch_scaffold00296_131549 | Ca_desi_scaffold   | 131549                         | [T/C]       | NA                                         |
| Ca_Desi_Ch_scaffold00296_131550 | Ca_desi_scaffold   | 131550                         | [A/T]       | NA                                         |
| Ca_Desi_Ch_scaffold00297_4879   | Ca_desi_scaffold   | 4879                           | [G/A]       | NA                                         |
| Ca_Desi_Ch_scaffold00301_123623 | Ca_desi_scaffold   | 123623                         | [T/C]       | NA                                         |
| Ca_Desi_Ch_scaffold00301_158237 | Ca_desi_scaffold   | 158237                         | [A/T]       | NA                                         |
| Ca_Desi_Ch_scaffold00301_158377 | Ca_desi_scaffold   | 158377                         | [A/C]       | NA                                         |
| Ca_Desi_Ch_scaffold00304_112094 | Ca_desi_scaffold   | 112094                         | [T/A]       | NA                                         |
| Ca_Desi_Ch_scaffold00304_112102 | Ca_desi_scaffold   | 112102                         | [T/A]       | NA                                         |
| Ca_Desi_Ch_scaffold00304_112104 | Ca_desi_scaffold   | 112104                         | [G/A]       | NA                                         |
| Ca_Desi_Ch_scaffold00304_112106 | Ca_desi_scaffold   | 112106                         | [T/A]       | NA                                         |
| Ca_Desi_Ch_scaffold00304_195202 | Ca_desi_scaffold   | 195202                         | [T/A]       | NA                                         |
| Ca_Desi_Ch_scaffold00304_195207 | Ca_desi_scaffold   | 195207                         | [A/C]       | NA                                         |
| Ca_Desi_Ch_scaffold00304_195215 | Ca_desi_scaffold   | 195215                         | [T/A]       | NA                                         |
| Ca_Desi_Ch_scaffold00305_2888   | Ca_desi_scaffold   | 2888                           | [A/C]       | NA                                         |
| Ca_Desi_Ch_scaffold00305_37162  | Ca_desi_scaffold   | 37162                          | [G/T]       | NA                                         |
| Ca_Desi_Ch_scaffold00305_63530  | Ca_desi_scaffold   | 63530                          | [T/G]       | NA                                         |
| Ca_Desi_Ch_scaffold00305_112106 | Ca_desi_scaffold   | 112106                         | [A/C]       | NA                                         |
| Ca_Desi_Ch_scaffold00305_119190 | Ca_desi_scaffold   | 119190                         | [C/T]       | NA                                         |
| Ca_Desi_Ch_scaffold00305_119211 | Ca_desi_scaffold   | 119211                         | [G/A]       | NA                                         |
| Ca_Desi_Ch_scaffold00305_124717 | Ca_desi_scaffold   | 124717                         | [T/A]       | NA                                         |
| Ca_Desi_Ch_scaffold00305_124741 | Ca_desi_scaffold   | 124741                         | [A/G]       | NA                                         |
| Ca_Desi_Ch_scaffold00305_124750 | Ca_desi_scaffold   | 124750                         | [A/C]       | NA                                         |
| Ca_Desi_Ch_scaffold00305_139930 | Ca_desi_scaffold   | 139930                         | [T/G]       | NA                                         |

| <b>SNP IDs</b>                   | <b>Chromosomes</b> | <b>Physical positions (bp)</b> | <b>SNPs</b> | <b>NCBI SNPdb accession IDs (NCBI_ss#)</b> |
|----------------------------------|--------------------|--------------------------------|-------------|--------------------------------------------|
| Ca_DesigChr_scaffold00305_139950 | Ca_desig_scaffold  | 139950                         | [A/C]       | NA                                         |
| Ca_DesigChr_scaffold00305_148990 | Ca_desig_scaffold  | 148990                         | [G/A]       | NA                                         |
| Ca_DesigChr_scaffold00305_165210 | Ca_desig_scaffold  | 165210                         | [T/G]       | NA                                         |
| Ca_DesigChr_scaffold00305_165212 | Ca_desig_scaffold  | 165212                         | [T/C]       | NA                                         |
| Ca_DesigChr_scaffold00305_165220 | Ca_desig_scaffold  | 165220                         | [A/C]       | NA                                         |
| Ca_DesigChr_scaffold00305_165237 | Ca_desig_scaffold  | 165237                         | [T/A]       | NA                                         |
| Ca_DesigChr_scaffold00305_184617 | Ca_desig_scaffold  | 184617                         | [A/C]       | NA                                         |
| Ca_DesigChr_scaffold00305_186878 | Ca_desig_scaffold  | 186878                         | [T/C]       | NA                                         |
| Ca_DesigChr_scaffold00305_186909 | Ca_desig_scaffold  | 186909                         | [A/G]       | NA                                         |
| Ca_DesigChr_scaffold00305_186914 | Ca_desig_scaffold  | 186914                         | [A/G]       | NA                                         |
| Ca_DesigChr_scaffold00307_80599  | Ca_desig_scaffold  | 80599                          | [T/G]       | NA                                         |
| Ca_DesigChr_scaffold00308_12985  | Ca_desig_scaffold  | 12985                          | [T/C]       | NA                                         |
| Ca_DesigChr_scaffold00308_45849  | Ca_desig_scaffold  | 45849                          | [A/G]       | NA                                         |
| Ca_DesigChr_scaffold00308_45873  | Ca_desig_scaffold  | 45873                          | [T/A]       | NA                                         |
| Ca_DesigChr_scaffold00308_48197  | Ca_desig_scaffold  | 48197                          | [G/A]       | NA                                         |
| Ca_DesigChr_scaffold00308_49181  | Ca_desig_scaffold  | 49181                          | [A/C]       | NA                                         |
| Ca_DesigChr_scaffold00308_49189  | Ca_desig_scaffold  | 49189                          | [A/C]       | NA                                         |
| Ca_DesigChr_scaffold00310_65823  | Ca_desig_scaffold  | 65823                          | [T/C]       | NA                                         |
| Ca_DesigChr_scaffold00310_65838  | Ca_desig_scaffold  | 65838                          | [T/C]       | NA                                         |
| Ca_DesigChr_scaffold00310_65840  | Ca_desig_scaffold  | 65840                          | [A/G]       | NA                                         |
| Ca_DesigChr_scaffold00310_65846  | Ca_desig_scaffold  | 65846                          | [T/C]       | NA                                         |
| Ca_DesigChr_scaffold00310_65857  | Ca_desig_scaffold  | 65857                          | [A/G]       | NA                                         |
| Ca_DesigChr_scaffold00310_65860  | Ca_desig_scaffold  | 65860                          | [T/A]       | NA                                         |
| Ca_DesigChr_scaffold00312_8720   | Ca_desig_scaffold  | 8720                           | [T/G]       | NA                                         |
| Ca_DesigChr_scaffold00312_8776   | Ca_desig_scaffold  | 8776                           | [A/T]       | NA                                         |
| Ca_DesigChr_scaffold00316_12767  | Ca_desig_scaffold  | 12767                          | [A/C]       | NA                                         |
| Ca_DesigChr_scaffold00316_56159  | Ca_desig_scaffold  | 56159                          | [T/G]       | NA                                         |
| Ca_DesigChr_scaffold00316_72296  | Ca_desig_scaffold  | 72296                          | [A/C]       | NA                                         |
| Ca_DesigChr_scaffold00316_72309  | Ca_desig_scaffold  | 72309                          | [T/C]       | NA                                         |
| Ca_DesigChr_scaffold00316_92856  | Ca_desig_scaffold  | 92856                          | [T/G]       | NA                                         |
| Ca_DesigChr_scaffold00316_108816 | Ca_desig_scaffold  | 108816                         | [A/C]       | NA                                         |
| Ca_DesigChr_scaffold00316_115704 | Ca_desig_scaffold  | 115704                         | [C/T]       | NA                                         |
| Ca_DesigChr_scaffold00316_147456 | Ca_desig_scaffold  | 147456                         | [T/C]       | NA                                         |
| Ca_DesigChr_scaffold00316_167346 | Ca_desig_scaffold  | 167346                         | [A/T]       | NA                                         |

| <b>SNP IDs</b>                   | <b>Chromosomes</b> | <b>Physical positions (bp)</b> | <b>SNPs</b> | <b>NCBI SNPdb accession IDs (NCBI_ss#)</b> |
|----------------------------------|--------------------|--------------------------------|-------------|--------------------------------------------|
| Ca_DesigChr_scaffold00321_101721 | Ca_desig_scaffold  | 101721                         | [A/C]       | NA                                         |
| Ca_DesigChr_scaffold00321_135259 | Ca_desig_scaffold  | 135259                         | [T/C]       | NA                                         |
| Ca_DesigChr_scaffold00321_135288 | Ca_desig_scaffold  | 135288                         | [G/A]       | NA                                         |
| Ca_DesigChr_scaffold00321_135290 | Ca_desig_scaffold  | 135290                         | [T/G]       | NA                                         |
| Ca_DesigChr_scaffold00321_135292 | Ca_desig_scaffold  | 135292                         | [T/G]       | NA                                         |
| Ca_DesigChr_scaffold00321_135294 | Ca_desig_scaffold  | 135294                         | [T/G]       | NA                                         |
| Ca_DesigChr_scaffold00321_167100 | Ca_desig_scaffold  | 167100                         | [T/C]       | NA                                         |
| Ca_DesigChr_scaffold00321_172570 | Ca_desig_scaffold  | 172570                         | [G/C]       | NA                                         |
| Ca_DesigChr_scaffold00321_172587 | Ca_desig_scaffold  | 172587                         | [A/C]       | NA                                         |
| Ca_DesigChr_scaffold00321_172596 | Ca_desig_scaffold  | 172596                         | [A/G]       | NA                                         |
| Ca_DesigChr_scaffold00321_172597 | Ca_desig_scaffold  | 172597                         | [A/G]       | NA                                         |
| Ca_DesigChr_scaffold00321_172599 | Ca_desig_scaffold  | 172599                         | [A/C]       | NA                                         |
| Ca_DesigChr_scaffold00321_172601 | Ca_desig_scaffold  | 172601                         | [A/C]       | NA                                         |
| Ca_DesigChr_scaffold00321_172612 | Ca_desig_scaffold  | 172612                         | [A/G]       | NA                                         |
| Ca_DesigChr_scaffold00321_172614 | Ca_desig_scaffold  | 172614                         | [A/G]       | NA                                         |
| Ca_DesigChr_scaffold00321_172619 | Ca_desig_scaffold  | 172619                         | [A/G]       | NA                                         |
| Ca_DesigChr_scaffold00321_172655 | Ca_desig_scaffold  | 172655                         | [A/C]       | NA                                         |
| Ca_DesigChr_scaffold00321_172661 | Ca_desig_scaffold  | 172661                         | [A/G]       | NA                                         |
| Ca_DesigChr_scaffold00321_172664 | Ca_desig_scaffold  | 172664                         | [T/C]       | NA                                         |
| Ca_DesigChr_scaffold00321_172669 | Ca_desig_scaffold  | 172669                         | [T/C]       | NA                                         |
| Ca_DesigChr_scaffold00321_172670 | Ca_desig_scaffold  | 172670                         | [C/T]       | NA                                         |
| Ca_DesigChr_scaffold00321_172682 | Ca_desig_scaffold  | 172682                         | [A/G]       | NA                                         |
| Ca_DesigChr_scaffold00321_172691 | Ca_desig_scaffold  | 172691                         | [A/T]       | NA                                         |
| Ca_DesigChr_scaffold00321_172704 | Ca_desig_scaffold  | 172704                         | [T/G]       | NA                                         |
| Ca_DesigChr_scaffold00321_181281 | Ca_desig_scaffold  | 181281                         | [T/G]       | NA                                         |
| Ca_DesigChr_scaffold00321_182700 | Ca_desig_scaffold  | 182700                         | [T/G]       | NA                                         |
| Ca_DesigChr_scaffold00322_56984  | Ca_desig_scaffold  | 56984                          | [T/C]       | NA                                         |
| Ca_DesigChr_scaffold00322_56985  | Ca_desig_scaffold  | 56985                          | [A/T]       | NA                                         |
| Ca_DesigChr_scaffold00322_57008  | Ca_desig_scaffold  | 57008                          | [A/C]       | NA                                         |
| Ca_DesigChr_scaffold00322_80673  | Ca_desig_scaffold  | 80673                          | [A/C]       | NA                                         |
| Ca_DesigChr_scaffold00322_80702  | Ca_desig_scaffold  | 80702                          | [G/T]       | NA                                         |
| Ca_DesigChr_scaffold00322_80705  | Ca_desig_scaffold  | 80705                          | [C/G]       | NA                                         |
| Ca_DesigChr_scaffold00322_80706  | Ca_desig_scaffold  | 80706                          | [G/C]       | NA                                         |
| Ca_DesigChr_scaffold00322_80709  | Ca_desig_scaffold  | 80709                          | [T/G]       | NA                                         |

| <b>SNP IDs</b>                          | <b>Chromosomes</b> | <b>Physical positions (bp)</b> | <b>SNPs</b> | <b>NCBI SNPdb accession IDs (NCBI_ss#)</b> |
|-----------------------------------------|--------------------|--------------------------------|-------------|--------------------------------------------|
| Ca_Desi_Chromosome_scaffold00322_80710  | Ca_desi_scaffold   | 80710                          | [A/C]       | NA                                         |
| Ca_Desi_Chromosome_scaffold00322_93543  | Ca_desi_scaffold   | 93543                          | [A/T]       | NA                                         |
| Ca_Desi_Chromosome_scaffold00322_93579  | Ca_desi_scaffold   | 93579                          | [T/G]       | NA                                         |
| Ca_Desi_Chromosome_scaffold00322_117138 | Ca_desi_scaffold   | 117138                         | [T/C]       | NA                                         |
| Ca_Desi_Chromosome_scaffold00325_9549   | Ca_desi_scaffold   | 9549                           | [T/G]       | NA                                         |
| Ca_Desi_Chromosome_scaffold00325_10653  | Ca_desi_scaffold   | 10653                          | [A/T]       | NA                                         |
| Ca_Desi_Chromosome_scaffold00325_10654  | Ca_desi_scaffold   | 10654                          | [T/C]       | NA                                         |
| Ca_Desi_Chromosome_scaffold00325_10655  | Ca_desi_scaffold   | 10655                          | [G/T]       | NA                                         |
| Ca_Desi_Chromosome_scaffold00327_40910  | Ca_desi_scaffold   | 40910                          | [A/G]       | NA                                         |
| Ca_Desi_Chromosome_scaffold00327_42516  | Ca_desi_scaffold   | 42516                          | [T/A]       | NA                                         |
| Ca_Desi_Chromosome_scaffold00327_44515  | Ca_desi_scaffold   | 44515                          | [A/G]       | NA                                         |
| Ca_Desi_Chromosome_scaffold00327_75686  | Ca_desi_scaffold   | 75686                          | [A/T]       | NA                                         |
| Ca_Desi_Chromosome_scaffold00327_75695  | Ca_desi_scaffold   | 75695                          | [A/G]       | NA                                         |
| Ca_Desi_Chromosome_scaffold00327_75706  | Ca_desi_scaffold   | 75706                          | [A/C]       | NA                                         |
| Ca_Desi_Chromosome_scaffold00327_75722  | Ca_desi_scaffold   | 75722                          | [T/C]       | NA                                         |
| Ca_Desi_Chromosome_scaffold00327_75729  | Ca_desi_scaffold   | 75729                          | [A/G]       | NA                                         |
| Ca_Desi_Chromosome_scaffold00327_75731  | Ca_desi_scaffold   | 75731                          | [A/G]       | NA                                         |
| Ca_Desi_Chromosome_scaffold00327_75733  | Ca_desi_scaffold   | 75733                          | [G/C]       | NA                                         |
| Ca_Desi_Chromosome_scaffold00327_75734  | Ca_desi_scaffold   | 75734                          | [T/C]       | NA                                         |
| Ca_Desi_Chromosome_scaffold00327_75742  | Ca_desi_scaffold   | 75742                          | [C/G]       | NA                                         |
| Ca_Desi_Chromosome_scaffold00327_75745  | Ca_desi_scaffold   | 75745                          | [G/A]       | NA                                         |
| Ca_Desi_Chromosome_scaffold00327_75746  | Ca_desi_scaffold   | 75746                          | [G/A]       | NA                                         |
| Ca_Desi_Chromosome_scaffold00327_75747  | Ca_desi_scaffold   | 75747                          | [C/A]       | NA                                         |
| Ca_Desi_Chromosome_scaffold00327_75748  | Ca_desi_scaffold   | 75748                          | [T/C]       | NA                                         |
| Ca_Desi_Chromosome_scaffold00327_106744 | Ca_desi_scaffold   | 106744                         | [A/T]       | NA                                         |
| Ca_Desi_Chromosome_scaffold00327_106760 | Ca_desi_scaffold   | 106760                         | [G/A]       | NA                                         |
| Ca_Desi_Chromosome_scaffold00327_106782 | Ca_desi_scaffold   | 106782                         | [A/G]       | NA                                         |
| Ca_Desi_Chromosome_scaffold00327_106805 | Ca_desi_scaffold   | 106805                         | [T/C]       | NA                                         |
| Ca_Desi_Chromosome_scaffold00327_109872 | Ca_desi_scaffold   | 109872                         | [A/C]       | NA                                         |
| Ca_Desi_Chromosome_scaffold00327_112403 | Ca_desi_scaffold   | 112403                         | [G/C]       | NA                                         |
| Ca_Desi_Chromosome_scaffold00327_112405 | Ca_desi_scaffold   | 112405                         | [T/G]       | NA                                         |
| Ca_Desi_Chromosome_scaffold00327_121084 | Ca_desi_scaffold   | 121084                         | [A/C]       | NA                                         |
| Ca_Desi_Chromosome_scaffold00327_121102 | Ca_desi_scaffold   | 121102                         | [T/C]       | NA                                         |
| Ca_Desi_Chromosome_scaffold00330_3148   | Ca_desi_scaffold   | 3148                           | [A/G]       | NA                                         |

| <b>SNP IDs</b>                  | <b>Chromosomes</b> | <b>Physical positions (bp)</b> | <b>SNPs</b> | <b>NCBI SNPdb accession IDs (NCBI_ss#)</b> |
|---------------------------------|--------------------|--------------------------------|-------------|--------------------------------------------|
| Ca_Desi_Ch_scaffold00330_31237  | Ca_desi_scaffold   | 31237                          | [T/G]       | NA                                         |
| Ca_Desi_Ch_scaffold00330_31255  | Ca_desi_scaffold   | 31255                          | [A/G]       | NA                                         |
| Ca_Desi_Ch_scaffold00331_47816  | Ca_desi_scaffold   | 47816                          | [A/G]       | NA                                         |
| Ca_Desi_Ch_scaffold00331_52242  | Ca_desi_scaffold   | 52242                          | [T/A]       | NA                                         |
| Ca_Desi_Ch_scaffold00331_81369  | Ca_desi_scaffold   | 81369                          | [T/C]       | NA                                         |
| Ca_Desi_Ch_scaffold00331_82085  | Ca_desi_scaffold   | 82085                          | [G/T]       | NA                                         |
| Ca_Desi_Ch_scaffold00331_82087  | Ca_desi_scaffold   | 82087                          | [G/T]       | NA                                         |
| Ca_Desi_Ch_scaffold00331_82108  | Ca_desi_scaffold   | 82108                          | [A/C]       | NA                                         |
| Ca_Desi_Ch_scaffold00331_87006  | Ca_desi_scaffold   | 87006                          | [A/G]       | NA                                         |
| Ca_Desi_Ch_scaffold00331_87032  | Ca_desi_scaffold   | 87032                          | [A/G]       | NA                                         |
| Ca_Desi_Ch_scaffold00331_87052  | Ca_desi_scaffold   | 87052                          | [A/G]       | NA                                         |
| Ca_Desi_Ch_scaffold00331_96512  | Ca_desi_scaffold   | 96512                          | [A/C]       | NA                                         |
| Ca_Desi_Ch_scaffold00331_97307  | Ca_desi_scaffold   | 97307                          | [A/T]       | NA                                         |
| Ca_Desi_Ch_scaffold00331_97308  | Ca_desi_scaffold   | 97308                          | [T/C]       | NA                                         |
| Ca_Desi_Ch_scaffold00331_97309  | Ca_desi_scaffold   | 97309                          | [G/T]       | NA                                         |
| Ca_Desi_Ch_scaffold00331_97359  | Ca_desi_scaffold   | 97359                          | [C/A]       | NA                                         |
| Ca_Desi_Ch_scaffold00331_108675 | Ca_desi_scaffold   | 108675                         | [A/C]       | NA                                         |
| Ca_Desi_Ch_scaffold00331_108699 | Ca_desi_scaffold   | 108699                         | [C/T]       | NA                                         |
| Ca_Desi_Ch_scaffold00331_108727 | Ca_desi_scaffold   | 108727                         | [T/A]       | NA                                         |
| Ca_Desi_Ch_scaffold00331_108758 | Ca_desi_scaffold   | 108758                         | [C/T]       | NA                                         |
| Ca_Desi_Ch_scaffold00331_111796 | Ca_desi_scaffold   | 111796                         | [A/T]       | NA                                         |
| Ca_Desi_Ch_scaffold00331_111820 | Ca_desi_scaffold   | 111820                         | [G/T]       | NA                                         |
| Ca_Desi_Ch_scaffold00331_116816 | Ca_desi_scaffold   | 116816                         | [A/G]       | NA                                         |
| Ca_Desi_Ch_scaffold00331_123281 | Ca_desi_scaffold   | 123281                         | [C/T]       | NA                                         |
| Ca_Desi_Ch_scaffold00331_170910 | Ca_desi_scaffold   | 170910                         | [A/C]       | NA                                         |
| Ca_Desi_Ch_scaffold00331_173679 | Ca_desi_scaffold   | 173679                         | [G/A]       | NA                                         |
| Ca_Desi_Ch_scaffold00331_180895 | Ca_desi_scaffold   | 180895                         | [C/T]       | NA                                         |
| Ca_Desi_Ch_scaffold00331_181554 | Ca_desi_scaffold   | 181554                         | [C/A]       | NA                                         |
| Ca_Desi_Ch_scaffold00331_181642 | Ca_desi_scaffold   | 181642                         | [C/T]       | NA                                         |
| Ca_Desi_Ch_scaffold00331_181654 | Ca_desi_scaffold   | 181654                         | [A/C]       | NA                                         |
| Ca_Desi_Ch_scaffold00331_181674 | Ca_desi_scaffold   | 181674                         | [T/A]       | NA                                         |
| Ca_Desi_Ch_scaffold00331_184588 | Ca_desi_scaffold   | 184588                         | [C/G]       | NA                                         |
| Ca_Desi_Ch_scaffold00331_184631 | Ca_desi_scaffold   | 184631                         | [T/C]       | NA                                         |
| Ca_Desi_Ch_scaffold00331_184647 | Ca_desi_scaffold   | 184647                         | [A/G]       | NA                                         |

| <b>SNP IDs</b>                    | <b>Chromosomes</b> | <b>Physical positions (bp)</b> | <b>SNPs</b> | <b>NCBI SNPdb accession IDs (NCBI_ss#)</b> |
|-----------------------------------|--------------------|--------------------------------|-------------|--------------------------------------------|
| Ca_Desig_Chr_scaffold00331_184669 | Ca_desig_scaffold  | 184669                         | [A/G]       | NA                                         |
| Ca_Desig_Chr_scaffold00331_184677 | Ca_desig_scaffold  | 184677                         | [A/C]       | NA                                         |
| Ca_Desig_Chr_scaffold00331_184681 | Ca_desig_scaffold  | 184681                         | [C/A]       | NA                                         |
| Ca_Desig_Chr_scaffold00331_184734 | Ca_desig_scaffold  | 184734                         | [G/C]       | NA                                         |
| Ca_Desig_Chr_scaffold00331_185387 | Ca_desig_scaffold  | 185387                         | [A/G]       | NA                                         |
| Ca_Desig_Chr_scaffold00331_185465 | Ca_desig_scaffold  | 185465                         | [C/T]       | NA                                         |
| Ca_Desig_Chr_scaffold00331_185726 | Ca_desig_scaffold  | 185726                         | [A/G]       | NA                                         |
| Ca_Desig_Chr_scaffold00331_185765 | Ca_desig_scaffold  | 185765                         | [T/G]       | NA                                         |
| Ca_Desig_Chr_scaffold00331_186127 | Ca_desig_scaffold  | 186127                         | [A/C]       | NA                                         |
| Ca_Desig_Chr_scaffold00332_25821  | Ca_desig_scaffold  | 25821                          | [T/G]       | NA                                         |
| Ca_Desig_Chr_scaffold00332_50912  | Ca_desig_scaffold  | 50912                          | [T/G]       | NA                                         |
| Ca_Desig_Chr_scaffold00332_50982  | Ca_desig_scaffold  | 50982                          | [A/C]       | NA                                         |
| Ca_Desig_Chr_scaffold00332_51099  | Ca_desig_scaffold  | 51099                          | [T/G]       | NA                                         |
| Ca_Desig_Chr_scaffold00332_87122  | Ca_desig_scaffold  | 87122                          | [G/A]       | NA                                         |
| Ca_Desig_Chr_scaffold00332_87125  | Ca_desig_scaffold  | 87125                          | [G/A]       | NA                                         |
| Ca_Desig_Chr_scaffold00332_87127  | Ca_desig_scaffold  | 87127                          | [T/C]       | NA                                         |
| Ca_Desig_Chr_scaffold00332_87130  | Ca_desig_scaffold  | 87130                          | [A/C]       | NA                                         |
| Ca_Desig_Chr_scaffold00332_96231  | Ca_desig_scaffold  | 96231                          | [T/C]       | NA                                         |
| Ca_Desig_Chr_scaffold00332_129501 | Ca_desig_scaffold  | 129501                         | [G/A]       | NA                                         |
| Ca_Desig_Chr_scaffold00332_135205 | Ca_desig_scaffold  | 135205                         | [A/G]       | NA                                         |
| Ca_Desig_Chr_scaffold00332_174353 | Ca_desig_scaffold  | 174353                         | [A/G]       | NA                                         |
| Ca_Desig_Chr_scaffold00332_174370 | Ca_desig_scaffold  | 174370                         | [A/G]       | NA                                         |
| Ca_Desig_Chr_scaffold00332_174378 | Ca_desig_scaffold  | 174378                         | [A/G]       | NA                                         |
| Ca_Desig_Chr_scaffold00332_186650 | Ca_desig_scaffold  | 186650                         | [T/C]       | NA                                         |
| Ca_Desig_Chr_scaffold00332_193779 | Ca_desig_scaffold  | 193779                         | [A/C]       | NA                                         |
| Ca_Desig_Chr_scaffold00335_57019  | Ca_desig_scaffold  | 57019                          | [A/C]       | NA                                         |
| Ca_Desig_Chr_scaffold00335_57023  | Ca_desig_scaffold  | 57023                          | [A/C]       | NA                                         |
| Ca_Desig_Chr_scaffold00335_129825 | Ca_desig_scaffold  | 129825                         | [T/A]       | NA                                         |
| Ca_Desig_Chr_scaffold00335_129831 | Ca_desig_scaffold  | 129831                         | [T/A]       | NA                                         |
| Ca_Desig_Chr_scaffold00335_129886 | Ca_desig_scaffold  | 129886                         | [T/C]       | NA                                         |
| Ca_Desig_Chr_scaffold00335_129892 | Ca_desig_scaffold  | 129892                         | [A/G]       | NA                                         |
| Ca_Desig_Chr_scaffold00335_129937 | Ca_desig_scaffold  | 129937                         | [T/G]       | NA                                         |
| Ca_Desig_Chr_scaffold00337_43364  | Ca_desig_scaffold  | 43364                          | [A/C]       | NA                                         |
| Ca_Desig_Chr_scaffold00337_43932  | Ca_desig_scaffold  | 43932                          | [C/T]       | NA                                         |

| <b>SNP IDs</b>                    | <b>Chromosomes</b> | <b>Physical positions (bp)</b> | <b>SNPs</b> | <b>NCBI SNPdb accession IDs (NCBI_ss#)</b> |
|-----------------------------------|--------------------|--------------------------------|-------------|--------------------------------------------|
| Ca_Desig_Chr_scaffold00337_43937  | Ca_desig_scaffold  | 43937                          | [T/C]       | NA                                         |
| Ca_Desig_Chr_scaffold00337_43943  | Ca_desig_scaffold  | 43943                          | [C/T]       | NA                                         |
| Ca_Desig_Chr_scaffold00337_43950  | Ca_desig_scaffold  | 43950                          | [A/G]       | NA                                         |
| Ca_Desig_Chr_scaffold00337_43960  | Ca_desig_scaffold  | 43960                          | [T/C]       | NA                                         |
| Ca_Desig_Chr_scaffold00337_48694  | Ca_desig_scaffold  | 48694                          | [G/T]       | NA                                         |
| Ca_Desig_Chr_scaffold00337_49937  | Ca_desig_scaffold  | 49937                          | [A/C]       | NA                                         |
| Ca_Desig_Chr_scaffold00337_49938  | Ca_desig_scaffold  | 49938                          | [C/T]       | NA                                         |
| Ca_Desig_Chr_scaffold00337_50101  | Ca_desig_scaffold  | 50101                          | [T/C]       | NA                                         |
| Ca_Desig_Chr_scaffold00337_50180  | Ca_desig_scaffold  | 50180                          | [A/C]       | NA                                         |
| Ca_Desig_Chr_scaffold00337_55298  | Ca_desig_scaffold  | 55298                          | [A/T]       | NA                                         |
| Ca_Desig_Chr_scaffold00337_55320  | Ca_desig_scaffold  | 55320                          | [A/G]       | NA                                         |
| Ca_Desig_Chr_scaffold00337_65388  | Ca_desig_scaffold  | 65388                          | [T/C]       | NA                                         |
| Ca_Desig_Chr_scaffold00337_65398  | Ca_desig_scaffold  | 65398                          | [T/A]       | NA                                         |
| Ca_Desig_Chr_scaffold00337_88157  | Ca_desig_scaffold  | 88157                          | [T/C]       | NA                                         |
| Ca_Desig_Chr_scaffold00337_88207  | Ca_desig_scaffold  | 88207                          | [T/C]       | NA                                         |
| Ca_Desig_Chr_scaffold00337_88209  | Ca_desig_scaffold  | 88209                          | [A/C]       | NA                                         |
| Ca_Desig_Chr_scaffold00337_88224  | Ca_desig_scaffold  | 88224                          | [A/C]       | NA                                         |
| Ca_Desig_Chr_scaffold00337_88227  | Ca_desig_scaffold  | 88227                          | [A/C]       | NA                                         |
| Ca_Desig_Chr_scaffold00337_88230  | Ca_desig_scaffold  | 88230                          | [A/T]       | NA                                         |
| Ca_Desig_Chr_scaffold00337_109353 | Ca_desig_scaffold  | 109353                         | [A/G]       | NA                                         |
| Ca_Desig_Chr_scaffold00337_125899 | Ca_desig_scaffold  | 125899                         | [T/C]       | NA                                         |
| Ca_Desig_Chr_scaffold00337_157094 | Ca_desig_scaffold  | 157094                         | [A/C]       | NA                                         |
| Ca_Desig_Chr_scaffold00341_32675  | Ca_desig_scaffold  | 32675                          | [A/G]       | NA                                         |
| Ca_Desig_Chr_scaffold00341_32686  | Ca_desig_scaffold  | 32686                          | [A/C]       | NA                                         |
| Ca_Desig_Chr_scaffold00341_32698  | Ca_desig_scaffold  | 32698                          | [A/C]       | NA                                         |
| Ca_Desig_Chr_scaffold00341_32701  | Ca_desig_scaffold  | 32701                          | [A/C]       | NA                                         |
| Ca_Desig_Chr_scaffold00341_116173 | Ca_desig_scaffold  | 116173                         | [T/C]       | NA                                         |
| Ca_Desig_Chr_scaffold00341_116177 | Ca_desig_scaffold  | 116177                         | [A/C]       | NA                                         |
| Ca_Desig_Chr_scaffold00341_116185 | Ca_desig_scaffold  | 116185                         | [T/C]       | NA                                         |
| Ca_Desig_Chr_scaffold00341_116194 | Ca_desig_scaffold  | 116194                         | [A/G]       | NA                                         |
| Ca_Desig_Chr_scaffold00341_116221 | Ca_desig_scaffold  | 116221                         | [T/C]       | NA                                         |
| Ca_Desig_Chr_scaffold00341_116226 | Ca_desig_scaffold  | 116226                         | [T/C]       | NA                                         |
| Ca_Desig_Chr_scaffold00341_184232 | Ca_desig_scaffold  | 184232                         | [A/G]       | NA                                         |
| Ca_Desig_Chr_scaffold00341_184237 | Ca_desig_scaffold  | 184237                         | [A/C]       | NA                                         |



| <b>SNP IDs</b>                    | <b>Chromosomes</b> | <b>Physical positions (bp)</b> | <b>SNPs</b> | <b>NCBI SNPdb accession IDs (NCBI_ss#)</b> |
|-----------------------------------|--------------------|--------------------------------|-------------|--------------------------------------------|
| Ca_Desig_Chr_scaffold00341_184244 | Ca_desig_scaffold  | 184244                         | [T/C]       | NA                                         |
| Ca_Desig_Chr_scaffold00341_184262 | Ca_desig_scaffold  | 184262                         | [C/A]       | NA                                         |
| Ca_Desig_Chr_scaffold00341_184268 | Ca_desig_scaffold  | 184268                         | [T/C]       | NA                                         |
| Ca_Desig_Chr_scaffold00342_91800  | Ca_desig_scaffold  | 91800                          | [G/A]       | NA                                         |
| Ca_Desig_Chr_scaffold00343_50032  | Ca_desig_scaffold  | 50032                          | [A/C]       | NA                                         |
| Ca_Desig_Chr_scaffold00343_50038  | Ca_desig_scaffold  | 50038                          | [A/C]       | NA                                         |
| Ca_Desig_Chr_scaffold00343_155693 | Ca_desig_scaffold  | 155693                         | [T/G]       | NA                                         |
| Ca_Desig_Chr_scaffold00346_133897 | Ca_desig_scaffold  | 133897                         | [A/G]       | NA                                         |
| Ca_Desig_Chr_scaffold00346_133971 | Ca_desig_scaffold  | 133971                         | [C/A]       | NA                                         |
| Ca_Desig_Chr_scaffold00346_134074 | Ca_desig_scaffold  | 134074                         | [T/C]       | NA                                         |
| Ca_Desig_Chr_scaffold00346_134078 | Ca_desig_scaffold  | 134078                         | [G/T]       | NA                                         |
| Ca_Desig_Chr_scaffold00347_38132  | Ca_desig_scaffold  | 38132                          | [A/G]       | NA                                         |
| Ca_Desig_Chr_scaffold00347_38133  | Ca_desig_scaffold  | 38133                          | [C/T]       | NA                                         |
| Ca_Desig_Chr_scaffold00347_38134  | Ca_desig_scaffold  | 38134                          | [C/A]       | NA                                         |
| Ca_Desig_Chr_scaffold00347_77413  | Ca_desig_scaffold  | 77413                          | [C/G]       | NA                                         |
| Ca_Desig_Chr_scaffold00347_77414  | Ca_desig_scaffold  | 77414                          | [T/A]       | NA                                         |
| Ca_Desig_Chr_scaffold00347_146601 | Ca_desig_scaffold  | 146601                         | [C/A]       | NA                                         |
| Ca_Desig_Chr_scaffold00347_146602 | Ca_desig_scaffold  | 146602                         | [T/G]       | NA                                         |
| Ca_Desig_Chr_scaffold00347_169966 | Ca_desig_scaffold  | 169966                         | [A/C]       | NA                                         |
| Ca_Desig_Chr_scaffold00347_170012 | Ca_desig_scaffold  | 170012                         | [A/G]       | NA                                         |
| Ca_Desig_Chr_scaffold00347_170030 | Ca_desig_scaffold  | 170030                         | [A/G]       | NA                                         |
| Ca_Desig_Chr_scaffold00347_170035 | Ca_desig_scaffold  | 170035                         | [T/G]       | NA                                         |
| Ca_Desig_Chr_scaffold00347_170054 | Ca_desig_scaffold  | 170054                         | [A/C]       | NA                                         |
| Ca_Desig_Chr_scaffold00347_179005 | Ca_desig_scaffold  | 179005                         | [T/A]       | NA                                         |
| Ca_Desig_Chr_scaffold00348_90424  | Ca_desig_scaffold  | 90424                          | [T/C]       | NA                                         |
| Ca_Desig_Chr_scaffold00348_142955 | Ca_desig_scaffold  | 142955                         | [A/G]       | NA                                         |
| Ca_Desig_Chr_scaffold00348_142982 | Ca_desig_scaffold  | 142982                         | [A/G]       | NA                                         |
| Ca_Desig_Chr_scaffold00348_143514 | Ca_desig_scaffold  | 143514                         | [A/C]       | NA                                         |
| Ca_Desig_Chr_scaffold00348_143570 | Ca_desig_scaffold  | 143570                         | [T/C]       | NA                                         |
| Ca_Desig_Chr_scaffold00348_169105 | Ca_desig_scaffold  | 169105                         | [A/C]       | NA                                         |
| Ca_Desig_Chr_scaffold00348_175759 | Ca_desig_scaffold  | 175759                         | [T/G]       | NA                                         |
| Ca_Desig_Chr_scaffold00348_175784 | Ca_desig_scaffold  | 175784                         | [T/G]       | NA                                         |
| Ca_Desig_Chr_scaffold00351_37509  | Ca_desig_scaffold  | 37509                          | [T/G]       | NA                                         |
| Ca_Desig_Chr_scaffold00351_37607  | Ca_desig_scaffold  | 37607                          | [C/T]       | NA                                         |

| <b>SNP IDs</b>                    | <b>Chromosomes</b> | <b>Physical positions (bp)</b> | <b>SNPs</b> | <b>NCBI SNPdb accession IDs (NCBI_ss#)</b> |
|-----------------------------------|--------------------|--------------------------------|-------------|--------------------------------------------|
| Ca_Desig_Chr_scaffold00351_37631  | Ca_desig_scaffold  | 37631                          | [T/G]       | NA                                         |
| Ca_Desig_Chr_scaffold00352_81178  | Ca_desig_scaffold  | 81178                          | [A/G]       | NA                                         |
| Ca_Desig_Chr_scaffold00352_81197  | Ca_desig_scaffold  | 81197                          | [A/G]       | NA                                         |
| Ca_Desig_Chr_scaffold00352_81207  | Ca_desig_scaffold  | 81207                          | [T/C]       | NA                                         |
| Ca_Desig_Chr_scaffold00352_81209  | Ca_desig_scaffold  | 81209                          | [T/C]       | NA                                         |
| Ca_Desig_Chr_scaffold00352_81215  | Ca_desig_scaffold  | 81215                          | [T/G]       | NA                                         |
| Ca_Desig_Chr_scaffold00352_81235  | Ca_desig_scaffold  | 81235                          | [T/C]       | NA                                         |
| Ca_Desig_Chr_scaffold00352_91717  | Ca_desig_scaffold  | 91717                          | [T/C]       | NA                                         |
| Ca_Desig_Chr_scaffold00352_91724  | Ca_desig_scaffold  | 91724                          | [T/C]       | NA                                         |
| Ca_Desig_Chr_scaffold00352_91726  | Ca_desig_scaffold  | 91726                          | [T/C]       | NA                                         |
| Ca_Desig_Chr_scaffold00352_91736  | Ca_desig_scaffold  | 91736                          | [T/C]       | NA                                         |
| Ca_Desig_Chr_scaffold00352_91738  | Ca_desig_scaffold  | 91738                          | [A/G]       | NA                                         |
| Ca_Desig_Chr_scaffold00352_91743  | Ca_desig_scaffold  | 91743                          | [A/G]       | NA                                         |
| Ca_Desig_Chr_scaffold00352_91745  | Ca_desig_scaffold  | 91745                          | [T/C]       | NA                                         |
| Ca_Desig_Chr_scaffold00352_91756  | Ca_desig_scaffold  | 91756                          | [T/C]       | NA                                         |
| Ca_Desig_Chr_scaffold00352_91763  | Ca_desig_scaffold  | 91763                          | [C/G]       | NA                                         |
| Ca_Desig_Chr_scaffold00352_145363 | Ca_desig_scaffold  | 145363                         | [C/A]       | NA                                         |
| Ca_Desig_Chr_scaffold00352_145364 | Ca_desig_scaffold  | 145364                         | [A/G]       | NA                                         |
| Ca_Desig_Chr_scaffold00352_148023 | Ca_desig_scaffold  | 148023                         | [A/T]       | NA                                         |
| Ca_Desig_Chr_scaffold00352_148032 | Ca_desig_scaffold  | 148032                         | [C/A]       | NA                                         |
| Ca_Desig_Chr_scaffold00352_148037 | Ca_desig_scaffold  | 148037                         | [A/G]       | NA                                         |
| Ca_Desig_Chr_scaffold00352_148065 | Ca_desig_scaffold  | 148065                         | [T/C]       | NA                                         |
| Ca_Desig_Chr_scaffold00352_148067 | Ca_desig_scaffold  | 148067                         | [C/T]       | NA                                         |
| Ca_Desig_Chr_scaffold00352_148072 | Ca_desig_scaffold  | 148072                         | [T/C]       | NA                                         |
| Ca_Desig_Chr_scaffold00352_148073 | Ca_desig_scaffold  | 148073                         | [T/C]       | NA                                         |
| Ca_Desig_Chr_scaffold00352_148081 | Ca_desig_scaffold  | 148081                         | [T/C]       | NA                                         |
| Ca_Desig_Chr_scaffold00352_148690 | Ca_desig_scaffold  | 148690                         | [A/G]       | NA                                         |
| Ca_Desig_Chr_scaffold00352_148698 | Ca_desig_scaffold  | 148698                         | [T/G]       | NA                                         |
| Ca_Desig_Chr_scaffold00352_148716 | Ca_desig_scaffold  | 148716                         | [A/G]       | NA                                         |
| Ca_Desig_Chr_scaffold00352_148722 | Ca_desig_scaffold  | 148722                         | [A/G]       | NA                                         |
| Ca_Desig_Chr_scaffold00352_148731 | Ca_desig_scaffold  | 148731                         | [A/G]       | NA                                         |
| Ca_Desig_Chr_scaffold00352_148734 | Ca_desig_scaffold  | 148734                         | [A/G]       | NA                                         |
| Ca_Desig_Chr_scaffold00352_156339 | Ca_desig_scaffold  | 156339                         | [G/A]       | NA                                         |
| Ca_Desig_Chr_scaffold00352_156342 | Ca_desig_scaffold  | 156342                         | [T/C]       | NA                                         |

| <b>SNP IDs</b>                  | <b>Chromosomes</b> | <b>Physical positions (bp)</b> | <b>SNPs</b> | <b>NCBI SNPdb accession IDs (NCBI_ss#)</b> |
|---------------------------------|--------------------|--------------------------------|-------------|--------------------------------------------|
| Ca_Desi_Ch_scaffold00352_184765 | Ca_desi_scaffold   | 184765                         | [A/G]       | NA                                         |
| Ca_Desi_Ch_scaffold00352_184780 | Ca_desi_scaffold   | 184780                         | [T/C]       | NA                                         |
| Ca_Desi_Ch_scaffold00352_184796 | Ca_desi_scaffold   | 184796                         | [A/G]       | NA                                         |
| Ca_Desi_Ch_scaffold00352_184801 | Ca_desi_scaffold   | 184801                         | [T/G]       | NA                                         |
| Ca_Desi_Ch_scaffold00352_184822 | Ca_desi_scaffold   | 184822                         | [A/G]       | NA                                         |
| Ca_Desi_Ch_scaffold00352_184827 | Ca_desi_scaffold   | 184827                         | [A/G]       | NA                                         |
| Ca_Desi_Ch_scaffold00352_186531 | Ca_desi_scaffold   | 186531                         | [A/C]       | NA                                         |
| Ca_Desi_Ch_scaffold00352_186533 | Ca_desi_scaffold   | 186533                         | [A/C]       | NA                                         |
| Ca_Desi_Ch_scaffold00352_186574 | Ca_desi_scaffold   | 186574                         | [T/C]       | NA                                         |
| Ca_Desi_Ch_scaffold00352_186593 | Ca_desi_scaffold   | 186593                         | [T/C]       | NA                                         |
| Ca_Desi_Ch_scaffold00355_20349  | Ca_desi_scaffold   | 20349                          | [T/A]       | NA                                         |
| Ca_Desi_Ch_scaffold00355_24275  | Ca_desi_scaffold   | 24275                          | [G/A]       | NA                                         |
| Ca_Desi_Ch_scaffold00355_24276  | Ca_desi_scaffold   | 24276                          | [A/T]       | NA                                         |
| Ca_Desi_Ch_scaffold00355_24277  | Ca_desi_scaffold   | 24277                          | [A/C]       | NA                                         |
| Ca_Desi_Ch_scaffold00355_24278  | Ca_desi_scaffold   | 24278                          | [G/T]       | NA                                         |
| Ca_Desi_Ch_scaffold00355_57652  | Ca_desi_scaffold   | 57652                          | [C/A]       | NA                                         |
| Ca_Desi_Ch_scaffold00357_16769  | Ca_desi_scaffold   | 16769                          | [A/C]       | NA                                         |
| Ca_Desi_Ch_scaffold00357_16770  | Ca_desi_scaffold   | 16770                          | [G/C]       | NA                                         |
| Ca_Desi_Ch_scaffold00357_16771  | Ca_desi_scaffold   | 16771                          | [A/G]       | NA                                         |
| Ca_Desi_Ch_scaffold00357_16772  | Ca_desi_scaffold   | 16772                          | [T/A]       | NA                                         |
| Ca_Desi_Ch_scaffold00357_66309  | Ca_desi_scaffold   | 66309                          | [A/G]       | NA                                         |
| Ca_Desi_Ch_scaffold00357_127716 | Ca_desi_scaffold   | 127716                         | [A/G]       | NA                                         |
| Ca_Desi_Ch_scaffold00358_4113   | Ca_desi_scaffold   | 4113                           | [T/C]       | NA                                         |
| Ca_Desi_Ch_scaffold00358_4156   | Ca_desi_scaffold   | 4156                           | [A/C]       | NA                                         |
| Ca_Desi_Ch_scaffold00358_54059  | Ca_desi_scaffold   | 54059                          | [A/T]       | NA                                         |
| Ca_Desi_Ch_scaffold00358_54060  | Ca_desi_scaffold   | 54060                          | [C/T]       | NA                                         |
| Ca_Desi_Ch_scaffold00358_59936  | Ca_desi_scaffold   | 59936                          | [A/G]       | NA                                         |
| Ca_Desi_Ch_scaffold00358_59939  | Ca_desi_scaffold   | 59939                          | [T/G]       | NA                                         |
| Ca_Desi_Ch_scaffold00358_59941  | Ca_desi_scaffold   | 59941                          | [A/G]       | NA                                         |
| Ca_Desi_Ch_scaffold00358_84609  | Ca_desi_scaffold   | 84609                          | [A/G]       | NA                                         |
| Ca_Desi_Ch_scaffold00358_87034  | Ca_desi_scaffold   | 87034                          | [T/G]       | NA                                         |
| Ca_Desi_Ch_scaffold00358_87048  | Ca_desi_scaffold   | 87048                          | [A/G]       | NA                                         |
| Ca_Desi_Ch_scaffold00358_87076  | Ca_desi_scaffold   | 87076                          | [A/G]       | NA                                         |
| Ca_Desi_Ch_scaffold00358_87142  | Ca_desi_scaffold   | 87142                          | [T/G]       | NA                                         |

| <b>SNP IDs</b>                     | <b>Chromosomes</b> | <b>Physical positions (bp)</b> | <b>SNPs</b> | <b>NCBI SNPdb accession IDs (NCBI_ss#)</b> |
|------------------------------------|--------------------|--------------------------------|-------------|--------------------------------------------|
| Ca_Desi_Chrom_scaffold00358_119510 | Ca_desi_scaffold   | 119510                         | [T/G]       | NA                                         |
| Ca_Desi_Chrom_scaffold00358_152834 | Ca_desi_scaffold   | 152834                         | [A/G]       | NA                                         |
| Ca_Desi_Chrom_scaffold00358_166943 | Ca_desi_scaffold   | 166943                         | [T/A]       | NA                                         |
| Ca_Desi_Chrom_scaffold00358_166965 | Ca_desi_scaffold   | 166965                         | [T/A]       | NA                                         |
| Ca_Desi_Chrom_scaffold00358_167008 | Ca_desi_scaffold   | 167008                         | [A/C]       | NA                                         |
| Ca_Desi_Chrom_scaffold00358_167029 | Ca_desi_scaffold   | 167029                         | [A/G]       | NA                                         |
| Ca_Desi_Chrom_scaffold00358_168974 | Ca_desi_scaffold   | 168974                         | [T/C]       | NA                                         |
| Ca_Desi_Chrom_scaffold00360_23311  | Ca_desi_scaffold   | 23311                          | [T/G]       | NA                                         |
| Ca_Desi_Chrom_scaffold00360_152629 | Ca_desi_scaffold   | 152629                         | [A/G]       | NA                                         |
| Ca_Desi_Chrom_scaffold00360_154557 | Ca_desi_scaffold   | 154557                         | [C/A]       | NA                                         |
| Ca_Desi_Chrom_scaffold00360_154558 | Ca_desi_scaffold   | 154558                         | [T/G]       | NA                                         |
| Ca_Desi_Chrom_scaffold00360_169244 | Ca_desi_scaffold   | 169244                         | [A/G]       | NA                                         |
| Ca_Desi_Chrom_scaffold00360_169328 | Ca_desi_scaffold   | 169328                         | [T/C]       | NA                                         |
| Ca_Desi_Chrom_scaffold00360_169365 | Ca_desi_scaffold   | 169365                         | [A/C]       | NA                                         |
| Ca_Desi_Chrom_scaffold00360_169408 | Ca_desi_scaffold   | 169408                         | [G/A]       | NA                                         |
| Ca_Desi_Chrom_scaffold00360_170399 | Ca_desi_scaffold   | 170399                         | [A/C]       | NA                                         |
| Ca_Desi_Chrom_scaffold00360_170411 | Ca_desi_scaffold   | 170411                         | [T/A]       | NA                                         |
| Ca_Desi_Chrom_scaffold00360_170429 | Ca_desi_scaffold   | 170429                         | [A/G]       | NA                                         |
| Ca_Desi_Chrom_scaffold00360_170431 | Ca_desi_scaffold   | 170431                         | [T/C]       | NA                                         |
| Ca_Desi_Chrom_scaffold00360_170442 | Ca_desi_scaffold   | 170442                         | [A/G]       | NA                                         |
| Ca_Desi_Chrom_scaffold00360_170450 | Ca_desi_scaffold   | 170450                         | [T/G]       | NA                                         |
| Ca_Desi_Chrom_scaffold00360_173971 | Ca_desi_scaffold   | 173971                         | [A/T]       | NA                                         |
| Ca_Desi_Chrom_scaffold00360_173994 | Ca_desi_scaffold   | 173994                         | [T/C]       | NA                                         |
| Ca_Desi_Chrom_scaffold00360_174001 | Ca_desi_scaffold   | 174001                         | [A/G]       | NA                                         |
| Ca_Desi_Chrom_scaffold00360_174012 | Ca_desi_scaffold   | 174012                         | [T/G]       | NA                                         |
| Ca_Desi_Chrom_scaffold00360_174024 | Ca_desi_scaffold   | 174024                         | [T/C]       | NA                                         |
| Ca_Desi_Chrom_scaffold00360_175256 | Ca_desi_scaffold   | 175256                         | [A/G]       | NA                                         |
| Ca_Desi_Chrom_scaffold00363_9113   | Ca_desi_scaffold   | 9113                           | [T/C]       | NA                                         |
| Ca_Desi_Chrom_scaffold00363_14344  | Ca_desi_scaffold   | 14344                          | [A/C]       | NA                                         |
| Ca_Desi_Chrom_scaffold00363_17802  | Ca_desi_scaffold   | 17802                          | [A/C]       | NA                                         |
| Ca_Desi_Chrom_scaffold00364_38850  | Ca_desi_scaffold   | 38850                          | [A/C]       | NA                                         |
| Ca_Desi_Chrom_scaffold00364_82829  | Ca_desi_scaffold   | 82829                          | [T/G]       | NA                                         |
| Ca_Desi_Chrom_scaffold00368_61843  | Ca_desi_scaffold   | 61843                          | [T/C]       | NA                                         |
| Ca_Desi_Chrom_scaffold00368_61844  | Ca_desi_scaffold   | 61844                          | [C/A]       | NA                                         |

| <b>SNP IDs</b>                  | <b>Chromosomes</b> | <b>Physical positions (bp)</b> | <b>SNPs</b> | <b>NCBI SNPdb accession IDs (NCBI_ss#)</b> |
|---------------------------------|--------------------|--------------------------------|-------------|--------------------------------------------|
| Ca_Desi_Ch_scaffold00368_61914  | Ca_desi_scaffold   | 61914                          | [G/T]       | NA                                         |
| Ca_Desi_Ch_scaffold00368_61921  | Ca_desi_scaffold   | 61921                          | [T/C]       | NA                                         |
| Ca_Desi_Ch_scaffold00368_61945  | Ca_desi_scaffold   | 61945                          | [A/C]       | NA                                         |
| Ca_Desi_Ch_scaffold00368_61950  | Ca_desi_scaffold   | 61950                          | [A/C]       | NA                                         |
| Ca_Desi_Ch_scaffold00368_61968  | Ca_desi_scaffold   | 61968                          | [A/C]       | NA                                         |
| Ca_Desi_Ch_scaffold00368_61977  | Ca_desi_scaffold   | 61977                          | [T/C]       | NA                                         |
| Ca_Desi_Ch_scaffold00368_183591 | Ca_desi_scaffold   | 183591                         | [C/A]       | NA                                         |
| Ca_Desi_Ch_scaffold00371_172367 | Ca_desi_scaffold   | 172367                         | [A/G]       | NA                                         |
| Ca_Desi_Ch_scaffold00371_172377 | Ca_desi_scaffold   | 172377                         | [T/A]       | NA                                         |
| Ca_Desi_Ch_scaffold00371_172389 | Ca_desi_scaffold   | 172389                         | [T/G]       | NA                                         |
| Ca_Desi_Ch_scaffold00374_166828 | Ca_desi_scaffold   | 166828                         | [T/C]       | NA                                         |
| Ca_Desi_Ch_scaffold00378_54920  | Ca_desi_scaffold   | 54920                          | [A/C]       | NA                                         |
| Ca_Desi_Ch_scaffold00378_54923  | Ca_desi_scaffold   | 54923                          | [T/C]       | NA                                         |
| Ca_Desi_Ch_scaffold00378_54926  | Ca_desi_scaffold   | 54926                          | [A/C]       | NA                                         |
| Ca_Desi_Ch_scaffold00378_54941  | Ca_desi_scaffold   | 54941                          | [C/T]       | NA                                         |
| Ca_Desi_Ch_scaffold00378_54946  | Ca_desi_scaffold   | 54946                          | [A/C]       | NA                                         |
| Ca_Desi_Ch_scaffold00378_54948  | Ca_desi_scaffold   | 54948                          | [C/T]       | NA                                         |
| Ca_Desi_Ch_scaffold00378_54950  | Ca_desi_scaffold   | 54950                          | [T/C]       | NA                                         |
| Ca_Desi_Ch_scaffold00378_54952  | Ca_desi_scaffold   | 54952                          | [A/C]       | NA                                         |
| Ca_Desi_Ch_scaffold00378_54954  | Ca_desi_scaffold   | 54954                          | [T/C]       | NA                                         |
| Ca_Desi_Ch_scaffold00378_54956  | Ca_desi_scaffold   | 54956                          | [T/C]       | NA                                         |
| Ca_Desi_Ch_scaffold00378_54958  | Ca_desi_scaffold   | 54958                          | [A/G]       | NA                                         |
| Ca_Desi_Ch_scaffold00378_54964  | Ca_desi_scaffold   | 54964                          | [A/C]       | NA                                         |
| Ca_Desi_Ch_scaffold00378_166284 | Ca_desi_scaffold   | 166284                         | [A/C]       | NA                                         |
| Ca_Desi_Ch_scaffold00381_91737  | Ca_desi_scaffold   | 91737                          | [A/C]       | NA                                         |
| Ca_Desi_Ch_scaffold00381_127203 | Ca_desi_scaffold   | 127203                         | [T/A]       | NA                                         |
| Ca_Desi_Ch_scaffold00381_127299 | Ca_desi_scaffold   | 127299                         | [T/G]       | NA                                         |
| Ca_Desi_Ch_scaffold00381_127339 | Ca_desi_scaffold   | 127339                         | [A/G]       | NA                                         |
| Ca_Desi_Ch_scaffold00381_127344 | Ca_desi_scaffold   | 127344                         | [A/G]       | NA                                         |
| Ca_Desi_Ch_scaffold00381_128121 | Ca_desi_scaffold   | 128121                         | [A/C]       | NA                                         |
| Ca_Desi_Ch_scaffold00381_136098 | Ca_desi_scaffold   | 136098                         | [T/A]       | NA                                         |
| Ca_Desi_Ch_scaffold00381_136128 | Ca_desi_scaffold   | 136128                         | [A/C]       | NA                                         |
| Ca_Desi_Ch_scaffold00381_136194 | Ca_desi_scaffold   | 136194                         | [T/G]       | NA                                         |
| Ca_Desi_Ch_scaffold00381_136201 | Ca_desi_scaffold   | 136201                         | [C/T]       | NA                                         |

| <b>SNP IDs</b>                  | <b>Chromosomes</b> | <b>Physical positions (bp)</b> | <b>SNPs</b> | <b>NCBI SNPdb accession IDs (NCBI_ss#)</b> |
|---------------------------------|--------------------|--------------------------------|-------------|--------------------------------------------|
| Ca_Desi_Ch_scaffold00381_136221 | Ca_desi_scaffold   | 136221                         | [A/G]       | NA                                         |
| Ca_Desi_Ch_scaffold00381_136234 | Ca_desi_scaffold   | 136234                         | [A/G]       | NA                                         |
| Ca_Desi_Ch_scaffold00381_136239 | Ca_desi_scaffold   | 136239                         | [A/C]       | NA                                         |
| Ca_Desi_Ch_scaffold00381_179596 | Ca_desi_scaffold   | 179596                         | [T/C]       | NA                                         |
| Ca_Desi_Ch_scaffold00381_179641 | Ca_desi_scaffold   | 179641                         | [A/C]       | NA                                         |
| Ca_Desi_Ch_scaffold00382_116793 | Ca_desi_scaffold   | 116793                         | [A/G]       | NA                                         |
| Ca_Desi_Ch_scaffold00382_116803 | Ca_desi_scaffold   | 116803                         | [A/C]       | NA                                         |
| Ca_Desi_Ch_scaffold00382_116818 | Ca_desi_scaffold   | 116818                         | [T/C]       | NA                                         |
| Ca_Desi_Ch_scaffold00382_116824 | Ca_desi_scaffold   | 116824                         | [T/C]       | NA                                         |
| Ca_Desi_Ch_scaffold00382_116841 | Ca_desi_scaffold   | 116841                         | [A/G]       | NA                                         |
| Ca_Desi_Ch_scaffold00382_116849 | Ca_desi_scaffold   | 116849                         | [T/C]       | NA                                         |
| Ca_Desi_Ch_scaffold00382_116853 | Ca_desi_scaffold   | 116853                         | [T/C]       | NA                                         |
| Ca_Desi_Ch_scaffold00383_39570  | Ca_desi_scaffold   | 39570                          | [T/C]       | NA                                         |
| Ca_Desi_Ch_scaffold00383_39583  | Ca_desi_scaffold   | 39583                          | [T/G]       | NA                                         |
| Ca_Desi_Ch_scaffold00383_39627  | Ca_desi_scaffold   | 39627                          | [A/G]       | NA                                         |
| Ca_Desi_Ch_scaffold00383_55779  | Ca_desi_scaffold   | 55779                          | [G/A]       | NA                                         |
| Ca_Desi_Ch_scaffold00383_62326  | Ca_desi_scaffold   | 62326                          | [A/C]       | NA                                         |
| Ca_Desi_Ch_scaffold00383_92034  | Ca_desi_scaffold   | 92034                          | [C/G]       | NA                                         |
| Ca_Desi_Ch_scaffold00383_92036  | Ca_desi_scaffold   | 92036                          | [T/G]       | NA                                         |
| Ca_Desi_Ch_scaffold00383_92050  | Ca_desi_scaffold   | 92050                          | [T/C]       | NA                                         |
| Ca_Desi_Ch_scaffold00383_146071 | Ca_desi_scaffold   | 146071                         | [A/G]       | NA                                         |
| Ca_Desi_Ch_scaffold00383_146086 | Ca_desi_scaffold   | 146086                         | [A/C]       | NA                                         |
| Ca_Desi_Ch_scaffold00383_146117 | Ca_desi_scaffold   | 146117                         | [T/C]       | NA                                         |
| Ca_Desi_Ch_scaffold00383_170998 | Ca_desi_scaffold   | 170998                         | [G/T]       | NA                                         |
| Ca_Desi_Ch_scaffold00383_171011 | Ca_desi_scaffold   | 171011                         | [T/G]       | NA                                         |
| Ca_Desi_Ch_scaffold00383_171019 | Ca_desi_scaffold   | 171019                         | [G/A]       | NA                                         |
| Ca_Desi_Ch_scaffold00383_171024 | Ca_desi_scaffold   | 171024                         | [C/A]       | NA                                         |
| Ca_Desi_Ch_scaffold00384_90858  | Ca_desi_scaffold   | 90858                          | [T/C]       | NA                                         |
| Ca_Desi_Ch_scaffold00384_91094  | Ca_desi_scaffold   | 91094                          | [T/G]       | NA                                         |
| Ca_Desi_Ch_scaffold00385_2969   | Ca_desi_scaffold   | 2969                           | [A/C]       | NA                                         |
| Ca_Desi_Ch_scaffold00385_139899 | Ca_desi_scaffold   | 139899                         | [A/T]       | NA                                         |
| Ca_Desi_Ch_scaffold00385_166511 | Ca_desi_scaffold   | 166511                         | [A/G]       | NA                                         |
| Ca_Desi_Ch_scaffold00385_166529 | Ca_desi_scaffold   | 166529                         | [A/G]       | NA                                         |
| Ca_Desi_Ch_scaffold00385_166532 | Ca_desi_scaffold   | 166532                         | [A/G]       | NA                                         |

| <b>SNP IDs</b>                  | <b>Chromosomes</b> | <b>Physical positions (bp)</b> | <b>SNPs</b> | <b>NCBI SNPdb accession IDs (NCBI_ss#)</b> |
|---------------------------------|--------------------|--------------------------------|-------------|--------------------------------------------|
| Ca_Desi_Ch_scaffold00385_167063 | Ca_desi_scaffold   | 167063                         | [T/C]       | NA                                         |
| Ca_Desi_Ch_scaffold00394_56048  | Ca_desi_scaffold   | 56048                          | [T/A]       | NA                                         |
| Ca_Desi_Ch_scaffold00394_56049  | Ca_desi_scaffold   | 56049                          | [T/A]       | NA                                         |
| Ca_Desi_Ch_scaffold00394_56050  | Ca_desi_scaffold   | 56050                          | [T/A]       | NA                                         |
| Ca_Desi_Ch_scaffold00394_84528  | Ca_desi_scaffold   | 84528                          | [A/T]       | NA                                         |
| Ca_Desi_Ch_scaffold00394_84529  | Ca_desi_scaffold   | 84529                          | [A/C]       | NA                                         |
| Ca_Desi_Ch_scaffold00394_84530  | Ca_desi_scaffold   | 84530                          | [G/T]       | NA                                         |
| Ca_Desi_Ch_scaffold00396_30814  | Ca_desi_scaffold   | 30814                          | [T/G]       | NA                                         |
| Ca_Desi_Ch_scaffold00396_44258  | Ca_desi_scaffold   | 44258                          | [A/C]       | NA                                         |
| Ca_Desi_Ch_scaffold00396_44260  | Ca_desi_scaffold   | 44260                          | [T/C]       | NA                                         |
| Ca_Desi_Ch_scaffold00396_44267  | Ca_desi_scaffold   | 44267                          | [A/C]       | NA                                         |
| Ca_Desi_Ch_scaffold00396_44272  | Ca_desi_scaffold   | 44272                          | [T/C]       | NA                                         |
| Ca_Desi_Ch_scaffold00396_44280  | Ca_desi_scaffold   | 44280                          | [T/G]       | NA                                         |
| Ca_Desi_Ch_scaffold00396_44284  | Ca_desi_scaffold   | 44284                          | [T/C]       | NA                                         |
| Ca_Desi_Ch_scaffold00396_44288  | Ca_desi_scaffold   | 44288                          | [A/C]       | NA                                         |
| Ca_Desi_Ch_scaffold00396_44304  | Ca_desi_scaffold   | 44304                          | [T/C]       | NA                                         |
| Ca_Desi_Ch_scaffold00396_44306  | Ca_desi_scaffold   | 44306                          | [T/C]       | NA                                         |
| Ca_Desi_Ch_scaffold00398_133396 | Ca_desi_scaffold   | 133396                         | [T/G]       | NA                                         |
| Ca_Desi_Ch_scaffold00398_169822 | Ca_desi_scaffold   | 169822                         | [A/C]       | NA                                         |
| Ca_Desi_Ch_scaffold00398_169852 | Ca_desi_scaffold   | 169852                         | [T/C]       | NA                                         |
| Ca_Desi_Ch_scaffold00398_169855 | Ca_desi_scaffold   | 169855                         | [T/G]       | NA                                         |
| Ca_Desi_Ch_scaffold00398_171126 | Ca_desi_scaffold   | 171126                         | [T/C]       | NA                                         |
| Ca_Desi_Ch_scaffold00398_171175 | Ca_desi_scaffold   | 171175                         | [A/C]       | NA                                         |
| Ca_Desi_Ch_scaffold00398_171180 | Ca_desi_scaffold   | 171180                         | [A/T]       | NA                                         |
| Ca_Desi_Ch_scaffold00398_173746 | Ca_desi_scaffold   | 173746                         | [A/T]       | NA                                         |
| Ca_Desi_Ch_scaffold00398_173794 | Ca_desi_scaffold   | 173794                         | [T/C]       | NA                                         |
| Ca_Desi_Ch_scaffold00398_173799 | Ca_desi_scaffold   | 173799                         | [G/T]       | NA                                         |
| Ca_Desi_Ch_scaffold00398_173803 | Ca_desi_scaffold   | 173803                         | [C/A]       | NA                                         |
| Ca_Desi_Ch_scaffold00400_3796   | Ca_desi_scaffold   | 3796                           | [T/G]       | NA                                         |
| Ca_Desi_Ch_scaffold00400_3799   | Ca_desi_scaffold   | 3799                           | [T/C]       | NA                                         |
| Ca_Desi_Ch_scaffold00400_85350  | Ca_desi_scaffold   | 85350                          | [T/C]       | NA                                         |
| Ca_Desi_Ch_scaffold00400_85459  | Ca_desi_scaffold   | 85459                          | [T/G]       | NA                                         |
| Ca_Desi_Ch_scaffold00400_133152 | Ca_desi_scaffold   | 133152                         | [T/G]       | NA                                         |
| Ca_Desi_Ch_scaffold00400_133164 | Ca_desi_scaffold   | 133164                         | [T/A]       | NA                                         |

| <b>SNP IDs</b>                          | <b>Chromosomes</b> | <b>Physical positions (bp)</b> | <b>SNPs</b> | <b>NCBI SNPdb accession IDs (NCBI_ss#)</b> |
|-----------------------------------------|--------------------|--------------------------------|-------------|--------------------------------------------|
| Ca_Desi_Chromosome_scaffold00400_134868 | Ca_desi_scaffold   | 134868                         | [T/A]       | NA                                         |
| Ca_Desi_Chromosome_scaffold00400_134870 | Ca_desi_scaffold   | 134870                         | [C/A]       | NA                                         |
| Ca_Desi_Chromosome_scaffold00400_134892 | Ca_desi_scaffold   | 134892                         | [G/C]       | NA                                         |
| Ca_Desi_Chromosome_scaffold00400_134900 | Ca_desi_scaffold   | 134900                         | [A/G]       | NA                                         |
| Ca_Desi_Chromosome_scaffold00400_137447 | Ca_desi_scaffold   | 137447                         | [A/T]       | NA                                         |
| Ca_Desi_Chromosome_scaffold00400_137508 | Ca_desi_scaffold   | 137508                         | [A/C]       | NA                                         |
| Ca_Desi_Chromosome_scaffold00400_150159 | Ca_desi_scaffold   | 150159                         | [T/C]       | NA                                         |
| Ca_Desi_Chromosome_scaffold00400_150189 | Ca_desi_scaffold   | 150189                         | [T/A]       | NA                                         |
| Ca_Desi_Chromosome_scaffold00400_150191 | Ca_desi_scaffold   | 150191                         | [C/T]       | NA                                         |
| Ca_Desi_Chromosome_scaffold00402_10900  | Ca_desi_scaffold   | 10900                          | [T/G]       | NA                                         |
| Ca_Desi_Chromosome_scaffold00402_10945  | Ca_desi_scaffold   | 10945                          | [A/C]       | NA                                         |
| Ca_Desi_Chromosome_scaffold00402_159404 | Ca_desi_scaffold   | 159404                         | [A/G]       | NA                                         |
| Ca_Desi_Chromosome_scaffold00402_159409 | Ca_desi_scaffold   | 159409                         | [A/C]       | NA                                         |
| Ca_Desi_Chromosome_scaffold00402_159413 | Ca_desi_scaffold   | 159413                         | [T/A]       | NA                                         |
| Ca_Desi_Chromosome_scaffold00402_159414 | Ca_desi_scaffold   | 159414                         | [C/T]       | NA                                         |
| Ca_Desi_Chromosome_scaffold00402_176530 | Ca_desi_scaffold   | 176530                         | [T/G]       | NA                                         |
| Ca_Desi_Chromosome_scaffold00402_176537 | Ca_desi_scaffold   | 176537                         | [T/C]       | NA                                         |
| Ca_Desi_Chromosome_scaffold00407_64963  | Ca_desi_scaffold   | 64963                          | [A/C]       | NA                                         |
| Ca_Desi_Chromosome_scaffold00407_68909  | Ca_desi_scaffold   | 68909                          | [A/C]       | NA                                         |
| Ca_Desi_Chromosome_scaffold00407_85536  | Ca_desi_scaffold   | 85536                          | [T/G]       | NA                                         |
| Ca_Desi_Chromosome_scaffold00407_168854 | Ca_desi_scaffold   | 168854                         | [T/G]       | NA                                         |
| Ca_Desi_Chromosome_scaffold00407_168860 | Ca_desi_scaffold   | 168860                         | [T/C]       | NA                                         |
| Ca_Desi_Chromosome_scaffold00408_16029  | Ca_desi_scaffold   | 16029                          | [T/A]       | NA                                         |
| Ca_Desi_Chromosome_scaffold00408_16038  | Ca_desi_scaffold   | 16038                          | [A/C]       | NA                                         |
| Ca_Desi_Chromosome_scaffold00408_16063  | Ca_desi_scaffold   | 16063                          | [T/C]       | NA                                         |
| Ca_Desi_Chromosome_scaffold00408_56755  | Ca_desi_scaffold   | 56755                          | [A/G]       | NA                                         |
| Ca_Desi_Chromosome_scaffold00408_59971  | Ca_desi_scaffold   | 59971                          | [A/C]       | NA                                         |
| Ca_Desi_Chromosome_scaffold00408_100159 | Ca_desi_scaffold   | 100159                         | [A/C]       | NA                                         |
| Ca_Desi_Chromosome_scaffold00409_7121   | Ca_desi_scaffold   | 7121                           | [A/T]       | NA                                         |
| Ca_Desi_Chromosome_scaffold00409_7129   | Ca_desi_scaffold   | 7129                           | [A/G]       | NA                                         |
| Ca_Desi_Chromosome_scaffold00409_7130   | Ca_desi_scaffold   | 7130                           | [A/G]       | NA                                         |
| Ca_Desi_Chromosome_scaffold00409_7133   | Ca_desi_scaffold   | 7133                           | [G/A]       | NA                                         |
| Ca_Desi_Chromosome_scaffold00409_7144   | Ca_desi_scaffold   | 7144                           | [T/C]       | NA                                         |
| Ca_Desi_Chromosome_scaffold00409_7147   | Ca_desi_scaffold   | 7147                           | [A/C]       | NA                                         |



| <b>SNP IDs</b>                  | <b>Chromosomes</b> | <b>Physical positions (bp)</b> | <b>SNPs</b> | <b>NCBI SNPdb accession IDs (NCBI_ss#)</b> |
|---------------------------------|--------------------|--------------------------------|-------------|--------------------------------------------|
| Ca_Desi_Ch_scaffold00409_7163   | Ca_desi_scaffold   | 7163                           | [T/C]       | NA                                         |
| Ca_Desi_Ch_scaffold00409_7167   | Ca_desi_scaffold   | 7167                           | [T/C]       | NA                                         |
| Ca_Desi_Ch_scaffold00409_7169   | Ca_desi_scaffold   | 7169                           | [T/C]       | NA                                         |
| Ca_Desi_Ch_scaffold00409_7173   | Ca_desi_scaffold   | 7173                           | [T/A]       | NA                                         |
| Ca_Desi_Ch_scaffold00409_37396  | Ca_desi_scaffold   | 37396                          | [A/C]       | NA                                         |
| Ca_Desi_Ch_scaffold00409_37414  | Ca_desi_scaffold   | 37414                          | [A/C]       | NA                                         |
| Ca_Desi_Ch_scaffold00409_37424  | Ca_desi_scaffold   | 37424                          | [A/C]       | NA                                         |
| Ca_Desi_Ch_scaffold00409_37441  | Ca_desi_scaffold   | 37441                          | [T/C]       | NA                                         |
| Ca_Desi_Ch_scaffold00409_87610  | Ca_desi_scaffold   | 87610                          | [A/C]       | NA                                         |
| Ca_Desi_Ch_scaffold00409_92434  | Ca_desi_scaffold   | 92434                          | [C/T]       | NA                                         |
| Ca_Desi_Ch_scaffold00417_7413   | Ca_desi_scaffold   | 7413                           | [A/C]       | NA                                         |
| Ca_Desi_Ch_scaffold00417_38550  | Ca_desi_scaffold   | 38550                          | [A/G]       | NA                                         |
| Ca_Desi_Ch_scaffold00417_38571  | Ca_desi_scaffold   | 38571                          | [A/G]       | NA                                         |
| Ca_Desi_Ch_scaffold00417_140255 | Ca_desi_scaffold   | 140255                         | [T/C]       | NA                                         |
| Ca_Desi_Ch_scaffold00417_140282 | Ca_desi_scaffold   | 140282                         | [T/C]       | NA                                         |
| Ca_Desi_Ch_scaffold00417_140303 | Ca_desi_scaffold   | 140303                         | [A/G]       | NA                                         |
| Ca_Desi_Ch_scaffold00417_140368 | Ca_desi_scaffold   | 140368                         | [T/A]       | NA                                         |
| Ca_Desi_Ch_scaffold00417_158176 | Ca_desi_scaffold   | 158176                         | [A/G]       | NA                                         |
| Ca_Desi_Ch_scaffold00417_158195 | Ca_desi_scaffold   | 158195                         | [A/C]       | NA                                         |
| Ca_Desi_Ch_scaffold00417_173368 | Ca_desi_scaffold   | 173368                         | [T/G]       | NA                                         |
| Ca_Desi_Ch_scaffold00418_106163 | Ca_desi_scaffold   | 106163                         | [T/G]       | NA                                         |
| Ca_Desi_Ch_scaffold00418_106184 | Ca_desi_scaffold   | 106184                         | [T/G]       | NA                                         |
| Ca_Desi_Ch_scaffold00418_106196 | Ca_desi_scaffold   | 106196                         | [A/G]       | NA                                         |
| Ca_Desi_Ch_scaffold00418_106254 | Ca_desi_scaffold   | 106254                         | [A/G]       | NA                                         |
| Ca_Desi_Ch_scaffold00418_106262 | Ca_desi_scaffold   | 106262                         | [A/G]       | NA                                         |
| Ca_Desi_Ch_scaffold00418_106271 | Ca_desi_scaffold   | 106271                         | [T/G]       | NA                                         |
| Ca_Desi_Ch_scaffold00418_106276 | Ca_desi_scaffold   | 106276                         | [G/A]       | NA                                         |
| Ca_Desi_Ch_scaffold00418_106277 | Ca_desi_scaffold   | 106277                         | [A/G]       | NA                                         |
| Ca_Desi_Ch_scaffold00418_106278 | Ca_desi_scaffold   | 106278                         | [A/G]       | NA                                         |
| Ca_Desi_Ch_scaffold00418_106285 | Ca_desi_scaffold   | 106285                         | [A/G]       | NA                                         |
| Ca_Desi_Ch_scaffold00418_106287 | Ca_desi_scaffold   | 106287                         | [T/G]       | NA                                         |
| Ca_Desi_Ch_scaffold00418_106288 | Ca_desi_scaffold   | 106288                         | [T/C]       | NA                                         |
| Ca_Desi_Ch_scaffold00418_106299 | Ca_desi_scaffold   | 106299                         | [A/G]       | NA                                         |
| Ca_Desi_Ch_scaffold00418_106303 | Ca_desi_scaffold   | 106303                         | [A/G]       | NA                                         |

| <b>SNP IDs</b>                          | <b>Chromosomes</b> | <b>Physical positions (bp)</b> | <b>SNPs</b> | <b>NCBI SNPdb accession IDs (NCBI_ss#)</b> |
|-----------------------------------------|--------------------|--------------------------------|-------------|--------------------------------------------|
| Ca_Desi_Chromosome_scaffold00418_106305 | Ca_desi_scaffold   | 106305                         | [A/G]       | NA                                         |
| Ca_Desi_Chromosome_scaffold00418_106318 | Ca_desi_scaffold   | 106318                         | [C/G]       | NA                                         |
| Ca_Desi_Chromosome_scaffold00418_141043 | Ca_desi_scaffold   | 141043                         | [C/A]       | NA                                         |
| Ca_Desi_Chromosome_scaffold00419_17568  | Ca_desi_scaffold   | 17568                          | [A/T]       | NA                                         |
| Ca_Desi_Chromosome_scaffold00419_31772  | Ca_desi_scaffold   | 31772                          | [T/A]       | NA                                         |
| Ca_Desi_Chromosome_scaffold00419_35889  | Ca_desi_scaffold   | 35889                          | [T/C]       | NA                                         |
| Ca_Desi_Chromosome_scaffold00419_46878  | Ca_desi_scaffold   | 46878                          | [A/C]       | NA                                         |
| Ca_Desi_Chromosome_scaffold00419_93424  | Ca_desi_scaffold   | 93424                          | [T/C]       | NA                                         |
| Ca_Desi_Chromosome_scaffold00419_93441  | Ca_desi_scaffold   | 93441                          | [T/C]       | NA                                         |
| Ca_Desi_Chromosome_scaffold00419_93451  | Ca_desi_scaffold   | 93451                          | [A/C]       | NA                                         |
| Ca_Desi_Chromosome_scaffold00419_93469  | Ca_desi_scaffold   | 93469                          | [T/C]       | NA                                         |
| Ca_Desi_Chromosome_scaffold00420_23275  | Ca_desi_scaffold   | 23275                          | [A/C]       | NA                                         |
| Ca_Desi_Chromosome_scaffold00420_41762  | Ca_desi_scaffold   | 41762                          | [C/T]       | NA                                         |
| Ca_Desi_Chromosome_scaffold00420_95114  | Ca_desi_scaffold   | 95114                          | [A/C]       | NA                                         |
| Ca_Desi_Chromosome_scaffold00420_95130  | Ca_desi_scaffold   | 95130                          | [T/C]       | NA                                         |
| Ca_Desi_Chromosome_scaffold00420_95135  | Ca_desi_scaffold   | 95135                          | [T/G]       | NA                                         |
| Ca_Desi_Chromosome_scaffold00420_95147  | Ca_desi_scaffold   | 95147                          | [T/C]       | NA                                         |
| Ca_Desi_Chromosome_scaffold00420_153441 | Ca_desi_scaffold   | 153441                         | [A/C]       | NA                                         |
| Ca_Desi_Chromosome_scaffold00420_153544 | Ca_desi_scaffold   | 153544                         | [C/T]       | NA                                         |
| Ca_Desi_Chromosome_scaffold00420_153620 | Ca_desi_scaffold   | 153620                         | [T/G]       | NA                                         |
| Ca_Desi_Chromosome_scaffold00420_153647 | Ca_desi_scaffold   | 153647                         | [T/G]       | NA                                         |
| Ca_Desi_Chromosome_scaffold00422_135539 | Ca_desi_scaffold   | 135539                         | [T/C]       | NA                                         |
| Ca_Desi_Chromosome_scaffold00422_135557 | Ca_desi_scaffold   | 135557                         | [T/G]       | NA                                         |
| Ca_Desi_Chromosome_scaffold00422_136343 | Ca_desi_scaffold   | 136343                         | [A/T]       | NA                                         |
| Ca_Desi_Chromosome_scaffold00423_13372  | Ca_desi_scaffold   | 13372                          | [G/T]       | NA                                         |
| Ca_Desi_Chromosome_scaffold00423_13394  | Ca_desi_scaffold   | 13394                          | [T/C]       | NA                                         |
| Ca_Desi_Chromosome_scaffold00423_13408  | Ca_desi_scaffold   | 13408                          | [A/C]       | NA                                         |
| Ca_Desi_Chromosome_scaffold00423_13855  | Ca_desi_scaffold   | 13855                          | [C/A]       | NA                                         |
| Ca_Desi_Chromosome_scaffold00423_13858  | Ca_desi_scaffold   | 13858                          | [T/A]       | NA                                         |
| Ca_Desi_Chromosome_scaffold00423_13900  | Ca_desi_scaffold   | 13900                          | [T/G]       | NA                                         |
| Ca_Desi_Chromosome_scaffold00423_31420  | Ca_desi_scaffold   | 31420                          | [G/T]       | NA                                         |
| Ca_Desi_Chromosome_scaffold00423_40819  | Ca_desi_scaffold   | 40819                          | [T/C]       | NA                                         |
| Ca_Desi_Chromosome_scaffold00423_60478  | Ca_desi_scaffold   | 60478                          | [T/C]       | NA                                         |
| Ca_Desi_Chromosome_scaffold00423_61666  | Ca_desi_scaffold   | 61666                          | [A/G]       | NA                                         |

| <b>SNP IDs</b>                  | <b>Chromosomes</b> | <b>Physical positions (bp)</b> | <b>SNPs</b> | <b>NCBI SNPdb accession IDs (NCBI_ss#)</b> |
|---------------------------------|--------------------|--------------------------------|-------------|--------------------------------------------|
| Ca_Desi_Ch_scaffold00423_73839  | Ca_desi_scaffold   | 73839                          | [C/A]       | NA                                         |
| Ca_Desi_Ch_scaffold00423_74452  | Ca_desi_scaffold   | 74452                          | [C/T]       | NA                                         |
| Ca_Desi_Ch_scaffold00423_76157  | Ca_desi_scaffold   | 76157                          | [T/G]       | NA                                         |
| Ca_Desi_Ch_scaffold00423_82031  | Ca_desi_scaffold   | 82031                          | [T/A]       | NA                                         |
| Ca_Desi_Ch_scaffold00423_99599  | Ca_desi_scaffold   | 99599                          | [A/T]       | NA                                         |
| Ca_Desi_Ch_scaffold00423_99668  | Ca_desi_scaffold   | 99668                          | [A/C]       | NA                                         |
| Ca_Desi_Ch_scaffold00423_103678 | Ca_desi_scaffold   | 103678                         | [G/A]       | NA                                         |
| Ca_Desi_Ch_scaffold00423_103696 | Ca_desi_scaffold   | 103696                         | [A/C]       | NA                                         |
| Ca_Desi_Ch_scaffold00423_103711 | Ca_desi_scaffold   | 103711                         | [T/G]       | NA                                         |
| Ca_Desi_Ch_scaffold00423_114034 | Ca_desi_scaffold   | 114034                         | [A/T]       | NA                                         |
| Ca_Desi_Ch_scaffold00423_129695 | Ca_desi_scaffold   | 129695                         | [C/A]       | NA                                         |
| Ca_Desi_Ch_scaffold00423_129711 | Ca_desi_scaffold   | 129711                         | [C/T]       | NA                                         |
| Ca_Desi_Ch_scaffold00423_129732 | Ca_desi_scaffold   | 129732                         | [C/T]       | NA                                         |
| Ca_Desi_Ch_scaffold00423_129740 | Ca_desi_scaffold   | 129740                         | [G/A]       | NA                                         |
| Ca_Desi_Ch_scaffold00423_129744 | Ca_desi_scaffold   | 129744                         | [G/A]       | NA                                         |
| Ca_Desi_Ch_scaffold00429_4604   | Ca_desi_scaffold   | 4604                           | [A/C]       | NA                                         |
| Ca_Desi_Ch_scaffold00429_107667 | Ca_desi_scaffold   | 107667                         | [A/C]       | NA                                         |
| Ca_Desi_Ch_scaffold00429_114370 | Ca_desi_scaffold   | 114370                         | [A/C]       | NA                                         |
| Ca_Desi_Ch_scaffold00429_164944 | Ca_desi_scaffold   | 164944                         | [T/C]       | NA                                         |
| Ca_Desi_Ch_scaffold00429_165025 | Ca_desi_scaffold   | 165025                         | [A/C]       | NA                                         |
| Ca_Desi_Ch_scaffold00435_93713  | Ca_desi_scaffold   | 93713                          | [C/A]       | NA                                         |
| Ca_Desi_Ch_scaffold00435_93714  | Ca_desi_scaffold   | 93714                          | [C/G]       | NA                                         |
| Ca_Desi_Ch_scaffold00435_93715  | Ca_desi_scaffold   | 93715                          | [T/A]       | NA                                         |
| Ca_Desi_Ch_scaffold00435_158606 | Ca_desi_scaffold   | 158606                         | [T/C]       | NA                                         |
| Ca_Desi_Ch_scaffold00437_63836  | Ca_desi_scaffold   | 63836                          | [T/C]       | NA                                         |
| Ca_Desi_Ch_scaffold00437_67004  | Ca_desi_scaffold   | 67004                          | [A/C]       | NA                                         |
| Ca_Desi_Ch_scaffold00437_67007  | Ca_desi_scaffold   | 67007                          | [A/C]       | NA                                         |
| Ca_Desi_Ch_scaffold00437_67012  | Ca_desi_scaffold   | 67012                          | [T/C]       | NA                                         |
| Ca_Desi_Ch_scaffold00437_67027  | Ca_desi_scaffold   | 67027                          | [T/G]       | NA                                         |
| Ca_Desi_Ch_scaffold00437_67031  | Ca_desi_scaffold   | 67031                          | [A/G]       | NA                                         |
| Ca_Desi_Ch_scaffold00437_95662  | Ca_desi_scaffold   | 95662                          | [T/G]       | NA                                         |
| Ca_Desi_Ch_scaffold00437_95795  | Ca_desi_scaffold   | 95795                          | [T/C]       | NA                                         |
| Ca_Desi_Ch_scaffold00437_95817  | Ca_desi_scaffold   | 95817                          | [T/G]       | NA                                         |
| Ca_Desi_Ch_scaffold00437_95842  | Ca_desi_scaffold   | 95842                          | [T/C]       | NA                                         |

| <b>SNP IDs</b>                  | <b>Chromosomes</b> | <b>Physical positions (bp)</b> | <b>SNPs</b> | <b>NCBI SNPdb accession IDs (NCBI_ss#)</b> |
|---------------------------------|--------------------|--------------------------------|-------------|--------------------------------------------|
| Ca_Desi_Ch_scaffold00437_95930  | Ca_desi_scaffold   | 95930                          | [T/G]       | NA                                         |
| Ca_Desi_Ch_scaffold00437_96010  | Ca_desi_scaffold   | 96010                          | [T/G]       | NA                                         |
| Ca_Desi_Ch_scaffold00437_96380  | Ca_desi_scaffold   | 96380                          | [T/G]       | NA                                         |
| Ca_Desi_Ch_scaffold00437_96424  | Ca_desi_scaffold   | 96424                          | [A/C]       | NA                                         |
| Ca_Desi_Ch_scaffold00438_28165  | Ca_desi_scaffold   | 28165                          | [T/C]       | NA                                         |
| Ca_Desi_Ch_scaffold00438_28169  | Ca_desi_scaffold   | 28169                          | [T/C]       | NA                                         |
| Ca_Desi_Ch_scaffold00438_28176  | Ca_desi_scaffold   | 28176                          | [T/C]       | NA                                         |
| Ca_Desi_Ch_scaffold00438_28191  | Ca_desi_scaffold   | 28191                          | [G/C]       | NA                                         |
| Ca_Desi_Ch_scaffold00438_28200  | Ca_desi_scaffold   | 28200                          | [A/G]       | NA                                         |
| Ca_Desi_Ch_scaffold00438_28204  | Ca_desi_scaffold   | 28204                          | [T/C]       | NA                                         |
| Ca_Desi_Ch_scaffold00438_98402  | Ca_desi_scaffold   | 98402                          | [A/G]       | NA                                         |
| Ca_Desi_Ch_scaffold00438_121464 | Ca_desi_scaffold   | 121464                         | [A/G]       | NA                                         |
| Ca_Desi_Ch_scaffold00438_121465 | Ca_desi_scaffold   | 121465                         | [T/G]       | NA                                         |
| Ca_Desi_Ch_scaffold00438_121466 | Ca_desi_scaffold   | 121466                         | [C/A]       | NA                                         |
| Ca_Desi_Ch_scaffold00438_121467 | Ca_desi_scaffold   | 121467                         | [T/G]       | NA                                         |
| Ca_Desi_Ch_scaffold00438_129503 | Ca_desi_scaffold   | 129503                         | [T/A]       | NA                                         |
| Ca_Desi_Ch_scaffold00438_129538 | Ca_desi_scaffold   | 129538                         | [T/C]       | NA                                         |
| Ca_Desi_Ch_scaffold00438_130696 | Ca_desi_scaffold   | 130696                         | [T/C]       | NA                                         |
| Ca_Desi_Ch_scaffold00438_130732 | Ca_desi_scaffold   | 130732                         | [T/C]       | NA                                         |
| Ca_Desi_Ch_scaffold00438_130748 | Ca_desi_scaffold   | 130748                         | [A/G]       | NA                                         |
| Ca_Desi_Ch_scaffold00440_8156   | Ca_desi_scaffold   | 8156                           | [T/C]       | NA                                         |
| Ca_Desi_Ch_scaffold00440_8164   | Ca_desi_scaffold   | 8164                           | [T/C]       | NA                                         |
| Ca_Desi_Ch_scaffold00440_57285  | Ca_desi_scaffold   | 57285                          | [T/C]       | NA                                         |
| Ca_Desi_Ch_scaffold00440_57340  | Ca_desi_scaffold   | 57340                          | [T/A]       | NA                                         |
| Ca_Desi_Ch_scaffold00440_141021 | Ca_desi_scaffold   | 141021                         | [C/T]       | NA                                         |
| Ca_Desi_Ch_scaffold00440_141022 | Ca_desi_scaffold   | 141022                         | [A/G]       | NA                                         |
| Ca_Desi_Ch_scaffold00440_141131 | Ca_desi_scaffold   | 141131                         | [C/T]       | NA                                         |
| Ca_Desi_Ch_scaffold00440_141645 | Ca_desi_scaffold   | 141645                         | [C/T]       | NA                                         |
| Ca_Desi_Ch_scaffold00440_151234 | Ca_desi_scaffold   | 151234                         | [A/T]       | NA                                         |
| Ca_Desi_Ch_scaffold00440_151292 | Ca_desi_scaffold   | 151292                         | [A/G]       | NA                                         |
| Ca_Desi_Ch_scaffold00440_151294 | Ca_desi_scaffold   | 151294                         | [A/G]       | NA                                         |
| Ca_Desi_Ch_scaffold00440_161069 | Ca_desi_scaffold   | 161069                         | [A/G]       | NA                                         |
| Ca_Desi_Ch_scaffold00440_161076 | Ca_desi_scaffold   | 161076                         | [T/G]       | NA                                         |
| Ca_Desi_Ch_scaffold00440_161096 | Ca_desi_scaffold   | 161096                         | [T/G]       | NA                                         |

| <b>SNP IDs</b>                    | <b>Chromosomes</b> | <b>Physical positions (bp)</b> | <b>SNPs</b> | <b>NCBI SNPdb accession IDs (NCBI_ss#)</b> |
|-----------------------------------|--------------------|--------------------------------|-------------|--------------------------------------------|
| Ca_Desig_Chr_scaffold00440_161105 | Ca_desig_scaffold  | 161105                         | [T/C]       | NA                                         |
| Ca_Desig_Chr_scaffold00440_161122 | Ca_desig_scaffold  | 161122                         | [C/A]       | NA                                         |
| Ca_Desig_Chr_scaffold00440_161186 | Ca_desig_scaffold  | 161186                         | [T/C]       | NA                                         |
| Ca_Desig_Chr_scaffold00444_69152  | Ca_desig_scaffold  | 69152                          | [T/A]       | NA                                         |
| Ca_Desig_Chr_scaffold00447_10482  | Ca_desig_scaffold  | 10482                          | [T/G]       | NA                                         |
| Ca_Desig_Chr_scaffold00447_10491  | Ca_desig_scaffold  | 10491                          | [A/C]       | NA                                         |
| Ca_Desig_Chr_scaffold00447_71827  | Ca_desig_scaffold  | 71827                          | [A/C]       | NA                                         |
| Ca_Desig_Chr_scaffold00447_71838  | Ca_desig_scaffold  | 71838                          | [C/G]       | NA                                         |
| Ca_Desig_Chr_scaffold00447_71975  | Ca_desig_scaffold  | 71975                          | [C/T]       | NA                                         |
| Ca_Desig_Chr_scaffold00447_71990  | Ca_desig_scaffold  | 71990                          | [T/A]       | NA                                         |
| Ca_Desig_Chr_scaffold00447_72008  | Ca_desig_scaffold  | 72008                          | [T/C]       | NA                                         |
| Ca_Desig_Chr_scaffold00447_73167  | Ca_desig_scaffold  | 73167                          | [T/G]       | NA                                         |
| Ca_Desig_Chr_scaffold00447_73227  | Ca_desig_scaffold  | 73227                          | [T/G]       | NA                                         |
| Ca_Desig_Chr_scaffold00447_73272  | Ca_desig_scaffold  | 73272                          | [A/C]       | NA                                         |
| Ca_Desig_Chr_scaffold00447_73310  | Ca_desig_scaffold  | 73310                          | [T/C]       | NA                                         |
| Ca_Desig_Chr_scaffold00447_73317  | Ca_desig_scaffold  | 73317                          | [T/C]       | NA                                         |
| Ca_Desig_Chr_scaffold00447_73339  | Ca_desig_scaffold  | 73339                          | [T/C]       | NA                                         |
| Ca_Desig_Chr_scaffold00447_73344  | Ca_desig_scaffold  | 73344                          | [T/G]       | NA                                         |
| Ca_Desig_Chr_scaffold00447_73349  | Ca_desig_scaffold  | 73349                          | [C/T]       | NA                                         |
| Ca_Desig_Chr_scaffold00447_73352  | Ca_desig_scaffold  | 73352                          | [G/A]       | NA                                         |
| Ca_Desig_Chr_scaffold00447_73358  | Ca_desig_scaffold  | 73358                          | [C/T]       | NA                                         |
| Ca_Desig_Chr_scaffold00447_73363  | Ca_desig_scaffold  | 73363                          | [T/G]       | NA                                         |
| Ca_Desig_Chr_scaffold00447_73380  | Ca_desig_scaffold  | 73380                          | [A/G]       | NA                                         |
| Ca_Desig_Chr_scaffold00447_73442  | Ca_desig_scaffold  | 73442                          | [T/G]       | NA                                         |
| Ca_Desig_Chr_scaffold00447_73538  | Ca_desig_scaffold  | 73538                          | [A/C]       | NA                                         |
| Ca_Desig_Chr_scaffold00447_73553  | Ca_desig_scaffold  | 73553                          | [T/A]       | NA                                         |
| Ca_Desig_Chr_scaffold00447_73960  | Ca_desig_scaffold  | 73960                          | [A/C]       | NA                                         |
| Ca_Desig_Chr_scaffold00447_80387  | Ca_desig_scaffold  | 80387                          | [A/G]       | NA                                         |
| Ca_Desig_Chr_scaffold00447_80389  | Ca_desig_scaffold  | 80389                          | [A/G]       | NA                                         |
| Ca_Desig_Chr_scaffold00447_80391  | Ca_desig_scaffold  | 80391                          | [A/G]       | NA                                         |
| Ca_Desig_Chr_scaffold00447_80400  | Ca_desig_scaffold  | 80400                          | [C/G]       | NA                                         |
| Ca_Desig_Chr_scaffold00447_80406  | Ca_desig_scaffold  | 80406                          | [A/G]       | NA                                         |
| Ca_Desig_Chr_scaffold00447_80408  | Ca_desig_scaffold  | 80408                          | [A/G]       | NA                                         |
| Ca_Desig_Chr_scaffold00447_80412  | Ca_desig_scaffold  | 80412                          | [A/G]       | NA                                         |

| <b>SNP IDs</b>                          | <b>Chromosomes</b> | <b>Physical positions (bp)</b> | <b>SNPs</b> | <b>NCBI SNPdb accession IDs (NCBI_ss#)</b> |
|-----------------------------------------|--------------------|--------------------------------|-------------|--------------------------------------------|
| Ca_Desi_Chromosome_scaffold00447_80416  | Ca_desi_scaffold   | 80416                          | [A/G]       | NA                                         |
| Ca_Desi_Chromosome_scaffold00447_80420  | Ca_desi_scaffold   | 80420                          | [A/G]       | NA                                         |
| Ca_Desi_Chromosome_scaffold00447_80423  | Ca_desi_scaffold   | 80423                          | [G/A]       | NA                                         |
| Ca_Desi_Chromosome_scaffold00447_80427  | Ca_desi_scaffold   | 80427                          | [A/G]       | NA                                         |
| Ca_Desi_Chromosome_scaffold00447_80431  | Ca_desi_scaffold   | 80431                          | [A/G]       | NA                                         |
| Ca_Desi_Chromosome_scaffold00447_80437  | Ca_desi_scaffold   | 80437                          | [T/C]       | NA                                         |
| Ca_Desi_Chromosome_scaffold00447_80443  | Ca_desi_scaffold   | 80443                          | [A/G]       | NA                                         |
| Ca_Desi_Chromosome_scaffold00447_139080 | Ca_desi_scaffold   | 139080                         | [A/T]       | NA                                         |
| Ca_Desi_Chromosome_scaffold00447_139088 | Ca_desi_scaffold   | 139088                         | [A/G]       | NA                                         |
| Ca_Desi_Chromosome_scaffold00447_139093 | Ca_desi_scaffold   | 139093                         | [A/G]       | NA                                         |
| Ca_Desi_Chromosome_scaffold00447_139115 | Ca_desi_scaffold   | 139115                         | [T/G]       | NA                                         |
| Ca_Desi_Chromosome_scaffold00447_139189 | Ca_desi_scaffold   | 139189                         | [T/G]       | NA                                         |
| Ca_Desi_Chromosome_scaffold00447_139194 | Ca_desi_scaffold   | 139194                         | [T/A]       | NA                                         |
| Ca_Desi_Chromosome_scaffold00448_18208  | Ca_desi_scaffold   | 18208                          | [T/C]       | NA                                         |
| Ca_Desi_Chromosome_scaffold00448_18245  | Ca_desi_scaffold   | 18245                          | [G/A]       | NA                                         |
| Ca_Desi_Chromosome_scaffold00448_18258  | Ca_desi_scaffold   | 18258                          | [A/G]       | NA                                         |
| Ca_Desi_Chromosome_scaffold00448_85452  | Ca_desi_scaffold   | 85452                          | [T/C]       | NA                                         |
| Ca_Desi_Chromosome_scaffold00448_85533  | Ca_desi_scaffold   | 85533                          | [A/T]       | NA                                         |
| Ca_Desi_Chromosome_scaffold00448_86013  | Ca_desi_scaffold   | 86013                          | [A/G]       | NA                                         |
| Ca_Desi_Chromosome_scaffold00448_86042  | Ca_desi_scaffold   | 86042                          | [T/C]       | NA                                         |
| Ca_Desi_Chromosome_scaffold00448_86059  | Ca_desi_scaffold   | 86059                          | [A/G]       | NA                                         |
| Ca_Desi_Chromosome_scaffold00448_114076 | Ca_desi_scaffold   | 114076                         | [A/G]       | NA                                         |
| Ca_Desi_Chromosome_scaffold00449_24155  | Ca_desi_scaffold   | 24155                          | [A/C]       | NA                                         |
| Ca_Desi_Chromosome_scaffold00450_11902  | Ca_desi_scaffold   | 11902                          | [A/G]       | NA                                         |
| Ca_Desi_Chromosome_scaffold00450_42631  | Ca_desi_scaffold   | 42631                          | [G/C]       | NA                                         |
| Ca_Desi_Chromosome_scaffold00450_42645  | Ca_desi_scaffold   | 42645                          | [T/C]       | NA                                         |
| Ca_Desi_Chromosome_scaffold00450_42652  | Ca_desi_scaffold   | 42652                          | [T/G]       | NA                                         |
| Ca_Desi_Chromosome_scaffold00450_42662  | Ca_desi_scaffold   | 42662                          | [T/C]       | NA                                         |
| Ca_Desi_Chromosome_scaffold00450_42664  | Ca_desi_scaffold   | 42664                          | [A/G]       | NA                                         |
| Ca_Desi_Chromosome_scaffold00450_42666  | Ca_desi_scaffold   | 42666                          | [G/T]       | NA                                         |
| Ca_Desi_Chromosome_scaffold00450_42669  | Ca_desi_scaffold   | 42669                          | [T/C]       | NA                                         |
| Ca_Desi_Chromosome_scaffold00450_42672  | Ca_desi_scaffold   | 42672                          | [A/G]       | NA                                         |
| Ca_Desi_Chromosome_scaffold00450_42686  | Ca_desi_scaffold   | 42686                          | [A/G]       | NA                                         |
| Ca_Desi_Chromosome_scaffold00450_42688  | Ca_desi_scaffold   | 42688                          | [A/G]       | NA                                         |

| <b>SNP IDs</b>                  | <b>Chromosomes</b> | <b>Physical positions (bp)</b> | <b>SNPs</b> | <b>NCBI SNPdb accession IDs (NCBI_ss#)</b> |
|---------------------------------|--------------------|--------------------------------|-------------|--------------------------------------------|
| Ca_Desi_Ch_scaffold00450_42690  | Ca_desi_scaffold   | 42690                          | [C/A]       | NA                                         |
| Ca_Desi_Ch_scaffold00450_42691  | Ca_desi_scaffold   | 42691                          | [A/C]       | NA                                         |
| Ca_Desi_Ch_scaffold00450_93356  | Ca_desi_scaffold   | 93356                          | [T/C]       | NA                                         |
| Ca_Desi_Ch_scaffold00450_106885 | Ca_desi_scaffold   | 106885                         | [T/C]       | NA                                         |
| Ca_Desi_Ch_scaffold00450_106886 | Ca_desi_scaffold   | 106886                         | [G/T]       | NA                                         |
| Ca_Desi_Ch_scaffold00450_107009 | Ca_desi_scaffold   | 107009                         | [G/A]       | NA                                         |
| Ca_Desi_Ch_scaffold00450_107233 | Ca_desi_scaffold   | 107233                         | [C/T]       | NA                                         |
| Ca_Desi_Ch_scaffold00450_124388 | Ca_desi_scaffold   | 124388                         | [T/G]       | NA                                         |
| Ca_Desi_Ch_scaffold00450_129149 | Ca_desi_scaffold   | 129149                         | [G/A]       | NA                                         |
| Ca_Desi_Ch_scaffold00450_129268 | Ca_desi_scaffold   | 129268                         | [T/C]       | NA                                         |
| Ca_Desi_Ch_scaffold00450_130653 | Ca_desi_scaffold   | 130653                         | [A/G]       | NA                                         |
| Ca_Desi_Ch_scaffold00450_134154 | Ca_desi_scaffold   | 134154                         | [G/A]       | NA                                         |
| Ca_Desi_Ch_scaffold00450_134186 | Ca_desi_scaffold   | 134186                         | [T/C]       | NA                                         |
| Ca_Desi_Ch_scaffold00450_134195 | Ca_desi_scaffold   | 134195                         | [A/G]       | NA                                         |
| Ca_Desi_Ch_scaffold00450_134208 | Ca_desi_scaffold   | 134208                         | [A/G]       | NA                                         |
| Ca_Desi_Ch_scaffold00450_134215 | Ca_desi_scaffold   | 134215                         | [T/C]       | NA                                         |
| Ca_Desi_Ch_scaffold00450_134227 | Ca_desi_scaffold   | 134227                         | [T/C]       | NA                                         |
| Ca_Desi_Ch_scaffold00450_134231 | Ca_desi_scaffold   | 134231                         | [A/G]       | NA                                         |
| Ca_Desi_Ch_scaffold00450_134235 | Ca_desi_scaffold   | 134235                         | [T/A]       | NA                                         |
| Ca_Desi_Ch_scaffold00450_134239 | Ca_desi_scaffold   | 134239                         | [A/G]       | NA                                         |
| Ca_Desi_Ch_scaffold00451_84637  | Ca_desi_scaffold   | 84637                          | [T/C]       | NA                                         |
| Ca_Desi_Ch_scaffold00451_100379 | Ca_desi_scaffold   | 100379                         | [T/G]       | NA                                         |
| Ca_Desi_Ch_scaffold00455_60546  | Ca_desi_scaffold   | 60546                          | [T/G]       | NA                                         |
| Ca_Desi_Ch_scaffold00455_60645  | Ca_desi_scaffold   | 60645                          | [A/C]       | NA                                         |
| Ca_Desi_Ch_scaffold00461_110699 | Ca_desi_scaffold   | 110699                         | [T/A]       | NA                                         |
| Ca_Desi_Ch_scaffold00461_110726 | Ca_desi_scaffold   | 110726                         | [T/G]       | NA                                         |
| Ca_Desi_Ch_scaffold00461_116183 | Ca_desi_scaffold   | 116183                         | [A/G]       | NA                                         |
| Ca_Desi_Ch_scaffold00461_117730 | Ca_desi_scaffold   | 117730                         | [A/C]       | NA                                         |
| Ca_Desi_Ch_scaffold00463_9718   | Ca_desi_scaffold   | 9718                           | [C/T]       | NA                                         |
| Ca_Desi_Ch_scaffold00463_10282  | Ca_desi_scaffold   | 10282                          | [T/A]       | NA                                         |
| Ca_Desi_Ch_scaffold00463_10298  | Ca_desi_scaffold   | 10298                          | [C/T]       | NA                                         |
| Ca_Desi_Ch_scaffold00463_10382  | Ca_desi_scaffold   | 10382                          | [G/C]       | NA                                         |
| Ca_Desi_Ch_scaffold00463_34042  | Ca_desi_scaffold   | 34042                          | [G/C]       | NA                                         |
| Ca_Desi_Ch_scaffold00463_34405  | Ca_desi_scaffold   | 34405                          | [G/C]       | NA                                         |

| <b>SNP IDs</b>                    | <b>Chromosomes</b> | <b>Physical positions (bp)</b> | <b>SNPs</b> | <b>NCBI SNPdb accession IDs (NCBI_ss#)</b> |
|-----------------------------------|--------------------|--------------------------------|-------------|--------------------------------------------|
| Ca_Desig_Chr_scaffold00463_51838  | Ca_desig_scaffold  | 51838                          | [C/T]       | NA                                         |
| Ca_Desig_Chr_scaffold00463_57798  | Ca_desig_scaffold  | 57798                          | [T/C]       | NA                                         |
| Ca_Desig_Chr_scaffold00463_57852  | Ca_desig_scaffold  | 57852                          | [A/G]       | NA                                         |
| Ca_Desig_Chr_scaffold00463_66352  | Ca_desig_scaffold  | 66352                          | [T/A]       | NA                                         |
| Ca_Desig_Chr_scaffold00463_72141  | Ca_desig_scaffold  | 72141                          | [T/A]       | NA                                         |
| Ca_Desig_Chr_scaffold00463_72452  | Ca_desig_scaffold  | 72452                          | [A/G]       | NA                                         |
| Ca_Desig_Chr_scaffold00463_72595  | Ca_desig_scaffold  | 72595                          | [A/G]       | NA                                         |
| Ca_Desig_Chr_scaffold00463_72612  | Ca_desig_scaffold  | 72612                          | [T/C]       | NA                                         |
| Ca_Desig_Chr_scaffold00463_72620  | Ca_desig_scaffold  | 72620                          | [A/C]       | NA                                         |
| Ca_Desig_Chr_scaffold00463_72627  | Ca_desig_scaffold  | 72627                          | [G/T]       | NA                                         |
| Ca_Desig_Chr_scaffold00463_72634  | Ca_desig_scaffold  | 72634                          | [C/T]       | NA                                         |
| Ca_Desig_Chr_scaffold00463_76464  | Ca_desig_scaffold  | 76464                          | [A/T]       | NA                                         |
| Ca_Desig_Chr_scaffold00463_76599  | Ca_desig_scaffold  | 76599                          | [T/G]       | NA                                         |
| Ca_Desig_Chr_scaffold00463_118443 | Ca_desig_scaffold  | 118443                         | [T/C]       | NA                                         |
| Ca_Desig_Chr_scaffold00463_123508 | Ca_desig_scaffold  | 123508                         | [C/A]       | NA                                         |
| Ca_Desig_Chr_scaffold00463_144717 | Ca_desig_scaffold  | 144717                         | [T/C]       | NA                                         |
| Ca_Desig_Chr_scaffold00463_144719 | Ca_desig_scaffold  | 144719                         | [G/T]       | NA                                         |
| Ca_Desig_Chr_scaffold00463_149512 | Ca_desig_scaffold  | 149512                         | [T/C]       | NA                                         |
| Ca_Desig_Chr_scaffold00463_149608 | Ca_desig_scaffold  | 149608                         | [A/G]       | NA                                         |
| Ca_Desig_Chr_scaffold00463_151376 | Ca_desig_scaffold  | 151376                         | [C/T]       | NA                                         |
| Ca_Desig_Chr_scaffold00463_153343 | Ca_desig_scaffold  | 153343                         | [A/C]       | NA                                         |
| Ca_Desig_Chr_scaffold00463_153756 | Ca_desig_scaffold  | 153756                         | [C/T]       | NA                                         |
| Ca_Desig_Chr_scaffold00463_153806 | Ca_desig_scaffold  | 153806                         | [A/G]       | NA                                         |
| Ca_Desig_Chr_scaffold00463_162987 | Ca_desig_scaffold  | 162987                         | [C/T]       | NA                                         |
| Ca_Desig_Chr_scaffold00467_55594  | Ca_desig_scaffold  | 55594                          | [T/G]       | NA                                         |
| Ca_Desig_Chr_scaffold00467_58664  | Ca_desig_scaffold  | 58664                          | [A/C]       | NA                                         |
| Ca_Desig_Chr_scaffold00467_58665  | Ca_desig_scaffold  | 58665                          | [A/G]       | NA                                         |
| Ca_Desig_Chr_scaffold00467_68839  | Ca_desig_scaffold  | 68839                          | [T/G]       | NA                                         |
| Ca_Desig_Chr_scaffold00467_78296  | Ca_desig_scaffold  | 78296                          | [A/C]       | NA                                         |
| Ca_Desig_Chr_scaffold00467_81178  | Ca_desig_scaffold  | 81178                          | [T/C]       | NA                                         |
| Ca_Desig_Chr_scaffold00467_81192  | Ca_desig_scaffold  | 81192                          | [A/G]       | NA                                         |
| Ca_Desig_Chr_scaffold00467_81217  | Ca_desig_scaffold  | 81217                          | [T/G]       | NA                                         |
| Ca_Desig_Chr_scaffold00467_81238  | Ca_desig_scaffold  | 81238                          | [A/G]       | NA                                         |
| Ca_Desig_Chr_scaffold00467_132305 | Ca_desig_scaffold  | 132305                         | [T/C]       | NA                                         |



| <b>SNP IDs</b>                   | <b>Chromosomes</b> | <b>Physical positions (bp)</b> | <b>SNPs</b> | <b>NCBI SNPdb accession IDs (NCBI_ss#)</b> |
|----------------------------------|--------------------|--------------------------------|-------------|--------------------------------------------|
| Ca_DesigChr_scaffold00467_132323 | Ca_desig_scaffold  | 132323                         | [A/G]       | NA                                         |
| Ca_DesigChr_scaffold00467_132347 | Ca_desig_scaffold  | 132347                         | [A/G]       | NA                                         |
| Ca_DesigChr_scaffold00467_132349 | Ca_desig_scaffold  | 132349                         | [T/A]       | NA                                         |
| Ca_DesigChr_scaffold00467_147555 | Ca_desig_scaffold  | 147555                         | [A/G]       | NA                                         |
| Ca_DesigChr_scaffold00467_147558 | Ca_desig_scaffold  | 147558                         | [T/C]       | NA                                         |
| Ca_DesigChr_scaffold00467_147586 | Ca_desig_scaffold  | 147586                         | [C/T]       | NA                                         |
| Ca_DesigChr_scaffold00467_148145 | Ca_desig_scaffold  | 148145                         | [T/A]       | NA                                         |
| Ca_DesigChr_scaffold00467_148198 | Ca_desig_scaffold  | 148198                         | [T/A]       | NA                                         |
| Ca_DesigChr_scaffold00467_148340 | Ca_desig_scaffold  | 148340                         | [T/A]       | NA                                         |
| Ca_DesigChr_scaffold00467_148359 | Ca_desig_scaffold  | 148359                         | [C/G]       | NA                                         |
| Ca_DesigChr_scaffold00467_148366 | Ca_desig_scaffold  | 148366                         | [G/T]       | NA                                         |
| Ca_DesigChr_scaffold00467_148411 | Ca_desig_scaffold  | 148411                         | [T/C]       | NA                                         |
| Ca_DesigChr_scaffold00467_148505 | Ca_desig_scaffold  | 148505                         | [T/C]       | NA                                         |
| Ca_DesigChr_scaffold00467_148563 | Ca_desig_scaffold  | 148563                         | [T/C]       | NA                                         |
| Ca_DesigChr_scaffold00467_148585 | Ca_desig_scaffold  | 148585                         | [T/C]       | NA                                         |
| Ca_DesigChr_scaffold00467_148600 | Ca_desig_scaffold  | 148600                         | [C/T]       | NA                                         |
| Ca_DesigChr_scaffold00467_148627 | Ca_desig_scaffold  | 148627                         | [C/A]       | NA                                         |
| Ca_DesigChr_scaffold00469_19072  | Ca_desig_scaffold  | 19072                          | [A/T]       | NA                                         |
| Ca_DesigChr_scaffold00469_19080  | Ca_desig_scaffold  | 19080                          | [T/A]       | NA                                         |
| Ca_DesigChr_scaffold00469_19081  | Ca_desig_scaffold  | 19081                          | [A/T]       | NA                                         |
| Ca_DesigChr_scaffold00469_19085  | Ca_desig_scaffold  | 19085                          | [G/T]       | NA                                         |
| Ca_DesigChr_scaffold00469_49193  | Ca_desig_scaffold  | 49193                          | [C/T]       | NA                                         |
| Ca_DesigChr_scaffold00469_78933  | Ca_desig_scaffold  | 78933                          | [T/G]       | NA                                         |
| Ca_DesigChr_scaffold00469_78934  | Ca_desig_scaffold  | 78934                          | [C/A]       | NA                                         |
| Ca_DesigChr_scaffold00469_78935  | Ca_desig_scaffold  | 78935                          | [T/G]       | NA                                         |
| Ca_DesigChr_scaffold00473_13636  | Ca_desig_scaffold  | 13636                          | [T/G]       | NA                                         |
| Ca_DesigChr_scaffold00473_13648  | Ca_desig_scaffold  | 13648                          | [A/C]       | NA                                         |
| Ca_DesigChr_scaffold00473_54840  | Ca_desig_scaffold  | 54840                          | [T/C]       | NA                                         |
| Ca_DesigChr_scaffold00473_54845  | Ca_desig_scaffold  | 54845                          | [A/G]       | NA                                         |
| Ca_DesigChr_scaffold00473_54871  | Ca_desig_scaffold  | 54871                          | [T/G]       | NA                                         |
| Ca_DesigChr_scaffold00473_54873  | Ca_desig_scaffold  | 54873                          | [C/A]       | NA                                         |
| Ca_DesigChr_scaffold00473_54878  | Ca_desig_scaffold  | 54878                          | [A/G]       | NA                                         |
| Ca_DesigChr_scaffold00473_54883  | Ca_desig_scaffold  | 54883                          | [A/G]       | NA                                         |
| Ca_DesigChr_scaffold00473_54889  | Ca_desig_scaffold  | 54889                          | [A/G]       | NA                                         |

| <b>SNP IDs</b>                  | <b>Chromosomes</b> | <b>Physical positions (bp)</b> | <b>SNPs</b> | <b>NCBI SNPdb accession IDs (NCBI_ss#)</b> |
|---------------------------------|--------------------|--------------------------------|-------------|--------------------------------------------|
| Ca_Desi_Ch_scaffold00473_54893  | Ca_desi_scaffold   | 54893                          | [G/A]       | NA                                         |
| Ca_Desi_Ch_scaffold00473_54894  | Ca_desi_scaffold   | 54894                          | [A/G]       | NA                                         |
| Ca_Desi_Ch_scaffold00473_54904  | Ca_desi_scaffold   | 54904                          | [A/G]       | NA                                         |
| Ca_Desi_Ch_scaffold00473_54906  | Ca_desi_scaffold   | 54906                          | [G/A]       | NA                                         |
| Ca_Desi_Ch_scaffold00473_62186  | Ca_desi_scaffold   | 62186                          | [A/T]       | NA                                         |
| Ca_Desi_Ch_scaffold00473_62190  | Ca_desi_scaffold   | 62190                          | [G/A]       | NA                                         |
| Ca_Desi_Ch_scaffold00473_62191  | Ca_desi_scaffold   | 62191                          | [A/T]       | NA                                         |
| Ca_Desi_Ch_scaffold00473_62192  | Ca_desi_scaffold   | 62192                          | [T/C]       | NA                                         |
| Ca_Desi_Ch_scaffold00473_62193  | Ca_desi_scaffold   | 62193                          | [G/T]       | NA                                         |
| Ca_Desi_Ch_scaffold00473_83681  | Ca_desi_scaffold   | 83681                          | [T/G]       | NA                                         |
| Ca_Desi_Ch_scaffold00473_104203 | Ca_desi_scaffold   | 104203                         | [T/C]       | NA                                         |
| Ca_Desi_Ch_scaffold00473_104224 | Ca_desi_scaffold   | 104224                         | [A/G]       | NA                                         |
| Ca_Desi_Ch_scaffold00473_104247 | Ca_desi_scaffold   | 104247                         | [G/T]       | NA                                         |
| Ca_Desi_Ch_scaffold00473_104252 | Ca_desi_scaffold   | 104252                         | [A/C]       | NA                                         |
| Ca_Desi_Ch_scaffold00473_104255 | Ca_desi_scaffold   | 104255                         | [A/G]       | NA                                         |
| Ca_Desi_Ch_scaffold00473_104262 | Ca_desi_scaffold   | 104262                         | [A/G]       | NA                                         |
| Ca_Desi_Ch_scaffold00473_104270 | Ca_desi_scaffold   | 104270                         | [A/C]       | NA                                         |
| Ca_Desi_Ch_scaffold00473_141612 | Ca_desi_scaffold   | 141612                         | [C/A]       | NA                                         |
| Ca_Desi_Ch_scaffold00473_141613 | Ca_desi_scaffold   | 141613                         | [T/G]       | NA                                         |
| Ca_Desi_Ch_scaffold00473_141614 | Ca_desi_scaffold   | 141614                         | [G/A]       | NA                                         |
| Ca_Desi_Ch_scaffold00473_141615 | Ca_desi_scaffold   | 141615                         | [G/T]       | NA                                         |
| Ca_Desi_Ch_scaffold00473_154904 | Ca_desi_scaffold   | 154904                         | [T/G]       | NA                                         |
| Ca_Desi_Ch_scaffold00473_154913 | Ca_desi_scaffold   | 154913                         | [G/A]       | NA                                         |
| Ca_Desi_Ch_scaffold00473_154922 | Ca_desi_scaffold   | 154922                         | [A/T]       | NA                                         |
| Ca_Desi_Ch_scaffold00473_154924 | Ca_desi_scaffold   | 154924                         | [C/T]       | NA                                         |
| Ca_Desi_Ch_scaffold00473_155146 | Ca_desi_scaffold   | 155146                         | [C/T]       | NA                                         |
| Ca_Desi_Ch_scaffold00473_155168 | Ca_desi_scaffold   | 155168                         | [T/C]       | NA                                         |
| Ca_Desi_Ch_scaffold00473_155182 | Ca_desi_scaffold   | 155182                         | [G/A]       | NA                                         |
| Ca_Desi_Ch_scaffold00473_161758 | Ca_desi_scaffold   | 161758                         | [C/T]       | NA                                         |
| Ca_Desi_Ch_scaffold00473_161766 | Ca_desi_scaffold   | 161766                         | [G/C]       | NA                                         |
| Ca_Desi_Ch_scaffold00476_15599  | Ca_desi_scaffold   | 15599                          | [A/C]       | NA                                         |
| Ca_Desi_Ch_scaffold00476_16266  | Ca_desi_scaffold   | 16266                          | [A/C]       | NA                                         |
| Ca_Desi_Ch_scaffold00476_16274  | Ca_desi_scaffold   | 16274                          | [T/C]       | NA                                         |
| Ca_Desi_Ch_scaffold00476_23776  | Ca_desi_scaffold   | 23776                          | [T/A]       | NA                                         |

| <b>SNP IDs</b>                    | <b>Chromosomes</b> | <b>Physical positions (bp)</b> | <b>SNPs</b> | <b>NCBI SNPdb accession IDs (NCBI_ss#)</b> |
|-----------------------------------|--------------------|--------------------------------|-------------|--------------------------------------------|
| Ca_Desig_Chr_scaffold00476_99671  | Ca_desig_scaffold  | 99671                          | [T/C]       | NA                                         |
| Ca_Desig_Chr_scaffold00476_148083 | Ca_desig_scaffold  | 148083                         | [T/A]       | NA                                         |
| Ca_Desig_Chr_scaffold00476_148103 | Ca_desig_scaffold  | 148103                         | [A/C]       | NA                                         |
| Ca_Desig_Chr_scaffold00477_39708  | Ca_desig_scaffold  | 39708                          | [T/C]       | NA                                         |
| Ca_Desig_Chr_scaffold00477_60122  | Ca_desig_scaffold  | 60122                          | [T/C]       | NA                                         |
| Ca_Desig_Chr_scaffold00477_60145  | Ca_desig_scaffold  | 60145                          | [A/T]       | NA                                         |
| Ca_Desig_Chr_scaffold00477_71955  | Ca_desig_scaffold  | 71955                          | [T/G]       | NA                                         |
| Ca_Desig_Chr_scaffold00477_71957  | Ca_desig_scaffold  | 71957                          | [T/G]       | NA                                         |
| Ca_Desig_Chr_scaffold00477_103690 | Ca_desig_scaffold  | 103690                         | [T/C]       | NA                                         |
| Ca_Desig_Chr_scaffold00477_103701 | Ca_desig_scaffold  | 103701                         | [A/T]       | NA                                         |
| Ca_Desig_Chr_scaffold00477_125334 | Ca_desig_scaffold  | 125334                         | [A/G]       | NA                                         |
| Ca_Desig_Chr_scaffold00477_125464 | Ca_desig_scaffold  | 125464                         | [T/C]       | NA                                         |
| Ca_Desig_Chr_scaffold00477_125502 | Ca_desig_scaffold  | 125502                         | [T/G]       | NA                                         |
| Ca_Desig_Chr_scaffold00477_128423 | Ca_desig_scaffold  | 128423                         | [T/C]       | NA                                         |
| Ca_Desig_Chr_scaffold00477_128430 | Ca_desig_scaffold  | 128430                         | [A/G]       | NA                                         |
| Ca_Desig_Chr_scaffold00477_128433 | Ca_desig_scaffold  | 128433                         | [A/G]       | NA                                         |
| Ca_Desig_Chr_scaffold00477_128436 | Ca_desig_scaffold  | 128436                         | [A/G]       | NA                                         |
| Ca_Desig_Chr_scaffold00477_128456 | Ca_desig_scaffold  | 128456                         | [A/G]       | NA                                         |
| Ca_Desig_Chr_scaffold00477_128461 | Ca_desig_scaffold  | 128461                         | [T/G]       | NA                                         |
| Ca_Desig_Chr_scaffold00477_128478 | Ca_desig_scaffold  | 128478                         | [A/G]       | NA                                         |
| Ca_Desig_Chr_scaffold00477_128481 | Ca_desig_scaffold  | 128481                         | [T/C]       | NA                                         |
| Ca_Desig_Chr_scaffold00477_128483 | Ca_desig_scaffold  | 128483                         | [A/G]       | NA                                         |
| Ca_Desig_Chr_scaffold00477_137017 | Ca_desig_scaffold  | 137017                         | [T/C]       | NA                                         |
| Ca_Desig_Chr_scaffold00477_150163 | Ca_desig_scaffold  | 150163                         | [A/G]       | NA                                         |
| Ca_Desig_Chr_scaffold00478_62028  | Ca_desig_scaffold  | 62028                          | [T/C]       | NA                                         |
| Ca_Desig_Chr_scaffold00478_63560  | Ca_desig_scaffold  | 63560                          | [A/C]       | NA                                         |
| Ca_Desig_Chr_scaffold00478_63682  | Ca_desig_scaffold  | 63682                          | [A/G]       | NA                                         |
| Ca_Desig_Chr_scaffold00478_63877  | Ca_desig_scaffold  | 63877                          | [G/A]       | NA                                         |
| Ca_Desig_Chr_scaffold00478_63884  | Ca_desig_scaffold  | 63884                          | [T/C]       | NA                                         |
| Ca_Desig_Chr_scaffold00478_63894  | Ca_desig_scaffold  | 63894                          | [A/G]       | NA                                         |
| Ca_Desig_Chr_scaffold00478_63923  | Ca_desig_scaffold  | 63923                          | [T/C]       | NA                                         |
| Ca_Desig_Chr_scaffold00478_63934  | Ca_desig_scaffold  | 63934                          | [A/G]       | NA                                         |
| Ca_Desig_Chr_scaffold00478_63940  | Ca_desig_scaffold  | 63940                          | [T/G]       | NA                                         |
| Ca_Desig_Chr_scaffold00478_70202  | Ca_desig_scaffold  | 70202                          | [T/C]       | NA                                         |

| <b>SNP IDs</b>                  | <b>Chromosomes</b> | <b>Physical positions (bp)</b> | <b>SNPs</b> | <b>NCBI SNPdb accession IDs (NCBI_ss#)</b> |
|---------------------------------|--------------------|--------------------------------|-------------|--------------------------------------------|
| Ca_Desi_Ch_scaffold00478_70265  | Ca_desi_scaffold   | 70265                          | [A/G]       | NA                                         |
| Ca_Desi_Ch_scaffold00481_20530  | Ca_desi_scaffold   | 20530                          | [T/A]       | NA                                         |
| Ca_Desi_Ch_scaffold00481_48343  | Ca_desi_scaffold   | 48343                          | [C/A]       | NA                                         |
| Ca_Desi_Ch_scaffold00481_48344  | Ca_desi_scaffold   | 48344                          | [T/G]       | NA                                         |
| Ca_Desi_Ch_scaffold00481_48346  | Ca_desi_scaffold   | 48346                          | [A/T]       | NA                                         |
| Ca_Desi_Ch_scaffold00481_53505  | Ca_desi_scaffold   | 53505                          | [T/C]       | NA                                         |
| Ca_Desi_Ch_scaffold00481_53507  | Ca_desi_scaffold   | 53507                          | [T/C]       | NA                                         |
| Ca_Desi_Ch_scaffold00481_53522  | Ca_desi_scaffold   | 53522                          | [T/C]       | NA                                         |
| Ca_Desi_Ch_scaffold00481_53528  | Ca_desi_scaffold   | 53528                          | [A/G]       | NA                                         |
| Ca_Desi_Ch_scaffold00481_53534  | Ca_desi_scaffold   | 53534                          | [T/C]       | NA                                         |
| Ca_Desi_Ch_scaffold00481_53538  | Ca_desi_scaffold   | 53538                          | [A/C]       | NA                                         |
| Ca_Desi_Ch_scaffold00481_53541  | Ca_desi_scaffold   | 53541                          | [T/C]       | NA                                         |
| Ca_Desi_Ch_scaffold00481_53547  | Ca_desi_scaffold   | 53547                          | [A/C]       | NA                                         |
| Ca_Desi_Ch_scaffold00481_55775  | Ca_desi_scaffold   | 55775                          | [T/C]       | NA                                         |
| Ca_Desi_Ch_scaffold00481_95659  | Ca_desi_scaffold   | 95659                          | [A/C]       | NA                                         |
| Ca_Desi_Ch_scaffold00481_126578 | Ca_desi_scaffold   | 126578                         | [A/C]       | NA                                         |
| Ca_Desi_Ch_scaffold00481_126598 | Ca_desi_scaffold   | 126598                         | [A/T]       | NA                                         |
| Ca_Desi_Ch_scaffold00481_126606 | Ca_desi_scaffold   | 126606                         | [A/C]       | NA                                         |
| Ca_Desi_Ch_scaffold00481_133178 | Ca_desi_scaffold   | 133178                         | [T/C]       | NA                                         |
| Ca_Desi_Ch_scaffold00481_133182 | Ca_desi_scaffold   | 133182                         | [A/C]       | NA                                         |
| Ca_Desi_Ch_scaffold00481_133363 | Ca_desi_scaffold   | 133363                         | [G/T]       | NA                                         |
| Ca_Desi_Ch_scaffold00487_1422   | Ca_desi_scaffold   | 1422                           | [A/G]       | NA                                         |
| Ca_Desi_Ch_scaffold00487_42320  | Ca_desi_scaffold   | 42320                          | [A/C]       | NA                                         |
| Ca_Desi_Ch_scaffold00487_56856  | Ca_desi_scaffold   | 56856                          | [T/G]       | NA                                         |
| Ca_Desi_Ch_scaffold00487_56858  | Ca_desi_scaffold   | 56858                          | [G/A]       | NA                                         |
| Ca_Desi_Ch_scaffold00487_146620 | Ca_desi_scaffold   | 146620                         | [T/C]       | NA                                         |
| Ca_Desi_Ch_scaffold00487_146626 | Ca_desi_scaffold   | 146626                         | [A/C]       | NA                                         |
| Ca_Desi_Ch_scaffold00487_146647 | Ca_desi_scaffold   | 146647                         | [A/C]       | NA                                         |
| Ca_Desi_Ch_scaffold00487_151143 | Ca_desi_scaffold   | 151143                         | [A/T]       | NA                                         |
| Ca_Desi_Ch_scaffold00487_151159 | Ca_desi_scaffold   | 151159                         | [A/C]       | NA                                         |
| Ca_Desi_Ch_scaffold00487_151571 | Ca_desi_scaffold   | 151571                         | [T/C]       | NA                                         |
| Ca_Desi_Ch_scaffold00487_151606 | Ca_desi_scaffold   | 151606                         | [T/G]       | NA                                         |
| Ca_Desi_Ch_scaffold00490_29831  | Ca_desi_scaffold   | 29831                          | [A/G]       | NA                                         |
| Ca_Desi_Ch_scaffold00490_29836  | Ca_desi_scaffold   | 29836                          | [T/C]       | NA                                         |

| <b>SNP IDs</b>                    | <b>Chromosomes</b> | <b>Physical positions (bp)</b> | <b>SNPs</b> | <b>NCBI SNPdb accession IDs (NCBI_ss#)</b> |
|-----------------------------------|--------------------|--------------------------------|-------------|--------------------------------------------|
| Ca_Desig_Chr_scaffold00490_29875  | Ca_desig_scaffold  | 29875                          | [T/C]       | NA                                         |
| Ca_Desig_Chr_scaffold00490_65391  | Ca_desig_scaffold  | 65391                          | [T/G]       | NA                                         |
| Ca_Desig_Chr_scaffold00490_65437  | Ca_desig_scaffold  | 65437                          | [A/G]       | NA                                         |
| Ca_Desig_Chr_scaffold00491_32734  | Ca_desig_scaffold  | 32734                          | [A/G]       | NA                                         |
| Ca_Desig_Chr_scaffold00491_32739  | Ca_desig_scaffold  | 32739                          | [T/C]       | NA                                         |
| Ca_Desig_Chr_scaffold00491_33900  | Ca_desig_scaffold  | 33900                          | [C/A]       | NA                                         |
| Ca_Desig_Chr_scaffold00491_35034  | Ca_desig_scaffold  | 35034                          | [G/T]       | NA                                         |
| Ca_Desig_Chr_scaffold00491_74743  | Ca_desig_scaffold  | 74743                          | [T/C]       | NA                                         |
| Ca_Desig_Chr_scaffold00491_74751  | Ca_desig_scaffold  | 74751                          | [A/G]       | NA                                         |
| Ca_Desig_Chr_scaffold00491_74785  | Ca_desig_scaffold  | 74785                          | [A/C]       | NA                                         |
| Ca_Desig_Chr_scaffold00491_155230 | Ca_desig_scaffold  | 155230                         | [A/G]       | NA                                         |
| Ca_Desig_Chr_scaffold00492_8589   | Ca_desig_scaffold  | 8589                           | [T/A]       | NA                                         |
| Ca_Desig_Chr_scaffold00492_8621   | Ca_desig_scaffold  | 8621                           | [T/A]       | NA                                         |
| Ca_Desig_Chr_scaffold00492_8625   | Ca_desig_scaffold  | 8625                           | [T/G]       | NA                                         |
| Ca_Desig_Chr_scaffold00492_25677  | Ca_desig_scaffold  | 25677                          | [G/A]       | NA                                         |
| Ca_Desig_Chr_scaffold00492_25679  | Ca_desig_scaffold  | 25679                          | [A/G]       | NA                                         |
| Ca_Desig_Chr_scaffold00492_25680  | Ca_desig_scaffold  | 25680                          | [A/C]       | NA                                         |
| Ca_Desig_Chr_scaffold00492_25681  | Ca_desig_scaffold  | 25681                          | [A/C]       | NA                                         |
| Ca_Desig_Chr_scaffold00492_25682  | Ca_desig_scaffold  | 25682                          | [G/C]       | NA                                         |
| Ca_Desig_Chr_scaffold00492_25683  | Ca_desig_scaffold  | 25683                          | [A/T]       | NA                                         |
| Ca_Desig_Chr_scaffold00492_37535  | Ca_desig_scaffold  | 37535                          | [A/C]       | NA                                         |
| Ca_Desig_Chr_scaffold00492_110002 | Ca_desig_scaffold  | 110002                         | [T/C]       | NA                                         |
| Ca_Desig_Chr_scaffold00494_3155   | Ca_desig_scaffold  | 3155                           | [A/C]       | NA                                         |
| Ca_Desig_Chr_scaffold00494_29982  | Ca_desig_scaffold  | 29982                          | [A/T]       | NA                                         |
| Ca_Desig_Chr_scaffold00495_33630  | Ca_desig_scaffold  | 33630                          | [T/G]       | NA                                         |
| Ca_Desig_Chr_scaffold00495_33663  | Ca_desig_scaffold  | 33663                          | [A/G]       | NA                                         |
| Ca_Desig_Chr_scaffold00495_65179  | Ca_desig_scaffold  | 65179                          | [C/T]       | NA                                         |
| Ca_Desig_Chr_scaffold00495_65383  | Ca_desig_scaffold  | 65383                          | [G/C]       | NA                                         |
| Ca_Desig_Chr_scaffold00495_65384  | Ca_desig_scaffold  | 65384                          | [G/T]       | NA                                         |
| Ca_Desig_Chr_scaffold00495_68595  | Ca_desig_scaffold  | 68595                          | [T/A]       | NA                                         |
| Ca_Desig_Chr_scaffold00495_78043  | Ca_desig_scaffold  | 78043                          | [A/G]       | NA                                         |
| Ca_Desig_Chr_scaffold00497_14567  | Ca_desig_scaffold  | 14567                          | [A/C]       | NA                                         |
| Ca_Desig_Chr_scaffold00497_19330  | Ca_desig_scaffold  | 19330                          | [A/T]       | NA                                         |
| Ca_Desig_Chr_scaffold00497_124398 | Ca_desig_scaffold  | 124398                         | [T/C]       | NA                                         |

| <b>SNP IDs</b>                    | <b>Chromosomes</b> | <b>Physical positions (bp)</b> | <b>SNPs</b> | <b>NCBI SNPdb accession IDs (NCBI_ss#)</b> |
|-----------------------------------|--------------------|--------------------------------|-------------|--------------------------------------------|
| Ca_Desig_Chr_scaffold00497_127110 | Ca_desig_scaffold  | 127110                         | [T/G]       | NA                                         |
| Ca_Desig_Chr_scaffold00497_127112 | Ca_desig_scaffold  | 127112                         | [T/C]       | NA                                         |
| Ca_Desig_Chr_scaffold00497_127117 | Ca_desig_scaffold  | 127117                         | [A/C]       | NA                                         |
| Ca_Desig_Chr_scaffold00497_127136 | Ca_desig_scaffold  | 127136                         | [G/T]       | NA                                         |
| Ca_Desig_Chr_scaffold00497_127137 | Ca_desig_scaffold  | 127137                         | [T/C]       | NA                                         |
| Ca_Desig_Chr_scaffold00497_127591 | Ca_desig_scaffold  | 127591                         | [A/C]       | NA                                         |
| Ca_Desig_Chr_scaffold00497_129088 | Ca_desig_scaffold  | 129088                         | [A/T]       | NA                                         |
| Ca_Desig_Chr_scaffold00497_129103 | Ca_desig_scaffold  | 129103                         | [T/G]       | NA                                         |
| Ca_Desig_Chr_scaffold00501_65162  | Ca_desig_scaffold  | 65162                          | [T/A]       | NA                                         |
| Ca_Desig_Chr_scaffold00502_71283  | Ca_desig_scaffold  | 71283                          | [T/C]       | NA                                         |
| Ca_Desig_Chr_scaffold00502_71324  | Ca_desig_scaffold  | 71324                          | [A/C]       | NA                                         |
| Ca_Desig_Chr_scaffold00505_34380  | Ca_desig_scaffold  | 34380                          | [A/C]       | NA                                         |
| Ca_Desig_Chr_scaffold00505_34389  | Ca_desig_scaffold  | 34389                          | [A/T]       | NA                                         |
| Ca_Desig_Chr_scaffold00505_34405  | Ca_desig_scaffold  | 34405                          | [A/T]       | NA                                         |
| Ca_Desig_Chr_scaffold00505_41793  | Ca_desig_scaffold  | 41793                          | [A/T]       | NA                                         |
| Ca_Desig_Chr_scaffold00505_41794  | Ca_desig_scaffold  | 41794                          | [A/T]       | NA                                         |
| Ca_Desig_Chr_scaffold00505_41797  | Ca_desig_scaffold  | 41797                          | [T/C]       | NA                                         |
| Ca_Desig_Chr_scaffold00505_41815  | Ca_desig_scaffold  | 41815                          | [A/C]       | NA                                         |
| Ca_Desig_Chr_scaffold00505_41822  | Ca_desig_scaffold  | 41822                          | [A/G]       | NA                                         |
| Ca_Desig_Chr_scaffold00505_48469  | Ca_desig_scaffold  | 48469                          | [A/C]       | NA                                         |
| Ca_Desig_Chr_scaffold00505_48499  | Ca_desig_scaffold  | 48499                          | [A/C]       | NA                                         |
| Ca_Desig_Chr_scaffold00505_51938  | Ca_desig_scaffold  | 51938                          | [A/C]       | NA                                         |
| Ca_Desig_Chr_scaffold00505_51965  | Ca_desig_scaffold  | 51965                          | [T/G]       | NA                                         |
| Ca_Desig_Chr_scaffold00505_65163  | Ca_desig_scaffold  | 65163                          | [C/T]       | NA                                         |
| Ca_Desig_Chr_scaffold00505_65164  | Ca_desig_scaffold  | 65164                          | [T/C]       | NA                                         |
| Ca_Desig_Chr_scaffold00505_65174  | Ca_desig_scaffold  | 65174                          | [C/T]       | NA                                         |
| Ca_Desig_Chr_scaffold00505_65175  | Ca_desig_scaffold  | 65175                          | [T/C]       | NA                                         |
| Ca_Desig_Chr_scaffold00505_65177  | Ca_desig_scaffold  | 65177                          | [T/C]       | NA                                         |
| Ca_Desig_Chr_scaffold00505_65198  | Ca_desig_scaffold  | 65198                          | [A/T]       | NA                                         |
| Ca_Desig_Chr_scaffold00505_102206 | Ca_desig_scaffold  | 102206                         | [A/G]       | NA                                         |
| Ca_Desig_Chr_scaffold00505_116713 | Ca_desig_scaffold  | 116713                         | [T/A]       | NA                                         |
| Ca_Desig_Chr_scaffold00505_117825 | Ca_desig_scaffold  | 117825                         | [A/G]       | NA                                         |
| Ca_Desig_Chr_scaffold00505_117860 | Ca_desig_scaffold  | 117860                         | [A/G]       | NA                                         |
| Ca_Desig_Chr_scaffold00505_130160 | Ca_desig_scaffold  | 130160                         | [A/G]       | NA                                         |

| <b>SNP IDs</b>                   | <b>Chromosomes</b> | <b>Physical positions (bp)</b> | <b>SNPs</b> | <b>NCBI SNPdb accession IDs (NCBI_ss#)</b> |
|----------------------------------|--------------------|--------------------------------|-------------|--------------------------------------------|
| Ca_DesigChr_scaffold00505_130320 | Ca_desig_scaffold  | 130320                         | [A/C]       | NA                                         |
| Ca_DesigChr_scaffold00505_139298 | Ca_desig_scaffold  | 139298                         | [A/C]       | NA                                         |
| Ca_DesigChr_scaffold00509_60157  | Ca_desig_scaffold  | 60157                          | [T/G]       | NA                                         |
| Ca_DesigChr_scaffold00509_60175  | Ca_desig_scaffold  | 60175                          | [A/G]       | NA                                         |
| Ca_DesigChr_scaffold00509_60176  | Ca_desig_scaffold  | 60176                          | [G/T]       | NA                                         |
| Ca_DesigChr_scaffold00510_77666  | Ca_desig_scaffold  | 77666                          | [T/G]       | NA                                         |
| Ca_DesigChr_scaffold00515_17208  | Ca_desig_scaffold  | 17208                          | [A/C]       | NA                                         |
| Ca_DesigChr_scaffold00515_17214  | Ca_desig_scaffold  | 17214                          | [A/C]       | NA                                         |
| Ca_DesigChr_scaffold00515_46439  | Ca_desig_scaffold  | 46439                          | [A/G]       | NA                                         |
| Ca_DesigChr_scaffold00515_46442  | Ca_desig_scaffold  | 46442                          | [A/T]       | NA                                         |
| Ca_DesigChr_scaffold00515_46449  | Ca_desig_scaffold  | 46449                          | [T/C]       | NA                                         |
| Ca_DesigChr_scaffold00515_46461  | Ca_desig_scaffold  | 46461                          | [T/G]       | NA                                         |
| Ca_DesigChr_scaffold00515_46466  | Ca_desig_scaffold  | 46466                          | [T/G]       | NA                                         |
| Ca_DesigChr_scaffold00515_76618  | Ca_desig_scaffold  | 76618                          | [A/C]       | NA                                         |
| Ca_DesigChr_scaffold00515_76645  | Ca_desig_scaffold  | 76645                          | [A/T]       | NA                                         |
| Ca_DesigChr_scaffold00515_80218  | Ca_desig_scaffold  | 80218                          | [T/C]       | NA                                         |
| Ca_DesigChr_scaffold00515_80522  | Ca_desig_scaffold  | 80522                          | [T/G]       | NA                                         |
| Ca_DesigChr_scaffold00515_144058 | Ca_desig_scaffold  | 144058                         | [T/G]       | NA                                         |
| Ca_DesigChr_scaffold00515_144498 | Ca_desig_scaffold  | 144498                         | [T/C]       | NA                                         |
| Ca_DesigChr_scaffold00517_84696  | Ca_desig_scaffold  | 84696                          | [A/G]       | NA                                         |
| Ca_DesigChr_scaffold00517_84706  | Ca_desig_scaffold  | 84706                          | [T/G]       | NA                                         |
| Ca_DesigChr_scaffold00517_84708  | Ca_desig_scaffold  | 84708                          | [A/G]       | NA                                         |
| Ca_DesigChr_scaffold00517_84710  | Ca_desig_scaffold  | 84710                          | [T/G]       | NA                                         |
| Ca_DesigChr_scaffold00517_84712  | Ca_desig_scaffold  | 84712                          | [T/C]       | NA                                         |
| Ca_DesigChr_scaffold00517_84726  | Ca_desig_scaffold  | 84726                          | [A/T]       | NA                                         |
| Ca_DesigChr_scaffold00518_68949  | Ca_desig_scaffold  | 68949                          | [A/G]       | NA                                         |
| Ca_DesigChr_scaffold00518_76069  | Ca_desig_scaffold  | 76069                          | [G/A]       | NA                                         |
| Ca_DesigChr_scaffold00518_123875 | Ca_desig_scaffold  | 123875                         | [A/G]       | NA                                         |
| Ca_DesigChr_scaffold00518_126179 | Ca_desig_scaffold  | 126179                         | [T/C]       | NA                                         |
| Ca_DesigChr_scaffold00518_126205 | Ca_desig_scaffold  | 126205                         | [A/C]       | NA                                         |
| Ca_DesigChr_scaffold00519_148327 | Ca_desig_scaffold  | 148327                         | [G/A]       | NA                                         |
| Ca_DesigChr_scaffold00520_22882  | Ca_desig_scaffold  | 22882                          | [C/A]       | NA                                         |
| Ca_DesigChr_scaffold00520_22883  | Ca_desig_scaffold  | 22883                          | [C/G]       | NA                                         |
| Ca_DesigChr_scaffold00520_22884  | Ca_desig_scaffold  | 22884                          | [G/A]       | NA                                         |

| <b>SNP IDs</b>                  | <b>Chromosomes</b> | <b>Physical positions (bp)</b> | <b>SNPs</b> | <b>NCBI SNPdb accession IDs (NCBI_ss#)</b> |
|---------------------------------|--------------------|--------------------------------|-------------|--------------------------------------------|
| Ca_Desi_Ch_scaffold00520_32672  | Ca_desi_scaffold   | 32672                          | [T/C]       | NA                                         |
| Ca_Desi_Ch_scaffold00520_32695  | Ca_desi_scaffold   | 32695                          | [T/C]       | NA                                         |
| Ca_Desi_Ch_scaffold00520_32705  | Ca_desi_scaffold   | 32705                          | [T/C]       | NA                                         |
| Ca_Desi_Ch_scaffold00520_72332  | Ca_desi_scaffold   | 72332                          | [A/G]       | NA                                         |
| Ca_Desi_Ch_scaffold00520_72343  | Ca_desi_scaffold   | 72343                          | [A/G]       | NA                                         |
| Ca_Desi_Ch_scaffold00520_72356  | Ca_desi_scaffold   | 72356                          | [T/C]       | NA                                         |
| Ca_Desi_Ch_scaffold00520_72360  | Ca_desi_scaffold   | 72360                          | [T/C]       | NA                                         |
| Ca_Desi_Ch_scaffold00520_72367  | Ca_desi_scaffold   | 72367                          | [T/C]       | NA                                         |
| Ca_Desi_Ch_scaffold00520_72372  | Ca_desi_scaffold   | 72372                          | [G/T]       | NA                                         |
| Ca_Desi_Ch_scaffold00520_72390  | Ca_desi_scaffold   | 72390                          | [T/C]       | NA                                         |
| Ca_Desi_Ch_scaffold00520_72393  | Ca_desi_scaffold   | 72393                          | [T/C]       | NA                                         |
| Ca_Desi_Ch_scaffold00520_121943 | Ca_desi_scaffold   | 121943                         | [A/C]       | NA                                         |
| Ca_Desi_Ch_scaffold00520_121953 | Ca_desi_scaffold   | 121953                         | [T/G]       | NA                                         |
| Ca_Desi_Ch_scaffold00521_22803  | Ca_desi_scaffold   | 22803                          | [A/C]       | NA                                         |
| Ca_Desi_Ch_scaffold00521_23808  | Ca_desi_scaffold   | 23808                          | [T/G]       | NA                                         |
| Ca_Desi_Ch_scaffold00521_23812  | Ca_desi_scaffold   | 23812                          | [T/C]       | NA                                         |
| Ca_Desi_Ch_scaffold00521_23817  | Ca_desi_scaffold   | 23817                          | [A/G]       | NA                                         |
| Ca_Desi_Ch_scaffold00521_23830  | Ca_desi_scaffold   | 23830                          | [T/G]       | NA                                         |
| Ca_Desi_Ch_scaffold00521_23840  | Ca_desi_scaffold   | 23840                          | [G/A]       | NA                                         |
| Ca_Desi_Ch_scaffold00521_23845  | Ca_desi_scaffold   | 23845                          | [T/C]       | NA                                         |
| Ca_Desi_Ch_scaffold00521_48952  | Ca_desi_scaffold   | 48952                          | [T/G]       | NA                                         |
| Ca_Desi_Ch_scaffold00522_1779   | Ca_desi_scaffold   | 1779                           | [A/C]       | NA                                         |
| Ca_Desi_Ch_scaffold00522_1794   | Ca_desi_scaffold   | 1794                           | [A/C]       | NA                                         |
| Ca_Desi_Ch_scaffold00522_1901   | Ca_desi_scaffold   | 1901                           | [C/A]       | NA                                         |
| Ca_Desi_Ch_scaffold00522_1902   | Ca_desi_scaffold   | 1902                           | [A/G]       | NA                                         |
| Ca_Desi_Ch_scaffold00522_1939   | Ca_desi_scaffold   | 1939                           | [A/C]       | NA                                         |
| Ca_Desi_Ch_scaffold00522_1946   | Ca_desi_scaffold   | 1946                           | [T/A]       | NA                                         |
| Ca_Desi_Ch_scaffold00522_1948   | Ca_desi_scaffold   | 1948                           | [A/C]       | NA                                         |
| Ca_Desi_Ch_scaffold00522_1954   | Ca_desi_scaffold   | 1954                           | [A/C]       | NA                                         |
| Ca_Desi_Ch_scaffold00522_1955   | Ca_desi_scaffold   | 1955                           | [A/C]       | NA                                         |
| Ca_Desi_Ch_scaffold00522_2406   | Ca_desi_scaffold   | 2406                           | [G/A]       | NA                                         |
| Ca_Desi_Ch_scaffold00522_73650  | Ca_desi_scaffold   | 73650                          | [T/C]       | NA                                         |
| Ca_Desi_Ch_scaffold00522_73666  | Ca_desi_scaffold   | 73666                          | [T/G]       | NA                                         |
| Ca_Desi_Ch_scaffold00522_73720  | Ca_desi_scaffold   | 73720                          | [A/T]       | NA                                         |



| <b>SNP IDs</b>                  | <b>Chromosomes</b> | <b>Physical positions (bp)</b> | <b>SNPs</b> | <b>NCBI SNPdb accession IDs (NCBI_ss#)</b> |
|---------------------------------|--------------------|--------------------------------|-------------|--------------------------------------------|
| Ca_Desi_Ch_scaffold00522_77190  | Ca_desi_scaffold   | 77190                          | [A/T]       | NA                                         |
| Ca_Desi_Ch_scaffold00522_105144 | Ca_desi_scaffold   | 105144                         | [C/T]       | NA                                         |
| Ca_Desi_Ch_scaffold00522_105154 | Ca_desi_scaffold   | 105154                         | [A/C]       | NA                                         |
| Ca_Desi_Ch_scaffold00522_105163 | Ca_desi_scaffold   | 105163                         | [G/T]       | NA                                         |
| Ca_Desi_Ch_scaffold00522_105172 | Ca_desi_scaffold   | 105172                         | [A/C]       | NA                                         |
| Ca_Desi_Ch_scaffold00522_105182 | Ca_desi_scaffold   | 105182                         | [A/G]       | NA                                         |
| Ca_Desi_Ch_scaffold00522_105202 | Ca_desi_scaffold   | 105202                         | [C/T]       | NA                                         |
| Ca_Desi_Ch_scaffold00522_121416 | Ca_desi_scaffold   | 121416                         | [T/C]       | NA                                         |
| Ca_Desi_Ch_scaffold00522_121425 | Ca_desi_scaffold   | 121425                         | [T/C]       | NA                                         |
| Ca_Desi_Ch_scaffold00522_121442 | Ca_desi_scaffold   | 121442                         | [A/G]       | NA                                         |
| Ca_Desi_Ch_scaffold00522_124257 | Ca_desi_scaffold   | 124257                         | [A/C]       | NA                                         |
| Ca_Desi_Ch_scaffold00522_124268 | Ca_desi_scaffold   | 124268                         | [T/C]       | NA                                         |
| Ca_Desi_Ch_scaffold00522_127205 | Ca_desi_scaffold   | 127205                         | [C/A]       | NA                                         |
| Ca_Desi_Ch_scaffold00522_127237 | Ca_desi_scaffold   | 127237                         | [A/C]       | NA                                         |
| Ca_Desi_Ch_scaffold00522_127253 | Ca_desi_scaffold   | 127253                         | [A/C]       | NA                                         |
| Ca_Desi_Ch_scaffold00523_66853  | Ca_desi_scaffold   | 66853                          | [T/G]       | NA                                         |
| Ca_Desi_Ch_scaffold00526_123257 | Ca_desi_scaffold   | 123257                         | [T/A]       | NA                                         |
| Ca_Desi_Ch_scaffold00526_123301 | Ca_desi_scaffold   | 123301                         | [A/C]       | NA                                         |
| Ca_Desi_Ch_scaffold00529_42505  | Ca_desi_scaffold   | 42505                          | [G/A]       | NA                                         |
| Ca_Desi_Ch_scaffold00534_43371  | Ca_desi_scaffold   | 43371                          | [T/G]       | NA                                         |
| Ca_Desi_Ch_scaffold00536_63256  | Ca_desi_scaffold   | 63256                          | [A/C]       | NA                                         |
| Ca_Desi_Ch_scaffold00538_5224   | Ca_desi_scaffold   | 5224                           | [G/T]       | NA                                         |
| Ca_Desi_Ch_scaffold00538_5225   | Ca_desi_scaffold   | 5225                           | [T/G]       | NA                                         |
| Ca_Desi_Ch_scaffold00538_57882  | Ca_desi_scaffold   | 57882                          | [T/G]       | NA                                         |
| Ca_Desi_Ch_scaffold00538_78789  | Ca_desi_scaffold   | 78789                          | [T/A]       | NA                                         |
| Ca_Desi_Ch_scaffold00538_78814  | Ca_desi_scaffold   | 78814                          | [T/A]       | NA                                         |
| Ca_Desi_Ch_scaffold00538_96762  | Ca_desi_scaffold   | 96762                          | [C/A]       | NA                                         |
| Ca_Desi_Ch_scaffold00539_39144  | Ca_desi_scaffold   | 39144                          | [T/G]       | NA                                         |
| Ca_Desi_Ch_scaffold00539_39150  | Ca_desi_scaffold   | 39150                          | [T/G]       | NA                                         |
| Ca_Desi_Ch_scaffold00539_137532 | Ca_desi_scaffold   | 137532                         | [A/C]       | NA                                         |
| Ca_Desi_Ch_scaffold00539_137625 | Ca_desi_scaffold   | 137625                         | [T/C]       | NA                                         |
| Ca_Desi_Ch_scaffold00541_1769   | Ca_desi_scaffold   | 1769                           | [T/A]       | NA                                         |
| Ca_Desi_Ch_scaffold00541_63800  | Ca_desi_scaffold   | 63800                          | [G/A]       | NA                                         |
| Ca_Desi_Ch_scaffold00541_63804  | Ca_desi_scaffold   | 63804                          | [T/A]       | NA                                         |

| <b>SNP IDs</b>                   | <b>Chromosomes</b> | <b>Physical positions (bp)</b> | <b>SNPs</b> | <b>NCBI SNPdb accession IDs (NCBI_ss#)</b> |
|----------------------------------|--------------------|--------------------------------|-------------|--------------------------------------------|
| Ca_DesigChr_scaffold00541_63888  | Ca_desig_scaffold  | 63888                          | [T/G]       | NA                                         |
| Ca_DesigChr_scaffold00541_97543  | Ca_desig_scaffold  | 97543                          | [A/T]       | NA                                         |
| Ca_DesigChr_scaffold00541_119768 | Ca_desig_scaffold  | 119768                         | [T/G]       | NA                                         |
| Ca_DesigChr_scaffold00541_119798 | Ca_desig_scaffold  | 119798                         | [A/G]       | NA                                         |
| Ca_DesigChr_scaffold00544_4659   | Ca_desig_scaffold  | 4659                           | [T/G]       | NA                                         |
| Ca_DesigChr_scaffold00544_54773  | Ca_desig_scaffold  | 54773                          | [A/C]       | NA                                         |
| Ca_DesigChr_scaffold00544_137630 | Ca_desig_scaffold  | 137630                         | [C/A]       | NA                                         |
| Ca_DesigChr_scaffold00544_140418 | Ca_desig_scaffold  | 140418                         | [T/C]       | NA                                         |
| Ca_DesigChr_scaffold00544_141186 | Ca_desig_scaffold  | 141186                         | [A/G]       | NA                                         |
| Ca_DesigChr_scaffold00544_141268 | Ca_desig_scaffold  | 141268                         | [T/C]       | NA                                         |
| Ca_DesigChr_scaffold00549_53290  | Ca_desig_scaffold  | 53290                          | [C/T]       | NA                                         |
| Ca_DesigChr_scaffold00549_53315  | Ca_desig_scaffold  | 53315                          | [A/G]       | NA                                         |
| Ca_DesigChr_scaffold00549_53338  | Ca_desig_scaffold  | 53338                          | [A/C]       | NA                                         |
| Ca_DesigChr_scaffold00549_114462 | Ca_desig_scaffold  | 114462                         | [T/G]       | NA                                         |
| Ca_DesigChr_scaffold00549_114554 | Ca_desig_scaffold  | 114554                         | [G/A]       | NA                                         |
| Ca_DesigChr_scaffold00551_11169  | Ca_desig_scaffold  | 11169                          | [G/A]       | NA                                         |
| Ca_DesigChr_scaffold00551_15632  | Ca_desig_scaffold  | 15632                          | [T/A]       | NA                                         |
| Ca_DesigChr_scaffold00551_15835  | Ca_desig_scaffold  | 15835                          | [G/A]       | NA                                         |
| Ca_DesigChr_scaffold00551_15856  | Ca_desig_scaffold  | 15856                          | [A/G]       | NA                                         |
| Ca_DesigChr_scaffold00551_15868  | Ca_desig_scaffold  | 15868                          | [A/G]       | NA                                         |
| Ca_DesigChr_scaffold00551_25672  | Ca_desig_scaffold  | 25672                          | [A/C]       | NA                                         |
| Ca_DesigChr_scaffold00551_30709  | Ca_desig_scaffold  | 30709                          | [C/G]       | NA                                         |
| Ca_DesigChr_scaffold00551_38527  | Ca_desig_scaffold  | 38527                          | [A/T]       | NA                                         |
| Ca_DesigChr_scaffold00551_122488 | Ca_desig_scaffold  | 122488                         | [T/C]       | NA                                         |
| Ca_DesigChr_scaffold00551_122496 | Ca_desig_scaffold  | 122496                         | [A/C]       | NA                                         |
| Ca_DesigChr_scaffold00553_105119 | Ca_desig_scaffold  | 105119                         | [T/C]       | NA                                         |
| Ca_DesigChr_scaffold00553_107552 | Ca_desig_scaffold  | 107552                         | [C/T]       | NA                                         |
| Ca_DesigChr_scaffold00553_138911 | Ca_desig_scaffold  | 138911                         | [T/C]       | NA                                         |
| Ca_DesigChr_scaffold00553_138918 | Ca_desig_scaffold  | 138918                         | [A/G]       | NA                                         |
| Ca_DesigChr_scaffold00553_138920 | Ca_desig_scaffold  | 138920                         | [T/C]       | NA                                         |
| Ca_DesigChr_scaffold00553_138931 | Ca_desig_scaffold  | 138931                         | [T/C]       | NA                                         |
| Ca_DesigChr_scaffold00553_138939 | Ca_desig_scaffold  | 138939                         | [T/G]       | NA                                         |
| Ca_DesigChr_scaffold00555_104287 | Ca_desig_scaffold  | 104287                         | [T/C]       | NA                                         |
| Ca_DesigChr_scaffold00555_104291 | Ca_desig_scaffold  | 104291                         | [T/C]       | NA                                         |

| <b>SNP IDs</b>                  | <b>Chromosomes</b> | <b>Physical positions (bp)</b> | <b>SNPs</b> | <b>NCBI SNPdb accession IDs (NCBI_ss#)</b> |
|---------------------------------|--------------------|--------------------------------|-------------|--------------------------------------------|
| Ca_Desi_Ch_scaffold00555_104296 | Ca_desi_scaffold   | 104296                         | [A/G]       | NA                                         |
| Ca_Desi_Ch_scaffold00555_104302 | Ca_desi_scaffold   | 104302                         | [T/C]       | NA                                         |
| Ca_Desi_Ch_scaffold00555_104304 | Ca_desi_scaffold   | 104304                         | [A/C]       | NA                                         |
| Ca_Desi_Ch_scaffold00555_104336 | Ca_desi_scaffold   | 104336                         | [A/C]       | NA                                         |
| Ca_Desi_Ch_scaffold00557_58519  | Ca_desi_scaffold   | 58519                          | [T/G]       | NA                                         |
| Ca_Desi_Ch_scaffold00557_58520  | Ca_desi_scaffold   | 58520                          | [A/T]       | NA                                         |
| Ca_Desi_Ch_scaffold00557_58584  | Ca_desi_scaffold   | 58584                          | [C/T]       | NA                                         |
| Ca_Desi_Ch_scaffold00557_58588  | Ca_desi_scaffold   | 58588                          | [T/C]       | NA                                         |
| Ca_Desi_Ch_scaffold00557_61058  | Ca_desi_scaffold   | 61058                          | [A/T]       | NA                                         |
| Ca_Desi_Ch_scaffold00557_61075  | Ca_desi_scaffold   | 61075                          | [T/C]       | NA                                         |
| Ca_Desi_Ch_scaffold00557_64954  | Ca_desi_scaffold   | 64954                          | [A/G]       | NA                                         |
| Ca_Desi_Ch_scaffold00557_135544 | Ca_desi_scaffold   | 135544                         | [A/C]       | NA                                         |
| Ca_Desi_Ch_scaffold00557_135579 | Ca_desi_scaffold   | 135579                         | [A/G]       | NA                                         |
| Ca_Desi_Ch_scaffold00557_135590 | Ca_desi_scaffold   | 135590                         | [T/C]       | NA                                         |
| Ca_Desi_Ch_scaffold00558_52127  | Ca_desi_scaffold   | 52127                          | [T/C]       | NA                                         |
| Ca_Desi_Ch_scaffold00558_80335  | Ca_desi_scaffold   | 80335                          | [T/G]       | NA                                         |
| Ca_Desi_Ch_scaffold00558_80341  | Ca_desi_scaffold   | 80341                          | [A/G]       | NA                                         |
| Ca_Desi_Ch_scaffold00558_80359  | Ca_desi_scaffold   | 80359                          | [C/A]       | NA                                         |
| Ca_Desi_Ch_scaffold00558_80360  | Ca_desi_scaffold   | 80360                          | [T/C]       | NA                                         |
| Ca_Desi_Ch_scaffold00558_107866 | Ca_desi_scaffold   | 107866                         | [A/G]       | NA                                         |
| Ca_Desi_Ch_scaffold00558_107873 | Ca_desi_scaffold   | 107873                         | [T/G]       | NA                                         |
| Ca_Desi_Ch_scaffold00568_55798  | Ca_desi_scaffold   | 55798                          | [A/C]       | NA                                         |
| Ca_Desi_Ch_scaffold00568_75197  | Ca_desi_scaffold   | 75197                          | [G/A]       | NA                                         |
| Ca_Desi_Ch_scaffold00568_124820 | Ca_desi_scaffold   | 124820                         | [A/G]       | NA                                         |
| Ca_Desi_Ch_scaffold00568_125813 | Ca_desi_scaffold   | 125813                         | [T/G]       | NA                                         |
| Ca_Desi_Ch_scaffold00568_125818 | Ca_desi_scaffold   | 125818                         | [T/G]       | NA                                         |
| Ca_Desi_Ch_scaffold00570_74399  | Ca_desi_scaffold   | 74399                          | [T/C]       | NA                                         |
| Ca_Desi_Ch_scaffold00570_74416  | Ca_desi_scaffold   | 74416                          | [A/G]       | NA                                         |
| Ca_Desi_Ch_scaffold00571_66779  | Ca_desi_scaffold   | 66779                          | [T/C]       | NA                                         |
| Ca_Desi_Ch_scaffold00576_107481 | Ca_desi_scaffold   | 107481                         | [G/T]       | NA                                         |
| Ca_Desi_Ch_scaffold00576_107482 | Ca_desi_scaffold   | 107482                         | [A/T]       | NA                                         |
| Ca_Desi_Ch_scaffold00576_107498 | Ca_desi_scaffold   | 107498                         | [T/G]       | NA                                         |
| Ca_Desi_Ch_scaffold00579_29917  | Ca_desi_scaffold   | 29917                          | [T/A]       | NA                                         |
| Ca_Desi_Ch_scaffold00579_29925  | Ca_desi_scaffold   | 29925                          | [A/G]       | NA                                         |

| <b>SNP IDs</b>                  | <b>Chromosomes</b> | <b>Physical positions (bp)</b> | <b>SNPs</b> | <b>NCBI SNPdb accession IDs (NCBI_ss#)</b> |
|---------------------------------|--------------------|--------------------------------|-------------|--------------------------------------------|
| Ca_Desi_Ch_scaffold00579_29938  | Ca_desi_scaffold   | 29938                          | [A/C]       | NA                                         |
| Ca_Desi_Ch_scaffold00579_29943  | Ca_desi_scaffold   | 29943                          | [A/C]       | NA                                         |
| Ca_Desi_Ch_scaffold00579_32816  | Ca_desi_scaffold   | 32816                          | [T/C]       | NA                                         |
| Ca_Desi_Ch_scaffold00579_45024  | Ca_desi_scaffold   | 45024                          | [T/A]       | NA                                         |
| Ca_Desi_Ch_scaffold00579_113782 | Ca_desi_scaffold   | 113782                         | [T/G]       | NA                                         |
| Ca_Desi_Ch_scaffold00580_51028  | Ca_desi_scaffold   | 51028                          | [T/A]       | NA                                         |
| Ca_Desi_Ch_scaffold00580_68142  | Ca_desi_scaffold   | 68142                          | [A/C]       | NA                                         |
| Ca_Desi_Ch_scaffold00581_23323  | Ca_desi_scaffold   | 23323                          | [T/A]       | NA                                         |
| Ca_Desi_Ch_scaffold00581_23329  | Ca_desi_scaffold   | 23329                          | [T/G]       | NA                                         |
| Ca_Desi_Ch_scaffold00581_23334  | Ca_desi_scaffold   | 23334                          | [A/C]       | NA                                         |
| Ca_Desi_Ch_scaffold00581_23351  | Ca_desi_scaffold   | 23351                          | [A/T]       | NA                                         |
| Ca_Desi_Ch_scaffold00581_34444  | Ca_desi_scaffold   | 34444                          | [A/C]       | NA                                         |
| Ca_Desi_Ch_scaffold00581_34470  | Ca_desi_scaffold   | 34470                          | [A/G]       | NA                                         |
| Ca_Desi_Ch_scaffold00581_35428  | Ca_desi_scaffold   | 35428                          | [G/A]       | NA                                         |
| Ca_Desi_Ch_scaffold00581_35429  | Ca_desi_scaffold   | 35429                          | [G/A]       | NA                                         |
| Ca_Desi_Ch_scaffold00581_35430  | Ca_desi_scaffold   | 35430                          | [A/G]       | NA                                         |
| Ca_Desi_Ch_scaffold00581_35680  | Ca_desi_scaffold   | 35680                          | [T/A]       | NA                                         |
| Ca_Desi_Ch_scaffold00581_35683  | Ca_desi_scaffold   | 35683                          | [T/G]       | NA                                         |
| Ca_Desi_Ch_scaffold00581_35686  | Ca_desi_scaffold   | 35686                          | [A/C]       | NA                                         |
| Ca_Desi_Ch_scaffold00581_35696  | Ca_desi_scaffold   | 35696                          | [A/C]       | NA                                         |
| Ca_Desi_Ch_scaffold00581_111447 | Ca_desi_scaffold   | 111447                         | [T/A]       | NA                                         |
| Ca_Desi_Ch_scaffold00582_8116   | Ca_desi_scaffold   | 8116                           | [G/A]       | NA                                         |
| Ca_Desi_Ch_scaffold00582_8119   | Ca_desi_scaffold   | 8119                           | [T/A]       | NA                                         |
| Ca_Desi_Ch_scaffold00582_19254  | Ca_desi_scaffold   | 19254                          | [T/G]       | NA                                         |
| Ca_Desi_Ch_scaffold00582_20302  | Ca_desi_scaffold   | 20302                          | [T/C]       | NA                                         |
| Ca_Desi_Ch_scaffold00583_37728  | Ca_desi_scaffold   | 37728                          | [T/C]       | NA                                         |
| Ca_Desi_Ch_scaffold00583_43297  | Ca_desi_scaffold   | 43297                          | [A/C]       | NA                                         |
| Ca_Desi_Ch_scaffold00585_65955  | Ca_desi_scaffold   | 65955                          | [A/T]       | NA                                         |
| Ca_Desi_Ch_scaffold00587_16156  | Ca_desi_scaffold   | 16156                          | [A/G]       | NA                                         |
| Ca_Desi_Ch_scaffold00587_16165  | Ca_desi_scaffold   | 16165                          | [A/C]       | NA                                         |
| Ca_Desi_Ch_scaffold00587_16188  | Ca_desi_scaffold   | 16188                          | [A/C]       | NA                                         |
| Ca_Desi_Ch_scaffold00587_16194  | Ca_desi_scaffold   | 16194                          | [T/G]       | NA                                         |
| Ca_Desi_Ch_scaffold00587_16196  | Ca_desi_scaffold   | 16196                          | [T/C]       | NA                                         |
| Ca_Desi_Ch_scaffold00587_16209  | Ca_desi_scaffold   | 16209                          | [T/C]       | NA                                         |

| <b>SNP IDs</b>                    | <b>Chromosomes</b> | <b>Physical positions (bp)</b> | <b>SNPs</b> | <b>NCBI SNPdb accession IDs (NCBI_ss#)</b> |
|-----------------------------------|--------------------|--------------------------------|-------------|--------------------------------------------|
| Ca_Desig_Chr_scaffold00587_112173 | Ca_desig_scaffold  | 112173                         | [C/T]       | NA                                         |
| Ca_Desig_Chr_scaffold00592_4557   | Ca_desig_scaffold  | 4557                           | [T/C]       | NA                                         |
| Ca_Desig_Chr_scaffold00592_4564   | Ca_desig_scaffold  | 4564                           | [A/G]       | NA                                         |
| Ca_Desig_Chr_scaffold00592_4593   | Ca_desig_scaffold  | 4593                           | [A/G]       | NA                                         |
| Ca_Desig_Chr_scaffold00592_16074  | Ca_desig_scaffold  | 16074                          | [A/T]       | NA                                         |
| Ca_Desig_Chr_scaffold00592_16091  | Ca_desig_scaffold  | 16091                          | [C/G]       | NA                                         |
| Ca_Desig_Chr_scaffold00592_16155  | Ca_desig_scaffold  | 16155                          | [C/G]       | NA                                         |
| Ca_Desig_Chr_scaffold00592_17412  | Ca_desig_scaffold  | 17412                          | [T/C]       | NA                                         |
| Ca_Desig_Chr_scaffold00592_17425  | Ca_desig_scaffold  | 17425                          | [T/A]       | NA                                         |
| Ca_Desig_Chr_scaffold00592_17445  | Ca_desig_scaffold  | 17445                          | [T/A]       | NA                                         |
| Ca_Desig_Chr_scaffold00592_17506  | Ca_desig_scaffold  | 17506                          | [A/T]       | NA                                         |
| Ca_Desig_Chr_scaffold00592_22430  | Ca_desig_scaffold  | 22430                          | [T/G]       | NA                                         |
| Ca_Desig_Chr_scaffold00592_22433  | Ca_desig_scaffold  | 22433                          | [C/G]       | NA                                         |
| Ca_Desig_Chr_scaffold00592_22445  | Ca_desig_scaffold  | 22445                          | [T/C]       | NA                                         |
| Ca_Desig_Chr_scaffold00592_22450  | Ca_desig_scaffold  | 22450                          | [C/G]       | NA                                         |
| Ca_Desig_Chr_scaffold00592_22463  | Ca_desig_scaffold  | 22463                          | [A/G]       | NA                                         |
| Ca_Desig_Chr_scaffold00592_22476  | Ca_desig_scaffold  | 22476                          | [A/G]       | NA                                         |
| Ca_Desig_Chr_scaffold00592_34202  | Ca_desig_scaffold  | 34202                          | [T/G]       | NA                                         |
| Ca_Desig_Chr_scaffold00592_34214  | Ca_desig_scaffold  | 34214                          | [T/G]       | NA                                         |
| Ca_Desig_Chr_scaffold00592_34218  | Ca_desig_scaffold  | 34218                          | [A/G]       | NA                                         |
| Ca_Desig_Chr_scaffold00592_34228  | Ca_desig_scaffold  | 34228                          | [T/C]       | NA                                         |
| Ca_Desig_Chr_scaffold00592_34254  | Ca_desig_scaffold  | 34254                          | [T/G]       | NA                                         |
| Ca_Desig_Chr_scaffold00592_34260  | Ca_desig_scaffold  | 34260                          | [A/G]       | NA                                         |
| Ca_Desig_Chr_scaffold00592_34263  | Ca_desig_scaffold  | 34263                          | [T/G]       | NA                                         |
| Ca_Desig_Chr_scaffold00592_34275  | Ca_desig_scaffold  | 34275                          | [T/G]       | NA                                         |
| Ca_Desig_Chr_scaffold00592_34288  | Ca_desig_scaffold  | 34288                          | [A/G]       | NA                                         |
| Ca_Desig_Chr_scaffold00592_34289  | Ca_desig_scaffold  | 34289                          | [C/A]       | NA                                         |
| Ca_Desig_Chr_scaffold00592_47796  | Ca_desig_scaffold  | 47796                          | [A/T]       | NA                                         |
| Ca_Desig_Chr_scaffold00592_47812  | Ca_desig_scaffold  | 47812                          | [A/G]       | NA                                         |
| Ca_Desig_Chr_scaffold00592_47816  | Ca_desig_scaffold  | 47816                          | [A/G]       | NA                                         |
| Ca_Desig_Chr_scaffold00592_47820  | Ca_desig_scaffold  | 47820                          | [T/C]       | NA                                         |
| Ca_Desig_Chr_scaffold00592_128486 | Ca_desig_scaffold  | 128486                         | [T/C]       | NA                                         |
| Ca_Desig_Chr_scaffold00592_128498 | Ca_desig_scaffold  | 128498                         | [A/G]       | NA                                         |
| Ca_Desig_Chr_scaffold00592_128510 | Ca_desig_scaffold  | 128510                         | [A/G]       | NA                                         |

| <b>SNP IDs</b>                  | <b>Chromosomes</b> | <b>Physical positions (bp)</b> | <b>SNPs</b> | <b>NCBI SNPdb accession IDs (NCBI_ss#)</b> |
|---------------------------------|--------------------|--------------------------------|-------------|--------------------------------------------|
| Ca_Desi_Ch_scaffold00598_40248  | Ca_desi_scaffold   | 40248                          | [T/G]       | NA                                         |
| Ca_Desi_Ch_scaffold00598_40251  | Ca_desi_scaffold   | 40251                          | [A/G]       | NA                                         |
| Ca_Desi_Ch_scaffold00598_40255  | Ca_desi_scaffold   | 40255                          | [A/G]       | NA                                         |
| Ca_Desi_Ch_scaffold00598_40267  | Ca_desi_scaffold   | 40267                          | [T/C]       | NA                                         |
| Ca_Desi_Ch_scaffold00598_54407  | Ca_desi_scaffold   | 54407                          | [A/T]       | NA                                         |
| Ca_Desi_Ch_scaffold00601_5841   | Ca_desi_scaffold   | 5841                           | [T/G]       | NA                                         |
| Ca_Desi_Ch_scaffold00601_11946  | Ca_desi_scaffold   | 11946                          | [T/A]       | NA                                         |
| Ca_Desi_Ch_scaffold00601_43339  | Ca_desi_scaffold   | 43339                          | [A/G]       | NA                                         |
| Ca_Desi_Ch_scaffold00601_100331 | Ca_desi_scaffold   | 100331                         | [T/C]       | NA                                         |
| Ca_Desi_Ch_scaffold00601_101201 | Ca_desi_scaffold   | 101201                         | [T/G]       | NA                                         |
| Ca_Desi_Ch_scaffold00601_101214 | Ca_desi_scaffold   | 101214                         | [A/G]       | NA                                         |
| Ca_Desi_Ch_scaffold00601_101236 | Ca_desi_scaffold   | 101236                         | [A/C]       | NA                                         |
| Ca_Desi_Ch_scaffold00601_101244 | Ca_desi_scaffold   | 101244                         | [A/G]       | NA                                         |
| Ca_Desi_Ch_scaffold00601_101290 | Ca_desi_scaffold   | 101290                         | [T/G]       | NA                                         |
| Ca_Desi_Ch_scaffold00601_101304 | Ca_desi_scaffold   | 101304                         | [G/C]       | NA                                         |
| Ca_Desi_Ch_scaffold00603_15560  | Ca_desi_scaffold   | 15560                          | [T/G]       | NA                                         |
| Ca_Desi_Ch_scaffold00603_15606  | Ca_desi_scaffold   | 15606                          | [A/G]       | NA                                         |
| Ca_Desi_Ch_scaffold00603_21255  | Ca_desi_scaffold   | 21255                          | [T/G]       | NA                                         |
| Ca_Desi_Ch_scaffold00603_77045  | Ca_desi_scaffold   | 77045                          | [A/C]       | NA                                         |
| Ca_Desi_Ch_scaffold00603_77410  | Ca_desi_scaffold   | 77410                          | [T/C]       | NA                                         |
| Ca_Desi_Ch_scaffold00603_77440  | Ca_desi_scaffold   | 77440                          | [A/G]       | NA                                         |
| Ca_Desi_Ch_scaffold00603_77475  | Ca_desi_scaffold   | 77475                          | [T/C]       | NA                                         |
| Ca_Desi_Ch_scaffold00603_77484  | Ca_desi_scaffold   | 77484                          | [A/C]       | NA                                         |
| Ca_Desi_Ch_scaffold00603_77487  | Ca_desi_scaffold   | 77487                          | [A/G]       | NA                                         |
| Ca_Desi_Ch_scaffold00603_77488  | Ca_desi_scaffold   | 77488                          | [A/G]       | NA                                         |
| Ca_Desi_Ch_scaffold00603_77497  | Ca_desi_scaffold   | 77497                          | [A/C]       | NA                                         |
| Ca_Desi_Ch_scaffold00603_77511  | Ca_desi_scaffold   | 77511                          | [T/C]       | NA                                         |
| Ca_Desi_Ch_scaffold00603_77515  | Ca_desi_scaffold   | 77515                          | [T/C]       | NA                                         |
| Ca_Desi_Ch_scaffold00603_77518  | Ca_desi_scaffold   | 77518                          | [A/G]       | NA                                         |
| Ca_Desi_Ch_scaffold00603_77524  | Ca_desi_scaffold   | 77524                          | [T/C]       | NA                                         |
| Ca_Desi_Ch_scaffold00603_77526  | Ca_desi_scaffold   | 77526                          | [T/C]       | NA                                         |
| Ca_Desi_Ch_scaffold00603_77529  | Ca_desi_scaffold   | 77529                          | [T/C]       | NA                                         |
| Ca_Desi_Ch_scaffold00603_77537  | Ca_desi_scaffold   | 77537                          | [A/G]       | NA                                         |
| Ca_Desi_Ch_scaffold00603_78087  | Ca_desi_scaffold   | 78087                          | [T/C]       | NA                                         |

| <b>SNP IDs</b>                    | <b>Chromosomes</b> | <b>Physical positions (bp)</b> | <b>SNPs</b> | <b>NCBI SNPdb accession IDs (NCBI_ss#)</b> |
|-----------------------------------|--------------------|--------------------------------|-------------|--------------------------------------------|
| Ca_Desig_Chr_scaffold00603_78102  | Ca_desig_scaffold  | 78102                          | [T/G]       | NA                                         |
| Ca_Desig_Chr_scaffold00603_78117  | Ca_desig_scaffold  | 78117                          | [T/G]       | NA                                         |
| Ca_Desig_Chr_scaffold00603_78127  | Ca_desig_scaffold  | 78127                          | [T/G]       | NA                                         |
| Ca_Desig_Chr_scaffold00604_27312  | Ca_desig_scaffold  | 27312                          | [A/G]       | NA                                         |
| Ca_Desig_Chr_scaffold00604_27332  | Ca_desig_scaffold  | 27332                          | [T/C]       | NA                                         |
| Ca_Desig_Chr_scaffold00604_27343  | Ca_desig_scaffold  | 27343                          | [T/C]       | NA                                         |
| Ca_Desig_Chr_scaffold00604_27352  | Ca_desig_scaffold  | 27352                          | [A/G]       | NA                                         |
| Ca_Desig_Chr_scaffold00604_27360  | Ca_desig_scaffold  | 27360                          | [A/G]       | NA                                         |
| Ca_Desig_Chr_scaffold00604_27372  | Ca_desig_scaffold  | 27372                          | [T/A]       | NA                                         |
| Ca_Desig_Chr_scaffold00604_46339  | Ca_desig_scaffold  | 46339                          | [T/C]       | NA                                         |
| Ca_Desig_Chr_scaffold00604_46392  | Ca_desig_scaffold  | 46392                          | [A/C]       | NA                                         |
| Ca_Desig_Chr_scaffold00604_70270  | Ca_desig_scaffold  | 70270                          | [A/G]       | NA                                         |
| Ca_Desig_Chr_scaffold00604_82344  | Ca_desig_scaffold  | 82344                          | [T/G]       | NA                                         |
| Ca_Desig_Chr_scaffold00604_97629  | Ca_desig_scaffold  | 97629                          | [T/G]       | NA                                         |
| Ca_Desig_Chr_scaffold00604_97744  | Ca_desig_scaffold  | 97744                          | [A/C]       | NA                                         |
| Ca_Desig_Chr_scaffold00606_59513  | Ca_desig_scaffold  | 59513                          | [A/T]       | NA                                         |
| Ca_Desig_Chr_scaffold00606_59514  | Ca_desig_scaffold  | 59514                          | [A/C]       | NA                                         |
| Ca_Desig_Chr_scaffold00606_59515  | Ca_desig_scaffold  | 59515                          | [G/T]       | NA                                         |
| Ca_Desig_Chr_scaffold00606_132097 | Ca_desig_scaffold  | 132097                         | [G/A]       | NA                                         |
| Ca_Desig_Chr_scaffold00606_132098 | Ca_desig_scaffold  | 132098                         | [A/T]       | NA                                         |
| Ca_Desig_Chr_scaffold00606_132099 | Ca_desig_scaffold  | 132099                         | [A/C]       | NA                                         |
| Ca_Desig_Chr_scaffold00606_132100 | Ca_desig_scaffold  | 132100                         | [G/T]       | NA                                         |
| Ca_Desig_Chr_scaffold00606_133867 | Ca_desig_scaffold  | 133867                         | [T/G]       | NA                                         |
| Ca_Desig_Chr_scaffold00606_133878 | Ca_desig_scaffold  | 133878                         | [T/G]       | NA                                         |
| Ca_Desig_Chr_scaffold00607_52883  | Ca_desig_scaffold  | 52883                          | [A/G]       | NA                                         |
| Ca_Desig_Chr_scaffold00607_52899  | Ca_desig_scaffold  | 52899                          | [A/G]       | NA                                         |
| Ca_Desig_Chr_scaffold00607_52901  | Ca_desig_scaffold  | 52901                          | [A/G]       | NA                                         |
| Ca_Desig_Chr_scaffold00607_52903  | Ca_desig_scaffold  | 52903                          | [A/G]       | NA                                         |
| Ca_Desig_Chr_scaffold00607_52920  | Ca_desig_scaffold  | 52920                          | [G/A]       | NA                                         |
| Ca_Desig_Chr_scaffold00607_52924  | Ca_desig_scaffold  | 52924                          | [A/G]       | NA                                         |
| Ca_Desig_Chr_scaffold00607_52927  | Ca_desig_scaffold  | 52927                          | [G/A]       | NA                                         |
| Ca_Desig_Chr_scaffold00607_52933  | Ca_desig_scaffold  | 52933                          | [A/G]       | NA                                         |
| Ca_Desig_Chr_scaffold00607_52937  | Ca_desig_scaffold  | 52937                          | [A/G]       | NA                                         |
| Ca_Desig_Chr_scaffold00607_52939  | Ca_desig_scaffold  | 52939                          | [A/G]       | NA                                         |

| <b>SNP IDs</b>                  | <b>Chromosomes</b> | <b>Physical positions (bp)</b> | <b>SNPs</b> | <b>NCBI SNPdb accession IDs (NCBI_ss#)</b> |
|---------------------------------|--------------------|--------------------------------|-------------|--------------------------------------------|
| Ca_Desi_Ch_scaffold00607_52945  | Ca_desi_scaffold   | 52945                          | [A/G]       | NA                                         |
| Ca_Desi_Ch_scaffold00607_52946  | Ca_desi_scaffold   | 52946                          | [G/A]       | NA                                         |
| Ca_Desi_Ch_scaffold00607_52947  | Ca_desi_scaffold   | 52947                          | [A/G]       | NA                                         |
| Ca_Desi_Ch_scaffold00607_52948  | Ca_desi_scaffold   | 52948                          | [T/A]       | NA                                         |
| Ca_Desi_Ch_scaffold00607_52952  | Ca_desi_scaffold   | 52952                          | [A/G]       | NA                                         |
| Ca_Desi_Ch_scaffold00607_52957  | Ca_desi_scaffold   | 52957                          | [A/G]       | NA                                         |
| Ca_Desi_Ch_scaffold00607_52959  | Ca_desi_scaffold   | 52959                          | [A/G]       | NA                                         |
| Ca_Desi_Ch_scaffold00607_52962  | Ca_desi_scaffold   | 52962                          | [A/G]       | NA                                         |
| Ca_Desi_Ch_scaffold00607_52968  | Ca_desi_scaffold   | 52968                          | [T/G]       | NA                                         |
| Ca_Desi_Ch_scaffold00607_52978  | Ca_desi_scaffold   | 52978                          | [T/G]       | NA                                         |
| Ca_Desi_Ch_scaffold00607_52990  | Ca_desi_scaffold   | 52990                          | [T/G]       | NA                                         |
| Ca_Desi_Ch_scaffold00607_52994  | Ca_desi_scaffold   | 52994                          | [T/A]       | NA                                         |
| Ca_Desi_Ch_scaffold00607_79727  | Ca_desi_scaffold   | 79727                          | [G/C]       | NA                                         |
| Ca_Desi_Ch_scaffold00607_79729  | Ca_desi_scaffold   | 79729                          | [C/A]       | NA                                         |
| Ca_Desi_Ch_scaffold00607_104070 | Ca_desi_scaffold   | 104070                         | [T/C]       | NA                                         |
| Ca_Desi_Ch_scaffold00607_104074 | Ca_desi_scaffold   | 104074                         | [T/C]       | NA                                         |
| Ca_Desi_Ch_scaffold00607_104098 | Ca_desi_scaffold   | 104098                         | [G/A]       | NA                                         |
| Ca_Desi_Ch_scaffold00607_104105 | Ca_desi_scaffold   | 104105                         | [G/A]       | NA                                         |
| Ca_Desi_Ch_scaffold00610_38506  | Ca_desi_scaffold   | 38506                          | [C/A]       | NA                                         |
| Ca_Desi_Ch_scaffold00610_49651  | Ca_desi_scaffold   | 49651                          | [T/C]       | NA                                         |
| Ca_Desi_Ch_scaffold00610_49663  | Ca_desi_scaffold   | 49663                          | [T/A]       | NA                                         |
| Ca_Desi_Ch_scaffold00610_49673  | Ca_desi_scaffold   | 49673                          | [A/T]       | NA                                         |
| Ca_Desi_Ch_scaffold00610_49697  | Ca_desi_scaffold   | 49697                          | [T/C]       | NA                                         |
| Ca_Desi_Ch_scaffold00610_91382  | Ca_desi_scaffold   | 91382                          | [T/G]       | NA                                         |
| Ca_Desi_Ch_scaffold00610_97394  | Ca_desi_scaffold   | 97394                          | [T/G]       | NA                                         |
| Ca_Desi_Ch_scaffold00610_99266  | Ca_desi_scaffold   | 99266                          | [C/A]       | NA                                         |
| Ca_Desi_Ch_scaffold00610_99267  | Ca_desi_scaffold   | 99267                          | [T/G]       | NA                                         |
| Ca_Desi_Ch_scaffold00610_99271  | Ca_desi_scaffold   | 99271                          | [A/G]       | NA                                         |
| Ca_Desi_Ch_scaffold00610_103917 | Ca_desi_scaffold   | 103917                         | [T/C]       | NA                                         |
| Ca_Desi_Ch_scaffold00610_103949 | Ca_desi_scaffold   | 103949                         | [T/G]       | NA                                         |
| Ca_Desi_Ch_scaffold00610_105319 | Ca_desi_scaffold   | 105319                         | [T/G]       | NA                                         |
| Ca_Desi_Ch_scaffold00610_105322 | Ca_desi_scaffold   | 105322                         | [T/G]       | NA                                         |
| Ca_Desi_Ch_scaffold00610_106312 | Ca_desi_scaffold   | 106312                         | [A/C]       | NA                                         |
| Ca_Desi_Ch_scaffold00610_129957 | Ca_desi_scaffold   | 129957                         | [A/G]       | NA                                         |



| <b>SNP IDs</b>                    | <b>Chromosomes</b> | <b>Physical positions (bp)</b> | <b>SNPs</b> | <b>NCBI SNPdb accession IDs (NCBI_ss#)</b> |
|-----------------------------------|--------------------|--------------------------------|-------------|--------------------------------------------|
| Ca_Desig_Chr_scaffold00610_129963 | Ca_desig_scaffold  | 129963                         | [A/G]       | NA                                         |
| Ca_Desig_Chr_scaffold00611_72787  | Ca_desig_scaffold  | 72787                          | [C/A]       | NA                                         |
| Ca_Desig_Chr_scaffold00611_72802  | Ca_desig_scaffold  | 72802                          | [T/C]       | NA                                         |
| Ca_Desig_Chr_scaffold00611_72828  | Ca_desig_scaffold  | 72828                          | [T/C]       | NA                                         |
| Ca_Desig_Chr_scaffold00611_86246  | Ca_desig_scaffold  | 86246                          | [G/T]       | NA                                         |
| Ca_Desig_Chr_scaffold00611_122021 | Ca_desig_scaffold  | 122021                         | [T/A]       | NA                                         |
| Ca_Desig_Chr_scaffold00614_53788  | Ca_desig_scaffold  | 53788                          | [T/G]       | NA                                         |
| Ca_Desig_Chr_scaffold00614_85669  | Ca_desig_scaffold  | 85669                          | [T/C]       | NA                                         |
| Ca_Desig_Chr_scaffold00614_121895 | Ca_desig_scaffold  | 121895                         | [T/G]       | NA                                         |
| Ca_Desig_Chr_scaffold00619_73822  | Ca_desig_scaffold  | 73822                          | [T/G]       | NA                                         |
| Ca_Desig_Chr_scaffold00619_87897  | Ca_desig_scaffold  | 87897                          | [G/C]       | NA                                         |
| Ca_Desig_Chr_scaffold00619_128635 | Ca_desig_scaffold  | 128635                         | [T/C]       | NA                                         |
| Ca_Desig_Chr_scaffold00620_5565   | Ca_desig_scaffold  | 5565                           | [A/C]       | NA                                         |
| Ca_Desig_Chr_scaffold00620_5571   | Ca_desig_scaffold  | 5571                           | [A/C]       | NA                                         |
| Ca_Desig_Chr_scaffold00620_30192  | Ca_desig_scaffold  | 30192                          | [C/A]       | NA                                         |
| Ca_Desig_Chr_scaffold00620_42072  | Ca_desig_scaffold  | 42072                          | [T/G]       | NA                                         |
| Ca_Desig_Chr_scaffold00620_42150  | Ca_desig_scaffold  | 42150                          | [T/C]       | NA                                         |
| Ca_Desig_Chr_scaffold00620_42159  | Ca_desig_scaffold  | 42159                          | [T/G]       | NA                                         |
| Ca_Desig_Chr_scaffold00620_42168  | Ca_desig_scaffold  | 42168                          | [T/G]       | NA                                         |
| Ca_Desig_Chr_scaffold00620_42201  | Ca_desig_scaffold  | 42201                          | [A/C]       | NA                                         |
| Ca_Desig_Chr_scaffold00620_42213  | Ca_desig_scaffold  | 42213                          | [T/C]       | NA                                         |
| Ca_Desig_Chr_scaffold00620_42281  | Ca_desig_scaffold  | 42281                          | [C/A]       | NA                                         |
| Ca_Desig_Chr_scaffold00620_89634  | Ca_desig_scaffold  | 89634                          | [T/C]       | NA                                         |
| Ca_Desig_Chr_scaffold00625_12384  | Ca_desig_scaffold  | 12384                          | [A/C]       | NA                                         |
| Ca_Desig_Chr_scaffold00625_42887  | Ca_desig_scaffold  | 42887                          | [T/G]       | NA                                         |
| Ca_Desig_Chr_scaffold00625_42917  | Ca_desig_scaffold  | 42917                          | [A/G]       | NA                                         |
| Ca_Desig_Chr_scaffold00625_43359  | Ca_desig_scaffold  | 43359                          | [T/G]       | NA                                         |
| Ca_Desig_Chr_scaffold00625_43363  | Ca_desig_scaffold  | 43363                          | [T/G]       | NA                                         |
| Ca_Desig_Chr_scaffold00625_43408  | Ca_desig_scaffold  | 43408                          | [A/C]       | NA                                         |
| Ca_Desig_Chr_scaffold00625_43447  | Ca_desig_scaffold  | 43447                          | [A/G]       | NA                                         |
| Ca_Desig_Chr_scaffold00626_82435  | Ca_desig_scaffold  | 82435                          | [T/G]       | NA                                         |
| Ca_Desig_Chr_scaffold00626_82449  | Ca_desig_scaffold  | 82449                          | [T/C]       | NA                                         |
| Ca_Desig_Chr_scaffold00628_47136  | Ca_desig_scaffold  | 47136                          | [A/C]       | NA                                         |
| Ca_Desig_Chr_scaffold00628_52226  | Ca_desig_scaffold  | 52226                          | [A/C]       | NA                                         |

| <b>SNP IDs</b>                  | <b>Chromosomes</b> | <b>Physical positions (bp)</b> | <b>SNPs</b> | <b>NCBI SNPdb accession IDs (NCBI_ss#)</b> |
|---------------------------------|--------------------|--------------------------------|-------------|--------------------------------------------|
| Ca_Desi_Ch_scaffold00628_52231  | Ca_desi_scaffold   | 52231                          | [A/C]       | NA                                         |
| Ca_Desi_Ch_scaffold00628_52261  | Ca_desi_scaffold   | 52261                          | [A/G]       | NA                                         |
| Ca_Desi_Ch_scaffold00628_97901  | Ca_desi_scaffold   | 97901                          | [T/G]       | NA                                         |
| Ca_Desi_Ch_scaffold00628_97904  | Ca_desi_scaffold   | 97904                          | [T/G]       | NA                                         |
| Ca_Desi_Ch_scaffold00628_97907  | Ca_desi_scaffold   | 97907                          | [T/G]       | NA                                         |
| Ca_Desi_Ch_scaffold00628_97938  | Ca_desi_scaffold   | 97938                          | [C/A]       | NA                                         |
| Ca_Desi_Ch_scaffold00628_97939  | Ca_desi_scaffold   | 97939                          | [T/G]       | NA                                         |
| Ca_Desi_Ch_scaffold00628_97940  | Ca_desi_scaffold   | 97940                          | [T/A]       | NA                                         |
| Ca_Desi_Ch_scaffold00630_6208   | Ca_desi_scaffold   | 6208                           | [A/G]       | NA                                         |
| Ca_Desi_Ch_scaffold00630_6866   | Ca_desi_scaffold   | 6866                           | [C/T]       | NA                                         |
| Ca_Desi_Ch_scaffold00630_6867   | Ca_desi_scaffold   | 6867                           | [T/G]       | NA                                         |
| Ca_Desi_Ch_scaffold00630_44933  | Ca_desi_scaffold   | 44933                          | [T/A]       | NA                                         |
| Ca_Desi_Ch_scaffold00630_44934  | Ca_desi_scaffold   | 44934                          | [C/T]       | NA                                         |
| Ca_Desi_Ch_scaffold00630_44935  | Ca_desi_scaffold   | 44935                          | [A/C]       | NA                                         |
| Ca_Desi_Ch_scaffold00630_44936  | Ca_desi_scaffold   | 44936                          | [G/T]       | NA                                         |
| Ca_Desi_Ch_scaffold00630_103244 | Ca_desi_scaffold   | 103244                         | [T/C]       | NA                                         |
| Ca_Desi_Ch_scaffold00630_103264 | Ca_desi_scaffold   | 103264                         | [T/G]       | NA                                         |
| Ca_Desi_Ch_scaffold00635_6240   | Ca_desi_scaffold   | 6240                           | [A/C]       | NA                                         |
| Ca_Desi_Ch_scaffold00635_6245   | Ca_desi_scaffold   | 6245                           | [A/T]       | NA                                         |
| Ca_Desi_Ch_scaffold00635_73949  | Ca_desi_scaffold   | 73949                          | [T/A]       | NA                                         |
| Ca_Desi_Ch_scaffold00635_79839  | Ca_desi_scaffold   | 79839                          | [A/G]       | NA                                         |
| Ca_Desi_Ch_scaffold00635_79841  | Ca_desi_scaffold   | 79841                          | [T/C]       | NA                                         |
| Ca_Desi_Ch_scaffold00635_79875  | Ca_desi_scaffold   | 79875                          | [C/T]       | NA                                         |
| Ca_Desi_Ch_scaffold00635_79876  | Ca_desi_scaffold   | 79876                          | [T/C]       | NA                                         |
| Ca_Desi_Ch_scaffold00635_79904  | Ca_desi_scaffold   | 79904                          | [A/G]       | NA                                         |
| Ca_Desi_Ch_scaffold00635_79927  | Ca_desi_scaffold   | 79927                          | [T/G]       | NA                                         |
| Ca_Desi_Ch_scaffold00635_79930  | Ca_desi_scaffold   | 79930                          | [T/C]       | NA                                         |
| Ca_Desi_Ch_scaffold00635_132697 | Ca_desi_scaffold   | 132697                         | [A/T]       | NA                                         |
| Ca_Desi_Ch_scaffold00635_132731 | Ca_desi_scaffold   | 132731                         | [T/C]       | NA                                         |
| Ca_Desi_Ch_scaffold00637_44806  | Ca_desi_scaffold   | 44806                          | [A/C]       | NA                                         |
| Ca_Desi_Ch_scaffold00637_44807  | Ca_desi_scaffold   | 44807                          | [T/A]       | NA                                         |
| Ca_Desi_Ch_scaffold00637_44808  | Ca_desi_scaffold   | 44808                          | [C/A]       | NA                                         |
| Ca_Desi_Ch_scaffold00637_44809  | Ca_desi_scaffold   | 44809                          | [T/G]       | NA                                         |
| Ca_Desi_Ch_scaffold00637_124449 | Ca_desi_scaffold   | 124449                         | [T/G]       | NA                                         |

| <b>SNP IDs</b>                  | <b>Chromosomes</b> | <b>Physical positions (bp)</b> | <b>SNPs</b> | <b>NCBI SNPdb accession IDs (NCBI_ss#)</b> |
|---------------------------------|--------------------|--------------------------------|-------------|--------------------------------------------|
| Ca_Desi_Ch_scaffold00637_124476 | Ca_desi_scaffold   | 124476                         | [T/G]       | NA                                         |
| Ca_Desi_Ch_scaffold00640_8626   | Ca_desi_scaffold   | 8626                           | [T/C]       | NA                                         |
| Ca_Desi_Ch_scaffold00640_10770  | Ca_desi_scaffold   | 10770                          | [G/A]       | NA                                         |
| Ca_Desi_Ch_scaffold00640_10938  | Ca_desi_scaffold   | 10938                          | [A/G]       | NA                                         |
| Ca_Desi_Ch_scaffold00640_10950  | Ca_desi_scaffold   | 10950                          | [A/G]       | NA                                         |
| Ca_Desi_Ch_scaffold00640_12335  | Ca_desi_scaffold   | 12335                          | [A/T]       | NA                                         |
| Ca_Desi_Ch_scaffold00640_12350  | Ca_desi_scaffold   | 12350                          | [T/G]       | NA                                         |
| Ca_Desi_Ch_scaffold00640_12431  | Ca_desi_scaffold   | 12431                          | [G/A]       | NA                                         |
| Ca_Desi_Ch_scaffold00640_12677  | Ca_desi_scaffold   | 12677                          | [C/A]       | NA                                         |
| Ca_Desi_Ch_scaffold00640_58176  | Ca_desi_scaffold   | 58176                          | [T/C]       | NA                                         |
| Ca_Desi_Ch_scaffold00640_58651  | Ca_desi_scaffold   | 58651                          | [A/T]       | NA                                         |
| Ca_Desi_Ch_scaffold00640_101890 | Ca_desi_scaffold   | 101890                         | [T/C]       | NA                                         |
| Ca_Desi_Ch_scaffold00640_117972 | Ca_desi_scaffold   | 117972                         | [A/G]       | NA                                         |
| Ca_Desi_Ch_scaffold00640_118021 | Ca_desi_scaffold   | 118021                         | [C/T]       | NA                                         |
| Ca_Desi_Ch_scaffold00640_118439 | Ca_desi_scaffold   | 118439                         | [C/T]       | NA                                         |
| Ca_Desi_Ch_scaffold00640_120278 | Ca_desi_scaffold   | 120278                         | [C/T]       | NA                                         |
| Ca_Desi_Ch_scaffold00640_120311 | Ca_desi_scaffold   | 120311                         | [A/C]       | NA                                         |
| Ca_Desi_Ch_scaffold00640_120339 | Ca_desi_scaffold   | 120339                         | [A/C]       | NA                                         |
| Ca_Desi_Ch_scaffold00640_121004 | Ca_desi_scaffold   | 121004                         | [C/T]       | NA                                         |
| Ca_Desi_Ch_scaffold00640_121029 | Ca_desi_scaffold   | 121029                         | [G/A]       | NA                                         |
| Ca_Desi_Ch_scaffold00640_121036 | Ca_desi_scaffold   | 121036                         | [T/C]       | NA                                         |
| Ca_Desi_Ch_scaffold00640_121071 | Ca_desi_scaffold   | 121071                         | [T/C]       | NA                                         |
| Ca_Desi_Ch_scaffold00640_121103 | Ca_desi_scaffold   | 121103                         | [A/G]       | NA                                         |
| Ca_Desi_Ch_scaffold00642_21166  | Ca_desi_scaffold   | 21166                          | [A/G]       | NA                                         |
| Ca_Desi_Ch_scaffold00642_21175  | Ca_desi_scaffold   | 21175                          | [A/G]       | NA                                         |
| Ca_Desi_Ch_scaffold00642_21180  | Ca_desi_scaffold   | 21180                          | [T/C]       | NA                                         |
| Ca_Desi_Ch_scaffold00642_21188  | Ca_desi_scaffold   | 21188                          | [A/G]       | NA                                         |
| Ca_Desi_Ch_scaffold00642_51024  | Ca_desi_scaffold   | 51024                          | [A/C]       | NA                                         |
| Ca_Desi_Ch_scaffold00642_51030  | Ca_desi_scaffold   | 51030                          | [A/C]       | NA                                         |
| Ca_Desi_Ch_scaffold00642_51036  | Ca_desi_scaffold   | 51036                          | [A/C]       | NA                                         |
| Ca_Desi_Ch_scaffold00642_51039  | Ca_desi_scaffold   | 51039                          | [C/T]       | NA                                         |
| Ca_Desi_Ch_scaffold00642_51043  | Ca_desi_scaffold   | 51043                          | [A/C]       | NA                                         |
| Ca_Desi_Ch_scaffold00642_51047  | Ca_desi_scaffold   | 51047                          | [T/C]       | NA                                         |
| Ca_Desi_Ch_scaffold00642_51053  | Ca_desi_scaffold   | 51053                          | [A/C]       | NA                                         |

| <b>SNP IDs</b>                   | <b>Chromosomes</b> | <b>Physical positions (bp)</b> | <b>SNPs</b> | <b>NCBI SNPdb accession IDs (NCBI_ss#)</b> |
|----------------------------------|--------------------|--------------------------------|-------------|--------------------------------------------|
| Ca_DesigChr_scaffold00642_51094  | Ca_desig_scaffold  | 51094                          | [A/T]       | NA                                         |
| Ca_DesigChr_scaffold00642_51099  | Ca_desig_scaffold  | 51099                          | [T/C]       | NA                                         |
| Ca_DesigChr_scaffold00642_51100  | Ca_desig_scaffold  | 51100                          | [G/T]       | NA                                         |
| Ca_DesigChr_scaffold00642_51107  | Ca_desig_scaffold  | 51107                          | [T/C]       | NA                                         |
| Ca_DesigChr_scaffold00642_51110  | Ca_desig_scaffold  | 51110                          | [T/C]       | NA                                         |
| Ca_DesigChr_scaffold00642_51113  | Ca_desig_scaffold  | 51113                          | [G/A]       | NA                                         |
| Ca_DesigChr_scaffold00642_51118  | Ca_desig_scaffold  | 51118                          | [A/C]       | NA                                         |
| Ca_DesigChr_scaffold00642_51120  | Ca_desig_scaffold  | 51120                          | [T/C]       | NA                                         |
| Ca_DesigChr_scaffold00642_51121  | Ca_desig_scaffold  | 51121                          | [T/C]       | NA                                         |
| Ca_DesigChr_scaffold00642_51125  | Ca_desig_scaffold  | 51125                          | [A/G]       | NA                                         |
| Ca_DesigChr_scaffold00642_51181  | Ca_desig_scaffold  | 51181                          | [T/G]       | NA                                         |
| Ca_DesigChr_scaffold00642_51825  | Ca_desig_scaffold  | 51825                          | [A/G]       | NA                                         |
| Ca_DesigChr_scaffold00642_52050  | Ca_desig_scaffold  | 52050                          | [T/C]       | NA                                         |
| Ca_DesigChr_scaffold00642_52057  | Ca_desig_scaffold  | 52057                          | [T/G]       | NA                                         |
| Ca_DesigChr_scaffold00642_52060  | Ca_desig_scaffold  | 52060                          | [A/C]       | NA                                         |
| Ca_DesigChr_scaffold00642_52075  | Ca_desig_scaffold  | 52075                          | [A/G]       | NA                                         |
| Ca_DesigChr_scaffold00642_52112  | Ca_desig_scaffold  | 52112                          | [A/C]       | NA                                         |
| Ca_DesigChr_scaffold00642_52116  | Ca_desig_scaffold  | 52116                          | [A/G]       | NA                                         |
| Ca_DesigChr_scaffold00642_52158  | Ca_desig_scaffold  | 52158                          | [T/G]       | NA                                         |
| Ca_DesigChr_scaffold00644_14893  | Ca_desig_scaffold  | 14893                          | [G/A]       | NA                                         |
| Ca_DesigChr_scaffold00644_52490  | Ca_desig_scaffold  | 52490                          | [T/G]       | NA                                         |
| Ca_DesigChr_scaffold00644_79725  | Ca_desig_scaffold  | 79725                          | [G/C]       | NA                                         |
| Ca_DesigChr_scaffold00644_79726  | Ca_desig_scaffold  | 79726                          | [A/T]       | NA                                         |
| Ca_DesigChr_scaffold00644_81010  | Ca_desig_scaffold  | 81010                          | [T/G]       | NA                                         |
| Ca_DesigChr_scaffold00644_81029  | Ca_desig_scaffold  | 81029                          | [T/G]       | NA                                         |
| Ca_DesigChr_scaffold00644_84908  | Ca_desig_scaffold  | 84908                          | [A/G]       | NA                                         |
| Ca_DesigChr_scaffold00644_100047 | Ca_desig_scaffold  | 100047                         | [G/T]       | NA                                         |
| Ca_DesigChr_scaffold00644_100049 | Ca_desig_scaffold  | 100049                         | [A/G]       | NA                                         |
| Ca_DesigChr_scaffold00645_34072  | Ca_desig_scaffold  | 34072                          | [A/C]       | NA                                         |
| Ca_DesigChr_scaffold00645_34104  | Ca_desig_scaffold  | 34104                          | [A/G]       | NA                                         |
| Ca_DesigChr_scaffold00645_34116  | Ca_desig_scaffold  | 34116                          | [C/T]       | NA                                         |
| Ca_DesigChr_scaffold00645_35578  | Ca_desig_scaffold  | 35578                          | [A/G]       | NA                                         |
| Ca_DesigChr_scaffold00645_48791  | Ca_desig_scaffold  | 48791                          | [A/C]       | NA                                         |
| Ca_DesigChr_scaffold00645_108696 | Ca_desig_scaffold  | 108696                         | [T/C]       | NA                                         |

| <b>SNP IDs</b>                    | <b>Chromosomes</b> | <b>Physical positions (bp)</b> | <b>SNPs</b> | <b>NCBI SNPdb accession IDs (NCBI_ss#)</b> |
|-----------------------------------|--------------------|--------------------------------|-------------|--------------------------------------------|
| Ca_Desig_Chr_scaffold00645_108698 | Ca_desig_scaffold  | 108698                         | [T/C]       | NA                                         |
| Ca_Desig_Chr_scaffold00645_108736 | Ca_desig_scaffold  | 108736                         | [T/C]       | NA                                         |
| Ca_Desig_Chr_scaffold00645_108815 | Ca_desig_scaffold  | 108815                         | [T/G]       | NA                                         |
| Ca_Desig_Chr_scaffold00645_108836 | Ca_desig_scaffold  | 108836                         | [A/T]       | NA                                         |
| Ca_Desig_Chr_scaffold00646_65070  | Ca_desig_scaffold  | 65070                          | [A/G]       | NA                                         |
| Ca_Desig_Chr_scaffold00651_22298  | Ca_desig_scaffold  | 22298                          | [A/G]       | NA                                         |
| Ca_Desig_Chr_scaffold00651_22307  | Ca_desig_scaffold  | 22307                          | [T/C]       | NA                                         |
| Ca_Desig_Chr_scaffold00651_22340  | Ca_desig_scaffold  | 22340                          | [A/C]       | NA                                         |
| Ca_Desig_Chr_scaffold00651_22351  | Ca_desig_scaffold  | 22351                          | [T/C]       | NA                                         |
| Ca_Desig_Chr_scaffold00651_81319  | Ca_desig_scaffold  | 81319                          | [T/G]       | NA                                         |
| Ca_Desig_Chr_scaffold00651_81328  | Ca_desig_scaffold  | 81328                          | [A/G]       | NA                                         |
| Ca_Desig_Chr_scaffold00651_81342  | Ca_desig_scaffold  | 81342                          | [C/G]       | NA                                         |
| Ca_Desig_Chr_scaffold00651_81418  | Ca_desig_scaffold  | 81418                          | [T/G]       | NA                                         |
| Ca_Desig_Chr_scaffold00651_81444  | Ca_desig_scaffold  | 81444                          | [T/G]       | NA                                         |
| Ca_Desig_Chr_scaffold00651_104156 | Ca_desig_scaffold  | 104156                         | [A/G]       | NA                                         |
| Ca_Desig_Chr_scaffold00651_110967 | Ca_desig_scaffold  | 110967                         | [G/A]       | NA                                         |
| Ca_Desig_Chr_scaffold00651_110970 | Ca_desig_scaffold  | 110970                         | [G/T]       | NA                                         |
| Ca_Desig_Chr_scaffold00657_26187  | Ca_desig_scaffold  | 26187                          | [T/A]       | NA                                         |
| Ca_Desig_Chr_scaffold00658_42622  | Ca_desig_scaffold  | 42622                          | [T/G]       | NA                                         |
| Ca_Desig_Chr_scaffold00658_42664  | Ca_desig_scaffold  | 42664                          | [T/A]       | NA                                         |
| Ca_Desig_Chr_scaffold00658_43921  | Ca_desig_scaffold  | 43921                          | [T/C]       | NA                                         |
| Ca_Desig_Chr_scaffold00660_62101  | Ca_desig_scaffold  | 62101                          | [A/G]       | NA                                         |
| Ca_Desig_Chr_scaffold00660_62167  | Ca_desig_scaffold  | 62167                          | [A/G]       | NA                                         |
| Ca_Desig_Chr_scaffold00660_91152  | Ca_desig_scaffold  | 91152                          | [G/C]       | NA                                         |
| Ca_Desig_Chr_scaffold00660_92102  | Ca_desig_scaffold  | 92102                          | [G/T]       | NA                                         |
| Ca_Desig_Chr_scaffold00660_116328 | Ca_desig_scaffold  | 116328                         | [A/G]       | NA                                         |
| Ca_Desig_Chr_scaffold00660_118046 | Ca_desig_scaffold  | 118046                         | [T/A]       | NA                                         |
| Ca_Desig_Chr_scaffold00666_82811  | Ca_desig_scaffold  | 82811                          | [T/G]       | NA                                         |
| Ca_Desig_Chr_scaffold00667_13645  | Ca_desig_scaffold  | 13645                          | [T/G]       | NA                                         |
| Ca_Desig_Chr_scaffold00667_17500  | Ca_desig_scaffold  | 17500                          | [T/G]       | NA                                         |
| Ca_Desig_Chr_scaffold00667_17511  | Ca_desig_scaffold  | 17511                          | [T/C]       | NA                                         |
| Ca_Desig_Chr_scaffold00667_29575  | Ca_desig_scaffold  | 29575                          | [A/T]       | NA                                         |
| Ca_Desig_Chr_scaffold00667_87161  | Ca_desig_scaffold  | 87161                          | [T/C]       | NA                                         |
| Ca_Desig_Chr_scaffold00667_87186  | Ca_desig_scaffold  | 87186                          | [T/G]       | NA                                         |

| <b>SNP IDs</b>                   | <b>Chromosomes</b> | <b>Physical positions (bp)</b> | <b>SNPs</b> | <b>NCBI SNPdb accession IDs (NCBI_ss#)</b> |
|----------------------------------|--------------------|--------------------------------|-------------|--------------------------------------------|
| Ca_DesigChr_scaffold00667_87210  | Ca_desig_scaffold  | 87210                          | [T/G]       | NA                                         |
| Ca_DesigChr_scaffold00667_87211  | Ca_desig_scaffold  | 87211                          | [T/C]       | NA                                         |
| Ca_DesigChr_scaffold00667_87263  | Ca_desig_scaffold  | 87263                          | [A/G]       | NA                                         |
| Ca_DesigChr_scaffold00667_87267  | Ca_desig_scaffold  | 87267                          | [A/G]       | NA                                         |
| Ca_DesigChr_scaffold00667_87310  | Ca_desig_scaffold  | 87310                          | [T/A]       | NA                                         |
| Ca_DesigChr_scaffold00671_60374  | Ca_desig_scaffold  | 60374                          | [T/G]       | NA                                         |
| Ca_DesigChr_scaffold00671_80338  | Ca_desig_scaffold  | 80338                          | [G/A]       | NA                                         |
| Ca_DesigChr_scaffold00671_103337 | Ca_desig_scaffold  | 103337                         | [C/T]       | NA                                         |
| Ca_DesigChr_scaffold00671_105552 | Ca_desig_scaffold  | 105552                         | [T/C]       | NA                                         |
| Ca_DesigChr_scaffold00671_105554 | Ca_desig_scaffold  | 105554                         | [A/C]       | NA                                         |
| Ca_DesigChr_scaffold00671_105557 | Ca_desig_scaffold  | 105557                         | [A/G]       | NA                                         |
| Ca_DesigChr_scaffold00671_105577 | Ca_desig_scaffold  | 105577                         | [A/G]       | NA                                         |
| Ca_DesigChr_scaffold00673_39080  | Ca_desig_scaffold  | 39080                          | [G/T]       | NA                                         |
| Ca_DesigChr_scaffold00676_43050  | Ca_desig_scaffold  | 43050                          | [T/C]       | NA                                         |
| Ca_DesigChr_scaffold00676_43064  | Ca_desig_scaffold  | 43064                          | [T/G]       | NA                                         |
| Ca_DesigChr_scaffold00676_43080  | Ca_desig_scaffold  | 43080                          | [A/G]       | NA                                         |
| Ca_DesigChr_scaffold00680_11570  | Ca_desig_scaffold  | 11570                          | [T/A]       | NA                                         |
| Ca_DesigChr_scaffold00680_16149  | Ca_desig_scaffold  | 16149                          | [C/A]       | NA                                         |
| Ca_DesigChr_scaffold00680_16150  | Ca_desig_scaffold  | 16150                          | [C/G]       | NA                                         |
| Ca_DesigChr_scaffold00680_16151  | Ca_desig_scaffold  | 16151                          | [C/A]       | NA                                         |
| Ca_DesigChr_scaffold00680_35014  | Ca_desig_scaffold  | 35014                          | [A/T]       | NA                                         |
| Ca_DesigChr_scaffold00680_40148  | Ca_desig_scaffold  | 40148                          | [T/G]       | NA                                         |
| Ca_DesigChr_scaffold00680_40161  | Ca_desig_scaffold  | 40161                          | [T/C]       | NA                                         |
| Ca_DesigChr_scaffold00680_40165  | Ca_desig_scaffold  | 40165                          | [A/G]       | NA                                         |
| Ca_DesigChr_scaffold00680_46004  | Ca_desig_scaffold  | 46004                          | [T/C]       | NA                                         |
| Ca_DesigChr_scaffold00680_47818  | Ca_desig_scaffold  | 47818                          | [T/C]       | NA                                         |
| Ca_DesigChr_scaffold00680_47983  | Ca_desig_scaffold  | 47983                          | [A/C]       | NA                                         |
| Ca_DesigChr_scaffold00680_76268  | Ca_desig_scaffold  | 76268                          | [A/G]       | NA                                         |
| Ca_DesigChr_scaffold00680_76288  | Ca_desig_scaffold  | 76288                          | [T/A]       | NA                                         |
| Ca_DesigChr_scaffold00680_76291  | Ca_desig_scaffold  | 76291                          | [T/A]       | NA                                         |
| Ca_DesigChr_scaffold00681_11640  | Ca_desig_scaffold  | 11640                          | [T/G]       | NA                                         |
| Ca_DesigChr_scaffold00681_11676  | Ca_desig_scaffold  | 11676                          | [T/C]       | NA                                         |
| Ca_DesigChr_scaffold00684_76271  | Ca_desig_scaffold  | 76271                          | [T/G]       | NA                                         |
| Ca_DesigChr_scaffold00684_77186  | Ca_desig_scaffold  | 77186                          | [A/T]       | NA                                         |

| <b>SNP IDs</b>                  | <b>Chromosomes</b> | <b>Physical positions (bp)</b> | <b>SNPs</b> | <b>NCBI SNPdb accession IDs (NCBI_ss#)</b> |
|---------------------------------|--------------------|--------------------------------|-------------|--------------------------------------------|
| Ca_Desi_Ch_scaffold00684_77198  | Ca_desi_scaffold   | 77198                          | [T/C]       | NA                                         |
| Ca_Desi_Ch_scaffold00684_77223  | Ca_desi_scaffold   | 77223                          | [T/G]       | NA                                         |
| Ca_Desi_Ch_scaffold00684_77232  | Ca_desi_scaffold   | 77232                          | [A/G]       | NA                                         |
| Ca_Desi_Ch_scaffold00690_7943   | Ca_desi_scaffold   | 7943                           | [A/C]       | NA                                         |
| Ca_Desi_Ch_scaffold00690_7946   | Ca_desi_scaffold   | 7946                           | [C/G]       | NA                                         |
| Ca_Desi_Ch_scaffold00691_22603  | Ca_desi_scaffold   | 22603                          | [G/A]       | NA                                         |
| Ca_Desi_Ch_scaffold00691_22605  | Ca_desi_scaffold   | 22605                          | [T/C]       | NA                                         |
| Ca_Desi_Ch_scaffold00691_22609  | Ca_desi_scaffold   | 22609                          | [A/C]       | NA                                         |
| Ca_Desi_Ch_scaffold00691_22617  | Ca_desi_scaffold   | 22617                          | [A/C]       | NA                                         |
| Ca_Desi_Ch_scaffold00691_22634  | Ca_desi_scaffold   | 22634                          | [T/C]       | NA                                         |
| Ca_Desi_Ch_scaffold00691_22638  | Ca_desi_scaffold   | 22638                          | [A/G]       | NA                                         |
| Ca_Desi_Ch_scaffold00691_22641  | Ca_desi_scaffold   | 22641                          | [T/G]       | NA                                         |
| Ca_Desi_Ch_scaffold00691_22649  | Ca_desi_scaffold   | 22649                          | [A/G]       | NA                                         |
| Ca_Desi_Ch_scaffold00691_22656  | Ca_desi_scaffold   | 22656                          | [T/A]       | NA                                         |
| Ca_Desi_Ch_scaffold00691_25752  | Ca_desi_scaffold   | 25752                          | [G/A]       | NA                                         |
| Ca_Desi_Ch_scaffold00691_25754  | Ca_desi_scaffold   | 25754                          | [C/A]       | NA                                         |
| Ca_Desi_Ch_scaffold00691_25758  | Ca_desi_scaffold   | 25758                          | [G/C]       | NA                                         |
| Ca_Desi_Ch_scaffold00691_25759  | Ca_desi_scaffold   | 25759                          | [G/A]       | NA                                         |
| Ca_Desi_Ch_scaffold00691_25760  | Ca_desi_scaffold   | 25760                          | [G/T]       | NA                                         |
| Ca_Desi_Ch_scaffold00691_25761  | Ca_desi_scaffold   | 25761                          | [C/A]       | NA                                         |
| Ca_Desi_Ch_scaffold00691_25772  | Ca_desi_scaffold   | 25772                          | [T/G]       | NA                                         |
| Ca_Desi_Ch_scaffold00691_26460  | Ca_desi_scaffold   | 26460                          | [A/G]       | NA                                         |
| Ca_Desi_Ch_scaffold00691_26479  | Ca_desi_scaffold   | 26479                          | [T/C]       | NA                                         |
| Ca_Desi_Ch_scaffold00691_26481  | Ca_desi_scaffold   | 26481                          | [A/G]       | NA                                         |
| Ca_Desi_Ch_scaffold00691_26509  | Ca_desi_scaffold   | 26509                          | [A/C]       | NA                                         |
| Ca_Desi_Ch_scaffold00691_26519  | Ca_desi_scaffold   | 26519                          | [A/G]       | NA                                         |
| Ca_Desi_Ch_scaffold00691_26532  | Ca_desi_scaffold   | 26532                          | [T/A]       | NA                                         |
| Ca_Desi_Ch_scaffold00691_73147  | Ca_desi_scaffold   | 73147                          | [C/A]       | NA                                         |
| Ca_Desi_Ch_scaffold00691_101373 | Ca_desi_scaffold   | 101373                         | [T/G]       | NA                                         |
| Ca_Desi_Ch_scaffold00691_119388 | Ca_desi_scaffold   | 119388                         | [T/C]       | NA                                         |
| Ca_Desi_Ch_scaffold00691_119392 | Ca_desi_scaffold   | 119392                         | [A/G]       | NA                                         |
| Ca_Desi_Ch_scaffold00691_119406 | Ca_desi_scaffold   | 119406                         | [A/G]       | NA                                         |
| Ca_Desi_Ch_scaffold00691_119409 | Ca_desi_scaffold   | 119409                         | [A/C]       | NA                                         |
| Ca_Desi_Ch_scaffold00691_119415 | Ca_desi_scaffold   | 119415                         | [A/G]       | NA                                         |

| <b>SNP IDs</b>                  | <b>Chromosomes</b> | <b>Physical positions (bp)</b> | <b>SNPs</b> | <b>NCBI SNPdb accession IDs (NCBI_ss#)</b> |
|---------------------------------|--------------------|--------------------------------|-------------|--------------------------------------------|
| Ca_Desi_Ch_scaffold00691_119444 | Ca_desi_scaffold   | 119444                         | [T/G]       | NA                                         |
| Ca_Desi_Ch_scaffold00691_119449 | Ca_desi_scaffold   | 119449                         | [T/G]       | NA                                         |
| Ca_Desi_Ch_scaffold00691_119470 | Ca_desi_scaffold   | 119470                         | [T/G]       | NA                                         |
| Ca_Desi_Ch_scaffold00691_120349 | Ca_desi_scaffold   | 120349                         | [A/G]       | NA                                         |
| Ca_Desi_Ch_scaffold00696_26571  | Ca_desi_scaffold   | 26571                          | [A/C]       | NA                                         |
| Ca_Desi_Ch_scaffold00696_36702  | Ca_desi_scaffold   | 36702                          | [C/T]       | NA                                         |
| Ca_Desi_Ch_scaffold00696_80862  | Ca_desi_scaffold   | 80862                          | [A/C]       | NA                                         |
| Ca_Desi_Ch_scaffold00696_104870 | Ca_desi_scaffold   | 104870                         | [T/G]       | NA                                         |
| Ca_Desi_Ch_scaffold00696_104900 | Ca_desi_scaffold   | 104900                         | [A/C]       | NA                                         |
| Ca_Desi_Ch_scaffold00696_114457 | Ca_desi_scaffold   | 114457                         | [C/A]       | NA                                         |
| Ca_Desi_Ch_scaffold00696_114458 | Ca_desi_scaffold   | 114458                         | [A/G]       | NA                                         |
| Ca_Desi_Ch_scaffold00696_114911 | Ca_desi_scaffold   | 114911                         | [A/T]       | NA                                         |
| Ca_Desi_Ch_scaffold00696_119288 | Ca_desi_scaffold   | 119288                         | [G/T]       | NA                                         |
| Ca_Desi_Ch_scaffold00696_119289 | Ca_desi_scaffold   | 119289                         | [A/C]       | NA                                         |
| Ca_Desi_Ch_scaffold00696_119290 | Ca_desi_scaffold   | 119290                         | [G/T]       | NA                                         |
| Ca_Desi_Ch_scaffold00696_123805 | Ca_desi_scaffold   | 123805                         | [G/T]       | NA                                         |
| Ca_Desi_Ch_scaffold00696_123806 | Ca_desi_scaffold   | 123806                         | [T/C]       | NA                                         |
| Ca_Desi_Ch_scaffold00698_6353   | Ca_desi_scaffold   | 6353                           | [A/G]       | NA                                         |
| Ca_Desi_Ch_scaffold00698_6358   | Ca_desi_scaffold   | 6358                           | [T/G]       | NA                                         |
| Ca_Desi_Ch_scaffold00698_6364   | Ca_desi_scaffold   | 6364                           | [T/C]       | NA                                         |
| Ca_Desi_Ch_scaffold00698_6370   | Ca_desi_scaffold   | 6370                           | [T/C]       | NA                                         |
| Ca_Desi_Ch_scaffold00698_6388   | Ca_desi_scaffold   | 6388                           | [A/G]       | NA                                         |
| Ca_Desi_Ch_scaffold00698_6403   | Ca_desi_scaffold   | 6403                           | [T/G]       | NA                                         |
| Ca_Desi_Ch_scaffold00698_34498  | Ca_desi_scaffold   | 34498                          | [T/C]       | NA                                         |
| Ca_Desi_Ch_scaffold00698_34626  | Ca_desi_scaffold   | 34626                          | [T/G]       | NA                                         |
| Ca_Desi_Ch_scaffold00698_34669  | Ca_desi_scaffold   | 34669                          | [T/A]       | NA                                         |
| Ca_Desi_Ch_scaffold00698_34796  | Ca_desi_scaffold   | 34796                          | [G/A]       | NA                                         |
| Ca_Desi_Ch_scaffold00698_34798  | Ca_desi_scaffold   | 34798                          | [G/A]       | NA                                         |
| Ca_Desi_Ch_scaffold00698_34800  | Ca_desi_scaffold   | 34800                          | [G/A]       | NA                                         |
| Ca_Desi_Ch_scaffold00698_34931  | Ca_desi_scaffold   | 34931                          | [A/G]       | NA                                         |
| Ca_Desi_Ch_scaffold00698_93664  | Ca_desi_scaffold   | 93664                          | [T/G]       | NA                                         |
| Ca_Desi_Ch_scaffold00698_93668  | Ca_desi_scaffold   | 93668                          | [T/G]       | NA                                         |
| Ca_Desi_Ch_scaffold00698_93674  | Ca_desi_scaffold   | 93674                          | [T/G]       | NA                                         |
| Ca_Desi_Ch_scaffold00698_96099  | Ca_desi_scaffold   | 96099                          | [C/A]       | NA                                         |



| <b>SNP IDs</b>                  | <b>Chromosomes</b> | <b>Physical positions (bp)</b> | <b>SNPs</b> | <b>NCBI SNPdb accession IDs (NCBI_ss#)</b> |
|---------------------------------|--------------------|--------------------------------|-------------|--------------------------------------------|
| Ca_Desi_Ch_scaffold00698_96104  | Ca_desi_scaffold   | 96104                          | [A/C]       | NA                                         |
| Ca_Desi_Ch_scaffold00698_96116  | Ca_desi_scaffold   | 96116                          | [A/T]       | NA                                         |
| Ca_Desi_Ch_scaffold00698_107632 | Ca_desi_scaffold   | 107632                         | [T/C]       | NA                                         |
| Ca_Desi_Ch_scaffold00698_108740 | Ca_desi_scaffold   | 108740                         | [A/C]       | NA                                         |
| Ca_Desi_Ch_scaffold00703_53523  | Ca_desi_scaffold   | 53523                          | [A/G]       | NA                                         |
| Ca_Desi_Ch_scaffold00703_98932  | Ca_desi_scaffold   | 98932                          | [G/C]       | NA                                         |
| Ca_Desi_Ch_scaffold00710_59429  | Ca_desi_scaffold   | 59429                          | [T/C]       | NA                                         |
| Ca_Desi_Ch_scaffold00714_76609  | Ca_desi_scaffold   | 76609                          | [T/C]       | NA                                         |
| Ca_Desi_Ch_scaffold00714_76626  | Ca_desi_scaffold   | 76626                          | [T/C]       | NA                                         |
| Ca_Desi_Ch_scaffold00714_76630  | Ca_desi_scaffold   | 76630                          | [A/G]       | NA                                         |
| Ca_Desi_Ch_scaffold00714_76633  | Ca_desi_scaffold   | 76633                          | [T/G]       | NA                                         |
| Ca_Desi_Ch_scaffold00715_5631   | Ca_desi_scaffold   | 5631                           | [A/C]       | NA                                         |
| Ca_Desi_Ch_scaffold00715_5647   | Ca_desi_scaffold   | 5647                           | [G/C]       | NA                                         |
| Ca_Desi_Ch_scaffold00717_19313  | Ca_desi_scaffold   | 19313                          | [T/C]       | NA                                         |
| Ca_Desi_Ch_scaffold00717_19324  | Ca_desi_scaffold   | 19324                          | [T/G]       | NA                                         |
| Ca_Desi_Ch_scaffold00718_42563  | Ca_desi_scaffold   | 42563                          | [T/C]       | NA                                         |
| Ca_Desi_Ch_scaffold00718_42569  | Ca_desi_scaffold   | 42569                          | [T/C]       | NA                                         |
| Ca_Desi_Ch_scaffold00718_42571  | Ca_desi_scaffold   | 42571                          | [A/C]       | NA                                         |
| Ca_Desi_Ch_scaffold00718_42599  | Ca_desi_scaffold   | 42599                          | [T/C]       | NA                                         |
| Ca_Desi_Ch_scaffold00719_108890 | Ca_desi_scaffold   | 108890                         | [A/C]       | NA                                         |
| Ca_Desi_Ch_scaffold00719_108923 | Ca_desi_scaffold   | 108923                         | [T/G]       | NA                                         |
| Ca_Desi_Ch_scaffold00719_108926 | Ca_desi_scaffold   | 108926                         | [T/G]       | NA                                         |
| Ca_Desi_Ch_scaffold00724_86377  | Ca_desi_scaffold   | 86377                          | [C/T]       | NA                                         |
| Ca_Desi_Ch_scaffold00724_86398  | Ca_desi_scaffold   | 86398                          | [A/G]       | NA                                         |
| Ca_Desi_Ch_scaffold00725_103102 | Ca_desi_scaffold   | 103102                         | [A/T]       | NA                                         |
| Ca_Desi_Ch_scaffold00725_103103 | Ca_desi_scaffold   | 103103                         | [A/C]       | NA                                         |
| Ca_Desi_Ch_scaffold00725_103104 | Ca_desi_scaffold   | 103104                         | [G/T]       | NA                                         |
| Ca_Desi_Ch_scaffold00726_55116  | Ca_desi_scaffold   | 55116                          | [C/T]       | NA                                         |
| Ca_Desi_Ch_scaffold00726_81476  | Ca_desi_scaffold   | 81476                          | [T/G]       | NA                                         |
| Ca_Desi_Ch_scaffold00726_81509  | Ca_desi_scaffold   | 81509                          | [T/G]       | NA                                         |
| Ca_Desi_Ch_scaffold00726_81968  | Ca_desi_scaffold   | 81968                          | [A/T]       | NA                                         |
| Ca_Desi_Ch_scaffold00726_82006  | Ca_desi_scaffold   | 82006                          | [T/G]       | NA                                         |
| Ca_Desi_Ch_scaffold00726_82058  | Ca_desi_scaffold   | 82058                          | [T/A]       | NA                                         |
| Ca_Desi_Ch_scaffold00726_82157  | Ca_desi_scaffold   | 82157                          | [A/C]       | NA                                         |

| <b>SNP IDs</b>                    | <b>Chromosomes</b> | <b>Physical positions (bp)</b> | <b>SNPs</b> | <b>NCBI SNPdb accession IDs (NCBI_ss#)</b> |
|-----------------------------------|--------------------|--------------------------------|-------------|--------------------------------------------|
| Ca_Desig_Chr_scaffold00727_60075  | Ca_desig_scaffold  | 60075                          | [T/C]       | NA                                         |
| Ca_Desig_Chr_scaffold00727_60291  | Ca_desig_scaffold  | 60291                          | [T/G]       | NA                                         |
| Ca_Desig_Chr_scaffold00727_116463 | Ca_desig_scaffold  | 116463                         | [A/C]       | NA                                         |
| Ca_Desig_Chr_scaffold00727_116479 | Ca_desig_scaffold  | 116479                         | [T/A]       | NA                                         |
| Ca_Desig_Chr_scaffold00728_15425  | Ca_desig_scaffold  | 15425                          | [A/C]       | NA                                         |
| Ca_Desig_Chr_scaffold00728_16410  | Ca_desig_scaffold  | 16410                          | [G/C]       | NA                                         |
| Ca_Desig_Chr_scaffold00728_16411  | Ca_desig_scaffold  | 16411                          | [G/T]       | NA                                         |
| Ca_Desig_Chr_scaffold00729_47081  | Ca_desig_scaffold  | 47081                          | [A/C]       | NA                                         |
| Ca_Desig_Chr_scaffold00729_47086  | Ca_desig_scaffold  | 47086                          | [A/C]       | NA                                         |
| Ca_Desig_Chr_scaffold00729_47103  | Ca_desig_scaffold  | 47103                          | [A/G]       | NA                                         |
| Ca_Desig_Chr_scaffold00729_47124  | Ca_desig_scaffold  | 47124                          | [A/T]       | NA                                         |
| Ca_Desig_Chr_scaffold00729_47134  | Ca_desig_scaffold  | 47134                          | [A/C]       | NA                                         |
| Ca_Desig_Chr_scaffold00729_47139  | Ca_desig_scaffold  | 47139                          | [A/C]       | NA                                         |
| Ca_Desig_Chr_scaffold00729_47147  | Ca_desig_scaffold  | 47147                          | [T/G]       | NA                                         |
| Ca_Desig_Chr_scaffold00729_47162  | Ca_desig_scaffold  | 47162                          | [A/G]       | NA                                         |
| Ca_Desig_Chr_scaffold00729_47166  | Ca_desig_scaffold  | 47166                          | [A/G]       | NA                                         |
| Ca_Desig_Chr_scaffold00729_47169  | Ca_desig_scaffold  | 47169                          | [T/C]       | NA                                         |
| Ca_Desig_Chr_scaffold00729_47190  | Ca_desig_scaffold  | 47190                          | [A/C]       | NA                                         |
| Ca_Desig_Chr_scaffold00729_47220  | Ca_desig_scaffold  | 47220                          | [T/A]       | NA                                         |
| Ca_Desig_Chr_scaffold00729_47911  | Ca_desig_scaffold  | 47911                          | [A/G]       | NA                                         |
| Ca_Desig_Chr_scaffold00729_47924  | Ca_desig_scaffold  | 47924                          | [T/C]       | NA                                         |
| Ca_Desig_Chr_scaffold00729_47926  | Ca_desig_scaffold  | 47926                          | [T/C]       | NA                                         |
| Ca_Desig_Chr_scaffold00729_47930  | Ca_desig_scaffold  | 47930                          | [A/G]       | NA                                         |
| Ca_Desig_Chr_scaffold00729_47939  | Ca_desig_scaffold  | 47939                          | [A/G]       | NA                                         |
| Ca_Desig_Chr_scaffold00729_47945  | Ca_desig_scaffold  | 47945                          | [A/G]       | NA                                         |
| Ca_Desig_Chr_scaffold00729_47950  | Ca_desig_scaffold  | 47950                          | [T/C]       | NA                                         |
| Ca_Desig_Chr_scaffold00729_47952  | Ca_desig_scaffold  | 47952                          | [C/G]       | NA                                         |
| Ca_Desig_Chr_scaffold00729_47957  | Ca_desig_scaffold  | 47957                          | [A/G]       | NA                                         |
| Ca_Desig_Chr_scaffold00729_47977  | Ca_desig_scaffold  | 47977                          | [A/G]       | NA                                         |
| Ca_Desig_Chr_scaffold00729_47982  | Ca_desig_scaffold  | 47982                          | [T/G]       | NA                                         |
| Ca_Desig_Chr_scaffold00729_47985  | Ca_desig_scaffold  | 47985                          | [C/G]       | NA                                         |
| Ca_Desig_Chr_scaffold00729_48002  | Ca_desig_scaffold  | 48002                          | [A/C]       | NA                                         |
| Ca_Desig_Chr_scaffold00729_48009  | Ca_desig_scaffold  | 48009                          | [T/G]       | NA                                         |
| Ca_Desig_Chr_scaffold00729_53519  | Ca_desig_scaffold  | 53519                          | [G/C]       | NA                                         |

| <b>SNP IDs</b>                   | <b>Chromosomes</b> | <b>Physical positions (bp)</b> | <b>SNPs</b> | <b>NCBI SNPdb accession IDs (NCBI_ss#)</b> |
|----------------------------------|--------------------|--------------------------------|-------------|--------------------------------------------|
| Ca_Desi_Chrc_scaffold00730_43618 | Ca_desi_scaffold   | 43618                          | [A/G]       | NA                                         |
| Ca_Desi_Chrc_scaffold00730_43682 | Ca_desi_scaffold   | 43682                          | [A/G]       | NA                                         |
| Ca_Desi_Chrc_scaffold00730_43694 | Ca_desi_scaffold   | 43694                          | [A/C]       | NA                                         |
| Ca_Desi_Chrc_scaffold00730_43700 | Ca_desi_scaffold   | 43700                          | [A/T]       | NA                                         |
| Ca_Desi_Chrc_scaffold00730_46329 | Ca_desi_scaffold   | 46329                          | [A/T]       | NA                                         |
| Ca_Desi_Chrc_scaffold00730_65023 | Ca_desi_scaffold   | 65023                          | [T/A]       | NA                                         |
| Ca_Desi_Chrc_scaffold00730_99479 | Ca_desi_scaffold   | 99479                          | [G/C]       | NA                                         |
| Ca_Desi_Chrc_scaffold00730_99480 | Ca_desi_scaffold   | 99480                          | [G/T]       | NA                                         |
| Ca_Desi_Chrc_scaffold00731_3601  | Ca_desi_scaffold   | 3601                           | [A/G]       | NA                                         |
| Ca_Desi_Chrc_scaffold00731_3779  | Ca_desi_scaffold   | 3779                           | [A/G]       | NA                                         |
| Ca_Desi_Chrc_scaffold00731_3780  | Ca_desi_scaffold   | 3780                           | [G/T]       | NA                                         |
| Ca_Desi_Chrc_scaffold00731_7761  | Ca_desi_scaffold   | 7761                           | [T/C]       | NA                                         |
| Ca_Desi_Chrc_scaffold00731_8939  | Ca_desi_scaffold   | 8939                           | [C/A]       | NA                                         |
| Ca_Desi_Chrc_scaffold00731_8952  | Ca_desi_scaffold   | 8952                           | [A/C]       | NA                                         |
| Ca_Desi_Chrc_scaffold00731_9088  | Ca_desi_scaffold   | 9088                           | [A/G]       | NA                                         |
| Ca_Desi_Chrc_scaffold00731_9095  | Ca_desi_scaffold   | 9095                           | [T/G]       | NA                                         |
| Ca_Desi_Chrc_scaffold00731_9110  | Ca_desi_scaffold   | 9110                           | [G/A]       | NA                                         |
| Ca_Desi_Chrc_scaffold00731_69135 | Ca_desi_scaffold   | 69135                          | [A/T]       | NA                                         |
| Ca_Desi_Chrc_scaffold00731_71112 | Ca_desi_scaffold   | 71112                          | [C/T]       | NA                                         |
| Ca_Desi_Chrc_scaffold00731_72993 | Ca_desi_scaffold   | 72993                          | [A/G]       | NA                                         |
| Ca_Desi_Chrc_scaffold00731_74182 | Ca_desi_scaffold   | 74182                          | [T/C]       | NA                                         |
| Ca_Desi_Chrc_scaffold00731_74184 | Ca_desi_scaffold   | 74184                          | [A/G]       | NA                                         |
| Ca_Desi_Chrc_scaffold00731_74192 | Ca_desi_scaffold   | 74192                          | [A/C]       | NA                                         |
| Ca_Desi_Chrc_scaffold00731_74207 | Ca_desi_scaffold   | 74207                          | [A/C]       | NA                                         |
| Ca_Desi_Chrc_scaffold00731_74226 | Ca_desi_scaffold   | 74226                          | [T/C]       | NA                                         |
| Ca_Desi_Chrc_scaffold00731_74291 | Ca_desi_scaffold   | 74291                          | [C/A]       | NA                                         |
| Ca_Desi_Chrc_scaffold00731_74304 | Ca_desi_scaffold   | 74304                          | [G/A]       | NA                                         |
| Ca_Desi_Chrc_scaffold00733_9373  | Ca_desi_scaffold   | 9373                           | [A/G]       | NA                                         |
| Ca_Desi_Chrc_scaffold00733_9398  | Ca_desi_scaffold   | 9398                           | [T/C]       | NA                                         |
| Ca_Desi_Chrc_scaffold00733_9431  | Ca_desi_scaffold   | 9431                           | [T/A]       | NA                                         |
| Ca_Desi_Chrc_scaffold00735_8618  | Ca_desi_scaffold   | 8618                           | [T/C]       | NA                                         |
| Ca_Desi_Chrc_scaffold00735_8651  | Ca_desi_scaffold   | 8651                           | [T/C]       | NA                                         |
| Ca_Desi_Chrc_scaffold00735_8663  | Ca_desi_scaffold   | 8663                           | [A/G]       | NA                                         |
| Ca_Desi_Chrc_scaffold00741_98175 | Ca_desi_scaffold   | 98175                          | [A/C]       | NA                                         |

| <b>SNP IDs</b>                  | <b>Chromosomes</b> | <b>Physical positions (bp)</b> | <b>SNPs</b> | <b>NCBI SNPdb accession IDs (NCBI_ss#)</b> |
|---------------------------------|--------------------|--------------------------------|-------------|--------------------------------------------|
| Ca_Desi_Ch_scaffold00741_98183  | Ca_desi_scaffold   | 98183                          | [A/C]       | NA                                         |
| Ca_Desi_Ch_scaffold00741_98191  | Ca_desi_scaffold   | 98191                          | [T/C]       | NA                                         |
| Ca_Desi_Ch_scaffold00741_98210  | Ca_desi_scaffold   | 98210                          | [T/G]       | NA                                         |
| Ca_Desi_Ch_scaffold00741_98221  | Ca_desi_scaffold   | 98221                          | [A/G]       | NA                                         |
| Ca_Desi_Ch_scaffold00741_98520  | Ca_desi_scaffold   | 98520                          | [A/C]       | NA                                         |
| Ca_Desi_Ch_scaffold00741_114447 | Ca_desi_scaffold   | 114447                         | [T/G]       | NA                                         |
| Ca_Desi_Ch_scaffold00741_120096 | Ca_desi_scaffold   | 120096                         | [T/G]       | NA                                         |
| Ca_Desi_Ch_scaffold00741_120129 | Ca_desi_scaffold   | 120129                         | [A/T]       | NA                                         |
| Ca_Desi_Ch_scaffold00741_120130 | Ca_desi_scaffold   | 120130                         | [G/T]       | NA                                         |
| Ca_Desi_Ch_scaffold00741_120154 | Ca_desi_scaffold   | 120154                         | [C/G]       | NA                                         |
| Ca_Desi_Ch_scaffold00744_39013  | Ca_desi_scaffold   | 39013                          | [T/C]       | NA                                         |
| Ca_Desi_Ch_scaffold00745_16240  | Ca_desi_scaffold   | 16240                          | [T/C]       | NA                                         |
| Ca_Desi_Ch_scaffold00745_58402  | Ca_desi_scaffold   | 58402                          | [G/A]       | NA                                         |
| Ca_Desi_Ch_scaffold00745_58405  | Ca_desi_scaffold   | 58405                          | [A/G]       | NA                                         |
| Ca_Desi_Ch_scaffold00745_61013  | Ca_desi_scaffold   | 61013                          | [A/C]       | NA                                         |
| Ca_Desi_Ch_scaffold00745_61248  | Ca_desi_scaffold   | 61248                          | [T/A]       | NA                                         |
| Ca_Desi_Ch_scaffold00745_63716  | Ca_desi_scaffold   | 63716                          | [A/G]       | NA                                         |
| Ca_Desi_Ch_scaffold00745_69808  | Ca_desi_scaffold   | 69808                          | [A/G]       | NA                                         |
| Ca_Desi_Ch_scaffold00745_69832  | Ca_desi_scaffold   | 69832                          | [A/C]       | NA                                         |
| Ca_Desi_Ch_scaffold00748_31268  | Ca_desi_scaffold   | 31268                          | [T/G]       | NA                                         |
| Ca_Desi_Ch_scaffold00748_72276  | Ca_desi_scaffold   | 72276                          | [A/C]       | NA                                         |
| Ca_Desi_Ch_scaffold00748_72311  | Ca_desi_scaffold   | 72311                          | [A/C]       | NA                                         |
| Ca_Desi_Ch_scaffold00748_72742  | Ca_desi_scaffold   | 72742                          | [A/G]       | NA                                         |
| Ca_Desi_Ch_scaffold00748_72764  | Ca_desi_scaffold   | 72764                          | [T/C]       | NA                                         |
| Ca_Desi_Ch_scaffold00748_72777  | Ca_desi_scaffold   | 72777                          | [A/G]       | NA                                         |
| Ca_Desi_Ch_scaffold00748_72779  | Ca_desi_scaffold   | 72779                          | [A/G]       | NA                                         |
| Ca_Desi_Ch_scaffold00748_72781  | Ca_desi_scaffold   | 72781                          | [T/G]       | NA                                         |
| Ca_Desi_Ch_scaffold00748_72812  | Ca_desi_scaffold   | 72812                          | [A/C]       | NA                                         |
| Ca_Desi_Ch_scaffold00748_72821  | Ca_desi_scaffold   | 72821                          | [A/G]       | NA                                         |
| Ca_Desi_Ch_scaffold00748_89411  | Ca_desi_scaffold   | 89411                          | [C/A]       | NA                                         |
| Ca_Desi_Ch_scaffold00748_89412  | Ca_desi_scaffold   | 89412                          | [C/G]       | NA                                         |
| Ca_Desi_Ch_scaffold00748_89414  | Ca_desi_scaffold   | 89414                          | [A/T]       | NA                                         |
| Ca_Desi_Ch_scaffold00748_100666 | Ca_desi_scaffold   | 100666                         | [T/G]       | NA                                         |
| Ca_Desi_Ch_scaffold00750_37798  | Ca_desi_scaffold   | 37798                          | [T/G]       | NA                                         |

| <b>SNP IDs</b>                    | <b>Chromosomes</b> | <b>Physical positions (bp)</b> | <b>SNPs</b> | <b>NCBI SNPdb accession IDs (NCBI_ss#)</b> |
|-----------------------------------|--------------------|--------------------------------|-------------|--------------------------------------------|
| Ca_Desig_Chr_scaffold00750_37803  | Ca_desig_scaffold  | 37803                          | [T/C]       | NA                                         |
| Ca_Desig_Chr_scaffold00750_37832  | Ca_desig_scaffold  | 37832                          | [T/C]       | NA                                         |
| Ca_Desig_Chr_scaffold00750_37856  | Ca_desig_scaffold  | 37856                          | [G/A]       | NA                                         |
| Ca_Desig_Chr_scaffold00750_93806  | Ca_desig_scaffold  | 93806                          | [A/G]       | NA                                         |
| Ca_Desig_Chr_scaffold00751_11586  | Ca_desig_scaffold  | 11586                          | [T/C]       | NA                                         |
| Ca_Desig_Chr_scaffold00751_11598  | Ca_desig_scaffold  | 11598                          | [A/G]       | NA                                         |
| Ca_Desig_Chr_scaffold00751_11603  | Ca_desig_scaffold  | 11603                          | [T/C]       | NA                                         |
| Ca_Desig_Chr_scaffold00751_11643  | Ca_desig_scaffold  | 11643                          | [T/C]       | NA                                         |
| Ca_Desig_Chr_scaffold00751_14615  | Ca_desig_scaffold  | 14615                          | [T/G]       | NA                                         |
| Ca_Desig_Chr_scaffold00751_83815  | Ca_desig_scaffold  | 83815                          | [T/G]       | NA                                         |
| Ca_Desig_Chr_scaffold00751_88948  | Ca_desig_scaffold  | 88948                          | [T/G]       | NA                                         |
| Ca_Desig_Chr_scaffold00751_95712  | Ca_desig_scaffold  | 95712                          | [A/C]       | NA                                         |
| Ca_Desig_Chr_scaffold00751_114869 | Ca_desig_scaffold  | 114869                         | [T/G]       | NA                                         |
| Ca_Desig_Chr_scaffold00752_60953  | Ca_desig_scaffold  | 60953                          | [A/G]       | NA                                         |
| Ca_Desig_Chr_scaffold00760_119393 | Ca_desig_scaffold  | 119393                         | [T/C]       | NA                                         |
| Ca_Desig_Chr_scaffold00760_119395 | Ca_desig_scaffold  | 119395                         | [A/G]       | NA                                         |
| Ca_Desig_Chr_scaffold00761_88090  | Ca_desig_scaffold  | 88090                          | [T/C]       | NA                                         |
| Ca_Desig_Chr_scaffold00761_88093  | Ca_desig_scaffold  | 88093                          | [T/G]       | NA                                         |
| Ca_Desig_Chr_scaffold00761_88111  | Ca_desig_scaffold  | 88111                          | [T/G]       | NA                                         |
| Ca_Desig_Chr_scaffold00761_88112  | Ca_desig_scaffold  | 88112                          | [T/G]       | NA                                         |
| Ca_Desig_Chr_scaffold00761_88114  | Ca_desig_scaffold  | 88114                          | [G/A]       | NA                                         |
| Ca_Desig_Chr_scaffold00761_88120  | Ca_desig_scaffold  | 88120                          | [G/A]       | NA                                         |
| Ca_Desig_Chr_scaffold00761_88134  | Ca_desig_scaffold  | 88134                          | [T/C]       | NA                                         |
| Ca_Desig_Chr_scaffold00767_11936  | Ca_desig_scaffold  | 11936                          | [C/G]       | NA                                         |
| Ca_Desig_Chr_scaffold00767_11939  | Ca_desig_scaffold  | 11939                          | [C/T]       | NA                                         |
| Ca_Desig_Chr_scaffold00767_11940  | Ca_desig_scaffold  | 11940                          | [A/G]       | NA                                         |
| Ca_Desig_Chr_scaffold00767_11942  | Ca_desig_scaffold  | 11942                          | [A/G]       | NA                                         |
| Ca_Desig_Chr_scaffold00767_14175  | Ca_desig_scaffold  | 14175                          | [A/C]       | NA                                         |
| Ca_Desig_Chr_scaffold00767_17926  | Ca_desig_scaffold  | 17926                          | [T/A]       | NA                                         |
| Ca_Desig_Chr_scaffold00768_40801  | Ca_desig_scaffold  | 40801                          | [A/G]       | NA                                         |
| Ca_Desig_Chr_scaffold00768_40835  | Ca_desig_scaffold  | 40835                          | [A/G]       | NA                                         |
| Ca_Desig_Chr_scaffold00768_78784  | Ca_desig_scaffold  | 78784                          | [G/T]       | NA                                         |
| Ca_Desig_Chr_scaffold00768_109481 | Ca_desig_scaffold  | 109481                         | [G/T]       | NA                                         |
| Ca_Desig_Chr_scaffold00769_11130  | Ca_desig_scaffold  | 11130                          | [A/T]       | NA                                         |

| <b>SNP IDs</b>                    | <b>Chromosomes</b> | <b>Physical positions (bp)</b> | <b>SNPs</b> | <b>NCBI SNPdb accession IDs (NCBI_ss#)</b> |
|-----------------------------------|--------------------|--------------------------------|-------------|--------------------------------------------|
| Ca_Desig_Chr_scaffold00769_11131  | Ca_desig_scaffold  | 11131                          | [G/C]       | NA                                         |
| Ca_Desig_Chr_scaffold00769_11132  | Ca_desig_scaffold  | 11132                          | [A/C]       | NA                                         |
| Ca_Desig_Chr_scaffold00769_39191  | Ca_desig_scaffold  | 39191                          | [T/A]       | NA                                         |
| Ca_Desig_Chr_scaffold00769_100727 | Ca_desig_scaffold  | 100727                         | [C/T]       | NA                                         |
| Ca_Desig_Chr_scaffold00770_81211  | Ca_desig_scaffold  | 81211                          | [T/G]       | NA                                         |
| Ca_Desig_Chr_scaffold00770_106106 | Ca_desig_scaffold  | 106106                         | [A/C]       | NA                                         |
| Ca_Desig_Chr_scaffold00772_64787  | Ca_desig_scaffold  | 64787                          | [T/A]       | NA                                         |
| Ca_Desig_Chr_scaffold00772_64788  | Ca_desig_scaffold  | 64788                          | [C/A]       | NA                                         |
| Ca_Desig_Chr_scaffold00772_64789  | Ca_desig_scaffold  | 64789                          | [T/G]       | NA                                         |
| Ca_Desig_Chr_scaffold00772_95800  | Ca_desig_scaffold  | 95800                          | [A/G]       | NA                                         |
| Ca_Desig_Chr_scaffold00772_95807  | Ca_desig_scaffold  | 95807                          | [A/G]       | NA                                         |
| Ca_Desig_Chr_scaffold00773_22455  | Ca_desig_scaffold  | 22455                          | [A/G]       | NA                                         |
| Ca_Desig_Chr_scaffold00773_22470  | Ca_desig_scaffold  | 22470                          | [T/C]       | NA                                         |
| Ca_Desig_Chr_scaffold00773_106762 | Ca_desig_scaffold  | 106762                         | [T/G]       | NA                                         |
| Ca_Desig_Chr_scaffold00773_106774 | Ca_desig_scaffold  | 106774                         | [A/C]       | NA                                         |
| Ca_Desig_Chr_scaffold00773_108182 | Ca_desig_scaffold  | 108182                         | [T/G]       | NA                                         |
| Ca_Desig_Chr_scaffold00774_100957 | Ca_desig_scaffold  | 100957                         | [A/C]       | NA                                         |
| Ca_Desig_Chr_scaffold00774_101025 | Ca_desig_scaffold  | 101025                         | [T/G]       | NA                                         |
| Ca_Desig_Chr_scaffold00774_101044 | Ca_desig_scaffold  | 101044                         | [C/T]       | NA                                         |
| Ca_Desig_Chr_scaffold00776_18039  | Ca_desig_scaffold  | 18039                          | [T/C]       | NA                                         |
| Ca_Desig_Chr_scaffold00776_18132  | Ca_desig_scaffold  | 18132                          | [T/G]       | NA                                         |
| Ca_Desig_Chr_scaffold00776_18747  | Ca_desig_scaffold  | 18747                          | [T/G]       | NA                                         |
| Ca_Desig_Chr_scaffold00776_39821  | Ca_desig_scaffold  | 39821                          | [A/T]       | NA                                         |
| Ca_Desig_Chr_scaffold00776_39914  | Ca_desig_scaffold  | 39914                          | [A/C]       | NA                                         |
| Ca_Desig_Chr_scaffold00776_51308  | Ca_desig_scaffold  | 51308                          | [C/A]       | NA                                         |
| Ca_Desig_Chr_scaffold00776_79101  | Ca_desig_scaffold  | 79101                          | [T/G]       | NA                                         |
| Ca_Desig_Chr_scaffold00776_87753  | Ca_desig_scaffold  | 87753                          | [T/C]       | NA                                         |
| Ca_Desig_Chr_scaffold00776_88621  | Ca_desig_scaffold  | 88621                          | [T/G]       | NA                                         |
| Ca_Desig_Chr_scaffold00776_88941  | Ca_desig_scaffold  | 88941                          | [T/G]       | NA                                         |
| Ca_Desig_Chr_scaffold00776_99806  | Ca_desig_scaffold  | 99806                          | [C/G]       | NA                                         |
| Ca_Desig_Chr_scaffold00777_32922  | Ca_desig_scaffold  | 32922                          | [T/C]       | NA                                         |
| Ca_Desig_Chr_scaffold00777_32929  | Ca_desig_scaffold  | 32929                          | [A/G]       | NA                                         |
| Ca_Desig_Chr_scaffold00777_45106  | Ca_desig_scaffold  | 45106                          | [A/G]       | NA                                         |
| Ca_Desig_Chr_scaffold00777_45112  | Ca_desig_scaffold  | 45112                          | [A/G]       | NA                                         |

| <b>SNP IDs</b>                  | <b>Chromosomes</b> | <b>Physical positions (bp)</b> | <b>SNPs</b> | <b>NCBI SNPdb accession IDs (NCBI_ss#)</b> |
|---------------------------------|--------------------|--------------------------------|-------------|--------------------------------------------|
| Ca_Desi_Ch_scaffold00777_45133  | Ca_desi_scaffold   | 45133                          | [T/C]       | NA                                         |
| Ca_Desi_Ch_scaffold00777_45137  | Ca_desi_scaffold   | 45137                          | [A/G]       | NA                                         |
| Ca_Desi_Ch_scaffold00777_45156  | Ca_desi_scaffold   | 45156                          | [A/G]       | NA                                         |
| Ca_Desi_Ch_scaffold00777_100226 | Ca_desi_scaffold   | 100226                         | [T/G]       | NA                                         |
| Ca_Desi_Ch_scaffold00777_102421 | Ca_desi_scaffold   | 102421                         | [T/G]       | NA                                         |
| Ca_Desi_Ch_scaffold00777_102425 | Ca_desi_scaffold   | 102425                         | [A/G]       | NA                                         |
| Ca_Desi_Ch_scaffold00777_102443 | Ca_desi_scaffold   | 102443                         | [T/C]       | NA                                         |
| Ca_Desi_Ch_scaffold00778_52260  | Ca_desi_scaffold   | 52260                          | [A/C]       | NA                                         |
| Ca_Desi_Ch_scaffold00778_52262  | Ca_desi_scaffold   | 52262                          | [T/C]       | NA                                         |
| Ca_Desi_Ch_scaffold00778_63682  | Ca_desi_scaffold   | 63682                          | [A/C]       | NA                                         |
| Ca_Desi_Ch_scaffold00778_63707  | Ca_desi_scaffold   | 63707                          | [T/C]       | NA                                         |
| Ca_Desi_Ch_scaffold00778_75488  | Ca_desi_scaffold   | 75488                          | [T/G]       | NA                                         |
| Ca_Desi_Ch_scaffold00778_75513  | Ca_desi_scaffold   | 75513                          | [T/G]       | NA                                         |
| Ca_Desi_Ch_scaffold00778_75518  | Ca_desi_scaffold   | 75518                          | [T/C]       | NA                                         |
| Ca_Desi_Ch_scaffold00778_76884  | Ca_desi_scaffold   | 76884                          | [T/C]       | NA                                         |
| Ca_Desi_Ch_scaffold00778_76890  | Ca_desi_scaffold   | 76890                          | [A/T]       | NA                                         |
| Ca_Desi_Ch_scaffold00778_76899  | Ca_desi_scaffold   | 76899                          | [T/C]       | NA                                         |
| Ca_Desi_Ch_scaffold00778_82393  | Ca_desi_scaffold   | 82393                          | [T/G]       | NA                                         |
| Ca_Desi_Ch_scaffold00778_82425  | Ca_desi_scaffold   | 82425                          | [T/C]       | NA                                         |
| Ca_Desi_Ch_scaffold00778_111132 | Ca_desi_scaffold   | 111132                         | [T/A]       | NA                                         |
| Ca_Desi_Ch_scaffold00778_111169 | Ca_desi_scaffold   | 111169                         | [A/C]       | NA                                         |
| Ca_Desi_Ch_scaffold00778_111174 | Ca_desi_scaffold   | 111174                         | [T/C]       | NA                                         |
| Ca_Desi_Ch_scaffold00778_111194 | Ca_desi_scaffold   | 111194                         | [A/C]       | NA                                         |
| Ca_Desi_Ch_scaffold00779_46177  | Ca_desi_scaffold   | 46177                          | [A/G]       | NA                                         |
| Ca_Desi_Ch_scaffold00779_46184  | Ca_desi_scaffold   | 46184                          | [T/C]       | NA                                         |
| Ca_Desi_Ch_scaffold00779_46214  | Ca_desi_scaffold   | 46214                          | [T/C]       | NA                                         |
| Ca_Desi_Ch_scaffold00782_23065  | Ca_desi_scaffold   | 23065                          | [A/G]       | NA                                         |
| Ca_Desi_Ch_scaffold00782_31121  | Ca_desi_scaffold   | 31121                          | [A/G]       | NA                                         |
| Ca_Desi_Ch_scaffold00782_34465  | Ca_desi_scaffold   | 34465                          | [A/G]       | NA                                         |
| Ca_Desi_Ch_scaffold00782_51681  | Ca_desi_scaffold   | 51681                          | [T/C]       | NA                                         |
| Ca_Desi_Ch_scaffold00782_76425  | Ca_desi_scaffold   | 76425                          | [T/C]       | NA                                         |
| Ca_Desi_Ch_scaffold00782_76610  | Ca_desi_scaffold   | 76610                          | [A/C]       | NA                                         |
| Ca_Desi_Ch_scaffold00785_34103  | Ca_desi_scaffold   | 34103                          | [T/G]       | NA                                         |
| Ca_Desi_Ch_scaffold00788_76043  | Ca_desi_scaffold   | 76043                          | [T/C]       | NA                                         |

| <b>SNP IDs</b>                    | <b>Chromosomes</b> | <b>Physical positions (bp)</b> | <b>SNPs</b> | <b>NCBI SNPdb accession IDs (NCBI_ss#)</b> |
|-----------------------------------|--------------------|--------------------------------|-------------|--------------------------------------------|
| Ca_Desig_Chr_scaffold00788_76066  | Ca_desig_scaffold  | 76066                          | [A/T]       | NA                                         |
| Ca_Desig_Chr_scaffold00788_110617 | Ca_desig_scaffold  | 110617                         | [A/C]       | NA                                         |
| Ca_Desig_Chr_scaffold00789_38055  | Ca_desig_scaffold  | 38055                          | [T/G]       | NA                                         |
| Ca_Desig_Chr_scaffold00789_38058  | Ca_desig_scaffold  | 38058                          | [T/C]       | NA                                         |
| Ca_Desig_Chr_scaffold00789_38103  | Ca_desig_scaffold  | 38103                          | [A/T]       | NA                                         |
| Ca_Desig_Chr_scaffold00789_40975  | Ca_desig_scaffold  | 40975                          | [T/A]       | NA                                         |
| Ca_Desig_Chr_scaffold00789_40998  | Ca_desig_scaffold  | 40998                          | [A/G]       | NA                                         |
| Ca_Desig_Chr_scaffold00789_43641  | Ca_desig_scaffold  | 43641                          | [T/G]       | NA                                         |
| Ca_Desig_Chr_scaffold00789_43763  | Ca_desig_scaffold  | 43763                          | [T/C]       | NA                                         |
| Ca_Desig_Chr_scaffold00789_43781  | Ca_desig_scaffold  | 43781                          | [A/G]       | NA                                         |
| Ca_Desig_Chr_scaffold00789_43797  | Ca_desig_scaffold  | 43797                          | [T/C]       | NA                                         |
| Ca_Desig_Chr_scaffold00789_63236  | Ca_desig_scaffold  | 63236                          | [T/C]       | NA                                         |
| Ca_Desig_Chr_scaffold00789_63240  | Ca_desig_scaffold  | 63240                          | [A/C]       | NA                                         |
| Ca_Desig_Chr_scaffold00789_88207  | Ca_desig_scaffold  | 88207                          | [T/G]       | NA                                         |
| Ca_Desig_Chr_scaffold00789_88375  | Ca_desig_scaffold  | 88375                          | [T/A]       | NA                                         |
| Ca_Desig_Chr_scaffold00789_88381  | Ca_desig_scaffold  | 88381                          | [T/G]       | NA                                         |
| Ca_Desig_Chr_scaffold00789_88388  | Ca_desig_scaffold  | 88388                          | [T/G]       | NA                                         |
| Ca_Desig_Chr_scaffold00789_88925  | Ca_desig_scaffold  | 88925                          | [T/G]       | NA                                         |
| Ca_Desig_Chr_scaffold00789_88932  | Ca_desig_scaffold  | 88932                          | [T/C]       | NA                                         |
| Ca_Desig_Chr_scaffold00789_88961  | Ca_desig_scaffold  | 88961                          | [A/C]       | NA                                         |
| Ca_Desig_Chr_scaffold00789_88984  | Ca_desig_scaffold  | 88984                          | [A/G]       | NA                                         |
| Ca_Desig_Chr_scaffold00789_89027  | Ca_desig_scaffold  | 89027                          | [A/C]       | NA                                         |
| Ca_Desig_Chr_scaffold00789_113695 | Ca_desig_scaffold  | 113695                         | [A/G]       | NA                                         |
| Ca_Desig_Chr_scaffold00790_75305  | Ca_desig_scaffold  | 75305                          | [T/G]       | NA                                         |
| Ca_Desig_Chr_scaffold00790_75574  | Ca_desig_scaffold  | 75574                          | [G/A]       | NA                                         |
| Ca_Desig_Chr_scaffold00790_75594  | Ca_desig_scaffold  | 75594                          | [T/G]       | NA                                         |
| Ca_Desig_Chr_scaffold00790_78283  | Ca_desig_scaffold  | 78283                          | [T/C]       | NA                                         |
| Ca_Desig_Chr_scaffold00791_52983  | Ca_desig_scaffold  | 52983                          | [G/T]       | NA                                         |
| Ca_Desig_Chr_scaffold00792_11129  | Ca_desig_scaffold  | 11129                          | [G/A]       | NA                                         |
| Ca_Desig_Chr_scaffold00792_11139  | Ca_desig_scaffold  | 11139                          | [G/A]       | NA                                         |
| Ca_Desig_Chr_scaffold00792_11169  | Ca_desig_scaffold  | 11169                          | [A/T]       | NA                                         |
| Ca_Desig_Chr_scaffold00792_33201  | Ca_desig_scaffold  | 33201                          | [A/G]       | NA                                         |
| Ca_Desig_Chr_scaffold00792_33304  | Ca_desig_scaffold  | 33304                          | [A/T]       | NA                                         |
| Ca_Desig_Chr_scaffold00792_33311  | Ca_desig_scaffold  | 33311                          | [A/C]       | NA                                         |



| <b>SNP IDs</b>                    | <b>Chromosomes</b> | <b>Physical positions (bp)</b> | <b>SNPs</b> | <b>NCBI SNPdb accession IDs (NCBI_ss#)</b> |
|-----------------------------------|--------------------|--------------------------------|-------------|--------------------------------------------|
| Ca_Desig_Chr_scaffold00792_51776  | Ca_desig_scaffold  | 51776                          | [A/G]       | NA                                         |
| Ca_Desig_Chr_scaffold00792_109657 | Ca_desig_scaffold  | 109657                         | [A/T]       | NA                                         |
| Ca_Desig_Chr_scaffold00792_111259 | Ca_desig_scaffold  | 111259                         | [T/G]       | NA                                         |
| Ca_Desig_Chr_scaffold00795_15272  | Ca_desig_scaffold  | 15272                          | [G/T]       | NA                                         |
| Ca_Desig_Chr_scaffold00795_41339  | Ca_desig_scaffold  | 41339                          | [T/G]       | NA                                         |
| Ca_Desig_Chr_scaffold00797_21531  | Ca_desig_scaffold  | 21531                          | [A/G]       | NA                                         |
| Ca_Desig_Chr_scaffold00797_21554  | Ca_desig_scaffold  | 21554                          | [A/C]       | NA                                         |
| Ca_Desig_Chr_scaffold00797_21566  | Ca_desig_scaffold  | 21566                          | [A/G]       | NA                                         |
| Ca_Desig_Chr_scaffold00797_21644  | Ca_desig_scaffold  | 21644                          | [T/G]       | NA                                         |
| Ca_Desig_Chr_scaffold00797_47234  | Ca_desig_scaffold  | 47234                          | [A/G]       | NA                                         |
| Ca_Desig_Chr_scaffold00797_47242  | Ca_desig_scaffold  | 47242                          | [T/C]       | NA                                         |
| Ca_Desig_Chr_scaffold00797_47251  | Ca_desig_scaffold  | 47251                          | [T/C]       | NA                                         |
| Ca_Desig_Chr_scaffold00798_26164  | Ca_desig_scaffold  | 26164                          | [A/G]       | NA                                         |
| Ca_Desig_Chr_scaffold00798_36319  | Ca_desig_scaffold  | 36319                          | [C/T]       | NA                                         |
| Ca_Desig_Chr_scaffold00798_36488  | Ca_desig_scaffold  | 36488                          | [A/G]       | NA                                         |
| Ca_Desig_Chr_scaffold00798_38018  | Ca_desig_scaffold  | 38018                          | [C/A]       | NA                                         |
| Ca_Desig_Chr_scaffold00798_38072  | Ca_desig_scaffold  | 38072                          | [G/C]       | NA                                         |
| Ca_Desig_Chr_scaffold00798_38150  | Ca_desig_scaffold  | 38150                          | [C/G]       | NA                                         |
| Ca_Desig_Chr_scaffold00798_42447  | Ca_desig_scaffold  | 42447                          | [T/C]       | NA                                         |
| Ca_Desig_Chr_scaffold00798_42470  | Ca_desig_scaffold  | 42470                          | [A/G]       | NA                                         |
| Ca_Desig_Chr_scaffold00798_42473  | Ca_desig_scaffold  | 42473                          | [T/C]       | NA                                         |
| Ca_Desig_Chr_scaffold00798_43937  | Ca_desig_scaffold  | 43937                          | [C/A]       | NA                                         |
| Ca_Desig_Chr_scaffold00798_44770  | Ca_desig_scaffold  | 44770                          | [T/A]       | NA                                         |
| Ca_Desig_Chr_scaffold00798_44801  | Ca_desig_scaffold  | 44801                          | [A/C]       | NA                                         |
| Ca_Desig_Chr_scaffold00798_44811  | Ca_desig_scaffold  | 44811                          | [A/C]       | NA                                         |
| Ca_Desig_Chr_scaffold00801_10575  | Ca_desig_scaffold  | 10575                          | [A/C]       | NA                                         |
| Ca_Desig_Chr_scaffold00801_10587  | Ca_desig_scaffold  | 10587                          | [A/G]       | NA                                         |
| Ca_Desig_Chr_scaffold00801_12407  | Ca_desig_scaffold  | 12407                          | [T/G]       | NA                                         |
| Ca_Desig_Chr_scaffold00801_13759  | Ca_desig_scaffold  | 13759                          | [T/C]       | NA                                         |
| Ca_Desig_Chr_scaffold00801_75310  | Ca_desig_scaffold  | 75310                          | [C/T]       | NA                                         |
| Ca_Desig_Chr_scaffold00806_15332  | Ca_desig_scaffold  | 15332                          | [A/G]       | NA                                         |
| Ca_Desig_Chr_scaffold00806_17016  | Ca_desig_scaffold  | 17016                          | [A/T]       | NA                                         |
| Ca_Desig_Chr_scaffold00806_17728  | Ca_desig_scaffold  | 17728                          | [A/G]       | NA                                         |
| Ca_Desig_Chr_scaffold00806_17739  | Ca_desig_scaffold  | 17739                          | [A/G]       | NA                                         |

| <b>SNP IDs</b>                  | <b>Chromosomes</b> | <b>Physical positions (bp)</b> | <b>SNPs</b> | <b>NCBI SNPdb accession IDs (NCBI_ss#)</b> |
|---------------------------------|--------------------|--------------------------------|-------------|--------------------------------------------|
| Ca_Desi_Ch_scaffold00806_17772  | Ca_desi_scaffold   | 17772                          | [A/G]       | NA                                         |
| Ca_Desi_Ch_scaffold00806_18265  | Ca_desi_scaffold   | 18265                          | [T/C]       | NA                                         |
| Ca_Desi_Ch_scaffold00806_18285  | Ca_desi_scaffold   | 18285                          | [T/G]       | NA                                         |
| Ca_Desi_Ch_scaffold00806_18297  | Ca_desi_scaffold   | 18297                          | [T/G]       | NA                                         |
| Ca_Desi_Ch_scaffold00806_18310  | Ca_desi_scaffold   | 18310                          | [T/C]       | NA                                         |
| Ca_Desi_Ch_scaffold00806_18317  | Ca_desi_scaffold   | 18317                          | [A/G]       | NA                                         |
| Ca_Desi_Ch_scaffold00806_40216  | Ca_desi_scaffold   | 40216                          | [G/A]       | NA                                         |
| Ca_Desi_Ch_scaffold00806_62463  | Ca_desi_scaffold   | 62463                          | [G/A]       | NA                                         |
| Ca_Desi_Ch_scaffold00806_62480  | Ca_desi_scaffold   | 62480                          | [T/C]       | NA                                         |
| Ca_Desi_Ch_scaffold00806_67314  | Ca_desi_scaffold   | 67314                          | [C/T]       | NA                                         |
| Ca_Desi_Ch_scaffold00806_67361  | Ca_desi_scaffold   | 67361                          | [C/A]       | NA                                         |
| Ca_Desi_Ch_scaffold00806_67362  | Ca_desi_scaffold   | 67362                          | [A/G]       | NA                                         |
| Ca_Desi_Ch_scaffold00806_67542  | Ca_desi_scaffold   | 67542                          | [G/C]       | NA                                         |
| Ca_Desi_Ch_scaffold00806_71524  | Ca_desi_scaffold   | 71524                          | [A/G]       | NA                                         |
| Ca_Desi_Ch_scaffold00806_74425  | Ca_desi_scaffold   | 74425                          | [T/C]       | NA                                         |
| Ca_Desi_Ch_scaffold00806_95130  | Ca_desi_scaffold   | 95130                          | [C/T]       | NA                                         |
| Ca_Desi_Ch_scaffold00806_95148  | Ca_desi_scaffold   | 95148                          | [A/G]       | NA                                         |
| Ca_Desi_Ch_scaffold00806_95154  | Ca_desi_scaffold   | 95154                          | [C/T]       | NA                                         |
| Ca_Desi_Ch_scaffold00806_95306  | Ca_desi_scaffold   | 95306                          | [G/A]       | NA                                         |
| Ca_Desi_Ch_scaffold00806_95341  | Ca_desi_scaffold   | 95341                          | [G/A]       | NA                                         |
| Ca_Desi_Ch_scaffold00806_95448  | Ca_desi_scaffold   | 95448                          | [G/C]       | NA                                         |
| Ca_Desi_Ch_scaffold00806_95483  | Ca_desi_scaffold   | 95483                          | [C/A]       | NA                                         |
| Ca_Desi_Ch_scaffold00806_95501  | Ca_desi_scaffold   | 95501                          | [G/A]       | NA                                         |
| Ca_Desi_Ch_scaffold00806_95568  | Ca_desi_scaffold   | 95568                          | [T/C]       | NA                                         |
| Ca_Desi_Ch_scaffold00806_95793  | Ca_desi_scaffold   | 95793                          | [T/A]       | NA                                         |
| Ca_Desi_Ch_scaffold00806_102216 | Ca_desi_scaffold   | 102216                         | [T/C]       | NA                                         |
| Ca_Desi_Ch_scaffold00806_105393 | Ca_desi_scaffold   | 105393                         | [A/T]       | NA                                         |
| Ca_Desi_Ch_scaffold00806_105419 | Ca_desi_scaffold   | 105419                         | [T/C]       | NA                                         |
| Ca_Desi_Ch_scaffold00806_105426 | Ca_desi_scaffold   | 105426                         | [T/C]       | NA                                         |
| Ca_Desi_Ch_scaffold00806_105455 | Ca_desi_scaffold   | 105455                         | [T/C]       | NA                                         |
| Ca_Desi_Ch_scaffold00806_109687 | Ca_desi_scaffold   | 109687                         | [A/G]       | NA                                         |
| Ca_Desi_Ch_scaffold00807_88227  | Ca_desi_scaffold   | 88227                          | [G/A]       | NA                                         |
| Ca_Desi_Ch_scaffold00807_89274  | Ca_desi_scaffold   | 89274                          | [C/A]       | NA                                         |
| Ca_Desi_Ch_scaffold00807_89281  | Ca_desi_scaffold   | 89281                          | [T/A]       | NA                                         |

| <b>SNP IDs</b>                    | <b>Chromosomes</b> | <b>Physical positions (bp)</b> | <b>SNPs</b> | <b>NCBI SNPdb accession IDs (NCBI_ss#)</b> |
|-----------------------------------|--------------------|--------------------------------|-------------|--------------------------------------------|
| Ca_Desig_Chr_scaffold00807_89286  | Ca_desig_scaffold  | 89286                          | [G/A]       | NA                                         |
| Ca_Desig_Chr_scaffold00807_89315  | Ca_desig_scaffold  | 89315                          | [G/A]       | NA                                         |
| Ca_Desig_Chr_scaffold00809_1497   | Ca_desig_scaffold  | 1497                           | [A/C]       | NA                                         |
| Ca_Desig_Chr_scaffold00809_37893  | Ca_desig_scaffold  | 37893                          | [T/C]       | NA                                         |
| Ca_Desig_Chr_scaffold00809_37920  | Ca_desig_scaffold  | 37920                          | [C/G]       | NA                                         |
| Ca_Desig_Chr_scaffold00809_37995  | Ca_desig_scaffold  | 37995                          | [T/C]       | NA                                         |
| Ca_Desig_Chr_scaffold00809_38009  | Ca_desig_scaffold  | 38009                          | [T/C]       | NA                                         |
| Ca_Desig_Chr_scaffold00810_38346  | Ca_desig_scaffold  | 38346                          | [T/C]       | NA                                         |
| Ca_Desig_Chr_scaffold00810_38362  | Ca_desig_scaffold  | 38362                          | [T/C]       | NA                                         |
| Ca_Desig_Chr_scaffold00810_78113  | Ca_desig_scaffold  | 78113                          | [T/A]       | NA                                         |
| Ca_Desig_Chr_scaffold00810_78206  | Ca_desig_scaffold  | 78206                          | [A/G]       | NA                                         |
| Ca_Desig_Chr_scaffold00810_78234  | Ca_desig_scaffold  | 78234                          | [T/C]       | NA                                         |
| Ca_Desig_Chr_scaffold00810_78240  | Ca_desig_scaffold  | 78240                          | [A/G]       | NA                                         |
| Ca_Desig_Chr_scaffold00810_78246  | Ca_desig_scaffold  | 78246                          | [T/G]       | NA                                         |
| Ca_Desig_Chr_scaffold00810_78276  | Ca_desig_scaffold  | 78276                          | [A/T]       | NA                                         |
| Ca_Desig_Chr_scaffold00810_78313  | Ca_desig_scaffold  | 78313                          | [G/A]       | NA                                         |
| Ca_Desig_Chr_scaffold00810_78339  | Ca_desig_scaffold  | 78339                          | [A/G]       | NA                                         |
| Ca_Desig_Chr_scaffold00810_78351  | Ca_desig_scaffold  | 78351                          | [A/G]       | NA                                         |
| Ca_Desig_Chr_scaffold00810_78356  | Ca_desig_scaffold  | 78356                          | [T/G]       | NA                                         |
| Ca_Desig_Chr_scaffold00810_78372  | Ca_desig_scaffold  | 78372                          | [T/G]       | NA                                         |
| Ca_Desig_Chr_scaffold00812_120    | Ca_desig_scaffold  | 120                            | [G/T]       | NA                                         |
| Ca_Desig_Chr_scaffold00812_50769  | Ca_desig_scaffold  | 50769                          | [A/C]       | NA                                         |
| Ca_Desig_Chr_scaffold00812_110114 | Ca_desig_scaffold  | 110114                         | [T/C]       | NA                                         |
| Ca_Desig_Chr_scaffold00812_110120 | Ca_desig_scaffold  | 110120                         | [T/G]       | NA                                         |
| Ca_Desig_Chr_scaffold00812_110138 | Ca_desig_scaffold  | 110138                         | [A/C]       | NA                                         |
| Ca_Desig_Chr_scaffold00812_110152 | Ca_desig_scaffold  | 110152                         | [C/G]       | NA                                         |
| Ca_Desig_Chr_scaffold00812_111316 | Ca_desig_scaffold  | 111316                         | [T/C]       | NA                                         |
| Ca_Desig_Chr_scaffold00812_111332 | Ca_desig_scaffold  | 111332                         | [A/G]       | NA                                         |
| Ca_Desig_Chr_scaffold00812_111346 | Ca_desig_scaffold  | 111346                         | [A/C]       | NA                                         |
| Ca_Desig_Chr_scaffold00812_111349 | Ca_desig_scaffold  | 111349                         | [T/C]       | NA                                         |
| Ca_Desig_Chr_scaffold00813_53430  | Ca_desig_scaffold  | 53430                          | [T/G]       | NA                                         |
| Ca_Desig_Chr_scaffold00813_53439  | Ca_desig_scaffold  | 53439                          | [T/G]       | NA                                         |
| Ca_Desig_Chr_scaffold00813_53472  | Ca_desig_scaffold  | 53472                          | [T/C]       | NA                                         |
| Ca_Desig_Chr_scaffold00813_53481  | Ca_desig_scaffold  | 53481                          | [T/C]       | NA                                         |

| <b>SNP IDs</b>                    | <b>Chromosomes</b> | <b>Physical positions (bp)</b> | <b>SNPs</b> | <b>NCBI SNPdb accession IDs (NCBI_ss#)</b> |
|-----------------------------------|--------------------|--------------------------------|-------------|--------------------------------------------|
| Ca_Desig_Chr_scaffold00813_53502  | Ca_desig_scaffold  | 53502                          | [T/G]       | NA                                         |
| Ca_Desig_Chr_scaffold00815_16593  | Ca_desig_scaffold  | 16593                          | [T/C]       | NA                                         |
| Ca_Desig_Chr_scaffold00815_16603  | Ca_desig_scaffold  | 16603                          | [T/C]       | NA                                         |
| Ca_Desig_Chr_scaffold00815_19628  | Ca_desig_scaffold  | 19628                          | [T/A]       | NA                                         |
| Ca_Desig_Chr_scaffold00815_19644  | Ca_desig_scaffold  | 19644                          | [T/A]       | NA                                         |
| Ca_Desig_Chr_scaffold00815_19650  | Ca_desig_scaffold  | 19650                          | [A/T]       | NA                                         |
| Ca_Desig_Chr_scaffold00815_19687  | Ca_desig_scaffold  | 19687                          | [A/G]       | NA                                         |
| Ca_Desig_Chr_scaffold00815_19735  | Ca_desig_scaffold  | 19735                          | [T/A]       | NA                                         |
| Ca_Desig_Chr_scaffold00815_19749  | Ca_desig_scaffold  | 19749                          | [A/G]       | NA                                         |
| Ca_Desig_Chr_scaffold00815_36317  | Ca_desig_scaffold  | 36317                          | [C/A]       | NA                                         |
| Ca_Desig_Chr_scaffold00815_36318  | Ca_desig_scaffold  | 36318                          | [A/G]       | NA                                         |
| Ca_Desig_Chr_scaffold00815_38035  | Ca_desig_scaffold  | 38035                          | [T/G]       | NA                                         |
| Ca_Desig_Chr_scaffold00815_38174  | Ca_desig_scaffold  | 38174                          | [A/C]       | NA                                         |
| Ca_Desig_Chr_scaffold00815_38335  | Ca_desig_scaffold  | 38335                          | [C/A]       | NA                                         |
| Ca_Desig_Chr_scaffold00815_38702  | Ca_desig_scaffold  | 38702                          | [A/C]       | NA                                         |
| Ca_Desig_Chr_scaffold00815_38703  | Ca_desig_scaffold  | 38703                          | [T/A]       | NA                                         |
| Ca_Desig_Chr_scaffold00815_38704  | Ca_desig_scaffold  | 38704                          | [C/A]       | NA                                         |
| Ca_Desig_Chr_scaffold00815_38705  | Ca_desig_scaffold  | 38705                          | [T/G]       | NA                                         |
| Ca_Desig_Chr_scaffold00815_104550 | Ca_desig_scaffold  | 104550                         | [A/C]       | NA                                         |
| Ca_Desig_Chr_scaffold00816_45279  | Ca_desig_scaffold  | 45279                          | [A/C]       | NA                                         |
| Ca_Desig_Chr_scaffold00816_45301  | Ca_desig_scaffold  | 45301                          | [T/G]       | NA                                         |
| Ca_Desig_Chr_scaffold00816_59504  | Ca_desig_scaffold  | 59504                          | [A/C]       | NA                                         |
| Ca_Desig_Chr_scaffold00816_59510  | Ca_desig_scaffold  | 59510                          | [T/A]       | NA                                         |
| Ca_Desig_Chr_scaffold00816_59515  | Ca_desig_scaffold  | 59515                          | [A/G]       | NA                                         |
| Ca_Desig_Chr_scaffold00816_76955  | Ca_desig_scaffold  | 76955                          | [A/G]       | NA                                         |
| Ca_Desig_Chr_scaffold00822_15730  | Ca_desig_scaffold  | 15730                          | [A/G]       | NA                                         |
| Ca_Desig_Chr_scaffold00822_81280  | Ca_desig_scaffold  | 81280                          | [A/G]       | NA                                         |
| Ca_Desig_Chr_scaffold00822_81366  | Ca_desig_scaffold  | 81366                          | [A/G]       | NA                                         |
| Ca_Desig_Chr_scaffold00822_85924  | Ca_desig_scaffold  | 85924                          | [C/T]       | NA                                         |
| Ca_Desig_Chr_scaffold00822_85954  | Ca_desig_scaffold  | 85954                          | [C/T]       | NA                                         |
| Ca_Desig_Chr_scaffold00822_85957  | Ca_desig_scaffold  | 85957                          | [A/G]       | NA                                         |
| Ca_Desig_Chr_scaffold00822_86086  | Ca_desig_scaffold  | 86086                          | [T/C]       | NA                                         |
| Ca_Desig_Chr_scaffold00822_89409  | Ca_desig_scaffold  | 89409                          | [T/C]       | NA                                         |
| Ca_Desig_Chr_scaffold00822_89413  | Ca_desig_scaffold  | 89413                          | [A/C]       | NA                                         |

| <b>SNP IDs</b>                   | <b>Chromosomes</b> | <b>Physical positions (bp)</b> | <b>SNPs</b> | <b>NCBI SNPdb accession IDs (NCBI_ss#)</b> |
|----------------------------------|--------------------|--------------------------------|-------------|--------------------------------------------|
| Ca_Desig_Chr_scaffold00823_20730 | Ca_desig_scaffold  | 20730                          | [T/G]       | NA                                         |
| Ca_Desig_Chr_scaffold00823_22002 | Ca_desig_scaffold  | 22002                          | [T/G]       | NA                                         |
| Ca_Desig_Chr_scaffold00823_22519 | Ca_desig_scaffold  | 22519                          | [A/C]       | NA                                         |
| Ca_Desig_Chr_scaffold00823_22614 | Ca_desig_scaffold  | 22614                          | [T/C]       | NA                                         |
| Ca_Desig_Chr_scaffold00823_22664 | Ca_desig_scaffold  | 22664                          | [T/C]       | NA                                         |
| Ca_Desig_Chr_scaffold00823_22685 | Ca_desig_scaffold  | 22685                          | [T/C]       | NA                                         |
| Ca_Desig_Chr_scaffold00824_42501 | Ca_desig_scaffold  | 42501                          | [C/T]       | NA                                         |
| Ca_Desig_Chr_scaffold00824_44982 | Ca_desig_scaffold  | 44982                          | [A/G]       | NA                                         |
| Ca_Desig_Chr_scaffold00824_45017 | Ca_desig_scaffold  | 45017                          | [T/C]       | NA                                         |
| Ca_Desig_Chr_scaffold00833_15577 | Ca_desig_scaffold  | 15577                          | [G/A]       | NA                                         |
| Ca_Desig_Chr_scaffold00833_25290 | Ca_desig_scaffold  | 25290                          | [T/C]       | NA                                         |
| Ca_Desig_Chr_scaffold00833_25308 | Ca_desig_scaffold  | 25308                          | [A/T]       | NA                                         |
| Ca_Desig_Chr_scaffold00833_25309 | Ca_desig_scaffold  | 25309                          | [A/C]       | NA                                         |
| Ca_Desig_Chr_scaffold00833_25310 | Ca_desig_scaffold  | 25310                          | [G/T]       | NA                                         |
| Ca_Desig_Chr_scaffold00833_26294 | Ca_desig_scaffold  | 26294                          | [G/C]       | NA                                         |
| Ca_Desig_Chr_scaffold00833_84456 | Ca_desig_scaffold  | 84456                          | [G/A]       | NA                                         |
| Ca_Desig_Chr_scaffold00833_97153 | Ca_desig_scaffold  | 97153                          | [A/T]       | NA                                         |
| Ca_Desig_Chr_scaffold00833_97201 | Ca_desig_scaffold  | 97201                          | [A/G]       | NA                                         |
| Ca_Desig_Chr_scaffold00833_97206 | Ca_desig_scaffold  | 97206                          | [A/G]       | NA                                         |
| Ca_Desig_Chr_scaffold00833_97279 | Ca_desig_scaffold  | 97279                          | [A/G]       | NA                                         |
| Ca_Desig_Chr_scaffold00833_97309 | Ca_desig_scaffold  | 97309                          | [A/G]       | NA                                         |
| Ca_Desig_Chr_scaffold00833_97364 | Ca_desig_scaffold  | 97364                          | [A/C]       | NA                                         |
| Ca_Desig_Chr_scaffold00834_68485 | Ca_desig_scaffold  | 68485                          | [A/C]       | NA                                         |
| Ca_Desig_Chr_scaffold00834_68661 | Ca_desig_scaffold  | 68661                          | [A/T]       | NA                                         |
| Ca_Desig_Chr_scaffold00836_9785  | Ca_desig_scaffold  | 9785                           | [G/T]       | NA                                         |
| Ca_Desig_Chr_scaffold00836_9787  | Ca_desig_scaffold  | 9787                           | [T/G]       | NA                                         |
| Ca_Desig_Chr_scaffold00836_9794  | Ca_desig_scaffold  | 9794                           | [A/C]       | NA                                         |
| Ca_Desig_Chr_scaffold00836_9830  | Ca_desig_scaffold  | 9830                           | [A/G]       | NA                                         |
| Ca_Desig_Chr_scaffold00836_10510 | Ca_desig_scaffold  | 10510                          | [A/C]       | NA                                         |
| Ca_Desig_Chr_scaffold00837_100   | Ca_desig_scaffold  | 100                            | [A/G]       | NA                                         |
| Ca_Desig_Chr_scaffold00837_137   | Ca_desig_scaffold  | 137                            | [G/T]       | NA                                         |
| Ca_Desig_Chr_scaffold00837_165   | Ca_desig_scaffold  | 165                            | [T/C]       | NA                                         |
| Ca_Desig_Chr_scaffold00837_166   | Ca_desig_scaffold  | 166                            | [C/A]       | NA                                         |
| Ca_Desig_Chr_scaffold00837_169   | Ca_desig_scaffold  | 169                            | [C/T]       | NA                                         |

| <b>SNP IDs</b>                  | <b>Chromosomes</b> | <b>Physical positions (bp)</b> | <b>SNPs</b> | <b>NCBI SNPdb accession IDs (NCBI_ss#)</b> |
|---------------------------------|--------------------|--------------------------------|-------------|--------------------------------------------|
| Ca_Desi_Ch_scaffold00837_36868  | Ca_desi_scaffold   | 36868                          | [A/C]       | NA                                         |
| Ca_Desi_Ch_scaffold00837_72090  | Ca_desi_scaffold   | 72090                          | [A/G]       | NA                                         |
| Ca_Desi_Ch_scaffold00837_78628  | Ca_desi_scaffold   | 78628                          | [A/C]       | NA                                         |
| Ca_Desi_Ch_scaffold00837_92981  | Ca_desi_scaffold   | 92981                          | [A/G]       | NA                                         |
| Ca_Desi_Ch_scaffold00837_108494 | Ca_desi_scaffold   | 108494                         | [T/C]       | NA                                         |
| Ca_Desi_Ch_scaffold00840_86679  | Ca_desi_scaffold   | 86679                          | [T/C]       | NA                                         |
| Ca_Desi_Ch_scaffold00840_86730  | Ca_desi_scaffold   | 86730                          | [A/C]       | NA                                         |
| Ca_Desi_Ch_scaffold00842_41406  | Ca_desi_scaffold   | 41406                          | [T/C]       | NA                                         |
| Ca_Desi_Ch_scaffold00842_83367  | Ca_desi_scaffold   | 83367                          | [C/A]       | NA                                         |
| Ca_Desi_Ch_scaffold00842_89873  | Ca_desi_scaffold   | 89873                          | [T/C]       | NA                                         |
| Ca_Desi_Ch_scaffold00848_6175   | Ca_desi_scaffold   | 6175                           | [T/G]       | NA                                         |
| Ca_Desi_Ch_scaffold00848_6189   | Ca_desi_scaffold   | 6189                           | [A/G]       | NA                                         |
| Ca_Desi_Ch_scaffold00848_6211   | Ca_desi_scaffold   | 6211                           | [T/C]       | NA                                         |
| Ca_Desi_Ch_scaffold00848_6232   | Ca_desi_scaffold   | 6232                           | [A/G]       | NA                                         |
| Ca_Desi_Ch_scaffold00848_63268  | Ca_desi_scaffold   | 63268                          | [A/G]       | NA                                         |
| Ca_Desi_Ch_scaffold00848_69852  | Ca_desi_scaffold   | 69852                          | [T/A]       | NA                                         |
| Ca_Desi_Ch_scaffold00850_19158  | Ca_desi_scaffold   | 19158                          | [T/C]       | NA                                         |
| Ca_Desi_Ch_scaffold00850_20380  | Ca_desi_scaffold   | 20380                          | [A/C]       | NA                                         |
| Ca_Desi_Ch_scaffold00850_20384  | Ca_desi_scaffold   | 20384                          | [A/C]       | NA                                         |
| Ca_Desi_Ch_scaffold00850_20416  | Ca_desi_scaffold   | 20416                          | [A/C]       | NA                                         |
| Ca_Desi_Ch_scaffold00850_22360  | Ca_desi_scaffold   | 22360                          | [A/C]       | NA                                         |
| Ca_Desi_Ch_scaffold00850_22370  | Ca_desi_scaffold   | 22370                          | [A/C]       | NA                                         |
| Ca_Desi_Ch_scaffold00850_22374  | Ca_desi_scaffold   | 22374                          | [T/C]       | NA                                         |
| Ca_Desi_Ch_scaffold00850_22376  | Ca_desi_scaffold   | 22376                          | [G/T]       | NA                                         |
| Ca_Desi_Ch_scaffold00850_22395  | Ca_desi_scaffold   | 22395                          | [A/G]       | NA                                         |
| Ca_Desi_Ch_scaffold00850_83647  | Ca_desi_scaffold   | 83647                          | [T/C]       | NA                                         |
| Ca_Desi_Ch_scaffold00850_83691  | Ca_desi_scaffold   | 83691                          | [A/C]       | NA                                         |
| Ca_Desi_Ch_scaffold00850_86704  | Ca_desi_scaffold   | 86704                          | [T/C]       | NA                                         |
| Ca_Desi_Ch_scaffold00850_86708  | Ca_desi_scaffold   | 86708                          | [A/G]       | NA                                         |
| Ca_Desi_Ch_scaffold00850_86737  | Ca_desi_scaffold   | 86737                          | [T/C]       | NA                                         |
| Ca_Desi_Ch_scaffold00850_86740  | Ca_desi_scaffold   | 86740                          | [T/G]       | NA                                         |
| Ca_Desi_Ch_scaffold00850_86742  | Ca_desi_scaffold   | 86742                          | [A/G]       | NA                                         |
| Ca_Desi_Ch_scaffold00850_86746  | Ca_desi_scaffold   | 86746                          | [A/C]       | NA                                         |
| Ca_Desi_Ch_scaffold00850_86753  | Ca_desi_scaffold   | 86753                          | [A/G]       | NA                                         |

| <b>SNP IDs</b>                   | <b>Chromosomes</b> | <b>Physical positions (bp)</b> | <b>SNPs</b> | <b>NCBI SNPdb accession IDs (NCBI_ss#)</b> |
|----------------------------------|--------------------|--------------------------------|-------------|--------------------------------------------|
| Ca_Desig_Chr_scaffold00850_86756 | Ca_desig_scaffold  | 86756                          | [A/G]       | NA                                         |
| Ca_Desig_Chr_scaffold00850_86764 | Ca_desig_scaffold  | 86764                          | [T/A]       | NA                                         |
| Ca_Desig_Chr_scaffold00850_91032 | Ca_desig_scaffold  | 91032                          | [A/G]       | NA                                         |
| Ca_Desig_Chr_scaffold00851_23938 | Ca_desig_scaffold  | 23938                          | [A/G]       | NA                                         |
| Ca_Desig_Chr_scaffold00851_23961 | Ca_desig_scaffold  | 23961                          | [G/A]       | NA                                         |
| Ca_Desig_Chr_scaffold00851_23968 | Ca_desig_scaffold  | 23968                          | [T/G]       | NA                                         |
| Ca_Desig_Chr_scaffold00851_24044 | Ca_desig_scaffold  | 24044                          | [A/T]       | NA                                         |
| Ca_Desig_Chr_scaffold00851_33874 | Ca_desig_scaffold  | 33874                          | [T/G]       | NA                                         |
| Ca_Desig_Chr_scaffold00851_40660 | Ca_desig_scaffold  | 40660                          | [A/G]       | NA                                         |
| Ca_Desig_Chr_scaffold00851_50401 | Ca_desig_scaffold  | 50401                          | [C/A]       | NA                                         |
| Ca_Desig_Chr_scaffold00851_50402 | Ca_desig_scaffold  | 50402                          | [A/G]       | NA                                         |
| Ca_Desig_Chr_scaffold00851_50403 | Ca_desig_scaffold  | 50403                          | [T/A]       | NA                                         |
| Ca_Desig_Chr_scaffold00851_77595 | Ca_desig_scaffold  | 77595                          | [T/C]       | NA                                         |
| Ca_Desig_Chr_scaffold00851_77601 | Ca_desig_scaffold  | 77601                          | [T/G]       | NA                                         |
| Ca_Desig_Chr_scaffold00851_77605 | Ca_desig_scaffold  | 77605                          | [A/G]       | NA                                         |
| Ca_Desig_Chr_scaffold00851_77608 | Ca_desig_scaffold  | 77608                          | [A/G]       | NA                                         |
| Ca_Desig_Chr_scaffold00851_77610 | Ca_desig_scaffold  | 77610                          | [T/C]       | NA                                         |
| Ca_Desig_Chr_scaffold00851_77614 | Ca_desig_scaffold  | 77614                          | [A/G]       | NA                                         |
| Ca_Desig_Chr_scaffold00851_77615 | Ca_desig_scaffold  | 77615                          | [T/C]       | NA                                         |
| Ca_Desig_Chr_scaffold00851_77634 | Ca_desig_scaffold  | 77634                          | [T/C]       | NA                                         |
| Ca_Desig_Chr_scaffold00851_77641 | Ca_desig_scaffold  | 77641                          | [A/G]       | NA                                         |
| Ca_Desig_Chr_scaffold00851_77643 | Ca_desig_scaffold  | 77643                          | [A/G]       | NA                                         |
| Ca_Desig_Chr_scaffold00851_77660 | Ca_desig_scaffold  | 77660                          | [A/G]       | NA                                         |
| Ca_Desig_Chr_scaffold00852_11044 | Ca_desig_scaffold  | 11044                          | [T/G]       | NA                                         |
| Ca_Desig_Chr_scaffold00852_61185 | Ca_desig_scaffold  | 61185                          | [T/G]       | NA                                         |
| Ca_Desig_Chr_scaffold00852_61191 | Ca_desig_scaffold  | 61191                          | [C/T]       | NA                                         |
| Ca_Desig_Chr_scaffold00852_61197 | Ca_desig_scaffold  | 61197                          | [G/T]       | NA                                         |
| Ca_Desig_Chr_scaffold00852_80707 | Ca_desig_scaffold  | 80707                          | [A/G]       | NA                                         |
| Ca_Desig_Chr_scaffold00852_80726 | Ca_desig_scaffold  | 80726                          | [T/C]       | NA                                         |
| Ca_Desig_Chr_scaffold00852_80737 | Ca_desig_scaffold  | 80737                          | [A/C]       | NA                                         |
| Ca_Desig_Chr_scaffold00852_81177 | Ca_desig_scaffold  | 81177                          | [T/G]       | NA                                         |
| Ca_Desig_Chr_scaffold00852_81182 | Ca_desig_scaffold  | 81182                          | [T/G]       | NA                                         |
| Ca_Desig_Chr_scaffold00853_14584 | Ca_desig_scaffold  | 14584                          | [C/G]       | NA                                         |
| Ca_Desig_Chr_scaffold00853_21850 | Ca_desig_scaffold  | 21850                          | [T/A]       | NA                                         |

| <b>SNP IDs</b>                 | <b>Chromosomes</b> | <b>Physical positions (bp)</b> | <b>SNPs</b> | <b>NCBI SNPdb accession IDs (NCBI_ss#)</b> |
|--------------------------------|--------------------|--------------------------------|-------------|--------------------------------------------|
| Ca_Desi_Ch_scaffold00853_21851 | Ca_desi_scaffold   | 21851                          | [A/T]       | NA                                         |
| Ca_Desi_Ch_scaffold00853_21891 | Ca_desi_scaffold   | 21891                          | [A/G]       | NA                                         |
| Ca_Desi_Ch_scaffold00854_10034 | Ca_desi_scaffold   | 10034                          | [T/C]       | NA                                         |
| Ca_Desi_Ch_scaffold00854_19482 | Ca_desi_scaffold   | 19482                          | [T/C]       | NA                                         |
| Ca_Desi_Ch_scaffold00854_19664 | Ca_desi_scaffold   | 19664                          | [A/C]       | NA                                         |
| Ca_Desi_Ch_scaffold00854_50891 | Ca_desi_scaffold   | 50891                          | [A/G]       | NA                                         |
| Ca_Desi_Ch_scaffold00854_50926 | Ca_desi_scaffold   | 50926                          | [T/A]       | NA                                         |
| Ca_Desi_Ch_scaffold00854_51947 | Ca_desi_scaffold   | 51947                          | [A/G]       | NA                                         |
| Ca_Desi_Ch_scaffold00854_51986 | Ca_desi_scaffold   | 51986                          | [A/C]       | NA                                         |
| Ca_Desi_Ch_scaffold00854_59832 | Ca_desi_scaffold   | 59832                          | [A/G]       | NA                                         |
| Ca_Desi_Ch_scaffold00854_59914 | Ca_desi_scaffold   | 59914                          | [A/C]       | NA                                         |
| Ca_Desi_Ch_scaffold00854_59921 | Ca_desi_scaffold   | 59921                          | [A/G]       | NA                                         |
| Ca_Desi_Ch_scaffold00854_64234 | Ca_desi_scaffold   | 64234                          | [T/G]       | NA                                         |
| Ca_Desi_Ch_scaffold00854_73610 | Ca_desi_scaffold   | 73610                          | [A/G]       | NA                                         |
| Ca_Desi_Ch_scaffold00854_77025 | Ca_desi_scaffold   | 77025                          | [A/C]       | NA                                         |
| Ca_Desi_Ch_scaffold00854_77036 | Ca_desi_scaffold   | 77036                          | [T/C]       | NA                                         |
| Ca_Desi_Ch_scaffold00854_77049 | Ca_desi_scaffold   | 77049                          | [T/G]       | NA                                         |
| Ca_Desi_Ch_scaffold00854_77056 | Ca_desi_scaffold   | 77056                          | [T/C]       | NA                                         |
| Ca_Desi_Ch_scaffold00854_92745 | Ca_desi_scaffold   | 92745                          | [T/G]       | NA                                         |
| Ca_Desi_Ch_scaffold00854_92765 | Ca_desi_scaffold   | 92765                          | [T/G]       | NA                                         |
| Ca_Desi_Ch_scaffold00854_97701 | Ca_desi_scaffold   | 97701                          | [T/G]       | NA                                         |
| Ca_Desi_Ch_scaffold00854_97708 | Ca_desi_scaffold   | 97708                          | [T/C]       | NA                                         |
| Ca_Desi_Ch_scaffold00854_97760 | Ca_desi_scaffold   | 97760                          | [A/C]       | NA                                         |
| Ca_Desi_Ch_scaffold00854_97767 | Ca_desi_scaffold   | 97767                          | [T/C]       | NA                                         |
| Ca_Desi_Ch_scaffold00859_23860 | Ca_desi_scaffold   | 23860                          | [T/G]       | NA                                         |
| Ca_Desi_Ch_scaffold00859_24531 | Ca_desi_scaffold   | 24531                          | [G/C]       | NA                                         |
| Ca_Desi_Ch_scaffold00859_24553 | Ca_desi_scaffold   | 24553                          | [T/G]       | NA                                         |
| Ca_Desi_Ch_scaffold00859_24567 | Ca_desi_scaffold   | 24567                          | [A/C]       | NA                                         |
| Ca_Desi_Ch_scaffold00859_70728 | Ca_desi_scaffold   | 70728                          | [T/C]       | NA                                         |
| Ca_Desi_Ch_scaffold00859_94323 | Ca_desi_scaffold   | 94323                          | [T/G]       | NA                                         |
| Ca_Desi_Ch_scaffold00859_94337 | Ca_desi_scaffold   | 94337                          | [T/C]       | NA                                         |
| Ca_Desi_Ch_scaffold00859_94343 | Ca_desi_scaffold   | 94343                          | [T/C]       | NA                                         |
| Ca_Desi_Ch_scaffold00859_94351 | Ca_desi_scaffold   | 94351                          | [G/T]       | NA                                         |
| Ca_Desi_Ch_scaffold00860_31749 | Ca_desi_scaffold   | 31749                          | [T/G]       | NA                                         |



| <b>SNP IDs</b>                   | <b>Chromosomes</b> | <b>Physical positions (bp)</b> | <b>SNPs</b> | <b>NCBI SNPdb accession IDs (NCBI_ss#)</b> |
|----------------------------------|--------------------|--------------------------------|-------------|--------------------------------------------|
| Ca_Desig_Chr_scaffold00860_53581 | Ca_desig_scaffold  | 53581                          | [T/C]       | NA                                         |
| Ca_Desig_Chr_scaffold00860_53591 | Ca_desig_scaffold  | 53591                          | [A/T]       | NA                                         |
| Ca_Desig_Chr_scaffold00860_53599 | Ca_desig_scaffold  | 53599                          | [T/G]       | NA                                         |
| Ca_Desig_Chr_scaffold00860_53610 | Ca_desig_scaffold  | 53610                          | [T/G]       | NA                                         |
| Ca_Desig_Chr_scaffold00866_806   | Ca_desig_scaffold  | 806                            | [T/G]       | NA                                         |
| Ca_Desig_Chr_scaffold00870_89893 | Ca_desig_scaffold  | 89893                          | [A/C]       | NA                                         |
| Ca_Desig_Chr_scaffold00870_89897 | Ca_desig_scaffold  | 89897                          | [T/G]       | NA                                         |
| Ca_Desig_Chr_scaffold00872_53376 | Ca_desig_scaffold  | 53376                          | [C/G]       | NA                                         |
| Ca_Desig_Chr_scaffold00872_53377 | Ca_desig_scaffold  | 53377                          | [G/T]       | NA                                         |
| Ca_Desig_Chr_scaffold00872_53405 | Ca_desig_scaffold  | 53405                          | [A/C]       | NA                                         |
| Ca_Desig_Chr_scaffold00872_60842 | Ca_desig_scaffold  | 60842                          | [A/G]       | NA                                         |
| Ca_Desig_Chr_scaffold00872_86314 | Ca_desig_scaffold  | 86314                          | [A/C]       | NA                                         |
| Ca_Desig_Chr_scaffold00872_86330 | Ca_desig_scaffold  | 86330                          | [A/T]       | NA                                         |
| Ca_Desig_Chr_scaffold00879_24957 | Ca_desig_scaffold  | 24957                          | [A/G]       | NA                                         |
| Ca_Desig_Chr_scaffold00879_54243 | Ca_desig_scaffold  | 54243                          | [A/T]       | NA                                         |
| Ca_Desig_Chr_scaffold00879_54246 | Ca_desig_scaffold  | 54246                          | [A/C]       | NA                                         |
| Ca_Desig_Chr_scaffold00879_54256 | Ca_desig_scaffold  | 54256                          | [G/T]       | NA                                         |
| Ca_Desig_Chr_scaffold00879_54262 | Ca_desig_scaffold  | 54262                          | [T/C]       | NA                                         |
| Ca_Desig_Chr_scaffold00879_54265 | Ca_desig_scaffold  | 54265                          | [T/C]       | NA                                         |
| Ca_Desig_Chr_scaffold00879_54268 | Ca_desig_scaffold  | 54268                          | [A/C]       | NA                                         |
| Ca_Desig_Chr_scaffold00879_54273 | Ca_desig_scaffold  | 54273                          | [A/G]       | NA                                         |
| Ca_Desig_Chr_scaffold00879_54280 | Ca_desig_scaffold  | 54280                          | [A/C]       | NA                                         |
| Ca_Desig_Chr_scaffold00879_54290 | Ca_desig_scaffold  | 54290                          | [T/C]       | NA                                         |
| Ca_Desig_Chr_scaffold00879_54303 | Ca_desig_scaffold  | 54303                          | [A/G]       | NA                                         |
| Ca_Desig_Chr_scaffold00879_54585 | Ca_desig_scaffold  | 54585                          | [T/C]       | NA                                         |
| Ca_Desig_Chr_scaffold00879_54590 | Ca_desig_scaffold  | 54590                          | [C/A]       | NA                                         |
| Ca_Desig_Chr_scaffold00879_54621 | Ca_desig_scaffold  | 54621                          | [A/G]       | NA                                         |
| Ca_Desig_Chr_scaffold00879_54628 | Ca_desig_scaffold  | 54628                          | [A/G]       | NA                                         |
| Ca_Desig_Chr_scaffold00879_55945 | Ca_desig_scaffold  | 55945                          | [A/C]       | NA                                         |
| Ca_Desig_Chr_scaffold00879_55947 | Ca_desig_scaffold  | 55947                          | [T/C]       | NA                                         |
| Ca_Desig_Chr_scaffold00879_55955 | Ca_desig_scaffold  | 55955                          | [A/G]       | NA                                         |
| Ca_Desig_Chr_scaffold00879_55959 | Ca_desig_scaffold  | 55959                          | [T/C]       | NA                                         |
| Ca_Desig_Chr_scaffold00879_55970 | Ca_desig_scaffold  | 55970                          | [A/C]       | NA                                         |
| Ca_Desig_Chr_scaffold00879_55978 | Ca_desig_scaffold  | 55978                          | [A/G]       | NA                                         |

| <b>SNP IDs</b>                    | <b>Chromosomes</b> | <b>Physical positions (bp)</b> | <b>SNPs</b> | <b>NCBI SNPdb accession IDs (NCBI_ss#)</b> |
|-----------------------------------|--------------------|--------------------------------|-------------|--------------------------------------------|
| Ca_Desig_Chr_scaffold00879_56132  | Ca_desig_scaffold  | 56132                          | [A/C]       | NA                                         |
| Ca_Desig_Chr_scaffold00879_56138  | Ca_desig_scaffold  | 56138                          | [A/C]       | NA                                         |
| Ca_Desig_Chr_scaffold00879_105694 | Ca_desig_scaffold  | 105694                         | [T/G]       | NA                                         |
| Ca_Desig_Chr_scaffold00881_27923  | Ca_desig_scaffold  | 27923                          | [A/C]       | NA                                         |
| Ca_Desig_Chr_scaffold00881_27931  | Ca_desig_scaffold  | 27931                          | [A/G]       | NA                                         |
| Ca_Desig_Chr_scaffold00881_35479  | Ca_desig_scaffold  | 35479                          | [A/G]       | NA                                         |
| Ca_Desig_Chr_scaffold00881_35496  | Ca_desig_scaffold  | 35496                          | [A/G]       | NA                                         |
| Ca_Desig_Chr_scaffold00881_35498  | Ca_desig_scaffold  | 35498                          | [T/G]       | NA                                         |
| Ca_Desig_Chr_scaffold00881_35507  | Ca_desig_scaffold  | 35507                          | [T/G]       | NA                                         |
| Ca_Desig_Chr_scaffold00881_35510  | Ca_desig_scaffold  | 35510                          | [A/G]       | NA                                         |
| Ca_Desig_Chr_scaffold00885_7126   | Ca_desig_scaffold  | 7126                           | [A/T]       | NA                                         |
| Ca_Desig_Chr_scaffold00885_7411   | Ca_desig_scaffold  | 7411                           | [A/C]       | NA                                         |
| Ca_Desig_Chr_scaffold00885_7925   | Ca_desig_scaffold  | 7925                           | [G/A]       | NA                                         |
| Ca_Desig_Chr_scaffold00885_10350  | Ca_desig_scaffold  | 10350                          | [C/T]       | NA                                         |
| Ca_Desig_Chr_scaffold00885_36964  | Ca_desig_scaffold  | 36964                          | [A/T]       | NA                                         |
| Ca_Desig_Chr_scaffold00885_53215  | Ca_desig_scaffold  | 53215                          | [G/T]       | NA                                         |
| Ca_Desig_Chr_scaffold00885_53697  | Ca_desig_scaffold  | 53697                          | [G/T]       | NA                                         |
| Ca_Desig_Chr_scaffold00885_53698  | Ca_desig_scaffold  | 53698                          | [T/G]       | NA                                         |
| Ca_Desig_Chr_scaffold00885_83516  | Ca_desig_scaffold  | 83516                          | [T/C]       | NA                                         |
| Ca_Desig_Chr_scaffold00885_83564  | Ca_desig_scaffold  | 83564                          | [A/T]       | NA                                         |
| Ca_Desig_Chr_scaffold00893_478    | Ca_desig_scaffold  | 478                            | [T/C]       | NA                                         |
| Ca_Desig_Chr_scaffold00893_31949  | Ca_desig_scaffold  | 31949                          | [T/G]       | NA                                         |
| Ca_Desig_Chr_scaffold00893_34553  | Ca_desig_scaffold  | 34553                          | [C/A]       | NA                                         |
| Ca_Desig_Chr_scaffold00893_34554  | Ca_desig_scaffold  | 34554                          | [C/G]       | NA                                         |
| Ca_Desig_Chr_scaffold00893_34555  | Ca_desig_scaffold  | 34555                          | [G/A]       | NA                                         |
| Ca_Desig_Chr_scaffold00893_47854  | Ca_desig_scaffold  | 47854                          | [A/G]       | NA                                         |
| Ca_Desig_Chr_scaffold00893_47857  | Ca_desig_scaffold  | 47857                          | [T/C]       | NA                                         |
| Ca_Desig_Chr_scaffold00893_47860  | Ca_desig_scaffold  | 47860                          | [T/C]       | NA                                         |
| Ca_Desig_Chr_scaffold00893_47889  | Ca_desig_scaffold  | 47889                          | [T/C]       | NA                                         |
| Ca_Desig_Chr_scaffold00893_47892  | Ca_desig_scaffold  | 47892                          | [A/G]       | NA                                         |
| Ca_Desig_Chr_scaffold00893_47894  | Ca_desig_scaffold  | 47894                          | [A/G]       | NA                                         |
| Ca_Desig_Chr_scaffold00893_47900  | Ca_desig_scaffold  | 47900                          | [A/G]       | NA                                         |
| Ca_Desig_Chr_scaffold00893_51937  | Ca_desig_scaffold  | 51937                          | [T/G]       | NA                                         |
| Ca_Desig_Chr_scaffold00893_64765  | Ca_desig_scaffold  | 64765                          | [T/C]       | NA                                         |

| <b>SNP IDs</b>                   | <b>Chromosomes</b> | <b>Physical positions (bp)</b> | <b>SNPs</b> | <b>NCBI SNPdb accession IDs (NCBI_ss#)</b> |
|----------------------------------|--------------------|--------------------------------|-------------|--------------------------------------------|
| Ca_DesigChr_scaffold00893_64786  | Ca_desig_scaffold  | 64786                          | [A/G]       | NA                                         |
| Ca_DesigChr_scaffold00893_64805  | Ca_desig_scaffold  | 64805                          | [A/C]       | NA                                         |
| Ca_DesigChr_scaffold00893_64832  | Ca_desig_scaffold  | 64832                          | [C/T]       | NA                                         |
| Ca_DesigChr_scaffold00893_80228  | Ca_desig_scaffold  | 80228                          | [C/A]       | NA                                         |
| Ca_DesigChr_scaffold00897_36057  | Ca_desig_scaffold  | 36057                          | [C/T]       | NA                                         |
| Ca_DesigChr_scaffold00897_38148  | Ca_desig_scaffold  | 38148                          | [A/G]       | NA                                         |
| Ca_DesigChr_scaffold00897_38177  | Ca_desig_scaffold  | 38177                          | [A/C]       | NA                                         |
| Ca_DesigChr_scaffold00897_38225  | Ca_desig_scaffold  | 38225                          | [T/G]       | NA                                         |
| Ca_DesigChr_scaffold00897_86258  | Ca_desig_scaffold  | 86258                          | [A/C]       | NA                                         |
| Ca_DesigChr_scaffold00897_86270  | Ca_desig_scaffold  | 86270                          | [T/A]       | NA                                         |
| Ca_DesigChr_scaffold00897_86284  | Ca_desig_scaffold  | 86284                          | [A/C]       | NA                                         |
| Ca_DesigChr_scaffold00897_86767  | Ca_desig_scaffold  | 86767                          | [C/A]       | NA                                         |
| Ca_DesigChr_scaffold00897_95927  | Ca_desig_scaffold  | 95927                          | [T/G]       | NA                                         |
| Ca_DesigChr_scaffold00897_95933  | Ca_desig_scaffold  | 95933                          | [G/A]       | NA                                         |
| Ca_DesigChr_scaffold00897_96041  | Ca_desig_scaffold  | 96041                          | [T/G]       | NA                                         |
| Ca_DesigChr_scaffold00897_104578 | Ca_desig_scaffold  | 104578                         | [A/G]       | NA                                         |
| Ca_DesigChr_scaffold00897_104631 | Ca_desig_scaffold  | 104631                         | [A/C]       | NA                                         |
| Ca_DesigChr_scaffold00897_104642 | Ca_desig_scaffold  | 104642                         | [A/G]       | NA                                         |
| Ca_DesigChr_scaffold00897_104650 | Ca_desig_scaffold  | 104650                         | [T/C]       | NA                                         |
| Ca_DesigChr_scaffold00897_104674 | Ca_desig_scaffold  | 104674                         | [T/A]       | NA                                         |
| Ca_DesigChr_scaffold00897_105062 | Ca_desig_scaffold  | 105062                         | [C/T]       | NA                                         |
| Ca_DesigChr_scaffold00897_105071 | Ca_desig_scaffold  | 105071                         | [A/C]       | NA                                         |
| Ca_DesigChr_scaffold00897_106078 | Ca_desig_scaffold  | 106078                         | [C/T]       | NA                                         |
| Ca_DesigChr_scaffold00899_15438  | Ca_desig_scaffold  | 15438                          | [C/A]       | NA                                         |
| Ca_DesigChr_scaffold00899_15440  | Ca_desig_scaffold  | 15440                          | [T/C]       | NA                                         |
| Ca_DesigChr_scaffold00899_102533 | Ca_desig_scaffold  | 102533                         | [A/G]       | NA                                         |
| Ca_DesigChr_scaffold00899_102534 | Ca_desig_scaffold  | 102534                         | [T/A]       | NA                                         |
| Ca_DesigChr_scaffold00900_17481  | Ca_desig_scaffold  | 17481                          | [T/A]       | NA                                         |
| Ca_DesigChr_scaffold00900_26228  | Ca_desig_scaffold  | 26228                          | [A/C]       | NA                                         |
| Ca_DesigChr_scaffold00900_26256  | Ca_desig_scaffold  | 26256                          | [A/C]       | NA                                         |
| Ca_DesigChr_scaffold00900_26260  | Ca_desig_scaffold  | 26260                          | [A/C]       | NA                                         |
| Ca_DesigChr_scaffold00900_47531  | Ca_desig_scaffold  | 47531                          | [G/T]       | NA                                         |
| Ca_DesigChr_scaffold00900_60957  | Ca_desig_scaffold  | 60957                          | [T/G]       | NA                                         |
| Ca_DesigChr_scaffold00900_96568  | Ca_desig_scaffold  | 96568                          | [C/T]       | NA                                         |

| <b>SNP IDs</b>                   | <b>Chromosomes</b> | <b>Physical positions (bp)</b> | <b>SNPs</b> | <b>NCBI SNPdb accession IDs (NCBI_ss#)</b> |
|----------------------------------|--------------------|--------------------------------|-------------|--------------------------------------------|
| Ca_DesigChr_scaffold00900_96570  | Ca_desig_scaffold  | 96570                          | [C/T]       | NA                                         |
| Ca_DesigChr_scaffold00903_63146  | Ca_desig_scaffold  | 63146                          | [T/C]       | NA                                         |
| Ca_DesigChr_scaffold00903_78234  | Ca_desig_scaffold  | 78234                          | [A/G]       | NA                                         |
| Ca_DesigChr_scaffold00903_95241  | Ca_desig_scaffold  | 95241                          | [T/G]       | NA                                         |
| Ca_DesigChr_scaffold00906_26212  | Ca_desig_scaffold  | 26212                          | [C/T]       | NA                                         |
| Ca_DesigChr_scaffold00906_26254  | Ca_desig_scaffold  | 26254                          | [C/T]       | NA                                         |
| Ca_DesigChr_scaffold00906_76018  | Ca_desig_scaffold  | 76018                          | [T/C]       | NA                                         |
| Ca_DesigChr_scaffold00906_76035  | Ca_desig_scaffold  | 76035                          | [C/T]       | NA                                         |
| Ca_DesigChr_scaffold00906_76061  | Ca_desig_scaffold  | 76061                          | [T/C]       | NA                                         |
| Ca_DesigChr_scaffold00906_87031  | Ca_desig_scaffold  | 87031                          | [T/A]       | NA                                         |
| Ca_DesigChr_scaffold00906_87099  | Ca_desig_scaffold  | 87099                          | [C/G]       | NA                                         |
| Ca_DesigChr_scaffold00906_91967  | Ca_desig_scaffold  | 91967                          | [C/A]       | NA                                         |
| Ca_DesigChr_scaffold00906_98125  | Ca_desig_scaffold  | 98125                          | [C/T]       | NA                                         |
| Ca_DesigChr_scaffold00906_98155  | Ca_desig_scaffold  | 98155                          | [C/T]       | NA                                         |
| Ca_DesigChr_scaffold00906_98214  | Ca_desig_scaffold  | 98214                          | [T/C]       | NA                                         |
| Ca_DesigChr_scaffold00906_98443  | Ca_desig_scaffold  | 98443                          | [C/T]       | NA                                         |
| Ca_DesigChr_scaffold00906_100047 | Ca_desig_scaffold  | 100047                         | [G/T]       | NA                                         |
| Ca_DesigChr_scaffold00906_100048 | Ca_desig_scaffold  | 100048                         | [C/T]       | NA                                         |
| Ca_DesigChr_scaffold00917_36409  | Ca_desig_scaffold  | 36409                          | [A/C]       | NA                                         |
| Ca_DesigChr_scaffold00917_66277  | Ca_desig_scaffold  | 66277                          | [A/G]       | NA                                         |
| Ca_DesigChr_scaffold00917_74228  | Ca_desig_scaffold  | 74228                          | [T/C]       | NA                                         |
| Ca_DesigChr_scaffold00917_74237  | Ca_desig_scaffold  | 74237                          | [A/G]       | NA                                         |
| Ca_DesigChr_scaffold00917_74244  | Ca_desig_scaffold  | 74244                          | [T/G]       | NA                                         |
| Ca_DesigChr_scaffold00917_74270  | Ca_desig_scaffold  | 74270                          | [A/C]       | NA                                         |
| Ca_DesigChr_scaffold00917_97807  | Ca_desig_scaffold  | 97807                          | [T/C]       | NA                                         |
| Ca_DesigChr_scaffold00919_53254  | Ca_desig_scaffold  | 53254                          | [A/T]       | NA                                         |
| Ca_DesigChr_scaffold00919_54330  | Ca_desig_scaffold  | 54330                          | [A/G]       | NA                                         |
| Ca_DesigChr_scaffold00919_54337  | Ca_desig_scaffold  | 54337                          | [A/C]       | NA                                         |
| Ca_DesigChr_scaffold00922_5152   | Ca_desig_scaffold  | 5152                           | [T/C]       | NA                                         |
| Ca_DesigChr_scaffold00922_5155   | Ca_desig_scaffold  | 5155                           | [T/C]       | NA                                         |
| Ca_DesigChr_scaffold00922_5217   | Ca_desig_scaffold  | 5217                           | [T/G]       | NA                                         |
| Ca_DesigChr_scaffold00922_5228   | Ca_desig_scaffold  | 5228                           | [C/G]       | NA                                         |
| Ca_DesigChr_scaffold00922_5354   | Ca_desig_scaffold  | 5354                           | [A/G]       | NA                                         |
| Ca_DesigChr_scaffold00922_5356   | Ca_desig_scaffold  | 5356                           | [T/A]       | NA                                         |

| <b>SNP IDs</b>                  | <b>Chromosomes</b> | <b>Physical positions (bp)</b> | <b>SNPs</b> | <b>NCBI SNPdb accession IDs (NCBI_ss#)</b> |
|---------------------------------|--------------------|--------------------------------|-------------|--------------------------------------------|
| Ca_DesigChr_scaffold00922_5395  | Ca_desig_scaffold  | 5395                           | [A/C]       | NA                                         |
| Ca_DesigChr_scaffold00922_5399  | Ca_desig_scaffold  | 5399                           | [A/C]       | NA                                         |
| Ca_DesigChr_scaffold00922_5425  | Ca_desig_scaffold  | 5425                           | [A/C]       | NA                                         |
| Ca_DesigChr_scaffold00922_9633  | Ca_desig_scaffold  | 9633                           | [A/G]       | NA                                         |
| Ca_DesigChr_scaffold00922_9635  | Ca_desig_scaffold  | 9635                           | [G/A]       | NA                                         |
| Ca_DesigChr_scaffold00922_9637  | Ca_desig_scaffold  | 9637                           | [A/C]       | NA                                         |
| Ca_DesigChr_scaffold00922_9638  | Ca_desig_scaffold  | 9638                           | [C/G]       | NA                                         |
| Ca_DesigChr_scaffold00922_38697 | Ca_desig_scaffold  | 38697                          | [T/C]       | NA                                         |
| Ca_DesigChr_scaffold00922_82142 | Ca_desig_scaffold  | 82142                          | [T/G]       | NA                                         |
| Ca_DesigChr_scaffold00922_82150 | Ca_desig_scaffold  | 82150                          | [C/A]       | NA                                         |
| Ca_DesigChr_scaffold00922_82161 | Ca_desig_scaffold  | 82161                          | [G/A]       | NA                                         |
| Ca_DesigChr_scaffold00922_82183 | Ca_desig_scaffold  | 82183                          | [T/G]       | NA                                         |
| Ca_DesigChr_scaffold00924_85867 | Ca_desig_scaffold  | 85867                          | [A/C]       | NA                                         |
| Ca_DesigChr_scaffold00927_10188 | Ca_desig_scaffold  | 10188                          | [T/G]       | NA                                         |
| Ca_DesigChr_scaffold00927_10204 | Ca_desig_scaffold  | 10204                          | [T/G]       | NA                                         |
| Ca_DesigChr_scaffold00927_10212 | Ca_desig_scaffold  | 10212                          | [T/C]       | NA                                         |
| Ca_DesigChr_scaffold00927_10750 | Ca_desig_scaffold  | 10750                          | [T/G]       | NA                                         |
| Ca_DesigChr_scaffold00927_10806 | Ca_desig_scaffold  | 10806                          | [T/G]       | NA                                         |
| Ca_DesigChr_scaffold00927_10904 | Ca_desig_scaffold  | 10904                          | [T/G]       | NA                                         |
| Ca_DesigChr_scaffold00927_10914 | Ca_desig_scaffold  | 10914                          | [A/G]       | NA                                         |
| Ca_DesigChr_scaffold00927_10926 | Ca_desig_scaffold  | 10926                          | [T/G]       | NA                                         |
| Ca_DesigChr_scaffold00927_10944 | Ca_desig_scaffold  | 10944                          | [T/G]       | NA                                         |
| Ca_DesigChr_scaffold00927_10993 | Ca_desig_scaffold  | 10993                          | [T/G]       | NA                                         |
| Ca_DesigChr_scaffold00927_10996 | Ca_desig_scaffold  | 10996                          | [T/G]       | NA                                         |
| Ca_DesigChr_scaffold00927_10998 | Ca_desig_scaffold  | 10998                          | [A/G]       | NA                                         |
| Ca_DesigChr_scaffold00927_11000 | Ca_desig_scaffold  | 11000                          | [A/G]       | NA                                         |
| Ca_DesigChr_scaffold00927_11004 | Ca_desig_scaffold  | 11004                          | [A/G]       | NA                                         |
| Ca_DesigChr_scaffold00927_11010 | Ca_desig_scaffold  | 11010                          | [A/C]       | NA                                         |
| Ca_DesigChr_scaffold00927_11022 | Ca_desig_scaffold  | 11022                          | [A/T]       | NA                                         |
| Ca_DesigChr_scaffold00927_11028 | Ca_desig_scaffold  | 11028                          | [T/G]       | NA                                         |
| Ca_DesigChr_scaffold00927_11029 | Ca_desig_scaffold  | 11029                          | [A/G]       | NA                                         |
| Ca_DesigChr_scaffold00927_11036 | Ca_desig_scaffold  | 11036                          | [T/C]       | NA                                         |
| Ca_DesigChr_scaffold00927_11041 | Ca_desig_scaffold  | 11041                          | [A/G]       | NA                                         |
| Ca_DesigChr_scaffold00927_11059 | Ca_desig_scaffold  | 11059                          | [T/C]       | NA                                         |

| <b>SNP IDs</b>                 | <b>Chromosomes</b> | <b>Physical positions (bp)</b> | <b>SNPs</b> | <b>NCBI SNPdb accession IDs (NCBI_ss#)</b> |
|--------------------------------|--------------------|--------------------------------|-------------|--------------------------------------------|
| Ca_Desi_Ch_scaffold00927_11071 | Ca_desi_scaffold   | 11071                          | [T/G]       | NA                                         |
| Ca_Desi_Ch_scaffold00927_11074 | Ca_desi_scaffold   | 11074                          | [T/G]       | NA                                         |
| Ca_Desi_Ch_scaffold00927_11106 | Ca_desi_scaffold   | 11106                          | [T/C]       | NA                                         |
| Ca_Desi_Ch_scaffold00927_11145 | Ca_desi_scaffold   | 11145                          | [A/G]       | NA                                         |
| Ca_Desi_Ch_scaffold00927_11152 | Ca_desi_scaffold   | 11152                          | [T/G]       | NA                                         |
| Ca_Desi_Ch_scaffold00927_11181 | Ca_desi_scaffold   | 11181                          | [A/G]       | NA                                         |
| Ca_Desi_Ch_scaffold00927_11187 | Ca_desi_scaffold   | 11187                          | [T/A]       | NA                                         |
| Ca_Desi_Ch_scaffold00927_11193 | Ca_desi_scaffold   | 11193                          | [T/C]       | NA                                         |
| Ca_Desi_Ch_scaffold00927_11223 | Ca_desi_scaffold   | 11223                          | [A/G]       | NA                                         |
| Ca_Desi_Ch_scaffold00927_11225 | Ca_desi_scaffold   | 11225                          | [T/C]       | NA                                         |
| Ca_Desi_Ch_scaffold00927_11265 | Ca_desi_scaffold   | 11265                          | [T/G]       | NA                                         |
| Ca_Desi_Ch_scaffold00927_11305 | Ca_desi_scaffold   | 11305                          | [T/C]       | NA                                         |
| Ca_Desi_Ch_scaffold00927_11308 | Ca_desi_scaffold   | 11308                          | [T/G]       | NA                                         |
| Ca_Desi_Ch_scaffold00927_11351 | Ca_desi_scaffold   | 11351                          | [T/C]       | NA                                         |
| Ca_Desi_Ch_scaffold00927_11353 | Ca_desi_scaffold   | 11353                          | [A/G]       | NA                                         |
| Ca_Desi_Ch_scaffold00927_11377 | Ca_desi_scaffold   | 11377                          | [T/C]       | NA                                         |
| Ca_Desi_Ch_scaffold00927_11382 | Ca_desi_scaffold   | 11382                          | [A/G]       | NA                                         |
| Ca_Desi_Ch_scaffold00927_11384 | Ca_desi_scaffold   | 11384                          | [T/C]       | NA                                         |
| Ca_Desi_Ch_scaffold00927_11389 | Ca_desi_scaffold   | 11389                          | [T/G]       | NA                                         |
| Ca_Desi_Ch_scaffold00927_11392 | Ca_desi_scaffold   | 11392                          | [T/C]       | NA                                         |
| Ca_Desi_Ch_scaffold00927_11394 | Ca_desi_scaffold   | 11394                          | [A/G]       | NA                                         |
| Ca_Desi_Ch_scaffold00927_11416 | Ca_desi_scaffold   | 11416                          | [A/G]       | NA                                         |
| Ca_Desi_Ch_scaffold00927_11418 | Ca_desi_scaffold   | 11418                          | [A/C]       | NA                                         |
| Ca_Desi_Ch_scaffold00927_11435 | Ca_desi_scaffold   | 11435                          | [T/C]       | NA                                         |
| Ca_Desi_Ch_scaffold00927_11446 | Ca_desi_scaffold   | 11446                          | [T/C]       | NA                                         |
| Ca_Desi_Ch_scaffold00927_11468 | Ca_desi_scaffold   | 11468                          | [T/C]       | NA                                         |
| Ca_Desi_Ch_scaffold00927_11473 | Ca_desi_scaffold   | 11473                          | [T/C]       | NA                                         |
| Ca_Desi_Ch_scaffold00927_11478 | Ca_desi_scaffold   | 11478                          | [A/G]       | NA                                         |
| Ca_Desi_Ch_scaffold00927_11502 | Ca_desi_scaffold   | 11502                          | [A/C]       | NA                                         |
| Ca_Desi_Ch_scaffold00927_11513 | Ca_desi_scaffold   | 11513                          | [A/C]       | NA                                         |
| Ca_Desi_Ch_scaffold00927_11529 | Ca_desi_scaffold   | 11529                          | [T/C]       | NA                                         |
| Ca_Desi_Ch_scaffold00927_11552 | Ca_desi_scaffold   | 11552                          | [T/C]       | NA                                         |
| Ca_Desi_Ch_scaffold00927_11557 | Ca_desi_scaffold   | 11557                          | [T/C]       | NA                                         |
| Ca_Desi_Ch_scaffold00927_11566 | Ca_desi_scaffold   | 11566                          | [G/A]       | NA                                         |

| <b>SNP IDs</b>                   | <b>Chromosomes</b> | <b>Physical positions (bp)</b> | <b>SNPs</b> | <b>NCBI SNPdb accession IDs (NCBI_ss#)</b> |
|----------------------------------|--------------------|--------------------------------|-------------|--------------------------------------------|
| Ca_Desig_Chr_scaffold00927_11571 | Ca_desig_scaffold  | 11571                          | [A/C]       | NA                                         |
| Ca_Desig_Chr_scaffold00927_11586 | Ca_desig_scaffold  | 11586                          | [A/G]       | NA                                         |
| Ca_Desig_Chr_scaffold00927_11596 | Ca_desig_scaffold  | 11596                          | [A/G]       | NA                                         |
| Ca_Desig_Chr_scaffold00927_11628 | Ca_desig_scaffold  | 11628                          | [T/C]       | NA                                         |
| Ca_Desig_Chr_scaffold00927_11631 | Ca_desig_scaffold  | 11631                          | [T/G]       | NA                                         |
| Ca_Desig_Chr_scaffold00927_11636 | Ca_desig_scaffold  | 11636                          | [A/G]       | NA                                         |
| Ca_Desig_Chr_scaffold00927_11643 | Ca_desig_scaffold  | 11643                          | [T/A]       | NA                                         |
| Ca_Desig_Chr_scaffold00927_11663 | Ca_desig_scaffold  | 11663                          | [T/C]       | NA                                         |
| Ca_Desig_Chr_scaffold00927_11666 | Ca_desig_scaffold  | 11666                          | [T/G]       | NA                                         |
| Ca_Desig_Chr_scaffold00927_11679 | Ca_desig_scaffold  | 11679                          | [A/G]       | NA                                         |
| Ca_Desig_Chr_scaffold00927_11703 | Ca_desig_scaffold  | 11703                          | [T/C]       | NA                                         |
| Ca_Desig_Chr_scaffold00927_11708 | Ca_desig_scaffold  | 11708                          | [A/G]       | NA                                         |
| Ca_Desig_Chr_scaffold00927_11710 | Ca_desig_scaffold  | 11710                          | [T/C]       | NA                                         |
| Ca_Desig_Chr_scaffold00927_11730 | Ca_desig_scaffold  | 11730                          | [A/C]       | NA                                         |
| Ca_Desig_Chr_scaffold00927_11754 | Ca_desig_scaffold  | 11754                          | [A/G]       | NA                                         |
| Ca_Desig_Chr_scaffold00927_11794 | Ca_desig_scaffold  | 11794                          | [T/C]       | NA                                         |
| Ca_Desig_Chr_scaffold00927_11814 | Ca_desig_scaffold  | 11814                          | [A/C]       | NA                                         |
| Ca_Desig_Chr_scaffold00927_11834 | Ca_desig_scaffold  | 11834                          | [T/G]       | NA                                         |
| Ca_Desig_Chr_scaffold00927_11861 | Ca_desig_scaffold  | 11861                          | [T/C]       | NA                                         |
| Ca_Desig_Chr_scaffold00927_11864 | Ca_desig_scaffold  | 11864                          | [A/G]       | NA                                         |
| Ca_Desig_Chr_scaffold00927_11866 | Ca_desig_scaffold  | 11866                          | [T/C]       | NA                                         |
| Ca_Desig_Chr_scaffold00927_11871 | Ca_desig_scaffold  | 11871                          | [T/G]       | NA                                         |
| Ca_Desig_Chr_scaffold00927_11874 | Ca_desig_scaffold  | 11874                          | [T/G]       | NA                                         |
| Ca_Desig_Chr_scaffold00927_11876 | Ca_desig_scaffold  | 11876                          | [A/G]       | NA                                         |
| Ca_Desig_Chr_scaffold00927_11882 | Ca_desig_scaffold  | 11882                          | [A/G]       | NA                                         |
| Ca_Desig_Chr_scaffold00927_11899 | Ca_desig_scaffold  | 11899                          | [A/C]       | NA                                         |
| Ca_Desig_Chr_scaffold00927_11949 | Ca_desig_scaffold  | 11949                          | [T/C]       | NA                                         |
| Ca_Desig_Chr_scaffold00927_11989 | Ca_desig_scaffold  | 11989                          | [T/G]       | NA                                         |
| Ca_Desig_Chr_scaffold00927_12019 | Ca_desig_scaffold  | 12019                          | [A/G]       | NA                                         |
| Ca_Desig_Chr_scaffold00927_12029 | Ca_desig_scaffold  | 12029                          | [T/G]       | NA                                         |
| Ca_Desig_Chr_scaffold00927_12055 | Ca_desig_scaffold  | 12055                          | [A/G]       | NA                                         |
| Ca_Desig_Chr_scaffold00927_12058 | Ca_desig_scaffold  | 12058                          | [T/C]       | NA                                         |
| Ca_Desig_Chr_scaffold00927_12061 | Ca_desig_scaffold  | 12061                          | [T/A]       | NA                                         |
| Ca_Desig_Chr_scaffold00927_12399 | Ca_desig_scaffold  | 12399                          | [T/C]       | NA                                         |

| <b>SNP IDs</b>                 | <b>Chromosomes</b> | <b>Physical positions (bp)</b> | <b>SNPs</b> | <b>NCBI SNPdb accession IDs (NCBI_ss#)</b> |
|--------------------------------|--------------------|--------------------------------|-------------|--------------------------------------------|
| Ca_Desi_Ch_scaffold00927_12439 | Ca_desi_scaffold   | 12439                          | [T/G]       | NA                                         |
| Ca_Desi_Ch_scaffold00927_12470 | Ca_desi_scaffold   | 12470                          | [T/C]       | NA                                         |
| Ca_Desi_Ch_scaffold00927_12485 | Ca_desi_scaffold   | 12485                          | [T/G]       | NA                                         |
| Ca_Desi_Ch_scaffold00927_12489 | Ca_desi_scaffold   | 12489                          | [A/G]       | NA                                         |
| Ca_Desi_Ch_scaffold00927_12494 | Ca_desi_scaffold   | 12494                          | [T/G]       | NA                                         |
| Ca_Desi_Ch_scaffold00927_12495 | Ca_desi_scaffold   | 12495                          | [A/G]       | NA                                         |
| Ca_Desi_Ch_scaffold00927_12511 | Ca_desi_scaffold   | 12511                          | [A/C]       | NA                                         |
| Ca_Desi_Ch_scaffold00927_12517 | Ca_desi_scaffold   | 12517                          | [T/G]       | NA                                         |
| Ca_Desi_Ch_scaffold00927_12522 | Ca_desi_scaffold   | 12522                          | [A/G]       | NA                                         |
| Ca_Desi_Ch_scaffold00927_12530 | Ca_desi_scaffold   | 12530                          | [A/G]       | NA                                         |
| Ca_Desi_Ch_scaffold00927_12561 | Ca_desi_scaffold   | 12561                          | [T/C]       | NA                                         |
| Ca_Desi_Ch_scaffold00927_12569 | Ca_desi_scaffold   | 12569                          | [T/G]       | NA                                         |
| Ca_Desi_Ch_scaffold00927_12595 | Ca_desi_scaffold   | 12595                          | [A/C]       | NA                                         |
| Ca_Desi_Ch_scaffold00927_12601 | Ca_desi_scaffold   | 12601                          | [T/C]       | NA                                         |
| Ca_Desi_Ch_scaffold00927_12650 | Ca_desi_scaffold   | 12650                          | [T/C]       | NA                                         |
| Ca_Desi_Ch_scaffold00927_12657 | Ca_desi_scaffold   | 12657                          | [A/G]       | NA                                         |
| Ca_Desi_Ch_scaffold00927_12673 | Ca_desi_scaffold   | 12673                          | [A/C]       | NA                                         |
| Ca_Desi_Ch_scaffold00927_12679 | Ca_desi_scaffold   | 12679                          | [T/G]       | NA                                         |
| Ca_Desi_Ch_scaffold00927_12684 | Ca_desi_scaffold   | 12684                          | [A/C]       | NA                                         |
| Ca_Desi_Ch_scaffold00927_12719 | Ca_desi_scaffold   | 12719                          | [T/G]       | NA                                         |
| Ca_Desi_Ch_scaffold00927_12729 | Ca_desi_scaffold   | 12729                          | [A/G]       | NA                                         |
| Ca_Desi_Ch_scaffold00927_12732 | Ca_desi_scaffold   | 12732                          | [A/G]       | NA                                         |
| Ca_Desi_Ch_scaffold00927_12748 | Ca_desi_scaffold   | 12748                          | [A/C]       | NA                                         |
| Ca_Desi_Ch_scaffold00927_12754 | Ca_desi_scaffold   | 12754                          | [T/G]       | NA                                         |
| Ca_Desi_Ch_scaffold00927_12806 | Ca_desi_scaffold   | 12806                          | [T/G]       | NA                                         |
| Ca_Desi_Ch_scaffold00927_12809 | Ca_desi_scaffold   | 12809                          | [A/C]       | NA                                         |
| Ca_Desi_Ch_scaffold00927_12823 | Ca_desi_scaffold   | 12823                          | [A/C]       | NA                                         |
| Ca_Desi_Ch_scaffold00927_12829 | Ca_desi_scaffold   | 12829                          | [T/G]       | NA                                         |
| Ca_Desi_Ch_scaffold00927_12842 | Ca_desi_scaffold   | 12842                          | [A/T]       | NA                                         |
| Ca_Desi_Ch_scaffold00927_12864 | Ca_desi_scaffold   | 12864                          | [T/G]       | NA                                         |
| Ca_Desi_Ch_scaffold00927_12872 | Ca_desi_scaffold   | 12872                          | [T/C]       | NA                                         |
| Ca_Desi_Ch_scaffold00927_12898 | Ca_desi_scaffold   | 12898                          | [A/C]       | NA                                         |
| Ca_Desi_Ch_scaffold00927_12904 | Ca_desi_scaffold   | 12904                          | [T/G]       | NA                                         |
| Ca_Desi_Ch_scaffold00927_12917 | Ca_desi_scaffold   | 12917                          | [A/C]       | NA                                         |



| <b>SNP IDs</b>                 | <b>Chromosomes</b> | <b>Physical positions (bp)</b> | <b>SNPs</b> | <b>NCBI SNPdb accession IDs (NCBI_ss#)</b> |
|--------------------------------|--------------------|--------------------------------|-------------|--------------------------------------------|
| Ca_Desi_Ch_scaffold00927_12930 | Ca_desi_scaffold   | 12930                          | [A/G]       | NA                                         |
| Ca_Desi_Ch_scaffold00928_67124 | Ca_desi_scaffold   | 67124                          | [T/C]       | NA                                         |
| Ca_Desi_Ch_scaffold00928_67162 | Ca_desi_scaffold   | 67162                          | [T/G]       | NA                                         |
| Ca_Desi_Ch_scaffold00928_67201 | Ca_desi_scaffold   | 67201                          | [A/C]       | NA                                         |
| Ca_Desi_Ch_scaffold00928_81701 | Ca_desi_scaffold   | 81701                          | [A/C]       | NA                                         |
| Ca_Desi_Ch_scaffold00928_81714 | Ca_desi_scaffold   | 81714                          | [A/C]       | NA                                         |
| Ca_Desi_Ch_scaffold00928_81715 | Ca_desi_scaffold   | 81715                          | [C/A]       | NA                                         |
| Ca_Desi_Ch_scaffold00928_81716 | Ca_desi_scaffold   | 81716                          | [C/G]       | NA                                         |
| Ca_Desi_Ch_scaffold00928_81717 | Ca_desi_scaffold   | 81717                          | [G/A]       | NA                                         |
| Ca_Desi_Ch_scaffold00930_27033 | Ca_desi_scaffold   | 27033                          | [C/T]       | NA                                         |
| Ca_Desi_Ch_scaffold00930_27048 | Ca_desi_scaffold   | 27048                          | [T/C]       | NA                                         |
| Ca_Desi_Ch_scaffold00930_27063 | Ca_desi_scaffold   | 27063                          | [A/T]       | NA                                         |
| Ca_Desi_Ch_scaffold00930_27089 | Ca_desi_scaffold   | 27089                          | [T/C]       | NA                                         |
| Ca_Desi_Ch_scaffold00930_27177 | Ca_desi_scaffold   | 27177                          | [A/C]       | NA                                         |
| Ca_Desi_Ch_scaffold00930_28287 | Ca_desi_scaffold   | 28287                          | [A/C]       | NA                                         |
| Ca_Desi_Ch_scaffold00930_28402 | Ca_desi_scaffold   | 28402                          | [G/A]       | NA                                         |
| Ca_Desi_Ch_scaffold00930_28426 | Ca_desi_scaffold   | 28426                          | [T/A]       | NA                                         |
| Ca_Desi_Ch_scaffold00930_28524 | Ca_desi_scaffold   | 28524                          | [C/T]       | NA                                         |
| Ca_Desi_Ch_scaffold00930_85348 | Ca_desi_scaffold   | 85348                          | [T/C]       | NA                                         |
| Ca_Desi_Ch_scaffold00930_87097 | Ca_desi_scaffold   | 87097                          | [A/G]       | NA                                         |
| Ca_Desi_Ch_scaffold00930_87259 | Ca_desi_scaffold   | 87259                          | [A/C]       | NA                                         |
| Ca_Desi_Ch_scaffold00930_90238 | Ca_desi_scaffold   | 90238                          | [G/T]       | NA                                         |
| Ca_Desi_Ch_scaffold00930_91560 | Ca_desi_scaffold   | 91560                          | [G/A]       | NA                                         |
| Ca_Desi_Ch_scaffold00933_75161 | Ca_desi_scaffold   | 75161                          | [A/C]       | NA                                         |
| Ca_Desi_Ch_scaffold00935_16869 | Ca_desi_scaffold   | 16869                          | [A/G]       | NA                                         |
| Ca_Desi_Ch_scaffold00935_16901 | Ca_desi_scaffold   | 16901                          | [A/C]       | NA                                         |
| Ca_Desi_Ch_scaffold00935_34654 | Ca_desi_scaffold   | 34654                          | [C/T]       | NA                                         |
| Ca_Desi_Ch_scaffold00938_55404 | Ca_desi_scaffold   | 55404                          | [T/C]       | NA                                         |
| Ca_Desi_Ch_scaffold00938_55425 | Ca_desi_scaffold   | 55425                          | [T/G]       | NA                                         |
| Ca_Desi_Ch_scaffold00938_55447 | Ca_desi_scaffold   | 55447                          | [A/C]       | NA                                         |
| Ca_Desi_Ch_scaffold00938_55456 | Ca_desi_scaffold   | 55456                          | [A/C]       | NA                                         |
| Ca_Desi_Ch_scaffold00938_57490 | Ca_desi_scaffold   | 57490                          | [A/C]       | NA                                         |
| Ca_Desi_Ch_scaffold00940_4561  | Ca_desi_scaffold   | 4561                           | [A/T]       | NA                                         |
| Ca_Desi_Ch_scaffold00940_4587  | Ca_desi_scaffold   | 4587                           | [C/A]       | NA                                         |

| <b>SNP IDs</b>                 | <b>Chromosomes</b> | <b>Physical positions (bp)</b> | <b>SNPs</b> | <b>NCBI SNPdb accession IDs (NCBI_ss#)</b> |
|--------------------------------|--------------------|--------------------------------|-------------|--------------------------------------------|
| Ca_Desi_Ch_scaffold00940_4590  | Ca_desi_scaffold   | 4590                           | [G/C]       | NA                                         |
| Ca_Desi_Ch_scaffold00940_4875  | Ca_desi_scaffold   | 4875                           | [A/C]       | NA                                         |
| Ca_Desi_Ch_scaffold00940_7087  | Ca_desi_scaffold   | 7087                           | [G/T]       | NA                                         |
| Ca_Desi_Ch_scaffold00940_7189  | Ca_desi_scaffold   | 7189                           | [T/G]       | NA                                         |
| Ca_Desi_Ch_scaffold00940_7190  | Ca_desi_scaffold   | 7190                           | [G/C]       | NA                                         |
| Ca_Desi_Ch_scaffold00940_7400  | Ca_desi_scaffold   | 7400                           | [C/T]       | NA                                         |
| Ca_Desi_Ch_scaffold00940_7449  | Ca_desi_scaffold   | 7449                           | [T/C]       | NA                                         |
| Ca_Desi_Ch_scaffold00940_13611 | Ca_desi_scaffold   | 13611                          | [A/G]       | NA                                         |
| Ca_Desi_Ch_scaffold00940_13631 | Ca_desi_scaffold   | 13631                          | [A/G]       | NA                                         |
| Ca_Desi_Ch_scaffold00940_27811 | Ca_desi_scaffold   | 27811                          | [A/C]       | NA                                         |
| Ca_Desi_Ch_scaffold00940_27814 | Ca_desi_scaffold   | 27814                          | [A/C]       | NA                                         |
| Ca_Desi_Ch_scaffold00940_27819 | Ca_desi_scaffold   | 27819                          | [A/C]       | NA                                         |
| Ca_Desi_Ch_scaffold00940_27871 | Ca_desi_scaffold   | 27871                          | [A/C]       | NA                                         |
| Ca_Desi_Ch_scaffold00940_27874 | Ca_desi_scaffold   | 27874                          | [A/C]       | NA                                         |
| Ca_Desi_Ch_scaffold00940_27880 | Ca_desi_scaffold   | 27880                          | [G/A]       | NA                                         |
| Ca_Desi_Ch_scaffold00940_27886 | Ca_desi_scaffold   | 27886                          | [A/C]       | NA                                         |
| Ca_Desi_Ch_scaffold00940_27892 | Ca_desi_scaffold   | 27892                          | [C/T]       | NA                                         |
| Ca_Desi_Ch_scaffold00940_27901 | Ca_desi_scaffold   | 27901                          | [A/C]       | NA                                         |
| Ca_Desi_Ch_scaffold00940_33957 | Ca_desi_scaffold   | 33957                          | [A/C]       | NA                                         |
| Ca_Desi_Ch_scaffold00940_34284 | Ca_desi_scaffold   | 34284                          | [C/T]       | NA                                         |
| Ca_Desi_Ch_scaffold00940_47087 | Ca_desi_scaffold   | 47087                          | [A/G]       | NA                                         |
| Ca_Desi_Ch_scaffold00940_47090 | Ca_desi_scaffold   | 47090                          | [T/G]       | NA                                         |
| Ca_Desi_Ch_scaffold00941_24055 | Ca_desi_scaffold   | 24055                          | [T/G]       | NA                                         |
| Ca_Desi_Ch_scaffold00942_89444 | Ca_desi_scaffold   | 89444                          | [T/C]       | NA                                         |
| Ca_Desi_Ch_scaffold00942_89479 | Ca_desi_scaffold   | 89479                          | [T/C]       | NA                                         |
| Ca_Desi_Ch_scaffold00943_35567 | Ca_desi_scaffold   | 35567                          | [A/G]       | NA                                         |
| Ca_Desi_Ch_scaffold00943_35574 | Ca_desi_scaffold   | 35574                          | [A/G]       | NA                                         |
| Ca_Desi_Ch_scaffold00943_35577 | Ca_desi_scaffold   | 35577                          | [A/C]       | NA                                         |
| Ca_Desi_Ch_scaffold00943_42106 | Ca_desi_scaffold   | 42106                          | [A/G]       | NA                                         |
| Ca_Desi_Ch_scaffold00943_42118 | Ca_desi_scaffold   | 42118                          | [T/C]       | NA                                         |
| Ca_Desi_Ch_scaffold00943_42122 | Ca_desi_scaffold   | 42122                          | [T/C]       | NA                                         |
| Ca_Desi_Ch_scaffold00943_42128 | Ca_desi_scaffold   | 42128                          | [A/G]       | NA                                         |
| Ca_Desi_Ch_scaffold00943_43465 | Ca_desi_scaffold   | 43465                          | [A/C]       | NA                                         |
| Ca_Desi_Ch_scaffold00943_43471 | Ca_desi_scaffold   | 43471                          | [A/G]       | NA                                         |

| <b>SNP IDs</b>                    | <b>Chromosomes</b> | <b>Physical positions (bp)</b> | <b>SNPs</b> | <b>NCBI SNPdb accession IDs (NCBI_ss#)</b> |
|-----------------------------------|--------------------|--------------------------------|-------------|--------------------------------------------|
| Ca_Desig_Chr_scaffold00943_43487  | Ca_desig_scaffold  | 43487                          | [T/C]       | NA                                         |
| Ca_Desig_Chr_scaffold00943_43492  | Ca_desig_scaffold  | 43492                          | [T/C]       | NA                                         |
| Ca_Desig_Chr_scaffold00943_43495  | Ca_desig_scaffold  | 43495                          | [T/A]       | NA                                         |
| Ca_Desig_Chr_scaffold00943_43505  | Ca_desig_scaffold  | 43505                          | [T/G]       | NA                                         |
| Ca_Desig_Chr_scaffold00943_43515  | Ca_desig_scaffold  | 43515                          | [A/G]       | NA                                         |
| Ca_Desig_Chr_scaffold00943_93905  | Ca_desig_scaffold  | 93905                          | [T/G]       | NA                                         |
| Ca_Desig_Chr_scaffold00943_97453  | Ca_desig_scaffold  | 97453                          | [A/G]       | NA                                         |
| Ca_Desig_Chr_scaffold00943_97475  | Ca_desig_scaffold  | 97475                          | [T/C]       | NA                                         |
| Ca_Desig_Chr_scaffold00943_97483  | Ca_desig_scaffold  | 97483                          | [A/G]       | NA                                         |
| Ca_Desig_Chr_scaffold00943_101445 | Ca_desig_scaffold  | 101445                         | [T/G]       | NA                                         |
| Ca_Desig_Chr_scaffold00946_20004  | Ca_desig_scaffold  | 20004                          | [A/T]       | NA                                         |
| Ca_Desig_Chr_scaffold00946_20014  | Ca_desig_scaffold  | 20014                          | [A/C]       | NA                                         |
| Ca_Desig_Chr_scaffold00946_20022  | Ca_desig_scaffold  | 20022                          | [A/C]       | NA                                         |
| Ca_Desig_Chr_scaffold00946_20037  | Ca_desig_scaffold  | 20037                          | [T/G]       | NA                                         |
| Ca_Desig_Chr_scaffold00946_33796  | Ca_desig_scaffold  | 33796                          | [T/C]       | NA                                         |
| Ca_Desig_Chr_scaffold00946_44808  | Ca_desig_scaffold  | 44808                          | [T/C]       | NA                                         |
| Ca_Desig_Chr_scaffold00946_44826  | Ca_desig_scaffold  | 44826                          | [A/G]       | NA                                         |
| Ca_Desig_Chr_scaffold00946_44902  | Ca_desig_scaffold  | 44902                          | [A/T]       | NA                                         |
| Ca_Desig_Chr_scaffold00946_44903  | Ca_desig_scaffold  | 44903                          | [A/T]       | NA                                         |
| Ca_Desig_Chr_scaffold00946_44905  | Ca_desig_scaffold  | 44905                          | [A/T]       | NA                                         |
| Ca_Desig_Chr_scaffold00946_44920  | Ca_desig_scaffold  | 44920                          | [A/C]       | NA                                         |
| Ca_Desig_Chr_scaffold00946_47653  | Ca_desig_scaffold  | 47653                          | [T/G]       | NA                                         |
| Ca_Desig_Chr_scaffold00952_69629  | Ca_desig_scaffold  | 69629                          | [T/A]       | NA                                         |
| Ca_Desig_Chr_scaffold00952_69633  | Ca_desig_scaffold  | 69633                          | [T/G]       | NA                                         |
| Ca_Desig_Chr_scaffold00952_69655  | Ca_desig_scaffold  | 69655                          | [A/C]       | NA                                         |
| Ca_Desig_Chr_scaffold00952_69679  | Ca_desig_scaffold  | 69679                          | [G/A]       | NA                                         |
| Ca_Desig_Chr_scaffold00953_6356   | Ca_desig_scaffold  | 6356                           | [T/C]       | NA                                         |
| Ca_Desig_Chr_scaffold00953_7977   | Ca_desig_scaffold  | 7977                           | [T/A]       | NA                                         |
| Ca_Desig_Chr_scaffold00953_7985   | Ca_desig_scaffold  | 7985                           | [T/C]       | NA                                         |
| Ca_Desig_Chr_scaffold00953_10408  | Ca_desig_scaffold  | 10408                          | [T/C]       | NA                                         |
| Ca_Desig_Chr_scaffold00953_10471  | Ca_desig_scaffold  | 10471                          | [A/G]       | NA                                         |
| Ca_Desig_Chr_scaffold00953_10479  | Ca_desig_scaffold  | 10479                          | [A/G]       | NA                                         |
| Ca_Desig_Chr_scaffold00953_13590  | Ca_desig_scaffold  | 13590                          | [T/C]       | NA                                         |
| Ca_Desig_Chr_scaffold00953_13608  | Ca_desig_scaffold  | 13608                          | [A/T]       | NA                                         |

| <b>SNP IDs</b>                 | <b>Chromosomes</b> | <b>Physical positions (bp)</b> | <b>SNPs</b> | <b>NCBI SNPdb accession IDs (NCBI_ss#)</b> |
|--------------------------------|--------------------|--------------------------------|-------------|--------------------------------------------|
| Ca_Desi_Ch_scaffold00953_13610 | Ca_desi_scaffold   | 13610                          | [T/G]       | NA                                         |
| Ca_Desi_Ch_scaffold00953_13614 | Ca_desi_scaffold   | 13614                          | [G/C]       | NA                                         |
| Ca_Desi_Ch_scaffold00953_13615 | Ca_desi_scaffold   | 13615                          | [C/A]       | NA                                         |
| Ca_Desi_Ch_scaffold00953_61034 | Ca_desi_scaffold   | 61034                          | [T/G]       | NA                                         |
| Ca_Desi_Ch_scaffold00953_75412 | Ca_desi_scaffold   | 75412                          | [A/C]       | NA                                         |
| Ca_Desi_Ch_scaffold00953_75460 | Ca_desi_scaffold   | 75460                          | [A/G]       | NA                                         |
| Ca_Desi_Ch_scaffold00954_87737 | Ca_desi_scaffold   | 87737                          | [C/G]       | NA                                         |
| Ca_Desi_Ch_scaffold00954_88599 | Ca_desi_scaffold   | 88599                          | [A/G]       | NA                                         |
| Ca_Desi_Ch_scaffold00954_88609 | Ca_desi_scaffold   | 88609                          | [T/A]       | NA                                         |
| Ca_Desi_Ch_scaffold00954_88626 | Ca_desi_scaffold   | 88626                          | [T/C]       | NA                                         |
| Ca_Desi_Ch_scaffold00955_5427  | Ca_desi_scaffold   | 5427                           | [A/G]       | NA                                         |
| Ca_Desi_Ch_scaffold00955_32937 | Ca_desi_scaffold   | 32937                          | [G/A]       | NA                                         |
| Ca_Desi_Ch_scaffold00955_62227 | Ca_desi_scaffold   | 62227                          | [C/T]       | NA                                         |
| Ca_Desi_Ch_scaffold00955_62353 | Ca_desi_scaffold   | 62353                          | [C/G]       | NA                                         |
| Ca_Desi_Ch_scaffold00955_64098 | Ca_desi_scaffold   | 64098                          | [C/T]       | NA                                         |
| Ca_Desi_Ch_scaffold00955_64255 | Ca_desi_scaffold   | 64255                          | [T/C]       | NA                                         |
| Ca_Desi_Ch_scaffold00955_64438 | Ca_desi_scaffold   | 64438                          | [T/C]       | NA                                         |
| Ca_Desi_Ch_scaffold00955_64912 | Ca_desi_scaffold   | 64912                          | [C/T]       | NA                                         |
| Ca_Desi_Ch_scaffold00955_66125 | Ca_desi_scaffold   | 66125                          | [A/G]       | NA                                         |
| Ca_Desi_Ch_scaffold00955_66131 | Ca_desi_scaffold   | 66131                          | [A/G]       | NA                                         |
| Ca_Desi_Ch_scaffold00955_66137 | Ca_desi_scaffold   | 66137                          | [A/C]       | NA                                         |
| Ca_Desi_Ch_scaffold00955_66163 | Ca_desi_scaffold   | 66163                          | [A/G]       | NA                                         |
| Ca_Desi_Ch_scaffold00955_66166 | Ca_desi_scaffold   | 66166                          | [G/C]       | NA                                         |
| Ca_Desi_Ch_scaffold00955_66168 | Ca_desi_scaffold   | 66168                          | [T/C]       | NA                                         |
| Ca_Desi_Ch_scaffold00955_66176 | Ca_desi_scaffold   | 66176                          | [A/G]       | NA                                         |
| Ca_Desi_Ch_scaffold00955_66187 | Ca_desi_scaffold   | 66187                          | [T/C]       | NA                                         |
| Ca_Desi_Ch_scaffold00955_75899 | Ca_desi_scaffold   | 75899                          | [T/A]       | NA                                         |
| Ca_Desi_Ch_scaffold00955_87584 | Ca_desi_scaffold   | 87584                          | [A/C]       | NA                                         |
| Ca_Desi_Ch_scaffold00961_105   | Ca_desi_scaffold   | 105                            | [G/A]       | NA                                         |
| Ca_Desi_Ch_scaffold00961_137   | Ca_desi_scaffold   | 137                            | [C/A]       | NA                                         |
| Ca_Desi_Ch_scaffold00961_151   | Ca_desi_scaffold   | 151                            | [C/T]       | NA                                         |
| Ca_Desi_Ch_scaffold00961_161   | Ca_desi_scaffold   | 161                            | [C/T]       | NA                                         |
| Ca_Desi_Ch_scaffold00961_56154 | Ca_desi_scaffold   | 56154                          | [T/G]       | NA                                         |
| Ca_Desi_Ch_scaffold00964_39641 | Ca_desi_scaffold   | 39641                          | [T/G]       | NA                                         |

| <b>SNP IDs</b>                 | <b>Chromosomes</b> | <b>Physical positions (bp)</b> | <b>SNPs</b> | <b>NCBI SNPdb accession IDs (NCBI_ss#)</b> |
|--------------------------------|--------------------|--------------------------------|-------------|--------------------------------------------|
| Ca_Desi_Ch_scaffold00964_39662 | Ca_desi_scaffold   | 39662                          | [T/G]       | NA                                         |
| Ca_Desi_Ch_scaffold00965_35533 | Ca_desi_scaffold   | 35533                          | [A/C]       | NA                                         |
| Ca_Desi_Ch_scaffold00965_35599 | Ca_desi_scaffold   | 35599                          | [T/G]       | NA                                         |
| Ca_Desi_Ch_scaffold00966_21519 | Ca_desi_scaffold   | 21519                          | [A/C]       | NA                                         |
| Ca_Desi_Ch_scaffold00966_21523 | Ca_desi_scaffold   | 21523                          | [A/C]       | NA                                         |
| Ca_Desi_Ch_scaffold00966_21946 | Ca_desi_scaffold   | 21946                          | [T/C]       | NA                                         |
| Ca_Desi_Ch_scaffold00966_21976 | Ca_desi_scaffold   | 21976                          | [T/A]       | NA                                         |
| Ca_Desi_Ch_scaffold00966_22000 | Ca_desi_scaffold   | 22000                          | [A/G]       | NA                                         |
| Ca_Desi_Ch_scaffold00966_22004 | Ca_desi_scaffold   | 22004                          | [A/G]       | NA                                         |
| Ca_Desi_Ch_scaffold00966_22014 | Ca_desi_scaffold   | 22014                          | [A/G]       | NA                                         |
| Ca_Desi_Ch_scaffold00966_22016 | Ca_desi_scaffold   | 22016                          | [T/C]       | NA                                         |
| Ca_Desi_Ch_scaffold00966_27250 | Ca_desi_scaffold   | 27250                          | [G/A]       | NA                                         |
| Ca_Desi_Ch_scaffold00968_37706 | Ca_desi_scaffold   | 37706                          | [G/T]       | NA                                         |
| Ca_Desi_Ch_scaffold00971_16219 | Ca_desi_scaffold   | 16219                          | [A/G]       | NA                                         |
| Ca_Desi_Ch_scaffold00971_33011 | Ca_desi_scaffold   | 33011                          | [A/C]       | NA                                         |
| Ca_Desi_Ch_scaffold00971_79252 | Ca_desi_scaffold   | 79252                          | [A/G]       | NA                                         |
| Ca_Desi_Ch_scaffold00971_79262 | Ca_desi_scaffold   | 79262                          | [T/C]       | NA                                         |
| Ca_Desi_Ch_scaffold00972_42170 | Ca_desi_scaffold   | 42170                          | [T/C]       | NA                                         |
| Ca_Desi_Ch_scaffold00972_42188 | Ca_desi_scaffold   | 42188                          | [A/G]       | NA                                         |
| Ca_Desi_Ch_scaffold00972_42196 | Ca_desi_scaffold   | 42196                          | [T/C]       | NA                                         |
| Ca_Desi_Ch_scaffold00972_42208 | Ca_desi_scaffold   | 42208                          | [A/G]       | NA                                         |
| Ca_Desi_Ch_scaffold00972_42248 | Ca_desi_scaffold   | 42248                          | [A/G]       | NA                                         |
| Ca_Desi_Ch_scaffold00978_29258 | Ca_desi_scaffold   | 29258                          | [A/G]       | NA                                         |
| Ca_Desi_Ch_scaffold00978_75248 | Ca_desi_scaffold   | 75248                          | [T/G]       | NA                                         |
| Ca_Desi_Ch_scaffold00978_75250 | Ca_desi_scaffold   | 75250                          | [A/G]       | NA                                         |
| Ca_Desi_Ch_scaffold00979_27531 | Ca_desi_scaffold   | 27531                          | [G/T]       | NA                                         |
| Ca_Desi_Ch_scaffold00979_29943 | Ca_desi_scaffold   | 29943                          | [T/G]       | NA                                         |
| Ca_Desi_Ch_scaffold00979_29959 | Ca_desi_scaffold   | 29959                          | [T/G]       | NA                                         |
| Ca_Desi_Ch_scaffold00979_29962 | Ca_desi_scaffold   | 29962                          | [T/A]       | NA                                         |
| Ca_Desi_Ch_scaffold00979_58156 | Ca_desi_scaffold   | 58156                          | [T/C]       | NA                                         |
| Ca_Desi_Ch_scaffold00979_59308 | Ca_desi_scaffold   | 59308                          | [T/G]       | NA                                         |
| Ca_Desi_Ch_scaffold00981_80500 | Ca_desi_scaffold   | 80500                          | [A/C]       | NA                                         |
| Ca_Desi_Ch_scaffold00981_80518 | Ca_desi_scaffold   | 80518                          | [A/C]       | NA                                         |
| Ca_Desi_Ch_scaffold00981_80523 | Ca_desi_scaffold   | 80523                          | [A/C]       | NA                                         |

| <b>SNP IDs</b>                   | <b>Chromosomes</b> | <b>Physical positions (bp)</b> | <b>SNPs</b> | <b>NCBI SNPdb accession IDs (NCBI_ss#)</b> |
|----------------------------------|--------------------|--------------------------------|-------------|--------------------------------------------|
| Ca_Desig_Chr_scaffold00981_80570 | Ca_desig_scaffold  | 80570                          | [A/C]       | NA                                         |
| Ca_Desig_Chr_scaffold00981_80639 | Ca_desig_scaffold  | 80639                          | [A/C]       | NA                                         |
| Ca_Desig_Chr_scaffold00983_38962 | Ca_desig_scaffold  | 38962                          | [T/G]       | NA                                         |
| Ca_Desig_Chr_scaffold00983_38982 | Ca_desig_scaffold  | 38982                          | [T/C]       | NA                                         |
| Ca_Desig_Chr_scaffold00985_16803 | Ca_desig_scaffold  | 16803                          | [A/G]       | NA                                         |
| Ca_Desig_Chr_scaffold00988_76063 | Ca_desig_scaffold  | 76063                          | [T/C]       | NA                                         |
| Ca_Desig_Chr_scaffold00988_79192 | Ca_desig_scaffold  | 79192                          | [T/G]       | NA                                         |
| Ca_Desig_Chr_scaffold00988_82381 | Ca_desig_scaffold  | 82381                          | [T/G]       | NA                                         |
| Ca_Desig_Chr_scaffold00988_82465 | Ca_desig_scaffold  | 82465                          | [T/C]       | NA                                         |
| Ca_Desig_Chr_scaffold00988_82466 | Ca_desig_scaffold  | 82466                          | [G/T]       | NA                                         |
| Ca_Desig_Chr_scaffold00988_90936 | Ca_desig_scaffold  | 90936                          | [A/C]       | NA                                         |
| Ca_Desig_Chr_scaffold00989_41083 | Ca_desig_scaffold  | 41083                          | [T/A]       | NA                                         |
| Ca_Desig_Chr_scaffold00989_41086 | Ca_desig_scaffold  | 41086                          | [A/C]       | NA                                         |
| Ca_Desig_Chr_scaffold00989_41109 | Ca_desig_scaffold  | 41109                          | [A/G]       | NA                                         |
| Ca_Desig_Chr_scaffold00989_86313 | Ca_desig_scaffold  | 86313                          | [A/T]       | NA                                         |
| Ca_Desig_Chr_scaffold00997_4028  | Ca_desig_scaffold  | 4028                           | [A/T]       | NA                                         |
| Ca_Desig_Chr_scaffold00997_42541 | Ca_desig_scaffold  | 42541                          | [T/C]       | NA                                         |
| Ca_Desig_Chr_scaffold00997_42559 | Ca_desig_scaffold  | 42559                          | [T/C]       | NA                                         |
| Ca_Desig_Chr_scaffold00997_42568 | Ca_desig_scaffold  | 42568                          | [A/G]       | NA                                         |
| Ca_Desig_Chr_scaffold01006_42734 | Ca_desig_scaffold  | 42734                          | [C/G]       | NA                                         |
| Ca_Desig_Chr_scaffold01006_42759 | Ca_desig_scaffold  | 42759                          | [T/C]       | NA                                         |
| Ca_Desig_Chr_scaffold01006_43051 | Ca_desig_scaffold  | 43051                          | [T/G]       | NA                                         |
| Ca_Desig_Chr_scaffold01007_90164 | Ca_desig_scaffold  | 90164                          | [C/A]       | NA                                         |
| Ca_Desig_Chr_scaffold01007_90252 | Ca_desig_scaffold  | 90252                          | [A/G]       | NA                                         |
| Ca_Desig_Chr_scaffold01007_90259 | Ca_desig_scaffold  | 90259                          | [C/A]       | NA                                         |
| Ca_Desig_Chr_scaffold01007_90277 | Ca_desig_scaffold  | 90277                          | [C/T]       | NA                                         |
| Ca_Desig_Chr_scaffold01007_90278 | Ca_desig_scaffold  | 90278                          | [A/G]       | NA                                         |
| Ca_Desig_Chr_scaffold01009_27225 | Ca_desig_scaffold  | 27225                          | [T/A]       | NA                                         |
| Ca_Desig_Chr_scaffold01009_27226 | Ca_desig_scaffold  | 27226                          | [T/A]       | NA                                         |
| Ca_Desig_Chr_scaffold01009_27227 | Ca_desig_scaffold  | 27227                          | [A/C]       | NA                                         |
| Ca_Desig_Chr_scaffold01009_27312 | Ca_desig_scaffold  | 27312                          | [A/T]       | NA                                         |
| Ca_Desig_Chr_scaffold01009_27322 | Ca_desig_scaffold  | 27322                          | [A/G]       | NA                                         |
| Ca_Desig_Chr_scaffold01009_27333 | Ca_desig_scaffold  | 27333                          | [T/C]       | NA                                         |
| Ca_Desig_Chr_scaffold01009_27345 | Ca_desig_scaffold  | 27345                          | [A/G]       | NA                                         |

| <b>SNP IDs</b>                 | <b>Chromosomes</b> | <b>Physical positions (bp)</b> | <b>SNPs</b> | <b>NCBI SNPdb accession IDs (NCBI_ss#)</b> |
|--------------------------------|--------------------|--------------------------------|-------------|--------------------------------------------|
| Ca_Desi_Ch_scaffold01009_27349 | Ca_desi_scaffold   | 27349                          | [T/C]       | NA                                         |
| Ca_Desi_Ch_scaffold01009_27354 | Ca_desi_scaffold   | 27354                          | [T/C]       | NA                                         |
| Ca_Desi_Ch_scaffold01009_27356 | Ca_desi_scaffold   | 27356                          | [A/G]       | NA                                         |
| Ca_Desi_Ch_scaffold01009_33563 | Ca_desi_scaffold   | 33563                          | [C/A]       | NA                                         |
| Ca_Desi_Ch_scaffold01009_33564 | Ca_desi_scaffold   | 33564                          | [A/T]       | NA                                         |
| Ca_Desi_Ch_scaffold01009_33565 | Ca_desi_scaffold   | 33565                          | [A/C]       | NA                                         |
| Ca_Desi_Ch_scaffold01009_33566 | Ca_desi_scaffold   | 33566                          | [G/T]       | NA                                         |
| Ca_Desi_Ch_scaffold01010_61944 | Ca_desi_scaffold   | 61944                          | [T/C]       | NA                                         |
| Ca_Desi_Ch_scaffold01010_61946 | Ca_desi_scaffold   | 61946                          | [C/G]       | NA                                         |
| Ca_Desi_Ch_scaffold01010_61949 | Ca_desi_scaffold   | 61949                          | [T/C]       | NA                                         |
| Ca_Desi_Ch_scaffold01010_61955 | Ca_desi_scaffold   | 61955                          | [T/C]       | NA                                         |
| Ca_Desi_Ch_scaffold01010_61959 | Ca_desi_scaffold   | 61959                          | [T/C]       | NA                                         |
| Ca_Desi_Ch_scaffold01010_61968 | Ca_desi_scaffold   | 61968                          | [T/G]       | NA                                         |
| Ca_Desi_Ch_scaffold01010_61971 | Ca_desi_scaffold   | 61971                          | [T/C]       | NA                                         |
| Ca_Desi_Ch_scaffold01010_62666 | Ca_desi_scaffold   | 62666                          | [T/G]       | NA                                         |
| Ca_Desi_Ch_scaffold01010_68716 | Ca_desi_scaffold   | 68716                          | [A/C]       | NA                                         |
| Ca_Desi_Ch_scaffold01010_68717 | Ca_desi_scaffold   | 68717                          | [G/T]       | NA                                         |
| Ca_Desi_Ch_scaffold01010_68830 | Ca_desi_scaffold   | 68830                          | [T/A]       | NA                                         |
| Ca_Desi_Ch_scaffold01010_92688 | Ca_desi_scaffold   | 92688                          | [A/G]       | NA                                         |
| Ca_Desi_Ch_scaffold01010_92690 | Ca_desi_scaffold   | 92690                          | [T/G]       | NA                                         |
| Ca_Desi_Ch_scaffold01013_88641 | Ca_desi_scaffold   | 88641                          | [T/G]       | NA                                         |
| Ca_Desi_Ch_scaffold01013_88647 | Ca_desi_scaffold   | 88647                          | [T/C]       | NA                                         |
| Ca_Desi_Ch_scaffold01013_88655 | Ca_desi_scaffold   | 88655                          | [T/C]       | NA                                         |
| Ca_Desi_Ch_scaffold01013_88666 | Ca_desi_scaffold   | 88666                          | [T/C]       | NA                                         |
| Ca_Desi_Ch_scaffold01013_89864 | Ca_desi_scaffold   | 89864                          | [G/A]       | NA                                         |
| Ca_Desi_Ch_scaffold01013_89870 | Ca_desi_scaffold   | 89870                          | [T/G]       | NA                                         |
| Ca_Desi_Ch_scaffold01013_89889 | Ca_desi_scaffold   | 89889                          | [G/T]       | NA                                         |
| Ca_Desi_Ch_scaffold01013_89894 | Ca_desi_scaffold   | 89894                          | [A/T]       | NA                                         |
| Ca_Desi_Ch_scaffold01015_22843 | Ca_desi_scaffold   | 22843                          | [A/G]       | NA                                         |
| Ca_Desi_Ch_scaffold01015_22861 | Ca_desi_scaffold   | 22861                          | [T/A]       | NA                                         |
| Ca_Desi_Ch_scaffold01015_22864 | Ca_desi_scaffold   | 22864                          | [T/C]       | NA                                         |
| Ca_Desi_Ch_scaffold01015_31831 | Ca_desi_scaffold   | 31831                          | [T/G]       | NA                                         |
| Ca_Desi_Ch_scaffold01015_31843 | Ca_desi_scaffold   | 31843                          | [T/G]       | NA                                         |
| Ca_Desi_Ch_scaffold01015_31875 | Ca_desi_scaffold   | 31875                          | [T/G]       | NA                                         |

| <b>SNP IDs</b>                 | <b>Chromosomes</b> | <b>Physical positions (bp)</b> | <b>SNPs</b> | <b>NCBI SNPdb accession IDs (NCBI_ss#)</b> |
|--------------------------------|--------------------|--------------------------------|-------------|--------------------------------------------|
| Ca_Desi_Ch_scaffold01016_16446 | Ca_desi_scaffold   | 16446                          | [T/C]       | NA                                         |
| Ca_Desi_Ch_scaffold01016_16447 | Ca_desi_scaffold   | 16447                          | [A/T]       | NA                                         |
| Ca_Desi_Ch_scaffold01016_16479 | Ca_desi_scaffold   | 16479                          | [T/A]       | NA                                         |
| Ca_Desi_Ch_scaffold01016_37030 | Ca_desi_scaffold   | 37030                          | [A/T]       | NA                                         |
| Ca_Desi_Ch_scaffold01016_75205 | Ca_desi_scaffold   | 75205                          | [T/C]       | NA                                         |
| Ca_Desi_Ch_scaffold01016_93642 | Ca_desi_scaffold   | 93642                          | [A/C]       | NA                                         |
| Ca_Desi_Ch_scaffold01024_79231 | Ca_desi_scaffold   | 79231                          | [T/G]       | NA                                         |
| Ca_Desi_Ch_scaffold01024_79239 | Ca_desi_scaffold   | 79239                          | [A/T]       | NA                                         |
| Ca_Desi_Ch_scaffold01024_83029 | Ca_desi_scaffold   | 83029                          | [A/G]       | NA                                         |
| Ca_Desi_Ch_scaffold01024_83030 | Ca_desi_scaffold   | 83030                          | [A/G]       | NA                                         |
| Ca_Desi_Ch_scaffold01024_83032 | Ca_desi_scaffold   | 83032                          | [A/C]       | NA                                         |
| Ca_Desi_Ch_scaffold01024_83036 | Ca_desi_scaffold   | 83036                          | [T/C]       | NA                                         |
| Ca_Desi_Ch_scaffold01024_83041 | Ca_desi_scaffold   | 83041                          | [T/C]       | NA                                         |
| Ca_Desi_Ch_scaffold01024_83043 | Ca_desi_scaffold   | 83043                          | [T/C]       | NA                                         |
| Ca_Desi_Ch_scaffold01024_83052 | Ca_desi_scaffold   | 83052                          | [T/C]       | NA                                         |
| Ca_Desi_Ch_scaffold01024_83055 | Ca_desi_scaffold   | 83055                          | [A/C]       | NA                                         |
| Ca_Desi_Ch_scaffold01024_83061 | Ca_desi_scaffold   | 83061                          | [A/G]       | NA                                         |
| Ca_Desi_Ch_scaffold01024_83072 | Ca_desi_scaffold   | 83072                          | [A/G]       | NA                                         |
| Ca_Desi_Ch_scaffold01024_83076 | Ca_desi_scaffold   | 83076                          | [T/C]       | NA                                         |
| Ca_Desi_Ch_scaffold01024_83082 | Ca_desi_scaffold   | 83082                          | [T/C]       | NA                                         |
| Ca_Desi_Ch_scaffold01024_86249 | Ca_desi_scaffold   | 86249                          | [A/T]       | NA                                         |
| Ca_Desi_Ch_scaffold01025_30026 | Ca_desi_scaffold   | 30026                          | [T/C]       | NA                                         |
| Ca_Desi_Ch_scaffold01029_32655 | Ca_desi_scaffold   | 32655                          | [T/G]       | NA                                         |
| Ca_Desi_Ch_scaffold01031_25405 | Ca_desi_scaffold   | 25405                          | [T/A]       | NA                                         |
| Ca_Desi_Ch_scaffold01031_35195 | Ca_desi_scaffold   | 35195                          | [T/C]       | NA                                         |
| Ca_Desi_Ch_scaffold01031_35202 | Ca_desi_scaffold   | 35202                          | [A/G]       | NA                                         |
| Ca_Desi_Ch_scaffold01031_35212 | Ca_desi_scaffold   | 35212                          | [A/G]       | NA                                         |
| Ca_Desi_Ch_scaffold01031_35231 | Ca_desi_scaffold   | 35231                          | [T/A]       | NA                                         |
| Ca_Desi_Ch_scaffold01033_9668  | Ca_desi_scaffold   | 9668                           | [T/G]       | NA                                         |
| Ca_Desi_Ch_scaffold01033_10631 | Ca_desi_scaffold   | 10631                          | [A/C]       | NA                                         |
| Ca_Desi_Ch_scaffold01033_10658 | Ca_desi_scaffold   | 10658                          | [A/T]       | NA                                         |
| Ca_Desi_Ch_scaffold01033_10667 | Ca_desi_scaffold   | 10667                          | [C/T]       | NA                                         |
| Ca_Desi_Ch_scaffold01034_25733 | Ca_desi_scaffold   | 25733                          | [A/C]       | NA                                         |
| Ca_Desi_Ch_scaffold01034_25738 | Ca_desi_scaffold   | 25738                          | [T/C]       | NA                                         |



| <b>SNP IDs</b>                   | <b>Chromosomes</b> | <b>Physical positions (bp)</b> | <b>SNPs</b> | <b>NCBI SNPdb accession IDs (NCBI_ss#)</b> |
|----------------------------------|--------------------|--------------------------------|-------------|--------------------------------------------|
| Ca_Desig_Chr_scaffold01034_25742 | Ca_desig_scaffold  | 25742                          | [T/C]       | NA                                         |
| Ca_Desig_Chr_scaffold01034_25755 | Ca_desig_scaffold  | 25755                          | [T/C]       | NA                                         |
| Ca_Desig_Chr_scaffold01034_25761 | Ca_desig_scaffold  | 25761                          | [T/C]       | NA                                         |
| Ca_Desig_Chr_scaffold01034_25764 | Ca_desig_scaffold  | 25764                          | [T/G]       | NA                                         |
| Ca_Desig_Chr_scaffold01034_25781 | Ca_desig_scaffold  | 25781                          | [A/T]       | NA                                         |
| Ca_Desig_Chr_scaffold01036_62685 | Ca_desig_scaffold  | 62685                          | [A/C]       | NA                                         |
| Ca_Desig_Chr_scaffold01036_63469 | Ca_desig_scaffold  | 63469                          | [A/G]       | NA                                         |
| Ca_Desig_Chr_scaffold01036_63470 | Ca_desig_scaffold  | 63470                          | [T/G]       | NA                                         |
| Ca_Desig_Chr_scaffold01036_63482 | Ca_desig_scaffold  | 63482                          | [T/G]       | NA                                         |
| Ca_Desig_Chr_scaffold01036_63486 | Ca_desig_scaffold  | 63486                          | [T/G]       | NA                                         |
| Ca_Desig_Chr_scaffold01036_63490 | Ca_desig_scaffold  | 63490                          | [T/G]       | NA                                         |
| Ca_Desig_Chr_scaffold01036_63506 | Ca_desig_scaffold  | 63506                          | [A/G]       | NA                                         |
| Ca_Desig_Chr_scaffold01040_45602 | Ca_desig_scaffold  | 45602                          | [A/T]       | NA                                         |
| Ca_Desig_Chr_scaffold01041_42075 | Ca_desig_scaffold  | 42075                          | [T/C]       | NA                                         |
| Ca_Desig_Chr_scaffold01041_42083 | Ca_desig_scaffold  | 42083                          | [A/G]       | NA                                         |
| Ca_Desig_Chr_scaffold01041_42094 | Ca_desig_scaffold  | 42094                          | [A/C]       | NA                                         |
| Ca_Desig_Chr_scaffold01041_42110 | Ca_desig_scaffold  | 42110                          | [T/C]       | NA                                         |
| Ca_Desig_Chr_scaffold01041_42131 | Ca_desig_scaffold  | 42131                          | [T/C]       | NA                                         |
| Ca_Desig_Chr_scaffold01041_44882 | Ca_desig_scaffold  | 44882                          | [A/G]       | NA                                         |
| Ca_Desig_Chr_scaffold01043_81601 | Ca_desig_scaffold  | 81601                          | [T/G]       | NA                                         |
| Ca_Desig_Chr_scaffold01043_81615 | Ca_desig_scaffold  | 81615                          | [T/C]       | NA                                         |
| Ca_Desig_Chr_scaffold01043_81634 | Ca_desig_scaffold  | 81634                          | [A/C]       | NA                                         |
| Ca_Desig_Chr_scaffold01043_81645 | Ca_desig_scaffold  | 81645                          | [A/G]       | NA                                         |
| Ca_Desig_Chr_scaffold01044_75187 | Ca_desig_scaffold  | 75187                          | [T/G]       | NA                                         |
| Ca_Desig_Chr_scaffold01044_75211 | Ca_desig_scaffold  | 75211                          | [T/G]       | NA                                         |
| Ca_Desig_Chr_scaffold01044_75217 | Ca_desig_scaffold  | 75217                          | [C/T]       | NA                                         |
| Ca_Desig_Chr_scaffold01044_75224 | Ca_desig_scaffold  | 75224                          | [T/C]       | NA                                         |
| Ca_Desig_Chr_scaffold01044_75227 | Ca_desig_scaffold  | 75227                          | [T/C]       | NA                                         |
| Ca_Desig_Chr_scaffold01044_75233 | Ca_desig_scaffold  | 75233                          | [A/C]       | NA                                         |
| Ca_Desig_Chr_scaffold01044_83873 | Ca_desig_scaffold  | 83873                          | [T/G]       | NA                                         |
| Ca_Desig_Chr_scaffold01044_83892 | Ca_desig_scaffold  | 83892                          | [A/G]       | NA                                         |
| Ca_Desig_Chr_scaffold01045_11859 | Ca_desig_scaffold  | 11859                          | [T/C]       | NA                                         |
| Ca_Desig_Chr_scaffold01045_11871 | Ca_desig_scaffold  | 11871                          | [A/C]       | NA                                         |
| Ca_Desig_Chr_scaffold01045_11876 | Ca_desig_scaffold  | 11876                          | [A/G]       | NA                                         |

| <b>SNP IDs</b>                  | <b>Chromosomes</b> | <b>Physical positions (bp)</b> | <b>SNPs</b> | <b>NCBI SNPdb accession IDs (NCBI_ss#)</b> |
|---------------------------------|--------------------|--------------------------------|-------------|--------------------------------------------|
| Ca_DesigChr_scaffold01045_11892 | Ca_desig_scaffold  | 11892                          | [T/C]       | NA                                         |
| Ca_DesigChr_scaffold01045_11896 | Ca_desig_scaffold  | 11896                          | [T/G]       | NA                                         |
| Ca_DesigChr_scaffold01045_16966 | Ca_desig_scaffold  | 16966                          | [A/C]       | NA                                         |
| Ca_DesigChr_scaffold01045_17005 | Ca_desig_scaffold  | 17005                          | [T/A]       | NA                                         |
| Ca_DesigChr_scaffold01045_63502 | Ca_desig_scaffold  | 63502                          | [T/G]       | NA                                         |
| Ca_DesigChr_scaffold01045_65605 | Ca_desig_scaffold  | 65605                          | [T/G]       | NA                                         |
| Ca_DesigChr_scaffold01045_65683 | Ca_desig_scaffold  | 65683                          | [A/C]       | NA                                         |
| Ca_DesigChr_scaffold01045_65965 | Ca_desig_scaffold  | 65965                          | [T/G]       | NA                                         |
| Ca_DesigChr_scaffold01045_65978 | Ca_desig_scaffold  | 65978                          | [T/C]       | NA                                         |
| Ca_DesigChr_scaffold01045_65984 | Ca_desig_scaffold  | 65984                          | [T/G]       | NA                                         |
| Ca_DesigChr_scaffold01045_66043 | Ca_desig_scaffold  | 66043                          | [T/G]       | NA                                         |
| Ca_DesigChr_scaffold01045_86035 | Ca_desig_scaffold  | 86035                          | [T/C]       | NA                                         |
| Ca_DesigChr_scaffold01045_87309 | Ca_desig_scaffold  | 87309                          | [A/G]       | NA                                         |
| Ca_DesigChr_scaffold01045_87318 | Ca_desig_scaffold  | 87318                          | [A/G]       | NA                                         |
| Ca_DesigChr_scaffold01045_88372 | Ca_desig_scaffold  | 88372                          | [T/G]       | NA                                         |
| Ca_DesigChr_scaffold01046_36143 | Ca_desig_scaffold  | 36143                          | [T/C]       | NA                                         |
| Ca_DesigChr_scaffold01046_36153 | Ca_desig_scaffold  | 36153                          | [G/T]       | NA                                         |
| Ca_DesigChr_scaffold01046_36159 | Ca_desig_scaffold  | 36159                          | [G/A]       | NA                                         |
| Ca_DesigChr_scaffold01055_72547 | Ca_desig_scaffold  | 72547                          | [A/T]       | NA                                         |
| Ca_DesigChr_scaffold01055_73148 | Ca_desig_scaffold  | 73148                          | [C/T]       | NA                                         |
| Ca_DesigChr_scaffold01055_75176 | Ca_desig_scaffold  | 75176                          | [A/C]       | NA                                         |
| Ca_DesigChr_scaffold01055_75209 | Ca_desig_scaffold  | 75209                          | [C/A]       | NA                                         |
| Ca_DesigChr_scaffold01055_75218 | Ca_desig_scaffold  | 75218                          | [C/T]       | NA                                         |
| Ca_DesigChr_scaffold01058_85904 | Ca_desig_scaffold  | 85904                          | [A/C]       | NA                                         |
| Ca_DesigChr_scaffold01058_85914 | Ca_desig_scaffold  | 85914                          | [A/G]       | NA                                         |
| Ca_DesigChr_scaffold01058_85918 | Ca_desig_scaffold  | 85918                          | [T/C]       | NA                                         |
| Ca_DesigChr_scaffold01058_85958 | Ca_desig_scaffold  | 85958                          | [A/G]       | NA                                         |
| Ca_DesigChr_scaffold01063_55422 | Ca_desig_scaffold  | 55422                          | [G/T]       | NA                                         |
| Ca_DesigChr_scaffold01063_55430 | Ca_desig_scaffold  | 55430                          | [C/T]       | NA                                         |
| Ca_DesigChr_scaffold01066_66304 | Ca_desig_scaffold  | 66304                          | [A/C]       | NA                                         |
| Ca_DesigChr_scaffold01066_78663 | Ca_desig_scaffold  | 78663                          | [T/C]       | NA                                         |
| Ca_DesigChr_scaffold01066_78668 | Ca_desig_scaffold  | 78668                          | [G/C]       | NA                                         |
| Ca_DesigChr_scaffold01066_78673 | Ca_desig_scaffold  | 78673                          | [C/A]       | NA                                         |
| Ca_DesigChr_scaffold01066_78683 | Ca_desig_scaffold  | 78683                          | [A/C]       | NA                                         |

| <b>SNP IDs</b>                   | <b>Chromosomes</b> | <b>Physical positions (bp)</b> | <b>SNPs</b> | <b>NCBI SNPdb accession IDs (NCBI_ss#)</b> |
|----------------------------------|--------------------|--------------------------------|-------------|--------------------------------------------|
| Ca_Desig_Chr_scaffold01066_79452 | Ca_desig_scaffold  | 79452                          | [T/C]       | NA                                         |
| Ca_Desig_Chr_scaffold01066_79464 | Ca_desig_scaffold  | 79464                          | [C/T]       | NA                                         |
| Ca_Desig_Chr_scaffold01066_79467 | Ca_desig_scaffold  | 79467                          | [T/C]       | NA                                         |
| Ca_Desig_Chr_scaffold01066_79478 | Ca_desig_scaffold  | 79478                          | [A/G]       | NA                                         |
| Ca_Desig_Chr_scaffold01066_79484 | Ca_desig_scaffold  | 79484                          | [A/G]       | NA                                         |
| Ca_Desig_Chr_scaffold01066_79489 | Ca_desig_scaffold  | 79489                          | [T/C]       | NA                                         |
| Ca_Desig_Chr_scaffold01066_79495 | Ca_desig_scaffold  | 79495                          | [A/G]       | NA                                         |
| Ca_Desig_Chr_scaffold01066_79503 | Ca_desig_scaffold  | 79503                          | [C/T]       | NA                                         |
| Ca_Desig_Chr_scaffold01066_79509 | Ca_desig_scaffold  | 79509                          | [A/T]       | NA                                         |
| Ca_Desig_Chr_scaffold01066_80163 | Ca_desig_scaffold  | 80163                          | [T/A]       | NA                                         |
| Ca_Desig_Chr_scaffold01066_80887 | Ca_desig_scaffold  | 80887                          | [G/A]       | NA                                         |
| Ca_Desig_Chr_scaffold01066_80915 | Ca_desig_scaffold  | 80915                          | [T/C]       | NA                                         |
| Ca_Desig_Chr_scaffold01066_80919 | Ca_desig_scaffold  | 80919                          | [C/T]       | NA                                         |
| Ca_Desig_Chr_scaffold01069_67072 | Ca_desig_scaffold  | 67072                          | [T/G]       | NA                                         |
| Ca_Desig_Chr_scaffold01069_80686 | Ca_desig_scaffold  | 80686                          | [A/T]       | NA                                         |
| Ca_Desig_Chr_scaffold01069_80712 | Ca_desig_scaffold  | 80712                          | [T/C]       | NA                                         |
| Ca_Desig_Chr_scaffold01069_80714 | Ca_desig_scaffold  | 80714                          | [T/C]       | NA                                         |
| Ca_Desig_Chr_scaffold01069_80725 | Ca_desig_scaffold  | 80725                          | [A/G]       | NA                                         |
| Ca_Desig_Chr_scaffold01069_80732 | Ca_desig_scaffold  | 80732                          | [T/C]       | NA                                         |
| Ca_Desig_Chr_scaffold01069_80743 | Ca_desig_scaffold  | 80743                          | [T/A]       | NA                                         |
| Ca_Desig_Chr_scaffold01069_81723 | Ca_desig_scaffold  | 81723                          | [A/T]       | NA                                         |
| Ca_Desig_Chr_scaffold01069_81773 | Ca_desig_scaffold  | 81773                          | [A/G]       | NA                                         |
| Ca_Desig_Chr_scaffold01069_81775 | Ca_desig_scaffold  | 81775                          | [T/G]       | NA                                         |
| Ca_Desig_Chr_scaffold01073_42578 | Ca_desig_scaffold  | 42578                          | [T/A]       | NA                                         |
| Ca_Desig_Chr_scaffold01074_16988 | Ca_desig_scaffold  | 16988                          | [T/G]       | NA                                         |
| Ca_Desig_Chr_scaffold01074_86915 | Ca_desig_scaffold  | 86915                          | [A/C]       | NA                                         |
| Ca_Desig_Chr_scaffold01074_86940 | Ca_desig_scaffold  | 86940                          | [A/C]       | NA                                         |
| Ca_Desig_Chr_scaffold01074_89021 | Ca_desig_scaffold  | 89021                          | [A/C]       | NA                                         |
| Ca_Desig_Chr_scaffold01078_60476 | Ca_desig_scaffold  | 60476                          | [A/T]       | NA                                         |
| Ca_Desig_Chr_scaffold01078_60685 | Ca_desig_scaffold  | 60685                          | [T/C]       | NA                                         |
| Ca_Desig_Chr_scaffold01078_60700 | Ca_desig_scaffold  | 60700                          | [G/A]       | NA                                         |
| Ca_Desig_Chr_scaffold01079_58024 | Ca_desig_scaffold  | 58024                          | [T/G]       | NA                                         |
| Ca_Desig_Chr_scaffold01081_37593 | Ca_desig_scaffold  | 37593                          | [T/C]       | NA                                         |
| Ca_Desig_Chr_scaffold01081_37782 | Ca_desig_scaffold  | 37782                          | [T/A]       | NA                                         |

| <b>SNP IDs</b>                  | <b>Chromosomes</b> | <b>Physical positions (bp)</b> | <b>SNPs</b> | <b>NCBI SNPdb accession IDs (NCBI_ss#)</b> |
|---------------------------------|--------------------|--------------------------------|-------------|--------------------------------------------|
| Ca_DesigChr_scaffold01081_69994 | Ca_desig_scaffold  | 69994                          | [T/C]       | NA                                         |
| Ca_DesigChr_scaffold01081_69998 | Ca_desig_scaffold  | 69998                          | [A/C]       | NA                                         |
| Ca_DesigChr_scaffold01081_70049 | Ca_desig_scaffold  | 70049                          | [A/G]       | NA                                         |
| Ca_DesigChr_scaffold01082_12246 | Ca_desig_scaffold  | 12246                          | [A/C]       | NA                                         |
| Ca_DesigChr_scaffold01082_14050 | Ca_desig_scaffold  | 14050                          | [A/C]       | NA                                         |
| Ca_DesigChr_scaffold01082_15035 | Ca_desig_scaffold  | 15035                          | [T/C]       | NA                                         |
| Ca_DesigChr_scaffold01086_48901 | Ca_desig_scaffold  | 48901                          | [A/C]       | NA                                         |
| Ca_DesigChr_scaffold01092_79276 | Ca_desig_scaffold  | 79276                          | [T/G]       | NA                                         |
| Ca_DesigChr_scaffold01093_11169 | Ca_desig_scaffold  | 11169                          | [A/T]       | NA                                         |
| Ca_DesigChr_scaffold01093_11196 | Ca_desig_scaffold  | 11196                          | [A/T]       | NA                                         |
| Ca_DesigChr_scaffold01093_11204 | Ca_desig_scaffold  | 11204                          | [C/T]       | NA                                         |
| Ca_DesigChr_scaffold01093_27880 | Ca_desig_scaffold  | 27880                          | [T/G]       | NA                                         |
| Ca_DesigChr_scaffold01093_27883 | Ca_desig_scaffold  | 27883                          | [T/G]       | NA                                         |
| Ca_DesigChr_scaffold01093_28930 | Ca_desig_scaffold  | 28930                          | [T/C]       | NA                                         |
| Ca_DesigChr_scaffold01093_28934 | Ca_desig_scaffold  | 28934                          | [C/T]       | NA                                         |
| Ca_DesigChr_scaffold01093_28936 | Ca_desig_scaffold  | 28936                          | [T/C]       | NA                                         |
| Ca_DesigChr_scaffold01093_28975 | Ca_desig_scaffold  | 28975                          | [A/G]       | NA                                         |
| Ca_DesigChr_scaffold01094_73439 | Ca_desig_scaffold  | 73439                          | [A/C]       | NA                                         |
| Ca_DesigChr_scaffold01094_74659 | Ca_desig_scaffold  | 74659                          | [T/G]       | NA                                         |
| Ca_DesigChr_scaffold01094_75325 | Ca_desig_scaffold  | 75325                          | [T/C]       | NA                                         |
| Ca_DesigChr_scaffold01100_20450 | Ca_desig_scaffold  | 20450                          | [A/T]       | NA                                         |
| Ca_DesigChr_scaffold01100_20700 | Ca_desig_scaffold  | 20700                          | [C/G]       | NA                                         |
| Ca_DesigChr_scaffold01100_44718 | Ca_desig_scaffold  | 44718                          | [A/C]       | NA                                         |
| Ca_DesigChr_scaffold01100_44762 | Ca_desig_scaffold  | 44762                          | [C/T]       | NA                                         |
| Ca_DesigChr_scaffold01100_49124 | Ca_desig_scaffold  | 49124                          | [C/T]       | NA                                         |
| Ca_DesigChr_scaffold01100_61259 | Ca_desig_scaffold  | 61259                          | [A/G]       | NA                                         |
| Ca_DesigChr_scaffold01100_61260 | Ca_desig_scaffold  | 61260                          | [G/A]       | NA                                         |
| Ca_DesigChr_scaffold01107_9600  | Ca_desig_scaffold  | 9600                           | [A/G]       | NA                                         |
| Ca_DesigChr_scaffold01107_10277 | Ca_desig_scaffold  | 10277                          | [C/T]       | NA                                         |
| Ca_DesigChr_scaffold01107_10346 | Ca_desig_scaffold  | 10346                          | [A/C]       | NA                                         |
| Ca_DesigChr_scaffold01107_56652 | Ca_desig_scaffold  | 56652                          | [A/C]       | NA                                         |
| Ca_DesigChr_scaffold01107_76315 | Ca_desig_scaffold  | 76315                          | [T/C]       | NA                                         |
| Ca_DesigChr_scaffold01107_76332 | Ca_desig_scaffold  | 76332                          | [A/G]       | NA                                         |
| Ca_DesigChr_scaffold01107_76349 | Ca_desig_scaffold  | 76349                          | [A/C]       | NA                                         |

| <b>SNP IDs</b>                 | <b>Chromosomes</b> | <b>Physical positions (bp)</b> | <b>SNPs</b> | <b>NCBI SNPdb accession IDs (NCBI_ss#)</b> |
|--------------------------------|--------------------|--------------------------------|-------------|--------------------------------------------|
| Ca_Desi_Ch_scaffold01107_76427 | Ca_desi_scaffold   | 76427                          | [T/G]       | NA                                         |
| Ca_Desi_Ch_scaffold01109_47216 | Ca_desi_scaffold   | 47216                          | [A/C]       | NA                                         |
| Ca_Desi_Ch_scaffold01109_47229 | Ca_desi_scaffold   | 47229                          | [A/C]       | NA                                         |
| Ca_Desi_Ch_scaffold01110_40552 | Ca_desi_scaffold   | 40552                          | [T/C]       | NA                                         |
| Ca_Desi_Ch_scaffold01110_40585 | Ca_desi_scaffold   | 40585                          | [A/G]       | NA                                         |
| Ca_Desi_Ch_scaffold01110_40618 | Ca_desi_scaffold   | 40618                          | [A/G]       | NA                                         |
| Ca_Desi_Ch_scaffold01110_40632 | Ca_desi_scaffold   | 40632                          | [T/C]       | NA                                         |
| Ca_Desi_Ch_scaffold01110_40637 | Ca_desi_scaffold   | 40637                          | [T/C]       | NA                                         |
| Ca_Desi_Ch_scaffold01110_62846 | Ca_desi_scaffold   | 62846                          | [T/C]       | NA                                         |
| Ca_Desi_Ch_scaffold01110_62850 | Ca_desi_scaffold   | 62850                          | [T/A]       | NA                                         |
| Ca_Desi_Ch_scaffold01110_62898 | Ca_desi_scaffold   | 62898                          | [A/G]       | NA                                         |
| Ca_Desi_Ch_scaffold01112_29660 | Ca_desi_scaffold   | 29660                          | [A/G]       | NA                                         |
| Ca_Desi_Ch_scaffold01112_29663 | Ca_desi_scaffold   | 29663                          | [T/C]       | NA                                         |
| Ca_Desi_Ch_scaffold01112_29667 | Ca_desi_scaffold   | 29667                          | [T/C]       | NA                                         |
| Ca_Desi_Ch_scaffold01112_29673 | Ca_desi_scaffold   | 29673                          | [T/C]       | NA                                         |
| Ca_Desi_Ch_scaffold01112_29679 | Ca_desi_scaffold   | 29679                          | [T/C]       | NA                                         |
| Ca_Desi_Ch_scaffold01112_29680 | Ca_desi_scaffold   | 29680                          | [T/C]       | NA                                         |
| Ca_Desi_Ch_scaffold01112_29683 | Ca_desi_scaffold   | 29683                          | [T/C]       | NA                                         |
| Ca_Desi_Ch_scaffold01112_29686 | Ca_desi_scaffold   | 29686                          | [A/G]       | NA                                         |
| Ca_Desi_Ch_scaffold01112_29689 | Ca_desi_scaffold   | 29689                          | [T/C]       | NA                                         |
| Ca_Desi_Ch_scaffold01112_29690 | Ca_desi_scaffold   | 29690                          | [C/T]       | NA                                         |
| Ca_Desi_Ch_scaffold01112_29692 | Ca_desi_scaffold   | 29692                          | [A/G]       | NA                                         |
| Ca_Desi_Ch_scaffold01112_29694 | Ca_desi_scaffold   | 29694                          | [A/G]       | NA                                         |
| Ca_Desi_Ch_scaffold01112_29696 | Ca_desi_scaffold   | 29696                          | [A/G]       | NA                                         |
| Ca_Desi_Ch_scaffold01112_29702 | Ca_desi_scaffold   | 29702                          | [A/G]       | NA                                         |
| Ca_Desi_Ch_scaffold01112_29707 | Ca_desi_scaffold   | 29707                          | [C/T]       | NA                                         |
| Ca_Desi_Ch_scaffold01112_29708 | Ca_desi_scaffold   | 29708                          | [T/C]       | NA                                         |
| Ca_Desi_Ch_scaffold01112_29712 | Ca_desi_scaffold   | 29712                          | [A/G]       | NA                                         |
| Ca_Desi_Ch_scaffold01112_29714 | Ca_desi_scaffold   | 29714                          | [T/G]       | NA                                         |
| Ca_Desi_Ch_scaffold01112_29718 | Ca_desi_scaffold   | 29718                          | [T/C]       | NA                                         |
| Ca_Desi_Ch_scaffold01112_29760 | Ca_desi_scaffold   | 29760                          | [A/C]       | NA                                         |
| Ca_Desi_Ch_scaffold01112_29767 | Ca_desi_scaffold   | 29767                          | [A/G]       | NA                                         |
| Ca_Desi_Ch_scaffold01112_29771 | Ca_desi_scaffold   | 29771                          | [T/G]       | NA                                         |
| Ca_Desi_Ch_scaffold01112_29807 | Ca_desi_scaffold   | 29807                          | [A/C]       | NA                                         |

| <b>SNP IDs</b>                 | <b>Chromosomes</b> | <b>Physical positions (bp)</b> | <b>SNPs</b> | <b>NCBI SNPdb accession IDs (NCBI_ss#)</b> |
|--------------------------------|--------------------|--------------------------------|-------------|--------------------------------------------|
| Ca_Desi_Ch_scaffold01112_36235 | Ca_desi_scaffold   | 36235                          | [A/C]       | NA                                         |
| Ca_Desi_Ch_scaffold01112_36258 | Ca_desi_scaffold   | 36258                          | [A/C]       | NA                                         |
| Ca_Desi_Ch_scaffold01120_40398 | Ca_desi_scaffold   | 40398                          | [T/G]       | NA                                         |
| Ca_Desi_Ch_scaffold01120_42466 | Ca_desi_scaffold   | 42466                          | [A/T]       | NA                                         |
| Ca_Desi_Ch_scaffold01120_72300 | Ca_desi_scaffold   | 72300                          | [A/G]       | NA                                         |
| Ca_Desi_Ch_scaffold01120_80917 | Ca_desi_scaffold   | 80917                          | [T/G]       | NA                                         |
| Ca_Desi_Ch_scaffold01120_80922 | Ca_desi_scaffold   | 80922                          | [T/G]       | NA                                         |
| Ca_Desi_Ch_scaffold01120_81942 | Ca_desi_scaffold   | 81942                          | [T/C]       | NA                                         |
| Ca_Desi_Ch_scaffold01120_85618 | Ca_desi_scaffold   | 85618                          | [A/C]       | NA                                         |
| Ca_Desi_Ch_scaffold01120_85636 | Ca_desi_scaffold   | 85636                          | [A/C]       | NA                                         |
| Ca_Desi_Ch_scaffold01120_90068 | Ca_desi_scaffold   | 90068                          | [T/C]       | NA                                         |
| Ca_Desi_Ch_scaffold01121_8582  | Ca_desi_scaffold   | 8582                           | [A/C]       | NA                                         |
| Ca_Desi_Ch_scaffold01121_58155 | Ca_desi_scaffold   | 58155                          | [A/G]       | NA                                         |
| Ca_Desi_Ch_scaffold01121_58405 | Ca_desi_scaffold   | 58405                          | [C/A]       | NA                                         |
| Ca_Desi_Ch_scaffold01121_62363 | Ca_desi_scaffold   | 62363                          | [G/C]       | NA                                         |
| Ca_Desi_Ch_scaffold01121_63448 | Ca_desi_scaffold   | 63448                          | [A/C]       | NA                                         |
| Ca_Desi_Ch_scaffold01121_64890 | Ca_desi_scaffold   | 64890                          | [A/C]       | NA                                         |
| Ca_Desi_Ch_scaffold01121_64908 | Ca_desi_scaffold   | 64908                          | [T/C]       | NA                                         |
| Ca_Desi_Ch_scaffold01121_67795 | Ca_desi_scaffold   | 67795                          | [A/G]       | NA                                         |
| Ca_Desi_Ch_scaffold01121_70249 | Ca_desi_scaffold   | 70249                          | [C/A]       | NA                                         |
| Ca_Desi_Ch_scaffold01121_79767 | Ca_desi_scaffold   | 79767                          | [C/T]       | NA                                         |
| Ca_Desi_Ch_scaffold01121_80074 | Ca_desi_scaffold   | 80074                          | [T/C]       | NA                                         |
| Ca_Desi_Ch_scaffold01121_80240 | Ca_desi_scaffold   | 80240                          | [A/C]       | NA                                         |
| Ca_Desi_Ch_scaffold01121_80269 | Ca_desi_scaffold   | 80269                          | [G/C]       | NA                                         |
| Ca_Desi_Ch_scaffold01123_20844 | Ca_desi_scaffold   | 20844                          | [A/G]       | NA                                         |
| Ca_Desi_Ch_scaffold01123_20846 | Ca_desi_scaffold   | 20846                          | [A/T]       | NA                                         |
| Ca_Desi_Ch_scaffold01123_72827 | Ca_desi_scaffold   | 72827                          | [A/C]       | NA                                         |
| Ca_Desi_Ch_scaffold01123_72828 | Ca_desi_scaffold   | 72828                          | [G/C]       | NA                                         |
| Ca_Desi_Ch_scaffold01131_42665 | Ca_desi_scaffold   | 42665                          | [A/C]       | NA                                         |
| Ca_Desi_Ch_scaffold01131_42666 | Ca_desi_scaffold   | 42666                          | [C/A]       | NA                                         |
| Ca_Desi_Ch_scaffold01131_44117 | Ca_desi_scaffold   | 44117                          | [T/G]       | NA                                         |
| Ca_Desi_Ch_scaffold01131_44322 | Ca_desi_scaffold   | 44322                          | [A/C]       | NA                                         |
| Ca_Desi_Ch_scaffold01131_49630 | Ca_desi_scaffold   | 49630                          | [A/G]       | NA                                         |
| Ca_Desi_Ch_scaffold01131_49647 | Ca_desi_scaffold   | 49647                          | [A/C]       | NA                                         |

| <b>SNP IDs</b>                         | <b>Chromosomes</b> | <b>Physical positions (bp)</b> | <b>SNPs</b> | <b>NCBI SNPdb accession IDs (NCBI_ss#)</b> |
|----------------------------------------|--------------------|--------------------------------|-------------|--------------------------------------------|
| Ca_Desi_Chromosome_scaffold01131_49656 | Ca_desi_scaffold   | 49656                          | [T/C]       | NA                                         |
| Ca_Desi_Chromosome_scaffold01131_49663 | Ca_desi_scaffold   | 49663                          | [T/C]       | NA                                         |
| Ca_Desi_Chromosome_scaffold01131_49665 | Ca_desi_scaffold   | 49665                          | [T/C]       | NA                                         |
| Ca_Desi_Chromosome_scaffold01131_49675 | Ca_desi_scaffold   | 49675                          | [A/G]       | NA                                         |
| Ca_Desi_Chromosome_scaffold01131_49678 | Ca_desi_scaffold   | 49678                          | [T/C]       | NA                                         |
| Ca_Desi_Chromosome_scaffold01131_49679 | Ca_desi_scaffold   | 49679                          | [A/G]       | NA                                         |
| Ca_Desi_Chromosome_scaffold01133_66151 | Ca_desi_scaffold   | 66151                          | [T/A]       | NA                                         |
| Ca_Desi_Chromosome_scaffold01133_66319 | Ca_desi_scaffold   | 66319                          | [T/G]       | NA                                         |
| Ca_Desi_Chromosome_scaffold01133_66380 | Ca_desi_scaffold   | 66380                          | [A/T]       | NA                                         |
| Ca_Desi_Chromosome_scaffold01133_67391 | Ca_desi_scaffold   | 67391                          | [A/G]       | NA                                         |
| Ca_Desi_Chromosome_scaffold01135_31641 | Ca_desi_scaffold   | 31641                          | [T/C]       | NA                                         |
| Ca_Desi_Chromosome_scaffold01135_67509 | Ca_desi_scaffold   | 67509                          | [A/C]       | NA                                         |
| Ca_Desi_Chromosome_scaffold01135_67530 | Ca_desi_scaffold   | 67530                          | [A/T]       | NA                                         |
| Ca_Desi_Chromosome_scaffold01135_67539 | Ca_desi_scaffold   | 67539                          | [A/C]       | NA                                         |
| Ca_Desi_Chromosome_scaffold01136_8719  | Ca_desi_scaffold   | 8719                           | [T/C]       | NA                                         |
| Ca_Desi_Chromosome_scaffold01136_8788  | Ca_desi_scaffold   | 8788                           | [A/T]       | NA                                         |
| Ca_Desi_Chromosome_scaffold01136_81445 | Ca_desi_scaffold   | 81445                          | [A/T]       | NA                                         |
| Ca_Desi_Chromosome_scaffold01137_49885 | Ca_desi_scaffold   | 49885                          | [A/C]       | NA                                         |
| Ca_Desi_Chromosome_scaffold01137_49993 | Ca_desi_scaffold   | 49993                          | [C/A]       | NA                                         |
| Ca_Desi_Chromosome_scaffold01137_49994 | Ca_desi_scaffold   | 49994                          | [A/G]       | NA                                         |
| Ca_Desi_Chromosome_scaffold01137_49996 | Ca_desi_scaffold   | 49996                          | [A/T]       | NA                                         |
| Ca_Desi_Chromosome_scaffold01137_49997 | Ca_desi_scaffold   | 49997                          | [T/C]       | NA                                         |
| Ca_Desi_Chromosome_scaffold01141_454   | Ca_desi_scaffold   | 454                            | [T/C]       | NA                                         |
| Ca_Desi_Chromosome_scaffold01141_491   | Ca_desi_scaffold   | 491                            | [A/G]       | NA                                         |
| Ca_Desi_Chromosome_scaffold01141_5432  | Ca_desi_scaffold   | 5432                           | [A/G]       | NA                                         |
| Ca_Desi_Chromosome_scaffold01141_5827  | Ca_desi_scaffold   | 5827                           | [T/C]       | NA                                         |
| Ca_Desi_Chromosome_scaffold01141_5864  | Ca_desi_scaffold   | 5864                           | [A/C]       | NA                                         |
| Ca_Desi_Chromosome_scaffold01142_76469 | Ca_desi_scaffold   | 76469                          | [A/G]       | NA                                         |
| Ca_Desi_Chromosome_scaffold01145_11087 | Ca_desi_scaffold   | 11087                          | [G/A]       | NA                                         |
| Ca_Desi_Chromosome_scaffold01145_11093 | Ca_desi_scaffold   | 11093                          | [A/G]       | NA                                         |
| Ca_Desi_Chromosome_scaffold01145_11097 | Ca_desi_scaffold   | 11097                          | [A/G]       | NA                                         |
| Ca_Desi_Chromosome_scaffold01145_11115 | Ca_desi_scaffold   | 11115                          | [A/G]       | NA                                         |
| Ca_Desi_Chromosome_scaffold01148_2280  | Ca_desi_scaffold   | 2280                           | [T/C]       | NA                                         |
| Ca_Desi_Chromosome_scaffold01148_2303  | Ca_desi_scaffold   | 2303                           | [T/C]       | NA                                         |

| <b>SNP IDs</b>                   | <b>Chromosomes</b> | <b>Physical positions (bp)</b> | <b>SNPs</b> | <b>NCBI SNPdb accession IDs (NCBI_ss#)</b> |
|----------------------------------|--------------------|--------------------------------|-------------|--------------------------------------------|
| Ca_Desig_Chr_scaffold01148_2333  | Ca_desig_scaffold  | 2333                           | [T/C]       | NA                                         |
| Ca_Desig_Chr_scaffold01148_21493 | Ca_desig_scaffold  | 21493                          | [A/G]       | NA                                         |
| Ca_Desig_Chr_scaffold01148_49608 | Ca_desig_scaffold  | 49608                          | [A/G]       | NA                                         |
| Ca_Desig_Chr_scaffold01148_50549 | Ca_desig_scaffold  | 50549                          | [A/C]       | NA                                         |
| Ca_Desig_Chr_scaffold01148_59421 | Ca_desig_scaffold  | 59421                          | [C/A]       | NA                                         |
| Ca_Desig_Chr_scaffold01148_59422 | Ca_desig_scaffold  | 59422                          | [T/G]       | NA                                         |
| Ca_Desig_Chr_scaffold01148_59423 | Ca_desig_scaffold  | 59423                          | [C/A]       | NA                                         |
| Ca_Desig_Chr_scaffold01148_59424 | Ca_desig_scaffold  | 59424                          | [C/T]       | NA                                         |
| Ca_Desig_Chr_scaffold01148_60105 | Ca_desig_scaffold  | 60105                          | [T/G]       | NA                                         |
| Ca_Desig_Chr_scaffold01148_60207 | Ca_desig_scaffold  | 60207                          | [T/G]       | NA                                         |
| Ca_Desig_Chr_scaffold01151_67472 | Ca_desig_scaffold  | 67472                          | [A/C]       | NA                                         |
| Ca_Desig_Chr_scaffold01151_67491 | Ca_desig_scaffold  | 67491                          | [A/C]       | NA                                         |
| Ca_Desig_Chr_scaffold01152_21247 | Ca_desig_scaffold  | 21247                          | [C/T]       | NA                                         |
| Ca_Desig_Chr_scaffold01152_21262 | Ca_desig_scaffold  | 21262                          | [G/A]       | NA                                         |
| Ca_Desig_Chr_scaffold01152_21294 | Ca_desig_scaffold  | 21294                          | [G/A]       | NA                                         |
| Ca_Desig_Chr_scaffold01156_24083 | Ca_desig_scaffold  | 24083                          | [T/C]       | NA                                         |
| Ca_Desig_Chr_scaffold01156_24108 | Ca_desig_scaffold  | 24108                          | [T/G]       | NA                                         |
| Ca_Desig_Chr_scaffold01156_24111 | Ca_desig_scaffold  | 24111                          | [A/T]       | NA                                         |
| Ca_Desig_Chr_scaffold01156_24119 | Ca_desig_scaffold  | 24119                          | [A/C]       | NA                                         |
| Ca_Desig_Chr_scaffold01156_45702 | Ca_desig_scaffold  | 45702                          | [T/A]       | NA                                         |
| Ca_Desig_Chr_scaffold01159_75703 | Ca_desig_scaffold  | 75703                          | [T/C]       | NA                                         |
| Ca_Desig_Chr_scaffold01159_75722 | Ca_desig_scaffold  | 75722                          | [T/C]       | NA                                         |
| Ca_Desig_Chr_scaffold01159_75730 | Ca_desig_scaffold  | 75730                          | [T/C]       | NA                                         |
| Ca_Desig_Chr_scaffold01159_75735 | Ca_desig_scaffold  | 75735                          | [T/G]       | NA                                         |
| Ca_Desig_Chr_scaffold01159_75745 | Ca_desig_scaffold  | 75745                          | [A/G]       | NA                                         |
| Ca_Desig_Chr_scaffold01159_75747 | Ca_desig_scaffold  | 75747                          | [T/C]       | NA                                         |
| Ca_Desig_Chr_scaffold01159_75750 | Ca_desig_scaffold  | 75750                          | [T/G]       | NA                                         |
| Ca_Desig_Chr_scaffold01159_75752 | Ca_desig_scaffold  | 75752                          | [T/C]       | NA                                         |
| Ca_Desig_Chr_scaffold01159_75754 | Ca_desig_scaffold  | 75754                          | [T/C]       | NA                                         |
| Ca_Desig_Chr_scaffold01159_75756 | Ca_desig_scaffold  | 75756                          | [A/G]       | NA                                         |
| Ca_Desig_Chr_scaffold01159_75765 | Ca_desig_scaffold  | 75765                          | [T/C]       | NA                                         |
| Ca_Desig_Chr_scaffold01159_75767 | Ca_desig_scaffold  | 75767                          | [A/G]       | NA                                         |
| Ca_Desig_Chr_scaffold01164_38621 | Ca_desig_scaffold  | 38621                          | [T/G]       | NA                                         |
| Ca_Desig_Chr_scaffold01166_21186 | Ca_desig_scaffold  | 21186                          | [T/G]       | NA                                         |



| <b>SNP IDs</b>                   | <b>Chromosomes</b> | <b>Physical positions (bp)</b> | <b>SNPs</b> | <b>NCBI SNPdb accession IDs (NCBI_ss#)</b> |
|----------------------------------|--------------------|--------------------------------|-------------|--------------------------------------------|
| Ca_Desig_Chr_scaffold01166_23293 | Ca_desig_scaffold  | 23293                          | [A/G]       | NA                                         |
| Ca_Desig_Chr_scaffold01166_23329 | Ca_desig_scaffold  | 23329                          | [A/G]       | NA                                         |
| Ca_Desig_Chr_scaffold01166_23340 | Ca_desig_scaffold  | 23340                          | [A/C]       | NA                                         |
| Ca_Desig_Chr_scaffold01166_23345 | Ca_desig_scaffold  | 23345                          | [T/C]       | NA                                         |
| Ca_Desig_Chr_scaffold01166_23349 | Ca_desig_scaffold  | 23349                          | [A/G]       | NA                                         |
| Ca_Desig_Chr_scaffold01166_23948 | Ca_desig_scaffold  | 23948                          | [T/G]       | NA                                         |
| Ca_Desig_Chr_scaffold01166_25064 | Ca_desig_scaffold  | 25064                          | [T/C]       | NA                                         |
| Ca_Desig_Chr_scaffold01166_25074 | Ca_desig_scaffold  | 25074                          | [A/C]       | NA                                         |
| Ca_Desig_Chr_scaffold01166_25080 | Ca_desig_scaffold  | 25080                          | [A/G]       | NA                                         |
| Ca_Desig_Chr_scaffold01166_25084 | Ca_desig_scaffold  | 25084                          | [A/G]       | NA                                         |
| Ca_Desig_Chr_scaffold01166_25090 | Ca_desig_scaffold  | 25090                          | [A/G]       | NA                                         |
| Ca_Desig_Chr_scaffold01166_25102 | Ca_desig_scaffold  | 25102                          | [A/G]       | NA                                         |
| Ca_Desig_Chr_scaffold01166_25104 | Ca_desig_scaffold  | 25104                          | [T/G]       | NA                                         |
| Ca_Desig_Chr_scaffold01167_20364 | Ca_desig_scaffold  | 20364                          | [T/C]       | NA                                         |
| Ca_Desig_Chr_scaffold01167_20391 | Ca_desig_scaffold  | 20391                          | [T/C]       | NA                                         |
| Ca_Desig_Chr_scaffold01167_20395 | Ca_desig_scaffold  | 20395                          | [A/G]       | NA                                         |
| Ca_Desig_Chr_scaffold01167_85881 | Ca_desig_scaffold  | 85881                          | [T/C]       | NA                                         |
| Ca_Desig_Chr_scaffold01167_85889 | Ca_desig_scaffold  | 85889                          | [T/C]       | NA                                         |
| Ca_Desig_Chr_scaffold01167_85892 | Ca_desig_scaffold  | 85892                          | [A/G]       | NA                                         |
| Ca_Desig_Chr_scaffold01167_85893 | Ca_desig_scaffold  | 85893                          | [T/C]       | NA                                         |
| Ca_Desig_Chr_scaffold01167_85898 | Ca_desig_scaffold  | 85898                          | [T/C]       | NA                                         |
| Ca_Desig_Chr_scaffold01167_85901 | Ca_desig_scaffold  | 85901                          | [A/G]       | NA                                         |
| Ca_Desig_Chr_scaffold01167_85905 | Ca_desig_scaffold  | 85905                          | [T/G]       | NA                                         |
| Ca_Desig_Chr_scaffold01167_85908 | Ca_desig_scaffold  | 85908                          | [A/G]       | NA                                         |
| Ca_Desig_Chr_scaffold01167_85913 | Ca_desig_scaffold  | 85913                          | [A/G]       | NA                                         |
| Ca_Desig_Chr_scaffold01167_85914 | Ca_desig_scaffold  | 85914                          | [T/C]       | NA                                         |
| Ca_Desig_Chr_scaffold01167_85917 | Ca_desig_scaffold  | 85917                          | [A/G]       | NA                                         |
| Ca_Desig_Chr_scaffold01167_85922 | Ca_desig_scaffold  | 85922                          | [T/G]       | NA                                         |
| Ca_Desig_Chr_scaffold01167_85924 | Ca_desig_scaffold  | 85924                          | [T/C]       | NA                                         |
| Ca_Desig_Chr_scaffold01169_65105 | Ca_desig_scaffold  | 65105                          | [T/G]       | NA                                         |
| Ca_Desig_Chr_scaffold01169_79882 | Ca_desig_scaffold  | 79882                          | [A/T]       | NA                                         |
| Ca_Desig_Chr_scaffold01169_81450 | Ca_desig_scaffold  | 81450                          | [T/C]       | NA                                         |
| Ca_Desig_Chr_scaffold01172_60985 | Ca_desig_scaffold  | 60985                          | [A/C]       | NA                                         |
| Ca_Desig_Chr_scaffold01172_61041 | Ca_desig_scaffold  | 61041                          | [G/A]       | NA                                         |

| <b>SNP IDs</b>                 | <b>Chromosomes</b> | <b>Physical positions (bp)</b> | <b>SNPs</b> | <b>NCBI SNPdb accession IDs (NCBI_ss#)</b> |
|--------------------------------|--------------------|--------------------------------|-------------|--------------------------------------------|
| Ca_Desi_Ch_scaffold01173_6464  | Ca_desi_scaffold   | 6464                           | [T/C]       | NA                                         |
| Ca_Desi_Ch_scaffold01173_6484  | Ca_desi_scaffold   | 6484                           | [T/G]       | NA                                         |
| Ca_Desi_Ch_scaffold01173_6496  | Ca_desi_scaffold   | 6496                           | [A/G]       | NA                                         |
| Ca_Desi_Ch_scaffold01173_6507  | Ca_desi_scaffold   | 6507                           | [A/G]       | NA                                         |
| Ca_Desi_Ch_scaffold01173_6937  | Ca_desi_scaffold   | 6937                           | [T/C]       | NA                                         |
| Ca_Desi_Ch_scaffold01173_6940  | Ca_desi_scaffold   | 6940                           | [A/C]       | NA                                         |
| Ca_Desi_Ch_scaffold01173_6953  | Ca_desi_scaffold   | 6953                           | [T/C]       | NA                                         |
| Ca_Desi_Ch_scaffold01173_6955  | Ca_desi_scaffold   | 6955                           | [A/G]       | NA                                         |
| Ca_Desi_Ch_scaffold01173_6970  | Ca_desi_scaffold   | 6970                           | [T/C]       | NA                                         |
| Ca_Desi_Ch_scaffold01173_6982  | Ca_desi_scaffold   | 6982                           | [A/G]       | NA                                         |
| Ca_Desi_Ch_scaffold01174_36626 | Ca_desi_scaffold   | 36626                          | [T/G]       | NA                                         |
| Ca_Desi_Ch_scaffold01174_36629 | Ca_desi_scaffold   | 36629                          | [T/G]       | NA                                         |
| Ca_Desi_Ch_scaffold01174_59167 | Ca_desi_scaffold   | 59167                          | [T/A]       | NA                                         |
| Ca_Desi_Ch_scaffold01174_59628 | Ca_desi_scaffold   | 59628                          | [T/G]       | NA                                         |
| Ca_Desi_Ch_scaffold01174_63333 | Ca_desi_scaffold   | 63333                          | [A/G]       | NA                                         |
| Ca_Desi_Ch_scaffold01174_63336 | Ca_desi_scaffold   | 63336                          | [A/C]       | NA                                         |
| Ca_Desi_Ch_scaffold01174_63347 | Ca_desi_scaffold   | 63347                          | [T/C]       | NA                                         |
| Ca_Desi_Ch_scaffold01174_63361 | Ca_desi_scaffold   | 63361                          | [A/G]       | NA                                         |
| Ca_Desi_Ch_scaffold01174_82974 | Ca_desi_scaffold   | 82974                          | [T/C]       | NA                                         |
| Ca_Desi_Ch_scaffold01174_82985 | Ca_desi_scaffold   | 82985                          | [T/G]       | NA                                         |
| Ca_Desi_Ch_scaffold01174_82999 | Ca_desi_scaffold   | 82999                          | [T/C]       | NA                                         |
| Ca_Desi_Ch_scaffold01178_51376 | Ca_desi_scaffold   | 51376                          | [C/T]       | NA                                         |
| Ca_Desi_Ch_scaffold01186_45845 | Ca_desi_scaffold   | 45845                          | [T/C]       | NA                                         |
| Ca_Desi_Ch_scaffold01189_75211 | Ca_desi_scaffold   | 75211                          | [A/G]       | NA                                         |
| Ca_Desi_Ch_scaffold01189_75224 | Ca_desi_scaffold   | 75224                          | [G/T]       | NA                                         |
| Ca_Desi_Ch_scaffold01189_75226 | Ca_desi_scaffold   | 75226                          | [T/C]       | NA                                         |
| Ca_Desi_Ch_scaffold01189_75230 | Ca_desi_scaffold   | 75230                          | [A/G]       | NA                                         |
| Ca_Desi_Ch_scaffold01189_75236 | Ca_desi_scaffold   | 75236                          | [A/G]       | NA                                         |
| Ca_Desi_Ch_scaffold01191_42252 | Ca_desi_scaffold   | 42252                          | [A/G]       | NA                                         |
| Ca_Desi_Ch_scaffold01191_42260 | Ca_desi_scaffold   | 42260                          | [G/A]       | NA                                         |
| Ca_Desi_Ch_scaffold01191_42264 | Ca_desi_scaffold   | 42264                          | [A/T]       | NA                                         |
| Ca_Desi_Ch_scaffold01191_49636 | Ca_desi_scaffold   | 49636                          | [G/C]       | NA                                         |
| Ca_Desi_Ch_scaffold01191_52241 | Ca_desi_scaffold   | 52241                          | [T/A]       | NA                                         |
| Ca_Desi_Ch_scaffold01191_52478 | Ca_desi_scaffold   | 52478                          | [A/T]       | NA                                         |

| <b>SNP IDs</b>                   | <b>Chromosomes</b> | <b>Physical positions (bp)</b> | <b>SNPs</b> | <b>NCBI SNPdb accession IDs (NCBI_ss#)</b> |
|----------------------------------|--------------------|--------------------------------|-------------|--------------------------------------------|
| Ca_Desig_Chr_scaffold01191_61547 | Ca_desig_scaffold  | 61547                          | [T/A]       | NA                                         |
| Ca_Desig_Chr_scaffold01191_72296 | Ca_desig_scaffold  | 72296                          | [A/G]       | NA                                         |
| Ca_Desig_Chr_scaffold01192_5169  | Ca_desig_scaffold  | 5169                           | [T/C]       | NA                                         |
| Ca_Desig_Chr_scaffold01192_5202  | Ca_desig_scaffold  | 5202                           | [A/G]       | NA                                         |
| Ca_Desig_Chr_scaffold01196_18110 | Ca_desig_scaffold  | 18110                          | [G/C]       | NA                                         |
| Ca_Desig_Chr_scaffold01196_18111 | Ca_desig_scaffold  | 18111                          | [G/T]       | NA                                         |
| Ca_Desig_Chr_scaffold01196_18119 | Ca_desig_scaffold  | 18119                          | [A/G]       | NA                                         |
| Ca_Desig_Chr_scaffold01198_54523 | Ca_desig_scaffold  | 54523                          | [T/A]       | NA                                         |
| Ca_Desig_Chr_scaffold01198_57793 | Ca_desig_scaffold  | 57793                          | [C/T]       | NA                                         |
| Ca_Desig_Chr_scaffold01198_57800 | Ca_desig_scaffold  | 57800                          | [T/G]       | NA                                         |
| Ca_Desig_Chr_scaffold01198_57805 | Ca_desig_scaffold  | 57805                          | [T/C]       | NA                                         |
| Ca_Desig_Chr_scaffold01198_57807 | Ca_desig_scaffold  | 57807                          | [C/A]       | NA                                         |
| Ca_Desig_Chr_scaffold01198_57809 | Ca_desig_scaffold  | 57809                          | [G/A]       | NA                                         |
| Ca_Desig_Chr_scaffold01198_57811 | Ca_desig_scaffold  | 57811                          | [A/C]       | NA                                         |
| Ca_Desig_Chr_scaffold01198_57814 | Ca_desig_scaffold  | 57814                          | [G/C]       | NA                                         |
| Ca_Desig_Chr_scaffold01198_57819 | Ca_desig_scaffold  | 57819                          | [C/A]       | NA                                         |
| Ca_Desig_Chr_scaffold01200_29990 | Ca_desig_scaffold  | 29990                          | [A/C]       | NA                                         |
| Ca_Desig_Chr_scaffold01200_30013 | Ca_desig_scaffold  | 30013                          | [T/C]       | NA                                         |
| Ca_Desig_Chr_scaffold01200_73329 | Ca_desig_scaffold  | 73329                          | [T/C]       | NA                                         |
| Ca_Desig_Chr_scaffold01200_73336 | Ca_desig_scaffold  | 73336                          | [A/C]       | NA                                         |
| Ca_Desig_Chr_scaffold01200_73342 | Ca_desig_scaffold  | 73342                          | [A/C]       | NA                                         |
| Ca_Desig_Chr_scaffold01200_73346 | Ca_desig_scaffold  | 73346                          | [T/C]       | NA                                         |
| Ca_Desig_Chr_scaffold01200_73354 | Ca_desig_scaffold  | 73354                          | [T/A]       | NA                                         |
| Ca_Desig_Chr_scaffold01207_62312 | Ca_desig_scaffold  | 62312                          | [T/C]       | NA                                         |
| Ca_Desig_Chr_scaffold01207_62325 | Ca_desig_scaffold  | 62325                          | [T/A]       | NA                                         |
| Ca_Desig_Chr_scaffold01207_62361 | Ca_desig_scaffold  | 62361                          | [T/A]       | NA                                         |
| Ca_Desig_Chr_scaffold01211_10297 | Ca_desig_scaffold  | 10297                          | [C/A]       | NA                                         |
| Ca_Desig_Chr_scaffold01211_10298 | Ca_desig_scaffold  | 10298                          | [T/G]       | NA                                         |
| Ca_Desig_Chr_scaffold01211_10299 | Ca_desig_scaffold  | 10299                          | [C/A]       | NA                                         |
| Ca_Desig_Chr_scaffold01211_10300 | Ca_desig_scaffold  | 10300                          | [C/T]       | NA                                         |
| Ca_Desig_Chr_scaffold01211_65188 | Ca_desig_scaffold  | 65188                          | [T/G]       | NA                                         |
| Ca_Desig_Chr_scaffold01213_31835 | Ca_desig_scaffold  | 31835                          | [A/T]       | NA                                         |
| Ca_Desig_Chr_scaffold01213_31852 | Ca_desig_scaffold  | 31852                          | [A/C]       | NA                                         |
| Ca_Desig_Chr_scaffold01213_31857 | Ca_desig_scaffold  | 31857                          | [T/C]       | NA                                         |

| <b>SNP IDs</b>                   | <b>Chromosomes</b> | <b>Physical positions (bp)</b> | <b>SNPs</b> | <b>NCBI SNPdb accession IDs (NCBI_ss#)</b> |
|----------------------------------|--------------------|--------------------------------|-------------|--------------------------------------------|
| Ca_Desig_Chr_scaffold01213_58348 | Ca_desig_scaffold  | 58348                          | [T/G]       | NA                                         |
| Ca_Desig_Chr_scaffold01213_58442 | Ca_desig_scaffold  | 58442                          | [A/G]       | NA                                         |
| Ca_Desig_Chr_scaffold01214_20944 | Ca_desig_scaffold  | 20944                          | [T/C]       | NA                                         |
| Ca_Desig_Chr_scaffold01214_20956 | Ca_desig_scaffold  | 20956                          | [T/A]       | NA                                         |
| Ca_Desig_Chr_scaffold01214_20962 | Ca_desig_scaffold  | 20962                          | [A/C]       | NA                                         |
| Ca_Desig_Chr_scaffold01214_20991 | Ca_desig_scaffold  | 20991                          | [A/C]       | NA                                         |
| Ca_Desig_Chr_scaffold01214_20994 | Ca_desig_scaffold  | 20994                          | [A/C]       | NA                                         |
| Ca_Desig_Chr_scaffold01214_81423 | Ca_desig_scaffold  | 81423                          | [A/G]       | NA                                         |
| Ca_Desig_Chr_scaffold01216_47446 | Ca_desig_scaffold  | 47446                          | [G/A]       | NA                                         |
| Ca_Desig_Chr_scaffold01216_47561 | Ca_desig_scaffold  | 47561                          | [G/A]       | NA                                         |
| Ca_Desig_Chr_scaffold01216_47600 | Ca_desig_scaffold  | 47600                          | [A/T]       | NA                                         |
| Ca_Desig_Chr_scaffold01216_49454 | Ca_desig_scaffold  | 49454                          | [A/T]       | NA                                         |
| Ca_Desig_Chr_scaffold01216_49793 | Ca_desig_scaffold  | 49793                          | [G/A]       | NA                                         |
| Ca_Desig_Chr_scaffold01216_49831 | Ca_desig_scaffold  | 49831                          | [G/A]       | NA                                         |
| Ca_Desig_Chr_scaffold01216_62521 | Ca_desig_scaffold  | 62521                          | [T/C]       | NA                                         |
| Ca_Desig_Chr_scaffold01225_77178 | Ca_desig_scaffold  | 77178                          | [T/C]       | NA                                         |
| Ca_Desig_Chr_scaffold01226_14794 | Ca_desig_scaffold  | 14794                          | [T/A]       | NA                                         |
| Ca_Desig_Chr_scaffold01226_45416 | Ca_desig_scaffold  | 45416                          | [A/C]       | NA                                         |
| Ca_Desig_Chr_scaffold01226_45417 | Ca_desig_scaffold  | 45417                          | [C/T]       | NA                                         |
| Ca_Desig_Chr_scaffold01226_45419 | Ca_desig_scaffold  | 45419                          | [C/T]       | NA                                         |
| Ca_Desig_Chr_scaffold01226_45428 | Ca_desig_scaffold  | 45428                          | [T/C]       | NA                                         |
| Ca_Desig_Chr_scaffold01226_70571 | Ca_desig_scaffold  | 70571                          | [G/C]       | NA                                         |
| Ca_Desig_Chr_scaffold01226_70576 | Ca_desig_scaffold  | 70576                          | [C/T]       | NA                                         |
| Ca_Desig_Chr_scaffold01226_83221 | Ca_desig_scaffold  | 83221                          | [A/C]       | NA                                         |
| Ca_Desig_Chr_scaffold01229_58643 | Ca_desig_scaffold  | 58643                          | [T/G]       | NA                                         |
| Ca_Desig_Chr_scaffold01229_63807 | Ca_desig_scaffold  | 63807                          | [T/A]       | NA                                         |
| Ca_Desig_Chr_scaffold01230_4663  | Ca_desig_scaffold  | 4663                           | [T/C]       | NA                                         |
| Ca_Desig_Chr_scaffold01230_4837  | Ca_desig_scaffold  | 4837                           | [A/G]       | NA                                         |
| Ca_Desig_Chr_scaffold01230_4839  | Ca_desig_scaffold  | 4839                           | [A/C]       | NA                                         |
| Ca_Desig_Chr_scaffold01230_5094  | Ca_desig_scaffold  | 5094                           | [A/C]       | NA                                         |
| Ca_Desig_Chr_scaffold01230_5108  | Ca_desig_scaffold  | 5108                           | [A/G]       | NA                                         |
| Ca_Desig_Chr_scaffold01230_5112  | Ca_desig_scaffold  | 5112                           | [T/C]       | NA                                         |
| Ca_Desig_Chr_scaffold01230_5117  | Ca_desig_scaffold  | 5117                           | [A/G]       | NA                                         |
| Ca_Desig_Chr_scaffold01230_5276  | Ca_desig_scaffold  | 5276                           | [A/G]       | NA                                         |

| <b>SNP IDs</b>                         | <b>Chromosomes</b> | <b>Physical positions (bp)</b> | <b>SNPs</b> | <b>NCBI SNPdb accession IDs (NCBI_ss#)</b> |
|----------------------------------------|--------------------|--------------------------------|-------------|--------------------------------------------|
| Ca_Desi_Chromosome_scaffold01230_5304  | Ca_desi_scaffold   | 5304                           | [A/G]       | NA                                         |
| Ca_Desi_Chromosome_scaffold01230_10633 | Ca_desi_scaffold   | 10633                          | [A/G]       | NA                                         |
| Ca_Desi_Chromosome_scaffold01230_11978 | Ca_desi_scaffold   | 11978                          | [C/A]       | NA                                         |
| Ca_Desi_Chromosome_scaffold01230_11979 | Ca_desi_scaffold   | 11979                          | [C/G]       | NA                                         |
| Ca_Desi_Chromosome_scaffold01231_16170 | Ca_desi_scaffold   | 16170                          | [A/T]       | NA                                         |
| Ca_Desi_Chromosome_scaffold01231_22422 | Ca_desi_scaffold   | 22422                          | [C/T]       | NA                                         |
| Ca_Desi_Chromosome_scaffold01231_22730 | Ca_desi_scaffold   | 22730                          | [T/G]       | NA                                         |
| Ca_Desi_Chromosome_scaffold01231_41429 | Ca_desi_scaffold   | 41429                          | [A/T]       | NA                                         |
| Ca_Desi_Chromosome_scaffold01231_41437 | Ca_desi_scaffold   | 41437                          | [A/C]       | NA                                         |
| Ca_Desi_Chromosome_scaffold01231_71252 | Ca_desi_scaffold   | 71252                          | [C/T]       | NA                                         |
| Ca_Desi_Chromosome_scaffold01231_71261 | Ca_desi_scaffold   | 71261                          | [A/G]       | NA                                         |
| Ca_Desi_Chromosome_scaffold01231_71279 | Ca_desi_scaffold   | 71279                          | [G/A]       | NA                                         |
| Ca_Desi_Chromosome_scaffold01231_71295 | Ca_desi_scaffold   | 71295                          | [C/T]       | NA                                         |
| Ca_Desi_Chromosome_scaffold01231_77083 | Ca_desi_scaffold   | 77083                          | [G/A]       | NA                                         |
| Ca_Desi_Chromosome_scaffold01231_77159 | Ca_desi_scaffold   | 77159                          | [C/T]       | NA                                         |
| Ca_Desi_Chromosome_scaffold01231_77198 | Ca_desi_scaffold   | 77198                          | [A/G]       | NA                                         |
| Ca_Desi_Chromosome_scaffold01231_77445 | Ca_desi_scaffold   | 77445                          | [C/T]       | NA                                         |
| Ca_Desi_Chromosome_scaffold01231_77529 | Ca_desi_scaffold   | 77529                          | [G/A]       | NA                                         |
| Ca_Desi_Chromosome_scaffold01234_18631 | Ca_desi_scaffold   | 18631                          | [T/C]       | NA                                         |
| Ca_Desi_Chromosome_scaffold01234_18649 | Ca_desi_scaffold   | 18649                          | [T/G]       | NA                                         |
| Ca_Desi_Chromosome_scaffold01234_18655 | Ca_desi_scaffold   | 18655                          | [T/C]       | NA                                         |
| Ca_Desi_Chromosome_scaffold01235_23838 | Ca_desi_scaffold   | 23838                          | [T/C]       | NA                                         |
| Ca_Desi_Chromosome_scaffold01235_23870 | Ca_desi_scaffold   | 23870                          | [A/G]       | NA                                         |
| Ca_Desi_Chromosome_scaffold01235_45425 | Ca_desi_scaffold   | 45425                          | [T/G]       | NA                                         |
| Ca_Desi_Chromosome_scaffold01235_45438 | Ca_desi_scaffold   | 45438                          | [T/C]       | NA                                         |
| Ca_Desi_Chromosome_scaffold01235_61100 | Ca_desi_scaffold   | 61100                          | [T/C]       | NA                                         |
| Ca_Desi_Chromosome_scaffold01237_18843 | Ca_desi_scaffold   | 18843                          | [T/G]       | NA                                         |
| Ca_Desi_Chromosome_scaffold01237_18845 | Ca_desi_scaffold   | 18845                          | [C/G]       | NA                                         |
| Ca_Desi_Chromosome_scaffold01237_18846 | Ca_desi_scaffold   | 18846                          | [G/T]       | NA                                         |
| Ca_Desi_Chromosome_scaffold01237_18849 | Ca_desi_scaffold   | 18849                          | [T/G]       | NA                                         |
| Ca_Desi_Chromosome_scaffold01237_18851 | Ca_desi_scaffold   | 18851                          | [A/G]       | NA                                         |
| Ca_Desi_Chromosome_scaffold01237_18852 | Ca_desi_scaffold   | 18852                          | [T/G]       | NA                                         |
| Ca_Desi_Chromosome_scaffold01237_18854 | Ca_desi_scaffold   | 18854                          | [C/G]       | NA                                         |
| Ca_Desi_Chromosome_scaffold01237_18855 | Ca_desi_scaffold   | 18855                          | [G/T]       | NA                                         |

| <b>SNP IDs</b>                 | <b>Chromosomes</b> | <b>Physical positions (bp)</b> | <b>SNPs</b> | <b>NCBI SNPdb accession IDs (NCBI_ss#)</b> |
|--------------------------------|--------------------|--------------------------------|-------------|--------------------------------------------|
| Ca_Desi_Ch_scaffold01237_18856 | Ca_desi_scaffold   | 18856                          | [T/A]       | NA                                         |
| Ca_Desi_Ch_scaffold01237_18858 | Ca_desi_scaffold   | 18858                          | [G/C]       | NA                                         |
| Ca_Desi_Ch_scaffold01237_18879 | Ca_desi_scaffold   | 18879                          | [T/C]       | NA                                         |
| Ca_Desi_Ch_scaffold01237_18883 | Ca_desi_scaffold   | 18883                          | [T/G]       | NA                                         |
| Ca_Desi_Ch_scaffold01237_18903 | Ca_desi_scaffold   | 18903                          | [T/A]       | NA                                         |
| Ca_Desi_Ch_scaffold01239_40181 | Ca_desi_scaffold   | 40181                          | [T/G]       | NA                                         |
| Ca_Desi_Ch_scaffold01241_27505 | Ca_desi_scaffold   | 27505                          | [A/G]       | NA                                         |
| Ca_Desi_Ch_scaffold01241_30859 | Ca_desi_scaffold   | 30859                          | [A/C]       | NA                                         |
| Ca_Desi_Ch_scaffold01241_30864 | Ca_desi_scaffold   | 30864                          | [C/T]       | NA                                         |
| Ca_Desi_Ch_scaffold01241_61518 | Ca_desi_scaffold   | 61518                          | [A/G]       | NA                                         |
| Ca_Desi_Ch_scaffold01241_61526 | Ca_desi_scaffold   | 61526                          | [A/G]       | NA                                         |
| Ca_Desi_Ch_scaffold01241_67195 | Ca_desi_scaffold   | 67195                          | [T/G]       | NA                                         |
| Ca_Desi_Ch_scaffold01241_67284 | Ca_desi_scaffold   | 67284                          | [G/T]       | NA                                         |
| Ca_Desi_Ch_scaffold01241_82674 | Ca_desi_scaffold   | 82674                          | [C/A]       | NA                                         |
| Ca_Desi_Ch_scaffold01241_82675 | Ca_desi_scaffold   | 82675                          | [C/G]       | NA                                         |
| Ca_Desi_Ch_scaffold01241_82677 | Ca_desi_scaffold   | 82677                          | [A/T]       | NA                                         |
| Ca_Desi_Ch_scaffold01242_12009 | Ca_desi_scaffold   | 12009                          | [T/A]       | NA                                         |
| Ca_Desi_Ch_scaffold01242_12061 | Ca_desi_scaffold   | 12061                          | [T/C]       | NA                                         |
| Ca_Desi_Ch_scaffold01242_12266 | Ca_desi_scaffold   | 12266                          | [A/C]       | NA                                         |
| Ca_Desi_Ch_scaffold01242_12292 | Ca_desi_scaffold   | 12292                          | [A/T]       | NA                                         |
| Ca_Desi_Ch_scaffold01242_14587 | Ca_desi_scaffold   | 14587                          | [T/G]       | NA                                         |
| Ca_Desi_Ch_scaffold01242_14593 | Ca_desi_scaffold   | 14593                          | [T/C]       | NA                                         |
| Ca_Desi_Ch_scaffold01242_83250 | Ca_desi_scaffold   | 83250                          | [T/C]       | NA                                         |
| Ca_Desi_Ch_scaffold01242_83279 | Ca_desi_scaffold   | 83279                          | [T/C]       | NA                                         |
| Ca_Desi_Ch_scaffold01242_83293 | Ca_desi_scaffold   | 83293                          | [T/C]       | NA                                         |
| Ca_Desi_Ch_scaffold01242_83302 | Ca_desi_scaffold   | 83302                          | [T/C]       | NA                                         |
| Ca_Desi_Ch_scaffold01250_47548 | Ca_desi_scaffold   | 47548                          | [T/C]       | NA                                         |
| Ca_Desi_Ch_scaffold01250_47550 | Ca_desi_scaffold   | 47550                          | [A/G]       | NA                                         |
| Ca_Desi_Ch_scaffold01250_47567 | Ca_desi_scaffold   | 47567                          | [A/G]       | NA                                         |
| Ca_Desi_Ch_scaffold01250_65840 | Ca_desi_scaffold   | 65840                          | [T/G]       | NA                                         |
| Ca_Desi_Ch_scaffold01251_45773 | Ca_desi_scaffold   | 45773                          | [T/C]       | NA                                         |
| Ca_Desi_Ch_scaffold01251_45818 | Ca_desi_scaffold   | 45818                          | [A/G]       | NA                                         |
| Ca_Desi_Ch_scaffold01251_45891 | Ca_desi_scaffold   | 45891                          | [T/C]       | NA                                         |
| Ca_Desi_Ch_scaffold01254_54145 | Ca_desi_scaffold   | 54145                          | [A/T]       | NA                                         |

| <b>SNP IDs</b>                   | <b>Chromosomes</b> | <b>Physical positions (bp)</b> | <b>SNPs</b> | <b>NCBI SNPdb accession IDs (NCBI_ss#)</b> |
|----------------------------------|--------------------|--------------------------------|-------------|--------------------------------------------|
| Ca_Desig_Chr_scaffold01254_54171 | Ca_desig_scaffold  | 54171                          | [C/T]       | NA                                         |
| Ca_Desig_Chr_scaffold01254_54172 | Ca_desig_scaffold  | 54172                          | [A/C]       | NA                                         |
| Ca_Desig_Chr_scaffold01254_54174 | Ca_desig_scaffold  | 54174                          | [C/T]       | NA                                         |
| Ca_Desig_Chr_scaffold01254_54185 | Ca_desig_scaffold  | 54185                          | [A/G]       | NA                                         |
| Ca_Desig_Chr_scaffold01254_56414 | Ca_desig_scaffold  | 56414                          | [T/A]       | NA                                         |
| Ca_Desig_Chr_scaffold01254_56419 | Ca_desig_scaffold  | 56419                          | [A/C]       | NA                                         |
| Ca_Desig_Chr_scaffold01254_56425 | Ca_desig_scaffold  | 56425                          | [A/C]       | NA                                         |
| Ca_Desig_Chr_scaffold01254_56453 | Ca_desig_scaffold  | 56453                          | [A/G]       | NA                                         |
| Ca_Desig_Chr_scaffold01255_2758  | Ca_desig_scaffold  | 2758                           | [A/G]       | NA                                         |
| Ca_Desig_Chr_scaffold01256_25803 | Ca_desig_scaffold  | 25803                          | [T/C]       | NA                                         |
| Ca_Desig_Chr_scaffold01257_52865 | Ca_desig_scaffold  | 52865                          | [T/C]       | NA                                         |
| Ca_Desig_Chr_scaffold01257_52894 | Ca_desig_scaffold  | 52894                          | [A/G]       | NA                                         |
| Ca_Desig_Chr_scaffold01258_80275 | Ca_desig_scaffold  | 80275                          | [A/T]       | NA                                         |
| Ca_Desig_Chr_scaffold01258_80281 | Ca_desig_scaffold  | 80281                          | [A/G]       | NA                                         |
| Ca_Desig_Chr_scaffold01258_80285 | Ca_desig_scaffold  | 80285                          | [T/C]       | NA                                         |
| Ca_Desig_Chr_scaffold01258_80288 | Ca_desig_scaffold  | 80288                          | [T/C]       | NA                                         |
| Ca_Desig_Chr_scaffold01258_80290 | Ca_desig_scaffold  | 80290                          | [T/C]       | NA                                         |
| Ca_Desig_Chr_scaffold01258_80297 | Ca_desig_scaffold  | 80297                          | [T/C]       | NA                                         |
| Ca_Desig_Chr_scaffold01258_80303 | Ca_desig_scaffold  | 80303                          | [A/G]       | NA                                         |
| Ca_Desig_Chr_scaffold01258_80306 | Ca_desig_scaffold  | 80306                          | [A/G]       | NA                                         |
| Ca_Desig_Chr_scaffold01258_80315 | Ca_desig_scaffold  | 80315                          | [G/A]       | NA                                         |
| Ca_Desig_Chr_scaffold01258_80316 | Ca_desig_scaffold  | 80316                          | [A/G]       | NA                                         |
| Ca_Desig_Chr_scaffold01258_80318 | Ca_desig_scaffold  | 80318                          | [C/T]       | NA                                         |
| Ca_Desig_Chr_scaffold01258_80327 | Ca_desig_scaffold  | 80327                          | [T/C]       | NA                                         |
| Ca_Desig_Chr_scaffold01258_80333 | Ca_desig_scaffold  | 80333                          | [T/C]       | NA                                         |
| Ca_Desig_Chr_scaffold01261_59687 | Ca_desig_scaffold  | 59687                          | [G/C]       | NA                                         |
| Ca_Desig_Chr_scaffold01261_59688 | Ca_desig_scaffold  | 59688                          | [G/T]       | NA                                         |
| Ca_Desig_Chr_scaffold01263_8357  | Ca_desig_scaffold  | 8357                           | [T/C]       | NA                                         |
| Ca_Desig_Chr_scaffold01263_8411  | Ca_desig_scaffold  | 8411                           | [A/G]       | NA                                         |
| Ca_Desig_Chr_scaffold01263_8432  | Ca_desig_scaffold  | 8432                           | [A/C]       | NA                                         |
| Ca_Desig_Chr_scaffold01265_54159 | Ca_desig_scaffold  | 54159                          | [T/C]       | NA                                         |
| Ca_Desig_Chr_scaffold01266_23839 | Ca_desig_scaffold  | 23839                          | [A/C]       | NA                                         |
| Ca_Desig_Chr_scaffold01266_35845 | Ca_desig_scaffold  | 35845                          | [G/T]       | NA                                         |
| Ca_Desig_Chr_scaffold01266_74341 | Ca_desig_scaffold  | 74341                          | [T/C]       | NA                                         |

| <b>SNP IDs</b>                   | <b>Chromosomes</b> | <b>Physical positions (bp)</b> | <b>SNPs</b> | <b>NCBI SNPdb accession IDs (NCBI_ss#)</b> |
|----------------------------------|--------------------|--------------------------------|-------------|--------------------------------------------|
| Ca_Desig_Chr_scaffold01266_74350 | Ca_desig_scaffold  | 74350                          | [T/G]       | NA                                         |
| Ca_Desig_Chr_scaffold01266_74375 | Ca_desig_scaffold  | 74375                          | [T/G]       | NA                                         |
| Ca_Desig_Chr_scaffold01266_74378 | Ca_desig_scaffold  | 74378                          | [C/T]       | NA                                         |
| Ca_Desig_Chr_scaffold01266_74381 | Ca_desig_scaffold  | 74381                          | [T/A]       | NA                                         |
| Ca_Desig_Chr_scaffold01270_45475 | Ca_desig_scaffold  | 45475                          | [A/T]       | NA                                         |
| Ca_Desig_Chr_scaffold01282_48094 | Ca_desig_scaffold  | 48094                          | [T/A]       | NA                                         |
| Ca_Desig_Chr_scaffold01282_75683 | Ca_desig_scaffold  | 75683                          | [T/C]       | NA                                         |
| Ca_Desig_Chr_scaffold01282_75691 | Ca_desig_scaffold  | 75691                          | [A/C]       | NA                                         |
| Ca_Desig_Chr_scaffold01282_75769 | Ca_desig_scaffold  | 75769                          | [A/G]       | NA                                         |
| Ca_Desig_Chr_scaffold01282_75799 | Ca_desig_scaffold  | 75799                          | [T/C]       | NA                                         |
| Ca_Desig_Chr_scaffold01285_11589 | Ca_desig_scaffold  | 11589                          | [A/T]       | NA                                         |
| Ca_Desig_Chr_scaffold01285_14427 | Ca_desig_scaffold  | 14427                          | [T/A]       | NA                                         |
| Ca_Desig_Chr_scaffold01285_14437 | Ca_desig_scaffold  | 14437                          | [A/G]       | NA                                         |
| Ca_Desig_Chr_scaffold01285_14454 | Ca_desig_scaffold  | 14454                          | [A/G]       | NA                                         |
| Ca_Desig_Chr_scaffold01288_14461 | Ca_desig_scaffold  | 14461                          | [T/C]       | NA                                         |
| Ca_Desig_Chr_scaffold01288_14462 | Ca_desig_scaffold  | 14462                          | [G/T]       | NA                                         |
| Ca_Desig_Chr_scaffold01288_16238 | Ca_desig_scaffold  | 16238                          | [T/A]       | NA                                         |
| Ca_Desig_Chr_scaffold01288_16242 | Ca_desig_scaffold  | 16242                          | [C/T]       | NA                                         |
| Ca_Desig_Chr_scaffold01288_16248 | Ca_desig_scaffold  | 16248                          | [G/T]       | NA                                         |
| Ca_Desig_Chr_scaffold01288_16259 | Ca_desig_scaffold  | 16259                          | [C/G]       | NA                                         |
| Ca_Desig_Chr_scaffold01288_16268 | Ca_desig_scaffold  | 16268                          | [T/G]       | NA                                         |
| Ca_Desig_Chr_scaffold01288_16272 | Ca_desig_scaffold  | 16272                          | [T/A]       | NA                                         |
| Ca_Desig_Chr_scaffold01288_16274 | Ca_desig_scaffold  | 16274                          | [G/C]       | NA                                         |
| Ca_Desig_Chr_scaffold01288_16275 | Ca_desig_scaffold  | 16275                          | [T/G]       | NA                                         |
| Ca_Desig_Chr_scaffold01288_16606 | Ca_desig_scaffold  | 16606                          | [T/G]       | NA                                         |
| Ca_Desig_Chr_scaffold01288_16621 | Ca_desig_scaffold  | 16621                          | [A/C]       | NA                                         |
| Ca_Desig_Chr_scaffold01288_16645 | Ca_desig_scaffold  | 16645                          | [C/T]       | NA                                         |
| Ca_Desig_Chr_scaffold01288_44549 | Ca_desig_scaffold  | 44549                          | [A/C]       | NA                                         |
| Ca_Desig_Chr_scaffold01289_7943  | Ca_desig_scaffold  | 7943                           | [A/T]       | NA                                         |
| Ca_Desig_Chr_scaffold01289_12629 | Ca_desig_scaffold  | 12629                          | [G/A]       | NA                                         |
| Ca_Desig_Chr_scaffold01289_27150 | Ca_desig_scaffold  | 27150                          | [T/A]       | NA                                         |
| Ca_Desig_Chr_scaffold01289_42358 | Ca_desig_scaffold  | 42358                          | [G/A]       | NA                                         |
| Ca_Desig_Chr_scaffold01289_42669 | Ca_desig_scaffold  | 42669                          | [T/A]       | NA                                         |
| Ca_Desig_Chr_scaffold01289_43639 | Ca_desig_scaffold  | 43639                          | [G/T]       | NA                                         |



| <b>SNP IDs</b>                   | <b>Chromosomes</b> | <b>Physical positions (bp)</b> | <b>SNPs</b> | <b>NCBI SNPdb accession IDs (NCBI_ss#)</b> |
|----------------------------------|--------------------|--------------------------------|-------------|--------------------------------------------|
| Ca_Desig_Chr_scaffold01289_50153 | Ca_desig_scaffold  | 50153                          | [A/G]       | NA                                         |
| Ca_Desig_Chr_scaffold01289_51956 | Ca_desig_scaffold  | 51956                          | [C/T]       | NA                                         |
| Ca_Desig_Chr_scaffold01289_79148 | Ca_desig_scaffold  | 79148                          | [C/T]       | NA                                         |
| Ca_Desig_Chr_scaffold01290_17712 | Ca_desig_scaffold  | 17712                          | [A/G]       | NA                                         |
| Ca_Desig_Chr_scaffold01290_17790 | Ca_desig_scaffold  | 17790                          | [T/C]       | NA                                         |
| Ca_Desig_Chr_scaffold01290_17794 | Ca_desig_scaffold  | 17794                          | [A/C]       | NA                                         |
| Ca_Desig_Chr_scaffold01290_17797 | Ca_desig_scaffold  | 17797                          | [T/C]       | NA                                         |
| Ca_Desig_Chr_scaffold01290_17801 | Ca_desig_scaffold  | 17801                          | [A/C]       | NA                                         |
| Ca_Desig_Chr_scaffold01290_17809 | Ca_desig_scaffold  | 17809                          | [T/C]       | NA                                         |
| Ca_Desig_Chr_scaffold01290_17813 | Ca_desig_scaffold  | 17813                          | [T/C]       | NA                                         |
| Ca_Desig_Chr_scaffold01290_17820 | Ca_desig_scaffold  | 17820                          | [T/C]       | NA                                         |
| Ca_Desig_Chr_scaffold01290_17827 | Ca_desig_scaffold  | 17827                          | [A/C]       | NA                                         |
| Ca_Desig_Chr_scaffold01290_25520 | Ca_desig_scaffold  | 25520                          | [T/G]       | NA                                         |
| Ca_Desig_Chr_scaffold01290_25522 | Ca_desig_scaffold  | 25522                          | [A/G]       | NA                                         |
| Ca_Desig_Chr_scaffold01290_25526 | Ca_desig_scaffold  | 25526                          | [C/T]       | NA                                         |
| Ca_Desig_Chr_scaffold01290_32085 | Ca_desig_scaffold  | 32085                          | [T/C]       | NA                                         |
| Ca_Desig_Chr_scaffold01290_32086 | Ca_desig_scaffold  | 32086                          | [C/T]       | NA                                         |
| Ca_Desig_Chr_scaffold01290_32087 | Ca_desig_scaffold  | 32087                          | [T/C]       | NA                                         |
| Ca_Desig_Chr_scaffold01290_33921 | Ca_desig_scaffold  | 33921                          | [A/G]       | NA                                         |
| Ca_Desig_Chr_scaffold01290_33936 | Ca_desig_scaffold  | 33936                          | [A/G]       | NA                                         |
| Ca_Desig_Chr_scaffold01290_33954 | Ca_desig_scaffold  | 33954                          | [A/G]       | NA                                         |
| Ca_Desig_Chr_scaffold01290_49012 | Ca_desig_scaffold  | 49012                          | [T/G]       | NA                                         |
| Ca_Desig_Chr_scaffold01290_65766 | Ca_desig_scaffold  | 65766                          | [T/G]       | NA                                         |
| Ca_Desig_Chr_scaffold01290_72809 | Ca_desig_scaffold  | 72809                          | [C/T]       | NA                                         |
| Ca_Desig_Chr_scaffold01290_72810 | Ca_desig_scaffold  | 72810                          | [T/C]       | NA                                         |
| Ca_Desig_Chr_scaffold01290_72811 | Ca_desig_scaffold  | 72811                          | [G/T]       | NA                                         |
| Ca_Desig_Chr_scaffold01291_29063 | Ca_desig_scaffold  | 29063                          | [C/T]       | NA                                         |
| Ca_Desig_Chr_scaffold01291_45277 | Ca_desig_scaffold  | 45277                          | [T/G]       | NA                                         |
| Ca_Desig_Chr_scaffold01291_70030 | Ca_desig_scaffold  | 70030                          | [T/C]       | NA                                         |
| Ca_Desig_Chr_scaffold01291_70033 | Ca_desig_scaffold  | 70033                          | [G/C]       | NA                                         |
| Ca_Desig_Chr_scaffold01291_70039 | Ca_desig_scaffold  | 70039                          | [T/C]       | NA                                         |
| Ca_Desig_Chr_scaffold01291_70058 | Ca_desig_scaffold  | 70058                          | [A/G]       | NA                                         |
| Ca_Desig_Chr_scaffold01292_26209 | Ca_desig_scaffold  | 26209                          | [T/C]       | NA                                         |
| Ca_Desig_Chr_scaffold01292_26214 | Ca_desig_scaffold  | 26214                          | [A/G]       | NA                                         |

| <b>SNP IDs</b>                  | <b>Chromosomes</b> | <b>Physical positions (bp)</b> | <b>SNPs</b> | <b>NCBI SNPdb accession IDs (NCBI_ss#)</b> |
|---------------------------------|--------------------|--------------------------------|-------------|--------------------------------------------|
| Ca_DesigChr_scaffold01292_26235 | Ca_desig_scaffold  | 26235                          | [T/C]       | NA                                         |
| Ca_DesigChr_scaffold01292_51466 | Ca_desig_scaffold  | 51466                          | [T/G]       | NA                                         |
| Ca_DesigChr_scaffold01292_51626 | Ca_desig_scaffold  | 51626                          | [T/C]       | NA                                         |
| Ca_DesigChr_scaffold01292_51638 | Ca_desig_scaffold  | 51638                          | [T/C]       | NA                                         |
| Ca_DesigChr_scaffold01292_51651 | Ca_desig_scaffold  | 51651                          | [A/G]       | NA                                         |
| Ca_DesigChr_scaffold01295_1485  | Ca_desig_scaffold  | 1485                           | [C/T]       | NA                                         |
| Ca_DesigChr_scaffold01295_1500  | Ca_desig_scaffold  | 1500                           | [C/G]       | NA                                         |
| Ca_DesigChr_scaffold01295_1520  | Ca_desig_scaffold  | 1520                           | [A/G]       | NA                                         |
| Ca_DesigChr_scaffold01297_42157 | Ca_desig_scaffold  | 42157                          | [T/C]       | NA                                         |
| Ca_DesigChr_scaffold01297_42221 | Ca_desig_scaffold  | 42221                          | [T/C]       | NA                                         |
| Ca_DesigChr_scaffold01297_46441 | Ca_desig_scaffold  | 46441                          | [A/G]       | NA                                         |
| Ca_DesigChr_scaffold01297_46451 | Ca_desig_scaffold  | 46451                          | [T/C]       | NA                                         |
| Ca_DesigChr_scaffold01297_46460 | Ca_desig_scaffold  | 46460                          | [T/C]       | NA                                         |
| Ca_DesigChr_scaffold01297_46470 | Ca_desig_scaffold  | 46470                          | [T/C]       | NA                                         |
| Ca_DesigChr_scaffold01297_46474 | Ca_desig_scaffold  | 46474                          | [T/C]       | NA                                         |
| Ca_DesigChr_scaffold01297_46475 | Ca_desig_scaffold  | 46475                          | [T/C]       | NA                                         |
| Ca_DesigChr_scaffold01297_46476 | Ca_desig_scaffold  | 46476                          | [G/T]       | NA                                         |
| Ca_DesigChr_scaffold01301_46168 | Ca_desig_scaffold  | 46168                          | [G/C]       | NA                                         |
| Ca_DesigChr_scaffold01304_1056  | Ca_desig_scaffold  | 1056                           | [T/C]       | NA                                         |
| Ca_DesigChr_scaffold01304_1075  | Ca_desig_scaffold  | 1075                           | [T/G]       | NA                                         |
| Ca_DesigChr_scaffold01304_1082  | Ca_desig_scaffold  | 1082                           | [A/C]       | NA                                         |
| Ca_DesigChr_scaffold01304_75016 | Ca_desig_scaffold  | 75016                          | [A/G]       | NA                                         |
| Ca_DesigChr_scaffold01306_8398  | Ca_desig_scaffold  | 8398                           | [C/A]       | NA                                         |
| Ca_DesigChr_scaffold01306_8482  | Ca_desig_scaffold  | 8482                           | [A/C]       | NA                                         |
| Ca_DesigChr_scaffold01312_58362 | Ca_desig_scaffold  | 58362                          | [T/C]       | NA                                         |
| Ca_DesigChr_scaffold01312_58364 | Ca_desig_scaffold  | 58364                          | [A/G]       | NA                                         |
| Ca_DesigChr_scaffold01312_60904 | Ca_desig_scaffold  | 60904                          | [T/G]       | NA                                         |
| Ca_DesigChr_scaffold01313_39964 | Ca_desig_scaffold  | 39964                          | [A/C]       | NA                                         |
| Ca_DesigChr_scaffold01313_39981 | Ca_desig_scaffold  | 39981                          | [T/G]       | NA                                         |
| Ca_DesigChr_scaffold01313_39984 | Ca_desig_scaffold  | 39984                          | [T/G]       | NA                                         |
| Ca_DesigChr_scaffold01313_63419 | Ca_desig_scaffold  | 63419                          | [A/T]       | NA                                         |
| Ca_DesigChr_scaffold01319_732   | Ca_desig_scaffold  | 732                            | [T/G]       | NA                                         |
| Ca_DesigChr_scaffold01319_71458 | Ca_desig_scaffold  | 71458                          | [T/C]       | NA                                         |
| Ca_DesigChr_scaffold01326_18678 | Ca_desig_scaffold  | 18678                          | [T/A]       | NA                                         |

| <b>SNP IDs</b>                   | <b>Chromosomes</b> | <b>Physical positions (bp)</b> | <b>SNPs</b> | <b>NCBI SNPdb accession IDs (NCBI_ss#)</b> |
|----------------------------------|--------------------|--------------------------------|-------------|--------------------------------------------|
| Ca_Desig_Chr_scaffold01326_18720 | Ca_desig_scaffold  | 18720                          | [T/C]       | NA                                         |
| Ca_Desig_Chr_scaffold01326_27914 | Ca_desig_scaffold  | 27914                          | [G/A]       | NA                                         |
| Ca_Desig_Chr_scaffold01330_27512 | Ca_desig_scaffold  | 27512                          | [A/G]       | NA                                         |
| Ca_Desig_Chr_scaffold01330_27527 | Ca_desig_scaffold  | 27527                          | [T/A]       | NA                                         |
| Ca_Desig_Chr_scaffold01330_27549 | Ca_desig_scaffold  | 27549                          | [T/C]       | NA                                         |
| Ca_Desig_Chr_scaffold01330_27551 | Ca_desig_scaffold  | 27551                          | [A/C]       | NA                                         |
| Ca_Desig_Chr_scaffold01330_52099 | Ca_desig_scaffold  | 52099                          | [T/A]       | NA                                         |
| Ca_Desig_Chr_scaffold01332_33501 | Ca_desig_scaffold  | 33501                          | [C/A]       | NA                                         |
| Ca_Desig_Chr_scaffold01332_57693 | Ca_desig_scaffold  | 57693                          | [A/G]       | NA                                         |
| Ca_Desig_Chr_scaffold01332_57695 | Ca_desig_scaffold  | 57695                          | [T/G]       | NA                                         |
| Ca_Desig_Chr_scaffold01332_57700 | Ca_desig_scaffold  | 57700                          | [T/G]       | NA                                         |
| Ca_Desig_Chr_scaffold01332_58220 | Ca_desig_scaffold  | 58220                          | [A/G]       | NA                                         |
| Ca_Desig_Chr_scaffold01332_58278 | Ca_desig_scaffold  | 58278                          | [C/T]       | NA                                         |
| Ca_Desig_Chr_scaffold01332_58291 | Ca_desig_scaffold  | 58291                          | [A/T]       | NA                                         |
| Ca_Desig_Chr_scaffold01332_58306 | Ca_desig_scaffold  | 58306                          | [A/C]       | NA                                         |
| Ca_Desig_Chr_scaffold01332_58318 | Ca_desig_scaffold  | 58318                          | [A/C]       | NA                                         |
| Ca_Desig_Chr_scaffold01337_27976 | Ca_desig_scaffold  | 27976                          | [A/G]       | NA                                         |
| Ca_Desig_Chr_scaffold01340_12983 | Ca_desig_scaffold  | 12983                          | [T/C]       | NA                                         |
| Ca_Desig_Chr_scaffold01340_50869 | Ca_desig_scaffold  | 50869                          | [A/T]       | NA                                         |
| Ca_Desig_Chr_scaffold01340_50885 | Ca_desig_scaffold  | 50885                          | [A/G]       | NA                                         |
| Ca_Desig_Chr_scaffold01345_19354 | Ca_desig_scaffold  | 19354                          | [A/G]       | NA                                         |
| Ca_Desig_Chr_scaffold01345_19362 | Ca_desig_scaffold  | 19362                          | [T/G]       | NA                                         |
| Ca_Desig_Chr_scaffold01345_19366 | Ca_desig_scaffold  | 19366                          | [A/T]       | NA                                         |
| Ca_Desig_Chr_scaffold01345_19374 | Ca_desig_scaffold  | 19374                          | [A/C]       | NA                                         |
| Ca_Desig_Chr_scaffold01345_24126 | Ca_desig_scaffold  | 24126                          | [A/G]       | NA                                         |
| Ca_Desig_Chr_scaffold01345_24128 | Ca_desig_scaffold  | 24128                          | [A/G]       | NA                                         |
| Ca_Desig_Chr_scaffold01345_24145 | Ca_desig_scaffold  | 24145                          | [T/C]       | NA                                         |
| Ca_Desig_Chr_scaffold01345_24155 | Ca_desig_scaffold  | 24155                          | [T/C]       | NA                                         |
| Ca_Desig_Chr_scaffold01345_24185 | Ca_desig_scaffold  | 24185                          | [C/G]       | NA                                         |
| Ca_Desig_Chr_scaffold01345_24367 | Ca_desig_scaffold  | 24367                          | [C/A]       | NA                                         |
| Ca_Desig_Chr_scaffold01345_25195 | Ca_desig_scaffold  | 25195                          | [G/A]       | NA                                         |
| Ca_Desig_Chr_scaffold01345_25196 | Ca_desig_scaffold  | 25196                          | [A/T]       | NA                                         |
| Ca_Desig_Chr_scaffold01345_55381 | Ca_desig_scaffold  | 55381                          | [A/G]       | NA                                         |
| Ca_Desig_Chr_scaffold01345_55415 | Ca_desig_scaffold  | 55415                          | [A/G]       | NA                                         |

| <b>SNP IDs</b>                   | <b>Chromosomes</b> | <b>Physical positions (bp)</b> | <b>SNPs</b> | <b>NCBI SNPdb accession IDs (NCBI_ss#)</b> |
|----------------------------------|--------------------|--------------------------------|-------------|--------------------------------------------|
| Ca_Desig_Chr_scaffold01345_55417 | Ca_desig_scaffold  | 55417                          | [T/C]       | NA                                         |
| Ca_Desig_Chr_scaffold01345_55422 | Ca_desig_scaffold  | 55422                          | [T/A]       | NA                                         |
| Ca_Desig_Chr_scaffold01348_41833 | Ca_desig_scaffold  | 41833                          | [A/C]       | NA                                         |
| Ca_Desig_Chr_scaffold01348_41896 | Ca_desig_scaffold  | 41896                          | [T/C]       | NA                                         |
| Ca_Desig_Chr_scaffold01348_52778 | Ca_desig_scaffold  | 52778                          | [T/G]       | NA                                         |
| Ca_Desig_Chr_scaffold01348_52781 | Ca_desig_scaffold  | 52781                          | [T/G]       | NA                                         |
| Ca_Desig_Chr_scaffold01349_19747 | Ca_desig_scaffold  | 19747                          | [T/C]       | NA                                         |
| Ca_Desig_Chr_scaffold01349_19752 | Ca_desig_scaffold  | 19752                          | [T/C]       | NA                                         |
| Ca_Desig_Chr_scaffold01349_19762 | Ca_desig_scaffold  | 19762                          | [T/C]       | NA                                         |
| Ca_Desig_Chr_scaffold01349_19764 | Ca_desig_scaffold  | 19764                          | [A/C]       | NA                                         |
| Ca_Desig_Chr_scaffold01349_19779 | Ca_desig_scaffold  | 19779                          | [A/T]       | NA                                         |
| Ca_Desig_Chr_scaffold01349_32196 | Ca_desig_scaffold  | 32196                          | [T/A]       | NA                                         |
| Ca_Desig_Chr_scaffold01349_62141 | Ca_desig_scaffold  | 62141                          | [T/G]       | NA                                         |
| Ca_Desig_Chr_scaffold01354_7813  | Ca_desig_scaffold  | 7813                           | [C/A]       | NA                                         |
| Ca_Desig_Chr_scaffold01354_7814  | Ca_desig_scaffold  | 7814                           | [T/G]       | NA                                         |
| Ca_Desig_Chr_scaffold01354_64240 | Ca_desig_scaffold  | 64240                          | [T/A]       | NA                                         |
| Ca_Desig_Chr_scaffold01357_28303 | Ca_desig_scaffold  | 28303                          | [A/G]       | NA                                         |
| Ca_Desig_Chr_scaffold01357_44942 | Ca_desig_scaffold  | 44942                          | [T/C]       | NA                                         |
| Ca_Desig_Chr_scaffold01357_44946 | Ca_desig_scaffold  | 44946                          | [A/G]       | NA                                         |
| Ca_Desig_Chr_scaffold01357_44949 | Ca_desig_scaffold  | 44949                          | [T/A]       | NA                                         |
| Ca_Desig_Chr_scaffold01359_8551  | Ca_desig_scaffold  | 8551                           | [T/G]       | NA                                         |
| Ca_Desig_Chr_scaffold01359_10522 | Ca_desig_scaffold  | 10522                          | [C/A]       | NA                                         |
| Ca_Desig_Chr_scaffold01359_12936 | Ca_desig_scaffold  | 12936                          | [T/G]       | NA                                         |
| Ca_Desig_Chr_scaffold01359_12956 | Ca_desig_scaffold  | 12956                          | [T/G]       | NA                                         |
| Ca_Desig_Chr_scaffold01359_12961 | Ca_desig_scaffold  | 12961                          | [A/C]       | NA                                         |
| Ca_Desig_Chr_scaffold01359_14273 | Ca_desig_scaffold  | 14273                          | [A/C]       | NA                                         |
| Ca_Desig_Chr_scaffold01359_14282 | Ca_desig_scaffold  | 14282                          | [T/C]       | NA                                         |
| Ca_Desig_Chr_scaffold01359_14584 | Ca_desig_scaffold  | 14584                          | [G/T]       | NA                                         |
| Ca_Desig_Chr_scaffold01359_17854 | Ca_desig_scaffold  | 17854                          | [T/C]       | NA                                         |
| Ca_Desig_Chr_scaffold01359_17865 | Ca_desig_scaffold  | 17865                          | [A/C]       | NA                                         |
| Ca_Desig_Chr_scaffold01359_17875 | Ca_desig_scaffold  | 17875                          | [T/C]       | NA                                         |
| Ca_Desig_Chr_scaffold01359_17892 | Ca_desig_scaffold  | 17892                          | [A/G]       | NA                                         |
| Ca_Desig_Chr_scaffold01359_17914 | Ca_desig_scaffold  | 17914                          | [T/C]       | NA                                         |
| Ca_Desig_Chr_scaffold01359_17948 | Ca_desig_scaffold  | 17948                          | [T/G]       | NA                                         |

| <b>SNP IDs</b>                 | <b>Chromosomes</b> | <b>Physical positions (bp)</b> | <b>SNPs</b> | <b>NCBI SNPdb accession IDs (NCBI_ss#)</b> |
|--------------------------------|--------------------|--------------------------------|-------------|--------------------------------------------|
| Ca_Desi_Ch_scaffold01359_17966 | Ca_desi_scaffold   | 17966                          | [T/A]       | NA                                         |
| Ca_Desi_Ch_scaffold01361_64093 | Ca_desi_scaffold   | 64093                          | [A/C]       | NA                                         |
| Ca_Desi_Ch_scaffold01361_64111 | Ca_desi_scaffold   | 64111                          | [T/C]       | NA                                         |
| Ca_Desi_Ch_scaffold01361_66243 | Ca_desi_scaffold   | 66243                          | [A/C]       | NA                                         |
| Ca_Desi_Ch_scaffold01368_66961 | Ca_desi_scaffold   | 66961                          | [T/G]       | NA                                         |
| Ca_Desi_Ch_scaffold01368_66971 | Ca_desi_scaffold   | 66971                          | [T/G]       | NA                                         |
| Ca_Desi_Ch_scaffold01368_67014 | Ca_desi_scaffold   | 67014                          | [A/G]       | NA                                         |
| Ca_Desi_Ch_scaffold01369_69816 | Ca_desi_scaffold   | 69816                          | [A/G]       | NA                                         |
| Ca_Desi_Ch_scaffold01372_24040 | Ca_desi_scaffold   | 24040                          | [A/G]       | NA                                         |
| Ca_Desi_Ch_scaffold01372_24083 | Ca_desi_scaffold   | 24083                          | [A/C]       | NA                                         |
| Ca_Desi_Ch_scaffold01372_30012 | Ca_desi_scaffold   | 30012                          | [A/G]       | NA                                         |
| Ca_Desi_Ch_scaffold01372_30151 | Ca_desi_scaffold   | 30151                          | [C/G]       | NA                                         |
| Ca_Desi_Ch_scaffold01372_50036 | Ca_desi_scaffold   | 50036                          | [C/T]       | NA                                         |
| Ca_Desi_Ch_scaffold01375_24171 | Ca_desi_scaffold   | 24171                          | [A/G]       | NA                                         |
| Ca_Desi_Ch_scaffold01375_24184 | Ca_desi_scaffold   | 24184                          | [T/C]       | NA                                         |
| Ca_Desi_Ch_scaffold01375_24193 | Ca_desi_scaffold   | 24193                          | [T/C]       | NA                                         |
| Ca_Desi_Ch_scaffold01375_24196 | Ca_desi_scaffold   | 24196                          | [T/C]       | NA                                         |
| Ca_Desi_Ch_scaffold01375_24198 | Ca_desi_scaffold   | 24198                          | [A/G]       | NA                                         |
| Ca_Desi_Ch_scaffold01375_24207 | Ca_desi_scaffold   | 24207                          | [A/C]       | NA                                         |
| Ca_Desi_Ch_scaffold01375_24210 | Ca_desi_scaffold   | 24210                          | [A/C]       | NA                                         |
| Ca_Desi_Ch_scaffold01376_9533  | Ca_desi_scaffold   | 9533                           | [T/G]       | NA                                         |
| Ca_Desi_Ch_scaffold01376_9536  | Ca_desi_scaffold   | 9536                           | [A/T]       | NA                                         |
| Ca_Desi_Ch_scaffold01376_27450 | Ca_desi_scaffold   | 27450                          | [T/G]       | NA                                         |
| Ca_Desi_Ch_scaffold01376_27456 | Ca_desi_scaffold   | 27456                          | [A/C]       | NA                                         |
| Ca_Desi_Ch_scaffold01379_16922 | Ca_desi_scaffold   | 16922                          | [T/C]       | NA                                         |
| Ca_Desi_Ch_scaffold01379_16926 | Ca_desi_scaffold   | 16926                          | [A/G]       | NA                                         |
| Ca_Desi_Ch_scaffold01379_16935 | Ca_desi_scaffold   | 16935                          | [A/G]       | NA                                         |
| Ca_Desi_Ch_scaffold01379_16939 | Ca_desi_scaffold   | 16939                          | [T/C]       | NA                                         |
| Ca_Desi_Ch_scaffold01379_16946 | Ca_desi_scaffold   | 16946                          | [A/G]       | NA                                         |
| Ca_Desi_Ch_scaffold01379_16952 | Ca_desi_scaffold   | 16952                          | [T/C]       | NA                                         |
| Ca_Desi_Ch_scaffold01379_16956 | Ca_desi_scaffold   | 16956                          | [A/T]       | NA                                         |
| Ca_Desi_Ch_scaffold01379_16968 | Ca_desi_scaffold   | 16968                          | [A/G]       | NA                                         |
| Ca_Desi_Ch_scaffold01379_16973 | Ca_desi_scaffold   | 16973                          | [A/C]       | NA                                         |
| Ca_Desi_Ch_scaffold01379_16977 | Ca_desi_scaffold   | 16977                          | [T/C]       | NA                                         |

| <b>SNP IDs</b>                 | <b>Chromosomes</b> | <b>Physical positions (bp)</b> | <b>SNPs</b> | <b>NCBI SNPdb accession IDs (NCBI_ss#)</b> |
|--------------------------------|--------------------|--------------------------------|-------------|--------------------------------------------|
| Ca_Desi_Ch_scaffold01379_16988 | Ca_desi_scaffold   | 16988                          | [T/C]       | NA                                         |
| Ca_Desi_Ch_scaffold01379_17026 | Ca_desi_scaffold   | 17026                          | [T/C]       | NA                                         |
| Ca_Desi_Ch_scaffold01379_17036 | Ca_desi_scaffold   | 17036                          | [A/C]       | NA                                         |
| Ca_Desi_Ch_scaffold01380_36047 | Ca_desi_scaffold   | 36047                          | [T/G]       | NA                                         |
| Ca_Desi_Ch_scaffold01381_55122 | Ca_desi_scaffold   | 55122                          | [A/T]       | NA                                         |
| Ca_Desi_Ch_scaffold01381_55244 | Ca_desi_scaffold   | 55244                          | [A/G]       | NA                                         |
| Ca_Desi_Ch_scaffold01381_55341 | Ca_desi_scaffold   | 55341                          | [A/G]       | NA                                         |
| Ca_Desi_Ch_scaffold01381_55363 | Ca_desi_scaffold   | 55363                          | [T/A]       | NA                                         |
| Ca_Desi_Ch_scaffold01382_18727 | Ca_desi_scaffold   | 18727                          | [T/C]       | NA                                         |
| Ca_Desi_Ch_scaffold01383_23006 | Ca_desi_scaffold   | 23006                          | [T/G]       | NA                                         |
| Ca_Desi_Ch_scaffold01383_48250 | Ca_desi_scaffold   | 48250                          | [A/G]       | NA                                         |
| Ca_Desi_Ch_scaffold01383_48259 | Ca_desi_scaffold   | 48259                          | [A/C]       | NA                                         |
| Ca_Desi_Ch_scaffold01383_48282 | Ca_desi_scaffold   | 48282                          | [T/A]       | NA                                         |
| Ca_Desi_Ch_scaffold01383_48292 | Ca_desi_scaffold   | 48292                          | [T/A]       | NA                                         |
| Ca_Desi_Ch_scaffold01383_58938 | Ca_desi_scaffold   | 58938                          | [T/C]       | NA                                         |
| Ca_Desi_Ch_scaffold01383_64504 | Ca_desi_scaffold   | 64504                          | [T/G]       | NA                                         |
| Ca_Desi_Ch_scaffold01383_64509 | Ca_desi_scaffold   | 64509                          | [T/A]       | NA                                         |
| Ca_Desi_Ch_scaffold01383_64522 | Ca_desi_scaffold   | 64522                          | [T/A]       | NA                                         |
| Ca_Desi_Ch_scaffold01387_21705 | Ca_desi_scaffold   | 21705                          | [T/G]       | NA                                         |
| Ca_Desi_Ch_scaffold01387_36007 | Ca_desi_scaffold   | 36007                          | [A/T]       | NA                                         |
| Ca_Desi_Ch_scaffold01388_49102 | Ca_desi_scaffold   | 49102                          | [A/C]       | NA                                         |
| Ca_Desi_Ch_scaffold01388_49117 | Ca_desi_scaffold   | 49117                          | [A/T]       | NA                                         |
| Ca_Desi_Ch_scaffold01389_10293 | Ca_desi_scaffold   | 10293                          | [A/C]       | NA                                         |
| Ca_Desi_Ch_scaffold01389_10452 | Ca_desi_scaffold   | 10452                          | [A/G]       | NA                                         |
| Ca_Desi_Ch_scaffold01389_10476 | Ca_desi_scaffold   | 10476                          | [T/C]       | NA                                         |
| Ca_Desi_Ch_scaffold01390_18060 | Ca_desi_scaffold   | 18060                          | [T/G]       | NA                                         |
| Ca_Desi_Ch_scaffold01391_69752 | Ca_desi_scaffold   | 69752                          | [T/G]       | NA                                         |
| Ca_Desi_Ch_scaffold01391_69788 | Ca_desi_scaffold   | 69788                          | [A/G]       | NA                                         |
| Ca_Desi_Ch_scaffold01391_72729 | Ca_desi_scaffold   | 72729                          | [T/G]       | NA                                         |
| Ca_Desi_Ch_scaffold01392_47670 | Ca_desi_scaffold   | 47670                          | [A/C]       | NA                                         |
| Ca_Desi_Ch_scaffold01392_48063 | Ca_desi_scaffold   | 48063                          | [T/C]       | NA                                         |
| Ca_Desi_Ch_scaffold01392_48065 | Ca_desi_scaffold   | 48065                          | [T/C]       | NA                                         |
| Ca_Desi_Ch_scaffold01392_48076 | Ca_desi_scaffold   | 48076                          | [A/G]       | NA                                         |
| Ca_Desi_Ch_scaffold01392_48077 | Ca_desi_scaffold   | 48077                          | [A/G]       | NA                                         |

| <b>SNP IDs</b>                   | <b>Chromosomes</b> | <b>Physical positions (bp)</b> | <b>SNPs</b> | <b>NCBI SNPdb accession IDs (NCBI_ss#)</b> |
|----------------------------------|--------------------|--------------------------------|-------------|--------------------------------------------|
| Ca_Desig_Chr_scaffold01392_48084 | Ca_desig_scaffold  | 48084                          | [A/T]       | NA                                         |
| Ca_Desig_Chr_scaffold01392_48099 | Ca_desig_scaffold  | 48099                          | [A/G]       | NA                                         |
| Ca_Desig_Chr_scaffold01392_48111 | Ca_desig_scaffold  | 48111                          | [A/G]       | NA                                         |
| Ca_Desig_Chr_scaffold01392_48112 | Ca_desig_scaffold  | 48112                          | [C/T]       | NA                                         |
| Ca_Desig_Chr_scaffold01392_48113 | Ca_desig_scaffold  | 48113                          | [T/G]       | NA                                         |
| Ca_Desig_Chr_scaffold01392_48140 | Ca_desig_scaffold  | 48140                          | [A/G]       | NA                                         |
| Ca_Desig_Chr_scaffold01393_15887 | Ca_desig_scaffold  | 15887                          | [T/C]       | NA                                         |
| Ca_Desig_Chr_scaffold01393_15908 | Ca_desig_scaffold  | 15908                          | [A/C]       | NA                                         |
| Ca_Desig_Chr_scaffold01393_15919 | Ca_desig_scaffold  | 15919                          | [T/C]       | NA                                         |
| Ca_Desig_Chr_scaffold01393_17516 | Ca_desig_scaffold  | 17516                          | [A/G]       | NA                                         |
| Ca_Desig_Chr_scaffold01393_19519 | Ca_desig_scaffold  | 19519                          | [A/G]       | NA                                         |
| Ca_Desig_Chr_scaffold01393_19540 | Ca_desig_scaffold  | 19540                          | [T/G]       | NA                                         |
| Ca_Desig_Chr_scaffold01393_73675 | Ca_desig_scaffold  | 73675                          | [A/T]       | NA                                         |
| Ca_Desig_Chr_scaffold01393_73707 | Ca_desig_scaffold  | 73707                          | [G/A]       | NA                                         |
| Ca_Desig_Chr_scaffold01394_943   | Ca_desig_scaffold  | 943                            | [A/C]       | NA                                         |
| Ca_Desig_Chr_scaffold01394_951   | Ca_desig_scaffold  | 951                            | [T/A]       | NA                                         |
| Ca_Desig_Chr_scaffold01394_1025  | Ca_desig_scaffold  | 1025                           | [T/G]       | NA                                         |
| Ca_Desig_Chr_scaffold01394_1030  | Ca_desig_scaffold  | 1030                           | [T/G]       | NA                                         |
| Ca_Desig_Chr_scaffold01394_1082  | Ca_desig_scaffold  | 1082                           | [T/G]       | NA                                         |
| Ca_Desig_Chr_scaffold01394_1842  | Ca_desig_scaffold  | 1842                           | [T/G]       | NA                                         |
| Ca_Desig_Chr_scaffold01394_1885  | Ca_desig_scaffold  | 1885                           | [A/G]       | NA                                         |
| Ca_Desig_Chr_scaffold01394_67417 | Ca_desig_scaffold  | 67417                          | [G/T]       | NA                                         |
| Ca_Desig_Chr_scaffold01394_68387 | Ca_desig_scaffold  | 68387                          | [C/A]       | NA                                         |
| Ca_Desig_Chr_scaffold01394_70050 | Ca_desig_scaffold  | 70050                          | [T/G]       | NA                                         |
| Ca_Desig_Chr_scaffold01394_70140 | Ca_desig_scaffold  | 70140                          | [T/G]       | NA                                         |
| Ca_Desig_Chr_scaffold01394_70905 | Ca_desig_scaffold  | 70905                          | [T/G]       | NA                                         |
| Ca_Desig_Chr_scaffold01394_70914 | Ca_desig_scaffold  | 70914                          | [T/C]       | NA                                         |
| Ca_Desig_Chr_scaffold01394_70931 | Ca_desig_scaffold  | 70931                          | [A/G]       | NA                                         |
| Ca_Desig_Chr_scaffold01394_70937 | Ca_desig_scaffold  | 70937                          | [A/G]       | NA                                         |
| Ca_Desig_Chr_scaffold01394_70940 | Ca_desig_scaffold  | 70940                          | [T/C]       | NA                                         |
| Ca_Desig_Chr_scaffold01394_70958 | Ca_desig_scaffold  | 70958                          | [A/G]       | NA                                         |
| Ca_Desig_Chr_scaffold01394_70970 | Ca_desig_scaffold  | 70970                          | [T/G]       | NA                                         |
| Ca_Desig_Chr_scaffold01394_70974 | Ca_desig_scaffold  | 70974                          | [T/C]       | NA                                         |
| Ca_Desig_Chr_scaffold01394_70998 | Ca_desig_scaffold  | 70998                          | [T/C]       | NA                                         |

| <b>SNP IDs</b>                  | <b>Chromosomes</b> | <b>Physical positions (bp)</b> | <b>SNPs</b> | <b>NCBI SNPdb accession IDs (NCBI_ss#)</b> |
|---------------------------------|--------------------|--------------------------------|-------------|--------------------------------------------|
| Ca_DesigChr_scaffold01394_71001 | Ca_desig_scaffold  | 71001                          | [T/C]       | NA                                         |
| Ca_DesigChr_scaffold01394_71004 | Ca_desig_scaffold  | 71004                          | [T/A]       | NA                                         |
| Ca_DesigChr_scaffold01395_35900 | Ca_desig_scaffold  | 35900                          | [A/C]       | NA                                         |
| Ca_DesigChr_scaffold01395_35901 | Ca_desig_scaffold  | 35901                          | [G/T]       | NA                                         |
| Ca_DesigChr_scaffold01395_35902 | Ca_desig_scaffold  | 35902                          | [A/T]       | NA                                         |
| Ca_DesigChr_scaffold01396_33901 | Ca_desig_scaffold  | 33901                          | [T/C]       | NA                                         |
| Ca_DesigChr_scaffold01398_2192  | Ca_desig_scaffold  | 2192                           | [C/G]       | NA                                         |
| Ca_DesigChr_scaffold01398_47436 | Ca_desig_scaffold  | 47436                          | [A/T]       | NA                                         |
| Ca_DesigChr_scaffold01398_47470 | Ca_desig_scaffold  | 47470                          | [G/C]       | NA                                         |
| Ca_DesigChr_scaffold01398_47543 | Ca_desig_scaffold  | 47543                          | [C/G]       | NA                                         |
| Ca_DesigChr_scaffold01398_47548 | Ca_desig_scaffold  | 47548                          | [C/T]       | NA                                         |
| Ca_DesigChr_scaffold01398_47557 | Ca_desig_scaffold  | 47557                          | [A/G]       | NA                                         |
| Ca_DesigChr_scaffold01398_48122 | Ca_desig_scaffold  | 48122                          | [G/C]       | NA                                         |
| Ca_DesigChr_scaffold01398_48139 | Ca_desig_scaffold  | 48139                          | [C/T]       | NA                                         |
| Ca_DesigChr_scaffold01405_55627 | Ca_desig_scaffold  | 55627                          | [A/G]       | NA                                         |
| Ca_DesigChr_scaffold01405_55639 | Ca_desig_scaffold  | 55639                          | [T/C]       | NA                                         |
| Ca_DesigChr_scaffold01405_55648 | Ca_desig_scaffold  | 55648                          | [A/G]       | NA                                         |
| Ca_DesigChr_scaffold01405_55663 | Ca_desig_scaffold  | 55663                          | [A/T]       | NA                                         |
| Ca_DesigChr_scaffold01405_67835 | Ca_desig_scaffold  | 67835                          | [T/G]       | NA                                         |
| Ca_DesigChr_scaffold01405_67846 | Ca_desig_scaffold  | 67846                          | [T/G]       | NA                                         |
| Ca_DesigChr_scaffold01409_7394  | Ca_desig_scaffold  | 7394                           | [A/C]       | NA                                         |
| Ca_DesigChr_scaffold01409_7396  | Ca_desig_scaffold  | 7396                           | [T/C]       | NA                                         |
| Ca_DesigChr_scaffold01409_19593 | Ca_desig_scaffold  | 19593                          | [A/C]       | NA                                         |
| Ca_DesigChr_scaffold01409_24569 | Ca_desig_scaffold  | 24569                          | [A/C]       | NA                                         |
| Ca_DesigChr_scaffold01412_36905 | Ca_desig_scaffold  | 36905                          | [T/G]       | NA                                         |
| Ca_DesigChr_scaffold01412_36923 | Ca_desig_scaffold  | 36923                          | [A/G]       | NA                                         |
| Ca_DesigChr_scaffold01412_46430 | Ca_desig_scaffold  | 46430                          | [T/G]       | NA                                         |
| Ca_DesigChr_scaffold01412_51584 | Ca_desig_scaffold  | 51584                          | [A/C]       | NA                                         |
| Ca_DesigChr_scaffold01412_51591 | Ca_desig_scaffold  | 51591                          | [A/C]       | NA                                         |
| Ca_DesigChr_scaffold01412_51607 | Ca_desig_scaffold  | 51607                          | [A/C]       | NA                                         |
| Ca_DesigChr_scaffold01412_51622 | Ca_desig_scaffold  | 51622                          | [A/C]       | NA                                         |
| Ca_DesigChr_scaffold01412_51699 | Ca_desig_scaffold  | 51699                          | [A/C]       | NA                                         |
| Ca_DesigChr_scaffold01422_44271 | Ca_desig_scaffold  | 44271                          | [T/G]       | NA                                         |
| Ca_DesigChr_scaffold01422_44275 | Ca_desig_scaffold  | 44275                          | [T/C]       | NA                                         |



| <b>SNP IDs</b>                  | <b>Chromosomes</b> | <b>Physical positions (bp)</b> | <b>SNPs</b> | <b>NCBI SNPdb accession IDs (NCBI_ss#)</b> |
|---------------------------------|--------------------|--------------------------------|-------------|--------------------------------------------|
| Ca_Desi_Chr_scaffold01422_52789 | Ca_desi_scaffold   | 52789                          | [T/G]       | NA                                         |
| Ca_Desi_Chr_scaffold01422_55861 | Ca_desi_scaffold   | 55861                          | [A/C]       | NA                                         |
| Ca_Desi_Chr_scaffold01422_72006 | Ca_desi_scaffold   | 72006                          | [T/C]       | NA                                         |
| Ca_Desi_Chr_scaffold01422_72011 | Ca_desi_scaffold   | 72011                          | [A/G]       | NA                                         |
| Ca_Desi_Chr_scaffold01422_72013 | Ca_desi_scaffold   | 72013                          | [T/C]       | NA                                         |
| Ca_Desi_Chr_scaffold01422_72015 | Ca_desi_scaffold   | 72015                          | [T/C]       | NA                                         |
| Ca_Desi_Chr_scaffold01422_72046 | Ca_desi_scaffold   | 72046                          | [T/C]       | NA                                         |
| Ca_Desi_Chr_scaffold01422_72049 | Ca_desi_scaffold   | 72049                          | [A/G]       | NA                                         |
| Ca_Desi_Chr_scaffold01422_72051 | Ca_desi_scaffold   | 72051                          | [T/C]       | NA                                         |
| Ca_Desi_Chr_scaffold01426_4129  | Ca_desi_scaffold   | 4129                           | [A/T]       | NA                                         |
| Ca_Desi_Chr_scaffold01426_33295 | Ca_desi_scaffold   | 33295                          | [T/G]       | NA                                         |
| Ca_Desi_Chr_scaffold01426_36944 | Ca_desi_scaffold   | 36944                          | [A/C]       | NA                                         |
| Ca_Desi_Chr_scaffold01426_36957 | Ca_desi_scaffold   | 36957                          | [A/C]       | NA                                         |
| Ca_Desi_Chr_scaffold01426_36991 | Ca_desi_scaffold   | 36991                          | [T/C]       | NA                                         |
| Ca_Desi_Chr_scaffold01426_64586 | Ca_desi_scaffold   | 64586                          | [T/G]       | NA                                         |
| Ca_Desi_Chr_scaffold01426_73737 | Ca_desi_scaffold   | 73737                          | [C/T]       | NA                                         |
| Ca_Desi_Chr_scaffold01426_73768 | Ca_desi_scaffold   | 73768                          | [A/G]       | NA                                         |
| Ca_Desi_Chr_scaffold01426_73770 | Ca_desi_scaffold   | 73770                          | [A/C]       | NA                                         |
| Ca_Desi_Chr_scaffold01426_73786 | Ca_desi_scaffold   | 73786                          | [T/C]       | NA                                         |
| Ca_Desi_Chr_scaffold01426_73797 | Ca_desi_scaffold   | 73797                          | [A/G]       | NA                                         |
| Ca_Desi_Chr_scaffold01426_73802 | Ca_desi_scaffold   | 73802                          | [A/C]       | NA                                         |
| Ca_Desi_Chr_scaffold01427_20205 | Ca_desi_scaffold   | 20205                          | [T/G]       | NA                                         |
| Ca_Desi_Chr_scaffold01429_72645 | Ca_desi_scaffold   | 72645                          | [T/A]       | NA                                         |
| Ca_Desi_Chr_scaffold01434_30423 | Ca_desi_scaffold   | 30423                          | [A/G]       | NA                                         |
| Ca_Desi_Chr_scaffold01434_30426 | Ca_desi_scaffold   | 30426                          | [T/C]       | NA                                         |
| Ca_Desi_Chr_scaffold01434_30433 | Ca_desi_scaffold   | 30433                          | [A/G]       | NA                                         |
| Ca_Desi_Chr_scaffold01434_30455 | Ca_desi_scaffold   | 30455                          | [T/C]       | NA                                         |
| Ca_Desi_Chr_scaffold01434_30479 | Ca_desi_scaffold   | 30479                          | [A/G]       | NA                                         |
| Ca_Desi_Chr_scaffold01434_30482 | Ca_desi_scaffold   | 30482                          | [A/C]       | NA                                         |
| Ca_Desi_Chr_scaffold01434_31260 | Ca_desi_scaffold   | 31260                          | [A/C]       | NA                                         |
| Ca_Desi_Chr_scaffold01434_42484 | Ca_desi_scaffold   | 42484                          | [C/A]       | NA                                         |
| Ca_Desi_Chr_scaffold01434_42485 | Ca_desi_scaffold   | 42485                          | [T/G]       | NA                                         |
| Ca_Desi_Chr_scaffold01434_42486 | Ca_desi_scaffold   | 42486                          | [G/A]       | NA                                         |
| Ca_Desi_Chr_scaffold01434_42487 | Ca_desi_scaffold   | 42487                          | [G/T]       | NA                                         |

| <b>SNP IDs</b>                         | <b>Chromosomes</b> | <b>Physical positions (bp)</b> | <b>SNPs</b> | <b>NCBI SNPdb accession IDs (NCBI_ss#)</b> |
|----------------------------------------|--------------------|--------------------------------|-------------|--------------------------------------------|
| Ca_Desi_Chromosome_scaffold01434_42488 | Ca_desi_scaffold   | 42488                          | [T/C]       | NA                                         |
| Ca_Desi_Chromosome_scaffold01434_47737 | Ca_desi_scaffold   | 47737                          | [A/G]       | NA                                         |
| Ca_Desi_Chromosome_scaffold01434_47816 | Ca_desi_scaffold   | 47816                          | [A/C]       | NA                                         |
| Ca_Desi_Chromosome_scaffold01434_47951 | Ca_desi_scaffold   | 47951                          | [A/C]       | NA                                         |
| Ca_Desi_Chromosome_scaffold01435_18752 | Ca_desi_scaffold   | 18752                          | [T/A]       | NA                                         |
| Ca_Desi_Chromosome_scaffold01435_18757 | Ca_desi_scaffold   | 18757                          | [A/T]       | NA                                         |
| Ca_Desi_Chromosome_scaffold01435_18785 | Ca_desi_scaffold   | 18785                          | [T/A]       | NA                                         |
| Ca_Desi_Chromosome_scaffold01435_18787 | Ca_desi_scaffold   | 18787                          | [T/C]       | NA                                         |
| Ca_Desi_Chromosome_scaffold01435_18803 | Ca_desi_scaffold   | 18803                          | [A/G]       | NA                                         |
| Ca_Desi_Chromosome_scaffold01438_24837 | Ca_desi_scaffold   | 24837                          | [T/C]       | NA                                         |
| Ca_Desi_Chromosome_scaffold01441_36056 | Ca_desi_scaffold   | 36056                          | [T/G]       | NA                                         |
| Ca_Desi_Chromosome_scaffold01442_60586 | Ca_desi_scaffold   | 60586                          | [A/C]       | NA                                         |
| Ca_Desi_Chromosome_scaffold01444_11709 | Ca_desi_scaffold   | 11709                          | [T/G]       | NA                                         |
| Ca_Desi_Chromosome_scaffold01444_11723 | Ca_desi_scaffold   | 11723                          | [A/C]       | NA                                         |
| Ca_Desi_Chromosome_scaffold01447_40324 | Ca_desi_scaffold   | 40324                          | [A/C]       | NA                                         |
| Ca_Desi_Chromosome_scaffold01447_40346 | Ca_desi_scaffold   | 40346                          | [T/G]       | NA                                         |
| Ca_Desi_Chromosome_scaffold01447_40353 | Ca_desi_scaffold   | 40353                          | [A/C]       | NA                                         |
| Ca_Desi_Chromosome_scaffold01447_40370 | Ca_desi_scaffold   | 40370                          | [T/A]       | NA                                         |
| Ca_Desi_Chromosome_scaffold01448_23865 | Ca_desi_scaffold   | 23865                          | [A/C]       | NA                                         |
| Ca_Desi_Chromosome_scaffold01448_23883 | Ca_desi_scaffold   | 23883                          | [A/G]       | NA                                         |
| Ca_Desi_Chromosome_scaffold01448_23885 | Ca_desi_scaffold   | 23885                          | [T/G]       | NA                                         |
| Ca_Desi_Chromosome_scaffold01448_23897 | Ca_desi_scaffold   | 23897                          | [C/T]       | NA                                         |
| Ca_Desi_Chromosome_scaffold01448_45877 | Ca_desi_scaffold   | 45877                          | [T/G]       | NA                                         |
| Ca_Desi_Chromosome_scaffold01448_46069 | Ca_desi_scaffold   | 46069                          | [A/T]       | NA                                         |
| Ca_Desi_Chromosome_scaffold01453_18991 | Ca_desi_scaffold   | 18991                          | [A/G]       | NA                                         |
| Ca_Desi_Chromosome_scaffold01455_16491 | Ca_desi_scaffold   | 16491                          | [A/T]       | NA                                         |
| Ca_Desi_Chromosome_scaffold01455_16499 | Ca_desi_scaffold   | 16499                          | [T/C]       | NA                                         |
| Ca_Desi_Chromosome_scaffold01455_16502 | Ca_desi_scaffold   | 16502                          | [T/A]       | NA                                         |
| Ca_Desi_Chromosome_scaffold01455_16515 | Ca_desi_scaffold   | 16515                          | [A/G]       | NA                                         |
| Ca_Desi_Chromosome_scaffold01455_16522 | Ca_desi_scaffold   | 16522                          | [A/G]       | NA                                         |
| Ca_Desi_Chromosome_scaffold01455_16526 | Ca_desi_scaffold   | 16526                          | [T/C]       | NA                                         |
| Ca_Desi_Chromosome_scaffold01455_16536 | Ca_desi_scaffold   | 16536                          | [G/A]       | NA                                         |
| Ca_Desi_Chromosome_scaffold01455_16538 | Ca_desi_scaffold   | 16538                          | [T/G]       | NA                                         |
| Ca_Desi_Chromosome_scaffold01457_51359 | Ca_desi_scaffold   | 51359                          | [T/G]       | NA                                         |

| <b>SNP IDs</b>                 | <b>Chromosomes</b> | <b>Physical positions (bp)</b> | <b>SNPs</b> | <b>NCBI SNPdb accession IDs (NCBI_ss#)</b> |
|--------------------------------|--------------------|--------------------------------|-------------|--------------------------------------------|
| Ca_Desi_Ch_scaffold01465_30021 | Ca_desi_scaffold   | 30021                          | [A/T]       | NA                                         |
| Ca_Desi_Ch_scaffold01465_66924 | Ca_desi_scaffold   | 66924                          | [T/C]       | NA                                         |
| Ca_Desi_Ch_scaffold01466_49502 | Ca_desi_scaffold   | 49502                          | [T/C]       | NA                                         |
| Ca_Desi_Ch_scaffold01466_57673 | Ca_desi_scaffold   | 57673                          | [G/T]       | NA                                         |
| Ca_Desi_Ch_scaffold01466_57682 | Ca_desi_scaffold   | 57682                          | [C/A]       | NA                                         |
| Ca_Desi_Ch_scaffold01471_46132 | Ca_desi_scaffold   | 46132                          | [A/C]       | NA                                         |
| Ca_Desi_Ch_scaffold01471_46241 | Ca_desi_scaffold   | 46241                          | [T/C]       | NA                                         |
| Ca_Desi_Ch_scaffold01471_54113 | Ca_desi_scaffold   | 54113                          | [T/C]       | NA                                         |
| Ca_Desi_Ch_scaffold01471_56868 | Ca_desi_scaffold   | 56868                          | [A/T]       | NA                                         |
| Ca_Desi_Ch_scaffold01471_57257 | Ca_desi_scaffold   | 57257                          | [T/A]       | NA                                         |
| Ca_Desi_Ch_scaffold01471_67217 | Ca_desi_scaffold   | 67217                          | [T/C]       | NA                                         |
| Ca_Desi_Ch_scaffold01472_43689 | Ca_desi_scaffold   | 43689                          | [C/T]       | NA                                         |
| Ca_Desi_Ch_scaffold01472_43696 | Ca_desi_scaffold   | 43696                          | [C/T]       | NA                                         |
| Ca_Desi_Ch_scaffold01477_42164 | Ca_desi_scaffold   | 42164                          | [T/A]       | NA                                         |
| Ca_Desi_Ch_scaffold01477_45871 | Ca_desi_scaffold   | 45871                          | [A/C]       | NA                                         |
| Ca_Desi_Ch_scaffold01477_68662 | Ca_desi_scaffold   | 68662                          | [A/T]       | NA                                         |
| Ca_Desi_Ch_scaffold01477_68680 | Ca_desi_scaffold   | 68680                          | [A/G]       | NA                                         |
| Ca_Desi_Ch_scaffold01478_47181 | Ca_desi_scaffold   | 47181                          | [T/G]       | NA                                         |
| Ca_Desi_Ch_scaffold01478_47236 | Ca_desi_scaffold   | 47236                          | [A/G]       | NA                                         |
| Ca_Desi_Ch_scaffold01478_47244 | Ca_desi_scaffold   | 47244                          | [A/G]       | NA                                         |
| Ca_Desi_Ch_scaffold01478_53217 | Ca_desi_scaffold   | 53217                          | [A/C]       | NA                                         |
| Ca_Desi_Ch_scaffold01478_53224 | Ca_desi_scaffold   | 53224                          | [T/C]       | NA                                         |
| Ca_Desi_Ch_scaffold01478_58200 | Ca_desi_scaffold   | 58200                          | [T/C]       | NA                                         |
| Ca_Desi_Ch_scaffold01478_58210 | Ca_desi_scaffold   | 58210                          | [T/G]       | NA                                         |
| Ca_Desi_Ch_scaffold01478_58225 | Ca_desi_scaffold   | 58225                          | [A/G]       | NA                                         |
| Ca_Desi_Ch_scaffold01478_58228 | Ca_desi_scaffold   | 58228                          | [T/A]       | NA                                         |
| Ca_Desi_Ch_scaffold01478_59058 | Ca_desi_scaffold   | 59058                          | [A/C]       | NA                                         |
| Ca_Desi_Ch_scaffold01479_41916 | Ca_desi_scaffold   | 41916                          | [A/G]       | NA                                         |
| Ca_Desi_Ch_scaffold01484_25791 | Ca_desi_scaffold   | 25791                          | [A/T]       | NA                                         |
| Ca_Desi_Ch_scaffold01484_25887 | Ca_desi_scaffold   | 25887                          | [T/G]       | NA                                         |
| Ca_Desi_Ch_scaffold01484_25904 | Ca_desi_scaffold   | 25904                          | [A/G]       | NA                                         |
| Ca_Desi_Ch_scaffold01484_36526 | Ca_desi_scaffold   | 36526                          | [A/G]       | NA                                         |
| Ca_Desi_Ch_scaffold01484_47193 | Ca_desi_scaffold   | 47193                          | [A/C]       | NA                                         |
| Ca_Desi_Ch_scaffold01484_47403 | Ca_desi_scaffold   | 47403                          | [A/C]       | NA                                         |

| <b>SNP IDs</b>                         | <b>Chromosomes</b> | <b>Physical positions (bp)</b> | <b>SNPs</b> | <b>NCBI SNPdb accession IDs (NCBI_ss#)</b> |
|----------------------------------------|--------------------|--------------------------------|-------------|--------------------------------------------|
| Ca_Desi_Chromosome_scaffold01484_47454 | Ca_desi_scaffold   | 47454                          | [C/G]       | NA                                         |
| Ca_Desi_Chromosome_scaffold01484_47460 | Ca_desi_scaffold   | 47460                          | [T/C]       | NA                                         |
| Ca_Desi_Chromosome_scaffold01484_47472 | Ca_desi_scaffold   | 47472                          | [A/C]       | NA                                         |
| Ca_Desi_Chromosome_scaffold01484_47478 | Ca_desi_scaffold   | 47478                          | [A/C]       | NA                                         |
| Ca_Desi_Chromosome_scaffold01484_47481 | Ca_desi_scaffold   | 47481                          | [A/C]       | NA                                         |
| Ca_Desi_Chromosome_scaffold01484_47484 | Ca_desi_scaffold   | 47484                          | [A/C]       | NA                                         |
| Ca_Desi_Chromosome_scaffold01484_47511 | Ca_desi_scaffold   | 47511                          | [A/C]       | NA                                         |
| Ca_Desi_Chromosome_scaffold01484_47514 | Ca_desi_scaffold   | 47514                          | [T/C]       | NA                                         |
| Ca_Desi_Chromosome_scaffold01485_15931 | Ca_desi_scaffold   | 15931                          | [A/T]       | NA                                         |
| Ca_Desi_Chromosome_scaffold01485_15955 | Ca_desi_scaffold   | 15955                          | [A/G]       | NA                                         |
| Ca_Desi_Chromosome_scaffold01485_15960 | Ca_desi_scaffold   | 15960                          | [A/C]       | NA                                         |
| Ca_Desi_Chromosome_scaffold01485_15991 | Ca_desi_scaffold   | 15991                          | [T/A]       | NA                                         |
| Ca_Desi_Chromosome_scaffold01485_17870 | Ca_desi_scaffold   | 17870                          | [T/G]       | NA                                         |
| Ca_Desi_Chromosome_scaffold01485_17872 | Ca_desi_scaffold   | 17872                          | [T/G]       | NA                                         |
| Ca_Desi_Chromosome_scaffold01485_17880 | Ca_desi_scaffold   | 17880                          | [T/C]       | NA                                         |
| Ca_Desi_Chromosome_scaffold01485_17910 | Ca_desi_scaffold   | 17910                          | [A/G]       | NA                                         |
| Ca_Desi_Chromosome_scaffold01485_20749 | Ca_desi_scaffold   | 20749                          | [T/A]       | NA                                         |
| Ca_Desi_Chromosome_scaffold01485_66043 | Ca_desi_scaffold   | 66043                          | [A/G]       | NA                                         |
| Ca_Desi_Chromosome_scaffold01485_66132 | Ca_desi_scaffold   | 66132                          | [A/C]       | NA                                         |
| Ca_Desi_Chromosome_scaffold01497_65314 | Ca_desi_scaffold   | 65314                          | [T/A]       | NA                                         |
| Ca_Desi_Chromosome_scaffold01497_65323 | Ca_desi_scaffold   | 65323                          | [T/G]       | NA                                         |
| Ca_Desi_Chromosome_scaffold01497_65339 | Ca_desi_scaffold   | 65339                          | [T/G]       | NA                                         |
| Ca_Desi_Chromosome_scaffold01498_25822 | Ca_desi_scaffold   | 25822                          | [A/G]       | NA                                         |
| Ca_Desi_Chromosome_scaffold01498_25849 | Ca_desi_scaffold   | 25849                          | [A/C]       | NA                                         |
| Ca_Desi_Chromosome_scaffold01498_29290 | Ca_desi_scaffold   | 29290                          | [A/C]       | NA                                         |
| Ca_Desi_Chromosome_scaffold01498_48706 | Ca_desi_scaffold   | 48706                          | [A/T]       | NA                                         |
| Ca_Desi_Chromosome_scaffold01498_51436 | Ca_desi_scaffold   | 51436                          | [A/G]       | NA                                         |
| Ca_Desi_Chromosome_scaffold01498_51800 | Ca_desi_scaffold   | 51800                          | [T/C]       | NA                                         |
| Ca_Desi_Chromosome_scaffold01498_51809 | Ca_desi_scaffold   | 51809                          | [A/G]       | NA                                         |
| Ca_Desi_Chromosome_scaffold01498_51826 | Ca_desi_scaffold   | 51826                          | [T/C]       | NA                                         |
| Ca_Desi_Chromosome_scaffold01498_51832 | Ca_desi_scaffold   | 51832                          | [A/C]       | NA                                         |
| Ca_Desi_Chromosome_scaffold01498_51835 | Ca_desi_scaffold   | 51835                          | [T/C]       | NA                                         |
| Ca_Desi_Chromosome_scaffold01498_51845 | Ca_desi_scaffold   | 51845                          | [T/C]       | NA                                         |
| Ca_Desi_Chromosome_scaffold01504_18401 | Ca_desi_scaffold   | 18401                          | [A/C]       | NA                                         |

| <b>SNP IDs</b>                   | <b>Chromosomes</b> | <b>Physical positions (bp)</b> | <b>SNPs</b> | <b>NCBI SNPdb accession IDs (NCBI_ss#)</b> |
|----------------------------------|--------------------|--------------------------------|-------------|--------------------------------------------|
| Ca_Desig_Chr_scaffold01504_18404 | Ca_desig_scaffold  | 18404                          | [A/C]       | NA                                         |
| Ca_Desig_Chr_scaffold01504_18406 | Ca_desig_scaffold  | 18406                          | [T/C]       | NA                                         |
| Ca_Desig_Chr_scaffold01504_18423 | Ca_desig_scaffold  | 18423                          | [A/G]       | NA                                         |
| Ca_Desig_Chr_scaffold01504_18441 | Ca_desig_scaffold  | 18441                          | [A/G]       | NA                                         |
| Ca_Desig_Chr_scaffold01506_16462 | Ca_desig_scaffold  | 16462                          | [T/G]       | NA                                         |
| Ca_Desig_Chr_scaffold01506_37529 | Ca_desig_scaffold  | 37529                          | [T/C]       | NA                                         |
| Ca_Desig_Chr_scaffold01506_37537 | Ca_desig_scaffold  | 37537                          | [T/C]       | NA                                         |
| Ca_Desig_Chr_scaffold01506_37539 | Ca_desig_scaffold  | 37539                          | [A/C]       | NA                                         |
| Ca_Desig_Chr_scaffold01520_4780  | Ca_desig_scaffold  | 4780                           | [C/T]       | NA                                         |
| Ca_Desig_Chr_scaffold01520_21629 | Ca_desig_scaffold  | 21629                          | [A/C]       | NA                                         |
| Ca_Desig_Chr_scaffold01520_21630 | Ca_desig_scaffold  | 21630                          | [G/C]       | NA                                         |
| Ca_Desig_Chr_scaffold01520_21631 | Ca_desig_scaffold  | 21631                          | [A/T]       | NA                                         |
| Ca_Desig_Chr_scaffold01520_21632 | Ca_desig_scaffold  | 21632                          | [T/G]       | NA                                         |
| Ca_Desig_Chr_scaffold01520_26244 | Ca_desig_scaffold  | 26244                          | [A/G]       | NA                                         |
| Ca_Desig_Chr_scaffold01520_26261 | Ca_desig_scaffold  | 26261                          | [A/C]       | NA                                         |
| Ca_Desig_Chr_scaffold01520_26263 | Ca_desig_scaffold  | 26263                          | [T/C]       | NA                                         |
| Ca_Desig_Chr_scaffold01520_49335 | Ca_desig_scaffold  | 49335                          | [A/C]       | NA                                         |
| Ca_Desig_Chr_scaffold01522_31924 | Ca_desig_scaffold  | 31924                          | [T/C]       | NA                                         |
| Ca_Desig_Chr_scaffold01522_35094 | Ca_desig_scaffold  | 35094                          | [T/A]       | NA                                         |
| Ca_Desig_Chr_scaffold01522_35565 | Ca_desig_scaffold  | 35565                          | [T/C]       | NA                                         |
| Ca_Desig_Chr_scaffold01523_26687 | Ca_desig_scaffold  | 26687                          | [T/A]       | NA                                         |
| Ca_Desig_Chr_scaffold01523_53503 | Ca_desig_scaffold  | 53503                          | [A/T]       | NA                                         |
| Ca_Desig_Chr_scaffold01527_3447  | Ca_desig_scaffold  | 3447                           | [T/G]       | NA                                         |
| Ca_Desig_Chr_scaffold01527_3525  | Ca_desig_scaffold  | 3525                           | [A/C]       | NA                                         |
| Ca_Desig_Chr_scaffold01527_26644 | Ca_desig_scaffold  | 26644                          | [C/A]       | NA                                         |
| Ca_Desig_Chr_scaffold01527_26645 | Ca_desig_scaffold  | 26645                          | [T/G]       | NA                                         |
| Ca_Desig_Chr_scaffold01531_17637 | Ca_desig_scaffold  | 17637                          | [A/G]       | NA                                         |
| Ca_Desig_Chr_scaffold01531_17642 | Ca_desig_scaffold  | 17642                          | [A/G]       | NA                                         |
| Ca_Desig_Chr_scaffold01531_17649 | Ca_desig_scaffold  | 17649                          | [A/G]       | NA                                         |
| Ca_Desig_Chr_scaffold01531_17657 | Ca_desig_scaffold  | 17657                          | [T/G]       | NA                                         |
| Ca_Desig_Chr_scaffold01531_17659 | Ca_desig_scaffold  | 17659                          | [C/T]       | NA                                         |
| Ca_Desig_Chr_scaffold01531_17661 | Ca_desig_scaffold  | 17661                          | [A/G]       | NA                                         |
| Ca_Desig_Chr_scaffold01531_17663 | Ca_desig_scaffold  | 17663                          | [A/G]       | NA                                         |
| Ca_Desig_Chr_scaffold01531_31485 | Ca_desig_scaffold  | 31485                          | [G/A]       | NA                                         |

| <b>SNP IDs</b>                   | <b>Chromosomes</b> | <b>Physical positions (bp)</b> | <b>SNPs</b> | <b>NCBI SNPdb accession IDs (NCBI_ss#)</b> |
|----------------------------------|--------------------|--------------------------------|-------------|--------------------------------------------|
| Ca_Desig_Chr_scaffold01531_40611 | Ca_desig_scaffold  | 40611                          | [T/C]       | NA                                         |
| Ca_Desig_Chr_scaffold01531_41122 | Ca_desig_scaffold  | 41122                          | [T/C]       | NA                                         |
| Ca_Desig_Chr_scaffold01531_41314 | Ca_desig_scaffold  | 41314                          | [C/G]       | NA                                         |
| Ca_Desig_Chr_scaffold01531_41315 | Ca_desig_scaffold  | 41315                          | [A/G]       | NA                                         |
| Ca_Desig_Chr_scaffold01531_46040 | Ca_desig_scaffold  | 46040                          | [A/G]       | NA                                         |
| Ca_Desig_Chr_scaffold01531_58468 | Ca_desig_scaffold  | 58468                          | [T/C]       | NA                                         |
| Ca_Desig_Chr_scaffold01531_58501 | Ca_desig_scaffold  | 58501                          | [A/G]       | NA                                         |
| Ca_Desig_Chr_scaffold01531_59068 | Ca_desig_scaffold  | 59068                          | [T/G]       | NA                                         |
| Ca_Desig_Chr_scaffold01531_59069 | Ca_desig_scaffold  | 59069                          | [A/T]       | NA                                         |
| Ca_Desig_Chr_scaffold01531_59089 | Ca_desig_scaffold  | 59089                          | [T/G]       | NA                                         |
| Ca_Desig_Chr_scaffold01531_60108 | Ca_desig_scaffold  | 60108                          | [T/C]       | NA                                         |
| Ca_Desig_Chr_scaffold01531_61500 | Ca_desig_scaffold  | 61500                          | [T/C]       | NA                                         |
| Ca_Desig_Chr_scaffold01531_61503 | Ca_desig_scaffold  | 61503                          | [T/C]       | NA                                         |
| Ca_Desig_Chr_scaffold01531_61512 | Ca_desig_scaffold  | 61512                          | [T/C]       | NA                                         |
| Ca_Desig_Chr_scaffold01531_62239 | Ca_desig_scaffold  | 62239                          | [T/C]       | NA                                         |
| Ca_Desig_Chr_scaffold01531_62248 | Ca_desig_scaffold  | 62248                          | [T/C]       | NA                                         |
| Ca_Desig_Chr_scaffold01531_62251 | Ca_desig_scaffold  | 62251                          | [A/C]       | NA                                         |
| Ca_Desig_Chr_scaffold01531_62328 | Ca_desig_scaffold  | 62328                          | [A/C]       | NA                                         |
| Ca_Desig_Chr_scaffold01531_62331 | Ca_desig_scaffold  | 62331                          | [A/C]       | NA                                         |
| Ca_Desig_Chr_scaffold01535_48203 | Ca_desig_scaffold  | 48203                          | [A/T]       | NA                                         |
| Ca_Desig_Chr_scaffold01535_48206 | Ca_desig_scaffold  | 48206                          | [A/G]       | NA                                         |
| Ca_Desig_Chr_scaffold01535_48230 | Ca_desig_scaffold  | 48230                          | [G/A]       | NA                                         |
| Ca_Desig_Chr_scaffold01539_25296 | Ca_desig_scaffold  | 25296                          | [G/A]       | NA                                         |
| Ca_Desig_Chr_scaffold01539_32807 | Ca_desig_scaffold  | 32807                          | [T/A]       | NA                                         |
| Ca_Desig_Chr_scaffold01539_32816 | Ca_desig_scaffold  | 32816                          | [A/G]       | NA                                         |
| Ca_Desig_Chr_scaffold01539_32829 | Ca_desig_scaffold  | 32829                          | [G/C]       | NA                                         |
| Ca_Desig_Chr_scaffold01539_32830 | Ca_desig_scaffold  | 32830                          | [A/G]       | NA                                         |
| Ca_Desig_Chr_scaffold01540_876   | Ca_desig_scaffold  | 876                            | [A/T]       | NA                                         |
| Ca_Desig_Chr_scaffold01540_55407 | Ca_desig_scaffold  | 55407                          | [T/C]       | NA                                         |
| Ca_Desig_Chr_scaffold01540_55425 | Ca_desig_scaffold  | 55425                          | [A/G]       | NA                                         |
| Ca_Desig_Chr_scaffold01540_55431 | Ca_desig_scaffold  | 55431                          | [A/C]       | NA                                         |
| Ca_Desig_Chr_scaffold01540_55441 | Ca_desig_scaffold  | 55441                          | [A/G]       | NA                                         |
| Ca_Desig_Chr_scaffold01540_55444 | Ca_desig_scaffold  | 55444                          | [T/C]       | NA                                         |
| Ca_Desig_Chr_scaffold01544_17635 | Ca_desig_scaffold  | 17635                          | [A/T]       | NA                                         |

| <b>SNP IDs</b>                 | <b>Chromosomes</b> | <b>Physical positions (bp)</b> | <b>SNPs</b> | <b>NCBI SNPdb accession IDs (NCBI_ss#)</b> |
|--------------------------------|--------------------|--------------------------------|-------------|--------------------------------------------|
| Ca_Desi_Ch_scaffold01544_17646 | Ca_desi_scaffold   | 17646                          | [T/C]       | NA                                         |
| Ca_Desi_Ch_scaffold01544_17648 | Ca_desi_scaffold   | 17648                          | [A/G]       | NA                                         |
| Ca_Desi_Ch_scaffold01544_17652 | Ca_desi_scaffold   | 17652                          | [T/C]       | NA                                         |
| Ca_Desi_Ch_scaffold01544_17682 | Ca_desi_scaffold   | 17682                          | [T/A]       | NA                                         |
| Ca_Desi_Ch_scaffold01544_21835 | Ca_desi_scaffold   | 21835                          | [A/T]       | NA                                         |
| Ca_Desi_Ch_scaffold01544_59952 | Ca_desi_scaffold   | 59952                          | [T/G]       | NA                                         |
| Ca_Desi_Ch_scaffold01546_44858 | Ca_desi_scaffold   | 44858                          | [T/C]       | NA                                         |
| Ca_Desi_Ch_scaffold01546_44877 | Ca_desi_scaffold   | 44877                          | [A/G]       | NA                                         |
| Ca_Desi_Ch_scaffold01548_29248 | Ca_desi_scaffold   | 29248                          | [T/G]       | NA                                         |
| Ca_Desi_Ch_scaffold01549_55101 | Ca_desi_scaffold   | 55101                          | [T/G]       | NA                                         |
| Ca_Desi_Ch_scaffold01549_62415 | Ca_desi_scaffold   | 62415                          | [T/G]       | NA                                         |
| Ca_Desi_Ch_scaffold01553_9038  | Ca_desi_scaffold   | 9038                           | [G/A]       | NA                                         |
| Ca_Desi_Ch_scaffold01553_9049  | Ca_desi_scaffold   | 9049                           | [G/A]       | NA                                         |
| Ca_Desi_Ch_scaffold01553_9062  | Ca_desi_scaffold   | 9062                           | [A/G]       | NA                                         |
| Ca_Desi_Ch_scaffold01553_9072  | Ca_desi_scaffold   | 9072                           | [T/C]       | NA                                         |
| Ca_Desi_Ch_scaffold01555_57802 | Ca_desi_scaffold   | 57802                          | [C/T]       | NA                                         |
| Ca_Desi_Ch_scaffold01555_57814 | Ca_desi_scaffold   | 57814                          | [T/A]       | NA                                         |
| Ca_Desi_Ch_scaffold01555_57826 | Ca_desi_scaffold   | 57826                          | [T/A]       | NA                                         |
| Ca_Desi_Ch_scaffold01555_57835 | Ca_desi_scaffold   | 57835                          | [T/A]       | NA                                         |
| Ca_Desi_Ch_scaffold01558_31648 | Ca_desi_scaffold   | 31648                          | [T/C]       | NA                                         |
| Ca_Desi_Ch_scaffold01560_46166 | Ca_desi_scaffold   | 46166                          | [T/G]       | NA                                         |
| Ca_Desi_Ch_scaffold01560_46170 | Ca_desi_scaffold   | 46170                          | [G/A]       | NA                                         |
| Ca_Desi_Ch_scaffold01560_46196 | Ca_desi_scaffold   | 46196                          | [T/C]       | NA                                         |
| Ca_Desi_Ch_scaffold01570_52822 | Ca_desi_scaffold   | 52822                          | [T/G]       | NA                                         |
| Ca_Desi_Ch_scaffold01570_53071 | Ca_desi_scaffold   | 53071                          | [A/T]       | NA                                         |
| Ca_Desi_Ch_scaffold01575_19342 | Ca_desi_scaffold   | 19342                          | [T/G]       | NA                                         |
| Ca_Desi_Ch_scaffold01575_19385 | Ca_desi_scaffold   | 19385                          | [A/T]       | NA                                         |
| Ca_Desi_Ch_scaffold01576_64293 | Ca_desi_scaffold   | 64293                          | [C/T]       | NA                                         |
| Ca_Desi_Ch_scaffold01578_40911 | Ca_desi_scaffold   | 40911                          | [T/G]       | NA                                         |
| Ca_Desi_Ch_scaffold01583_14688 | Ca_desi_scaffold   | 14688                          | [A/G]       | NA                                         |
| Ca_Desi_Ch_scaffold01583_14703 | Ca_desi_scaffold   | 14703                          | [A/G]       | NA                                         |
| Ca_Desi_Ch_scaffold01583_43893 | Ca_desi_scaffold   | 43893                          | [C/T]       | NA                                         |
| Ca_Desi_Ch_scaffold01586_2236  | Ca_desi_scaffold   | 2236                           | [T/G]       | NA                                         |
| Ca_Desi_Ch_scaffold01586_2242  | Ca_desi_scaffold   | 2242                           | [A/C]       | NA                                         |

| <b>SNP IDs</b>                  | <b>Chromosomes</b> | <b>Physical positions (bp)</b> | <b>SNPs</b> | <b>NCBI SNPdb accession IDs (NCBI_ss#)</b> |
|---------------------------------|--------------------|--------------------------------|-------------|--------------------------------------------|
| Ca_DesigChr_scaffold01586_2265  | Ca_desig_scaffold  | 2265                           | [T/C]       | NA                                         |
| Ca_DesigChr_scaffold01586_2272  | Ca_desig_scaffold  | 2272                           | [A/G]       | NA                                         |
| Ca_DesigChr_scaffold01586_41166 | Ca_desig_scaffold  | 41166                          | [T/C]       | NA                                         |
| Ca_DesigChr_scaffold01586_41172 | Ca_desig_scaffold  | 41172                          | [A/C]       | NA                                         |
| Ca_DesigChr_scaffold01586_41178 | Ca_desig_scaffold  | 41178                          | [G/C]       | NA                                         |
| Ca_DesigChr_scaffold01586_41185 | Ca_desig_scaffold  | 41185                          | [T/G]       | NA                                         |
| Ca_DesigChr_scaffold01586_41202 | Ca_desig_scaffold  | 41202                          | [A/G]       | NA                                         |
| Ca_DesigChr_scaffold01586_41204 | Ca_desig_scaffold  | 41204                          | [T/C]       | NA                                         |
| Ca_DesigChr_scaffold01586_41217 | Ca_desig_scaffold  | 41217                          | [A/G]       | NA                                         |
| Ca_DesigChr_scaffold01586_41227 | Ca_desig_scaffold  | 41227                          | [T/A]       | NA                                         |
| Ca_DesigChr_scaffold01586_41530 | Ca_desig_scaffold  | 41530                          | [A/T]       | NA                                         |
| Ca_DesigChr_scaffold01586_41547 | Ca_desig_scaffold  | 41547                          | [T/C]       | NA                                         |
| Ca_DesigChr_scaffold01586_41551 | Ca_desig_scaffold  | 41551                          | [A/C]       | NA                                         |
| Ca_DesigChr_scaffold01586_41560 | Ca_desig_scaffold  | 41560                          | [T/C]       | NA                                         |
| Ca_DesigChr_scaffold01586_41569 | Ca_desig_scaffold  | 41569                          | [T/C]       | NA                                         |
| Ca_DesigChr_scaffold01586_41572 | Ca_desig_scaffold  | 41572                          | [A/G]       | NA                                         |
| Ca_DesigChr_scaffold01588_7848  | Ca_desig_scaffold  | 7848                           | [A/C]       | NA                                         |
| Ca_DesigChr_scaffold01589_25170 | Ca_desig_scaffold  | 25170                          | [A/C]       | NA                                         |
| Ca_DesigChr_scaffold01589_25188 | Ca_desig_scaffold  | 25188                          | [C/T]       | NA                                         |
| Ca_DesigChr_scaffold01594_36146 | Ca_desig_scaffold  | 36146                          | [T/G]       | NA                                         |
| Ca_DesigChr_scaffold01597_45255 | Ca_desig_scaffold  | 45255                          | [T/C]       | NA                                         |
| Ca_DesigChr_scaffold01597_60566 | Ca_desig_scaffold  | 60566                          | [A/G]       | NA                                         |
| Ca_DesigChr_scaffold01600_22158 | Ca_desig_scaffold  | 22158                          | [A/T]       | NA                                         |
| Ca_DesigChr_scaffold01600_22177 | Ca_desig_scaffold  | 22177                          | [A/G]       | NA                                         |
| Ca_DesigChr_scaffold01600_22199 | Ca_desig_scaffold  | 22199                          | [T/C]       | NA                                         |
| Ca_DesigChr_scaffold01600_30784 | Ca_desig_scaffold  | 30784                          | [A/C]       | NA                                         |
| Ca_DesigChr_scaffold01603_33297 | Ca_desig_scaffold  | 33297                          | [C/A]       | NA                                         |
| Ca_DesigChr_scaffold01604_26382 | Ca_desig_scaffold  | 26382                          | [T/C]       | NA                                         |
| Ca_DesigChr_scaffold01605_10976 | Ca_desig_scaffold  | 10976                          | [T/G]       | NA                                         |
| Ca_DesigChr_scaffold01608_17073 | Ca_desig_scaffold  | 17073                          | [A/C]       | NA                                         |
| Ca_DesigChr_scaffold01609_14794 | Ca_desig_scaffold  | 14794                          | [A/C]       | NA                                         |
| Ca_DesigChr_scaffold01609_14795 | Ca_desig_scaffold  | 14795                          | [G/T]       | NA                                         |
| Ca_DesigChr_scaffold01609_14799 | Ca_desig_scaffold  | 14799                          | [G/C]       | NA                                         |
| Ca_DesigChr_scaffold01609_14800 | Ca_desig_scaffold  | 14800                          | [G/A]       | NA                                         |



| <b>SNP IDs</b>                 | <b>Chromosomes</b> | <b>Physical positions (bp)</b> | <b>SNPs</b> | <b>NCBI SNPdb accession IDs (NCBI_ss#)</b> |
|--------------------------------|--------------------|--------------------------------|-------------|--------------------------------------------|
| Ca_Desi_Ch_scaffold01619_44790 | Ca_desi_scaffold   | 44790                          | [T/C]       | NA                                         |
| Ca_Desi_Ch_scaffold01619_61722 | Ca_desi_scaffold   | 61722                          | [A/G]       | NA                                         |
| Ca_Desi_Ch_scaffold01619_61735 | Ca_desi_scaffold   | 61735                          | [C/T]       | NA                                         |
| Ca_Desi_Ch_scaffold01619_61739 | Ca_desi_scaffold   | 61739                          | [G/A]       | NA                                         |
| Ca_Desi_Ch_scaffold01619_61745 | Ca_desi_scaffold   | 61745                          | [A/G]       | NA                                         |
| Ca_Desi_Ch_scaffold01623_7339  | Ca_desi_scaffold   | 7339                           | [A/C]       | NA                                         |
| Ca_Desi_Ch_scaffold01623_7342  | Ca_desi_scaffold   | 7342                           | [A/C]       | NA                                         |
| Ca_Desi_Ch_scaffold01623_7363  | Ca_desi_scaffold   | 7363                           | [A/G]       | NA                                         |
| Ca_Desi_Ch_scaffold01623_7378  | Ca_desi_scaffold   | 7378                           | [T/C]       | NA                                         |
| Ca_Desi_Ch_scaffold01624_35479 | Ca_desi_scaffold   | 35479                          | [T/G]       | NA                                         |
| Ca_Desi_Ch_scaffold01624_35497 | Ca_desi_scaffold   | 35497                          | [T/G]       | NA                                         |
| Ca_Desi_Ch_scaffold01624_35522 | Ca_desi_scaffold   | 35522                          | [A/C]       | NA                                         |
| Ca_Desi_Ch_scaffold01624_35538 | Ca_desi_scaffold   | 35538                          | [A/C]       | NA                                         |
| Ca_Desi_Ch_scaffold01624_35559 | Ca_desi_scaffold   | 35559                          | [C/T]       | NA                                         |
| Ca_Desi_Ch_scaffold01624_52339 | Ca_desi_scaffold   | 52339                          | [A/C]       | NA                                         |
| Ca_Desi_Ch_scaffold01624_52352 | Ca_desi_scaffold   | 52352                          | [A/G]       | NA                                         |
| Ca_Desi_Ch_scaffold01626_51208 | Ca_desi_scaffold   | 51208                          | [T/G]       | NA                                         |
| Ca_Desi_Ch_scaffold01626_51459 | Ca_desi_scaffold   | 51459                          | [A/C]       | NA                                         |
| Ca_Desi_Ch_scaffold01626_51507 | Ca_desi_scaffold   | 51507                          | [A/G]       | NA                                         |
| Ca_Desi_Ch_scaffold01626_51514 | Ca_desi_scaffold   | 51514                          | [A/G]       | NA                                         |
| Ca_Desi_Ch_scaffold01626_51521 | Ca_desi_scaffold   | 51521                          | [T/G]       | NA                                         |
| Ca_Desi_Ch_scaffold01626_51530 | Ca_desi_scaffold   | 51530                          | [T/G]       | NA                                         |
| Ca_Desi_Ch_scaffold01629_54889 | Ca_desi_scaffold   | 54889                          | [T/G]       | NA                                         |
| Ca_Desi_Ch_scaffold01629_54960 | Ca_desi_scaffold   | 54960                          | [A/C]       | NA                                         |
| Ca_Desi_Ch_scaffold01631_34201 | Ca_desi_scaffold   | 34201                          | [T/G]       | NA                                         |
| Ca_Desi_Ch_scaffold01631_34202 | Ca_desi_scaffold   | 34202                          | [C/A]       | NA                                         |
| Ca_Desi_Ch_scaffold01631_34203 | Ca_desi_scaffold   | 34203                          | [T/G]       | NA                                         |
| Ca_Desi_Ch_scaffold01651_26498 | Ca_desi_scaffold   | 26498                          | [T/C]       | NA                                         |
| Ca_Desi_Ch_scaffold01654_41004 | Ca_desi_scaffold   | 41004                          | [T/C]       | NA                                         |
| Ca_Desi_Ch_scaffold01656_2485  | Ca_desi_scaffold   | 2485                           | [T/A]       | NA                                         |
| Ca_Desi_Ch_scaffold01657_57703 | Ca_desi_scaffold   | 57703                          | [T/G]       | NA                                         |
| Ca_Desi_Ch_scaffold01658_55321 | Ca_desi_scaffold   | 55321                          | [C/G]       | NA                                         |
| Ca_Desi_Ch_scaffold01660_37070 | Ca_desi_scaffold   | 37070                          | [C/A]       | NA                                         |
| Ca_Desi_Ch_scaffold01660_37071 | Ca_desi_scaffold   | 37071                          | [A/G]       | NA                                         |

| <b>SNP IDs</b>                  | <b>Chromosomes</b> | <b>Physical positions (bp)</b> | <b>SNPs</b> | <b>NCBI SNPdb accession IDs (NCBI_ss#)</b> |
|---------------------------------|--------------------|--------------------------------|-------------|--------------------------------------------|
| Ca_DesigChr_scaffold01660_37072 | Ca_desig_scaffold  | 37072                          | [T/A]       | NA                                         |
| Ca_DesigChr_scaffold01660_37073 | Ca_desig_scaffold  | 37073                          | [A/C]       | NA                                         |
| Ca_DesigChr_scaffold01660_37081 | Ca_desig_scaffold  | 37081                          | [C/G]       | NA                                         |
| Ca_DesigChr_scaffold01660_41603 | Ca_desig_scaffold  | 41603                          | [T/A]       | NA                                         |
| Ca_DesigChr_scaffold01665_23394 | Ca_desig_scaffold  | 23394                          | [A/C]       | NA                                         |
| Ca_DesigChr_scaffold01667_33589 | Ca_desig_scaffold  | 33589                          | [T/C]       | NA                                         |
| Ca_DesigChr_scaffold01667_33591 | Ca_desig_scaffold  | 33591                          | [A/T]       | NA                                         |
| Ca_DesigChr_scaffold01670_1615  | Ca_desig_scaffold  | 1615                           | [T/C]       | NA                                         |
| Ca_DesigChr_scaffold01670_19126 | Ca_desig_scaffold  | 19126                          | [A/C]       | NA                                         |
| Ca_DesigChr_scaffold01670_43600 | Ca_desig_scaffold  | 43600                          | [T/G]       | NA                                         |
| Ca_DesigChr_scaffold01670_43665 | Ca_desig_scaffold  | 43665                          | [A/G]       | NA                                         |
| Ca_DesigChr_scaffold01676_25908 | Ca_desig_scaffold  | 25908                          | [T/G]       | NA                                         |
| Ca_DesigChr_scaffold01678_51569 | Ca_desig_scaffold  | 51569                          | [A/C]       | NA                                         |
| Ca_DesigChr_scaffold01678_51583 | Ca_desig_scaffold  | 51583                          | [A/C]       | NA                                         |
| Ca_DesigChr_scaffold01678_54685 | Ca_desig_scaffold  | 54685                          | [A/G]       | NA                                         |
| Ca_DesigChr_scaffold01678_54689 | Ca_desig_scaffold  | 54689                          | [T/G]       | NA                                         |
| Ca_DesigChr_scaffold01678_54695 | Ca_desig_scaffold  | 54695                          | [T/G]       | NA                                         |
| Ca_DesigChr_scaffold01678_54701 | Ca_desig_scaffold  | 54701                          | [T/G]       | NA                                         |
| Ca_DesigChr_scaffold01678_54704 | Ca_desig_scaffold  | 54704                          | [A/G]       | NA                                         |
| Ca_DesigChr_scaffold01678_54719 | Ca_desig_scaffold  | 54719                          | [T/G]       | NA                                         |
| Ca_DesigChr_scaffold01687_32411 | Ca_desig_scaffold  | 32411                          | [T/C]       | NA                                         |
| Ca_DesigChr_scaffold01687_32412 | Ca_desig_scaffold  | 32412                          | [T/C]       | NA                                         |
| Ca_DesigChr_scaffold01687_32435 | Ca_desig_scaffold  | 32435                          | [G/C]       | NA                                         |
| Ca_DesigChr_scaffold01694_933   | Ca_desig_scaffold  | 933                            | [T/A]       | NA                                         |
| Ca_DesigChr_scaffold01694_1105  | Ca_desig_scaffold  | 1105                           | [G/T]       | NA                                         |
| Ca_DesigChr_scaffold01694_1109  | Ca_desig_scaffold  | 1109                           | [T/G]       | NA                                         |
| Ca_DesigChr_scaffold01694_1122  | Ca_desig_scaffold  | 1122                           | [A/C]       | NA                                         |
| Ca_DesigChr_scaffold01694_4576  | Ca_desig_scaffold  | 4576                           | [T/G]       | NA                                         |
| Ca_DesigChr_scaffold01694_18650 | Ca_desig_scaffold  | 18650                          | [A/T]       | NA                                         |
| Ca_DesigChr_scaffold01694_18651 | Ca_desig_scaffold  | 18651                          | [A/T]       | NA                                         |
| Ca_DesigChr_scaffold01694_18664 | Ca_desig_scaffold  | 18664                          | [A/C]       | NA                                         |
| Ca_DesigChr_scaffold01694_18686 | Ca_desig_scaffold  | 18686                          | [G/C]       | NA                                         |
| Ca_DesigChr_scaffold01694_18691 | Ca_desig_scaffold  | 18691                          | [A/G]       | NA                                         |
| Ca_DesigChr_scaffold01694_53973 | Ca_desig_scaffold  | 53973                          | [T/G]       | NA                                         |

| <b>SNP IDs</b>                   | <b>Chromosomes</b> | <b>Physical positions (bp)</b> | <b>SNPs</b> | <b>NCBI SNPdb accession IDs (NCBI_ss#)</b> |
|----------------------------------|--------------------|--------------------------------|-------------|--------------------------------------------|
| Ca_Desig_Chr_scaffold01694_53974 | Ca_desig_scaffold  | 53974                          | [G/T]       | NA                                         |
| Ca_Desig_Chr_scaffold01694_53976 | Ca_desig_scaffold  | 53976                          | [G/T]       | NA                                         |
| Ca_Desig_Chr_scaffold01694_53977 | Ca_desig_scaffold  | 53977                          | [T/G]       | NA                                         |
| Ca_Desig_Chr_scaffold01698_19192 | Ca_desig_scaffold  | 19192                          | [A/C]       | NA                                         |
| Ca_Desig_Chr_scaffold01698_19220 | Ca_desig_scaffold  | 19220                          | [A/G]       | NA                                         |
| Ca_Desig_Chr_scaffold01698_19229 | Ca_desig_scaffold  | 19229                          | [T/G]       | NA                                         |
| Ca_Desig_Chr_scaffold01706_9907  | Ca_desig_scaffold  | 9907                           | [T/A]       | NA                                         |
| Ca_Desig_Chr_scaffold01706_9978  | Ca_desig_scaffold  | 9978                           | [T/G]       | NA                                         |
| Ca_Desig_Chr_scaffold01706_10002 | Ca_desig_scaffold  | 10002                          | [T/A]       | NA                                         |
| Ca_Desig_Chr_scaffold01706_45965 | Ca_desig_scaffold  | 45965                          | [A/C]       | NA                                         |
| Ca_Desig_Chr_scaffold01706_46045 | Ca_desig_scaffold  | 46045                          | [A/G]       | NA                                         |
| Ca_Desig_Chr_scaffold01706_46123 | Ca_desig_scaffold  | 46123                          | [T/C]       | NA                                         |
| Ca_Desig_Chr_scaffold01706_46136 | Ca_desig_scaffold  | 46136                          | [C/A]       | NA                                         |
| Ca_Desig_Chr_scaffold01706_46138 | Ca_desig_scaffold  | 46138                          | [A/G]       | NA                                         |
| Ca_Desig_Chr_scaffold01706_56832 | Ca_desig_scaffold  | 56832                          | [C/T]       | NA                                         |
| Ca_Desig_Chr_scaffold01706_56843 | Ca_desig_scaffold  | 56843                          | [G/A]       | NA                                         |
| Ca_Desig_Chr_scaffold01706_57959 | Ca_desig_scaffold  | 57959                          | [A/C]       | NA                                         |
| Ca_Desig_Chr_scaffold01706_58077 | Ca_desig_scaffold  | 58077                          | [C/A]       | NA                                         |
| Ca_Desig_Chr_scaffold01708_38000 | Ca_desig_scaffold  | 38000                          | [A/G]       | NA                                         |
| Ca_Desig_Chr_scaffold01708_38011 | Ca_desig_scaffold  | 38011                          | [A/C]       | NA                                         |
| Ca_Desig_Chr_scaffold01708_38019 | Ca_desig_scaffold  | 38019                          | [A/G]       | NA                                         |
| Ca_Desig_Chr_scaffold01708_38037 | Ca_desig_scaffold  | 38037                          | [T/G]       | NA                                         |
| Ca_Desig_Chr_scaffold01708_38040 | Ca_desig_scaffold  | 38040                          | [T/G]       | NA                                         |
| Ca_Desig_Chr_scaffold01708_38055 | Ca_desig_scaffold  | 38055                          | [A/G]       | NA                                         |
| Ca_Desig_Chr_scaffold01708_53452 | Ca_desig_scaffold  | 53452                          | [T/G]       | NA                                         |
| Ca_Desig_Chr_scaffold01710_52243 | Ca_desig_scaffold  | 52243                          | [C/T]       | NA                                         |
| Ca_Desig_Chr_scaffold01711_9821  | Ca_desig_scaffold  | 9821                           | [A/T]       | NA                                         |
| Ca_Desig_Chr_scaffold01711_38404 | Ca_desig_scaffold  | 38404                          | [G/T]       | NA                                         |
| Ca_Desig_Chr_scaffold01712_5386  | Ca_desig_scaffold  | 5386                           | [A/G]       | NA                                         |
| Ca_Desig_Chr_scaffold01712_6625  | Ca_desig_scaffold  | 6625                           | [T/G]       | NA                                         |
| Ca_Desig_Chr_scaffold01712_6639  | Ca_desig_scaffold  | 6639                           | [T/A]       | NA                                         |
| Ca_Desig_Chr_scaffold01712_6696  | Ca_desig_scaffold  | 6696                           | [A/G]       | NA                                         |
| Ca_Desig_Chr_scaffold01712_6722  | Ca_desig_scaffold  | 6722                           | [T/G]       | NA                                         |
| Ca_Desig_Chr_scaffold01712_56645 | Ca_desig_scaffold  | 56645                          | [T/G]       | NA                                         |

| <b>SNP IDs</b>                 | <b>Chromosomes</b> | <b>Physical positions (bp)</b> | <b>SNPs</b> | <b>NCBI SNPdb accession IDs (NCBI_ss#)</b> |
|--------------------------------|--------------------|--------------------------------|-------------|--------------------------------------------|
| Ca_Desi_Ch_scaffold01712_56667 | Ca_desi_scaffold   | 56667                          | [A/G]       | NA                                         |
| Ca_Desi_Ch_scaffold01715_5110  | Ca_desi_scaffold   | 5110                           | [A/C]       | NA                                         |
| Ca_Desi_Ch_scaffold01717_22258 | Ca_desi_scaffold   | 22258                          | [A/G]       | NA                                         |
| Ca_Desi_Ch_scaffold01717_22296 | Ca_desi_scaffold   | 22296                          | [T/C]       | NA                                         |
| Ca_Desi_Ch_scaffold01717_26208 | Ca_desi_scaffold   | 26208                          | [A/G]       | NA                                         |
| Ca_Desi_Ch_scaffold01721_18447 | Ca_desi_scaffold   | 18447                          | [T/A]       | NA                                         |
| Ca_Desi_Ch_scaffold01721_19501 | Ca_desi_scaffold   | 19501                          | [T/G]       | NA                                         |
| Ca_Desi_Ch_scaffold01721_19513 | Ca_desi_scaffold   | 19513                          | [A/G]       | NA                                         |
| Ca_Desi_Ch_scaffold01721_19525 | Ca_desi_scaffold   | 19525                          | [C/A]       | NA                                         |
| Ca_Desi_Ch_scaffold01721_20459 | Ca_desi_scaffold   | 20459                          | [T/C]       | NA                                         |
| Ca_Desi_Ch_scaffold01721_20480 | Ca_desi_scaffold   | 20480                          | [T/G]       | NA                                         |
| Ca_Desi_Ch_scaffold01721_20495 | Ca_desi_scaffold   | 20495                          | [T/G]       | NA                                         |
| Ca_Desi_Ch_scaffold01721_20496 | Ca_desi_scaffold   | 20496                          | [G/C]       | NA                                         |
| Ca_Desi_Ch_scaffold01721_20499 | Ca_desi_scaffold   | 20499                          | [G/A]       | NA                                         |
| Ca_Desi_Ch_scaffold01721_20503 | Ca_desi_scaffold   | 20503                          | [G/A]       | NA                                         |
| Ca_Desi_Ch_scaffold01721_20555 | Ca_desi_scaffold   | 20555                          | [T/A]       | NA                                         |
| Ca_Desi_Ch_scaffold01721_20567 | Ca_desi_scaffold   | 20567                          | [A/C]       | NA                                         |
| Ca_Desi_Ch_scaffold01721_23205 | Ca_desi_scaffold   | 23205                          | [G/T]       | NA                                         |
| Ca_Desi_Ch_scaffold01721_34371 | Ca_desi_scaffold   | 34371                          | [A/G]       | NA                                         |
| Ca_Desi_Ch_scaffold01721_34377 | Ca_desi_scaffold   | 34377                          | [T/C]       | NA                                         |
| Ca_Desi_Ch_scaffold01721_34390 | Ca_desi_scaffold   | 34390                          | [T/C]       | NA                                         |
| Ca_Desi_Ch_scaffold01721_34396 | Ca_desi_scaffold   | 34396                          | [T/G]       | NA                                         |
| Ca_Desi_Ch_scaffold01721_38928 | Ca_desi_scaffold   | 38928                          | [A/T]       | NA                                         |
| Ca_Desi_Ch_scaffold01721_51385 | Ca_desi_scaffold   | 51385                          | [C/T]       | NA                                         |
| Ca_Desi_Ch_scaffold01723_63045 | Ca_desi_scaffold   | 63045                          | [T/G]       | NA                                         |
| Ca_Desi_Ch_scaffold01723_63050 | Ca_desi_scaffold   | 63050                          | [T/G]       | NA                                         |
| Ca_Desi_Ch_scaffold01723_63085 | Ca_desi_scaffold   | 63085                          | [A/G]       | NA                                         |
| Ca_Desi_Ch_scaffold01734_35901 | Ca_desi_scaffold   | 35901                          | [T/C]       | NA                                         |
| Ca_Desi_Ch_scaffold01734_35912 | Ca_desi_scaffold   | 35912                          | [T/C]       | NA                                         |
| Ca_Desi_Ch_scaffold01734_35920 | Ca_desi_scaffold   | 35920                          | [A/G]       | NA                                         |
| Ca_Desi_Ch_scaffold01734_35932 | Ca_desi_scaffold   | 35932                          | [A/G]       | NA                                         |
| Ca_Desi_Ch_scaffold01734_35939 | Ca_desi_scaffold   | 35939                          | [A/G]       | NA                                         |
| Ca_Desi_Ch_scaffold01734_35941 | Ca_desi_scaffold   | 35941                          | [T/G]       | NA                                         |
| Ca_Desi_Ch_scaffold01734_35950 | Ca_desi_scaffold   | 35950                          | [T/C]       | NA                                         |

| <b>SNP IDs</b>                 | <b>Chromosomes</b> | <b>Physical positions (bp)</b> | <b>SNPs</b> | <b>NCBI SNPdb accession IDs (NCBI_ss#)</b> |
|--------------------------------|--------------------|--------------------------------|-------------|--------------------------------------------|
| Ca_Desi_Ch_scaffold01734_35970 | Ca_desi_scaffold   | 35970                          | [G/A]       | NA                                         |
| Ca_Desi_Ch_scaffold01734_35974 | Ca_desi_scaffold   | 35974                          | [A/C]       | NA                                         |
| Ca_Desi_Ch_scaffold01734_35978 | Ca_desi_scaffold   | 35978                          | [A/G]       | NA                                         |
| Ca_Desi_Ch_scaffold01734_43301 | Ca_desi_scaffold   | 43301                          | [A/T]       | NA                                         |
| Ca_Desi_Ch_scaffold01734_43321 | Ca_desi_scaffold   | 43321                          | [T/C]       | NA                                         |
| Ca_Desi_Ch_scaffold01734_43326 | Ca_desi_scaffold   | 43326                          | [G/T]       | NA                                         |
| Ca_Desi_Ch_scaffold01734_43329 | Ca_desi_scaffold   | 43329                          | [A/G]       | NA                                         |
| Ca_Desi_Ch_scaffold01734_43335 | Ca_desi_scaffold   | 43335                          | [A/G]       | NA                                         |
| Ca_Desi_Ch_scaffold01734_43347 | Ca_desi_scaffold   | 43347                          | [T/A]       | NA                                         |
| Ca_Desi_Ch_scaffold01734_43351 | Ca_desi_scaffold   | 43351                          | [A/C]       | NA                                         |
| Ca_Desi_Ch_scaffold01734_43360 | Ca_desi_scaffold   | 43360                          | [C/A]       | NA                                         |
| Ca_Desi_Ch_scaffold01734_43370 | Ca_desi_scaffold   | 43370                          | [T/C]       | NA                                         |
| Ca_Desi_Ch_scaffold01734_43391 | Ca_desi_scaffold   | 43391                          | [A/C]       | NA                                         |
| Ca_Desi_Ch_scaffold01734_44255 | Ca_desi_scaffold   | 44255                          | [A/C]       | NA                                         |
| Ca_Desi_Ch_scaffold01734_44276 | Ca_desi_scaffold   | 44276                          | [A/G]       | NA                                         |
| Ca_Desi_Ch_scaffold01734_50401 | Ca_desi_scaffold   | 50401                          | [A/C]       | NA                                         |
| Ca_Desi_Ch_scaffold01734_53345 | Ca_desi_scaffold   | 53345                          | [A/T]       | NA                                         |
| Ca_Desi_Ch_scaffold01734_54040 | Ca_desi_scaffold   | 54040                          | [A/G]       | NA                                         |
| Ca_Desi_Ch_scaffold01734_54787 | Ca_desi_scaffold   | 54787                          | [T/C]       | NA                                         |
| Ca_Desi_Ch_scaffold01734_54801 | Ca_desi_scaffold   | 54801                          | [A/G]       | NA                                         |
| Ca_Desi_Ch_scaffold01734_54839 | Ca_desi_scaffold   | 54839                          | [T/C]       | NA                                         |
| Ca_Desi_Ch_scaffold01734_54844 | Ca_desi_scaffold   | 54844                          | [T/C]       | NA                                         |
| Ca_Desi_Ch_scaffold01748_29599 | Ca_desi_scaffold   | 29599                          | [T/G]       | NA                                         |
| Ca_Desi_Ch_scaffold01758_35102 | Ca_desi_scaffold   | 35102                          | [T/G]       | NA                                         |
| Ca_Desi_Ch_scaffold01758_35155 | Ca_desi_scaffold   | 35155                          | [T/C]       | NA                                         |
| Ca_Desi_Ch_scaffold01760_6715  | Ca_desi_scaffold   | 6715                           | [A/G]       | NA                                         |
| Ca_Desi_Ch_scaffold01761_43928 | Ca_desi_scaffold   | 43928                          | [G/A]       | NA                                         |
| Ca_Desi_Ch_scaffold01769_10227 | Ca_desi_scaffold   | 10227                          | [A/C]       | NA                                         |
| Ca_Desi_Ch_scaffold01769_10244 | Ca_desi_scaffold   | 10244                          | [G/C]       | NA                                         |
| Ca_Desi_Ch_scaffold01769_10327 | Ca_desi_scaffold   | 10327                          | [C/T]       | NA                                         |
| Ca_Desi_Ch_scaffold01769_10329 | Ca_desi_scaffold   | 10329                          | [T/G]       | NA                                         |
| Ca_Desi_Ch_scaffold01772_1772  | Ca_desi_scaffold   | 1772                           | [T/C]       | NA                                         |
| Ca_Desi_Ch_scaffold01772_24791 | Ca_desi_scaffold   | 24791                          | [T/C]       | NA                                         |
| Ca_Desi_Ch_scaffold01772_24809 | Ca_desi_scaffold   | 24809                          | [T/G]       | NA                                         |

| <b>SNP IDs</b>                 | <b>Chromosomes</b> | <b>Physical positions (bp)</b> | <b>SNPs</b> | <b>NCBI SNPdb accession IDs (NCBI_ss#)</b> |
|--------------------------------|--------------------|--------------------------------|-------------|--------------------------------------------|
| Ca_Desi_Ch_scaffold01772_24823 | Ca_desi_scaffold   | 24823                          | [A/G]       | NA                                         |
| Ca_Desi_Ch_scaffold01772_24826 | Ca_desi_scaffold   | 24826                          | [A/G]       | NA                                         |
| Ca_Desi_Ch_scaffold01772_60551 | Ca_desi_scaffold   | 60551                          | [G/C]       | NA                                         |
| Ca_Desi_Ch_scaffold01774_21371 | Ca_desi_scaffold   | 21371                          | [C/T]       | NA                                         |
| Ca_Desi_Ch_scaffold01774_28171 | Ca_desi_scaffold   | 28171                          | [A/C]       | NA                                         |
| Ca_Desi_Ch_scaffold01774_28190 | Ca_desi_scaffold   | 28190                          | [T/C]       | NA                                         |
| Ca_Desi_Ch_scaffold01774_28196 | Ca_desi_scaffold   | 28196                          | [A/G]       | NA                                         |
| Ca_Desi_Ch_scaffold01774_44348 | Ca_desi_scaffold   | 44348                          | [T/C]       | NA                                         |
| Ca_Desi_Ch_scaffold01774_52756 | Ca_desi_scaffold   | 52756                          | [T/G]       | NA                                         |
| Ca_Desi_Ch_scaffold01778_33535 | Ca_desi_scaffold   | 33535                          | [A/G]       | NA                                         |
| Ca_Desi_Ch_scaffold01778_33544 | Ca_desi_scaffold   | 33544                          | [T/C]       | NA                                         |
| Ca_Desi_Ch_scaffold01784_30796 | Ca_desi_scaffold   | 30796                          | [T/C]       | NA                                         |
| Ca_Desi_Ch_scaffold01793_11585 | Ca_desi_scaffold   | 11585                          | [A/G]       | NA                                         |
| Ca_Desi_Ch_scaffold01793_11612 | Ca_desi_scaffold   | 11612                          | [A/G]       | NA                                         |
| Ca_Desi_Ch_scaffold01793_11615 | Ca_desi_scaffold   | 11615                          | [A/G]       | NA                                         |
| Ca_Desi_Ch_scaffold01793_11625 | Ca_desi_scaffold   | 11625                          | [T/G]       | NA                                         |
| Ca_Desi_Ch_scaffold01793_11646 | Ca_desi_scaffold   | 11646                          | [T/C]       | NA                                         |
| Ca_Desi_Ch_scaffold01799_51791 | Ca_desi_scaffold   | 51791                          | [T/C]       | NA                                         |
| Ca_Desi_Ch_scaffold01803_34650 | Ca_desi_scaffold   | 34650                          | [T/G]       | NA                                         |
| Ca_Desi_Ch_scaffold01805_14447 | Ca_desi_scaffold   | 14447                          | [A/G]       | NA                                         |
| Ca_Desi_Ch_scaffold01805_14452 | Ca_desi_scaffold   | 14452                          | [A/G]       | NA                                         |
| Ca_Desi_Ch_scaffold01805_14458 | Ca_desi_scaffold   | 14458                          | [T/C]       | NA                                         |
| Ca_Desi_Ch_scaffold01805_14466 | Ca_desi_scaffold   | 14466                          | [A/G]       | NA                                         |
| Ca_Desi_Ch_scaffold01805_14468 | Ca_desi_scaffold   | 14468                          | [G/A]       | NA                                         |
| Ca_Desi_Ch_scaffold01805_14469 | Ca_desi_scaffold   | 14469                          | [A/G]       | NA                                         |
| Ca_Desi_Ch_scaffold01805_14471 | Ca_desi_scaffold   | 14471                          | [A/G]       | NA                                         |
| Ca_Desi_Ch_scaffold01805_14484 | Ca_desi_scaffold   | 14484                          | [T/C]       | NA                                         |
| Ca_Desi_Ch_scaffold01805_14490 | Ca_desi_scaffold   | 14490                          | [T/G]       | NA                                         |
| Ca_Desi_Ch_scaffold01806_14458 | Ca_desi_scaffold   | 14458                          | [C/A]       | NA                                         |
| Ca_Desi_Ch_scaffold01806_14460 | Ca_desi_scaffold   | 14460                          | [A/C]       | NA                                         |
| Ca_Desi_Ch_scaffold01806_14461 | Ca_desi_scaffold   | 14461                          | [G/T]       | NA                                         |
| Ca_Desi_Ch_scaffold01806_20246 | Ca_desi_scaffold   | 20246                          | [A/C]       | NA                                         |
| Ca_Desi_Ch_scaffold01806_20254 | Ca_desi_scaffold   | 20254                          | [T/G]       | NA                                         |
| Ca_Desi_Ch_scaffold01806_20257 | Ca_desi_scaffold   | 20257                          | [T/C]       | NA                                         |

| <b>SNP IDs</b>                 | <b>Chromosomes</b> | <b>Physical positions (bp)</b> | <b>SNPs</b> | <b>NCBI SNPdb accession IDs (NCBI_ss#)</b> |
|--------------------------------|--------------------|--------------------------------|-------------|--------------------------------------------|
| Ca_Desi_Ch_scaffold01806_20274 | Ca_desi_scaffold   | 20274                          | [A/G]       | NA                                         |
| Ca_Desi_Ch_scaffold01806_21532 | Ca_desi_scaffold   | 21532                          | [A/C]       | NA                                         |
| Ca_Desi_Ch_scaffold01806_23228 | Ca_desi_scaffold   | 23228                          | [A/C]       | NA                                         |
| Ca_Desi_Ch_scaffold01810_16222 | Ca_desi_scaffold   | 16222                          | [A/G]       | NA                                         |
| Ca_Desi_Ch_scaffold01810_16236 | Ca_desi_scaffold   | 16236                          | [A/G]       | NA                                         |
| Ca_Desi_Ch_scaffold01810_21877 | Ca_desi_scaffold   | 21877                          | [T/G]       | NA                                         |
| Ca_Desi_Ch_scaffold01811_1937  | Ca_desi_scaffold   | 1937                           | [C/A]       | NA                                         |
| Ca_Desi_Ch_scaffold01811_1952  | Ca_desi_scaffold   | 1952                           | [A/G]       | NA                                         |
| Ca_Desi_Ch_scaffold01811_1953  | Ca_desi_scaffold   | 1953                           | [G/T]       | NA                                         |
| Ca_Desi_Ch_scaffold01811_18524 | Ca_desi_scaffold   | 18524                          | [T/A]       | NA                                         |
| Ca_Desi_Ch_scaffold01813_50810 | Ca_desi_scaffold   | 50810                          | [A/T]       | NA                                         |
| Ca_Desi_Ch_scaffold01813_50817 | Ca_desi_scaffold   | 50817                          | [A/C]       | NA                                         |
| Ca_Desi_Ch_scaffold01813_50827 | Ca_desi_scaffold   | 50827                          | [A/C]       | NA                                         |
| Ca_Desi_Ch_scaffold01814_20264 | Ca_desi_scaffold   | 20264                          | [A/T]       | NA                                         |
| Ca_Desi_Ch_scaffold01824_12080 | Ca_desi_scaffold   | 12080                          | [T/A]       | NA                                         |
| Ca_Desi_Ch_scaffold01824_12088 | Ca_desi_scaffold   | 12088                          | [A/C]       | NA                                         |
| Ca_Desi_Ch_scaffold01825_37430 | Ca_desi_scaffold   | 37430                          | [G/T]       | NA                                         |
| Ca_Desi_Ch_scaffold01825_37431 | Ca_desi_scaffold   | 37431                          | [A/G]       | NA                                         |
| Ca_Desi_Ch_scaffold01825_37503 | Ca_desi_scaffold   | 37503                          | [G/C]       | NA                                         |
| Ca_Desi_Ch_scaffold01825_37526 | Ca_desi_scaffold   | 37526                          | [T/G]       | NA                                         |
| Ca_Desi_Ch_scaffold01825_38745 | Ca_desi_scaffold   | 38745                          | [C/A]       | NA                                         |
| Ca_Desi_Ch_scaffold01825_39200 | Ca_desi_scaffold   | 39200                          | [T/G]       | NA                                         |
| Ca_Desi_Ch_scaffold01825_39525 | Ca_desi_scaffold   | 39525                          | [T/C]       | NA                                         |
| Ca_Desi_Ch_scaffold01825_39543 | Ca_desi_scaffold   | 39543                          | [C/T]       | NA                                         |
| Ca_Desi_Ch_scaffold01826_4478  | Ca_desi_scaffold   | 4478                           | [A/C]       | NA                                         |
| Ca_Desi_Ch_scaffold01826_4503  | Ca_desi_scaffold   | 4503                           | [A/G]       | NA                                         |
| Ca_Desi_Ch_scaffold01826_4512  | Ca_desi_scaffold   | 4512                           | [A/G]       | NA                                         |
| Ca_Desi_Ch_scaffold01826_42198 | Ca_desi_scaffold   | 42198                          | [G/A]       | NA                                         |
| Ca_Desi_Ch_scaffold01826_42201 | Ca_desi_scaffold   | 42201                          | [A/C]       | NA                                         |
| Ca_Desi_Ch_scaffold01826_48101 | Ca_desi_scaffold   | 48101                          | [C/G]       | NA                                         |
| Ca_Desi_Ch_scaffold01826_48103 | Ca_desi_scaffold   | 48103                          | [G/C]       | NA                                         |
| Ca_Desi_Ch_scaffold01828_44422 | Ca_desi_scaffold   | 44422                          | [T/G]       | NA                                         |
| Ca_Desi_Ch_scaffold01828_46419 | Ca_desi_scaffold   | 46419                          | [T/C]       | NA                                         |
| Ca_Desi_Ch_scaffold01828_55508 | Ca_desi_scaffold   | 55508                          | [T/G]       | NA                                         |

| <b>SNP IDs</b>                 | <b>Chromosomes</b> | <b>Physical positions (bp)</b> | <b>SNPs</b> | <b>NCBI SNPdb accession IDs (NCBI_ss#)</b> |
|--------------------------------|--------------------|--------------------------------|-------------|--------------------------------------------|
| Ca_Desi_Ch_scaffold01832_33253 | Ca_desi_scaffold   | 33253                          | [T/C]       | NA                                         |
| Ca_Desi_Ch_scaffold01832_33254 | Ca_desi_scaffold   | 33254                          | [G/T]       | NA                                         |
| Ca_Desi_Ch_scaffold01832_33333 | Ca_desi_scaffold   | 33333                          | [T/C]       | NA                                         |
| Ca_Desi_Ch_scaffold01832_33363 | Ca_desi_scaffold   | 33363                          | [A/G]       | NA                                         |
| Ca_Desi_Ch_scaffold01832_33378 | Ca_desi_scaffold   | 33378                          | [A/G]       | NA                                         |
| Ca_Desi_Ch_scaffold01834_1217  | Ca_desi_scaffold   | 1217                           | [T/C]       | NA                                         |
| Ca_Desi_Ch_scaffold01834_1274  | Ca_desi_scaffold   | 1274                           | [A/C]       | NA                                         |
| Ca_Desi_Ch_scaffold01838_16458 | Ca_desi_scaffold   | 16458                          | [T/G]       | NA                                         |
| Ca_Desi_Ch_scaffold01838_16464 | Ca_desi_scaffold   | 16464                          | [T/G]       | NA                                         |
| Ca_Desi_Ch_scaffold01838_16496 | Ca_desi_scaffold   | 16496                          | [A/G]       | NA                                         |
| Ca_Desi_Ch_scaffold01838_16506 | Ca_desi_scaffold   | 16506                          | [T/C]       | NA                                         |
| Ca_Desi_Ch_scaffold01838_42525 | Ca_desi_scaffold   | 42525                          | [T/C]       | NA                                         |
| Ca_Desi_Ch_scaffold01838_42576 | Ca_desi_scaffold   | 42576                          | [A/G]       | NA                                         |
| Ca_Desi_Ch_scaffold01840_46129 | Ca_desi_scaffold   | 46129                          | [G/A]       | NA                                         |
| Ca_Desi_Ch_scaffold01840_46146 | Ca_desi_scaffold   | 46146                          | [G/A]       | NA                                         |
| Ca_Desi_Ch_scaffold01841_27445 | Ca_desi_scaffold   | 27445                          | [T/G]       | NA                                         |
| Ca_Desi_Ch_scaffold01841_27449 | Ca_desi_scaffold   | 27449                          | [T/G]       | NA                                         |
| Ca_Desi_Ch_scaffold01841_27482 | Ca_desi_scaffold   | 27482                          | [A/C]       | NA                                         |
| Ca_Desi_Ch_scaffold01841_27496 | Ca_desi_scaffold   | 27496                          | [A/C]       | NA                                         |
| Ca_Desi_Ch_scaffold01841_27518 | Ca_desi_scaffold   | 27518                          | [A/G]       | NA                                         |
| Ca_Desi_Ch_scaffold01844_28061 | Ca_desi_scaffold   | 28061                          | [G/A]       | NA                                         |
| Ca_Desi_Ch_scaffold01846_18639 | Ca_desi_scaffold   | 18639                          | [T/G]       | NA                                         |
| Ca_Desi_Ch_scaffold01846_18647 | Ca_desi_scaffold   | 18647                          | [T/G]       | NA                                         |
| Ca_Desi_Ch_scaffold01850_27432 | Ca_desi_scaffold   | 27432                          | [T/A]       | NA                                         |
| Ca_Desi_Ch_scaffold01850_33396 | Ca_desi_scaffold   | 33396                          | [A/G]       | NA                                         |
| Ca_Desi_Ch_scaffold01850_33532 | Ca_desi_scaffold   | 33532                          | [T/G]       | NA                                         |
| Ca_Desi_Ch_scaffold01856_34232 | Ca_desi_scaffold   | 34232                          | [T/C]       | NA                                         |
| Ca_Desi_Ch_scaffold01856_34256 | Ca_desi_scaffold   | 34256                          | [T/G]       | NA                                         |
| Ca_Desi_Ch_scaffold01857_42131 | Ca_desi_scaffold   | 42131                          | [T/G]       | NA                                         |
| Ca_Desi_Ch_scaffold01876_6449  | Ca_desi_scaffold   | 6449                           | [T/A]       | NA                                         |
| Ca_Desi_Ch_scaffold01876_6458  | Ca_desi_scaffold   | 6458                           | [T/G]       | NA                                         |
| Ca_Desi_Ch_scaffold01876_6461  | Ca_desi_scaffold   | 6461                           | [T/G]       | NA                                         |
| Ca_Desi_Ch_scaffold01876_33613 | Ca_desi_scaffold   | 33613                          | [A/T]       | NA                                         |
| Ca_Desi_Ch_scaffold01876_43520 | Ca_desi_scaffold   | 43520                          | [C/A]       | NA                                         |



| <b>SNP IDs</b>                         | <b>Chromosomes</b> | <b>Physical positions (bp)</b> | <b>SNPs</b> | <b>NCBI SNPdb accession IDs (NCBI_ss#)</b> |
|----------------------------------------|--------------------|--------------------------------|-------------|--------------------------------------------|
| Ca_Desi_Chromosome_scaffold01876_43521 | Ca_desi_scaffold   | 43521                          | [A/G]       | NA                                         |
| Ca_Desi_Chromosome_scaffold01876_49543 | Ca_desi_scaffold   | 49543                          | [A/G]       | NA                                         |
| Ca_Desi_Chromosome_scaffold01876_49551 | Ca_desi_scaffold   | 49551                          | [T/G]       | NA                                         |
| Ca_Desi_Chromosome_scaffold01876_49996 | Ca_desi_scaffold   | 49996                          | [A/G]       | NA                                         |
| Ca_Desi_Chromosome_scaffold01876_50004 | Ca_desi_scaffold   | 50004                          | [T/G]       | NA                                         |
| Ca_Desi_Chromosome_scaffold01878_49606 | Ca_desi_scaffold   | 49606                          | [A/G]       | NA                                         |
| Ca_Desi_Chromosome_scaffold01878_49612 | Ca_desi_scaffold   | 49612                          | [C/T]       | NA                                         |
| Ca_Desi_Chromosome_scaffold01880_6361  | Ca_desi_scaffold   | 6361                           | [T/A]       | NA                                         |
| Ca_Desi_Chromosome_scaffold01880_6602  | Ca_desi_scaffold   | 6602                           | [A/C]       | NA                                         |
| Ca_Desi_Chromosome_scaffold01880_7186  | Ca_desi_scaffold   | 7186                           | [A/G]       | NA                                         |
| Ca_Desi_Chromosome_scaffold01880_7235  | Ca_desi_scaffold   | 7235                           | [A/C]       | NA                                         |
| Ca_Desi_Chromosome_scaffold01880_7245  | Ca_desi_scaffold   | 7245                           | [A/C]       | NA                                         |
| Ca_Desi_Chromosome_scaffold01880_7945  | Ca_desi_scaffold   | 7945                           | [T/C]       | NA                                         |
| Ca_Desi_Chromosome_scaffold01880_7968  | Ca_desi_scaffold   | 7968                           | [A/G]       | NA                                         |
| Ca_Desi_Chromosome_scaffold01880_7971  | Ca_desi_scaffold   | 7971                           | [G/A]       | NA                                         |
| Ca_Desi_Chromosome_scaffold01882_40378 | Ca_desi_scaffold   | 40378                          | [A/G]       | NA                                         |
| Ca_Desi_Chromosome_scaffold01882_40384 | Ca_desi_scaffold   | 40384                          | [T/G]       | NA                                         |
| Ca_Desi_Chromosome_scaffold01882_40403 | Ca_desi_scaffold   | 40403                          | [T/A]       | NA                                         |
| Ca_Desi_Chromosome_scaffold01885_12264 | Ca_desi_scaffold   | 12264                          | [C/G]       | NA                                         |
| Ca_Desi_Chromosome_scaffold01885_12269 | Ca_desi_scaffold   | 12269                          | [T/C]       | NA                                         |
| Ca_Desi_Chromosome_scaffold01893_3534  | Ca_desi_scaffold   | 3534                           | [A/C]       | NA                                         |
| Ca_Desi_Chromosome_scaffold01893_3639  | Ca_desi_scaffold   | 3639                           | [A/G]       | NA                                         |
| Ca_Desi_Chromosome_scaffold01896_10371 | Ca_desi_scaffold   | 10371                          | [T/C]       | NA                                         |
| Ca_Desi_Chromosome_scaffold01896_10376 | Ca_desi_scaffold   | 10376                          | [T/G]       | NA                                         |
| Ca_Desi_Chromosome_scaffold01896_10388 | Ca_desi_scaffold   | 10388                          | [A/G]       | NA                                         |
| Ca_Desi_Chromosome_scaffold01896_10758 | Ca_desi_scaffold   | 10758                          | [T/G]       | NA                                         |
| Ca_Desi_Chromosome_scaffold01896_10874 | Ca_desi_scaffold   | 10874                          | [T/G]       | NA                                         |
| Ca_Desi_Chromosome_scaffold01899_48246 | Ca_desi_scaffold   | 48246                          | [T/C]       | NA                                         |
| Ca_Desi_Chromosome_scaffold01903_32853 | Ca_desi_scaffold   | 32853                          | [A/C]       | NA                                         |
| Ca_Desi_Chromosome_scaffold01903_33627 | Ca_desi_scaffold   | 33627                          | [T/C]       | NA                                         |
| Ca_Desi_Chromosome_scaffold01903_50956 | Ca_desi_scaffold   | 50956                          | [A/G]       | NA                                         |
| Ca_Desi_Chromosome_scaffold01903_50966 | Ca_desi_scaffold   | 50966                          | [C/T]       | NA                                         |
| Ca_Desi_Chromosome_scaffold01903_50983 | Ca_desi_scaffold   | 50983                          | [C/T]       | NA                                         |
| Ca_Desi_Chromosome_scaffold01903_50984 | Ca_desi_scaffold   | 50984                          | [A/G]       | NA                                         |

| <b>SNP IDs</b>                   | <b>Chromosomes</b> | <b>Physical positions (bp)</b> | <b>SNPs</b> | <b>NCBI SNPdb accession IDs (NCBI_ss#)</b> |
|----------------------------------|--------------------|--------------------------------|-------------|--------------------------------------------|
| Ca_Desig_Chr_scaffold01904_42685 | Ca_desig_scaffold  | 42685                          | [A/T]       | NA                                         |
| Ca_Desig_Chr_scaffold01904_42702 | Ca_desig_scaffold  | 42702                          | [T/C]       | NA                                         |
| Ca_Desig_Chr_scaffold01904_42711 | Ca_desig_scaffold  | 42711                          | [T/C]       | NA                                         |
| Ca_Desig_Chr_scaffold01904_42722 | Ca_desig_scaffold  | 42722                          | [T/C]       | NA                                         |
| Ca_Desig_Chr_scaffold01904_42725 | Ca_desig_scaffold  | 42725                          | [T/C]       | NA                                         |
| Ca_Desig_Chr_scaffold01904_42734 | Ca_desig_scaffold  | 42734                          | [A/G]       | NA                                         |
| Ca_Desig_Chr_scaffold01904_42742 | Ca_desig_scaffold  | 42742                          | [T/C]       | NA                                         |
| Ca_Desig_Chr_scaffold01904_42745 | Ca_desig_scaffold  | 42745                          | [T/A]       | NA                                         |
| Ca_Desig_Chr_scaffold01907_21410 | Ca_desig_scaffold  | 21410                          | [T/C]       | NA                                         |
| Ca_Desig_Chr_scaffold01907_21438 | Ca_desig_scaffold  | 21438                          | [A/C]       | NA                                         |
| Ca_Desig_Chr_scaffold01910_21555 | Ca_desig_scaffold  | 21555                          | [T/G]       | NA                                         |
| Ca_Desig_Chr_scaffold01910_21575 | Ca_desig_scaffold  | 21575                          | [A/T]       | NA                                         |
| Ca_Desig_Chr_scaffold01911_34400 | Ca_desig_scaffold  | 34400                          | [A/C]       | NA                                         |
| Ca_Desig_Chr_scaffold01911_34403 | Ca_desig_scaffold  | 34403                          | [T/C]       | NA                                         |
| Ca_Desig_Chr_scaffold01911_35307 | Ca_desig_scaffold  | 35307                          | [G/T]       | NA                                         |
| Ca_Desig_Chr_scaffold01911_38635 | Ca_desig_scaffold  | 38635                          | [A/C]       | NA                                         |
| Ca_Desig_Chr_scaffold01914_843   | Ca_desig_scaffold  | 843                            | [C/A]       | NA                                         |
| Ca_Desig_Chr_scaffold01914_845   | Ca_desig_scaffold  | 845                            | [A/C]       | NA                                         |
| Ca_Desig_Chr_scaffold01914_5541  | Ca_desig_scaffold  | 5541                           | [T/C]       | NA                                         |
| Ca_Desig_Chr_scaffold01914_40724 | Ca_desig_scaffold  | 40724                          | [T/C]       | NA                                         |
| Ca_Desig_Chr_scaffold01914_40733 | Ca_desig_scaffold  | 40733                          | [T/C]       | NA                                         |
| Ca_Desig_Chr_scaffold01914_40740 | Ca_desig_scaffold  | 40740                          | [T/G]       | NA                                         |
| Ca_Desig_Chr_scaffold01914_40755 | Ca_desig_scaffold  | 40755                          | [A/C]       | NA                                         |
| Ca_Desig_Chr_scaffold01914_40765 | Ca_desig_scaffold  | 40765                          | [A/C]       | NA                                         |
| Ca_Desig_Chr_scaffold01917_38145 | Ca_desig_scaffold  | 38145                          | [C/T]       | NA                                         |
| Ca_Desig_Chr_scaffold01918_8685  | Ca_desig_scaffold  | 8685                           | [C/T]       | NA                                         |
| Ca_Desig_Chr_scaffold01918_8686  | Ca_desig_scaffold  | 8686                           | [G/C]       | NA                                         |
| Ca_Desig_Chr_scaffold01918_8691  | Ca_desig_scaffold  | 8691                           | [A/C]       | NA                                         |
| Ca_Desig_Chr_scaffold01918_8708  | Ca_desig_scaffold  | 8708                           | [C/T]       | NA                                         |
| Ca_Desig_Chr_scaffold01918_8725  | Ca_desig_scaffold  | 8725                           | [C/T]       | NA                                         |
| Ca_Desig_Chr_scaffold01918_9193  | Ca_desig_scaffold  | 9193                           | [C/A]       | NA                                         |
| Ca_Desig_Chr_scaffold01918_9209  | Ca_desig_scaffold  | 9209                           | [A/T]       | NA                                         |
| Ca_Desig_Chr_scaffold01918_9216  | Ca_desig_scaffold  | 9216                           | [G/A]       | NA                                         |
| Ca_Desig_Chr_scaffold01918_9400  | Ca_desig_scaffold  | 9400                           | [T/C]       | NA                                         |

| <b>SNP IDs</b>                 | <b>Chromosomes</b> | <b>Physical positions (bp)</b> | <b>SNPs</b> | <b>NCBI SNPdb accession IDs (NCBI_ss#)</b> |
|--------------------------------|--------------------|--------------------------------|-------------|--------------------------------------------|
| Ca_Desi_Ch_scaffold01918_9413  | Ca_desi_scaffold   | 9413                           | [G/A]       | NA                                         |
| Ca_Desi_Ch_scaffold01918_9419  | Ca_desi_scaffold   | 9419                           | [G/A]       | NA                                         |
| Ca_Desi_Ch_scaffold01918_9667  | Ca_desi_scaffold   | 9667                           | [C/A]       | NA                                         |
| Ca_Desi_Ch_scaffold01918_9705  | Ca_desi_scaffold   | 9705                           | [G/A]       | NA                                         |
| Ca_Desi_Ch_scaffold01922_17830 | Ca_desi_scaffold   | 17830                          | [C/A]       | NA                                         |
| Ca_Desi_Ch_scaffold01922_17831 | Ca_desi_scaffold   | 17831                          | [C/G]       | NA                                         |
| Ca_Desi_Ch_scaffold01922_17832 | Ca_desi_scaffold   | 17832                          | [G/A]       | NA                                         |
| Ca_Desi_Ch_scaffold01922_17833 | Ca_desi_scaffold   | 17833                          | [A/T]       | NA                                         |
| Ca_Desi_Ch_scaffold01925_38220 | Ca_desi_scaffold   | 38220                          | [A/G]       | NA                                         |
| Ca_Desi_Ch_scaffold01927_36092 | Ca_desi_scaffold   | 36092                          | [T/G]       | NA                                         |
| Ca_Desi_Ch_scaffold01927_36106 | Ca_desi_scaffold   | 36106                          | [A/C]       | NA                                         |
| Ca_Desi_Ch_scaffold01927_45720 | Ca_desi_scaffold   | 45720                          | [T/C]       | NA                                         |
| Ca_Desi_Ch_scaffold01927_45733 | Ca_desi_scaffold   | 45733                          | [T/C]       | NA                                         |
| Ca_Desi_Ch_scaffold01927_45745 | Ca_desi_scaffold   | 45745                          | [T/G]       | NA                                         |
| Ca_Desi_Ch_scaffold01927_48238 | Ca_desi_scaffold   | 48238                          | [A/T]       | NA                                         |
| Ca_Desi_Ch_scaffold01927_48246 | Ca_desi_scaffold   | 48246                          | [T/G]       | NA                                         |
| Ca_Desi_Ch_scaffold01927_48249 | Ca_desi_scaffold   | 48249                          | [T/G]       | NA                                         |
| Ca_Desi_Ch_scaffold01927_48260 | Ca_desi_scaffold   | 48260                          | [A/G]       | NA                                         |
| Ca_Desi_Ch_scaffold01935_48108 | Ca_desi_scaffold   | 48108                          | [T/G]       | NA                                         |
| Ca_Desi_Ch_scaffold01937_7915  | Ca_desi_scaffold   | 7915                           | [T/G]       | NA                                         |
| Ca_Desi_Ch_scaffold01937_7947  | Ca_desi_scaffold   | 7947                           | [T/G]       | NA                                         |
| Ca_Desi_Ch_scaffold01937_8146  | Ca_desi_scaffold   | 8146                           | [T/C]       | NA                                         |
| Ca_Desi_Ch_scaffold01937_8162  | Ca_desi_scaffold   | 8162                           | [T/C]       | NA                                         |
| Ca_Desi_Ch_scaffold01937_8163  | Ca_desi_scaffold   | 8163                           | [G/T]       | NA                                         |
| Ca_Desi_Ch_scaffold01937_8221  | Ca_desi_scaffold   | 8221                           | [A/G]       | NA                                         |
| Ca_Desi_Ch_scaffold01937_8248  | Ca_desi_scaffold   | 8248                           | [C/T]       | NA                                         |
| Ca_Desi_Ch_scaffold01937_8264  | Ca_desi_scaffold   | 8264                           | [A/C]       | NA                                         |
| Ca_Desi_Ch_scaffold01937_8281  | Ca_desi_scaffold   | 8281                           | [T/C]       | NA                                         |
| Ca_Desi_Ch_scaffold01937_10395 | Ca_desi_scaffold   | 10395                          | [C/T]       | NA                                         |
| Ca_Desi_Ch_scaffold01937_10469 | Ca_desi_scaffold   | 10469                          | [G/T]       | NA                                         |
| Ca_Desi_Ch_scaffold01937_53104 | Ca_desi_scaffold   | 53104                          | [A/G]       | NA                                         |
| Ca_Desi_Ch_scaffold01937_55399 | Ca_desi_scaffold   | 55399                          | [C/T]       | NA                                         |
| Ca_Desi_Ch_scaffold01937_55410 | Ca_desi_scaffold   | 55410                          | [G/A]       | NA                                         |
| Ca_Desi_Ch_scaffold01943_19727 | Ca_desi_scaffold   | 19727                          | [T/G]       | NA                                         |

| <b>SNP IDs</b>                 | <b>Chromosomes</b> | <b>Physical positions (bp)</b> | <b>SNPs</b> | <b>NCBI SNPdb accession IDs (NCBI_ss#)</b> |
|--------------------------------|--------------------|--------------------------------|-------------|--------------------------------------------|
| Ca_Desi_Ch_scaffold01943_49402 | Ca_desi_scaffold   | 49402                          | [T/G]       | NA                                         |
| Ca_Desi_Ch_scaffold01943_49404 | Ca_desi_scaffold   | 49404                          | [A/G]       | NA                                         |
| Ca_Desi_Ch_scaffold01943_49409 | Ca_desi_scaffold   | 49409                          | [C/A]       | NA                                         |
| Ca_Desi_Ch_scaffold01948_30279 | Ca_desi_scaffold   | 30279                          | [T/C]       | NA                                         |
| Ca_Desi_Ch_scaffold01948_30283 | Ca_desi_scaffold   | 30283                          | [T/C]       | NA                                         |
| Ca_Desi_Ch_scaffold01948_30288 | Ca_desi_scaffold   | 30288                          | [C/T]       | NA                                         |
| Ca_Desi_Ch_scaffold01948_30296 | Ca_desi_scaffold   | 30296                          | [T/C]       | NA                                         |
| Ca_Desi_Ch_scaffold01948_30306 | Ca_desi_scaffold   | 30306                          | [G/C]       | NA                                         |
| Ca_Desi_Ch_scaffold01948_30309 | Ca_desi_scaffold   | 30309                          | [A/C]       | NA                                         |
| Ca_Desi_Ch_scaffold01948_30312 | Ca_desi_scaffold   | 30312                          | [T/C]       | NA                                         |
| Ca_Desi_Ch_scaffold01948_30326 | Ca_desi_scaffold   | 30326                          | [T/C]       | NA                                         |
| Ca_Desi_Ch_scaffold01948_36846 | Ca_desi_scaffold   | 36846                          | [T/G]       | NA                                         |
| Ca_Desi_Ch_scaffold01948_54908 | Ca_desi_scaffold   | 54908                          | [T/A]       | NA                                         |
| Ca_Desi_Ch_scaffold01952_5947  | Ca_desi_scaffold   | 5947                           | [A/C]       | NA                                         |
| Ca_Desi_Ch_scaffold01952_5964  | Ca_desi_scaffold   | 5964                           | [T/C]       | NA                                         |
| Ca_Desi_Ch_scaffold01952_5970  | Ca_desi_scaffold   | 5970                           | [T/C]       | NA                                         |
| Ca_Desi_Ch_scaffold01952_5972  | Ca_desi_scaffold   | 5972                           | [A/G]       | NA                                         |
| Ca_Desi_Ch_scaffold01952_5982  | Ca_desi_scaffold   | 5982                           | [T/C]       | NA                                         |
| Ca_Desi_Ch_scaffold01952_5986  | Ca_desi_scaffold   | 5986                           | [T/A]       | NA                                         |
| Ca_Desi_Ch_scaffold01959_27451 | Ca_desi_scaffold   | 27451                          | [T/C]       | NA                                         |
| Ca_Desi_Ch_scaffold01959_27461 | Ca_desi_scaffold   | 27461                          | [T/G]       | NA                                         |
| Ca_Desi_Ch_scaffold01959_27481 | Ca_desi_scaffold   | 27481                          | [A/G]       | NA                                         |
| Ca_Desi_Ch_scaffold01959_27490 | Ca_desi_scaffold   | 27490                          | [A/C]       | NA                                         |
| Ca_Desi_Ch_scaffold01959_29145 | Ca_desi_scaffold   | 29145                          | [T/G]       | NA                                         |
| Ca_Desi_Ch_scaffold01962_25741 | Ca_desi_scaffold   | 25741                          | [G/A]       | NA                                         |
| Ca_Desi_Ch_scaffold01962_42501 | Ca_desi_scaffold   | 42501                          | [A/G]       | NA                                         |
| Ca_Desi_Ch_scaffold01962_42502 | Ca_desi_scaffold   | 42502                          | [G/A]       | NA                                         |
| Ca_Desi_Ch_scaffold01965_3023  | Ca_desi_scaffold   | 3023                           | [A/C]       | NA                                         |
| Ca_Desi_Ch_scaffold01969_35880 | Ca_desi_scaffold   | 35880                          | [A/G]       | NA                                         |
| Ca_Desi_Ch_scaffold01972_7439  | Ca_desi_scaffold   | 7439                           | [T/G]       | NA                                         |
| Ca_Desi_Ch_scaffold01972_13966 | Ca_desi_scaffold   | 13966                          | [T/G]       | NA                                         |
| Ca_Desi_Ch_scaffold01972_15976 | Ca_desi_scaffold   | 15976                          | [T/A]       | NA                                         |
| Ca_Desi_Ch_scaffold01972_18627 | Ca_desi_scaffold   | 18627                          | [T/C]       | NA                                         |
| Ca_Desi_Ch_scaffold01972_18636 | Ca_desi_scaffold   | 18636                          | [T/C]       | NA                                         |

| <b>SNP IDs</b>                   | <b>Chromosomes</b> | <b>Physical positions (bp)</b> | <b>SNPs</b> | <b>NCBI SNPdb accession IDs (NCBI_ss#)</b> |
|----------------------------------|--------------------|--------------------------------|-------------|--------------------------------------------|
| Ca_Desig_Chr_scaffold01972_18671 | Ca_desig_scaffold  | 18671                          | [A/G]       | NA                                         |
| Ca_Desig_Chr_scaffold01972_22516 | Ca_desig_scaffold  | 22516                          | [A/C]       | NA                                         |
| Ca_Desig_Chr_scaffold01972_22572 | Ca_desig_scaffold  | 22572                          | [A/G]       | NA                                         |
| Ca_Desig_Chr_scaffold01974_20015 | Ca_desig_scaffold  | 20015                          | [A/C]       | NA                                         |
| Ca_Desig_Chr_scaffold01974_50268 | Ca_desig_scaffold  | 50268                          | [T/A]       | NA                                         |
| Ca_Desig_Chr_scaffold01980_28216 | Ca_desig_scaffold  | 28216                          | [T/A]       | NA                                         |
| Ca_Desig_Chr_scaffold01980_28228 | Ca_desig_scaffold  | 28228                          | [T/A]       | NA                                         |
| Ca_Desig_Chr_scaffold01980_28462 | Ca_desig_scaffold  | 28462                          | [T/C]       | NA                                         |
| Ca_Desig_Chr_scaffold01980_28492 | Ca_desig_scaffold  | 28492                          | [A/C]       | NA                                         |
| Ca_Desig_Chr_scaffold01986_534   | Ca_desig_scaffold  | 534                            | [G/A]       | NA                                         |
| Ca_Desig_Chr_scaffold01986_15269 | Ca_desig_scaffold  | 15269                          | [T/C]       | NA                                         |
| Ca_Desig_Chr_scaffold01987_31274 | Ca_desig_scaffold  | 31274                          | [T/G]       | NA                                         |
| Ca_Desig_Chr_scaffold01987_31277 | Ca_desig_scaffold  | 31277                          | [T/G]       | NA                                         |
| Ca_Desig_Chr_scaffold01989_2321  | Ca_desig_scaffold  | 2321                           | [C/A]       | NA                                         |
| Ca_Desig_Chr_scaffold01989_15556 | Ca_desig_scaffold  | 15556                          | [T/C]       | NA                                         |
| Ca_Desig_Chr_scaffold01989_15560 | Ca_desig_scaffold  | 15560                          | [G/T]       | NA                                         |
| Ca_Desig_Chr_scaffold01993_46890 | Ca_desig_scaffold  | 46890                          | [A/G]       | NA                                         |
| Ca_Desig_Chr_scaffold01996_38777 | Ca_desig_scaffold  | 38777                          | [T/G]       | NA                                         |
| Ca_Desig_Chr_scaffold01996_38794 | Ca_desig_scaffold  | 38794                          | [A/C]       | NA                                         |
| Ca_Desig_Chr_scaffold01996_48229 | Ca_desig_scaffold  | 48229                          | [T/C]       | NA                                         |
| Ca_Desig_Chr_scaffold01996_48255 | Ca_desig_scaffold  | 48255                          | [T/G]       | NA                                         |
| Ca_Desig_Chr_scaffold01996_48263 | Ca_desig_scaffold  | 48263                          | [A/G]       | NA                                         |
| Ca_Desig_Chr_scaffold02003_43481 | Ca_desig_scaffold  | 43481                          | [A/G]       | NA                                         |
| Ca_Desig_Chr_scaffold02013_43827 | Ca_desig_scaffold  | 43827                          | [A/G]       | NA                                         |
| Ca_Desig_Chr_scaffold02013_44096 | Ca_desig_scaffold  | 44096                          | [T/C]       | NA                                         |
| Ca_Desig_Chr_scaffold02017_39667 | Ca_desig_scaffold  | 39667                          | [T/C]       | NA                                         |
| Ca_Desig_Chr_scaffold02017_42357 | Ca_desig_scaffold  | 42357                          | [A/G]       | NA                                         |
| Ca_Desig_Chr_scaffold02017_42368 | Ca_desig_scaffold  | 42368                          | [T/G]       | NA                                         |
| Ca_Desig_Chr_scaffold02017_42382 | Ca_desig_scaffold  | 42382                          | [A/G]       | NA                                         |
| Ca_Desig_Chr_scaffold02017_42394 | Ca_desig_scaffold  | 42394                          | [T/A]       | NA                                         |
| Ca_Desig_Chr_scaffold02019_4620  | Ca_desig_scaffold  | 4620                           | [T/G]       | NA                                         |
| Ca_Desig_Chr_scaffold02019_8846  | Ca_desig_scaffold  | 8846                           | [A/C]       | NA                                         |
| Ca_Desig_Chr_scaffold02025_21912 | Ca_desig_scaffold  | 21912                          | [T/C]       | NA                                         |
| Ca_Desig_Chr_scaffold02025_21923 | Ca_desig_scaffold  | 21923                          | [A/C]       | NA                                         |

| <b>SNP IDs</b>                 | <b>Chromosomes</b> | <b>Physical positions (bp)</b> | <b>SNPs</b> | <b>NCBI SNPdb accession IDs (NCBI_ss#)</b> |
|--------------------------------|--------------------|--------------------------------|-------------|--------------------------------------------|
| Ca_Desi_Ch_scaffold02025_21962 | Ca_desi_scaffold   | 21962                          | [A/G]       | NA                                         |
| Ca_Desi_Ch_scaffold02025_50317 | Ca_desi_scaffold   | 50317                          | [T/C]       | NA                                         |
| Ca_Desi_Ch_scaffold02025_50349 | Ca_desi_scaffold   | 50349                          | [T/C]       | NA                                         |
| Ca_Desi_Ch_scaffold02025_50361 | Ca_desi_scaffold   | 50361                          | [T/C]       | NA                                         |
| Ca_Desi_Ch_scaffold02025_50367 | Ca_desi_scaffold   | 50367                          | [A/G]       | NA                                         |
| Ca_Desi_Ch_scaffold02025_50369 | Ca_desi_scaffold   | 50369                          | [A/G]       | NA                                         |
| Ca_Desi_Ch_scaffold02025_50371 | Ca_desi_scaffold   | 50371                          | [A/G]       | NA                                         |
| Ca_Desi_Ch_scaffold02025_50372 | Ca_desi_scaffold   | 50372                          | [C/G]       | NA                                         |
| Ca_Desi_Ch_scaffold02025_50373 | Ca_desi_scaffold   | 50373                          | [G/C]       | NA                                         |
| Ca_Desi_Ch_scaffold02026_27382 | Ca_desi_scaffold   | 27382                          | [T/A]       | NA                                         |
| Ca_Desi_Ch_scaffold02027_37276 | Ca_desi_scaffold   | 37276                          | [A/C]       | NA                                         |
| Ca_Desi_Ch_scaffold02034_20925 | Ca_desi_scaffold   | 20925                          | [A/C]       | NA                                         |
| Ca_Desi_Ch_scaffold02034_25858 | Ca_desi_scaffold   | 25858                          | [T/A]       | NA                                         |
| Ca_Desi_Ch_scaffold02034_27171 | Ca_desi_scaffold   | 27171                          | [T/C]       | NA                                         |
| Ca_Desi_Ch_scaffold02034_27176 | Ca_desi_scaffold   | 27176                          | [T/C]       | NA                                         |
| Ca_Desi_Ch_scaffold02037_684   | Ca_desi_scaffold   | 684                            | [A/G]       | NA                                         |
| Ca_Desi_Ch_scaffold02037_44036 | Ca_desi_scaffold   | 44036                          | [A/T]       | NA                                         |
| Ca_Desi_Ch_scaffold02037_44133 | Ca_desi_scaffold   | 44133                          | [A/G]       | NA                                         |
| Ca_Desi_Ch_scaffold02038_30278 | Ca_desi_scaffold   | 30278                          | [A/C]       | NA                                         |
| Ca_Desi_Ch_scaffold02038_49234 | Ca_desi_scaffold   | 49234                          | [C/A]       | NA                                         |
| Ca_Desi_Ch_scaffold02039_37374 | Ca_desi_scaffold   | 37374                          | [A/C]       | NA                                         |
| Ca_Desi_Ch_scaffold02057_9382  | Ca_desi_scaffold   | 9382                           | [T/C]       | NA                                         |
| Ca_Desi_Ch_scaffold02058_36704 | Ca_desi_scaffold   | 36704                          | [A/C]       | NA                                         |
| Ca_Desi_Ch_scaffold02060_7278  | Ca_desi_scaffold   | 7278                           | [A/C]       | NA                                         |
| Ca_Desi_Ch_scaffold02060_7384  | Ca_desi_scaffold   | 7384                           | [A/C]       | NA                                         |
| Ca_Desi_Ch_scaffold02060_43360 | Ca_desi_scaffold   | 43360                          | [A/G]       | NA                                         |
| Ca_Desi_Ch_scaffold02060_43370 | Ca_desi_scaffold   | 43370                          | [T/C]       | NA                                         |
| Ca_Desi_Ch_scaffold02060_43372 | Ca_desi_scaffold   | 43372                          | [T/C]       | NA                                         |
| Ca_Desi_Ch_scaffold02060_43376 | Ca_desi_scaffold   | 43376                          | [T/C]       | NA                                         |
| Ca_Desi_Ch_scaffold02060_43384 | Ca_desi_scaffold   | 43384                          | [A/G]       | NA                                         |
| Ca_Desi_Ch_scaffold02060_43391 | Ca_desi_scaffold   | 43391                          | [A/G]       | NA                                         |
| Ca_Desi_Ch_scaffold02060_43394 | Ca_desi_scaffold   | 43394                          | [A/G]       | NA                                         |
| Ca_Desi_Ch_scaffold02060_43424 | Ca_desi_scaffold   | 43424                          | [A/C]       | NA                                         |
| Ca_Desi_Ch_scaffold02060_43428 | Ca_desi_scaffold   | 43428                          | [T/C]       | NA                                         |

| <b>SNP IDs</b>                 | <b>Chromosomes</b> | <b>Physical positions (bp)</b> | <b>SNPs</b> | <b>NCBI SNPdb accession IDs (NCBI_ss#)</b> |
|--------------------------------|--------------------|--------------------------------|-------------|--------------------------------------------|
| Ca_Desi_Ch_scaffold02060_43454 | Ca_desi_scaffold   | 43454                          | [T/A]       | NA                                         |
| Ca_Desi_Ch_scaffold02060_43461 | Ca_desi_scaffold   | 43461                          | [T/C]       | NA                                         |
| Ca_Desi_Ch_scaffold02068_33865 | Ca_desi_scaffold   | 33865                          | [T/G]       | NA                                         |
| Ca_Desi_Ch_scaffold02068_33903 | Ca_desi_scaffold   | 33903                          | [T/G]       | NA                                         |
| Ca_Desi_Ch_scaffold02071_20216 | Ca_desi_scaffold   | 20216                          | [T/G]       | NA                                         |
| Ca_Desi_Ch_scaffold02071_20228 | Ca_desi_scaffold   | 20228                          | [T/G]       | NA                                         |
| Ca_Desi_Ch_scaffold02074_3386  | Ca_desi_scaffold   | 3386                           | [C/A]       | NA                                         |
| Ca_Desi_Ch_scaffold02076_21882 | Ca_desi_scaffold   | 21882                          | [A/T]       | NA                                         |
| Ca_Desi_Ch_scaffold02076_21890 | Ca_desi_scaffold   | 21890                          | [A/C]       | NA                                         |
| Ca_Desi_Ch_scaffold02080_9470  | Ca_desi_scaffold   | 9470                           | [A/G]       | NA                                         |
| Ca_Desi_Ch_scaffold02080_9474  | Ca_desi_scaffold   | 9474                           | [T/C]       | NA                                         |
| Ca_Desi_Ch_scaffold02080_9491  | Ca_desi_scaffold   | 9491                           | [T/G]       | NA                                         |
| Ca_Desi_Ch_scaffold02080_9496  | Ca_desi_scaffold   | 9496                           | [T/G]       | NA                                         |
| Ca_Desi_Ch_scaffold02080_9501  | Ca_desi_scaffold   | 9501                           | [T/C]       | NA                                         |
| Ca_Desi_Ch_scaffold02080_9502  | Ca_desi_scaffold   | 9502                           | [T/C]       | NA                                         |
| Ca_Desi_Ch_scaffold02085_13321 | Ca_desi_scaffold   | 13321                          | [T/G]       | NA                                         |
| Ca_Desi_Ch_scaffold02085_24443 | Ca_desi_scaffold   | 24443                          | [A/G]       | NA                                         |
| Ca_Desi_Ch_scaffold02085_24455 | Ca_desi_scaffold   | 24455                          | [G/C]       | NA                                         |
| Ca_Desi_Ch_scaffold02086_50657 | Ca_desi_scaffold   | 50657                          | [A/G]       | NA                                         |
| Ca_Desi_Ch_scaffold02086_50658 | Ca_desi_scaffold   | 50658                          | [T/G]       | NA                                         |
| Ca_Desi_Ch_scaffold02086_50659 | Ca_desi_scaffold   | 50659                          | [C/A]       | NA                                         |
| Ca_Desi_Ch_scaffold02086_50660 | Ca_desi_scaffold   | 50660                          | [T/G]       | NA                                         |
| Ca_Desi_Ch_scaffold02086_50754 | Ca_desi_scaffold   | 50754                          | [A/G]       | NA                                         |
| Ca_Desi_Ch_scaffold02086_50805 | Ca_desi_scaffold   | 50805                          | [A/G]       | NA                                         |
| Ca_Desi_Ch_scaffold02086_50807 | Ca_desi_scaffold   | 50807                          | [T/C]       | NA                                         |
| Ca_Desi_Ch_scaffold02088_14305 | Ca_desi_scaffold   | 14305                          | [T/A]       | NA                                         |
| Ca_Desi_Ch_scaffold02088_14324 | Ca_desi_scaffold   | 14324                          | [T/G]       | NA                                         |
| Ca_Desi_Ch_scaffold02088_14365 | Ca_desi_scaffold   | 14365                          | [A/G]       | NA                                         |
| Ca_Desi_Ch_scaffold02088_43910 | Ca_desi_scaffold   | 43910                          | [A/G]       | NA                                         |
| Ca_Desi_Ch_scaffold02088_52349 | Ca_desi_scaffold   | 52349                          | [A/T]       | NA                                         |
| Ca_Desi_Ch_scaffold02088_52354 | Ca_desi_scaffold   | 52354                          | [G/A]       | NA                                         |
| Ca_Desi_Ch_scaffold02088_52357 | Ca_desi_scaffold   | 52357                          | [T/A]       | NA                                         |
| Ca_Desi_Ch_scaffold02088_52358 | Ca_desi_scaffold   | 52358                          | [A/G]       | NA                                         |
| Ca_Desi_Ch_scaffold02088_52359 | Ca_desi_scaffold   | 52359                          | [G/A]       | NA                                         |

| <b>SNP IDs</b>                  | <b>Chromosomes</b> | <b>Physical positions (bp)</b> | <b>SNPs</b> | <b>NCBI SNPdb accession IDs (NCBI_ss#)</b> |
|---------------------------------|--------------------|--------------------------------|-------------|--------------------------------------------|
| Ca_DesigChr_scaffold02088_52360 | Ca_desig_scaffold  | 52360                          | [A/G]       | NA                                         |
| Ca_DesigChr_scaffold02088_52361 | Ca_desig_scaffold  | 52361                          | [A/G]       | NA                                         |
| Ca_DesigChr_scaffold02088_52362 | Ca_desig_scaffold  | 52362                          | [A/G]       | NA                                         |
| Ca_DesigChr_scaffold02088_52365 | Ca_desig_scaffold  | 52365                          | [A/C]       | NA                                         |
| Ca_DesigChr_scaffold02088_52367 | Ca_desig_scaffold  | 52367                          | [G/A]       | NA                                         |
| Ca_DesigChr_scaffold02088_52371 | Ca_desig_scaffold  | 52371                          | [T/C]       | NA                                         |
| Ca_DesigChr_scaffold02088_52380 | Ca_desig_scaffold  | 52380                          | [A/G]       | NA                                         |
| Ca_DesigChr_scaffold02088_52383 | Ca_desig_scaffold  | 52383                          | [A/G]       | NA                                         |
| Ca_DesigChr_scaffold02088_52385 | Ca_desig_scaffold  | 52385                          | [A/G]       | NA                                         |
| Ca_DesigChr_scaffold02088_52389 | Ca_desig_scaffold  | 52389                          | [T/C]       | NA                                         |
| Ca_DesigChr_scaffold02088_52391 | Ca_desig_scaffold  | 52391                          | [A/G]       | NA                                         |
| Ca_DesigChr_scaffold02095_12197 | Ca_desig_scaffold  | 12197                          | [T/G]       | NA                                         |
| Ca_DesigChr_scaffold02095_32547 | Ca_desig_scaffold  | 32547                          | [T/G]       | NA                                         |
| Ca_DesigChr_scaffold02095_32550 | Ca_desig_scaffold  | 32550                          | [A/T]       | NA                                         |
| Ca_DesigChr_scaffold02095_32721 | Ca_desig_scaffold  | 32721                          | [A/C]       | NA                                         |
| Ca_DesigChr_scaffold02095_32722 | Ca_desig_scaffold  | 32722                          | [G/T]       | NA                                         |
| Ca_DesigChr_scaffold02096_10700 | Ca_desig_scaffold  | 10700                          | [A/T]       | NA                                         |
| Ca_DesigChr_scaffold02096_10701 | Ca_desig_scaffold  | 10701                          | [T/C]       | NA                                         |
| Ca_DesigChr_scaffold02096_10702 | Ca_desig_scaffold  | 10702                          | [G/T]       | NA                                         |
| Ca_DesigChr_scaffold02097_3936  | Ca_desig_scaffold  | 3936                           | [T/G]       | NA                                         |
| Ca_DesigChr_scaffold02097_3951  | Ca_desig_scaffold  | 3951                           | [A/C]       | NA                                         |
| Ca_DesigChr_scaffold02097_3967  | Ca_desig_scaffold  | 3967                           | [A/C]       | NA                                         |
| Ca_DesigChr_scaffold02097_4557  | Ca_desig_scaffold  | 4557                           | [A/G]       | NA                                         |
| Ca_DesigChr_scaffold02097_4567  | Ca_desig_scaffold  | 4567                           | [T/C]       | NA                                         |
| Ca_DesigChr_scaffold02098_37289 | Ca_desig_scaffold  | 37289                          | [A/C]       | NA                                         |
| Ca_DesigChr_scaffold02098_37301 | Ca_desig_scaffold  | 37301                          | [A/C]       | NA                                         |
| Ca_DesigChr_scaffold02098_43700 | Ca_desig_scaffold  | 43700                          | [C/A]       | NA                                         |
| Ca_DesigChr_scaffold02103_15896 | Ca_desig_scaffold  | 15896                          | [G/A]       | NA                                         |
| Ca_DesigChr_scaffold02103_15914 | Ca_desig_scaffold  | 15914                          | [G/T]       | NA                                         |
| Ca_DesigChr_scaffold02105_31709 | Ca_desig_scaffold  | 31709                          | [T/C]       | NA                                         |
| Ca_DesigChr_scaffold02112_26551 | Ca_desig_scaffold  | 26551                          | [T/A]       | NA                                         |
| Ca_DesigChr_scaffold02112_26555 | Ca_desig_scaffold  | 26555                          | [A/C]       | NA                                         |
| Ca_DesigChr_scaffold02112_26572 | Ca_desig_scaffold  | 26572                          | [A/G]       | NA                                         |
| Ca_DesigChr_scaffold02114_40435 | Ca_desig_scaffold  | 40435                          | [T/G]       | NA                                         |



| <b>SNP IDs</b>                 | <b>Chromosomes</b> | <b>Physical positions (bp)</b> | <b>SNPs</b> | <b>NCBI SNPdb accession IDs (NCBI_ss#)</b> |
|--------------------------------|--------------------|--------------------------------|-------------|--------------------------------------------|
| Ca_Desi_Ch_scaffold02114_40465 | Ca_desi_scaffold   | 40465                          | [T/G]       | NA                                         |
| Ca_Desi_Ch_scaffold02116_3064  | Ca_desi_scaffold   | 3064                           | [T/C]       | NA                                         |
| Ca_Desi_Ch_scaffold02120_47499 | Ca_desi_scaffold   | 47499                          | [T/A]       | NA                                         |
| Ca_Desi_Ch_scaffold02120_47601 | Ca_desi_scaffold   | 47601                          | [G/A]       | NA                                         |
| Ca_Desi_Ch_scaffold02120_47609 | Ca_desi_scaffold   | 47609                          | [T/G]       | NA                                         |
| Ca_Desi_Ch_scaffold02120_47620 | Ca_desi_scaffold   | 47620                          | [T/G]       | NA                                         |
| Ca_Desi_Ch_scaffold02120_47637 | Ca_desi_scaffold   | 47637                          | [T/A]       | NA                                         |
| Ca_Desi_Ch_scaffold02120_47685 | Ca_desi_scaffold   | 47685                          | [A/G]       | NA                                         |
| Ca_Desi_Ch_scaffold02120_47709 | Ca_desi_scaffold   | 47709                          | [T/C]       | NA                                         |
| Ca_Desi_Ch_scaffold02127_4394  | Ca_desi_scaffold   | 4394                           | [T/C]       | NA                                         |
| Ca_Desi_Ch_scaffold02127_31119 | Ca_desi_scaffold   | 31119                          | [T/C]       | NA                                         |
| Ca_Desi_Ch_scaffold02127_31131 | Ca_desi_scaffold   | 31131                          | [T/A]       | NA                                         |
| Ca_Desi_Ch_scaffold02127_31140 | Ca_desi_scaffold   | 31140                          | [T/C]       | NA                                         |
| Ca_Desi_Ch_scaffold02127_31457 | Ca_desi_scaffold   | 31457                          | [A/G]       | NA                                         |
| Ca_Desi_Ch_scaffold02129_45702 | Ca_desi_scaffold   | 45702                          | [T/G]       | NA                                         |
| Ca_Desi_Ch_scaffold02133_2478  | Ca_desi_scaffold   | 2478                           | [T/G]       | NA                                         |
| Ca_Desi_Ch_scaffold02133_7298  | Ca_desi_scaffold   | 7298                           | [T/C]       | NA                                         |
| Ca_Desi_Ch_scaffold02133_7316  | Ca_desi_scaffold   | 7316                           | [A/G]       | NA                                         |
| Ca_Desi_Ch_scaffold02133_7334  | Ca_desi_scaffold   | 7334                           | [A/G]       | NA                                         |
| Ca_Desi_Ch_scaffold02133_15690 | Ca_desi_scaffold   | 15690                          | [A/G]       | NA                                         |
| Ca_Desi_Ch_scaffold02133_29122 | Ca_desi_scaffold   | 29122                          | [T/G]       | NA                                         |
| Ca_Desi_Ch_scaffold02133_29129 | Ca_desi_scaffold   | 29129                          | [T/G]       | NA                                         |
| Ca_Desi_Ch_scaffold02133_37655 | Ca_desi_scaffold   | 37655                          | [A/C]       | NA                                         |
| Ca_Desi_Ch_scaffold02134_12888 | Ca_desi_scaffold   | 12888                          | [A/G]       | NA                                         |
| Ca_Desi_Ch_scaffold02134_12893 | Ca_desi_scaffold   | 12893                          | [T/A]       | NA                                         |
| Ca_Desi_Ch_scaffold02135_33977 | Ca_desi_scaffold   | 33977                          | [T/C]       | NA                                         |
| Ca_Desi_Ch_scaffold02135_33991 | Ca_desi_scaffold   | 33991                          | [T/C]       | NA                                         |
| Ca_Desi_Ch_scaffold02135_34010 | Ca_desi_scaffold   | 34010                          | [A/G]       | NA                                         |
| Ca_Desi_Ch_scaffold02136_18039 | Ca_desi_scaffold   | 18039                          | [C/A]       | NA                                         |
| Ca_Desi_Ch_scaffold02136_18040 | Ca_desi_scaffold   | 18040                          | [T/G]       | NA                                         |
| Ca_Desi_Ch_scaffold02136_18041 | Ca_desi_scaffold   | 18041                          | [G/A]       | NA                                         |
| Ca_Desi_Ch_scaffold02136_19072 | Ca_desi_scaffold   | 19072                          | [T/C]       | NA                                         |
| Ca_Desi_Ch_scaffold02136_19130 | Ca_desi_scaffold   | 19130                          | [C/A]       | NA                                         |
| Ca_Desi_Ch_scaffold02136_19131 | Ca_desi_scaffold   | 19131                          | [A/T]       | NA                                         |

| <b>SNP IDs</b>                 | <b>Chromosomes</b> | <b>Physical positions (bp)</b> | <b>SNPs</b> | <b>NCBI SNPdb accession IDs (NCBI_ss#)</b> |
|--------------------------------|--------------------|--------------------------------|-------------|--------------------------------------------|
| Ca_Desi_Ch_scaffold02136_19132 | Ca_desi_scaffold   | 19132                          | [G/C]       | NA                                         |
| Ca_Desi_Ch_scaffold02136_19133 | Ca_desi_scaffold   | 19133                          | [G/T]       | NA                                         |
| Ca_Desi_Ch_scaffold02136_19167 | Ca_desi_scaffold   | 19167                          | [A/G]       | NA                                         |
| Ca_Desi_Ch_scaffold02136_19253 | Ca_desi_scaffold   | 19253                          | [T/G]       | NA                                         |
| Ca_Desi_Ch_scaffold02136_19262 | Ca_desi_scaffold   | 19262                          | [T/A]       | NA                                         |
| Ca_Desi_Ch_scaffold02136_19274 | Ca_desi_scaffold   | 19274                          | [G/T]       | NA                                         |
| Ca_Desi_Ch_scaffold02136_19279 | Ca_desi_scaffold   | 19279                          | [T/A]       | NA                                         |
| Ca_Desi_Ch_scaffold02136_19844 | Ca_desi_scaffold   | 19844                          | [A/G]       | NA                                         |
| Ca_Desi_Ch_scaffold02136_19846 | Ca_desi_scaffold   | 19846                          | [T/A]       | NA                                         |
| Ca_Desi_Ch_scaffold02136_19869 | Ca_desi_scaffold   | 19869                          | [A/G]       | NA                                         |
| Ca_Desi_Ch_scaffold02136_19873 | Ca_desi_scaffold   | 19873                          | [T/C]       | NA                                         |
| Ca_Desi_Ch_scaffold02136_19926 | Ca_desi_scaffold   | 19926                          | [T/G]       | NA                                         |
| Ca_Desi_Ch_scaffold02136_28229 | Ca_desi_scaffold   | 28229                          | [T/G]       | NA                                         |
| Ca_Desi_Ch_scaffold02136_28253 | Ca_desi_scaffold   | 28253                          | [A/C]       | NA                                         |
| Ca_Desi_Ch_scaffold02136_28256 | Ca_desi_scaffold   | 28256                          | [A/C]       | NA                                         |
| Ca_Desi_Ch_scaffold02136_28313 | Ca_desi_scaffold   | 28313                          | [A/T]       | NA                                         |
| Ca_Desi_Ch_scaffold02136_28316 | Ca_desi_scaffold   | 28316                          | [T/C]       | NA                                         |
| Ca_Desi_Ch_scaffold02136_28320 | Ca_desi_scaffold   | 28320                          | [A/G]       | NA                                         |
| Ca_Desi_Ch_scaffold02136_28326 | Ca_desi_scaffold   | 28326                          | [T/C]       | NA                                         |
| Ca_Desi_Ch_scaffold02136_28328 | Ca_desi_scaffold   | 28328                          | [T/C]       | NA                                         |
| Ca_Desi_Ch_scaffold02136_28351 | Ca_desi_scaffold   | 28351                          | [T/C]       | NA                                         |
| Ca_Desi_Ch_scaffold02136_28359 | Ca_desi_scaffold   | 28359                          | [A/G]       | NA                                         |
| Ca_Desi_Ch_scaffold02136_28371 | Ca_desi_scaffold   | 28371                          | [T/C]       | NA                                         |
| Ca_Desi_Ch_scaffold02141_24253 | Ca_desi_scaffold   | 24253                          | [A/G]       | NA                                         |
| Ca_Desi_Ch_scaffold02141_49139 | Ca_desi_scaffold   | 49139                          | [T/C]       | NA                                         |
| Ca_Desi_Ch_scaffold02141_49144 | Ca_desi_scaffold   | 49144                          | [A/T]       | NA                                         |
| Ca_Desi_Ch_scaffold02142_6683  | Ca_desi_scaffold   | 6683                           | [C/T]       | NA                                         |
| Ca_Desi_Ch_scaffold02142_26337 | Ca_desi_scaffold   | 26337                          | [A/G]       | NA                                         |
| Ca_Desi_Ch_scaffold02142_26541 | Ca_desi_scaffold   | 26541                          | [T/C]       | NA                                         |
| Ca_Desi_Ch_scaffold02142_30207 | Ca_desi_scaffold   | 30207                          | [T/A]       | NA                                         |
| Ca_Desi_Ch_scaffold02145_27512 | Ca_desi_scaffold   | 27512                          | [G/T]       | NA                                         |
| Ca_Desi_Ch_scaffold02147_10201 | Ca_desi_scaffold   | 10201                          | [C/A]       | NA                                         |
| Ca_Desi_Ch_scaffold02148_13767 | Ca_desi_scaffold   | 13767                          | [T/C]       | NA                                         |
| Ca_Desi_Ch_scaffold02148_13888 | Ca_desi_scaffold   | 13888                          | [T/C]       | NA                                         |

| <b>SNP IDs</b>                         | <b>Chromosomes</b> | <b>Physical positions (bp)</b> | <b>SNPs</b> | <b>NCBI SNPdb accession IDs (NCBI_ss#)</b> |
|----------------------------------------|--------------------|--------------------------------|-------------|--------------------------------------------|
| Ca_Desi_Chromosome_scaffold02157_5153  | Ca_desi_scaffold   | 5153                           | [A/T]       | NA                                         |
| Ca_Desi_Chromosome_scaffold02157_5165  | Ca_desi_scaffold   | 5165                           | [A/C]       | NA                                         |
| Ca_Desi_Chromosome_scaffold02157_5167  | Ca_desi_scaffold   | 5167                           | [T/C]       | NA                                         |
| Ca_Desi_Chromosome_scaffold02157_5171  | Ca_desi_scaffold   | 5171                           | [A/G]       | NA                                         |
| Ca_Desi_Chromosome_scaffold02157_5183  | Ca_desi_scaffold   | 5183                           | [T/C]       | NA                                         |
| Ca_Desi_Chromosome_scaffold02162_7134  | Ca_desi_scaffold   | 7134                           | [A/G]       | NA                                         |
| Ca_Desi_Chromosome_scaffold02162_49056 | Ca_desi_scaffold   | 49056                          | [T/G]       | NA                                         |
| Ca_Desi_Chromosome_scaffold02166_38722 | Ca_desi_scaffold   | 38722                          | [A/G]       | NA                                         |
| Ca_Desi_Chromosome_scaffold02168_46017 | Ca_desi_scaffold   | 46017                          | [A/C]       | NA                                         |
| Ca_Desi_Chromosome_scaffold02168_47370 | Ca_desi_scaffold   | 47370                          | [A/T]       | NA                                         |
| Ca_Desi_Chromosome_scaffold02168_47409 | Ca_desi_scaffold   | 47409                          | [A/T]       | NA                                         |
| Ca_Desi_Chromosome_scaffold02168_47416 | Ca_desi_scaffold   | 47416                          | [T/G]       | NA                                         |
| Ca_Desi_Chromosome_scaffold02168_47419 | Ca_desi_scaffold   | 47419                          | [A/C]       | NA                                         |
| Ca_Desi_Chromosome_scaffold02168_47423 | Ca_desi_scaffold   | 47423                          | [T/C]       | NA                                         |
| Ca_Desi_Chromosome_scaffold02168_47429 | Ca_desi_scaffold   | 47429                          | [T/C]       | NA                                         |
| Ca_Desi_Chromosome_scaffold02168_48448 | Ca_desi_scaffold   | 48448                          | [T/A]       | NA                                         |
| Ca_Desi_Chromosome_scaffold02171_39791 | Ca_desi_scaffold   | 39791                          | [G/A]       | NA                                         |
| Ca_Desi_Chromosome_scaffold02171_40362 | Ca_desi_scaffold   | 40362                          | [T/A]       | NA                                         |
| Ca_Desi_Chromosome_scaffold02171_42267 | Ca_desi_scaffold   | 42267                          | [G/C]       | NA                                         |
| Ca_Desi_Chromosome_scaffold02173_28299 | Ca_desi_scaffold   | 28299                          | [T/G]       | NA                                         |
| Ca_Desi_Chromosome_scaffold02174_16006 | Ca_desi_scaffold   | 16006                          | [A/G]       | NA                                         |
| Ca_Desi_Chromosome_scaffold02177_46520 | Ca_desi_scaffold   | 46520                          | [C/A]       | NA                                         |
| Ca_Desi_Chromosome_scaffold02177_46521 | Ca_desi_scaffold   | 46521                          | [T/G]       | NA                                         |
| Ca_Desi_Chromosome_scaffold02180_39122 | Ca_desi_scaffold   | 39122                          | [G/T]       | NA                                         |
| Ca_Desi_Chromosome_scaffold02180_39135 | Ca_desi_scaffold   | 39135                          | [T/G]       | NA                                         |
| Ca_Desi_Chromosome_scaffold02180_39156 | Ca_desi_scaffold   | 39156                          | [T/C]       | NA                                         |
| Ca_Desi_Chromosome_scaffold02187_25369 | Ca_desi_scaffold   | 25369                          | [A/T]       | NA                                         |
| Ca_Desi_Chromosome_scaffold02187_25406 | Ca_desi_scaffold   | 25406                          | [T/C]       | NA                                         |
| Ca_Desi_Chromosome_scaffold02187_25472 | Ca_desi_scaffold   | 25472                          | [A/G]       | NA                                         |
| Ca_Desi_Chromosome_scaffold02191_15494 | Ca_desi_scaffold   | 15494                          | [A/G]       | NA                                         |
| Ca_Desi_Chromosome_scaffold02191_15496 | Ca_desi_scaffold   | 15496                          | [A/G]       | NA                                         |
| Ca_Desi_Chromosome_scaffold02191_15570 | Ca_desi_scaffold   | 15570                          | [T/A]       | NA                                         |
| Ca_Desi_Chromosome_scaffold02191_30672 | Ca_desi_scaffold   | 30672                          | [A/C]       | NA                                         |
| Ca_Desi_Chromosome_scaffold02192_3938  | Ca_desi_scaffold   | 3938                           | [G/A]       | NA                                         |

| <b>SNP IDs</b>                 | <b>Chromosomes</b> | <b>Physical positions (bp)</b> | <b>SNPs</b> | <b>NCBI SNPdb accession IDs (NCBI_ss#)</b> |
|--------------------------------|--------------------|--------------------------------|-------------|--------------------------------------------|
| Ca_Desi_Ch_scaffold02192_3958  | Ca_desi_scaffold   | 3958                           | [A/G]       | NA                                         |
| Ca_Desi_Ch_scaffold02192_3986  | Ca_desi_scaffold   | 3986                           | [C/T]       | NA                                         |
| Ca_Desi_Ch_scaffold02192_4013  | Ca_desi_scaffold   | 4013                           | [G/A]       | NA                                         |
| Ca_Desi_Ch_scaffold02192_4027  | Ca_desi_scaffold   | 4027                           | [T/C]       | NA                                         |
| Ca_Desi_Ch_scaffold02192_4036  | Ca_desi_scaffold   | 4036                           | [A/G]       | NA                                         |
| Ca_Desi_Ch_scaffold02192_4104  | Ca_desi_scaffold   | 4104                           | [T/G]       | NA                                         |
| Ca_Desi_Ch_scaffold02192_4116  | Ca_desi_scaffold   | 4116                           | [T/G]       | NA                                         |
| Ca_Desi_Ch_scaffold02192_4163  | Ca_desi_scaffold   | 4163                           | [A/G]       | NA                                         |
| Ca_Desi_Ch_scaffold02192_4172  | Ca_desi_scaffold   | 4172                           | [A/G]       | NA                                         |
| Ca_Desi_Ch_scaffold02192_4178  | Ca_desi_scaffold   | 4178                           | [G/T]       | NA                                         |
| Ca_Desi_Ch_scaffold02192_42975 | Ca_desi_scaffold   | 42975                          | [C/T]       | NA                                         |
| Ca_Desi_Ch_scaffold02192_43053 | Ca_desi_scaffold   | 43053                          | [A/C]       | NA                                         |
| Ca_Desi_Ch_scaffold02192_43142 | Ca_desi_scaffold   | 43142                          | [A/T]       | NA                                         |
| Ca_Desi_Ch_scaffold02192_48669 | Ca_desi_scaffold   | 48669                          | [T/C]       | NA                                         |
| Ca_Desi_Ch_scaffold02192_49208 | Ca_desi_scaffold   | 49208                          | [T/C]       | NA                                         |
| Ca_Desi_Ch_scaffold02197_35002 | Ca_desi_scaffold   | 35002                          | [T/C]       | NA                                         |
| Ca_Desi_Ch_scaffold02201_17180 | Ca_desi_scaffold   | 17180                          | [A/T]       | NA                                         |
| Ca_Desi_Ch_scaffold02209_43918 | Ca_desi_scaffold   | 43918                          | [T/C]       | NA                                         |
| Ca_Desi_Ch_scaffold02209_43988 | Ca_desi_scaffold   | 43988                          | [A/G]       | NA                                         |
| Ca_Desi_Ch_scaffold02209_43990 | Ca_desi_scaffold   | 43990                          | [A/C]       | NA                                         |
| Ca_Desi_Ch_scaffold02209_44004 | Ca_desi_scaffold   | 44004                          | [T/C]       | NA                                         |
| Ca_Desi_Ch_scaffold02209_44007 | Ca_desi_scaffold   | 44007                          | [T/G]       | NA                                         |
| Ca_Desi_Ch_scaffold02209_44024 | Ca_desi_scaffold   | 44024                          | [T/C]       | NA                                         |
| Ca_Desi_Ch_scaffold02218_13983 | Ca_desi_scaffold   | 13983                          | [A/C]       | NA                                         |
| Ca_Desi_Ch_scaffold02218_13995 | Ca_desi_scaffold   | 13995                          | [A/C]       | NA                                         |
| Ca_Desi_Ch_scaffold02225_28837 | Ca_desi_scaffold   | 28837                          | [T/G]       | NA                                         |
| Ca_Desi_Ch_scaffold02225_28848 | Ca_desi_scaffold   | 28848                          | [T/C]       | NA                                         |
| Ca_Desi_Ch_scaffold02225_28850 | Ca_desi_scaffold   | 28850                          | [T/C]       | NA                                         |
| Ca_Desi_Ch_scaffold02225_28876 | Ca_desi_scaffold   | 28876                          | [A/G]       | NA                                         |
| Ca_Desi_Ch_scaffold02225_28885 | Ca_desi_scaffold   | 28885                          | [A/G]       | NA                                         |
| Ca_Desi_Ch_scaffold02225_32638 | Ca_desi_scaffold   | 32638                          | [C/T]       | NA                                         |
| Ca_Desi_Ch_scaffold02226_995   | Ca_desi_scaffold   | 995                            | [C/G]       | NA                                         |
| Ca_Desi_Ch_scaffold02227_19126 | Ca_desi_scaffold   | 19126                          | [T/C]       | NA                                         |
| Ca_Desi_Ch_scaffold02227_19136 | Ca_desi_scaffold   | 19136                          | [A/G]       | NA                                         |

| <b>SNP IDs</b>                   | <b>Chromosomes</b> | <b>Physical positions (bp)</b> | <b>SNPs</b> | <b>NCBI SNPdb accession IDs (NCBI_ss#)</b> |
|----------------------------------|--------------------|--------------------------------|-------------|--------------------------------------------|
| Ca_Desig_Chr_scaffold02227_19147 | Ca_desig_scaffold  | 19147                          | [A/G]       | NA                                         |
| Ca_Desig_Chr_scaffold02227_19160 | Ca_desig_scaffold  | 19160                          | [T/C]       | NA                                         |
| Ca_Desig_Chr_scaffold02227_19168 | Ca_desig_scaffold  | 19168                          | [A/C]       | NA                                         |
| Ca_Desig_Chr_scaffold02227_19181 | Ca_desig_scaffold  | 19181                          | [A/T]       | NA                                         |
| Ca_Desig_Chr_scaffold02227_19404 | Ca_desig_scaffold  | 19404                          | [A/C]       | NA                                         |
| Ca_Desig_Chr_scaffold02227_19408 | Ca_desig_scaffold  | 19408                          | [T/C]       | NA                                         |
| Ca_Desig_Chr_scaffold02227_19418 | Ca_desig_scaffold  | 19418                          | [T/C]       | NA                                         |
| Ca_Desig_Chr_scaffold02227_19426 | Ca_desig_scaffold  | 19426                          | [A/C]       | NA                                         |
| Ca_Desig_Chr_scaffold02227_29013 | Ca_desig_scaffold  | 29013                          | [A/C]       | NA                                         |
| Ca_Desig_Chr_scaffold02229_42213 | Ca_desig_scaffold  | 42213                          | [T/G]       | NA                                         |
| Ca_Desig_Chr_scaffold02229_42303 | Ca_desig_scaffold  | 42303                          | [T/C]       | NA                                         |
| Ca_Desig_Chr_scaffold02229_42307 | Ca_desig_scaffold  | 42307                          | [T/G]       | NA                                         |
| Ca_Desig_Chr_scaffold02229_42333 | Ca_desig_scaffold  | 42333                          | [T/G]       | NA                                         |
| Ca_Desig_Chr_scaffold02236_46003 | Ca_desig_scaffold  | 46003                          | [A/G]       | NA                                         |
| Ca_Desig_Chr_scaffold02244_31153 | Ca_desig_scaffold  | 31153                          | [C/T]       | NA                                         |
| Ca_Desig_Chr_scaffold02244_31159 | Ca_desig_scaffold  | 31159                          | [C/T]       | NA                                         |
| Ca_Desig_Chr_scaffold02244_31161 | Ca_desig_scaffold  | 31161                          | [A/T]       | NA                                         |
| Ca_Desig_Chr_scaffold02244_31163 | Ca_desig_scaffold  | 31163                          | [C/T]       | NA                                         |
| Ca_Desig_Chr_scaffold02244_31172 | Ca_desig_scaffold  | 31172                          | [A/G]       | NA                                         |
| Ca_Desig_Chr_scaffold02247_35927 | Ca_desig_scaffold  | 35927                          | [A/C]       | NA                                         |
| Ca_Desig_Chr_scaffold02248_6766  | Ca_desig_scaffold  | 6766                           | [A/C]       | NA                                         |
| Ca_Desig_Chr_scaffold02248_6774  | Ca_desig_scaffold  | 6774                           | [A/G]       | NA                                         |
| Ca_Desig_Chr_scaffold02248_6776  | Ca_desig_scaffold  | 6776                           | [G/C]       | NA                                         |
| Ca_Desig_Chr_scaffold02248_6788  | Ca_desig_scaffold  | 6788                           | [A/G]       | NA                                         |
| Ca_Desig_Chr_scaffold02248_6796  | Ca_desig_scaffold  | 6796                           | [A/G]       | NA                                         |
| Ca_Desig_Chr_scaffold02248_6809  | Ca_desig_scaffold  | 6809                           | [T/C]       | NA                                         |
| Ca_Desig_Chr_scaffold02248_7713  | Ca_desig_scaffold  | 7713                           | [A/G]       | NA                                         |
| Ca_Desig_Chr_scaffold02255_20813 | Ca_desig_scaffold  | 20813                          | [A/T]       | NA                                         |
| Ca_Desig_Chr_scaffold02255_21012 | Ca_desig_scaffold  | 21012                          | [G/C]       | NA                                         |
| Ca_Desig_Chr_scaffold02255_21031 | Ca_desig_scaffold  | 21031                          | [A/G]       | NA                                         |
| Ca_Desig_Chr_scaffold02255_35762 | Ca_desig_scaffold  | 35762                          | [T/G]       | NA                                         |
| Ca_Desig_Chr_scaffold02257_10460 | Ca_desig_scaffold  | 10460                          | [A/T]       | NA                                         |
| Ca_Desig_Chr_scaffold02257_10475 | Ca_desig_scaffold  | 10475                          | [T/G]       | NA                                         |
| Ca_Desig_Chr_scaffold02257_10491 | Ca_desig_scaffold  | 10491                          | [T/G]       | NA                                         |

| <b>SNP IDs</b>                   | <b>Chromosomes</b> | <b>Physical positions (bp)</b> | <b>SNPs</b> | <b>NCBI SNPdb accession IDs (NCBI_ss#)</b> |
|----------------------------------|--------------------|--------------------------------|-------------|--------------------------------------------|
| Ca_Desig_Chr_scaffold02257_10497 | Ca_desig_scaffold  | 10497                          | [T/G]       | NA                                         |
| Ca_Desig_Chr_scaffold02257_10508 | Ca_desig_scaffold  | 10508                          | [A/G]       | NA                                         |
| Ca_Desig_Chr_scaffold02257_10536 | Ca_desig_scaffold  | 10536                          | [T/G]       | NA                                         |
| Ca_Desig_Chr_scaffold02257_10565 | Ca_desig_scaffold  | 10565                          | [T/G]       | NA                                         |
| Ca_Desig_Chr_scaffold02257_10661 | Ca_desig_scaffold  | 10661                          | [A/G]       | NA                                         |
| Ca_Desig_Chr_scaffold02257_10674 | Ca_desig_scaffold  | 10674                          | [T/G]       | NA                                         |
| Ca_Desig_Chr_scaffold02257_10685 | Ca_desig_scaffold  | 10685                          | [T/G]       | NA                                         |
| Ca_Desig_Chr_scaffold02257_10765 | Ca_desig_scaffold  | 10765                          | [T/G]       | NA                                         |
| Ca_Desig_Chr_scaffold02257_10786 | Ca_desig_scaffold  | 10786                          | [A/G]       | NA                                         |
| Ca_Desig_Chr_scaffold02257_21953 | Ca_desig_scaffold  | 21953                          | [T/G]       | NA                                         |
| Ca_Desig_Chr_scaffold02257_22067 | Ca_desig_scaffold  | 22067                          | [T/G]       | NA                                         |
| Ca_Desig_Chr_scaffold02257_32638 | Ca_desig_scaffold  | 32638                          | [A/G]       | NA                                         |
| Ca_Desig_Chr_scaffold02257_32682 | Ca_desig_scaffold  | 32682                          | [T/G]       | NA                                         |
| Ca_Desig_Chr_scaffold02257_34669 | Ca_desig_scaffold  | 34669                          | [T/C]       | NA                                         |
| Ca_Desig_Chr_scaffold02259_28518 | Ca_desig_scaffold  | 28518                          | [A/G]       | NA                                         |
| Ca_Desig_Chr_scaffold02259_28552 | Ca_desig_scaffold  | 28552                          | [C/T]       | NA                                         |
| Ca_Desig_Chr_scaffold02259_31822 | Ca_desig_scaffold  | 31822                          | [A/G]       | NA                                         |
| Ca_Desig_Chr_scaffold02267_3233  | Ca_desig_scaffold  | 3233                           | [A/C]       | NA                                         |
| Ca_Desig_Chr_scaffold02273_5555  | Ca_desig_scaffold  | 5555                           | [T/C]       | NA                                         |
| Ca_Desig_Chr_scaffold02273_5618  | Ca_desig_scaffold  | 5618                           | [A/C]       | NA                                         |
| Ca_Desig_Chr_scaffold02279_1843  | Ca_desig_scaffold  | 1843                           | [T/C]       | NA                                         |
| Ca_Desig_Chr_scaffold02279_1844  | Ca_desig_scaffold  | 1844                           | [C/T]       | NA                                         |
| Ca_Desig_Chr_scaffold02279_1845  | Ca_desig_scaffold  | 1845                           | [C/A]       | NA                                         |
| Ca_Desig_Chr_scaffold02279_1846  | Ca_desig_scaffold  | 1846                           | [A/C]       | NA                                         |
| Ca_Desig_Chr_scaffold02279_1847  | Ca_desig_scaffold  | 1847                           | [A/C]       | NA                                         |
| Ca_Desig_Chr_scaffold02282_18640 | Ca_desig_scaffold  | 18640                          | [A/G]       | NA                                         |
| Ca_Desig_Chr_scaffold02283_9628  | Ca_desig_scaffold  | 9628                           | [C/T]       | NA                                         |
| Ca_Desig_Chr_scaffold02283_9629  | Ca_desig_scaffold  | 9629                           | [T/C]       | NA                                         |
| Ca_Desig_Chr_scaffold02283_9636  | Ca_desig_scaffold  | 9636                           | [T/C]       | NA                                         |
| Ca_Desig_Chr_scaffold02283_36280 | Ca_desig_scaffold  | 36280                          | [T/G]       | NA                                         |
| Ca_Desig_Chr_scaffold02283_36307 | Ca_desig_scaffold  | 36307                          | [A/C]       | NA                                         |
| Ca_Desig_Chr_scaffold02286_17517 | Ca_desig_scaffold  | 17517                          | [T/C]       | NA                                         |
| Ca_Desig_Chr_scaffold02287_12226 | Ca_desig_scaffold  | 12226                          | [A/C]       | NA                                         |
| Ca_Desig_Chr_scaffold02287_12305 | Ca_desig_scaffold  | 12305                          | [A/G]       | NA                                         |

| <b>SNP IDs</b>                 | <b>Chromosomes</b> | <b>Physical positions (bp)</b> | <b>SNPs</b> | <b>NCBI SNPdb accession IDs (NCBI_ss#)</b> |
|--------------------------------|--------------------|--------------------------------|-------------|--------------------------------------------|
| Ca_Desi_Ch_scaffold02287_12311 | Ca_desi_scaffold   | 12311                          | [T/C]       | NA                                         |
| Ca_Desi_Ch_scaffold02287_12315 | Ca_desi_scaffold   | 12315                          | [T/C]       | NA                                         |
| Ca_Desi_Ch_scaffold02287_12333 | Ca_desi_scaffold   | 12333                          | [T/C]       | NA                                         |
| Ca_Desi_Ch_scaffold02287_12348 | Ca_desi_scaffold   | 12348                          | [A/G]       | NA                                         |
| Ca_Desi_Ch_scaffold02291_45778 | Ca_desi_scaffold   | 45778                          | [T/C]       | NA                                         |
| Ca_Desi_Ch_scaffold02291_45793 | Ca_desi_scaffold   | 45793                          | [A/T]       | NA                                         |
| Ca_Desi_Ch_scaffold02291_45813 | Ca_desi_scaffold   | 45813                          | [A/G]       | NA                                         |
| Ca_Desi_Ch_scaffold02291_45837 | Ca_desi_scaffold   | 45837                          | [A/G]       | NA                                         |
| Ca_Desi_Ch_scaffold02297_25095 | Ca_desi_scaffold   | 25095                          | [A/T]       | NA                                         |
| Ca_Desi_Ch_scaffold02297_25154 | Ca_desi_scaffold   | 25154                          | [G/C]       | NA                                         |
| Ca_Desi_Ch_scaffold02297_25241 | Ca_desi_scaffold   | 25241                          | [A/T]       | NA                                         |
| Ca_Desi_Ch_scaffold02297_25686 | Ca_desi_scaffold   | 25686                          | [C/T]       | NA                                         |
| Ca_Desi_Ch_scaffold02297_25740 | Ca_desi_scaffold   | 25740                          | [G/T]       | NA                                         |
| Ca_Desi_Ch_scaffold02297_25753 | Ca_desi_scaffold   | 25753                          | [T/C]       | NA                                         |
| Ca_Desi_Ch_scaffold02297_25768 | Ca_desi_scaffold   | 25768                          | [C/T]       | NA                                         |
| Ca_Desi_Ch_scaffold02304_8324  | Ca_desi_scaffold   | 8324                           | [A/C]       | NA                                         |
| Ca_Desi_Ch_scaffold02305_29748 | Ca_desi_scaffold   | 29748                          | [T/G]       | NA                                         |
| Ca_Desi_Ch_scaffold02311_18532 | Ca_desi_scaffold   | 18532                          | [T/C]       | NA                                         |
| Ca_Desi_Ch_scaffold02311_18557 | Ca_desi_scaffold   | 18557                          | [A/G]       | NA                                         |
| Ca_Desi_Ch_scaffold02311_18565 | Ca_desi_scaffold   | 18565                          | [T/C]       | NA                                         |
| Ca_Desi_Ch_scaffold02311_18568 | Ca_desi_scaffold   | 18568                          | [A/C]       | NA                                         |
| Ca_Desi_Ch_scaffold02311_18574 | Ca_desi_scaffold   | 18574                          | [T/C]       | NA                                         |
| Ca_Desi_Ch_scaffold02312_928   | Ca_desi_scaffold   | 928                            | [T/C]       | NA                                         |
| Ca_Desi_Ch_scaffold02312_957   | Ca_desi_scaffold   | 957                            | [T/G]       | NA                                         |
| Ca_Desi_Ch_scaffold02312_959   | Ca_desi_scaffold   | 959                            | [C/A]       | NA                                         |
| Ca_Desi_Ch_scaffold02312_962   | Ca_desi_scaffold   | 962                            | [T/C]       | NA                                         |
| Ca_Desi_Ch_scaffold02312_964   | Ca_desi_scaffold   | 964                            | [T/C]       | NA                                         |
| Ca_Desi_Ch_scaffold02312_3014  | Ca_desi_scaffold   | 3014                           | [G/A]       | NA                                         |
| Ca_Desi_Ch_scaffold02312_3126  | Ca_desi_scaffold   | 3126                           | [A/T]       | NA                                         |
| Ca_Desi_Ch_scaffold02312_3186  | Ca_desi_scaffold   | 3186                           | [G/A]       | NA                                         |
| Ca_Desi_Ch_scaffold02312_3842  | Ca_desi_scaffold   | 3842                           | [C/T]       | NA                                         |
| Ca_Desi_Ch_scaffold02312_3849  | Ca_desi_scaffold   | 3849                           | [T/C]       | NA                                         |
| Ca_Desi_Ch_scaffold02312_3859  | Ca_desi_scaffold   | 3859                           | [C/T]       | NA                                         |
| Ca_Desi_Ch_scaffold02312_3868  | Ca_desi_scaffold   | 3868                           | [T/A]       | NA                                         |

| <b>SNP IDs</b>                   | <b>Chromosomes</b> | <b>Physical positions (bp)</b> | <b>SNPs</b> | <b>NCBI SNPdb accession IDs (NCBI_ss#)</b> |
|----------------------------------|--------------------|--------------------------------|-------------|--------------------------------------------|
| Ca_Desig_Chr_scaffold02312_40688 | Ca_desig_scaffold  | 40688                          | [G/C]       | NA                                         |
| Ca_Desig_Chr_scaffold02312_40694 | Ca_desig_scaffold  | 40694                          | [T/C]       | NA                                         |
| Ca_Desig_Chr_scaffold02312_40709 | Ca_desig_scaffold  | 40709                          | [C/T]       | NA                                         |
| Ca_Desig_Chr_scaffold02319_37852 | Ca_desig_scaffold  | 37852                          | [G/C]       | NA                                         |
| Ca_Desig_Chr_scaffold02319_37854 | Ca_desig_scaffold  | 37854                          | [A/T]       | NA                                         |
| Ca_Desig_Chr_scaffold02319_37873 | Ca_desig_scaffold  | 37873                          | [T/A]       | NA                                         |
| Ca_Desig_Chr_scaffold02319_37877 | Ca_desig_scaffold  | 37877                          | [C/A]       | NA                                         |
| Ca_Desig_Chr_scaffold02319_37879 | Ca_desig_scaffold  | 37879                          | [A/C]       | NA                                         |
| Ca_Desig_Chr_scaffold02329_42113 | Ca_desig_scaffold  | 42113                          | [T/G]       | NA                                         |
| Ca_Desig_Chr_scaffold02330_20687 | Ca_desig_scaffold  | 20687                          | [A/T]       | NA                                         |
| Ca_Desig_Chr_scaffold02330_20688 | Ca_desig_scaffold  | 20688                          | [C/T]       | NA                                         |
| Ca_Desig_Chr_scaffold02330_20692 | Ca_desig_scaffold  | 20692                          | [A/T]       | NA                                         |
| Ca_Desig_Chr_scaffold02330_20696 | Ca_desig_scaffold  | 20696                          | [A/T]       | NA                                         |
| Ca_Desig_Chr_scaffold02330_20705 | Ca_desig_scaffold  | 20705                          | [C/T]       | NA                                         |
| Ca_Desig_Chr_scaffold02331_4100  | Ca_desig_scaffold  | 4100                           | [T/C]       | NA                                         |
| Ca_Desig_Chr_scaffold02331_7573  | Ca_desig_scaffold  | 7573                           | [T/C]       | NA                                         |
| Ca_Desig_Chr_scaffold02331_7725  | Ca_desig_scaffold  | 7725                           | [A/T]       | NA                                         |
| Ca_Desig_Chr_scaffold02331_7733  | Ca_desig_scaffold  | 7733                           | [T/C]       | NA                                         |
| Ca_Desig_Chr_scaffold02331_20083 | Ca_desig_scaffold  | 20083                          | [C/G]       | NA                                         |
| Ca_Desig_Chr_scaffold02331_24952 | Ca_desig_scaffold  | 24952                          | [T/C]       | NA                                         |
| Ca_Desig_Chr_scaffold02331_24988 | Ca_desig_scaffold  | 24988                          | [T/G]       | NA                                         |
| Ca_Desig_Chr_scaffold02331_24994 | Ca_desig_scaffold  | 24994                          | [C/G]       | NA                                         |
| Ca_Desig_Chr_scaffold02331_24997 | Ca_desig_scaffold  | 24997                          | [A/G]       | NA                                         |
| Ca_Desig_Chr_scaffold02331_27348 | Ca_desig_scaffold  | 27348                          | [C/T]       | NA                                         |
| Ca_Desig_Chr_scaffold02331_37834 | Ca_desig_scaffold  | 37834                          | [A/G]       | NA                                         |
| Ca_Desig_Chr_scaffold02331_38095 | Ca_desig_scaffold  | 38095                          | [G/C]       | NA                                         |
| Ca_Desig_Chr_scaffold02335_13564 | Ca_desig_scaffold  | 13564                          | [C/T]       | NA                                         |
| Ca_Desig_Chr_scaffold02335_13566 | Ca_desig_scaffold  | 13566                          | [T/G]       | NA                                         |
| Ca_Desig_Chr_scaffold02335_13578 | Ca_desig_scaffold  | 13578                          | [C/A]       | NA                                         |
| Ca_Desig_Chr_scaffold02335_13586 | Ca_desig_scaffold  | 13586                          | [T/A]       | NA                                         |
| Ca_Desig_Chr_scaffold02335_13603 | Ca_desig_scaffold  | 13603                          | [T/C]       | NA                                         |
| Ca_Desig_Chr_scaffold02335_13636 | Ca_desig_scaffold  | 13636                          | [T/G]       | NA                                         |
| Ca_Desig_Chr_scaffold02336_7293  | Ca_desig_scaffold  | 7293                           | [T/C]       | NA                                         |
| Ca_Desig_Chr_scaffold02337_15523 | Ca_desig_scaffold  | 15523                          | [T/G]       | NA                                         |



| <b>SNP IDs</b>                 | <b>Chromosomes</b> | <b>Physical positions (bp)</b> | <b>SNPs</b> | <b>NCBI SNPdb accession IDs (NCBI_ss#)</b> |
|--------------------------------|--------------------|--------------------------------|-------------|--------------------------------------------|
| Ca_Desi_Ch_scaffold02337_15531 | Ca_desi_scaffold   | 15531                          | [T/C]       | NA                                         |
| Ca_Desi_Ch_scaffold02337_15600 | Ca_desi_scaffold   | 15600                          | [A/G]       | NA                                         |
| Ca_Desi_Ch_scaffold02337_15611 | Ca_desi_scaffold   | 15611                          | [A/C]       | NA                                         |
| Ca_Desi_Ch_scaffold02340_19114 | Ca_desi_scaffold   | 19114                          | [C/G]       | NA                                         |
| Ca_Desi_Ch_scaffold02340_19682 | Ca_desi_scaffold   | 19682                          | [A/T]       | NA                                         |
| Ca_Desi_Ch_scaffold02340_19698 | Ca_desi_scaffold   | 19698                          | [C/T]       | NA                                         |
| Ca_Desi_Ch_scaffold02342_3671  | Ca_desi_scaffold   | 3671                           | [T/G]       | NA                                         |
| Ca_Desi_Ch_scaffold02342_7758  | Ca_desi_scaffold   | 7758                           | [T/G]       | NA                                         |
| Ca_Desi_Ch_scaffold02342_7767  | Ca_desi_scaffold   | 7767                           | [A/C]       | NA                                         |
| Ca_Desi_Ch_scaffold02342_8997  | Ca_desi_scaffold   | 8997                           | [A/T]       | NA                                         |
| Ca_Desi_Ch_scaffold02342_9019  | Ca_desi_scaffold   | 9019                           | [A/G]       | NA                                         |
| Ca_Desi_Ch_scaffold02343_9383  | Ca_desi_scaffold   | 9383                           | [A/C]       | NA                                         |
| Ca_Desi_Ch_scaffold02348_27238 | Ca_desi_scaffold   | 27238                          | [A/T]       | NA                                         |
| Ca_Desi_Ch_scaffold02357_21668 | Ca_desi_scaffold   | 21668                          | [T/C]       | NA                                         |
| Ca_Desi_Ch_scaffold02357_21734 | Ca_desi_scaffold   | 21734                          | [A/C]       | NA                                         |
| Ca_Desi_Ch_scaffold02359_9328  | Ca_desi_scaffold   | 9328                           | [T/C]       | NA                                         |
| Ca_Desi_Ch_scaffold02359_9345  | Ca_desi_scaffold   | 9345                           | [T/G]       | NA                                         |
| Ca_Desi_Ch_scaffold02361_28258 | Ca_desi_scaffold   | 28258                          | [A/C]       | NA                                         |
| Ca_Desi_Ch_scaffold02368_13839 | Ca_desi_scaffold   | 13839                          | [T/C]       | NA                                         |
| Ca_Desi_Ch_scaffold02370_17554 | Ca_desi_scaffold   | 17554                          | [G/A]       | NA                                         |
| Ca_Desi_Ch_scaffold02370_17555 | Ca_desi_scaffold   | 17555                          | [T/A]       | NA                                         |
| Ca_Desi_Ch_scaffold02370_17560 | Ca_desi_scaffold   | 17560                          | [A/G]       | NA                                         |
| Ca_Desi_Ch_scaffold02370_17566 | Ca_desi_scaffold   | 17566                          | [A/G]       | NA                                         |
| Ca_Desi_Ch_scaffold02371_42216 | Ca_desi_scaffold   | 42216                          | [T/G]       | NA                                         |
| Ca_Desi_Ch_scaffold02377_16993 | Ca_desi_scaffold   | 16993                          | [A/G]       | NA                                         |
| Ca_Desi_Ch_scaffold02377_17002 | Ca_desi_scaffold   | 17002                          | [T/C]       | NA                                         |
| Ca_Desi_Ch_scaffold02377_17044 | Ca_desi_scaffold   | 17044                          | [A/G]       | NA                                         |
| Ca_Desi_Ch_scaffold02384_14562 | Ca_desi_scaffold   | 14562                          | [T/C]       | NA                                         |
| Ca_Desi_Ch_scaffold02384_14620 | Ca_desi_scaffold   | 14620                          | [T/G]       | NA                                         |
| Ca_Desi_Ch_scaffold02384_16877 | Ca_desi_scaffold   | 16877                          | [T/C]       | NA                                         |
| Ca_Desi_Ch_scaffold02384_16885 | Ca_desi_scaffold   | 16885                          | [A/C]       | NA                                         |
| Ca_Desi_Ch_scaffold02384_16900 | Ca_desi_scaffold   | 16900                          | [T/G]       | NA                                         |
| Ca_Desi_Ch_scaffold02384_16904 | Ca_desi_scaffold   | 16904                          | [A/C]       | NA                                         |
| Ca_Desi_Ch_scaffold02384_16914 | Ca_desi_scaffold   | 16914                          | [A/C]       | NA                                         |

| <b>SNP IDs</b>                 | <b>Chromosomes</b> | <b>Physical positions (bp)</b> | <b>SNPs</b> | <b>NCBI SNPdb accession IDs (NCBI_ss#)</b> |
|--------------------------------|--------------------|--------------------------------|-------------|--------------------------------------------|
| Ca_Desi_Ch_scaffold02387_41149 | Ca_desi_scaffold   | 41149                          | [A/G]       | NA                                         |
| Ca_Desi_Ch_scaffold02387_41182 | Ca_desi_scaffold   | 41182                          | [T/C]       | NA                                         |
| Ca_Desi_Ch_scaffold02387_41231 | Ca_desi_scaffold   | 41231                          | [T/G]       | NA                                         |
| Ca_Desi_Ch_scaffold02387_41234 | Ca_desi_scaffold   | 41234                          | [T/G]       | NA                                         |
| Ca_Desi_Ch_scaffold02387_41237 | Ca_desi_scaffold   | 41237                          | [A/G]       | NA                                         |
| Ca_Desi_Ch_scaffold02387_41243 | Ca_desi_scaffold   | 41243                          | [C/G]       | NA                                         |
| Ca_Desi_Ch_scaffold02387_41249 | Ca_desi_scaffold   | 41249                          | [T/G]       | NA                                         |
| Ca_Desi_Ch_scaffold02389_37839 | Ca_desi_scaffold   | 37839                          | [T/G]       | NA                                         |
| Ca_Desi_Ch_scaffold02389_38908 | Ca_desi_scaffold   | 38908                          | [T/G]       | NA                                         |
| Ca_Desi_Ch_scaffold02389_42534 | Ca_desi_scaffold   | 42534                          | [A/G]       | NA                                         |
| Ca_Desi_Ch_scaffold02389_42537 | Ca_desi_scaffold   | 42537                          | [T/G]       | NA                                         |
| Ca_Desi_Ch_scaffold02389_42552 | Ca_desi_scaffold   | 42552                          | [T/C]       | NA                                         |
| Ca_Desi_Ch_scaffold02389_42554 | Ca_desi_scaffold   | 42554                          | [A/G]       | NA                                         |
| Ca_Desi_Ch_scaffold02389_42556 | Ca_desi_scaffold   | 42556                          | [T/C]       | NA                                         |
| Ca_Desi_Ch_scaffold02389_42563 | Ca_desi_scaffold   | 42563                          | [T/C]       | NA                                         |
| Ca_Desi_Ch_scaffold02389_42567 | Ca_desi_scaffold   | 42567                          | [A/G]       | NA                                         |
| Ca_Desi_Ch_scaffold02391_35148 | Ca_desi_scaffold   | 35148                          | [A/T]       | NA                                         |
| Ca_Desi_Ch_scaffold02391_41556 | Ca_desi_scaffold   | 41556                          | [A/G]       | NA                                         |
| Ca_Desi_Ch_scaffold02391_41565 | Ca_desi_scaffold   | 41565                          | [C/G]       | NA                                         |
| Ca_Desi_Ch_scaffold02391_41566 | Ca_desi_scaffold   | 41566                          | [A/C]       | NA                                         |
| Ca_Desi_Ch_scaffold02395_38849 | Ca_desi_scaffold   | 38849                          | [T/A]       | NA                                         |
| Ca_Desi_Ch_scaffold02401_2318  | Ca_desi_scaffold   | 2318                           | [A/C]       | NA                                         |
| Ca_Desi_Ch_scaffold02401_5641  | Ca_desi_scaffold   | 5641                           | [T/G]       | NA                                         |
| Ca_Desi_Ch_scaffold02401_5756  | Ca_desi_scaffold   | 5756                           | [T/G]       | NA                                         |
| Ca_Desi_Ch_scaffold02401_5773  | Ca_desi_scaffold   | 5773                           | [T/C]       | NA                                         |
| Ca_Desi_Ch_scaffold02401_12927 | Ca_desi_scaffold   | 12927                          | [A/G]       | NA                                         |
| Ca_Desi_Ch_scaffold02401_27129 | Ca_desi_scaffold   | 27129                          | [T/G]       | NA                                         |
| Ca_Desi_Ch_scaffold02402_41537 | Ca_desi_scaffold   | 41537                          | [T/A]       | NA                                         |
| Ca_Desi_Ch_scaffold02402_41539 | Ca_desi_scaffold   | 41539                          | [A/C]       | NA                                         |
| Ca_Desi_Ch_scaffold02402_41540 | Ca_desi_scaffold   | 41540                          | [G/T]       | NA                                         |
| Ca_Desi_Ch_scaffold02404_19740 | Ca_desi_scaffold   | 19740                          | [T/C]       | NA                                         |
| Ca_Desi_Ch_scaffold02404_19767 | Ca_desi_scaffold   | 19767                          | [T/C]       | NA                                         |
| Ca_Desi_Ch_scaffold02404_19809 | Ca_desi_scaffold   | 19809                          | [T/C]       | NA                                         |
| Ca_Desi_Ch_scaffold02404_20851 | Ca_desi_scaffold   | 20851                          | [T/C]       | NA                                         |

| <b>SNP IDs</b>                 | <b>Chromosomes</b> | <b>Physical positions (bp)</b> | <b>SNPs</b> | <b>NCBI SNPdb accession IDs (NCBI_ss#)</b> |
|--------------------------------|--------------------|--------------------------------|-------------|--------------------------------------------|
| Ca_Desi_Ch_scaffold02404_33944 | Ca_desi_scaffold   | 33944                          | [A/C]       | NA                                         |
| Ca_Desi_Ch_scaffold02404_36320 | Ca_desi_scaffold   | 36320                          | [A/C]       | NA                                         |
| Ca_Desi_Ch_scaffold02406_34878 | Ca_desi_scaffold   | 34878                          | [T/A]       | NA                                         |
| Ca_Desi_Ch_scaffold02407_25895 | Ca_desi_scaffold   | 25895                          | [T/C]       | NA                                         |
| Ca_Desi_Ch_scaffold02414_4515  | Ca_desi_scaffold   | 4515                           | [C/T]       | NA                                         |
| Ca_Desi_Ch_scaffold02414_4518  | Ca_desi_scaffold   | 4518                           | [C/T]       | NA                                         |
| Ca_Desi_Ch_scaffold02414_5046  | Ca_desi_scaffold   | 5046                           | [G/C]       | NA                                         |
| Ca_Desi_Ch_scaffold02415_1781  | Ca_desi_scaffold   | 1781                           | [C/G]       | NA                                         |
| Ca_Desi_Ch_scaffold02416_3216  | Ca_desi_scaffold   | 3216                           | [C/G]       | NA                                         |
| Ca_Desi_Ch_scaffold02416_7540  | Ca_desi_scaffold   | 7540                           | [T/G]       | NA                                         |
| Ca_Desi_Ch_scaffold02416_7550  | Ca_desi_scaffold   | 7550                           | [A/G]       | NA                                         |
| Ca_Desi_Ch_scaffold02418_15570 | Ca_desi_scaffold   | 15570                          | [T/G]       | NA                                         |
| Ca_Desi_Ch_scaffold02421_23556 | Ca_desi_scaffold   | 23556                          | [A/C]       | NA                                         |
| Ca_Desi_Ch_scaffold02421_23585 | Ca_desi_scaffold   | 23585                          | [T/A]       | NA                                         |
| Ca_Desi_Ch_scaffold02421_27360 | Ca_desi_scaffold   | 27360                          | [T/C]       | NA                                         |
| Ca_Desi_Ch_scaffold02422_40150 | Ca_desi_scaffold   | 40150                          | [T/G]       | NA                                         |
| Ca_Desi_Ch_scaffold02427_33789 | Ca_desi_scaffold   | 33789                          | [G/A]       | NA                                         |
| Ca_Desi_Ch_scaffold02430_4407  | Ca_desi_scaffold   | 4407                           | [A/G]       | NA                                         |
| Ca_Desi_Ch_scaffold02430_4436  | Ca_desi_scaffold   | 4436                           | [C/T]       | NA                                         |
| Ca_Desi_Ch_scaffold02434_11181 | Ca_desi_scaffold   | 11181                          | [T/C]       | NA                                         |
| Ca_Desi_Ch_scaffold02434_27819 | Ca_desi_scaffold   | 27819                          | [T/G]       | NA                                         |
| Ca_Desi_Ch_scaffold02434_27940 | Ca_desi_scaffold   | 27940                          | [A/C]       | NA                                         |
| Ca_Desi_Ch_scaffold02434_27948 | Ca_desi_scaffold   | 27948                          | [A/G]       | NA                                         |
| Ca_Desi_Ch_scaffold02434_27956 | Ca_desi_scaffold   | 27956                          | [A/G]       | NA                                         |
| Ca_Desi_Ch_scaffold02434_27961 | Ca_desi_scaffold   | 27961                          | [T/C]       | NA                                         |
| Ca_Desi_Ch_scaffold02434_27965 | Ca_desi_scaffold   | 27965                          | [A/G]       | NA                                         |
| Ca_Desi_Ch_scaffold02434_27975 | Ca_desi_scaffold   | 27975                          | [T/A]       | NA                                         |
| Ca_Desi_Ch_scaffold02434_28034 | Ca_desi_scaffold   | 28034                          | [T/G]       | NA                                         |
| Ca_Desi_Ch_scaffold02434_28037 | Ca_desi_scaffold   | 28037                          | [T/C]       | NA                                         |
| Ca_Desi_Ch_scaffold02434_28051 | Ca_desi_scaffold   | 28051                          | [A/G]       | NA                                         |
| Ca_Desi_Ch_scaffold02434_28075 | Ca_desi_scaffold   | 28075                          | [T/C]       | NA                                         |
| Ca_Desi_Ch_scaffold02434_28331 | Ca_desi_scaffold   | 28331                          | [T/C]       | NA                                         |
| Ca_Desi_Ch_scaffold02434_28397 | Ca_desi_scaffold   | 28397                          | [A/G]       | NA                                         |
| Ca_Desi_Ch_scaffold02434_30001 | Ca_desi_scaffold   | 30001                          | [T/G]       | NA                                         |

| <b>SNP IDs</b>                 | <b>Chromosomes</b> | <b>Physical positions (bp)</b> | <b>SNPs</b> | <b>NCBI SNPdb accession IDs (NCBI_ss#)</b> |
|--------------------------------|--------------------|--------------------------------|-------------|--------------------------------------------|
| Ca_Desi_Ch_scaffold02437_10448 | Ca_desi_scaffold   | 10448                          | [A/G]       | NA                                         |
| Ca_Desi_Ch_scaffold02437_10451 | Ca_desi_scaffold   | 10451                          | [C/T]       | NA                                         |
| Ca_Desi_Ch_scaffold02437_10556 | Ca_desi_scaffold   | 10556                          | [A/G]       | NA                                         |
| Ca_Desi_Ch_scaffold02437_10694 | Ca_desi_scaffold   | 10694                          | [G/T]       | NA                                         |
| Ca_Desi_Ch_scaffold02437_10754 | Ca_desi_scaffold   | 10754                          | [G/A]       | NA                                         |
| Ca_Desi_Ch_scaffold02437_21498 | Ca_desi_scaffold   | 21498                          | [A/G]       | NA                                         |
| Ca_Desi_Ch_scaffold02437_21853 | Ca_desi_scaffold   | 21853                          | [A/T]       | NA                                         |
| Ca_Desi_Ch_scaffold02437_21874 | Ca_desi_scaffold   | 21874                          | [T/C]       | NA                                         |
| Ca_Desi_Ch_scaffold02437_24605 | Ca_desi_scaffold   | 24605                          | [G/T]       | NA                                         |
| Ca_Desi_Ch_scaffold02437_24637 | Ca_desi_scaffold   | 24637                          | [A/G]       | NA                                         |
| Ca_Desi_Ch_scaffold02437_24664 | Ca_desi_scaffold   | 24664                          | [A/C]       | NA                                         |
| Ca_Desi_Ch_scaffold02437_24691 | Ca_desi_scaffold   | 24691                          | [A/G]       | NA                                         |
| Ca_Desi_Ch_scaffold02437_24695 | Ca_desi_scaffold   | 24695                          | [A/G]       | NA                                         |
| Ca_Desi_Ch_scaffold02437_24945 | Ca_desi_scaffold   | 24945                          | [T/G]       | NA                                         |
| Ca_Desi_Ch_scaffold02443_19233 | Ca_desi_scaffold   | 19233                          | [T/C]       | NA                                         |
| Ca_Desi_Ch_scaffold02443_19247 | Ca_desi_scaffold   | 19247                          | [T/G]       | NA                                         |
| Ca_Desi_Ch_scaffold02445_12079 | Ca_desi_scaffold   | 12079                          | [A/C]       | NA                                         |
| Ca_Desi_Ch_scaffold02446_21352 | Ca_desi_scaffold   | 21352                          | [A/G]       | NA                                         |
| Ca_Desi_Ch_scaffold02446_21358 | Ca_desi_scaffold   | 21358                          | [A/G]       | NA                                         |
| Ca_Desi_Ch_scaffold02446_21360 | Ca_desi_scaffold   | 21360                          | [A/G]       | NA                                         |
| Ca_Desi_Ch_scaffold02446_21373 | Ca_desi_scaffold   | 21373                          | [A/G]       | NA                                         |
| Ca_Desi_Ch_scaffold02446_21402 | Ca_desi_scaffold   | 21402                          | [T/C]       | NA                                         |
| Ca_Desi_Ch_scaffold02446_21406 | Ca_desi_scaffold   | 21406                          | [A/C]       | NA                                         |
| Ca_Desi_Ch_scaffold02446_21991 | Ca_desi_scaffold   | 21991                          | [T/G]       | NA                                         |
| Ca_Desi_Ch_scaffold02446_22014 | Ca_desi_scaffold   | 22014                          | [A/G]       | NA                                         |
| Ca_Desi_Ch_scaffold02446_22021 | Ca_desi_scaffold   | 22021                          | [T/G]       | NA                                         |
| Ca_Desi_Ch_scaffold02446_24405 | Ca_desi_scaffold   | 24405                          | [T/C]       | NA                                         |
| Ca_Desi_Ch_scaffold02446_24415 | Ca_desi_scaffold   | 24415                          | [A/G]       | NA                                         |
| Ca_Desi_Ch_scaffold02446_24421 | Ca_desi_scaffold   | 24421                          | [A/C]       | NA                                         |
| Ca_Desi_Ch_scaffold02446_24443 | Ca_desi_scaffold   | 24443                          | [A/G]       | NA                                         |
| Ca_Desi_Ch_scaffold02446_24450 | Ca_desi_scaffold   | 24450                          | [T/C]       | NA                                         |
| Ca_Desi_Ch_scaffold02446_26915 | Ca_desi_scaffold   | 26915                          | [A/T]       | NA                                         |
| Ca_Desi_Ch_scaffold02446_26918 | Ca_desi_scaffold   | 26918                          | [G/C]       | NA                                         |
| Ca_Desi_Ch_scaffold02446_26919 | Ca_desi_scaffold   | 26919                          | [C/G]       | NA                                         |

| <b>SNP IDs</b>                   | <b>Chromosomes</b> | <b>Physical positions (bp)</b> | <b>SNPs</b> | <b>NCBI SNPdb accession IDs (NCBI_ss#)</b> |
|----------------------------------|--------------------|--------------------------------|-------------|--------------------------------------------|
| Ca_Desig_Chr_scaffold02446_26921 | Ca_desig_scaffold  | 26921                          | [C/A]       | NA                                         |
| Ca_Desig_Chr_scaffold02446_26922 | Ca_desig_scaffold  | 26922                          | [A/G]       | NA                                         |
| Ca_Desig_Chr_scaffold02446_26923 | Ca_desig_scaffold  | 26923                          | [G/A]       | NA                                         |
| Ca_Desig_Chr_scaffold02446_26931 | Ca_desig_scaffold  | 26931                          | [T/C]       | NA                                         |
| Ca_Desig_Chr_scaffold02446_26934 | Ca_desig_scaffold  | 26934                          | [T/C]       | NA                                         |
| Ca_Desig_Chr_scaffold02446_26935 | Ca_desig_scaffold  | 26935                          | [C/G]       | NA                                         |
| Ca_Desig_Chr_scaffold02446_26937 | Ca_desig_scaffold  | 26937                          | [T/C]       | NA                                         |
| Ca_Desig_Chr_scaffold02446_26940 | Ca_desig_scaffold  | 26940                          | [G/T]       | NA                                         |
| Ca_Desig_Chr_scaffold02446_26941 | Ca_desig_scaffold  | 26941                          | [T/C]       | NA                                         |
| Ca_Desig_Chr_scaffold02446_26945 | Ca_desig_scaffold  | 26945                          | [A/C]       | NA                                         |
| Ca_Desig_Chr_scaffold02446_26948 | Ca_desig_scaffold  | 26948                          | [C/A]       | NA                                         |
| Ca_Desig_Chr_scaffold02446_26956 | Ca_desig_scaffold  | 26956                          | [A/T]       | NA                                         |
| Ca_Desig_Chr_scaffold02447_36007 | Ca_desig_scaffold  | 36007                          | [T/G]       | NA                                         |
| Ca_Desig_Chr_scaffold02458_6744  | Ca_desig_scaffold  | 6744                           | [T/C]       | NA                                         |
| Ca_Desig_Chr_scaffold02458_6758  | Ca_desig_scaffold  | 6758                           | [T/C]       | NA                                         |
| Ca_Desig_Chr_scaffold02458_6764  | Ca_desig_scaffold  | 6764                           | [A/G]       | NA                                         |
| Ca_Desig_Chr_scaffold02458_6770  | Ca_desig_scaffold  | 6770                           | [A/G]       | NA                                         |
| Ca_Desig_Chr_scaffold02458_6777  | Ca_desig_scaffold  | 6777                           | [T/A]       | NA                                         |
| Ca_Desig_Chr_scaffold02458_6781  | Ca_desig_scaffold  | 6781                           | [A/G]       | NA                                         |
| Ca_Desig_Chr_scaffold02458_6785  | Ca_desig_scaffold  | 6785                           | [A/G]       | NA                                         |
| Ca_Desig_Chr_scaffold02458_6791  | Ca_desig_scaffold  | 6791                           | [T/C]       | NA                                         |
| Ca_Desig_Chr_scaffold02458_36649 | Ca_desig_scaffold  | 36649                          | [T/C]       | NA                                         |
| Ca_Desig_Chr_scaffold02458_36720 | Ca_desig_scaffold  | 36720                          | [A/G]       | NA                                         |
| Ca_Desig_Chr_scaffold02460_9381  | Ca_desig_scaffold  | 9381                           | [A/T]       | NA                                         |
| Ca_Desig_Chr_scaffold02460_30268 | Ca_desig_scaffold  | 30268                          | [A/T]       | NA                                         |
| Ca_Desig_Chr_scaffold02460_30272 | Ca_desig_scaffold  | 30272                          | [C/G]       | NA                                         |
| Ca_Desig_Chr_scaffold02460_30274 | Ca_desig_scaffold  | 30274                          | [G/A]       | NA                                         |
| Ca_Desig_Chr_scaffold02460_30275 | Ca_desig_scaffold  | 30275                          | [G/C]       | NA                                         |
| Ca_Desig_Chr_scaffold02460_30276 | Ca_desig_scaffold  | 30276                          | [T/C]       | NA                                         |
| Ca_Desig_Chr_scaffold02460_30282 | Ca_desig_scaffold  | 30282                          | [T/G]       | NA                                         |
| Ca_Desig_Chr_scaffold02460_30285 | Ca_desig_scaffold  | 30285                          | [T/G]       | NA                                         |
| Ca_Desig_Chr_scaffold02460_30294 | Ca_desig_scaffold  | 30294                          | [T/G]       | NA                                         |
| Ca_Desig_Chr_scaffold02460_30300 | Ca_desig_scaffold  | 30300                          | [A/G]       | NA                                         |
| Ca_Desig_Chr_scaffold02460_30303 | Ca_desig_scaffold  | 30303                          | [A/G]       | NA                                         |

| <b>SNP IDs</b>                   | <b>Chromosomes</b> | <b>Physical positions (bp)</b> | <b>SNPs</b> | <b>NCBI SNPdb accession IDs (NCBI_ss#)</b> |
|----------------------------------|--------------------|--------------------------------|-------------|--------------------------------------------|
| Ca_Desig_Chr_scaffold02460_30306 | Ca_desig_scaffold  | 30306                          | [A/G]       | NA                                         |
| Ca_Desig_Chr_scaffold02460_30308 | Ca_desig_scaffold  | 30308                          | [G/C]       | NA                                         |
| Ca_Desig_Chr_scaffold02460_30309 | Ca_desig_scaffold  | 30309                          | [A/G]       | NA                                         |
| Ca_Desig_Chr_scaffold02467_1980  | Ca_desig_scaffold  | 1980                           | [T/G]       | NA                                         |
| Ca_Desig_Chr_scaffold02467_1984  | Ca_desig_scaffold  | 1984                           | [G/T]       | NA                                         |
| Ca_Desig_Chr_scaffold02470_42155 | Ca_desig_scaffold  | 42155                          | [T/C]       | NA                                         |
| Ca_Desig_Chr_scaffold02470_42174 | Ca_desig_scaffold  | 42174                          | [A/T]       | NA                                         |
| Ca_Desig_Chr_scaffold02470_42194 | Ca_desig_scaffold  | 42194                          | [T/C]       | NA                                         |
| Ca_Desig_Chr_scaffold02470_42211 | Ca_desig_scaffold  | 42211                          | [T/C]       | NA                                         |
| Ca_Desig_Chr_scaffold02470_42220 | Ca_desig_scaffold  | 42220                          | [T/C]       | NA                                         |
| Ca_Desig_Chr_scaffold02470_42226 | Ca_desig_scaffold  | 42226                          | [A/G]       | NA                                         |
| Ca_Desig_Chr_scaffold02470_42235 | Ca_desig_scaffold  | 42235                          | [T/C]       | NA                                         |
| Ca_Desig_Chr_scaffold02470_42241 | Ca_desig_scaffold  | 42241                          | [A/G]       | NA                                         |
| Ca_Desig_Chr_scaffold02470_42243 | Ca_desig_scaffold  | 42243                          | [T/G]       | NA                                         |
| Ca_Desig_Chr_scaffold02470_42247 | Ca_desig_scaffold  | 42247                          | [T/C]       | NA                                         |
| Ca_Desig_Chr_scaffold02476_22506 | Ca_desig_scaffold  | 22506                          | [G/A]       | NA                                         |
| Ca_Desig_Chr_scaffold02476_22518 | Ca_desig_scaffold  | 22518                          | [T/G]       | NA                                         |
| Ca_Desig_Chr_scaffold02476_22549 | Ca_desig_scaffold  | 22549                          | [A/C]       | NA                                         |
| Ca_Desig_Chr_scaffold02476_22551 | Ca_desig_scaffold  | 22551                          | [T/C]       | NA                                         |
| Ca_Desig_Chr_scaffold02476_22554 | Ca_desig_scaffold  | 22554                          | [A/C]       | NA                                         |
| Ca_Desig_Chr_scaffold02476_23414 | Ca_desig_scaffold  | 23414                          | [T/G]       | NA                                         |
| Ca_Desig_Chr_scaffold02476_23417 | Ca_desig_scaffold  | 23417                          | [A/G]       | NA                                         |
| Ca_Desig_Chr_scaffold02476_35000 | Ca_desig_scaffold  | 35000                          | [A/C]       | NA                                         |
| Ca_Desig_Chr_scaffold02476_35029 | Ca_desig_scaffold  | 35029                          | [A/G]       | NA                                         |
| Ca_Desig_Chr_scaffold02478_867   | Ca_desig_scaffold  | 867                            | [C/T]       | NA                                         |
| Ca_Desig_Chr_scaffold02478_37008 | Ca_desig_scaffold  | 37008                          | [G/A]       | NA                                         |
| Ca_Desig_Chr_scaffold02478_37036 | Ca_desig_scaffold  | 37036                          | [G/A]       | NA                                         |
| Ca_Desig_Chr_scaffold02478_37185 | Ca_desig_scaffold  | 37185                          | [A/G]       | NA                                         |
| Ca_Desig_Chr_scaffold02478_37194 | Ca_desig_scaffold  | 37194                          | [A/G]       | NA                                         |
| Ca_Desig_Chr_scaffold02478_37259 | Ca_desig_scaffold  | 37259                          | [A/G]       | NA                                         |
| Ca_Desig_Chr_scaffold02478_37275 | Ca_desig_scaffold  | 37275                          | [A/G]       | NA                                         |
| Ca_Desig_Chr_scaffold02478_37295 | Ca_desig_scaffold  | 37295                          | [A/C]       | NA                                         |
| Ca_Desig_Chr_scaffold02482_13351 | Ca_desig_scaffold  | 13351                          | [T/C]       | NA                                         |
| Ca_Desig_Chr_scaffold02482_13358 | Ca_desig_scaffold  | 13358                          | [A/G]       | NA                                         |

| <b>SNP IDs</b>                  | <b>Chromosomes</b> | <b>Physical positions (bp)</b> | <b>SNPs</b> | <b>NCBI SNPdb accession IDs (NCBI_ss#)</b> |
|---------------------------------|--------------------|--------------------------------|-------------|--------------------------------------------|
| Ca_DesigChr_scaffold02485_38183 | Ca_desig_scaffold  | 38183                          | [T/C]       | NA                                         |
| Ca_DesigChr_scaffold02485_38186 | Ca_desig_scaffold  | 38186                          | [A/G]       | NA                                         |
| Ca_DesigChr_scaffold02485_38189 | Ca_desig_scaffold  | 38189                          | [A/G]       | NA                                         |
| Ca_DesigChr_scaffold02485_38199 | Ca_desig_scaffold  | 38199                          | [T/G]       | NA                                         |
| Ca_DesigChr_scaffold02485_38208 | Ca_desig_scaffold  | 38208                          | [T/C]       | NA                                         |
| Ca_DesigChr_scaffold02485_38214 | Ca_desig_scaffold  | 38214                          | [C/T]       | NA                                         |
| Ca_DesigChr_scaffold02485_38215 | Ca_desig_scaffold  | 38215                          | [T/C]       | NA                                         |
| Ca_DesigChr_scaffold02485_38217 | Ca_desig_scaffold  | 38217                          | [T/C]       | NA                                         |
| Ca_DesigChr_scaffold02485_38233 | Ca_desig_scaffold  | 38233                          | [A/G]       | NA                                         |
| Ca_DesigChr_scaffold02486_8095  | Ca_desig_scaffold  | 8095                           | [T/G]       | NA                                         |
| Ca_DesigChr_scaffold02487_7703  | Ca_desig_scaffold  | 7703                           | [A/G]       | NA                                         |
| Ca_DesigChr_scaffold02487_7705  | Ca_desig_scaffold  | 7705                           | [A/G]       | NA                                         |
| Ca_DesigChr_scaffold02493_37024 | Ca_desig_scaffold  | 37024                          | [T/C]       | NA                                         |
| Ca_DesigChr_scaffold02493_37043 | Ca_desig_scaffold  | 37043                          | [T/C]       | NA                                         |
| Ca_DesigChr_scaffold02493_37103 | Ca_desig_scaffold  | 37103                          | [T/A]       | NA                                         |
| Ca_DesigChr_scaffold02494_18482 | Ca_desig_scaffold  | 18482                          | [C/T]       | NA                                         |
| Ca_DesigChr_scaffold02494_30715 | Ca_desig_scaffold  | 30715                          | [T/C]       | NA                                         |
| Ca_DesigChr_scaffold02494_30779 | Ca_desig_scaffold  | 30779                          | [A/C]       | NA                                         |
| Ca_DesigChr_scaffold02497_24052 | Ca_desig_scaffold  | 24052                          | [T/G]       | NA                                         |
| Ca_DesigChr_scaffold02502_23999 | Ca_desig_scaffold  | 23999                          | [T/C]       | NA                                         |
| Ca_DesigChr_scaffold02502_24009 | Ca_desig_scaffold  | 24009                          | [T/C]       | NA                                         |
| Ca_DesigChr_scaffold02502_24065 | Ca_desig_scaffold  | 24065                          | [A/G]       | NA                                         |
| Ca_DesigChr_scaffold02503_31455 | Ca_desig_scaffold  | 31455                          | [A/G]       | NA                                         |
| Ca_DesigChr_scaffold02514_1020  | Ca_desig_scaffold  | 1020                           | [C/T]       | NA                                         |
| Ca_DesigChr_scaffold02514_1026  | Ca_desig_scaffold  | 1026                           | [G/T]       | NA                                         |
| Ca_DesigChr_scaffold02514_6393  | Ca_desig_scaffold  | 6393                           | [T/C]       | NA                                         |
| Ca_DesigChr_scaffold02514_6420  | Ca_desig_scaffold  | 6420                           | [A/T]       | NA                                         |
| Ca_DesigChr_scaffold02523_39385 | Ca_desig_scaffold  | 39385                          | [A/C]       | NA                                         |
| Ca_DesigChr_scaffold02527_16654 | Ca_desig_scaffold  | 16654                          | [G/T]       | NA                                         |
| Ca_DesigChr_scaffold02527_16673 | Ca_desig_scaffold  | 16673                          | [A/T]       | NA                                         |
| Ca_DesigChr_scaffold02528_17075 | Ca_desig_scaffold  | 17075                          | [T/G]       | NA                                         |
| Ca_DesigChr_scaffold02528_17159 | Ca_desig_scaffold  | 17159                          | [T/G]       | NA                                         |
| Ca_DesigChr_scaffold02528_17179 | Ca_desig_scaffold  | 17179                          | [A/C]       | NA                                         |
| Ca_DesigChr_scaffold02528_17185 | Ca_desig_scaffold  | 17185                          | [T/C]       | NA                                         |

| <b>SNP IDs</b>                 | <b>Chromosomes</b> | <b>Physical positions (bp)</b> | <b>SNPs</b> | <b>NCBI SNPdb accession IDs (NCBI_ss#)</b> |
|--------------------------------|--------------------|--------------------------------|-------------|--------------------------------------------|
| Ca_Desi_Ch_scaffold02528_17191 | Ca_desi_scaffold   | 17191                          | [A/C]       | NA                                         |
| Ca_Desi_Ch_scaffold02528_17195 | Ca_desi_scaffold   | 17195                          | [A/C]       | NA                                         |
| Ca_Desi_Ch_scaffold02528_30947 | Ca_desi_scaffold   | 30947                          | [T/G]       | NA                                         |
| Ca_Desi_Ch_scaffold02529_14815 | Ca_desi_scaffold   | 14815                          | [A/G]       | NA                                         |
| Ca_Desi_Ch_scaffold02529_14818 | Ca_desi_scaffold   | 14818                          | [T/C]       | NA                                         |
| Ca_Desi_Ch_scaffold02529_14828 | Ca_desi_scaffold   | 14828                          | [A/G]       | NA                                         |
| Ca_Desi_Ch_scaffold02529_14862 | Ca_desi_scaffold   | 14862                          | [A/G]       | NA                                         |
| Ca_Desi_Ch_scaffold02529_14868 | Ca_desi_scaffold   | 14868                          | [T/C]       | NA                                         |
| Ca_Desi_Ch_scaffold02529_16343 | Ca_desi_scaffold   | 16343                          | [T/G]       | NA                                         |
| Ca_Desi_Ch_scaffold02537_13712 | Ca_desi_scaffold   | 13712                          | [G/A]       | NA                                         |
| Ca_Desi_Ch_scaffold02537_13729 | Ca_desi_scaffold   | 13729                          | [C/T]       | NA                                         |
| Ca_Desi_Ch_scaffold02537_35978 | Ca_desi_scaffold   | 35978                          | [C/A]       | NA                                         |
| Ca_Desi_Ch_scaffold02537_35987 | Ca_desi_scaffold   | 35987                          | [T/C]       | NA                                         |
| Ca_Desi_Ch_scaffold02538_8168  | Ca_desi_scaffold   | 8168                           | [T/C]       | NA                                         |
| Ca_Desi_Ch_scaffold02538_12713 | Ca_desi_scaffold   | 12713                          | [T/A]       | NA                                         |
| Ca_Desi_Ch_scaffold02545_5960  | Ca_desi_scaffold   | 5960                           | [T/G]       | NA                                         |
| Ca_Desi_Ch_scaffold02545_9913  | Ca_desi_scaffold   | 9913                           | [T/A]       | NA                                         |
| Ca_Desi_Ch_scaffold02547_20189 | Ca_desi_scaffold   | 20189                          | [T/C]       | NA                                         |
| Ca_Desi_Ch_scaffold02547_20197 | Ca_desi_scaffold   | 20197                          | [G/T]       | NA                                         |
| Ca_Desi_Ch_scaffold02547_20214 | Ca_desi_scaffold   | 20214                          | [A/G]       | NA                                         |
| Ca_Desi_Ch_scaffold02547_20246 | Ca_desi_scaffold   | 20246                          | [A/G]       | NA                                         |
| Ca_Desi_Ch_scaffold02547_20275 | Ca_desi_scaffold   | 20275                          | [T/G]       | NA                                         |
| Ca_Desi_Ch_scaffold02547_20284 | Ca_desi_scaffold   | 20284                          | [A/G]       | NA                                         |
| Ca_Desi_Ch_scaffold02547_20288 | Ca_desi_scaffold   | 20288                          | [T/G]       | NA                                         |
| Ca_Desi_Ch_scaffold02547_20303 | Ca_desi_scaffold   | 20303                          | [T/A]       | NA                                         |
| Ca_Desi_Ch_scaffold02548_11246 | Ca_desi_scaffold   | 11246                          | [T/G]       | NA                                         |
| Ca_Desi_Ch_scaffold02548_11287 | Ca_desi_scaffold   | 11287                          | [T/G]       | NA                                         |
| Ca_Desi_Ch_scaffold02554_10724 | Ca_desi_scaffold   | 10724                          | [T/C]       | NA                                         |
| Ca_Desi_Ch_scaffold02554_10733 | Ca_desi_scaffold   | 10733                          | [A/G]       | NA                                         |
| Ca_Desi_Ch_scaffold02562_722   | Ca_desi_scaffold   | 722                            | [T/A]       | NA                                         |
| Ca_Desi_Ch_scaffold02562_16495 | Ca_desi_scaffold   | 16495                          | [T/G]       | NA                                         |
| Ca_Desi_Ch_scaffold02562_22965 | Ca_desi_scaffold   | 22965                          | [C/T]       | NA                                         |
| Ca_Desi_Ch_scaffold02562_25606 | Ca_desi_scaffold   | 25606                          | [T/G]       | NA                                         |
| Ca_Desi_Ch_scaffold02562_26515 | Ca_desi_scaffold   | 26515                          | [A/T]       | NA                                         |



| <b>SNP IDs</b>                 | <b>Chromosomes</b> | <b>Physical positions (bp)</b> | <b>SNPs</b> | <b>NCBI SNPdb accession IDs (NCBI_ss#)</b> |
|--------------------------------|--------------------|--------------------------------|-------------|--------------------------------------------|
| Ca_Desi_Ch_scaffold02562_26633 | Ca_desi_scaffold   | 26633                          | [T/G]       | NA                                         |
| Ca_Desi_Ch_scaffold02562_35472 | Ca_desi_scaffold   | 35472                          | [T/C]       | NA                                         |
| Ca_Desi_Ch_scaffold02562_35478 | Ca_desi_scaffold   | 35478                          | [A/G]       | NA                                         |
| Ca_Desi_Ch_scaffold02562_35483 | Ca_desi_scaffold   | 35483                          | [A/C]       | NA                                         |
| Ca_Desi_Ch_scaffold02562_35486 | Ca_desi_scaffold   | 35486                          | [T/C]       | NA                                         |
| Ca_Desi_Ch_scaffold02562_35491 | Ca_desi_scaffold   | 35491                          | [A/G]       | NA                                         |
| Ca_Desi_Ch_scaffold02562_35512 | Ca_desi_scaffold   | 35512                          | [A/G]       | NA                                         |
| Ca_Desi_Ch_scaffold02566_17740 | Ca_desi_scaffold   | 17740                          | [A/T]       | NA                                         |
| Ca_Desi_Ch_scaffold02566_17748 | Ca_desi_scaffold   | 17748                          | [A/G]       | NA                                         |
| Ca_Desi_Ch_scaffold02566_17755 | Ca_desi_scaffold   | 17755                          | [G/T]       | NA                                         |
| Ca_Desi_Ch_scaffold02566_17756 | Ca_desi_scaffold   | 17756                          | [A/G]       | NA                                         |
| Ca_Desi_Ch_scaffold02566_17767 | Ca_desi_scaffold   | 17767                          | [A/G]       | NA                                         |
| Ca_Desi_Ch_scaffold02566_17776 | Ca_desi_scaffold   | 17776                          | [T/A]       | NA                                         |
| Ca_Desi_Ch_scaffold02573_24474 | Ca_desi_scaffold   | 24474                          | [T/G]       | NA                                         |
| Ca_Desi_Ch_scaffold02584_784   | Ca_desi_scaffold   | 784                            | [G/T]       | NA                                         |
| Ca_Desi_Ch_scaffold02584_793   | Ca_desi_scaffold   | 793                            | [T/C]       | NA                                         |
| Ca_Desi_Ch_scaffold02584_795   | Ca_desi_scaffold   | 795                            | [A/C]       | NA                                         |
| Ca_Desi_Ch_scaffold02584_797   | Ca_desi_scaffold   | 797                            | [T/C]       | NA                                         |
| Ca_Desi_Ch_scaffold02584_801   | Ca_desi_scaffold   | 801                            | [T/C]       | NA                                         |
| Ca_Desi_Ch_scaffold02584_803   | Ca_desi_scaffold   | 803                            | [C/A]       | NA                                         |
| Ca_Desi_Ch_scaffold02584_805   | Ca_desi_scaffold   | 805                            | [T/G]       | NA                                         |
| Ca_Desi_Ch_scaffold02584_820   | Ca_desi_scaffold   | 820                            | [T/C]       | NA                                         |
| Ca_Desi_Ch_scaffold02584_824   | Ca_desi_scaffold   | 824                            | [T/C]       | NA                                         |
| Ca_Desi_Ch_scaffold02584_825   | Ca_desi_scaffold   | 825                            | [C/G]       | NA                                         |
| Ca_Desi_Ch_scaffold02584_833   | Ca_desi_scaffold   | 833                            | [G/A]       | NA                                         |
| Ca_Desi_Ch_scaffold02584_33946 | Ca_desi_scaffold   | 33946                          | [T/A]       | NA                                         |
| Ca_Desi_Ch_scaffold02584_34087 | Ca_desi_scaffold   | 34087                          | [A/C]       | NA                                         |
| Ca_Desi_Ch_scaffold02592_4241  | Ca_desi_scaffold   | 4241                           | [A/G]       | NA                                         |
| Ca_Desi_Ch_scaffold02593_4635  | Ca_desi_scaffold   | 4635                           | [A/G]       | NA                                         |
| Ca_Desi_Ch_scaffold02595_17174 | Ca_desi_scaffold   | 17174                          | [C/G]       | NA                                         |
| Ca_Desi_Ch_scaffold02595_17176 | Ca_desi_scaffold   | 17176                          | [T/C]       | NA                                         |
| Ca_Desi_Ch_scaffold02595_17178 | Ca_desi_scaffold   | 17178                          | [T/A]       | NA                                         |
| Ca_Desi_Ch_scaffold02595_17194 | Ca_desi_scaffold   | 17194                          | [T/A]       | NA                                         |
| Ca_Desi_Ch_scaffold02595_32237 | Ca_desi_scaffold   | 32237                          | [T/C]       | NA                                         |

| <b>SNP IDs</b>                  | <b>Chromosomes</b> | <b>Physical positions (bp)</b> | <b>SNPs</b> | <b>NCBI SNPdb accession IDs (NCBI_ss#)</b> |
|---------------------------------|--------------------|--------------------------------|-------------|--------------------------------------------|
| Ca_DesigChr_scaffold02595_32270 | Ca_desig_scaffold  | 32270                          | [C/A]       | NA                                         |
| Ca_DesigChr_scaffold02595_34448 | Ca_desig_scaffold  | 34448                          | [A/T]       | NA                                         |
| Ca_DesigChr_scaffold02596_3362  | Ca_desig_scaffold  | 3362                           | [T/C]       | NA                                         |
| Ca_DesigChr_scaffold02596_3364  | Ca_desig_scaffold  | 3364                           | [T/C]       | NA                                         |
| Ca_DesigChr_scaffold02596_29935 | Ca_desig_scaffold  | 29935                          | [G/A]       | NA                                         |
| Ca_DesigChr_scaffold02602_3505  | Ca_desig_scaffold  | 3505                           | [A/C]       | NA                                         |
| Ca_DesigChr_scaffold02602_8133  | Ca_desig_scaffold  | 8133                           | [T/C]       | NA                                         |
| Ca_DesigChr_scaffold02602_8138  | Ca_desig_scaffold  | 8138                           | [A/G]       | NA                                         |
| Ca_DesigChr_scaffold02602_8152  | Ca_desig_scaffold  | 8152                           | [T/C]       | NA                                         |
| Ca_DesigChr_scaffold02602_8171  | Ca_desig_scaffold  | 8171                           | [T/C]       | NA                                         |
| Ca_DesigChr_scaffold02602_8182  | Ca_desig_scaffold  | 8182                           | [A/G]       | NA                                         |
| Ca_DesigChr_scaffold02602_8189  | Ca_desig_scaffold  | 8189                           | [T/C]       | NA                                         |
| Ca_DesigChr_scaffold02602_22134 | Ca_desig_scaffold  | 22134                          | [T/C]       | NA                                         |
| Ca_DesigChr_scaffold02602_22137 | Ca_desig_scaffold  | 22137                          | [A/T]       | NA                                         |
| Ca_DesigChr_scaffold02602_22138 | Ca_desig_scaffold  | 22138                          | [T/C]       | NA                                         |
| Ca_DesigChr_scaffold02602_22159 | Ca_desig_scaffold  | 22159                          | [G/T]       | NA                                         |
| Ca_DesigChr_scaffold02603_4424  | Ca_desig_scaffold  | 4424                           | [T/G]       | NA                                         |
| Ca_DesigChr_scaffold02603_4433  | Ca_desig_scaffold  | 4433                           | [A/G]       | NA                                         |
| Ca_DesigChr_scaffold02603_4559  | Ca_desig_scaffold  | 4559                           | [A/C]       | NA                                         |
| Ca_DesigChr_scaffold02603_7442  | Ca_desig_scaffold  | 7442                           | [G/A]       | NA                                         |
| Ca_DesigChr_scaffold02603_7443  | Ca_desig_scaffold  | 7443                           | [A/G]       | NA                                         |
| Ca_DesigChr_scaffold02603_7972  | Ca_desig_scaffold  | 7972                           | [T/G]       | NA                                         |
| Ca_DesigChr_scaffold02603_16445 | Ca_desig_scaffold  | 16445                          | [T/A]       | NA                                         |
| Ca_DesigChr_scaffold02603_16475 | Ca_desig_scaffold  | 16475                          | [A/T]       | NA                                         |
| Ca_DesigChr_scaffold02610_29165 | Ca_desig_scaffold  | 29165                          | [A/G]       | NA                                         |
| Ca_DesigChr_scaffold02610_29168 | Ca_desig_scaffold  | 29168                          | [G/T]       | NA                                         |
| Ca_DesigChr_scaffold02610_29170 | Ca_desig_scaffold  | 29170                          | [T/C]       | NA                                         |
| Ca_DesigChr_scaffold02610_29179 | Ca_desig_scaffold  | 29179                          | [A/T]       | NA                                         |
| Ca_DesigChr_scaffold02610_29186 | Ca_desig_scaffold  | 29186                          | [A/G]       | NA                                         |
| Ca_DesigChr_scaffold02610_29198 | Ca_desig_scaffold  | 29198                          | [T/G]       | NA                                         |
| Ca_DesigChr_scaffold02610_29200 | Ca_desig_scaffold  | 29200                          | [T/G]       | NA                                         |
| Ca_DesigChr_scaffold02610_29208 | Ca_desig_scaffold  | 29208                          | [T/G]       | NA                                         |
| Ca_DesigChr_scaffold02610_29213 | Ca_desig_scaffold  | 29213                          | [C/T]       | NA                                         |
| Ca_DesigChr_scaffold02610_29225 | Ca_desig_scaffold  | 29225                          | [T/C]       | NA                                         |

| <b>SNP IDs</b>                 | <b>Chromosomes</b> | <b>Physical positions (bp)</b> | <b>SNPs</b> | <b>NCBI SNPdb accession IDs (NCBI_ss#)</b> |
|--------------------------------|--------------------|--------------------------------|-------------|--------------------------------------------|
| Ca_Desi_Ch_scaffold02611_598   | Ca_desi_scaffold   | 598                            | [C/T]       | NA                                         |
| Ca_Desi_Ch_scaffold02613_23135 | Ca_desi_scaffold   | 23135                          | [T/C]       | NA                                         |
| Ca_Desi_Ch_scaffold02615_5918  | Ca_desi_scaffold   | 5918                           | [T/G]       | NA                                         |
| Ca_Desi_Ch_scaffold02616_19146 | Ca_desi_scaffold   | 19146                          | [T/G]       | NA                                         |
| Ca_Desi_Ch_scaffold02616_19155 | Ca_desi_scaffold   | 19155                          | [A/T]       | NA                                         |
| Ca_Desi_Ch_scaffold02619_19839 | Ca_desi_scaffold   | 19839                          | [T/G]       | NA                                         |
| Ca_Desi_Ch_scaffold02619_19842 | Ca_desi_scaffold   | 19842                          | [T/G]       | NA                                         |
| Ca_Desi_Ch_scaffold02619_19848 | Ca_desi_scaffold   | 19848                          | [T/G]       | NA                                         |
| Ca_Desi_Ch_scaffold02619_19856 | Ca_desi_scaffold   | 19856                          | [T/G]       | NA                                         |
| Ca_Desi_Ch_scaffold02620_3523  | Ca_desi_scaffold   | 3523                           | [A/G]       | NA                                         |
| Ca_Desi_Ch_scaffold02620_3544  | Ca_desi_scaffold   | 3544                           | [A/C]       | NA                                         |
| Ca_Desi_Ch_scaffold02620_7573  | Ca_desi_scaffold   | 7573                           | [T/G]       | NA                                         |
| Ca_Desi_Ch_scaffold02620_13497 | Ca_desi_scaffold   | 13497                          | [A/T]       | NA                                         |
| Ca_Desi_Ch_scaffold02620_13520 | Ca_desi_scaffold   | 13520                          | [T/C]       | NA                                         |
| Ca_Desi_Ch_scaffold02620_13523 | Ca_desi_scaffold   | 13523                          | [T/G]       | NA                                         |
| Ca_Desi_Ch_scaffold02620_13526 | Ca_desi_scaffold   | 13526                          | [C/G]       | NA                                         |
| Ca_Desi_Ch_scaffold02625_3275  | Ca_desi_scaffold   | 3275                           | [T/C]       | NA                                         |
| Ca_Desi_Ch_scaffold02625_3277  | Ca_desi_scaffold   | 3277                           | [T/C]       | NA                                         |
| Ca_Desi_Ch_scaffold02625_3282  | Ca_desi_scaffold   | 3282                           | [T/C]       | NA                                         |
| Ca_Desi_Ch_scaffold02625_3288  | Ca_desi_scaffold   | 3288                           | [G/A]       | NA                                         |
| Ca_Desi_Ch_scaffold02625_3295  | Ca_desi_scaffold   | 3295                           | [T/C]       | NA                                         |
| Ca_Desi_Ch_scaffold02625_3324  | Ca_desi_scaffold   | 3324                           | [T/G]       | NA                                         |
| Ca_Desi_Ch_scaffold02632_38661 | Ca_desi_scaffold   | 38661                          | [T/G]       | NA                                         |
| Ca_Desi_Ch_scaffold02632_38671 | Ca_desi_scaffold   | 38671                          | [T/G]       | NA                                         |
| Ca_Desi_Ch_scaffold02635_34690 | Ca_desi_scaffold   | 34690                          | [A/C]       | NA                                         |
| Ca_Desi_Ch_scaffold02635_34729 | Ca_desi_scaffold   | 34729                          | [T/G]       | NA                                         |
| Ca_Desi_Ch_scaffold02635_34732 | Ca_desi_scaffold   | 34732                          | [A/G]       | NA                                         |
| Ca_Desi_Ch_scaffold02639_22142 | Ca_desi_scaffold   | 22142                          | [A/T]       | NA                                         |
| Ca_Desi_Ch_scaffold02639_22166 | Ca_desi_scaffold   | 22166                          | [A/C]       | NA                                         |
| Ca_Desi_Ch_scaffold02639_22168 | Ca_desi_scaffold   | 22168                          | [A/C]       | NA                                         |
| Ca_Desi_Ch_scaffold02639_22180 | Ca_desi_scaffold   | 22180                          | [A/G]       | NA                                         |
| Ca_Desi_Ch_scaffold02642_6093  | Ca_desi_scaffold   | 6093                           | [G/T]       | NA                                         |
| Ca_Desi_Ch_scaffold02646_26626 | Ca_desi_scaffold   | 26626                          | [T/G]       | NA                                         |
| Ca_Desi_Ch_scaffold02651_7265  | Ca_desi_scaffold   | 7265                           | [T/C]       | NA                                         |

| <b>SNP IDs</b>                   | <b>Chromosomes</b> | <b>Physical positions (bp)</b> | <b>SNPs</b> | <b>NCBI SNPdb accession IDs (NCBI_ss#)</b> |
|----------------------------------|--------------------|--------------------------------|-------------|--------------------------------------------|
| Ca_Desig_Chr_scaffold02651_7268  | Ca_desig_scaffold  | 7268                           | [T/G]       | NA                                         |
| Ca_Desig_Chr_scaffold02651_7295  | Ca_desig_scaffold  | 7295                           | [A/G]       | NA                                         |
| Ca_Desig_Chr_scaffold02651_7310  | Ca_desig_scaffold  | 7310                           | [T/C]       | NA                                         |
| Ca_Desig_Chr_scaffold02651_7319  | Ca_desig_scaffold  | 7319                           | [A/C]       | NA                                         |
| Ca_Desig_Chr_scaffold02651_38826 | Ca_desig_scaffold  | 38826                          | [T/G]       | NA                                         |
| Ca_Desig_Chr_scaffold02651_39943 | Ca_desig_scaffold  | 39943                          | [A/C]       | NA                                         |
| Ca_Desig_Chr_scaffold02653_32606 | Ca_desig_scaffold  | 32606                          | [A/G]       | NA                                         |
| Ca_Desig_Chr_scaffold02653_32608 | Ca_desig_scaffold  | 32608                          | [A/G]       | NA                                         |
| Ca_Desig_Chr_scaffold02653_35896 | Ca_desig_scaffold  | 35896                          | [C/A]       | NA                                         |
| Ca_Desig_Chr_scaffold02653_35897 | Ca_desig_scaffold  | 35897                          | [T/G]       | NA                                         |
| Ca_Desig_Chr_scaffold02655_35738 | Ca_desig_scaffold  | 35738                          | [T/G]       | NA                                         |
| Ca_Desig_Chr_scaffold02655_35755 | Ca_desig_scaffold  | 35755                          | [T/G]       | NA                                         |
| Ca_Desig_Chr_scaffold02655_35757 | Ca_desig_scaffold  | 35757                          | [A/G]       | NA                                         |
| Ca_Desig_Chr_scaffold02660_17049 | Ca_desig_scaffold  | 17049                          | [T/G]       | NA                                         |
| Ca_Desig_Chr_scaffold02663_19718 | Ca_desig_scaffold  | 19718                          | [A/C]       | NA                                         |
| Ca_Desig_Chr_scaffold02663_19727 | Ca_desig_scaffold  | 19727                          | [A/C]       | NA                                         |
| Ca_Desig_Chr_scaffold02663_19781 | Ca_desig_scaffold  | 19781                          | [A/C]       | NA                                         |
| Ca_Desig_Chr_scaffold02663_19787 | Ca_desig_scaffold  | 19787                          | [A/C]       | NA                                         |
| Ca_Desig_Chr_scaffold02667_9737  | Ca_desig_scaffold  | 9737                           | [C/A]       | NA                                         |
| Ca_Desig_Chr_scaffold02667_17304 | Ca_desig_scaffold  | 17304                          | [G/A]       | NA                                         |
| Ca_Desig_Chr_scaffold02667_17313 | Ca_desig_scaffold  | 17313                          | [C/A]       | NA                                         |
| Ca_Desig_Chr_scaffold02667_17367 | Ca_desig_scaffold  | 17367                          | [A/G]       | NA                                         |
| Ca_Desig_Chr_scaffold02667_17368 | Ca_desig_scaffold  | 17368                          | [G/A]       | NA                                         |
| Ca_Desig_Chr_scaffold02667_17389 | Ca_desig_scaffold  | 17389                          | [T/C]       | NA                                         |
| Ca_Desig_Chr_scaffold02667_17390 | Ca_desig_scaffold  | 17390                          | [G/T]       | NA                                         |
| Ca_Desig_Chr_scaffold02667_17408 | Ca_desig_scaffold  | 17408                          | [A/C]       | NA                                         |
| Ca_Desig_Chr_scaffold02667_28631 | Ca_desig_scaffold  | 28631                          | [A/G]       | NA                                         |
| Ca_Desig_Chr_scaffold02667_28664 | Ca_desig_scaffold  | 28664                          | [C/A]       | NA                                         |
| Ca_Desig_Chr_scaffold02667_28726 | Ca_desig_scaffold  | 28726                          | [C/T]       | NA                                         |
| Ca_Desig_Chr_scaffold02667_29312 | Ca_desig_scaffold  | 29312                          | [T/C]       | NA                                         |
| Ca_Desig_Chr_scaffold02669_16936 | Ca_desig_scaffold  | 16936                          | [T/G]       | NA                                         |
| Ca_Desig_Chr_scaffold02669_16938 | Ca_desig_scaffold  | 16938                          | [A/T]       | NA                                         |
| Ca_Desig_Chr_scaffold02669_16941 | Ca_desig_scaffold  | 16941                          | [T/G]       | NA                                         |
| Ca_Desig_Chr_scaffold02669_16946 | Ca_desig_scaffold  | 16946                          | [C/G]       | NA                                         |

| <b>SNP IDs</b>                 | <b>Chromosomes</b> | <b>Physical positions (bp)</b> | <b>SNPs</b> | <b>NCBI SNPdb accession IDs (NCBI_ss#)</b> |
|--------------------------------|--------------------|--------------------------------|-------------|--------------------------------------------|
| Ca_Desi_Ch_scaffold02669_16947 | Ca_desi_scaffold   | 16947                          | [A/C]       | NA                                         |
| Ca_Desi_Ch_scaffold02669_16949 | Ca_desi_scaffold   | 16949                          | [A/G]       | NA                                         |
| Ca_Desi_Ch_scaffold02669_18692 | Ca_desi_scaffold   | 18692                          | [A/G]       | NA                                         |
| Ca_Desi_Ch_scaffold02669_18719 | Ca_desi_scaffold   | 18719                          | [A/G]       | NA                                         |
| Ca_Desi_Ch_scaffold02669_18730 | Ca_desi_scaffold   | 18730                          | [T/A]       | NA                                         |
| Ca_Desi_Ch_scaffold02669_36688 | Ca_desi_scaffold   | 36688                          | [T/C]       | NA                                         |
| Ca_Desi_Ch_scaffold02669_36713 | Ca_desi_scaffold   | 36713                          | [T/C]       | NA                                         |
| Ca_Desi_Ch_scaffold02670_28435 | Ca_desi_scaffold   | 28435                          | [C/T]       | NA                                         |
| Ca_Desi_Ch_scaffold02673_14233 | Ca_desi_scaffold   | 14233                          | [T/C]       | NA                                         |
| Ca_Desi_Ch_scaffold02673_14365 | Ca_desi_scaffold   | 14365                          | [C/T]       | NA                                         |
| Ca_Desi_Ch_scaffold02675_31671 | Ca_desi_scaffold   | 31671                          | [T/G]       | NA                                         |
| Ca_Desi_Ch_scaffold02675_31723 | Ca_desi_scaffold   | 31723                          | [A/C]       | NA                                         |
| Ca_Desi_Ch_scaffold02682_16230 | Ca_desi_scaffold   | 16230                          | [A/T]       | NA                                         |
| Ca_Desi_Ch_scaffold02682_38814 | Ca_desi_scaffold   | 38814                          | [T/G]       | NA                                         |
| Ca_Desi_Ch_scaffold02689_30356 | Ca_desi_scaffold   | 30356                          | [C/A]       | NA                                         |
| Ca_Desi_Ch_scaffold02693_12901 | Ca_desi_scaffold   | 12901                          | [A/G]       | NA                                         |
| Ca_Desi_Ch_scaffold02693_34356 | Ca_desi_scaffold   | 34356                          | [A/T]       | NA                                         |
| Ca_Desi_Ch_scaffold02693_34366 | Ca_desi_scaffold   | 34366                          | [C/T]       | NA                                         |
| Ca_Desi_Ch_scaffold02693_34406 | Ca_desi_scaffold   | 34406                          | [A/T]       | NA                                         |
| Ca_Desi_Ch_scaffold02693_34733 | Ca_desi_scaffold   | 34733                          | [G/A]       | NA                                         |
| Ca_Desi_Ch_scaffold02701_6630  | Ca_desi_scaffold   | 6630                           | [A/C]       | NA                                         |
| Ca_Desi_Ch_scaffold02701_6694  | Ca_desi_scaffold   | 6694                           | [T/C]       | NA                                         |
| Ca_Desi_Ch_scaffold02701_6697  | Ca_desi_scaffold   | 6697                           | [A/T]       | NA                                         |
| Ca_Desi_Ch_scaffold02701_6708  | Ca_desi_scaffold   | 6708                           | [A/C]       | NA                                         |
| Ca_Desi_Ch_scaffold02701_6729  | Ca_desi_scaffold   | 6729                           | [A/C]       | NA                                         |
| Ca_Desi_Ch_scaffold02701_6735  | Ca_desi_scaffold   | 6735                           | [T/C]       | NA                                         |
| Ca_Desi_Ch_scaffold02701_34128 | Ca_desi_scaffold   | 34128                          | [G/T]       | NA                                         |
| Ca_Desi_Ch_scaffold02703_3834  | Ca_desi_scaffold   | 3834                           | [G/A]       | NA                                         |
| Ca_Desi_Ch_scaffold02703_14631 | Ca_desi_scaffold   | 14631                          | [G/A]       | NA                                         |
| Ca_Desi_Ch_scaffold02703_14699 | Ca_desi_scaffold   | 14699                          | [T/G]       | NA                                         |
| Ca_Desi_Ch_scaffold02712_27000 | Ca_desi_scaffold   | 27000                          | [A/G]       | NA                                         |
| Ca_Desi_Ch_scaffold02712_27033 | Ca_desi_scaffold   | 27033                          | [T/C]       | NA                                         |
| Ca_Desi_Ch_scaffold02712_27038 | Ca_desi_scaffold   | 27038                          | [A/G]       | NA                                         |
| Ca_Desi_Ch_scaffold02712_27043 | Ca_desi_scaffold   | 27043                          | [T/C]       | NA                                         |

| <b>SNP IDs</b>                   | <b>Chromosomes</b> | <b>Physical positions (bp)</b> | <b>SNPs</b> | <b>NCBI SNPdb accession IDs (NCBI_ss#)</b> |
|----------------------------------|--------------------|--------------------------------|-------------|--------------------------------------------|
| Ca_Desig_Chr_scaffold02713_15222 | Ca_desig_scaffold  | 15222                          | [T/C]       | NA                                         |
| Ca_Desig_Chr_scaffold02713_15295 | Ca_desig_scaffold  | 15295                          | [A/T]       | NA                                         |
| Ca_Desig_Chr_scaffold02713_15312 | Ca_desig_scaffold  | 15312                          | [A/G]       | NA                                         |
| Ca_Desig_Chr_scaffold02713_15314 | Ca_desig_scaffold  | 15314                          | [A/G]       | NA                                         |
| Ca_Desig_Chr_scaffold02713_15320 | Ca_desig_scaffold  | 15320                          | [A/G]       | NA                                         |
| Ca_Desig_Chr_scaffold02713_15322 | Ca_desig_scaffold  | 15322                          | [T/C]       | NA                                         |
| Ca_Desig_Chr_scaffold02713_15333 | Ca_desig_scaffold  | 15333                          | [A/G]       | NA                                         |
| Ca_Desig_Chr_scaffold02713_15346 | Ca_desig_scaffold  | 15346                          | [A/T]       | NA                                         |
| Ca_Desig_Chr_scaffold02713_17358 | Ca_desig_scaffold  | 17358                          | [A/G]       | NA                                         |
| Ca_Desig_Chr_scaffold02714_17131 | Ca_desig_scaffold  | 17131                          | [A/G]       | NA                                         |
| Ca_Desig_Chr_scaffold02714_17155 | Ca_desig_scaffold  | 17155                          | [A/G]       | NA                                         |
| Ca_Desig_Chr_scaffold02714_17157 | Ca_desig_scaffold  | 17157                          | [T/G]       | NA                                         |
| Ca_Desig_Chr_scaffold02714_17160 | Ca_desig_scaffold  | 17160                          | [C/T]       | NA                                         |
| Ca_Desig_Chr_scaffold02714_17161 | Ca_desig_scaffold  | 17161                          | [T/C]       | NA                                         |
| Ca_Desig_Chr_scaffold02714_17162 | Ca_desig_scaffold  | 17162                          | [T/G]       | NA                                         |
| Ca_Desig_Chr_scaffold02714_17168 | Ca_desig_scaffold  | 17168                          | [T/C]       | NA                                         |
| Ca_Desig_Chr_scaffold02714_17178 | Ca_desig_scaffold  | 17178                          | [A/G]       | NA                                         |
| Ca_Desig_Chr_scaffold02714_17526 | Ca_desig_scaffold  | 17526                          | [T/G]       | NA                                         |
| Ca_Desig_Chr_scaffold02714_30191 | Ca_desig_scaffold  | 30191                          | [A/C]       | NA                                         |
| Ca_Desig_Chr_scaffold02717_9016  | Ca_desig_scaffold  | 9016                           | [T/C]       | NA                                         |
| Ca_Desig_Chr_scaffold02717_9042  | Ca_desig_scaffold  | 9042                           | [A/G]       | NA                                         |
| Ca_Desig_Chr_scaffold02717_20210 | Ca_desig_scaffold  | 20210                          | [A/G]       | NA                                         |
| Ca_Desig_Chr_scaffold02717_20248 | Ca_desig_scaffold  | 20248                          | [A/T]       | NA                                         |
| Ca_Desig_Chr_scaffold02717_20287 | Ca_desig_scaffold  | 20287                          | [A/C]       | NA                                         |
| Ca_Desig_Chr_scaffold02717_20308 | Ca_desig_scaffold  | 20308                          | [A/C]       | NA                                         |
| Ca_Desig_Chr_scaffold02717_20384 | Ca_desig_scaffold  | 20384                          | [T/G]       | NA                                         |
| Ca_Desig_Chr_scaffold02722_11659 | Ca_desig_scaffold  | 11659                          | [T/C]       | NA                                         |
| Ca_Desig_Chr_scaffold02724_21761 | Ca_desig_scaffold  | 21761                          | [T/C]       | NA                                         |
| Ca_Desig_Chr_scaffold02726_26805 | Ca_desig_scaffold  | 26805                          | [T/G]       | NA                                         |
| Ca_Desig_Chr_scaffold02734_20171 | Ca_desig_scaffold  | 20171                          | [A/G]       | NA                                         |
| Ca_Desig_Chr_scaffold02735_10694 | Ca_desig_scaffold  | 10694                          | [A/C]       | NA                                         |
| Ca_Desig_Chr_scaffold02735_10813 | Ca_desig_scaffold  | 10813                          | [C/T]       | NA                                         |
| Ca_Desig_Chr_scaffold02737_15151 | Ca_desig_scaffold  | 15151                          | [T/C]       | NA                                         |
| Ca_Desig_Chr_scaffold02740_7740  | Ca_desig_scaffold  | 7740                           | [C/A]       | NA                                         |

| <b>SNP IDs</b>                   | <b>Chromosomes</b> | <b>Physical positions (bp)</b> | <b>SNPs</b> | <b>NCBI SNPdb accession IDs (NCBI_ss#)</b> |
|----------------------------------|--------------------|--------------------------------|-------------|--------------------------------------------|
| Ca_Desig_Chr_scaffold02740_7741  | Ca_desig_scaffold  | 7741                           | [C/G]       | NA                                         |
| Ca_Desig_Chr_scaffold02740_19630 | Ca_desig_scaffold  | 19630                          | [A/C]       | NA                                         |
| Ca_Desig_Chr_scaffold02740_19640 | Ca_desig_scaffold  | 19640                          | [C/T]       | NA                                         |
| Ca_Desig_Chr_scaffold02748_18322 | Ca_desig_scaffold  | 18322                          | [T/G]       | NA                                         |
| Ca_Desig_Chr_scaffold02748_18450 | Ca_desig_scaffold  | 18450                          | [A/G]       | NA                                         |
| Ca_Desig_Chr_scaffold02748_18472 | Ca_desig_scaffold  | 18472                          | [T/G]       | NA                                         |
| Ca_Desig_Chr_scaffold02748_38526 | Ca_desig_scaffold  | 38526                          | [T/C]       | NA                                         |
| Ca_Desig_Chr_scaffold02748_38603 | Ca_desig_scaffold  | 38603                          | [T/G]       | NA                                         |
| Ca_Desig_Chr_scaffold02748_38646 | Ca_desig_scaffold  | 38646                          | [A/C]       | NA                                         |
| Ca_Desig_Chr_scaffold02750_14951 | Ca_desig_scaffold  | 14951                          | [T/C]       | NA                                         |
| Ca_Desig_Chr_scaffold02750_19276 | Ca_desig_scaffold  | 19276                          | [C/T]       | NA                                         |
| Ca_Desig_Chr_scaffold02759_10366 | Ca_desig_scaffold  | 10366                          | [G/C]       | NA                                         |
| Ca_Desig_Chr_scaffold02759_10384 | Ca_desig_scaffold  | 10384                          | [A/C]       | NA                                         |
| Ca_Desig_Chr_scaffold02759_10412 | Ca_desig_scaffold  | 10412                          | [A/C]       | NA                                         |
| Ca_Desig_Chr_scaffold02776_17074 | Ca_desig_scaffold  | 17074                          | [T/C]       | NA                                         |
| Ca_Desig_Chr_scaffold02777_3479  | Ca_desig_scaffold  | 3479                           | [C/A]       | NA                                         |
| Ca_Desig_Chr_scaffold02777_33018 | Ca_desig_scaffold  | 33018                          | [T/C]       | NA                                         |
| Ca_Desig_Chr_scaffold02777_33022 | Ca_desig_scaffold  | 33022                          | [T/C]       | NA                                         |
| Ca_Desig_Chr_scaffold02777_33026 | Ca_desig_scaffold  | 33026                          | [T/C]       | NA                                         |
| Ca_Desig_Chr_scaffold02777_33029 | Ca_desig_scaffold  | 33029                          | [T/C]       | NA                                         |
| Ca_Desig_Chr_scaffold02777_33031 | Ca_desig_scaffold  | 33031                          | [T/G]       | NA                                         |
| Ca_Desig_Chr_scaffold02777_33036 | Ca_desig_scaffold  | 33036                          | [A/G]       | NA                                         |
| Ca_Desig_Chr_scaffold02777_33037 | Ca_desig_scaffold  | 33037                          | [G/T]       | NA                                         |
| Ca_Desig_Chr_scaffold02777_33041 | Ca_desig_scaffold  | 33041                          | [C/G]       | NA                                         |
| Ca_Desig_Chr_scaffold02777_33046 | Ca_desig_scaffold  | 33046                          | [G/T]       | NA                                         |
| Ca_Desig_Chr_scaffold02777_33057 | Ca_desig_scaffold  | 33057                          | [A/G]       | NA                                         |
| Ca_Desig_Chr_scaffold02778_6920  | Ca_desig_scaffold  | 6920                           | [A/C]       | NA                                         |
| Ca_Desig_Chr_scaffold02778_6921  | Ca_desig_scaffold  | 6921                           | [G/T]       | NA                                         |
| Ca_Desig_Chr_scaffold02781_20009 | Ca_desig_scaffold  | 20009                          | [A/G]       | NA                                         |
| Ca_Desig_Chr_scaffold02781_20888 | Ca_desig_scaffold  | 20888                          | [T/C]       | NA                                         |
| Ca_Desig_Chr_scaffold02781_20915 | Ca_desig_scaffold  | 20915                          | [A/C]       | NA                                         |
| Ca_Desig_Chr_scaffold02787_2466  | Ca_desig_scaffold  | 2466                           | [C/T]       | NA                                         |
| Ca_Desig_Chr_scaffold02802_21417 | Ca_desig_scaffold  | 21417                          | [A/C]       | NA                                         |
| Ca_Desig_Chr_scaffold02804_18197 | Ca_desig_scaffold  | 18197                          | [T/A]       | NA                                         |

| <b>SNP IDs</b>                    | <b>Chromosomes</b> | <b>Physical positions (bp)</b> | <b>SNPs</b> | <b>NCBI SNPdb accession IDs (NCBI_ss#)</b> |
|-----------------------------------|--------------------|--------------------------------|-------------|--------------------------------------------|
| Ca_Desi_Chrom_scaffold02804_18218 | Ca_desi_scaffold   | 18218                          | [T/C]       | NA                                         |
| Ca_Desi_Chrom_scaffold02804_18239 | Ca_desi_scaffold   | 18239                          | [T/C]       | NA                                         |
| Ca_Desi_Chrom_scaffold02804_18241 | Ca_desi_scaffold   | 18241                          | [G/T]       | NA                                         |
| Ca_Desi_Chrom_scaffold02804_18278 | Ca_desi_scaffold   | 18278                          | [T/C]       | NA                                         |
| Ca_Desi_Chrom_scaffold02821_15956 | Ca_desi_scaffold   | 15956                          | [T/C]       | NA                                         |
| Ca_Desi_Chrom_scaffold02821_15976 | Ca_desi_scaffold   | 15976                          | [T/C]       | NA                                         |
| Ca_Desi_Chrom_scaffold02821_15978 | Ca_desi_scaffold   | 15978                          | [T/C]       | NA                                         |
| Ca_Desi_Chrom_scaffold02821_15988 | Ca_desi_scaffold   | 15988                          | [A/T]       | NA                                         |
| Ca_Desi_Chrom_scaffold02821_15991 | Ca_desi_scaffold   | 15991                          | [T/C]       | NA                                         |
| Ca_Desi_Chrom_scaffold02821_15996 | Ca_desi_scaffold   | 15996                          | [T/G]       | NA                                         |
| Ca_Desi_Chrom_scaffold02833_28955 | Ca_desi_scaffold   | 28955                          | [A/C]       | NA                                         |
| Ca_Desi_Chrom_scaffold02833_28971 | Ca_desi_scaffold   | 28971                          | [A/G]       | NA                                         |
| Ca_Desi_Chrom_scaffold02836_3402  | Ca_desi_scaffold   | 3402                           | [A/G]       | NA                                         |
| Ca_Desi_Chrom_scaffold02836_3410  | Ca_desi_scaffold   | 3410                           | [C/T]       | NA                                         |
| Ca_Desi_Chrom_scaffold02844_30219 | Ca_desi_scaffold   | 30219                          | [T/C]       | NA                                         |
| Ca_Desi_Chrom_scaffold02844_30256 | Ca_desi_scaffold   | 30256                          | [T/G]       | NA                                         |
| Ca_Desi_Chrom_scaffold02845_1822  | Ca_desi_scaffold   | 1822                           | [T/C]       | NA                                         |
| Ca_Desi_Chrom_scaffold02845_1833  | Ca_desi_scaffold   | 1833                           | [A/C]       | NA                                         |
| Ca_Desi_Chrom_scaffold02850_5372  | Ca_desi_scaffold   | 5372                           | [T/C]       | NA                                         |
| Ca_Desi_Chrom_scaffold02850_6654  | Ca_desi_scaffold   | 6654                           | [T/C]       | NA                                         |
| Ca_Desi_Chrom_scaffold02850_6687  | Ca_desi_scaffold   | 6687                           | [T/C]       | NA                                         |
| Ca_Desi_Chrom_scaffold02850_6769  | Ca_desi_scaffold   | 6769                           | [A/C]       | NA                                         |
| Ca_Desi_Chrom_scaffold02857_17579 | Ca_desi_scaffold   | 17579                          | [T/G]       | NA                                         |
| Ca_Desi_Chrom_scaffold02857_22847 | Ca_desi_scaffold   | 22847                          | [T/G]       | NA                                         |
| Ca_Desi_Chrom_scaffold02859_13104 | Ca_desi_scaffold   | 13104                          | [T/G]       | NA                                         |
| Ca_Desi_Chrom_scaffold02859_13196 | Ca_desi_scaffold   | 13196                          | [G/T]       | NA                                         |
| Ca_Desi_Chrom_scaffold02868_25199 | Ca_desi_scaffold   | 25199                          | [A/T]       | NA                                         |
| Ca_Desi_Chrom_scaffold02872_24599 | Ca_desi_scaffold   | 24599                          | [A/C]       | NA                                         |
| Ca_Desi_Chrom_scaffold02872_24623 | Ca_desi_scaffold   | 24623                          | [A/T]       | NA                                         |
| Ca_Desi_Chrom_scaffold02882_27389 | Ca_desi_scaffold   | 27389                          | [G/A]       | NA                                         |
| Ca_Desi_Chrom_scaffold02882_28545 | Ca_desi_scaffold   | 28545                          | [T/A]       | NA                                         |
| Ca_Desi_Chrom_scaffold02882_28845 | Ca_desi_scaffold   | 28845                          | [T/G]       | NA                                         |
| Ca_Desi_Chrom_scaffold02882_28847 | Ca_desi_scaffold   | 28847                          | [T/G]       | NA                                         |
| Ca_Desi_Chrom_scaffold02890_4753  | Ca_desi_scaffold   | 4753                           | [C/A]       | NA                                         |



| <b>SNP IDs</b>                 | <b>Chromosomes</b> | <b>Physical positions (bp)</b> | <b>SNPs</b> | <b>NCBI SNPdb accession IDs (NCBI_ss#)</b> |
|--------------------------------|--------------------|--------------------------------|-------------|--------------------------------------------|
| Ca_Desi_Ch_scaffold02890_4754  | Ca_desi_scaffold   | 4754                           | [A/G]       | NA                                         |
| Ca_Desi_Ch_scaffold02912_12193 | Ca_desi_scaffold   | 12193                          | [C/G]       | NA                                         |
| Ca_Desi_Ch_scaffold02912_12194 | Ca_desi_scaffold   | 12194                          | [C/A]       | NA                                         |
| Ca_Desi_Ch_scaffold02912_12196 | Ca_desi_scaffold   | 12196                          | [G/C]       | NA                                         |
| Ca_Desi_Ch_scaffold02912_12197 | Ca_desi_scaffold   | 12197                          | [G/T]       | NA                                         |
| Ca_Desi_Ch_scaffold02918_5634  | Ca_desi_scaffold   | 5634                           | [C/T]       | NA                                         |
| Ca_Desi_Ch_scaffold02918_5647  | Ca_desi_scaffold   | 5647                           | [A/G]       | NA                                         |
| Ca_Desi_Ch_scaffold02918_5661  | Ca_desi_scaffold   | 5661                           | [A/G]       | NA                                         |
| Ca_Desi_Ch_scaffold02919_13761 | Ca_desi_scaffold   | 13761                          | [A/C]       | NA                                         |
| Ca_Desi_Ch_scaffold02920_2806  | Ca_desi_scaffold   | 2806                           | [T/C]       | NA                                         |
| Ca_Desi_Ch_scaffold02922_2020  | Ca_desi_scaffold   | 2020                           | [A/C]       | NA                                         |
| Ca_Desi_Ch_scaffold02923_3643  | Ca_desi_scaffold   | 3643                           | [A/C]       | NA                                         |
| Ca_Desi_Ch_scaffold02924_33074 | Ca_desi_scaffold   | 33074                          | [T/C]       | NA                                         |
| Ca_Desi_Ch_scaffold02924_33103 | Ca_desi_scaffold   | 33103                          | [T/C]       | NA                                         |
| Ca_Desi_Ch_scaffold02925_35677 | Ca_desi_scaffold   | 35677                          | [A/G]       | NA                                         |
| Ca_Desi_Ch_scaffold02925_35703 | Ca_desi_scaffold   | 35703                          | [G/A]       | NA                                         |
| Ca_Desi_Ch_scaffold02925_35707 | Ca_desi_scaffold   | 35707                          | [C/T]       | NA                                         |
| Ca_Desi_Ch_scaffold02932_4567  | Ca_desi_scaffold   | 4567                           | [T/G]       | NA                                         |
| Ca_Desi_Ch_scaffold02932_4571  | Ca_desi_scaffold   | 4571                           | [A/G]       | NA                                         |
| Ca_Desi_Ch_scaffold02942_23253 | Ca_desi_scaffold   | 23253                          | [T/C]       | NA                                         |
| Ca_Desi_Ch_scaffold02942_24491 | Ca_desi_scaffold   | 24491                          | [T/C]       | NA                                         |
| Ca_Desi_Ch_scaffold02942_24495 | Ca_desi_scaffold   | 24495                          | [T/G]       | NA                                         |
| Ca_Desi_Ch_scaffold02949_4089  | Ca_desi_scaffold   | 4089                           | [A/C]       | NA                                         |
| Ca_Desi_Ch_scaffold02949_4186  | Ca_desi_scaffold   | 4186                           | [C/A]       | NA                                         |
| Ca_Desi_Ch_scaffold02949_4187  | Ca_desi_scaffold   | 4187                           | [A/G]       | NA                                         |
| Ca_Desi_Ch_scaffold02949_4189  | Ca_desi_scaffold   | 4189                           | [A/T]       | NA                                         |
| Ca_Desi_Ch_scaffold02949_4474  | Ca_desi_scaffold   | 4474                           | [T/C]       | NA                                         |
| Ca_Desi_Ch_scaffold02968_23816 | Ca_desi_scaffold   | 23816                          | [A/G]       | NA                                         |
| Ca_Desi_Ch_scaffold02972_24031 | Ca_desi_scaffold   | 24031                          | [C/T]       | NA                                         |
| Ca_Desi_Ch_scaffold02972_24478 | Ca_desi_scaffold   | 24478                          | [G/T]       | NA                                         |
| Ca_Desi_Ch_scaffold02972_24479 | Ca_desi_scaffold   | 24479                          | [T/A]       | NA                                         |
| Ca_Desi_Ch_scaffold02972_26247 | Ca_desi_scaffold   | 26247                          | [C/A]       | NA                                         |
| Ca_Desi_Ch_scaffold02972_26248 | Ca_desi_scaffold   | 26248                          | [A/C]       | NA                                         |
| Ca_Desi_Ch_scaffold02972_26252 | Ca_desi_scaffold   | 26252                          | [G/A]       | NA                                         |

| <b>SNP IDs</b>                  | <b>Chromosomes</b> | <b>Physical positions (bp)</b> | <b>SNPs</b> | <b>NCBI SNPdb accession IDs (NCBI_ss#)</b> |
|---------------------------------|--------------------|--------------------------------|-------------|--------------------------------------------|
| Ca_DesigChr_scaffold02972_26313 | Ca_desig_scaffold  | 26313                          | [C/T]       | NA                                         |
| Ca_DesigChr_scaffold02972_26333 | Ca_desig_scaffold  | 26333                          | [A/C]       | NA                                         |
| Ca_DesigChr_scaffold02972_26337 | Ca_desig_scaffold  | 26337                          | [A/G]       | NA                                         |
| Ca_DesigChr_scaffold02972_26362 | Ca_desig_scaffold  | 26362                          | [A/C]       | NA                                         |
| Ca_DesigChr_scaffold02972_26365 | Ca_desig_scaffold  | 26365                          | [C/A]       | NA                                         |
| Ca_DesigChr_scaffold02972_26366 | Ca_desig_scaffold  | 26366                          | [A/G]       | NA                                         |
| Ca_DesigChr_scaffold02972_26368 | Ca_desig_scaffold  | 26368                          | [A/G]       | NA                                         |
| Ca_DesigChr_scaffold02972_26380 | Ca_desig_scaffold  | 26380                          | [C/T]       | NA                                         |
| Ca_DesigChr_scaffold02972_26396 | Ca_desig_scaffold  | 26396                          | [A/G]       | NA                                         |
| Ca_DesigChr_scaffold02972_26397 | Ca_desig_scaffold  | 26397                          | [A/C]       | NA                                         |
| Ca_DesigChr_scaffold02972_26408 | Ca_desig_scaffold  | 26408                          | [G/A]       | NA                                         |
| Ca_DesigChr_scaffold02972_26411 | Ca_desig_scaffold  | 26411                          | [T/G]       | NA                                         |
| Ca_DesigChr_scaffold02972_26437 | Ca_desig_scaffold  | 26437                          | [C/G]       | NA                                         |
| Ca_DesigChr_scaffold02972_31159 | Ca_desig_scaffold  | 31159                          | [G/A]       | NA                                         |
| Ca_DesigChr_scaffold02972_33313 | Ca_desig_scaffold  | 33313                          | [T/G]       | NA                                         |
| Ca_DesigChr_scaffold02982_9422  | Ca_desig_scaffold  | 9422                           | [T/G]       | NA                                         |
| Ca_DesigChr_scaffold02983_1562  | Ca_desig_scaffold  | 1562                           | [C/T]       | NA                                         |
| Ca_DesigChr_scaffold02983_12599 | Ca_desig_scaffold  | 12599                          | [G/A]       | NA                                         |
| Ca_DesigChr_scaffold02983_12629 | Ca_desig_scaffold  | 12629                          | [G/C]       | NA                                         |
| Ca_DesigChr_scaffold02983_12630 | Ca_desig_scaffold  | 12630                          | [A/T]       | NA                                         |
| Ca_DesigChr_scaffold02984_9195  | Ca_desig_scaffold  | 9195                           | [A/G]       | NA                                         |
| Ca_DesigChr_scaffold02984_31723 | Ca_desig_scaffold  | 31723                          | [T/G]       | NA                                         |
| Ca_DesigChr_scaffold02996_5981  | Ca_desig_scaffold  | 5981                           | [A/C]       | NA                                         |
| Ca_DesigChr_scaffold02996_5985  | Ca_desig_scaffold  | 5985                           | [G/A]       | NA                                         |
| Ca_DesigChr_scaffold02996_6654  | Ca_desig_scaffold  | 6654                           | [T/G]       | NA                                         |
| Ca_DesigChr_scaffold02996_6656  | Ca_desig_scaffold  | 6656                           | [A/G]       | NA                                         |
| Ca_DesigChr_scaffold02999_24593 | Ca_desig_scaffold  | 24593                          | [T/G]       | NA                                         |
| Ca_DesigChr_scaffold02999_24634 | Ca_desig_scaffold  | 24634                          | [T/C]       | NA                                         |
| Ca_DesigChr_scaffold02999_24636 | Ca_desig_scaffold  | 24636                          | [C/A]       | NA                                         |
| Ca_DesigChr_scaffold03000_2675  | Ca_desig_scaffold  | 2675                           | [A/C]       | NA                                         |
| Ca_DesigChr_scaffold03004_2560  | Ca_desig_scaffold  | 2560                           | [C/A]       | NA                                         |
| Ca_DesigChr_scaffold03004_18460 | Ca_desig_scaffold  | 18460                          | [G/A]       | NA                                         |
| Ca_DesigChr_scaffold03004_18478 | Ca_desig_scaffold  | 18478                          | [C/T]       | NA                                         |
| Ca_DesigChr_scaffold03004_21059 | Ca_desig_scaffold  | 21059                          | [C/G]       | NA                                         |

| <b>SNP IDs</b>                   | <b>Chromosomes</b> | <b>Physical positions (bp)</b> | <b>SNPs</b> | <b>NCBI SNPdb accession IDs (NCBI_ss#)</b> |
|----------------------------------|--------------------|--------------------------------|-------------|--------------------------------------------|
| Ca_Desig_Chr_scaffold03004_21773 | Ca_desig_scaffold  | 21773                          | [G/A]       | NA                                         |
| Ca_Desig_Chr_scaffold03004_24459 | Ca_desig_scaffold  | 24459                          | [A/G]       | NA                                         |
| Ca_Desig_Chr_scaffold03004_24624 | Ca_desig_scaffold  | 24624                          | [T/A]       | NA                                         |
| Ca_Desig_Chr_scaffold03004_24712 | Ca_desig_scaffold  | 24712                          | [T/G]       | NA                                         |
| Ca_Desig_Chr_scaffold03004_24760 | Ca_desig_scaffold  | 24760                          | [T/C]       | NA                                         |
| Ca_Desig_Chr_scaffold03004_24839 | Ca_desig_scaffold  | 24839                          | [G/A]       | NA                                         |
| Ca_Desig_Chr_scaffold03026_31679 | Ca_desig_scaffold  | 31679                          | [A/T]       | NA                                         |
| Ca_Desig_Chr_scaffold03026_31705 | Ca_desig_scaffold  | 31705                          | [C/G]       | NA                                         |
| Ca_Desig_Chr_scaffold03026_31721 | Ca_desig_scaffold  | 31721                          | [C/T]       | NA                                         |
| Ca_Desig_Chr_scaffold03026_31734 | Ca_desig_scaffold  | 31734                          | [G/A]       | NA                                         |
| Ca_Desig_Chr_scaffold03026_31778 | Ca_desig_scaffold  | 31778                          | [G/A]       | NA                                         |
| Ca_Desig_Chr_scaffold03030_13422 | Ca_desig_scaffold  | 13422                          | [A/C]       | NA                                         |
| Ca_Desig_Chr_scaffold03030_16041 | Ca_desig_scaffold  | 16041                          | [T/C]       | NA                                         |
| Ca_Desig_Chr_scaffold03031_29777 | Ca_desig_scaffold  | 29777                          | [A/T]       | NA                                         |
| Ca_Desig_Chr_scaffold03036_1050  | Ca_desig_scaffold  | 1050                           | [A/C]       | NA                                         |
| Ca_Desig_Chr_scaffold03036_1054  | Ca_desig_scaffold  | 1054                           | [A/C]       | NA                                         |
| Ca_Desig_Chr_scaffold03049_11148 | Ca_desig_scaffold  | 11148                          | [A/C]       | NA                                         |
| Ca_Desig_Chr_scaffold03052_28024 | Ca_desig_scaffold  | 28024                          | [G/A]       | NA                                         |
| Ca_Desig_Chr_scaffold03053_29468 | Ca_desig_scaffold  | 29468                          | [T/G]       | NA                                         |
| Ca_Desig_Chr_scaffold03054_10442 | Ca_desig_scaffold  | 10442                          | [A/C]       | NA                                         |
| Ca_Desig_Chr_scaffold03054_10448 | Ca_desig_scaffold  | 10448                          | [A/C]       | NA                                         |
| Ca_Desig_Chr_scaffold03057_10447 | Ca_desig_scaffold  | 10447                          | [A/G]       | NA                                         |
| Ca_Desig_Chr_scaffold03057_10450 | Ca_desig_scaffold  | 10450                          | [A/G]       | NA                                         |
| Ca_Desig_Chr_scaffold03057_10453 | Ca_desig_scaffold  | 10453                          | [T/G]       | NA                                         |
| Ca_Desig_Chr_scaffold03060_31683 | Ca_desig_scaffold  | 31683                          | [C/T]       | NA                                         |
| Ca_Desig_Chr_scaffold03060_31713 | Ca_desig_scaffold  | 31713                          | [G/A]       | NA                                         |
| Ca_Desig_Chr_scaffold03060_31725 | Ca_desig_scaffold  | 31725                          | [G/T]       | NA                                         |
| Ca_Desig_Chr_scaffold03060_31730 | Ca_desig_scaffold  | 31730                          | [T/G]       | NA                                         |
| Ca_Desig_Chr_scaffold03061_4958  | Ca_desig_scaffold  | 4958                           | [A/G]       | NA                                         |
| Ca_Desig_Chr_scaffold03069_2257  | Ca_desig_scaffold  | 2257                           | [T/G]       | NA                                         |
| Ca_Desig_Chr_scaffold03069_2258  | Ca_desig_scaffold  | 2258                           | [C/A]       | NA                                         |
| Ca_Desig_Chr_scaffold03069_2259  | Ca_desig_scaffold  | 2259                           | [T/G]       | NA                                         |
| Ca_Desig_Chr_scaffold03070_18155 | Ca_desig_scaffold  | 18155                          | [T/A]       | NA                                         |
| Ca_Desig_Chr_scaffold03081_11542 | Ca_desig_scaffold  | 11542                          | [A/G]       | NA                                         |

| <b>SNP IDs</b>                 | <b>Chromosomes</b> | <b>Physical positions (bp)</b> | <b>SNPs</b> | <b>NCBI SNPdb accession IDs (NCBI_ss#)</b> |
|--------------------------------|--------------------|--------------------------------|-------------|--------------------------------------------|
| Ca_Desi_Ch_scaffold03081_11562 | Ca_desi_scaffold   | 11562                          | [C/T]       | NA                                         |
| Ca_Desi_Ch_scaffold03081_11574 | Ca_desi_scaffold   | 11574                          | [G/T]       | NA                                         |
| Ca_Desi_Ch_scaffold03081_11575 | Ca_desi_scaffold   | 11575                          | [T/G]       | NA                                         |
| Ca_Desi_Ch_scaffold03081_11587 | Ca_desi_scaffold   | 11587                          | [T/G]       | NA                                         |
| Ca_Desi_Ch_scaffold03081_11590 | Ca_desi_scaffold   | 11590                          | [A/C]       | NA                                         |
| Ca_Desi_Ch_scaffold03081_21369 | Ca_desi_scaffold   | 21369                          | [T/C]       | NA                                         |
| Ca_Desi_Ch_scaffold03081_21395 | Ca_desi_scaffold   | 21395                          | [A/C]       | NA                                         |
| Ca_Desi_Ch_scaffold03081_21521 | Ca_desi_scaffold   | 21521                          | [A/C]       | NA                                         |
| Ca_Desi_Ch_scaffold03081_21540 | Ca_desi_scaffold   | 21540                          | [T/C]       | NA                                         |
| Ca_Desi_Ch_scaffold03081_21717 | Ca_desi_scaffold   | 21717                          | [T/G]       | NA                                         |
| Ca_Desi_Ch_scaffold03081_25848 | Ca_desi_scaffold   | 25848                          | [T/A]       | NA                                         |
| Ca_Desi_Ch_scaffold03083_13887 | Ca_desi_scaffold   | 13887                          | [C/A]       | NA                                         |
| Ca_Desi_Ch_scaffold03095_20545 | Ca_desi_scaffold   | 20545                          | [T/G]       | NA                                         |
| Ca_Desi_Ch_scaffold03095_23355 | Ca_desi_scaffold   | 23355                          | [T/A]       | NA                                         |
| Ca_Desi_Ch_scaffold03104_2617  | Ca_desi_scaffold   | 2617                           | [T/C]       | NA                                         |
| Ca_Desi_Ch_scaffold03104_2625  | Ca_desi_scaffold   | 2625                           | [A/G]       | NA                                         |
| Ca_Desi_Ch_scaffold03104_2635  | Ca_desi_scaffold   | 2635                           | [A/G]       | NA                                         |
| Ca_Desi_Ch_scaffold03111_4778  | Ca_desi_scaffold   | 4778                           | [A/G]       | NA                                         |
| Ca_Desi_Ch_scaffold03111_8472  | Ca_desi_scaffold   | 8472                           | [T/C]       | NA                                         |
| Ca_Desi_Ch_scaffold03111_8503  | Ca_desi_scaffold   | 8503                           | [A/G]       | NA                                         |
| Ca_Desi_Ch_scaffold03111_12956 | Ca_desi_scaffold   | 12956                          | [A/C]       | NA                                         |
| Ca_Desi_Ch_scaffold03119_2133  | Ca_desi_scaffold   | 2133                           | [A/T]       | NA                                         |
| Ca_Desi_Ch_scaffold03119_2156  | Ca_desi_scaffold   | 2156                           | [G/A]       | NA                                         |
| Ca_Desi_Ch_scaffold03122_20712 | Ca_desi_scaffold   | 20712                          | [G/A]       | NA                                         |
| Ca_Desi_Ch_scaffold03132_13301 | Ca_desi_scaffold   | 13301                          | [T/A]       | NA                                         |
| Ca_Desi_Ch_scaffold03132_13390 | Ca_desi_scaffold   | 13390                          | [A/C]       | NA                                         |
| Ca_Desi_Ch_scaffold03133_2382  | Ca_desi_scaffold   | 2382                           | [T/C]       | NA                                         |
| Ca_Desi_Ch_scaffold03133_2389  | Ca_desi_scaffold   | 2389                           | [T/A]       | NA                                         |
| Ca_Desi_Ch_scaffold03133_2396  | Ca_desi_scaffold   | 2396                           | [T/C]       | NA                                         |
| Ca_Desi_Ch_scaffold03133_2398  | Ca_desi_scaffold   | 2398                           | [T/C]       | NA                                         |
| Ca_Desi_Ch_scaffold03133_2401  | Ca_desi_scaffold   | 2401                           | [T/C]       | NA                                         |
| Ca_Desi_Ch_scaffold03133_2405  | Ca_desi_scaffold   | 2405                           | [T/C]       | NA                                         |
| Ca_Desi_Ch_scaffold03133_2411  | Ca_desi_scaffold   | 2411                           | [A/G]       | NA                                         |
| Ca_Desi_Ch_scaffold03133_2413  | Ca_desi_scaffold   | 2413                           | [A/G]       | NA                                         |

| <b>SNP IDs</b>                   | <b>Chromosomes</b> | <b>Physical positions (bp)</b> | <b>SNPs</b> | <b>NCBI SNPdb accession IDs (NCBI_ss#)</b> |
|----------------------------------|--------------------|--------------------------------|-------------|--------------------------------------------|
| Ca_Desig_Chr_scaffold03133_2415  | Ca_desig_scaffold  | 2415                           | [A/G]       | NA                                         |
| Ca_Desig_Chr_scaffold03133_2427  | Ca_desig_scaffold  | 2427                           | [T/A]       | NA                                         |
| Ca_Desig_Chr_scaffold03133_8922  | Ca_desig_scaffold  | 8922                           | [C/T]       | NA                                         |
| Ca_Desig_Chr_scaffold03140_2559  | Ca_desig_scaffold  | 2559                           | [G/A]       | NA                                         |
| Ca_Desig_Chr_scaffold03147_19442 | Ca_desig_scaffold  | 19442                          | [T/C]       | NA                                         |
| Ca_Desig_Chr_scaffold03147_19445 | Ca_desig_scaffold  | 19445                          | [G/A]       | NA                                         |
| Ca_Desig_Chr_scaffold03147_19449 | Ca_desig_scaffold  | 19449                          | [C/T]       | NA                                         |
| Ca_Desig_Chr_scaffold03147_19451 | Ca_desig_scaffold  | 19451                          | [A/C]       | NA                                         |
| Ca_Desig_Chr_scaffold03147_19453 | Ca_desig_scaffold  | 19453                          | [A/C]       | NA                                         |
| Ca_Desig_Chr_scaffold03163_531   | Ca_desig_scaffold  | 531                            | [C/A]       | NA                                         |
| Ca_Desig_Chr_scaffold03181_8835  | Ca_desig_scaffold  | 8835                           | [T/C]       | NA                                         |
| Ca_Desig_Chr_scaffold03181_23286 | Ca_desig_scaffold  | 23286                          | [A/C]       | NA                                         |
| Ca_Desig_Chr_scaffold03182_7138  | Ca_desig_scaffold  | 7138                           | [T/G]       | NA                                         |
| Ca_Desig_Chr_scaffold03186_10976 | Ca_desig_scaffold  | 10976                          | [C/G]       | NA                                         |
| Ca_Desig_Chr_scaffold03186_10977 | Ca_desig_scaffold  | 10977                          | [T/G]       | NA                                         |
| Ca_Desig_Chr_scaffold03190_14308 | Ca_desig_scaffold  | 14308                          | [A/C]       | NA                                         |
| Ca_Desig_Chr_scaffold03190_28094 | Ca_desig_scaffold  | 28094                          | [C/G]       | NA                                         |
| Ca_Desig_Chr_scaffold03200_14144 | Ca_desig_scaffold  | 14144                          | [A/G]       | NA                                         |
| Ca_Desig_Chr_scaffold03202_19918 | Ca_desig_scaffold  | 19918                          | [A/G]       | NA                                         |
| Ca_Desig_Chr_scaffold03210_6991  | Ca_desig_scaffold  | 6991                           | [G/A]       | NA                                         |
| Ca_Desig_Chr_scaffold03223_19183 | Ca_desig_scaffold  | 19183                          | [A/T]       | NA                                         |
| Ca_Desig_Chr_scaffold03223_19185 | Ca_desig_scaffold  | 19185                          | [C/T]       | NA                                         |
| Ca_Desig_Chr_scaffold03223_19194 | Ca_desig_scaffold  | 19194                          | [T/C]       | NA                                         |
| Ca_Desig_Chr_scaffold03223_19206 | Ca_desig_scaffold  | 19206                          | [C/A]       | NA                                         |
| Ca_Desig_Chr_scaffold03232_15594 | Ca_desig_scaffold  | 15594                          | [T/C]       | NA                                         |
| Ca_Desig_Chr_scaffold03232_15609 | Ca_desig_scaffold  | 15609                          | [A/C]       | NA                                         |
| Ca_Desig_Chr_scaffold03232_15619 | Ca_desig_scaffold  | 15619                          | [A/C]       | NA                                         |
| Ca_Desig_Chr_scaffold03251_17371 | Ca_desig_scaffold  | 17371                          | [A/C]       | NA                                         |
| Ca_Desig_Chr_scaffold03251_20399 | Ca_desig_scaffold  | 20399                          | [A/C]       | NA                                         |
| Ca_Desig_Chr_scaffold03253_25588 | Ca_desig_scaffold  | 25588                          | [C/A]       | NA                                         |
| Ca_Desig_Chr_scaffold03253_25624 | Ca_desig_scaffold  | 25624                          | [T/G]       | NA                                         |
| Ca_Desig_Chr_scaffold03255_17376 | Ca_desig_scaffold  | 17376                          | [A/T]       | NA                                         |
| Ca_Desig_Chr_scaffold03258_4390  | Ca_desig_scaffold  | 4390                           | [T/G]       | NA                                         |
| Ca_Desig_Chr_scaffold03258_12996 | Ca_desig_scaffold  | 12996                          | [A/C]       | NA                                         |

| <b>SNP IDs</b>                    | <b>Chromosomes</b> | <b>Physical positions (bp)</b> | <b>SNPs</b> | <b>NCBI SNPdb accession IDs (NCBI_ss#)</b> |
|-----------------------------------|--------------------|--------------------------------|-------------|--------------------------------------------|
| Ca_Desi_Chrom_scaffold03258_20301 | Ca_desi_scaffold   | 20301                          | [A/G]       | NA                                         |
| Ca_Desi_Chrom_scaffold03258_20320 | Ca_desi_scaffold   | 20320                          | [T/C]       | NA                                         |
| Ca_Desi_Chrom_scaffold03258_20344 | Ca_desi_scaffold   | 20344                          | [T/A]       | NA                                         |
| Ca_Desi_Chrom_scaffold03258_21359 | Ca_desi_scaffold   | 21359                          | [A/C]       | NA                                         |
| Ca_Desi_Chrom_scaffold03259_23212 | Ca_desi_scaffold   | 23212                          | [G/T]       | NA                                         |
| Ca_Desi_Chrom_scaffold03260_7286  | Ca_desi_scaffold   | 7286                           | [T/C]       | NA                                         |
| Ca_Desi_Chrom_scaffold03260_12469 | Ca_desi_scaffold   | 12469                          | [A/C]       | NA                                         |
| Ca_Desi_Chrom_scaffold03260_12490 | Ca_desi_scaffold   | 12490                          | [T/A]       | NA                                         |
| Ca_Desi_Chrom_scaffold03260_14144 | Ca_desi_scaffold   | 14144                          | [T/C]       | NA                                         |
| Ca_Desi_Chrom_scaffold03260_14147 | Ca_desi_scaffold   | 14147                          | [T/C]       | NA                                         |
| Ca_Desi_Chrom_scaffold03260_14153 | Ca_desi_scaffold   | 14153                          | [T/C]       | NA                                         |
| Ca_Desi_Chrom_scaffold03260_14167 | Ca_desi_scaffold   | 14167                          | [A/G]       | NA                                         |
| Ca_Desi_Chrom_scaffold03260_14168 | Ca_desi_scaffold   | 14168                          | [G/A]       | NA                                         |
| Ca_Desi_Chrom_scaffold03260_14169 | Ca_desi_scaffold   | 14169                          | [A/G]       | NA                                         |
| Ca_Desi_Chrom_scaffold03260_14178 | Ca_desi_scaffold   | 14178                          | [A/G]       | NA                                         |
| Ca_Desi_Chrom_scaffold03260_14181 | Ca_desi_scaffold   | 14181                          | [A/C]       | NA                                         |
| Ca_Desi_Chrom_scaffold03260_14195 | Ca_desi_scaffold   | 14195                          | [A/G]       | NA                                         |
| Ca_Desi_Chrom_scaffold03260_14200 | Ca_desi_scaffold   | 14200                          | [A/G]       | NA                                         |
| Ca_Desi_Chrom_scaffold03260_14219 | Ca_desi_scaffold   | 14219                          | [T/A]       | NA                                         |
| Ca_Desi_Chrom_scaffold03260_14305 | Ca_desi_scaffold   | 14305                          | [A/C]       | NA                                         |
| Ca_Desi_Chrom_scaffold03261_6750  | Ca_desi_scaffold   | 6750                           | [C/T]       | NA                                         |
| Ca_Desi_Chrom_scaffold03261_6796  | Ca_desi_scaffold   | 6796                           | [T/C]       | NA                                         |
| Ca_Desi_Chrom_scaffold03261_7784  | Ca_desi_scaffold   | 7784                           | [A/G]       | NA                                         |
| Ca_Desi_Chrom_scaffold03261_7786  | Ca_desi_scaffold   | 7786                           | [T/C]       | NA                                         |
| Ca_Desi_Chrom_scaffold03261_16416 | Ca_desi_scaffold   | 16416                          | [A/C]       | NA                                         |
| Ca_Desi_Chrom_scaffold03271_11281 | Ca_desi_scaffold   | 11281                          | [T/A]       | NA                                         |
| Ca_Desi_Chrom_scaffold03271_11327 | Ca_desi_scaffold   | 11327                          | [T/C]       | NA                                         |
| Ca_Desi_Chrom_scaffold03271_16062 | Ca_desi_scaffold   | 16062                          | [G/T]       | NA                                         |
| Ca_Desi_Chrom_scaffold03271_16234 | Ca_desi_scaffold   | 16234                          | [A/C]       | NA                                         |
| Ca_Desi_Chrom_scaffold03271_17342 | Ca_desi_scaffold   | 17342                          | [A/C]       | NA                                         |
| Ca_Desi_Chrom_scaffold03271_26546 | Ca_desi_scaffold   | 26546                          | [A/T]       | NA                                         |
| Ca_Desi_Chrom_scaffold03271_26550 | Ca_desi_scaffold   | 26550                          | [A/G]       | NA                                         |
| Ca_Desi_Chrom_scaffold03271_26552 | Ca_desi_scaffold   | 26552                          | [A/C]       | NA                                         |
| Ca_Desi_Chrom_scaffold03271_26568 | Ca_desi_scaffold   | 26568                          | [T/C]       | NA                                         |

| <b>SNP IDs</b>                 | <b>Chromosomes</b> | <b>Physical positions (bp)</b> | <b>SNPs</b> | <b>NCBI SNPdb accession IDs (NCBI_ss#)</b> |
|--------------------------------|--------------------|--------------------------------|-------------|--------------------------------------------|
| Ca_Desi_Ch_scaffold03271_26572 | Ca_desi_scaffold   | 26572                          | [A/G]       | NA                                         |
| Ca_Desi_Ch_scaffold03271_26575 | Ca_desi_scaffold   | 26575                          | [A/C]       | NA                                         |
| Ca_Desi_Ch_scaffold03271_26591 | Ca_desi_scaffold   | 26591                          | [T/C]       | NA                                         |
| Ca_Desi_Ch_scaffold03271_26593 | Ca_desi_scaffold   | 26593                          | [G/C]       | NA                                         |
| Ca_Desi_Ch_scaffold03284_9627  | Ca_desi_scaffold   | 9627                           | [A/G]       | NA                                         |
| Ca_Desi_Ch_scaffold03286_19086 | Ca_desi_scaffold   | 19086                          | [A/G]       | NA                                         |
| Ca_Desi_Ch_scaffold03290_30239 | Ca_desi_scaffold   | 30239                          | [G/A]       | NA                                         |
| Ca_Desi_Ch_scaffold03290_30240 | Ca_desi_scaffold   | 30240                          | [A/G]       | NA                                         |
| Ca_Desi_Ch_scaffold03290_30242 | Ca_desi_scaffold   | 30242                          | [T/C]       | NA                                         |
| Ca_Desi_Ch_scaffold03290_30247 | Ca_desi_scaffold   | 30247                          | [T/C]       | NA                                         |
| Ca_Desi_Ch_scaffold03290_30251 | Ca_desi_scaffold   | 30251                          | [T/C]       | NA                                         |
| Ca_Desi_Ch_scaffold03290_30253 | Ca_desi_scaffold   | 30253                          | [T/C]       | NA                                         |
| Ca_Desi_Ch_scaffold03290_30255 | Ca_desi_scaffold   | 30255                          | [A/C]       | NA                                         |
| Ca_Desi_Ch_scaffold03290_30261 | Ca_desi_scaffold   | 30261                          | [A/G]       | NA                                         |
| Ca_Desi_Ch_scaffold03290_30269 | Ca_desi_scaffold   | 30269                          | [A/G]       | NA                                         |
| Ca_Desi_Ch_scaffold03290_30271 | Ca_desi_scaffold   | 30271                          | [A/G]       | NA                                         |
| Ca_Desi_Ch_scaffold03290_30275 | Ca_desi_scaffold   | 30275                          | [T/G]       | NA                                         |
| Ca_Desi_Ch_scaffold03290_30283 | Ca_desi_scaffold   | 30283                          | [T/A]       | NA                                         |
| Ca_Desi_Ch_scaffold03297_15068 | Ca_desi_scaffold   | 15068                          | [T/A]       | NA                                         |
| Ca_Desi_Ch_scaffold03297_15076 | Ca_desi_scaffold   | 15076                          | [A/G]       | NA                                         |
| Ca_Desi_Ch_scaffold03297_15091 | Ca_desi_scaffold   | 15091                          | [A/C]       | NA                                         |
| Ca_Desi_Ch_scaffold03297_21895 | Ca_desi_scaffold   | 21895                          | [A/T]       | NA                                         |
| Ca_Desi_Ch_scaffold03297_21896 | Ca_desi_scaffold   | 21896                          | [T/A]       | NA                                         |
| Ca_Desi_Ch_scaffold03297_21897 | Ca_desi_scaffold   | 21897                          | [C/A]       | NA                                         |
| Ca_Desi_Ch_scaffold03297_21898 | Ca_desi_scaffold   | 21898                          | [T/G]       | NA                                         |
| Ca_Desi_Ch_scaffold03300_21301 | Ca_desi_scaffold   | 21301                          | [A/C]       | NA                                         |
| Ca_Desi_Ch_scaffold03313_21748 | Ca_desi_scaffold   | 21748                          | [C/G]       | NA                                         |
| Ca_Desi_Ch_scaffold03313_25190 | Ca_desi_scaffold   | 25190                          | [C/G]       | NA                                         |
| Ca_Desi_Ch_scaffold03319_21822 | Ca_desi_scaffold   | 21822                          | [A/G]       | NA                                         |
| Ca_Desi_Ch_scaffold03326_10607 | Ca_desi_scaffold   | 10607                          | [C/T]       | NA                                         |
| Ca_Desi_Ch_scaffold03326_10611 | Ca_desi_scaffold   | 10611                          | [A/C]       | NA                                         |
| Ca_Desi_Ch_scaffold03330_14720 | Ca_desi_scaffold   | 14720                          | [C/T]       | NA                                         |
| Ca_Desi_Ch_scaffold03333_16237 | Ca_desi_scaffold   | 16237                          | [G/T]       | NA                                         |
| Ca_Desi_Ch_scaffold03354_16496 | Ca_desi_scaffold   | 16496                          | [A/C]       | NA                                         |

| <b>SNP IDs</b>                   | <b>Chromosomes</b> | <b>Physical positions (bp)</b> | <b>SNPs</b> | <b>NCBI SNPdb accession IDs (NCBI_ss#)</b> |
|----------------------------------|--------------------|--------------------------------|-------------|--------------------------------------------|
| Ca_Desig_Chr_scaffold03354_16497 | Ca_desig_scaffold  | 16497                          | [G/A]       | NA                                         |
| Ca_Desig_Chr_scaffold03354_16499 | Ca_desig_scaffold  | 16499                          | [T/A]       | NA                                         |
| Ca_Desig_Chr_scaffold03354_16500 | Ca_desig_scaffold  | 16500                          | [C/T]       | NA                                         |
| Ca_Desig_Chr_scaffold03354_23034 | Ca_desig_scaffold  | 23034                          | [G/A]       | NA                                         |
| Ca_Desig_Chr_scaffold03357_22162 | Ca_desig_scaffold  | 22162                          | [T/G]       | NA                                         |
| Ca_Desig_Chr_scaffold03357_22229 | Ca_desig_scaffold  | 22229                          | [T/G]       | NA                                         |
| Ca_Desig_Chr_scaffold03357_25040 | Ca_desig_scaffold  | 25040                          | [T/G]       | NA                                         |
| Ca_Desig_Chr_scaffold03357_25648 | Ca_desig_scaffold  | 25648                          | [T/C]       | NA                                         |
| Ca_Desig_Chr_scaffold03357_25657 | Ca_desig_scaffold  | 25657                          | [A/C]       | NA                                         |
| Ca_Desig_Chr_scaffold03357_25660 | Ca_desig_scaffold  | 25660                          | [A/C]       | NA                                         |
| Ca_Desig_Chr_scaffold03357_25664 | Ca_desig_scaffold  | 25664                          | [A/C]       | NA                                         |
| Ca_Desig_Chr_scaffold03357_25681 | Ca_desig_scaffold  | 25681                          | [T/C]       | NA                                         |
| Ca_Desig_Chr_scaffold03370_535   | Ca_desig_scaffold  | 535                            | [C/T]       | NA                                         |
| Ca_Desig_Chr_scaffold03370_706   | Ca_desig_scaffold  | 706                            | [A/C]       | NA                                         |
| Ca_Desig_Chr_scaffold03390_7000  | Ca_desig_scaffold  | 7000                           | [A/C]       | NA                                         |
| Ca_Desig_Chr_scaffold03390_7006  | Ca_desig_scaffold  | 7006                           | [A/C]       | NA                                         |
| Ca_Desig_Chr_scaffold03411_747   | Ca_desig_scaffold  | 747                            | [A/C]       | NA                                         |
| Ca_Desig_Chr_scaffold03415_27496 | Ca_desig_scaffold  | 27496                          | [A/G]       | NA                                         |
| Ca_Desig_Chr_scaffold03422_5591  | Ca_desig_scaffold  | 5591                           | [C/A]       | NA                                         |
| Ca_Desig_Chr_scaffold03422_9554  | Ca_desig_scaffold  | 9554                           | [T/G]       | NA                                         |
| Ca_Desig_Chr_scaffold03429_8431  | Ca_desig_scaffold  | 8431                           | [T/C]       | NA                                         |
| Ca_Desig_Chr_scaffold03429_23018 | Ca_desig_scaffold  | 23018                          | [A/G]       | NA                                         |
| Ca_Desig_Chr_scaffold03429_23047 | Ca_desig_scaffold  | 23047                          | [G/T]       | NA                                         |
| Ca_Desig_Chr_scaffold03429_23080 | Ca_desig_scaffold  | 23080                          | [G/A]       | NA                                         |
| Ca_Desig_Chr_scaffold03429_23097 | Ca_desig_scaffold  | 23097                          | [A/C]       | NA                                         |
| Ca_Desig_Chr_scaffold03429_23349 | Ca_desig_scaffold  | 23349                          | [A/G]       | NA                                         |
| Ca_Desig_Chr_scaffold03429_23623 | Ca_desig_scaffold  | 23623                          | [T/G]       | NA                                         |
| Ca_Desig_Chr_scaffold03429_23742 | Ca_desig_scaffold  | 23742                          | [T/C]       | NA                                         |
| Ca_Desig_Chr_scaffold03429_23749 | Ca_desig_scaffold  | 23749                          | [T/A]       | NA                                         |
| Ca_Desig_Chr_scaffold03429_23752 | Ca_desig_scaffold  | 23752                          | [T/C]       | NA                                         |
| Ca_Desig_Chr_scaffold03429_23754 | Ca_desig_scaffold  | 23754                          | [A/G]       | NA                                         |
| Ca_Desig_Chr_scaffold03429_23776 | Ca_desig_scaffold  | 23776                          | [A/G]       | NA                                         |
| Ca_Desig_Chr_scaffold03429_23780 | Ca_desig_scaffold  | 23780                          | [A/G]       | NA                                         |
| Ca_Desig_Chr_scaffold03429_23786 | Ca_desig_scaffold  | 23786                          | [T/C]       | NA                                         |



| <b>SNP IDs</b>                   | <b>Chromosomes</b> | <b>Physical positions (bp)</b> | <b>SNPs</b> | <b>NCBI SNPdb accession IDs (NCBI_ss#)</b> |
|----------------------------------|--------------------|--------------------------------|-------------|--------------------------------------------|
| Ca_Desig_Chr_scaffold03429_23794 | Ca_desig_scaffold  | 23794                          | [A/G]       | NA                                         |
| Ca_Desig_Chr_scaffold03429_23800 | Ca_desig_scaffold  | 23800                          | [T/C]       | NA                                         |
| Ca_Desig_Chr_scaffold03429_23838 | Ca_desig_scaffold  | 23838                          | [G/A]       | NA                                         |
| Ca_Desig_Chr_scaffold03429_24444 | Ca_desig_scaffold  | 24444                          | [T/G]       | NA                                         |
| Ca_Desig_Chr_scaffold03429_26838 | Ca_desig_scaffold  | 26838                          | [A/T]       | NA                                         |
| Ca_Desig_Chr_scaffold03429_27747 | Ca_desig_scaffold  | 27747                          | [C/T]       | NA                                         |
| Ca_Desig_Chr_scaffold03434_15735 | Ca_desig_scaffold  | 15735                          | [T/C]       | NA                                         |
| Ca_Desig_Chr_scaffold03434_15773 | Ca_desig_scaffold  | 15773                          | [T/G]       | NA                                         |
| Ca_Desig_Chr_scaffold03434_18720 | Ca_desig_scaffold  | 18720                          | [A/T]       | NA                                         |
| Ca_Desig_Chr_scaffold03434_22493 | Ca_desig_scaffold  | 22493                          | [A/T]       | NA                                         |
| Ca_Desig_Chr_scaffold03439_12604 | Ca_desig_scaffold  | 12604                          | [A/T]       | NA                                         |
| Ca_Desig_Chr_scaffold03439_12610 | Ca_desig_scaffold  | 12610                          | [A/G]       | NA                                         |
| Ca_Desig_Chr_scaffold03439_12611 | Ca_desig_scaffold  | 12611                          | [T/C]       | NA                                         |
| Ca_Desig_Chr_scaffold03439_12614 | Ca_desig_scaffold  | 12614                          | [T/C]       | NA                                         |
| Ca_Desig_Chr_scaffold03439_12615 | Ca_desig_scaffold  | 12615                          | [T/C]       | NA                                         |
| Ca_Desig_Chr_scaffold03443_10355 | Ca_desig_scaffold  | 10355                          | [T/G]       | NA                                         |
| Ca_Desig_Chr_scaffold03443_10356 | Ca_desig_scaffold  | 10356                          | [C/T]       | NA                                         |
| Ca_Desig_Chr_scaffold03443_10358 | Ca_desig_scaffold  | 10358                          | [T/C]       | NA                                         |
| Ca_Desig_Chr_scaffold03444_18712 | Ca_desig_scaffold  | 18712                          | [T/C]       | NA                                         |
| Ca_Desig_Chr_scaffold03446_13520 | Ca_desig_scaffold  | 13520                          | [A/G]       | NA                                         |
| Ca_Desig_Chr_scaffold03446_13534 | Ca_desig_scaffold  | 13534                          | [T/G]       | NA                                         |
| Ca_Desig_Chr_scaffold03446_13542 | Ca_desig_scaffold  | 13542                          | [T/C]       | NA                                         |
| Ca_Desig_Chr_scaffold03462_21152 | Ca_desig_scaffold  | 21152                          | [A/C]       | NA                                         |
| Ca_Desig_Chr_scaffold03466_20154 | Ca_desig_scaffold  | 20154                          | [T/G]       | NA                                         |
| Ca_Desig_Chr_scaffold03478_19753 | Ca_desig_scaffold  | 19753                          | [T/G]       | NA                                         |
| Ca_Desig_Chr_scaffold03487_27799 | Ca_desig_scaffold  | 27799                          | [T/A]       | NA                                         |
| Ca_Desig_Chr_scaffold03487_27821 | Ca_desig_scaffold  | 27821                          | [A/G]       | NA                                         |
| Ca_Desig_Chr_scaffold03487_27840 | Ca_desig_scaffold  | 27840                          | [A/G]       | NA                                         |
| Ca_Desig_Chr_scaffold03494_10829 | Ca_desig_scaffold  | 10829                          | [A/G]       | NA                                         |
| Ca_Desig_Chr_scaffold03540_26762 | Ca_desig_scaffold  | 26762                          | [T/C]       | NA                                         |
| Ca_Desig_Chr_scaffold03544_12310 | Ca_desig_scaffold  | 12310                          | [A/T]       | NA                                         |
| Ca_Desig_Chr_scaffold03548_12180 | Ca_desig_scaffold  | 12180                          | [T/A]       | NA                                         |
| Ca_Desig_Chr_scaffold03549_7641  | Ca_desig_scaffold  | 7641                           | [T/G]       | NA                                         |
| Ca_Desig_Chr_scaffold03550_21627 | Ca_desig_scaffold  | 21627                          | [A/G]       | NA                                         |

| <b>SNP IDs</b>                  | <b>Chromosomes</b> | <b>Physical positions (bp)</b> | <b>SNPs</b> | <b>NCBI SNPdb accession IDs (NCBI_ss#)</b> |
|---------------------------------|--------------------|--------------------------------|-------------|--------------------------------------------|
| Ca_DesigChr_scaffold03550_21629 | Ca_desig_scaffold  | 21629                          | [T/G]       | NA                                         |
| Ca_DesigChr_scaffold03550_21631 | Ca_desig_scaffold  | 21631                          | [T/G]       | NA                                         |
| Ca_DesigChr_scaffold03550_21650 | Ca_desig_scaffold  | 21650                          | [T/C]       | NA                                         |
| Ca_DesigChr_scaffold03555_3006  | Ca_desig_scaffold  | 3006                           | [C/A]       | NA                                         |
| Ca_DesigChr_scaffold03555_3007  | Ca_desig_scaffold  | 3007                           | [C/G]       | NA                                         |
| Ca_DesigChr_scaffold03555_3008  | Ca_desig_scaffold  | 3008                           | [T/A]       | NA                                         |
| Ca_DesigChr_scaffold03556_372   | Ca_desig_scaffold  | 372                            | [T/A]       | NA                                         |
| Ca_DesigChr_scaffold03556_374   | Ca_desig_scaffold  | 374                            | [T/G]       | NA                                         |
| Ca_DesigChr_scaffold03556_407   | Ca_desig_scaffold  | 407                            | [A/T]       | NA                                         |
| Ca_DesigChr_scaffold03556_412   | Ca_desig_scaffold  | 412                            | [A/C]       | NA                                         |
| Ca_DesigChr_scaffold03562_12485 | Ca_desig_scaffold  | 12485                          | [G/A]       | NA                                         |
| Ca_DesigChr_scaffold03562_22877 | Ca_desig_scaffold  | 22877                          | [T/G]       | NA                                         |
| Ca_DesigChr_scaffold03563_1592  | Ca_desig_scaffold  | 1592                           | [A/G]       | NA                                         |
| Ca_DesigChr_scaffold03563_1605  | Ca_desig_scaffold  | 1605                           | [A/T]       | NA                                         |
| Ca_DesigChr_scaffold03563_1610  | Ca_desig_scaffold  | 1610                           | [A/G]       | NA                                         |
| Ca_DesigChr_scaffold03563_1613  | Ca_desig_scaffold  | 1613                           | [T/G]       | NA                                         |
| Ca_DesigChr_scaffold03563_1616  | Ca_desig_scaffold  | 1616                           | [T/G]       | NA                                         |
| Ca_DesigChr_scaffold03563_1619  | Ca_desig_scaffold  | 1619                           | [T/G]       | NA                                         |
| Ca_DesigChr_scaffold03563_25383 | Ca_desig_scaffold  | 25383                          | [T/A]       | NA                                         |
| Ca_DesigChr_scaffold03563_25385 | Ca_desig_scaffold  | 25385                          | [A/G]       | NA                                         |
| Ca_DesigChr_scaffold03563_25975 | Ca_desig_scaffold  | 25975                          | [A/T]       | NA                                         |
| Ca_DesigChr_scaffold03563_25983 | Ca_desig_scaffold  | 25983                          | [T/G]       | NA                                         |
| Ca_DesigChr_scaffold03563_25985 | Ca_desig_scaffold  | 25985                          | [T/G]       | NA                                         |
| Ca_DesigChr_scaffold03563_25988 | Ca_desig_scaffold  | 25988                          | [T/G]       | NA                                         |
| Ca_DesigChr_scaffold03563_25991 | Ca_desig_scaffold  | 25991                          | [T/C]       | NA                                         |
| Ca_DesigChr_scaffold03563_26000 | Ca_desig_scaffold  | 26000                          | [A/G]       | NA                                         |
| Ca_DesigChr_scaffold03563_26046 | Ca_desig_scaffold  | 26046                          | [T/C]       | NA                                         |
| Ca_DesigChr_scaffold03563_26066 | Ca_desig_scaffold  | 26066                          | [A/G]       | NA                                         |
| Ca_DesigChr_scaffold03563_26068 | Ca_desig_scaffold  | 26068                          | [T/G]       | NA                                         |
| Ca_DesigChr_scaffold03563_26272 | Ca_desig_scaffold  | 26272                          | [A/C]       | NA                                         |
| Ca_DesigChr_scaffold03563_26273 | Ca_desig_scaffold  | 26273                          | [T/A]       | NA                                         |
| Ca_DesigChr_scaffold03563_26274 | Ca_desig_scaffold  | 26274                          | [C/G]       | NA                                         |
| Ca_DesigChr_scaffold03563_26275 | Ca_desig_scaffold  | 26275                          | [T/G]       | NA                                         |
| Ca_DesigChr_scaffold03575_8135  | Ca_desig_scaffold  | 8135                           | [A/C]       | NA                                         |

| <b>SNP IDs</b>                   | <b>Chromosomes</b> | <b>Physical positions (bp)</b> | <b>SNPs</b> | <b>NCBI SNPdb accession IDs (NCBI_ss#)</b> |
|----------------------------------|--------------------|--------------------------------|-------------|--------------------------------------------|
| Ca_Desig_Chr_scaffold03576_20682 | Ca_desig_scaffold  | 20682                          | [T/C]       | NA                                         |
| Ca_Desig_Chr_scaffold03589_9161  | Ca_desig_scaffold  | 9161                           | [T/G]       | NA                                         |
| Ca_Desig_Chr_scaffold03589_9201  | Ca_desig_scaffold  | 9201                           | [A/G]       | NA                                         |
| Ca_Desig_Chr_scaffold03592_5080  | Ca_desig_scaffold  | 5080                           | [C/A]       | NA                                         |
| Ca_Desig_Chr_scaffold03592_5119  | Ca_desig_scaffold  | 5119                           | [A/G]       | NA                                         |
| Ca_Desig_Chr_scaffold03602_18532 | Ca_desig_scaffold  | 18532                          | [A/G]       | NA                                         |
| Ca_Desig_Chr_scaffold03602_18535 | Ca_desig_scaffold  | 18535                          | [A/G]       | NA                                         |
| Ca_Desig_Chr_scaffold03602_27486 | Ca_desig_scaffold  | 27486                          | [T/G]       | NA                                         |
| Ca_Desig_Chr_scaffold03617_15813 | Ca_desig_scaffold  | 15813                          | [G/A]       | NA                                         |
| Ca_Desig_Chr_scaffold03618_1919  | Ca_desig_scaffold  | 1919                           | [C/A]       | NA                                         |
| Ca_Desig_Chr_scaffold03626_11847 | Ca_desig_scaffold  | 11847                          | [T/G]       | NA                                         |
| Ca_Desig_Chr_scaffold03636_15783 | Ca_desig_scaffold  | 15783                          | [T/C]       | NA                                         |
| Ca_Desig_Chr_scaffold03636_15792 | Ca_desig_scaffold  | 15792                          | [T/C]       | NA                                         |
| Ca_Desig_Chr_scaffold03640_7938  | Ca_desig_scaffold  | 7938                           | [A/C]       | NA                                         |
| Ca_Desig_Chr_scaffold03640_7939  | Ca_desig_scaffold  | 7939                           | [T/G]       | NA                                         |
| Ca_Desig_Chr_scaffold03640_7942  | Ca_desig_scaffold  | 7942                           | [G/C]       | NA                                         |
| Ca_Desig_Chr_scaffold03640_7943  | Ca_desig_scaffold  | 7943                           | [G/T]       | NA                                         |
| Ca_Desig_Chr_scaffold03645_21707 | Ca_desig_scaffold  | 21707                          | [A/T]       | NA                                         |
| Ca_Desig_Chr_scaffold03645_21742 | Ca_desig_scaffold  | 21742                          | [G/T]       | NA                                         |
| Ca_Desig_Chr_scaffold03647_9538  | Ca_desig_scaffold  | 9538                           | [T/G]       | NA                                         |
| Ca_Desig_Chr_scaffold03647_9547  | Ca_desig_scaffold  | 9547                           | [T/G]       | NA                                         |
| Ca_Desig_Chr_scaffold03647_9559  | Ca_desig_scaffold  | 9559                           | [G/A]       | NA                                         |
| Ca_Desig_Chr_scaffold03647_9563  | Ca_desig_scaffold  | 9563                           | [G/A]       | NA                                         |
| Ca_Desig_Chr_scaffold03647_9570  | Ca_desig_scaffold  | 9570                           | [T/C]       | NA                                         |
| Ca_Desig_Chr_scaffold03647_9571  | Ca_desig_scaffold  | 9571                           | [T/C]       | NA                                         |
| Ca_Desig_Chr_scaffold03661_3820  | Ca_desig_scaffold  | 3820                           | [T/C]       | NA                                         |
| Ca_Desig_Chr_scaffold03661_3823  | Ca_desig_scaffold  | 3823                           | [T/C]       | NA                                         |
| Ca_Desig_Chr_scaffold03661_3829  | Ca_desig_scaffold  | 3829                           | [T/G]       | NA                                         |
| Ca_Desig_Chr_scaffold03661_3859  | Ca_desig_scaffold  | 3859                           | [A/G]       | NA                                         |
| Ca_Desig_Chr_scaffold03674_6252  | Ca_desig_scaffold  | 6252                           | [A/G]       | NA                                         |
| Ca_Desig_Chr_scaffold03676_17619 | Ca_desig_scaffold  | 17619                          | [A/C]       | NA                                         |
| Ca_Desig_Chr_scaffold03676_17620 | Ca_desig_scaffold  | 17620                          | [G/T]       | NA                                         |
| Ca_Desig_Chr_scaffold03700_18176 | Ca_desig_scaffold  | 18176                          | [A/G]       | NA                                         |
| Ca_Desig_Chr_scaffold03704_6224  | Ca_desig_scaffold  | 6224                           | [A/C]       | NA                                         |

| <b>SNP IDs</b>                   | <b>Chromosomes</b> | <b>Physical positions (bp)</b> | <b>SNPs</b> | <b>NCBI SNPdb accession IDs (NCBI_ss#)</b> |
|----------------------------------|--------------------|--------------------------------|-------------|--------------------------------------------|
| Ca_Desig_Chr_scaffold03704_9343  | Ca_desig_scaffold  | 9343                           | [T/G]       | NA                                         |
| Ca_Desig_Chr_scaffold03704_15297 | Ca_desig_scaffold  | 15297                          | [A/G]       | NA                                         |
| Ca_Desig_Chr_scaffold03714_20698 | Ca_desig_scaffold  | 20698                          | [T/C]       | NA                                         |
| Ca_Desig_Chr_scaffold03724_9705  | Ca_desig_scaffold  | 9705                           | [A/T]       | NA                                         |
| Ca_Desig_Chr_scaffold03741_13260 | Ca_desig_scaffold  | 13260                          | [G/C]       | NA                                         |
| Ca_Desig_Chr_scaffold03741_13261 | Ca_desig_scaffold  | 13261                          | [G/T]       | NA                                         |
| Ca_Desig_Chr_scaffold03741_18252 | Ca_desig_scaffold  | 18252                          | [G/C]       | NA                                         |
| Ca_Desig_Chr_scaffold03741_18253 | Ca_desig_scaffold  | 18253                          | [G/T]       | NA                                         |
| Ca_Desig_Chr_scaffold03745_21848 | Ca_desig_scaffold  | 21848                          | [T/C]       | NA                                         |
| Ca_Desig_Chr_scaffold03745_21880 | Ca_desig_scaffold  | 21880                          | [T/C]       | NA                                         |
| Ca_Desig_Chr_scaffold03745_21890 | Ca_desig_scaffold  | 21890                          | [A/G]       | NA                                         |
| Ca_Desig_Chr_scaffold03750_12208 | Ca_desig_scaffold  | 12208                          | [C/A]       | NA                                         |
| Ca_Desig_Chr_scaffold03755_3215  | Ca_desig_scaffold  | 3215                           | [A/T]       | NA                                         |
| Ca_Desig_Chr_scaffold03755_12567 | Ca_desig_scaffold  | 12567                          | [A/C]       | NA                                         |
| Ca_Desig_Chr_scaffold03758_16098 | Ca_desig_scaffold  | 16098                          | [T/G]       | NA                                         |
| Ca_Desig_Chr_scaffold03761_12125 | Ca_desig_scaffold  | 12125                          | [A/G]       | NA                                         |
| Ca_Desig_Chr_scaffold03761_12127 | Ca_desig_scaffold  | 12127                          | [A/G]       | NA                                         |
| Ca_Desig_Chr_scaffold03761_12134 | Ca_desig_scaffold  | 12134                          | [T/C]       | NA                                         |
| Ca_Desig_Chr_scaffold03761_12140 | Ca_desig_scaffold  | 12140                          | [A/C]       | NA                                         |
| Ca_Desig_Chr_scaffold03761_12168 | Ca_desig_scaffold  | 12168                          | [A/T]       | NA                                         |
| Ca_Desig_Chr_scaffold03761_12711 | Ca_desig_scaffold  | 12711                          | [T/G]       | NA                                         |
| Ca_Desig_Chr_scaffold03761_12737 | Ca_desig_scaffold  | 12737                          | [A/G]       | NA                                         |
| Ca_Desig_Chr_scaffold03761_20950 | Ca_desig_scaffold  | 20950                          | [A/C]       | NA                                         |
| Ca_Desig_Chr_scaffold03765_5399  | Ca_desig_scaffold  | 5399                           | [T/A]       | NA                                         |
| Ca_Desig_Chr_scaffold03773_10121 | Ca_desig_scaffold  | 10121                          | [A/G]       | NA                                         |
| Ca_Desig_Chr_scaffold03805_12798 | Ca_desig_scaffold  | 12798                          | [T/C]       | NA                                         |
| Ca_Desig_Chr_scaffold03805_12824 | Ca_desig_scaffold  | 12824                          | [T/C]       | NA                                         |
| Ca_Desig_Chr_scaffold03813_11002 | Ca_desig_scaffold  | 11002                          | [G/A]       | NA                                         |
| Ca_Desig_Chr_scaffold03813_11006 | Ca_desig_scaffold  | 11006                          | [C/T]       | NA                                         |
| Ca_Desig_Chr_scaffold03830_16123 | Ca_desig_scaffold  | 16123                          | [A/G]       | NA                                         |
| Ca_Desig_Chr_scaffold03830_16126 | Ca_desig_scaffold  | 16126                          | [T/G]       | NA                                         |
| Ca_Desig_Chr_scaffold03830_16132 | Ca_desig_scaffold  | 16132                          | [A/G]       | NA                                         |
| Ca_Desig_Chr_scaffold03830_16140 | Ca_desig_scaffold  | 16140                          | [T/C]       | NA                                         |
| Ca_Desig_Chr_scaffold03830_16143 | Ca_desig_scaffold  | 16143                          | [T/A]       | NA                                         |

| <b>SNP IDs</b>                 | <b>Chromosomes</b> | <b>Physical positions (bp)</b> | <b>SNPs</b> | <b>NCBI SNPdb accession IDs (NCBI_ss#)</b> |
|--------------------------------|--------------------|--------------------------------|-------------|--------------------------------------------|
| Ca_Desi_Ch_scaffold03861_1535  | Ca_desi_scaffold   | 1535                           | [T/C]       | NA                                         |
| Ca_Desi_Ch_scaffold03861_1542  | Ca_desi_scaffold   | 1542                           | [G/C]       | NA                                         |
| Ca_Desi_Ch_scaffold03861_1548  | Ca_desi_scaffold   | 1548                           | [A/G]       | NA                                         |
| Ca_Desi_Ch_scaffold03861_1553  | Ca_desi_scaffold   | 1553                           | [A/G]       | NA                                         |
| Ca_Desi_Ch_scaffold03861_1557  | Ca_desi_scaffold   | 1557                           | [A/G]       | NA                                         |
| Ca_Desi_Ch_scaffold03861_1565  | Ca_desi_scaffold   | 1565                           | [A/G]       | NA                                         |
| Ca_Desi_Ch_scaffold03861_1566  | Ca_desi_scaffold   | 1566                           | [A/G]       | NA                                         |
| Ca_Desi_Ch_scaffold03861_1568  | Ca_desi_scaffold   | 1568                           | [A/G]       | NA                                         |
| Ca_Desi_Ch_scaffold03861_1576  | Ca_desi_scaffold   | 1576                           | [A/G]       | NA                                         |
| Ca_Desi_Ch_scaffold03861_1579  | Ca_desi_scaffold   | 1579                           | [T/C]       | NA                                         |
| Ca_Desi_Ch_scaffold03861_1614  | Ca_desi_scaffold   | 1614                           | [T/C]       | NA                                         |
| Ca_Desi_Ch_scaffold03861_1618  | Ca_desi_scaffold   | 1618                           | [T/C]       | NA                                         |
| Ca_Desi_Ch_scaffold03861_1620  | Ca_desi_scaffold   | 1620                           | [T/C]       | NA                                         |
| Ca_Desi_Ch_scaffold03861_1625  | Ca_desi_scaffold   | 1625                           | [T/C]       | NA                                         |
| Ca_Desi_Ch_scaffold03861_1627  | Ca_desi_scaffold   | 1627                           | [T/C]       | NA                                         |
| Ca_Desi_Ch_scaffold03861_1633  | Ca_desi_scaffold   | 1633                           | [A/G]       | NA                                         |
| Ca_Desi_Ch_scaffold03861_1637  | Ca_desi_scaffold   | 1637                           | [T/C]       | NA                                         |
| Ca_Desi_Ch_scaffold03861_1647  | Ca_desi_scaffold   | 1647                           | [T/C]       | NA                                         |
| Ca_Desi_Ch_scaffold03861_1662  | Ca_desi_scaffold   | 1662                           | [A/C]       | NA                                         |
| Ca_Desi_Ch_scaffold03861_1666  | Ca_desi_scaffold   | 1666                           | [T/C]       | NA                                         |
| Ca_Desi_Ch_scaffold03861_1671  | Ca_desi_scaffold   | 1671                           | [A/C]       | NA                                         |
| Ca_Desi_Ch_scaffold03861_1673  | Ca_desi_scaffold   | 1673                           | [T/C]       | NA                                         |
| Ca_Desi_Ch_scaffold03861_1676  | Ca_desi_scaffold   | 1676                           | [T/C]       | NA                                         |
| Ca_Desi_Ch_scaffold03861_1682  | Ca_desi_scaffold   | 1682                           | [T/C]       | NA                                         |
| Ca_Desi_Ch_scaffold03868_9462  | Ca_desi_scaffold   | 9462                           | [T/C]       | NA                                         |
| Ca_Desi_Ch_scaffold03868_9540  | Ca_desi_scaffold   | 9540                           | [A/C]       | NA                                         |
| Ca_Desi_Ch_scaffold03886_3633  | Ca_desi_scaffold   | 3633                           | [G/T]       | NA                                         |
| Ca_Desi_Ch_scaffold03888_2451  | Ca_desi_scaffold   | 2451                           | [A/C]       | NA                                         |
| Ca_Desi_Ch_scaffold03895_23697 | Ca_desi_scaffold   | 23697                          | [T/G]       | NA                                         |
| Ca_Desi_Ch_scaffold03899_18455 | Ca_desi_scaffold   | 18455                          | [A/G]       | NA                                         |
| Ca_Desi_Ch_scaffold03899_18475 | Ca_desi_scaffold   | 18475                          | [C/G]       | NA                                         |
| Ca_Desi_Ch_scaffold03903_18690 | Ca_desi_scaffold   | 18690                          | [C/G]       | NA                                         |
| Ca_Desi_Ch_scaffold03903_19335 | Ca_desi_scaffold   | 19335                          | [C/A]       | NA                                         |
| Ca_Desi_Ch_scaffold03905_19194 | Ca_desi_scaffold   | 19194                          | [T/C]       | NA                                         |

| <b>SNP IDs</b>                   | <b>Chromosomes</b> | <b>Physical positions (bp)</b> | <b>SNPs</b> | <b>NCBI SNPdb accession IDs (NCBI_ss#)</b> |
|----------------------------------|--------------------|--------------------------------|-------------|--------------------------------------------|
| Ca_Desig_Chr_scaffold03905_19208 | Ca_desig_scaffold  | 19208                          | [T/C]       | NA                                         |
| Ca_Desig_Chr_scaffold03907_7751  | Ca_desig_scaffold  | 7751                           | [A/G]       | NA                                         |
| Ca_Desig_Chr_scaffold03907_8010  | Ca_desig_scaffold  | 8010                           | [A/T]       | NA                                         |
| Ca_Desig_Chr_scaffold03907_8014  | Ca_desig_scaffold  | 8014                           | [A/G]       | NA                                         |
| Ca_Desig_Chr_scaffold03907_8023  | Ca_desig_scaffold  | 8023                           | [A/C]       | NA                                         |
| Ca_Desig_Chr_scaffold03907_8033  | Ca_desig_scaffold  | 8033                           | [T/G]       | NA                                         |
| Ca_Desig_Chr_scaffold03907_12196 | Ca_desig_scaffold  | 12196                          | [T/A]       | NA                                         |
| Ca_Desig_Chr_scaffold03907_12215 | Ca_desig_scaffold  | 12215                          | [A/G]       | NA                                         |
| Ca_Desig_Chr_scaffold03913_13407 | Ca_desig_scaffold  | 13407                          | [A/G]       | NA                                         |
| Ca_Desig_Chr_scaffold03913_13419 | Ca_desig_scaffold  | 13419                          | [A/G]       | NA                                         |
| Ca_Desig_Chr_scaffold03913_13435 | Ca_desig_scaffold  | 13435                          | [T/G]       | NA                                         |
| Ca_Desig_Chr_scaffold03913_13438 | Ca_desig_scaffold  | 13438                          | [T/A]       | NA                                         |
| Ca_Desig_Chr_scaffold03913_13441 | Ca_desig_scaffold  | 13441                          | [A/G]       | NA                                         |
| Ca_Desig_Chr_scaffold03913_13445 | Ca_desig_scaffold  | 13445                          | [T/A]       | NA                                         |
| Ca_Desig_Chr_scaffold03925_20377 | Ca_desig_scaffold  | 20377                          | [T/C]       | NA                                         |
| Ca_Desig_Chr_scaffold03925_20382 | Ca_desig_scaffold  | 20382                          | [A/G]       | NA                                         |
| Ca_Desig_Chr_scaffold03925_20412 | Ca_desig_scaffold  | 20412                          | [A/G]       | NA                                         |
| Ca_Desig_Chr_scaffold03925_20427 | Ca_desig_scaffold  | 20427                          | [A/G]       | NA                                         |
| Ca_Desig_Chr_scaffold03925_20432 | Ca_desig_scaffold  | 20432                          | [T/C]       | NA                                         |
| Ca_Desig_Chr_scaffold03925_20441 | Ca_desig_scaffold  | 20441                          | [A/G]       | NA                                         |
| Ca_Desig_Chr_scaffold03925_20453 | Ca_desig_scaffold  | 20453                          | [T/G]       | NA                                         |
| Ca_Desig_Chr_scaffold03925_20457 | Ca_desig_scaffold  | 20457                          | [A/G]       | NA                                         |
| Ca_Desig_Chr_scaffold03925_20459 | Ca_desig_scaffold  | 20459                          | [T/A]       | NA                                         |
| Ca_Desig_Chr_scaffold03925_20467 | Ca_desig_scaffold  | 20467                          | [A/T]       | NA                                         |
| Ca_Desig_Chr_scaffold03925_21078 | Ca_desig_scaffold  | 21078                          | [T/C]       | NA                                         |
| Ca_Desig_Chr_scaffold03925_21083 | Ca_desig_scaffold  | 21083                          | [T/C]       | NA                                         |
| Ca_Desig_Chr_scaffold03925_21090 | Ca_desig_scaffold  | 21090                          | [T/C]       | NA                                         |
| Ca_Desig_Chr_scaffold03925_21096 | Ca_desig_scaffold  | 21096                          | [A/G]       | NA                                         |
| Ca_Desig_Chr_scaffold03925_21102 | Ca_desig_scaffold  | 21102                          | [T/C]       | NA                                         |
| Ca_Desig_Chr_scaffold03925_21111 | Ca_desig_scaffold  | 21111                          | [T/G]       | NA                                         |
| Ca_Desig_Chr_scaffold03925_21123 | Ca_desig_scaffold  | 21123                          | [T/A]       | NA                                         |
| Ca_Desig_Chr_scaffold03933_8077  | Ca_desig_scaffold  | 8077                           | [T/C]       | NA                                         |
| Ca_Desig_Chr_scaffold03933_8093  | Ca_desig_scaffold  | 8093                           | [T/G]       | NA                                         |
| Ca_Desig_Chr_scaffold03933_9673  | Ca_desig_scaffold  | 9673                           | [A/T]       | NA                                         |

| <b>SNP IDs</b>                 | <b>Chromosomes</b> | <b>Physical positions (bp)</b> | <b>SNPs</b> | <b>NCBI SNPdb accession IDs (NCBI_ss#)</b> |
|--------------------------------|--------------------|--------------------------------|-------------|--------------------------------------------|
| Ca_Desi_Ch_scaffold03933_15350 | Ca_desi_scaffold   | 15350                          | [T/C]       | NA                                         |
| Ca_Desi_Ch_scaffold03933_15363 | Ca_desi_scaffold   | 15363                          | [T/C]       | NA                                         |
| Ca_Desi_Ch_scaffold03933_15373 | Ca_desi_scaffold   | 15373                          | [A/G]       | NA                                         |
| Ca_Desi_Ch_scaffold03933_15387 | Ca_desi_scaffold   | 15387                          | [T/C]       | NA                                         |
| Ca_Desi_Ch_scaffold03937_17883 | Ca_desi_scaffold   | 17883                          | [G/A]       | NA                                         |
| Ca_Desi_Ch_scaffold03937_18054 | Ca_desi_scaffold   | 18054                          | [T/G]       | NA                                         |
| Ca_Desi_Ch_scaffold03941_618   | Ca_desi_scaffold   | 618                            | [G/A]       | NA                                         |
| Ca_Desi_Ch_scaffold03941_624   | Ca_desi_scaffold   | 624                            | [A/G]       | NA                                         |
| Ca_Desi_Ch_scaffold03944_422   | Ca_desi_scaffold   | 422                            | [T/C]       | NA                                         |
| Ca_Desi_Ch_scaffold03944_427   | Ca_desi_scaffold   | 427                            | [C/T]       | NA                                         |
| Ca_Desi_Ch_scaffold03949_11085 | Ca_desi_scaffold   | 11085                          | [T/C]       | NA                                         |
| Ca_Desi_Ch_scaffold03949_11090 | Ca_desi_scaffold   | 11090                          | [A/G]       | NA                                         |
| Ca_Desi_Ch_scaffold03949_11104 | Ca_desi_scaffold   | 11104                          | [T/C]       | NA                                         |
| Ca_Desi_Ch_scaffold03949_11108 | Ca_desi_scaffold   | 11108                          | [T/G]       | NA                                         |
| Ca_Desi_Ch_scaffold03949_11115 | Ca_desi_scaffold   | 11115                          | [T/C]       | NA                                         |
| Ca_Desi_Ch_scaffold03950_12547 | Ca_desi_scaffold   | 12547                          | [A/C]       | NA                                         |
| Ca_Desi_Ch_scaffold03950_14742 | Ca_desi_scaffold   | 14742                          | [A/G]       | NA                                         |
| Ca_Desi_Ch_scaffold03950_14760 | Ca_desi_scaffold   | 14760                          | [A/G]       | NA                                         |
| Ca_Desi_Ch_scaffold03950_14770 | Ca_desi_scaffold   | 14770                          | [T/C]       | NA                                         |
| Ca_Desi_Ch_scaffold03950_14784 | Ca_desi_scaffold   | 14784                          | [A/G]       | NA                                         |
| Ca_Desi_Ch_scaffold03954_1788  | Ca_desi_scaffold   | 1788                           | [T/C]       | NA                                         |
| Ca_Desi_Ch_scaffold03954_2782  | Ca_desi_scaffold   | 2782                           | [T/A]       | NA                                         |
| Ca_Desi_Ch_scaffold03978_19060 | Ca_desi_scaffold   | 19060                          | [T/C]       | NA                                         |
| Ca_Desi_Ch_scaffold03978_19074 | Ca_desi_scaffold   | 19074                          | [G/T]       | NA                                         |
| Ca_Desi_Ch_scaffold03989_15350 | Ca_desi_scaffold   | 15350                          | [A/G]       | NA                                         |
| Ca_Desi_Ch_scaffold03989_15374 | Ca_desi_scaffold   | 15374                          | [A/C]       | NA                                         |
| Ca_Desi_Ch_scaffold03989_15385 | Ca_desi_scaffold   | 15385                          | [A/C]       | NA                                         |
| Ca_Desi_Ch_scaffold03989_15400 | Ca_desi_scaffold   | 15400                          | [T/C]       | NA                                         |
| Ca_Desi_Ch_scaffold03989_15409 | Ca_desi_scaffold   | 15409                          | [C/G]       | NA                                         |
| Ca_Desi_Ch_scaffold04007_21953 | Ca_desi_scaffold   | 21953                          | [T/C]       | NA                                         |
| Ca_Desi_Ch_scaffold04007_21964 | Ca_desi_scaffold   | 21964                          | [T/C]       | NA                                         |
| Ca_Desi_Ch_scaffold04007_21971 | Ca_desi_scaffold   | 21971                          | [T/C]       | NA                                         |
| Ca_Desi_Ch_scaffold04007_21976 | Ca_desi_scaffold   | 21976                          | [T/C]       | NA                                         |
| Ca_Desi_Ch_scaffold04007_21978 | Ca_desi_scaffold   | 21978                          | [T/G]       | NA                                         |

| <b>SNP IDs</b>                   | <b>Chromosomes</b> | <b>Physical positions (bp)</b> | <b>SNPs</b> | <b>NCBI SNPdb accession IDs (NCBI_ss#)</b> |
|----------------------------------|--------------------|--------------------------------|-------------|--------------------------------------------|
| Ca_Desig_Chr_scaffold04008_15327 | Ca_desig_scaffold  | 15327                          | [T/G]       | NA                                         |
| Ca_Desig_Chr_scaffold04008_15336 | Ca_desig_scaffold  | 15336                          | [G/A]       | NA                                         |
| Ca_Desig_Chr_scaffold04017_17813 | Ca_desig_scaffold  | 17813                          | [T/C]       | NA                                         |
| Ca_Desig_Chr_scaffold04017_17816 | Ca_desig_scaffold  | 17816                          | [A/C]       | NA                                         |
| Ca_Desig_Chr_scaffold04017_17825 | Ca_desig_scaffold  | 17825                          | [A/G]       | NA                                         |
| Ca_Desig_Chr_scaffold04017_17829 | Ca_desig_scaffold  | 17829                          | [A/G]       | NA                                         |
| Ca_Desig_Chr_scaffold04017_17835 | Ca_desig_scaffold  | 17835                          | [A/G]       | NA                                         |
| Ca_Desig_Chr_scaffold04017_17837 | Ca_desig_scaffold  | 17837                          | [T/G]       | NA                                         |
| Ca_Desig_Chr_scaffold04017_17840 | Ca_desig_scaffold  | 17840                          | [T/G]       | NA                                         |
| Ca_Desig_Chr_scaffold04017_17843 | Ca_desig_scaffold  | 17843                          | [T/A]       | NA                                         |
| Ca_Desig_Chr_scaffold04025_8095  | Ca_desig_scaffold  | 8095                           | [T/A]       | NA                                         |
| Ca_Desig_Chr_scaffold04027_3949  | Ca_desig_scaffold  | 3949                           | [A/T]       | NA                                         |
| Ca_Desig_Chr_scaffold04027_9513  | Ca_desig_scaffold  | 9513                           | [T/C]       | NA                                         |
| Ca_Desig_Chr_scaffold04027_9538  | Ca_desig_scaffold  | 9538                           | [T/C]       | NA                                         |
| Ca_Desig_Chr_scaffold04027_9551  | Ca_desig_scaffold  | 9551                           | [A/G]       | NA                                         |
| Ca_Desig_Chr_scaffold04029_15259 | Ca_desig_scaffold  | 15259                          | [A/C]       | NA                                         |
| Ca_Desig_Chr_scaffold04029_15287 | Ca_desig_scaffold  | 15287                          | [T/C]       | NA                                         |
| Ca_Desig_Chr_scaffold04040_14321 | Ca_desig_scaffold  | 14321                          | [G/A]       | NA                                         |
| Ca_Desig_Chr_scaffold04040_14329 | Ca_desig_scaffold  | 14329                          | [T/C]       | NA                                         |
| Ca_Desig_Chr_scaffold04040_15409 | Ca_desig_scaffold  | 15409                          | [A/G]       | NA                                         |
| Ca_Desig_Chr_scaffold04040_15425 | Ca_desig_scaffold  | 15425                          | [T/C]       | NA                                         |
| Ca_Desig_Chr_scaffold04040_15433 | Ca_desig_scaffold  | 15433                          | [T/G]       | NA                                         |
| Ca_Desig_Chr_scaffold04054_1137  | Ca_desig_scaffold  | 1137                           | [T/G]       | NA                                         |
| Ca_Desig_Chr_scaffold04073_14823 | Ca_desig_scaffold  | 14823                          | [A/T]       | NA                                         |
| Ca_Desig_Chr_scaffold04073_14831 | Ca_desig_scaffold  | 14831                          | [A/G]       | NA                                         |
| Ca_Desig_Chr_scaffold04073_14855 | Ca_desig_scaffold  | 14855                          | [T/C]       | NA                                         |
| Ca_Desig_Chr_scaffold04073_14881 | Ca_desig_scaffold  | 14881                          | [T/C]       | NA                                         |
| Ca_Desig_Chr_scaffold04073_15713 | Ca_desig_scaffold  | 15713                          | [A/T]       | NA                                         |
| Ca_Desig_Chr_scaffold04073_15733 | Ca_desig_scaffold  | 15733                          | [A/T]       | NA                                         |
| Ca_Desig_Chr_scaffold04079_9695  | Ca_desig_scaffold  | 9695                           | [G/T]       | NA                                         |
| Ca_Desig_Chr_scaffold04085_1686  | Ca_desig_scaffold  | 1686                           | [C/A]       | NA                                         |
| Ca_Desig_Chr_scaffold04085_1688  | Ca_desig_scaffold  | 1688                           | [A/G]       | NA                                         |
| Ca_Desig_Chr_scaffold04102_11199 | Ca_desig_scaffold  | 11199                          | [T/G]       | NA                                         |
| Ca_Desig_Chr_scaffold04105_19479 | Ca_desig_scaffold  | 19479                          | [T/G]       | NA                                         |



| <b>SNP IDs</b>                         | <b>Chromosomes</b> | <b>Physical positions (bp)</b> | <b>SNPs</b> | <b>NCBI SNPdb accession IDs (NCBI_ss#)</b> |
|----------------------------------------|--------------------|--------------------------------|-------------|--------------------------------------------|
| Ca_Desi_Chromosome_scaffold04106_5643  | Ca_desi_scaffold   | 5643                           | [G/T]       | NA                                         |
| Ca_Desi_Chromosome_scaffold04106_5644  | Ca_desi_scaffold   | 5644                           | [A/C]       | NA                                         |
| Ca_Desi_Chromosome_scaffold04106_5645  | Ca_desi_scaffold   | 5645                           | [G/T]       | NA                                         |
| Ca_Desi_Chromosome_scaffold04112_15682 | Ca_desi_scaffold   | 15682                          | [A/C]       | NA                                         |
| Ca_Desi_Chromosome_scaffold04112_15683 | Ca_desi_scaffold   | 15683                          | [G/C]       | NA                                         |
| Ca_Desi_Chromosome_scaffold04125_2084  | Ca_desi_scaffold   | 2084                           | [A/C]       | NA                                         |
| Ca_Desi_Chromosome_scaffold04127_2688  | Ca_desi_scaffold   | 2688                           | [A/C]       | NA                                         |
| Ca_Desi_Chromosome_scaffold04127_3552  | Ca_desi_scaffold   | 3552                           | [T/C]       | NA                                         |
| Ca_Desi_Chromosome_scaffold04127_3628  | Ca_desi_scaffold   | 3628                           | [G/T]       | NA                                         |
| Ca_Desi_Chromosome_scaffold04127_5840  | Ca_desi_scaffold   | 5840                           | [C/A]       | NA                                         |
| Ca_Desi_Chromosome_scaffold04127_5867  | Ca_desi_scaffold   | 5867                           | [C/T]       | NA                                         |
| Ca_Desi_Chromosome_scaffold04127_5869  | Ca_desi_scaffold   | 5869                           | [T/G]       | NA                                         |
| Ca_Desi_Chromosome_scaffold04127_5897  | Ca_desi_scaffold   | 5897                           | [A/C]       | NA                                         |
| Ca_Desi_Chromosome_scaffold04130_17014 | Ca_desi_scaffold   | 17014                          | [T/G]       | NA                                         |
| Ca_Desi_Chromosome_scaffold04130_17022 | Ca_desi_scaffold   | 17022                          | [T/G]       | NA                                         |
| Ca_Desi_Chromosome_scaffold04144_4124  | Ca_desi_scaffold   | 4124                           | [T/G]       | NA                                         |
| Ca_Desi_Chromosome_scaffold04144_8514  | Ca_desi_scaffold   | 8514                           | [G/A]       | NA                                         |
| Ca_Desi_Chromosome_scaffold04144_8618  | Ca_desi_scaffold   | 8618                           | [A/C]       | NA                                         |
| Ca_Desi_Chromosome_scaffold04156_12822 | Ca_desi_scaffold   | 12822                          | [A/G]       | NA                                         |
| Ca_Desi_Chromosome_scaffold04156_12850 | Ca_desi_scaffold   | 12850                          | [A/C]       | NA                                         |
| Ca_Desi_Chromosome_scaffold04158_6185  | Ca_desi_scaffold   | 6185                           | [G/T]       | NA                                         |
| Ca_Desi_Chromosome_scaffold04158_6186  | Ca_desi_scaffold   | 6186                           | [C/G]       | NA                                         |
| Ca_Desi_Chromosome_scaffold04158_6298  | Ca_desi_scaffold   | 6298                           | [T/G]       | NA                                         |
| Ca_Desi_Chromosome_scaffold04160_15332 | Ca_desi_scaffold   | 15332                          | [A/T]       | NA                                         |
| Ca_Desi_Chromosome_scaffold04160_15479 | Ca_desi_scaffold   | 15479                          | [A/C]       | NA                                         |
| Ca_Desi_Chromosome_scaffold04160_17065 | Ca_desi_scaffold   | 17065                          | [A/T]       | NA                                         |
| Ca_Desi_Chromosome_scaffold04160_17074 | Ca_desi_scaffold   | 17074                          | [A/G]       | NA                                         |
| Ca_Desi_Chromosome_scaffold04160_17080 | Ca_desi_scaffold   | 17080                          | [A/G]       | NA                                         |
| Ca_Desi_Chromosome_scaffold04160_17087 | Ca_desi_scaffold   | 17087                          | [T/C]       | NA                                         |
| Ca_Desi_Chromosome_scaffold04160_17092 | Ca_desi_scaffold   | 17092                          | [A/G]       | NA                                         |
| Ca_Desi_Chromosome_scaffold04160_17098 | Ca_desi_scaffold   | 17098                          | [T/G]       | NA                                         |
| Ca_Desi_Chromosome_scaffold04160_17108 | Ca_desi_scaffold   | 17108                          | [A/G]       | NA                                         |
| Ca_Desi_Chromosome_scaffold04160_17110 | Ca_desi_scaffold   | 17110                          | [A/G]       | NA                                         |
| Ca_Desi_Chromosome_scaffold04160_17120 | Ca_desi_scaffold   | 17120                          | [T/C]       | NA                                         |

| <b>SNP IDs</b>                   | <b>Chromosomes</b> | <b>Physical positions (bp)</b> | <b>SNPs</b> | <b>NCBI SNPdb accession IDs (NCBI_ss#)</b> |
|----------------------------------|--------------------|--------------------------------|-------------|--------------------------------------------|
| Ca_Desig_Chr_scaffold04165_15558 | Ca_desig_scaffold  | 15558                          | [G/T]       | NA                                         |
| Ca_Desig_Chr_scaffold04178_20209 | Ca_desig_scaffold  | 20209                          | [T/C]       | NA                                         |
| Ca_Desig_Chr_scaffold04185_4807  | Ca_desig_scaffold  | 4807                           | [T/C]       | NA                                         |
| Ca_Desig_Chr_scaffold04185_7175  | Ca_desig_scaffold  | 7175                           | [T/A]       | NA                                         |
| Ca_Desig_Chr_scaffold04185_7249  | Ca_desig_scaffold  | 7249                           | [C/T]       | NA                                         |
| Ca_Desig_Chr_scaffold04185_7264  | Ca_desig_scaffold  | 7264                           | [T/C]       | NA                                         |
| Ca_Desig_Chr_scaffold04185_7339  | Ca_desig_scaffold  | 7339                           | [G/A]       | NA                                         |
| Ca_Desig_Chr_scaffold04185_7340  | Ca_desig_scaffold  | 7340                           | [A/T]       | NA                                         |
| Ca_Desig_Chr_scaffold04185_7701  | Ca_desig_scaffold  | 7701                           | [G/A]       | NA                                         |
| Ca_Desig_Chr_scaffold04185_7729  | Ca_desig_scaffold  | 7729                           | [T/C]       | NA                                         |
| Ca_Desig_Chr_scaffold04185_7917  | Ca_desig_scaffold  | 7917                           | [T/C]       | NA                                         |
| Ca_Desig_Chr_scaffold04185_7936  | Ca_desig_scaffold  | 7936                           | [G/A]       | NA                                         |
| Ca_Desig_Chr_scaffold04189_4183  | Ca_desig_scaffold  | 4183                           | [A/C]       | NA                                         |
| Ca_Desig_Chr_scaffold04189_4186  | Ca_desig_scaffold  | 4186                           | [G/T]       | NA                                         |
| Ca_Desig_Chr_scaffold04207_4796  | Ca_desig_scaffold  | 4796                           | [T/G]       | NA                                         |
| Ca_Desig_Chr_scaffold04207_4800  | Ca_desig_scaffold  | 4800                           | [T/G]       | NA                                         |
| Ca_Desig_Chr_scaffold04207_4831  | Ca_desig_scaffold  | 4831                           | [A/C]       | NA                                         |
| Ca_Desig_Chr_scaffold04214_402   | Ca_desig_scaffold  | 402                            | [T/G]       | NA                                         |
| Ca_Desig_Chr_scaffold04214_408   | Ca_desig_scaffold  | 408                            | [T/G]       | NA                                         |
| Ca_Desig_Chr_scaffold04219_7413  | Ca_desig_scaffold  | 7413                           | [T/G]       | NA                                         |
| Ca_Desig_Chr_scaffold04219_7415  | Ca_desig_scaffold  | 7415                           | [T/G]       | NA                                         |
| Ca_Desig_Chr_scaffold04231_6025  | Ca_desig_scaffold  | 6025                           | [A/C]       | NA                                         |
| Ca_Desig_Chr_scaffold04242_2168  | Ca_desig_scaffold  | 2168                           | [T/G]       | NA                                         |
| Ca_Desig_Chr_scaffold04242_15007 | Ca_desig_scaffold  | 15007                          | [T/G]       | NA                                         |
| Ca_Desig_Chr_scaffold04253_7089  | Ca_desig_scaffold  | 7089                           | [T/A]       | NA                                         |
| Ca_Desig_Chr_scaffold04259_980   | Ca_desig_scaffold  | 980                            | [A/T]       | NA                                         |
| Ca_Desig_Chr_scaffold04259_1557  | Ca_desig_scaffold  | 1557                           | [C/T]       | NA                                         |
| Ca_Desig_Chr_scaffold04316_5219  | Ca_desig_scaffold  | 5219                           | [A/G]       | NA                                         |
| Ca_Desig_Chr_scaffold04316_10139 | Ca_desig_scaffold  | 10139                          | [T/G]       | NA                                         |
| Ca_Desig_Chr_scaffold04316_10209 | Ca_desig_scaffold  | 10209                          | [C/G]       | NA                                         |
| Ca_Desig_Chr_scaffold04316_10710 | Ca_desig_scaffold  | 10710                          | [T/G]       | NA                                         |
| Ca_Desig_Chr_scaffold04316_12627 | Ca_desig_scaffold  | 12627                          | [T/G]       | NA                                         |
| Ca_Desig_Chr_scaffold04316_12630 | Ca_desig_scaffold  | 12630                          | [T/G]       | NA                                         |
| Ca_Desig_Chr_scaffold04319_6093  | Ca_desig_scaffold  | 6093                           | [T/C]       | NA                                         |

| <b>SNP IDs</b>                 | <b>Chromosomes</b> | <b>Physical positions (bp)</b> | <b>SNPs</b> | <b>NCBI SNPdb accession IDs (NCBI_ss#)</b> |
|--------------------------------|--------------------|--------------------------------|-------------|--------------------------------------------|
| Ca_Desi_Ch_scaffold04326_9610  | Ca_desi_scaffold   | 9610                           | [T/G]       | NA                                         |
| Ca_Desi_Ch_scaffold04334_1917  | Ca_desi_scaffold   | 1917                           | [T/C]       | NA                                         |
| Ca_Desi_Ch_scaffold04334_1919  | Ca_desi_scaffold   | 1919                           | [G/C]       | NA                                         |
| Ca_Desi_Ch_scaffold04334_1921  | Ca_desi_scaffold   | 1921                           | [T/C]       | NA                                         |
| Ca_Desi_Ch_scaffold04349_2544  | Ca_desi_scaffold   | 2544                           | [G/A]       | NA                                         |
| Ca_Desi_Ch_scaffold04349_2819  | Ca_desi_scaffold   | 2819                           | [T/C]       | NA                                         |
| Ca_Desi_Ch_scaffold04349_2829  | Ca_desi_scaffold   | 2829                           | [A/G]       | NA                                         |
| Ca_Desi_Ch_scaffold04349_2835  | Ca_desi_scaffold   | 2835                           | [T/G]       | NA                                         |
| Ca_Desi_Ch_scaffold04349_18021 | Ca_desi_scaffold   | 18021                          | [T/C]       | NA                                         |
| Ca_Desi_Ch_scaffold04353_12790 | Ca_desi_scaffold   | 12790                          | [G/A]       | NA                                         |
| Ca_Desi_Ch_scaffold04364_13608 | Ca_desi_scaffold   | 13608                          | [T/G]       | NA                                         |
| Ca_Desi_Ch_scaffold04371_10480 | Ca_desi_scaffold   | 10480                          | [T/G]       | NA                                         |
| Ca_Desi_Ch_scaffold04379_8803  | Ca_desi_scaffold   | 8803                           | [A/T]       | NA                                         |
| Ca_Desi_Ch_scaffold04379_8806  | Ca_desi_scaffold   | 8806                           | [G/T]       | NA                                         |
| Ca_Desi_Ch_scaffold04379_8816  | Ca_desi_scaffold   | 8816                           | [A/G]       | NA                                         |
| Ca_Desi_Ch_scaffold04379_8820  | Ca_desi_scaffold   | 8820                           | [A/G]       | NA                                         |
| Ca_Desi_Ch_scaffold04379_8823  | Ca_desi_scaffold   | 8823                           | [A/G]       | NA                                         |
| Ca_Desi_Ch_scaffold04379_8824  | Ca_desi_scaffold   | 8824                           | [A/G]       | NA                                         |
| Ca_Desi_Ch_scaffold04379_8826  | Ca_desi_scaffold   | 8826                           | [A/G]       | NA                                         |
| Ca_Desi_Ch_scaffold04379_8828  | Ca_desi_scaffold   | 8828                           | [A/C]       | NA                                         |
| Ca_Desi_Ch_scaffold04379_8833  | Ca_desi_scaffold   | 8833                           | [A/G]       | NA                                         |
| Ca_Desi_Ch_scaffold04379_8839  | Ca_desi_scaffold   | 8839                           | [A/G]       | NA                                         |
| Ca_Desi_Ch_scaffold04379_8843  | Ca_desi_scaffold   | 8843                           | [A/G]       | NA                                         |
| Ca_Desi_Ch_scaffold04379_8847  | Ca_desi_scaffold   | 8847                           | [A/G]       | NA                                         |
| Ca_Desi_Ch_scaffold04379_8851  | Ca_desi_scaffold   | 8851                           | [A/G]       | NA                                         |
| Ca_Desi_Ch_scaffold04379_8856  | Ca_desi_scaffold   | 8856                           | [A/G]       | NA                                         |
| Ca_Desi_Ch_scaffold04379_8863  | Ca_desi_scaffold   | 8863                           | [T/C]       | NA                                         |
| Ca_Desi_Ch_scaffold04379_8870  | Ca_desi_scaffold   | 8870                           | [A/G]       | NA                                         |
| Ca_Desi_Ch_scaffold04379_8872  | Ca_desi_scaffold   | 8872                           | [A/G]       | NA                                         |
| Ca_Desi_Ch_scaffold04379_8876  | Ca_desi_scaffold   | 8876                           | [A/G]       | NA                                         |
| Ca_Desi_Ch_scaffold04379_8879  | Ca_desi_scaffold   | 8879                           | [A/G]       | NA                                         |
| Ca_Desi_Ch_scaffold04379_8880  | Ca_desi_scaffold   | 8880                           | [A/G]       | NA                                         |
| Ca_Desi_Ch_scaffold04379_8883  | Ca_desi_scaffold   | 8883                           | [T/G]       | NA                                         |
| Ca_Desi_Ch_scaffold04379_8889  | Ca_desi_scaffold   | 8889                           | [A/G]       | NA                                         |

| <b>SNP IDs</b>                   | <b>Chromosomes</b> | <b>Physical positions (bp)</b> | <b>SNPs</b> | <b>NCBI SNPdb accession IDs (NCBI_ss#)</b> |
|----------------------------------|--------------------|--------------------------------|-------------|--------------------------------------------|
| Ca_Desig_Chr_scaffold04379_8893  | Ca_desig_scaffold  | 8893                           | [A/G]       | NA                                         |
| Ca_Desig_Chr_scaffold04379_8899  | Ca_desig_scaffold  | 8899                           | [A/G]       | NA                                         |
| Ca_Desig_Chr_scaffold04379_8903  | Ca_desig_scaffold  | 8903                           | [A/G]       | NA                                         |
| Ca_Desig_Chr_scaffold04379_8905  | Ca_desig_scaffold  | 8905                           | [A/G]       | NA                                         |
| Ca_Desig_Chr_scaffold04379_8907  | Ca_desig_scaffold  | 8907                           | [T/C]       | NA                                         |
| Ca_Desig_Chr_scaffold04379_8913  | Ca_desig_scaffold  | 8913                           | [T/C]       | NA                                         |
| Ca_Desig_Chr_scaffold04379_8915  | Ca_desig_scaffold  | 8915                           | [T/C]       | NA                                         |
| Ca_Desig_Chr_scaffold04379_8922  | Ca_desig_scaffold  | 8922                           | [A/G]       | NA                                         |
| Ca_Desig_Chr_scaffold04379_8928  | Ca_desig_scaffold  | 8928                           | [C/A]       | NA                                         |
| Ca_Desig_Chr_scaffold04384_1027  | Ca_desig_scaffold  | 1027                           | [A/C]       | NA                                         |
| Ca_Desig_Chr_scaffold04384_1032  | Ca_desig_scaffold  | 1032                           | [T/C]       | NA                                         |
| Ca_Desig_Chr_scaffold04384_5214  | Ca_desig_scaffold  | 5214                           | [G/A]       | NA                                         |
| Ca_Desig_Chr_scaffold04400_15656 | Ca_desig_scaffold  | 15656                          | [T/C]       | NA                                         |
| Ca_Desig_Chr_scaffold04414_7728  | Ca_desig_scaffold  | 7728                           | [A/C]       | NA                                         |
| Ca_Desig_Chr_scaffold04423_2454  | Ca_desig_scaffold  | 2454                           | [A/C]       | NA                                         |
| Ca_Desig_Chr_scaffold04423_12404 | Ca_desig_scaffold  | 12404                          | [A/G]       | NA                                         |
| Ca_Desig_Chr_scaffold04423_12408 | Ca_desig_scaffold  | 12408                          | [T/G]       | NA                                         |
| Ca_Desig_Chr_scaffold04423_12411 | Ca_desig_scaffold  | 12411                          | [T/G]       | NA                                         |
| Ca_Desig_Chr_scaffold04423_12414 | Ca_desig_scaffold  | 12414                          | [T/G]       | NA                                         |
| Ca_Desig_Chr_scaffold04423_12420 | Ca_desig_scaffold  | 12420                          | [A/G]       | NA                                         |
| Ca_Desig_Chr_scaffold04423_12429 | Ca_desig_scaffold  | 12429                          | [A/G]       | NA                                         |
| Ca_Desig_Chr_scaffold04423_12438 | Ca_desig_scaffold  | 12438                          | [A/G]       | NA                                         |
| Ca_Desig_Chr_scaffold04423_12443 | Ca_desig_scaffold  | 12443                          | [A/G]       | NA                                         |
| Ca_Desig_Chr_scaffold04431_755   | Ca_desig_scaffold  | 755                            | [A/T]       | NA                                         |
| Ca_Desig_Chr_scaffold04431_758   | Ca_desig_scaffold  | 758                            | [G/A]       | NA                                         |
| Ca_Desig_Chr_scaffold04431_763   | Ca_desig_scaffold  | 763                            | [T/C]       | NA                                         |
| Ca_Desig_Chr_scaffold04447_5029  | Ca_desig_scaffold  | 5029                           | [C/T]       | NA                                         |
| Ca_Desig_Chr_scaffold04447_5208  | Ca_desig_scaffold  | 5208                           | [C/T]       | NA                                         |
| Ca_Desig_Chr_scaffold04447_5284  | Ca_desig_scaffold  | 5284                           | [C/A]       | NA                                         |
| Ca_Desig_Chr_scaffold04447_5285  | Ca_desig_scaffold  | 5285                           | [T/G]       | NA                                         |
| Ca_Desig_Chr_scaffold04447_5286  | Ca_desig_scaffold  | 5286                           | [G/A]       | NA                                         |
| Ca_Desig_Chr_scaffold04448_6266  | Ca_desig_scaffold  | 6266                           | [A/C]       | NA                                         |
| Ca_Desig_Chr_scaffold04457_19027 | Ca_desig_scaffold  | 19027                          | [A/C]       | NA                                         |
| Ca_Desig_Chr_scaffold04457_19030 | Ca_desig_scaffold  | 19030                          | [C/T]       | NA                                         |

| <b>SNP IDs</b>                  | <b>Chromosomes</b> | <b>Physical positions (bp)</b> | <b>SNPs</b> | <b>NCBI SNPdb accession IDs (NCBI_ss#)</b> |
|---------------------------------|--------------------|--------------------------------|-------------|--------------------------------------------|
| Ca_Desi_Chr_scaffold04460_11627 | Ca_desi_scaffold   | 11627                          | [T/G]       | NA                                         |
| Ca_Desi_Chr_scaffold04460_11654 | Ca_desi_scaffold   | 11654                          | [T/C]       | NA                                         |
| Ca_Desi_Chr_scaffold04460_11655 | Ca_desi_scaffold   | 11655                          | [G/T]       | NA                                         |
| Ca_Desi_Chr_scaffold04463_821   | Ca_desi_scaffold   | 821                            | [A/C]       | NA                                         |
| Ca_Desi_Chr_scaffold04463_849   | Ca_desi_scaffold   | 849                            | [T/C]       | NA                                         |
| Ca_Desi_Chr_scaffold04463_856   | Ca_desi_scaffold   | 856                            | [T/C]       | NA                                         |
| Ca_Desi_Chr_scaffold04463_878   | Ca_desi_scaffold   | 878                            | [T/C]       | NA                                         |
| Ca_Desi_Chr_scaffold04463_897   | Ca_desi_scaffold   | 897                            | [T/G]       | NA                                         |
| Ca_Desi_Chr_scaffold04463_898   | Ca_desi_scaffold   | 898                            | [A/C]       | NA                                         |
| Ca_Desi_Chr_scaffold04463_917   | Ca_desi_scaffold   | 917                            | [C/G]       | NA                                         |
| Ca_Desi_Chr_scaffold04463_918   | Ca_desi_scaffold   | 918                            | [A/G]       | NA                                         |
| Ca_Desi_Chr_scaffold04463_941   | Ca_desi_scaffold   | 941                            | [A/C]       | NA                                         |
| Ca_Desi_Chr_scaffold04472_16931 | Ca_desi_scaffold   | 16931                          | [T/G]       | NA                                         |
| Ca_Desi_Chr_scaffold04484_15551 | Ca_desi_scaffold   | 15551                          | [A/G]       | NA                                         |
| Ca_Desi_Chr_scaffold04484_15870 | Ca_desi_scaffold   | 15870                          | [A/T]       | NA                                         |
| Ca_Desi_Chr_scaffold04496_9279  | Ca_desi_scaffold   | 9279                           | [T/C]       | NA                                         |
| Ca_Desi_Chr_scaffold04496_9297  | Ca_desi_scaffold   | 9297                           | [A/G]       | NA                                         |
| Ca_Desi_Chr_scaffold04496_9309  | Ca_desi_scaffold   | 9309                           | [T/G]       | NA                                         |
| Ca_Desi_Chr_scaffold04496_9312  | Ca_desi_scaffold   | 9312                           | [T/G]       | NA                                         |
| Ca_Desi_Chr_scaffold04496_9313  | Ca_desi_scaffold   | 9313                           | [A/C]       | NA                                         |
| Ca_Desi_Chr_scaffold04496_9317  | Ca_desi_scaffold   | 9317                           | [A/C]       | NA                                         |
| Ca_Desi_Chr_scaffold04534_15826 | Ca_desi_scaffold   | 15826                          | [T/C]       | NA                                         |
| Ca_Desi_Chr_scaffold04534_15831 | Ca_desi_scaffold   | 15831                          | [T/C]       | NA                                         |
| Ca_Desi_Chr_scaffold04534_15837 | Ca_desi_scaffold   | 15837                          | [T/C]       | NA                                         |
| Ca_Desi_Chr_scaffold04534_15843 | Ca_desi_scaffold   | 15843                          | [T/C]       | NA                                         |
| Ca_Desi_Chr_scaffold04534_15849 | Ca_desi_scaffold   | 15849                          | [T/C]       | NA                                         |
| Ca_Desi_Chr_scaffold04534_15869 | Ca_desi_scaffold   | 15869                          | [T/C]       | NA                                         |
| Ca_Desi_Chr_scaffold04534_15875 | Ca_desi_scaffold   | 15875                          | [T/A]       | NA                                         |
| Ca_Desi_Chr_scaffold04550_12689 | Ca_desi_scaffold   | 12689                          | [T/C]       | NA                                         |
| Ca_Desi_Chr_scaffold04553_13800 | Ca_desi_scaffold   | 13800                          | [T/G]       | NA                                         |
| Ca_Desi_Chr_scaffold04564_10854 | Ca_desi_scaffold   | 10854                          | [T/G]       | NA                                         |
| Ca_Desi_Chr_scaffold04564_10866 | Ca_desi_scaffold   | 10866                          | [T/G]       | NA                                         |
| Ca_Desi_Chr_scaffold04564_10869 | Ca_desi_scaffold   | 10869                          | [T/C]       | NA                                         |
| Ca_Desi_Chr_scaffold04564_10878 | Ca_desi_scaffold   | 10878                          | [T/G]       | NA                                         |

| <b>SNP IDs</b>                   | <b>Chromosomes</b> | <b>Physical positions (bp)</b> | <b>SNPs</b> | <b>NCBI SNPdb accession IDs (NCBI_ss#)</b> |
|----------------------------------|--------------------|--------------------------------|-------------|--------------------------------------------|
| Ca_Desig_Chr_scaffold04564_10879 | Ca_desig_scaffold  | 10879                          | [A/C]       | NA                                         |
| Ca_Desig_Chr_scaffold04564_10885 | Ca_desig_scaffold  | 10885                          | [A/C]       | NA                                         |
| Ca_Desig_Chr_scaffold04564_10896 | Ca_desig_scaffold  | 10896                          | [A/C]       | NA                                         |
| Ca_Desig_Chr_scaffold04564_10914 | Ca_desig_scaffold  | 10914                          | [A/C]       | NA                                         |
| Ca_Desig_Chr_scaffold04564_13384 | Ca_desig_scaffold  | 13384                          | [T/G]       | NA                                         |
| Ca_Desig_Chr_scaffold04564_13388 | Ca_desig_scaffold  | 13388                          | [T/G]       | NA                                         |
| Ca_Desig_Chr_scaffold04564_13397 | Ca_desig_scaffold  | 13397                          | [T/G]       | NA                                         |
| Ca_Desig_Chr_scaffold04565_8783  | Ca_desig_scaffold  | 8783                           | [T/C]       | NA                                         |
| Ca_Desig_Chr_scaffold04565_8790  | Ca_desig_scaffold  | 8790                           | [T/C]       | NA                                         |
| Ca_Desig_Chr_scaffold04565_8800  | Ca_desig_scaffold  | 8800                           | [T/G]       | NA                                         |
| Ca_Desig_Chr_scaffold04565_8811  | Ca_desig_scaffold  | 8811                           | [T/G]       | NA                                         |
| Ca_Desig_Chr_scaffold04570_6408  | Ca_desig_scaffold  | 6408                           | [G/A]       | NA                                         |
| Ca_Desig_Chr_scaffold04570_7074  | Ca_desig_scaffold  | 7074                           | [A/G]       | NA                                         |
| Ca_Desig_Chr_scaffold04570_7104  | Ca_desig_scaffold  | 7104                           | [T/C]       | NA                                         |
| Ca_Desig_Chr_scaffold04574_170   | Ca_desig_scaffold  | 170                            | [T/A]       | NA                                         |
| Ca_Desig_Chr_scaffold04574_193   | Ca_desig_scaffold  | 193                            | [C/T]       | NA                                         |
| Ca_Desig_Chr_scaffold04574_199   | Ca_desig_scaffold  | 199                            | [T/A]       | NA                                         |
| Ca_Desig_Chr_scaffold04579_1758  | Ca_desig_scaffold  | 1758                           | [C/A]       | NA                                         |
| Ca_Desig_Chr_scaffold04579_4463  | Ca_desig_scaffold  | 4463                           | [G/A]       | NA                                         |
| Ca_Desig_Chr_scaffold04579_15170 | Ca_desig_scaffold  | 15170                          | [C/G]       | NA                                         |
| Ca_Desig_Chr_scaffold04579_15254 | Ca_desig_scaffold  | 15254                          | [T/A]       | NA                                         |
| Ca_Desig_Chr_scaffold04579_17937 | Ca_desig_scaffold  | 17937                          | [C/G]       | NA                                         |
| Ca_Desig_Chr_scaffold04579_17997 | Ca_desig_scaffold  | 17997                          | [G/A]       | NA                                         |
| Ca_Desig_Chr_scaffold04579_17999 | Ca_desig_scaffold  | 17999                          | [G/T]       | NA                                         |
| Ca_Desig_Chr_scaffold04581_7816  | Ca_desig_scaffold  | 7816                           | [G/A]       | NA                                         |
| Ca_Desig_Chr_scaffold04591_11810 | Ca_desig_scaffold  | 11810                          | [A/C]       | NA                                         |
| Ca_Desig_Chr_scaffold04591_11873 | Ca_desig_scaffold  | 11873                          | [T/G]       | NA                                         |
| Ca_Desig_Chr_scaffold04591_11882 | Ca_desig_scaffold  | 11882                          | [C/T]       | NA                                         |
| Ca_Desig_Chr_scaffold04593_15999 | Ca_desig_scaffold  | 15999                          | [A/C]       | NA                                         |
| Ca_Desig_Chr_scaffold04606_3067  | Ca_desig_scaffold  | 3067                           | [G/A]       | NA                                         |
| Ca_Desig_Chr_scaffold04606_3578  | Ca_desig_scaffold  | 3578                           | [A/G]       | NA                                         |
| Ca_Desig_Chr_scaffold04606_7109  | Ca_desig_scaffold  | 7109                           | [C/T]       | NA                                         |
| Ca_Desig_Chr_scaffold04629_9825  | Ca_desig_scaffold  | 9825                           | [A/G]       | NA                                         |
| Ca_Desig_Chr_scaffold04652_4356  | Ca_desig_scaffold  | 4356                           | [A/C]       | NA                                         |

| <b>SNP IDs</b>                         | <b>Chromosomes</b> | <b>Physical positions (bp)</b> | <b>SNPs</b> | <b>NCBI SNPdb accession IDs (NCBI_ss#)</b> |
|----------------------------------------|--------------------|--------------------------------|-------------|--------------------------------------------|
| Ca_Desi_Chromosome_scaffold04652_15252 | Ca_desi_scaffold   | 15252                          | [A/T]       | NA                                         |
| Ca_Desi_Chromosome_scaffold04666_3087  | Ca_desi_scaffold   | 3087                           | [T/C]       | NA                                         |
| Ca_Desi_Chromosome_scaffold04666_3091  | Ca_desi_scaffold   | 3091                           | [T/G]       | NA                                         |
| Ca_Desi_Chromosome_scaffold04666_3118  | Ca_desi_scaffold   | 3118                           | [T/G]       | NA                                         |
| Ca_Desi_Chromosome_scaffold04666_3120  | Ca_desi_scaffold   | 3120                           | [T/G]       | NA                                         |
| Ca_Desi_Chromosome_scaffold04666_3125  | Ca_desi_scaffold   | 3125                           | [T/C]       | NA                                         |
| Ca_Desi_Chromosome_scaffold04666_3130  | Ca_desi_scaffold   | 3130                           | [T/A]       | NA                                         |
| Ca_Desi_Chromosome_scaffold04666_3148  | Ca_desi_scaffold   | 3148                           | [A/G]       | NA                                         |
| Ca_Desi_Chromosome_scaffold04666_3149  | Ca_desi_scaffold   | 3149                           | [A/G]       | NA                                         |
| Ca_Desi_Chromosome_scaffold04666_3454  | Ca_desi_scaffold   | 3454                           | [T/C]       | NA                                         |
| Ca_Desi_Chromosome_scaffold04666_12710 | Ca_desi_scaffold   | 12710                          | [A/T]       | NA                                         |
| Ca_Desi_Chromosome_scaffold04677_9950  | Ca_desi_scaffold   | 9950                           | [T/G]       | NA                                         |
| Ca_Desi_Chromosome_scaffold04691_15273 | Ca_desi_scaffold   | 15273                          | [A/T]       | NA                                         |
| Ca_Desi_Chromosome_scaffold04691_15299 | Ca_desi_scaffold   | 15299                          | [A/G]       | NA                                         |
| Ca_Desi_Chromosome_scaffold04691_15304 | Ca_desi_scaffold   | 15304                          | [C/G]       | NA                                         |
| Ca_Desi_Chromosome_scaffold04703_6039  | Ca_desi_scaffold   | 6039                           | [A/C]       | NA                                         |
| Ca_Desi_Chromosome_scaffold04707_6177  | Ca_desi_scaffold   | 6177                           | [A/G]       | NA                                         |
| Ca_Desi_Chromosome_scaffold04732_1913  | Ca_desi_scaffold   | 1913                           | [G/A]       | NA                                         |
| Ca_Desi_Chromosome_scaffold04738_12054 | Ca_desi_scaffold   | 12054                          | [A/C]       | NA                                         |
| Ca_Desi_Chromosome_scaffold04738_12055 | Ca_desi_scaffold   | 12055                          | [G/A]       | NA                                         |
| Ca_Desi_Chromosome_scaffold04738_12056 | Ca_desi_scaffold   | 12056                          | [A/T]       | NA                                         |
| Ca_Desi_Chromosome_scaffold04738_12263 | Ca_desi_scaffold   | 12263                          | [T/C]       | NA                                         |
| Ca_Desi_Chromosome_scaffold04751_7697  | Ca_desi_scaffold   | 7697                           | [T/C]       | NA                                         |
| Ca_Desi_Chromosome_scaffold04751_7699  | Ca_desi_scaffold   | 7699                           | [A/G]       | NA                                         |
| Ca_Desi_Chromosome_scaffold04751_7711  | Ca_desi_scaffold   | 7711                           | [T/C]       | NA                                         |
| Ca_Desi_Chromosome_scaffold04751_7714  | Ca_desi_scaffold   | 7714                           | [A/G]       | NA                                         |
| Ca_Desi_Chromosome_scaffold04751_7723  | Ca_desi_scaffold   | 7723                           | [T/C]       | NA                                         |
| Ca_Desi_Chromosome_scaffold04751_7725  | Ca_desi_scaffold   | 7725                           | [A/G]       | NA                                         |
| Ca_Desi_Chromosome_scaffold04751_7736  | Ca_desi_scaffold   | 7736                           | [A/G]       | NA                                         |
| Ca_Desi_Chromosome_scaffold04751_7744  | Ca_desi_scaffold   | 7744                           | [T/A]       | NA                                         |
| Ca_Desi_Chromosome_scaffold04751_13634 | Ca_desi_scaffold   | 13634                          | [T/G]       | NA                                         |
| Ca_Desi_Chromosome_scaffold04769_378   | Ca_desi_scaffold   | 378                            | [C/T]       | NA                                         |
| Ca_Desi_Chromosome_scaffold04772_9527  | Ca_desi_scaffold   | 9527                           | [A/G]       | NA                                         |
| Ca_Desi_Chromosome_scaffold04772_9557  | Ca_desi_scaffold   | 9557                           | [T/G]       | NA                                         |

| <b>SNP IDs</b>                         | <b>Chromosomes</b> | <b>Physical positions (bp)</b> | <b>SNPs</b> | <b>NCBI SNPdb accession IDs (NCBI_ss#)</b> |
|----------------------------------------|--------------------|--------------------------------|-------------|--------------------------------------------|
| Ca_Desi_Chromosome_scaffold04772_10064 | Ca_desi_scaffold   | 10064                          | [G/T]       | NA                                         |
| Ca_Desi_Chromosome_scaffold04772_10229 | Ca_desi_scaffold   | 10229                          | [A/C]       | NA                                         |
| Ca_Desi_Chromosome_scaffold04787_3348  | Ca_desi_scaffold   | 3348                           | [A/G]       | NA                                         |
| Ca_Desi_Chromosome_scaffold04787_3357  | Ca_desi_scaffold   | 3357                           | [A/G]       | NA                                         |
| Ca_Desi_Chromosome_scaffold04787_3359  | Ca_desi_scaffold   | 3359                           | [T/A]       | NA                                         |
| Ca_Desi_Chromosome_scaffold04787_3373  | Ca_desi_scaffold   | 3373                           | [T/C]       | NA                                         |
| Ca_Desi_Chromosome_scaffold04787_3376  | Ca_desi_scaffold   | 3376                           | [T/C]       | NA                                         |
| Ca_Desi_Chromosome_scaffold04787_3381  | Ca_desi_scaffold   | 3381                           | [T/C]       | NA                                         |
| Ca_Desi_Chromosome_scaffold04787_3408  | Ca_desi_scaffold   | 3408                           | [T/A]       | NA                                         |
| Ca_Desi_Chromosome_scaffold04794_10756 | Ca_desi_scaffold   | 10756                          | [T/G]       | NA                                         |
| Ca_Desi_Chromosome_scaffold04796_5513  | Ca_desi_scaffold   | 5513                           | [T/A]       | NA                                         |
| Ca_Desi_Chromosome_scaffold04814_9058  | Ca_desi_scaffold   | 9058                           | [T/C]       | NA                                         |
| Ca_Desi_Chromosome_scaffold04814_9088  | Ca_desi_scaffold   | 9088                           | [G/T]       | NA                                         |
| Ca_Desi_Chromosome_scaffold04814_9200  | Ca_desi_scaffold   | 9200                           | [G/A]       | NA                                         |
| Ca_Desi_Chromosome_scaffold04820_1349  | Ca_desi_scaffold   | 1349                           | [A/C]       | NA                                         |
| Ca_Desi_Chromosome_scaffold04832_10269 | Ca_desi_scaffold   | 10269                          | [T/C]       | NA                                         |
| Ca_Desi_Chromosome_scaffold04832_10270 | Ca_desi_scaffold   | 10270                          | [G/T]       | NA                                         |
| Ca_Desi_Chromosome_scaffold04832_10279 | Ca_desi_scaffold   | 10279                          | [C/G]       | NA                                         |
| Ca_Desi_Chromosome_scaffold04832_10302 | Ca_desi_scaffold   | 10302                          | [G/A]       | NA                                         |
| Ca_Desi_Chromosome_scaffold04832_10585 | Ca_desi_scaffold   | 10585                          | [C/T]       | NA                                         |
| Ca_Desi_Chromosome_scaffold04832_10597 | Ca_desi_scaffold   | 10597                          | [C/A]       | NA                                         |
| Ca_Desi_Chromosome_scaffold04832_10601 | Ca_desi_scaffold   | 10601                          | [C/T]       | NA                                         |
| Ca_Desi_Chromosome_scaffold04833_3636  | Ca_desi_scaffold   | 3636                           | [G/A]       | NA                                         |
| Ca_Desi_Chromosome_scaffold04842_13831 | Ca_desi_scaffold   | 13831                          | [G/A]       | NA                                         |
| Ca_Desi_Chromosome_scaffold04865_3180  | Ca_desi_scaffold   | 3180                           | [C/A]       | NA                                         |
| Ca_Desi_Chromosome_scaffold04867_5240  | Ca_desi_scaffold   | 5240                           | [T/C]       | NA                                         |
| Ca_Desi_Chromosome_scaffold04888_10517 | Ca_desi_scaffold   | 10517                          | [T/G]       | NA                                         |
| Ca_Desi_Chromosome_scaffold04897_2916  | Ca_desi_scaffold   | 2916                           | [A/C]       | NA                                         |
| Ca_Desi_Chromosome_scaffold04897_2919  | Ca_desi_scaffold   | 2919                           | [T/C]       | NA                                         |
| Ca_Desi_Chromosome_scaffold04897_2921  | Ca_desi_scaffold   | 2921                           | [A/C]       | NA                                         |
| Ca_Desi_Chromosome_scaffold04916_197   | Ca_desi_scaffold   | 197                            | [C/T]       | NA                                         |
| Ca_Desi_Chromosome_scaffold04917_14132 | Ca_desi_scaffold   | 14132                          | [G/T]       | NA                                         |
| Ca_Desi_Chromosome_scaffold04917_14143 | Ca_desi_scaffold   | 14143                          | [A/T]       | NA                                         |
| Ca_Desi_Chromosome_scaffold04917_14151 | Ca_desi_scaffold   | 14151                          | [T/A]       | NA                                         |



| <b>SNP IDs</b>                   | <b>Chromosomes</b> | <b>Physical positions (bp)</b> | <b>SNPs</b> | <b>NCBI SNPdb accession IDs (NCBI_ss#)</b> |
|----------------------------------|--------------------|--------------------------------|-------------|--------------------------------------------|
| Ca_Desig_Chr_scaffold04919_1865  | Ca_desig_scaffold  | 1865                           | [A/G]       | NA                                         |
| Ca_Desig_Chr_scaffold04919_1913  | Ca_desig_scaffold  | 1913                           | [T/C]       | NA                                         |
| Ca_Desig_Chr_scaffold04929_5144  | Ca_desig_scaffold  | 5144                           | [C/A]       | NA                                         |
| Ca_Desig_Chr_scaffold04929_5155  | Ca_desig_scaffold  | 5155                           | [G/T]       | NA                                         |
| Ca_Desig_Chr_scaffold04929_5163  | Ca_desig_scaffold  | 5163                           | [G/T]       | NA                                         |
| Ca_Desig_Chr_scaffold04929_5170  | Ca_desig_scaffold  | 5170                           | [T/G]       | NA                                         |
| Ca_Desig_Chr_scaffold04929_5200  | Ca_desig_scaffold  | 5200                           | [T/C]       | NA                                         |
| Ca_Desig_Chr_scaffold04929_5201  | Ca_desig_scaffold  | 5201                           | [G/T]       | NA                                         |
| Ca_Desig_Chr_scaffold04929_5204  | Ca_desig_scaffold  | 5204                           | [G/T]       | NA                                         |
| Ca_Desig_Chr_scaffold04929_5244  | Ca_desig_scaffold  | 5244                           | [G/T]       | NA                                         |
| Ca_Desig_Chr_scaffold04929_10896 | Ca_desig_scaffold  | 10896                          | [T/C]       | NA                                         |
| Ca_Desig_Chr_scaffold04929_10906 | Ca_desig_scaffold  | 10906                          | [G/A]       | NA                                         |
| Ca_Desig_Chr_scaffold04949_6516  | Ca_desig_scaffold  | 6516                           | [T/C]       | NA                                         |
| Ca_Desig_Chr_scaffold04949_6529  | Ca_desig_scaffold  | 6529                           | [A/G]       | NA                                         |
| Ca_Desig_Chr_scaffold04949_6540  | Ca_desig_scaffold  | 6540                           | [T/G]       | NA                                         |
| Ca_Desig_Chr_scaffold04949_6576  | Ca_desig_scaffold  | 6576                           | [A/G]       | NA                                         |
| Ca_Desig_Chr_scaffold04949_6598  | Ca_desig_scaffold  | 6598                           | [A/C]       | NA                                         |
| Ca_Desig_Chr_scaffold04949_6890  | Ca_desig_scaffold  | 6890                           | [A/C]       | NA                                         |
| Ca_Desig_Chr_scaffold04961_3248  | Ca_desig_scaffold  | 3248                           | [A/C]       | NA                                         |
| Ca_Desig_Chr_scaffold04961_3306  | Ca_desig_scaffold  | 3306                           | [T/C]       | NA                                         |
| Ca_Desig_Chr_scaffold04962_9128  | Ca_desig_scaffold  | 9128                           | [T/A]       | NA                                         |
| Ca_Desig_Chr_scaffold04962_9287  | Ca_desig_scaffold  | 9287                           | [T/C]       | NA                                         |
| Ca_Desig_Chr_scaffold04962_9307  | Ca_desig_scaffold  | 9307                           | [G/A]       | NA                                         |
| Ca_Desig_Chr_scaffold04963_1747  | Ca_desig_scaffold  | 1747                           | [T/G]       | NA                                         |
| Ca_Desig_Chr_scaffold04982_2628  | Ca_desig_scaffold  | 2628                           | [A/G]       | NA                                         |
| Ca_Desig_Chr_scaffold04984_11081 | Ca_desig_scaffold  | 11081                          | [G/A]       | NA                                         |
| Ca_Desig_Chr_scaffold04984_11119 | Ca_desig_scaffold  | 11119                          | [T/C]       | NA                                         |
| Ca_Desig_Chr_scaffold04984_11135 | Ca_desig_scaffold  | 11135                          | [C/T]       | NA                                         |
| Ca_Desig_Chr_scaffold04987_8545  | Ca_desig_scaffold  | 8545                           | [A/G]       | NA                                         |
| Ca_Desig_Chr_scaffold04991_6832  | Ca_desig_scaffold  | 6832                           | [T/A]       | NA                                         |
| Ca_Desig_Chr_scaffold04991_6865  | Ca_desig_scaffold  | 6865                           | [A/G]       | NA                                         |
| Ca_Desig_Chr_scaffold05002_5852  | Ca_desig_scaffold  | 5852                           | [A/T]       | NA                                         |
| Ca_Desig_Chr_scaffold05002_5865  | Ca_desig_scaffold  | 5865                           | [C/T]       | NA                                         |
| Ca_Desig_Chr_scaffold05002_12954 | Ca_desig_scaffold  | 12954                          | [T/C]       | NA                                         |

| <b>SNP IDs</b>                  | <b>Chromosomes</b> | <b>Physical positions (bp)</b> | <b>SNPs</b> | <b>NCBI SNPdb accession IDs (NCBI_ss#)</b> |
|---------------------------------|--------------------|--------------------------------|-------------|--------------------------------------------|
| Ca_DesigChr_scaffold05011_4793  | Ca_desig_scaffold  | 4793                           | [A/C]       | NA                                         |
| Ca_DesigChr_scaffold05011_4836  | Ca_desig_scaffold  | 4836                           | [G/A]       | NA                                         |
| Ca_DesigChr_scaffold05011_4837  | Ca_desig_scaffold  | 4837                           | [G/T]       | NA                                         |
| Ca_DesigChr_scaffold05014_1886  | Ca_desig_scaffold  | 1886                           | [T/A]       | NA                                         |
| Ca_DesigChr_scaffold05014_1887  | Ca_desig_scaffold  | 1887                           | [C/T]       | NA                                         |
| Ca_DesigChr_scaffold05014_1888  | Ca_desig_scaffold  | 1888                           | [A/C]       | NA                                         |
| Ca_DesigChr_scaffold05014_1889  | Ca_desig_scaffold  | 1889                           | [G/T]       | NA                                         |
| Ca_DesigChr_scaffold05014_3459  | Ca_desig_scaffold  | 3459                           | [T/G]       | NA                                         |
| Ca_DesigChr_scaffold05014_3464  | Ca_desig_scaffold  | 3464                           | [G/A]       | NA                                         |
| Ca_DesigChr_scaffold05014_9528  | Ca_desig_scaffold  | 9528                           | [G/A]       | NA                                         |
| Ca_DesigChr_scaffold05034_12732 | Ca_desig_scaffold  | 12732                          | [T/G]       | NA                                         |
| Ca_DesigChr_scaffold05044_11899 | Ca_desig_scaffold  | 11899                          | [T/G]       | NA                                         |
| Ca_DesigChr_scaffold05044_11910 | Ca_desig_scaffold  | 11910                          | [A/G]       | NA                                         |
| Ca_DesigChr_scaffold05046_3593  | Ca_desig_scaffold  | 3593                           | [T/G]       | NA                                         |
| Ca_DesigChr_scaffold05051_11362 | Ca_desig_scaffold  | 11362                          | [T/C]       | NA                                         |
| Ca_DesigChr_scaffold05051_11369 | Ca_desig_scaffold  | 11369                          | [C/T]       | NA                                         |
| Ca_DesigChr_scaffold05051_11384 | Ca_desig_scaffold  | 11384                          | [C/T]       | NA                                         |
| Ca_DesigChr_scaffold05051_13164 | Ca_desig_scaffold  | 13164                          | [T/G]       | NA                                         |
| Ca_DesigChr_scaffold05056_7266  | Ca_desig_scaffold  | 7266                           | [A/C]       | NA                                         |
| Ca_DesigChr_scaffold05062_3657  | Ca_desig_scaffold  | 3657                           | [G/A]       | NA                                         |
| Ca_DesigChr_scaffold05062_3660  | Ca_desig_scaffold  | 3660                           | [C/T]       | NA                                         |
| Ca_DesigChr_scaffold05062_3684  | Ca_desig_scaffold  | 3684                           | [C/A]       | NA                                         |
| Ca_DesigChr_scaffold05064_849   | Ca_desig_scaffold  | 849                            | [T/G]       | NA                                         |
| Ca_DesigChr_scaffold05064_861   | Ca_desig_scaffold  | 861                            | [T/A]       | NA                                         |
| Ca_DesigChr_scaffold05064_877   | Ca_desig_scaffold  | 877                            | [T/G]       | NA                                         |
| Ca_DesigChr_scaffold05064_882   | Ca_desig_scaffold  | 882                            | [A/T]       | NA                                         |
| Ca_DesigChr_scaffold05064_886   | Ca_desig_scaffold  | 886                            | [A/C]       | NA                                         |
| Ca_DesigChr_scaffold05064_2489  | Ca_desig_scaffold  | 2489                           | [A/T]       | NA                                         |
| Ca_DesigChr_scaffold05072_926   | Ca_desig_scaffold  | 926                            | [A/G]       | NA                                         |
| Ca_DesigChr_scaffold05072_934   | Ca_desig_scaffold  | 934                            | [T/C]       | NA                                         |
| Ca_DesigChr_scaffold05072_936   | Ca_desig_scaffold  | 936                            | [T/C]       | NA                                         |
| Ca_DesigChr_scaffold05072_956   | Ca_desig_scaffold  | 956                            | [T/C]       | NA                                         |
| Ca_DesigChr_scaffold05072_962   | Ca_desig_scaffold  | 962                            | [T/C]       | NA                                         |
| Ca_DesigChr_scaffold05072_1086  | Ca_desig_scaffold  | 1086                           | [T/C]       | NA                                         |

| <b>SNP IDs</b>                  | <b>Chromosomes</b> | <b>Physical positions (bp)</b> | <b>SNPs</b> | <b>NCBI SNPdb accession IDs (NCBI_ss#)</b> |
|---------------------------------|--------------------|--------------------------------|-------------|--------------------------------------------|
| Ca_Desig_Chr_scaffold05072_1112 | Ca_desig_scaffold  | 1112                           | [A/G]       | NA                                         |
| Ca_Desig_Chr_scaffold05072_1116 | Ca_desig_scaffold  | 1116                           | [A/G]       | NA                                         |
| Ca_Desig_Chr_scaffold05072_1117 | Ca_desig_scaffold  | 1117                           | [A/G]       | NA                                         |
| Ca_Desig_Chr_scaffold05072_3036 | Ca_desig_scaffold  | 3036                           | [A/C]       | NA                                         |
| Ca_Desig_Chr_scaffold05072_3086 | Ca_desig_scaffold  | 3086                           | [T/A]       | NA                                         |
| Ca_Desig_Chr_scaffold05072_3144 | Ca_desig_scaffold  | 3144                           | [T/G]       | NA                                         |
| Ca_Desig_Chr_scaffold05072_3946 | Ca_desig_scaffold  | 3946                           | [T/G]       | NA                                         |
| Ca_Desig_Chr_scaffold05072_3951 | Ca_desig_scaffold  | 3951                           | [T/G]       | NA                                         |
| Ca_Desig_Chr_scaffold05072_4758 | Ca_desig_scaffold  | 4758                           | [A/G]       | NA                                         |
| Ca_Desig_Chr_scaffold05072_4759 | Ca_desig_scaffold  | 4759                           | [C/T]       | NA                                         |
| Ca_Desig_Chr_scaffold05072_4761 | Ca_desig_scaffold  | 4761                           | [A/G]       | NA                                         |
| Ca_Desig_Chr_scaffold05072_4762 | Ca_desig_scaffold  | 4762                           | [A/G]       | NA                                         |
| Ca_Desig_Chr_scaffold05072_4763 | Ca_desig_scaffold  | 4763                           | [A/G]       | NA                                         |
| Ca_Desig_Chr_scaffold05072_4765 | Ca_desig_scaffold  | 4765                           | [G/A]       | NA                                         |
| Ca_Desig_Chr_scaffold05072_4766 | Ca_desig_scaffold  | 4766                           | [C/T]       | NA                                         |
| Ca_Desig_Chr_scaffold05072_4767 | Ca_desig_scaffold  | 4767                           | [T/C]       | NA                                         |
| Ca_Desig_Chr_scaffold05072_4768 | Ca_desig_scaffold  | 4768                           | [G/A]       | NA                                         |
| Ca_Desig_Chr_scaffold05072_4769 | Ca_desig_scaffold  | 4769                           | [G/A]       | NA                                         |
| Ca_Desig_Chr_scaffold05072_4770 | Ca_desig_scaffold  | 4770                           | [T/G]       | NA                                         |
| Ca_Desig_Chr_scaffold05072_4772 | Ca_desig_scaffold  | 4772                           | [G/A]       | NA                                         |
| Ca_Desig_Chr_scaffold05072_4773 | Ca_desig_scaffold  | 4773                           | [T/C]       | NA                                         |
| Ca_Desig_Chr_scaffold05072_4774 | Ca_desig_scaffold  | 4774                           | [T/C]       | NA                                         |
| Ca_Desig_Chr_scaffold05072_4775 | Ca_desig_scaffold  | 4775                           | [G/A]       | NA                                         |
| Ca_Desig_Chr_scaffold05072_4776 | Ca_desig_scaffold  | 4776                           | [T/C]       | NA                                         |
| Ca_Desig_Chr_scaffold05072_4777 | Ca_desig_scaffold  | 4777                           | [T/C]       | NA                                         |
| Ca_Desig_Chr_scaffold05072_4778 | Ca_desig_scaffold  | 4778                           | [T/C]       | NA                                         |
| Ca_Desig_Chr_scaffold05072_4779 | Ca_desig_scaffold  | 4779                           | [C/T]       | NA                                         |
| Ca_Desig_Chr_scaffold05072_4780 | Ca_desig_scaffold  | 4780                           | [T/C]       | NA                                         |
| Ca_Desig_Chr_scaffold05072_4781 | Ca_desig_scaffold  | 4781                           | [T/C]       | NA                                         |
| Ca_Desig_Chr_scaffold05072_4782 | Ca_desig_scaffold  | 4782                           | [G/A]       | NA                                         |
| Ca_Desig_Chr_scaffold05072_4783 | Ca_desig_scaffold  | 4783                           | [T/C]       | NA                                         |
| Ca_Desig_Chr_scaffold05072_4784 | Ca_desig_scaffold  | 4784                           | [T/C]       | NA                                         |
| Ca_Desig_Chr_scaffold05072_4786 | Ca_desig_scaffold  | 4786                           | [T/C]       | NA                                         |
| Ca_Desig_Chr_scaffold05072_4787 | Ca_desig_scaffold  | 4787                           | [A/G]       | NA                                         |

| <b>SNP IDs</b>                  | <b>Chromosomes</b> | <b>Physical positions (bp)</b> | <b>SNPs</b> | <b>NCBI SNPdb accession IDs (NCBI_ss#)</b> |
|---------------------------------|--------------------|--------------------------------|-------------|--------------------------------------------|
| Ca_Desig_Chr_scaffold05072_4788 | Ca_desig_scaffold  | 4788                           | [A/G]       | NA                                         |
| Ca_Desig_Chr_scaffold05072_4790 | Ca_desig_scaffold  | 4790                           | [T/G]       | NA                                         |
| Ca_Desig_Chr_scaffold05072_4791 | Ca_desig_scaffold  | 4791                           | [G/A]       | NA                                         |
| Ca_Desig_Chr_scaffold05072_4792 | Ca_desig_scaffold  | 4792                           | [A/G]       | NA                                         |
| Ca_Desig_Chr_scaffold05072_4793 | Ca_desig_scaffold  | 4793                           | [A/G]       | NA                                         |
| Ca_Desig_Chr_scaffold05072_4794 | Ca_desig_scaffold  | 4794                           | [T/C]       | NA                                         |
| Ca_Desig_Chr_scaffold05072_4795 | Ca_desig_scaffold  | 4795                           | [G/A]       | NA                                         |
| Ca_Desig_Chr_scaffold05072_4796 | Ca_desig_scaffold  | 4796                           | [C/T]       | NA                                         |
| Ca_Desig_Chr_scaffold05072_4797 | Ca_desig_scaffold  | 4797                           | [A/G]       | NA                                         |
| Ca_Desig_Chr_scaffold05072_4798 | Ca_desig_scaffold  | 4798                           | [A/G]       | NA                                         |
| Ca_Desig_Chr_scaffold05072_4800 | Ca_desig_scaffold  | 4800                           | [G/A]       | NA                                         |
| Ca_Desig_Chr_scaffold05072_4801 | Ca_desig_scaffold  | 4801                           | [A/G]       | NA                                         |
| Ca_Desig_Chr_scaffold05072_4802 | Ca_desig_scaffold  | 4802                           | [A/G]       | NA                                         |
| Ca_Desig_Chr_scaffold05072_4803 | Ca_desig_scaffold  | 4803                           | [A/G]       | NA                                         |
| Ca_Desig_Chr_scaffold05072_4804 | Ca_desig_scaffold  | 4804                           | [A/G]       | NA                                         |
| Ca_Desig_Chr_scaffold05072_4805 | Ca_desig_scaffold  | 4805                           | [G/A]       | NA                                         |
| Ca_Desig_Chr_scaffold05072_4806 | Ca_desig_scaffold  | 4806                           | [A/G]       | NA                                         |
| Ca_Desig_Chr_scaffold05072_4810 | Ca_desig_scaffold  | 4810                           | [G/A]       | NA                                         |
| Ca_Desig_Chr_scaffold05072_4811 | Ca_desig_scaffold  | 4811                           | [G/A]       | NA                                         |
| Ca_Desig_Chr_scaffold05072_4812 | Ca_desig_scaffold  | 4812                           | [A/G]       | NA                                         |
| Ca_Desig_Chr_scaffold05072_4813 | Ca_desig_scaffold  | 4813                           | [T/C]       | NA                                         |
| Ca_Desig_Chr_scaffold05072_4815 | Ca_desig_scaffold  | 4815                           | [T/C]       | NA                                         |
| Ca_Desig_Chr_scaffold05072_4816 | Ca_desig_scaffold  | 4816                           | [A/G]       | NA                                         |
| Ca_Desig_Chr_scaffold05072_4817 | Ca_desig_scaffold  | 4817                           | [A/G]       | NA                                         |
| Ca_Desig_Chr_scaffold05072_4818 | Ca_desig_scaffold  | 4818                           | [C/T]       | NA                                         |
| Ca_Desig_Chr_scaffold05072_4820 | Ca_desig_scaffold  | 4820                           | [A/G]       | NA                                         |
| Ca_Desig_Chr_scaffold05072_4821 | Ca_desig_scaffold  | 4821                           | [T/C]       | NA                                         |
| Ca_Desig_Chr_scaffold05072_4822 | Ca_desig_scaffold  | 4822                           | [A/G]       | NA                                         |
| Ca_Desig_Chr_scaffold05072_4823 | Ca_desig_scaffold  | 4823                           | [A/G]       | NA                                         |
| Ca_Desig_Chr_scaffold05072_4824 | Ca_desig_scaffold  | 4824                           | [A/G]       | NA                                         |
| Ca_Desig_Chr_scaffold05072_4825 | Ca_desig_scaffold  | 4825                           | [T/C]       | NA                                         |
| Ca_Desig_Chr_scaffold05072_4827 | Ca_desig_scaffold  | 4827                           | [A/G]       | NA                                         |
| Ca_Desig_Chr_scaffold05072_4828 | Ca_desig_scaffold  | 4828                           | [A/G]       | NA                                         |
| Ca_Desig_Chr_scaffold05072_4829 | Ca_desig_scaffold  | 4829                           | [A/G]       | NA                                         |

| <b>SNP IDs</b>                  | <b>Chromosomes</b> | <b>Physical positions (bp)</b> | <b>SNPs</b> | <b>NCBI SNPdb accession IDs (NCBI_ss#)</b> |
|---------------------------------|--------------------|--------------------------------|-------------|--------------------------------------------|
| Ca_Desig_Chr_scaffold05072_4830 | Ca_desig_scaffold  | 4830                           | [G/A]       | NA                                         |
| Ca_Desig_Chr_scaffold05072_4831 | Ca_desig_scaffold  | 4831                           | [A/G]       | NA                                         |
| Ca_Desig_Chr_scaffold05072_4832 | Ca_desig_scaffold  | 4832                           | [T/C]       | NA                                         |
| Ca_Desig_Chr_scaffold05072_4834 | Ca_desig_scaffold  | 4834                           | [T/C]       | NA                                         |
| Ca_Desig_Chr_scaffold05072_4836 | Ca_desig_scaffold  | 4836                           | [A/G]       | NA                                         |
| Ca_Desig_Chr_scaffold05072_4837 | Ca_desig_scaffold  | 4837                           | [T/C]       | NA                                         |
| Ca_Desig_Chr_scaffold05072_4838 | Ca_desig_scaffold  | 4838                           | [A/G]       | NA                                         |
| Ca_Desig_Chr_scaffold05072_4839 | Ca_desig_scaffold  | 4839                           | [T/C]       | NA                                         |
| Ca_Desig_Chr_scaffold05072_4840 | Ca_desig_scaffold  | 4840                           | [A/G]       | NA                                         |
| Ca_Desig_Chr_scaffold05072_4841 | Ca_desig_scaffold  | 4841                           | [T/C]       | NA                                         |
| Ca_Desig_Chr_scaffold05072_4842 | Ca_desig_scaffold  | 4842                           | [T/C]       | NA                                         |
| Ca_Desig_Chr_scaffold05072_4843 | Ca_desig_scaffold  | 4843                           | [A/G]       | NA                                         |
| Ca_Desig_Chr_scaffold05072_4844 | Ca_desig_scaffold  | 4844                           | [T/C]       | NA                                         |
| Ca_Desig_Chr_scaffold05072_4845 | Ca_desig_scaffold  | 4845                           | [G/A]       | NA                                         |
| Ca_Desig_Chr_scaffold05072_4846 | Ca_desig_scaffold  | 4846                           | [T/C]       | NA                                         |
| Ca_Desig_Chr_scaffold05072_4847 | Ca_desig_scaffold  | 4847                           | [A/G]       | NA                                         |
| Ca_Desig_Chr_scaffold05072_4849 | Ca_desig_scaffold  | 4849                           | [A/G]       | NA                                         |
| Ca_Desig_Chr_scaffold05072_4850 | Ca_desig_scaffold  | 4850                           | [T/C]       | NA                                         |
| Ca_Desig_Chr_scaffold05072_4851 | Ca_desig_scaffold  | 4851                           | [T/C]       | NA                                         |
| Ca_Desig_Chr_scaffold05072_4852 | Ca_desig_scaffold  | 4852                           | [T/C]       | NA                                         |
| Ca_Desig_Chr_scaffold05072_4854 | Ca_desig_scaffold  | 4854                           | [G/A]       | NA                                         |
| Ca_Desig_Chr_scaffold05072_4855 | Ca_desig_scaffold  | 4855                           | [T/C]       | NA                                         |
| Ca_Desig_Chr_scaffold05072_4969 | Ca_desig_scaffold  | 4969                           | [T/C]       | NA                                         |
| Ca_Desig_Chr_scaffold05072_4971 | Ca_desig_scaffold  | 4971                           | [G/A]       | NA                                         |
| Ca_Desig_Chr_scaffold05072_4973 | Ca_desig_scaffold  | 4973                           | [T/C]       | NA                                         |
| Ca_Desig_Chr_scaffold05072_4974 | Ca_desig_scaffold  | 4974                           | [T/C]       | NA                                         |
| Ca_Desig_Chr_scaffold05072_4978 | Ca_desig_scaffold  | 4978                           | [T/G]       | NA                                         |
| Ca_Desig_Chr_scaffold05072_4982 | Ca_desig_scaffold  | 4982                           | [C/T]       | NA                                         |
| Ca_Desig_Chr_scaffold05072_4983 | Ca_desig_scaffold  | 4983                           | [G/A]       | NA                                         |
| Ca_Desig_Chr_scaffold05072_4986 | Ca_desig_scaffold  | 4986                           | [T/C]       | NA                                         |
| Ca_Desig_Chr_scaffold05072_4987 | Ca_desig_scaffold  | 4987                           | [T/C]       | NA                                         |
| Ca_Desig_Chr_scaffold05072_4988 | Ca_desig_scaffold  | 4988                           | [T/C]       | NA                                         |
| Ca_Desig_Chr_scaffold05072_4989 | Ca_desig_scaffold  | 4989                           | [G/A]       | NA                                         |
| Ca_Desig_Chr_scaffold05072_4990 | Ca_desig_scaffold  | 4990                           | [C/T]       | NA                                         |

| <b>SNP IDs</b>                        | <b>Chromosomes</b> | <b>Physical positions (bp)</b> | <b>SNPs</b> | <b>NCBI SNPdb accession IDs (NCBI_ss#)</b> |
|---------------------------------------|--------------------|--------------------------------|-------------|--------------------------------------------|
| Ca_Desi_Chromosome_scaffold05072_4996 | Ca_desi_scaffold   | 4996                           | [T/C]       | NA                                         |
| Ca_Desi_Chromosome_scaffold05072_4997 | Ca_desi_scaffold   | 4997                           | [C/T]       | NA                                         |
| Ca_Desi_Chromosome_scaffold05072_4999 | Ca_desi_scaffold   | 4999                           | [T/C]       | NA                                         |
| Ca_Desi_Chromosome_scaffold05072_5001 | Ca_desi_scaffold   | 5001                           | [G/A]       | NA                                         |
| Ca_Desi_Chromosome_scaffold05072_5006 | Ca_desi_scaffold   | 5006                           | [A/G]       | NA                                         |
| Ca_Desi_Chromosome_scaffold05072_5008 | Ca_desi_scaffold   | 5008                           | [T/C]       | NA                                         |
| Ca_Desi_Chromosome_scaffold05072_5010 | Ca_desi_scaffold   | 5010                           | [C/T]       | NA                                         |
| Ca_Desi_Chromosome_scaffold05072_5014 | Ca_desi_scaffold   | 5014                           | [A/G]       | NA                                         |
| Ca_Desi_Chromosome_scaffold05072_5016 | Ca_desi_scaffold   | 5016                           | [A/G]       | NA                                         |
| Ca_Desi_Chromosome_scaffold05072_5018 | Ca_desi_scaffold   | 5018                           | [A/G]       | NA                                         |
| Ca_Desi_Chromosome_scaffold05072_5020 | Ca_desi_scaffold   | 5020                           | [A/G]       | NA                                         |
| Ca_Desi_Chromosome_scaffold05072_5021 | Ca_desi_scaffold   | 5021                           | [T/C]       | NA                                         |
| Ca_Desi_Chromosome_scaffold05072_5023 | Ca_desi_scaffold   | 5023                           | [C/A]       | NA                                         |
| Ca_Desi_Chromosome_scaffold05072_5029 | Ca_desi_scaffold   | 5029                           | [G/A]       | NA                                         |
| Ca_Desi_Chromosome_scaffold05072_5030 | Ca_desi_scaffold   | 5030                           | [C/T]       | NA                                         |
| Ca_Desi_Chromosome_scaffold05072_5031 | Ca_desi_scaffold   | 5031                           | [T/C]       | NA                                         |
| Ca_Desi_Chromosome_scaffold05072_5032 | Ca_desi_scaffold   | 5032                           | [A/C]       | NA                                         |
| Ca_Desi_Chromosome_scaffold05072_5033 | Ca_desi_scaffold   | 5033                           | [C/T]       | NA                                         |
| Ca_Desi_Chromosome_scaffold05072_5034 | Ca_desi_scaffold   | 5034                           | [C/T]       | NA                                         |
| Ca_Desi_Chromosome_scaffold05072_5035 | Ca_desi_scaffold   | 5035                           | [C/T]       | NA                                         |
| Ca_Desi_Chromosome_scaffold05072_5036 | Ca_desi_scaffold   | 5036                           | [A/G]       | NA                                         |
| Ca_Desi_Chromosome_scaffold05072_5038 | Ca_desi_scaffold   | 5038                           | [C/T]       | NA                                         |
| Ca_Desi_Chromosome_scaffold05072_5039 | Ca_desi_scaffold   | 5039                           | [G/A]       | NA                                         |
| Ca_Desi_Chromosome_scaffold05072_5040 | Ca_desi_scaffold   | 5040                           | [C/T]       | NA                                         |
| Ca_Desi_Chromosome_scaffold05072_5042 | Ca_desi_scaffold   | 5042                           | [T/C]       | NA                                         |
| Ca_Desi_Chromosome_scaffold05072_5043 | Ca_desi_scaffold   | 5043                           | [A/G]       | NA                                         |
| Ca_Desi_Chromosome_scaffold05072_5044 | Ca_desi_scaffold   | 5044                           | [A/G]       | NA                                         |
| Ca_Desi_Chromosome_scaffold05072_5045 | Ca_desi_scaffold   | 5045                           | [C/A]       | NA                                         |
| Ca_Desi_Chromosome_scaffold05072_5046 | Ca_desi_scaffold   | 5046                           | [C/T]       | NA                                         |
| Ca_Desi_Chromosome_scaffold05072_5047 | Ca_desi_scaffold   | 5047                           | [T/C]       | NA                                         |
| Ca_Desi_Chromosome_scaffold05072_5048 | Ca_desi_scaffold   | 5048                           | [T/C]       | NA                                         |
| Ca_Desi_Chromosome_scaffold05072_5050 | Ca_desi_scaffold   | 5050                           | [T/C]       | NA                                         |
| Ca_Desi_Chromosome_scaffold05072_5051 | Ca_desi_scaffold   | 5051                           | [C/T]       | NA                                         |
| Ca_Desi_Chromosome_scaffold05072_5054 | Ca_desi_scaffold   | 5054                           | [C/T]       | NA                                         |

| <b>SNP IDs</b>                | <b>Chromosomes</b> | <b>Physical positions (bp)</b> | <b>SNPs</b> | <b>NCBI SNPdb accession IDs (NCBI_ss#)</b> |
|-------------------------------|--------------------|--------------------------------|-------------|--------------------------------------------|
| Ca_Desi_Ch_scaffold05072_5055 | Ca_desi_scaffold   | 5055                           | [C/T]       | NA                                         |
| Ca_Desi_Ch_scaffold05072_5056 | Ca_desi_scaffold   | 5056                           | [C/T]       | NA                                         |
| Ca_Desi_Ch_scaffold05072_5057 | Ca_desi_scaffold   | 5057                           | [T/C]       | NA                                         |
| Ca_Desi_Ch_scaffold05072_5058 | Ca_desi_scaffold   | 5058                           | [A/T]       | NA                                         |
| Ca_Desi_Ch_scaffold05072_5059 | Ca_desi_scaffold   | 5059                           | [C/T]       | NA                                         |
| Ca_Desi_Ch_scaffold05072_5060 | Ca_desi_scaffold   | 5060                           | [T/C]       | NA                                         |
| Ca_Desi_Ch_scaffold05072_5061 | Ca_desi_scaffold   | 5061                           | [C/T]       | NA                                         |
| Ca_Desi_Ch_scaffold05072_5062 | Ca_desi_scaffold   | 5062                           | [C/T]       | NA                                         |
| Ca_Desi_Ch_scaffold05072_5063 | Ca_desi_scaffold   | 5063                           | [T/C]       | NA                                         |
| Ca_Desi_Ch_scaffold05072_5064 | Ca_desi_scaffold   | 5064                           | [C/T]       | NA                                         |
| Ca_Desi_Ch_scaffold05072_5065 | Ca_desi_scaffold   | 5065                           | [T/C]       | NA                                         |
| Ca_Desi_Ch_scaffold05072_5066 | Ca_desi_scaffold   | 5066                           | [C/T]       | NA                                         |
| Ca_Desi_Ch_scaffold05072_5067 | Ca_desi_scaffold   | 5067                           | [T/C]       | NA                                         |
| Ca_Desi_Ch_scaffold05072_5068 | Ca_desi_scaffold   | 5068                           | [G/T]       | NA                                         |
| Ca_Desi_Ch_scaffold05072_5069 | Ca_desi_scaffold   | 5069                           | [T/C]       | NA                                         |
| Ca_Desi_Ch_scaffold05072_5071 | Ca_desi_scaffold   | 5071                           | [C/T]       | NA                                         |
| Ca_Desi_Ch_scaffold05072_5072 | Ca_desi_scaffold   | 5072                           | [G/A]       | NA                                         |
| Ca_Desi_Ch_scaffold05072_5073 | Ca_desi_scaffold   | 5073                           | [T/C]       | NA                                         |
| Ca_Desi_Ch_scaffold05072_5074 | Ca_desi_scaffold   | 5074                           | [C/T]       | NA                                         |
| Ca_Desi_Ch_scaffold05072_5075 | Ca_desi_scaffold   | 5075                           | [A/C]       | NA                                         |
| Ca_Desi_Ch_scaffold05072_5076 | Ca_desi_scaffold   | 5076                           | [T/C]       | NA                                         |
| Ca_Desi_Ch_scaffold05072_5077 | Ca_desi_scaffold   | 5077                           | [C/T]       | NA                                         |
| Ca_Desi_Ch_scaffold05072_5078 | Ca_desi_scaffold   | 5078                           | [T/C]       | NA                                         |
| Ca_Desi_Ch_scaffold05072_5079 | Ca_desi_scaffold   | 5079                           | [T/C]       | NA                                         |
| Ca_Desi_Ch_scaffold05072_5081 | Ca_desi_scaffold   | 5081                           | [T/C]       | NA                                         |
| Ca_Desi_Ch_scaffold05072_5082 | Ca_desi_scaffold   | 5082                           | [T/C]       | NA                                         |
| Ca_Desi_Ch_scaffold05072_5084 | Ca_desi_scaffold   | 5084                           | [A/G]       | NA                                         |
| Ca_Desi_Ch_scaffold05072_5085 | Ca_desi_scaffold   | 5085                           | [G/T]       | NA                                         |
| Ca_Desi_Ch_scaffold05072_5086 | Ca_desi_scaffold   | 5086                           | [G/A]       | NA                                         |
| Ca_Desi_Ch_scaffold05072_5087 | Ca_desi_scaffold   | 5087                           | [G/T]       | NA                                         |
| Ca_Desi_Ch_scaffold05072_5150 | Ca_desi_scaffold   | 5150                           | [A/G]       | NA                                         |
| Ca_Desi_Ch_scaffold05072_5152 | Ca_desi_scaffold   | 5152                           | [A/G]       | NA                                         |
| Ca_Desi_Ch_scaffold05072_5153 | Ca_desi_scaffold   | 5153                           | [G/A]       | NA                                         |
| Ca_Desi_Ch_scaffold05072_5154 | Ca_desi_scaffold   | 5154                           | [A/G]       | NA                                         |

| <b>SNP IDs</b>                 | <b>Chromosomes</b> | <b>Physical positions (bp)</b> | <b>SNPs</b> | <b>NCBI SNPdb accession IDs (NCBI_ss#)</b> |
|--------------------------------|--------------------|--------------------------------|-------------|--------------------------------------------|
| Ca_DesigChr_scaffold05072_5155 | Ca_desig_scaffold  | 5155                           | [G/A]       | NA                                         |
| Ca_DesigChr_scaffold05072_5156 | Ca_desig_scaffold  | 5156                           | [C/T]       | NA                                         |
| Ca_DesigChr_scaffold05072_5157 | Ca_desig_scaffold  | 5157                           | [G/A]       | NA                                         |
| Ca_DesigChr_scaffold05072_5158 | Ca_desig_scaffold  | 5158                           | [A/G]       | NA                                         |
| Ca_DesigChr_scaffold05072_5159 | Ca_desig_scaffold  | 5159                           | [A/G]       | NA                                         |
| Ca_DesigChr_scaffold05072_5160 | Ca_desig_scaffold  | 5160                           | [C/T]       | NA                                         |
| Ca_DesigChr_scaffold05072_5161 | Ca_desig_scaffold  | 5161                           | [C/T]       | NA                                         |
| Ca_DesigChr_scaffold05072_5162 | Ca_desig_scaffold  | 5162                           | [G/A]       | NA                                         |
| Ca_DesigChr_scaffold05072_5164 | Ca_desig_scaffold  | 5164                           | [A/G]       | NA                                         |
| Ca_DesigChr_scaffold05072_5165 | Ca_desig_scaffold  | 5165                           | [C/A]       | NA                                         |
| Ca_DesigChr_scaffold05072_5166 | Ca_desig_scaffold  | 5166                           | [A/G]       | NA                                         |
| Ca_DesigChr_scaffold05072_5167 | Ca_desig_scaffold  | 5167                           | [A/G]       | NA                                         |
| Ca_DesigChr_scaffold05072_5168 | Ca_desig_scaffold  | 5168                           | [C/T]       | NA                                         |
| Ca_DesigChr_scaffold05072_5169 | Ca_desig_scaffold  | 5169                           | [A/G]       | NA                                         |
| Ca_DesigChr_scaffold05072_5170 | Ca_desig_scaffold  | 5170                           | [A/G]       | NA                                         |
| Ca_DesigChr_scaffold05072_5173 | Ca_desig_scaffold  | 5173                           | [T/C]       | NA                                         |
| Ca_DesigChr_scaffold05072_5174 | Ca_desig_scaffold  | 5174                           | [A/G]       | NA                                         |
| Ca_DesigChr_scaffold05072_5175 | Ca_desig_scaffold  | 5175                           | [A/G]       | NA                                         |
| Ca_DesigChr_scaffold05072_5176 | Ca_desig_scaffold  | 5176                           | [G/A]       | NA                                         |
| Ca_DesigChr_scaffold05072_5177 | Ca_desig_scaffold  | 5177                           | [A/G]       | NA                                         |
| Ca_DesigChr_scaffold05072_5178 | Ca_desig_scaffold  | 5178                           | [A/C]       | NA                                         |
| Ca_DesigChr_scaffold05072_5180 | Ca_desig_scaffold  | 5180                           | [T/C]       | NA                                         |
| Ca_DesigChr_scaffold05072_5181 | Ca_desig_scaffold  | 5181                           | [G/A]       | NA                                         |
| Ca_DesigChr_scaffold05072_5182 | Ca_desig_scaffold  | 5182                           | [C/T]       | NA                                         |
| Ca_DesigChr_scaffold05072_5183 | Ca_desig_scaffold  | 5183                           | [A/G]       | NA                                         |
| Ca_DesigChr_scaffold05072_5185 | Ca_desig_scaffold  | 5185                           | [G/C]       | NA                                         |
| Ca_DesigChr_scaffold05072_5186 | Ca_desig_scaffold  | 5186                           | [C/T]       | NA                                         |
| Ca_DesigChr_scaffold05072_5187 | Ca_desig_scaffold  | 5187                           | [T/C]       | NA                                         |
| Ca_DesigChr_scaffold05072_5188 | Ca_desig_scaffold  | 5188                           | [T/C]       | NA                                         |
| Ca_DesigChr_scaffold05072_5189 | Ca_desig_scaffold  | 5189                           | [T/C]       | NA                                         |
| Ca_DesigChr_scaffold05072_5191 | Ca_desig_scaffold  | 5191                           | [C/T]       | NA                                         |
| Ca_DesigChr_scaffold05072_5192 | Ca_desig_scaffold  | 5192                           | [C/T]       | NA                                         |
| Ca_DesigChr_scaffold05072_5193 | Ca_desig_scaffold  | 5193                           | [C/T]       | NA                                         |
| Ca_DesigChr_scaffold05072_5195 | Ca_desig_scaffold  | 5195                           | [G/A]       | NA                                         |



| <b>SNP IDs</b>                  | <b>Chromosomes</b> | <b>Physical positions (bp)</b> | <b>SNPs</b> | <b>NCBI SNPdb accession IDs (NCBI_ss#)</b> |
|---------------------------------|--------------------|--------------------------------|-------------|--------------------------------------------|
| Ca_Desig_Chr_scaffold05072_5196 | Ca_desig_scaffold  | 5196                           | [A/G]       | NA                                         |
| Ca_Desig_Chr_scaffold05072_5197 | Ca_desig_scaffold  | 5197                           | [T/C]       | NA                                         |
| Ca_Desig_Chr_scaffold05072_5198 | Ca_desig_scaffold  | 5198                           | [G/A]       | NA                                         |
| Ca_Desig_Chr_scaffold05072_5199 | Ca_desig_scaffold  | 5199                           | [G/A]       | NA                                         |
| Ca_Desig_Chr_scaffold05072_5200 | Ca_desig_scaffold  | 5200                           | [T/C]       | NA                                         |
| Ca_Desig_Chr_scaffold05072_5201 | Ca_desig_scaffold  | 5201                           | [T/C]       | NA                                         |
| Ca_Desig_Chr_scaffold05072_5202 | Ca_desig_scaffold  | 5202                           | [G/A]       | NA                                         |
| Ca_Desig_Chr_scaffold05072_5204 | Ca_desig_scaffold  | 5204                           | [A/G]       | NA                                         |
| Ca_Desig_Chr_scaffold05072_5205 | Ca_desig_scaffold  | 5205                           | [G/T]       | NA                                         |
| Ca_Desig_Chr_scaffold05072_5206 | Ca_desig_scaffold  | 5206                           | [C/T]       | NA                                         |
| Ca_Desig_Chr_scaffold05072_5207 | Ca_desig_scaffold  | 5207                           | [C/T]       | NA                                         |
| Ca_Desig_Chr_scaffold05072_5208 | Ca_desig_scaffold  | 5208                           | [G/A]       | NA                                         |
| Ca_Desig_Chr_scaffold05072_5209 | Ca_desig_scaffold  | 5209                           | [G/A]       | NA                                         |
| Ca_Desig_Chr_scaffold05072_5260 | Ca_desig_scaffold  | 5260                           | [T/G]       | NA                                         |
| Ca_Desig_Chr_scaffold05072_5865 | Ca_desig_scaffold  | 5865                           | [T/G]       | NA                                         |
| Ca_Desig_Chr_scaffold05072_5872 | Ca_desig_scaffold  | 5872                           | [T/C]       | NA                                         |
| Ca_Desig_Chr_scaffold05072_5887 | Ca_desig_scaffold  | 5887                           | [C/A]       | NA                                         |
| Ca_Desig_Chr_scaffold05072_5888 | Ca_desig_scaffold  | 5888                           | [C/G]       | NA                                         |
| Ca_Desig_Chr_scaffold05072_5889 | Ca_desig_scaffold  | 5889                           | [T/A]       | NA                                         |
| Ca_Desig_Chr_scaffold05072_5890 | Ca_desig_scaffold  | 5890                           | [A/T]       | NA                                         |
| Ca_Desig_Chr_scaffold05072_6248 | Ca_desig_scaffold  | 6248                           | [A/C]       | NA                                         |
| Ca_Desig_Chr_scaffold05072_6252 | Ca_desig_scaffold  | 6252                           | [T/C]       | NA                                         |
| Ca_Desig_Chr_scaffold05072_6258 | Ca_desig_scaffold  | 6258                           | [A/C]       | NA                                         |
| Ca_Desig_Chr_scaffold05072_6295 | Ca_desig_scaffold  | 6295                           | [T/A]       | NA                                         |
| Ca_Desig_Chr_scaffold05072_6298 | Ca_desig_scaffold  | 6298                           | [A/G]       | NA                                         |
| Ca_Desig_Chr_scaffold05072_6299 | Ca_desig_scaffold  | 6299                           | [C/T]       | NA                                         |
| Ca_Desig_Chr_scaffold05072_6300 | Ca_desig_scaffold  | 6300                           | [T/C]       | NA                                         |
| Ca_Desig_Chr_scaffold05072_6302 | Ca_desig_scaffold  | 6302                           | [T/C]       | NA                                         |
| Ca_Desig_Chr_scaffold05072_6303 | Ca_desig_scaffold  | 6303                           | [T/C]       | NA                                         |
| Ca_Desig_Chr_scaffold05072_6304 | Ca_desig_scaffold  | 6304                           | [T/C]       | NA                                         |
| Ca_Desig_Chr_scaffold05072_6305 | Ca_desig_scaffold  | 6305                           | [G/A]       | NA                                         |
| Ca_Desig_Chr_scaffold05072_6306 | Ca_desig_scaffold  | 6306                           | [A/G]       | NA                                         |
| Ca_Desig_Chr_scaffold05072_6307 | Ca_desig_scaffold  | 6307                           | [T/C]       | NA                                         |
| Ca_Desig_Chr_scaffold05072_6308 | Ca_desig_scaffold  | 6308                           | [C/T]       | NA                                         |

| <b>SNP IDs</b>                  | <b>Chromosomes</b> | <b>Physical positions (bp)</b> | <b>SNPs</b> | <b>NCBI SNPdb accession IDs (NCBI_ss#)</b> |
|---------------------------------|--------------------|--------------------------------|-------------|--------------------------------------------|
| Ca_Desig_Chr_scaffold05072_6309 | Ca_desig_scaffold  | 6309                           | [G/A]       | NA                                         |
| Ca_Desig_Chr_scaffold05072_6310 | Ca_desig_scaffold  | 6310                           | [A/G]       | NA                                         |
| Ca_Desig_Chr_scaffold05072_6311 | Ca_desig_scaffold  | 6311                           | [A/G]       | NA                                         |
| Ca_Desig_Chr_scaffold05072_6312 | Ca_desig_scaffold  | 6312                           | [C/T]       | NA                                         |
| Ca_Desig_Chr_scaffold05072_6313 | Ca_desig_scaffold  | 6313                           | [C/T]       | NA                                         |
| Ca_Desig_Chr_scaffold05072_6314 | Ca_desig_scaffold  | 6314                           | [G/A]       | NA                                         |
| Ca_Desig_Chr_scaffold05072_6315 | Ca_desig_scaffold  | 6315                           | [T/C]       | NA                                         |
| Ca_Desig_Chr_scaffold05072_6316 | Ca_desig_scaffold  | 6316                           | [C/T]       | NA                                         |
| Ca_Desig_Chr_scaffold05072_6317 | Ca_desig_scaffold  | 6317                           | [T/C]       | NA                                         |
| Ca_Desig_Chr_scaffold05072_6318 | Ca_desig_scaffold  | 6318                           | [G/A]       | NA                                         |
| Ca_Desig_Chr_scaffold05072_6319 | Ca_desig_scaffold  | 6319                           | [T/C]       | NA                                         |
| Ca_Desig_Chr_scaffold05072_6320 | Ca_desig_scaffold  | 6320                           | [T/C]       | NA                                         |
| Ca_Desig_Chr_scaffold05072_6321 | Ca_desig_scaffold  | 6321                           | [G/A]       | NA                                         |
| Ca_Desig_Chr_scaffold05072_6322 | Ca_desig_scaffold  | 6322                           | [C/T]       | NA                                         |
| Ca_Desig_Chr_scaffold05072_6323 | Ca_desig_scaffold  | 6323                           | [G/A]       | NA                                         |
| Ca_Desig_Chr_scaffold05072_6324 | Ca_desig_scaffold  | 6324                           | [A/G]       | NA                                         |
| Ca_Desig_Chr_scaffold05072_6326 | Ca_desig_scaffold  | 6326                           | [A/G]       | NA                                         |
| Ca_Desig_Chr_scaffold05072_6327 | Ca_desig_scaffold  | 6327                           | [A/G]       | NA                                         |
| Ca_Desig_Chr_scaffold05072_6329 | Ca_desig_scaffold  | 6329                           | [A/G]       | NA                                         |
| Ca_Desig_Chr_scaffold05072_6330 | Ca_desig_scaffold  | 6330                           | [A/G]       | NA                                         |
| Ca_Desig_Chr_scaffold05072_6331 | Ca_desig_scaffold  | 6331                           | [A/G]       | NA                                         |
| Ca_Desig_Chr_scaffold05072_6332 | Ca_desig_scaffold  | 6332                           | [A/G]       | NA                                         |
| Ca_Desig_Chr_scaffold05072_6333 | Ca_desig_scaffold  | 6333                           | [G/A]       | NA                                         |
| Ca_Desig_Chr_scaffold05072_6334 | Ca_desig_scaffold  | 6334                           | [A/G]       | NA                                         |
| Ca_Desig_Chr_scaffold05072_6335 | Ca_desig_scaffold  | 6335                           | [A/G]       | NA                                         |
| Ca_Desig_Chr_scaffold05072_6337 | Ca_desig_scaffold  | 6337                           | [G/A]       | NA                                         |
| Ca_Desig_Chr_scaffold05072_6338 | Ca_desig_scaffold  | 6338                           | [C/T]       | NA                                         |
| Ca_Desig_Chr_scaffold05072_6339 | Ca_desig_scaffold  | 6339                           | [T/C]       | NA                                         |
| Ca_Desig_Chr_scaffold05072_6340 | Ca_desig_scaffold  | 6340                           | [T/C]       | NA                                         |
| Ca_Desig_Chr_scaffold05072_6341 | Ca_desig_scaffold  | 6341                           | [T/C]       | NA                                         |
| Ca_Desig_Chr_scaffold05072_6342 | Ca_desig_scaffold  | 6342                           | [G/T]       | NA                                         |
| Ca_Desig_Chr_scaffold05072_6343 | Ca_desig_scaffold  | 6343                           | [A/G]       | NA                                         |
| Ca_Desig_Chr_scaffold05072_6344 | Ca_desig_scaffold  | 6344                           | [T/C]       | NA                                         |
| Ca_Desig_Chr_scaffold05072_6345 | Ca_desig_scaffold  | 6345                           | [T/C]       | NA                                         |

| <b>SNP IDs</b>                  | <b>Chromosomes</b> | <b>Physical positions (bp)</b> | <b>SNPs</b> | <b>NCBI SNPdb accession IDs (NCBI_ss#)</b> |
|---------------------------------|--------------------|--------------------------------|-------------|--------------------------------------------|
| Ca_Desig_Chr_scaffold05072_6346 | Ca_desig_scaffold  | 6346                           | [G/T]       | NA                                         |
| Ca_Desig_Chr_scaffold05072_6347 | Ca_desig_scaffold  | 6347                           | [A/G]       | NA                                         |
| Ca_Desig_Chr_scaffold05072_6349 | Ca_desig_scaffold  | 6349                           | [A/G]       | NA                                         |
| Ca_Desig_Chr_scaffold05072_6350 | Ca_desig_scaffold  | 6350                           | [A/G]       | NA                                         |
| Ca_Desig_Chr_scaffold05072_6351 | Ca_desig_scaffold  | 6351                           | [A/G]       | NA                                         |
| Ca_Desig_Chr_scaffold05072_6352 | Ca_desig_scaffold  | 6352                           | [A/G]       | NA                                         |
| Ca_Desig_Chr_scaffold05072_6353 | Ca_desig_scaffold  | 6353                           | [A/G]       | NA                                         |
| Ca_Desig_Chr_scaffold05072_6354 | Ca_desig_scaffold  | 6354                           | [G/A]       | NA                                         |
| Ca_Desig_Chr_scaffold05072_6355 | Ca_desig_scaffold  | 6355                           | [A/G]       | NA                                         |
| Ca_Desig_Chr_scaffold05072_6356 | Ca_desig_scaffold  | 6356                           | [A/G]       | NA                                         |
| Ca_Desig_Chr_scaffold05072_6357 | Ca_desig_scaffold  | 6357                           | [A/G]       | NA                                         |
| Ca_Desig_Chr_scaffold05072_6392 | Ca_desig_scaffold  | 6392                           | [A/G]       | NA                                         |
| Ca_Desig_Chr_scaffold05072_6396 | Ca_desig_scaffold  | 6396                           | [A/G]       | NA                                         |
| Ca_Desig_Chr_scaffold05072_6397 | Ca_desig_scaffold  | 6397                           | [G/A]       | NA                                         |
| Ca_Desig_Chr_scaffold05072_6398 | Ca_desig_scaffold  | 6398                           | [A/G]       | NA                                         |
| Ca_Desig_Chr_scaffold05072_6400 | Ca_desig_scaffold  | 6400                           | [A/G]       | NA                                         |
| Ca_Desig_Chr_scaffold05072_6401 | Ca_desig_scaffold  | 6401                           | [T/C]       | NA                                         |
| Ca_Desig_Chr_scaffold05072_6402 | Ca_desig_scaffold  | 6402                           | [G/A]       | NA                                         |
| Ca_Desig_Chr_scaffold05072_6403 | Ca_desig_scaffold  | 6403                           | [A/G]       | NA                                         |
| Ca_Desig_Chr_scaffold05072_6404 | Ca_desig_scaffold  | 6404                           | [C/T]       | NA                                         |
| Ca_Desig_Chr_scaffold05072_6405 | Ca_desig_scaffold  | 6405                           | [T/A]       | NA                                         |
| Ca_Desig_Chr_scaffold05072_6406 | Ca_desig_scaffold  | 6406                           | [A/G]       | NA                                         |
| Ca_Desig_Chr_scaffold05072_6407 | Ca_desig_scaffold  | 6407                           | [G/A]       | NA                                         |
| Ca_Desig_Chr_scaffold05072_6408 | Ca_desig_scaffold  | 6408                           | [G/A]       | NA                                         |
| Ca_Desig_Chr_scaffold05072_6409 | Ca_desig_scaffold  | 6409                           | [G/A]       | NA                                         |
| Ca_Desig_Chr_scaffold05072_6410 | Ca_desig_scaffold  | 6410                           | [T/C]       | NA                                         |
| Ca_Desig_Chr_scaffold05072_6411 | Ca_desig_scaffold  | 6411                           | [C/T]       | NA                                         |
| Ca_Desig_Chr_scaffold05072_6412 | Ca_desig_scaffold  | 6412                           | [C/T]       | NA                                         |
| Ca_Desig_Chr_scaffold05072_6413 | Ca_desig_scaffold  | 6413                           | [A/G]       | NA                                         |
| Ca_Desig_Chr_scaffold05072_6414 | Ca_desig_scaffold  | 6414                           | [G/A]       | NA                                         |
| Ca_Desig_Chr_scaffold05072_6415 | Ca_desig_scaffold  | 6415                           | [T/C]       | NA                                         |
| Ca_Desig_Chr_scaffold05072_6416 | Ca_desig_scaffold  | 6416                           | [A/G]       | NA                                         |
| Ca_Desig_Chr_scaffold05072_6417 | Ca_desig_scaffold  | 6417                           | [T/C]       | NA                                         |
| Ca_Desig_Chr_scaffold05072_6419 | Ca_desig_scaffold  | 6419                           | [A/G]       | NA                                         |

| <b>SNP IDs</b>                 | <b>Chromosomes</b> | <b>Physical positions (bp)</b> | <b>SNPs</b> | <b>NCBI SNPdb accession IDs (NCBI_ss#)</b> |
|--------------------------------|--------------------|--------------------------------|-------------|--------------------------------------------|
| Ca_DesigChr_scaffold05072_6420 | Ca_desig_scaffold  | 6420                           | [T/C]       | NA                                         |
| Ca_DesigChr_scaffold05072_6421 | Ca_desig_scaffold  | 6421                           | [G/A]       | NA                                         |
| Ca_DesigChr_scaffold05072_6424 | Ca_desig_scaffold  | 6424                           | [C/T]       | NA                                         |
| Ca_DesigChr_scaffold05072_6425 | Ca_desig_scaffold  | 6425                           | [A/G]       | NA                                         |
| Ca_DesigChr_scaffold05072_6426 | Ca_desig_scaffold  | 6426                           | [G/A]       | NA                                         |
| Ca_DesigChr_scaffold05072_6428 | Ca_desig_scaffold  | 6428                           | [G/A]       | NA                                         |
| Ca_DesigChr_scaffold05072_6429 | Ca_desig_scaffold  | 6429                           | [A/G]       | NA                                         |
| Ca_DesigChr_scaffold05072_6430 | Ca_desig_scaffold  | 6430                           | [G/A]       | NA                                         |
| Ca_DesigChr_scaffold05072_6431 | Ca_desig_scaffold  | 6431                           | [C/T]       | NA                                         |
| Ca_DesigChr_scaffold05072_6432 | Ca_desig_scaffold  | 6432                           | [C/T]       | NA                                         |
| Ca_DesigChr_scaffold05072_6433 | Ca_desig_scaffold  | 6433                           | [A/G]       | NA                                         |
| Ca_DesigChr_scaffold05072_6434 | Ca_desig_scaffold  | 6434                           | [T/C]       | NA                                         |
| Ca_DesigChr_scaffold05072_6435 | Ca_desig_scaffold  | 6435                           | [G/A]       | NA                                         |
| Ca_DesigChr_scaffold05072_6436 | Ca_desig_scaffold  | 6436                           | [G/A]       | NA                                         |
| Ca_DesigChr_scaffold05072_6438 | Ca_desig_scaffold  | 6438                           | [A/G]       | NA                                         |
| Ca_DesigChr_scaffold05072_6439 | Ca_desig_scaffold  | 6439                           | [T/C]       | NA                                         |
| Ca_DesigChr_scaffold05072_6441 | Ca_desig_scaffold  | 6441                           | [C/T]       | NA                                         |
| Ca_DesigChr_scaffold05072_6442 | Ca_desig_scaffold  | 6442                           | [T/C]       | NA                                         |
| Ca_DesigChr_scaffold05072_6444 | Ca_desig_scaffold  | 6444                           | [T/C]       | NA                                         |
| Ca_DesigChr_scaffold05072_6445 | Ca_desig_scaffold  | 6445                           | [A/G]       | NA                                         |
| Ca_DesigChr_scaffold05072_6447 | Ca_desig_scaffold  | 6447                           | [A/G]       | NA                                         |
| Ca_DesigChr_scaffold05072_6448 | Ca_desig_scaffold  | 6448                           | [A/G]       | NA                                         |
| Ca_DesigChr_scaffold05072_6449 | Ca_desig_scaffold  | 6449                           | [T/C]       | NA                                         |
| Ca_DesigChr_scaffold05072_6450 | Ca_desig_scaffold  | 6450                           | [A/G]       | NA                                         |
| Ca_DesigChr_scaffold05072_6451 | Ca_desig_scaffold  | 6451                           | [G/A]       | NA                                         |
| Ca_DesigChr_scaffold05072_6485 | Ca_desig_scaffold  | 6485                           | [T/C]       | NA                                         |
| Ca_DesigChr_scaffold05072_6516 | Ca_desig_scaffold  | 6516                           | [A/G]       | NA                                         |
| Ca_DesigChr_scaffold05072_6653 | Ca_desig_scaffold  | 6653                           | [T/C]       | NA                                         |
| Ca_DesigChr_scaffold05072_6667 | Ca_desig_scaffold  | 6667                           | [A/G]       | NA                                         |
| Ca_DesigChr_scaffold05072_6688 | Ca_desig_scaffold  | 6688                           | [T/C]       | NA                                         |
| Ca_DesigChr_scaffold05072_7881 | Ca_desig_scaffold  | 7881                           | [C/A]       | NA                                         |
| Ca_DesigChr_scaffold05072_7882 | Ca_desig_scaffold  | 7882                           | [T/G]       | NA                                         |
| Ca_DesigChr_scaffold05072_7883 | Ca_desig_scaffold  | 7883                           | [T/A]       | NA                                         |
| Ca_DesigChr_scaffold05072_7884 | Ca_desig_scaffold  | 7884                           | [C/T]       | NA                                         |

| <b>SNP IDs</b>                  | <b>Chromosomes</b> | <b>Physical positions (bp)</b> | <b>SNPs</b> | <b>NCBI SNPdb accession IDs (NCBI_ss#)</b> |
|---------------------------------|--------------------|--------------------------------|-------------|--------------------------------------------|
| Ca_DesigChr_scaffold05072_10740 | Ca_desig_scaffold  | 10740                          | [A/G]       | NA                                         |
| Ca_DesigChr_scaffold05072_10759 | Ca_desig_scaffold  | 10759                          | [T/C]       | NA                                         |
| Ca_DesigChr_scaffold05072_10795 | Ca_desig_scaffold  | 10795                          | [T/C]       | NA                                         |
| Ca_DesigChr_scaffold05072_10799 | Ca_desig_scaffold  | 10799                          | [A/C]       | NA                                         |
| Ca_DesigChr_scaffold05072_10802 | Ca_desig_scaffold  | 10802                          | [A/C]       | NA                                         |
| Ca_DesigChr_scaffold05072_10810 | Ca_desig_scaffold  | 10810                          | [T/A]       | NA                                         |
| Ca_DesigChr_scaffold05072_10985 | Ca_desig_scaffold  | 10985                          | [T/C]       | NA                                         |
| Ca_DesigChr_scaffold05072_10999 | Ca_desig_scaffold  | 10999                          | [A/G]       | NA                                         |
| Ca_DesigChr_scaffold05072_11009 | Ca_desig_scaffold  | 11009                          | [T/G]       | NA                                         |
| Ca_DesigChr_scaffold05072_11012 | Ca_desig_scaffold  | 11012                          | [A/G]       | NA                                         |
| Ca_DesigChr_scaffold05072_11015 | Ca_desig_scaffold  | 11015                          | [T/A]       | NA                                         |
| Ca_DesigChr_scaffold05072_11016 | Ca_desig_scaffold  | 11016                          | [A/G]       | NA                                         |
| Ca_DesigChr_scaffold05072_11026 | Ca_desig_scaffold  | 11026                          | [A/G]       | NA                                         |
| Ca_DesigChr_scaffold05072_11054 | Ca_desig_scaffold  | 11054                          | [T/C]       | NA                                         |
| Ca_DesigChr_scaffold05072_11055 | Ca_desig_scaffold  | 11055                          | [A/G]       | NA                                         |
| Ca_DesigChr_scaffold05072_12202 | Ca_desig_scaffold  | 12202                          | [T/C]       | NA                                         |
| Ca_DesigChr_scaffold05072_12218 | Ca_desig_scaffold  | 12218                          | [T/A]       | NA                                         |
| Ca_DesigChr_scaffold05072_12227 | Ca_desig_scaffold  | 12227                          | [C/T]       | NA                                         |
| Ca_DesigChr_scaffold05072_12487 | Ca_desig_scaffold  | 12487                          | [T/C]       | NA                                         |
| Ca_DesigChr_scaffold05072_12497 | Ca_desig_scaffold  | 12497                          | [A/G]       | NA                                         |
| Ca_DesigChr_scaffold05072_12501 | Ca_desig_scaffold  | 12501                          | [T/C]       | NA                                         |
| Ca_DesigChr_scaffold05072_12502 | Ca_desig_scaffold  | 12502                          | [A/G]       | NA                                         |
| Ca_DesigChr_scaffold05072_12503 | Ca_desig_scaffold  | 12503                          | [T/C]       | NA                                         |
| Ca_DesigChr_scaffold05072_12505 | Ca_desig_scaffold  | 12505                          | [A/G]       | NA                                         |
| Ca_DesigChr_scaffold05072_12507 | Ca_desig_scaffold  | 12507                          | [T/C]       | NA                                         |
| Ca_DesigChr_scaffold05072_12519 | Ca_desig_scaffold  | 12519                          | [A/G]       | NA                                         |
| Ca_DesigChr_scaffold05072_12577 | Ca_desig_scaffold  | 12577                          | [T/C]       | NA                                         |
| Ca_DesigChr_scaffold05072_13063 | Ca_desig_scaffold  | 13063                          | [A/G]       | NA                                         |
| Ca_DesigChr_scaffold05072_13069 | Ca_desig_scaffold  | 13069                          | [T/C]       | NA                                         |
| Ca_DesigChr_scaffold05072_13153 | Ca_desig_scaffold  | 13153                          | [T/C]       | NA                                         |
| Ca_DesigChr_scaffold05072_13361 | Ca_desig_scaffold  | 13361                          | [A/G]       | NA                                         |
| Ca_DesigChr_scaffold05072_13416 | Ca_desig_scaffold  | 13416                          | [A/G]       | NA                                         |
| Ca_DesigChr_scaffold05072_13516 | Ca_desig_scaffold  | 13516                          | [T/C]       | NA                                         |
| Ca_DesigChr_scaffold05072_13517 | Ca_desig_scaffold  | 13517                          | [T/C]       | NA                                         |

| <b>SNP IDs</b>                   | <b>Chromosomes</b> | <b>Physical positions (bp)</b> | <b>SNPs</b> | <b>NCBI SNPdb accession IDs (NCBI_ss#)</b> |
|----------------------------------|--------------------|--------------------------------|-------------|--------------------------------------------|
| Ca_Desig_Chr_scaffold05072_13519 | Ca_desig_scaffold  | 13519                          | [A/G]       | NA                                         |
| Ca_Desig_Chr_scaffold05072_13520 | Ca_desig_scaffold  | 13520                          | [T/C]       | NA                                         |
| Ca_Desig_Chr_scaffold05072_13522 | Ca_desig_scaffold  | 13522                          | [T/C]       | NA                                         |
| Ca_Desig_Chr_scaffold05072_13524 | Ca_desig_scaffold  | 13524                          | [T/C]       | NA                                         |
| Ca_Desig_Chr_scaffold05072_13525 | Ca_desig_scaffold  | 13525                          | [A/G]       | NA                                         |
| Ca_Desig_Chr_scaffold05072_13526 | Ca_desig_scaffold  | 13526                          | [T/C]       | NA                                         |
| Ca_Desig_Chr_scaffold05072_13527 | Ca_desig_scaffold  | 13527                          | [G/A]       | NA                                         |
| Ca_Desig_Chr_scaffold05072_13530 | Ca_desig_scaffold  | 13530                          | [C/T]       | NA                                         |
| Ca_Desig_Chr_scaffold05072_13532 | Ca_desig_scaffold  | 13532                          | [T/C]       | NA                                         |
| Ca_Desig_Chr_scaffold05072_13534 | Ca_desig_scaffold  | 13534                          | [G/A]       | NA                                         |
| Ca_Desig_Chr_scaffold05072_13535 | Ca_desig_scaffold  | 13535                          | [C/T]       | NA                                         |
| Ca_Desig_Chr_scaffold05072_13536 | Ca_desig_scaffold  | 13536                          | [G/A]       | NA                                         |
| Ca_Desig_Chr_scaffold05072_13537 | Ca_desig_scaffold  | 13537                          | [T/C]       | NA                                         |
| Ca_Desig_Chr_scaffold05072_13540 | Ca_desig_scaffold  | 13540                          | [T/C]       | NA                                         |
| Ca_Desig_Chr_scaffold05072_13541 | Ca_desig_scaffold  | 13541                          | [T/C]       | NA                                         |
| Ca_Desig_Chr_scaffold05072_13544 | Ca_desig_scaffold  | 13544                          | [A/G]       | NA                                         |
| Ca_Desig_Chr_scaffold05072_13545 | Ca_desig_scaffold  | 13545                          | [T/C]       | NA                                         |
| Ca_Desig_Chr_scaffold05072_13547 | Ca_desig_scaffold  | 13547                          | [A/G]       | NA                                         |
| Ca_Desig_Chr_scaffold05072_13548 | Ca_desig_scaffold  | 13548                          | [T/C]       | NA                                         |
| Ca_Desig_Chr_scaffold05072_13549 | Ca_desig_scaffold  | 13549                          | [A/G]       | NA                                         |
| Ca_Desig_Chr_scaffold05072_13556 | Ca_desig_scaffold  | 13556                          | [A/G]       | NA                                         |
| Ca_Desig_Chr_scaffold05072_13557 | Ca_desig_scaffold  | 13557                          | [G/A]       | NA                                         |
| Ca_Desig_Chr_scaffold05072_13559 | Ca_desig_scaffold  | 13559                          | [T/C]       | NA                                         |
| Ca_Desig_Chr_scaffold05072_13562 | Ca_desig_scaffold  | 13562                          | [T/C]       | NA                                         |
| Ca_Desig_Chr_scaffold05072_13564 | Ca_desig_scaffold  | 13564                          | [T/C]       | NA                                         |
| Ca_Desig_Chr_scaffold05072_13565 | Ca_desig_scaffold  | 13565                          | [T/C]       | NA                                         |
| Ca_Desig_Chr_scaffold05072_13566 | Ca_desig_scaffold  | 13566                          | [G/A]       | NA                                         |
| Ca_Desig_Chr_scaffold05072_13568 | Ca_desig_scaffold  | 13568                          | [C/T]       | NA                                         |
| Ca_Desig_Chr_scaffold05072_13570 | Ca_desig_scaffold  | 13570                          | [T/C]       | NA                                         |
| Ca_Desig_Chr_scaffold05072_13571 | Ca_desig_scaffold  | 13571                          | [G/A]       | NA                                         |
| Ca_Desig_Chr_scaffold05072_13573 | Ca_desig_scaffold  | 13573                          | [C/T]       | NA                                         |
| Ca_Desig_Chr_scaffold05072_13574 | Ca_desig_scaffold  | 13574                          | [G/A]       | NA                                         |
| Ca_Desig_Chr_scaffold05072_13654 | Ca_desig_scaffold  | 13654                          | [A/G]       | NA                                         |
| Ca_Desig_Chr_scaffold05072_13655 | Ca_desig_scaffold  | 13655                          | [A/G]       | NA                                         |

| <b>SNP IDs</b>                  | <b>Chromosomes</b> | <b>Physical positions (bp)</b> | <b>SNPs</b> | <b>NCBI SNPdb accession IDs (NCBI_ss#)</b> |
|---------------------------------|--------------------|--------------------------------|-------------|--------------------------------------------|
| Ca_DesigChr_scaffold05072_13657 | Ca_desig_scaffold  | 13657                          | [T/C]       | NA                                         |
| Ca_DesigChr_scaffold05072_13659 | Ca_desig_scaffold  | 13659                          | [T/C]       | NA                                         |
| Ca_DesigChr_scaffold05072_13660 | Ca_desig_scaffold  | 13660                          | [T/C]       | NA                                         |
| Ca_DesigChr_scaffold05072_13663 | Ca_desig_scaffold  | 13663                          | [T/C]       | NA                                         |
| Ca_DesigChr_scaffold05072_13666 | Ca_desig_scaffold  | 13666                          | [T/C]       | NA                                         |
| Ca_DesigChr_scaffold05072_13667 | Ca_desig_scaffold  | 13667                          | [T/A]       | NA                                         |
| Ca_DesigChr_scaffold05072_13668 | Ca_desig_scaffold  | 13668                          | [A/G]       | NA                                         |
| Ca_DesigChr_scaffold05072_13669 | Ca_desig_scaffold  | 13669                          | [A/G]       | NA                                         |
| Ca_DesigChr_scaffold05072_13670 | Ca_desig_scaffold  | 13670                          | [A/G]       | NA                                         |
| Ca_DesigChr_scaffold05072_13672 | Ca_desig_scaffold  | 13672                          | [A/G]       | NA                                         |
| Ca_DesigChr_scaffold05072_13673 | Ca_desig_scaffold  | 13673                          | [A/G]       | NA                                         |
| Ca_DesigChr_scaffold05072_13674 | Ca_desig_scaffold  | 13674                          | [A/G]       | NA                                         |
| Ca_DesigChr_scaffold05072_13677 | Ca_desig_scaffold  | 13677                          | [A/G]       | NA                                         |
| Ca_DesigChr_scaffold05072_13679 | Ca_desig_scaffold  | 13679                          | [A/G]       | NA                                         |
| Ca_DesigChr_scaffold05072_13681 | Ca_desig_scaffold  | 13681                          | [T/C]       | NA                                         |
| Ca_DesigChr_scaffold05072_13682 | Ca_desig_scaffold  | 13682                          | [T/C]       | NA                                         |
| Ca_DesigChr_scaffold05072_13683 | Ca_desig_scaffold  | 13683                          | [A/G]       | NA                                         |
| Ca_DesigChr_scaffold05072_13686 | Ca_desig_scaffold  | 13686                          | [A/G]       | NA                                         |
| Ca_DesigChr_scaffold05072_13687 | Ca_desig_scaffold  | 13687                          | [T/C]       | NA                                         |
| Ca_DesigChr_scaffold05072_13689 | Ca_desig_scaffold  | 13689                          | [A/G]       | NA                                         |
| Ca_DesigChr_scaffold05072_13690 | Ca_desig_scaffold  | 13690                          | [T/C]       | NA                                         |
| Ca_DesigChr_scaffold05072_13695 | Ca_desig_scaffold  | 13695                          | [C/T]       | NA                                         |
| Ca_DesigChr_scaffold05072_13697 | Ca_desig_scaffold  | 13697                          | [T/C]       | NA                                         |
| Ca_DesigChr_scaffold05072_13699 | Ca_desig_scaffold  | 13699                          | [T/C]       | NA                                         |
| Ca_DesigChr_scaffold05072_13701 | Ca_desig_scaffold  | 13701                          | [A/G]       | NA                                         |
| Ca_DesigChr_scaffold05072_13703 | Ca_desig_scaffold  | 13703                          | [T/C]       | NA                                         |
| Ca_DesigChr_scaffold05072_13704 | Ca_desig_scaffold  | 13704                          | [T/C]       | NA                                         |
| Ca_DesigChr_scaffold05072_13705 | Ca_desig_scaffold  | 13705                          | [T/C]       | NA                                         |
| Ca_DesigChr_scaffold05072_13708 | Ca_desig_scaffold  | 13708                          | [A/G]       | NA                                         |
| Ca_DesigChr_scaffold05072_13710 | Ca_desig_scaffold  | 13710                          | [T/C]       | NA                                         |
| Ca_DesigChr_scaffold05072_13711 | Ca_desig_scaffold  | 13711                          | [T/C]       | NA                                         |
| Ca_DesigChr_scaffold05072_13713 | Ca_desig_scaffold  | 13713                          | [C/T]       | NA                                         |
| Ca_DesigChr_scaffold05072_13876 | Ca_desig_scaffold  | 13876                          | [A/T]       | NA                                         |
| Ca_DesigChr_scaffold05072_13879 | Ca_desig_scaffold  | 13879                          | [G/C]       | NA                                         |

| <b>SNP IDs</b>                   | <b>Chromosomes</b> | <b>Physical positions (bp)</b> | <b>SNPs</b> | <b>NCBI SNPdb accession IDs (NCBI_ss#)</b> |
|----------------------------------|--------------------|--------------------------------|-------------|--------------------------------------------|
| Ca_Desig_Chr_scaffold05072_13881 | Ca_desig_scaffold  | 13881                          | [T/C]       | NA                                         |
| Ca_Desig_Chr_scaffold05072_13883 | Ca_desig_scaffold  | 13883                          | [G/A]       | NA                                         |
| Ca_Desig_Chr_scaffold05072_13884 | Ca_desig_scaffold  | 13884                          | [T/C]       | NA                                         |
| Ca_Desig_Chr_scaffold05072_13885 | Ca_desig_scaffold  | 13885                          | [A/G]       | NA                                         |
| Ca_Desig_Chr_scaffold05072_13886 | Ca_desig_scaffold  | 13886                          | [A/G]       | NA                                         |
| Ca_Desig_Chr_scaffold05072_13887 | Ca_desig_scaffold  | 13887                          | [A/G]       | NA                                         |
| Ca_Desig_Chr_scaffold05072_13888 | Ca_desig_scaffold  | 13888                          | [G/A]       | NA                                         |
| Ca_Desig_Chr_scaffold05072_13889 | Ca_desig_scaffold  | 13889                          | [T/C]       | NA                                         |
| Ca_Desig_Chr_scaffold05072_13890 | Ca_desig_scaffold  | 13890                          | [A/G]       | NA                                         |
| Ca_Desig_Chr_scaffold05072_13891 | Ca_desig_scaffold  | 13891                          | [A/G]       | NA                                         |
| Ca_Desig_Chr_scaffold05072_13892 | Ca_desig_scaffold  | 13892                          | [A/G]       | NA                                         |
| Ca_Desig_Chr_scaffold05072_13894 | Ca_desig_scaffold  | 13894                          | [T/C]       | NA                                         |
| Ca_Desig_Chr_scaffold05072_13896 | Ca_desig_scaffold  | 13896                          | [T/C]       | NA                                         |
| Ca_Desig_Chr_scaffold05072_13897 | Ca_desig_scaffold  | 13897                          | [A/G]       | NA                                         |
| Ca_Desig_Chr_scaffold05072_13898 | Ca_desig_scaffold  | 13898                          | [C/T]       | NA                                         |
| Ca_Desig_Chr_scaffold05072_13899 | Ca_desig_scaffold  | 13899                          | [A/G]       | NA                                         |
| Ca_Desig_Chr_scaffold05072_13901 | Ca_desig_scaffold  | 13901                          | [T/C]       | NA                                         |
| Ca_Desig_Chr_scaffold05072_13902 | Ca_desig_scaffold  | 13902                          | [C/T]       | NA                                         |
| Ca_Desig_Chr_scaffold05072_13903 | Ca_desig_scaffold  | 13903                          | [A/G]       | NA                                         |
| Ca_Desig_Chr_scaffold05072_13904 | Ca_desig_scaffold  | 13904                          | [A/G]       | NA                                         |
| Ca_Desig_Chr_scaffold05072_13907 | Ca_desig_scaffold  | 13907                          | [C/A]       | NA                                         |
| Ca_Desig_Chr_scaffold05072_13908 | Ca_desig_scaffold  | 13908                          | [A/G]       | NA                                         |
| Ca_Desig_Chr_scaffold05072_13909 | Ca_desig_scaffold  | 13909                          | [A/G]       | NA                                         |
| Ca_Desig_Chr_scaffold05072_13910 | Ca_desig_scaffold  | 13910                          | [G/A]       | NA                                         |
| Ca_Desig_Chr_scaffold05072_13914 | Ca_desig_scaffold  | 13914                          | [T/C]       | NA                                         |
| Ca_Desig_Chr_scaffold05072_13917 | Ca_desig_scaffold  | 13917                          | [T/C]       | NA                                         |
| Ca_Desig_Chr_scaffold05072_13919 | Ca_desig_scaffold  | 13919                          | [A/G]       | NA                                         |
| Ca_Desig_Chr_scaffold05072_13922 | Ca_desig_scaffold  | 13922                          | [A/T]       | NA                                         |
| Ca_Desig_Chr_scaffold05072_14343 | Ca_desig_scaffold  | 14343                          | [A/T]       | NA                                         |
| Ca_Desig_Chr_scaffold05077_6750  | Ca_desig_scaffold  | 6750                           | [A/T]       | NA                                         |
| Ca_Desig_Chr_scaffold05077_8077  | Ca_desig_scaffold  | 8077                           | [A/T]       | NA                                         |
| Ca_Desig_Chr_scaffold05077_8081  | Ca_desig_scaffold  | 8081                           | [C/T]       | NA                                         |
| Ca_Desig_Chr_scaffold05077_8108  | Ca_desig_scaffold  | 8108                           | [T/C]       | NA                                         |
| Ca_Desig_Chr_scaffold05077_8116  | Ca_desig_scaffold  | 8116                           | [T/C]       | NA                                         |



| <b>SNP IDs</b>                   | <b>Chromosomes</b> | <b>Physical positions (bp)</b> | <b>SNPs</b> | <b>NCBI SNPdb accession IDs (NCBI_ss#)</b> |
|----------------------------------|--------------------|--------------------------------|-------------|--------------------------------------------|
| Ca_Desig_Chr_scaffold05077_8126  | Ca_desig_scaffold  | 8126                           | [A/T]       | NA                                         |
| Ca_Desig_Chr_scaffold05077_8138  | Ca_desig_scaffold  | 8138                           | [T/C]       | NA                                         |
| Ca_Desig_Chr_scaffold05091_6468  | Ca_desig_scaffold  | 6468                           | [C/T]       | NA                                         |
| Ca_Desig_Chr_scaffold05091_6490  | Ca_desig_scaffold  | 6490                           | [C/A]       | NA                                         |
| Ca_Desig_Chr_scaffold05096_6683  | Ca_desig_scaffold  | 6683                           | [G/A]       | NA                                         |
| Ca_Desig_Chr_scaffold05096_6704  | Ca_desig_scaffold  | 6704                           | [A/C]       | NA                                         |
| Ca_Desig_Chr_scaffold05096_6725  | Ca_desig_scaffold  | 6725                           | [T/G]       | NA                                         |
| Ca_Desig_Chr_scaffold05096_6729  | Ca_desig_scaffold  | 6729                           | [C/A]       | NA                                         |
| Ca_Desig_Chr_scaffold05108_8073  | Ca_desig_scaffold  | 8073                           | [A/G]       | NA                                         |
| Ca_Desig_Chr_scaffold05108_12620 | Ca_desig_scaffold  | 12620                          | [T/C]       | NA                                         |
| Ca_Desig_Chr_scaffold05108_12626 | Ca_desig_scaffold  | 12626                          | [T/C]       | NA                                         |
| Ca_Desig_Chr_scaffold05121_9270  | Ca_desig_scaffold  | 9270                           | [T/C]       | NA                                         |
| Ca_Desig_Chr_scaffold05131_9526  | Ca_desig_scaffold  | 9526                           | [A/C]       | NA                                         |
| Ca_Desig_Chr_scaffold05156_5107  | Ca_desig_scaffold  | 5107                           | [A/G]       | NA                                         |
| Ca_Desig_Chr_scaffold05156_5109  | Ca_desig_scaffold  | 5109                           | [T/C]       | NA                                         |
| Ca_Desig_Chr_scaffold05156_5112  | Ca_desig_scaffold  | 5112                           | [A/C]       | NA                                         |
| Ca_Desig_Chr_scaffold05156_5118  | Ca_desig_scaffold  | 5118                           | [A/G]       | NA                                         |
| Ca_Desig_Chr_scaffold05156_5119  | Ca_desig_scaffold  | 5119                           | [T/C]       | NA                                         |
| Ca_Desig_Chr_scaffold05156_5128  | Ca_desig_scaffold  | 5128                           | [A/C]       | NA                                         |
| Ca_Desig_Chr_scaffold05156_5131  | Ca_desig_scaffold  | 5131                           | [T/C]       | NA                                         |
| Ca_Desig_Chr_scaffold05156_5154  | Ca_desig_scaffold  | 5154                           | [A/T]       | NA                                         |
| Ca_Desig_Chr_scaffold05156_5199  | Ca_desig_scaffold  | 5199                           | [G/A]       | NA                                         |
| Ca_Desig_Chr_scaffold05156_5209  | Ca_desig_scaffold  | 5209                           | [A/C]       | NA                                         |
| Ca_Desig_Chr_scaffold05156_5216  | Ca_desig_scaffold  | 5216                           | [C/A]       | NA                                         |
| Ca_Desig_Chr_scaffold05156_5218  | Ca_desig_scaffold  | 5218                           | [T/C]       | NA                                         |
| Ca_Desig_Chr_scaffold05163_5685  | Ca_desig_scaffold  | 5685                           | [C/T]       | NA                                         |
| Ca_Desig_Chr_scaffold05163_5691  | Ca_desig_scaffold  | 5691                           | [G/A]       | NA                                         |
| Ca_Desig_Chr_scaffold05163_5725  | Ca_desig_scaffold  | 5725                           | [G/C]       | NA                                         |
| Ca_Desig_Chr_scaffold05163_5727  | Ca_desig_scaffold  | 5727                           | [A/G]       | NA                                         |
| Ca_Desig_Chr_scaffold05168_13382 | Ca_desig_scaffold  | 13382                          | [A/G]       | NA                                         |
| Ca_Desig_Chr_scaffold05171_13047 | Ca_desig_scaffold  | 13047                          | [A/G]       | NA                                         |
| Ca_Desig_Chr_scaffold05203_11532 | Ca_desig_scaffold  | 11532                          | [T/G]       | NA                                         |
| Ca_Desig_Chr_scaffold05206_11158 | Ca_desig_scaffold  | 11158                          | [G/A]       | NA                                         |
| Ca_Desig_Chr_scaffold05224_11504 | Ca_desig_scaffold  | 11504                          | [T/C]       | NA                                         |

| <b>SNP IDs</b>                   | <b>Chromosomes</b> | <b>Physical positions (bp)</b> | <b>SNPs</b> | <b>NCBI SNPdb accession IDs (NCBI_ss#)</b> |
|----------------------------------|--------------------|--------------------------------|-------------|--------------------------------------------|
| Ca_Desig_Chr_scaffold05224_11591 | Ca_desig_scaffold  | 11591                          | [A/C]       | NA                                         |
| Ca_Desig_Chr_scaffold05224_11703 | Ca_desig_scaffold  | 11703                          | [A/G]       | NA                                         |
| Ca_Desig_Chr_scaffold05238_2821  | Ca_desig_scaffold  | 2821                           | [T/C]       | NA                                         |
| Ca_Desig_Chr_scaffold05238_9038  | Ca_desig_scaffold  | 9038                           | [A/T]       | NA                                         |
| Ca_Desig_Chr_scaffold05238_9054  | Ca_desig_scaffold  | 9054                           | [T/C]       | NA                                         |
| Ca_Desig_Chr_scaffold05247_6750  | Ca_desig_scaffold  | 6750                           | [C/T]       | NA                                         |
| Ca_Desig_Chr_scaffold05247_6759  | Ca_desig_scaffold  | 6759                           | [A/T]       | NA                                         |
| Ca_Desig_Chr_scaffold05250_7505  | Ca_desig_scaffold  | 7505                           | [C/T]       | NA                                         |
| Ca_Desig_Chr_scaffold05254_5702  | Ca_desig_scaffold  | 5702                           | [A/T]       | NA                                         |
| Ca_Desig_Chr_scaffold05254_5703  | Ca_desig_scaffold  | 5703                           | [T/C]       | NA                                         |
| Ca_Desig_Chr_scaffold05254_5704  | Ca_desig_scaffold  | 5704                           | [G/T]       | NA                                         |
| Ca_Desig_Chr_scaffold05255_2892  | Ca_desig_scaffold  | 2892                           | [T/C]       | NA                                         |
| Ca_Desig_Chr_scaffold05255_2909  | Ca_desig_scaffold  | 2909                           | [A/C]       | NA                                         |
| Ca_Desig_Chr_scaffold05255_2912  | Ca_desig_scaffold  | 2912                           | [T/C]       | NA                                         |
| Ca_Desig_Chr_scaffold05255_3919  | Ca_desig_scaffold  | 3919                           | [A/C]       | NA                                         |
| Ca_Desig_Chr_scaffold05255_5601  | Ca_desig_scaffold  | 5601                           | [T/G]       | NA                                         |
| Ca_Desig_Chr_scaffold05255_6018  | Ca_desig_scaffold  | 6018                           | [A/G]       | NA                                         |
| Ca_Desig_Chr_scaffold05263_9408  | Ca_desig_scaffold  | 9408                           | [A/G]       | NA                                         |
| Ca_Desig_Chr_scaffold05263_9410  | Ca_desig_scaffold  | 9410                           | [A/G]       | NA                                         |
| Ca_Desig_Chr_scaffold05263_9411  | Ca_desig_scaffold  | 9411                           | [A/G]       | NA                                         |
| Ca_Desig_Chr_scaffold05263_11567 | Ca_desig_scaffold  | 11567                          | [A/C]       | NA                                         |
| Ca_Desig_Chr_scaffold05263_11603 | Ca_desig_scaffold  | 11603                          | [C/T]       | NA                                         |
| Ca_Desig_Chr_scaffold05263_11670 | Ca_desig_scaffold  | 11670                          | [C/T]       | NA                                         |
| Ca_Desig_Chr_scaffold05263_11671 | Ca_desig_scaffold  | 11671                          | [A/C]       | NA                                         |
| Ca_Desig_Chr_scaffold05263_11674 | Ca_desig_scaffold  | 11674                          | [A/C]       | NA                                         |
| Ca_Desig_Chr_scaffold05263_11681 | Ca_desig_scaffold  | 11681                          | [A/C]       | NA                                         |
| Ca_Desig_Chr_scaffold05263_11689 | Ca_desig_scaffold  | 11689                          | [A/G]       | NA                                         |
| Ca_Desig_Chr_scaffold05263_11701 | Ca_desig_scaffold  | 11701                          | [C/T]       | NA                                         |
| Ca_Desig_Chr_scaffold05263_11710 | Ca_desig_scaffold  | 11710                          | [T/G]       | NA                                         |
| Ca_Desig_Chr_scaffold05263_11728 | Ca_desig_scaffold  | 11728                          | [T/C]       | NA                                         |
| Ca_Desig_Chr_scaffold05282_3855  | Ca_desig_scaffold  | 3855                           | [A/G]       | NA                                         |
| Ca_Desig_Chr_scaffold05282_3862  | Ca_desig_scaffold  | 3862                           | [A/G]       | NA                                         |
| Ca_Desig_Chr_scaffold05283_144   | Ca_desig_scaffold  | 144                            | [A/T]       | NA                                         |
| Ca_Desig_Chr_scaffold05308_5468  | Ca_desig_scaffold  | 5468                           | [T/C]       | NA                                         |

| <b>SNP IDs</b>                 | <b>Chromosomes</b> | <b>Physical positions (bp)</b> | <b>SNPs</b> | <b>NCBI SNPdb accession IDs (NCBI_ss#)</b> |
|--------------------------------|--------------------|--------------------------------|-------------|--------------------------------------------|
| Ca_Desi_Ch_scaffold05308_8001  | Ca_desi_scaffold   | 8001                           | [T/C]       | NA                                         |
| Ca_Desi_Ch_scaffold05308_8003  | Ca_desi_scaffold   | 8003                           | [A/C]       | NA                                         |
| Ca_Desi_Ch_scaffold05308_8010  | Ca_desi_scaffold   | 8010                           | [T/G]       | NA                                         |
| Ca_Desi_Ch_scaffold05308_8083  | Ca_desi_scaffold   | 8083                           | [T/C]       | NA                                         |
| Ca_Desi_Ch_scaffold05336_11748 | Ca_desi_scaffold   | 11748                          | [G/T]       | NA                                         |
| Ca_Desi_Ch_scaffold05364_5692  | Ca_desi_scaffold   | 5692                           | [T/G]       | NA                                         |
| Ca_Desi_Ch_scaffold05369_3083  | Ca_desi_scaffold   | 3083                           | [C/A]       | NA                                         |
| Ca_Desi_Ch_scaffold05369_3087  | Ca_desi_scaffold   | 3087                           | [G/C]       | NA                                         |
| Ca_Desi_Ch_scaffold05369_3089  | Ca_desi_scaffold   | 3089                           | [A/T]       | NA                                         |
| Ca_Desi_Ch_scaffold05369_3102  | Ca_desi_scaffold   | 3102                           | [G/A]       | NA                                         |
| Ca_Desi_Ch_scaffold05372_3339  | Ca_desi_scaffold   | 3339                           | [A/G]       | NA                                         |
| Ca_Desi_Ch_scaffold05372_3342  | Ca_desi_scaffold   | 3342                           | [C/T]       | NA                                         |
| Ca_Desi_Ch_scaffold05372_6494  | Ca_desi_scaffold   | 6494                           | [T/A]       | NA                                         |
| Ca_Desi_Ch_scaffold05372_6496  | Ca_desi_scaffold   | 6496                           | [A/T]       | NA                                         |
| Ca_Desi_Ch_scaffold05372_6497  | Ca_desi_scaffold   | 6497                           | [C/G]       | NA                                         |
| Ca_Desi_Ch_scaffold05372_6552  | Ca_desi_scaffold   | 6552                           | [T/A]       | NA                                         |
| Ca_Desi_Ch_scaffold05386_1972  | Ca_desi_scaffold   | 1972                           | [A/C]       | NA                                         |
| Ca_Desi_Ch_scaffold05386_2033  | Ca_desi_scaffold   | 2033                           | [T/C]       | NA                                         |
| Ca_Desi_Ch_scaffold05400_2687  | Ca_desi_scaffold   | 2687                           | [A/G]       | NA                                         |
| Ca_Desi_Ch_scaffold05404_8539  | Ca_desi_scaffold   | 8539                           | [A/C]       | NA                                         |
| Ca_Desi_Ch_scaffold05404_8542  | Ca_desi_scaffold   | 8542                           | [A/T]       | NA                                         |
| Ca_Desi_Ch_scaffold05404_8543  | Ca_desi_scaffold   | 8543                           | [A/C]       | NA                                         |
| Ca_Desi_Ch_scaffold05404_8544  | Ca_desi_scaffold   | 8544                           | [G/T]       | NA                                         |
| Ca_Desi_Ch_scaffold05411_507   | Ca_desi_scaffold   | 507                            | [C/G]       | NA                                         |
| Ca_Desi_Ch_scaffold05411_5372  | Ca_desi_scaffold   | 5372                           | [T/C]       | NA                                         |
| Ca_Desi_Ch_scaffold05411_5436  | Ca_desi_scaffold   | 5436                           | [A/G]       | NA                                         |
| Ca_Desi_Ch_scaffold05450_5702  | Ca_desi_scaffold   | 5702                           | [C/A]       | NA                                         |
| Ca_Desi_Ch_scaffold05450_7608  | Ca_desi_scaffold   | 7608                           | [G/A]       | NA                                         |
| Ca_Desi_Ch_scaffold05450_7615  | Ca_desi_scaffold   | 7615                           | [C/T]       | NA                                         |
| Ca_Desi_Ch_scaffold05450_7625  | Ca_desi_scaffold   | 7625                           | [A/C]       | NA                                         |
| Ca_Desi_Ch_scaffold05468_6018  | Ca_desi_scaffold   | 6018                           | [T/C]       | NA                                         |
| Ca_Desi_Ch_scaffold05503_10047 | Ca_desi_scaffold   | 10047                          | [T/G]       | NA                                         |
| Ca_Desi_Ch_scaffold05503_10067 | Ca_desi_scaffold   | 10067                          | [T/C]       | NA                                         |
| Ca_Desi_Ch_scaffold05518_1990  | Ca_desi_scaffold   | 1990                           | [T/C]       | NA                                         |

| <b>SNP IDs</b>                 | <b>Chromosomes</b> | <b>Physical positions (bp)</b> | <b>SNPs</b> | <b>NCBI SNPdb accession IDs (NCBI_ss#)</b> |
|--------------------------------|--------------------|--------------------------------|-------------|--------------------------------------------|
| Ca_Desi_Ch_scaffold05518_1996  | Ca_desi_scaffold   | 1996                           | [G/A]       | NA                                         |
| Ca_Desi_Ch_scaffold05518_2010  | Ca_desi_scaffold   | 2010                           | [C/T]       | NA                                         |
| Ca_Desi_Ch_scaffold05518_2017  | Ca_desi_scaffold   | 2017                           | [T/C]       | NA                                         |
| Ca_Desi_Ch_scaffold05518_2413  | Ca_desi_scaffold   | 2413                           | [G/T]       | NA                                         |
| Ca_Desi_Ch_scaffold05518_2419  | Ca_desi_scaffold   | 2419                           | [C/T]       | NA                                         |
| Ca_Desi_Ch_scaffold05518_2477  | Ca_desi_scaffold   | 2477                           | [A/T]       | NA                                         |
| Ca_Desi_Ch_scaffold05518_2510  | Ca_desi_scaffold   | 2510                           | [A/G]       | NA                                         |
| Ca_Desi_Ch_scaffold05518_2536  | Ca_desi_scaffold   | 2536                           | [A/G]       | NA                                         |
| Ca_Desi_Ch_scaffold05518_2538  | Ca_desi_scaffold   | 2538                           | [T/C]       | NA                                         |
| Ca_Desi_Ch_scaffold05518_2552  | Ca_desi_scaffold   | 2552                           | [G/A]       | NA                                         |
| Ca_Desi_Ch_scaffold05531_3353  | Ca_desi_scaffold   | 3353                           | [T/C]       | NA                                         |
| Ca_Desi_Ch_scaffold05531_3354  | Ca_desi_scaffold   | 3354                           | [G/T]       | NA                                         |
| Ca_Desi_Ch_scaffold05531_8709  | Ca_desi_scaffold   | 8709                           | [T/G]       | NA                                         |
| Ca_Desi_Ch_scaffold05531_8711  | Ca_desi_scaffold   | 8711                           | [T/C]       | NA                                         |
| Ca_Desi_Ch_scaffold05531_8714  | Ca_desi_scaffold   | 8714                           | [C/T]       | NA                                         |
| Ca_Desi_Ch_scaffold05558_4653  | Ca_desi_scaffold   | 4653                           | [T/C]       | NA                                         |
| Ca_Desi_Ch_scaffold05558_4697  | Ca_desi_scaffold   | 4697                           | [A/C]       | NA                                         |
| Ca_Desi_Ch_scaffold05562_784   | Ca_desi_scaffold   | 784                            | [T/G]       | NA                                         |
| Ca_Desi_Ch_scaffold05562_786   | Ca_desi_scaffold   | 786                            | [T/C]       | NA                                         |
| Ca_Desi_Ch_scaffold05562_787   | Ca_desi_scaffold   | 787                            | [C/T]       | NA                                         |
| Ca_Desi_Ch_scaffold05562_798   | Ca_desi_scaffold   | 798                            | [T/G]       | NA                                         |
| Ca_Desi_Ch_scaffold05562_827   | Ca_desi_scaffold   | 827                            | [A/G]       | NA                                         |
| Ca_Desi_Ch_scaffold05588_1256  | Ca_desi_scaffold   | 1256                           | [T/A]       | NA                                         |
| Ca_Desi_Ch_scaffold05588_1271  | Ca_desi_scaffold   | 1271                           | [T/G]       | NA                                         |
| Ca_Desi_Ch_scaffold05588_1307  | Ca_desi_scaffold   | 1307                           | [C/T]       | NA                                         |
| Ca_Desi_Ch_scaffold05588_4822  | Ca_desi_scaffold   | 4822                           | [T/G]       | NA                                         |
| Ca_Desi_Ch_scaffold05588_4831  | Ca_desi_scaffold   | 4831                           | [T/G]       | NA                                         |
| Ca_Desi_Ch_scaffold05596_6922  | Ca_desi_scaffold   | 6922                           | [A/C]       | NA                                         |
| Ca_Desi_Ch_scaffold05603_10470 | Ca_desi_scaffold   | 10470                          | [T/A]       | NA                                         |
| Ca_Desi_Ch_scaffold05603_10472 | Ca_desi_scaffold   | 10472                          | [T/C]       | NA                                         |
| Ca_Desi_Ch_scaffold05603_10513 | Ca_desi_scaffold   | 10513                          | [C/T]       | NA                                         |
| Ca_Desi_Ch_scaffold05613_5172  | Ca_desi_scaffold   | 5172                           | [A/G]       | NA                                         |
| Ca_Desi_Ch_scaffold05613_5194  | Ca_desi_scaffold   | 5194                           | [A/G]       | NA                                         |
| Ca_Desi_Ch_scaffold05620_2447  | Ca_desi_scaffold   | 2447                           | [T/C]       | NA                                         |

| <b>SNP IDs</b>                | <b>Chromosomes</b> | <b>Physical positions (bp)</b> | <b>SNPs</b> | <b>NCBI SNPdb accession IDs (NCBI_ss#)</b> |
|-------------------------------|--------------------|--------------------------------|-------------|--------------------------------------------|
| Ca_Desi_Ch_scaffold05620_2545 | Ca_desi_scaffold   | 2545                           | [T/G]       | NA                                         |
| Ca_Desi_Ch_scaffold05655_1144 | Ca_desi_scaffold   | 1144                           | [A/G]       | NA                                         |
| Ca_Desi_Ch_scaffold05679_671  | Ca_desi_scaffold   | 671                            | [T/C]       | NA                                         |
| Ca_Desi_Ch_scaffold05679_5828 | Ca_desi_scaffold   | 5828                           | [T/C]       | NA                                         |
| Ca_Desi_Ch_scaffold05679_8415 | Ca_desi_scaffold   | 8415                           | [A/G]       | NA                                         |
| Ca_Desi_Ch_scaffold05685_528  | Ca_desi_scaffold   | 528                            | [G/A]       | NA                                         |
| Ca_Desi_Ch_scaffold05685_543  | Ca_desi_scaffold   | 543                            | [G/A]       | NA                                         |
| Ca_Desi_Ch_scaffold05693_1756 | Ca_desi_scaffold   | 1756                           | [A/C]       | NA                                         |
| Ca_Desi_Ch_scaffold05693_1766 | Ca_desi_scaffold   | 1766                           | [T/C]       | NA                                         |
| Ca_Desi_Ch_scaffold05693_1781 | Ca_desi_scaffold   | 1781                           | [A/C]       | NA                                         |
| Ca_Desi_Ch_scaffold05693_1790 | Ca_desi_scaffold   | 1790                           | [A/C]       | NA                                         |
| Ca_Desi_Ch_scaffold05693_1792 | Ca_desi_scaffold   | 1792                           | [T/C]       | NA                                         |
| Ca_Desi_Ch_scaffold05693_1794 | Ca_desi_scaffold   | 1794                           | [T/C]       | NA                                         |
| Ca_Desi_Ch_scaffold05693_1801 | Ca_desi_scaffold   | 1801                           | [T/C]       | NA                                         |
| Ca_Desi_Ch_scaffold05695_5698 | Ca_desi_scaffold   | 5698                           | [T/G]       | NA                                         |
| Ca_Desi_Ch_scaffold05695_5756 | Ca_desi_scaffold   | 5756                           | [A/G]       | NA                                         |
| Ca_Desi_Ch_scaffold05703_2353 | Ca_desi_scaffold   | 2353                           | [A/C]       | NA                                         |
| Ca_Desi_Ch_scaffold05718_6131 | Ca_desi_scaffold   | 6131                           | [G/A]       | NA                                         |
| Ca_Desi_Ch_scaffold05718_6132 | Ca_desi_scaffold   | 6132                           | [A/G]       | NA                                         |
| Ca_Desi_Ch_scaffold05718_6232 | Ca_desi_scaffold   | 6232                           | [A/T]       | NA                                         |
| Ca_Desi_Ch_scaffold05718_8802 | Ca_desi_scaffold   | 8802                           | [A/T]       | NA                                         |
| Ca_Desi_Ch_scaffold05742_4735 | Ca_desi_scaffold   | 4735                           | [T/G]       | NA                                         |
| Ca_Desi_Ch_scaffold05742_4742 | Ca_desi_scaffold   | 4742                           | [T/C]       | NA                                         |
| Ca_Desi_Ch_scaffold05742_4760 | Ca_desi_scaffold   | 4760                           | [A/G]       | NA                                         |
| Ca_Desi_Ch_scaffold05748_7639 | Ca_desi_scaffold   | 7639                           | [T/G]       | NA                                         |
| Ca_Desi_Ch_scaffold05748_7664 | Ca_desi_scaffold   | 7664                           | [T/C]       | NA                                         |
| Ca_Desi_Ch_scaffold05748_7675 | Ca_desi_scaffold   | 7675                           | [T/C]       | NA                                         |
| Ca_Desi_Ch_scaffold05748_7686 | Ca_desi_scaffold   | 7686                           | [A/G]       | NA                                         |
| Ca_Desi_Ch_scaffold05748_7688 | Ca_desi_scaffold   | 7688                           | [A/C]       | NA                                         |
| Ca_Desi_Ch_scaffold05753_7645 | Ca_desi_scaffold   | 7645                           | [A/G]       | NA                                         |
| Ca_Desi_Ch_scaffold05753_7665 | Ca_desi_scaffold   | 7665                           | [A/C]       | NA                                         |
| Ca_Desi_Ch_scaffold05753_7666 | Ca_desi_scaffold   | 7666                           | [C/A]       | NA                                         |
| Ca_Desi_Ch_scaffold05753_7667 | Ca_desi_scaffold   | 7667                           | [T/G]       | NA                                         |
| Ca_Desi_Ch_scaffold05753_7668 | Ca_desi_scaffold   | 7668                           | [C/A]       | NA                                         |

| <b>SNP IDs</b>                 | <b>Chromosomes</b> | <b>Physical positions (bp)</b> | <b>SNPs</b> | <b>NCBI SNPdb accession IDs (NCBI_ss#)</b> |
|--------------------------------|--------------------|--------------------------------|-------------|--------------------------------------------|
| Ca_Desi_Ch_scaffold05753_9330  | Ca_desi_scaffold   | 9330                           | [C/A]       | NA                                         |
| Ca_Desi_Ch_scaffold05773_9838  | Ca_desi_scaffold   | 9838                           | [T/A]       | NA                                         |
| Ca_Desi_Ch_scaffold05773_9864  | Ca_desi_scaffold   | 9864                           | [A/G]       | NA                                         |
| Ca_Desi_Ch_scaffold05773_9872  | Ca_desi_scaffold   | 9872                           | [T/C]       | NA                                         |
| Ca_Desi_Ch_scaffold05773_9895  | Ca_desi_scaffold   | 9895                           | [T/C]       | NA                                         |
| Ca_Desi_Ch_scaffold05775_5945  | Ca_desi_scaffold   | 5945                           | [A/G]       | NA                                         |
| Ca_Desi_Ch_scaffold05775_5948  | Ca_desi_scaffold   | 5948                           | [A/G]       | NA                                         |
| Ca_Desi_Ch_scaffold05779_3971  | Ca_desi_scaffold   | 3971                           | [G/T]       | NA                                         |
| Ca_Desi_Ch_scaffold05779_3977  | Ca_desi_scaffold   | 3977                           | [G/A]       | NA                                         |
| Ca_Desi_Ch_scaffold05779_3978  | Ca_desi_scaffold   | 3978                           | [A/G]       | NA                                         |
| Ca_Desi_Ch_scaffold05779_3990  | Ca_desi_scaffold   | 3990                           | [T/G]       | NA                                         |
| Ca_Desi_Ch_scaffold05779_3993  | Ca_desi_scaffold   | 3993                           | [T/C]       | NA                                         |
| Ca_Desi_Ch_scaffold05786_3038  | Ca_desi_scaffold   | 3038                           | [T/G]       | NA                                         |
| Ca_Desi_Ch_scaffold05871_7178  | Ca_desi_scaffold   | 7178                           | [T/C]       | NA                                         |
| Ca_Desi_Ch_scaffold05917_3642  | Ca_desi_scaffold   | 3642                           | [G/A]       | NA                                         |
| Ca_Desi_Ch_scaffold05917_3651  | Ca_desi_scaffold   | 3651                           | [A/T]       | NA                                         |
| Ca_Desi_Ch_scaffold05917_3673  | Ca_desi_scaffold   | 3673                           | [A/T]       | NA                                         |
| Ca_Desi_Ch_scaffold05925_3260  | Ca_desi_scaffold   | 3260                           | [A/T]       | NA                                         |
| Ca_Desi_Ch_scaffold05925_3265  | Ca_desi_scaffold   | 3265                           | [A/G]       | NA                                         |
| Ca_Desi_Ch_scaffold05925_3278  | Ca_desi_scaffold   | 3278                           | [A/G]       | NA                                         |
| Ca_Desi_Ch_scaffold05925_3281  | Ca_desi_scaffold   | 3281                           | [A/G]       | NA                                         |
| Ca_Desi_Ch_scaffold05925_3292  | Ca_desi_scaffold   | 3292                           | [T/G]       | NA                                         |
| Ca_Desi_Ch_scaffold05925_3294  | Ca_desi_scaffold   | 3294                           | [T/C]       | NA                                         |
| Ca_Desi_Ch_scaffold05925_3297  | Ca_desi_scaffold   | 3297                           | [T/C]       | NA                                         |
| Ca_Desi_Ch_scaffold05925_3314  | Ca_desi_scaffold   | 3314                           | [T/C]       | NA                                         |
| Ca_Desi_Ch_scaffold06004_545   | Ca_desi_scaffold   | 545                            | [C/T]       | NA                                         |
| Ca_Desi_Ch_scaffold06004_4893  | Ca_desi_scaffold   | 4893                           | [T/G]       | NA                                         |
| Ca_Desi_Ch_scaffold06018_10198 | Ca_desi_scaffold   | 10198                          | [T/C]       | NA                                         |
| Ca_Desi_Ch_scaffold06024_8491  | Ca_desi_scaffold   | 8491                           | [T/C]       | NA                                         |
| Ca_Desi_Ch_scaffold06024_8500  | Ca_desi_scaffold   | 8500                           | [T/C]       | NA                                         |
| Ca_Desi_Ch_scaffold06024_8508  | Ca_desi_scaffold   | 8508                           | [G/T]       | NA                                         |
| Ca_Desi_Ch_scaffold06024_8510  | Ca_desi_scaffold   | 8510                           | [C/A]       | NA                                         |
| Ca_Desi_Ch_scaffold06024_8512  | Ca_desi_scaffold   | 8512                           | [A/C]       | NA                                         |
| Ca_Desi_Ch_scaffold06024_8517  | Ca_desi_scaffold   | 8517                           | [T/C]       | NA                                         |

| <b>SNP IDs</b>                  | <b>Chromosomes</b> | <b>Physical positions (bp)</b> | <b>SNPs</b> | <b>NCBI SNPdb accession IDs (NCBI_ss#)</b> |
|---------------------------------|--------------------|--------------------------------|-------------|--------------------------------------------|
| Ca_Desig_Chr_scaffold06024_8532 | Ca_desig_scaffold  | 8532                           | [A/C]       | NA                                         |
| Ca_Desig_Chr_scaffold06024_8537 | Ca_desig_scaffold  | 8537                           | [G/T]       | NA                                         |
| Ca_Desig_Chr_scaffold06024_8539 | Ca_desig_scaffold  | 8539                           | [T/G]       | NA                                         |
| Ca_Desig_Chr_scaffold06024_8542 | Ca_desig_scaffold  | 8542                           | [T/G]       | NA                                         |
| Ca_Desig_Chr_scaffold06024_8544 | Ca_desig_scaffold  | 8544                           | [A/T]       | NA                                         |
| Ca_Desig_Chr_scaffold06024_8546 | Ca_desig_scaffold  | 8546                           | [T/G]       | NA                                         |
| Ca_Desig_Chr_scaffold06041_1547 | Ca_desig_scaffold  | 1547                           | [T/G]       | NA                                         |
| Ca_Desig_Chr_scaffold06051_6462 | Ca_desig_scaffold  | 6462                           | [T/A]       | NA                                         |
| Ca_Desig_Chr_scaffold06051_6476 | Ca_desig_scaffold  | 6476                           | [A/G]       | NA                                         |
| Ca_Desig_Chr_scaffold06051_6490 | Ca_desig_scaffold  | 6490                           | [A/G]       | NA                                         |
| Ca_Desig_Chr_scaffold06051_6497 | Ca_desig_scaffold  | 6497                           | [T/G]       | NA                                         |
| Ca_Desig_Chr_scaffold06051_6510 | Ca_desig_scaffold  | 6510                           | [A/G]       | NA                                         |
| Ca_Desig_Chr_scaffold06051_7196 | Ca_desig_scaffold  | 7196                           | [A/G]       | NA                                         |
| Ca_Desig_Chr_scaffold06051_8943 | Ca_desig_scaffold  | 8943                           | [A/C]       | NA                                         |
| Ca_Desig_Chr_scaffold06051_9425 | Ca_desig_scaffold  | 9425                           | [G/A]       | NA                                         |
| Ca_Desig_Chr_scaffold06051_9449 | Ca_desig_scaffold  | 9449                           | [A/C]       | NA                                         |
| Ca_Desig_Chr_scaffold06058_5000 | Ca_desig_scaffold  | 5000                           | [A/C]       | NA                                         |
| Ca_Desig_Chr_scaffold06066_570  | Ca_desig_scaffold  | 570                            | [T/G]       | NA                                         |
| Ca_Desig_Chr_scaffold06077_5096 | Ca_desig_scaffold  | 5096                           | [T/C]       | NA                                         |
| Ca_Desig_Chr_scaffold06077_5111 | Ca_desig_scaffold  | 5111                           | [A/G]       | NA                                         |
| Ca_Desig_Chr_scaffold06080_8399 | Ca_desig_scaffold  | 8399                           | [T/A]       | NA                                         |
| Ca_Desig_Chr_scaffold06082_9259 | Ca_desig_scaffold  | 9259                           | [A/C]       | NA                                         |
| Ca_Desig_Chr_scaffold06082_9264 | Ca_desig_scaffold  | 9264                           | [A/G]       | NA                                         |
| Ca_Desig_Chr_scaffold06082_9279 | Ca_desig_scaffold  | 9279                           | [A/T]       | NA                                         |
| Ca_Desig_Chr_scaffold06082_9530 | Ca_desig_scaffold  | 9530                           | [A/C]       | NA                                         |
| Ca_Desig_Chr_scaffold06087_6211 | Ca_desig_scaffold  | 6211                           | [A/G]       | NA                                         |
| Ca_Desig_Chr_scaffold06087_6212 | Ca_desig_scaffold  | 6212                           | [T/C]       | NA                                         |
| Ca_Desig_Chr_scaffold06087_6227 | Ca_desig_scaffold  | 6227                           | [T/C]       | NA                                         |
| Ca_Desig_Chr_scaffold06087_6230 | Ca_desig_scaffold  | 6230                           | [T/G]       | NA                                         |
| Ca_Desig_Chr_scaffold06087_6291 | Ca_desig_scaffold  | 6291                           | [A/G]       | NA                                         |
| Ca_Desig_Chr_scaffold06087_6301 | Ca_desig_scaffold  | 6301                           | [A/G]       | NA                                         |
| Ca_Desig_Chr_scaffold06087_6302 | Ca_desig_scaffold  | 6302                           | [T/C]       | NA                                         |
| Ca_Desig_Chr_scaffold06087_6306 | Ca_desig_scaffold  | 6306                           | [A/C]       | NA                                         |
| Ca_Desig_Chr_scaffold06087_6321 | Ca_desig_scaffold  | 6321                           | [T/C]       | NA                                         |

| <b>SNP IDs</b>                  | <b>Chromosomes</b> | <b>Physical positions (bp)</b> | <b>SNPs</b> | <b>NCBI SNPdb accession IDs (NCBI_ss#)</b> |
|---------------------------------|--------------------|--------------------------------|-------------|--------------------------------------------|
| Ca_Desig_Chr_scaffold06087_6326 | Ca_desig_scaffold  | 6326                           | [A/G]       | NA                                         |
| Ca_Desig_Chr_scaffold06087_6329 | Ca_desig_scaffold  | 6329                           | [A/G]       | NA                                         |
| Ca_Desig_Chr_scaffold06087_6339 | Ca_desig_scaffold  | 6339                           | [G/T]       | NA                                         |
| Ca_Desig_Chr_scaffold06087_6345 | Ca_desig_scaffold  | 6345                           | [G/A]       | NA                                         |
| Ca_Desig_Chr_scaffold06087_6347 | Ca_desig_scaffold  | 6347                           | [T/C]       | NA                                         |
| Ca_Desig_Chr_scaffold06087_6353 | Ca_desig_scaffold  | 6353                           | [A/G]       | NA                                         |
| Ca_Desig_Chr_scaffold06087_6427 | Ca_desig_scaffold  | 6427                           | [T/G]       | NA                                         |
| Ca_Desig_Chr_scaffold06087_6430 | Ca_desig_scaffold  | 6430                           | [T/G]       | NA                                         |
| Ca_Desig_Chr_scaffold06087_6431 | Ca_desig_scaffold  | 6431                           | [A/G]       | NA                                         |
| Ca_Desig_Chr_scaffold06087_6463 | Ca_desig_scaffold  | 6463                           | [T/C]       | NA                                         |
| Ca_Desig_Chr_scaffold06107_7401 | Ca_desig_scaffold  | 7401                           | [A/G]       | NA                                         |
| Ca_Desig_Chr_scaffold06107_9211 | Ca_desig_scaffold  | 9211                           | [A/C]       | NA                                         |
| Ca_Desig_Chr_scaffold06108_1511 | Ca_desig_scaffold  | 1511                           | [C/A]       | NA                                         |
| Ca_Desig_Chr_scaffold06108_1512 | Ca_desig_scaffold  | 1512                           | [T/G]       | NA                                         |
| Ca_Desig_Chr_scaffold06116_2136 | Ca_desig_scaffold  | 2136                           | [T/G]       | NA                                         |
| Ca_Desig_Chr_scaffold06131_3729 | Ca_desig_scaffold  | 3729                           | [T/A]       | NA                                         |
| Ca_Desig_Chr_scaffold06132_3385 | Ca_desig_scaffold  | 3385                           | [T/C]       | NA                                         |
| Ca_Desig_Chr_scaffold06163_1904 | Ca_desig_scaffold  | 1904                           | [T/G]       | NA                                         |
| Ca_Desig_Chr_scaffold06163_1906 | Ca_desig_scaffold  | 1906                           | [A/G]       | NA                                         |
| Ca_Desig_Chr_scaffold06163_1915 | Ca_desig_scaffold  | 1915                           | [T/G]       | NA                                         |
| Ca_Desig_Chr_scaffold06163_1918 | Ca_desig_scaffold  | 1918                           | [T/G]       | NA                                         |
| Ca_Desig_Chr_scaffold06163_1936 | Ca_desig_scaffold  | 1936                           | [A/C]       | NA                                         |
| Ca_Desig_Chr_scaffold06163_1978 | Ca_desig_scaffold  | 1978                           | [A/G]       | NA                                         |
| Ca_Desig_Chr_scaffold06176_1071 | Ca_desig_scaffold  | 1071                           | [T/G]       | NA                                         |
| Ca_Desig_Chr_scaffold06176_1078 | Ca_desig_scaffold  | 1078                           | [T/G]       | NA                                         |
| Ca_Desig_Chr_scaffold06205_5970 | Ca_desig_scaffold  | 5970                           | [T/C]       | NA                                         |
| Ca_Desig_Chr_scaffold06208_2028 | Ca_desig_scaffold  | 2028                           | [T/G]       | NA                                         |
| Ca_Desig_Chr_scaffold06209_4038 | Ca_desig_scaffold  | 4038                           | [T/G]       | NA                                         |
| Ca_Desig_Chr_scaffold06209_4146 | Ca_desig_scaffold  | 4146                           | [A/G]       | NA                                         |
| Ca_Desig_Chr_scaffold06209_4156 | Ca_desig_scaffold  | 4156                           | [C/A]       | NA                                         |
| Ca_Desig_Chr_scaffold06209_4160 | Ca_desig_scaffold  | 4160                           | [T/C]       | NA                                         |
| Ca_Desig_Chr_scaffold06209_4184 | Ca_desig_scaffold  | 4184                           | [T/C]       | NA                                         |
| Ca_Desig_Chr_scaffold06222_1875 | Ca_desig_scaffold  | 1875                           | [T/G]       | NA                                         |
| Ca_Desig_Chr_scaffold06222_1884 | Ca_desig_scaffold  | 1884                           | [T/G]       | NA                                         |



| <b>SNP IDs</b>                 | <b>Chromosomes</b> | <b>Physical positions (bp)</b> | <b>SNPs</b> | <b>NCBI SNPdb accession IDs (NCBI_ss#)</b> |
|--------------------------------|--------------------|--------------------------------|-------------|--------------------------------------------|
| Ca_DesigChr_scaffold06222_1917 | Ca_desig_scaffold  | 1917                           | [T/G]       | NA                                         |
| Ca_DesigChr_scaffold06222_6187 | Ca_desig_scaffold  | 6187                           | [A/C]       | NA                                         |
| Ca_DesigChr_scaffold06240_2249 | Ca_desig_scaffold  | 2249                           | [T/C]       | NA                                         |
| Ca_DesigChr_scaffold06240_2251 | Ca_desig_scaffold  | 2251                           | [A/C]       | NA                                         |
| Ca_DesigChr_scaffold06240_2258 | Ca_desig_scaffold  | 2258                           | [A/C]       | NA                                         |
| Ca_DesigChr_scaffold06240_2260 | Ca_desig_scaffold  | 2260                           | [T/C]       | NA                                         |
| Ca_DesigChr_scaffold06240_2263 | Ca_desig_scaffold  | 2263                           | [G/C]       | NA                                         |
| Ca_DesigChr_scaffold06242_6132 | Ca_desig_scaffold  | 6132                           | [C/A]       | NA                                         |
| Ca_DesigChr_scaffold06269_5606 | Ca_desig_scaffold  | 5606                           | [G/A]       | NA                                         |
| Ca_DesigChr_scaffold06276_6244 | Ca_desig_scaffold  | 6244                           | [T/C]       | NA                                         |
| Ca_DesigChr_scaffold06324_8970 | Ca_desig_scaffold  | 8970                           | [A/G]       | NA                                         |
| Ca_DesigChr_scaffold06358_5254 | Ca_desig_scaffold  | 5254                           | [T/C]       | NA                                         |
| Ca_DesigChr_scaffold06358_5419 | Ca_desig_scaffold  | 5419                           | [G/T]       | NA                                         |
| Ca_DesigChr_scaffold06358_5423 | Ca_desig_scaffold  | 5423                           | [A/G]       | NA                                         |
| Ca_DesigChr_scaffold06358_5424 | Ca_desig_scaffold  | 5424                           | [C/A]       | NA                                         |
| Ca_DesigChr_scaffold06358_5425 | Ca_desig_scaffold  | 5425                           | [G/A]       | NA                                         |
| Ca_DesigChr_scaffold06358_5427 | Ca_desig_scaffold  | 5427                           | [A/G]       | NA                                         |
| Ca_DesigChr_scaffold06358_5428 | Ca_desig_scaffold  | 5428                           | [A/G]       | NA                                         |
| Ca_DesigChr_scaffold06358_5429 | Ca_desig_scaffold  | 5429                           | [G/A]       | NA                                         |
| Ca_DesigChr_scaffold06358_5430 | Ca_desig_scaffold  | 5430                           | [A/G]       | NA                                         |
| Ca_DesigChr_scaffold06358_5431 | Ca_desig_scaffold  | 5431                           | [A/G]       | NA                                         |
| Ca_DesigChr_scaffold06358_5434 | Ca_desig_scaffold  | 5434                           | [T/A]       | NA                                         |
| Ca_DesigChr_scaffold06358_5435 | Ca_desig_scaffold  | 5435                           | [T/C]       | NA                                         |
| Ca_DesigChr_scaffold06358_5436 | Ca_desig_scaffold  | 5436                           | [C/T]       | NA                                         |
| Ca_DesigChr_scaffold06358_5439 | Ca_desig_scaffold  | 5439                           | [T/C]       | NA                                         |
| Ca_DesigChr_scaffold06358_5441 | Ca_desig_scaffold  | 5441                           | [A/G]       | NA                                         |
| Ca_DesigChr_scaffold06358_5442 | Ca_desig_scaffold  | 5442                           | [A/G]       | NA                                         |
| Ca_DesigChr_scaffold06358_5443 | Ca_desig_scaffold  | 5443                           | [C/A]       | NA                                         |
| Ca_DesigChr_scaffold06358_5449 | Ca_desig_scaffold  | 5449                           | [A/G]       | NA                                         |
| Ca_DesigChr_scaffold06358_5450 | Ca_desig_scaffold  | 5450                           | [A/G]       | NA                                         |
| Ca_DesigChr_scaffold06358_5451 | Ca_desig_scaffold  | 5451                           | [A/T]       | NA                                         |
| Ca_DesigChr_scaffold06358_5457 | Ca_desig_scaffold  | 5457                           | [A/G]       | NA                                         |
| Ca_DesigChr_scaffold06358_5458 | Ca_desig_scaffold  | 5458                           | [T/A]       | NA                                         |
| Ca_DesigChr_scaffold06358_5461 | Ca_desig_scaffold  | 5461                           | [A/G]       | NA                                         |

| <b>SNP IDs</b>                  | <b>Chromosomes</b> | <b>Physical positions (bp)</b> | <b>SNPs</b> | <b>NCBI SNPdb accession IDs (NCBI_ss#)</b> |
|---------------------------------|--------------------|--------------------------------|-------------|--------------------------------------------|
| Ca_Desig_Chr_scaffold06358_5465 | Ca_desig_scaffold  | 5465                           | [T/C]       | NA                                         |
| Ca_Desig_Chr_scaffold06358_5466 | Ca_desig_scaffold  | 5466                           | [G/T]       | NA                                         |
| Ca_Desig_Chr_scaffold06358_5472 | Ca_desig_scaffold  | 5472                           | [T/C]       | NA                                         |
| Ca_Desig_Chr_scaffold06358_5478 | Ca_desig_scaffold  | 5478                           | [T/C]       | NA                                         |
| Ca_Desig_Chr_scaffold06358_5480 | Ca_desig_scaffold  | 5480                           | [A/G]       | NA                                         |
| Ca_Desig_Chr_scaffold06358_5481 | Ca_desig_scaffold  | 5481                           | [A/G]       | NA                                         |
| Ca_Desig_Chr_scaffold06364_8688 | Ca_desig_scaffold  | 8688                           | [C/A]       | NA                                         |
| Ca_Desig_Chr_scaffold06364_8689 | Ca_desig_scaffold  | 8689                           | [T/G]       | NA                                         |
| Ca_Desig_Chr_scaffold06364_8690 | Ca_desig_scaffold  | 8690                           | [G/A]       | NA                                         |
| Ca_Desig_Chr_scaffold06365_2837 | Ca_desig_scaffold  | 2837                           | [T/C]       | NA                                         |
| Ca_Desig_Chr_scaffold06365_2856 | Ca_desig_scaffold  | 2856                           | [A/C]       | NA                                         |
| Ca_Desig_Chr_scaffold06388_2021 | Ca_desig_scaffold  | 2021                           | [G/A]       | NA                                         |
| Ca_Desig_Chr_scaffold06388_2023 | Ca_desig_scaffold  | 2023                           | [G/A]       | NA                                         |
| Ca_Desig_Chr_scaffold06388_2028 | Ca_desig_scaffold  | 2028                           | [G/A]       | NA                                         |
| Ca_Desig_Chr_scaffold06388_2038 | Ca_desig_scaffold  | 2038                           | [C/T]       | NA                                         |
| Ca_Desig_Chr_scaffold06388_2039 | Ca_desig_scaffold  | 2039                           | [G/C]       | NA                                         |
| Ca_Desig_Chr_scaffold06388_2045 | Ca_desig_scaffold  | 2045                           | [G/A]       | NA                                         |
| Ca_Desig_Chr_scaffold06388_2050 | Ca_desig_scaffold  | 2050                           | [G/A]       | NA                                         |
| Ca_Desig_Chr_scaffold06388_2066 | Ca_desig_scaffold  | 2066                           | [G/A]       | NA                                         |
| Ca_Desig_Chr_scaffold06388_2822 | Ca_desig_scaffold  | 2822                           | [T/C]       | NA                                         |
| Ca_Desig_Chr_scaffold06395_2619 | Ca_desig_scaffold  | 2619                           | [C/A]       | NA                                         |
| Ca_Desig_Chr_scaffold06395_2620 | Ca_desig_scaffold  | 2620                           | [T/G]       | NA                                         |
| Ca_Desig_Chr_scaffold06395_3495 | Ca_desig_scaffold  | 3495                           | [T/C]       | NA                                         |
| Ca_Desig_Chr_scaffold06395_3505 | Ca_desig_scaffold  | 3505                           | [A/G]       | NA                                         |
| Ca_Desig_Chr_scaffold06395_3512 | Ca_desig_scaffold  | 3512                           | [A/G]       | NA                                         |
| Ca_Desig_Chr_scaffold06395_3520 | Ca_desig_scaffold  | 3520                           | [T/C]       | NA                                         |
| Ca_Desig_Chr_scaffold06435_9064 | Ca_desig_scaffold  | 9064                           | [A/C]       | NA                                         |
| Ca_Desig_Chr_scaffold06435_9067 | Ca_desig_scaffold  | 9067                           | [A/C]       | NA                                         |
| Ca_Desig_Chr_scaffold06439_4093 | Ca_desig_scaffold  | 4093                           | [A/G]       | NA                                         |
| Ca_Desig_Chr_scaffold06439_4105 | Ca_desig_scaffold  | 4105                           | [A/G]       | NA                                         |
| Ca_Desig_Chr_scaffold06458_8031 | Ca_desig_scaffold  | 8031                           | [A/G]       | NA                                         |
| Ca_Desig_Chr_scaffold06458_8051 | Ca_desig_scaffold  | 8051                           | [A/C]       | NA                                         |
| Ca_Desig_Chr_scaffold06458_8071 | Ca_desig_scaffold  | 8071                           | [T/C]       | NA                                         |
| Ca_Desig_Chr_scaffold06458_8081 | Ca_desig_scaffold  | 8081                           | [T/G]       | NA                                         |

| <b>SNP IDs</b>                | <b>Chromosomes</b> | <b>Physical positions (bp)</b> | <b>SNPs</b> | <b>NCBI SNPdb accession IDs (NCBI_ss#)</b> |
|-------------------------------|--------------------|--------------------------------|-------------|--------------------------------------------|
| Ca_Desi_Ch_scaffold06458_8088 | Ca_desi_scaffold   | 8088                           | [T/C]       | NA                                         |
| Ca_Desi_Ch_scaffold06459_2810 | Ca_desi_scaffold   | 2810                           | [C/A]       | NA                                         |
| Ca_Desi_Ch_scaffold06459_2817 | Ca_desi_scaffold   | 2817                           | [G/A]       | NA                                         |
| Ca_Desi_Ch_scaffold06472_2157 | Ca_desi_scaffold   | 2157                           | [T/C]       | NA                                         |
| Ca_Desi_Ch_scaffold06472_2158 | Ca_desi_scaffold   | 2158                           | [G/A]       | NA                                         |
| Ca_Desi_Ch_scaffold06509_501  | Ca_desi_scaffold   | 501                            | [A/T]       | NA                                         |
| Ca_Desi_Ch_scaffold06521_2644 | Ca_desi_scaffold   | 2644                           | [G/A]       | NA                                         |
| Ca_Desi_Ch_scaffold06521_2679 | Ca_desi_scaffold   | 2679                           | [A/T]       | NA                                         |
| Ca_Desi_Ch_scaffold06521_2734 | Ca_desi_scaffold   | 2734                           | [G/A]       | NA                                         |
| Ca_Desi_Ch_scaffold06521_2741 | Ca_desi_scaffold   | 2741                           | [G/T]       | NA                                         |
| Ca_Desi_Ch_scaffold06521_2803 | Ca_desi_scaffold   | 2803                           | [G/T]       | NA                                         |
| Ca_Desi_Ch_scaffold06546_3337 | Ca_desi_scaffold   | 3337                           | [T/G]       | NA                                         |
| Ca_Desi_Ch_scaffold06546_3907 | Ca_desi_scaffold   | 3907                           | [A/G]       | NA                                         |
| Ca_Desi_Ch_scaffold06546_3910 | Ca_desi_scaffold   | 3910                           | [T/A]       | NA                                         |
| Ca_Desi_Ch_scaffold06546_3913 | Ca_desi_scaffold   | 3913                           | [T/C]       | NA                                         |
| Ca_Desi_Ch_scaffold06546_3916 | Ca_desi_scaffold   | 3916                           | [A/G]       | NA                                         |
| Ca_Desi_Ch_scaffold06546_3918 | Ca_desi_scaffold   | 3918                           | [A/G]       | NA                                         |
| Ca_Desi_Ch_scaffold06546_3921 | Ca_desi_scaffold   | 3921                           | [T/A]       | NA                                         |
| Ca_Desi_Ch_scaffold06546_3923 | Ca_desi_scaffold   | 3923                           | [T/C]       | NA                                         |
| Ca_Desi_Ch_scaffold06546_3924 | Ca_desi_scaffold   | 3924                           | [T/C]       | NA                                         |
| Ca_Desi_Ch_scaffold06546_3926 | Ca_desi_scaffold   | 3926                           | [A/G]       | NA                                         |
| Ca_Desi_Ch_scaffold06546_3928 | Ca_desi_scaffold   | 3928                           | [T/C]       | NA                                         |
| Ca_Desi_Ch_scaffold06546_3929 | Ca_desi_scaffold   | 3929                           | [T/C]       | NA                                         |
| Ca_Desi_Ch_scaffold06546_3931 | Ca_desi_scaffold   | 3931                           | [A/G]       | NA                                         |
| Ca_Desi_Ch_scaffold06546_3940 | Ca_desi_scaffold   | 3940                           | [T/C]       | NA                                         |
| Ca_Desi_Ch_scaffold06546_3950 | Ca_desi_scaffold   | 3950                           | [A/G]       | NA                                         |
| Ca_Desi_Ch_scaffold06546_3952 | Ca_desi_scaffold   | 3952                           | [A/G]       | NA                                         |
| Ca_Desi_Ch_scaffold06546_3954 | Ca_desi_scaffold   | 3954                           | [A/G]       | NA                                         |
| Ca_Desi_Ch_scaffold06546_3958 | Ca_desi_scaffold   | 3958                           | [A/G]       | NA                                         |
| Ca_Desi_Ch_scaffold06546_3963 | Ca_desi_scaffold   | 3963                           | [T/C]       | NA                                         |
| Ca_Desi_Ch_scaffold06546_4124 | Ca_desi_scaffold   | 4124                           | [A/G]       | NA                                         |
| Ca_Desi_Ch_scaffold06546_4127 | Ca_desi_scaffold   | 4127                           | [A/G]       | NA                                         |
| Ca_Desi_Ch_scaffold06546_4129 | Ca_desi_scaffold   | 4129                           | [A/G]       | NA                                         |
| Ca_Desi_Ch_scaffold06546_4131 | Ca_desi_scaffold   | 4131                           | [T/G]       | NA                                         |

| <b>SNP IDs</b>                | <b>Chromosomes</b> | <b>Physical positions (bp)</b> | <b>SNPs</b> | <b>NCBI SNPdb accession IDs (NCBI_ss#)</b> |
|-------------------------------|--------------------|--------------------------------|-------------|--------------------------------------------|
| Ca_Desi_Ch_scaffold06546_4136 | Ca_desi_scaffold   | 4136                           | [A/G]       | NA                                         |
| Ca_Desi_Ch_scaffold06546_4138 | Ca_desi_scaffold   | 4138                           | [A/G]       | NA                                         |
| Ca_Desi_Ch_scaffold06546_4144 | Ca_desi_scaffold   | 4144                           | [T/C]       | NA                                         |
| Ca_Desi_Ch_scaffold06546_4145 | Ca_desi_scaffold   | 4145                           | [T/C]       | NA                                         |
| Ca_Desi_Ch_scaffold06546_4147 | Ca_desi_scaffold   | 4147                           | [T/C]       | NA                                         |
| Ca_Desi_Ch_scaffold06546_4148 | Ca_desi_scaffold   | 4148                           | [T/C]       | NA                                         |
| Ca_Desi_Ch_scaffold06546_4149 | Ca_desi_scaffold   | 4149                           | [T/C]       | NA                                         |
| Ca_Desi_Ch_scaffold06546_4150 | Ca_desi_scaffold   | 4150                           | [C/T]       | NA                                         |
| Ca_Desi_Ch_scaffold06546_4151 | Ca_desi_scaffold   | 4151                           | [A/G]       | NA                                         |
| Ca_Desi_Ch_scaffold06546_4152 | Ca_desi_scaffold   | 4152                           | [C/A]       | NA                                         |
| Ca_Desi_Ch_scaffold06546_4161 | Ca_desi_scaffold   | 4161                           | [T/C]       | NA                                         |
| Ca_Desi_Ch_scaffold06546_4164 | Ca_desi_scaffold   | 4164                           | [A/G]       | NA                                         |
| Ca_Desi_Ch_scaffold06546_4169 | Ca_desi_scaffold   | 4169                           | [G/T]       | NA                                         |
| Ca_Desi_Ch_scaffold06546_4173 | Ca_desi_scaffold   | 4173                           | [T/C]       | NA                                         |
| Ca_Desi_Ch_scaffold06546_4175 | Ca_desi_scaffold   | 4175                           | [T/C]       | NA                                         |
| Ca_Desi_Ch_scaffold06546_5166 | Ca_desi_scaffold   | 5166                           | [C/A]       | NA                                         |
| Ca_Desi_Ch_scaffold06546_5167 | Ca_desi_scaffold   | 5167                           | [T/G]       | NA                                         |
| Ca_Desi_Ch_scaffold06546_6268 | Ca_desi_scaffold   | 6268                           | [T/C]       | NA                                         |
| Ca_Desi_Ch_scaffold06546_6292 | Ca_desi_scaffold   | 6292                           | [T/G]       | NA                                         |
| Ca_Desi_Ch_scaffold06546_6302 | Ca_desi_scaffold   | 6302                           | [A/G]       | NA                                         |
| Ca_Desi_Ch_scaffold06546_6304 | Ca_desi_scaffold   | 6304                           | [T/G]       | NA                                         |
| Ca_Desi_Ch_scaffold06546_6307 | Ca_desi_scaffold   | 6307                           | [A/G]       | NA                                         |
| Ca_Desi_Ch_scaffold06546_6510 | Ca_desi_scaffold   | 6510                           | [A/C]       | NA                                         |
| Ca_Desi_Ch_scaffold06546_6543 | Ca_desi_scaffold   | 6543                           | [A/T]       | NA                                         |
| Ca_Desi_Ch_scaffold06546_6545 | Ca_desi_scaffold   | 6545                           | [A/C]       | NA                                         |
| Ca_Desi_Ch_scaffold06546_6585 | Ca_desi_scaffold   | 6585                           | [C/A]       | NA                                         |
| Ca_Desi_Ch_scaffold06546_7085 | Ca_desi_scaffold   | 7085                           | [A/C]       | NA                                         |
| Ca_Desi_Ch_scaffold06546_8839 | Ca_desi_scaffold   | 8839                           | [A/G]       | NA                                         |
| Ca_Desi_Ch_scaffold06549_286  | Ca_desi_scaffold   | 286                            | [A/T]       | NA                                         |
| Ca_Desi_Ch_scaffold06549_288  | Ca_desi_scaffold   | 288                            | [T/C]       | NA                                         |
| Ca_Desi_Ch_scaffold06551_6332 | Ca_desi_scaffold   | 6332                           | [A/C]       | NA                                         |
| Ca_Desi_Ch_scaffold06566_2596 | Ca_desi_scaffold   | 2596                           | [A/G]       | NA                                         |
| Ca_Desi_Ch_scaffold06566_2600 | Ca_desi_scaffold   | 2600                           | [T/C]       | NA                                         |
| Ca_Desi_Ch_scaffold06566_2613 | Ca_desi_scaffold   | 2613                           | [C/T]       | NA                                         |

| <b>SNP IDs</b>                | <b>Chromosomes</b> | <b>Physical positions (bp)</b> | <b>SNPs</b> | <b>NCBI SNPdb accession IDs (NCBI_ss#)</b> |
|-------------------------------|--------------------|--------------------------------|-------------|--------------------------------------------|
| Ca_Desi_Ch_scaffold06566_2615 | Ca_desi_scaffold   | 2615                           | [A/T]       | NA                                         |
| Ca_Desi_Ch_scaffold06566_2617 | Ca_desi_scaffold   | 2617                           | [T/G]       | NA                                         |
| Ca_Desi_Ch_scaffold06566_2623 | Ca_desi_scaffold   | 2623                           | [A/G]       | NA                                         |
| Ca_Desi_Ch_scaffold06566_2624 | Ca_desi_scaffold   | 2624                           | [C/A]       | NA                                         |
| Ca_Desi_Ch_scaffold06566_2626 | Ca_desi_scaffold   | 2626                           | [A/C]       | NA                                         |
| Ca_Desi_Ch_scaffold06566_2631 | Ca_desi_scaffold   | 2631                           | [A/G]       | NA                                         |
| Ca_Desi_Ch_scaffold06566_2633 | Ca_desi_scaffold   | 2633                           | [A/C]       | NA                                         |
| Ca_Desi_Ch_scaffold06566_2650 | Ca_desi_scaffold   | 2650                           | [T/A]       | NA                                         |
| Ca_Desi_Ch_scaffold06566_6339 | Ca_desi_scaffold   | 6339                           | [T/G]       | NA                                         |
| Ca_Desi_Ch_scaffold06572_670  | Ca_desi_scaffold   | 670                            | [A/T]       | NA                                         |
| Ca_Desi_Ch_scaffold06592_3600 | Ca_desi_scaffold   | 3600                           | [C/A]       | NA                                         |
| Ca_Desi_Ch_scaffold06592_3622 | Ca_desi_scaffold   | 3622                           | [T/C]       | NA                                         |
| Ca_Desi_Ch_scaffold06592_3640 | Ca_desi_scaffold   | 3640                           | [A/G]       | NA                                         |
| Ca_Desi_Ch_scaffold06592_3647 | Ca_desi_scaffold   | 3647                           | [A/G]       | NA                                         |
| Ca_Desi_Ch_scaffold06592_3650 | Ca_desi_scaffold   | 3650                           | [T/A]       | NA                                         |
| Ca_Desi_Ch_scaffold06592_3658 | Ca_desi_scaffold   | 3658                           | [A/C]       | NA                                         |
| Ca_Desi_Ch_scaffold06592_3665 | Ca_desi_scaffold   | 3665                           | [T/C]       | NA                                         |
| Ca_Desi_Ch_scaffold06592_3672 | Ca_desi_scaffold   | 3672                           | [T/C]       | NA                                         |
| Ca_Desi_Ch_scaffold06592_3723 | Ca_desi_scaffold   | 3723                           | [C/T]       | NA                                         |
| Ca_Desi_Ch_scaffold06592_4370 | Ca_desi_scaffold   | 4370                           | [T/G]       | NA                                         |
| Ca_Desi_Ch_scaffold06595_2072 | Ca_desi_scaffold   | 2072                           | [G/A]       | NA                                         |
| Ca_Desi_Ch_scaffold06595_2074 | Ca_desi_scaffold   | 2074                           | [T/A]       | NA                                         |
| Ca_Desi_Ch_scaffold06595_3066 | Ca_desi_scaffold   | 3066                           | [T/G]       | NA                                         |
| Ca_Desi_Ch_scaffold06595_3116 | Ca_desi_scaffold   | 3116                           | [T/A]       | NA                                         |
| Ca_Desi_Ch_scaffold06595_3127 | Ca_desi_scaffold   | 3127                           | [A/G]       | NA                                         |
| Ca_Desi_Ch_scaffold06595_3133 | Ca_desi_scaffold   | 3133                           | [T/C]       | NA                                         |
| Ca_Desi_Ch_scaffold06595_3279 | Ca_desi_scaffold   | 3279                           | [A/C]       | NA                                         |
| Ca_Desi_Ch_scaffold06595_3281 | Ca_desi_scaffold   | 3281                           | [A/C]       | NA                                         |
| Ca_Desi_Ch_scaffold06595_4482 | Ca_desi_scaffold   | 4482                           | [T/G]       | NA                                         |
| Ca_Desi_Ch_scaffold06595_4520 | Ca_desi_scaffold   | 4520                           | [T/G]       | NA                                         |
| Ca_Desi_Ch_scaffold06595_4812 | Ca_desi_scaffold   | 4812                           | [A/G]       | NA                                         |
| Ca_Desi_Ch_scaffold06595_4858 | Ca_desi_scaffold   | 4858                           | [T/A]       | NA                                         |
| Ca_Desi_Ch_scaffold06595_4861 | Ca_desi_scaffold   | 4861                           | [T/C]       | NA                                         |
| Ca_Desi_Ch_scaffold06595_4862 | Ca_desi_scaffold   | 4862                           | [T/C]       | NA                                         |

| <b>SNP IDs</b>                 | <b>Chromosomes</b> | <b>Physical positions (bp)</b> | <b>SNPs</b> | <b>NCBI SNPdb accession IDs (NCBI_ss#)</b> |
|--------------------------------|--------------------|--------------------------------|-------------|--------------------------------------------|
| Ca_DesigChr_scaffold06595_4863 | Ca_desig_scaffold  | 4863                           | [T/C]       | NA                                         |
| Ca_DesigChr_scaffold06595_4865 | Ca_desig_scaffold  | 4865                           | [T/C]       | NA                                         |
| Ca_DesigChr_scaffold06595_4866 | Ca_desig_scaffold  | 4866                           | [C/T]       | NA                                         |
| Ca_DesigChr_scaffold06595_4867 | Ca_desig_scaffold  | 4867                           | [T/C]       | NA                                         |
| Ca_DesigChr_scaffold06595_4868 | Ca_desig_scaffold  | 4868                           | [A/G]       | NA                                         |
| Ca_DesigChr_scaffold06595_4869 | Ca_desig_scaffold  | 4869                           | [T/C]       | NA                                         |
| Ca_DesigChr_scaffold06595_4870 | Ca_desig_scaffold  | 4870                           | [T/C]       | NA                                         |
| Ca_DesigChr_scaffold06595_4871 | Ca_desig_scaffold  | 4871                           | [T/C]       | NA                                         |
| Ca_DesigChr_scaffold06595_4872 | Ca_desig_scaffold  | 4872                           | [G/A]       | NA                                         |
| Ca_DesigChr_scaffold06595_4873 | Ca_desig_scaffold  | 4873                           | [G/A]       | NA                                         |
| Ca_DesigChr_scaffold06595_4874 | Ca_desig_scaffold  | 4874                           | [C/T]       | NA                                         |
| Ca_DesigChr_scaffold06595_4875 | Ca_desig_scaffold  | 4875                           | [A/G]       | NA                                         |
| Ca_DesigChr_scaffold06595_4876 | Ca_desig_scaffold  | 4876                           | [A/G]       | NA                                         |
| Ca_DesigChr_scaffold06595_4877 | Ca_desig_scaffold  | 4877                           | [A/G]       | NA                                         |
| Ca_DesigChr_scaffold06595_4878 | Ca_desig_scaffold  | 4878                           | [G/A]       | NA                                         |
| Ca_DesigChr_scaffold06595_4879 | Ca_desig_scaffold  | 4879                           | [C/T]       | NA                                         |
| Ca_DesigChr_scaffold06595_4880 | Ca_desig_scaffold  | 4880                           | [A/G]       | NA                                         |
| Ca_DesigChr_scaffold06595_4881 | Ca_desig_scaffold  | 4881                           | [A/G]       | NA                                         |
| Ca_DesigChr_scaffold06595_4883 | Ca_desig_scaffold  | 4883                           | [G/A]       | NA                                         |
| Ca_DesigChr_scaffold06595_4884 | Ca_desig_scaffold  | 4884                           | [G/A]       | NA                                         |
| Ca_DesigChr_scaffold06595_4886 | Ca_desig_scaffold  | 4886                           | [A/G]       | NA                                         |
| Ca_DesigChr_scaffold06595_4887 | Ca_desig_scaffold  | 4887                           | [G/A]       | NA                                         |
| Ca_DesigChr_scaffold06595_4888 | Ca_desig_scaffold  | 4888                           | [A/G]       | NA                                         |
| Ca_DesigChr_scaffold06595_4889 | Ca_desig_scaffold  | 4889                           | [T/A]       | NA                                         |
| Ca_DesigChr_scaffold06595_4890 | Ca_desig_scaffold  | 4890                           | [A/G]       | NA                                         |
| Ca_DesigChr_scaffold06595_4891 | Ca_desig_scaffold  | 4891                           | [T/C]       | NA                                         |
| Ca_DesigChr_scaffold06595_4892 | Ca_desig_scaffold  | 4892                           | [G/A]       | NA                                         |
| Ca_DesigChr_scaffold06595_4894 | Ca_desig_scaffold  | 4894                           | [A/G]       | NA                                         |
| Ca_DesigChr_scaffold06595_4895 | Ca_desig_scaffold  | 4895                           | [T/C]       | NA                                         |
| Ca_DesigChr_scaffold06595_4896 | Ca_desig_scaffold  | 4896                           | [C/T]       | NA                                         |
| Ca_DesigChr_scaffold06595_4897 | Ca_desig_scaffold  | 4897                           | [C/T]       | NA                                         |
| Ca_DesigChr_scaffold06595_4898 | Ca_desig_scaffold  | 4898                           | [A/G]       | NA                                         |
| Ca_DesigChr_scaffold06595_4899 | Ca_desig_scaffold  | 4899                           | [C/T]       | NA                                         |
| Ca_DesigChr_scaffold06595_4900 | Ca_desig_scaffold  | 4900                           | [C/T]       | NA                                         |

| <b>SNP IDs</b>                 | <b>Chromosomes</b> | <b>Physical positions (bp)</b> | <b>SNPs</b> | <b>NCBI SNPdb accession IDs (NCBI_ss#)</b> |
|--------------------------------|--------------------|--------------------------------|-------------|--------------------------------------------|
| Ca_DesigChr_scaffold06595_4901 | Ca_desig_scaffold  | 4901                           | [A/G]       | NA                                         |
| Ca_DesigChr_scaffold06595_4902 | Ca_desig_scaffold  | 4902                           | [G/A]       | NA                                         |
| Ca_DesigChr_scaffold06595_4903 | Ca_desig_scaffold  | 4903                           | [T/C]       | NA                                         |
| Ca_DesigChr_scaffold06595_4904 | Ca_desig_scaffold  | 4904                           | [T/C]       | NA                                         |
| Ca_DesigChr_scaffold06595_4905 | Ca_desig_scaffold  | 4905                           | [A/G]       | NA                                         |
| Ca_DesigChr_scaffold06595_4906 | Ca_desig_scaffold  | 4906                           | [C/T]       | NA                                         |
| Ca_DesigChr_scaffold06595_4907 | Ca_desig_scaffold  | 4907                           | [C/T]       | NA                                         |
| Ca_DesigChr_scaffold06595_4908 | Ca_desig_scaffold  | 4908                           | [A/C]       | NA                                         |
| Ca_DesigChr_scaffold06595_4909 | Ca_desig_scaffold  | 4909                           | [C/T]       | NA                                         |
| Ca_DesigChr_scaffold06595_4910 | Ca_desig_scaffold  | 4910                           | [T/C]       | NA                                         |
| Ca_DesigChr_scaffold06595_4911 | Ca_desig_scaffold  | 4911                           | [T/C]       | NA                                         |
| Ca_DesigChr_scaffold06595_4912 | Ca_desig_scaffold  | 4912                           | [T/C]       | NA                                         |
| Ca_DesigChr_scaffold06595_4913 | Ca_desig_scaffold  | 4913                           | [A/G]       | NA                                         |
| Ca_DesigChr_scaffold06595_4914 | Ca_desig_scaffold  | 4914                           | [A/G]       | NA                                         |
| Ca_DesigChr_scaffold06595_4915 | Ca_desig_scaffold  | 4915                           | [C/T]       | NA                                         |
| Ca_DesigChr_scaffold06595_4916 | Ca_desig_scaffold  | 4916                           | [G/A]       | NA                                         |
| Ca_DesigChr_scaffold06595_4924 | Ca_desig_scaffold  | 4924                           | [A/G]       | NA                                         |
| Ca_DesigChr_scaffold06595_4925 | Ca_desig_scaffold  | 4925                           | [A/G]       | NA                                         |
| Ca_DesigChr_scaffold06595_4926 | Ca_desig_scaffold  | 4926                           | [A/G]       | NA                                         |
| Ca_DesigChr_scaffold06595_4927 | Ca_desig_scaffold  | 4927                           | [T/C]       | NA                                         |
| Ca_DesigChr_scaffold06595_4928 | Ca_desig_scaffold  | 4928                           | [T/C]       | NA                                         |
| Ca_DesigChr_scaffold06595_4929 | Ca_desig_scaffold  | 4929                           | [G/A]       | NA                                         |
| Ca_DesigChr_scaffold06595_4930 | Ca_desig_scaffold  | 4930                           | [A/G]       | NA                                         |
| Ca_DesigChr_scaffold06595_4931 | Ca_desig_scaffold  | 4931                           | [G/A]       | NA                                         |
| Ca_DesigChr_scaffold06595_4932 | Ca_desig_scaffold  | 4932                           | [C/T]       | NA                                         |
| Ca_DesigChr_scaffold06595_4933 | Ca_desig_scaffold  | 4933                           | [A/G]       | NA                                         |
| Ca_DesigChr_scaffold06595_4934 | Ca_desig_scaffold  | 4934                           | [A/G]       | NA                                         |
| Ca_DesigChr_scaffold06595_4935 | Ca_desig_scaffold  | 4935                           | [G/A]       | NA                                         |
| Ca_DesigChr_scaffold06595_4936 | Ca_desig_scaffold  | 4936                           | [C/T]       | NA                                         |
| Ca_DesigChr_scaffold06595_4937 | Ca_desig_scaffold  | 4937                           | [T/C]       | NA                                         |
| Ca_DesigChr_scaffold06595_4938 | Ca_desig_scaffold  | 4938                           | [A/G]       | NA                                         |
| Ca_DesigChr_scaffold06595_4939 | Ca_desig_scaffold  | 4939                           | [T/C]       | NA                                         |
| Ca_DesigChr_scaffold06595_4940 | Ca_desig_scaffold  | 4940                           | [T/C]       | NA                                         |
| Ca_DesigChr_scaffold06595_4941 | Ca_desig_scaffold  | 4941                           | [A/G]       | NA                                         |

| <b>SNP IDs</b>                 | <b>Chromosomes</b> | <b>Physical positions (bp)</b> | <b>SNPs</b> | <b>NCBI SNPdb accession IDs (NCBI_ss#)</b> |
|--------------------------------|--------------------|--------------------------------|-------------|--------------------------------------------|
| Ca_Desi_Chr_scaffold06595_4942 | Ca_desi_scaffold   | 4942                           | [T/C]       | NA                                         |
| Ca_Desi_Chr_scaffold06595_4943 | Ca_desi_scaffold   | 4943                           | [T/C]       | NA                                         |
| Ca_Desi_Chr_scaffold06595_4944 | Ca_desi_scaffold   | 4944                           | [A/G]       | NA                                         |
| Ca_Desi_Chr_scaffold06595_4945 | Ca_desi_scaffold   | 4945                           | [A/G]       | NA                                         |
| Ca_Desi_Chr_scaffold06595_4946 | Ca_desi_scaffold   | 4946                           | [T/C]       | NA                                         |
| Ca_Desi_Chr_scaffold06595_4948 | Ca_desi_scaffold   | 4948                           | [T/C]       | NA                                         |
| Ca_Desi_Chr_scaffold06595_4949 | Ca_desi_scaffold   | 4949                           | [A/G]       | NA                                         |
| Ca_Desi_Chr_scaffold06595_4951 | Ca_desi_scaffold   | 4951                           | [A/G]       | NA                                         |
| Ca_Desi_Chr_scaffold06595_4952 | Ca_desi_scaffold   | 4952                           | [G/A]       | NA                                         |
| Ca_Desi_Chr_scaffold06595_4953 | Ca_desi_scaffold   | 4953                           | [A/G]       | NA                                         |
| Ca_Desi_Chr_scaffold06595_4954 | Ca_desi_scaffold   | 4954                           | [A/G]       | NA                                         |
| Ca_Desi_Chr_scaffold06595_4955 | Ca_desi_scaffold   | 4955                           | [C/T]       | NA                                         |
| Ca_Desi_Chr_scaffold06595_4956 | Ca_desi_scaffold   | 4956                           | [G/A]       | NA                                         |
| Ca_Desi_Chr_scaffold06595_4957 | Ca_desi_scaffold   | 4957                           | [C/T]       | NA                                         |
| Ca_Desi_Chr_scaffold06595_4958 | Ca_desi_scaffold   | 4958                           | [A/G]       | NA                                         |
| Ca_Desi_Chr_scaffold06595_4959 | Ca_desi_scaffold   | 4959                           | [A/G]       | NA                                         |
| Ca_Desi_Chr_scaffold06595_4960 | Ca_desi_scaffold   | 4960                           | [A/G]       | NA                                         |
| Ca_Desi_Chr_scaffold06595_4962 | Ca_desi_scaffold   | 4962                           | [C/T]       | NA                                         |
| Ca_Desi_Chr_scaffold06595_4963 | Ca_desi_scaffold   | 4963                           | [T/C]       | NA                                         |
| Ca_Desi_Chr_scaffold06595_4964 | Ca_desi_scaffold   | 4964                           | [C/T]       | NA                                         |
| Ca_Desi_Chr_scaffold06595_4965 | Ca_desi_scaffold   | 4965                           | [C/T]       | NA                                         |
| Ca_Desi_Chr_scaffold06595_4966 | Ca_desi_scaffold   | 4966                           | [A/G]       | NA                                         |
| Ca_Desi_Chr_scaffold06595_4967 | Ca_desi_scaffold   | 4967                           | [G/A]       | NA                                         |
| Ca_Desi_Chr_scaffold06595_4968 | Ca_desi_scaffold   | 4968                           | [C/T]       | NA                                         |
| Ca_Desi_Chr_scaffold06595_4969 | Ca_desi_scaffold   | 4969                           | [A/G]       | NA                                         |
| Ca_Desi_Chr_scaffold06595_4970 | Ca_desi_scaffold   | 4970                           | [G/A]       | NA                                         |
| Ca_Desi_Chr_scaffold06595_4971 | Ca_desi_scaffold   | 4971                           | [G/A]       | NA                                         |
| Ca_Desi_Chr_scaffold06595_4972 | Ca_desi_scaffold   | 4972                           | [A/G]       | NA                                         |
| Ca_Desi_Chr_scaffold06595_4973 | Ca_desi_scaffold   | 4973                           | [G/A]       | NA                                         |
| Ca_Desi_Chr_scaffold06595_4974 | Ca_desi_scaffold   | 4974                           | [C/T]       | NA                                         |
| Ca_Desi_Chr_scaffold06595_4975 | Ca_desi_scaffold   | 4975                           | [A/G]       | NA                                         |
| Ca_Desi_Chr_scaffold06595_4976 | Ca_desi_scaffold   | 4976                           | [A/G]       | NA                                         |
| Ca_Desi_Chr_scaffold06595_4977 | Ca_desi_scaffold   | 4977                           | [A/G]       | NA                                         |
| Ca_Desi_Chr_scaffold06595_4978 | Ca_desi_scaffold   | 4978                           | [C/T]       | NA                                         |



| <b>SNP IDs</b>                | <b>Chromosomes</b> | <b>Physical positions (bp)</b> | <b>SNPs</b> | <b>NCBI SNPdb accession IDs (NCBI_ss#)</b> |
|-------------------------------|--------------------|--------------------------------|-------------|--------------------------------------------|
| Ca_Desi_Ch_scaffold06595_4979 | Ca_desi_scaffold   | 4979                           | [C/T]       | NA                                         |
| Ca_Desi_Ch_scaffold06595_4980 | Ca_desi_scaffold   | 4980                           | [C/T]       | NA                                         |
| Ca_Desi_Ch_scaffold06595_4981 | Ca_desi_scaffold   | 4981                           | [T/C]       | NA                                         |
| Ca_Desi_Ch_scaffold06595_4982 | Ca_desi_scaffold   | 4982                           | [G/A]       | NA                                         |
| Ca_Desi_Ch_scaffold06595_4985 | Ca_desi_scaffold   | 4985                           | [T/A]       | NA                                         |
| Ca_Desi_Ch_scaffold06604_479  | Ca_desi_scaffold   | 479                            | [T/C]       | NA                                         |
| Ca_Desi_Ch_scaffold06604_496  | Ca_desi_scaffold   | 496                            | [G/A]       | NA                                         |
| Ca_Desi_Ch_scaffold06604_501  | Ca_desi_scaffold   | 501                            | [T/C]       | NA                                         |
| Ca_Desi_Ch_scaffold06610_303  | Ca_desi_scaffold   | 303                            | [T/C]       | NA                                         |
| Ca_Desi_Ch_scaffold06610_305  | Ca_desi_scaffold   | 305                            | [T/C]       | NA                                         |
| Ca_Desi_Ch_scaffold06610_310  | Ca_desi_scaffold   | 310                            | [A/G]       | NA                                         |
| Ca_Desi_Ch_scaffold06610_318  | Ca_desi_scaffold   | 318                            | [T/C]       | NA                                         |
| Ca_Desi_Ch_scaffold06610_321  | Ca_desi_scaffold   | 321                            | [A/G]       | NA                                         |
| Ca_Desi_Ch_scaffold06610_323  | Ca_desi_scaffold   | 323                            | [A/G]       | NA                                         |
| Ca_Desi_Ch_scaffold06610_329  | Ca_desi_scaffold   | 329                            | [A/G]       | NA                                         |
| Ca_Desi_Ch_scaffold06610_336  | Ca_desi_scaffold   | 336                            | [T/G]       | NA                                         |
| Ca_Desi_Ch_scaffold06642_7030 | Ca_desi_scaffold   | 7030                           | [T/G]       | NA                                         |
| Ca_Desi_Ch_scaffold06664_2741 | Ca_desi_scaffold   | 2741                           | [A/T]       | NA                                         |
| Ca_Desi_Ch_scaffold06685_7870 | Ca_desi_scaffold   | 7870                           | [C/T]       | NA                                         |
| Ca_Desi_Ch_scaffold06698_4032 | Ca_desi_scaffold   | 4032                           | [G/T]       | NA                                         |
| Ca_Desi_Ch_scaffold06790_7969 | Ca_desi_scaffold   | 7969                           | [T/C]       | NA                                         |
| Ca_Desi_Ch_scaffold06822_1484 | Ca_desi_scaffold   | 1484                           | [A/C]       | NA                                         |
| Ca_Desi_Ch_scaffold06834_7906 | Ca_desi_scaffold   | 7906                           | [T/A]       | NA                                         |
| Ca_Desi_Ch_scaffold06834_7982 | Ca_desi_scaffold   | 7982                           | [T/C]       | NA                                         |
| Ca_Desi_Ch_scaffold06834_7985 | Ca_desi_scaffold   | 7985                           | [C/G]       | NA                                         |
| Ca_Desi_Ch_scaffold06834_7987 | Ca_desi_scaffold   | 7987                           | [C/A]       | NA                                         |
| Ca_Desi_Ch_scaffold06873_7834 | Ca_desi_scaffold   | 7834                           | [T/G]       | NA                                         |
| Ca_Desi_Ch_scaffold06895_4683 | Ca_desi_scaffold   | 4683                           | [A/T]       | NA                                         |
| Ca_Desi_Ch_scaffold06898_1650 | Ca_desi_scaffold   | 1650                           | [T/G]       | NA                                         |
| Ca_Desi_Ch_scaffold06911_3686 | Ca_desi_scaffold   | 3686                           | [A/C]       | NA                                         |
| Ca_Desi_Ch_scaffold06911_3711 | Ca_desi_scaffold   | 3711                           | [T/C]       | NA                                         |
| Ca_Desi_Ch_scaffold06911_3719 | Ca_desi_scaffold   | 3719                           | [A/G]       | NA                                         |
| Ca_Desi_Ch_scaffold06950_3294 | Ca_desi_scaffold   | 3294                           | [C/A]       | NA                                         |
| Ca_Desi_Ch_scaffold06951_4617 | Ca_desi_scaffold   | 4617                           | [T/G]       | NA                                         |

| <b>SNP IDs</b>                | <b>Chromosomes</b> | <b>Physical positions (bp)</b> | <b>SNPs</b> | <b>NCBI SNPdb accession IDs (NCBI_ss#)</b> |
|-------------------------------|--------------------|--------------------------------|-------------|--------------------------------------------|
| Ca_Desi_Ch_scaffold06951_4629 | Ca_desi_scaffold   | 4629                           | [T/C]       | NA                                         |
| Ca_Desi_Ch_scaffold06951_4641 | Ca_desi_scaffold   | 4641                           | [T/C]       | NA                                         |
| Ca_Desi_Ch_scaffold06951_4682 | Ca_desi_scaffold   | 4682                           | [A/G]       | NA                                         |
| Ca_Desi_Ch_scaffold06955_2006 | Ca_desi_scaffold   | 2006                           | [G/A]       | NA                                         |
| Ca_Desi_Ch_scaffold06962_2372 | Ca_desi_scaffold   | 2372                           | [A/G]       | NA                                         |
| Ca_Desi_Ch_scaffold06962_2393 | Ca_desi_scaffold   | 2393                           | [C/T]       | NA                                         |
| Ca_Desi_Ch_scaffold06962_2400 | Ca_desi_scaffold   | 2400                           | [A/T]       | NA                                         |
| Ca_Desi_Ch_scaffold06978_5206 | Ca_desi_scaffold   | 5206                           | [G/A]       | NA                                         |
| Ca_Desi_Ch_scaffold06978_5207 | Ca_desi_scaffold   | 5207                           | [A/T]       | NA                                         |
| Ca_Desi_Ch_scaffold06978_5208 | Ca_desi_scaffold   | 5208                           | [T/C]       | NA                                         |
| Ca_Desi_Ch_scaffold06978_5209 | Ca_desi_scaffold   | 5209                           | [G/T]       | NA                                         |
| Ca_Desi_Ch_scaffold06978_6758 | Ca_desi_scaffold   | 6758                           | [T/G]       | NA                                         |
| Ca_Desi_Ch_scaffold07031_1985 | Ca_desi_scaffold   | 1985                           | [T/G]       | NA                                         |
| Ca_Desi_Ch_scaffold07031_2081 | Ca_desi_scaffold   | 2081                           | [T/C]       | NA                                         |
| Ca_Desi_Ch_scaffold07031_2083 | Ca_desi_scaffold   | 2083                           | [T/G]       | NA                                         |
| Ca_Desi_Ch_scaffold07031_2759 | Ca_desi_scaffold   | 2759                           | [T/C]       | NA                                         |
| Ca_Desi_Ch_scaffold07031_2985 | Ca_desi_scaffold   | 2985                           | [G/T]       | NA                                         |
| Ca_Desi_Ch_scaffold07031_7594 | Ca_desi_scaffold   | 7594                           | [T/C]       | NA                                         |
| Ca_Desi_Ch_scaffold07031_7596 | Ca_desi_scaffold   | 7596                           | [A/C]       | NA                                         |
| Ca_Desi_Ch_scaffold07031_7605 | Ca_desi_scaffold   | 7605                           | [T/G]       | NA                                         |
| Ca_Desi_Ch_scaffold07031_7614 | Ca_desi_scaffold   | 7614                           | [A/G]       | NA                                         |
| Ca_Desi_Ch_scaffold07031_7637 | Ca_desi_scaffold   | 7637                           | [T/C]       | NA                                         |
| Ca_Desi_Ch_scaffold07031_7684 | Ca_desi_scaffold   | 7684                           | [A/G]       | NA                                         |
| Ca_Desi_Ch_scaffold07036_1533 | Ca_desi_scaffold   | 1533                           | [T/C]       | NA                                         |
| Ca_Desi_Ch_scaffold07049_1502 | Ca_desi_scaffold   | 1502                           | [G/T]       | NA                                         |
| Ca_Desi_Ch_scaffold07085_5392 | Ca_desi_scaffold   | 5392                           | [T/G]       | NA                                         |
| Ca_Desi_Ch_scaffold07140_2661 | Ca_desi_scaffold   | 2661                           | [T/A]       | NA                                         |
| Ca_Desi_Ch_scaffold07154_6925 | Ca_desi_scaffold   | 6925                           | [A/C]       | NA                                         |
| Ca_Desi_Ch_scaffold07154_6934 | Ca_desi_scaffold   | 6934                           | [C/T]       | NA                                         |
| Ca_Desi_Ch_scaffold07154_6943 | Ca_desi_scaffold   | 6943                           | [C/A]       | NA                                         |
| Ca_Desi_Ch_scaffold07200_7204 | Ca_desi_scaffold   | 7204                           | [C/T]       | NA                                         |
| Ca_Desi_Ch_scaffold07209_2089 | Ca_desi_scaffold   | 2089                           | [A/C]       | NA                                         |
| Ca_Desi_Ch_scaffold07209_2149 | Ca_desi_scaffold   | 2149                           | [A/G]       | NA                                         |
| Ca_Desi_Ch_scaffold07209_2151 | Ca_desi_scaffold   | 2151                           | [A/C]       | NA                                         |

| <b>SNP IDs</b>                  | <b>Chromosomes</b> | <b>Physical positions (bp)</b> | <b>SNPs</b> | <b>NCBI SNPdb accession IDs (NCBI_ss#)</b> |
|---------------------------------|--------------------|--------------------------------|-------------|--------------------------------------------|
| Ca_Desig_Chr_scaffold07220_1734 | Ca_desig_scaffold  | 1734                           | [T/C]       | NA                                         |
| Ca_Desig_Chr_scaffold07220_1810 | Ca_desig_scaffold  | 1810                           | [T/C]       | NA                                         |
| Ca_Desig_Chr_scaffold07289_928  | Ca_desig_scaffold  | 928                            | [T/C]       | NA                                         |
| Ca_Desig_Chr_scaffold07289_1085 | Ca_desig_scaffold  | 1085                           | [G/C]       | NA                                         |
| Ca_Desig_Chr_scaffold07289_3950 | Ca_desig_scaffold  | 3950                           | [C/T]       | NA                                         |
| Ca_Desig_Chr_scaffold07289_3952 | Ca_desig_scaffold  | 3952                           | [T/A]       | NA                                         |
| Ca_Desig_Chr_scaffold07289_3968 | Ca_desig_scaffold  | 3968                           | [G/C]       | NA                                         |
| Ca_Desig_Chr_scaffold07289_4068 | Ca_desig_scaffold  | 4068                           | [G/T]       | NA                                         |
| Ca_Desig_Chr_scaffold07289_4097 | Ca_desig_scaffold  | 4097                           | [T/C]       | NA                                         |
| Ca_Desig_Chr_scaffold07289_4117 | Ca_desig_scaffold  | 4117                           | [T/A]       | NA                                         |
| Ca_Desig_Chr_scaffold07289_4208 | Ca_desig_scaffold  | 4208                           | [A/C]       | NA                                         |
| Ca_Desig_Chr_scaffold07289_4213 | Ca_desig_scaffold  | 4213                           | [T/C]       | NA                                         |
| Ca_Desig_Chr_scaffold07289_4396 | Ca_desig_scaffold  | 4396                           | [C/T]       | NA                                         |
| Ca_Desig_Chr_scaffold07289_4411 | Ca_desig_scaffold  | 4411                           | [T/C]       | NA                                         |
| Ca_Desig_Chr_scaffold07293_5381 | Ca_desig_scaffold  | 5381                           | [A/G]       | NA                                         |
| Ca_Desig_Chr_scaffold07304_5659 | Ca_desig_scaffold  | 5659                           | [T/C]       | NA                                         |
| Ca_Desig_Chr_scaffold07363_2683 | Ca_desig_scaffold  | 2683                           | [A/T]       | NA                                         |
| Ca_Desig_Chr_scaffold07363_2684 | Ca_desig_scaffold  | 2684                           | [T/G]       | NA                                         |
| Ca_Desig_Chr_scaffold07363_2685 | Ca_desig_scaffold  | 2685                           | [C/G]       | NA                                         |
| Ca_Desig_Chr_scaffold07363_2686 | Ca_desig_scaffold  | 2686                           | [T/G]       | NA                                         |
| Ca_Desig_Chr_scaffold07369_2281 | Ca_desig_scaffold  | 2281                           | [C/A]       | NA                                         |
| Ca_Desig_Chr_scaffold07369_4522 | Ca_desig_scaffold  | 4522                           | [T/C]       | NA                                         |
| Ca_Desig_Chr_scaffold07369_4524 | Ca_desig_scaffold  | 4524                           | [T/C]       | NA                                         |
| Ca_Desig_Chr_scaffold07369_4540 | Ca_desig_scaffold  | 4540                           | [A/G]       | NA                                         |
| Ca_Desig_Chr_scaffold07369_4560 | Ca_desig_scaffold  | 4560                           | [T/G]       | NA                                         |
| Ca_Desig_Chr_scaffold07369_4570 | Ca_desig_scaffold  | 4570                           | [A/G]       | NA                                         |
| Ca_Desig_Chr_scaffold07374_6419 | Ca_desig_scaffold  | 6419                           | [A/T]       | NA                                         |
| Ca_Desig_Chr_scaffold07374_6442 | Ca_desig_scaffold  | 6442                           | [T/C]       | NA                                         |
| Ca_Desig_Chr_scaffold07374_6445 | Ca_desig_scaffold  | 6445                           | [A/G]       | NA                                         |
| Ca_Desig_Chr_scaffold07374_6454 | Ca_desig_scaffold  | 6454                           | [T/C]       | NA                                         |
| Ca_Desig_Chr_scaffold07374_6468 | Ca_desig_scaffold  | 6468                           | [T/A]       | NA                                         |
| Ca_Desig_Chr_scaffold07407_3817 | Ca_desig_scaffold  | 3817                           | [A/T]       | NA                                         |
| Ca_Desig_Chr_scaffold07420_2666 | Ca_desig_scaffold  | 2666                           | [C/T]       | NA                                         |
| Ca_Desig_Chr_scaffold07423_3371 | Ca_desig_scaffold  | 3371                           | [A/C]       | NA                                         |

| <b>SNP IDs</b>                        | <b>Chromosomes</b> | <b>Physical positions (bp)</b> | <b>SNPs</b> | <b>NCBI SNPdb accession IDs (NCBI_ss#)</b> |
|---------------------------------------|--------------------|--------------------------------|-------------|--------------------------------------------|
| Ca_Desi_Chromosome_scaffold07427_6901 | Ca_desi_scaffold   | 6901                           | [T/A]       | NA                                         |
| Ca_Desi_Chromosome_scaffold07487_3379 | Ca_desi_scaffold   | 3379                           | [G/A]       | NA                                         |
| Ca_Desi_Chromosome_scaffold07487_3385 | Ca_desi_scaffold   | 3385                           | [G/C]       | NA                                         |
| Ca_Desi_Chromosome_scaffold07487_3410 | Ca_desi_scaffold   | 3410                           | [A/C]       | NA                                         |
| Ca_Desi_Chromosome_scaffold07506_697  | Ca_desi_scaffold   | 697                            | [C/G]       | NA                                         |
| Ca_Desi_Chromosome_scaffold07506_715  | Ca_desi_scaffold   | 715                            | [G/A]       | NA                                         |
| Ca_Desi_Chromosome_scaffold07506_720  | Ca_desi_scaffold   | 720                            | [A/G]       | NA                                         |
| Ca_Desi_Chromosome_scaffold07506_755  | Ca_desi_scaffold   | 755                            | [T/A]       | NA                                         |
| Ca_Desi_Chromosome_scaffold07506_759  | Ca_desi_scaffold   | 759                            | [A/G]       | NA                                         |
| Ca_Desi_Chromosome_scaffold07511_3460 | Ca_desi_scaffold   | 3460                           | [G/T]       | NA                                         |
| Ca_Desi_Chromosome_scaffold07535_5758 | Ca_desi_scaffold   | 5758                           | [A/C]       | NA                                         |
| Ca_Desi_Chromosome_scaffold07535_5759 | Ca_desi_scaffold   | 5759                           | [G/T]       | NA                                         |
| Ca_Desi_Chromosome_scaffold07577_4158 | Ca_desi_scaffold   | 4158                           | [C/T]       | NA                                         |
| Ca_Desi_Chromosome_scaffold07577_4191 | Ca_desi_scaffold   | 4191                           | [T/G]       | NA                                         |
| Ca_Desi_Chromosome_scaffold07577_4210 | Ca_desi_scaffold   | 4210                           | [G/T]       | NA                                         |
| Ca_Desi_Chromosome_scaffold07577_4228 | Ca_desi_scaffold   | 4228                           | [A/G]       | NA                                         |
| Ca_Desi_Chromosome_scaffold07577_4235 | Ca_desi_scaffold   | 4235                           | [T/G]       | NA                                         |
| Ca_Desi_Chromosome_scaffold07577_4240 | Ca_desi_scaffold   | 4240                           | [T/A]       | NA                                         |
| Ca_Desi_Chromosome_scaffold07581_5635 | Ca_desi_scaffold   | 5635                           | [A/G]       | NA                                         |
| Ca_Desi_Chromosome_scaffold07582_4667 | Ca_desi_scaffold   | 4667                           | [A/C]       | NA                                         |
| Ca_Desi_Chromosome_scaffold07582_5367 | Ca_desi_scaffold   | 5367                           | [A/G]       | NA                                         |
| Ca_Desi_Chromosome_scaffold07582_5504 | Ca_desi_scaffold   | 5504                           | [A/C]       | NA                                         |
| Ca_Desi_Chromosome_scaffold07582_5535 | Ca_desi_scaffold   | 5535                           | [G/A]       | NA                                         |
| Ca_Desi_Chromosome_scaffold07582_5538 | Ca_desi_scaffold   | 5538                           | [G/A]       | NA                                         |
| Ca_Desi_Chromosome_scaffold07582_5540 | Ca_desi_scaffold   | 5540                           | [G/A]       | NA                                         |
| Ca_Desi_Chromosome_scaffold07588_6565 | Ca_desi_scaffold   | 6565                           | [A/G]       | NA                                         |
| Ca_Desi_Chromosome_scaffold07588_6574 | Ca_desi_scaffold   | 6574                           | [T/G]       | NA                                         |
| Ca_Desi_Chromosome_scaffold07588_6593 | Ca_desi_scaffold   | 6593                           | [T/C]       | NA                                         |
| Ca_Desi_Chromosome_scaffold07588_6606 | Ca_desi_scaffold   | 6606                           | [G/A]       | NA                                         |
| Ca_Desi_Chromosome_scaffold07588_6611 | Ca_desi_scaffold   | 6611                           | [G/A]       | NA                                         |
| Ca_Desi_Chromosome_scaffold07708_3346 | Ca_desi_scaffold   | 3346                           | [T/G]       | NA                                         |
| Ca_Desi_Chromosome_scaffold07708_3361 | Ca_desi_scaffold   | 3361                           | [A/G]       | NA                                         |
| Ca_Desi_Chromosome_scaffold07732_198  | Ca_desi_scaffold   | 198                            | [G/T]       | NA                                         |
| Ca_Desi_Chromosome_scaffold07757_6442 | Ca_desi_scaffold   | 6442                           | [T/G]       | NA                                         |

| <b>SNP IDs</b>                | <b>Chromosomes</b> | <b>Physical positions (bp)</b> | <b>SNPs</b> | <b>NCBI SNPdb accession IDs (NCBI_ss#)</b> |
|-------------------------------|--------------------|--------------------------------|-------------|--------------------------------------------|
| Ca_Desi_Ch_scaffold07757_6450 | Ca_desi_scaffold   | 6450                           | [T/G]       | NA                                         |
| Ca_Desi_Ch_scaffold07800_40   | Ca_desi_scaffold   | 40                             | [A/G]       | NA                                         |
| Ca_Desi_Ch_scaffold07800_42   | Ca_desi_scaffold   | 42                             | [A/G]       | NA                                         |
| Ca_Desi_Ch_scaffold07800_60   | Ca_desi_scaffold   | 60                             | [T/C]       | NA                                         |
| Ca_Desi_Ch_scaffold07800_229  | Ca_desi_scaffold   | 229                            | [A/C]       | NA                                         |
| Ca_Desi_Ch_scaffold07800_236  | Ca_desi_scaffold   | 236                            | [A/G]       | NA                                         |
| Ca_Desi_Ch_scaffold07800_1666 | Ca_desi_scaffold   | 1666                           | [T/C]       | NA                                         |
| Ca_Desi_Ch_scaffold07800_1667 | Ca_desi_scaffold   | 1667                           | [A/G]       | NA                                         |
| Ca_Desi_Ch_scaffold07800_1668 | Ca_desi_scaffold   | 1668                           | [T/C]       | NA                                         |
| Ca_Desi_Ch_scaffold07800_1669 | Ca_desi_scaffold   | 1669                           | [A/G]       | NA                                         |
| Ca_Desi_Ch_scaffold07800_1670 | Ca_desi_scaffold   | 1670                           | [C/T]       | NA                                         |
| Ca_Desi_Ch_scaffold07800_1671 | Ca_desi_scaffold   | 1671                           | [C/T]       | NA                                         |
| Ca_Desi_Ch_scaffold07800_1672 | Ca_desi_scaffold   | 1672                           | [G/A]       | NA                                         |
| Ca_Desi_Ch_scaffold07800_1673 | Ca_desi_scaffold   | 1673                           | [A/G]       | NA                                         |
| Ca_Desi_Ch_scaffold07800_1674 | Ca_desi_scaffold   | 1674                           | [A/G]       | NA                                         |
| Ca_Desi_Ch_scaffold07800_1677 | Ca_desi_scaffold   | 1677                           | [C/T]       | NA                                         |
| Ca_Desi_Ch_scaffold07800_1679 | Ca_desi_scaffold   | 1679                           | [C/T]       | NA                                         |
| Ca_Desi_Ch_scaffold07800_1681 | Ca_desi_scaffold   | 1681                           | [G/A]       | NA                                         |
| Ca_Desi_Ch_scaffold07800_1683 | Ca_desi_scaffold   | 1683                           | [A/G]       | NA                                         |
| Ca_Desi_Ch_scaffold07800_1686 | Ca_desi_scaffold   | 1686                           | [C/T]       | NA                                         |
| Ca_Desi_Ch_scaffold07800_1687 | Ca_desi_scaffold   | 1687                           | [C/T]       | NA                                         |
| Ca_Desi_Ch_scaffold07800_1688 | Ca_desi_scaffold   | 1688                           | [A/G]       | NA                                         |
| Ca_Desi_Ch_scaffold07800_1689 | Ca_desi_scaffold   | 1689                           | [T/C]       | NA                                         |
| Ca_Desi_Ch_scaffold07800_1690 | Ca_desi_scaffold   | 1690                           | [C/T]       | NA                                         |
| Ca_Desi_Ch_scaffold07800_1691 | Ca_desi_scaffold   | 1691                           | [G/A]       | NA                                         |
| Ca_Desi_Ch_scaffold07800_1695 | Ca_desi_scaffold   | 1695                           | [A/G]       | NA                                         |
| Ca_Desi_Ch_scaffold07800_1696 | Ca_desi_scaffold   | 1696                           | [C/T]       | NA                                         |
| Ca_Desi_Ch_scaffold07800_1697 | Ca_desi_scaffold   | 1697                           | [C/T]       | NA                                         |
| Ca_Desi_Ch_scaffold07800_1698 | Ca_desi_scaffold   | 1698                           | [G/A]       | NA                                         |
| Ca_Desi_Ch_scaffold07800_1699 | Ca_desi_scaffold   | 1699                           | [A/G]       | NA                                         |
| Ca_Desi_Ch_scaffold07800_1705 | Ca_desi_scaffold   | 1705                           | [A/G]       | NA                                         |
| Ca_Desi_Ch_scaffold07800_1706 | Ca_desi_scaffold   | 1706                           | [A/G]       | NA                                         |
| Ca_Desi_Ch_scaffold07800_1707 | Ca_desi_scaffold   | 1707                           | [G/A]       | NA                                         |
| Ca_Desi_Ch_scaffold07800_1708 | Ca_desi_scaffold   | 1708                           | [G/A]       | NA                                         |

| <b>SNP IDs</b>                | <b>Chromosomes</b> | <b>Physical positions (bp)</b> | <b>SNPs</b> | <b>NCBI SNPdb accession IDs (NCBI_ss#)</b> |
|-------------------------------|--------------------|--------------------------------|-------------|--------------------------------------------|
| Ca_Desi_Ch_scaffold07800_1710 | Ca_desi_scaffold   | 1710                           | [C/A]       | NA                                         |
| Ca_Desi_Ch_scaffold07800_1711 | Ca_desi_scaffold   | 1711                           | [A/G]       | NA                                         |
| Ca_Desi_Ch_scaffold07800_1712 | Ca_desi_scaffold   | 1712                           | [T/C]       | NA                                         |
| Ca_Desi_Ch_scaffold07800_1713 | Ca_desi_scaffold   | 1713                           | [G/A]       | NA                                         |
| Ca_Desi_Ch_scaffold07800_1714 | Ca_desi_scaffold   | 1714                           | [A/G]       | NA                                         |
| Ca_Desi_Ch_scaffold07800_1715 | Ca_desi_scaffold   | 1715                           | [T/C]       | NA                                         |
| Ca_Desi_Ch_scaffold07800_1716 | Ca_desi_scaffold   | 1716                           | [C/T]       | NA                                         |
| Ca_Desi_Ch_scaffold07800_1717 | Ca_desi_scaffold   | 1717                           | [C/T]       | NA                                         |
| Ca_Desi_Ch_scaffold07800_1720 | Ca_desi_scaffold   | 1720                           | [A/G]       | NA                                         |
| Ca_Desi_Ch_scaffold07800_1721 | Ca_desi_scaffold   | 1721                           | [G/A]       | NA                                         |
| Ca_Desi_Ch_scaffold07800_1722 | Ca_desi_scaffold   | 1722                           | [G/A]       | NA                                         |
| Ca_Desi_Ch_scaffold07800_1723 | Ca_desi_scaffold   | 1723                           | [G/A]       | NA                                         |
| Ca_Desi_Ch_scaffold07800_1724 | Ca_desi_scaffold   | 1724                           | [G/A]       | NA                                         |
| Ca_Desi_Ch_scaffold07800_1860 | Ca_desi_scaffold   | 1860                           | [T/C]       | NA                                         |
| Ca_Desi_Ch_scaffold07800_1861 | Ca_desi_scaffold   | 1861                           | [C/T]       | NA                                         |
| Ca_Desi_Ch_scaffold07800_1862 | Ca_desi_scaffold   | 1862                           | [C/T]       | NA                                         |
| Ca_Desi_Ch_scaffold07800_1865 | Ca_desi_scaffold   | 1865                           | [T/C]       | NA                                         |
| Ca_Desi_Ch_scaffold07800_1866 | Ca_desi_scaffold   | 1866                           | [C/T]       | NA                                         |
| Ca_Desi_Ch_scaffold07800_1867 | Ca_desi_scaffold   | 1867                           | [C/T]       | NA                                         |
| Ca_Desi_Ch_scaffold07800_1868 | Ca_desi_scaffold   | 1868                           | [G/C]       | NA                                         |
| Ca_Desi_Ch_scaffold07800_1870 | Ca_desi_scaffold   | 1870                           | [C/T]       | NA                                         |
| Ca_Desi_Ch_scaffold07800_1871 | Ca_desi_scaffold   | 1871                           | [G/A]       | NA                                         |
| Ca_Desi_Ch_scaffold07800_1872 | Ca_desi_scaffold   | 1872                           | [C/T]       | NA                                         |
| Ca_Desi_Ch_scaffold07800_1873 | Ca_desi_scaffold   | 1873                           | [G/A]       | NA                                         |
| Ca_Desi_Ch_scaffold07800_1877 | Ca_desi_scaffold   | 1877                           | [T/C]       | NA                                         |
| Ca_Desi_Ch_scaffold07800_1879 | Ca_desi_scaffold   | 1879                           | [A/G]       | NA                                         |
| Ca_Desi_Ch_scaffold07800_1880 | Ca_desi_scaffold   | 1880                           | [T/C]       | NA                                         |
| Ca_Desi_Ch_scaffold07800_1881 | Ca_desi_scaffold   | 1881                           | [G/A]       | NA                                         |
| Ca_Desi_Ch_scaffold07800_1882 | Ca_desi_scaffold   | 1882                           | [A/G]       | NA                                         |
| Ca_Desi_Ch_scaffold07800_1883 | Ca_desi_scaffold   | 1883                           | [A/G]       | NA                                         |
| Ca_Desi_Ch_scaffold07800_1885 | Ca_desi_scaffold   | 1885                           | [T/C]       | NA                                         |
| Ca_Desi_Ch_scaffold07800_1886 | Ca_desi_scaffold   | 1886                           | [G/T]       | NA                                         |
| Ca_Desi_Ch_scaffold07800_1887 | Ca_desi_scaffold   | 1887                           | [A/G]       | NA                                         |
| Ca_Desi_Ch_scaffold07800_1888 | Ca_desi_scaffold   | 1888                           | [A/T]       | NA                                         |

| <b>SNP IDs</b>                  | <b>Chromosomes</b> | <b>Physical positions (bp)</b> | <b>SNPs</b> | <b>NCBI SNPdb accession IDs (NCBI_ss#)</b> |
|---------------------------------|--------------------|--------------------------------|-------------|--------------------------------------------|
| Ca_Desig_Chr_scaffold07800_1889 | Ca_desig_scaffold  | 1889                           | [C/T]       | NA                                         |
| Ca_Desig_Chr_scaffold07800_1890 | Ca_desig_scaffold  | 1890                           | [T/C]       | NA                                         |
| Ca_Desig_Chr_scaffold07800_1891 | Ca_desig_scaffold  | 1891                           | [T/C]       | NA                                         |
| Ca_Desig_Chr_scaffold07800_1893 | Ca_desig_scaffold  | 1893                           | [G/T]       | NA                                         |
| Ca_Desig_Chr_scaffold07800_1894 | Ca_desig_scaffold  | 1894                           | [T/A]       | NA                                         |
| Ca_Desig_Chr_scaffold07800_1895 | Ca_desig_scaffold  | 1895                           | [T/C]       | NA                                         |
| Ca_Desig_Chr_scaffold07800_1897 | Ca_desig_scaffold  | 1897                           | [C/T]       | NA                                         |
| Ca_Desig_Chr_scaffold07800_1899 | Ca_desig_scaffold  | 1899                           | [T/C]       | NA                                         |
| Ca_Desig_Chr_scaffold07800_1900 | Ca_desig_scaffold  | 1900                           | [T/C]       | NA                                         |
| Ca_Desig_Chr_scaffold07800_1901 | Ca_desig_scaffold  | 1901                           | [C/T]       | NA                                         |
| Ca_Desig_Chr_scaffold07800_1904 | Ca_desig_scaffold  | 1904                           | [G/A]       | NA                                         |
| Ca_Desig_Chr_scaffold07800_1905 | Ca_desig_scaffold  | 1905                           | [C/T]       | NA                                         |
| Ca_Desig_Chr_scaffold07800_1906 | Ca_desig_scaffold  | 1906                           | [G/A]       | NA                                         |
| Ca_Desig_Chr_scaffold07800_1907 | Ca_desig_scaffold  | 1907                           | [C/T]       | NA                                         |
| Ca_Desig_Chr_scaffold07800_1908 | Ca_desig_scaffold  | 1908                           | [G/A]       | NA                                         |
| Ca_Desig_Chr_scaffold07800_1909 | Ca_desig_scaffold  | 1909                           | [C/T]       | NA                                         |
| Ca_Desig_Chr_scaffold07800_1911 | Ca_desig_scaffold  | 1911                           | [A/G]       | NA                                         |
| Ca_Desig_Chr_scaffold07800_1912 | Ca_desig_scaffold  | 1912                           | [A/G]       | NA                                         |
| Ca_Desig_Chr_scaffold07800_1916 | Ca_desig_scaffold  | 1916                           | [A/G]       | NA                                         |
| Ca_Desig_Chr_scaffold07800_1917 | Ca_desig_scaffold  | 1917                           | [A/G]       | NA                                         |
| Ca_Desig_Chr_scaffold07800_1918 | Ca_desig_scaffold  | 1918                           | [T/C]       | NA                                         |
| Ca_Desig_Chr_scaffold07800_1919 | Ca_desig_scaffold  | 1919                           | [G/A]       | NA                                         |
| Ca_Desig_Chr_scaffold07800_1922 | Ca_desig_scaffold  | 1922                           | [C/T]       | NA                                         |
| Ca_Desig_Chr_scaffold07800_2083 | Ca_desig_scaffold  | 2083                           | [A/G]       | NA                                         |
| Ca_Desig_Chr_scaffold07800_2092 | Ca_desig_scaffold  | 2092                           | [A/T]       | NA                                         |
| Ca_Desig_Chr_scaffold07800_2093 | Ca_desig_scaffold  | 2093                           | [T/G]       | NA                                         |
| Ca_Desig_Chr_scaffold07800_2095 | Ca_desig_scaffold  | 2095                           | [G/T]       | NA                                         |
| Ca_Desig_Chr_scaffold07800_2101 | Ca_desig_scaffold  | 2101                           | [T/C]       | NA                                         |
| Ca_Desig_Chr_scaffold07800_2105 | Ca_desig_scaffold  | 2105                           | [A/C]       | NA                                         |
| Ca_Desig_Chr_scaffold07800_2107 | Ca_desig_scaffold  | 2107                           | [G/A]       | NA                                         |
| Ca_Desig_Chr_scaffold07800_2108 | Ca_desig_scaffold  | 2108                           | [A/G]       | NA                                         |
| Ca_Desig_Chr_scaffold07800_2112 | Ca_desig_scaffold  | 2112                           | [G/A]       | NA                                         |
| Ca_Desig_Chr_scaffold07800_2113 | Ca_desig_scaffold  | 2113                           | [A/G]       | NA                                         |
| Ca_Desig_Chr_scaffold07800_2114 | Ca_desig_scaffold  | 2114                           | [T/C]       | NA                                         |

| <b>SNP IDs</b>                | <b>Chromosomes</b> | <b>Physical positions (bp)</b> | <b>SNPs</b> | <b>NCBI SNPdb accession IDs (NCBI_ss#)</b> |
|-------------------------------|--------------------|--------------------------------|-------------|--------------------------------------------|
| Ca_Desi_Ch_scaffold07800_2125 | Ca_desi_scaffold   | 2125                           | [T/C]       | NA                                         |
| Ca_Desi_Ch_scaffold07800_2132 | Ca_desi_scaffold   | 2132                           | [A/G]       | NA                                         |
| Ca_Desi_Ch_scaffold07800_2133 | Ca_desi_scaffold   | 2133                           | [T/C]       | NA                                         |
| Ca_Desi_Ch_scaffold07800_2140 | Ca_desi_scaffold   | 2140                           | [C/G]       | NA                                         |
| Ca_Desi_Ch_scaffold07800_2148 | Ca_desi_scaffold   | 2148                           | [A/G]       | NA                                         |
| Ca_Desi_Ch_scaffold07800_2149 | Ca_desi_scaffold   | 2149                           | [T/C]       | NA                                         |
| Ca_Desi_Ch_scaffold07800_2151 | Ca_desi_scaffold   | 2151                           | [T/C]       | NA                                         |
| Ca_Desi_Ch_scaffold07800_2154 | Ca_desi_scaffold   | 2154                           | [G/A]       | NA                                         |
| Ca_Desi_Ch_scaffold07800_2157 | Ca_desi_scaffold   | 2157                           | [A/G]       | NA                                         |
| Ca_Desi_Ch_scaffold07800_2158 | Ca_desi_scaffold   | 2158                           | [T/C]       | NA                                         |
| Ca_Desi_Ch_scaffold07800_2159 | Ca_desi_scaffold   | 2159                           | [T/C]       | NA                                         |
| Ca_Desi_Ch_scaffold07800_2160 | Ca_desi_scaffold   | 2160                           | [T/C]       | NA                                         |
| Ca_Desi_Ch_scaffold07800_2162 | Ca_desi_scaffold   | 2162                           | [A/G]       | NA                                         |
| Ca_Desi_Ch_scaffold07800_2164 | Ca_desi_scaffold   | 2164                           | [T/G]       | NA                                         |
| Ca_Desi_Ch_scaffold07800_2167 | Ca_desi_scaffold   | 2167                           | [G/A]       | NA                                         |
| Ca_Desi_Ch_scaffold07800_2168 | Ca_desi_scaffold   | 2168                           | [A/G]       | NA                                         |
| Ca_Desi_Ch_scaffold07800_2169 | Ca_desi_scaffold   | 2169                           | [T/C]       | NA                                         |
| Ca_Desi_Ch_scaffold07800_2171 | Ca_desi_scaffold   | 2171                           | [A/G]       | NA                                         |
| Ca_Desi_Ch_scaffold07800_2173 | Ca_desi_scaffold   | 2173                           | [A/G]       | NA                                         |
| Ca_Desi_Ch_scaffold07800_2174 | Ca_desi_scaffold   | 2174                           | [T/C]       | NA                                         |
| Ca_Desi_Ch_scaffold07800_2175 | Ca_desi_scaffold   | 2175                           | [C/T]       | NA                                         |
| Ca_Desi_Ch_scaffold07800_2176 | Ca_desi_scaffold   | 2176                           | [T/C]       | NA                                         |
| Ca_Desi_Ch_scaffold07800_2182 | Ca_desi_scaffold   | 2182                           | [T/C]       | NA                                         |
| Ca_Desi_Ch_scaffold07800_2184 | Ca_desi_scaffold   | 2184                           | [T/C]       | NA                                         |
| Ca_Desi_Ch_scaffold07800_2186 | Ca_desi_scaffold   | 2186                           | [A/G]       | NA                                         |
| Ca_Desi_Ch_scaffold07800_2191 | Ca_desi_scaffold   | 2191                           | [A/G]       | NA                                         |
| Ca_Desi_Ch_scaffold07800_2193 | Ca_desi_scaffold   | 2193                           | [C/T]       | NA                                         |
| Ca_Desi_Ch_scaffold07800_2194 | Ca_desi_scaffold   | 2194                           | [T/C]       | NA                                         |
| Ca_Desi_Ch_scaffold07800_2195 | Ca_desi_scaffold   | 2195                           | [T/C]       | NA                                         |
| Ca_Desi_Ch_scaffold07800_2200 | Ca_desi_scaffold   | 2200                           | [A/G]       | NA                                         |
| Ca_Desi_Ch_scaffold07800_2201 | Ca_desi_scaffold   | 2201                           | [C/T]       | NA                                         |
| Ca_Desi_Ch_scaffold07800_2203 | Ca_desi_scaffold   | 2203                           | [T/C]       | NA                                         |
| Ca_Desi_Ch_scaffold07800_2204 | Ca_desi_scaffold   | 2204                           | [A/G]       | NA                                         |
| Ca_Desi_Ch_scaffold07800_2276 | Ca_desi_scaffold   | 2276                           | [A/G]       | NA                                         |



| <b>SNP IDs</b>                  | <b>Chromosomes</b> | <b>Physical positions (bp)</b> | <b>SNPs</b> | <b>NCBI SNPdb accession IDs (NCBI_ss#)</b> |
|---------------------------------|--------------------|--------------------------------|-------------|--------------------------------------------|
| Ca_Desig_Chr_scaffold07800_2289 | Ca_desig_scaffold  | 2289                           | [A/G]       | NA                                         |
| Ca_Desig_Chr_scaffold07800_2409 | Ca_desig_scaffold  | 2409                           | [T/C]       | NA                                         |
| Ca_Desig_Chr_scaffold07800_2414 | Ca_desig_scaffold  | 2414                           | [T/C]       | NA                                         |
| Ca_Desig_Chr_scaffold07800_2425 | Ca_desig_scaffold  | 2425                           | [A/G]       | NA                                         |
| Ca_Desig_Chr_scaffold07800_2429 | Ca_desig_scaffold  | 2429                           | [T/C]       | NA                                         |
| Ca_Desig_Chr_scaffold07800_2435 | Ca_desig_scaffold  | 2435                           | [A/G]       | NA                                         |
| Ca_Desig_Chr_scaffold07800_2438 | Ca_desig_scaffold  | 2438                           | [T/C]       | NA                                         |
| Ca_Desig_Chr_scaffold07800_2441 | Ca_desig_scaffold  | 2441                           | [A/G]       | NA                                         |
| Ca_Desig_Chr_scaffold07800_2444 | Ca_desig_scaffold  | 2444                           | [A/T]       | NA                                         |
| Ca_Desig_Chr_scaffold07800_2453 | Ca_desig_scaffold  | 2453                           | [A/G]       | NA                                         |
| Ca_Desig_Chr_scaffold07800_2457 | Ca_desig_scaffold  | 2457                           | [A/G]       | NA                                         |
| Ca_Desig_Chr_scaffold07800_2460 | Ca_desig_scaffold  | 2460                           | [A/G]       | NA                                         |
| Ca_Desig_Chr_scaffold07800_2462 | Ca_desig_scaffold  | 2462                           | [A/G]       | NA                                         |
| Ca_Desig_Chr_scaffold07800_2466 | Ca_desig_scaffold  | 2466                           | [T/A]       | NA                                         |
| Ca_Desig_Chr_scaffold07800_2469 | Ca_desig_scaffold  | 2469                           | [T/C]       | NA                                         |
| Ca_Desig_Chr_scaffold07800_2481 | Ca_desig_scaffold  | 2481                           | [A/G]       | NA                                         |
| Ca_Desig_Chr_scaffold07800_2482 | Ca_desig_scaffold  | 2482                           | [A/G]       | NA                                         |
| Ca_Desig_Chr_scaffold07800_2484 | Ca_desig_scaffold  | 2484                           | [A/G]       | NA                                         |
| Ca_Desig_Chr_scaffold07800_2485 | Ca_desig_scaffold  | 2485                           | [A/G]       | NA                                         |
| Ca_Desig_Chr_scaffold07800_2494 | Ca_desig_scaffold  | 2494                           | [T/C]       | NA                                         |
| Ca_Desig_Chr_scaffold07800_2497 | Ca_desig_scaffold  | 2497                           | [A/C]       | NA                                         |
| Ca_Desig_Chr_scaffold07800_2500 | Ca_desig_scaffold  | 2500                           | [A/G]       | NA                                         |
| Ca_Desig_Chr_scaffold07800_2502 | Ca_desig_scaffold  | 2502                           | [A/G]       | NA                                         |
| Ca_Desig_Chr_scaffold07800_2508 | Ca_desig_scaffold  | 2508                           | [T/C]       | NA                                         |
| Ca_Desig_Chr_scaffold07800_2510 | Ca_desig_scaffold  | 2510                           | [A/G]       | NA                                         |
| Ca_Desig_Chr_scaffold07800_2512 | Ca_desig_scaffold  | 2512                           | [C/A]       | NA                                         |
| Ca_Desig_Chr_scaffold07800_2513 | Ca_desig_scaffold  | 2513                           | [T/G]       | NA                                         |
| Ca_Desig_Chr_scaffold07800_2534 | Ca_desig_scaffold  | 2534                           | [A/G]       | NA                                         |
| Ca_Desig_Chr_scaffold07800_2568 | Ca_desig_scaffold  | 2568                           | [T/G]       | NA                                         |
| Ca_Desig_Chr_scaffold07800_2573 | Ca_desig_scaffold  | 2573                           | [G/T]       | NA                                         |
| Ca_Desig_Chr_scaffold07800_2574 | Ca_desig_scaffold  | 2574                           | [C/T]       | NA                                         |
| Ca_Desig_Chr_scaffold07800_2575 | Ca_desig_scaffold  | 2575                           | [T/C]       | NA                                         |
| Ca_Desig_Chr_scaffold07800_2576 | Ca_desig_scaffold  | 2576                           | [G/A]       | NA                                         |
| Ca_Desig_Chr_scaffold07800_2577 | Ca_desig_scaffold  | 2577                           | [A/G]       | NA                                         |

| <b>SNP IDs</b>                | <b>Chromosomes</b> | <b>Physical positions (bp)</b> | <b>SNPs</b> | <b>NCBI SNPdb accession IDs (NCBI_ss#)</b> |
|-------------------------------|--------------------|--------------------------------|-------------|--------------------------------------------|
| Ca_Desi_Ch_scaffold07800_2578 | Ca_desi_scaffold   | 2578                           | [G/A]       | NA                                         |
| Ca_Desi_Ch_scaffold07800_2579 | Ca_desi_scaffold   | 2579                           | [A/G]       | NA                                         |
| Ca_Desi_Ch_scaffold07800_2580 | Ca_desi_scaffold   | 2580                           | [A/G]       | NA                                         |
| Ca_Desi_Ch_scaffold07800_2582 | Ca_desi_scaffold   | 2582                           | [G/A]       | NA                                         |
| Ca_Desi_Ch_scaffold07800_2583 | Ca_desi_scaffold   | 2583                           | [G/A]       | NA                                         |
| Ca_Desi_Ch_scaffold07800_2584 | Ca_desi_scaffold   | 2584                           | [A/G]       | NA                                         |
| Ca_Desi_Ch_scaffold07800_2585 | Ca_desi_scaffold   | 2585                           | [A/G]       | NA                                         |
| Ca_Desi_Ch_scaffold07800_2586 | Ca_desi_scaffold   | 2586                           | [T/C]       | NA                                         |
| Ca_Desi_Ch_scaffold07800_2587 | Ca_desi_scaffold   | 2587                           | [A/G]       | NA                                         |
| Ca_Desi_Ch_scaffold07800_2589 | Ca_desi_scaffold   | 2589                           | [T/C]       | NA                                         |
| Ca_Desi_Ch_scaffold07800_2590 | Ca_desi_scaffold   | 2590                           | [G/A]       | NA                                         |
| Ca_Desi_Ch_scaffold07800_2591 | Ca_desi_scaffold   | 2591                           | [T/C]       | NA                                         |
| Ca_Desi_Ch_scaffold07800_2592 | Ca_desi_scaffold   | 2592                           | [T/C]       | NA                                         |
| Ca_Desi_Ch_scaffold07800_2593 | Ca_desi_scaffold   | 2593                           | [C/T]       | NA                                         |
| Ca_Desi_Ch_scaffold07800_2594 | Ca_desi_scaffold   | 2594                           | [G/A]       | NA                                         |
| Ca_Desi_Ch_scaffold07800_2595 | Ca_desi_scaffold   | 2595                           | [T/C]       | NA                                         |
| Ca_Desi_Ch_scaffold07800_2596 | Ca_desi_scaffold   | 2596                           | [G/A]       | NA                                         |
| Ca_Desi_Ch_scaffold07800_2597 | Ca_desi_scaffold   | 2597                           | [T/C]       | NA                                         |
| Ca_Desi_Ch_scaffold07800_2598 | Ca_desi_scaffold   | 2598                           | [C/T]       | NA                                         |
| Ca_Desi_Ch_scaffold07800_2599 | Ca_desi_scaffold   | 2599                           | [C/T]       | NA                                         |
| Ca_Desi_Ch_scaffold07800_2600 | Ca_desi_scaffold   | 2600                           | [A/G]       | NA                                         |
| Ca_Desi_Ch_scaffold07800_2601 | Ca_desi_scaffold   | 2601                           | [A/G]       | NA                                         |
| Ca_Desi_Ch_scaffold07800_2602 | Ca_desi_scaffold   | 2602                           | [A/G]       | NA                                         |
| Ca_Desi_Ch_scaffold07800_2603 | Ca_desi_scaffold   | 2603                           | [G/A]       | NA                                         |
| Ca_Desi_Ch_scaffold07800_2604 | Ca_desi_scaffold   | 2604                           | [G/A]       | NA                                         |
| Ca_Desi_Ch_scaffold07800_2605 | Ca_desi_scaffold   | 2605                           | [T/C]       | NA                                         |
| Ca_Desi_Ch_scaffold07800_2606 | Ca_desi_scaffold   | 2606                           | [G/A]       | NA                                         |
| Ca_Desi_Ch_scaffold07800_2607 | Ca_desi_scaffold   | 2607                           | [A/G]       | NA                                         |
| Ca_Desi_Ch_scaffold07800_2608 | Ca_desi_scaffold   | 2608                           | [A/G]       | NA                                         |
| Ca_Desi_Ch_scaffold07800_2609 | Ca_desi_scaffold   | 2609                           | [C/T]       | NA                                         |
| Ca_Desi_Ch_scaffold07800_2610 | Ca_desi_scaffold   | 2610                           | [A/G]       | NA                                         |
| Ca_Desi_Ch_scaffold07800_2611 | Ca_desi_scaffold   | 2611                           | [A/G]       | NA                                         |
| Ca_Desi_Ch_scaffold07800_2613 | Ca_desi_scaffold   | 2613                           | [G/T]       | NA                                         |
| Ca_Desi_Ch_scaffold07800_2614 | Ca_desi_scaffold   | 2614                           | [C/T]       | NA                                         |

| <b>SNP IDs</b>                 | <b>Chromosomes</b> | <b>Physical positions (bp)</b> | <b>SNPs</b> | <b>NCBI SNPdb accession IDs (NCBI_ss#)</b> |
|--------------------------------|--------------------|--------------------------------|-------------|--------------------------------------------|
| Ca_DesigChr_scaffold07800_2615 | Ca_desig_scaffold  | 2615                           | [C/T]       | NA                                         |
| Ca_DesigChr_scaffold07800_2617 | Ca_desig_scaffold  | 2617                           | [T/C]       | NA                                         |
| Ca_DesigChr_scaffold07800_2618 | Ca_desig_scaffold  | 2618                           | [A/G]       | NA                                         |
| Ca_DesigChr_scaffold07800_2620 | Ca_desig_scaffold  | 2620                           | [C/T]       | NA                                         |
| Ca_DesigChr_scaffold07800_2621 | Ca_desig_scaffold  | 2621                           | [T/C]       | NA                                         |
| Ca_DesigChr_scaffold07800_2622 | Ca_desig_scaffold  | 2622                           | [T/C]       | NA                                         |
| Ca_DesigChr_scaffold07800_2624 | Ca_desig_scaffold  | 2624                           | [T/C]       | NA                                         |
| Ca_DesigChr_scaffold07800_2625 | Ca_desig_scaffold  | 2625                           | [A/G]       | NA                                         |
| Ca_DesigChr_scaffold07800_2626 | Ca_desig_scaffold  | 2626                           | [G/A]       | NA                                         |
| Ca_DesigChr_scaffold07800_2627 | Ca_desig_scaffold  | 2627                           | [A/G]       | NA                                         |
| Ca_DesigChr_scaffold07800_2629 | Ca_desig_scaffold  | 2629                           | [T/C]       | NA                                         |
| Ca_DesigChr_scaffold07800_2630 | Ca_desig_scaffold  | 2630                           | [T/C]       | NA                                         |
| Ca_DesigChr_scaffold07800_2631 | Ca_desig_scaffold  | 2631                           | [C/T]       | NA                                         |
| Ca_DesigChr_scaffold07800_3616 | Ca_desig_scaffold  | 3616                           | [T/A]       | NA                                         |
| Ca_DesigChr_scaffold07800_3619 | Ca_desig_scaffold  | 3619                           | [A/G]       | NA                                         |
| Ca_DesigChr_scaffold07800_3620 | Ca_desig_scaffold  | 3620                           | [C/T]       | NA                                         |
| Ca_DesigChr_scaffold07800_3621 | Ca_desig_scaffold  | 3621                           | [T/C]       | NA                                         |
| Ca_DesigChr_scaffold07800_3622 | Ca_desig_scaffold  | 3622                           | [T/C]       | NA                                         |
| Ca_DesigChr_scaffold07800_3623 | Ca_desig_scaffold  | 3623                           | [C/T]       | NA                                         |
| Ca_DesigChr_scaffold07800_3624 | Ca_desig_scaffold  | 3624                           | [T/C]       | NA                                         |
| Ca_DesigChr_scaffold07800_3625 | Ca_desig_scaffold  | 3625                           | [G/T]       | NA                                         |
| Ca_DesigChr_scaffold07800_3626 | Ca_desig_scaffold  | 3626                           | [T/C]       | NA                                         |
| Ca_DesigChr_scaffold07800_3628 | Ca_desig_scaffold  | 3628                           | [C/T]       | NA                                         |
| Ca_DesigChr_scaffold07800_3629 | Ca_desig_scaffold  | 3629                           | [G/A]       | NA                                         |
| Ca_DesigChr_scaffold07800_3630 | Ca_desig_scaffold  | 3630                           | [T/C]       | NA                                         |
| Ca_DesigChr_scaffold07800_3631 | Ca_desig_scaffold  | 3631                           | [G/A]       | NA                                         |
| Ca_DesigChr_scaffold07800_3632 | Ca_desig_scaffold  | 3632                           | [A/G]       | NA                                         |
| Ca_DesigChr_scaffold07800_3633 | Ca_desig_scaffold  | 3633                           | [T/C]       | NA                                         |
| Ca_DesigChr_scaffold07800_3634 | Ca_desig_scaffold  | 3634                           | [C/T]       | NA                                         |
| Ca_DesigChr_scaffold07800_3635 | Ca_desig_scaffold  | 3635                           | [G/A]       | NA                                         |
| Ca_DesigChr_scaffold07800_3636 | Ca_desig_scaffold  | 3636                           | [T/C]       | NA                                         |
| Ca_DesigChr_scaffold07800_3637 | Ca_desig_scaffold  | 3637                           | [A/G]       | NA                                         |
| Ca_DesigChr_scaffold07800_3638 | Ca_desig_scaffold  | 3638                           | [G/A]       | NA                                         |
| Ca_DesigChr_scaffold07800_3640 | Ca_desig_scaffold  | 3640                           | [A/G]       | NA                                         |

| <b>SNP IDs</b>                  | <b>Chromosomes</b> | <b>Physical positions (bp)</b> | <b>SNPs</b> | <b>NCBI SNPdb accession IDs (NCBI_ss#)</b> |
|---------------------------------|--------------------|--------------------------------|-------------|--------------------------------------------|
| Ca_Desig_Chr_scaffold07800_3641 | Ca_desig_scaffold  | 3641                           | [T/C]       | NA                                         |
| Ca_Desig_Chr_scaffold07800_3642 | Ca_desig_scaffold  | 3642                           | [G/A]       | NA                                         |
| Ca_Desig_Chr_scaffold07800_3643 | Ca_desig_scaffold  | 3643                           | [T/C]       | NA                                         |
| Ca_Desig_Chr_scaffold07800_3644 | Ca_desig_scaffold  | 3644                           | [C/T]       | NA                                         |
| Ca_Desig_Chr_scaffold07800_3646 | Ca_desig_scaffold  | 3646                           | [C/T]       | NA                                         |
| Ca_Desig_Chr_scaffold07800_3647 | Ca_desig_scaffold  | 3647                           | [G/T]       | NA                                         |
| Ca_Desig_Chr_scaffold07800_3648 | Ca_desig_scaffold  | 3648                           | [T/C]       | NA                                         |
| Ca_Desig_Chr_scaffold07800_3649 | Ca_desig_scaffold  | 3649                           | [C/T]       | NA                                         |
| Ca_Desig_Chr_scaffold07800_3650 | Ca_desig_scaffold  | 3650                           | [G/A]       | NA                                         |
| Ca_Desig_Chr_scaffold07800_3651 | Ca_desig_scaffold  | 3651                           | [T/C]       | NA                                         |
| Ca_Desig_Chr_scaffold07800_3652 | Ca_desig_scaffold  | 3652                           | [C/T]       | NA                                         |
| Ca_Desig_Chr_scaffold07800_3653 | Ca_desig_scaffold  | 3653                           | [T/C]       | NA                                         |
| Ca_Desig_Chr_scaffold07800_3654 | Ca_desig_scaffold  | 3654                           | [C/T]       | NA                                         |
| Ca_Desig_Chr_scaffold07800_3655 | Ca_desig_scaffold  | 3655                           | [G/A]       | NA                                         |
| Ca_Desig_Chr_scaffold07800_3656 | Ca_desig_scaffold  | 3656                           | [T/C]       | NA                                         |
| Ca_Desig_Chr_scaffold07800_3657 | Ca_desig_scaffold  | 3657                           | [C/T]       | NA                                         |
| Ca_Desig_Chr_scaffold07800_3658 | Ca_desig_scaffold  | 3658                           | [C/T]       | NA                                         |
| Ca_Desig_Chr_scaffold07800_3659 | Ca_desig_scaffold  | 3659                           | [C/T]       | NA                                         |
| Ca_Desig_Chr_scaffold07800_3660 | Ca_desig_scaffold  | 3660                           | [C/T]       | NA                                         |
| Ca_Desig_Chr_scaffold07800_3663 | Ca_desig_scaffold  | 3663                           | [T/A]       | NA                                         |
| Ca_Desig_Chr_scaffold07800_4285 | Ca_desig_scaffold  | 4285                           | [T/A]       | NA                                         |
| Ca_Desig_Chr_scaffold07800_4308 | Ca_desig_scaffold  | 4308                           | [T/C]       | NA                                         |
| Ca_Desig_Chr_scaffold07800_4313 | Ca_desig_scaffold  | 4313                           | [T/G]       | NA                                         |
| Ca_Desig_Chr_scaffold07800_4680 | Ca_desig_scaffold  | 4680                           | [G/T]       | NA                                         |
| Ca_Desig_Chr_scaffold07800_4681 | Ca_desig_scaffold  | 4681                           | [C/A]       | NA                                         |
| Ca_Desig_Chr_scaffold07800_4683 | Ca_desig_scaffold  | 4683                           | [A/C]       | NA                                         |
| Ca_Desig_Chr_scaffold07800_4688 | Ca_desig_scaffold  | 4688                           | [G/T]       | NA                                         |
| Ca_Desig_Chr_scaffold07800_4696 | Ca_desig_scaffold  | 4696                           | [T/C]       | NA                                         |
| Ca_Desig_Chr_scaffold07800_4699 | Ca_desig_scaffold  | 4699                           | [A/G]       | NA                                         |
| Ca_Desig_Chr_scaffold07800_4703 | Ca_desig_scaffold  | 4703                           | [T/C]       | NA                                         |
| Ca_Desig_Chr_scaffold07800_4705 | Ca_desig_scaffold  | 4705                           | [T/C]       | NA                                         |
| Ca_Desig_Chr_scaffold07800_4711 | Ca_desig_scaffold  | 4711                           | [A/G]       | NA                                         |
| Ca_Desig_Chr_scaffold07800_4719 | Ca_desig_scaffold  | 4719                           | [T/C]       | NA                                         |
| Ca_Desig_Chr_scaffold07800_4723 | Ca_desig_scaffold  | 4723                           | [A/G]       | NA                                         |

| <b>SNP IDs</b>                  | <b>Chromosomes</b> | <b>Physical positions (bp)</b> | <b>SNPs</b> | <b>NCBI SNPdb accession IDs (NCBI_ss#)</b> |
|---------------------------------|--------------------|--------------------------------|-------------|--------------------------------------------|
| Ca_Desig_Chr_scaffold07800_4735 | Ca_desig_scaffold  | 4735                           | [T/C]       | NA                                         |
| Ca_Desig_Chr_scaffold07800_4749 | Ca_desig_scaffold  | 4749                           | [T/G]       | NA                                         |
| Ca_Desig_Chr_scaffold07800_4775 | Ca_desig_scaffold  | 4775                           | [T/C]       | NA                                         |
| Ca_Desig_Chr_scaffold07800_4780 | Ca_desig_scaffold  | 4780                           | [T/G]       | NA                                         |
| Ca_Desig_Chr_scaffold07800_5077 | Ca_desig_scaffold  | 5077                           | [G/T]       | NA                                         |
| Ca_Desig_Chr_scaffold07800_5078 | Ca_desig_scaffold  | 5078                           | [G/C]       | NA                                         |
| Ca_Desig_Chr_scaffold07800_5079 | Ca_desig_scaffold  | 5079                           | [G/T]       | NA                                         |
| Ca_Desig_Chr_scaffold07800_5095 | Ca_desig_scaffold  | 5095                           | [A/C]       | NA                                         |
| Ca_Desig_Chr_scaffold07800_6019 | Ca_desig_scaffold  | 6019                           | [A/C]       | NA                                         |
| Ca_Desig_Chr_scaffold07800_6096 | Ca_desig_scaffold  | 6096                           | [T/C]       | NA                                         |
| Ca_Desig_Chr_scaffold07800_6167 | Ca_desig_scaffold  | 6167                           | [G/T]       | NA                                         |
| Ca_Desig_Chr_scaffold07800_6168 | Ca_desig_scaffold  | 6168                           | [A/T]       | NA                                         |
| Ca_Desig_Chr_scaffold07819_1484 | Ca_desig_scaffold  | 1484                           | [T/G]       | NA                                         |
| Ca_Desig_Chr_scaffold07819_3639 | Ca_desig_scaffold  | 3639                           | [T/G]       | NA                                         |
| Ca_Desig_Chr_scaffold07819_3730 | Ca_desig_scaffold  | 3730                           | [T/C]       | NA                                         |
| Ca_Desig_Chr_scaffold07819_3731 | Ca_desig_scaffold  | 3731                           | [T/C]       | NA                                         |
| Ca_Desig_Chr_scaffold07819_3733 | Ca_desig_scaffold  | 3733                           | [A/G]       | NA                                         |
| Ca_Desig_Chr_scaffold07819_3735 | Ca_desig_scaffold  | 3735                           | [T/C]       | NA                                         |
| Ca_Desig_Chr_scaffold07819_3737 | Ca_desig_scaffold  | 3737                           | [A/G]       | NA                                         |
| Ca_Desig_Chr_scaffold07819_3738 | Ca_desig_scaffold  | 3738                           | [A/G]       | NA                                         |
| Ca_Desig_Chr_scaffold07819_3741 | Ca_desig_scaffold  | 3741                           | [T/G]       | NA                                         |
| Ca_Desig_Chr_scaffold07819_3743 | Ca_desig_scaffold  | 3743                           | [T/C]       | NA                                         |
| Ca_Desig_Chr_scaffold07819_3746 | Ca_desig_scaffold  | 3746                           | [A/G]       | NA                                         |
| Ca_Desig_Chr_scaffold07819_3749 | Ca_desig_scaffold  | 3749                           | [T/C]       | NA                                         |
| Ca_Desig_Chr_scaffold07819_3751 | Ca_desig_scaffold  | 3751                           | [A/T]       | NA                                         |
| Ca_Desig_Chr_scaffold07819_3756 | Ca_desig_scaffold  | 3756                           | [A/G]       | NA                                         |
| Ca_Desig_Chr_scaffold07819_3761 | Ca_desig_scaffold  | 3761                           | [A/G]       | NA                                         |
| Ca_Desig_Chr_scaffold07819_3764 | Ca_desig_scaffold  | 3764                           | [A/G]       | NA                                         |
| Ca_Desig_Chr_scaffold07819_3766 | Ca_desig_scaffold  | 3766                           | [T/G]       | NA                                         |
| Ca_Desig_Chr_scaffold07819_3769 | Ca_desig_scaffold  | 3769                           | [A/G]       | NA                                         |
| Ca_Desig_Chr_scaffold07819_3771 | Ca_desig_scaffold  | 3771                           | [T/C]       | NA                                         |
| Ca_Desig_Chr_scaffold07819_3776 | Ca_desig_scaffold  | 3776                           | [T/C]       | NA                                         |
| Ca_Desig_Chr_scaffold07819_3779 | Ca_desig_scaffold  | 3779                           | [T/C]       | NA                                         |
| Ca_Desig_Chr_scaffold07819_3780 | Ca_desig_scaffold  | 3780                           | [T/C]       | NA                                         |

| <b>SNP IDs</b>                | <b>Chromosomes</b> | <b>Physical positions (bp)</b> | <b>SNPs</b> | <b>NCBI SNPdb accession IDs (NCBI_ss#)</b> |
|-------------------------------|--------------------|--------------------------------|-------------|--------------------------------------------|
| Ca_Desi_Ch_scaffold07819_3782 | Ca_desi_scaffold   | 3782                           | [T/C]       | NA                                         |
| Ca_Desi_Ch_scaffold07819_3784 | Ca_desi_scaffold   | 3784                           | [T/C]       | NA                                         |
| Ca_Desi_Ch_scaffold07819_3786 | Ca_desi_scaffold   | 3786                           | [G/A]       | NA                                         |
| Ca_Desi_Ch_scaffold07819_3787 | Ca_desi_scaffold   | 3787                           | [C/T]       | NA                                         |
| Ca_Desi_Ch_scaffold07819_3788 | Ca_desi_scaffold   | 3788                           | [A/G]       | NA                                         |
| Ca_Desi_Ch_scaffold07819_3872 | Ca_desi_scaffold   | 3872                           | [A/C]       | NA                                         |
| Ca_Desi_Ch_scaffold07819_3874 | Ca_desi_scaffold   | 3874                           | [A/G]       | NA                                         |
| Ca_Desi_Ch_scaffold07819_3876 | Ca_desi_scaffold   | 3876                           | [A/G]       | NA                                         |
| Ca_Desi_Ch_scaffold07819_3879 | Ca_desi_scaffold   | 3879                           | [C/G]       | NA                                         |
| Ca_Desi_Ch_scaffold07819_3880 | Ca_desi_scaffold   | 3880                           | [C/T]       | NA                                         |
| Ca_Desi_Ch_scaffold07819_3882 | Ca_desi_scaffold   | 3882                           | [A/G]       | NA                                         |
| Ca_Desi_Ch_scaffold07819_3885 | Ca_desi_scaffold   | 3885                           | [A/C]       | NA                                         |
| Ca_Desi_Ch_scaffold07819_3890 | Ca_desi_scaffold   | 3890                           | [T/C]       | NA                                         |
| Ca_Desi_Ch_scaffold07819_3894 | Ca_desi_scaffold   | 3894                           | [A/G]       | NA                                         |
| Ca_Desi_Ch_scaffold07819_3895 | Ca_desi_scaffold   | 3895                           | [T/C]       | NA                                         |
| Ca_Desi_Ch_scaffold07819_3899 | Ca_desi_scaffold   | 3899                           | [A/G]       | NA                                         |
| Ca_Desi_Ch_scaffold07819_3900 | Ca_desi_scaffold   | 3900                           | [T/C]       | NA                                         |
| Ca_Desi_Ch_scaffold07819_3903 | Ca_desi_scaffold   | 3903                           | [T/C]       | NA                                         |
| Ca_Desi_Ch_scaffold07819_3904 | Ca_desi_scaffold   | 3904                           | [T/C]       | NA                                         |
| Ca_Desi_Ch_scaffold07819_3906 | Ca_desi_scaffold   | 3906                           | [T/C]       | NA                                         |
| Ca_Desi_Ch_scaffold07819_3912 | Ca_desi_scaffold   | 3912                           | [T/C]       | NA                                         |
| Ca_Desi_Ch_scaffold07819_3914 | Ca_desi_scaffold   | 3914                           | [T/C]       | NA                                         |
| Ca_Desi_Ch_scaffold07819_3916 | Ca_desi_scaffold   | 3916                           | [T/C]       | NA                                         |
| Ca_Desi_Ch_scaffold07819_3918 | Ca_desi_scaffold   | 3918                           | [A/G]       | NA                                         |
| Ca_Desi_Ch_scaffold07819_3920 | Ca_desi_scaffold   | 3920                           | [T/C]       | NA                                         |
| Ca_Desi_Ch_scaffold07819_3922 | Ca_desi_scaffold   | 3922                           | [A/G]       | NA                                         |
| Ca_Desi_Ch_scaffold07819_3923 | Ca_desi_scaffold   | 3923                           | [A/G]       | NA                                         |
| Ca_Desi_Ch_scaffold07819_3927 | Ca_desi_scaffold   | 3927                           | [A/G]       | NA                                         |
| Ca_Desi_Ch_scaffold07819_3930 | Ca_desi_scaffold   | 3930                           | [T/C]       | NA                                         |
| Ca_Desi_Ch_scaffold07819_3931 | Ca_desi_scaffold   | 3931                           | [A/G]       | NA                                         |
| Ca_Desi_Ch_scaffold07827_4639 | Ca_desi_scaffold   | 4639                           | [T/C]       | NA                                         |
| Ca_Desi_Ch_scaffold07827_4644 | Ca_desi_scaffold   | 4644                           | [T/C]       | NA                                         |
| Ca_Desi_Ch_scaffold07827_4650 | Ca_desi_scaffold   | 4650                           | [A/G]       | NA                                         |
| Ca_Desi_Ch_scaffold07827_4655 | Ca_desi_scaffold   | 4655                           | [T/G]       | NA                                         |

| <b>SNP IDs</b>                  | <b>Chromosomes</b> | <b>Physical positions (bp)</b> | <b>SNPs</b> | <b>NCBI SNPdb accession IDs (NCBI_ss#)</b> |
|---------------------------------|--------------------|--------------------------------|-------------|--------------------------------------------|
| Ca_Desig_Chr_scaffold07827_4658 | Ca_desig_scaffold  | 4658                           | [T/C]       | NA                                         |
| Ca_Desig_Chr_scaffold07827_4660 | Ca_desig_scaffold  | 4660                           | [T/C]       | NA                                         |
| Ca_Desig_Chr_scaffold07827_4670 | Ca_desig_scaffold  | 4670                           | [A/G]       | NA                                         |
| Ca_Desig_Chr_scaffold07827_4671 | Ca_desig_scaffold  | 4671                           | [T/C]       | NA                                         |
| Ca_Desig_Chr_scaffold07827_4698 | Ca_desig_scaffold  | 4698                           | [T/C]       | NA                                         |
| Ca_Desig_Chr_scaffold07827_4710 | Ca_desig_scaffold  | 4710                           | [A/G]       | NA                                         |
| Ca_Desig_Chr_scaffold07827_4716 | Ca_desig_scaffold  | 4716                           | [A/G]       | NA                                         |
| Ca_Desig_Chr_scaffold07827_4794 | Ca_desig_scaffold  | 4794                           | [T/G]       | NA                                         |
| Ca_Desig_Chr_scaffold07828_458  | Ca_desig_scaffold  | 458                            | [A/G]       | NA                                         |
| Ca_Desig_Chr_scaffold07828_461  | Ca_desig_scaffold  | 461                            | [A/G]       | NA                                         |
| Ca_Desig_Chr_scaffold07828_462  | Ca_desig_scaffold  | 462                            | [A/G]       | NA                                         |
| Ca_Desig_Chr_scaffold07828_465  | Ca_desig_scaffold  | 465                            | [A/G]       | NA                                         |
| Ca_Desig_Chr_scaffold07828_469  | Ca_desig_scaffold  | 469                            | [A/G]       | NA                                         |
| Ca_Desig_Chr_scaffold07828_470  | Ca_desig_scaffold  | 470                            | [A/G]       | NA                                         |
| Ca_Desig_Chr_scaffold07828_472  | Ca_desig_scaffold  | 472                            | [A/G]       | NA                                         |
| Ca_Desig_Chr_scaffold07828_477  | Ca_desig_scaffold  | 477                            | [T/C]       | NA                                         |
| Ca_Desig_Chr_scaffold07828_487  | Ca_desig_scaffold  | 487                            | [T/G]       | NA                                         |
| Ca_Desig_Chr_scaffold07828_491  | Ca_desig_scaffold  | 491                            | [T/G]       | NA                                         |
| Ca_Desig_Chr_scaffold07828_493  | Ca_desig_scaffold  | 493                            | [T/C]       | NA                                         |
| Ca_Desig_Chr_scaffold07828_495  | Ca_desig_scaffold  | 495                            | [C/T]       | NA                                         |
| Ca_Desig_Chr_scaffold07828_498  | Ca_desig_scaffold  | 498                            | [T/G]       | NA                                         |
| Ca_Desig_Chr_scaffold07828_500  | Ca_desig_scaffold  | 500                            | [A/G]       | NA                                         |
| Ca_Desig_Chr_scaffold07828_506  | Ca_desig_scaffold  | 506                            | [T/C]       | NA                                         |
| Ca_Desig_Chr_scaffold07828_510  | Ca_desig_scaffold  | 510                            | [A/G]       | NA                                         |
| Ca_Desig_Chr_scaffold07828_512  | Ca_desig_scaffold  | 512                            | [A/G]       | NA                                         |
| Ca_Desig_Chr_scaffold07828_614  | Ca_desig_scaffold  | 614                            | [A/C]       | NA                                         |
| Ca_Desig_Chr_scaffold07828_616  | Ca_desig_scaffold  | 616                            | [G/T]       | NA                                         |
| Ca_Desig_Chr_scaffold07828_618  | Ca_desig_scaffold  | 618                            | [T/C]       | NA                                         |
| Ca_Desig_Chr_scaffold07828_622  | Ca_desig_scaffold  | 622                            | [A/G]       | NA                                         |
| Ca_Desig_Chr_scaffold07828_632  | Ca_desig_scaffold  | 632                            | [A/G]       | NA                                         |
| Ca_Desig_Chr_scaffold07828_634  | Ca_desig_scaffold  | 634                            | [A/G]       | NA                                         |
| Ca_Desig_Chr_scaffold07828_637  | Ca_desig_scaffold  | 637                            | [A/G]       | NA                                         |
| Ca_Desig_Chr_scaffold07828_640  | Ca_desig_scaffold  | 640                            | [G/A]       | NA                                         |
| Ca_Desig_Chr_scaffold07828_642  | Ca_desig_scaffold  | 642                            | [T/C]       | NA                                         |

| <b>SNP IDs</b>                 | <b>Chromosomes</b> | <b>Physical positions (bp)</b> | <b>SNPs</b> | <b>NCBI SNPdb accession IDs (NCBI_ss#)</b> |
|--------------------------------|--------------------|--------------------------------|-------------|--------------------------------------------|
| Ca_DesigChr_scaffold07828_645  | Ca_desig_scaffold  | 645                            | [T/C]       | NA                                         |
| Ca_DesigChr_scaffold07828_646  | Ca_desig_scaffold  | 646                            | [T/C]       | NA                                         |
| Ca_DesigChr_scaffold07828_648  | Ca_desig_scaffold  | 648                            | [A/C]       | NA                                         |
| Ca_DesigChr_scaffold07828_655  | Ca_desig_scaffold  | 655                            | [A/G]       | NA                                         |
| Ca_DesigChr_scaffold07828_656  | Ca_desig_scaffold  | 656                            | [A/G]       | NA                                         |
| Ca_DesigChr_scaffold07828_661  | Ca_desig_scaffold  | 661                            | [A/G]       | NA                                         |
| Ca_DesigChr_scaffold07828_667  | Ca_desig_scaffold  | 667                            | [T/C]       | NA                                         |
| Ca_DesigChr_scaffold07828_668  | Ca_desig_scaffold  | 668                            | [T/C]       | NA                                         |
| Ca_DesigChr_scaffold07828_673  | Ca_desig_scaffold  | 673                            | [A/G]       | NA                                         |
| Ca_DesigChr_scaffold07828_1398 | Ca_desig_scaffold  | 1398                           | [A/C]       | NA                                         |
| Ca_DesigChr_scaffold07828_3657 | Ca_desig_scaffold  | 3657                           | [A/G]       | NA                                         |
| Ca_DesigChr_scaffold07828_3661 | Ca_desig_scaffold  | 3661                           | [A/G]       | NA                                         |
| Ca_DesigChr_scaffold07828_3670 | Ca_desig_scaffold  | 3670                           | [C/T]       | NA                                         |
| Ca_DesigChr_scaffold07828_3682 | Ca_desig_scaffold  | 3682                           | [A/G]       | NA                                         |
| Ca_DesigChr_scaffold07828_3694 | Ca_desig_scaffold  | 3694                           | [C/A]       | NA                                         |
| Ca_DesigChr_scaffold07828_3714 | Ca_desig_scaffold  | 3714                           | [T/C]       | NA                                         |
| Ca_DesigChr_scaffold07828_3715 | Ca_desig_scaffold  | 3715                           | [C/G]       | NA                                         |
| Ca_DesigChr_scaffold07828_3883 | Ca_desig_scaffold  | 3883                           | [C/T]       | NA                                         |
| Ca_DesigChr_scaffold07828_3911 | Ca_desig_scaffold  | 3911                           | [A/G]       | NA                                         |
| Ca_DesigChr_scaffold07828_3912 | Ca_desig_scaffold  | 3912                           | [T/C]       | NA                                         |
| Ca_DesigChr_scaffold07828_3914 | Ca_desig_scaffold  | 3914                           | [T/C]       | NA                                         |
| Ca_DesigChr_scaffold07828_3919 | Ca_desig_scaffold  | 3919                           | [A/G]       | NA                                         |
| Ca_DesigChr_scaffold07828_3921 | Ca_desig_scaffold  | 3921                           | [A/G]       | NA                                         |
| Ca_DesigChr_scaffold07828_3923 | Ca_desig_scaffold  | 3923                           | [T/C]       | NA                                         |
| Ca_DesigChr_scaffold07828_3925 | Ca_desig_scaffold  | 3925                           | [A/G]       | NA                                         |
| Ca_DesigChr_scaffold07828_3926 | Ca_desig_scaffold  | 3926                           | [A/G]       | NA                                         |
| Ca_DesigChr_scaffold07828_4332 | Ca_desig_scaffold  | 4332                           | [T/C]       | NA                                         |
| Ca_DesigChr_scaffold07828_4478 | Ca_desig_scaffold  | 4478                           | [C/T]       | NA                                         |
| Ca_DesigChr_scaffold07828_4480 | Ca_desig_scaffold  | 4480                           | [T/C]       | NA                                         |
| Ca_DesigChr_scaffold07828_4481 | Ca_desig_scaffold  | 4481                           | [A/G]       | NA                                         |
| Ca_DesigChr_scaffold07828_4482 | Ca_desig_scaffold  | 4482                           | [C/T]       | NA                                         |
| Ca_DesigChr_scaffold07828_4483 | Ca_desig_scaffold  | 4483                           | [T/C]       | NA                                         |
| Ca_DesigChr_scaffold07828_4484 | Ca_desig_scaffold  | 4484                           | [T/C]       | NA                                         |
| Ca_DesigChr_scaffold07828_4485 | Ca_desig_scaffold  | 4485                           | [T/C]       | NA                                         |



| <b>SNP IDs</b>                  | <b>Chromosomes</b> | <b>Physical positions (bp)</b> | <b>SNPs</b> | <b>NCBI SNPdb accession IDs (NCBI_ss#)</b> |
|---------------------------------|--------------------|--------------------------------|-------------|--------------------------------------------|
| Ca_Desig_Chr_scaffold07828_4487 | Ca_desig_scaffold  | 4487                           | [T/C]       | NA                                         |
| Ca_Desig_Chr_scaffold07828_4489 | Ca_desig_scaffold  | 4489                           | [T/C]       | NA                                         |
| Ca_Desig_Chr_scaffold07828_4490 | Ca_desig_scaffold  | 4490                           | [T/C]       | NA                                         |
| Ca_Desig_Chr_scaffold07828_4491 | Ca_desig_scaffold  | 4491                           | [T/C]       | NA                                         |
| Ca_Desig_Chr_scaffold07828_4494 | Ca_desig_scaffold  | 4494                           | [T/C]       | NA                                         |
| Ca_Desig_Chr_scaffold07828_4495 | Ca_desig_scaffold  | 4495                           | [T/C]       | NA                                         |
| Ca_Desig_Chr_scaffold07828_4497 | Ca_desig_scaffold  | 4497                           | [T/C]       | NA                                         |
| Ca_Desig_Chr_scaffold07828_4498 | Ca_desig_scaffold  | 4498                           | [T/C]       | NA                                         |
| Ca_Desig_Chr_scaffold07828_4501 | Ca_desig_scaffold  | 4501                           | [A/G]       | NA                                         |
| Ca_Desig_Chr_scaffold07828_4503 | Ca_desig_scaffold  | 4503                           | [T/C]       | NA                                         |
| Ca_Desig_Chr_scaffold07828_4504 | Ca_desig_scaffold  | 4504                           | [T/C]       | NA                                         |
| Ca_Desig_Chr_scaffold07828_4505 | Ca_desig_scaffold  | 4505                           | [T/C]       | NA                                         |
| Ca_Desig_Chr_scaffold07828_4506 | Ca_desig_scaffold  | 4506                           | [G/T]       | NA                                         |
| Ca_Desig_Chr_scaffold07828_4507 | Ca_desig_scaffold  | 4507                           | [C/A]       | NA                                         |
| Ca_Desig_Chr_scaffold07828_4508 | Ca_desig_scaffold  | 4508                           | [C/T]       | NA                                         |
| Ca_Desig_Chr_scaffold07828_4509 | Ca_desig_scaffold  | 4509                           | [T/C]       | NA                                         |
| Ca_Desig_Chr_scaffold07828_4511 | Ca_desig_scaffold  | 4511                           | [T/C]       | NA                                         |
| Ca_Desig_Chr_scaffold07828_4513 | Ca_desig_scaffold  | 4513                           | [C/T]       | NA                                         |
| Ca_Desig_Chr_scaffold07828_4514 | Ca_desig_scaffold  | 4514                           | [G/A]       | NA                                         |
| Ca_Desig_Chr_scaffold07828_4515 | Ca_desig_scaffold  | 4515                           | [G/A]       | NA                                         |
| Ca_Desig_Chr_scaffold07828_4517 | Ca_desig_scaffold  | 4517                           | [A/G]       | NA                                         |
| Ca_Desig_Chr_scaffold07828_4518 | Ca_desig_scaffold  | 4518                           | [A/G]       | NA                                         |
| Ca_Desig_Chr_scaffold07828_4519 | Ca_desig_scaffold  | 4519                           | [G/A]       | NA                                         |
| Ca_Desig_Chr_scaffold07828_4520 | Ca_desig_scaffold  | 4520                           | [G/A]       | NA                                         |
| Ca_Desig_Chr_scaffold07828_4521 | Ca_desig_scaffold  | 4521                           | [A/G]       | NA                                         |
| Ca_Desig_Chr_scaffold07828_4524 | Ca_desig_scaffold  | 4524                           | [A/G]       | NA                                         |
| Ca_Desig_Chr_scaffold07828_4525 | Ca_desig_scaffold  | 4525                           | [A/G]       | NA                                         |
| Ca_Desig_Chr_scaffold07828_4527 | Ca_desig_scaffold  | 4527                           | [C/T]       | NA                                         |
| Ca_Desig_Chr_scaffold07828_4528 | Ca_desig_scaffold  | 4528                           | [C/T]       | NA                                         |
| Ca_Desig_Chr_scaffold07828_4530 | Ca_desig_scaffold  | 4530                           | [T/C]       | NA                                         |
| Ca_Desig_Chr_scaffold07828_4532 | Ca_desig_scaffold  | 4532                           | [A/G]       | NA                                         |
| Ca_Desig_Chr_scaffold07828_4533 | Ca_desig_scaffold  | 4533                           | [T/C]       | NA                                         |
| Ca_Desig_Chr_scaffold07828_4534 | Ca_desig_scaffold  | 4534                           | [A/G]       | NA                                         |
| Ca_Desig_Chr_scaffold07828_4535 | Ca_desig_scaffold  | 4535                           | [A/G]       | NA                                         |

| <b>SNP IDs</b>                | <b>Chromosomes</b> | <b>Physical positions (bp)</b> | <b>SNPs</b> | <b>NCBI SNPdb accession IDs (NCBI_ss#)</b> |
|-------------------------------|--------------------|--------------------------------|-------------|--------------------------------------------|
| Ca_Desi_Ch_scaffold07828_4537 | Ca_desi_scaffold   | 4537                           | [C/G]       | NA                                         |
| Ca_Desi_Ch_scaffold07828_4581 | Ca_desi_scaffold   | 4581                           | [T/C]       | NA                                         |
| Ca_Desi_Ch_scaffold07828_4586 | Ca_desi_scaffold   | 4586                           | [C/T]       | NA                                         |
| Ca_Desi_Ch_scaffold07828_4587 | Ca_desi_scaffold   | 4587                           | [A/G]       | NA                                         |
| Ca_Desi_Ch_scaffold07828_4588 | Ca_desi_scaffold   | 4588                           | [A/G]       | NA                                         |
| Ca_Desi_Ch_scaffold07828_4590 | Ca_desi_scaffold   | 4590                           | [A/G]       | NA                                         |
| Ca_Desi_Ch_scaffold07828_4591 | Ca_desi_scaffold   | 4591                           | [T/C]       | NA                                         |
| Ca_Desi_Ch_scaffold07828_4594 | Ca_desi_scaffold   | 4594                           | [T/C]       | NA                                         |
| Ca_Desi_Ch_scaffold07828_4595 | Ca_desi_scaffold   | 4595                           | [A/G]       | NA                                         |
| Ca_Desi_Ch_scaffold07828_4596 | Ca_desi_scaffold   | 4596                           | [T/C]       | NA                                         |
| Ca_Desi_Ch_scaffold07828_4599 | Ca_desi_scaffold   | 4599                           | [T/C]       | NA                                         |
| Ca_Desi_Ch_scaffold07828_4601 | Ca_desi_scaffold   | 4601                           | [T/A]       | NA                                         |
| Ca_Desi_Ch_scaffold07828_4602 | Ca_desi_scaffold   | 4602                           | [A/G]       | NA                                         |
| Ca_Desi_Ch_scaffold07828_4604 | Ca_desi_scaffold   | 4604                           | [A/G]       | NA                                         |
| Ca_Desi_Ch_scaffold07828_4605 | Ca_desi_scaffold   | 4605                           | [A/G]       | NA                                         |
| Ca_Desi_Ch_scaffold07828_4607 | Ca_desi_scaffold   | 4607                           | [A/G]       | NA                                         |
| Ca_Desi_Ch_scaffold07828_4608 | Ca_desi_scaffold   | 4608                           | [G/A]       | NA                                         |
| Ca_Desi_Ch_scaffold07828_4609 | Ca_desi_scaffold   | 4609                           | [C/T]       | NA                                         |
| Ca_Desi_Ch_scaffold07828_4610 | Ca_desi_scaffold   | 4610                           | [A/G]       | NA                                         |
| Ca_Desi_Ch_scaffold07828_4611 | Ca_desi_scaffold   | 4611                           | [A/G]       | NA                                         |
| Ca_Desi_Ch_scaffold07828_4612 | Ca_desi_scaffold   | 4612                           | [A/G]       | NA                                         |
| Ca_Desi_Ch_scaffold07828_4613 | Ca_desi_scaffold   | 4613                           | [A/G]       | NA                                         |
| Ca_Desi_Ch_scaffold07828_4618 | Ca_desi_scaffold   | 4618                           | [C/T]       | NA                                         |
| Ca_Desi_Ch_scaffold07828_4619 | Ca_desi_scaffold   | 4619                           | [G/A]       | NA                                         |
| Ca_Desi_Ch_scaffold07828_4620 | Ca_desi_scaffold   | 4620                           | [A/G]       | NA                                         |
| Ca_Desi_Ch_scaffold07828_4625 | Ca_desi_scaffold   | 4625                           | [T/C]       | NA                                         |
| Ca_Desi_Ch_scaffold07828_4626 | Ca_desi_scaffold   | 4626                           | [C/T]       | NA                                         |
| Ca_Desi_Ch_scaffold07828_4627 | Ca_desi_scaffold   | 4627                           | [C/T]       | NA                                         |
| Ca_Desi_Ch_scaffold07828_4630 | Ca_desi_scaffold   | 4630                           | [T/C]       | NA                                         |
| Ca_Desi_Ch_scaffold07828_4631 | Ca_desi_scaffold   | 4631                           | [T/C]       | NA                                         |
| Ca_Desi_Ch_scaffold07828_4632 | Ca_desi_scaffold   | 4632                           | [T/C]       | NA                                         |
| Ca_Desi_Ch_scaffold07828_4633 | Ca_desi_scaffold   | 4633                           | [T/C]       | NA                                         |
| Ca_Desi_Ch_scaffold07828_4636 | Ca_desi_scaffold   | 4636                           | [T/C]       | NA                                         |
| Ca_Desi_Ch_scaffold07828_4637 | Ca_desi_scaffold   | 4637                           | [T/C]       | NA                                         |

| <b>SNP IDs</b>                        | <b>Chromosomes</b> | <b>Physical positions (bp)</b> | <b>SNPs</b> | <b>NCBI SNPdb accession IDs (NCBI_ss#)</b> |
|---------------------------------------|--------------------|--------------------------------|-------------|--------------------------------------------|
| Ca_Desi_Chromosome_scaffold07828_4639 | Ca_desi_scaffold   | 4639                           | [A/G]       | NA                                         |
| Ca_Desi_Chromosome_scaffold07828_4645 | Ca_desi_scaffold   | 4645                           | [T/C]       | NA                                         |
| Ca_Desi_Chromosome_scaffold07828_4646 | Ca_desi_scaffold   | 4646                           | [G/A]       | NA                                         |
| Ca_Desi_Chromosome_scaffold07828_4648 | Ca_desi_scaffold   | 4648                           | [C/T]       | NA                                         |
| Ca_Desi_Chromosome_scaffold07828_4649 | Ca_desi_scaffold   | 4649                           | [A/G]       | NA                                         |
| Ca_Desi_Chromosome_scaffold07828_4650 | Ca_desi_scaffold   | 4650                           | [A/G]       | NA                                         |
| Ca_Desi_Chromosome_scaffold07828_4651 | Ca_desi_scaffold   | 4651                           | [A/G]       | NA                                         |
| Ca_Desi_Chromosome_scaffold07828_4654 | Ca_desi_scaffold   | 4654                           | [A/G]       | NA                                         |
| Ca_Desi_Chromosome_scaffold07828_4655 | Ca_desi_scaffold   | 4655                           | [A/G]       | NA                                         |
| Ca_Desi_Chromosome_scaffold07828_4656 | Ca_desi_scaffold   | 4656                           | [A/G]       | NA                                         |
| Ca_Desi_Chromosome_scaffold07828_4658 | Ca_desi_scaffold   | 4658                           | [A/G]       | NA                                         |
| Ca_Desi_Chromosome_scaffold07828_4660 | Ca_desi_scaffold   | 4660                           | [A/G]       | NA                                         |
| Ca_Desi_Chromosome_scaffold07828_4661 | Ca_desi_scaffold   | 4661                           | [A/G]       | NA                                         |
| Ca_Desi_Chromosome_scaffold07828_4663 | Ca_desi_scaffold   | 4663                           | [T/C]       | NA                                         |
| Ca_Desi_Chromosome_scaffold07828_4665 | Ca_desi_scaffold   | 4665                           | [A/G]       | NA                                         |
| Ca_Desi_Chromosome_scaffold07828_4666 | Ca_desi_scaffold   | 4666                           | [A/G]       | NA                                         |
| Ca_Desi_Chromosome_scaffold07828_4667 | Ca_desi_scaffold   | 4667                           | [T/C]       | NA                                         |
| Ca_Desi_Chromosome_scaffold07828_4671 | Ca_desi_scaffold   | 4671                           | [T/C]       | NA                                         |
| Ca_Desi_Chromosome_scaffold07828_4672 | Ca_desi_scaffold   | 4672                           | [T/C]       | NA                                         |
| Ca_Desi_Chromosome_scaffold07828_4673 | Ca_desi_scaffold   | 4673                           | [T/C]       | NA                                         |
| Ca_Desi_Chromosome_scaffold07828_4674 | Ca_desi_scaffold   | 4674                           | [G/A]       | NA                                         |
| Ca_Desi_Chromosome_scaffold07828_4677 | Ca_desi_scaffold   | 4677                           | [T/C]       | NA                                         |
| Ca_Desi_Chromosome_scaffold07828_4679 | Ca_desi_scaffold   | 4679                           | [T/G]       | NA                                         |
| Ca_Desi_Chromosome_scaffold07828_4680 | Ca_desi_scaffold   | 4680                           | [T/C]       | NA                                         |
| Ca_Desi_Chromosome_scaffold07828_4681 | Ca_desi_scaffold   | 4681                           | [C/T]       | NA                                         |
| Ca_Desi_Chromosome_scaffold07828_4683 | Ca_desi_scaffold   | 4683                           | [G/A]       | NA                                         |
| Ca_Desi_Chromosome_scaffold07828_4684 | Ca_desi_scaffold   | 4684                           | [T/A]       | NA                                         |
| Ca_Desi_Chromosome_scaffold07828_4685 | Ca_desi_scaffold   | 4685                           | [A/G]       | NA                                         |
| Ca_Desi_Chromosome_scaffold07828_4686 | Ca_desi_scaffold   | 4686                           | [T/C]       | NA                                         |
| Ca_Desi_Chromosome_scaffold07828_4688 | Ca_desi_scaffold   | 4688                           | [A/G]       | NA                                         |
| Ca_Desi_Chromosome_scaffold07828_4689 | Ca_desi_scaffold   | 4689                           | [T/C]       | NA                                         |
| Ca_Desi_Chromosome_scaffold07828_4690 | Ca_desi_scaffold   | 4690                           | [T/C]       | NA                                         |
| Ca_Desi_Chromosome_scaffold07828_4691 | Ca_desi_scaffold   | 4691                           | [C/T]       | NA                                         |
| Ca_Desi_Chromosome_scaffold07828_4692 | Ca_desi_scaffold   | 4692                           | [T/C]       | NA                                         |

| <b>SNP IDs</b>                | <b>Chromosomes</b> | <b>Physical positions (bp)</b> | <b>SNPs</b> | <b>NCBI SNPdb accession IDs (NCBI_ss#)</b> |
|-------------------------------|--------------------|--------------------------------|-------------|--------------------------------------------|
| Ca_Desi_Ch_scaffold07828_4693 | Ca_desi_scaffold   | 4693                           | [G/T]       | NA                                         |
| Ca_Desi_Ch_scaffold07828_4694 | Ca_desi_scaffold   | 4694                           | [C/T]       | NA                                         |
| Ca_Desi_Ch_scaffold07828_4696 | Ca_desi_scaffold   | 4696                           | [T/C]       | NA                                         |
| Ca_Desi_Ch_scaffold07828_4697 | Ca_desi_scaffold   | 4697                           | [T/C]       | NA                                         |
| Ca_Desi_Ch_scaffold07828_4698 | Ca_desi_scaffold   | 4698                           | [C/T]       | NA                                         |
| Ca_Desi_Ch_scaffold07828_4700 | Ca_desi_scaffold   | 4700                           | [T/C]       | NA                                         |
| Ca_Desi_Ch_scaffold07828_4701 | Ca_desi_scaffold   | 4701                           | [T/C]       | NA                                         |
| Ca_Desi_Ch_scaffold07828_4703 | Ca_desi_scaffold   | 4703                           | [A/G]       | NA                                         |
| Ca_Desi_Ch_scaffold07828_4749 | Ca_desi_scaffold   | 4749                           | [A/G]       | NA                                         |
| Ca_Desi_Ch_scaffold07828_4778 | Ca_desi_scaffold   | 4778                           | [A/G]       | NA                                         |
| Ca_Desi_Ch_scaffold07828_4784 | Ca_desi_scaffold   | 4784                           | [T/C]       | NA                                         |
| Ca_Desi_Ch_scaffold07828_4793 | Ca_desi_scaffold   | 4793                           | [C/T]       | NA                                         |
| Ca_Desi_Ch_scaffold07828_4806 | Ca_desi_scaffold   | 4806                           | [A/G]       | NA                                         |
| Ca_Desi_Ch_scaffold07828_4808 | Ca_desi_scaffold   | 4808                           | [A/G]       | NA                                         |
| Ca_Desi_Ch_scaffold07828_4809 | Ca_desi_scaffold   | 4809                           | [G/A]       | NA                                         |
| Ca_Desi_Ch_scaffold07828_4811 | Ca_desi_scaffold   | 4811                           | [T/C]       | NA                                         |
| Ca_Desi_Ch_scaffold07828_4813 | Ca_desi_scaffold   | 4813                           | [A/G]       | NA                                         |
| Ca_Desi_Ch_scaffold07828_4816 | Ca_desi_scaffold   | 4816                           | [A/C]       | NA                                         |
| Ca_Desi_Ch_scaffold07828_4819 | Ca_desi_scaffold   | 4819                           | [T/C]       | NA                                         |
| Ca_Desi_Ch_scaffold07828_4820 | Ca_desi_scaffold   | 4820                           | [T/C]       | NA                                         |
| Ca_Desi_Ch_scaffold07828_4823 | Ca_desi_scaffold   | 4823                           | [T/C]       | NA                                         |
| Ca_Desi_Ch_scaffold07828_4824 | Ca_desi_scaffold   | 4824                           | [T/C]       | NA                                         |
| Ca_Desi_Ch_scaffold07828_4826 | Ca_desi_scaffold   | 4826                           | [T/C]       | NA                                         |
| Ca_Desi_Ch_scaffold07828_4829 | Ca_desi_scaffold   | 4829                           | [T/C]       | NA                                         |
| Ca_Desi_Ch_scaffold07828_4830 | Ca_desi_scaffold   | 4830                           | [T/C]       | NA                                         |
| Ca_Desi_Ch_scaffold07828_4832 | Ca_desi_scaffold   | 4832                           | [T/C]       | NA                                         |
| Ca_Desi_Ch_scaffold07828_4838 | Ca_desi_scaffold   | 4838                           | [T/C]       | NA                                         |
| Ca_Desi_Ch_scaffold07828_4839 | Ca_desi_scaffold   | 4839                           | [A/G]       | NA                                         |
| Ca_Desi_Ch_scaffold07828_4846 | Ca_desi_scaffold   | 4846                           | [G/A]       | NA                                         |
| Ca_Desi_Ch_scaffold07828_4848 | Ca_desi_scaffold   | 4848                           | [T/C]       | NA                                         |
| Ca_Desi_Ch_scaffold07828_4853 | Ca_desi_scaffold   | 4853                           | [T/C]       | NA                                         |
| Ca_Desi_Ch_scaffold07828_4854 | Ca_desi_scaffold   | 4854                           | [T/C]       | NA                                         |
| Ca_Desi_Ch_scaffold07828_4856 | Ca_desi_scaffold   | 4856                           | [A/G]       | NA                                         |
| Ca_Desi_Ch_scaffold07828_4858 | Ca_desi_scaffold   | 4858                           | [T/C]       | NA                                         |

| <b>SNP IDs</b>                 | <b>Chromosomes</b> | <b>Physical positions (bp)</b> | <b>SNPs</b> | <b>NCBI SNPdb accession IDs (NCBI_ss#)</b> |
|--------------------------------|--------------------|--------------------------------|-------------|--------------------------------------------|
| Ca_DesigChr_scaffold07828_4861 | Ca_desig_scaffold  | 4861                           | [A/G]       | NA                                         |
| Ca_DesigChr_scaffold07828_4863 | Ca_desig_scaffold  | 4863                           | [T/C]       | NA                                         |
| Ca_DesigChr_scaffold07828_4865 | Ca_desig_scaffold  | 4865                           | [A/G]       | NA                                         |
| Ca_DesigChr_scaffold07828_4871 | Ca_desig_scaffold  | 4871                           | [T/C]       | NA                                         |
| Ca_DesigChr_scaffold07828_4889 | Ca_desig_scaffold  | 4889                           | [A/G]       | NA                                         |
| Ca_DesigChr_scaffold07828_4891 | Ca_desig_scaffold  | 4891                           | [A/G]       | NA                                         |
| Ca_DesigChr_scaffold07828_4893 | Ca_desig_scaffold  | 4893                           | [T/C]       | NA                                         |
| Ca_DesigChr_scaffold07828_4897 | Ca_desig_scaffold  | 4897                           | [A/G]       | NA                                         |
| Ca_DesigChr_scaffold07828_4898 | Ca_desig_scaffold  | 4898                           | [A/G]       | NA                                         |
| Ca_DesigChr_scaffold07828_4904 | Ca_desig_scaffold  | 4904                           | [A/G]       | NA                                         |
| Ca_DesigChr_scaffold07828_4915 | Ca_desig_scaffold  | 4915                           | [T/C]       | NA                                         |
| Ca_DesigChr_scaffold07828_4917 | Ca_desig_scaffold  | 4917                           | [A/G]       | NA                                         |
| Ca_DesigChr_scaffold07828_4919 | Ca_desig_scaffold  | 4919                           | [T/C]       | NA                                         |
| Ca_DesigChr_scaffold07828_4922 | Ca_desig_scaffold  | 4922                           | [T/C]       | NA                                         |
| Ca_DesigChr_scaffold07828_5016 | Ca_desig_scaffold  | 5016                           | [A/G]       | NA                                         |
| Ca_DesigChr_scaffold07828_5017 | Ca_desig_scaffold  | 5017                           | [A/G]       | NA                                         |
| Ca_DesigChr_scaffold07828_5038 | Ca_desig_scaffold  | 5038                           | [A/G]       | NA                                         |
| Ca_DesigChr_scaffold07828_6346 | Ca_desig_scaffold  | 6346                           | [A/G]       | NA                                         |
| Ca_DesigChr_scaffold07828_6352 | Ca_desig_scaffold  | 6352                           | [A/G]       | NA                                         |
| Ca_DesigChr_scaffold07828_6354 | Ca_desig_scaffold  | 6354                           | [A/G]       | NA                                         |
| Ca_DesigChr_scaffold07828_6357 | Ca_desig_scaffold  | 6357                           | [G/T]       | NA                                         |
| Ca_DesigChr_scaffold07828_6363 | Ca_desig_scaffold  | 6363                           | [T/G]       | NA                                         |
| Ca_DesigChr_scaffold07828_6652 | Ca_desig_scaffold  | 6652                           | [T/C]       | NA                                         |
| Ca_DesigChr_scaffold07828_6661 | Ca_desig_scaffold  | 6661                           | [T/C]       | NA                                         |
| Ca_DesigChr_scaffold07828_6667 | Ca_desig_scaffold  | 6667                           | [T/A]       | NA                                         |
| Ca_DesigChr_scaffold07828_6669 | Ca_desig_scaffold  | 6669                           | [A/G]       | NA                                         |
| Ca_DesigChr_scaffold07828_6678 | Ca_desig_scaffold  | 6678                           | [T/C]       | NA                                         |
| Ca_DesigChr_scaffold07828_6680 | Ca_desig_scaffold  | 6680                           | [A/G]       | NA                                         |
| Ca_DesigChr_scaffold07828_6682 | Ca_desig_scaffold  | 6682                           | [A/G]       | NA                                         |
| Ca_DesigChr_scaffold07828_6685 | Ca_desig_scaffold  | 6685                           | [A/G]       | NA                                         |
| Ca_DesigChr_scaffold07828_6688 | Ca_desig_scaffold  | 6688                           | [G/A]       | NA                                         |
| Ca_DesigChr_scaffold07828_6692 | Ca_desig_scaffold  | 6692                           | [T/C]       | NA                                         |
| Ca_DesigChr_scaffold07828_6697 | Ca_desig_scaffold  | 6697                           | [T/C]       | NA                                         |
| Ca_DesigChr_scaffold07828_6700 | Ca_desig_scaffold  | 6700                           | [A/G]       | NA                                         |

| <b>SNP IDs</b>                | <b>Chromosomes</b> | <b>Physical positions (bp)</b> | <b>SNPs</b> | <b>NCBI SNPdb accession IDs (NCBI_ss#)</b> |
|-------------------------------|--------------------|--------------------------------|-------------|--------------------------------------------|
| Ca_Desi_Ch_scaffold07828_6702 | Ca_desi_scaffold   | 6702                           | [A/G]       | NA                                         |
| Ca_Desi_Ch_scaffold07828_6703 | Ca_desi_scaffold   | 6703                           | [T/C]       | NA                                         |
| Ca_Desi_Ch_scaffold07828_6706 | Ca_desi_scaffold   | 6706                           | [T/C]       | NA                                         |
| Ca_Desi_Ch_scaffold07828_6708 | Ca_desi_scaffold   | 6708                           | [T/C]       | NA                                         |
| Ca_Desi_Ch_scaffold07845_1694 | Ca_desi_scaffold   | 1694                           | [A/C]       | NA                                         |
| Ca_Desi_Ch_scaffold07877_2091 | Ca_desi_scaffold   | 2091                           | [G/A]       | NA                                         |
| Ca_Desi_Ch_scaffold07914_717  | Ca_desi_scaffold   | 717                            | [T/C]       | NA                                         |
| Ca_Desi_Ch_scaffold07925_4158 | Ca_desi_scaffold   | 4158                           | [A/G]       | NA                                         |
| Ca_Desi_Ch_scaffold07925_4592 | Ca_desi_scaffold   | 4592                           | [A/G]       | NA                                         |
| Ca_Desi_Ch_scaffold07925_4617 | Ca_desi_scaffold   | 4617                           | [A/G]       | NA                                         |
| Ca_Desi_Ch_scaffold07974_1512 | Ca_desi_scaffold   | 1512                           | [A/C]       | NA                                         |
| Ca_Desi_Ch_scaffold08005_1609 | Ca_desi_scaffold   | 1609                           | [T/C]       | NA                                         |
| Ca_Desi_Ch_scaffold08029_5544 | Ca_desi_scaffold   | 5544                           | [T/A]       | NA                                         |
| Ca_Desi_Ch_scaffold08033_2737 | Ca_desi_scaffold   | 2737                           | [A/G]       | NA                                         |
| Ca_Desi_Ch_scaffold08033_2746 | Ca_desi_scaffold   | 2746                           | [T/A]       | NA                                         |
| Ca_Desi_Ch_scaffold08033_2771 | Ca_desi_scaffold   | 2771                           | [C/T]       | NA                                         |
| Ca_Desi_Ch_scaffold08049_2788 | Ca_desi_scaffold   | 2788                           | [C/A]       | NA                                         |
| Ca_Desi_Ch_scaffold08052_4038 | Ca_desi_scaffold   | 4038                           | [T/C]       | NA                                         |
| Ca_Desi_Ch_scaffold08052_4067 | Ca_desi_scaffold   | 4067                           | [A/G]       | NA                                         |
| Ca_Desi_Ch_scaffold08052_5210 | Ca_desi_scaffold   | 5210                           | [C/T]       | NA                                         |
| Ca_Desi_Ch_scaffold08052_5230 | Ca_desi_scaffold   | 5230                           | [A/G]       | NA                                         |
| Ca_Desi_Ch_scaffold08052_5240 | Ca_desi_scaffold   | 5240                           | [A/G]       | NA                                         |
| Ca_Desi_Ch_scaffold08148_1331 | Ca_desi_scaffold   | 1331                           | [T/C]       | NA                                         |
| Ca_Desi_Ch_scaffold08168_5724 | Ca_desi_scaffold   | 5724                           | [A/C]       | NA                                         |
| Ca_Desi_Ch_scaffold08176_3577 | Ca_desi_scaffold   | 3577                           | [T/G]       | NA                                         |
| Ca_Desi_Ch_scaffold08176_3662 | Ca_desi_scaffold   | 3662                           | [A/G]       | NA                                         |
| Ca_Desi_Ch_scaffold08199_237  | Ca_desi_scaffold   | 237                            | [T/G]       | NA                                         |
| Ca_Desi_Ch_scaffold08199_251  | Ca_desi_scaffold   | 251                            | [A/G]       | NA                                         |
| Ca_Desi_Ch_scaffold08230_1653 | Ca_desi_scaffold   | 1653                           | [T/A]       | NA                                         |
| Ca_Desi_Ch_scaffold08230_1657 | Ca_desi_scaffold   | 1657                           | [T/G]       | NA                                         |
| Ca_Desi_Ch_scaffold08230_2872 | Ca_desi_scaffold   | 2872                           | [T/G]       | NA                                         |
| Ca_Desi_Ch_scaffold08230_6538 | Ca_desi_scaffold   | 6538                           | [T/C]       | NA                                         |
| Ca_Desi_Ch_scaffold08230_6539 | Ca_desi_scaffold   | 6539                           | [A/G]       | NA                                         |
| Ca_Desi_Ch_scaffold08230_6540 | Ca_desi_scaffold   | 6540                           | [A/G]       | NA                                         |

| <b>SNP IDs</b>                 | <b>Chromosomes</b> | <b>Physical positions (bp)</b> | <b>SNPs</b> | <b>NCBI SNPdb accession IDs (NCBI_ss#)</b> |
|--------------------------------|--------------------|--------------------------------|-------------|--------------------------------------------|
| Ca_DesigChr_scaffold08230_6542 | Ca_desig_scaffold  | 6542                           | [A/G]       | NA                                         |
| Ca_DesigChr_scaffold08230_6543 | Ca_desig_scaffold  | 6543                           | [G/A]       | NA                                         |
| Ca_DesigChr_scaffold08230_6544 | Ca_desig_scaffold  | 6544                           | [C/T]       | NA                                         |
| Ca_DesigChr_scaffold08230_6546 | Ca_desig_scaffold  | 6546                           | [G/T]       | NA                                         |
| Ca_DesigChr_scaffold08230_6547 | Ca_desig_scaffold  | 6547                           | [A/G]       | NA                                         |
| Ca_DesigChr_scaffold08230_6548 | Ca_desig_scaffold  | 6548                           | [A/G]       | NA                                         |
| Ca_DesigChr_scaffold08230_6549 | Ca_desig_scaffold  | 6549                           | [T/C]       | NA                                         |
| Ca_DesigChr_scaffold08230_6550 | Ca_desig_scaffold  | 6550                           | [T/C]       | NA                                         |
| Ca_DesigChr_scaffold08230_6551 | Ca_desig_scaffold  | 6551                           | [C/T]       | NA                                         |
| Ca_DesigChr_scaffold08230_6552 | Ca_desig_scaffold  | 6552                           | [T/C]       | NA                                         |
| Ca_DesigChr_scaffold08230_6553 | Ca_desig_scaffold  | 6553                           | [A/G]       | NA                                         |
| Ca_DesigChr_scaffold08230_6554 | Ca_desig_scaffold  | 6554                           | [T/C]       | NA                                         |
| Ca_DesigChr_scaffold08230_6555 | Ca_desig_scaffold  | 6555                           | [C/T]       | NA                                         |
| Ca_DesigChr_scaffold08230_6556 | Ca_desig_scaffold  | 6556                           | [T/C]       | NA                                         |
| Ca_DesigChr_scaffold08230_6557 | Ca_desig_scaffold  | 6557                           | [A/G]       | NA                                         |
| Ca_DesigChr_scaffold08230_6558 | Ca_desig_scaffold  | 6558                           | [T/C]       | NA                                         |
| Ca_DesigChr_scaffold08230_6559 | Ca_desig_scaffold  | 6559                           | [C/T]       | NA                                         |
| Ca_DesigChr_scaffold08230_6560 | Ca_desig_scaffold  | 6560                           | [A/G]       | NA                                         |
| Ca_DesigChr_scaffold08230_6561 | Ca_desig_scaffold  | 6561                           | [C/T]       | NA                                         |
| Ca_DesigChr_scaffold08230_6562 | Ca_desig_scaffold  | 6562                           | [C/T]       | NA                                         |
| Ca_DesigChr_scaffold08230_6563 | Ca_desig_scaffold  | 6563                           | [T/C]       | NA                                         |
| Ca_DesigChr_scaffold08230_6565 | Ca_desig_scaffold  | 6565                           | [T/C]       | NA                                         |
| Ca_DesigChr_scaffold08230_6566 | Ca_desig_scaffold  | 6566                           | [G/A]       | NA                                         |
| Ca_DesigChr_scaffold08230_6567 | Ca_desig_scaffold  | 6567                           | [C/T]       | NA                                         |
| Ca_DesigChr_scaffold08230_6568 | Ca_desig_scaffold  | 6568                           | [T/C]       | NA                                         |
| Ca_DesigChr_scaffold08230_6569 | Ca_desig_scaffold  | 6569                           | [A/G]       | NA                                         |
| Ca_DesigChr_scaffold08230_6570 | Ca_desig_scaffold  | 6570                           | [C/T]       | NA                                         |
| Ca_DesigChr_scaffold08230_6571 | Ca_desig_scaffold  | 6571                           | [A/G]       | NA                                         |
| Ca_DesigChr_scaffold08230_6574 | Ca_desig_scaffold  | 6574                           | [A/G]       | NA                                         |
| Ca_DesigChr_scaffold08230_6575 | Ca_desig_scaffold  | 6575                           | [G/A]       | NA                                         |
| Ca_DesigChr_scaffold08230_6576 | Ca_desig_scaffold  | 6576                           | [A/G]       | NA                                         |
| Ca_DesigChr_scaffold08230_6577 | Ca_desig_scaffold  | 6577                           | [T/C]       | NA                                         |
| Ca_DesigChr_scaffold08230_6578 | Ca_desig_scaffold  | 6578                           | [T/C]       | NA                                         |
| Ca_DesigChr_scaffold08230_6579 | Ca_desig_scaffold  | 6579                           | [G/A]       | NA                                         |

| <b>SNP IDs</b>                  | <b>Chromosomes</b> | <b>Physical positions (bp)</b> | <b>SNPs</b> | <b>NCBI SNPdb accession IDs (NCBI_ss#)</b> |
|---------------------------------|--------------------|--------------------------------|-------------|--------------------------------------------|
| Ca_Desig_Chr_scaffold08230_6580 | Ca_desig_scaffold  | 6580                           | [A/G]       | NA                                         |
| Ca_Desig_Chr_scaffold08230_6582 | Ca_desig_scaffold  | 6582                           | [G/A]       | NA                                         |
| Ca_Desig_Chr_scaffold08230_6583 | Ca_desig_scaffold  | 6583                           | [A/G]       | NA                                         |
| Ca_Desig_Chr_scaffold08230_6584 | Ca_desig_scaffold  | 6584                           | [A/G]       | NA                                         |
| Ca_Desig_Chr_scaffold08230_6585 | Ca_desig_scaffold  | 6585                           | [C/T]       | NA                                         |
| Ca_Desig_Chr_scaffold08230_6586 | Ca_desig_scaffold  | 6586                           | [C/T]       | NA                                         |
| Ca_Desig_Chr_scaffold08230_6587 | Ca_desig_scaffold  | 6587                           | [T/C]       | NA                                         |
| Ca_Desig_Chr_scaffold08230_6588 | Ca_desig_scaffold  | 6588                           | [G/A]       | NA                                         |
| Ca_Desig_Chr_scaffold08230_6589 | Ca_desig_scaffold  | 6589                           | [C/T]       | NA                                         |
| Ca_Desig_Chr_scaffold08230_6590 | Ca_desig_scaffold  | 6590                           | [T/C]       | NA                                         |
| Ca_Desig_Chr_scaffold08230_6591 | Ca_desig_scaffold  | 6591                           | [T/C]       | NA                                         |
| Ca_Desig_Chr_scaffold08230_6592 | Ca_desig_scaffold  | 6592                           | [T/C]       | NA                                         |
| Ca_Desig_Chr_scaffold08230_6594 | Ca_desig_scaffold  | 6594                           | [A/G]       | NA                                         |
| Ca_Desig_Chr_scaffold08230_6595 | Ca_desig_scaffold  | 6595                           | [T/C]       | NA                                         |
| Ca_Desig_Chr_scaffold08230_6596 | Ca_desig_scaffold  | 6596                           | [T/C]       | NA                                         |
| Ca_Desig_Chr_scaffold08230_6597 | Ca_desig_scaffold  | 6597                           | [A/G]       | NA                                         |
| Ca_Desig_Chr_scaffold08239_1024 | Ca_desig_scaffold  | 1024                           | [A/C]       | NA                                         |
| Ca_Desig_Chr_scaffold08239_1033 | Ca_desig_scaffold  | 1033                           | [C/A]       | NA                                         |
| Ca_Desig_Chr_scaffold08245_4000 | Ca_desig_scaffold  | 4000                           | [G/A]       | NA                                         |
| Ca_Desig_Chr_scaffold08245_4030 | Ca_desig_scaffold  | 4030                           | [C/T]       | NA                                         |
| Ca_Desig_Chr_scaffold08245_4038 | Ca_desig_scaffold  | 4038                           | [G/A]       | NA                                         |
| Ca_Desig_Chr_scaffold08249_5640 | Ca_desig_scaffold  | 5640                           | [C/T]       | NA                                         |
| Ca_Desig_Chr_scaffold08257_5542 | Ca_desig_scaffold  | 5542                           | [A/C]       | NA                                         |
| Ca_Desig_Chr_scaffold08257_5566 | Ca_desig_scaffold  | 5566                           | [A/C]       | NA                                         |
| Ca_Desig_Chr_scaffold08272_270  | Ca_desig_scaffold  | 270                            | [T/C]       | NA                                         |
| Ca_Desig_Chr_scaffold08274_2347 | Ca_desig_scaffold  | 2347                           | [A/G]       | NA                                         |
| Ca_Desig_Chr_scaffold08274_2350 | Ca_desig_scaffold  | 2350                           | [A/G]       | NA                                         |
| Ca_Desig_Chr_scaffold08274_2351 | Ca_desig_scaffold  | 2351                           | [C/T]       | NA                                         |
| Ca_Desig_Chr_scaffold08274_2364 | Ca_desig_scaffold  | 2364                           | [T/C]       | NA                                         |
| Ca_Desig_Chr_scaffold08286_2732 | Ca_desig_scaffold  | 2732                           | [A/T]       | NA                                         |
| Ca_Desig_Chr_scaffold08306_4999 | Ca_desig_scaffold  | 4999                           | [T/C]       | NA                                         |
| Ca_Desig_Chr_scaffold08317_4432 | Ca_desig_scaffold  | 4432                           | [A/G]       | NA                                         |
| Ca_Desig_Chr_scaffold08317_4434 | Ca_desig_scaffold  | 4434                           | [A/C]       | NA                                         |
| Ca_Desig_Chr_scaffold08317_4447 | Ca_desig_scaffold  | 4447                           | [A/G]       | NA                                         |



| <b>SNP IDs</b>                | <b>Chromosomes</b> | <b>Physical positions (bp)</b> | <b>SNPs</b> | <b>NCBI SNPdb accession IDs (NCBI_ss#)</b> |
|-------------------------------|--------------------|--------------------------------|-------------|--------------------------------------------|
| Ca_Desi_Ch_scaffold08317_4459 | Ca_desi_scaffold   | 4459                           | [A/C]       | NA                                         |
| Ca_Desi_Ch_scaffold08364_2177 | Ca_desi_scaffold   | 2177                           | [A/T]       | NA                                         |
| Ca_Desi_Ch_scaffold08418_698  | Ca_desi_scaffold   | 698                            | [A/G]       | NA                                         |
| Ca_Desi_Ch_scaffold08418_886  | Ca_desi_scaffold   | 886                            | [G/T]       | NA                                         |
| Ca_Desi_Ch_scaffold08418_890  | Ca_desi_scaffold   | 890                            | [G/C]       | NA                                         |
| Ca_Desi_Ch_scaffold08418_1039 | Ca_desi_scaffold   | 1039                           | [G/T]       | NA                                         |
| Ca_Desi_Ch_scaffold08418_3085 | Ca_desi_scaffold   | 3085                           | [T/A]       | NA                                         |
| Ca_Desi_Ch_scaffold08418_3093 | Ca_desi_scaffold   | 3093                           | [T/A]       | NA                                         |
| Ca_Desi_Ch_scaffold08418_3120 | Ca_desi_scaffold   | 3120                           | [T/A]       | NA                                         |
| Ca_Desi_Ch_scaffold08418_3123 | Ca_desi_scaffold   | 3123                           | [A/G]       | NA                                         |
| Ca_Desi_Ch_scaffold08433_2030 | Ca_desi_scaffold   | 2030                           | [A/C]       | NA                                         |
| Ca_Desi_Ch_scaffold08433_2035 | Ca_desi_scaffold   | 2035                           | [T/C]       | NA                                         |
| Ca_Desi_Ch_scaffold08433_2046 | Ca_desi_scaffold   | 2046                           | [G/C]       | NA                                         |
| Ca_Desi_Ch_scaffold08433_2050 | Ca_desi_scaffold   | 2050                           | [A/C]       | NA                                         |
| Ca_Desi_Ch_scaffold08433_2061 | Ca_desi_scaffold   | 2061                           | [T/C]       | NA                                         |
| Ca_Desi_Ch_scaffold08433_2064 | Ca_desi_scaffold   | 2064                           | [T/C]       | NA                                         |
| Ca_Desi_Ch_scaffold08433_2068 | Ca_desi_scaffold   | 2068                           | [A/G]       | NA                                         |
| Ca_Desi_Ch_scaffold08433_2078 | Ca_desi_scaffold   | 2078                           | [T/C]       | NA                                         |
| Ca_Desi_Ch_scaffold08499_2277 | Ca_desi_scaffold   | 2277                           | [G/A]       | NA                                         |
| Ca_Desi_Ch_scaffold08555_4275 | Ca_desi_scaffold   | 4275                           | [G/A]       | NA                                         |
| Ca_Desi_Ch_scaffold08555_4302 | Ca_desi_scaffold   | 4302                           | [C/T]       | NA                                         |
| Ca_Desi_Ch_scaffold08555_4303 | Ca_desi_scaffold   | 4303                           | [T/A]       | NA                                         |
| Ca_Desi_Ch_scaffold08555_4333 | Ca_desi_scaffold   | 4333                           | [T/G]       | NA                                         |
| Ca_Desi_Ch_scaffold08572_4826 | Ca_desi_scaffold   | 4826                           | [A/C]       | NA                                         |
| Ca_Desi_Ch_scaffold08594_2119 | Ca_desi_scaffold   | 2119                           | [A/C]       | NA                                         |
| Ca_Desi_Ch_scaffold08594_3232 | Ca_desi_scaffold   | 3232                           | [T/G]       | NA                                         |
| Ca_Desi_Ch_scaffold08617_402  | Ca_desi_scaffold   | 402                            | [T/G]       | NA                                         |
| Ca_Desi_Ch_scaffold08617_622  | Ca_desi_scaffold   | 622                            | [C/T]       | NA                                         |
| Ca_Desi_Ch_scaffold08617_4791 | Ca_desi_scaffold   | 4791                           | [A/C]       | NA                                         |
| Ca_Desi_Ch_scaffold08617_4804 | Ca_desi_scaffold   | 4804                           | [A/C]       | NA                                         |
| Ca_Desi_Ch_scaffold08617_4816 | Ca_desi_scaffold   | 4816                           | [A/G]       | NA                                         |
| Ca_Desi_Ch_scaffold08627_2708 | Ca_desi_scaffold   | 2708                           | [T/C]       | NA                                         |
| Ca_Desi_Ch_scaffold08627_2861 | Ca_desi_scaffold   | 2861                           | [G/A]       | NA                                         |
| Ca_Desi_Ch_scaffold08653_5630 | Ca_desi_scaffold   | 5630                           | [T/G]       | NA                                         |

| <b>SNP IDs</b>                  | <b>Chromosomes</b> | <b>Physical positions (bp)</b> | <b>SNPs</b> | <b>NCBI SNPdb accession IDs (NCBI_ss#)</b> |
|---------------------------------|--------------------|--------------------------------|-------------|--------------------------------------------|
| Ca_Desig_Chr_scaffold08686_4911 | Ca_desig_scaffold  | 4911                           | [T/G]       | NA                                         |
| Ca_Desig_Chr_scaffold08711_2031 | Ca_desig_scaffold  | 2031                           | [G/C]       | NA                                         |
| Ca_Desig_Chr_scaffold08711_2035 | Ca_desig_scaffold  | 2035                           | [G/A]       | NA                                         |
| Ca_Desig_Chr_scaffold08711_2968 | Ca_desig_scaffold  | 2968                           | [G/A]       | NA                                         |
| Ca_Desig_Chr_scaffold08723_78   | Ca_desig_scaffold  | 78                             | [G/A]       | NA                                         |
| Ca_Desig_Chr_scaffold08723_80   | Ca_desig_scaffold  | 80                             | [C/T]       | NA                                         |
| Ca_Desig_Chr_scaffold08723_88   | Ca_desig_scaffold  | 88                             | [A/T]       | NA                                         |
| Ca_Desig_Chr_scaffold08723_104  | Ca_desig_scaffold  | 104                            | [C/T]       | NA                                         |
| Ca_Desig_Chr_scaffold08723_108  | Ca_desig_scaffold  | 108                            | [G/A]       | NA                                         |
| Ca_Desig_Chr_scaffold08723_4784 | Ca_desig_scaffold  | 4784                           | [A/C]       | NA                                         |
| Ca_Desig_Chr_scaffold08742_908  | Ca_desig_scaffold  | 908                            | [T/C]       | NA                                         |
| Ca_Desig_Chr_scaffold08742_918  | Ca_desig_scaffold  | 918                            | [T/C]       | NA                                         |
| Ca_Desig_Chr_scaffold08742_922  | Ca_desig_scaffold  | 922                            | [C/G]       | NA                                         |
| Ca_Desig_Chr_scaffold08742_930  | Ca_desig_scaffold  | 930                            | [A/C]       | NA                                         |
| Ca_Desig_Chr_scaffold08742_955  | Ca_desig_scaffold  | 955                            | [T/C]       | NA                                         |
| Ca_Desig_Chr_scaffold08742_959  | Ca_desig_scaffold  | 959                            | [T/C]       | NA                                         |
| Ca_Desig_Chr_scaffold08742_963  | Ca_desig_scaffold  | 963                            | [A/G]       | NA                                         |
| Ca_Desig_Chr_scaffold08874_350  | Ca_desig_scaffold  | 350                            | [A/C]       | NA                                         |
| Ca_Desig_Chr_scaffold08916_4239 | Ca_desig_scaffold  | 4239                           | [T/C]       | NA                                         |
| Ca_Desig_Chr_scaffold08916_4269 | Ca_desig_scaffold  | 4269                           | [T/G]       | NA                                         |
| Ca_Desig_Chr_scaffold08937_105  | Ca_desig_scaffold  | 105                            | [A/G]       | NA                                         |
| Ca_Desig_Chr_scaffold08937_108  | Ca_desig_scaffold  | 108                            | [A/T]       | NA                                         |
| Ca_Desig_Chr_scaffold08937_118  | Ca_desig_scaffold  | 118                            | [T/C]       | NA                                         |
| Ca_Desig_Chr_scaffold08937_132  | Ca_desig_scaffold  | 132                            | [T/C]       | NA                                         |
| Ca_Desig_Chr_scaffold08937_146  | Ca_desig_scaffold  | 146                            | [A/G]       | NA                                         |
| Ca_Desig_Chr_scaffold08937_151  | Ca_desig_scaffold  | 151                            | [T/C]       | NA                                         |
| Ca_Desig_Chr_scaffold08937_154  | Ca_desig_scaffold  | 154                            | [T/C]       | NA                                         |
| Ca_Desig_Chr_scaffold08937_155  | Ca_desig_scaffold  | 155                            | [T/C]       | NA                                         |
| Ca_Desig_Chr_scaffold08937_1771 | Ca_desig_scaffold  | 1771                           | [T/G]       | NA                                         |
| Ca_Desig_Chr_scaffold08937_3012 | Ca_desig_scaffold  | 3012                           | [T/C]       | NA                                         |
| Ca_Desig_Chr_scaffold08937_3381 | Ca_desig_scaffold  | 3381                           | [T/C]       | NA                                         |
| Ca_Desig_Chr_scaffold08937_3387 | Ca_desig_scaffold  | 3387                           | [T/A]       | NA                                         |
| Ca_Desig_Chr_scaffold08937_4235 | Ca_desig_scaffold  | 4235                           | [A/G]       | NA                                         |
| Ca_Desig_Chr_scaffold08937_4248 | Ca_desig_scaffold  | 4248                           | [T/C]       | NA                                         |

| <b>SNP IDs</b>                | <b>Chromosomes</b> | <b>Physical positions (bp)</b> | <b>SNPs</b> | <b>NCBI SNPdb accession IDs (NCBI_ss#)</b> |
|-------------------------------|--------------------|--------------------------------|-------------|--------------------------------------------|
| Ca_Desi_Ch_scaffold08937_4254 | Ca_desi_scaffold   | 4254                           | [T/C]       | NA                                         |
| Ca_Desi_Ch_scaffold08937_4260 | Ca_desi_scaffold   | 4260                           | [G/A]       | NA                                         |
| Ca_Desi_Ch_scaffold08937_4265 | Ca_desi_scaffold   | 4265                           | [T/G]       | NA                                         |
| Ca_Desi_Ch_scaffold08937_4268 | Ca_desi_scaffold   | 4268                           | [T/G]       | NA                                         |
| Ca_Desi_Ch_scaffold08937_4273 | Ca_desi_scaffold   | 4273                           | [T/C]       | NA                                         |
| Ca_Desi_Ch_scaffold08937_4276 | Ca_desi_scaffold   | 4276                           | [T/C]       | NA                                         |
| Ca_Desi_Ch_scaffold08937_4279 | Ca_desi_scaffold   | 4279                           | [T/C]       | NA                                         |
| Ca_Desi_Ch_scaffold08937_4281 | Ca_desi_scaffold   | 4281                           | [A/G]       | NA                                         |
| Ca_Desi_Ch_scaffold08937_4282 | Ca_desi_scaffold   | 4282                           | [A/G]       | NA                                         |
| Ca_Desi_Ch_scaffold08937_4283 | Ca_desi_scaffold   | 4283                           | [A/G]       | NA                                         |
| Ca_Desi_Ch_scaffold08937_4285 | Ca_desi_scaffold   | 4285                           | [A/G]       | NA                                         |
| Ca_Desi_Ch_scaffold08937_4286 | Ca_desi_scaffold   | 4286                           | [A/G]       | NA                                         |
| Ca_Desi_Ch_scaffold08937_4440 | Ca_desi_scaffold   | 4440                           | [G/A]       | NA                                         |
| Ca_Desi_Ch_scaffold08937_4441 | Ca_desi_scaffold   | 4441                           | [T/C]       | NA                                         |
| Ca_Desi_Ch_scaffold08937_4442 | Ca_desi_scaffold   | 4442                           | [T/C]       | NA                                         |
| Ca_Desi_Ch_scaffold08937_4443 | Ca_desi_scaffold   | 4443                           | [G/T]       | NA                                         |
| Ca_Desi_Ch_scaffold08937_4445 | Ca_desi_scaffold   | 4445                           | [A/G]       | NA                                         |
| Ca_Desi_Ch_scaffold08937_4452 | Ca_desi_scaffold   | 4452                           | [A/G]       | NA                                         |
| Ca_Desi_Ch_scaffold08937_4455 | Ca_desi_scaffold   | 4455                           | [T/C]       | NA                                         |
| Ca_Desi_Ch_scaffold08937_4460 | Ca_desi_scaffold   | 4460                           | [T/C]       | NA                                         |
| Ca_Desi_Ch_scaffold08937_4469 | Ca_desi_scaffold   | 4469                           | [T/C]       | NA                                         |
| Ca_Desi_Ch_scaffold08937_4470 | Ca_desi_scaffold   | 4470                           | [T/C]       | NA                                         |
| Ca_Desi_Ch_scaffold08937_4478 | Ca_desi_scaffold   | 4478                           | [T/C]       | NA                                         |
| Ca_Desi_Ch_scaffold08937_4480 | Ca_desi_scaffold   | 4480                           | [A/G]       | NA                                         |
| Ca_Desi_Ch_scaffold08937_4481 | Ca_desi_scaffold   | 4481                           | [T/C]       | NA                                         |
| Ca_Desi_Ch_scaffold08937_4483 | Ca_desi_scaffold   | 4483                           | [A/G]       | NA                                         |
| Ca_Desi_Ch_scaffold08937_4486 | Ca_desi_scaffold   | 4486                           | [A/G]       | NA                                         |
| Ca_Desi_Ch_scaffold08937_4490 | Ca_desi_scaffold   | 4490                           | [A/G]       | NA                                         |
| Ca_Desi_Ch_scaffold08937_4494 | Ca_desi_scaffold   | 4494                           | [C/T]       | NA                                         |
| Ca_Desi_Ch_scaffold08953_2468 | Ca_desi_scaffold   | 2468                           | [T/C]       | NA                                         |
| Ca_Desi_Ch_scaffold08953_2472 | Ca_desi_scaffold   | 2472                           | [T/C]       | NA                                         |
| Ca_Desi_Ch_scaffold08953_2475 | Ca_desi_scaffold   | 2475                           | [T/C]       | NA                                         |
| Ca_Desi_Ch_scaffold08953_2495 | Ca_desi_scaffold   | 2495                           | [A/C]       | NA                                         |
| Ca_Desi_Ch_scaffold08997_1165 | Ca_desi_scaffold   | 1165                           | [A/G]       | NA                                         |

| <b>SNP IDs</b>                  | <b>Chromosomes</b> | <b>Physical positions (bp)</b> | <b>SNPs</b> | <b>NCBI SNPdb accession IDs (NCBI_ss#)</b> |
|---------------------------------|--------------------|--------------------------------|-------------|--------------------------------------------|
| Ca_Desig_Chr_scaffold08997_1176 | Ca_desig_scaffold  | 1176                           | [G/A]       | NA                                         |
| Ca_Desig_Chr_scaffold08997_1178 | Ca_desig_scaffold  | 1178                           | [G/C]       | NA                                         |
| Ca_Desig_Chr_scaffold08997_1193 | Ca_desig_scaffold  | 1193                           | [G/A]       | NA                                         |
| Ca_Desig_Chr_scaffold08997_1210 | Ca_desig_scaffold  | 1210                           | [A/G]       | NA                                         |
| Ca_Desig_Chr_scaffold08997_1223 | Ca_desig_scaffold  | 1223                           | [T/A]       | NA                                         |
| Ca_Desig_Chr_scaffold09037_3773 | Ca_desig_scaffold  | 3773                           | [T/A]       | NA                                         |
| Ca_Desig_Chr_scaffold09037_3776 | Ca_desig_scaffold  | 3776                           | [A/C]       | NA                                         |
| Ca_Desig_Chr_scaffold09037_3790 | Ca_desig_scaffold  | 3790                           | [T/C]       | NA                                         |
| Ca_Desig_Chr_scaffold09037_3791 | Ca_desig_scaffold  | 3791                           | [T/C]       | NA                                         |
| Ca_Desig_Chr_scaffold09037_3810 | Ca_desig_scaffold  | 3810                           | [G/A]       | NA                                         |
| Ca_Desig_Chr_scaffold09037_3812 | Ca_desig_scaffold  | 3812                           | [A/G]       | NA                                         |
| Ca_Desig_Chr_scaffold09037_3814 | Ca_desig_scaffold  | 3814                           | [T/A]       | NA                                         |
| Ca_Desig_Chr_scaffold09037_3827 | Ca_desig_scaffold  | 3827                           | [T/A]       | NA                                         |
| Ca_Desig_Chr_scaffold09037_3849 | Ca_desig_scaffold  | 3849                           | [A/G]       | NA                                         |
| Ca_Desig_Chr_scaffold09037_3879 | Ca_desig_scaffold  | 3879                           | [T/C]       | NA                                         |
| Ca_Desig_Chr_scaffold09108_2606 | Ca_desig_scaffold  | 2606                           | [T/A]       | NA                                         |
| Ca_Desig_Chr_scaffold09143_5706 | Ca_desig_scaffold  | 5706                           | [T/G]       | NA                                         |
| Ca_Desig_Chr_scaffold09143_5711 | Ca_desig_scaffold  | 5711                           | [T/G]       | NA                                         |
| Ca_Desig_Chr_scaffold09143_5713 | Ca_desig_scaffold  | 5713                           | [A/G]       | NA                                         |
| Ca_Desig_Chr_scaffold09143_5717 | Ca_desig_scaffold  | 5717                           | [A/G]       | NA                                         |
| Ca_Desig_Chr_scaffold09143_5721 | Ca_desig_scaffold  | 5721                           | [A/G]       | NA                                         |
| Ca_Desig_Chr_scaffold09239_2325 | Ca_desig_scaffold  | 2325                           | [G/T]       | NA                                         |
| Ca_Desig_Chr_scaffold09239_2364 | Ca_desig_scaffold  | 2364                           | [A/G]       | NA                                         |
| Ca_Desig_Chr_scaffold09239_2402 | Ca_desig_scaffold  | 2402                           | [T/C]       | NA                                         |
| Ca_Desig_Chr_scaffold09239_2438 | Ca_desig_scaffold  | 2438                           | [A/C]       | NA                                         |
| Ca_Desig_Chr_scaffold09239_2494 | Ca_desig_scaffold  | 2494                           | [C/G]       | NA                                         |
| Ca_Desig_Chr_scaffold09239_2541 | Ca_desig_scaffold  | 2541                           | [A/T]       | NA                                         |
| Ca_Desig_Chr_scaffold09239_2579 | Ca_desig_scaffold  | 2579                           | [A/C]       | NA                                         |
| Ca_Desig_Chr_scaffold09239_2580 | Ca_desig_scaffold  | 2580                           | [C/T]       | NA                                         |
| Ca_Desig_Chr_scaffold09239_2643 | Ca_desig_scaffold  | 2643                           | [A/C]       | NA                                         |
| Ca_Desig_Chr_scaffold09255_3471 | Ca_desig_scaffold  | 3471                           | [G/T]       | NA                                         |
| Ca_Desig_Chr_scaffold09257_1645 | Ca_desig_scaffold  | 1645                           | [T/C]       | NA                                         |
| Ca_Desig_Chr_scaffold09260_1463 | Ca_desig_scaffold  | 1463                           | [A/C]       | NA                                         |
| Ca_Desig_Chr_scaffold09334_2164 | Ca_desig_scaffold  | 2164                           | [A/G]       | NA                                         |

| <b>SNP IDs</b>                | <b>Chromosomes</b> | <b>Physical positions (bp)</b> | <b>SNPs</b> | <b>NCBI SNPdb accession IDs (NCBI_ss#)</b> |
|-------------------------------|--------------------|--------------------------------|-------------|--------------------------------------------|
| Ca_Desi_Ch_scaffold09334_2179 | Ca_desi_scaffold   | 2179                           | [T/G]       | NA                                         |
| Ca_Desi_Ch_scaffold09397_4019 | Ca_desi_scaffold   | 4019                           | [T/C]       | NA                                         |
| Ca_Desi_Ch_scaffold09397_4029 | Ca_desi_scaffold   | 4029                           | [A/C]       | NA                                         |
| Ca_Desi_Ch_scaffold09397_4082 | Ca_desi_scaffold   | 4082                           | [T/G]       | NA                                         |
| Ca_Desi_Ch_scaffold09397_4117 | Ca_desi_scaffold   | 4117                           | [T/G]       | NA                                         |
| Ca_Desi_Ch_scaffold09397_4120 | Ca_desi_scaffold   | 4120                           | [T/G]       | NA                                         |
| Ca_Desi_Ch_scaffold09398_511  | Ca_desi_scaffold   | 511                            | [A/G]       | NA                                         |
| Ca_Desi_Ch_scaffold09425_1759 | Ca_desi_scaffold   | 1759                           | [T/C]       | NA                                         |
| Ca_Desi_Ch_scaffold09425_1777 | Ca_desi_scaffold   | 1777                           | [T/G]       | NA                                         |
| Ca_Desi_Ch_scaffold09425_1820 | Ca_desi_scaffold   | 1820                           | [A/G]       | NA                                         |
| Ca_Desi_Ch_scaffold09425_1822 | Ca_desi_scaffold   | 1822                           | [G/T]       | NA                                         |
| Ca_Desi_Ch_scaffold09476_2724 | Ca_desi_scaffold   | 2724                           | [T/C]       | NA                                         |
| Ca_Desi_Ch_scaffold09476_2730 | Ca_desi_scaffold   | 2730                           | [T/C]       | NA                                         |
| Ca_Desi_Ch_scaffold09476_2731 | Ca_desi_scaffold   | 2731                           | [T/C]       | NA                                         |
| Ca_Desi_Ch_scaffold09476_2733 | Ca_desi_scaffold   | 2733                           | [T/C]       | NA                                         |
| Ca_Desi_Ch_scaffold09476_2734 | Ca_desi_scaffold   | 2734                           | [C/T]       | NA                                         |
| Ca_Desi_Ch_scaffold09476_2735 | Ca_desi_scaffold   | 2735                           | [G/A]       | NA                                         |
| Ca_Desi_Ch_scaffold09476_2736 | Ca_desi_scaffold   | 2736                           | [A/G]       | NA                                         |
| Ca_Desi_Ch_scaffold09476_2737 | Ca_desi_scaffold   | 2737                           | [G/A]       | NA                                         |
| Ca_Desi_Ch_scaffold09476_2738 | Ca_desi_scaffold   | 2738                           | [C/T]       | NA                                         |
| Ca_Desi_Ch_scaffold09476_2739 | Ca_desi_scaffold   | 2739                           | [T/C]       | NA                                         |
| Ca_Desi_Ch_scaffold09476_2740 | Ca_desi_scaffold   | 2740                           | [T/C]       | NA                                         |
| Ca_Desi_Ch_scaffold09476_2741 | Ca_desi_scaffold   | 2741                           | [A/T]       | NA                                         |
| Ca_Desi_Ch_scaffold09476_2742 | Ca_desi_scaffold   | 2742                           | [T/C]       | NA                                         |
| Ca_Desi_Ch_scaffold09476_2743 | Ca_desi_scaffold   | 2743                           | [T/C]       | NA                                         |
| Ca_Desi_Ch_scaffold09476_2744 | Ca_desi_scaffold   | 2744                           | [C/T]       | NA                                         |
| Ca_Desi_Ch_scaffold09476_2745 | Ca_desi_scaffold   | 2745                           | [T/C]       | NA                                         |
| Ca_Desi_Ch_scaffold09476_2746 | Ca_desi_scaffold   | 2746                           | [T/C]       | NA                                         |
| Ca_Desi_Ch_scaffold09476_2747 | Ca_desi_scaffold   | 2747                           | [T/C]       | NA                                         |
| Ca_Desi_Ch_scaffold09476_2748 | Ca_desi_scaffold   | 2748                           | [T/C]       | NA                                         |
| Ca_Desi_Ch_scaffold09476_2749 | Ca_desi_scaffold   | 2749                           | [T/C]       | NA                                         |
| Ca_Desi_Ch_scaffold09476_2750 | Ca_desi_scaffold   | 2750                           | [A/T]       | NA                                         |
| Ca_Desi_Ch_scaffold09476_2751 | Ca_desi_scaffold   | 2751                           | [A/G]       | NA                                         |
| Ca_Desi_Ch_scaffold09476_2752 | Ca_desi_scaffold   | 2752                           | [G/T]       | NA                                         |

| <b>SNP IDs</b>                | <b>Chromosomes</b> | <b>Physical positions (bp)</b> | <b>SNPs</b> | <b>NCBI SNPdb accession IDs (NCBI_ss#)</b> |
|-------------------------------|--------------------|--------------------------------|-------------|--------------------------------------------|
| Ca_Desi_Ch_scaffold09476_2753 | Ca_desi_scaffold   | 2753                           | [A/G]       | NA                                         |
| Ca_Desi_Ch_scaffold09476_2755 | Ca_desi_scaffold   | 2755                           | [A/G]       | NA                                         |
| Ca_Desi_Ch_scaffold09476_2757 | Ca_desi_scaffold   | 2757                           | [T/C]       | NA                                         |
| Ca_Desi_Ch_scaffold09476_2758 | Ca_desi_scaffold   | 2758                           | [G/A]       | NA                                         |
| Ca_Desi_Ch_scaffold09476_2759 | Ca_desi_scaffold   | 2759                           | [A/G]       | NA                                         |
| Ca_Desi_Ch_scaffold09476_2760 | Ca_desi_scaffold   | 2760                           | [T/C]       | NA                                         |
| Ca_Desi_Ch_scaffold09527_3049 | Ca_desi_scaffold   | 3049                           | [T/G]       | NA                                         |
| Ca_Desi_Ch_scaffold09536_3187 | Ca_desi_scaffold   | 3187                           | [A/G]       | NA                                         |
| Ca_Desi_Ch_scaffold09536_3225 | Ca_desi_scaffold   | 3225                           | [T/G]       | NA                                         |
| Ca_Desi_Ch_scaffold09536_3227 | Ca_desi_scaffold   | 3227                           | [T/G]       | NA                                         |
| Ca_Desi_Ch_scaffold09536_3235 | Ca_desi_scaffold   | 3235                           | [A/G]       | NA                                         |
| Ca_Desi_Ch_scaffold09536_3247 | Ca_desi_scaffold   | 3247                           | [T/C]       | NA                                         |
| Ca_Desi_Ch_scaffold09536_4788 | Ca_desi_scaffold   | 4788                           | [T/G]       | NA                                         |
| Ca_Desi_Ch_scaffold09549_3572 | Ca_desi_scaffold   | 3572                           | [T/G]       | NA                                         |
| Ca_Desi_Ch_scaffold09621_1607 | Ca_desi_scaffold   | 1607                           | [T/G]       | NA                                         |
| Ca_Desi_Ch_scaffold09621_1713 | Ca_desi_scaffold   | 1713                           | [G/T]       | NA                                         |
| Ca_Desi_Ch_scaffold09621_1728 | Ca_desi_scaffold   | 1728                           | [T/G]       | NA                                         |
| Ca_Desi_Ch_scaffold09641_2687 | Ca_desi_scaffold   | 2687                           | [T/C]       | NA                                         |
| Ca_Desi_Ch_scaffold09677_4142 | Ca_desi_scaffold   | 4142                           | [G/A]       | NA                                         |
| Ca_Desi_Ch_scaffold09677_4159 | Ca_desi_scaffold   | 4159                           | [C/T]       | NA                                         |
| Ca_Desi_Ch_scaffold09677_4174 | Ca_desi_scaffold   | 4174                           | [C/T]       | NA                                         |
| Ca_Desi_Ch_scaffold09692_3436 | Ca_desi_scaffold   | 3436                           | [A/C]       | NA                                         |
| Ca_Desi_Ch_scaffold09692_3442 | Ca_desi_scaffold   | 3442                           | [A/C]       | NA                                         |
| Ca_Desi_Ch_scaffold09724_2749 | Ca_desi_scaffold   | 2749                           | [A/T]       | NA                                         |
| Ca_Desi_Ch_scaffold09724_2806 | Ca_desi_scaffold   | 2806                           | [A/T]       | NA                                         |
| Ca_Desi_Ch_scaffold09724_2809 | Ca_desi_scaffold   | 2809                           | [C/T]       | NA                                         |
| Ca_Desi_Ch_scaffold09724_2810 | Ca_desi_scaffold   | 2810                           | [T/C]       | NA                                         |
| Ca_Desi_Ch_scaffold09724_2811 | Ca_desi_scaffold   | 2811                           | [C/T]       | NA                                         |
| Ca_Desi_Ch_scaffold09724_2812 | Ca_desi_scaffold   | 2812                           | [C/T]       | NA                                         |
| Ca_Desi_Ch_scaffold09724_2813 | Ca_desi_scaffold   | 2813                           | [G/A]       | NA                                         |
| Ca_Desi_Ch_scaffold09724_2814 | Ca_desi_scaffold   | 2814                           | [C/T]       | NA                                         |
| Ca_Desi_Ch_scaffold09724_2815 | Ca_desi_scaffold   | 2815                           | [A/G]       | NA                                         |
| Ca_Desi_Ch_scaffold09724_2816 | Ca_desi_scaffold   | 2816                           | [T/C]       | NA                                         |
| Ca_Desi_Ch_scaffold09724_2817 | Ca_desi_scaffold   | 2817                           | [G/A]       | NA                                         |

| <b>SNP IDs</b>                        | <b>Chromosomes</b> | <b>Physical positions (bp)</b> | <b>SNPs</b> | <b>NCBI SNPdb accession IDs (NCBI_ss#)</b> |
|---------------------------------------|--------------------|--------------------------------|-------------|--------------------------------------------|
| Ca_Desi_Chromosome_scaffold09724_2818 | Ca_desi_scaffold   | 2818                           | [T/C]       | NA                                         |
| Ca_Desi_Chromosome_scaffold09724_2819 | Ca_desi_scaffold   | 2819                           | [C/T]       | NA                                         |
| Ca_Desi_Chromosome_scaffold09724_2820 | Ca_desi_scaffold   | 2820                           | [A/G]       | NA                                         |
| Ca_Desi_Chromosome_scaffold09724_2822 | Ca_desi_scaffold   | 2822                           | [G/A]       | NA                                         |
| Ca_Desi_Chromosome_scaffold09724_2823 | Ca_desi_scaffold   | 2823                           | [A/G]       | NA                                         |
| Ca_Desi_Chromosome_scaffold09724_2824 | Ca_desi_scaffold   | 2824                           | [T/C]       | NA                                         |
| Ca_Desi_Chromosome_scaffold09724_2825 | Ca_desi_scaffold   | 2825                           | [G/A]       | NA                                         |
| Ca_Desi_Chromosome_scaffold09724_2826 | Ca_desi_scaffold   | 2826                           | [G/A]       | NA                                         |
| Ca_Desi_Chromosome_scaffold09724_2827 | Ca_desi_scaffold   | 2827                           | [G/A]       | NA                                         |
| Ca_Desi_Chromosome_scaffold09724_2828 | Ca_desi_scaffold   | 2828                           | [A/G]       | NA                                         |
| Ca_Desi_Chromosome_scaffold09724_2829 | Ca_desi_scaffold   | 2829                           | [A/G]       | NA                                         |
| Ca_Desi_Chromosome_scaffold09724_2830 | Ca_desi_scaffold   | 2830                           | [T/C]       | NA                                         |
| Ca_Desi_Chromosome_scaffold09724_2831 | Ca_desi_scaffold   | 2831                           | [G/A]       | NA                                         |
| Ca_Desi_Chromosome_scaffold09724_2832 | Ca_desi_scaffold   | 2832                           | [A/G]       | NA                                         |
| Ca_Desi_Chromosome_scaffold09724_2833 | Ca_desi_scaffold   | 2833                           | [A/G]       | NA                                         |
| Ca_Desi_Chromosome_scaffold09724_2834 | Ca_desi_scaffold   | 2834                           | [G/A]       | NA                                         |
| Ca_Desi_Chromosome_scaffold09724_2835 | Ca_desi_scaffold   | 2835                           | [A/G]       | NA                                         |
| Ca_Desi_Chromosome_scaffold09724_2836 | Ca_desi_scaffold   | 2836                           | [T/C]       | NA                                         |
| Ca_Desi_Chromosome_scaffold09724_2837 | Ca_desi_scaffold   | 2837                           | [A/G]       | NA                                         |
| Ca_Desi_Chromosome_scaffold09724_2838 | Ca_desi_scaffold   | 2838                           | [G/A]       | NA                                         |
| Ca_Desi_Chromosome_scaffold09724_2839 | Ca_desi_scaffold   | 2839                           | [A/G]       | NA                                         |
| Ca_Desi_Chromosome_scaffold09724_2840 | Ca_desi_scaffold   | 2840                           | [C/T]       | NA                                         |
| Ca_Desi_Chromosome_scaffold09724_2841 | Ca_desi_scaffold   | 2841                           | [T/C]       | NA                                         |
| Ca_Desi_Chromosome_scaffold09724_2842 | Ca_desi_scaffold   | 2842                           | [T/C]       | NA                                         |
| Ca_Desi_Chromosome_scaffold09724_2843 | Ca_desi_scaffold   | 2843                           | [A/G]       | NA                                         |
| Ca_Desi_Chromosome_scaffold09724_2845 | Ca_desi_scaffold   | 2845                           | [T/A]       | NA                                         |
| Ca_Desi_Chromosome_scaffold09724_2846 | Ca_desi_scaffold   | 2846                           | [A/G]       | NA                                         |
| Ca_Desi_Chromosome_scaffold09724_2847 | Ca_desi_scaffold   | 2847                           | [T/C]       | NA                                         |
| Ca_Desi_Chromosome_scaffold09724_2848 | Ca_desi_scaffold   | 2848                           | [C/T]       | NA                                         |
| Ca_Desi_Chromosome_scaffold09724_2849 | Ca_desi_scaffold   | 2849                           | [A/G]       | NA                                         |
| Ca_Desi_Chromosome_scaffold09724_2850 | Ca_desi_scaffold   | 2850                           | [A/G]       | NA                                         |
| Ca_Desi_Chromosome_scaffold09724_2851 | Ca_desi_scaffold   | 2851                           | [G/A]       | NA                                         |
| Ca_Desi_Chromosome_scaffold09724_2852 | Ca_desi_scaffold   | 2852                           | [C/A]       | NA                                         |
| Ca_Desi_Chromosome_scaffold09724_2853 | Ca_desi_scaffold   | 2853                           | [A/G]       | NA                                         |

| <b>SNP IDs</b>                  | <b>Chromosomes</b> | <b>Physical positions (bp)</b> | <b>SNPs</b> | <b>NCBI SNPdb accession IDs (NCBI_ss#)</b> |
|---------------------------------|--------------------|--------------------------------|-------------|--------------------------------------------|
| Ca_Desig_Chr_scaffold09724_2854 | Ca_desig_scaffold  | 2854                           | [A/G]       | NA                                         |
| Ca_Desig_Chr_scaffold09724_2855 | Ca_desig_scaffold  | 2855                           | [C/T]       | NA                                         |
| Ca_Desig_Chr_scaffold09724_2856 | Ca_desig_scaffold  | 2856                           | [T/C]       | NA                                         |
| Ca_Desig_Chr_scaffold09724_2857 | Ca_desig_scaffold  | 2857                           | [T/C]       | NA                                         |
| Ca_Desig_Chr_scaffold09724_2858 | Ca_desig_scaffold  | 2858                           | [T/C]       | NA                                         |
| Ca_Desig_Chr_scaffold09724_2860 | Ca_desig_scaffold  | 2860                           | [A/G]       | NA                                         |
| Ca_Desig_Chr_scaffold09724_2861 | Ca_desig_scaffold  | 2861                           | [G/A]       | NA                                         |
| Ca_Desig_Chr_scaffold09724_2862 | Ca_desig_scaffold  | 2862                           | [G/A]       | NA                                         |
| Ca_Desig_Chr_scaffold09724_2863 | Ca_desig_scaffold  | 2863                           | [C/T]       | NA                                         |
| Ca_Desig_Chr_scaffold09724_2864 | Ca_desig_scaffold  | 2864                           | [T/C]       | NA                                         |
| Ca_Desig_Chr_scaffold09724_2865 | Ca_desig_scaffold  | 2865                           | [A/G]       | NA                                         |
| Ca_Desig_Chr_scaffold09724_2866 | Ca_desig_scaffold  | 2866                           | [G/A]       | NA                                         |
| Ca_Desig_Chr_scaffold09724_2868 | Ca_desig_scaffold  | 2868                           | [A/G]       | NA                                         |
| Ca_Desig_Chr_scaffold09724_2979 | Ca_desig_scaffold  | 2979                           | [T/G]       | NA                                         |
| Ca_Desig_Chr_scaffold09724_2981 | Ca_desig_scaffold  | 2981                           | [C/A]       | NA                                         |
| Ca_Desig_Chr_scaffold09724_2982 | Ca_desig_scaffold  | 2982                           | [T/C]       | NA                                         |
| Ca_Desig_Chr_scaffold09724_3392 | Ca_desig_scaffold  | 3392                           | [A/C]       | NA                                         |
| Ca_Desig_Chr_scaffold09724_3421 | Ca_desig_scaffold  | 3421                           | [A/C]       | NA                                         |
| Ca_Desig_Chr_scaffold09724_3424 | Ca_desig_scaffold  | 3424                           | [A/G]       | NA                                         |
| Ca_Desig_Chr_scaffold09724_3454 | Ca_desig_scaffold  | 3454                           | [T/C]       | NA                                         |
| Ca_Desig_Chr_scaffold09724_3458 | Ca_desig_scaffold  | 3458                           | [T/C]       | NA                                         |
| Ca_Desig_Chr_scaffold09724_3459 | Ca_desig_scaffold  | 3459                           | [T/C]       | NA                                         |
| Ca_Desig_Chr_scaffold09724_3461 | Ca_desig_scaffold  | 3461                           | [A/G]       | NA                                         |
| Ca_Desig_Chr_scaffold09724_3463 | Ca_desig_scaffold  | 3463                           | [A/G]       | NA                                         |
| Ca_Desig_Chr_scaffold09724_3465 | Ca_desig_scaffold  | 3465                           | [A/G]       | NA                                         |
| Ca_Desig_Chr_scaffold09724_3467 | Ca_desig_scaffold  | 3467                           | [A/G]       | NA                                         |
| Ca_Desig_Chr_scaffold09724_3468 | Ca_desig_scaffold  | 3468                           | [A/G]       | NA                                         |
| Ca_Desig_Chr_scaffold09724_3469 | Ca_desig_scaffold  | 3469                           | [A/G]       | NA                                         |
| Ca_Desig_Chr_scaffold09724_3471 | Ca_desig_scaffold  | 3471                           | [C/A]       | NA                                         |
| Ca_Desig_Chr_scaffold09724_3472 | Ca_desig_scaffold  | 3472                           | [G/A]       | NA                                         |
| Ca_Desig_Chr_scaffold09724_3474 | Ca_desig_scaffold  | 3474                           | [A/G]       | NA                                         |
| Ca_Desig_Chr_scaffold09724_3476 | Ca_desig_scaffold  | 3476                           | [A/G]       | NA                                         |
| Ca_Desig_Chr_scaffold09724_3477 | Ca_desig_scaffold  | 3477                           | [A/G]       | NA                                         |
| Ca_Desig_Chr_scaffold09724_3479 | Ca_desig_scaffold  | 3479                           | [A/G]       | NA                                         |



| <b>SNP IDs</b>                  | <b>Chromosomes</b> | <b>Physical positions (bp)</b> | <b>SNPs</b> | <b>NCBI SNPdb accession IDs (NCBI_ss#)</b> |
|---------------------------------|--------------------|--------------------------------|-------------|--------------------------------------------|
| Ca_Desig_Chr_scaffold09724_3480 | Ca_desig_scaffold  | 3480                           | [A/G]       | NA                                         |
| Ca_Desig_Chr_scaffold09724_3481 | Ca_desig_scaffold  | 3481                           | [C/A]       | NA                                         |
| Ca_Desig_Chr_scaffold09724_3483 | Ca_desig_scaffold  | 3483                           | [A/G]       | NA                                         |
| Ca_Desig_Chr_scaffold09724_3487 | Ca_desig_scaffold  | 3487                           | [A/G]       | NA                                         |
| Ca_Desig_Chr_scaffold09724_3489 | Ca_desig_scaffold  | 3489                           | [A/G]       | NA                                         |
| Ca_Desig_Chr_scaffold09724_3490 | Ca_desig_scaffold  | 3490                           | [T/C]       | NA                                         |
| Ca_Desig_Chr_scaffold09724_3491 | Ca_desig_scaffold  | 3491                           | [T/C]       | NA                                         |
| Ca_Desig_Chr_scaffold09724_3492 | Ca_desig_scaffold  | 3492                           | [T/C]       | NA                                         |
| Ca_Desig_Chr_scaffold09724_3494 | Ca_desig_scaffold  | 3494                           | [C/T]       | NA                                         |
| Ca_Desig_Chr_scaffold09724_3497 | Ca_desig_scaffold  | 3497                           | [C/T]       | NA                                         |
| Ca_Desig_Chr_scaffold09724_3498 | Ca_desig_scaffold  | 3498                           | [C/A]       | NA                                         |
| Ca_Desig_Chr_scaffold09724_3499 | Ca_desig_scaffold  | 3499                           | [A/G]       | NA                                         |
| Ca_Desig_Chr_scaffold09724_3500 | Ca_desig_scaffold  | 3500                           | [A/G]       | NA                                         |
| Ca_Desig_Chr_scaffold09724_3502 | Ca_desig_scaffold  | 3502                           | [G/A]       | NA                                         |
| Ca_Desig_Chr_scaffold09724_3503 | Ca_desig_scaffold  | 3503                           | [T/C]       | NA                                         |
| Ca_Desig_Chr_scaffold09724_3505 | Ca_desig_scaffold  | 3505                           | [A/G]       | NA                                         |
| Ca_Desig_Chr_scaffold09724_3506 | Ca_desig_scaffold  | 3506                           | [A/G]       | NA                                         |
| Ca_Desig_Chr_scaffold09724_3508 | Ca_desig_scaffold  | 3508                           | [A/G]       | NA                                         |
| Ca_Desig_Chr_scaffold09724_3509 | Ca_desig_scaffold  | 3509                           | [A/G]       | NA                                         |
| Ca_Desig_Chr_scaffold09724_3510 | Ca_desig_scaffold  | 3510                           | [T/C]       | NA                                         |
| Ca_Desig_Chr_scaffold09724_3511 | Ca_desig_scaffold  | 3511                           | [G/A]       | NA                                         |
| Ca_Desig_Chr_scaffold09724_3512 | Ca_desig_scaffold  | 3512                           | [C/T]       | NA                                         |
| Ca_Desig_Chr_scaffold09724_3513 | Ca_desig_scaffold  | 3513                           | [G/C]       | NA                                         |
| Ca_Desig_Chr_scaffold09724_3581 | Ca_desig_scaffold  | 3581                           | [T/C]       | NA                                         |
| Ca_Desig_Chr_scaffold09724_3587 | Ca_desig_scaffold  | 3587                           | [A/G]       | NA                                         |
| Ca_Desig_Chr_scaffold09724_3588 | Ca_desig_scaffold  | 3588                           | [T/C]       | NA                                         |
| Ca_Desig_Chr_scaffold09724_3593 | Ca_desig_scaffold  | 3593                           | [T/C]       | NA                                         |
| Ca_Desig_Chr_scaffold09724_3594 | Ca_desig_scaffold  | 3594                           | [G/T]       | NA                                         |
| Ca_Desig_Chr_scaffold09724_3600 | Ca_desig_scaffold  | 3600                           | [T/A]       | NA                                         |
| Ca_Desig_Chr_scaffold09724_3603 | Ca_desig_scaffold  | 3603                           | [A/G]       | NA                                         |
| Ca_Desig_Chr_scaffold09724_3605 | Ca_desig_scaffold  | 3605                           | [A/G]       | NA                                         |
| Ca_Desig_Chr_scaffold09724_3606 | Ca_desig_scaffold  | 3606                           | [T/C]       | NA                                         |
| Ca_Desig_Chr_scaffold09724_3608 | Ca_desig_scaffold  | 3608                           | [A/G]       | NA                                         |
| Ca_Desig_Chr_scaffold09724_3610 | Ca_desig_scaffold  | 3610                           | [A/G]       | NA                                         |

| <b>SNP IDs</b>                  | <b>Chromosomes</b> | <b>Physical positions (bp)</b> | <b>SNPs</b> | <b>NCBI SNPdb accession IDs (NCBI_ss#)</b> |
|---------------------------------|--------------------|--------------------------------|-------------|--------------------------------------------|
| Ca_Desig_Chr_scaffold09724_3611 | Ca_desig_scaffold  | 3611                           | [T/C]       | NA                                         |
| Ca_Desig_Chr_scaffold09724_3614 | Ca_desig_scaffold  | 3614                           | [A/C]       | NA                                         |
| Ca_Desig_Chr_scaffold09724_3617 | Ca_desig_scaffold  | 3617                           | [A/G]       | NA                                         |
| Ca_Desig_Chr_scaffold09724_3619 | Ca_desig_scaffold  | 3619                           | [A/G]       | NA                                         |
| Ca_Desig_Chr_scaffold09724_3626 | Ca_desig_scaffold  | 3626                           | [A/G]       | NA                                         |
| Ca_Desig_Chr_scaffold09724_3628 | Ca_desig_scaffold  | 3628                           | [T/C]       | NA                                         |
| Ca_Desig_Chr_scaffold09724_3632 | Ca_desig_scaffold  | 3632                           | [T/C]       | NA                                         |
| Ca_Desig_Chr_scaffold09724_3633 | Ca_desig_scaffold  | 3633                           | [T/C]       | NA                                         |
| Ca_Desig_Chr_scaffold09724_3640 | Ca_desig_scaffold  | 3640                           | [T/C]       | NA                                         |
| Ca_Desig_Chr_scaffold09724_3662 | Ca_desig_scaffold  | 3662                           | [T/C]       | NA                                         |
| Ca_Desig_Chr_scaffold09724_3663 | Ca_desig_scaffold  | 3663                           | [C/T]       | NA                                         |
| Ca_Desig_Chr_scaffold09724_3664 | Ca_desig_scaffold  | 3664                           | [C/T]       | NA                                         |
| Ca_Desig_Chr_scaffold09724_3665 | Ca_desig_scaffold  | 3665                           | [A/G]       | NA                                         |
| Ca_Desig_Chr_scaffold09724_3666 | Ca_desig_scaffold  | 3666                           | [C/T]       | NA                                         |
| Ca_Desig_Chr_scaffold09724_3667 | Ca_desig_scaffold  | 3667                           | [T/C]       | NA                                         |
| Ca_Desig_Chr_scaffold09724_3668 | Ca_desig_scaffold  | 3668                           | [A/G]       | NA                                         |
| Ca_Desig_Chr_scaffold09724_3669 | Ca_desig_scaffold  | 3669                           | [A/G]       | NA                                         |
| Ca_Desig_Chr_scaffold09724_3671 | Ca_desig_scaffold  | 3671                           | [G/A]       | NA                                         |
| Ca_Desig_Chr_scaffold09724_3672 | Ca_desig_scaffold  | 3672                           | [G/T]       | NA                                         |
| Ca_Desig_Chr_scaffold09724_3673 | Ca_desig_scaffold  | 3673                           | [A/G]       | NA                                         |
| Ca_Desig_Chr_scaffold09724_3674 | Ca_desig_scaffold  | 3674                           | [T/C]       | NA                                         |
| Ca_Desig_Chr_scaffold09724_3675 | Ca_desig_scaffold  | 3675                           | [T/C]       | NA                                         |
| Ca_Desig_Chr_scaffold09724_3676 | Ca_desig_scaffold  | 3676                           | [C/T]       | NA                                         |
| Ca_Desig_Chr_scaffold09724_3677 | Ca_desig_scaffold  | 3677                           | [G/A]       | NA                                         |
| Ca_Desig_Chr_scaffold09724_3678 | Ca_desig_scaffold  | 3678                           | [T/C]       | NA                                         |
| Ca_Desig_Chr_scaffold09724_3679 | Ca_desig_scaffold  | 3679                           | [G/A]       | NA                                         |
| Ca_Desig_Chr_scaffold09724_3680 | Ca_desig_scaffold  | 3680                           | [G/A]       | NA                                         |
| Ca_Desig_Chr_scaffold09724_3681 | Ca_desig_scaffold  | 3681                           | [A/G]       | NA                                         |
| Ca_Desig_Chr_scaffold09724_3682 | Ca_desig_scaffold  | 3682                           | [A/G]       | NA                                         |
| Ca_Desig_Chr_scaffold09724_3683 | Ca_desig_scaffold  | 3683                           | [T/C]       | NA                                         |
| Ca_Desig_Chr_scaffold09724_3684 | Ca_desig_scaffold  | 3684                           | [T/C]       | NA                                         |
| Ca_Desig_Chr_scaffold09724_3685 | Ca_desig_scaffold  | 3685                           | [T/C]       | NA                                         |
| Ca_Desig_Chr_scaffold09724_3686 | Ca_desig_scaffold  | 3686                           | [C/T]       | NA                                         |
| Ca_Desig_Chr_scaffold09724_3687 | Ca_desig_scaffold  | 3687                           | [T/C]       | NA                                         |

| <b>SNP IDs</b>                  | <b>Chromosomes</b> | <b>Physical positions (bp)</b> | <b>SNPs</b> | <b>NCBI SNPdb accession IDs (NCBI_ss#)</b> |
|---------------------------------|--------------------|--------------------------------|-------------|--------------------------------------------|
| Ca_Desig_Chr_scaffold09724_3688 | Ca_desig_scaffold  | 3688                           | [A/G]       | NA                                         |
| Ca_Desig_Chr_scaffold09724_3689 | Ca_desig_scaffold  | 3689                           | [T/C]       | NA                                         |
| Ca_Desig_Chr_scaffold09724_3691 | Ca_desig_scaffold  | 3691                           | [G/A]       | NA                                         |
| Ca_Desig_Chr_scaffold09724_3692 | Ca_desig_scaffold  | 3692                           | [A/G]       | NA                                         |
| Ca_Desig_Chr_scaffold09724_3693 | Ca_desig_scaffold  | 3693                           | [T/C]       | NA                                         |
| Ca_Desig_Chr_scaffold09724_3694 | Ca_desig_scaffold  | 3694                           | [T/C]       | NA                                         |
| Ca_Desig_Chr_scaffold09724_3695 | Ca_desig_scaffold  | 3695                           | [G/A]       | NA                                         |
| Ca_Desig_Chr_scaffold09724_3696 | Ca_desig_scaffold  | 3696                           | [C/T]       | NA                                         |
| Ca_Desig_Chr_scaffold09724_3697 | Ca_desig_scaffold  | 3697                           | [G/A]       | NA                                         |
| Ca_Desig_Chr_scaffold09724_3700 | Ca_desig_scaffold  | 3700                           | [G/C]       | NA                                         |
| Ca_Desig_Chr_scaffold09724_3702 | Ca_desig_scaffold  | 3702                           | [G/A]       | NA                                         |
| Ca_Desig_Chr_scaffold09724_3703 | Ca_desig_scaffold  | 3703                           | [G/A]       | NA                                         |
| Ca_Desig_Chr_scaffold09724_3704 | Ca_desig_scaffold  | 3704                           | [G/A]       | NA                                         |
| Ca_Desig_Chr_scaffold09724_3706 | Ca_desig_scaffold  | 3706                           | [A/G]       | NA                                         |
| Ca_Desig_Chr_scaffold09724_3707 | Ca_desig_scaffold  | 3707                           | [A/G]       | NA                                         |
| Ca_Desig_Chr_scaffold09724_3708 | Ca_desig_scaffold  | 3708                           | [T/C]       | NA                                         |
| Ca_Desig_Chr_scaffold09724_3709 | Ca_desig_scaffold  | 3709                           | [C/T]       | NA                                         |
| Ca_Desig_Chr_scaffold09724_3710 | Ca_desig_scaffold  | 3710                           | [T/C]       | NA                                         |
| Ca_Desig_Chr_scaffold09724_3711 | Ca_desig_scaffold  | 3711                           | [A/C]       | NA                                         |
| Ca_Desig_Chr_scaffold09724_3712 | Ca_desig_scaffold  | 3712                           | [C/T]       | NA                                         |
| Ca_Desig_Chr_scaffold09724_3713 | Ca_desig_scaffold  | 3713                           | [C/T]       | NA                                         |
| Ca_Desig_Chr_scaffold09724_3714 | Ca_desig_scaffold  | 3714                           | [A/G]       | NA                                         |
| Ca_Desig_Chr_scaffold09724_3715 | Ca_desig_scaffold  | 3715                           | [A/G]       | NA                                         |
| Ca_Desig_Chr_scaffold09724_3716 | Ca_desig_scaffold  | 3716                           | [A/G]       | NA                                         |
| Ca_Desig_Chr_scaffold09724_3718 | Ca_desig_scaffold  | 3718                           | [C/T]       | NA                                         |
| Ca_Desig_Chr_scaffold09724_3719 | Ca_desig_scaffold  | 3719                           | [T/C]       | NA                                         |
| Ca_Desig_Chr_scaffold09724_3720 | Ca_desig_scaffold  | 3720                           | [A/G]       | NA                                         |
| Ca_Desig_Chr_scaffold09724_3721 | Ca_desig_scaffold  | 3721                           | [G/A]       | NA                                         |
| Ca_Desig_Chr_scaffold09724_3722 | Ca_desig_scaffold  | 3722                           | [G/A]       | NA                                         |
| Ca_Desig_Chr_scaffold09724_3723 | Ca_desig_scaffold  | 3723                           | [C/T]       | NA                                         |
| Ca_Desig_Chr_scaffold09724_3724 | Ca_desig_scaffold  | 3724                           | [A/G]       | NA                                         |
| Ca_Desig_Chr_scaffold09724_3725 | Ca_desig_scaffold  | 3725                           | [G/A]       | NA                                         |
| Ca_Desig_Chr_scaffold09724_3726 | Ca_desig_scaffold  | 3726                           | [A/G]       | NA                                         |
| Ca_Desig_Chr_scaffold09724_3727 | Ca_desig_scaffold  | 3727                           | [T/C]       | NA                                         |

| <b>SNP IDs</b>                | <b>Chromosomes</b> | <b>Physical positions (bp)</b> | <b>SNPs</b> | <b>NCBI SNPdb accession IDs (NCBI_ss#)</b> |
|-------------------------------|--------------------|--------------------------------|-------------|--------------------------------------------|
| Ca_Desi_Ch_scaffold09724_3728 | Ca_desi_scaffold   | 3728                           | [A/G]       | NA                                         |
| Ca_Desi_Ch_scaffold09724_3729 | Ca_desi_scaffold   | 3729                           | [G/A]       | NA                                         |
| Ca_Desi_Ch_scaffold09724_3730 | Ca_desi_scaffold   | 3730                           | [A/G]       | NA                                         |
| Ca_Desi_Ch_scaffold09724_3731 | Ca_desi_scaffold   | 3731                           | [T/C]       | NA                                         |
| Ca_Desi_Ch_scaffold09724_3732 | Ca_desi_scaffold   | 3732                           | [A/G]       | NA                                         |
| Ca_Desi_Ch_scaffold09724_3736 | Ca_desi_scaffold   | 3736                           | [T/C]       | NA                                         |
| Ca_Desi_Ch_scaffold09724_3737 | Ca_desi_scaffold   | 3737                           | [C/T]       | NA                                         |
| Ca_Desi_Ch_scaffold09724_3738 | Ca_desi_scaffold   | 3738                           | [C/T]       | NA                                         |
| Ca_Desi_Ch_scaffold09724_3739 | Ca_desi_scaffold   | 3739                           | [T/C]       | NA                                         |
| Ca_Desi_Ch_scaffold09724_3740 | Ca_desi_scaffold   | 3740                           | [T/C]       | NA                                         |
| Ca_Desi_Ch_scaffold09724_3741 | Ca_desi_scaffold   | 3741                           | [T/C]       | NA                                         |
| Ca_Desi_Ch_scaffold09724_3744 | Ca_desi_scaffold   | 3744                           | [C/T]       | NA                                         |
| Ca_Desi_Ch_scaffold09724_3745 | Ca_desi_scaffold   | 3745                           | [G/A]       | NA                                         |
| Ca_Desi_Ch_scaffold09724_3746 | Ca_desi_scaffold   | 3746                           | [C/T]       | NA                                         |
| Ca_Desi_Ch_scaffold09724_3747 | Ca_desi_scaffold   | 3747                           | [T/C]       | NA                                         |
| Ca_Desi_Ch_scaffold09724_3748 | Ca_desi_scaffold   | 3748                           | [G/A]       | NA                                         |
| Ca_Desi_Ch_scaffold09724_3760 | Ca_desi_scaffold   | 3760                           | [A/G]       | NA                                         |
| Ca_Desi_Ch_scaffold09724_3762 | Ca_desi_scaffold   | 3762                           | [A/G]       | NA                                         |
| Ca_Desi_Ch_scaffold09724_3764 | Ca_desi_scaffold   | 3764                           | [T/A]       | NA                                         |
| Ca_Desi_Ch_scaffold09724_3770 | Ca_desi_scaffold   | 3770                           | [A/G]       | NA                                         |
| Ca_Desi_Ch_scaffold09724_3802 | Ca_desi_scaffold   | 3802                           | [T/C]       | NA                                         |
| Ca_Desi_Ch_scaffold09724_3807 | Ca_desi_scaffold   | 3807                           | [T/C]       | NA                                         |
| Ca_Desi_Ch_scaffold09724_3814 | Ca_desi_scaffold   | 3814                           | [T/G]       | NA                                         |
| Ca_Desi_Ch_scaffold09724_3822 | Ca_desi_scaffold   | 3822                           | [T/G]       | NA                                         |
| Ca_Desi_Ch_scaffold09724_3831 | Ca_desi_scaffold   | 3831                           | [T/C]       | NA                                         |
| Ca_Desi_Ch_scaffold09724_3949 | Ca_desi_scaffold   | 3949                           | [A/G]       | NA                                         |
| Ca_Desi_Ch_scaffold09724_3954 | Ca_desi_scaffold   | 3954                           | [T/C]       | NA                                         |
| Ca_Desi_Ch_scaffold09724_3960 | Ca_desi_scaffold   | 3960                           | [A/G]       | NA                                         |
| Ca_Desi_Ch_scaffold09724_3962 | Ca_desi_scaffold   | 3962                           | [A/G]       | NA                                         |
| Ca_Desi_Ch_scaffold09724_3967 | Ca_desi_scaffold   | 3967                           | [A/G]       | NA                                         |
| Ca_Desi_Ch_scaffold09724_3970 | Ca_desi_scaffold   | 3970                           | [A/G]       | NA                                         |
| Ca_Desi_Ch_scaffold09724_3971 | Ca_desi_scaffold   | 3971                           | [A/G]       | NA                                         |
| Ca_Desi_Ch_scaffold09724_3977 | Ca_desi_scaffold   | 3977                           | [A/G]       | NA                                         |
| Ca_Desi_Ch_scaffold09724_3978 | Ca_desi_scaffold   | 3978                           | [A/G]       | NA                                         |

| <b>SNP IDs</b>                  | <b>Chromosomes</b> | <b>Physical positions (bp)</b> | <b>SNPs</b> | <b>NCBI SNPdb accession IDs (NCBI_ss#)</b> |
|---------------------------------|--------------------|--------------------------------|-------------|--------------------------------------------|
| Ca_Desig_Chr_scaffold09724_3986 | Ca_desig_scaffold  | 3986                           | [A/G]       | NA                                         |
| Ca_Desig_Chr_scaffold09724_3989 | Ca_desig_scaffold  | 3989                           | [A/G]       | NA                                         |
| Ca_Desig_Chr_scaffold09724_3993 | Ca_desig_scaffold  | 3993                           | [T/C]       | NA                                         |
| Ca_Desig_Chr_scaffold09724_3994 | Ca_desig_scaffold  | 3994                           | [T/C]       | NA                                         |
| Ca_Desig_Chr_scaffold09724_3998 | Ca_desig_scaffold  | 3998                           | [T/C]       | NA                                         |
| Ca_Desig_Chr_scaffold09724_3999 | Ca_desig_scaffold  | 3999                           | [T/C]       | NA                                         |
| Ca_Desig_Chr_scaffold09724_4002 | Ca_desig_scaffold  | 4002                           | [T/C]       | NA                                         |
| Ca_Desig_Chr_scaffold09780_1830 | Ca_desig_scaffold  | 1830                           | [G/T]       | NA                                         |
| Ca_Desig_Chr_scaffold09780_1961 | Ca_desig_scaffold  | 1961                           | [T/A]       | NA                                         |
| Ca_Desig_Chr_scaffold09780_2181 | Ca_desig_scaffold  | 2181                           | [G/A]       | NA                                         |
| Ca_Desig_Chr_scaffold09780_2255 | Ca_desig_scaffold  | 2255                           | [A/C]       | NA                                         |
| Ca_Desig_Chr_scaffold09780_3590 | Ca_desig_scaffold  | 3590                           | [A/G]       | NA                                         |
| Ca_Desig_Chr_scaffold09909_3981 | Ca_desig_scaffold  | 3981                           | [A/T]       | NA                                         |
| Ca_Desig_Chr_scaffold09909_4016 | Ca_desig_scaffold  | 4016                           | [T/C]       | NA                                         |
| Ca_Desig_Chr_scaffold09909_4017 | Ca_desig_scaffold  | 4017                           | [C/G]       | NA                                         |
| Ca_Desig_Chr_scaffold09948_5028 | Ca_desig_scaffold  | 5028                           | [T/C]       | NA                                         |
| Ca_Desig_Chr_scaffold09962_273  | Ca_desig_scaffold  | 273                            | [T/G]       | NA                                         |
| Ca_Desig_Chr_scaffold09962_707  | Ca_desig_scaffold  | 707                            | [A/G]       | NA                                         |
| Ca_Desig_Chr_scaffold09962_748  | Ca_desig_scaffold  | 748                            | [A/G]       | NA                                         |
| Ca_Desig_Chr_scaffold09962_761  | Ca_desig_scaffold  | 761                            | [G/A]       | NA                                         |
| Ca_Desig_Chr_scaffold09962_762  | Ca_desig_scaffold  | 762                            | [A/G]       | NA                                         |
| Ca_Desig_Chr_scaffold09962_764  | Ca_desig_scaffold  | 764                            | [T/C]       | NA                                         |
| Ca_Desig_Chr_scaffold09962_765  | Ca_desig_scaffold  | 765                            | [C/T]       | NA                                         |
| Ca_Desig_Chr_scaffold09962_766  | Ca_desig_scaffold  | 766                            | [A/G]       | NA                                         |
| Ca_Desig_Chr_scaffold09962_767  | Ca_desig_scaffold  | 767                            | [G/A]       | NA                                         |
| Ca_Desig_Chr_scaffold09962_768  | Ca_desig_scaffold  | 768                            | [G/A]       | NA                                         |
| Ca_Desig_Chr_scaffold09962_769  | Ca_desig_scaffold  | 769                            | [C/T]       | NA                                         |
| Ca_Desig_Chr_scaffold09962_770  | Ca_desig_scaffold  | 770                            | [A/G]       | NA                                         |
| Ca_Desig_Chr_scaffold09962_771  | Ca_desig_scaffold  | 771                            | [T/C]       | NA                                         |
| Ca_Desig_Chr_scaffold09962_772  | Ca_desig_scaffold  | 772                            | [T/C]       | NA                                         |
| Ca_Desig_Chr_scaffold09962_773  | Ca_desig_scaffold  | 773                            | [A/G]       | NA                                         |
| Ca_Desig_Chr_scaffold09962_774  | Ca_desig_scaffold  | 774                            | [C/T]       | NA                                         |
| Ca_Desig_Chr_scaffold09962_775  | Ca_desig_scaffold  | 775                            | [T/C]       | NA                                         |
| Ca_Desig_Chr_scaffold09962_776  | Ca_desig_scaffold  | 776                            | [C/T]       | NA                                         |

| <b>SNP IDs</b>                | <b>Chromosomes</b> | <b>Physical positions (bp)</b> | <b>SNPs</b> | <b>NCBI SNPdb accession IDs (NCBI_ss#)</b> |
|-------------------------------|--------------------|--------------------------------|-------------|--------------------------------------------|
| Ca_Desi_Chr_scaffold09962_777 | Ca_desi_scaffold   | 777                            | [A/G]       | NA                                         |
| Ca_Desi_Chr_scaffold09962_778 | Ca_desi_scaffold   | 778                            | [A/G]       | NA                                         |
| Ca_Desi_Chr_scaffold09962_779 | Ca_desi_scaffold   | 779                            | [T/C]       | NA                                         |
| Ca_Desi_Chr_scaffold09962_780 | Ca_desi_scaffold   | 780                            | [A/G]       | NA                                         |
| Ca_Desi_Chr_scaffold09962_781 | Ca_desi_scaffold   | 781                            | [G/A]       | NA                                         |
| Ca_Desi_Chr_scaffold09962_782 | Ca_desi_scaffold   | 782                            | [A/G]       | NA                                         |
| Ca_Desi_Chr_scaffold09962_783 | Ca_desi_scaffold   | 783                            | [G/A]       | NA                                         |
| Ca_Desi_Chr_scaffold09962_784 | Ca_desi_scaffold   | 784                            | [G/A]       | NA                                         |
| Ca_Desi_Chr_scaffold09962_786 | Ca_desi_scaffold   | 786                            | [G/A]       | NA                                         |
| Ca_Desi_Chr_scaffold09962_787 | Ca_desi_scaffold   | 787                            | [C/T]       | NA                                         |
| Ca_Desi_Chr_scaffold09962_788 | Ca_desi_scaffold   | 788                            | [A/G]       | NA                                         |
| Ca_Desi_Chr_scaffold09962_789 | Ca_desi_scaffold   | 789                            | [A/G]       | NA                                         |
| Ca_Desi_Chr_scaffold09962_791 | Ca_desi_scaffold   | 791                            | [G/A]       | NA                                         |
| Ca_Desi_Chr_scaffold09962_793 | Ca_desi_scaffold   | 793                            | [T/C]       | NA                                         |
| Ca_Desi_Chr_scaffold09962_794 | Ca_desi_scaffold   | 794                            | [T/C]       | NA                                         |
| Ca_Desi_Chr_scaffold09962_795 | Ca_desi_scaffold   | 795                            | [A/G]       | NA                                         |
| Ca_Desi_Chr_scaffold09962_797 | Ca_desi_scaffold   | 797                            | [A/G]       | NA                                         |
| Ca_Desi_Chr_scaffold09962_798 | Ca_desi_scaffold   | 798                            | [G/A]       | NA                                         |
| Ca_Desi_Chr_scaffold09962_799 | Ca_desi_scaffold   | 799                            | [A/G]       | NA                                         |
| Ca_Desi_Chr_scaffold09962_800 | Ca_desi_scaffold   | 800                            | [A/G]       | NA                                         |
| Ca_Desi_Chr_scaffold09962_803 | Ca_desi_scaffold   | 803                            | [A/G]       | NA                                         |
| Ca_Desi_Chr_scaffold09962_805 | Ca_desi_scaffold   | 805                            | [T/C]       | NA                                         |
| Ca_Desi_Chr_scaffold09962_806 | Ca_desi_scaffold   | 806                            | [T/C]       | NA                                         |
| Ca_Desi_Chr_scaffold09962_807 | Ca_desi_scaffold   | 807                            | [A/G]       | NA                                         |
| Ca_Desi_Chr_scaffold09962_808 | Ca_desi_scaffold   | 808                            | [A/G]       | NA                                         |
| Ca_Desi_Chr_scaffold09962_809 | Ca_desi_scaffold   | 809                            | [A/G]       | NA                                         |
| Ca_Desi_Chr_scaffold09962_810 | Ca_desi_scaffold   | 810                            | [C/T]       | NA                                         |
| Ca_Desi_Chr_scaffold09962_811 | Ca_desi_scaffold   | 811                            | [A/G]       | NA                                         |
| Ca_Desi_Chr_scaffold09962_812 | Ca_desi_scaffold   | 812                            | [A/G]       | NA                                         |
| Ca_Desi_Chr_scaffold09962_813 | Ca_desi_scaffold   | 813                            | [C/T]       | NA                                         |
| Ca_Desi_Chr_scaffold09962_814 | Ca_desi_scaffold   | 814                            | [C/T]       | NA                                         |
| Ca_Desi_Chr_scaffold09962_815 | Ca_desi_scaffold   | 815                            | [A/G]       | NA                                         |
| Ca_Desi_Chr_scaffold09962_816 | Ca_desi_scaffold   | 816                            | [C/T]       | NA                                         |
| Ca_Desi_Chr_scaffold09962_817 | Ca_desi_scaffold   | 817                            | [A/G]       | NA                                         |

| <b>SNP IDs</b>                  | <b>Chromosomes</b> | <b>Physical positions (bp)</b> | <b>SNPs</b> | <b>NCBI SNPdb accession IDs (NCBI_ss#)</b> |
|---------------------------------|--------------------|--------------------------------|-------------|--------------------------------------------|
| Ca_Desi_Chrom_scaffold09962_818 | Ca_desi_scaffold   | 818                            | [A/G]       | NA                                         |
| Ca_Desi_Chrom_scaffold09962_819 | Ca_desi_scaffold   | 819                            | [T/C]       | NA                                         |
| Ca_Desi_Chrom_scaffold09962_820 | Ca_desi_scaffold   | 820                            | [A/G]       | NA                                         |
| Ca_Desi_Chrom_scaffold09962_821 | Ca_desi_scaffold   | 821                            | [T/C]       | NA                                         |
| Ca_Desi_Chrom_scaffold09962_822 | Ca_desi_scaffold   | 822                            | [G/A]       | NA                                         |
| Ca_Desi_Chrom_scaffold09962_823 | Ca_desi_scaffold   | 823                            | [C/T]       | NA                                         |
| Ca_Desi_Chrom_scaffold09962_824 | Ca_desi_scaffold   | 824                            | [A/C]       | NA                                         |
| Ca_Desi_Chrom_scaffold09962_825 | Ca_desi_scaffold   | 825                            | [C/T]       | NA                                         |
| Ca_Desi_Chrom_scaffold09962_826 | Ca_desi_scaffold   | 826                            | [C/T]       | NA                                         |
| Ca_Desi_Chrom_scaffold09962_829 | Ca_desi_scaffold   | 829                            | [T/C]       | NA                                         |
| Ca_Desi_Chrom_scaffold09962_830 | Ca_desi_scaffold   | 830                            | [T/C]       | NA                                         |
| Ca_Desi_Chrom_scaffold09962_831 | Ca_desi_scaffold   | 831                            | [C/T]       | NA                                         |
| Ca_Desi_Chrom_scaffold09962_832 | Ca_desi_scaffold   | 832                            | [C/T]       | NA                                         |
| Ca_Desi_Chrom_scaffold09962_833 | Ca_desi_scaffold   | 833                            | [A/G]       | NA                                         |
| Ca_Desi_Chrom_scaffold09962_834 | Ca_desi_scaffold   | 834                            | [A/G]       | NA                                         |
| Ca_Desi_Chrom_scaffold09962_835 | Ca_desi_scaffold   | 835                            | [T/C]       | NA                                         |
| Ca_Desi_Chrom_scaffold09962_836 | Ca_desi_scaffold   | 836                            | [T/C]       | NA                                         |
| Ca_Desi_Chrom_scaffold09962_837 | Ca_desi_scaffold   | 837                            | [G/A]       | NA                                         |
| Ca_Desi_Chrom_scaffold09962_838 | Ca_desi_scaffold   | 838                            | [A/G]       | NA                                         |
| Ca_Desi_Chrom_scaffold09962_839 | Ca_desi_scaffold   | 839                            | [A/G]       | NA                                         |
| Ca_Desi_Chrom_scaffold09962_840 | Ca_desi_scaffold   | 840                            | [A/G]       | NA                                         |
| Ca_Desi_Chrom_scaffold09962_841 | Ca_desi_scaffold   | 841                            | [A/G]       | NA                                         |
| Ca_Desi_Chrom_scaffold09962_842 | Ca_desi_scaffold   | 842                            | [A/G]       | NA                                         |
| Ca_Desi_Chrom_scaffold09962_844 | Ca_desi_scaffold   | 844                            | [A/G]       | NA                                         |
| Ca_Desi_Chrom_scaffold09962_845 | Ca_desi_scaffold   | 845                            | [A/G]       | NA                                         |
| Ca_Desi_Chrom_scaffold09962_846 | Ca_desi_scaffold   | 846                            | [A/G]       | NA                                         |
| Ca_Desi_Chrom_scaffold09962_847 | Ca_desi_scaffold   | 847                            | [T/C]       | NA                                         |
| Ca_Desi_Chrom_scaffold09962_848 | Ca_desi_scaffold   | 848                            | [T/C]       | NA                                         |
| Ca_Desi_Chrom_scaffold09962_849 | Ca_desi_scaffold   | 849                            | [A/G]       | NA                                         |
| Ca_Desi_Chrom_scaffold09962_850 | Ca_desi_scaffold   | 850                            | [T/C]       | NA                                         |
| Ca_Desi_Chrom_scaffold09962_851 | Ca_desi_scaffold   | 851                            | [A/G]       | NA                                         |
| Ca_Desi_Chrom_scaffold09962_853 | Ca_desi_scaffold   | 853                            | [T/C]       | NA                                         |
| Ca_Desi_Chrom_scaffold09962_854 | Ca_desi_scaffold   | 854                            | [C/T]       | NA                                         |
| Ca_Desi_Chrom_scaffold09962_855 | Ca_desi_scaffold   | 855                            | [A/G]       | NA                                         |

| <b>SNP IDs</b>                 | <b>Chromosomes</b> | <b>Physical positions (bp)</b> | <b>SNPs</b> | <b>NCBI SNPdb accession IDs (NCBI_ss#)</b> |
|--------------------------------|--------------------|--------------------------------|-------------|--------------------------------------------|
| Ca_Desig_Chr_scaffold09962_856 | Ca_desig_scaffold  | 856                            | [T/C]       | NA                                         |
| Ca_Desig_Chr_scaffold09962_857 | Ca_desig_scaffold  | 857                            | [A/G]       | NA                                         |
| Ca_Desig_Chr_scaffold09962_858 | Ca_desig_scaffold  | 858                            | [T/C]       | NA                                         |
| Ca_Desig_Chr_scaffold09962_859 | Ca_desig_scaffold  | 859                            | [A/G]       | NA                                         |
| Ca_Desig_Chr_scaffold09962_860 | Ca_desig_scaffold  | 860                            | [T/C]       | NA                                         |
| Ca_Desig_Chr_scaffold09962_866 | Ca_desig_scaffold  | 866                            | [T/C]       | NA                                         |
| Ca_Desig_Chr_scaffold09962_867 | Ca_desig_scaffold  | 867                            | [G/A]       | NA                                         |
| Ca_Desig_Chr_scaffold09962_869 | Ca_desig_scaffold  | 869                            | [C/T]       | NA                                         |
| Ca_Desig_Chr_scaffold09962_870 | Ca_desig_scaffold  | 870                            | [A/G]       | NA                                         |
| Ca_Desig_Chr_scaffold09962_871 | Ca_desig_scaffold  | 871                            | [A/G]       | NA                                         |
| Ca_Desig_Chr_scaffold09962_872 | Ca_desig_scaffold  | 872                            | [T/C]       | NA                                         |
| Ca_Desig_Chr_scaffold09962_873 | Ca_desig_scaffold  | 873                            | [G/A]       | NA                                         |
| Ca_Desig_Chr_scaffold09962_875 | Ca_desig_scaffold  | 875                            | [A/G]       | NA                                         |
| Ca_Desig_Chr_scaffold09962_876 | Ca_desig_scaffold  | 876                            | [T/C]       | NA                                         |
| Ca_Desig_Chr_scaffold09962_877 | Ca_desig_scaffold  | 877                            | [T/C]       | NA                                         |
| Ca_Desig_Chr_scaffold09962_878 | Ca_desig_scaffold  | 878                            | [C/T]       | NA                                         |
| Ca_Desig_Chr_scaffold09962_879 | Ca_desig_scaffold  | 879                            | [T/C]       | NA                                         |
| Ca_Desig_Chr_scaffold09962_880 | Ca_desig_scaffold  | 880                            | [G/A]       | NA                                         |
| Ca_Desig_Chr_scaffold09962_881 | Ca_desig_scaffold  | 881                            | [T/C]       | NA                                         |
| Ca_Desig_Chr_scaffold09962_882 | Ca_desig_scaffold  | 882                            | [G/A]       | NA                                         |
| Ca_Desig_Chr_scaffold09962_883 | Ca_desig_scaffold  | 883                            | [A/G]       | NA                                         |
| Ca_Desig_Chr_scaffold09962_884 | Ca_desig_scaffold  | 884                            | [T/C]       | NA                                         |
| Ca_Desig_Chr_scaffold09962_885 | Ca_desig_scaffold  | 885                            | [C/T]       | NA                                         |
| Ca_Desig_Chr_scaffold09962_886 | Ca_desig_scaffold  | 886                            | [G/A]       | NA                                         |
| Ca_Desig_Chr_scaffold09962_887 | Ca_desig_scaffold  | 887                            | [A/G]       | NA                                         |
| Ca_Desig_Chr_scaffold09962_888 | Ca_desig_scaffold  | 888                            | [A/G]       | NA                                         |
| Ca_Desig_Chr_scaffold09962_889 | Ca_desig_scaffold  | 889                            | [T/C]       | NA                                         |
| Ca_Desig_Chr_scaffold09962_890 | Ca_desig_scaffold  | 890                            | [G/A]       | NA                                         |
| Ca_Desig_Chr_scaffold09962_891 | Ca_desig_scaffold  | 891                            | [C/T]       | NA                                         |
| Ca_Desig_Chr_scaffold09962_893 | Ca_desig_scaffold  | 893                            | [A/G]       | NA                                         |
| Ca_Desig_Chr_scaffold09962_894 | Ca_desig_scaffold  | 894                            | [T/C]       | NA                                         |
| Ca_Desig_Chr_scaffold09962_895 | Ca_desig_scaffold  | 895                            | [T/C]       | NA                                         |
| Ca_Desig_Chr_scaffold09962_896 | Ca_desig_scaffold  | 896                            | [A/G]       | NA                                         |
| Ca_Desig_Chr_scaffold09962_897 | Ca_desig_scaffold  | 897                            | [G/T]       | NA                                         |



| <b>SNP IDs</b>               | <b>Chromosomes</b> | <b>Physical positions (bp)</b> | <b>SNPs</b> | <b>NCBI SNPdb accession IDs (NCBI_ss#)</b> |
|------------------------------|--------------------|--------------------------------|-------------|--------------------------------------------|
| Ca_Desi_Ch_scaffold09962_898 | Ca_desi_scaffold   | 898                            | [A/G]       | NA                                         |
| Ca_Desi_Ch_scaffold09962_900 | Ca_desi_scaffold   | 900                            | [A/G]       | NA                                         |
| Ca_Desi_Ch_scaffold09962_901 | Ca_desi_scaffold   | 901                            | [A/G]       | NA                                         |
| Ca_Desi_Ch_scaffold09962_902 | Ca_desi_scaffold   | 902                            | [A/G]       | NA                                         |
| Ca_Desi_Ch_scaffold09962_903 | Ca_desi_scaffold   | 903                            | [A/G]       | NA                                         |
| Ca_Desi_Ch_scaffold09962_904 | Ca_desi_scaffold   | 904                            | [T/C]       | NA                                         |
| Ca_Desi_Ch_scaffold09962_905 | Ca_desi_scaffold   | 905                            | [T/C]       | NA                                         |
| Ca_Desi_Ch_scaffold09962_906 | Ca_desi_scaffold   | 906                            | [G/A]       | NA                                         |
| Ca_Desi_Ch_scaffold09962_907 | Ca_desi_scaffold   | 907                            | [C/A]       | NA                                         |
| Ca_Desi_Ch_scaffold09962_908 | Ca_desi_scaffold   | 908                            | [T/C]       | NA                                         |
| Ca_Desi_Ch_scaffold09962_909 | Ca_desi_scaffold   | 909                            | [C/T]       | NA                                         |
| Ca_Desi_Ch_scaffold09962_910 | Ca_desi_scaffold   | 910                            | [A/G]       | NA                                         |
| Ca_Desi_Ch_scaffold09962_911 | Ca_desi_scaffold   | 911                            | [A/G]       | NA                                         |
| Ca_Desi_Ch_scaffold09962_912 | Ca_desi_scaffold   | 912                            | [T/C]       | NA                                         |
| Ca_Desi_Ch_scaffold09962_913 | Ca_desi_scaffold   | 913                            | [A/G]       | NA                                         |
| Ca_Desi_Ch_scaffold09962_914 | Ca_desi_scaffold   | 914                            | [T/C]       | NA                                         |
| Ca_Desi_Ch_scaffold09962_916 | Ca_desi_scaffold   | 916                            | [A/G]       | NA                                         |
| Ca_Desi_Ch_scaffold09962_917 | Ca_desi_scaffold   | 917                            | [A/G]       | NA                                         |
| Ca_Desi_Ch_scaffold09962_918 | Ca_desi_scaffold   | 918                            | [A/G]       | NA                                         |
| Ca_Desi_Ch_scaffold09962_920 | Ca_desi_scaffold   | 920                            | [A/G]       | NA                                         |
| Ca_Desi_Ch_scaffold09962_922 | Ca_desi_scaffold   | 922                            | [A/G]       | NA                                         |
| Ca_Desi_Ch_scaffold09962_924 | Ca_desi_scaffold   | 924                            | [A/G]       | NA                                         |
| Ca_Desi_Ch_scaffold09962_987 | Ca_desi_scaffold   | 987                            | [A/G]       | NA                                         |
| Ca_Desi_Ch_scaffold09962_988 | Ca_desi_scaffold   | 988                            | [A/G]       | NA                                         |
| Ca_Desi_Ch_scaffold09962_989 | Ca_desi_scaffold   | 989                            | [G/A]       | NA                                         |
| Ca_Desi_Ch_scaffold09962_990 | Ca_desi_scaffold   | 990                            | [A/G]       | NA                                         |
| Ca_Desi_Ch_scaffold09962_991 | Ca_desi_scaffold   | 991                            | [T/C]       | NA                                         |
| Ca_Desi_Ch_scaffold09962_992 | Ca_desi_scaffold   | 992                            | [A/G]       | NA                                         |
| Ca_Desi_Ch_scaffold09962_994 | Ca_desi_scaffold   | 994                            | [A/G]       | NA                                         |
| Ca_Desi_Ch_scaffold09962_995 | Ca_desi_scaffold   | 995                            | [A/G]       | NA                                         |
| Ca_Desi_Ch_scaffold09962_996 | Ca_desi_scaffold   | 996                            | [C/T]       | NA                                         |
| Ca_Desi_Ch_scaffold09962_997 | Ca_desi_scaffold   | 997                            | [C/G]       | NA                                         |
| Ca_Desi_Ch_scaffold09962_998 | Ca_desi_scaffold   | 998                            | [G/A]       | NA                                         |
| Ca_Desi_Ch_scaffold09962_999 | Ca_desi_scaffold   | 999                            | [G/A]       | NA                                         |

| <b>SNP IDs</b>                  | <b>Chromosomes</b> | <b>Physical positions (bp)</b> | <b>SNPs</b> | <b>NCBI SNPdb accession IDs (NCBI_ss#)</b> |
|---------------------------------|--------------------|--------------------------------|-------------|--------------------------------------------|
| Ca_Desig_Chr_scaffold09962_1000 | Ca_desig_scaffold  | 1000                           | [A/G]       | NA                                         |
| Ca_Desig_Chr_scaffold09962_1001 | Ca_desig_scaffold  | 1001                           | [T/C]       | NA                                         |
| Ca_Desig_Chr_scaffold09962_1002 | Ca_desig_scaffold  | 1002                           | [G/A]       | NA                                         |
| Ca_Desig_Chr_scaffold09962_1003 | Ca_desig_scaffold  | 1003                           | [C/T]       | NA                                         |
| Ca_Desig_Chr_scaffold09962_1004 | Ca_desig_scaffold  | 1004                           | [A/G]       | NA                                         |
| Ca_Desig_Chr_scaffold09962_1005 | Ca_desig_scaffold  | 1005                           | [T/C]       | NA                                         |
| Ca_Desig_Chr_scaffold09962_1006 | Ca_desig_scaffold  | 1006                           | [T/C]       | NA                                         |
| Ca_Desig_Chr_scaffold09962_1007 | Ca_desig_scaffold  | 1007                           | [C/T]       | NA                                         |
| Ca_Desig_Chr_scaffold09962_1008 | Ca_desig_scaffold  | 1008                           | [T/C]       | NA                                         |
| Ca_Desig_Chr_scaffold09962_1009 | Ca_desig_scaffold  | 1009                           | [T/A]       | NA                                         |
| Ca_Desig_Chr_scaffold09962_1010 | Ca_desig_scaffold  | 1010                           | [A/G]       | NA                                         |
| Ca_Desig_Chr_scaffold09962_1011 | Ca_desig_scaffold  | 1011                           | [A/G]       | NA                                         |
| Ca_Desig_Chr_scaffold09962_1012 | Ca_desig_scaffold  | 1012                           | [A/G]       | NA                                         |
| Ca_Desig_Chr_scaffold09962_1013 | Ca_desig_scaffold  | 1013                           | [A/G]       | NA                                         |
| Ca_Desig_Chr_scaffold09962_1014 | Ca_desig_scaffold  | 1014                           | [G/A]       | NA                                         |
| Ca_Desig_Chr_scaffold09962_1015 | Ca_desig_scaffold  | 1015                           | [A/G]       | NA                                         |
| Ca_Desig_Chr_scaffold09962_1016 | Ca_desig_scaffold  | 1016                           | [A/G]       | NA                                         |
| Ca_Desig_Chr_scaffold09962_1017 | Ca_desig_scaffold  | 1017                           | [A/G]       | NA                                         |
| Ca_Desig_Chr_scaffold09962_1018 | Ca_desig_scaffold  | 1018                           | [A/G]       | NA                                         |
| Ca_Desig_Chr_scaffold09962_1019 | Ca_desig_scaffold  | 1019                           | [A/G]       | NA                                         |
| Ca_Desig_Chr_scaffold09962_1020 | Ca_desig_scaffold  | 1020                           | [G/C]       | NA                                         |
| Ca_Desig_Chr_scaffold09962_1021 | Ca_desig_scaffold  | 1021                           | [C/T]       | NA                                         |
| Ca_Desig_Chr_scaffold09962_1022 | Ca_desig_scaffold  | 1022                           | [G/A]       | NA                                         |
| Ca_Desig_Chr_scaffold09962_1024 | Ca_desig_scaffold  | 1024                           | [T/C]       | NA                                         |
| Ca_Desig_Chr_scaffold09962_1025 | Ca_desig_scaffold  | 1025                           | [A/G]       | NA                                         |
| Ca_Desig_Chr_scaffold09962_1026 | Ca_desig_scaffold  | 1026                           | [A/G]       | NA                                         |
| Ca_Desig_Chr_scaffold09962_1028 | Ca_desig_scaffold  | 1028                           | [G/A]       | NA                                         |
| Ca_Desig_Chr_scaffold09962_1029 | Ca_desig_scaffold  | 1029                           | [A/G]       | NA                                         |
| Ca_Desig_Chr_scaffold09962_1030 | Ca_desig_scaffold  | 1030                           | [A/G]       | NA                                         |
| Ca_Desig_Chr_scaffold09962_1031 | Ca_desig_scaffold  | 1031                           | [T/G]       | NA                                         |
| Ca_Desig_Chr_scaffold09962_1032 | Ca_desig_scaffold  | 1032                           | [T/G]       | NA                                         |
| Ca_Desig_Chr_scaffold09962_1033 | Ca_desig_scaffold  | 1033                           | [A/G]       | NA                                         |
| Ca_Desig_Chr_scaffold09962_1035 | Ca_desig_scaffold  | 1035                           | [G/A]       | NA                                         |
| Ca_Desig_Chr_scaffold09962_1036 | Ca_desig_scaffold  | 1036                           | [A/G]       | NA                                         |

| <b>SNP IDs</b>                  | <b>Chromosomes</b> | <b>Physical positions (bp)</b> | <b>SNPs</b> | <b>NCBI SNPdb accession IDs (NCBI_ss#)</b> |
|---------------------------------|--------------------|--------------------------------|-------------|--------------------------------------------|
| Ca_Desig_Chr_scaffold09962_1037 | Ca_desig_scaffold  | 1037                           | [T/C]       | NA                                         |
| Ca_Desig_Chr_scaffold09962_1038 | Ca_desig_scaffold  | 1038                           | [G/A]       | NA                                         |
| Ca_Desig_Chr_scaffold09962_1040 | Ca_desig_scaffold  | 1040                           | [G/T]       | NA                                         |
| Ca_Desig_Chr_scaffold09962_1041 | Ca_desig_scaffold  | 1041                           | [C/T]       | NA                                         |
| Ca_Desig_Chr_scaffold09962_1042 | Ca_desig_scaffold  | 1042                           | [C/T]       | NA                                         |
| Ca_Desig_Chr_scaffold09962_1043 | Ca_desig_scaffold  | 1043                           | [G/A]       | NA                                         |
| Ca_Desig_Chr_scaffold09962_1044 | Ca_desig_scaffold  | 1044                           | [G/A]       | NA                                         |
| Ca_Desig_Chr_scaffold09962_1384 | Ca_desig_scaffold  | 1384                           | [A/C]       | NA                                         |
| Ca_Desig_Chr_scaffold09962_2838 | Ca_desig_scaffold  | 2838                           | [A/C]       | NA                                         |
| Ca_Desig_Chr_scaffold09991_1317 | Ca_desig_scaffold  | 1317                           | [T/G]       | NA                                         |
| Ca_Desig_Chr_scaffold09991_1322 | Ca_desig_scaffold  | 1322                           | [A/G]       | NA                                         |
| Ca_Desig_Chr_scaffold10015_74   | Ca_desig_scaffold  | 74                             | [G/T]       | NA                                         |
| Ca_Desig_Chr_scaffold10015_434  | Ca_desig_scaffold  | 434                            | [T/G]       | NA                                         |
| Ca_Desig_Chr_scaffold10015_1166 | Ca_desig_scaffold  | 1166                           | [T/G]       | NA                                         |
| Ca_Desig_Chr_scaffold10015_3285 | Ca_desig_scaffold  | 3285                           | [A/G]       | NA                                         |
| Ca_Desig_Chr_scaffold10015_3310 | Ca_desig_scaffold  | 3310                           | [A/G]       | NA                                         |
| Ca_Desig_Chr_scaffold10015_3312 | Ca_desig_scaffold  | 3312                           | [A/G]       | NA                                         |
| Ca_Desig_Chr_scaffold10015_3314 | Ca_desig_scaffold  | 3314                           | [A/G]       | NA                                         |
| Ca_Desig_Chr_scaffold10015_3319 | Ca_desig_scaffold  | 3319                           | [A/G]       | NA                                         |
| Ca_Desig_Chr_scaffold10015_3327 | Ca_desig_scaffold  | 3327                           | [T/A]       | NA                                         |
| Ca_Desig_Chr_scaffold10015_3337 | Ca_desig_scaffold  | 3337                           | [T/C]       | NA                                         |
| Ca_Desig_Chr_scaffold10015_3338 | Ca_desig_scaffold  | 3338                           | [G/A]       | NA                                         |
| Ca_Desig_Chr_scaffold10015_3593 | Ca_desig_scaffold  | 3593                           | [A/G]       | NA                                         |
| Ca_Desig_Chr_scaffold10015_3594 | Ca_desig_scaffold  | 3594                           | [A/G]       | NA                                         |
| Ca_Desig_Chr_scaffold10015_3598 | Ca_desig_scaffold  | 3598                           | [C/T]       | NA                                         |
| Ca_Desig_Chr_scaffold10015_3604 | Ca_desig_scaffold  | 3604                           | [T/C]       | NA                                         |
| Ca_Desig_Chr_scaffold10015_3624 | Ca_desig_scaffold  | 3624                           | [A/G]       | NA                                         |
| Ca_Desig_Chr_scaffold10015_3634 | Ca_desig_scaffold  | 3634                           | [T/C]       | NA                                         |
| Ca_Desig_Chr_scaffold10015_3638 | Ca_desig_scaffold  | 3638                           | [A/G]       | NA                                         |
| Ca_Desig_Chr_scaffold10015_3651 | Ca_desig_scaffold  | 3651                           | [G/C]       | NA                                         |
| Ca_Desig_Chr_scaffold10015_3652 | Ca_desig_scaffold  | 3652                           | [T/C]       | NA                                         |
| Ca_Desig_Chr_scaffold10015_3653 | Ca_desig_scaffold  | 3653                           | [A/G]       | NA                                         |
| Ca_Desig_Chr_scaffold10015_3654 | Ca_desig_scaffold  | 3654                           | [A/G]       | NA                                         |
| Ca_Desig_Chr_scaffold10015_3658 | Ca_desig_scaffold  | 3658                           | [A/G]       | NA                                         |

| <b>SNP IDs</b>                 | <b>Chromosomes</b> | <b>Physical positions (bp)</b> | <b>SNPs</b> | <b>NCBI SNPdb accession IDs (NCBI_ss#)</b> |
|--------------------------------|--------------------|--------------------------------|-------------|--------------------------------------------|
| Ca_Desi_Chr_scaffold10015_3660 | Ca_desi_scaffold   | 3660                           | [A/G]       | NA                                         |
| Ca_Desi_Chr_scaffold10015_3662 | Ca_desi_scaffold   | 3662                           | [A/G]       | NA                                         |
| Ca_Desi_Chr_scaffold10015_3664 | Ca_desi_scaffold   | 3664                           | [C/T]       | NA                                         |
| Ca_Desi_Chr_scaffold10015_3666 | Ca_desi_scaffold   | 3666                           | [A/G]       | NA                                         |
| Ca_Desi_Chr_scaffold10015_3667 | Ca_desi_scaffold   | 3667                           | [T/C]       | NA                                         |
| Ca_Desi_Chr_scaffold10015_3668 | Ca_desi_scaffold   | 3668                           | [T/C]       | NA                                         |
| Ca_Desi_Chr_scaffold10015_3672 | Ca_desi_scaffold   | 3672                           | [T/C]       | NA                                         |
| Ca_Desi_Chr_scaffold10015_3673 | Ca_desi_scaffold   | 3673                           | [T/C]       | NA                                         |
| Ca_Desi_Chr_scaffold10015_3680 | Ca_desi_scaffold   | 3680                           | [G/A]       | NA                                         |
| Ca_Desi_Chr_scaffold10015_3681 | Ca_desi_scaffold   | 3681                           | [A/G]       | NA                                         |
| Ca_Desi_Chr_scaffold10015_3683 | Ca_desi_scaffold   | 3683                           | [A/G]       | NA                                         |
| Ca_Desi_Chr_scaffold10015_3685 | Ca_desi_scaffold   | 3685                           | [A/G]       | NA                                         |
| Ca_Desi_Chr_scaffold10015_3687 | Ca_desi_scaffold   | 3687                           | [A/G]       | NA                                         |
| Ca_Desi_Chr_scaffold10015_3688 | Ca_desi_scaffold   | 3688                           | [A/G]       | NA                                         |
| Ca_Desi_Chr_scaffold10015_3689 | Ca_desi_scaffold   | 3689                           | [T/C]       | NA                                         |
| Ca_Desi_Chr_scaffold10015_3693 | Ca_desi_scaffold   | 3693                           | [C/T]       | NA                                         |
| Ca_Desi_Chr_scaffold10015_3694 | Ca_desi_scaffold   | 3694                           | [G/A]       | NA                                         |
| Ca_Desi_Chr_scaffold10015_3698 | Ca_desi_scaffold   | 3698                           | [A/G]       | NA                                         |
| Ca_Desi_Chr_scaffold10015_3699 | Ca_desi_scaffold   | 3699                           | [C/T]       | NA                                         |
| Ca_Desi_Chr_scaffold10015_3701 | Ca_desi_scaffold   | 3701                           | [A/G]       | NA                                         |
| Ca_Desi_Chr_scaffold10015_3703 | Ca_desi_scaffold   | 3703                           | [C/A]       | NA                                         |
| Ca_Desi_Chr_scaffold10015_3706 | Ca_desi_scaffold   | 3706                           | [T/C]       | NA                                         |
| Ca_Desi_Chr_scaffold10015_3708 | Ca_desi_scaffold   | 3708                           | [T/C]       | NA                                         |
| Ca_Desi_Chr_scaffold10015_3710 | Ca_desi_scaffold   | 3710                           | [G/C]       | NA                                         |
| Ca_Desi_Chr_scaffold10015_3822 | Ca_desi_scaffold   | 3822                           | [T/A]       | NA                                         |
| Ca_Desi_Chr_scaffold10015_3823 | Ca_desi_scaffold   | 3823                           | [A/G]       | NA                                         |
| Ca_Desi_Chr_scaffold10015_3824 | Ca_desi_scaffold   | 3824                           | [T/A]       | NA                                         |
| Ca_Desi_Chr_scaffold10015_3828 | Ca_desi_scaffold   | 3828                           | [T/G]       | NA                                         |
| Ca_Desi_Chr_scaffold10015_3832 | Ca_desi_scaffold   | 3832                           | [T/G]       | NA                                         |
| Ca_Desi_Chr_scaffold10015_3843 | Ca_desi_scaffold   | 3843                           | [G/A]       | NA                                         |
| Ca_Desi_Chr_scaffold10015_3847 | Ca_desi_scaffold   | 3847                           | [T/G]       | NA                                         |
| Ca_Desi_Chr_scaffold10015_3848 | Ca_desi_scaffold   | 3848                           | [T/G]       | NA                                         |
| Ca_Desi_Chr_scaffold10015_3849 | Ca_desi_scaffold   | 3849                           | [G/T]       | NA                                         |
| Ca_Desi_Chr_scaffold10015_3850 | Ca_desi_scaffold   | 3850                           | [C/T]       | NA                                         |

| <b>SNP IDs</b>                | <b>Chromosomes</b> | <b>Physical positions (bp)</b> | <b>SNPs</b> | <b>NCBI SNPdb accession IDs (NCBI_ss#)</b> |
|-------------------------------|--------------------|--------------------------------|-------------|--------------------------------------------|
| Ca_Desi_Ch_scaffold10015_3851 | Ca_desi_scaffold   | 3851                           | [T/C]       | NA                                         |
| Ca_Desi_Ch_scaffold10015_3852 | Ca_desi_scaffold   | 3852                           | [T/G]       | NA                                         |
| Ca_Desi_Ch_scaffold10015_3854 | Ca_desi_scaffold   | 3854                           | [T/C]       | NA                                         |
| Ca_Desi_Ch_scaffold10015_3855 | Ca_desi_scaffold   | 3855                           | [T/C]       | NA                                         |
| Ca_Desi_Ch_scaffold10015_3857 | Ca_desi_scaffold   | 3857                           | [A/G]       | NA                                         |
| Ca_Desi_Ch_scaffold10015_3859 | Ca_desi_scaffold   | 3859                           | [A/G]       | NA                                         |
| Ca_Desi_Ch_scaffold10015_3860 | Ca_desi_scaffold   | 3860                           | [A/G]       | NA                                         |
| Ca_Desi_Ch_scaffold10015_3864 | Ca_desi_scaffold   | 3864                           | [T/C]       | NA                                         |
| Ca_Desi_Ch_scaffold10015_3865 | Ca_desi_scaffold   | 3865                           | [A/G]       | NA                                         |
| Ca_Desi_Ch_scaffold10015_3866 | Ca_desi_scaffold   | 3866                           | [T/C]       | NA                                         |
| Ca_Desi_Ch_scaffold10015_3877 | Ca_desi_scaffold   | 3877                           | [A/G]       | NA                                         |
| Ca_Desi_Ch_scaffold10015_3881 | Ca_desi_scaffold   | 3881                           | [G/A]       | NA                                         |
| Ca_Desi_Ch_scaffold10015_3882 | Ca_desi_scaffold   | 3882                           | [C/T]       | NA                                         |
| Ca_Desi_Ch_scaffold10015_3883 | Ca_desi_scaffold   | 3883                           | [G/A]       | NA                                         |
| Ca_Desi_Ch_scaffold10015_3893 | Ca_desi_scaffold   | 3893                           | [T/C]       | NA                                         |
| Ca_Desi_Ch_scaffold10015_3903 | Ca_desi_scaffold   | 3903                           | [T/C]       | NA                                         |
| Ca_Desi_Ch_scaffold10015_3911 | Ca_desi_scaffold   | 3911                           | [A/C]       | NA                                         |
| Ca_Desi_Ch_scaffold10015_3914 | Ca_desi_scaffold   | 3914                           | [T/C]       | NA                                         |
| Ca_Desi_Ch_scaffold10015_3922 | Ca_desi_scaffold   | 3922                           | [T/C]       | NA                                         |
| Ca_Desi_Ch_scaffold10040_3643 | Ca_desi_scaffold   | 3643                           | [C/T]       | NA                                         |
| Ca_Desi_Ch_scaffold10040_3695 | Ca_desi_scaffold   | 3695                           | [C/T]       | NA                                         |
| Ca_Desi_Ch_scaffold10040_3710 | Ca_desi_scaffold   | 3710                           | [C/T]       | NA                                         |
| Ca_Desi_Ch_scaffold10040_3713 | Ca_desi_scaffold   | 3713                           | [G/T]       | NA                                         |
| Ca_Desi_Ch_scaffold10040_3714 | Ca_desi_scaffold   | 3714                           | [T/C]       | NA                                         |
| Ca_Desi_Ch_scaffold10040_3741 | Ca_desi_scaffold   | 3741                           | [C/T]       | NA                                         |
| Ca_Desi_Ch_scaffold10040_3744 | Ca_desi_scaffold   | 3744                           | [C/A]       | NA                                         |
| Ca_Desi_Ch_scaffold10040_3746 | Ca_desi_scaffold   | 3746                           | [G/T]       | NA                                         |
| Ca_Desi_Ch_scaffold10040_3760 | Ca_desi_scaffold   | 3760                           | [T/C]       | NA                                         |
| Ca_Desi_Ch_scaffold10040_3765 | Ca_desi_scaffold   | 3765                           | [G/A]       | NA                                         |
| Ca_Desi_Ch_scaffold10069_2142 | Ca_desi_scaffold   | 2142                           | [A/C]       | NA                                         |
| Ca_Desi_Ch_scaffold10069_2149 | Ca_desi_scaffold   | 2149                           | [A/C]       | NA                                         |
| Ca_Desi_Ch_scaffold10069_2151 | Ca_desi_scaffold   | 2151                           | [T/C]       | NA                                         |
| Ca_Desi_Ch_scaffold10069_2170 | Ca_desi_scaffold   | 2170                           | [A/C]       | NA                                         |
| Ca_Desi_Ch_scaffold10069_2261 | Ca_desi_scaffold   | 2261                           | [A/C]       | NA                                         |

| <b>SNP IDs</b>                  | <b>Chromosomes</b> | <b>Physical positions (bp)</b> | <b>SNPs</b> | <b>NCBI SNPdb accession IDs (NCBI_ss#)</b> |
|---------------------------------|--------------------|--------------------------------|-------------|--------------------------------------------|
| Ca_Desig_Chr_scaffold10069_2263 | Ca_desig_scaffold  | 2263                           | [A/C]       | NA                                         |
| Ca_Desig_Chr_scaffold10069_2273 | Ca_desig_scaffold  | 2273                           | [A/C]       | NA                                         |
| Ca_Desig_Chr_scaffold10069_2279 | Ca_desig_scaffold  | 2279                           | [C/T]       | NA                                         |
| Ca_Desig_Chr_scaffold10109_768  | Ca_desig_scaffold  | 768                            | [T/G]       | NA                                         |
| Ca_Desig_Chr_scaffold10127_862  | Ca_desig_scaffold  | 862                            | [T/A]       | NA                                         |
| Ca_Desig_Chr_scaffold10127_1042 | Ca_desig_scaffold  | 1042                           | [G/A]       | NA                                         |
| Ca_Desig_Chr_scaffold10127_1167 | Ca_desig_scaffold  | 1167                           | [A/C]       | NA                                         |
| Ca_Desig_Chr_scaffold10127_1198 | Ca_desig_scaffold  | 1198                           | [A/T]       | NA                                         |
| Ca_Desig_Chr_scaffold10127_1207 | Ca_desig_scaffold  | 1207                           | [A/G]       | NA                                         |
| Ca_Desig_Chr_scaffold10235_153  | Ca_desig_scaffold  | 153                            | [A/C]       | NA                                         |
| Ca_Desig_Chr_scaffold10235_167  | Ca_desig_scaffold  | 167                            | [A/C]       | NA                                         |
| Ca_Desig_Chr_scaffold10235_175  | Ca_desig_scaffold  | 175                            | [T/C]       | NA                                         |
| Ca_Desig_Chr_scaffold10388_1019 | Ca_desig_scaffold  | 1019                           | [T/A]       | NA                                         |
| Ca_Desig_Chr_scaffold10484_363  | Ca_desig_scaffold  | 363                            | [C/T]       | NA                                         |
| Ca_Desig_Chr_scaffold10536_1939 | Ca_desig_scaffold  | 1939                           | [A/G]       | NA                                         |
| Ca_Desig_Chr_scaffold10567_2665 | Ca_desig_scaffold  | 2665                           | [A/G]       | NA                                         |
| Ca_Desig_Chr_scaffold10567_2668 | Ca_desig_scaffold  | 2668                           | [T/C]       | NA                                         |
| Ca_Desig_Chr_scaffold10567_2682 | Ca_desig_scaffold  | 2682                           | [A/G]       | NA                                         |
| Ca_Desig_Chr_scaffold10567_2711 | Ca_desig_scaffold  | 2711                           | [A/G]       | NA                                         |
| Ca_Desig_Chr_scaffold10652_1394 | Ca_desig_scaffold  | 1394                           | [C/T]       | NA                                         |
| Ca_Desig_Chr_scaffold10706_4484 | Ca_desig_scaffold  | 4484                           | [T/C]       | NA                                         |
| Ca_Desig_Chr_scaffold10706_4491 | Ca_desig_scaffold  | 4491                           | [T/C]       | NA                                         |
| Ca_Desig_Chr_scaffold10706_4526 | Ca_desig_scaffold  | 4526                           | [T/C]       | NA                                         |
| Ca_Desig_Chr_scaffold10706_4531 | Ca_desig_scaffold  | 4531                           | [A/G]       | NA                                         |
| Ca_Desig_Chr_scaffold10811_1936 | Ca_desig_scaffold  | 1936                           | [C/T]       | NA                                         |
| Ca_Desig_Chr_scaffold10811_1963 | Ca_desig_scaffold  | 1963                           | [A/T]       | NA                                         |
| Ca_Desig_Chr_scaffold10834_3513 | Ca_desig_scaffold  | 3513                           | [A/G]       | NA                                         |
| Ca_Desig_Chr_scaffold10834_3529 | Ca_desig_scaffold  | 3529                           | [C/T]       | NA                                         |
| Ca_Desig_Chr_scaffold10834_3546 | Ca_desig_scaffold  | 3546                           | [A/G]       | NA                                         |
| Ca_Desig_Chr_scaffold10834_3548 | Ca_desig_scaffold  | 3548                           | [A/G]       | NA                                         |
| Ca_Desig_Chr_scaffold10837_4068 | Ca_desig_scaffold  | 4068                           | [C/T]       | NA                                         |
| Ca_Desig_Chr_scaffold10837_4104 | Ca_desig_scaffold  | 4104                           | [A/G]       | NA                                         |
| Ca_Desig_Chr_scaffold10864_1346 | Ca_desig_scaffold  | 1346                           | [A/C]       | NA                                         |
| Ca_Desig_Chr_scaffold10864_1364 | Ca_desig_scaffold  | 1364                           | [G/A]       | NA                                         |

| <b>SNP IDs</b>                  | <b>Chromosomes</b> | <b>Physical positions (bp)</b> | <b>SNPs</b> | <b>NCBI SNPdb accession IDs (NCBI_ss#)</b> |
|---------------------------------|--------------------|--------------------------------|-------------|--------------------------------------------|
| Ca_Desig_Chr_scaffold10864_1370 | Ca_desig_scaffold  | 1370                           | [T/A]       | NA                                         |
| Ca_Desig_Chr_scaffold10866_3681 | Ca_desig_scaffold  | 3681                           | [T/C]       | NA                                         |
| Ca_Desig_Chr_scaffold10866_3689 | Ca_desig_scaffold  | 3689                           | [T/G]       | NA                                         |
| Ca_Desig_Chr_scaffold10866_3699 | Ca_desig_scaffold  | 3699                           | [T/C]       | NA                                         |
| Ca_Desig_Chr_scaffold10866_3702 | Ca_desig_scaffold  | 3702                           | [T/G]       | NA                                         |
| Ca_Desig_Chr_scaffold10866_3706 | Ca_desig_scaffold  | 3706                           | [T/G]       | NA                                         |
| Ca_Desig_Chr_scaffold10866_3708 | Ca_desig_scaffold  | 3708                           | [A/C]       | NA                                         |
| Ca_Desig_Chr_scaffold10974_2116 | Ca_desig_scaffold  | 2116                           | [C/A]       | NA                                         |
| Ca_Desig_Chr_scaffold10974_2195 | Ca_desig_scaffold  | 2195                           | [A/C]       | NA                                         |
| Ca_Desig_Chr_scaffold10974_3008 | Ca_desig_scaffold  | 3008                           | [A/G]       | NA                                         |
| Ca_Desig_Chr_scaffold10974_3531 | Ca_desig_scaffold  | 3531                           | [A/G]       | NA                                         |
| Ca_Desig_Chr_scaffold10974_3532 | Ca_desig_scaffold  | 3532                           | [G/A]       | NA                                         |
| Ca_Desig_Chr_scaffold10974_3533 | Ca_desig_scaffold  | 3533                           | [A/G]       | NA                                         |
| Ca_Desig_Chr_scaffold10974_3534 | Ca_desig_scaffold  | 3534                           | [A/G]       | NA                                         |
| Ca_Desig_Chr_scaffold10974_3535 | Ca_desig_scaffold  | 3535                           | [A/G]       | NA                                         |
| Ca_Desig_Chr_scaffold10974_3536 | Ca_desig_scaffold  | 3536                           | [G/A]       | NA                                         |
| Ca_Desig_Chr_scaffold10974_3537 | Ca_desig_scaffold  | 3537                           | [G/A]       | NA                                         |
| Ca_Desig_Chr_scaffold10974_3538 | Ca_desig_scaffold  | 3538                           | [G/A]       | NA                                         |
| Ca_Desig_Chr_scaffold10974_3539 | Ca_desig_scaffold  | 3539                           | [C/T]       | NA                                         |
| Ca_Desig_Chr_scaffold10974_3540 | Ca_desig_scaffold  | 3540                           | [A/G]       | NA                                         |
| Ca_Desig_Chr_scaffold10974_3541 | Ca_desig_scaffold  | 3541                           | [A/G]       | NA                                         |
| Ca_Desig_Chr_scaffold10974_3542 | Ca_desig_scaffold  | 3542                           | [T/C]       | NA                                         |
| Ca_Desig_Chr_scaffold10974_3543 | Ca_desig_scaffold  | 3543                           | [A/G]       | NA                                         |
| Ca_Desig_Chr_scaffold10974_3544 | Ca_desig_scaffold  | 3544                           | [T/C]       | NA                                         |
| Ca_Desig_Chr_scaffold10974_3545 | Ca_desig_scaffold  | 3545                           | [G/A]       | NA                                         |
| Ca_Desig_Chr_scaffold10974_3546 | Ca_desig_scaffold  | 3546                           | [G/A]       | NA                                         |
| Ca_Desig_Chr_scaffold10974_3547 | Ca_desig_scaffold  | 3547                           | [C/T]       | NA                                         |
| Ca_Desig_Chr_scaffold10974_3548 | Ca_desig_scaffold  | 3548                           | [A/G]       | NA                                         |
| Ca_Desig_Chr_scaffold10974_3549 | Ca_desig_scaffold  | 3549                           | [A/G]       | NA                                         |
| Ca_Desig_Chr_scaffold10974_3550 | Ca_desig_scaffold  | 3550                           | [T/C]       | NA                                         |
| Ca_Desig_Chr_scaffold10974_3551 | Ca_desig_scaffold  | 3551                           | [C/T]       | NA                                         |
| Ca_Desig_Chr_scaffold10974_3552 | Ca_desig_scaffold  | 3552                           | [T/C]       | NA                                         |
| Ca_Desig_Chr_scaffold10974_3553 | Ca_desig_scaffold  | 3553                           | [T/C]       | NA                                         |
| Ca_Desig_Chr_scaffold10974_3554 | Ca_desig_scaffold  | 3554                           | [T/C]       | NA                                         |

| <b>SNP IDs</b>                  | <b>Chromosomes</b> | <b>Physical positions (bp)</b> | <b>SNPs</b> | <b>NCBI SNPdb accession IDs (NCBI_ss#)</b> |
|---------------------------------|--------------------|--------------------------------|-------------|--------------------------------------------|
| Ca_Desig_Chr_scaffold10974_3555 | Ca_desig_scaffold  | 3555                           | [A/G]       | NA                                         |
| Ca_Desig_Chr_scaffold10974_3556 | Ca_desig_scaffold  | 3556                           | [T/C]       | NA                                         |
| Ca_Desig_Chr_scaffold10974_3557 | Ca_desig_scaffold  | 3557                           | [T/C]       | NA                                         |
| Ca_Desig_Chr_scaffold10974_3558 | Ca_desig_scaffold  | 3558                           | [A/G]       | NA                                         |
| Ca_Desig_Chr_scaffold10974_3559 | Ca_desig_scaffold  | 3559                           | [G/A]       | NA                                         |
| Ca_Desig_Chr_scaffold10974_3560 | Ca_desig_scaffold  | 3560                           | [A/G]       | NA                                         |
| Ca_Desig_Chr_scaffold10974_3561 | Ca_desig_scaffold  | 3561                           | [A/G]       | NA                                         |
| Ca_Desig_Chr_scaffold10974_3562 | Ca_desig_scaffold  | 3562                           | [T/C]       | NA                                         |
| Ca_Desig_Chr_scaffold10974_3563 | Ca_desig_scaffold  | 3563                           | [C/T]       | NA                                         |
| Ca_Desig_Chr_scaffold10974_3564 | Ca_desig_scaffold  | 3564                           | [T/C]       | NA                                         |
| Ca_Desig_Chr_scaffold10974_3565 | Ca_desig_scaffold  | 3565                           | [T/C]       | NA                                         |
| Ca_Desig_Chr_scaffold10974_3566 | Ca_desig_scaffold  | 3566                           | [T/C]       | NA                                         |
| Ca_Desig_Chr_scaffold10974_3567 | Ca_desig_scaffold  | 3567                           | [C/T]       | NA                                         |
| Ca_Desig_Chr_scaffold10974_3568 | Ca_desig_scaffold  | 3568                           | [T/C]       | NA                                         |
| Ca_Desig_Chr_scaffold10974_3569 | Ca_desig_scaffold  | 3569                           | [C/T]       | NA                                         |
| Ca_Desig_Chr_scaffold10974_3570 | Ca_desig_scaffold  | 3570                           | [C/T]       | NA                                         |
| Ca_Desig_Chr_scaffold10974_3571 | Ca_desig_scaffold  | 3571                           | [A/G]       | NA                                         |
| Ca_Desig_Chr_scaffold10974_3572 | Ca_desig_scaffold  | 3572                           | [A/G]       | NA                                         |
| Ca_Desig_Chr_scaffold10974_3573 | Ca_desig_scaffold  | 3573                           | [T/C]       | NA                                         |
| Ca_Desig_Chr_scaffold10974_3574 | Ca_desig_scaffold  | 3574                           | [G/A]       | NA                                         |
| Ca_Desig_Chr_scaffold10974_3575 | Ca_desig_scaffold  | 3575                           | [C/T]       | NA                                         |
| Ca_Desig_Chr_scaffold10974_3576 | Ca_desig_scaffold  | 3576                           | [T/C]       | NA                                         |
| Ca_Desig_Chr_scaffold10974_3577 | Ca_desig_scaffold  | 3577                           | [T/C]       | NA                                         |
| Ca_Desig_Chr_scaffold10974_3578 | Ca_desig_scaffold  | 3578                           | [T/C]       | NA                                         |
| Ca_Desig_Chr_scaffold10974_3579 | Ca_desig_scaffold  | 3579                           | [T/C]       | NA                                         |
| Ca_Desig_Chr_scaffold10974_3580 | Ca_desig_scaffold  | 3580                           | [C/T]       | NA                                         |
| Ca_Desig_Chr_scaffold10974_3581 | Ca_desig_scaffold  | 3581                           | [C/T]       | NA                                         |
| Ca_Desig_Chr_scaffold10974_3582 | Ca_desig_scaffold  | 3582                           | [G/A]       | NA                                         |
| Ca_Desig_Chr_scaffold10974_3583 | Ca_desig_scaffold  | 3583                           | [G/A]       | NA                                         |
| Ca_Desig_Chr_scaffold10974_3584 | Ca_desig_scaffold  | 3584                           | [G/A]       | NA                                         |
| Ca_Desig_Chr_scaffold10974_3585 | Ca_desig_scaffold  | 3585                           | [G/A]       | NA                                         |
| Ca_Desig_Chr_scaffold10974_3586 | Ca_desig_scaffold  | 3586                           | [T/C]       | NA                                         |
| Ca_Desig_Chr_scaffold10974_3587 | Ca_desig_scaffold  | 3587                           | [G/A]       | NA                                         |
| Ca_Desig_Chr_scaffold10974_3588 | Ca_desig_scaffold  | 3588                           | [A/G]       | NA                                         |



| <b>SNP IDs</b>                  | <b>Chromosomes</b> | <b>Physical positions (bp)</b> | <b>SNPs</b> | <b>NCBI SNPdb accession IDs (NCBI_ss#)</b> |
|---------------------------------|--------------------|--------------------------------|-------------|--------------------------------------------|
| Ca_Desig_Chr_scaffold10974_3589 | Ca_desig_scaffold  | 3589                           | [A/G]       | NA                                         |
| Ca_Desig_Chr_scaffold10974_3592 | Ca_desig_scaffold  | 3592                           | [T/A]       | NA                                         |
| Ca_Desig_Chr_scaffold10974_3595 | Ca_desig_scaffold  | 3595                           | [T/C]       | NA                                         |
| Ca_Desig_Chr_scaffold10974_3596 | Ca_desig_scaffold  | 3596                           | [C/T]       | NA                                         |
| Ca_Desig_Chr_scaffold10974_3597 | Ca_desig_scaffold  | 3597                           | [A/G]       | NA                                         |
| Ca_Desig_Chr_scaffold10974_3598 | Ca_desig_scaffold  | 3598                           | [A/G]       | NA                                         |
| Ca_Desig_Chr_scaffold10974_3600 | Ca_desig_scaffold  | 3600                           | [T/C]       | NA                                         |
| Ca_Desig_Chr_scaffold10974_3601 | Ca_desig_scaffold  | 3601                           | [T/C]       | NA                                         |
| Ca_Desig_Chr_scaffold10974_3602 | Ca_desig_scaffold  | 3602                           | [G/A]       | NA                                         |
| Ca_Desig_Chr_scaffold10974_3603 | Ca_desig_scaffold  | 3603                           | [A/G]       | NA                                         |
| Ca_Desig_Chr_scaffold10974_3604 | Ca_desig_scaffold  | 3604                           | [T/C]       | NA                                         |
| Ca_Desig_Chr_scaffold10974_3606 | Ca_desig_scaffold  | 3606                           | [T/C]       | NA                                         |
| Ca_Desig_Chr_scaffold10974_3607 | Ca_desig_scaffold  | 3607                           | [T/C]       | NA                                         |
| Ca_Desig_Chr_scaffold10974_3608 | Ca_desig_scaffold  | 3608                           | [A/G]       | NA                                         |
| Ca_Desig_Chr_scaffold10974_3609 | Ca_desig_scaffold  | 3609                           | [A/G]       | NA                                         |
| Ca_Desig_Chr_scaffold10974_3610 | Ca_desig_scaffold  | 3610                           | [T/C]       | NA                                         |
| Ca_Desig_Chr_scaffold10974_3611 | Ca_desig_scaffold  | 3611                           | [T/C]       | NA                                         |
| Ca_Desig_Chr_scaffold10974_3612 | Ca_desig_scaffold  | 3612                           | [A/G]       | NA                                         |
| Ca_Desig_Chr_scaffold10974_3613 | Ca_desig_scaffold  | 3613                           | [A/G]       | NA                                         |
| Ca_Desig_Chr_scaffold10974_3615 | Ca_desig_scaffold  | 3615                           | [T/C]       | NA                                         |
| Ca_Desig_Chr_scaffold10974_3617 | Ca_desig_scaffold  | 3617                           | [T/C]       | NA                                         |
| Ca_Desig_Chr_scaffold10974_3618 | Ca_desig_scaffold  | 3618                           | [T/C]       | NA                                         |
| Ca_Desig_Chr_scaffold10974_3620 | Ca_desig_scaffold  | 3620                           | [T/C]       | NA                                         |
| Ca_Desig_Chr_scaffold10974_3622 | Ca_desig_scaffold  | 3622                           | [T/C]       | NA                                         |
| Ca_Desig_Chr_scaffold10974_3623 | Ca_desig_scaffold  | 3623                           | [T/C]       | NA                                         |
| Ca_Desig_Chr_scaffold10974_3624 | Ca_desig_scaffold  | 3624                           | [A/G]       | NA                                         |
| Ca_Desig_Chr_scaffold10974_3625 | Ca_desig_scaffold  | 3625                           | [T/C]       | NA                                         |
| Ca_Desig_Chr_scaffold10974_3626 | Ca_desig_scaffold  | 3626                           | [G/A]       | NA                                         |
| Ca_Desig_Chr_scaffold10974_3628 | Ca_desig_scaffold  | 3628                           | [T/C]       | NA                                         |
| Ca_Desig_Chr_scaffold10974_3629 | Ca_desig_scaffold  | 3629                           | [A/G]       | NA                                         |
| Ca_Desig_Chr_scaffold10974_3631 | Ca_desig_scaffold  | 3631                           | [C/T]       | NA                                         |
| Ca_Desig_Chr_scaffold10974_3632 | Ca_desig_scaffold  | 3632                           | [G/A]       | NA                                         |
| Ca_Desig_Chr_scaffold10974_3633 | Ca_desig_scaffold  | 3633                           | [T/C]       | NA                                         |
| Ca_Desig_Chr_scaffold10974_3634 | Ca_desig_scaffold  | 3634                           | [G/A]       | NA                                         |

| <b>SNP IDs</b>                  | <b>Chromosomes</b> | <b>Physical positions (bp)</b> | <b>SNPs</b> | <b>NCBI SNPdb accession IDs (NCBI_ss#)</b> |
|---------------------------------|--------------------|--------------------------------|-------------|--------------------------------------------|
| Ca_Desig_Chr_scaffold10974_3635 | Ca_desig_scaffold  | 3635                           | [T/C]       | NA                                         |
| Ca_Desig_Chr_scaffold10974_3637 | Ca_desig_scaffold  | 3637                           | [T/C]       | NA                                         |
| Ca_Desig_Chr_scaffold10974_3638 | Ca_desig_scaffold  | 3638                           | [C/T]       | NA                                         |
| Ca_Desig_Chr_scaffold10974_3639 | Ca_desig_scaffold  | 3639                           | [T/C]       | NA                                         |
| Ca_Desig_Chr_scaffold10974_3640 | Ca_desig_scaffold  | 3640                           | [T/C]       | NA                                         |
| Ca_Desig_Chr_scaffold10974_3641 | Ca_desig_scaffold  | 3641                           | [T/C]       | NA                                         |
| Ca_Desig_Chr_scaffold10974_3642 | Ca_desig_scaffold  | 3642                           | [T/C]       | NA                                         |
| Ca_Desig_Chr_scaffold10974_3643 | Ca_desig_scaffold  | 3643                           | [G/T]       | NA                                         |
| Ca_Desig_Chr_scaffold10974_3644 | Ca_desig_scaffold  | 3644                           | [A/G]       | NA                                         |
| Ca_Desig_Chr_scaffold10974_3645 | Ca_desig_scaffold  | 3645                           | [C/T]       | NA                                         |
| Ca_Desig_Chr_scaffold10974_3646 | Ca_desig_scaffold  | 3646                           | [T/C]       | NA                                         |
| Ca_Desig_Chr_scaffold10974_3647 | Ca_desig_scaffold  | 3647                           | [G/A]       | NA                                         |
| Ca_Desig_Chr_scaffold10974_3648 | Ca_desig_scaffold  | 3648                           | [G/A]       | NA                                         |
| Ca_Desig_Chr_scaffold10974_3649 | Ca_desig_scaffold  | 3649                           | [C/T]       | NA                                         |
| Ca_Desig_Chr_scaffold10974_3650 | Ca_desig_scaffold  | 3650                           | [C/T]       | NA                                         |
| Ca_Desig_Chr_scaffold10974_3651 | Ca_desig_scaffold  | 3651                           | [A/G]       | NA                                         |
| Ca_Desig_Chr_scaffold10974_3652 | Ca_desig_scaffold  | 3652                           | [A/G]       | NA                                         |
| Ca_Desig_Chr_scaffold10974_3654 | Ca_desig_scaffold  | 3654                           | [C/G]       | NA                                         |
| Ca_Desig_Chr_scaffold10974_3682 | Ca_desig_scaffold  | 3682                           | [T/C]       | NA                                         |
| Ca_Desig_Chr_scaffold10974_3683 | Ca_desig_scaffold  | 3683                           | [A/G]       | NA                                         |
| Ca_Desig_Chr_scaffold10974_3684 | Ca_desig_scaffold  | 3684                           | [A/G]       | NA                                         |
| Ca_Desig_Chr_scaffold10974_3685 | Ca_desig_scaffold  | 3685                           | [T/C]       | NA                                         |
| Ca_Desig_Chr_scaffold10974_3687 | Ca_desig_scaffold  | 3687                           | [T/C]       | NA                                         |
| Ca_Desig_Chr_scaffold10974_3688 | Ca_desig_scaffold  | 3688                           | [T/C]       | NA                                         |
| Ca_Desig_Chr_scaffold10974_3690 | Ca_desig_scaffold  | 3690                           | [T/C]       | NA                                         |
| Ca_Desig_Chr_scaffold10974_3691 | Ca_desig_scaffold  | 3691                           | [C/A]       | NA                                         |
| Ca_Desig_Chr_scaffold10974_3692 | Ca_desig_scaffold  | 3692                           | [C/T]       | NA                                         |
| Ca_Desig_Chr_scaffold10974_3693 | Ca_desig_scaffold  | 3693                           | [A/G]       | NA                                         |
| Ca_Desig_Chr_scaffold10974_3694 | Ca_desig_scaffold  | 3694                           | [T/C]       | NA                                         |
| Ca_Desig_Chr_scaffold10974_3695 | Ca_desig_scaffold  | 3695                           | [T/C]       | NA                                         |
| Ca_Desig_Chr_scaffold10974_3696 | Ca_desig_scaffold  | 3696                           | [A/G]       | NA                                         |
| Ca_Desig_Chr_scaffold10974_3699 | Ca_desig_scaffold  | 3699                           | [T/C]       | NA                                         |
| Ca_Desig_Chr_scaffold10974_3700 | Ca_desig_scaffold  | 3700                           | [T/C]       | NA                                         |
| Ca_Desig_Chr_scaffold10974_3701 | Ca_desig_scaffold  | 3701                           | [A/G]       | NA                                         |

| <b>SNP IDs</b>                | <b>Chromosomes</b> | <b>Physical positions (bp)</b> | <b>SNPs</b> | <b>NCBI SNPdb accession IDs (NCBI_ss#)</b> |
|-------------------------------|--------------------|--------------------------------|-------------|--------------------------------------------|
| Ca_Desi_Ch_scaffold10974_3703 | Ca_desi_scaffold   | 3703                           | [G/A]       | NA                                         |
| Ca_Desi_Ch_scaffold10974_3704 | Ca_desi_scaffold   | 3704                           | [G/A]       | NA                                         |
| Ca_Desi_Ch_scaffold10974_3705 | Ca_desi_scaffold   | 3705                           | [T/C]       | NA                                         |
| Ca_Desi_Ch_scaffold10974_3706 | Ca_desi_scaffold   | 3706                           | [G/A]       | NA                                         |
| Ca_Desi_Ch_scaffold10974_3707 | Ca_desi_scaffold   | 3707                           | [G/A]       | NA                                         |
| Ca_Desi_Ch_scaffold10974_3708 | Ca_desi_scaffold   | 3708                           | [C/T]       | NA                                         |
| Ca_Desi_Ch_scaffold10974_3709 | Ca_desi_scaffold   | 3709                           | [C/T]       | NA                                         |
| Ca_Desi_Ch_scaffold10974_3710 | Ca_desi_scaffold   | 3710                           | [A/G]       | NA                                         |
| Ca_Desi_Ch_scaffold10974_3711 | Ca_desi_scaffold   | 3711                           | [C/A]       | NA                                         |
| Ca_Desi_Ch_scaffold10974_3712 | Ca_desi_scaffold   | 3712                           | [A/G]       | NA                                         |
| Ca_Desi_Ch_scaffold10974_3713 | Ca_desi_scaffold   | 3713                           | [G/A]       | NA                                         |
| Ca_Desi_Ch_scaffold10974_3714 | Ca_desi_scaffold   | 3714                           | [T/C]       | NA                                         |
| Ca_Desi_Ch_scaffold10974_3715 | Ca_desi_scaffold   | 3715                           | [G/A]       | NA                                         |
| Ca_Desi_Ch_scaffold10974_3716 | Ca_desi_scaffold   | 3716                           | [G/A]       | NA                                         |
| Ca_Desi_Ch_scaffold10974_3718 | Ca_desi_scaffold   | 3718                           | [A/G]       | NA                                         |
| Ca_Desi_Ch_scaffold10974_3719 | Ca_desi_scaffold   | 3719                           | [T/C]       | NA                                         |
| Ca_Desi_Ch_scaffold10974_3720 | Ca_desi_scaffold   | 3720                           | [G/A]       | NA                                         |
| Ca_Desi_Ch_scaffold10974_3721 | Ca_desi_scaffold   | 3721                           | [A/G]       | NA                                         |
| Ca_Desi_Ch_scaffold10974_3722 | Ca_desi_scaffold   | 3722                           | [C/T]       | NA                                         |
| Ca_Desi_Ch_scaffold10974_3723 | Ca_desi_scaffold   | 3723                           | [G/A]       | NA                                         |
| Ca_Desi_Ch_scaffold10974_3724 | Ca_desi_scaffold   | 3724                           | [A/G]       | NA                                         |
| Ca_Desi_Ch_scaffold10974_3725 | Ca_desi_scaffold   | 3725                           | [G/A]       | NA                                         |
| Ca_Desi_Ch_scaffold10974_3726 | Ca_desi_scaffold   | 3726                           | [G/A]       | NA                                         |
| Ca_Desi_Ch_scaffold10974_3727 | Ca_desi_scaffold   | 3727                           | [C/T]       | NA                                         |
| Ca_Desi_Ch_scaffold10974_3728 | Ca_desi_scaffold   | 3728                           | [A/G]       | NA                                         |
| Ca_Desi_Ch_scaffold10974_3729 | Ca_desi_scaffold   | 3729                           | [G/A]       | NA                                         |
| Ca_Desi_Ch_scaffold10974_3730 | Ca_desi_scaffold   | 3730                           | [G/A]       | NA                                         |
| Ca_Desi_Ch_scaffold10974_3731 | Ca_desi_scaffold   | 3731                           | [A/G]       | NA                                         |
| Ca_Desi_Ch_scaffold10974_3732 | Ca_desi_scaffold   | 3732                           | [A/G]       | NA                                         |
| Ca_Desi_Ch_scaffold10974_3734 | Ca_desi_scaffold   | 3734                           | [T/C]       | NA                                         |
| Ca_Desi_Ch_scaffold10974_3735 | Ca_desi_scaffold   | 3735                           | [T/C]       | NA                                         |
| Ca_Desi_Ch_scaffold10974_3736 | Ca_desi_scaffold   | 3736                           | [A/G]       | NA                                         |
| Ca_Desi_Ch_scaffold10974_3737 | Ca_desi_scaffold   | 3737                           | [G/A]       | NA                                         |
| Ca_Desi_Ch_scaffold10974_3738 | Ca_desi_scaffold   | 3738                           | [A/G]       | NA                                         |

| <b>SNP IDs</b>                | <b>Chromosomes</b> | <b>Physical positions (bp)</b> | <b>SNPs</b> | <b>NCBI SNPdb accession IDs (NCBI_ss#)</b> |
|-------------------------------|--------------------|--------------------------------|-------------|--------------------------------------------|
| Ca_Desi_Ch_scaffold10974_3739 | Ca_desi_scaffold   | 3739                           | [G/A]       | NA                                         |
| Ca_Desi_Ch_scaffold10974_3740 | Ca_desi_scaffold   | 3740                           | [A/G]       | NA                                         |
| Ca_Desi_Ch_scaffold10974_3741 | Ca_desi_scaffold   | 3741                           | [T/C]       | NA                                         |
| Ca_Desi_Ch_scaffold11087_233  | Ca_desi_scaffold   | 233                            | [T/G]       | NA                                         |
| Ca_Desi_Ch_scaffold11130_127  | Ca_desi_scaffold   | 127                            | [G/T]       | NA                                         |
| Ca_Desi_Ch_scaffold11130_138  | Ca_desi_scaffold   | 138                            | [C/T]       | NA                                         |
| Ca_Desi_Ch_scaffold11219_956  | Ca_desi_scaffold   | 956                            | [T/G]       | NA                                         |
| Ca_Desi_Ch_scaffold11230_220  | Ca_desi_scaffold   | 220                            | [C/T]       | NA                                         |
| Ca_Desi_Ch_scaffold11230_223  | Ca_desi_scaffold   | 223                            | [T/C]       | NA                                         |
| Ca_Desi_Ch_scaffold11230_224  | Ca_desi_scaffold   | 224                            | [T/C]       | NA                                         |
| Ca_Desi_Ch_scaffold11230_227  | Ca_desi_scaffold   | 227                            | [T/C]       | NA                                         |
| Ca_Desi_Ch_scaffold11230_231  | Ca_desi_scaffold   | 231                            | [A/G]       | NA                                         |
| Ca_Desi_Ch_scaffold11230_232  | Ca_desi_scaffold   | 232                            | [G/A]       | NA                                         |
| Ca_Desi_Ch_scaffold11230_233  | Ca_desi_scaffold   | 233                            | [A/G]       | NA                                         |
| Ca_Desi_Ch_scaffold11230_234  | Ca_desi_scaffold   | 234                            | [A/G]       | NA                                         |
| Ca_Desi_Ch_scaffold11230_238  | Ca_desi_scaffold   | 238                            | [T/C]       | NA                                         |
| Ca_Desi_Ch_scaffold11230_240  | Ca_desi_scaffold   | 240                            | [T/C]       | NA                                         |
| Ca_Desi_Ch_scaffold11230_242  | Ca_desi_scaffold   | 242                            | [A/G]       | NA                                         |
| Ca_Desi_Ch_scaffold11230_244  | Ca_desi_scaffold   | 244                            | [A/G]       | NA                                         |
| Ca_Desi_Ch_scaffold11230_247  | Ca_desi_scaffold   | 247                            | [A/C]       | NA                                         |
| Ca_Desi_Ch_scaffold11230_250  | Ca_desi_scaffold   | 250                            | [A/C]       | NA                                         |
| Ca_Desi_Ch_scaffold11230_253  | Ca_desi_scaffold   | 253                            | [T/C]       | NA                                         |
| Ca_Desi_Ch_scaffold11230_255  | Ca_desi_scaffold   | 255                            | [T/C]       | NA                                         |
| Ca_Desi_Ch_scaffold11230_257  | Ca_desi_scaffold   | 257                            | [A/G]       | NA                                         |
| Ca_Desi_Ch_scaffold11230_262  | Ca_desi_scaffold   | 262                            | [C/T]       | NA                                         |
| Ca_Desi_Ch_scaffold11230_264  | Ca_desi_scaffold   | 264                            | [A/G]       | NA                                         |
| Ca_Desi_Ch_scaffold11230_269  | Ca_desi_scaffold   | 269                            | [C/T]       | NA                                         |
| Ca_Desi_Ch_scaffold11230_272  | Ca_desi_scaffold   | 272                            | [T/C]       | NA                                         |
| Ca_Desi_Ch_scaffold11230_275  | Ca_desi_scaffold   | 275                            | [A/G]       | NA                                         |
| Ca_Desi_Ch_scaffold11230_279  | Ca_desi_scaffold   | 279                            | [A/G]       | NA                                         |
| Ca_Desi_Ch_scaffold11230_371  | Ca_desi_scaffold   | 371                            | [G/C]       | NA                                         |
| Ca_Desi_Ch_scaffold11230_372  | Ca_desi_scaffold   | 372                            | [G/A]       | NA                                         |
| Ca_Desi_Ch_scaffold11230_373  | Ca_desi_scaffold   | 373                            | [C/A]       | NA                                         |
| Ca_Desi_Ch_scaffold11230_374  | Ca_desi_scaffold   | 374                            | [T/C]       | NA                                         |

| <b>SNP IDs</b>                 | <b>Chromosomes</b> | <b>Physical positions (bp)</b> | <b>SNPs</b> | <b>NCBI SNPdb accession IDs (NCBI_ss#)</b> |
|--------------------------------|--------------------|--------------------------------|-------------|--------------------------------------------|
| Ca_Desig_Chr_scaffold11230_375 | Ca_desig_scaffold  | 375                            | [C/T]       | NA                                         |
| Ca_Desig_Chr_scaffold11230_376 | Ca_desig_scaffold  | 376                            | [G/A]       | NA                                         |
| Ca_Desig_Chr_scaffold11230_377 | Ca_desig_scaffold  | 377                            | [A/G]       | NA                                         |
| Ca_Desig_Chr_scaffold11230_378 | Ca_desig_scaffold  | 378                            | [T/C]       | NA                                         |
| Ca_Desig_Chr_scaffold11230_380 | Ca_desig_scaffold  | 380                            | [T/C]       | NA                                         |
| Ca_Desig_Chr_scaffold11230_381 | Ca_desig_scaffold  | 381                            | [G/A]       | NA                                         |
| Ca_Desig_Chr_scaffold11230_383 | Ca_desig_scaffold  | 383                            | [T/C]       | NA                                         |
| Ca_Desig_Chr_scaffold11230_384 | Ca_desig_scaffold  | 384                            | [T/C]       | NA                                         |
| Ca_Desig_Chr_scaffold11230_385 | Ca_desig_scaffold  | 385                            | [T/C]       | NA                                         |
| Ca_Desig_Chr_scaffold11230_386 | Ca_desig_scaffold  | 386                            | [A/G]       | NA                                         |
| Ca_Desig_Chr_scaffold11230_388 | Ca_desig_scaffold  | 388                            | [T/C]       | NA                                         |
| Ca_Desig_Chr_scaffold11230_389 | Ca_desig_scaffold  | 389                            | [A/G]       | NA                                         |
| Ca_Desig_Chr_scaffold11230_390 | Ca_desig_scaffold  | 390                            | [T/C]       | NA                                         |
| Ca_Desig_Chr_scaffold11230_391 | Ca_desig_scaffold  | 391                            | [C/T]       | NA                                         |
| Ca_Desig_Chr_scaffold11230_392 | Ca_desig_scaffold  | 392                            | [A/G]       | NA                                         |
| Ca_Desig_Chr_scaffold11230_393 | Ca_desig_scaffold  | 393                            | [A/G]       | NA                                         |
| Ca_Desig_Chr_scaffold11230_394 | Ca_desig_scaffold  | 394                            | [G/A]       | NA                                         |
| Ca_Desig_Chr_scaffold11230_396 | Ca_desig_scaffold  | 396                            | [T/C]       | NA                                         |
| Ca_Desig_Chr_scaffold11230_397 | Ca_desig_scaffold  | 397                            | [G/T]       | NA                                         |
| Ca_Desig_Chr_scaffold11230_398 | Ca_desig_scaffold  | 398                            | [A/G]       | NA                                         |
| Ca_Desig_Chr_scaffold11230_399 | Ca_desig_scaffold  | 399                            | [T/C]       | NA                                         |
| Ca_Desig_Chr_scaffold11230_400 | Ca_desig_scaffold  | 400                            | [T/C]       | NA                                         |
| Ca_Desig_Chr_scaffold11230_401 | Ca_desig_scaffold  | 401                            | [C/T]       | NA                                         |
| Ca_Desig_Chr_scaffold11230_402 | Ca_desig_scaffold  | 402                            | [T/C]       | NA                                         |
| Ca_Desig_Chr_scaffold11230_404 | Ca_desig_scaffold  | 404                            | [T/C]       | NA                                         |
| Ca_Desig_Chr_scaffold11230_405 | Ca_desig_scaffold  | 405                            | [T/C]       | NA                                         |
| Ca_Desig_Chr_scaffold11230_406 | Ca_desig_scaffold  | 406                            | [T/C]       | NA                                         |
| Ca_Desig_Chr_scaffold11230_408 | Ca_desig_scaffold  | 408                            | [T/C]       | NA                                         |
| Ca_Desig_Chr_scaffold11230_409 | Ca_desig_scaffold  | 409                            | [G/T]       | NA                                         |
| Ca_Desig_Chr_scaffold11230_410 | Ca_desig_scaffold  | 410                            | [T/C]       | NA                                         |
| Ca_Desig_Chr_scaffold11230_411 | Ca_desig_scaffold  | 411                            | [T/C]       | NA                                         |
| Ca_Desig_Chr_scaffold11230_412 | Ca_desig_scaffold  | 412                            | [T/C]       | NA                                         |
| Ca_Desig_Chr_scaffold11230_413 | Ca_desig_scaffold  | 413                            | [C/T]       | NA                                         |
| Ca_Desig_Chr_scaffold11230_416 | Ca_desig_scaffold  | 416                            | [T/A]       | NA                                         |

| <b>SNP IDs</b>                        | <b>Chromosomes</b> | <b>Physical positions (bp)</b> | <b>SNPs</b> | <b>NCBI SNPdb accession IDs (NCBI_ss#)</b> |
|---------------------------------------|--------------------|--------------------------------|-------------|--------------------------------------------|
| Ca_Desi_Chromosome_scaffold11230_417  | Ca_desi_scaffold   | 417                            | [A/G]       | NA                                         |
| Ca_Desi_Chromosome_scaffold11230_418  | Ca_desi_scaffold   | 418                            | [T/C]       | NA                                         |
| Ca_Desi_Chromosome_scaffold11230_420  | Ca_desi_scaffold   | 420                            | [T/C]       | NA                                         |
| Ca_Desi_Chromosome_scaffold11230_424  | Ca_desi_scaffold   | 424                            | [G/A]       | NA                                         |
| Ca_Desi_Chromosome_scaffold11230_425  | Ca_desi_scaffold   | 425                            | [G/A]       | NA                                         |
| Ca_Desi_Chromosome_scaffold11230_426  | Ca_desi_scaffold   | 426                            | [T/C]       | NA                                         |
| Ca_Desi_Chromosome_scaffold11230_429  | Ca_desi_scaffold   | 429                            | [G/A]       | NA                                         |
| Ca_Desi_Chromosome_scaffold11230_430  | Ca_desi_scaffold   | 430                            | [C/G]       | NA                                         |
| Ca_Desi_Chromosome_scaffold11230_1081 | Ca_desi_scaffold   | 1081                           | [A/G]       | NA                                         |
| Ca_Desi_Chromosome_scaffold11230_1107 | Ca_desi_scaffold   | 1107                           | [A/C]       | NA                                         |
| Ca_Desi_Chromosome_scaffold11230_1117 | Ca_desi_scaffold   | 1117                           | [G/T]       | NA                                         |
| Ca_Desi_Chromosome_scaffold11230_1172 | Ca_desi_scaffold   | 1172                           | [A/G]       | NA                                         |
| Ca_Desi_Chromosome_scaffold11230_1180 | Ca_desi_scaffold   | 1180                           | [A/G]       | NA                                         |
| Ca_Desi_Chromosome_scaffold11230_1583 | Ca_desi_scaffold   | 1583                           | [G/A]       | NA                                         |
| Ca_Desi_Chromosome_scaffold11230_1584 | Ca_desi_scaffold   | 1584                           | [G/A]       | NA                                         |
| Ca_Desi_Chromosome_scaffold11230_1585 | Ca_desi_scaffold   | 1585                           | [C/T]       | NA                                         |
| Ca_Desi_Chromosome_scaffold11230_1586 | Ca_desi_scaffold   | 1586                           | [G/A]       | NA                                         |
| Ca_Desi_Chromosome_scaffold11230_1587 | Ca_desi_scaffold   | 1587                           | [A/G]       | NA                                         |
| Ca_Desi_Chromosome_scaffold11230_1588 | Ca_desi_scaffold   | 1588                           | [T/C]       | NA                                         |
| Ca_Desi_Chromosome_scaffold11230_1589 | Ca_desi_scaffold   | 1589                           | [T/C]       | NA                                         |
| Ca_Desi_Chromosome_scaffold11230_1590 | Ca_desi_scaffold   | 1590                           | [A/G]       | NA                                         |
| Ca_Desi_Chromosome_scaffold11230_1591 | Ca_desi_scaffold   | 1591                           | [C/T]       | NA                                         |
| Ca_Desi_Chromosome_scaffold11230_1592 | Ca_desi_scaffold   | 1592                           | [G/A]       | NA                                         |
| Ca_Desi_Chromosome_scaffold11230_1593 | Ca_desi_scaffold   | 1593                           | [G/A]       | NA                                         |
| Ca_Desi_Chromosome_scaffold11230_1594 | Ca_desi_scaffold   | 1594                           | [A/G]       | NA                                         |
| Ca_Desi_Chromosome_scaffold11230_1595 | Ca_desi_scaffold   | 1595                           | [T/C]       | NA                                         |
| Ca_Desi_Chromosome_scaffold11230_1596 | Ca_desi_scaffold   | 1596                           | [A/G]       | NA                                         |
| Ca_Desi_Chromosome_scaffold11230_1597 | Ca_desi_scaffold   | 1597                           | [C/A]       | NA                                         |
| Ca_Desi_Chromosome_scaffold11230_1598 | Ca_desi_scaffold   | 1598                           | [C/T]       | NA                                         |
| Ca_Desi_Chromosome_scaffold11230_1599 | Ca_desi_scaffold   | 1599                           | [T/C]       | NA                                         |
| Ca_Desi_Chromosome_scaffold11230_1600 | Ca_desi_scaffold   | 1600                           | [C/T]       | NA                                         |
| Ca_Desi_Chromosome_scaffold11230_1601 | Ca_desi_scaffold   | 1601                           | [T/C]       | NA                                         |
| Ca_Desi_Chromosome_scaffold11230_1602 | Ca_desi_scaffold   | 1602                           | [C/T]       | NA                                         |
| Ca_Desi_Chromosome_scaffold11230_1603 | Ca_desi_scaffold   | 1603                           | [A/G]       | NA                                         |

| <b>SNP IDs</b>                | <b>Chromosomes</b> | <b>Physical positions (bp)</b> | <b>SNPs</b> | <b>NCBI SNPdb accession IDs (NCBI_ss#)</b> |
|-------------------------------|--------------------|--------------------------------|-------------|--------------------------------------------|
| Ca_Desi_Ch_scaffold11230_1604 | Ca_desi_scaffold   | 1604                           | [G/A]       | NA                                         |
| Ca_Desi_Ch_scaffold11230_1605 | Ca_desi_scaffold   | 1605                           | [G/A]       | NA                                         |
| Ca_Desi_Ch_scaffold11230_1606 | Ca_desi_scaffold   | 1606                           | [C/A]       | NA                                         |
| Ca_Desi_Ch_scaffold11230_1607 | Ca_desi_scaffold   | 1607                           | [A/G]       | NA                                         |
| Ca_Desi_Ch_scaffold11230_1608 | Ca_desi_scaffold   | 1608                           | [T/C]       | NA                                         |
| Ca_Desi_Ch_scaffold11230_1609 | Ca_desi_scaffold   | 1609                           | [C/T]       | NA                                         |
| Ca_Desi_Ch_scaffold11230_1610 | Ca_desi_scaffold   | 1610                           | [T/C]       | NA                                         |
| Ca_Desi_Ch_scaffold11230_1611 | Ca_desi_scaffold   | 1611                           | [C/T]       | NA                                         |
| Ca_Desi_Ch_scaffold11230_1612 | Ca_desi_scaffold   | 1612                           | [T/C]       | NA                                         |
| Ca_Desi_Ch_scaffold11230_1613 | Ca_desi_scaffold   | 1613                           | [A/G]       | NA                                         |
| Ca_Desi_Ch_scaffold11230_1614 | Ca_desi_scaffold   | 1614                           | [C/T]       | NA                                         |
| Ca_Desi_Ch_scaffold11230_1615 | Ca_desi_scaffold   | 1615                           | [T/C]       | NA                                         |
| Ca_Desi_Ch_scaffold11230_1616 | Ca_desi_scaffold   | 1616                           | [C/T]       | NA                                         |
| Ca_Desi_Ch_scaffold11230_1617 | Ca_desi_scaffold   | 1617                           | [T/C]       | NA                                         |
| Ca_Desi_Ch_scaffold11230_1618 | Ca_desi_scaffold   | 1618                           | [G/T]       | NA                                         |
| Ca_Desi_Ch_scaffold11230_1620 | Ca_desi_scaffold   | 1620                           | [G/A]       | NA                                         |
| Ca_Desi_Ch_scaffold11230_1621 | Ca_desi_scaffold   | 1621                           | [A/G]       | NA                                         |
| Ca_Desi_Ch_scaffold11230_1622 | Ca_desi_scaffold   | 1622                           | [G/A]       | NA                                         |
| Ca_Desi_Ch_scaffold11230_1624 | Ca_desi_scaffold   | 1624                           | [C/T]       | NA                                         |
| Ca_Desi_Ch_scaffold11230_1625 | Ca_desi_scaffold   | 1625                           | [C/T]       | NA                                         |
| Ca_Desi_Ch_scaffold11230_1629 | Ca_desi_scaffold   | 1629                           | [A/T]       | NA                                         |
| Ca_Desi_Ch_scaffold11273_3399 | Ca_desi_scaffold   | 3399                           | [T/G]       | NA                                         |
| Ca_Desi_Ch_scaffold11373_51   | Ca_desi_scaffold   | 51                             | [A/T]       | NA                                         |
| Ca_Desi_Ch_scaffold11373_53   | Ca_desi_scaffold   | 53                             | [C/T]       | NA                                         |
| Ca_Desi_Ch_scaffold11373_55   | Ca_desi_scaffold   | 55                             | [T/C]       | NA                                         |
| Ca_Desi_Ch_scaffold11373_58   | Ca_desi_scaffold   | 58                             | [T/C]       | NA                                         |
| Ca_Desi_Ch_scaffold11373_63   | Ca_desi_scaffold   | 63                             | [A/G]       | NA                                         |
| Ca_Desi_Ch_scaffold11373_64   | Ca_desi_scaffold   | 64                             | [A/C]       | NA                                         |
| Ca_Desi_Ch_scaffold11373_69   | Ca_desi_scaffold   | 69                             | [T/C]       | NA                                         |
| Ca_Desi_Ch_scaffold11373_77   | Ca_desi_scaffold   | 77                             | [A/G]       | NA                                         |
| Ca_Desi_Ch_scaffold11373_81   | Ca_desi_scaffold   | 81                             | [T/C]       | NA                                         |
| Ca_Desi_Ch_scaffold11373_85   | Ca_desi_scaffold   | 85                             | [A/G]       | NA                                         |
| Ca_Desi_Ch_scaffold11373_87   | Ca_desi_scaffold   | 87                             | [A/G]       | NA                                         |
| Ca_Desi_Ch_scaffold11373_97   | Ca_desi_scaffold   | 97                             | [T/C]       | NA                                         |

| <b>SNP IDs</b>                  | <b>Chromosomes</b> | <b>Physical positions (bp)</b> | <b>SNPs</b> | <b>NCBI SNPdb accession IDs (NCBI_ss#)</b> |
|---------------------------------|--------------------|--------------------------------|-------------|--------------------------------------------|
| Ca_Desig_Chr_scaffold11373_106  | Ca_desig_scaffold  | 106                            | [A/G]       | NA                                         |
| Ca_Desig_Chr_scaffold11373_1234 | Ca_desig_scaffold  | 1234                           | [C/T]       | NA                                         |
| Ca_Desig_Chr_scaffold11373_1271 | Ca_desig_scaffold  | 1271                           | [G/T]       | NA                                         |
| Ca_Desig_Chr_scaffold11373_1272 | Ca_desig_scaffold  | 1272                           | [C/T]       | NA                                         |
| Ca_Desig_Chr_scaffold11373_2511 | Ca_desig_scaffold  | 2511                           | [T/C]       | NA                                         |
| Ca_Desig_Chr_scaffold11373_2513 | Ca_desig_scaffold  | 2513                           | [A/G]       | NA                                         |
| Ca_Desig_Chr_scaffold11373_2517 | Ca_desig_scaffold  | 2517                           | [A/G]       | NA                                         |
| Ca_Desig_Chr_scaffold11373_2525 | Ca_desig_scaffold  | 2525                           | [T/G]       | NA                                         |
| Ca_Desig_Chr_scaffold11373_2528 | Ca_desig_scaffold  | 2528                           | [T/G]       | NA                                         |
| Ca_Desig_Chr_scaffold11373_2529 | Ca_desig_scaffold  | 2529                           | [A/G]       | NA                                         |
| Ca_Desig_Chr_scaffold11373_2531 | Ca_desig_scaffold  | 2531                           | [T/G]       | NA                                         |
| Ca_Desig_Chr_scaffold11373_2534 | Ca_desig_scaffold  | 2534                           | [T/C]       | NA                                         |
| Ca_Desig_Chr_scaffold11373_2535 | Ca_desig_scaffold  | 2535                           | [T/C]       | NA                                         |
| Ca_Desig_Chr_scaffold11373_2536 | Ca_desig_scaffold  | 2536                           | [C/T]       | NA                                         |
| Ca_Desig_Chr_scaffold11373_2539 | Ca_desig_scaffold  | 2539                           | [T/C]       | NA                                         |
| Ca_Desig_Chr_scaffold11373_2543 | Ca_desig_scaffold  | 2543                           | [T/C]       | NA                                         |
| Ca_Desig_Chr_scaffold11373_2545 | Ca_desig_scaffold  | 2545                           | [T/C]       | NA                                         |
| Ca_Desig_Chr_scaffold11373_2548 | Ca_desig_scaffold  | 2548                           | [A/G]       | NA                                         |
| Ca_Desig_Chr_scaffold11373_2550 | Ca_desig_scaffold  | 2550                           | [A/G]       | NA                                         |
| Ca_Desig_Chr_scaffold11373_2552 | Ca_desig_scaffold  | 2552                           | [A/G]       | NA                                         |
| Ca_Desig_Chr_scaffold11373_2556 | Ca_desig_scaffold  | 2556                           | [A/G]       | NA                                         |
| Ca_Desig_Chr_scaffold11373_2557 | Ca_desig_scaffold  | 2557                           | [A/G]       | NA                                         |
| Ca_Desig_Chr_scaffold11373_2558 | Ca_desig_scaffold  | 2558                           | [T/C]       | NA                                         |
| Ca_Desig_Chr_scaffold11373_2658 | Ca_desig_scaffold  | 2658                           | [A/G]       | NA                                         |
| Ca_Desig_Chr_scaffold11373_2729 | Ca_desig_scaffold  | 2729                           | [T/C]       | NA                                         |
| Ca_Desig_Chr_scaffold11373_2733 | Ca_desig_scaffold  | 2733                           | [T/C]       | NA                                         |
| Ca_Desig_Chr_scaffold11373_2737 | Ca_desig_scaffold  | 2737                           | [T/C]       | NA                                         |
| Ca_Desig_Chr_scaffold11373_2741 | Ca_desig_scaffold  | 2741                           | [A/G]       | NA                                         |
| Ca_Desig_Chr_scaffold11373_2743 | Ca_desig_scaffold  | 2743                           | [T/C]       | NA                                         |
| Ca_Desig_Chr_scaffold11373_2746 | Ca_desig_scaffold  | 2746                           | [A/G]       | NA                                         |
| Ca_Desig_Chr_scaffold11373_2747 | Ca_desig_scaffold  | 2747                           | [G/A]       | NA                                         |
| Ca_Desig_Chr_scaffold11373_2751 | Ca_desig_scaffold  | 2751                           | [T/C]       | NA                                         |
| Ca_Desig_Chr_scaffold11373_2758 | Ca_desig_scaffold  | 2758                           | [A/G]       | NA                                         |
| Ca_Desig_Chr_scaffold11373_2764 | Ca_desig_scaffold  | 2764                           | [T/C]       | NA                                         |



| <b>SNP IDs</b>                  | <b>Chromosomes</b> | <b>Physical positions (bp)</b> | <b>SNPs</b> | <b>NCBI SNPdb accession IDs (NCBI_ss#)</b> |
|---------------------------------|--------------------|--------------------------------|-------------|--------------------------------------------|
| Ca_Desig_Chr_scaffold11373_2768 | Ca_desig_scaffold  | 2768                           | [T/C]       | NA                                         |
| Ca_Desig_Chr_scaffold11373_2773 | Ca_desig_scaffold  | 2773                           | [A/G]       | NA                                         |
| Ca_Desig_Chr_scaffold11373_2777 | Ca_desig_scaffold  | 2777                           | [T/C]       | NA                                         |
| Ca_Desig_Chr_scaffold11373_2783 | Ca_desig_scaffold  | 2783                           | [C/A]       | NA                                         |
| Ca_Desig_Chr_scaffold11414_3011 | Ca_desig_scaffold  | 3011                           | [T/C]       | NA                                         |
| Ca_Desig_Chr_scaffold11414_3012 | Ca_desig_scaffold  | 3012                           | [C/T]       | NA                                         |
| Ca_Desig_Chr_scaffold11414_3013 | Ca_desig_scaffold  | 3013                           | [C/T]       | NA                                         |
| Ca_Desig_Chr_scaffold11414_3014 | Ca_desig_scaffold  | 3014                           | [C/T]       | NA                                         |
| Ca_Desig_Chr_scaffold11414_3015 | Ca_desig_scaffold  | 3015                           | [A/G]       | NA                                         |
| Ca_Desig_Chr_scaffold11414_3016 | Ca_desig_scaffold  | 3016                           | [C/T]       | NA                                         |
| Ca_Desig_Chr_scaffold11414_3017 | Ca_desig_scaffold  | 3017                           | [G/A]       | NA                                         |
| Ca_Desig_Chr_scaffold11414_3018 | Ca_desig_scaffold  | 3018                           | [A/G]       | NA                                         |
| Ca_Desig_Chr_scaffold11414_3020 | Ca_desig_scaffold  | 3020                           | [A/G]       | NA                                         |
| Ca_Desig_Chr_scaffold11414_3021 | Ca_desig_scaffold  | 3021                           | [A/G]       | NA                                         |
| Ca_Desig_Chr_scaffold11414_3024 | Ca_desig_scaffold  | 3024                           | [T/C]       | NA                                         |
| Ca_Desig_Chr_scaffold11414_3025 | Ca_desig_scaffold  | 3025                           | [T/C]       | NA                                         |
| Ca_Desig_Chr_scaffold11414_3026 | Ca_desig_scaffold  | 3026                           | [T/C]       | NA                                         |
| Ca_Desig_Chr_scaffold11414_3027 | Ca_desig_scaffold  | 3027                           | [T/C]       | NA                                         |
| Ca_Desig_Chr_scaffold11414_3028 | Ca_desig_scaffold  | 3028                           | [T/C]       | NA                                         |
| Ca_Desig_Chr_scaffold11414_3029 | Ca_desig_scaffold  | 3029                           | [T/C]       | NA                                         |
| Ca_Desig_Chr_scaffold11414_3031 | Ca_desig_scaffold  | 3031                           | [G/A]       | NA                                         |
| Ca_Desig_Chr_scaffold11414_3032 | Ca_desig_scaffold  | 3032                           | [G/A]       | NA                                         |
| Ca_Desig_Chr_scaffold11414_3034 | Ca_desig_scaffold  | 3034                           | [A/G]       | NA                                         |
| Ca_Desig_Chr_scaffold11414_3035 | Ca_desig_scaffold  | 3035                           | [T/C]       | NA                                         |
| Ca_Desig_Chr_scaffold11414_3036 | Ca_desig_scaffold  | 3036                           | [T/C]       | NA                                         |
| Ca_Desig_Chr_scaffold11414_3037 | Ca_desig_scaffold  | 3037                           | [T/C]       | NA                                         |
| Ca_Desig_Chr_scaffold11414_3038 | Ca_desig_scaffold  | 3038                           | [A/G]       | NA                                         |
| Ca_Desig_Chr_scaffold11414_3039 | Ca_desig_scaffold  | 3039                           | [C/T]       | NA                                         |
| Ca_Desig_Chr_scaffold11414_3040 | Ca_desig_scaffold  | 3040                           | [A/G]       | NA                                         |
| Ca_Desig_Chr_scaffold11414_3041 | Ca_desig_scaffold  | 3041                           | [T/C]       | NA                                         |
| Ca_Desig_Chr_scaffold11414_3042 | Ca_desig_scaffold  | 3042                           | [A/G]       | NA                                         |
| Ca_Desig_Chr_scaffold11414_3043 | Ca_desig_scaffold  | 3043                           | [A/G]       | NA                                         |
| Ca_Desig_Chr_scaffold11414_3044 | Ca_desig_scaffold  | 3044                           | [T/C]       | NA                                         |
| Ca_Desig_Chr_scaffold11414_3045 | Ca_desig_scaffold  | 3045                           | [G/T]       | NA                                         |

| <b>SNP IDs</b>                  | <b>Chromosomes</b> | <b>Physical positions (bp)</b> | <b>SNPs</b> | <b>NCBI SNPdb accession IDs (NCBI_ss#)</b> |
|---------------------------------|--------------------|--------------------------------|-------------|--------------------------------------------|
| Ca_Desig_Chr_scaffold11414_3046 | Ca_desig_scaffold  | 3046                           | [A/G]       | NA                                         |
| Ca_Desig_Chr_scaffold11414_3047 | Ca_desig_scaffold  | 3047                           | [A/G]       | NA                                         |
| Ca_Desig_Chr_scaffold11414_3048 | Ca_desig_scaffold  | 3048                           | [A/G]       | NA                                         |
| Ca_Desig_Chr_scaffold11414_3049 | Ca_desig_scaffold  | 3049                           | [C/T]       | NA                                         |
| Ca_Desig_Chr_scaffold11414_3050 | Ca_desig_scaffold  | 3050                           | [T/C]       | NA                                         |
| Ca_Desig_Chr_scaffold11414_3051 | Ca_desig_scaffold  | 3051                           | [T/C]       | NA                                         |
| Ca_Desig_Chr_scaffold11414_3052 | Ca_desig_scaffold  | 3052                           | [A/G]       | NA                                         |
| Ca_Desig_Chr_scaffold11414_3053 | Ca_desig_scaffold  | 3053                           | [T/C]       | NA                                         |
| Ca_Desig_Chr_scaffold11414_3054 | Ca_desig_scaffold  | 3054                           | [C/T]       | NA                                         |
| Ca_Desig_Chr_scaffold11414_3055 | Ca_desig_scaffold  | 3055                           | [G/A]       | NA                                         |
| Ca_Desig_Chr_scaffold11414_3056 | Ca_desig_scaffold  | 3056                           | [T/C]       | NA                                         |
| Ca_Desig_Chr_scaffold11414_3057 | Ca_desig_scaffold  | 3057                           | [A/G]       | NA                                         |
| Ca_Desig_Chr_scaffold11414_3058 | Ca_desig_scaffold  | 3058                           | [G/T]       | NA                                         |
| Ca_Desig_Chr_scaffold11414_3059 | Ca_desig_scaffold  | 3059                           | [T/C]       | NA                                         |
| Ca_Desig_Chr_scaffold11414_3060 | Ca_desig_scaffold  | 3060                           | [G/A]       | NA                                         |
| Ca_Desig_Chr_scaffold11414_3061 | Ca_desig_scaffold  | 3061                           | [G/A]       | NA                                         |
| Ca_Desig_Chr_scaffold11414_3062 | Ca_desig_scaffold  | 3062                           | [C/T]       | NA                                         |
| Ca_Desig_Chr_scaffold11414_3063 | Ca_desig_scaffold  | 3063                           | [A/G]       | NA                                         |
| Ca_Desig_Chr_scaffold11414_3064 | Ca_desig_scaffold  | 3064                           | [C/T]       | NA                                         |
| Ca_Desig_Chr_scaffold11414_3065 | Ca_desig_scaffold  | 3065                           | [T/C]       | NA                                         |
| Ca_Desig_Chr_scaffold11414_3067 | Ca_desig_scaffold  | 3067                           | [T/C]       | NA                                         |
| Ca_Desig_Chr_scaffold11414_3068 | Ca_desig_scaffold  | 3068                           | [T/C]       | NA                                         |
| Ca_Desig_Chr_scaffold11414_3070 | Ca_desig_scaffold  | 3070                           | [G/A]       | NA                                         |
| Ca_Desig_Chr_scaffold11414_3091 | Ca_desig_scaffold  | 3091                           | [C/G]       | NA                                         |
| Ca_Desig_Chr_scaffold11414_3092 | Ca_desig_scaffold  | 3092                           | [C/T]       | NA                                         |
| Ca_Desig_Chr_scaffold11414_3093 | Ca_desig_scaffold  | 3093                           | [A/G]       | NA                                         |
| Ca_Desig_Chr_scaffold11414_3094 | Ca_desig_scaffold  | 3094                           | [A/G]       | NA                                         |
| Ca_Desig_Chr_scaffold11414_3096 | Ca_desig_scaffold  | 3096                           | [A/G]       | NA                                         |
| Ca_Desig_Chr_scaffold11414_3097 | Ca_desig_scaffold  | 3097                           | [G/T]       | NA                                         |
| Ca_Desig_Chr_scaffold11414_3098 | Ca_desig_scaffold  | 3098                           | [T/C]       | NA                                         |
| Ca_Desig_Chr_scaffold11414_3099 | Ca_desig_scaffold  | 3099                           | [T/C]       | NA                                         |
| Ca_Desig_Chr_scaffold11414_3100 | Ca_desig_scaffold  | 3100                           | [G/A]       | NA                                         |
| Ca_Desig_Chr_scaffold11414_3101 | Ca_desig_scaffold  | 3101                           | [G/T]       | NA                                         |
| Ca_Desig_Chr_scaffold11414_3102 | Ca_desig_scaffold  | 3102                           | [T/C]       | NA                                         |

| <b>SNP IDs</b>                  | <b>Chromosomes</b> | <b>Physical positions (bp)</b> | <b>SNPs</b> | <b>NCBI SNPdb accession IDs (NCBI_ss#)</b> |
|---------------------------------|--------------------|--------------------------------|-------------|--------------------------------------------|
| Ca_Desig_Chr_scaffold11414_3103 | Ca_desig_scaffold  | 3103                           | [T/C]       | NA                                         |
| Ca_Desig_Chr_scaffold11414_3104 | Ca_desig_scaffold  | 3104                           | [C/T]       | NA                                         |
| Ca_Desig_Chr_scaffold11414_3105 | Ca_desig_scaffold  | 3105                           | [T/C]       | NA                                         |
| Ca_Desig_Chr_scaffold11414_3106 | Ca_desig_scaffold  | 3106                           | [T/C]       | NA                                         |
| Ca_Desig_Chr_scaffold11414_3107 | Ca_desig_scaffold  | 3107                           | [A/G]       | NA                                         |
| Ca_Desig_Chr_scaffold11414_3108 | Ca_desig_scaffold  | 3108                           | [A/G]       | NA                                         |
| Ca_Desig_Chr_scaffold11414_3109 | Ca_desig_scaffold  | 3109                           | [C/T]       | NA                                         |
| Ca_Desig_Chr_scaffold11414_3110 | Ca_desig_scaffold  | 3110                           | [C/A]       | NA                                         |
| Ca_Desig_Chr_scaffold11414_3111 | Ca_desig_scaffold  | 3111                           | [A/G]       | NA                                         |
| Ca_Desig_Chr_scaffold11414_3112 | Ca_desig_scaffold  | 3112                           | [A/G]       | NA                                         |
| Ca_Desig_Chr_scaffold11414_3113 | Ca_desig_scaffold  | 3113                           | [A/G]       | NA                                         |
| Ca_Desig_Chr_scaffold11414_3114 | Ca_desig_scaffold  | 3114                           | [G/A]       | NA                                         |
| Ca_Desig_Chr_scaffold11414_3115 | Ca_desig_scaffold  | 3115                           | [A/G]       | NA                                         |
| Ca_Desig_Chr_scaffold11414_3116 | Ca_desig_scaffold  | 3116                           | [C/T]       | NA                                         |
| Ca_Desig_Chr_scaffold11414_3117 | Ca_desig_scaffold  | 3117                           | [G/A]       | NA                                         |
| Ca_Desig_Chr_scaffold11414_3118 | Ca_desig_scaffold  | 3118                           | [A/G]       | NA                                         |
| Ca_Desig_Chr_scaffold11414_3119 | Ca_desig_scaffold  | 3119                           | [G/A]       | NA                                         |
| Ca_Desig_Chr_scaffold11414_3120 | Ca_desig_scaffold  | 3120                           | [A/G]       | NA                                         |
| Ca_Desig_Chr_scaffold11414_3121 | Ca_desig_scaffold  | 3121                           | [T/C]       | NA                                         |
| Ca_Desig_Chr_scaffold11414_3122 | Ca_desig_scaffold  | 3122                           | [T/C]       | NA                                         |
| Ca_Desig_Chr_scaffold11414_3123 | Ca_desig_scaffold  | 3123                           | [G/A]       | NA                                         |
| Ca_Desig_Chr_scaffold11414_3124 | Ca_desig_scaffold  | 3124                           | [C/T]       | NA                                         |
| Ca_Desig_Chr_scaffold11414_3125 | Ca_desig_scaffold  | 3125                           | [A/G]       | NA                                         |
| Ca_Desig_Chr_scaffold11414_3126 | Ca_desig_scaffold  | 3126                           | [C/A]       | NA                                         |
| Ca_Desig_Chr_scaffold11414_3127 | Ca_desig_scaffold  | 3127                           | [A/G]       | NA                                         |
| Ca_Desig_Chr_scaffold11414_3128 | Ca_desig_scaffold  | 3128                           | [A/G]       | NA                                         |
| Ca_Desig_Chr_scaffold11414_3130 | Ca_desig_scaffold  | 3130                           | [T/C]       | NA                                         |
| Ca_Desig_Chr_scaffold11414_3131 | Ca_desig_scaffold  | 3131                           | [T/C]       | NA                                         |
| Ca_Desig_Chr_scaffold11414_3132 | Ca_desig_scaffold  | 3132                           | [C/T]       | NA                                         |
| Ca_Desig_Chr_scaffold11414_3133 | Ca_desig_scaffold  | 3133                           | [A/G]       | NA                                         |
| Ca_Desig_Chr_scaffold11414_3134 | Ca_desig_scaffold  | 3134                           | [A/G]       | NA                                         |
| Ca_Desig_Chr_scaffold11414_3135 | Ca_desig_scaffold  | 3135                           | [C/T]       | NA                                         |
| Ca_Desig_Chr_scaffold11414_3136 | Ca_desig_scaffold  | 3136                           | [A/G]       | NA                                         |
| Ca_Desig_Chr_scaffold11414_3137 | Ca_desig_scaffold  | 3137                           | [T/C]       | NA                                         |

| <b>SNP IDs</b>                | <b>Chromosomes</b> | <b>Physical positions (bp)</b> | <b>SNPs</b> | <b>NCBI SNPdb accession IDs (NCBI_ss#)</b> |
|-------------------------------|--------------------|--------------------------------|-------------|--------------------------------------------|
| Ca_Desi_Ch_scaffold11414_3138 | Ca_desi_scaffold   | 3138                           | [T/C]       | NA                                         |
| Ca_Desi_Ch_scaffold11414_3139 | Ca_desi_scaffold   | 3139                           | [C/T]       | NA                                         |
| Ca_Desi_Ch_scaffold11414_3140 | Ca_desi_scaffold   | 3140                           | [A/G]       | NA                                         |
| Ca_Desi_Ch_scaffold11414_3141 | Ca_desi_scaffold   | 3141                           | [A/G]       | NA                                         |
| Ca_Desi_Ch_scaffold11414_3142 | Ca_desi_scaffold   | 3142                           | [T/C]       | NA                                         |
| Ca_Desi_Ch_scaffold11414_3143 | Ca_desi_scaffold   | 3143                           | [C/T]       | NA                                         |
| Ca_Desi_Ch_scaffold11414_3144 | Ca_desi_scaffold   | 3144                           | [G/A]       | NA                                         |
| Ca_Desi_Ch_scaffold11414_3145 | Ca_desi_scaffold   | 3145                           | [C/T]       | NA                                         |
| Ca_Desi_Ch_scaffold11414_3146 | Ca_desi_scaffold   | 3146                           | [G/A]       | NA                                         |
| Ca_Desi_Ch_scaffold11414_3147 | Ca_desi_scaffold   | 3147                           | [C/T]       | NA                                         |
| Ca_Desi_Ch_scaffold11414_3149 | Ca_desi_scaffold   | 3149                           | [G/A]       | NA                                         |
| Ca_Desi_Ch_scaffold11414_3150 | Ca_desi_scaffold   | 3150                           | [C/T]       | NA                                         |
| Ca_Desi_Ch_scaffold11414_3153 | Ca_desi_scaffold   | 3153                           | [T/A]       | NA                                         |
| Ca_Desi_Ch_scaffold11418_205  | Ca_desi_scaffold   | 205                            | [A/G]       | NA                                         |
| Ca_Desi_Ch_scaffold11418_206  | Ca_desi_scaffold   | 206                            | [G/A]       | NA                                         |
| Ca_Desi_Ch_scaffold11418_287  | Ca_desi_scaffold   | 287                            | [A/C]       | NA                                         |
| Ca_Desi_Ch_scaffold11418_292  | Ca_desi_scaffold   | 292                            | [C/T]       | NA                                         |
| Ca_Desi_Ch_scaffold11652_219  | Ca_desi_scaffold   | 219                            | [C/T]       | NA                                         |
| Ca_Desi_Ch_scaffold11652_290  | Ca_desi_scaffold   | 290                            | [C/G]       | NA                                         |
| Ca_Desi_Ch_scaffold11652_340  | Ca_desi_scaffold   | 340                            | [C/A]       | NA                                         |
| Ca_Desi_Ch_scaffold11652_345  | Ca_desi_scaffold   | 345                            | [G/A]       | NA                                         |
| Ca_Desi_Ch_scaffold11658_3838 | Ca_desi_scaffold   | 3838                           | [T/C]       | NA                                         |
| Ca_Desi_Ch_scaffold11658_3845 | Ca_desi_scaffold   | 3845                           | [A/T]       | NA                                         |
| Ca_Desi_Ch_scaffold11697_3800 | Ca_desi_scaffold   | 3800                           | [A/G]       | NA                                         |
| Ca_Desi_Ch_scaffold11697_3805 | Ca_desi_scaffold   | 3805                           | [T/C]       | NA                                         |
| Ca_Desi_Ch_scaffold11697_3814 | Ca_desi_scaffold   | 3814                           | [T/C]       | NA                                         |
| Ca_Desi_Ch_scaffold11697_3848 | Ca_desi_scaffold   | 3848                           | [T/A]       | NA                                         |
| Ca_Desi_Ch_scaffold11707_3883 | Ca_desi_scaffold   | 3883                           | [T/G]       | NA                                         |
| Ca_Desi_Ch_scaffold11711_1368 | Ca_desi_scaffold   | 1368                           | [A/G]       | NA                                         |
| Ca_Desi_Ch_scaffold11711_1381 | Ca_desi_scaffold   | 1381                           | [T/C]       | NA                                         |
| Ca_Desi_Ch_scaffold11711_1383 | Ca_desi_scaffold   | 1383                           | [T/C]       | NA                                         |
| Ca_Desi_Ch_scaffold11711_1388 | Ca_desi_scaffold   | 1388                           | [T/C]       | NA                                         |
| Ca_Desi_Ch_scaffold11711_1394 | Ca_desi_scaffold   | 1394                           | [T/G]       | NA                                         |
| Ca_Desi_Ch_scaffold11711_1395 | Ca_desi_scaffold   | 1395                           | [A/G]       | NA                                         |

| <b>SNP IDs</b>                  | <b>Chromosomes</b> | <b>Physical positions (bp)</b> | <b>SNPs</b> | <b>NCBI SNPdb accession IDs (NCBI_ss#)</b> |
|---------------------------------|--------------------|--------------------------------|-------------|--------------------------------------------|
| Ca_Desig_Chr_scaffold11711_1397 | Ca_desig_scaffold  | 1397                           | [T/C]       | NA                                         |
| Ca_Desig_Chr_scaffold11711_1400 | Ca_desig_scaffold  | 1400                           | [T/C]       | NA                                         |
| Ca_Desig_Chr_scaffold11711_1408 | Ca_desig_scaffold  | 1408                           | [T/C]       | NA                                         |
| Ca_Desig_Chr_scaffold11711_1413 | Ca_desig_scaffold  | 1413                           | [T/C]       | NA                                         |
| Ca_Desig_Chr_scaffold11711_1415 | Ca_desig_scaffold  | 1415                           | [T/C]       | NA                                         |
| Ca_Desig_Chr_scaffold11711_1427 | Ca_desig_scaffold  | 1427                           | [T/C]       | NA                                         |
| Ca_Desig_Chr_scaffold11711_1745 | Ca_desig_scaffold  | 1745                           | [T/C]       | NA                                         |
| Ca_Desig_Chr_scaffold11711_1750 | Ca_desig_scaffold  | 1750                           | [T/C]       | NA                                         |
| Ca_Desig_Chr_scaffold11711_1760 | Ca_desig_scaffold  | 1760                           | [A/G]       | NA                                         |
| Ca_Desig_Chr_scaffold11711_1763 | Ca_desig_scaffold  | 1763                           | [A/G]       | NA                                         |
| Ca_Desig_Chr_scaffold11711_1778 | Ca_desig_scaffold  | 1778                           | [T/C]       | NA                                         |
| Ca_Desig_Chr_scaffold11711_1790 | Ca_desig_scaffold  | 1790                           | [A/G]       | NA                                         |
| Ca_Desig_Chr_scaffold11711_1797 | Ca_desig_scaffold  | 1797                           | [A/G]       | NA                                         |
| Ca_Desig_Chr_scaffold11711_1913 | Ca_desig_scaffold  | 1913                           | [T/C]       | NA                                         |
| Ca_Desig_Chr_scaffold11711_1914 | Ca_desig_scaffold  | 1914                           | [C/G]       | NA                                         |
| Ca_Desig_Chr_scaffold11711_1915 | Ca_desig_scaffold  | 1915                           | [T/A]       | NA                                         |
| Ca_Desig_Chr_scaffold11711_1916 | Ca_desig_scaffold  | 1916                           | [T/C]       | NA                                         |
| Ca_Desig_Chr_scaffold11711_1918 | Ca_desig_scaffold  | 1918                           | [T/C]       | NA                                         |
| Ca_Desig_Chr_scaffold11711_1920 | Ca_desig_scaffold  | 1920                           | [A/C]       | NA                                         |
| Ca_Desig_Chr_scaffold11711_1922 | Ca_desig_scaffold  | 1922                           | [T/C]       | NA                                         |
| Ca_Desig_Chr_scaffold11711_1936 | Ca_desig_scaffold  | 1936                           | [T/C]       | NA                                         |
| Ca_Desig_Chr_scaffold11711_1941 | Ca_desig_scaffold  | 1941                           | [A/G]       | NA                                         |
| Ca_Desig_Chr_scaffold11711_1950 | Ca_desig_scaffold  | 1950                           | [A/G]       | NA                                         |
| Ca_Desig_Chr_scaffold11711_1952 | Ca_desig_scaffold  | 1952                           | [A/G]       | NA                                         |
| Ca_Desig_Chr_scaffold11711_1970 | Ca_desig_scaffold  | 1970                           | [A/G]       | NA                                         |
| Ca_Desig_Chr_scaffold11711_1971 | Ca_desig_scaffold  | 1971                           | [T/C]       | NA                                         |
| Ca_Desig_Chr_scaffold11711_2461 | Ca_desig_scaffold  | 2461                           | [A/C]       | NA                                         |
| Ca_Desig_Chr_scaffold11711_2485 | Ca_desig_scaffold  | 2485                           | [A/T]       | NA                                         |
| Ca_Desig_Chr_scaffold11711_2488 | Ca_desig_scaffold  | 2488                           | [C/T]       | NA                                         |
| Ca_Desig_Chr_scaffold11711_2489 | Ca_desig_scaffold  | 2489                           | [T/C]       | NA                                         |
| Ca_Desig_Chr_scaffold11711_2490 | Ca_desig_scaffold  | 2490                           | [C/T]       | NA                                         |
| Ca_Desig_Chr_scaffold11711_2491 | Ca_desig_scaffold  | 2491                           | [A/G]       | NA                                         |
| Ca_Desig_Chr_scaffold11711_2492 | Ca_desig_scaffold  | 2492                           | [A/G]       | NA                                         |
| Ca_Desig_Chr_scaffold11711_2493 | Ca_desig_scaffold  | 2493                           | [T/C]       | NA                                         |

| <b>SNP IDs</b>                  | <b>Chromosomes</b> | <b>Physical positions (bp)</b> | <b>SNPs</b> | <b>NCBI SNPdb accession IDs (NCBI_ss#)</b> |
|---------------------------------|--------------------|--------------------------------|-------------|--------------------------------------------|
| Ca_Desig_Chr_scaffold11711_2494 | Ca_desig_scaffold  | 2494                           | [A/G]       | NA                                         |
| Ca_Desig_Chr_scaffold11711_2495 | Ca_desig_scaffold  | 2495                           | [A/G]       | NA                                         |
| Ca_Desig_Chr_scaffold11711_2496 | Ca_desig_scaffold  | 2496                           | [A/G]       | NA                                         |
| Ca_Desig_Chr_scaffold11711_2497 | Ca_desig_scaffold  | 2497                           | [A/G]       | NA                                         |
| Ca_Desig_Chr_scaffold11711_2498 | Ca_desig_scaffold  | 2498                           | [A/G]       | NA                                         |
| Ca_Desig_Chr_scaffold11711_2499 | Ca_desig_scaffold  | 2499                           | [T/C]       | NA                                         |
| Ca_Desig_Chr_scaffold11711_2500 | Ca_desig_scaffold  | 2500                           | [C/T]       | NA                                         |
| Ca_Desig_Chr_scaffold11711_2501 | Ca_desig_scaffold  | 2501                           | [A/G]       | NA                                         |
| Ca_Desig_Chr_scaffold11711_2502 | Ca_desig_scaffold  | 2502                           | [A/G]       | NA                                         |
| Ca_Desig_Chr_scaffold11711_2503 | Ca_desig_scaffold  | 2503                           | [G/A]       | NA                                         |
| Ca_Desig_Chr_scaffold11711_2504 | Ca_desig_scaffold  | 2504                           | [A/G]       | NA                                         |
| Ca_Desig_Chr_scaffold11711_2505 | Ca_desig_scaffold  | 2505                           | [A/G]       | NA                                         |
| Ca_Desig_Chr_scaffold11711_2506 | Ca_desig_scaffold  | 2506                           | [A/G]       | NA                                         |
| Ca_Desig_Chr_scaffold11711_2507 | Ca_desig_scaffold  | 2507                           | [A/G]       | NA                                         |
| Ca_Desig_Chr_scaffold11711_2508 | Ca_desig_scaffold  | 2508                           | [A/G]       | NA                                         |
| Ca_Desig_Chr_scaffold11711_2509 | Ca_desig_scaffold  | 2509                           | [C/T]       | NA                                         |
| Ca_Desig_Chr_scaffold11711_2510 | Ca_desig_scaffold  | 2510                           | [G/A]       | NA                                         |
| Ca_Desig_Chr_scaffold11711_2511 | Ca_desig_scaffold  | 2511                           | [T/C]       | NA                                         |
| Ca_Desig_Chr_scaffold11711_2512 | Ca_desig_scaffold  | 2512                           | [C/T]       | NA                                         |
| Ca_Desig_Chr_scaffold11711_2513 | Ca_desig_scaffold  | 2513                           | [C/T]       | NA                                         |
| Ca_Desig_Chr_scaffold11711_2514 | Ca_desig_scaffold  | 2514                           | [T/C]       | NA                                         |
| Ca_Desig_Chr_scaffold11711_2515 | Ca_desig_scaffold  | 2515                           | [C/A]       | NA                                         |
| Ca_Desig_Chr_scaffold11711_2516 | Ca_desig_scaffold  | 2516                           | [C/T]       | NA                                         |
| Ca_Desig_Chr_scaffold11711_2517 | Ca_desig_scaffold  | 2517                           | [T/C]       | NA                                         |
| Ca_Desig_Chr_scaffold11711_2518 | Ca_desig_scaffold  | 2518                           | [C/T]       | NA                                         |
| Ca_Desig_Chr_scaffold11711_2519 | Ca_desig_scaffold  | 2519                           | [A/G]       | NA                                         |
| Ca_Desig_Chr_scaffold11711_2520 | Ca_desig_scaffold  | 2520                           | [G/A]       | NA                                         |
| Ca_Desig_Chr_scaffold11711_2521 | Ca_desig_scaffold  | 2521                           | [G/A]       | NA                                         |
| Ca_Desig_Chr_scaffold11711_2522 | Ca_desig_scaffold  | 2522                           | [A/G]       | NA                                         |
| Ca_Desig_Chr_scaffold11711_2523 | Ca_desig_scaffold  | 2523                           | [A/G]       | NA                                         |
| Ca_Desig_Chr_scaffold11711_2524 | Ca_desig_scaffold  | 2524                           | [A/G]       | NA                                         |
| Ca_Desig_Chr_scaffold11711_2525 | Ca_desig_scaffold  | 2525                           | [G/A]       | NA                                         |
| Ca_Desig_Chr_scaffold11711_2526 | Ca_desig_scaffold  | 2526                           | [A/G]       | NA                                         |
| Ca_Desig_Chr_scaffold11711_2527 | Ca_desig_scaffold  | 2527                           | [A/G]       | NA                                         |

| <b>SNP IDs</b>                        | <b>Chromosomes</b> | <b>Physical positions (bp)</b> | <b>SNPs</b> | <b>NCBI SNPdb accession IDs (NCBI_ss#)</b> |
|---------------------------------------|--------------------|--------------------------------|-------------|--------------------------------------------|
| Ca_Desi_Chromosome_scaffold11711_2528 | Ca_desi_scaffold   | 2528                           | [A/G]       | NA                                         |
| Ca_Desi_Chromosome_scaffold11711_2529 | Ca_desi_scaffold   | 2529                           | [G/A]       | NA                                         |
| Ca_Desi_Chromosome_scaffold11711_2530 | Ca_desi_scaffold   | 2530                           | [C/T]       | NA                                         |
| Ca_Desi_Chromosome_scaffold11711_2531 | Ca_desi_scaffold   | 2531                           | [T/C]       | NA                                         |
| Ca_Desi_Chromosome_scaffold11711_2532 | Ca_desi_scaffold   | 2532                           | [G/A]       | NA                                         |
| Ca_Desi_Chromosome_scaffold11711_2533 | Ca_desi_scaffold   | 2533                           | [A/G]       | NA                                         |
| Ca_Desi_Chromosome_scaffold11711_2534 | Ca_desi_scaffold   | 2534                           | [T/C]       | NA                                         |
| Ca_Desi_Chromosome_scaffold11711_2535 | Ca_desi_scaffold   | 2535                           | [T/C]       | NA                                         |
| Ca_Desi_Chromosome_scaffold11711_2536 | Ca_desi_scaffold   | 2536                           | [C/T]       | NA                                         |
| Ca_Desi_Chromosome_scaffold11711_2537 | Ca_desi_scaffold   | 2537                           | [A/G]       | NA                                         |
| Ca_Desi_Chromosome_scaffold11711_2538 | Ca_desi_scaffold   | 2538                           | [C/T]       | NA                                         |
| Ca_Desi_Chromosome_scaffold11711_2539 | Ca_desi_scaffold   | 2539                           | [C/T]       | NA                                         |
| Ca_Desi_Chromosome_scaffold11711_2540 | Ca_desi_scaffold   | 2540                           | [T/C]       | NA                                         |
| Ca_Desi_Chromosome_scaffold11711_2541 | Ca_desi_scaffold   | 2541                           | [C/T]       | NA                                         |
| Ca_Desi_Chromosome_scaffold11711_2542 | Ca_desi_scaffold   | 2542                           | [T/C]       | NA                                         |
| Ca_Desi_Chromosome_scaffold11711_2543 | Ca_desi_scaffold   | 2543                           | [A/G]       | NA                                         |
| Ca_Desi_Chromosome_scaffold11711_2544 | Ca_desi_scaffold   | 2544                           | [C/T]       | NA                                         |
| Ca_Desi_Chromosome_scaffold11711_2545 | Ca_desi_scaffold   | 2545                           | [C/T]       | NA                                         |
| Ca_Desi_Chromosome_scaffold11711_2625 | Ca_desi_scaffold   | 2625                           | [T/A]       | NA                                         |
| Ca_Desi_Chromosome_scaffold11711_2646 | Ca_desi_scaffold   | 2646                           | [C/A]       | NA                                         |
| Ca_Desi_Chromosome_scaffold11711_2916 | Ca_desi_scaffold   | 2916                           | [T/C]       | NA                                         |
| Ca_Desi_Chromosome_scaffold11711_2937 | Ca_desi_scaffold   | 2937                           | [A/G]       | NA                                         |
| Ca_Desi_Chromosome_scaffold11711_2939 | Ca_desi_scaffold   | 2939                           | [T/C]       | NA                                         |
| Ca_Desi_Chromosome_scaffold11732_737  | Ca_desi_scaffold   | 737                            | [A/C]       | NA                                         |
| Ca_Desi_Chromosome_scaffold11794_2876 | Ca_desi_scaffold   | 2876                           | [T/C]       | NA                                         |
| Ca_Desi_Chromosome_scaffold11869_94   | Ca_desi_scaffold   | 94                             | [C/T]       | NA                                         |
| Ca_Desi_Chromosome_scaffold11869_117  | Ca_desi_scaffold   | 117                            | [A/G]       | NA                                         |
| Ca_Desi_Chromosome_scaffold11869_121  | Ca_desi_scaffold   | 121                            | [A/G]       | NA                                         |
| Ca_Desi_Chromosome_scaffold11869_123  | Ca_desi_scaffold   | 123                            | [A/G]       | NA                                         |
| Ca_Desi_Chromosome_scaffold11869_159  | Ca_desi_scaffold   | 159                            | [C/T]       | NA                                         |
| Ca_Desi_Chromosome_scaffold11886_3312 | Ca_desi_scaffold   | 3312                           | [T/G]       | NA                                         |
| Ca_Desi_Chromosome_scaffold11905_1432 | Ca_desi_scaffold   | 1432                           | [A/G]       | NA                                         |
| Ca_Desi_Chromosome_scaffold11905_1457 | Ca_desi_scaffold   | 1457                           | [A/G]       | NA                                         |
| Ca_Desi_Chromosome_scaffold11937_3368 | Ca_desi_scaffold   | 3368                           | [C/T]       | NA                                         |

| <b>SNP IDs</b>                  | <b>Chromosomes</b> | <b>Physical positions (bp)</b> | <b>SNPs</b> | <b>NCBI SNPdb accession IDs (NCBI_ss#)</b> |
|---------------------------------|--------------------|--------------------------------|-------------|--------------------------------------------|
| Ca_Desig_Chr_scaffold11965_2020 | Ca_desig_scaffold  | 2020                           | [A/T]       | NA                                         |
| Ca_Desig_Chr_scaffold12017_3551 | Ca_desig_scaffold  | 3551                           | [T/C]       | NA                                         |
| Ca_Desig_Chr_scaffold12017_3557 | Ca_desig_scaffold  | 3557                           | [A/G]       | NA                                         |
| Ca_Desig_Chr_scaffold12017_3570 | Ca_desig_scaffold  | 3570                           | [A/G]       | NA                                         |
| Ca_Desig_Chr_scaffold12017_3576 | Ca_desig_scaffold  | 3576                           | [A/G]       | NA                                         |
| Ca_Desig_Chr_scaffold12128_473  | Ca_desig_scaffold  | 473                            | [C/A]       | NA                                         |
| Ca_Desig_Chr_scaffold12128_2292 | Ca_desig_scaffold  | 2292                           | [C/T]       | NA                                         |
| Ca_Desig_Chr_scaffold12128_2293 | Ca_desig_scaffold  | 2293                           | [A/G]       | NA                                         |
| Ca_Desig_Chr_scaffold12128_2295 | Ca_desig_scaffold  | 2295                           | [A/G]       | NA                                         |
| Ca_Desig_Chr_scaffold12128_2296 | Ca_desig_scaffold  | 2296                           | [A/G]       | NA                                         |
| Ca_Desig_Chr_scaffold12128_2297 | Ca_desig_scaffold  | 2297                           | [A/G]       | NA                                         |
| Ca_Desig_Chr_scaffold12128_2299 | Ca_desig_scaffold  | 2299                           | [A/G]       | NA                                         |
| Ca_Desig_Chr_scaffold12128_2301 | Ca_desig_scaffold  | 2301                           | [T/C]       | NA                                         |
| Ca_Desig_Chr_scaffold12128_2303 | Ca_desig_scaffold  | 2303                           | [A/G]       | NA                                         |
| Ca_Desig_Chr_scaffold12128_2305 | Ca_desig_scaffold  | 2305                           | [C/T]       | NA                                         |
| Ca_Desig_Chr_scaffold12128_2306 | Ca_desig_scaffold  | 2306                           | [T/C]       | NA                                         |
| Ca_Desig_Chr_scaffold12128_2307 | Ca_desig_scaffold  | 2307                           | [T/C]       | NA                                         |
| Ca_Desig_Chr_scaffold12128_2308 | Ca_desig_scaffold  | 2308                           | [A/G]       | NA                                         |
| Ca_Desig_Chr_scaffold12128_2312 | Ca_desig_scaffold  | 2312                           | [G/A]       | NA                                         |
| Ca_Desig_Chr_scaffold12128_2313 | Ca_desig_scaffold  | 2313                           | [C/T]       | NA                                         |
| Ca_Desig_Chr_scaffold12128_2314 | Ca_desig_scaffold  | 2314                           | [A/G]       | NA                                         |
| Ca_Desig_Chr_scaffold12128_2315 | Ca_desig_scaffold  | 2315                           | [T/C]       | NA                                         |
| Ca_Desig_Chr_scaffold12128_2316 | Ca_desig_scaffold  | 2316                           | [A/G]       | NA                                         |
| Ca_Desig_Chr_scaffold12128_2317 | Ca_desig_scaffold  | 2317                           | [G/A]       | NA                                         |
| Ca_Desig_Chr_scaffold12128_2318 | Ca_desig_scaffold  | 2318                           | [C/T]       | NA                                         |
| Ca_Desig_Chr_scaffold12128_2319 | Ca_desig_scaffold  | 2319                           | [G/A]       | NA                                         |
| Ca_Desig_Chr_scaffold12128_2320 | Ca_desig_scaffold  | 2320                           | [C/T]       | NA                                         |
| Ca_Desig_Chr_scaffold12128_2321 | Ca_desig_scaffold  | 2321                           | [T/C]       | NA                                         |
| Ca_Desig_Chr_scaffold12128_2322 | Ca_desig_scaffold  | 2322                           | [T/C]       | NA                                         |
| Ca_Desig_Chr_scaffold12128_2323 | Ca_desig_scaffold  | 2323                           | [A/G]       | NA                                         |
| Ca_Desig_Chr_scaffold12128_2324 | Ca_desig_scaffold  | 2324                           | [A/G]       | NA                                         |
| Ca_Desig_Chr_scaffold12128_2325 | Ca_desig_scaffold  | 2325                           | [A/G]       | NA                                         |
| Ca_Desig_Chr_scaffold12128_2326 | Ca_desig_scaffold  | 2326                           | [T/C]       | NA                                         |
| Ca_Desig_Chr_scaffold12128_2327 | Ca_desig_scaffold  | 2327                           | [A/G]       | NA                                         |



| <b>SNP IDs</b>                  | <b>Chromosomes</b> | <b>Physical positions (bp)</b> | <b>SNPs</b> | <b>NCBI SNPdb accession IDs (NCBI_ss#)</b> |
|---------------------------------|--------------------|--------------------------------|-------------|--------------------------------------------|
| Ca_Desig_Chr_scaffold12128_2328 | Ca_desig_scaffold  | 2328                           | [A/G]       | NA                                         |
| Ca_Desig_Chr_scaffold12128_2331 | Ca_desig_scaffold  | 2331                           | [G/A]       | NA                                         |
| Ca_Desig_Chr_scaffold12128_2332 | Ca_desig_scaffold  | 2332                           | [G/A]       | NA                                         |
| Ca_Desig_Chr_scaffold12128_2333 | Ca_desig_scaffold  | 2333                           | [T/C]       | NA                                         |
| Ca_Desig_Chr_scaffold12128_2334 | Ca_desig_scaffold  | 2334                           | [T/C]       | NA                                         |
| Ca_Desig_Chr_scaffold12128_2335 | Ca_desig_scaffold  | 2335                           | [G/A]       | NA                                         |
| Ca_Desig_Chr_scaffold12128_2336 | Ca_desig_scaffold  | 2336                           | [A/G]       | NA                                         |
| Ca_Desig_Chr_scaffold12128_2337 | Ca_desig_scaffold  | 2337                           | [A/G]       | NA                                         |
| Ca_Desig_Chr_scaffold12128_2338 | Ca_desig_scaffold  | 2338                           | [G/A]       | NA                                         |
| Ca_Desig_Chr_scaffold12128_2339 | Ca_desig_scaffold  | 2339                           | [A/G]       | NA                                         |
| Ca_Desig_Chr_scaffold12128_2342 | Ca_desig_scaffold  | 2342                           | [A/G]       | NA                                         |
| Ca_Desig_Chr_scaffold12128_2344 | Ca_desig_scaffold  | 2344                           | [C/T]       | NA                                         |
| Ca_Desig_Chr_scaffold12128_2345 | Ca_desig_scaffold  | 2345                           | [T/C]       | NA                                         |
| Ca_Desig_Chr_scaffold12128_2346 | Ca_desig_scaffold  | 2346                           | [T/C]       | NA                                         |
| Ca_Desig_Chr_scaffold12128_2347 | Ca_desig_scaffold  | 2347                           | [T/C]       | NA                                         |
| Ca_Desig_Chr_scaffold12128_2349 | Ca_desig_scaffold  | 2349                           | [C/T]       | NA                                         |
| Ca_Desig_Chr_scaffold12128_2350 | Ca_desig_scaffold  | 2350                           | [A/G]       | NA                                         |
| Ca_Desig_Chr_scaffold12128_2351 | Ca_desig_scaffold  | 2351                           | [T/C]       | NA                                         |
| Ca_Desig_Chr_scaffold12128_2352 | Ca_desig_scaffold  | 2352                           | [C/T]       | NA                                         |
| Ca_Desig_Chr_scaffold12128_2353 | Ca_desig_scaffold  | 2353                           | [C/T]       | NA                                         |
| Ca_Desig_Chr_scaffold12128_2354 | Ca_desig_scaffold  | 2354                           | [C/T]       | NA                                         |
| Ca_Desig_Chr_scaffold12128_2355 | Ca_desig_scaffold  | 2355                           | [G/A]       | NA                                         |
| Ca_Desig_Chr_scaffold12128_2356 | Ca_desig_scaffold  | 2356                           | [A/G]       | NA                                         |
| Ca_Desig_Chr_scaffold12128_2357 | Ca_desig_scaffold  | 2357                           | [C/T]       | NA                                         |
| Ca_Desig_Chr_scaffold12128_2358 | Ca_desig_scaffold  | 2358                           | [A/G]       | NA                                         |
| Ca_Desig_Chr_scaffold12128_2359 | Ca_desig_scaffold  | 2359                           | [A/G]       | NA                                         |
| Ca_Desig_Chr_scaffold12128_2360 | Ca_desig_scaffold  | 2360                           | [T/C]       | NA                                         |
| Ca_Desig_Chr_scaffold12128_2361 | Ca_desig_scaffold  | 2361                           | [T/C]       | NA                                         |
| Ca_Desig_Chr_scaffold12128_2362 | Ca_desig_scaffold  | 2362                           | [A/G]       | NA                                         |
| Ca_Desig_Chr_scaffold12128_2363 | Ca_desig_scaffold  | 2363                           | [C/T]       | NA                                         |
| Ca_Desig_Chr_scaffold12128_2364 | Ca_desig_scaffold  | 2364                           | [T/C]       | NA                                         |
| Ca_Desig_Chr_scaffold12128_2365 | Ca_desig_scaffold  | 2365                           | [A/G]       | NA                                         |
| Ca_Desig_Chr_scaffold12128_2366 | Ca_desig_scaffold  | 2366                           | [C/T]       | NA                                         |
| Ca_Desig_Chr_scaffold12128_2367 | Ca_desig_scaffold  | 2367                           | [T/C]       | NA                                         |

| <b>SNP IDs</b>                | <b>Chromosomes</b> | <b>Physical positions (bp)</b> | <b>SNPs</b> | <b>NCBI SNPdb accession IDs (NCBI_ss#)</b> |
|-------------------------------|--------------------|--------------------------------|-------------|--------------------------------------------|
| Ca_Desi_Ch_scaffold12128_2368 | Ca_desi_scaffold   | 2368                           | [G/A]       | NA                                         |
| Ca_Desi_Ch_scaffold12128_2369 | Ca_desi_scaffold   | 2369                           | [A/G]       | NA                                         |
| Ca_Desi_Ch_scaffold12128_2370 | Ca_desi_scaffold   | 2370                           | [C/A]       | NA                                         |
| Ca_Desi_Ch_scaffold12128_2371 | Ca_desi_scaffold   | 2371                           | [T/C]       | NA                                         |
| Ca_Desi_Ch_scaffold12128_2372 | Ca_desi_scaffold   | 2372                           | [T/C]       | NA                                         |
| Ca_Desi_Ch_scaffold12128_2373 | Ca_desi_scaffold   | 2373                           | [T/C]       | NA                                         |
| Ca_Desi_Ch_scaffold12128_2375 | Ca_desi_scaffold   | 2375                           | [C/T]       | NA                                         |
| Ca_Desi_Ch_scaffold12128_2377 | Ca_desi_scaffold   | 2377                           | [T/C]       | NA                                         |
| Ca_Desi_Ch_scaffold12128_2378 | Ca_desi_scaffold   | 2378                           | [T/C]       | NA                                         |
| Ca_Desi_Ch_scaffold12128_2379 | Ca_desi_scaffold   | 2379                           | [T/C]       | NA                                         |
| Ca_Desi_Ch_scaffold12128_2380 | Ca_desi_scaffold   | 2380                           | [T/C]       | NA                                         |
| Ca_Desi_Ch_scaffold12128_2381 | Ca_desi_scaffold   | 2381                           | [T/C]       | NA                                         |
| Ca_Desi_Ch_scaffold12128_2383 | Ca_desi_scaffold   | 2383                           | [G/A]       | NA                                         |
| Ca_Desi_Ch_scaffold12128_2385 | Ca_desi_scaffold   | 2385                           | [A/G]       | NA                                         |
| Ca_Desi_Ch_scaffold12128_2386 | Ca_desi_scaffold   | 2386                           | [T/C]       | NA                                         |
| Ca_Desi_Ch_scaffold12128_2387 | Ca_desi_scaffold   | 2387                           | [T/C]       | NA                                         |
| Ca_Desi_Ch_scaffold12128_2388 | Ca_desi_scaffold   | 2388                           | [T/C]       | NA                                         |
| Ca_Desi_Ch_scaffold12128_2389 | Ca_desi_scaffold   | 2389                           | [C/T]       | NA                                         |
| Ca_Desi_Ch_scaffold12128_2390 | Ca_desi_scaffold   | 2390                           | [A/G]       | NA                                         |
| Ca_Desi_Ch_scaffold12128_2391 | Ca_desi_scaffold   | 2391                           | [C/T]       | NA                                         |
| Ca_Desi_Ch_scaffold12128_2392 | Ca_desi_scaffold   | 2392                           | [T/C]       | NA                                         |
| Ca_Desi_Ch_scaffold12128_2393 | Ca_desi_scaffold   | 2393                           | [T/C]       | NA                                         |
| Ca_Desi_Ch_scaffold12128_2394 | Ca_desi_scaffold   | 2394                           | [A/G]       | NA                                         |
| Ca_Desi_Ch_scaffold12128_2395 | Ca_desi_scaffold   | 2395                           | [A/G]       | NA                                         |
| Ca_Desi_Ch_scaffold12128_2396 | Ca_desi_scaffold   | 2396                           | [A/G]       | NA                                         |
| Ca_Desi_Ch_scaffold12128_2397 | Ca_desi_scaffold   | 2397                           | [A/G]       | NA                                         |
| Ca_Desi_Ch_scaffold12128_2399 | Ca_desi_scaffold   | 2399                           | [A/G]       | NA                                         |
| Ca_Desi_Ch_scaffold12128_2401 | Ca_desi_scaffold   | 2401                           | [T/C]       | NA                                         |
| Ca_Desi_Ch_scaffold12128_2402 | Ca_desi_scaffold   | 2402                           | [G/A]       | NA                                         |
| Ca_Desi_Ch_scaffold12128_2403 | Ca_desi_scaffold   | 2403                           | [G/A]       | NA                                         |
| Ca_Desi_Ch_scaffold12128_2404 | Ca_desi_scaffold   | 2404                           | [A/G]       | NA                                         |
| Ca_Desi_Ch_scaffold12128_2405 | Ca_desi_scaffold   | 2405                           | [C/T]       | NA                                         |
| Ca_Desi_Ch_scaffold12128_2406 | Ca_desi_scaffold   | 2406                           | [T/C]       | NA                                         |
| Ca_Desi_Ch_scaffold12128_2407 | Ca_desi_scaffold   | 2407                           | [T/C]       | NA                                         |

| <b>SNP IDs</b>                  | <b>Chromosomes</b> | <b>Physical positions (bp)</b> | <b>SNPs</b> | <b>NCBI SNPdb accession IDs (NCBI_ss#)</b> |
|---------------------------------|--------------------|--------------------------------|-------------|--------------------------------------------|
| Ca_Desig_Chr_scaffold12128_2408 | Ca_desig_scaffold  | 2408                           | [C/T]       | NA                                         |
| Ca_Desig_Chr_scaffold12128_2409 | Ca_desig_scaffold  | 2409                           | [A/G]       | NA                                         |
| Ca_Desig_Chr_scaffold12128_2410 | Ca_desig_scaffold  | 2410                           | [A/G]       | NA                                         |
| Ca_Desig_Chr_scaffold12128_2447 | Ca_desig_scaffold  | 2447                           | [A/G]       | NA                                         |
| Ca_Desig_Chr_scaffold12128_2449 | Ca_desig_scaffold  | 2449                           | [T/C]       | NA                                         |
| Ca_Desig_Chr_scaffold12128_2450 | Ca_desig_scaffold  | 2450                           | [A/G]       | NA                                         |
| Ca_Desig_Chr_scaffold12128_2451 | Ca_desig_scaffold  | 2451                           | [A/G]       | NA                                         |
| Ca_Desig_Chr_scaffold12128_2452 | Ca_desig_scaffold  | 2452                           | [T/C]       | NA                                         |
| Ca_Desig_Chr_scaffold12128_2455 | Ca_desig_scaffold  | 2455                           | [A/G]       | NA                                         |
| Ca_Desig_Chr_scaffold12128_2456 | Ca_desig_scaffold  | 2456                           | [A/G]       | NA                                         |
| Ca_Desig_Chr_scaffold12128_2457 | Ca_desig_scaffold  | 2457                           | [G/A]       | NA                                         |
| Ca_Desig_Chr_scaffold12128_2458 | Ca_desig_scaffold  | 2458                           | [A/G]       | NA                                         |
| Ca_Desig_Chr_scaffold12128_2459 | Ca_desig_scaffold  | 2459                           | [A/G]       | NA                                         |
| Ca_Desig_Chr_scaffold12128_2460 | Ca_desig_scaffold  | 2460                           | [T/C]       | NA                                         |
| Ca_Desig_Chr_scaffold12128_2462 | Ca_desig_scaffold  | 2462                           | [G/A]       | NA                                         |
| Ca_Desig_Chr_scaffold12128_2464 | Ca_desig_scaffold  | 2464                           | [G/A]       | NA                                         |
| Ca_Desig_Chr_scaffold12128_2465 | Ca_desig_scaffold  | 2465                           | [C/T]       | NA                                         |
| Ca_Desig_Chr_scaffold12128_2466 | Ca_desig_scaffold  | 2466                           | [A/G]       | NA                                         |
| Ca_Desig_Chr_scaffold12128_2467 | Ca_desig_scaffold  | 2467                           | [A/G]       | NA                                         |
| Ca_Desig_Chr_scaffold12128_2468 | Ca_desig_scaffold  | 2468                           | [G/A]       | NA                                         |
| Ca_Desig_Chr_scaffold12128_2471 | Ca_desig_scaffold  | 2471                           | [T/C]       | NA                                         |
| Ca_Desig_Chr_scaffold12128_2472 | Ca_desig_scaffold  | 2472                           | [A/G]       | NA                                         |
| Ca_Desig_Chr_scaffold12128_2473 | Ca_desig_scaffold  | 2473                           | [A/G]       | NA                                         |
| Ca_Desig_Chr_scaffold12128_2474 | Ca_desig_scaffold  | 2474                           | [T/C]       | NA                                         |
| Ca_Desig_Chr_scaffold12128_2475 | Ca_desig_scaffold  | 2475                           | [T/C]       | NA                                         |
| Ca_Desig_Chr_scaffold12128_2476 | Ca_desig_scaffold  | 2476                           | [T/C]       | NA                                         |
| Ca_Desig_Chr_scaffold12128_2479 | Ca_desig_scaffold  | 2479                           | [A/G]       | NA                                         |
| Ca_Desig_Chr_scaffold12128_2481 | Ca_desig_scaffold  | 2481                           | [A/G]       | NA                                         |
| Ca_Desig_Chr_scaffold12128_2483 | Ca_desig_scaffold  | 2483                           | [A/G]       | NA                                         |
| Ca_Desig_Chr_scaffold12128_2484 | Ca_desig_scaffold  | 2484                           | [A/G]       | NA                                         |
| Ca_Desig_Chr_scaffold12128_2485 | Ca_desig_scaffold  | 2485                           | [T/C]       | NA                                         |
| Ca_Desig_Chr_scaffold12128_2486 | Ca_desig_scaffold  | 2486                           | [G/A]       | NA                                         |
| Ca_Desig_Chr_scaffold12128_2489 | Ca_desig_scaffold  | 2489                           | [A/G]       | NA                                         |
| Ca_Desig_Chr_scaffold12128_2490 | Ca_desig_scaffold  | 2490                           | [A/G]       | NA                                         |

| <b>SNP IDs</b>                  | <b>Chromosomes</b> | <b>Physical positions (bp)</b> | <b>SNPs</b> | <b>NCBI SNPdb accession IDs (NCBI_ss#)</b> |
|---------------------------------|--------------------|--------------------------------|-------------|--------------------------------------------|
| Ca_Desig_Chr_scaffold12128_2492 | Ca_desig_scaffold  | 2492                           | [T/C]       | NA                                         |
| Ca_Desig_Chr_scaffold12128_2495 | Ca_desig_scaffold  | 2495                           | [T/C]       | NA                                         |
| Ca_Desig_Chr_scaffold12128_2496 | Ca_desig_scaffold  | 2496                           | [T/C]       | NA                                         |
| Ca_Desig_Chr_scaffold12128_2498 | Ca_desig_scaffold  | 2498                           | [A/G]       | NA                                         |
| Ca_Desig_Chr_scaffold12128_2499 | Ca_desig_scaffold  | 2499                           | [G/T]       | NA                                         |
| Ca_Desig_Chr_scaffold12128_2500 | Ca_desig_scaffold  | 2500                           | [A/G]       | NA                                         |
| Ca_Desig_Chr_scaffold12128_2501 | Ca_desig_scaffold  | 2501                           | [A/G]       | NA                                         |
| Ca_Desig_Chr_scaffold12128_2502 | Ca_desig_scaffold  | 2502                           | [G/A]       | NA                                         |
| Ca_Desig_Chr_scaffold12128_2503 | Ca_desig_scaffold  | 2503                           | [G/A]       | NA                                         |
| Ca_Desig_Chr_scaffold12128_2504 | Ca_desig_scaffold  | 2504                           | [A/G]       | NA                                         |
| Ca_Desig_Chr_scaffold12128_2528 | Ca_desig_scaffold  | 2528                           | [A/G]       | NA                                         |
| Ca_Desig_Chr_scaffold12128_2561 | Ca_desig_scaffold  | 2561                           | [T/G]       | NA                                         |
| Ca_Desig_Chr_scaffold12128_3605 | Ca_desig_scaffold  | 3605                           | [T/C]       | NA                                         |
| Ca_Desig_Chr_scaffold12128_3606 | Ca_desig_scaffold  | 3606                           | [T/C]       | NA                                         |
| Ca_Desig_Chr_scaffold12128_3607 | Ca_desig_scaffold  | 3607                           | [T/C]       | NA                                         |
| Ca_Desig_Chr_scaffold12128_3609 | Ca_desig_scaffold  | 3609                           | [T/C]       | NA                                         |
| Ca_Desig_Chr_scaffold12128_3610 | Ca_desig_scaffold  | 3610                           | [A/G]       | NA                                         |
| Ca_Desig_Chr_scaffold12128_3612 | Ca_desig_scaffold  | 3612                           | [T/C]       | NA                                         |
| Ca_Desig_Chr_scaffold12128_3613 | Ca_desig_scaffold  | 3613                           | [A/G]       | NA                                         |
| Ca_Desig_Chr_scaffold12128_3616 | Ca_desig_scaffold  | 3616                           | [A/G]       | NA                                         |
| Ca_Desig_Chr_scaffold12128_3617 | Ca_desig_scaffold  | 3617                           | [A/G]       | NA                                         |
| Ca_Desig_Chr_scaffold12128_3620 | Ca_desig_scaffold  | 3620                           | [A/G]       | NA                                         |
| Ca_Desig_Chr_scaffold12128_3621 | Ca_desig_scaffold  | 3621                           | [A/G]       | NA                                         |
| Ca_Desig_Chr_scaffold12128_3624 | Ca_desig_scaffold  | 3624                           | [A/G]       | NA                                         |
| Ca_Desig_Chr_scaffold12128_3625 | Ca_desig_scaffold  | 3625                           | [A/G]       | NA                                         |
| Ca_Desig_Chr_scaffold12128_3626 | Ca_desig_scaffold  | 3626                           | [A/G]       | NA                                         |
| Ca_Desig_Chr_scaffold12128_3628 | Ca_desig_scaffold  | 3628                           | [A/G]       | NA                                         |
| Ca_Desig_Chr_scaffold12128_3629 | Ca_desig_scaffold  | 3629                           | [A/G]       | NA                                         |
| Ca_Desig_Chr_scaffold12128_3630 | Ca_desig_scaffold  | 3630                           | [A/G]       | NA                                         |
| Ca_Desig_Chr_scaffold12128_3631 | Ca_desig_scaffold  | 3631                           | [A/G]       | NA                                         |
| Ca_Desig_Chr_scaffold12128_3634 | Ca_desig_scaffold  | 3634                           | [A/G]       | NA                                         |
| Ca_Desig_Chr_scaffold12128_3635 | Ca_desig_scaffold  | 3635                           | [T/C]       | NA                                         |
| Ca_Desig_Chr_scaffold12128_3636 | Ca_desig_scaffold  | 3636                           | [G/A]       | NA                                         |
| Ca_Desig_Chr_scaffold12128_3640 | Ca_desig_scaffold  | 3640                           | [T/C]       | NA                                         |

| <b>SNP IDs</b>                | <b>Chromosomes</b> | <b>Physical positions (bp)</b> | <b>SNPs</b> | <b>NCBI SNPdb accession IDs (NCBI_ss#)</b> |
|-------------------------------|--------------------|--------------------------------|-------------|--------------------------------------------|
| Ca_Desi_Ch_scaffold12128_3641 | Ca_desi_scaffold   | 3641                           | [A/G]       | NA                                         |
| Ca_Desi_Ch_scaffold12128_3643 | Ca_desi_scaffold   | 3643                           | [A/G]       | NA                                         |
| Ca_Desi_Ch_scaffold12128_3644 | Ca_desi_scaffold   | 3644                           | [T/C]       | NA                                         |
| Ca_Desi_Ch_scaffold12128_3646 | Ca_desi_scaffold   | 3646                           | [T/C]       | NA                                         |
| Ca_Desi_Ch_scaffold12128_3648 | Ca_desi_scaffold   | 3648                           | [A/G]       | NA                                         |
| Ca_Desi_Ch_scaffold12128_3649 | Ca_desi_scaffold   | 3649                           | [A/G]       | NA                                         |
| Ca_Desi_Ch_scaffold12128_3650 | Ca_desi_scaffold   | 3650                           | [C/T]       | NA                                         |
| Ca_Desi_Ch_scaffold12128_3651 | Ca_desi_scaffold   | 3651                           | [A/G]       | NA                                         |
| Ca_Desi_Ch_scaffold12128_3654 | Ca_desi_scaffold   | 3654                           | [G/A]       | NA                                         |
| Ca_Desi_Ch_scaffold12128_3656 | Ca_desi_scaffold   | 3656                           | [G/A]       | NA                                         |
| Ca_Desi_Ch_scaffold12128_3658 | Ca_desi_scaffold   | 3658                           | [A/G]       | NA                                         |
| Ca_Desi_Ch_scaffold12128_3659 | Ca_desi_scaffold   | 3659                           | [A/G]       | NA                                         |
| Ca_Desi_Ch_scaffold12128_3661 | Ca_desi_scaffold   | 3661                           | [T/C]       | NA                                         |
| Ca_Desi_Ch_scaffold12128_3662 | Ca_desi_scaffold   | 3662                           | [T/C]       | NA                                         |
| Ca_Desi_Ch_scaffold12128_3664 | Ca_desi_scaffold   | 3664                           | [A/G]       | NA                                         |
| Ca_Desi_Ch_scaffold12129_688  | Ca_desi_scaffold   | 688                            | [A/G]       | NA                                         |
| Ca_Desi_Ch_scaffold12129_692  | Ca_desi_scaffold   | 692                            | [T/C]       | NA                                         |
| Ca_Desi_Ch_scaffold12129_701  | Ca_desi_scaffold   | 701                            | [T/C]       | NA                                         |
| Ca_Desi_Ch_scaffold12129_717  | Ca_desi_scaffold   | 717                            | [A/G]       | NA                                         |
| Ca_Desi_Ch_scaffold12129_725  | Ca_desi_scaffold   | 725                            | [T/C]       | NA                                         |
| Ca_Desi_Ch_scaffold12129_729  | Ca_desi_scaffold   | 729                            | [A/G]       | NA                                         |
| Ca_Desi_Ch_scaffold12129_736  | Ca_desi_scaffold   | 736                            | [A/T]       | NA                                         |
| Ca_Desi_Ch_scaffold12148_2584 | Ca_desi_scaffold   | 2584                           | [T/G]       | NA                                         |
| Ca_Desi_Ch_scaffold12148_2592 | Ca_desi_scaffold   | 2592                           | [G/A]       | NA                                         |
| Ca_Desi_Ch_scaffold12148_2684 | Ca_desi_scaffold   | 2684                           | [T/C]       | NA                                         |
| Ca_Desi_Ch_scaffold12165_3433 | Ca_desi_scaffold   | 3433                           | [A/G]       | NA                                         |
| Ca_Desi_Ch_scaffold12165_3434 | Ca_desi_scaffold   | 3434                           | [A/G]       | NA                                         |
| Ca_Desi_Ch_scaffold12165_3454 | Ca_desi_scaffold   | 3454                           | [T/A]       | NA                                         |
| Ca_Desi_Ch_scaffold12165_3462 | Ca_desi_scaffold   | 3462                           | [A/G]       | NA                                         |
| Ca_Desi_Ch_scaffold12203_772  | Ca_desi_scaffold   | 772                            | [C/A]       | NA                                         |
| Ca_Desi_Ch_scaffold12254_3453 | Ca_desi_scaffold   | 3453                           | [T/G]       | NA                                         |
| Ca_Desi_Ch_scaffold12301_3161 | Ca_desi_scaffold   | 3161                           | [T/G]       | NA                                         |
| Ca_Desi_Ch_scaffold12348_293  | Ca_desi_scaffold   | 293                            | [T/C]       | NA                                         |
| Ca_Desi_Ch_scaffold12348_295  | Ca_desi_scaffold   | 295                            | [A/G]       | NA                                         |

| <b>SNP IDs</b>                  | <b>Chromosomes</b> | <b>Physical positions (bp)</b> | <b>SNPs</b> | <b>NCBI SNPdb accession IDs (NCBI_ss#)</b> |
|---------------------------------|--------------------|--------------------------------|-------------|--------------------------------------------|
| Ca_Desig_Chr_scaffold12348_304  | Ca_desig_scaffold  | 304                            | [A/G]       | NA                                         |
| Ca_Desig_Chr_scaffold12348_305  | Ca_desig_scaffold  | 305                            | [T/C]       | NA                                         |
| Ca_Desig_Chr_scaffold12348_311  | Ca_desig_scaffold  | 311                            | [T/C]       | NA                                         |
| Ca_Desig_Chr_scaffold12348_316  | Ca_desig_scaffold  | 316                            | [A/G]       | NA                                         |
| Ca_Desig_Chr_scaffold12348_323  | Ca_desig_scaffold  | 323                            | [A/G]       | NA                                         |
| Ca_Desig_Chr_scaffold12348_328  | Ca_desig_scaffold  | 328                            | [A/G]       | NA                                         |
| Ca_Desig_Chr_scaffold12348_331  | Ca_desig_scaffold  | 331                            | [A/G]       | NA                                         |
| Ca_Desig_Chr_scaffold12348_333  | Ca_desig_scaffold  | 333                            | [T/C]       | NA                                         |
| Ca_Desig_Chr_scaffold12348_340  | Ca_desig_scaffold  | 340                            | [A/G]       | NA                                         |
| Ca_Desig_Chr_scaffold12348_342  | Ca_desig_scaffold  | 342                            | [A/G]       | NA                                         |
| Ca_Desig_Chr_scaffold12348_343  | Ca_desig_scaffold  | 343                            | [T/C]       | NA                                         |
| Ca_Desig_Chr_scaffold12348_345  | Ca_desig_scaffold  | 345                            | [A/G]       | NA                                         |
| Ca_Desig_Chr_scaffold12348_347  | Ca_desig_scaffold  | 347                            | [C/A]       | NA                                         |
| Ca_Desig_Chr_scaffold12348_348  | Ca_desig_scaffold  | 348                            | [T/G]       | NA                                         |
| Ca_Desig_Chr_scaffold12348_350  | Ca_desig_scaffold  | 350                            | [T/C]       | NA                                         |
| Ca_Desig_Chr_scaffold12348_351  | Ca_desig_scaffold  | 351                            | [C/A]       | NA                                         |
| Ca_Desig_Chr_scaffold12348_352  | Ca_desig_scaffold  | 352                            | [T/G]       | NA                                         |
| Ca_Desig_Chr_scaffold12348_354  | Ca_desig_scaffold  | 354                            | [A/G]       | NA                                         |
| Ca_Desig_Chr_scaffold12348_360  | Ca_desig_scaffold  | 360                            | [A/G]       | NA                                         |
| Ca_Desig_Chr_scaffold12348_365  | Ca_desig_scaffold  | 365                            | [T/C]       | NA                                         |
| Ca_Desig_Chr_scaffold12348_367  | Ca_desig_scaffold  | 367                            | [A/G]       | NA                                         |
| Ca_Desig_Chr_scaffold12348_370  | Ca_desig_scaffold  | 370                            | [A/G]       | NA                                         |
| Ca_Desig_Chr_scaffold12348_376  | Ca_desig_scaffold  | 376                            | [T/C]       | NA                                         |
| Ca_Desig_Chr_scaffold12348_383  | Ca_desig_scaffold  | 383                            | [T/C]       | NA                                         |
| Ca_Desig_Chr_scaffold12348_710  | Ca_desig_scaffold  | 710                            | [A/G]       | NA                                         |
| Ca_Desig_Chr_scaffold12348_732  | Ca_desig_scaffold  | 732                            | [G/C]       | NA                                         |
| Ca_Desig_Chr_scaffold12348_1625 | Ca_desig_scaffold  | 1625                           | [A/G]       | NA                                         |
| Ca_Desig_Chr_scaffold12348_1630 | Ca_desig_scaffold  | 1630                           | [A/C]       | NA                                         |
| Ca_Desig_Chr_scaffold12348_1653 | Ca_desig_scaffold  | 1653                           | [G/T]       | NA                                         |
| Ca_Desig_Chr_scaffold12348_1672 | Ca_desig_scaffold  | 1672                           | [A/G]       | NA                                         |
| Ca_Desig_Chr_scaffold12348_1845 | Ca_desig_scaffold  | 1845                           | [G/T]       | NA                                         |
| Ca_Desig_Chr_scaffold12367_1942 | Ca_desig_scaffold  | 1942                           | [A/G]       | NA                                         |
| Ca_Desig_Chr_scaffold12367_1979 | Ca_desig_scaffold  | 1979                           | [A/G]       | NA                                         |
| Ca_Desig_Chr_scaffold12372_919  | Ca_desig_scaffold  | 919                            | [A/G]       | NA                                         |

| <b>SNP IDs</b>                 | <b>Chromosomes</b> | <b>Physical positions (bp)</b> | <b>SNPs</b> | <b>NCBI SNPdb accession IDs (NCBI_ss#)</b> |
|--------------------------------|--------------------|--------------------------------|-------------|--------------------------------------------|
| Ca_Desig_Chr_scaffold12372_920 | Ca_desig_scaffold  | 920                            | [T/C]       | NA                                         |
| Ca_Desig_Chr_scaffold12372_921 | Ca_desig_scaffold  | 921                            | [G/A]       | NA                                         |
| Ca_Desig_Chr_scaffold12372_922 | Ca_desig_scaffold  | 922                            | [G/A]       | NA                                         |
| Ca_Desig_Chr_scaffold12372_923 | Ca_desig_scaffold  | 923                            | [G/A]       | NA                                         |
| Ca_Desig_Chr_scaffold12372_924 | Ca_desig_scaffold  | 924                            | [A/G]       | NA                                         |
| Ca_Desig_Chr_scaffold12372_925 | Ca_desig_scaffold  | 925                            | [G/A]       | NA                                         |
| Ca_Desig_Chr_scaffold12372_926 | Ca_desig_scaffold  | 926                            | [C/T]       | NA                                         |
| Ca_Desig_Chr_scaffold12372_927 | Ca_desig_scaffold  | 927                            | [G/A]       | NA                                         |
| Ca_Desig_Chr_scaffold12372_928 | Ca_desig_scaffold  | 928                            | [G/A]       | NA                                         |
| Ca_Desig_Chr_scaffold12372_929 | Ca_desig_scaffold  | 929                            | [A/G]       | NA                                         |
| Ca_Desig_Chr_scaffold12372_930 | Ca_desig_scaffold  | 930                            | [T/C]       | NA                                         |
| Ca_Desig_Chr_scaffold12372_931 | Ca_desig_scaffold  | 931                            | [T/C]       | NA                                         |
| Ca_Desig_Chr_scaffold12372_932 | Ca_desig_scaffold  | 932                            | [A/G]       | NA                                         |
| Ca_Desig_Chr_scaffold12372_933 | Ca_desig_scaffold  | 933                            | [C/T]       | NA                                         |
| Ca_Desig_Chr_scaffold12372_934 | Ca_desig_scaffold  | 934                            | [C/T]       | NA                                         |
| Ca_Desig_Chr_scaffold12372_935 | Ca_desig_scaffold  | 935                            | [C/T]       | NA                                         |
| Ca_Desig_Chr_scaffold12372_936 | Ca_desig_scaffold  | 936                            | [A/G]       | NA                                         |
| Ca_Desig_Chr_scaffold12372_937 | Ca_desig_scaffold  | 937                            | [A/G]       | NA                                         |
| Ca_Desig_Chr_scaffold12372_939 | Ca_desig_scaffold  | 939                            | [A/G]       | NA                                         |
| Ca_Desig_Chr_scaffold12372_940 | Ca_desig_scaffold  | 940                            | [A/G]       | NA                                         |
| Ca_Desig_Chr_scaffold12372_943 | Ca_desig_scaffold  | 943                            | [C/T]       | NA                                         |
| Ca_Desig_Chr_scaffold12372_944 | Ca_desig_scaffold  | 944                            | [C/T]       | NA                                         |
| Ca_Desig_Chr_scaffold12372_945 | Ca_desig_scaffold  | 945                            | [C/A]       | NA                                         |
| Ca_Desig_Chr_scaffold12372_946 | Ca_desig_scaffold  | 946                            | [T/C]       | NA                                         |
| Ca_Desig_Chr_scaffold12372_950 | Ca_desig_scaffold  | 950                            | [A/G]       | NA                                         |
| Ca_Desig_Chr_scaffold12372_951 | Ca_desig_scaffold  | 951                            | [A/G]       | NA                                         |
| Ca_Desig_Chr_scaffold12372_953 | Ca_desig_scaffold  | 953                            | [A/G]       | NA                                         |
| Ca_Desig_Chr_scaffold12372_954 | Ca_desig_scaffold  | 954                            | [A/G]       | NA                                         |
| Ca_Desig_Chr_scaffold12372_955 | Ca_desig_scaffold  | 955                            | [T/C]       | NA                                         |
| Ca_Desig_Chr_scaffold12372_957 | Ca_desig_scaffold  | 957                            | [A/G]       | NA                                         |
| Ca_Desig_Chr_scaffold12372_958 | Ca_desig_scaffold  | 958                            | [A/G]       | NA                                         |
| Ca_Desig_Chr_scaffold12372_959 | Ca_desig_scaffold  | 959                            | [A/G]       | NA                                         |
| Ca_Desig_Chr_scaffold12372_960 | Ca_desig_scaffold  | 960                            | [A/G]       | NA                                         |
| Ca_Desig_Chr_scaffold12372_961 | Ca_desig_scaffold  | 961                            | [A/G]       | NA                                         |

| <b>SNP IDs</b>                        | <b>Chromosomes</b> | <b>Physical positions (bp)</b> | <b>SNPs</b> | <b>NCBI SNPdb accession IDs (NCBI_ss#)</b> |
|---------------------------------------|--------------------|--------------------------------|-------------|--------------------------------------------|
| Ca_Desi_Chromosome_scaffold12372_962  | Ca_desi_scaffold   | 962                            | [A/G]       | NA                                         |
| Ca_Desi_Chromosome_scaffold12372_963  | Ca_desi_scaffold   | 963                            | [A/G]       | NA                                         |
| Ca_Desi_Chromosome_scaffold12372_966  | Ca_desi_scaffold   | 966                            | [A/G]       | NA                                         |
| Ca_Desi_Chromosome_scaffold12372_967  | Ca_desi_scaffold   | 967                            | [T/C]       | NA                                         |
| Ca_Desi_Chromosome_scaffold12372_968  | Ca_desi_scaffold   | 968                            | [A/G]       | NA                                         |
| Ca_Desi_Chromosome_scaffold12372_969  | Ca_desi_scaffold   | 969                            | [T/C]       | NA                                         |
| Ca_Desi_Chromosome_scaffold12372_970  | Ca_desi_scaffold   | 970                            | [C/A]       | NA                                         |
| Ca_Desi_Chromosome_scaffold12372_971  | Ca_desi_scaffold   | 971                            | [T/C]       | NA                                         |
| Ca_Desi_Chromosome_scaffold12372_972  | Ca_desi_scaffold   | 972                            | [C/T]       | NA                                         |
| Ca_Desi_Chromosome_scaffold12372_973  | Ca_desi_scaffold   | 973                            | [G/A]       | NA                                         |
| Ca_Desi_Chromosome_scaffold12372_974  | Ca_desi_scaffold   | 974                            | [G/A]       | NA                                         |
| Ca_Desi_Chromosome_scaffold12372_975  | Ca_desi_scaffold   | 975                            | [T/G]       | NA                                         |
| Ca_Desi_Chromosome_scaffold12372_976  | Ca_desi_scaffold   | 976                            | [A/G]       | NA                                         |
| Ca_Desi_Chromosome_scaffold12372_1028 | Ca_desi_scaffold   | 1028                           | [C/A]       | NA                                         |
| Ca_Desi_Chromosome_scaffold12372_1031 | Ca_desi_scaffold   | 1031                           | [A/G]       | NA                                         |
| Ca_Desi_Chromosome_scaffold12372_1033 | Ca_desi_scaffold   | 1033                           | [G/A]       | NA                                         |
| Ca_Desi_Chromosome_scaffold12372_1034 | Ca_desi_scaffold   | 1034                           | [A/G]       | NA                                         |
| Ca_Desi_Chromosome_scaffold12372_1036 | Ca_desi_scaffold   | 1036                           | [A/G]       | NA                                         |
| Ca_Desi_Chromosome_scaffold12372_1037 | Ca_desi_scaffold   | 1037                           | [A/G]       | NA                                         |
| Ca_Desi_Chromosome_scaffold12372_1038 | Ca_desi_scaffold   | 1038                           | [A/G]       | NA                                         |
| Ca_Desi_Chromosome_scaffold12372_1039 | Ca_desi_scaffold   | 1039                           | [C/T]       | NA                                         |
| Ca_Desi_Chromosome_scaffold12372_1040 | Ca_desi_scaffold   | 1040                           | [C/T]       | NA                                         |
| Ca_Desi_Chromosome_scaffold12372_1042 | Ca_desi_scaffold   | 1042                           | [C/T]       | NA                                         |
| Ca_Desi_Chromosome_scaffold12372_1044 | Ca_desi_scaffold   | 1044                           | [T/C]       | NA                                         |
| Ca_Desi_Chromosome_scaffold12372_1047 | Ca_desi_scaffold   | 1047                           | [A/G]       | NA                                         |
| Ca_Desi_Chromosome_scaffold12372_1048 | Ca_desi_scaffold   | 1048                           | [A/G]       | NA                                         |
| Ca_Desi_Chromosome_scaffold12372_1050 | Ca_desi_scaffold   | 1050                           | [T/C]       | NA                                         |
| Ca_Desi_Chromosome_scaffold12372_1052 | Ca_desi_scaffold   | 1052                           | [C/T]       | NA                                         |
| Ca_Desi_Chromosome_scaffold12372_1053 | Ca_desi_scaffold   | 1053                           | [G/A]       | NA                                         |
| Ca_Desi_Chromosome_scaffold12372_1054 | Ca_desi_scaffold   | 1054                           | [A/G]       | NA                                         |
| Ca_Desi_Chromosome_scaffold12372_1056 | Ca_desi_scaffold   | 1056                           | [G/A]       | NA                                         |
| Ca_Desi_Chromosome_scaffold12372_1057 | Ca_desi_scaffold   | 1057                           | [A/C]       | NA                                         |
| Ca_Desi_Chromosome_scaffold12372_1060 | Ca_desi_scaffold   | 1060                           | [T/C]       | NA                                         |
| Ca_Desi_Chromosome_scaffold12372_1061 | Ca_desi_scaffold   | 1061                           | [T/C]       | NA                                         |



| <b>SNP IDs</b>                  | <b>Chromosomes</b> | <b>Physical positions (bp)</b> | <b>SNPs</b> | <b>NCBI SNPdb accession IDs (NCBI_ss#)</b> |
|---------------------------------|--------------------|--------------------------------|-------------|--------------------------------------------|
| Ca_Desig_Chr_scaffold12372_1065 | Ca_desig_scaffold  | 1065                           | [T/A]       | NA                                         |
| Ca_Desig_Chr_scaffold12372_1068 | Ca_desig_scaffold  | 1068                           | [C/T]       | NA                                         |
| Ca_Desig_Chr_scaffold12372_1069 | Ca_desig_scaffold  | 1069                           | [G/A]       | NA                                         |
| Ca_Desig_Chr_scaffold12372_1070 | Ca_desig_scaffold  | 1070                           | [T/C]       | NA                                         |
| Ca_Desig_Chr_scaffold12372_1071 | Ca_desig_scaffold  | 1071                           | [A/C]       | NA                                         |
| Ca_Desig_Chr_scaffold12372_1073 | Ca_desig_scaffold  | 1073                           | [C/T]       | NA                                         |
| Ca_Desig_Chr_scaffold12372_1075 | Ca_desig_scaffold  | 1075                           | [T/C]       | NA                                         |
| Ca_Desig_Chr_scaffold12372_1079 | Ca_desig_scaffold  | 1079                           | [C/T]       | NA                                         |
| Ca_Desig_Chr_scaffold12372_1080 | Ca_desig_scaffold  | 1080                           | [C/T]       | NA                                         |
| Ca_Desig_Chr_scaffold12372_1082 | Ca_desig_scaffold  | 1082                           | [G/A]       | NA                                         |
| Ca_Desig_Chr_scaffold12372_1083 | Ca_desig_scaffold  | 1083                           | [A/G]       | NA                                         |
| Ca_Desig_Chr_scaffold12372_1084 | Ca_desig_scaffold  | 1084                           | [A/G]       | NA                                         |
| Ca_Desig_Chr_scaffold12372_1086 | Ca_desig_scaffold  | 1086                           | [C/T]       | NA                                         |
| Ca_Desig_Chr_scaffold12372_1087 | Ca_desig_scaffold  | 1087                           | [A/G]       | NA                                         |
| Ca_Desig_Chr_scaffold12372_1296 | Ca_desig_scaffold  | 1296                           | [T/G]       | NA                                         |
| Ca_Desig_Chr_scaffold12372_1611 | Ca_desig_scaffold  | 1611                           | [A/C]       | NA                                         |
| Ca_Desig_Chr_scaffold12372_1655 | Ca_desig_scaffold  | 1655                           | [T/C]       | NA                                         |
| Ca_Desig_Chr_scaffold12372_1656 | Ca_desig_scaffold  | 1656                           | [T/C]       | NA                                         |
| Ca_Desig_Chr_scaffold12372_1659 | Ca_desig_scaffold  | 1659                           | [A/G]       | NA                                         |
| Ca_Desig_Chr_scaffold12372_1660 | Ca_desig_scaffold  | 1660                           | [T/C]       | NA                                         |
| Ca_Desig_Chr_scaffold12372_1661 | Ca_desig_scaffold  | 1661                           | [A/G]       | NA                                         |
| Ca_Desig_Chr_scaffold12372_1662 | Ca_desig_scaffold  | 1662                           | [T/C]       | NA                                         |
| Ca_Desig_Chr_scaffold12372_1664 | Ca_desig_scaffold  | 1664                           | [A/G]       | NA                                         |
| Ca_Desig_Chr_scaffold12372_1666 | Ca_desig_scaffold  | 1666                           | [T/C]       | NA                                         |
| Ca_Desig_Chr_scaffold12372_1668 | Ca_desig_scaffold  | 1668                           | [T/C]       | NA                                         |
| Ca_Desig_Chr_scaffold12372_1670 | Ca_desig_scaffold  | 1670                           | [A/G]       | NA                                         |
| Ca_Desig_Chr_scaffold12372_1673 | Ca_desig_scaffold  | 1673                           | [A/G]       | NA                                         |
| Ca_Desig_Chr_scaffold12372_1674 | Ca_desig_scaffold  | 1674                           | [A/G]       | NA                                         |
| Ca_Desig_Chr_scaffold12372_1675 | Ca_desig_scaffold  | 1675                           | [T/C]       | NA                                         |
| Ca_Desig_Chr_scaffold12372_1676 | Ca_desig_scaffold  | 1676                           | [T/C]       | NA                                         |
| Ca_Desig_Chr_scaffold12372_1681 | Ca_desig_scaffold  | 1681                           | [A/G]       | NA                                         |
| Ca_Desig_Chr_scaffold12372_1682 | Ca_desig_scaffold  | 1682                           | [A/G]       | NA                                         |
| Ca_Desig_Chr_scaffold12372_1686 | Ca_desig_scaffold  | 1686                           | [A/G]       | NA                                         |
| Ca_Desig_Chr_scaffold12372_1689 | Ca_desig_scaffold  | 1689                           | [C/A]       | NA                                         |

| <b>SNP IDs</b>                  | <b>Chromosomes</b> | <b>Physical positions (bp)</b> | <b>SNPs</b> | <b>NCBI SNPdb accession IDs (NCBI_ss#)</b> |
|---------------------------------|--------------------|--------------------------------|-------------|--------------------------------------------|
| Ca_Desig_Chr_scaffold12372_1690 | Ca_desig_scaffold  | 1690                           | [A/G]       | NA                                         |
| Ca_Desig_Chr_scaffold12372_1691 | Ca_desig_scaffold  | 1691                           | [A/G]       | NA                                         |
| Ca_Desig_Chr_scaffold12372_1692 | Ca_desig_scaffold  | 1692                           | [A/G]       | NA                                         |
| Ca_Desig_Chr_scaffold12372_1694 | Ca_desig_scaffold  | 1694                           | [T/C]       | NA                                         |
| Ca_Desig_Chr_scaffold12372_1696 | Ca_desig_scaffold  | 1696                           | [C/T]       | NA                                         |
| Ca_Desig_Chr_scaffold12372_1699 | Ca_desig_scaffold  | 1699                           | [T/A]       | NA                                         |
| Ca_Desig_Chr_scaffold12372_1700 | Ca_desig_scaffold  | 1700                           | [A/G]       | NA                                         |
| Ca_Desig_Chr_scaffold12372_1701 | Ca_desig_scaffold  | 1701                           | [T/C]       | NA                                         |
| Ca_Desig_Chr_scaffold12372_1702 | Ca_desig_scaffold  | 1702                           | [T/C]       | NA                                         |
| Ca_Desig_Chr_scaffold12372_1703 | Ca_desig_scaffold  | 1703                           | [T/C]       | NA                                         |
| Ca_Desig_Chr_scaffold12372_1704 | Ca_desig_scaffold  | 1704                           | [G/A]       | NA                                         |
| Ca_Desig_Chr_scaffold12372_1705 | Ca_desig_scaffold  | 1705                           | [A/G]       | NA                                         |
| Ca_Desig_Chr_scaffold12372_1707 | Ca_desig_scaffold  | 1707                           | [G/A]       | NA                                         |
| Ca_Desig_Chr_scaffold12372_1708 | Ca_desig_scaffold  | 1708                           | [A/G]       | NA                                         |
| Ca_Desig_Chr_scaffold12372_1709 | Ca_desig_scaffold  | 1709                           | [A/G]       | NA                                         |
| Ca_Desig_Chr_scaffold12372_1711 | Ca_desig_scaffold  | 1711                           | [A/G]       | NA                                         |
| Ca_Desig_Chr_scaffold12372_1712 | Ca_desig_scaffold  | 1712                           | [T/C]       | NA                                         |
| Ca_Desig_Chr_scaffold12372_1782 | Ca_desig_scaffold  | 1782                           | [A/G]       | NA                                         |
| Ca_Desig_Chr_scaffold12372_1784 | Ca_desig_scaffold  | 1784                           | [T/C]       | NA                                         |
| Ca_Desig_Chr_scaffold12372_1785 | Ca_desig_scaffold  | 1785                           | [A/G]       | NA                                         |
| Ca_Desig_Chr_scaffold12372_1786 | Ca_desig_scaffold  | 1786                           | [A/G]       | NA                                         |
| Ca_Desig_Chr_scaffold12372_1788 | Ca_desig_scaffold  | 1788                           | [G/T]       | NA                                         |
| Ca_Desig_Chr_scaffold12372_1789 | Ca_desig_scaffold  | 1789                           | [T/C]       | NA                                         |
| Ca_Desig_Chr_scaffold12372_1790 | Ca_desig_scaffold  | 1790                           | [T/C]       | NA                                         |
| Ca_Desig_Chr_scaffold12372_1792 | Ca_desig_scaffold  | 1792                           | [C/T]       | NA                                         |
| Ca_Desig_Chr_scaffold12372_1793 | Ca_desig_scaffold  | 1793                           | [T/C]       | NA                                         |
| Ca_Desig_Chr_scaffold12372_1794 | Ca_desig_scaffold  | 1794                           | [T/C]       | NA                                         |
| Ca_Desig_Chr_scaffold12372_1799 | Ca_desig_scaffold  | 1799                           | [T/C]       | NA                                         |
| Ca_Desig_Chr_scaffold12372_1802 | Ca_desig_scaffold  | 1802                           | [A/G]       | NA                                         |
| Ca_Desig_Chr_scaffold12372_1804 | Ca_desig_scaffold  | 1804                           | [T/C]       | NA                                         |
| Ca_Desig_Chr_scaffold12372_1806 | Ca_desig_scaffold  | 1806                           | [C/A]       | NA                                         |
| Ca_Desig_Chr_scaffold12372_1807 | Ca_desig_scaffold  | 1807                           | [A/G]       | NA                                         |
| Ca_Desig_Chr_scaffold12372_1808 | Ca_desig_scaffold  | 1808                           | [A/G]       | NA                                         |
| Ca_Desig_Chr_scaffold12372_1810 | Ca_desig_scaffold  | 1810                           | [A/G]       | NA                                         |

| <b>SNP IDs</b>                | <b>Chromosomes</b> | <b>Physical positions (bp)</b> | <b>SNPs</b> | <b>NCBI SNPdb accession IDs (NCBI_ss#)</b> |
|-------------------------------|--------------------|--------------------------------|-------------|--------------------------------------------|
| Ca_Desi_Ch_scaffold12372_1811 | Ca_desi_scaffold   | 1811                           | [C/T]       | NA                                         |
| Ca_Desi_Ch_scaffold12372_1812 | Ca_desi_scaffold   | 1812                           | [A/G]       | NA                                         |
| Ca_Desi_Ch_scaffold12372_1815 | Ca_desi_scaffold   | 1815                           | [A/G]       | NA                                         |
| Ca_Desi_Ch_scaffold12372_1816 | Ca_desi_scaffold   | 1816                           | [A/G]       | NA                                         |
| Ca_Desi_Ch_scaffold12372_1817 | Ca_desi_scaffold   | 1817                           | [A/G]       | NA                                         |
| Ca_Desi_Ch_scaffold12372_1818 | Ca_desi_scaffold   | 1818                           | [G/T]       | NA                                         |
| Ca_Desi_Ch_scaffold12372_1820 | Ca_desi_scaffold   | 1820                           | [G/A]       | NA                                         |
| Ca_Desi_Ch_scaffold12372_1824 | Ca_desi_scaffold   | 1824                           | [T/C]       | NA                                         |
| Ca_Desi_Ch_scaffold12372_1826 | Ca_desi_scaffold   | 1826                           | [T/C]       | NA                                         |
| Ca_Desi_Ch_scaffold12372_1827 | Ca_desi_scaffold   | 1827                           | [T/C]       | NA                                         |
| Ca_Desi_Ch_scaffold12372_1828 | Ca_desi_scaffold   | 1828                           | [T/C]       | NA                                         |
| Ca_Desi_Ch_scaffold12372_1829 | Ca_desi_scaffold   | 1829                           | [T/C]       | NA                                         |
| Ca_Desi_Ch_scaffold12372_1830 | Ca_desi_scaffold   | 1830                           | [T/C]       | NA                                         |
| Ca_Desi_Ch_scaffold12372_1832 | Ca_desi_scaffold   | 1832                           | [T/C]       | NA                                         |
| Ca_Desi_Ch_scaffold12372_1834 | Ca_desi_scaffold   | 1834                           | [A/G]       | NA                                         |
| Ca_Desi_Ch_scaffold12372_1835 | Ca_desi_scaffold   | 1835                           | [T/C]       | NA                                         |
| Ca_Desi_Ch_scaffold12372_1839 | Ca_desi_scaffold   | 1839                           | [T/C]       | NA                                         |
| Ca_Desi_Ch_scaffold12372_1882 | Ca_desi_scaffold   | 1882                           | [A/T]       | NA                                         |
| Ca_Desi_Ch_scaffold12372_2211 | Ca_desi_scaffold   | 2211                           | [T/C]       | NA                                         |
| Ca_Desi_Ch_scaffold12372_2212 | Ca_desi_scaffold   | 2212                           | [T/C]       | NA                                         |
| Ca_Desi_Ch_scaffold12372_2213 | Ca_desi_scaffold   | 2213                           | [C/T]       | NA                                         |
| Ca_Desi_Ch_scaffold12372_2214 | Ca_desi_scaffold   | 2214                           | [G/A]       | NA                                         |
| Ca_Desi_Ch_scaffold12372_2215 | Ca_desi_scaffold   | 2215                           | [T/G]       | NA                                         |
| Ca_Desi_Ch_scaffold12372_2216 | Ca_desi_scaffold   | 2216                           | [T/C]       | NA                                         |
| Ca_Desi_Ch_scaffold12372_2217 | Ca_desi_scaffold   | 2217                           | [G/A]       | NA                                         |
| Ca_Desi_Ch_scaffold12372_2218 | Ca_desi_scaffold   | 2218                           | [C/T]       | NA                                         |
| Ca_Desi_Ch_scaffold12372_2219 | Ca_desi_scaffold   | 2219                           | [C/T]       | NA                                         |
| Ca_Desi_Ch_scaffold12372_2220 | Ca_desi_scaffold   | 2220                           | [T/C]       | NA                                         |
| Ca_Desi_Ch_scaffold12372_2222 | Ca_desi_scaffold   | 2222                           | [C/T]       | NA                                         |
| Ca_Desi_Ch_scaffold12372_2226 | Ca_desi_scaffold   | 2226                           | [T/C]       | NA                                         |
| Ca_Desi_Ch_scaffold12372_2227 | Ca_desi_scaffold   | 2227                           | [T/C]       | NA                                         |
| Ca_Desi_Ch_scaffold12372_2228 | Ca_desi_scaffold   | 2228                           | [A/G]       | NA                                         |
| Ca_Desi_Ch_scaffold12372_2229 | Ca_desi_scaffold   | 2229                           | [T/C]       | NA                                         |
| Ca_Desi_Ch_scaffold12372_2230 | Ca_desi_scaffold   | 2230                           | [A/G]       | NA                                         |

| <b>SNP IDs</b>                  | <b>Chromosomes</b> | <b>Physical positions (bp)</b> | <b>SNPs</b> | <b>NCBI SNPdb accession IDs (NCBI_ss#)</b> |
|---------------------------------|--------------------|--------------------------------|-------------|--------------------------------------------|
| Ca_Desig_Chr_scaffold12372_2231 | Ca_desig_scaffold  | 2231                           | [T/C]       | NA                                         |
| Ca_Desig_Chr_scaffold12372_2232 | Ca_desig_scaffold  | 2232                           | [C/T]       | NA                                         |
| Ca_Desig_Chr_scaffold12372_2233 | Ca_desig_scaffold  | 2233                           | [T/C]       | NA                                         |
| Ca_Desig_Chr_scaffold12372_2234 | Ca_desig_scaffold  | 2234                           | [C/G]       | NA                                         |
| Ca_Desig_Chr_scaffold12372_2235 | Ca_desig_scaffold  | 2235                           | [G/T]       | NA                                         |
| Ca_Desig_Chr_scaffold12372_2236 | Ca_desig_scaffold  | 2236                           | [G/A]       | NA                                         |
| Ca_Desig_Chr_scaffold12372_2237 | Ca_desig_scaffold  | 2237                           | [C/T]       | NA                                         |
| Ca_Desig_Chr_scaffold12372_2239 | Ca_desig_scaffold  | 2239                           | [C/T]       | NA                                         |
| Ca_Desig_Chr_scaffold12372_2240 | Ca_desig_scaffold  | 2240                           | [G/A]       | NA                                         |
| Ca_Desig_Chr_scaffold12372_2242 | Ca_desig_scaffold  | 2242                           | [G/A]       | NA                                         |
| Ca_Desig_Chr_scaffold12372_2243 | Ca_desig_scaffold  | 2243                           | [A/G]       | NA                                         |
| Ca_Desig_Chr_scaffold12372_2244 | Ca_desig_scaffold  | 2244                           | [A/G]       | NA                                         |
| Ca_Desig_Chr_scaffold12372_2245 | Ca_desig_scaffold  | 2245                           | [A/G]       | NA                                         |
| Ca_Desig_Chr_scaffold12372_2246 | Ca_desig_scaffold  | 2246                           | [G/A]       | NA                                         |
| Ca_Desig_Chr_scaffold12372_2247 | Ca_desig_scaffold  | 2247                           | [C/G]       | NA                                         |
| Ca_Desig_Chr_scaffold12372_2248 | Ca_desig_scaffold  | 2248                           | [G/C]       | NA                                         |
| Ca_Desig_Chr_scaffold12372_2249 | Ca_desig_scaffold  | 2249                           | [C/T]       | NA                                         |
| Ca_Desig_Chr_scaffold12372_2250 | Ca_desig_scaffold  | 2250                           | [T/C]       | NA                                         |
| Ca_Desig_Chr_scaffold12372_2251 | Ca_desig_scaffold  | 2251                           | [G/T]       | NA                                         |
| Ca_Desig_Chr_scaffold12372_2252 | Ca_desig_scaffold  | 2252                           | [G/A]       | NA                                         |
| Ca_Desig_Chr_scaffold12372_2253 | Ca_desig_scaffold  | 2253                           | [C/T]       | NA                                         |
| Ca_Desig_Chr_scaffold12372_2254 | Ca_desig_scaffold  | 2254                           | [A/G]       | NA                                         |
| Ca_Desig_Chr_scaffold12372_2255 | Ca_desig_scaffold  | 2255                           | [A/G]       | NA                                         |
| Ca_Desig_Chr_scaffold12372_2256 | Ca_desig_scaffold  | 2256                           | [C/A]       | NA                                         |
| Ca_Desig_Chr_scaffold12372_2257 | Ca_desig_scaffold  | 2257                           | [A/G]       | NA                                         |
| Ca_Desig_Chr_scaffold12372_2258 | Ca_desig_scaffold  | 2258                           | [A/G]       | NA                                         |
| Ca_Desig_Chr_scaffold12372_2259 | Ca_desig_scaffold  | 2259                           | [C/T]       | NA                                         |
| Ca_Desig_Chr_scaffold12372_2260 | Ca_desig_scaffold  | 2260                           | [A/G]       | NA                                         |
| Ca_Desig_Chr_scaffold12372_2261 | Ca_desig_scaffold  | 2261                           | [G/A]       | NA                                         |
| Ca_Desig_Chr_scaffold12372_2262 | Ca_desig_scaffold  | 2262                           | [A/G]       | NA                                         |
| Ca_Desig_Chr_scaffold12372_2263 | Ca_desig_scaffold  | 2263                           | [A/G]       | NA                                         |
| Ca_Desig_Chr_scaffold12372_2264 | Ca_desig_scaffold  | 2264                           | [A/C]       | NA                                         |
| Ca_Desig_Chr_scaffold12372_2265 | Ca_desig_scaffold  | 2265                           | [G/A]       | NA                                         |
| Ca_Desig_Chr_scaffold12372_2266 | Ca_desig_scaffold  | 2266                           | [G/A]       | NA                                         |

| <b>SNP IDs</b>                | <b>Chromosomes</b> | <b>Physical positions (bp)</b> | <b>SNPs</b> | <b>NCBI SNPdb accession IDs (NCBI_ss#)</b> |
|-------------------------------|--------------------|--------------------------------|-------------|--------------------------------------------|
| Ca_Desi_Ch_scaffold12372_2267 | Ca_desi_scaffold   | 2267                           | [A/G]       | NA                                         |
| Ca_Desi_Ch_scaffold12372_2318 | Ca_desi_scaffold   | 2318                           | [T/C]       | NA                                         |
| Ca_Desi_Ch_scaffold12372_2319 | Ca_desi_scaffold   | 2319                           | [A/G]       | NA                                         |
| Ca_Desi_Ch_scaffold12372_2320 | Ca_desi_scaffold   | 2320                           | [G/A]       | NA                                         |
| Ca_Desi_Ch_scaffold12372_2322 | Ca_desi_scaffold   | 2322                           | [T/C]       | NA                                         |
| Ca_Desi_Ch_scaffold12372_2323 | Ca_desi_scaffold   | 2323                           | [T/C]       | NA                                         |
| Ca_Desi_Ch_scaffold12372_2324 | Ca_desi_scaffold   | 2324                           | [C/T]       | NA                                         |
| Ca_Desi_Ch_scaffold12372_2325 | Ca_desi_scaffold   | 2325                           | [G/A]       | NA                                         |
| Ca_Desi_Ch_scaffold12372_2326 | Ca_desi_scaffold   | 2326                           | [G/A]       | NA                                         |
| Ca_Desi_Ch_scaffold12372_2327 | Ca_desi_scaffold   | 2327                           | [C/A]       | NA                                         |
| Ca_Desi_Ch_scaffold12372_2328 | Ca_desi_scaffold   | 2328                           | [A/G]       | NA                                         |
| Ca_Desi_Ch_scaffold12372_2329 | Ca_desi_scaffold   | 2329                           | [T/C]       | NA                                         |
| Ca_Desi_Ch_scaffold12372_2331 | Ca_desi_scaffold   | 2331                           | [T/C]       | NA                                         |
| Ca_Desi_Ch_scaffold12372_2332 | Ca_desi_scaffold   | 2332                           | [A/C]       | NA                                         |
| Ca_Desi_Ch_scaffold12372_2333 | Ca_desi_scaffold   | 2333                           | [C/A]       | NA                                         |
| Ca_Desi_Ch_scaffold12372_2334 | Ca_desi_scaffold   | 2334                           | [T/A]       | NA                                         |
| Ca_Desi_Ch_scaffold12372_2335 | Ca_desi_scaffold   | 2335                           | [A/G]       | NA                                         |
| Ca_Desi_Ch_scaffold12372_2338 | Ca_desi_scaffold   | 2338                           | [A/G]       | NA                                         |
| Ca_Desi_Ch_scaffold12372_2341 | Ca_desi_scaffold   | 2341                           | [G/A]       | NA                                         |
| Ca_Desi_Ch_scaffold12372_2342 | Ca_desi_scaffold   | 2342                           | [A/G]       | NA                                         |
| Ca_Desi_Ch_scaffold12372_2343 | Ca_desi_scaffold   | 2343                           | [G/A]       | NA                                         |
| Ca_Desi_Ch_scaffold12372_2344 | Ca_desi_scaffold   | 2344                           | [A/G]       | NA                                         |
| Ca_Desi_Ch_scaffold12372_2345 | Ca_desi_scaffold   | 2345                           | [G/A]       | NA                                         |
| Ca_Desi_Ch_scaffold12372_2346 | Ca_desi_scaffold   | 2346                           | [A/G]       | NA                                         |
| Ca_Desi_Ch_scaffold12372_2347 | Ca_desi_scaffold   | 2347                           | [A/G]       | NA                                         |
| Ca_Desi_Ch_scaffold12372_2349 | Ca_desi_scaffold   | 2349                           | [C/T]       | NA                                         |
| Ca_Desi_Ch_scaffold12372_2351 | Ca_desi_scaffold   | 2351                           | [A/C]       | NA                                         |
| Ca_Desi_Ch_scaffold12372_2353 | Ca_desi_scaffold   | 2353                           | [T/C]       | NA                                         |
| Ca_Desi_Ch_scaffold12372_2354 | Ca_desi_scaffold   | 2354                           | [T/C]       | NA                                         |
| Ca_Desi_Ch_scaffold12372_2355 | Ca_desi_scaffold   | 2355                           | [G/A]       | NA                                         |
| Ca_Desi_Ch_scaffold12372_2356 | Ca_desi_scaffold   | 2356                           | [A/G]       | NA                                         |
| Ca_Desi_Ch_scaffold12372_2357 | Ca_desi_scaffold   | 2357                           | [G/A]       | NA                                         |
| Ca_Desi_Ch_scaffold12372_2358 | Ca_desi_scaffold   | 2358                           | [A/G]       | NA                                         |
| Ca_Desi_Ch_scaffold12372_2359 | Ca_desi_scaffold   | 2359                           | [T/C]       | NA                                         |

| <b>SNP IDs</b>                  | <b>Chromosomes</b> | <b>Physical positions (bp)</b> | <b>SNPs</b> | <b>NCBI SNPdb accession IDs (NCBI_ss#)</b> |
|---------------------------------|--------------------|--------------------------------|-------------|--------------------------------------------|
| Ca_Desig_Chr_scaffold12372_2360 | Ca_desig_scaffold  | 2360                           | [A/G]       | NA                                         |
| Ca_Desig_Chr_scaffold12372_2361 | Ca_desig_scaffold  | 2361                           | [A/C]       | NA                                         |
| Ca_Desig_Chr_scaffold12372_2364 | Ca_desig_scaffold  | 2364                           | [A/G]       | NA                                         |
| Ca_Desig_Chr_scaffold12372_2365 | Ca_desig_scaffold  | 2365                           | [C/T]       | NA                                         |
| Ca_Desig_Chr_scaffold12372_2367 | Ca_desig_scaffold  | 2367                           | [C/T]       | NA                                         |
| Ca_Desig_Chr_scaffold12372_2369 | Ca_desig_scaffold  | 2369                           | [T/C]       | NA                                         |
| Ca_Desig_Chr_scaffold12372_2371 | Ca_desig_scaffold  | 2371                           | [T/C]       | NA                                         |
| Ca_Desig_Chr_scaffold12372_2374 | Ca_desig_scaffold  | 2374                           | [T/C]       | NA                                         |
| Ca_Desig_Chr_scaffold12372_2375 | Ca_desig_scaffold  | 2375                           | [A/G]       | NA                                         |
| Ca_Desig_Chr_scaffold12372_2376 | Ca_desig_scaffold  | 2376                           | [G/A]       | NA                                         |
| Ca_Desig_Chr_scaffold12372_2427 | Ca_desig_scaffold  | 2427                           | [T/G]       | NA                                         |
| Ca_Desig_Chr_scaffold12389_3400 | Ca_desig_scaffold  | 3400                           | [A/T]       | NA                                         |
| Ca_Desig_Chr_scaffold12402_1494 | Ca_desig_scaffold  | 1494                           | [T/C]       | NA                                         |
| Ca_Desig_Chr_scaffold12402_1497 | Ca_desig_scaffold  | 1497                           | [T/C]       | NA                                         |
| Ca_Desig_Chr_scaffold12402_1498 | Ca_desig_scaffold  | 1498                           | [A/G]       | NA                                         |
| Ca_Desig_Chr_scaffold12402_1505 | Ca_desig_scaffold  | 1505                           | [T/C]       | NA                                         |
| Ca_Desig_Chr_scaffold12402_1508 | Ca_desig_scaffold  | 1508                           | [A/G]       | NA                                         |
| Ca_Desig_Chr_scaffold12402_1509 | Ca_desig_scaffold  | 1509                           | [T/C]       | NA                                         |
| Ca_Desig_Chr_scaffold12402_1512 | Ca_desig_scaffold  | 1512                           | [T/G]       | NA                                         |
| Ca_Desig_Chr_scaffold12402_1514 | Ca_desig_scaffold  | 1514                           | [A/G]       | NA                                         |
| Ca_Desig_Chr_scaffold12402_1515 | Ca_desig_scaffold  | 1515                           | [A/G]       | NA                                         |
| Ca_Desig_Chr_scaffold12402_1518 | Ca_desig_scaffold  | 1518                           | [A/G]       | NA                                         |
| Ca_Desig_Chr_scaffold12402_1522 | Ca_desig_scaffold  | 1522                           | [T/C]       | NA                                         |
| Ca_Desig_Chr_scaffold12402_1523 | Ca_desig_scaffold  | 1523                           | [T/C]       | NA                                         |
| Ca_Desig_Chr_scaffold12402_1526 | Ca_desig_scaffold  | 1526                           | [A/G]       | NA                                         |
| Ca_Desig_Chr_scaffold12402_1527 | Ca_desig_scaffold  | 1527                           | [A/G]       | NA                                         |
| Ca_Desig_Chr_scaffold12402_1530 | Ca_desig_scaffold  | 1530                           | [C/T]       | NA                                         |
| Ca_Desig_Chr_scaffold12402_1532 | Ca_desig_scaffold  | 1532                           | [T/C]       | NA                                         |
| Ca_Desig_Chr_scaffold12402_1534 | Ca_desig_scaffold  | 1534                           | [T/C]       | NA                                         |
| Ca_Desig_Chr_scaffold12402_1535 | Ca_desig_scaffold  | 1535                           | [T/C]       | NA                                         |
| Ca_Desig_Chr_scaffold12402_1537 | Ca_desig_scaffold  | 1537                           | [A/G]       | NA                                         |
| Ca_Desig_Chr_scaffold12402_1539 | Ca_desig_scaffold  | 1539                           | [A/G]       | NA                                         |
| Ca_Desig_Chr_scaffold12402_1540 | Ca_desig_scaffold  | 1540                           | [A/G]       | NA                                         |
| Ca_Desig_Chr_scaffold12402_1541 | Ca_desig_scaffold  | 1541                           | [A/G]       | NA                                         |

| <b>SNP IDs</b>                  | <b>Chromosomes</b> | <b>Physical positions (bp)</b> | <b>SNPs</b> | <b>NCBI SNPdb accession IDs (NCBI_ss#)</b> |
|---------------------------------|--------------------|--------------------------------|-------------|--------------------------------------------|
| Ca_Desig_Chr_scaffold12402_1548 | Ca_desig_scaffold  | 1548                           | [A/G]       | NA                                         |
| Ca_Desig_Chr_scaffold12402_1549 | Ca_desig_scaffold  | 1549                           | [A/G]       | NA                                         |
| Ca_Desig_Chr_scaffold12402_1550 | Ca_desig_scaffold  | 1550                           | [T/C]       | NA                                         |
| Ca_Desig_Chr_scaffold12402_1737 | Ca_desig_scaffold  | 1737                           | [T/C]       | NA                                         |
| Ca_Desig_Chr_scaffold12402_1743 | Ca_desig_scaffold  | 1743                           | [T/C]       | NA                                         |
| Ca_Desig_Chr_scaffold12402_1744 | Ca_desig_scaffold  | 1744                           | [A/G]       | NA                                         |
| Ca_Desig_Chr_scaffold12402_1745 | Ca_desig_scaffold  | 1745                           | [T/C]       | NA                                         |
| Ca_Desig_Chr_scaffold12402_1747 | Ca_desig_scaffold  | 1747                           | [T/C]       | NA                                         |
| Ca_Desig_Chr_scaffold12402_1749 | Ca_desig_scaffold  | 1749                           | [T/C]       | NA                                         |
| Ca_Desig_Chr_scaffold12402_1758 | Ca_desig_scaffold  | 1758                           | [A/G]       | NA                                         |
| Ca_Desig_Chr_scaffold12402_1760 | Ca_desig_scaffold  | 1760                           | [T/C]       | NA                                         |
| Ca_Desig_Chr_scaffold12402_1764 | Ca_desig_scaffold  | 1764                           | [T/C]       | NA                                         |
| Ca_Desig_Chr_scaffold12402_1767 | Ca_desig_scaffold  | 1767                           | [T/C]       | NA                                         |
| Ca_Desig_Chr_scaffold12402_1769 | Ca_desig_scaffold  | 1769                           | [T/C]       | NA                                         |
| Ca_Desig_Chr_scaffold12402_1772 | Ca_desig_scaffold  | 1772                           | [A/G]       | NA                                         |
| Ca_Desig_Chr_scaffold12402_1774 | Ca_desig_scaffold  | 1774                           | [A/G]       | NA                                         |
| Ca_Desig_Chr_scaffold12402_1778 | Ca_desig_scaffold  | 1778                           | [A/G]       | NA                                         |
| Ca_Desig_Chr_scaffold12402_1780 | Ca_desig_scaffold  | 1780                           | [A/G]       | NA                                         |
| Ca_Desig_Chr_scaffold12402_1783 | Ca_desig_scaffold  | 1783                           | [T/C]       | NA                                         |
| Ca_Desig_Chr_scaffold12402_1785 | Ca_desig_scaffold  | 1785                           | [T/C]       | NA                                         |
| Ca_Desig_Chr_scaffold12402_1786 | Ca_desig_scaffold  | 1786                           | [T/C]       | NA                                         |
| Ca_Desig_Chr_scaffold12402_1790 | Ca_desig_scaffold  | 1790                           | [T/C]       | NA                                         |
| Ca_Desig_Chr_scaffold12402_1792 | Ca_desig_scaffold  | 1792                           | [T/C]       | NA                                         |
| Ca_Desig_Chr_scaffold12402_1794 | Ca_desig_scaffold  | 1794                           | [T/C]       | NA                                         |
| Ca_Desig_Chr_scaffold12402_1795 | Ca_desig_scaffold  | 1795                           | [C/A]       | NA                                         |
| Ca_Desig_Chr_scaffold12402_1957 | Ca_desig_scaffold  | 1957                           | [T/C]       | NA                                         |
| Ca_Desig_Chr_scaffold12402_1959 | Ca_desig_scaffold  | 1959                           | [T/C]       | NA                                         |
| Ca_Desig_Chr_scaffold12402_1970 | Ca_desig_scaffold  | 1970                           | [T/C]       | NA                                         |
| Ca_Desig_Chr_scaffold12402_1975 | Ca_desig_scaffold  | 1975                           | [C/T]       | NA                                         |
| Ca_Desig_Chr_scaffold12402_1976 | Ca_desig_scaffold  | 1976                           | [T/C]       | NA                                         |
| Ca_Desig_Chr_scaffold12402_1982 | Ca_desig_scaffold  | 1982                           | [A/G]       | NA                                         |
| Ca_Desig_Chr_scaffold12402_1984 | Ca_desig_scaffold  | 1984                           | [T/C]       | NA                                         |
| Ca_Desig_Chr_scaffold12402_1989 | Ca_desig_scaffold  | 1989                           | [T/C]       | NA                                         |
| Ca_Desig_Chr_scaffold12402_1993 | Ca_desig_scaffold  | 1993                           | [T/A]       | NA                                         |

| <b>SNP IDs</b>                        | <b>Chromosomes</b> | <b>Physical positions (bp)</b> | <b>SNPs</b> | <b>NCBI SNPdb accession IDs (NCBI_ss#)</b> |
|---------------------------------------|--------------------|--------------------------------|-------------|--------------------------------------------|
| Ca_Desi_Chromosome_scaffold12402_1999 | Ca_desi_scaffold   | 1999                           | [A/G]       | NA                                         |
| Ca_Desi_Chromosome_scaffold12402_2002 | Ca_desi_scaffold   | 2002                           | [A/G]       | NA                                         |
| Ca_Desi_Chromosome_scaffold12402_2005 | Ca_desi_scaffold   | 2005                           | [T/C]       | NA                                         |
| Ca_Desi_Chromosome_scaffold12402_2007 | Ca_desi_scaffold   | 2007                           | [A/G]       | NA                                         |
| Ca_Desi_Chromosome_scaffold12402_2008 | Ca_desi_scaffold   | 2008                           | [C/G]       | NA                                         |
| Ca_Desi_Chromosome_scaffold12402_2119 | Ca_desi_scaffold   | 2119                           | [A/C]       | NA                                         |
| Ca_Desi_Chromosome_scaffold12402_2124 | Ca_desi_scaffold   | 2124                           | [A/G]       | NA                                         |
| Ca_Desi_Chromosome_scaffold12402_2125 | Ca_desi_scaffold   | 2125                           | [T/C]       | NA                                         |
| Ca_Desi_Chromosome_scaffold12402_2126 | Ca_desi_scaffold   | 2126                           | [T/C]       | NA                                         |
| Ca_Desi_Chromosome_scaffold12402_2128 | Ca_desi_scaffold   | 2128                           | [A/G]       | NA                                         |
| Ca_Desi_Chromosome_scaffold12402_2129 | Ca_desi_scaffold   | 2129                           | [A/G]       | NA                                         |
| Ca_Desi_Chromosome_scaffold12402_2130 | Ca_desi_scaffold   | 2130                           | [T/A]       | NA                                         |
| Ca_Desi_Chromosome_scaffold12402_2133 | Ca_desi_scaffold   | 2133                           | [A/G]       | NA                                         |
| Ca_Desi_Chromosome_scaffold12402_2135 | Ca_desi_scaffold   | 2135                           | [T/C]       | NA                                         |
| Ca_Desi_Chromosome_scaffold12402_2136 | Ca_desi_scaffold   | 2136                           | [T/C]       | NA                                         |
| Ca_Desi_Chromosome_scaffold12402_2139 | Ca_desi_scaffold   | 2139                           | [T/C]       | NA                                         |
| Ca_Desi_Chromosome_scaffold12402_2143 | Ca_desi_scaffold   | 2143                           | [A/G]       | NA                                         |
| Ca_Desi_Chromosome_scaffold12402_2144 | Ca_desi_scaffold   | 2144                           | [A/G]       | NA                                         |
| Ca_Desi_Chromosome_scaffold12402_2145 | Ca_desi_scaffold   | 2145                           | [A/G]       | NA                                         |
| Ca_Desi_Chromosome_scaffold12402_2148 | Ca_desi_scaffold   | 2148                           | [T/C]       | NA                                         |
| Ca_Desi_Chromosome_scaffold12402_2152 | Ca_desi_scaffold   | 2152                           | [T/C]       | NA                                         |
| Ca_Desi_Chromosome_scaffold12402_2153 | Ca_desi_scaffold   | 2153                           | [A/G]       | NA                                         |
| Ca_Desi_Chromosome_scaffold12402_2155 | Ca_desi_scaffold   | 2155                           | [A/G]       | NA                                         |
| Ca_Desi_Chromosome_scaffold12402_2157 | Ca_desi_scaffold   | 2157                           | [T/C]       | NA                                         |
| Ca_Desi_Chromosome_scaffold12402_2159 | Ca_desi_scaffold   | 2159                           | [T/C]       | NA                                         |
| Ca_Desi_Chromosome_scaffold12402_2163 | Ca_desi_scaffold   | 2163                           | [A/G]       | NA                                         |
| Ca_Desi_Chromosome_scaffold12402_2166 | Ca_desi_scaffold   | 2166                           | [A/G]       | NA                                         |
| Ca_Desi_Chromosome_scaffold12402_2168 | Ca_desi_scaffold   | 2168                           | [T/C]       | NA                                         |
| Ca_Desi_Chromosome_scaffold12402_2170 | Ca_desi_scaffold   | 2170                           | [A/G]       | NA                                         |
| Ca_Desi_Chromosome_scaffold12402_2173 | Ca_desi_scaffold   | 2173                           | [A/G]       | NA                                         |
| Ca_Desi_Chromosome_scaffold12402_2175 | Ca_desi_scaffold   | 2175                           | [A/G]       | NA                                         |
| Ca_Desi_Chromosome_scaffold12402_2176 | Ca_desi_scaffold   | 2176                           | [A/G]       | NA                                         |
| Ca_Desi_Chromosome_scaffold12402_2241 | Ca_desi_scaffold   | 2241                           | [C/A]       | NA                                         |
| Ca_Desi_Chromosome_scaffold12419_305  | Ca_desi_scaffold   | 305                            | [T/C]       | NA                                         |



| <b>SNP IDs</b>                  | <b>Chromosomes</b> | <b>Physical positions (bp)</b> | <b>SNPs</b> | <b>NCBI SNPdb accession IDs (NCBI_ss#)</b> |
|---------------------------------|--------------------|--------------------------------|-------------|--------------------------------------------|
| Ca_Desig_Chr_scaffold12419_353  | Ca_desig_scaffold  | 353                            | [T/C]       | NA                                         |
| Ca_Desig_Chr_scaffold12419_414  | Ca_desig_scaffold  | 414                            | [G/A]       | NA                                         |
| Ca_Desig_Chr_scaffold12419_419  | Ca_desig_scaffold  | 419                            | [T/G]       | NA                                         |
| Ca_Desig_Chr_scaffold12419_449  | Ca_desig_scaffold  | 449                            | [A/C]       | NA                                         |
| Ca_Desig_Chr_scaffold12419_875  | Ca_desig_scaffold  | 875                            | [T/C]       | NA                                         |
| Ca_Desig_Chr_scaffold12419_1637 | Ca_desig_scaffold  | 1637                           | [T/G]       | NA                                         |
| Ca_Desig_Chr_scaffold12419_2551 | Ca_desig_scaffold  | 2551                           | [C/A]       | NA                                         |
| Ca_Desig_Chr_scaffold12419_2677 | Ca_desig_scaffold  | 2677                           | [G/C]       | NA                                         |
| Ca_Desig_Chr_scaffold12419_2691 | Ca_desig_scaffold  | 2691                           | [T/C]       | NA                                         |
| Ca_Desig_Chr_scaffold12419_2693 | Ca_desig_scaffold  | 2693                           | [A/C]       | NA                                         |
| Ca_Desig_Chr_scaffold12419_2695 | Ca_desig_scaffold  | 2695                           | [T/C]       | NA                                         |
| Ca_Desig_Chr_scaffold12419_2698 | Ca_desig_scaffold  | 2698                           | [A/C]       | NA                                         |
| Ca_Desig_Chr_scaffold12419_2700 | Ca_desig_scaffold  | 2700                           | [T/C]       | NA                                         |
| Ca_Desig_Chr_scaffold12419_3332 | Ca_desig_scaffold  | 3332                           | [A/C]       | NA                                         |
| Ca_Desig_Chr_scaffold12419_3356 | Ca_desig_scaffold  | 3356                           | [A/T]       | NA                                         |
| Ca_Desig_Chr_scaffold12419_3359 | Ca_desig_scaffold  | 3359                           | [T/C]       | NA                                         |
| Ca_Desig_Chr_scaffold12419_3360 | Ca_desig_scaffold  | 3360                           | [A/G]       | NA                                         |
| Ca_Desig_Chr_scaffold12419_3361 | Ca_desig_scaffold  | 3361                           | [G/A]       | NA                                         |
| Ca_Desig_Chr_scaffold12419_3362 | Ca_desig_scaffold  | 3362                           | [C/T]       | NA                                         |
| Ca_Desig_Chr_scaffold12419_3363 | Ca_desig_scaffold  | 3363                           | [T/C]       | NA                                         |
| Ca_Desig_Chr_scaffold12419_3364 | Ca_desig_scaffold  | 3364                           | [A/G]       | NA                                         |
| Ca_Desig_Chr_scaffold12419_3365 | Ca_desig_scaffold  | 3365                           | [G/A]       | NA                                         |
| Ca_Desig_Chr_scaffold12419_3366 | Ca_desig_scaffold  | 3366                           | [C/T]       | NA                                         |
| Ca_Desig_Chr_scaffold12419_3367 | Ca_desig_scaffold  | 3367                           | [C/T]       | NA                                         |
| Ca_Desig_Chr_scaffold12419_3368 | Ca_desig_scaffold  | 3368                           | [A/G]       | NA                                         |
| Ca_Desig_Chr_scaffold12419_3369 | Ca_desig_scaffold  | 3369                           | [A/G]       | NA                                         |
| Ca_Desig_Chr_scaffold12419_3370 | Ca_desig_scaffold  | 3370                           | [A/G]       | NA                                         |
| Ca_Desig_Chr_scaffold12419_3371 | Ca_desig_scaffold  | 3371                           | [G/T]       | NA                                         |
| Ca_Desig_Chr_scaffold12419_3372 | Ca_desig_scaffold  | 3372                           | [C/T]       | NA                                         |
| Ca_Desig_Chr_scaffold12419_3373 | Ca_desig_scaffold  | 3373                           | [C/T]       | NA                                         |
| Ca_Desig_Chr_scaffold12419_3374 | Ca_desig_scaffold  | 3374                           | [A/G]       | NA                                         |
| Ca_Desig_Chr_scaffold12419_3375 | Ca_desig_scaffold  | 3375                           | [A/G]       | NA                                         |
| Ca_Desig_Chr_scaffold12419_3376 | Ca_desig_scaffold  | 3376                           | [A/G]       | NA                                         |
| Ca_Desig_Chr_scaffold12419_3377 | Ca_desig_scaffold  | 3377                           | [T/C]       | NA                                         |

| <b>SNP IDs</b>                  | <b>Chromosomes</b> | <b>Physical positions (bp)</b> | <b>SNPs</b> | <b>NCBI SNPdb accession IDs (NCBI_ss#)</b> |
|---------------------------------|--------------------|--------------------------------|-------------|--------------------------------------------|
| Ca_Desig_Chr_scaffold12419_3378 | Ca_desig_scaffold  | 3378                           | [C/T]       | NA                                         |
| Ca_Desig_Chr_scaffold12419_3379 | Ca_desig_scaffold  | 3379                           | [G/A]       | NA                                         |
| Ca_Desig_Chr_scaffold12419_3380 | Ca_desig_scaffold  | 3380                           | [T/C]       | NA                                         |
| Ca_Desig_Chr_scaffold12419_3381 | Ca_desig_scaffold  | 3381                           | [A/G]       | NA                                         |
| Ca_Desig_Chr_scaffold12419_3382 | Ca_desig_scaffold  | 3382                           | [G/A]       | NA                                         |
| Ca_Desig_Chr_scaffold12419_3383 | Ca_desig_scaffold  | 3383                           | [G/A]       | NA                                         |
| Ca_Desig_Chr_scaffold12419_3384 | Ca_desig_scaffold  | 3384                           | [A/G]       | NA                                         |
| Ca_Desig_Chr_scaffold12419_3385 | Ca_desig_scaffold  | 3385                           | [G/A]       | NA                                         |
| Ca_Desig_Chr_scaffold12419_3386 | Ca_desig_scaffold  | 3386                           | [C/T]       | NA                                         |
| Ca_Desig_Chr_scaffold12419_3387 | Ca_desig_scaffold  | 3387                           | [A/G]       | NA                                         |
| Ca_Desig_Chr_scaffold12419_3388 | Ca_desig_scaffold  | 3388                           | [A/G]       | NA                                         |
| Ca_Desig_Chr_scaffold12419_3389 | Ca_desig_scaffold  | 3389                           | [A/G]       | NA                                         |
| Ca_Desig_Chr_scaffold12419_3390 | Ca_desig_scaffold  | 3390                           | [C/A]       | NA                                         |
| Ca_Desig_Chr_scaffold12419_3391 | Ca_desig_scaffold  | 3391                           | [A/G]       | NA                                         |
| Ca_Desig_Chr_scaffold12419_3392 | Ca_desig_scaffold  | 3392                           | [A/G]       | NA                                         |
| Ca_Desig_Chr_scaffold12419_3393 | Ca_desig_scaffold  | 3393                           | [G/A]       | NA                                         |
| Ca_Desig_Chr_scaffold12419_3394 | Ca_desig_scaffold  | 3394                           | [C/T]       | NA                                         |
| Ca_Desig_Chr_scaffold12419_3395 | Ca_desig_scaffold  | 3395                           | [A/G]       | NA                                         |
| Ca_Desig_Chr_scaffold12419_3396 | Ca_desig_scaffold  | 3396                           | [A/G]       | NA                                         |
| Ca_Desig_Chr_scaffold12419_3397 | Ca_desig_scaffold  | 3397                           | [C/T]       | NA                                         |
| Ca_Desig_Chr_scaffold12419_3398 | Ca_desig_scaffold  | 3398                           | [G/A]       | NA                                         |
| Ca_Desig_Chr_scaffold12419_3399 | Ca_desig_scaffold  | 3399                           | [G/A]       | NA                                         |
| Ca_Desig_Chr_scaffold12419_3400 | Ca_desig_scaffold  | 3400                           | [A/G]       | NA                                         |
| Ca_Desig_Chr_scaffold12419_3402 | Ca_desig_scaffold  | 3402                           | [T/C]       | NA                                         |
| Ca_Desig_Chr_scaffold12419_3403 | Ca_desig_scaffold  | 3403                           | [G/A]       | NA                                         |
| Ca_Desig_Chr_scaffold12419_3404 | Ca_desig_scaffold  | 3404                           | [A/G]       | NA                                         |
| Ca_Desig_Chr_scaffold12419_3405 | Ca_desig_scaffold  | 3405                           | [G/A]       | NA                                         |
| Ca_Desig_Chr_scaffold12419_3406 | Ca_desig_scaffold  | 3406                           | [C/T]       | NA                                         |
| Ca_Desig_Chr_scaffold12419_3407 | Ca_desig_scaffold  | 3407                           | [G/A]       | NA                                         |
| Ca_Desig_Chr_scaffold12419_3408 | Ca_desig_scaffold  | 3408                           | [C/T]       | NA                                         |
| Ca_Desig_Chr_scaffold12419_3410 | Ca_desig_scaffold  | 3410                           | [T/C]       | NA                                         |
| Ca_Desig_Chr_scaffold12419_3411 | Ca_desig_scaffold  | 3411                           | [A/G]       | NA                                         |
| Ca_Desig_Chr_scaffold12419_3412 | Ca_desig_scaffold  | 3412                           | [G/A]       | NA                                         |
| Ca_Desig_Chr_scaffold12419_3413 | Ca_desig_scaffold  | 3413                           | [C/T]       | NA                                         |

| <b>SNP IDs</b>                  | <b>Chromosomes</b> | <b>Physical positions (bp)</b> | <b>SNPs</b> | <b>NCBI SNPdb accession IDs (NCBI_ss#)</b> |
|---------------------------------|--------------------|--------------------------------|-------------|--------------------------------------------|
| Ca_Desig_Chr_scaffold12419_3414 | Ca_desig_scaffold  | 3414                           | [G/A]       | NA                                         |
| Ca_Desig_Chr_scaffold12419_3415 | Ca_desig_scaffold  | 3415                           | [C/T]       | NA                                         |
| Ca_Desig_Chr_scaffold12419_3417 | Ca_desig_scaffold  | 3417                           | [A/G]       | NA                                         |
| Ca_Desig_Chr_scaffold12419_3418 | Ca_desig_scaffold  | 3418                           | [A/G]       | NA                                         |
| Ca_Desig_Chr_scaffold12419_3448 | Ca_desig_scaffold  | 3448                           | [G/A]       | NA                                         |
| Ca_Desig_Chr_scaffold12419_3449 | Ca_desig_scaffold  | 3449                           | [C/T]       | NA                                         |
| Ca_Desig_Chr_scaffold12419_3450 | Ca_desig_scaffold  | 3450                           | [G/A]       | NA                                         |
| Ca_Desig_Chr_scaffold12419_3451 | Ca_desig_scaffold  | 3451                           | [T/C]       | NA                                         |
| Ca_Desig_Chr_scaffold12419_3452 | Ca_desig_scaffold  | 3452                           | [G/A]       | NA                                         |
| Ca_Desig_Chr_scaffold12419_3453 | Ca_desig_scaffold  | 3453                           | [A/G]       | NA                                         |
| Ca_Desig_Chr_scaffold12419_3455 | Ca_desig_scaffold  | 3455                           | [T/C]       | NA                                         |
| Ca_Desig_Chr_scaffold12419_3456 | Ca_desig_scaffold  | 3456                           | [C/T]       | NA                                         |
| Ca_Desig_Chr_scaffold12419_3457 | Ca_desig_scaffold  | 3457                           | [A/G]       | NA                                         |
| Ca_Desig_Chr_scaffold12419_3458 | Ca_desig_scaffold  | 3458                           | [C/T]       | NA                                         |
| Ca_Desig_Chr_scaffold12419_3459 | Ca_desig_scaffold  | 3459                           | [G/A]       | NA                                         |
| Ca_Desig_Chr_scaffold12419_3460 | Ca_desig_scaffold  | 3460                           | [C/G]       | NA                                         |
| Ca_Desig_Chr_scaffold12419_3461 | Ca_desig_scaffold  | 3461                           | [G/A]       | NA                                         |
| Ca_Desig_Chr_scaffold12419_3462 | Ca_desig_scaffold  | 3462                           | [C/A]       | NA                                         |
| Ca_Desig_Chr_scaffold12419_3463 | Ca_desig_scaffold  | 3463                           | [A/G]       | NA                                         |
| Ca_Desig_Chr_scaffold12419_3464 | Ca_desig_scaffold  | 3464                           | [T/C]       | NA                                         |
| Ca_Desig_Chr_scaffold12419_3465 | Ca_desig_scaffold  | 3465                           | [A/G]       | NA                                         |
| Ca_Desig_Chr_scaffold12419_3466 | Ca_desig_scaffold  | 3466                           | [C/T]       | NA                                         |
| Ca_Desig_Chr_scaffold12419_3467 | Ca_desig_scaffold  | 3467                           | [G/A]       | NA                                         |
| Ca_Desig_Chr_scaffold12419_3468 | Ca_desig_scaffold  | 3468                           | [T/C]       | NA                                         |
| Ca_Desig_Chr_scaffold12419_3470 | Ca_desig_scaffold  | 3470                           | [T/C]       | NA                                         |
| Ca_Desig_Chr_scaffold12419_3471 | Ca_desig_scaffold  | 3471                           | [T/C]       | NA                                         |
| Ca_Desig_Chr_scaffold12419_3472 | Ca_desig_scaffold  | 3472                           | [C/T]       | NA                                         |
| Ca_Desig_Chr_scaffold12419_3473 | Ca_desig_scaffold  | 3473                           | [T/C]       | NA                                         |
| Ca_Desig_Chr_scaffold12419_3474 | Ca_desig_scaffold  | 3474                           | [T/C]       | NA                                         |
| Ca_Desig_Chr_scaffold12419_3475 | Ca_desig_scaffold  | 3475                           | [G/A]       | NA                                         |
| Ca_Desig_Chr_scaffold12419_3476 | Ca_desig_scaffold  | 3476                           | [C/T]       | NA                                         |
| Ca_Desig_Chr_scaffold12419_3477 | Ca_desig_scaffold  | 3477                           | [C/T]       | NA                                         |
| Ca_Desig_Chr_scaffold12419_3478 | Ca_desig_scaffold  | 3478                           | [G/A]       | NA                                         |
| Ca_Desig_Chr_scaffold12419_3479 | Ca_desig_scaffold  | 3479                           | [G/A]       | NA                                         |

| <b>SNP IDs</b>                  | <b>Chromosomes</b> | <b>Physical positions (bp)</b> | <b>SNPs</b> | <b>NCBI SNPdb accession IDs (NCBI_ss#)</b> |
|---------------------------------|--------------------|--------------------------------|-------------|--------------------------------------------|
| Ca_Desig_Chr_scaffold12419_3481 | Ca_desig_scaffold  | 3481                           | [A/G]       | NA                                         |
| Ca_Desig_Chr_scaffold12419_3482 | Ca_desig_scaffold  | 3482                           | [G/A]       | NA                                         |
| Ca_Desig_Chr_scaffold12419_3483 | Ca_desig_scaffold  | 3483                           | [T/C]       | NA                                         |
| Ca_Desig_Chr_scaffold12419_3484 | Ca_desig_scaffold  | 3484                           | [C/A]       | NA                                         |
| Ca_Desig_Chr_scaffold12419_3485 | Ca_desig_scaffold  | 3485                           | [A/G]       | NA                                         |
| Ca_Desig_Chr_scaffold12419_3486 | Ca_desig_scaffold  | 3486                           | [A/G]       | NA                                         |
| Ca_Desig_Chr_scaffold12419_3487 | Ca_desig_scaffold  | 3487                           | [A/G]       | NA                                         |
| Ca_Desig_Chr_scaffold12419_3488 | Ca_desig_scaffold  | 3488                           | [T/C]       | NA                                         |
| Ca_Desig_Chr_scaffold12419_3489 | Ca_desig_scaffold  | 3489                           | [C/T]       | NA                                         |
| Ca_Desig_Chr_scaffold12419_3490 | Ca_desig_scaffold  | 3490                           | [A/G]       | NA                                         |
| Ca_Desig_Chr_scaffold12419_3491 | Ca_desig_scaffold  | 3491                           | [A/G]       | NA                                         |
| Ca_Desig_Chr_scaffold12419_3492 | Ca_desig_scaffold  | 3492                           | [T/C]       | NA                                         |
| Ca_Desig_Chr_scaffold12419_3493 | Ca_desig_scaffold  | 3493                           | [G/A]       | NA                                         |
| Ca_Desig_Chr_scaffold12419_3494 | Ca_desig_scaffold  | 3494                           | [T/C]       | NA                                         |
| Ca_Desig_Chr_scaffold12419_3495 | Ca_desig_scaffold  | 3495                           | [T/C]       | NA                                         |
| Ca_Desig_Chr_scaffold12419_3497 | Ca_desig_scaffold  | 3497                           | [G/A]       | NA                                         |
| Ca_Desig_Chr_scaffold12419_3498 | Ca_desig_scaffold  | 3498                           | [G/A]       | NA                                         |
| Ca_Desig_Chr_scaffold12419_3499 | Ca_desig_scaffold  | 3499                           | [G/A]       | NA                                         |
| Ca_Desig_Chr_scaffold12419_3500 | Ca_desig_scaffold  | 3500                           | [G/A]       | NA                                         |
| Ca_Desig_Chr_scaffold12419_3502 | Ca_desig_scaffold  | 3502                           | [A/G]       | NA                                         |
| Ca_Desig_Chr_scaffold12419_3504 | Ca_desig_scaffold  | 3504                           | [T/C]       | NA                                         |
| Ca_Desig_Chr_scaffold12419_3505 | Ca_desig_scaffold  | 3505                           | [A/G]       | NA                                         |
| Ca_Desig_Chr_scaffold12419_3509 | Ca_desig_scaffold  | 3509                           | [A/T]       | NA                                         |
| Ca_Desig_Chr_scaffold12419_3515 | Ca_desig_scaffold  | 3515                           | [A/G]       | NA                                         |
| Ca_Desig_Chr_scaffold12419_3517 | Ca_desig_scaffold  | 3517                           | [T/C]       | NA                                         |
| Ca_Desig_Chr_scaffold12419_3523 | Ca_desig_scaffold  | 3523                           | [T/C]       | NA                                         |
| Ca_Desig_Chr_scaffold12419_3541 | Ca_desig_scaffold  | 3541                           | [T/A]       | NA                                         |
| Ca_Desig_Chr_scaffold12419_3543 | Ca_desig_scaffold  | 3543                           | [A/G]       | NA                                         |
| Ca_Desig_Chr_scaffold12419_3546 | Ca_desig_scaffold  | 3546                           | [T/G]       | NA                                         |
| Ca_Desig_Chr_scaffold12419_3551 | Ca_desig_scaffold  | 3551                           | [T/C]       | NA                                         |
| Ca_Desig_Chr_scaffold12419_3552 | Ca_desig_scaffold  | 3552                           | [T/C]       | NA                                         |
| Ca_Desig_Chr_scaffold12419_3554 | Ca_desig_scaffold  | 3554                           | [A/G]       | NA                                         |
| Ca_Desig_Chr_scaffold12419_3557 | Ca_desig_scaffold  | 3557                           | [T/C]       | NA                                         |
| Ca_Desig_Chr_scaffold12419_3562 | Ca_desig_scaffold  | 3562                           | [T/C]       | NA                                         |

| <b>SNP IDs</b>                  | <b>Chromosomes</b> | <b>Physical positions (bp)</b> | <b>SNPs</b> | <b>NCBI SNPdb accession IDs (NCBI_ss#)</b> |
|---------------------------------|--------------------|--------------------------------|-------------|--------------------------------------------|
| Ca_Desig_Chr_scaffold12419_3565 | Ca_desig_scaffold  | 3565                           | [A/G]       | NA                                         |
| Ca_Desig_Chr_scaffold12419_3567 | Ca_desig_scaffold  | 3567                           | [T/C]       | NA                                         |
| Ca_Desig_Chr_scaffold12419_3571 | Ca_desig_scaffold  | 3571                           | [T/C]       | NA                                         |
| Ca_Desig_Chr_scaffold12429_288  | Ca_desig_scaffold  | 288                            | [T/G]       | NA                                         |
| Ca_Desig_Chr_scaffold12429_320  | Ca_desig_scaffold  | 320                            | [G/T]       | NA                                         |
| Ca_Desig_Chr_scaffold12429_1989 | Ca_desig_scaffold  | 1989                           | [A/G]       | NA                                         |
| Ca_Desig_Chr_scaffold12429_1990 | Ca_desig_scaffold  | 1990                           | [A/G]       | NA                                         |
| Ca_Desig_Chr_scaffold12429_1992 | Ca_desig_scaffold  | 1992                           | [T/C]       | NA                                         |
| Ca_Desig_Chr_scaffold12429_1994 | Ca_desig_scaffold  | 1994                           | [A/G]       | NA                                         |
| Ca_Desig_Chr_scaffold12429_1996 | Ca_desig_scaffold  | 1996                           | [T/C]       | NA                                         |
| Ca_Desig_Chr_scaffold12429_1998 | Ca_desig_scaffold  | 1998                           | [T/C]       | NA                                         |
| Ca_Desig_Chr_scaffold12429_2002 | Ca_desig_scaffold  | 2002                           | [A/G]       | NA                                         |
| Ca_Desig_Chr_scaffold12429_2004 | Ca_desig_scaffold  | 2004                           | [T/C]       | NA                                         |
| Ca_Desig_Chr_scaffold12429_2008 | Ca_desig_scaffold  | 2008                           | [T/C]       | NA                                         |
| Ca_Desig_Chr_scaffold12429_2009 | Ca_desig_scaffold  | 2009                           | [A/G]       | NA                                         |
| Ca_Desig_Chr_scaffold12429_2012 | Ca_desig_scaffold  | 2012                           | [A/G]       | NA                                         |
| Ca_Desig_Chr_scaffold12429_2015 | Ca_desig_scaffold  | 2015                           | [A/G]       | NA                                         |
| Ca_Desig_Chr_scaffold12429_2018 | Ca_desig_scaffold  | 2018                           | [T/C]       | NA                                         |
| Ca_Desig_Chr_scaffold12429_2026 | Ca_desig_scaffold  | 2026                           | [T/C]       | NA                                         |
| Ca_Desig_Chr_scaffold12429_2029 | Ca_desig_scaffold  | 2029                           | [T/C]       | NA                                         |
| Ca_Desig_Chr_scaffold12429_2034 | Ca_desig_scaffold  | 2034                           | [A/C]       | NA                                         |
| Ca_Desig_Chr_scaffold12429_2036 | Ca_desig_scaffold  | 2036                           | [T/C]       | NA                                         |
| Ca_Desig_Chr_scaffold12429_2038 | Ca_desig_scaffold  | 2038                           | [T/C]       | NA                                         |
| Ca_Desig_Chr_scaffold12429_2040 | Ca_desig_scaffold  | 2040                           | [T/C]       | NA                                         |
| Ca_Desig_Chr_scaffold12429_2042 | Ca_desig_scaffold  | 2042                           | [T/C]       | NA                                         |
| Ca_Desig_Chr_scaffold12429_2043 | Ca_desig_scaffold  | 2043                           | [T/C]       | NA                                         |
| Ca_Desig_Chr_scaffold12429_2045 | Ca_desig_scaffold  | 2045                           | [A/G]       | NA                                         |
| Ca_Desig_Chr_scaffold12429_2046 | Ca_desig_scaffold  | 2046                           | [C/G]       | NA                                         |
| Ca_Desig_Chr_scaffold12429_2047 | Ca_desig_scaffold  | 2047                           | [A/C]       | NA                                         |
| Ca_Desig_Chr_scaffold12429_2051 | Ca_desig_scaffold  | 2051                           | [T/C]       | NA                                         |
| Ca_Desig_Chr_scaffold12429_2052 | Ca_desig_scaffold  | 2052                           | [T/C]       | NA                                         |
| Ca_Desig_Chr_scaffold12429_2054 | Ca_desig_scaffold  | 2054                           | [T/C]       | NA                                         |
| Ca_Desig_Chr_scaffold12429_2057 | Ca_desig_scaffold  | 2057                           | [A/G]       | NA                                         |
| Ca_Desig_Chr_scaffold12429_2058 | Ca_desig_scaffold  | 2058                           | [A/G]       | NA                                         |

| <b>SNP IDs</b>                | <b>Chromosomes</b> | <b>Physical positions (bp)</b> | <b>SNPs</b> | <b>NCBI SNPdb accession IDs (NCBI_ss#)</b> |
|-------------------------------|--------------------|--------------------------------|-------------|--------------------------------------------|
| Ca_Desi_Ch_scaffold12429_2061 | Ca_desi_scaffold   | 2061                           | [A/G]       | NA                                         |
| Ca_Desi_Ch_scaffold12429_2063 | Ca_desi_scaffold   | 2063                           | [A/G]       | NA                                         |
| Ca_Desi_Ch_scaffold12429_2066 | Ca_desi_scaffold   | 2066                           | [A/G]       | NA                                         |
| Ca_Desi_Ch_scaffold12429_2069 | Ca_desi_scaffold   | 2069                           | [A/G]       | NA                                         |
| Ca_Desi_Ch_scaffold12429_2070 | Ca_desi_scaffold   | 2070                           | [A/G]       | NA                                         |
| Ca_Desi_Ch_scaffold12429_2071 | Ca_desi_scaffold   | 2071                           | [A/G]       | NA                                         |
| Ca_Desi_Ch_scaffold12429_2082 | Ca_desi_scaffold   | 2082                           | [A/G]       | NA                                         |
| Ca_Desi_Ch_scaffold12429_2085 | Ca_desi_scaffold   | 2085                           | [T/C]       | NA                                         |
| Ca_Desi_Ch_scaffold12429_2086 | Ca_desi_scaffold   | 2086                           | [A/G]       | NA                                         |
| Ca_Desi_Ch_scaffold12429_2089 | Ca_desi_scaffold   | 2089                           | [A/G]       | NA                                         |
| Ca_Desi_Ch_scaffold12429_2092 | Ca_desi_scaffold   | 2092                           | [A/G]       | NA                                         |
| Ca_Desi_Ch_scaffold12429_2097 | Ca_desi_scaffold   | 2097                           | [T/C]       | NA                                         |
| Ca_Desi_Ch_scaffold12429_2101 | Ca_desi_scaffold   | 2101                           | [T/C]       | NA                                         |
| Ca_Desi_Ch_scaffold12429_2107 | Ca_desi_scaffold   | 2107                           | [A/G]       | NA                                         |
| Ca_Desi_Ch_scaffold12429_2109 | Ca_desi_scaffold   | 2109                           | [A/G]       | NA                                         |
| Ca_Desi_Ch_scaffold12429_2110 | Ca_desi_scaffold   | 2110                           | [T/C]       | NA                                         |
| Ca_Desi_Ch_scaffold12429_2117 | Ca_desi_scaffold   | 2117                           | [A/G]       | NA                                         |
| Ca_Desi_Ch_scaffold12429_2120 | Ca_desi_scaffold   | 2120                           | [A/G]       | NA                                         |
| Ca_Desi_Ch_scaffold12429_2124 | Ca_desi_scaffold   | 2124                           | [A/G]       | NA                                         |
| Ca_Desi_Ch_scaffold12429_2126 | Ca_desi_scaffold   | 2126                           | [T/G]       | NA                                         |
| Ca_Desi_Ch_scaffold12429_2128 | Ca_desi_scaffold   | 2128                           | [T/C]       | NA                                         |
| Ca_Desi_Ch_scaffold12429_2129 | Ca_desi_scaffold   | 2129                           | [A/G]       | NA                                         |
| Ca_Desi_Ch_scaffold12429_2131 | Ca_desi_scaffold   | 2131                           | [T/C]       | NA                                         |
| Ca_Desi_Ch_scaffold12429_2132 | Ca_desi_scaffold   | 2132                           | [T/C]       | NA                                         |
| Ca_Desi_Ch_scaffold12429_2134 | Ca_desi_scaffold   | 2134                           | [A/G]       | NA                                         |
| Ca_Desi_Ch_scaffold12429_2139 | Ca_desi_scaffold   | 2139                           | [T/C]       | NA                                         |
| Ca_Desi_Ch_scaffold12429_2140 | Ca_desi_scaffold   | 2140                           | [T/C]       | NA                                         |
| Ca_Desi_Ch_scaffold12429_2141 | Ca_desi_scaffold   | 2141                           | [C/G]       | NA                                         |
| Ca_Desi_Ch_scaffold12429_2236 | Ca_desi_scaffold   | 2236                           | [T/C]       | NA                                         |
| Ca_Desi_Ch_scaffold12429_2238 | Ca_desi_scaffold   | 2238                           | [T/C]       | NA                                         |
| Ca_Desi_Ch_scaffold12429_2244 | Ca_desi_scaffold   | 2244                           | [T/C]       | NA                                         |
| Ca_Desi_Ch_scaffold12429_2247 | Ca_desi_scaffold   | 2247                           | [A/C]       | NA                                         |
| Ca_Desi_Ch_scaffold12429_2249 | Ca_desi_scaffold   | 2249                           | [T/C]       | NA                                         |
| Ca_Desi_Ch_scaffold12429_2253 | Ca_desi_scaffold   | 2253                           | [T/C]       | NA                                         |

| <b>SNP IDs</b>                  | <b>Chromosomes</b> | <b>Physical positions (bp)</b> | <b>SNPs</b> | <b>NCBI SNPdb accession IDs (NCBI_ss#)</b> |
|---------------------------------|--------------------|--------------------------------|-------------|--------------------------------------------|
| Ca_Desig_Chr_scaffold12429_2254 | Ca_desig_scaffold  | 2254                           | [T/C]       | NA                                         |
| Ca_Desig_Chr_scaffold12429_2255 | Ca_desig_scaffold  | 2255                           | [T/C]       | NA                                         |
| Ca_Desig_Chr_scaffold12429_2259 | Ca_desig_scaffold  | 2259                           | [T/C]       | NA                                         |
| Ca_Desig_Chr_scaffold12429_2261 | Ca_desig_scaffold  | 2261                           | [T/C]       | NA                                         |
| Ca_Desig_Chr_scaffold12429_2265 | Ca_desig_scaffold  | 2265                           | [A/G]       | NA                                         |
| Ca_Desig_Chr_scaffold12429_2267 | Ca_desig_scaffold  | 2267                           | [A/G]       | NA                                         |
| Ca_Desig_Chr_scaffold12429_2269 | Ca_desig_scaffold  | 2269                           | [A/G]       | NA                                         |
| Ca_Desig_Chr_scaffold12429_2271 | Ca_desig_scaffold  | 2271                           | [A/G]       | NA                                         |
| Ca_Desig_Chr_scaffold12429_2272 | Ca_desig_scaffold  | 2272                           | [A/G]       | NA                                         |
| Ca_Desig_Chr_scaffold12429_2276 | Ca_desig_scaffold  | 2276                           | [A/G]       | NA                                         |
| Ca_Desig_Chr_scaffold12429_2279 | Ca_desig_scaffold  | 2279                           | [A/G]       | NA                                         |
| Ca_Desig_Chr_scaffold12429_2282 | Ca_desig_scaffold  | 2282                           | [C/T]       | NA                                         |
| Ca_Desig_Chr_scaffold12429_2285 | Ca_desig_scaffold  | 2285                           | [T/C]       | NA                                         |
| Ca_Desig_Chr_scaffold12429_2289 | Ca_desig_scaffold  | 2289                           | [A/G]       | NA                                         |
| Ca_Desig_Chr_scaffold12429_2293 | Ca_desig_scaffold  | 2293                           | [A/G]       | NA                                         |
| Ca_Desig_Chr_scaffold12429_2294 | Ca_desig_scaffold  | 2294                           | [A/G]       | NA                                         |
| Ca_Desig_Chr_scaffold12429_2300 | Ca_desig_scaffold  | 2300                           | [C/T]       | NA                                         |
| Ca_Desig_Chr_scaffold12429_2301 | Ca_desig_scaffold  | 2301                           | [C/T]       | NA                                         |
| Ca_Desig_Chr_scaffold12429_2302 | Ca_desig_scaffold  | 2302                           | [T/C]       | NA                                         |
| Ca_Desig_Chr_scaffold12429_2303 | Ca_desig_scaffold  | 2303                           | [A/G]       | NA                                         |
| Ca_Desig_Chr_scaffold12429_2305 | Ca_desig_scaffold  | 2305                           | [C/T]       | NA                                         |
| Ca_Desig_Chr_scaffold12429_2306 | Ca_desig_scaffold  | 2306                           | [C/T]       | NA                                         |
| Ca_Desig_Chr_scaffold12429_2307 | Ca_desig_scaffold  | 2307                           | [T/C]       | NA                                         |
| Ca_Desig_Chr_scaffold12429_2309 | Ca_desig_scaffold  | 2309                           | [T/C]       | NA                                         |
| Ca_Desig_Chr_scaffold12429_2311 | Ca_desig_scaffold  | 2311                           | [T/C]       | NA                                         |
| Ca_Desig_Chr_scaffold12429_2313 | Ca_desig_scaffold  | 2313                           | [C/T]       | NA                                         |
| Ca_Desig_Chr_scaffold12429_2314 | Ca_desig_scaffold  | 2314                           | [G/A]       | NA                                         |
| Ca_Desig_Chr_scaffold12429_2315 | Ca_desig_scaffold  | 2315                           | [G/A]       | NA                                         |
| Ca_Desig_Chr_scaffold12429_2316 | Ca_desig_scaffold  | 2316                           | [C/T]       | NA                                         |
| Ca_Desig_Chr_scaffold12429_2317 | Ca_desig_scaffold  | 2317                           | [C/T]       | NA                                         |
| Ca_Desig_Chr_scaffold12429_2318 | Ca_desig_scaffold  | 2318                           | [G/A]       | NA                                         |
| Ca_Desig_Chr_scaffold12429_2319 | Ca_desig_scaffold  | 2319                           | [A/G]       | NA                                         |
| Ca_Desig_Chr_scaffold12429_2320 | Ca_desig_scaffold  | 2320                           | [T/C]       | NA                                         |
| Ca_Desig_Chr_scaffold12429_2321 | Ca_desig_scaffold  | 2321                           | [C/T]       | NA                                         |

| <b>SNP IDs</b>                  | <b>Chromosomes</b> | <b>Physical positions (bp)</b> | <b>SNPs</b> | <b>NCBI SNPdb accession IDs (NCBI_ss#)</b> |
|---------------------------------|--------------------|--------------------------------|-------------|--------------------------------------------|
| Ca_Desig_Chr_scaffold12429_2322 | Ca_desig_scaffold  | 2322                           | [A/G]       | NA                                         |
| Ca_Desig_Chr_scaffold12429_2323 | Ca_desig_scaffold  | 2323                           | [T/C]       | NA                                         |
| Ca_Desig_Chr_scaffold12429_2324 | Ca_desig_scaffold  | 2324                           | [T/C]       | NA                                         |
| Ca_Desig_Chr_scaffold12429_2325 | Ca_desig_scaffold  | 2325                           | [C/T]       | NA                                         |
| Ca_Desig_Chr_scaffold12429_2326 | Ca_desig_scaffold  | 2326                           | [C/T]       | NA                                         |
| Ca_Desig_Chr_scaffold12429_2327 | Ca_desig_scaffold  | 2327                           | [G/A]       | NA                                         |
| Ca_Desig_Chr_scaffold12429_2328 | Ca_desig_scaffold  | 2328                           | [C/T]       | NA                                         |
| Ca_Desig_Chr_scaffold12429_2329 | Ca_desig_scaffold  | 2329                           | [T/C]       | NA                                         |
| Ca_Desig_Chr_scaffold12429_2330 | Ca_desig_scaffold  | 2330                           | [G/C]       | NA                                         |
| Ca_Desig_Chr_scaffold12429_2332 | Ca_desig_scaffold  | 2332                           | [C/T]       | NA                                         |
| Ca_Desig_Chr_scaffold12429_2333 | Ca_desig_scaffold  | 2333                           | [A/G]       | NA                                         |
| Ca_Desig_Chr_scaffold12429_2334 | Ca_desig_scaffold  | 2334                           | [T/C]       | NA                                         |
| Ca_Desig_Chr_scaffold12429_2335 | Ca_desig_scaffold  | 2335                           | [C/T]       | NA                                         |
| Ca_Desig_Chr_scaffold12429_2336 | Ca_desig_scaffold  | 2336                           | [T/C]       | NA                                         |
| Ca_Desig_Chr_scaffold12429_2337 | Ca_desig_scaffold  | 2337                           | [T/C]       | NA                                         |
| Ca_Desig_Chr_scaffold12429_2338 | Ca_desig_scaffold  | 2338                           | [G/A]       | NA                                         |
| Ca_Desig_Chr_scaffold12429_2339 | Ca_desig_scaffold  | 2339                           | [C/T]       | NA                                         |
| Ca_Desig_Chr_scaffold12429_2340 | Ca_desig_scaffold  | 2340                           | [A/G]       | NA                                         |
| Ca_Desig_Chr_scaffold12429_2341 | Ca_desig_scaffold  | 2341                           | [T/C]       | NA                                         |
| Ca_Desig_Chr_scaffold12429_2342 | Ca_desig_scaffold  | 2342                           | [T/C]       | NA                                         |
| Ca_Desig_Chr_scaffold12429_2343 | Ca_desig_scaffold  | 2343                           | [C/T]       | NA                                         |
| Ca_Desig_Chr_scaffold12429_2344 | Ca_desig_scaffold  | 2344                           | [A/G]       | NA                                         |
| Ca_Desig_Chr_scaffold12429_2345 | Ca_desig_scaffold  | 2345                           | [C/T]       | NA                                         |
| Ca_Desig_Chr_scaffold12429_2346 | Ca_desig_scaffold  | 2346                           | [G/C]       | NA                                         |
| Ca_Desig_Chr_scaffold12429_2347 | Ca_desig_scaffold  | 2347                           | [C/T]       | NA                                         |
| Ca_Desig_Chr_scaffold12429_2348 | Ca_desig_scaffold  | 2348                           | [C/T]       | NA                                         |
| Ca_Desig_Chr_scaffold12429_2349 | Ca_desig_scaffold  | 2349                           | [T/C]       | NA                                         |
| Ca_Desig_Chr_scaffold12429_2350 | Ca_desig_scaffold  | 2350                           | [C/T]       | NA                                         |
| Ca_Desig_Chr_scaffold12429_2351 | Ca_desig_scaffold  | 2351                           | [C/T]       | NA                                         |
| Ca_Desig_Chr_scaffold12429_2352 | Ca_desig_scaffold  | 2352                           | [G/A]       | NA                                         |
| Ca_Desig_Chr_scaffold12429_2353 | Ca_desig_scaffold  | 2353                           | [T/C]       | NA                                         |
| Ca_Desig_Chr_scaffold12429_2354 | Ca_desig_scaffold  | 2354                           | [T/C]       | NA                                         |
| Ca_Desig_Chr_scaffold12429_2355 | Ca_desig_scaffold  | 2355                           | [T/C]       | NA                                         |
| Ca_Desig_Chr_scaffold12429_2356 | Ca_desig_scaffold  | 2356                           | [G/A]       | NA                                         |



| <b>SNP IDs</b>                | <b>Chromosomes</b> | <b>Physical positions (bp)</b> | <b>SNPs</b> | <b>NCBI SNPdb accession IDs (NCBI_ss#)</b> |
|-------------------------------|--------------------|--------------------------------|-------------|--------------------------------------------|
| Ca_Desi_Ch_scaffold12429_2357 | Ca_desi_scaffold   | 2357                           | [A/G]       | NA                                         |
| Ca_Desi_Ch_scaffold12429_2359 | Ca_desi_scaffold   | 2359                           | [T/C]       | NA                                         |
| Ca_Desi_Ch_scaffold12429_2474 | Ca_desi_scaffold   | 2474                           | [A/G]       | NA                                         |
| Ca_Desi_Ch_scaffold12429_2475 | Ca_desi_scaffold   | 2475                           | [T/C]       | NA                                         |
| Ca_Desi_Ch_scaffold12429_2477 | Ca_desi_scaffold   | 2477                           | [T/C]       | NA                                         |
| Ca_Desi_Ch_scaffold12429_2479 | Ca_desi_scaffold   | 2479                           | [T/C]       | NA                                         |
| Ca_Desi_Ch_scaffold12429_2481 | Ca_desi_scaffold   | 2481                           | [C/T]       | NA                                         |
| Ca_Desi_Ch_scaffold12429_2789 | Ca_desi_scaffold   | 2789                           | [T/C]       | NA                                         |
| Ca_Desi_Ch_scaffold12429_2803 | Ca_desi_scaffold   | 2803                           | [T/C]       | NA                                         |
| Ca_Desi_Ch_scaffold12429_2806 | Ca_desi_scaffold   | 2806                           | [A/G]       | NA                                         |
| Ca_Desi_Ch_scaffold12429_2823 | Ca_desi_scaffold   | 2823                           | [A/G]       | NA                                         |
| Ca_Desi_Ch_scaffold12429_2830 | Ca_desi_scaffold   | 2830                           | [T/C]       | NA                                         |
| Ca_Desi_Ch_scaffold12429_3056 | Ca_desi_scaffold   | 3056                           | [A/G]       | NA                                         |
| Ca_Desi_Ch_scaffold12429_3077 | Ca_desi_scaffold   | 3077                           | [A/T]       | NA                                         |
| Ca_Desi_Ch_scaffold12429_3081 | Ca_desi_scaffold   | 3081                           | [T/C]       | NA                                         |
| Ca_Desi_Ch_scaffold12429_3088 | Ca_desi_scaffold   | 3088                           | [T/C]       | NA                                         |
| Ca_Desi_Ch_scaffold12429_3105 | Ca_desi_scaffold   | 3105                           | [T/C]       | NA                                         |
| Ca_Desi_Ch_scaffold12429_3122 | Ca_desi_scaffold   | 3122                           | [T/C]       | NA                                         |
| Ca_Desi_Ch_scaffold12429_3129 | Ca_desi_scaffold   | 3129                           | [A/G]       | NA                                         |
| Ca_Desi_Ch_scaffold12429_3138 | Ca_desi_scaffold   | 3138                           | [A/G]       | NA                                         |
| Ca_Desi_Ch_scaffold12429_3143 | Ca_desi_scaffold   | 3143                           | [A/G]       | NA                                         |
| Ca_Desi_Ch_scaffold12429_3154 | Ca_desi_scaffold   | 3154                           | [T/C]       | NA                                         |
| Ca_Desi_Ch_scaffold12429_3178 | Ca_desi_scaffold   | 3178                           | [T/G]       | NA                                         |
| Ca_Desi_Ch_scaffold12429_3180 | Ca_desi_scaffold   | 3180                           | [A/G]       | NA                                         |
| Ca_Desi_Ch_scaffold12488_1493 | Ca_desi_scaffold   | 1493                           | [T/A]       | NA                                         |
| Ca_Desi_Ch_scaffold12488_1495 | Ca_desi_scaffold   | 1495                           | [A/G]       | NA                                         |
| Ca_Desi_Ch_scaffold12488_1499 | Ca_desi_scaffold   | 1499                           | [A/G]       | NA                                         |
| Ca_Desi_Ch_scaffold12488_1521 | Ca_desi_scaffold   | 1521                           | [A/G]       | NA                                         |
| Ca_Desi_Ch_scaffold12488_1542 | Ca_desi_scaffold   | 1542                           | [C/G]       | NA                                         |
| Ca_Desi_Ch_scaffold12488_2091 | Ca_desi_scaffold   | 2091                           | [C/A]       | NA                                         |
| Ca_Desi_Ch_scaffold12562_203  | Ca_desi_scaffold   | 203                            | [A/C]       | NA                                         |
| Ca_Desi_Ch_scaffold12566_806  | Ca_desi_scaffold   | 806                            | [C/T]       | NA                                         |
| Ca_Desi_Ch_scaffold12566_807  | Ca_desi_scaffold   | 807                            | [A/G]       | NA                                         |
| Ca_Desi_Ch_scaffold12566_809  | Ca_desi_scaffold   | 809                            | [A/G]       | NA                                         |

| <b>SNP IDs</b>                 | <b>Chromosomes</b> | <b>Physical positions (bp)</b> | <b>SNPs</b> | <b>NCBI SNPdb accession IDs (NCBI_ss#)</b> |
|--------------------------------|--------------------|--------------------------------|-------------|--------------------------------------------|
| Ca_Desig_Chr_scaffold12566_811 | Ca_desig_scaffold  | 811                            | [T/C]       | NA                                         |
| Ca_Desig_Chr_scaffold12566_812 | Ca_desig_scaffold  | 812                            | [G/A]       | NA                                         |
| Ca_Desig_Chr_scaffold12566_813 | Ca_desig_scaffold  | 813                            | [A/G]       | NA                                         |
| Ca_Desig_Chr_scaffold12566_815 | Ca_desig_scaffold  | 815                            | [T/C]       | NA                                         |
| Ca_Desig_Chr_scaffold12566_816 | Ca_desig_scaffold  | 816                            | [A/G]       | NA                                         |
| Ca_Desig_Chr_scaffold12566_817 | Ca_desig_scaffold  | 817                            | [C/T]       | NA                                         |
| Ca_Desig_Chr_scaffold12566_818 | Ca_desig_scaffold  | 818                            | [G/A]       | NA                                         |
| Ca_Desig_Chr_scaffold12566_820 | Ca_desig_scaffold  | 820                            | [A/G]       | NA                                         |
| Ca_Desig_Chr_scaffold12566_822 | Ca_desig_scaffold  | 822                            | [A/G]       | NA                                         |
| Ca_Desig_Chr_scaffold12566_823 | Ca_desig_scaffold  | 823                            | [T/C]       | NA                                         |
| Ca_Desig_Chr_scaffold12566_824 | Ca_desig_scaffold  | 824                            | [A/G]       | NA                                         |
| Ca_Desig_Chr_scaffold12566_826 | Ca_desig_scaffold  | 826                            | [A/G]       | NA                                         |
| Ca_Desig_Chr_scaffold12566_827 | Ca_desig_scaffold  | 827                            | [A/G]       | NA                                         |
| Ca_Desig_Chr_scaffold12566_828 | Ca_desig_scaffold  | 828                            | [A/G]       | NA                                         |
| Ca_Desig_Chr_scaffold12566_830 | Ca_desig_scaffold  | 830                            | [A/G]       | NA                                         |
| Ca_Desig_Chr_scaffold12566_831 | Ca_desig_scaffold  | 831                            | [A/G]       | NA                                         |
| Ca_Desig_Chr_scaffold12566_833 | Ca_desig_scaffold  | 833                            | [A/G]       | NA                                         |
| Ca_Desig_Chr_scaffold12566_834 | Ca_desig_scaffold  | 834                            | [G/A]       | NA                                         |
| Ca_Desig_Chr_scaffold12566_836 | Ca_desig_scaffold  | 836                            | [A/G]       | NA                                         |
| Ca_Desig_Chr_scaffold12566_837 | Ca_desig_scaffold  | 837                            | [T/C]       | NA                                         |
| Ca_Desig_Chr_scaffold12566_838 | Ca_desig_scaffold  | 838                            | [G/A]       | NA                                         |
| Ca_Desig_Chr_scaffold12566_841 | Ca_desig_scaffold  | 841                            | [A/G]       | NA                                         |
| Ca_Desig_Chr_scaffold12566_842 | Ca_desig_scaffold  | 842                            | [A/G]       | NA                                         |
| Ca_Desig_Chr_scaffold12566_843 | Ca_desig_scaffold  | 843                            | [G/A]       | NA                                         |
| Ca_Desig_Chr_scaffold12566_844 | Ca_desig_scaffold  | 844                            | [A/G]       | NA                                         |
| Ca_Desig_Chr_scaffold12566_845 | Ca_desig_scaffold  | 845                            | [T/C]       | NA                                         |
| Ca_Desig_Chr_scaffold12566_846 | Ca_desig_scaffold  | 846                            | [G/A]       | NA                                         |
| Ca_Desig_Chr_scaffold12566_847 | Ca_desig_scaffold  | 847                            | [A/G]       | NA                                         |
| Ca_Desig_Chr_scaffold12566_848 | Ca_desig_scaffold  | 848                            | [A/G]       | NA                                         |
| Ca_Desig_Chr_scaffold12566_850 | Ca_desig_scaffold  | 850                            | [C/T]       | NA                                         |
| Ca_Desig_Chr_scaffold12566_851 | Ca_desig_scaffold  | 851                            | [G/A]       | NA                                         |
| Ca_Desig_Chr_scaffold12566_852 | Ca_desig_scaffold  | 852                            | [A/G]       | NA                                         |
| Ca_Desig_Chr_scaffold12566_853 | Ca_desig_scaffold  | 853                            | [T/C]       | NA                                         |
| Ca_Desig_Chr_scaffold12566_854 | Ca_desig_scaffold  | 854                            | [A/G]       | NA                                         |

| <b>SNP IDs</b>               | <b>Chromosomes</b> | <b>Physical positions (bp)</b> | <b>SNPs</b> | <b>NCBI SNPdb accession IDs (NCBI_ss#)</b> |
|------------------------------|--------------------|--------------------------------|-------------|--------------------------------------------|
| Ca_Desi_Ch_scaffold12566_855 | Ca_desi_scaffold   | 855                            | [T/C]       | NA                                         |
| Ca_Desi_Ch_scaffold12566_856 | Ca_desi_scaffold   | 856                            | [T/C]       | NA                                         |
| Ca_Desi_Ch_scaffold12566_858 | Ca_desi_scaffold   | 858                            | [A/G]       | NA                                         |
| Ca_Desi_Ch_scaffold12566_859 | Ca_desi_scaffold   | 859                            | [A/G]       | NA                                         |
| Ca_Desi_Ch_scaffold12566_860 | Ca_desi_scaffold   | 860                            | [A/G]       | NA                                         |
| Ca_Desi_Ch_scaffold12566_861 | Ca_desi_scaffold   | 861                            | [A/G]       | NA                                         |
| Ca_Desi_Ch_scaffold12566_862 | Ca_desi_scaffold   | 862                            | [A/G]       | NA                                         |
| Ca_Desi_Ch_scaffold12566_863 | Ca_desi_scaffold   | 863                            | [A/G]       | NA                                         |
| Ca_Desi_Ch_scaffold12566_864 | Ca_desi_scaffold   | 864                            | [G/A]       | NA                                         |
| Ca_Desi_Ch_scaffold12566_917 | Ca_desi_scaffold   | 917                            | [T/C]       | NA                                         |
| Ca_Desi_Ch_scaffold12566_919 | Ca_desi_scaffold   | 919                            | [A/G]       | NA                                         |
| Ca_Desi_Ch_scaffold12566_921 | Ca_desi_scaffold   | 921                            | [T/C]       | NA                                         |
| Ca_Desi_Ch_scaffold12566_922 | Ca_desi_scaffold   | 922                            | [C/T]       | NA                                         |
| Ca_Desi_Ch_scaffold12566_923 | Ca_desi_scaffold   | 923                            | [T/C]       | NA                                         |
| Ca_Desi_Ch_scaffold12566_924 | Ca_desi_scaffold   | 924                            | [T/C]       | NA                                         |
| Ca_Desi_Ch_scaffold12566_926 | Ca_desi_scaffold   | 926                            | [G/A]       | NA                                         |
| Ca_Desi_Ch_scaffold12566_928 | Ca_desi_scaffold   | 928                            | [T/G]       | NA                                         |
| Ca_Desi_Ch_scaffold12566_929 | Ca_desi_scaffold   | 929                            | [G/A]       | NA                                         |
| Ca_Desi_Ch_scaffold12566_932 | Ca_desi_scaffold   | 932                            | [G/T]       | NA                                         |
| Ca_Desi_Ch_scaffold12566_933 | Ca_desi_scaffold   | 933                            | [T/C]       | NA                                         |
| Ca_Desi_Ch_scaffold12566_934 | Ca_desi_scaffold   | 934                            | [A/G]       | NA                                         |
| Ca_Desi_Ch_scaffold12566_935 | Ca_desi_scaffold   | 935                            | [A/G]       | NA                                         |
| Ca_Desi_Ch_scaffold12566_936 | Ca_desi_scaffold   | 936                            | [T/C]       | NA                                         |
| Ca_Desi_Ch_scaffold12566_937 | Ca_desi_scaffold   | 937                            | [A/T]       | NA                                         |
| Ca_Desi_Ch_scaffold12566_938 | Ca_desi_scaffold   | 938                            | [T/C]       | NA                                         |
| Ca_Desi_Ch_scaffold12566_940 | Ca_desi_scaffold   | 940                            | [C/T]       | NA                                         |
| Ca_Desi_Ch_scaffold12566_941 | Ca_desi_scaffold   | 941                            | [T/C]       | NA                                         |
| Ca_Desi_Ch_scaffold12566_943 | Ca_desi_scaffold   | 943                            | [T/C]       | NA                                         |
| Ca_Desi_Ch_scaffold12566_945 | Ca_desi_scaffold   | 945                            | [T/C]       | NA                                         |
| Ca_Desi_Ch_scaffold12566_948 | Ca_desi_scaffold   | 948                            | [T/C]       | NA                                         |
| Ca_Desi_Ch_scaffold12566_949 | Ca_desi_scaffold   | 949                            | [G/A]       | NA                                         |
| Ca_Desi_Ch_scaffold12566_952 | Ca_desi_scaffold   | 952                            | [C/T]       | NA                                         |
| Ca_Desi_Ch_scaffold12566_954 | Ca_desi_scaffold   | 954                            | [T/C]       | NA                                         |
| Ca_Desi_Ch_scaffold12566_955 | Ca_desi_scaffold   | 955                            | [A/G]       | NA                                         |

| <b>SNP IDs</b>                | <b>Chromosomes</b> | <b>Physical positions (bp)</b> | <b>SNPs</b> | <b>NCBI SNPdb accession IDs (NCBI_ss#)</b> |
|-------------------------------|--------------------|--------------------------------|-------------|--------------------------------------------|
| Ca_Desi_Ch_scaffold12566_957  | Ca_desi_scaffold   | 957                            | [G/A]       | NA                                         |
| Ca_Desi_Ch_scaffold12566_958  | Ca_desi_scaffold   | 958                            | [T/C]       | NA                                         |
| Ca_Desi_Ch_scaffold12566_961  | Ca_desi_scaffold   | 961                            | [T/C]       | NA                                         |
| Ca_Desi_Ch_scaffold12566_962  | Ca_desi_scaffold   | 962                            | [A/G]       | NA                                         |
| Ca_Desi_Ch_scaffold12566_966  | Ca_desi_scaffold   | 966                            | [T/C]       | NA                                         |
| Ca_Desi_Ch_scaffold12566_967  | Ca_desi_scaffold   | 967                            | [G/A]       | NA                                         |
| Ca_Desi_Ch_scaffold12566_968  | Ca_desi_scaffold   | 968                            | [C/T]       | NA                                         |
| Ca_Desi_Ch_scaffold12566_969  | Ca_desi_scaffold   | 969                            | [A/G]       | NA                                         |
| Ca_Desi_Ch_scaffold12566_970  | Ca_desi_scaffold   | 970                            | [A/G]       | NA                                         |
| Ca_Desi_Ch_scaffold12566_972  | Ca_desi_scaffold   | 972                            | [T/C]       | NA                                         |
| Ca_Desi_Ch_scaffold12566_973  | Ca_desi_scaffold   | 973                            | [C/T]       | NA                                         |
| Ca_Desi_Ch_scaffold12566_974  | Ca_desi_scaffold   | 974                            | [A/G]       | NA                                         |
| Ca_Desi_Ch_scaffold12566_1018 | Ca_desi_scaffold   | 1018                           | [A/G]       | NA                                         |
| Ca_Desi_Ch_scaffold12566_1019 | Ca_desi_scaffold   | 1019                           | [T/C]       | NA                                         |
| Ca_Desi_Ch_scaffold12566_1022 | Ca_desi_scaffold   | 1022                           | [A/G]       | NA                                         |
| Ca_Desi_Ch_scaffold12566_1023 | Ca_desi_scaffold   | 1023                           | [G/A]       | NA                                         |
| Ca_Desi_Ch_scaffold12566_1025 | Ca_desi_scaffold   | 1025                           | [A/G]       | NA                                         |
| Ca_Desi_Ch_scaffold12566_1026 | Ca_desi_scaffold   | 1026                           | [A/G]       | NA                                         |
| Ca_Desi_Ch_scaffold12566_1027 | Ca_desi_scaffold   | 1027                           | [A/G]       | NA                                         |
| Ca_Desi_Ch_scaffold12566_1029 | Ca_desi_scaffold   | 1029                           | [A/G]       | NA                                         |
| Ca_Desi_Ch_scaffold12566_1030 | Ca_desi_scaffold   | 1030                           | [A/G]       | NA                                         |
| Ca_Desi_Ch_scaffold12566_1031 | Ca_desi_scaffold   | 1031                           | [T/C]       | NA                                         |
| Ca_Desi_Ch_scaffold12566_1032 | Ca_desi_scaffold   | 1032                           | [T/C]       | NA                                         |
| Ca_Desi_Ch_scaffold12566_1034 | Ca_desi_scaffold   | 1034                           | [C/T]       | NA                                         |
| Ca_Desi_Ch_scaffold12566_1035 | Ca_desi_scaffold   | 1035                           | [A/G]       | NA                                         |
| Ca_Desi_Ch_scaffold12566_1036 | Ca_desi_scaffold   | 1036                           | [T/C]       | NA                                         |
| Ca_Desi_Ch_scaffold12566_1038 | Ca_desi_scaffold   | 1038                           | [T/C]       | NA                                         |
| Ca_Desi_Ch_scaffold12566_1042 | Ca_desi_scaffold   | 1042                           | [A/G]       | NA                                         |
| Ca_Desi_Ch_scaffold12566_1045 | Ca_desi_scaffold   | 1045                           | [T/C]       | NA                                         |
| Ca_Desi_Ch_scaffold12566_1047 | Ca_desi_scaffold   | 1047                           | [A/G]       | NA                                         |
| Ca_Desi_Ch_scaffold12566_1048 | Ca_desi_scaffold   | 1048                           | [A/G]       | NA                                         |
| Ca_Desi_Ch_scaffold12566_1049 | Ca_desi_scaffold   | 1049                           | [A/G]       | NA                                         |
| Ca_Desi_Ch_scaffold12566_1050 | Ca_desi_scaffold   | 1050                           | [A/G]       | NA                                         |
| Ca_Desi_Ch_scaffold12566_1051 | Ca_desi_scaffold   | 1051                           | [C/T]       | NA                                         |

| <b>SNP IDs</b>                  | <b>Chromosomes</b> | <b>Physical positions (bp)</b> | <b>SNPs</b> | <b>NCBI SNPdb accession IDs (NCBI_ss#)</b> |
|---------------------------------|--------------------|--------------------------------|-------------|--------------------------------------------|
| Ca_Desig_Chr_scaffold12566_1052 | Ca_desig_scaffold  | 1052                           | [A/G]       | NA                                         |
| Ca_Desig_Chr_scaffold12566_1053 | Ca_desig_scaffold  | 1053                           | [T/C]       | NA                                         |
| Ca_Desig_Chr_scaffold12566_1054 | Ca_desig_scaffold  | 1054                           | [A/G]       | NA                                         |
| Ca_Desig_Chr_scaffold12566_1055 | Ca_desig_scaffold  | 1055                           | [A/G]       | NA                                         |
| Ca_Desig_Chr_scaffold12566_1058 | Ca_desig_scaffold  | 1058                           | [T/C]       | NA                                         |
| Ca_Desig_Chr_scaffold12566_1059 | Ca_desig_scaffold  | 1059                           | [A/G]       | NA                                         |
| Ca_Desig_Chr_scaffold12566_1061 | Ca_desig_scaffold  | 1061                           | [A/G]       | NA                                         |
| Ca_Desig_Chr_scaffold12566_1063 | Ca_desig_scaffold  | 1063                           | [T/C]       | NA                                         |
| Ca_Desig_Chr_scaffold12566_1064 | Ca_desig_scaffold  | 1064                           | [T/C]       | NA                                         |
| Ca_Desig_Chr_scaffold12566_1065 | Ca_desig_scaffold  | 1065                           | [G/A]       | NA                                         |
| Ca_Desig_Chr_scaffold12566_1066 | Ca_desig_scaffold  | 1066                           | [A/G]       | NA                                         |
| Ca_Desig_Chr_scaffold12566_1067 | Ca_desig_scaffold  | 1067                           | [A/G]       | NA                                         |
| Ca_Desig_Chr_scaffold12566_1068 | Ca_desig_scaffold  | 1068                           | [C/T]       | NA                                         |
| Ca_Desig_Chr_scaffold12566_1069 | Ca_desig_scaffold  | 1069                           | [G/A]       | NA                                         |
| Ca_Desig_Chr_scaffold12566_1070 | Ca_desig_scaffold  | 1070                           | [A/G]       | NA                                         |
| Ca_Desig_Chr_scaffold12566_1071 | Ca_desig_scaffold  | 1071                           | [T/C]       | NA                                         |
| Ca_Desig_Chr_scaffold12566_1073 | Ca_desig_scaffold  | 1073                           | [T/C]       | NA                                         |
| Ca_Desig_Chr_scaffold12566_1074 | Ca_desig_scaffold  | 1074                           | [A/G]       | NA                                         |
| Ca_Desig_Chr_scaffold12566_1076 | Ca_desig_scaffold  | 1076                           | [T/C]       | NA                                         |
| Ca_Desig_Chr_scaffold12566_1077 | Ca_desig_scaffold  | 1077                           | [T/C]       | NA                                         |
| Ca_Desig_Chr_scaffold12566_1154 | Ca_desig_scaffold  | 1154                           | [C/T]       | NA                                         |
| Ca_Desig_Chr_scaffold12566_1155 | Ca_desig_scaffold  | 1155                           | [A/G]       | NA                                         |
| Ca_Desig_Chr_scaffold12566_1156 | Ca_desig_scaffold  | 1156                           | [A/G]       | NA                                         |
| Ca_Desig_Chr_scaffold12566_1157 | Ca_desig_scaffold  | 1157                           | [T/C]       | NA                                         |
| Ca_Desig_Chr_scaffold12566_1159 | Ca_desig_scaffold  | 1159                           | [A/G]       | NA                                         |
| Ca_Desig_Chr_scaffold12566_1161 | Ca_desig_scaffold  | 1161                           | [T/C]       | NA                                         |
| Ca_Desig_Chr_scaffold12566_1163 | Ca_desig_scaffold  | 1163                           | [T/C]       | NA                                         |
| Ca_Desig_Chr_scaffold12566_1164 | Ca_desig_scaffold  | 1164                           | [G/A]       | NA                                         |
| Ca_Desig_Chr_scaffold12566_1165 | Ca_desig_scaffold  | 1165                           | [T/C]       | NA                                         |
| Ca_Desig_Chr_scaffold12566_1168 | Ca_desig_scaffold  | 1168                           | [A/G]       | NA                                         |
| Ca_Desig_Chr_scaffold12566_1170 | Ca_desig_scaffold  | 1170                           | [T/C]       | NA                                         |
| Ca_Desig_Chr_scaffold12566_1172 | Ca_desig_scaffold  | 1172                           | [A/G]       | NA                                         |
| Ca_Desig_Chr_scaffold12566_1173 | Ca_desig_scaffold  | 1173                           | [A/G]       | NA                                         |
| Ca_Desig_Chr_scaffold12566_1175 | Ca_desig_scaffold  | 1175                           | [T/C]       | NA                                         |

| <b>SNP IDs</b>                  | <b>Chromosomes</b> | <b>Physical positions (bp)</b> | <b>SNPs</b> | <b>NCBI SNPdb accession IDs (NCBI_ss#)</b> |
|---------------------------------|--------------------|--------------------------------|-------------|--------------------------------------------|
| Ca_Desig_Chr_scaffold12566_1178 | Ca_desig_scaffold  | 1178                           | [T/C]       | NA                                         |
| Ca_Desig_Chr_scaffold12566_1179 | Ca_desig_scaffold  | 1179                           | [T/C]       | NA                                         |
| Ca_Desig_Chr_scaffold12566_1181 | Ca_desig_scaffold  | 1181                           | [A/G]       | NA                                         |
| Ca_Desig_Chr_scaffold12566_1183 | Ca_desig_scaffold  | 1183                           | [T/C]       | NA                                         |
| Ca_Desig_Chr_scaffold12566_1184 | Ca_desig_scaffold  | 1184                           | [T/C]       | NA                                         |
| Ca_Desig_Chr_scaffold12566_1185 | Ca_desig_scaffold  | 1185                           | [C/T]       | NA                                         |
| Ca_Desig_Chr_scaffold12566_1186 | Ca_desig_scaffold  | 1186                           | [G/A]       | NA                                         |
| Ca_Desig_Chr_scaffold12566_1188 | Ca_desig_scaffold  | 1188                           | [T/C]       | NA                                         |
| Ca_Desig_Chr_scaffold12566_1191 | Ca_desig_scaffold  | 1191                           | [T/C]       | NA                                         |
| Ca_Desig_Chr_scaffold12566_1195 | Ca_desig_scaffold  | 1195                           | [T/C]       | NA                                         |
| Ca_Desig_Chr_scaffold12566_1196 | Ca_desig_scaffold  | 1196                           | [T/C]       | NA                                         |
| Ca_Desig_Chr_scaffold12566_1198 | Ca_desig_scaffold  | 1198                           | [A/G]       | NA                                         |
| Ca_Desig_Chr_scaffold12566_1200 | Ca_desig_scaffold  | 1200                           | [A/G]       | NA                                         |
| Ca_Desig_Chr_scaffold12566_1202 | Ca_desig_scaffold  | 1202                           | [T/C]       | NA                                         |
| Ca_Desig_Chr_scaffold12566_1204 | Ca_desig_scaffold  | 1204                           | [A/G]       | NA                                         |
| Ca_Desig_Chr_scaffold12566_1205 | Ca_desig_scaffold  | 1205                           | [A/G]       | NA                                         |
| Ca_Desig_Chr_scaffold12566_1206 | Ca_desig_scaffold  | 1206                           | [A/G]       | NA                                         |
| Ca_Desig_Chr_scaffold12566_1207 | Ca_desig_scaffold  | 1207                           | [A/G]       | NA                                         |
| Ca_Desig_Chr_scaffold12566_1208 | Ca_desig_scaffold  | 1208                           | [A/G]       | NA                                         |
| Ca_Desig_Chr_scaffold12566_1211 | Ca_desig_scaffold  | 1211                           | [A/G]       | NA                                         |
| Ca_Desig_Chr_scaffold12566_3107 | Ca_desig_scaffold  | 3107                           | [A/G]       | NA                                         |
| Ca_Desig_Chr_scaffold12566_3108 | Ca_desig_scaffold  | 3108                           | [T/C]       | NA                                         |
| Ca_Desig_Chr_scaffold12566_3113 | Ca_desig_scaffold  | 3113                           | [A/G]       | NA                                         |
| Ca_Desig_Chr_scaffold12566_3115 | Ca_desig_scaffold  | 3115                           | [A/G]       | NA                                         |
| Ca_Desig_Chr_scaffold12566_3117 | Ca_desig_scaffold  | 3117                           | [T/G]       | NA                                         |
| Ca_Desig_Chr_scaffold12566_3118 | Ca_desig_scaffold  | 3118                           | [T/C]       | NA                                         |
| Ca_Desig_Chr_scaffold12566_3122 | Ca_desig_scaffold  | 3122                           | [A/G]       | NA                                         |
| Ca_Desig_Chr_scaffold12566_3128 | Ca_desig_scaffold  | 3128                           | [T/C]       | NA                                         |
| Ca_Desig_Chr_scaffold12566_3130 | Ca_desig_scaffold  | 3130                           | [A/G]       | NA                                         |
| Ca_Desig_Chr_scaffold12566_3132 | Ca_desig_scaffold  | 3132                           | [A/G]       | NA                                         |
| Ca_Desig_Chr_scaffold12566_3134 | Ca_desig_scaffold  | 3134                           | [T/C]       | NA                                         |
| Ca_Desig_Chr_scaffold12566_3137 | Ca_desig_scaffold  | 3137                           | [A/G]       | NA                                         |
| Ca_Desig_Chr_scaffold12566_3138 | Ca_desig_scaffold  | 3138                           | [T/C]       | NA                                         |
| Ca_Desig_Chr_scaffold12566_3139 | Ca_desig_scaffold  | 3139                           | [C/T]       | NA                                         |

| <b>SNP IDs</b>                  | <b>Chromosomes</b> | <b>Physical positions (bp)</b> | <b>SNPs</b> | <b>NCBI SNPdb accession IDs (NCBI_ss#)</b> |
|---------------------------------|--------------------|--------------------------------|-------------|--------------------------------------------|
| Ca_Desig_Chr_scaffold12566_3145 | Ca_desig_scaffold  | 3145                           | [T/C]       | NA                                         |
| Ca_Desig_Chr_scaffold12566_3147 | Ca_desig_scaffold  | 3147                           | [T/C]       | NA                                         |
| Ca_Desig_Chr_scaffold12566_3149 | Ca_desig_scaffold  | 3149                           | [A/G]       | NA                                         |
| Ca_Desig_Chr_scaffold12566_3151 | Ca_desig_scaffold  | 3151                           | [A/G]       | NA                                         |
| Ca_Desig_Chr_scaffold12566_3153 | Ca_desig_scaffold  | 3153                           | [T/C]       | NA                                         |
| Ca_Desig_Chr_scaffold12566_3154 | Ca_desig_scaffold  | 3154                           | [T/C]       | NA                                         |
| Ca_Desig_Chr_scaffold12566_3155 | Ca_desig_scaffold  | 3155                           | [T/C]       | NA                                         |
| Ca_Desig_Chr_scaffold12566_3160 | Ca_desig_scaffold  | 3160                           | [T/C]       | NA                                         |
| Ca_Desig_Chr_scaffold12566_3161 | Ca_desig_scaffold  | 3161                           | [A/G]       | NA                                         |
| Ca_Desig_Chr_scaffold12566_3162 | Ca_desig_scaffold  | 3162                           | [A/G]       | NA                                         |
| Ca_Desig_Chr_scaffold12566_3164 | Ca_desig_scaffold  | 3164                           | [A/G]       | NA                                         |
| Ca_Desig_Chr_scaffold12566_3261 | Ca_desig_scaffold  | 3261                           | [A/G]       | NA                                         |
| Ca_Desig_Chr_scaffold12566_3262 | Ca_desig_scaffold  | 3262                           | [T/C]       | NA                                         |
| Ca_Desig_Chr_scaffold12566_3264 | Ca_desig_scaffold  | 3264                           | [T/C]       | NA                                         |
| Ca_Desig_Chr_scaffold12566_3268 | Ca_desig_scaffold  | 3268                           | [A/G]       | NA                                         |
| Ca_Desig_Chr_scaffold12566_3269 | Ca_desig_scaffold  | 3269                           | [A/G]       | NA                                         |
| Ca_Desig_Chr_scaffold12566_3270 | Ca_desig_scaffold  | 3270                           | [A/C]       | NA                                         |
| Ca_Desig_Chr_scaffold12566_3275 | Ca_desig_scaffold  | 3275                           | [C/G]       | NA                                         |
| Ca_Desig_Chr_scaffold12566_3277 | Ca_desig_scaffold  | 3277                           | [T/C]       | NA                                         |
| Ca_Desig_Chr_scaffold12566_3278 | Ca_desig_scaffold  | 3278                           | [T/C]       | NA                                         |
| Ca_Desig_Chr_scaffold12566_3280 | Ca_desig_scaffold  | 3280                           | [T/C]       | NA                                         |
| Ca_Desig_Chr_scaffold12566_3281 | Ca_desig_scaffold  | 3281                           | [T/C]       | NA                                         |
| Ca_Desig_Chr_scaffold12566_3282 | Ca_desig_scaffold  | 3282                           | [T/C]       | NA                                         |
| Ca_Desig_Chr_scaffold12566_3284 | Ca_desig_scaffold  | 3284                           | [A/G]       | NA                                         |
| Ca_Desig_Chr_scaffold12566_3285 | Ca_desig_scaffold  | 3285                           | [C/T]       | NA                                         |
| Ca_Desig_Chr_scaffold12566_3287 | Ca_desig_scaffold  | 3287                           | [T/C]       | NA                                         |
| Ca_Desig_Chr_scaffold12566_3289 | Ca_desig_scaffold  | 3289                           | [T/C]       | NA                                         |
| Ca_Desig_Chr_scaffold12566_3290 | Ca_desig_scaffold  | 3290                           | [T/C]       | NA                                         |
| Ca_Desig_Chr_scaffold12566_3291 | Ca_desig_scaffold  | 3291                           | [A/G]       | NA                                         |
| Ca_Desig_Chr_scaffold12566_3292 | Ca_desig_scaffold  | 3292                           | [A/G]       | NA                                         |
| Ca_Desig_Chr_scaffold12566_3296 | Ca_desig_scaffold  | 3296                           | [G/A]       | NA                                         |
| Ca_Desig_Chr_scaffold12566_3297 | Ca_desig_scaffold  | 3297                           | [A/G]       | NA                                         |
| Ca_Desig_Chr_scaffold12566_3301 | Ca_desig_scaffold  | 3301                           | [T/C]       | NA                                         |
| Ca_Desig_Chr_scaffold12566_3304 | Ca_desig_scaffold  | 3304                           | [T/C]       | NA                                         |

| <b>SNP IDs</b>                 | <b>Chromosomes</b> | <b>Physical positions (bp)</b> | <b>SNPs</b> | <b>NCBI SNPdb accession IDs (NCBI_ss#)</b> |
|--------------------------------|--------------------|--------------------------------|-------------|--------------------------------------------|
| Ca_DesigChr_scaffold12566_3306 | Ca_desig_scaffold  | 3306                           | [T/C]       | NA                                         |
| Ca_DesigChr_scaffold12566_3307 | Ca_desig_scaffold  | 3307                           | [A/G]       | NA                                         |
| Ca_DesigChr_scaffold12566_3312 | Ca_desig_scaffold  | 3312                           | [A/G]       | NA                                         |
| Ca_DesigChr_scaffold12566_3334 | Ca_desig_scaffold  | 3334                           | [T/C]       | NA                                         |
| Ca_DesigChr_scaffold12566_3362 | Ca_desig_scaffold  | 3362                           | [T/C]       | NA                                         |
| Ca_DesigChr_scaffold12566_3375 | Ca_desig_scaffold  | 3375                           | [T/C]       | NA                                         |
| Ca_DesigChr_scaffold12595_99   | Ca_desig_scaffold  | 99                             | [G/T]       | NA                                         |
| Ca_DesigChr_scaffold12595_119  | Ca_desig_scaffold  | 119                            | [A/G]       | NA                                         |
| Ca_DesigChr_scaffold12619_431  | Ca_desig_scaffold  | 431                            | [C/A]       | NA                                         |
| Ca_DesigChr_scaffold12643_1835 | Ca_desig_scaffold  | 1835                           | [A/G]       | NA                                         |
| Ca_DesigChr_scaffold12643_1847 | Ca_desig_scaffold  | 1847                           | [T/C]       | NA                                         |
| Ca_DesigChr_scaffold12643_1853 | Ca_desig_scaffold  | 1853                           | [G/C]       | NA                                         |
| Ca_DesigChr_scaffold12643_1875 | Ca_desig_scaffold  | 1875                           | [T/C]       | NA                                         |
| Ca_DesigChr_scaffold12643_1904 | Ca_desig_scaffold  | 1904                           | [A/T]       | NA                                         |
| Ca_DesigChr_scaffold12645_1823 | Ca_desig_scaffold  | 1823                           | [A/G]       | NA                                         |
| Ca_DesigChr_scaffold12645_1852 | Ca_desig_scaffold  | 1852                           | [C/T]       | NA                                         |
| Ca_DesigChr_scaffold12659_3591 | Ca_desig_scaffold  | 3591                           | [T/G]       | NA                                         |
| Ca_DesigChr_scaffold12659_3615 | Ca_desig_scaffold  | 3615                           | [T/G]       | NA                                         |
| Ca_DesigChr_scaffold12665_3478 | Ca_desig_scaffold  | 3478                           | [T/C]       | NA                                         |
| Ca_DesigChr_scaffold12665_3490 | Ca_desig_scaffold  | 3490                           | [T/C]       | NA                                         |
| Ca_DesigChr_scaffold12665_3502 | Ca_desig_scaffold  | 3502                           | [T/C]       | NA                                         |
| Ca_DesigChr_scaffold12665_3508 | Ca_desig_scaffold  | 3508                           | [T/G]       | NA                                         |
| Ca_DesigChr_scaffold12665_3512 | Ca_desig_scaffold  | 3512                           | [T/C]       | NA                                         |
| Ca_DesigChr_scaffold12665_3516 | Ca_desig_scaffold  | 3516                           | [T/C]       | NA                                         |
| Ca_DesigChr_scaffold12665_3530 | Ca_desig_scaffold  | 3530                           | [A/G]       | NA                                         |
| Ca_DesigChr_scaffold12683_2153 | Ca_desig_scaffold  | 2153                           | [T/G]       | NA                                         |
| Ca_DesigChr_scaffold12683_2159 | Ca_desig_scaffold  | 2159                           | [T/G]       | NA                                         |
| Ca_DesigChr_scaffold12683_2165 | Ca_desig_scaffold  | 2165                           | [T/A]       | NA                                         |
| Ca_DesigChr_scaffold12683_2166 | Ca_desig_scaffold  | 2166                           | [A/T]       | NA                                         |
| Ca_DesigChr_scaffold12700_2842 | Ca_desig_scaffold  | 2842                           | [A/G]       | NA                                         |
| Ca_DesigChr_scaffold12700_2848 | Ca_desig_scaffold  | 2848                           | [T/A]       | NA                                         |
| Ca_DesigChr_scaffold12700_2882 | Ca_desig_scaffold  | 2882                           | [A/G]       | NA                                         |
| Ca_DesigChr_scaffold12700_3197 | Ca_desig_scaffold  | 3197                           | [T/C]       | NA                                         |
| Ca_DesigChr_scaffold12700_3238 | Ca_desig_scaffold  | 3238                           | [A/C]       | NA                                         |



| <b>SNP IDs</b>                  | <b>Chromosomes</b> | <b>Physical positions (bp)</b> | <b>SNPs</b> | <b>NCBI SNPdb accession IDs (NCBI_ss#)</b> |
|---------------------------------|--------------------|--------------------------------|-------------|--------------------------------------------|
| Ca_Desig_Chr_scaffold12700_3272 | Ca_desig_scaffold  | 3272                           | [G/A]       | NA                                         |
| Ca_Desig_Chr_scaffold12728_2960 | Ca_desig_scaffold  | 2960                           | [A/C]       | NA                                         |
| Ca_Desig_Chr_scaffold12728_3035 | Ca_desig_scaffold  | 3035                           | [G/T]       | NA                                         |
| Ca_Desig_Chr_scaffold12728_3050 | Ca_desig_scaffold  | 3050                           | [C/T]       | NA                                         |
| Ca_Desig_Chr_scaffold12754_624  | Ca_desig_scaffold  | 624                            | [A/C]       | NA                                         |
| Ca_Desig_Chr_scaffold12754_719  | Ca_desig_scaffold  | 719                            | [A/G]       | NA                                         |
| Ca_Desig_Chr_scaffold12754_720  | Ca_desig_scaffold  | 720                            | [T/C]       | NA                                         |
| Ca_Desig_Chr_scaffold12754_721  | Ca_desig_scaffold  | 721                            | [T/C]       | NA                                         |
| Ca_Desig_Chr_scaffold12754_722  | Ca_desig_scaffold  | 722                            | [T/C]       | NA                                         |
| Ca_Desig_Chr_scaffold12754_723  | Ca_desig_scaffold  | 723                            | [C/T]       | NA                                         |
| Ca_Desig_Chr_scaffold12754_724  | Ca_desig_scaffold  | 724                            | [A/G]       | NA                                         |
| Ca_Desig_Chr_scaffold12754_725  | Ca_desig_scaffold  | 725                            | [A/G]       | NA                                         |
| Ca_Desig_Chr_scaffold12754_726  | Ca_desig_scaffold  | 726                            | [T/C]       | NA                                         |
| Ca_Desig_Chr_scaffold12754_727  | Ca_desig_scaffold  | 727                            | [A/G]       | NA                                         |
| Ca_Desig_Chr_scaffold12754_728  | Ca_desig_scaffold  | 728                            | [T/C]       | NA                                         |
| Ca_Desig_Chr_scaffold12754_730  | Ca_desig_scaffold  | 730                            | [G/A]       | NA                                         |
| Ca_Desig_Chr_scaffold12754_731  | Ca_desig_scaffold  | 731                            | [T/C]       | NA                                         |
| Ca_Desig_Chr_scaffold12754_732  | Ca_desig_scaffold  | 732                            | [C/T]       | NA                                         |
| Ca_Desig_Chr_scaffold12754_733  | Ca_desig_scaffold  | 733                            | [C/T]       | NA                                         |
| Ca_Desig_Chr_scaffold12754_734  | Ca_desig_scaffold  | 734                            | [C/T]       | NA                                         |
| Ca_Desig_Chr_scaffold12754_735  | Ca_desig_scaffold  | 735                            | [T/C]       | NA                                         |
| Ca_Desig_Chr_scaffold12754_736  | Ca_desig_scaffold  | 736                            | [T/C]       | NA                                         |
| Ca_Desig_Chr_scaffold12754_737  | Ca_desig_scaffold  | 737                            | [C/T]       | NA                                         |
| Ca_Desig_Chr_scaffold12754_738  | Ca_desig_scaffold  | 738                            | [G/A]       | NA                                         |
| Ca_Desig_Chr_scaffold12754_739  | Ca_desig_scaffold  | 739                            | [G/A]       | NA                                         |
| Ca_Desig_Chr_scaffold12754_740  | Ca_desig_scaffold  | 740                            | [T/C]       | NA                                         |
| Ca_Desig_Chr_scaffold12754_741  | Ca_desig_scaffold  | 741                            | [C/T]       | NA                                         |
| Ca_Desig_Chr_scaffold12754_742  | Ca_desig_scaffold  | 742                            | [C/A]       | NA                                         |
| Ca_Desig_Chr_scaffold12754_743  | Ca_desig_scaffold  | 743                            | [T/C]       | NA                                         |
| Ca_Desig_Chr_scaffold12754_744  | Ca_desig_scaffold  | 744                            | [T/C]       | NA                                         |
| Ca_Desig_Chr_scaffold12754_745  | Ca_desig_scaffold  | 745                            | [C/T]       | NA                                         |
| Ca_Desig_Chr_scaffold12754_746  | Ca_desig_scaffold  | 746                            | [T/C]       | NA                                         |
| Ca_Desig_Chr_scaffold12754_747  | Ca_desig_scaffold  | 747                            | [T/C]       | NA                                         |
| Ca_Desig_Chr_scaffold12754_748  | Ca_desig_scaffold  | 748                            | [T/C]       | NA                                         |

| <b>SNP IDs</b>                  | <b>Chromosomes</b> | <b>Physical positions (bp)</b> | <b>SNPs</b> | <b>NCBI SNPdb accession IDs (NCBI_ss#)</b> |
|---------------------------------|--------------------|--------------------------------|-------------|--------------------------------------------|
| Ca_Desig_Chr_scaffold12754_749  | Ca_desig_scaffold  | 749                            | [A/G]       | NA                                         |
| Ca_Desig_Chr_scaffold12754_750  | Ca_desig_scaffold  | 750                            | [G/A]       | NA                                         |
| Ca_Desig_Chr_scaffold12754_751  | Ca_desig_scaffold  | 751                            | [A/G]       | NA                                         |
| Ca_Desig_Chr_scaffold12754_752  | Ca_desig_scaffold  | 752                            | [G/A]       | NA                                         |
| Ca_Desig_Chr_scaffold12754_753  | Ca_desig_scaffold  | 753                            | [A/G]       | NA                                         |
| Ca_Desig_Chr_scaffold12754_754  | Ca_desig_scaffold  | 754                            | [A/G]       | NA                                         |
| Ca_Desig_Chr_scaffold12754_755  | Ca_desig_scaffold  | 755                            | [A/G]       | NA                                         |
| Ca_Desig_Chr_scaffold12754_756  | Ca_desig_scaffold  | 756                            | [T/C]       | NA                                         |
| Ca_Desig_Chr_scaffold12754_758  | Ca_desig_scaffold  | 758                            | [T/C]       | NA                                         |
| Ca_Desig_Chr_scaffold12754_759  | Ca_desig_scaffold  | 759                            | [T/C]       | NA                                         |
| Ca_Desig_Chr_scaffold12754_760  | Ca_desig_scaffold  | 760                            | [C/T]       | NA                                         |
| Ca_Desig_Chr_scaffold12754_761  | Ca_desig_scaffold  | 761                            | [T/C]       | NA                                         |
| Ca_Desig_Chr_scaffold12754_762  | Ca_desig_scaffold  | 762                            | [T/C]       | NA                                         |
| Ca_Desig_Chr_scaffold12754_763  | Ca_desig_scaffold  | 763                            | [T/C]       | NA                                         |
| Ca_Desig_Chr_scaffold12754_765  | Ca_desig_scaffold  | 765                            | [T/C]       | NA                                         |
| Ca_Desig_Chr_scaffold12754_766  | Ca_desig_scaffold  | 766                            | [T/C]       | NA                                         |
| Ca_Desig_Chr_scaffold12754_767  | Ca_desig_scaffold  | 767                            | [T/C]       | NA                                         |
| Ca_Desig_Chr_scaffold12754_768  | Ca_desig_scaffold  | 768                            | [A/G]       | NA                                         |
| Ca_Desig_Chr_scaffold12754_769  | Ca_desig_scaffold  | 769                            | [T/C]       | NA                                         |
| Ca_Desig_Chr_scaffold12754_770  | Ca_desig_scaffold  | 770                            | [A/G]       | NA                                         |
| Ca_Desig_Chr_scaffold12754_771  | Ca_desig_scaffold  | 771                            | [G/A]       | NA                                         |
| Ca_Desig_Chr_scaffold12754_772  | Ca_desig_scaffold  | 772                            | [C/T]       | NA                                         |
| Ca_Desig_Chr_scaffold12754_773  | Ca_desig_scaffold  | 773                            | [A/G]       | NA                                         |
| Ca_Desig_Chr_scaffold12754_774  | Ca_desig_scaffold  | 774                            | [C/T]       | NA                                         |
| Ca_Desig_Chr_scaffold12754_775  | Ca_desig_scaffold  | 775                            | [T/C]       | NA                                         |
| Ca_Desig_Chr_scaffold12754_776  | Ca_desig_scaffold  | 776                            | [G/A]       | NA                                         |
| Ca_Desig_Chr_scaffold12754_777  | Ca_desig_scaffold  | 777                            | [A/G]       | NA                                         |
| Ca_Desig_Chr_scaffold12754_780  | Ca_desig_scaffold  | 780                            | [T/A]       | NA                                         |
| Ca_Desig_Chr_scaffold12754_1823 | Ca_desig_scaffold  | 1823                           | [G/A]       | NA                                         |
| Ca_Desig_Chr_scaffold12754_1825 | Ca_desig_scaffold  | 1825                           | [T/C]       | NA                                         |
| Ca_Desig_Chr_scaffold12754_1826 | Ca_desig_scaffold  | 1826                           | [A/G]       | NA                                         |
| Ca_Desig_Chr_scaffold12754_1828 | Ca_desig_scaffold  | 1828                           | [A/G]       | NA                                         |
| Ca_Desig_Chr_scaffold12754_1829 | Ca_desig_scaffold  | 1829                           | [A/G]       | NA                                         |
| Ca_Desig_Chr_scaffold12754_1831 | Ca_desig_scaffold  | 1831                           | [A/G]       | NA                                         |

| <b>SNP IDs</b>                        | <b>Chromosomes</b> | <b>Physical positions (bp)</b> | <b>SNPs</b> | <b>NCBI SNPdb accession IDs (NCBI_ss#)</b> |
|---------------------------------------|--------------------|--------------------------------|-------------|--------------------------------------------|
| Ca_Desi_Chromosome_scaffold12754_1833 | Ca_desi_scaffold   | 1833                           | [A/G]       | NA                                         |
| Ca_Desi_Chromosome_scaffold12754_1835 | Ca_desi_scaffold   | 1835                           | [C/T]       | NA                                         |
| Ca_Desi_Chromosome_scaffold12754_1836 | Ca_desi_scaffold   | 1836                           | [C/T]       | NA                                         |
| Ca_Desi_Chromosome_scaffold12754_1837 | Ca_desi_scaffold   | 1837                           | [T/C]       | NA                                         |
| Ca_Desi_Chromosome_scaffold12754_1838 | Ca_desi_scaffold   | 1838                           | [A/G]       | NA                                         |
| Ca_Desi_Chromosome_scaffold12754_1839 | Ca_desi_scaffold   | 1839                           | [T/C]       | NA                                         |
| Ca_Desi_Chromosome_scaffold12754_1840 | Ca_desi_scaffold   | 1840                           | [G/A]       | NA                                         |
| Ca_Desi_Chromosome_scaffold12754_1841 | Ca_desi_scaffold   | 1841                           | [T/C]       | NA                                         |
| Ca_Desi_Chromosome_scaffold12754_1842 | Ca_desi_scaffold   | 1842                           | [A/G]       | NA                                         |
| Ca_Desi_Chromosome_scaffold12754_1843 | Ca_desi_scaffold   | 1843                           | [T/C]       | NA                                         |
| Ca_Desi_Chromosome_scaffold12754_1845 | Ca_desi_scaffold   | 1845                           | [C/T]       | NA                                         |
| Ca_Desi_Chromosome_scaffold12754_1848 | Ca_desi_scaffold   | 1848                           | [T/C]       | NA                                         |
| Ca_Desi_Chromosome_scaffold12754_1849 | Ca_desi_scaffold   | 1849                           | [G/A]       | NA                                         |
| Ca_Desi_Chromosome_scaffold12754_1850 | Ca_desi_scaffold   | 1850                           | [G/A]       | NA                                         |
| Ca_Desi_Chromosome_scaffold12754_1851 | Ca_desi_scaffold   | 1851                           | [A/G]       | NA                                         |
| Ca_Desi_Chromosome_scaffold12754_1852 | Ca_desi_scaffold   | 1852                           | [T/C]       | NA                                         |
| Ca_Desi_Chromosome_scaffold12754_1853 | Ca_desi_scaffold   | 1853                           | [G/A]       | NA                                         |
| Ca_Desi_Chromosome_scaffold12754_1854 | Ca_desi_scaffold   | 1854                           | [T/C]       | NA                                         |
| Ca_Desi_Chromosome_scaffold12754_1855 | Ca_desi_scaffold   | 1855                           | [C/A]       | NA                                         |
| Ca_Desi_Chromosome_scaffold12754_1856 | Ca_desi_scaffold   | 1856                           | [A/G]       | NA                                         |
| Ca_Desi_Chromosome_scaffold12754_1857 | Ca_desi_scaffold   | 1857                           | [A/G]       | NA                                         |
| Ca_Desi_Chromosome_scaffold12754_1859 | Ca_desi_scaffold   | 1859                           | [A/G]       | NA                                         |
| Ca_Desi_Chromosome_scaffold12754_1860 | Ca_desi_scaffold   | 1860                           | [A/G]       | NA                                         |
| Ca_Desi_Chromosome_scaffold12754_1861 | Ca_desi_scaffold   | 1861                           | [T/C]       | NA                                         |
| Ca_Desi_Chromosome_scaffold12754_1862 | Ca_desi_scaffold   | 1862                           | [G/A]       | NA                                         |
| Ca_Desi_Chromosome_scaffold12754_1863 | Ca_desi_scaffold   | 1863                           | [C/T]       | NA                                         |
| Ca_Desi_Chromosome_scaffold12754_1864 | Ca_desi_scaffold   | 1864                           | [T/C]       | NA                                         |
| Ca_Desi_Chromosome_scaffold12754_1865 | Ca_desi_scaffold   | 1865                           | [T/C]       | NA                                         |
| Ca_Desi_Chromosome_scaffold12754_1866 | Ca_desi_scaffold   | 1866                           | [T/C]       | NA                                         |
| Ca_Desi_Chromosome_scaffold12754_1867 | Ca_desi_scaffold   | 1867                           | [A/T]       | NA                                         |
| Ca_Desi_Chromosome_scaffold12754_1868 | Ca_desi_scaffold   | 1868                           | [T/C]       | NA                                         |
| Ca_Desi_Chromosome_scaffold12754_1870 | Ca_desi_scaffold   | 1870                           | [T/C]       | NA                                         |
| Ca_Desi_Chromosome_scaffold12754_1871 | Ca_desi_scaffold   | 1871                           | [A/G]       | NA                                         |
| Ca_Desi_Chromosome_scaffold12754_1872 | Ca_desi_scaffold   | 1872                           | [A/G]       | NA                                         |

| <b>SNP IDs</b>                  | <b>Chromosomes</b> | <b>Physical positions (bp)</b> | <b>SNPs</b> | <b>NCBI SNPdb accession IDs (NCBI_ss#)</b> |
|---------------------------------|--------------------|--------------------------------|-------------|--------------------------------------------|
| Ca_Desig_Chr_scaffold12754_1873 | Ca_desig_scaffold  | 1873                           | [T/C]       | NA                                         |
| Ca_Desig_Chr_scaffold12754_1875 | Ca_desig_scaffold  | 1875                           | [G/A]       | NA                                         |
| Ca_Desig_Chr_scaffold12754_1876 | Ca_desig_scaffold  | 1876                           | [A/G]       | NA                                         |
| Ca_Desig_Chr_scaffold12754_1877 | Ca_desig_scaffold  | 1877                           | [G/A]       | NA                                         |
| Ca_Desig_Chr_scaffold12754_1878 | Ca_desig_scaffold  | 1878                           | [G/A]       | NA                                         |
| Ca_Desig_Chr_scaffold12754_1879 | Ca_desig_scaffold  | 1879                           | [G/A]       | NA                                         |
| Ca_Desig_Chr_scaffold12754_1880 | Ca_desig_scaffold  | 1880                           | [C/G]       | NA                                         |
| Ca_Desig_Chr_scaffold12754_1906 | Ca_desig_scaffold  | 1906                           | [G/T]       | NA                                         |
| Ca_Desig_Chr_scaffold12754_1907 | Ca_desig_scaffold  | 1907                           | [G/A]       | NA                                         |
| Ca_Desig_Chr_scaffold12754_1908 | Ca_desig_scaffold  | 1908                           | [G/A]       | NA                                         |
| Ca_Desig_Chr_scaffold12754_1910 | Ca_desig_scaffold  | 1910                           | [A/G]       | NA                                         |
| Ca_Desig_Chr_scaffold12754_1911 | Ca_desig_scaffold  | 1911                           | [A/G]       | NA                                         |
| Ca_Desig_Chr_scaffold12754_1914 | Ca_desig_scaffold  | 1914                           | [A/G]       | NA                                         |
| Ca_Desig_Chr_scaffold12754_1915 | Ca_desig_scaffold  | 1915                           | [G/A]       | NA                                         |
| Ca_Desig_Chr_scaffold12754_1916 | Ca_desig_scaffold  | 1916                           | [G/A]       | NA                                         |
| Ca_Desig_Chr_scaffold12754_1917 | Ca_desig_scaffold  | 1917                           | [A/G]       | NA                                         |
| Ca_Desig_Chr_scaffold12754_1918 | Ca_desig_scaffold  | 1918                           | [G/A]       | NA                                         |
| Ca_Desig_Chr_scaffold12754_1919 | Ca_desig_scaffold  | 1919                           | [A/G]       | NA                                         |
| Ca_Desig_Chr_scaffold12754_1920 | Ca_desig_scaffold  | 1920                           | [A/G]       | NA                                         |
| Ca_Desig_Chr_scaffold12754_1921 | Ca_desig_scaffold  | 1921                           | [T/C]       | NA                                         |
| Ca_Desig_Chr_scaffold12754_1922 | Ca_desig_scaffold  | 1922                           | [T/C]       | NA                                         |
| Ca_Desig_Chr_scaffold12754_1925 | Ca_desig_scaffold  | 1925                           | [T/C]       | NA                                         |
| Ca_Desig_Chr_scaffold12754_1926 | Ca_desig_scaffold  | 1926                           | [C/T]       | NA                                         |
| Ca_Desig_Chr_scaffold12754_1928 | Ca_desig_scaffold  | 1928                           | [C/T]       | NA                                         |
| Ca_Desig_Chr_scaffold12754_1929 | Ca_desig_scaffold  | 1929                           | [C/T]       | NA                                         |
| Ca_Desig_Chr_scaffold12754_1930 | Ca_desig_scaffold  | 1930                           | [C/T]       | NA                                         |
| Ca_Desig_Chr_scaffold12754_1931 | Ca_desig_scaffold  | 1931                           | [C/T]       | NA                                         |
| Ca_Desig_Chr_scaffold12754_1932 | Ca_desig_scaffold  | 1932                           | [G/A]       | NA                                         |
| Ca_Desig_Chr_scaffold12754_1933 | Ca_desig_scaffold  | 1933                           | [G/A]       | NA                                         |
| Ca_Desig_Chr_scaffold12754_1934 | Ca_desig_scaffold  | 1934                           | [C/G]       | NA                                         |
| Ca_Desig_Chr_scaffold12754_1935 | Ca_desig_scaffold  | 1935                           | [T/C]       | NA                                         |
| Ca_Desig_Chr_scaffold12754_1936 | Ca_desig_scaffold  | 1936                           | [C/T]       | NA                                         |
| Ca_Desig_Chr_scaffold12754_1937 | Ca_desig_scaffold  | 1937                           | [T/C]       | NA                                         |
| Ca_Desig_Chr_scaffold12754_1938 | Ca_desig_scaffold  | 1938                           | [A/G]       | NA                                         |

| <b>SNP IDs</b>                        | <b>Chromosomes</b> | <b>Physical positions (bp)</b> | <b>SNPs</b> | <b>NCBI SNPdb accession IDs (NCBI_ss#)</b> |
|---------------------------------------|--------------------|--------------------------------|-------------|--------------------------------------------|
| Ca_Desi_Chromosome_scaffold12754_1939 | Ca_desi_scaffold   | 1939                           | [A/G]       | NA                                         |
| Ca_Desi_Chromosome_scaffold12754_1941 | Ca_desi_scaffold   | 1941                           | [T/C]       | NA                                         |
| Ca_Desi_Chromosome_scaffold12754_1943 | Ca_desi_scaffold   | 1943                           | [G/A]       | NA                                         |
| Ca_Desi_Chromosome_scaffold12754_1944 | Ca_desi_scaffold   | 1944                           | [T/C]       | NA                                         |
| Ca_Desi_Chromosome_scaffold12754_1945 | Ca_desi_scaffold   | 1945                           | [T/C]       | NA                                         |
| Ca_Desi_Chromosome_scaffold12754_1946 | Ca_desi_scaffold   | 1946                           | [T/C]       | NA                                         |
| Ca_Desi_Chromosome_scaffold12754_1947 | Ca_desi_scaffold   | 1947                           | [C/T]       | NA                                         |
| Ca_Desi_Chromosome_scaffold12754_1948 | Ca_desi_scaffold   | 1948                           | [A/G]       | NA                                         |
| Ca_Desi_Chromosome_scaffold12754_1950 | Ca_desi_scaffold   | 1950                           | [T/C]       | NA                                         |
| Ca_Desi_Chromosome_scaffold12754_1951 | Ca_desi_scaffold   | 1951                           | [C/T]       | NA                                         |
| Ca_Desi_Chromosome_scaffold12754_1954 | Ca_desi_scaffold   | 1954                           | [T/C]       | NA                                         |
| Ca_Desi_Chromosome_scaffold12754_1956 | Ca_desi_scaffold   | 1956                           | [T/C]       | NA                                         |
| Ca_Desi_Chromosome_scaffold12754_1957 | Ca_desi_scaffold   | 1957                           | [A/G]       | NA                                         |
| Ca_Desi_Chromosome_scaffold12754_1958 | Ca_desi_scaffold   | 1958                           | [T/C]       | NA                                         |
| Ca_Desi_Chromosome_scaffold12754_1959 | Ca_desi_scaffold   | 1959                           | [A/G]       | NA                                         |
| Ca_Desi_Chromosome_scaffold12754_1960 | Ca_desi_scaffold   | 1960                           | [T/C]       | NA                                         |
| Ca_Desi_Chromosome_scaffold12754_1961 | Ca_desi_scaffold   | 1961                           | [A/G]       | NA                                         |
| Ca_Desi_Chromosome_scaffold12754_1962 | Ca_desi_scaffold   | 1962                           | [A/G]       | NA                                         |
| Ca_Desi_Chromosome_scaffold12754_1964 | Ca_desi_scaffold   | 1964                           | [C/A]       | NA                                         |
| Ca_Desi_Chromosome_scaffold12754_1965 | Ca_desi_scaffold   | 1965                           | [A/G]       | NA                                         |
| Ca_Desi_Chromosome_scaffold12754_1971 | Ca_desi_scaffold   | 1971                           | [T/C]       | NA                                         |
| Ca_Desi_Chromosome_scaffold12754_1972 | Ca_desi_scaffold   | 1972                           | [T/C]       | NA                                         |
| Ca_Desi_Chromosome_scaffold12754_1973 | Ca_desi_scaffold   | 1973                           | [T/C]       | NA                                         |
| Ca_Desi_Chromosome_scaffold12754_1976 | Ca_desi_scaffold   | 1976                           | [T/C]       | NA                                         |
| Ca_Desi_Chromosome_scaffold12754_1978 | Ca_desi_scaffold   | 1978                           | [A/G]       | NA                                         |
| Ca_Desi_Chromosome_scaffold12754_1982 | Ca_desi_scaffold   | 1982                           | [A/G]       | NA                                         |
| Ca_Desi_Chromosome_scaffold12754_1995 | Ca_desi_scaffold   | 1995                           | [T/C]       | NA                                         |
| Ca_Desi_Chromosome_scaffold12754_1997 | Ca_desi_scaffold   | 1997                           | [T/C]       | NA                                         |
| Ca_Desi_Chromosome_scaffold12754_2001 | Ca_desi_scaffold   | 2001                           | [T/C]       | NA                                         |
| Ca_Desi_Chromosome_scaffold12754_2004 | Ca_desi_scaffold   | 2004                           | [G/A]       | NA                                         |
| Ca_Desi_Chromosome_scaffold12754_2008 | Ca_desi_scaffold   | 2008                           | [T/C]       | NA                                         |
| Ca_Desi_Chromosome_scaffold12754_2009 | Ca_desi_scaffold   | 2009                           | [C/T]       | NA                                         |
| Ca_Desi_Chromosome_scaffold12754_2012 | Ca_desi_scaffold   | 2012                           | [A/G]       | NA                                         |
| Ca_Desi_Chromosome_scaffold12754_2015 | Ca_desi_scaffold   | 2015                           | [T/C]       | NA                                         |

| <b>SNP IDs</b>                  | <b>Chromosomes</b> | <b>Physical positions (bp)</b> | <b>SNPs</b> | <b>NCBI SNPdb accession IDs (NCBI_ss#)</b> |
|---------------------------------|--------------------|--------------------------------|-------------|--------------------------------------------|
| Ca_Desig_Chr_scaffold12754_2018 | Ca_desig_scaffold  | 2018                           | [A/G]       | NA                                         |
| Ca_Desig_Chr_scaffold12754_2026 | Ca_desig_scaffold  | 2026                           | [A/C]       | NA                                         |
| Ca_Desig_Chr_scaffold12754_2027 | Ca_desig_scaffold  | 2027                           | [T/C]       | NA                                         |
| Ca_Desig_Chr_scaffold12754_2029 | Ca_desig_scaffold  | 2029                           | [T/C]       | NA                                         |
| Ca_Desig_Chr_scaffold12754_2124 | Ca_desig_scaffold  | 2124                           | [A/C]       | NA                                         |
| Ca_Desig_Chr_scaffold12754_2272 | Ca_desig_scaffold  | 2272                           | [G/T]       | NA                                         |
| Ca_Desig_Chr_scaffold12754_2274 | Ca_desig_scaffold  | 2274                           | [G/T]       | NA                                         |
| Ca_Desig_Chr_scaffold12754_2285 | Ca_desig_scaffold  | 2285                           | [A/G]       | NA                                         |
| Ca_Desig_Chr_scaffold12754_2296 | Ca_desig_scaffold  | 2296                           | [T/C]       | NA                                         |
| Ca_Desig_Chr_scaffold12754_2310 | Ca_desig_scaffold  | 2310                           | [T/C]       | NA                                         |
| Ca_Desig_Chr_scaffold12754_2393 | Ca_desig_scaffold  | 2393                           | [C/A]       | NA                                         |
| Ca_Desig_Chr_scaffold12754_2394 | Ca_desig_scaffold  | 2394                           | [T/G]       | NA                                         |
| Ca_Desig_Chr_scaffold12754_2395 | Ca_desig_scaffold  | 2395                           | [G/A]       | NA                                         |
| Ca_Desig_Chr_scaffold12754_3417 | Ca_desig_scaffold  | 3417                           | [A/T]       | NA                                         |
| Ca_Desig_Chr_scaffold12775_3322 | Ca_desig_scaffold  | 3322                           | [T/C]       | NA                                         |
| Ca_Desig_Chr_scaffold12854_1124 | Ca_desig_scaffold  | 1124                           | [T/G]       | NA                                         |
| Ca_Desig_Chr_scaffold12885_2665 | Ca_desig_scaffold  | 2665                           | [T/G]       | NA                                         |
| Ca_Desig_Chr_scaffold12885_2675 | Ca_desig_scaffold  | 2675                           | [T/C]       | NA                                         |
| Ca_Desig_Chr_scaffold12885_2695 | Ca_desig_scaffold  | 2695                           | [T/G]       | NA                                         |
| Ca_Desig_Chr_scaffold12952_1730 | Ca_desig_scaffold  | 1730                           | [A/G]       | NA                                         |
| Ca_Desig_Chr_scaffold12955_1579 | Ca_desig_scaffold  | 1579                           | [T/G]       | NA                                         |
| Ca_Desig_Chr_scaffold12955_2433 | Ca_desig_scaffold  | 2433                           | [A/G]       | NA                                         |
| Ca_Desig_Chr_scaffold12955_2447 | Ca_desig_scaffold  | 2447                           | [A/C]       | NA                                         |
| Ca_Desig_Chr_scaffold12955_2450 | Ca_desig_scaffold  | 2450                           | [A/C]       | NA                                         |
| Ca_Desig_Chr_scaffold12955_2456 | Ca_desig_scaffold  | 2456                           | [T/C]       | NA                                         |
| Ca_Desig_Chr_scaffold12955_2471 | Ca_desig_scaffold  | 2471                           | [A/C]       | NA                                         |
| Ca_Desig_Chr_scaffold12955_2577 | Ca_desig_scaffold  | 2577                           | [T/A]       | NA                                         |
| Ca_Desig_Chr_scaffold12982_673  | Ca_desig_scaffold  | 673                            | [A/T]       | NA                                         |
| Ca_Desig_Chr_scaffold13035_3342 | Ca_desig_scaffold  | 3342                           | [T/C]       | NA                                         |
| Ca_Desig_Chr_scaffold13063_3267 | Ca_desig_scaffold  | 3267                           | [G/A]       | NA                                         |
| Ca_Desig_Chr_scaffold13063_3305 | Ca_desig_scaffold  | 3305                           | [C/T]       | NA                                         |
| Ca_Desig_Chr_scaffold13063_3310 | Ca_desig_scaffold  | 3310                           | [G/A]       | NA                                         |
| Ca_Desig_Chr_scaffold13063_3323 | Ca_desig_scaffold  | 3323                           | [G/T]       | NA                                         |
| Ca_Desig_Chr_scaffold13078_3314 | Ca_desig_scaffold  | 3314                           | [A/C]       | NA                                         |

| <b>SNP IDs</b>                | <b>Chromosomes</b> | <b>Physical positions (bp)</b> | <b>SNPs</b> | <b>NCBI SNPdb accession IDs (NCBI_ss#)</b> |
|-------------------------------|--------------------|--------------------------------|-------------|--------------------------------------------|
| Ca_Desi_Ch_scaffold13311_2541 | Ca_desi_scaffold   | 2541                           | [A/G]       | NA                                         |
| Ca_Desi_Ch_scaffold13329_1070 | Ca_desi_scaffold   | 1070                           | [C/A]       | NA                                         |
| Ca_Desi_Ch_scaffold13329_1072 | Ca_desi_scaffold   | 1072                           | [T/A]       | NA                                         |
| Ca_Desi_Ch_scaffold13329_1100 | Ca_desi_scaffold   | 1100                           | [G/A]       | NA                                         |
| Ca_Desi_Ch_scaffold13329_1105 | Ca_desi_scaffold   | 1105                           | [T/A]       | NA                                         |
| Ca_Desi_Ch_scaffold13356_1399 | Ca_desi_scaffold   | 1399                           | [A/T]       | NA                                         |
| Ca_Desi_Ch_scaffold13361_1972 | Ca_desi_scaffold   | 1972                           | [A/G]       | NA                                         |
| Ca_Desi_Ch_scaffold13367_757  | Ca_desi_scaffold   | 757                            | [T/G]       | NA                                         |
| Ca_Desi_Ch_scaffold13430_169  | Ca_desi_scaffold   | 169                            | [T/G]       | NA                                         |
| Ca_Desi_Ch_scaffold13430_253  | Ca_desi_scaffold   | 253                            | [T/C]       | NA                                         |
| Ca_Desi_Ch_scaffold13430_271  | Ca_desi_scaffold   | 271                            | [T/C]       | NA                                         |
| Ca_Desi_Ch_scaffold13430_514  | Ca_desi_scaffold   | 514                            | [G/A]       | NA                                         |
| Ca_Desi_Ch_scaffold13430_517  | Ca_desi_scaffold   | 517                            | [C/T]       | NA                                         |
| Ca_Desi_Ch_scaffold13485_2644 | Ca_desi_scaffold   | 2644                           | [C/T]       | NA                                         |
| Ca_Desi_Ch_scaffold13522_335  | Ca_desi_scaffold   | 335                            | [T/G]       | NA                                         |
| Ca_Desi_Ch_scaffold13522_353  | Ca_desi_scaffold   | 353                            | [T/C]       | NA                                         |
| Ca_Desi_Ch_scaffold13604_1502 | Ca_desi_scaffold   | 1502                           | [A/G]       | NA                                         |
| Ca_Desi_Ch_scaffold13604_1518 | Ca_desi_scaffold   | 1518                           | [G/A]       | NA                                         |
| Ca_Desi_Ch_scaffold13620_2461 | Ca_desi_scaffold   | 2461                           | [A/C]       | NA                                         |
| Ca_Desi_Ch_scaffold13720_436  | Ca_desi_scaffold   | 436                            | [A/G]       | NA                                         |
| Ca_Desi_Ch_scaffold13720_1387 | Ca_desi_scaffold   | 1387                           | [T/G]       | NA                                         |
| Ca_Desi_Ch_scaffold13747_624  | Ca_desi_scaffold   | 624                            | [C/T]       | NA                                         |
| Ca_Desi_Ch_scaffold13747_625  | Ca_desi_scaffold   | 625                            | [G/A]       | NA                                         |
| Ca_Desi_Ch_scaffold13747_628  | Ca_desi_scaffold   | 628                            | [T/C]       | NA                                         |
| Ca_Desi_Ch_scaffold13747_630  | Ca_desi_scaffold   | 630                            | [G/T]       | NA                                         |
| Ca_Desi_Ch_scaffold13747_631  | Ca_desi_scaffold   | 631                            | [C/T]       | NA                                         |
| Ca_Desi_Ch_scaffold13747_632  | Ca_desi_scaffold   | 632                            | [T/C]       | NA                                         |
| Ca_Desi_Ch_scaffold13747_633  | Ca_desi_scaffold   | 633                            | [T/C]       | NA                                         |
| Ca_Desi_Ch_scaffold13747_636  | Ca_desi_scaffold   | 636                            | [T/C]       | NA                                         |
| Ca_Desi_Ch_scaffold13747_639  | Ca_desi_scaffold   | 639                            | [A/G]       | NA                                         |
| Ca_Desi_Ch_scaffold13747_640  | Ca_desi_scaffold   | 640                            | [T/C]       | NA                                         |
| Ca_Desi_Ch_scaffold13747_641  | Ca_desi_scaffold   | 641                            | [T/C]       | NA                                         |
| Ca_Desi_Ch_scaffold13747_642  | Ca_desi_scaffold   | 642                            | [G/T]       | NA                                         |
| Ca_Desi_Ch_scaffold13747_644  | Ca_desi_scaffold   | 644                            | [T/C]       | NA                                         |

| <b>SNP IDs</b>               | <b>Chromosomes</b> | <b>Physical positions (bp)</b> | <b>SNPs</b> | <b>NCBI SNPdb accession IDs (NCBI_ss#)</b> |
|------------------------------|--------------------|--------------------------------|-------------|--------------------------------------------|
| Ca_Desi_Ch_scaffold13747_646 | Ca_desi_scaffold   | 646                            | [A/G]       | NA                                         |
| Ca_Desi_Ch_scaffold13747_647 | Ca_desi_scaffold   | 647                            | [A/G]       | NA                                         |
| Ca_Desi_Ch_scaffold13747_650 | Ca_desi_scaffold   | 650                            | [A/G]       | NA                                         |
| Ca_Desi_Ch_scaffold13747_651 | Ca_desi_scaffold   | 651                            | [A/G]       | NA                                         |
| Ca_Desi_Ch_scaffold13747_653 | Ca_desi_scaffold   | 653                            | [A/G]       | NA                                         |
| Ca_Desi_Ch_scaffold13747_654 | Ca_desi_scaffold   | 654                            | [A/G]       | NA                                         |
| Ca_Desi_Ch_scaffold13747_656 | Ca_desi_scaffold   | 656                            | [A/G]       | NA                                         |
| Ca_Desi_Ch_scaffold13747_657 | Ca_desi_scaffold   | 657                            | [T/C]       | NA                                         |
| Ca_Desi_Ch_scaffold13747_658 | Ca_desi_scaffold   | 658                            | [G/A]       | NA                                         |
| Ca_Desi_Ch_scaffold13747_659 | Ca_desi_scaffold   | 659                            | [A/G]       | NA                                         |
| Ca_Desi_Ch_scaffold13747_660 | Ca_desi_scaffold   | 660                            | [A/G]       | NA                                         |
| Ca_Desi_Ch_scaffold13747_661 | Ca_desi_scaffold   | 661                            | [A/G]       | NA                                         |
| Ca_Desi_Ch_scaffold13747_662 | Ca_desi_scaffold   | 662                            | [T/A]       | NA                                         |
| Ca_Desi_Ch_scaffold13747_671 | Ca_desi_scaffold   | 671                            | [T/C]       | NA                                         |
| Ca_Desi_Ch_scaffold13747_673 | Ca_desi_scaffold   | 673                            | [T/C]       | NA                                         |
| Ca_Desi_Ch_scaffold13747_676 | Ca_desi_scaffold   | 676                            | [A/G]       | NA                                         |
| Ca_Desi_Ch_scaffold13747_677 | Ca_desi_scaffold   | 677                            | [A/G]       | NA                                         |
| Ca_Desi_Ch_scaffold13747_678 | Ca_desi_scaffold   | 678                            | [C/T]       | NA                                         |
| Ca_Desi_Ch_scaffold13747_680 | Ca_desi_scaffold   | 680                            | [T/C]       | NA                                         |
| Ca_Desi_Ch_scaffold13747_682 | Ca_desi_scaffold   | 682                            | [T/C]       | NA                                         |
| Ca_Desi_Ch_scaffold13747_683 | Ca_desi_scaffold   | 683                            | [T/C]       | NA                                         |
| Ca_Desi_Ch_scaffold13747_685 | Ca_desi_scaffold   | 685                            | [T/C]       | NA                                         |
| Ca_Desi_Ch_scaffold13747_688 | Ca_desi_scaffold   | 688                            | [C/G]       | NA                                         |
| Ca_Desi_Ch_scaffold13747_690 | Ca_desi_scaffold   | 690                            | [A/G]       | NA                                         |
| Ca_Desi_Ch_scaffold13747_694 | Ca_desi_scaffold   | 694                            | [T/C]       | NA                                         |
| Ca_Desi_Ch_scaffold13747_695 | Ca_desi_scaffold   | 695                            | [T/C]       | NA                                         |
| Ca_Desi_Ch_scaffold13747_701 | Ca_desi_scaffold   | 701                            | [T/C]       | NA                                         |
| Ca_Desi_Ch_scaffold13747_705 | Ca_desi_scaffold   | 705                            | [A/G]       | NA                                         |
| Ca_Desi_Ch_scaffold13747_710 | Ca_desi_scaffold   | 710                            | [T/C]       | NA                                         |
| Ca_Desi_Ch_scaffold13747_712 | Ca_desi_scaffold   | 712                            | [T/C]       | NA                                         |
| Ca_Desi_Ch_scaffold13747_714 | Ca_desi_scaffold   | 714                            | [T/C]       | NA                                         |
| Ca_Desi_Ch_scaffold13747_715 | Ca_desi_scaffold   | 715                            | [T/C]       | NA                                         |
| Ca_Desi_Ch_scaffold13747_716 | Ca_desi_scaffold   | 716                            | [T/C]       | NA                                         |
| Ca_Desi_Ch_scaffold13747_720 | Ca_desi_scaffold   | 720                            | [T/C]       | NA                                         |



| <b>SNP IDs</b>                | <b>Chromosomes</b> | <b>Physical positions (bp)</b> | <b>SNPs</b> | <b>NCBI SNPdb accession IDs (NCBI_ss#)</b> |
|-------------------------------|--------------------|--------------------------------|-------------|--------------------------------------------|
| Ca_Desi_Ch_scaffold13747_722  | Ca_desi_scaffold   | 722                            | [T/C]       | NA                                         |
| Ca_Desi_Ch_scaffold13747_724  | Ca_desi_scaffold   | 724                            | [A/G]       | NA                                         |
| Ca_Desi_Ch_scaffold13747_725  | Ca_desi_scaffold   | 725                            | [A/G]       | NA                                         |
| Ca_Desi_Ch_scaffold13747_2319 | Ca_desi_scaffold   | 2319                           | [G/T]       | NA                                         |
| Ca_Desi_Ch_scaffold13747_2320 | Ca_desi_scaffold   | 2320                           | [G/A]       | NA                                         |
| Ca_Desi_Ch_scaffold13747_2323 | Ca_desi_scaffold   | 2323                           | [G/C]       | NA                                         |
| Ca_Desi_Ch_scaffold13750_231  | Ca_desi_scaffold   | 231                            | [A/C]       | NA                                         |
| Ca_Desi_Ch_scaffold13750_244  | Ca_desi_scaffold   | 244                            | [T/C]       | NA                                         |
| Ca_Desi_Ch_scaffold13750_247  | Ca_desi_scaffold   | 247                            | [A/C]       | NA                                         |
| Ca_Desi_Ch_scaffold13750_258  | Ca_desi_scaffold   | 258                            | [T/C]       | NA                                         |
| Ca_Desi_Ch_scaffold13774_1832 | Ca_desi_scaffold   | 1832                           | [A/T]       | NA                                         |
| Ca_Desi_Ch_scaffold13774_1870 | Ca_desi_scaffold   | 1870                           | [A/C]       | NA                                         |
| Ca_Desi_Ch_scaffold13791_591  | Ca_desi_scaffold   | 591                            | [T/G]       | NA                                         |
| Ca_Desi_Ch_scaffold13815_1348 | Ca_desi_scaffold   | 1348                           | [T/C]       | NA                                         |
| Ca_Desi_Ch_scaffold13815_1349 | Ca_desi_scaffold   | 1349                           | [T/C]       | NA                                         |
| Ca_Desi_Ch_scaffold13815_1355 | Ca_desi_scaffold   | 1355                           | [T/C]       | NA                                         |
| Ca_Desi_Ch_scaffold13815_1357 | Ca_desi_scaffold   | 1357                           | [C/T]       | NA                                         |
| Ca_Desi_Ch_scaffold13815_1358 | Ca_desi_scaffold   | 1358                           | [G/A]       | NA                                         |
| Ca_Desi_Ch_scaffold13815_1360 | Ca_desi_scaffold   | 1360                           | [T/C]       | NA                                         |
| Ca_Desi_Ch_scaffold13815_1361 | Ca_desi_scaffold   | 1361                           | [T/C]       | NA                                         |
| Ca_Desi_Ch_scaffold13815_1363 | Ca_desi_scaffold   | 1363                           | [A/G]       | NA                                         |
| Ca_Desi_Ch_scaffold13815_1365 | Ca_desi_scaffold   | 1365                           | [T/C]       | NA                                         |
| Ca_Desi_Ch_scaffold13815_1367 | Ca_desi_scaffold   | 1367                           | [T/C]       | NA                                         |
| Ca_Desi_Ch_scaffold13815_1373 | Ca_desi_scaffold   | 1373                           | [A/G]       | NA                                         |
| Ca_Desi_Ch_scaffold13815_1375 | Ca_desi_scaffold   | 1375                           | [T/G]       | NA                                         |
| Ca_Desi_Ch_scaffold13815_1377 | Ca_desi_scaffold   | 1377                           | [A/G]       | NA                                         |
| Ca_Desi_Ch_scaffold13815_1379 | Ca_desi_scaffold   | 1379                           | [A/G]       | NA                                         |
| Ca_Desi_Ch_scaffold13815_1380 | Ca_desi_scaffold   | 1380                           | [T/C]       | NA                                         |
| Ca_Desi_Ch_scaffold13815_1382 | Ca_desi_scaffold   | 1382                           | [A/G]       | NA                                         |
| Ca_Desi_Ch_scaffold13815_1384 | Ca_desi_scaffold   | 1384                           | [T/C]       | NA                                         |
| Ca_Desi_Ch_scaffold13815_1385 | Ca_desi_scaffold   | 1385                           | [A/G]       | NA                                         |
| Ca_Desi_Ch_scaffold13815_1386 | Ca_desi_scaffold   | 1386                           | [G/A]       | NA                                         |
| Ca_Desi_Ch_scaffold13815_1388 | Ca_desi_scaffold   | 1388                           | [C/T]       | NA                                         |
| Ca_Desi_Ch_scaffold13815_1390 | Ca_desi_scaffold   | 1390                           | [A/G]       | NA                                         |

| <b>SNP IDs</b>                | <b>Chromosomes</b> | <b>Physical positions (bp)</b> | <b>SNPs</b> | <b>NCBI SNPdb accession IDs (NCBI_ss#)</b> |
|-------------------------------|--------------------|--------------------------------|-------------|--------------------------------------------|
| Ca_Desi_Ch_scaffold13815_1392 | Ca_desi_scaffold   | 1392                           | [A/G]       | NA                                         |
| Ca_Desi_Ch_scaffold13815_1393 | Ca_desi_scaffold   | 1393                           | [A/G]       | NA                                         |
| Ca_Desi_Ch_scaffold13815_1396 | Ca_desi_scaffold   | 1396                           | [T/C]       | NA                                         |
| Ca_Desi_Ch_scaffold13815_1398 | Ca_desi_scaffold   | 1398                           | [A/G]       | NA                                         |
| Ca_Desi_Ch_scaffold13815_1400 | Ca_desi_scaffold   | 1400                           | [A/G]       | NA                                         |
| Ca_Desi_Ch_scaffold13815_1403 | Ca_desi_scaffold   | 1403                           | [C/T]       | NA                                         |
| Ca_Desi_Ch_scaffold13815_1484 | Ca_desi_scaffold   | 1484                           | [C/G]       | NA                                         |
| Ca_Desi_Ch_scaffold13815_1485 | Ca_desi_scaffold   | 1485                           | [T/C]       | NA                                         |
| Ca_Desi_Ch_scaffold13815_1488 | Ca_desi_scaffold   | 1488                           | [A/G]       | NA                                         |
| Ca_Desi_Ch_scaffold13815_1489 | Ca_desi_scaffold   | 1489                           | [T/C]       | NA                                         |
| Ca_Desi_Ch_scaffold13815_1492 | Ca_desi_scaffold   | 1492                           | [A/G]       | NA                                         |
| Ca_Desi_Ch_scaffold13815_1494 | Ca_desi_scaffold   | 1494                           | [T/C]       | NA                                         |
| Ca_Desi_Ch_scaffold13815_1496 | Ca_desi_scaffold   | 1496                           | [A/G]       | NA                                         |
| Ca_Desi_Ch_scaffold13815_1500 | Ca_desi_scaffold   | 1500                           | [A/G]       | NA                                         |
| Ca_Desi_Ch_scaffold13815_1504 | Ca_desi_scaffold   | 1504                           | [A/G]       | NA                                         |
| Ca_Desi_Ch_scaffold13815_1505 | Ca_desi_scaffold   | 1505                           | [A/G]       | NA                                         |
| Ca_Desi_Ch_scaffold13815_1507 | Ca_desi_scaffold   | 1507                           | [A/G]       | NA                                         |
| Ca_Desi_Ch_scaffold13815_1510 | Ca_desi_scaffold   | 1510                           | [T/C]       | NA                                         |
| Ca_Desi_Ch_scaffold13815_1514 | Ca_desi_scaffold   | 1514                           | [A/G]       | NA                                         |
| Ca_Desi_Ch_scaffold13815_1518 | Ca_desi_scaffold   | 1518                           | [A/G]       | NA                                         |
| Ca_Desi_Ch_scaffold13815_1520 | Ca_desi_scaffold   | 1520                           | [A/G]       | NA                                         |
| Ca_Desi_Ch_scaffold13815_1522 | Ca_desi_scaffold   | 1522                           | [A/G]       | NA                                         |
| Ca_Desi_Ch_scaffold13815_1524 | Ca_desi_scaffold   | 1524                           | [T/C]       | NA                                         |
| Ca_Desi_Ch_scaffold13815_1526 | Ca_desi_scaffold   | 1526                           | [T/C]       | NA                                         |
| Ca_Desi_Ch_scaffold13815_1529 | Ca_desi_scaffold   | 1529                           | [A/G]       | NA                                         |
| Ca_Desi_Ch_scaffold13815_1530 | Ca_desi_scaffold   | 1530                           | [A/G]       | NA                                         |
| Ca_Desi_Ch_scaffold13815_1533 | Ca_desi_scaffold   | 1533                           | [A/G]       | NA                                         |
| Ca_Desi_Ch_scaffold13815_1534 | Ca_desi_scaffold   | 1534                           | [A/G]       | NA                                         |
| Ca_Desi_Ch_scaffold13815_1535 | Ca_desi_scaffold   | 1535                           | [T/C]       | NA                                         |
| Ca_Desi_Ch_scaffold13815_1537 | Ca_desi_scaffold   | 1537                           | [A/G]       | NA                                         |
| Ca_Desi_Ch_scaffold13815_1542 | Ca_desi_scaffold   | 1542                           | [A/G]       | NA                                         |
| Ca_Desi_Ch_scaffold13815_1543 | Ca_desi_scaffold   | 1543                           | [A/G]       | NA                                         |
| Ca_Desi_Ch_scaffold13815_1556 | Ca_desi_scaffold   | 1556                           | [G/T]       | NA                                         |
| Ca_Desi_Ch_scaffold13815_1576 | Ca_desi_scaffold   | 1576                           | [A/C]       | NA                                         |

| <b>SNP IDs</b>                | <b>Chromosomes</b> | <b>Physical positions (bp)</b> | <b>SNPs</b> | <b>NCBI SNPdb accession IDs (NCBI_ss#)</b> |
|-------------------------------|--------------------|--------------------------------|-------------|--------------------------------------------|
| Ca_Desi_Ch_scaffold13842_3000 | Ca_desi_scaffold   | 3000                           | [T/G]       | NA                                         |
| Ca_Desi_Ch_scaffold13842_3016 | Ca_desi_scaffold   | 3016                           | [T/G]       | NA                                         |
| Ca_Desi_Ch_scaffold13842_3024 | Ca_desi_scaffold   | 3024                           | [A/G]       | NA                                         |
| Ca_Desi_Ch_scaffold13842_3096 | Ca_desi_scaffold   | 3096                           | [T/G]       | NA                                         |
| Ca_Desi_Ch_scaffold13856_144  | Ca_desi_scaffold   | 144                            | [A/G]       | NA                                         |
| Ca_Desi_Ch_scaffold13856_238  | Ca_desi_scaffold   | 238                            | [T/G]       | NA                                         |
| Ca_Desi_Ch_scaffold13856_273  | Ca_desi_scaffold   | 273                            | [A/C]       | NA                                         |
| Ca_Desi_Ch_scaffold13856_374  | Ca_desi_scaffold   | 374                            | [C/T]       | NA                                         |
| Ca_Desi_Ch_scaffold13989_1517 | Ca_desi_scaffold   | 1517                           | [T/G]       | NA                                         |
| Ca_Desi_Ch_scaffold13989_1525 | Ca_desi_scaffold   | 1525                           | [T/C]       | NA                                         |
| Ca_Desi_Ch_scaffold13989_1551 | Ca_desi_scaffold   | 1551                           | [A/C]       | NA                                         |
| Ca_Desi_Ch_scaffold13989_1577 | Ca_desi_scaffold   | 1577                           | [A/G]       | NA                                         |
| Ca_Desi_Ch_scaffold14032_2505 | Ca_desi_scaffold   | 2505                           | [A/C]       | NA                                         |
| Ca_Desi_Ch_scaffold14224_943  | Ca_desi_scaffold   | 943                            | [A/G]       | NA                                         |
| Ca_Desi_Ch_scaffold14224_947  | Ca_desi_scaffold   | 947                            | [A/G]       | NA                                         |
| Ca_Desi_Ch_scaffold14224_968  | Ca_desi_scaffold   | 968                            | [T/C]       | NA                                         |
| Ca_Desi_Ch_scaffold14224_984  | Ca_desi_scaffold   | 984                            | [T/C]       | NA                                         |
| Ca_Desi_Ch_scaffold14224_1756 | Ca_desi_scaffold   | 1756                           | [T/C]       | NA                                         |
| Ca_Desi_Ch_scaffold14224_1757 | Ca_desi_scaffold   | 1757                           | [C/T]       | NA                                         |
| Ca_Desi_Ch_scaffold14224_1758 | Ca_desi_scaffold   | 1758                           | [C/T]       | NA                                         |
| Ca_Desi_Ch_scaffold14224_1760 | Ca_desi_scaffold   | 1760                           | [T/C]       | NA                                         |
| Ca_Desi_Ch_scaffold14224_1762 | Ca_desi_scaffold   | 1762                           | [T/C]       | NA                                         |
| Ca_Desi_Ch_scaffold14224_1763 | Ca_desi_scaffold   | 1763                           | [G/A]       | NA                                         |
| Ca_Desi_Ch_scaffold14224_1764 | Ca_desi_scaffold   | 1764                           | [G/A]       | NA                                         |
| Ca_Desi_Ch_scaffold14224_1765 | Ca_desi_scaffold   | 1765                           | [G/A]       | NA                                         |
| Ca_Desi_Ch_scaffold14224_1766 | Ca_desi_scaffold   | 1766                           | [C/T]       | NA                                         |
| Ca_Desi_Ch_scaffold14224_1767 | Ca_desi_scaffold   | 1767                           | [A/G]       | NA                                         |
| Ca_Desi_Ch_scaffold14224_1768 | Ca_desi_scaffold   | 1768                           | [T/C]       | NA                                         |
| Ca_Desi_Ch_scaffold14224_1769 | Ca_desi_scaffold   | 1769                           | [T/C]       | NA                                         |
| Ca_Desi_Ch_scaffold14224_1770 | Ca_desi_scaffold   | 1770                           | [C/T]       | NA                                         |
| Ca_Desi_Ch_scaffold14224_1771 | Ca_desi_scaffold   | 1771                           | [A/G]       | NA                                         |
| Ca_Desi_Ch_scaffold14224_1772 | Ca_desi_scaffold   | 1772                           | [A/G]       | NA                                         |
| Ca_Desi_Ch_scaffold14224_1773 | Ca_desi_scaffold   | 1773                           | [G/A]       | NA                                         |
| Ca_Desi_Ch_scaffold14224_1774 | Ca_desi_scaffold   | 1774                           | [A/G]       | NA                                         |

| <b>SNP IDs</b>                | <b>Chromosomes</b> | <b>Physical positions (bp)</b> | <b>SNPs</b> | <b>NCBI SNPdb accession IDs (NCBI_ss#)</b> |
|-------------------------------|--------------------|--------------------------------|-------------|--------------------------------------------|
| Ca_Desi_Ch_scaffold14224_1775 | Ca_desi_scaffold   | 1775                           | [A/G]       | NA                                         |
| Ca_Desi_Ch_scaffold14224_1776 | Ca_desi_scaffold   | 1776                           | [G/A]       | NA                                         |
| Ca_Desi_Ch_scaffold14224_1778 | Ca_desi_scaffold   | 1778                           | [C/T]       | NA                                         |
| Ca_Desi_Ch_scaffold14224_1779 | Ca_desi_scaffold   | 1779                           | [C/T]       | NA                                         |
| Ca_Desi_Ch_scaffold14224_1780 | Ca_desi_scaffold   | 1780                           | [T/C]       | NA                                         |
| Ca_Desi_Ch_scaffold14224_1781 | Ca_desi_scaffold   | 1781                           | [T/C]       | NA                                         |
| Ca_Desi_Ch_scaffold14224_1782 | Ca_desi_scaffold   | 1782                           | [C/T]       | NA                                         |
| Ca_Desi_Ch_scaffold14224_1783 | Ca_desi_scaffold   | 1783                           | [T/C]       | NA                                         |
| Ca_Desi_Ch_scaffold14224_1784 | Ca_desi_scaffold   | 1784                           | [T/C]       | NA                                         |
| Ca_Desi_Ch_scaffold14224_1785 | Ca_desi_scaffold   | 1785                           | [T/C]       | NA                                         |
| Ca_Desi_Ch_scaffold14224_1786 | Ca_desi_scaffold   | 1786                           | [C/T]       | NA                                         |
| Ca_Desi_Ch_scaffold14224_1787 | Ca_desi_scaffold   | 1787                           | [C/T]       | NA                                         |
| Ca_Desi_Ch_scaffold14224_1788 | Ca_desi_scaffold   | 1788                           | [C/T]       | NA                                         |
| Ca_Desi_Ch_scaffold14224_1789 | Ca_desi_scaffold   | 1789                           | [A/G]       | NA                                         |
| Ca_Desi_Ch_scaffold14224_1790 | Ca_desi_scaffold   | 1790                           | [A/G]       | NA                                         |
| Ca_Desi_Ch_scaffold14224_1792 | Ca_desi_scaffold   | 1792                           | [C/T]       | NA                                         |
| Ca_Desi_Ch_scaffold14224_1793 | Ca_desi_scaffold   | 1793                           | [G/A]       | NA                                         |
| Ca_Desi_Ch_scaffold14224_1794 | Ca_desi_scaffold   | 1794                           | [A/G]       | NA                                         |
| Ca_Desi_Ch_scaffold14224_1795 | Ca_desi_scaffold   | 1795                           | [T/C]       | NA                                         |
| Ca_Desi_Ch_scaffold14224_1796 | Ca_desi_scaffold   | 1796                           | [T/C]       | NA                                         |
| Ca_Desi_Ch_scaffold14224_1797 | Ca_desi_scaffold   | 1797                           | [C/T]       | NA                                         |
| Ca_Desi_Ch_scaffold14224_1798 | Ca_desi_scaffold   | 1798                           | [T/C]       | NA                                         |
| Ca_Desi_Ch_scaffold14224_1800 | Ca_desi_scaffold   | 1800                           | [T/C]       | NA                                         |
| Ca_Desi_Ch_scaffold14224_1801 | Ca_desi_scaffold   | 1801                           | [T/C]       | NA                                         |
| Ca_Desi_Ch_scaffold14224_1802 | Ca_desi_scaffold   | 1802                           | [G/T]       | NA                                         |
| Ca_Desi_Ch_scaffold14224_1803 | Ca_desi_scaffold   | 1803                           | [T/C]       | NA                                         |
| Ca_Desi_Ch_scaffold14224_1804 | Ca_desi_scaffold   | 1804                           | [G/T]       | NA                                         |
| Ca_Desi_Ch_scaffold14224_1805 | Ca_desi_scaffold   | 1805                           | [T/C]       | NA                                         |
| Ca_Desi_Ch_scaffold14224_1806 | Ca_desi_scaffold   | 1806                           | [G/A]       | NA                                         |
| Ca_Desi_Ch_scaffold14224_1807 | Ca_desi_scaffold   | 1807                           | [C/T]       | NA                                         |
| Ca_Desi_Ch_scaffold14224_1809 | Ca_desi_scaffold   | 1809                           | [T/C]       | NA                                         |
| Ca_Desi_Ch_scaffold14224_1810 | Ca_desi_scaffold   | 1810                           | [T/C]       | NA                                         |
| Ca_Desi_Ch_scaffold14224_1811 | Ca_desi_scaffold   | 1811                           | [T/C]       | NA                                         |
| Ca_Desi_Ch_scaffold14224_1812 | Ca_desi_scaffold   | 1812                           | [A/G]       | NA                                         |

| <b>SNP IDs</b>                        | <b>Chromosomes</b> | <b>Physical positions (bp)</b> | <b>SNPs</b> | <b>NCBI SNPdb accession IDs (NCBI_ss#)</b> |
|---------------------------------------|--------------------|--------------------------------|-------------|--------------------------------------------|
| Ca_Desi_Chromosome_scaffold14224_1813 | Ca_desi_scaffold   | 1813                           | [A/G]       | NA                                         |
| Ca_Desi_Chromosome_scaffold14224_1815 | Ca_desi_scaffold   | 1815                           | [T/C]       | NA                                         |
| Ca_Desi_Chromosome_scaffold14224_1866 | Ca_desi_scaffold   | 1866                           | [T/C]       | NA                                         |
| Ca_Desi_Chromosome_scaffold14224_1867 | Ca_desi_scaffold   | 1867                           | [T/C]       | NA                                         |
| Ca_Desi_Chromosome_scaffold14224_1869 | Ca_desi_scaffold   | 1869                           | [T/C]       | NA                                         |
| Ca_Desi_Chromosome_scaffold14224_1870 | Ca_desi_scaffold   | 1870                           | [T/C]       | NA                                         |
| Ca_Desi_Chromosome_scaffold14224_1871 | Ca_desi_scaffold   | 1871                           | [T/C]       | NA                                         |
| Ca_Desi_Chromosome_scaffold14224_1872 | Ca_desi_scaffold   | 1872                           | [T/C]       | NA                                         |
| Ca_Desi_Chromosome_scaffold14224_1873 | Ca_desi_scaffold   | 1873                           | [A/G]       | NA                                         |
| Ca_Desi_Chromosome_scaffold14224_1874 | Ca_desi_scaffold   | 1874                           | [A/G]       | NA                                         |
| Ca_Desi_Chromosome_scaffold14224_1875 | Ca_desi_scaffold   | 1875                           | [T/C]       | NA                                         |
| Ca_Desi_Chromosome_scaffold14224_1876 | Ca_desi_scaffold   | 1876                           | [G/A]       | NA                                         |
| Ca_Desi_Chromosome_scaffold14224_1877 | Ca_desi_scaffold   | 1877                           | [C/T]       | NA                                         |
| Ca_Desi_Chromosome_scaffold14224_1879 | Ca_desi_scaffold   | 1879                           | [T/C]       | NA                                         |
| Ca_Desi_Chromosome_scaffold14224_1880 | Ca_desi_scaffold   | 1880                           | [A/G]       | NA                                         |
| Ca_Desi_Chromosome_scaffold14224_1881 | Ca_desi_scaffold   | 1881                           | [C/A]       | NA                                         |
| Ca_Desi_Chromosome_scaffold14224_1882 | Ca_desi_scaffold   | 1882                           | [A/G]       | NA                                         |
| Ca_Desi_Chromosome_scaffold14224_1884 | Ca_desi_scaffold   | 1884                           | [A/G]       | NA                                         |
| Ca_Desi_Chromosome_scaffold14224_1885 | Ca_desi_scaffold   | 1885                           | [G/A]       | NA                                         |
| Ca_Desi_Chromosome_scaffold14224_1886 | Ca_desi_scaffold   | 1886                           | [A/G]       | NA                                         |
| Ca_Desi_Chromosome_scaffold14224_1888 | Ca_desi_scaffold   | 1888                           | [G/A]       | NA                                         |
| Ca_Desi_Chromosome_scaffold14224_1889 | Ca_desi_scaffold   | 1889                           | [C/T]       | NA                                         |
| Ca_Desi_Chromosome_scaffold14224_1891 | Ca_desi_scaffold   | 1891                           | [T/C]       | NA                                         |
| Ca_Desi_Chromosome_scaffold14224_1892 | Ca_desi_scaffold   | 1892                           | [G/A]       | NA                                         |
| Ca_Desi_Chromosome_scaffold14224_1893 | Ca_desi_scaffold   | 1893                           | [C/T]       | NA                                         |
| Ca_Desi_Chromosome_scaffold14224_1894 | Ca_desi_scaffold   | 1894                           | [T/C]       | NA                                         |
| Ca_Desi_Chromosome_scaffold14224_1895 | Ca_desi_scaffold   | 1895                           | [A/G]       | NA                                         |
| Ca_Desi_Chromosome_scaffold14224_1897 | Ca_desi_scaffold   | 1897                           | [A/G]       | NA                                         |
| Ca_Desi_Chromosome_scaffold14224_1898 | Ca_desi_scaffold   | 1898                           | [G/A]       | NA                                         |
| Ca_Desi_Chromosome_scaffold14224_1899 | Ca_desi_scaffold   | 1899                           | [C/T]       | NA                                         |
| Ca_Desi_Chromosome_scaffold14224_1900 | Ca_desi_scaffold   | 1900                           | [C/T]       | NA                                         |
| Ca_Desi_Chromosome_scaffold14224_1901 | Ca_desi_scaffold   | 1901                           | [C/T]       | NA                                         |
| Ca_Desi_Chromosome_scaffold14224_1902 | Ca_desi_scaffold   | 1902                           | [T/C]       | NA                                         |
| Ca_Desi_Chromosome_scaffold14224_1903 | Ca_desi_scaffold   | 1903                           | [T/C]       | NA                                         |

| <b>SNP IDs</b>                | <b>Chromosomes</b> | <b>Physical positions (bp)</b> | <b>SNPs</b> | <b>NCBI SNPdb accession IDs (NCBI_ss#)</b> |
|-------------------------------|--------------------|--------------------------------|-------------|--------------------------------------------|
| Ca_Desi_Ch_scaffold14224_1904 | Ca_desi_scaffold   | 1904                           | [T/C]       | NA                                         |
| Ca_Desi_Ch_scaffold14224_1905 | Ca_desi_scaffold   | 1905                           | [T/C]       | NA                                         |
| Ca_Desi_Ch_scaffold14224_1906 | Ca_desi_scaffold   | 1906                           | [A/G]       | NA                                         |
| Ca_Desi_Ch_scaffold14224_1907 | Ca_desi_scaffold   | 1907                           | [A/G]       | NA                                         |
| Ca_Desi_Ch_scaffold14224_1908 | Ca_desi_scaffold   | 1908                           | [G/A]       | NA                                         |
| Ca_Desi_Ch_scaffold14224_1909 | Ca_desi_scaffold   | 1909                           | [G/A]       | NA                                         |
| Ca_Desi_Ch_scaffold14224_1911 | Ca_desi_scaffold   | 1911                           | [A/G]       | NA                                         |
| Ca_Desi_Ch_scaffold14224_1912 | Ca_desi_scaffold   | 1912                           | [T/C]       | NA                                         |
| Ca_Desi_Ch_scaffold14224_1913 | Ca_desi_scaffold   | 1913                           | [G/A]       | NA                                         |
| Ca_Desi_Ch_scaffold14224_1914 | Ca_desi_scaffold   | 1914                           | [G/A]       | NA                                         |
| Ca_Desi_Ch_scaffold14224_1915 | Ca_desi_scaffold   | 1915                           | [A/G]       | NA                                         |
| Ca_Desi_Ch_scaffold14224_1916 | Ca_desi_scaffold   | 1916                           | [T/C]       | NA                                         |
| Ca_Desi_Ch_scaffold14224_1917 | Ca_desi_scaffold   | 1917                           | [T/C]       | NA                                         |
| Ca_Desi_Ch_scaffold14224_1918 | Ca_desi_scaffold   | 1918                           | [C/T]       | NA                                         |
| Ca_Desi_Ch_scaffold14224_1920 | Ca_desi_scaffold   | 1920                           | [T/C]       | NA                                         |
| Ca_Desi_Ch_scaffold14224_1921 | Ca_desi_scaffold   | 1921                           | [A/G]       | NA                                         |
| Ca_Desi_Ch_scaffold14224_1922 | Ca_desi_scaffold   | 1922                           | [A/G]       | NA                                         |
| Ca_Desi_Ch_scaffold14224_1923 | Ca_desi_scaffold   | 1923                           | [A/G]       | NA                                         |
| Ca_Desi_Ch_scaffold14224_1927 | Ca_desi_scaffold   | 1927                           | [T/A]       | NA                                         |
| Ca_Desi_Ch_scaffold14224_2504 | Ca_desi_scaffold   | 2504                           | [T/C]       | NA                                         |
| Ca_Desi_Ch_scaffold14224_2506 | Ca_desi_scaffold   | 2506                           | [T/C]       | NA                                         |
| Ca_Desi_Ch_scaffold14224_2509 | Ca_desi_scaffold   | 2509                           | [A/G]       | NA                                         |
| Ca_Desi_Ch_scaffold14224_2511 | Ca_desi_scaffold   | 2511                           | [C/T]       | NA                                         |
| Ca_Desi_Ch_scaffold14224_2514 | Ca_desi_scaffold   | 2514                           | [C/T]       | NA                                         |
| Ca_Desi_Ch_scaffold14224_2515 | Ca_desi_scaffold   | 2515                           | [T/C]       | NA                                         |
| Ca_Desi_Ch_scaffold14224_2516 | Ca_desi_scaffold   | 2516                           | [T/C]       | NA                                         |
| Ca_Desi_Ch_scaffold14224_2517 | Ca_desi_scaffold   | 2517                           | [T/C]       | NA                                         |
| Ca_Desi_Ch_scaffold14224_2519 | Ca_desi_scaffold   | 2519                           | [A/G]       | NA                                         |
| Ca_Desi_Ch_scaffold14224_2521 | Ca_desi_scaffold   | 2521                           | [T/C]       | NA                                         |
| Ca_Desi_Ch_scaffold14224_2523 | Ca_desi_scaffold   | 2523                           | [T/C]       | NA                                         |
| Ca_Desi_Ch_scaffold14224_2525 | Ca_desi_scaffold   | 2525                           | [A/G]       | NA                                         |
| Ca_Desi_Ch_scaffold14224_2527 | Ca_desi_scaffold   | 2527                           | [A/G]       | NA                                         |
| Ca_Desi_Ch_scaffold14224_2531 | Ca_desi_scaffold   | 2531                           | [T/C]       | NA                                         |
| Ca_Desi_Ch_scaffold14224_2534 | Ca_desi_scaffold   | 2534                           | [T/C]       | NA                                         |

| <b>SNP IDs</b>                        | <b>Chromosomes</b> | <b>Physical positions (bp)</b> | <b>SNPs</b> | <b>NCBI SNPdb accession IDs (NCBI_ss#)</b> |
|---------------------------------------|--------------------|--------------------------------|-------------|--------------------------------------------|
| Ca_Desi_Chromosome_scaffold14224_2538 | Ca_desi_scaffold   | 2538                           | [T/C]       | NA                                         |
| Ca_Desi_Chromosome_scaffold14224_2542 | Ca_desi_scaffold   | 2542                           | [A/G]       | NA                                         |
| Ca_Desi_Chromosome_scaffold14224_2543 | Ca_desi_scaffold   | 2543                           | [T/C]       | NA                                         |
| Ca_Desi_Chromosome_scaffold14224_2545 | Ca_desi_scaffold   | 2545                           | [T/C]       | NA                                         |
| Ca_Desi_Chromosome_scaffold14224_2547 | Ca_desi_scaffold   | 2547                           | [G/A]       | NA                                         |
| Ca_Desi_Chromosome_scaffold14224_2548 | Ca_desi_scaffold   | 2548                           | [C/T]       | NA                                         |
| Ca_Desi_Chromosome_scaffold14224_2550 | Ca_desi_scaffold   | 2550                           | [T/G]       | NA                                         |
| Ca_Desi_Chromosome_scaffold14224_2551 | Ca_desi_scaffold   | 2551                           | [G/T]       | NA                                         |
| Ca_Desi_Chromosome_scaffold14224_2552 | Ca_desi_scaffold   | 2552                           | [T/C]       | NA                                         |
| Ca_Desi_Chromosome_scaffold14224_2553 | Ca_desi_scaffold   | 2553                           | [T/C]       | NA                                         |
| Ca_Desi_Chromosome_scaffold14224_2554 | Ca_desi_scaffold   | 2554                           | [T/C]       | NA                                         |
| Ca_Desi_Chromosome_scaffold14224_2555 | Ca_desi_scaffold   | 2555                           | [C/T]       | NA                                         |
| Ca_Desi_Chromosome_scaffold14224_2556 | Ca_desi_scaffold   | 2556                           | [G/T]       | NA                                         |
| Ca_Desi_Chromosome_scaffold14224_2558 | Ca_desi_scaffold   | 2558                           | [T/C]       | NA                                         |
| Ca_Desi_Chromosome_scaffold14224_2559 | Ca_desi_scaffold   | 2559                           | [C/T]       | NA                                         |
| Ca_Desi_Chromosome_scaffold14224_2560 | Ca_desi_scaffold   | 2560                           | [G/C]       | NA                                         |
| Ca_Desi_Chromosome_scaffold14224_2562 | Ca_desi_scaffold   | 2562                           | [T/C]       | NA                                         |
| Ca_Desi_Chromosome_scaffold14224_2563 | Ca_desi_scaffold   | 2563                           | [A/T]       | NA                                         |
| Ca_Desi_Chromosome_scaffold14224_2672 | Ca_desi_scaffold   | 2672                           | [A/G]       | NA                                         |
| Ca_Desi_Chromosome_scaffold14224_2673 | Ca_desi_scaffold   | 2673                           | [A/G]       | NA                                         |
| Ca_Desi_Chromosome_scaffold14224_2674 | Ca_desi_scaffold   | 2674                           | [A/G]       | NA                                         |
| Ca_Desi_Chromosome_scaffold14224_2676 | Ca_desi_scaffold   | 2676                           | [A/G]       | NA                                         |
| Ca_Desi_Chromosome_scaffold14224_2677 | Ca_desi_scaffold   | 2677                           | [A/G]       | NA                                         |
| Ca_Desi_Chromosome_scaffold14224_2680 | Ca_desi_scaffold   | 2680                           | [A/G]       | NA                                         |
| Ca_Desi_Chromosome_scaffold14224_2681 | Ca_desi_scaffold   | 2681                           | [A/G]       | NA                                         |
| Ca_Desi_Chromosome_scaffold14224_2682 | Ca_desi_scaffold   | 2682                           | [A/G]       | NA                                         |
| Ca_Desi_Chromosome_scaffold14224_2683 | Ca_desi_scaffold   | 2683                           | [A/G]       | NA                                         |
| Ca_Desi_Chromosome_scaffold14224_2690 | Ca_desi_scaffold   | 2690                           | [A/G]       | NA                                         |
| Ca_Desi_Chromosome_scaffold14224_2693 | Ca_desi_scaffold   | 2693                           | [T/C]       | NA                                         |
| Ca_Desi_Chromosome_scaffold14224_2694 | Ca_desi_scaffold   | 2694                           | [T/C]       | NA                                         |
| Ca_Desi_Chromosome_scaffold14224_2695 | Ca_desi_scaffold   | 2695                           | [G/A]       | NA                                         |
| Ca_Desi_Chromosome_scaffold14224_2697 | Ca_desi_scaffold   | 2697                           | [A/G]       | NA                                         |
| Ca_Desi_Chromosome_scaffold14224_2699 | Ca_desi_scaffold   | 2699                           | [A/G]       | NA                                         |
| Ca_Desi_Chromosome_scaffold14224_2701 | Ca_desi_scaffold   | 2701                           | [A/G]       | NA                                         |

| <b>SNP IDs</b>                  | <b>Chromosomes</b> | <b>Physical positions (bp)</b> | <b>SNPs</b> | <b>NCBI SNPdb accession IDs (NCBI_ss#)</b> |
|---------------------------------|--------------------|--------------------------------|-------------|--------------------------------------------|
| Ca_Desig_Chr_scaffold14224_2703 | Ca_desig_scaffold  | 2703                           | [T/C]       | NA                                         |
| Ca_Desig_Chr_scaffold14224_2704 | Ca_desig_scaffold  | 2704                           | [T/C]       | NA                                         |
| Ca_Desig_Chr_scaffold14224_2705 | Ca_desig_scaffold  | 2705                           | [A/C]       | NA                                         |
| Ca_Desig_Chr_scaffold14224_2708 | Ca_desig_scaffold  | 2708                           | [T/C]       | NA                                         |
| Ca_Desig_Chr_scaffold14224_2711 | Ca_desig_scaffold  | 2711                           | [T/C]       | NA                                         |
| Ca_Desig_Chr_scaffold14224_2713 | Ca_desig_scaffold  | 2713                           | [A/G]       | NA                                         |
| Ca_Desig_Chr_scaffold14224_2717 | Ca_desig_scaffold  | 2717                           | [T/C]       | NA                                         |
| Ca_Desig_Chr_scaffold14224_2718 | Ca_desig_scaffold  | 2718                           | [A/G]       | NA                                         |
| Ca_Desig_Chr_scaffold14224_2719 | Ca_desig_scaffold  | 2719                           | [T/C]       | NA                                         |
| Ca_Desig_Chr_scaffold14224_2721 | Ca_desig_scaffold  | 2721                           | [T/C]       | NA                                         |
| Ca_Desig_Chr_scaffold14224_2724 | Ca_desig_scaffold  | 2724                           | [T/C]       | NA                                         |
| Ca_Desig_Chr_scaffold14224_2725 | Ca_desig_scaffold  | 2725                           | [T/C]       | NA                                         |
| Ca_Desig_Chr_scaffold14224_2726 | Ca_desig_scaffold  | 2726                           | [T/C]       | NA                                         |
| Ca_Desig_Chr_scaffold14224_2729 | Ca_desig_scaffold  | 2729                           | [A/G]       | NA                                         |
| Ca_Desig_Chr_scaffold14224_2730 | Ca_desig_scaffold  | 2730                           | [A/G]       | NA                                         |
| Ca_Desig_Chr_scaffold14224_2731 | Ca_desig_scaffold  | 2731                           | [A/G]       | NA                                         |
| Ca_Desig_Chr_scaffold14224_2737 | Ca_desig_scaffold  | 2737                           | [G/A]       | NA                                         |
| Ca_Desig_Chr_scaffold14224_2746 | Ca_desig_scaffold  | 2746                           | [C/G]       | NA                                         |
| Ca_Desig_Chr_scaffold14224_2747 | Ca_desig_scaffold  | 2747                           | [C/G]       | NA                                         |
| Ca_Desig_Chr_scaffold14224_2750 | Ca_desig_scaffold  | 2750                           | [A/G]       | NA                                         |
| Ca_Desig_Chr_scaffold14224_2755 | Ca_desig_scaffold  | 2755                           | [T/C]       | NA                                         |
| Ca_Desig_Chr_scaffold14224_2770 | Ca_desig_scaffold  | 2770                           | [A/T]       | NA                                         |
| Ca_Desig_Chr_scaffold14224_2771 | Ca_desig_scaffold  | 2771                           | [A/T]       | NA                                         |
| Ca_Desig_Chr_scaffold14224_2772 | Ca_desig_scaffold  | 2772                           | [T/C]       | NA                                         |
| Ca_Desig_Chr_scaffold14224_2773 | Ca_desig_scaffold  | 2773                           | [G/T]       | NA                                         |
| Ca_Desig_Chr_scaffold14224_2774 | Ca_desig_scaffold  | 2774                           | [A/G]       | NA                                         |
| Ca_Desig_Chr_scaffold14224_2775 | Ca_desig_scaffold  | 2775                           | [A/G]       | NA                                         |
| Ca_Desig_Chr_scaffold14224_2776 | Ca_desig_scaffold  | 2776                           | [A/G]       | NA                                         |
| Ca_Desig_Chr_scaffold14224_2777 | Ca_desig_scaffold  | 2777                           | [G/A]       | NA                                         |
| Ca_Desig_Chr_scaffold14224_2778 | Ca_desig_scaffold  | 2778                           | [A/G]       | NA                                         |
| Ca_Desig_Chr_scaffold14224_2782 | Ca_desig_scaffold  | 2782                           | [T/C]       | NA                                         |
| Ca_Desig_Chr_scaffold14224_2783 | Ca_desig_scaffold  | 2783                           | [C/T]       | NA                                         |
| Ca_Desig_Chr_scaffold14224_2784 | Ca_desig_scaffold  | 2784                           | [G/C]       | NA                                         |
| Ca_Desig_Chr_scaffold14224_2787 | Ca_desig_scaffold  | 2787                           | [C/T]       | NA                                         |



| <b>SNP IDs</b>                | <b>Chromosomes</b> | <b>Physical positions (bp)</b> | <b>SNPs</b> | <b>NCBI SNPdb accession IDs (NCBI_ss#)</b> |
|-------------------------------|--------------------|--------------------------------|-------------|--------------------------------------------|
| Ca_Desi_Ch_scaffold14224_2788 | Ca_desi_scaffold   | 2788                           | [G/C]       | NA                                         |
| Ca_Desi_Ch_scaffold14224_2793 | Ca_desi_scaffold   | 2793                           | [G/C]       | NA                                         |
| Ca_Desi_Ch_scaffold14224_2795 | Ca_desi_scaffold   | 2795                           | [T/C]       | NA                                         |
| Ca_Desi_Ch_scaffold14224_2796 | Ca_desi_scaffold   | 2796                           | [T/C]       | NA                                         |
| Ca_Desi_Ch_scaffold14239_2058 | Ca_desi_scaffold   | 2058                           | [T/G]       | NA                                         |
| Ca_Desi_Ch_scaffold14239_2072 | Ca_desi_scaffold   | 2072                           | [G/C]       | NA                                         |
| Ca_Desi_Ch_scaffold14239_2080 | Ca_desi_scaffold   | 2080                           | [A/G]       | NA                                         |
| Ca_Desi_Ch_scaffold14295_881  | Ca_desi_scaffold   | 881                            | [T/C]       | NA                                         |
| Ca_Desi_Ch_scaffold14395_2168 | Ca_desi_scaffold   | 2168                           | [C/G]       | NA                                         |
| Ca_Desi_Ch_scaffold14395_2202 | Ca_desi_scaffold   | 2202                           | [G/T]       | NA                                         |
| Ca_Desi_Ch_scaffold14436_656  | Ca_desi_scaffold   | 656                            | [T/G]       | NA                                         |
| Ca_Desi_Ch_scaffold14499_2492 | Ca_desi_scaffold   | 2492                           | [C/G]       | NA                                         |
| Ca_Desi_Ch_scaffold14499_2494 | Ca_desi_scaffold   | 2494                           | [A/G]       | NA                                         |
| Ca_Desi_Ch_scaffold14499_2498 | Ca_desi_scaffold   | 2498                           | [T/C]       | NA                                         |
| Ca_Desi_Ch_scaffold14499_2499 | Ca_desi_scaffold   | 2499                           | [G/T]       | NA                                         |
| Ca_Desi_Ch_scaffold14499_2500 | Ca_desi_scaffold   | 2500                           | [T/G]       | NA                                         |
| Ca_Desi_Ch_scaffold14499_2503 | Ca_desi_scaffold   | 2503                           | [T/C]       | NA                                         |
| Ca_Desi_Ch_scaffold14499_2508 | Ca_desi_scaffold   | 2508                           | [T/C]       | NA                                         |
| Ca_Desi_Ch_scaffold14499_2513 | Ca_desi_scaffold   | 2513                           | [T/G]       | NA                                         |
| Ca_Desi_Ch_scaffold14499_2516 | Ca_desi_scaffold   | 2516                           | [T/C]       | NA                                         |
| Ca_Desi_Ch_scaffold14499_2518 | Ca_desi_scaffold   | 2518                           | [T/C]       | NA                                         |
| Ca_Desi_Ch_scaffold14499_2520 | Ca_desi_scaffold   | 2520                           | [T/C]       | NA                                         |
| Ca_Desi_Ch_scaffold14499_2522 | Ca_desi_scaffold   | 2522                           | [T/C]       | NA                                         |
| Ca_Desi_Ch_scaffold14499_2525 | Ca_desi_scaffold   | 2525                           | [T/C]       | NA                                         |
| Ca_Desi_Ch_scaffold14499_2530 | Ca_desi_scaffold   | 2530                           | [A/G]       | NA                                         |
| Ca_Desi_Ch_scaffold14499_2534 | Ca_desi_scaffold   | 2534                           | [A/G]       | NA                                         |
| Ca_Desi_Ch_scaffold14499_2619 | Ca_desi_scaffold   | 2619                           | [T/G]       | NA                                         |
| Ca_Desi_Ch_scaffold14499_2672 | Ca_desi_scaffold   | 2672                           | [C/T]       | NA                                         |
| Ca_Desi_Ch_scaffold14499_2673 | Ca_desi_scaffold   | 2673                           | [T/C]       | NA                                         |
| Ca_Desi_Ch_scaffold14499_2675 | Ca_desi_scaffold   | 2675                           | [T/G]       | NA                                         |
| Ca_Desi_Ch_scaffold14499_2676 | Ca_desi_scaffold   | 2676                           | [G/C]       | NA                                         |
| Ca_Desi_Ch_scaffold14499_2682 | Ca_desi_scaffold   | 2682                           | [A/T]       | NA                                         |
| Ca_Desi_Ch_scaffold14499_2684 | Ca_desi_scaffold   | 2684                           | [T/C]       | NA                                         |
| Ca_Desi_Ch_scaffold14499_2690 | Ca_desi_scaffold   | 2690                           | [A/G]       | NA                                         |

| <b>SNP IDs</b>                  | <b>Chromosomes</b> | <b>Physical positions (bp)</b> | <b>SNPs</b> | <b>NCBI SNPdb accession IDs (NCBI_ss#)</b> |
|---------------------------------|--------------------|--------------------------------|-------------|--------------------------------------------|
| Ca_Desig_Chr_scaffold14499_2695 | Ca_desig_scaffold  | 2695                           | [A/T]       | NA                                         |
| Ca_Desig_Chr_scaffold14499_2698 | Ca_desig_scaffold  | 2698                           | [T/C]       | NA                                         |
| Ca_Desig_Chr_scaffold14499_2701 | Ca_desig_scaffold  | 2701                           | [T/C]       | NA                                         |
| Ca_Desig_Chr_scaffold14499_2703 | Ca_desig_scaffold  | 2703                           | [T/C]       | NA                                         |
| Ca_Desig_Chr_scaffold14499_2707 | Ca_desig_scaffold  | 2707                           | [A/G]       | NA                                         |
| Ca_Desig_Chr_scaffold14499_2709 | Ca_desig_scaffold  | 2709                           | [A/G]       | NA                                         |
| Ca_Desig_Chr_scaffold14499_2711 | Ca_desig_scaffold  | 2711                           | [A/G]       | NA                                         |
| Ca_Desig_Chr_scaffold14499_2713 | Ca_desig_scaffold  | 2713                           | [T/C]       | NA                                         |
| Ca_Desig_Chr_scaffold14499_2714 | Ca_desig_scaffold  | 2714                           | [T/C]       | NA                                         |
| Ca_Desig_Chr_scaffold14499_2716 | Ca_desig_scaffold  | 2716                           | [T/C]       | NA                                         |
| Ca_Desig_Chr_scaffold14499_2720 | Ca_desig_scaffold  | 2720                           | [A/G]       | NA                                         |
| Ca_Desig_Chr_scaffold14499_2725 | Ca_desig_scaffold  | 2725                           | [T/C]       | NA                                         |
| Ca_Desig_Chr_scaffold14499_2726 | Ca_desig_scaffold  | 2726                           | [T/C]       | NA                                         |
| Ca_Desig_Chr_scaffold14499_2730 | Ca_desig_scaffold  | 2730                           | [A/G]       | NA                                         |
| Ca_Desig_Chr_scaffold14500_1242 | Ca_desig_scaffold  | 1242                           | [C/T]       | NA                                         |
| Ca_Desig_Chr_scaffold14546_373  | Ca_desig_scaffold  | 373                            | [G/A]       | NA                                         |
| Ca_Desig_Chr_scaffold14546_395  | Ca_desig_scaffold  | 395                            | [A/G]       | NA                                         |
| Ca_Desig_Chr_scaffold14576_254  | Ca_desig_scaffold  | 254                            | [C/T]       | NA                                         |
| Ca_Desig_Chr_scaffold14650_1705 | Ca_desig_scaffold  | 1705                           | [A/G]       | NA                                         |
| Ca_Desig_Chr_scaffold14650_1708 | Ca_desig_scaffold  | 1708                           | [T/C]       | NA                                         |
| Ca_Desig_Chr_scaffold14650_1717 | Ca_desig_scaffold  | 1717                           | [A/G]       | NA                                         |
| Ca_Desig_Chr_scaffold14650_1727 | Ca_desig_scaffold  | 1727                           | [T/G]       | NA                                         |
| Ca_Desig_Chr_scaffold14650_1735 | Ca_desig_scaffold  | 1735                           | [T/C]       | NA                                         |
| Ca_Desig_Chr_scaffold14650_1739 | Ca_desig_scaffold  | 1739                           | [T/G]       | NA                                         |
| Ca_Desig_Chr_scaffold14650_1741 | Ca_desig_scaffold  | 1741                           | [T/C]       | NA                                         |
| Ca_Desig_Chr_scaffold14650_1743 | Ca_desig_scaffold  | 1743                           | [A/G]       | NA                                         |
| Ca_Desig_Chr_scaffold14650_1745 | Ca_desig_scaffold  | 1745                           | [A/G]       | NA                                         |
| Ca_Desig_Chr_scaffold14650_1755 | Ca_desig_scaffold  | 1755                           | [T/G]       | NA                                         |
| Ca_Desig_Chr_scaffold14650_1928 | Ca_desig_scaffold  | 1928                           | [T/C]       | NA                                         |
| Ca_Desig_Chr_scaffold14650_2195 | Ca_desig_scaffold  | 2195                           | [T/A]       | NA                                         |
| Ca_Desig_Chr_scaffold14667_2025 | Ca_desig_scaffold  | 2025                           | [G/A]       | NA                                         |
| Ca_Desig_Chr_scaffold14680_2034 | Ca_desig_scaffold  | 2034                           | [A/G]       | NA                                         |
| Ca_Desig_Chr_scaffold14680_2046 | Ca_desig_scaffold  | 2046                           | [T/C]       | NA                                         |
| Ca_Desig_Chr_scaffold14680_2049 | Ca_desig_scaffold  | 2049                           | [T/G]       | NA                                         |

| <b>SNP IDs</b>                | <b>Chromosomes</b> | <b>Physical positions (bp)</b> | <b>SNPs</b> | <b>NCBI SNPdb accession IDs (NCBI_ss#)</b> |
|-------------------------------|--------------------|--------------------------------|-------------|--------------------------------------------|
| Ca_Desi_Ch_scaffold14680_2052 | Ca_desi_scaffold   | 2052                           | [T/G]       | NA                                         |
| Ca_Desi_Ch_scaffold14680_2059 | Ca_desi_scaffold   | 2059                           | [T/G]       | NA                                         |
| Ca_Desi_Ch_scaffold14680_2064 | Ca_desi_scaffold   | 2064                           | [A/G]       | NA                                         |
| Ca_Desi_Ch_scaffold14680_2068 | Ca_desi_scaffold   | 2068                           | [T/G]       | NA                                         |
| Ca_Desi_Ch_scaffold14680_2074 | Ca_desi_scaffold   | 2074                           | [T/C]       | NA                                         |
| Ca_Desi_Ch_scaffold14701_975  | Ca_desi_scaffold   | 975                            | [A/C]       | NA                                         |
| Ca_Desi_Ch_scaffold14718_1056 | Ca_desi_scaffold   | 1056                           | [A/G]       | NA                                         |
| Ca_Desi_Ch_scaffold14718_1061 | Ca_desi_scaffold   | 1061                           | [T/C]       | NA                                         |
| Ca_Desi_Ch_scaffold14718_1078 | Ca_desi_scaffold   | 1078                           | [A/C]       | NA                                         |
| Ca_Desi_Ch_scaffold14785_1612 | Ca_desi_scaffold   | 1612                           | [T/A]       | NA                                         |
| Ca_Desi_Ch_scaffold14785_1645 | Ca_desi_scaffold   | 1645                           | [A/G]       | NA                                         |
| Ca_Desi_Ch_scaffold14785_1647 | Ca_desi_scaffold   | 1647                           | [A/G]       | NA                                         |
| Ca_Desi_Ch_scaffold14806_2152 | Ca_desi_scaffold   | 2152                           | [T/G]       | NA                                         |
| Ca_Desi_Ch_scaffold14895_2390 | Ca_desi_scaffold   | 2390                           | [A/G]       | NA                                         |
| Ca_Desi_Ch_scaffold14895_2404 | Ca_desi_scaffold   | 2404                           | [T/G]       | NA                                         |
| Ca_Desi_Ch_scaffold14895_2426 | Ca_desi_scaffold   | 2426                           | [T/C]       | NA                                         |
| Ca_Desi_Ch_scaffold14936_147  | Ca_desi_scaffold   | 147                            | [A/G]       | NA                                         |
| Ca_Desi_Ch_scaffold14936_148  | Ca_desi_scaffold   | 148                            | [C/A]       | NA                                         |
| Ca_Desi_Ch_scaffold14936_149  | Ca_desi_scaffold   | 149                            | [G/T]       | NA                                         |
| Ca_Desi_Ch_scaffold14936_151  | Ca_desi_scaffold   | 151                            | [G/T]       | NA                                         |
| Ca_Desi_Ch_scaffold14939_1175 | Ca_desi_scaffold   | 1175                           | [A/C]       | NA                                         |
| Ca_Desi_Ch_scaffold14939_1181 | Ca_desi_scaffold   | 1181                           | [T/C]       | NA                                         |
| Ca_Desi_Ch_scaffold14939_1184 | Ca_desi_scaffold   | 1184                           | [T/A]       | NA                                         |
| Ca_Desi_Ch_scaffold14939_1185 | Ca_desi_scaffold   | 1185                           | [A/G]       | NA                                         |
| Ca_Desi_Ch_scaffold14939_1187 | Ca_desi_scaffold   | 1187                           | [A/G]       | NA                                         |
| Ca_Desi_Ch_scaffold14939_1189 | Ca_desi_scaffold   | 1189                           | [T/C]       | NA                                         |
| Ca_Desi_Ch_scaffold14939_1190 | Ca_desi_scaffold   | 1190                           | [A/G]       | NA                                         |
| Ca_Desi_Ch_scaffold14939_1191 | Ca_desi_scaffold   | 1191                           | [A/G]       | NA                                         |
| Ca_Desi_Ch_scaffold14939_1193 | Ca_desi_scaffold   | 1193                           | [C/T]       | NA                                         |
| Ca_Desi_Ch_scaffold14939_1196 | Ca_desi_scaffold   | 1196                           | [T/G]       | NA                                         |
| Ca_Desi_Ch_scaffold14939_1198 | Ca_desi_scaffold   | 1198                           | [T/G]       | NA                                         |
| Ca_Desi_Ch_scaffold14939_1201 | Ca_desi_scaffold   | 1201                           | [A/G]       | NA                                         |
| Ca_Desi_Ch_scaffold14939_1208 | Ca_desi_scaffold   | 1208                           | [G/A]       | NA                                         |
| Ca_Desi_Ch_scaffold14939_1210 | Ca_desi_scaffold   | 1210                           | [A/G]       | NA                                         |

| <b>SNP IDs</b>                  | <b>Chromosomes</b> | <b>Physical positions (bp)</b> | <b>SNPs</b> | <b>NCBI SNPdb accession IDs (NCBI_ss#)</b> |
|---------------------------------|--------------------|--------------------------------|-------------|--------------------------------------------|
| Ca_Desig_Chr_scaffold14939_1211 | Ca_desig_scaffold  | 1211                           | [T/C]       | NA                                         |
| Ca_Desig_Chr_scaffold14939_1212 | Ca_desig_scaffold  | 1212                           | [C/T]       | NA                                         |
| Ca_Desig_Chr_scaffold14939_1213 | Ca_desig_scaffold  | 1213                           | [T/C]       | NA                                         |
| Ca_Desig_Chr_scaffold14939_1214 | Ca_desig_scaffold  | 1214                           | [T/C]       | NA                                         |
| Ca_Desig_Chr_scaffold14939_1216 | Ca_desig_scaffold  | 1216                           | [T/C]       | NA                                         |
| Ca_Desig_Chr_scaffold14939_1221 | Ca_desig_scaffold  | 1221                           | [T/A]       | NA                                         |
| Ca_Desig_Chr_scaffold14939_1228 | Ca_desig_scaffold  | 1228                           | [T/C]       | NA                                         |
| Ca_Desig_Chr_scaffold14939_1230 | Ca_desig_scaffold  | 1230                           | [T/C]       | NA                                         |
| Ca_Desig_Chr_scaffold14939_1261 | Ca_desig_scaffold  | 1261                           | [T/C]       | NA                                         |
| Ca_Desig_Chr_scaffold14939_1276 | Ca_desig_scaffold  | 1276                           | [T/C]       | NA                                         |
| Ca_Desig_Chr_scaffold14995_79   | Ca_desig_scaffold  | 79                             | [A/G]       | NA                                         |
| Ca_Desig_Chr_scaffold14995_119  | Ca_desig_scaffold  | 119                            | [T/A]       | NA                                         |
| Ca_Desig_Chr_scaffold14997_2323 | Ca_desig_scaffold  | 2323                           | [G/C]       | NA                                         |
| Ca_Desig_Chr_scaffold14997_2342 | Ca_desig_scaffold  | 2342                           | [G/A]       | NA                                         |
| Ca_Desig_Chr_scaffold14997_2350 | Ca_desig_scaffold  | 2350                           | [T/G]       | NA                                         |
| Ca_Desig_Chr_scaffold14997_2354 | Ca_desig_scaffold  | 2354                           | [G/A]       | NA                                         |
| Ca_Desig_Chr_scaffold14998_2169 | Ca_desig_scaffold  | 2169                           | [G/T]       | NA                                         |
| Ca_Desig_Chr_scaffold14998_2176 | Ca_desig_scaffold  | 2176                           | [A/C]       | NA                                         |
| Ca_Desig_Chr_scaffold15005_701  | Ca_desig_scaffold  | 701                            | [T/C]       | NA                                         |
| Ca_Desig_Chr_scaffold15005_704  | Ca_desig_scaffold  | 704                            | [A/G]       | NA                                         |
| Ca_Desig_Chr_scaffold15005_710  | Ca_desig_scaffold  | 710                            | [A/G]       | NA                                         |
| Ca_Desig_Chr_scaffold15005_714  | Ca_desig_scaffold  | 714                            | [A/G]       | NA                                         |
| Ca_Desig_Chr_scaffold15005_718  | Ca_desig_scaffold  | 718                            | [A/G]       | NA                                         |
| Ca_Desig_Chr_scaffold15005_728  | Ca_desig_scaffold  | 728                            | [G/A]       | NA                                         |
| Ca_Desig_Chr_scaffold15005_738  | Ca_desig_scaffold  | 738                            | [T/C]       | NA                                         |
| Ca_Desig_Chr_scaffold15005_746  | Ca_desig_scaffold  | 746                            | [A/T]       | NA                                         |
| Ca_Desig_Chr_scaffold15005_780  | Ca_desig_scaffold  | 780                            | [A/G]       | NA                                         |
| Ca_Desig_Chr_scaffold15005_784  | Ca_desig_scaffold  | 784                            | [T/C]       | NA                                         |
| Ca_Desig_Chr_scaffold15005_791  | Ca_desig_scaffold  | 791                            | [A/G]       | NA                                         |
| Ca_Desig_Chr_scaffold15005_793  | Ca_desig_scaffold  | 793                            | [A/G]       | NA                                         |
| Ca_Desig_Chr_scaffold15005_804  | Ca_desig_scaffold  | 804                            | [A/G]       | NA                                         |
| Ca_Desig_Chr_scaffold15005_806  | Ca_desig_scaffold  | 806                            | [C/T]       | NA                                         |
| Ca_Desig_Chr_scaffold15005_808  | Ca_desig_scaffold  | 808                            | [A/G]       | NA                                         |
| Ca_Desig_Chr_scaffold15005_810  | Ca_desig_scaffold  | 810                            | [C/T]       | NA                                         |

| <b>SNP IDs</b>                | <b>Chromosomes</b> | <b>Physical positions (bp)</b> | <b>SNPs</b> | <b>NCBI SNPdb accession IDs (NCBI_ss#)</b> |
|-------------------------------|--------------------|--------------------------------|-------------|--------------------------------------------|
| Ca_Desi_Ch_scaffold15005_812  | Ca_desi_scaffold   | 812                            | [T/C]       | NA                                         |
| Ca_Desi_Ch_scaffold15005_813  | Ca_desi_scaffold   | 813                            | [T/C]       | NA                                         |
| Ca_Desi_Ch_scaffold15005_815  | Ca_desi_scaffold   | 815                            | [C/T]       | NA                                         |
| Ca_Desi_Ch_scaffold15005_817  | Ca_desi_scaffold   | 817                            | [A/G]       | NA                                         |
| Ca_Desi_Ch_scaffold15005_819  | Ca_desi_scaffold   | 819                            | [G/A]       | NA                                         |
| Ca_Desi_Ch_scaffold15005_826  | Ca_desi_scaffold   | 826                            | [T/C]       | NA                                         |
| Ca_Desi_Ch_scaffold15005_828  | Ca_desi_scaffold   | 828                            | [A/G]       | NA                                         |
| Ca_Desi_Ch_scaffold15005_831  | Ca_desi_scaffold   | 831                            | [T/C]       | NA                                         |
| Ca_Desi_Ch_scaffold15005_832  | Ca_desi_scaffold   | 832                            | [G/A]       | NA                                         |
| Ca_Desi_Ch_scaffold15005_833  | Ca_desi_scaffold   | 833                            | [A/G]       | NA                                         |
| Ca_Desi_Ch_scaffold15005_837  | Ca_desi_scaffold   | 837                            | [A/C]       | NA                                         |
| Ca_Desi_Ch_scaffold15005_850  | Ca_desi_scaffold   | 850                            | [A/T]       | NA                                         |
| Ca_Desi_Ch_scaffold15005_851  | Ca_desi_scaffold   | 851                            | [G/A]       | NA                                         |
| Ca_Desi_Ch_scaffold15005_852  | Ca_desi_scaffold   | 852                            | [A/G]       | NA                                         |
| Ca_Desi_Ch_scaffold15005_854  | Ca_desi_scaffold   | 854                            | [C/T]       | NA                                         |
| Ca_Desi_Ch_scaffold15005_856  | Ca_desi_scaffold   | 856                            | [A/G]       | NA                                         |
| Ca_Desi_Ch_scaffold15005_857  | Ca_desi_scaffold   | 857                            | [A/G]       | NA                                         |
| Ca_Desi_Ch_scaffold15005_859  | Ca_desi_scaffold   | 859                            | [A/G]       | NA                                         |
| Ca_Desi_Ch_scaffold15005_1088 | Ca_desi_scaffold   | 1088                           | [T/G]       | NA                                         |
| Ca_Desi_Ch_scaffold15005_1251 | Ca_desi_scaffold   | 1251                           | [A/C]       | NA                                         |
| Ca_Desi_Ch_scaffold15005_1305 | Ca_desi_scaffold   | 1305                           | [A/G]       | NA                                         |
| Ca_Desi_Ch_scaffold15005_1331 | Ca_desi_scaffold   | 1331                           | [A/C]       | NA                                         |
| Ca_Desi_Ch_scaffold15005_1344 | Ca_desi_scaffold   | 1344                           | [T/C]       | NA                                         |
| Ca_Desi_Ch_scaffold15005_1348 | Ca_desi_scaffold   | 1348                           | [A/C]       | NA                                         |
| Ca_Desi_Ch_scaffold15005_1350 | Ca_desi_scaffold   | 1350                           | [T/C]       | NA                                         |
| Ca_Desi_Ch_scaffold15005_1359 | Ca_desi_scaffold   | 1359                           | [A/G]       | NA                                         |
| Ca_Desi_Ch_scaffold15005_1600 | Ca_desi_scaffold   | 1600                           | [A/G]       | NA                                         |
| Ca_Desi_Ch_scaffold15005_1615 | Ca_desi_scaffold   | 1615                           | [A/G]       | NA                                         |
| Ca_Desi_Ch_scaffold15005_1646 | Ca_desi_scaffold   | 1646                           | [A/G]       | NA                                         |
| Ca_Desi_Ch_scaffold15076_1211 | Ca_desi_scaffold   | 1211                           | [T/G]       | NA                                         |
| Ca_Desi_Ch_scaffold15076_1227 | Ca_desi_scaffold   | 1227                           | [T/G]       | NA                                         |
| Ca_Desi_Ch_scaffold15076_1243 | Ca_desi_scaffold   | 1243                           | [C/A]       | NA                                         |
| Ca_Desi_Ch_scaffold15136_1872 | Ca_desi_scaffold   | 1872                           | [T/G]       | NA                                         |
| Ca_Desi_Ch_scaffold15136_2011 | Ca_desi_scaffold   | 2011                           | [T/G]       | NA                                         |

| <b>SNP IDs</b>                        | <b>Chromosomes</b> | <b>Physical positions (bp)</b> | <b>SNPs</b> | <b>NCBI SNPdb accession IDs (NCBI_ss#)</b> |
|---------------------------------------|--------------------|--------------------------------|-------------|--------------------------------------------|
| Ca_Desi_Chromosome_scaffold15136_2026 | Ca_desi_scaffold   | 2026                           | [T/G]       | NA                                         |
| Ca_Desi_Chromosome_scaffold15136_2029 | Ca_desi_scaffold   | 2029                           | [A/G]       | NA                                         |
| Ca_Desi_Chromosome_scaffold15136_2035 | Ca_desi_scaffold   | 2035                           | [T/G]       | NA                                         |
| Ca_Desi_Chromosome_scaffold15193_1664 | Ca_desi_scaffold   | 1664                           | [A/G]       | NA                                         |
| Ca_Desi_Chromosome_scaffold15193_1696 | Ca_desi_scaffold   | 1696                           | [C/G]       | NA                                         |
| Ca_Desi_Chromosome_scaffold15193_1701 | Ca_desi_scaffold   | 1701                           | [A/C]       | NA                                         |
| Ca_Desi_Chromosome_scaffold15212_520  | Ca_desi_scaffold   | 520                            | [A/G]       | NA                                         |
| Ca_Desi_Chromosome_scaffold15212_522  | Ca_desi_scaffold   | 522                            | [T/G]       | NA                                         |
| Ca_Desi_Chromosome_scaffold15212_1490 | Ca_desi_scaffold   | 1490                           | [T/G]       | NA                                         |
| Ca_Desi_Chromosome_scaffold15212_2048 | Ca_desi_scaffold   | 2048                           | [G/T]       | NA                                         |
| Ca_Desi_Chromosome_scaffold15212_2152 | Ca_desi_scaffold   | 2152                           | [T/C]       | NA                                         |
| Ca_Desi_Chromosome_scaffold15212_2157 | Ca_desi_scaffold   | 2157                           | [A/G]       | NA                                         |
| Ca_Desi_Chromosome_scaffold15212_2158 | Ca_desi_scaffold   | 2158                           | [A/G]       | NA                                         |
| Ca_Desi_Chromosome_scaffold15212_2175 | Ca_desi_scaffold   | 2175                           | [C/T]       | NA                                         |
| Ca_Desi_Chromosome_scaffold15212_2179 | Ca_desi_scaffold   | 2179                           | [T/C]       | NA                                         |
| Ca_Desi_Chromosome_scaffold15212_2185 | Ca_desi_scaffold   | 2185                           | [T/C]       | NA                                         |
| Ca_Desi_Chromosome_scaffold15212_2188 | Ca_desi_scaffold   | 2188                           | [T/C]       | NA                                         |
| Ca_Desi_Chromosome_scaffold15212_2190 | Ca_desi_scaffold   | 2190                           | [T/C]       | NA                                         |
| Ca_Desi_Chromosome_scaffold15212_2195 | Ca_desi_scaffold   | 2195                           | [A/G]       | NA                                         |
| Ca_Desi_Chromosome_scaffold15225_1078 | Ca_desi_scaffold   | 1078                           | [T/A]       | NA                                         |
| Ca_Desi_Chromosome_scaffold15244_2225 | Ca_desi_scaffold   | 2225                           | [G/A]       | NA                                         |
| Ca_Desi_Chromosome_scaffold15244_2338 | Ca_desi_scaffold   | 2338                           | [G/C]       | NA                                         |
| Ca_Desi_Chromosome_scaffold15274_1044 | Ca_desi_scaffold   | 1044                           | [T/G]       | NA                                         |
| Ca_Desi_Chromosome_scaffold15292_1843 | Ca_desi_scaffold   | 1843                           | [T/C]       | NA                                         |
| Ca_Desi_Chromosome_scaffold15292_1853 | Ca_desi_scaffold   | 1853                           | [T/C]       | NA                                         |
| Ca_Desi_Chromosome_scaffold15292_1855 | Ca_desi_scaffold   | 1855                           | [A/C]       | NA                                         |
| Ca_Desi_Chromosome_scaffold15292_1870 | Ca_desi_scaffold   | 1870                           | [A/G]       | NA                                         |
| Ca_Desi_Chromosome_scaffold15292_1877 | Ca_desi_scaffold   | 1877                           | [A/G]       | NA                                         |
| Ca_Desi_Chromosome_scaffold15292_1881 | Ca_desi_scaffold   | 1881                           | [A/G]       | NA                                         |
| Ca_Desi_Chromosome_scaffold15292_1883 | Ca_desi_scaffold   | 1883                           | [A/G]       | NA                                         |
| Ca_Desi_Chromosome_scaffold15292_1894 | Ca_desi_scaffold   | 1894                           | [T/C]       | NA                                         |
| Ca_Desi_Chromosome_scaffold15292_1896 | Ca_desi_scaffold   | 1896                           | [A/G]       | NA                                         |
| Ca_Desi_Chromosome_scaffold15515_1111 | Ca_desi_scaffold   | 1111                           | [A/C]       | NA                                         |
| Ca_Desi_Chromosome_scaffold15534_2140 | Ca_desi_scaffold   | 2140                           | [A/T]       | NA                                         |

| <b>SNP IDs</b>                | <b>Chromosomes</b> | <b>Physical positions (bp)</b> | <b>SNPs</b> | <b>NCBI SNPdb accession IDs (NCBI_ss#)</b> |
|-------------------------------|--------------------|--------------------------------|-------------|--------------------------------------------|
| Ca_Desi_Ch_scaffold15534_2223 | Ca_desi_scaffold   | 2223                           | [T/A]       | NA                                         |
| Ca_Desi_Ch_scaffold15543_692  | Ca_desi_scaffold   | 692                            | [G/C]       | NA                                         |
| Ca_Desi_Ch_scaffold15763_203  | Ca_desi_scaffold   | 203                            | [G/A]       | NA                                         |
| Ca_Desi_Ch_scaffold15786_1185 | Ca_desi_scaffold   | 1185                           | [T/G]       | NA                                         |
| Ca_Desi_Ch_scaffold15794_366  | Ca_desi_scaffold   | 366                            | [C/T]       | NA                                         |
| Ca_Desi_Ch_scaffold15812_356  | Ca_desi_scaffold   | 356                            | [T/C]       | NA                                         |
| Ca_Desi_Ch_scaffold15812_453  | Ca_desi_scaffold   | 453                            | [T/C]       | NA                                         |
| Ca_Desi_Ch_scaffold15812_462  | Ca_desi_scaffold   | 462                            | [T/G]       | NA                                         |
| Ca_Desi_Ch_scaffold15812_662  | Ca_desi_scaffold   | 662                            | [T/G]       | NA                                         |
| Ca_Desi_Ch_scaffold15812_673  | Ca_desi_scaffold   | 673                            | [A/G]       | NA                                         |
| Ca_Desi_Ch_scaffold15812_739  | Ca_desi_scaffold   | 739                            | [T/C]       | NA                                         |
| Ca_Desi_Ch_scaffold15812_741  | Ca_desi_scaffold   | 741                            | [T/C]       | NA                                         |
| Ca_Desi_Ch_scaffold15812_743  | Ca_desi_scaffold   | 743                            | [A/G]       | NA                                         |
| Ca_Desi_Ch_scaffold15812_744  | Ca_desi_scaffold   | 744                            | [G/A]       | NA                                         |
| Ca_Desi_Ch_scaffold15812_745  | Ca_desi_scaffold   | 745                            | [G/A]       | NA                                         |
| Ca_Desi_Ch_scaffold15812_746  | Ca_desi_scaffold   | 746                            | [T/C]       | NA                                         |
| Ca_Desi_Ch_scaffold15812_747  | Ca_desi_scaffold   | 747                            | [C/T]       | NA                                         |
| Ca_Desi_Ch_scaffold15812_748  | Ca_desi_scaffold   | 748                            | [G/A]       | NA                                         |
| Ca_Desi_Ch_scaffold15812_749  | Ca_desi_scaffold   | 749                            | [A/G]       | NA                                         |
| Ca_Desi_Ch_scaffold15812_750  | Ca_desi_scaffold   | 750                            | [G/A]       | NA                                         |
| Ca_Desi_Ch_scaffold15812_751  | Ca_desi_scaffold   | 751                            | [T/C]       | NA                                         |
| Ca_Desi_Ch_scaffold15812_752  | Ca_desi_scaffold   | 752                            | [T/C]       | NA                                         |
| Ca_Desi_Ch_scaffold15812_753  | Ca_desi_scaffold   | 753                            | [G/A]       | NA                                         |
| Ca_Desi_Ch_scaffold15812_754  | Ca_desi_scaffold   | 754                            | [A/G]       | NA                                         |
| Ca_Desi_Ch_scaffold15812_755  | Ca_desi_scaffold   | 755                            | [G/A]       | NA                                         |
| Ca_Desi_Ch_scaffold15812_756  | Ca_desi_scaffold   | 756                            | [G/A]       | NA                                         |
| Ca_Desi_Ch_scaffold15812_757  | Ca_desi_scaffold   | 757                            | [G/A]       | NA                                         |
| Ca_Desi_Ch_scaffold15812_758  | Ca_desi_scaffold   | 758                            | [C/T]       | NA                                         |
| Ca_Desi_Ch_scaffold15812_759  | Ca_desi_scaffold   | 759                            | [T/C]       | NA                                         |
| Ca_Desi_Ch_scaffold15812_760  | Ca_desi_scaffold   | 760                            | [T/C]       | NA                                         |
| Ca_Desi_Ch_scaffold15812_761  | Ca_desi_scaffold   | 761                            | [G/A]       | NA                                         |
| Ca_Desi_Ch_scaffold15812_762  | Ca_desi_scaffold   | 762                            | [A/G]       | NA                                         |
| Ca_Desi_Ch_scaffold15812_763  | Ca_desi_scaffold   | 763                            | [G/A]       | NA                                         |
| Ca_Desi_Ch_scaffold15812_765  | Ca_desi_scaffold   | 765                            | [T/C]       | NA                                         |

| <b>SNP IDs</b>                 | <b>Chromosomes</b> | <b>Physical positions (bp)</b> | <b>SNPs</b> | <b>NCBI SNPdb accession IDs (NCBI_ss#)</b> |
|--------------------------------|--------------------|--------------------------------|-------------|--------------------------------------------|
| Ca_Desig_Chr_scaffold15812_766 | Ca_desig_scaffold  | 766                            | [T/C]       | NA                                         |
| Ca_Desig_Chr_scaffold15812_767 | Ca_desig_scaffold  | 767                            | [C/T]       | NA                                         |
| Ca_Desig_Chr_scaffold15812_768 | Ca_desig_scaffold  | 768                            | [T/C]       | NA                                         |
| Ca_Desig_Chr_scaffold15812_769 | Ca_desig_scaffold  | 769                            | [A/G]       | NA                                         |
| Ca_Desig_Chr_scaffold15812_770 | Ca_desig_scaffold  | 770                            | [T/C]       | NA                                         |
| Ca_Desig_Chr_scaffold15812_771 | Ca_desig_scaffold  | 771                            | [G/T]       | NA                                         |
| Ca_Desig_Chr_scaffold15812_772 | Ca_desig_scaffold  | 772                            | [A/G]       | NA                                         |
| Ca_Desig_Chr_scaffold15812_773 | Ca_desig_scaffold  | 773                            | [T/C]       | NA                                         |
| Ca_Desig_Chr_scaffold15812_774 | Ca_desig_scaffold  | 774                            | [T/C]       | NA                                         |
| Ca_Desig_Chr_scaffold15812_775 | Ca_desig_scaffold  | 775                            | [C/T]       | NA                                         |
| Ca_Desig_Chr_scaffold15812_776 | Ca_desig_scaffold  | 776                            | [C/T]       | NA                                         |
| Ca_Desig_Chr_scaffold15812_777 | Ca_desig_scaffold  | 777                            | [T/C]       | NA                                         |
| Ca_Desig_Chr_scaffold15812_778 | Ca_desig_scaffold  | 778                            | [G/A]       | NA                                         |
| Ca_Desig_Chr_scaffold15812_779 | Ca_desig_scaffold  | 779                            | [T/C]       | NA                                         |
| Ca_Desig_Chr_scaffold15812_780 | Ca_desig_scaffold  | 780                            | [A/G]       | NA                                         |
| Ca_Desig_Chr_scaffold15812_781 | Ca_desig_scaffold  | 781                            | [T/C]       | NA                                         |
| Ca_Desig_Chr_scaffold15812_782 | Ca_desig_scaffold  | 782                            | [T/C]       | NA                                         |
| Ca_Desig_Chr_scaffold15812_785 | Ca_desig_scaffold  | 785                            | [T/C]       | NA                                         |
| Ca_Desig_Chr_scaffold15812_786 | Ca_desig_scaffold  | 786                            | [G/A]       | NA                                         |
| Ca_Desig_Chr_scaffold15812_787 | Ca_desig_scaffold  | 787                            | [C/T]       | NA                                         |
| Ca_Desig_Chr_scaffold15812_788 | Ca_desig_scaffold  | 788                            | [T/C]       | NA                                         |
| Ca_Desig_Chr_scaffold15812_789 | Ca_desig_scaffold  | 789                            | [T/C]       | NA                                         |
| Ca_Desig_Chr_scaffold15812_790 | Ca_desig_scaffold  | 790                            | [T/C]       | NA                                         |
| Ca_Desig_Chr_scaffold15812_791 | Ca_desig_scaffold  | 791                            | [T/C]       | NA                                         |
| Ca_Desig_Chr_scaffold15812_792 | Ca_desig_scaffold  | 792                            | [G/A]       | NA                                         |
| Ca_Desig_Chr_scaffold15812_793 | Ca_desig_scaffold  | 793                            | [C/T]       | NA                                         |
| Ca_Desig_Chr_scaffold15812_794 | Ca_desig_scaffold  | 794                            | [G/A]       | NA                                         |
| Ca_Desig_Chr_scaffold15812_795 | Ca_desig_scaffold  | 795                            | [C/T]       | NA                                         |
| Ca_Desig_Chr_scaffold15812_796 | Ca_desig_scaffold  | 796                            | [C/T]       | NA                                         |
| Ca_Desig_Chr_scaffold15812_797 | Ca_desig_scaffold  | 797                            | [G/A]       | NA                                         |
| Ca_Desig_Chr_scaffold15812_800 | Ca_desig_scaffold  | 800                            | [T/A]       | NA                                         |
| Ca_Desig_Chr_scaffold15812_816 | Ca_desig_scaffold  | 816                            | [C/A]       | NA                                         |
| Ca_Desig_Chr_scaffold15812_817 | Ca_desig_scaffold  | 817                            | [A/G]       | NA                                         |
| Ca_Desig_Chr_scaffold15812_818 | Ca_desig_scaffold  | 818                            | [A/G]       | NA                                         |



| <b>SNP IDs</b>               | <b>Chromosomes</b> | <b>Physical positions (bp)</b> | <b>SNPs</b> | <b>NCBI SNPdb accession IDs (NCBI_ss#)</b> |
|------------------------------|--------------------|--------------------------------|-------------|--------------------------------------------|
| Ca_Desi_Ch_scaffold15812_819 | Ca_desi_scaffold   | 819                            | [A/G]       | NA                                         |
| Ca_Desi_Ch_scaffold15812_820 | Ca_desi_scaffold   | 820                            | [A/G]       | NA                                         |
| Ca_Desi_Ch_scaffold15812_821 | Ca_desi_scaffold   | 821                            | [A/G]       | NA                                         |
| Ca_Desi_Ch_scaffold15812_822 | Ca_desi_scaffold   | 822                            | [G/A]       | NA                                         |
| Ca_Desi_Ch_scaffold15812_823 | Ca_desi_scaffold   | 823                            | [A/G]       | NA                                         |
| Ca_Desi_Ch_scaffold15812_824 | Ca_desi_scaffold   | 824                            | [A/G]       | NA                                         |
| Ca_Desi_Ch_scaffold15812_825 | Ca_desi_scaffold   | 825                            | [A/G]       | NA                                         |
| Ca_Desi_Ch_scaffold15812_826 | Ca_desi_scaffold   | 826                            | [G/A]       | NA                                         |
| Ca_Desi_Ch_scaffold15812_827 | Ca_desi_scaffold   | 827                            | [G/A]       | NA                                         |
| Ca_Desi_Ch_scaffold15812_828 | Ca_desi_scaffold   | 828                            | [C/T]       | NA                                         |
| Ca_Desi_Ch_scaffold15812_829 | Ca_desi_scaffold   | 829                            | [C/T]       | NA                                         |
| Ca_Desi_Ch_scaffold15812_830 | Ca_desi_scaffold   | 830                            | [A/G]       | NA                                         |
| Ca_Desi_Ch_scaffold15812_831 | Ca_desi_scaffold   | 831                            | [G/A]       | NA                                         |
| Ca_Desi_Ch_scaffold15812_832 | Ca_desi_scaffold   | 832                            | [T/C]       | NA                                         |
| Ca_Desi_Ch_scaffold15812_833 | Ca_desi_scaffold   | 833                            | [T/C]       | NA                                         |
| Ca_Desi_Ch_scaffold15812_834 | Ca_desi_scaffold   | 834                            | [C/T]       | NA                                         |
| Ca_Desi_Ch_scaffold15812_835 | Ca_desi_scaffold   | 835                            | [T/C]       | NA                                         |
| Ca_Desi_Ch_scaffold15812_836 | Ca_desi_scaffold   | 836                            | [T/C]       | NA                                         |
| Ca_Desi_Ch_scaffold15812_837 | Ca_desi_scaffold   | 837                            | [G/A]       | NA                                         |
| Ca_Desi_Ch_scaffold15812_838 | Ca_desi_scaffold   | 838                            | [T/C]       | NA                                         |
| Ca_Desi_Ch_scaffold15812_839 | Ca_desi_scaffold   | 839                            | [C/T]       | NA                                         |
| Ca_Desi_Ch_scaffold15812_840 | Ca_desi_scaffold   | 840                            | [T/C]       | NA                                         |
| Ca_Desi_Ch_scaffold15812_841 | Ca_desi_scaffold   | 841                            | [A/G]       | NA                                         |
| Ca_Desi_Ch_scaffold15812_842 | Ca_desi_scaffold   | 842                            | [A/G]       | NA                                         |
| Ca_Desi_Ch_scaffold15812_843 | Ca_desi_scaffold   | 843                            | [T/C]       | NA                                         |
| Ca_Desi_Ch_scaffold15812_844 | Ca_desi_scaffold   | 844                            | [C/T]       | NA                                         |
| Ca_Desi_Ch_scaffold15812_845 | Ca_desi_scaffold   | 845                            | [G/A]       | NA                                         |
| Ca_Desi_Ch_scaffold15812_846 | Ca_desi_scaffold   | 846                            | [A/G]       | NA                                         |
| Ca_Desi_Ch_scaffold15812_847 | Ca_desi_scaffold   | 847                            | [T/C]       | NA                                         |
| Ca_Desi_Ch_scaffold15812_848 | Ca_desi_scaffold   | 848                            | [A/G]       | NA                                         |
| Ca_Desi_Ch_scaffold15812_849 | Ca_desi_scaffold   | 849                            | [G/A]       | NA                                         |
| Ca_Desi_Ch_scaffold15812_850 | Ca_desi_scaffold   | 850                            | [T/C]       | NA                                         |
| Ca_Desi_Ch_scaffold15812_851 | Ca_desi_scaffold   | 851                            | [G/A]       | NA                                         |
| Ca_Desi_Ch_scaffold15812_852 | Ca_desi_scaffold   | 852                            | [G/A]       | NA                                         |

| <b>SNP IDs</b>               | <b>Chromosomes</b> | <b>Physical positions (bp)</b> | <b>SNPs</b> | <b>NCBI SNPdb accession IDs (NCBI_ss#)</b> |
|------------------------------|--------------------|--------------------------------|-------------|--------------------------------------------|
| Ca_Desi_Ch_scaffold15812_853 | Ca_desi_scaffold   | 853                            | [C/T]       | NA                                         |
| Ca_Desi_Ch_scaffold15812_854 | Ca_desi_scaffold   | 854                            | [T/C]       | NA                                         |
| Ca_Desi_Ch_scaffold15812_855 | Ca_desi_scaffold   | 855                            | [C/T]       | NA                                         |
| Ca_Desi_Ch_scaffold15812_856 | Ca_desi_scaffold   | 856                            | [G/C]       | NA                                         |
| Ca_Desi_Ch_scaffold15812_857 | Ca_desi_scaffold   | 857                            | [T/G]       | NA                                         |
| Ca_Desi_Ch_scaffold15812_858 | Ca_desi_scaffold   | 858                            | [T/C]       | NA                                         |
| Ca_Desi_Ch_scaffold15812_859 | Ca_desi_scaffold   | 859                            | [C/T]       | NA                                         |
| Ca_Desi_Ch_scaffold15812_861 | Ca_desi_scaffold   | 861                            | [T/C]       | NA                                         |
| Ca_Desi_Ch_scaffold15812_863 | Ca_desi_scaffold   | 863                            | [T/C]       | NA                                         |
| Ca_Desi_Ch_scaffold15812_864 | Ca_desi_scaffold   | 864                            | [G/A]       | NA                                         |
| Ca_Desi_Ch_scaffold15812_865 | Ca_desi_scaffold   | 865                            | [A/G]       | NA                                         |
| Ca_Desi_Ch_scaffold15812_866 | Ca_desi_scaffold   | 866                            | [T/C]       | NA                                         |
| Ca_Desi_Ch_scaffold15812_867 | Ca_desi_scaffold   | 867                            | [T/C]       | NA                                         |
| Ca_Desi_Ch_scaffold15812_868 | Ca_desi_scaffold   | 868                            | [A/G]       | NA                                         |
| Ca_Desi_Ch_scaffold15812_869 | Ca_desi_scaffold   | 869                            | [T/C]       | NA                                         |
| Ca_Desi_Ch_scaffold15812_870 | Ca_desi_scaffold   | 870                            | [G/A]       | NA                                         |
| Ca_Desi_Ch_scaffold15812_871 | Ca_desi_scaffold   | 871                            | [G/A]       | NA                                         |
| Ca_Desi_Ch_scaffold15812_872 | Ca_desi_scaffold   | 872                            | [T/C]       | NA                                         |
| Ca_Desi_Ch_scaffold15812_873 | Ca_desi_scaffold   | 873                            | [T/C]       | NA                                         |
| Ca_Desi_Ch_scaffold15812_874 | Ca_desi_scaffold   | 874                            | [G/A]       | NA                                         |
| Ca_Desi_Ch_scaffold15812_875 | Ca_desi_scaffold   | 875                            | [A/G]       | NA                                         |
| Ca_Desi_Ch_scaffold15812_954 | Ca_desi_scaffold   | 954                            | [A/G]       | NA                                         |
| Ca_Desi_Ch_scaffold15812_955 | Ca_desi_scaffold   | 955                            | [T/C]       | NA                                         |
| Ca_Desi_Ch_scaffold15812_956 | Ca_desi_scaffold   | 956                            | [A/G]       | NA                                         |
| Ca_Desi_Ch_scaffold15812_957 | Ca_desi_scaffold   | 957                            | [A/G]       | NA                                         |
| Ca_Desi_Ch_scaffold15812_958 | Ca_desi_scaffold   | 958                            | [A/G]       | NA                                         |
| Ca_Desi_Ch_scaffold15812_959 | Ca_desi_scaffold   | 959                            | [A/G]       | NA                                         |
| Ca_Desi_Ch_scaffold15812_960 | Ca_desi_scaffold   | 960                            | [G/T]       | NA                                         |
| Ca_Desi_Ch_scaffold15812_962 | Ca_desi_scaffold   | 962                            | [T/C]       | NA                                         |
| Ca_Desi_Ch_scaffold15812_963 | Ca_desi_scaffold   | 963                            | [C/T]       | NA                                         |
| Ca_Desi_Ch_scaffold15812_964 | Ca_desi_scaffold   | 964                            | [G/A]       | NA                                         |
| Ca_Desi_Ch_scaffold15812_965 | Ca_desi_scaffold   | 965                            | [A/G]       | NA                                         |
| Ca_Desi_Ch_scaffold15812_966 | Ca_desi_scaffold   | 966                            | [G/A]       | NA                                         |
| Ca_Desi_Ch_scaffold15812_967 | Ca_desi_scaffold   | 967                            | [C/T]       | NA                                         |

| <b>SNP IDs</b>                  | <b>Chromosomes</b> | <b>Physical positions (bp)</b> | <b>SNPs</b> | <b>NCBI SNPdb accession IDs (NCBI_ss#)</b> |
|---------------------------------|--------------------|--------------------------------|-------------|--------------------------------------------|
| Ca_Desig_Chr_scaffold15812_968  | Ca_desig_scaffold  | 968                            | [T/C]       | NA                                         |
| Ca_Desig_Chr_scaffold15812_969  | Ca_desig_scaffold  | 969                            | [T/C]       | NA                                         |
| Ca_Desig_Chr_scaffold15812_970  | Ca_desig_scaffold  | 970                            | [C/T]       | NA                                         |
| Ca_Desig_Chr_scaffold15812_971  | Ca_desig_scaffold  | 971                            | [T/C]       | NA                                         |
| Ca_Desig_Chr_scaffold15812_972  | Ca_desig_scaffold  | 972                            | [C/T]       | NA                                         |
| Ca_Desig_Chr_scaffold15812_973  | Ca_desig_scaffold  | 973                            | [C/T]       | NA                                         |
| Ca_Desig_Chr_scaffold15812_974  | Ca_desig_scaffold  | 974                            | [A/C]       | NA                                         |
| Ca_Desig_Chr_scaffold15812_975  | Ca_desig_scaffold  | 975                            | [C/T]       | NA                                         |
| Ca_Desig_Chr_scaffold15812_976  | Ca_desig_scaffold  | 976                            | [T/C]       | NA                                         |
| Ca_Desig_Chr_scaffold15812_977  | Ca_desig_scaffold  | 977                            | [G/A]       | NA                                         |
| Ca_Desig_Chr_scaffold15812_978  | Ca_desig_scaffold  | 978                            | [A/G]       | NA                                         |
| Ca_Desig_Chr_scaffold15812_979  | Ca_desig_scaffold  | 979                            | [T/C]       | NA                                         |
| Ca_Desig_Chr_scaffold15812_980  | Ca_desig_scaffold  | 980                            | [C/T]       | NA                                         |
| Ca_Desig_Chr_scaffold15812_981  | Ca_desig_scaffold  | 981                            | [G/A]       | NA                                         |
| Ca_Desig_Chr_scaffold15812_982  | Ca_desig_scaffold  | 982                            | [A/G]       | NA                                         |
| Ca_Desig_Chr_scaffold15812_983  | Ca_desig_scaffold  | 983                            | [T/C]       | NA                                         |
| Ca_Desig_Chr_scaffold15812_984  | Ca_desig_scaffold  | 984                            | [T/C]       | NA                                         |
| Ca_Desig_Chr_scaffold15812_985  | Ca_desig_scaffold  | 985                            | [T/C]       | NA                                         |
| Ca_Desig_Chr_scaffold15812_986  | Ca_desig_scaffold  | 986                            | [C/T]       | NA                                         |
| Ca_Desig_Chr_scaffold15812_987  | Ca_desig_scaffold  | 987                            | [A/G]       | NA                                         |
| Ca_Desig_Chr_scaffold15812_988  | Ca_desig_scaffold  | 988                            | [C/T]       | NA                                         |
| Ca_Desig_Chr_scaffold15812_989  | Ca_desig_scaffold  | 989                            | [A/G]       | NA                                         |
| Ca_Desig_Chr_scaffold15812_990  | Ca_desig_scaffold  | 990                            | [A/G]       | NA                                         |
| Ca_Desig_Chr_scaffold15812_991  | Ca_desig_scaffold  | 991                            | [G/A]       | NA                                         |
| Ca_Desig_Chr_scaffold15812_992  | Ca_desig_scaffold  | 992                            | [T/C]       | NA                                         |
| Ca_Desig_Chr_scaffold15812_993  | Ca_desig_scaffold  | 993                            | [A/G]       | NA                                         |
| Ca_Desig_Chr_scaffold15812_994  | Ca_desig_scaffold  | 994                            | [A/G]       | NA                                         |
| Ca_Desig_Chr_scaffold15812_995  | Ca_desig_scaffold  | 995                            | [T/C]       | NA                                         |
| Ca_Desig_Chr_scaffold15812_996  | Ca_desig_scaffold  | 996                            | [T/C]       | NA                                         |
| Ca_Desig_Chr_scaffold15812_998  | Ca_desig_scaffold  | 998                            | [A/G]       | NA                                         |
| Ca_Desig_Chr_scaffold15812_1000 | Ca_desig_scaffold  | 1000                           | [T/C]       | NA                                         |
| Ca_Desig_Chr_scaffold15812_1001 | Ca_desig_scaffold  | 1001                           | [G/A]       | NA                                         |
| Ca_Desig_Chr_scaffold15812_1002 | Ca_desig_scaffold  | 1002                           | [G/A]       | NA                                         |
| Ca_Desig_Chr_scaffold15812_1003 | Ca_desig_scaffold  | 1003                           | [C/T]       | NA                                         |

| <b>SNP IDs</b>                        | <b>Chromosomes</b> | <b>Physical positions (bp)</b> | <b>SNPs</b> | <b>NCBI SNPdb accession IDs (NCBI_ss#)</b> |
|---------------------------------------|--------------------|--------------------------------|-------------|--------------------------------------------|
| Ca_Desi_Chromosome_scaffold15812_1004 | Ca_desi_scaffold   | 1004                           | [T/C]       | NA                                         |
| Ca_Desi_Chromosome_scaffold15812_1005 | Ca_desi_scaffold   | 1005                           | [G/A]       | NA                                         |
| Ca_Desi_Chromosome_scaffold15812_1006 | Ca_desi_scaffold   | 1006                           | [A/G]       | NA                                         |
| Ca_Desi_Chromosome_scaffold15812_1007 | Ca_desi_scaffold   | 1007                           | [G/A]       | NA                                         |
| Ca_Desi_Chromosome_scaffold15812_1008 | Ca_desi_scaffold   | 1008                           | [C/T]       | NA                                         |
| Ca_Desi_Chromosome_scaffold15812_1009 | Ca_desi_scaffold   | 1009                           | [T/C]       | NA                                         |
| Ca_Desi_Chromosome_scaffold15812_1010 | Ca_desi_scaffold   | 1010                           | [A/G]       | NA                                         |
| Ca_Desi_Chromosome_scaffold15812_1011 | Ca_desi_scaffold   | 1011                           | [T/C]       | NA                                         |
| Ca_Desi_Chromosome_scaffold15812_1012 | Ca_desi_scaffold   | 1012                           | [A/G]       | NA                                         |
| Ca_Desi_Chromosome_scaffold15812_1074 | Ca_desi_scaffold   | 1074                           | [G/A]       | NA                                         |
| Ca_Desi_Chromosome_scaffold15812_1075 | Ca_desi_scaffold   | 1075                           | [G/T]       | NA                                         |
| Ca_Desi_Chromosome_scaffold15812_1078 | Ca_desi_scaffold   | 1078                           | [T/C]       | NA                                         |
| Ca_Desi_Chromosome_scaffold15812_1079 | Ca_desi_scaffold   | 1079                           | [A/C]       | NA                                         |
| Ca_Desi_Chromosome_scaffold15812_1080 | Ca_desi_scaffold   | 1080                           | [C/T]       | NA                                         |
| Ca_Desi_Chromosome_scaffold15812_1081 | Ca_desi_scaffold   | 1081                           | [C/T]       | NA                                         |
| Ca_Desi_Chromosome_scaffold15812_1082 | Ca_desi_scaffold   | 1082                           | [G/A]       | NA                                         |
| Ca_Desi_Chromosome_scaffold15812_1083 | Ca_desi_scaffold   | 1083                           | [T/C]       | NA                                         |
| Ca_Desi_Chromosome_scaffold15812_1084 | Ca_desi_scaffold   | 1084                           | [C/T]       | NA                                         |
| Ca_Desi_Chromosome_scaffold15812_1085 | Ca_desi_scaffold   | 1085                           | [G/A]       | NA                                         |
| Ca_Desi_Chromosome_scaffold15812_1086 | Ca_desi_scaffold   | 1086                           | [C/T]       | NA                                         |
| Ca_Desi_Chromosome_scaffold15812_1087 | Ca_desi_scaffold   | 1087                           | [T/C]       | NA                                         |
| Ca_Desi_Chromosome_scaffold15812_1089 | Ca_desi_scaffold   | 1089                           | [C/T]       | NA                                         |
| Ca_Desi_Chromosome_scaffold15812_1090 | Ca_desi_scaffold   | 1090                           | [T/C]       | NA                                         |
| Ca_Desi_Chromosome_scaffold15812_1091 | Ca_desi_scaffold   | 1091                           | [C/T]       | NA                                         |
| Ca_Desi_Chromosome_scaffold15812_1093 | Ca_desi_scaffold   | 1093                           | [T/C]       | NA                                         |
| Ca_Desi_Chromosome_scaffold15812_1094 | Ca_desi_scaffold   | 1094                           | [T/C]       | NA                                         |
| Ca_Desi_Chromosome_scaffold15812_1096 | Ca_desi_scaffold   | 1096                           | [T/C]       | NA                                         |
| Ca_Desi_Chromosome_scaffold15812_1097 | Ca_desi_scaffold   | 1097                           | [C/T]       | NA                                         |
| Ca_Desi_Chromosome_scaffold15812_1098 | Ca_desi_scaffold   | 1098                           | [C/T]       | NA                                         |
| Ca_Desi_Chromosome_scaffold15812_1099 | Ca_desi_scaffold   | 1099                           | [G/A]       | NA                                         |
| Ca_Desi_Chromosome_scaffold15812_1100 | Ca_desi_scaffold   | 1100                           | [C/T]       | NA                                         |
| Ca_Desi_Chromosome_scaffold15812_1101 | Ca_desi_scaffold   | 1101                           | [C/T]       | NA                                         |
| Ca_Desi_Chromosome_scaffold15812_1102 | Ca_desi_scaffold   | 1102                           | [G/A]       | NA                                         |
| Ca_Desi_Chromosome_scaffold15812_1103 | Ca_desi_scaffold   | 1103                           | [T/C]       | NA                                         |

| <b>SNP IDs</b>                  | <b>Chromosomes</b> | <b>Physical positions (bp)</b> | <b>SNPs</b> | <b>NCBI SNPdb accession IDs (NCBI_ss#)</b> |
|---------------------------------|--------------------|--------------------------------|-------------|--------------------------------------------|
| Ca_Desig_Chr_scaffold15812_1104 | Ca_desig_scaffold  | 1104                           | [T/C]       | NA                                         |
| Ca_Desig_Chr_scaffold15812_1105 | Ca_desig_scaffold  | 1105                           | [G/A]       | NA                                         |
| Ca_Desig_Chr_scaffold15812_1106 | Ca_desig_scaffold  | 1106                           | [A/G]       | NA                                         |
| Ca_Desig_Chr_scaffold15812_1107 | Ca_desig_scaffold  | 1107                           | [C/T]       | NA                                         |
| Ca_Desig_Chr_scaffold15812_1108 | Ca_desig_scaffold  | 1108                           | [T/C]       | NA                                         |
| Ca_Desig_Chr_scaffold15812_1109 | Ca_desig_scaffold  | 1109                           | [G/A]       | NA                                         |
| Ca_Desig_Chr_scaffold15812_1110 | Ca_desig_scaffold  | 1110                           | [A/G]       | NA                                         |
| Ca_Desig_Chr_scaffold15812_1111 | Ca_desig_scaffold  | 1111                           | [T/C]       | NA                                         |
| Ca_Desig_Chr_scaffold15812_1113 | Ca_desig_scaffold  | 1113                           | [T/C]       | NA                                         |
| Ca_Desig_Chr_scaffold15812_1115 | Ca_desig_scaffold  | 1115                           | [A/G]       | NA                                         |
| Ca_Desig_Chr_scaffold15812_1116 | Ca_desig_scaffold  | 1116                           | [T/C]       | NA                                         |
| Ca_Desig_Chr_scaffold15812_1117 | Ca_desig_scaffold  | 1117                           | [G/A]       | NA                                         |
| Ca_Desig_Chr_scaffold15812_1120 | Ca_desig_scaffold  | 1120                           | [C/T]       | NA                                         |
| Ca_Desig_Chr_scaffold15812_1121 | Ca_desig_scaffold  | 1121                           | [T/C]       | NA                                         |
| Ca_Desig_Chr_scaffold15812_1122 | Ca_desig_scaffold  | 1122                           | [T/C]       | NA                                         |
| Ca_Desig_Chr_scaffold15812_1123 | Ca_desig_scaffold  | 1123                           | [A/G]       | NA                                         |
| Ca_Desig_Chr_scaffold15812_1124 | Ca_desig_scaffold  | 1124                           | [A/G]       | NA                                         |
| Ca_Desig_Chr_scaffold15812_1125 | Ca_desig_scaffold  | 1125                           | [A/G]       | NA                                         |
| Ca_Desig_Chr_scaffold15812_1126 | Ca_desig_scaffold  | 1126                           | [T/C]       | NA                                         |
| Ca_Desig_Chr_scaffold15812_1127 | Ca_desig_scaffold  | 1127                           | [G/A]       | NA                                         |
| Ca_Desig_Chr_scaffold15812_1128 | Ca_desig_scaffold  | 1128                           | [C/T]       | NA                                         |
| Ca_Desig_Chr_scaffold15812_1129 | Ca_desig_scaffold  | 1129                           | [C/T]       | NA                                         |
| Ca_Desig_Chr_scaffold15812_1130 | Ca_desig_scaffold  | 1130                           | [T/C]       | NA                                         |
| Ca_Desig_Chr_scaffold15812_1131 | Ca_desig_scaffold  | 1131                           | [A/G]       | NA                                         |
| Ca_Desig_Chr_scaffold15812_1132 | Ca_desig_scaffold  | 1132                           | [G/A]       | NA                                         |
| Ca_Desig_Chr_scaffold15812_1231 | Ca_desig_scaffold  | 1231                           | [A/T]       | NA                                         |
| Ca_Desig_Chr_scaffold15933_927  | Ca_desig_scaffold  | 927                            | [G/C]       | NA                                         |
| Ca_Desig_Chr_scaffold15945_41   | Ca_desig_scaffold  | 41                             | [A/G]       | NA                                         |
| Ca_Desig_Chr_scaffold15945_43   | Ca_desig_scaffold  | 43                             | [A/G]       | NA                                         |
| Ca_Desig_Chr_scaffold15945_45   | Ca_desig_scaffold  | 45                             | [T/C]       | NA                                         |
| Ca_Desig_Chr_scaffold15945_46   | Ca_desig_scaffold  | 46                             | [T/C]       | NA                                         |
| Ca_Desig_Chr_scaffold15945_49   | Ca_desig_scaffold  | 49                             | [T/C]       | NA                                         |
| Ca_Desig_Chr_scaffold15945_54   | Ca_desig_scaffold  | 54                             | [T/C]       | NA                                         |
| Ca_Desig_Chr_scaffold15945_58   | Ca_desig_scaffold  | 58                             | [A/C]       | NA                                         |

| <b>SNP IDs</b>                 | <b>Chromosomes</b> | <b>Physical positions (bp)</b> | <b>SNPs</b> | <b>NCBI SNPdb accession IDs (NCBI_ss#)</b> |
|--------------------------------|--------------------|--------------------------------|-------------|--------------------------------------------|
| Ca_Desig_Chr_scaffold15945_62  | Ca_desig_scaffold  | 62                             | [A/G]       | NA                                         |
| Ca_Desig_Chr_scaffold15945_64  | Ca_desig_scaffold  | 64                             | [T/C]       | NA                                         |
| Ca_Desig_Chr_scaffold15945_70  | Ca_desig_scaffold  | 70                             | [A/G]       | NA                                         |
| Ca_Desig_Chr_scaffold15945_71  | Ca_desig_scaffold  | 71                             | [A/G]       | NA                                         |
| Ca_Desig_Chr_scaffold15945_77  | Ca_desig_scaffold  | 77                             | [T/C]       | NA                                         |
| Ca_Desig_Chr_scaffold15945_84  | Ca_desig_scaffold  | 84                             | [T/C]       | NA                                         |
| Ca_Desig_Chr_scaffold15945_86  | Ca_desig_scaffold  | 86                             | [T/C]       | NA                                         |
| Ca_Desig_Chr_scaffold15945_88  | Ca_desig_scaffold  | 88                             | [T/C]       | NA                                         |
| Ca_Desig_Chr_scaffold15945_92  | Ca_desig_scaffold  | 92                             | [T/C]       | NA                                         |
| Ca_Desig_Chr_scaffold15945_94  | Ca_desig_scaffold  | 94                             | [T/C]       | NA                                         |
| Ca_Desig_Chr_scaffold15945_98  | Ca_desig_scaffold  | 98                             | [T/C]       | NA                                         |
| Ca_Desig_Chr_scaffold15945_105 | Ca_desig_scaffold  | 105                            | [T/C]       | NA                                         |
| Ca_Desig_Chr_scaffold15945_106 | Ca_desig_scaffold  | 106                            | [A/G]       | NA                                         |
| Ca_Desig_Chr_scaffold15945_107 | Ca_desig_scaffold  | 107                            | [T/C]       | NA                                         |
| Ca_Desig_Chr_scaffold15945_108 | Ca_desig_scaffold  | 108                            | [C/T]       | NA                                         |
| Ca_Desig_Chr_scaffold15945_109 | Ca_desig_scaffold  | 109                            | [T/C]       | NA                                         |
| Ca_Desig_Chr_scaffold15945_110 | Ca_desig_scaffold  | 110                            | [T/C]       | NA                                         |
| Ca_Desig_Chr_scaffold15945_111 | Ca_desig_scaffold  | 111                            | [T/C]       | NA                                         |
| Ca_Desig_Chr_scaffold15945_113 | Ca_desig_scaffold  | 113                            | [T/C]       | NA                                         |
| Ca_Desig_Chr_scaffold15945_114 | Ca_desig_scaffold  | 114                            | [A/G]       | NA                                         |
| Ca_Desig_Chr_scaffold15945_115 | Ca_desig_scaffold  | 115                            | [A/G]       | NA                                         |
| Ca_Desig_Chr_scaffold15945_116 | Ca_desig_scaffold  | 116                            | [A/G]       | NA                                         |
| Ca_Desig_Chr_scaffold15945_118 | Ca_desig_scaffold  | 118                            | [A/G]       | NA                                         |
| Ca_Desig_Chr_scaffold15945_120 | Ca_desig_scaffold  | 120                            | [G/A]       | NA                                         |
| Ca_Desig_Chr_scaffold15945_121 | Ca_desig_scaffold  | 121                            | [A/G]       | NA                                         |
| Ca_Desig_Chr_scaffold15945_123 | Ca_desig_scaffold  | 123                            | [A/G]       | NA                                         |
| Ca_Desig_Chr_scaffold15945_125 | Ca_desig_scaffold  | 125                            | [A/G]       | NA                                         |
| Ca_Desig_Chr_scaffold15945_126 | Ca_desig_scaffold  | 126                            | [A/G]       | NA                                         |
| Ca_Desig_Chr_scaffold15945_127 | Ca_desig_scaffold  | 127                            | [A/G]       | NA                                         |
| Ca_Desig_Chr_scaffold15945_129 | Ca_desig_scaffold  | 129                            | [A/G]       | NA                                         |
| Ca_Desig_Chr_scaffold15945_130 | Ca_desig_scaffold  | 130                            | [T/A]       | NA                                         |
| Ca_Desig_Chr_scaffold15945_131 | Ca_desig_scaffold  | 131                            | [A/G]       | NA                                         |
| Ca_Desig_Chr_scaffold15945_132 | Ca_desig_scaffold  | 132                            | [G/A]       | NA                                         |
| Ca_Desig_Chr_scaffold15945_133 | Ca_desig_scaffold  | 133                            | [C/T]       | NA                                         |

| <b>SNP IDs</b>                 | <b>Chromosomes</b> | <b>Physical positions (bp)</b> | <b>SNPs</b> | <b>NCBI SNPdb accession IDs (NCBI_ss#)</b> |
|--------------------------------|--------------------|--------------------------------|-------------|--------------------------------------------|
| Ca_Desig_Chr_scaffold15945_134 | Ca_desig_scaffold  | 134                            | [C/T]       | NA                                         |
| Ca_Desig_Chr_scaffold15945_136 | Ca_desig_scaffold  | 136                            | [T/C]       | NA                                         |
| Ca_Desig_Chr_scaffold15945_137 | Ca_desig_scaffold  | 137                            | [A/G]       | NA                                         |
| Ca_Desig_Chr_scaffold15945_139 | Ca_desig_scaffold  | 139                            | [A/G]       | NA                                         |
| Ca_Desig_Chr_scaffold15945_141 | Ca_desig_scaffold  | 141                            | [T/C]       | NA                                         |
| Ca_Desig_Chr_scaffold15945_143 | Ca_desig_scaffold  | 143                            | [A/G]       | NA                                         |
| Ca_Desig_Chr_scaffold15945_145 | Ca_desig_scaffold  | 145                            | [T/C]       | NA                                         |
| Ca_Desig_Chr_scaffold15945_146 | Ca_desig_scaffold  | 146                            | [G/A]       | NA                                         |
| Ca_Desig_Chr_scaffold15945_147 | Ca_desig_scaffold  | 147                            | [A/G]       | NA                                         |
| Ca_Desig_Chr_scaffold15945_148 | Ca_desig_scaffold  | 148                            | [C/A]       | NA                                         |
| Ca_Desig_Chr_scaffold15945_149 | Ca_desig_scaffold  | 149                            | [T/C]       | NA                                         |
| Ca_Desig_Chr_scaffold15945_150 | Ca_desig_scaffold  | 150                            | [T/C]       | NA                                         |
| Ca_Desig_Chr_scaffold15945_151 | Ca_desig_scaffold  | 151                            | [T/C]       | NA                                         |
| Ca_Desig_Chr_scaffold15945_152 | Ca_desig_scaffold  | 152                            | [T/C]       | NA                                         |
| Ca_Desig_Chr_scaffold15945_153 | Ca_desig_scaffold  | 153                            | [C/A]       | NA                                         |
| Ca_Desig_Chr_scaffold15945_154 | Ca_desig_scaffold  | 154                            | [A/G]       | NA                                         |
| Ca_Desig_Chr_scaffold15945_155 | Ca_desig_scaffold  | 155                            | [A/G]       | NA                                         |
| Ca_Desig_Chr_scaffold15945_156 | Ca_desig_scaffold  | 156                            | [A/G]       | NA                                         |
| Ca_Desig_Chr_scaffold15945_158 | Ca_desig_scaffold  | 158                            | [A/G]       | NA                                         |
| Ca_Desig_Chr_scaffold15945_160 | Ca_desig_scaffold  | 160                            | [A/G]       | NA                                         |
| Ca_Desig_Chr_scaffold15945_162 | Ca_desig_scaffold  | 162                            | [A/G]       | NA                                         |
| Ca_Desig_Chr_scaffold15945_183 | Ca_desig_scaffold  | 183                            | [T/C]       | NA                                         |
| Ca_Desig_Chr_scaffold15945_198 | Ca_desig_scaffold  | 198                            | [A/G]       | NA                                         |
| Ca_Desig_Chr_scaffold15945_215 | Ca_desig_scaffold  | 215                            | [G/C]       | NA                                         |
| Ca_Desig_Chr_scaffold15945_216 | Ca_desig_scaffold  | 216                            | [A/G]       | NA                                         |
| Ca_Desig_Chr_scaffold15945_218 | Ca_desig_scaffold  | 218                            | [A/G]       | NA                                         |
| Ca_Desig_Chr_scaffold15945_219 | Ca_desig_scaffold  | 219                            | [T/C]       | NA                                         |
| Ca_Desig_Chr_scaffold15945_220 | Ca_desig_scaffold  | 220                            | [C/T]       | NA                                         |
| Ca_Desig_Chr_scaffold15945_221 | Ca_desig_scaffold  | 221                            | [G/T]       | NA                                         |
| Ca_Desig_Chr_scaffold15945_222 | Ca_desig_scaffold  | 222                            | [G/A]       | NA                                         |
| Ca_Desig_Chr_scaffold15945_225 | Ca_desig_scaffold  | 225                            | [T/C]       | NA                                         |
| Ca_Desig_Chr_scaffold15945_228 | Ca_desig_scaffold  | 228                            | [A/G]       | NA                                         |
| Ca_Desig_Chr_scaffold15945_229 | Ca_desig_scaffold  | 229                            | [A/G]       | NA                                         |
| Ca_Desig_Chr_scaffold15945_231 | Ca_desig_scaffold  | 231                            | [T/C]       | NA                                         |

| <b>SNP IDs</b>                 | <b>Chromosomes</b> | <b>Physical positions (bp)</b> | <b>SNPs</b> | <b>NCBI SNPdb accession IDs (NCBI_ss#)</b> |
|--------------------------------|--------------------|--------------------------------|-------------|--------------------------------------------|
| Ca_Desig_Chr_scaffold15945_232 | Ca_desig_scaffold  | 232                            | [A/G]       | NA                                         |
| Ca_Desig_Chr_scaffold15945_233 | Ca_desig_scaffold  | 233                            | [A/G]       | NA                                         |
| Ca_Desig_Chr_scaffold15945_234 | Ca_desig_scaffold  | 234                            | [T/C]       | NA                                         |
| Ca_Desig_Chr_scaffold15945_235 | Ca_desig_scaffold  | 235                            | [A/G]       | NA                                         |
| Ca_Desig_Chr_scaffold15945_237 | Ca_desig_scaffold  | 237                            | [T/C]       | NA                                         |
| Ca_Desig_Chr_scaffold15945_238 | Ca_desig_scaffold  | 238                            | [A/G]       | NA                                         |
| Ca_Desig_Chr_scaffold15945_240 | Ca_desig_scaffold  | 240                            | [G/A]       | NA                                         |
| Ca_Desig_Chr_scaffold15945_242 | Ca_desig_scaffold  | 242                            | [A/G]       | NA                                         |
| Ca_Desig_Chr_scaffold15945_243 | Ca_desig_scaffold  | 243                            | [T/C]       | NA                                         |
| Ca_Desig_Chr_scaffold15945_244 | Ca_desig_scaffold  | 244                            | [T/C]       | NA                                         |
| Ca_Desig_Chr_scaffold15945_245 | Ca_desig_scaffold  | 245                            | [T/C]       | NA                                         |
| Ca_Desig_Chr_scaffold15945_247 | Ca_desig_scaffold  | 247                            | [A/G]       | NA                                         |
| Ca_Desig_Chr_scaffold15945_249 | Ca_desig_scaffold  | 249                            | [T/C]       | NA                                         |
| Ca_Desig_Chr_scaffold15945_250 | Ca_desig_scaffold  | 250                            | [T/C]       | NA                                         |
| Ca_Desig_Chr_scaffold15945_251 | Ca_desig_scaffold  | 251                            | [T/C]       | NA                                         |
| Ca_Desig_Chr_scaffold15945_252 | Ca_desig_scaffold  | 252                            | [G/A]       | NA                                         |
| Ca_Desig_Chr_scaffold15945_253 | Ca_desig_scaffold  | 253                            | [C/T]       | NA                                         |
| Ca_Desig_Chr_scaffold15945_254 | Ca_desig_scaffold  | 254                            | [T/C]       | NA                                         |
| Ca_Desig_Chr_scaffold15945_255 | Ca_desig_scaffold  | 255                            | [T/C]       | NA                                         |
| Ca_Desig_Chr_scaffold15945_256 | Ca_desig_scaffold  | 256                            | [T/C]       | NA                                         |
| Ca_Desig_Chr_scaffold15945_257 | Ca_desig_scaffold  | 257                            | [A/G]       | NA                                         |
| Ca_Desig_Chr_scaffold15945_258 | Ca_desig_scaffold  | 258                            | [T/C]       | NA                                         |
| Ca_Desig_Chr_scaffold15945_260 | Ca_desig_scaffold  | 260                            | [G/A]       | NA                                         |
| Ca_Desig_Chr_scaffold15945_261 | Ca_desig_scaffold  | 261                            | [T/C]       | NA                                         |
| Ca_Desig_Chr_scaffold15945_262 | Ca_desig_scaffold  | 262                            | [A/G]       | NA                                         |
| Ca_Desig_Chr_scaffold15945_263 | Ca_desig_scaffold  | 263                            | [T/C]       | NA                                         |
| Ca_Desig_Chr_scaffold15945_264 | Ca_desig_scaffold  | 264                            | [A/G]       | NA                                         |
| Ca_Desig_Chr_scaffold15945_266 | Ca_desig_scaffold  | 266                            | [T/C]       | NA                                         |
| Ca_Desig_Chr_scaffold15945_267 | Ca_desig_scaffold  | 267                            | [T/C]       | NA                                         |
| Ca_Desig_Chr_scaffold15945_268 | Ca_desig_scaffold  | 268                            | [T/C]       | NA                                         |
| Ca_Desig_Chr_scaffold15945_270 | Ca_desig_scaffold  | 270                            | [T/C]       | NA                                         |
| Ca_Desig_Chr_scaffold15945_271 | Ca_desig_scaffold  | 271                            | [A/G]       | NA                                         |
| Ca_Desig_Chr_scaffold15945_273 | Ca_desig_scaffold  | 273                            | [A/G]       | NA                                         |
| Ca_Desig_Chr_scaffold15945_274 | Ca_desig_scaffold  | 274                            | [A/G]       | NA                                         |



| <b>SNP IDs</b>               | <b>Chromosomes</b> | <b>Physical positions (bp)</b> | <b>SNPs</b> | <b>NCBI SNPdb accession IDs (NCBI_ss#)</b> |
|------------------------------|--------------------|--------------------------------|-------------|--------------------------------------------|
| Ca_Desi_Ch_scaffold15945_312 | Ca_desi_scaffold   | 312                            | [G/T]       | NA                                         |
| Ca_Desi_Ch_scaffold15945_313 | Ca_desi_scaffold   | 313                            | [C/T]       | NA                                         |
| Ca_Desi_Ch_scaffold15945_314 | Ca_desi_scaffold   | 314                            | [T/C]       | NA                                         |
| Ca_Desi_Ch_scaffold15945_315 | Ca_desi_scaffold   | 315                            | [T/C]       | NA                                         |
| Ca_Desi_Ch_scaffold15945_316 | Ca_desi_scaffold   | 316                            | [A/G]       | NA                                         |
| Ca_Desi_Ch_scaffold15945_317 | Ca_desi_scaffold   | 317                            | [A/G]       | NA                                         |
| Ca_Desi_Ch_scaffold15945_318 | Ca_desi_scaffold   | 318                            | [A/G]       | NA                                         |
| Ca_Desi_Ch_scaffold15945_319 | Ca_desi_scaffold   | 319                            | [A/G]       | NA                                         |
| Ca_Desi_Ch_scaffold15945_320 | Ca_desi_scaffold   | 320                            | [T/C]       | NA                                         |
| Ca_Desi_Ch_scaffold15945_321 | Ca_desi_scaffold   | 321                            | [G/A]       | NA                                         |
| Ca_Desi_Ch_scaffold15945_322 | Ca_desi_scaffold   | 322                            | [A/G]       | NA                                         |
| Ca_Desi_Ch_scaffold15945_323 | Ca_desi_scaffold   | 323                            | [T/C]       | NA                                         |
| Ca_Desi_Ch_scaffold15945_324 | Ca_desi_scaffold   | 324                            | [T/C]       | NA                                         |
| Ca_Desi_Ch_scaffold15945_325 | Ca_desi_scaffold   | 325                            | [T/C]       | NA                                         |
| Ca_Desi_Ch_scaffold15945_326 | Ca_desi_scaffold   | 326                            | [A/G]       | NA                                         |
| Ca_Desi_Ch_scaffold15945_327 | Ca_desi_scaffold   | 327                            | [T/C]       | NA                                         |
| Ca_Desi_Ch_scaffold15945_328 | Ca_desi_scaffold   | 328                            | [C/T]       | NA                                         |
| Ca_Desi_Ch_scaffold15945_329 | Ca_desi_scaffold   | 329                            | [T/C]       | NA                                         |
| Ca_Desi_Ch_scaffold15945_330 | Ca_desi_scaffold   | 330                            | [A/G]       | NA                                         |
| Ca_Desi_Ch_scaffold15945_331 | Ca_desi_scaffold   | 331                            | [A/G]       | NA                                         |
| Ca_Desi_Ch_scaffold15945_332 | Ca_desi_scaffold   | 332                            | [G/A]       | NA                                         |
| Ca_Desi_Ch_scaffold15945_333 | Ca_desi_scaffold   | 333                            | [T/C]       | NA                                         |
| Ca_Desi_Ch_scaffold15945_334 | Ca_desi_scaffold   | 334                            | [C/A]       | NA                                         |
| Ca_Desi_Ch_scaffold15945_335 | Ca_desi_scaffold   | 335                            | [A/G]       | NA                                         |
| Ca_Desi_Ch_scaffold15945_336 | Ca_desi_scaffold   | 336                            | [A/G]       | NA                                         |
| Ca_Desi_Ch_scaffold15945_337 | Ca_desi_scaffold   | 337                            | [A/G]       | NA                                         |
| Ca_Desi_Ch_scaffold15945_338 | Ca_desi_scaffold   | 338                            | [G/A]       | NA                                         |
| Ca_Desi_Ch_scaffold15945_339 | Ca_desi_scaffold   | 339                            | [C/T]       | NA                                         |
| Ca_Desi_Ch_scaffold15945_340 | Ca_desi_scaffold   | 340                            | [T/C]       | NA                                         |
| Ca_Desi_Ch_scaffold15945_341 | Ca_desi_scaffold   | 341                            | [T/C]       | NA                                         |
| Ca_Desi_Ch_scaffold15945_342 | Ca_desi_scaffold   | 342                            | [A/G]       | NA                                         |
| Ca_Desi_Ch_scaffold15945_343 | Ca_desi_scaffold   | 343                            | [T/C]       | NA                                         |
| Ca_Desi_Ch_scaffold15945_344 | Ca_desi_scaffold   | 344                            | [G/A]       | NA                                         |
| Ca_Desi_Ch_scaffold15945_345 | Ca_desi_scaffold   | 345                            | [G/T]       | NA                                         |

| <b>SNP IDs</b>                  | <b>Chromosomes</b> | <b>Physical positions (bp)</b> | <b>SNPs</b> | <b>NCBI SNPdb accession IDs (NCBI_ss#)</b> |
|---------------------------------|--------------------|--------------------------------|-------------|--------------------------------------------|
| Ca_Desig_Chr_scaffold15945_346  | Ca_desig_scaffold  | 346                            | [T/C]       | NA                                         |
| Ca_Desig_Chr_scaffold15945_347  | Ca_desig_scaffold  | 347                            | [T/C]       | NA                                         |
| Ca_Desig_Chr_scaffold15945_348  | Ca_desig_scaffold  | 348                            | [G/T]       | NA                                         |
| Ca_Desig_Chr_scaffold15945_349  | Ca_desig_scaffold  | 349                            | [C/T]       | NA                                         |
| Ca_Desig_Chr_scaffold15945_350  | Ca_desig_scaffold  | 350                            | [T/C]       | NA                                         |
| Ca_Desig_Chr_scaffold15945_351  | Ca_desig_scaffold  | 351                            | [T/C]       | NA                                         |
| Ca_Desig_Chr_scaffold15945_352  | Ca_desig_scaffold  | 352                            | [A/G]       | NA                                         |
| Ca_Desig_Chr_scaffold15945_353  | Ca_desig_scaffold  | 353                            | [T/C]       | NA                                         |
| Ca_Desig_Chr_scaffold15945_354  | Ca_desig_scaffold  | 354                            | [A/G]       | NA                                         |
| Ca_Desig_Chr_scaffold15945_355  | Ca_desig_scaffold  | 355                            | [G/A]       | NA                                         |
| Ca_Desig_Chr_scaffold15945_356  | Ca_desig_scaffold  | 356                            | [G/A]       | NA                                         |
| Ca_Desig_Chr_scaffold15945_357  | Ca_desig_scaffold  | 357                            | [C/T]       | NA                                         |
| Ca_Desig_Chr_scaffold15945_358  | Ca_desig_scaffold  | 358                            | [A/G]       | NA                                         |
| Ca_Desig_Chr_scaffold15945_359  | Ca_desig_scaffold  | 359                            | [G/A]       | NA                                         |
| Ca_Desig_Chr_scaffold15945_360  | Ca_desig_scaffold  | 360                            | [T/G]       | NA                                         |
| Ca_Desig_Chr_scaffold15945_361  | Ca_desig_scaffold  | 361                            | [A/G]       | NA                                         |
| Ca_Desig_Chr_scaffold15945_362  | Ca_desig_scaffold  | 362                            | [G/A]       | NA                                         |
| Ca_Desig_Chr_scaffold15945_363  | Ca_desig_scaffold  | 363                            | [C/T]       | NA                                         |
| Ca_Desig_Chr_scaffold15945_364  | Ca_desig_scaffold  | 364                            | [T/C]       | NA                                         |
| Ca_Desig_Chr_scaffold15945_365  | Ca_desig_scaffold  | 365                            | [A/G]       | NA                                         |
| Ca_Desig_Chr_scaffold15945_366  | Ca_desig_scaffold  | 366                            | [A/G]       | NA                                         |
| Ca_Desig_Chr_scaffold15945_367  | Ca_desig_scaffold  | 367                            | [G/A]       | NA                                         |
| Ca_Desig_Chr_scaffold15945_368  | Ca_desig_scaffold  | 368                            | [C/T]       | NA                                         |
| Ca_Desig_Chr_scaffold15945_369  | Ca_desig_scaffold  | 369                            | [G/A]       | NA                                         |
| Ca_Desig_Chr_scaffold15945_370  | Ca_desig_scaffold  | 370                            | [C/T]       | NA                                         |
| Ca_Desig_Chr_scaffold15945_373  | Ca_desig_scaffold  | 373                            | [T/A]       | NA                                         |
| Ca_Desig_Chr_scaffold15945_2272 | Ca_desig_scaffold  | 2272                           | [A/T]       | NA                                         |
| Ca_Desig_Chr_scaffold15945_2275 | Ca_desig_scaffold  | 2275                           | [A/G]       | NA                                         |
| Ca_Desig_Chr_scaffold15945_2276 | Ca_desig_scaffold  | 2276                           | [A/G]       | NA                                         |
| Ca_Desig_Chr_scaffold15945_2278 | Ca_desig_scaffold  | 2278                           | [A/G]       | NA                                         |
| Ca_Desig_Chr_scaffold15945_2279 | Ca_desig_scaffold  | 2279                           | [T/C]       | NA                                         |
| Ca_Desig_Chr_scaffold15945_2280 | Ca_desig_scaffold  | 2280                           | [A/G]       | NA                                         |
| Ca_Desig_Chr_scaffold15945_2281 | Ca_desig_scaffold  | 2281                           | [G/A]       | NA                                         |
| Ca_Desig_Chr_scaffold15945_2282 | Ca_desig_scaffold  | 2282                           | [C/T]       | NA                                         |

| <b>SNP IDs</b>                | <b>Chromosomes</b> | <b>Physical positions (bp)</b> | <b>SNPs</b> | <b>NCBI SNPdb accession IDs (NCBI_ss#)</b> |
|-------------------------------|--------------------|--------------------------------|-------------|--------------------------------------------|
| Ca_Desi_Ch_scaffold15945_2283 | Ca_desi_scaffold   | 2283                           | [G/A]       | NA                                         |
| Ca_Desi_Ch_scaffold15945_2284 | Ca_desi_scaffold   | 2284                           | [C/T]       | NA                                         |
| Ca_Desi_Ch_scaffold15945_2285 | Ca_desi_scaffold   | 2285                           | [C/T]       | NA                                         |
| Ca_Desi_Ch_scaffold15945_2286 | Ca_desi_scaffold   | 2286                           | [G/A]       | NA                                         |
| Ca_Desi_Ch_scaffold15945_2288 | Ca_desi_scaffold   | 2288                           | [T/C]       | NA                                         |
| Ca_Desi_Ch_scaffold15945_2289 | Ca_desi_scaffold   | 2289                           | [T/C]       | NA                                         |
| Ca_Desi_Ch_scaffold15945_2290 | Ca_desi_scaffold   | 2290                           | [T/C]       | NA                                         |
| Ca_Desi_Ch_scaffold15945_2291 | Ca_desi_scaffold   | 2291                           | [A/G]       | NA                                         |
| Ca_Desi_Ch_scaffold15945_2292 | Ca_desi_scaffold   | 2292                           | [G/A]       | NA                                         |
| Ca_Desi_Ch_scaffold15945_2293 | Ca_desi_scaffold   | 2293                           | [A/G]       | NA                                         |
| Ca_Desi_Ch_scaffold15945_2294 | Ca_desi_scaffold   | 2294                           | [A/G]       | NA                                         |
| Ca_Desi_Ch_scaffold15945_2295 | Ca_desi_scaffold   | 2295                           | [T/C]       | NA                                         |
| Ca_Desi_Ch_scaffold15945_2296 | Ca_desi_scaffold   | 2296                           | [T/C]       | NA                                         |
| Ca_Desi_Ch_scaffold15945_2297 | Ca_desi_scaffold   | 2297                           | [C/T]       | NA                                         |
| Ca_Desi_Ch_scaffold15945_2298 | Ca_desi_scaffold   | 2298                           | [G/A]       | NA                                         |
| Ca_Desi_Ch_scaffold15945_2299 | Ca_desi_scaffold   | 2299                           | [C/T]       | NA                                         |
| Ca_Desi_Ch_scaffold15945_2300 | Ca_desi_scaffold   | 2300                           | [G/A]       | NA                                         |
| Ca_Desi_Ch_scaffold15945_2301 | Ca_desi_scaffold   | 2301                           | [A/G]       | NA                                         |
| Ca_Desi_Ch_scaffold15945_2302 | Ca_desi_scaffold   | 2302                           | [G/A]       | NA                                         |
| Ca_Desi_Ch_scaffold15945_2303 | Ca_desi_scaffold   | 2303                           | [A/G]       | NA                                         |
| Ca_Desi_Ch_scaffold15945_2305 | Ca_desi_scaffold   | 2305                           | [A/G]       | NA                                         |
| Ca_Desi_Ch_scaffold15945_2306 | Ca_desi_scaffold   | 2306                           | [T/C]       | NA                                         |
| Ca_Desi_Ch_scaffold15945_2307 | Ca_desi_scaffold   | 2307                           | [T/C]       | NA                                         |
| Ca_Desi_Ch_scaffold15945_2308 | Ca_desi_scaffold   | 2308                           | [T/C]       | NA                                         |
| Ca_Desi_Ch_scaffold15945_2309 | Ca_desi_scaffold   | 2309                           | [C/T]       | NA                                         |
| Ca_Desi_Ch_scaffold15945_2310 | Ca_desi_scaffold   | 2310                           | [A/G]       | NA                                         |
| Ca_Desi_Ch_scaffold15945_2311 | Ca_desi_scaffold   | 2311                           | [G/A]       | NA                                         |
| Ca_Desi_Ch_scaffold15945_2312 | Ca_desi_scaffold   | 2312                           | [T/A]       | NA                                         |
| Ca_Desi_Ch_scaffold15945_2313 | Ca_desi_scaffold   | 2313                           | [A/G]       | NA                                         |
| Ca_Desi_Ch_scaffold15945_2314 | Ca_desi_scaffold   | 2314                           | [C/T]       | NA                                         |
| Ca_Desi_Ch_scaffold15945_2315 | Ca_desi_scaffold   | 2315                           | [G/A]       | NA                                         |
| Ca_Desi_Ch_scaffold15945_2316 | Ca_desi_scaffold   | 2316                           | [C/T]       | NA                                         |
| Ca_Desi_Ch_scaffold15945_2317 | Ca_desi_scaffold   | 2317                           | [T/C]       | NA                                         |
| Ca_Desi_Ch_scaffold15945_2318 | Ca_desi_scaffold   | 2318                           | [A/G]       | NA                                         |

| <b>SNP IDs</b>                  | <b>Chromosomes</b> | <b>Physical positions (bp)</b> | <b>SNPs</b> | <b>NCBI SNPdb accession IDs (NCBI_ss#)</b> |
|---------------------------------|--------------------|--------------------------------|-------------|--------------------------------------------|
| Ca_Desig_Chr_scaffold15945_2319 | Ca_desig_scaffold  | 2319                           | [A/G]       | NA                                         |
| Ca_Desig_Chr_scaffold15945_2321 | Ca_desig_scaffold  | 2321                           | [T/G]       | NA                                         |
| Ca_Desig_Chr_scaffold15945_2323 | Ca_desig_scaffold  | 2323                           | [A/G]       | NA                                         |
| Ca_Desig_Chr_scaffold15945_2324 | Ca_desig_scaffold  | 2324                           | [A/G]       | NA                                         |
| Ca_Desig_Chr_scaffold15945_2325 | Ca_desig_scaffold  | 2325                           | [A/G]       | NA                                         |
| Ca_Desig_Chr_scaffold15945_2326 | Ca_desig_scaffold  | 2326                           | [C/T]       | NA                                         |
| Ca_Desig_Chr_scaffold15945_2327 | Ca_desig_scaffold  | 2327                           | [G/A]       | NA                                         |
| Ca_Desig_Chr_scaffold15945_2328 | Ca_desig_scaffold  | 2328                           | [G/A]       | NA                                         |
| Ca_Desig_Chr_scaffold15945_2329 | Ca_desig_scaffold  | 2329                           | [T/G]       | NA                                         |
| Ca_Desig_Chr_scaffold15945_2330 | Ca_desig_scaffold  | 2330                           | [C/T]       | NA                                         |
| Ca_Desig_Chr_scaffold15945_2331 | Ca_desig_scaffold  | 2331                           | [G/A]       | NA                                         |
| Ca_Desig_Chr_scaffold16004_1078 | Ca_desig_scaffold  | 1078                           | [T/G]       | NA                                         |
| Ca_Desig_Chr_scaffold16059_945  | Ca_desig_scaffold  | 945                            | [A/T]       | NA                                         |
| Ca_Desig_Chr_scaffold16233_191  | Ca_desig_scaffold  | 191                            | [A/T]       | NA                                         |
| Ca_Desig_Chr_scaffold16257_113  | Ca_desig_scaffold  | 113                            | [T/G]       | NA                                         |
| Ca_Desig_Chr_scaffold16264_2023 | Ca_desig_scaffold  | 2023                           | [A/G]       | NA                                         |
| Ca_Desig_Chr_scaffold16428_511  | Ca_desig_scaffold  | 511                            | [G/A]       | NA                                         |
| Ca_Desig_Chr_scaffold16469_817  | Ca_desig_scaffold  | 817                            | [A/G]       | NA                                         |
| Ca_Desig_Chr_scaffold16469_818  | Ca_desig_scaffold  | 818                            | [T/C]       | NA                                         |
| Ca_Desig_Chr_scaffold16469_819  | Ca_desig_scaffold  | 819                            | [T/C]       | NA                                         |
| Ca_Desig_Chr_scaffold16469_821  | Ca_desig_scaffold  | 821                            | [T/C]       | NA                                         |
| Ca_Desig_Chr_scaffold16469_823  | Ca_desig_scaffold  | 823                            | [A/G]       | NA                                         |
| Ca_Desig_Chr_scaffold16469_824  | Ca_desig_scaffold  | 824                            | [A/G]       | NA                                         |
| Ca_Desig_Chr_scaffold16469_825  | Ca_desig_scaffold  | 825                            | [A/G]       | NA                                         |
| Ca_Desig_Chr_scaffold16469_827  | Ca_desig_scaffold  | 827                            | [A/G]       | NA                                         |
| Ca_Desig_Chr_scaffold16469_828  | Ca_desig_scaffold  | 828                            | [T/C]       | NA                                         |
| Ca_Desig_Chr_scaffold16469_829  | Ca_desig_scaffold  | 829                            | [A/G]       | NA                                         |
| Ca_Desig_Chr_scaffold16469_831  | Ca_desig_scaffold  | 831                            | [A/G]       | NA                                         |
| Ca_Desig_Chr_scaffold16469_833  | Ca_desig_scaffold  | 833                            | [A/G]       | NA                                         |
| Ca_Desig_Chr_scaffold16469_837  | Ca_desig_scaffold  | 837                            | [T/C]       | NA                                         |
| Ca_Desig_Chr_scaffold16469_839  | Ca_desig_scaffold  | 839                            | [G/A]       | NA                                         |
| Ca_Desig_Chr_scaffold16469_840  | Ca_desig_scaffold  | 840                            | [T/G]       | NA                                         |
| Ca_Desig_Chr_scaffold16469_842  | Ca_desig_scaffold  | 842                            | [A/G]       | NA                                         |
| Ca_Desig_Chr_scaffold16469_844  | Ca_desig_scaffold  | 844                            | [T/G]       | NA                                         |

| <b>SNP IDs</b>                 | <b>Chromosomes</b> | <b>Physical positions (bp)</b> | <b>SNPs</b> | <b>NCBI SNPdb accession IDs (NCBI_ss#)</b> |
|--------------------------------|--------------------|--------------------------------|-------------|--------------------------------------------|
| Ca_Desig_Chr_scaffold16469_845 | Ca_desig_scaffold  | 845                            | [A/G]       | NA                                         |
| Ca_Desig_Chr_scaffold16469_847 | Ca_desig_scaffold  | 847                            | [T/C]       | NA                                         |
| Ca_Desig_Chr_scaffold16469_848 | Ca_desig_scaffold  | 848                            | [T/C]       | NA                                         |
| Ca_Desig_Chr_scaffold16469_849 | Ca_desig_scaffold  | 849                            | [T/C]       | NA                                         |
| Ca_Desig_Chr_scaffold16469_851 | Ca_desig_scaffold  | 851                            | [A/G]       | NA                                         |
| Ca_Desig_Chr_scaffold16469_853 | Ca_desig_scaffold  | 853                            | [A/G]       | NA                                         |
| Ca_Desig_Chr_scaffold16469_855 | Ca_desig_scaffold  | 855                            | [T/C]       | NA                                         |
| Ca_Desig_Chr_scaffold16469_857 | Ca_desig_scaffold  | 857                            | [A/G]       | NA                                         |
| Ca_Desig_Chr_scaffold16469_858 | Ca_desig_scaffold  | 858                            | [T/C]       | NA                                         |
| Ca_Desig_Chr_scaffold16469_860 | Ca_desig_scaffold  | 860                            | [A/G]       | NA                                         |
| Ca_Desig_Chr_scaffold16469_861 | Ca_desig_scaffold  | 861                            | [T/C]       | NA                                         |
| Ca_Desig_Chr_scaffold16469_862 | Ca_desig_scaffold  | 862                            | [A/G]       | NA                                         |
| Ca_Desig_Chr_scaffold16469_865 | Ca_desig_scaffold  | 865                            | [T/C]       | NA                                         |
| Ca_Desig_Chr_scaffold16469_866 | Ca_desig_scaffold  | 866                            | [T/C]       | NA                                         |
| Ca_Desig_Chr_scaffold16469_869 | Ca_desig_scaffold  | 869                            | [T/C]       | NA                                         |
| Ca_Desig_Chr_scaffold16469_870 | Ca_desig_scaffold  | 870                            | [T/C]       | NA                                         |
| Ca_Desig_Chr_scaffold16469_872 | Ca_desig_scaffold  | 872                            | [A/G]       | NA                                         |
| Ca_Desig_Chr_scaffold16469_873 | Ca_desig_scaffold  | 873                            | [T/C]       | NA                                         |
| Ca_Desig_Chr_scaffold16469_875 | Ca_desig_scaffold  | 875                            | [T/C]       | NA                                         |
| Ca_Desig_Chr_scaffold16469_919 | Ca_desig_scaffold  | 919                            | [T/C]       | NA                                         |
| Ca_Desig_Chr_scaffold16469_920 | Ca_desig_scaffold  | 920                            | [C/T]       | NA                                         |
| Ca_Desig_Chr_scaffold16469_923 | Ca_desig_scaffold  | 923                            | [T/C]       | NA                                         |
| Ca_Desig_Chr_scaffold16469_925 | Ca_desig_scaffold  | 925                            | [T/C]       | NA                                         |
| Ca_Desig_Chr_scaffold16469_926 | Ca_desig_scaffold  | 926                            | [C/T]       | NA                                         |
| Ca_Desig_Chr_scaffold16469_927 | Ca_desig_scaffold  | 927                            | [C/T]       | NA                                         |
| Ca_Desig_Chr_scaffold16469_928 | Ca_desig_scaffold  | 928                            | [C/T]       | NA                                         |
| Ca_Desig_Chr_scaffold16469_929 | Ca_desig_scaffold  | 929                            | [C/T]       | NA                                         |
| Ca_Desig_Chr_scaffold16469_930 | Ca_desig_scaffold  | 930                            | [T/C]       | NA                                         |
| Ca_Desig_Chr_scaffold16469_931 | Ca_desig_scaffold  | 931                            | [T/C]       | NA                                         |
| Ca_Desig_Chr_scaffold16469_932 | Ca_desig_scaffold  | 932                            | [C/T]       | NA                                         |
| Ca_Desig_Chr_scaffold16469_934 | Ca_desig_scaffold  | 934                            | [C/T]       | NA                                         |
| Ca_Desig_Chr_scaffold16469_935 | Ca_desig_scaffold  | 935                            | [A/G]       | NA                                         |
| Ca_Desig_Chr_scaffold16469_936 | Ca_desig_scaffold  | 936                            | [G/A]       | NA                                         |
| Ca_Desig_Chr_scaffold16469_937 | Ca_desig_scaffold  | 937                            | [A/G]       | NA                                         |

| <b>SNP IDs</b>                  | <b>Chromosomes</b> | <b>Physical positions (bp)</b> | <b>SNPs</b> | <b>NCBI SNPdb accession IDs (NCBI_ss#)</b> |
|---------------------------------|--------------------|--------------------------------|-------------|--------------------------------------------|
| Ca_Desig_Chr_scaffold16469_939  | Ca_desig_scaffold  | 939                            | [T/C]       | NA                                         |
| Ca_Desig_Chr_scaffold16469_940  | Ca_desig_scaffold  | 940                            | [C/T]       | NA                                         |
| Ca_Desig_Chr_scaffold16469_941  | Ca_desig_scaffold  | 941                            | [T/C]       | NA                                         |
| Ca_Desig_Chr_scaffold16469_943  | Ca_desig_scaffold  | 943                            | [T/C]       | NA                                         |
| Ca_Desig_Chr_scaffold16469_944  | Ca_desig_scaffold  | 944                            | [T/C]       | NA                                         |
| Ca_Desig_Chr_scaffold16469_945  | Ca_desig_scaffold  | 945                            | [G/A]       | NA                                         |
| Ca_Desig_Chr_scaffold16469_946  | Ca_desig_scaffold  | 946                            | [T/C]       | NA                                         |
| Ca_Desig_Chr_scaffold16469_947  | Ca_desig_scaffold  | 947                            | [C/T]       | NA                                         |
| Ca_Desig_Chr_scaffold16469_948  | Ca_desig_scaffold  | 948                            | [C/T]       | NA                                         |
| Ca_Desig_Chr_scaffold16469_949  | Ca_desig_scaffold  | 949                            | [A/G]       | NA                                         |
| Ca_Desig_Chr_scaffold16469_951  | Ca_desig_scaffold  | 951                            | [A/C]       | NA                                         |
| Ca_Desig_Chr_scaffold16469_952  | Ca_desig_scaffold  | 952                            | [C/T]       | NA                                         |
| Ca_Desig_Chr_scaffold16469_953  | Ca_desig_scaffold  | 953                            | [G/A]       | NA                                         |
| Ca_Desig_Chr_scaffold16469_954  | Ca_desig_scaffold  | 954                            | [T/C]       | NA                                         |
| Ca_Desig_Chr_scaffold16469_955  | Ca_desig_scaffold  | 955                            | [T/C]       | NA                                         |
| Ca_Desig_Chr_scaffold16469_956  | Ca_desig_scaffold  | 956                            | [G/A]       | NA                                         |
| Ca_Desig_Chr_scaffold16469_957  | Ca_desig_scaffold  | 957                            | [G/A]       | NA                                         |
| Ca_Desig_Chr_scaffold16469_958  | Ca_desig_scaffold  | 958                            | [G/A]       | NA                                         |
| Ca_Desig_Chr_scaffold16469_959  | Ca_desig_scaffold  | 959                            | [G/A]       | NA                                         |
| Ca_Desig_Chr_scaffold16469_960  | Ca_desig_scaffold  | 960                            | [C/T]       | NA                                         |
| Ca_Desig_Chr_scaffold16469_961  | Ca_desig_scaffold  | 961                            | [T/C]       | NA                                         |
| Ca_Desig_Chr_scaffold16469_962  | Ca_desig_scaffold  | 962                            | [A/G]       | NA                                         |
| Ca_Desig_Chr_scaffold16469_963  | Ca_desig_scaffold  | 963                            | [A/G]       | NA                                         |
| Ca_Desig_Chr_scaffold16469_964  | Ca_desig_scaffold  | 964                            | [T/C]       | NA                                         |
| Ca_Desig_Chr_scaffold16469_965  | Ca_desig_scaffold  | 965                            | [C/T]       | NA                                         |
| Ca_Desig_Chr_scaffold16469_966  | Ca_desig_scaffold  | 966                            | [A/G]       | NA                                         |
| Ca_Desig_Chr_scaffold16469_967  | Ca_desig_scaffold  | 967                            | [A/G]       | NA                                         |
| Ca_Desig_Chr_scaffold16469_970  | Ca_desig_scaffold  | 970                            | [A/G]       | NA                                         |
| Ca_Desig_Chr_scaffold16469_971  | Ca_desig_scaffold  | 971                            | [G/C]       | NA                                         |
| Ca_Desig_Chr_scaffold16469_974  | Ca_desig_scaffold  | 974                            | [G/A]       | NA                                         |
| Ca_Desig_Chr_scaffold16469_975  | Ca_desig_scaffold  | 975                            | [A/G]       | NA                                         |
| Ca_Desig_Chr_scaffold16469_976  | Ca_desig_scaffold  | 976                            | [A/G]       | NA                                         |
| Ca_Desig_Chr_scaffold16557_1952 | Ca_desig_scaffold  | 1952                           | [C/T]       | NA                                         |
| Ca_Desig_Chr_scaffold16557_2033 | Ca_desig_scaffold  | 2033                           | [C/T]       | NA                                         |

| <b>SNP IDs</b>                  | <b>Chromosomes</b> | <b>Physical positions (bp)</b> | <b>SNPs</b> | <b>NCBI SNPdb accession IDs (NCBI_ss#)</b> |
|---------------------------------|--------------------|--------------------------------|-------------|--------------------------------------------|
| Ca_Desig_Chr_scaffold16557_2080 | Ca_desig_scaffold  | 2080                           | [A/C]       | NA                                         |
| Ca_Desig_Chr_scaffold16739_163  | Ca_desig_scaffold  | 163                            | [C/G]       | NA                                         |
| Ca_Desig_Chr_scaffold16739_166  | Ca_desig_scaffold  | 166                            | [A/C]       | NA                                         |
| Ca_Desig_Chr_scaffold16739_168  | Ca_desig_scaffold  | 168                            | [C/T]       | NA                                         |
| Ca_Desig_Chr_scaffold16739_170  | Ca_desig_scaffold  | 170                            | [T/C]       | NA                                         |
| Ca_Desig_Chr_scaffold16739_321  | Ca_desig_scaffold  | 321                            | [T/C]       | NA                                         |
| Ca_Desig_Chr_scaffold16739_846  | Ca_desig_scaffold  | 846                            | [A/C]       | NA                                         |
| Ca_Desig_Chr_scaffold16739_875  | Ca_desig_scaffold  | 875                            | [G/A]       | NA                                         |
| Ca_Desig_Chr_scaffold16739_876  | Ca_desig_scaffold  | 876                            | [C/T]       | NA                                         |
| Ca_Desig_Chr_scaffold16739_877  | Ca_desig_scaffold  | 877                            | [G/A]       | NA                                         |
| Ca_Desig_Chr_scaffold16739_878  | Ca_desig_scaffold  | 878                            | [A/G]       | NA                                         |
| Ca_Desig_Chr_scaffold16739_879  | Ca_desig_scaffold  | 879                            | [A/G]       | NA                                         |
| Ca_Desig_Chr_scaffold16739_880  | Ca_desig_scaffold  | 880                            | [A/G]       | NA                                         |
| Ca_Desig_Chr_scaffold16739_882  | Ca_desig_scaffold  | 882                            | [A/G]       | NA                                         |
| Ca_Desig_Chr_scaffold16739_883  | Ca_desig_scaffold  | 883                            | [A/G]       | NA                                         |
| Ca_Desig_Chr_scaffold16739_884  | Ca_desig_scaffold  | 884                            | [A/G]       | NA                                         |
| Ca_Desig_Chr_scaffold16739_885  | Ca_desig_scaffold  | 885                            | [G/A]       | NA                                         |
| Ca_Desig_Chr_scaffold16739_886  | Ca_desig_scaffold  | 886                            | [A/G]       | NA                                         |
| Ca_Desig_Chr_scaffold16739_888  | Ca_desig_scaffold  | 888                            | [T/C]       | NA                                         |
| Ca_Desig_Chr_scaffold16739_889  | Ca_desig_scaffold  | 889                            | [T/C]       | NA                                         |
| Ca_Desig_Chr_scaffold16739_890  | Ca_desig_scaffold  | 890                            | [C/T]       | NA                                         |
| Ca_Desig_Chr_scaffold16739_892  | Ca_desig_scaffold  | 892                            | [T/C]       | NA                                         |
| Ca_Desig_Chr_scaffold16739_893  | Ca_desig_scaffold  | 893                            | [T/C]       | NA                                         |
| Ca_Desig_Chr_scaffold16739_895  | Ca_desig_scaffold  | 895                            | [T/C]       | NA                                         |
| Ca_Desig_Chr_scaffold16739_896  | Ca_desig_scaffold  | 896                            | [T/C]       | NA                                         |
| Ca_Desig_Chr_scaffold16739_897  | Ca_desig_scaffold  | 897                            | [A/G]       | NA                                         |
| Ca_Desig_Chr_scaffold16739_898  | Ca_desig_scaffold  | 898                            | [T/C]       | NA                                         |
| Ca_Desig_Chr_scaffold16739_899  | Ca_desig_scaffold  | 899                            | [T/C]       | NA                                         |
| Ca_Desig_Chr_scaffold16739_900  | Ca_desig_scaffold  | 900                            | [G/A]       | NA                                         |
| Ca_Desig_Chr_scaffold16739_901  | Ca_desig_scaffold  | 901                            | [C/T]       | NA                                         |
| Ca_Desig_Chr_scaffold16739_902  | Ca_desig_scaffold  | 902                            | [G/A]       | NA                                         |
| Ca_Desig_Chr_scaffold16739_903  | Ca_desig_scaffold  | 903                            | [T/C]       | NA                                         |
| Ca_Desig_Chr_scaffold16739_904  | Ca_desig_scaffold  | 904                            | [T/C]       | NA                                         |
| Ca_Desig_Chr_scaffold16739_905  | Ca_desig_scaffold  | 905                            | [C/T]       | NA                                         |

| <b>SNP IDs</b>                | <b>Chromosomes</b> | <b>Physical positions (bp)</b> | <b>SNPs</b> | <b>NCBI SNPdb accession IDs (NCBI_ss#)</b> |
|-------------------------------|--------------------|--------------------------------|-------------|--------------------------------------------|
| Ca_Desi_Ch_scaffold16739_906  | Ca_desi_scaffold   | 906                            | [G/A]       | NA                                         |
| Ca_Desi_Ch_scaffold16739_907  | Ca_desi_scaffold   | 907                            | [T/C]       | NA                                         |
| Ca_Desi_Ch_scaffold16739_908  | Ca_desi_scaffold   | 908                            | [G/T]       | NA                                         |
| Ca_Desi_Ch_scaffold16739_909  | Ca_desi_scaffold   | 909                            | [C/T]       | NA                                         |
| Ca_Desi_Ch_scaffold16739_910  | Ca_desi_scaffold   | 910                            | [C/T]       | NA                                         |
| Ca_Desi_Ch_scaffold16739_911  | Ca_desi_scaffold   | 911                            | [C/T]       | NA                                         |
| Ca_Desi_Ch_scaffold16739_912  | Ca_desi_scaffold   | 912                            | [T/C]       | NA                                         |
| Ca_Desi_Ch_scaffold16739_913  | Ca_desi_scaffold   | 913                            | [A/G]       | NA                                         |
| Ca_Desi_Ch_scaffold16739_914  | Ca_desi_scaffold   | 914                            | [C/T]       | NA                                         |
| Ca_Desi_Ch_scaffold16739_915  | Ca_desi_scaffold   | 915                            | [G/A]       | NA                                         |
| Ca_Desi_Ch_scaffold16739_916  | Ca_desi_scaffold   | 916                            | [A/G]       | NA                                         |
| Ca_Desi_Ch_scaffold16739_917  | Ca_desi_scaffold   | 917                            | [C/T]       | NA                                         |
| Ca_Desi_Ch_scaffold16739_918  | Ca_desi_scaffold   | 918                            | [T/C]       | NA                                         |
| Ca_Desi_Ch_scaffold16739_919  | Ca_desi_scaffold   | 919                            | [A/G]       | NA                                         |
| Ca_Desi_Ch_scaffold16739_920  | Ca_desi_scaffold   | 920                            | [G/A]       | NA                                         |
| Ca_Desi_Ch_scaffold16739_922  | Ca_desi_scaffold   | 922                            | [A/G]       | NA                                         |
| Ca_Desi_Ch_scaffold16739_923  | Ca_desi_scaffold   | 923                            | [G/A]       | NA                                         |
| Ca_Desi_Ch_scaffold16739_924  | Ca_desi_scaffold   | 924                            | [T/C]       | NA                                         |
| Ca_Desi_Ch_scaffold16739_925  | Ca_desi_scaffold   | 925                            | [T/C]       | NA                                         |
| Ca_Desi_Ch_scaffold16739_926  | Ca_desi_scaffold   | 926                            | [C/T]       | NA                                         |
| Ca_Desi_Ch_scaffold16739_927  | Ca_desi_scaffold   | 927                            | [A/G]       | NA                                         |
| Ca_Desi_Ch_scaffold16739_928  | Ca_desi_scaffold   | 928                            | [C/T]       | NA                                         |
| Ca_Desi_Ch_scaffold16739_929  | Ca_desi_scaffold   | 929                            | [T/C]       | NA                                         |
| Ca_Desi_Ch_scaffold16739_930  | Ca_desi_scaffold   | 930                            | [C/T]       | NA                                         |
| Ca_Desi_Ch_scaffold16739_931  | Ca_desi_scaffold   | 931                            | [A/G]       | NA                                         |
| Ca_Desi_Ch_scaffold16739_932  | Ca_desi_scaffold   | 932                            | [C/T]       | NA                                         |
| Ca_Desi_Ch_scaffold16739_933  | Ca_desi_scaffold   | 933                            | [T/C]       | NA                                         |
| Ca_Desi_Ch_scaffold16739_934  | Ca_desi_scaffold   | 934                            | [C/T]       | NA                                         |
| Ca_Desi_Ch_scaffold16739_1016 | Ca_desi_scaffold   | 1016                           | [A/G]       | NA                                         |
| Ca_Desi_Ch_scaffold16739_1017 | Ca_desi_scaffold   | 1017                           | [T/C]       | NA                                         |
| Ca_Desi_Ch_scaffold16739_1019 | Ca_desi_scaffold   | 1019                           | [C/T]       | NA                                         |
| Ca_Desi_Ch_scaffold16739_1021 | Ca_desi_scaffold   | 1021                           | [T/C]       | NA                                         |
| Ca_Desi_Ch_scaffold16739_1022 | Ca_desi_scaffold   | 1022                           | [T/C]       | NA                                         |
| Ca_Desi_Ch_scaffold16739_1024 | Ca_desi_scaffold   | 1024                           | [T/C]       | NA                                         |



| <b>SNP IDs</b>                        | <b>Chromosomes</b> | <b>Physical positions (bp)</b> | <b>SNPs</b> | <b>NCBI SNPdb accession IDs (NCBI_ss#)</b> |
|---------------------------------------|--------------------|--------------------------------|-------------|--------------------------------------------|
| Ca_Desi_Chromosome_scaffold16739_1025 | Ca_desi_scaffold   | 1025                           | [T/C]       | NA                                         |
| Ca_Desi_Chromosome_scaffold16739_1026 | Ca_desi_scaffold   | 1026                           | [A/G]       | NA                                         |
| Ca_Desi_Chromosome_scaffold16739_1027 | Ca_desi_scaffold   | 1027                           | [T/C]       | NA                                         |
| Ca_Desi_Chromosome_scaffold16739_1029 | Ca_desi_scaffold   | 1029                           | [C/T]       | NA                                         |
| Ca_Desi_Chromosome_scaffold16739_1030 | Ca_desi_scaffold   | 1030                           | [C/T]       | NA                                         |
| Ca_Desi_Chromosome_scaffold16739_1032 | Ca_desi_scaffold   | 1032                           | [T/C]       | NA                                         |
| Ca_Desi_Chromosome_scaffold16739_1033 | Ca_desi_scaffold   | 1033                           | [T/C]       | NA                                         |
| Ca_Desi_Chromosome_scaffold16739_1034 | Ca_desi_scaffold   | 1034                           | [A/G]       | NA                                         |
| Ca_Desi_Chromosome_scaffold16739_1036 | Ca_desi_scaffold   | 1036                           | [G/A]       | NA                                         |
| Ca_Desi_Chromosome_scaffold16739_1037 | Ca_desi_scaffold   | 1037                           | [A/G]       | NA                                         |
| Ca_Desi_Chromosome_scaffold16739_1038 | Ca_desi_scaffold   | 1038                           | [A/G]       | NA                                         |
| Ca_Desi_Chromosome_scaffold16739_1039 | Ca_desi_scaffold   | 1039                           | [G/A]       | NA                                         |
| Ca_Desi_Chromosome_scaffold16739_1040 | Ca_desi_scaffold   | 1040                           | [A/G]       | NA                                         |
| Ca_Desi_Chromosome_scaffold16739_1042 | Ca_desi_scaffold   | 1042                           | [T/C]       | NA                                         |
| Ca_Desi_Chromosome_scaffold16739_1043 | Ca_desi_scaffold   | 1043                           | [T/C]       | NA                                         |
| Ca_Desi_Chromosome_scaffold16739_1044 | Ca_desi_scaffold   | 1044                           | [A/G]       | NA                                         |
| Ca_Desi_Chromosome_scaffold16739_1045 | Ca_desi_scaffold   | 1045                           | [A/G]       | NA                                         |
| Ca_Desi_Chromosome_scaffold16739_1047 | Ca_desi_scaffold   | 1047                           | [G/A]       | NA                                         |
| Ca_Desi_Chromosome_scaffold16739_1048 | Ca_desi_scaffold   | 1048                           | [G/A]       | NA                                         |
| Ca_Desi_Chromosome_scaffold16739_1049 | Ca_desi_scaffold   | 1049                           | [A/G]       | NA                                         |
| Ca_Desi_Chromosome_scaffold16739_1050 | Ca_desi_scaffold   | 1050                           | [G/T]       | NA                                         |
| Ca_Desi_Chromosome_scaffold16739_1051 | Ca_desi_scaffold   | 1051                           | [T/C]       | NA                                         |
| Ca_Desi_Chromosome_scaffold16739_1052 | Ca_desi_scaffold   | 1052                           | [T/C]       | NA                                         |
| Ca_Desi_Chromosome_scaffold16739_1053 | Ca_desi_scaffold   | 1053                           | [A/G]       | NA                                         |
| Ca_Desi_Chromosome_scaffold16739_1054 | Ca_desi_scaffold   | 1054                           | [A/G]       | NA                                         |
| Ca_Desi_Chromosome_scaffold16739_1055 | Ca_desi_scaffold   | 1055                           | [C/T]       | NA                                         |
| Ca_Desi_Chromosome_scaffold16739_1056 | Ca_desi_scaffold   | 1056                           | [C/T]       | NA                                         |
| Ca_Desi_Chromosome_scaffold16739_1057 | Ca_desi_scaffold   | 1057                           | [A/G]       | NA                                         |
| Ca_Desi_Chromosome_scaffold16739_1058 | Ca_desi_scaffold   | 1058                           | [A/G]       | NA                                         |
| Ca_Desi_Chromosome_scaffold16739_1059 | Ca_desi_scaffold   | 1059                           | [T/C]       | NA                                         |
| Ca_Desi_Chromosome_scaffold16739_1061 | Ca_desi_scaffold   | 1061                           | [T/C]       | NA                                         |
| Ca_Desi_Chromosome_scaffold16739_1063 | Ca_desi_scaffold   | 1063                           | [T/C]       | NA                                         |
| Ca_Desi_Chromosome_scaffold16739_1064 | Ca_desi_scaffold   | 1064                           | [A/G]       | NA                                         |
| Ca_Desi_Chromosome_scaffold16739_1065 | Ca_desi_scaffold   | 1065                           | [T/C]       | NA                                         |

| <b>SNP IDs</b>                | <b>Chromosomes</b> | <b>Physical positions (bp)</b> | <b>SNPs</b> | <b>NCBI SNPdb accession IDs (NCBI_ss#)</b> |
|-------------------------------|--------------------|--------------------------------|-------------|--------------------------------------------|
| Ca_Desi_Ch_scaffold16739_1067 | Ca_desi_scaffold   | 1067                           | [T/C]       | NA                                         |
| Ca_Desi_Ch_scaffold16739_1069 | Ca_desi_scaffold   | 1069                           | [T/C]       | NA                                         |
| Ca_Desi_Ch_scaffold16739_1071 | Ca_desi_scaffold   | 1071                           | [T/C]       | NA                                         |
| Ca_Desi_Ch_scaffold16739_1072 | Ca_desi_scaffold   | 1072                           | [T/C]       | NA                                         |
| Ca_Desi_Ch_scaffold16739_1073 | Ca_desi_scaffold   | 1073                           | [T/C]       | NA                                         |
| Ca_Desi_Ch_scaffold16739_1074 | Ca_desi_scaffold   | 1074                           | [C/A]       | NA                                         |
| Ca_Desi_Ch_scaffold16739_1075 | Ca_desi_scaffold   | 1075                           | [C/T]       | NA                                         |
| Ca_Desi_Ch_scaffold16739_1078 | Ca_desi_scaffold   | 1078                           | [T/A]       | NA                                         |
| Ca_Desi_Ch_scaffold16739_1097 | Ca_desi_scaffold   | 1097                           | [T/C]       | NA                                         |
| Ca_Desi_Ch_scaffold16739_1124 | Ca_desi_scaffold   | 1124                           | [T/A]       | NA                                         |
| Ca_Desi_Ch_scaffold16739_1128 | Ca_desi_scaffold   | 1128                           | [T/G]       | NA                                         |
| Ca_Desi_Ch_scaffold16739_1343 | Ca_desi_scaffold   | 1343                           | [T/C]       | NA                                         |
| Ca_Desi_Ch_scaffold16815_188  | Ca_desi_scaffold   | 188                            | [T/A]       | NA                                         |
| Ca_Desi_Ch_scaffold16815_200  | Ca_desi_scaffold   | 200                            | [T/C]       | NA                                         |
| Ca_Desi_Ch_scaffold16815_331  | Ca_desi_scaffold   | 331                            | [A/G]       | NA                                         |
| Ca_Desi_Ch_scaffold16815_557  | Ca_desi_scaffold   | 557                            | [T/C]       | NA                                         |
| Ca_Desi_Ch_scaffold16815_620  | Ca_desi_scaffold   | 620                            | [C/T]       | NA                                         |
| Ca_Desi_Ch_scaffold16815_629  | Ca_desi_scaffold   | 629                            | [C/T]       | NA                                         |
| Ca_Desi_Ch_scaffold16815_644  | Ca_desi_scaffold   | 644                            | [A/C]       | NA                                         |
| Ca_Desi_Ch_scaffold16815_672  | Ca_desi_scaffold   | 672                            | [A/G]       | NA                                         |
| Ca_Desi_Ch_scaffold16815_713  | Ca_desi_scaffold   | 713                            | [A/G]       | NA                                         |
| Ca_Desi_Ch_scaffold16854_820  | Ca_desi_scaffold   | 820                            | [A/G]       | NA                                         |
| Ca_Desi_Ch_scaffold16854_852  | Ca_desi_scaffold   | 852                            | [C/T]       | NA                                         |
| Ca_Desi_Ch_scaffold17378_1358 | Ca_desi_scaffold   | 1358                           | [T/C]       | NA                                         |
| Ca_Desi_Ch_scaffold17394_1339 | Ca_desi_scaffold   | 1339                           | [A/G]       | NA                                         |
| Ca_Desi_Ch_scaffold17394_1340 | Ca_desi_scaffold   | 1340                           | [A/G]       | NA                                         |
| Ca_Desi_Ch_scaffold17394_1342 | Ca_desi_scaffold   | 1342                           | [T/C]       | NA                                         |
| Ca_Desi_Ch_scaffold17394_1343 | Ca_desi_scaffold   | 1343                           | [T/C]       | NA                                         |
| Ca_Desi_Ch_scaffold17394_1345 | Ca_desi_scaffold   | 1345                           | [T/C]       | NA                                         |
| Ca_Desi_Ch_scaffold17394_1347 | Ca_desi_scaffold   | 1347                           | [C/T]       | NA                                         |
| Ca_Desi_Ch_scaffold17394_1349 | Ca_desi_scaffold   | 1349                           | [T/C]       | NA                                         |
| Ca_Desi_Ch_scaffold17394_1350 | Ca_desi_scaffold   | 1350                           | [T/C]       | NA                                         |
| Ca_Desi_Ch_scaffold17394_1352 | Ca_desi_scaffold   | 1352                           | [A/G]       | NA                                         |
| Ca_Desi_Ch_scaffold17394_1356 | Ca_desi_scaffold   | 1356                           | [A/G]       | NA                                         |

| <b>SNP IDs</b>                  | <b>Chromosomes</b> | <b>Physical positions (bp)</b> | <b>SNPs</b> | <b>NCBI SNPdb accession IDs (NCBI_ss#)</b> |
|---------------------------------|--------------------|--------------------------------|-------------|--------------------------------------------|
| Ca_Desig_Chr_scaffold17394_1360 | Ca_desig_scaffold  | 1360                           | [A/G]       | NA                                         |
| Ca_Desig_Chr_scaffold17394_1362 | Ca_desig_scaffold  | 1362                           | [T/C]       | NA                                         |
| Ca_Desig_Chr_scaffold17394_1365 | Ca_desig_scaffold  | 1365                           | [A/G]       | NA                                         |
| Ca_Desig_Chr_scaffold17394_1366 | Ca_desig_scaffold  | 1366                           | [A/G]       | NA                                         |
| Ca_Desig_Chr_scaffold17394_1368 | Ca_desig_scaffold  | 1368                           | [A/G]       | NA                                         |
| Ca_Desig_Chr_scaffold17394_1369 | Ca_desig_scaffold  | 1369                           | [A/G]       | NA                                         |
| Ca_Desig_Chr_scaffold17394_1372 | Ca_desig_scaffold  | 1372                           | [T/C]       | NA                                         |
| Ca_Desig_Chr_scaffold17394_1377 | Ca_desig_scaffold  | 1377                           | [A/G]       | NA                                         |
| Ca_Desig_Chr_scaffold17394_1379 | Ca_desig_scaffold  | 1379                           | [T/C]       | NA                                         |
| Ca_Desig_Chr_scaffold17394_1381 | Ca_desig_scaffold  | 1381                           | [T/C]       | NA                                         |
| Ca_Desig_Chr_scaffold17394_1385 | Ca_desig_scaffold  | 1385                           | [A/G]       | NA                                         |
| Ca_Desig_Chr_scaffold17394_1387 | Ca_desig_scaffold  | 1387                           | [A/G]       | NA                                         |
| Ca_Desig_Chr_scaffold17394_1388 | Ca_desig_scaffold  | 1388                           | [A/G]       | NA                                         |
| Ca_Desig_Chr_scaffold17394_1389 | Ca_desig_scaffold  | 1389                           | [A/G]       | NA                                         |
| Ca_Desig_Chr_scaffold17394_1391 | Ca_desig_scaffold  | 1391                           | [A/G]       | NA                                         |
| Ca_Desig_Chr_scaffold17394_1393 | Ca_desig_scaffold  | 1393                           | [A/G]       | NA                                         |
| Ca_Desig_Chr_scaffold17394_1397 | Ca_desig_scaffold  | 1397                           | [T/G]       | NA                                         |
| Ca_Desig_Chr_scaffold17394_1398 | Ca_desig_scaffold  | 1398                           | [A/G]       | NA                                         |
| Ca_Desig_Chr_scaffold17394_1645 | Ca_desig_scaffold  | 1645                           | [A/G]       | NA                                         |
| Ca_Desig_Chr_scaffold17394_1652 | Ca_desig_scaffold  | 1652                           | [T/C]       | NA                                         |
| Ca_Desig_Chr_scaffold17394_1656 | Ca_desig_scaffold  | 1656                           | [T/C]       | NA                                         |
| Ca_Desig_Chr_scaffold17394_1658 | Ca_desig_scaffold  | 1658                           | [T/C]       | NA                                         |
| Ca_Desig_Chr_scaffold17394_1662 | Ca_desig_scaffold  | 1662                           | [T/C]       | NA                                         |
| Ca_Desig_Chr_scaffold17394_1669 | Ca_desig_scaffold  | 1669                           | [A/G]       | NA                                         |
| Ca_Desig_Chr_scaffold17394_1671 | Ca_desig_scaffold  | 1671                           | [A/G]       | NA                                         |
| Ca_Desig_Chr_scaffold17394_1673 | Ca_desig_scaffold  | 1673                           | [T/C]       | NA                                         |
| Ca_Desig_Chr_scaffold17394_1675 | Ca_desig_scaffold  | 1675                           | [T/C]       | NA                                         |
| Ca_Desig_Chr_scaffold17394_1696 | Ca_desig_scaffold  | 1696                           | [A/G]       | NA                                         |
| Ca_Desig_Chr_scaffold17394_1704 | Ca_desig_scaffold  | 1704                           | [A/G]       | NA                                         |
| Ca_Desig_Chr_scaffold17403_447  | Ca_desig_scaffold  | 447                            | [C/T]       | NA                                         |
| Ca_Desig_Chr_scaffold17408_452  | Ca_desig_scaffold  | 452                            | [T/C]       | NA                                         |
| Ca_Desig_Chr_scaffold17417_1751 | Ca_desig_scaffold  | 1751                           | [G/C]       | NA                                         |
| Ca_Desig_Chr_scaffold17480_311  | Ca_desig_scaffold  | 311                            | [T/C]       | NA                                         |
| Ca_Desig_Chr_scaffold17480_412  | Ca_desig_scaffold  | 412                            | [T/A]       | NA                                         |

| <b>SNP IDs</b>                        | <b>Chromosomes</b> | <b>Physical positions (bp)</b> | <b>SNPs</b> | <b>NCBI SNPdb accession IDs (NCBI_ss#)</b> |
|---------------------------------------|--------------------|--------------------------------|-------------|--------------------------------------------|
| Ca_Desi_Chromosome_scaffold17524_1198 | Ca_desi_scaffold   | 1198                           | [G/A]       | NA                                         |
| Ca_Desi_Chromosome_scaffold17524_1199 | Ca_desi_scaffold   | 1199                           | [G/T]       | NA                                         |
| Ca_Desi_Chromosome_scaffold17524_1203 | Ca_desi_scaffold   | 1203                           | [G/A]       | NA                                         |
| Ca_Desi_Chromosome_scaffold17524_1204 | Ca_desi_scaffold   | 1204                           | [C/A]       | NA                                         |
| Ca_Desi_Chromosome_scaffold17524_1702 | Ca_desi_scaffold   | 1702                           | [A/T]       | NA                                         |
| Ca_Desi_Chromosome_scaffold17524_1705 | Ca_desi_scaffold   | 1705                           | [T/C]       | NA                                         |
| Ca_Desi_Chromosome_scaffold17524_1706 | Ca_desi_scaffold   | 1706                           | [G/A]       | NA                                         |
| Ca_Desi_Chromosome_scaffold17524_1708 | Ca_desi_scaffold   | 1708                           | [T/C]       | NA                                         |
| Ca_Desi_Chromosome_scaffold17524_1709 | Ca_desi_scaffold   | 1709                           | [A/G]       | NA                                         |
| Ca_Desi_Chromosome_scaffold17524_1710 | Ca_desi_scaffold   | 1710                           | [T/C]       | NA                                         |
| Ca_Desi_Chromosome_scaffold17524_1711 | Ca_desi_scaffold   | 1711                           | [A/G]       | NA                                         |
| Ca_Desi_Chromosome_scaffold17524_1713 | Ca_desi_scaffold   | 1713                           | [A/G]       | NA                                         |
| Ca_Desi_Chromosome_scaffold17524_1714 | Ca_desi_scaffold   | 1714                           | [T/C]       | NA                                         |
| Ca_Desi_Chromosome_scaffold17524_1715 | Ca_desi_scaffold   | 1715                           | [G/A]       | NA                                         |
| Ca_Desi_Chromosome_scaffold17524_1716 | Ca_desi_scaffold   | 1716                           | [A/G]       | NA                                         |
| Ca_Desi_Chromosome_scaffold17524_1717 | Ca_desi_scaffold   | 1717                           | [A/G]       | NA                                         |
| Ca_Desi_Chromosome_scaffold17524_1718 | Ca_desi_scaffold   | 1718                           | [T/C]       | NA                                         |
| Ca_Desi_Chromosome_scaffold17524_1719 | Ca_desi_scaffold   | 1719                           | [A/G]       | NA                                         |
| Ca_Desi_Chromosome_scaffold17524_1720 | Ca_desi_scaffold   | 1720                           | [A/G]       | NA                                         |
| Ca_Desi_Chromosome_scaffold17524_1721 | Ca_desi_scaffold   | 1721                           | [A/G]       | NA                                         |
| Ca_Desi_Chromosome_scaffold17524_1723 | Ca_desi_scaffold   | 1723                           | [G/A]       | NA                                         |
| Ca_Desi_Chromosome_scaffold17524_1724 | Ca_desi_scaffold   | 1724                           | [C/T]       | NA                                         |
| Ca_Desi_Chromosome_scaffold17524_1725 | Ca_desi_scaffold   | 1725                           | [G/A]       | NA                                         |
| Ca_Desi_Chromosome_scaffold17524_1726 | Ca_desi_scaffold   | 1726                           | [G/A]       | NA                                         |
| Ca_Desi_Chromosome_scaffold17524_1727 | Ca_desi_scaffold   | 1727                           | [G/A]       | NA                                         |
| Ca_Desi_Chromosome_scaffold17524_1728 | Ca_desi_scaffold   | 1728                           | [C/T]       | NA                                         |
| Ca_Desi_Chromosome_scaffold17524_1729 | Ca_desi_scaffold   | 1729                           | [C/A]       | NA                                         |
| Ca_Desi_Chromosome_scaffold17524_1730 | Ca_desi_scaffold   | 1730                           | [G/A]       | NA                                         |
| Ca_Desi_Chromosome_scaffold17524_1732 | Ca_desi_scaffold   | 1732                           | [T/C]       | NA                                         |
| Ca_Desi_Chromosome_scaffold17524_1733 | Ca_desi_scaffold   | 1733                           | [T/C]       | NA                                         |
| Ca_Desi_Chromosome_scaffold17524_1734 | Ca_desi_scaffold   | 1734                           | [G/T]       | NA                                         |
| Ca_Desi_Chromosome_scaffold17524_1735 | Ca_desi_scaffold   | 1735                           | [A/G]       | NA                                         |
| Ca_Desi_Chromosome_scaffold17524_1736 | Ca_desi_scaffold   | 1736                           | [A/G]       | NA                                         |
| Ca_Desi_Chromosome_scaffold17524_1737 | Ca_desi_scaffold   | 1737                           | [C/T]       | NA                                         |

| <b>SNP IDs</b>                  | <b>Chromosomes</b> | <b>Physical positions (bp)</b> | <b>SNPs</b> | <b>NCBI SNPdb accession IDs (NCBI_ss#)</b> |
|---------------------------------|--------------------|--------------------------------|-------------|--------------------------------------------|
| Ca_Desig_Chr_scaffold17524_1738 | Ca_desig_scaffold  | 1738                           | [G/A]       | NA                                         |
| Ca_Desig_Chr_scaffold17524_1739 | Ca_desig_scaffold  | 1739                           | [G/A]       | NA                                         |
| Ca_Desig_Chr_scaffold17524_1740 | Ca_desig_scaffold  | 1740                           | [G/A]       | NA                                         |
| Ca_Desig_Chr_scaffold17524_1741 | Ca_desig_scaffold  | 1741                           | [A/G]       | NA                                         |
| Ca_Desig_Chr_scaffold17524_1742 | Ca_desig_scaffold  | 1742                           | [C/A]       | NA                                         |
| Ca_Desig_Chr_scaffold17524_1744 | Ca_desig_scaffold  | 1744                           | [T/C]       | NA                                         |
| Ca_Desig_Chr_scaffold17524_1745 | Ca_desig_scaffold  | 1745                           | [A/T]       | NA                                         |
| Ca_Desig_Chr_scaffold17524_1746 | Ca_desig_scaffold  | 1746                           | [T/C]       | NA                                         |
| Ca_Desig_Chr_scaffold17524_1747 | Ca_desig_scaffold  | 1747                           | [T/C]       | NA                                         |
| Ca_Desig_Chr_scaffold17524_1748 | Ca_desig_scaffold  | 1748                           | [C/T]       | NA                                         |
| Ca_Desig_Chr_scaffold17524_1749 | Ca_desig_scaffold  | 1749                           | [T/C]       | NA                                         |
| Ca_Desig_Chr_scaffold17524_1750 | Ca_desig_scaffold  | 1750                           | [C/T]       | NA                                         |
| Ca_Desig_Chr_scaffold17524_1751 | Ca_desig_scaffold  | 1751                           | [T/C]       | NA                                         |
| Ca_Desig_Chr_scaffold17524_1752 | Ca_desig_scaffold  | 1752                           | [T/C]       | NA                                         |
| Ca_Desig_Chr_scaffold17524_1753 | Ca_desig_scaffold  | 1753                           | [A/G]       | NA                                         |
| Ca_Desig_Chr_scaffold17524_1754 | Ca_desig_scaffold  | 1754                           | [A/G]       | NA                                         |
| Ca_Desig_Chr_scaffold17524_1755 | Ca_desig_scaffold  | 1755                           | [T/C]       | NA                                         |
| Ca_Desig_Chr_scaffold17524_1756 | Ca_desig_scaffold  | 1756                           | [A/G]       | NA                                         |
| Ca_Desig_Chr_scaffold17524_1757 | Ca_desig_scaffold  | 1757                           | [G/A]       | NA                                         |
| Ca_Desig_Chr_scaffold17524_1758 | Ca_desig_scaffold  | 1758                           | [G/A]       | NA                                         |
| Ca_Desig_Chr_scaffold17524_1759 | Ca_desig_scaffold  | 1759                           | [C/T]       | NA                                         |
| Ca_Desig_Chr_scaffold17524_1760 | Ca_desig_scaffold  | 1760                           | [G/A]       | NA                                         |
| Ca_Desig_Chr_scaffold17524_1761 | Ca_desig_scaffold  | 1761                           | [G/A]       | NA                                         |
| Ca_Desig_Chr_scaffold17524_1762 | Ca_desig_scaffold  | 1762                           | [C/A]       | NA                                         |
| Ca_Desig_Chr_scaffold17524_1764 | Ca_desig_scaffold  | 1764                           | [A/G]       | NA                                         |
| Ca_Desig_Chr_scaffold17524_1902 | Ca_desig_scaffold  | 1902                           | [T/A]       | NA                                         |
| Ca_Desig_Chr_scaffold17524_1911 | Ca_desig_scaffold  | 1911                           | [A/G]       | NA                                         |
| Ca_Desig_Chr_scaffold17524_1922 | Ca_desig_scaffold  | 1922                           | [A/G]       | NA                                         |
| Ca_Desig_Chr_scaffold17524_1945 | Ca_desig_scaffold  | 1945                           | [A/G]       | NA                                         |
| Ca_Desig_Chr_scaffold17524_1953 | Ca_desig_scaffold  | 1953                           | [A/G]       | NA                                         |
| Ca_Desig_Chr_scaffold17524_1955 | Ca_desig_scaffold  | 1955                           | [A/G]       | NA                                         |
| Ca_Desig_Chr_scaffold17580_273  | Ca_desig_scaffold  | 273                            | [C/A]       | NA                                         |
| Ca_Desig_Chr_scaffold17580_277  | Ca_desig_scaffold  | 277                            | [A/C]       | NA                                         |
| Ca_Desig_Chr_scaffold17580_278  | Ca_desig_scaffold  | 278                            | [C/G]       | NA                                         |

| <b>SNP IDs</b>               | <b>Chromosomes</b> | <b>Physical positions (bp)</b> | <b>SNPs</b> | <b>NCBI SNPdb accession IDs (NCBI_ss#)</b> |
|------------------------------|--------------------|--------------------------------|-------------|--------------------------------------------|
| Ca_Desi_Ch_scaffold17580_892 | Ca_desi_scaffold   | 892                            | [A/G]       | NA                                         |
| Ca_Desi_Ch_scaffold17580_893 | Ca_desi_scaffold   | 893                            | [G/A]       | NA                                         |
| Ca_Desi_Ch_scaffold17580_894 | Ca_desi_scaffold   | 894                            | [T/A]       | NA                                         |
| Ca_Desi_Ch_scaffold17580_895 | Ca_desi_scaffold   | 895                            | [A/G]       | NA                                         |
| Ca_Desi_Ch_scaffold17580_896 | Ca_desi_scaffold   | 896                            | [A/G]       | NA                                         |
| Ca_Desi_Ch_scaffold17580_897 | Ca_desi_scaffold   | 897                            | [T/C]       | NA                                         |
| Ca_Desi_Ch_scaffold17580_898 | Ca_desi_scaffold   | 898                            | [T/C]       | NA                                         |
| Ca_Desi_Ch_scaffold17580_900 | Ca_desi_scaffold   | 900                            | [T/C]       | NA                                         |
| Ca_Desi_Ch_scaffold17580_901 | Ca_desi_scaffold   | 901                            | [T/C]       | NA                                         |
| Ca_Desi_Ch_scaffold17580_902 | Ca_desi_scaffold   | 902                            | [T/C]       | NA                                         |
| Ca_Desi_Ch_scaffold17580_903 | Ca_desi_scaffold   | 903                            | [G/A]       | NA                                         |
| Ca_Desi_Ch_scaffold17580_905 | Ca_desi_scaffold   | 905                            | [A/G]       | NA                                         |
| Ca_Desi_Ch_scaffold17580_906 | Ca_desi_scaffold   | 906                            | [A/G]       | NA                                         |
| Ca_Desi_Ch_scaffold17580_907 | Ca_desi_scaffold   | 907                            | [A/G]       | NA                                         |
| Ca_Desi_Ch_scaffold17580_908 | Ca_desi_scaffold   | 908                            | [A/G]       | NA                                         |
| Ca_Desi_Ch_scaffold17580_909 | Ca_desi_scaffold   | 909                            | [G/A]       | NA                                         |
| Ca_Desi_Ch_scaffold17580_910 | Ca_desi_scaffold   | 910                            | [C/T]       | NA                                         |
| Ca_Desi_Ch_scaffold17580_911 | Ca_desi_scaffold   | 911                            | [C/T]       | NA                                         |
| Ca_Desi_Ch_scaffold17580_912 | Ca_desi_scaffold   | 912                            | [C/T]       | NA                                         |
| Ca_Desi_Ch_scaffold17580_913 | Ca_desi_scaffold   | 913                            | [G/A]       | NA                                         |
| Ca_Desi_Ch_scaffold17580_914 | Ca_desi_scaffold   | 914                            | [G/A]       | NA                                         |
| Ca_Desi_Ch_scaffold17580_915 | Ca_desi_scaffold   | 915                            | [T/C]       | NA                                         |
| Ca_Desi_Ch_scaffold17580_916 | Ca_desi_scaffold   | 916                            | [T/C]       | NA                                         |
| Ca_Desi_Ch_scaffold17580_917 | Ca_desi_scaffold   | 917                            | [C/T]       | NA                                         |
| Ca_Desi_Ch_scaffold17580_918 | Ca_desi_scaffold   | 918                            | [T/C]       | NA                                         |
| Ca_Desi_Ch_scaffold17580_919 | Ca_desi_scaffold   | 919                            | [C/T]       | NA                                         |
| Ca_Desi_Ch_scaffold17580_920 | Ca_desi_scaffold   | 920                            | [T/C]       | NA                                         |
| Ca_Desi_Ch_scaffold17580_921 | Ca_desi_scaffold   | 921                            | [T/C]       | NA                                         |
| Ca_Desi_Ch_scaffold17580_922 | Ca_desi_scaffold   | 922                            | [T/C]       | NA                                         |
| Ca_Desi_Ch_scaffold17580_924 | Ca_desi_scaffold   | 924                            | [T/C]       | NA                                         |
| Ca_Desi_Ch_scaffold17580_925 | Ca_desi_scaffold   | 925                            | [A/G]       | NA                                         |
| Ca_Desi_Ch_scaffold17580_926 | Ca_desi_scaffold   | 926                            | [T/C]       | NA                                         |
| Ca_Desi_Ch_scaffold17580_927 | Ca_desi_scaffold   | 927                            | [T/C]       | NA                                         |
| Ca_Desi_Ch_scaffold17580_928 | Ca_desi_scaffold   | 928                            | [C/T]       | NA                                         |

| <b>SNP IDs</b>                 | <b>Chromosomes</b> | <b>Physical positions (bp)</b> | <b>SNPs</b> | <b>NCBI SNPdb accession IDs (NCBI_ss#)</b> |
|--------------------------------|--------------------|--------------------------------|-------------|--------------------------------------------|
| Ca_Desig_Chr_scaffold17580_929 | Ca_desig_scaffold  | 929                            | [G/A]       | NA                                         |
| Ca_Desig_Chr_scaffold17580_930 | Ca_desig_scaffold  | 930                            | [A/G]       | NA                                         |
| Ca_Desig_Chr_scaffold17580_931 | Ca_desig_scaffold  | 931                            | [G/A]       | NA                                         |
| Ca_Desig_Chr_scaffold17580_932 | Ca_desig_scaffold  | 932                            | [C/T]       | NA                                         |
| Ca_Desig_Chr_scaffold17580_933 | Ca_desig_scaffold  | 933                            | [T/C]       | NA                                         |
| Ca_Desig_Chr_scaffold17580_934 | Ca_desig_scaffold  | 934                            | [T/C]       | NA                                         |
| Ca_Desig_Chr_scaffold17580_935 | Ca_desig_scaffold  | 935                            | [T/C]       | NA                                         |
| Ca_Desig_Chr_scaffold17580_936 | Ca_desig_scaffold  | 936                            | [C/T]       | NA                                         |
| Ca_Desig_Chr_scaffold17580_937 | Ca_desig_scaffold  | 937                            | [A/G]       | NA                                         |
| Ca_Desig_Chr_scaffold17580_938 | Ca_desig_scaffold  | 938                            | [T/C]       | NA                                         |
| Ca_Desig_Chr_scaffold17580_939 | Ca_desig_scaffold  | 939                            | [T/C]       | NA                                         |
| Ca_Desig_Chr_scaffold17580_940 | Ca_desig_scaffold  | 940                            | [C/T]       | NA                                         |
| Ca_Desig_Chr_scaffold17580_941 | Ca_desig_scaffold  | 941                            | [C/T]       | NA                                         |
| Ca_Desig_Chr_scaffold17580_942 | Ca_desig_scaffold  | 942                            | [T/C]       | NA                                         |
| Ca_Desig_Chr_scaffold17580_943 | Ca_desig_scaffold  | 943                            | [A/G]       | NA                                         |
| Ca_Desig_Chr_scaffold17580_944 | Ca_desig_scaffold  | 944                            | [A/G]       | NA                                         |
| Ca_Desig_Chr_scaffold17580_945 | Ca_desig_scaffold  | 945                            | [A/G]       | NA                                         |
| Ca_Desig_Chr_scaffold17580_946 | Ca_desig_scaffold  | 946                            | [T/C]       | NA                                         |
| Ca_Desig_Chr_scaffold17580_947 | Ca_desig_scaffold  | 947                            | [C/A]       | NA                                         |
| Ca_Desig_Chr_scaffold17580_948 | Ca_desig_scaffold  | 948                            | [C/A]       | NA                                         |
| Ca_Desig_Chr_scaffold17580_949 | Ca_desig_scaffold  | 949                            | [A/G]       | NA                                         |
| Ca_Desig_Chr_scaffold17580_950 | Ca_desig_scaffold  | 950                            | [C/T]       | NA                                         |
| Ca_Desig_Chr_scaffold17580_976 | Ca_desig_scaffold  | 976                            | [C/G]       | NA                                         |
| Ca_Desig_Chr_scaffold17580_977 | Ca_desig_scaffold  | 977                            | [A/G]       | NA                                         |
| Ca_Desig_Chr_scaffold17580_978 | Ca_desig_scaffold  | 978                            | [C/T]       | NA                                         |
| Ca_Desig_Chr_scaffold17580_979 | Ca_desig_scaffold  | 979                            | [C/G]       | NA                                         |
| Ca_Desig_Chr_scaffold17580_980 | Ca_desig_scaffold  | 980                            | [A/G]       | NA                                         |
| Ca_Desig_Chr_scaffold17580_981 | Ca_desig_scaffold  | 981                            | [A/G]       | NA                                         |
| Ca_Desig_Chr_scaffold17580_982 | Ca_desig_scaffold  | 982                            | [T/C]       | NA                                         |
| Ca_Desig_Chr_scaffold17580_983 | Ca_desig_scaffold  | 983                            | [A/G]       | NA                                         |
| Ca_Desig_Chr_scaffold17580_985 | Ca_desig_scaffold  | 985                            | [A/G]       | NA                                         |
| Ca_Desig_Chr_scaffold17580_986 | Ca_desig_scaffold  | 986                            | [T/C]       | NA                                         |
| Ca_Desig_Chr_scaffold17580_987 | Ca_desig_scaffold  | 987                            | [A/G]       | NA                                         |
| Ca_Desig_Chr_scaffold17580_988 | Ca_desig_scaffold  | 988                            | [G/A]       | NA                                         |

| <b>SNP IDs</b>                | <b>Chromosomes</b> | <b>Physical positions (bp)</b> | <b>SNPs</b> | <b>NCBI SNPdb accession IDs (NCBI_ss#)</b> |
|-------------------------------|--------------------|--------------------------------|-------------|--------------------------------------------|
| Ca_Desi_Ch_scaffold17580_989  | Ca_desi_scaffold   | 989                            | [A/G]       | NA                                         |
| Ca_Desi_Ch_scaffold17580_990  | Ca_desi_scaffold   | 990                            | [G/A]       | NA                                         |
| Ca_Desi_Ch_scaffold17580_991  | Ca_desi_scaffold   | 991                            | [A/G]       | NA                                         |
| Ca_Desi_Ch_scaffold17580_992  | Ca_desi_scaffold   | 992                            | [C/A]       | NA                                         |
| Ca_Desi_Ch_scaffold17580_993  | Ca_desi_scaffold   | 993                            | [A/G]       | NA                                         |
| Ca_Desi_Ch_scaffold17580_994  | Ca_desi_scaffold   | 994                            | [A/G]       | NA                                         |
| Ca_Desi_Ch_scaffold17580_995  | Ca_desi_scaffold   | 995                            | [A/G]       | NA                                         |
| Ca_Desi_Ch_scaffold17580_996  | Ca_desi_scaffold   | 996                            | [T/C]       | NA                                         |
| Ca_Desi_Ch_scaffold17580_997  | Ca_desi_scaffold   | 997                            | [G/A]       | NA                                         |
| Ca_Desi_Ch_scaffold17580_998  | Ca_desi_scaffold   | 998                            | [G/A]       | NA                                         |
| Ca_Desi_Ch_scaffold17580_999  | Ca_desi_scaffold   | 999                            | [G/A]       | NA                                         |
| Ca_Desi_Ch_scaffold17580_1000 | Ca_desi_scaffold   | 1000                           | [A/G]       | NA                                         |
| Ca_Desi_Ch_scaffold17580_1001 | Ca_desi_scaffold   | 1001                           | [A/G]       | NA                                         |
| Ca_Desi_Ch_scaffold17580_1002 | Ca_desi_scaffold   | 1002                           | [T/C]       | NA                                         |
| Ca_Desi_Ch_scaffold17580_1003 | Ca_desi_scaffold   | 1003                           | [A/G]       | NA                                         |
| Ca_Desi_Ch_scaffold17580_1004 | Ca_desi_scaffold   | 1004                           | [A/G]       | NA                                         |
| Ca_Desi_Ch_scaffold17580_1005 | Ca_desi_scaffold   | 1005                           | [C/T]       | NA                                         |
| Ca_Desi_Ch_scaffold17580_1006 | Ca_desi_scaffold   | 1006                           | [C/T]       | NA                                         |
| Ca_Desi_Ch_scaffold17580_1007 | Ca_desi_scaffold   | 1007                           | [G/A]       | NA                                         |
| Ca_Desi_Ch_scaffold17580_1008 | Ca_desi_scaffold   | 1008                           | [A/G]       | NA                                         |
| Ca_Desi_Ch_scaffold17580_1009 | Ca_desi_scaffold   | 1009                           | [A/G]       | NA                                         |
| Ca_Desi_Ch_scaffold17580_1010 | Ca_desi_scaffold   | 1010                           | [C/T]       | NA                                         |
| Ca_Desi_Ch_scaffold17580_1012 | Ca_desi_scaffold   | 1012                           | [A/G]       | NA                                         |
| Ca_Desi_Ch_scaffold17580_1013 | Ca_desi_scaffold   | 1013                           | [C/T]       | NA                                         |
| Ca_Desi_Ch_scaffold17580_1014 | Ca_desi_scaffold   | 1014                           | [G/A]       | NA                                         |
| Ca_Desi_Ch_scaffold17580_1015 | Ca_desi_scaffold   | 1015                           | [T/C]       | NA                                         |
| Ca_Desi_Ch_scaffold17580_1017 | Ca_desi_scaffold   | 1017                           | [T/C]       | NA                                         |
| Ca_Desi_Ch_scaffold17580_1018 | Ca_desi_scaffold   | 1018                           | [A/G]       | NA                                         |
| Ca_Desi_Ch_scaffold17580_1019 | Ca_desi_scaffold   | 1019                           | [C/A]       | NA                                         |
| Ca_Desi_Ch_scaffold17580_1020 | Ca_desi_scaffold   | 1020                           | [A/G]       | NA                                         |
| Ca_Desi_Ch_scaffold17580_1021 | Ca_desi_scaffold   | 1021                           | [A/G]       | NA                                         |
| Ca_Desi_Ch_scaffold17580_1022 | Ca_desi_scaffold   | 1022                           | [A/G]       | NA                                         |
| Ca_Desi_Ch_scaffold17580_1023 | Ca_desi_scaffold   | 1023                           | [A/G]       | NA                                         |
| Ca_Desi_Ch_scaffold17580_1024 | Ca_desi_scaffold   | 1024                           | [T/C]       | NA                                         |



| <b>SNP IDs</b>                | <b>Chromosomes</b> | <b>Physical positions (bp)</b> | <b>SNPs</b> | <b>NCBI SNPdb accession IDs (NCBI_ss#)</b> |
|-------------------------------|--------------------|--------------------------------|-------------|--------------------------------------------|
| Ca_Desi_Ch_scaffold17580_1025 | Ca_desi_scaffold   | 1025                           | [G/A]       | NA                                         |
| Ca_Desi_Ch_scaffold17580_1027 | Ca_desi_scaffold   | 1027                           | [C/T]       | NA                                         |
| Ca_Desi_Ch_scaffold17580_1028 | Ca_desi_scaffold   | 1028                           | [A/G]       | NA                                         |
| Ca_Desi_Ch_scaffold17580_1029 | Ca_desi_scaffold   | 1029                           | [G/A]       | NA                                         |
| Ca_Desi_Ch_scaffold17580_1030 | Ca_desi_scaffold   | 1030                           | [T/C]       | NA                                         |
| Ca_Desi_Ch_scaffold17580_1031 | Ca_desi_scaffold   | 1031                           | [A/G]       | NA                                         |
| Ca_Desi_Ch_scaffold17580_1033 | Ca_desi_scaffold   | 1033                           | [C/T]       | NA                                         |
| Ca_Desi_Ch_scaffold17580_1034 | Ca_desi_scaffold   | 1034                           | [A/G]       | NA                                         |
| Ca_Desi_Ch_scaffold17580_1035 | Ca_desi_scaffold   | 1035                           | [T/C]       | NA                                         |
| Ca_Desi_Ch_scaffold17580_1036 | Ca_desi_scaffold   | 1036                           | [G/A]       | NA                                         |
| Ca_Desi_Ch_scaffold17580_1037 | Ca_desi_scaffold   | 1037                           | [C/A]       | NA                                         |
| Ca_Desi_Ch_scaffold17580_1041 | Ca_desi_scaffold   | 1041                           | [T/C]       | NA                                         |
| Ca_Desi_Ch_scaffold17580_1043 | Ca_desi_scaffold   | 1043                           | [C/T]       | NA                                         |
| Ca_Desi_Ch_scaffold17580_1045 | Ca_desi_scaffold   | 1045                           | [T/C]       | NA                                         |
| Ca_Desi_Ch_scaffold17580_1047 | Ca_desi_scaffold   | 1047                           | [A/G]       | NA                                         |
| Ca_Desi_Ch_scaffold17580_1049 | Ca_desi_scaffold   | 1049                           | [A/G]       | NA                                         |
| Ca_Desi_Ch_scaffold17580_1050 | Ca_desi_scaffold   | 1050                           | [G/A]       | NA                                         |
| Ca_Desi_Ch_scaffold17580_1054 | Ca_desi_scaffold   | 1054                           | [A/G]       | NA                                         |
| Ca_Desi_Ch_scaffold17580_1057 | Ca_desi_scaffold   | 1057                           | [T/C]       | NA                                         |
| Ca_Desi_Ch_scaffold17580_1059 | Ca_desi_scaffold   | 1059                           | [A/G]       | NA                                         |
| Ca_Desi_Ch_scaffold17580_1067 | Ca_desi_scaffold   | 1067                           | [T/C]       | NA                                         |
| Ca_Desi_Ch_scaffold17580_1070 | Ca_desi_scaffold   | 1070                           | [T/C]       | NA                                         |
| Ca_Desi_Ch_scaffold17580_1077 | Ca_desi_scaffold   | 1077                           | [A/G]       | NA                                         |
| Ca_Desi_Ch_scaffold17580_1088 | Ca_desi_scaffold   | 1088                           | [G/A]       | NA                                         |
| Ca_Desi_Ch_scaffold17580_1098 | Ca_desi_scaffold   | 1098                           | [A/G]       | NA                                         |
| Ca_Desi_Ch_scaffold17580_1100 | Ca_desi_scaffold   | 1100                           | [A/G]       | NA                                         |
| Ca_Desi_Ch_scaffold17580_1278 | Ca_desi_scaffold   | 1278                           | [T/C]       | NA                                         |
| Ca_Desi_Ch_scaffold17580_1281 | Ca_desi_scaffold   | 1281                           | [T/C]       | NA                                         |
| Ca_Desi_Ch_scaffold17580_1283 | Ca_desi_scaffold   | 1283                           | [T/C]       | NA                                         |
| Ca_Desi_Ch_scaffold17580_1284 | Ca_desi_scaffold   | 1284                           | [T/C]       | NA                                         |
| Ca_Desi_Ch_scaffold17580_1288 | Ca_desi_scaffold   | 1288                           | [T/C]       | NA                                         |
| Ca_Desi_Ch_scaffold17580_1297 | Ca_desi_scaffold   | 1297                           | [A/G]       | NA                                         |
| Ca_Desi_Ch_scaffold17580_1299 | Ca_desi_scaffold   | 1299                           | [T/G]       | NA                                         |
| Ca_Desi_Ch_scaffold17580_1302 | Ca_desi_scaffold   | 1302                           | [A/G]       | NA                                         |

| <b>SNP IDs</b>                 | <b>Chromosomes</b> | <b>Physical positions (bp)</b> | <b>SNPs</b> | <b>NCBI SNPdb accession IDs (NCBI_ss#)</b> |
|--------------------------------|--------------------|--------------------------------|-------------|--------------------------------------------|
| Ca_Desi_Chr_scaffold17580_1305 | Ca_desi_scaffold   | 1305                           | [A/G]       | NA                                         |
| Ca_Desi_Chr_scaffold17580_1308 | Ca_desi_scaffold   | 1308                           | [A/G]       | NA                                         |
| Ca_Desi_Chr_scaffold17580_1311 | Ca_desi_scaffold   | 1311                           | [A/G]       | NA                                         |
| Ca_Desi_Chr_scaffold17580_1319 | Ca_desi_scaffold   | 1319                           | [T/C]       | NA                                         |
| Ca_Desi_Chr_scaffold17580_1322 | Ca_desi_scaffold   | 1322                           | [C/T]       | NA                                         |
| Ca_Desi_Chr_scaffold17580_1326 | Ca_desi_scaffold   | 1326                           | [T/A]       | NA                                         |
| Ca_Desi_Chr_scaffold17612_1800 | Ca_desi_scaffold   | 1800                           | [G/A]       | NA                                         |
| Ca_Desi_Chr_scaffold17626_1205 | Ca_desi_scaffold   | 1205                           | [T/C]       | NA                                         |
| Ca_Desi_Chr_scaffold17626_1210 | Ca_desi_scaffold   | 1210                           | [G/C]       | NA                                         |
| Ca_Desi_Chr_scaffold17626_1236 | Ca_desi_scaffold   | 1236                           | [T/C]       | NA                                         |
| Ca_Desi_Chr_scaffold17720_1141 | Ca_desi_scaffold   | 1141                           | [T/C]       | NA                                         |
| Ca_Desi_Chr_scaffold17720_1145 | Ca_desi_scaffold   | 1145                           | [T/C]       | NA                                         |
| Ca_Desi_Chr_scaffold17720_1155 | Ca_desi_scaffold   | 1155                           | [A/C]       | NA                                         |
| Ca_Desi_Chr_scaffold17872_1506 | Ca_desi_scaffold   | 1506                           | [G/A]       | NA                                         |
| Ca_Desi_Chr_scaffold17872_1509 | Ca_desi_scaffold   | 1509                           | [C/A]       | NA                                         |
| Ca_Desi_Chr_scaffold17872_1510 | Ca_desi_scaffold   | 1510                           | [A/G]       | NA                                         |
| Ca_Desi_Chr_scaffold17872_1511 | Ca_desi_scaffold   | 1511                           | [A/C]       | NA                                         |
| Ca_Desi_Chr_scaffold17872_1533 | Ca_desi_scaffold   | 1533                           | [A/G]       | NA                                         |
| Ca_Desi_Chr_scaffold17872_1545 | Ca_desi_scaffold   | 1545                           | [C/T]       | NA                                         |
| Ca_Desi_Chr_scaffold17872_1560 | Ca_desi_scaffold   | 1560                           | [T/G]       | NA                                         |
| Ca_Desi_Chr_scaffold17872_1563 | Ca_desi_scaffold   | 1563                           | [T/G]       | NA                                         |
| Ca_Desi_Chr_scaffold17943_458  | Ca_desi_scaffold   | 458                            | [T/C]       | NA                                         |
| Ca_Desi_Chr_scaffold17972_610  | Ca_desi_scaffold   | 610                            | [A/C]       | NA                                         |
| Ca_Desi_Chr_scaffold17972_648  | Ca_desi_scaffold   | 648                            | [T/A]       | NA                                         |
| Ca_Desi_Chr_scaffold17972_651  | Ca_desi_scaffold   | 651                            | [T/C]       | NA                                         |
| Ca_Desi_Chr_scaffold17972_652  | Ca_desi_scaffold   | 652                            | [G/A]       | NA                                         |
| Ca_Desi_Chr_scaffold17972_653  | Ca_desi_scaffold   | 653                            | [G/A]       | NA                                         |
| Ca_Desi_Chr_scaffold17972_654  | Ca_desi_scaffold   | 654                            | [A/G]       | NA                                         |
| Ca_Desi_Chr_scaffold17972_655  | Ca_desi_scaffold   | 655                            | [A/T]       | NA                                         |
| Ca_Desi_Chr_scaffold17972_656  | Ca_desi_scaffold   | 656                            | [C/A]       | NA                                         |
| Ca_Desi_Chr_scaffold17972_658  | Ca_desi_scaffold   | 658                            | [A/G]       | NA                                         |
| Ca_Desi_Chr_scaffold17972_660  | Ca_desi_scaffold   | 660                            | [A/G]       | NA                                         |
| Ca_Desi_Chr_scaffold17972_661  | Ca_desi_scaffold   | 661                            | [G/A]       | NA                                         |
| Ca_Desi_Chr_scaffold17972_662  | Ca_desi_scaffold   | 662                            | [T/C]       | NA                                         |

| <b>SNP IDs</b>                        | <b>Chromosomes</b> | <b>Physical positions (bp)</b> | <b>SNPs</b> | <b>NCBI SNPdb accession IDs (NCBI_ss#)</b> |
|---------------------------------------|--------------------|--------------------------------|-------------|--------------------------------------------|
| Ca_Desi_Chromosome_scaffold17972_663  | Ca_desi_scaffold   | 663                            | [T/C]       | NA                                         |
| Ca_Desi_Chromosome_scaffold17972_664  | Ca_desi_scaffold   | 664                            | [T/C]       | NA                                         |
| Ca_Desi_Chromosome_scaffold17972_665  | Ca_desi_scaffold   | 665                            | [A/G]       | NA                                         |
| Ca_Desi_Chromosome_scaffold17972_666  | Ca_desi_scaffold   | 666                            | [A/G]       | NA                                         |
| Ca_Desi_Chromosome_scaffold17972_667  | Ca_desi_scaffold   | 667                            | [G/A]       | NA                                         |
| Ca_Desi_Chromosome_scaffold17972_668  | Ca_desi_scaffold   | 668                            | [A/G]       | NA                                         |
| Ca_Desi_Chromosome_scaffold17972_669  | Ca_desi_scaffold   | 669                            | [A/G]       | NA                                         |
| Ca_Desi_Chromosome_scaffold17972_670  | Ca_desi_scaffold   | 670                            | [A/G]       | NA                                         |
| Ca_Desi_Chromosome_scaffold17972_671  | Ca_desi_scaffold   | 671                            | [G/A]       | NA                                         |
| Ca_Desi_Chromosome_scaffold17972_672  | Ca_desi_scaffold   | 672                            | [A/G]       | NA                                         |
| Ca_Desi_Chromosome_scaffold17972_673  | Ca_desi_scaffold   | 673                            | [G/A]       | NA                                         |
| Ca_Desi_Chromosome_scaffold17972_674  | Ca_desi_scaffold   | 674                            | [G/C]       | NA                                         |
| Ca_Desi_Chromosome_scaffold17972_675  | Ca_desi_scaffold   | 675                            | [C/T]       | NA                                         |
| Ca_Desi_Chromosome_scaffold17972_676  | Ca_desi_scaffold   | 676                            | [G/A]       | NA                                         |
| Ca_Desi_Chromosome_scaffold17972_677  | Ca_desi_scaffold   | 677                            | [G/A]       | NA                                         |
| Ca_Desi_Chromosome_scaffold17972_678  | Ca_desi_scaffold   | 678                            | [A/G]       | NA                                         |
| Ca_Desi_Chromosome_scaffold17972_679  | Ca_desi_scaffold   | 679                            | [A/G]       | NA                                         |
| Ca_Desi_Chromosome_scaffold17972_680  | Ca_desi_scaffold   | 680                            | [C/A]       | NA                                         |
| Ca_Desi_Chromosome_scaffold17972_681  | Ca_desi_scaffold   | 681                            | [A/G]       | NA                                         |
| Ca_Desi_Chromosome_scaffold17972_682  | Ca_desi_scaffold   | 682                            | [T/C]       | NA                                         |
| Ca_Desi_Chromosome_scaffold17972_683  | Ca_desi_scaffold   | 683                            | [C/T]       | NA                                         |
| Ca_Desi_Chromosome_scaffold17972_684  | Ca_desi_scaffold   | 684                            | [G/A]       | NA                                         |
| Ca_Desi_Chromosome_scaffold17972_686  | Ca_desi_scaffold   | 686                            | [T/C]       | NA                                         |
| Ca_Desi_Chromosome_scaffold17972_687  | Ca_desi_scaffold   | 687                            | [C/T]       | NA                                         |
| Ca_Desi_Chromosome_scaffold17972_688  | Ca_desi_scaffold   | 688                            | [T/C]       | NA                                         |
| Ca_Desi_Chromosome_scaffold17972_690  | Ca_desi_scaffold   | 690                            | [C/T]       | NA                                         |
| Ca_Desi_Chromosome_scaffold17972_691  | Ca_desi_scaffold   | 691                            | [G/A]       | NA                                         |
| Ca_Desi_Chromosome_scaffold17972_693  | Ca_desi_scaffold   | 693                            | [G/A]       | NA                                         |
| Ca_Desi_Chromosome_scaffold17972_696  | Ca_desi_scaffold   | 696                            | [A/T]       | NA                                         |
| Ca_Desi_Chromosome_scaffold17972_1086 | Ca_desi_scaffold   | 1086                           | [T/A]       | NA                                         |
| Ca_Desi_Chromosome_scaffold17972_1138 | Ca_desi_scaffold   | 1138                           | [T/C]       | NA                                         |
| Ca_Desi_Chromosome_scaffold17972_1155 | Ca_desi_scaffold   | 1155                           | [T/C]       | NA                                         |
| Ca_Desi_Chromosome_scaffold17972_1158 | Ca_desi_scaffold   | 1158                           | [T/A]       | NA                                         |
| Ca_Desi_Chromosome_scaffold17972_1402 | Ca_desi_scaffold   | 1402                           | [T/C]       | NA                                         |

| <b>SNP IDs</b>                  | <b>Chromosomes</b> | <b>Physical positions (bp)</b> | <b>SNPs</b> | <b>NCBI SNPdb accession IDs (NCBI_ss#)</b> |
|---------------------------------|--------------------|--------------------------------|-------------|--------------------------------------------|
| Ca_Desig_Chr_scaffold17972_1427 | Ca_desig_scaffold  | 1427                           | [A/G]       | NA                                         |
| Ca_Desig_Chr_scaffold17972_1443 | Ca_desig_scaffold  | 1443                           | [C/T]       | NA                                         |
| Ca_Desig_Chr_scaffold17972_1444 | Ca_desig_scaffold  | 1444                           | [T/C]       | NA                                         |
| Ca_Desig_Chr_scaffold17972_1445 | Ca_desig_scaffold  | 1445                           | [A/G]       | NA                                         |
| Ca_Desig_Chr_scaffold17972_1446 | Ca_desig_scaffold  | 1446                           | [G/A]       | NA                                         |
| Ca_Desig_Chr_scaffold17972_1447 | Ca_desig_scaffold  | 1447                           | [C/T]       | NA                                         |
| Ca_Desig_Chr_scaffold17972_1448 | Ca_desig_scaffold  | 1448                           | [A/G]       | NA                                         |
| Ca_Desig_Chr_scaffold17972_1449 | Ca_desig_scaffold  | 1449                           | [T/C]       | NA                                         |
| Ca_Desig_Chr_scaffold17972_1450 | Ca_desig_scaffold  | 1450                           | [C/T]       | NA                                         |
| Ca_Desig_Chr_scaffold17972_1451 | Ca_desig_scaffold  | 1451                           | [A/G]       | NA                                         |
| Ca_Desig_Chr_scaffold17972_1453 | Ca_desig_scaffold  | 1453                           | [T/C]       | NA                                         |
| Ca_Desig_Chr_scaffold17972_1454 | Ca_desig_scaffold  | 1454                           | [T/C]       | NA                                         |
| Ca_Desig_Chr_scaffold17972_1455 | Ca_desig_scaffold  | 1455                           | [T/C]       | NA                                         |
| Ca_Desig_Chr_scaffold17972_1456 | Ca_desig_scaffold  | 1456                           | [A/G]       | NA                                         |
| Ca_Desig_Chr_scaffold17972_1458 | Ca_desig_scaffold  | 1458                           | [A/G]       | NA                                         |
| Ca_Desig_Chr_scaffold17972_1459 | Ca_desig_scaffold  | 1459                           | [T/C]       | NA                                         |
| Ca_Desig_Chr_scaffold17972_1460 | Ca_desig_scaffold  | 1460                           | [A/G]       | NA                                         |
| Ca_Desig_Chr_scaffold17972_1463 | Ca_desig_scaffold  | 1463                           | [A/G]       | NA                                         |
| Ca_Desig_Chr_scaffold17972_1466 | Ca_desig_scaffold  | 1466                           | [A/G]       | NA                                         |
| Ca_Desig_Chr_scaffold17972_1468 | Ca_desig_scaffold  | 1468                           | [A/G]       | NA                                         |
| Ca_Desig_Chr_scaffold17972_1469 | Ca_desig_scaffold  | 1469                           | [A/G]       | NA                                         |
| Ca_Desig_Chr_scaffold17972_1470 | Ca_desig_scaffold  | 1470                           | [T/C]       | NA                                         |
| Ca_Desig_Chr_scaffold17972_1471 | Ca_desig_scaffold  | 1471                           | [G/A]       | NA                                         |
| Ca_Desig_Chr_scaffold17972_1472 | Ca_desig_scaffold  | 1472                           | [G/A]       | NA                                         |
| Ca_Desig_Chr_scaffold17972_1473 | Ca_desig_scaffold  | 1473                           | [A/G]       | NA                                         |
| Ca_Desig_Chr_scaffold17972_1474 | Ca_desig_scaffold  | 1474                           | [T/C]       | NA                                         |
| Ca_Desig_Chr_scaffold17972_1476 | Ca_desig_scaffold  | 1476                           | [A/G]       | NA                                         |
| Ca_Desig_Chr_scaffold17972_1478 | Ca_desig_scaffold  | 1478                           | [T/C]       | NA                                         |
| Ca_Desig_Chr_scaffold17972_1479 | Ca_desig_scaffold  | 1479                           | [T/C]       | NA                                         |
| Ca_Desig_Chr_scaffold17972_1480 | Ca_desig_scaffold  | 1480                           | [A/G]       | NA                                         |
| Ca_Desig_Chr_scaffold17972_1481 | Ca_desig_scaffold  | 1481                           | [C/A]       | NA                                         |
| Ca_Desig_Chr_scaffold17972_1482 | Ca_desig_scaffold  | 1482                           | [A/G]       | NA                                         |
| Ca_Desig_Chr_scaffold17972_1483 | Ca_desig_scaffold  | 1483                           | [A/G]       | NA                                         |
| Ca_Desig_Chr_scaffold17972_1485 | Ca_desig_scaffold  | 1485                           | [T/C]       | NA                                         |

| <b>SNP IDs</b>                        | <b>Chromosomes</b> | <b>Physical positions (bp)</b> | <b>SNPs</b> | <b>NCBI SNPdb accession IDs (NCBI_ss#)</b> |
|---------------------------------------|--------------------|--------------------------------|-------------|--------------------------------------------|
| Ca_Desi_Chromosome_scaffold17972_1486 | Ca_desi_scaffold   | 1486                           | [G/A]       | NA                                         |
| Ca_Desi_Chromosome_scaffold17972_1487 | Ca_desi_scaffold   | 1487                           | [A/G]       | NA                                         |
| Ca_Desi_Chromosome_scaffold17972_1488 | Ca_desi_scaffold   | 1488                           | [A/G]       | NA                                         |
| Ca_Desi_Chromosome_scaffold17972_1489 | Ca_desi_scaffold   | 1489                           | [A/G]       | NA                                         |
| Ca_Desi_Chromosome_scaffold17972_1491 | Ca_desi_scaffold   | 1491                           | [T/C]       | NA                                         |
| Ca_Desi_Chromosome_scaffold17972_1492 | Ca_desi_scaffold   | 1492                           | [C/A]       | NA                                         |
| Ca_Desi_Chromosome_scaffold17972_1493 | Ca_desi_scaffold   | 1493                           | [A/G]       | NA                                         |
| Ca_Desi_Chromosome_scaffold17972_1495 | Ca_desi_scaffold   | 1495                           | [T/C]       | NA                                         |
| Ca_Desi_Chromosome_scaffold17972_1496 | Ca_desi_scaffold   | 1496                           | [T/C]       | NA                                         |
| Ca_Desi_Chromosome_scaffold17972_1498 | Ca_desi_scaffold   | 1498                           | [T/C]       | NA                                         |
| Ca_Desi_Chromosome_scaffold17972_1500 | Ca_desi_scaffold   | 1500                           | [C/T]       | NA                                         |
| Ca_Desi_Chromosome_scaffold17972_1501 | Ca_desi_scaffold   | 1501                           | [G/A]       | NA                                         |
| Ca_Desi_Chromosome_scaffold17972_1578 | Ca_desi_scaffold   | 1578                           | [T/C]       | NA                                         |
| Ca_Desi_Chromosome_scaffold17972_1580 | Ca_desi_scaffold   | 1580                           | [G/A]       | NA                                         |
| Ca_Desi_Chromosome_scaffold17972_1581 | Ca_desi_scaffold   | 1581                           | [A/G]       | NA                                         |
| Ca_Desi_Chromosome_scaffold17972_1582 | Ca_desi_scaffold   | 1582                           | [T/C]       | NA                                         |
| Ca_Desi_Chromosome_scaffold17972_1583 | Ca_desi_scaffold   | 1583                           | [T/C]       | NA                                         |
| Ca_Desi_Chromosome_scaffold17972_1584 | Ca_desi_scaffold   | 1584                           | [C/T]       | NA                                         |
| Ca_Desi_Chromosome_scaffold17972_1585 | Ca_desi_scaffold   | 1585                           | [G/A]       | NA                                         |
| Ca_Desi_Chromosome_scaffold17972_1586 | Ca_desi_scaffold   | 1586                           | [T/C]       | NA                                         |
| Ca_Desi_Chromosome_scaffold17972_1588 | Ca_desi_scaffold   | 1588                           | [A/G]       | NA                                         |
| Ca_Desi_Chromosome_scaffold17972_1589 | Ca_desi_scaffold   | 1589                           | [C/A]       | NA                                         |
| Ca_Desi_Chromosome_scaffold17972_1590 | Ca_desi_scaffold   | 1590                           | [A/G]       | NA                                         |
| Ca_Desi_Chromosome_scaffold17972_1591 | Ca_desi_scaffold   | 1591                           | [T/C]       | NA                                         |
| Ca_Desi_Chromosome_scaffold17972_1592 | Ca_desi_scaffold   | 1592                           | [G/A]       | NA                                         |
| Ca_Desi_Chromosome_scaffold17972_1593 | Ca_desi_scaffold   | 1593                           | [A/G]       | NA                                         |
| Ca_Desi_Chromosome_scaffold17972_1594 | Ca_desi_scaffold   | 1594                           | [A/G]       | NA                                         |
| Ca_Desi_Chromosome_scaffold17972_1595 | Ca_desi_scaffold   | 1595                           | [C/T]       | NA                                         |
| Ca_Desi_Chromosome_scaffold17972_1596 | Ca_desi_scaffold   | 1596                           | [G/A]       | NA                                         |
| Ca_Desi_Chromosome_scaffold17972_1598 | Ca_desi_scaffold   | 1598                           | [G/A]       | NA                                         |
| Ca_Desi_Chromosome_scaffold17972_1599 | Ca_desi_scaffold   | 1599                           | [A/G]       | NA                                         |
| Ca_Desi_Chromosome_scaffold17972_1600 | Ca_desi_scaffold   | 1600                           | [G/A]       | NA                                         |
| Ca_Desi_Chromosome_scaffold17972_1601 | Ca_desi_scaffold   | 1601                           | [C/G]       | NA                                         |
| Ca_Desi_Chromosome_scaffold17972_1602 | Ca_desi_scaffold   | 1602                           | [G/A]       | NA                                         |

| <b>SNP IDs</b>                  | <b>Chromosomes</b> | <b>Physical positions (bp)</b> | <b>SNPs</b> | <b>NCBI SNPdb accession IDs (NCBI_ss#)</b> |
|---------------------------------|--------------------|--------------------------------|-------------|--------------------------------------------|
| Ca_Desig_Chr_scaffold17972_1603 | Ca_desig_scaffold  | 1603                           | [G/A]       | NA                                         |
| Ca_Desig_Chr_scaffold17972_1604 | Ca_desig_scaffold  | 1604                           | [A/G]       | NA                                         |
| Ca_Desig_Chr_scaffold17972_1605 | Ca_desig_scaffold  | 1605                           | [C/T]       | NA                                         |
| Ca_Desig_Chr_scaffold17972_1606 | Ca_desig_scaffold  | 1606                           | [G/A]       | NA                                         |
| Ca_Desig_Chr_scaffold17972_1607 | Ca_desig_scaffold  | 1607                           | [A/G]       | NA                                         |
| Ca_Desig_Chr_scaffold17972_1608 | Ca_desig_scaffold  | 1608                           | [T/C]       | NA                                         |
| Ca_Desig_Chr_scaffold17972_1609 | Ca_desig_scaffold  | 1609                           | [T/C]       | NA                                         |
| Ca_Desig_Chr_scaffold17972_1610 | Ca_desig_scaffold  | 1610                           | [C/T]       | NA                                         |
| Ca_Desig_Chr_scaffold17972_1611 | Ca_desig_scaffold  | 1611                           | [C/T]       | NA                                         |
| Ca_Desig_Chr_scaffold17972_1613 | Ca_desig_scaffold  | 1613                           | [T/C]       | NA                                         |
| Ca_Desig_Chr_scaffold17972_1614 | Ca_desig_scaffold  | 1614                           | [C/T]       | NA                                         |
| Ca_Desig_Chr_scaffold17972_1616 | Ca_desig_scaffold  | 1616                           | [T/C]       | NA                                         |
| Ca_Desig_Chr_scaffold17972_1617 | Ca_desig_scaffold  | 1617                           | [C/T]       | NA                                         |
| Ca_Desig_Chr_scaffold17972_1618 | Ca_desig_scaffold  | 1618                           | [T/C]       | NA                                         |
| Ca_Desig_Chr_scaffold17972_1619 | Ca_desig_scaffold  | 1619                           | [C/T]       | NA                                         |
| Ca_Desig_Chr_scaffold17972_1620 | Ca_desig_scaffold  | 1620                           | [T/C]       | NA                                         |
| Ca_Desig_Chr_scaffold17972_1623 | Ca_desig_scaffold  | 1623                           | [C/T]       | NA                                         |
| Ca_Desig_Chr_scaffold17972_1625 | Ca_desig_scaffold  | 1625                           | [T/C]       | NA                                         |
| Ca_Desig_Chr_scaffold17972_1626 | Ca_desig_scaffold  | 1626                           | [T/C]       | NA                                         |
| Ca_Desig_Chr_scaffold17972_1627 | Ca_desig_scaffold  | 1627                           | [T/C]       | NA                                         |
| Ca_Desig_Chr_scaffold17972_1628 | Ca_desig_scaffold  | 1628                           | [T/C]       | NA                                         |
| Ca_Desig_Chr_scaffold17972_1629 | Ca_desig_scaffold  | 1629                           | [C/T]       | NA                                         |
| Ca_Desig_Chr_scaffold17972_1631 | Ca_desig_scaffold  | 1631                           | [G/A]       | NA                                         |
| Ca_Desig_Chr_scaffold17972_1633 | Ca_desig_scaffold  | 1633                           | [G/A]       | NA                                         |
| Ca_Desig_Chr_scaffold17972_1634 | Ca_desig_scaffold  | 1634                           | [A/G]       | NA                                         |
| Ca_Desig_Chr_scaffold17972_1635 | Ca_desig_scaffold  | 1635                           | [A/G]       | NA                                         |
| Ca_Desig_Chr_scaffold17972_1636 | Ca_desig_scaffold  | 1636                           | [T/C]       | NA                                         |
| Ca_Desig_Chr_scaffold17972_1637 | Ca_desig_scaffold  | 1637                           | [G/A]       | NA                                         |
| Ca_Desig_Chr_scaffold17972_1668 | Ca_desig_scaffold  | 1668                           | [T/G]       | NA                                         |
| Ca_Desig_Chr_scaffold18179_62   | Ca_desig_scaffold  | 62                             | [G/A]       | NA                                         |
| Ca_Desig_Chr_scaffold18194_534  | Ca_desig_scaffold  | 534                            | [G/C]       | NA                                         |
| Ca_Desig_Chr_scaffold18221_1870 | Ca_desig_scaffold  | 1870                           | [C/A]       | NA                                         |
| Ca_Desig_Chr_scaffold18230_477  | Ca_desig_scaffold  | 477                            | [G/T]       | NA                                         |
| Ca_Desig_Chr_scaffold18334_122  | Ca_desig_scaffold  | 122                            | [T/C]       | NA                                         |

| <b>SNP IDs</b>               | <b>Chromosomes</b> | <b>Physical positions (bp)</b> | <b>SNPs</b> | <b>NCBI SNPdb accession IDs (NCBI_ss#)</b> |
|------------------------------|--------------------|--------------------------------|-------------|--------------------------------------------|
| Ca_Desi_Ch_scaffold18424_317 | Ca_desi_scaffold   | 317                            | [T/C]       | NA                                         |
| Ca_Desi_Ch_scaffold18424_318 | Ca_desi_scaffold   | 318                            | [A/G]       | NA                                         |
| Ca_Desi_Ch_scaffold18424_319 | Ca_desi_scaffold   | 319                            | [A/G]       | NA                                         |
| Ca_Desi_Ch_scaffold18424_321 | Ca_desi_scaffold   | 321                            | [G/A]       | NA                                         |
| Ca_Desi_Ch_scaffold18424_322 | Ca_desi_scaffold   | 322                            | [A/G]       | NA                                         |
| Ca_Desi_Ch_scaffold18424_323 | Ca_desi_scaffold   | 323                            | [A/G]       | NA                                         |
| Ca_Desi_Ch_scaffold18424_324 | Ca_desi_scaffold   | 324                            | [C/T]       | NA                                         |
| Ca_Desi_Ch_scaffold18424_326 | Ca_desi_scaffold   | 326                            | [T/C]       | NA                                         |
| Ca_Desi_Ch_scaffold18424_327 | Ca_desi_scaffold   | 327                            | [T/C]       | NA                                         |
| Ca_Desi_Ch_scaffold18424_328 | Ca_desi_scaffold   | 328                            | [A/G]       | NA                                         |
| Ca_Desi_Ch_scaffold18424_329 | Ca_desi_scaffold   | 329                            | [G/A]       | NA                                         |
| Ca_Desi_Ch_scaffold18424_330 | Ca_desi_scaffold   | 330                            | [A/G]       | NA                                         |
| Ca_Desi_Ch_scaffold18424_331 | Ca_desi_scaffold   | 331                            | [A/G]       | NA                                         |
| Ca_Desi_Ch_scaffold18424_332 | Ca_desi_scaffold   | 332                            | [T/C]       | NA                                         |
| Ca_Desi_Ch_scaffold18424_333 | Ca_desi_scaffold   | 333                            | [T/C]       | NA                                         |
| Ca_Desi_Ch_scaffold18424_334 | Ca_desi_scaffold   | 334                            | [A/G]       | NA                                         |
| Ca_Desi_Ch_scaffold18424_335 | Ca_desi_scaffold   | 335                            | [A/C]       | NA                                         |
| Ca_Desi_Ch_scaffold18424_336 | Ca_desi_scaffold   | 336                            | [C/T]       | NA                                         |
| Ca_Desi_Ch_scaffold18424_337 | Ca_desi_scaffold   | 337                            | [C/T]       | NA                                         |
| Ca_Desi_Ch_scaffold18424_338 | Ca_desi_scaffold   | 338                            | [C/T]       | NA                                         |
| Ca_Desi_Ch_scaffold18424_339 | Ca_desi_scaffold   | 339                            | [T/C]       | NA                                         |
| Ca_Desi_Ch_scaffold18424_341 | Ca_desi_scaffold   | 341                            | [C/T]       | NA                                         |
| Ca_Desi_Ch_scaffold18424_342 | Ca_desi_scaffold   | 342                            | [C/T]       | NA                                         |
| Ca_Desi_Ch_scaffold18424_343 | Ca_desi_scaffold   | 343                            | [T/C]       | NA                                         |
| Ca_Desi_Ch_scaffold18424_344 | Ca_desi_scaffold   | 344                            | [G/A]       | NA                                         |
| Ca_Desi_Ch_scaffold18424_345 | Ca_desi_scaffold   | 345                            | [T/C]       | NA                                         |
| Ca_Desi_Ch_scaffold18424_346 | Ca_desi_scaffold   | 346                            | [C/T]       | NA                                         |
| Ca_Desi_Ch_scaffold18424_347 | Ca_desi_scaffold   | 347                            | [G/A]       | NA                                         |
| Ca_Desi_Ch_scaffold18424_348 | Ca_desi_scaffold   | 348                            | [A/G]       | NA                                         |
| Ca_Desi_Ch_scaffold18424_349 | Ca_desi_scaffold   | 349                            | [T/C]       | NA                                         |
| Ca_Desi_Ch_scaffold18424_351 | Ca_desi_scaffold   | 351                            | [A/G]       | NA                                         |
| Ca_Desi_Ch_scaffold18424_352 | Ca_desi_scaffold   | 352                            | [A/G]       | NA                                         |
| Ca_Desi_Ch_scaffold18424_353 | Ca_desi_scaffold   | 353                            | [A/G]       | NA                                         |
| Ca_Desi_Ch_scaffold18424_354 | Ca_desi_scaffold   | 354                            | [A/G]       | NA                                         |

| <b>SNP IDs</b>                | <b>Chromosomes</b> | <b>Physical positions (bp)</b> | <b>SNPs</b> | <b>NCBI SNPdb accession IDs (NCBI_ss#)</b> |
|-------------------------------|--------------------|--------------------------------|-------------|--------------------------------------------|
| Ca_Desi_Ch_scaffold18424_355  | Ca_desi_scaffold   | 355                            | [A/G]       | NA                                         |
| Ca_Desi_Ch_scaffold18424_358  | Ca_desi_scaffold   | 358                            | [A/G]       | NA                                         |
| Ca_Desi_Ch_scaffold18424_359  | Ca_desi_scaffold   | 359                            | [G/A]       | NA                                         |
| Ca_Desi_Ch_scaffold18424_361  | Ca_desi_scaffold   | 361                            | [A/G]       | NA                                         |
| Ca_Desi_Ch_scaffold18424_362  | Ca_desi_scaffold   | 362                            | [T/C]       | NA                                         |
| Ca_Desi_Ch_scaffold18424_363  | Ca_desi_scaffold   | 363                            | [T/C]       | NA                                         |
| Ca_Desi_Ch_scaffold18424_364  | Ca_desi_scaffold   | 364                            | [T/C]       | NA                                         |
| Ca_Desi_Ch_scaffold18424_365  | Ca_desi_scaffold   | 365                            | [G/A]       | NA                                         |
| Ca_Desi_Ch_scaffold18424_366  | Ca_desi_scaffold   | 366                            | [A/G]       | NA                                         |
| Ca_Desi_Ch_scaffold18424_367  | Ca_desi_scaffold   | 367                            | [G/A]       | NA                                         |
| Ca_Desi_Ch_scaffold18424_368  | Ca_desi_scaffold   | 368                            | [A/G]       | NA                                         |
| Ca_Desi_Ch_scaffold18424_369  | Ca_desi_scaffold   | 369                            | [G/A]       | NA                                         |
| Ca_Desi_Ch_scaffold18424_370  | Ca_desi_scaffold   | 370                            | [G/A]       | NA                                         |
| Ca_Desi_Ch_scaffold18424_371  | Ca_desi_scaffold   | 371                            | [A/G]       | NA                                         |
| Ca_Desi_Ch_scaffold18424_372  | Ca_desi_scaffold   | 372                            | [G/A]       | NA                                         |
| Ca_Desi_Ch_scaffold18424_373  | Ca_desi_scaffold   | 373                            | [T/C]       | NA                                         |
| Ca_Desi_Ch_scaffold18424_374  | Ca_desi_scaffold   | 374                            | [G/A]       | NA                                         |
| Ca_Desi_Ch_scaffold18424_375  | Ca_desi_scaffold   | 375                            | [A/G]       | NA                                         |
| Ca_Desi_Ch_scaffold18424_376  | Ca_desi_scaffold   | 376                            | [A/G]       | NA                                         |
| Ca_Desi_Ch_scaffold18424_379  | Ca_desi_scaffold   | 379                            | [T/A]       | NA                                         |
| Ca_Desi_Ch_scaffold18445_1446 | Ca_desi_scaffold   | 1446                           | [T/C]       | NA                                         |
| Ca_Desi_Ch_scaffold18445_1452 | Ca_desi_scaffold   | 1452                           | [T/G]       | NA                                         |
| Ca_Desi_Ch_scaffold18455_368  | Ca_desi_scaffold   | 368                            | [G/A]       | NA                                         |
| Ca_Desi_Ch_scaffold18455_373  | Ca_desi_scaffold   | 373                            | [T/C]       | NA                                         |
| Ca_Desi_Ch_scaffold18455_383  | Ca_desi_scaffold   | 383                            | [A/G]       | NA                                         |
| Ca_Desi_Ch_scaffold18455_388  | Ca_desi_scaffold   | 388                            | [T/C]       | NA                                         |
| Ca_Desi_Ch_scaffold18455_389  | Ca_desi_scaffold   | 389                            | [T/C]       | NA                                         |
| Ca_Desi_Ch_scaffold18455_393  | Ca_desi_scaffold   | 393                            | [T/C]       | NA                                         |
| Ca_Desi_Ch_scaffold18455_395  | Ca_desi_scaffold   | 395                            | [T/C]       | NA                                         |
| Ca_Desi_Ch_scaffold18455_399  | Ca_desi_scaffold   | 399                            | [T/C]       | NA                                         |
| Ca_Desi_Ch_scaffold18455_400  | Ca_desi_scaffold   | 400                            | [A/G]       | NA                                         |
| Ca_Desi_Ch_scaffold18455_402  | Ca_desi_scaffold   | 402                            | [A/G]       | NA                                         |
| Ca_Desi_Ch_scaffold18455_403  | Ca_desi_scaffold   | 403                            | [T/C]       | NA                                         |
| Ca_Desi_Ch_scaffold18455_404  | Ca_desi_scaffold   | 404                            | [T/C]       | NA                                         |



| <b>SNP IDs</b>                 | <b>Chromosomes</b> | <b>Physical positions (bp)</b> | <b>SNPs</b> | <b>NCBI SNPdb accession IDs (NCBI_ss#)</b> |
|--------------------------------|--------------------|--------------------------------|-------------|--------------------------------------------|
| Ca_Desig_Chr_scaffold18455_406 | Ca_desig_scaffold  | 406                            | [A/G]       | NA                                         |
| Ca_Desig_Chr_scaffold18455_410 | Ca_desig_scaffold  | 410                            | [A/G]       | NA                                         |
| Ca_Desig_Chr_scaffold18455_411 | Ca_desig_scaffold  | 411                            | [A/G]       | NA                                         |
| Ca_Desig_Chr_scaffold18455_415 | Ca_desig_scaffold  | 415                            | [A/G]       | NA                                         |
| Ca_Desig_Chr_scaffold18455_417 | Ca_desig_scaffold  | 417                            | [A/G]       | NA                                         |
| Ca_Desig_Chr_scaffold18455_418 | Ca_desig_scaffold  | 418                            | [A/G]       | NA                                         |
| Ca_Desig_Chr_scaffold18455_421 | Ca_desig_scaffold  | 421                            | [C/A]       | NA                                         |
| Ca_Desig_Chr_scaffold18455_442 | Ca_desig_scaffold  | 442                            | [T/G]       | NA                                         |
| Ca_Desig_Chr_scaffold18455_600 | Ca_desig_scaffold  | 600                            | [G/T]       | NA                                         |
| Ca_Desig_Chr_scaffold18455_601 | Ca_desig_scaffold  | 601                            | [A/G]       | NA                                         |
| Ca_Desig_Chr_scaffold18455_603 | Ca_desig_scaffold  | 603                            | [A/G]       | NA                                         |
| Ca_Desig_Chr_scaffold18455_605 | Ca_desig_scaffold  | 605                            | [A/G]       | NA                                         |
| Ca_Desig_Chr_scaffold18455_607 | Ca_desig_scaffold  | 607                            | [T/C]       | NA                                         |
| Ca_Desig_Chr_scaffold18455_613 | Ca_desig_scaffold  | 613                            | [T/C]       | NA                                         |
| Ca_Desig_Chr_scaffold18455_617 | Ca_desig_scaffold  | 617                            | [A/G]       | NA                                         |
| Ca_Desig_Chr_scaffold18455_618 | Ca_desig_scaffold  | 618                            | [T/C]       | NA                                         |
| Ca_Desig_Chr_scaffold18455_621 | Ca_desig_scaffold  | 621                            | [A/G]       | NA                                         |
| Ca_Desig_Chr_scaffold18455_624 | Ca_desig_scaffold  | 624                            | [T/C]       | NA                                         |
| Ca_Desig_Chr_scaffold18455_627 | Ca_desig_scaffold  | 627                            | [A/G]       | NA                                         |
| Ca_Desig_Chr_scaffold18455_630 | Ca_desig_scaffold  | 630                            | [A/G]       | NA                                         |
| Ca_Desig_Chr_scaffold18455_632 | Ca_desig_scaffold  | 632                            | [T/C]       | NA                                         |
| Ca_Desig_Chr_scaffold18455_634 | Ca_desig_scaffold  | 634                            | [A/G]       | NA                                         |
| Ca_Desig_Chr_scaffold18455_637 | Ca_desig_scaffold  | 637                            | [T/C]       | NA                                         |
| Ca_Desig_Chr_scaffold18455_638 | Ca_desig_scaffold  | 638                            | [A/G]       | NA                                         |
| Ca_Desig_Chr_scaffold18455_639 | Ca_desig_scaffold  | 639                            | [T/C]       | NA                                         |
| Ca_Desig_Chr_scaffold18455_640 | Ca_desig_scaffold  | 640                            | [T/C]       | NA                                         |
| Ca_Desig_Chr_scaffold18455_641 | Ca_desig_scaffold  | 641                            | [A/C]       | NA                                         |
| Ca_Desig_Chr_scaffold18455_645 | Ca_desig_scaffold  | 645                            | [T/C]       | NA                                         |
| Ca_Desig_Chr_scaffold18455_646 | Ca_desig_scaffold  | 646                            | [T/C]       | NA                                         |
| Ca_Desig_Chr_scaffold18455_647 | Ca_desig_scaffold  | 647                            | [T/C]       | NA                                         |
| Ca_Desig_Chr_scaffold18455_649 | Ca_desig_scaffold  | 649                            | [T/C]       | NA                                         |
| Ca_Desig_Chr_scaffold18455_652 | Ca_desig_scaffold  | 652                            | [A/G]       | NA                                         |
| Ca_Desig_Chr_scaffold18455_653 | Ca_desig_scaffold  | 653                            | [A/G]       | NA                                         |
| Ca_Desig_Chr_scaffold18455_654 | Ca_desig_scaffold  | 654                            | [A/G]       | NA                                         |

| <b>SNP IDs</b>                  | <b>Chromosomes</b> | <b>Physical positions (bp)</b> | <b>SNPs</b> | <b>NCBI SNPdb accession IDs (NCBI_ss#)</b> |
|---------------------------------|--------------------|--------------------------------|-------------|--------------------------------------------|
| Ca_Desig_Chr_scaffold18455_656  | Ca_desig_scaffold  | 656                            | [G/A]       | NA                                         |
| Ca_Desig_Chr_scaffold18455_657  | Ca_desig_scaffold  | 657                            | [A/G]       | NA                                         |
| Ca_Desig_Chr_scaffold18455_658  | Ca_desig_scaffold  | 658                            | [T/C]       | NA                                         |
| Ca_Desig_Chr_scaffold18455_1525 | Ca_desig_scaffold  | 1525                           | [T/G]       | NA                                         |
| Ca_Desig_Chr_scaffold18455_1541 | Ca_desig_scaffold  | 1541                           | [T/C]       | NA                                         |
| Ca_Desig_Chr_scaffold18455_1593 | Ca_desig_scaffold  | 1593                           | [T/C]       | NA                                         |
| Ca_Desig_Chr_scaffold18455_1594 | Ca_desig_scaffold  | 1594                           | [G/A]       | NA                                         |
| Ca_Desig_Chr_scaffold18455_1595 | Ca_desig_scaffold  | 1595                           | [A/G]       | NA                                         |
| Ca_Desig_Chr_scaffold18455_1598 | Ca_desig_scaffold  | 1598                           | [A/G]       | NA                                         |
| Ca_Desig_Chr_scaffold18455_1599 | Ca_desig_scaffold  | 1599                           | [A/G]       | NA                                         |
| Ca_Desig_Chr_scaffold18455_1600 | Ca_desig_scaffold  | 1600                           | [T/C]       | NA                                         |
| Ca_Desig_Chr_scaffold18455_1601 | Ca_desig_scaffold  | 1601                           | [T/C]       | NA                                         |
| Ca_Desig_Chr_scaffold18455_1602 | Ca_desig_scaffold  | 1602                           | [T/C]       | NA                                         |
| Ca_Desig_Chr_scaffold18455_1603 | Ca_desig_scaffold  | 1603                           | [A/G]       | NA                                         |
| Ca_Desig_Chr_scaffold18455_1604 | Ca_desig_scaffold  | 1604                           | [T/C]       | NA                                         |
| Ca_Desig_Chr_scaffold18455_1605 | Ca_desig_scaffold  | 1605                           | [C/T]       | NA                                         |
| Ca_Desig_Chr_scaffold18455_1606 | Ca_desig_scaffold  | 1606                           | [A/G]       | NA                                         |
| Ca_Desig_Chr_scaffold18455_1607 | Ca_desig_scaffold  | 1607                           | [T/C]       | NA                                         |
| Ca_Desig_Chr_scaffold18455_1608 | Ca_desig_scaffold  | 1608                           | [A/G]       | NA                                         |
| Ca_Desig_Chr_scaffold18455_1610 | Ca_desig_scaffold  | 1610                           | [T/C]       | NA                                         |
| Ca_Desig_Chr_scaffold18455_1611 | Ca_desig_scaffold  | 1611                           | [C/T]       | NA                                         |
| Ca_Desig_Chr_scaffold18455_1612 | Ca_desig_scaffold  | 1612                           | [G/A]       | NA                                         |
| Ca_Desig_Chr_scaffold18455_1613 | Ca_desig_scaffold  | 1613                           | [A/G]       | NA                                         |
| Ca_Desig_Chr_scaffold18455_1614 | Ca_desig_scaffold  | 1614                           | [A/G]       | NA                                         |
| Ca_Desig_Chr_scaffold18455_1615 | Ca_desig_scaffold  | 1615                           | [A/G]       | NA                                         |
| Ca_Desig_Chr_scaffold18455_1617 | Ca_desig_scaffold  | 1617                           | [A/G]       | NA                                         |
| Ca_Desig_Chr_scaffold18455_1618 | Ca_desig_scaffold  | 1618                           | [G/A]       | NA                                         |
| Ca_Desig_Chr_scaffold18455_1619 | Ca_desig_scaffold  | 1619                           | [A/G]       | NA                                         |
| Ca_Desig_Chr_scaffold18455_1620 | Ca_desig_scaffold  | 1620                           | [A/G]       | NA                                         |
| Ca_Desig_Chr_scaffold18455_1621 | Ca_desig_scaffold  | 1621                           | [A/G]       | NA                                         |
| Ca_Desig_Chr_scaffold18455_1622 | Ca_desig_scaffold  | 1622                           | [C/A]       | NA                                         |
| Ca_Desig_Chr_scaffold18455_1623 | Ca_desig_scaffold  | 1623                           | [G/A]       | NA                                         |
| Ca_Desig_Chr_scaffold18455_1624 | Ca_desig_scaffold  | 1624                           | [A/G]       | NA                                         |
| Ca_Desig_Chr_scaffold18455_1625 | Ca_desig_scaffold  | 1625                           | [A/G]       | NA                                         |

| <b>SNP IDs</b>                  | <b>Chromosomes</b> | <b>Physical positions (bp)</b> | <b>SNPs</b> | <b>NCBI SNPdb accession IDs (NCBI_ss#)</b> |
|---------------------------------|--------------------|--------------------------------|-------------|--------------------------------------------|
| Ca_Desig_Chr_scaffold18455_1626 | Ca_desig_scaffold  | 1626                           | [G/A]       | NA                                         |
| Ca_Desig_Chr_scaffold18455_1628 | Ca_desig_scaffold  | 1628                           | [T/C]       | NA                                         |
| Ca_Desig_Chr_scaffold18455_1629 | Ca_desig_scaffold  | 1629                           | [T/C]       | NA                                         |
| Ca_Desig_Chr_scaffold18455_1630 | Ca_desig_scaffold  | 1630                           | [C/T]       | NA                                         |
| Ca_Desig_Chr_scaffold18455_1632 | Ca_desig_scaffold  | 1632                           | [T/G]       | NA                                         |
| Ca_Desig_Chr_scaffold18455_1634 | Ca_desig_scaffold  | 1634                           | [T/C]       | NA                                         |
| Ca_Desig_Chr_scaffold18455_1635 | Ca_desig_scaffold  | 1635                           | [T/C]       | NA                                         |
| Ca_Desig_Chr_scaffold18455_1636 | Ca_desig_scaffold  | 1636                           | [T/C]       | NA                                         |
| Ca_Desig_Chr_scaffold18455_1638 | Ca_desig_scaffold  | 1638                           | [T/C]       | NA                                         |
| Ca_Desig_Chr_scaffold18455_1639 | Ca_desig_scaffold  | 1639                           | [T/C]       | NA                                         |
| Ca_Desig_Chr_scaffold18455_1640 | Ca_desig_scaffold  | 1640                           | [T/C]       | NA                                         |
| Ca_Desig_Chr_scaffold18455_1641 | Ca_desig_scaffold  | 1641                           | [T/C]       | NA                                         |
| Ca_Desig_Chr_scaffold18455_1642 | Ca_desig_scaffold  | 1642                           | [T/C]       | NA                                         |
| Ca_Desig_Chr_scaffold18455_1643 | Ca_desig_scaffold  | 1643                           | [C/T]       | NA                                         |
| Ca_Desig_Chr_scaffold18455_1644 | Ca_desig_scaffold  | 1644                           | [T/C]       | NA                                         |
| Ca_Desig_Chr_scaffold18455_1645 | Ca_desig_scaffold  | 1645                           | [T/C]       | NA                                         |
| Ca_Desig_Chr_scaffold18455_1646 | Ca_desig_scaffold  | 1646                           | [C/T]       | NA                                         |
| Ca_Desig_Chr_scaffold18455_1647 | Ca_desig_scaffold  | 1647                           | [A/G]       | NA                                         |
| Ca_Desig_Chr_scaffold18455_1648 | Ca_desig_scaffold  | 1648                           | [A/G]       | NA                                         |
| Ca_Desig_Chr_scaffold18455_1649 | Ca_desig_scaffold  | 1649                           | [A/G]       | NA                                         |
| Ca_Desig_Chr_scaffold18455_1650 | Ca_desig_scaffold  | 1650                           | [C/T]       | NA                                         |
| Ca_Desig_Chr_scaffold18455_1651 | Ca_desig_scaffold  | 1651                           | [C/T]       | NA                                         |
| Ca_Desig_Chr_scaffold18455_1652 | Ca_desig_scaffold  | 1652                           | [C/T]       | NA                                         |
| Ca_Desig_Chr_scaffold18481_1576 | Ca_desig_scaffold  | 1576                           | [A/G]       | NA                                         |
| Ca_Desig_Chr_scaffold18481_1578 | Ca_desig_scaffold  | 1578                           | [G/A]       | NA                                         |
| Ca_Desig_Chr_scaffold18481_1579 | Ca_desig_scaffold  | 1579                           | [A/G]       | NA                                         |
| Ca_Desig_Chr_scaffold18481_1580 | Ca_desig_scaffold  | 1580                           | [A/G]       | NA                                         |
| Ca_Desig_Chr_scaffold18481_1581 | Ca_desig_scaffold  | 1581                           | [A/G]       | NA                                         |
| Ca_Desig_Chr_scaffold18481_1582 | Ca_desig_scaffold  | 1582                           | [T/C]       | NA                                         |
| Ca_Desig_Chr_scaffold18481_1583 | Ca_desig_scaffold  | 1583                           | [C/T]       | NA                                         |
| Ca_Desig_Chr_scaffold18481_1584 | Ca_desig_scaffold  | 1584                           | [A/G]       | NA                                         |
| Ca_Desig_Chr_scaffold18481_1585 | Ca_desig_scaffold  | 1585                           | [T/C]       | NA                                         |
| Ca_Desig_Chr_scaffold18481_1586 | Ca_desig_scaffold  | 1586                           | [A/G]       | NA                                         |
| Ca_Desig_Chr_scaffold18481_1588 | Ca_desig_scaffold  | 1588                           | [A/G]       | NA                                         |

| <b>SNP IDs</b>                  | <b>Chromosomes</b> | <b>Physical positions (bp)</b> | <b>SNPs</b> | <b>NCBI SNPdb accession IDs (NCBI_ss#)</b> |
|---------------------------------|--------------------|--------------------------------|-------------|--------------------------------------------|
| Ca_Desig_Chr_scaffold18481_1590 | Ca_desig_scaffold  | 1590                           | [G/A]       | NA                                         |
| Ca_Desig_Chr_scaffold18481_1591 | Ca_desig_scaffold  | 1591                           | [C/T]       | NA                                         |
| Ca_Desig_Chr_scaffold18481_1592 | Ca_desig_scaffold  | 1592                           | [C/T]       | NA                                         |
| Ca_Desig_Chr_scaffold18481_1593 | Ca_desig_scaffold  | 1593                           | [C/T]       | NA                                         |
| Ca_Desig_Chr_scaffold18481_1594 | Ca_desig_scaffold  | 1594                           | [A/G]       | NA                                         |
| Ca_Desig_Chr_scaffold18481_1596 | Ca_desig_scaffold  | 1596                           | [A/G]       | NA                                         |
| Ca_Desig_Chr_scaffold18481_1597 | Ca_desig_scaffold  | 1597                           | [A/G]       | NA                                         |
| Ca_Desig_Chr_scaffold18481_1598 | Ca_desig_scaffold  | 1598                           | [G/A]       | NA                                         |
| Ca_Desig_Chr_scaffold18481_1599 | Ca_desig_scaffold  | 1599                           | [C/T]       | NA                                         |
| Ca_Desig_Chr_scaffold18481_1600 | Ca_desig_scaffold  | 1600                           | [T/C]       | NA                                         |
| Ca_Desig_Chr_scaffold18481_1601 | Ca_desig_scaffold  | 1601                           | [C/T]       | NA                                         |
| Ca_Desig_Chr_scaffold18481_1602 | Ca_desig_scaffold  | 1602                           | [A/G]       | NA                                         |
| Ca_Desig_Chr_scaffold18481_1603 | Ca_desig_scaffold  | 1603                           | [T/C]       | NA                                         |
| Ca_Desig_Chr_scaffold18481_1604 | Ca_desig_scaffold  | 1604                           | [A/G]       | NA                                         |
| Ca_Desig_Chr_scaffold18481_1605 | Ca_desig_scaffold  | 1605                           | [G/A]       | NA                                         |
| Ca_Desig_Chr_scaffold18481_1606 | Ca_desig_scaffold  | 1606                           | [T/C]       | NA                                         |
| Ca_Desig_Chr_scaffold18481_1607 | Ca_desig_scaffold  | 1607                           | [C/T]       | NA                                         |
| Ca_Desig_Chr_scaffold18481_1608 | Ca_desig_scaffold  | 1608                           | [G/A]       | NA                                         |
| Ca_Desig_Chr_scaffold18481_1609 | Ca_desig_scaffold  | 1609                           | [C/T]       | NA                                         |
| Ca_Desig_Chr_scaffold18481_1610 | Ca_desig_scaffold  | 1610                           | [A/G]       | NA                                         |
| Ca_Desig_Chr_scaffold18481_1611 | Ca_desig_scaffold  | 1611                           | [C/T]       | NA                                         |
| Ca_Desig_Chr_scaffold18481_1612 | Ca_desig_scaffold  | 1612                           | [A/G]       | NA                                         |
| Ca_Desig_Chr_scaffold18481_1613 | Ca_desig_scaffold  | 1613                           | [C/T]       | NA                                         |
| Ca_Desig_Chr_scaffold18481_1614 | Ca_desig_scaffold  | 1614                           | [C/A]       | NA                                         |
| Ca_Desig_Chr_scaffold18481_1615 | Ca_desig_scaffold  | 1615                           | [A/G]       | NA                                         |
| Ca_Desig_Chr_scaffold18481_1616 | Ca_desig_scaffold  | 1616                           | [A/G]       | NA                                         |
| Ca_Desig_Chr_scaffold18481_1617 | Ca_desig_scaffold  | 1617                           | [C/T]       | NA                                         |
| Ca_Desig_Chr_scaffold18481_1618 | Ca_desig_scaffold  | 1618                           | [C/T]       | NA                                         |
| Ca_Desig_Chr_scaffold18481_1619 | Ca_desig_scaffold  | 1619                           | [A/G]       | NA                                         |
| Ca_Desig_Chr_scaffold18481_1620 | Ca_desig_scaffold  | 1620                           | [A/G]       | NA                                         |
| Ca_Desig_Chr_scaffold18481_1621 | Ca_desig_scaffold  | 1621                           | [A/G]       | NA                                         |
| Ca_Desig_Chr_scaffold18481_1622 | Ca_desig_scaffold  | 1622                           | [G/A]       | NA                                         |
| Ca_Desig_Chr_scaffold18481_1623 | Ca_desig_scaffold  | 1623                           | [A/G]       | NA                                         |
| Ca_Desig_Chr_scaffold18481_1625 | Ca_desig_scaffold  | 1625                           | [T/C]       | NA                                         |

| <b>SNP IDs</b>                | <b>Chromosomes</b> | <b>Physical positions (bp)</b> | <b>SNPs</b> | <b>NCBI SNPdb accession IDs (NCBI_ss#)</b> |
|-------------------------------|--------------------|--------------------------------|-------------|--------------------------------------------|
| Ca_Desi_Ch_scaffold18481_1626 | Ca_desi_scaffold   | 1626                           | [A/G]       | NA                                         |
| Ca_Desi_Ch_scaffold18481_1627 | Ca_desi_scaffold   | 1627                           | [A/G]       | NA                                         |
| Ca_Desi_Ch_scaffold18481_1628 | Ca_desi_scaffold   | 1628                           | [A/G]       | NA                                         |
| Ca_Desi_Ch_scaffold18481_1630 | Ca_desi_scaffold   | 1630                           | [T/C]       | NA                                         |
| Ca_Desi_Ch_scaffold18481_1631 | Ca_desi_scaffold   | 1631                           | [A/G]       | NA                                         |
| Ca_Desi_Ch_scaffold18481_1632 | Ca_desi_scaffold   | 1632                           | [A/G]       | NA                                         |
| Ca_Desi_Ch_scaffold18481_1659 | Ca_desi_scaffold   | 1659                           | [C/A]       | NA                                         |
| Ca_Desi_Ch_scaffold18551_156  | Ca_desi_scaffold   | 156                            | [A/G]       | NA                                         |
| Ca_Desi_Ch_scaffold18788_547  | Ca_desi_scaffold   | 547                            | [G/T]       | NA                                         |
| Ca_Desi_Ch_scaffold18788_549  | Ca_desi_scaffold   | 549                            | [A/G]       | NA                                         |
| Ca_Desi_Ch_scaffold18788_553  | Ca_desi_scaffold   | 553                            | [A/G]       | NA                                         |
| Ca_Desi_Ch_scaffold18788_556  | Ca_desi_scaffold   | 556                            | [T/C]       | NA                                         |
| Ca_Desi_Ch_scaffold18788_558  | Ca_desi_scaffold   | 558                            | [A/G]       | NA                                         |
| Ca_Desi_Ch_scaffold18788_559  | Ca_desi_scaffold   | 559                            | [A/G]       | NA                                         |
| Ca_Desi_Ch_scaffold18788_560  | Ca_desi_scaffold   | 560                            | [A/G]       | NA                                         |
| Ca_Desi_Ch_scaffold18788_561  | Ca_desi_scaffold   | 561                            | [T/C]       | NA                                         |
| Ca_Desi_Ch_scaffold18788_563  | Ca_desi_scaffold   | 563                            | [G/A]       | NA                                         |
| Ca_Desi_Ch_scaffold18788_565  | Ca_desi_scaffold   | 565                            | [T/C]       | NA                                         |
| Ca_Desi_Ch_scaffold18788_566  | Ca_desi_scaffold   | 566                            | [T/C]       | NA                                         |
| Ca_Desi_Ch_scaffold18788_570  | Ca_desi_scaffold   | 570                            | [T/C]       | NA                                         |
| Ca_Desi_Ch_scaffold18788_571  | Ca_desi_scaffold   | 571                            | [T/C]       | NA                                         |
| Ca_Desi_Ch_scaffold18788_572  | Ca_desi_scaffold   | 572                            | [C/T]       | NA                                         |
| Ca_Desi_Ch_scaffold18788_573  | Ca_desi_scaffold   | 573                            | [G/A]       | NA                                         |
| Ca_Desi_Ch_scaffold18788_575  | Ca_desi_scaffold   | 575                            | [T/C]       | NA                                         |
| Ca_Desi_Ch_scaffold18788_578  | Ca_desi_scaffold   | 578                            | [A/G]       | NA                                         |
| Ca_Desi_Ch_scaffold18788_581  | Ca_desi_scaffold   | 581                            | [T/C]       | NA                                         |
| Ca_Desi_Ch_scaffold18788_584  | Ca_desi_scaffold   | 584                            | [T/C]       | NA                                         |
| Ca_Desi_Ch_scaffold18788_586  | Ca_desi_scaffold   | 586                            | [G/A]       | NA                                         |
| Ca_Desi_Ch_scaffold18788_589  | Ca_desi_scaffold   | 589                            | [A/G]       | NA                                         |
| Ca_Desi_Ch_scaffold18788_591  | Ca_desi_scaffold   | 591                            | [T/G]       | NA                                         |
| Ca_Desi_Ch_scaffold18788_592  | Ca_desi_scaffold   | 592                            | [T/C]       | NA                                         |
| Ca_Desi_Ch_scaffold18788_593  | Ca_desi_scaffold   | 593                            | [T/C]       | NA                                         |
| Ca_Desi_Ch_scaffold18788_594  | Ca_desi_scaffold   | 594                            | [G/T]       | NA                                         |
| Ca_Desi_Ch_scaffold18788_595  | Ca_desi_scaffold   | 595                            | [A/G]       | NA                                         |

| <b>SNP IDs</b>                 | <b>Chromosomes</b> | <b>Physical positions (bp)</b> | <b>SNPs</b> | <b>NCBI SNPdb accession IDs (NCBI_ss#)</b> |
|--------------------------------|--------------------|--------------------------------|-------------|--------------------------------------------|
| Ca_Desig_Chr_scaffold18788_596 | Ca_desig_scaffold  | 596                            | [A/G]       | NA                                         |
| Ca_Desig_Chr_scaffold18788_599 | Ca_desig_scaffold  | 599                            | [T/C]       | NA                                         |
| Ca_Desig_Chr_scaffold18788_600 | Ca_desig_scaffold  | 600                            | [T/C]       | NA                                         |
| Ca_Desig_Chr_scaffold18788_602 | Ca_desig_scaffold  | 602                            | [A/G]       | NA                                         |
| Ca_Desig_Chr_scaffold18788_603 | Ca_desig_scaffold  | 603                            | [A/G]       | NA                                         |
| Ca_Desig_Chr_scaffold18788_605 | Ca_desig_scaffold  | 605                            | [A/G]       | NA                                         |
| Ca_Desig_Chr_scaffold18788_606 | Ca_desig_scaffold  | 606                            | [C/G]       | NA                                         |
| Ca_Desig_Chr_scaffold18788_607 | Ca_desig_scaffold  | 607                            | [A/G]       | NA                                         |
| Ca_Desig_Chr_scaffold18788_608 | Ca_desig_scaffold  | 608                            | [G/A]       | NA                                         |
| Ca_Desig_Chr_scaffold18788_861 | Ca_desig_scaffold  | 861                            | [T/C]       | NA                                         |
| Ca_Desig_Chr_scaffold18788_862 | Ca_desig_scaffold  | 862                            | [C/T]       | NA                                         |
| Ca_Desig_Chr_scaffold18788_863 | Ca_desig_scaffold  | 863                            | [T/C]       | NA                                         |
| Ca_Desig_Chr_scaffold18788_864 | Ca_desig_scaffold  | 864                            | [C/T]       | NA                                         |
| Ca_Desig_Chr_scaffold18788_865 | Ca_desig_scaffold  | 865                            | [T/C]       | NA                                         |
| Ca_Desig_Chr_scaffold18788_867 | Ca_desig_scaffold  | 867                            | [T/C]       | NA                                         |
| Ca_Desig_Chr_scaffold18788_868 | Ca_desig_scaffold  | 868                            | [T/C]       | NA                                         |
| Ca_Desig_Chr_scaffold18788_869 | Ca_desig_scaffold  | 869                            | [T/C]       | NA                                         |
| Ca_Desig_Chr_scaffold18788_871 | Ca_desig_scaffold  | 871                            | [C/T]       | NA                                         |
| Ca_Desig_Chr_scaffold18788_873 | Ca_desig_scaffold  | 873                            | [G/A]       | NA                                         |
| Ca_Desig_Chr_scaffold18788_874 | Ca_desig_scaffold  | 874                            | [C/T]       | NA                                         |
| Ca_Desig_Chr_scaffold18788_875 | Ca_desig_scaffold  | 875                            | [T/C]       | NA                                         |
| Ca_Desig_Chr_scaffold18788_876 | Ca_desig_scaffold  | 876                            | [T/C]       | NA                                         |
| Ca_Desig_Chr_scaffold18788_877 | Ca_desig_scaffold  | 877                            | [A/G]       | NA                                         |
| Ca_Desig_Chr_scaffold18788_878 | Ca_desig_scaffold  | 878                            | [G/A]       | NA                                         |
| Ca_Desig_Chr_scaffold18788_879 | Ca_desig_scaffold  | 879                            | [C/T]       | NA                                         |
| Ca_Desig_Chr_scaffold18788_880 | Ca_desig_scaffold  | 880                            | [C/T]       | NA                                         |
| Ca_Desig_Chr_scaffold18788_881 | Ca_desig_scaffold  | 881                            | [T/C]       | NA                                         |
| Ca_Desig_Chr_scaffold18788_884 | Ca_desig_scaffold  | 884                            | [C/T]       | NA                                         |
| Ca_Desig_Chr_scaffold18788_885 | Ca_desig_scaffold  | 885                            | [G/A]       | NA                                         |
| Ca_Desig_Chr_scaffold18788_886 | Ca_desig_scaffold  | 886                            | [C/T]       | NA                                         |
| Ca_Desig_Chr_scaffold18788_887 | Ca_desig_scaffold  | 887                            | [T/C]       | NA                                         |
| Ca_Desig_Chr_scaffold18788_889 | Ca_desig_scaffold  | 889                            | [C/T]       | NA                                         |
| Ca_Desig_Chr_scaffold18788_891 | Ca_desig_scaffold  | 891                            | [T/C]       | NA                                         |
| Ca_Desig_Chr_scaffold18788_895 | Ca_desig_scaffold  | 895                            | [C/T]       | NA                                         |

| <b>SNP IDs</b>                | <b>Chromosomes</b> | <b>Physical positions (bp)</b> | <b>SNPs</b> | <b>NCBI SNPdb accession IDs (NCBI_ss#)</b> |
|-------------------------------|--------------------|--------------------------------|-------------|--------------------------------------------|
| Ca_Desi_Ch_scaffold18788_896  | Ca_desi_scaffold   | 896                            | [T/C]       | NA                                         |
| Ca_Desi_Ch_scaffold18788_897  | Ca_desi_scaffold   | 897                            | [T/C]       | NA                                         |
| Ca_Desi_Ch_scaffold18788_899  | Ca_desi_scaffold   | 899                            | [T/C]       | NA                                         |
| Ca_Desi_Ch_scaffold18788_900  | Ca_desi_scaffold   | 900                            | [A/G]       | NA                                         |
| Ca_Desi_Ch_scaffold18788_901  | Ca_desi_scaffold   | 901                            | [T/C]       | NA                                         |
| Ca_Desi_Ch_scaffold18788_903  | Ca_desi_scaffold   | 903                            | [C/T]       | NA                                         |
| Ca_Desi_Ch_scaffold18788_904  | Ca_desi_scaffold   | 904                            | [C/T]       | NA                                         |
| Ca_Desi_Ch_scaffold18788_905  | Ca_desi_scaffold   | 905                            | [C/T]       | NA                                         |
| Ca_Desi_Ch_scaffold18788_907  | Ca_desi_scaffold   | 907                            | [T/C]       | NA                                         |
| Ca_Desi_Ch_scaffold18788_908  | Ca_desi_scaffold   | 908                            | [G/A]       | NA                                         |
| Ca_Desi_Ch_scaffold18788_909  | Ca_desi_scaffold   | 909                            | [G/A]       | NA                                         |
| Ca_Desi_Ch_scaffold18788_910  | Ca_desi_scaffold   | 910                            | [T/C]       | NA                                         |
| Ca_Desi_Ch_scaffold18788_911  | Ca_desi_scaffold   | 911                            | [G/A]       | NA                                         |
| Ca_Desi_Ch_scaffold18788_912  | Ca_desi_scaffold   | 912                            | [T/C]       | NA                                         |
| Ca_Desi_Ch_scaffold18788_913  | Ca_desi_scaffold   | 913                            | [A/G]       | NA                                         |
| Ca_Desi_Ch_scaffold18788_915  | Ca_desi_scaffold   | 915                            | [G/A]       | NA                                         |
| Ca_Desi_Ch_scaffold18788_916  | Ca_desi_scaffold   | 916                            | [A/G]       | NA                                         |
| Ca_Desi_Ch_scaffold18788_917  | Ca_desi_scaffold   | 917                            | [A/G]       | NA                                         |
| Ca_Desi_Ch_scaffold18788_918  | Ca_desi_scaffold   | 918                            | [A/G]       | NA                                         |
| Ca_Desi_Ch_scaffold18844_1197 | Ca_desi_scaffold   | 1197                           | [A/G]       | NA                                         |
| Ca_Desi_Ch_scaffold18844_1198 | Ca_desi_scaffold   | 1198                           | [A/G]       | NA                                         |
| Ca_Desi_Ch_scaffold18844_1236 | Ca_desi_scaffold   | 1236                           | [T/C]       | NA                                         |
| Ca_Desi_Ch_scaffold18919_67   | Ca_desi_scaffold   | 67                             | [T/C]       | NA                                         |
| Ca_Desi_Ch_scaffold18919_76   | Ca_desi_scaffold   | 76                             | [G/A]       | NA                                         |
| Ca_Desi_Ch_scaffold19013_216  | Ca_desi_scaffold   | 216                            | [T/C]       | NA                                         |
| Ca_Desi_Ch_scaffold19013_221  | Ca_desi_scaffold   | 221                            | [T/A]       | NA                                         |
| Ca_Desi_Ch_scaffold19043_519  | Ca_desi_scaffold   | 519                            | [T/C]       | NA                                         |
| Ca_Desi_Ch_scaffold19043_539  | Ca_desi_scaffold   | 539                            | [A/G]       | NA                                         |
| Ca_Desi_Ch_scaffold19043_541  | Ca_desi_scaffold   | 541                            | [C/A]       | NA                                         |
| Ca_Desi_Ch_scaffold19068_288  | Ca_desi_scaffold   | 288                            | [T/G]       | NA                                         |
| Ca_Desi_Ch_scaffold19161_66   | Ca_desi_scaffold   | 66                             | [C/T]       | NA                                         |
| Ca_Desi_Ch_scaffold19263_717  | Ca_desi_scaffold   | 717                            | [G/T]       | NA                                         |
| Ca_Desi_Ch_scaffold19263_939  | Ca_desi_scaffold   | 939                            | [A/G]       | NA                                         |
| Ca_Desi_Ch_scaffold19446_1515 | Ca_desi_scaffold   | 1515                           | [T/A]       | NA                                         |

| <b>SNP IDs</b>                  | <b>Chromosomes</b> | <b>Physical positions (bp)</b> | <b>SNPs</b> | <b>NCBI SNPdb accession IDs (NCBI_ss#)</b> |
|---------------------------------|--------------------|--------------------------------|-------------|--------------------------------------------|
| Ca_Desig_Chr_scaffold19709_192  | Ca_desig_scaffold  | 192                            | [T/A]       | NA                                         |
| Ca_Desig_Chr_scaffold19709_197  | Ca_desig_scaffold  | 197                            | [A/G]       | NA                                         |
| Ca_Desig_Chr_scaffold19709_443  | Ca_desig_scaffold  | 443                            | [A/G]       | NA                                         |
| Ca_Desig_Chr_scaffold19709_462  | Ca_desig_scaffold  | 462                            | [T/C]       | NA                                         |
| Ca_Desig_Chr_scaffold19709_479  | Ca_desig_scaffold  | 479                            | [T/A]       | NA                                         |
| Ca_Desig_Chr_scaffold19709_495  | Ca_desig_scaffold  | 495                            | [T/C]       | NA                                         |
| Ca_Desig_Chr_scaffold19709_520  | Ca_desig_scaffold  | 520                            | [T/A]       | NA                                         |
| Ca_Desig_Chr_scaffold19709_526  | Ca_desig_scaffold  | 526                            | [T/C]       | NA                                         |
| Ca_Desig_Chr_scaffold19709_572  | Ca_desig_scaffold  | 572                            | [C/A]       | NA                                         |
| Ca_Desig_Chr_scaffold19709_1531 | Ca_desig_scaffold  | 1531                           | [G/A]       | NA                                         |
| Ca_Desig_Chr_scaffold19709_1540 | Ca_desig_scaffold  | 1540                           | [A/G]       | NA                                         |
| Ca_Desig_Chr_scaffold19715_1133 | Ca_desig_scaffold  | 1133                           | [G/A]       | NA                                         |
| Ca_Desig_Chr_scaffold19776_47   | Ca_desig_scaffold  | 47                             | [G/A]       | NA                                         |
| Ca_Desig_Chr_scaffold19810_1444 | Ca_desig_scaffold  | 1444                           | [C/T]       | NA                                         |
| Ca_Desig_Chr_scaffold19810_1497 | Ca_desig_scaffold  | 1497                           | [A/C]       | NA                                         |
| Ca_Desig_Chr_scaffold19810_1533 | Ca_desig_scaffold  | 1533                           | [C/A]       | NA                                         |
| Ca_Desig_Chr_scaffold19950_1138 | Ca_desig_scaffold  | 1138                           | [G/A]       | NA                                         |
| Ca_Desig_Chr_scaffold20023_546  | Ca_desig_scaffold  | 546                            | [C/G]       | NA                                         |
| Ca_Desig_Chr_scaffold20089_560  | Ca_desig_scaffold  | 560                            | [A/C]       | NA                                         |
| Ca_Desig_Chr_scaffold20089_563  | Ca_desig_scaffold  | 563                            | [A/G]       | NA                                         |
| Ca_Desig_Chr_scaffold20089_625  | Ca_desig_scaffold  | 625                            | [C/T]       | NA                                         |
| Ca_Desig_Chr_scaffold20089_654  | Ca_desig_scaffold  | 654                            | [T/C]       | NA                                         |
| Ca_Desig_Chr_scaffold20089_658  | Ca_desig_scaffold  | 658                            | [A/G]       | NA                                         |
| Ca_Desig_Chr_scaffold20089_661  | Ca_desig_scaffold  | 661                            | [T/C]       | NA                                         |
| Ca_Desig_Chr_scaffold20089_688  | Ca_desig_scaffold  | 688                            | [A/T]       | NA                                         |
| Ca_Desig_Chr_scaffold20089_692  | Ca_desig_scaffold  | 692                            | [T/C]       | NA                                         |
| Ca_Desig_Chr_scaffold20089_696  | Ca_desig_scaffold  | 696                            | [A/C]       | NA                                         |
| Ca_Desig_Chr_scaffold20089_705  | Ca_desig_scaffold  | 705                            | [A/G]       | NA                                         |
| Ca_Desig_Chr_scaffold20260_1564 | Ca_desig_scaffold  | 1564                           | [T/G]       | NA                                         |
| Ca_Desig_Chr_scaffold20354_600  | Ca_desig_scaffold  | 600                            | [A/G]       | NA                                         |
| Ca_Desig_Chr_scaffold20354_603  | Ca_desig_scaffold  | 603                            | [A/G]       | NA                                         |
| Ca_Desig_Chr_scaffold20381_471  | Ca_desig_scaffold  | 471                            | [T/C]       | NA                                         |
| Ca_Desig_Chr_scaffold20381_482  | Ca_desig_scaffold  | 482                            | [T/A]       | NA                                         |
| Ca_Desig_Chr_scaffold20381_486  | Ca_desig_scaffold  | 486                            | [A/G]       | NA                                         |



| <b>SNP IDs</b>                | <b>Chromosomes</b> | <b>Physical positions (bp)</b> | <b>SNPs</b> | <b>NCBI SNPdb accession IDs (NCBI_ss#)</b> |
|-------------------------------|--------------------|--------------------------------|-------------|--------------------------------------------|
| Ca_Desi_Ch_scaffold20432_1425 | Ca_desi_scaffold   | 1425                           | [C/T]       | NA                                         |
| Ca_Desi_Ch_scaffold20432_1426 | Ca_desi_scaffold   | 1426                           | [G/A]       | NA                                         |
| Ca_Desi_Ch_scaffold20599_825  | Ca_desi_scaffold   | 825                            | [A/T]       | NA                                         |
| Ca_Desi_Ch_scaffold20611_119  | Ca_desi_scaffold   | 119                            | [C/T]       | NA                                         |
| Ca_Desi_Ch_scaffold20748_381  | Ca_desi_scaffold   | 381                            | [C/A]       | NA                                         |
| Ca_Desi_Ch_scaffold20781_439  | Ca_desi_scaffold   | 439                            | [A/G]       | NA                                         |
| Ca_Desi_Ch_scaffold20781_441  | Ca_desi_scaffold   | 441                            | [A/G]       | NA                                         |
| Ca_Desi_Ch_scaffold20781_443  | Ca_desi_scaffold   | 443                            | [A/G]       | NA                                         |
| Ca_Desi_Ch_scaffold20781_446  | Ca_desi_scaffold   | 446                            | [A/G]       | NA                                         |
| Ca_Desi_Ch_scaffold20781_448  | Ca_desi_scaffold   | 448                            | [T/C]       | NA                                         |
| Ca_Desi_Ch_scaffold20781_450  | Ca_desi_scaffold   | 450                            | [T/C]       | NA                                         |
| Ca_Desi_Ch_scaffold20781_452  | Ca_desi_scaffold   | 452                            | [A/G]       | NA                                         |
| Ca_Desi_Ch_scaffold20781_454  | Ca_desi_scaffold   | 454                            | [T/C]       | NA                                         |
| Ca_Desi_Ch_scaffold20781_457  | Ca_desi_scaffold   | 457                            | [T/C]       | NA                                         |
| Ca_Desi_Ch_scaffold20781_466  | Ca_desi_scaffold   | 466                            | [A/G]       | NA                                         |
| Ca_Desi_Ch_scaffold20781_477  | Ca_desi_scaffold   | 477                            | [T/C]       | NA                                         |
| Ca_Desi_Ch_scaffold20781_481  | Ca_desi_scaffold   | 481                            | [A/G]       | NA                                         |
| Ca_Desi_Ch_scaffold20781_484  | Ca_desi_scaffold   | 484                            | [A/G]       | NA                                         |
| Ca_Desi_Ch_scaffold20781_487  | Ca_desi_scaffold   | 487                            | [A/G]       | NA                                         |
| Ca_Desi_Ch_scaffold20781_488  | Ca_desi_scaffold   | 488                            | [A/G]       | NA                                         |
| Ca_Desi_Ch_scaffold20781_491  | Ca_desi_scaffold   | 491                            | [T/C]       | NA                                         |
| Ca_Desi_Ch_scaffold20781_493  | Ca_desi_scaffold   | 493                            | [T/C]       | NA                                         |
| Ca_Desi_Ch_scaffold20781_508  | Ca_desi_scaffold   | 508                            | [A/G]       | NA                                         |
| Ca_Desi_Ch_scaffold20781_509  | Ca_desi_scaffold   | 509                            | [T/C]       | NA                                         |
| Ca_Desi_Ch_scaffold20781_512  | Ca_desi_scaffold   | 512                            | [A/G]       | NA                                         |
| Ca_Desi_Ch_scaffold20781_515  | Ca_desi_scaffold   | 515                            | [A/G]       | NA                                         |
| Ca_Desi_Ch_scaffold20781_523  | Ca_desi_scaffold   | 523                            | [A/T]       | NA                                         |
| Ca_Desi_Ch_scaffold20781_526  | Ca_desi_scaffold   | 526                            | [A/G]       | NA                                         |
| Ca_Desi_Ch_scaffold20781_530  | Ca_desi_scaffold   | 530                            | [A/G]       | NA                                         |
| Ca_Desi_Ch_scaffold20781_534  | Ca_desi_scaffold   | 534                            | [T/C]       | NA                                         |
| Ca_Desi_Ch_scaffold20781_535  | Ca_desi_scaffold   | 535                            | [T/C]       | NA                                         |
| Ca_Desi_Ch_scaffold20781_538  | Ca_desi_scaffold   | 538                            | [T/C]       | NA                                         |
| Ca_Desi_Ch_scaffold20781_1159 | Ca_desi_scaffold   | 1159                           | [T/C]       | NA                                         |
| Ca_Desi_Ch_scaffold20781_1171 | Ca_desi_scaffold   | 1171                           | [T/A]       | NA                                         |

| <b>SNP IDs</b>                        | <b>Chromosomes</b> | <b>Physical positions (bp)</b> | <b>SNPs</b> | <b>NCBI SNPdb accession IDs (NCBI_ss#)</b> |
|---------------------------------------|--------------------|--------------------------------|-------------|--------------------------------------------|
| Ca_Desi_Chromosome_scaffold20781_1173 | Ca_desi_scaffold   | 1173                           | [A/G]       | NA                                         |
| Ca_Desi_Chromosome_scaffold20781_1174 | Ca_desi_scaffold   | 1174                           | [T/C]       | NA                                         |
| Ca_Desi_Chromosome_scaffold20781_1184 | Ca_desi_scaffold   | 1184                           | [A/G]       | NA                                         |
| Ca_Desi_Chromosome_scaffold20781_1187 | Ca_desi_scaffold   | 1187                           | [T/C]       | NA                                         |
| Ca_Desi_Chromosome_scaffold20781_1193 | Ca_desi_scaffold   | 1193                           | [T/C]       | NA                                         |
| Ca_Desi_Chromosome_scaffold20781_1195 | Ca_desi_scaffold   | 1195                           | [T/C]       | NA                                         |
| Ca_Desi_Chromosome_scaffold20781_1206 | Ca_desi_scaffold   | 1206                           | [T/C]       | NA                                         |
| Ca_Desi_Chromosome_scaffold20781_1210 | Ca_desi_scaffold   | 1210                           | [T/C]       | NA                                         |
| Ca_Desi_Chromosome_scaffold20781_1218 | Ca_desi_scaffold   | 1218                           | [G/C]       | NA                                         |
| Ca_Desi_Chromosome_scaffold20806_80   | Ca_desi_scaffold   | 80                             | [C/T]       | NA                                         |
| Ca_Desi_Chromosome_scaffold20806_85   | Ca_desi_scaffold   | 85                             | [A/T]       | NA                                         |
| Ca_Desi_Chromosome_scaffold20806_111  | Ca_desi_scaffold   | 111                            | [A/G]       | NA                                         |
| Ca_Desi_Chromosome_scaffold20806_117  | Ca_desi_scaffold   | 117                            | [T/C]       | NA                                         |
| Ca_Desi_Chromosome_scaffold20806_121  | Ca_desi_scaffold   | 121                            | [A/G]       | NA                                         |
| Ca_Desi_Chromosome_scaffold21140_280  | Ca_desi_scaffold   | 280                            | [T/C]       | NA                                         |
| Ca_Desi_Chromosome_scaffold21140_285  | Ca_desi_scaffold   | 285                            | [A/G]       | NA                                         |
| Ca_Desi_Chromosome_scaffold21140_289  | Ca_desi_scaffold   | 289                            | [A/G]       | NA                                         |
| Ca_Desi_Chromosome_scaffold21140_292  | Ca_desi_scaffold   | 292                            | [T/G]       | NA                                         |
| Ca_Desi_Chromosome_scaffold21140_294  | Ca_desi_scaffold   | 294                            | [T/C]       | NA                                         |
| Ca_Desi_Chromosome_scaffold21140_295  | Ca_desi_scaffold   | 295                            | [T/C]       | NA                                         |
| Ca_Desi_Chromosome_scaffold21140_297  | Ca_desi_scaffold   | 297                            | [T/C]       | NA                                         |
| Ca_Desi_Chromosome_scaffold21140_298  | Ca_desi_scaffold   | 298                            | [T/C]       | NA                                         |
| Ca_Desi_Chromosome_scaffold21140_300  | Ca_desi_scaffold   | 300                            | [T/C]       | NA                                         |
| Ca_Desi_Chromosome_scaffold21140_302  | Ca_desi_scaffold   | 302                            | [T/C]       | NA                                         |
| Ca_Desi_Chromosome_scaffold21140_304  | Ca_desi_scaffold   | 304                            | [A/G]       | NA                                         |
| Ca_Desi_Chromosome_scaffold21140_307  | Ca_desi_scaffold   | 307                            | [T/C]       | NA                                         |
| Ca_Desi_Chromosome_scaffold21140_310  | Ca_desi_scaffold   | 310                            | [A/G]       | NA                                         |
| Ca_Desi_Chromosome_scaffold21140_313  | Ca_desi_scaffold   | 313                            | [A/G]       | NA                                         |
| Ca_Desi_Chromosome_scaffold21140_316  | Ca_desi_scaffold   | 316                            | [A/G]       | NA                                         |
| Ca_Desi_Chromosome_scaffold21140_318  | Ca_desi_scaffold   | 318                            | [A/G]       | NA                                         |
| Ca_Desi_Chromosome_scaffold21140_319  | Ca_desi_scaffold   | 319                            | [T/C]       | NA                                         |
| Ca_Desi_Chromosome_scaffold21140_321  | Ca_desi_scaffold   | 321                            | [C/T]       | NA                                         |
| Ca_Desi_Chromosome_scaffold21140_323  | Ca_desi_scaffold   | 323                            | [A/C]       | NA                                         |
| Ca_Desi_Chromosome_scaffold21140_325  | Ca_desi_scaffold   | 325                            | [A/G]       | NA                                         |

| <b>SNP IDs</b>                | <b>Chromosomes</b> | <b>Physical positions (bp)</b> | <b>SNPs</b> | <b>NCBI SNPdb accession IDs (NCBI_ss#)</b> |
|-------------------------------|--------------------|--------------------------------|-------------|--------------------------------------------|
| Ca_Desi_Ch_scaffold21140_326  | Ca_desi_scaffold   | 326                            | [A/G]       | NA                                         |
| Ca_Desi_Ch_scaffold21140_330  | Ca_desi_scaffold   | 330                            | [T/C]       | NA                                         |
| Ca_Desi_Ch_scaffold21140_332  | Ca_desi_scaffold   | 332                            | [A/G]       | NA                                         |
| Ca_Desi_Ch_scaffold21140_334  | Ca_desi_scaffold   | 334                            | [T/C]       | NA                                         |
| Ca_Desi_Ch_scaffold21140_335  | Ca_desi_scaffold   | 335                            | [T/C]       | NA                                         |
| Ca_Desi_Ch_scaffold21140_337  | Ca_desi_scaffold   | 337                            | [T/C]       | NA                                         |
| Ca_Desi_Ch_scaffold21180_890  | Ca_desi_scaffold   | 890                            | [G/A]       | NA                                         |
| Ca_Desi_Ch_scaffold21180_989  | Ca_desi_scaffold   | 989                            | [T/A]       | NA                                         |
| Ca_Desi_Ch_scaffold21244_5    | Ca_desi_scaffold   | 5                              | [T/G]       | NA                                         |
| Ca_Desi_Ch_scaffold21465_102  | Ca_desi_scaffold   | 102                            | [T/G]       | NA                                         |
| Ca_Desi_Ch_scaffold21533_29   | Ca_desi_scaffold   | 29                             | [T/C]       | NA                                         |
| Ca_Desi_Ch_scaffold21687_517  | Ca_desi_scaffold   | 517                            | [A/C]       | NA                                         |
| Ca_Desi_Ch_scaffold21687_518  | Ca_desi_scaffold   | 518                            | [A/G]       | NA                                         |
| Ca_Desi_Ch_scaffold21721_1414 | Ca_desi_scaffold   | 1414                           | [C/A]       | NA                                         |
| Ca_Desi_Ch_scaffold22001_1201 | Ca_desi_scaffold   | 1201                           | [C/A]       | NA                                         |
| Ca_Desi_Ch_scaffold22001_1202 | Ca_desi_scaffold   | 1202                           | [C/G]       | NA                                         |
| Ca_Desi_Ch_scaffold22001_1203 | Ca_desi_scaffold   | 1203                           | [T/A]       | NA                                         |
| Ca_Desi_Ch_scaffold22001_1204 | Ca_desi_scaffold   | 1204                           | [G/T]       | NA                                         |
| Ca_Desi_Ch_scaffold22369_1398 | Ca_desi_scaffold   | 1398                           | [T/C]       | NA                                         |
| Ca_Desi_Ch_scaffold22369_1399 | Ca_desi_scaffold   | 1399                           | [T/C]       | NA                                         |
| Ca_Desi_Ch_scaffold22369_1401 | Ca_desi_scaffold   | 1401                           | [G/A]       | NA                                         |
| Ca_Desi_Ch_scaffold22369_1403 | Ca_desi_scaffold   | 1403                           | [T/C]       | NA                                         |
| Ca_Desi_Ch_scaffold22369_1404 | Ca_desi_scaffold   | 1404                           | [T/C]       | NA                                         |
| Ca_Desi_Ch_scaffold22369_1405 | Ca_desi_scaffold   | 1405                           | [T/C]       | NA                                         |
| Ca_Desi_Ch_scaffold22369_1406 | Ca_desi_scaffold   | 1406                           | [T/C]       | NA                                         |
| Ca_Desi_Ch_scaffold22369_1407 | Ca_desi_scaffold   | 1407                           | [G/T]       | NA                                         |
| Ca_Desi_Ch_scaffold22369_1408 | Ca_desi_scaffold   | 1408                           | [G/T]       | NA                                         |
| Ca_Desi_Ch_scaffold22369_1409 | Ca_desi_scaffold   | 1409                           | [C/T]       | NA                                         |
| Ca_Desi_Ch_scaffold22369_1410 | Ca_desi_scaffold   | 1410                           | [G/A]       | NA                                         |
| Ca_Desi_Ch_scaffold22369_1411 | Ca_desi_scaffold   | 1411                           | [T/C]       | NA                                         |
| Ca_Desi_Ch_scaffold22369_1412 | Ca_desi_scaffold   | 1412                           | [T/C]       | NA                                         |
| Ca_Desi_Ch_scaffold22369_1414 | Ca_desi_scaffold   | 1414                           | [C/T]       | NA                                         |
| Ca_Desi_Ch_scaffold22369_1415 | Ca_desi_scaffold   | 1415                           | [T/C]       | NA                                         |
| Ca_Desi_Ch_scaffold22369_1416 | Ca_desi_scaffold   | 1416                           | [T/C]       | NA                                         |

| <b>SNP IDs</b>                        | <b>Chromosomes</b> | <b>Physical positions (bp)</b> | <b>SNPs</b> | <b>NCBI SNPdb accession IDs (NCBI_ss#)</b> |
|---------------------------------------|--------------------|--------------------------------|-------------|--------------------------------------------|
| Ca_Desi_Chromosome_scaffold22369_1417 | Ca_desi_scaffold   | 1417                           | [C/T]       | NA                                         |
| Ca_Desi_Chromosome_scaffold22369_1418 | Ca_desi_scaffold   | 1418                           | [G/A]       | NA                                         |
| Ca_Desi_Chromosome_scaffold22369_1419 | Ca_desi_scaffold   | 1419                           | [T/C]       | NA                                         |
| Ca_Desi_Chromosome_scaffold22369_1420 | Ca_desi_scaffold   | 1420                           | [A/G]       | NA                                         |
| Ca_Desi_Chromosome_scaffold22369_1422 | Ca_desi_scaffold   | 1422                           | [A/G]       | NA                                         |
| Ca_Desi_Chromosome_scaffold22369_1423 | Ca_desi_scaffold   | 1423                           | [T/C]       | NA                                         |
| Ca_Desi_Chromosome_scaffold22369_1424 | Ca_desi_scaffold   | 1424                           | [C/T]       | NA                                         |
| Ca_Desi_Chromosome_scaffold22369_1425 | Ca_desi_scaffold   | 1425                           | [T/C]       | NA                                         |
| Ca_Desi_Chromosome_scaffold22369_1426 | Ca_desi_scaffold   | 1426                           | [G/A]       | NA                                         |
| Ca_Desi_Chromosome_scaffold22369_1427 | Ca_desi_scaffold   | 1427                           | [C/T]       | NA                                         |
| Ca_Desi_Chromosome_scaffold22369_1430 | Ca_desi_scaffold   | 1430                           | [A/G]       | NA                                         |
| Ca_Desi_Chromosome_scaffold22369_1431 | Ca_desi_scaffold   | 1431                           | [T/C]       | NA                                         |
| Ca_Desi_Chromosome_scaffold22369_1432 | Ca_desi_scaffold   | 1432                           | [T/C]       | NA                                         |
| Ca_Desi_Chromosome_scaffold22369_1433 | Ca_desi_scaffold   | 1433                           | [T/C]       | NA                                         |
| Ca_Desi_Chromosome_scaffold22369_1434 | Ca_desi_scaffold   | 1434                           | [C/T]       | NA                                         |
| Ca_Desi_Chromosome_scaffold22369_1435 | Ca_desi_scaffold   | 1435                           | [A/G]       | NA                                         |
| Ca_Desi_Chromosome_scaffold22369_1436 | Ca_desi_scaffold   | 1436                           | [C/T]       | NA                                         |
| Ca_Desi_Chromosome_scaffold22369_1437 | Ca_desi_scaffold   | 1437                           | [C/T]       | NA                                         |
| Ca_Desi_Chromosome_scaffold22369_1440 | Ca_desi_scaffold   | 1440                           | [T/C]       | NA                                         |
| Ca_Desi_Chromosome_scaffold22369_1441 | Ca_desi_scaffold   | 1441                           | [A/G]       | NA                                         |
| Ca_Desi_Chromosome_scaffold22369_1442 | Ca_desi_scaffold   | 1442                           | [C/T]       | NA                                         |
| Ca_Desi_Chromosome_scaffold22369_1443 | Ca_desi_scaffold   | 1443                           | [A/G]       | NA                                         |
| Ca_Desi_Chromosome_scaffold22369_1445 | Ca_desi_scaffold   | 1445                           | [A/G]       | NA                                         |
| Ca_Desi_Chromosome_scaffold22369_1446 | Ca_desi_scaffold   | 1446                           | [C/T]       | NA                                         |
| Ca_Desi_Chromosome_scaffold22369_1447 | Ca_desi_scaffold   | 1447                           | [G/A]       | NA                                         |
| Ca_Desi_Chromosome_scaffold22369_1448 | Ca_desi_scaffold   | 1448                           | [A/G]       | NA                                         |
| Ca_Desi_Chromosome_scaffold22369_1449 | Ca_desi_scaffold   | 1449                           | [A/G]       | NA                                         |
| Ca_Desi_Chromosome_scaffold22369_1450 | Ca_desi_scaffold   | 1450                           | [A/G]       | NA                                         |
| Ca_Desi_Chromosome_scaffold22369_1451 | Ca_desi_scaffold   | 1451                           | [T/C]       | NA                                         |
| Ca_Desi_Chromosome_scaffold22369_1452 | Ca_desi_scaffold   | 1452                           | [T/C]       | NA                                         |
| Ca_Desi_Chromosome_scaffold22369_1453 | Ca_desi_scaffold   | 1453                           | [C/A]       | NA                                         |
| Ca_Desi_Chromosome_scaffold22369_1454 | Ca_desi_scaffold   | 1454                           | [C/A]       | NA                                         |
| Ca_Desi_Chromosome_scaffold22369_1455 | Ca_desi_scaffold   | 1455                           | [A/G]       | NA                                         |
| Ca_Desi_Chromosome_scaffold22421_1449 | Ca_desi_scaffold   | 1449                           | [T/C]       | NA                                         |

| <b>SNP IDs</b>                | <b>Chromosomes</b> | <b>Physical positions (bp)</b> | <b>SNPs</b> | <b>NCBI SNPdb accession IDs (NCBI_ss#)</b> |
|-------------------------------|--------------------|--------------------------------|-------------|--------------------------------------------|
| Ca_Desi_Ch_scaffold22614_474  | Ca_desi_scaffold   | 474                            | [C/T]       | NA                                         |
| Ca_Desi_Ch_scaffold22935_210  | Ca_desi_scaffold   | 210                            | [A/G]       | NA                                         |
| Ca_Desi_Ch_scaffold23009_720  | Ca_desi_scaffold   | 720                            | [A/G]       | NA                                         |
| Ca_Desi_Ch_scaffold23428_455  | Ca_desi_scaffold   | 455                            | [T/C]       | NA                                         |
| Ca_Desi_Ch_scaffold23428_492  | Ca_desi_scaffold   | 492                            | [T/C]       | NA                                         |
| Ca_Desi_Ch_scaffold23428_504  | Ca_desi_scaffold   | 504                            | [A/T]       | NA                                         |
| Ca_Desi_Ch_scaffold23428_535  | Ca_desi_scaffold   | 535                            | [A/G]       | NA                                         |
| Ca_Desi_Ch_scaffold23439_484  | Ca_desi_scaffold   | 484                            | [A/T]       | NA                                         |
| Ca_Desi_Ch_scaffold23439_488  | Ca_desi_scaffold   | 488                            | [T/C]       | NA                                         |
| Ca_Desi_Ch_scaffold23439_492  | Ca_desi_scaffold   | 492                            | [A/G]       | NA                                         |
| Ca_Desi_Ch_scaffold23439_493  | Ca_desi_scaffold   | 493                            | [A/G]       | NA                                         |
| Ca_Desi_Ch_scaffold23439_496  | Ca_desi_scaffold   | 496                            | [A/G]       | NA                                         |
| Ca_Desi_Ch_scaffold23439_498  | Ca_desi_scaffold   | 498                            | [A/G]       | NA                                         |
| Ca_Desi_Ch_scaffold23439_500  | Ca_desi_scaffold   | 500                            | [A/G]       | NA                                         |
| Ca_Desi_Ch_scaffold23439_501  | Ca_desi_scaffold   | 501                            | [T/C]       | NA                                         |
| Ca_Desi_Ch_scaffold23439_503  | Ca_desi_scaffold   | 503                            | [T/C]       | NA                                         |
| Ca_Desi_Ch_scaffold23439_506  | Ca_desi_scaffold   | 506                            | [T/C]       | NA                                         |
| Ca_Desi_Ch_scaffold23439_510  | Ca_desi_scaffold   | 510                            | [T/C]       | NA                                         |
| Ca_Desi_Ch_scaffold23439_517  | Ca_desi_scaffold   | 517                            | [T/C]       | NA                                         |
| Ca_Desi_Ch_scaffold23439_521  | Ca_desi_scaffold   | 521                            | [A/G]       | NA                                         |
| Ca_Desi_Ch_scaffold23439_522  | Ca_desi_scaffold   | 522                            | [T/C]       | NA                                         |
| Ca_Desi_Ch_scaffold23439_526  | Ca_desi_scaffold   | 526                            | [A/G]       | NA                                         |
| Ca_Desi_Ch_scaffold23439_527  | Ca_desi_scaffold   | 527                            | [T/C]       | NA                                         |
| Ca_Desi_Ch_scaffold23439_531  | Ca_desi_scaffold   | 531                            | [T/C]       | NA                                         |
| Ca_Desi_Ch_scaffold23439_534  | Ca_desi_scaffold   | 534                            | [T/C]       | NA                                         |
| Ca_Desi_Ch_scaffold23439_538  | Ca_desi_scaffold   | 538                            | [A/T]       | NA                                         |
| Ca_Desi_Ch_scaffold23439_569  | Ca_desi_scaffold   | 569                            | [T/C]       | NA                                         |
| Ca_Desi_Ch_scaffold23439_775  | Ca_desi_scaffold   | 775                            | [A/G]       | NA                                         |
| Ca_Desi_Ch_scaffold23439_805  | Ca_desi_scaffold   | 805                            | [A/G]       | NA                                         |
| Ca_Desi_Ch_scaffold23439_1152 | Ca_desi_scaffold   | 1152                           | [A/C]       | NA                                         |
| Ca_Desi_Ch_scaffold23439_1179 | Ca_desi_scaffold   | 1179                           | [G/C]       | NA                                         |
| Ca_Desi_Ch_scaffold23439_1180 | Ca_desi_scaffold   | 1180                           | [C/T]       | NA                                         |
| Ca_Desi_Ch_scaffold23439_1181 | Ca_desi_scaffold   | 1181                           | [G/A]       | NA                                         |
| Ca_Desi_Ch_scaffold23439_1182 | Ca_desi_scaffold   | 1182                           | [A/G]       | NA                                         |

| <b>SNP IDs</b>                | <b>Chromosomes</b> | <b>Physical positions (bp)</b> | <b>SNPs</b> | <b>NCBI SNPdb accession IDs (NCBI_ss#)</b> |
|-------------------------------|--------------------|--------------------------------|-------------|--------------------------------------------|
| Ca_Desi_Ch_scaffold23439_1183 | Ca_desi_scaffold   | 1183                           | [C/T]       | NA                                         |
| Ca_Desi_Ch_scaffold23439_1184 | Ca_desi_scaffold   | 1184                           | [C/T]       | NA                                         |
| Ca_Desi_Ch_scaffold23439_1185 | Ca_desi_scaffold   | 1185                           | [T/C]       | NA                                         |
| Ca_Desi_Ch_scaffold23439_1186 | Ca_desi_scaffold   | 1186                           | [C/T]       | NA                                         |
| Ca_Desi_Ch_scaffold23439_1187 | Ca_desi_scaffold   | 1187                           | [G/A]       | NA                                         |
| Ca_Desi_Ch_scaffold23439_1189 | Ca_desi_scaffold   | 1189                           | [A/G]       | NA                                         |
| Ca_Desi_Ch_scaffold23439_1190 | Ca_desi_scaffold   | 1190                           | [C/T]       | NA                                         |
| Ca_Desi_Ch_scaffold23439_1191 | Ca_desi_scaffold   | 1191                           | [A/G]       | NA                                         |
| Ca_Desi_Ch_scaffold23439_1192 | Ca_desi_scaffold   | 1192                           | [C/T]       | NA                                         |
| Ca_Desi_Ch_scaffold23439_1193 | Ca_desi_scaffold   | 1193                           | [A/G]       | NA                                         |
| Ca_Desi_Ch_scaffold23439_1194 | Ca_desi_scaffold   | 1194                           | [T/C]       | NA                                         |
| Ca_Desi_Ch_scaffold23439_1195 | Ca_desi_scaffold   | 1195                           | [C/T]       | NA                                         |
| Ca_Desi_Ch_scaffold23439_1196 | Ca_desi_scaffold   | 1196                           | [G/A]       | NA                                         |
| Ca_Desi_Ch_scaffold23439_1197 | Ca_desi_scaffold   | 1197                           | [A/G]       | NA                                         |
| Ca_Desi_Ch_scaffold23439_1198 | Ca_desi_scaffold   | 1198                           | [C/T]       | NA                                         |
| Ca_Desi_Ch_scaffold23439_1199 | Ca_desi_scaffold   | 1199                           | [A/G]       | NA                                         |
| Ca_Desi_Ch_scaffold23439_1200 | Ca_desi_scaffold   | 1200                           | [A/G]       | NA                                         |
| Ca_Desi_Ch_scaffold23439_1201 | Ca_desi_scaffold   | 1201                           | [A/G]       | NA                                         |
| Ca_Desi_Ch_scaffold23439_1202 | Ca_desi_scaffold   | 1202                           | [G/T]       | NA                                         |
| Ca_Desi_Ch_scaffold23439_1204 | Ca_desi_scaffold   | 1204                           | [C/T]       | NA                                         |
| Ca_Desi_Ch_scaffold23439_1205 | Ca_desi_scaffold   | 1205                           | [C/T]       | NA                                         |
| Ca_Desi_Ch_scaffold23439_1206 | Ca_desi_scaffold   | 1206                           | [A/G]       | NA                                         |
| Ca_Desi_Ch_scaffold23439_1207 | Ca_desi_scaffold   | 1207                           | [T/C]       | NA                                         |
| Ca_Desi_Ch_scaffold23439_1208 | Ca_desi_scaffold   | 1208                           | [T/C]       | NA                                         |
| Ca_Desi_Ch_scaffold23439_1209 | Ca_desi_scaffold   | 1209                           | [C/T]       | NA                                         |
| Ca_Desi_Ch_scaffold23439_1210 | Ca_desi_scaffold   | 1210                           | [T/C]       | NA                                         |
| Ca_Desi_Ch_scaffold23439_1212 | Ca_desi_scaffold   | 1212                           | [T/C]       | NA                                         |
| Ca_Desi_Ch_scaffold23439_1213 | Ca_desi_scaffold   | 1213                           | [T/C]       | NA                                         |
| Ca_Desi_Ch_scaffold23439_1214 | Ca_desi_scaffold   | 1214                           | [T/C]       | NA                                         |
| Ca_Desi_Ch_scaffold23439_1215 | Ca_desi_scaffold   | 1215                           | [A/G]       | NA                                         |
| Ca_Desi_Ch_scaffold23439_1216 | Ca_desi_scaffold   | 1216                           | [A/G]       | NA                                         |
| Ca_Desi_Ch_scaffold23439_1217 | Ca_desi_scaffold   | 1217                           | [G/T]       | NA                                         |
| Ca_Desi_Ch_scaffold23439_1218 | Ca_desi_scaffold   | 1218                           | [T/G]       | NA                                         |
| Ca_Desi_Ch_scaffold23439_1219 | Ca_desi_scaffold   | 1219                           | [G/A]       | NA                                         |

| <b>SNP IDs</b>                 | <b>Chromosomes</b> | <b>Physical positions (bp)</b> | <b>SNPs</b> | <b>NCBI SNPdb accession IDs (NCBI_ss#)</b> |
|--------------------------------|--------------------|--------------------------------|-------------|--------------------------------------------|
| Ca_DesigChr_scaffold23439_1220 | Ca_desig_scaffold  | 1220                           | [A/G]       | NA                                         |
| Ca_DesigChr_scaffold23439_1221 | Ca_desig_scaffold  | 1221                           | [G/A]       | NA                                         |
| Ca_DesigChr_scaffold23439_1223 | Ca_desig_scaffold  | 1223                           | [G/A]       | NA                                         |
| Ca_DesigChr_scaffold23439_1224 | Ca_desig_scaffold  | 1224                           | [A/G]       | NA                                         |
| Ca_DesigChr_scaffold23439_1225 | Ca_desig_scaffold  | 1225                           | [C/T]       | NA                                         |
| Ca_DesigChr_scaffold23439_1226 | Ca_desig_scaffold  | 1226                           | [G/A]       | NA                                         |
| Ca_DesigChr_scaffold23439_1227 | Ca_desig_scaffold  | 1227                           | [T/C]       | NA                                         |
| Ca_DesigChr_scaffold23439_1228 | Ca_desig_scaffold  | 1228                           | [C/T]       | NA                                         |
| Ca_DesigChr_scaffold23439_1229 | Ca_desig_scaffold  | 1229                           | [G/A]       | NA                                         |
| Ca_DesigChr_scaffold23439_1230 | Ca_desig_scaffold  | 1230                           | [T/C]       | NA                                         |
| Ca_DesigChr_scaffold23439_1231 | Ca_desig_scaffold  | 1231                           | [C/T]       | NA                                         |
| Ca_DesigChr_scaffold23439_1232 | Ca_desig_scaffold  | 1232                           | [G/A]       | NA                                         |
| Ca_DesigChr_scaffold23439_1233 | Ca_desig_scaffold  | 1233                           | [T/C]       | NA                                         |
| Ca_DesigChr_scaffold23439_1234 | Ca_desig_scaffold  | 1234                           | [T/C]       | NA                                         |
| Ca_DesigChr_scaffold23439_1235 | Ca_desig_scaffold  | 1235                           | [A/G]       | NA                                         |
| Ca_DesigChr_scaffold23439_1236 | Ca_desig_scaffold  | 1236                           | [T/C]       | NA                                         |
| Ca_DesigChr_scaffold23439_1237 | Ca_desig_scaffold  | 1237                           | [C/T]       | NA                                         |
| Ca_DesigChr_scaffold23439_1238 | Ca_desig_scaffold  | 1238                           | [T/G]       | NA                                         |
| Ca_DesigChr_scaffold23439_1385 | Ca_desig_scaffold  | 1385                           | [T/C]       | NA                                         |
| Ca_DesigChr_scaffold23677_1141 | Ca_desig_scaffold  | 1141                           | [C/A]       | NA                                         |
| Ca_DesigChr_scaffold23695_326  | Ca_desig_scaffold  | 326                            | [A/C]       | NA                                         |
| Ca_DesigChr_scaffold23695_334  | Ca_desig_scaffold  | 334                            | [A/C]       | NA                                         |
| Ca_DesigChr_scaffold23695_396  | Ca_desig_scaffold  | 396                            | [A/C]       | NA                                         |
| Ca_DesigChr_scaffold23732_1099 | Ca_desig_scaffold  | 1099                           | [A/G]       | NA                                         |
| Ca_DesigChr_scaffold23830_788  | Ca_desig_scaffold  | 788                            | [T/A]       | NA                                         |
| Ca_DesigChr_scaffold23830_789  | Ca_desig_scaffold  | 789                            | [G/T]       | NA                                         |
| Ca_DesigChr_scaffold23830_790  | Ca_desig_scaffold  | 790                            | [C/G]       | NA                                         |
| Ca_DesigChr_scaffold23830_792  | Ca_desig_scaffold  | 792                            | [C/T]       | NA                                         |
| Ca_DesigChr_scaffold23830_794  | Ca_desig_scaffold  | 794                            | [A/G]       | NA                                         |
| Ca_DesigChr_scaffold23830_795  | Ca_desig_scaffold  | 795                            | [A/G]       | NA                                         |
| Ca_DesigChr_scaffold23830_796  | Ca_desig_scaffold  | 796                            | [A/G]       | NA                                         |
| Ca_DesigChr_scaffold23830_798  | Ca_desig_scaffold  | 798                            | [C/T]       | NA                                         |
| Ca_DesigChr_scaffold23830_799  | Ca_desig_scaffold  | 799                            | [C/T]       | NA                                         |
| Ca_DesigChr_scaffold23830_800  | Ca_desig_scaffold  | 800                            | [G/A]       | NA                                         |

| <b>SNP IDs</b>               | <b>Chromosomes</b> | <b>Physical positions (bp)</b> | <b>SNPs</b> | <b>NCBI SNPdb accession IDs (NCBI_ss#)</b> |
|------------------------------|--------------------|--------------------------------|-------------|--------------------------------------------|
| Ca_Desi_Ch_scaffold23830_801 | Ca_desi_scaffold   | 801                            | [C/T]       | NA                                         |
| Ca_Desi_Ch_scaffold23830_802 | Ca_desi_scaffold   | 802                            | [G/A]       | NA                                         |
| Ca_Desi_Ch_scaffold23830_803 | Ca_desi_scaffold   | 803                            | [T/C]       | NA                                         |
| Ca_Desi_Ch_scaffold23830_805 | Ca_desi_scaffold   | 805                            | [C/T]       | NA                                         |
| Ca_Desi_Ch_scaffold23830_806 | Ca_desi_scaffold   | 806                            | [G/A]       | NA                                         |
| Ca_Desi_Ch_scaffold23830_807 | Ca_desi_scaffold   | 807                            | [C/T]       | NA                                         |
| Ca_Desi_Ch_scaffold23830_809 | Ca_desi_scaffold   | 809                            | [C/T]       | NA                                         |
| Ca_Desi_Ch_scaffold23830_811 | Ca_desi_scaffold   | 811                            | [T/C]       | NA                                         |
| Ca_Desi_Ch_scaffold23830_812 | Ca_desi_scaffold   | 812                            | [C/T]       | NA                                         |
| Ca_Desi_Ch_scaffold23830_814 | Ca_desi_scaffold   | 814                            | [G/A]       | NA                                         |
| Ca_Desi_Ch_scaffold23830_815 | Ca_desi_scaffold   | 815                            | [T/C]       | NA                                         |
| Ca_Desi_Ch_scaffold23830_816 | Ca_desi_scaffold   | 816                            | [T/C]       | NA                                         |
| Ca_Desi_Ch_scaffold23830_817 | Ca_desi_scaffold   | 817                            | [T/C]       | NA                                         |
| Ca_Desi_Ch_scaffold23830_819 | Ca_desi_scaffold   | 819                            | [C/T]       | NA                                         |
| Ca_Desi_Ch_scaffold23830_820 | Ca_desi_scaffold   | 820                            | [T/C]       | NA                                         |
| Ca_Desi_Ch_scaffold23830_821 | Ca_desi_scaffold   | 821                            | [T/C]       | NA                                         |
| Ca_Desi_Ch_scaffold23830_822 | Ca_desi_scaffold   | 822                            | [G/A]       | NA                                         |
| Ca_Desi_Ch_scaffold23830_823 | Ca_desi_scaffold   | 823                            | [C/T]       | NA                                         |
| Ca_Desi_Ch_scaffold23830_824 | Ca_desi_scaffold   | 824                            | [C/T]       | NA                                         |
| Ca_Desi_Ch_scaffold23830_825 | Ca_desi_scaffold   | 825                            | [C/T]       | NA                                         |
| Ca_Desi_Ch_scaffold23830_826 | Ca_desi_scaffold   | 826                            | [G/A]       | NA                                         |
| Ca_Desi_Ch_scaffold23830_827 | Ca_desi_scaffold   | 827                            | [C/T]       | NA                                         |
| Ca_Desi_Ch_scaffold23830_828 | Ca_desi_scaffold   | 828                            | [T/C]       | NA                                         |
| Ca_Desi_Ch_scaffold23830_829 | Ca_desi_scaffold   | 829                            | [A/G]       | NA                                         |
| Ca_Desi_Ch_scaffold23830_832 | Ca_desi_scaffold   | 832                            | [T/A]       | NA                                         |
| Ca_Desi_Ch_scaffold23830_835 | Ca_desi_scaffold   | 835                            | [A/G]       | NA                                         |
| Ca_Desi_Ch_scaffold23830_836 | Ca_desi_scaffold   | 836                            | [A/G]       | NA                                         |
| Ca_Desi_Ch_scaffold23830_837 | Ca_desi_scaffold   | 837                            | [T/C]       | NA                                         |
| Ca_Desi_Ch_scaffold23830_840 | Ca_desi_scaffold   | 840                            | [A/G]       | NA                                         |
| Ca_Desi_Ch_scaffold23830_846 | Ca_desi_scaffold   | 846                            | [A/G]       | NA                                         |
| Ca_Desi_Ch_scaffold23830_851 | Ca_desi_scaffold   | 851                            | [A/G]       | NA                                         |
| Ca_Desi_Ch_scaffold23830_856 | Ca_desi_scaffold   | 856                            | [A/G]       | NA                                         |
| Ca_Desi_Ch_scaffold23830_858 | Ca_desi_scaffold   | 858                            | [A/G]       | NA                                         |
| Ca_Desi_Ch_scaffold23830_860 | Ca_desi_scaffold   | 860                            | [A/G]       | NA                                         |



| <b>SNP IDs</b>                | <b>Chromosomes</b> | <b>Physical positions (bp)</b> | <b>SNPs</b> | <b>NCBI SNPdb accession IDs (NCBI_ss#)</b> |
|-------------------------------|--------------------|--------------------------------|-------------|--------------------------------------------|
| Ca_Desi_Ch_scaffold23830_862  | Ca_desi_scaffold   | 862                            | [T/G]       | NA                                         |
| Ca_Desi_Ch_scaffold23830_865  | Ca_desi_scaffold   | 865                            | [T/C]       | NA                                         |
| Ca_Desi_Ch_scaffold23830_870  | Ca_desi_scaffold   | 870                            | [A/G]       | NA                                         |
| Ca_Desi_Ch_scaffold23830_871  | Ca_desi_scaffold   | 871                            | [T/C]       | NA                                         |
| Ca_Desi_Ch_scaffold23830_872  | Ca_desi_scaffold   | 872                            | [T/C]       | NA                                         |
| Ca_Desi_Ch_scaffold23830_873  | Ca_desi_scaffold   | 873                            | [C/T]       | NA                                         |
| Ca_Desi_Ch_scaffold23830_876  | Ca_desi_scaffold   | 876                            | [A/G]       | NA                                         |
| Ca_Desi_Ch_scaffold23830_877  | Ca_desi_scaffold   | 877                            | [A/G]       | NA                                         |
| Ca_Desi_Ch_scaffold23830_878  | Ca_desi_scaffold   | 878                            | [G/A]       | NA                                         |
| Ca_Desi_Ch_scaffold23830_886  | Ca_desi_scaffold   | 886                            | [C/A]       | NA                                         |
| Ca_Desi_Ch_scaffold23830_887  | Ca_desi_scaffold   | 887                            | [T/C]       | NA                                         |
| Ca_Desi_Ch_scaffold23830_891  | Ca_desi_scaffold   | 891                            | [T/C]       | NA                                         |
| Ca_Desi_Ch_scaffold23830_892  | Ca_desi_scaffold   | 892                            | [T/C]       | NA                                         |
| Ca_Desi_Ch_scaffold23830_904  | Ca_desi_scaffold   | 904                            | [C/A]       | NA                                         |
| Ca_Desi_Ch_scaffold23830_905  | Ca_desi_scaffold   | 905                            | [A/G]       | NA                                         |
| Ca_Desi_Ch_scaffold23830_906  | Ca_desi_scaffold   | 906                            | [C/A]       | NA                                         |
| Ca_Desi_Ch_scaffold23830_907  | Ca_desi_scaffold   | 907                            | [A/T]       | NA                                         |
| Ca_Desi_Ch_scaffold23830_908  | Ca_desi_scaffold   | 908                            | [G/C]       | NA                                         |
| Ca_Desi_Ch_scaffold23830_960  | Ca_desi_scaffold   | 960                            | [C/A]       | NA                                         |
| Ca_Desi_Ch_scaffold23830_961  | Ca_desi_scaffold   | 961                            | [T/G]       | NA                                         |
| Ca_Desi_Ch_scaffold23830_962  | Ca_desi_scaffold   | 962                            | [C/A]       | NA                                         |
| Ca_Desi_Ch_scaffold23830_963  | Ca_desi_scaffold   | 963                            | [A/T]       | NA                                         |
| Ca_Desi_Ch_scaffold23830_998  | Ca_desi_scaffold   | 998                            | [T/C]       | NA                                         |
| Ca_Desi_Ch_scaffold23830_1020 | Ca_desi_scaffold   | 1020                           | [T/G]       | NA                                         |
| Ca_Desi_Ch_scaffold23830_1082 | Ca_desi_scaffold   | 1082                           | [A/G]       | NA                                         |
| Ca_Desi_Ch_scaffold23830_1085 | Ca_desi_scaffold   | 1085                           | [T/C]       | NA                                         |
| Ca_Desi_Ch_scaffold23830_1087 | Ca_desi_scaffold   | 1087                           | [T/A]       | NA                                         |
| Ca_Desi_Ch_scaffold23830_1088 | Ca_desi_scaffold   | 1088                           | [A/G]       | NA                                         |
| Ca_Desi_Ch_scaffold23830_1089 | Ca_desi_scaffold   | 1089                           | [T/C]       | NA                                         |
| Ca_Desi_Ch_scaffold23830_1091 | Ca_desi_scaffold   | 1091                           | [A/G]       | NA                                         |
| Ca_Desi_Ch_scaffold23830_1093 | Ca_desi_scaffold   | 1093                           | [A/G]       | NA                                         |
| Ca_Desi_Ch_scaffold23830_1095 | Ca_desi_scaffold   | 1095                           | [T/C]       | NA                                         |
| Ca_Desi_Ch_scaffold23830_1097 | Ca_desi_scaffold   | 1097                           | [A/G]       | NA                                         |
| Ca_Desi_Ch_scaffold23830_1099 | Ca_desi_scaffold   | 1099                           | [T/C]       | NA                                         |

| <b>SNP IDs</b>                | <b>Chromosomes</b> | <b>Physical positions (bp)</b> | <b>SNPs</b> | <b>NCBI SNPdb accession IDs (NCBI_ss#)</b> |
|-------------------------------|--------------------|--------------------------------|-------------|--------------------------------------------|
| Ca_Desi_Ch_scaffold23830_1100 | Ca_desi_scaffold   | 1100                           | [A/G]       | NA                                         |
| Ca_Desi_Ch_scaffold23830_1103 | Ca_desi_scaffold   | 1103                           | [A/G]       | NA                                         |
| Ca_Desi_Ch_scaffold23830_1104 | Ca_desi_scaffold   | 1104                           | [T/C]       | NA                                         |
| Ca_Desi_Ch_scaffold23830_1109 | Ca_desi_scaffold   | 1109                           | [T/C]       | NA                                         |
| Ca_Desi_Ch_scaffold23830_1112 | Ca_desi_scaffold   | 1112                           | [A/G]       | NA                                         |
| Ca_Desi_Ch_scaffold23830_1115 | Ca_desi_scaffold   | 1115                           | [A/G]       | NA                                         |
| Ca_Desi_Ch_scaffold23830_1117 | Ca_desi_scaffold   | 1117                           | [A/G]       | NA                                         |
| Ca_Desi_Ch_scaffold23830_1120 | Ca_desi_scaffold   | 1120                           | [T/C]       | NA                                         |
| Ca_Desi_Ch_scaffold23830_1121 | Ca_desi_scaffold   | 1121                           | [T/C]       | NA                                         |
| Ca_Desi_Ch_scaffold23830_1122 | Ca_desi_scaffold   | 1122                           | [T/C]       | NA                                         |
| Ca_Desi_Ch_scaffold23830_1123 | Ca_desi_scaffold   | 1123                           | [T/C]       | NA                                         |
| Ca_Desi_Ch_scaffold23830_1125 | Ca_desi_scaffold   | 1125                           | [T/C]       | NA                                         |
| Ca_Desi_Ch_scaffold23830_1128 | Ca_desi_scaffold   | 1128                           | [T/C]       | NA                                         |
| Ca_Desi_Ch_scaffold23830_1129 | Ca_desi_scaffold   | 1129                           | [T/C]       | NA                                         |
| Ca_Desi_Ch_scaffold23830_1130 | Ca_desi_scaffold   | 1130                           | [C/T]       | NA                                         |
| Ca_Desi_Ch_scaffold23830_1134 | Ca_desi_scaffold   | 1134                           | [T/C]       | NA                                         |
| Ca_Desi_Ch_scaffold23830_1135 | Ca_desi_scaffold   | 1135                           | [G/A]       | NA                                         |
| Ca_Desi_Ch_scaffold23830_1136 | Ca_desi_scaffold   | 1136                           | [T/C]       | NA                                         |
| Ca_Desi_Ch_scaffold23830_1138 | Ca_desi_scaffold   | 1138                           | [A/G]       | NA                                         |
| Ca_Desi_Ch_scaffold23830_1139 | Ca_desi_scaffold   | 1139                           | [A/G]       | NA                                         |
| Ca_Desi_Ch_scaffold23830_1141 | Ca_desi_scaffold   | 1141                           | [G/C]       | NA                                         |
| Ca_Desi_Ch_scaffold23877_345  | Ca_desi_scaffold   | 345                            | [T/C]       | NA                                         |
| Ca_Desi_Ch_scaffold23877_346  | Ca_desi_scaffold   | 346                            | [T/C]       | NA                                         |
| Ca_Desi_Ch_scaffold23877_347  | Ca_desi_scaffold   | 347                            | [A/G]       | NA                                         |
| Ca_Desi_Ch_scaffold23877_349  | Ca_desi_scaffold   | 349                            | [T/C]       | NA                                         |
| Ca_Desi_Ch_scaffold23877_350  | Ca_desi_scaffold   | 350                            | [T/C]       | NA                                         |
| Ca_Desi_Ch_scaffold23877_351  | Ca_desi_scaffold   | 351                            | [G/A]       | NA                                         |
| Ca_Desi_Ch_scaffold23877_352  | Ca_desi_scaffold   | 352                            | [A/G]       | NA                                         |
| Ca_Desi_Ch_scaffold23877_353  | Ca_desi_scaffold   | 353                            | [T/C]       | NA                                         |
| Ca_Desi_Ch_scaffold23877_354  | Ca_desi_scaffold   | 354                            | [G/A]       | NA                                         |
| Ca_Desi_Ch_scaffold23877_355  | Ca_desi_scaffold   | 355                            | [T/C]       | NA                                         |
| Ca_Desi_Ch_scaffold23877_357  | Ca_desi_scaffold   | 357                            | [A/G]       | NA                                         |
| Ca_Desi_Ch_scaffold23877_358  | Ca_desi_scaffold   | 358                            | [A/G]       | NA                                         |
| Ca_Desi_Ch_scaffold23877_359  | Ca_desi_scaffold   | 359                            | [A/G]       | NA                                         |

| <b>SNP IDs</b>                 | <b>Chromosomes</b> | <b>Physical positions (bp)</b> | <b>SNPs</b> | <b>NCBI SNPdb accession IDs (NCBI_ss#)</b> |
|--------------------------------|--------------------|--------------------------------|-------------|--------------------------------------------|
| Ca_Desig_Chr_scaffold23877_360 | Ca_desig_scaffold  | 360                            | [G/A]       | NA                                         |
| Ca_Desig_Chr_scaffold23877_361 | Ca_desig_scaffold  | 361                            | [A/G]       | NA                                         |
| Ca_Desig_Chr_scaffold23877_362 | Ca_desig_scaffold  | 362                            | [A/G]       | NA                                         |
| Ca_Desig_Chr_scaffold23877_363 | Ca_desig_scaffold  | 363                            | [T/C]       | NA                                         |
| Ca_Desig_Chr_scaffold23877_364 | Ca_desig_scaffold  | 364                            | [C/T]       | NA                                         |
| Ca_Desig_Chr_scaffold23877_365 | Ca_desig_scaffold  | 365                            | [C/T]       | NA                                         |
| Ca_Desig_Chr_scaffold23877_366 | Ca_desig_scaffold  | 366                            | [C/T]       | NA                                         |
| Ca_Desig_Chr_scaffold23877_369 | Ca_desig_scaffold  | 369                            | [T/C]       | NA                                         |
| Ca_Desig_Chr_scaffold23877_370 | Ca_desig_scaffold  | 370                            | [T/C]       | NA                                         |
| Ca_Desig_Chr_scaffold23877_371 | Ca_desig_scaffold  | 371                            | [G/A]       | NA                                         |
| Ca_Desig_Chr_scaffold23877_373 | Ca_desig_scaffold  | 373                            | [T/C]       | NA                                         |
| Ca_Desig_Chr_scaffold23877_374 | Ca_desig_scaffold  | 374                            | [T/C]       | NA                                         |
| Ca_Desig_Chr_scaffold23877_376 | Ca_desig_scaffold  | 376                            | [C/T]       | NA                                         |
| Ca_Desig_Chr_scaffold23877_377 | Ca_desig_scaffold  | 377                            | [T/C]       | NA                                         |
| Ca_Desig_Chr_scaffold23877_378 | Ca_desig_scaffold  | 378                            | [A/G]       | NA                                         |
| Ca_Desig_Chr_scaffold23877_380 | Ca_desig_scaffold  | 380                            | [T/C]       | NA                                         |
| Ca_Desig_Chr_scaffold23877_381 | Ca_desig_scaffold  | 381                            | [C/T]       | NA                                         |
| Ca_Desig_Chr_scaffold23877_382 | Ca_desig_scaffold  | 382                            | [A/T]       | NA                                         |
| Ca_Desig_Chr_scaffold23877_383 | Ca_desig_scaffold  | 383                            | [T/C]       | NA                                         |
| Ca_Desig_Chr_scaffold23877_384 | Ca_desig_scaffold  | 384                            | [T/C]       | NA                                         |
| Ca_Desig_Chr_scaffold23877_385 | Ca_desig_scaffold  | 385                            | [T/C]       | NA                                         |
| Ca_Desig_Chr_scaffold23877_386 | Ca_desig_scaffold  | 386                            | [A/G]       | NA                                         |
| Ca_Desig_Chr_scaffold23877_388 | Ca_desig_scaffold  | 388                            | [T/C]       | NA                                         |
| Ca_Desig_Chr_scaffold23877_389 | Ca_desig_scaffold  | 389                            | [A/G]       | NA                                         |
| Ca_Desig_Chr_scaffold23877_390 | Ca_desig_scaffold  | 390                            | [T/C]       | NA                                         |
| Ca_Desig_Chr_scaffold23877_391 | Ca_desig_scaffold  | 391                            | [G/A]       | NA                                         |
| Ca_Desig_Chr_scaffold23877_392 | Ca_desig_scaffold  | 392                            | [G/A]       | NA                                         |
| Ca_Desig_Chr_scaffold23877_393 | Ca_desig_scaffold  | 393                            | [T/C]       | NA                                         |
| Ca_Desig_Chr_scaffold23877_395 | Ca_desig_scaffold  | 395                            | [T/C]       | NA                                         |
| Ca_Desig_Chr_scaffold23877_396 | Ca_desig_scaffold  | 396                            | [T/C]       | NA                                         |
| Ca_Desig_Chr_scaffold23877_397 | Ca_desig_scaffold  | 397                            | [G/A]       | NA                                         |
| Ca_Desig_Chr_scaffold23877_398 | Ca_desig_scaffold  | 398                            | [C/T]       | NA                                         |
| Ca_Desig_Chr_scaffold23877_399 | Ca_desig_scaffold  | 399                            | [T/C]       | NA                                         |
| Ca_Desig_Chr_scaffold23877_400 | Ca_desig_scaffold  | 400                            | [C/T]       | NA                                         |

| <b>SNP IDs</b>               | <b>Chromosomes</b> | <b>Physical positions (bp)</b> | <b>SNPs</b> | <b>NCBI SNPdb accession IDs (NCBI_ss#)</b> |
|------------------------------|--------------------|--------------------------------|-------------|--------------------------------------------|
| Ca_Desi_Ch_scaffold23877_401 | Ca_desi_scaffold   | 401                            | [G/A]       | NA                                         |
| Ca_Desi_Ch_scaffold23877_431 | Ca_desi_scaffold   | 431                            | [T/C]       | NA                                         |
| Ca_Desi_Ch_scaffold23877_432 | Ca_desi_scaffold   | 432                            | [T/C]       | NA                                         |
| Ca_Desi_Ch_scaffold23877_434 | Ca_desi_scaffold   | 434                            | [T/C]       | NA                                         |
| Ca_Desi_Ch_scaffold23877_436 | Ca_desi_scaffold   | 436                            | [T/C]       | NA                                         |
| Ca_Desi_Ch_scaffold23877_437 | Ca_desi_scaffold   | 437                            | [T/C]       | NA                                         |
| Ca_Desi_Ch_scaffold23877_439 | Ca_desi_scaffold   | 439                            | [T/C]       | NA                                         |
| Ca_Desi_Ch_scaffold23877_440 | Ca_desi_scaffold   | 440                            | [T/C]       | NA                                         |
| Ca_Desi_Ch_scaffold23877_441 | Ca_desi_scaffold   | 441                            | [T/C]       | NA                                         |
| Ca_Desi_Ch_scaffold23877_443 | Ca_desi_scaffold   | 443                            | [T/C]       | NA                                         |
| Ca_Desi_Ch_scaffold23877_444 | Ca_desi_scaffold   | 444                            | [T/C]       | NA                                         |
| Ca_Desi_Ch_scaffold23877_445 | Ca_desi_scaffold   | 445                            | [T/C]       | NA                                         |
| Ca_Desi_Ch_scaffold23877_448 | Ca_desi_scaffold   | 448                            | [T/C]       | NA                                         |
| Ca_Desi_Ch_scaffold23877_450 | Ca_desi_scaffold   | 450                            | [A/G]       | NA                                         |
| Ca_Desi_Ch_scaffold23877_458 | Ca_desi_scaffold   | 458                            | [T/C]       | NA                                         |
| Ca_Desi_Ch_scaffold23877_459 | Ca_desi_scaffold   | 459                            | [T/C]       | NA                                         |
| Ca_Desi_Ch_scaffold23877_460 | Ca_desi_scaffold   | 460                            | [T/C]       | NA                                         |
| Ca_Desi_Ch_scaffold23877_461 | Ca_desi_scaffold   | 461                            | [A/G]       | NA                                         |
| Ca_Desi_Ch_scaffold23877_466 | Ca_desi_scaffold   | 466                            | [T/C]       | NA                                         |
| Ca_Desi_Ch_scaffold23877_467 | Ca_desi_scaffold   | 467                            | [T/C]       | NA                                         |
| Ca_Desi_Ch_scaffold23877_470 | Ca_desi_scaffold   | 470                            | [T/C]       | NA                                         |
| Ca_Desi_Ch_scaffold23877_471 | Ca_desi_scaffold   | 471                            | [T/C]       | NA                                         |
| Ca_Desi_Ch_scaffold23877_472 | Ca_desi_scaffold   | 472                            | [T/C]       | NA                                         |
| Ca_Desi_Ch_scaffold23877_473 | Ca_desi_scaffold   | 473                            | [C/T]       | NA                                         |
| Ca_Desi_Ch_scaffold23877_475 | Ca_desi_scaffold   | 475                            | [T/C]       | NA                                         |
| Ca_Desi_Ch_scaffold23877_476 | Ca_desi_scaffold   | 476                            | [T/C]       | NA                                         |
| Ca_Desi_Ch_scaffold23877_477 | Ca_desi_scaffold   | 477                            | [T/C]       | NA                                         |
| Ca_Desi_Ch_scaffold23877_478 | Ca_desi_scaffold   | 478                            | [C/T]       | NA                                         |
| Ca_Desi_Ch_scaffold23877_479 | Ca_desi_scaffold   | 479                            | [G/A]       | NA                                         |
| Ca_Desi_Ch_scaffold23877_481 | Ca_desi_scaffold   | 481                            | [G/A]       | NA                                         |
| Ca_Desi_Ch_scaffold23877_483 | Ca_desi_scaffold   | 483                            | [T/C]       | NA                                         |
| Ca_Desi_Ch_scaffold23877_484 | Ca_desi_scaffold   | 484                            | [A/G]       | NA                                         |
| Ca_Desi_Ch_scaffold23926_768 | Ca_desi_scaffold   | 768                            | [T/C]       | NA                                         |
| Ca_Desi_Ch_scaffold23926_786 | Ca_desi_scaffold   | 786                            | [T/C]       | NA                                         |

| <b>SNP IDs</b>                | <b>Chromosomes</b> | <b>Physical positions (bp)</b> | <b>SNPs</b> | <b>NCBI SNPdb accession IDs (NCBI_ss#)</b> |
|-------------------------------|--------------------|--------------------------------|-------------|--------------------------------------------|
| Ca_Desi_Ch_scaffold23978_332  | Ca_desi_scaffold   | 332                            | [G/C]       | NA                                         |
| Ca_Desi_Ch_scaffold23984_446  | Ca_desi_scaffold   | 446                            | [A/C]       | NA                                         |
| Ca_Desi_Ch_scaffold23984_916  | Ca_desi_scaffold   | 916                            | [A/C]       | NA                                         |
| Ca_Desi_Ch_scaffold23984_927  | Ca_desi_scaffold   | 927                            | [T/G]       | NA                                         |
| Ca_Desi_Ch_scaffold23984_976  | Ca_desi_scaffold   | 976                            | [A/T]       | NA                                         |
| Ca_Desi_Ch_scaffold23984_979  | Ca_desi_scaffold   | 979                            | [G/A]       | NA                                         |
| Ca_Desi_Ch_scaffold23984_980  | Ca_desi_scaffold   | 980                            | [A/G]       | NA                                         |
| Ca_Desi_Ch_scaffold23984_981  | Ca_desi_scaffold   | 981                            | [A/G]       | NA                                         |
| Ca_Desi_Ch_scaffold23984_982  | Ca_desi_scaffold   | 982                            | [T/C]       | NA                                         |
| Ca_Desi_Ch_scaffold23984_983  | Ca_desi_scaffold   | 983                            | [T/C]       | NA                                         |
| Ca_Desi_Ch_scaffold23984_986  | Ca_desi_scaffold   | 986                            | [C/T]       | NA                                         |
| Ca_Desi_Ch_scaffold23984_987  | Ca_desi_scaffold   | 987                            | [C/T]       | NA                                         |
| Ca_Desi_Ch_scaffold23984_988  | Ca_desi_scaffold   | 988                            | [A/G]       | NA                                         |
| Ca_Desi_Ch_scaffold23984_989  | Ca_desi_scaffold   | 989                            | [T/C]       | NA                                         |
| Ca_Desi_Ch_scaffold23984_990  | Ca_desi_scaffold   | 990                            | [A/G]       | NA                                         |
| Ca_Desi_Ch_scaffold23984_991  | Ca_desi_scaffold   | 991                            | [C/T]       | NA                                         |
| Ca_Desi_Ch_scaffold23984_992  | Ca_desi_scaffold   | 992                            | [A/G]       | NA                                         |
| Ca_Desi_Ch_scaffold23984_993  | Ca_desi_scaffold   | 993                            | [G/A]       | NA                                         |
| Ca_Desi_Ch_scaffold23984_994  | Ca_desi_scaffold   | 994                            | [A/G]       | NA                                         |
| Ca_Desi_Ch_scaffold23984_995  | Ca_desi_scaffold   | 995                            | [T/C]       | NA                                         |
| Ca_Desi_Ch_scaffold23984_996  | Ca_desi_scaffold   | 996                            | [A/G]       | NA                                         |
| Ca_Desi_Ch_scaffold23984_997  | Ca_desi_scaffold   | 997                            | [G/A]       | NA                                         |
| Ca_Desi_Ch_scaffold23984_998  | Ca_desi_scaffold   | 998                            | [A/G]       | NA                                         |
| Ca_Desi_Ch_scaffold23984_1000 | Ca_desi_scaffold   | 1000                           | [G/A]       | NA                                         |
| Ca_Desi_Ch_scaffold23984_1001 | Ca_desi_scaffold   | 1001                           | [C/T]       | NA                                         |
| Ca_Desi_Ch_scaffold23984_1002 | Ca_desi_scaffold   | 1002                           | [G/A]       | NA                                         |
| Ca_Desi_Ch_scaffold23984_1005 | Ca_desi_scaffold   | 1005                           | [T/C]       | NA                                         |
| Ca_Desi_Ch_scaffold23984_1006 | Ca_desi_scaffold   | 1006                           | [A/G]       | NA                                         |
| Ca_Desi_Ch_scaffold23984_1007 | Ca_desi_scaffold   | 1007                           | [T/C]       | NA                                         |
| Ca_Desi_Ch_scaffold23984_1008 | Ca_desi_scaffold   | 1008                           | [A/G]       | NA                                         |
| Ca_Desi_Ch_scaffold23984_1011 | Ca_desi_scaffold   | 1011                           | [A/G]       | NA                                         |
| Ca_Desi_Ch_scaffold23984_1015 | Ca_desi_scaffold   | 1015                           | [A/G]       | NA                                         |
| Ca_Desi_Ch_scaffold23984_1016 | Ca_desi_scaffold   | 1016                           | [T/C]       | NA                                         |
| Ca_Desi_Ch_scaffold23984_1017 | Ca_desi_scaffold   | 1017                           | [A/G]       | NA                                         |

| <b>SNP IDs</b>                | <b>Chromosomes</b> | <b>Physical positions (bp)</b> | <b>SNPs</b> | <b>NCBI SNPdb accession IDs (NCBI_ss#)</b> |
|-------------------------------|--------------------|--------------------------------|-------------|--------------------------------------------|
| Ca_Desi_Ch_scaffold23984_1019 | Ca_desi_scaffold   | 1019                           | [T/C]       | NA                                         |
| Ca_Desi_Ch_scaffold23984_1020 | Ca_desi_scaffold   | 1020                           | [C/T]       | NA                                         |
| Ca_Desi_Ch_scaffold23984_1021 | Ca_desi_scaffold   | 1021                           | [C/T]       | NA                                         |
| Ca_Desi_Ch_scaffold23984_1022 | Ca_desi_scaffold   | 1022                           | [G/A]       | NA                                         |
| Ca_Desi_Ch_scaffold23984_1023 | Ca_desi_scaffold   | 1023                           | [A/G]       | NA                                         |
| Ca_Desi_Ch_scaffold23984_1024 | Ca_desi_scaffold   | 1024                           | [A/G]       | NA                                         |
| Ca_Desi_Ch_scaffold23984_1025 | Ca_desi_scaffold   | 1025                           | [G/A]       | NA                                         |
| Ca_Desi_Ch_scaffold23984_1026 | Ca_desi_scaffold   | 1026                           | [G/A]       | NA                                         |
| Ca_Desi_Ch_scaffold23984_1027 | Ca_desi_scaffold   | 1027                           | [C/A]       | NA                                         |
| Ca_Desi_Ch_scaffold23984_1028 | Ca_desi_scaffold   | 1028                           | [T/C]       | NA                                         |
| Ca_Desi_Ch_scaffold23984_1029 | Ca_desi_scaffold   | 1029                           | [T/C]       | NA                                         |
| Ca_Desi_Ch_scaffold23984_1030 | Ca_desi_scaffold   | 1030                           | [C/T]       | NA                                         |
| Ca_Desi_Ch_scaffold23984_1031 | Ca_desi_scaffold   | 1031                           | [G/A]       | NA                                         |
| Ca_Desi_Ch_scaffold23984_1032 | Ca_desi_scaffold   | 1032                           | [G/A]       | NA                                         |
| Ca_Desi_Ch_scaffold23984_1033 | Ca_desi_scaffold   | 1033                           | [G/A]       | NA                                         |
| Ca_Desi_Ch_scaffold23984_1034 | Ca_desi_scaffold   | 1034                           | [A/G]       | NA                                         |
| Ca_Desi_Ch_scaffold23984_1035 | Ca_desi_scaffold   | 1035                           | [T/C]       | NA                                         |
| Ca_Desi_Ch_scaffold23984_1036 | Ca_desi_scaffold   | 1036                           | [C/T]       | NA                                         |
| Ca_Desi_Ch_scaffold23984_1100 | Ca_desi_scaffold   | 1100                           | [A/G]       | NA                                         |
| Ca_Desi_Ch_scaffold23984_1101 | Ca_desi_scaffold   | 1101                           | [C/T]       | NA                                         |
| Ca_Desi_Ch_scaffold23984_1102 | Ca_desi_scaffold   | 1102                           | [G/A]       | NA                                         |
| Ca_Desi_Ch_scaffold23984_1103 | Ca_desi_scaffold   | 1103                           | [G/A]       | NA                                         |
| Ca_Desi_Ch_scaffold23984_1104 | Ca_desi_scaffold   | 1104                           | [A/G]       | NA                                         |
| Ca_Desi_Ch_scaffold23984_1105 | Ca_desi_scaffold   | 1105                           | [G/A]       | NA                                         |
| Ca_Desi_Ch_scaffold23984_1106 | Ca_desi_scaffold   | 1106                           | [A/G]       | NA                                         |
| Ca_Desi_Ch_scaffold23984_1107 | Ca_desi_scaffold   | 1107                           | [C/T]       | NA                                         |
| Ca_Desi_Ch_scaffold23984_1108 | Ca_desi_scaffold   | 1108                           | [A/G]       | NA                                         |
| Ca_Desi_Ch_scaffold23984_1109 | Ca_desi_scaffold   | 1109                           | [T/C]       | NA                                         |
| Ca_Desi_Ch_scaffold23984_1110 | Ca_desi_scaffold   | 1110                           | [C/T]       | NA                                         |
| Ca_Desi_Ch_scaffold23984_1112 | Ca_desi_scaffold   | 1112                           | [T/C]       | NA                                         |
| Ca_Desi_Ch_scaffold23984_1113 | Ca_desi_scaffold   | 1113                           | [A/G]       | NA                                         |
| Ca_Desi_Ch_scaffold23984_1114 | Ca_desi_scaffold   | 1114                           | [A/G]       | NA                                         |
| Ca_Desi_Ch_scaffold23984_1115 | Ca_desi_scaffold   | 1115                           | [A/G]       | NA                                         |
| Ca_Desi_Ch_scaffold23984_1116 | Ca_desi_scaffold   | 1116                           | [T/C]       | NA                                         |

| <b>SNP IDs</b>                        | <b>Chromosomes</b> | <b>Physical positions (bp)</b> | <b>SNPs</b> | <b>NCBI SNPdb accession IDs (NCBI_ss#)</b> |
|---------------------------------------|--------------------|--------------------------------|-------------|--------------------------------------------|
| Ca_Desi_Chromosome_scaffold23984_1117 | Ca_desi_scaffold   | 1117                           | [T/C]       | NA                                         |
| Ca_Desi_Chromosome_scaffold23984_1118 | Ca_desi_scaffold   | 1118                           | [G/A]       | NA                                         |
| Ca_Desi_Chromosome_scaffold23984_1119 | Ca_desi_scaffold   | 1119                           | [G/A]       | NA                                         |
| Ca_Desi_Chromosome_scaffold23984_1120 | Ca_desi_scaffold   | 1120                           | [T/C]       | NA                                         |
| Ca_Desi_Chromosome_scaffold23984_1121 | Ca_desi_scaffold   | 1121                           | [C/T]       | NA                                         |
| Ca_Desi_Chromosome_scaffold23984_1122 | Ca_desi_scaffold   | 1122                           | [T/C]       | NA                                         |
| Ca_Desi_Chromosome_scaffold23984_1123 | Ca_desi_scaffold   | 1123                           | [G/A]       | NA                                         |
| Ca_Desi_Chromosome_scaffold23984_1124 | Ca_desi_scaffold   | 1124                           | [C/T]       | NA                                         |
| Ca_Desi_Chromosome_scaffold23984_1125 | Ca_desi_scaffold   | 1125                           | [G/A]       | NA                                         |
| Ca_Desi_Chromosome_scaffold23984_1126 | Ca_desi_scaffold   | 1126                           | [G/A]       | NA                                         |
| Ca_Desi_Chromosome_scaffold23984_1127 | Ca_desi_scaffold   | 1127                           | [G/A]       | NA                                         |
| Ca_Desi_Chromosome_scaffold23984_1128 | Ca_desi_scaffold   | 1128                           | [C/T]       | NA                                         |
| Ca_Desi_Chromosome_scaffold23984_1129 | Ca_desi_scaffold   | 1129                           | [A/G]       | NA                                         |
| Ca_Desi_Chromosome_scaffold23984_1130 | Ca_desi_scaffold   | 1130                           | [T/C]       | NA                                         |
| Ca_Desi_Chromosome_scaffold23984_1132 | Ca_desi_scaffold   | 1132                           | [G/A]       | NA                                         |
| Ca_Desi_Chromosome_scaffold23984_1133 | Ca_desi_scaffold   | 1133                           | [C/T]       | NA                                         |
| Ca_Desi_Chromosome_scaffold23984_1134 | Ca_desi_scaffold   | 1134                           | [G/A]       | NA                                         |
| Ca_Desi_Chromosome_scaffold23984_1135 | Ca_desi_scaffold   | 1135                           | [A/G]       | NA                                         |
| Ca_Desi_Chromosome_scaffold23984_1136 | Ca_desi_scaffold   | 1136                           | [T/C]       | NA                                         |
| Ca_Desi_Chromosome_scaffold23984_1137 | Ca_desi_scaffold   | 1137                           | [A/G]       | NA                                         |
| Ca_Desi_Chromosome_scaffold23984_1138 | Ca_desi_scaffold   | 1138                           | [A/G]       | NA                                         |
| Ca_Desi_Chromosome_scaffold23984_1139 | Ca_desi_scaffold   | 1139                           | [G/T]       | NA                                         |
| Ca_Desi_Chromosome_scaffold23984_1140 | Ca_desi_scaffold   | 1140                           | [T/C]       | NA                                         |
| Ca_Desi_Chromosome_scaffold23984_1143 | Ca_desi_scaffold   | 1143                           | [T/C]       | NA                                         |
| Ca_Desi_Chromosome_scaffold23984_1145 | Ca_desi_scaffold   | 1145                           | [T/C]       | NA                                         |
| Ca_Desi_Chromosome_scaffold23984_1147 | Ca_desi_scaffold   | 1147                           | [T/C]       | NA                                         |
| Ca_Desi_Chromosome_scaffold23984_1148 | Ca_desi_scaffold   | 1148                           | [C/T]       | NA                                         |
| Ca_Desi_Chromosome_scaffold23984_1149 | Ca_desi_scaffold   | 1149                           | [C/T]       | NA                                         |
| Ca_Desi_Chromosome_scaffold23984_1150 | Ca_desi_scaffold   | 1150                           | [T/C]       | NA                                         |
| Ca_Desi_Chromosome_scaffold23984_1151 | Ca_desi_scaffold   | 1151                           | [A/G]       | NA                                         |
| Ca_Desi_Chromosome_scaffold23984_1153 | Ca_desi_scaffold   | 1153                           | [T/C]       | NA                                         |
| Ca_Desi_Chromosome_scaffold23984_1154 | Ca_desi_scaffold   | 1154                           | [A/G]       | NA                                         |
| Ca_Desi_Chromosome_scaffold23984_1155 | Ca_desi_scaffold   | 1155                           | [C/T]       | NA                                         |
| Ca_Desi_Chromosome_scaffold23984_1156 | Ca_desi_scaffold   | 1156                           | [A/G]       | NA                                         |

| <b>SNP IDs</b>                 | <b>Chromosomes</b> | <b>Physical positions (bp)</b> | <b>SNPs</b> | <b>NCBI SNPdb accession IDs (NCBI_ss#)</b> |
|--------------------------------|--------------------|--------------------------------|-------------|--------------------------------------------|
| Ca_Desi_Chr_scaffold23984_1157 | Ca_desi_scaffold   | 1157                           | [G/A]       | NA                                         |
| Ca_Desi_Chr_scaffold23984_1158 | Ca_desi_scaffold   | 1158                           | [G/A]       | NA                                         |
| Ca_Desi_Chr_scaffold23984_1159 | Ca_desi_scaffold   | 1159                           | [T/C]       | NA                                         |
| Ca_Desi_Chr_scaffold23984_1213 | Ca_desi_scaffold   | 1213                           | [T/G]       | NA                                         |
| Ca_Desi_Chr_scaffold24239_1114 | Ca_desi_scaffold   | 1114                           | [T/G]       | NA                                         |
| Ca_Desi_Chr_scaffold24257_71   | Ca_desi_scaffold   | 71                             | [A/G]       | NA                                         |
| Ca_Desi_Chr_scaffold24257_72   | Ca_desi_scaffold   | 72                             | [T/C]       | NA                                         |
| Ca_Desi_Chr_scaffold24257_79   | Ca_desi_scaffold   | 79                             | [A/G]       | NA                                         |
| Ca_Desi_Chr_scaffold24257_81   | Ca_desi_scaffold   | 81                             | [A/G]       | NA                                         |
| Ca_Desi_Chr_scaffold24257_84   | Ca_desi_scaffold   | 84                             | [A/G]       | NA                                         |
| Ca_Desi_Chr_scaffold24257_91   | Ca_desi_scaffold   | 91                             | [A/G]       | NA                                         |
| Ca_Desi_Chr_scaffold24257_93   | Ca_desi_scaffold   | 93                             | [T/G]       | NA                                         |
| Ca_Desi_Chr_scaffold24257_95   | Ca_desi_scaffold   | 95                             | [A/G]       | NA                                         |
| Ca_Desi_Chr_scaffold24257_102  | Ca_desi_scaffold   | 102                            | [A/C]       | NA                                         |
| Ca_Desi_Chr_scaffold24257_106  | Ca_desi_scaffold   | 106                            | [A/G]       | NA                                         |
| Ca_Desi_Chr_scaffold24257_108  | Ca_desi_scaffold   | 108                            | [T/C]       | NA                                         |
| Ca_Desi_Chr_scaffold24257_116  | Ca_desi_scaffold   | 116                            | [A/G]       | NA                                         |
| Ca_Desi_Chr_scaffold24257_120  | Ca_desi_scaffold   | 120                            | [T/C]       | NA                                         |
| Ca_Desi_Chr_scaffold24257_122  | Ca_desi_scaffold   | 122                            | [T/C]       | NA                                         |
| Ca_Desi_Chr_scaffold24257_127  | Ca_desi_scaffold   | 127                            | [A/G]       | NA                                         |
| Ca_Desi_Chr_scaffold24395_220  | Ca_desi_scaffold   | 220                            | [A/G]       | NA                                         |
| Ca_Desi_Chr_scaffold24395_256  | Ca_desi_scaffold   | 256                            | [G/T]       | NA                                         |
| Ca_Desi_Chr_scaffold24515_709  | Ca_desi_scaffold   | 709                            | [C/A]       | NA                                         |
| Ca_Desi_Chr_scaffold24554_632  | Ca_desi_scaffold   | 632                            | [A/T]       | NA                                         |
| Ca_Desi_Chr_scaffold24778_504  | Ca_desi_scaffold   | 504                            | [T/G]       | NA                                         |
| Ca_Desi_Chr_scaffold24778_532  | Ca_desi_scaffold   | 532                            | [T/A]       | NA                                         |
| Ca_Desi_Chr_scaffold24829_572  | Ca_desi_scaffold   | 572                            | [T/C]       | NA                                         |
| Ca_Desi_Chr_scaffold24829_580  | Ca_desi_scaffold   | 580                            | [T/A]       | NA                                         |
| Ca_Desi_Chr_scaffold24829_603  | Ca_desi_scaffold   | 603                            | [T/C]       | NA                                         |
| Ca_Desi_Chr_scaffold24829_609  | Ca_desi_scaffold   | 609                            | [A/C]       | NA                                         |
| Ca_Desi_Chr_scaffold24829_612  | Ca_desi_scaffold   | 612                            | [A/C]       | NA                                         |
| Ca_Desi_Chr_scaffold24829_615  | Ca_desi_scaffold   | 615                            | [A/C]       | NA                                         |
| Ca_Desi_Chr_scaffold24829_629  | Ca_desi_scaffold   | 629                            | [A/C]       | NA                                         |
| Ca_Desi_Chr_scaffold24829_744  | Ca_desi_scaffold   | 744                            | [C/T]       | NA                                         |



| <b>SNP IDs</b>                | <b>Chromosomes</b> | <b>Physical positions (bp)</b> | <b>SNPs</b> | <b>NCBI SNPdb accession IDs (NCBI_ss#)</b> |
|-------------------------------|--------------------|--------------------------------|-------------|--------------------------------------------|
| Ca_Desi_Ch_scaffold24829_778  | Ca_desi_scaffold   | 778                            | [G/C]       | NA                                         |
| Ca_Desi_Ch_scaffold24976_1270 | Ca_desi_scaffold   | 1270                           | [G/A]       | NA                                         |
| Ca_Desi_Ch_scaffold24976_1294 | Ca_desi_scaffold   | 1294                           | [A/G]       | NA                                         |
| Ca_Desi_Ch_scaffold24986_655  | Ca_desi_scaffold   | 655                            | [T/G]       | NA                                         |
| Ca_Desi_Ch_scaffold24986_664  | Ca_desi_scaffold   | 664                            | [T/G]       | NA                                         |
| Ca_Desi_Ch_scaffold24986_678  | Ca_desi_scaffold   | 678                            | [A/C]       | NA                                         |
| Ca_Desi_Ch_scaffold24986_690  | Ca_desi_scaffold   | 690                            | [A/G]       | NA                                         |
| Ca_Desi_Ch_scaffold24986_706  | Ca_desi_scaffold   | 706                            | [A/G]       | NA                                         |
| Ca_Desi_Ch_scaffold24988_1049 | Ca_desi_scaffold   | 1049                           | [C/T]       | NA                                         |
| Ca_Desi_Ch_scaffold25004_101  | Ca_desi_scaffold   | 101                            | [T/A]       | NA                                         |
| Ca_Desi_Ch_scaffold25004_732  | Ca_desi_scaffold   | 732                            | [T/C]       | NA                                         |
| Ca_Desi_Ch_scaffold25004_832  | Ca_desi_scaffold   | 832                            | [A/G]       | NA                                         |
| Ca_Desi_Ch_scaffold25004_834  | Ca_desi_scaffold   | 834                            | [A/T]       | NA                                         |
| Ca_Desi_Ch_scaffold25004_1071 | Ca_desi_scaffold   | 1071                           | [A/C]       | NA                                         |
| Ca_Desi_Ch_scaffold25255_764  | Ca_desi_scaffold   | 764                            | [T/G]       | NA                                         |
| Ca_Desi_Ch_scaffold25255_782  | Ca_desi_scaffold   | 782                            | [G/A]       | NA                                         |
| Ca_Desi_Ch_scaffold25255_785  | Ca_desi_scaffold   | 785                            | [A/C]       | NA                                         |
| Ca_Desi_Ch_scaffold25255_787  | Ca_desi_scaffold   | 787                            | [C/T]       | NA                                         |
| Ca_Desi_Ch_scaffold25304_1091 | Ca_desi_scaffold   | 1091                           | [A/G]       | NA                                         |
| Ca_Desi_Ch_scaffold25424_121  | Ca_desi_scaffold   | 121                            | [T/G]       | NA                                         |
| Ca_Desi_Ch_scaffold25459_134  | Ca_desi_scaffold   | 134                            | [T/C]       | NA                                         |
| Ca_Desi_Ch_scaffold25459_135  | Ca_desi_scaffold   | 135                            | [T/C]       | NA                                         |
| Ca_Desi_Ch_scaffold25459_136  | Ca_desi_scaffold   | 136                            | [A/G]       | NA                                         |
| Ca_Desi_Ch_scaffold25459_138  | Ca_desi_scaffold   | 138                            | [A/G]       | NA                                         |
| Ca_Desi_Ch_scaffold25459_139  | Ca_desi_scaffold   | 139                            | [T/C]       | NA                                         |
| Ca_Desi_Ch_scaffold25459_141  | Ca_desi_scaffold   | 141                            | [A/G]       | NA                                         |
| Ca_Desi_Ch_scaffold25459_143  | Ca_desi_scaffold   | 143                            | [G/A]       | NA                                         |
| Ca_Desi_Ch_scaffold25459_145  | Ca_desi_scaffold   | 145                            | [G/A]       | NA                                         |
| Ca_Desi_Ch_scaffold25459_146  | Ca_desi_scaffold   | 146                            | [A/G]       | NA                                         |
| Ca_Desi_Ch_scaffold25459_148  | Ca_desi_scaffold   | 148                            | [A/G]       | NA                                         |
| Ca_Desi_Ch_scaffold25459_150  | Ca_desi_scaffold   | 150                            | [T/C]       | NA                                         |
| Ca_Desi_Ch_scaffold25459_153  | Ca_desi_scaffold   | 153                            | [A/G]       | NA                                         |
| Ca_Desi_Ch_scaffold25459_154  | Ca_desi_scaffold   | 154                            | [T/C]       | NA                                         |
| Ca_Desi_Ch_scaffold25459_157  | Ca_desi_scaffold   | 157                            | [T/C]       | NA                                         |

| <b>SNP IDs</b>                       | <b>Chromosomes</b> | <b>Physical positions (bp)</b> | <b>SNPs</b> | <b>NCBI SNPdb accession IDs (NCBI_ss#)</b> |
|--------------------------------------|--------------------|--------------------------------|-------------|--------------------------------------------|
| Ca_Desi_Chromosome_scaffold25459_158 | Ca_desi_scaffold   | 158                            | [C/T]       | NA                                         |
| Ca_Desi_Chromosome_scaffold25459_159 | Ca_desi_scaffold   | 159                            | [A/G]       | NA                                         |
| Ca_Desi_Chromosome_scaffold25459_160 | Ca_desi_scaffold   | 160                            | [A/G]       | NA                                         |
| Ca_Desi_Chromosome_scaffold25459_162 | Ca_desi_scaffold   | 162                            | [A/C]       | NA                                         |
| Ca_Desi_Chromosome_scaffold25459_164 | Ca_desi_scaffold   | 164                            | [A/C]       | NA                                         |
| Ca_Desi_Chromosome_scaffold25459_166 | Ca_desi_scaffold   | 166                            | [A/C]       | NA                                         |
| Ca_Desi_Chromosome_scaffold25459_169 | Ca_desi_scaffold   | 169                            | [T/C]       | NA                                         |
| Ca_Desi_Chromosome_scaffold25459_170 | Ca_desi_scaffold   | 170                            | [A/C]       | NA                                         |
| Ca_Desi_Chromosome_scaffold25459_173 | Ca_desi_scaffold   | 173                            | [T/C]       | NA                                         |
| Ca_Desi_Chromosome_scaffold25459_174 | Ca_desi_scaffold   | 174                            | [A/G]       | NA                                         |
| Ca_Desi_Chromosome_scaffold25459_175 | Ca_desi_scaffold   | 175                            | [A/G]       | NA                                         |
| Ca_Desi_Chromosome_scaffold25459_176 | Ca_desi_scaffold   | 176                            | [A/G]       | NA                                         |
| Ca_Desi_Chromosome_scaffold25459_182 | Ca_desi_scaffold   | 182                            | [T/C]       | NA                                         |
| Ca_Desi_Chromosome_scaffold25459_183 | Ca_desi_scaffold   | 183                            | [A/G]       | NA                                         |
| Ca_Desi_Chromosome_scaffold25459_186 | Ca_desi_scaffold   | 186                            | [T/C]       | NA                                         |
| Ca_Desi_Chromosome_scaffold25459_187 | Ca_desi_scaffold   | 187                            | [T/C]       | NA                                         |
| Ca_Desi_Chromosome_scaffold25459_192 | Ca_desi_scaffold   | 192                            | [T/C]       | NA                                         |
| Ca_Desi_Chromosome_scaffold25459_193 | Ca_desi_scaffold   | 193                            | [T/C]       | NA                                         |
| Ca_Desi_Chromosome_scaffold25505_615 | Ca_desi_scaffold   | 615                            | [G/T]       | NA                                         |
| Ca_Desi_Chromosome_scaffold25506_906 | Ca_desi_scaffold   | 906                            | [C/T]       | NA                                         |
| Ca_Desi_Chromosome_scaffold25634_180 | Ca_desi_scaffold   | 180                            | [T/G]       | NA                                         |
| Ca_Desi_Chromosome_scaffold25634_193 | Ca_desi_scaffold   | 193                            | [A/G]       | NA                                         |
| Ca_Desi_Chromosome_scaffold25636_353 | Ca_desi_scaffold   | 353                            | [A/C]       | NA                                         |
| Ca_Desi_Chromosome_scaffold25636_361 | Ca_desi_scaffold   | 361                            | [T/C]       | NA                                         |
| Ca_Desi_Chromosome_scaffold25636_365 | Ca_desi_scaffold   | 365                            | [G/C]       | NA                                         |
| Ca_Desi_Chromosome_scaffold25810_343 | Ca_desi_scaffold   | 343                            | [G/A]       | NA                                         |
| Ca_Desi_Chromosome_scaffold25810_387 | Ca_desi_scaffold   | 387                            | [A/G]       | NA                                         |
| Ca_Desi_Chromosome_scaffold25810_390 | Ca_desi_scaffold   | 390                            | [A/G]       | NA                                         |
| Ca_Desi_Chromosome_scaffold25810_391 | Ca_desi_scaffold   | 391                            | [C/G]       | NA                                         |
| Ca_Desi_Chromosome_scaffold25810_396 | Ca_desi_scaffold   | 396                            | [A/G]       | NA                                         |
| Ca_Desi_Chromosome_scaffold25810_401 | Ca_desi_scaffold   | 401                            | [T/C]       | NA                                         |
| Ca_Desi_Chromosome_scaffold25810_414 | Ca_desi_scaffold   | 414                            | [A/G]       | NA                                         |
| Ca_Desi_Chromosome_scaffold25810_421 | Ca_desi_scaffold   | 421                            | [T/C]       | NA                                         |
| Ca_Desi_Chromosome_scaffold25810_424 | Ca_desi_scaffold   | 424                            | [T/A]       | NA                                         |

| <b>SNP IDs</b>                | <b>Chromosomes</b> | <b>Physical positions (bp)</b> | <b>SNPs</b> | <b>NCBI SNPdb accession IDs (NCBI_ss#)</b> |
|-------------------------------|--------------------|--------------------------------|-------------|--------------------------------------------|
| Ca_Desi_Ch_scaffold25810_425  | Ca_desi_scaffold   | 425                            | [A/G]       | NA                                         |
| Ca_Desi_Ch_scaffold25810_428  | Ca_desi_scaffold   | 428                            | [A/G]       | NA                                         |
| Ca_Desi_Ch_scaffold25810_429  | Ca_desi_scaffold   | 429                            | [A/G]       | NA                                         |
| Ca_Desi_Ch_scaffold25810_432  | Ca_desi_scaffold   | 432                            | [A/G]       | NA                                         |
| Ca_Desi_Ch_scaffold25810_444  | Ca_desi_scaffold   | 444                            | [A/G]       | NA                                         |
| Ca_Desi_Ch_scaffold25810_446  | Ca_desi_scaffold   | 446                            | [A/G]       | NA                                         |
| Ca_Desi_Ch_scaffold25810_449  | Ca_desi_scaffold   | 449                            | [T/C]       | NA                                         |
| Ca_Desi_Ch_scaffold26049_1086 | Ca_desi_scaffold   | 1086                           | [A/T]       | NA                                         |
| Ca_Desi_Ch_scaffold26119_366  | Ca_desi_scaffold   | 366                            | [T/C]       | NA                                         |
| Ca_Desi_Ch_scaffold26119_367  | Ca_desi_scaffold   | 367                            | [G/T]       | NA                                         |
| Ca_Desi_Ch_scaffold26119_368  | Ca_desi_scaffold   | 368                            | [C/T]       | NA                                         |
| Ca_Desi_Ch_scaffold26119_369  | Ca_desi_scaffold   | 369                            | [C/T]       | NA                                         |
| Ca_Desi_Ch_scaffold26119_370  | Ca_desi_scaffold   | 370                            | [G/A]       | NA                                         |
| Ca_Desi_Ch_scaffold26119_371  | Ca_desi_scaffold   | 371                            | [T/C]       | NA                                         |
| Ca_Desi_Ch_scaffold26119_373  | Ca_desi_scaffold   | 373                            | [A/G]       | NA                                         |
| Ca_Desi_Ch_scaffold26119_375  | Ca_desi_scaffold   | 375                            | [A/G]       | NA                                         |
| Ca_Desi_Ch_scaffold26119_377  | Ca_desi_scaffold   | 377                            | [T/C]       | NA                                         |
| Ca_Desi_Ch_scaffold26119_378  | Ca_desi_scaffold   | 378                            | [A/G]       | NA                                         |
| Ca_Desi_Ch_scaffold26119_379  | Ca_desi_scaffold   | 379                            | [A/G]       | NA                                         |
| Ca_Desi_Ch_scaffold26119_380  | Ca_desi_scaffold   | 380                            | [A/G]       | NA                                         |
| Ca_Desi_Ch_scaffold26119_381  | Ca_desi_scaffold   | 381                            | [G/A]       | NA                                         |
| Ca_Desi_Ch_scaffold26119_384  | Ca_desi_scaffold   | 384                            | [T/C]       | NA                                         |
| Ca_Desi_Ch_scaffold26119_385  | Ca_desi_scaffold   | 385                            | [T/C]       | NA                                         |
| Ca_Desi_Ch_scaffold26119_386  | Ca_desi_scaffold   | 386                            | [A/G]       | NA                                         |
| Ca_Desi_Ch_scaffold26119_388  | Ca_desi_scaffold   | 388                            | [A/G]       | NA                                         |
| Ca_Desi_Ch_scaffold26119_389  | Ca_desi_scaffold   | 389                            | [T/C]       | NA                                         |
| Ca_Desi_Ch_scaffold26119_390  | Ca_desi_scaffold   | 390                            | [T/C]       | NA                                         |
| Ca_Desi_Ch_scaffold26119_391  | Ca_desi_scaffold   | 391                            | [A/G]       | NA                                         |
| Ca_Desi_Ch_scaffold26119_392  | Ca_desi_scaffold   | 392                            | [T/C]       | NA                                         |
| Ca_Desi_Ch_scaffold26119_393  | Ca_desi_scaffold   | 393                            | [A/G]       | NA                                         |
| Ca_Desi_Ch_scaffold26119_394  | Ca_desi_scaffold   | 394                            | [A/G]       | NA                                         |
| Ca_Desi_Ch_scaffold26119_395  | Ca_desi_scaffold   | 395                            | [C/T]       | NA                                         |
| Ca_Desi_Ch_scaffold26119_396  | Ca_desi_scaffold   | 396                            | [A/G]       | NA                                         |
| Ca_Desi_Ch_scaffold26119_399  | Ca_desi_scaffold   | 399                            | [A/G]       | NA                                         |

| <b>SNP IDs</b>                 | <b>Chromosomes</b> | <b>Physical positions (bp)</b> | <b>SNPs</b> | <b>NCBI SNPdb accession IDs (NCBI_ss#)</b> |
|--------------------------------|--------------------|--------------------------------|-------------|--------------------------------------------|
| Ca_Desig_Chr_scaffold26119_400 | Ca_desig_scaffold  | 400                            | [A/G]       | NA                                         |
| Ca_Desig_Chr_scaffold26119_401 | Ca_desig_scaffold  | 401                            | [T/C]       | NA                                         |
| Ca_Desig_Chr_scaffold26119_402 | Ca_desig_scaffold  | 402                            | [C/T]       | NA                                         |
| Ca_Desig_Chr_scaffold26119_403 | Ca_desig_scaffold  | 403                            | [T/C]       | NA                                         |
| Ca_Desig_Chr_scaffold26119_404 | Ca_desig_scaffold  | 404                            | [C/T]       | NA                                         |
| Ca_Desig_Chr_scaffold26119_405 | Ca_desig_scaffold  | 405                            | [A/G]       | NA                                         |
| Ca_Desig_Chr_scaffold26119_407 | Ca_desig_scaffold  | 407                            | [C/T]       | NA                                         |
| Ca_Desig_Chr_scaffold26119_408 | Ca_desig_scaffold  | 408                            | [G/A]       | NA                                         |
| Ca_Desig_Chr_scaffold26119_411 | Ca_desig_scaffold  | 411                            | [T/C]       | NA                                         |
| Ca_Desig_Chr_scaffold26119_412 | Ca_desig_scaffold  | 412                            | [G/C]       | NA                                         |
| Ca_Desig_Chr_scaffold26119_413 | Ca_desig_scaffold  | 413                            | [C/T]       | NA                                         |
| Ca_Desig_Chr_scaffold26119_414 | Ca_desig_scaffold  | 414                            | [T/C]       | NA                                         |
| Ca_Desig_Chr_scaffold26119_415 | Ca_desig_scaffold  | 415                            | [C/T]       | NA                                         |
| Ca_Desig_Chr_scaffold26119_416 | Ca_desig_scaffold  | 416                            | [C/T]       | NA                                         |
| Ca_Desig_Chr_scaffold26119_418 | Ca_desig_scaffold  | 418                            | [C/T]       | NA                                         |
| Ca_Desig_Chr_scaffold26119_419 | Ca_desig_scaffold  | 419                            | [G/A]       | NA                                         |
| Ca_Desig_Chr_scaffold26119_420 | Ca_desig_scaffold  | 420                            | [A/G]       | NA                                         |
| Ca_Desig_Chr_scaffold26119_422 | Ca_desig_scaffold  | 422                            | [T/C]       | NA                                         |
| Ca_Desig_Chr_scaffold26119_424 | Ca_desig_scaffold  | 424                            | [G/A]       | NA                                         |
| Ca_Desig_Chr_scaffold26119_425 | Ca_desig_scaffold  | 425                            | [C/A]       | NA                                         |
| Ca_Desig_Chr_scaffold26119_426 | Ca_desig_scaffold  | 426                            | [T/C]       | NA                                         |
| Ca_Desig_Chr_scaffold26119_427 | Ca_desig_scaffold  | 427                            | [A/G]       | NA                                         |
| Ca_Desig_Chr_scaffold26119_461 | Ca_desig_scaffold  | 461                            | [A/G]       | NA                                         |
| Ca_Desig_Chr_scaffold26119_463 | Ca_desig_scaffold  | 463                            | [A/G]       | NA                                         |
| Ca_Desig_Chr_scaffold26119_465 | Ca_desig_scaffold  | 465                            | [A/G]       | NA                                         |
| Ca_Desig_Chr_scaffold26119_467 | Ca_desig_scaffold  | 467                            | [G/A]       | NA                                         |
| Ca_Desig_Chr_scaffold26119_468 | Ca_desig_scaffold  | 468                            | [A/G]       | NA                                         |
| Ca_Desig_Chr_scaffold26119_469 | Ca_desig_scaffold  | 469                            | [T/C]       | NA                                         |
| Ca_Desig_Chr_scaffold26119_471 | Ca_desig_scaffold  | 471                            | [T/C]       | NA                                         |
| Ca_Desig_Chr_scaffold26119_472 | Ca_desig_scaffold  | 472                            | [A/G]       | NA                                         |
| Ca_Desig_Chr_scaffold26119_473 | Ca_desig_scaffold  | 473                            | [T/C]       | NA                                         |
| Ca_Desig_Chr_scaffold26119_474 | Ca_desig_scaffold  | 474                            | [G/A]       | NA                                         |
| Ca_Desig_Chr_scaffold26119_475 | Ca_desig_scaffold  | 475                            | [A/G]       | NA                                         |
| Ca_Desig_Chr_scaffold26119_476 | Ca_desig_scaffold  | 476                            | [A/G]       | NA                                         |

| <b>SNP IDs</b>                 | <b>Chromosomes</b> | <b>Physical positions (bp)</b> | <b>SNPs</b> | <b>NCBI SNPdb accession IDs (NCBI_ss#)</b> |
|--------------------------------|--------------------|--------------------------------|-------------|--------------------------------------------|
| Ca_Desig_Chr_scaffold26119_477 | Ca_desig_scaffold  | 477                            | [T/C]       | NA                                         |
| Ca_Desig_Chr_scaffold26119_478 | Ca_desig_scaffold  | 478                            | [A/G]       | NA                                         |
| Ca_Desig_Chr_scaffold26119_479 | Ca_desig_scaffold  | 479                            | [G/A]       | NA                                         |
| Ca_Desig_Chr_scaffold26119_481 | Ca_desig_scaffold  | 481                            | [C/A]       | NA                                         |
| Ca_Desig_Chr_scaffold26119_482 | Ca_desig_scaffold  | 482                            | [A/G]       | NA                                         |
| Ca_Desig_Chr_scaffold26119_483 | Ca_desig_scaffold  | 483                            | [A/G]       | NA                                         |
| Ca_Desig_Chr_scaffold26119_485 | Ca_desig_scaffold  | 485                            | [A/G]       | NA                                         |
| Ca_Desig_Chr_scaffold26119_486 | Ca_desig_scaffold  | 486                            | [A/G]       | NA                                         |
| Ca_Desig_Chr_scaffold26119_487 | Ca_desig_scaffold  | 487                            | [A/G]       | NA                                         |
| Ca_Desig_Chr_scaffold26119_489 | Ca_desig_scaffold  | 489                            | [A/G]       | NA                                         |
| Ca_Desig_Chr_scaffold26119_493 | Ca_desig_scaffold  | 493                            | [T/C]       | NA                                         |
| Ca_Desig_Chr_scaffold26119_494 | Ca_desig_scaffold  | 494                            | [A/G]       | NA                                         |
| Ca_Desig_Chr_scaffold26119_497 | Ca_desig_scaffold  | 497                            | [T/C]       | NA                                         |
| Ca_Desig_Chr_scaffold26119_498 | Ca_desig_scaffold  | 498                            | [T/C]       | NA                                         |
| Ca_Desig_Chr_scaffold26119_499 | Ca_desig_scaffold  | 499                            | [G/T]       | NA                                         |
| Ca_Desig_Chr_scaffold26119_500 | Ca_desig_scaffold  | 500                            | [A/G]       | NA                                         |
| Ca_Desig_Chr_scaffold26119_501 | Ca_desig_scaffold  | 501                            | [T/C]       | NA                                         |
| Ca_Desig_Chr_scaffold26119_502 | Ca_desig_scaffold  | 502                            | [T/C]       | NA                                         |
| Ca_Desig_Chr_scaffold26119_503 | Ca_desig_scaffold  | 503                            | [A/G]       | NA                                         |
| Ca_Desig_Chr_scaffold26119_505 | Ca_desig_scaffold  | 505                            | [A/G]       | NA                                         |
| Ca_Desig_Chr_scaffold26119_507 | Ca_desig_scaffold  | 507                            | [G/A]       | NA                                         |
| Ca_Desig_Chr_scaffold26119_508 | Ca_desig_scaffold  | 508                            | [A/G]       | NA                                         |
| Ca_Desig_Chr_scaffold26119_509 | Ca_desig_scaffold  | 509                            | [A/G]       | NA                                         |
| Ca_Desig_Chr_scaffold26119_511 | Ca_desig_scaffold  | 511                            | [T/C]       | NA                                         |
| Ca_Desig_Chr_scaffold26119_512 | Ca_desig_scaffold  | 512                            | [A/G]       | NA                                         |
| Ca_Desig_Chr_scaffold26119_513 | Ca_desig_scaffold  | 513                            | [A/G]       | NA                                         |
| Ca_Desig_Chr_scaffold26119_515 | Ca_desig_scaffold  | 515                            | [C/T]       | NA                                         |
| Ca_Desig_Chr_scaffold26119_516 | Ca_desig_scaffold  | 516                            | [A/G]       | NA                                         |
| Ca_Desig_Chr_scaffold26119_518 | Ca_desig_scaffold  | 518                            | [C/T]       | NA                                         |
| Ca_Desig_Chr_scaffold26119_519 | Ca_desig_scaffold  | 519                            | [A/G]       | NA                                         |
| Ca_Desig_Chr_scaffold26119_520 | Ca_desig_scaffold  | 520                            | [A/G]       | NA                                         |
| Ca_Desig_Chr_scaffold26119_542 | Ca_desig_scaffold  | 542                            | [T/G]       | NA                                         |
| Ca_Desig_Chr_scaffold26119_548 | Ca_desig_scaffold  | 548                            | [T/C]       | NA                                         |
| Ca_Desig_Chr_scaffold26119_550 | Ca_desig_scaffold  | 550                            | [G/C]       | NA                                         |

| <b>SNP IDs</b>               | <b>Chromosomes</b> | <b>Physical positions (bp)</b> | <b>SNPs</b> | <b>NCBI SNPdb accession IDs (NCBI_ss#)</b> |
|------------------------------|--------------------|--------------------------------|-------------|--------------------------------------------|
| Ca_Desi_Ch_scaffold26119_552 | Ca_desi_scaffold   | 552                            | [T/C]       | NA                                         |
| Ca_Desi_Ch_scaffold26119_554 | Ca_desi_scaffold   | 554                            | [G/T]       | NA                                         |
| Ca_Desi_Ch_scaffold26119_556 | Ca_desi_scaffold   | 556                            | [T/C]       | NA                                         |
| Ca_Desi_Ch_scaffold26119_558 | Ca_desi_scaffold   | 558                            | [A/T]       | NA                                         |
| Ca_Desi_Ch_scaffold26119_563 | Ca_desi_scaffold   | 563                            | [A/T]       | NA                                         |
| Ca_Desi_Ch_scaffold26119_565 | Ca_desi_scaffold   | 565                            | [A/C]       | NA                                         |
| Ca_Desi_Ch_scaffold26119_570 | Ca_desi_scaffold   | 570                            | [C/A]       | NA                                         |
| Ca_Desi_Ch_scaffold26119_572 | Ca_desi_scaffold   | 572                            | [G/A]       | NA                                         |
| Ca_Desi_Ch_scaffold26119_575 | Ca_desi_scaffold   | 575                            | [T/C]       | NA                                         |
| Ca_Desi_Ch_scaffold26119_584 | Ca_desi_scaffold   | 584                            | [C/A]       | NA                                         |
| Ca_Desi_Ch_scaffold26119_770 | Ca_desi_scaffold   | 770                            | [T/G]       | NA                                         |
| Ca_Desi_Ch_scaffold26119_775 | Ca_desi_scaffold   | 775                            | [A/C]       | NA                                         |
| Ca_Desi_Ch_scaffold26119_786 | Ca_desi_scaffold   | 786                            | [T/C]       | NA                                         |
| Ca_Desi_Ch_scaffold26119_794 | Ca_desi_scaffold   | 794                            | [T/C]       | NA                                         |
| Ca_Desi_Ch_scaffold26119_811 | Ca_desi_scaffold   | 811                            | [A/G]       | NA                                         |
| Ca_Desi_Ch_scaffold26119_850 | Ca_desi_scaffold   | 850                            | [A/G]       | NA                                         |
| Ca_Desi_Ch_scaffold26119_859 | Ca_desi_scaffold   | 859                            | [A/G]       | NA                                         |
| Ca_Desi_Ch_scaffold26119_866 | Ca_desi_scaffold   | 866                            | [T/C]       | NA                                         |
| Ca_Desi_Ch_scaffold26119_889 | Ca_desi_scaffold   | 889                            | [A/G]       | NA                                         |
| Ca_Desi_Ch_scaffold26121_690 | Ca_desi_scaffold   | 690                            | [A/G]       | NA                                         |
| Ca_Desi_Ch_scaffold26331_179 | Ca_desi_scaffold   | 179                            | [A/G]       | NA                                         |
| Ca_Desi_Ch_scaffold26551_526 | Ca_desi_scaffold   | 526                            | [T/C]       | NA                                         |
| Ca_Desi_Ch_scaffold26551_527 | Ca_desi_scaffold   | 527                            | [T/C]       | NA                                         |
| Ca_Desi_Ch_scaffold26551_529 | Ca_desi_scaffold   | 529                            | [A/G]       | NA                                         |
| Ca_Desi_Ch_scaffold26551_530 | Ca_desi_scaffold   | 530                            | [T/C]       | NA                                         |
| Ca_Desi_Ch_scaffold26551_533 | Ca_desi_scaffold   | 533                            | [G/A]       | NA                                         |
| Ca_Desi_Ch_scaffold26551_535 | Ca_desi_scaffold   | 535                            | [T/C]       | NA                                         |
| Ca_Desi_Ch_scaffold26551_536 | Ca_desi_scaffold   | 536                            | [T/C]       | NA                                         |
| Ca_Desi_Ch_scaffold26551_537 | Ca_desi_scaffold   | 537                            | [A/G]       | NA                                         |
| Ca_Desi_Ch_scaffold26551_538 | Ca_desi_scaffold   | 538                            | [A/G]       | NA                                         |
| Ca_Desi_Ch_scaffold26551_541 | Ca_desi_scaffold   | 541                            | [G/A]       | NA                                         |
| Ca_Desi_Ch_scaffold26551_542 | Ca_desi_scaffold   | 542                            | [G/A]       | NA                                         |
| Ca_Desi_Ch_scaffold26551_544 | Ca_desi_scaffold   | 544                            | [A/G]       | NA                                         |
| Ca_Desi_Ch_scaffold26551_546 | Ca_desi_scaffold   | 546                            | [T/C]       | NA                                         |

| <b>SNP IDs</b>                 | <b>Chromosomes</b> | <b>Physical positions (bp)</b> | <b>SNPs</b> | <b>NCBI SNPdb accession IDs (NCBI_ss#)</b> |
|--------------------------------|--------------------|--------------------------------|-------------|--------------------------------------------|
| Ca_Desig_Chr_scaffold26551_547 | Ca_desig_scaffold  | 547                            | [T/C]       | NA                                         |
| Ca_Desig_Chr_scaffold26551_548 | Ca_desig_scaffold  | 548                            | [T/C]       | NA                                         |
| Ca_Desig_Chr_scaffold26551_549 | Ca_desig_scaffold  | 549                            | [C/T]       | NA                                         |
| Ca_Desig_Chr_scaffold26551_550 | Ca_desig_scaffold  | 550                            | [G/A]       | NA                                         |
| Ca_Desig_Chr_scaffold26551_552 | Ca_desig_scaffold  | 552                            | [A/G]       | NA                                         |
| Ca_Desig_Chr_scaffold26551_554 | Ca_desig_scaffold  | 554                            | [A/G]       | NA                                         |
| Ca_Desig_Chr_scaffold26551_555 | Ca_desig_scaffold  | 555                            | [T/C]       | NA                                         |
| Ca_Desig_Chr_scaffold26551_556 | Ca_desig_scaffold  | 556                            | [C/T]       | NA                                         |
| Ca_Desig_Chr_scaffold26551_557 | Ca_desig_scaffold  | 557                            | [T/C]       | NA                                         |
| Ca_Desig_Chr_scaffold26551_559 | Ca_desig_scaffold  | 559                            | [C/T]       | NA                                         |
| Ca_Desig_Chr_scaffold26551_560 | Ca_desig_scaffold  | 560                            | [A/G]       | NA                                         |
| Ca_Desig_Chr_scaffold26551_563 | Ca_desig_scaffold  | 563                            | [A/G]       | NA                                         |
| Ca_Desig_Chr_scaffold26551_568 | Ca_desig_scaffold  | 568                            | [A/G]       | NA                                         |
| Ca_Desig_Chr_scaffold26551_569 | Ca_desig_scaffold  | 569                            | [A/G]       | NA                                         |
| Ca_Desig_Chr_scaffold26551_571 | Ca_desig_scaffold  | 571                            | [T/C]       | NA                                         |
| Ca_Desig_Chr_scaffold26551_572 | Ca_desig_scaffold  | 572                            | [A/G]       | NA                                         |
| Ca_Desig_Chr_scaffold26551_575 | Ca_desig_scaffold  | 575                            | [A/G]       | NA                                         |
| Ca_Desig_Chr_scaffold26551_576 | Ca_desig_scaffold  | 576                            | [T/C]       | NA                                         |
| Ca_Desig_Chr_scaffold26551_577 | Ca_desig_scaffold  | 577                            | [A/G]       | NA                                         |
| Ca_Desig_Chr_scaffold26551_578 | Ca_desig_scaffold  | 578                            | [T/C]       | NA                                         |
| Ca_Desig_Chr_scaffold26551_579 | Ca_desig_scaffold  | 579                            | [T/C]       | NA                                         |
| Ca_Desig_Chr_scaffold26551_581 | Ca_desig_scaffold  | 581                            | [A/G]       | NA                                         |
| Ca_Desig_Chr_scaffold26551_583 | Ca_desig_scaffold  | 583                            | [C/T]       | NA                                         |
| Ca_Desig_Chr_scaffold26551_585 | Ca_desig_scaffold  | 585                            | [A/G]       | NA                                         |
| Ca_Desig_Chr_scaffold26551_618 | Ca_desig_scaffold  | 618                            | [T/C]       | NA                                         |
| Ca_Desig_Chr_scaffold26551_620 | Ca_desig_scaffold  | 620                            | [T/C]       | NA                                         |
| Ca_Desig_Chr_scaffold26551_628 | Ca_desig_scaffold  | 628                            | [T/C]       | NA                                         |
| Ca_Desig_Chr_scaffold26551_638 | Ca_desig_scaffold  | 638                            | [A/G]       | NA                                         |
| Ca_Desig_Chr_scaffold26551_640 | Ca_desig_scaffold  | 640                            | [A/G]       | NA                                         |
| Ca_Desig_Chr_scaffold26551_642 | Ca_desig_scaffold  | 642                            | [T/C]       | NA                                         |
| Ca_Desig_Chr_scaffold26551_644 | Ca_desig_scaffold  | 644                            | [T/C]       | NA                                         |
| Ca_Desig_Chr_scaffold26551_650 | Ca_desig_scaffold  | 650                            | [T/C]       | NA                                         |
| Ca_Desig_Chr_scaffold26551_653 | Ca_desig_scaffold  | 653                            | [A/G]       | NA                                         |
| Ca_Desig_Chr_scaffold26551_655 | Ca_desig_scaffold  | 655                            | [A/G]       | NA                                         |

| <b>SNP IDs</b>               | <b>Chromosomes</b> | <b>Physical positions (bp)</b> | <b>SNPs</b> | <b>NCBI SNPdb accession IDs (NCBI_ss#)</b> |
|------------------------------|--------------------|--------------------------------|-------------|--------------------------------------------|
| Ca_Desi_Ch_scaffold26551_657 | Ca_desi_scaffold   | 657                            | [C/T]       | NA                                         |
| Ca_Desi_Ch_scaffold26551_659 | Ca_desi_scaffold   | 659                            | [A/G]       | NA                                         |
| Ca_Desi_Ch_scaffold26551_660 | Ca_desi_scaffold   | 660                            | [G/T]       | NA                                         |
| Ca_Desi_Ch_scaffold26551_661 | Ca_desi_scaffold   | 661                            | [C/A]       | NA                                         |
| Ca_Desi_Ch_scaffold26551_662 | Ca_desi_scaffold   | 662                            | [T/C]       | NA                                         |
| Ca_Desi_Ch_scaffold26551_663 | Ca_desi_scaffold   | 663                            | [C/T]       | NA                                         |
| Ca_Desi_Ch_scaffold26551_667 | Ca_desi_scaffold   | 667                            | [T/C]       | NA                                         |
| Ca_Desi_Ch_scaffold26551_668 | Ca_desi_scaffold   | 668                            | [A/T]       | NA                                         |
| Ca_Desi_Ch_scaffold26551_671 | Ca_desi_scaffold   | 671                            | [T/C]       | NA                                         |
| Ca_Desi_Ch_scaffold26551_672 | Ca_desi_scaffold   | 672                            | [G/A]       | NA                                         |
| Ca_Desi_Ch_scaffold26551_673 | Ca_desi_scaffold   | 673                            | [A/G]       | NA                                         |
| Ca_Desi_Ch_scaffold26551_674 | Ca_desi_scaffold   | 674                            | [A/G]       | NA                                         |
| Ca_Desi_Ch_scaffold26551_677 | Ca_desi_scaffold   | 677                            | [T/C]       | NA                                         |
| Ca_Desi_Ch_scaffold26551_678 | Ca_desi_scaffold   | 678                            | [A/G]       | NA                                         |
| Ca_Desi_Ch_scaffold26551_679 | Ca_desi_scaffold   | 679                            | [A/G]       | NA                                         |
| Ca_Desi_Ch_scaffold26551_680 | Ca_desi_scaffold   | 680                            | [G/A]       | NA                                         |
| Ca_Desi_Ch_scaffold26551_682 | Ca_desi_scaffold   | 682                            | [T/C]       | NA                                         |
| Ca_Desi_Ch_scaffold26551_683 | Ca_desi_scaffold   | 683                            | [A/G]       | NA                                         |
| Ca_Desi_Ch_scaffold26551_684 | Ca_desi_scaffold   | 684                            | [A/G]       | NA                                         |
| Ca_Desi_Ch_scaffold26551_686 | Ca_desi_scaffold   | 686                            | [T/C]       | NA                                         |
| Ca_Desi_Ch_scaffold26551_688 | Ca_desi_scaffold   | 688                            | [A/G]       | NA                                         |
| Ca_Desi_Ch_scaffold26551_689 | Ca_desi_scaffold   | 689                            | [A/G]       | NA                                         |
| Ca_Desi_Ch_scaffold26551_690 | Ca_desi_scaffold   | 690                            | [G/A]       | NA                                         |
| Ca_Desi_Ch_scaffold26551_691 | Ca_desi_scaffold   | 691                            | [T/C]       | NA                                         |
| Ca_Desi_Ch_scaffold26551_692 | Ca_desi_scaffold   | 692                            | [G/A]       | NA                                         |
| Ca_Desi_Ch_scaffold26551_693 | Ca_desi_scaffold   | 693                            | [G/A]       | NA                                         |
| Ca_Desi_Ch_scaffold26551_694 | Ca_desi_scaffold   | 694                            | [T/C]       | NA                                         |
| Ca_Desi_Ch_scaffold26551_695 | Ca_desi_scaffold   | 695                            | [G/A]       | NA                                         |
| Ca_Desi_Ch_scaffold26551_696 | Ca_desi_scaffold   | 696                            | [T/C]       | NA                                         |
| Ca_Desi_Ch_scaffold26551_697 | Ca_desi_scaffold   | 697                            | [G/A]       | NA                                         |
| Ca_Desi_Ch_scaffold26551_698 | Ca_desi_scaffold   | 698                            | [G/A]       | NA                                         |
| Ca_Desi_Ch_scaffold26551_700 | Ca_desi_scaffold   | 700                            | [T/C]       | NA                                         |
| Ca_Desi_Ch_scaffold26551_702 | Ca_desi_scaffold   | 702                            | [A/G]       | NA                                         |
| Ca_Desi_Ch_scaffold26551_703 | Ca_desi_scaffold   | 703                            | [A/G]       | NA                                         |



| <b>SNP IDs</b>                | <b>Chromosomes</b> | <b>Physical positions (bp)</b> | <b>SNPs</b> | <b>NCBI SNPdb accession IDs (NCBI_ss#)</b> |
|-------------------------------|--------------------|--------------------------------|-------------|--------------------------------------------|
| Ca_Desi_Ch_scaffold26551_704  | Ca_desi_scaffold   | 704                            | [T/C]       | NA                                         |
| Ca_Desi_Ch_scaffold26551_706  | Ca_desi_scaffold   | 706                            | [T/C]       | NA                                         |
| Ca_Desi_Ch_scaffold26551_707  | Ca_desi_scaffold   | 707                            | [T/C]       | NA                                         |
| Ca_Desi_Ch_scaffold26551_708  | Ca_desi_scaffold   | 708                            | [T/C]       | NA                                         |
| Ca_Desi_Ch_scaffold26551_709  | Ca_desi_scaffold   | 709                            | [T/C]       | NA                                         |
| Ca_Desi_Ch_scaffold26551_711  | Ca_desi_scaffold   | 711                            | [C/T]       | NA                                         |
| Ca_Desi_Ch_scaffold26551_712  | Ca_desi_scaffold   | 712                            | [A/G]       | NA                                         |
| Ca_Desi_Ch_scaffold26551_714  | Ca_desi_scaffold   | 714                            | [A/G]       | NA                                         |
| Ca_Desi_Ch_scaffold26551_716  | Ca_desi_scaffold   | 716                            | [G/A]       | NA                                         |
| Ca_Desi_Ch_scaffold26551_717  | Ca_desi_scaffold   | 717                            | [C/T]       | NA                                         |
| Ca_Desi_Ch_scaffold26551_718  | Ca_desi_scaffold   | 718                            | [C/T]       | NA                                         |
| Ca_Desi_Ch_scaffold26551_766  | Ca_desi_scaffold   | 766                            | [T/G]       | NA                                         |
| Ca_Desi_Ch_scaffold26551_777  | Ca_desi_scaffold   | 777                            | [T/C]       | NA                                         |
| Ca_Desi_Ch_scaffold26551_1052 | Ca_desi_scaffold   | 1052                           | [A/G]       | NA                                         |
| Ca_Desi_Ch_scaffold26551_1070 | Ca_desi_scaffold   | 1070                           | [T/A]       | NA                                         |
| Ca_Desi_Ch_scaffold26551_1078 | Ca_desi_scaffold   | 1078                           | [T/A]       | NA                                         |
| Ca_Desi_Ch_scaffold26551_1086 | Ca_desi_scaffold   | 1086                           | [A/G]       | NA                                         |
| Ca_Desi_Ch_scaffold26551_1087 | Ca_desi_scaffold   | 1087                           | [T/C]       | NA                                         |
| Ca_Desi_Ch_scaffold26551_1090 | Ca_desi_scaffold   | 1090                           | [A/G]       | NA                                         |
| Ca_Desi_Ch_scaffold26551_1091 | Ca_desi_scaffold   | 1091                           | [T/C]       | NA                                         |
| Ca_Desi_Ch_scaffold26551_1096 | Ca_desi_scaffold   | 1096                           | [T/G]       | NA                                         |
| Ca_Desi_Ch_scaffold26551_1098 | Ca_desi_scaffold   | 1098                           | [A/G]       | NA                                         |
| Ca_Desi_Ch_scaffold26551_1099 | Ca_desi_scaffold   | 1099                           | [T/C]       | NA                                         |
| Ca_Desi_Ch_scaffold26551_1106 | Ca_desi_scaffold   | 1106                           | [A/G]       | NA                                         |
| Ca_Desi_Ch_scaffold26551_1108 | Ca_desi_scaffold   | 1108                           | [T/C]       | NA                                         |
| Ca_Desi_Ch_scaffold26728_993  | Ca_desi_scaffold   | 993                            | [A/G]       | NA                                         |
| Ca_Desi_Ch_scaffold26744_227  | Ca_desi_scaffold   | 227                            | [A/C]       | NA                                         |
| Ca_Desi_Ch_scaffold26744_229  | Ca_desi_scaffold   | 229                            | [A/C]       | NA                                         |
| Ca_Desi_Ch_scaffold26744_236  | Ca_desi_scaffold   | 236                            | [A/G]       | NA                                         |
| Ca_Desi_Ch_scaffold26744_243  | Ca_desi_scaffold   | 243                            | [T/C]       | NA                                         |
| Ca_Desi_Ch_scaffold26744_248  | Ca_desi_scaffold   | 248                            | [T/G]       | NA                                         |
| Ca_Desi_Ch_scaffold26744_254  | Ca_desi_scaffold   | 254                            | [C/T]       | NA                                         |
| Ca_Desi_Ch_scaffold26744_256  | Ca_desi_scaffold   | 256                            | [T/C]       | NA                                         |
| Ca_Desi_Ch_scaffold26744_269  | Ca_desi_scaffold   | 269                            | [A/G]       | NA                                         |

| <b>SNP IDs</b>                  | <b>Chromosomes</b> | <b>Physical positions (bp)</b> | <b>SNPs</b> | <b>NCBI SNPdb accession IDs (NCBI_ss#)</b> |
|---------------------------------|--------------------|--------------------------------|-------------|--------------------------------------------|
| Ca_Desig_Chr_scaffold26758_166  | Ca_desig_scaffold  | 166                            | [A/T]       | NA                                         |
| Ca_Desig_Chr_scaffold27005_269  | Ca_desig_scaffold  | 269                            | [A/C]       | NA                                         |
| Ca_Desig_Chr_scaffold27005_357  | Ca_desig_scaffold  | 357                            | [T/G]       | NA                                         |
| Ca_Desig_Chr_scaffold27005_824  | Ca_desig_scaffold  | 824                            | [C/T]       | NA                                         |
| Ca_Desig_Chr_scaffold27005_846  | Ca_desig_scaffold  | 846                            | [A/C]       | NA                                         |
| Ca_Desig_Chr_scaffold27005_848  | Ca_desig_scaffold  | 848                            | [A/G]       | NA                                         |
| Ca_Desig_Chr_scaffold27266_59   | Ca_desig_scaffold  | 59                             | [A/T]       | NA                                         |
| Ca_Desig_Chr_scaffold27266_88   | Ca_desig_scaffold  | 88                             | [T/G]       | NA                                         |
| Ca_Desig_Chr_scaffold27395_1092 | Ca_desig_scaffold  | 1092                           | [G/A]       | NA                                         |
| Ca_Desig_Chr_scaffold27395_1114 | Ca_desig_scaffold  | 1114                           | [A/C]       | NA                                         |
| Ca_Desig_Chr_scaffold27395_1127 | Ca_desig_scaffold  | 1127                           | [C/A]       | NA                                         |
| Ca_Desig_Chr_scaffold27395_1132 | Ca_desig_scaffold  | 1132                           | [G/A]       | NA                                         |
| Ca_Desig_Chr_scaffold27560_1065 | Ca_desig_scaffold  | 1065                           | [C/G]       | NA                                         |
| Ca_Desig_Chr_scaffold27560_1067 | Ca_desig_scaffold  | 1067                           | [G/T]       | NA                                         |
| Ca_Desig_Chr_scaffold27560_1070 | Ca_desig_scaffold  | 1070                           | [A/C]       | NA                                         |
| Ca_Desig_Chr_scaffold27560_1078 | Ca_desig_scaffold  | 1078                           | [G/A]       | NA                                         |
| Ca_Desig_Chr_scaffold27693_483  | Ca_desig_scaffold  | 483                            | [A/G]       | NA                                         |
| Ca_Desig_Chr_scaffold27693_484  | Ca_desig_scaffold  | 484                            | [G/A]       | NA                                         |
| Ca_Desig_Chr_scaffold27693_485  | Ca_desig_scaffold  | 485                            | [C/A]       | NA                                         |
| Ca_Desig_Chr_scaffold27693_486  | Ca_desig_scaffold  | 486                            | [T/C]       | NA                                         |
| Ca_Desig_Chr_scaffold27693_487  | Ca_desig_scaffold  | 487                            | [A/G]       | NA                                         |
| Ca_Desig_Chr_scaffold27693_488  | Ca_desig_scaffold  | 488                            | [A/G]       | NA                                         |
| Ca_Desig_Chr_scaffold27693_489  | Ca_desig_scaffold  | 489                            | [T/C]       | NA                                         |
| Ca_Desig_Chr_scaffold27693_490  | Ca_desig_scaffold  | 490                            | [T/C]       | NA                                         |
| Ca_Desig_Chr_scaffold27693_491  | Ca_desig_scaffold  | 491                            | [C/T]       | NA                                         |
| Ca_Desig_Chr_scaffold27693_492  | Ca_desig_scaffold  | 492                            | [A/G]       | NA                                         |
| Ca_Desig_Chr_scaffold27693_494  | Ca_desig_scaffold  | 494                            | [G/A]       | NA                                         |
| Ca_Desig_Chr_scaffold27693_495  | Ca_desig_scaffold  | 495                            | [A/T]       | NA                                         |
| Ca_Desig_Chr_scaffold27693_496  | Ca_desig_scaffold  | 496                            | [C/A]       | NA                                         |
| Ca_Desig_Chr_scaffold27693_497  | Ca_desig_scaffold  | 497                            | [T/C]       | NA                                         |
| Ca_Desig_Chr_scaffold27693_498  | Ca_desig_scaffold  | 498                            | [C/A]       | NA                                         |
| Ca_Desig_Chr_scaffold27693_499  | Ca_desig_scaffold  | 499                            | [C/T]       | NA                                         |
| Ca_Desig_Chr_scaffold27693_500  | Ca_desig_scaffold  | 500                            | [A/G]       | NA                                         |
| Ca_Desig_Chr_scaffold27693_501  | Ca_desig_scaffold  | 501                            | [T/C]       | NA                                         |

| <b>SNP IDs</b>               | <b>Chromosomes</b> | <b>Physical positions (bp)</b> | <b>SNPs</b> | <b>NCBI SNPdb accession IDs (NCBI_ss#)</b> |
|------------------------------|--------------------|--------------------------------|-------------|--------------------------------------------|
| Ca_Desi_Ch_scaffold27693_502 | Ca_desi_scaffold   | 502                            | [T/C]       | NA                                         |
| Ca_Desi_Ch_scaffold27693_503 | Ca_desi_scaffold   | 503                            | [T/C]       | NA                                         |
| Ca_Desi_Ch_scaffold27693_504 | Ca_desi_scaffold   | 504                            | [T/C]       | NA                                         |
| Ca_Desi_Ch_scaffold27693_507 | Ca_desi_scaffold   | 507                            | [A/T]       | NA                                         |
| Ca_Desi_Ch_scaffold27693_563 | Ca_desi_scaffold   | 563                            | [C/A]       | NA                                         |
| Ca_Desi_Ch_scaffold27693_565 | Ca_desi_scaffold   | 565                            | [T/C]       | NA                                         |
| Ca_Desi_Ch_scaffold27693_569 | Ca_desi_scaffold   | 569                            | [C/A]       | NA                                         |
| Ca_Desi_Ch_scaffold27693_970 | Ca_desi_scaffold   | 970                            | [T/C]       | NA                                         |
| Ca_Desi_Ch_scaffold27695_269 | Ca_desi_scaffold   | 269                            | [A/G]       | NA                                         |
| Ca_Desi_Ch_scaffold27695_270 | Ca_desi_scaffold   | 270                            | [A/G]       | NA                                         |
| Ca_Desi_Ch_scaffold27695_273 | Ca_desi_scaffold   | 273                            | [A/G]       | NA                                         |
| Ca_Desi_Ch_scaffold27695_274 | Ca_desi_scaffold   | 274                            | [A/C]       | NA                                         |
| Ca_Desi_Ch_scaffold27695_278 | Ca_desi_scaffold   | 278                            | [T/C]       | NA                                         |
| Ca_Desi_Ch_scaffold27695_281 | Ca_desi_scaffold   | 281                            | [T/C]       | NA                                         |
| Ca_Desi_Ch_scaffold27695_287 | Ca_desi_scaffold   | 287                            | [A/G]       | NA                                         |
| Ca_Desi_Ch_scaffold27695_289 | Ca_desi_scaffold   | 289                            | [G/A]       | NA                                         |
| Ca_Desi_Ch_scaffold27695_290 | Ca_desi_scaffold   | 290                            | [A/G]       | NA                                         |
| Ca_Desi_Ch_scaffold27695_291 | Ca_desi_scaffold   | 291                            | [A/G]       | NA                                         |
| Ca_Desi_Ch_scaffold27695_293 | Ca_desi_scaffold   | 293                            | [T/C]       | NA                                         |
| Ca_Desi_Ch_scaffold27695_295 | Ca_desi_scaffold   | 295                            | [T/C]       | NA                                         |
| Ca_Desi_Ch_scaffold27695_298 | Ca_desi_scaffold   | 298                            | [T/C]       | NA                                         |
| Ca_Desi_Ch_scaffold27695_299 | Ca_desi_scaffold   | 299                            | [A/G]       | NA                                         |
| Ca_Desi_Ch_scaffold27695_300 | Ca_desi_scaffold   | 300                            | [T/C]       | NA                                         |
| Ca_Desi_Ch_scaffold27695_305 | Ca_desi_scaffold   | 305                            | [T/C]       | NA                                         |
| Ca_Desi_Ch_scaffold27695_307 | Ca_desi_scaffold   | 307                            | [C/T]       | NA                                         |
| Ca_Desi_Ch_scaffold27695_308 | Ca_desi_scaffold   | 308                            | [C/T]       | NA                                         |
| Ca_Desi_Ch_scaffold27695_310 | Ca_desi_scaffold   | 310                            | [A/G]       | NA                                         |
| Ca_Desi_Ch_scaffold27695_311 | Ca_desi_scaffold   | 311                            | [T/C]       | NA                                         |
| Ca_Desi_Ch_scaffold27695_315 | Ca_desi_scaffold   | 315                            | [T/C]       | NA                                         |
| Ca_Desi_Ch_scaffold27695_317 | Ca_desi_scaffold   | 317                            | [T/C]       | NA                                         |
| Ca_Desi_Ch_scaffold27695_320 | Ca_desi_scaffold   | 320                            | [A/G]       | NA                                         |
| Ca_Desi_Ch_scaffold27695_326 | Ca_desi_scaffold   | 326                            | [A/G]       | NA                                         |
| Ca_Desi_Ch_scaffold27695_328 | Ca_desi_scaffold   | 328                            | [A/G]       | NA                                         |
| Ca_Desi_Ch_scaffold27695_953 | Ca_desi_scaffold   | 953                            | [A/G]       | NA                                         |

| <b>SNP IDs</b>                | <b>Chromosomes</b> | <b>Physical positions (bp)</b> | <b>SNPs</b> | <b>NCBI SNPdb accession IDs (NCBI_ss#)</b> |
|-------------------------------|--------------------|--------------------------------|-------------|--------------------------------------------|
| Ca_Desi_Ch_scaffold27695_956  | Ca_desi_scaffold   | 956                            | [T/C]       | NA                                         |
| Ca_Desi_Ch_scaffold27695_957  | Ca_desi_scaffold   | 957                            | [A/G]       | NA                                         |
| Ca_Desi_Ch_scaffold27695_958  | Ca_desi_scaffold   | 958                            | [G/A]       | NA                                         |
| Ca_Desi_Ch_scaffold27695_959  | Ca_desi_scaffold   | 959                            | [A/G]       | NA                                         |
| Ca_Desi_Ch_scaffold27695_963  | Ca_desi_scaffold   | 963                            | [T/C]       | NA                                         |
| Ca_Desi_Ch_scaffold27695_966  | Ca_desi_scaffold   | 966                            | [A/G]       | NA                                         |
| Ca_Desi_Ch_scaffold27695_970  | Ca_desi_scaffold   | 970                            | [A/G]       | NA                                         |
| Ca_Desi_Ch_scaffold27695_972  | Ca_desi_scaffold   | 972                            | [T/G]       | NA                                         |
| Ca_Desi_Ch_scaffold27695_978  | Ca_desi_scaffold   | 978                            | [T/C]       | NA                                         |
| Ca_Desi_Ch_scaffold27695_983  | Ca_desi_scaffold   | 983                            | [A/G]       | NA                                         |
| Ca_Desi_Ch_scaffold27695_986  | Ca_desi_scaffold   | 986                            | [T/C]       | NA                                         |
| Ca_Desi_Ch_scaffold27695_988  | Ca_desi_scaffold   | 988                            | [T/C]       | NA                                         |
| Ca_Desi_Ch_scaffold27695_991  | Ca_desi_scaffold   | 991                            | [T/C]       | NA                                         |
| Ca_Desi_Ch_scaffold27695_993  | Ca_desi_scaffold   | 993                            | [T/C]       | NA                                         |
| Ca_Desi_Ch_scaffold27695_994  | Ca_desi_scaffold   | 994                            | [G/C]       | NA                                         |
| Ca_Desi_Ch_scaffold27695_1120 | Ca_desi_scaffold   | 1120                           | [T/G]       | NA                                         |
| Ca_Desi_Ch_scaffold27975_544  | Ca_desi_scaffold   | 544                            | [T/A]       | NA                                         |
| Ca_Desi_Ch_scaffold27975_551  | Ca_desi_scaffold   | 551                            | [G/T]       | NA                                         |
| Ca_Desi_Ch_scaffold27975_589  | Ca_desi_scaffold   | 589                            | [A/G]       | NA                                         |
| Ca_Desi_Ch_scaffold28189_780  | Ca_desi_scaffold   | 780                            | [T/C]       | NA                                         |
| Ca_Desi_Ch_scaffold28252_655  | Ca_desi_scaffold   | 655                            | [C/T]       | NA                                         |
| Ca_Desi_Ch_scaffold28410_249  | Ca_desi_scaffold   | 249                            | [T/C]       | NA                                         |
| Ca_Desi_Ch_scaffold28410_262  | Ca_desi_scaffold   | 262                            | [A/C]       | NA                                         |
| Ca_Desi_Ch_scaffold28410_271  | Ca_desi_scaffold   | 271                            | [C/A]       | NA                                         |
| Ca_Desi_Ch_scaffold28410_285  | Ca_desi_scaffold   | 285                            | [A/C]       | NA                                         |
| Ca_Desi_Ch_scaffold28410_287  | Ca_desi_scaffold   | 287                            | [C/A]       | NA                                         |
| Ca_Desi_Ch_scaffold28410_291  | Ca_desi_scaffold   | 291                            | [T/C]       | NA                                         |
| Ca_Desi_Ch_scaffold28410_296  | Ca_desi_scaffold   | 296                            | [A/G]       | NA                                         |
| Ca_Desi_Ch_scaffold28410_301  | Ca_desi_scaffold   | 301                            | [A/G]       | NA                                         |
| Ca_Desi_Ch_scaffold28410_304  | Ca_desi_scaffold   | 304                            | [A/G]       | NA                                         |
| Ca_Desi_Ch_scaffold28419_956  | Ca_desi_scaffold   | 956                            | [T/A]       | NA                                         |
| Ca_Desi_Ch_scaffold28553_270  | Ca_desi_scaffold   | 270                            | [T/C]       | NA                                         |
| Ca_Desi_Ch_scaffold28686_668  | Ca_desi_scaffold   | 668                            | [T/C]       | NA                                         |
| Ca_Desi_Ch_scaffold28686_883  | Ca_desi_scaffold   | 883                            | [T/C]       | NA                                         |

| <b>SNP IDs</b>                | <b>Chromosomes</b> | <b>Physical positions (bp)</b> | <b>SNPs</b> | <b>NCBI SNPdb accession IDs (NCBI_ss#)</b> |
|-------------------------------|--------------------|--------------------------------|-------------|--------------------------------------------|
| Ca_Desi_Ch_scaffold28686_887  | Ca_desi_scaffold   | 887                            | [A/G]       | NA                                         |
| Ca_Desi_Ch_scaffold28686_927  | Ca_desi_scaffold   | 927                            | [A/G]       | NA                                         |
| Ca_Desi_Ch_scaffold28686_929  | Ca_desi_scaffold   | 929                            | [A/G]       | NA                                         |
| Ca_Desi_Ch_scaffold28686_931  | Ca_desi_scaffold   | 931                            | [T/C]       | NA                                         |
| Ca_Desi_Ch_scaffold28686_938  | Ca_desi_scaffold   | 938                            | [A/G]       | NA                                         |
| Ca_Desi_Ch_scaffold28686_939  | Ca_desi_scaffold   | 939                            | [A/G]       | NA                                         |
| Ca_Desi_Ch_scaffold28686_941  | Ca_desi_scaffold   | 941                            | [T/C]       | NA                                         |
| Ca_Desi_Ch_scaffold28686_944  | Ca_desi_scaffold   | 944                            | [A/G]       | NA                                         |
| Ca_Desi_Ch_scaffold28686_946  | Ca_desi_scaffold   | 946                            | [A/G]       | NA                                         |
| Ca_Desi_Ch_scaffold28686_950  | Ca_desi_scaffold   | 950                            | [T/C]       | NA                                         |
| Ca_Desi_Ch_scaffold28686_952  | Ca_desi_scaffold   | 952                            | [A/G]       | NA                                         |
| Ca_Desi_Ch_scaffold28686_954  | Ca_desi_scaffold   | 954                            | [A/G]       | NA                                         |
| Ca_Desi_Ch_scaffold28686_955  | Ca_desi_scaffold   | 955                            | [A/G]       | NA                                         |
| Ca_Desi_Ch_scaffold28686_957  | Ca_desi_scaffold   | 957                            | [G/A]       | NA                                         |
| Ca_Desi_Ch_scaffold28686_958  | Ca_desi_scaffold   | 958                            | [A/G]       | NA                                         |
| Ca_Desi_Ch_scaffold28686_959  | Ca_desi_scaffold   | 959                            | [A/G]       | NA                                         |
| Ca_Desi_Ch_scaffold28686_967  | Ca_desi_scaffold   | 967                            | [A/G]       | NA                                         |
| Ca_Desi_Ch_scaffold28891_676  | Ca_desi_scaffold   | 676                            | [A/G]       | NA                                         |
| Ca_Desi_Ch_scaffold28891_684  | Ca_desi_scaffold   | 684                            | [C/A]       | NA                                         |
| Ca_Desi_Ch_scaffold29385_156  | Ca_desi_scaffold   | 156                            | [C/T]       | NA                                         |
| Ca_Desi_Ch_scaffold30236_1007 | Ca_desi_scaffold   | 1007                           | [C/T]       | NA                                         |
| Ca_Desi_Ch_scaffold30564_155  | Ca_desi_scaffold   | 155                            | [T/C]       | NA                                         |
| Ca_Desi_Ch_scaffold30564_158  | Ca_desi_scaffold   | 158                            | [C/A]       | NA                                         |
| Ca_Desi_Ch_scaffold30564_166  | Ca_desi_scaffold   | 166                            | [T/G]       | NA                                         |
| Ca_Desi_Ch_scaffold30564_172  | Ca_desi_scaffold   | 172                            | [A/T]       | NA                                         |
| Ca_Desi_Ch_scaffold30564_177  | Ca_desi_scaffold   | 177                            | [G/C]       | NA                                         |
| Ca_Desi_Ch_scaffold30564_184  | Ca_desi_scaffold   | 184                            | [C/A]       | NA                                         |
| Ca_Desi_Ch_scaffold30611_383  | Ca_desi_scaffold   | 383                            | [A/G]       | NA                                         |
| Ca_Desi_Ch_scaffold30611_386  | Ca_desi_scaffold   | 386                            | [T/C]       | NA                                         |
| Ca_Desi_Ch_scaffold30611_404  | Ca_desi_scaffold   | 404                            | [T/C]       | NA                                         |
| Ca_Desi_Ch_scaffold30611_422  | Ca_desi_scaffold   | 422                            | [T/G]       | NA                                         |
| Ca_Desi_Ch_scaffold30611_425  | Ca_desi_scaffold   | 425                            | [T/C]       | NA                                         |
| Ca_Desi_Ch_scaffold30611_428  | Ca_desi_scaffold   | 428                            | [A/G]       | NA                                         |
| Ca_Desi_Ch_scaffold30710_20   | Ca_desi_scaffold   | 20                             | [C/T]       | NA                                         |

| <b>SNP IDs</b>                 | <b>Chromosomes</b> | <b>Physical positions (bp)</b> | <b>SNPs</b> | <b>NCBI SNPdb accession IDs (NCBI_ss#)</b> |
|--------------------------------|--------------------|--------------------------------|-------------|--------------------------------------------|
| Ca_Desig_Chr_scaffold30710_21  | Ca_desig_scaffold  | 21                             | [A/G]       | NA                                         |
| Ca_Desig_Chr_scaffold30710_24  | Ca_desig_scaffold  | 24                             | [T/C]       | NA                                         |
| Ca_Desig_Chr_scaffold30710_26  | Ca_desig_scaffold  | 26                             | [A/G]       | NA                                         |
| Ca_Desig_Chr_scaffold30710_29  | Ca_desig_scaffold  | 29                             | [A/G]       | NA                                         |
| Ca_Desig_Chr_scaffold30710_32  | Ca_desig_scaffold  | 32                             | [T/C]       | NA                                         |
| Ca_Desig_Chr_scaffold30710_43  | Ca_desig_scaffold  | 43                             | [A/G]       | NA                                         |
| Ca_Desig_Chr_scaffold30710_45  | Ca_desig_scaffold  | 45                             | [T/C]       | NA                                         |
| Ca_Desig_Chr_scaffold30710_47  | Ca_desig_scaffold  | 47                             | [A/G]       | NA                                         |
| Ca_Desig_Chr_scaffold30710_56  | Ca_desig_scaffold  | 56                             | [T/G]       | NA                                         |
| Ca_Desig_Chr_scaffold30710_58  | Ca_desig_scaffold  | 58                             | [A/G]       | NA                                         |
| Ca_Desig_Chr_scaffold30710_59  | Ca_desig_scaffold  | 59                             | [T/C]       | NA                                         |
| Ca_Desig_Chr_scaffold30710_60  | Ca_desig_scaffold  | 60                             | [A/G]       | NA                                         |
| Ca_Desig_Chr_scaffold30710_62  | Ca_desig_scaffold  | 62                             | [A/G]       | NA                                         |
| Ca_Desig_Chr_scaffold30710_69  | Ca_desig_scaffold  | 69                             | [A/G]       | NA                                         |
| Ca_Desig_Chr_scaffold30710_74  | Ca_desig_scaffold  | 74                             | [T/A]       | NA                                         |
| Ca_Desig_Chr_scaffold30710_77  | Ca_desig_scaffold  | 77                             | [A/G]       | NA                                         |
| Ca_Desig_Chr_scaffold30710_131 | Ca_desig_scaffold  | 131                            | [A/G]       | NA                                         |
| Ca_Desig_Chr_scaffold30710_132 | Ca_desig_scaffold  | 132                            | [G/A]       | NA                                         |
| Ca_Desig_Chr_scaffold30710_133 | Ca_desig_scaffold  | 133                            | [C/T]       | NA                                         |
| Ca_Desig_Chr_scaffold30710_134 | Ca_desig_scaffold  | 134                            | [T/C]       | NA                                         |
| Ca_Desig_Chr_scaffold30710_135 | Ca_desig_scaffold  | 135                            | [C/T]       | NA                                         |
| Ca_Desig_Chr_scaffold30710_136 | Ca_desig_scaffold  | 136                            | [A/G]       | NA                                         |
| Ca_Desig_Chr_scaffold30710_138 | Ca_desig_scaffold  | 138                            | [T/C]       | NA                                         |
| Ca_Desig_Chr_scaffold30710_139 | Ca_desig_scaffold  | 139                            | [G/A]       | NA                                         |
| Ca_Desig_Chr_scaffold30710_140 | Ca_desig_scaffold  | 140                            | [A/G]       | NA                                         |
| Ca_Desig_Chr_scaffold30710_141 | Ca_desig_scaffold  | 141                            | [T/C]       | NA                                         |
| Ca_Desig_Chr_scaffold30710_142 | Ca_desig_scaffold  | 142                            | [C/T]       | NA                                         |
| Ca_Desig_Chr_scaffold30710_143 | Ca_desig_scaffold  | 143                            | [G/A]       | NA                                         |
| Ca_Desig_Chr_scaffold30710_144 | Ca_desig_scaffold  | 144                            | [A/G]       | NA                                         |
| Ca_Desig_Chr_scaffold30710_145 | Ca_desig_scaffold  | 145                            | [G/A]       | NA                                         |
| Ca_Desig_Chr_scaffold30710_146 | Ca_desig_scaffold  | 146                            | [C/G]       | NA                                         |
| Ca_Desig_Chr_scaffold30710_147 | Ca_desig_scaffold  | 147                            | [G/C]       | NA                                         |
| Ca_Desig_Chr_scaffold30710_148 | Ca_desig_scaffold  | 148                            | [C/T]       | NA                                         |
| Ca_Desig_Chr_scaffold30710_149 | Ca_desig_scaffold  | 149                            | [T/C]       | NA                                         |

| <b>SNP IDs</b>               | <b>Chromosomes</b> | <b>Physical positions (bp)</b> | <b>SNPs</b> | <b>NCBI SNPdb accession IDs (NCBI_ss#)</b> |
|------------------------------|--------------------|--------------------------------|-------------|--------------------------------------------|
| Ca_Desi_Ch_scaffold30710_150 | Ca_desi_scaffold   | 150                            | [C/T]       | NA                                         |
| Ca_Desi_Ch_scaffold30710_151 | Ca_desi_scaffold   | 151                            | [T/C]       | NA                                         |
| Ca_Desi_Ch_scaffold30710_152 | Ca_desi_scaffold   | 152                            | [T/C]       | NA                                         |
| Ca_Desi_Ch_scaffold30710_153 | Ca_desi_scaffold   | 153                            | [G/A]       | NA                                         |
| Ca_Desi_Ch_scaffold30710_154 | Ca_desi_scaffold   | 154                            | [C/T]       | NA                                         |
| Ca_Desi_Ch_scaffold30710_155 | Ca_desi_scaffold   | 155                            | [G/C]       | NA                                         |
| Ca_Desi_Ch_scaffold30710_156 | Ca_desi_scaffold   | 156                            | [C/T]       | NA                                         |
| Ca_Desi_Ch_scaffold30710_157 | Ca_desi_scaffold   | 157                            | [C/T]       | NA                                         |
| Ca_Desi_Ch_scaffold30710_158 | Ca_desi_scaffold   | 158                            | [G/A]       | NA                                         |
| Ca_Desi_Ch_scaffold30710_159 | Ca_desi_scaffold   | 159                            | [A/G]       | NA                                         |
| Ca_Desi_Ch_scaffold30710_160 | Ca_desi_scaffold   | 160                            | [A/G]       | NA                                         |
| Ca_Desi_Ch_scaffold30710_161 | Ca_desi_scaffold   | 161                            | [G/A]       | NA                                         |
| Ca_Desi_Ch_scaffold30710_162 | Ca_desi_scaffold   | 162                            | [A/G]       | NA                                         |
| Ca_Desi_Ch_scaffold30710_163 | Ca_desi_scaffold   | 163                            | [T/C]       | NA                                         |
| Ca_Desi_Ch_scaffold30710_164 | Ca_desi_scaffold   | 164                            | [G/A]       | NA                                         |
| Ca_Desi_Ch_scaffold30710_165 | Ca_desi_scaffold   | 165                            | [A/G]       | NA                                         |
| Ca_Desi_Ch_scaffold30710_166 | Ca_desi_scaffold   | 166                            | [A/G]       | NA                                         |
| Ca_Desi_Ch_scaffold30710_167 | Ca_desi_scaffold   | 167                            | [C/T]       | NA                                         |
| Ca_Desi_Ch_scaffold30710_168 | Ca_desi_scaffold   | 168                            | [G/A]       | NA                                         |
| Ca_Desi_Ch_scaffold30710_169 | Ca_desi_scaffold   | 169                            | [G/T]       | NA                                         |
| Ca_Desi_Ch_scaffold30710_170 | Ca_desi_scaffold   | 170                            | [G/A]       | NA                                         |
| Ca_Desi_Ch_scaffold30710_171 | Ca_desi_scaffold   | 171                            | [G/A]       | NA                                         |
| Ca_Desi_Ch_scaffold30710_172 | Ca_desi_scaffold   | 172                            | [C/T]       | NA                                         |
| Ca_Desi_Ch_scaffold30710_173 | Ca_desi_scaffold   | 173                            | [T/C]       | NA                                         |
| Ca_Desi_Ch_scaffold30710_174 | Ca_desi_scaffold   | 174                            | [A/G]       | NA                                         |
| Ca_Desi_Ch_scaffold30710_175 | Ca_desi_scaffold   | 175                            | [A/G]       | NA                                         |
| Ca_Desi_Ch_scaffold30710_176 | Ca_desi_scaffold   | 176                            | [G/A]       | NA                                         |
| Ca_Desi_Ch_scaffold30710_177 | Ca_desi_scaffold   | 177                            | [C/T]       | NA                                         |
| Ca_Desi_Ch_scaffold30710_178 | Ca_desi_scaffold   | 178                            | [G/A]       | NA                                         |
| Ca_Desi_Ch_scaffold30710_179 | Ca_desi_scaffold   | 179                            | [A/G]       | NA                                         |
| Ca_Desi_Ch_scaffold30710_180 | Ca_desi_scaffold   | 180                            | [T/C]       | NA                                         |
| Ca_Desi_Ch_scaffold30710_181 | Ca_desi_scaffold   | 181                            | [C/T]       | NA                                         |
| Ca_Desi_Ch_scaffold30710_182 | Ca_desi_scaffold   | 182                            | [T/C]       | NA                                         |
| Ca_Desi_Ch_scaffold30710_183 | Ca_desi_scaffold   | 183                            | [G/A]       | NA                                         |

| <b>SNP IDs</b>                 | <b>Chromosomes</b> | <b>Physical positions (bp)</b> | <b>SNPs</b> | <b>NCBI SNPdb accession IDs (NCBI_ss#)</b> |
|--------------------------------|--------------------|--------------------------------|-------------|--------------------------------------------|
| Ca_Desig_Chr_scaffold30710_184 | Ca_desig_scaffold  | 184                            | [C/T]       | NA                                         |
| Ca_Desig_Chr_scaffold30710_185 | Ca_desig_scaffold  | 185                            | [C/T]       | NA                                         |
| Ca_Desig_Chr_scaffold30710_186 | Ca_desig_scaffold  | 186                            | [G/A]       | NA                                         |
| Ca_Desig_Chr_scaffold30710_187 | Ca_desig_scaffold  | 187                            | [A/G]       | NA                                         |
| Ca_Desig_Chr_scaffold30710_188 | Ca_desig_scaffold  | 188                            | [A/G]       | NA                                         |
| Ca_Desig_Chr_scaffold30710_191 | Ca_desig_scaffold  | 191                            | [T/A]       | NA                                         |
| Ca_Desig_Chr_scaffold30837_721 | Ca_desig_scaffold  | 721                            | [C/T]       | NA                                         |
| Ca_Desig_Chr_scaffold30934_185 | Ca_desig_scaffold  | 185                            | [C/A]       | NA                                         |
| Ca_Desig_Chr_scaffold30934_186 | Ca_desig_scaffold  | 186                            | [G/C]       | NA                                         |
| Ca_Desig_Chr_scaffold30934_522 | Ca_desig_scaffold  | 522                            | [G/T]       | NA                                         |
| Ca_Desig_Chr_scaffold30934_628 | Ca_desig_scaffold  | 628                            | [T/G]       | NA                                         |
| Ca_Desig_Chr_scaffold30934_632 | Ca_desig_scaffold  | 632                            | [T/C]       | NA                                         |
| Ca_Desig_Chr_scaffold30934_655 | Ca_desig_scaffold  | 655                            | [C/A]       | NA                                         |
| Ca_Desig_Chr_scaffold30934_656 | Ca_desig_scaffold  | 656                            | [T/C]       | NA                                         |
| Ca_Desig_Chr_scaffold31074_529 | Ca_desig_scaffold  | 529                            | [A/G]       | NA                                         |
| Ca_Desig_Chr_scaffold31279_410 | Ca_desig_scaffold  | 410                            | [C/T]       | NA                                         |
| Ca_Desig_Chr_scaffold31279_428 | Ca_desig_scaffold  | 428                            | [A/T]       | NA                                         |
| Ca_Desig_Chr_scaffold31295_922 | Ca_desig_scaffold  | 922                            | [T/G]       | NA                                         |
| Ca_Desig_Chr_scaffold31295_925 | Ca_desig_scaffold  | 925                            | [A/G]       | NA                                         |
| Ca_Desig_Chr_scaffold31295_935 | Ca_desig_scaffold  | 935                            | [A/G]       | NA                                         |
| Ca_Desig_Chr_scaffold31295_937 | Ca_desig_scaffold  | 937                            | [T/C]       | NA                                         |
| Ca_Desig_Chr_scaffold31295_949 | Ca_desig_scaffold  | 949                            | [T/G]       | NA                                         |
| Ca_Desig_Chr_scaffold31305_333 | Ca_desig_scaffold  | 333                            | [T/C]       | NA                                         |
| Ca_Desig_Chr_scaffold31305_374 | Ca_desig_scaffold  | 374                            | [G/C]       | NA                                         |
| Ca_Desig_Chr_scaffold31305_377 | Ca_desig_scaffold  | 377                            | [A/G]       | NA                                         |
| Ca_Desig_Chr_scaffold31305_381 | Ca_desig_scaffold  | 381                            | [A/G]       | NA                                         |
| Ca_Desig_Chr_scaffold31305_382 | Ca_desig_scaffold  | 382                            | [A/G]       | NA                                         |
| Ca_Desig_Chr_scaffold31305_386 | Ca_desig_scaffold  | 386                            | [A/G]       | NA                                         |
| Ca_Desig_Chr_scaffold31305_389 | Ca_desig_scaffold  | 389                            | [T/C]       | NA                                         |
| Ca_Desig_Chr_scaffold31305_394 | Ca_desig_scaffold  | 394                            | [A/G]       | NA                                         |
| Ca_Desig_Chr_scaffold31305_397 | Ca_desig_scaffold  | 397                            | [A/G]       | NA                                         |
| Ca_Desig_Chr_scaffold31305_402 | Ca_desig_scaffold  | 402                            | [A/G]       | NA                                         |
| Ca_Desig_Chr_scaffold31305_404 | Ca_desig_scaffold  | 404                            | [T/C]       | NA                                         |
| Ca_Desig_Chr_scaffold31305_407 | Ca_desig_scaffold  | 407                            | [A/G]       | NA                                         |



| <b>SNP IDs</b>                 | <b>Chromosomes</b> | <b>Physical positions (bp)</b> | <b>SNPs</b> | <b>NCBI SNPdb accession IDs (NCBI_ss#)</b> |
|--------------------------------|--------------------|--------------------------------|-------------|--------------------------------------------|
| Ca_Desig_Chr_scaffold31305_411 | Ca_desig_scaffold  | 411                            | [A/G]       | NA                                         |
| Ca_Desig_Chr_scaffold31305_413 | Ca_desig_scaffold  | 413                            | [T/A]       | NA                                         |
| Ca_Desig_Chr_scaffold31305_416 | Ca_desig_scaffold  | 416                            | [T/G]       | NA                                         |
| Ca_Desig_Chr_scaffold31305_419 | Ca_desig_scaffold  | 419                            | [A/G]       | NA                                         |
| Ca_Desig_Chr_scaffold31305_421 | Ca_desig_scaffold  | 421                            | [T/G]       | NA                                         |
| Ca_Desig_Chr_scaffold31305_424 | Ca_desig_scaffold  | 424                            | [T/C]       | NA                                         |
| Ca_Desig_Chr_scaffold31305_426 | Ca_desig_scaffold  | 426                            | [A/G]       | NA                                         |
| Ca_Desig_Chr_scaffold31305_427 | Ca_desig_scaffold  | 427                            | [T/C]       | NA                                         |
| Ca_Desig_Chr_scaffold31305_430 | Ca_desig_scaffold  | 430                            | [T/C]       | NA                                         |
| Ca_Desig_Chr_scaffold31305_433 | Ca_desig_scaffold  | 433                            | [C/G]       | NA                                         |
| Ca_Desig_Chr_scaffold31346_563 | Ca_desig_scaffold  | 563                            | [A/T]       | NA                                         |
| Ca_Desig_Chr_scaffold32292_336 | Ca_desig_scaffold  | 336                            | [C/T]       | NA                                         |
| Ca_Desig_Chr_scaffold32312_210 | Ca_desig_scaffold  | 210                            | [T/C]       | NA                                         |
| Ca_Desig_Chr_scaffold32357_741 | Ca_desig_scaffold  | 741                            | [G/A]       | NA                                         |
| Ca_Desig_Chr_scaffold32698_661 | Ca_desig_scaffold  | 661                            | [C/T]       | NA                                         |
| Ca_Desig_Chr_scaffold33002_633 | Ca_desig_scaffold  | 633                            | [G/A]       | NA                                         |
| Ca_Desig_Chr_scaffold33002_672 | Ca_desig_scaffold  | 672                            | [T/C]       | NA                                         |
| Ca_Desig_Chr_scaffold33004_545 | Ca_desig_scaffold  | 545                            | [A/G]       | NA                                         |
| Ca_Desig_Chr_scaffold33252_906 | Ca_desig_scaffold  | 906                            | [G/A]       | NA                                         |
| Ca_Desig_Chr_scaffold33252_934 | Ca_desig_scaffold  | 934                            | [C/T]       | NA                                         |
| Ca_Desig_Chr_scaffold33252_935 | Ca_desig_scaffold  | 935                            | [G/T]       | NA                                         |
| Ca_Desig_Chr_scaffold33279_740 | Ca_desig_scaffold  | 740                            | [A/G]       | NA                                         |
| Ca_Desig_Chr_scaffold33279_748 | Ca_desig_scaffold  | 748                            | [A/T]       | NA                                         |
| Ca_Desig_Chr_scaffold33279_778 | Ca_desig_scaffold  | 778                            | [T/C]       | NA                                         |
| Ca_Desig_Chr_scaffold33279_780 | Ca_desig_scaffold  | 780                            | [T/C]       | NA                                         |
| Ca_Desig_Chr_scaffold33287_212 | Ca_desig_scaffold  | 212                            | [A/C]       | NA                                         |
| Ca_Desig_Chr_scaffold33287_234 | Ca_desig_scaffold  | 234                            | [A/C]       | NA                                         |
| Ca_Desig_Chr_scaffold33287_413 | Ca_desig_scaffold  | 413                            | [G/A]       | NA                                         |
| Ca_Desig_Chr_scaffold33287_415 | Ca_desig_scaffold  | 415                            | [A/G]       | NA                                         |
| Ca_Desig_Chr_scaffold33287_418 | Ca_desig_scaffold  | 418                            | [C/T]       | NA                                         |
| Ca_Desig_Chr_scaffold33287_419 | Ca_desig_scaffold  | 419                            | [G/A]       | NA                                         |
| Ca_Desig_Chr_scaffold33287_420 | Ca_desig_scaffold  | 420                            | [C/T]       | NA                                         |
| Ca_Desig_Chr_scaffold33287_470 | Ca_desig_scaffold  | 470                            | [G/C]       | NA                                         |
| Ca_Desig_Chr_scaffold33287_852 | Ca_desig_scaffold  | 852                            | [A/G]       | NA                                         |

| <b>SNP IDs</b>                  | <b>Chromosomes</b> | <b>Physical positions (bp)</b> | <b>SNPs</b> | <b>NCBI SNPdb accession IDs (NCBI_ss#)</b> |
|---------------------------------|--------------------|--------------------------------|-------------|--------------------------------------------|
| Ca_Desi_Chrom_scaffold33287_853 | Ca_desi_scaffold   | 853                            | [T/C]       | NA                                         |
| Ca_Desi_Chrom_scaffold33287_854 | Ca_desi_scaffold   | 854                            | [G/T]       | NA                                         |
| Ca_Desi_Chrom_scaffold33287_855 | Ca_desi_scaffold   | 855                            | [G/A]       | NA                                         |
| Ca_Desi_Chrom_scaffold33287_856 | Ca_desi_scaffold   | 856                            | [T/C]       | NA                                         |
| Ca_Desi_Chrom_scaffold33287_857 | Ca_desi_scaffold   | 857                            | [T/C]       | NA                                         |
| Ca_Desi_Chrom_scaffold33287_858 | Ca_desi_scaffold   | 858                            | [T/C]       | NA                                         |
| Ca_Desi_Chrom_scaffold33287_859 | Ca_desi_scaffold   | 859                            | [C/T]       | NA                                         |
| Ca_Desi_Chrom_scaffold33287_860 | Ca_desi_scaffold   | 860                            | [A/G]       | NA                                         |
| Ca_Desi_Chrom_scaffold33287_861 | Ca_desi_scaffold   | 861                            | [A/G]       | NA                                         |
| Ca_Desi_Chrom_scaffold33287_862 | Ca_desi_scaffold   | 862                            | [T/C]       | NA                                         |
| Ca_Desi_Chrom_scaffold33287_863 | Ca_desi_scaffold   | 863                            | [T/C]       | NA                                         |
| Ca_Desi_Chrom_scaffold33287_864 | Ca_desi_scaffold   | 864                            | [T/C]       | NA                                         |
| Ca_Desi_Chrom_scaffold33287_865 | Ca_desi_scaffold   | 865                            | [T/C]       | NA                                         |
| Ca_Desi_Chrom_scaffold33287_866 | Ca_desi_scaffold   | 866                            | [A/G]       | NA                                         |
| Ca_Desi_Chrom_scaffold33287_867 | Ca_desi_scaffold   | 867                            | [A/G]       | NA                                         |
| Ca_Desi_Chrom_scaffold33287_868 | Ca_desi_scaffold   | 868                            | [C/T]       | NA                                         |
| Ca_Desi_Chrom_scaffold33287_869 | Ca_desi_scaffold   | 869                            | [C/T]       | NA                                         |
| Ca_Desi_Chrom_scaffold33287_870 | Ca_desi_scaffold   | 870                            | [A/G]       | NA                                         |
| Ca_Desi_Chrom_scaffold33287_871 | Ca_desi_scaffold   | 871                            | [A/G]       | NA                                         |
| Ca_Desi_Chrom_scaffold33287_872 | Ca_desi_scaffold   | 872                            | [T/C]       | NA                                         |
| Ca_Desi_Chrom_scaffold33287_873 | Ca_desi_scaffold   | 873                            | [C/T]       | NA                                         |
| Ca_Desi_Chrom_scaffold33287_875 | Ca_desi_scaffold   | 875                            | [G/A]       | NA                                         |
| Ca_Desi_Chrom_scaffold33287_876 | Ca_desi_scaffold   | 876                            | [T/C]       | NA                                         |
| Ca_Desi_Chrom_scaffold33287_877 | Ca_desi_scaffold   | 877                            | [A/G]       | NA                                         |
| Ca_Desi_Chrom_scaffold33287_878 | Ca_desi_scaffold   | 878                            | [G/T]       | NA                                         |
| Ca_Desi_Chrom_scaffold33287_879 | Ca_desi_scaffold   | 879                            | [T/C]       | NA                                         |
| Ca_Desi_Chrom_scaffold33287_880 | Ca_desi_scaffold   | 880                            | [T/C]       | NA                                         |
| Ca_Desi_Chrom_scaffold33287_881 | Ca_desi_scaffold   | 881                            | [G/A]       | NA                                         |
| Ca_Desi_Chrom_scaffold33287_882 | Ca_desi_scaffold   | 882                            | [A/G]       | NA                                         |
| Ca_Desi_Chrom_scaffold33287_883 | Ca_desi_scaffold   | 883                            | [T/C]       | NA                                         |
| Ca_Desi_Chrom_scaffold33287_884 | Ca_desi_scaffold   | 884                            | [A/G]       | NA                                         |
| Ca_Desi_Chrom_scaffold33287_885 | Ca_desi_scaffold   | 885                            | [G/A]       | NA                                         |
| Ca_Desi_Chrom_scaffold33287_886 | Ca_desi_scaffold   | 886                            | [T/C]       | NA                                         |
| Ca_Desi_Chrom_scaffold33287_887 | Ca_desi_scaffold   | 887                            | [C/A]       | NA                                         |

| <b>SNP IDs</b>                       | <b>Chromosomes</b> | <b>Physical positions (bp)</b> | <b>SNPs</b> | <b>NCBI SNPdb accession IDs (NCBI_ss#)</b> |
|--------------------------------------|--------------------|--------------------------------|-------------|--------------------------------------------|
| Ca_Desi_Chromosome_scaffold33287_888 | Ca_desi_scaffold   | 888                            | [A/G]       | NA                                         |
| Ca_Desi_Chromosome_scaffold33287_889 | Ca_desi_scaffold   | 889                            | [A/G]       | NA                                         |
| Ca_Desi_Chromosome_scaffold33287_890 | Ca_desi_scaffold   | 890                            | [G/A]       | NA                                         |
| Ca_Desi_Chromosome_scaffold33287_891 | Ca_desi_scaffold   | 891                            | [G/C]       | NA                                         |
| Ca_Desi_Chromosome_scaffold33287_892 | Ca_desi_scaffold   | 892                            | [T/C]       | NA                                         |
| Ca_Desi_Chromosome_scaffold33287_893 | Ca_desi_scaffold   | 893                            | [C/T]       | NA                                         |
| Ca_Desi_Chromosome_scaffold33287_894 | Ca_desi_scaffold   | 894                            | [G/A]       | NA                                         |
| Ca_Desi_Chromosome_scaffold33287_895 | Ca_desi_scaffold   | 895                            | [T/C]       | NA                                         |
| Ca_Desi_Chromosome_scaffold33287_897 | Ca_desi_scaffold   | 897                            | [T/C]       | NA                                         |
| Ca_Desi_Chromosome_scaffold33287_898 | Ca_desi_scaffold   | 898                            | [A/G]       | NA                                         |
| Ca_Desi_Chromosome_scaffold33287_899 | Ca_desi_scaffold   | 899                            | [A/G]       | NA                                         |
| Ca_Desi_Chromosome_scaffold33287_900 | Ca_desi_scaffold   | 900                            | [T/C]       | NA                                         |
| Ca_Desi_Chromosome_scaffold33287_901 | Ca_desi_scaffold   | 901                            | [T/C]       | NA                                         |
| Ca_Desi_Chromosome_scaffold33287_903 | Ca_desi_scaffold   | 903                            | [A/G]       | NA                                         |
| Ca_Desi_Chromosome_scaffold33287_904 | Ca_desi_scaffold   | 904                            | [T/C]       | NA                                         |
| Ca_Desi_Chromosome_scaffold33287_908 | Ca_desi_scaffold   | 908                            | [T/C]       | NA                                         |
| Ca_Desi_Chromosome_scaffold33287_913 | Ca_desi_scaffold   | 913                            | [T/A]       | NA                                         |
| Ca_Desi_Chromosome_scaffold33600_227 | Ca_desi_scaffold   | 227                            | [A/G]       | NA                                         |
| Ca_Desi_Chromosome_scaffold33617_438 | Ca_desi_scaffold   | 438                            | [A/C]       | NA                                         |
| Ca_Desi_Chromosome_scaffold33742_227 | Ca_desi_scaffold   | 227                            | [A/T]       | NA                                         |
| Ca_Desi_Chromosome_scaffold33934_969 | Ca_desi_scaffold   | 969                            | [A/C]       | NA                                         |
| Ca_Desi_Chromosome_scaffold34000_162 | Ca_desi_scaffold   | 162                            | [T/G]       | NA                                         |
| Ca_Desi_Chromosome_scaffold34430_585 | Ca_desi_scaffold   | 585                            | [C/T]       | NA                                         |
| Ca_Desi_Chromosome_scaffold34618_232 | Ca_desi_scaffold   | 232                            | [A/G]       | NA                                         |
| Ca_Desi_Chromosome_scaffold34618_252 | Ca_desi_scaffold   | 252                            | [T/A]       | NA                                         |
| Ca_Desi_Chromosome_scaffold34857_286 | Ca_desi_scaffold   | 286                            | [A/G]       | NA                                         |
| Ca_Desi_Chromosome_scaffold34857_301 | Ca_desi_scaffold   | 301                            | [A/C]       | NA                                         |
| Ca_Desi_Chromosome_scaffold34857_700 | Ca_desi_scaffold   | 700                            | [T/C]       | NA                                         |
| Ca_Desi_Chromosome_scaffold34857_703 | Ca_desi_scaffold   | 703                            | [C/G]       | NA                                         |
| Ca_Desi_Chromosome_scaffold35065_413 | Ca_desi_scaffold   | 413                            | [A/C]       | NA                                         |
| Ca_Desi_Chromosome_scaffold35065_423 | Ca_desi_scaffold   | 423                            | [C/T]       | NA                                         |
| Ca_Desi_Chromosome_scaffold35065_448 | Ca_desi_scaffold   | 448                            | [C/A]       | NA                                         |
| Ca_Desi_Chromosome_scaffold35363_414 | Ca_desi_scaffold   | 414                            | [A/G]       | NA                                         |
| Ca_Desi_Chromosome_scaffold35363_425 | Ca_desi_scaffold   | 425                            | [T/C]       | NA                                         |

| <b>SNP IDs</b>                 | <b>Chromosomes</b> | <b>Physical positions (bp)</b> | <b>SNPs</b> | <b>NCBI SNPdb accession IDs (NCBI_ss#)</b> |
|--------------------------------|--------------------|--------------------------------|-------------|--------------------------------------------|
| Ca_Desig_Chr_scaffold35363_436 | Ca_desig_scaffold  | 436                            | [A/G]       | NA                                         |
| Ca_Desig_Chr_scaffold35363_448 | Ca_desig_scaffold  | 448                            | [A/G]       | NA                                         |
| Ca_Desig_Chr_scaffold35437_618 | Ca_desig_scaffold  | 618                            | [A/G]       | NA                                         |
| Ca_Desig_Chr_scaffold36066_569 | Ca_desig_scaffold  | 569                            | [C/A]       | NA                                         |
| Ca_Desig_Chr_scaffold36151_30  | Ca_desig_scaffold  | 30                             | [A/G]       | NA                                         |
| Ca_Desig_Chr_scaffold36184_859 | Ca_desig_scaffold  | 859                            | [T/C]       | NA                                         |
| Ca_Desig_Chr_scaffold36184_864 | Ca_desig_scaffold  | 864                            | [A/G]       | NA                                         |
| Ca_Desig_Chr_scaffold36184_868 | Ca_desig_scaffold  | 868                            | [T/C]       | NA                                         |
| Ca_Desig_Chr_scaffold36184_869 | Ca_desig_scaffold  | 869                            | [T/C]       | NA                                         |
| Ca_Desig_Chr_scaffold36184_872 | Ca_desig_scaffold  | 872                            | [T/C]       | NA                                         |
| Ca_Desig_Chr_scaffold36184_875 | Ca_desig_scaffold  | 875                            | [T/C]       | NA                                         |
| Ca_Desig_Chr_scaffold36184_877 | Ca_desig_scaffold  | 877                            | [T/C]       | NA                                         |
| Ca_Desig_Chr_scaffold36184_881 | Ca_desig_scaffold  | 881                            | [T/C]       | NA                                         |
| Ca_Desig_Chr_scaffold36184_882 | Ca_desig_scaffold  | 882                            | [T/C]       | NA                                         |
| Ca_Desig_Chr_scaffold36184_885 | Ca_desig_scaffold  | 885                            | [T/C]       | NA                                         |
| Ca_Desig_Chr_scaffold36184_887 | Ca_desig_scaffold  | 887                            | [T/C]       | NA                                         |
| Ca_Desig_Chr_scaffold36184_888 | Ca_desig_scaffold  | 888                            | [T/C]       | NA                                         |
| Ca_Desig_Chr_scaffold36184_890 | Ca_desig_scaffold  | 890                            | [T/C]       | NA                                         |
| Ca_Desig_Chr_scaffold36184_891 | Ca_desig_scaffold  | 891                            | [T/C]       | NA                                         |
| Ca_Desig_Chr_scaffold36184_894 | Ca_desig_scaffold  | 894                            | [A/G]       | NA                                         |
| Ca_Desig_Chr_scaffold36184_895 | Ca_desig_scaffold  | 895                            | [A/G]       | NA                                         |
| Ca_Desig_Chr_scaffold36184_897 | Ca_desig_scaffold  | 897                            | [A/G]       | NA                                         |
| Ca_Desig_Chr_scaffold36184_898 | Ca_desig_scaffold  | 898                            | [A/G]       | NA                                         |
| Ca_Desig_Chr_scaffold36184_902 | Ca_desig_scaffold  | 902                            | [G/T]       | NA                                         |
| Ca_Desig_Chr_scaffold36184_904 | Ca_desig_scaffold  | 904                            | [T/C]       | NA                                         |
| Ca_Desig_Chr_scaffold36184_905 | Ca_desig_scaffold  | 905                            | [T/C]       | NA                                         |
| Ca_Desig_Chr_scaffold36184_906 | Ca_desig_scaffold  | 906                            | [G/T]       | NA                                         |
| Ca_Desig_Chr_scaffold36184_907 | Ca_desig_scaffold  | 907                            | [A/G]       | NA                                         |
| Ca_Desig_Chr_scaffold36184_913 | Ca_desig_scaffold  | 913                            | [T/C]       | NA                                         |
| Ca_Desig_Chr_scaffold36184_914 | Ca_desig_scaffold  | 914                            | [T/C]       | NA                                         |
| Ca_Desig_Chr_scaffold36184_915 | Ca_desig_scaffold  | 915                            | [G/T]       | NA                                         |
| Ca_Desig_Chr_scaffold36184_917 | Ca_desig_scaffold  | 917                            | [C/G]       | NA                                         |
| Ca_Desig_Chr_scaffold36184_918 | Ca_desig_scaffold  | 918                            | [T/C]       | NA                                         |
| Ca_Desig_Chr_scaffold36580_576 | Ca_desig_scaffold  | 576                            | [T/A]       | NA                                         |

| <b>SNP IDs</b>               | <b>Chromosomes</b> | <b>Physical positions (bp)</b> | <b>SNPs</b> | <b>NCBI SNPdb accession IDs (NCBI_ss#)</b> |
|------------------------------|--------------------|--------------------------------|-------------|--------------------------------------------|
| Ca_Desi_Ch_scaffold36738_425 | Ca_desi_scaffold   | 425                            | [C/T]       | NA                                         |
| Ca_Desi_Ch_scaffold36738_437 | Ca_desi_scaffold   | 437                            | [G/A]       | NA                                         |
| Ca_Desi_Ch_scaffold36738_479 | Ca_desi_scaffold   | 479                            | [C/T]       | NA                                         |
| Ca_Desi_Ch_scaffold36738_497 | Ca_desi_scaffold   | 497                            | [C/T]       | NA                                         |
| Ca_Desi_Ch_scaffold36894_22  | Ca_desi_scaffold   | 22                             | [T/C]       | NA                                         |
| Ca_Desi_Ch_scaffold36894_26  | Ca_desi_scaffold   | 26                             | [A/G]       | NA                                         |
| Ca_Desi_Ch_scaffold36894_28  | Ca_desi_scaffold   | 28                             | [A/G]       | NA                                         |
| Ca_Desi_Ch_scaffold36894_29  | Ca_desi_scaffold   | 29                             | [A/G]       | NA                                         |
| Ca_Desi_Ch_scaffold36894_34  | Ca_desi_scaffold   | 34                             | [T/C]       | NA                                         |
| Ca_Desi_Ch_scaffold36894_35  | Ca_desi_scaffold   | 35                             | [T/C]       | NA                                         |
| Ca_Desi_Ch_scaffold36894_44  | Ca_desi_scaffold   | 44                             | [G/A]       | NA                                         |
| Ca_Desi_Ch_scaffold36894_45  | Ca_desi_scaffold   | 45                             | [A/G]       | NA                                         |
| Ca_Desi_Ch_scaffold36894_54  | Ca_desi_scaffold   | 54                             | [A/G]       | NA                                         |
| Ca_Desi_Ch_scaffold36894_55  | Ca_desi_scaffold   | 55                             | [A/G]       | NA                                         |
| Ca_Desi_Ch_scaffold36894_59  | Ca_desi_scaffold   | 59                             | [T/C]       | NA                                         |
| Ca_Desi_Ch_scaffold36894_62  | Ca_desi_scaffold   | 62                             | [T/C]       | NA                                         |
| Ca_Desi_Ch_scaffold36894_63  | Ca_desi_scaffold   | 63                             | [T/C]       | NA                                         |
| Ca_Desi_Ch_scaffold36894_67  | Ca_desi_scaffold   | 67                             | [A/G]       | NA                                         |
| Ca_Desi_Ch_scaffold36894_70  | Ca_desi_scaffold   | 70                             | [A/G]       | NA                                         |
| Ca_Desi_Ch_scaffold36894_74  | Ca_desi_scaffold   | 74                             | [T/C]       | NA                                         |
| Ca_Desi_Ch_scaffold36919_253 | Ca_desi_scaffold   | 253                            | [T/G]       | NA                                         |
| Ca_Desi_Ch_scaffold36929_366 | Ca_desi_scaffold   | 366                            | [C/T]       | NA                                         |
| Ca_Desi_Ch_scaffold36929_382 | Ca_desi_scaffold   | 382                            | [G/A]       | NA                                         |
| Ca_Desi_Ch_scaffold36929_401 | Ca_desi_scaffold   | 401                            | [G/A]       | NA                                         |
| Ca_Desi_Ch_scaffold36929_736 | Ca_desi_scaffold   | 736                            | [G/A]       | NA                                         |
| Ca_Desi_Ch_scaffold37054_695 | Ca_desi_scaffold   | 695                            | [G/A]       | NA                                         |
| Ca_Desi_Ch_scaffold37086_633 | Ca_desi_scaffold   | 633                            | [T/G]       | NA                                         |
| Ca_Desi_Ch_scaffold37086_638 | Ca_desi_scaffold   | 638                            | [T/G]       | NA                                         |
| Ca_Desi_Ch_scaffold37367_153 | Ca_desi_scaffold   | 153                            | [T/C]       | NA                                         |
| Ca_Desi_Ch_scaffold37367_187 | Ca_desi_scaffold   | 187                            | [G/T]       | NA                                         |
| Ca_Desi_Ch_scaffold37367_188 | Ca_desi_scaffold   | 188                            | [A/T]       | NA                                         |
| Ca_Desi_Ch_scaffold37878_320 | Ca_desi_scaffold   | 320                            | [T/A]       | NA                                         |
| Ca_Desi_Ch_scaffold37878_333 | Ca_desi_scaffold   | 333                            | [C/T]       | NA                                         |
| Ca_Desi_Ch_scaffold37878_334 | Ca_desi_scaffold   | 334                            | [C/G]       | NA                                         |

| <b>SNP IDs</b>                       | <b>Chromosomes</b> | <b>Physical positions (bp)</b> | <b>SNPs</b> | <b>NCBI SNPdb accession IDs (NCBI_ss#)</b> |
|--------------------------------------|--------------------|--------------------------------|-------------|--------------------------------------------|
| Ca_Desi_Chromosome_scaffold37878_541 | Ca_desi_scaffold   | 541                            | [C/T]       | NA                                         |
| Ca_Desi_Chromosome_scaffold37878_559 | Ca_desi_scaffold   | 559                            | [C/T]       | NA                                         |
| Ca_Desi_Chromosome_scaffold37884_59  | Ca_desi_scaffold   | 59                             | [A/G]       | NA                                         |
| Ca_Desi_Chromosome_scaffold38046_291 | Ca_desi_scaffold   | 291                            | [G/A]       | NA                                         |
| Ca_Desi_Chromosome_scaffold38146_369 | Ca_desi_scaffold   | 369                            | [T/A]       | NA                                         |
| Ca_Desi_Chromosome_scaffold38400_304 | Ca_desi_scaffold   | 304                            | [C/T]       | NA                                         |
| Ca_Desi_Chromosome_scaffold38428_678 | Ca_desi_scaffold   | 678                            | [T/C]       | NA                                         |
| Ca_Desi_Chromosome_scaffold38428_708 | Ca_desi_scaffold   | 708                            | [T/C]       | NA                                         |
| Ca_Desi_Chromosome_scaffold38480_666 | Ca_desi_scaffold   | 666                            | [C/T]       | NA                                         |
| Ca_Desi_Chromosome_scaffold38899_30  | Ca_desi_scaffold   | 30                             | [A/G]       | NA                                         |
| Ca_Desi_Chromosome_scaffold38899_38  | Ca_desi_scaffold   | 38                             | [A/G]       | NA                                         |
| Ca_Desi_Chromosome_scaffold38899_39  | Ca_desi_scaffold   | 39                             | [A/C]       | NA                                         |
| Ca_Desi_Chromosome_scaffold38899_64  | Ca_desi_scaffold   | 64                             | [A/G]       | NA                                         |
| Ca_Desi_Chromosome_scaffold38899_66  | Ca_desi_scaffold   | 66                             | [T/C]       | NA                                         |
| Ca_Desi_Chromosome_scaffold38899_68  | Ca_desi_scaffold   | 68                             | [G/A]       | NA                                         |
| Ca_Desi_Chromosome_scaffold38899_110 | Ca_desi_scaffold   | 110                            | [C/G]       | NA                                         |
| Ca_Desi_Chromosome_scaffold39439_176 | Ca_desi_scaffold   | 176                            | [A/T]       | NA                                         |
| Ca_Desi_Chromosome_scaffold39708_101 | Ca_desi_scaffold   | 101                            | [A/G]       | NA                                         |
| Ca_Desi_Chromosome_scaffold39708_103 | Ca_desi_scaffold   | 103                            | [T/G]       | NA                                         |
| Ca_Desi_Chromosome_scaffold39708_106 | Ca_desi_scaffold   | 106                            | [T/G]       | NA                                         |
| Ca_Desi_Chromosome_scaffold39708_107 | Ca_desi_scaffold   | 107                            | [G/A]       | NA                                         |
| Ca_Desi_Chromosome_scaffold39708_115 | Ca_desi_scaffold   | 115                            | [A/G]       | NA                                         |
| Ca_Desi_Chromosome_scaffold39708_127 | Ca_desi_scaffold   | 127                            | [T/C]       | NA                                         |
| Ca_Desi_Chromosome_scaffold39718_446 | Ca_desi_scaffold   | 446                            | [G/A]       | NA                                         |
| Ca_Desi_Chromosome_scaffold40029_808 | Ca_desi_scaffold   | 808                            | [A/C]       | NA                                         |
| Ca_Desi_Chromosome_scaffold40357_98  | Ca_desi_scaffold   | 98                             | [C/A]       | NA                                         |
| Ca_Desi_Chromosome_scaffold40403_78  | Ca_desi_scaffold   | 78                             | [G/T]       | NA                                         |
| Ca_Desi_Chromosome_scaffold40455_735 | Ca_desi_scaffold   | 735                            | [G/A]       | NA                                         |
| Ca_Desi_Chromosome_scaffold40455_736 | Ca_desi_scaffold   | 736                            | [G/T]       | NA                                         |
| Ca_Desi_Chromosome_scaffold40455_737 | Ca_desi_scaffold   | 737                            | [C/T]       | NA                                         |
| Ca_Desi_Chromosome_scaffold40509_619 | Ca_desi_scaffold   | 619                            | [T/G]       | NA                                         |
| Ca_Desi_Chromosome_scaffold40645_308 | Ca_desi_scaffold   | 308                            | [G/C]       | NA                                         |
| Ca_Desi_Chromosome_scaffold41141_618 | Ca_desi_scaffold   | 618                            | [T/G]       | NA                                         |
| Ca_Desi_Chromosome_scaffold41219_604 | Ca_desi_scaffold   | 604                            | [A/G]       | NA                                         |

| <b>SNP IDs</b>               | <b>Chromosomes</b> | <b>Physical positions (bp)</b> | <b>SNPs</b> | <b>NCBI SNPdb accession IDs (NCBI_ss#)</b> |
|------------------------------|--------------------|--------------------------------|-------------|--------------------------------------------|
| Ca_Desi_Ch_scaffold41258_507 | Ca_desi_scaffold   | 507                            | [T/A]       | NA                                         |
| Ca_Desi_Ch_scaffold41795_79  | Ca_desi_scaffold   | 79                             | [C/T]       | NA                                         |
| Ca_Desi_Ch_scaffold41795_96  | Ca_desi_scaffold   | 96                             | [C/T]       | NA                                         |
| Ca_Desi_Ch_scaffold41968_468 | Ca_desi_scaffold   | 468                            | [T/C]       | NA                                         |
| Ca_Desi_Ch_scaffold41968_497 | Ca_desi_scaffold   | 497                            | [G/A]       | NA                                         |
| Ca_Desi_Ch_scaffold42202_34  | Ca_desi_scaffold   | 34                             | [G/A]       | NA                                         |
| Ca_Desi_Ch_scaffold42202_36  | Ca_desi_scaffold   | 36                             | [A/G]       | NA                                         |
| Ca_Desi_Ch_scaffold42202_37  | Ca_desi_scaffold   | 37                             | [C/T]       | NA                                         |
| Ca_Desi_Ch_scaffold42202_38  | Ca_desi_scaffold   | 38                             | [G/A]       | NA                                         |
| Ca_Desi_Ch_scaffold42202_39  | Ca_desi_scaffold   | 39                             | [G/A]       | NA                                         |
| Ca_Desi_Ch_scaffold42202_41  | Ca_desi_scaffold   | 41                             | [T/C]       | NA                                         |
| Ca_Desi_Ch_scaffold42202_42  | Ca_desi_scaffold   | 42                             | [G/A]       | NA                                         |
| Ca_Desi_Ch_scaffold42202_43  | Ca_desi_scaffold   | 43                             | [A/G]       | NA                                         |
| Ca_Desi_Ch_scaffold42202_47  | Ca_desi_scaffold   | 47                             | [A/G]       | NA                                         |
| Ca_Desi_Ch_scaffold42202_49  | Ca_desi_scaffold   | 49                             | [G/A]       | NA                                         |
| Ca_Desi_Ch_scaffold42202_50  | Ca_desi_scaffold   | 50                             | [C/G]       | NA                                         |
| Ca_Desi_Ch_scaffold42202_51  | Ca_desi_scaffold   | 51                             | [G/A]       | NA                                         |
| Ca_Desi_Ch_scaffold42202_52  | Ca_desi_scaffold   | 52                             | [T/C]       | NA                                         |
| Ca_Desi_Ch_scaffold42202_54  | Ca_desi_scaffold   | 54                             | [A/G]       | NA                                         |
| Ca_Desi_Ch_scaffold42202_56  | Ca_desi_scaffold   | 56                             | [A/G]       | NA                                         |
| Ca_Desi_Ch_scaffold42202_57  | Ca_desi_scaffold   | 57                             | [A/C]       | NA                                         |
| Ca_Desi_Ch_scaffold42202_60  | Ca_desi_scaffold   | 60                             | [T/C]       | NA                                         |
| Ca_Desi_Ch_scaffold42202_65  | Ca_desi_scaffold   | 65                             | [T/C]       | NA                                         |
| Ca_Desi_Ch_scaffold42202_66  | Ca_desi_scaffold   | 66                             | [T/C]       | NA                                         |
| Ca_Desi_Ch_scaffold42202_70  | Ca_desi_scaffold   | 70                             | [A/G]       | NA                                         |
| Ca_Desi_Ch_scaffold42202_74  | Ca_desi_scaffold   | 74                             | [G/A]       | NA                                         |
| Ca_Desi_Ch_scaffold42202_75  | Ca_desi_scaffold   | 75                             | [G/A]       | NA                                         |
| Ca_Desi_Ch_scaffold42202_76  | Ca_desi_scaffold   | 76                             | [A/G]       | NA                                         |
| Ca_Desi_Ch_scaffold42202_77  | Ca_desi_scaffold   | 77                             | [C/A]       | NA                                         |
| Ca_Desi_Ch_scaffold42202_78  | Ca_desi_scaffold   | 78                             | [A/G]       | NA                                         |
| Ca_Desi_Ch_scaffold42202_81  | Ca_desi_scaffold   | 81                             | [A/G]       | NA                                         |
| Ca_Desi_Ch_scaffold42202_84  | Ca_desi_scaffold   | 84                             | [T/C]       | NA                                         |
| Ca_Desi_Ch_scaffold42202_85  | Ca_desi_scaffold   | 85                             | [G/A]       | NA                                         |
| Ca_Desi_Ch_scaffold42202_86  | Ca_desi_scaffold   | 86                             | [G/A]       | NA                                         |

| <b>SNP IDs</b>               | <b>Chromosomes</b> | <b>Physical positions (bp)</b> | <b>SNPs</b> | <b>NCBI SNPdb accession IDs (NCBI_ss#)</b> |
|------------------------------|--------------------|--------------------------------|-------------|--------------------------------------------|
| Ca_Desi_Ch_scaffold42202_87  | Ca_desi_scaffold   | 87                             | [A/G]       | NA                                         |
| Ca_Desi_Ch_scaffold42202_88  | Ca_desi_scaffold   | 88                             | [A/G]       | NA                                         |
| Ca_Desi_Ch_scaffold42202_89  | Ca_desi_scaffold   | 89                             | [A/G]       | NA                                         |
| Ca_Desi_Ch_scaffold42202_91  | Ca_desi_scaffold   | 91                             | [G/A]       | NA                                         |
| Ca_Desi_Ch_scaffold42202_241 | Ca_desi_scaffold   | 241                            | [A/G]       | NA                                         |
| Ca_Desi_Ch_scaffold42202_274 | Ca_desi_scaffold   | 274                            | [G/T]       | NA                                         |
| Ca_Desi_Ch_scaffold42202_278 | Ca_desi_scaffold   | 278                            | [A/C]       | NA                                         |
| Ca_Desi_Ch_scaffold42202_281 | Ca_desi_scaffold   | 281                            | [T/C]       | NA                                         |
| Ca_Desi_Ch_scaffold42202_285 | Ca_desi_scaffold   | 285                            | [G/C]       | NA                                         |
| Ca_Desi_Ch_scaffold42202_289 | Ca_desi_scaffold   | 289                            | [T/C]       | NA                                         |
| Ca_Desi_Ch_scaffold42202_291 | Ca_desi_scaffold   | 291                            | [G/T]       | NA                                         |
| Ca_Desi_Ch_scaffold42202_297 | Ca_desi_scaffold   | 297                            | [A/G]       | NA                                         |
| Ca_Desi_Ch_scaffold42202_303 | Ca_desi_scaffold   | 303                            | [A/C]       | NA                                         |
| Ca_Desi_Ch_scaffold42202_307 | Ca_desi_scaffold   | 307                            | [A/G]       | NA                                         |
| Ca_Desi_Ch_scaffold42202_312 | Ca_desi_scaffold   | 312                            | [T/A]       | NA                                         |
| Ca_Desi_Ch_scaffold42202_316 | Ca_desi_scaffold   | 316                            | [G/C]       | NA                                         |
| Ca_Desi_Ch_scaffold42202_319 | Ca_desi_scaffold   | 319                            | [T/G]       | NA                                         |
| Ca_Desi_Ch_scaffold42202_322 | Ca_desi_scaffold   | 322                            | [A/C]       | NA                                         |
| Ca_Desi_Ch_scaffold42202_325 | Ca_desi_scaffold   | 325                            | [A/G]       | NA                                         |
| Ca_Desi_Ch_scaffold42202_326 | Ca_desi_scaffold   | 326                            | [A/G]       | NA                                         |
| Ca_Desi_Ch_scaffold42202_329 | Ca_desi_scaffold   | 329                            | [A/G]       | NA                                         |
| Ca_Desi_Ch_scaffold42202_330 | Ca_desi_scaffold   | 330                            | [G/T]       | NA                                         |
| Ca_Desi_Ch_scaffold42202_420 | Ca_desi_scaffold   | 420                            | [G/A]       | NA                                         |
| Ca_Desi_Ch_scaffold42202_422 | Ca_desi_scaffold   | 422                            | [T/G]       | NA                                         |
| Ca_Desi_Ch_scaffold42202_423 | Ca_desi_scaffold   | 423                            | [A/G]       | NA                                         |
| Ca_Desi_Ch_scaffold42202_424 | Ca_desi_scaffold   | 424                            | [A/G]       | NA                                         |
| Ca_Desi_Ch_scaffold42202_426 | Ca_desi_scaffold   | 426                            | [A/G]       | NA                                         |
| Ca_Desi_Ch_scaffold42202_428 | Ca_desi_scaffold   | 428                            | [A/G]       | NA                                         |
| Ca_Desi_Ch_scaffold42202_430 | Ca_desi_scaffold   | 430                            | [A/G]       | NA                                         |
| Ca_Desi_Ch_scaffold42202_433 | Ca_desi_scaffold   | 433                            | [A/G]       | NA                                         |
| Ca_Desi_Ch_scaffold42202_434 | Ca_desi_scaffold   | 434                            | [T/C]       | NA                                         |
| Ca_Desi_Ch_scaffold42202_435 | Ca_desi_scaffold   | 435                            | [G/A]       | NA                                         |
| Ca_Desi_Ch_scaffold42202_436 | Ca_desi_scaffold   | 436                            | [C/T]       | NA                                         |
| Ca_Desi_Ch_scaffold42202_437 | Ca_desi_scaffold   | 437                            | [A/G]       | NA                                         |



| <b>SNP IDs</b>                       | <b>Chromosomes</b> | <b>Physical positions (bp)</b> | <b>SNPs</b> | <b>NCBI SNPdb accession IDs (NCBI_ss#)</b> |
|--------------------------------------|--------------------|--------------------------------|-------------|--------------------------------------------|
| Ca_Desi_Chromosome_scaffold42202_438 | Ca_desi_scaffold   | 438                            | [A/G]       | NA                                         |
| Ca_Desi_Chromosome_scaffold42202_441 | Ca_desi_scaffold   | 441                            | [G/A]       | NA                                         |
| Ca_Desi_Chromosome_scaffold42202_442 | Ca_desi_scaffold   | 442                            | [T/C]       | NA                                         |
| Ca_Desi_Chromosome_scaffold42202_443 | Ca_desi_scaffold   | 443                            | [T/C]       | NA                                         |
| Ca_Desi_Chromosome_scaffold42202_444 | Ca_desi_scaffold   | 444                            | [A/G]       | NA                                         |
| Ca_Desi_Chromosome_scaffold42202_445 | Ca_desi_scaffold   | 445                            | [T/C]       | NA                                         |
| Ca_Desi_Chromosome_scaffold42202_446 | Ca_desi_scaffold   | 446                            | [C/T]       | NA                                         |
| Ca_Desi_Chromosome_scaffold42202_447 | Ca_desi_scaffold   | 447                            | [C/T]       | NA                                         |
| Ca_Desi_Chromosome_scaffold42202_448 | Ca_desi_scaffold   | 448                            | [G/A]       | NA                                         |
| Ca_Desi_Chromosome_scaffold42202_450 | Ca_desi_scaffold   | 450                            | [A/G]       | NA                                         |
| Ca_Desi_Chromosome_scaffold42202_451 | Ca_desi_scaffold   | 451                            | [A/G]       | NA                                         |
| Ca_Desi_Chromosome_scaffold42202_452 | Ca_desi_scaffold   | 452                            | [T/C]       | NA                                         |
| Ca_Desi_Chromosome_scaffold42202_454 | Ca_desi_scaffold   | 454                            | [A/G]       | NA                                         |
| Ca_Desi_Chromosome_scaffold42202_455 | Ca_desi_scaffold   | 455                            | [T/C]       | NA                                         |
| Ca_Desi_Chromosome_scaffold42202_456 | Ca_desi_scaffold   | 456                            | [T/C]       | NA                                         |
| Ca_Desi_Chromosome_scaffold42202_457 | Ca_desi_scaffold   | 457                            | [G/T]       | NA                                         |
| Ca_Desi_Chromosome_scaffold42202_460 | Ca_desi_scaffold   | 460                            | [C/G]       | NA                                         |
| Ca_Desi_Chromosome_scaffold42202_461 | Ca_desi_scaffold   | 461                            | [G/A]       | NA                                         |
| Ca_Desi_Chromosome_scaffold42202_462 | Ca_desi_scaffold   | 462                            | [T/G]       | NA                                         |
| Ca_Desi_Chromosome_scaffold42202_463 | Ca_desi_scaffold   | 463                            | [A/G]       | NA                                         |
| Ca_Desi_Chromosome_scaffold42202_465 | Ca_desi_scaffold   | 465                            | [A/G]       | NA                                         |
| Ca_Desi_Chromosome_scaffold42202_513 | Ca_desi_scaffold   | 513                            | [A/C]       | NA                                         |
| Ca_Desi_Chromosome_scaffold42202_685 | Ca_desi_scaffold   | 685                            | [A/C]       | NA                                         |
| Ca_Desi_Chromosome_scaffold42214_487 | Ca_desi_scaffold   | 487                            | [G/C]       | NA                                         |
| Ca_Desi_Chromosome_scaffold42214_488 | Ca_desi_scaffold   | 488                            | [G/A]       | NA                                         |
| Ca_Desi_Chromosome_scaffold42214_489 | Ca_desi_scaffold   | 489                            | [C/T]       | NA                                         |
| Ca_Desi_Chromosome_scaffold42214_490 | Ca_desi_scaffold   | 490                            | [A/G]       | NA                                         |
| Ca_Desi_Chromosome_scaffold42214_492 | Ca_desi_scaffold   | 492                            | [C/T]       | NA                                         |
| Ca_Desi_Chromosome_scaffold42214_493 | Ca_desi_scaffold   | 493                            | [T/C]       | NA                                         |
| Ca_Desi_Chromosome_scaffold42214_494 | Ca_desi_scaffold   | 494                            | [G/A]       | NA                                         |
| Ca_Desi_Chromosome_scaffold42214_495 | Ca_desi_scaffold   | 495                            | [C/T]       | NA                                         |
| Ca_Desi_Chromosome_scaffold42214_496 | Ca_desi_scaffold   | 496                            | [T/C]       | NA                                         |
| Ca_Desi_Chromosome_scaffold42214_497 | Ca_desi_scaffold   | 497                            | [T/C]       | NA                                         |
| Ca_Desi_Chromosome_scaffold42214_498 | Ca_desi_scaffold   | 498                            | [G/A]       | NA                                         |

| <b>SNP IDs</b>                 | <b>Chromosomes</b> | <b>Physical positions (bp)</b> | <b>SNPs</b> | <b>NCBI SNPdb accession IDs (NCBI_ss#)</b> |
|--------------------------------|--------------------|--------------------------------|-------------|--------------------------------------------|
| Ca_Desig_Chr_scaffold42214_499 | Ca_desig_scaffold  | 499                            | [A/G]       | NA                                         |
| Ca_Desig_Chr_scaffold42214_500 | Ca_desig_scaffold  | 500                            | [G/T]       | NA                                         |
| Ca_Desig_Chr_scaffold42214_501 | Ca_desig_scaffold  | 501                            | [C/T]       | NA                                         |
| Ca_Desig_Chr_scaffold42214_502 | Ca_desig_scaffold  | 502                            | [T/C]       | NA                                         |
| Ca_Desig_Chr_scaffold42214_503 | Ca_desig_scaffold  | 503                            | [G/A]       | NA                                         |
| Ca_Desig_Chr_scaffold42214_504 | Ca_desig_scaffold  | 504                            | [A/G]       | NA                                         |
| Ca_Desig_Chr_scaffold42214_505 | Ca_desig_scaffold  | 505                            | [T/C]       | NA                                         |
| Ca_Desig_Chr_scaffold42214_506 | Ca_desig_scaffold  | 506                            | [A/G]       | NA                                         |
| Ca_Desig_Chr_scaffold42214_508 | Ca_desig_scaffold  | 508                            | [G/A]       | NA                                         |
| Ca_Desig_Chr_scaffold42214_510 | Ca_desig_scaffold  | 510                            | [A/G]       | NA                                         |
| Ca_Desig_Chr_scaffold42214_511 | Ca_desig_scaffold  | 511                            | [A/G]       | NA                                         |
| Ca_Desig_Chr_scaffold42214_512 | Ca_desig_scaffold  | 512                            | [A/G]       | NA                                         |
| Ca_Desig_Chr_scaffold42214_513 | Ca_desig_scaffold  | 513                            | [C/A]       | NA                                         |
| Ca_Desig_Chr_scaffold42214_514 | Ca_desig_scaffold  | 514                            | [A/G]       | NA                                         |
| Ca_Desig_Chr_scaffold42214_515 | Ca_desig_scaffold  | 515                            | [A/G]       | NA                                         |
| Ca_Desig_Chr_scaffold42214_516 | Ca_desig_scaffold  | 516                            | [G/A]       | NA                                         |
| Ca_Desig_Chr_scaffold42214_517 | Ca_desig_scaffold  | 517                            | [A/G]       | NA                                         |
| Ca_Desig_Chr_scaffold42214_519 | Ca_desig_scaffold  | 519                            | [T/C]       | NA                                         |
| Ca_Desig_Chr_scaffold42214_520 | Ca_desig_scaffold  | 520                            | [A/G]       | NA                                         |
| Ca_Desig_Chr_scaffold42214_522 | Ca_desig_scaffold  | 522                            | [A/G]       | NA                                         |
| Ca_Desig_Chr_scaffold42214_523 | Ca_desig_scaffold  | 523                            | [A/G]       | NA                                         |
| Ca_Desig_Chr_scaffold42214_524 | Ca_desig_scaffold  | 524                            | [A/G]       | NA                                         |
| Ca_Desig_Chr_scaffold42214_525 | Ca_desig_scaffold  | 525                            | [G/A]       | NA                                         |
| Ca_Desig_Chr_scaffold42214_526 | Ca_desig_scaffold  | 526                            | [A/G]       | NA                                         |
| Ca_Desig_Chr_scaffold42214_527 | Ca_desig_scaffold  | 527                            | [C/T]       | NA                                         |
| Ca_Desig_Chr_scaffold42214_528 | Ca_desig_scaffold  | 528                            | [C/T]       | NA                                         |
| Ca_Desig_Chr_scaffold42214_529 | Ca_desig_scaffold  | 529                            | [G/A]       | NA                                         |
| Ca_Desig_Chr_scaffold42214_531 | Ca_desig_scaffold  | 531                            | [T/C]       | NA                                         |
| Ca_Desig_Chr_scaffold42214_532 | Ca_desig_scaffold  | 532                            | [T/C]       | NA                                         |
| Ca_Desig_Chr_scaffold42214_533 | Ca_desig_scaffold  | 533                            | [A/G]       | NA                                         |
| Ca_Desig_Chr_scaffold42214_534 | Ca_desig_scaffold  | 534                            | [C/T]       | NA                                         |
| Ca_Desig_Chr_scaffold42214_535 | Ca_desig_scaffold  | 535                            | [A/G]       | NA                                         |
| Ca_Desig_Chr_scaffold42214_536 | Ca_desig_scaffold  | 536                            | [C/T]       | NA                                         |
| Ca_Desig_Chr_scaffold42214_537 | Ca_desig_scaffold  | 537                            | [G/A]       | NA                                         |

| <b>SNP IDs</b>                 | <b>Chromosomes</b> | <b>Physical positions (bp)</b> | <b>SNPs</b> | <b>NCBI SNPdb accession IDs (NCBI_ss#)</b> |
|--------------------------------|--------------------|--------------------------------|-------------|--------------------------------------------|
| Ca_Desig_Chr_scaffold42214_538 | Ca_desig_scaffold  | 538                            | [T/C]       | NA                                         |
| Ca_Desig_Chr_scaffold42214_539 | Ca_desig_scaffold  | 539                            | [A/G]       | NA                                         |
| Ca_Desig_Chr_scaffold42214_540 | Ca_desig_scaffold  | 540                            | [C/T]       | NA                                         |
| Ca_Desig_Chr_scaffold42214_541 | Ca_desig_scaffold  | 541                            | [A/G]       | NA                                         |
| Ca_Desig_Chr_scaffold42214_542 | Ca_desig_scaffold  | 542                            | [C/T]       | NA                                         |
| Ca_Desig_Chr_scaffold42214_543 | Ca_desig_scaffold  | 543                            | [C/T]       | NA                                         |
| Ca_Desig_Chr_scaffold42214_544 | Ca_desig_scaffold  | 544                            | [A/G]       | NA                                         |
| Ca_Desig_Chr_scaffold42214_545 | Ca_desig_scaffold  | 545                            | [A/G]       | NA                                         |
| Ca_Desig_Chr_scaffold42214_546 | Ca_desig_scaffold  | 546                            | [C/G]       | NA                                         |
| Ca_Desig_Chr_scaffold42214_613 | Ca_desig_scaffold  | 613                            | [T/C]       | NA                                         |
| Ca_Desig_Chr_scaffold42214_615 | Ca_desig_scaffold  | 615                            | [T/C]       | NA                                         |
| Ca_Desig_Chr_scaffold42214_616 | Ca_desig_scaffold  | 616                            | [T/C]       | NA                                         |
| Ca_Desig_Chr_scaffold42214_618 | Ca_desig_scaffold  | 618                            | [T/C]       | NA                                         |
| Ca_Desig_Chr_scaffold42214_619 | Ca_desig_scaffold  | 619                            | [T/C]       | NA                                         |
| Ca_Desig_Chr_scaffold42214_621 | Ca_desig_scaffold  | 621                            | [T/C]       | NA                                         |
| Ca_Desig_Chr_scaffold42214_623 | Ca_desig_scaffold  | 623                            | [C/T]       | NA                                         |
| Ca_Desig_Chr_scaffold42214_624 | Ca_desig_scaffold  | 624                            | [G/A]       | NA                                         |
| Ca_Desig_Chr_scaffold42214_626 | Ca_desig_scaffold  | 626                            | [A/G]       | NA                                         |
| Ca_Desig_Chr_scaffold42214_627 | Ca_desig_scaffold  | 627                            | [G/A]       | NA                                         |
| Ca_Desig_Chr_scaffold42214_628 | Ca_desig_scaffold  | 628                            | [A/G]       | NA                                         |
| Ca_Desig_Chr_scaffold42214_629 | Ca_desig_scaffold  | 629                            | [T/C]       | NA                                         |
| Ca_Desig_Chr_scaffold42214_631 | Ca_desig_scaffold  | 631                            | [A/G]       | NA                                         |
| Ca_Desig_Chr_scaffold42214_633 | Ca_desig_scaffold  | 633                            | [A/G]       | NA                                         |
| Ca_Desig_Chr_scaffold42214_635 | Ca_desig_scaffold  | 635                            | [T/C]       | NA                                         |
| Ca_Desig_Chr_scaffold42214_636 | Ca_desig_scaffold  | 636                            | [C/T]       | NA                                         |
| Ca_Desig_Chr_scaffold42214_637 | Ca_desig_scaffold  | 637                            | [G/A]       | NA                                         |
| Ca_Desig_Chr_scaffold42214_638 | Ca_desig_scaffold  | 638                            | [T/C]       | NA                                         |
| Ca_Desig_Chr_scaffold42214_639 | Ca_desig_scaffold  | 639                            | [T/C]       | NA                                         |
| Ca_Desig_Chr_scaffold42214_641 | Ca_desig_scaffold  | 641                            | [A/C]       | NA                                         |
| Ca_Desig_Chr_scaffold42214_643 | Ca_desig_scaffold  | 643                            | [T/C]       | NA                                         |
| Ca_Desig_Chr_scaffold42214_644 | Ca_desig_scaffold  | 644                            | [T/C]       | NA                                         |
| Ca_Desig_Chr_scaffold42214_646 | Ca_desig_scaffold  | 646                            | [T/C]       | NA                                         |
| Ca_Desig_Chr_scaffold42214_648 | Ca_desig_scaffold  | 648                            | [T/C]       | NA                                         |
| Ca_Desig_Chr_scaffold42214_649 | Ca_desig_scaffold  | 649                            | [A/G]       | NA                                         |

| <b>SNP IDs</b>                       | <b>Chromosomes</b> | <b>Physical positions (bp)</b> | <b>SNPs</b> | <b>NCBI SNPdb accession IDs (NCBI_ss#)</b> |
|--------------------------------------|--------------------|--------------------------------|-------------|--------------------------------------------|
| Ca_Desi_Chromosome_scaffold42214_650 | Ca_desi_scaffold   | 650                            | [T/C]       | NA                                         |
| Ca_Desi_Chromosome_scaffold42214_651 | Ca_desi_scaffold   | 651                            | [C/T]       | NA                                         |
| Ca_Desi_Chromosome_scaffold42214_653 | Ca_desi_scaffold   | 653                            | [A/G]       | NA                                         |
| Ca_Desi_Chromosome_scaffold42214_654 | Ca_desi_scaffold   | 654                            | [A/G]       | NA                                         |
| Ca_Desi_Chromosome_scaffold42214_655 | Ca_desi_scaffold   | 655                            | [A/G]       | NA                                         |
| Ca_Desi_Chromosome_scaffold42214_657 | Ca_desi_scaffold   | 657                            | [A/G]       | NA                                         |
| Ca_Desi_Chromosome_scaffold42214_659 | Ca_desi_scaffold   | 659                            | [C/T]       | NA                                         |
| Ca_Desi_Chromosome_scaffold42214_660 | Ca_desi_scaffold   | 660                            | [G/A]       | NA                                         |
| Ca_Desi_Chromosome_scaffold42214_661 | Ca_desi_scaffold   | 661                            | [T/C]       | NA                                         |
| Ca_Desi_Chromosome_scaffold42214_662 | Ca_desi_scaffold   | 662                            | [A/G]       | NA                                         |
| Ca_Desi_Chromosome_scaffold42214_663 | Ca_desi_scaffold   | 663                            | [T/C]       | NA                                         |
| Ca_Desi_Chromosome_scaffold42214_664 | Ca_desi_scaffold   | 664                            | [T/C]       | NA                                         |
| Ca_Desi_Chromosome_scaffold42214_666 | Ca_desi_scaffold   | 666                            | [T/C]       | NA                                         |
| Ca_Desi_Chromosome_scaffold42214_667 | Ca_desi_scaffold   | 667                            | [T/C]       | NA                                         |
| Ca_Desi_Chromosome_scaffold42214_668 | Ca_desi_scaffold   | 668                            | [T/C]       | NA                                         |
| Ca_Desi_Chromosome_scaffold42214_670 | Ca_desi_scaffold   | 670                            | [A/G]       | NA                                         |
| Ca_Desi_Chromosome_scaffold42214_671 | Ca_desi_scaffold   | 671                            | [T/C]       | NA                                         |
| Ca_Desi_Chromosome_scaffold42214_672 | Ca_desi_scaffold   | 672                            | [T/C]       | NA                                         |
| Ca_Desi_Chromosome_scaffold42228_126 | Ca_desi_scaffold   | 126                            | [C/T]       | NA                                         |
| Ca_Desi_Chromosome_scaffold42228_257 | Ca_desi_scaffold   | 257                            | [G/A]       | NA                                         |
| Ca_Desi_Chromosome_scaffold42442_713 | Ca_desi_scaffold   | 713                            | [C/T]       | NA                                         |
| Ca_Desi_Chromosome_scaffold42442_716 | Ca_desi_scaffold   | 716                            | [G/A]       | NA                                         |
| Ca_Desi_Chromosome_scaffold42442_734 | Ca_desi_scaffold   | 734                            | [C/T]       | NA                                         |
| Ca_Desi_Chromosome_scaffold42442_746 | Ca_desi_scaffold   | 746                            | [T/C]       | NA                                         |
| Ca_Desi_Chromosome_scaffold42442_749 | Ca_desi_scaffold   | 749                            | [G/T]       | NA                                         |
| Ca_Desi_Chromosome_scaffold42442_753 | Ca_desi_scaffold   | 753                            | [C/T]       | NA                                         |
| Ca_Desi_Chromosome_scaffold42739_331 | Ca_desi_scaffold   | 331                            | [A/G]       | NA                                         |
| Ca_Desi_Chromosome_scaffold42739_601 | Ca_desi_scaffold   | 601                            | [T/C]       | NA                                         |
| Ca_Desi_Chromosome_scaffold42786_585 | Ca_desi_scaffold   | 585                            | [T/G]       | NA                                         |
| Ca_Desi_Chromosome_scaffold43008_644 | Ca_desi_scaffold   | 644                            | [T/C]       | NA                                         |
| Ca_Desi_Chromosome_scaffold43008_693 | Ca_desi_scaffold   | 693                            | [A/G]       | NA                                         |
| Ca_Desi_Chromosome_scaffold43318_189 | Ca_desi_scaffold   | 189                            | [G/A]       | NA                                         |
| Ca_Desi_Chromosome_scaffold43318_399 | Ca_desi_scaffold   | 399                            | [A/C]       | NA                                         |
| Ca_Desi_Chromosome_scaffold43318_400 | Ca_desi_scaffold   | 400                            | [G/T]       | NA                                         |

| <b>SNP IDs</b>               | <b>Chromosomes</b> | <b>Physical positions (bp)</b> | <b>SNPs</b> | <b>NCBI SNPdb accession IDs (NCBI_ss#)</b> |
|------------------------------|--------------------|--------------------------------|-------------|--------------------------------------------|
| Ca_Desi_Ch_scaffold43318_443 | Ca_desi_scaffold   | 443                            | [C/T]       | NA                                         |
| Ca_Desi_Ch_scaffold43370_430 | Ca_desi_scaffold   | 430                            | [G/A]       | NA                                         |
| Ca_Desi_Ch_scaffold43462_605 | Ca_desi_scaffold   | 605                            | [A/G]       | NA                                         |
| Ca_Desi_Ch_scaffold43462_606 | Ca_desi_scaffold   | 606                            | [T/C]       | NA                                         |
| Ca_Desi_Ch_scaffold43462_608 | Ca_desi_scaffold   | 608                            | [T/C]       | NA                                         |
| Ca_Desi_Ch_scaffold43462_612 | Ca_desi_scaffold   | 612                            | [T/C]       | NA                                         |
| Ca_Desi_Ch_scaffold43462_614 | Ca_desi_scaffold   | 614                            | [T/C]       | NA                                         |
| Ca_Desi_Ch_scaffold43462_622 | Ca_desi_scaffold   | 622                            | [A/G]       | NA                                         |
| Ca_Desi_Ch_scaffold43462_628 | Ca_desi_scaffold   | 628                            | [T/C]       | NA                                         |
| Ca_Desi_Ch_scaffold43462_631 | Ca_desi_scaffold   | 631                            | [C/T]       | NA                                         |
| Ca_Desi_Ch_scaffold43462_636 | Ca_desi_scaffold   | 636                            | [T/C]       | NA                                         |
| Ca_Desi_Ch_scaffold43462_638 | Ca_desi_scaffold   | 638                            | [T/G]       | NA                                         |
| Ca_Desi_Ch_scaffold43462_642 | Ca_desi_scaffold   | 642                            | [G/T]       | NA                                         |
| Ca_Desi_Ch_scaffold43462_645 | Ca_desi_scaffold   | 645                            | [C/G]       | NA                                         |
| Ca_Desi_Ch_scaffold43462_646 | Ca_desi_scaffold   | 646                            | [T/C]       | NA                                         |
| Ca_Desi_Ch_scaffold43462_649 | Ca_desi_scaffold   | 649                            | [T/C]       | NA                                         |
| Ca_Desi_Ch_scaffold43462_651 | Ca_desi_scaffold   | 651                            | [T/C]       | NA                                         |
| Ca_Desi_Ch_scaffold43462_654 | Ca_desi_scaffold   | 654                            | [G/T]       | NA                                         |
| Ca_Desi_Ch_scaffold43462_655 | Ca_desi_scaffold   | 655                            | [A/T]       | NA                                         |
| Ca_Desi_Ch_scaffold43462_657 | Ca_desi_scaffold   | 657                            | [C/T]       | NA                                         |
| Ca_Desi_Ch_scaffold43462_660 | Ca_desi_scaffold   | 660                            | [A/G]       | NA                                         |
| Ca_Desi_Ch_scaffold43462_662 | Ca_desi_scaffold   | 662                            | [T/C]       | NA                                         |
| Ca_Desi_Ch_scaffold43462_663 | Ca_desi_scaffold   | 663                            | [G/T]       | NA                                         |
| Ca_Desi_Ch_scaffold43875_523 | Ca_desi_scaffold   | 523                            | [A/T]       | NA                                         |
| Ca_Desi_Ch_scaffold43875_526 | Ca_desi_scaffold   | 526                            | [T/C]       | NA                                         |
| Ca_Desi_Ch_scaffold43875_527 | Ca_desi_scaffold   | 527                            | [C/T]       | NA                                         |
| Ca_Desi_Ch_scaffold43875_528 | Ca_desi_scaffold   | 528                            | [C/T]       | NA                                         |
| Ca_Desi_Ch_scaffold43875_529 | Ca_desi_scaffold   | 529                            | [C/T]       | NA                                         |
| Ca_Desi_Ch_scaffold43875_530 | Ca_desi_scaffold   | 530                            | [A/G]       | NA                                         |
| Ca_Desi_Ch_scaffold43875_531 | Ca_desi_scaffold   | 531                            | [T/C]       | NA                                         |
| Ca_Desi_Ch_scaffold43875_532 | Ca_desi_scaffold   | 532                            | [T/C]       | NA                                         |
| Ca_Desi_Ch_scaffold43875_533 | Ca_desi_scaffold   | 533                            | [C/T]       | NA                                         |
| Ca_Desi_Ch_scaffold43875_534 | Ca_desi_scaffold   | 534                            | [C/T]       | NA                                         |
| Ca_Desi_Ch_scaffold43875_535 | Ca_desi_scaffold   | 535                            | [T/C]       | NA                                         |

| <b>SNP IDs</b>               | <b>Chromosomes</b> | <b>Physical positions (bp)</b> | <b>SNPs</b> | <b>NCBI SNPdb accession IDs (NCBI_ss#)</b> |
|------------------------------|--------------------|--------------------------------|-------------|--------------------------------------------|
| Ca_Desi_Ch_scaffold43875_536 | Ca_desi_scaffold   | 536                            | [C/T]       | NA                                         |
| Ca_Desi_Ch_scaffold43875_537 | Ca_desi_scaffold   | 537                            | [C/A]       | NA                                         |
| Ca_Desi_Ch_scaffold43875_538 | Ca_desi_scaffold   | 538                            | [A/G]       | NA                                         |
| Ca_Desi_Ch_scaffold43875_539 | Ca_desi_scaffold   | 539                            | [C/T]       | NA                                         |
| Ca_Desi_Ch_scaffold43875_540 | Ca_desi_scaffold   | 540                            | [C/T]       | NA                                         |
| Ca_Desi_Ch_scaffold43875_541 | Ca_desi_scaffold   | 541                            | [A/G]       | NA                                         |
| Ca_Desi_Ch_scaffold43875_542 | Ca_desi_scaffold   | 542                            | [A/G]       | NA                                         |
| Ca_Desi_Ch_scaffold43875_543 | Ca_desi_scaffold   | 543                            | [A/G]       | NA                                         |
| Ca_Desi_Ch_scaffold43875_544 | Ca_desi_scaffold   | 544                            | [T/C]       | NA                                         |
| Ca_Desi_Ch_scaffold43875_545 | Ca_desi_scaffold   | 545                            | [C/T]       | NA                                         |
| Ca_Desi_Ch_scaffold43875_546 | Ca_desi_scaffold   | 546                            | [G/A]       | NA                                         |
| Ca_Desi_Ch_scaffold43875_547 | Ca_desi_scaffold   | 547                            | [C/T]       | NA                                         |
| Ca_Desi_Ch_scaffold43875_548 | Ca_desi_scaffold   | 548                            | [T/C]       | NA                                         |
| Ca_Desi_Ch_scaffold43875_549 | Ca_desi_scaffold   | 549                            | [A/G]       | NA                                         |
| Ca_Desi_Ch_scaffold43875_552 | Ca_desi_scaffold   | 552                            | [A/G]       | NA                                         |
| Ca_Desi_Ch_scaffold43875_553 | Ca_desi_scaffold   | 553                            | [T/C]       | NA                                         |
| Ca_Desi_Ch_scaffold43875_554 | Ca_desi_scaffold   | 554                            | [A/G]       | NA                                         |
| Ca_Desi_Ch_scaffold43875_555 | Ca_desi_scaffold   | 555                            | [A/G]       | NA                                         |
| Ca_Desi_Ch_scaffold43875_556 | Ca_desi_scaffold   | 556                            | [G/A]       | NA                                         |
| Ca_Desi_Ch_scaffold43875_558 | Ca_desi_scaffold   | 558                            | [A/G]       | NA                                         |
| Ca_Desi_Ch_scaffold43875_559 | Ca_desi_scaffold   | 559                            | [A/G]       | NA                                         |
| Ca_Desi_Ch_scaffold43875_560 | Ca_desi_scaffold   | 560                            | [A/G]       | NA                                         |
| Ca_Desi_Ch_scaffold43875_561 | Ca_desi_scaffold   | 561                            | [C/A]       | NA                                         |
| Ca_Desi_Ch_scaffold43875_562 | Ca_desi_scaffold   | 562                            | [A/G]       | NA                                         |
| Ca_Desi_Ch_scaffold43875_563 | Ca_desi_scaffold   | 563                            | [A/G]       | NA                                         |
| Ca_Desi_Ch_scaffold43875_564 | Ca_desi_scaffold   | 564                            | [A/G]       | NA                                         |
| Ca_Desi_Ch_scaffold43875_565 | Ca_desi_scaffold   | 565                            | [T/C]       | NA                                         |
| Ca_Desi_Ch_scaffold43875_566 | Ca_desi_scaffold   | 566                            | [C/A]       | NA                                         |
| Ca_Desi_Ch_scaffold43875_567 | Ca_desi_scaffold   | 567                            | [C/T]       | NA                                         |
| Ca_Desi_Ch_scaffold43875_568 | Ca_desi_scaffold   | 568                            | [G/A]       | NA                                         |
| Ca_Desi_Ch_scaffold43875_569 | Ca_desi_scaffold   | 569                            | [A/G]       | NA                                         |
| Ca_Desi_Ch_scaffold43875_570 | Ca_desi_scaffold   | 570                            | [A/G]       | NA                                         |
| Ca_Desi_Ch_scaffold43875_571 | Ca_desi_scaffold   | 571                            | [T/C]       | NA                                         |
| Ca_Desi_Ch_scaffold43875_572 | Ca_desi_scaffold   | 572                            | [T/C]       | NA                                         |

| <b>SNP IDs</b>                 | <b>Chromosomes</b> | <b>Physical positions (bp)</b> | <b>SNPs</b> | <b>NCBI SNPdb accession IDs (NCBI_ss#)</b> |
|--------------------------------|--------------------|--------------------------------|-------------|--------------------------------------------|
| Ca_Desig_Chr_scaffold43875_573 | Ca_desig_scaffold  | 573                            | [G/A]       | NA                                         |
| Ca_Desig_Chr_scaffold43875_574 | Ca_desig_scaffold  | 574                            | [G/A]       | NA                                         |
| Ca_Desig_Chr_scaffold43875_578 | Ca_desig_scaffold  | 578                            | [A/G]       | NA                                         |
| Ca_Desig_Chr_scaffold43875_579 | Ca_desig_scaffold  | 579                            | [T/C]       | NA                                         |
| Ca_Desig_Chr_scaffold43875_580 | Ca_desig_scaffold  | 580                            | [T/C]       | NA                                         |
| Ca_Desig_Chr_scaffold43875_581 | Ca_desig_scaffold  | 581                            | [C/T]       | NA                                         |
| Ca_Desig_Chr_scaffold43875_582 | Ca_desig_scaffold  | 582                            | [G/T]       | NA                                         |
| Ca_Desig_Chr_scaffold43875_583 | Ca_desig_scaffold  | 583                            | [G/A]       | NA                                         |
| Ca_Desig_Chr_scaffold43875_584 | Ca_desig_scaffold  | 584                            | [C/T]       | NA                                         |
| Ca_Desig_Chr_scaffold44312_462 | Ca_desig_scaffold  | 462                            | [A/G]       | NA                                         |
| Ca_Desig_Chr_scaffold44312_500 | Ca_desig_scaffold  | 500                            | [A/G]       | NA                                         |
| Ca_Desig_Chr_scaffold44312_602 | Ca_desig_scaffold  | 602                            | [T/G]       | NA                                         |
| Ca_Desig_Chr_scaffold44312_634 | Ca_desig_scaffold  | 634                            | [C/T]       | NA                                         |
| Ca_Desig_Chr_scaffold44312_635 | Ca_desig_scaffold  | 635                            | [A/T]       | NA                                         |
| Ca_Desig_Chr_scaffold44312_637 | Ca_desig_scaffold  | 637                            | [C/T]       | NA                                         |
| Ca_Desig_Chr_scaffold44312_638 | Ca_desig_scaffold  | 638                            | [T/C]       | NA                                         |
| Ca_Desig_Chr_scaffold44312_641 | Ca_desig_scaffold  | 641                            | [A/G]       | NA                                         |
| Ca_Desig_Chr_scaffold44312_642 | Ca_desig_scaffold  | 642                            | [A/G]       | NA                                         |
| Ca_Desig_Chr_scaffold44312_644 | Ca_desig_scaffold  | 644                            | [T/C]       | NA                                         |
| Ca_Desig_Chr_scaffold44312_645 | Ca_desig_scaffold  | 645                            | [T/C]       | NA                                         |
| Ca_Desig_Chr_scaffold44312_646 | Ca_desig_scaffold  | 646                            | [A/G]       | NA                                         |
| Ca_Desig_Chr_scaffold44312_647 | Ca_desig_scaffold  | 647                            | [T/C]       | NA                                         |
| Ca_Desig_Chr_scaffold44312_648 | Ca_desig_scaffold  | 648                            | [G/A]       | NA                                         |
| Ca_Desig_Chr_scaffold44312_650 | Ca_desig_scaffold  | 650                            | [T/C]       | NA                                         |
| Ca_Desig_Chr_scaffold44312_651 | Ca_desig_scaffold  | 651                            | [A/G]       | NA                                         |
| Ca_Desig_Chr_scaffold44312_653 | Ca_desig_scaffold  | 653                            | [T/A]       | NA                                         |
| Ca_Desig_Chr_scaffold44312_654 | Ca_desig_scaffold  | 654                            | [A/G]       | NA                                         |
| Ca_Desig_Chr_scaffold44312_656 | Ca_desig_scaffold  | 656                            | [T/C]       | NA                                         |
| Ca_Desig_Chr_scaffold44312_657 | Ca_desig_scaffold  | 657                            | [T/C]       | NA                                         |
| Ca_Desig_Chr_scaffold44312_659 | Ca_desig_scaffold  | 659                            | [C/T]       | NA                                         |
| Ca_Desig_Chr_scaffold44312_660 | Ca_desig_scaffold  | 660                            | [A/G]       | NA                                         |
| Ca_Desig_Chr_scaffold44312_661 | Ca_desig_scaffold  | 661                            | [T/C]       | NA                                         |
| Ca_Desig_Chr_scaffold44312_663 | Ca_desig_scaffold  | 663                            | [G/C]       | NA                                         |
| Ca_Desig_Chr_scaffold44312_665 | Ca_desig_scaffold  | 665                            | [C/T]       | NA                                         |

| <b>SNP IDs</b>               | <b>Chromosomes</b> | <b>Physical positions (bp)</b> | <b>SNPs</b> | <b>NCBI SNPdb accession IDs (NCBI_ss#)</b> |
|------------------------------|--------------------|--------------------------------|-------------|--------------------------------------------|
| Ca_Desi_Ch_scaffold44312_668 | Ca_desi_scaffold   | 668                            | [G/A]       | NA                                         |
| Ca_Desi_Ch_scaffold44312_669 | Ca_desi_scaffold   | 669                            | [C/T]       | NA                                         |
| Ca_Desi_Ch_scaffold44312_670 | Ca_desi_scaffold   | 670                            | [T/C]       | NA                                         |
| Ca_Desi_Ch_scaffold44312_671 | Ca_desi_scaffold   | 671                            | [T/C]       | NA                                         |
| Ca_Desi_Ch_scaffold44312_672 | Ca_desi_scaffold   | 672                            | [T/C]       | NA                                         |
| Ca_Desi_Ch_scaffold44312_673 | Ca_desi_scaffold   | 673                            | [A/G]       | NA                                         |
| Ca_Desi_Ch_scaffold44312_674 | Ca_desi_scaffold   | 674                            | [T/C]       | NA                                         |
| Ca_Desi_Ch_scaffold44312_676 | Ca_desi_scaffold   | 676                            | [T/C]       | NA                                         |
| Ca_Desi_Ch_scaffold44312_677 | Ca_desi_scaffold   | 677                            | [A/G]       | NA                                         |
| Ca_Desi_Ch_scaffold44312_679 | Ca_desi_scaffold   | 679                            | [T/G]       | NA                                         |
| Ca_Desi_Ch_scaffold44312_681 | Ca_desi_scaffold   | 681                            | [A/G]       | NA                                         |
| Ca_Desi_Ch_scaffold44312_683 | Ca_desi_scaffold   | 683                            | [A/G]       | NA                                         |
| Ca_Desi_Ch_scaffold44312_685 | Ca_desi_scaffold   | 685                            | [A/G]       | NA                                         |
| Ca_Desi_Ch_scaffold44312_686 | Ca_desi_scaffold   | 686                            | [A/G]       | NA                                         |
| Ca_Desi_Ch_scaffold44312_687 | Ca_desi_scaffold   | 687                            | [A/G]       | NA                                         |
| Ca_Desi_Ch_scaffold44312_688 | Ca_desi_scaffold   | 688                            | [T/G]       | NA                                         |
| Ca_Desi_Ch_scaffold44312_689 | Ca_desi_scaffold   | 689                            | [T/C]       | NA                                         |
| Ca_Desi_Ch_scaffold44312_690 | Ca_desi_scaffold   | 690                            | [T/C]       | NA                                         |
| Ca_Desi_Ch_scaffold44312_691 | Ca_desi_scaffold   | 691                            | [G/A]       | NA                                         |
| Ca_Desi_Ch_scaffold44312_693 | Ca_desi_scaffold   | 693                            | [T/C]       | NA                                         |
| Ca_Desi_Ch_scaffold44312_694 | Ca_desi_scaffold   | 694                            | [G/A]       | NA                                         |
| Ca_Desi_Ch_scaffold44312_696 | Ca_desi_scaffold   | 696                            | [T/C]       | NA                                         |
| Ca_Desi_Ch_scaffold44312_699 | Ca_desi_scaffold   | 699                            | [T/C]       | NA                                         |
| Ca_Desi_Ch_scaffold44312_700 | Ca_desi_scaffold   | 700                            | [C/T]       | NA                                         |
| Ca_Desi_Ch_scaffold44312_701 | Ca_desi_scaffold   | 701                            | [C/T]       | NA                                         |
| Ca_Desi_Ch_scaffold44312_702 | Ca_desi_scaffold   | 702                            | [A/G]       | NA                                         |
| Ca_Desi_Ch_scaffold44312_704 | Ca_desi_scaffold   | 704                            | [G/A]       | NA                                         |
| Ca_Desi_Ch_scaffold44312_705 | Ca_desi_scaffold   | 705                            | [A/G]       | NA                                         |
| Ca_Desi_Ch_scaffold44312_706 | Ca_desi_scaffold   | 706                            | [C/T]       | NA                                         |
| Ca_Desi_Ch_scaffold44312_707 | Ca_desi_scaffold   | 707                            | [A/G]       | NA                                         |
| Ca_Desi_Ch_scaffold44312_708 | Ca_desi_scaffold   | 708                            | [T/C]       | NA                                         |
| Ca_Desi_Ch_scaffold44312_709 | Ca_desi_scaffold   | 709                            | [A/G]       | NA                                         |
| Ca_Desi_Ch_scaffold44312_710 | Ca_desi_scaffold   | 710                            | [C/T]       | NA                                         |
| Ca_Desi_Ch_scaffold44312_711 | Ca_desi_scaffold   | 711                            | [A/G]       | NA                                         |



| <b>SNP IDs</b>                 | <b>Chromosomes</b> | <b>Physical positions (bp)</b> | <b>SNPs</b> | <b>NCBI SNPdb accession IDs (NCBI_ss#)</b> |
|--------------------------------|--------------------|--------------------------------|-------------|--------------------------------------------|
| Ca_Desig_Chr_scaffold44312_713 | Ca_desig_scaffold  | 713                            | [A/G]       | NA                                         |
| Ca_Desig_Chr_scaffold44312_714 | Ca_desig_scaffold  | 714                            | [A/G]       | NA                                         |
| Ca_Desig_Chr_scaffold44312_716 | Ca_desig_scaffold  | 716                            | [T/C]       | NA                                         |
| Ca_Desig_Chr_scaffold44312_717 | Ca_desig_scaffold  | 717                            | [A/G]       | NA                                         |
| Ca_Desig_Chr_scaffold44312_718 | Ca_desig_scaffold  | 718                            | [T/C]       | NA                                         |
| Ca_Desig_Chr_scaffold44312_719 | Ca_desig_scaffold  | 719                            | [C/T]       | NA                                         |
| Ca_Desig_Chr_scaffold44312_721 | Ca_desig_scaffold  | 721                            | [T/C]       | NA                                         |
| Ca_Desig_Chr_scaffold44312_723 | Ca_desig_scaffold  | 723                            | [T/C]       | NA                                         |
| Ca_Desig_Chr_scaffold44312_724 | Ca_desig_scaffold  | 724                            | [G/A]       | NA                                         |
| Ca_Desig_Chr_scaffold44312_725 | Ca_desig_scaffold  | 725                            | [G/A]       | NA                                         |
| Ca_Desig_Chr_scaffold44312_726 | Ca_desig_scaffold  | 726                            | [A/G]       | NA                                         |
| Ca_Desig_Chr_scaffold44312_727 | Ca_desig_scaffold  | 727                            | [T/C]       | NA                                         |
| Ca_Desig_Chr_scaffold44312_728 | Ca_desig_scaffold  | 728                            | [G/A]       | NA                                         |
| Ca_Desig_Chr_scaffold44312_729 | Ca_desig_scaffold  | 729                            | [T/C]       | NA                                         |
| Ca_Desig_Chr_scaffold44312_730 | Ca_desig_scaffold  | 730                            | [G/A]       | NA                                         |
| Ca_Desig_Chr_scaffold44312_731 | Ca_desig_scaffold  | 731                            | [G/A]       | NA                                         |
| Ca_Desig_Chr_scaffold44312_732 | Ca_desig_scaffold  | 732                            | [T/G]       | NA                                         |
| Ca_Desig_Chr_scaffold44312_733 | Ca_desig_scaffold  | 733                            | [G/A]       | NA                                         |
| Ca_Desig_Chr_scaffold44312_734 | Ca_desig_scaffold  | 734                            | [A/G]       | NA                                         |
| Ca_Desig_Chr_scaffold44312_735 | Ca_desig_scaffold  | 735                            | [A/G]       | NA                                         |
| Ca_Desig_Chr_scaffold44312_736 | Ca_desig_scaffold  | 736                            | [C/T]       | NA                                         |
| Ca_Desig_Chr_scaffold44312_737 | Ca_desig_scaffold  | 737                            | [A/G]       | NA                                         |
| Ca_Desig_Chr_scaffold44312_738 | Ca_desig_scaffold  | 738                            | [A/G]       | NA                                         |
| Ca_Desig_Chr_scaffold44312_739 | Ca_desig_scaffold  | 739                            | [A/G]       | NA                                         |
| Ca_Desig_Chr_scaffold44312_740 | Ca_desig_scaffold  | 740                            | [G/A]       | NA                                         |
| Ca_Desig_Chr_scaffold44312_741 | Ca_desig_scaffold  | 741                            | [C/A]       | NA                                         |
| Ca_Desig_Chr_scaffold44312_742 | Ca_desig_scaffold  | 742                            | [A/G]       | NA                                         |
| Ca_Desig_Chr_scaffold44312_743 | Ca_desig_scaffold  | 743                            | [A/G]       | NA                                         |
| Ca_Desig_Chr_scaffold44312_744 | Ca_desig_scaffold  | 744                            | [T/C]       | NA                                         |
| Ca_Desig_Chr_scaffold44312_745 | Ca_desig_scaffold  | 745                            | [C/T]       | NA                                         |
| Ca_Desig_Chr_scaffold44312_746 | Ca_desig_scaffold  | 746                            | [A/G]       | NA                                         |
| Ca_Desig_Chr_scaffold44312_748 | Ca_desig_scaffold  | 748                            | [C/T]       | NA                                         |
| Ca_Desig_Chr_scaffold44312_749 | Ca_desig_scaffold  | 749                            | [T/C]       | NA                                         |
| Ca_Desig_Chr_scaffold44312_750 | Ca_desig_scaffold  | 750                            | [T/C]       | NA                                         |

| <b>SNP IDs</b>               | <b>Chromosomes</b> | <b>Physical positions (bp)</b> | <b>SNPs</b> | <b>NCBI SNPdb accession IDs (NCBI_ss#)</b> |
|------------------------------|--------------------|--------------------------------|-------------|--------------------------------------------|
| Ca_Desi_Ch_scaffold44312_752 | Ca_desi_scaffold   | 752                            | [T/C]       | NA                                         |
| Ca_Desi_Ch_scaffold44312_753 | Ca_desi_scaffold   | 753                            | [T/C]       | NA                                         |
| Ca_Desi_Ch_scaffold44312_754 | Ca_desi_scaffold   | 754                            | [C/T]       | NA                                         |
| Ca_Desi_Ch_scaffold44907_53  | Ca_desi_scaffold   | 53                             | [T/C]       | NA                                         |
| Ca_Desi_Ch_scaffold44974_141 | Ca_desi_scaffold   | 141                            | [T/G]       | NA                                         |
| Ca_Desi_Ch_scaffold45025_159 | Ca_desi_scaffold   | 159                            | [A/G]       | NA                                         |
| Ca_Desi_Ch_scaffold45025_281 | Ca_desi_scaffold   | 281                            | [G/A]       | NA                                         |
| Ca_Desi_Ch_scaffold45025_290 | Ca_desi_scaffold   | 290                            | [C/T]       | NA                                         |
| Ca_Desi_Ch_scaffold45025_296 | Ca_desi_scaffold   | 296                            | [A/G]       | NA                                         |
| Ca_Desi_Ch_scaffold45025_304 | Ca_desi_scaffold   | 304                            | [A/C]       | NA                                         |
| Ca_Desi_Ch_scaffold45041_323 | Ca_desi_scaffold   | 323                            | [A/G]       | NA                                         |
| Ca_Desi_Ch_scaffold45041_324 | Ca_desi_scaffold   | 324                            | [T/G]       | NA                                         |
| Ca_Desi_Ch_scaffold45041_325 | Ca_desi_scaffold   | 325                            | [C/T]       | NA                                         |
| Ca_Desi_Ch_scaffold45041_326 | Ca_desi_scaffold   | 326                            | [G/C]       | NA                                         |
| Ca_Desi_Ch_scaffold45041_327 | Ca_desi_scaffold   | 327                            | [C/T]       | NA                                         |
| Ca_Desi_Ch_scaffold45041_328 | Ca_desi_scaffold   | 328                            | [G/A]       | NA                                         |
| Ca_Desi_Ch_scaffold45041_331 | Ca_desi_scaffold   | 331                            | [C/G]       | NA                                         |
| Ca_Desi_Ch_scaffold45041_336 | Ca_desi_scaffold   | 336                            | [G/A]       | NA                                         |
| Ca_Desi_Ch_scaffold45041_337 | Ca_desi_scaffold   | 337                            | [A/G]       | NA                                         |
| Ca_Desi_Ch_scaffold45041_338 | Ca_desi_scaffold   | 338                            | [G/A]       | NA                                         |
| Ca_Desi_Ch_scaffold45041_339 | Ca_desi_scaffold   | 339                            | [G/A]       | NA                                         |
| Ca_Desi_Ch_scaffold45041_341 | Ca_desi_scaffold   | 341                            | [T/C]       | NA                                         |
| Ca_Desi_Ch_scaffold45041_342 | Ca_desi_scaffold   | 342                            | [G/A]       | NA                                         |
| Ca_Desi_Ch_scaffold45041_343 | Ca_desi_scaffold   | 343                            | [A/G]       | NA                                         |
| Ca_Desi_Ch_scaffold45041_344 | Ca_desi_scaffold   | 344                            | [G/A]       | NA                                         |
| Ca_Desi_Ch_scaffold45041_345 | Ca_desi_scaffold   | 345                            | [C/T]       | NA                                         |
| Ca_Desi_Ch_scaffold45041_346 | Ca_desi_scaffold   | 346                            | [T/C]       | NA                                         |
| Ca_Desi_Ch_scaffold45041_348 | Ca_desi_scaffold   | 348                            | [A/G]       | NA                                         |
| Ca_Desi_Ch_scaffold45041_350 | Ca_desi_scaffold   | 350                            | [T/C]       | NA                                         |
| Ca_Desi_Ch_scaffold45041_351 | Ca_desi_scaffold   | 351                            | [T/C]       | NA                                         |
| Ca_Desi_Ch_scaffold45041_355 | Ca_desi_scaffold   | 355                            | [A/G]       | NA                                         |
| Ca_Desi_Ch_scaffold45041_356 | Ca_desi_scaffold   | 356                            | [A/G]       | NA                                         |
| Ca_Desi_Ch_scaffold45041_357 | Ca_desi_scaffold   | 357                            | [A/C]       | NA                                         |
| Ca_Desi_Ch_scaffold45041_360 | Ca_desi_scaffold   | 360                            | [T/C]       | NA                                         |

| <b>SNP IDs</b>                 | <b>Chromosomes</b> | <b>Physical positions (bp)</b> | <b>SNPs</b> | <b>NCBI SNPdb accession IDs (NCBI_ss#)</b> |
|--------------------------------|--------------------|--------------------------------|-------------|--------------------------------------------|
| Ca_Desig_Chr_scaffold45041_362 | Ca_desig_scaffold  | 362                            | [T/C]       | NA                                         |
| Ca_Desig_Chr_scaffold45041_365 | Ca_desig_scaffold  | 365                            | [T/C]       | NA                                         |
| Ca_Desig_Chr_scaffold45041_367 | Ca_desig_scaffold  | 367                            | [A/G]       | NA                                         |
| Ca_Desig_Chr_scaffold45041_369 | Ca_desig_scaffold  | 369                            | [T/C]       | NA                                         |
| Ca_Desig_Chr_scaffold45041_370 | Ca_desig_scaffold  | 370                            | [T/C]       | NA                                         |
| Ca_Desig_Chr_scaffold45041_372 | Ca_desig_scaffold  | 372                            | [G/A]       | NA                                         |
| Ca_Desig_Chr_scaffold45041_374 | Ca_desig_scaffold  | 374                            | [A/G]       | NA                                         |
| Ca_Desig_Chr_scaffold45041_375 | Ca_desig_scaffold  | 375                            | [T/C]       | NA                                         |
| Ca_Desig_Chr_scaffold45041_376 | Ca_desig_scaffold  | 376                            | [T/C]       | NA                                         |
| Ca_Desig_Chr_scaffold45041_378 | Ca_desig_scaffold  | 378                            | [T/C]       | NA                                         |
| Ca_Desig_Chr_scaffold45041_379 | Ca_desig_scaffold  | 379                            | [A/G]       | NA                                         |
| Ca_Desig_Chr_scaffold45041_401 | Ca_desig_scaffold  | 401                            | [A/G]       | NA                                         |
| Ca_Desig_Chr_scaffold45041_426 | Ca_desig_scaffold  | 426                            | [T/G]       | NA                                         |
| Ca_Desig_Chr_scaffold45041_432 | Ca_desig_scaffold  | 432                            | [A/G]       | NA                                         |
| Ca_Desig_Chr_scaffold45041_441 | Ca_desig_scaffold  | 441                            | [T/A]       | NA                                         |
| Ca_Desig_Chr_scaffold45041_445 | Ca_desig_scaffold  | 445                            | [T/C]       | NA                                         |
| Ca_Desig_Chr_scaffold45050_446 | Ca_desig_scaffold  | 446                            | [T/G]       | NA                                         |
| Ca_Desig_Chr_scaffold45050_450 | Ca_desig_scaffold  | 450                            | [A/C]       | NA                                         |
| Ca_Desig_Chr_scaffold45050_466 | Ca_desig_scaffold  | 466                            | [T/C]       | NA                                         |
| Ca_Desig_Chr_scaffold45190_121 | Ca_desig_scaffold  | 121                            | [A/G]       | NA                                         |
| Ca_Desig_Chr_scaffold45190_148 | Ca_desig_scaffold  | 148                            | [A/G]       | NA                                         |
| Ca_Desig_Chr_scaffold45190_154 | Ca_desig_scaffold  | 154                            | [C/T]       | NA                                         |
| Ca_Desig_Chr_scaffold45190_157 | Ca_desig_scaffold  | 157                            | [T/G]       | NA                                         |
| Ca_Desig_Chr_scaffold45190_159 | Ca_desig_scaffold  | 159                            | [A/G]       | NA                                         |
| Ca_Desig_Chr_scaffold45190_160 | Ca_desig_scaffold  | 160                            | [A/G]       | NA                                         |
| Ca_Desig_Chr_scaffold45190_162 | Ca_desig_scaffold  | 162                            | [T/C]       | NA                                         |
| Ca_Desig_Chr_scaffold45190_166 | Ca_desig_scaffold  | 166                            | [T/C]       | NA                                         |
| Ca_Desig_Chr_scaffold45190_172 | Ca_desig_scaffold  | 172                            | [A/G]       | NA                                         |
| Ca_Desig_Chr_scaffold45190_177 | Ca_desig_scaffold  | 177                            | [A/G]       | NA                                         |
| Ca_Desig_Chr_scaffold45190_180 | Ca_desig_scaffold  | 180                            | [T/A]       | NA                                         |
| Ca_Desig_Chr_scaffold45190_184 | Ca_desig_scaffold  | 184                            | [A/G]       | NA                                         |
| Ca_Desig_Chr_scaffold45190_186 | Ca_desig_scaffold  | 186                            | [T/A]       | NA                                         |
| Ca_Desig_Chr_scaffold45190_187 | Ca_desig_scaffold  | 187                            | [A/G]       | NA                                         |
| Ca_Desig_Chr_scaffold45190_190 | Ca_desig_scaffold  | 190                            | [T/C]       | NA                                         |

| <b>SNP IDs</b>               | <b>Chromosomes</b> | <b>Physical positions (bp)</b> | <b>SNPs</b> | <b>NCBI SNPdb accession IDs (NCBI_ss#)</b> |
|------------------------------|--------------------|--------------------------------|-------------|--------------------------------------------|
| Ca_Desi_Ch_scaffold45190_191 | Ca_desi_scaffold   | 191                            | [T/C]       | NA                                         |
| Ca_Desi_Ch_scaffold45190_192 | Ca_desi_scaffold   | 192                            | [A/G]       | NA                                         |
| Ca_Desi_Ch_scaffold45190_195 | Ca_desi_scaffold   | 195                            | [T/C]       | NA                                         |
| Ca_Desi_Ch_scaffold45190_200 | Ca_desi_scaffold   | 200                            | [T/C]       | NA                                         |
| Ca_Desi_Ch_scaffold45190_202 | Ca_desi_scaffold   | 202                            | [G/T]       | NA                                         |
| Ca_Desi_Ch_scaffold45190_203 | Ca_desi_scaffold   | 203                            | [G/T]       | NA                                         |
| Ca_Desi_Ch_scaffold45568_539 | Ca_desi_scaffold   | 539                            | [G/A]       | NA                                         |
| Ca_Desi_Ch_scaffold45624_150 | Ca_desi_scaffold   | 150                            | [C/T]       | NA                                         |
| Ca_Desi_Ch_scaffold45903_34  | Ca_desi_scaffold   | 34                             | [C/A]       | NA                                         |
| Ca_Desi_Ch_scaffold45903_68  | Ca_desi_scaffold   | 68                             | [A/C]       | NA                                         |
| Ca_Desi_Ch_scaffold45903_69  | Ca_desi_scaffold   | 69                             | [T/C]       | NA                                         |
| Ca_Desi_Ch_scaffold46097_356 | Ca_desi_scaffold   | 356                            | [G/A]       | NA                                         |
| Ca_Desi_Ch_scaffold46097_360 | Ca_desi_scaffold   | 360                            | [T/G]       | NA                                         |
| Ca_Desi_Ch_scaffold46097_381 | Ca_desi_scaffold   | 381                            | [T/A]       | NA                                         |
| Ca_Desi_Ch_scaffold46103_302 | Ca_desi_scaffold   | 302                            | [A/T]       | NA                                         |
| Ca_Desi_Ch_scaffold46103_342 | Ca_desi_scaffold   | 342                            | [C/A]       | NA                                         |
| Ca_Desi_Ch_scaffold46306_273 | Ca_desi_scaffold   | 273                            | [G/A]       | NA                                         |
| Ca_Desi_Ch_scaffold46783_225 | Ca_desi_scaffold   | 225                            | [C/T]       | NA                                         |
| Ca_Desi_Ch_scaffold46783_238 | Ca_desi_scaffold   | 238                            | [A/G]       | NA                                         |
| Ca_Desi_Ch_scaffold46783_253 | Ca_desi_scaffold   | 253                            | [C/T]       | NA                                         |
| Ca_Desi_Ch_scaffold46942_224 | Ca_desi_scaffold   | 224                            | [G/A]       | NA                                         |
| Ca_Desi_Ch_scaffold46942_378 | Ca_desi_scaffold   | 378                            | [G/A]       | NA                                         |
| Ca_Desi_Ch_scaffold46942_404 | Ca_desi_scaffold   | 404                            | [C/T]       | NA                                         |
| Ca_Desi_Ch_scaffold46942_408 | Ca_desi_scaffold   | 408                            | [T/G]       | NA                                         |
| Ca_Desi_Ch_scaffold46942_432 | Ca_desi_scaffold   | 432                            | [T/A]       | NA                                         |
| Ca_Desi_Ch_scaffold47096_102 | Ca_desi_scaffold   | 102                            | [C/T]       | NA                                         |
| Ca_Desi_Ch_scaffold47278_587 | Ca_desi_scaffold   | 587                            | [G/C]       | NA                                         |
| Ca_Desi_Ch_scaffold47543_397 | Ca_desi_scaffold   | 397                            | [T/G]       | NA                                         |
| Ca_Desi_Ch_scaffold47543_581 | Ca_desi_scaffold   | 581                            | [A/G]       | NA                                         |
| Ca_Desi_Ch_scaffold48126_196 | Ca_desi_scaffold   | 196                            | [A/T]       | NA                                         |
| Ca_Desi_Ch_scaffold48396_661 | Ca_desi_scaffold   | 661                            | [G/A]       | NA                                         |
| Ca_Desi_Ch_scaffold48444_46  | Ca_desi_scaffold   | 46                             | [C/T]       | NA                                         |
| Ca_Desi_Ch_scaffold48444_65  | Ca_desi_scaffold   | 65                             | [C/T]       | NA                                         |
| Ca_Desi_Ch_scaffold48559_340 | Ca_desi_scaffold   | 340                            | [C/T]       | NA                                         |

| <b>SNP IDs</b>                 | <b>Chromosomes</b> | <b>Physical positions (bp)</b> | <b>SNPs</b> | <b>NCBI SNPdb accession IDs (NCBI_ss#)</b> |
|--------------------------------|--------------------|--------------------------------|-------------|--------------------------------------------|
| Ca_Desig_Chr_scaffold48559_343 | Ca_desig_scaffold  | 343                            | [C/T]       | NA                                         |
| Ca_Desig_Chr_scaffold48559_381 | Ca_desig_scaffold  | 381                            | [G/T]       | NA                                         |
| Ca_Desig_Chr_scaffold48559_382 | Ca_desig_scaffold  | 382                            | [G/T]       | NA                                         |
| Ca_Desig_Chr_scaffold48712_429 | Ca_desig_scaffold  | 429                            | [A/C]       | NA                                         |
| Ca_Desig_Chr_scaffold48747_422 | Ca_desig_scaffold  | 422                            | [T/C]       | NA                                         |
| Ca_Desig_Chr_scaffold48747_429 | Ca_desig_scaffold  | 429                            | [A/G]       | NA                                         |
| Ca_Desig_Chr_scaffold48747_431 | Ca_desig_scaffold  | 431                            | [A/G]       | NA                                         |
| Ca_Desig_Chr_scaffold48770_644 | Ca_desig_scaffold  | 644                            | [T/C]       | NA                                         |
| Ca_Desig_Chr_scaffold49596_572 | Ca_desig_scaffold  | 572                            | [T/G]       | NA                                         |
| Ca_Desig_Chr_scaffold49705_247 | Ca_desig_scaffold  | 247                            | [G/A]       | NA                                         |
| Ca_Desig_Chr_scaffold50119_97  | Ca_desig_scaffold  | 97                             | [A/C]       | NA                                         |
| Ca_Desig_Chr_scaffold50119_109 | Ca_desig_scaffold  | 109                            | [G/A]       | NA                                         |
| Ca_Desig_Chr_scaffold50119_473 | Ca_desig_scaffold  | 473                            | [A/C]       | NA                                         |
| Ca_Desig_Chr_scaffold50119_488 | Ca_desig_scaffold  | 488                            | [T/G]       | NA                                         |
| Ca_Desig_Chr_scaffold50119_490 | Ca_desig_scaffold  | 490                            | [C/A]       | NA                                         |
| Ca_Desig_Chr_scaffold50119_507 | Ca_desig_scaffold  | 507                            | [A/G]       | NA                                         |
| Ca_Desig_Chr_scaffold50291_533 | Ca_desig_scaffold  | 533                            | [A/G]       | NA                                         |
| Ca_Desig_Chr_scaffold50291_535 | Ca_desig_scaffold  | 535                            | [A/G]       | NA                                         |
| Ca_Desig_Chr_scaffold50291_540 | Ca_desig_scaffold  | 540                            | [A/G]       | NA                                         |
| Ca_Desig_Chr_scaffold50291_543 | Ca_desig_scaffold  | 543                            | [T/C]       | NA                                         |
| Ca_Desig_Chr_scaffold50431_198 | Ca_desig_scaffold  | 198                            | [T/C]       | NA                                         |
| Ca_Desig_Chr_scaffold50431_212 | Ca_desig_scaffold  | 212                            | [T/C]       | NA                                         |
| Ca_Desig_Chr_scaffold50431_220 | Ca_desig_scaffold  | 220                            | [G/C]       | NA                                         |
| Ca_Desig_Chr_scaffold50431_229 | Ca_desig_scaffold  | 229                            | [T/C]       | NA                                         |
| Ca_Desig_Chr_scaffold50431_234 | Ca_desig_scaffold  | 234                            | [T/C]       | NA                                         |
| Ca_Desig_Chr_scaffold50507_238 | Ca_desig_scaffold  | 238                            | [A/C]       | NA                                         |
| Ca_Desig_Chr_scaffold50507_306 | Ca_desig_scaffold  | 306                            | [G/C]       | NA                                         |
| Ca_Desig_Chr_scaffold50507_314 | Ca_desig_scaffold  | 314                            | [A/C]       | NA                                         |
| Ca_Desig_Chr_scaffold50507_317 | Ca_desig_scaffold  | 317                            | [T/C]       | NA                                         |
| Ca_Desig_Chr_scaffold50507_333 | Ca_desig_scaffold  | 333                            | [T/C]       | NA                                         |
| Ca_Desig_Chr_scaffold50507_350 | Ca_desig_scaffold  | 350                            | [T/A]       | NA                                         |
| Ca_Desig_Chr_scaffold50507_353 | Ca_desig_scaffold  | 353                            | [T/A]       | NA                                         |
| Ca_Desig_Chr_scaffold50663_617 | Ca_desig_scaffold  | 617                            | [G/T]       | NA                                         |
| Ca_Desig_Chr_scaffold50728_414 | Ca_desig_scaffold  | 414                            | [C/T]       | NA                                         |

| <b>SNP IDs</b>                       | <b>Chromosomes</b> | <b>Physical positions (bp)</b> | <b>SNPs</b> | <b>NCBI SNPdb accession IDs (NCBI_ss#)</b> |
|--------------------------------------|--------------------|--------------------------------|-------------|--------------------------------------------|
| Ca_Desi_Chromosome_scaffold50785_643 | Ca_desi_scaffold   | 643                            | [C/T]       | NA                                         |
| Ca_Desi_Chromosome_scaffold50785_686 | Ca_desi_scaffold   | 686                            | [G/C]       | NA                                         |
| Ca_Desi_Chromosome_scaffold50785_691 | Ca_desi_scaffold   | 691                            | [T/C]       | NA                                         |
| Ca_Desi_Chromosome_scaffold51894_72  | Ca_desi_scaffold   | 72                             | [G/A]       | NA                                         |
| Ca_Desi_Chromosome_scaffold52815_427 | Ca_desi_scaffold   | 427                            | [A/C]       | NA                                         |
| Ca_Desi_Chromosome_scaffold52815_460 | Ca_desi_scaffold   | 460                            | [A/G]       | NA                                         |
| Ca_Desi_Chromosome_scaffold52815_462 | Ca_desi_scaffold   | 462                            | [G/A]       | NA                                         |
| Ca_Desi_Chromosome_scaffold52815_463 | Ca_desi_scaffold   | 463                            | [T/C]       | NA                                         |
| Ca_Desi_Chromosome_scaffold52815_465 | Ca_desi_scaffold   | 465                            | [C/T]       | NA                                         |
| Ca_Desi_Chromosome_scaffold52815_466 | Ca_desi_scaffold   | 466                            | [T/C]       | NA                                         |
| Ca_Desi_Chromosome_scaffold52815_468 | Ca_desi_scaffold   | 468                            | [T/A]       | NA                                         |
| Ca_Desi_Chromosome_scaffold52815_469 | Ca_desi_scaffold   | 469                            | [A/G]       | NA                                         |
| Ca_Desi_Chromosome_scaffold52815_470 | Ca_desi_scaffold   | 470                            | [G/A]       | NA                                         |
| Ca_Desi_Chromosome_scaffold52815_472 | Ca_desi_scaffold   | 472                            | [G/A]       | NA                                         |
| Ca_Desi_Chromosome_scaffold52815_473 | Ca_desi_scaffold   | 473                            | [A/G]       | NA                                         |
| Ca_Desi_Chromosome_scaffold52815_474 | Ca_desi_scaffold   | 474                            | [A/G]       | NA                                         |
| Ca_Desi_Chromosome_scaffold52815_475 | Ca_desi_scaffold   | 475                            | [A/G]       | NA                                         |
| Ca_Desi_Chromosome_scaffold52815_477 | Ca_desi_scaffold   | 477                            | [T/C]       | NA                                         |
| Ca_Desi_Chromosome_scaffold52815_479 | Ca_desi_scaffold   | 479                            | [A/G]       | NA                                         |
| Ca_Desi_Chromosome_scaffold52815_480 | Ca_desi_scaffold   | 480                            | [T/C]       | NA                                         |
| Ca_Desi_Chromosome_scaffold52815_481 | Ca_desi_scaffold   | 481                            | [T/C]       | NA                                         |
| Ca_Desi_Chromosome_scaffold52815_482 | Ca_desi_scaffold   | 482                            | [G/T]       | NA                                         |
| Ca_Desi_Chromosome_scaffold52815_483 | Ca_desi_scaffold   | 483                            | [C/T]       | NA                                         |
| Ca_Desi_Chromosome_scaffold52815_484 | Ca_desi_scaffold   | 484                            | [A/G]       | NA                                         |
| Ca_Desi_Chromosome_scaffold52815_485 | Ca_desi_scaffold   | 485                            | [A/G]       | NA                                         |
| Ca_Desi_Chromosome_scaffold52815_486 | Ca_desi_scaffold   | 486                            | [A/G]       | NA                                         |
| Ca_Desi_Chromosome_scaffold52815_487 | Ca_desi_scaffold   | 487                            | [A/G]       | NA                                         |
| Ca_Desi_Chromosome_scaffold52815_489 | Ca_desi_scaffold   | 489                            | [A/G]       | NA                                         |
| Ca_Desi_Chromosome_scaffold52815_490 | Ca_desi_scaffold   | 490                            | [A/G]       | NA                                         |
| Ca_Desi_Chromosome_scaffold52815_494 | Ca_desi_scaffold   | 494                            | [A/G]       | NA                                         |
| Ca_Desi_Chromosome_scaffold52815_495 | Ca_desi_scaffold   | 495                            | [A/G]       | NA                                         |
| Ca_Desi_Chromosome_scaffold52815_496 | Ca_desi_scaffold   | 496                            | [A/G]       | NA                                         |
| Ca_Desi_Chromosome_scaffold52815_497 | Ca_desi_scaffold   | 497                            | [T/A]       | NA                                         |
| Ca_Desi_Chromosome_scaffold52815_498 | Ca_desi_scaffold   | 498                            | [C/T]       | NA                                         |

| <b>SNP IDs</b>                 | <b>Chromosomes</b> | <b>Physical positions (bp)</b> | <b>SNPs</b> | <b>NCBI SNPdb accession IDs (NCBI_ss#)</b> |
|--------------------------------|--------------------|--------------------------------|-------------|--------------------------------------------|
| Ca_Desig_Chr_scaffold52815_502 | Ca_desig_scaffold  | 502                            | [A/G]       | NA                                         |
| Ca_Desig_Chr_scaffold52815_503 | Ca_desig_scaffold  | 503                            | [A/G]       | NA                                         |
| Ca_Desig_Chr_scaffold52815_505 | Ca_desig_scaffold  | 505                            | [A/G]       | NA                                         |
| Ca_Desig_Chr_scaffold52815_506 | Ca_desig_scaffold  | 506                            | [T/C]       | NA                                         |
| Ca_Desig_Chr_scaffold52815_508 | Ca_desig_scaffold  | 508                            | [A/G]       | NA                                         |
| Ca_Desig_Chr_scaffold52815_510 | Ca_desig_scaffold  | 510                            | [A/G]       | NA                                         |
| Ca_Desig_Chr_scaffold52815_512 | Ca_desig_scaffold  | 512                            | [T/C]       | NA                                         |
| Ca_Desig_Chr_scaffold52815_513 | Ca_desig_scaffold  | 513                            | [T/C]       | NA                                         |
| Ca_Desig_Chr_scaffold52815_516 | Ca_desig_scaffold  | 516                            | [C/A]       | NA                                         |
| Ca_Desig_Chr_scaffold52863_324 | Ca_desig_scaffold  | 324                            | [C/T]       | NA                                         |
| Ca_Desig_Chr_scaffold53048_543 | Ca_desig_scaffold  | 543                            | [T/C]       | NA                                         |
| Ca_Desig_Chr_scaffold53048_545 | Ca_desig_scaffold  | 545                            | [T/C]       | NA                                         |
| Ca_Desig_Chr_scaffold53048_546 | Ca_desig_scaffold  | 546                            | [C/T]       | NA                                         |
| Ca_Desig_Chr_scaffold53048_549 | Ca_desig_scaffold  | 549                            | [T/C]       | NA                                         |
| Ca_Desig_Chr_scaffold53048_552 | Ca_desig_scaffold  | 552                            | [A/G]       | NA                                         |
| Ca_Desig_Chr_scaffold53048_562 | Ca_desig_scaffold  | 562                            | [A/G]       | NA                                         |
| Ca_Desig_Chr_scaffold53048_565 | Ca_desig_scaffold  | 565                            | [T/C]       | NA                                         |
| Ca_Desig_Chr_scaffold53048_566 | Ca_desig_scaffold  | 566                            | [T/A]       | NA                                         |
| Ca_Desig_Chr_scaffold53048_582 | Ca_desig_scaffold  | 582                            | [G/A]       | NA                                         |
| Ca_Desig_Chr_scaffold53048_586 | Ca_desig_scaffold  | 586                            | [T/C]       | NA                                         |
| Ca_Desig_Chr_scaffold53441_473 | Ca_desig_scaffold  | 473                            | [A/C]       | NA                                         |
| Ca_Desig_Chr_scaffold53674_530 | Ca_desig_scaffold  | 530                            | [G/A]       | NA                                         |
| Ca_Desig_Chr_scaffold53674_535 | Ca_desig_scaffold  | 535                            | [G/A]       | NA                                         |
| Ca_Desig_Chr_scaffold53674_554 | Ca_desig_scaffold  | 554                            | [C/G]       | NA                                         |
| Ca_Desig_Chr_scaffold53674_561 | Ca_desig_scaffold  | 561                            | [T/C]       | NA                                         |
| Ca_Desig_Chr_scaffold53689_83  | Ca_desig_scaffold  | 83                             | [G/A]       | NA                                         |
| Ca_Desig_Chr_scaffold53689_84  | Ca_desig_scaffold  | 84                             | [G/A]       | NA                                         |
| Ca_Desig_Chr_scaffold54001_353 | Ca_desig_scaffold  | 353                            | [A/G]       | NA                                         |
| Ca_Desig_Chr_scaffold54021_213 | Ca_desig_scaffold  | 213                            | [G/A]       | NA                                         |
| Ca_Desig_Chr_scaffold54730_72  | Ca_desig_scaffold  | 72                             | [A/G]       | NA                                         |
| Ca_Desig_Chr_scaffold54733_548 | Ca_desig_scaffold  | 548                            | [G/A]       | NA                                         |
| Ca_Desig_Chr_scaffold54733_562 | Ca_desig_scaffold  | 562                            | [A/G]       | NA                                         |
| Ca_Desig_Chr_scaffold54733_564 | Ca_desig_scaffold  | 564                            | [T/C]       | NA                                         |
| Ca_Desig_Chr_scaffold54733_583 | Ca_desig_scaffold  | 583                            | [A/G]       | NA                                         |

| <b>SNP IDs</b>                       | <b>Chromosomes</b> | <b>Physical positions (bp)</b> | <b>SNPs</b> | <b>NCBI SNPdb accession IDs (NCBI_ss#)</b> |
|--------------------------------------|--------------------|--------------------------------|-------------|--------------------------------------------|
| Ca_Desi_Chromosome_scaffold54733_586 | Ca_desi_scaffold   | 586                            | [T/G]       | NA                                         |
| Ca_Desi_Chromosome_scaffold54794_462 | Ca_desi_scaffold   | 462                            | [G/C]       | NA                                         |
| Ca_Desi_Chromosome_scaffold54794_494 | Ca_desi_scaffold   | 494                            | [C/A]       | NA                                         |
| Ca_Desi_Chromosome_scaffold54794_508 | Ca_desi_scaffold   | 508                            | [T/C]       | NA                                         |
| Ca_Desi_Chromosome_scaffold54847_369 | Ca_desi_scaffold   | 369                            | [G/T]       | NA                                         |
| Ca_Desi_Chromosome_scaffold54847_371 | Ca_desi_scaffold   | 371                            | [A/G]       | NA                                         |
| Ca_Desi_Chromosome_scaffold54942_247 | Ca_desi_scaffold   | 247                            | [T/A]       | NA                                         |
| Ca_Desi_Chromosome_scaffold55248_482 | Ca_desi_scaffold   | 482                            | [A/C]       | NA                                         |
| Ca_Desi_Chromosome_scaffold55277_173 | Ca_desi_scaffold   | 173                            | [A/C]       | NA                                         |
| Ca_Desi_Chromosome_scaffold55866_49  | Ca_desi_scaffold   | 49                             | [T/G]       | NA                                         |
| Ca_Desi_Chromosome_scaffold56807_212 | Ca_desi_scaffold   | 212                            | [C/T]       | NA                                         |
| Ca_Desi_Chromosome_scaffold56819_521 | Ca_desi_scaffold   | 521                            | [G/A]       | NA                                         |
| Ca_Desi_Chromosome_scaffold56989_601 | Ca_desi_scaffold   | 601                            | [C/G]       | NA                                         |
| Ca_Desi_Chromosome_scaffold57400_369 | Ca_desi_scaffold   | 369                            | [C/T]       | NA                                         |
| Ca_Desi_Chromosome_scaffold57520_137 | Ca_desi_scaffold   | 137                            | [T/C]       | NA                                         |
| Ca_Desi_Chromosome_scaffold57520_141 | Ca_desi_scaffold   | 141                            | [A/G]       | NA                                         |
| Ca_Desi_Chromosome_scaffold57520_143 | Ca_desi_scaffold   | 143                            | [T/C]       | NA                                         |
| Ca_Desi_Chromosome_scaffold57520_152 | Ca_desi_scaffold   | 152                            | [T/C]       | NA                                         |
| Ca_Desi_Chromosome_scaffold57520_154 | Ca_desi_scaffold   | 154                            | [T/C]       | NA                                         |
| Ca_Desi_Chromosome_scaffold57520_156 | Ca_desi_scaffold   | 156                            | [T/C]       | NA                                         |
| Ca_Desi_Chromosome_scaffold57520_160 | Ca_desi_scaffold   | 160                            | [T/C]       | NA                                         |
| Ca_Desi_Chromosome_scaffold57520_166 | Ca_desi_scaffold   | 166                            | [T/C]       | NA                                         |
| Ca_Desi_Chromosome_scaffold57520_168 | Ca_desi_scaffold   | 168                            | [T/C]       | NA                                         |
| Ca_Desi_Chromosome_scaffold57520_172 | Ca_desi_scaffold   | 172                            | [T/C]       | NA                                         |
| Ca_Desi_Chromosome_scaffold57520_184 | Ca_desi_scaffold   | 184                            | [A/G]       | NA                                         |
| Ca_Desi_Chromosome_scaffold57979_544 | Ca_desi_scaffold   | 544                            | [A/G]       | NA                                         |
| Ca_Desi_Chromosome_scaffold57985_188 | Ca_desi_scaffold   | 188                            | [A/T]       | NA                                         |
| Ca_Desi_Chromosome_scaffold58057_258 | Ca_desi_scaffold   | 258                            | [T/C]       | NA                                         |
| Ca_Desi_Chromosome_scaffold58162_265 | Ca_desi_scaffold   | 265                            | [T/A]       | NA                                         |
| Ca_Desi_Chromosome_scaffold58162_295 | Ca_desi_scaffold   | 295                            | [G/A]       | NA                                         |
| Ca_Desi_Chromosome_scaffold58162_371 | Ca_desi_scaffold   | 371                            | [C/T]       | NA                                         |
| Ca_Desi_Chromosome_scaffold58162_389 | Ca_desi_scaffold   | 389                            | [C/A]       | NA                                         |
| Ca_Desi_Chromosome_scaffold58949_72  | Ca_desi_scaffold   | 72                             | [A/T]       | NA                                         |
| Ca_Desi_Chromosome_scaffold59075_134 | Ca_desi_scaffold   | 134                            | [T/C]       | NA                                         |



| <b>SNP IDs</b>                 | <b>Chromosomes</b> | <b>Physical positions (bp)</b> | <b>SNPs</b> | <b>NCBI SNPdb accession IDs (NCBI_ss#)</b> |
|--------------------------------|--------------------|--------------------------------|-------------|--------------------------------------------|
| Ca_Desig_Chr_scaffold59308_553 | Ca_desig_scaffold  | 553                            | [T/C]       | NA                                         |
| Ca_Desig_Chr_scaffold59308_559 | Ca_desig_scaffold  | 559                            | [T/C]       | NA                                         |
| Ca_Desig_Chr_scaffold59308_564 | Ca_desig_scaffold  | 564                            | [A/G]       | NA                                         |
| Ca_Desig_Chr_scaffold59308_579 | Ca_desig_scaffold  | 579                            | [T/A]       | NA                                         |
| Ca_Desig_Chr_scaffold59308_583 | Ca_desig_scaffold  | 583                            | [T/G]       | NA                                         |
| Ca_Desig_Chr_scaffold59527_53  | Ca_desig_scaffold  | 53                             | [G/T]       | NA                                         |
| Ca_Desig_Chr_scaffold59527_76  | Ca_desig_scaffold  | 76                             | [C/G]       | NA                                         |
| Ca_Desig_Chr_scaffold59527_278 | Ca_desig_scaffold  | 278                            | [C/T]       | NA                                         |
| Ca_Desig_Chr_scaffold59527_324 | Ca_desig_scaffold  | 324                            | [T/A]       | NA                                         |
| Ca_Desig_Chr_scaffold60056_313 | Ca_desig_scaffold  | 313                            | [G/A]       | NA                                         |
| Ca_Desig_Chr_scaffold60086_18  | Ca_desig_scaffold  | 18                             | [C/T]       | NA                                         |
| Ca_Desig_Chr_scaffold60086_32  | Ca_desig_scaffold  | 32                             | [T/G]       | NA                                         |
| Ca_Desig_Chr_scaffold60086_61  | Ca_desig_scaffold  | 61                             | [A/G]       | NA                                         |
| Ca_Desig_Chr_scaffold60575_396 | Ca_desig_scaffold  | 396                            | [C/T]       | NA                                         |
| Ca_Desig_Chr_scaffold60575_398 | Ca_desig_scaffold  | 398                            | [T/G]       | NA                                         |
| Ca_Desig_Chr_scaffold60788_334 | Ca_desig_scaffold  | 334                            | [C/A]       | NA                                         |
| Ca_Desig_Chr_scaffold60788_344 | Ca_desig_scaffold  | 344                            | [T/C]       | NA                                         |
| Ca_Desig_Chr_scaffold60788_388 | Ca_desig_scaffold  | 388                            | [A/G]       | NA                                         |
| Ca_Desig_Chr_scaffold60788_391 | Ca_desig_scaffold  | 391                            | [G/T]       | NA                                         |
| Ca_Desig_Chr_scaffold60788_438 | Ca_desig_scaffold  | 438                            | [C/G]       | NA                                         |
| Ca_Desig_Chr_scaffold60788_443 | Ca_desig_scaffold  | 443                            | [T/C]       | NA                                         |
| Ca_Desig_Chr_scaffold60788_488 | Ca_desig_scaffold  | 488                            | [A/T]       | NA                                         |
| Ca_Desig_Chr_scaffold60878_252 | Ca_desig_scaffold  | 252                            | [C/T]       | NA                                         |
| Ca_Desig_Chr_scaffold61139_314 | Ca_desig_scaffold  | 314                            | [A/T]       | NA                                         |
| Ca_Desig_Chr_scaffold61263_30  | Ca_desig_scaffold  | 30                             | [C/T]       | NA                                         |
| Ca_Desig_Chr_scaffold61859_233 | Ca_desig_scaffold  | 233                            | [G/A]       | NA                                         |
| Ca_Desig_Chr_scaffold61970_390 | Ca_desig_scaffold  | 390                            | [C/T]       | NA                                         |
| Ca_Desig_Chr_scaffold62150_347 | Ca_desig_scaffold  | 347                            | [T/G]       | NA                                         |
| Ca_Desig_Chr_scaffold62517_210 | Ca_desig_scaffold  | 210                            | [A/T]       | NA                                         |
| Ca_Desig_Chr_scaffold63521_400 | Ca_desig_scaffold  | 400                            | [A/G]       | NA                                         |
| Ca_Desig_Chr_scaffold63740_284 | Ca_desig_scaffold  | 284                            | [A/G]       | NA                                         |
| Ca_Desig_Chr_scaffold63740_301 | Ca_desig_scaffold  | 301                            | [T/C]       | NA                                         |
| Ca_Desig_Chr_scaffold63740_307 | Ca_desig_scaffold  | 307                            | [A/T]       | NA                                         |
| Ca_Desig_Chr_scaffold63740_312 | Ca_desig_scaffold  | 312                            | [C/T]       | NA                                         |

| <b>SNP IDs</b>                 | <b>Chromosomes</b> | <b>Physical positions (bp)</b> | <b>SNPs</b> | <b>NCBI SNPdb accession IDs (NCBI_ss#)</b> |
|--------------------------------|--------------------|--------------------------------|-------------|--------------------------------------------|
| Ca_Desig_Chr_scaffold65104_321 | Ca_desig_scaffold  | 321                            | [T/C]       | NA                                         |
| Ca_Desig_Chr_scaffold65124_252 | Ca_desig_scaffold  | 252                            | [G/T]       | NA                                         |
| Ca_Desig_Chr_scaffold65563_230 | Ca_desig_scaffold  | 230                            | [C/T]       | NA                                         |
| Ca_Desig_Chr_scaffold65563_235 | Ca_desig_scaffold  | 235                            | [A/G]       | NA                                         |
| Ca_Desig_Chr_scaffold65758_116 | Ca_desig_scaffold  | 116                            | [C/T]       | NA                                         |
| Ca_Desig_Chr_scaffold65758_126 | Ca_desig_scaffold  | 126                            | [A/C]       | NA                                         |
| Ca_Desig_Chr_scaffold65758_137 | Ca_desig_scaffold  | 137                            | [T/A]       | NA                                         |
| Ca_Desig_Chr_scaffold65758_148 | Ca_desig_scaffold  | 148                            | [T/A]       | NA                                         |
| Ca_Desig_Chr_scaffold65758_161 | Ca_desig_scaffold  | 161                            | [G/T]       | NA                                         |
| Ca_Desig_Chr_scaffold65827_204 | Ca_desig_scaffold  | 204                            | [C/T]       | NA                                         |
| Ca_Desig_Chr_scaffold65827_224 | Ca_desig_scaffold  | 224                            | [T/A]       | NA                                         |
| Ca_Desig_Chr_65620_51          | Ca_desig_scaffold  | 51                             | [G/A]       | NA                                         |
| Ca_Desig_Chr_66416_269         | Ca_desig_scaffold  | 269                            | [C/T]       | NA                                         |
| Ca_Desig_Chr_66416_289         | Ca_desig_scaffold  | 289                            | [A/G]       | NA                                         |
| Ca_Desig_Chr_68413_206         | Ca_desig_scaffold  | 206                            | [A/G]       | NA                                         |
| Ca_Desig_Chr_68413_209         | Ca_desig_scaffold  | 209                            | [G/T]       | NA                                         |
| Ca_Desig_Chr_68730_212         | Ca_desig_scaffold  | 212                            | [T/A]       | NA                                         |
| Ca_Desig_Chr_68730_225         | Ca_desig_scaffold  | 225                            | [G/T]       | NA                                         |
| Ca_Desig_Chr_68730_229         | Ca_desig_scaffold  | 229                            | [C/G]       | NA                                         |
| Ca_Desig_Chr_68730_247         | Ca_desig_scaffold  | 247                            | [A/C]       | NA                                         |
| Ca_Desig_Chr_68730_255         | Ca_desig_scaffold  | 255                            | [C/T]       | NA                                         |
| Ca_Desig_Chr_68730_256         | Ca_desig_scaffold  | 256                            | [T/C]       | NA                                         |
| Ca_Desig_Chr_68764_235         | Ca_desig_scaffold  | 235                            | [C/T]       | NA                                         |
| Ca_Desig_Chr_68949_361         | Ca_desig_scaffold  | 361                            | [A/G]       | NA                                         |
| Ca_Desig_Chr_68949_427         | Ca_desig_scaffold  | 427                            | [C/T]       | NA                                         |
| Ca_Desig_Chr_68949_428         | Ca_desig_scaffold  | 428                            | [A/G]       | NA                                         |
| Ca_Desig_Chr_68949_429         | Ca_desig_scaffold  | 429                            | [T/C]       | NA                                         |
| Ca_Desig_Chr_68949_430         | Ca_desig_scaffold  | 430                            | [C/A]       | NA                                         |
| Ca_Desig_Chr_68949_431         | Ca_desig_scaffold  | 431                            | [T/C]       | NA                                         |
| Ca_Desig_Chr_68949_432         | Ca_desig_scaffold  | 432                            | [C/T]       | NA                                         |
| Ca_Desig_Chr_68949_433         | Ca_desig_scaffold  | 433                            | [T/C]       | NA                                         |
| Ca_Desig_Chr_68949_434         | Ca_desig_scaffold  | 434                            | [T/C]       | NA                                         |
| Ca_Desig_Chr_68949_435         | Ca_desig_scaffold  | 435                            | [T/C]       | NA                                         |
| Ca_Desig_Chr_68949_436         | Ca_desig_scaffold  | 436                            | [C/T]       | NA                                         |

| <b>SNP IDs</b>          | <b>Chromosomes</b> | <b>Physical positions (bp)</b> | <b>SNPs</b> | <b>NCBI SNPdb accession IDs (NCBI_ss#)</b> |
|-------------------------|--------------------|--------------------------------|-------------|--------------------------------------------|
| Ca_Desi_Chrom_68949_437 | Ca_desi_scaffold   | 437                            | [T/C]       | NA                                         |
| Ca_Desi_Chrom_68949_438 | Ca_desi_scaffold   | 438                            | [C/T]       | NA                                         |
| Ca_Desi_Chrom_68949_439 | Ca_desi_scaffold   | 439                            | [T/C]       | NA                                         |
| Ca_Desi_Chrom_68949_440 | Ca_desi_scaffold   | 440                            | [T/C]       | NA                                         |
| Ca_Desi_Chrom_68949_441 | Ca_desi_scaffold   | 441                            | [G/A]       | NA                                         |
| Ca_Desi_Chrom_68949_442 | Ca_desi_scaffold   | 442                            | [G/A]       | NA                                         |
| Ca_Desi_Chrom_68949_443 | Ca_desi_scaffold   | 443                            | [T/C]       | NA                                         |
| Ca_Desi_Chrom_68949_444 | Ca_desi_scaffold   | 444                            | [C/T]       | NA                                         |
| Ca_Desi_Chrom_68949_445 | Ca_desi_scaffold   | 445                            | [A/G]       | NA                                         |
| Ca_Desi_Chrom_68949_446 | Ca_desi_scaffold   | 446                            | [A/G]       | NA                                         |
| Ca_Desi_Chrom_68949_447 | Ca_desi_scaffold   | 447                            | [A/G]       | NA                                         |
| Ca_Desi_Chrom_68949_448 | Ca_desi_scaffold   | 448                            | [A/G]       | NA                                         |
| Ca_Desi_Chrom_68949_449 | Ca_desi_scaffold   | 449                            | [G/A]       | NA                                         |
| Ca_Desi_Chrom_68949_450 | Ca_desi_scaffold   | 450                            | [G/A]       | NA                                         |
| Ca_Desi_Chrom_68949_451 | Ca_desi_scaffold   | 451                            | [C/A]       | NA                                         |
| Ca_Desi_Chrom_68949_452 | Ca_desi_scaffold   | 452                            | [A/G]       | NA                                         |
| Ca_Desi_Chrom_68949_453 | Ca_desi_scaffold   | 453                            | [T/C]       | NA                                         |
| Ca_Desi_Chrom_68949_454 | Ca_desi_scaffold   | 454                            | [T/C]       | NA                                         |
| Ca_Desi_Chrom_68949_455 | Ca_desi_scaffold   | 455                            | [T/C]       | NA                                         |
| Ca_Desi_Chrom_68949_456 | Ca_desi_scaffold   | 456                            | [C/T]       | NA                                         |
| Ca_Desi_Chrom_68949_457 | Ca_desi_scaffold   | 457                            | [C/T]       | NA                                         |
| Ca_Desi_Chrom_68949_458 | Ca_desi_scaffold   | 458                            | [G/A]       | NA                                         |
| Ca_Desi_Chrom_68949_460 | Ca_desi_scaffold   | 460                            | [T/C]       | NA                                         |
| Ca_Desi_Chrom_68949_461 | Ca_desi_scaffold   | 461                            | [C/T]       | NA                                         |
| Ca_Desi_Chrom_68949_463 | Ca_desi_scaffold   | 463                            | [T/C]       | NA                                         |
| Ca_Desi_Chrom_68949_464 | Ca_desi_scaffold   | 464                            | [A/G]       | NA                                         |
| Ca_Desi_Chrom_68949_465 | Ca_desi_scaffold   | 465                            | [A/G]       | NA                                         |
| Ca_Desi_Chrom_68949_466 | Ca_desi_scaffold   | 466                            | [A/G]       | NA                                         |
| Ca_Desi_Chrom_68949_468 | Ca_desi_scaffold   | 468                            | [G/A]       | NA                                         |
| Ca_Desi_Chrom_68949_469 | Ca_desi_scaffold   | 469                            | [A/G]       | NA                                         |
| Ca_Desi_Chrom_68949_470 | Ca_desi_scaffold   | 470                            | [A/G]       | NA                                         |
| Ca_Desi_Chrom_68949_471 | Ca_desi_scaffold   | 471                            | [A/G]       | NA                                         |
| Ca_Desi_Chrom_68949_472 | Ca_desi_scaffold   | 472                            | [C/A]       | NA                                         |
| Ca_Desi_Chrom_68949_473 | Ca_desi_scaffold   | 473                            | [A/G]       | NA                                         |

| <b>SNP IDs</b>          | <b>Chromosomes</b> | <b>Physical positions (bp)</b> | <b>SNPs</b> | <b>NCBI SNPdb accession IDs (NCBI_ss#)</b> |
|-------------------------|--------------------|--------------------------------|-------------|--------------------------------------------|
| Ca_Desi_Chrom_68949_474 | Ca_desi_scaffold   | 474                            | [C/T]       | NA                                         |
| Ca_Desi_Chrom_68949_475 | Ca_desi_scaffold   | 475                            | [T/C]       | NA                                         |
| Ca_Desi_Chrom_68949_476 | Ca_desi_scaffold   | 476                            | [C/T]       | NA                                         |
| Ca_Desi_Chrom_68949_477 | Ca_desi_scaffold   | 477                            | [T/C]       | NA                                         |
| Ca_Desi_Chrom_68949_478 | Ca_desi_scaffold   | 478                            | [T/C]       | NA                                         |
| Ca_Desi_Chrom_68949_479 | Ca_desi_scaffold   | 479                            | [G/A]       | NA                                         |
| Ca_Desi_Chrom_68949_480 | Ca_desi_scaffold   | 480                            | [C/T]       | NA                                         |
| Ca_Desi_Chrom_68949_481 | Ca_desi_scaffold   | 481                            | [T/C]       | NA                                         |
| Ca_Desi_Chrom_68949_482 | Ca_desi_scaffold   | 482                            | [C/T]       | NA                                         |
| Ca_Desi_Chrom_68949_483 | Ca_desi_scaffold   | 483                            | [G/A]       | NA                                         |
| Ca_Desi_Chrom_68949_484 | Ca_desi_scaffold   | 484                            | [C/T]       | NA                                         |
| Ca_Desi_Chrom_68949_485 | Ca_desi_scaffold   | 485                            | [C/T]       | NA                                         |
| Ca_Desi_Chrom_69045_35  | Ca_desi_scaffold   | 35                             | [T/C]       | NA                                         |
| Ca_Desi_Chrom_69045_36  | Ca_desi_scaffold   | 36                             | [T/C]       | NA                                         |
| Ca_Desi_Chrom_69045_37  | Ca_desi_scaffold   | 37                             | [C/T]       | NA                                         |
| Ca_Desi_Chrom_69045_38  | Ca_desi_scaffold   | 38                             | [C/T]       | NA                                         |
| Ca_Desi_Chrom_69045_39  | Ca_desi_scaffold   | 39                             | [T/C]       | NA                                         |
| Ca_Desi_Chrom_69045_40  | Ca_desi_scaffold   | 40                             | [A/G]       | NA                                         |
| Ca_Desi_Chrom_69045_41  | Ca_desi_scaffold   | 41                             | [A/G]       | NA                                         |
| Ca_Desi_Chrom_69045_42  | Ca_desi_scaffold   | 42                             | [T/C]       | NA                                         |
| Ca_Desi_Chrom_69045_43  | Ca_desi_scaffold   | 43                             | [C/T]       | NA                                         |
| Ca_Desi_Chrom_69045_44  | Ca_desi_scaffold   | 44                             | [A/G]       | NA                                         |
| Ca_Desi_Chrom_69045_45  | Ca_desi_scaffold   | 45                             | [C/T]       | NA                                         |
| Ca_Desi_Chrom_69045_46  | Ca_desi_scaffold   | 46                             | [G/A]       | NA                                         |
| Ca_Desi_Chrom_69045_47  | Ca_desi_scaffold   | 47                             | [A/G]       | NA                                         |
| Ca_Desi_Chrom_69045_48  | Ca_desi_scaffold   | 48                             | [A/G]       | NA                                         |
| Ca_Desi_Chrom_69045_49  | Ca_desi_scaffold   | 49                             | [G/A]       | NA                                         |
| Ca_Desi_Chrom_69045_50  | Ca_desi_scaffold   | 50                             | [C/T]       | NA                                         |
| Ca_Desi_Chrom_69045_51  | Ca_desi_scaffold   | 51                             | [T/C]       | NA                                         |
| Ca_Desi_Chrom_69045_52  | Ca_desi_scaffold   | 52                             | [A/G]       | NA                                         |
| Ca_Desi_Chrom_69045_53  | Ca_desi_scaffold   | 53                             | [A/G]       | NA                                         |
| Ca_Desi_Chrom_69045_55  | Ca_desi_scaffold   | 55                             | [G/A]       | NA                                         |
| Ca_Desi_Chrom_69045_56  | Ca_desi_scaffold   | 56                             | [C/T]       | NA                                         |
| Ca_Desi_Chrom_69045_57  | Ca_desi_scaffold   | 57                             | [C/T]       | NA                                         |

| <b>SNP IDs</b>        | <b>Chromosomes</b> | <b>Physical positions (bp)</b> | <b>SNPs</b> | <b>NCBI SNPdb accession IDs (NCBI_ss#)</b> |
|-----------------------|--------------------|--------------------------------|-------------|--------------------------------------------|
| Ca_Desig_Chr_69045_58 | Ca_desig_scaffold  | 58                             | [T/C]       | NA                                         |
| Ca_Desig_Chr_69045_59 | Ca_desig_scaffold  | 59                             | [C/T]       | NA                                         |
| Ca_Desig_Chr_69045_60 | Ca_desig_scaffold  | 60                             | [A/G]       | NA                                         |
| Ca_Desig_Chr_69045_61 | Ca_desig_scaffold  | 61                             | [G/A]       | NA                                         |
| Ca_Desig_Chr_69045_62 | Ca_desig_scaffold  | 62                             | [G/A]       | NA                                         |
| Ca_Desig_Chr_69045_63 | Ca_desig_scaffold  | 63                             | [A/G]       | NA                                         |
| Ca_Desig_Chr_69045_64 | Ca_desig_scaffold  | 64                             | [A/G]       | NA                                         |
| Ca_Desig_Chr_69045_65 | Ca_desig_scaffold  | 65                             | [G/A]       | NA                                         |
| Ca_Desig_Chr_69045_66 | Ca_desig_scaffold  | 66                             | [A/G]       | NA                                         |
| Ca_Desig_Chr_69045_67 | Ca_desig_scaffold  | 67                             | [G/A]       | NA                                         |
| Ca_Desig_Chr_69045_68 | Ca_desig_scaffold  | 68                             | [G/A]       | NA                                         |
| Ca_Desig_Chr_69045_69 | Ca_desig_scaffold  | 69                             | [G/A]       | NA                                         |
| Ca_Desig_Chr_69045_70 | Ca_desig_scaffold  | 70                             | [G/A]       | NA                                         |
| Ca_Desig_Chr_69045_71 | Ca_desig_scaffold  | 71                             | [C/T]       | NA                                         |
| Ca_Desig_Chr_69045_73 | Ca_desig_scaffold  | 73                             | [T/C]       | NA                                         |
| Ca_Desig_Chr_69045_74 | Ca_desig_scaffold  | 74                             | [A/G]       | NA                                         |
| Ca_Desig_Chr_69045_76 | Ca_desig_scaffold  | 76                             | [C/T]       | NA                                         |
| Ca_Desig_Chr_69045_77 | Ca_desig_scaffold  | 77                             | [G/A]       | NA                                         |
| Ca_Desig_Chr_69045_78 | Ca_desig_scaffold  | 78                             | [A/G]       | NA                                         |
| Ca_Desig_Chr_69045_79 | Ca_desig_scaffold  | 79                             | [A/G]       | NA                                         |
| Ca_Desig_Chr_69045_80 | Ca_desig_scaffold  | 80                             | [A/G]       | NA                                         |
| Ca_Desig_Chr_69045_82 | Ca_desig_scaffold  | 82                             | [A/G]       | NA                                         |
| Ca_Desig_Chr_69045_83 | Ca_desig_scaffold  | 83                             | [A/G]       | NA                                         |
| Ca_Desig_Chr_69045_84 | Ca_desig_scaffold  | 84                             | [A/G]       | NA                                         |
| Ca_Desig_Chr_69045_85 | Ca_desig_scaffold  | 85                             | [T/C]       | NA                                         |
| Ca_Desig_Chr_69045_86 | Ca_desig_scaffold  | 86                             | [C/T]       | NA                                         |
| Ca_Desig_Chr_69045_87 | Ca_desig_scaffold  | 87                             | [C/T]       | NA                                         |
| Ca_Desig_Chr_69045_88 | Ca_desig_scaffold  | 88                             | [T/C]       | NA                                         |
| Ca_Desig_Chr_69045_89 | Ca_desig_scaffold  | 89                             | [T/C]       | NA                                         |
| Ca_Desig_Chr_69045_90 | Ca_desig_scaffold  | 90                             | [T/C]       | NA                                         |
| Ca_Desig_Chr_69045_91 | Ca_desig_scaffold  | 91                             | [A/G]       | NA                                         |
| Ca_Desig_Chr_69045_93 | Ca_desig_scaffold  | 93                             | [C/T]       | NA                                         |
| Ca_Desig_Chr_69045_94 | Ca_desig_scaffold  | 94                             | [A/G]       | NA                                         |
| Ca_Desig_Chr_69045_97 | Ca_desig_scaffold  | 97                             | [A/T]       | NA                                         |

| <b>SNP IDs</b>       | <b>Chromosomes</b> | <b>Physical positions (bp)</b> | <b>SNPs</b> | <b>NCBI SNPdb accession IDs (NCBI_ss#)</b> |
|----------------------|--------------------|--------------------------------|-------------|--------------------------------------------|
| Ca_Desi_Ch_69045_137 | Ca_desi_scaffold   | 137                            | [T/G]       | NA                                         |
| Ca_Desi_Ch_69045_146 | Ca_desi_scaffold   | 146                            | [A/G]       | NA                                         |
| Ca_Desi_Ch_69045_152 | Ca_desi_scaffold   | 152                            | [G/T]       | NA                                         |
| Ca_Desi_Ch_69247_380 | Ca_desi_scaffold   | 380                            | [G/C]       | NA                                         |
| Ca_Desi_Ch_69247_392 | Ca_desi_scaffold   | 392                            | [A/C]       | NA                                         |
| Ca_Desi_Ch_69247_453 | Ca_desi_scaffold   | 453                            | [G/T]       | NA                                         |
| Ca_Desi_Ch_69247_519 | Ca_desi_scaffold   | 519                            | [C/A]       | NA                                         |
| Ca_Desi_Ch_69309_221 | Ca_desi_scaffold   | 221                            | [T/A]       | NA                                         |
| Ca_Desi_Ch_69423_145 | Ca_desi_scaffold   | 145                            | [C/A]       | NA                                         |
| Ca_Desi_Ch_70557_307 | Ca_desi_scaffold   | 307                            | [C/T]       | NA                                         |
| Ca_Desi_Ch_71000_323 | Ca_desi_scaffold   | 323                            | [C/T]       | NA                                         |
| Ca_Desi_Ch_71598_97  | Ca_desi_scaffold   | 97                             | [T/A]       | NA                                         |
| Ca_Desi_Ch_71598_288 | Ca_desi_scaffold   | 288                            | [C/T]       | NA                                         |
| Ca_Desi_Ch_72256_126 | Ca_desi_scaffold   | 126                            | [G/T]       | NA                                         |
| Ca_Desi_Ch_72662_310 | Ca_desi_scaffold   | 310                            | [G/A]       | NA                                         |
| Ca_Desi_Ch_72662_312 | Ca_desi_scaffold   | 312                            | [A/G]       | NA                                         |
| Ca_Desi_Ch_72662_315 | Ca_desi_scaffold   | 315                            | [T/C]       | NA                                         |
| Ca_Desi_Ch_72662_317 | Ca_desi_scaffold   | 317                            | [T/C]       | NA                                         |
| Ca_Desi_Ch_72662_318 | Ca_desi_scaffold   | 318                            | [T/C]       | NA                                         |
| Ca_Desi_Ch_72662_320 | Ca_desi_scaffold   | 320                            | [T/C]       | NA                                         |
| Ca_Desi_Ch_72662_322 | Ca_desi_scaffold   | 322                            | [T/C]       | NA                                         |
| Ca_Desi_Ch_72662_324 | Ca_desi_scaffold   | 324                            | [A/G]       | NA                                         |
| Ca_Desi_Ch_72662_330 | Ca_desi_scaffold   | 330                            | [T/C]       | NA                                         |
| Ca_Desi_Ch_72662_331 | Ca_desi_scaffold   | 331                            | [G/A]       | NA                                         |
| Ca_Desi_Ch_72662_332 | Ca_desi_scaffold   | 332                            | [G/A]       | NA                                         |
| Ca_Desi_Ch_72662_333 | Ca_desi_scaffold   | 333                            | [A/G]       | NA                                         |
| Ca_Desi_Ch_72662_334 | Ca_desi_scaffold   | 334                            | [T/C]       | NA                                         |
| Ca_Desi_Ch_72662_335 | Ca_desi_scaffold   | 335                            | [C/A]       | NA                                         |
| Ca_Desi_Ch_72662_339 | Ca_desi_scaffold   | 339                            | [T/A]       | NA                                         |
| Ca_Desi_Ch_72662_342 | Ca_desi_scaffold   | 342                            | [T/A]       | NA                                         |
| Ca_Desi_Ch_72662_349 | Ca_desi_scaffold   | 349                            | [T/C]       | NA                                         |
| Ca_Desi_Ch_72662_352 | Ca_desi_scaffold   | 352                            | [T/C]       | NA                                         |
| Ca_Desi_Ch_72662_353 | Ca_desi_scaffold   | 353                            | [T/C]       | NA                                         |
| Ca_Desi_Ch_72662_356 | Ca_desi_scaffold   | 356                            | [T/C]       | NA                                         |

| <b>SNP IDs</b>          | <b>Chromosomes</b> | <b>Physical positions (bp)</b> | <b>SNPs</b> | <b>NCBI SNPdb accession IDs (NCBI_ss#)</b> |
|-------------------------|--------------------|--------------------------------|-------------|--------------------------------------------|
| Ca_Desi_Chrom_72662_360 | Ca_desi_scaffold   | 360                            | [T/G]       | NA                                         |
| Ca_Desi_Chrom_72662_361 | Ca_desi_scaffold   | 361                            | [G/A]       | NA                                         |
| Ca_Desi_Chrom_72662_363 | Ca_desi_scaffold   | 363                            | [T/C]       | NA                                         |
| Ca_Desi_Chrom_72662_364 | Ca_desi_scaffold   | 364                            | [C/T]       | NA                                         |
| Ca_Desi_Chrom_72662_365 | Ca_desi_scaffold   | 365                            | [T/C]       | NA                                         |
| Ca_Desi_Chrom_72662_366 | Ca_desi_scaffold   | 366                            | [A/G]       | NA                                         |
| Ca_Desi_Chrom_72662_369 | Ca_desi_scaffold   | 369                            | [A/G]       | NA                                         |
| Ca_Desi_Chrom_72662_416 | Ca_desi_scaffold   | 416                            | [T/C]       | NA                                         |
| Ca_Desi_Chrom_72662_435 | Ca_desi_scaffold   | 435                            | [T/C]       | NA                                         |
| Ca_Desi_Chrom_72662_437 | Ca_desi_scaffold   | 437                            | [T/C]       | NA                                         |
| Ca_Desi_Chrom_75064_140 | Ca_desi_scaffold   | 140                            | [A/C]       | NA                                         |
| Ca_Desi_Chrom_75064_141 | Ca_desi_scaffold   | 141                            | [C/A]       | NA                                         |
| Ca_Desi_Chrom_75207_374 | Ca_desi_scaffold   | 374                            | [T/C]       | NA                                         |
| Ca_Desi_Chrom_75207_386 | Ca_desi_scaffold   | 386                            | [T/G]       | NA                                         |
| Ca_Desi_Chrom_75207_388 | Ca_desi_scaffold   | 388                            | [T/C]       | NA                                         |
| Ca_Desi_Chrom_75207_390 | Ca_desi_scaffold   | 390                            | [A/G]       | NA                                         |
| Ca_Desi_Chrom_75207_401 | Ca_desi_scaffold   | 401                            | [T/C]       | NA                                         |
| Ca_Desi_Chrom_75207_413 | Ca_desi_scaffold   | 413                            | [T/C]       | NA                                         |
| Ca_Desi_Chrom_75207_416 | Ca_desi_scaffold   | 416                            | [T/G]       | NA                                         |
| Ca_Desi_Chrom_75223_255 | Ca_desi_scaffold   | 255                            | [T/C]       | NA                                         |
| Ca_Desi_Chrom_75363_316 | Ca_desi_scaffold   | 316                            | [C/T]       | NA                                         |
| Ca_Desi_Chrom_75509_95  | Ca_desi_scaffold   | 95                             | [G/T]       | NA                                         |
| Ca_Desi_Chrom_75509_100 | Ca_desi_scaffold   | 100                            | [G/A]       | NA                                         |
| Ca_Desi_Chrom_75589_269 | Ca_desi_scaffold   | 269                            | [T/C]       | NA                                         |
| Ca_Desi_Chrom_75589_274 | Ca_desi_scaffold   | 274                            | [T/C]       | NA                                         |
| Ca_Desi_Chrom_75589_282 | Ca_desi_scaffold   | 282                            | [T/G]       | NA                                         |
| Ca_Desi_Chrom_76834_173 | Ca_desi_scaffold   | 173                            | [T/A]       | NA                                         |
| Ca_Desi_Chrom_76887_91  | Ca_desi_scaffold   | 91                             | [G/T]       | NA                                         |
| Ca_Desi_Chrom_77314_150 | Ca_desi_scaffold   | 150                            | [C/T]       | NA                                         |
| Ca_Desi_Chrom_77332_53  | Ca_desi_scaffold   | 53                             | [A/G]       | NA                                         |
| Ca_Desi_Chrom_77332_171 | Ca_desi_scaffold   | 171                            | [T/C]       | NA                                         |
| Ca_Desi_Chrom_77443_196 | Ca_desi_scaffold   | 196                            | [G/A]       | NA                                         |
| Ca_Desi_Chrom_77476_181 | Ca_desi_scaffold   | 181                            | [C/G]       | NA                                         |
| Ca_Desi_Chrom_77759_393 | Ca_desi_scaffold   | 393                            | [A/G]       | NA                                         |

| <b>SNP IDs</b>          | <b>Chromosomes</b> | <b>Physical positions (bp)</b> | <b>SNPs</b> | <b>NCBI SNPdb accession IDs (NCBI_ss#)</b> |
|-------------------------|--------------------|--------------------------------|-------------|--------------------------------------------|
| Ca_Desi_Chrom_77759_396 | Ca_desi_scaffold   | 396                            | [T/C]       | NA                                         |
| Ca_Desi_Chrom_77821_109 | Ca_desi_scaffold   | 109                            | [A/C]       | NA                                         |
| Ca_Desi_Chrom_77821_182 | Ca_desi_scaffold   | 182                            | [T/G]       | NA                                         |
| Ca_Desi_Chrom_77821_209 | Ca_desi_scaffold   | 209                            | [C/T]       | NA                                         |
| Ca_Desi_Chrom_77868_318 | Ca_desi_scaffold   | 318                            | [G/A]       | NA                                         |
| Ca_Desi_Chrom_77868_333 | Ca_desi_scaffold   | 333                            | [A/G]       | NA                                         |
| Ca_Desi_Chrom_77868_346 | Ca_desi_scaffold   | 346                            | [G/A]       | NA                                         |
| Ca_Desi_Chrom_77902_101 | Ca_desi_scaffold   | 101                            | [A/C]       | NA                                         |
| Ca_Desi_Chrom_77902_105 | Ca_desi_scaffold   | 105                            | [G/A]       | NA                                         |
| Ca_Desi_Chrom_77902_106 | Ca_desi_scaffold   | 106                            | [G/A]       | NA                                         |
| Ca_Desi_Chrom_77902_107 | Ca_desi_scaffold   | 107                            | [G/T]       | NA                                         |
| Ca_Desi_Chrom_77902_116 | Ca_desi_scaffold   | 116                            | [C/T]       | NA                                         |
| Ca_Desi_Chrom_77902_123 | Ca_desi_scaffold   | 123                            | [C/T]       | NA                                         |
| Ca_Desi_Chrom_77902_131 | Ca_desi_scaffold   | 131                            | [T/C]       | NA                                         |
| Ca_Desi_Chrom_77902_136 | Ca_desi_scaffold   | 136                            | [C/A]       | NA                                         |
| Ca_Desi_Chrom_77902_147 | Ca_desi_scaffold   | 147                            | [G/A]       | NA                                         |
| Ca_Desi_Chrom_77902_150 | Ca_desi_scaffold   | 150                            | [G/A]       | NA                                         |
| Ca_Desi_Chrom_78193_184 | Ca_desi_scaffold   | 184                            | [T/C]       | NA                                         |
| Ca_Desi_Chrom_78193_203 | Ca_desi_scaffold   | 203                            | [T/A]       | NA                                         |
| Ca_Desi_Chrom_78735_367 | Ca_desi_scaffold   | 367                            | [T/C]       | NA                                         |
| Ca_Desi_Chrom_78735_373 | Ca_desi_scaffold   | 373                            | [G/A]       | NA                                         |
| Ca_Desi_Chrom_79856_95  | Ca_desi_scaffold   | 95                             | [G/A]       | NA                                         |
| Ca_Desi_Chrom_80701_373 | Ca_desi_scaffold   | 373                            | [G/A]       | NA                                         |
| Ca_Desi_Chrom_81733_148 | Ca_desi_scaffold   | 148                            | [A/G]       | NA                                         |
| Ca_Desi_Chrom_83533_166 | Ca_desi_scaffold   | 166                            | [C/G]       | NA                                         |
| Ca_Desi_Chrom_84251_346 | Ca_desi_scaffold   | 346                            | [C/A]       | NA                                         |
| Ca_Desi_Chrom_84899_399 | Ca_desi_scaffold   | 399                            | [A/G]       | NA                                         |
| Ca_Desi_Chrom_85037_287 | Ca_desi_scaffold   | 287                            | [A/G]       | NA                                         |
| Ca_Desi_Chrom_85037_320 | Ca_desi_scaffold   | 320                            | [G/A]       | NA                                         |
| Ca_Desi_Chrom_85298_46  | Ca_desi_scaffold   | 46                             | [A/G]       | NA                                         |
| Ca_Desi_Chrom_85870_50  | Ca_desi_scaffold   | 50                             | [C/A]       | NA                                         |
| Ca_Desi_Chrom_86083_164 | Ca_desi_scaffold   | 164                            | [C/T]       | NA                                         |
| Ca_Desi_Chrom_86083_165 | Ca_desi_scaffold   | 165                            | [A/C]       | NA                                         |
| Ca_Desi_Chrom_86083_166 | Ca_desi_scaffold   | 166                            | [T/G]       | NA                                         |



| <b>SNP IDs</b>         | <b>Chromosomes</b> | <b>Physical positions (bp)</b> | <b>SNPs</b> | <b>NCBI SNPdb accession IDs (NCBI_ss#)</b> |
|------------------------|--------------------|--------------------------------|-------------|--------------------------------------------|
| Ca_Desig_Chr_86083_167 | Ca_desig_scaffold  | 167                            | [C/T]       | NA                                         |
| Ca_Desig_Chr_86083_170 | Ca_desig_scaffold  | 170                            | [G/T]       | NA                                         |
| Ca_Desig_Chr_86083_173 | Ca_desig_scaffold  | 173                            | [C/T]       | NA                                         |
| Ca_Desig_Chr_86083_174 | Ca_desig_scaffold  | 174                            | [G/C]       | NA                                         |
| Ca_Desig_Chr_86083_176 | Ca_desig_scaffold  | 176                            | [A/G]       | NA                                         |
| Ca_Desig_Chr_86083_177 | Ca_desig_scaffold  | 177                            | [A/C]       | NA                                         |
| Ca_Desig_Chr_86083_179 | Ca_desig_scaffold  | 179                            | [G/C]       | NA                                         |
| Ca_Desig_Chr_86083_183 | Ca_desig_scaffold  | 183                            | [T/C]       | NA                                         |
| Ca_Desig_Chr_86083_184 | Ca_desig_scaffold  | 184                            | [C/T]       | NA                                         |
| Ca_Desig_Chr_86083_186 | Ca_desig_scaffold  | 186                            | [A/G]       | NA                                         |
| Ca_Desig_Chr_86083_189 | Ca_desig_scaffold  | 189                            | [T/C]       | NA                                         |
| Ca_Desig_Chr_86083_192 | Ca_desig_scaffold  | 192                            | [T/C]       | NA                                         |
| Ca_Desig_Chr_86083_194 | Ca_desig_scaffold  | 194                            | [T/C]       | NA                                         |
| Ca_Desig_Chr_86083_198 | Ca_desig_scaffold  | 198                            | [A/G]       | NA                                         |
| Ca_Desig_Chr_86083_200 | Ca_desig_scaffold  | 200                            | [T/C]       | NA                                         |
| Ca_Desig_Chr_86083_205 | Ca_desig_scaffold  | 205                            | [A/G]       | NA                                         |
| Ca_Desig_Chr_86083_210 | Ca_desig_scaffold  | 210                            | [T/G]       | NA                                         |
| Ca_Desig_Chr_86083_214 | Ca_desig_scaffold  | 214                            | [A/G]       | NA                                         |
| Ca_Desig_Chr_86083_216 | Ca_desig_scaffold  | 216                            | [G/A]       | NA                                         |
| Ca_Desig_Chr_86083_218 | Ca_desig_scaffold  | 218                            | [T/C]       | NA                                         |
| Ca_Desig_Chr_86145_68  | Ca_desig_scaffold  | 68                             | [G/C]       | NA                                         |
| Ca_Desig_Chr_86145_69  | Ca_desig_scaffold  | 69                             | [T/C]       | NA                                         |
| Ca_Desig_Chr_86145_70  | Ca_desig_scaffold  | 70                             | [T/C]       | NA                                         |
| Ca_Desig_Chr_86145_71  | Ca_desig_scaffold  | 71                             | [G/A]       | NA                                         |
| Ca_Desig_Chr_86145_73  | Ca_desig_scaffold  | 73                             | [T/C]       | NA                                         |
| Ca_Desig_Chr_86145_75  | Ca_desig_scaffold  | 75                             | [T/C]       | NA                                         |
| Ca_Desig_Chr_86145_79  | Ca_desig_scaffold  | 79                             | [T/C]       | NA                                         |
| Ca_Desig_Chr_86145_81  | Ca_desig_scaffold  | 81                             | [A/G]       | NA                                         |
| Ca_Desig_Chr_86145_83  | Ca_desig_scaffold  | 83                             | [T/C]       | NA                                         |
| Ca_Desig_Chr_86145_84  | Ca_desig_scaffold  | 84                             | [T/C]       | NA                                         |
| Ca_Desig_Chr_86145_88  | Ca_desig_scaffold  | 88                             | [C/T]       | NA                                         |
| Ca_Desig_Chr_86145_90  | Ca_desig_scaffold  | 90                             | [T/C]       | NA                                         |
| Ca_Desig_Chr_86145_91  | Ca_desig_scaffold  | 91                             | [T/C]       | NA                                         |
| Ca_Desig_Chr_86145_93  | Ca_desig_scaffold  | 93                             | [C/T]       | NA                                         |

| <b>SNP IDs</b>         | <b>Chromosomes</b> | <b>Physical positions (bp)</b> | <b>SNPs</b> | <b>NCBI SNPdb accession IDs (NCBI_ss#)</b> |
|------------------------|--------------------|--------------------------------|-------------|--------------------------------------------|
| Ca_Desig_Chr_86145_96  | Ca_desig_scaffold  | 96                             | [T/C]       | NA                                         |
| Ca_Desig_Chr_86145_97  | Ca_desig_scaffold  | 97                             | [T/C]       | NA                                         |
| Ca_Desig_Chr_86145_99  | Ca_desig_scaffold  | 99                             | [T/C]       | NA                                         |
| Ca_Desig_Chr_86145_101 | Ca_desig_scaffold  | 101                            | [T/C]       | NA                                         |
| Ca_Desig_Chr_86145_103 | Ca_desig_scaffold  | 103                            | [C/T]       | NA                                         |
| Ca_Desig_Chr_86145_107 | Ca_desig_scaffold  | 107                            | [T/C]       | NA                                         |
| Ca_Desig_Chr_86145_108 | Ca_desig_scaffold  | 108                            | [T/C]       | NA                                         |
| Ca_Desig_Chr_86145_110 | Ca_desig_scaffold  | 110                            | [T/C]       | NA                                         |
| Ca_Desig_Chr_86145_117 | Ca_desig_scaffold  | 117                            | [T/C]       | NA                                         |
| Ca_Desig_Chr_86145_118 | Ca_desig_scaffold  | 118                            | [T/C]       | NA                                         |
| Ca_Desig_Chr_86145_120 | Ca_desig_scaffold  | 120                            | [T/C]       | NA                                         |
| Ca_Desig_Chr_86145_121 | Ca_desig_scaffold  | 121                            | [T/C]       | NA                                         |
| Ca_Desig_Chr_86145_124 | Ca_desig_scaffold  | 124                            | [T/C]       | NA                                         |
| Ca_Desig_Chr_86145_127 | Ca_desig_scaffold  | 127                            | [A/G]       | NA                                         |
| Ca_Desig_Chr_86769_190 | Ca_desig_scaffold  | 190                            | [C/A]       | NA                                         |
| Ca_Desig_Chr_86783_143 | Ca_desig_scaffold  | 143                            | [T/A]       | NA                                         |
| Ca_Desig_Chr_86783_146 | Ca_desig_scaffold  | 146                            | [C/T]       | NA                                         |
| Ca_Desig_Chr_86783_147 | Ca_desig_scaffold  | 147                            | [T/C]       | NA                                         |
| Ca_Desig_Chr_86825_167 | Ca_desig_scaffold  | 167                            | [T/C]       | NA                                         |
| Ca_Desig_Chr_87881_77  | Ca_desig_scaffold  | 77                             | [A/C]       | NA                                         |
| Ca_Desig_Chr_87881_110 | Ca_desig_scaffold  | 110                            | [C/A]       | NA                                         |
| Ca_Desig_Chr_88244_69  | Ca_desig_scaffold  | 69                             | [C/G]       | NA                                         |
| Ca_Desig_Chr_88244_97  | Ca_desig_scaffold  | 97                             | [A/C]       | NA                                         |
| Ca_Desig_Chr_88244_105 | Ca_desig_scaffold  | 105                            | [G/A]       | NA                                         |
| Ca_Desig_Chr_88244_114 | Ca_desig_scaffold  | 114                            | [G/C]       | NA                                         |
| Ca_Desig_Chr_88244_118 | Ca_desig_scaffold  | 118                            | [T/C]       | NA                                         |
| Ca_Desig_Chr_88244_144 | Ca_desig_scaffold  | 144                            | [A/G]       | NA                                         |
| Ca_Desig_Chr_88588_249 | Ca_desig_scaffold  | 249                            | [A/G]       | NA                                         |
| Ca_Desig_Chr_89153_224 | Ca_desig_scaffold  | 224                            | [A/C]       | NA                                         |
| Ca_Desig_Chr_89666_317 | Ca_desig_scaffold  | 317                            | [T/C]       | NA                                         |
| Ca_Desig_Chr_89666_318 | Ca_desig_scaffold  | 318                            | [A/G]       | NA                                         |
| Ca_Desig_Chr_89666_320 | Ca_desig_scaffold  | 320                            | [A/G]       | NA                                         |
| Ca_Desig_Chr_89666_321 | Ca_desig_scaffold  | 321                            | [T/C]       | NA                                         |
| Ca_Desig_Chr_89666_324 | Ca_desig_scaffold  | 324                            | [C/T]       | NA                                         |

| <b>SNP IDs</b>          | <b>Chromosomes</b> | <b>Physical positions (bp)</b> | <b>SNPs</b> | <b>NCBI SNPdb accession IDs (NCBI_ss#)</b> |
|-------------------------|--------------------|--------------------------------|-------------|--------------------------------------------|
| Ca_Desi_Chrom_89666_326 | Ca_desi_scaffold   | 326                            | [C/T]       | NA                                         |
| Ca_Desi_Chrom_89666_327 | Ca_desi_scaffold   | 327                            | [G/A]       | NA                                         |
| Ca_Desi_Chrom_89666_329 | Ca_desi_scaffold   | 329                            | [A/G]       | NA                                         |
| Ca_Desi_Chrom_89666_330 | Ca_desi_scaffold   | 330                            | [A/G]       | NA                                         |
| Ca_Desi_Chrom_89666_331 | Ca_desi_scaffold   | 331                            | [T/C]       | NA                                         |
| Ca_Desi_Chrom_89666_333 | Ca_desi_scaffold   | 333                            | [A/G]       | NA                                         |
| Ca_Desi_Chrom_89666_335 | Ca_desi_scaffold   | 335                            | [T/C]       | NA                                         |
| Ca_Desi_Chrom_89666_336 | Ca_desi_scaffold   | 336                            | [C/T]       | NA                                         |
| Ca_Desi_Chrom_89666_337 | Ca_desi_scaffold   | 337                            | [A/G]       | NA                                         |
| Ca_Desi_Chrom_89666_338 | Ca_desi_scaffold   | 338                            | [C/T]       | NA                                         |
| Ca_Desi_Chrom_89666_339 | Ca_desi_scaffold   | 339                            | [T/C]       | NA                                         |
| Ca_Desi_Chrom_89666_340 | Ca_desi_scaffold   | 340                            | [T/C]       | NA                                         |
| Ca_Desi_Chrom_89666_341 | Ca_desi_scaffold   | 341                            | [C/T]       | NA                                         |
| Ca_Desi_Chrom_89666_342 | Ca_desi_scaffold   | 342                            | [A/G]       | NA                                         |
| Ca_Desi_Chrom_89666_343 | Ca_desi_scaffold   | 343                            | [A/G]       | NA                                         |
| Ca_Desi_Chrom_89666_345 | Ca_desi_scaffold   | 345                            | [A/G]       | NA                                         |
| Ca_Desi_Chrom_89666_346 | Ca_desi_scaffold   | 346                            | [A/G]       | NA                                         |
| Ca_Desi_Chrom_89666_347 | Ca_desi_scaffold   | 347                            | [T/C]       | NA                                         |
| Ca_Desi_Chrom_89666_349 | Ca_desi_scaffold   | 349                            | [T/C]       | NA                                         |
| Ca_Desi_Chrom_89666_350 | Ca_desi_scaffold   | 350                            | [T/C]       | NA                                         |
| Ca_Desi_Chrom_89666_351 | Ca_desi_scaffold   | 351                            | [C/T]       | NA                                         |
| Ca_Desi_Chrom_89666_352 | Ca_desi_scaffold   | 352                            | [G/A]       | NA                                         |
| Ca_Desi_Chrom_89666_353 | Ca_desi_scaffold   | 353                            | [A/G]       | NA                                         |
| Ca_Desi_Chrom_89666_354 | Ca_desi_scaffold   | 354                            | [T/C]       | NA                                         |
| Ca_Desi_Chrom_89666_357 | Ca_desi_scaffold   | 357                            | [T/C]       | NA                                         |
| Ca_Desi_Chrom_89666_358 | Ca_desi_scaffold   | 358                            | [T/C]       | NA                                         |
| Ca_Desi_Chrom_89666_359 | Ca_desi_scaffold   | 359                            | [C/T]       | NA                                         |
| Ca_Desi_Chrom_89666_360 | Ca_desi_scaffold   | 360                            | [T/C]       | NA                                         |
| Ca_Desi_Chrom_89666_361 | Ca_desi_scaffold   | 361                            | [A/T]       | NA                                         |
| Ca_Desi_Chrom_89666_362 | Ca_desi_scaffold   | 362                            | [T/C]       | NA                                         |
| Ca_Desi_Chrom_89666_363 | Ca_desi_scaffold   | 363                            | [G/A]       | NA                                         |
| Ca_Desi_Chrom_89666_364 | Ca_desi_scaffold   | 364                            | [A/G]       | NA                                         |
| Ca_Desi_Chrom_89666_366 | Ca_desi_scaffold   | 366                            | [T/C]       | NA                                         |
| Ca_Desi_Chrom_89666_367 | Ca_desi_scaffold   | 367                            | [A/G]       | NA                                         |

| <b>SNP IDs</b>          | <b>Chromosomes</b> | <b>Physical positions (bp)</b> | <b>SNPs</b> | <b>NCBI SNPdb accession IDs (NCBI_ss#)</b> |
|-------------------------|--------------------|--------------------------------|-------------|--------------------------------------------|
| Ca_Desi_Chrom_89666_368 | Ca_desi_scaffold   | 368                            | [T/C]       | NA                                         |
| Ca_Desi_Chrom_89666_371 | Ca_desi_scaffold   | 371                            | [A/G]       | NA                                         |
| Ca_Desi_Chrom_89666_372 | Ca_desi_scaffold   | 372                            | [A/G]       | NA                                         |
| Ca_Desi_Chrom_89666_373 | Ca_desi_scaffold   | 373                            | [A/G]       | NA                                         |
| Ca_Desi_Chrom_89666_374 | Ca_desi_scaffold   | 374                            | [A/G]       | NA                                         |
| Ca_Desi_Chrom_89666_375 | Ca_desi_scaffold   | 375                            | [T/C]       | NA                                         |
| Ca_Desi_Chrom_90330_40  | Ca_desi_scaffold   | 40                             | [C/T]       | NA                                         |
| Ca_Desi_Chrom_90330_43  | Ca_desi_scaffold   | 43                             | [A/T]       | NA                                         |
| Ca_Desi_Chrom_90903_108 | Ca_desi_scaffold   | 108                            | [C/T]       | NA                                         |
| Ca_Desi_Chrom_90965_227 | Ca_desi_scaffold   | 227                            | [T/G]       | NA                                         |
| Ca_Desi_Chrom_90965_233 | Ca_desi_scaffold   | 233                            | [A/G]       | NA                                         |
| Ca_Desi_Chrom_90974_256 | Ca_desi_scaffold   | 256                            | [A/G]       | NA                                         |
| Ca_Desi_Chrom_90974_264 | Ca_desi_scaffold   | 264                            | [G/T]       | NA                                         |
| Ca_Desi_Chrom_90974_284 | Ca_desi_scaffold   | 284                            | [A/G]       | NA                                         |
| Ca_Desi_Chrom_91115_178 | Ca_desi_scaffold   | 178                            | [A/C]       | NA                                         |
| Ca_Desi_Chrom_91115_183 | Ca_desi_scaffold   | 183                            | [T/A]       | NA                                         |
| Ca_Desi_Chrom_91657_149 | Ca_desi_scaffold   | 149                            | [G/A]       | NA                                         |
| Ca_Desi_Chrom_92320_140 | Ca_desi_scaffold   | 140                            | [A/C]       | NA                                         |
| Ca_Desi_Chrom_92425_364 | Ca_desi_scaffold   | 364                            | [A/C]       | NA                                         |
| Ca_Desi_Chrom_92665_96  | Ca_desi_scaffold   | 96                             | [T/C]       | NA                                         |
| Ca_Desi_Chrom_92665_204 | Ca_desi_scaffold   | 204                            | [G/C]       | NA                                         |
| Ca_Desi_Chrom_92764_127 | Ca_desi_scaffold   | 127                            | [G/A]       | NA                                         |
| Ca_Desi_Chrom_92764_135 | Ca_desi_scaffold   | 135                            | [C/T]       | NA                                         |
| Ca_Desi_Chrom_92764_170 | Ca_desi_scaffold   | 170                            | [C/T]       | NA                                         |
| Ca_Desi_Chrom_93336_150 | Ca_desi_scaffold   | 150                            | [A/G]       | NA                                         |
| Ca_Desi_Chrom_93478_165 | Ca_desi_scaffold   | 165                            | [G/A]       | NA                                         |
| Ca_Desi_Chrom_93480_168 | Ca_desi_scaffold   | 168                            | [A/G]       | NA                                         |
| Ca_Desi_Chrom_94571_35  | Ca_desi_scaffold   | 35                             | [T/A]       | NA                                         |
| Ca_Desi_Chrom_94571_38  | Ca_desi_scaffold   | 38                             | [A/G]       | NA                                         |
| Ca_Desi_Chrom_94571_39  | Ca_desi_scaffold   | 39                             | [T/C]       | NA                                         |
| Ca_Desi_Chrom_94571_40  | Ca_desi_scaffold   | 40                             | [C/A]       | NA                                         |
| Ca_Desi_Chrom_94571_41  | Ca_desi_scaffold   | 41                             | [A/G]       | NA                                         |
| Ca_Desi_Chrom_94571_43  | Ca_desi_scaffold   | 43                             | [A/G]       | NA                                         |
| Ca_Desi_Chrom_94571_44  | Ca_desi_scaffold   | 44                             | [A/G]       | NA                                         |

| <b>SNP IDs</b>         | <b>Chromosomes</b> | <b>Physical positions (bp)</b> | <b>SNPs</b> | <b>NCBI SNPdb accession IDs (NCBI_ss#)</b> |
|------------------------|--------------------|--------------------------------|-------------|--------------------------------------------|
| Ca_Desi_Chrr_94571_45  | Ca_desi_scaffold   | 45                             | [A/G]       | NA                                         |
| Ca_Desi_Chrr_94571_48  | Ca_desi_scaffold   | 48                             | [A/G]       | NA                                         |
| Ca_Desi_Chrr_94571_49  | Ca_desi_scaffold   | 49                             | [A/G]       | NA                                         |
| Ca_Desi_Chrr_94571_50  | Ca_desi_scaffold   | 50                             | [A/G]       | NA                                         |
| Ca_Desi_Chrr_94571_51  | Ca_desi_scaffold   | 51                             | [T/C]       | NA                                         |
| Ca_Desi_Chrr_94571_53  | Ca_desi_scaffold   | 53                             | [G/A]       | NA                                         |
| Ca_Desi_Chrr_94571_54  | Ca_desi_scaffold   | 54                             | [C/A]       | NA                                         |
| Ca_Desi_Chrr_94571_55  | Ca_desi_scaffold   | 55                             | [A/G]       | NA                                         |
| Ca_Desi_Chrr_94571_56  | Ca_desi_scaffold   | 56                             | [A/G]       | NA                                         |
| Ca_Desi_Chrr_94571_59  | Ca_desi_scaffold   | 59                             | [T/C]       | NA                                         |
| Ca_Desi_Chrr_94571_60  | Ca_desi_scaffold   | 60                             | [T/C]       | NA                                         |
| Ca_Desi_Chrr_94571_61  | Ca_desi_scaffold   | 61                             | [C/T]       | NA                                         |
| Ca_Desi_Chrr_94571_63  | Ca_desi_scaffold   | 63                             | [G/A]       | NA                                         |
| Ca_Desi_Chrr_94571_64  | Ca_desi_scaffold   | 64                             | [A/G]       | NA                                         |
| Ca_Desi_Chrr_94571_67  | Ca_desi_scaffold   | 67                             | [A/G]       | NA                                         |
| Ca_Desi_Chrr_94571_69  | Ca_desi_scaffold   | 69                             | [A/G]       | NA                                         |
| Ca_Desi_Chrr_94571_70  | Ca_desi_scaffold   | 70                             | [A/G]       | NA                                         |
| Ca_Desi_Chrr_94571_71  | Ca_desi_scaffold   | 71                             | [A/G]       | NA                                         |
| Ca_Desi_Chrr_94571_73  | Ca_desi_scaffold   | 73                             | [G/A]       | NA                                         |
| Ca_Desi_Chrr_94571_74  | Ca_desi_scaffold   | 74                             | [A/G]       | NA                                         |
| Ca_Desi_Chrr_94571_77  | Ca_desi_scaffold   | 77                             | [A/T]       | NA                                         |
| Ca_Desi_Chrr_94917_242 | Ca_desi_scaffold   | 242                            | [G/A]       | NA                                         |
| Ca_Desi_Chrr_94917_248 | Ca_desi_scaffold   | 248                            | [A/C]       | NA                                         |
| Ca_Desi_Chrr_94917_253 | Ca_desi_scaffold   | 253                            | [C/T]       | NA                                         |
| Ca_Desi_Chrr_94917_273 | Ca_desi_scaffold   | 273                            | [A/G]       | NA                                         |
| Ca_Desi_Chrr_95081_286 | Ca_desi_scaffold   | 286                            | [T/A]       | NA                                         |
| Ca_Desi_Chrr_95081_287 | Ca_desi_scaffold   | 287                            | [T/G]       | NA                                         |
| Ca_Desi_Chrr_95081_297 | Ca_desi_scaffold   | 297                            | [G/A]       | NA                                         |
| Ca_Desi_Chrr_95403_269 | Ca_desi_scaffold   | 269                            | [T/A]       | NA                                         |
| Ca_Desi_Chrr_95403_270 | Ca_desi_scaffold   | 270                            | [G/T]       | NA                                         |
| Ca_Desi_Chrr_95407_108 | Ca_desi_scaffold   | 108                            | [T/G]       | NA                                         |
| Ca_Desi_Chrr_95896_196 | Ca_desi_scaffold   | 196                            | [G/C]       | NA                                         |
| Ca_Desi_Chrr_95896_229 | Ca_desi_scaffold   | 229                            | [A/T]       | NA                                         |
| Ca_Desi_Chrr_96225_344 | Ca_desi_scaffold   | 344                            | [G/A]       | NA                                         |

| <b>SNP IDs</b>           | <b>Chromosomes</b> | <b>Physical positions (bp)</b> | <b>SNPs</b> | <b>NCBI SNPdb accession IDs (NCBI_ss#)</b> |
|--------------------------|--------------------|--------------------------------|-------------|--------------------------------------------|
| Ca_Desi_Chrom_96225_364  | Ca_desi_scaffold   | 364                            | [T/G]       | NA                                         |
| Ca_Desi_Chrom_96247_318  | Ca_desi_scaffold   | 318                            | [T/A]       | NA                                         |
| Ca_Desi_Chrom_97708_134  | Ca_desi_scaffold   | 134                            | [T/C]       | NA                                         |
| Ca_Desi_Chrom_97964_98   | Ca_desi_scaffold   | 98                             | [A/G]       | NA                                         |
| Ca_Desi_Chrom_98224_174  | Ca_desi_scaffold   | 174                            | [C/T]       | NA                                         |
| Ca_Desi_Chrom_98775_110  | Ca_desi_scaffold   | 110                            | [T/A]       | NA                                         |
| Ca_Desi_Chrom_98775_151  | Ca_desi_scaffold   | 151                            | [A/C]       | NA                                         |
| Ca_Desi_Chrom_99492_19   | Ca_desi_scaffold   | 19                             | [C/T]       | NA                                         |
| Ca_Desi_Chrom_99492_52   | Ca_desi_scaffold   | 52                             | [C/T]       | NA                                         |
| Ca_Desi_Chrom_100247_43  | Ca_desi_scaffold   | 43                             | [G/A]       | NA                                         |
| Ca_Desi_Chrom_102368_89  | Ca_desi_scaffold   | 89                             | [C/T]       | NA                                         |
| Ca_Desi_Chrom_102368_111 | Ca_desi_scaffold   | 111                            | [T/G]       | NA                                         |
| Ca_Desi_Chrom_102368_335 | Ca_desi_scaffold   | 335                            | [G/A]       | NA                                         |
| Ca_Desi_Chrom_102864_278 | Ca_desi_scaffold   | 278                            | [T/C]       | NA                                         |
| Ca_Desi_Chrom_103289_10  | Ca_desi_scaffold   | 10                             | [T/C]       | NA                                         |
| Ca_Desi_Chrom_103289_11  | Ca_desi_scaffold   | 11                             | [T/C]       | NA                                         |
| Ca_Desi_Chrom_103289_15  | Ca_desi_scaffold   | 15                             | [A/G]       | NA                                         |
| Ca_Desi_Chrom_103289_16  | Ca_desi_scaffold   | 16                             | [A/G]       | NA                                         |
| Ca_Desi_Chrom_103289_18  | Ca_desi_scaffold   | 18                             | [A/G]       | NA                                         |
| Ca_Desi_Chrom_103289_19  | Ca_desi_scaffold   | 19                             | [A/G]       | NA                                         |
| Ca_Desi_Chrom_103289_22  | Ca_desi_scaffold   | 22                             | [T/C]       | NA                                         |
| Ca_Desi_Chrom_103289_25  | Ca_desi_scaffold   | 25                             | [T/C]       | NA                                         |
| Ca_Desi_Chrom_103289_28  | Ca_desi_scaffold   | 28                             | [C/T]       | NA                                         |
| Ca_Desi_Chrom_103289_33  | Ca_desi_scaffold   | 33                             | [A/G]       | NA                                         |
| Ca_Desi_Chrom_103289_34  | Ca_desi_scaffold   | 34                             | [A/G]       | NA                                         |
| Ca_Desi_Chrom_103289_35  | Ca_desi_scaffold   | 35                             | [T/C]       | NA                                         |
| Ca_Desi_Chrom_103289_37  | Ca_desi_scaffold   | 37                             | [T/C]       | NA                                         |
| Ca_Desi_Chrom_103289_38  | Ca_desi_scaffold   | 38                             | [A/G]       | NA                                         |
| Ca_Desi_Chrom_103289_39  | Ca_desi_scaffold   | 39                             | [T/C]       | NA                                         |
| Ca_Desi_Chrom_103289_41  | Ca_desi_scaffold   | 41                             | [A/G]       | NA                                         |
| Ca_Desi_Chrom_103289_43  | Ca_desi_scaffold   | 43                             | [T/C]       | NA                                         |
| Ca_Desi_Chrom_103289_45  | Ca_desi_scaffold   | 45                             | [A/G]       | NA                                         |
| Ca_Desi_Chrom_103289_46  | Ca_desi_scaffold   | 46                             | [T/C]       | NA                                         |
| Ca_Desi_Chrom_103289_47  | Ca_desi_scaffold   | 47                             | [G/A]       | NA                                         |

| <b>SNP IDs</b>           | <b>Chromosomes</b> | <b>Physical positions (bp)</b> | <b>SNPs</b> | <b>NCBI SNPdb accession IDs (NCBI_ss#)</b> |
|--------------------------|--------------------|--------------------------------|-------------|--------------------------------------------|
| Ca_Desi_Chrom_103289_49  | Ca_desi_scaffold   | 49                             | [T/C]       | NA                                         |
| Ca_Desi_Chrom_103289_53  | Ca_desi_scaffold   | 53                             | [T/C]       | NA                                         |
| Ca_Desi_Chrom_103289_55  | Ca_desi_scaffold   | 55                             | [A/G]       | NA                                         |
| Ca_Desi_Chrom_103289_59  | Ca_desi_scaffold   | 59                             | [T/C]       | NA                                         |
| Ca_Desi_Chrom_103289_61  | Ca_desi_scaffold   | 61                             | [T/C]       | NA                                         |
| Ca_Desi_Chrom_103289_64  | Ca_desi_scaffold   | 64                             | [A/G]       | NA                                         |
| Ca_Desi_Chrom_103289_65  | Ca_desi_scaffold   | 65                             | [A/G]       | NA                                         |
| Ca_Desi_Chrom_103289_66  | Ca_desi_scaffold   | 66                             | [A/G]       | NA                                         |
| Ca_Desi_Chrom_103289_67  | Ca_desi_scaffold   | 67                             | [T/C]       | NA                                         |
| Ca_Desi_Chrom_103289_141 | Ca_desi_scaffold   | 141                            | [A/G]       | NA                                         |
| Ca_Desi_Chrom_103289_142 | Ca_desi_scaffold   | 142                            | [T/C]       | NA                                         |
| Ca_Desi_Chrom_103289_143 | Ca_desi_scaffold   | 143                            | [T/C]       | NA                                         |
| Ca_Desi_Chrom_103289_144 | Ca_desi_scaffold   | 144                            | [T/C]       | NA                                         |
| Ca_Desi_Chrom_103289_145 | Ca_desi_scaffold   | 145                            | [T/C]       | NA                                         |
| Ca_Desi_Chrom_103289_147 | Ca_desi_scaffold   | 147                            | [T/C]       | NA                                         |
| Ca_Desi_Chrom_103289_148 | Ca_desi_scaffold   | 148                            | [T/C]       | NA                                         |
| Ca_Desi_Chrom_103289_150 | Ca_desi_scaffold   | 150                            | [T/C]       | NA                                         |
| Ca_Desi_Chrom_103289_151 | Ca_desi_scaffold   | 151                            | [A/G]       | NA                                         |
| Ca_Desi_Chrom_103289_153 | Ca_desi_scaffold   | 153                            | [G/A]       | NA                                         |
| Ca_Desi_Chrom_103289_154 | Ca_desi_scaffold   | 154                            | [A/G]       | NA                                         |
| Ca_Desi_Chrom_103289_155 | Ca_desi_scaffold   | 155                            | [T/C]       | NA                                         |
| Ca_Desi_Chrom_103289_156 | Ca_desi_scaffold   | 156                            | [T/C]       | NA                                         |
| Ca_Desi_Chrom_103289_157 | Ca_desi_scaffold   | 157                            | [C/T]       | NA                                         |
| Ca_Desi_Chrom_103289_158 | Ca_desi_scaffold   | 158                            | [T/C]       | NA                                         |
| Ca_Desi_Chrom_103289_159 | Ca_desi_scaffold   | 159                            | [T/C]       | NA                                         |
| Ca_Desi_Chrom_103289_161 | Ca_desi_scaffold   | 161                            | [C/T]       | NA                                         |
| Ca_Desi_Chrom_103289_162 | Ca_desi_scaffold   | 162                            | [T/C]       | NA                                         |
| Ca_Desi_Chrom_103289_163 | Ca_desi_scaffold   | 163                            | [A/G]       | NA                                         |
| Ca_Desi_Chrom_103289_164 | Ca_desi_scaffold   | 164                            | [T/C]       | NA                                         |
| Ca_Desi_Chrom_103289_165 | Ca_desi_scaffold   | 165                            | [T/C]       | NA                                         |
| Ca_Desi_Chrom_103289_166 | Ca_desi_scaffold   | 166                            | [C/T]       | NA                                         |
| Ca_Desi_Chrom_103289_168 | Ca_desi_scaffold   | 168                            | [T/C]       | NA                                         |
| Ca_Desi_Chrom_103289_169 | Ca_desi_scaffold   | 169                            | [A/G]       | NA                                         |
| Ca_Desi_Chrom_103289_170 | Ca_desi_scaffold   | 170                            | [G/A]       | NA                                         |

| <b>SNP IDs</b>           | <b>Chromosomes</b> | <b>Physical positions (bp)</b> | <b>SNPs</b> | <b>NCBI SNPdb accession IDs (NCBI_ss#)</b> |
|--------------------------|--------------------|--------------------------------|-------------|--------------------------------------------|
| Ca_Desi_Chrom_103289_171 | Ca_desi_scaffold   | 171                            | [G/A]       | NA                                         |
| Ca_Desi_Chrom_103289_172 | Ca_desi_scaffold   | 172                            | [T/C]       | NA                                         |
| Ca_Desi_Chrom_103289_173 | Ca_desi_scaffold   | 173                            | [C/T]       | NA                                         |
| Ca_Desi_Chrom_103289_174 | Ca_desi_scaffold   | 174                            | [A/G]       | NA                                         |
| Ca_Desi_Chrom_103289_175 | Ca_desi_scaffold   | 175                            | [T/C]       | NA                                         |
| Ca_Desi_Chrom_103289_176 | Ca_desi_scaffold   | 176                            | [T/C]       | NA                                         |
| Ca_Desi_Chrom_103289_177 | Ca_desi_scaffold   | 177                            | [T/C]       | NA                                         |
| Ca_Desi_Chrom_103289_178 | Ca_desi_scaffold   | 178                            | [A/G]       | NA                                         |
| Ca_Desi_Chrom_103289_179 | Ca_desi_scaffold   | 179                            | [T/C]       | NA                                         |
| Ca_Desi_Chrom_103289_181 | Ca_desi_scaffold   | 181                            | [G/A]       | NA                                         |
| Ca_Desi_Chrom_103289_183 | Ca_desi_scaffold   | 183                            | [A/G]       | NA                                         |
| Ca_Desi_Chrom_103289_184 | Ca_desi_scaffold   | 184                            | [C/T]       | NA                                         |
| Ca_Desi_Chrom_103289_185 | Ca_desi_scaffold   | 185                            | [G/A]       | NA                                         |
| Ca_Desi_Chrom_103289_186 | Ca_desi_scaffold   | 186                            | [C/T]       | NA                                         |
| Ca_Desi_Chrom_103289_187 | Ca_desi_scaffold   | 187                            | [G/A]       | NA                                         |
| Ca_Desi_Chrom_103289_188 | Ca_desi_scaffold   | 188                            | [G/A]       | NA                                         |
| Ca_Desi_Chrom_103289_190 | Ca_desi_scaffold   | 190                            | [A/G]       | NA                                         |
| Ca_Desi_Chrom_103289_191 | Ca_desi_scaffold   | 191                            | [A/G]       | NA                                         |
| Ca_Desi_Chrom_103289_192 | Ca_desi_scaffold   | 192                            | [G/A]       | NA                                         |
| Ca_Desi_Chrom_103289_193 | Ca_desi_scaffold   | 193                            | [A/G]       | NA                                         |
| Ca_Desi_Chrom_103289_194 | Ca_desi_scaffold   | 194                            | [G/A]       | NA                                         |
| Ca_Desi_Chrom_103289_195 | Ca_desi_scaffold   | 195                            | [C/T]       | NA                                         |
| Ca_Desi_Chrom_103289_196 | Ca_desi_scaffold   | 196                            | [T/C]       | NA                                         |
| Ca_Desi_Chrom_103289_197 | Ca_desi_scaffold   | 197                            | [C/T]       | NA                                         |
| Ca_Desi_Chrom_103289_198 | Ca_desi_scaffold   | 198                            | [G/A]       | NA                                         |
| Ca_Desi_Chrom_103289_199 | Ca_desi_scaffold   | 199                            | [C/T]       | NA                                         |
| Ca_Desi_Chrom_103289_200 | Ca_desi_scaffold   | 200                            | [G/A]       | NA                                         |
| Ca_Desi_Chrom_103289_201 | Ca_desi_scaffold   | 201                            | [C/T]       | NA                                         |
| Ca_Desi_Chrom_103289_202 | Ca_desi_scaffold   | 202                            | [A/G]       | NA                                         |
| Ca_Desi_Chrom_106251_132 | Ca_desi_scaffold   | 132                            | [G/T]       | NA                                         |
| Ca_Desi_Chrom_106251_163 | Ca_desi_scaffold   | 163                            | [C/T]       | NA                                         |
| Ca_Desi_Chrom_106343_95  | Ca_desi_scaffold   | 95                             | [C/G]       | NA                                         |
| Ca_Desi_Chrom_106597_60  | Ca_desi_scaffold   | 60                             | [C/T]       | NA                                         |
| Ca_Desi_Chrom_106597_67  | Ca_desi_scaffold   | 67                             | [C/A]       | NA                                         |



| <b>SNP IDs</b>           | <b>Chromosomes</b> | <b>Physical positions (bp)</b> | <b>SNPs</b> | <b>NCBI SNPdb accession IDs (NCBI_ss#)</b> |
|--------------------------|--------------------|--------------------------------|-------------|--------------------------------------------|
| Ca_Desi_Chrom_106597_80  | Ca_desi_scaffold   | 80                             | [T/A]       | NA                                         |
| Ca_Desi_Chrom_106597_81  | Ca_desi_scaffold   | 81                             | [G/A]       | NA                                         |
| Ca_Desi_Chrom_106597_82  | Ca_desi_scaffold   | 82                             | [C/T]       | NA                                         |
| Ca_Desi_Chrom_106597_86  | Ca_desi_scaffold   | 86                             | [T/A]       | NA                                         |
| Ca_Desi_Chrom_106597_98  | Ca_desi_scaffold   | 98                             | [A/G]       | NA                                         |
| Ca_Desi_Chrom_106597_109 | Ca_desi_scaffold   | 109                            | [C/A]       | NA                                         |
| Ca_Desi_Chrom_106597_110 | Ca_desi_scaffold   | 110                            | [T/G]       | NA                                         |
| Ca_Desi_Chrom_106597_111 | Ca_desi_scaffold   | 111                            | [G/T]       | NA                                         |
| Ca_Desi_Chrom_106597_130 | Ca_desi_scaffold   | 130                            | [C/T]       | NA                                         |
| Ca_Desi_Chrom_106597_132 | Ca_desi_scaffold   | 132                            | [A/T]       | NA                                         |
| Ca_Desi_Chrom_106597_142 | Ca_desi_scaffold   | 142                            | [G/A]       | NA                                         |
| Ca_Desi_Chrom_106597_172 | Ca_desi_scaffold   | 172                            | [T/A]       | NA                                         |
| Ca_Desi_Chrom_106597_182 | Ca_desi_scaffold   | 182                            | [A/C]       | NA                                         |
| Ca_Desi_Chrom_107034_108 | Ca_desi_scaffold   | 108                            | [A/T]       | NA                                         |
| Ca_Desi_Chrom_107034_128 | Ca_desi_scaffold   | 128                            | [T/G]       | NA                                         |
| Ca_Desi_Chrom_107485_87  | Ca_desi_scaffold   | 87                             | [T/A]       | NA                                         |
| Ca_Desi_Chrom_107485_94  | Ca_desi_scaffold   | 94                             | [G/A]       | NA                                         |
| Ca_Desi_Chrom_107485_169 | Ca_desi_scaffold   | 169                            | [T/C]       | NA                                         |
| Ca_Desi_Chrom_107485_171 | Ca_desi_scaffold   | 171                            | [T/G]       | NA                                         |
| Ca_Desi_Chrom_107485_190 | Ca_desi_scaffold   | 190                            | [A/C]       | NA                                         |
| Ca_Desi_Chrom_107485_200 | Ca_desi_scaffold   | 200                            | [A/G]       | NA                                         |
| Ca_Desi_Chrom_107485_203 | Ca_desi_scaffold   | 203                            | [A/G]       | NA                                         |
| Ca_Desi_Chrom_107771_86  | Ca_desi_scaffold   | 86                             | [T/G]       | NA                                         |
| Ca_Desi_Chrom_107777_56  | Ca_desi_scaffold   | 56                             | [A/G]       | NA                                         |
| Ca_Desi_Chrom_107777_59  | Ca_desi_scaffold   | 59                             | [C/A]       | NA                                         |
| Ca_Desi_Chrom_107777_93  | Ca_desi_scaffold   | 93                             | [C/T]       | NA                                         |
| Ca_Desi_Chrom_107777_107 | Ca_desi_scaffold   | 107                            | [A/C]       | NA                                         |
| Ca_Desi_Chrom_107777_108 | Ca_desi_scaffold   | 108                            | [T/C]       | NA                                         |
| Ca_Desi_Chrom_109110_319 | Ca_desi_scaffold   | 319                            | [C/T]       | NA                                         |
| Ca_Desi_Chrom_109110_324 | Ca_desi_scaffold   | 324                            | [T/G]       | NA                                         |
| Ca_Desi_Chrom_109498_204 | Ca_desi_scaffold   | 204                            | [G/A]       | NA                                         |
| Ca_Desi_Chrom_110719_109 | Ca_desi_scaffold   | 109                            | [T/A]       | NA                                         |
| Ca_Desi_Chrom_110719_139 | Ca_desi_scaffold   | 139                            | [C/T]       | NA                                         |
| Ca_Desi_Chrom_110719_141 | Ca_desi_scaffold   | 141                            | [A/G]       | NA                                         |

| <b>SNP IDs</b>           | <b>Chromosomes</b> | <b>Physical positions (bp)</b> | <b>SNPs</b> | <b>NCBI SNPdb accession IDs (NCBI_ss#)</b> |
|--------------------------|--------------------|--------------------------------|-------------|--------------------------------------------|
| Ca_Desi_Chrom_110719_144 | Ca_desi_scaffold   | 144                            | [A/G]       | NA                                         |
| Ca_Desi_Chrom_111739_108 | Ca_desi_scaffold   | 108                            | [C/T]       | NA                                         |
| Ca_Desi_Chrom_111895_56  | Ca_desi_scaffold   | 56                             | [C/T]       | NA                                         |
| Ca_Desi_Chrom_111895_93  | Ca_desi_scaffold   | 93                             | [T/A]       | NA                                         |
| Ca_Desi_Chrom_111895_104 | Ca_desi_scaffold   | 104                            | [C/T]       | NA                                         |
| Ca_Desi_Chrom_111895_106 | Ca_desi_scaffold   | 106                            | [A/G]       | NA                                         |
| Ca_Desi_Chrom_111895_243 | Ca_desi_scaffold   | 243                            | [T/C]       | NA                                         |
| Ca_Desi_Chrom_112418_93  | Ca_desi_scaffold   | 93                             | [C/T]       | NA                                         |
| Ca_Desi_Chrom_112418_107 | Ca_desi_scaffold   | 107                            | [A/T]       | NA                                         |
| Ca_Desi_Chrom_112418_110 | Ca_desi_scaffold   | 110                            | [C/T]       | NA                                         |
| Ca_Desi_Chrom_113836_37  | Ca_desi_scaffold   | 37                             | [C/T]       | NA                                         |
| Ca_Desi_Chrom_113836_57  | Ca_desi_scaffold   | 57                             | [A/T]       | NA                                         |
| Ca_Desi_Chrom_115776_70  | Ca_desi_scaffold   | 70                             | [G/A]       | NA                                         |
| Ca_Desi_Chrom_115776_76  | Ca_desi_scaffold   | 76                             | [A/G]       | NA                                         |
| Ca_Desi_Chrom_115776_77  | Ca_desi_scaffold   | 77                             | [G/A]       | NA                                         |
| Ca_Desi_Chrom_115776_82  | Ca_desi_scaffold   | 82                             | [G/A]       | NA                                         |
| Ca_Desi_Chrom_115776_85  | Ca_desi_scaffold   | 85                             | [C/T]       | NA                                         |
| Ca_Desi_Chrom_115776_92  | Ca_desi_scaffold   | 92                             | [T/G]       | NA                                         |
| Ca_Desi_Chrom_115776_100 | Ca_desi_scaffold   | 100                            | [C/T]       | NA                                         |
| Ca_Desi_Chrom_115776_102 | Ca_desi_scaffold   | 102                            | [G/A]       | NA                                         |
| Ca_Desi_Chrom_115776_112 | Ca_desi_scaffold   | 112                            | [A/C]       | NA                                         |
| Ca_Desi_Chrom_115776_115 | Ca_desi_scaffold   | 115                            | [C/T]       | NA                                         |
| Ca_Desi_Chrom_115776_122 | Ca_desi_scaffold   | 122                            | [G/A]       | NA                                         |
| Ca_Desi_Chrom_116165_310 | Ca_desi_scaffold   | 310                            | [A/T]       | NA                                         |
| Ca_Desi_Chrom_116190_101 | Ca_desi_scaffold   | 101                            | [A/C]       | NA                                         |
| Ca_Desi_Chrom_116408_178 | Ca_desi_scaffold   | 178                            | [A/G]       | NA                                         |
| Ca_Desi_Chrom_116408_225 | Ca_desi_scaffold   | 225                            | [T/A]       | NA                                         |
| Ca_Desi_Chrom_117790_191 | Ca_desi_scaffold   | 191                            | [G/A]       | NA                                         |
| Ca_Desi_Chrom_117969_92  | Ca_desi_scaffold   | 92                             | [G/A]       | NA                                         |
| Ca_Desi_Chrom_117969_105 | Ca_desi_scaffold   | 105                            | [A/C]       | NA                                         |
| Ca_Desi_Chrom_118891_107 | Ca_desi_scaffold   | 107                            | [C/A]       | NA                                         |
| Ca_Desi_Chrom_118991_212 | Ca_desi_scaffold   | 212                            | [G/C]       | NA                                         |
| Ca_Desi_Chrom_119257_47  | Ca_desi_scaffold   | 47                             | [A/T]       | NA                                         |
| Ca_Desi_Chrom_119257_67  | Ca_desi_scaffold   | 67                             | [G/A]       | NA                                         |

| <b>SNP IDs</b>           | <b>Chromosomes</b> | <b>Physical positions (bp)</b> | <b>SNPs</b> | <b>NCBI SNPdb accession IDs (NCBI_ss#)</b> |
|--------------------------|--------------------|--------------------------------|-------------|--------------------------------------------|
| Ca_Desi_Chrom_120295_180 | Ca_desi_scaffold   | 180                            | [A/T]       | NA                                         |
| Ca_Desi_Chrom_120685_224 | Ca_desi_scaffold   | 224                            | [A/C]       | NA                                         |
| Ca_Desi_Chrom_125200_63  | Ca_desi_scaffold   | 63                             | [G/A]       | NA                                         |
| Ca_Desi_Chrom_125786_65  | Ca_desi_scaffold   | 65                             | [T/C]       | NA                                         |
| Ca_Desi_Chrom_125786_119 | Ca_desi_scaffold   | 119                            | [C/A]       | NA                                         |
| Ca_Desi_Chrom_127596_152 | Ca_desi_scaffold   | 152                            | [A/G]       | NA                                         |
| Ca_Desi_Chrom_127596_159 | Ca_desi_scaffold   | 159                            | [T/A]       | NA                                         |
| Ca_Desi_Chrom_128341_59  | Ca_desi_scaffold   | 59                             | [T/A]       | NA                                         |
| Ca_Desi_Chrom_128341_62  | Ca_desi_scaffold   | 62                             | [T/C]       | NA                                         |
| Ca_Desi_Chrom_128341_83  | Ca_desi_scaffold   | 83                             | [G/A]       | NA                                         |
| Ca_Desi_Chrom_129541_151 | Ca_desi_scaffold   | 151                            | [C/A]       | NA                                         |
| Ca_Desi_Chrom_129541_155 | Ca_desi_scaffold   | 155                            | [G/C]       | NA                                         |
| Ca_Desi_Chrom_129541_160 | Ca_desi_scaffold   | 160                            | [C/A]       | NA                                         |
| Ca_Desi_Chrom_129541_161 | Ca_desi_scaffold   | 161                            | [C/A]       | NA                                         |
| Ca_Desi_Chrom_129541_167 | Ca_desi_scaffold   | 167                            | [G/T]       | NA                                         |
| Ca_Desi_Chrom_129541_196 | Ca_desi_scaffold   | 196                            | [T/A]       | NA                                         |
| Ca_Desi_Chrom_133605_159 | Ca_desi_scaffold   | 159                            | [A/C]       | NA                                         |
| Ca_Desi_Chrom_133676_62  | Ca_desi_scaffold   | 62                             | [A/C]       | NA                                         |
| Ca_Desi_Chrom_133676_77  | Ca_desi_scaffold   | 77                             | [G/A]       | NA                                         |
| Ca_Desi_Chrom_133676_93  | Ca_desi_scaffold   | 93                             | [T/C]       | NA                                         |
| Ca_Desi_Chrom_133676_122 | Ca_desi_scaffold   | 122                            | [T/A]       | NA                                         |
| Ca_Desi_Chrom_133676_125 | Ca_desi_scaffold   | 125                            | [T/C]       | NA                                         |
| Ca_Desi_Chrom_133676_126 | Ca_desi_scaffold   | 126                            | [G/A]       | NA                                         |
| Ca_Desi_Chrom_133676_127 | Ca_desi_scaffold   | 127                            | [A/G]       | NA                                         |
| Ca_Desi_Chrom_133676_128 | Ca_desi_scaffold   | 128                            | [C/T]       | NA                                         |
| Ca_Desi_Chrom_133676_129 | Ca_desi_scaffold   | 129                            | [C/T]       | NA                                         |
| Ca_Desi_Chrom_133676_130 | Ca_desi_scaffold   | 130                            | [T/C]       | NA                                         |
| Ca_Desi_Chrom_133676_131 | Ca_desi_scaffold   | 131                            | [C/T]       | NA                                         |
| Ca_Desi_Chrom_133676_132 | Ca_desi_scaffold   | 132                            | [A/G]       | NA                                         |
| Ca_Desi_Chrom_133676_133 | Ca_desi_scaffold   | 133                            | [C/T]       | NA                                         |
| Ca_Desi_Chrom_133676_134 | Ca_desi_scaffold   | 134                            | [C/T]       | NA                                         |
| Ca_Desi_Chrom_133676_135 | Ca_desi_scaffold   | 135                            | [C/T]       | NA                                         |
| Ca_Desi_Chrom_133676_136 | Ca_desi_scaffold   | 136                            | [A/G]       | NA                                         |
| Ca_Desi_Chrom_133676_137 | Ca_desi_scaffold   | 137                            | [C/T]       | NA                                         |

| <b>SNP IDs</b>           | <b>Chromosomes</b> | <b>Physical positions (bp)</b> | <b>SNPs</b> | <b>NCBI SNPdb accession IDs (NCBI_ss#)</b> |
|--------------------------|--------------------|--------------------------------|-------------|--------------------------------------------|
| Ca_Desi_Chrom_133676_138 | Ca_desi_scaffold   | 138                            | [A/G]       | NA                                         |
| Ca_Desi_Chrom_133676_139 | Ca_desi_scaffold   | 139                            | [C/T]       | NA                                         |
| Ca_Desi_Chrom_133676_140 | Ca_desi_scaffold   | 140                            | [C/T]       | NA                                         |
| Ca_Desi_Chrom_133676_141 | Ca_desi_scaffold   | 141                            | [T/C]       | NA                                         |
| Ca_Desi_Chrom_133676_142 | Ca_desi_scaffold   | 142                            | [A/G]       | NA                                         |
| Ca_Desi_Chrom_133676_143 | Ca_desi_scaffold   | 143                            | [C/T]       | NA                                         |
| Ca_Desi_Chrom_133676_144 | Ca_desi_scaffold   | 144                            | [T/C]       | NA                                         |
| Ca_Desi_Chrom_133676_145 | Ca_desi_scaffold   | 145                            | [T/C]       | NA                                         |
| Ca_Desi_Chrom_133676_146 | Ca_desi_scaffold   | 146                            | [T/C]       | NA                                         |
| Ca_Desi_Chrom_133676_147 | Ca_desi_scaffold   | 147                            | [T/C]       | NA                                         |
| Ca_Desi_Chrom_133676_148 | Ca_desi_scaffold   | 148                            | [G/T]       | NA                                         |
| Ca_Desi_Chrom_133676_149 | Ca_desi_scaffold   | 149                            | [T/C]       | NA                                         |
| Ca_Desi_Chrom_133676_150 | Ca_desi_scaffold   | 150                            | [T/C]       | NA                                         |
| Ca_Desi_Chrom_133676_151 | Ca_desi_scaffold   | 151                            | [A/G]       | NA                                         |
| Ca_Desi_Chrom_133676_152 | Ca_desi_scaffold   | 152                            | [G/A]       | NA                                         |
| Ca_Desi_Chrom_133676_153 | Ca_desi_scaffold   | 153                            | [A/G]       | NA                                         |
| Ca_Desi_Chrom_133676_154 | Ca_desi_scaffold   | 154                            | [T/C]       | NA                                         |
| Ca_Desi_Chrom_133676_155 | Ca_desi_scaffold   | 155                            | [A/G]       | NA                                         |
| Ca_Desi_Chrom_133676_156 | Ca_desi_scaffold   | 156                            | [C/T]       | NA                                         |
| Ca_Desi_Chrom_133676_157 | Ca_desi_scaffold   | 157                            | [C/T]       | NA                                         |
| Ca_Desi_Chrom_133676_158 | Ca_desi_scaffold   | 158                            | [A/G]       | NA                                         |
| Ca_Desi_Chrom_133676_159 | Ca_desi_scaffold   | 159                            | [A/G]       | NA                                         |
| Ca_Desi_Chrom_133676_160 | Ca_desi_scaffold   | 160                            | [T/C]       | NA                                         |
| Ca_Desi_Chrom_133676_161 | Ca_desi_scaffold   | 161                            | [C/T]       | NA                                         |
| Ca_Desi_Chrom_133676_162 | Ca_desi_scaffold   | 162                            | [A/G]       | NA                                         |
| Ca_Desi_Chrom_133676_164 | Ca_desi_scaffold   | 164                            | [G/A]       | NA                                         |
| Ca_Desi_Chrom_133676_165 | Ca_desi_scaffold   | 165                            | [G/A]       | NA                                         |
| Ca_Desi_Chrom_133676_166 | Ca_desi_scaffold   | 166                            | [G/A]       | NA                                         |
| Ca_Desi_Chrom_133676_167 | Ca_desi_scaffold   | 167                            | [C/T]       | NA                                         |
| Ca_Desi_Chrom_133676_168 | Ca_desi_scaffold   | 168                            | [T/C]       | NA                                         |
| Ca_Desi_Chrom_133676_169 | Ca_desi_scaffold   | 169                            | [G/A]       | NA                                         |
| Ca_Desi_Chrom_133676_170 | Ca_desi_scaffold   | 170                            | [A/G]       | NA                                         |
| Ca_Desi_Chrom_133676_171 | Ca_desi_scaffold   | 171                            | [T/C]       | NA                                         |
| Ca_Desi_Chrom_133676_172 | Ca_desi_scaffold   | 172                            | [T/C]       | NA                                         |

| <b>SNP IDs</b>           | <b>Chromosomes</b> | <b>Physical positions (bp)</b> | <b>SNPs</b> | <b>NCBI SNPdb accession IDs (NCBI_ss#)</b> |
|--------------------------|--------------------|--------------------------------|-------------|--------------------------------------------|
| Ca_Desi_Chrom_133676_173 | Ca_desi_scaffold   | 173                            | [C/T]       | NA                                         |
| Ca_Desi_Chrom_133676_174 | Ca_desi_scaffold   | 174                            | [A/G]       | NA                                         |
| Ca_Desi_Chrom_133676_175 | Ca_desi_scaffold   | 175                            | [C/T]       | NA                                         |
| Ca_Desi_Chrom_133676_176 | Ca_desi_scaffold   | 176                            | [G/A]       | NA                                         |
| Ca_Desi_Chrom_133676_177 | Ca_desi_scaffold   | 177                            | [T/C]       | NA                                         |
| Ca_Desi_Chrom_133676_178 | Ca_desi_scaffold   | 178                            | [C/T]       | NA                                         |
| Ca_Desi_Chrom_133676_179 | Ca_desi_scaffold   | 179                            | [T/C]       | NA                                         |
| Ca_Desi_Chrom_133676_180 | Ca_desi_scaffold   | 180                            | [G/A]       | NA                                         |
| Ca_Desi_Chrom_133676_181 | Ca_desi_scaffold   | 181                            | [G/A]       | NA                                         |
| Ca_Desi_Chrom_133676_184 | Ca_desi_scaffold   | 184                            | [T/C]       | NA                                         |
| Ca_Desi_Chrom_136434_198 | Ca_desi_scaffold   | 198                            | [C/G]       | NA                                         |
| Ca_Desi_Chrom_136434_214 | Ca_desi_scaffold   | 214                            | [C/T]       | NA                                         |
| Ca_Desi_Chrom_136434_216 | Ca_desi_scaffold   | 216                            | [T/C]       | NA                                         |
| Ca_Desi_Chrom_136434_219 | Ca_desi_scaffold   | 219                            | [G/T]       | NA                                         |
| Ca_Desi_Chrom_136434_221 | Ca_desi_scaffold   | 221                            | [C/A]       | NA                                         |
| Ca_Desi_Chrom_136434_225 | Ca_desi_scaffold   | 225                            | [G/T]       | NA                                         |
| Ca_Desi_Chrom_136434_230 | Ca_desi_scaffold   | 230                            | [G/A]       | NA                                         |
| Ca_Desi_Chrom_136434_231 | Ca_desi_scaffold   | 231                            | [G/A]       | NA                                         |
| Ca_Desi_Chrom_136434_240 | Ca_desi_scaffold   | 240                            | [C/G]       | NA                                         |
| Ca_Desi_Chrom_136434_249 | Ca_desi_scaffold   | 249                            | [T/G]       | NA                                         |
| Ca_Desi_Chrom_136434_255 | Ca_desi_scaffold   | 255                            | [A/T]       | NA                                         |
| Ca_Desi_Chrom_139678_222 | Ca_desi_scaffold   | 222                            | [T/C]       | NA                                         |
| Ca_Desi_Chrom_141681_74  | Ca_desi_scaffold   | 74                             | [G/C]       | NA                                         |
| Ca_Desi_Chrom_142937_105 | Ca_desi_scaffold   | 105                            | [T/A]       | NA                                         |
| Ca_Desi_Chrom_142937_111 | Ca_desi_scaffold   | 111                            | [C/A]       | NA                                         |
| Ca_Desi_Chrom_142937_131 | Ca_desi_scaffold   | 131                            | [C/T]       | NA                                         |
| Ca_Desi_Chrom_142937_139 | Ca_desi_scaffold   | 139                            | [T/A]       | NA                                         |
| Ca_Desi_Chrom_142937_144 | Ca_desi_scaffold   | 144                            | [G/A]       | NA                                         |
| Ca_Desi_Chrom_143604_130 | Ca_desi_scaffold   | 130                            | [C/A]       | NA                                         |
| Ca_Desi_Chrom_145542_60  | Ca_desi_scaffold   | 60                             | [T/C]       | NA                                         |
| Ca_Desi_Chrom_145542_61  | Ca_desi_scaffold   | 61                             | [C/T]       | NA                                         |
| Ca_Desi_Chrom_145542_63  | Ca_desi_scaffold   | 63                             | [T/C]       | NA                                         |
| Ca_Desi_Chrom_146944_95  | Ca_desi_scaffold   | 95                             | [A/G]       | NA                                         |
| Ca_Desi_Chrom_146944_104 | Ca_desi_scaffold   | 104                            | [T/C]       | NA                                         |

| <b>SNP IDs</b>           | <b>Chromosomes</b> | <b>Physical positions (bp)</b> | <b>SNPs</b> | <b>NCBI SNPdb accession IDs (NCBI_ss#)</b> |
|--------------------------|--------------------|--------------------------------|-------------|--------------------------------------------|
| Ca_Desi_Chrom_146944_105 | Ca_desi_scaffold   | 105                            | [T/C]       | NA                                         |
| Ca_Desi_Chrom_146944_106 | Ca_desi_scaffold   | 106                            | [T/C]       | NA                                         |
| Ca_Desi_Chrom_146944_109 | Ca_desi_scaffold   | 109                            | [T/C]       | NA                                         |
| Ca_Desi_Chrom_146944_112 | Ca_desi_scaffold   | 112                            | [T/C]       | NA                                         |
| Ca_Desi_Chrom_146944_116 | Ca_desi_scaffold   | 116                            | [T/C]       | NA                                         |
| Ca_Desi_Chrom_146944_128 | Ca_desi_scaffold   | 128                            | [A/G]       | NA                                         |
| Ca_Desi_Chrom_146944_135 | Ca_desi_scaffold   | 135                            | [T/G]       | NA                                         |
| Ca_Desi_Chrom_146944_137 | Ca_desi_scaffold   | 137                            | [C/T]       | NA                                         |
| Ca_Desi_Chrom_146944_138 | Ca_desi_scaffold   | 138                            | [T/C]       | NA                                         |
| Ca_Desi_Chrom_146944_141 | Ca_desi_scaffold   | 141                            | [T/C]       | NA                                         |
| Ca_Desi_Chrom_146944_143 | Ca_desi_scaffold   | 143                            | [A/G]       | NA                                         |
| Ca_Desi_Chrom_146944_146 | Ca_desi_scaffold   | 146                            | [T/C]       | NA                                         |
| Ca_Desi_Chrom_147183_54  | Ca_desi_scaffold   | 54                             | [A/T]       | NA                                         |
| Ca_Desi_Chrom_148778_96  | Ca_desi_scaffold   | 96                             | [T/C]       | NA                                         |
| Ca_Desi_Chrom_148778_98  | Ca_desi_scaffold   | 98                             | [C/T]       | NA                                         |
| Ca_Desi_Chrom_148778_99  | Ca_desi_scaffold   | 99                             | [A/G]       | NA                                         |
| Ca_Desi_Chrom_148778_102 | Ca_desi_scaffold   | 102                            | [T/C]       | NA                                         |
| Ca_Desi_Chrom_148778_103 | Ca_desi_scaffold   | 103                            | [A/G]       | NA                                         |
| Ca_Desi_Chrom_148778_104 | Ca_desi_scaffold   | 104                            | [T/C]       | NA                                         |
| Ca_Desi_Chrom_148778_106 | Ca_desi_scaffold   | 106                            | [A/G]       | NA                                         |
| Ca_Desi_Chrom_148778_108 | Ca_desi_scaffold   | 108                            | [A/G]       | NA                                         |
| Ca_Desi_Chrom_148778_109 | Ca_desi_scaffold   | 109                            | [A/G]       | NA                                         |
| Ca_Desi_Chrom_148778_110 | Ca_desi_scaffold   | 110                            | [T/C]       | NA                                         |
| Ca_Desi_Chrom_148778_111 | Ca_desi_scaffold   | 111                            | [G/A]       | NA                                         |
| Ca_Desi_Chrom_148778_112 | Ca_desi_scaffold   | 112                            | [A/G]       | NA                                         |
| Ca_Desi_Chrom_148778_113 | Ca_desi_scaffold   | 113                            | [T/C]       | NA                                         |
| Ca_Desi_Chrom_148778_114 | Ca_desi_scaffold   | 114                            | [G/A]       | NA                                         |
| Ca_Desi_Chrom_148778_116 | Ca_desi_scaffold   | 116                            | [A/G]       | NA                                         |
| Ca_Desi_Chrom_148778_117 | Ca_desi_scaffold   | 117                            | [T/C]       | NA                                         |
| Ca_Desi_Chrom_148778_119 | Ca_desi_scaffold   | 119                            | [A/G]       | NA                                         |
| Ca_Desi_Chrom_148778_128 | Ca_desi_scaffold   | 128                            | [G/A]       | NA                                         |
| Ca_Desi_Chrom_148778_129 | Ca_desi_scaffold   | 129                            | [T/C]       | NA                                         |
| Ca_Desi_Chrom_148778_130 | Ca_desi_scaffold   | 130                            | [A/G]       | NA                                         |
| Ca_Desi_Chrom_148778_131 | Ca_desi_scaffold   | 131                            | [T/C]       | NA                                         |

| <b>SNP IDs</b>           | <b>Chromosomes</b> | <b>Physical positions (bp)</b> | <b>SNPs</b> | <b>NCBI SNPdb accession IDs (NCBI_ss#)</b> |
|--------------------------|--------------------|--------------------------------|-------------|--------------------------------------------|
| Ca_Desi_Chrom_148778_132 | Ca_desi_scaffold   | 132                            | [C/T]       | NA                                         |
| Ca_Desi_Chrom_148778_133 | Ca_desi_scaffold   | 133                            | [G/A]       | NA                                         |
| Ca_Desi_Chrom_148778_134 | Ca_desi_scaffold   | 134                            | [G/A]       | NA                                         |
| Ca_Desi_Chrom_148778_135 | Ca_desi_scaffold   | 135                            | [A/G]       | NA                                         |
| Ca_Desi_Chrom_148778_138 | Ca_desi_scaffold   | 138                            | [A/G]       | NA                                         |
| Ca_Desi_Chrom_148778_140 | Ca_desi_scaffold   | 140                            | [T/G]       | NA                                         |
| Ca_Desi_Chrom_148778_141 | Ca_desi_scaffold   | 141                            | [T/C]       | NA                                         |
| Ca_Desi_Chrom_148778_142 | Ca_desi_scaffold   | 142                            | [T/C]       | NA                                         |
| Ca_Desi_Chrom_148778_143 | Ca_desi_scaffold   | 143                            | [C/T]       | NA                                         |
| Ca_Desi_Chrom_148778_144 | Ca_desi_scaffold   | 144                            | [A/G]       | NA                                         |
| Ca_Desi_Chrom_148778_146 | Ca_desi_scaffold   | 146                            | [C/T]       | NA                                         |
| Ca_Desi_Chrom_148778_147 | Ca_desi_scaffold   | 147                            | [T/C]       | NA                                         |
| Ca_Desi_Chrom_148778_148 | Ca_desi_scaffold   | 148                            | [G/A]       | NA                                         |
| Ca_Desi_Chrom_148778_149 | Ca_desi_scaffold   | 149                            | [A/G]       | NA                                         |
| Ca_Desi_Chrom_148778_150 | Ca_desi_scaffold   | 150                            | [T/C]       | NA                                         |
| Ca_Desi_Chrom_148778_152 | Ca_desi_scaffold   | 152                            | [T/C]       | NA                                         |
| Ca_Desi_Chrom_148778_153 | Ca_desi_scaffold   | 153                            | [A/G]       | NA                                         |
| Ca_Desi_Chrom_148778_155 | Ca_desi_scaffold   | 155                            | [C/G]       | NA                                         |
| Ca_Desi_Chrom_149053_186 | Ca_desi_scaffold   | 186                            | [T/C]       | NA                                         |
| Ca_Desi_Chrom_150206_164 | Ca_desi_scaffold   | 164                            | [G/A]       | NA                                         |
| Ca_Desi_Chrom_150206_166 | Ca_desi_scaffold   | 166                            | [C/T]       | NA                                         |
| Ca_Desi_Chrom_152888_35  | Ca_desi_scaffold   | 35                             | [T/A]       | NA                                         |
| Ca_Desi_Chrom_152888_59  | Ca_desi_scaffold   | 59                             | [C/T]       | NA                                         |
| Ca_Desi_Chrom_152888_61  | Ca_desi_scaffold   | 61                             | [C/T]       | NA                                         |
| Ca_Desi_Chrom_152888_62  | Ca_desi_scaffold   | 62                             | [C/T]       | NA                                         |
| Ca_Desi_Chrom_152888_63  | Ca_desi_scaffold   | 63                             | [T/C]       | NA                                         |
| Ca_Desi_Chrom_152888_65  | Ca_desi_scaffold   | 65                             | [C/T]       | NA                                         |
| Ca_Desi_Chrom_152888_66  | Ca_desi_scaffold   | 66                             | [A/C]       | NA                                         |
| Ca_Desi_Chrom_152888_67  | Ca_desi_scaffold   | 67                             | [G/T]       | NA                                         |
| Ca_Desi_Chrom_152888_84  | Ca_desi_scaffold   | 84                             | [C/A]       | NA                                         |
| Ca_Desi_Chrom_153453_224 | Ca_desi_scaffold   | 224                            | [G/A]       | NA                                         |
| Ca_Desi_Chrom_153496_166 | Ca_desi_scaffold   | 166                            | [T/G]       | NA                                         |
| Ca_Desi_Chrom_153496_175 | Ca_desi_scaffold   | 175                            | [A/G]       | NA                                         |
| Ca_Desi_Chrom_153496_177 | Ca_desi_scaffold   | 177                            | [A/G]       | NA                                         |

| <b>SNP IDs</b>           | <b>Chromosomes</b> | <b>Physical positions (bp)</b> | <b>SNPs</b> | <b>NCBI SNPdb accession IDs (NCBI_ss#)</b> |
|--------------------------|--------------------|--------------------------------|-------------|--------------------------------------------|
| Ca_Desi_Chrom_153496_179 | Ca_desi_scaffold   | 179                            | [T/G]       | NA                                         |
| Ca_Desi_Chrom_154087_152 | Ca_desi_scaffold   | 152                            | [G/A]       | NA                                         |
| Ca_Desi_Chrom_154087_164 | Ca_desi_scaffold   | 164                            | [A/C]       | NA                                         |
| Ca_Desi_Chrom_154087_169 | Ca_desi_scaffold   | 169                            | [T/A]       | NA                                         |
| Ca_Desi_Chrom_154087_177 | Ca_desi_scaffold   | 177                            | [G/C]       | NA                                         |
| Ca_Desi_Chrom_154772_43  | Ca_desi_scaffold   | 43                             | [T/G]       | NA                                         |
| Ca_Desi_Chrom_156427_47  | Ca_desi_scaffold   | 47                             | [A/G]       | NA                                         |
| Ca_Desi_Chrom_156427_50  | Ca_desi_scaffold   | 50                             | [T/C]       | NA                                         |
| Ca_Desi_Chrom_156427_56  | Ca_desi_scaffold   | 56                             | [T/C]       | NA                                         |
| Ca_Desi_Chrom_156427_57  | Ca_desi_scaffold   | 57                             | [T/C]       | NA                                         |
| Ca_Desi_Chrom_156427_59  | Ca_desi_scaffold   | 59                             | [A/G]       | NA                                         |
| Ca_Desi_Chrom_156427_61  | Ca_desi_scaffold   | 61                             | [A/G]       | NA                                         |
| Ca_Desi_Chrom_156427_64  | Ca_desi_scaffold   | 64                             | [C/A]       | NA                                         |
| Ca_Desi_Chrom_156427_65  | Ca_desi_scaffold   | 65                             | [A/G]       | NA                                         |
| Ca_Desi_Chrom_156427_66  | Ca_desi_scaffold   | 66                             | [C/T]       | NA                                         |
| Ca_Desi_Chrom_156427_69  | Ca_desi_scaffold   | 69                             | [A/G]       | NA                                         |
| Ca_Desi_Chrom_156427_73  | Ca_desi_scaffold   | 73                             | [T/G]       | NA                                         |
| Ca_Desi_Chrom_156427_74  | Ca_desi_scaffold   | 74                             | [T/C]       | NA                                         |
| Ca_Desi_Chrom_156427_79  | Ca_desi_scaffold   | 79                             | [T/C]       | NA                                         |
| Ca_Desi_Chrom_157946_101 | Ca_desi_scaffold   | 101                            | [A/G]       | NA                                         |
| Ca_Desi_Chrom_158858_42  | Ca_desi_scaffold   | 42                             | [G/A]       | NA                                         |
| Ca_Desi_Chrom_158858_67  | Ca_desi_scaffold   | 67                             | [A/C]       | NA                                         |
| Ca_Desi_Chrom_159578_26  | Ca_desi_scaffold   | 26                             | [C/T]       | NA                                         |
| Ca_Desi_Chrom_159763_158 | Ca_desi_scaffold   | 158                            | [A/G]       | NA                                         |
| Ca_Desi_Chrom_161361_7   | Ca_desi_scaffold   | 7                              | [G/A]       | NA                                         |
| Ca_Desi_Chrom_161361_18  | Ca_desi_scaffold   | 18                             | [T/C]       | NA                                         |
| Ca_Desi_Chrom_161361_37  | Ca_desi_scaffold   | 37                             | [A/T]       | NA                                         |
| Ca_Desi_Chrom_162436_83  | Ca_desi_scaffold   | 83                             | [G/A]       | NA                                         |
| Ca_Desi_Chrom_162436_97  | Ca_desi_scaffold   | 97                             | [C/A]       | NA                                         |
| Ca_Desi_Chrom_162436_104 | Ca_desi_scaffold   | 104                            | [A/G]       | NA                                         |
| Ca_Desi_Chrom_162436_125 | Ca_desi_scaffold   | 125                            | [G/A]       | NA                                         |
| Ca_Desi_Chrom_166028_38  | Ca_desi_scaffold   | 38                             | [T/C]       | NA                                         |
| Ca_Desi_Chrom_166028_68  | Ca_desi_scaffold   | 68                             | [T/C]       | NA                                         |
| Ca_Desi_Chrom_166028_76  | Ca_desi_scaffold   | 76                             | [C/A]       | NA                                         |



| <b>SNP IDs</b>           | <b>Chromosomes</b> | <b>Physical positions (bp)</b> | <b>SNPs</b> | <b>NCBI SNPdb accession IDs (NCBI_ss#)</b> |
|--------------------------|--------------------|--------------------------------|-------------|--------------------------------------------|
| Ca_Desi_Chrom_166028_77  | Ca_desi_scaffold   | 77                             | [T/A]       | NA                                         |
| Ca_Desi_Chrom_166028_78  | Ca_desi_scaffold   | 78                             | [T/A]       | NA                                         |
| Ca_Desi_Chrom_166028_79  | Ca_desi_scaffold   | 79                             | [C/T]       | NA                                         |
| Ca_Desi_Chrom_167967_67  | Ca_desi_scaffold   | 67                             | [T/C]       | NA                                         |
| Ca_Desi_Chrom_167967_78  | Ca_desi_scaffold   | 78                             | [T/C]       | NA                                         |
| Ca_Desi_Chrom_167967_81  | Ca_desi_scaffold   | 81                             | [G/A]       | NA                                         |
| Ca_Desi_Chrom_167967_112 | Ca_desi_scaffold   | 112                            | [A/G]       | NA                                         |
| Ca_Desi_Chrom_167967_118 | Ca_desi_scaffold   | 118                            | [A/G]       | NA                                         |
| Ca_Desi_Chrom_169625_23  | Ca_desi_scaffold   | 23                             | [C/T]       | NA                                         |
| Ca_Desi_Chrom_169625_68  | Ca_desi_scaffold   | 68                             | [A/G]       | NA                                         |
| Ca_Desi_Chrom_169625_69  | Ca_desi_scaffold   | 69                             | [A/G]       | NA                                         |

**Table S3: 3625 and 2177 high-quality SNPs (MAF >20%) identified by reference *desi* and *kabuli* genome-based GBS assay, respectively mapped on ultra-high density intra-specific genetic linkage maps of chickpea**

| SNP IDs       | SNPs  | Linkage Group (LGs) | Genetic positions (cM) of mapped SNPs |
|---------------|-------|---------------------|---------------------------------------|
| Ca_Desi_SNP1  | [T/C] | Ca_Desi_LG01        | 0.000                                 |
| Ca_Desi_SNP2  | [C/G] | Ca_Desi_LG01        | 0.146                                 |
| Ca_Desi_SNP3  | [C/T] | Ca_Desi_LG01        | 0.559                                 |
| Ca_Desi_SNP4  | [A/C] | Ca_Desi_LG01        | 0.856                                 |
| Ca_Desi_SNP5  | [A/G] | Ca_Desi_LG01        | 0.923                                 |
| Ca_Desi_SNP6  | [G/T] | Ca_Desi_LG01        | 1.215                                 |
| Ca_Desi_SNP7  | [A/C] | Ca_Desi_LG01        | 2.584                                 |
| Ca_Desi_SNP8  | [C/T] | Ca_Desi_LG01        | 2.603                                 |
| Ca_Desi_SNP9  | [G/C] | Ca_Desi_LG01        | 3.543                                 |
| Ca_Desi_SNP10 | [T/G] | Ca_Desi_LG01        | 4.062                                 |
| Ca_Desi_SNP11 | [A/C] | Ca_Desi_LG01        | 4.585                                 |
| Ca_Desi_SNP12 | [T/G] | Ca_Desi_LG01        | 5.086                                 |
| Ca_Desi_SNP13 | [A/G] | Ca_Desi_LG01        | 5.238                                 |
| Ca_Desi_SNP14 | [C/A] | Ca_Desi_LG01        | 5.410                                 |
| Ca_Desi_SNP15 | [A/T] | Ca_Desi_LG01        | 5.540                                 |
| Ca_Desi_SNP16 | [T/C] | Ca_Desi_LG01        | 5.562                                 |
| Ca_Desi_SNP17 | [T/C] | Ca_Desi_LG01        | 7.518                                 |
| Ca_Desi_SNP18 | [C/T] | Ca_Desi_LG01        | 7.553                                 |
| Ca_Desi_SNP19 | [C/A] | Ca_Desi_LG01        | 8.101                                 |
| Ca_Desi_SNP20 | [A/C] | Ca_Desi_LG01        | 8.356                                 |
| Ca_Desi_SNP21 | [T/C] | Ca_Desi_LG01        | 8.403                                 |
| Ca_Desi_SNP22 | [A/G] | Ca_Desi_LG01        | 8.844                                 |
| Ca_Desi_SNP23 | [C/A] | Ca_Desi_LG01        | 9.458                                 |
| Ca_Desi_SNP24 | [T/C] | Ca_Desi_LG01        | 9.870                                 |
| Ca_Desi_SNP25 | [T/G] | Ca_Desi_LG01        | 10.180                                |
| Ca_Desi_SNP26 | [T/G] | Ca_Desi_LG01        | 10.209                                |
| Ca_Desi_SNP27 | [T/C] | Ca_Desi_LG01        | 10.570                                |

| <b>SNP IDs</b> | <b>SNPs</b> | <b>Linkage Group (LGs)</b> | <b>Genetic positions (cM) of mapped SNPs</b> |
|----------------|-------------|----------------------------|----------------------------------------------|
| Ca_Desi_SNP28  | [T/C]       | Ca_Desi_LG01               | 10.835                                       |
| Ca_Desi_SNP29  | [T/G]       | Ca_Desi_LG01               | 10.862                                       |
| Ca_Desi_SNP30  | [A/G]       | Ca_Desi_LG01               | 12.036                                       |
| Ca_Desi_SNP31  | [A/C]       | Ca_Desi_LG01               | 12.317                                       |
| Ca_Desi_SNP32  | [T/C]       | Ca_Desi_LG01               | 12.508                                       |
| Ca_Desi_SNP33  | [T/C]       | Ca_Desi_LG01               | 12.618                                       |
| Ca_Desi_SNP34  | [T/C]       | Ca_Desi_LG01               | 12.694                                       |
| Ca_Desi_SNP35  | [T/G]       | Ca_Desi_LG01               | 13.178                                       |
| Ca_Desi_SNP36  | [T/C]       | Ca_Desi_LG01               | 13.207                                       |
| Ca_Desi_SNP37  | [T/G]       | Ca_Desi_LG01               | 13.525                                       |
| Ca_Desi_SNP38  | [T/C]       | Ca_Desi_LG01               | 13.649                                       |
| Ca_Desi_SNP39  | [A/G]       | Ca_Desi_LG01               | 13.710                                       |
| Ca_Desi_SNP40  | [A/G]       | Ca_Desi_LG01               | 13.733                                       |
| Ca_Desi_SNP41  | [T/C]       | Ca_Desi_LG01               | 13.930                                       |
| Ca_Desi_SNP42  | [G/A]       | Ca_Desi_LG01               | 14.480                                       |
| Ca_Desi_SNP43  | [A/G]       | Ca_Desi_LG01               | 15.473                                       |
| Ca_Desi_SNP44  | [T/A]       | Ca_Desi_LG01               | 15.641                                       |
| Ca_Desi_SNP45  | [C/T]       | Ca_Desi_LG01               | 15.646                                       |
| Ca_Desi_SNP46  | [A/T]       | Ca_Desi_LG01               | 15.953                                       |
| Ca_Desi_SNP47  | [T/C]       | Ca_Desi_LG01               | 16.168                                       |
| Ca_Desi_SNP48  | [C/A]       | Ca_Desi_LG01               | 16.247                                       |
| Ca_Desi_SNP49  | [A/C]       | Ca_Desi_LG01               | 16.247                                       |
| Ca_Desi_SNP50  | [A/G]       | Ca_Desi_LG01               | 16.385                                       |
| Ca_Desi_SNP51  | [G/T]       | Ca_Desi_LG01               | 16.460                                       |
| Ca_Desi_SNP52  | [C/T]       | Ca_Desi_LG01               | 16.521                                       |
| Ca_Desi_SNP53  | [T/G]       | Ca_Desi_LG01               | 16.666                                       |
| Ca_Desi_SNP54  | [A/C]       | Ca_Desi_LG01               | 16.737                                       |
| Ca_Desi_SNP55  | [C/A]       | Ca_Desi_LG01               | 16.820                                       |
| Ca_Desi_SNP56  | [A/G]       | Ca_Desi_LG01               | 16.833                                       |
| Ca_Desi_SNP57  | [G/A]       | Ca_Desi_LG01               | 17.345                                       |
| Ca_Desi_SNP58  | [A/T]       | Ca_Desi_LG01               | 17.452                                       |

| <b>SNP IDs</b> | <b>SNPs</b> | <b>Linkage Group (LGs)</b> | <b>Genetic positions (cM) of mapped SNPs</b> |
|----------------|-------------|----------------------------|----------------------------------------------|
| Ca_Desi_SNP59  | [T/C]       | Ca_Desi_LG01               | 17.519                                       |
| Ca_Desi_SNP60  | [A/C]       | Ca_Desi_LG01               | 17.522                                       |
| Ca_Desi_SNP61  | [G/T]       | Ca_Desi_LG01               | 18.048                                       |
| Ca_Desi_SNP62  | [A/G]       | Ca_Desi_LG01               | 18.485                                       |
| Ca_Desi_SNP63  | [G/T]       | Ca_Desi_LG01               | 18.616                                       |
| Ca_Desi_SNP64  | [T/C]       | Ca_Desi_LG01               | 18.686                                       |
| Ca_Desi_SNP65  | [T/G]       | Ca_Desi_LG01               | 18.796                                       |
| Ca_Desi_SNP66  | [A/G]       | Ca_Desi_LG01               | 19.017                                       |
| Ca_Desi_SNP67  | [T/C]       | Ca_Desi_LG01               | 19.215                                       |
| Ca_Desi_SNP68  | [T/G]       | Ca_Desi_LG01               | 19.319                                       |
| Ca_Desi_SNP69  | [G/C]       | Ca_Desi_LG01               | 19.335                                       |
| Ca_Desi_SNP70  | [T/C]       | Ca_Desi_LG01               | 19.570                                       |
| Ca_Desi_SNP71  | [C/T]       | Ca_Desi_LG01               | 19.738                                       |
| Ca_Desi_SNP72  | [G/A]       | Ca_Desi_LG01               | 19.751                                       |
| Ca_Desi_SNP73  | [A/G]       | Ca_Desi_LG01               | 20.095                                       |
| Ca_Desi_SNP74  | [A/G]       | Ca_Desi_LG01               | 20.246                                       |
| Ca_Desi_SNP75  | [A/C]       | Ca_Desi_LG01               | 20.251                                       |
| Ca_Desi_SNP76  | [A/G]       | Ca_Desi_LG01               | 20.446                                       |
| Ca_Desi_SNP77  | [G/C]       | Ca_Desi_LG01               | 20.499                                       |
| Ca_Desi_SNP78  | [A/G]       | Ca_Desi_LG01               | 20.697                                       |
| Ca_Desi_SNP79  | [C/A]       | Ca_Desi_LG01               | 20.789                                       |
| Ca_Desi_SNP80  | [A/G]       | Ca_Desi_LG01               | 20.876                                       |
| Ca_Desi_SNP81  | [C/T]       | Ca_Desi_LG01               | 20.950                                       |
| Ca_Desi_SNP82  | [T/C]       | Ca_Desi_LG01               | 21.033                                       |
| Ca_Desi_SNP83  | [A/G]       | Ca_Desi_LG01               | 21.062                                       |
| Ca_Desi_SNP84  | [T/C]       | Ca_Desi_LG01               | 21.063                                       |
| Ca_Desi_SNP85  | [T/C]       | Ca_Desi_LG01               | 21.137                                       |
| Ca_Desi_SNP86  | [T/G]       | Ca_Desi_LG01               | 21.157                                       |
| Ca_Desi_SNP87  | [T/G]       | Ca_Desi_LG01               | 21.184                                       |
| Ca_Desi_SNP88  | [C/A]       | Ca_Desi_LG01               | 21.275                                       |
| Ca_Desi_SNP89  | [T/C]       | Ca_Desi_LG01               | 21.376                                       |

| <b>SNP IDs</b> | <b>SNPs</b> | <b>Linkage Group (LGs)</b> | <b>Genetic positions (cM) of mapped SNPs</b> |
|----------------|-------------|----------------------------|----------------------------------------------|
| Ca_Desi_SNP90  | [A/C]       | Ca_Desi_LG01               | 21.388                                       |
| Ca_Desi_SNP91  | [G/C]       | Ca_Desi_LG01               | 21.590                                       |
| Ca_Desi_SNP92  | [A/G]       | Ca_Desi_LG01               | 21.631                                       |
| Ca_Desi_SNP93  | [T/G]       | Ca_Desi_LG01               | 21.779                                       |
| Ca_Desi_SNP94  | [G/T]       | Ca_Desi_LG01               | 22.083                                       |
| Ca_Desi_SNP95  | [T/C]       | Ca_Desi_LG01               | 22.101                                       |
| Ca_Desi_SNP96  | [G/T]       | Ca_Desi_LG01               | 22.270                                       |
| Ca_Desi_SNP97  | [A/C]       | Ca_Desi_LG01               | 22.343                                       |
| Ca_Desi_SNP98  | [T/G]       | Ca_Desi_LG01               | 22.501                                       |
| Ca_Desi_SNP99  | [C/T]       | Ca_Desi_LG01               | 22.503                                       |
| Ca_Desi_SNP100 | [G/T]       | Ca_Desi_LG01               | 22.516                                       |
| Ca_Desi_SNP101 | [G/T]       | Ca_Desi_LG01               | 22.550                                       |
| Ca_Desi_SNP102 | [A/G]       | Ca_Desi_LG01               | 22.554                                       |
| Ca_Desi_SNP103 | [A/C]       | Ca_Desi_LG01               | 22.645                                       |
| Ca_Desi_SNP104 | [T/C]       | Ca_Desi_LG01               | 22.695                                       |
| Ca_Desi_SNP105 | [G/C]       | Ca_Desi_LG01               | 22.775                                       |
| Ca_Desi_SNP106 | [C/T]       | Ca_Desi_LG01               | 22.854                                       |
| Ca_Desi_SNP107 | [A/G]       | Ca_Desi_LG01               | 22.861                                       |
| Ca_Desi_SNP108 | [A/G]       | Ca_Desi_LG01               | 22.911                                       |
| Ca_Desi_SNP109 | [C/G]       | Ca_Desi_LG01               | 22.938                                       |
| Ca_Desi_SNP110 | [A/C]       | Ca_Desi_LG01               | 23.190                                       |
| Ca_Desi_SNP111 | [A/C]       | Ca_Desi_LG01               | 23.224                                       |
| Ca_Desi_SNP112 | [A/C]       | Ca_Desi_LG01               | 23.297                                       |
| Ca_Desi_SNP113 | [T/C]       | Ca_Desi_LG01               | 23.469                                       |
| Ca_Desi_SNP114 | [G/A]       | Ca_Desi_LG01               | 23.498                                       |
| Ca_Desi_SNP115 | [G/A]       | Ca_Desi_LG01               | 23.577                                       |
| Ca_Desi_SNP116 | [A/C]       | Ca_Desi_LG01               | 23.580                                       |
| Ca_Desi_SNP117 | [C/T]       | Ca_Desi_LG01               | 23.647                                       |
| Ca_Desi_SNP118 | [A/G]       | Ca_Desi_LG01               | 23.756                                       |
| Ca_Desi_SNP119 | [G/A]       | Ca_Desi_LG01               | 23.826                                       |
| Ca_Desi_SNP120 | [T/C]       | Ca_Desi_LG01               | 23.840                                       |

| <b>SNP IDs</b> | <b>SNPs</b> | <b>Linkage Group (LGs)</b> | <b>Genetic positions (cM) of mapped SNPs</b> |
|----------------|-------------|----------------------------|----------------------------------------------|
| Ca_Desi_SNP121 | [G/T]       | Ca_Desi_LG01               | 23.886                                       |
| Ca_Desi_SNP122 | [T/C]       | Ca_Desi_LG01               | 24.023                                       |
| Ca_Desi_SNP123 | [C/T]       | Ca_Desi_LG01               | 24.050                                       |
| Ca_Desi_SNP124 | [T/G]       | Ca_Desi_LG01               | 24.127                                       |
| Ca_Desi_SNP125 | [T/C]       | Ca_Desi_LG01               | 24.187                                       |
| Ca_Desi_SNP126 | [A/G]       | Ca_Desi_LG01               | 24.256                                       |
| Ca_Desi_SNP127 | [A/C]       | Ca_Desi_LG01               | 24.391                                       |
| Ca_Desi_SNP128 | [C/T]       | Ca_Desi_LG01               | 24.501                                       |
| Ca_Desi_SNP129 | [C/A]       | Ca_Desi_LG01               | 24.568                                       |
| Ca_Desi_SNP130 | [A/G]       | Ca_Desi_LG01               | 24.774                                       |
| Ca_Desi_SNP131 | [C/T]       | Ca_Desi_LG01               | 24.813                                       |
| Ca_Desi_SNP132 | [T/C]       | Ca_Desi_LG01               | 24.909                                       |
| Ca_Desi_SNP133 | [A/G]       | Ca_Desi_LG01               | 24.977                                       |
| Ca_Desi_SNP134 | [C/T]       | Ca_Desi_LG01               | 25.031                                       |
| Ca_Desi_SNP135 | [T/C]       | Ca_Desi_LG01               | 25.220                                       |
| Ca_Desi_SNP136 | [A/C]       | Ca_Desi_LG01               | 25.243                                       |
| Ca_Desi_SNP137 | [G/T]       | Ca_Desi_LG01               | 25.380                                       |
| Ca_Desi_SNP138 | [A/G]       | Ca_Desi_LG01               | 25.394                                       |
| Ca_Desi_SNP139 | [G/A]       | Ca_Desi_LG01               | 25.489                                       |
| Ca_Desi_SNP140 | [T/C]       | Ca_Desi_LG01               | 25.750                                       |
| Ca_Desi_SNP141 | [T/C]       | Ca_Desi_LG01               | 25.792                                       |
| Ca_Desi_SNP142 | [T/C]       | Ca_Desi_LG01               | 25.834                                       |
| Ca_Desi_SNP143 | [T/C]       | Ca_Desi_LG01               | 25.904                                       |
| Ca_Desi_SNP144 | [T/A]       | Ca_Desi_LG01               | 25.933                                       |
| Ca_Desi_SNP145 | [A/G]       | Ca_Desi_LG01               | 25.970                                       |
| Ca_Desi_SNP146 | [C/T]       | Ca_Desi_LG01               | 26.034                                       |
| Ca_Desi_SNP147 | [T/G]       | Ca_Desi_LG01               | 26.129                                       |
| Ca_Desi_SNP148 | [C/A]       | Ca_Desi_LG01               | 26.146                                       |
| Ca_Desi_SNP149 | [T/G]       | Ca_Desi_LG01               | 26.198                                       |
| Ca_Desi_SNP150 | [T/G]       | Ca_Desi_LG01               | 26.418                                       |
| Ca_Desi_SNP151 | [T/C]       | Ca_Desi_LG01               | 26.510                                       |

| <b>SNP IDs</b> | <b>SNPs</b> | <b>Linkage Group (LGs)</b> | <b>Genetic positions (cM) of mapped SNPs</b> |
|----------------|-------------|----------------------------|----------------------------------------------|
| Ca_Desi_SNP152 | [A/G]       | Ca_Desi_LG01               | 26.521                                       |
| Ca_Desi_SNP153 | [A/G]       | Ca_Desi_LG01               | 26.553                                       |
| Ca_Desi_SNP154 | [C/G]       | Ca_Desi_LG01               | 26.678                                       |
| Ca_Desi_SNP155 | [A/C]       | Ca_Desi_LG01               | 26.686                                       |
| Ca_Desi_SNP156 | [G/T]       | Ca_Desi_LG01               | 26.745                                       |
| Ca_Desi_SNP157 | [G/C]       | Ca_Desi_LG01               | 26.903                                       |
| Ca_Desi_SNP158 | [G/A]       | Ca_Desi_LG01               | 26.972                                       |
| Ca_Desi_SNP159 | [A/G]       | Ca_Desi_LG01               | 27.048                                       |
| Ca_Desi_SNP160 | [C/T]       | Ca_Desi_LG01               | 27.105                                       |
| Ca_Desi_SNP161 | [G/T]       | Ca_Desi_LG01               | 27.239                                       |
| Ca_Desi_SNP162 | [T/C]       | Ca_Desi_LG01               | 27.283                                       |
| Ca_Desi_SNP163 | [T/C]       | Ca_Desi_LG01               | 27.329                                       |
| Ca_Desi_SNP164 | [A/C]       | Ca_Desi_LG01               | 27.545                                       |
| Ca_Desi_SNP165 | [T/C]       | Ca_Desi_LG01               | 27.580                                       |
| Ca_Desi_SNP166 | [T/G]       | Ca_Desi_LG01               | 27.676                                       |
| Ca_Desi_SNP167 | [A/G]       | Ca_Desi_LG01               | 27.789                                       |
| Ca_Desi_SNP168 | [A/C]       | Ca_Desi_LG01               | 27.892                                       |
| Ca_Desi_SNP169 | [G/A]       | Ca_Desi_LG01               | 28.100                                       |
| Ca_Desi_SNP170 | [C/A]       | Ca_Desi_LG01               | 28.135                                       |
| Ca_Desi_SNP171 | [T/C]       | Ca_Desi_LG01               | 28.158                                       |
| Ca_Desi_SNP172 | [A/G]       | Ca_Desi_LG01               | 28.166                                       |
| Ca_Desi_SNP173 | [A/C]       | Ca_Desi_LG01               | 28.195                                       |
| Ca_Desi_SNP174 | [A/G]       | Ca_Desi_LG01               | 28.307                                       |
| Ca_Desi_SNP175 | [T/C]       | Ca_Desi_LG01               | 28.428                                       |
| Ca_Desi_SNP176 | [G/C]       | Ca_Desi_LG01               | 28.485                                       |
| Ca_Desi_SNP177 | [T/C]       | Ca_Desi_LG01               | 28.644                                       |
| Ca_Desi_SNP178 | [A/T]       | Ca_Desi_LG01               | 28.784                                       |
| Ca_Desi_SNP179 | [A/G]       | Ca_Desi_LG01               | 28.870                                       |
| Ca_Desi_SNP180 | [G/T]       | Ca_Desi_LG01               | 29.009                                       |
| Ca_Desi_SNP181 | [T/G]       | Ca_Desi_LG01               | 29.069                                       |
| Ca_Desi_SNP182 | [C/T]       | Ca_Desi_LG01               | 29.166                                       |

| <b>SNP IDs</b> | <b>SNPs</b> | <b>Linkage Group (LGs)</b> | <b>Genetic positions (cM) of mapped SNPs</b> |
|----------------|-------------|----------------------------|----------------------------------------------|
| Ca_Desi_SNP183 | [T/C]       | Ca_Desi_LG01               | 29.285                                       |
| Ca_Desi_SNP184 | [A/G]       | Ca_Desi_LG01               | 29.306                                       |
| Ca_Desi_SNP185 | [A/G]       | Ca_Desi_LG01               | 29.321                                       |
| Ca_Desi_SNP186 | [T/C]       | Ca_Desi_LG01               | 29.326                                       |
| Ca_Desi_SNP187 | [G/C]       | Ca_Desi_LG01               | 29.349                                       |
| Ca_Desi_SNP188 | [G/A]       | Ca_Desi_LG01               | 29.359                                       |
| Ca_Desi_SNP189 | [T/G]       | Ca_Desi_LG01               | 29.372                                       |
| Ca_Desi_SNP190 | [A/T]       | Ca_Desi_LG01               | 29.427                                       |
| Ca_Desi_SNP191 | [G/A]       | Ca_Desi_LG01               | 29.612                                       |
| Ca_Desi_SNP192 | [A/C]       | Ca_Desi_LG01               | 29.709                                       |
| Ca_Desi_SNP193 | [A/G]       | Ca_Desi_LG01               | 29.772                                       |
| Ca_Desi_SNP194 | [A/C]       | Ca_Desi_LG01               | 29.881                                       |
| Ca_Desi_SNP195 | [T/A]       | Ca_Desi_LG01               | 29.923                                       |
| Ca_Desi_SNP196 | [A/C]       | Ca_Desi_LG01               | 29.977                                       |
| Ca_Desi_SNP197 | [T/G]       | Ca_Desi_LG01               | 29.978                                       |
| Ca_Desi_SNP198 | [A/C]       | Ca_Desi_LG01               | 30.017                                       |
| Ca_Desi_SNP199 | [T/G]       | Ca_Desi_LG01               | 30.020                                       |
| Ca_Desi_SNP200 | [T/C]       | Ca_Desi_LG01               | 30.034                                       |
| Ca_Desi_SNP201 | [A/C]       | Ca_Desi_LG01               | 30.164                                       |
| Ca_Desi_SNP202 | [C/G]       | Ca_Desi_LG01               | 30.186                                       |
| Ca_Desi_SNP203 | [A/G]       | Ca_Desi_LG01               | 30.456                                       |
| Ca_Desi_SNP204 | [T/G]       | Ca_Desi_LG01               | 30.463                                       |
| Ca_Desi_SNP205 | [T/G]       | Ca_Desi_LG01               | 30.466                                       |
| Ca_Desi_SNP206 | [A/G]       | Ca_Desi_LG01               | 30.555                                       |
| Ca_Desi_SNP207 | [C/T]       | Ca_Desi_LG01               | 30.735                                       |
| Ca_Desi_SNP208 | [T/G]       | Ca_Desi_LG01               | 30.777                                       |
| Ca_Desi_SNP209 | [T/G]       | Ca_Desi_LG01               | 30.918                                       |
| Ca_Desi_SNP210 | [C/T]       | Ca_Desi_LG01               | 30.946                                       |
| Ca_Desi_SNP211 | [C/T]       | Ca_Desi_LG01               | 31.129                                       |
| Ca_Desi_SNP212 | [C/A]       | Ca_Desi_LG01               | 31.156                                       |
| Ca_Desi_SNP213 | [A/T]       | Ca_Desi_LG01               | 31.237                                       |



| <b>SNP IDs</b> | <b>SNPs</b> | <b>Linkage Group (LGs)</b> | <b>Genetic positions (cM) of mapped SNPs</b> |
|----------------|-------------|----------------------------|----------------------------------------------|
| Ca_Desi_SNP214 | [T/G]       | Ca_Desi_LG01               | 31.367                                       |
| Ca_Desi_SNP215 | [G/C]       | Ca_Desi_LG01               | 31.532                                       |
| Ca_Desi_SNP216 | [T/G]       | Ca_Desi_LG01               | 31.546                                       |
| Ca_Desi_SNP217 | [A/G]       | Ca_Desi_LG01               | 31.566                                       |
| Ca_Desi_SNP218 | [C/T]       | Ca_Desi_LG01               | 31.666                                       |
| Ca_Desi_SNP219 | [A/T]       | Ca_Desi_LG01               | 31.702                                       |
| Ca_Desi_SNP220 | [C/G]       | Ca_Desi_LG01               | 31.825                                       |
| Ca_Desi_SNP221 | [T/C]       | Ca_Desi_LG01               | 31.851                                       |
| Ca_Desi_SNP222 | [T/C]       | Ca_Desi_LG01               | 31.870                                       |
| Ca_Desi_SNP223 | [A/G]       | Ca_Desi_LG01               | 31.957                                       |
| Ca_Desi_SNP224 | [T/C]       | Ca_Desi_LG01               | 32.027                                       |
| Ca_Desi_SNP225 | [T/A]       | Ca_Desi_LG01               | 32.033                                       |
| Ca_Desi_SNP226 | [C/T]       | Ca_Desi_LG01               | 32.056                                       |
| Ca_Desi_SNP227 | [A/G]       | Ca_Desi_LG01               | 32.080                                       |
| Ca_Desi_SNP228 | [A/C]       | Ca_Desi_LG01               | 32.190                                       |
| Ca_Desi_SNP229 | [T/C]       | Ca_Desi_LG01               | 32.328                                       |
| Ca_Desi_SNP230 | [C/T]       | Ca_Desi_LG01               | 32.362                                       |
| Ca_Desi_SNP231 | [G/T]       | Ca_Desi_LG01               | 32.398                                       |
| Ca_Desi_SNP232 | [A/C]       | Ca_Desi_LG01               | 32.448                                       |
| Ca_Desi_SNP233 | [A/G]       | Ca_Desi_LG01               | 32.460                                       |
| Ca_Desi_SNP234 | [T/A]       | Ca_Desi_LG01               | 32.495                                       |
| Ca_Desi_SNP235 | [G/A]       | Ca_Desi_LG01               | 32.501                                       |
| Ca_Desi_SNP236 | [A/C]       | Ca_Desi_LG01               | 32.707                                       |
| Ca_Desi_SNP237 | [G/T]       | Ca_Desi_LG01               | 32.956                                       |
| Ca_Desi_SNP238 | [A/G]       | Ca_Desi_LG01               | 32.989                                       |
| Ca_Desi_SNP239 | [T/A]       | Ca_Desi_LG01               | 33.102                                       |
| Ca_Desi_SNP240 | [T/C]       | Ca_Desi_LG01               | 33.139                                       |
| Ca_Desi_SNP241 | [C/G]       | Ca_Desi_LG01               | 33.241                                       |
| Ca_Desi_SNP242 | [G/A]       | Ca_Desi_LG01               | 33.301                                       |
| Ca_Desi_SNP243 | [A/T]       | Ca_Desi_LG01               | 33.324                                       |
| Ca_Desi_SNP244 | [G/A]       | Ca_Desi_LG01               | 33.376                                       |

| <b>SNP IDs</b> | <b>SNPs</b> | <b>Linkage Group (LGs)</b> | <b>Genetic positions (cM) of mapped SNPs</b> |
|----------------|-------------|----------------------------|----------------------------------------------|
| Ca_Desi_SNP245 | [G/A]       | Ca_Desi_LG01               | 33.427                                       |
| Ca_Desi_SNP246 | [G/A]       | Ca_Desi_LG01               | 33.642                                       |
| Ca_Desi_SNP247 | [T/C]       | Ca_Desi_LG01               | 33.751                                       |
| Ca_Desi_SNP248 | [A/C]       | Ca_Desi_LG01               | 34.019                                       |
| Ca_Desi_SNP249 | [A/G]       | Ca_Desi_LG01               | 34.247                                       |
| Ca_Desi_SNP250 | [C/G]       | Ca_Desi_LG01               | 34.293                                       |
| Ca_Desi_SNP251 | [C/A]       | Ca_Desi_LG01               | 34.372                                       |
| Ca_Desi_SNP252 | [C/T]       | Ca_Desi_LG01               | 34.453                                       |
| Ca_Desi_SNP253 | [A/G]       | Ca_Desi_LG01               | 34.466                                       |
| Ca_Desi_SNP254 | [C/A]       | Ca_Desi_LG01               | 34.520                                       |
| Ca_Desi_SNP255 | [A/C]       | Ca_Desi_LG01               | 34.683                                       |
| Ca_Desi_SNP256 | [T/C]       | Ca_Desi_LG01               | 34.918                                       |
| Ca_Desi_SNP257 | [C/T]       | Ca_Desi_LG01               | 35.214                                       |
| Ca_Desi_SNP258 | [C/T]       | Ca_Desi_LG01               | 35.417                                       |
| Ca_Desi_SNP259 | [A/C]       | Ca_Desi_LG01               | 35.478                                       |
| Ca_Desi_SNP260 | [T/G]       | Ca_Desi_LG01               | 35.536                                       |
| Ca_Desi_SNP261 | [G/A]       | Ca_Desi_LG01               | 35.554                                       |
| Ca_Desi_SNP262 | [T/G]       | Ca_Desi_LG01               | 35.782                                       |
| Ca_Desi_SNP263 | [A/G]       | Ca_Desi_LG01               | 36.163                                       |
| Ca_Desi_SNP264 | [A/G]       | Ca_Desi_LG01               | 36.358                                       |
| Ca_Desi_SNP265 | [T/C]       | Ca_Desi_LG01               | 36.514                                       |
| Ca_Desi_SNP266 | [C/T]       | Ca_Desi_LG01               | 36.525                                       |
| Ca_Desi_SNP267 | [C/T]       | Ca_Desi_LG01               | 36.560                                       |
| Ca_Desi_SNP268 | [A/C]       | Ca_Desi_LG01               | 36.582                                       |
| Ca_Desi_SNP269 | [G/A]       | Ca_Desi_LG01               | 36.653                                       |
| Ca_Desi_SNP270 | [G/A]       | Ca_Desi_LG01               | 36.698                                       |
| Ca_Desi_SNP271 | [T/G]       | Ca_Desi_LG01               | 36.743                                       |
| Ca_Desi_SNP272 | [C/G]       | Ca_Desi_LG01               | 36.750                                       |
| Ca_Desi_SNP273 | [A/G]       | Ca_Desi_LG01               | 36.796                                       |
| Ca_Desi_SNP274 | [A/C]       | Ca_Desi_LG01               | 36.836                                       |
| Ca_Desi_SNP275 | [G/A]       | Ca_Desi_LG01               | 36.879                                       |

| <b>SNP IDs</b> | <b>SNPs</b> | <b>Linkage Group (LGs)</b> | <b>Genetic positions (cM) of mapped SNPs</b> |
|----------------|-------------|----------------------------|----------------------------------------------|
| Ca_Desi_SNP276 | [A/C]       | Ca_Desi_LG01               | 36.964                                       |
| Ca_Desi_SNP277 | [T/C]       | Ca_Desi_LG01               | 37.126                                       |
| Ca_Desi_SNP278 | [T/C]       | Ca_Desi_LG01               | 37.132                                       |
| Ca_Desi_SNP279 | [T/C]       | Ca_Desi_LG01               | 37.136                                       |
| Ca_Desi_SNP280 | [A/G]       | Ca_Desi_LG01               | 37.646                                       |
| Ca_Desi_SNP281 | [C/A]       | Ca_Desi_LG01               | 37.674                                       |
| Ca_Desi_SNP282 | [G/C]       | Ca_Desi_LG01               | 37.748                                       |
| Ca_Desi_SNP283 | [A/G]       | Ca_Desi_LG01               | 37.762                                       |
| Ca_Desi_SNP284 | [C/T]       | Ca_Desi_LG01               | 37.964                                       |
| Ca_Desi_SNP285 | [T/A]       | Ca_Desi_LG01               | 38.033                                       |
| Ca_Desi_SNP286 | [T/A]       | Ca_Desi_LG01               | 38.049                                       |
| Ca_Desi_SNP287 | [T/C]       | Ca_Desi_LG01               | 38.051                                       |
| Ca_Desi_SNP288 | [C/T]       | Ca_Desi_LG01               | 38.142                                       |
| Ca_Desi_SNP289 | [C/T]       | Ca_Desi_LG01               | 38.376                                       |
| Ca_Desi_SNP290 | [A/T]       | Ca_Desi_LG01               | 38.702                                       |
| Ca_Desi_SNP291 | [G/C]       | Ca_Desi_LG01               | 38.731                                       |
| Ca_Desi_SNP292 | [A/C]       | Ca_Desi_LG01               | 38.810                                       |
| Ca_Desi_SNP293 | [C/T]       | Ca_Desi_LG01               | 38.827                                       |
| Ca_Desi_SNP294 | [C/G]       | Ca_Desi_LG01               | 39.080                                       |
| Ca_Desi_SNP295 | [C/T]       | Ca_Desi_LG01               | 39.127                                       |
| Ca_Desi_SNP296 | [A/G]       | Ca_Desi_LG01               | 39.166                                       |
| Ca_Desi_SNP297 | [A/G]       | Ca_Desi_LG01               | 39.397                                       |
| Ca_Desi_SNP298 | [G/T]       | Ca_Desi_LG01               | 39.425                                       |
| Ca_Desi_SNP299 | [A/C]       | Ca_Desi_LG01               | 39.439                                       |
| Ca_Desi_SNP300 | [G/A]       | Ca_Desi_LG01               | 39.484                                       |
| Ca_Desi_SNP301 | [A/C]       | Ca_Desi_LG01               | 39.506                                       |
| Ca_Desi_SNP302 | [A/G]       | Ca_Desi_LG01               | 39.508                                       |
| Ca_Desi_SNP303 | [A/C]       | Ca_Desi_LG01               | 39.538                                       |
| Ca_Desi_SNP304 | [T/G]       | Ca_Desi_LG01               | 39.610                                       |
| Ca_Desi_SNP305 | [C/T]       | Ca_Desi_LG01               | 39.719                                       |
| Ca_Desi_SNP306 | [G/A]       | Ca_Desi_LG01               | 39.793                                       |

| <b>SNP IDs</b> | <b>SNPs</b> | <b>Linkage Group (LGs)</b> | <b>Genetic positions (cM) of mapped SNPs</b> |
|----------------|-------------|----------------------------|----------------------------------------------|
| Ca_Desi_SNP307 | [A/G]       | Ca_Desi_LG01               | 39.842                                       |
| Ca_Desi_SNP308 | [G/C]       | Ca_Desi_LG01               | 39.893                                       |
| Ca_Desi_SNP309 | [G/T]       | Ca_Desi_LG01               | 39.980                                       |
| Ca_Desi_SNP310 | [T/C]       | Ca_Desi_LG01               | 40.186                                       |
| Ca_Desi_SNP311 | [A/G]       | Ca_Desi_LG01               | 40.216                                       |
| Ca_Desi_SNP312 | [T/C]       | Ca_Desi_LG01               | 40.347                                       |
| Ca_Desi_SNP313 | [C/T]       | Ca_Desi_LG01               | 40.403                                       |
| Ca_Desi_SNP314 | [A/G]       | Ca_Desi_LG01               | 40.431                                       |
| Ca_Desi_SNP315 | [T/C]       | Ca_Desi_LG01               | 40.558                                       |
| Ca_Desi_SNP316 | [A/G]       | Ca_Desi_LG01               | 40.604                                       |
| Ca_Desi_SNP317 | [T/C]       | Ca_Desi_LG01               | 41.006                                       |
| Ca_Desi_SNP318 | [T/C]       | Ca_Desi_LG01               | 41.013                                       |
| Ca_Desi_SNP319 | [C/A]       | Ca_Desi_LG01               | 41.032                                       |
| Ca_Desi_SNP320 | [T/C]       | Ca_Desi_LG01               | 41.144                                       |
| Ca_Desi_SNP321 | [T/C]       | Ca_Desi_LG01               | 41.149                                       |
| Ca_Desi_SNP322 | [T/G]       | Ca_Desi_LG01               | 41.224                                       |
| Ca_Desi_SNP323 | [T/G]       | Ca_Desi_LG01               | 41.255                                       |
| Ca_Desi_SNP324 | [G/A]       | Ca_Desi_LG01               | 41.310                                       |
| Ca_Desi_SNP325 | [A/G]       | Ca_Desi_LG01               | 41.414                                       |
| Ca_Desi_SNP326 | [T/C]       | Ca_Desi_LG01               | 41.489                                       |
| Ca_Desi_SNP327 | [G/A]       | Ca_Desi_LG01               | 41.490                                       |
| Ca_Desi_SNP328 | [A/G]       | Ca_Desi_LG01               | 41.561                                       |
| Ca_Desi_SNP329 | [G/A]       | Ca_Desi_LG01               | 41.598                                       |
| Ca_Desi_SNP330 | [C/T]       | Ca_Desi_LG01               | 41.721                                       |
| Ca_Desi_SNP331 | [T/C]       | Ca_Desi_LG01               | 41.819                                       |
| Ca_Desi_SNP332 | [T/C]       | Ca_Desi_LG01               | 41.909                                       |
| Ca_Desi_SNP333 | [T/C]       | Ca_Desi_LG01               | 42.172                                       |
| Ca_Desi_SNP334 | [A/T]       | Ca_Desi_LG01               | 42.374                                       |
| Ca_Desi_SNP335 | [G/A]       | Ca_Desi_LG01               | 42.400                                       |
| Ca_Desi_SNP336 | [T/C]       | Ca_Desi_LG01               | 42.430                                       |
| Ca_Desi_SNP337 | [C/T]       | Ca_Desi_LG01               | 42.664                                       |

| <b>SNP IDs</b> | <b>SNPs</b> | <b>Linkage Group (LGs)</b> | <b>Genetic positions (cM) of mapped SNPs</b> |
|----------------|-------------|----------------------------|----------------------------------------------|
| Ca_Desi_SNP338 | [A/C]       | Ca_Desi_LG01               | 42.667                                       |
| Ca_Desi_SNP339 | [C/T]       | Ca_Desi_LG01               | 42.830                                       |
| Ca_Desi_SNP340 | [C/T]       | Ca_Desi_LG01               | 42.927                                       |
| Ca_Desi_SNP341 | [G/T]       | Ca_Desi_LG01               | 42.947                                       |
| Ca_Desi_SNP342 | [A/G]       | Ca_Desi_LG01               | 42.989                                       |
| Ca_Desi_SNP343 | [T/G]       | Ca_Desi_LG01               | 43.057                                       |
| Ca_Desi_SNP344 | [T/C]       | Ca_Desi_LG01               | 43.146                                       |
| Ca_Desi_SNP345 | [A/G]       | Ca_Desi_LG01               | 43.261                                       |
| Ca_Desi_SNP346 | [A/G]       | Ca_Desi_LG01               | 43.282                                       |
| Ca_Desi_SNP347 | [C/A]       | Ca_Desi_LG01               | 43.445                                       |
| Ca_Desi_SNP348 | [A/G]       | Ca_Desi_LG01               | 43.467                                       |
| Ca_Desi_SNP349 | [A/T]       | Ca_Desi_LG01               | 43.745                                       |
| Ca_Desi_SNP350 | [G/T]       | Ca_Desi_LG01               | 43.968                                       |
| Ca_Desi_SNP351 | [T/G]       | Ca_Desi_LG01               | 44.063                                       |
| Ca_Desi_SNP352 | [A/G]       | Ca_Desi_LG01               | 44.121                                       |
| Ca_Desi_SNP353 | [T/C]       | Ca_Desi_LG01               | 44.159                                       |
| Ca_Desi_SNP354 | [C/T]       | Ca_Desi_LG01               | 44.308                                       |
| Ca_Desi_SNP355 | [T/C]       | Ca_Desi_LG01               | 44.325                                       |
| Ca_Desi_SNP356 | [A/C]       | Ca_Desi_LG01               | 44.327                                       |
| Ca_Desi_SNP357 | [A/G]       | Ca_Desi_LG01               | 44.362                                       |
| Ca_Desi_SNP358 | [A/C]       | Ca_Desi_LG01               | 44.480                                       |
| Ca_Desi_SNP359 | [A/G]       | Ca_Desi_LG01               | 44.588                                       |
| Ca_Desi_SNP360 | [C/T]       | Ca_Desi_LG01               | 44.844                                       |
| Ca_Desi_SNP361 | [A/G]       | Ca_Desi_LG01               | 44.856                                       |
| Ca_Desi_SNP362 | [G/A]       | Ca_Desi_LG01               | 44.873                                       |
| Ca_Desi_SNP363 | [T/C]       | Ca_Desi_LG01               | 45.043                                       |
| Ca_Desi_SNP364 | [C/A]       | Ca_Desi_LG01               | 45.048                                       |
| Ca_Desi_SNP365 | [T/A]       | Ca_Desi_LG01               | 45.079                                       |
| Ca_Desi_SNP366 | [C/T]       | Ca_Desi_LG01               | 45.210                                       |
| Ca_Desi_SNP367 | [A/G]       | Ca_Desi_LG01               | 45.225                                       |
| Ca_Desi_SNP368 | [G/A]       | Ca_Desi_LG01               | 45.447                                       |

| <b>SNP IDs</b> | <b>SNPs</b> | <b>Linkage Group (LGs)</b> | <b>Genetic positions (cM) of mapped SNPs</b> |
|----------------|-------------|----------------------------|----------------------------------------------|
| Ca_Desi_SNP369 | [G/C]       | Ca_Desi_LG01               | 45.488                                       |
| Ca_Desi_SNP370 | [A/G]       | Ca_Desi_LG01               | 45.539                                       |
| Ca_Desi_SNP371 | [A/C]       | Ca_Desi_LG01               | 45.656                                       |
| Ca_Desi_SNP372 | [C/T]       | Ca_Desi_LG01               | 45.723                                       |
| Ca_Desi_SNP373 | [C/T]       | Ca_Desi_LG01               | 45.726                                       |
| Ca_Desi_SNP374 | [A/C]       | Ca_Desi_LG01               | 45.748                                       |
| Ca_Desi_SNP375 | [T/G]       | Ca_Desi_LG01               | 45.765                                       |
| Ca_Desi_SNP376 | [T/C]       | Ca_Desi_LG01               | 45.800                                       |
| Ca_Desi_SNP377 | [C/T]       | Ca_Desi_LG01               | 45.974                                       |
| Ca_Desi_SNP378 | [G/A]       | Ca_Desi_LG01               | 46.133                                       |
| Ca_Desi_SNP379 | [T/G]       | Ca_Desi_LG01               | 46.235                                       |
| Ca_Desi_SNP380 | [G/A]       | Ca_Desi_LG01               | 46.295                                       |
| Ca_Desi_SNP381 | [A/G]       | Ca_Desi_LG01               | 46.497                                       |
| Ca_Desi_SNP382 | [A/G]       | Ca_Desi_LG01               | 46.768                                       |
| Ca_Desi_SNP383 | [T/G]       | Ca_Desi_LG01               | 46.770                                       |
| Ca_Desi_SNP384 | [A/C]       | Ca_Desi_LG01               | 46.791                                       |
| Ca_Desi_SNP385 | [C/T]       | Ca_Desi_LG01               | 46.870                                       |
| Ca_Desi_SNP386 | [T/C]       | Ca_Desi_LG01               | 46.942                                       |
| Ca_Desi_SNP387 | [T/C]       | Ca_Desi_LG01               | 47.032                                       |
| Ca_Desi_SNP388 | [T/C]       | Ca_Desi_LG01               | 47.299                                       |
| Ca_Desi_SNP389 | [A/C]       | Ca_Desi_LG01               | 47.453                                       |
| Ca_Desi_SNP390 | [T/C]       | Ca_Desi_LG01               | 47.458                                       |
| Ca_Desi_SNP391 | [A/G]       | Ca_Desi_LG01               | 47.484                                       |
| Ca_Desi_SNP392 | [C/A]       | Ca_Desi_LG01               | 47.566                                       |
| Ca_Desi_SNP393 | [A/C]       | Ca_Desi_LG01               | 47.658                                       |
| Ca_Desi_SNP394 | [T/G]       | Ca_Desi_LG01               | 47.793                                       |
| Ca_Desi_SNP395 | [A/G]       | Ca_Desi_LG01               | 48.130                                       |
| Ca_Desi_SNP396 | [C/T]       | Ca_Desi_LG01               | 48.136                                       |
| Ca_Desi_SNP397 | [A/T]       | Ca_Desi_LG01               | 48.623                                       |
| Ca_Desi_SNP398 | [C/T]       | Ca_Desi_LG01               | 48.663                                       |
| Ca_Desi_SNP399 | [G/A]       | Ca_Desi_LG01               | 48.690                                       |

| <b>SNP IDs</b> | <b>SNPs</b> | <b>Linkage Group (LGs)</b> | <b>Genetic positions (cM) of mapped SNPs</b> |
|----------------|-------------|----------------------------|----------------------------------------------|
| Ca_Desi_SNP400 | [T/C]       | Ca_Desi_LG01               | 48.765                                       |
| Ca_Desi_SNP401 | [C/A]       | Ca_Desi_LG01               | 48.793                                       |
| Ca_Desi_SNP402 | [C/A]       | Ca_Desi_LG01               | 48.807                                       |
| Ca_Desi_SNP403 | [A/G]       | Ca_Desi_LG01               | 48.911                                       |
| Ca_Desi_SNP404 | [A/G]       | Ca_Desi_LG01               | 49.194                                       |
| Ca_Desi_SNP405 | [T/C]       | Ca_Desi_LG01               | 49.198                                       |
| Ca_Desi_SNP406 | [T/C]       | Ca_Desi_LG01               | 49.398                                       |
| Ca_Desi_SNP407 | [C/G]       | Ca_Desi_LG01               | 49.411                                       |
| Ca_Desi_SNP408 | [T/G]       | Ca_Desi_LG01               | 49.586                                       |
| Ca_Desi_SNP409 | [T/G]       | Ca_Desi_LG01               | 49.635                                       |
| Ca_Desi_SNP410 | [T/G]       | Ca_Desi_LG01               | 49.730                                       |
| Ca_Desi_SNP411 | [T/A]       | Ca_Desi_LG01               | 49.755                                       |
| Ca_Desi_SNP412 | [G/C]       | Ca_Desi_LG01               | 50.066                                       |
| Ca_Desi_SNP413 | [A/G]       | Ca_Desi_LG01               | 50.267                                       |
| Ca_Desi_SNP414 | [C/A]       | Ca_Desi_LG01               | 50.537                                       |
| Ca_Desi_SNP415 | [T/C]       | Ca_Desi_LG01               | 50.556                                       |
| Ca_Desi_SNP416 | [T/C]       | Ca_Desi_LG01               | 50.565                                       |
| Ca_Desi_SNP417 | [T/C]       | Ca_Desi_LG01               | 50.617                                       |
| Ca_Desi_SNP418 | [A/G]       | Ca_Desi_LG01               | 50.671                                       |
| Ca_Desi_SNP419 | [A/C]       | Ca_Desi_LG01               | 50.686                                       |
| Ca_Desi_SNP420 | [T/C]       | Ca_Desi_LG01               | 50.698                                       |
| Ca_Desi_SNP421 | [C/A]       | Ca_Desi_LG01               | 50.717                                       |
| Ca_Desi_SNP422 | [T/C]       | Ca_Desi_LG01               | 50.746                                       |
| Ca_Desi_SNP423 | [A/T]       | Ca_Desi_LG01               | 50.789                                       |
| Ca_Desi_SNP424 | [A/G]       | Ca_Desi_LG01               | 50.850                                       |
| Ca_Desi_SNP425 | [T/G]       | Ca_Desi_LG01               | 50.949                                       |
| Ca_Desi_SNP426 | [C/T]       | Ca_Desi_LG01               | 50.983                                       |
| Ca_Desi_SNP427 | [C/T]       | Ca_Desi_LG01               | 51.121                                       |
| Ca_Desi_SNP428 | [C/G]       | Ca_Desi_LG01               | 51.170                                       |
| Ca_Desi_SNP429 | [T/A]       | Ca_Desi_LG01               | 51.199                                       |
| Ca_Desi_SNP430 | [G/C]       | Ca_Desi_LG01               | 51.211                                       |

| <b>SNP IDs</b> | <b>SNPs</b> | <b>Linkage Group (LGs)</b> | <b>Genetic positions (cM) of mapped SNPs</b> |
|----------------|-------------|----------------------------|----------------------------------------------|
| Ca_Desi_SNP431 | [C/A]       | Ca_Desi_LG01               | 51.251                                       |
| Ca_Desi_SNP432 | [A/G]       | Ca_Desi_LG01               | 51.305                                       |
| Ca_Desi_SNP433 | [T/C]       | Ca_Desi_LG01               | 51.332                                       |
| Ca_Desi_SNP434 | [A/G]       | Ca_Desi_LG01               | 51.343                                       |
| Ca_Desi_SNP435 | [T/G]       | Ca_Desi_LG01               | 51.387                                       |
| Ca_Desi_SNP436 | [T/C]       | Ca_Desi_LG01               | 51.398                                       |
| Ca_Desi_SNP437 | [A/G]       | Ca_Desi_LG01               | 51.512                                       |
| Ca_Desi_SNP438 | [G/T]       | Ca_Desi_LG01               | 51.531                                       |
| Ca_Desi_SNP439 | [A/G]       | Ca_Desi_LG01               | 51.552                                       |
| Ca_Desi_SNP440 | [A/C]       | Ca_Desi_LG01               | 51.653                                       |
| Ca_Desi_SNP441 | [T/A]       | Ca_Desi_LG01               | 51.899                                       |
| Ca_Desi_SNP442 | [T/G]       | Ca_Desi_LG01               | 51.928                                       |
| Ca_Desi_SNP443 | [A/G]       | Ca_Desi_LG01               | 51.995                                       |
| Ca_Desi_SNP444 | [T/A]       | Ca_Desi_LG01               | 52.008                                       |
| Ca_Desi_SNP445 | [A/G]       | Ca_Desi_LG01               | 52.196                                       |
| Ca_Desi_SNP446 | [A/T]       | Ca_Desi_LG01               | 52.210                                       |
| Ca_Desi_SNP447 | [T/C]       | Ca_Desi_LG01               | 52.279                                       |
| Ca_Desi_SNP448 | [A/G]       | Ca_Desi_LG01               | 52.282                                       |
| Ca_Desi_SNP449 | [T/C]       | Ca_Desi_LG01               | 52.290                                       |
| Ca_Desi_SNP450 | [A/G]       | Ca_Desi_LG01               | 52.318                                       |
| Ca_Desi_SNP451 | [G/T]       | Ca_Desi_LG01               | 52.321                                       |
| Ca_Desi_SNP452 | [T/C]       | Ca_Desi_LG01               | 52.377                                       |
| Ca_Desi_SNP453 | [A/G]       | Ca_Desi_LG01               | 52.439                                       |
| Ca_Desi_SNP454 | [G/T]       | Ca_Desi_LG01               | 52.446                                       |
| Ca_Desi_SNP455 | [A/T]       | Ca_Desi_LG01               | 52.460                                       |
| Ca_Desi_SNP456 | [A/G]       | Ca_Desi_LG01               | 52.521                                       |
| Ca_Desi_SNP457 | [C/T]       | Ca_Desi_LG01               | 52.670                                       |
| Ca_Desi_SNP458 | [A/G]       | Ca_Desi_LG01               | 52.730                                       |
| Ca_Desi_SNP459 | [A/C]       | Ca_Desi_LG01               | 52.751                                       |
| Ca_Desi_SNP460 | [A/C]       | Ca_Desi_LG01               | 52.758                                       |
| Ca_Desi_SNP461 | [T/C]       | Ca_Desi_LG01               | 52.803                                       |



| <b>SNP IDs</b> | <b>SNPs</b> | <b>Linkage Group (LGs)</b> | <b>Genetic positions (cM) of mapped SNPs</b> |
|----------------|-------------|----------------------------|----------------------------------------------|
| Ca_Desi_SNP462 | [G/A]       | Ca_Desi_LG01               | 52.830                                       |
| Ca_Desi_SNP463 | [A/T]       | Ca_Desi_LG01               | 52.834                                       |
| Ca_Desi_SNP464 | [C/T]       | Ca_Desi_LG01               | 52.959                                       |
| Ca_Desi_SNP465 | [T/G]       | Ca_Desi_LG01               | 53.054                                       |
| Ca_Desi_SNP466 | [G/T]       | Ca_Desi_LG01               | 53.292                                       |
| Ca_Desi_SNP467 | [A/C]       | Ca_Desi_LG01               | 53.407                                       |
| Ca_Desi_SNP468 | [G/T]       | Ca_Desi_LG01               | 53.519                                       |
| Ca_Desi_SNP469 | [T/C]       | Ca_Desi_LG01               | 53.535                                       |
| Ca_Desi_SNP470 | [C/T]       | Ca_Desi_LG01               | 53.579                                       |
| Ca_Desi_SNP471 | [T/G]       | Ca_Desi_LG01               | 53.581                                       |
| Ca_Desi_SNP472 | [G/T]       | Ca_Desi_LG01               | 53.621                                       |
| Ca_Desi_SNP473 | [A/C]       | Ca_Desi_LG01               | 53.728                                       |
| Ca_Desi_SNP474 | [A/G]       | Ca_Desi_LG01               | 53.729                                       |
| Ca_Desi_SNP475 | [G/A]       | Ca_Desi_LG01               | 53.738                                       |
| Ca_Desi_SNP476 | [A/C]       | Ca_Desi_LG01               | 53.739                                       |
| Ca_Desi_SNP477 | [T/G]       | Ca_Desi_LG01               | 54.094                                       |
| Ca_Desi_SNP478 | [T/C]       | Ca_Desi_LG01               | 54.128                                       |
| Ca_Desi_SNP479 | [T/C]       | Ca_Desi_LG01               | 54.141                                       |
| Ca_Desi_SNP480 | [C/G]       | Ca_Desi_LG01               | 54.145                                       |
| Ca_Desi_SNP481 | [T/C]       | Ca_Desi_LG01               | 54.172                                       |
| Ca_Desi_SNP482 | [G/T]       | Ca_Desi_LG01               | 54.344                                       |
| Ca_Desi_SNP483 | [T/C]       | Ca_Desi_LG01               | 54.383                                       |
| Ca_Desi_SNP484 | [C/T]       | Ca_Desi_LG01               | 54.441                                       |
| Ca_Desi_SNP485 | [A/G]       | Ca_Desi_LG01               | 54.508                                       |
| Ca_Desi_SNP486 | [A/C]       | Ca_Desi_LG01               | 54.514                                       |
| Ca_Desi_SNP487 | [T/C]       | Ca_Desi_LG01               | 54.536                                       |
| Ca_Desi_SNP488 | [T/C]       | Ca_Desi_LG01               | 54.597                                       |
| Ca_Desi_SNP489 | [G/A]       | Ca_Desi_LG01               | 54.713                                       |
| Ca_Desi_SNP490 | [A/G]       | Ca_Desi_LG01               | 54.869                                       |
| Ca_Desi_SNP491 | [T/C]       | Ca_Desi_LG01               | 54.883                                       |
| Ca_Desi_SNP492 | [G/C]       | Ca_Desi_LG01               | 55.000                                       |

| <b>SNP IDs</b> | <b>SNPs</b> | <b>Linkage Group (LGs)</b> | <b>Genetic positions (cM) of mapped SNPs</b> |
|----------------|-------------|----------------------------|----------------------------------------------|
| Ca_Desi_SNP493 | [T/A]       | Ca_Desi_LG01               | 55.012                                       |
| Ca_Desi_SNP494 | [A/G]       | Ca_Desi_LG01               | 55.109                                       |
| Ca_Desi_SNP495 | [A/C]       | Ca_Desi_LG01               | 55.115                                       |
| Ca_Desi_SNP496 | [A/G]       | Ca_Desi_LG01               | 55.118                                       |
| Ca_Desi_SNP497 | [G/A]       | Ca_Desi_LG01               | 55.160                                       |
| Ca_Desi_SNP498 | [T/C]       | Ca_Desi_LG01               | 55.161                                       |
| Ca_Desi_SNP499 | [A/T]       | Ca_Desi_LG01               | 55.224                                       |
| Ca_Desi_SNP500 | [A/G]       | Ca_Desi_LG01               | 55.245                                       |
| Ca_Desi_SNP501 | [A/C]       | Ca_Desi_LG01               | 55.295                                       |
| Ca_Desi_SNP502 | [C/T]       | Ca_Desi_LG01               | 55.318                                       |
| Ca_Desi_SNP503 | [T/C]       | Ca_Desi_LG01               | 55.349                                       |
| Ca_Desi_SNP504 | [A/G]       | Ca_Desi_LG01               | 55.433                                       |
| Ca_Desi_SNP505 | [A/G]       | Ca_Desi_LG01               | 55.442                                       |
| Ca_Desi_SNP506 | [A/G]       | Ca_Desi_LG01               | 55.456                                       |
| Ca_Desi_SNP507 | [T/C]       | Ca_Desi_LG01               | 55.475                                       |
| Ca_Desi_SNP508 | [T/C]       | Ca_Desi_LG01               | 55.538                                       |
| Ca_Desi_SNP509 | [T/A]       | Ca_Desi_LG01               | 55.724                                       |
| Ca_Desi_SNP510 | [C/A]       | Ca_Desi_LG01               | 55.732                                       |
| Ca_Desi_SNP511 | [T/C]       | Ca_Desi_LG01               | 55.757                                       |
| Ca_Desi_SNP512 | [T/C]       | Ca_Desi_LG01               | 56.022                                       |
| Ca_Desi_SNP513 | [C/T]       | Ca_Desi_LG01               | 56.043                                       |
| Ca_Desi_SNP514 | [A/G]       | Ca_Desi_LG01               | 56.130                                       |
| Ca_Desi_SNP515 | [A/G]       | Ca_Desi_LG01               | 56.158                                       |
| Ca_Desi_SNP516 | [A/C]       | Ca_Desi_LG01               | 56.301                                       |
| Ca_Desi_SNP517 | [A/C]       | Ca_Desi_LG01               | 56.350                                       |
| Ca_Desi_SNP518 | [A/T]       | Ca_Desi_LG01               | 56.514                                       |
| Ca_Desi_SNP519 | [T/C]       | Ca_Desi_LG01               | 56.572                                       |
| Ca_Desi_SNP520 | [T/G]       | Ca_Desi_LG01               | 56.606                                       |
| Ca_Desi_SNP521 | [A/G]       | Ca_Desi_LG01               | 56.661                                       |
| Ca_Desi_SNP522 | [A/T]       | Ca_Desi_LG01               | 56.690                                       |
| Ca_Desi_SNP523 | [T/C]       | Ca_Desi_LG01               | 56.760                                       |

| <b>SNP IDs</b> | <b>SNPs</b> | <b>Linkage Group (LGs)</b> | <b>Genetic positions (cM) of mapped SNPs</b> |
|----------------|-------------|----------------------------|----------------------------------------------|
| Ca_Desi_SNP524 | [A/T]       | Ca_Desi_LG01               | 56.786                                       |
| Ca_Desi_SNP525 | [A/G]       | Ca_Desi_LG01               | 56.984                                       |
| Ca_Desi_SNP526 | [A/G]       | Ca_Desi_LG01               | 57.121                                       |
| Ca_Desi_SNP527 | [T/C]       | Ca_Desi_LG01               | 57.172                                       |
| Ca_Desi_SNP528 | [T/C]       | Ca_Desi_LG01               | 57.223                                       |
| Ca_Desi_SNP529 | [T/C]       | Ca_Desi_LG01               | 57.294                                       |
| Ca_Desi_SNP530 | [G/C]       | Ca_Desi_LG01               | 57.334                                       |
| Ca_Desi_SNP531 | [A/G]       | Ca_Desi_LG01               | 57.540                                       |
| Ca_Desi_SNP532 | [T/C]       | Ca_Desi_LG01               | 57.632                                       |
| Ca_Desi_SNP533 | [A/G]       | Ca_Desi_LG01               | 57.688                                       |
| Ca_Desi_SNP534 | [A/C]       | Ca_Desi_LG01               | 57.692                                       |
| Ca_Desi_SNP535 | [T/G]       | Ca_Desi_LG01               | 57.700                                       |
| Ca_Desi_SNP536 | [G/A]       | Ca_Desi_LG01               | 57.720                                       |
| Ca_Desi_SNP537 | [A/C]       | Ca_Desi_LG01               | 57.906                                       |
| Ca_Desi_SNP538 | [A/G]       | Ca_Desi_LG01               | 57.927                                       |
| Ca_Desi_SNP539 | [T/G]       | Ca_Desi_LG01               | 58.070                                       |
| Ca_Desi_SNP540 | [G/T]       | Ca_Desi_LG01               | 58.093                                       |
| Ca_Desi_SNP541 | [T/G]       | Ca_Desi_LG01               | 58.304                                       |
| Ca_Desi_SNP542 | [A/C]       | Ca_Desi_LG01               | 58.358                                       |
| Ca_Desi_SNP543 | [T/A]       | Ca_Desi_LG01               | 58.390                                       |
| Ca_Desi_SNP544 | [A/C]       | Ca_Desi_LG01               | 58.530                                       |
| Ca_Desi_SNP545 | [T/C]       | Ca_Desi_LG01               | 58.758                                       |
| Ca_Desi_SNP546 | [T/G]       | Ca_Desi_LG01               | 58.790                                       |
| Ca_Desi_SNP547 | [T/C]       | Ca_Desi_LG01               | 58.843                                       |
| Ca_Desi_SNP548 | [T/C]       | Ca_Desi_LG01               | 58.876                                       |
| Ca_Desi_SNP549 | [T/C]       | Ca_Desi_LG01               | 58.928                                       |
| Ca_Desi_SNP550 | [G/A]       | Ca_Desi_LG01               | 58.934                                       |
| Ca_Desi_SNP551 | [T/G]       | Ca_Desi_LG01               | 58.947                                       |
| Ca_Desi_SNP552 | [C/A]       | Ca_Desi_LG01               | 58.974                                       |
| Ca_Desi_SNP553 | [T/G]       | Ca_Desi_LG01               | 58.981                                       |
| Ca_Desi_SNP554 | [A/T]       | Ca_Desi_LG01               | 59.042                                       |

| <b>SNP IDs</b> | <b>SNPs</b> | <b>Linkage Group (LGs)</b> | <b>Genetic positions (cM) of mapped SNPs</b> |
|----------------|-------------|----------------------------|----------------------------------------------|
| Ca_Desi_SNP555 | [G/A]       | Ca_Desi_LG01               | 59.057                                       |
| Ca_Desi_SNP556 | [T/C]       | Ca_Desi_LG01               | 59.075                                       |
| Ca_Desi_SNP557 | [G/A]       | Ca_Desi_LG01               | 59.131                                       |
| Ca_Desi_SNP558 | [A/G]       | Ca_Desi_LG01               | 59.154                                       |
| Ca_Desi_SNP559 | [A/G]       | Ca_Desi_LG01               | 59.239                                       |
| Ca_Desi_SNP560 | [A/T]       | Ca_Desi_LG01               | 59.271                                       |
| Ca_Desi_SNP561 | [A/C]       | Ca_Desi_LG01               | 59.306                                       |
| Ca_Desi_SNP562 | [T/G]       | Ca_Desi_LG01               | 59.429                                       |
| Ca_Desi_SNP563 | [A/C]       | Ca_Desi_LG01               | 59.578                                       |
| Ca_Desi_SNP564 | [T/C]       | Ca_Desi_LG01               | 59.584                                       |
| Ca_Desi_SNP565 | [T/C]       | Ca_Desi_LG01               | 59.590                                       |
| Ca_Desi_SNP566 | [C/A]       | Ca_Desi_LG01               | 59.671                                       |
| Ca_Desi_SNP567 | [C/T]       | Ca_Desi_LG01               | 59.822                                       |
| Ca_Desi_SNP568 | [G/C]       | Ca_Desi_LG01               | 59.845                                       |
| Ca_Desi_SNP569 | [G/A]       | Ca_Desi_LG01               | 59.869                                       |
| Ca_Desi_SNP570 | [C/G]       | Ca_Desi_LG01               | 60.108                                       |
| Ca_Desi_SNP571 | [A/G]       | Ca_Desi_LG01               | 60.189                                       |
| Ca_Desi_SNP572 | [A/G]       | Ca_Desi_LG01               | 60.401                                       |
| Ca_Desi_SNP573 | [A/G]       | Ca_Desi_LG01               | 60.446                                       |
| Ca_Desi_SNP574 | [A/G]       | Ca_Desi_LG01               | 60.495                                       |
| Ca_Desi_SNP575 | [A/G]       | Ca_Desi_LG01               | 60.548                                       |
| Ca_Desi_SNP576 | [C/T]       | Ca_Desi_LG01               | 60.616                                       |
| Ca_Desi_SNP577 | [T/C]       | Ca_Desi_LG01               | 60.619                                       |
| Ca_Desi_SNP578 | [G/T]       | Ca_Desi_LG01               | 60.673                                       |
| Ca_Desi_SNP579 | [G/A]       | Ca_Desi_LG01               | 60.722                                       |
| Ca_Desi_SNP580 | [T/C]       | Ca_Desi_LG01               | 60.775                                       |
| Ca_Desi_SNP581 | [A/C]       | Ca_Desi_LG01               | 60.915                                       |
| Ca_Desi_SNP582 | [T/C]       | Ca_Desi_LG01               | 60.938                                       |
| Ca_Desi_SNP583 | [A/G]       | Ca_Desi_LG01               | 61.090                                       |
| Ca_Desi_SNP584 | [A/C]       | Ca_Desi_LG01               | 61.091                                       |
| Ca_Desi_SNP585 | [A/G]       | Ca_Desi_LG01               | 61.093                                       |

| <b>SNP IDs</b> | <b>SNPs</b> | <b>Linkage Group (LGs)</b> | <b>Genetic positions (cM) of mapped SNPs</b> |
|----------------|-------------|----------------------------|----------------------------------------------|
| Ca_Desi_SNP586 | [G/A]       | Ca_Desi_LG01               | 61.159                                       |
| Ca_Desi_SNP587 | [T/A]       | Ca_Desi_LG01               | 61.182                                       |
| Ca_Desi_SNP588 | [A/G]       | Ca_Desi_LG01               | 61.355                                       |
| Ca_Desi_SNP589 | [T/C]       | Ca_Desi_LG01               | 61.361                                       |
| Ca_Desi_SNP590 | [T/C]       | Ca_Desi_LG01               | 61.417                                       |
| Ca_Desi_SNP591 | [T/C]       | Ca_Desi_LG01               | 61.419                                       |
| Ca_Desi_SNP592 | [T/G]       | Ca_Desi_LG01               | 61.466                                       |
| Ca_Desi_SNP593 | [A/C]       | Ca_Desi_LG01               | 61.615                                       |
| Ca_Desi_SNP594 | [C/T]       | Ca_Desi_LG01               | 61.623                                       |
| Ca_Desi_SNP595 | [T/G]       | Ca_Desi_LG01               | 61.738                                       |
| Ca_Desi_SNP596 | [T/C]       | Ca_Desi_LG01               | 61.997                                       |
| Ca_Desi_SNP597 | [T/C]       | Ca_Desi_LG01               | 62.083                                       |
| Ca_Desi_SNP598 | [A/G]       | Ca_Desi_LG01               | 62.174                                       |
| Ca_Desi_SNP599 | [A/G]       | Ca_Desi_LG01               | 62.397                                       |
| Ca_Desi_SNP600 | [A/G]       | Ca_Desi_LG01               | 62.456                                       |
| Ca_Desi_SNP601 | [G/A]       | Ca_Desi_LG01               | 62.570                                       |
| Ca_Desi_SNP602 | [T/C]       | Ca_Desi_LG01               | 62.707                                       |
| Ca_Desi_SNP603 | [T/C]       | Ca_Desi_LG01               | 62.708                                       |
| Ca_Desi_SNP604 | [T/G]       | Ca_Desi_LG01               | 62.819                                       |
| Ca_Desi_SNP605 | [A/T]       | Ca_Desi_LG01               | 62.823                                       |
| Ca_Desi_SNP606 | [A/G]       | Ca_Desi_LG01               | 62.887                                       |
| Ca_Desi_SNP607 | [T/A]       | Ca_Desi_LG01               | 63.022                                       |
| Ca_Desi_SNP608 | [C/T]       | Ca_Desi_LG01               | 63.083                                       |
| Ca_Desi_SNP609 | [A/G]       | Ca_Desi_LG01               | 63.198                                       |
| Ca_Desi_SNP610 | [A/G]       | Ca_Desi_LG01               | 63.255                                       |
| Ca_Desi_SNP611 | [T/C]       | Ca_Desi_LG01               | 63.312                                       |
| Ca_Desi_SNP612 | [T/G]       | Ca_Desi_LG01               | 63.341                                       |
| Ca_Desi_SNP613 | [A/G]       | Ca_Desi_LG01               | 63.381                                       |
| Ca_Desi_SNP614 | [T/C]       | Ca_Desi_LG01               | 63.469                                       |
| Ca_Desi_SNP615 | [A/G]       | Ca_Desi_LG01               | 63.538                                       |
| Ca_Desi_SNP616 | [T/G]       | Ca_Desi_LG01               | 63.546                                       |

| <b>SNP IDs</b>  | <b>SNPs</b> | <b>Linkage Group (LGs)</b> | <b>Genetic positions (cM) of mapped SNPs</b> |
|-----------------|-------------|----------------------------|----------------------------------------------|
| Ca_Desig_SNP617 | [T/G]       | Ca_Desig_LG01              | 63.583                                       |
| Ca_Desig_SNP618 | [A/G]       | Ca_Desig_LG01              | 63.722                                       |
| Ca_Desig_SNP619 | [G/A]       | Ca_Desig_LG01              | 63.920                                       |
| Ca_Desig_SNP620 | [A/G]       | Ca_Desig_LG01              | 63.980                                       |
| Ca_Desig_SNP621 | [G/T]       | Ca_Desig_LG01              | 64.000                                       |
| Ca_Desig_SNP622 | [C/T]       | Ca_Desig_LG01              | 64.053                                       |
| Ca_Desig_SNP623 | [A/C]       | Ca_Desig_LG01              | 64.064                                       |
| Ca_Desig_SNP624 | [A/C]       | Ca_Desig_LG01              | 64.169                                       |
| Ca_Desig_SNP625 | [T/C]       | Ca_Desig_LG01              | 64.180                                       |
| Ca_Desig_SNP626 | [A/G]       | Ca_Desig_LG01              | 64.183                                       |
| Ca_Desig_SNP627 | [T/G]       | Ca_Desig_LG01              | 64.237                                       |
| Ca_Desig_SNP628 | [A/G]       | Ca_Desig_LG01              | 64.307                                       |
| Ca_Desig_SNP629 | [A/G]       | Ca_Desig_LG01              | 64.359                                       |
| Ca_Desig_SNP630 | [A/C]       | Ca_Desig_LG01              | 64.397                                       |
| Ca_Desig_SNP631 | [G/A]       | Ca_Desig_LG01              | 64.423                                       |
| Ca_Desig_SNP632 | [T/G]       | Ca_Desig_LG01              | 64.462                                       |
| Ca_Desig_SNP633 | [A/G]       | Ca_Desig_LG01              | 64.494                                       |
| Ca_Desig_SNP634 | [C/T]       | Ca_Desig_LG01              | 64.545                                       |
| Ca_Desig_SNP635 | [C/A]       | Ca_Desig_LG01              | 64.572                                       |
| Ca_Desig_SNP636 | [G/A]       | Ca_Desig_LG01              | 64.655                                       |
| Ca_Desig_SNP637 | [T/G]       | Ca_Desig_LG01              | 64.707                                       |
| Ca_Desig_SNP638 | [G/A]       | Ca_Desig_LG01              | 64.817                                       |
| Ca_Desig_SNP639 | [A/C]       | Ca_Desig_LG01              | 64.977                                       |
| Ca_Desig_SNP640 | [A/G]       | Ca_Desig_LG01              | 65.111                                       |
| Ca_Desig_SNP641 | [A/G]       | Ca_Desig_LG01              | 65.404                                       |
| Ca_Desig_SNP642 | [A/C]       | Ca_Desig_LG01              | 65.547                                       |
| Ca_Desig_SNP643 | [C/G]       | Ca_Desig_LG01              | 65.622                                       |
| Ca_Desig_SNP644 | [A/G]       | Ca_Desig_LG01              | 65.630                                       |
| Ca_Desig_SNP645 | [T/C]       | Ca_Desig_LG01              | 65.674                                       |
| Ca_Desig_SNP646 | [T/C]       | Ca_Desig_LG01              | 65.773                                       |
| Ca_Desig_SNP647 | [C/A]       | Ca_Desig_LG01              | 65.941                                       |

| <b>SNP IDs</b> | <b>SNPs</b> | <b>Linkage Group (LGs)</b> | <b>Genetic positions (cM) of mapped SNPs</b> |
|----------------|-------------|----------------------------|----------------------------------------------|
| Ca_Desi_SNP648 | [T/C]       | Ca_Desi_LG01               | 66.014                                       |
| Ca_Desi_SNP649 | [A/C]       | Ca_Desi_LG01               | 66.061                                       |
| Ca_Desi_SNP650 | [T/G]       | Ca_Desi_LG01               | 66.206                                       |
| Ca_Desi_SNP651 | [A/G]       | Ca_Desi_LG01               | 66.299                                       |
| Ca_Desi_SNP652 | [G/A]       | Ca_Desi_LG01               | 66.744                                       |
| Ca_Desi_SNP653 | [A/G]       | Ca_Desi_LG01               | 66.813                                       |
| Ca_Desi_SNP654 | [A/C]       | Ca_Desi_LG01               | 66.876                                       |
| Ca_Desi_SNP655 | [T/A]       | Ca_Desi_LG01               | 67.106                                       |
| Ca_Desi_SNP656 | [A/C]       | Ca_Desi_LG01               | 67.134                                       |
| Ca_Desi_SNP657 | [T/C]       | Ca_Desi_LG01               | 67.220                                       |
| Ca_Desi_SNP658 | [T/C]       | Ca_Desi_LG01               | 67.262                                       |
| Ca_Desi_SNP659 | [T/G]       | Ca_Desi_LG01               | 67.383                                       |
| Ca_Desi_SNP660 | [T/A]       | Ca_Desi_LG01               | 67.535                                       |
| Ca_Desi_SNP661 | [T/C]       | Ca_Desi_LG01               | 67.922                                       |
| Ca_Desi_SNP662 | [G/C]       | Ca_Desi_LG01               | 68.187                                       |
| Ca_Desi_SNP663 | [A/C]       | Ca_Desi_LG01               | 68.264                                       |
| Ca_Desi_SNP664 | [A/G]       | Ca_Desi_LG01               | 68.342                                       |
| Ca_Desi_SNP665 | [T/G]       | Ca_Desi_LG01               | 68.556                                       |
| Ca_Desi_SNP666 | [G/A]       | Ca_Desi_LG01               | 68.593                                       |
| Ca_Desi_SNP667 | [T/C]       | Ca_Desi_LG01               | 68.602                                       |
| Ca_Desi_SNP668 | [C/T]       | Ca_Desi_LG01               | 68.874                                       |
| Ca_Desi_SNP669 | [T/C]       | Ca_Desi_LG01               | 68.933                                       |
| Ca_Desi_SNP670 | [C/T]       | Ca_Desi_LG01               | 69.055                                       |
| Ca_Desi_SNP671 | [A/G]       | Ca_Desi_LG01               | 69.095                                       |
| Ca_Desi_SNP672 | [A/G]       | Ca_Desi_LG01               | 69.194                                       |
| Ca_Desi_SNP673 | [T/C]       | Ca_Desi_LG01               | 69.204                                       |
| Ca_Desi_SNP674 | [T/C]       | Ca_Desi_LG01               | 69.303                                       |
| Ca_Desi_SNP675 | [T/C]       | Ca_Desi_LG01               | 69.389                                       |
| Ca_Desi_SNP676 | [A/G]       | Ca_Desi_LG01               | 69.453                                       |
| Ca_Desi_SNP677 | [A/G]       | Ca_Desi_LG01               | 69.737                                       |
| Ca_Desi_SNP678 | [A/G]       | Ca_Desi_LG01               | 69.757                                       |

| <b>SNP IDs</b> | <b>SNPs</b> | <b>Linkage Group (LGs)</b> | <b>Genetic positions (cM) of mapped SNPs</b> |
|----------------|-------------|----------------------------|----------------------------------------------|
| Ca_Desi_SNP679 | [A/T]       | Ca_Desi_LG01               | 69.876                                       |
| Ca_Desi_SNP680 | [C/A]       | Ca_Desi_LG01               | 70.529                                       |
| Ca_Desi_SNP681 | [A/T]       | Ca_Desi_LG01               | 70.639                                       |
| Ca_Desi_SNP682 | [A/G]       | Ca_Desi_LG01               | 71.370                                       |
| Ca_Desi_SNP683 | [G/A]       | Ca_Desi_LG01               | 71.452                                       |
| Ca_Desi_SNP684 | [T/C]       | Ca_Desi_LG01               | 71.548                                       |
| Ca_Desi_SNP685 | [G/A]       | Ca_Desi_LG01               | 71.700                                       |
| Ca_Desi_SNP686 | [A/T]       | Ca_Desi_LG01               | 71.827                                       |
| Ca_Desi_SNP687 | [C/A]       | Ca_Desi_LG01               | 71.914                                       |
| Ca_Desi_SNP688 | [A/G]       | Ca_Desi_LG01               | 71.993                                       |
| Ca_Desi_SNP689 | [T/C]       | Ca_Desi_LG01               | 72.305                                       |
| Ca_Desi_SNP690 | [T/G]       | Ca_Desi_LG01               | 72.454                                       |
| Ca_Desi_SNP691 | [T/G]       | Ca_Desi_LG01               | 72.506                                       |
| Ca_Desi_SNP692 | [A/C]       | Ca_Desi_LG01               | 72.543                                       |
| Ca_Desi_SNP693 | [A/C]       | Ca_Desi_LG01               | 72.636                                       |
| Ca_Desi_SNP694 | [T/G]       | Ca_Desi_LG01               | 72.752                                       |
| Ca_Desi_SNP695 | [A/C]       | Ca_Desi_LG01               | 72.769                                       |
| Ca_Desi_SNP696 | [T/C]       | Ca_Desi_LG01               | 72.878                                       |
| Ca_Desi_SNP697 | [C/A]       | Ca_Desi_LG01               | 73.001                                       |
| Ca_Desi_SNP698 | [T/G]       | Ca_Desi_LG01               | 73.166                                       |
| Ca_Desi_SNP699 | [A/G]       | Ca_Desi_LG01               | 73.737                                       |
| Ca_Desi_SNP700 | [A/G]       | Ca_Desi_LG01               | 73.820                                       |
| Ca_Desi_SNP701 | [C/T]       | Ca_Desi_LG01               | 73.822                                       |
| Ca_Desi_SNP702 | [T/C]       | Ca_Desi_LG01               | 73.978                                       |
| Ca_Desi_SNP703 | [C/T]       | Ca_Desi_LG01               | 73.997                                       |
| Ca_Desi_SNP704 | [A/C]       | Ca_Desi_LG01               | 74.092                                       |
| Ca_Desi_SNP705 | [A/C]       | Ca_Desi_LG01               | 74.200                                       |
| Ca_Desi_SNP706 | [T/C]       | Ca_Desi_LG01               | 75.068                                       |
| Ca_Desi_SNP707 | [A/G]       | Ca_Desi_LG01               | 75.258                                       |
| Ca_Desi_SNP708 | [A/G]       | Ca_Desi_LG01               | 75.381                                       |
| Ca_Desi_SNP709 | [T/A]       | Ca_Desi_LG01               | 75.405                                       |



| <b>SNP IDs</b> | <b>SNPs</b> | <b>Linkage Group (LGs)</b> | <b>Genetic positions (cM) of mapped SNPs</b> |
|----------------|-------------|----------------------------|----------------------------------------------|
| Ca_Desi_SNP710 | [G/C]       | Ca_Desi_LG01               | 75.652                                       |
| Ca_Desi_SNP711 | [C/T]       | Ca_Desi_LG01               | 75.838                                       |
| Ca_Desi_SNP712 | [A/T]       | Ca_Desi_LG01               | 75.972                                       |
| Ca_Desi_SNP713 | [T/C]       | Ca_Desi_LG01               | 76.187                                       |
| Ca_Desi_SNP714 | [C/A]       | Ca_Desi_LG01               | 76.275                                       |
| Ca_Desi_SNP715 | [T/G]       | Ca_Desi_LG01               | 76.317                                       |
| Ca_Desi_SNP716 | [T/G]       | Ca_Desi_LG01               | 76.792                                       |
| Ca_Desi_SNP717 | [T/C]       | Ca_Desi_LG01               | 77.331                                       |
| Ca_Desi_SNP718 | [A/C]       | Ca_Desi_LG01               | 77.653                                       |
| Ca_Desi_SNP719 | [A/G]       | Ca_Desi_LG01               | 78.635                                       |
| Ca_Desi_SNP720 | [A/G]       | Ca_Desi_LG01               | 78.771                                       |
| Ca_Desi_SNP721 | [T/G]       | Ca_Desi_LG01               | 78.995                                       |
| Ca_Desi_SNP722 | [T/G]       | Ca_Desi_LG01               | 79.324                                       |
| Ca_Desi_SNP723 | [A/G]       | Ca_Desi_LG01               | 79.431                                       |
| Ca_Desi_SNP724 | [G/A]       | Ca_Desi_LG01               | 80.720                                       |
| Ca_Desi_SNP725 | [T/G]       | Ca_Desi_LG01               | 80.791                                       |
| Ca_Desi_SNP726 | [T/G]       | Ca_Desi_LG01               | 80.988                                       |
| Ca_Desi_SNP727 | [A/C]       | Ca_Desi_LG01               | 81.116                                       |
| Ca_Desi_SNP728 | [C/T]       | Ca_Desi_LG01               | 81.151                                       |
| Ca_Desi_SNP729 | [T/C]       | Ca_Desi_LG01               | 81.184                                       |
| Ca_Desi_SNP730 | [C/T]       | Ca_Desi_LG01               | 81.557                                       |
| Ca_Desi_SNP731 | [T/C]       | Ca_Desi_LG01               | 82.277                                       |
| Ca_Desi_SNP732 | [A/G]       | Ca_Desi_LG01               | 83.102                                       |
| Ca_Desi_SNP733 | [G/A]       | Ca_Desi_LG01               | 83.657                                       |
| Ca_Desi_SNP734 | [A/T]       | Ca_Desi_LG01               | 84.062                                       |
| Ca_Desi_SNP735 | [T/C]       | Ca_Desi_LG01               | 85.443                                       |
| Ca_Desi_SNP736 | [A/G]       | Ca_Desi_LG01               | 86.076                                       |
| Ca_Desi_SNP737 | [A/G]       | Ca_Desi_LG02               | 0.000                                        |
| Ca_Desi_SNP738 | [A/C]       | Ca_Desi_LG02               | 1.214                                        |
| Ca_Desi_SNP739 | [T/C]       | Ca_Desi_LG02               | 2.230                                        |
| Ca_Desi_SNP740 | [C/A]       | Ca_Desi_LG02               | 2.321                                        |

| <b>SNP IDs</b> | <b>SNPs</b> | <b>Linkage Group (LGs)</b> | <b>Genetic positions (cM) of mapped SNPs</b> |
|----------------|-------------|----------------------------|----------------------------------------------|
| Ca_Desi_SNP741 | [T/A]       | Ca_Desi_LG02               | 2.705                                        |
| Ca_Desi_SNP742 | [A/C]       | Ca_Desi_LG02               | 2.849                                        |
| Ca_Desi_SNP743 | [G/C]       | Ca_Desi_LG02               | 3.178                                        |
| Ca_Desi_SNP744 | [T/C]       | Ca_Desi_LG02               | 3.418                                        |
| Ca_Desi_SNP745 | [G/A]       | Ca_Desi_LG02               | 3.585                                        |
| Ca_Desi_SNP746 | [G/C]       | Ca_Desi_LG02               | 4.524                                        |
| Ca_Desi_SNP747 | [T/G]       | Ca_Desi_LG02               | 4.552                                        |
| Ca_Desi_SNP748 | [A/G]       | Ca_Desi_LG02               | 5.233                                        |
| Ca_Desi_SNP749 | [G/A]       | Ca_Desi_LG02               | 5.373                                        |
| Ca_Desi_SNP750 | [T/C]       | Ca_Desi_LG02               | 5.473                                        |
| Ca_Desi_SNP751 | [T/C]       | Ca_Desi_LG02               | 7.891                                        |
| Ca_Desi_SNP752 | [G/A]       | Ca_Desi_LG02               | 9.224                                        |
| Ca_Desi_SNP753 | [T/C]       | Ca_Desi_LG02               | 9.275                                        |
| Ca_Desi_SNP754 | [G/A]       | Ca_Desi_LG02               | 10.101                                       |
| Ca_Desi_SNP755 | [T/C]       | Ca_Desi_LG02               | 11.016                                       |
| Ca_Desi_SNP756 | [T/G]       | Ca_Desi_LG02               | 11.641                                       |
| Ca_Desi_SNP757 | [T/C]       | Ca_Desi_LG02               | 11.958                                       |
| Ca_Desi_SNP758 | [T/C]       | Ca_Desi_LG02               | 12.025                                       |
| Ca_Desi_SNP759 | [A/C]       | Ca_Desi_LG02               | 12.451                                       |
| Ca_Desi_SNP760 | [C/A]       | Ca_Desi_LG02               | 12.634                                       |
| Ca_Desi_SNP761 | [T/G]       | Ca_Desi_LG02               | 12.680                                       |
| Ca_Desi_SNP762 | [C/G]       | Ca_Desi_LG02               | 13.743                                       |
| Ca_Desi_SNP763 | [A/G]       | Ca_Desi_LG02               | 14.012                                       |
| Ca_Desi_SNP764 | [T/C]       | Ca_Desi_LG02               | 14.531                                       |
| Ca_Desi_SNP765 | [T/C]       | Ca_Desi_LG02               | 14.980                                       |
| Ca_Desi_SNP766 | [G/A]       | Ca_Desi_LG02               | 15.083                                       |
| Ca_Desi_SNP767 | [A/T]       | Ca_Desi_LG02               | 15.150                                       |
| Ca_Desi_SNP768 | [G/T]       | Ca_Desi_LG02               | 15.258                                       |
| Ca_Desi_SNP769 | [A/T]       | Ca_Desi_LG02               | 15.314                                       |
| Ca_Desi_SNP770 | [T/G]       | Ca_Desi_LG02               | 15.882                                       |
| Ca_Desi_SNP771 | [T/C]       | Ca_Desi_LG02               | 16.304                                       |

| <b>SNP IDs</b> | <b>SNPs</b> | <b>Linkage Group (LGs)</b> | <b>Genetic positions (cM) of mapped SNPs</b> |
|----------------|-------------|----------------------------|----------------------------------------------|
| Ca_Desi_SNP772 | [A/T]       | Ca_Desi_LG02               | 16.619                                       |
| Ca_Desi_SNP773 | [A/T]       | Ca_Desi_LG02               | 16.870                                       |
| Ca_Desi_SNP774 | [A/C]       | Ca_Desi_LG02               | 17.433                                       |
| Ca_Desi_SNP775 | [T/C]       | Ca_Desi_LG02               | 17.461                                       |
| Ca_Desi_SNP776 | [C/A]       | Ca_Desi_LG02               | 17.586                                       |
| Ca_Desi_SNP777 | [T/G]       | Ca_Desi_LG02               | 17.692                                       |
| Ca_Desi_SNP778 | [A/G]       | Ca_Desi_LG02               | 18.172                                       |
| Ca_Desi_SNP779 | [T/C]       | Ca_Desi_LG02               | 18.309                                       |
| Ca_Desi_SNP780 | [T/G]       | Ca_Desi_LG02               | 18.389                                       |
| Ca_Desi_SNP781 | [T/C]       | Ca_Desi_LG02               | 18.513                                       |
| Ca_Desi_SNP782 | [C/A]       | Ca_Desi_LG02               | 18.518                                       |
| Ca_Desi_SNP783 | [A/C]       | Ca_Desi_LG02               | 19.265                                       |
| Ca_Desi_SNP784 | [T/C]       | Ca_Desi_LG02               | 19.321                                       |
| Ca_Desi_SNP785 | [T/C]       | Ca_Desi_LG02               | 19.553                                       |
| Ca_Desi_SNP786 | [T/G]       | Ca_Desi_LG02               | 19.609                                       |
| Ca_Desi_SNP787 | [A/C]       | Ca_Desi_LG02               | 19.941                                       |
| Ca_Desi_SNP788 | [T/C]       | Ca_Desi_LG02               | 20.521                                       |
| Ca_Desi_SNP789 | [T/G]       | Ca_Desi_LG02               | 20.549                                       |
| Ca_Desi_SNP790 | [T/C]       | Ca_Desi_LG02               | 20.817                                       |
| Ca_Desi_SNP791 | [C/T]       | Ca_Desi_LG02               | 20.818                                       |
| Ca_Desi_SNP792 | [G/A]       | Ca_Desi_LG02               | 20.867                                       |
| Ca_Desi_SNP793 | [T/C]       | Ca_Desi_LG02               | 20.974                                       |
| Ca_Desi_SNP794 | [G/A]       | Ca_Desi_LG02               | 21.063                                       |
| Ca_Desi_SNP795 | [A/G]       | Ca_Desi_LG02               | 21.077                                       |
| Ca_Desi_SNP796 | [A/G]       | Ca_Desi_LG02               | 21.137                                       |
| Ca_Desi_SNP797 | [T/G]       | Ca_Desi_LG02               | 21.428                                       |
| Ca_Desi_SNP798 | [T/G]       | Ca_Desi_LG02               | 21.477                                       |
| Ca_Desi_SNP799 | [G/A]       | Ca_Desi_LG02               | 21.635                                       |
| Ca_Desi_SNP800 | [T/C]       | Ca_Desi_LG02               | 21.691                                       |
| Ca_Desi_SNP801 | [A/C]       | Ca_Desi_LG02               | 21.729                                       |
| Ca_Desi_SNP802 | [G/A]       | Ca_Desi_LG02               | 21.745                                       |

| <b>SNP IDs</b> | <b>SNPs</b> | <b>Linkage Group (LGs)</b> | <b>Genetic positions (cM) of mapped SNPs</b> |
|----------------|-------------|----------------------------|----------------------------------------------|
| Ca_Desi_SNP803 | [C/A]       | Ca_Desi_LG02               | 21.885                                       |
| Ca_Desi_SNP804 | [T/C]       | Ca_Desi_LG02               | 21.920                                       |
| Ca_Desi_SNP805 | [T/C]       | Ca_Desi_LG02               | 22.093                                       |
| Ca_Desi_SNP806 | [A/C]       | Ca_Desi_LG02               | 22.119                                       |
| Ca_Desi_SNP807 | [T/A]       | Ca_Desi_LG02               | 22.167                                       |
| Ca_Desi_SNP808 | [A/G]       | Ca_Desi_LG02               | 22.278                                       |
| Ca_Desi_SNP809 | [A/C]       | Ca_Desi_LG02               | 22.364                                       |
| Ca_Desi_SNP810 | [A/G]       | Ca_Desi_LG02               | 22.608                                       |
| Ca_Desi_SNP811 | [A/C]       | Ca_Desi_LG02               | 22.887                                       |
| Ca_Desi_SNP812 | [T/C]       | Ca_Desi_LG02               | 22.891                                       |
| Ca_Desi_SNP813 | [A/G]       | Ca_Desi_LG02               | 23.051                                       |
| Ca_Desi_SNP814 | [T/C]       | Ca_Desi_LG02               | 23.058                                       |
| Ca_Desi_SNP815 | [C/T]       | Ca_Desi_LG02               | 23.124                                       |
| Ca_Desi_SNP816 | [A/G]       | Ca_Desi_LG02               | 23.432                                       |
| Ca_Desi_SNP817 | [G/A]       | Ca_Desi_LG02               | 23.490                                       |
| Ca_Desi_SNP818 | [A/G]       | Ca_Desi_LG02               | 23.629                                       |
| Ca_Desi_SNP819 | [T/C]       | Ca_Desi_LG02               | 23.857                                       |
| Ca_Desi_SNP820 | [T/C]       | Ca_Desi_LG02               | 24.070                                       |
| Ca_Desi_SNP821 | [T/G]       | Ca_Desi_LG02               | 24.119                                       |
| Ca_Desi_SNP822 | [A/G]       | Ca_Desi_LG02               | 24.210                                       |
| Ca_Desi_SNP823 | [G/A]       | Ca_Desi_LG02               | 24.800                                       |
| Ca_Desi_SNP824 | [A/G]       | Ca_Desi_LG02               | 24.898                                       |
| Ca_Desi_SNP825 | [T/C]       | Ca_Desi_LG02               | 25.050                                       |
| Ca_Desi_SNP826 | [T/A]       | Ca_Desi_LG02               | 25.066                                       |
| Ca_Desi_SNP827 | [T/A]       | Ca_Desi_LG02               | 25.120                                       |
| Ca_Desi_SNP828 | [A/G]       | Ca_Desi_LG02               | 25.309                                       |
| Ca_Desi_SNP829 | [T/C]       | Ca_Desi_LG02               | 25.333                                       |
| Ca_Desi_SNP830 | [A/G]       | Ca_Desi_LG02               | 25.439                                       |
| Ca_Desi_SNP831 | [C/T]       | Ca_Desi_LG02               | 25.855                                       |
| Ca_Desi_SNP832 | [A/C]       | Ca_Desi_LG02               | 25.904                                       |
| Ca_Desi_SNP833 | [A/C]       | Ca_Desi_LG02               | 25.933                                       |

| <b>SNP IDs</b> | <b>SNPs</b> | <b>Linkage Group (LGs)</b> | <b>Genetic positions (cM) of mapped SNPs</b> |
|----------------|-------------|----------------------------|----------------------------------------------|
| Ca_Desi_SNP834 | [A/T]       | Ca_Desi_LG02               | 26.100                                       |
| Ca_Desi_SNP835 | [C/G]       | Ca_Desi_LG02               | 26.656                                       |
| Ca_Desi_SNP836 | [T/A]       | Ca_Desi_LG02               | 27.158                                       |
| Ca_Desi_SNP837 | [A/G]       | Ca_Desi_LG02               | 27.533                                       |
| Ca_Desi_SNP838 | [C/T]       | Ca_Desi_LG02               | 27.628                                       |
| Ca_Desi_SNP839 | [G/A]       | Ca_Desi_LG02               | 27.721                                       |
| Ca_Desi_SNP840 | [A/G]       | Ca_Desi_LG02               | 27.733                                       |
| Ca_Desi_SNP841 | [A/C]       | Ca_Desi_LG02               | 27.796                                       |
| Ca_Desi_SNP842 | [G/A]       | Ca_Desi_LG02               | 28.259                                       |
| Ca_Desi_SNP843 | [T/C]       | Ca_Desi_LG02               | 28.908                                       |
| Ca_Desi_SNP844 | [G/A]       | Ca_Desi_LG02               | 29.047                                       |
| Ca_Desi_SNP845 | [T/A]       | Ca_Desi_LG02               | 29.183                                       |
| Ca_Desi_SNP846 | [T/G]       | Ca_Desi_LG02               | 29.245                                       |
| Ca_Desi_SNP847 | [A/G]       | Ca_Desi_LG02               | 29.256                                       |
| Ca_Desi_SNP848 | [A/G]       | Ca_Desi_LG02               | 29.496                                       |
| Ca_Desi_SNP849 | [A/C]       | Ca_Desi_LG02               | 29.763                                       |
| Ca_Desi_SNP850 | [G/A]       | Ca_Desi_LG02               | 29.795                                       |
| Ca_Desi_SNP851 | [T/A]       | Ca_Desi_LG02               | 29.852                                       |
| Ca_Desi_SNP852 | [A/T]       | Ca_Desi_LG02               | 29.921                                       |
| Ca_Desi_SNP853 | [T/G]       | Ca_Desi_LG02               | 30.107                                       |
| Ca_Desi_SNP854 | [T/C]       | Ca_Desi_LG02               | 30.425                                       |
| Ca_Desi_SNP855 | [T/C]       | Ca_Desi_LG02               | 30.539                                       |
| Ca_Desi_SNP856 | [A/G]       | Ca_Desi_LG02               | 30.705                                       |
| Ca_Desi_SNP857 | [C/A]       | Ca_Desi_LG02               | 31.030                                       |
| Ca_Desi_SNP858 | [A/C]       | Ca_Desi_LG02               | 31.546                                       |
| Ca_Desi_SNP859 | [A/C]       | Ca_Desi_LG02               | 31.685                                       |
| Ca_Desi_SNP860 | [C/A]       | Ca_Desi_LG02               | 31.885                                       |
| Ca_Desi_SNP861 | [T/C]       | Ca_Desi_LG02               | 32.043                                       |
| Ca_Desi_SNP862 | [A/G]       | Ca_Desi_LG02               | 32.138                                       |
| Ca_Desi_SNP863 | [T/C]       | Ca_Desi_LG02               | 32.173                                       |
| Ca_Desi_SNP864 | [A/G]       | Ca_Desi_LG02               | 32.299                                       |

| <b>SNP IDs</b> | <b>SNPs</b> | <b>Linkage Group (LGs)</b> | <b>Genetic positions (cM) of mapped SNPs</b> |
|----------------|-------------|----------------------------|----------------------------------------------|
| Ca_Desi_SNP865 | [C/G]       | Ca_Desi_LG02               | 32.838                                       |
| Ca_Desi_SNP866 | [A/G]       | Ca_Desi_LG02               | 33.033                                       |
| Ca_Desi_SNP867 | [T/G]       | Ca_Desi_LG02               | 33.064                                       |
| Ca_Desi_SNP868 | [C/A]       | Ca_Desi_LG02               | 33.317                                       |
| Ca_Desi_SNP869 | [A/G]       | Ca_Desi_LG02               | 33.349                                       |
| Ca_Desi_SNP870 | [T/C]       | Ca_Desi_LG02               | 33.681                                       |
| Ca_Desi_SNP871 | [A/C]       | Ca_Desi_LG02               | 33.849                                       |
| Ca_Desi_SNP872 | [T/C]       | Ca_Desi_LG02               | 33.916                                       |
| Ca_Desi_SNP873 | [C/T]       | Ca_Desi_LG02               | 34.145                                       |
| Ca_Desi_SNP874 | [T/C]       | Ca_Desi_LG02               | 34.232                                       |
| Ca_Desi_SNP875 | [T/G]       | Ca_Desi_LG02               | 34.764                                       |
| Ca_Desi_SNP876 | [T/G]       | Ca_Desi_LG02               | 34.918                                       |
| Ca_Desi_SNP877 | [T/G]       | Ca_Desi_LG02               | 34.948                                       |
| Ca_Desi_SNP878 | [A/C]       | Ca_Desi_LG02               | 35.093                                       |
| Ca_Desi_SNP879 | [T/G]       | Ca_Desi_LG02               | 35.137                                       |
| Ca_Desi_SNP880 | [G/T]       | Ca_Desi_LG02               | 35.342                                       |
| Ca_Desi_SNP881 | [T/G]       | Ca_Desi_LG02               | 35.542                                       |
| Ca_Desi_SNP882 | [A/C]       | Ca_Desi_LG02               | 35.612                                       |
| Ca_Desi_SNP883 | [C/T]       | Ca_Desi_LG02               | 36.356                                       |
| Ca_Desi_SNP884 | [A/G]       | Ca_Desi_LG02               | 36.425                                       |
| Ca_Desi_SNP885 | [T/G]       | Ca_Desi_LG02               | 36.447                                       |
| Ca_Desi_SNP886 | [C/T]       | Ca_Desi_LG02               | 36.827                                       |
| Ca_Desi_SNP887 | [T/C]       | Ca_Desi_LG02               | 36.944                                       |
| Ca_Desi_SNP888 | [A/G]       | Ca_Desi_LG02               | 37.013                                       |
| Ca_Desi_SNP889 | [T/C]       | Ca_Desi_LG02               | 37.014                                       |
| Ca_Desi_SNP890 | [C/T]       | Ca_Desi_LG02               | 37.154                                       |
| Ca_Desi_SNP891 | [T/G]       | Ca_Desi_LG02               | 37.288                                       |
| Ca_Desi_SNP892 | [T/G]       | Ca_Desi_LG02               | 37.346                                       |
| Ca_Desi_SNP893 | [T/C]       | Ca_Desi_LG02               | 37.627                                       |
| Ca_Desi_SNP894 | [A/T]       | Ca_Desi_LG02               | 37.650                                       |
| Ca_Desi_SNP895 | [A/G]       | Ca_Desi_LG02               | 37.724                                       |

| <b>SNP IDs</b> | <b>SNPs</b> | <b>Linkage Group (LGs)</b> | <b>Genetic positions (cM) of mapped SNPs</b> |
|----------------|-------------|----------------------------|----------------------------------------------|
| Ca_Desi_SNP896 | [A/G]       | Ca_Desi_LG02               | 37.791                                       |
| Ca_Desi_SNP897 | [C/A]       | Ca_Desi_LG02               | 38.127                                       |
| Ca_Desi_SNP898 | [A/T]       | Ca_Desi_LG02               | 38.647                                       |
| Ca_Desi_SNP899 | [A/C]       | Ca_Desi_LG02               | 38.934                                       |
| Ca_Desi_SNP900 | [A/C]       | Ca_Desi_LG02               | 38.993                                       |
| Ca_Desi_SNP901 | [G/A]       | Ca_Desi_LG02               | 39.121                                       |
| Ca_Desi_SNP902 | [A/G]       | Ca_Desi_LG02               | 39.180                                       |
| Ca_Desi_SNP903 | [G/T]       | Ca_Desi_LG02               | 39.185                                       |
| Ca_Desi_SNP904 | [T/G]       | Ca_Desi_LG02               | 39.252                                       |
| Ca_Desi_SNP905 | [T/G]       | Ca_Desi_LG02               | 39.293                                       |
| Ca_Desi_SNP906 | [A/G]       | Ca_Desi_LG02               | 39.444                                       |
| Ca_Desi_SNP907 | [C/T]       | Ca_Desi_LG02               | 39.562                                       |
| Ca_Desi_SNP908 | [A/C]       | Ca_Desi_LG02               | 39.624                                       |
| Ca_Desi_SNP909 | [A/C]       | Ca_Desi_LG02               | 39.980                                       |
| Ca_Desi_SNP910 | [A/G]       | Ca_Desi_LG02               | 40.124                                       |
| Ca_Desi_SNP911 | [C/T]       | Ca_Desi_LG02               | 40.142                                       |
| Ca_Desi_SNP912 | [T/G]       | Ca_Desi_LG02               | 40.301                                       |
| Ca_Desi_SNP913 | [A/G]       | Ca_Desi_LG02               | 40.539                                       |
| Ca_Desi_SNP914 | [T/C]       | Ca_Desi_LG02               | 40.704                                       |
| Ca_Desi_SNP915 | [G/A]       | Ca_Desi_LG02               | 40.720                                       |
| Ca_Desi_SNP916 | [T/C]       | Ca_Desi_LG02               | 41.617                                       |
| Ca_Desi_SNP917 | [G/A]       | Ca_Desi_LG02               | 41.658                                       |
| Ca_Desi_SNP918 | [A/C]       | Ca_Desi_LG02               | 41.692                                       |
| Ca_Desi_SNP919 | [A/G]       | Ca_Desi_LG02               | 42.477                                       |
| Ca_Desi_SNP920 | [G/T]       | Ca_Desi_LG02               | 42.882                                       |
| Ca_Desi_SNP921 | [T/C]       | Ca_Desi_LG02               | 42.945                                       |
| Ca_Desi_SNP922 | [A/T]       | Ca_Desi_LG02               | 43.413                                       |
| Ca_Desi_SNP923 | [T/C]       | Ca_Desi_LG02               | 43.734                                       |
| Ca_Desi_SNP924 | [C/T]       | Ca_Desi_LG02               | 43.831                                       |
| Ca_Desi_SNP925 | [G/C]       | Ca_Desi_LG02               | 44.265                                       |
| Ca_Desi_SNP926 | [A/G]       | Ca_Desi_LG02               | 44.290                                       |

| <b>SNP IDs</b> | <b>SNPs</b> | <b>Linkage Group (LGs)</b> | <b>Genetic positions (cM) of mapped SNPs</b> |
|----------------|-------------|----------------------------|----------------------------------------------|
| Ca_Desi_SNP927 | [T/G]       | Ca_Desi_LG02               | 44.375                                       |
| Ca_Desi_SNP928 | [A/G]       | Ca_Desi_LG02               | 44.910                                       |
| Ca_Desi_SNP929 | [A/G]       | Ca_Desi_LG02               | 44.960                                       |
| Ca_Desi_SNP930 | [A/G]       | Ca_Desi_LG02               | 45.077                                       |
| Ca_Desi_SNP931 | [T/C]       | Ca_Desi_LG02               | 45.150                                       |
| Ca_Desi_SNP932 | [T/C]       | Ca_Desi_LG02               | 45.243                                       |
| Ca_Desi_SNP933 | [A/G]       | Ca_Desi_LG02               | 45.244                                       |
| Ca_Desi_SNP934 | [G/C]       | Ca_Desi_LG02               | 45.348                                       |
| Ca_Desi_SNP935 | [C/T]       | Ca_Desi_LG02               | 45.682                                       |
| Ca_Desi_SNP936 | [T/A]       | Ca_Desi_LG02               | 46.011                                       |
| Ca_Desi_SNP937 | [T/C]       | Ca_Desi_LG02               | 46.237                                       |
| Ca_Desi_SNP938 | [A/G]       | Ca_Desi_LG02               | 46.457                                       |
| Ca_Desi_SNP939 | [T/G]       | Ca_Desi_LG02               | 47.310                                       |
| Ca_Desi_SNP940 | [G/A]       | Ca_Desi_LG02               | 47.410                                       |
| Ca_Desi_SNP941 | [T/C]       | Ca_Desi_LG02               | 47.550                                       |
| Ca_Desi_SNP942 | [C/T]       | Ca_Desi_LG02               | 47.879                                       |
| Ca_Desi_SNP943 | [C/T]       | Ca_Desi_LG02               | 47.915                                       |
| Ca_Desi_SNP944 | [C/A]       | Ca_Desi_LG02               | 47.932                                       |
| Ca_Desi_SNP945 | [G/A]       | Ca_Desi_LG02               | 48.243                                       |
| Ca_Desi_SNP946 | [T/C]       | Ca_Desi_LG02               | 48.400                                       |
| Ca_Desi_SNP947 | [C/T]       | Ca_Desi_LG02               | 48.937                                       |
| Ca_Desi_SNP948 | [G/A]       | Ca_Desi_LG02               | 48.982                                       |
| Ca_Desi_SNP949 | [T/C]       | Ca_Desi_LG02               | 49.010                                       |
| Ca_Desi_SNP950 | [T/A]       | Ca_Desi_LG02               | 49.068                                       |
| Ca_Desi_SNP951 | [G/A]       | Ca_Desi_LG02               | 49.205                                       |
| Ca_Desi_SNP952 | [T/C]       | Ca_Desi_LG02               | 49.209                                       |
| Ca_Desi_SNP953 | [T/A]       | Ca_Desi_LG02               | 49.216                                       |
| Ca_Desi_SNP954 | [G/A]       | Ca_Desi_LG02               | 49.449                                       |
| Ca_Desi_SNP955 | [G/A]       | Ca_Desi_LG02               | 49.517                                       |
| Ca_Desi_SNP956 | [C/T]       | Ca_Desi_LG02               | 49.985                                       |
| Ca_Desi_SNP957 | [T/G]       | Ca_Desi_LG02               | 50.016                                       |



| <b>SNP IDs</b> | <b>SNPs</b> | <b>Linkage Group (LGs)</b> | <b>Genetic positions (cM) of mapped SNPs</b> |
|----------------|-------------|----------------------------|----------------------------------------------|
| Ca_Desi_SNP958 | [C/A]       | Ca_Desi_LG02               | 50.036                                       |
| Ca_Desi_SNP959 | [C/G]       | Ca_Desi_LG02               | 50.308                                       |
| Ca_Desi_SNP960 | [T/C]       | Ca_Desi_LG02               | 50.363                                       |
| Ca_Desi_SNP961 | [T/C]       | Ca_Desi_LG02               | 50.639                                       |
| Ca_Desi_SNP962 | [T/C]       | Ca_Desi_LG02               | 50.648                                       |
| Ca_Desi_SNP963 | [G/T]       | Ca_Desi_LG02               | 50.652                                       |
| Ca_Desi_SNP964 | [T/G]       | Ca_Desi_LG02               | 50.946                                       |
| Ca_Desi_SNP965 | [C/A]       | Ca_Desi_LG02               | 51.231                                       |
| Ca_Desi_SNP966 | [G/A]       | Ca_Desi_LG02               | 51.885                                       |
| Ca_Desi_SNP967 | [A/C]       | Ca_Desi_LG02               | 51.989                                       |
| Ca_Desi_SNP968 | [G/C]       | Ca_Desi_LG02               | 52.048                                       |
| Ca_Desi_SNP969 | [T/A]       | Ca_Desi_LG02               | 52.068                                       |
| Ca_Desi_SNP970 | [T/C]       | Ca_Desi_LG02               | 52.123                                       |
| Ca_Desi_SNP971 | [A/G]       | Ca_Desi_LG02               | 52.349                                       |
| Ca_Desi_SNP972 | [A/T]       | Ca_Desi_LG02               | 52.638                                       |
| Ca_Desi_SNP973 | [C/A]       | Ca_Desi_LG02               | 52.651                                       |
| Ca_Desi_SNP974 | [T/G]       | Ca_Desi_LG02               | 52.735                                       |
| Ca_Desi_SNP975 | [G/T]       | Ca_Desi_LG02               | 53.175                                       |
| Ca_Desi_SNP976 | [C/T]       | Ca_Desi_LG02               | 53.193                                       |
| Ca_Desi_SNP977 | [T/G]       | Ca_Desi_LG02               | 53.228                                       |
| Ca_Desi_SNP978 | [T/C]       | Ca_Desi_LG02               | 53.302                                       |
| Ca_Desi_SNP979 | [T/G]       | Ca_Desi_LG02               | 53.826                                       |
| Ca_Desi_SNP980 | [G/T]       | Ca_Desi_LG02               | 53.899                                       |
| Ca_Desi_SNP981 | [A/G]       | Ca_Desi_LG02               | 54.043                                       |
| Ca_Desi_SNP982 | [A/G]       | Ca_Desi_LG02               | 54.108                                       |
| Ca_Desi_SNP983 | [C/T]       | Ca_Desi_LG02               | 54.195                                       |
| Ca_Desi_SNP984 | [G/T]       | Ca_Desi_LG02               | 54.289                                       |
| Ca_Desi_SNP985 | [C/A]       | Ca_Desi_LG02               | 54.437                                       |
| Ca_Desi_SNP986 | [G/A]       | Ca_Desi_LG02               | 54.503                                       |
| Ca_Desi_SNP987 | [C/G]       | Ca_Desi_LG02               | 54.567                                       |
| Ca_Desi_SNP988 | [G/A]       | Ca_Desi_LG02               | 54.772                                       |

| <b>SNP IDs</b>  | <b>SNPs</b> | <b>Linkage Group (LGs)</b> | <b>Genetic positions (cM) of mapped SNPs</b> |
|-----------------|-------------|----------------------------|----------------------------------------------|
| Ca_Desi_SNP989  | [A/T]       | Ca_Desi_LG02               | 54.802                                       |
| Ca_Desi_SNP990  | [A/C]       | Ca_Desi_LG02               | 54.924                                       |
| Ca_Desi_SNP991  | [A/G]       | Ca_Desi_LG02               | 55.085                                       |
| Ca_Desi_SNP992  | [T/C]       | Ca_Desi_LG02               | 55.249                                       |
| Ca_Desi_SNP993  | [G/A]       | Ca_Desi_LG02               | 55.257                                       |
| Ca_Desi_SNP994  | [C/A]       | Ca_Desi_LG02               | 55.312                                       |
| Ca_Desi_SNP995  | [T/A]       | Ca_Desi_LG02               | 55.927                                       |
| Ca_Desi_SNP996  | [A/G]       | Ca_Desi_LG02               | 55.981                                       |
| Ca_Desi_SNP997  | [A/T]       | Ca_Desi_LG02               | 55.986                                       |
| Ca_Desi_SNP998  | [A/G]       | Ca_Desi_LG02               | 56.016                                       |
| Ca_Desi_SNP999  | [G/T]       | Ca_Desi_LG02               | 56.089                                       |
| Ca_Desi_SNP1000 | [G/A]       | Ca_Desi_LG02               | 56.102                                       |
| Ca_Desi_SNP1001 | [T/G]       | Ca_Desi_LG02               | 56.228                                       |
| Ca_Desi_SNP1002 | [A/C]       | Ca_Desi_LG02               | 56.264                                       |
| Ca_Desi_SNP1003 | [A/G]       | Ca_Desi_LG02               | 56.473                                       |
| Ca_Desi_SNP1004 | [T/C]       | Ca_Desi_LG02               | 56.846                                       |
| Ca_Desi_SNP1005 | [T/G]       | Ca_Desi_LG02               | 57.359                                       |
| Ca_Desi_SNP1006 | [C/T]       | Ca_Desi_LG02               | 57.412                                       |
| Ca_Desi_SNP1007 | [C/A]       | Ca_Desi_LG02               | 57.551                                       |
| Ca_Desi_SNP1008 | [A/T]       | Ca_Desi_LG02               | 57.713                                       |
| Ca_Desi_SNP1009 | [G/A]       | Ca_Desi_LG02               | 57.750                                       |
| Ca_Desi_SNP1010 | [T/G]       | Ca_Desi_LG02               | 57.777                                       |
| Ca_Desi_SNP1011 | [A/C]       | Ca_Desi_LG02               | 58.051                                       |
| Ca_Desi_SNP1012 | [G/A]       | Ca_Desi_LG02               | 58.324                                       |
| Ca_Desi_SNP1013 | [A/T]       | Ca_Desi_LG02               | 58.332                                       |
| Ca_Desi_SNP1014 | [G/C]       | Ca_Desi_LG02               | 58.377                                       |
| Ca_Desi_SNP1015 | [A/C]       | Ca_Desi_LG02               | 58.567                                       |
| Ca_Desi_SNP1016 | [T/G]       | Ca_Desi_LG02               | 58.677                                       |
| Ca_Desi_SNP1017 | [C/A]       | Ca_Desi_LG02               | 58.762                                       |
| Ca_Desi_SNP1018 | [T/G]       | Ca_Desi_LG02               | 58.762                                       |
| Ca_Desi_SNP1019 | [C/T]       | Ca_Desi_LG02               | 58.922                                       |

| <b>SNP IDs</b>  | <b>SNPs</b> | <b>Linkage Group (LGs)</b> | <b>Genetic positions (cM) of mapped SNPs</b> |
|-----------------|-------------|----------------------------|----------------------------------------------|
| Ca_Desi_SNP1020 | [T/C]       | Ca_Desi_LG02               | 58.949                                       |
| Ca_Desi_SNP1021 | [C/T]       | Ca_Desi_LG02               | 59.223                                       |
| Ca_Desi_SNP1022 | [T/A]       | Ca_Desi_LG02               | 59.346                                       |
| Ca_Desi_SNP1023 | [T/A]       | Ca_Desi_LG02               | 59.390                                       |
| Ca_Desi_SNP1024 | [T/A]       | Ca_Desi_LG02               | 59.450                                       |
| Ca_Desi_SNP1025 | [T/G]       | Ca_Desi_LG02               | 59.468                                       |
| Ca_Desi_SNP1026 | [A/C]       | Ca_Desi_LG02               | 59.628                                       |
| Ca_Desi_SNP1027 | [C/G]       | Ca_Desi_LG02               | 59.686                                       |
| Ca_Desi_SNP1028 | [T/C]       | Ca_Desi_LG02               | 59.829                                       |
| Ca_Desi_SNP1029 | [A/G]       | Ca_Desi_LG02               | 59.951                                       |
| Ca_Desi_SNP1030 | [C/A]       | Ca_Desi_LG02               | 59.959                                       |
| Ca_Desi_SNP1031 | [T/C]       | Ca_Desi_LG02               | 60.029                                       |
| Ca_Desi_SNP1032 | [C/T]       | Ca_Desi_LG02               | 60.051                                       |
| Ca_Desi_SNP1033 | [G/A]       | Ca_Desi_LG02               | 60.245                                       |
| Ca_Desi_SNP1034 | [T/A]       | Ca_Desi_LG02               | 60.455                                       |
| Ca_Desi_SNP1035 | [A/G]       | Ca_Desi_LG02               | 60.602                                       |
| Ca_Desi_SNP1036 | [T/A]       | Ca_Desi_LG02               | 60.686                                       |
| Ca_Desi_SNP1037 | [G/T]       | Ca_Desi_LG02               | 60.867                                       |
| Ca_Desi_SNP1038 | [T/C]       | Ca_Desi_LG02               | 60.894                                       |
| Ca_Desi_SNP1039 | [T/G]       | Ca_Desi_LG02               | 60.983                                       |
| Ca_Desi_SNP1040 | [A/G]       | Ca_Desi_LG02               | 61.095                                       |
| Ca_Desi_SNP1041 | [G/A]       | Ca_Desi_LG02               | 61.202                                       |
| Ca_Desi_SNP1042 | [G/T]       | Ca_Desi_LG02               | 61.380                                       |
| Ca_Desi_SNP1043 | [G/A]       | Ca_Desi_LG02               | 61.623                                       |
| Ca_Desi_SNP1044 | [G/T]       | Ca_Desi_LG02               | 61.640                                       |
| Ca_Desi_SNP1045 | [C/T]       | Ca_Desi_LG02               | 61.801                                       |
| Ca_Desi_SNP1046 | [A/G]       | Ca_Desi_LG02               | 62.123                                       |
| Ca_Desi_SNP1047 | [C/T]       | Ca_Desi_LG02               | 62.540                                       |
| Ca_Desi_SNP1048 | [A/G]       | Ca_Desi_LG02               | 62.579                                       |
| Ca_Desi_SNP1049 | [T/C]       | Ca_Desi_LG02               | 62.887                                       |
| Ca_Desi_SNP1050 | [C/A]       | Ca_Desi_LG02               | 63.252                                       |

| <b>SNP IDs</b>  | <b>SNPs</b> | <b>Linkage Group (LGs)</b> | <b>Genetic positions (cM) of mapped SNPs</b> |
|-----------------|-------------|----------------------------|----------------------------------------------|
| Ca_Desi_SNP1051 | [G/C]       | Ca_Desi_LG02               | 63.283                                       |
| Ca_Desi_SNP1052 | [T/C]       | Ca_Desi_LG02               | 63.294                                       |
| Ca_Desi_SNP1053 | [A/C]       | Ca_Desi_LG02               | 63.480                                       |
| Ca_Desi_SNP1054 | [G/C]       | Ca_Desi_LG02               | 63.596                                       |
| Ca_Desi_SNP1055 | [G/A]       | Ca_Desi_LG02               | 63.960                                       |
| Ca_Desi_SNP1056 | [A/C]       | Ca_Desi_LG02               | 63.979                                       |
| Ca_Desi_SNP1057 | [T/G]       | Ca_Desi_LG02               | 64.504                                       |
| Ca_Desi_SNP1058 | [A/G]       | Ca_Desi_LG02               | 64.966                                       |
| Ca_Desi_SNP1059 | [G/A]       | Ca_Desi_LG02               | 65.037                                       |
| Ca_Desi_SNP1060 | [C/T]       | Ca_Desi_LG02               | 65.170                                       |
| Ca_Desi_SNP1061 | [T/C]       | Ca_Desi_LG02               | 65.331                                       |
| Ca_Desi_SNP1062 | [G/A]       | Ca_Desi_LG02               | 65.342                                       |
| Ca_Desi_SNP1063 | [A/T]       | Ca_Desi_LG02               | 65.470                                       |
| Ca_Desi_SNP1064 | [G/C]       | Ca_Desi_LG02               | 65.752                                       |
| Ca_Desi_SNP1065 | [C/A]       | Ca_Desi_LG02               | 65.898                                       |
| Ca_Desi_SNP1066 | [C/T]       | Ca_Desi_LG02               | 65.927                                       |
| Ca_Desi_SNP1067 | [C/A]       | Ca_Desi_LG02               | 66.023                                       |
| Ca_Desi_SNP1068 | [C/T]       | Ca_Desi_LG02               | 66.216                                       |
| Ca_Desi_SNP1069 | [T/C]       | Ca_Desi_LG02               | 66.261                                       |
| Ca_Desi_SNP1070 | [C/G]       | Ca_Desi_LG02               | 66.323                                       |
| Ca_Desi_SNP1071 | [G/T]       | Ca_Desi_LG02               | 66.454                                       |
| Ca_Desi_SNP1072 | [A/G]       | Ca_Desi_LG02               | 66.487                                       |
| Ca_Desi_SNP1073 | [T/G]       | Ca_Desi_LG02               | 66.489                                       |
| Ca_Desi_SNP1074 | [G/A]       | Ca_Desi_LG02               | 66.676                                       |
| Ca_Desi_SNP1075 | [T/G]       | Ca_Desi_LG02               | 66.885                                       |
| Ca_Desi_SNP1076 | [C/T]       | Ca_Desi_LG02               | 66.944                                       |
| Ca_Desi_SNP1077 | [A/G]       | Ca_Desi_LG02               | 67.180                                       |
| Ca_Desi_SNP1078 | [T/C]       | Ca_Desi_LG02               | 67.189                                       |
| Ca_Desi_SNP1079 | [C/A]       | Ca_Desi_LG02               | 67.473                                       |
| Ca_Desi_SNP1080 | [T/C]       | Ca_Desi_LG02               | 68.055                                       |
| Ca_Desi_SNP1081 | [T/G]       | Ca_Desi_LG02               | 68.116                                       |

| <b>SNP IDs</b>  | <b>SNPs</b> | <b>Linkage Group (LGs)</b> | <b>Genetic positions (cM) of mapped SNPs</b> |
|-----------------|-------------|----------------------------|----------------------------------------------|
| Ca_Desi_SNP1082 | [C/G]       | Ca_Desi_LG02               | 68.176                                       |
| Ca_Desi_SNP1083 | [A/C]       | Ca_Desi_LG02               | 68.702                                       |
| Ca_Desi_SNP1084 | [G/A]       | Ca_Desi_LG02               | 69.229                                       |
| Ca_Desi_SNP1085 | [T/C]       | Ca_Desi_LG02               | 69.305                                       |
| Ca_Desi_SNP1086 | [A/T]       | Ca_Desi_LG02               | 69.517                                       |
| Ca_Desi_SNP1087 | [C/A]       | Ca_Desi_LG02               | 70.652                                       |
| Ca_Desi_SNP1088 | [T/C]       | Ca_Desi_LG02               | 71.220                                       |
| Ca_Desi_SNP1089 | [G/A]       | Ca_Desi_LG02               | 71.426                                       |
| Ca_Desi_SNP1090 | [T/C]       | Ca_Desi_LG02               | 71.617                                       |
| Ca_Desi_SNP1091 | [T/C]       | Ca_Desi_LG02               | 72.225                                       |
| Ca_Desi_SNP1092 | [G/T]       | Ca_Desi_LG02               | 72.553                                       |
| Ca_Desi_SNP1093 | [T/G]       | Ca_Desi_LG02               | 72.650                                       |
| Ca_Desi_SNP1094 | [G/A]       | Ca_Desi_LG02               | 72.651                                       |
| Ca_Desi_SNP1095 | [T/C]       | Ca_Desi_LG02               | 72.654                                       |
| Ca_Desi_SNP1096 | [A/G]       | Ca_Desi_LG02               | 72.858                                       |
| Ca_Desi_SNP1097 | [T/C]       | Ca_Desi_LG02               | 73.001                                       |
| Ca_Desi_SNP1098 | [T/G]       | Ca_Desi_LG02               | 73.106                                       |
| Ca_Desi_SNP1099 | [T/C]       | Ca_Desi_LG02               | 73.744                                       |
| Ca_Desi_SNP1100 | [T/G]       | Ca_Desi_LG02               | 73.919                                       |
| Ca_Desi_SNP1101 | [A/T]       | Ca_Desi_LG02               | 74.938                                       |
| Ca_Desi_SNP1102 | [T/G]       | Ca_Desi_LG02               | 75.118                                       |
| Ca_Desi_SNP1103 | [T/G]       | Ca_Desi_LG02               | 75.188                                       |
| Ca_Desi_SNP1104 | [A/C]       | Ca_Desi_LG02               | 75.481                                       |
| Ca_Desi_SNP1105 | [A/G]       | Ca_Desi_LG02               | 75.564                                       |
| Ca_Desi_SNP1106 | [G/A]       | Ca_Desi_LG02               | 75.604                                       |
| Ca_Desi_SNP1107 | [A/G]       | Ca_Desi_LG02               | 76.236                                       |
| Ca_Desi_SNP1108 | [T/C]       | Ca_Desi_LG02               | 76.299                                       |
| Ca_Desi_SNP1109 | [T/C]       | Ca_Desi_LG02               | 76.413                                       |
| Ca_Desi_SNP1110 | [T/G]       | Ca_Desi_LG02               | 77.015                                       |
| Ca_Desi_SNP1111 | [A/C]       | Ca_Desi_LG02               | 77.413                                       |
| Ca_Desi_SNP1112 | [G/A]       | Ca_Desi_LG02               | 78.259                                       |

| <b>SNP IDs</b>  | <b>SNPs</b> | <b>Linkage Group (LGs)</b> | <b>Genetic positions (cM) of mapped SNPs</b> |
|-----------------|-------------|----------------------------|----------------------------------------------|
| Ca_Desi_SNP1113 | [A/G]       | Ca_Desi_LG02               | 80.057                                       |
| Ca_Desi_SNP1114 | [T/C]       | Ca_Desi_LG02               | 80.649                                       |
| Ca_Desi_SNP1115 | [T/C]       | Ca_Desi_LG02               | 81.060                                       |
| Ca_Desi_SNP1116 | [A/G]       | Ca_Desi_LG02               | 81.772                                       |
| Ca_Desi_SNP1117 | [G/A]       | Ca_Desi_LG02               | 81.851                                       |
| Ca_Desi_SNP1118 | [G/A]       | Ca_Desi_LG02               | 82.194                                       |
| Ca_Desi_SNP1119 | [T/A]       | Ca_Desi_LG02               | 82.517                                       |
| Ca_Desi_SNP1120 | [T/G]       | Ca_Desi_LG02               | 82.886                                       |
| Ca_Desi_SNP1121 | [A/G]       | Ca_Desi_LG02               | 83.282                                       |
| Ca_Desi_SNP1122 | [T/G]       | Ca_Desi_LG02               | 85.662                                       |
| Ca_Desi_SNP1123 | [A/C]       | Ca_Desi_LG03               | 0.000                                        |
| Ca_Desi_SNP1124 | [A/G]       | Ca_Desi_LG03               | 0.042                                        |
| Ca_Desi_SNP1125 | [A/G]       | Ca_Desi_LG03               | 0.388                                        |
| Ca_Desi_SNP1126 | [G/A]       | Ca_Desi_LG03               | 0.565                                        |
| Ca_Desi_SNP1127 | [C/T]       | Ca_Desi_LG03               | 0.622                                        |
| Ca_Desi_SNP1128 | [A/C]       | Ca_Desi_LG03               | 1.412                                        |
| Ca_Desi_SNP1129 | [T/C]       | Ca_Desi_LG03               | 2.133                                        |
| Ca_Desi_SNP1130 | [T/C]       | Ca_Desi_LG03               | 2.815                                        |
| Ca_Desi_SNP1131 | [T/G]       | Ca_Desi_LG03               | 3.631                                        |
| Ca_Desi_SNP1132 | [G/A]       | Ca_Desi_LG03               | 3.906                                        |
| Ca_Desi_SNP1133 | [C/A]       | Ca_Desi_LG03               | 3.909                                        |
| Ca_Desi_SNP1134 | [A/G]       | Ca_Desi_LG03               | 4.790                                        |
| Ca_Desi_SNP1135 | [C/T]       | Ca_Desi_LG03               | 5.127                                        |
| Ca_Desi_SNP1136 | [C/T]       | Ca_Desi_LG03               | 5.285                                        |
| Ca_Desi_SNP1137 | [T/G]       | Ca_Desi_LG03               | 6.550                                        |
| Ca_Desi_SNP1138 | [A/G]       | Ca_Desi_LG03               | 6.609                                        |
| Ca_Desi_SNP1139 | [A/T]       | Ca_Desi_LG03               | 6.847                                        |
| Ca_Desi_SNP1140 | [T/G]       | Ca_Desi_LG03               | 7.583                                        |
| Ca_Desi_SNP1141 | [T/C]       | Ca_Desi_LG03               | 7.885                                        |
| Ca_Desi_SNP1142 | [T/C]       | Ca_Desi_LG03               | 7.896                                        |
| Ca_Desi_SNP1143 | [A/T]       | Ca_Desi_LG03               | 8.022                                        |

| <b>SNP IDs</b>  | <b>SNPs</b> | <b>Linkage Group (LGs)</b> | <b>Genetic positions (cM) of mapped SNPs</b> |
|-----------------|-------------|----------------------------|----------------------------------------------|
| Ca_Desi_SNP1144 | [A/C]       | Ca_Desi_LG03               | 8.417                                        |
| Ca_Desi_SNP1145 | [T/C]       | Ca_Desi_LG03               | 8.777                                        |
| Ca_Desi_SNP1146 | [T/A]       | Ca_Desi_LG03               | 8.906                                        |
| Ca_Desi_SNP1147 | [T/G]       | Ca_Desi_LG03               | 9.661                                        |
| Ca_Desi_SNP1148 | [A/G]       | Ca_Desi_LG03               | 10.182                                       |
| Ca_Desi_SNP1149 | [T/C]       | Ca_Desi_LG03               | 10.278                                       |
| Ca_Desi_SNP1150 | [A/C]       | Ca_Desi_LG03               | 10.368                                       |
| Ca_Desi_SNP1151 | [T/C]       | Ca_Desi_LG03               | 11.047                                       |
| Ca_Desi_SNP1152 | [A/G]       | Ca_Desi_LG03               | 11.064                                       |
| Ca_Desi_SNP1153 | [G/A]       | Ca_Desi_LG03               | 11.104                                       |
| Ca_Desi_SNP1154 | [T/C]       | Ca_Desi_LG03               | 11.186                                       |
| Ca_Desi_SNP1155 | [A/G]       | Ca_Desi_LG03               | 11.221                                       |
| Ca_Desi_SNP1156 | [T/C]       | Ca_Desi_LG03               | 11.927                                       |
| Ca_Desi_SNP1157 | [C/T]       | Ca_Desi_LG03               | 11.982                                       |
| Ca_Desi_SNP1158 | [C/A]       | Ca_Desi_LG03               | 12.864                                       |
| Ca_Desi_SNP1159 | [C/T]       | Ca_Desi_LG03               | 13.115                                       |
| Ca_Desi_SNP1160 | [G/A]       | Ca_Desi_LG03               | 13.338                                       |
| Ca_Desi_SNP1161 | [A/G]       | Ca_Desi_LG03               | 13.354                                       |
| Ca_Desi_SNP1162 | [A/G]       | Ca_Desi_LG03               | 13.436                                       |
| Ca_Desi_SNP1163 | [T/G]       | Ca_Desi_LG03               | 13.885                                       |
| Ca_Desi_SNP1164 | [C/T]       | Ca_Desi_LG03               | 13.962                                       |
| Ca_Desi_SNP1165 | [A/C]       | Ca_Desi_LG03               | 14.156                                       |
| Ca_Desi_SNP1166 | [T/C]       | Ca_Desi_LG03               | 14.667                                       |
| Ca_Desi_SNP1167 | [T/C]       | Ca_Desi_LG03               | 14.913                                       |
| Ca_Desi_SNP1168 | [C/T]       | Ca_Desi_LG03               | 14.989                                       |
| Ca_Desi_SNP1169 | [T/G]       | Ca_Desi_LG03               | 15.361                                       |
| Ca_Desi_SNP1170 | [T/C]       | Ca_Desi_LG03               | 15.369                                       |
| Ca_Desi_SNP1171 | [A/G]       | Ca_Desi_LG03               | 15.397                                       |
| Ca_Desi_SNP1172 | [T/C]       | Ca_Desi_LG03               | 15.475                                       |
| Ca_Desi_SNP1173 | [A/C]       | Ca_Desi_LG03               | 15.809                                       |
| Ca_Desi_SNP1174 | [T/G]       | Ca_Desi_LG03               | 15.870                                       |

| <b>SNP IDs</b>  | <b>SNPs</b> | <b>Linkage Group (LGs)</b> | <b>Genetic positions (cM) of mapped SNPs</b> |
|-----------------|-------------|----------------------------|----------------------------------------------|
| Ca_Desi_SNP1175 | [A/G]       | Ca_Desi_LG03               | 15.898                                       |
| Ca_Desi_SNP1176 | [C/T]       | Ca_Desi_LG03               | 15.980                                       |
| Ca_Desi_SNP1177 | [A/G]       | Ca_Desi_LG03               | 15.981                                       |
| Ca_Desi_SNP1178 | [A/G]       | Ca_Desi_LG03               | 16.225                                       |
| Ca_Desi_SNP1179 | [T/G]       | Ca_Desi_LG03               | 16.230                                       |
| Ca_Desi_SNP1180 | [T/C]       | Ca_Desi_LG03               | 16.428                                       |
| Ca_Desi_SNP1181 | [C/T]       | Ca_Desi_LG03               | 16.583                                       |
| Ca_Desi_SNP1182 | [T/A]       | Ca_Desi_LG03               | 16.856                                       |
| Ca_Desi_SNP1183 | [C/A]       | Ca_Desi_LG03               | 17.280                                       |
| Ca_Desi_SNP1184 | [A/G]       | Ca_Desi_LG03               | 17.344                                       |
| Ca_Desi_SNP1185 | [A/G]       | Ca_Desi_LG03               | 17.349                                       |
| Ca_Desi_SNP1186 | [A/G]       | Ca_Desi_LG03               | 17.402                                       |
| Ca_Desi_SNP1187 | [A/G]       | Ca_Desi_LG03               | 17.404                                       |
| Ca_Desi_SNP1188 | [T/G]       | Ca_Desi_LG03               | 17.447                                       |
| Ca_Desi_SNP1189 | [C/G]       | Ca_Desi_LG03               | 17.620                                       |
| Ca_Desi_SNP1190 | [T/A]       | Ca_Desi_LG03               | 18.070                                       |
| Ca_Desi_SNP1191 | [A/G]       | Ca_Desi_LG03               | 18.071                                       |
| Ca_Desi_SNP1192 | [C/T]       | Ca_Desi_LG03               | 18.164                                       |
| Ca_Desi_SNP1193 | [C/G]       | Ca_Desi_LG03               | 18.172                                       |
| Ca_Desi_SNP1194 | [T/C]       | Ca_Desi_LG03               | 18.362                                       |
| Ca_Desi_SNP1195 | [T/G]       | Ca_Desi_LG03               | 18.554                                       |
| Ca_Desi_SNP1196 | [A/G]       | Ca_Desi_LG03               | 18.574                                       |
| Ca_Desi_SNP1197 | [A/T]       | Ca_Desi_LG03               | 18.641                                       |
| Ca_Desi_SNP1198 | [A/G]       | Ca_Desi_LG03               | 18.685                                       |
| Ca_Desi_SNP1199 | [C/A]       | Ca_Desi_LG03               | 19.083                                       |
| Ca_Desi_SNP1200 | [A/G]       | Ca_Desi_LG03               | 19.088                                       |
| Ca_Desi_SNP1201 | [T/G]       | Ca_Desi_LG03               | 19.092                                       |
| Ca_Desi_SNP1202 | [G/A]       | Ca_Desi_LG03               | 19.132                                       |
| Ca_Desi_SNP1203 | [T/C]       | Ca_Desi_LG03               | 19.244                                       |
| Ca_Desi_SNP1204 | [G/A]       | Ca_Desi_LG03               | 19.666                                       |
| Ca_Desi_SNP1205 | [T/C]       | Ca_Desi_LG03               | 19.757                                       |



| <b>SNP IDs</b>  | <b>SNPs</b> | <b>Linkage Group (LGs)</b> | <b>Genetic positions (cM) of mapped SNPs</b> |
|-----------------|-------------|----------------------------|----------------------------------------------|
| Ca_Desi_SNP1206 | [T/G]       | Ca_Desi_LG03               | 19.906                                       |
| Ca_Desi_SNP1207 | [G/T]       | Ca_Desi_LG03               | 20.059                                       |
| Ca_Desi_SNP1208 | [C/T]       | Ca_Desi_LG03               | 20.158                                       |
| Ca_Desi_SNP1209 | [C/A]       | Ca_Desi_LG03               | 20.223                                       |
| Ca_Desi_SNP1210 | [C/A]       | Ca_Desi_LG03               | 20.732                                       |
| Ca_Desi_SNP1211 | [C/T]       | Ca_Desi_LG03               | 20.977                                       |
| Ca_Desi_SNP1212 | [G/A]       | Ca_Desi_LG03               | 21.043                                       |
| Ca_Desi_SNP1213 | [A/C]       | Ca_Desi_LG03               | 21.209                                       |
| Ca_Desi_SNP1214 | [G/A]       | Ca_Desi_LG03               | 21.351                                       |
| Ca_Desi_SNP1215 | [T/A]       | Ca_Desi_LG03               | 21.447                                       |
| Ca_Desi_SNP1216 | [G/T]       | Ca_Desi_LG03               | 21.495                                       |
| Ca_Desi_SNP1217 | [G/T]       | Ca_Desi_LG03               | 21.615                                       |
| Ca_Desi_SNP1218 | [A/G]       | Ca_Desi_LG03               | 21.832                                       |
| Ca_Desi_SNP1219 | [T/C]       | Ca_Desi_LG03               | 21.875                                       |
| Ca_Desi_SNP1220 | [T/G]       | Ca_Desi_LG03               | 21.901                                       |
| Ca_Desi_SNP1221 | [C/T]       | Ca_Desi_LG03               | 22.008                                       |
| Ca_Desi_SNP1222 | [C/A]       | Ca_Desi_LG03               | 22.022                                       |
| Ca_Desi_SNP1223 | [T/G]       | Ca_Desi_LG03               | 22.161                                       |
| Ca_Desi_SNP1224 | [G/A]       | Ca_Desi_LG03               | 22.180                                       |
| Ca_Desi_SNP1225 | [T/A]       | Ca_Desi_LG03               | 22.423                                       |
| Ca_Desi_SNP1226 | [T/G]       | Ca_Desi_LG03               | 22.536                                       |
| Ca_Desi_SNP1227 | [A/G]       | Ca_Desi_LG03               | 22.595                                       |
| Ca_Desi_SNP1228 | [A/C]       | Ca_Desi_LG03               | 22.679                                       |
| Ca_Desi_SNP1229 | [T/C]       | Ca_Desi_LG03               | 22.693                                       |
| Ca_Desi_SNP1230 | [T/C]       | Ca_Desi_LG03               | 22.728                                       |
| Ca_Desi_SNP1231 | [A/C]       | Ca_Desi_LG03               | 22.846                                       |
| Ca_Desi_SNP1232 | [A/C]       | Ca_Desi_LG03               | 22.995                                       |
| Ca_Desi_SNP1233 | [T/C]       | Ca_Desi_LG03               | 23.095                                       |
| Ca_Desi_SNP1234 | [A/G]       | Ca_Desi_LG03               | 23.231                                       |
| Ca_Desi_SNP1235 | [A/G]       | Ca_Desi_LG03               | 23.383                                       |
| Ca_Desi_SNP1236 | [C/T]       | Ca_Desi_LG03               | 23.412                                       |

| <b>SNP IDs</b>  | <b>SNPs</b> | <b>Linkage Group (LGs)</b> | <b>Genetic positions (cM) of mapped SNPs</b> |
|-----------------|-------------|----------------------------|----------------------------------------------|
| Ca_Desi_SNP1237 | [A/C]       | Ca_Desi_LG03               | 23.508                                       |
| Ca_Desi_SNP1238 | [C/T]       | Ca_Desi_LG03               | 23.565                                       |
| Ca_Desi_SNP1239 | [T/C]       | Ca_Desi_LG03               | 23.747                                       |
| Ca_Desi_SNP1240 | [T/C]       | Ca_Desi_LG03               | 23.787                                       |
| Ca_Desi_SNP1241 | [C/A]       | Ca_Desi_LG03               | 23.974                                       |
| Ca_Desi_SNP1242 | [T/C]       | Ca_Desi_LG03               | 24.024                                       |
| Ca_Desi_SNP1243 | [C/T]       | Ca_Desi_LG03               | 24.185                                       |
| Ca_Desi_SNP1244 | [T/G]       | Ca_Desi_LG03               | 24.399                                       |
| Ca_Desi_SNP1245 | [A/G]       | Ca_Desi_LG03               | 25.059                                       |
| Ca_Desi_SNP1246 | [A/C]       | Ca_Desi_LG03               | 25.076                                       |
| Ca_Desi_SNP1247 | [T/C]       | Ca_Desi_LG03               | 25.216                                       |
| Ca_Desi_SNP1248 | [T/C]       | Ca_Desi_LG03               | 25.237                                       |
| Ca_Desi_SNP1249 | [T/G]       | Ca_Desi_LG03               | 25.599                                       |
| Ca_Desi_SNP1250 | [G/T]       | Ca_Desi_LG03               | 25.777                                       |
| Ca_Desi_SNP1251 | [T/C]       | Ca_Desi_LG03               | 26.358                                       |
| Ca_Desi_SNP1252 | [T/C]       | Ca_Desi_LG03               | 26.535                                       |
| Ca_Desi_SNP1253 | [T/A]       | Ca_Desi_LG03               | 26.536                                       |
| Ca_Desi_SNP1254 | [A/C]       | Ca_Desi_LG03               | 26.582                                       |
| Ca_Desi_SNP1255 | [T/G]       | Ca_Desi_LG03               | 26.736                                       |
| Ca_Desi_SNP1256 | [C/A]       | Ca_Desi_LG03               | 26.968                                       |
| Ca_Desi_SNP1257 | [G/T]       | Ca_Desi_LG03               | 27.014                                       |
| Ca_Desi_SNP1258 | [A/G]       | Ca_Desi_LG03               | 27.071                                       |
| Ca_Desi_SNP1259 | [A/T]       | Ca_Desi_LG03               | 27.143                                       |
| Ca_Desi_SNP1260 | [T/C]       | Ca_Desi_LG03               | 27.197                                       |
| Ca_Desi_SNP1261 | [A/C]       | Ca_Desi_LG03               | 27.359                                       |
| Ca_Desi_SNP1262 | [A/G]       | Ca_Desi_LG03               | 27.454                                       |
| Ca_Desi_SNP1263 | [C/A]       | Ca_Desi_LG03               | 27.480                                       |
| Ca_Desi_SNP1264 | [A/G]       | Ca_Desi_LG03               | 27.506                                       |
| Ca_Desi_SNP1265 | [A/G]       | Ca_Desi_LG03               | 27.526                                       |
| Ca_Desi_SNP1266 | [T/A]       | Ca_Desi_LG03               | 27.560                                       |
| Ca_Desi_SNP1267 | [A/G]       | Ca_Desi_LG03               | 27.583                                       |

| <b>SNP IDs</b>  | <b>SNPs</b> | <b>Linkage Group (LGs)</b> | <b>Genetic positions (cM) of mapped SNPs</b> |
|-----------------|-------------|----------------------------|----------------------------------------------|
| Ca_Desi_SNP1268 | [T/C]       | Ca_Desi_LG03               | 27.704                                       |
| Ca_Desi_SNP1269 | [C/T]       | Ca_Desi_LG03               | 27.891                                       |
| Ca_Desi_SNP1270 | [T/G]       | Ca_Desi_LG03               | 27.953                                       |
| Ca_Desi_SNP1271 | [G/A]       | Ca_Desi_LG03               | 28.006                                       |
| Ca_Desi_SNP1272 | [G/T]       | Ca_Desi_LG03               | 28.017                                       |
| Ca_Desi_SNP1273 | [A/G]       | Ca_Desi_LG03               | 28.035                                       |
| Ca_Desi_SNP1274 | [C/T]       | Ca_Desi_LG03               | 28.451                                       |
| Ca_Desi_SNP1275 | [G/T]       | Ca_Desi_LG03               | 28.511                                       |
| Ca_Desi_SNP1276 | [A/T]       | Ca_Desi_LG03               | 28.563                                       |
| Ca_Desi_SNP1277 | [A/G]       | Ca_Desi_LG03               | 28.631                                       |
| Ca_Desi_SNP1278 | [T/A]       | Ca_Desi_LG03               | 28.706                                       |
| Ca_Desi_SNP1279 | [G/A]       | Ca_Desi_LG03               | 29.153                                       |
| Ca_Desi_SNP1280 | [A/C]       | Ca_Desi_LG03               | 29.357                                       |
| Ca_Desi_SNP1281 | [A/G]       | Ca_Desi_LG03               | 29.407                                       |
| Ca_Desi_SNP1282 | [A/C]       | Ca_Desi_LG03               | 29.820                                       |
| Ca_Desi_SNP1283 | [A/G]       | Ca_Desi_LG03               | 29.869                                       |
| Ca_Desi_SNP1284 | [T/C]       | Ca_Desi_LG03               | 30.261                                       |
| Ca_Desi_SNP1285 | [T/C]       | Ca_Desi_LG03               | 30.305                                       |
| Ca_Desi_SNP1286 | [T/G]       | Ca_Desi_LG03               | 30.512                                       |
| Ca_Desi_SNP1287 | [T/G]       | Ca_Desi_LG03               | 30.670                                       |
| Ca_Desi_SNP1288 | [A/C]       | Ca_Desi_LG03               | 31.041                                       |
| Ca_Desi_SNP1289 | [T/G]       | Ca_Desi_LG03               | 31.055                                       |
| Ca_Desi_SNP1290 | [T/C]       | Ca_Desi_LG03               | 31.179                                       |
| Ca_Desi_SNP1291 | [A/G]       | Ca_Desi_LG03               | 31.261                                       |
| Ca_Desi_SNP1292 | [C/A]       | Ca_Desi_LG03               | 31.388                                       |
| Ca_Desi_SNP1293 | [A/G]       | Ca_Desi_LG03               | 31.431                                       |
| Ca_Desi_SNP1294 | [G/T]       | Ca_Desi_LG03               | 31.493                                       |
| Ca_Desi_SNP1295 | [G/T]       | Ca_Desi_LG03               | 31.509                                       |
| Ca_Desi_SNP1296 | [G/T]       | Ca_Desi_LG03               | 31.555                                       |
| Ca_Desi_SNP1297 | [A/C]       | Ca_Desi_LG03               | 31.767                                       |
| Ca_Desi_SNP1298 | [G/C]       | Ca_Desi_LG03               | 31.841                                       |

| <b>SNP IDs</b>  | <b>SNPs</b> | <b>Linkage Group (LGs)</b> | <b>Genetic positions (cM) of mapped SNPs</b> |
|-----------------|-------------|----------------------------|----------------------------------------------|
| Ca_Desi_SNP1299 | [G/A]       | Ca_Desi_LG03               | 31.878                                       |
| Ca_Desi_SNP1300 | [A/T]       | Ca_Desi_LG03               | 31.907                                       |
| Ca_Desi_SNP1301 | [A/G]       | Ca_Desi_LG03               | 31.913                                       |
| Ca_Desi_SNP1302 | [G/T]       | Ca_Desi_LG03               | 32.195                                       |
| Ca_Desi_SNP1303 | [T/G]       | Ca_Desi_LG03               | 32.207                                       |
| Ca_Desi_SNP1304 | [C/T]       | Ca_Desi_LG03               | 32.480                                       |
| Ca_Desi_SNP1305 | [T/C]       | Ca_Desi_LG03               | 32.627                                       |
| Ca_Desi_SNP1306 | [G/A]       | Ca_Desi_LG03               | 32.689                                       |
| Ca_Desi_SNP1307 | [A/T]       | Ca_Desi_LG03               | 32.857                                       |
| Ca_Desi_SNP1308 | [T/C]       | Ca_Desi_LG03               | 33.217                                       |
| Ca_Desi_SNP1309 | [A/G]       | Ca_Desi_LG03               | 33.321                                       |
| Ca_Desi_SNP1310 | [C/A]       | Ca_Desi_LG03               | 33.602                                       |
| Ca_Desi_SNP1311 | [T/C]       | Ca_Desi_LG03               | 33.626                                       |
| Ca_Desi_SNP1312 | [G/A]       | Ca_Desi_LG03               | 33.652                                       |
| Ca_Desi_SNP1313 | [A/G]       | Ca_Desi_LG03               | 33.822                                       |
| Ca_Desi_SNP1314 | [T/C]       | Ca_Desi_LG03               | 33.922                                       |
| Ca_Desi_SNP1315 | [C/A]       | Ca_Desi_LG03               | 34.070                                       |
| Ca_Desi_SNP1316 | [C/T]       | Ca_Desi_LG03               | 34.268                                       |
| Ca_Desi_SNP1317 | [A/C]       | Ca_Desi_LG03               | 34.440                                       |
| Ca_Desi_SNP1318 | [A/C]       | Ca_Desi_LG03               | 34.449                                       |
| Ca_Desi_SNP1319 | [C/A]       | Ca_Desi_LG03               | 34.458                                       |
| Ca_Desi_SNP1320 | [T/C]       | Ca_Desi_LG03               | 34.475                                       |
| Ca_Desi_SNP1321 | [A/G]       | Ca_Desi_LG03               | 34.675                                       |
| Ca_Desi_SNP1322 | [T/G]       | Ca_Desi_LG03               | 34.753                                       |
| Ca_Desi_SNP1323 | [T/C]       | Ca_Desi_LG03               | 34.897                                       |
| Ca_Desi_SNP1324 | [G/A]       | Ca_Desi_LG03               | 35.072                                       |
| Ca_Desi_SNP1325 | [A/G]       | Ca_Desi_LG03               | 35.729                                       |
| Ca_Desi_SNP1326 | [A/C]       | Ca_Desi_LG03               | 35.994                                       |
| Ca_Desi_SNP1327 | [C/T]       | Ca_Desi_LG03               | 36.007                                       |
| Ca_Desi_SNP1328 | [G/A]       | Ca_Desi_LG03               | 36.130                                       |
| Ca_Desi_SNP1329 | [A/C]       | Ca_Desi_LG03               | 36.155                                       |

| <b>SNP IDs</b>  | <b>SNPs</b> | <b>Linkage Group (LGs)</b> | <b>Genetic positions (cM) of mapped SNPs</b> |
|-----------------|-------------|----------------------------|----------------------------------------------|
| Ca_Desi_SNP1330 | [C/T]       | Ca_Desi_LG03               | 36.189                                       |
| Ca_Desi_SNP1331 | [T/C]       | Ca_Desi_LG03               | 36.211                                       |
| Ca_Desi_SNP1332 | [G/A]       | Ca_Desi_LG03               | 36.309                                       |
| Ca_Desi_SNP1333 | [A/G]       | Ca_Desi_LG03               | 36.368                                       |
| Ca_Desi_SNP1334 | [T/G]       | Ca_Desi_LG03               | 36.372                                       |
| Ca_Desi_SNP1335 | [T/A]       | Ca_Desi_LG03               | 36.510                                       |
| Ca_Desi_SNP1336 | [A/G]       | Ca_Desi_LG03               | 36.649                                       |
| Ca_Desi_SNP1337 | [T/C]       | Ca_Desi_LG03               | 36.652                                       |
| Ca_Desi_SNP1338 | [T/C]       | Ca_Desi_LG03               | 36.704                                       |
| Ca_Desi_SNP1339 | [T/C]       | Ca_Desi_LG03               | 36.959                                       |
| Ca_Desi_SNP1340 | [G/C]       | Ca_Desi_LG03               | 37.072                                       |
| Ca_Desi_SNP1341 | [G/T]       | Ca_Desi_LG03               | 37.227                                       |
| Ca_Desi_SNP1342 | [C/T]       | Ca_Desi_LG03               | 37.253                                       |
| Ca_Desi_SNP1343 | [A/G]       | Ca_Desi_LG03               | 37.311                                       |
| Ca_Desi_SNP1344 | [G/T]       | Ca_Desi_LG03               | 37.372                                       |
| Ca_Desi_SNP1345 | [G/A]       | Ca_Desi_LG03               | 37.438                                       |
| Ca_Desi_SNP1346 | [A/C]       | Ca_Desi_LG03               | 37.539                                       |
| Ca_Desi_SNP1347 | [T/C]       | Ca_Desi_LG03               | 37.574                                       |
| Ca_Desi_SNP1348 | [T/A]       | Ca_Desi_LG03               | 37.589                                       |
| Ca_Desi_SNP1349 | [C/T]       | Ca_Desi_LG03               | 37.635                                       |
| Ca_Desi_SNP1350 | [G/A]       | Ca_Desi_LG03               | 38.025                                       |
| Ca_Desi_SNP1351 | [A/G]       | Ca_Desi_LG03               | 38.235                                       |
| Ca_Desi_SNP1352 | [T/G]       | Ca_Desi_LG03               | 38.362                                       |
| Ca_Desi_SNP1353 | [T/C]       | Ca_Desi_LG03               | 38.464                                       |
| Ca_Desi_SNP1354 | [A/C]       | Ca_Desi_LG03               | 38.510                                       |
| Ca_Desi_SNP1355 | [T/C]       | Ca_Desi_LG03               | 38.673                                       |
| Ca_Desi_SNP1356 | [C/T]       | Ca_Desi_LG03               | 38.753                                       |
| Ca_Desi_SNP1357 | [C/A]       | Ca_Desi_LG03               | 38.855                                       |
| Ca_Desi_SNP1358 | [T/C]       | Ca_Desi_LG03               | 38.879                                       |
| Ca_Desi_SNP1359 | [A/C]       | Ca_Desi_LG03               | 39.084                                       |
| Ca_Desi_SNP1360 | [C/G]       | Ca_Desi_LG03               | 39.456                                       |

| <b>SNP IDs</b>  | <b>SNPs</b> | <b>Linkage Group (LGs)</b> | <b>Genetic positions (cM) of mapped SNPs</b> |
|-----------------|-------------|----------------------------|----------------------------------------------|
| Ca_Desi_SNP1361 | [C/T]       | Ca_Desi_LG03               | 39.533                                       |
| Ca_Desi_SNP1362 | [A/C]       | Ca_Desi_LG03               | 39.543                                       |
| Ca_Desi_SNP1363 | [A/G]       | Ca_Desi_LG03               | 39.849                                       |
| Ca_Desi_SNP1364 | [G/A]       | Ca_Desi_LG03               | 39.858                                       |
| Ca_Desi_SNP1365 | [T/G]       | Ca_Desi_LG03               | 40.054                                       |
| Ca_Desi_SNP1366 | [A/G]       | Ca_Desi_LG03               | 40.095                                       |
| Ca_Desi_SNP1367 | [T/G]       | Ca_Desi_LG03               | 40.204                                       |
| Ca_Desi_SNP1368 | [G/T]       | Ca_Desi_LG03               | 40.220                                       |
| Ca_Desi_SNP1369 | [A/C]       | Ca_Desi_LG03               | 40.405                                       |
| Ca_Desi_SNP1370 | [C/A]       | Ca_Desi_LG03               | 40.439                                       |
| Ca_Desi_SNP1371 | [A/T]       | Ca_Desi_LG03               | 40.454                                       |
| Ca_Desi_SNP1372 | [T/C]       | Ca_Desi_LG03               | 40.483                                       |
| Ca_Desi_SNP1373 | [G/T]       | Ca_Desi_LG03               | 40.586                                       |
| Ca_Desi_SNP1374 | [T/A]       | Ca_Desi_LG03               | 40.700                                       |
| Ca_Desi_SNP1375 | [G/C]       | Ca_Desi_LG03               | 40.765                                       |
| Ca_Desi_SNP1376 | [C/T]       | Ca_Desi_LG03               | 40.768                                       |
| Ca_Desi_SNP1377 | [A/C]       | Ca_Desi_LG03               | 40.972                                       |
| Ca_Desi_SNP1378 | [G/A]       | Ca_Desi_LG03               | 41.143                                       |
| Ca_Desi_SNP1379 | [C/T]       | Ca_Desi_LG03               | 41.169                                       |
| Ca_Desi_SNP1380 | [G/A]       | Ca_Desi_LG03               | 41.228                                       |
| Ca_Desi_SNP1381 | [T/G]       | Ca_Desi_LG03               | 41.229                                       |
| Ca_Desi_SNP1382 | [A/G]       | Ca_Desi_LG03               | 41.513                                       |
| Ca_Desi_SNP1383 | [G/A]       | Ca_Desi_LG03               | 41.589                                       |
| Ca_Desi_SNP1384 | [T/C]       | Ca_Desi_LG03               | 41.630                                       |
| Ca_Desi_SNP1385 | [G/A]       | Ca_Desi_LG03               | 41.631                                       |
| Ca_Desi_SNP1386 | [A/T]       | Ca_Desi_LG03               | 41.668                                       |
| Ca_Desi_SNP1387 | [C/A]       | Ca_Desi_LG03               | 41.698                                       |
| Ca_Desi_SNP1388 | [G/A]       | Ca_Desi_LG03               | 41.812                                       |
| Ca_Desi_SNP1389 | [T/C]       | Ca_Desi_LG03               | 41.890                                       |
| Ca_Desi_SNP1390 | [T/C]       | Ca_Desi_LG03               | 41.996                                       |
| Ca_Desi_SNP1391 | [G/T]       | Ca_Desi_LG03               | 42.003                                       |

| <b>SNP IDs</b>  | <b>SNPs</b> | <b>Linkage Group (LGs)</b> | <b>Genetic positions (cM) of mapped SNPs</b> |
|-----------------|-------------|----------------------------|----------------------------------------------|
| Ca_Desi_SNP1392 | [T/G]       | Ca_Desi_LG03               | 42.050                                       |
| Ca_Desi_SNP1393 | [T/C]       | Ca_Desi_LG03               | 42.098                                       |
| Ca_Desi_SNP1394 | [T/G]       | Ca_Desi_LG03               | 42.263                                       |
| Ca_Desi_SNP1395 | [A/G]       | Ca_Desi_LG03               | 42.332                                       |
| Ca_Desi_SNP1396 | [A/C]       | Ca_Desi_LG03               | 42.344                                       |
| Ca_Desi_SNP1397 | [T/G]       | Ca_Desi_LG03               | 42.481                                       |
| Ca_Desi_SNP1398 | [T/G]       | Ca_Desi_LG03               | 42.482                                       |
| Ca_Desi_SNP1399 | [T/C]       | Ca_Desi_LG03               | 42.568                                       |
| Ca_Desi_SNP1400 | [C/T]       | Ca_Desi_LG03               | 42.627                                       |
| Ca_Desi_SNP1401 | [A/G]       | Ca_Desi_LG03               | 42.649                                       |
| Ca_Desi_SNP1402 | [C/A]       | Ca_Desi_LG03               | 42.732                                       |
| Ca_Desi_SNP1403 | [A/C]       | Ca_Desi_LG03               | 42.863                                       |
| Ca_Desi_SNP1404 | [A/G]       | Ca_Desi_LG03               | 42.866                                       |
| Ca_Desi_SNP1405 | [T/G]       | Ca_Desi_LG03               | 42.895                                       |
| Ca_Desi_SNP1406 | [A/C]       | Ca_Desi_LG03               | 42.916                                       |
| Ca_Desi_SNP1407 | [A/C]       | Ca_Desi_LG03               | 42.959                                       |
| Ca_Desi_SNP1408 | [A/T]       | Ca_Desi_LG03               | 43.049                                       |
| Ca_Desi_SNP1409 | [C/T]       | Ca_Desi_LG03               | 43.085                                       |
| Ca_Desi_SNP1410 | [T/C]       | Ca_Desi_LG03               | 43.209                                       |
| Ca_Desi_SNP1411 | [C/T]       | Ca_Desi_LG03               | 43.213                                       |
| Ca_Desi_SNP1412 | [T/C]       | Ca_Desi_LG03               | 43.269                                       |
| Ca_Desi_SNP1413 | [T/G]       | Ca_Desi_LG03               | 43.271                                       |
| Ca_Desi_SNP1414 | [T/G]       | Ca_Desi_LG03               | 43.446                                       |
| Ca_Desi_SNP1415 | [C/T]       | Ca_Desi_LG03               | 43.506                                       |
| Ca_Desi_SNP1416 | [T/G]       | Ca_Desi_LG03               | 43.746                                       |
| Ca_Desi_SNP1417 | [T/C]       | Ca_Desi_LG03               | 43.808                                       |
| Ca_Desi_SNP1418 | [T/G]       | Ca_Desi_LG03               | 43.914                                       |
| Ca_Desi_SNP1419 | [A/G]       | Ca_Desi_LG03               | 44.024                                       |
| Ca_Desi_SNP1420 | [A/C]       | Ca_Desi_LG03               | 44.078                                       |
| Ca_Desi_SNP1421 | [A/G]       | Ca_Desi_LG03               | 44.113                                       |
| Ca_Desi_SNP1422 | [T/C]       | Ca_Desi_LG03               | 44.121                                       |

| <b>SNP IDs</b>  | <b>SNPs</b> | <b>Linkage Group (LGs)</b> | <b>Genetic positions (cM) of mapped SNPs</b> |
|-----------------|-------------|----------------------------|----------------------------------------------|
| Ca_Desi_SNP1423 | [T/C]       | Ca_Desi_LG03               | 44.246                                       |
| Ca_Desi_SNP1424 | [G/A]       | Ca_Desi_LG03               | 44.399                                       |
| Ca_Desi_SNP1425 | [C/A]       | Ca_Desi_LG03               | 44.496                                       |
| Ca_Desi_SNP1426 | [A/G]       | Ca_Desi_LG03               | 44.721                                       |
| Ca_Desi_SNP1427 | [A/G]       | Ca_Desi_LG03               | 44.896                                       |
| Ca_Desi_SNP1428 | [C/A]       | Ca_Desi_LG03               | 45.030                                       |
| Ca_Desi_SNP1429 | [A/C]       | Ca_Desi_LG03               | 45.057                                       |
| Ca_Desi_SNP1430 | [T/C]       | Ca_Desi_LG03               | 45.090                                       |
| Ca_Desi_SNP1431 | [G/C]       | Ca_Desi_LG03               | 45.485                                       |
| Ca_Desi_SNP1432 | [T/C]       | Ca_Desi_LG03               | 45.553                                       |
| Ca_Desi_SNP1433 | [G/A]       | Ca_Desi_LG03               | 45.647                                       |
| Ca_Desi_SNP1434 | [T/C]       | Ca_Desi_LG03               | 45.678                                       |
| Ca_Desi_SNP1435 | [A/C]       | Ca_Desi_LG03               | 45.745                                       |
| Ca_Desi_SNP1436 | [T/C]       | Ca_Desi_LG03               | 45.829                                       |
| Ca_Desi_SNP1437 | [T/C]       | Ca_Desi_LG03               | 45.839                                       |
| Ca_Desi_SNP1438 | [A/G]       | Ca_Desi_LG03               | 45.973                                       |
| Ca_Desi_SNP1439 | [T/G]       | Ca_Desi_LG03               | 46.132                                       |
| Ca_Desi_SNP1440 | [T/C]       | Ca_Desi_LG03               | 46.159                                       |
| Ca_Desi_SNP1441 | [C/A]       | Ca_Desi_LG03               | 46.171                                       |
| Ca_Desi_SNP1442 | [T/C]       | Ca_Desi_LG03               | 46.173                                       |
| Ca_Desi_SNP1443 | [A/C]       | Ca_Desi_LG03               | 46.466                                       |
| Ca_Desi_SNP1444 | [T/C]       | Ca_Desi_LG03               | 46.508                                       |
| Ca_Desi_SNP1445 | [A/C]       | Ca_Desi_LG03               | 46.529                                       |
| Ca_Desi_SNP1446 | [A/G]       | Ca_Desi_LG03               | 47.027                                       |
| Ca_Desi_SNP1447 | [T/C]       | Ca_Desi_LG03               | 47.074                                       |
| Ca_Desi_SNP1448 | [A/G]       | Ca_Desi_LG03               | 47.227                                       |
| Ca_Desi_SNP1449 | [T/G]       | Ca_Desi_LG03               | 47.350                                       |
| Ca_Desi_SNP1450 | [A/G]       | Ca_Desi_LG03               | 47.394                                       |
| Ca_Desi_SNP1451 | [T/C]       | Ca_Desi_LG03               | 47.687                                       |
| Ca_Desi_SNP1452 | [G/A]       | Ca_Desi_LG03               | 47.992                                       |
| Ca_Desi_SNP1453 | [A/G]       | Ca_Desi_LG03               | 48.006                                       |



| <b>SNP IDs</b>  | <b>SNPs</b> | <b>Linkage Group (LGs)</b> | <b>Genetic positions (cM) of mapped SNPs</b> |
|-----------------|-------------|----------------------------|----------------------------------------------|
| Ca_Desi_SNP1454 | [A/G]       | Ca_Desi_LG03               | 48.027                                       |
| Ca_Desi_SNP1455 | [A/C]       | Ca_Desi_LG03               | 48.038                                       |
| Ca_Desi_SNP1456 | [T/C]       | Ca_Desi_LG03               | 48.114                                       |
| Ca_Desi_SNP1457 | [A/G]       | Ca_Desi_LG03               | 48.302                                       |
| Ca_Desi_SNP1458 | [T/G]       | Ca_Desi_LG03               | 48.313                                       |
| Ca_Desi_SNP1459 | [C/T]       | Ca_Desi_LG03               | 48.353                                       |
| Ca_Desi_SNP1460 | [A/T]       | Ca_Desi_LG03               | 48.583                                       |
| Ca_Desi_SNP1461 | [C/T]       | Ca_Desi_LG03               | 48.923                                       |
| Ca_Desi_SNP1462 | [A/C]       | Ca_Desi_LG03               | 49.068                                       |
| Ca_Desi_SNP1463 | [A/G]       | Ca_Desi_LG03               | 49.174                                       |
| Ca_Desi_SNP1464 | [C/T]       | Ca_Desi_LG03               | 49.373                                       |
| Ca_Desi_SNP1465 | [T/C]       | Ca_Desi_LG03               | 49.404                                       |
| Ca_Desi_SNP1466 | [G/T]       | Ca_Desi_LG03               | 49.717                                       |
| Ca_Desi_SNP1467 | [T/C]       | Ca_Desi_LG03               | 49.973                                       |
| Ca_Desi_SNP1468 | [T/C]       | Ca_Desi_LG03               | 50.032                                       |
| Ca_Desi_SNP1469 | [G/C]       | Ca_Desi_LG03               | 50.155                                       |
| Ca_Desi_SNP1470 | [G/T]       | Ca_Desi_LG03               | 50.176                                       |
| Ca_Desi_SNP1471 | [T/C]       | Ca_Desi_LG03               | 50.212                                       |
| Ca_Desi_SNP1472 | [G/A]       | Ca_Desi_LG03               | 50.290                                       |
| Ca_Desi_SNP1473 | [G/A]       | Ca_Desi_LG03               | 50.387                                       |
| Ca_Desi_SNP1474 | [A/C]       | Ca_Desi_LG03               | 50.445                                       |
| Ca_Desi_SNP1475 | [A/G]       | Ca_Desi_LG03               | 50.489                                       |
| Ca_Desi_SNP1476 | [T/G]       | Ca_Desi_LG03               | 50.548                                       |
| Ca_Desi_SNP1477 | [A/T]       | Ca_Desi_LG03               | 50.660                                       |
| Ca_Desi_SNP1478 | [C/T]       | Ca_Desi_LG03               | 50.771                                       |
| Ca_Desi_SNP1479 | [G/A]       | Ca_Desi_LG03               | 50.792                                       |
| Ca_Desi_SNP1480 | [A/C]       | Ca_Desi_LG03               | 50.832                                       |
| Ca_Desi_SNP1481 | [T/C]       | Ca_Desi_LG03               | 50.983                                       |
| Ca_Desi_SNP1482 | [G/T]       | Ca_Desi_LG03               | 51.327                                       |
| Ca_Desi_SNP1483 | [C/T]       | Ca_Desi_LG03               | 51.953                                       |
| Ca_Desi_SNP1484 | [T/C]       | Ca_Desi_LG03               | 52.068                                       |

| <b>SNP IDs</b>  | <b>SNPs</b> | <b>Linkage Group (LGs)</b> | <b>Genetic positions (cM) of mapped SNPs</b> |
|-----------------|-------------|----------------------------|----------------------------------------------|
| Ca_Desi_SNP1485 | [T/C]       | Ca_Desi_LG03               | 52.177                                       |
| Ca_Desi_SNP1486 | [A/G]       | Ca_Desi_LG03               | 52.290                                       |
| Ca_Desi_SNP1487 | [A/T]       | Ca_Desi_LG03               | 52.354                                       |
| Ca_Desi_SNP1488 | [T/C]       | Ca_Desi_LG03               | 52.423                                       |
| Ca_Desi_SNP1489 | [A/C]       | Ca_Desi_LG03               | 52.566                                       |
| Ca_Desi_SNP1490 | [G/T]       | Ca_Desi_LG03               | 52.585                                       |
| Ca_Desi_SNP1491 | [T/A]       | Ca_Desi_LG03               | 52.596                                       |
| Ca_Desi_SNP1492 | [G/A]       | Ca_Desi_LG03               | 53.010                                       |
| Ca_Desi_SNP1493 | [A/T]       | Ca_Desi_LG03               | 53.360                                       |
| Ca_Desi_SNP1494 | [T/A]       | Ca_Desi_LG03               | 53.525                                       |
| Ca_Desi_SNP1495 | [T/C]       | Ca_Desi_LG03               | 53.594                                       |
| Ca_Desi_SNP1496 | [A/C]       | Ca_Desi_LG03               | 53.732                                       |
| Ca_Desi_SNP1497 | [A/G]       | Ca_Desi_LG03               | 53.935                                       |
| Ca_Desi_SNP1498 | [C/A]       | Ca_Desi_LG03               | 54.051                                       |
| Ca_Desi_SNP1499 | [G/T]       | Ca_Desi_LG03               | 54.102                                       |
| Ca_Desi_SNP1500 | [A/C]       | Ca_Desi_LG03               | 54.103                                       |
| Ca_Desi_SNP1501 | [T/G]       | Ca_Desi_LG03               | 54.537                                       |
| Ca_Desi_SNP1502 | [G/A]       | Ca_Desi_LG03               | 54.788                                       |
| Ca_Desi_SNP1503 | [C/A]       | Ca_Desi_LG03               | 54.881                                       |
| Ca_Desi_SNP1504 | [A/C]       | Ca_Desi_LG03               | 54.888                                       |
| Ca_Desi_SNP1505 | [T/C]       | Ca_Desi_LG03               | 54.947                                       |
| Ca_Desi_SNP1506 | [G/T]       | Ca_Desi_LG03               | 54.973                                       |
| Ca_Desi_SNP1507 | [C/A]       | Ca_Desi_LG03               | 55.052                                       |
| Ca_Desi_SNP1508 | [A/C]       | Ca_Desi_LG03               | 55.098                                       |
| Ca_Desi_SNP1509 | [G/T]       | Ca_Desi_LG03               | 55.323                                       |
| Ca_Desi_SNP1510 | [T/G]       | Ca_Desi_LG03               | 55.363                                       |
| Ca_Desi_SNP1511 | [G/A]       | Ca_Desi_LG03               | 55.413                                       |
| Ca_Desi_SNP1512 | [A/C]       | Ca_Desi_LG03               | 55.471                                       |
| Ca_Desi_SNP1513 | [T/G]       | Ca_Desi_LG03               | 55.477                                       |
| Ca_Desi_SNP1514 | [A/C]       | Ca_Desi_LG03               | 55.480                                       |
| Ca_Desi_SNP1515 | [C/T]       | Ca_Desi_LG03               | 55.542                                       |

| <b>SNP IDs</b>  | <b>SNPs</b> | <b>Linkage Group (LGs)</b> | <b>Genetic positions (cM) of mapped SNPs</b> |
|-----------------|-------------|----------------------------|----------------------------------------------|
| Ca_Desi_SNP1516 | [T/G]       | Ca_Desi_LG03               | 55.619                                       |
| Ca_Desi_SNP1517 | [T/G]       | Ca_Desi_LG03               | 55.793                                       |
| Ca_Desi_SNP1518 | [G/T]       | Ca_Desi_LG03               | 56.118                                       |
| Ca_Desi_SNP1519 | [A/G]       | Ca_Desi_LG03               | 56.131                                       |
| Ca_Desi_SNP1520 | [A/G]       | Ca_Desi_LG03               | 56.159                                       |
| Ca_Desi_SNP1521 | [C/A]       | Ca_Desi_LG03               | 56.212                                       |
| Ca_Desi_SNP1522 | [G/A]       | Ca_Desi_LG03               | 56.306                                       |
| Ca_Desi_SNP1523 | [G/A]       | Ca_Desi_LG03               | 56.331                                       |
| Ca_Desi_SNP1524 | [C/A]       | Ca_Desi_LG03               | 56.445                                       |
| Ca_Desi_SNP1525 | [T/G]       | Ca_Desi_LG03               | 56.488                                       |
| Ca_Desi_SNP1526 | [A/C]       | Ca_Desi_LG03               | 56.674                                       |
| Ca_Desi_SNP1527 | [A/G]       | Ca_Desi_LG03               | 56.919                                       |
| Ca_Desi_SNP1528 | [G/A]       | Ca_Desi_LG03               | 57.030                                       |
| Ca_Desi_SNP1529 | [A/G]       | Ca_Desi_LG03               | 57.287                                       |
| Ca_Desi_SNP1530 | [C/G]       | Ca_Desi_LG03               | 57.291                                       |
| Ca_Desi_SNP1531 | [G/T]       | Ca_Desi_LG03               | 57.452                                       |
| Ca_Desi_SNP1532 | [A/T]       | Ca_Desi_LG03               | 57.528                                       |
| Ca_Desi_SNP1533 | [A/G]       | Ca_Desi_LG03               | 57.560                                       |
| Ca_Desi_SNP1534 | [A/C]       | Ca_Desi_LG03               | 57.583                                       |
| Ca_Desi_SNP1535 | [G/T]       | Ca_Desi_LG03               | 57.654                                       |
| Ca_Desi_SNP1536 | [T/C]       | Ca_Desi_LG03               | 57.692                                       |
| Ca_Desi_SNP1537 | [G/T]       | Ca_Desi_LG03               | 57.702                                       |
| Ca_Desi_SNP1538 | [T/A]       | Ca_Desi_LG03               | 57.753                                       |
| Ca_Desi_SNP1539 | [G/A]       | Ca_Desi_LG03               | 57.766                                       |
| Ca_Desi_SNP1540 | [A/C]       | Ca_Desi_LG03               | 57.846                                       |
| Ca_Desi_SNP1541 | [A/C]       | Ca_Desi_LG03               | 57.924                                       |
| Ca_Desi_SNP1542 | [G/T]       | Ca_Desi_LG03               | 57.954                                       |
| Ca_Desi_SNP1543 | [T/C]       | Ca_Desi_LG03               | 57.975                                       |
| Ca_Desi_SNP1544 | [A/T]       | Ca_Desi_LG03               | 58.198                                       |
| Ca_Desi_SNP1545 | [C/T]       | Ca_Desi_LG03               | 58.212                                       |
| Ca_Desi_SNP1546 | [A/C]       | Ca_Desi_LG03               | 58.235                                       |

| <b>SNP IDs</b>  | <b>SNPs</b> | <b>Linkage Group (LGs)</b> | <b>Genetic positions (cM) of mapped SNPs</b> |
|-----------------|-------------|----------------------------|----------------------------------------------|
| Ca_Desi_SNP1547 | [A/G]       | Ca_Desi_LG03               | 58.450                                       |
| Ca_Desi_SNP1548 | [C/A]       | Ca_Desi_LG03               | 58.561                                       |
| Ca_Desi_SNP1549 | [C/A]       | Ca_Desi_LG03               | 58.674                                       |
| Ca_Desi_SNP1550 | [T/C]       | Ca_Desi_LG03               | 58.683                                       |
| Ca_Desi_SNP1551 | [T/C]       | Ca_Desi_LG03               | 58.690                                       |
| Ca_Desi_SNP1552 | [T/C]       | Ca_Desi_LG03               | 58.788                                       |
| Ca_Desi_SNP1553 | [A/C]       | Ca_Desi_LG03               | 58.856                                       |
| Ca_Desi_SNP1554 | [C/G]       | Ca_Desi_LG03               | 58.871                                       |
| Ca_Desi_SNP1555 | [T/A]       | Ca_Desi_LG03               | 59.015                                       |
| Ca_Desi_SNP1556 | [G/C]       | Ca_Desi_LG03               | 59.069                                       |
| Ca_Desi_SNP1557 | [T/G]       | Ca_Desi_LG03               | 59.354                                       |
| Ca_Desi_SNP1558 | [T/C]       | Ca_Desi_LG03               | 59.365                                       |
| Ca_Desi_SNP1559 | [G/A]       | Ca_Desi_LG03               | 59.415                                       |
| Ca_Desi_SNP1560 | [G/T]       | Ca_Desi_LG03               | 59.451                                       |
| Ca_Desi_SNP1561 | [T/C]       | Ca_Desi_LG03               | 59.489                                       |
| Ca_Desi_SNP1562 | [A/G]       | Ca_Desi_LG03               | 59.590                                       |
| Ca_Desi_SNP1563 | [A/G]       | Ca_Desi_LG03               | 59.714                                       |
| Ca_Desi_SNP1564 | [A/G]       | Ca_Desi_LG03               | 60.360                                       |
| Ca_Desi_SNP1565 | [T/C]       | Ca_Desi_LG03               | 60.412                                       |
| Ca_Desi_SNP1566 | [T/C]       | Ca_Desi_LG03               | 60.818                                       |
| Ca_Desi_SNP1567 | [A/G]       | Ca_Desi_LG03               | 61.023                                       |
| Ca_Desi_SNP1568 | [A/C]       | Ca_Desi_LG03               | 61.121                                       |
| Ca_Desi_SNP1569 | [A/C]       | Ca_Desi_LG03               | 61.147                                       |
| Ca_Desi_SNP1570 | [T/G]       | Ca_Desi_LG03               | 61.500                                       |
| Ca_Desi_SNP1571 | [T/C]       | Ca_Desi_LG03               | 61.561                                       |
| Ca_Desi_SNP1572 | [T/C]       | Ca_Desi_LG03               | 61.599                                       |
| Ca_Desi_SNP1573 | [A/G]       | Ca_Desi_LG03               | 61.777                                       |
| Ca_Desi_SNP1574 | [G/C]       | Ca_Desi_LG03               | 61.824                                       |
| Ca_Desi_SNP1575 | [C/T]       | Ca_Desi_LG03               | 61.835                                       |
| Ca_Desi_SNP1576 | [G/A]       | Ca_Desi_LG03               | 62.021                                       |
| Ca_Desi_SNP1577 | [T/A]       | Ca_Desi_LG03               | 62.031                                       |

| <b>SNP IDs</b>  | <b>SNPs</b> | <b>Linkage Group (LGs)</b> | <b>Genetic positions (cM) of mapped SNPs</b> |
|-----------------|-------------|----------------------------|----------------------------------------------|
| Ca_Desi_SNP1578 | [C/T]       | Ca_Desi_LG03               | 62.305                                       |
| Ca_Desi_SNP1579 | [G/C]       | Ca_Desi_LG03               | 62.368                                       |
| Ca_Desi_SNP1580 | [T/C]       | Ca_Desi_LG03               | 62.465                                       |
| Ca_Desi_SNP1581 | [T/G]       | Ca_Desi_LG03               | 62.509                                       |
| Ca_Desi_SNP1582 | [A/G]       | Ca_Desi_LG03               | 62.612                                       |
| Ca_Desi_SNP1583 | [C/T]       | Ca_Desi_LG03               | 62.744                                       |
| Ca_Desi_SNP1584 | [T/G]       | Ca_Desi_LG03               | 62.995                                       |
| Ca_Desi_SNP1585 | [A/G]       | Ca_Desi_LG03               | 63.033                                       |
| Ca_Desi_SNP1586 | [T/G]       | Ca_Desi_LG03               | 63.297                                       |
| Ca_Desi_SNP1587 | [T/A]       | Ca_Desi_LG03               | 63.334                                       |
| Ca_Desi_SNP1588 | [T/C]       | Ca_Desi_LG03               | 63.485                                       |
| Ca_Desi_SNP1589 | [C/T]       | Ca_Desi_LG03               | 63.568                                       |
| Ca_Desi_SNP1590 | [A/C]       | Ca_Desi_LG03               | 63.742                                       |
| Ca_Desi_SNP1591 | [G/T]       | Ca_Desi_LG03               | 63.918                                       |
| Ca_Desi_SNP1592 | [A/G]       | Ca_Desi_LG03               | 63.973                                       |
| Ca_Desi_SNP1593 | [C/A]       | Ca_Desi_LG03               | 64.281                                       |
| Ca_Desi_SNP1594 | [A/G]       | Ca_Desi_LG03               | 64.373                                       |
| Ca_Desi_SNP1595 | [A/C]       | Ca_Desi_LG03               | 64.420                                       |
| Ca_Desi_SNP1596 | [A/C]       | Ca_Desi_LG03               | 64.660                                       |
| Ca_Desi_SNP1597 | [A/G]       | Ca_Desi_LG03               | 64.661                                       |
| Ca_Desi_SNP1598 | [A/G]       | Ca_Desi_LG03               | 64.699                                       |
| Ca_Desi_SNP1599 | [T/C]       | Ca_Desi_LG03               | 64.775                                       |
| Ca_Desi_SNP1600 | [A/G]       | Ca_Desi_LG03               | 64.911                                       |
| Ca_Desi_SNP1601 | [A/C]       | Ca_Desi_LG03               | 65.284                                       |
| Ca_Desi_SNP1602 | [A/C]       | Ca_Desi_LG03               | 65.354                                       |
| Ca_Desi_SNP1603 | [A/T]       | Ca_Desi_LG03               | 65.588                                       |
| Ca_Desi_SNP1604 | [C/T]       | Ca_Desi_LG03               | 65.605                                       |
| Ca_Desi_SNP1605 | [A/T]       | Ca_Desi_LG03               | 65.686                                       |
| Ca_Desi_SNP1606 | [A/G]       | Ca_Desi_LG03               | 65.904                                       |
| Ca_Desi_SNP1607 | [G/T]       | Ca_Desi_LG03               | 66.208                                       |
| Ca_Desi_SNP1608 | [A/G]       | Ca_Desi_LG03               | 66.345                                       |

| <b>SNP IDs</b>  | <b>SNPs</b> | <b>Linkage Group (LGs)</b> | <b>Genetic positions (cM) of mapped SNPs</b> |
|-----------------|-------------|----------------------------|----------------------------------------------|
| Ca_Desi_SNP1609 | [T/A]       | Ca_Desi_LG03               | 66.447                                       |
| Ca_Desi_SNP1610 | [G/C]       | Ca_Desi_LG03               | 66.557                                       |
| Ca_Desi_SNP1611 | [A/G]       | Ca_Desi_LG03               | 67.020                                       |
| Ca_Desi_SNP1612 | [T/C]       | Ca_Desi_LG03               | 67.204                                       |
| Ca_Desi_SNP1613 | [T/C]       | Ca_Desi_LG03               | 67.232                                       |
| Ca_Desi_SNP1614 | [A/C]       | Ca_Desi_LG03               | 67.278                                       |
| Ca_Desi_SNP1615 | [A/G]       | Ca_Desi_LG03               | 67.423                                       |
| Ca_Desi_SNP1616 | [C/G]       | Ca_Desi_LG03               | 67.755                                       |
| Ca_Desi_SNP1617 | [A/C]       | Ca_Desi_LG03               | 67.801                                       |
| Ca_Desi_SNP1618 | [A/G]       | Ca_Desi_LG03               | 67.861                                       |
| Ca_Desi_SNP1619 | [G/A]       | Ca_Desi_LG03               | 67.867                                       |
| Ca_Desi_SNP1620 | [A/C]       | Ca_Desi_LG03               | 67.958                                       |
| Ca_Desi_SNP1621 | [T/C]       | Ca_Desi_LG03               | 68.079                                       |
| Ca_Desi_SNP1622 | [C/T]       | Ca_Desi_LG03               | 68.142                                       |
| Ca_Desi_SNP1623 | [G/T]       | Ca_Desi_LG03               | 68.192                                       |
| Ca_Desi_SNP1624 | [G/A]       | Ca_Desi_LG03               | 68.300                                       |
| Ca_Desi_SNP1625 | [T/C]       | Ca_Desi_LG03               | 68.425                                       |
| Ca_Desi_SNP1626 | [T/C]       | Ca_Desi_LG03               | 69.023                                       |
| Ca_Desi_SNP1627 | [C/T]       | Ca_Desi_LG03               | 69.074                                       |
| Ca_Desi_SNP1628 | [C/T]       | Ca_Desi_LG03               | 69.175                                       |
| Ca_Desi_SNP1629 | [G/A]       | Ca_Desi_LG03               | 69.180                                       |
| Ca_Desi_SNP1630 | [A/C]       | Ca_Desi_LG03               | 69.301                                       |
| Ca_Desi_SNP1631 | [T/G]       | Ca_Desi_LG03               | 69.564                                       |
| Ca_Desi_SNP1632 | [T/C]       | Ca_Desi_LG03               | 69.583                                       |
| Ca_Desi_SNP1633 | [T/A]       | Ca_Desi_LG03               | 69.685                                       |
| Ca_Desi_SNP1634 | [G/A]       | Ca_Desi_LG03               | 70.062                                       |
| Ca_Desi_SNP1635 | [G/A]       | Ca_Desi_LG03               | 70.088                                       |
| Ca_Desi_SNP1636 | [G/A]       | Ca_Desi_LG03               | 70.212                                       |
| Ca_Desi_SNP1637 | [C/T]       | Ca_Desi_LG03               | 71.001                                       |
| Ca_Desi_SNP1638 | [A/G]       | Ca_Desi_LG03               | 71.116                                       |
| Ca_Desi_SNP1639 | [T/C]       | Ca_Desi_LG03               | 71.229                                       |

| <b>SNP IDs</b>  | <b>SNPs</b> | <b>Linkage Group (LGs)</b> | <b>Genetic positions (cM) of mapped SNPs</b> |
|-----------------|-------------|----------------------------|----------------------------------------------|
| Ca_Desi_SNP1640 | [C/G]       | Ca_Desi_LG03               | 71.266                                       |
| Ca_Desi_SNP1641 | [A/G]       | Ca_Desi_LG03               | 71.664                                       |
| Ca_Desi_SNP1642 | [T/C]       | Ca_Desi_LG03               | 71.815                                       |
| Ca_Desi_SNP1643 | [A/G]       | Ca_Desi_LG03               | 71.971                                       |
| Ca_Desi_SNP1644 | [A/G]       | Ca_Desi_LG03               | 72.091                                       |
| Ca_Desi_SNP1645 | [T/C]       | Ca_Desi_LG03               | 72.129                                       |
| Ca_Desi_SNP1646 | [A/C]       | Ca_Desi_LG03               | 72.228                                       |
| Ca_Desi_SNP1647 | [G/C]       | Ca_Desi_LG03               | 72.445                                       |
| Ca_Desi_SNP1648 | [C/G]       | Ca_Desi_LG03               | 72.758                                       |
| Ca_Desi_SNP1649 | [T/G]       | Ca_Desi_LG03               | 72.966                                       |
| Ca_Desi_SNP1650 | [T/C]       | Ca_Desi_LG03               | 73.031                                       |
| Ca_Desi_SNP1651 | [C/A]       | Ca_Desi_LG03               | 73.304                                       |
| Ca_Desi_SNP1652 | [T/G]       | Ca_Desi_LG03               | 73.662                                       |
| Ca_Desi_SNP1653 | [T/A]       | Ca_Desi_LG03               | 73.879                                       |
| Ca_Desi_SNP1654 | [T/C]       | Ca_Desi_LG03               | 74.345                                       |
| Ca_Desi_SNP1655 | [A/G]       | Ca_Desi_LG03               | 74.424                                       |
| Ca_Desi_SNP1656 | [G/T]       | Ca_Desi_LG03               | 74.794                                       |
| Ca_Desi_SNP1657 | [G/A]       | Ca_Desi_LG03               | 75.763                                       |
| Ca_Desi_SNP1658 | [A/C]       | Ca_Desi_LG03               | 76.174                                       |
| Ca_Desi_SNP1659 | [G/A]       | Ca_Desi_LG03               | 76.280                                       |
| Ca_Desi_SNP1660 | [T/C]       | Ca_Desi_LG03               | 76.350                                       |
| Ca_Desi_SNP1661 | [T/G]       | Ca_Desi_LG03               | 76.412                                       |
| Ca_Desi_SNP1662 | [G/C]       | Ca_Desi_LG03               | 76.463                                       |
| Ca_Desi_SNP1663 | [G/T]       | Ca_Desi_LG03               | 76.500                                       |
| Ca_Desi_SNP1664 | [T/A]       | Ca_Desi_LG03               | 76.699                                       |
| Ca_Desi_SNP1665 | [T/C]       | Ca_Desi_LG03               | 76.872                                       |
| Ca_Desi_SNP1666 | [T/C]       | Ca_Desi_LG03               | 76.979                                       |
| Ca_Desi_SNP1667 | [C/A]       | Ca_Desi_LG03               | 77.398                                       |
| Ca_Desi_SNP1668 | [A/G]       | Ca_Desi_LG03               | 77.559                                       |
| Ca_Desi_SNP1669 | [T/A]       | Ca_Desi_LG03               | 77.765                                       |
| Ca_Desi_SNP1670 | [G/C]       | Ca_Desi_LG03               | 77.810                                       |

| <b>SNP IDs</b>  | <b>SNPs</b> | <b>Linkage Group (LGs)</b> | <b>Genetic positions (cM) of mapped SNPs</b> |
|-----------------|-------------|----------------------------|----------------------------------------------|
| Ca_Desi_SNP1671 | [C/T]       | Ca_Desi_LG03               | 78.486                                       |
| Ca_Desi_SNP1672 | [G/A]       | Ca_Desi_LG03               | 78.511                                       |
| Ca_Desi_SNP1673 | [A/G]       | Ca_Desi_LG03               | 78.524                                       |
| Ca_Desi_SNP1674 | [A/G]       | Ca_Desi_LG03               | 78.706                                       |
| Ca_Desi_SNP1675 | [A/G]       | Ca_Desi_LG03               | 78.712                                       |
| Ca_Desi_SNP1676 | [C/A]       | Ca_Desi_LG03               | 78.728                                       |
| Ca_Desi_SNP1677 | [C/G]       | Ca_Desi_LG03               | 78.750                                       |
| Ca_Desi_SNP1678 | [A/C]       | Ca_Desi_LG03               | 78.982                                       |
| Ca_Desi_SNP1679 | [A/C]       | Ca_Desi_LG03               | 78.988                                       |
| Ca_Desi_SNP1680 | [C/T]       | Ca_Desi_LG03               | 79.005                                       |
| Ca_Desi_SNP1681 | [C/A]       | Ca_Desi_LG03               | 79.095                                       |
| Ca_Desi_SNP1682 | [C/A]       | Ca_Desi_LG03               | 79.229                                       |
| Ca_Desi_SNP1683 | [T/C]       | Ca_Desi_LG03               | 79.426                                       |
| Ca_Desi_SNP1684 | [A/G]       | Ca_Desi_LG03               | 79.504                                       |
| Ca_Desi_SNP1685 | [C/T]       | Ca_Desi_LG03               | 79.709                                       |
| Ca_Desi_SNP1686 | [A/G]       | Ca_Desi_LG03               | 79.757                                       |
| Ca_Desi_SNP1687 | [A/G]       | Ca_Desi_LG03               | 79.762                                       |
| Ca_Desi_SNP1688 | [C/T]       | Ca_Desi_LG03               | 80.216                                       |
| Ca_Desi_SNP1689 | [G/A]       | Ca_Desi_LG03               | 80.490                                       |
| Ca_Desi_SNP1690 | [A/G]       | Ca_Desi_LG03               | 80.779                                       |
| Ca_Desi_SNP1691 | [A/G]       | Ca_Desi_LG03               | 81.295                                       |
| Ca_Desi_SNP1692 | [A/G]       | Ca_Desi_LG03               | 81.347                                       |
| Ca_Desi_SNP1693 | [T/C]       | Ca_Desi_LG03               | 81.595                                       |
| Ca_Desi_SNP1694 | [C/T]       | Ca_Desi_LG03               | 81.619                                       |
| Ca_Desi_SNP1695 | [A/G]       | Ca_Desi_LG03               | 81.783                                       |
| Ca_Desi_SNP1696 | [C/T]       | Ca_Desi_LG03               | 81.788                                       |
| Ca_Desi_SNP1697 | [G/T]       | Ca_Desi_LG03               | 81.991                                       |
| Ca_Desi_SNP1698 | [A/G]       | Ca_Desi_LG03               | 82.001                                       |
| Ca_Desi_SNP1699 | [T/A]       | Ca_Desi_LG03               | 82.099                                       |
| Ca_Desi_SNP1700 | [C/T]       | Ca_Desi_LG03               | 82.496                                       |
| Ca_Desi_SNP1701 | [C/T]       | Ca_Desi_LG03               | 82.532                                       |



| <b>SNP IDs</b>  | <b>SNPs</b> | <b>Linkage Group (LGs)</b> | <b>Genetic positions (cM) of mapped SNPs</b> |
|-----------------|-------------|----------------------------|----------------------------------------------|
| Ca_Desi_SNP1702 | [T/C]       | Ca_Desi_LG03               | 83.322                                       |
| Ca_Desi_SNP1703 | [A/T]       | Ca_Desi_LG03               | 83.663                                       |
| Ca_Desi_SNP1704 | [T/A]       | Ca_Desi_LG03               | 83.986                                       |
| Ca_Desi_SNP1705 | [G/C]       | Ca_Desi_LG03               | 84.689                                       |
| Ca_Desi_SNP1706 | [A/G]       | Ca_Desi_LG03               | 84.731                                       |
| Ca_Desi_SNP1707 | [T/C]       | Ca_Desi_LG03               | 85.071                                       |
| Ca_Desi_SNP1708 | [C/T]       | Ca_Desi_LG03               | 85.779                                       |
| Ca_Desi_SNP1709 | [C/T]       | Ca_Desi_LG03               | 85.993                                       |
| Ca_Desi_SNP1710 | [A/G]       | Ca_Desi_LG04               | 0.000                                        |
| Ca_Desi_SNP1711 | [T/C]       | Ca_Desi_LG04               | 10.181                                       |
| Ca_Desi_SNP1712 | [G/C]       | Ca_Desi_LG04               | 10.511                                       |
| Ca_Desi_SNP1713 | [T/C]       | Ca_Desi_LG04               | 10.735                                       |
| Ca_Desi_SNP1714 | [A/T]       | Ca_Desi_LG04               | 11.298                                       |
| Ca_Desi_SNP1715 | [G/T]       | Ca_Desi_LG04               | 12.115                                       |
| Ca_Desi_SNP1716 | [T/A]       | Ca_Desi_LG04               | 12.456                                       |
| Ca_Desi_SNP1717 | [C/A]       | Ca_Desi_LG04               | 13.273                                       |
| Ca_Desi_SNP1718 | [T/C]       | Ca_Desi_LG04               | 13.702                                       |
| Ca_Desi_SNP1719 | [T/C]       | Ca_Desi_LG04               | 14.874                                       |
| Ca_Desi_SNP1720 | [T/C]       | Ca_Desi_LG04               | 15.130                                       |
| Ca_Desi_SNP1721 | [G/T]       | Ca_Desi_LG04               | 15.983                                       |
| Ca_Desi_SNP1722 | [G/A]       | Ca_Desi_LG04               | 16.006                                       |
| Ca_Desi_SNP1723 | [G/T]       | Ca_Desi_LG04               | 16.074                                       |
| Ca_Desi_SNP1724 | [A/C]       | Ca_Desi_LG04               | 16.304                                       |
| Ca_Desi_SNP1725 | [C/T]       | Ca_Desi_LG04               | 16.742                                       |
| Ca_Desi_SNP1726 | [G/A]       | Ca_Desi_LG04               | 16.812                                       |
| Ca_Desi_SNP1727 | [C/T]       | Ca_Desi_LG04               | 17.222                                       |
| Ca_Desi_SNP1728 | [T/C]       | Ca_Desi_LG04               | 17.855                                       |
| Ca_Desi_SNP1729 | [T/G]       | Ca_Desi_LG04               | 18.028                                       |
| Ca_Desi_SNP1730 | [G/A]       | Ca_Desi_LG04               | 18.427                                       |
| Ca_Desi_SNP1731 | [A/G]       | Ca_Desi_LG04               | 18.675                                       |
| Ca_Desi_SNP1732 | [T/C]       | Ca_Desi_LG04               | 18.688                                       |

| <b>SNP IDs</b>  | <b>SNPs</b> | <b>Linkage Group (LGs)</b> | <b>Genetic positions (cM) of mapped SNPs</b> |
|-----------------|-------------|----------------------------|----------------------------------------------|
| Ca_Desi_SNP1733 | [C/T]       | Ca_Desi_LG04               | 18.859                                       |
| Ca_Desi_SNP1734 | [C/T]       | Ca_Desi_LG04               | 18.999                                       |
| Ca_Desi_SNP1735 | [T/G]       | Ca_Desi_LG04               | 19.170                                       |
| Ca_Desi_SNP1736 | [C/T]       | Ca_Desi_LG04               | 19.374                                       |
| Ca_Desi_SNP1737 | [A/T]       | Ca_Desi_LG04               | 19.467                                       |
| Ca_Desi_SNP1738 | [G/C]       | Ca_Desi_LG04               | 19.483                                       |
| Ca_Desi_SNP1739 | [C/T]       | Ca_Desi_LG04               | 20.158                                       |
| Ca_Desi_SNP1740 | [A/T]       | Ca_Desi_LG04               | 20.221                                       |
| Ca_Desi_SNP1741 | [C/T]       | Ca_Desi_LG04               | 20.302                                       |
| Ca_Desi_SNP1742 | [G/A]       | Ca_Desi_LG04               | 20.484                                       |
| Ca_Desi_SNP1743 | [G/A]       | Ca_Desi_LG04               | 20.511                                       |
| Ca_Desi_SNP1744 | [A/G]       | Ca_Desi_LG04               | 20.935                                       |
| Ca_Desi_SNP1745 | [C/T]       | Ca_Desi_LG04               | 21.144                                       |
| Ca_Desi_SNP1746 | [C/T]       | Ca_Desi_LG04               | 21.272                                       |
| Ca_Desi_SNP1747 | [T/G]       | Ca_Desi_LG04               | 21.285                                       |
| Ca_Desi_SNP1748 | [G/T]       | Ca_Desi_LG04               | 21.503                                       |
| Ca_Desi_SNP1749 | [A/T]       | Ca_Desi_LG04               | 21.757                                       |
| Ca_Desi_SNP1750 | [G/A]       | Ca_Desi_LG04               | 21.848                                       |
| Ca_Desi_SNP1751 | [A/T]       | Ca_Desi_LG04               | 21.851                                       |
| Ca_Desi_SNP1752 | [C/T]       | Ca_Desi_LG04               | 22.037                                       |
| Ca_Desi_SNP1753 | [C/G]       | Ca_Desi_LG04               | 22.104                                       |
| Ca_Desi_SNP1754 | [C/G]       | Ca_Desi_LG04               | 22.163                                       |
| Ca_Desi_SNP1755 | [T/C]       | Ca_Desi_LG04               | 22.198                                       |
| Ca_Desi_SNP1756 | [A/C]       | Ca_Desi_LG04               | 22.224                                       |
| Ca_Desi_SNP1757 | [T/C]       | Ca_Desi_LG04               | 22.238                                       |
| Ca_Desi_SNP1758 | [T/C]       | Ca_Desi_LG04               | 22.539                                       |
| Ca_Desi_SNP1759 | [T/A]       | Ca_Desi_LG04               | 22.632                                       |
| Ca_Desi_SNP1760 | [T/C]       | Ca_Desi_LG04               | 23.095                                       |
| Ca_Desi_SNP1761 | [T/C]       | Ca_Desi_LG04               | 23.267                                       |
| Ca_Desi_SNP1762 | [C/T]       | Ca_Desi_LG04               | 23.269                                       |
| Ca_Desi_SNP1763 | [G/A]       | Ca_Desi_LG04               | 23.343                                       |

| <b>SNP IDs</b>  | <b>SNPs</b> | <b>Linkage Group (LGs)</b> | <b>Genetic positions (cM) of mapped SNPs</b> |
|-----------------|-------------|----------------------------|----------------------------------------------|
| Ca_Desi_SNP1764 | [T/C]       | Ca_Desi_LG04               | 23.378                                       |
| Ca_Desi_SNP1765 | [C/T]       | Ca_Desi_LG04               | 23.422                                       |
| Ca_Desi_SNP1766 | [C/A]       | Ca_Desi_LG04               | 23.475                                       |
| Ca_Desi_SNP1767 | [A/G]       | Ca_Desi_LG04               | 23.576                                       |
| Ca_Desi_SNP1768 | [A/G]       | Ca_Desi_LG04               | 23.603                                       |
| Ca_Desi_SNP1769 | [C/T]       | Ca_Desi_LG04               | 23.780                                       |
| Ca_Desi_SNP1770 | [G/A]       | Ca_Desi_LG04               | 23.784                                       |
| Ca_Desi_SNP1771 | [A/G]       | Ca_Desi_LG04               | 24.000                                       |
| Ca_Desi_SNP1772 | [G/T]       | Ca_Desi_LG04               | 24.107                                       |
| Ca_Desi_SNP1773 | [G/C]       | Ca_Desi_LG04               | 24.244                                       |
| Ca_Desi_SNP1774 | [T/C]       | Ca_Desi_LG04               | 24.457                                       |
| Ca_Desi_SNP1775 | [C/A]       | Ca_Desi_LG04               | 24.505                                       |
| Ca_Desi_SNP1776 | [T/C]       | Ca_Desi_LG04               | 24.839                                       |
| Ca_Desi_SNP1777 | [T/C]       | Ca_Desi_LG04               | 25.093                                       |
| Ca_Desi_SNP1778 | [C/T]       | Ca_Desi_LG04               | 25.130                                       |
| Ca_Desi_SNP1779 | [G/A]       | Ca_Desi_LG04               | 25.179                                       |
| Ca_Desi_SNP1780 | [T/C]       | Ca_Desi_LG04               | 25.218                                       |
| Ca_Desi_SNP1781 | [T/C]       | Ca_Desi_LG04               | 25.234                                       |
| Ca_Desi_SNP1782 | [C/T]       | Ca_Desi_LG04               | 25.445                                       |
| Ca_Desi_SNP1783 | [C/T]       | Ca_Desi_LG04               | 25.496                                       |
| Ca_Desi_SNP1784 | [A/G]       | Ca_Desi_LG04               | 25.676                                       |
| Ca_Desi_SNP1785 | [G/A]       | Ca_Desi_LG04               | 25.773                                       |
| Ca_Desi_SNP1786 | [C/G]       | Ca_Desi_LG04               | 25.847                                       |
| Ca_Desi_SNP1787 | [T/A]       | Ca_Desi_LG04               | 25.862                                       |
| Ca_Desi_SNP1788 | [A/G]       | Ca_Desi_LG04               | 25.939                                       |
| Ca_Desi_SNP1789 | [C/G]       | Ca_Desi_LG04               | 26.049                                       |
| Ca_Desi_SNP1790 | [T/C]       | Ca_Desi_LG04               | 26.106                                       |
| Ca_Desi_SNP1791 | [T/C]       | Ca_Desi_LG04               | 26.148                                       |
| Ca_Desi_SNP1792 | [C/G]       | Ca_Desi_LG04               | 26.305                                       |
| Ca_Desi_SNP1793 | [T/A]       | Ca_Desi_LG04               | 26.465                                       |
| Ca_Desi_SNP1794 | [A/G]       | Ca_Desi_LG04               | 26.501                                       |

| <b>SNP IDs</b>  | <b>SNPs</b> | <b>Linkage Group (LGs)</b> | <b>Genetic positions (cM) of mapped SNPs</b> |
|-----------------|-------------|----------------------------|----------------------------------------------|
| Ca_Desi_SNP1795 | [G/A]       | Ca_Desi_LG04               | 26.553                                       |
| Ca_Desi_SNP1796 | [G/A]       | Ca_Desi_LG04               | 26.730                                       |
| Ca_Desi_SNP1797 | [C/T]       | Ca_Desi_LG04               | 26.913                                       |
| Ca_Desi_SNP1798 | [T/C]       | Ca_Desi_LG04               | 26.957                                       |
| Ca_Desi_SNP1799 | [T/C]       | Ca_Desi_LG04               | 27.367                                       |
| Ca_Desi_SNP1800 | [G/T]       | Ca_Desi_LG04               | 27.393                                       |
| Ca_Desi_SNP1801 | [A/C]       | Ca_Desi_LG04               | 27.646                                       |
| Ca_Desi_SNP1802 | [T/G]       | Ca_Desi_LG04               | 27.809                                       |
| Ca_Desi_SNP1803 | [A/C]       | Ca_Desi_LG04               | 27.868                                       |
| Ca_Desi_SNP1804 | [G/T]       | Ca_Desi_LG04               | 28.494                                       |
| Ca_Desi_SNP1805 | [G/T]       | Ca_Desi_LG04               | 28.738                                       |
| Ca_Desi_SNP1806 | [A/G]       | Ca_Desi_LG04               | 28.787                                       |
| Ca_Desi_SNP1807 | [G/T]       | Ca_Desi_LG04               | 28.796                                       |
| Ca_Desi_SNP1808 | [A/T]       | Ca_Desi_LG04               | 29.122                                       |
| Ca_Desi_SNP1809 | [G/T]       | Ca_Desi_LG04               | 29.601                                       |
| Ca_Desi_SNP1810 | [A/G]       | Ca_Desi_LG04               | 30.527                                       |
| Ca_Desi_SNP1811 | [G/A]       | Ca_Desi_LG04               | 30.944                                       |
| Ca_Desi_SNP1812 | [A/T]       | Ca_Desi_LG04               | 31.979                                       |
| Ca_Desi_SNP1813 | [G/T]       | Ca_Desi_LG04               | 32.255                                       |
| Ca_Desi_SNP1814 | [T/C]       | Ca_Desi_LG04               | 32.976                                       |
| Ca_Desi_SNP1815 | [G/C]       | Ca_Desi_LG04               | 33.669                                       |
| Ca_Desi_SNP1816 | [A/G]       | Ca_Desi_LG04               | 33.742                                       |
| Ca_Desi_SNP1817 | [A/G]       | Ca_Desi_LG04               | 34.507                                       |
| Ca_Desi_SNP1818 | [T/C]       | Ca_Desi_LG04               | 34.978                                       |
| Ca_Desi_SNP1819 | [A/C]       | Ca_Desi_LG04               | 35.207                                       |
| Ca_Desi_SNP1820 | [A/G]       | Ca_Desi_LG04               | 35.604                                       |
| Ca_Desi_SNP1821 | [A/C]       | Ca_Desi_LG04               | 36.342                                       |
| Ca_Desi_SNP1822 | [A/G]       | Ca_Desi_LG04               | 36.362                                       |
| Ca_Desi_SNP1823 | [A/G]       | Ca_Desi_LG04               | 37.198                                       |
| Ca_Desi_SNP1824 | [G/A]       | Ca_Desi_LG04               | 37.353                                       |
| Ca_Desi_SNP1825 | [T/G]       | Ca_Desi_LG04               | 38.530                                       |

| <b>SNP IDs</b>  | <b>SNPs</b> | <b>Linkage Group (LGs)</b> | <b>Genetic positions (cM) of mapped SNPs</b> |
|-----------------|-------------|----------------------------|----------------------------------------------|
| Ca_Desi_SNP1826 | [A/C]       | Ca_Desi_LG04               | 38.966                                       |
| Ca_Desi_SNP1827 | [T/A]       | Ca_Desi_LG04               | 39.302                                       |
| Ca_Desi_SNP1828 | [T/C]       | Ca_Desi_LG04               | 39.319                                       |
| Ca_Desi_SNP1829 | [T/G]       | Ca_Desi_LG04               | 39.380                                       |
| Ca_Desi_SNP1830 | [G/A]       | Ca_Desi_LG04               | 39.451                                       |
| Ca_Desi_SNP1831 | [T/G]       | Ca_Desi_LG04               | 39.648                                       |
| Ca_Desi_SNP1832 | [G/A]       | Ca_Desi_LG04               | 39.921                                       |
| Ca_Desi_SNP1833 | [C/T]       | Ca_Desi_LG04               | 40.115                                       |
| Ca_Desi_SNP1834 | [A/G]       | Ca_Desi_LG04               | 40.386                                       |
| Ca_Desi_SNP1835 | [A/C]       | Ca_Desi_LG04               | 40.401                                       |
| Ca_Desi_SNP1836 | [A/G]       | Ca_Desi_LG04               | 41.152                                       |
| Ca_Desi_SNP1837 | [A/G]       | Ca_Desi_LG04               | 41.203                                       |
| Ca_Desi_SNP1838 | [A/C]       | Ca_Desi_LG04               | 41.381                                       |
| Ca_Desi_SNP1839 | [C/A]       | Ca_Desi_LG04               | 41.421                                       |
| Ca_Desi_SNP1840 | [T/A]       | Ca_Desi_LG04               | 41.524                                       |
| Ca_Desi_SNP1841 | [T/C]       | Ca_Desi_LG04               | 42.254                                       |
| Ca_Desi_SNP1842 | [T/A]       | Ca_Desi_LG04               | 42.717                                       |
| Ca_Desi_SNP1843 | [C/T]       | Ca_Desi_LG04               | 42.994                                       |
| Ca_Desi_SNP1844 | [T/G]       | Ca_Desi_LG04               | 43.310                                       |
| Ca_Desi_SNP1845 | [C/T]       | Ca_Desi_LG04               | 43.450                                       |
| Ca_Desi_SNP1846 | [T/G]       | Ca_Desi_LG04               | 43.508                                       |
| Ca_Desi_SNP1847 | [C/T]       | Ca_Desi_LG04               | 43.518                                       |
| Ca_Desi_SNP1848 | [T/A]       | Ca_Desi_LG04               | 43.534                                       |
| Ca_Desi_SNP1849 | [G/T]       | Ca_Desi_LG04               | 43.584                                       |
| Ca_Desi_SNP1850 | [A/T]       | Ca_Desi_LG04               | 43.618                                       |
| Ca_Desi_SNP1851 | [T/A]       | Ca_Desi_LG04               | 43.641                                       |
| Ca_Desi_SNP1852 | [A/T]       | Ca_Desi_LG04               | 43.692                                       |
| Ca_Desi_SNP1853 | [C/A]       | Ca_Desi_LG04               | 43.735                                       |
| Ca_Desi_SNP1854 | [C/T]       | Ca_Desi_LG04               | 43.786                                       |
| Ca_Desi_SNP1855 | [A/G]       | Ca_Desi_LG04               | 43.799                                       |
| Ca_Desi_SNP1856 | [A/G]       | Ca_Desi_LG04               | 43.947                                       |

| <b>SNP IDs</b>  | <b>SNPs</b> | <b>Linkage Group (LGs)</b> | <b>Genetic positions (cM) of mapped SNPs</b> |
|-----------------|-------------|----------------------------|----------------------------------------------|
| Ca_Desi_SNP1857 | [T/C]       | Ca_Desi_LG04               | 43.988                                       |
| Ca_Desi_SNP1858 | [T/C]       | Ca_Desi_LG04               | 44.009                                       |
| Ca_Desi_SNP1859 | [A/G]       | Ca_Desi_LG04               | 44.015                                       |
| Ca_Desi_SNP1860 | [T/G]       | Ca_Desi_LG04               | 44.113                                       |
| Ca_Desi_SNP1861 | [A/C]       | Ca_Desi_LG04               | 44.170                                       |
| Ca_Desi_SNP1862 | [A/G]       | Ca_Desi_LG04               | 44.253                                       |
| Ca_Desi_SNP1863 | [T/C]       | Ca_Desi_LG04               | 44.351                                       |
| Ca_Desi_SNP1864 | [T/A]       | Ca_Desi_LG04               | 44.370                                       |
| Ca_Desi_SNP1865 | [G/A]       | Ca_Desi_LG04               | 44.382                                       |
| Ca_Desi_SNP1866 | [A/G]       | Ca_Desi_LG04               | 44.429                                       |
| Ca_Desi_SNP1867 | [A/C]       | Ca_Desi_LG04               | 44.433                                       |
| Ca_Desi_SNP1868 | [C/A]       | Ca_Desi_LG04               | 44.494                                       |
| Ca_Desi_SNP1869 | [G/A]       | Ca_Desi_LG04               | 44.511                                       |
| Ca_Desi_SNP1870 | [C/A]       | Ca_Desi_LG04               | 44.645                                       |
| Ca_Desi_SNP1871 | [G/A]       | Ca_Desi_LG04               | 44.676                                       |
| Ca_Desi_SNP1872 | [T/C]       | Ca_Desi_LG04               | 44.716                                       |
| Ca_Desi_SNP1873 | [A/T]       | Ca_Desi_LG04               | 44.754                                       |
| Ca_Desi_SNP1874 | [T/C]       | Ca_Desi_LG04               | 44.759                                       |
| Ca_Desi_SNP1875 | [A/C]       | Ca_Desi_LG04               | 44.791                                       |
| Ca_Desi_SNP1876 | [T/C]       | Ca_Desi_LG04               | 44.841                                       |
| Ca_Desi_SNP1877 | [G/T]       | Ca_Desi_LG04               | 44.874                                       |
| Ca_Desi_SNP1878 | [T/G]       | Ca_Desi_LG04               | 44.907                                       |
| Ca_Desi_SNP1879 | [A/G]       | Ca_Desi_LG04               | 44.963                                       |
| Ca_Desi_SNP1880 | [A/C]       | Ca_Desi_LG04               | 45.091                                       |
| Ca_Desi_SNP1881 | [A/C]       | Ca_Desi_LG04               | 45.143                                       |
| Ca_Desi_SNP1882 | [G/A]       | Ca_Desi_LG04               | 45.362                                       |
| Ca_Desi_SNP1883 | [C/T]       | Ca_Desi_LG04               | 45.387                                       |
| Ca_Desi_SNP1884 | [A/T]       | Ca_Desi_LG04               | 45.388                                       |
| Ca_Desi_SNP1885 | [C/T]       | Ca_Desi_LG04               | 45.397                                       |
| Ca_Desi_SNP1886 | [T/A]       | Ca_Desi_LG04               | 45.470                                       |
| Ca_Desi_SNP1887 | [T/C]       | Ca_Desi_LG04               | 45.486                                       |

| <b>SNP IDs</b>  | <b>SNPs</b> | <b>Linkage Group (LGs)</b> | <b>Genetic positions (cM) of mapped SNPs</b> |
|-----------------|-------------|----------------------------|----------------------------------------------|
| Ca_Desi_SNP1888 | [T/C]       | Ca_Desi_LG04               | 45.700                                       |
| Ca_Desi_SNP1889 | [A/G]       | Ca_Desi_LG04               | 45.724                                       |
| Ca_Desi_SNP1890 | [G/A]       | Ca_Desi_LG04               | 45.828                                       |
| Ca_Desi_SNP1891 | [A/C]       | Ca_Desi_LG04               | 45.873                                       |
| Ca_Desi_SNP1892 | [C/G]       | Ca_Desi_LG04               | 45.947                                       |
| Ca_Desi_SNP1893 | [C/T]       | Ca_Desi_LG04               | 45.994                                       |
| Ca_Desi_SNP1894 | [G/A]       | Ca_Desi_LG04               | 46.016                                       |
| Ca_Desi_SNP1895 | [T/A]       | Ca_Desi_LG04               | 46.053                                       |
| Ca_Desi_SNP1896 | [G/A]       | Ca_Desi_LG04               | 46.122                                       |
| Ca_Desi_SNP1897 | [C/G]       | Ca_Desi_LG04               | 46.144                                       |
| Ca_Desi_SNP1898 | [T/A]       | Ca_Desi_LG04               | 46.460                                       |
| Ca_Desi_SNP1899 | [C/A]       | Ca_Desi_LG04               | 46.573                                       |
| Ca_Desi_SNP1900 | [T/G]       | Ca_Desi_LG04               | 46.820                                       |
| Ca_Desi_SNP1901 | [T/C]       | Ca_Desi_LG04               | 46.899                                       |
| Ca_Desi_SNP1902 | [G/A]       | Ca_Desi_LG04               | 46.899                                       |
| Ca_Desi_SNP1903 | [T/G]       | Ca_Desi_LG04               | 47.110                                       |
| Ca_Desi_SNP1904 | [T/C]       | Ca_Desi_LG04               | 47.123                                       |
| Ca_Desi_SNP1905 | [A/G]       | Ca_Desi_LG04               | 47.162                                       |
| Ca_Desi_SNP1906 | [A/T]       | Ca_Desi_LG04               | 47.236                                       |
| Ca_Desi_SNP1907 | [T/C]       | Ca_Desi_LG04               | 47.259                                       |
| Ca_Desi_SNP1908 | [C/T]       | Ca_Desi_LG04               | 47.474                                       |
| Ca_Desi_SNP1909 | [C/A]       | Ca_Desi_LG04               | 47.538                                       |
| Ca_Desi_SNP1910 | [A/G]       | Ca_Desi_LG04               | 47.538                                       |
| Ca_Desi_SNP1911 | [C/A]       | Ca_Desi_LG04               | 47.566                                       |
| Ca_Desi_SNP1912 | [T/C]       | Ca_Desi_LG04               | 47.572                                       |
| Ca_Desi_SNP1913 | [G/A]       | Ca_Desi_LG04               | 47.584                                       |
| Ca_Desi_SNP1914 | [A/G]       | Ca_Desi_LG04               | 47.605                                       |
| Ca_Desi_SNP1915 | [C/T]       | Ca_Desi_LG04               | 47.641                                       |
| Ca_Desi_SNP1916 | [G/A]       | Ca_Desi_LG04               | 47.693                                       |
| Ca_Desi_SNP1917 | [A/T]       | Ca_Desi_LG04               | 47.696                                       |
| Ca_Desi_SNP1918 | [A/C]       | Ca_Desi_LG04               | 47.757                                       |

| <b>SNP IDs</b>  | <b>SNPs</b> | <b>Linkage Group (LGs)</b> | <b>Genetic positions (cM) of mapped SNPs</b> |
|-----------------|-------------|----------------------------|----------------------------------------------|
| Ca_Desi_SNP1919 | [T/A]       | Ca_Desi_LG04               | 47.766                                       |
| Ca_Desi_SNP1920 | [A/G]       | Ca_Desi_LG04               | 47.769                                       |
| Ca_Desi_SNP1921 | [C/A]       | Ca_Desi_LG04               | 47.822                                       |
| Ca_Desi_SNP1922 | [G/T]       | Ca_Desi_LG04               | 47.879                                       |
| Ca_Desi_SNP1923 | [C/A]       | Ca_Desi_LG04               | 48.018                                       |
| Ca_Desi_SNP1924 | [G/T]       | Ca_Desi_LG04               | 48.045                                       |
| Ca_Desi_SNP1925 | [C/T]       | Ca_Desi_LG04               | 48.048                                       |
| Ca_Desi_SNP1926 | [G/A]       | Ca_Desi_LG04               | 48.085                                       |
| Ca_Desi_SNP1927 | [G/A]       | Ca_Desi_LG04               | 48.131                                       |
| Ca_Desi_SNP1928 | [T/A]       | Ca_Desi_LG04               | 48.147                                       |
| Ca_Desi_SNP1929 | [T/A]       | Ca_Desi_LG04               | 48.152                                       |
| Ca_Desi_SNP1930 | [G/T]       | Ca_Desi_LG04               | 48.178                                       |
| Ca_Desi_SNP1931 | [A/G]       | Ca_Desi_LG04               | 48.197                                       |
| Ca_Desi_SNP1932 | [T/G]       | Ca_Desi_LG04               | 48.201                                       |
| Ca_Desi_SNP1933 | [G/T]       | Ca_Desi_LG04               | 48.263                                       |
| Ca_Desi_SNP1934 | [G/A]       | Ca_Desi_LG04               | 48.266                                       |
| Ca_Desi_SNP1935 | [T/G]       | Ca_Desi_LG04               | 48.279                                       |
| Ca_Desi_SNP1936 | [T/C]       | Ca_Desi_LG04               | 48.328                                       |
| Ca_Desi_SNP1937 | [A/G]       | Ca_Desi_LG04               | 48.442                                       |
| Ca_Desi_SNP1938 | [A/G]       | Ca_Desi_LG04               | 48.474                                       |
| Ca_Desi_SNP1939 | [A/G]       | Ca_Desi_LG04               | 48.493                                       |
| Ca_Desi_SNP1940 | [C/A]       | Ca_Desi_LG04               | 48.502                                       |
| Ca_Desi_SNP1941 | [A/G]       | Ca_Desi_LG04               | 48.542                                       |
| Ca_Desi_SNP1942 | [T/C]       | Ca_Desi_LG04               | 48.619                                       |
| Ca_Desi_SNP1943 | [G/A]       | Ca_Desi_LG04               | 48.632                                       |
| Ca_Desi_SNP1944 | [A/G]       | Ca_Desi_LG04               | 48.637                                       |
| Ca_Desi_SNP1945 | [T/A]       | Ca_Desi_LG04               | 48.726                                       |
| Ca_Desi_SNP1946 | [T/G]       | Ca_Desi_LG04               | 48.769                                       |
| Ca_Desi_SNP1947 | [A/G]       | Ca_Desi_LG04               | 48.858                                       |
| Ca_Desi_SNP1948 | [A/G]       | Ca_Desi_LG04               | 48.868                                       |
| Ca_Desi_SNP1949 | [A/C]       | Ca_Desi_LG04               | 48.928                                       |



| <b>SNP IDs</b>  | <b>SNPs</b> | <b>Linkage Group (LGs)</b> | <b>Genetic positions (cM) of mapped SNPs</b> |
|-----------------|-------------|----------------------------|----------------------------------------------|
| Ca_Desi_SNP1950 | [T/G]       | Ca_Desi_LG04               | 48.950                                       |
| Ca_Desi_SNP1951 | [C/T]       | Ca_Desi_LG04               | 48.998                                       |
| Ca_Desi_SNP1952 | [A/G]       | Ca_Desi_LG04               | 49.023                                       |
| Ca_Desi_SNP1953 | [T/C]       | Ca_Desi_LG04               | 49.040                                       |
| Ca_Desi_SNP1954 | [G/A]       | Ca_Desi_LG04               | 49.073                                       |
| Ca_Desi_SNP1955 | [A/G]       | Ca_Desi_LG04               | 49.188                                       |
| Ca_Desi_SNP1956 | [A/G]       | Ca_Desi_LG04               | 49.255                                       |
| Ca_Desi_SNP1957 | [A/G]       | Ca_Desi_LG04               | 49.291                                       |
| Ca_Desi_SNP1958 | [G/T]       | Ca_Desi_LG04               | 49.305                                       |
| Ca_Desi_SNP1959 | [T/C]       | Ca_Desi_LG04               | 49.314                                       |
| Ca_Desi_SNP1960 | [C/T]       | Ca_Desi_LG04               | 49.351                                       |
| Ca_Desi_SNP1961 | [A/C]       | Ca_Desi_LG04               | 49.409                                       |
| Ca_Desi_SNP1962 | [T/G]       | Ca_Desi_LG04               | 49.424                                       |
| Ca_Desi_SNP1963 | [C/G]       | Ca_Desi_LG04               | 49.434                                       |
| Ca_Desi_SNP1964 | [G/A]       | Ca_Desi_LG04               | 49.475                                       |
| Ca_Desi_SNP1965 | [C/A]       | Ca_Desi_LG04               | 49.511                                       |
| Ca_Desi_SNP1966 | [G/A]       | Ca_Desi_LG04               | 49.571                                       |
| Ca_Desi_SNP1967 | [T/A]       | Ca_Desi_LG04               | 49.594                                       |
| Ca_Desi_SNP1968 | [A/G]       | Ca_Desi_LG04               | 49.618                                       |
| Ca_Desi_SNP1969 | [G/A]       | Ca_Desi_LG04               | 49.622                                       |
| Ca_Desi_SNP1970 | [T/G]       | Ca_Desi_LG04               | 49.670                                       |
| Ca_Desi_SNP1971 | [C/A]       | Ca_Desi_LG04               | 49.758                                       |
| Ca_Desi_SNP1972 | [A/G]       | Ca_Desi_LG04               | 49.762                                       |
| Ca_Desi_SNP1973 | [C/T]       | Ca_Desi_LG04               | 49.810                                       |
| Ca_Desi_SNP1974 | [C/G]       | Ca_Desi_LG04               | 49.811                                       |
| Ca_Desi_SNP1975 | [C/T]       | Ca_Desi_LG04               | 49.811                                       |
| Ca_Desi_SNP1976 | [A/C]       | Ca_Desi_LG04               | 49.815                                       |
| Ca_Desi_SNP1977 | [A/G]       | Ca_Desi_LG04               | 49.819                                       |
| Ca_Desi_SNP1978 | [A/G]       | Ca_Desi_LG04               | 49.862                                       |
| Ca_Desi_SNP1979 | [G/A]       | Ca_Desi_LG04               | 49.866                                       |
| Ca_Desi_SNP1980 | [C/G]       | Ca_Desi_LG04               | 49.872                                       |

| <b>SNP IDs</b>  | <b>SNPs</b> | <b>Linkage Group (LGs)</b> | <b>Genetic positions (cM) of mapped SNPs</b> |
|-----------------|-------------|----------------------------|----------------------------------------------|
| Ca_Desi_SNP1981 | [C/A]       | Ca_Desi_LG04               | 49.914                                       |
| Ca_Desi_SNP1982 | [G/A]       | Ca_Desi_LG04               | 49.916                                       |
| Ca_Desi_SNP1983 | [G/T]       | Ca_Desi_LG04               | 49.936                                       |
| Ca_Desi_SNP1984 | [C/G]       | Ca_Desi_LG04               | 49.994                                       |
| Ca_Desi_SNP1985 | [A/T]       | Ca_Desi_LG04               | 49.997                                       |
| Ca_Desi_SNP1986 | [T/G]       | Ca_Desi_LG04               | 50.085                                       |
| Ca_Desi_SNP1987 | [A/T]       | Ca_Desi_LG04               | 50.088                                       |
| Ca_Desi_SNP1988 | [A/G]       | Ca_Desi_LG04               | 50.200                                       |
| Ca_Desi_SNP1989 | [A/G]       | Ca_Desi_LG04               | 50.249                                       |
| Ca_Desi_SNP1990 | [A/C]       | Ca_Desi_LG04               | 50.315                                       |
| Ca_Desi_SNP1991 | [A/T]       | Ca_Desi_LG04               | 50.316                                       |
| Ca_Desi_SNP1992 | [C/A]       | Ca_Desi_LG04               | 50.347                                       |
| Ca_Desi_SNP1993 | [C/T]       | Ca_Desi_LG04               | 50.381                                       |
| Ca_Desi_SNP1994 | [A/G]       | Ca_Desi_LG04               | 50.388                                       |
| Ca_Desi_SNP1995 | [G/T]       | Ca_Desi_LG04               | 50.410                                       |
| Ca_Desi_SNP1996 | [A/C]       | Ca_Desi_LG04               | 50.420                                       |
| Ca_Desi_SNP1997 | [T/C]       | Ca_Desi_LG04               | 50.637                                       |
| Ca_Desi_SNP1998 | [T/C]       | Ca_Desi_LG04               | 50.659                                       |
| Ca_Desi_SNP1999 | [G/A]       | Ca_Desi_LG04               | 50.667                                       |
| Ca_Desi_SNP2000 | [G/A]       | Ca_Desi_LG04               | 50.693                                       |
| Ca_Desi_SNP2001 | [T/G]       | Ca_Desi_LG04               | 50.695                                       |
| Ca_Desi_SNP2002 | [C/A]       | Ca_Desi_LG04               | 50.719                                       |
| Ca_Desi_SNP2003 | [G/C]       | Ca_Desi_LG04               | 50.730                                       |
| Ca_Desi_SNP2004 | [T/C]       | Ca_Desi_LG04               | 50.848                                       |
| Ca_Desi_SNP2005 | [C/G]       | Ca_Desi_LG04               | 50.849                                       |
| Ca_Desi_SNP2006 | [A/G]       | Ca_Desi_LG04               | 50.860                                       |
| Ca_Desi_SNP2007 | [C/T]       | Ca_Desi_LG04               | 50.969                                       |
| Ca_Desi_SNP2008 | [C/G]       | Ca_Desi_LG04               | 51.036                                       |
| Ca_Desi_SNP2009 | [A/G]       | Ca_Desi_LG04               | 51.119                                       |
| Ca_Desi_SNP2010 | [G/T]       | Ca_Desi_LG04               | 51.282                                       |
| Ca_Desi_SNP2011 | [C/A]       | Ca_Desi_LG04               | 51.285                                       |

| <b>SNP IDs</b>  | <b>SNPs</b> | <b>Linkage Group (LGs)</b> | <b>Genetic positions (cM) of mapped SNPs</b> |
|-----------------|-------------|----------------------------|----------------------------------------------|
| Ca_Desi_SNP2012 | [A/T]       | Ca_Desi_LG04               | 51.287                                       |
| Ca_Desi_SNP2013 | [T/C]       | Ca_Desi_LG04               | 51.308                                       |
| Ca_Desi_SNP2014 | [T/A]       | Ca_Desi_LG04               | 51.372                                       |
| Ca_Desi_SNP2015 | [A/C]       | Ca_Desi_LG04               | 51.431                                       |
| Ca_Desi_SNP2016 | [A/G]       | Ca_Desi_LG04               | 51.437                                       |
| Ca_Desi_SNP2017 | [C/T]       | Ca_Desi_LG04               | 51.473                                       |
| Ca_Desi_SNP2018 | [T/G]       | Ca_Desi_LG04               | 51.504                                       |
| Ca_Desi_SNP2019 | [T/C]       | Ca_Desi_LG04               | 51.565                                       |
| Ca_Desi_SNP2020 | [A/G]       | Ca_Desi_LG04               | 51.584                                       |
| Ca_Desi_SNP2021 | [T/C]       | Ca_Desi_LG04               | 51.598                                       |
| Ca_Desi_SNP2022 | [C/A]       | Ca_Desi_LG04               | 51.632                                       |
| Ca_Desi_SNP2023 | [C/T]       | Ca_Desi_LG04               | 51.702                                       |
| Ca_Desi_SNP2024 | [T/C]       | Ca_Desi_LG04               | 51.713                                       |
| Ca_Desi_SNP2025 | [A/C]       | Ca_Desi_LG04               | 51.717                                       |
| Ca_Desi_SNP2026 | [C/G]       | Ca_Desi_LG04               | 51.799                                       |
| Ca_Desi_SNP2027 | [T/G]       | Ca_Desi_LG04               | 51.835                                       |
| Ca_Desi_SNP2028 | [A/T]       | Ca_Desi_LG04               | 51.893                                       |
| Ca_Desi_SNP2029 | [A/G]       | Ca_Desi_LG04               | 51.899                                       |
| Ca_Desi_SNP2030 | [A/T]       | Ca_Desi_LG04               | 51.933                                       |
| Ca_Desi_SNP2031 | [T/C]       | Ca_Desi_LG04               | 52.042                                       |
| Ca_Desi_SNP2032 | [T/C]       | Ca_Desi_LG04               | 52.079                                       |
| Ca_Desi_SNP2033 | [A/G]       | Ca_Desi_LG04               | 52.168                                       |
| Ca_Desi_SNP2034 | [A/C]       | Ca_Desi_LG04               | 52.195                                       |
| Ca_Desi_SNP2035 | [T/C]       | Ca_Desi_LG04               | 52.283                                       |
| Ca_Desi_SNP2036 | [T/C]       | Ca_Desi_LG04               | 52.307                                       |
| Ca_Desi_SNP2037 | [T/A]       | Ca_Desi_LG04               | 52.307                                       |
| Ca_Desi_SNP2038 | [G/A]       | Ca_Desi_LG04               | 52.311                                       |
| Ca_Desi_SNP2039 | [T/A]       | Ca_Desi_LG04               | 52.330                                       |
| Ca_Desi_SNP2040 | [C/T]       | Ca_Desi_LG04               | 52.483                                       |
| Ca_Desi_SNP2041 | [G/C]       | Ca_Desi_LG04               | 52.749                                       |
| Ca_Desi_SNP2042 | [C/T]       | Ca_Desi_LG04               | 52.793                                       |

| <b>SNP IDs</b>  | <b>SNPs</b> | <b>Linkage Group (LGs)</b> | <b>Genetic positions (cM) of mapped SNPs</b> |
|-----------------|-------------|----------------------------|----------------------------------------------|
| Ca_Desi_SNP2043 | [C/T]       | Ca_Desi_LG04               | 52.900                                       |
| Ca_Desi_SNP2044 | [G/A]       | Ca_Desi_LG04               | 52.965                                       |
| Ca_Desi_SNP2045 | [A/G]       | Ca_Desi_LG04               | 53.152                                       |
| Ca_Desi_SNP2046 | [A/C]       | Ca_Desi_LG04               | 53.171                                       |
| Ca_Desi_SNP2047 | [C/T]       | Ca_Desi_LG04               | 53.216                                       |
| Ca_Desi_SNP2048 | [T/C]       | Ca_Desi_LG04               | 53.479                                       |
| Ca_Desi_SNP2049 | [C/T]       | Ca_Desi_LG04               | 53.518                                       |
| Ca_Desi_SNP2050 | [T/C]       | Ca_Desi_LG04               | 53.592                                       |
| Ca_Desi_SNP2051 | [T/C]       | Ca_Desi_LG04               | 53.685                                       |
| Ca_Desi_SNP2052 | [A/G]       | Ca_Desi_LG04               | 53.740                                       |
| Ca_Desi_SNP2053 | [T/C]       | Ca_Desi_LG04               | 53.805                                       |
| Ca_Desi_SNP2054 | [T/C]       | Ca_Desi_LG04               | 53.830                                       |
| Ca_Desi_SNP2055 | [G/A]       | Ca_Desi_LG04               | 53.954                                       |
| Ca_Desi_SNP2056 | [T/G]       | Ca_Desi_LG04               | 54.021                                       |
| Ca_Desi_SNP2057 | [T/A]       | Ca_Desi_LG04               | 54.089                                       |
| Ca_Desi_SNP2058 | [C/A]       | Ca_Desi_LG04               | 54.161                                       |
| Ca_Desi_SNP2059 | [G/T]       | Ca_Desi_LG04               | 54.167                                       |
| Ca_Desi_SNP2060 | [T/C]       | Ca_Desi_LG04               | 54.181                                       |
| Ca_Desi_SNP2061 | [C/T]       | Ca_Desi_LG04               | 54.237                                       |
| Ca_Desi_SNP2062 | [C/G]       | Ca_Desi_LG04               | 54.263                                       |
| Ca_Desi_SNP2063 | [A/T]       | Ca_Desi_LG04               | 54.309                                       |
| Ca_Desi_SNP2064 | [C/T]       | Ca_Desi_LG04               | 54.352                                       |
| Ca_Desi_SNP2065 | [A/T]       | Ca_Desi_LG04               | 54.360                                       |
| Ca_Desi_SNP2066 | [A/C]       | Ca_Desi_LG04               | 54.370                                       |
| Ca_Desi_SNP2067 | [T/G]       | Ca_Desi_LG04               | 54.471                                       |
| Ca_Desi_SNP2068 | [A/G]       | Ca_Desi_LG04               | 54.662                                       |
| Ca_Desi_SNP2069 | [C/A]       | Ca_Desi_LG04               | 54.709                                       |
| Ca_Desi_SNP2070 | [T/C]       | Ca_Desi_LG04               | 54.740                                       |
| Ca_Desi_SNP2071 | [G/A]       | Ca_Desi_LG04               | 54.918                                       |
| Ca_Desi_SNP2072 | [A/C]       | Ca_Desi_LG04               | 54.957                                       |
| Ca_Desi_SNP2073 | [G/A]       | Ca_Desi_LG04               | 55.199                                       |

| <b>SNP IDs</b>  | <b>SNPs</b> | <b>Linkage Group (LGs)</b> | <b>Genetic positions (cM) of mapped SNPs</b> |
|-----------------|-------------|----------------------------|----------------------------------------------|
| Ca_Desi_SNP2074 | [A/G]       | Ca_Desi_LG04               | 55.305                                       |
| Ca_Desi_SNP2075 | [T/C]       | Ca_Desi_LG04               | 55.511                                       |
| Ca_Desi_SNP2076 | [T/C]       | Ca_Desi_LG04               | 55.572                                       |
| Ca_Desi_SNP2077 | [T/C]       | Ca_Desi_LG04               | 55.715                                       |
| Ca_Desi_SNP2078 | [C/T]       | Ca_Desi_LG04               | 55.735                                       |
| Ca_Desi_SNP2079 | [T/G]       | Ca_Desi_LG04               | 55.746                                       |
| Ca_Desi_SNP2080 | [G/A]       | Ca_Desi_LG04               | 55.821                                       |
| Ca_Desi_SNP2081 | [T/C]       | Ca_Desi_LG04               | 55.830                                       |
| Ca_Desi_SNP2082 | [T/A]       | Ca_Desi_LG04               | 55.930                                       |
| Ca_Desi_SNP2083 | [G/T]       | Ca_Desi_LG04               | 56.077                                       |
| Ca_Desi_SNP2084 | [A/T]       | Ca_Desi_LG04               | 56.093                                       |
| Ca_Desi_SNP2085 | [T/C]       | Ca_Desi_LG04               | 56.142                                       |
| Ca_Desi_SNP2086 | [C/T]       | Ca_Desi_LG04               | 56.189                                       |
| Ca_Desi_SNP2087 | [G/T]       | Ca_Desi_LG04               | 56.269                                       |
| Ca_Desi_SNP2088 | [G/A]       | Ca_Desi_LG04               | 56.304                                       |
| Ca_Desi_SNP2089 | [T/C]       | Ca_Desi_LG04               | 56.435                                       |
| Ca_Desi_SNP2090 | [A/T]       | Ca_Desi_LG04               | 56.442                                       |
| Ca_Desi_SNP2091 | [A/C]       | Ca_Desi_LG04               | 56.604                                       |
| Ca_Desi_SNP2092 | [G/A]       | Ca_Desi_LG04               | 56.636                                       |
| Ca_Desi_SNP2093 | [A/G]       | Ca_Desi_LG04               | 56.844                                       |
| Ca_Desi_SNP2094 | [A/G]       | Ca_Desi_LG04               | 56.949                                       |
| Ca_Desi_SNP2095 | [C/A]       | Ca_Desi_LG04               | 57.090                                       |
| Ca_Desi_SNP2096 | [T/C]       | Ca_Desi_LG04               | 57.146                                       |
| Ca_Desi_SNP2097 | [G/A]       | Ca_Desi_LG04               | 57.151                                       |
| Ca_Desi_SNP2098 | [T/C]       | Ca_Desi_LG04               | 57.365                                       |
| Ca_Desi_SNP2099 | [T/G]       | Ca_Desi_LG04               | 57.464                                       |
| Ca_Desi_SNP2100 | [G/C]       | Ca_Desi_LG04               | 57.498                                       |
| Ca_Desi_SNP2101 | [A/G]       | Ca_Desi_LG04               | 57.543                                       |
| Ca_Desi_SNP2102 | [C/T]       | Ca_Desi_LG04               | 57.561                                       |
| Ca_Desi_SNP2103 | [C/T]       | Ca_Desi_LG04               | 57.640                                       |
| Ca_Desi_SNP2104 | [G/A]       | Ca_Desi_LG04               | 57.948                                       |

| <b>SNP IDs</b>  | <b>SNPs</b> | <b>Linkage Group (LGs)</b> | <b>Genetic positions (cM) of mapped SNPs</b> |
|-----------------|-------------|----------------------------|----------------------------------------------|
| Ca_Desi_SNP2105 | [A/C]       | Ca_Desi_LG04               | 58.166                                       |
| Ca_Desi_SNP2106 | [C/A]       | Ca_Desi_LG04               | 58.210                                       |
| Ca_Desi_SNP2107 | [T/G]       | Ca_Desi_LG04               | 58.385                                       |
| Ca_Desi_SNP2108 | [G/T]       | Ca_Desi_LG04               | 58.519                                       |
| Ca_Desi_SNP2109 | [G/A]       | Ca_Desi_LG04               | 58.531                                       |
| Ca_Desi_SNP2110 | [A/C]       | Ca_Desi_LG04               | 58.549                                       |
| Ca_Desi_SNP2111 | [T/G]       | Ca_Desi_LG04               | 58.697                                       |
| Ca_Desi_SNP2112 | [A/G]       | Ca_Desi_LG04               | 59.364                                       |
| Ca_Desi_SNP2113 | [T/G]       | Ca_Desi_LG04               | 59.452                                       |
| Ca_Desi_SNP2114 | [T/C]       | Ca_Desi_LG04               | 59.616                                       |
| Ca_Desi_SNP2115 | [T/C]       | Ca_Desi_LG04               | 59.781                                       |
| Ca_Desi_SNP2116 | [G/T]       | Ca_Desi_LG04               | 59.818                                       |
| Ca_Desi_SNP2117 | [C/T]       | Ca_Desi_LG04               | 59.853                                       |
| Ca_Desi_SNP2118 | [T/C]       | Ca_Desi_LG04               | 60.563                                       |
| Ca_Desi_SNP2119 | [T/G]       | Ca_Desi_LG04               | 60.887                                       |
| Ca_Desi_SNP2120 | [C/A]       | Ca_Desi_LG04               | 60.901                                       |
| Ca_Desi_SNP2121 | [T/C]       | Ca_Desi_LG04               | 61.071                                       |
| Ca_Desi_SNP2122 | [T/G]       | Ca_Desi_LG04               | 61.124                                       |
| Ca_Desi_SNP2123 | [T/G]       | Ca_Desi_LG04               | 61.131                                       |
| Ca_Desi_SNP2124 | [A/C]       | Ca_Desi_LG04               | 61.439                                       |
| Ca_Desi_SNP2125 | [C/T]       | Ca_Desi_LG04               | 61.603                                       |
| Ca_Desi_SNP2126 | [C/A]       | Ca_Desi_LG04               | 61.706                                       |
| Ca_Desi_SNP2127 | [A/C]       | Ca_Desi_LG04               | 61.914                                       |
| Ca_Desi_SNP2128 | [T/G]       | Ca_Desi_LG04               | 62.546                                       |
| Ca_Desi_SNP2129 | [A/G]       | Ca_Desi_LG04               | 63.085                                       |
| Ca_Desi_SNP2130 | [C/A]       | Ca_Desi_LG04               | 63.295                                       |
| Ca_Desi_SNP2131 | [A/G]       | Ca_Desi_LG04               | 63.969                                       |
| Ca_Desi_SNP2132 | [G/T]       | Ca_Desi_LG04               | 64.063                                       |
| Ca_Desi_SNP2133 | [C/A]       | Ca_Desi_LG04               | 64.875                                       |
| Ca_Desi_SNP2134 | [G/T]       | Ca_Desi_LG04               | 64.952                                       |
| Ca_Desi_SNP2135 | [C/A]       | Ca_Desi_LG04               | 65.233                                       |

| <b>SNP IDs</b>  | <b>SNPs</b> | <b>Linkage Group (LGs)</b> | <b>Genetic positions (cM) of mapped SNPs</b> |
|-----------------|-------------|----------------------------|----------------------------------------------|
| Ca_Desi_SNP2136 | [A/G]       | Ca_Desi_LG04               | 65.669                                       |
| Ca_Desi_SNP2137 | [C/T]       | Ca_Desi_LG04               | 65.891                                       |
| Ca_Desi_SNP2138 | [A/G]       | Ca_Desi_LG04               | 65.893                                       |
| Ca_Desi_SNP2139 | [G/A]       | Ca_Desi_LG04               | 65.936                                       |
| Ca_Desi_SNP2140 | [T/A]       | Ca_Desi_LG04               | 66.146                                       |
| Ca_Desi_SNP2141 | [C/A]       | Ca_Desi_LG04               | 66.152                                       |
| Ca_Desi_SNP2142 | [C/A]       | Ca_Desi_LG04               | 66.179                                       |
| Ca_Desi_SNP2143 | [A/G]       | Ca_Desi_LG04               | 66.370                                       |
| Ca_Desi_SNP2144 | [A/G]       | Ca_Desi_LG04               | 66.488                                       |
| Ca_Desi_SNP2145 | [G/A]       | Ca_Desi_LG04               | 66.921                                       |
| Ca_Desi_SNP2146 | [T/C]       | Ca_Desi_LG04               | 67.018                                       |
| Ca_Desi_SNP2147 | [C/T]       | Ca_Desi_LG04               | 67.063                                       |
| Ca_Desi_SNP2148 | [T/A]       | Ca_Desi_LG04               | 67.115                                       |
| Ca_Desi_SNP2149 | [A/T]       | Ca_Desi_LG04               | 67.225                                       |
| Ca_Desi_SNP2150 | [T/C]       | Ca_Desi_LG04               | 67.227                                       |
| Ca_Desi_SNP2151 | [A/C]       | Ca_Desi_LG04               | 67.299                                       |
| Ca_Desi_SNP2152 | [T/C]       | Ca_Desi_LG04               | 67.322                                       |
| Ca_Desi_SNP2153 | [T/C]       | Ca_Desi_LG04               | 67.487                                       |
| Ca_Desi_SNP2154 | [A/C]       | Ca_Desi_LG04               | 67.516                                       |
| Ca_Desi_SNP2155 | [G/A]       | Ca_Desi_LG04               | 67.633                                       |
| Ca_Desi_SNP2156 | [A/C]       | Ca_Desi_LG04               | 67.670                                       |
| Ca_Desi_SNP2157 | [G/A]       | Ca_Desi_LG04               | 67.724                                       |
| Ca_Desi_SNP2158 | [A/G]       | Ca_Desi_LG04               | 67.746                                       |
| Ca_Desi_SNP2159 | [A/G]       | Ca_Desi_LG04               | 67.944                                       |
| Ca_Desi_SNP2160 | [T/C]       | Ca_Desi_LG04               | 68.026                                       |
| Ca_Desi_SNP2161 | [C/G]       | Ca_Desi_LG04               | 68.223                                       |
| Ca_Desi_SNP2162 | [C/A]       | Ca_Desi_LG04               | 68.352                                       |
| Ca_Desi_SNP2163 | [C/T]       | Ca_Desi_LG04               | 68.360                                       |
| Ca_Desi_SNP2164 | [G/C]       | Ca_Desi_LG04               | 68.598                                       |
| Ca_Desi_SNP2165 | [G/A]       | Ca_Desi_LG04               | 68.788                                       |
| Ca_Desi_SNP2166 | [T/C]       | Ca_Desi_LG04               | 68.868                                       |

| <b>SNP IDs</b>  | <b>SNPs</b> | <b>Linkage Group (LGs)</b> | <b>Genetic positions (cM) of mapped SNPs</b> |
|-----------------|-------------|----------------------------|----------------------------------------------|
| Ca_Desi_SNP2167 | [G/T]       | Ca_Desi_LG04               | 68.916                                       |
| Ca_Desi_SNP2168 | [A/G]       | Ca_Desi_LG04               | 69.187                                       |
| Ca_Desi_SNP2169 | [C/T]       | Ca_Desi_LG04               | 69.259                                       |
| Ca_Desi_SNP2170 | [A/T]       | Ca_Desi_LG04               | 69.377                                       |
| Ca_Desi_SNP2171 | [A/G]       | Ca_Desi_LG04               | 69.411                                       |
| Ca_Desi_SNP2172 | [A/G]       | Ca_Desi_LG04               | 69.432                                       |
| Ca_Desi_SNP2173 | [C/T]       | Ca_Desi_LG04               | 69.831                                       |
| Ca_Desi_SNP2174 | [G/A]       | Ca_Desi_LG04               | 69.855                                       |
| Ca_Desi_SNP2175 | [A/G]       | Ca_Desi_LG04               | 69.888                                       |
| Ca_Desi_SNP2176 | [G/A]       | Ca_Desi_LG04               | 70.080                                       |
| Ca_Desi_SNP2177 | [A/G]       | Ca_Desi_LG04               | 70.169                                       |
| Ca_Desi_SNP2178 | [G/C]       | Ca_Desi_LG04               | 70.274                                       |
| Ca_Desi_SNP2179 | [C/T]       | Ca_Desi_LG04               | 70.393                                       |
| Ca_Desi_SNP2180 | [T/C]       | Ca_Desi_LG04               | 70.443                                       |
| Ca_Desi_SNP2181 | [C/G]       | Ca_Desi_LG04               | 70.446                                       |
| Ca_Desi_SNP2182 | [T/C]       | Ca_Desi_LG04               | 70.540                                       |
| Ca_Desi_SNP2183 | [C/G]       | Ca_Desi_LG04               | 70.899                                       |
| Ca_Desi_SNP2184 | [A/G]       | Ca_Desi_LG04               | 70.936                                       |
| Ca_Desi_SNP2185 | [T/G]       | Ca_Desi_LG04               | 71.021                                       |
| Ca_Desi_SNP2186 | [T/G]       | Ca_Desi_LG04               | 71.147                                       |
| Ca_Desi_SNP2187 | [A/G]       | Ca_Desi_LG04               | 71.376                                       |
| Ca_Desi_SNP2188 | [A/G]       | Ca_Desi_LG04               | 71.553                                       |
| Ca_Desi_SNP2189 | [A/G]       | Ca_Desi_LG04               | 71.569                                       |
| Ca_Desi_SNP2190 | [C/T]       | Ca_Desi_LG04               | 71.605                                       |
| Ca_Desi_SNP2191 | [T/C]       | Ca_Desi_LG04               | 71.623                                       |
| Ca_Desi_SNP2192 | [A/G]       | Ca_Desi_LG04               | 71.707                                       |
| Ca_Desi_SNP2193 | [A/G]       | Ca_Desi_LG04               | 71.887                                       |
| Ca_Desi_SNP2194 | [A/G]       | Ca_Desi_LG04               | 71.938                                       |
| Ca_Desi_SNP2195 | [T/G]       | Ca_Desi_LG04               | 72.160                                       |
| Ca_Desi_SNP2196 | [T/A]       | Ca_Desi_LG04               | 72.530                                       |
| Ca_Desi_SNP2197 | [C/T]       | Ca_Desi_LG04               | 72.810                                       |



| <b>SNP IDs</b>  | <b>SNPs</b> | <b>Linkage Group (LGs)</b> | <b>Genetic positions (cM) of mapped SNPs</b> |
|-----------------|-------------|----------------------------|----------------------------------------------|
| Ca_Desi_SNP2198 | [G/T]       | Ca_Desi_LG04               | 72.861                                       |
| Ca_Desi_SNP2199 | [C/T]       | Ca_Desi_LG04               | 73.204                                       |
| Ca_Desi_SNP2200 | [A/G]       | Ca_Desi_LG04               | 73.329                                       |
| Ca_Desi_SNP2201 | [A/G]       | Ca_Desi_LG04               | 73.373                                       |
| Ca_Desi_SNP2202 | [T/C]       | Ca_Desi_LG04               | 73.466                                       |
| Ca_Desi_SNP2203 | [G/A]       | Ca_Desi_LG04               | 73.718                                       |
| Ca_Desi_SNP2204 | [C/T]       | Ca_Desi_LG04               | 73.868                                       |
| Ca_Desi_SNP2205 | [T/G]       | Ca_Desi_LG04               | 73.881                                       |
| Ca_Desi_SNP2206 | [T/A]       | Ca_Desi_LG04               | 73.946                                       |
| Ca_Desi_SNP2207 | [T/C]       | Ca_Desi_LG04               | 74.358                                       |
| Ca_Desi_SNP2208 | [C/T]       | Ca_Desi_LG04               | 74.383                                       |
| Ca_Desi_SNP2209 | [A/G]       | Ca_Desi_LG04               | 74.604                                       |
| Ca_Desi_SNP2210 | [A/T]       | Ca_Desi_LG04               | 74.653                                       |
| Ca_Desi_SNP2211 | [G/A]       | Ca_Desi_LG04               | 74.665                                       |
| Ca_Desi_SNP2212 | [G/A]       | Ca_Desi_LG04               | 74.730                                       |
| Ca_Desi_SNP2213 | [C/A]       | Ca_Desi_LG04               | 74.840                                       |
| Ca_Desi_SNP2214 | [C/T]       | Ca_Desi_LG04               | 74.890                                       |
| Ca_Desi_SNP2215 | [T/G]       | Ca_Desi_LG04               | 74.894                                       |
| Ca_Desi_SNP2216 | [A/G]       | Ca_Desi_LG04               | 74.932                                       |
| Ca_Desi_SNP2217 | [G/A]       | Ca_Desi_LG04               | 75.168                                       |
| Ca_Desi_SNP2218 | [A/C]       | Ca_Desi_LG04               | 75.244                                       |
| Ca_Desi_SNP2219 | [A/G]       | Ca_Desi_LG04               | 75.470                                       |
| Ca_Desi_SNP2220 | [C/T]       | Ca_Desi_LG04               | 75.669                                       |
| Ca_Desi_SNP2221 | [A/G]       | Ca_Desi_LG04               | 75.773                                       |
| Ca_Desi_SNP2222 | [A/G]       | Ca_Desi_LG04               | 76.537                                       |
| Ca_Desi_SNP2223 | [C/T]       | Ca_Desi_LG04               | 76.811                                       |
| Ca_Desi_SNP2224 | [C/T]       | Ca_Desi_LG04               | 76.908                                       |
| Ca_Desi_SNP2225 | [T/C]       | Ca_Desi_LG04               | 77.017                                       |
| Ca_Desi_SNP2226 | [A/G]       | Ca_Desi_LG04               | 77.053                                       |
| Ca_Desi_SNP2227 | [G/A]       | Ca_Desi_LG04               | 77.198                                       |
| Ca_Desi_SNP2228 | [G/T]       | Ca_Desi_LG04               | 77.211                                       |

| <b>SNP IDs</b>  | <b>SNPs</b> | <b>Linkage Group (LGs)</b> | <b>Genetic positions (cM) of mapped SNPs</b> |
|-----------------|-------------|----------------------------|----------------------------------------------|
| Ca_Desi_SNP2229 | [C/G]       | Ca_Desi_LG04               | 77.384                                       |
| Ca_Desi_SNP2230 | [T/C]       | Ca_Desi_LG04               | 77.574                                       |
| Ca_Desi_SNP2231 | [T/G]       | Ca_Desi_LG04               | 77.829                                       |
| Ca_Desi_SNP2232 | [G/A]       | Ca_Desi_LG04               | 77.847                                       |
| Ca_Desi_SNP2233 | [G/T]       | Ca_Desi_LG04               | 77.967                                       |
| Ca_Desi_SNP2234 | [A/T]       | Ca_Desi_LG04               | 77.980                                       |
| Ca_Desi_SNP2235 | [T/A]       | Ca_Desi_LG04               | 78.004                                       |
| Ca_Desi_SNP2236 | [T/C]       | Ca_Desi_LG04               | 78.180                                       |
| Ca_Desi_SNP2237 | [T/C]       | Ca_Desi_LG04               | 78.225                                       |
| Ca_Desi_SNP2238 | [A/G]       | Ca_Desi_LG04               | 78.380                                       |
| Ca_Desi_SNP2239 | [A/G]       | Ca_Desi_LG04               | 78.491                                       |
| Ca_Desi_SNP2240 | [C/T]       | Ca_Desi_LG04               | 78.547                                       |
| Ca_Desi_SNP2241 | [C/T]       | Ca_Desi_LG04               | 78.556                                       |
| Ca_Desi_SNP2242 | [G/A]       | Ca_Desi_LG04               | 78.633                                       |
| Ca_Desi_SNP2243 | [A/G]       | Ca_Desi_LG04               | 78.754                                       |
| Ca_Desi_SNP2244 | [G/A]       | Ca_Desi_LG04               | 78.773                                       |
| Ca_Desi_SNP2245 | [A/C]       | Ca_Desi_LG04               | 78.874                                       |
| Ca_Desi_SNP2246 | [T/A]       | Ca_Desi_LG04               | 79.006                                       |
| Ca_Desi_SNP2247 | [G/A]       | Ca_Desi_LG04               | 79.126                                       |
| Ca_Desi_SNP2248 | [G/T]       | Ca_Desi_LG04               | 79.225                                       |
| Ca_Desi_SNP2249 | [A/G]       | Ca_Desi_LG04               | 79.332                                       |
| Ca_Desi_SNP2250 | [T/C]       | Ca_Desi_LG04               | 79.408                                       |
| Ca_Desi_SNP2251 | [T/C]       | Ca_Desi_LG04               | 79.426                                       |
| Ca_Desi_SNP2252 | [A/C]       | Ca_Desi_LG04               | 79.852                                       |
| Ca_Desi_SNP2253 | [G/A]       | Ca_Desi_LG04               | 80.175                                       |
| Ca_Desi_SNP2254 | [T/G]       | Ca_Desi_LG04               | 80.279                                       |
| Ca_Desi_SNP2255 | [T/G]       | Ca_Desi_LG04               | 80.313                                       |
| Ca_Desi_SNP2256 | [G/T]       | Ca_Desi_LG04               | 80.348                                       |
| Ca_Desi_SNP2257 | [T/G]       | Ca_Desi_LG04               | 80.693                                       |
| Ca_Desi_SNP2258 | [T/A]       | Ca_Desi_LG04               | 81.107                                       |
| Ca_Desi_SNP2259 | [A/G]       | Ca_Desi_LG04               | 81.309                                       |

| <b>SNP IDs</b>  | <b>SNPs</b> | <b>Linkage Group (LGs)</b> | <b>Genetic positions (cM) of mapped SNPs</b> |
|-----------------|-------------|----------------------------|----------------------------------------------|
| Ca_Desi_SNP2260 | [T/G]       | Ca_Desi_LG04               | 81.983                                       |
| Ca_Desi_SNP2261 | [A/G]       | Ca_Desi_LG04               | 82.093                                       |
| Ca_Desi_SNP2262 | [C/G]       | Ca_Desi_LG04               | 82.257                                       |
| Ca_Desi_SNP2263 | [T/C]       | Ca_Desi_LG04               | 82.790                                       |
| Ca_Desi_SNP2264 | [A/T]       | Ca_Desi_LG04               | 82.810                                       |
| Ca_Desi_SNP2265 | [G/A]       | Ca_Desi_LG04               | 82.919                                       |
| Ca_Desi_SNP2266 | [T/G]       | Ca_Desi_LG04               | 83.078                                       |
| Ca_Desi_SNP2267 | [C/A]       | Ca_Desi_LG04               | 83.977                                       |
| Ca_Desi_SNP2268 | [T/G]       | Ca_Desi_LG04               | 84.048                                       |
| Ca_Desi_SNP2269 | [A/C]       | Ca_Desi_LG04               | 84.664                                       |
| Ca_Desi_SNP2270 | [T/C]       | Ca_Desi_LG04               | 84.721                                       |
| Ca_Desi_SNP2271 | [T/G]       | Ca_Desi_LG04               | 85.365                                       |
| Ca_Desi_SNP2272 | [T/G]       | Ca_Desi_LG04               | 85.944                                       |
| Ca_Desi_SNP2273 | [T/G]       | Ca_Desi_LG04               | 85.949                                       |
| Ca_Desi_SNP2274 | [A/C]       | Ca_Desi_LG04               | 86.240                                       |
| Ca_Desi_SNP2275 | [G/C]       | Ca_Desi_LG04               | 86.290                                       |
| Ca_Desi_SNP2276 | [T/C]       | Ca_Desi_LG04               | 87.627                                       |
| Ca_Desi_SNP2277 | [A/C]       | Ca_Desi_LG04               | 91.745                                       |
| Ca_Desi_SNP2278 | [T/C]       | Ca_Desi_LG04               | 94.250                                       |
| Ca_Desi_SNP2279 | [A/C]       | Ca_Desi_LG04               | 94.548                                       |
| Ca_Desi_SNP2280 | [A/G]       | Ca_Desi_LG04               | 94.690                                       |
| Ca_Desi_SNP2281 | [A/G]       | Ca_Desi_LG04               | 95.921                                       |
| Ca_Desi_SNP2282 | [G/A]       | Ca_Desi_LG04               | 96.031                                       |
| Ca_Desi_SNP2283 | [A/C]       | Ca_Desi_LG04               | 97.782                                       |
| Ca_Desi_SNP2284 | [T/G]       | Ca_Desi_LG05               | 0.000                                        |
| Ca_Desi_SNP2285 | [T/C]       | Ca_Desi_LG05               | 2.005                                        |
| Ca_Desi_SNP2286 | [T/C]       | Ca_Desi_LG05               | 2.906                                        |
| Ca_Desi_SNP2287 | [A/G]       | Ca_Desi_LG05               | 6.592                                        |
| Ca_Desi_SNP2288 | [A/C]       | Ca_Desi_LG05               | 7.367                                        |
| Ca_Desi_SNP2289 | [A/T]       | Ca_Desi_LG05               | 8.031                                        |
| Ca_Desi_SNP2290 | [A/G]       | Ca_Desi_LG05               | 8.168                                        |

| <b>SNP IDs</b>  | <b>SNPs</b> | <b>Linkage Group (LGs)</b> | <b>Genetic positions (cM) of mapped SNPs</b> |
|-----------------|-------------|----------------------------|----------------------------------------------|
| Ca_Desi_SNP2291 | [A/C]       | Ca_Desi_LG05               | 11.729                                       |
| Ca_Desi_SNP2292 | [T/C]       | Ca_Desi_LG05               | 11.736                                       |
| Ca_Desi_SNP2293 | [G/A]       | Ca_Desi_LG05               | 11.945                                       |
| Ca_Desi_SNP2294 | [A/C]       | Ca_Desi_LG05               | 12.308                                       |
| Ca_Desi_SNP2295 | [T/A]       | Ca_Desi_LG05               | 13.330                                       |
| Ca_Desi_SNP2296 | [A/C]       | Ca_Desi_LG05               | 14.077                                       |
| Ca_Desi_SNP2297 | [T/C]       | Ca_Desi_LG05               | 14.410                                       |
| Ca_Desi_SNP2298 | [A/G]       | Ca_Desi_LG05               | 14.439                                       |
| Ca_Desi_SNP2299 | [A/T]       | Ca_Desi_LG05               | 14.800                                       |
| Ca_Desi_SNP2300 | [C/G]       | Ca_Desi_LG05               | 14.947                                       |
| Ca_Desi_SNP2301 | [T/G]       | Ca_Desi_LG05               | 15.061                                       |
| Ca_Desi_SNP2302 | [T/C]       | Ca_Desi_LG05               | 15.267                                       |
| Ca_Desi_SNP2303 | [A/T]       | Ca_Desi_LG05               | 15.634                                       |
| Ca_Desi_SNP2304 | [T/C]       | Ca_Desi_LG05               | 15.947                                       |
| Ca_Desi_SNP2305 | [T/A]       | Ca_Desi_LG05               | 15.994                                       |
| Ca_Desi_SNP2306 | [T/C]       | Ca_Desi_LG05               | 16.773                                       |
| Ca_Desi_SNP2307 | [C/T]       | Ca_Desi_LG05               | 16.975                                       |
| Ca_Desi_SNP2308 | [C/T]       | Ca_Desi_LG05               | 17.521                                       |
| Ca_Desi_SNP2309 | [T/C]       | Ca_Desi_LG05               | 18.122                                       |
| Ca_Desi_SNP2310 | [T/C]       | Ca_Desi_LG05               | 18.201                                       |
| Ca_Desi_SNP2311 | [T/C]       | Ca_Desi_LG05               | 18.461                                       |
| Ca_Desi_SNP2312 | [G/A]       | Ca_Desi_LG05               | 18.515                                       |
| Ca_Desi_SNP2313 | [C/T]       | Ca_Desi_LG05               | 18.744                                       |
| Ca_Desi_SNP2314 | [A/G]       | Ca_Desi_LG05               | 18.990                                       |
| Ca_Desi_SNP2315 | [T/C]       | Ca_Desi_LG05               | 19.374                                       |
| Ca_Desi_SNP2316 | [A/G]       | Ca_Desi_LG05               | 19.377                                       |
| Ca_Desi_SNP2317 | [T/G]       | Ca_Desi_LG05               | 20.006                                       |
| Ca_Desi_SNP2318 | [A/G]       | Ca_Desi_LG05               | 20.039                                       |
| Ca_Desi_SNP2319 | [C/T]       | Ca_Desi_LG05               | 20.102                                       |
| Ca_Desi_SNP2320 | [T/C]       | Ca_Desi_LG05               | 20.388                                       |
| Ca_Desi_SNP2321 | [A/G]       | Ca_Desi_LG05               | 20.476                                       |

| <b>SNP IDs</b>  | <b>SNPs</b> | <b>Linkage Group (LGs)</b> | <b>Genetic positions (cM) of mapped SNPs</b> |
|-----------------|-------------|----------------------------|----------------------------------------------|
| Ca_Desi_SNP2322 | [C/T]       | Ca_Desi_LG05               | 20.608                                       |
| Ca_Desi_SNP2323 | [A/G]       | Ca_Desi_LG05               | 20.810                                       |
| Ca_Desi_SNP2324 | [C/T]       | Ca_Desi_LG05               | 21.302                                       |
| Ca_Desi_SNP2325 | [A/G]       | Ca_Desi_LG05               | 21.626                                       |
| Ca_Desi_SNP2326 | [C/T]       | Ca_Desi_LG05               | 21.885                                       |
| Ca_Desi_SNP2327 | [A/G]       | Ca_Desi_LG05               | 22.069                                       |
| Ca_Desi_SNP2328 | [A/G]       | Ca_Desi_LG05               | 22.091                                       |
| Ca_Desi_SNP2329 | [A/C]       | Ca_Desi_LG05               | 22.126                                       |
| Ca_Desi_SNP2330 | [A/G]       | Ca_Desi_LG05               | 22.612                                       |
| Ca_Desi_SNP2331 | [C/T]       | Ca_Desi_LG05               | 22.874                                       |
| Ca_Desi_SNP2332 | [G/T]       | Ca_Desi_LG05               | 23.046                                       |
| Ca_Desi_SNP2333 | [A/T]       | Ca_Desi_LG05               | 23.367                                       |
| Ca_Desi_SNP2334 | [T/C]       | Ca_Desi_LG05               | 23.683                                       |
| Ca_Desi_SNP2335 | [T/G]       | Ca_Desi_LG05               | 23.744                                       |
| Ca_Desi_SNP2336 | [T/C]       | Ca_Desi_LG05               | 23.792                                       |
| Ca_Desi_SNP2337 | [T/A]       | Ca_Desi_LG05               | 23.805                                       |
| Ca_Desi_SNP2338 | [C/G]       | Ca_Desi_LG05               | 24.875                                       |
| Ca_Desi_SNP2339 | [T/C]       | Ca_Desi_LG05               | 25.012                                       |
| Ca_Desi_SNP2340 | [A/C]       | Ca_Desi_LG05               | 25.029                                       |
| Ca_Desi_SNP2341 | [C/T]       | Ca_Desi_LG05               | 25.833                                       |
| Ca_Desi_SNP2342 | [A/G]       | Ca_Desi_LG05               | 25.834                                       |
| Ca_Desi_SNP2343 | [A/G]       | Ca_Desi_LG05               | 25.948                                       |
| Ca_Desi_SNP2344 | [G/A]       | Ca_Desi_LG05               | 26.237                                       |
| Ca_Desi_SNP2345 | [A/C]       | Ca_Desi_LG05               | 26.679                                       |
| Ca_Desi_SNP2346 | [G/A]       | Ca_Desi_LG05               | 26.766                                       |
| Ca_Desi_SNP2347 | [A/G]       | Ca_Desi_LG05               | 26.913                                       |
| Ca_Desi_SNP2348 | [T/G]       | Ca_Desi_LG05               | 27.507                                       |
| Ca_Desi_SNP2349 | [A/G]       | Ca_Desi_LG05               | 27.515                                       |
| Ca_Desi_SNP2350 | [G/A]       | Ca_Desi_LG05               | 27.620                                       |
| Ca_Desi_SNP2351 | [A/C]       | Ca_Desi_LG05               | 27.755                                       |
| Ca_Desi_SNP2352 | [G/A]       | Ca_Desi_LG05               | 27.865                                       |

| <b>SNP IDs</b>  | <b>SNPs</b> | <b>Linkage Group (LGs)</b> | <b>Genetic positions (cM) of mapped SNPs</b> |
|-----------------|-------------|----------------------------|----------------------------------------------|
| Ca_Desi_SNP2353 | [T/G]       | Ca_Desi_LG05               | 28.042                                       |
| Ca_Desi_SNP2354 | [C/T]       | Ca_Desi_LG05               | 28.115                                       |
| Ca_Desi_SNP2355 | [A/T]       | Ca_Desi_LG05               | 28.564                                       |
| Ca_Desi_SNP2356 | [T/G]       | Ca_Desi_LG05               | 28.659                                       |
| Ca_Desi_SNP2357 | [C/T]       | Ca_Desi_LG05               | 29.214                                       |
| Ca_Desi_SNP2358 | [A/G]       | Ca_Desi_LG05               | 29.997                                       |
| Ca_Desi_SNP2359 | [T/A]       | Ca_Desi_LG05               | 30.007                                       |
| Ca_Desi_SNP2360 | [T/A]       | Ca_Desi_LG05               | 30.039                                       |
| Ca_Desi_SNP2361 | [G/T]       | Ca_Desi_LG05               | 31.332                                       |
| Ca_Desi_SNP2362 | [T/C]       | Ca_Desi_LG05               | 31.552                                       |
| Ca_Desi_SNP2363 | [C/A]       | Ca_Desi_LG05               | 32.027                                       |
| Ca_Desi_SNP2364 | [T/G]       | Ca_Desi_LG05               | 32.574                                       |
| Ca_Desi_SNP2365 | [A/T]       | Ca_Desi_LG05               | 33.214                                       |
| Ca_Desi_SNP2366 | [G/A]       | Ca_Desi_LG05               | 33.498                                       |
| Ca_Desi_SNP2367 | [A/C]       | Ca_Desi_LG05               | 33.777                                       |
| Ca_Desi_SNP2368 | [A/G]       | Ca_Desi_LG05               | 33.814                                       |
| Ca_Desi_SNP2369 | [C/T]       | Ca_Desi_LG05               | 34.433                                       |
| Ca_Desi_SNP2370 | [C/G]       | Ca_Desi_LG05               | 34.453                                       |
| Ca_Desi_SNP2371 | [A/C]       | Ca_Desi_LG05               | 34.668                                       |
| Ca_Desi_SNP2372 | [G/T]       | Ca_Desi_LG05               | 34.704                                       |
| Ca_Desi_SNP2373 | [T/C]       | Ca_Desi_LG05               | 34.902                                       |
| Ca_Desi_SNP2374 | [G/T]       | Ca_Desi_LG05               | 34.985                                       |
| Ca_Desi_SNP2375 | [T/C]       | Ca_Desi_LG05               | 35.008                                       |
| Ca_Desi_SNP2376 | [G/C]       | Ca_Desi_LG05               | 35.011                                       |
| Ca_Desi_SNP2377 | [C/G]       | Ca_Desi_LG05               | 35.250                                       |
| Ca_Desi_SNP2378 | [A/C]       | Ca_Desi_LG05               | 35.404                                       |
| Ca_Desi_SNP2379 | [C/T]       | Ca_Desi_LG05               | 35.604                                       |
| Ca_Desi_SNP2380 | [G/A]       | Ca_Desi_LG05               | 35.638                                       |
| Ca_Desi_SNP2381 | [A/G]       | Ca_Desi_LG05               | 35.649                                       |
| Ca_Desi_SNP2382 | [G/T]       | Ca_Desi_LG05               | 35.968                                       |
| Ca_Desi_SNP2383 | [T/C]       | Ca_Desi_LG05               | 36.068                                       |

| <b>SNP IDs</b>  | <b>SNPs</b> | <b>Linkage Group (LGs)</b> | <b>Genetic positions (cM) of mapped SNPs</b> |
|-----------------|-------------|----------------------------|----------------------------------------------|
| Ca_Desi_SNP2384 | [T/C]       | Ca_Desi_LG05               | 36.106                                       |
| Ca_Desi_SNP2385 | [C/T]       | Ca_Desi_LG05               | 36.889                                       |
| Ca_Desi_SNP2386 | [T/G]       | Ca_Desi_LG05               | 36.895                                       |
| Ca_Desi_SNP2387 | [G/A]       | Ca_Desi_LG05               | 36.943                                       |
| Ca_Desi_SNP2388 | [A/C]       | Ca_Desi_LG05               | 37.002                                       |
| Ca_Desi_SNP2389 | [A/C]       | Ca_Desi_LG05               | 37.108                                       |
| Ca_Desi_SNP2390 | [T/C]       | Ca_Desi_LG05               | 37.189                                       |
| Ca_Desi_SNP2391 | [C/T]       | Ca_Desi_LG05               | 37.305                                       |
| Ca_Desi_SNP2392 | [C/T]       | Ca_Desi_LG05               | 37.314                                       |
| Ca_Desi_SNP2393 | [T/G]       | Ca_Desi_LG05               | 37.445                                       |
| Ca_Desi_SNP2394 | [A/G]       | Ca_Desi_LG05               | 37.901                                       |
| Ca_Desi_SNP2395 | [T/A]       | Ca_Desi_LG05               | 37.996                                       |
| Ca_Desi_SNP2396 | [C/A]       | Ca_Desi_LG05               | 38.152                                       |
| Ca_Desi_SNP2397 | [T/G]       | Ca_Desi_LG05               | 38.257                                       |
| Ca_Desi_SNP2398 | [C/G]       | Ca_Desi_LG05               | 38.350                                       |
| Ca_Desi_SNP2399 | [T/G]       | Ca_Desi_LG05               | 38.527                                       |
| Ca_Desi_SNP2400 | [G/A]       | Ca_Desi_LG05               | 39.007                                       |
| Ca_Desi_SNP2401 | [T/C]       | Ca_Desi_LG05               | 39.380                                       |
| Ca_Desi_SNP2402 | [A/G]       | Ca_Desi_LG05               | 39.395                                       |
| Ca_Desi_SNP2403 | [T/G]       | Ca_Desi_LG05               | 39.652                                       |
| Ca_Desi_SNP2404 | [T/C]       | Ca_Desi_LG05               | 39.691                                       |
| Ca_Desi_SNP2405 | [C/T]       | Ca_Desi_LG05               | 39.882                                       |
| Ca_Desi_SNP2406 | [T/G]       | Ca_Desi_LG05               | 40.430                                       |
| Ca_Desi_SNP2407 | [T/C]       | Ca_Desi_LG05               | 40.572                                       |
| Ca_Desi_SNP2408 | [G/T]       | Ca_Desi_LG05               | 40.625                                       |
| Ca_Desi_SNP2409 | [A/C]       | Ca_Desi_LG05               | 40.937                                       |
| Ca_Desi_SNP2410 | [T/C]       | Ca_Desi_LG05               | 40.983                                       |
| Ca_Desi_SNP2411 | [G/C]       | Ca_Desi_LG05               | 41.508                                       |
| Ca_Desi_SNP2412 | [G/T]       | Ca_Desi_LG05               | 41.640                                       |
| Ca_Desi_SNP2413 | [A/C]       | Ca_Desi_LG05               | 41.930                                       |
| Ca_Desi_SNP2414 | [A/C]       | Ca_Desi_LG05               | 41.941                                       |

| <b>SNP IDs</b>  | <b>SNPs</b> | <b>Linkage Group (LGs)</b> | <b>Genetic positions (cM) of mapped SNPs</b> |
|-----------------|-------------|----------------------------|----------------------------------------------|
| Ca_Desi_SNP2415 | [G/A]       | Ca_Desi_LG05               | 41.971                                       |
| Ca_Desi_SNP2416 | [T/G]       | Ca_Desi_LG05               | 42.064                                       |
| Ca_Desi_SNP2417 | [C/A]       | Ca_Desi_LG05               | 42.238                                       |
| Ca_Desi_SNP2418 | [T/G]       | Ca_Desi_LG05               | 42.700                                       |
| Ca_Desi_SNP2419 | [G/A]       | Ca_Desi_LG05               | 43.661                                       |
| Ca_Desi_SNP2420 | [G/A]       | Ca_Desi_LG05               | 43.836                                       |
| Ca_Desi_SNP2421 | [A/C]       | Ca_Desi_LG05               | 43.993                                       |
| Ca_Desi_SNP2422 | [G/T]       | Ca_Desi_LG05               | 44.208                                       |
| Ca_Desi_SNP2423 | [G/T]       | Ca_Desi_LG05               | 44.474                                       |
| Ca_Desi_SNP2424 | [A/T]       | Ca_Desi_LG05               | 45.017                                       |
| Ca_Desi_SNP2425 | [T/G]       | Ca_Desi_LG05               | 45.090                                       |
| Ca_Desi_SNP2426 | [T/C]       | Ca_Desi_LG05               | 45.127                                       |
| Ca_Desi_SNP2427 | [T/C]       | Ca_Desi_LG05               | 45.579                                       |
| Ca_Desi_SNP2428 | [A/G]       | Ca_Desi_LG05               | 46.096                                       |
| Ca_Desi_SNP2429 | [C/T]       | Ca_Desi_LG05               | 46.430                                       |
| Ca_Desi_SNP2430 | [C/A]       | Ca_Desi_LG05               | 46.470                                       |
| Ca_Desi_SNP2431 | [C/T]       | Ca_Desi_LG05               | 46.514                                       |
| Ca_Desi_SNP2432 | [C/A]       | Ca_Desi_LG05               | 46.522                                       |
| Ca_Desi_SNP2433 | [A/G]       | Ca_Desi_LG05               | 46.535                                       |
| Ca_Desi_SNP2434 | [T/C]       | Ca_Desi_LG05               | 46.614                                       |
| Ca_Desi_SNP2435 | [C/T]       | Ca_Desi_LG05               | 46.789                                       |
| Ca_Desi_SNP2436 | [A/C]       | Ca_Desi_LG05               | 46.977                                       |
| Ca_Desi_SNP2437 | [C/A]       | Ca_Desi_LG05               | 46.991                                       |
| Ca_Desi_SNP2438 | [A/C]       | Ca_Desi_LG05               | 47.050                                       |
| Ca_Desi_SNP2439 | [T/G]       | Ca_Desi_LG05               | 47.203                                       |
| Ca_Desi_SNP2440 | [A/T]       | Ca_Desi_LG05               | 47.589                                       |
| Ca_Desi_SNP2441 | [A/G]       | Ca_Desi_LG05               | 47.792                                       |
| Ca_Desi_SNP2442 | [A/G]       | Ca_Desi_LG05               | 47.806                                       |
| Ca_Desi_SNP2443 | [A/G]       | Ca_Desi_LG05               | 48.249                                       |
| Ca_Desi_SNP2444 | [G/A]       | Ca_Desi_LG05               | 48.347                                       |
| Ca_Desi_SNP2445 | [T/A]       | Ca_Desi_LG05               | 48.659                                       |



| <b>SNP IDs</b>  | <b>SNPs</b> | <b>Linkage Group (LGs)</b> | <b>Genetic positions (cM) of mapped SNPs</b> |
|-----------------|-------------|----------------------------|----------------------------------------------|
| Ca_Desi_SNP2446 | [C/T]       | Ca_Desi_LG05               | 48.732                                       |
| Ca_Desi_SNP2447 | [G/A]       | Ca_Desi_LG05               | 48.949                                       |
| Ca_Desi_SNP2448 | [C/A]       | Ca_Desi_LG05               | 49.043                                       |
| Ca_Desi_SNP2449 | [C/A]       | Ca_Desi_LG05               | 49.632                                       |
| Ca_Desi_SNP2450 | [A/G]       | Ca_Desi_LG05               | 50.011                                       |
| Ca_Desi_SNP2451 | [T/C]       | Ca_Desi_LG05               | 50.109                                       |
| Ca_Desi_SNP2452 | [A/G]       | Ca_Desi_LG05               | 50.131                                       |
| Ca_Desi_SNP2453 | [A/C]       | Ca_Desi_LG05               | 50.337                                       |
| Ca_Desi_SNP2454 | [A/G]       | Ca_Desi_LG05               | 50.490                                       |
| Ca_Desi_SNP2455 | [C/T]       | Ca_Desi_LG05               | 50.635                                       |
| Ca_Desi_SNP2456 | [C/A]       | Ca_Desi_LG05               | 50.996                                       |
| Ca_Desi_SNP2457 | [G/T]       | Ca_Desi_LG05               | 51.409                                       |
| Ca_Desi_SNP2458 | [A/G]       | Ca_Desi_LG05               | 51.509                                       |
| Ca_Desi_SNP2459 | [A/G]       | Ca_Desi_LG05               | 51.841                                       |
| Ca_Desi_SNP2460 | [A/C]       | Ca_Desi_LG05               | 52.125                                       |
| Ca_Desi_SNP2461 | [T/G]       | Ca_Desi_LG05               | 52.239                                       |
| Ca_Desi_SNP2462 | [A/C]       | Ca_Desi_LG05               | 52.288                                       |
| Ca_Desi_SNP2463 | [C/A]       | Ca_Desi_LG05               | 52.417                                       |
| Ca_Desi_SNP2464 | [A/G]       | Ca_Desi_LG05               | 52.520                                       |
| Ca_Desi_SNP2465 | [T/A]       | Ca_Desi_LG05               | 52.987                                       |
| Ca_Desi_SNP2466 | [A/G]       | Ca_Desi_LG05               | 53.113                                       |
| Ca_Desi_SNP2467 | [A/G]       | Ca_Desi_LG05               | 53.122                                       |
| Ca_Desi_SNP2468 | [A/G]       | Ca_Desi_LG05               | 53.139                                       |
| Ca_Desi_SNP2469 | [G/A]       | Ca_Desi_LG05               | 53.336                                       |
| Ca_Desi_SNP2470 | [T/G]       | Ca_Desi_LG05               | 53.431                                       |
| Ca_Desi_SNP2471 | [C/T]       | Ca_Desi_LG05               | 53.468                                       |
| Ca_Desi_SNP2472 | [G/T]       | Ca_Desi_LG05               | 53.566                                       |
| Ca_Desi_SNP2473 | [A/C]       | Ca_Desi_LG05               | 53.576                                       |
| Ca_Desi_SNP2474 | [A/C]       | Ca_Desi_LG05               | 54.164                                       |
| Ca_Desi_SNP2475 | [A/G]       | Ca_Desi_LG05               | 55.078                                       |
| Ca_Desi_SNP2476 | [A/C]       | Ca_Desi_LG05               | 55.348                                       |

| <b>SNP IDs</b>  | <b>SNPs</b> | <b>Linkage Group (LGs)</b> | <b>Genetic positions (cM) of mapped SNPs</b> |
|-----------------|-------------|----------------------------|----------------------------------------------|
| Ca_Desi_SNP2477 | [A/G]       | Ca_Desi_LG05               | 55.537                                       |
| Ca_Desi_SNP2478 | [C/G]       | Ca_Desi_LG05               | 55.708                                       |
| Ca_Desi_SNP2479 | [G/A]       | Ca_Desi_LG05               | 55.940                                       |
| Ca_Desi_SNP2480 | [A/T]       | Ca_Desi_LG05               | 56.037                                       |
| Ca_Desi_SNP2481 | [A/C]       | Ca_Desi_LG05               | 56.450                                       |
| Ca_Desi_SNP2482 | [A/C]       | Ca_Desi_LG05               | 56.754                                       |
| Ca_Desi_SNP2483 | [T/C]       | Ca_Desi_LG05               | 56.862                                       |
| Ca_Desi_SNP2484 | [A/G]       | Ca_Desi_LG05               | 57.089                                       |
| Ca_Desi_SNP2485 | [A/G]       | Ca_Desi_LG05               | 57.220                                       |
| Ca_Desi_SNP2486 | [T/G]       | Ca_Desi_LG05               | 57.359                                       |
| Ca_Desi_SNP2487 | [A/G]       | Ca_Desi_LG05               | 57.598                                       |
| Ca_Desi_SNP2488 | [T/C]       | Ca_Desi_LG05               | 57.907                                       |
| Ca_Desi_SNP2489 | [T/A]       | Ca_Desi_LG05               | 57.987                                       |
| Ca_Desi_SNP2490 | [C/G]       | Ca_Desi_LG05               | 58.056                                       |
| Ca_Desi_SNP2491 | [G/T]       | Ca_Desi_LG05               | 58.138                                       |
| Ca_Desi_SNP2492 | [T/C]       | Ca_Desi_LG05               | 58.349                                       |
| Ca_Desi_SNP2493 | [T/C]       | Ca_Desi_LG05               | 58.382                                       |
| Ca_Desi_SNP2494 | [A/G]       | Ca_Desi_LG05               | 58.522                                       |
| Ca_Desi_SNP2495 | [T/A]       | Ca_Desi_LG05               | 58.542                                       |
| Ca_Desi_SNP2496 | [A/C]       | Ca_Desi_LG05               | 58.639                                       |
| Ca_Desi_SNP2497 | [T/G]       | Ca_Desi_LG05               | 58.666                                       |
| Ca_Desi_SNP2498 | [C/T]       | Ca_Desi_LG05               | 58.877                                       |
| Ca_Desi_SNP2499 | [C/T]       | Ca_Desi_LG05               | 58.958                                       |
| Ca_Desi_SNP2500 | [A/G]       | Ca_Desi_LG05               | 59.080                                       |
| Ca_Desi_SNP2501 | [T/G]       | Ca_Desi_LG05               | 59.477                                       |
| Ca_Desi_SNP2502 | [A/G]       | Ca_Desi_LG05               | 60.009                                       |
| Ca_Desi_SNP2503 | [G/A]       | Ca_Desi_LG05               | 60.327                                       |
| Ca_Desi_SNP2504 | [A/T]       | Ca_Desi_LG05               | 60.379                                       |
| Ca_Desi_SNP2505 | [A/T]       | Ca_Desi_LG05               | 61.296                                       |
| Ca_Desi_SNP2506 | [A/G]       | Ca_Desi_LG05               | 61.498                                       |
| Ca_Desi_SNP2507 | [A/C]       | Ca_Desi_LG05               | 61.524                                       |

| <b>SNP IDs</b>  | <b>SNPs</b> | <b>Linkage Group (LGs)</b> | <b>Genetic positions (cM) of mapped SNPs</b> |
|-----------------|-------------|----------------------------|----------------------------------------------|
| Ca_Desi_SNP2508 | [G/A]       | Ca_Desi_LG05               | 62.042                                       |
| Ca_Desi_SNP2509 | [T/A]       | Ca_Desi_LG05               | 62.477                                       |
| Ca_Desi_SNP2510 | [T/G]       | Ca_Desi_LG05               | 62.621                                       |
| Ca_Desi_SNP2511 | [A/G]       | Ca_Desi_LG05               | 62.871                                       |
| Ca_Desi_SNP2512 | [G/A]       | Ca_Desi_LG05               | 62.970                                       |
| Ca_Desi_SNP2513 | [G/T]       | Ca_Desi_LG05               | 63.093                                       |
| Ca_Desi_SNP2514 | [A/G]       | Ca_Desi_LG05               | 63.503                                       |
| Ca_Desi_SNP2515 | [T/C]       | Ca_Desi_LG05               | 63.914                                       |
| Ca_Desi_SNP2516 | [T/C]       | Ca_Desi_LG05               | 64.778                                       |
| Ca_Desi_SNP2517 | [G/T]       | Ca_Desi_LG05               | 64.950                                       |
| Ca_Desi_SNP2518 | [T/G]       | Ca_Desi_LG05               | 65.084                                       |
| Ca_Desi_SNP2519 | [A/C]       | Ca_Desi_LG05               | 65.211                                       |
| Ca_Desi_SNP2520 | [T/C]       | Ca_Desi_LG05               | 65.704                                       |
| Ca_Desi_SNP2521 | [T/C]       | Ca_Desi_LG05               | 66.210                                       |
| Ca_Desi_SNP2522 | [T/C]       | Ca_Desi_LG05               | 66.340                                       |
| Ca_Desi_SNP2523 | [T/C]       | Ca_Desi_LG05               | 67.118                                       |
| Ca_Desi_SNP2524 | [A/G]       | Ca_Desi_LG05               | 67.128                                       |
| Ca_Desi_SNP2525 | [G/A]       | Ca_Desi_LG05               | 67.397                                       |
| Ca_Desi_SNP2526 | [T/C]       | Ca_Desi_LG05               | 67.550                                       |
| Ca_Desi_SNP2527 | [T/C]       | Ca_Desi_LG05               | 67.909                                       |
| Ca_Desi_SNP2528 | [A/C]       | Ca_Desi_LG05               | 68.591                                       |
| Ca_Desi_SNP2529 | [T/G]       | Ca_Desi_LG05               | 68.821                                       |
| Ca_Desi_SNP2530 | [T/G]       | Ca_Desi_LG05               | 68.973                                       |
| Ca_Desi_SNP2531 | [T/C]       | Ca_Desi_LG05               | 69.183                                       |
| Ca_Desi_SNP2532 | [A/C]       | Ca_Desi_LG05               | 69.732                                       |
| Ca_Desi_SNP2533 | [A/G]       | Ca_Desi_LG05               | 70.021                                       |
| Ca_Desi_SNP2534 | [A/C]       | Ca_Desi_LG05               | 70.210                                       |
| Ca_Desi_SNP2535 | [G/T]       | Ca_Desi_LG05               | 70.290                                       |
| Ca_Desi_SNP2536 | [T/G]       | Ca_Desi_LG05               | 70.500                                       |
| Ca_Desi_SNP2537 | [C/T]       | Ca_Desi_LG05               | 70.547                                       |
| Ca_Desi_SNP2538 | [T/G]       | Ca_Desi_LG05               | 70.600                                       |

| <b>SNP IDs</b>  | <b>SNPs</b> | <b>Linkage Group (LGs)</b> | <b>Genetic positions (cM) of mapped SNPs</b> |
|-----------------|-------------|----------------------------|----------------------------------------------|
| Ca_Desi_SNP2539 | [C/T]       | Ca_Desi_LG05               | 70.612                                       |
| Ca_Desi_SNP2540 | [C/T]       | Ca_Desi_LG05               | 70.696                                       |
| Ca_Desi_SNP2541 | [A/G]       | Ca_Desi_LG05               | 71.736                                       |
| Ca_Desi_SNP2542 | [A/C]       | Ca_Desi_LG05               | 72.170                                       |
| Ca_Desi_SNP2543 | [T/G]       | Ca_Desi_LG05               | 72.439                                       |
| Ca_Desi_SNP2544 | [G/C]       | Ca_Desi_LG05               | 72.464                                       |
| Ca_Desi_SNP2545 | [G/A]       | Ca_Desi_LG05               | 72.629                                       |
| Ca_Desi_SNP2546 | [A/G]       | Ca_Desi_LG05               | 73.403                                       |
| Ca_Desi_SNP2547 | [A/G]       | Ca_Desi_LG05               | 73.479                                       |
| Ca_Desi_SNP2548 | [A/C]       | Ca_Desi_LG05               | 73.532                                       |
| Ca_Desi_SNP2549 | [C/T]       | Ca_Desi_LG05               | 74.330                                       |
| Ca_Desi_SNP2550 | [A/G]       | Ca_Desi_LG05               | 74.490                                       |
| Ca_Desi_SNP2551 | [T/C]       | Ca_Desi_LG05               | 74.829                                       |
| Ca_Desi_SNP2552 | [A/C]       | Ca_Desi_LG05               | 74.934                                       |
| Ca_Desi_SNP2553 | [A/C]       | Ca_Desi_LG05               | 75.585                                       |
| Ca_Desi_SNP2554 | [T/C]       | Ca_Desi_LG05               | 75.857                                       |
| Ca_Desi_SNP2555 | [A/C]       | Ca_Desi_LG05               | 76.213                                       |
| Ca_Desi_SNP2556 | [A/T]       | Ca_Desi_LG05               | 76.770                                       |
| Ca_Desi_SNP2557 | [G/C]       | Ca_Desi_LG05               | 76.802                                       |
| Ca_Desi_SNP2558 | [T/A]       | Ca_Desi_LG05               | 77.003                                       |
| Ca_Desi_SNP2559 | [C/A]       | Ca_Desi_LG05               | 77.188                                       |
| Ca_Desi_SNP2560 | [T/C]       | Ca_Desi_LG05               | 77.195                                       |
| Ca_Desi_SNP2561 | [T/C]       | Ca_Desi_LG05               | 77.911                                       |
| Ca_Desi_SNP2562 | [T/C]       | Ca_Desi_LG05               | 78.024                                       |
| Ca_Desi_SNP2563 | [G/A]       | Ca_Desi_LG05               | 78.207                                       |
| Ca_Desi_SNP2564 | [G/A]       | Ca_Desi_LG05               | 78.250                                       |
| Ca_Desi_SNP2565 | [T/C]       | Ca_Desi_LG05               | 79.720                                       |
| Ca_Desi_SNP2566 | [C/T]       | Ca_Desi_LG05               | 79.861                                       |
| Ca_Desi_SNP2567 | [C/G]       | Ca_Desi_LG05               | 82.027                                       |
| Ca_Desi_SNP2568 | [A/T]       | Ca_Desi_LG05               | 83.557                                       |
| Ca_Desi_SNP2569 | [A/C]       | Ca_Desi_LG05               | 84.955                                       |

| <b>SNP IDs</b>  | <b>SNPs</b> | <b>Linkage Group (LGs)</b> | <b>Genetic positions (cM) of mapped SNPs</b> |
|-----------------|-------------|----------------------------|----------------------------------------------|
| Ca_Desi_SNP2570 | [C/T]       | Ca_Desi_LG05               | 84.994                                       |
| Ca_Desi_SNP2571 | [T/C]       | Ca_Desi_LG05               | 85.313                                       |
| Ca_Desi_SNP2572 | [G/T]       | Ca_Desi_LG05               | 86.979                                       |
| Ca_Desi_SNP2573 | [G/A]       | Ca_Desi_LG05               | 89.402                                       |
| Ca_Desi_SNP2574 | [T/G]       | Ca_Desi_LG05               | 94.059                                       |
| Ca_Desi_SNP2575 | [A/C]       | Ca_Desi_LG05               | 94.069                                       |
| Ca_Desi_SNP2576 | [C/A]       | Ca_Desi_LG06               | 0.000                                        |
| Ca_Desi_SNP2577 | [A/G]       | Ca_Desi_LG06               | 0.105                                        |
| Ca_Desi_SNP2578 | [C/A]       | Ca_Desi_LG06               | 0.122                                        |
| Ca_Desi_SNP2579 | [C/G]       | Ca_Desi_LG06               | 0.565                                        |
| Ca_Desi_SNP2580 | [A/G]       | Ca_Desi_LG06               | 0.745                                        |
| Ca_Desi_SNP2581 | [A/G]       | Ca_Desi_LG06               | 3.184                                        |
| Ca_Desi_SNP2582 | [C/A]       | Ca_Desi_LG06               | 3.440                                        |
| Ca_Desi_SNP2583 | [T/G]       | Ca_Desi_LG06               | 4.550                                        |
| Ca_Desi_SNP2584 | [T/G]       | Ca_Desi_LG06               | 4.790                                        |
| Ca_Desi_SNP2585 | [A/G]       | Ca_Desi_LG06               | 5.066                                        |
| Ca_Desi_SNP2586 | [C/G]       | Ca_Desi_LG06               | 5.078                                        |
| Ca_Desi_SNP2587 | [C/T]       | Ca_Desi_LG06               | 5.448                                        |
| Ca_Desi_SNP2588 | [A/G]       | Ca_Desi_LG06               | 6.020                                        |
| Ca_Desi_SNP2589 | [A/C]       | Ca_Desi_LG06               | 6.572                                        |
| Ca_Desi_SNP2590 | [T/C]       | Ca_Desi_LG06               | 6.673                                        |
| Ca_Desi_SNP2591 | [A/G]       | Ca_Desi_LG06               | 6.868                                        |
| Ca_Desi_SNP2592 | [C/A]       | Ca_Desi_LG06               | 7.149                                        |
| Ca_Desi_SNP2593 | [G/T]       | Ca_Desi_LG06               | 7.595                                        |
| Ca_Desi_SNP2594 | [T/C]       | Ca_Desi_LG06               | 8.146                                        |
| Ca_Desi_SNP2595 | [A/G]       | Ca_Desi_LG06               | 8.328                                        |
| Ca_Desi_SNP2596 | [C/T]       | Ca_Desi_LG06               | 8.995                                        |
| Ca_Desi_SNP2597 | [A/G]       | Ca_Desi_LG06               | 9.261                                        |
| Ca_Desi_SNP2598 | [G/A]       | Ca_Desi_LG06               | 9.373                                        |
| Ca_Desi_SNP2599 | [C/A]       | Ca_Desi_LG06               | 9.581                                        |
| Ca_Desi_SNP2600 | [T/G]       | Ca_Desi_LG06               | 9.637                                        |

| <b>SNP IDs</b>  | <b>SNPs</b> | <b>Linkage Group (LGs)</b> | <b>Genetic positions (cM) of mapped SNPs</b> |
|-----------------|-------------|----------------------------|----------------------------------------------|
| Ca_Desi_SNP2601 | [G/T]       | Ca_Desi_LG06               | 9.735                                        |
| Ca_Desi_SNP2602 | [T/C]       | Ca_Desi_LG06               | 10.228                                       |
| Ca_Desi_SNP2603 | [T/C]       | Ca_Desi_LG06               | 10.295                                       |
| Ca_Desi_SNP2604 | [A/G]       | Ca_Desi_LG06               | 10.389                                       |
| Ca_Desi_SNP2605 | [A/C]       | Ca_Desi_LG06               | 10.414                                       |
| Ca_Desi_SNP2606 | [T/G]       | Ca_Desi_LG06               | 10.777                                       |
| Ca_Desi_SNP2607 | [T/A]       | Ca_Desi_LG06               | 10.924                                       |
| Ca_Desi_SNP2608 | [T/G]       | Ca_Desi_LG06               | 10.981                                       |
| Ca_Desi_SNP2609 | [G/A]       | Ca_Desi_LG06               | 11.505                                       |
| Ca_Desi_SNP2610 | [G/A]       | Ca_Desi_LG06               | 11.552                                       |
| Ca_Desi_SNP2611 | [A/C]       | Ca_Desi_LG06               | 12.101                                       |
| Ca_Desi_SNP2612 | [G/A]       | Ca_Desi_LG06               | 12.721                                       |
| Ca_Desi_SNP2613 | [T/C]       | Ca_Desi_LG06               | 12.767                                       |
| Ca_Desi_SNP2614 | [G/T]       | Ca_Desi_LG06               | 12.823                                       |
| Ca_Desi_SNP2615 | [A/G]       | Ca_Desi_LG06               | 12.966                                       |
| Ca_Desi_SNP2616 | [C/T]       | Ca_Desi_LG06               | 13.102                                       |
| Ca_Desi_SNP2617 | [C/T]       | Ca_Desi_LG06               | 13.145                                       |
| Ca_Desi_SNP2618 | [T/G]       | Ca_Desi_LG06               | 13.808                                       |
| Ca_Desi_SNP2619 | [A/G]       | Ca_Desi_LG06               | 14.051                                       |
| Ca_Desi_SNP2620 | [G/A]       | Ca_Desi_LG06               | 14.080                                       |
| Ca_Desi_SNP2621 | [A/C]       | Ca_Desi_LG06               | 14.088                                       |
| Ca_Desi_SNP2622 | [T/A]       | Ca_Desi_LG06               | 14.108                                       |
| Ca_Desi_SNP2623 | [A/C]       | Ca_Desi_LG06               | 14.222                                       |
| Ca_Desi_SNP2624 | [T/G]       | Ca_Desi_LG06               | 14.772                                       |
| Ca_Desi_SNP2625 | [A/G]       | Ca_Desi_LG06               | 14.983                                       |
| Ca_Desi_SNP2626 | [C/G]       | Ca_Desi_LG06               | 15.077                                       |
| Ca_Desi_SNP2627 | [A/G]       | Ca_Desi_LG06               | 15.173                                       |
| Ca_Desi_SNP2628 | [A/T]       | Ca_Desi_LG06               | 15.677                                       |
| Ca_Desi_SNP2629 | [A/G]       | Ca_Desi_LG06               | 15.762                                       |
| Ca_Desi_SNP2630 | [T/G]       | Ca_Desi_LG06               | 15.892                                       |
| Ca_Desi_SNP2631 | [T/G]       | Ca_Desi_LG06               | 16.022                                       |

| <b>SNP IDs</b>  | <b>SNPs</b> | <b>Linkage Group (LGs)</b> | <b>Genetic positions (cM) of mapped SNPs</b> |
|-----------------|-------------|----------------------------|----------------------------------------------|
| Ca_Desi_SNP2632 | [A/G]       | Ca_Desi_LG06               | 16.215                                       |
| Ca_Desi_SNP2633 | [T/C]       | Ca_Desi_LG06               | 16.423                                       |
| Ca_Desi_SNP2634 | [A/G]       | Ca_Desi_LG06               | 16.446                                       |
| Ca_Desi_SNP2635 | [A/G]       | Ca_Desi_LG06               | 16.515                                       |
| Ca_Desi_SNP2636 | [C/T]       | Ca_Desi_LG06               | 16.698                                       |
| Ca_Desi_SNP2637 | [T/A]       | Ca_Desi_LG06               | 16.735                                       |
| Ca_Desi_SNP2638 | [G/A]       | Ca_Desi_LG06               | 16.891                                       |
| Ca_Desi_SNP2639 | [A/T]       | Ca_Desi_LG06               | 16.974                                       |
| Ca_Desi_SNP2640 | [T/C]       | Ca_Desi_LG06               | 16.987                                       |
| Ca_Desi_SNP2641 | [T/G]       | Ca_Desi_LG06               | 17.034                                       |
| Ca_Desi_SNP2642 | [A/T]       | Ca_Desi_LG06               | 17.263                                       |
| Ca_Desi_SNP2643 | [A/G]       | Ca_Desi_LG06               | 17.679                                       |
| Ca_Desi_SNP2644 | [C/A]       | Ca_Desi_LG06               | 18.083                                       |
| Ca_Desi_SNP2645 | [C/T]       | Ca_Desi_LG06               | 18.170                                       |
| Ca_Desi_SNP2646 | [C/A]       | Ca_Desi_LG06               | 18.197                                       |
| Ca_Desi_SNP2647 | [T/C]       | Ca_Desi_LG06               | 18.372                                       |
| Ca_Desi_SNP2648 | [A/G]       | Ca_Desi_LG06               | 18.788                                       |
| Ca_Desi_SNP2649 | [A/C]       | Ca_Desi_LG06               | 18.808                                       |
| Ca_Desi_SNP2650 | [T/C]       | Ca_Desi_LG06               | 18.812                                       |
| Ca_Desi_SNP2651 | [C/T]       | Ca_Desi_LG06               | 18.818                                       |
| Ca_Desi_SNP2652 | [G/A]       | Ca_Desi_LG06               | 18.822                                       |
| Ca_Desi_SNP2653 | [C/T]       | Ca_Desi_LG06               | 18.838                                       |
| Ca_Desi_SNP2654 | [A/G]       | Ca_Desi_LG06               | 19.128                                       |
| Ca_Desi_SNP2655 | [A/C]       | Ca_Desi_LG06               | 19.290                                       |
| Ca_Desi_SNP2656 | [C/T]       | Ca_Desi_LG06               | 19.483                                       |
| Ca_Desi_SNP2657 | [A/C]       | Ca_Desi_LG06               | 19.873                                       |
| Ca_Desi_SNP2658 | [C/G]       | Ca_Desi_LG06               | 19.941                                       |
| Ca_Desi_SNP2659 | [T/G]       | Ca_Desi_LG06               | 20.284                                       |
| Ca_Desi_SNP2660 | [T/C]       | Ca_Desi_LG06               | 20.435                                       |
| Ca_Desi_SNP2661 | [A/T]       | Ca_Desi_LG06               | 20.481                                       |
| Ca_Desi_SNP2662 | [C/A]       | Ca_Desi_LG06               | 20.848                                       |

| <b>SNP IDs</b>  | <b>SNPs</b> | <b>Linkage Group (LGs)</b> | <b>Genetic positions (cM) of mapped SNPs</b> |
|-----------------|-------------|----------------------------|----------------------------------------------|
| Ca_Desi_SNP2663 | [A/G]       | Ca_Desi_LG06               | 21.060                                       |
| Ca_Desi_SNP2664 | [A/G]       | Ca_Desi_LG06               | 21.227                                       |
| Ca_Desi_SNP2665 | [A/G]       | Ca_Desi_LG06               | 21.265                                       |
| Ca_Desi_SNP2666 | [G/T]       | Ca_Desi_LG06               | 21.309                                       |
| Ca_Desi_SNP2667 | [G/C]       | Ca_Desi_LG06               | 21.373                                       |
| Ca_Desi_SNP2668 | [A/C]       | Ca_Desi_LG06               | 21.409                                       |
| Ca_Desi_SNP2669 | [T/G]       | Ca_Desi_LG06               | 21.547                                       |
| Ca_Desi_SNP2670 | [T/C]       | Ca_Desi_LG06               | 21.913                                       |
| Ca_Desi_SNP2671 | [T/G]       | Ca_Desi_LG06               | 22.052                                       |
| Ca_Desi_SNP2672 | [T/A]       | Ca_Desi_LG06               | 22.242                                       |
| Ca_Desi_SNP2673 | [A/G]       | Ca_Desi_LG06               | 22.246                                       |
| Ca_Desi_SNP2674 | [A/C]       | Ca_Desi_LG06               | 22.421                                       |
| Ca_Desi_SNP2675 | [C/T]       | Ca_Desi_LG06               | 22.486                                       |
| Ca_Desi_SNP2676 | [T/A]       | Ca_Desi_LG06               | 22.672                                       |
| Ca_Desi_SNP2677 | [T/A]       | Ca_Desi_LG06               | 23.419                                       |
| Ca_Desi_SNP2678 | [A/G]       | Ca_Desi_LG06               | 23.454                                       |
| Ca_Desi_SNP2679 | [A/C]       | Ca_Desi_LG06               | 23.931                                       |
| Ca_Desi_SNP2680 | [T/A]       | Ca_Desi_LG06               | 24.029                                       |
| Ca_Desi_SNP2681 | [C/A]       | Ca_Desi_LG06               | 24.040                                       |
| Ca_Desi_SNP2682 | [T/G]       | Ca_Desi_LG06               | 24.259                                       |
| Ca_Desi_SNP2683 | [T/G]       | Ca_Desi_LG06               | 24.392                                       |
| Ca_Desi_SNP2684 | [T/G]       | Ca_Desi_LG06               | 24.410                                       |
| Ca_Desi_SNP2685 | [T/G]       | Ca_Desi_LG06               | 24.419                                       |
| Ca_Desi_SNP2686 | [T/C]       | Ca_Desi_LG06               | 24.585                                       |
| Ca_Desi_SNP2687 | [A/G]       | Ca_Desi_LG06               | 24.661                                       |
| Ca_Desi_SNP2688 | [C/T]       | Ca_Desi_LG06               | 24.683                                       |
| Ca_Desi_SNP2689 | [A/C]       | Ca_Desi_LG06               | 24.697                                       |
| Ca_Desi_SNP2690 | [C/T]       | Ca_Desi_LG06               | 24.809                                       |
| Ca_Desi_SNP2691 | [G/T]       | Ca_Desi_LG06               | 25.258                                       |
| Ca_Desi_SNP2692 | [T/A]       | Ca_Desi_LG06               | 25.388                                       |
| Ca_Desi_SNP2693 | [T/C]       | Ca_Desi_LG06               | 25.403                                       |



| <b>SNP IDs</b>  | <b>SNPs</b> | <b>Linkage Group (LGs)</b> | <b>Genetic positions (cM) of mapped SNPs</b> |
|-----------------|-------------|----------------------------|----------------------------------------------|
| Ca_Desi_SNP2694 | [A/C]       | Ca_Desi_LG06               | 25.616                                       |
| Ca_Desi_SNP2695 | [A/C]       | Ca_Desi_LG06               | 25.677                                       |
| Ca_Desi_SNP2696 | [C/T]       | Ca_Desi_LG06               | 25.767                                       |
| Ca_Desi_SNP2697 | [C/T]       | Ca_Desi_LG06               | 25.799                                       |
| Ca_Desi_SNP2698 | [G/C]       | Ca_Desi_LG06               | 25.853                                       |
| Ca_Desi_SNP2699 | [T/C]       | Ca_Desi_LG06               | 25.953                                       |
| Ca_Desi_SNP2700 | [A/G]       | Ca_Desi_LG06               | 26.189                                       |
| Ca_Desi_SNP2701 | [A/G]       | Ca_Desi_LG06               | 26.211                                       |
| Ca_Desi_SNP2702 | [T/G]       | Ca_Desi_LG06               | 26.239                                       |
| Ca_Desi_SNP2703 | [C/T]       | Ca_Desi_LG06               | 26.285                                       |
| Ca_Desi_SNP2704 | [C/T]       | Ca_Desi_LG06               | 26.383                                       |
| Ca_Desi_SNP2705 | [G/A]       | Ca_Desi_LG06               | 26.630                                       |
| Ca_Desi_SNP2706 | [A/G]       | Ca_Desi_LG06               | 26.807                                       |
| Ca_Desi_SNP2707 | [T/G]       | Ca_Desi_LG06               | 26.880                                       |
| Ca_Desi_SNP2708 | [T/G]       | Ca_Desi_LG06               | 26.954                                       |
| Ca_Desi_SNP2709 | [A/C]       | Ca_Desi_LG06               | 26.966                                       |
| Ca_Desi_SNP2710 | [A/G]       | Ca_Desi_LG06               | 27.064                                       |
| Ca_Desi_SNP2711 | [T/G]       | Ca_Desi_LG06               | 27.254                                       |
| Ca_Desi_SNP2712 | [C/T]       | Ca_Desi_LG06               | 27.556                                       |
| Ca_Desi_SNP2713 | [C/T]       | Ca_Desi_LG06               | 27.884                                       |
| Ca_Desi_SNP2714 | [C/A]       | Ca_Desi_LG06               | 28.375                                       |
| Ca_Desi_SNP2715 | [A/C]       | Ca_Desi_LG06               | 28.810                                       |
| Ca_Desi_SNP2716 | [T/G]       | Ca_Desi_LG06               | 28.980                                       |
| Ca_Desi_SNP2717 | [C/A]       | Ca_Desi_LG06               | 29.138                                       |
| Ca_Desi_SNP2718 | [G/A]       | Ca_Desi_LG06               | 29.484                                       |
| Ca_Desi_SNP2719 | [A/C]       | Ca_Desi_LG06               | 29.517                                       |
| Ca_Desi_SNP2720 | [G/A]       | Ca_Desi_LG06               | 29.608                                       |
| Ca_Desi_SNP2721 | [C/A]       | Ca_Desi_LG06               | 29.628                                       |
| Ca_Desi_SNP2722 | [A/C]       | Ca_Desi_LG06               | 29.665                                       |
| Ca_Desi_SNP2723 | [G/C]       | Ca_Desi_LG06               | 29.855                                       |
| Ca_Desi_SNP2724 | [G/A]       | Ca_Desi_LG06               | 29.875                                       |

| <b>SNP IDs</b>  | <b>SNPs</b> | <b>Linkage Group (LGs)</b> | <b>Genetic positions (cM) of mapped SNPs</b> |
|-----------------|-------------|----------------------------|----------------------------------------------|
| Ca_Desi_SNP2725 | [G/A]       | Ca_Desi_LG06               | 30.145                                       |
| Ca_Desi_SNP2726 | [G/A]       | Ca_Desi_LG06               | 30.173                                       |
| Ca_Desi_SNP2727 | [C/A]       | Ca_Desi_LG06               | 30.336                                       |
| Ca_Desi_SNP2728 | [C/T]       | Ca_Desi_LG06               | 30.577                                       |
| Ca_Desi_SNP2729 | [T/A]       | Ca_Desi_LG06               | 30.961                                       |
| Ca_Desi_SNP2730 | [C/G]       | Ca_Desi_LG06               | 31.301                                       |
| Ca_Desi_SNP2731 | [A/G]       | Ca_Desi_LG06               | 31.317                                       |
| Ca_Desi_SNP2732 | [C/T]       | Ca_Desi_LG06               | 31.381                                       |
| Ca_Desi_SNP2733 | [T/A]       | Ca_Desi_LG06               | 31.403                                       |
| Ca_Desi_SNP2734 | [G/C]       | Ca_Desi_LG06               | 31.413                                       |
| Ca_Desi_SNP2735 | [T/C]       | Ca_Desi_LG06               | 31.443                                       |
| Ca_Desi_SNP2736 | [C/T]       | Ca_Desi_LG06               | 31.646                                       |
| Ca_Desi_SNP2737 | [C/T]       | Ca_Desi_LG06               | 31.649                                       |
| Ca_Desi_SNP2738 | [G/C]       | Ca_Desi_LG06               | 31.935                                       |
| Ca_Desi_SNP2739 | [A/C]       | Ca_Desi_LG06               | 32.148                                       |
| Ca_Desi_SNP2740 | [T/A]       | Ca_Desi_LG06               | 32.308                                       |
| Ca_Desi_SNP2741 | [A/C]       | Ca_Desi_LG06               | 32.316                                       |
| Ca_Desi_SNP2742 | [C/A]       | Ca_Desi_LG06               | 32.950                                       |
| Ca_Desi_SNP2743 | [T/C]       | Ca_Desi_LG06               | 33.070                                       |
| Ca_Desi_SNP2744 | [T/C]       | Ca_Desi_LG06               | 33.278                                       |
| Ca_Desi_SNP2745 | [G/A]       | Ca_Desi_LG06               | 33.320                                       |
| Ca_Desi_SNP2746 | [C/T]       | Ca_Desi_LG06               | 33.462                                       |
| Ca_Desi_SNP2747 | [G/A]       | Ca_Desi_LG06               | 33.583                                       |
| Ca_Desi_SNP2748 | [A/C]       | Ca_Desi_LG06               | 34.054                                       |
| Ca_Desi_SNP2749 | [C/T]       | Ca_Desi_LG06               | 34.525                                       |
| Ca_Desi_SNP2750 | [T/G]       | Ca_Desi_LG06               | 34.712                                       |
| Ca_Desi_SNP2751 | [A/C]       | Ca_Desi_LG06               | 34.823                                       |
| Ca_Desi_SNP2752 | [T/A]       | Ca_Desi_LG06               | 34.856                                       |
| Ca_Desi_SNP2753 | [A/C]       | Ca_Desi_LG06               | 35.055                                       |
| Ca_Desi_SNP2754 | [T/G]       | Ca_Desi_LG06               | 35.444                                       |
| Ca_Desi_SNP2755 | [A/C]       | Ca_Desi_LG06               | 35.541                                       |

| <b>SNP IDs</b>  | <b>SNPs</b> | <b>Linkage Group (LGs)</b> | <b>Genetic positions (cM) of mapped SNPs</b> |
|-----------------|-------------|----------------------------|----------------------------------------------|
| Ca_Desi_SNP2756 | [T/C]       | Ca_Desi_LG06               | 35.860                                       |
| Ca_Desi_SNP2757 | [G/T]       | Ca_Desi_LG06               | 35.894                                       |
| Ca_Desi_SNP2758 | [A/C]       | Ca_Desi_LG06               | 35.988                                       |
| Ca_Desi_SNP2759 | [G/T]       | Ca_Desi_LG06               | 35.989                                       |
| Ca_Desi_SNP2760 | [C/T]       | Ca_Desi_LG06               | 36.576                                       |
| Ca_Desi_SNP2761 | [T/C]       | Ca_Desi_LG06               | 36.685                                       |
| Ca_Desi_SNP2762 | [A/G]       | Ca_Desi_LG06               | 36.868                                       |
| Ca_Desi_SNP2763 | [G/A]       | Ca_Desi_LG06               | 37.069                                       |
| Ca_Desi_SNP2764 | [T/C]       | Ca_Desi_LG06               | 37.103                                       |
| Ca_Desi_SNP2765 | [A/G]       | Ca_Desi_LG06               | 37.199                                       |
| Ca_Desi_SNP2766 | [C/T]       | Ca_Desi_LG06               | 37.225                                       |
| Ca_Desi_SNP2767 | [G/A]       | Ca_Desi_LG06               | 37.517                                       |
| Ca_Desi_SNP2768 | [A/G]       | Ca_Desi_LG06               | 37.574                                       |
| Ca_Desi_SNP2769 | [C/T]       | Ca_Desi_LG06               | 37.587                                       |
| Ca_Desi_SNP2770 | [C/G]       | Ca_Desi_LG06               | 37.703                                       |
| Ca_Desi_SNP2771 | [C/G]       | Ca_Desi_LG06               | 37.828                                       |
| Ca_Desi_SNP2772 | [A/T]       | Ca_Desi_LG06               | 37.987                                       |
| Ca_Desi_SNP2773 | [T/A]       | Ca_Desi_LG06               | 38.109                                       |
| Ca_Desi_SNP2774 | [G/A]       | Ca_Desi_LG06               | 38.353                                       |
| Ca_Desi_SNP2775 | [A/G]       | Ca_Desi_LG06               | 38.398                                       |
| Ca_Desi_SNP2776 | [C/A]       | Ca_Desi_LG06               | 38.707                                       |
| Ca_Desi_SNP2777 | [T/C]       | Ca_Desi_LG06               | 38.738                                       |
| Ca_Desi_SNP2778 | [T/C]       | Ca_Desi_LG06               | 39.011                                       |
| Ca_Desi_SNP2779 | [C/T]       | Ca_Desi_LG06               | 39.014                                       |
| Ca_Desi_SNP2780 | [G/A]       | Ca_Desi_LG06               | 39.117                                       |
| Ca_Desi_SNP2781 | [A/C]       | Ca_Desi_LG06               | 39.450                                       |
| Ca_Desi_SNP2782 | [G/A]       | Ca_Desi_LG06               | 39.676                                       |
| Ca_Desi_SNP2783 | [T/A]       | Ca_Desi_LG06               | 39.819                                       |
| Ca_Desi_SNP2784 | [T/G]       | Ca_Desi_LG06               | 40.017                                       |
| Ca_Desi_SNP2785 | [C/T]       | Ca_Desi_LG06               | 40.017                                       |
| Ca_Desi_SNP2786 | [C/T]       | Ca_Desi_LG06               | 40.360                                       |

| <b>SNP IDs</b>  | <b>SNPs</b> | <b>Linkage Group (LGs)</b> | <b>Genetic positions (cM) of mapped SNPs</b> |
|-----------------|-------------|----------------------------|----------------------------------------------|
| Ca_Desi_SNP2787 | [A/G]       | Ca_Desi_LG06               | 40.789                                       |
| Ca_Desi_SNP2788 | [G/T]       | Ca_Desi_LG06               | 40.881                                       |
| Ca_Desi_SNP2789 | [T/C]       | Ca_Desi_LG06               | 41.035                                       |
| Ca_Desi_SNP2790 | [A/G]       | Ca_Desi_LG06               | 41.075                                       |
| Ca_Desi_SNP2791 | [T/C]       | Ca_Desi_LG06               | 41.088                                       |
| Ca_Desi_SNP2792 | [T/A]       | Ca_Desi_LG06               | 41.264                                       |
| Ca_Desi_SNP2793 | [T/C]       | Ca_Desi_LG06               | 41.490                                       |
| Ca_Desi_SNP2794 | [C/A]       | Ca_Desi_LG06               | 41.551                                       |
| Ca_Desi_SNP2795 | [C/A]       | Ca_Desi_LG06               | 41.576                                       |
| Ca_Desi_SNP2796 | [C/T]       | Ca_Desi_LG06               | 41.817                                       |
| Ca_Desi_SNP2797 | [G/A]       | Ca_Desi_LG06               | 41.932                                       |
| Ca_Desi_SNP2798 | [A/G]       | Ca_Desi_LG06               | 42.006                                       |
| Ca_Desi_SNP2799 | [A/C]       | Ca_Desi_LG06               | 42.041                                       |
| Ca_Desi_SNP2800 | [G/A]       | Ca_Desi_LG06               | 42.168                                       |
| Ca_Desi_SNP2801 | [A/T]       | Ca_Desi_LG06               | 42.249                                       |
| Ca_Desi_SNP2802 | [C/T]       | Ca_Desi_LG06               | 42.387                                       |
| Ca_Desi_SNP2803 | [C/T]       | Ca_Desi_LG06               | 42.654                                       |
| Ca_Desi_SNP2804 | [G/T]       | Ca_Desi_LG06               | 42.714                                       |
| Ca_Desi_SNP2805 | [C/T]       | Ca_Desi_LG06               | 42.775                                       |
| Ca_Desi_SNP2806 | [T/G]       | Ca_Desi_LG06               | 42.820                                       |
| Ca_Desi_SNP2807 | [T/C]       | Ca_Desi_LG06               | 43.307                                       |
| Ca_Desi_SNP2808 | [A/C]       | Ca_Desi_LG06               | 43.414                                       |
| Ca_Desi_SNP2809 | [A/G]       | Ca_Desi_LG06               | 43.554                                       |
| Ca_Desi_SNP2810 | [T/C]       | Ca_Desi_LG06               | 43.588                                       |
| Ca_Desi_SNP2811 | [T/C]       | Ca_Desi_LG06               | 43.649                                       |
| Ca_Desi_SNP2812 | [T/G]       | Ca_Desi_LG06               | 43.679                                       |
| Ca_Desi_SNP2813 | [G/A]       | Ca_Desi_LG06               | 44.023                                       |
| Ca_Desi_SNP2814 | [A/G]       | Ca_Desi_LG06               | 44.114                                       |
| Ca_Desi_SNP2815 | [A/G]       | Ca_Desi_LG06               | 44.665                                       |
| Ca_Desi_SNP2816 | [T/C]       | Ca_Desi_LG06               | 44.774                                       |
| Ca_Desi_SNP2817 | [C/T]       | Ca_Desi_LG06               | 44.879                                       |

| <b>SNP IDs</b>  | <b>SNPs</b> | <b>Linkage Group (LGs)</b> | <b>Genetic positions (cM) of mapped SNPs</b> |
|-----------------|-------------|----------------------------|----------------------------------------------|
| Ca_Desi_SNP2818 | [A/C]       | Ca_Desi_LG06               | 44.881                                       |
| Ca_Desi_SNP2819 | [A/C]       | Ca_Desi_LG06               | 45.109                                       |
| Ca_Desi_SNP2820 | [T/C]       | Ca_Desi_LG06               | 45.170                                       |
| Ca_Desi_SNP2821 | [G/A]       | Ca_Desi_LG06               | 45.229                                       |
| Ca_Desi_SNP2822 | [T/C]       | Ca_Desi_LG06               | 45.231                                       |
| Ca_Desi_SNP2823 | [T/C]       | Ca_Desi_LG06               | 45.469                                       |
| Ca_Desi_SNP2824 | [G/T]       | Ca_Desi_LG06               | 45.490                                       |
| Ca_Desi_SNP2825 | [A/G]       | Ca_Desi_LG06               | 45.510                                       |
| Ca_Desi_SNP2826 | [C/T]       | Ca_Desi_LG06               | 45.532                                       |
| Ca_Desi_SNP2827 | [G/T]       | Ca_Desi_LG06               | 45.588                                       |
| Ca_Desi_SNP2828 | [T/A]       | Ca_Desi_LG06               | 45.683                                       |
| Ca_Desi_SNP2829 | [A/G]       | Ca_Desi_LG06               | 45.728                                       |
| Ca_Desi_SNP2830 | [T/C]       | Ca_Desi_LG06               | 45.752                                       |
| Ca_Desi_SNP2831 | [T/C]       | Ca_Desi_LG06               | 45.796                                       |
| Ca_Desi_SNP2832 | [T/C]       | Ca_Desi_LG06               | 45.857                                       |
| Ca_Desi_SNP2833 | [G/A]       | Ca_Desi_LG06               | 46.039                                       |
| Ca_Desi_SNP2834 | [G/A]       | Ca_Desi_LG06               | 46.146                                       |
| Ca_Desi_SNP2835 | [A/C]       | Ca_Desi_LG06               | 46.160                                       |
| Ca_Desi_SNP2836 | [A/G]       | Ca_Desi_LG06               | 46.577                                       |
| Ca_Desi_SNP2837 | [A/C]       | Ca_Desi_LG06               | 46.666                                       |
| Ca_Desi_SNP2838 | [C/T]       | Ca_Desi_LG06               | 46.711                                       |
| Ca_Desi_SNP2839 | [A/C]       | Ca_Desi_LG06               | 46.750                                       |
| Ca_Desi_SNP2840 | [A/T]       | Ca_Desi_LG06               | 46.780                                       |
| Ca_Desi_SNP2841 | [A/G]       | Ca_Desi_LG06               | 46.794                                       |
| Ca_Desi_SNP2842 | [T/A]       | Ca_Desi_LG06               | 46.807                                       |
| Ca_Desi_SNP2843 | [T/G]       | Ca_Desi_LG06               | 47.138                                       |
| Ca_Desi_SNP2844 | [G/A]       | Ca_Desi_LG06               | 47.667                                       |
| Ca_Desi_SNP2845 | [A/C]       | Ca_Desi_LG06               | 47.682                                       |
| Ca_Desi_SNP2846 | [A/T]       | Ca_Desi_LG06               | 47.695                                       |
| Ca_Desi_SNP2847 | [A/C]       | Ca_Desi_LG06               | 48.051                                       |
| Ca_Desi_SNP2848 | [A/G]       | Ca_Desi_LG06               | 48.306                                       |

| <b>SNP IDs</b>  | <b>SNPs</b> | <b>Linkage Group (LGs)</b> | <b>Genetic positions (cM) of mapped SNPs</b> |
|-----------------|-------------|----------------------------|----------------------------------------------|
| Ca_Desi_SNP2849 | [T/G]       | Ca_Desi_LG06               | 48.449                                       |
| Ca_Desi_SNP2850 | [T/C]       | Ca_Desi_LG06               | 48.876                                       |
| Ca_Desi_SNP2851 | [C/G]       | Ca_Desi_LG06               | 48.931                                       |
| Ca_Desi_SNP2852 | [A/C]       | Ca_Desi_LG06               | 49.123                                       |
| Ca_Desi_SNP2853 | [T/A]       | Ca_Desi_LG06               | 49.242                                       |
| Ca_Desi_SNP2854 | [G/A]       | Ca_Desi_LG06               | 49.284                                       |
| Ca_Desi_SNP2855 | [T/C]       | Ca_Desi_LG06               | 49.692                                       |
| Ca_Desi_SNP2856 | [G/T]       | Ca_Desi_LG06               | 49.796                                       |
| Ca_Desi_SNP2857 | [A/G]       | Ca_Desi_LG06               | 49.970                                       |
| Ca_Desi_SNP2858 | [G/C]       | Ca_Desi_LG06               | 50.111                                       |
| Ca_Desi_SNP2859 | [T/G]       | Ca_Desi_LG06               | 50.172                                       |
| Ca_Desi_SNP2860 | [C/T]       | Ca_Desi_LG06               | 50.698                                       |
| Ca_Desi_SNP2861 | [T/C]       | Ca_Desi_LG06               | 50.758                                       |
| Ca_Desi_SNP2862 | [T/C]       | Ca_Desi_LG06               | 50.820                                       |
| Ca_Desi_SNP2863 | [A/G]       | Ca_Desi_LG06               | 51.156                                       |
| Ca_Desi_SNP2864 | [A/C]       | Ca_Desi_LG06               | 51.292                                       |
| Ca_Desi_SNP2865 | [T/G]       | Ca_Desi_LG06               | 51.315                                       |
| Ca_Desi_SNP2866 | [A/G]       | Ca_Desi_LG06               | 51.944                                       |
| Ca_Desi_SNP2867 | [C/A]       | Ca_Desi_LG06               | 51.946                                       |
| Ca_Desi_SNP2868 | [A/C]       | Ca_Desi_LG06               | 51.965                                       |
| Ca_Desi_SNP2869 | [T/C]       | Ca_Desi_LG06               | 52.199                                       |
| Ca_Desi_SNP2870 | [T/C]       | Ca_Desi_LG06               | 52.641                                       |
| Ca_Desi_SNP2871 | [A/C]       | Ca_Desi_LG06               | 52.658                                       |
| Ca_Desi_SNP2872 | [G/A]       | Ca_Desi_LG06               | 52.909                                       |
| Ca_Desi_SNP2873 | [T/C]       | Ca_Desi_LG06               | 52.993                                       |
| Ca_Desi_SNP2874 | [T/C]       | Ca_Desi_LG06               | 53.028                                       |
| Ca_Desi_SNP2875 | [T/C]       | Ca_Desi_LG06               | 53.311                                       |
| Ca_Desi_SNP2876 | [C/T]       | Ca_Desi_LG06               | 53.400                                       |
| Ca_Desi_SNP2877 | [T/G]       | Ca_Desi_LG06               | 53.424                                       |
| Ca_Desi_SNP2878 | [G/A]       | Ca_Desi_LG06               | 53.451                                       |
| Ca_Desi_SNP2879 | [A/C]       | Ca_Desi_LG06               | 53.479                                       |

| <b>SNP IDs</b>  | <b>SNPs</b> | <b>Linkage Group (LGs)</b> | <b>Genetic positions (cM) of mapped SNPs</b> |
|-----------------|-------------|----------------------------|----------------------------------------------|
| Ca_Desi_SNP2880 | [A/C]       | Ca_Desi_LG06               | 53.846                                       |
| Ca_Desi_SNP2881 | [T/A]       | Ca_Desi_LG06               | 54.069                                       |
| Ca_Desi_SNP2882 | [A/G]       | Ca_Desi_LG06               | 54.073                                       |
| Ca_Desi_SNP2883 | [T/C]       | Ca_Desi_LG06               | 54.109                                       |
| Ca_Desi_SNP2884 | [G/T]       | Ca_Desi_LG06               | 54.164                                       |
| Ca_Desi_SNP2885 | [A/G]       | Ca_Desi_LG06               | 54.349                                       |
| Ca_Desi_SNP2886 | [A/T]       | Ca_Desi_LG06               | 54.569                                       |
| Ca_Desi_SNP2887 | [A/C]       | Ca_Desi_LG06               | 54.625                                       |
| Ca_Desi_SNP2888 | [G/A]       | Ca_Desi_LG06               | 54.676                                       |
| Ca_Desi_SNP2889 | [A/C]       | Ca_Desi_LG06               | 54.737                                       |
| Ca_Desi_SNP2890 | [A/G]       | Ca_Desi_LG06               | 54.800                                       |
| Ca_Desi_SNP2891 | [A/G]       | Ca_Desi_LG06               | 55.013                                       |
| Ca_Desi_SNP2892 | [T/C]       | Ca_Desi_LG06               | 55.028                                       |
| Ca_Desi_SNP2893 | [T/G]       | Ca_Desi_LG06               | 55.186                                       |
| Ca_Desi_SNP2894 | [A/C]       | Ca_Desi_LG06               | 55.424                                       |
| Ca_Desi_SNP2895 | [T/G]       | Ca_Desi_LG06               | 55.864                                       |
| Ca_Desi_SNP2896 | [T/C]       | Ca_Desi_LG06               | 55.946                                       |
| Ca_Desi_SNP2897 | [T/C]       | Ca_Desi_LG06               | 56.149                                       |
| Ca_Desi_SNP2898 | [C/T]       | Ca_Desi_LG06               | 56.494                                       |
| Ca_Desi_SNP2899 | [A/C]       | Ca_Desi_LG06               | 56.508                                       |
| Ca_Desi_SNP2900 | [A/G]       | Ca_Desi_LG06               | 56.539                                       |
| Ca_Desi_SNP2901 | [G/A]       | Ca_Desi_LG06               | 56.715                                       |
| Ca_Desi_SNP2902 | [G/T]       | Ca_Desi_LG06               | 56.733                                       |
| Ca_Desi_SNP2903 | [A/C]       | Ca_Desi_LG06               | 56.755                                       |
| Ca_Desi_SNP2904 | [A/C]       | Ca_Desi_LG06               | 57.250                                       |
| Ca_Desi_SNP2905 | [C/T]       | Ca_Desi_LG06               | 57.254                                       |
| Ca_Desi_SNP2906 | [A/C]       | Ca_Desi_LG06               | 57.325                                       |
| Ca_Desi_SNP2907 | [T/G]       | Ca_Desi_LG06               | 57.422                                       |
| Ca_Desi_SNP2908 | [C/A]       | Ca_Desi_LG06               | 57.425                                       |
| Ca_Desi_SNP2909 | [A/G]       | Ca_Desi_LG06               | 57.677                                       |
| Ca_Desi_SNP2910 | [T/A]       | Ca_Desi_LG06               | 57.730                                       |

| <b>SNP IDs</b>  | <b>SNPs</b> | <b>Linkage Group (LGs)</b> | <b>Genetic positions (cM) of mapped SNPs</b> |
|-----------------|-------------|----------------------------|----------------------------------------------|
| Ca_Desi_SNP2911 | [T/A]       | Ca_Desi_LG06               | 57.871                                       |
| Ca_Desi_SNP2912 | [G/T]       | Ca_Desi_LG06               | 57.966                                       |
| Ca_Desi_SNP2913 | [A/C]       | Ca_Desi_LG06               | 58.050                                       |
| Ca_Desi_SNP2914 | [T/C]       | Ca_Desi_LG06               | 58.157                                       |
| Ca_Desi_SNP2915 | [G/T]       | Ca_Desi_LG06               | 58.644                                       |
| Ca_Desi_SNP2916 | [A/C]       | Ca_Desi_LG06               | 58.744                                       |
| Ca_Desi_SNP2917 | [T/G]       | Ca_Desi_LG06               | 58.979                                       |
| Ca_Desi_SNP2918 | [A/G]       | Ca_Desi_LG06               | 59.178                                       |
| Ca_Desi_SNP2919 | [C/T]       | Ca_Desi_LG06               | 59.362                                       |
| Ca_Desi_SNP2920 | [C/T]       | Ca_Desi_LG06               | 59.512                                       |
| Ca_Desi_SNP2921 | [T/C]       | Ca_Desi_LG06               | 59.532                                       |
| Ca_Desi_SNP2922 | [C/T]       | Ca_Desi_LG06               | 59.836                                       |
| Ca_Desi_SNP2923 | [G/A]       | Ca_Desi_LG06               | 59.900                                       |
| Ca_Desi_SNP2924 | [T/C]       | Ca_Desi_LG06               | 60.127                                       |
| Ca_Desi_SNP2925 | [A/C]       | Ca_Desi_LG06               | 60.288                                       |
| Ca_Desi_SNP2926 | [A/T]       | Ca_Desi_LG06               | 60.352                                       |
| Ca_Desi_SNP2927 | [T/C]       | Ca_Desi_LG06               | 60.530                                       |
| Ca_Desi_SNP2928 | [G/A]       | Ca_Desi_LG06               | 60.885                                       |
| Ca_Desi_SNP2929 | [G/A]       | Ca_Desi_LG06               | 60.964                                       |
| Ca_Desi_SNP2930 | [C/A]       | Ca_Desi_LG06               | 61.967                                       |
| Ca_Desi_SNP2931 | [C/A]       | Ca_Desi_LG06               | 62.038                                       |
| Ca_Desi_SNP2932 | [T/C]       | Ca_Desi_LG06               | 62.256                                       |
| Ca_Desi_SNP2933 | [G/T]       | Ca_Desi_LG06               | 62.381                                       |
| Ca_Desi_SNP2934 | [C/A]       | Ca_Desi_LG06               | 62.480                                       |
| Ca_Desi_SNP2935 | [A/G]       | Ca_Desi_LG06               | 62.677                                       |
| Ca_Desi_SNP2936 | [A/T]       | Ca_Desi_LG06               | 62.735                                       |
| Ca_Desi_SNP2937 | [G/A]       | Ca_Desi_LG06               | 62.811                                       |
| Ca_Desi_SNP2938 | [G/A]       | Ca_Desi_LG06               | 62.986                                       |
| Ca_Desi_SNP2939 | [T/C]       | Ca_Desi_LG06               | 63.015                                       |
| Ca_Desi_SNP2940 | [A/G]       | Ca_Desi_LG06               | 63.173                                       |
| Ca_Desi_SNP2941 | [C/T]       | Ca_Desi_LG06               | 63.288                                       |



| <b>SNP IDs</b>  | <b>SNPs</b> | <b>Linkage Group (LGs)</b> | <b>Genetic positions (cM) of mapped SNPs</b> |
|-----------------|-------------|----------------------------|----------------------------------------------|
| Ca_Desi_SNP2942 | [T/C]       | Ca_Desi_LG06               | 63.290                                       |
| Ca_Desi_SNP2943 | [G/C]       | Ca_Desi_LG06               | 63.369                                       |
| Ca_Desi_SNP2944 | [T/C]       | Ca_Desi_LG06               | 63.533                                       |
| Ca_Desi_SNP2945 | [G/C]       | Ca_Desi_LG06               | 63.684                                       |
| Ca_Desi_SNP2946 | [T/A]       | Ca_Desi_LG06               | 63.888                                       |
| Ca_Desi_SNP2947 | [C/T]       | Ca_Desi_LG06               | 63.996                                       |
| Ca_Desi_SNP2948 | [A/G]       | Ca_Desi_LG06               | 64.307                                       |
| Ca_Desi_SNP2949 | [C/T]       | Ca_Desi_LG06               | 64.578                                       |
| Ca_Desi_SNP2950 | [T/G]       | Ca_Desi_LG06               | 64.725                                       |
| Ca_Desi_SNP2951 | [G/A]       | Ca_Desi_LG06               | 64.900                                       |
| Ca_Desi_SNP2952 | [C/G]       | Ca_Desi_LG06               | 65.074                                       |
| Ca_Desi_SNP2953 | [G/A]       | Ca_Desi_LG06               | 65.144                                       |
| Ca_Desi_SNP2954 | [T/C]       | Ca_Desi_LG06               | 65.806                                       |
| Ca_Desi_SNP2955 | [A/C]       | Ca_Desi_LG06               | 65.837                                       |
| Ca_Desi_SNP2956 | [A/G]       | Ca_Desi_LG06               | 66.043                                       |
| Ca_Desi_SNP2957 | [A/G]       | Ca_Desi_LG06               | 66.046                                       |
| Ca_Desi_SNP2958 | [T/C]       | Ca_Desi_LG06               | 66.092                                       |
| Ca_Desi_SNP2959 | [T/G]       | Ca_Desi_LG06               | 66.369                                       |
| Ca_Desi_SNP2960 | [T/G]       | Ca_Desi_LG06               | 66.699                                       |
| Ca_Desi_SNP2961 | [A/C]       | Ca_Desi_LG06               | 66.754                                       |
| Ca_Desi_SNP2962 | [T/C]       | Ca_Desi_LG06               | 67.060                                       |
| Ca_Desi_SNP2963 | [C/T]       | Ca_Desi_LG06               | 67.196                                       |
| Ca_Desi_SNP2964 | [G/T]       | Ca_Desi_LG06               | 67.790                                       |
| Ca_Desi_SNP2965 | [A/G]       | Ca_Desi_LG06               | 67.997                                       |
| Ca_Desi_SNP2966 | [C/T]       | Ca_Desi_LG06               | 68.102                                       |
| Ca_Desi_SNP2967 | [A/C]       | Ca_Desi_LG06               | 68.282                                       |
| Ca_Desi_SNP2968 | [A/G]       | Ca_Desi_LG06               | 68.471                                       |
| Ca_Desi_SNP2969 | [T/G]       | Ca_Desi_LG06               | 68.560                                       |
| Ca_Desi_SNP2970 | [G/T]       | Ca_Desi_LG06               | 68.564                                       |
| Ca_Desi_SNP2971 | [T/G]       | Ca_Desi_LG06               | 69.062                                       |
| Ca_Desi_SNP2972 | [C/G]       | Ca_Desi_LG06               | 69.223                                       |

| <b>SNP IDs</b>   | <b>SNPs</b> | <b>Linkage Group (LGs)</b> | <b>Genetic positions (cM) of mapped SNPs</b> |
|------------------|-------------|----------------------------|----------------------------------------------|
| Ca_Desig_SNP2973 | [G/A]       | Ca_Desig_LG06              | 69.407                                       |
| Ca_Desig_SNP2974 | [T/C]       | Ca_Desig_LG06              | 69.439                                       |
| Ca_Desig_SNP2975 | [T/C]       | Ca_Desig_LG06              | 69.735                                       |
| Ca_Desig_SNP2976 | [G/A]       | Ca_Desig_LG06              | 69.785                                       |
| Ca_Desig_SNP2977 | [T/C]       | Ca_Desig_LG06              | 70.041                                       |
| Ca_Desig_SNP2978 | [T/C]       | Ca_Desig_LG06              | 70.071                                       |
| Ca_Desig_SNP2979 | [A/G]       | Ca_Desig_LG06              | 70.322                                       |
| Ca_Desig_SNP2980 | [T/C]       | Ca_Desig_LG06              | 70.536                                       |
| Ca_Desig_SNP2981 | [G/C]       | Ca_Desig_LG06              | 71.494                                       |
| Ca_Desig_SNP2982 | [A/T]       | Ca_Desig_LG06              | 72.057                                       |
| Ca_Desig_SNP2983 | [T/G]       | Ca_Desig_LG06              | 72.216                                       |
| Ca_Desig_SNP2984 | [T/C]       | Ca_Desig_LG06              | 72.274                                       |
| Ca_Desig_SNP2985 | [A/G]       | Ca_Desig_LG06              | 73.465                                       |
| Ca_Desig_SNP2986 | [A/G]       | Ca_Desig_LG06              | 73.544                                       |
| Ca_Desig_SNP2987 | [T/C]       | Ca_Desig_LG06              | 73.577                                       |
| Ca_Desig_SNP2988 | [T/G]       | Ca_Desig_LG06              | 73.994                                       |
| Ca_Desig_SNP2989 | [T/C]       | Ca_Desig_LG06              | 75.127                                       |
| Ca_Desig_SNP2990 | [G/A]       | Ca_Desig_LG06              | 75.986                                       |
| Ca_Desig_SNP2991 | [T/C]       | Ca_Desig_LG06              | 76.795                                       |
| Ca_Desig_SNP2992 | [A/G]       | Ca_Desig_LG06              | 76.952                                       |
| Ca_Desig_SNP2993 | [A/T]       | Ca_Desig_LG06              | 77.157                                       |
| Ca_Desig_SNP2994 | [C/T]       | Ca_Desig_LG06              | 77.497                                       |
| Ca_Desig_SNP2995 | [C/A]       | Ca_Desig_LG06              | 78.929                                       |
| Ca_Desig_SNP2996 | [T/A]       | Ca_Desig_LG06              | 79.362                                       |
| Ca_Desig_SNP2997 | [T/C]       | Ca_Desig_LG06              | 79.404                                       |
| Ca_Desig_SNP2998 | [C/T]       | Ca_Desig_LG06              | 82.775                                       |
| Ca_Desig_SNP2999 | [G/T]       | Ca_Desig_LG06              | 83.224                                       |
| Ca_Desig_SNP3000 | [G/A]       | Ca_Desig_LG06              | 84.404                                       |
| Ca_Desig_SNP3001 | [A/G]       | Ca_Desig_LG06              | 84.604                                       |
| Ca_Desig_SNP3002 | [A/G]       | Ca_Desig_LG06              | 85.048                                       |
| Ca_Desig_SNP3003 | [T/C]       | Ca_Desig_LG06              | 85.182                                       |

| <b>SNP IDs</b>  | <b>SNPs</b> | <b>Linkage Group (LGs)</b> | <b>Genetic positions (cM) of mapped SNPs</b> |
|-----------------|-------------|----------------------------|----------------------------------------------|
| Ca_Desi_SNP3004 | [A/G]       | Ca_Desi_LG06               | 86.201                                       |
| Ca_Desi_SNP3005 | [G/T]       | Ca_Desi_LG06               | 87.601                                       |
| Ca_Desi_SNP3006 | [T/G]       | Ca_Desi_LG07               | 0.000                                        |
| Ca_Desi_SNP3007 | [T/C]       | Ca_Desi_LG07               | 1.014                                        |
| Ca_Desi_SNP3008 | [T/C]       | Ca_Desi_LG07               | 1.550                                        |
| Ca_Desi_SNP3009 | [T/C]       | Ca_Desi_LG07               | 1.591                                        |
| Ca_Desi_SNP3010 | [A/C]       | Ca_Desi_LG07               | 1.652                                        |
| Ca_Desi_SNP3011 | [A/C]       | Ca_Desi_LG07               | 1.680                                        |
| Ca_Desi_SNP3012 | [T/C]       | Ca_Desi_LG07               | 2.858                                        |
| Ca_Desi_SNP3013 | [A/C]       | Ca_Desi_LG07               | 3.387                                        |
| Ca_Desi_SNP3014 | [C/A]       | Ca_Desi_LG07               | 3.414                                        |
| Ca_Desi_SNP3015 | [A/G]       | Ca_Desi_LG07               | 4.643                                        |
| Ca_Desi_SNP3016 | [T/G]       | Ca_Desi_LG07               | 4.961                                        |
| Ca_Desi_SNP3017 | [T/C]       | Ca_Desi_LG07               | 5.342                                        |
| Ca_Desi_SNP3018 | [C/A]       | Ca_Desi_LG07               | 6.094                                        |
| Ca_Desi_SNP3019 | [A/G]       | Ca_Desi_LG07               | 7.157                                        |
| Ca_Desi_SNP3020 | [A/C]       | Ca_Desi_LG07               | 7.166                                        |
| Ca_Desi_SNP3021 | [A/G]       | Ca_Desi_LG07               | 7.278                                        |
| Ca_Desi_SNP3022 | [C/A]       | Ca_Desi_LG07               | 7.289                                        |
| Ca_Desi_SNP3023 | [A/G]       | Ca_Desi_LG07               | 7.403                                        |
| Ca_Desi_SNP3024 | [T/G]       | Ca_Desi_LG07               | 7.453                                        |
| Ca_Desi_SNP3025 | [A/C]       | Ca_Desi_LG07               | 7.687                                        |
| Ca_Desi_SNP3026 | [T/C]       | Ca_Desi_LG07               | 7.701                                        |
| Ca_Desi_SNP3027 | [A/G]       | Ca_Desi_LG07               | 7.745                                        |
| Ca_Desi_SNP3028 | [T/C]       | Ca_Desi_LG07               | 8.442                                        |
| Ca_Desi_SNP3029 | [A/C]       | Ca_Desi_LG07               | 8.444                                        |
| Ca_Desi_SNP3030 | [C/A]       | Ca_Desi_LG07               | 8.790                                        |
| Ca_Desi_SNP3031 | [T/C]       | Ca_Desi_LG07               | 8.873                                        |
| Ca_Desi_SNP3032 | [G/T]       | Ca_Desi_LG07               | 9.351                                        |
| Ca_Desi_SNP3033 | [C/G]       | Ca_Desi_LG07               | 9.932                                        |
| Ca_Desi_SNP3034 | [T/C]       | Ca_Desi_LG07               | 10.199                                       |

| <b>SNP IDs</b>  | <b>SNPs</b> | <b>Linkage Group (LGs)</b> | <b>Genetic positions (cM) of mapped SNPs</b> |
|-----------------|-------------|----------------------------|----------------------------------------------|
| Ca_Desi_SNP3035 | [C/T]       | Ca_Desi_LG07               | 10.304                                       |
| Ca_Desi_SNP3036 | [A/G]       | Ca_Desi_LG07               | 10.407                                       |
| Ca_Desi_SNP3037 | [T/C]       | Ca_Desi_LG07               | 10.424                                       |
| Ca_Desi_SNP3038 | [T/G]       | Ca_Desi_LG07               | 10.759                                       |
| Ca_Desi_SNP3039 | [A/C]       | Ca_Desi_LG07               | 10.942                                       |
| Ca_Desi_SNP3040 | [C/T]       | Ca_Desi_LG07               | 11.044                                       |
| Ca_Desi_SNP3041 | [C/A]       | Ca_Desi_LG07               | 11.363                                       |
| Ca_Desi_SNP3042 | [G/A]       | Ca_Desi_LG07               | 11.569                                       |
| Ca_Desi_SNP3043 | [T/C]       | Ca_Desi_LG07               | 12.006                                       |
| Ca_Desi_SNP3044 | [A/T]       | Ca_Desi_LG07               | 12.154                                       |
| Ca_Desi_SNP3045 | [A/G]       | Ca_Desi_LG07               | 12.285                                       |
| Ca_Desi_SNP3046 | [T/C]       | Ca_Desi_LG07               | 12.489                                       |
| Ca_Desi_SNP3047 | [G/A]       | Ca_Desi_LG07               | 13.236                                       |
| Ca_Desi_SNP3048 | [A/G]       | Ca_Desi_LG07               | 13.466                                       |
| Ca_Desi_SNP3049 | [A/G]       | Ca_Desi_LG07               | 13.613                                       |
| Ca_Desi_SNP3050 | [A/C]       | Ca_Desi_LG07               | 14.150                                       |
| Ca_Desi_SNP3051 | [A/G]       | Ca_Desi_LG07               | 14.259                                       |
| Ca_Desi_SNP3052 | [T/C]       | Ca_Desi_LG07               | 14.424                                       |
| Ca_Desi_SNP3053 | [A/C]       | Ca_Desi_LG07               | 14.724                                       |
| Ca_Desi_SNP3054 | [T/G]       | Ca_Desi_LG07               | 14.836                                       |
| Ca_Desi_SNP3055 | [T/C]       | Ca_Desi_LG07               | 15.299                                       |
| Ca_Desi_SNP3056 | [A/G]       | Ca_Desi_LG07               | 15.469                                       |
| Ca_Desi_SNP3057 | [A/C]       | Ca_Desi_LG07               | 15.869                                       |
| Ca_Desi_SNP3058 | [G/A]       | Ca_Desi_LG07               | 16.227                                       |
| Ca_Desi_SNP3059 | [A/G]       | Ca_Desi_LG07               | 16.242                                       |
| Ca_Desi_SNP3060 | [A/C]       | Ca_Desi_LG07               | 16.477                                       |
| Ca_Desi_SNP3061 | [A/G]       | Ca_Desi_LG07               | 16.485                                       |
| Ca_Desi_SNP3062 | [G/T]       | Ca_Desi_LG07               | 16.832                                       |
| Ca_Desi_SNP3063 | [T/C]       | Ca_Desi_LG07               | 16.852                                       |
| Ca_Desi_SNP3064 | [A/G]       | Ca_Desi_LG07               | 17.560                                       |
| Ca_Desi_SNP3065 | [T/G]       | Ca_Desi_LG07               | 17.648                                       |

| <b>SNP IDs</b>  | <b>SNPs</b> | <b>Linkage Group (LGs)</b> | <b>Genetic positions (cM) of mapped SNPs</b> |
|-----------------|-------------|----------------------------|----------------------------------------------|
| Ca_Desi_SNP3066 | [T/A]       | Ca_Desi_LG07               | 17.765                                       |
| Ca_Desi_SNP3067 | [T/C]       | Ca_Desi_LG07               | 17.857                                       |
| Ca_Desi_SNP3068 | [T/C]       | Ca_Desi_LG07               | 18.042                                       |
| Ca_Desi_SNP3069 | [C/A]       | Ca_Desi_LG07               | 18.335                                       |
| Ca_Desi_SNP3070 | [T/C]       | Ca_Desi_LG07               | 18.727                                       |
| Ca_Desi_SNP3071 | [A/C]       | Ca_Desi_LG07               | 19.035                                       |
| Ca_Desi_SNP3072 | [A/G]       | Ca_Desi_LG07               | 20.681                                       |
| Ca_Desi_SNP3073 | [T/C]       | Ca_Desi_LG07               | 20.687                                       |
| Ca_Desi_SNP3074 | [T/A]       | Ca_Desi_LG07               | 20.890                                       |
| Ca_Desi_SNP3075 | [T/C]       | Ca_Desi_LG07               | 21.296                                       |
| Ca_Desi_SNP3076 | [T/C]       | Ca_Desi_LG07               | 21.648                                       |
| Ca_Desi_SNP3077 | [C/A]       | Ca_Desi_LG07               | 22.457                                       |
| Ca_Desi_SNP3078 | [T/C]       | Ca_Desi_LG07               | 22.653                                       |
| Ca_Desi_SNP3079 | [T/C]       | Ca_Desi_LG07               | 22.774                                       |
| Ca_Desi_SNP3080 | [A/G]       | Ca_Desi_LG07               | 22.866                                       |
| Ca_Desi_SNP3081 | [G/C]       | Ca_Desi_LG07               | 23.190                                       |
| Ca_Desi_SNP3082 | [T/C]       | Ca_Desi_LG07               | 23.508                                       |
| Ca_Desi_SNP3083 | [C/A]       | Ca_Desi_LG07               | 23.542                                       |
| Ca_Desi_SNP3084 | [A/G]       | Ca_Desi_LG07               | 23.584                                       |
| Ca_Desi_SNP3085 | [A/C]       | Ca_Desi_LG07               | 24.208                                       |
| Ca_Desi_SNP3086 | [A/G]       | Ca_Desi_LG07               | 24.422                                       |
| Ca_Desi_SNP3087 | [T/C]       | Ca_Desi_LG07               | 24.428                                       |
| Ca_Desi_SNP3088 | [T/G]       | Ca_Desi_LG07               | 24.584                                       |
| Ca_Desi_SNP3089 | [T/C]       | Ca_Desi_LG07               | 24.832                                       |
| Ca_Desi_SNP3090 | [C/A]       | Ca_Desi_LG07               | 24.837                                       |
| Ca_Desi_SNP3091 | [C/A]       | Ca_Desi_LG07               | 24.848                                       |
| Ca_Desi_SNP3092 | [T/C]       | Ca_Desi_LG07               | 24.926                                       |
| Ca_Desi_SNP3093 | [C/T]       | Ca_Desi_LG07               | 25.333                                       |
| Ca_Desi_SNP3094 | [C/T]       | Ca_Desi_LG07               | 25.472                                       |
| Ca_Desi_SNP3095 | [C/G]       | Ca_Desi_LG07               | 26.078                                       |
| Ca_Desi_SNP3096 | [T/G]       | Ca_Desi_LG07               | 26.279                                       |

| <b>SNP IDs</b>  | <b>SNPs</b> | <b>Linkage Group (LGs)</b> | <b>Genetic positions (cM) of mapped SNPs</b> |
|-----------------|-------------|----------------------------|----------------------------------------------|
| Ca_Desi_SNP3097 | [C/A]       | Ca_Desi_LG07               | 26.369                                       |
| Ca_Desi_SNP3098 | [G/C]       | Ca_Desi_LG07               | 26.633                                       |
| Ca_Desi_SNP3099 | [A/G]       | Ca_Desi_LG07               | 26.835                                       |
| Ca_Desi_SNP3100 | [A/G]       | Ca_Desi_LG07               | 26.879                                       |
| Ca_Desi_SNP3101 | [T/C]       | Ca_Desi_LG07               | 26.885                                       |
| Ca_Desi_SNP3102 | [A/G]       | Ca_Desi_LG07               | 27.167                                       |
| Ca_Desi_SNP3103 | [G/A]       | Ca_Desi_LG07               | 27.212                                       |
| Ca_Desi_SNP3104 | [T/C]       | Ca_Desi_LG07               | 27.261                                       |
| Ca_Desi_SNP3105 | [G/A]       | Ca_Desi_LG07               | 27.284                                       |
| Ca_Desi_SNP3106 | [A/C]       | Ca_Desi_LG07               | 27.457                                       |
| Ca_Desi_SNP3107 | [T/G]       | Ca_Desi_LG07               | 27.490                                       |
| Ca_Desi_SNP3108 | [G/C]       | Ca_Desi_LG07               | 27.560                                       |
| Ca_Desi_SNP3109 | [A/G]       | Ca_Desi_LG07               | 27.689                                       |
| Ca_Desi_SNP3110 | [C/T]       | Ca_Desi_LG07               | 27.751                                       |
| Ca_Desi_SNP3111 | [G/A]       | Ca_Desi_LG07               | 27.884                                       |
| Ca_Desi_SNP3112 | [C/T]       | Ca_Desi_LG07               | 28.137                                       |
| Ca_Desi_SNP3113 | [T/G]       | Ca_Desi_LG07               | 28.215                                       |
| Ca_Desi_SNP3114 | [C/T]       | Ca_Desi_LG07               | 28.398                                       |
| Ca_Desi_SNP3115 | [A/C]       | Ca_Desi_LG07               | 28.537                                       |
| Ca_Desi_SNP3116 | [A/C]       | Ca_Desi_LG07               | 28.627                                       |
| Ca_Desi_SNP3117 | [A/C]       | Ca_Desi_LG07               | 28.724                                       |
| Ca_Desi_SNP3118 | [T/G]       | Ca_Desi_LG07               | 28.746                                       |
| Ca_Desi_SNP3119 | [G/T]       | Ca_Desi_LG07               | 28.888                                       |
| Ca_Desi_SNP3120 | [C/T]       | Ca_Desi_LG07               | 29.134                                       |
| Ca_Desi_SNP3121 | [A/G]       | Ca_Desi_LG07               | 29.182                                       |
| Ca_Desi_SNP3122 | [A/C]       | Ca_Desi_LG07               | 29.504                                       |
| Ca_Desi_SNP3123 | [A/G]       | Ca_Desi_LG07               | 29.561                                       |
| Ca_Desi_SNP3124 | [A/G]       | Ca_Desi_LG07               | 29.689                                       |
| Ca_Desi_SNP3125 | [T/C]       | Ca_Desi_LG07               | 29.703                                       |
| Ca_Desi_SNP3126 | [T/C]       | Ca_Desi_LG07               | 29.822                                       |
| Ca_Desi_SNP3127 | [C/A]       | Ca_Desi_LG07               | 29.898                                       |

| <b>SNP IDs</b>  | <b>SNPs</b> | <b>Linkage Group (LGs)</b> | <b>Genetic positions (cM) of mapped SNPs</b> |
|-----------------|-------------|----------------------------|----------------------------------------------|
| Ca_Desi_SNP3128 | [G/A]       | Ca_Desi_LG07               | 30.307                                       |
| Ca_Desi_SNP3129 | [A/C]       | Ca_Desi_LG07               | 30.550                                       |
| Ca_Desi_SNP3130 | [C/T]       | Ca_Desi_LG07               | 30.789                                       |
| Ca_Desi_SNP3131 | [T/G]       | Ca_Desi_LG07               | 30.951                                       |
| Ca_Desi_SNP3132 | [T/C]       | Ca_Desi_LG07               | 31.012                                       |
| Ca_Desi_SNP3133 | [T/G]       | Ca_Desi_LG07               | 31.029                                       |
| Ca_Desi_SNP3134 | [T/G]       | Ca_Desi_LG07               | 31.040                                       |
| Ca_Desi_SNP3135 | [A/T]       | Ca_Desi_LG07               | 31.195                                       |
| Ca_Desi_SNP3136 | [C/T]       | Ca_Desi_LG07               | 31.196                                       |
| Ca_Desi_SNP3137 | [T/C]       | Ca_Desi_LG07               | 31.249                                       |
| Ca_Desi_SNP3138 | [T/C]       | Ca_Desi_LG07               | 31.396                                       |
| Ca_Desi_SNP3139 | [G/A]       | Ca_Desi_LG07               | 31.429                                       |
| Ca_Desi_SNP3140 | [A/G]       | Ca_Desi_LG07               | 31.520                                       |
| Ca_Desi_SNP3141 | [C/G]       | Ca_Desi_LG07               | 31.609                                       |
| Ca_Desi_SNP3142 | [T/G]       | Ca_Desi_LG07               | 31.838                                       |
| Ca_Desi_SNP3143 | [G/A]       | Ca_Desi_LG07               | 31.919                                       |
| Ca_Desi_SNP3144 | [T/C]       | Ca_Desi_LG07               | 32.292                                       |
| Ca_Desi_SNP3145 | [G/T]       | Ca_Desi_LG07               | 32.329                                       |
| Ca_Desi_SNP3146 | [G/A]       | Ca_Desi_LG07               | 32.371                                       |
| Ca_Desi_SNP3147 | [A/T]       | Ca_Desi_LG07               | 32.502                                       |
| Ca_Desi_SNP3148 | [T/C]       | Ca_Desi_LG07               | 32.506                                       |
| Ca_Desi_SNP3149 | [T/C]       | Ca_Desi_LG07               | 32.586                                       |
| Ca_Desi_SNP3150 | [A/G]       | Ca_Desi_LG07               | 32.997                                       |
| Ca_Desi_SNP3151 | [C/G]       | Ca_Desi_LG07               | 33.246                                       |
| Ca_Desi_SNP3152 | [A/G]       | Ca_Desi_LG07               | 33.316                                       |
| Ca_Desi_SNP3153 | [G/A]       | Ca_Desi_LG07               | 33.544                                       |
| Ca_Desi_SNP3154 | [G/A]       | Ca_Desi_LG07               | 33.718                                       |
| Ca_Desi_SNP3155 | [T/C]       | Ca_Desi_LG07               | 33.835                                       |
| Ca_Desi_SNP3156 | [A/C]       | Ca_Desi_LG07               | 34.103                                       |
| Ca_Desi_SNP3157 | [T/A]       | Ca_Desi_LG07               | 34.458                                       |
| Ca_Desi_SNP3158 | [C/T]       | Ca_Desi_LG07               | 34.818                                       |

| <b>SNP IDs</b>  | <b>SNPs</b> | <b>Linkage Group (LGs)</b> | <b>Genetic positions (cM) of mapped SNPs</b> |
|-----------------|-------------|----------------------------|----------------------------------------------|
| Ca_Desi_SNP3159 | [T/C]       | Ca_Desi_LG07               | 34.858                                       |
| Ca_Desi_SNP3160 | [A/G]       | Ca_Desi_LG07               | 35.043                                       |
| Ca_Desi_SNP3161 | [A/G]       | Ca_Desi_LG07               | 35.227                                       |
| Ca_Desi_SNP3162 | [C/T]       | Ca_Desi_LG07               | 35.292                                       |
| Ca_Desi_SNP3163 | [A/T]       | Ca_Desi_LG07               | 35.298                                       |
| Ca_Desi_SNP3164 | [A/G]       | Ca_Desi_LG07               | 35.433                                       |
| Ca_Desi_SNP3165 | [T/C]       | Ca_Desi_LG07               | 35.434                                       |
| Ca_Desi_SNP3166 | [A/T]       | Ca_Desi_LG07               | 35.496                                       |
| Ca_Desi_SNP3167 | [T/C]       | Ca_Desi_LG07               | 35.587                                       |
| Ca_Desi_SNP3168 | [G/A]       | Ca_Desi_LG07               | 35.875                                       |
| Ca_Desi_SNP3169 | [A/C]       | Ca_Desi_LG07               | 35.916                                       |
| Ca_Desi_SNP3170 | [T/G]       | Ca_Desi_LG07               | 36.337                                       |
| Ca_Desi_SNP3171 | [C/T]       | Ca_Desi_LG07               | 36.383                                       |
| Ca_Desi_SNP3172 | [T/G]       | Ca_Desi_LG07               | 36.436                                       |
| Ca_Desi_SNP3173 | [A/G]       | Ca_Desi_LG07               | 36.457                                       |
| Ca_Desi_SNP3174 | [C/A]       | Ca_Desi_LG07               | 36.459                                       |
| Ca_Desi_SNP3175 | [G/C]       | Ca_Desi_LG07               | 36.511                                       |
| Ca_Desi_SNP3176 | [A/G]       | Ca_Desi_LG07               | 36.530                                       |
| Ca_Desi_SNP3177 | [T/A]       | Ca_Desi_LG07               | 36.621                                       |
| Ca_Desi_SNP3178 | [C/T]       | Ca_Desi_LG07               | 36.707                                       |
| Ca_Desi_SNP3179 | [T/G]       | Ca_Desi_LG07               | 36.909                                       |
| Ca_Desi_SNP3180 | [C/T]       | Ca_Desi_LG07               | 37.333                                       |
| Ca_Desi_SNP3181 | [G/T]       | Ca_Desi_LG07               | 37.671                                       |
| Ca_Desi_SNP3182 | [T/G]       | Ca_Desi_LG07               | 37.711                                       |
| Ca_Desi_SNP3183 | [G/T]       | Ca_Desi_LG07               | 37.785                                       |
| Ca_Desi_SNP3184 | [A/G]       | Ca_Desi_LG07               | 38.125                                       |
| Ca_Desi_SNP3185 | [G/T]       | Ca_Desi_LG07               | 38.563                                       |
| Ca_Desi_SNP3186 | [G/A]       | Ca_Desi_LG07               | 38.607                                       |
| Ca_Desi_SNP3187 | [C/T]       | Ca_Desi_LG07               | 38.618                                       |
| Ca_Desi_SNP3188 | [A/C]       | Ca_Desi_LG07               | 39.289                                       |
| Ca_Desi_SNP3189 | [T/G]       | Ca_Desi_LG07               | 39.329                                       |



| <b>SNP IDs</b>  | <b>SNPs</b> | <b>Linkage Group (LGs)</b> | <b>Genetic positions (cM) of mapped SNPs</b> |
|-----------------|-------------|----------------------------|----------------------------------------------|
| Ca_Desi_SNP3190 | [C/T]       | Ca_Desi_LG07               | 39.470                                       |
| Ca_Desi_SNP3191 | [A/T]       | Ca_Desi_LG07               | 39.649                                       |
| Ca_Desi_SNP3192 | [G/A]       | Ca_Desi_LG07               | 39.672                                       |
| Ca_Desi_SNP3193 | [C/A]       | Ca_Desi_LG07               | 39.735                                       |
| Ca_Desi_SNP3194 | [T/G]       | Ca_Desi_LG07               | 40.143                                       |
| Ca_Desi_SNP3195 | [A/G]       | Ca_Desi_LG07               | 40.432                                       |
| Ca_Desi_SNP3196 | [C/G]       | Ca_Desi_LG07               | 40.563                                       |
| Ca_Desi_SNP3197 | [G/A]       | Ca_Desi_LG07               | 40.602                                       |
| Ca_Desi_SNP3198 | [G/A]       | Ca_Desi_LG07               | 40.724                                       |
| Ca_Desi_SNP3199 | [C/T]       | Ca_Desi_LG07               | 41.434                                       |
| Ca_Desi_SNP3200 | [C/T]       | Ca_Desi_LG07               | 41.561                                       |
| Ca_Desi_SNP3201 | [C/T]       | Ca_Desi_LG07               | 41.623                                       |
| Ca_Desi_SNP3202 | [C/T]       | Ca_Desi_LG07               | 41.854                                       |
| Ca_Desi_SNP3203 | [A/G]       | Ca_Desi_LG07               | 41.898                                       |
| Ca_Desi_SNP3204 | [G/T]       | Ca_Desi_LG07               | 41.977                                       |
| Ca_Desi_SNP3205 | [A/T]       | Ca_Desi_LG07               | 41.998                                       |
| Ca_Desi_SNP3206 | [A/C]       | Ca_Desi_LG07               | 41.999                                       |
| Ca_Desi_SNP3207 | [T/C]       | Ca_Desi_LG07               | 42.100                                       |
| Ca_Desi_SNP3208 | [T/G]       | Ca_Desi_LG07               | 42.522                                       |
| Ca_Desi_SNP3209 | [G/T]       | Ca_Desi_LG07               | 42.561                                       |
| Ca_Desi_SNP3210 | [T/G]       | Ca_Desi_LG07               | 42.606                                       |
| Ca_Desi_SNP3211 | [A/G]       | Ca_Desi_LG07               | 42.800                                       |
| Ca_Desi_SNP3212 | [T/G]       | Ca_Desi_LG07               | 42.862                                       |
| Ca_Desi_SNP3213 | [G/A]       | Ca_Desi_LG07               | 42.897                                       |
| Ca_Desi_SNP3214 | [A/G]       | Ca_Desi_LG07               | 42.933                                       |
| Ca_Desi_SNP3215 | [A/T]       | Ca_Desi_LG07               | 43.070                                       |
| Ca_Desi_SNP3216 | [T/C]       | Ca_Desi_LG07               | 43.071                                       |
| Ca_Desi_SNP3217 | [C/G]       | Ca_Desi_LG07               | 43.110                                       |
| Ca_Desi_SNP3218 | [G/A]       | Ca_Desi_LG07               | 43.228                                       |
| Ca_Desi_SNP3219 | [A/G]       | Ca_Desi_LG07               | 43.405                                       |
| Ca_Desi_SNP3220 | [T/C]       | Ca_Desi_LG07               | 43.529                                       |

| <b>SNP IDs</b>  | <b>SNPs</b> | <b>Linkage Group (LGs)</b> | <b>Genetic positions (cM) of mapped SNPs</b> |
|-----------------|-------------|----------------------------|----------------------------------------------|
| Ca_Desi_SNP3221 | [T/C]       | Ca_Desi_LG07               | 43.654                                       |
| Ca_Desi_SNP3222 | [A/G]       | Ca_Desi_LG07               | 43.825                                       |
| Ca_Desi_SNP3223 | [A/G]       | Ca_Desi_LG07               | 43.830                                       |
| Ca_Desi_SNP3224 | [T/C]       | Ca_Desi_LG07               | 43.866                                       |
| Ca_Desi_SNP3225 | [C/A]       | Ca_Desi_LG07               | 44.427                                       |
| Ca_Desi_SNP3226 | [A/C]       | Ca_Desi_LG07               | 44.534                                       |
| Ca_Desi_SNP3227 | [T/C]       | Ca_Desi_LG07               | 44.578                                       |
| Ca_Desi_SNP3228 | [C/T]       | Ca_Desi_LG07               | 44.735                                       |
| Ca_Desi_SNP3229 | [G/A]       | Ca_Desi_LG07               | 44.790                                       |
| Ca_Desi_SNP3230 | [G/A]       | Ca_Desi_LG07               | 44.792                                       |
| Ca_Desi_SNP3231 | [T/C]       | Ca_Desi_LG07               | 45.036                                       |
| Ca_Desi_SNP3232 | [A/G]       | Ca_Desi_LG07               | 45.282                                       |
| Ca_Desi_SNP3233 | [A/G]       | Ca_Desi_LG07               | 45.385                                       |
| Ca_Desi_SNP3234 | [T/C]       | Ca_Desi_LG07               | 45.604                                       |
| Ca_Desi_SNP3235 | [C/G]       | Ca_Desi_LG07               | 45.724                                       |
| Ca_Desi_SNP3236 | [C/A]       | Ca_Desi_LG07               | 45.791                                       |
| Ca_Desi_SNP3237 | [T/C]       | Ca_Desi_LG07               | 45.938                                       |
| Ca_Desi_SNP3238 | [T/C]       | Ca_Desi_LG07               | 47.058                                       |
| Ca_Desi_SNP3239 | [A/G]       | Ca_Desi_LG07               | 47.232                                       |
| Ca_Desi_SNP3240 | [C/A]       | Ca_Desi_LG07               | 47.290                                       |
| Ca_Desi_SNP3241 | [A/C]       | Ca_Desi_LG07               | 47.507                                       |
| Ca_Desi_SNP3242 | [A/G]       | Ca_Desi_LG07               | 48.289                                       |
| Ca_Desi_SNP3243 | [G/A]       | Ca_Desi_LG07               | 48.751                                       |
| Ca_Desi_SNP3244 | [C/A]       | Ca_Desi_LG07               | 48.954                                       |
| Ca_Desi_SNP3245 | [T/C]       | Ca_Desi_LG07               | 49.226                                       |
| Ca_Desi_SNP3246 | [A/G]       | Ca_Desi_LG07               | 49.284                                       |
| Ca_Desi_SNP3247 | [G/A]       | Ca_Desi_LG07               | 49.367                                       |
| Ca_Desi_SNP3248 | [A/C]       | Ca_Desi_LG07               | 49.377                                       |
| Ca_Desi_SNP3249 | [A/C]       | Ca_Desi_LG07               | 50.078                                       |
| Ca_Desi_SNP3250 | [C/T]       | Ca_Desi_LG07               | 50.317                                       |
| Ca_Desi_SNP3251 | [C/T]       | Ca_Desi_LG07               | 50.349                                       |

| <b>SNP IDs</b>  | <b>SNPs</b> | <b>Linkage Group (LGs)</b> | <b>Genetic positions (cM) of mapped SNPs</b> |
|-----------------|-------------|----------------------------|----------------------------------------------|
| Ca_Desi_SNP3252 | [T/C]       | Ca_Desi_LG07               | 50.395                                       |
| Ca_Desi_SNP3253 | [T/A]       | Ca_Desi_LG07               | 50.527                                       |
| Ca_Desi_SNP3254 | [T/G]       | Ca_Desi_LG07               | 51.257                                       |
| Ca_Desi_SNP3255 | [C/T]       | Ca_Desi_LG07               | 51.299                                       |
| Ca_Desi_SNP3256 | [A/C]       | Ca_Desi_LG07               | 51.846                                       |
| Ca_Desi_SNP3257 | [A/C]       | Ca_Desi_LG07               | 51.888                                       |
| Ca_Desi_SNP3258 | [A/T]       | Ca_Desi_LG07               | 51.984                                       |
| Ca_Desi_SNP3259 | [A/G]       | Ca_Desi_LG07               | 52.282                                       |
| Ca_Desi_SNP3260 | [T/G]       | Ca_Desi_LG07               | 52.435                                       |
| Ca_Desi_SNP3261 | [G/A]       | Ca_Desi_LG07               | 52.596                                       |
| Ca_Desi_SNP3262 | [C/A]       | Ca_Desi_LG07               | 53.191                                       |
| Ca_Desi_SNP3263 | [A/G]       | Ca_Desi_LG07               | 53.442                                       |
| Ca_Desi_SNP3264 | [G/T]       | Ca_Desi_LG07               | 53.482                                       |
| Ca_Desi_SNP3265 | [A/C]       | Ca_Desi_LG07               | 53.575                                       |
| Ca_Desi_SNP3266 | [A/G]       | Ca_Desi_LG07               | 53.596                                       |
| Ca_Desi_SNP3267 | [A/G]       | Ca_Desi_LG07               | 54.031                                       |
| Ca_Desi_SNP3268 | [T/G]       | Ca_Desi_LG07               | 54.097                                       |
| Ca_Desi_SNP3269 | [A/T]       | Ca_Desi_LG07               | 54.679                                       |
| Ca_Desi_SNP3270 | [T/G]       | Ca_Desi_LG07               | 54.705                                       |
| Ca_Desi_SNP3271 | [T/G]       | Ca_Desi_LG07               | 54.792                                       |
| Ca_Desi_SNP3272 | [C/T]       | Ca_Desi_LG07               | 54.802                                       |
| Ca_Desi_SNP3273 | [C/A]       | Ca_Desi_LG07               | 55.041                                       |
| Ca_Desi_SNP3274 | [A/C]       | Ca_Desi_LG07               | 55.156                                       |
| Ca_Desi_SNP3275 | [T/G]       | Ca_Desi_LG07               | 55.228                                       |
| Ca_Desi_SNP3276 | [T/G]       | Ca_Desi_LG07               | 55.255                                       |
| Ca_Desi_SNP3277 | [A/C]       | Ca_Desi_LG07               | 56.386                                       |
| Ca_Desi_SNP3278 | [T/G]       | Ca_Desi_LG07               | 56.559                                       |
| Ca_Desi_SNP3279 | [A/G]       | Ca_Desi_LG07               | 56.764                                       |
| Ca_Desi_SNP3280 | [C/G]       | Ca_Desi_LG07               | 56.802                                       |
| Ca_Desi_SNP3281 | [T/A]       | Ca_Desi_LG07               | 57.275                                       |
| Ca_Desi_SNP3282 | [A/C]       | Ca_Desi_LG07               | 57.373                                       |

| <b>SNP IDs</b>  | <b>SNPs</b> | <b>Linkage Group (LGs)</b> | <b>Genetic positions (cM) of mapped SNPs</b> |
|-----------------|-------------|----------------------------|----------------------------------------------|
| Ca_Desi_SNP3283 | [A/G]       | Ca_Desi_LG07               | 57.622                                       |
| Ca_Desi_SNP3284 | [C/T]       | Ca_Desi_LG07               | 57.719                                       |
| Ca_Desi_SNP3285 | [A/G]       | Ca_Desi_LG07               | 57.843                                       |
| Ca_Desi_SNP3286 | [A/G]       | Ca_Desi_LG07               | 57.959                                       |
| Ca_Desi_SNP3287 | [A/C]       | Ca_Desi_LG07               | 58.030                                       |
| Ca_Desi_SNP3288 | [A/G]       | Ca_Desi_LG07               | 58.060                                       |
| Ca_Desi_SNP3289 | [A/G]       | Ca_Desi_LG07               | 58.150                                       |
| Ca_Desi_SNP3290 | [C/T]       | Ca_Desi_LG07               | 58.197                                       |
| Ca_Desi_SNP3291 | [T/G]       | Ca_Desi_LG07               | 58.469                                       |
| Ca_Desi_SNP3292 | [A/G]       | Ca_Desi_LG07               | 58.513                                       |
| Ca_Desi_SNP3293 | [T/C]       | Ca_Desi_LG07               | 58.553                                       |
| Ca_Desi_SNP3294 | [A/G]       | Ca_Desi_LG07               | 58.736                                       |
| Ca_Desi_SNP3295 | [T/C]       | Ca_Desi_LG07               | 59.121                                       |
| Ca_Desi_SNP3296 | [A/T]       | Ca_Desi_LG07               | 59.198                                       |
| Ca_Desi_SNP3297 | [T/C]       | Ca_Desi_LG07               | 59.353                                       |
| Ca_Desi_SNP3298 | [A/G]       | Ca_Desi_LG07               | 59.561                                       |
| Ca_Desi_SNP3299 | [A/G]       | Ca_Desi_LG07               | 59.719                                       |
| Ca_Desi_SNP3300 | [A/C]       | Ca_Desi_LG07               | 59.969                                       |
| Ca_Desi_SNP3301 | [C/T]       | Ca_Desi_LG07               | 60.242                                       |
| Ca_Desi_SNP3302 | [A/G]       | Ca_Desi_LG07               | 60.316                                       |
| Ca_Desi_SNP3303 | [A/C]       | Ca_Desi_LG07               | 61.140                                       |
| Ca_Desi_SNP3304 | [T/C]       | Ca_Desi_LG07               | 61.778                                       |
| Ca_Desi_SNP3305 | [C/G]       | Ca_Desi_LG07               | 61.887                                       |
| Ca_Desi_SNP3306 | [A/G]       | Ca_Desi_LG07               | 62.086                                       |
| Ca_Desi_SNP3307 | [A/G]       | Ca_Desi_LG07               | 62.367                                       |
| Ca_Desi_SNP3308 | [A/G]       | Ca_Desi_LG07               | 62.484                                       |
| Ca_Desi_SNP3309 | [C/G]       | Ca_Desi_LG07               | 62.695                                       |
| Ca_Desi_SNP3310 | [C/T]       | Ca_Desi_LG07               | 62.993                                       |
| Ca_Desi_SNP3311 | [A/G]       | Ca_Desi_LG07               | 63.055                                       |
| Ca_Desi_SNP3312 | [A/G]       | Ca_Desi_LG07               | 63.067                                       |
| Ca_Desi_SNP3313 | [G/A]       | Ca_Desi_LG07               | 63.674                                       |

| <b>SNP IDs</b>  | <b>SNPs</b> | <b>Linkage Group (LGs)</b> | <b>Genetic positions (cM) of mapped SNPs</b> |
|-----------------|-------------|----------------------------|----------------------------------------------|
| Ca_Desi_SNP3314 | [T/C]       | Ca_Desi_LG07               | 63.792                                       |
| Ca_Desi_SNP3315 | [A/C]       | Ca_Desi_LG07               | 63.926                                       |
| Ca_Desi_SNP3316 | [T/C]       | Ca_Desi_LG07               | 64.185                                       |
| Ca_Desi_SNP3317 | [T/C]       | Ca_Desi_LG07               | 64.304                                       |
| Ca_Desi_SNP3318 | [A/C]       | Ca_Desi_LG07               | 64.925                                       |
| Ca_Desi_SNP3319 | [G/A]       | Ca_Desi_LG07               | 64.944                                       |
| Ca_Desi_SNP3320 | [A/G]       | Ca_Desi_LG07               | 65.266                                       |
| Ca_Desi_SNP3321 | [T/G]       | Ca_Desi_LG07               | 65.326                                       |
| Ca_Desi_SNP3322 | [G/A]       | Ca_Desi_LG07               | 65.994                                       |
| Ca_Desi_SNP3323 | [C/T]       | Ca_Desi_LG07               | 66.154                                       |
| Ca_Desi_SNP3324 | [C/T]       | Ca_Desi_LG07               | 66.564                                       |
| Ca_Desi_SNP3325 | [C/A]       | Ca_Desi_LG07               | 67.069                                       |
| Ca_Desi_SNP3326 | [C/T]       | Ca_Desi_LG07               | 67.259                                       |
| Ca_Desi_SNP3327 | [T/C]       | Ca_Desi_LG07               | 67.260                                       |
| Ca_Desi_SNP3328 | [A/G]       | Ca_Desi_LG07               | 67.562                                       |
| Ca_Desi_SNP3329 | [T/A]       | Ca_Desi_LG07               | 68.509                                       |
| Ca_Desi_SNP3330 | [A/G]       | Ca_Desi_LG07               | 68.885                                       |
| Ca_Desi_SNP3331 | [T/A]       | Ca_Desi_LG07               | 68.901                                       |
| Ca_Desi_SNP3332 | [A/G]       | Ca_Desi_LG07               | 70.137                                       |
| Ca_Desi_SNP3333 | [C/G]       | Ca_Desi_LG07               | 70.874                                       |
| Ca_Desi_SNP3334 | [C/T]       | Ca_Desi_LG07               | 71.415                                       |
| Ca_Desi_SNP3335 | [T/G]       | Ca_Desi_LG07               | 71.902                                       |
| Ca_Desi_SNP3336 | [C/A]       | Ca_Desi_LG07               | 72.125                                       |
| Ca_Desi_SNP3337 | [G/A]       | Ca_Desi_LG07               | 72.506                                       |
| Ca_Desi_SNP3338 | [A/G]       | Ca_Desi_LG07               | 73.168                                       |
| Ca_Desi_SNP3339 | [A/G]       | Ca_Desi_LG07               | 74.352                                       |
| Ca_Desi_SNP3340 | [T/C]       | Ca_Desi_LG07               | 75.210                                       |
| Ca_Desi_SNP3341 | [T/C]       | Ca_Desi_LG07               | 75.253                                       |
| Ca_Desi_SNP3342 | [T/G]       | Ca_Desi_LG07               | 75.491                                       |
| Ca_Desi_SNP3343 | [C/T]       | Ca_Desi_LG07               | 77.740                                       |
| Ca_Desi_SNP3344 | [G/T]       | Ca_Desi_LG07               | 87.821                                       |

| <b>SNP IDs</b>  | <b>SNPs</b> | <b>Linkage Group (LGs)</b> | <b>Genetic positions (cM) of mapped SNPs</b> |
|-----------------|-------------|----------------------------|----------------------------------------------|
| Ca_Desi_SNP3345 | [C/A]       | Ca_Desi_LG08               | 0.000                                        |
| Ca_Desi_SNP3346 | [A/G]       | Ca_Desi_LG08               | 0.340                                        |
| Ca_Desi_SNP3347 | [C/A]       | Ca_Desi_LG08               | 0.603                                        |
| Ca_Desi_SNP3348 | [A/G]       | Ca_Desi_LG08               | 1.078                                        |
| Ca_Desi_SNP3349 | [A/G]       | Ca_Desi_LG08               | 1.621                                        |
| Ca_Desi_SNP3350 | [T/C]       | Ca_Desi_LG08               | 2.357                                        |
| Ca_Desi_SNP3351 | [A/G]       | Ca_Desi_LG08               | 2.731                                        |
| Ca_Desi_SNP3352 | [G/A]       | Ca_Desi_LG08               | 3.079                                        |
| Ca_Desi_SNP3353 | [T/A]       | Ca_Desi_LG08               | 3.922                                        |
| Ca_Desi_SNP3354 | [G/A]       | Ca_Desi_LG08               | 5.042                                        |
| Ca_Desi_SNP3355 | [A/G]       | Ca_Desi_LG08               | 5.183                                        |
| Ca_Desi_SNP3356 | [T/C]       | Ca_Desi_LG08               | 5.705                                        |
| Ca_Desi_SNP3357 | [A/G]       | Ca_Desi_LG08               | 7.258                                        |
| Ca_Desi_SNP3358 | [A/G]       | Ca_Desi_LG08               | 8.242                                        |
| Ca_Desi_SNP3359 | [G/A]       | Ca_Desi_LG08               | 8.558                                        |
| Ca_Desi_SNP3360 | [G/A]       | Ca_Desi_LG08               | 8.729                                        |
| Ca_Desi_SNP3361 | [C/A]       | Ca_Desi_LG08               | 8.873                                        |
| Ca_Desi_SNP3362 | [C/G]       | Ca_Desi_LG08               | 9.540                                        |
| Ca_Desi_SNP3363 | [T/C]       | Ca_Desi_LG08               | 9.661                                        |
| Ca_Desi_SNP3364 | [C/A]       | Ca_Desi_LG08               | 10.113                                       |
| Ca_Desi_SNP3365 | [T/G]       | Ca_Desi_LG08               | 10.320                                       |
| Ca_Desi_SNP3366 | [A/T]       | Ca_Desi_LG08               | 10.572                                       |
| Ca_Desi_SNP3367 | [A/C]       | Ca_Desi_LG08               | 10.632                                       |
| Ca_Desi_SNP3368 | [A/G]       | Ca_Desi_LG08               | 10.879                                       |
| Ca_Desi_SNP3369 | [A/G]       | Ca_Desi_LG08               | 11.100                                       |
| Ca_Desi_SNP3370 | [C/T]       | Ca_Desi_LG08               | 11.262                                       |
| Ca_Desi_SNP3371 | [A/C]       | Ca_Desi_LG08               | 11.366                                       |
| Ca_Desi_SNP3372 | [A/G]       | Ca_Desi_LG08               | 11.725                                       |
| Ca_Desi_SNP3373 | [T/G]       | Ca_Desi_LG08               | 11.745                                       |
| Ca_Desi_SNP3374 | [T/G]       | Ca_Desi_LG08               | 12.047                                       |
| Ca_Desi_SNP3375 | [G/A]       | Ca_Desi_LG08               | 12.064                                       |

| <b>SNP IDs</b>  | <b>SNPs</b> | <b>Linkage Group (LGs)</b> | <b>Genetic positions (cM) of mapped SNPs</b> |
|-----------------|-------------|----------------------------|----------------------------------------------|
| Ca_Desi_SNP3376 | [T/C]       | Ca_Desi_LG08               | 13.112                                       |
| Ca_Desi_SNP3377 | [A/G]       | Ca_Desi_LG08               | 13.656                                       |
| Ca_Desi_SNP3378 | [T/C]       | Ca_Desi_LG08               | 13.832                                       |
| Ca_Desi_SNP3379 | [G/A]       | Ca_Desi_LG08               | 14.383                                       |
| Ca_Desi_SNP3380 | [C/T]       | Ca_Desi_LG08               | 14.916                                       |
| Ca_Desi_SNP3381 | [T/C]       | Ca_Desi_LG08               | 15.680                                       |
| Ca_Desi_SNP3382 | [T/C]       | Ca_Desi_LG08               | 16.660                                       |
| Ca_Desi_SNP3383 | [T/C]       | Ca_Desi_LG08               | 17.169                                       |
| Ca_Desi_SNP3384 | [G/C]       | Ca_Desi_LG08               | 18.339                                       |
| Ca_Desi_SNP3385 | [C/T]       | Ca_Desi_LG08               | 18.690                                       |
| Ca_Desi_SNP3386 | [A/T]       | Ca_Desi_LG08               | 19.091                                       |
| Ca_Desi_SNP3387 | [T/C]       | Ca_Desi_LG08               | 19.508                                       |
| Ca_Desi_SNP3388 | [T/C]       | Ca_Desi_LG08               | 19.650                                       |
| Ca_Desi_SNP3389 | [G/C]       | Ca_Desi_LG08               | 19.651                                       |
| Ca_Desi_SNP3390 | [G/T]       | Ca_Desi_LG08               | 19.733                                       |
| Ca_Desi_SNP3391 | [C/G]       | Ca_Desi_LG08               | 20.146                                       |
| Ca_Desi_SNP3392 | [T/C]       | Ca_Desi_LG08               | 20.174                                       |
| Ca_Desi_SNP3393 | [G/A]       | Ca_Desi_LG08               | 20.558                                       |
| Ca_Desi_SNP3394 | [G/C]       | Ca_Desi_LG08               | 20.582                                       |
| Ca_Desi_SNP3395 | [T/G]       | Ca_Desi_LG08               | 20.724                                       |
| Ca_Desi_SNP3396 | [G/A]       | Ca_Desi_LG08               | 21.005                                       |
| Ca_Desi_SNP3397 | [T/C]       | Ca_Desi_LG08               | 21.044                                       |
| Ca_Desi_SNP3398 | [C/A]       | Ca_Desi_LG08               | 21.049                                       |
| Ca_Desi_SNP3399 | [A/G]       | Ca_Desi_LG08               | 21.137                                       |
| Ca_Desi_SNP3400 | [T/G]       | Ca_Desi_LG08               | 21.329                                       |
| Ca_Desi_SNP3401 | [C/T]       | Ca_Desi_LG08               | 21.382                                       |
| Ca_Desi_SNP3402 | [C/T]       | Ca_Desi_LG08               | 21.882                                       |
| Ca_Desi_SNP3403 | [A/T]       | Ca_Desi_LG08               | 21.921                                       |
| Ca_Desi_SNP3404 | [C/T]       | Ca_Desi_LG08               | 21.949                                       |
| Ca_Desi_SNP3405 | [T/C]       | Ca_Desi_LG08               | 21.953                                       |
| Ca_Desi_SNP3406 | [T/A]       | Ca_Desi_LG08               | 21.971                                       |

| <b>SNP IDs</b>  | <b>SNPs</b> | <b>Linkage Group (LGs)</b> | <b>Genetic positions (cM) of mapped SNPs</b> |
|-----------------|-------------|----------------------------|----------------------------------------------|
| Ca_Desi_SNP3407 | [G/A]       | Ca_Desi_LG08               | 21.976                                       |
| Ca_Desi_SNP3408 | [G/T]       | Ca_Desi_LG08               | 22.014                                       |
| Ca_Desi_SNP3409 | [C/G]       | Ca_Desi_LG08               | 22.207                                       |
| Ca_Desi_SNP3410 | [T/C]       | Ca_Desi_LG08               | 22.232                                       |
| Ca_Desi_SNP3411 | [A/G]       | Ca_Desi_LG08               | 22.455                                       |
| Ca_Desi_SNP3412 | [C/T]       | Ca_Desi_LG08               | 22.610                                       |
| Ca_Desi_SNP3413 | [A/G]       | Ca_Desi_LG08               | 22.777                                       |
| Ca_Desi_SNP3414 | [A/C]       | Ca_Desi_LG08               | 22.789                                       |
| Ca_Desi_SNP3415 | [C/T]       | Ca_Desi_LG08               | 22.790                                       |
| Ca_Desi_SNP3416 | [G/A]       | Ca_Desi_LG08               | 22.818                                       |
| Ca_Desi_SNP3417 | [A/C]       | Ca_Desi_LG08               | 22.912                                       |
| Ca_Desi_SNP3418 | [G/A]       | Ca_Desi_LG08               | 23.656                                       |
| Ca_Desi_SNP3419 | [T/G]       | Ca_Desi_LG08               | 23.664                                       |
| Ca_Desi_SNP3420 | [T/A]       | Ca_Desi_LG08               | 23.935                                       |
| Ca_Desi_SNP3421 | [C/T]       | Ca_Desi_LG08               | 24.262                                       |
| Ca_Desi_SNP3422 | [C/A]       | Ca_Desi_LG08               | 24.434                                       |
| Ca_Desi_SNP3423 | [G/A]       | Ca_Desi_LG08               | 24.547                                       |
| Ca_Desi_SNP3424 | [T/G]       | Ca_Desi_LG08               | 24.855                                       |
| Ca_Desi_SNP3425 | [T/C]       | Ca_Desi_LG08               | 25.610                                       |
| Ca_Desi_SNP3426 | [T/G]       | Ca_Desi_LG08               | 25.753                                       |
| Ca_Desi_SNP3427 | [A/T]       | Ca_Desi_LG08               | 25.756                                       |
| Ca_Desi_SNP3428 | [G/A]       | Ca_Desi_LG08               | 25.812                                       |
| Ca_Desi_SNP3429 | [A/G]       | Ca_Desi_LG08               | 26.103                                       |
| Ca_Desi_SNP3430 | [C/G]       | Ca_Desi_LG08               | 26.439                                       |
| Ca_Desi_SNP3431 | [G/A]       | Ca_Desi_LG08               | 26.439                                       |
| Ca_Desi_SNP3432 | [A/G]       | Ca_Desi_LG08               | 26.516                                       |
| Ca_Desi_SNP3433 | [G/T]       | Ca_Desi_LG08               | 26.835                                       |
| Ca_Desi_SNP3434 | [T/G]       | Ca_Desi_LG08               | 27.063                                       |
| Ca_Desi_SNP3435 | [A/G]       | Ca_Desi_LG08               | 27.550                                       |
| Ca_Desi_SNP3436 | [C/T]       | Ca_Desi_LG08               | 27.788                                       |
| Ca_Desi_SNP3437 | [G/T]       | Ca_Desi_LG08               | 27.834                                       |



| <b>SNP IDs</b>  | <b>SNPs</b> | <b>Linkage Group (LGs)</b> | <b>Genetic positions (cM) of mapped SNPs</b> |
|-----------------|-------------|----------------------------|----------------------------------------------|
| Ca_Desi_SNP3438 | [A/G]       | Ca_Desi_LG08               | 27.909                                       |
| Ca_Desi_SNP3439 | [T/G]       | Ca_Desi_LG08               | 27.981                                       |
| Ca_Desi_SNP3440 | [C/T]       | Ca_Desi_LG08               | 28.612                                       |
| Ca_Desi_SNP3441 | [C/G]       | Ca_Desi_LG08               | 28.997                                       |
| Ca_Desi_SNP3442 | [C/G]       | Ca_Desi_LG08               | 29.105                                       |
| Ca_Desi_SNP3443 | [A/C]       | Ca_Desi_LG08               | 29.244                                       |
| Ca_Desi_SNP3444 | [G/A]       | Ca_Desi_LG08               | 29.389                                       |
| Ca_Desi_SNP3445 | [A/G]       | Ca_Desi_LG08               | 29.455                                       |
| Ca_Desi_SNP3446 | [T/G]       | Ca_Desi_LG08               | 30.042                                       |
| Ca_Desi_SNP3447 | [A/C]       | Ca_Desi_LG08               | 30.299                                       |
| Ca_Desi_SNP3448 | [T/C]       | Ca_Desi_LG08               | 30.430                                       |
| Ca_Desi_SNP3449 | [T/C]       | Ca_Desi_LG08               | 30.550                                       |
| Ca_Desi_SNP3450 | [A/C]       | Ca_Desi_LG08               | 30.629                                       |
| Ca_Desi_SNP3451 | [A/G]       | Ca_Desi_LG08               | 31.181                                       |
| Ca_Desi_SNP3452 | [T/A]       | Ca_Desi_LG08               | 32.666                                       |
| Ca_Desi_SNP3453 | [A/T]       | Ca_Desi_LG08               | 32.873                                       |
| Ca_Desi_SNP3454 | [C/G]       | Ca_Desi_LG08               | 34.621                                       |
| Ca_Desi_SNP3455 | [A/G]       | Ca_Desi_LG08               | 34.668                                       |
| Ca_Desi_SNP3456 | [T/G]       | Ca_Desi_LG08               | 34.738                                       |
| Ca_Desi_SNP3457 | [T/G]       | Ca_Desi_LG08               | 35.325                                       |
| Ca_Desi_SNP3458 | [T/C]       | Ca_Desi_LG08               | 35.810                                       |
| Ca_Desi_SNP3459 | [G/A]       | Ca_Desi_LG08               | 36.055                                       |
| Ca_Desi_SNP3460 | [A/G]       | Ca_Desi_LG08               | 36.209                                       |
| Ca_Desi_SNP3461 | [A/G]       | Ca_Desi_LG08               | 36.253                                       |
| Ca_Desi_SNP3462 | [T/G]       | Ca_Desi_LG08               | 36.340                                       |
| Ca_Desi_SNP3463 | [G/A]       | Ca_Desi_LG08               | 36.542                                       |
| Ca_Desi_SNP3464 | [C/T]       | Ca_Desi_LG08               | 36.803                                       |
| Ca_Desi_SNP3465 | [C/T]       | Ca_Desi_LG08               | 37.290                                       |
| Ca_Desi_SNP3466 | [A/C]       | Ca_Desi_LG08               | 37.963                                       |
| Ca_Desi_SNP3467 | [A/G]       | Ca_Desi_LG08               | 38.257                                       |
| Ca_Desi_SNP3468 | [T/G]       | Ca_Desi_LG08               | 38.628                                       |

| <b>SNP IDs</b>  | <b>SNPs</b> | <b>Linkage Group (LGs)</b> | <b>Genetic positions (cM) of mapped SNPs</b> |
|-----------------|-------------|----------------------------|----------------------------------------------|
| Ca_Desi_SNP3469 | [A/G]       | Ca_Desi_LG08               | 38.657                                       |
| Ca_Desi_SNP3470 | [T/G]       | Ca_Desi_LG08               | 38.824                                       |
| Ca_Desi_SNP3471 | [T/C]       | Ca_Desi_LG08               | 39.091                                       |
| Ca_Desi_SNP3472 | [C/T]       | Ca_Desi_LG08               | 39.843                                       |
| Ca_Desi_SNP3473 | [T/C]       | Ca_Desi_LG08               | 40.210                                       |
| Ca_Desi_SNP3474 | [A/C]       | Ca_Desi_LG08               | 40.402                                       |
| Ca_Desi_SNP3475 | [T/G]       | Ca_Desi_LG08               | 40.777                                       |
| Ca_Desi_SNP3476 | [A/G]       | Ca_Desi_LG08               | 40.793                                       |
| Ca_Desi_SNP3477 | [A/C]       | Ca_Desi_LG08               | 41.009                                       |
| Ca_Desi_SNP3478 | [T/G]       | Ca_Desi_LG08               | 41.031                                       |
| Ca_Desi_SNP3479 | [A/T]       | Ca_Desi_LG08               | 41.254                                       |
| Ca_Desi_SNP3480 | [A/G]       | Ca_Desi_LG08               | 41.740                                       |
| Ca_Desi_SNP3481 | [A/G]       | Ca_Desi_LG08               | 42.006                                       |
| Ca_Desi_SNP3482 | [G/A]       | Ca_Desi_LG08               | 42.361                                       |
| Ca_Desi_SNP3483 | [A/C]       | Ca_Desi_LG08               | 42.377                                       |
| Ca_Desi_SNP3484 | [A/C]       | Ca_Desi_LG08               | 42.485                                       |
| Ca_Desi_SNP3485 | [A/G]       | Ca_Desi_LG08               | 42.492                                       |
| Ca_Desi_SNP3486 | [A/G]       | Ca_Desi_LG08               | 42.569                                       |
| Ca_Desi_SNP3487 | [T/G]       | Ca_Desi_LG08               | 43.068                                       |
| Ca_Desi_SNP3488 | [T/C]       | Ca_Desi_LG08               | 43.329                                       |
| Ca_Desi_SNP3489 | [A/C]       | Ca_Desi_LG08               | 43.764                                       |
| Ca_Desi_SNP3490 | [C/T]       | Ca_Desi_LG08               | 44.015                                       |
| Ca_Desi_SNP3491 | [T/G]       | Ca_Desi_LG08               | 44.194                                       |
| Ca_Desi_SNP3492 | [A/T]       | Ca_Desi_LG08               | 44.663                                       |
| Ca_Desi_SNP3493 | [A/G]       | Ca_Desi_LG08               | 44.882                                       |
| Ca_Desi_SNP3494 | [G/A]       | Ca_Desi_LG08               | 45.071                                       |
| Ca_Desi_SNP3495 | [C/G]       | Ca_Desi_LG08               | 45.440                                       |
| Ca_Desi_SNP3496 | [T/C]       | Ca_Desi_LG08               | 45.879                                       |
| Ca_Desi_SNP3497 | [C/A]       | Ca_Desi_LG08               | 45.989                                       |
| Ca_Desi_SNP3498 | [G/T]       | Ca_Desi_LG08               | 46.059                                       |
| Ca_Desi_SNP3499 | [A/C]       | Ca_Desi_LG08               | 46.342                                       |

| <b>SNP IDs</b>  | <b>SNPs</b> | <b>Linkage Group (LGs)</b> | <b>Genetic positions (cM) of mapped SNPs</b> |
|-----------------|-------------|----------------------------|----------------------------------------------|
| Ca_Desi_SNP3500 | [C/T]       | Ca_Desi_LG08               | 46.352                                       |
| Ca_Desi_SNP3501 | [C/T]       | Ca_Desi_LG08               | 47.010                                       |
| Ca_Desi_SNP3502 | [T/C]       | Ca_Desi_LG08               | 47.164                                       |
| Ca_Desi_SNP3503 | [G/A]       | Ca_Desi_LG08               | 47.438                                       |
| Ca_Desi_SNP3504 | [A/G]       | Ca_Desi_LG08               | 47.454                                       |
| Ca_Desi_SNP3505 | [A/C]       | Ca_Desi_LG08               | 47.750                                       |
| Ca_Desi_SNP3506 | [T/A]       | Ca_Desi_LG08               | 47.947                                       |
| Ca_Desi_SNP3507 | [C/A]       | Ca_Desi_LG08               | 48.426                                       |
| Ca_Desi_SNP3508 | [C/A]       | Ca_Desi_LG08               | 48.559                                       |
| Ca_Desi_SNP3509 | [T/A]       | Ca_Desi_LG08               | 49.495                                       |
| Ca_Desi_SNP3510 | [A/G]       | Ca_Desi_LG08               | 49.591                                       |
| Ca_Desi_SNP3511 | [T/G]       | Ca_Desi_LG08               | 49.635                                       |
| Ca_Desi_SNP3512 | [T/C]       | Ca_Desi_LG08               | 49.676                                       |
| Ca_Desi_SNP3513 | [G/A]       | Ca_Desi_LG08               | 49.792                                       |
| Ca_Desi_SNP3514 | [G/C]       | Ca_Desi_LG08               | 49.829                                       |
| Ca_Desi_SNP3515 | [T/C]       | Ca_Desi_LG08               | 49.938                                       |
| Ca_Desi_SNP3516 | [T/C]       | Ca_Desi_LG08               | 50.067                                       |
| Ca_Desi_SNP3517 | [T/C]       | Ca_Desi_LG08               | 50.074                                       |
| Ca_Desi_SNP3518 | [T/C]       | Ca_Desi_LG08               | 50.174                                       |
| Ca_Desi_SNP3519 | [A/C]       | Ca_Desi_LG08               | 50.202                                       |
| Ca_Desi_SNP3520 | [T/G]       | Ca_Desi_LG08               | 50.204                                       |
| Ca_Desi_SNP3521 | [A/C]       | Ca_Desi_LG08               | 50.549                                       |
| Ca_Desi_SNP3522 | [A/T]       | Ca_Desi_LG08               | 50.617                                       |
| Ca_Desi_SNP3523 | [C/A]       | Ca_Desi_LG08               | 50.623                                       |
| Ca_Desi_SNP3524 | [T/C]       | Ca_Desi_LG08               | 51.029                                       |
| Ca_Desi_SNP3525 | [G/T]       | Ca_Desi_LG08               | 51.542                                       |
| Ca_Desi_SNP3526 | [G/T]       | Ca_Desi_LG08               | 51.556                                       |
| Ca_Desi_SNP3527 | [A/G]       | Ca_Desi_LG08               | 51.751                                       |
| Ca_Desi_SNP3528 | [G/C]       | Ca_Desi_LG08               | 51.842                                       |
| Ca_Desi_SNP3529 | [A/C]       | Ca_Desi_LG08               | 51.862                                       |
| Ca_Desi_SNP3530 | [C/A]       | Ca_Desi_LG08               | 52.211                                       |

| <b>SNP IDs</b>  | <b>SNPs</b> | <b>Linkage Group (LGs)</b> | <b>Genetic positions (cM) of mapped SNPs</b> |
|-----------------|-------------|----------------------------|----------------------------------------------|
| Ca_Desi_SNP3531 | [C/G]       | Ca_Desi_LG08               | 52.456                                       |
| Ca_Desi_SNP3532 | [A/T]       | Ca_Desi_LG08               | 52.468                                       |
| Ca_Desi_SNP3533 | [A/C]       | Ca_Desi_LG08               | 53.645                                       |
| Ca_Desi_SNP3534 | [C/A]       | Ca_Desi_LG08               | 53.727                                       |
| Ca_Desi_SNP3535 | [T/G]       | Ca_Desi_LG08               | 53.793                                       |
| Ca_Desi_SNP3536 | [T/G]       | Ca_Desi_LG08               | 54.055                                       |
| Ca_Desi_SNP3537 | [T/C]       | Ca_Desi_LG08               | 54.212                                       |
| Ca_Desi_SNP3538 | [A/G]       | Ca_Desi_LG08               | 54.218                                       |
| Ca_Desi_SNP3539 | [A/G]       | Ca_Desi_LG08               | 54.457                                       |
| Ca_Desi_SNP3540 | [C/A]       | Ca_Desi_LG08               | 54.497                                       |
| Ca_Desi_SNP3541 | [C/G]       | Ca_Desi_LG08               | 54.553                                       |
| Ca_Desi_SNP3542 | [A/T]       | Ca_Desi_LG08               | 54.593                                       |
| Ca_Desi_SNP3543 | [T/C]       | Ca_Desi_LG08               | 54.839                                       |
| Ca_Desi_SNP3544 | [A/G]       | Ca_Desi_LG08               | 54.904                                       |
| Ca_Desi_SNP3545 | [C/T]       | Ca_Desi_LG08               | 55.002                                       |
| Ca_Desi_SNP3546 | [C/T]       | Ca_Desi_LG08               | 55.050                                       |
| Ca_Desi_SNP3547 | [A/C]       | Ca_Desi_LG08               | 55.244                                       |
| Ca_Desi_SNP3548 | [A/G]       | Ca_Desi_LG08               | 55.939                                       |
| Ca_Desi_SNP3549 | [C/G]       | Ca_Desi_LG08               | 56.131                                       |
| Ca_Desi_SNP3550 | [G/A]       | Ca_Desi_LG08               | 56.287                                       |
| Ca_Desi_SNP3551 | [A/G]       | Ca_Desi_LG08               | 56.294                                       |
| Ca_Desi_SNP3552 | [C/G]       | Ca_Desi_LG08               | 56.429                                       |
| Ca_Desi_SNP3553 | [A/C]       | Ca_Desi_LG08               | 56.482                                       |
| Ca_Desi_SNP3554 | [T/G]       | Ca_Desi_LG08               | 56.577                                       |
| Ca_Desi_SNP3555 | [T/G]       | Ca_Desi_LG08               | 57.041                                       |
| Ca_Desi_SNP3556 | [A/G]       | Ca_Desi_LG08               | 57.270                                       |
| Ca_Desi_SNP3557 | [T/C]       | Ca_Desi_LG08               | 57.292                                       |
| Ca_Desi_SNP3558 | [T/G]       | Ca_Desi_LG08               | 57.626                                       |
| Ca_Desi_SNP3559 | [T/G]       | Ca_Desi_LG08               | 57.855                                       |
| Ca_Desi_SNP3560 | [A/G]       | Ca_Desi_LG08               | 57.861                                       |
| Ca_Desi_SNP3561 | [T/A]       | Ca_Desi_LG08               | 58.066                                       |

| <b>SNP IDs</b>  | <b>SNPs</b> | <b>Linkage Group (LGs)</b> | <b>Genetic positions (cM) of mapped SNPs</b> |
|-----------------|-------------|----------------------------|----------------------------------------------|
| Ca_Desi_SNP3562 | [T/G]       | Ca_Desi_LG08               | 58.139                                       |
| Ca_Desi_SNP3563 | [T/A]       | Ca_Desi_LG08               | 59.089                                       |
| Ca_Desi_SNP3564 | [T/A]       | Ca_Desi_LG08               | 59.130                                       |
| Ca_Desi_SNP3565 | [T/C]       | Ca_Desi_LG08               | 59.490                                       |
| Ca_Desi_SNP3566 | [G/A]       | Ca_Desi_LG08               | 59.519                                       |
| Ca_Desi_SNP3567 | [A/G]       | Ca_Desi_LG08               | 59.585                                       |
| Ca_Desi_SNP3568 | [G/A]       | Ca_Desi_LG08               | 59.613                                       |
| Ca_Desi_SNP3569 | [A/G]       | Ca_Desi_LG08               | 59.913                                       |
| Ca_Desi_SNP3570 | [G/T]       | Ca_Desi_LG08               | 59.921                                       |
| Ca_Desi_SNP3571 | [T/C]       | Ca_Desi_LG08               | 60.149                                       |
| Ca_Desi_SNP3572 | [C/T]       | Ca_Desi_LG08               | 60.533                                       |
| Ca_Desi_SNP3573 | [T/A]       | Ca_Desi_LG08               | 60.605                                       |
| Ca_Desi_SNP3574 | [C/T]       | Ca_Desi_LG08               | 60.784                                       |
| Ca_Desi_SNP3575 | [A/G]       | Ca_Desi_LG08               | 60.871                                       |
| Ca_Desi_SNP3576 | [A/G]       | Ca_Desi_LG08               | 60.894                                       |
| Ca_Desi_SNP3577 | [G/A]       | Ca_Desi_LG08               | 60.958                                       |
| Ca_Desi_SNP3578 | [G/A]       | Ca_Desi_LG08               | 61.006                                       |
| Ca_Desi_SNP3579 | [G/A]       | Ca_Desi_LG08               | 61.503                                       |
| Ca_Desi_SNP3580 | [A/C]       | Ca_Desi_LG08               | 61.786                                       |
| Ca_Desi_SNP3581 | [T/C]       | Ca_Desi_LG08               | 61.989                                       |
| Ca_Desi_SNP3582 | [A/G]       | Ca_Desi_LG08               | 62.020                                       |
| Ca_Desi_SNP3583 | [T/C]       | Ca_Desi_LG08               | 62.119                                       |
| Ca_Desi_SNP3584 | [C/T]       | Ca_Desi_LG08               | 62.240                                       |
| Ca_Desi_SNP3585 | [A/G]       | Ca_Desi_LG08               | 62.590                                       |
| Ca_Desi_SNP3586 | [T/C]       | Ca_Desi_LG08               | 62.997                                       |
| Ca_Desi_SNP3587 | [A/G]       | Ca_Desi_LG08               | 63.151                                       |
| Ca_Desi_SNP3588 | [T/C]       | Ca_Desi_LG08               | 63.406                                       |
| Ca_Desi_SNP3589 | [A/G]       | Ca_Desi_LG08               | 63.731                                       |
| Ca_Desi_SNP3590 | [A/G]       | Ca_Desi_LG08               | 63.815                                       |
| Ca_Desi_SNP3591 | [T/G]       | Ca_Desi_LG08               | 63.850                                       |
| Ca_Desi_SNP3592 | [T/G]       | Ca_Desi_LG08               | 64.099                                       |

| <b>SNP IDs</b>  | <b>SNPs</b> | <b>Linkage Group (LGs)</b> | <b>Genetic positions (cM) of mapped SNPs</b> |
|-----------------|-------------|----------------------------|----------------------------------------------|
| Ca_Desi_SNP3593 | [A/G]       | Ca_Desi_LG08               | 64.489                                       |
| Ca_Desi_SNP3594 | [G/T]       | Ca_Desi_LG08               | 64.662                                       |
| Ca_Desi_SNP3595 | [A/G]       | Ca_Desi_LG08               | 64.671                                       |
| Ca_Desi_SNP3596 | [A/G]       | Ca_Desi_LG08               | 64.776                                       |
| Ca_Desi_SNP3597 | [G/A]       | Ca_Desi_LG08               | 64.925                                       |
| Ca_Desi_SNP3598 | [C/A]       | Ca_Desi_LG08               | 65.180                                       |
| Ca_Desi_SNP3599 | [A/T]       | Ca_Desi_LG08               | 65.229                                       |
| Ca_Desi_SNP3600 | [T/G]       | Ca_Desi_LG08               | 65.498                                       |
| Ca_Desi_SNP3601 | [A/G]       | Ca_Desi_LG08               | 65.499                                       |
| Ca_Desi_SNP3602 | [A/G]       | Ca_Desi_LG08               | 65.529                                       |
| Ca_Desi_SNP3603 | [T/A]       | Ca_Desi_LG08               | 65.657                                       |
| Ca_Desi_SNP3604 | [A/G]       | Ca_Desi_LG08               | 66.029                                       |
| Ca_Desi_SNP3605 | [G/T]       | Ca_Desi_LG08               | 66.290                                       |
| Ca_Desi_SNP3606 | [T/C]       | Ca_Desi_LG08               | 66.881                                       |
| Ca_Desi_SNP3607 | [A/G]       | Ca_Desi_LG08               | 67.785                                       |
| Ca_Desi_SNP3608 | [A/G]       | Ca_Desi_LG08               | 67.838                                       |
| Ca_Desi_SNP3609 | [A/G]       | Ca_Desi_LG08               | 68.508                                       |
| Ca_Desi_SNP3610 | [T/G]       | Ca_Desi_LG08               | 69.895                                       |
| Ca_Desi_SNP3611 | [C/A]       | Ca_Desi_LG08               | 69.976                                       |
| Ca_Desi_SNP3612 | [A/G]       | Ca_Desi_LG08               | 70.526                                       |
| Ca_Desi_SNP3613 | [T/C]       | Ca_Desi_LG08               | 71.006                                       |
| Ca_Desi_SNP3614 | [T/G]       | Ca_Desi_LG08               | 71.265                                       |
| Ca_Desi_SNP3615 | [T/C]       | Ca_Desi_LG08               | 71.606                                       |
| Ca_Desi_SNP3616 | [C/T]       | Ca_Desi_LG08               | 71.844                                       |
| Ca_Desi_SNP3617 | [A/C]       | Ca_Desi_LG08               | 73.520                                       |
| Ca_Desi_SNP3618 | [A/C]       | Ca_Desi_LG08               | 76.736                                       |
| Ca_Desi_SNP3619 | [T/G]       | Ca_Desi_LG08               | 77.683                                       |
| Ca_Desi_SNP3620 | [A/G]       | Ca_Desi_LG08               | 78.156                                       |
| Ca_Desi_SNP3621 | [G/A]       | Ca_Desi_LG08               | 78.509                                       |
| Ca_Desi_SNP3622 | [T/C]       | Ca_Desi_LG08               | 79.375                                       |
| Ca_Desi_SNP3623 | [A/T]       | Ca_Desi_LG08               | 80.766                                       |

| <b>SNP IDs</b>  | <b>SNPs</b> | <b>Linkage Group (LGs)</b> | <b>Genetic positions (cM) of mapped SNPs</b> |
|-----------------|-------------|----------------------------|----------------------------------------------|
| Ca_Desi_SNP3624 | [A/C]       | Ca_Desi_LG08               | 81.334                                       |
| Ca_Desi_SNP3625 | [T/C]       | Ca_Desi_LG08               | 89.085                                       |
| Ca_Kabuli_SNP1  | [A/G]       | Ca_Kabuli_LG01             | 0.000                                        |
| Ca_Kabuli_SNP2  | [C/A]       | Ca_Kabuli_LG01             | 0.900                                        |
| Ca_Kabuli_SNP3  | [C/T]       | Ca_Kabuli_LG01             | 1.633                                        |
| Ca_Kabuli_SNP4  | [C/T]       | Ca_Kabuli_LG01             | 1.825                                        |
| Ca_Kabuli_SNP5  | [G/C]       | Ca_Kabuli_LG01             | 1.927                                        |
| Ca_Kabuli_SNP6  | [A/G]       | Ca_Kabuli_LG01             | 2.251                                        |
| Ca_Kabuli_SNP7  | [G/A]       | Ca_Kabuli_LG01             | 2.575                                        |
| Ca_Kabuli_SNP8  | [A/C]       | Ca_Kabuli_LG01             | 2.800                                        |
| Ca_Kabuli_SNP9  | [G/A]       | Ca_Kabuli_LG01             | 2.919                                        |
| Ca_Kabuli_SNP10 | [A/T]       | Ca_Kabuli_LG01             | 2.970                                        |
| Ca_Kabuli_SNP11 | [T/C]       | Ca_Kabuli_LG01             | 3.018                                        |
| Ca_Kabuli_SNP12 | [G/A]       | Ca_Kabuli_LG01             | 3.374                                        |
| Ca_Kabuli_SNP13 | [G/A]       | Ca_Kabuli_LG01             | 3.694                                        |
| Ca_Kabuli_SNP14 | [C/A]       | Ca_Kabuli_LG01             | 3.824                                        |
| Ca_Kabuli_SNP15 | [G/A]       | Ca_Kabuli_LG01             | 3.842                                        |
| Ca_Kabuli_SNP16 | [T/G]       | Ca_Kabuli_LG01             | 4.350                                        |
| Ca_Kabuli_SNP17 | [A/G]       | Ca_Kabuli_LG01             | 5.266                                        |
| Ca_Kabuli_SNP18 | [G/T]       | Ca_Kabuli_LG01             | 5.327                                        |
| Ca_Kabuli_SNP19 | [G/C]       | Ca_Kabuli_LG01             | 5.724                                        |
| Ca_Kabuli_SNP20 | [G/A]       | Ca_Kabuli_LG01             | 5.851                                        |
| Ca_Kabuli_SNP21 | [A/G]       | Ca_Kabuli_LG01             | 5.878                                        |
| Ca_Kabuli_SNP22 | [A/G]       | Ca_Kabuli_LG01             | 5.878                                        |
| Ca_Kabuli_SNP23 | [T/G]       | Ca_Kabuli_LG01             | 6.039                                        |
| Ca_Kabuli_SNP24 | [C/G]       | Ca_Kabuli_LG01             | 6.319                                        |
| Ca_Kabuli_SNP25 | [C/T]       | Ca_Kabuli_LG01             | 6.566                                        |
| Ca_Kabuli_SNP26 | [C/A]       | Ca_Kabuli_LG01             | 7.142                                        |
| Ca_Kabuli_SNP27 | [C/T]       | Ca_Kabuli_LG01             | 7.551                                        |
| Ca_Kabuli_SNP28 | [G/A]       | Ca_Kabuli_LG01             | 7.624                                        |
| Ca_Kabuli_SNP29 | [T/G]       | Ca_Kabuli_LG01             | 7.909                                        |

| <b>SNP IDs</b>  | <b>SNPs</b> | <b>Linkage Group (LGs)</b> | <b>Genetic positions (cM) of mapped SNPs</b> |
|-----------------|-------------|----------------------------|----------------------------------------------|
| Ca_Kabuli_SNP30 | [T/A]       | Ca_Kabuli_LG01             | 9.159                                        |
| Ca_Kabuli_SNP31 | [A/T]       | Ca_Kabuli_LG01             | 9.159                                        |
| Ca_Kabuli_SNP32 | [A/G]       | Ca_Kabuli_LG01             | 9.681                                        |
| Ca_Kabuli_SNP33 | [A/G]       | Ca_Kabuli_LG01             | 9.858                                        |
| Ca_Kabuli_SNP34 | [T/C]       | Ca_Kabuli_LG01             | 10.407                                       |
| Ca_Kabuli_SNP35 | [G/A]       | Ca_Kabuli_LG01             | 10.531                                       |
| Ca_Kabuli_SNP36 | [C/G]       | Ca_Kabuli_LG01             | 10.868                                       |
| Ca_Kabuli_SNP37 | [C/A]       | Ca_Kabuli_LG01             | 11.244                                       |
| Ca_Kabuli_SNP38 | [C/A]       | Ca_Kabuli_LG01             | 11.440                                       |
| Ca_Kabuli_SNP39 | [A/C]       | Ca_Kabuli_LG01             | 11.470                                       |
| Ca_Kabuli_SNP40 | [C/T]       | Ca_Kabuli_LG01             | 11.550                                       |
| Ca_Kabuli_SNP41 | [C/T]       | Ca_Kabuli_LG01             | 11.684                                       |
| Ca_Kabuli_SNP42 | [C/G]       | Ca_Kabuli_LG01             | 12.016                                       |
| Ca_Kabuli_SNP43 | [C/T]       | Ca_Kabuli_LG01             | 12.247                                       |
| Ca_Kabuli_SNP44 | [A/G]       | Ca_Kabuli_LG01             | 12.329                                       |
| Ca_Kabuli_SNP45 | [C/T]       | Ca_Kabuli_LG01             | 12.329                                       |
| Ca_Kabuli_SNP46 | [T/C]       | Ca_Kabuli_LG01             | 12.372                                       |
| Ca_Kabuli_SNP47 | [T/C]       | Ca_Kabuli_LG01             | 12.383                                       |
| Ca_Kabuli_SNP48 | [T/G]       | Ca_Kabuli_LG01             | 13.072                                       |
| Ca_Kabuli_SNP49 | [G/A]       | Ca_Kabuli_LG01             | 13.172                                       |
| Ca_Kabuli_SNP50 | [T/C]       | Ca_Kabuli_LG01             | 13.684                                       |
| Ca_Kabuli_SNP51 | [G/T]       | Ca_Kabuli_LG01             | 13.687                                       |
| Ca_Kabuli_SNP52 | [T/C]       | Ca_Kabuli_LG01             | 13.690                                       |
| Ca_Kabuli_SNP53 | [A/C]       | Ca_Kabuli_LG01             | 13.967                                       |
| Ca_Kabuli_SNP54 | [C/G]       | Ca_Kabuli_LG01             | 14.733                                       |
| Ca_Kabuli_SNP55 | [G/C]       | Ca_Kabuli_LG01             | 14.910                                       |
| Ca_Kabuli_SNP56 | [T/A]       | Ca_Kabuli_LG01             | 14.917                                       |
| Ca_Kabuli_SNP57 | [G/T]       | Ca_Kabuli_LG01             | 15.803                                       |
| Ca_Kabuli_SNP58 | [G/A]       | Ca_Kabuli_LG01             | 15.854                                       |
| Ca_Kabuli_SNP59 | [A/T]       | Ca_Kabuli_LG01             | 16.201                                       |
| Ca_Kabuli_SNP60 | [C/T]       | Ca_Kabuli_LG01             | 16.264                                       |



| <b>SNP IDs</b>  | <b>SNPs</b> | <b>Linkage Group (LGs)</b> | <b>Genetic positions (cM) of mapped SNPs</b> |
|-----------------|-------------|----------------------------|----------------------------------------------|
| Ca_Kabuli_SNP61 | [C/T]       | Ca_Kabuli_LG01             | 17.512                                       |
| Ca_Kabuli_SNP62 | [C/T]       | Ca_Kabuli_LG01             | 17.983                                       |
| Ca_Kabuli_SNP63 | [T/C]       | Ca_Kabuli_LG01             | 18.218                                       |
| Ca_Kabuli_SNP64 | [A/G]       | Ca_Kabuli_LG01             | 19.082                                       |
| Ca_Kabuli_SNP65 | [T/G]       | Ca_Kabuli_LG01             | 19.143                                       |
| Ca_Kabuli_SNP66 | [C/T]       | Ca_Kabuli_LG01             | 19.270                                       |
| Ca_Kabuli_SNP67 | [A/T]       | Ca_Kabuli_LG01             | 19.416                                       |
| Ca_Kabuli_SNP68 | [C/T]       | Ca_Kabuli_LG01             | 19.518                                       |
| Ca_Kabuli_SNP69 | [T/C]       | Ca_Kabuli_LG01             | 19.524                                       |
| Ca_Kabuli_SNP70 | [G/T]       | Ca_Kabuli_LG01             | 20.091                                       |
| Ca_Kabuli_SNP71 | [G/A]       | Ca_Kabuli_LG01             | 20.096                                       |
| Ca_Kabuli_SNP72 | [T/C]       | Ca_Kabuli_LG01             | 20.136                                       |
| Ca_Kabuli_SNP73 | [G/A]       | Ca_Kabuli_LG01             | 20.218                                       |
| Ca_Kabuli_SNP74 | [T/G]       | Ca_Kabuli_LG01             | 20.429                                       |
| Ca_Kabuli_SNP75 | [T/G]       | Ca_Kabuli_LG01             | 20.690                                       |
| Ca_Kabuli_SNP76 | [G/A]       | Ca_Kabuli_LG01             | 20.710                                       |
| Ca_Kabuli_SNP77 | [C/T]       | Ca_Kabuli_LG01             | 20.984                                       |
| Ca_Kabuli_SNP78 | [G/A]       | Ca_Kabuli_LG01             | 21.231                                       |
| Ca_Kabuli_SNP79 | [A/C]       | Ca_Kabuli_LG01             | 22.695                                       |
| Ca_Kabuli_SNP80 | [C/T]       | Ca_Kabuli_LG01             | 22.719                                       |
| Ca_Kabuli_SNP81 | [G/A]       | Ca_Kabuli_LG01             | 23.310                                       |
| Ca_Kabuli_SNP82 | [T/G]       | Ca_Kabuli_LG01             | 23.371                                       |
| Ca_Kabuli_SNP83 | [T/A]       | Ca_Kabuli_LG01             | 23.418                                       |
| Ca_Kabuli_SNP84 | [G/A]       | Ca_Kabuli_LG01             | 23.874                                       |
| Ca_Kabuli_SNP85 | [C/T]       | Ca_Kabuli_LG01             | 24.053                                       |
| Ca_Kabuli_SNP86 | [A/C]       | Ca_Kabuli_LG01             | 24.199                                       |
| Ca_Kabuli_SNP87 | [A/T]       | Ca_Kabuli_LG01             | 24.539                                       |
| Ca_Kabuli_SNP88 | [G/A]       | Ca_Kabuli_LG01             | 24.751                                       |
| Ca_Kabuli_SNP89 | [A/C]       | Ca_Kabuli_LG01             | 25.076                                       |
| Ca_Kabuli_SNP90 | [T/G]       | Ca_Kabuli_LG01             | 25.234                                       |
| Ca_Kabuli_SNP91 | [A/G]       | Ca_Kabuli_LG01             | 25.255                                       |

| <b>SNP IDs</b>   | <b>SNPs</b> | <b>Linkage Group (LGs)</b> | <b>Genetic positions (cM) of mapped SNPs</b> |
|------------------|-------------|----------------------------|----------------------------------------------|
| Ca_Kabuli_SNP92  | [C/A]       | Ca_Kabuli_LG01             | 25.312                                       |
| Ca_Kabuli_SNP93  | [A/G]       | Ca_Kabuli_LG01             | 25.430                                       |
| Ca_Kabuli_SNP94  | [T/G]       | Ca_Kabuli_LG01             | 25.859                                       |
| Ca_Kabuli_SNP95  | [A/T]       | Ca_Kabuli_LG01             | 25.939                                       |
| Ca_Kabuli_SNP96  | [T/G]       | Ca_Kabuli_LG01             | 25.939                                       |
| Ca_Kabuli_SNP97  | [C/G]       | Ca_Kabuli_LG01             | 26.255                                       |
| Ca_Kabuli_SNP98  | [T/C]       | Ca_Kabuli_LG01             | 26.376                                       |
| Ca_Kabuli_SNP99  | [A/T]       | Ca_Kabuli_LG01             | 26.386                                       |
| Ca_Kabuli_SNP100 | [T/C]       | Ca_Kabuli_LG01             | 26.562                                       |
| Ca_Kabuli_SNP101 | [C/T]       | Ca_Kabuli_LG01             | 27.145                                       |
| Ca_Kabuli_SNP102 | [T/G]       | Ca_Kabuli_LG01             | 27.579                                       |
| Ca_Kabuli_SNP103 | [G/T]       | Ca_Kabuli_LG01             | 27.668                                       |
| Ca_Kabuli_SNP104 | [T/A]       | Ca_Kabuli_LG01             | 27.935                                       |
| Ca_Kabuli_SNP105 | [A/G]       | Ca_Kabuli_LG01             | 28.218                                       |
| Ca_Kabuli_SNP106 | [C/G]       | Ca_Kabuli_LG01             | 28.601                                       |
| Ca_Kabuli_SNP107 | [T/C]       | Ca_Kabuli_LG01             | 28.764                                       |
| Ca_Kabuli_SNP108 | [A/C]       | Ca_Kabuli_LG01             | 28.827                                       |
| Ca_Kabuli_SNP109 | [C/T]       | Ca_Kabuli_LG01             | 29.148                                       |
| Ca_Kabuli_SNP110 | [A/C]       | Ca_Kabuli_LG01             | 29.971                                       |
| Ca_Kabuli_SNP111 | [A/G]       | Ca_Kabuli_LG01             | 30.185                                       |
| Ca_Kabuli_SNP112 | [C/T]       | Ca_Kabuli_LG01             | 30.379                                       |
| Ca_Kabuli_SNP113 | [A/T]       | Ca_Kabuli_LG01             | 30.570                                       |
| Ca_Kabuli_SNP114 | [A/C]       | Ca_Kabuli_LG01             | 30.605                                       |
| Ca_Kabuli_SNP115 | [C/A]       | Ca_Kabuli_LG01             | 30.854                                       |
| Ca_Kabuli_SNP116 | [T/A]       | Ca_Kabuli_LG01             | 31.077                                       |
| Ca_Kabuli_SNP117 | [T/C]       | Ca_Kabuli_LG01             | 31.376                                       |
| Ca_Kabuli_SNP118 | [T/C]       | Ca_Kabuli_LG01             | 31.674                                       |
| Ca_Kabuli_SNP119 | [C/A]       | Ca_Kabuli_LG01             | 31.864                                       |
| Ca_Kabuli_SNP120 | [C/T]       | Ca_Kabuli_LG01             | 32.237                                       |
| Ca_Kabuli_SNP121 | [A/C]       | Ca_Kabuli_LG01             | 32.447                                       |
| Ca_Kabuli_SNP122 | [G/A]       | Ca_Kabuli_LG01             | 32.464                                       |

| <b>SNP IDs</b>   | <b>SNPs</b> | <b>Linkage Group (LGs)</b> | <b>Genetic positions (cM) of mapped SNPs</b> |
|------------------|-------------|----------------------------|----------------------------------------------|
| Ca_Kabuli_SNP123 | [G/A]       | Ca_Kabuli_LG01             | 32.592                                       |
| Ca_Kabuli_SNP124 | [T/C]       | Ca_Kabuli_LG01             | 32.678                                       |
| Ca_Kabuli_SNP125 | [A/G]       | Ca_Kabuli_LG01             | 32.941                                       |
| Ca_Kabuli_SNP126 | [T/A]       | Ca_Kabuli_LG01             | 33.279                                       |
| Ca_Kabuli_SNP127 | [A/G]       | Ca_Kabuli_LG01             | 33.429                                       |
| Ca_Kabuli_SNP128 | [A/T]       | Ca_Kabuli_LG01             | 33.473                                       |
| Ca_Kabuli_SNP129 | [C/A]       | Ca_Kabuli_LG01             | 33.597                                       |
| Ca_Kabuli_SNP130 | [A/C]       | Ca_Kabuli_LG01             | 33.677                                       |
| Ca_Kabuli_SNP131 | [T/G]       | Ca_Kabuli_LG01             | 33.723                                       |
| Ca_Kabuli_SNP132 | [A/C]       | Ca_Kabuli_LG01             | 33.761                                       |
| Ca_Kabuli_SNP133 | [A/G]       | Ca_Kabuli_LG01             | 33.825                                       |
| Ca_Kabuli_SNP134 | [A/G]       | Ca_Kabuli_LG01             | 34.045                                       |
| Ca_Kabuli_SNP135 | [T/A]       | Ca_Kabuli_LG01             | 34.057                                       |
| Ca_Kabuli_SNP136 | [C/G]       | Ca_Kabuli_LG01             | 35.230                                       |
| Ca_Kabuli_SNP137 | [A/G]       | Ca_Kabuli_LG01             | 35.620                                       |
| Ca_Kabuli_SNP138 | [T/C]       | Ca_Kabuli_LG01             | 35.720                                       |
| Ca_Kabuli_SNP139 | [C/T]       | Ca_Kabuli_LG01             | 35.765                                       |
| Ca_Kabuli_SNP140 | [G/A]       | Ca_Kabuli_LG01             | 35.804                                       |
| Ca_Kabuli_SNP141 | [A/T]       | Ca_Kabuli_LG01             | 36.236                                       |
| Ca_Kabuli_SNP142 | [G/A]       | Ca_Kabuli_LG01             | 36.322                                       |
| Ca_Kabuli_SNP143 | [T/G]       | Ca_Kabuli_LG01             | 36.456                                       |
| Ca_Kabuli_SNP144 | [C/A]       | Ca_Kabuli_LG01             | 36.826                                       |
| Ca_Kabuli_SNP145 | [A/C]       | Ca_Kabuli_LG01             | 37.177                                       |
| Ca_Kabuli_SNP146 | [G/C]       | Ca_Kabuli_LG01             | 37.486                                       |
| Ca_Kabuli_SNP147 | [T/G]       | Ca_Kabuli_LG01             | 38.001                                       |
| Ca_Kabuli_SNP148 | [T/G]       | Ca_Kabuli_LG01             | 38.043                                       |
| Ca_Kabuli_SNP149 | [A/G]       | Ca_Kabuli_LG01             | 38.170                                       |
| Ca_Kabuli_SNP150 | [T/G]       | Ca_Kabuli_LG01             | 38.490                                       |
| Ca_Kabuli_SNP151 | [G/T]       | Ca_Kabuli_LG01             | 38.628                                       |
| Ca_Kabuli_SNP152 | [T/G]       | Ca_Kabuli_LG01             | 38.645                                       |
| Ca_Kabuli_SNP153 | [C/G]       | Ca_Kabuli_LG01             | 39.070                                       |

| <b>SNP IDs</b>   | <b>SNPs</b> | <b>Linkage Group (LGs)</b> | <b>Genetic positions (cM) of mapped SNPs</b> |
|------------------|-------------|----------------------------|----------------------------------------------|
| Ca_Kabuli_SNP154 | [A/C]       | Ca_Kabuli_LG01             | 39.092                                       |
| Ca_Kabuli_SNP155 | [C/T]       | Ca_Kabuli_LG01             | 39.310                                       |
| Ca_Kabuli_SNP156 | [A/C]       | Ca_Kabuli_LG01             | 39.425                                       |
| Ca_Kabuli_SNP157 | [A/C]       | Ca_Kabuli_LG01             | 39.468                                       |
| Ca_Kabuli_SNP158 | [T/G]       | Ca_Kabuli_LG01             | 39.624                                       |
| Ca_Kabuli_SNP159 | [T/C]       | Ca_Kabuli_LG01             | 40.141                                       |
| Ca_Kabuli_SNP160 | [T/G]       | Ca_Kabuli_LG01             | 40.487                                       |
| Ca_Kabuli_SNP161 | [A/G]       | Ca_Kabuli_LG01             | 40.499                                       |
| Ca_Kabuli_SNP162 | [A/G]       | Ca_Kabuli_LG01             | 40.565                                       |
| Ca_Kabuli_SNP163 | [A/C]       | Ca_Kabuli_LG01             | 40.642                                       |
| Ca_Kabuli_SNP164 | [A/C]       | Ca_Kabuli_LG01             | 40.724                                       |
| Ca_Kabuli_SNP165 | [C/G]       | Ca_Kabuli_LG01             | 40.732                                       |
| Ca_Kabuli_SNP166 | [A/G]       | Ca_Kabuli_LG01             | 41.215                                       |
| Ca_Kabuli_SNP167 | [G/T]       | Ca_Kabuli_LG01             | 41.481                                       |
| Ca_Kabuli_SNP168 | [G/A]       | Ca_Kabuli_LG01             | 41.780                                       |
| Ca_Kabuli_SNP169 | [T/G]       | Ca_Kabuli_LG01             | 41.875                                       |
| Ca_Kabuli_SNP170 | [C/A]       | Ca_Kabuli_LG01             | 42.125                                       |
| Ca_Kabuli_SNP171 | [A/C]       | Ca_Kabuli_LG01             | 42.138                                       |
| Ca_Kabuli_SNP172 | [A/G]       | Ca_Kabuli_LG01             | 42.398                                       |
| Ca_Kabuli_SNP173 | [C/T]       | Ca_Kabuli_LG01             | 42.616                                       |
| Ca_Kabuli_SNP174 | [A/G]       | Ca_Kabuli_LG01             | 43.009                                       |
| Ca_Kabuli_SNP175 | [G/C]       | Ca_Kabuli_LG01             | 43.264                                       |
| Ca_Kabuli_SNP176 | [T/G]       | Ca_Kabuli_LG01             | 43.371                                       |
| Ca_Kabuli_SNP177 | [T/C]       | Ca_Kabuli_LG01             | 43.551                                       |
| Ca_Kabuli_SNP178 | [T/A]       | Ca_Kabuli_LG01             | 43.964                                       |
| Ca_Kabuli_SNP179 | [G/T]       | Ca_Kabuli_LG01             | 44.136                                       |
| Ca_Kabuli_SNP180 | [T/C]       | Ca_Kabuli_LG01             | 44.627                                       |
| Ca_Kabuli_SNP181 | [A/G]       | Ca_Kabuli_LG01             | 44.642                                       |
| Ca_Kabuli_SNP182 | [T/C]       | Ca_Kabuli_LG01             | 44.841                                       |
| Ca_Kabuli_SNP183 | [A/C]       | Ca_Kabuli_LG01             | 45.122                                       |
| Ca_Kabuli_SNP184 | [T/C]       | Ca_Kabuli_LG01             | 45.135                                       |

| <b>SNP IDs</b>   | <b>SNPs</b> | <b>Linkage Group (LGs)</b> | <b>Genetic positions (cM) of mapped SNPs</b> |
|------------------|-------------|----------------------------|----------------------------------------------|
| Ca_Kabuli_SNP185 | [A/C]       | Ca_Kabuli_LG01             | 45.196                                       |
| Ca_Kabuli_SNP186 | [C/T]       | Ca_Kabuli_LG01             | 45.270                                       |
| Ca_Kabuli_SNP187 | [C/T]       | Ca_Kabuli_LG01             | 45.277                                       |
| Ca_Kabuli_SNP188 | [C/A]       | Ca_Kabuli_LG01             | 45.277                                       |
| Ca_Kabuli_SNP189 | [C/T]       | Ca_Kabuli_LG01             | 45.277                                       |
| Ca_Kabuli_SNP190 | [G/T]       | Ca_Kabuli_LG01             | 45.306                                       |
| Ca_Kabuli_SNP191 | [C/T]       | Ca_Kabuli_LG01             | 46.090                                       |
| Ca_Kabuli_SNP192 | [A/C]       | Ca_Kabuli_LG01             | 46.245                                       |
| Ca_Kabuli_SNP193 | [A/C]       | Ca_Kabuli_LG01             | 46.284                                       |
| Ca_Kabuli_SNP194 | [A/G]       | Ca_Kabuli_LG01             | 46.568                                       |
| Ca_Kabuli_SNP195 | [C/A]       | Ca_Kabuli_LG01             | 47.189                                       |
| Ca_Kabuli_SNP196 | [G/A]       | Ca_Kabuli_LG01             | 47.274                                       |
| Ca_Kabuli_SNP197 | [A/C]       | Ca_Kabuli_LG01             | 47.289                                       |
| Ca_Kabuli_SNP198 | [T/A]       | Ca_Kabuli_LG01             | 47.794                                       |
| Ca_Kabuli_SNP199 | [A/G]       | Ca_Kabuli_LG01             | 47.828                                       |
| Ca_Kabuli_SNP200 | [C/T]       | Ca_Kabuli_LG01             | 48.546                                       |
| Ca_Kabuli_SNP201 | [T/G]       | Ca_Kabuli_LG01             | 49.435                                       |
| Ca_Kabuli_SNP202 | [T/C]       | Ca_Kabuli_LG01             | 49.500                                       |
| Ca_Kabuli_SNP203 | [A/C]       | Ca_Kabuli_LG01             | 49.991                                       |
| Ca_Kabuli_SNP204 | [A/T]       | Ca_Kabuli_LG01             | 50.094                                       |
| Ca_Kabuli_SNP205 | [C/T]       | Ca_Kabuli_LG01             | 50.591                                       |
| Ca_Kabuli_SNP206 | [A/G]       | Ca_Kabuli_LG01             | 50.707                                       |
| Ca_Kabuli_SNP207 | [T/C]       | Ca_Kabuli_LG01             | 50.769                                       |
| Ca_Kabuli_SNP208 | [A/C]       | Ca_Kabuli_LG01             | 50.972                                       |
| Ca_Kabuli_SNP209 | [C/T]       | Ca_Kabuli_LG01             | 50.973                                       |
| Ca_Kabuli_SNP210 | [A/C]       | Ca_Kabuli_LG01             | 51.173                                       |
| Ca_Kabuli_SNP211 | [G/T]       | Ca_Kabuli_LG01             | 51.207                                       |
| Ca_Kabuli_SNP212 | [C/T]       | Ca_Kabuli_LG01             | 51.302                                       |
| Ca_Kabuli_SNP213 | [A/G]       | Ca_Kabuli_LG01             | 51.507                                       |
| Ca_Kabuli_SNP214 | [C/A]       | Ca_Kabuli_LG01             | 51.759                                       |
| Ca_Kabuli_SNP215 | [A/C]       | Ca_Kabuli_LG01             | 51.894                                       |

| <b>SNP IDs</b>   | <b>SNPs</b> | <b>Linkage Group (LGs)</b> | <b>Genetic positions (cM) of mapped SNPs</b> |
|------------------|-------------|----------------------------|----------------------------------------------|
| Ca_Kabuli_SNP216 | [A/T]       | Ca_Kabuli_LG01             | 52.580                                       |
| Ca_Kabuli_SNP217 | [A/C]       | Ca_Kabuli_LG01             | 53.077                                       |
| Ca_Kabuli_SNP218 | [C/T]       | Ca_Kabuli_LG01             | 53.123                                       |
| Ca_Kabuli_SNP219 | [G/C]       | Ca_Kabuli_LG01             | 53.320                                       |
| Ca_Kabuli_SNP220 | [T/G]       | Ca_Kabuli_LG01             | 53.601                                       |
| Ca_Kabuli_SNP221 | [G/A]       | Ca_Kabuli_LG01             | 53.643                                       |
| Ca_Kabuli_SNP222 | [G/T]       | Ca_Kabuli_LG01             | 53.667                                       |
| Ca_Kabuli_SNP223 | [G/T]       | Ca_Kabuli_LG01             | 54.117                                       |
| Ca_Kabuli_SNP224 | [T/G]       | Ca_Kabuli_LG01             | 54.347                                       |
| Ca_Kabuli_SNP225 | [G/A]       | Ca_Kabuli_LG01             | 54.503                                       |
| Ca_Kabuli_SNP226 | [A/T]       | Ca_Kabuli_LG01             | 55.007                                       |
| Ca_Kabuli_SNP227 | [G/A]       | Ca_Kabuli_LG01             | 55.468                                       |
| Ca_Kabuli_SNP228 | [T/A]       | Ca_Kabuli_LG01             | 55.474                                       |
| Ca_Kabuli_SNP229 | [A/C]       | Ca_Kabuli_LG01             | 55.546                                       |
| Ca_Kabuli_SNP230 | [C/T]       | Ca_Kabuli_LG01             | 55.996                                       |
| Ca_Kabuli_SNP231 | [T/C]       | Ca_Kabuli_LG01             | 55.996                                       |
| Ca_Kabuli_SNP232 | [C/T]       | Ca_Kabuli_LG01             | 56.298                                       |
| Ca_Kabuli_SNP233 | [G/A]       | Ca_Kabuli_LG01             | 56.365                                       |
| Ca_Kabuli_SNP234 | [A/G]       | Ca_Kabuli_LG01             | 56.520                                       |
| Ca_Kabuli_SNP235 | [C/T]       | Ca_Kabuli_LG01             | 56.862                                       |
| Ca_Kabuli_SNP236 | [G/A]       | Ca_Kabuli_LG01             | 57.062                                       |
| Ca_Kabuli_SNP237 | [T/G]       | Ca_Kabuli_LG01             | 57.102                                       |
| Ca_Kabuli_SNP238 | [G/A]       | Ca_Kabuli_LG01             | 57.280                                       |
| Ca_Kabuli_SNP239 | [A/T]       | Ca_Kabuli_LG01             | 57.386                                       |
| Ca_Kabuli_SNP240 | [A/G]       | Ca_Kabuli_LG01             | 57.552                                       |
| Ca_Kabuli_SNP241 | [T/A]       | Ca_Kabuli_LG01             | 57.691                                       |
| Ca_Kabuli_SNP242 | [T/C]       | Ca_Kabuli_LG01             | 57.781                                       |
| Ca_Kabuli_SNP243 | [C/A]       | Ca_Kabuli_LG01             | 58.118                                       |
| Ca_Kabuli_SNP244 | [A/T]       | Ca_Kabuli_LG01             | 58.528                                       |
| Ca_Kabuli_SNP245 | [A/G]       | Ca_Kabuli_LG01             | 58.558                                       |
| Ca_Kabuli_SNP246 | [C/T]       | Ca_Kabuli_LG01             | 58.619                                       |

| <b>SNP IDs</b>   | <b>SNPs</b> | <b>Linkage Group (LGs)</b> | <b>Genetic positions (cM) of mapped SNPs</b> |
|------------------|-------------|----------------------------|----------------------------------------------|
| Ca_Kabuli_SNP247 | [G/T]       | Ca_Kabuli_LG01             | 58.739                                       |
| Ca_Kabuli_SNP248 | [C/T]       | Ca_Kabuli_LG01             | 58.807                                       |
| Ca_Kabuli_SNP249 | [A/G]       | Ca_Kabuli_LG01             | 58.898                                       |
| Ca_Kabuli_SNP250 | [T/A]       | Ca_Kabuli_LG01             | 58.939                                       |
| Ca_Kabuli_SNP251 | [G/A]       | Ca_Kabuli_LG01             | 59.137                                       |
| Ca_Kabuli_SNP252 | [A/C]       | Ca_Kabuli_LG01             | 59.668                                       |
| Ca_Kabuli_SNP253 | [C/A]       | Ca_Kabuli_LG01             | 59.849                                       |
| Ca_Kabuli_SNP254 | [T/C]       | Ca_Kabuli_LG01             | 59.859                                       |
| Ca_Kabuli_SNP255 | [A/C]       | Ca_Kabuli_LG01             | 59.945                                       |
| Ca_Kabuli_SNP256 | [C/T]       | Ca_Kabuli_LG01             | 60.252                                       |
| Ca_Kabuli_SNP257 | [A/G]       | Ca_Kabuli_LG01             | 60.299                                       |
| Ca_Kabuli_SNP258 | [C/T]       | Ca_Kabuli_LG01             | 60.723                                       |
| Ca_Kabuli_SNP259 | [G/C]       | Ca_Kabuli_LG01             | 60.809                                       |
| Ca_Kabuli_SNP260 | [T/G]       | Ca_Kabuli_LG01             | 61.120                                       |
| Ca_Kabuli_SNP261 | [T/A]       | Ca_Kabuli_LG01             | 61.120                                       |
| Ca_Kabuli_SNP262 | [C/T]       | Ca_Kabuli_LG01             | 61.574                                       |
| Ca_Kabuli_SNP263 | [G/T]       | Ca_Kabuli_LG01             | 61.928                                       |
| Ca_Kabuli_SNP264 | [G/A]       | Ca_Kabuli_LG01             | 62.065                                       |
| Ca_Kabuli_SNP265 | [A/G]       | Ca_Kabuli_LG01             | 62.065                                       |
| Ca_Kabuli_SNP266 | [C/A]       | Ca_Kabuli_LG01             | 62.065                                       |
| Ca_Kabuli_SNP267 | [A/C]       | Ca_Kabuli_LG01             | 62.065                                       |
| Ca_Kabuli_SNP268 | [A/C]       | Ca_Kabuli_LG01             | 62.065                                       |
| Ca_Kabuli_SNP269 | [G/T]       | Ca_Kabuli_LG01             | 62.150                                       |
| Ca_Kabuli_SNP270 | [C/A]       | Ca_Kabuli_LG01             | 62.361                                       |
| Ca_Kabuli_SNP271 | [G/T]       | Ca_Kabuli_LG01             | 62.956                                       |
| Ca_Kabuli_SNP272 | [T/A]       | Ca_Kabuli_LG01             | 63.028                                       |
| Ca_Kabuli_SNP273 | [G/A]       | Ca_Kabuli_LG01             | 63.090                                       |
| Ca_Kabuli_SNP274 | [T/G]       | Ca_Kabuli_LG01             | 63.981                                       |
| Ca_Kabuli_SNP275 | [G/T]       | Ca_Kabuli_LG01             | 64.625                                       |
| Ca_Kabuli_SNP276 | [T/G]       | Ca_Kabuli_LG01             | 64.810                                       |
| Ca_Kabuli_SNP277 | [G/C]       | Ca_Kabuli_LG01             | 64.946                                       |

| <b>SNP IDs</b>   | <b>SNPs</b> | <b>Linkage Group (LGs)</b> | <b>Genetic positions (cM) of mapped SNPs</b> |
|------------------|-------------|----------------------------|----------------------------------------------|
| Ca_Kabuli_SNP278 | [A/T]       | Ca_Kabuli_LG01             | 65.674                                       |
| Ca_Kabuli_SNP279 | [C/A]       | Ca_Kabuli_LG01             | 65.920                                       |
| Ca_Kabuli_SNP280 | [A/G]       | Ca_Kabuli_LG01             | 66.095                                       |
| Ca_Kabuli_SNP281 | [C/G]       | Ca_Kabuli_LG01             | 66.378                                       |
| Ca_Kabuli_SNP282 | [G/A]       | Ca_Kabuli_LG01             | 66.608                                       |
| Ca_Kabuli_SNP283 | [A/C]       | Ca_Kabuli_LG01             | 66.724                                       |
| Ca_Kabuli_SNP284 | [T/C]       | Ca_Kabuli_LG01             | 66.828                                       |
| Ca_Kabuli_SNP285 | [C/G]       | Ca_Kabuli_LG01             | 66.941                                       |
| Ca_Kabuli_SNP286 | [A/G]       | Ca_Kabuli_LG01             | 67.348                                       |
| Ca_Kabuli_SNP287 | [A/C]       | Ca_Kabuli_LG01             | 68.047                                       |
| Ca_Kabuli_SNP288 | [T/A]       | Ca_Kabuli_LG01             | 68.346                                       |
| Ca_Kabuli_SNP289 | [C/G]       | Ca_Kabuli_LG01             | 68.541                                       |
| Ca_Kabuli_SNP290 | [G/A]       | Ca_Kabuli_LG01             | 68.722                                       |
| Ca_Kabuli_SNP291 | [T/G]       | Ca_Kabuli_LG01             | 68.727                                       |
| Ca_Kabuli_SNP292 | [A/C]       | Ca_Kabuli_LG01             | 68.786                                       |
| Ca_Kabuli_SNP293 | [A/C]       | Ca_Kabuli_LG01             | 68.981                                       |
| Ca_Kabuli_SNP294 | [G/C]       | Ca_Kabuli_LG01             | 69.454                                       |
| Ca_Kabuli_SNP295 | [A/C]       | Ca_Kabuli_LG01             | 69.467                                       |
| Ca_Kabuli_SNP296 | [G/A]       | Ca_Kabuli_LG01             | 70.057                                       |
| Ca_Kabuli_SNP297 | [T/G]       | Ca_Kabuli_LG01             | 70.057                                       |
| Ca_Kabuli_SNP298 | [C/T]       | Ca_Kabuli_LG01             | 70.258                                       |
| Ca_Kabuli_SNP299 | [T/A]       | Ca_Kabuli_LG01             | 70.345                                       |
| Ca_Kabuli_SNP300 | [A/C]       | Ca_Kabuli_LG01             | 70.423                                       |
| Ca_Kabuli_SNP301 | [A/C]       | Ca_Kabuli_LG01             | 70.789                                       |
| Ca_Kabuli_SNP302 | [T/C]       | Ca_Kabuli_LG01             | 70.839                                       |
| Ca_Kabuli_SNP303 | [A/C]       | Ca_Kabuli_LG01             | 70.900                                       |
| Ca_Kabuli_SNP304 | [T/C]       | Ca_Kabuli_LG01             | 71.338                                       |
| Ca_Kabuli_SNP305 | [G/A]       | Ca_Kabuli_LG01             | 71.593                                       |
| Ca_Kabuli_SNP306 | [A/C]       | Ca_Kabuli_LG01             | 72.435                                       |
| Ca_Kabuli_SNP307 | [T/A]       | Ca_Kabuli_LG01             | 72.791                                       |
| Ca_Kabuli_SNP308 | [A/C]       | Ca_Kabuli_LG01             | 72.793                                       |



| <b>SNP IDs</b>   | <b>SNPs</b> | <b>Linkage Group (LGs)</b> | <b>Genetic positions (cM) of mapped SNPs</b> |
|------------------|-------------|----------------------------|----------------------------------------------|
| Ca_Kabuli_SNP309 | [A/G]       | Ca_Kabuli_LG01             | 73.022                                       |
| Ca_Kabuli_SNP310 | [A/G]       | Ca_Kabuli_LG01             | 73.224                                       |
| Ca_Kabuli_SNP311 | [A/G]       | Ca_Kabuli_LG01             | 73.374                                       |
| Ca_Kabuli_SNP312 | [C/T]       | Ca_Kabuli_LG01             | 74.267                                       |
| Ca_Kabuli_SNP313 | [T/C]       | Ca_Kabuli_LG01             | 75.251                                       |
| Ca_Kabuli_SNP314 | [T/G]       | Ca_Kabuli_LG01             | 76.539                                       |
| Ca_Kabuli_SNP315 | [T/G]       | Ca_Kabuli_LG01             | 76.896                                       |
| Ca_Kabuli_SNP316 | [A/G]       | Ca_Kabuli_LG01             | 77.497                                       |
| Ca_Kabuli_SNP317 | [A/G]       | Ca_Kabuli_LG01             | 77.888                                       |
| Ca_Kabuli_SNP318 | [G/T]       | Ca_Kabuli_LG01             | 78.241                                       |
| Ca_Kabuli_SNP319 | [A/C]       | Ca_Kabuli_LG01             | 78.348                                       |
| Ca_Kabuli_SNP320 | [T/G]       | Ca_Kabuli_LG01             | 78.878                                       |
| Ca_Kabuli_SNP321 | [T/A]       | Ca_Kabuli_LG01             | 79.240                                       |
| Ca_Kabuli_SNP322 | [T/C]       | Ca_Kabuli_LG01             | 79.266                                       |
| Ca_Kabuli_SNP323 | [G/C]       | Ca_Kabuli_LG01             | 79.353                                       |
| Ca_Kabuli_SNP324 | [G/C]       | Ca_Kabuli_LG01             | 80.433                                       |
| Ca_Kabuli_SNP325 | [T/C]       | Ca_Kabuli_LG01             | 80.433                                       |
| Ca_Kabuli_SNP326 | [A/T]       | Ca_Kabuli_LG01             | 80.588                                       |
| Ca_Kabuli_SNP327 | [A/C]       | Ca_Kabuli_LG01             | 81.709                                       |
| Ca_Kabuli_SNP328 | [C/T]       | Ca_Kabuli_LG01             | 81.828                                       |
| Ca_Kabuli_SNP329 | [T/A]       | Ca_Kabuli_LG01             | 81.848                                       |
| Ca_Kabuli_SNP330 | [C/A]       | Ca_Kabuli_LG01             | 82.417                                       |
| Ca_Kabuli_SNP331 | [A/G]       | Ca_Kabuli_LG01             | 82.500                                       |
| Ca_Kabuli_SNP332 | [G/A]       | Ca_Kabuli_LG01             | 82.676                                       |
| Ca_Kabuli_SNP333 | [A/G]       | Ca_Kabuli_LG01             | 82.892                                       |
| Ca_Kabuli_SNP334 | [G/C]       | Ca_Kabuli_LG01             | 83.136                                       |
| Ca_Kabuli_SNP335 | [G/T]       | Ca_Kabuli_LG01             | 83.923                                       |
| Ca_Kabuli_SNP336 | [T/C]       | Ca_Kabuli_LG01             | 84.204                                       |
| Ca_Kabuli_SNP337 | [T/C]       | Ca_Kabuli_LG01             | 84.204                                       |
| Ca_Kabuli_SNP338 | [A/C]       | Ca_Kabuli_LG01             | 84.964                                       |
| Ca_Kabuli_SNP339 | [C/A]       | Ca_Kabuli_LG01             | 86.057                                       |

| <b>SNP IDs</b>   | <b>SNPs</b> | <b>Linkage Group (LGs)</b> | <b>Genetic positions (cM) of mapped SNPs</b> |
|------------------|-------------|----------------------------|----------------------------------------------|
| Ca_Kabuli_SNP340 | [A/C]       | Ca_Kabuli_LG01             | 86.279                                       |
| Ca_Kabuli_SNP341 | [G/A]       | Ca_Kabuli_LG01             | 87.190                                       |
| Ca_Kabuli_SNP342 | [T/A]       | Ca_Kabuli_LG01             | 87.769                                       |
| Ca_Kabuli_SNP343 | [A/C]       | Ca_Kabuli_LG01             | 91.704                                       |
| Ca_Kabuli_SNP344 | [A/C]       | Ca_Kabuli_LG02             | 0.000                                        |
| Ca_Kabuli_SNP345 | [A/T]       | Ca_Kabuli_LG02             | 6.696                                        |
| Ca_Kabuli_SNP346 | [A/T]       | Ca_Kabuli_LG02             | 10.401                                       |
| Ca_Kabuli_SNP347 | [G/T]       | Ca_Kabuli_LG02             | 21.561                                       |
| Ca_Kabuli_SNP348 | [G/T]       | Ca_Kabuli_LG02             | 23.710                                       |
| Ca_Kabuli_SNP349 | [A/T]       | Ca_Kabuli_LG02             | 24.664                                       |
| Ca_Kabuli_SNP350 | [T/C]       | Ca_Kabuli_LG02             | 25.422                                       |
| Ca_Kabuli_SNP351 | [T/G]       | Ca_Kabuli_LG02             | 27.441                                       |
| Ca_Kabuli_SNP352 | [A/G]       | Ca_Kabuli_LG02             | 28.115                                       |
| Ca_Kabuli_SNP353 | [A/C]       | Ca_Kabuli_LG02             | 29.032                                       |
| Ca_Kabuli_SNP354 | [A/G]       | Ca_Kabuli_LG02             | 29.568                                       |
| Ca_Kabuli_SNP355 | [A/G]       | Ca_Kabuli_LG02             | 30.180                                       |
| Ca_Kabuli_SNP356 | [A/G]       | Ca_Kabuli_LG02             | 32.457                                       |
| Ca_Kabuli_SNP357 | [A/G]       | Ca_Kabuli_LG02             | 32.971                                       |
| Ca_Kabuli_SNP358 | [T/C]       | Ca_Kabuli_LG02             | 33.178                                       |
| Ca_Kabuli_SNP359 | [G/A]       | Ca_Kabuli_LG02             | 33.422                                       |
| Ca_Kabuli_SNP360 | [A/T]       | Ca_Kabuli_LG02             | 34.254                                       |
| Ca_Kabuli_SNP361 | [A/T]       | Ca_Kabuli_LG02             | 37.289                                       |
| Ca_Kabuli_SNP362 | [C/T]       | Ca_Kabuli_LG02             | 37.877                                       |
| Ca_Kabuli_SNP363 | [A/T]       | Ca_Kabuli_LG02             | 39.159                                       |
| Ca_Kabuli_SNP364 | [G/A]       | Ca_Kabuli_LG02             | 40.074                                       |
| Ca_Kabuli_SNP365 | [C/T]       | Ca_Kabuli_LG02             | 40.078                                       |
| Ca_Kabuli_SNP366 | [G/A]       | Ca_Kabuli_LG02             | 40.349                                       |
| Ca_Kabuli_SNP367 | [T/G]       | Ca_Kabuli_LG02             | 40.515                                       |
| Ca_Kabuli_SNP368 | [A/T]       | Ca_Kabuli_LG02             | 40.621                                       |
| Ca_Kabuli_SNP369 | [T/A]       | Ca_Kabuli_LG02             | 40.726                                       |
| Ca_Kabuli_SNP370 | [G/A]       | Ca_Kabuli_LG02             | 40.748                                       |

| <b>SNP IDs</b>   | <b>SNPs</b> | <b>Linkage Group (LGs)</b> | <b>Genetic positions (cM) of mapped SNPs</b> |
|------------------|-------------|----------------------------|----------------------------------------------|
| Ca_Kabuli_SNP371 | [A/G]       | Ca_Kabuli_LG02             | 41.421                                       |
| Ca_Kabuli_SNP372 | [C/T]       | Ca_Kabuli_LG02             | 42.283                                       |
| Ca_Kabuli_SNP373 | [C/T]       | Ca_Kabuli_LG02             | 42.868                                       |
| Ca_Kabuli_SNP374 | [A/C]       | Ca_Kabuli_LG02             | 43.088                                       |
| Ca_Kabuli_SNP375 | [C/A]       | Ca_Kabuli_LG02             | 43.181                                       |
| Ca_Kabuli_SNP376 | [G/A]       | Ca_Kabuli_LG02             | 43.579                                       |
| Ca_Kabuli_SNP377 | [G/T]       | Ca_Kabuli_LG02             | 43.856                                       |
| Ca_Kabuli_SNP378 | [A/G]       | Ca_Kabuli_LG02             | 44.536                                       |
| Ca_Kabuli_SNP379 | [T/G]       | Ca_Kabuli_LG02             | 44.589                                       |
| Ca_Kabuli_SNP380 | [C/T]       | Ca_Kabuli_LG02             | 45.035                                       |
| Ca_Kabuli_SNP381 | [A/T]       | Ca_Kabuli_LG02             | 45.320                                       |
| Ca_Kabuli_SNP382 | [T/C]       | Ca_Kabuli_LG02             | 46.221                                       |
| Ca_Kabuli_SNP383 | [A/G]       | Ca_Kabuli_LG02             | 46.592                                       |
| Ca_Kabuli_SNP384 | [T/G]       | Ca_Kabuli_LG02             | 46.992                                       |
| Ca_Kabuli_SNP385 | [A/C]       | Ca_Kabuli_LG02             | 47.144                                       |
| Ca_Kabuli_SNP386 | [A/C]       | Ca_Kabuli_LG02             | 47.203                                       |
| Ca_Kabuli_SNP387 | [T/G]       | Ca_Kabuli_LG02             | 47.637                                       |
| Ca_Kabuli_SNP388 | [T/A]       | Ca_Kabuli_LG02             | 47.995                                       |
| Ca_Kabuli_SNP389 | [C/T]       | Ca_Kabuli_LG02             | 48.239                                       |
| Ca_Kabuli_SNP390 | [T/A]       | Ca_Kabuli_LG02             | 48.494                                       |
| Ca_Kabuli_SNP391 | [T/A]       | Ca_Kabuli_LG02             | 50.347                                       |
| Ca_Kabuli_SNP392 | [A/T]       | Ca_Kabuli_LG02             | 50.560                                       |
| Ca_Kabuli_SNP393 | [C/T]       | Ca_Kabuli_LG02             | 51.018                                       |
| Ca_Kabuli_SNP394 | [C/T]       | Ca_Kabuli_LG02             | 53.022                                       |
| Ca_Kabuli_SNP395 | [A/T]       | Ca_Kabuli_LG02             | 53.095                                       |
| Ca_Kabuli_SNP396 | [A/C]       | Ca_Kabuli_LG02             | 54.486                                       |
| Ca_Kabuli_SNP397 | [T/G]       | Ca_Kabuli_LG02             | 54.577                                       |
| Ca_Kabuli_SNP398 | [T/A]       | Ca_Kabuli_LG02             | 55.285                                       |
| Ca_Kabuli_SNP399 | [A/G]       | Ca_Kabuli_LG02             | 55.573                                       |
| Ca_Kabuli_SNP400 | [A/C]       | Ca_Kabuli_LG02             | 55.678                                       |
| Ca_Kabuli_SNP401 | [G/T]       | Ca_Kabuli_LG02             | 55.798                                       |

| <b>SNP IDs</b>   | <b>SNPs</b> | <b>Linkage Group (LGs)</b> | <b>Genetic positions (cM) of mapped SNPs</b> |
|------------------|-------------|----------------------------|----------------------------------------------|
| Ca_Kabuli_SNP402 | [A/G]       | Ca_Kabuli_LG02             | 56.356                                       |
| Ca_Kabuli_SNP403 | [G/A]       | Ca_Kabuli_LG02             | 56.502                                       |
| Ca_Kabuli_SNP404 | [A/C]       | Ca_Kabuli_LG02             | 56.579                                       |
| Ca_Kabuli_SNP405 | [C/A]       | Ca_Kabuli_LG02             | 56.968                                       |
| Ca_Kabuli_SNP406 | [A/G]       | Ca_Kabuli_LG02             | 57.032                                       |
| Ca_Kabuli_SNP407 | [G/T]       | Ca_Kabuli_LG02             | 57.157                                       |
| Ca_Kabuli_SNP408 | [T/C]       | Ca_Kabuli_LG02             | 58.351                                       |
| Ca_Kabuli_SNP409 | [T/G]       | Ca_Kabuli_LG02             | 58.436                                       |
| Ca_Kabuli_SNP410 | [C/T]       | Ca_Kabuli_LG02             | 58.875                                       |
| Ca_Kabuli_SNP411 | [G/A]       | Ca_Kabuli_LG02             | 59.025                                       |
| Ca_Kabuli_SNP412 | [A/T]       | Ca_Kabuli_LG02             | 59.090                                       |
| Ca_Kabuli_SNP413 | [C/A]       | Ca_Kabuli_LG02             | 59.410                                       |
| Ca_Kabuli_SNP414 | [G/A]       | Ca_Kabuli_LG02             | 60.154                                       |
| Ca_Kabuli_SNP415 | [T/C]       | Ca_Kabuli_LG02             | 60.302                                       |
| Ca_Kabuli_SNP416 | [G/A]       | Ca_Kabuli_LG02             | 60.631                                       |
| Ca_Kabuli_SNP417 | [G/A]       | Ca_Kabuli_LG02             | 60.719                                       |
| Ca_Kabuli_SNP418 | [T/C]       | Ca_Kabuli_LG02             | 60.918                                       |
| Ca_Kabuli_SNP419 | [A/G]       | Ca_Kabuli_LG02             | 61.211                                       |
| Ca_Kabuli_SNP420 | [C/G]       | Ca_Kabuli_LG02             | 61.495                                       |
| Ca_Kabuli_SNP421 | [T/A]       | Ca_Kabuli_LG02             | 61.593                                       |
| Ca_Kabuli_SNP422 | [A/G]       | Ca_Kabuli_LG02             | 62.047                                       |
| Ca_Kabuli_SNP423 | [A/C]       | Ca_Kabuli_LG02             | 62.516                                       |
| Ca_Kabuli_SNP424 | [A/G]       | Ca_Kabuli_LG02             | 62.716                                       |
| Ca_Kabuli_SNP425 | [A/C]       | Ca_Kabuli_LG02             | 63.783                                       |
| Ca_Kabuli_SNP426 | [G/C]       | Ca_Kabuli_LG02             | 64.438                                       |
| Ca_Kabuli_SNP427 | [T/C]       | Ca_Kabuli_LG02             | 64.672                                       |
| Ca_Kabuli_SNP428 | [T/A]       | Ca_Kabuli_LG02             | 65.282                                       |
| Ca_Kabuli_SNP429 | [T/A]       | Ca_Kabuli_LG02             | 65.861                                       |
| Ca_Kabuli_SNP430 | [A/G]       | Ca_Kabuli_LG02             | 66.176                                       |
| Ca_Kabuli_SNP431 | [G/T]       | Ca_Kabuli_LG02             | 66.596                                       |
| Ca_Kabuli_SNP432 | [G/C]       | Ca_Kabuli_LG02             | 69.400                                       |

| <b>SNP IDs</b>   | <b>SNPs</b> | <b>Linkage Group (LGs)</b> | <b>Genetic positions (cM) of mapped SNPs</b> |
|------------------|-------------|----------------------------|----------------------------------------------|
| Ca_Kabuli_SNP433 | [G/A]       | Ca_Kabuli_LG02             | 69.727                                       |
| Ca_Kabuli_SNP434 | [A/G]       | Ca_Kabuli_LG02             | 69.922                                       |
| Ca_Kabuli_SNP435 | [G/C]       | Ca_Kabuli_LG02             | 70.336                                       |
| Ca_Kabuli_SNP436 | [G/T]       | Ca_Kabuli_LG02             | 71.220                                       |
| Ca_Kabuli_SNP437 | [G/A]       | Ca_Kabuli_LG02             | 72.023                                       |
| Ca_Kabuli_SNP438 | [T/C]       | Ca_Kabuli_LG02             | 72.879                                       |
| Ca_Kabuli_SNP439 | [G/T]       | Ca_Kabuli_LG02             | 73.160                                       |
| Ca_Kabuli_SNP440 | [G/A]       | Ca_Kabuli_LG02             | 73.184                                       |
| Ca_Kabuli_SNP441 | [T/C]       | Ca_Kabuli_LG02             | 73.358                                       |
| Ca_Kabuli_SNP442 | [A/T]       | Ca_Kabuli_LG02             | 77.158                                       |
| Ca_Kabuli_SNP443 | [T/G]       | Ca_Kabuli_LG02             | 80.104                                       |
| Ca_Kabuli_SNP444 | [A/C]       | Ca_Kabuli_LG02             | 80.670                                       |
| Ca_Kabuli_SNP445 | [T/G]       | Ca_Kabuli_LG02             | 81.180                                       |
| Ca_Kabuli_SNP446 | [C/A]       | Ca_Kabuli_LG02             | 81.972                                       |
| Ca_Kabuli_SNP447 | [G/T]       | Ca_Kabuli_LG02             | 82.057                                       |
| Ca_Kabuli_SNP448 | [C/G]       | Ca_Kabuli_LG02             | 82.151                                       |
| Ca_Kabuli_SNP449 | [A/T]       | Ca_Kabuli_LG02             | 82.315                                       |
| Ca_Kabuli_SNP450 | [A/C]       | Ca_Kabuli_LG02             | 82.502                                       |
| Ca_Kabuli_SNP451 | [A/T]       | Ca_Kabuli_LG02             | 82.625                                       |
| Ca_Kabuli_SNP452 | [A/G]       | Ca_Kabuli_LG02             | 82.720                                       |
| Ca_Kabuli_SNP453 | [T/C]       | Ca_Kabuli_LG02             | 82.812                                       |
| Ca_Kabuli_SNP454 | [C/A]       | Ca_Kabuli_LG02             | 82.842                                       |
| Ca_Kabuli_SNP455 | [A/C]       | Ca_Kabuli_LG02             | 82.883                                       |
| Ca_Kabuli_SNP456 | [G/C]       | Ca_Kabuli_LG02             | 82.883                                       |
| Ca_Kabuli_SNP457 | [G/A]       | Ca_Kabuli_LG02             | 82.926                                       |
| Ca_Kabuli_SNP458 | [T/G]       | Ca_Kabuli_LG02             | 83.000                                       |
| Ca_Kabuli_SNP459 | [A/C]       | Ca_Kabuli_LG02             | 83.053                                       |
| Ca_Kabuli_SNP460 | [C/T]       | Ca_Kabuli_LG02             | 83.206                                       |
| Ca_Kabuli_SNP461 | [C/T]       | Ca_Kabuli_LG02             | 83.410                                       |
| Ca_Kabuli_SNP462 | [G/T]       | Ca_Kabuli_LG02             | 84.151                                       |
| Ca_Kabuli_SNP463 | [C/T]       | Ca_Kabuli_LG02             | 84.204                                       |

| <b>SNP IDs</b>   | <b>SNPs</b> | <b>Linkage Group (LGs)</b> | <b>Genetic positions (cM) of mapped SNPs</b> |
|------------------|-------------|----------------------------|----------------------------------------------|
| Ca_Kabuli_SNP464 | [T/C]       | Ca_Kabuli_LG02             | 84.501                                       |
| Ca_Kabuli_SNP465 | [A/C]       | Ca_Kabuli_LG02             | 84.503                                       |
| Ca_Kabuli_SNP466 | [A/C]       | Ca_Kabuli_LG02             | 84.738                                       |
| Ca_Kabuli_SNP467 | [G/T]       | Ca_Kabuli_LG02             | 84.905                                       |
| Ca_Kabuli_SNP468 | [C/G]       | Ca_Kabuli_LG02             | 84.941                                       |
| Ca_Kabuli_SNP469 | [T/G]       | Ca_Kabuli_LG02             | 84.979                                       |
| Ca_Kabuli_SNP470 | [T/G]       | Ca_Kabuli_LG02             | 85.009                                       |
| Ca_Kabuli_SNP471 | [C/G]       | Ca_Kabuli_LG02             | 85.469                                       |
| Ca_Kabuli_SNP472 | [A/C]       | Ca_Kabuli_LG02             | 85.648                                       |
| Ca_Kabuli_SNP473 | [A/C]       | Ca_Kabuli_LG02             | 85.660                                       |
| Ca_Kabuli_SNP474 | [T/A]       | Ca_Kabuli_LG02             | 85.857                                       |
| Ca_Kabuli_SNP475 | [G/T]       | Ca_Kabuli_LG02             | 86.419                                       |
| Ca_Kabuli_SNP476 | [A/T]       | Ca_Kabuli_LG02             | 86.462                                       |
| Ca_Kabuli_SNP477 | [C/T]       | Ca_Kabuli_LG02             | 86.879                                       |
| Ca_Kabuli_SNP478 | [T/G]       | Ca_Kabuli_LG02             | 86.926                                       |
| Ca_Kabuli_SNP479 | [A/T]       | Ca_Kabuli_LG02             | 86.926                                       |
| Ca_Kabuli_SNP480 | [G/A]       | Ca_Kabuli_LG02             | 86.926                                       |
| Ca_Kabuli_SNP481 | [T/C]       | Ca_Kabuli_LG02             | 86.926                                       |
| Ca_Kabuli_SNP482 | [C/A]       | Ca_Kabuli_LG02             | 87.225                                       |
| Ca_Kabuli_SNP483 | [T/G]       | Ca_Kabuli_LG02             | 87.225                                       |
| Ca_Kabuli_SNP484 | [G/T]       | Ca_Kabuli_LG02             | 87.340                                       |
| Ca_Kabuli_SNP485 | [A/G]       | Ca_Kabuli_LG02             | 87.347                                       |
| Ca_Kabuli_SNP486 | [G/T]       | Ca_Kabuli_LG02             | 87.620                                       |
| Ca_Kabuli_SNP487 | [A/T]       | Ca_Kabuli_LG02             | 87.704                                       |
| Ca_Kabuli_SNP488 | [A/G]       | Ca_Kabuli_LG02             | 87.956                                       |
| Ca_Kabuli_SNP489 | [C/G]       | Ca_Kabuli_LG02             | 88.226                                       |
| Ca_Kabuli_SNP490 | [C/T]       | Ca_Kabuli_LG02             | 88.537                                       |
| Ca_Kabuli_SNP491 | [T/G]       | Ca_Kabuli_LG02             | 88.996                                       |
| Ca_Kabuli_SNP492 | [G/A]       | Ca_Kabuli_LG02             | 89.282                                       |
| Ca_Kabuli_SNP493 | [C/G]       | Ca_Kabuli_LG02             | 89.536                                       |
| Ca_Kabuli_SNP494 | [T/G]       | Ca_Kabuli_LG02             | 89.536                                       |

| <b>SNP IDs</b>   | <b>SNPs</b> | <b>Linkage Group (LGs)</b> | <b>Genetic positions (cM) of mapped SNPs</b> |
|------------------|-------------|----------------------------|----------------------------------------------|
| Ca_Kabuli_SNP495 | [C/G]       | Ca_Kabuli_LG02             | 89.536                                       |
| Ca_Kabuli_SNP496 | [G/T]       | Ca_Kabuli_LG02             | 89.536                                       |
| Ca_Kabuli_SNP497 | [T/C]       | Ca_Kabuli_LG02             | 89.536                                       |
| Ca_Kabuli_SNP498 | [G/T]       | Ca_Kabuli_LG02             | 89.644                                       |
| Ca_Kabuli_SNP499 | [A/C]       | Ca_Kabuli_LG02             | 90.275                                       |
| Ca_Kabuli_SNP500 | [T/C]       | Ca_Kabuli_LG02             | 91.139                                       |
| Ca_Kabuli_SNP501 | [C/T]       | Ca_Kabuli_LG02             | 91.507                                       |
| Ca_Kabuli_SNP502 | [C/T]       | Ca_Kabuli_LG02             | 91.678                                       |
| Ca_Kabuli_SNP503 | [C/T]       | Ca_Kabuli_LG02             | 91.847                                       |
| Ca_Kabuli_SNP504 | [A/G]       | Ca_Kabuli_LG02             | 92.255                                       |
| Ca_Kabuli_SNP505 | [C/G]       | Ca_Kabuli_LG02             | 93.006                                       |
| Ca_Kabuli_SNP506 | [T/C]       | Ca_Kabuli_LG02             | 93.990                                       |
| Ca_Kabuli_SNP507 | [G/C]       | Ca_Kabuli_LG02             | 94.054                                       |
| Ca_Kabuli_SNP508 | [G/T]       | Ca_Kabuli_LG02             | 94.110                                       |
| Ca_Kabuli_SNP509 | [A/T]       | Ca_Kabuli_LG02             | 95.626                                       |
| Ca_Kabuli_SNP510 | [A/G]       | Ca_Kabuli_LG02             | 95.650                                       |
| Ca_Kabuli_SNP511 | [G/T]       | Ca_Kabuli_LG02             | 96.207                                       |
| Ca_Kabuli_SNP512 | [T/A]       | Ca_Kabuli_LG02             | 99.574                                       |
| Ca_Kabuli_SNP513 | [G/A]       | Ca_Kabuli_LG02             | 100.022                                      |
| Ca_Kabuli_SNP514 | [G/T]       | Ca_Kabuli_LG02             | 100.740                                      |
| Ca_Kabuli_SNP515 | [A/C]       | Ca_Kabuli_LG02             | 102.094                                      |
| Ca_Kabuli_SNP516 | [G/T]       | Ca_Kabuli_LG02             | 102.243                                      |
| Ca_Kabuli_SNP517 | [T/G]       | Ca_Kabuli_LG02             | 102.481                                      |
| Ca_Kabuli_SNP518 | [T/C]       | Ca_Kabuli_LG02             | 103.449                                      |
| Ca_Kabuli_SNP519 | [C/G]       | Ca_Kabuli_LG02             | 103.524                                      |
| Ca_Kabuli_SNP520 | [A/T]       | Ca_Kabuli_LG02             | 103.543                                      |
| Ca_Kabuli_SNP521 | [A/G]       | Ca_Kabuli_LG02             | 105.385                                      |
| Ca_Kabuli_SNP522 | [C/T]       | Ca_Kabuli_LG02             | 106.089                                      |
| Ca_Kabuli_SNP523 | [C/T]       | Ca_Kabuli_LG02             | 106.135                                      |
| Ca_Kabuli_SNP524 | [A/C]       | Ca_Kabuli_LG02             | 106.557                                      |
| Ca_Kabuli_SNP525 | [T/G]       | Ca_Kabuli_LG02             | 107.053                                      |

| <b>SNP IDs</b>   | <b>SNPs</b> | <b>Linkage Group (LGs)</b> | <b>Genetic positions (cM) of mapped SNPs</b> |
|------------------|-------------|----------------------------|----------------------------------------------|
| Ca_Kabuli_SNP526 | [C/T]       | Ca_Kabuli_LG02             | 107.176                                      |
| Ca_Kabuli_SNP527 | [G/A]       | Ca_Kabuli_LG02             | 108.414                                      |
| Ca_Kabuli_SNP528 | [G/C]       | Ca_Kabuli_LG02             | 108.857                                      |
| Ca_Kabuli_SNP529 | [A/T]       | Ca_Kabuli_LG02             | 109.334                                      |
| Ca_Kabuli_SNP530 | [G/A]       | Ca_Kabuli_LG02             | 109.545                                      |
| Ca_Kabuli_SNP531 | [T/A]       | Ca_Kabuli_LG02             | 109.957                                      |
| Ca_Kabuli_SNP532 | [G/A]       | Ca_Kabuli_LG02             | 110.630                                      |
| Ca_Kabuli_SNP533 | [C/G]       | Ca_Kabuli_LG02             | 111.333                                      |
| Ca_Kabuli_SNP534 | [T/G]       | Ca_Kabuli_LG02             | 114.763                                      |
| Ca_Kabuli_SNP535 | [T/G]       | Ca_Kabuli_LG02             | 114.889                                      |
| Ca_Kabuli_SNP536 | [C/T]       | Ca_Kabuli_LG02             | 115.683                                      |
| Ca_Kabuli_SNP537 | [T/C]       | Ca_Kabuli_LG02             | 115.835                                      |
| Ca_Kabuli_SNP538 | [C/T]       | Ca_Kabuli_LG02             | 116.285                                      |
| Ca_Kabuli_SNP539 | [T/G]       | Ca_Kabuli_LG02             | 116.646                                      |
| Ca_Kabuli_SNP540 | [A/G]       | Ca_Kabuli_LG02             | 116.887                                      |
| Ca_Kabuli_SNP541 | [A/G]       | Ca_Kabuli_LG02             | 118.830                                      |
| Ca_Kabuli_SNP542 | [G/T]       | Ca_Kabuli_LG02             | 120.359                                      |
| Ca_Kabuli_SNP543 | [A/T]       | Ca_Kabuli_LG03             | 0.000                                        |
| Ca_Kabuli_SNP544 | [A/C]       | Ca_Kabuli_LG03             | 0.104                                        |
| Ca_Kabuli_SNP545 | [G/T]       | Ca_Kabuli_LG03             | 0.681                                        |
| Ca_Kabuli_SNP546 | [G/A]       | Ca_Kabuli_LG03             | 1.275                                        |
| Ca_Kabuli_SNP547 | [T/A]       | Ca_Kabuli_LG03             | 1.352                                        |
| Ca_Kabuli_SNP548 | [C/A]       | Ca_Kabuli_LG03             | 1.858                                        |
| Ca_Kabuli_SNP549 | [C/G]       | Ca_Kabuli_LG03             | 1.978                                        |
| Ca_Kabuli_SNP550 | [T/A]       | Ca_Kabuli_LG03             | 2.031                                        |
| Ca_Kabuli_SNP551 | [C/A]       | Ca_Kabuli_LG03             | 2.094                                        |
| Ca_Kabuli_SNP552 | [G/A]       | Ca_Kabuli_LG03             | 2.213                                        |
| Ca_Kabuli_SNP553 | [A/G]       | Ca_Kabuli_LG03             | 2.474                                        |
| Ca_Kabuli_SNP554 | [G/T]       | Ca_Kabuli_LG03             | 2.828                                        |
| Ca_Kabuli_SNP555 | [A/C]       | Ca_Kabuli_LG03             | 3.325                                        |
| Ca_Kabuli_SNP556 | [A/G]       | Ca_Kabuli_LG03             | 3.765                                        |



| <b>SNP IDs</b>   | <b>SNPs</b> | <b>Linkage Group (LGs)</b> | <b>Genetic positions (cM) of mapped SNPs</b> |
|------------------|-------------|----------------------------|----------------------------------------------|
| Ca_Kabuli_SNP557 | [C/T]       | Ca_Kabuli_LG03             | 4.182                                        |
| Ca_Kabuli_SNP558 | [A/G]       | Ca_Kabuli_LG03             | 4.457                                        |
| Ca_Kabuli_SNP559 | [G/T]       | Ca_Kabuli_LG03             | 4.566                                        |
| Ca_Kabuli_SNP560 | [A/C]       | Ca_Kabuli_LG03             | 4.754                                        |
| Ca_Kabuli_SNP561 | [A/G]       | Ca_Kabuli_LG03             | 4.920                                        |
| Ca_Kabuli_SNP562 | [A/G]       | Ca_Kabuli_LG03             | 5.141                                        |
| Ca_Kabuli_SNP563 | [T/G]       | Ca_Kabuli_LG03             | 5.175                                        |
| Ca_Kabuli_SNP564 | [G/T]       | Ca_Kabuli_LG03             | 5.223                                        |
| Ca_Kabuli_SNP565 | [A/T]       | Ca_Kabuli_LG03             | 5.254                                        |
| Ca_Kabuli_SNP566 | [G/T]       | Ca_Kabuli_LG03             | 5.500                                        |
| Ca_Kabuli_SNP567 | [A/G]       | Ca_Kabuli_LG03             | 5.615                                        |
| Ca_Kabuli_SNP568 | [T/G]       | Ca_Kabuli_LG03             | 6.457                                        |
| Ca_Kabuli_SNP569 | [T/A]       | Ca_Kabuli_LG03             | 6.720                                        |
| Ca_Kabuli_SNP570 | [A/G]       | Ca_Kabuli_LG03             | 6.720                                        |
| Ca_Kabuli_SNP571 | [A/C]       | Ca_Kabuli_LG03             | 6.725                                        |
| Ca_Kabuli_SNP572 | [A/G]       | Ca_Kabuli_LG03             | 6.907                                        |
| Ca_Kabuli_SNP573 | [T/C]       | Ca_Kabuli_LG03             | 7.098                                        |
| Ca_Kabuli_SNP574 | [A/C]       | Ca_Kabuli_LG03             | 8.285                                        |
| Ca_Kabuli_SNP575 | [C/T]       | Ca_Kabuli_LG03             | 8.384                                        |
| Ca_Kabuli_SNP576 | [T/G]       | Ca_Kabuli_LG03             | 8.451                                        |
| Ca_Kabuli_SNP577 | [A/G]       | Ca_Kabuli_LG03             | 8.515                                        |
| Ca_Kabuli_SNP578 | [G/T]       | Ca_Kabuli_LG03             | 9.045                                        |
| Ca_Kabuli_SNP579 | [C/T]       | Ca_Kabuli_LG03             | 9.064                                        |
| Ca_Kabuli_SNP580 | [A/C]       | Ca_Kabuli_LG03             | 9.145                                        |
| Ca_Kabuli_SNP581 | [C/A]       | Ca_Kabuli_LG03             | 9.465                                        |
| Ca_Kabuli_SNP582 | [C/T]       | Ca_Kabuli_LG03             | 9.505                                        |
| Ca_Kabuli_SNP583 | [T/G]       | Ca_Kabuli_LG03             | 10.417                                       |
| Ca_Kabuli_SNP584 | [G/A]       | Ca_Kabuli_LG03             | 10.459                                       |
| Ca_Kabuli_SNP585 | [C/T]       | Ca_Kabuli_LG03             | 10.467                                       |
| Ca_Kabuli_SNP586 | [A/C]       | Ca_Kabuli_LG03             | 10.499                                       |
| Ca_Kabuli_SNP587 | [A/C]       | Ca_Kabuli_LG03             | 10.564                                       |

| <b>SNP IDs</b>   | <b>SNPs</b> | <b>Linkage Group (LGs)</b> | <b>Genetic positions (cM) of mapped SNPs</b> |
|------------------|-------------|----------------------------|----------------------------------------------|
| Ca_Kabuli_SNP588 | [A/G]       | Ca_Kabuli_LG03             | 10.646                                       |
| Ca_Kabuli_SNP589 | [T/C]       | Ca_Kabuli_LG03             | 10.873                                       |
| Ca_Kabuli_SNP590 | [A/C]       | Ca_Kabuli_LG03             | 11.433                                       |
| Ca_Kabuli_SNP591 | [A/G]       | Ca_Kabuli_LG03             | 11.577                                       |
| Ca_Kabuli_SNP592 | [C/G]       | Ca_Kabuli_LG03             | 11.993                                       |
| Ca_Kabuli_SNP593 | [G/T]       | Ca_Kabuli_LG03             | 12.049                                       |
| Ca_Kabuli_SNP594 | [T/C]       | Ca_Kabuli_LG03             | 12.146                                       |
| Ca_Kabuli_SNP595 | [C/A]       | Ca_Kabuli_LG03             | 12.265                                       |
| Ca_Kabuli_SNP596 | [C/T]       | Ca_Kabuli_LG03             | 12.269                                       |
| Ca_Kabuli_SNP597 | [T/G]       | Ca_Kabuli_LG03             | 12.697                                       |
| Ca_Kabuli_SNP598 | [T/A]       | Ca_Kabuli_LG03             | 12.818                                       |
| Ca_Kabuli_SNP599 | [G/A]       | Ca_Kabuli_LG03             | 13.429                                       |
| Ca_Kabuli_SNP600 | [C/A]       | Ca_Kabuli_LG03             | 13.547                                       |
| Ca_Kabuli_SNP601 | [T/G]       | Ca_Kabuli_LG03             | 13.727                                       |
| Ca_Kabuli_SNP602 | [G/T]       | Ca_Kabuli_LG03             | 13.885                                       |
| Ca_Kabuli_SNP603 | [A/T]       | Ca_Kabuli_LG03             | 14.027                                       |
| Ca_Kabuli_SNP604 | [A/C]       | Ca_Kabuli_LG03             | 14.077                                       |
| Ca_Kabuli_SNP605 | [G/A]       | Ca_Kabuli_LG03             | 14.081                                       |
| Ca_Kabuli_SNP606 | [A/C]       | Ca_Kabuli_LG03             | 14.199                                       |
| Ca_Kabuli_SNP607 | [G/T]       | Ca_Kabuli_LG03             | 14.437                                       |
| Ca_Kabuli_SNP608 | [T/G]       | Ca_Kabuli_LG03             | 14.518                                       |
| Ca_Kabuli_SNP609 | [A/G]       | Ca_Kabuli_LG03             | 14.686                                       |
| Ca_Kabuli_SNP610 | [G/C]       | Ca_Kabuli_LG03             | 14.819                                       |
| Ca_Kabuli_SNP611 | [G/A]       | Ca_Kabuli_LG03             | 14.835                                       |
| Ca_Kabuli_SNP612 | [T/A]       | Ca_Kabuli_LG03             | 15.091                                       |
| Ca_Kabuli_SNP613 | [C/A]       | Ca_Kabuli_LG03             | 15.527                                       |
| Ca_Kabuli_SNP614 | [T/C]       | Ca_Kabuli_LG03             | 15.772                                       |
| Ca_Kabuli_SNP615 | [C/A]       | Ca_Kabuli_LG03             | 15.773                                       |
| Ca_Kabuli_SNP616 | [A/C]       | Ca_Kabuli_LG03             | 16.092                                       |
| Ca_Kabuli_SNP617 | [G/A]       | Ca_Kabuli_LG03             | 16.251                                       |
| Ca_Kabuli_SNP618 | [C/T]       | Ca_Kabuli_LG03             | 16.404                                       |

| <b>SNP IDs</b>   | <b>SNPs</b> | <b>Linkage Group (LGs)</b> | <b>Genetic positions (cM) of mapped SNPs</b> |
|------------------|-------------|----------------------------|----------------------------------------------|
| Ca_Kabuli_SNP619 | [A/T]       | Ca_Kabuli_LG03             | 16.633                                       |
| Ca_Kabuli_SNP620 | [G/A]       | Ca_Kabuli_LG03             | 16.763                                       |
| Ca_Kabuli_SNP621 | [G/A]       | Ca_Kabuli_LG03             | 16.839                                       |
| Ca_Kabuli_SNP622 | [C/T]       | Ca_Kabuli_LG03             | 16.859                                       |
| Ca_Kabuli_SNP623 | [A/C]       | Ca_Kabuli_LG03             | 17.251                                       |
| Ca_Kabuli_SNP624 | [T/G]       | Ca_Kabuli_LG03             | 17.611                                       |
| Ca_Kabuli_SNP625 | [G/A]       | Ca_Kabuli_LG03             | 17.640                                       |
| Ca_Kabuli_SNP626 | [C/G]       | Ca_Kabuli_LG03             | 17.685                                       |
| Ca_Kabuli_SNP627 | [A/C]       | Ca_Kabuli_LG03             | 18.100                                       |
| Ca_Kabuli_SNP628 | [T/C]       | Ca_Kabuli_LG03             | 18.248                                       |
| Ca_Kabuli_SNP629 | [C/A]       | Ca_Kabuli_LG03             | 18.259                                       |
| Ca_Kabuli_SNP630 | [A/C]       | Ca_Kabuli_LG03             | 18.344                                       |
| Ca_Kabuli_SNP631 | [C/G]       | Ca_Kabuli_LG03             | 18.641                                       |
| Ca_Kabuli_SNP632 | [A/G]       | Ca_Kabuli_LG03             | 18.667                                       |
| Ca_Kabuli_SNP633 | [T/C]       | Ca_Kabuli_LG03             | 18.894                                       |
| Ca_Kabuli_SNP634 | [G/A]       | Ca_Kabuli_LG03             | 19.206                                       |
| Ca_Kabuli_SNP635 | [C/A]       | Ca_Kabuli_LG03             | 19.684                                       |
| Ca_Kabuli_SNP636 | [T/C]       | Ca_Kabuli_LG03             | 19.839                                       |
| Ca_Kabuli_SNP637 | [T/C]       | Ca_Kabuli_LG03             | 19.886                                       |
| Ca_Kabuli_SNP638 | [C/G]       | Ca_Kabuli_LG03             | 20.018                                       |
| Ca_Kabuli_SNP639 | [T/G]       | Ca_Kabuli_LG03             | 20.064                                       |
| Ca_Kabuli_SNP640 | [C/A]       | Ca_Kabuli_LG03             | 20.687                                       |
| Ca_Kabuli_SNP641 | [G/T]       | Ca_Kabuli_LG03             | 20.833                                       |
| Ca_Kabuli_SNP642 | [G/T]       | Ca_Kabuli_LG03             | 21.390                                       |
| Ca_Kabuli_SNP643 | [T/A]       | Ca_Kabuli_LG03             | 21.550                                       |
| Ca_Kabuli_SNP644 | [T/C]       | Ca_Kabuli_LG03             | 21.846                                       |
| Ca_Kabuli_SNP645 | [C/T]       | Ca_Kabuli_LG03             | 21.879                                       |
| Ca_Kabuli_SNP646 | [T/G]       | Ca_Kabuli_LG03             | 22.343                                       |
| Ca_Kabuli_SNP647 | [G/T]       | Ca_Kabuli_LG03             | 22.358                                       |
| Ca_Kabuli_SNP648 | [T/A]       | Ca_Kabuli_LG03             | 22.656                                       |
| Ca_Kabuli_SNP649 | [T/G]       | Ca_Kabuli_LG03             | 22.722                                       |

| <b>SNP IDs</b>   | <b>SNPs</b> | <b>Linkage Group (LGs)</b> | <b>Genetic positions (cM) of mapped SNPs</b> |
|------------------|-------------|----------------------------|----------------------------------------------|
| Ca_Kabuli_SNP650 | [T/C]       | Ca_Kabuli_LG03             | 22.787                                       |
| Ca_Kabuli_SNP651 | [C/A]       | Ca_Kabuli_LG03             | 22.900                                       |
| Ca_Kabuli_SNP652 | [G/A]       | Ca_Kabuli_LG03             | 23.781                                       |
| Ca_Kabuli_SNP653 | [A/C]       | Ca_Kabuli_LG03             | 23.781                                       |
| Ca_Kabuli_SNP654 | [A/G]       | Ca_Kabuli_LG03             | 23.865                                       |
| Ca_Kabuli_SNP655 | [T/G]       | Ca_Kabuli_LG03             | 23.998                                       |
| Ca_Kabuli_SNP656 | [G/A]       | Ca_Kabuli_LG03             | 24.303                                       |
| Ca_Kabuli_SNP657 | [A/G]       | Ca_Kabuli_LG03             | 24.358                                       |
| Ca_Kabuli_SNP658 | [A/C]       | Ca_Kabuli_LG03             | 24.469                                       |
| Ca_Kabuli_SNP659 | [A/C]       | Ca_Kabuli_LG03             | 24.500                                       |
| Ca_Kabuli_SNP660 | [C/T]       | Ca_Kabuli_LG03             | 24.522                                       |
| Ca_Kabuli_SNP661 | [A/G]       | Ca_Kabuli_LG03             | 24.585                                       |
| Ca_Kabuli_SNP662 | [G/A]       | Ca_Kabuli_LG03             | 25.717                                       |
| Ca_Kabuli_SNP663 | [A/G]       | Ca_Kabuli_LG03             | 25.816                                       |
| Ca_Kabuli_SNP664 | [T/C]       | Ca_Kabuli_LG03             | 25.838                                       |
| Ca_Kabuli_SNP665 | [T/A]       | Ca_Kabuli_LG03             | 25.838                                       |
| Ca_Kabuli_SNP666 | [G/T]       | Ca_Kabuli_LG03             | 26.117                                       |
| Ca_Kabuli_SNP667 | [T/A]       | Ca_Kabuli_LG03             | 26.165                                       |
| Ca_Kabuli_SNP668 | [A/C]       | Ca_Kabuli_LG03             | 26.401                                       |
| Ca_Kabuli_SNP669 | [T/G]       | Ca_Kabuli_LG03             | 26.593                                       |
| Ca_Kabuli_SNP670 | [C/A]       | Ca_Kabuli_LG03             | 26.650                                       |
| Ca_Kabuli_SNP671 | [A/G]       | Ca_Kabuli_LG03             | 26.663                                       |
| Ca_Kabuli_SNP672 | [C/T]       | Ca_Kabuli_LG03             | 26.771                                       |
| Ca_Kabuli_SNP673 | [C/T]       | Ca_Kabuli_LG03             | 26.773                                       |
| Ca_Kabuli_SNP674 | [A/C]       | Ca_Kabuli_LG03             | 26.839                                       |
| Ca_Kabuli_SNP675 | [A/G]       | Ca_Kabuli_LG03             | 27.092                                       |
| Ca_Kabuli_SNP676 | [C/T]       | Ca_Kabuli_LG03             | 27.351                                       |
| Ca_Kabuli_SNP677 | [A/C]       | Ca_Kabuli_LG03             | 28.136                                       |
| Ca_Kabuli_SNP678 | [C/T]       | Ca_Kabuli_LG03             | 28.370                                       |
| Ca_Kabuli_SNP679 | [A/G]       | Ca_Kabuli_LG03             | 28.380                                       |
| Ca_Kabuli_SNP680 | [A/T]       | Ca_Kabuli_LG03             | 28.404                                       |

| <b>SNP IDs</b>   | <b>SNPs</b> | <b>Linkage Group (LGs)</b> | <b>Genetic positions (cM) of mapped SNPs</b> |
|------------------|-------------|----------------------------|----------------------------------------------|
| Ca_Kabuli_SNP681 | [T/C]       | Ca_Kabuli_LG03             | 28.609                                       |
| Ca_Kabuli_SNP682 | [G/A]       | Ca_Kabuli_LG03             | 28.616                                       |
| Ca_Kabuli_SNP683 | [C/T]       | Ca_Kabuli_LG03             | 29.410                                       |
| Ca_Kabuli_SNP684 | [T/G]       | Ca_Kabuli_LG03             | 29.638                                       |
| Ca_Kabuli_SNP685 | [T/G]       | Ca_Kabuli_LG03             | 29.687                                       |
| Ca_Kabuli_SNP686 | [A/T]       | Ca_Kabuli_LG03             | 29.839                                       |
| Ca_Kabuli_SNP687 | [A/T]       | Ca_Kabuli_LG03             | 29.917                                       |
| Ca_Kabuli_SNP688 | [T/G]       | Ca_Kabuli_LG03             | 30.072                                       |
| Ca_Kabuli_SNP689 | [G/A]       | Ca_Kabuli_LG03             | 30.074                                       |
| Ca_Kabuli_SNP690 | [A/T]       | Ca_Kabuli_LG03             | 30.289                                       |
| Ca_Kabuli_SNP691 | [C/T]       | Ca_Kabuli_LG03             | 30.337                                       |
| Ca_Kabuli_SNP692 | [T/G]       | Ca_Kabuli_LG03             | 30.393                                       |
| Ca_Kabuli_SNP693 | [C/T]       | Ca_Kabuli_LG03             | 30.461                                       |
| Ca_Kabuli_SNP694 | [A/T]       | Ca_Kabuli_LG03             | 30.917                                       |
| Ca_Kabuli_SNP695 | [C/T]       | Ca_Kabuli_LG03             | 30.955                                       |
| Ca_Kabuli_SNP696 | [G/A]       | Ca_Kabuli_LG03             | 30.970                                       |
| Ca_Kabuli_SNP697 | [T/G]       | Ca_Kabuli_LG03             | 30.988                                       |
| Ca_Kabuli_SNP698 | [A/C]       | Ca_Kabuli_LG03             | 31.056                                       |
| Ca_Kabuli_SNP699 | [A/C]       | Ca_Kabuli_LG03             | 31.220                                       |
| Ca_Kabuli_SNP700 | [C/A]       | Ca_Kabuli_LG03             | 31.432                                       |
| Ca_Kabuli_SNP701 | [G/T]       | Ca_Kabuli_LG03             | 31.446                                       |
| Ca_Kabuli_SNP702 | [G/T]       | Ca_Kabuli_LG03             | 32.105                                       |
| Ca_Kabuli_SNP703 | [G/T]       | Ca_Kabuli_LG03             | 32.305                                       |
| Ca_Kabuli_SNP704 | [G/A]       | Ca_Kabuli_LG03             | 32.408                                       |
| Ca_Kabuli_SNP705 | [A/G]       | Ca_Kabuli_LG03             | 32.841                                       |
| Ca_Kabuli_SNP706 | [A/G]       | Ca_Kabuli_LG03             | 33.153                                       |
| Ca_Kabuli_SNP707 | [C/G]       | Ca_Kabuli_LG03             | 33.282                                       |
| Ca_Kabuli_SNP708 | [T/C]       | Ca_Kabuli_LG03             | 33.883                                       |
| Ca_Kabuli_SNP709 | [C/T]       | Ca_Kabuli_LG03             | 33.950                                       |
| Ca_Kabuli_SNP710 | [A/G]       | Ca_Kabuli_LG03             | 34.063                                       |
| Ca_Kabuli_SNP711 | [T/A]       | Ca_Kabuli_LG03             | 34.063                                       |

| <b>SNP IDs</b>   | <b>SNPs</b> | <b>Linkage Group (LGs)</b> | <b>Genetic positions (cM) of mapped SNPs</b> |
|------------------|-------------|----------------------------|----------------------------------------------|
| Ca_Kabuli_SNP712 | [T/G]       | Ca_Kabuli_LG03             | 34.146                                       |
| Ca_Kabuli_SNP713 | [C/T]       | Ca_Kabuli_LG03             | 34.303                                       |
| Ca_Kabuli_SNP714 | [A/G]       | Ca_Kabuli_LG03             | 34.377                                       |
| Ca_Kabuli_SNP715 | [T/G]       | Ca_Kabuli_LG03             | 34.563                                       |
| Ca_Kabuli_SNP716 | [T/A]       | Ca_Kabuli_LG03             | 34.754                                       |
| Ca_Kabuli_SNP717 | [T/C]       | Ca_Kabuli_LG03             | 34.834                                       |
| Ca_Kabuli_SNP718 | [T/G]       | Ca_Kabuli_LG03             | 34.925                                       |
| Ca_Kabuli_SNP719 | [C/T]       | Ca_Kabuli_LG03             | 35.024                                       |
| Ca_Kabuli_SNP720 | [G/A]       | Ca_Kabuli_LG03             | 35.074                                       |
| Ca_Kabuli_SNP721 | [A/C]       | Ca_Kabuli_LG03             | 35.266                                       |
| Ca_Kabuli_SNP722 | [A/T]       | Ca_Kabuli_LG03             | 35.362                                       |
| Ca_Kabuli_SNP723 | [C/A]       | Ca_Kabuli_LG03             | 35.530                                       |
| Ca_Kabuli_SNP724 | [A/G]       | Ca_Kabuli_LG03             | 35.593                                       |
| Ca_Kabuli_SNP725 | [G/C]       | Ca_Kabuli_LG03             | 35.662                                       |
| Ca_Kabuli_SNP726 | [C/T]       | Ca_Kabuli_LG03             | 35.662                                       |
| Ca_Kabuli_SNP727 | [T/C]       | Ca_Kabuli_LG03             | 35.662                                       |
| Ca_Kabuli_SNP728 | [A/C]       | Ca_Kabuli_LG03             | 35.797                                       |
| Ca_Kabuli_SNP729 | [C/A]       | Ca_Kabuli_LG03             | 35.827                                       |
| Ca_Kabuli_SNP730 | [T/C]       | Ca_Kabuli_LG03             | 35.997                                       |
| Ca_Kabuli_SNP731 | [T/C]       | Ca_Kabuli_LG03             | 36.061                                       |
| Ca_Kabuli_SNP732 | [A/C]       | Ca_Kabuli_LG03             | 36.268                                       |
| Ca_Kabuli_SNP733 | [G/C]       | Ca_Kabuli_LG03             | 36.347                                       |
| Ca_Kabuli_SNP734 | [C/A]       | Ca_Kabuli_LG03             | 36.568                                       |
| Ca_Kabuli_SNP735 | [C/T]       | Ca_Kabuli_LG03             | 36.730                                       |
| Ca_Kabuli_SNP736 | [T/G]       | Ca_Kabuli_LG03             | 36.766                                       |
| Ca_Kabuli_SNP737 | [T/G]       | Ca_Kabuli_LG03             | 36.796                                       |
| Ca_Kabuli_SNP738 | [C/T]       | Ca_Kabuli_LG03             | 37.018                                       |
| Ca_Kabuli_SNP739 | [A/G]       | Ca_Kabuli_LG03             | 37.114                                       |
| Ca_Kabuli_SNP740 | [A/T]       | Ca_Kabuli_LG03             | 37.187                                       |
| Ca_Kabuli_SNP741 | [T/C]       | Ca_Kabuli_LG03             | 37.539                                       |
| Ca_Kabuli_SNP742 | [T/G]       | Ca_Kabuli_LG03             | 37.609                                       |

| <b>SNP IDs</b>   | <b>SNPs</b> | <b>Linkage Group (LGs)</b> | <b>Genetic positions (cM) of mapped SNPs</b> |
|------------------|-------------|----------------------------|----------------------------------------------|
| Ca_Kabuli_SNP743 | [T/A]       | Ca_Kabuli_LG03             | 37.861                                       |
| Ca_Kabuli_SNP744 | [T/G]       | Ca_Kabuli_LG03             | 37.880                                       |
| Ca_Kabuli_SNP745 | [G/T]       | Ca_Kabuli_LG03             | 38.066                                       |
| Ca_Kabuli_SNP746 | [G/A]       | Ca_Kabuli_LG03             | 38.320                                       |
| Ca_Kabuli_SNP747 | [G/C]       | Ca_Kabuli_LG03             | 38.366                                       |
| Ca_Kabuli_SNP748 | [G/T]       | Ca_Kabuli_LG03             | 38.417                                       |
| Ca_Kabuli_SNP749 | [C/T]       | Ca_Kabuli_LG03             | 38.675                                       |
| Ca_Kabuli_SNP750 | [C/A]       | Ca_Kabuli_LG03             | 38.706                                       |
| Ca_Kabuli_SNP751 | [A/G]       | Ca_Kabuli_LG03             | 38.709                                       |
| Ca_Kabuli_SNP752 | [C/T]       | Ca_Kabuli_LG03             | 38.709                                       |
| Ca_Kabuli_SNP753 | [T/G]       | Ca_Kabuli_LG03             | 38.753                                       |
| Ca_Kabuli_SNP754 | [A/T]       | Ca_Kabuli_LG03             | 38.798                                       |
| Ca_Kabuli_SNP755 | [A/G]       | Ca_Kabuli_LG03             | 38.798                                       |
| Ca_Kabuli_SNP756 | [G/T]       | Ca_Kabuli_LG03             | 38.823                                       |
| Ca_Kabuli_SNP757 | [A/C]       | Ca_Kabuli_LG03             | 38.870                                       |
| Ca_Kabuli_SNP758 | [A/C]       | Ca_Kabuli_LG03             | 38.911                                       |
| Ca_Kabuli_SNP759 | [G/T]       | Ca_Kabuli_LG03             | 38.941                                       |
| Ca_Kabuli_SNP760 | [T/G]       | Ca_Kabuli_LG03             | 38.962                                       |
| Ca_Kabuli_SNP761 | [G/A]       | Ca_Kabuli_LG03             | 39.178                                       |
| Ca_Kabuli_SNP762 | [T/G]       | Ca_Kabuli_LG03             | 39.178                                       |
| Ca_Kabuli_SNP763 | [T/C]       | Ca_Kabuli_LG03             | 39.340                                       |
| Ca_Kabuli_SNP764 | [G/A]       | Ca_Kabuli_LG03             | 39.521                                       |
| Ca_Kabuli_SNP765 | [A/T]       | Ca_Kabuli_LG03             | 39.521                                       |
| Ca_Kabuli_SNP766 | [C/T]       | Ca_Kabuli_LG03             | 39.521                                       |
| Ca_Kabuli_SNP767 | [C/G]       | Ca_Kabuli_LG03             | 39.634                                       |
| Ca_Kabuli_SNP768 | [G/C]       | Ca_Kabuli_LG03             | 39.757                                       |
| Ca_Kabuli_SNP769 | [G/A]       | Ca_Kabuli_LG03             | 39.774                                       |
| Ca_Kabuli_SNP770 | [G/T]       | Ca_Kabuli_LG03             | 39.984                                       |
| Ca_Kabuli_SNP771 | [A/G]       | Ca_Kabuli_LG03             | 40.049                                       |
| Ca_Kabuli_SNP772 | [C/A]       | Ca_Kabuli_LG03             | 40.328                                       |
| Ca_Kabuli_SNP773 | [A/C]       | Ca_Kabuli_LG03             | 40.523                                       |

| <b>SNP IDs</b>   | <b>SNPs</b> | <b>Linkage Group (LGs)</b> | <b>Genetic positions (cM) of mapped SNPs</b> |
|------------------|-------------|----------------------------|----------------------------------------------|
| Ca_Kabuli_SNP774 | [T/C]       | Ca_Kabuli_LG03             | 40.573                                       |
| Ca_Kabuli_SNP775 | [G/T]       | Ca_Kabuli_LG03             | 40.652                                       |
| Ca_Kabuli_SNP776 | [C/T]       | Ca_Kabuli_LG03             | 40.759                                       |
| Ca_Kabuli_SNP777 | [A/G]       | Ca_Kabuli_LG03             | 40.784                                       |
| Ca_Kabuli_SNP778 | [A/G]       | Ca_Kabuli_LG03             | 40.847                                       |
| Ca_Kabuli_SNP779 | [T/C]       | Ca_Kabuli_LG03             | 40.960                                       |
| Ca_Kabuli_SNP780 | [T/G]       | Ca_Kabuli_LG03             | 40.961                                       |
| Ca_Kabuli_SNP781 | [G/T]       | Ca_Kabuli_LG03             | 41.026                                       |
| Ca_Kabuli_SNP782 | [A/C]       | Ca_Kabuli_LG03             | 41.131                                       |
| Ca_Kabuli_SNP783 | [G/T]       | Ca_Kabuli_LG03             | 41.318                                       |
| Ca_Kabuli_SNP784 | [T/G]       | Ca_Kabuli_LG03             | 41.378                                       |
| Ca_Kabuli_SNP785 | [T/A]       | Ca_Kabuli_LG03             | 41.451                                       |
| Ca_Kabuli_SNP786 | [T/A]       | Ca_Kabuli_LG03             | 41.500                                       |
| Ca_Kabuli_SNP787 | [A/C]       | Ca_Kabuli_LG03             | 41.518                                       |
| Ca_Kabuli_SNP788 | [C/A]       | Ca_Kabuli_LG03             | 41.599                                       |
| Ca_Kabuli_SNP789 | [T/G]       | Ca_Kabuli_LG03             | 41.607                                       |
| Ca_Kabuli_SNP790 | [A/C]       | Ca_Kabuli_LG03             | 41.772                                       |
| Ca_Kabuli_SNP791 | [T/G]       | Ca_Kabuli_LG03             | 41.816                                       |
| Ca_Kabuli_SNP792 | [G/A]       | Ca_Kabuli_LG03             | 42.118                                       |
| Ca_Kabuli_SNP793 | [G/A]       | Ca_Kabuli_LG03             | 42.125                                       |
| Ca_Kabuli_SNP794 | [T/C]       | Ca_Kabuli_LG03             | 42.146                                       |
| Ca_Kabuli_SNP795 | [T/G]       | Ca_Kabuli_LG03             | 42.297                                       |
| Ca_Kabuli_SNP796 | [G/C]       | Ca_Kabuli_LG03             | 42.389                                       |
| Ca_Kabuli_SNP797 | [A/G]       | Ca_Kabuli_LG03             | 42.458                                       |
| Ca_Kabuli_SNP798 | [C/G]       | Ca_Kabuli_LG03             | 42.642                                       |
| Ca_Kabuli_SNP799 | [C/T]       | Ca_Kabuli_LG03             | 42.722                                       |
| Ca_Kabuli_SNP800 | [G/T]       | Ca_Kabuli_LG03             | 42.991                                       |
| Ca_Kabuli_SNP801 | [A/C]       | Ca_Kabuli_LG03             | 43.088                                       |
| Ca_Kabuli_SNP802 | [T/G]       | Ca_Kabuli_LG03             | 43.109                                       |
| Ca_Kabuli_SNP803 | [A/G]       | Ca_Kabuli_LG03             | 43.188                                       |
| Ca_Kabuli_SNP804 | [T/G]       | Ca_Kabuli_LG03             | 43.359                                       |



| <b>SNP IDs</b>   | <b>SNPs</b> | <b>Linkage Group (LGs)</b> | <b>Genetic positions (cM) of mapped SNPs</b> |
|------------------|-------------|----------------------------|----------------------------------------------|
| Ca_Kabuli_SNP805 | [G/T]       | Ca_Kabuli_LG03             | 43.463                                       |
| Ca_Kabuli_SNP806 | [G/A]       | Ca_Kabuli_LG03             | 43.611                                       |
| Ca_Kabuli_SNP807 | [A/T]       | Ca_Kabuli_LG03             | 43.774                                       |
| Ca_Kabuli_SNP808 | [T/C]       | Ca_Kabuli_LG03             | 43.785                                       |
| Ca_Kabuli_SNP809 | [T/G]       | Ca_Kabuli_LG03             | 43.788                                       |
| Ca_Kabuli_SNP810 | [A/C]       | Ca_Kabuli_LG03             | 43.844                                       |
| Ca_Kabuli_SNP811 | [T/G]       | Ca_Kabuli_LG03             | 43.933                                       |
| Ca_Kabuli_SNP812 | [G/C]       | Ca_Kabuli_LG03             | 44.088                                       |
| Ca_Kabuli_SNP813 | [G/T]       | Ca_Kabuli_LG03             | 44.223                                       |
| Ca_Kabuli_SNP814 | [C/T]       | Ca_Kabuli_LG03             | 44.401                                       |
| Ca_Kabuli_SNP815 | [A/G]       | Ca_Kabuli_LG03             | 44.486                                       |
| Ca_Kabuli_SNP816 | [T/G]       | Ca_Kabuli_LG03             | 44.509                                       |
| Ca_Kabuli_SNP817 | [C/T]       | Ca_Kabuli_LG03             | 45.137                                       |
| Ca_Kabuli_SNP818 | [C/A]       | Ca_Kabuli_LG03             | 45.616                                       |
| Ca_Kabuli_SNP819 | [A/G]       | Ca_Kabuli_LG03             | 45.668                                       |
| Ca_Kabuli_SNP820 | [T/A]       | Ca_Kabuli_LG03             | 45.733                                       |
| Ca_Kabuli_SNP821 | [T/A]       | Ca_Kabuli_LG03             | 45.743                                       |
| Ca_Kabuli_SNP822 | [A/T]       | Ca_Kabuli_LG03             | 45.821                                       |
| Ca_Kabuli_SNP823 | [A/T]       | Ca_Kabuli_LG03             | 45.866                                       |
| Ca_Kabuli_SNP824 | [T/C]       | Ca_Kabuli_LG03             | 45.913                                       |
| Ca_Kabuli_SNP825 | [A/C]       | Ca_Kabuli_LG03             | 45.916                                       |
| Ca_Kabuli_SNP826 | [A/C]       | Ca_Kabuli_LG03             | 46.074                                       |
| Ca_Kabuli_SNP827 | [A/C]       | Ca_Kabuli_LG03             | 46.394                                       |
| Ca_Kabuli_SNP828 | [A/C]       | Ca_Kabuli_LG03             | 46.434                                       |
| Ca_Kabuli_SNP829 | [A/C]       | Ca_Kabuli_LG03             | 46.575                                       |
| Ca_Kabuli_SNP830 | [A/C]       | Ca_Kabuli_LG03             | 46.619                                       |
| Ca_Kabuli_SNP831 | [G/T]       | Ca_Kabuli_LG03             | 46.706                                       |
| Ca_Kabuli_SNP832 | [T/A]       | Ca_Kabuli_LG03             | 46.741                                       |
| Ca_Kabuli_SNP833 | [T/G]       | Ca_Kabuli_LG03             | 47.082                                       |
| Ca_Kabuli_SNP834 | [A/C]       | Ca_Kabuli_LG03             | 47.256                                       |
| Ca_Kabuli_SNP835 | [G/T]       | Ca_Kabuli_LG03             | 47.323                                       |

| <b>SNP IDs</b>   | <b>SNPs</b> | <b>Linkage Group (LGs)</b> | <b>Genetic positions (cM) of mapped SNPs</b> |
|------------------|-------------|----------------------------|----------------------------------------------|
| Ca_Kabuli_SNP836 | [T/C]       | Ca_Kabuli_LG03             | 47.449                                       |
| Ca_Kabuli_SNP837 | [C/A]       | Ca_Kabuli_LG03             | 47.655                                       |
| Ca_Kabuli_SNP838 | [A/C]       | Ca_Kabuli_LG03             | 47.875                                       |
| Ca_Kabuli_SNP839 | [T/A]       | Ca_Kabuli_LG03             | 48.457                                       |
| Ca_Kabuli_SNP840 | [C/A]       | Ca_Kabuli_LG03             | 48.478                                       |
| Ca_Kabuli_SNP841 | [A/C]       | Ca_Kabuli_LG03             | 48.559                                       |
| Ca_Kabuli_SNP842 | [G/T]       | Ca_Kabuli_LG03             | 49.021                                       |
| Ca_Kabuli_SNP843 | [G/T]       | Ca_Kabuli_LG03             | 49.329                                       |
| Ca_Kabuli_SNP844 | [C/A]       | Ca_Kabuli_LG03             | 49.628                                       |
| Ca_Kabuli_SNP845 | [A/C]       | Ca_Kabuli_LG03             | 49.689                                       |
| Ca_Kabuli_SNP846 | [C/A]       | Ca_Kabuli_LG03             | 49.748                                       |
| Ca_Kabuli_SNP847 | [G/A]       | Ca_Kabuli_LG03             | 49.830                                       |
| Ca_Kabuli_SNP848 | [T/G]       | Ca_Kabuli_LG03             | 49.883                                       |
| Ca_Kabuli_SNP849 | [C/A]       | Ca_Kabuli_LG03             | 50.078                                       |
| Ca_Kabuli_SNP850 | [T/A]       | Ca_Kabuli_LG03             | 50.245                                       |
| Ca_Kabuli_SNP851 | [C/A]       | Ca_Kabuli_LG03             | 50.509                                       |
| Ca_Kabuli_SNP852 | [A/C]       | Ca_Kabuli_LG03             | 50.848                                       |
| Ca_Kabuli_SNP853 | [A/G]       | Ca_Kabuli_LG03             | 50.911                                       |
| Ca_Kabuli_SNP854 | [C/A]       | Ca_Kabuli_LG03             | 50.952                                       |
| Ca_Kabuli_SNP855 | [A/C]       | Ca_Kabuli_LG03             | 50.953                                       |
| Ca_Kabuli_SNP856 | [C/G]       | Ca_Kabuli_LG03             | 50.965                                       |
| Ca_Kabuli_SNP857 | [T/C]       | Ca_Kabuli_LG03             | 51.131                                       |
| Ca_Kabuli_SNP858 | [G/T]       | Ca_Kabuli_LG03             | 51.216                                       |
| Ca_Kabuli_SNP859 | [T/G]       | Ca_Kabuli_LG03             | 51.298                                       |
| Ca_Kabuli_SNP860 | [C/T]       | Ca_Kabuli_LG03             | 51.432                                       |
| Ca_Kabuli_SNP861 | [A/G]       | Ca_Kabuli_LG03             | 51.801                                       |
| Ca_Kabuli_SNP862 | [G/A]       | Ca_Kabuli_LG03             | 52.014                                       |
| Ca_Kabuli_SNP863 | [G/A]       | Ca_Kabuli_LG03             | 52.163                                       |
| Ca_Kabuli_SNP864 | [A/C]       | Ca_Kabuli_LG03             | 52.216                                       |
| Ca_Kabuli_SNP865 | [G/T]       | Ca_Kabuli_LG03             | 52.290                                       |
| Ca_Kabuli_SNP866 | [A/C]       | Ca_Kabuli_LG03             | 52.320                                       |

| <b>SNP IDs</b>   | <b>SNPs</b> | <b>Linkage Group (LGs)</b> | <b>Genetic positions (cM) of mapped SNPs</b> |
|------------------|-------------|----------------------------|----------------------------------------------|
| Ca_Kabuli_SNP867 | [G/A]       | Ca_Kabuli_LG03             | 52.419                                       |
| Ca_Kabuli_SNP868 | [A/C]       | Ca_Kabuli_LG03             | 52.444                                       |
| Ca_Kabuli_SNP869 | [G/T]       | Ca_Kabuli_LG03             | 52.944                                       |
| Ca_Kabuli_SNP870 | [A/C]       | Ca_Kabuli_LG03             | 52.987                                       |
| Ca_Kabuli_SNP871 | [G/C]       | Ca_Kabuli_LG03             | 53.038                                       |
| Ca_Kabuli_SNP872 | [T/G]       | Ca_Kabuli_LG03             | 53.086                                       |
| Ca_Kabuli_SNP873 | [G/T]       | Ca_Kabuli_LG03             | 53.119                                       |
| Ca_Kabuli_SNP874 | [A/G]       | Ca_Kabuli_LG03             | 53.245                                       |
| Ca_Kabuli_SNP875 | [G/T]       | Ca_Kabuli_LG03             | 53.283                                       |
| Ca_Kabuli_SNP876 | [G/A]       | Ca_Kabuli_LG03             | 53.351                                       |
| Ca_Kabuli_SNP877 | [G/T]       | Ca_Kabuli_LG03             | 53.385                                       |
| Ca_Kabuli_SNP878 | [C/T]       | Ca_Kabuli_LG03             | 53.390                                       |
| Ca_Kabuli_SNP879 | [A/C]       | Ca_Kabuli_LG03             | 53.562                                       |
| Ca_Kabuli_SNP880 | [G/T]       | Ca_Kabuli_LG03             | 53.793                                       |
| Ca_Kabuli_SNP881 | [C/A]       | Ca_Kabuli_LG03             | 53.964                                       |
| Ca_Kabuli_SNP882 | [T/A]       | Ca_Kabuli_LG03             | 53.996                                       |
| Ca_Kabuli_SNP883 | [G/A]       | Ca_Kabuli_LG03             | 54.536                                       |
| Ca_Kabuli_SNP884 | [T/A]       | Ca_Kabuli_LG03             | 54.565                                       |
| Ca_Kabuli_SNP885 | [A/G]       | Ca_Kabuli_LG03             | 54.669                                       |
| Ca_Kabuli_SNP886 | [T/G]       | Ca_Kabuli_LG03             | 54.693                                       |
| Ca_Kabuli_SNP887 | [T/C]       | Ca_Kabuli_LG03             | 54.817                                       |
| Ca_Kabuli_SNP888 | [T/G]       | Ca_Kabuli_LG03             | 54.862                                       |
| Ca_Kabuli_SNP889 | [A/C]       | Ca_Kabuli_LG03             | 54.976                                       |
| Ca_Kabuli_SNP890 | [A/T]       | Ca_Kabuli_LG03             | 54.986                                       |
| Ca_Kabuli_SNP891 | [T/G]       | Ca_Kabuli_LG03             | 55.209                                       |
| Ca_Kabuli_SNP892 | [C/T]       | Ca_Kabuli_LG03             | 55.263                                       |
| Ca_Kabuli_SNP893 | [G/T]       | Ca_Kabuli_LG03             | 55.345                                       |
| Ca_Kabuli_SNP894 | [C/T]       | Ca_Kabuli_LG03             | 55.537                                       |
| Ca_Kabuli_SNP895 | [A/C]       | Ca_Kabuli_LG03             | 56.204                                       |
| Ca_Kabuli_SNP896 | [T/G]       | Ca_Kabuli_LG03             | 56.213                                       |
| Ca_Kabuli_SNP897 | [C/T]       | Ca_Kabuli_LG03             | 56.439                                       |

| <b>SNP IDs</b>   | <b>SNPs</b> | <b>Linkage Group (LGs)</b> | <b>Genetic positions (cM) of mapped SNPs</b> |
|------------------|-------------|----------------------------|----------------------------------------------|
| Ca_Kabuli_SNP898 | [A/G]       | Ca_Kabuli_LG03             | 56.446                                       |
| Ca_Kabuli_SNP899 | [T/G]       | Ca_Kabuli_LG03             | 56.501                                       |
| Ca_Kabuli_SNP900 | [G/T]       | Ca_Kabuli_LG03             | 56.749                                       |
| Ca_Kabuli_SNP901 | [A/G]       | Ca_Kabuli_LG03             | 56.758                                       |
| Ca_Kabuli_SNP902 | [G/A]       | Ca_Kabuli_LG03             | 57.220                                       |
| Ca_Kabuli_SNP903 | [C/A]       | Ca_Kabuli_LG03             | 57.404                                       |
| Ca_Kabuli_SNP904 | [G/T]       | Ca_Kabuli_LG03             | 57.421                                       |
| Ca_Kabuli_SNP905 | [A/T]       | Ca_Kabuli_LG03             | 57.549                                       |
| Ca_Kabuli_SNP906 | [G/A]       | Ca_Kabuli_LG03             | 57.668                                       |
| Ca_Kabuli_SNP907 | [C/T]       | Ca_Kabuli_LG03             | 57.716                                       |
| Ca_Kabuli_SNP908 | [T/G]       | Ca_Kabuli_LG03             | 57.719                                       |
| Ca_Kabuli_SNP909 | [A/G]       | Ca_Kabuli_LG03             | 57.746                                       |
| Ca_Kabuli_SNP910 | [C/T]       | Ca_Kabuli_LG03             | 57.876                                       |
| Ca_Kabuli_SNP911 | [T/G]       | Ca_Kabuli_LG03             | 58.042                                       |
| Ca_Kabuli_SNP912 | [G/A]       | Ca_Kabuli_LG03             | 58.061                                       |
| Ca_Kabuli_SNP913 | [C/G]       | Ca_Kabuli_LG03             | 58.105                                       |
| Ca_Kabuli_SNP914 | [C/A]       | Ca_Kabuli_LG03             | 58.117                                       |
| Ca_Kabuli_SNP915 | [T/A]       | Ca_Kabuli_LG03             | 58.120                                       |
| Ca_Kabuli_SNP916 | [T/A]       | Ca_Kabuli_LG03             | 58.139                                       |
| Ca_Kabuli_SNP917 | [A/G]       | Ca_Kabuli_LG03             | 58.280                                       |
| Ca_Kabuli_SNP918 | [C/G]       | Ca_Kabuli_LG03             | 58.343                                       |
| Ca_Kabuli_SNP919 | [G/A]       | Ca_Kabuli_LG03             | 58.458                                       |
| Ca_Kabuli_SNP920 | [G/A]       | Ca_Kabuli_LG03             | 58.552                                       |
| Ca_Kabuli_SNP921 | [C/T]       | Ca_Kabuli_LG03             | 58.704                                       |
| Ca_Kabuli_SNP922 | [C/T]       | Ca_Kabuli_LG03             | 59.081                                       |
| Ca_Kabuli_SNP923 | [G/A]       | Ca_Kabuli_LG03             | 59.137                                       |
| Ca_Kabuli_SNP924 | [A/G]       | Ca_Kabuli_LG03             | 59.176                                       |
| Ca_Kabuli_SNP925 | [A/G]       | Ca_Kabuli_LG03             | 59.229                                       |
| Ca_Kabuli_SNP926 | [A/G]       | Ca_Kabuli_LG03             | 59.229                                       |
| Ca_Kabuli_SNP927 | [A/G]       | Ca_Kabuli_LG03             | 59.313                                       |
| Ca_Kabuli_SNP928 | [G/T]       | Ca_Kabuli_LG03             | 59.319                                       |

| <b>SNP IDs</b>   | <b>SNPs</b> | <b>Linkage Group (LGs)</b> | <b>Genetic positions (cM) of mapped SNPs</b> |
|------------------|-------------|----------------------------|----------------------------------------------|
| Ca_Kabuli_SNP929 | [A/G]       | Ca_Kabuli_LG03             | 59.468                                       |
| Ca_Kabuli_SNP930 | [A/C]       | Ca_Kabuli_LG03             | 59.588                                       |
| Ca_Kabuli_SNP931 | [T/A]       | Ca_Kabuli_LG03             | 59.680                                       |
| Ca_Kabuli_SNP932 | [A/T]       | Ca_Kabuli_LG03             | 60.109                                       |
| Ca_Kabuli_SNP933 | [A/C]       | Ca_Kabuli_LG03             | 60.336                                       |
| Ca_Kabuli_SNP934 | [T/G]       | Ca_Kabuli_LG03             | 60.554                                       |
| Ca_Kabuli_SNP935 | [A/G]       | Ca_Kabuli_LG03             | 60.775                                       |
| Ca_Kabuli_SNP936 | [A/T]       | Ca_Kabuli_LG03             | 60.783                                       |
| Ca_Kabuli_SNP937 | [G/A]       | Ca_Kabuli_LG03             | 60.783                                       |
| Ca_Kabuli_SNP938 | [A/G]       | Ca_Kabuli_LG03             | 61.617                                       |
| Ca_Kabuli_SNP939 | [A/G]       | Ca_Kabuli_LG03             | 61.642                                       |
| Ca_Kabuli_SNP940 | [G/C]       | Ca_Kabuli_LG03             | 61.721                                       |
| Ca_Kabuli_SNP941 | [A/G]       | Ca_Kabuli_LG03             | 61.782                                       |
| Ca_Kabuli_SNP942 | [A/T]       | Ca_Kabuli_LG03             | 62.489                                       |
| Ca_Kabuli_SNP943 | [A/G]       | Ca_Kabuli_LG03             | 62.489                                       |
| Ca_Kabuli_SNP944 | [C/A]       | Ca_Kabuli_LG03             | 62.529                                       |
| Ca_Kabuli_SNP945 | [T/A]       | Ca_Kabuli_LG03             | 62.572                                       |
| Ca_Kabuli_SNP946 | [T/A]       | Ca_Kabuli_LG03             | 62.595                                       |
| Ca_Kabuli_SNP947 | [C/A]       | Ca_Kabuli_LG03             | 62.629                                       |
| Ca_Kabuli_SNP948 | [T/G]       | Ca_Kabuli_LG03             | 62.759                                       |
| Ca_Kabuli_SNP949 | [A/C]       | Ca_Kabuli_LG03             | 62.899                                       |
| Ca_Kabuli_SNP950 | [C/A]       | Ca_Kabuli_LG03             | 63.452                                       |
| Ca_Kabuli_SNP951 | [C/T]       | Ca_Kabuli_LG03             | 63.549                                       |
| Ca_Kabuli_SNP952 | [A/T]       | Ca_Kabuli_LG03             | 63.577                                       |
| Ca_Kabuli_SNP953 | [G/A]       | Ca_Kabuli_LG03             | 63.730                                       |
| Ca_Kabuli_SNP954 | [C/T]       | Ca_Kabuli_LG03             | 64.032                                       |
| Ca_Kabuli_SNP955 | [T/C]       | Ca_Kabuli_LG03             | 64.032                                       |
| Ca_Kabuli_SNP956 | [C/A]       | Ca_Kabuli_LG03             | 64.183                                       |
| Ca_Kabuli_SNP957 | [A/C]       | Ca_Kabuli_LG03             | 64.283                                       |
| Ca_Kabuli_SNP958 | [A/C]       | Ca_Kabuli_LG03             | 64.302                                       |
| Ca_Kabuli_SNP959 | [T/C]       | Ca_Kabuli_LG03             | 64.780                                       |

| <b>SNP IDs</b>   | <b>SNPs</b> | <b>Linkage Group (LGs)</b> | <b>Genetic positions (cM) of mapped SNPs</b> |
|------------------|-------------|----------------------------|----------------------------------------------|
| Ca_Kabuli_SNP960 | [C/T]       | Ca_Kabuli_LG03             | 64.951                                       |
| Ca_Kabuli_SNP961 | [T/A]       | Ca_Kabuli_LG03             | 65.552                                       |
| Ca_Kabuli_SNP962 | [G/A]       | Ca_Kabuli_LG03             | 65.594                                       |
| Ca_Kabuli_SNP963 | [T/G]       | Ca_Kabuli_LG03             | 65.835                                       |
| Ca_Kabuli_SNP964 | [C/T]       | Ca_Kabuli_LG03             | 65.920                                       |
| Ca_Kabuli_SNP965 | [C/T]       | Ca_Kabuli_LG03             | 66.204                                       |
| Ca_Kabuli_SNP966 | [A/G]       | Ca_Kabuli_LG03             | 66.220                                       |
| Ca_Kabuli_SNP967 | [A/T]       | Ca_Kabuli_LG03             | 66.468                                       |
| Ca_Kabuli_SNP968 | [T/G]       | Ca_Kabuli_LG03             | 66.562                                       |
| Ca_Kabuli_SNP969 | [T/G]       | Ca_Kabuli_LG03             | 66.817                                       |
| Ca_Kabuli_SNP970 | [T/A]       | Ca_Kabuli_LG03             | 66.864                                       |
| Ca_Kabuli_SNP971 | [A/C]       | Ca_Kabuli_LG03             | 67.052                                       |
| Ca_Kabuli_SNP972 | [G/A]       | Ca_Kabuli_LG03             | 67.075                                       |
| Ca_Kabuli_SNP973 | [C/T]       | Ca_Kabuli_LG03             | 67.456                                       |
| Ca_Kabuli_SNP974 | [G/C]       | Ca_Kabuli_LG03             | 67.599                                       |
| Ca_Kabuli_SNP975 | [C/G]       | Ca_Kabuli_LG03             | 68.019                                       |
| Ca_Kabuli_SNP976 | [A/C]       | Ca_Kabuli_LG03             | 68.150                                       |
| Ca_Kabuli_SNP977 | [T/C]       | Ca_Kabuli_LG03             | 68.157                                       |
| Ca_Kabuli_SNP978 | [C/A]       | Ca_Kabuli_LG03             | 68.608                                       |
| Ca_Kabuli_SNP979 | [G/A]       | Ca_Kabuli_LG03             | 68.621                                       |
| Ca_Kabuli_SNP980 | [G/A]       | Ca_Kabuli_LG03             | 68.790                                       |
| Ca_Kabuli_SNP981 | [A/T]       | Ca_Kabuli_LG03             | 69.010                                       |
| Ca_Kabuli_SNP982 | [A/G]       | Ca_Kabuli_LG03             | 69.096                                       |
| Ca_Kabuli_SNP983 | [T/C]       | Ca_Kabuli_LG03             | 69.096                                       |
| Ca_Kabuli_SNP984 | [A/C]       | Ca_Kabuli_LG03             | 69.096                                       |
| Ca_Kabuli_SNP985 | [G/A]       | Ca_Kabuli_LG03             | 69.096                                       |
| Ca_Kabuli_SNP986 | [A/C]       | Ca_Kabuli_LG03             | 69.145                                       |
| Ca_Kabuli_SNP987 | [A/C]       | Ca_Kabuli_LG03             | 69.342                                       |
| Ca_Kabuli_SNP988 | [C/A]       | Ca_Kabuli_LG03             | 69.420                                       |
| Ca_Kabuli_SNP989 | [A/C]       | Ca_Kabuli_LG03             | 69.675                                       |
| Ca_Kabuli_SNP990 | [T/G]       | Ca_Kabuli_LG03             | 70.240                                       |

| <b>SNP IDs</b>    | <b>SNPs</b> | <b>Linkage Group (LGs)</b> | <b>Genetic positions (cM) of mapped SNPs</b> |
|-------------------|-------------|----------------------------|----------------------------------------------|
| Ca_Kabuli_SNP991  | [A/G]       | Ca_Kabuli_LG03             | 70.327                                       |
| Ca_Kabuli_SNP992  | [G/A]       | Ca_Kabuli_LG03             | 70.447                                       |
| Ca_Kabuli_SNP993  | [C/T]       | Ca_Kabuli_LG03             | 70.774                                       |
| Ca_Kabuli_SNP994  | [G/T]       | Ca_Kabuli_LG03             | 71.271                                       |
| Ca_Kabuli_SNP995  | [A/C]       | Ca_Kabuli_LG03             | 71.585                                       |
| Ca_Kabuli_SNP996  | [T/C]       | Ca_Kabuli_LG03             | 71.595                                       |
| Ca_Kabuli_SNP997  | [A/C]       | Ca_Kabuli_LG03             | 71.844                                       |
| Ca_Kabuli_SNP998  | [C/A]       | Ca_Kabuli_LG03             | 72.003                                       |
| Ca_Kabuli_SNP999  | [C/A]       | Ca_Kabuli_LG03             | 73.513                                       |
| Ca_Kabuli_SNP1000 | [T/C]       | Ca_Kabuli_LG03             | 73.529                                       |
| Ca_Kabuli_SNP1001 | [G/A]       | Ca_Kabuli_LG03             | 75.644                                       |
| Ca_Kabuli_SNP1002 | [A/T]       | Ca_Kabuli_LG03             | 76.132                                       |
| Ca_Kabuli_SNP1003 | [G/C]       | Ca_Kabuli_LG03             | 77.851                                       |
| Ca_Kabuli_SNP1004 | [A/C]       | Ca_Kabuli_LG03             | 81.410                                       |
| Ca_Kabuli_SNP1005 | [C/T]       | Ca_Kabuli_LG03             | 82.124                                       |
| Ca_Kabuli_SNP1006 | [C/T]       | Ca_Kabuli_LG04             | 0.000                                        |
| Ca_Kabuli_SNP1007 | [A/T]       | Ca_Kabuli_LG04             | 2.264                                        |
| Ca_Kabuli_SNP1008 | [G/A]       | Ca_Kabuli_LG04             | 3.961                                        |
| Ca_Kabuli_SNP1009 | [A/C]       | Ca_Kabuli_LG04             | 9.304                                        |
| Ca_Kabuli_SNP1010 | [A/C]       | Ca_Kabuli_LG04             | 9.545                                        |
| Ca_Kabuli_SNP1011 | [G/T]       | Ca_Kabuli_LG04             | 11.939                                       |
| Ca_Kabuli_SNP1012 | [T/C]       | Ca_Kabuli_LG04             | 12.398                                       |
| Ca_Kabuli_SNP1013 | [G/T]       | Ca_Kabuli_LG04             | 12.696                                       |
| Ca_Kabuli_SNP1014 | [A/G]       | Ca_Kabuli_LG04             | 14.342                                       |
| Ca_Kabuli_SNP1015 | [C/T]       | Ca_Kabuli_LG04             | 14.517                                       |
| Ca_Kabuli_SNP1016 | [A/C]       | Ca_Kabuli_LG04             | 15.244                                       |
| Ca_Kabuli_SNP1017 | [A/G]       | Ca_Kabuli_LG04             | 15.438                                       |
| Ca_Kabuli_SNP1018 | [T/A]       | Ca_Kabuli_LG04             | 15.774                                       |
| Ca_Kabuli_SNP1019 | [A/C]       | Ca_Kabuli_LG04             | 15.916                                       |
| Ca_Kabuli_SNP1020 | [A/T]       | Ca_Kabuli_LG04             | 15.970                                       |
| Ca_Kabuli_SNP1021 | [A/T]       | Ca_Kabuli_LG04             | 16.561                                       |

| <b>SNP IDs</b>    | <b>SNPs</b> | <b>Linkage Group (LGs)</b> | <b>Genetic positions (cM) of mapped SNPs</b> |
|-------------------|-------------|----------------------------|----------------------------------------------|
| Ca_Kabuli_SNP1022 | [A/G]       | Ca_Kabuli_LG04             | 16.965                                       |
| Ca_Kabuli_SNP1023 | [A/T]       | Ca_Kabuli_LG04             | 17.087                                       |
| Ca_Kabuli_SNP1024 | [C/G]       | Ca_Kabuli_LG04             | 17.837                                       |
| Ca_Kabuli_SNP1025 | [G/A]       | Ca_Kabuli_LG04             | 18.117                                       |
| Ca_Kabuli_SNP1026 | [A/G]       | Ca_Kabuli_LG04             | 18.257                                       |
| Ca_Kabuli_SNP1027 | [T/C]       | Ca_Kabuli_LG04             | 18.877                                       |
| Ca_Kabuli_SNP1028 | [T/G]       | Ca_Kabuli_LG04             | 19.005                                       |
| Ca_Kabuli_SNP1029 | [A/G]       | Ca_Kabuli_LG04             | 19.709                                       |
| Ca_Kabuli_SNP1030 | [C/T]       | Ca_Kabuli_LG04             | 19.918                                       |
| Ca_Kabuli_SNP1031 | [T/A]       | Ca_Kabuli_LG04             | 20.223                                       |
| Ca_Kabuli_SNP1032 | [G/A]       | Ca_Kabuli_LG04             | 20.351                                       |
| Ca_Kabuli_SNP1033 | [A/C]       | Ca_Kabuli_LG04             | 20.484                                       |
| Ca_Kabuli_SNP1034 | [T/C]       | Ca_Kabuli_LG04             | 21.079                                       |
| Ca_Kabuli_SNP1035 | [G/A]       | Ca_Kabuli_LG04             | 21.124                                       |
| Ca_Kabuli_SNP1036 | [C/T]       | Ca_Kabuli_LG04             | 21.330                                       |
| Ca_Kabuli_SNP1037 | [G/A]       | Ca_Kabuli_LG04             | 21.334                                       |
| Ca_Kabuli_SNP1038 | [C/T]       | Ca_Kabuli_LG04             | 21.486                                       |
| Ca_Kabuli_SNP1039 | [T/A]       | Ca_Kabuli_LG04             | 21.497                                       |
| Ca_Kabuli_SNP1040 | [C/A]       | Ca_Kabuli_LG04             | 22.046                                       |
| Ca_Kabuli_SNP1041 | [G/T]       | Ca_Kabuli_LG04             | 22.092                                       |
| Ca_Kabuli_SNP1042 | [A/C]       | Ca_Kabuli_LG04             | 22.764                                       |
| Ca_Kabuli_SNP1043 | [A/C]       | Ca_Kabuli_LG04             | 22.794                                       |
| Ca_Kabuli_SNP1044 | [G/A]       | Ca_Kabuli_LG04             | 23.944                                       |
| Ca_Kabuli_SNP1045 | [A/G]       | Ca_Kabuli_LG04             | 23.982                                       |
| Ca_Kabuli_SNP1046 | [A/G]       | Ca_Kabuli_LG04             | 24.132                                       |
| Ca_Kabuli_SNP1047 | [T/C]       | Ca_Kabuli_LG04             | 24.456                                       |
| Ca_Kabuli_SNP1048 | [T/A]       | Ca_Kabuli_LG04             | 25.071                                       |
| Ca_Kabuli_SNP1049 | [G/A]       | Ca_Kabuli_LG04             | 25.572                                       |
| Ca_Kabuli_SNP1050 | [T/A]       | Ca_Kabuli_LG04             | 26.132                                       |
| Ca_Kabuli_SNP1051 | [G/A]       | Ca_Kabuli_LG04             | 26.145                                       |
| Ca_Kabuli_SNP1052 | [G/C]       | Ca_Kabuli_LG04             | 26.286                                       |



| <b>SNP IDs</b>    | <b>SNPs</b> | <b>Linkage Group (LGs)</b> | <b>Genetic positions (cM) of mapped SNPs</b> |
|-------------------|-------------|----------------------------|----------------------------------------------|
| Ca_Kabuli_SNP1053 | [C/G]       | Ca_Kabuli_LG04             | 26.632                                       |
| Ca_Kabuli_SNP1054 | [G/A]       | Ca_Kabuli_LG04             | 26.721                                       |
| Ca_Kabuli_SNP1055 | [C/T]       | Ca_Kabuli_LG04             | 26.982                                       |
| Ca_Kabuli_SNP1056 | [T/G]       | Ca_Kabuli_LG04             | 26.992                                       |
| Ca_Kabuli_SNP1057 | [G/C]       | Ca_Kabuli_LG04             | 27.397                                       |
| Ca_Kabuli_SNP1058 | [G/T]       | Ca_Kabuli_LG04             | 27.450                                       |
| Ca_Kabuli_SNP1059 | [C/T]       | Ca_Kabuli_LG04             | 27.511                                       |
| Ca_Kabuli_SNP1060 | [T/G]       | Ca_Kabuli_LG04             | 27.706                                       |
| Ca_Kabuli_SNP1061 | [G/A]       | Ca_Kabuli_LG04             | 28.137                                       |
| Ca_Kabuli_SNP1062 | [C/A]       | Ca_Kabuli_LG04             | 28.142                                       |
| Ca_Kabuli_SNP1063 | [A/G]       | Ca_Kabuli_LG04             | 28.404                                       |
| Ca_Kabuli_SNP1064 | [T/G]       | Ca_Kabuli_LG04             | 28.451                                       |
| Ca_Kabuli_SNP1065 | [C/G]       | Ca_Kabuli_LG04             | 28.602                                       |
| Ca_Kabuli_SNP1066 | [G/T]       | Ca_Kabuli_LG04             | 28.758                                       |
| Ca_Kabuli_SNP1067 | [A/G]       | Ca_Kabuli_LG04             | 28.765                                       |
| Ca_Kabuli_SNP1068 | [A/G]       | Ca_Kabuli_LG04             | 29.197                                       |
| Ca_Kabuli_SNP1069 | [A/C]       | Ca_Kabuli_LG04             | 29.397                                       |
| Ca_Kabuli_SNP1070 | [C/G]       | Ca_Kabuli_LG04             | 29.511                                       |
| Ca_Kabuli_SNP1071 | [G/A]       | Ca_Kabuli_LG04             | 29.680                                       |
| Ca_Kabuli_SNP1072 | [G/C]       | Ca_Kabuli_LG04             | 29.770                                       |
| Ca_Kabuli_SNP1073 | [T/C]       | Ca_Kabuli_LG04             | 29.848                                       |
| Ca_Kabuli_SNP1074 | [T/C]       | Ca_Kabuli_LG04             | 30.306                                       |
| Ca_Kabuli_SNP1075 | [T/C]       | Ca_Kabuli_LG04             | 30.339                                       |
| Ca_Kabuli_SNP1076 | [T/G]       | Ca_Kabuli_LG04             | 30.362                                       |
| Ca_Kabuli_SNP1077 | [T/G]       | Ca_Kabuli_LG04             | 30.445                                       |
| Ca_Kabuli_SNP1078 | [A/C]       | Ca_Kabuli_LG04             | 30.549                                       |
| Ca_Kabuli_SNP1079 | [T/C]       | Ca_Kabuli_LG04             | 30.655                                       |
| Ca_Kabuli_SNP1080 | [T/G]       | Ca_Kabuli_LG04             | 31.024                                       |
| Ca_Kabuli_SNP1081 | [C/T]       | Ca_Kabuli_LG04             | 31.027                                       |
| Ca_Kabuli_SNP1082 | [C/T]       | Ca_Kabuli_LG04             | 31.038                                       |
| Ca_Kabuli_SNP1083 | [C/T]       | Ca_Kabuli_LG04             | 31.346                                       |

| <b>SNP IDs</b>    | <b>SNPs</b> | <b>Linkage Group (LGs)</b> | <b>Genetic positions (cM) of mapped SNPs</b> |
|-------------------|-------------|----------------------------|----------------------------------------------|
| Ca_Kabuli_SNP1084 | [C/A]       | Ca_Kabuli_LG04             | 31.457                                       |
| Ca_Kabuli_SNP1085 | [T/C]       | Ca_Kabuli_LG04             | 31.781                                       |
| Ca_Kabuli_SNP1086 | [T/G]       | Ca_Kabuli_LG04             | 31.839                                       |
| Ca_Kabuli_SNP1087 | [A/C]       | Ca_Kabuli_LG04             | 32.110                                       |
| Ca_Kabuli_SNP1088 | [C/G]       | Ca_Kabuli_LG04             | 32.203                                       |
| Ca_Kabuli_SNP1089 | [C/T]       | Ca_Kabuli_LG04             | 32.210                                       |
| Ca_Kabuli_SNP1090 | [C/A]       | Ca_Kabuli_LG04             | 32.402                                       |
| Ca_Kabuli_SNP1091 | [T/A]       | Ca_Kabuli_LG04             | 33.086                                       |
| Ca_Kabuli_SNP1092 | [A/C]       | Ca_Kabuli_LG04             | 33.150                                       |
| Ca_Kabuli_SNP1093 | [A/T]       | Ca_Kabuli_LG04             | 33.200                                       |
| Ca_Kabuli_SNP1094 | [C/T]       | Ca_Kabuli_LG04             | 33.297                                       |
| Ca_Kabuli_SNP1095 | [C/T]       | Ca_Kabuli_LG04             | 33.600                                       |
| Ca_Kabuli_SNP1096 | [T/A]       | Ca_Kabuli_LG04             | 33.796                                       |
| Ca_Kabuli_SNP1097 | [C/T]       | Ca_Kabuli_LG04             | 33.884                                       |
| Ca_Kabuli_SNP1098 | [A/T]       | Ca_Kabuli_LG04             | 33.956                                       |
| Ca_Kabuli_SNP1099 | [G/A]       | Ca_Kabuli_LG04             | 34.082                                       |
| Ca_Kabuli_SNP1100 | [T/C]       | Ca_Kabuli_LG04             | 34.098                                       |
| Ca_Kabuli_SNP1101 | [C/T]       | Ca_Kabuli_LG04             | 34.362                                       |
| Ca_Kabuli_SNP1102 | [G/A]       | Ca_Kabuli_LG04             | 34.677                                       |
| Ca_Kabuli_SNP1103 | [T/C]       | Ca_Kabuli_LG04             | 34.978                                       |
| Ca_Kabuli_SNP1104 | [A/T]       | Ca_Kabuli_LG04             | 34.978                                       |
| Ca_Kabuli_SNP1105 | [C/A]       | Ca_Kabuli_LG04             | 35.368                                       |
| Ca_Kabuli_SNP1106 | [T/A]       | Ca_Kabuli_LG04             | 35.373                                       |
| Ca_Kabuli_SNP1107 | [T/C]       | Ca_Kabuli_LG04             | 35.470                                       |
| Ca_Kabuli_SNP1108 | [A/C]       | Ca_Kabuli_LG04             | 35.808                                       |
| Ca_Kabuli_SNP1109 | [G/A]       | Ca_Kabuli_LG04             | 36.183                                       |
| Ca_Kabuli_SNP1110 | [T/G]       | Ca_Kabuli_LG04             | 36.236                                       |
| Ca_Kabuli_SNP1111 | [A/C]       | Ca_Kabuli_LG04             | 36.582                                       |
| Ca_Kabuli_SNP1112 | [T/G]       | Ca_Kabuli_LG04             | 36.704                                       |
| Ca_Kabuli_SNP1113 | [C/T]       | Ca_Kabuli_LG04             | 36.831                                       |
| Ca_Kabuli_SNP1114 | [G/A]       | Ca_Kabuli_LG04             | 36.991                                       |

| <b>SNP IDs</b>    | <b>SNPs</b> | <b>Linkage Group (LGs)</b> | <b>Genetic positions (cM) of mapped SNPs</b> |
|-------------------|-------------|----------------------------|----------------------------------------------|
| Ca_Kabuli_SNP1115 | [T/G]       | Ca_Kabuli_LG04             | 37.178                                       |
| Ca_Kabuli_SNP1116 | [C/T]       | Ca_Kabuli_LG04             | 37.539                                       |
| Ca_Kabuli_SNP1117 | [A/C]       | Ca_Kabuli_LG04             | 37.732                                       |
| Ca_Kabuli_SNP1118 | [T/G]       | Ca_Kabuli_LG04             | 37.809                                       |
| Ca_Kabuli_SNP1119 | [C/T]       | Ca_Kabuli_LG04             | 37.819                                       |
| Ca_Kabuli_SNP1120 | [A/G]       | Ca_Kabuli_LG04             | 38.701                                       |
| Ca_Kabuli_SNP1121 | [C/T]       | Ca_Kabuli_LG04             | 38.808                                       |
| Ca_Kabuli_SNP1122 | [G/T]       | Ca_Kabuli_LG04             | 38.808                                       |
| Ca_Kabuli_SNP1123 | [T/G]       | Ca_Kabuli_LG04             | 38.844                                       |
| Ca_Kabuli_SNP1124 | [A/C]       | Ca_Kabuli_LG04             | 39.007                                       |
| Ca_Kabuli_SNP1125 | [C/G]       | Ca_Kabuli_LG04             | 39.065                                       |
| Ca_Kabuli_SNP1126 | [G/A]       | Ca_Kabuli_LG04             | 39.189                                       |
| Ca_Kabuli_SNP1127 | [A/C]       | Ca_Kabuli_LG04             | 39.336                                       |
| Ca_Kabuli_SNP1128 | [C/A]       | Ca_Kabuli_LG04             | 39.447                                       |
| Ca_Kabuli_SNP1129 | [A/C]       | Ca_Kabuli_LG04             | 39.610                                       |
| Ca_Kabuli_SNP1130 | [T/G]       | Ca_Kabuli_LG04             | 39.730                                       |
| Ca_Kabuli_SNP1131 | [C/T]       | Ca_Kabuli_LG04             | 39.788                                       |
| Ca_Kabuli_SNP1132 | [C/T]       | Ca_Kabuli_LG04             | 39.834                                       |
| Ca_Kabuli_SNP1133 | [T/A]       | Ca_Kabuli_LG04             | 40.037                                       |
| Ca_Kabuli_SNP1134 | [T/C]       | Ca_Kabuli_LG04             | 40.228                                       |
| Ca_Kabuli_SNP1135 | [G/T]       | Ca_Kabuli_LG04             | 40.330                                       |
| Ca_Kabuli_SNP1136 | [A/C]       | Ca_Kabuli_LG04             | 40.899                                       |
| Ca_Kabuli_SNP1137 | [A/C]       | Ca_Kabuli_LG04             | 41.131                                       |
| Ca_Kabuli_SNP1138 | [A/C]       | Ca_Kabuli_LG04             | 41.151                                       |
| Ca_Kabuli_SNP1139 | [A/T]       | Ca_Kabuli_LG04             | 41.341                                       |
| Ca_Kabuli_SNP1140 | [C/A]       | Ca_Kabuli_LG04             | 41.487                                       |
| Ca_Kabuli_SNP1141 | [T/C]       | Ca_Kabuli_LG04             | 42.099                                       |
| Ca_Kabuli_SNP1142 | [A/C]       | Ca_Kabuli_LG04             | 42.750                                       |
| Ca_Kabuli_SNP1143 | [A/G]       | Ca_Kabuli_LG04             | 43.137                                       |
| Ca_Kabuli_SNP1144 | [T/G]       | Ca_Kabuli_LG04             | 43.179                                       |
| Ca_Kabuli_SNP1145 | [T/G]       | Ca_Kabuli_LG04             | 43.265                                       |

| <b>SNP IDs</b>    | <b>SNPs</b> | <b>Linkage Group (LGs)</b> | <b>Genetic positions (cM) of mapped SNPs</b> |
|-------------------|-------------|----------------------------|----------------------------------------------|
| Ca_Kabuli_SNP1146 | [T/C]       | Ca_Kabuli_LG04             | 43.377                                       |
| Ca_Kabuli_SNP1147 | [C/T]       | Ca_Kabuli_LG04             | 43.624                                       |
| Ca_Kabuli_SNP1148 | [G/A]       | Ca_Kabuli_LG04             | 44.737                                       |
| Ca_Kabuli_SNP1149 | [A/T]       | Ca_Kabuli_LG04             | 45.002                                       |
| Ca_Kabuli_SNP1150 | [C/G]       | Ca_Kabuli_LG04             | 45.245                                       |
| Ca_Kabuli_SNP1151 | [A/G]       | Ca_Kabuli_LG04             | 45.311                                       |
| Ca_Kabuli_SNP1152 | [T/C]       | Ca_Kabuli_LG04             | 45.671                                       |
| Ca_Kabuli_SNP1153 | [T/A]       | Ca_Kabuli_LG04             | 45.861                                       |
| Ca_Kabuli_SNP1154 | [C/T]       | Ca_Kabuli_LG04             | 45.964                                       |
| Ca_Kabuli_SNP1155 | [A/C]       | Ca_Kabuli_LG04             | 46.343                                       |
| Ca_Kabuli_SNP1156 | [A/C]       | Ca_Kabuli_LG04             | 46.473                                       |
| Ca_Kabuli_SNP1157 | [G/A]       | Ca_Kabuli_LG04             | 46.476                                       |
| Ca_Kabuli_SNP1158 | [T/A]       | Ca_Kabuli_LG04             | 46.718                                       |
| Ca_Kabuli_SNP1159 | [T/A]       | Ca_Kabuli_LG04             | 46.880                                       |
| Ca_Kabuli_SNP1160 | [C/T]       | Ca_Kabuli_LG04             | 46.958                                       |
| Ca_Kabuli_SNP1161 | [A/G]       | Ca_Kabuli_LG04             | 47.031                                       |
| Ca_Kabuli_SNP1162 | [C/T]       | Ca_Kabuli_LG04             | 47.150                                       |
| Ca_Kabuli_SNP1163 | [T/C]       | Ca_Kabuli_LG04             | 47.150                                       |
| Ca_Kabuli_SNP1164 | [A/C]       | Ca_Kabuli_LG04             | 47.242                                       |
| Ca_Kabuli_SNP1165 | [C/A]       | Ca_Kabuli_LG04             | 47.401                                       |
| Ca_Kabuli_SNP1166 | [A/T]       | Ca_Kabuli_LG04             | 47.619                                       |
| Ca_Kabuli_SNP1167 | [C/A]       | Ca_Kabuli_LG04             | 48.294                                       |
| Ca_Kabuli_SNP1168 | [T/G]       | Ca_Kabuli_LG04             | 48.343                                       |
| Ca_Kabuli_SNP1169 | [A/G]       | Ca_Kabuli_LG04             | 48.352                                       |
| Ca_Kabuli_SNP1170 | [G/A]       | Ca_Kabuli_LG04             | 48.465                                       |
| Ca_Kabuli_SNP1171 | [C/A]       | Ca_Kabuli_LG04             | 48.548                                       |
| Ca_Kabuli_SNP1172 | [G/T]       | Ca_Kabuli_LG04             | 48.650                                       |
| Ca_Kabuli_SNP1173 | [C/A]       | Ca_Kabuli_LG04             | 48.727                                       |
| Ca_Kabuli_SNP1174 | [A/C]       | Ca_Kabuli_LG04             | 48.788                                       |
| Ca_Kabuli_SNP1175 | [T/G]       | Ca_Kabuli_LG04             | 48.840                                       |
| Ca_Kabuli_SNP1176 | [C/T]       | Ca_Kabuli_LG04             | 48.897                                       |

| <b>SNP IDs</b>    | <b>SNPs</b> | <b>Linkage Group (LGs)</b> | <b>Genetic positions (cM) of mapped SNPs</b> |
|-------------------|-------------|----------------------------|----------------------------------------------|
| Ca_Kabuli_SNP1177 | [T/C]       | Ca_Kabuli_LG04             | 48.967                                       |
| Ca_Kabuli_SNP1178 | [T/G]       | Ca_Kabuli_LG04             | 49.004                                       |
| Ca_Kabuli_SNP1179 | [T/A]       | Ca_Kabuli_LG04             | 49.028                                       |
| Ca_Kabuli_SNP1180 | [G/A]       | Ca_Kabuli_LG04             | 49.212                                       |
| Ca_Kabuli_SNP1181 | [A/C]       | Ca_Kabuli_LG04             | 49.285                                       |
| Ca_Kabuli_SNP1182 | [C/T]       | Ca_Kabuli_LG04             | 49.377                                       |
| Ca_Kabuli_SNP1183 | [T/C]       | Ca_Kabuli_LG04             | 49.448                                       |
| Ca_Kabuli_SNP1184 | [T/G]       | Ca_Kabuli_LG04             | 49.755                                       |
| Ca_Kabuli_SNP1185 | [G/A]       | Ca_Kabuli_LG04             | 49.825                                       |
| Ca_Kabuli_SNP1186 | [A/T]       | Ca_Kabuli_LG04             | 49.922                                       |
| Ca_Kabuli_SNP1187 | [T/C]       | Ca_Kabuli_LG04             | 49.947                                       |
| Ca_Kabuli_SNP1188 | [C/T]       | Ca_Kabuli_LG04             | 50.593                                       |
| Ca_Kabuli_SNP1189 | [A/T]       | Ca_Kabuli_LG04             | 50.610                                       |
| Ca_Kabuli_SNP1190 | [C/T]       | Ca_Kabuli_LG04             | 50.756                                       |
| Ca_Kabuli_SNP1191 | [T/C]       | Ca_Kabuli_LG04             | 51.036                                       |
| Ca_Kabuli_SNP1192 | [A/G]       | Ca_Kabuli_LG04             | 51.056                                       |
| Ca_Kabuli_SNP1193 | [C/T]       | Ca_Kabuli_LG04             | 51.085                                       |
| Ca_Kabuli_SNP1194 | [G/A]       | Ca_Kabuli_LG04             | 51.153                                       |
| Ca_Kabuli_SNP1195 | [A/C]       | Ca_Kabuli_LG04             | 51.354                                       |
| Ca_Kabuli_SNP1196 | [T/G]       | Ca_Kabuli_LG04             | 51.414                                       |
| Ca_Kabuli_SNP1197 | [G/T]       | Ca_Kabuli_LG04             | 51.490                                       |
| Ca_Kabuli_SNP1198 | [C/A]       | Ca_Kabuli_LG04             | 51.746                                       |
| Ca_Kabuli_SNP1199 | [C/T]       | Ca_Kabuli_LG04             | 52.217                                       |
| Ca_Kabuli_SNP1200 | [G/A]       | Ca_Kabuli_LG04             | 52.479                                       |
| Ca_Kabuli_SNP1201 | [T/G]       | Ca_Kabuli_LG04             | 52.545                                       |
| Ca_Kabuli_SNP1202 | [A/C]       | Ca_Kabuli_LG04             | 52.554                                       |
| Ca_Kabuli_SNP1203 | [A/G]       | Ca_Kabuli_LG04             | 52.990                                       |
| Ca_Kabuli_SNP1204 | [G/A]       | Ca_Kabuli_LG04             | 53.009                                       |
| Ca_Kabuli_SNP1205 | [A/C]       | Ca_Kabuli_LG04             | 53.413                                       |
| Ca_Kabuli_SNP1206 | [G/A]       | Ca_Kabuli_LG04             | 53.798                                       |
| Ca_Kabuli_SNP1207 | [T/C]       | Ca_Kabuli_LG04             | 53.861                                       |

| <b>SNP IDs</b>    | <b>SNPs</b> | <b>Linkage Group (LGs)</b> | <b>Genetic positions (cM) of mapped SNPs</b> |
|-------------------|-------------|----------------------------|----------------------------------------------|
| Ca_Kabuli_SNP1208 | [G/A]       | Ca_Kabuli_LG04             | 54.045                                       |
| Ca_Kabuli_SNP1209 | [A/G]       | Ca_Kabuli_LG04             | 54.168                                       |
| Ca_Kabuli_SNP1210 | [C/T]       | Ca_Kabuli_LG04             | 54.197                                       |
| Ca_Kabuli_SNP1211 | [A/G]       | Ca_Kabuli_LG04             | 54.357                                       |
| Ca_Kabuli_SNP1212 | [T/G]       | Ca_Kabuli_LG04             | 54.478                                       |
| Ca_Kabuli_SNP1213 | [T/G]       | Ca_Kabuli_LG04             | 54.579                                       |
| Ca_Kabuli_SNP1214 | [A/C]       | Ca_Kabuli_LG04             | 54.650                                       |
| Ca_Kabuli_SNP1215 | [T/A]       | Ca_Kabuli_LG04             | 54.726                                       |
| Ca_Kabuli_SNP1216 | [T/G]       | Ca_Kabuli_LG04             | 54.747                                       |
| Ca_Kabuli_SNP1217 | [A/C]       | Ca_Kabuli_LG04             | 55.042                                       |
| Ca_Kabuli_SNP1218 | [T/C]       | Ca_Kabuli_LG04             | 55.047                                       |
| Ca_Kabuli_SNP1219 | [C/T]       | Ca_Kabuli_LG04             | 55.049                                       |
| Ca_Kabuli_SNP1220 | [C/T]       | Ca_Kabuli_LG04             | 55.049                                       |
| Ca_Kabuli_SNP1221 | [T/A]       | Ca_Kabuli_LG04             | 55.302                                       |
| Ca_Kabuli_SNP1222 | [G/A]       | Ca_Kabuli_LG04             | 55.508                                       |
| Ca_Kabuli_SNP1223 | [C/G]       | Ca_Kabuli_LG04             | 55.573                                       |
| Ca_Kabuli_SNP1224 | [C/T]       | Ca_Kabuli_LG04             | 56.016                                       |
| Ca_Kabuli_SNP1225 | [G/T]       | Ca_Kabuli_LG04             | 56.211                                       |
| Ca_Kabuli_SNP1226 | [T/C]       | Ca_Kabuli_LG04             | 56.245                                       |
| Ca_Kabuli_SNP1227 | [C/T]       | Ca_Kabuli_LG04             | 56.295                                       |
| Ca_Kabuli_SNP1228 | [G/T]       | Ca_Kabuli_LG04             | 56.309                                       |
| Ca_Kabuli_SNP1229 | [T/A]       | Ca_Kabuli_LG04             | 56.404                                       |
| Ca_Kabuli_SNP1230 | [A/C]       | Ca_Kabuli_LG04             | 56.414                                       |
| Ca_Kabuli_SNP1231 | [A/C]       | Ca_Kabuli_LG04             | 56.483                                       |
| Ca_Kabuli_SNP1232 | [A/G]       | Ca_Kabuli_LG04             | 56.491                                       |
| Ca_Kabuli_SNP1233 | [G/A]       | Ca_Kabuli_LG04             | 56.728                                       |
| Ca_Kabuli_SNP1234 | [C/T]       | Ca_Kabuli_LG04             | 56.895                                       |
| Ca_Kabuli_SNP1235 | [C/T]       | Ca_Kabuli_LG04             | 56.950                                       |
| Ca_Kabuli_SNP1236 | [A/G]       | Ca_Kabuli_LG04             | 56.950                                       |
| Ca_Kabuli_SNP1237 | [G/A]       | Ca_Kabuli_LG04             | 56.975                                       |
| Ca_Kabuli_SNP1238 | [A/G]       | Ca_Kabuli_LG04             | 56.976                                       |

| <b>SNP IDs</b>    | <b>SNPs</b> | <b>Linkage Group (LGs)</b> | <b>Genetic positions (cM) of mapped SNPs</b> |
|-------------------|-------------|----------------------------|----------------------------------------------|
| Ca_Kabuli_SNP1239 | [C/A]       | Ca_Kabuli_LG04             | 57.072                                       |
| Ca_Kabuli_SNP1240 | [A/G]       | Ca_Kabuli_LG04             | 57.173                                       |
| Ca_Kabuli_SNP1241 | [T/A]       | Ca_Kabuli_LG04             | 57.327                                       |
| Ca_Kabuli_SNP1242 | [A/T]       | Ca_Kabuli_LG04             | 57.445                                       |
| Ca_Kabuli_SNP1243 | [C/T]       | Ca_Kabuli_LG04             | 57.485                                       |
| Ca_Kabuli_SNP1244 | [C/T]       | Ca_Kabuli_LG04             | 57.502                                       |
| Ca_Kabuli_SNP1245 | [T/A]       | Ca_Kabuli_LG04             | 57.667                                       |
| Ca_Kabuli_SNP1246 | [G/A]       | Ca_Kabuli_LG04             | 57.674                                       |
| Ca_Kabuli_SNP1247 | [G/T]       | Ca_Kabuli_LG04             | 57.728                                       |
| Ca_Kabuli_SNP1248 | [A/T]       | Ca_Kabuli_LG04             | 57.738                                       |
| Ca_Kabuli_SNP1249 | [T/C]       | Ca_Kabuli_LG04             | 57.763                                       |
| Ca_Kabuli_SNP1250 | [C/A]       | Ca_Kabuli_LG04             | 57.800                                       |
| Ca_Kabuli_SNP1251 | [A/G]       | Ca_Kabuli_LG04             | 57.941                                       |
| Ca_Kabuli_SNP1252 | [A/C]       | Ca_Kabuli_LG04             | 57.989                                       |
| Ca_Kabuli_SNP1253 | [T/A]       | Ca_Kabuli_LG04             | 58.058                                       |
| Ca_Kabuli_SNP1254 | [G/T]       | Ca_Kabuli_LG04             | 58.136                                       |
| Ca_Kabuli_SNP1255 | [A/T]       | Ca_Kabuli_LG04             | 58.140                                       |
| Ca_Kabuli_SNP1256 | [A/G]       | Ca_Kabuli_LG04             | 58.193                                       |
| Ca_Kabuli_SNP1257 | [C/T]       | Ca_Kabuli_LG04             | 58.343                                       |
| Ca_Kabuli_SNP1258 | [C/T]       | Ca_Kabuli_LG04             | 58.343                                       |
| Ca_Kabuli_SNP1259 | [C/T]       | Ca_Kabuli_LG04             | 58.406                                       |
| Ca_Kabuli_SNP1260 | [T/A]       | Ca_Kabuli_LG04             | 58.437                                       |
| Ca_Kabuli_SNP1261 | [G/T]       | Ca_Kabuli_LG04             | 58.558                                       |
| Ca_Kabuli_SNP1262 | [T/A]       | Ca_Kabuli_LG04             | 58.672                                       |
| Ca_Kabuli_SNP1263 | [C/T]       | Ca_Kabuli_LG04             | 58.951                                       |
| Ca_Kabuli_SNP1264 | [C/A]       | Ca_Kabuli_LG04             | 59.066                                       |
| Ca_Kabuli_SNP1265 | [T/A]       | Ca_Kabuli_LG04             | 59.156                                       |
| Ca_Kabuli_SNP1266 | [G/T]       | Ca_Kabuli_LG04             | 59.221                                       |
| Ca_Kabuli_SNP1267 | [T/A]       | Ca_Kabuli_LG04             | 59.304                                       |
| Ca_Kabuli_SNP1268 | [G/A]       | Ca_Kabuli_LG04             | 59.363                                       |
| Ca_Kabuli_SNP1269 | [G/C]       | Ca_Kabuli_LG04             | 59.468                                       |

| <b>SNP IDs</b>    | <b>SNPs</b> | <b>Linkage Group (LGs)</b> | <b>Genetic positions (cM) of mapped SNPs</b> |
|-------------------|-------------|----------------------------|----------------------------------------------|
| Ca_Kabuli_SNP1270 | [A/G]       | Ca_Kabuli_LG04             | 59.493                                       |
| Ca_Kabuli_SNP1271 | [C/T]       | Ca_Kabuli_LG04             | 59.528                                       |
| Ca_Kabuli_SNP1272 | [T/A]       | Ca_Kabuli_LG04             | 59.533                                       |
| Ca_Kabuli_SNP1273 | [T/A]       | Ca_Kabuli_LG04             | 59.549                                       |
| Ca_Kabuli_SNP1274 | [G/C]       | Ca_Kabuli_LG04             | 59.557                                       |
| Ca_Kabuli_SNP1275 | [A/G]       | Ca_Kabuli_LG04             | 59.557                                       |
| Ca_Kabuli_SNP1276 | [A/G]       | Ca_Kabuli_LG04             | 59.598                                       |
| Ca_Kabuli_SNP1277 | [A/C]       | Ca_Kabuli_LG04             | 59.784                                       |
| Ca_Kabuli_SNP1278 | [G/A]       | Ca_Kabuli_LG04             | 59.994                                       |
| Ca_Kabuli_SNP1279 | [T/G]       | Ca_Kabuli_LG04             | 60.005                                       |
| Ca_Kabuli_SNP1280 | [C/A]       | Ca_Kabuli_LG04             | 60.060                                       |
| Ca_Kabuli_SNP1281 | [C/G]       | Ca_Kabuli_LG04             | 60.134                                       |
| Ca_Kabuli_SNP1282 | [T/A]       | Ca_Kabuli_LG04             | 60.282                                       |
| Ca_Kabuli_SNP1283 | [G/A]       | Ca_Kabuli_LG04             | 60.482                                       |
| Ca_Kabuli_SNP1284 | [G/T]       | Ca_Kabuli_LG04             | 60.643                                       |
| Ca_Kabuli_SNP1285 | [T/C]       | Ca_Kabuli_LG04             | 60.646                                       |
| Ca_Kabuli_SNP1286 | [C/A]       | Ca_Kabuli_LG04             | 60.696                                       |
| Ca_Kabuli_SNP1287 | [A/G]       | Ca_Kabuli_LG04             | 60.877                                       |
| Ca_Kabuli_SNP1288 | [T/G]       | Ca_Kabuli_LG04             | 60.933                                       |
| Ca_Kabuli_SNP1289 | [G/A]       | Ca_Kabuli_LG04             | 60.981                                       |
| Ca_Kabuli_SNP1290 | [A/G]       | Ca_Kabuli_LG04             | 61.022                                       |
| Ca_Kabuli_SNP1291 | [C/T]       | Ca_Kabuli_LG04             | 61.056                                       |
| Ca_Kabuli_SNP1292 | [T/G]       | Ca_Kabuli_LG04             | 61.075                                       |
| Ca_Kabuli_SNP1293 | [G/A]       | Ca_Kabuli_LG04             | 61.116                                       |
| Ca_Kabuli_SNP1294 | [A/G]       | Ca_Kabuli_LG04             | 61.155                                       |
| Ca_Kabuli_SNP1295 | [A/G]       | Ca_Kabuli_LG04             | 61.160                                       |
| Ca_Kabuli_SNP1296 | [A/G]       | Ca_Kabuli_LG04             | 61.318                                       |
| Ca_Kabuli_SNP1297 | [A/G]       | Ca_Kabuli_LG04             | 61.390                                       |
| Ca_Kabuli_SNP1298 | [T/C]       | Ca_Kabuli_LG04             | 61.515                                       |
| Ca_Kabuli_SNP1299 | [C/T]       | Ca_Kabuli_LG04             | 61.785                                       |
| Ca_Kabuli_SNP1300 | [A/T]       | Ca_Kabuli_LG04             | 61.809                                       |



| <b>SNP IDs</b>    | <b>SNPs</b> | <b>Linkage Group (LGs)</b> | <b>Genetic positions (cM) of mapped SNPs</b> |
|-------------------|-------------|----------------------------|----------------------------------------------|
| Ca_Kabuli_SNP1301 | [G/A]       | Ca_Kabuli_LG04             | 61.850                                       |
| Ca_Kabuli_SNP1302 | [G/T]       | Ca_Kabuli_LG04             | 62.072                                       |
| Ca_Kabuli_SNP1303 | [A/G]       | Ca_Kabuli_LG04             | 62.107                                       |
| Ca_Kabuli_SNP1304 | [A/C]       | Ca_Kabuli_LG04             | 62.306                                       |
| Ca_Kabuli_SNP1305 | [G/C]       | Ca_Kabuli_LG04             | 62.417                                       |
| Ca_Kabuli_SNP1306 | [A/G]       | Ca_Kabuli_LG04             | 62.438                                       |
| Ca_Kabuli_SNP1307 | [G/A]       | Ca_Kabuli_LG04             | 62.597                                       |
| Ca_Kabuli_SNP1308 | [C/T]       | Ca_Kabuli_LG04             | 62.639                                       |
| Ca_Kabuli_SNP1309 | [A/C]       | Ca_Kabuli_LG04             | 62.683                                       |
| Ca_Kabuli_SNP1310 | [A/G]       | Ca_Kabuli_LG04             | 62.735                                       |
| Ca_Kabuli_SNP1311 | [C/T]       | Ca_Kabuli_LG04             | 62.758                                       |
| Ca_Kabuli_SNP1312 | [G/C]       | Ca_Kabuli_LG04             | 62.788                                       |
| Ca_Kabuli_SNP1313 | [T/C]       | Ca_Kabuli_LG04             | 62.873                                       |
| Ca_Kabuli_SNP1314 | [C/T]       | Ca_Kabuli_LG04             | 62.917                                       |
| Ca_Kabuli_SNP1315 | [A/C]       | Ca_Kabuli_LG04             | 62.956                                       |
| Ca_Kabuli_SNP1316 | [C/G]       | Ca_Kabuli_LG04             | 62.995                                       |
| Ca_Kabuli_SNP1317 | [T/G]       | Ca_Kabuli_LG04             | 63.016                                       |
| Ca_Kabuli_SNP1318 | [C/T]       | Ca_Kabuli_LG04             | 63.039                                       |
| Ca_Kabuli_SNP1319 | [A/G]       | Ca_Kabuli_LG04             | 63.050                                       |
| Ca_Kabuli_SNP1320 | [A/G]       | Ca_Kabuli_LG04             | 63.156                                       |
| Ca_Kabuli_SNP1321 | [C/A]       | Ca_Kabuli_LG04             | 63.200                                       |
| Ca_Kabuli_SNP1322 | [C/T]       | Ca_Kabuli_LG04             | 63.214                                       |
| Ca_Kabuli_SNP1323 | [G/C]       | Ca_Kabuli_LG04             | 63.364                                       |
| Ca_Kabuli_SNP1324 | [C/G]       | Ca_Kabuli_LG04             | 63.392                                       |
| Ca_Kabuli_SNP1325 | [T/C]       | Ca_Kabuli_LG04             | 63.418                                       |
| Ca_Kabuli_SNP1326 | [G/A]       | Ca_Kabuli_LG04             | 63.573                                       |
| Ca_Kabuli_SNP1327 | [C/T]       | Ca_Kabuli_LG04             | 64.001                                       |
| Ca_Kabuli_SNP1328 | [C/A]       | Ca_Kabuli_LG04             | 64.104                                       |
| Ca_Kabuli_SNP1329 | [G/A]       | Ca_Kabuli_LG04             | 64.113                                       |
| Ca_Kabuli_SNP1330 | [C/G]       | Ca_Kabuli_LG04             | 64.133                                       |
| Ca_Kabuli_SNP1331 | [C/T]       | Ca_Kabuli_LG04             | 64.770                                       |

| <b>SNP IDs</b>    | <b>SNPs</b> | <b>Linkage Group (LGs)</b> | <b>Genetic positions (cM) of mapped SNPs</b> |
|-------------------|-------------|----------------------------|----------------------------------------------|
| Ca_Kabuli_SNP1332 | [A/C]       | Ca_Kabuli_LG04             | 64.800                                       |
| Ca_Kabuli_SNP1333 | [A/G]       | Ca_Kabuli_LG04             | 65.148                                       |
| Ca_Kabuli_SNP1334 | [C/T]       | Ca_Kabuli_LG04             | 65.313                                       |
| Ca_Kabuli_SNP1335 | [T/A]       | Ca_Kabuli_LG04             | 65.465                                       |
| Ca_Kabuli_SNP1336 | [A/G]       | Ca_Kabuli_LG04             | 65.670                                       |
| Ca_Kabuli_SNP1337 | [T/G]       | Ca_Kabuli_LG04             | 65.691                                       |
| Ca_Kabuli_SNP1338 | [G/A]       | Ca_Kabuli_LG04             | 65.777                                       |
| Ca_Kabuli_SNP1339 | [T/C]       | Ca_Kabuli_LG04             | 66.005                                       |
| Ca_Kabuli_SNP1340 | [T/A]       | Ca_Kabuli_LG04             | 66.059                                       |
| Ca_Kabuli_SNP1341 | [C/T]       | Ca_Kabuli_LG04             | 66.059                                       |
| Ca_Kabuli_SNP1342 | [A/T]       | Ca_Kabuli_LG04             | 66.285                                       |
| Ca_Kabuli_SNP1343 | [A/C]       | Ca_Kabuli_LG04             | 66.468                                       |
| Ca_Kabuli_SNP1344 | [G/T]       | Ca_Kabuli_LG04             | 66.756                                       |
| Ca_Kabuli_SNP1345 | [G/T]       | Ca_Kabuli_LG04             | 66.835                                       |
| Ca_Kabuli_SNP1346 | [C/T]       | Ca_Kabuli_LG04             | 66.948                                       |
| Ca_Kabuli_SNP1347 | [A/G]       | Ca_Kabuli_LG04             | 67.066                                       |
| Ca_Kabuli_SNP1348 | [T/C]       | Ca_Kabuli_LG04             | 67.432                                       |
| Ca_Kabuli_SNP1349 | [A/C]       | Ca_Kabuli_LG04             | 67.738                                       |
| Ca_Kabuli_SNP1350 | [T/G]       | Ca_Kabuli_LG04             | 67.793                                       |
| Ca_Kabuli_SNP1351 | [C/T]       | Ca_Kabuli_LG04             | 67.805                                       |
| Ca_Kabuli_SNP1352 | [A/G]       | Ca_Kabuli_LG04             | 67.967                                       |
| Ca_Kabuli_SNP1353 | [A/G]       | Ca_Kabuli_LG04             | 67.977                                       |
| Ca_Kabuli_SNP1354 | [C/T]       | Ca_Kabuli_LG04             | 68.386                                       |
| Ca_Kabuli_SNP1355 | [G/A]       | Ca_Kabuli_LG04             | 68.549                                       |
| Ca_Kabuli_SNP1356 | [A/G]       | Ca_Kabuli_LG04             | 68.728                                       |
| Ca_Kabuli_SNP1357 | [A/G]       | Ca_Kabuli_LG04             | 68.958                                       |
| Ca_Kabuli_SNP1358 | [C/T]       | Ca_Kabuli_LG04             | 69.628                                       |
| Ca_Kabuli_SNP1359 | [A/T]       | Ca_Kabuli_LG04             | 71.594                                       |
| Ca_Kabuli_SNP1360 | [G/T]       | Ca_Kabuli_LG04             | 71.722                                       |
| Ca_Kabuli_SNP1361 | [A/G]       | Ca_Kabuli_LG04             | 72.721                                       |
| Ca_Kabuli_SNP1362 | [T/A]       | Ca_Kabuli_LG04             | 73.323                                       |

| <b>SNP IDs</b>    | <b>SNPs</b> | <b>Linkage Group (LGs)</b> | <b>Genetic positions (cM) of mapped SNPs</b> |
|-------------------|-------------|----------------------------|----------------------------------------------|
| Ca_Kabuli_SNP1363 | [C/T]       | Ca_Kabuli_LG04             | 73.473                                       |
| Ca_Kabuli_SNP1364 | [C/A]       | Ca_Kabuli_LG04             | 75.827                                       |
| Ca_Kabuli_SNP1365 | [C/T]       | Ca_Kabuli_LG04             | 76.219                                       |
| Ca_Kabuli_SNP1366 | [C/T]       | Ca_Kabuli_LG04             | 76.522                                       |
| Ca_Kabuli_SNP1367 | [T/A]       | Ca_Kabuli_LG04             | 76.567                                       |
| Ca_Kabuli_SNP1368 | [C/T]       | Ca_Kabuli_LG04             | 76.866                                       |
| Ca_Kabuli_SNP1369 | [T/C]       | Ca_Kabuli_LG04             | 79.835                                       |
| Ca_Kabuli_SNP1370 | [A/C]       | Ca_Kabuli_LG04             | 80.097                                       |
| Ca_Kabuli_SNP1371 | [T/C]       | Ca_Kabuli_LG04             | 80.214                                       |
| Ca_Kabuli_SNP1372 | [A/C]       | Ca_Kabuli_LG04             | 80.864                                       |
| Ca_Kabuli_SNP1373 | [A/G]       | Ca_Kabuli_LG04             | 80.896                                       |
| Ca_Kabuli_SNP1374 | [C/T]       | Ca_Kabuli_LG04             | 81.863                                       |
| Ca_Kabuli_SNP1375 | [T/G]       | Ca_Kabuli_LG04             | 82.375                                       |
| Ca_Kabuli_SNP1376 | [A/C]       | Ca_Kabuli_LG04             | 82.408                                       |
| Ca_Kabuli_SNP1377 | [A/C]       | Ca_Kabuli_LG04             | 82.470                                       |
| Ca_Kabuli_SNP1378 | [C/G]       | Ca_Kabuli_LG04             | 83.161                                       |
| Ca_Kabuli_SNP1379 | [C/T]       | Ca_Kabuli_LG04             | 83.499                                       |
| Ca_Kabuli_SNP1380 | [G/T]       | Ca_Kabuli_LG04             | 83.902                                       |
| Ca_Kabuli_SNP1381 | [T/G]       | Ca_Kabuli_LG04             | 84.013                                       |
| Ca_Kabuli_SNP1382 | [G/A]       | Ca_Kabuli_LG04             | 84.268                                       |
| Ca_Kabuli_SNP1383 | [C/G]       | Ca_Kabuli_LG04             | 84.285                                       |
| Ca_Kabuli_SNP1384 | [C/T]       | Ca_Kabuli_LG04             | 84.669                                       |
| Ca_Kabuli_SNP1385 | [G/A]       | Ca_Kabuli_LG04             | 85.760                                       |
| Ca_Kabuli_SNP1386 | [C/G]       | Ca_Kabuli_LG04             | 85.954                                       |
| Ca_Kabuli_SNP1387 | [A/G]       | Ca_Kabuli_LG04             | 86.031                                       |
| Ca_Kabuli_SNP1388 | [T/G]       | Ca_Kabuli_LG04             | 86.271                                       |
| Ca_Kabuli_SNP1389 | [T/C]       | Ca_Kabuli_LG04             | 86.569                                       |
| Ca_Kabuli_SNP1390 | [A/T]       | Ca_Kabuli_LG04             | 87.754                                       |
| Ca_Kabuli_SNP1391 | [A/T]       | Ca_Kabuli_LG04             | 89.195                                       |
| Ca_Kabuli_SNP1392 | [A/T]       | Ca_Kabuli_LG04             | 89.820                                       |
| Ca_Kabuli_SNP1393 | [A/C]       | Ca_Kabuli_LG04             | 90.047                                       |

| <b>SNP IDs</b>    | <b>SNPs</b> | <b>Linkage Group (LGs)</b> | <b>Genetic positions (cM) of mapped SNPs</b> |
|-------------------|-------------|----------------------------|----------------------------------------------|
| Ca_Kabuli_SNP1394 | [T/C]       | Ca_Kabuli_LG04             | 92.022                                       |
| Ca_Kabuli_SNP1395 | [G/A]       | Ca_Kabuli_LG04             | 92.738                                       |
| Ca_Kabuli_SNP1396 | [A/G]       | Ca_Kabuli_LG04             | 93.479                                       |
| Ca_Kabuli_SNP1397 | [A/C]       | Ca_Kabuli_LG04             | 94.900                                       |
| Ca_Kabuli_SNP1398 | [T/C]       | Ca_Kabuli_LG04             | 95.802                                       |
| Ca_Kabuli_SNP1399 | [T/G]       | Ca_Kabuli_LG04             | 96.302                                       |
| Ca_Kabuli_SNP1400 | [T/A]       | Ca_Kabuli_LG04             | 97.436                                       |
| Ca_Kabuli_SNP1401 | [T/C]       | Ca_Kabuli_LG04             | 97.851                                       |
| Ca_Kabuli_SNP1402 | [T/C]       | Ca_Kabuli_LG04             | 98.883                                       |
| Ca_Kabuli_SNP1403 | [A/G]       | Ca_Kabuli_LG04             | 100.693                                      |
| Ca_Kabuli_SNP1404 | [G/A]       | Ca_Kabuli_LG04             | 105.127                                      |
| Ca_Kabuli_SNP1405 | [C/T]       | Ca_Kabuli_LG05             | 0.000                                        |
| Ca_Kabuli_SNP1406 | [A/T]       | Ca_Kabuli_LG05             | 0.247                                        |
| Ca_Kabuli_SNP1407 | [A/C]       | Ca_Kabuli_LG05             | 0.933                                        |
| Ca_Kabuli_SNP1408 | [A/C]       | Ca_Kabuli_LG05             | 1.763                                        |
| Ca_Kabuli_SNP1409 | [A/C]       | Ca_Kabuli_LG05             | 2.193                                        |
| Ca_Kabuli_SNP1410 | [C/A]       | Ca_Kabuli_LG05             | 2.284                                        |
| Ca_Kabuli_SNP1411 | [A/C]       | Ca_Kabuli_LG05             | 2.336                                        |
| Ca_Kabuli_SNP1412 | [G/A]       | Ca_Kabuli_LG05             | 2.539                                        |
| Ca_Kabuli_SNP1413 | [A/G]       | Ca_Kabuli_LG05             | 2.628                                        |
| Ca_Kabuli_SNP1414 | [C/T]       | Ca_Kabuli_LG05             | 3.217                                        |
| Ca_Kabuli_SNP1415 | [C/T]       | Ca_Kabuli_LG05             | 3.684                                        |
| Ca_Kabuli_SNP1416 | [C/T]       | Ca_Kabuli_LG05             | 4.247                                        |
| Ca_Kabuli_SNP1417 | [A/T]       | Ca_Kabuli_LG05             | 4.690                                        |
| Ca_Kabuli_SNP1418 | [T/C]       | Ca_Kabuli_LG05             | 5.539                                        |
| Ca_Kabuli_SNP1419 | [C/T]       | Ca_Kabuli_LG05             | 6.879                                        |
| Ca_Kabuli_SNP1420 | [G/T]       | Ca_Kabuli_LG05             | 7.709                                        |
| Ca_Kabuli_SNP1421 | [T/A]       | Ca_Kabuli_LG05             | 8.192                                        |
| Ca_Kabuli_SNP1422 | [T/G]       | Ca_Kabuli_LG05             | 9.112                                        |
| Ca_Kabuli_SNP1423 | [A/T]       | Ca_Kabuli_LG05             | 9.363                                        |
| Ca_Kabuli_SNP1424 | [G/T]       | Ca_Kabuli_LG05             | 9.752                                        |

| <b>SNP IDs</b>    | <b>SNPs</b> | <b>Linkage Group (LGs)</b> | <b>Genetic positions (cM) of mapped SNPs</b> |
|-------------------|-------------|----------------------------|----------------------------------------------|
| Ca_Kabuli_SNP1425 | [T/A]       | Ca_Kabuli_LG05             | 9.988                                        |
| Ca_Kabuli_SNP1426 | [C/G]       | Ca_Kabuli_LG05             | 10.607                                       |
| Ca_Kabuli_SNP1427 | [C/T]       | Ca_Kabuli_LG05             | 12.175                                       |
| Ca_Kabuli_SNP1428 | [T/G]       | Ca_Kabuli_LG05             | 12.435                                       |
| Ca_Kabuli_SNP1429 | [C/T]       | Ca_Kabuli_LG05             | 13.372                                       |
| Ca_Kabuli_SNP1430 | [A/C]       | Ca_Kabuli_LG05             | 13.898                                       |
| Ca_Kabuli_SNP1431 | [A/T]       | Ca_Kabuli_LG05             | 14.242                                       |
| Ca_Kabuli_SNP1432 | [C/T]       | Ca_Kabuli_LG05             | 14.955                                       |
| Ca_Kabuli_SNP1433 | [A/C]       | Ca_Kabuli_LG05             | 15.220                                       |
| Ca_Kabuli_SNP1434 | [T/A]       | Ca_Kabuli_LG05             | 16.752                                       |
| Ca_Kabuli_SNP1435 | [G/A]       | Ca_Kabuli_LG05             | 17.046                                       |
| Ca_Kabuli_SNP1436 | [T/C]       | Ca_Kabuli_LG05             | 18.681                                       |
| Ca_Kabuli_SNP1437 | [T/G]       | Ca_Kabuli_LG05             | 18.920                                       |
| Ca_Kabuli_SNP1438 | [G/C]       | Ca_Kabuli_LG05             | 21.550                                       |
| Ca_Kabuli_SNP1439 | [A/G]       | Ca_Kabuli_LG05             | 22.698                                       |
| Ca_Kabuli_SNP1440 | [G/T]       | Ca_Kabuli_LG05             | 22.828                                       |
| Ca_Kabuli_SNP1441 | [A/T]       | Ca_Kabuli_LG05             | 23.364                                       |
| Ca_Kabuli_SNP1442 | [C/T]       | Ca_Kabuli_LG05             | 24.118                                       |
| Ca_Kabuli_SNP1443 | [T/G]       | Ca_Kabuli_LG05             | 26.038                                       |
| Ca_Kabuli_SNP1444 | [C/G]       | Ca_Kabuli_LG05             | 26.803                                       |
| Ca_Kabuli_SNP1445 | [C/T]       | Ca_Kabuli_LG05             | 27.913                                       |
| Ca_Kabuli_SNP1446 | [T/A]       | Ca_Kabuli_LG05             | 28.151                                       |
| Ca_Kabuli_SNP1447 | [A/C]       | Ca_Kabuli_LG05             | 28.210                                       |
| Ca_Kabuli_SNP1448 | [G/A]       | Ca_Kabuli_LG05             | 28.285                                       |
| Ca_Kabuli_SNP1449 | [C/T]       | Ca_Kabuli_LG05             | 28.492                                       |
| Ca_Kabuli_SNP1450 | [T/C]       | Ca_Kabuli_LG05             | 29.120                                       |
| Ca_Kabuli_SNP1451 | [G/A]       | Ca_Kabuli_LG05             | 29.162                                       |
| Ca_Kabuli_SNP1452 | [A/G]       | Ca_Kabuli_LG05             | 29.903                                       |
| Ca_Kabuli_SNP1453 | [T/C]       | Ca_Kabuli_LG05             | 31.748                                       |
| Ca_Kabuli_SNP1454 | [G/A]       | Ca_Kabuli_LG05             | 33.074                                       |
| Ca_Kabuli_SNP1455 | [T/C]       | Ca_Kabuli_LG05             | 33.074                                       |

| <b>SNP IDs</b>    | <b>SNPs</b> | <b>Linkage Group (LGs)</b> | <b>Genetic positions (cM) of mapped SNPs</b> |
|-------------------|-------------|----------------------------|----------------------------------------------|
| Ca_Kabuli_SNP1456 | [T/G]       | Ca_Kabuli_LG05             | 33.074                                       |
| Ca_Kabuli_SNP1457 | [C/A]       | Ca_Kabuli_LG05             | 33.074                                       |
| Ca_Kabuli_SNP1458 | [T/A]       | Ca_Kabuli_LG05             | 33.443                                       |
| Ca_Kabuli_SNP1459 | [C/G]       | Ca_Kabuli_LG05             | 34.551                                       |
| Ca_Kabuli_SNP1460 | [G/A]       | Ca_Kabuli_LG05             | 35.812                                       |
| Ca_Kabuli_SNP1461 | [T/C]       | Ca_Kabuli_LG05             | 35.999                                       |
| Ca_Kabuli_SNP1462 | [A/T]       | Ca_Kabuli_LG05             | 36.191                                       |
| Ca_Kabuli_SNP1463 | [C/A]       | Ca_Kabuli_LG05             | 36.963                                       |
| Ca_Kabuli_SNP1464 | [G/T]       | Ca_Kabuli_LG05             | 38.276                                       |
| Ca_Kabuli_SNP1465 | [A/C]       | Ca_Kabuli_LG05             | 38.756                                       |
| Ca_Kabuli_SNP1466 | [T/C]       | Ca_Kabuli_LG05             | 38.976                                       |
| Ca_Kabuli_SNP1467 | [G/A]       | Ca_Kabuli_LG05             | 38.976                                       |
| Ca_Kabuli_SNP1468 | [A/C]       | Ca_Kabuli_LG05             | 39.337                                       |
| Ca_Kabuli_SNP1469 | [T/C]       | Ca_Kabuli_LG05             | 40.298                                       |
| Ca_Kabuli_SNP1470 | [G/A]       | Ca_Kabuli_LG05             | 40.333                                       |
| Ca_Kabuli_SNP1471 | [C/A]       | Ca_Kabuli_LG05             | 40.695                                       |
| Ca_Kabuli_SNP1472 | [G/A]       | Ca_Kabuli_LG05             | 41.094                                       |
| Ca_Kabuli_SNP1473 | [T/C]       | Ca_Kabuli_LG05             | 41.466                                       |
| Ca_Kabuli_SNP1474 | [T/C]       | Ca_Kabuli_LG05             | 41.466                                       |
| Ca_Kabuli_SNP1475 | [T/C]       | Ca_Kabuli_LG05             | 43.229                                       |
| Ca_Kabuli_SNP1476 | [C/T]       | Ca_Kabuli_LG05             | 43.577                                       |
| Ca_Kabuli_SNP1477 | [G/A]       | Ca_Kabuli_LG05             | 43.658                                       |
| Ca_Kabuli_SNP1478 | [G/A]       | Ca_Kabuli_LG05             | 44.120                                       |
| Ca_Kabuli_SNP1479 | [G/C]       | Ca_Kabuli_LG05             | 44.120                                       |
| Ca_Kabuli_SNP1480 | [C/T]       | Ca_Kabuli_LG05             | 44.120                                       |
| Ca_Kabuli_SNP1481 | [T/C]       | Ca_Kabuli_LG05             | 44.927                                       |
| Ca_Kabuli_SNP1482 | [G/A]       | Ca_Kabuli_LG05             | 44.936                                       |
| Ca_Kabuli_SNP1483 | [G/A]       | Ca_Kabuli_LG05             | 46.678                                       |
| Ca_Kabuli_SNP1484 | [C/T]       | Ca_Kabuli_LG05             | 46.678                                       |
| Ca_Kabuli_SNP1485 | [G/A]       | Ca_Kabuli_LG05             | 48.078                                       |
| Ca_Kabuli_SNP1486 | [G/A]       | Ca_Kabuli_LG05             | 51.385                                       |

| <b>SNP IDs</b>    | <b>SNPs</b> | <b>Linkage Group (LGs)</b> | <b>Genetic positions (cM) of mapped SNPs</b> |
|-------------------|-------------|----------------------------|----------------------------------------------|
| Ca_Kabuli_SNP1487 | [A/T]       | Ca_Kabuli_LG05             | 53.253                                       |
| Ca_Kabuli_SNP1488 | [G/T]       | Ca_Kabuli_LG05             | 53.879                                       |
| Ca_Kabuli_SNP1489 | [A/T]       | Ca_Kabuli_LG05             | 54.539                                       |
| Ca_Kabuli_SNP1490 | [A/T]       | Ca_Kabuli_LG05             | 57.250                                       |
| Ca_Kabuli_SNP1491 | [C/T]       | Ca_Kabuli_LG05             | 57.498                                       |
| Ca_Kabuli_SNP1492 | [G/T]       | Ca_Kabuli_LG05             | 57.608                                       |
| Ca_Kabuli_SNP1493 | [A/T]       | Ca_Kabuli_LG05             | 58.687                                       |
| Ca_Kabuli_SNP1494 | [T/G]       | Ca_Kabuli_LG05             | 59.090                                       |
| Ca_Kabuli_SNP1495 | [T/A]       | Ca_Kabuli_LG05             | 59.820                                       |
| Ca_Kabuli_SNP1496 | [G/T]       | Ca_Kabuli_LG05             | 60.546                                       |
| Ca_Kabuli_SNP1497 | [T/G]       | Ca_Kabuli_LG05             | 61.247                                       |
| Ca_Kabuli_SNP1498 | [T/G]       | Ca_Kabuli_LG05             | 62.194                                       |
| Ca_Kabuli_SNP1499 | [A/C]       | Ca_Kabuli_LG05             | 62.442                                       |
| Ca_Kabuli_SNP1500 | [A/C]       | Ca_Kabuli_LG05             | 62.735                                       |
| Ca_Kabuli_SNP1501 | [G/T]       | Ca_Kabuli_LG05             | 63.940                                       |
| Ca_Kabuli_SNP1502 | [T/C]       | Ca_Kabuli_LG05             | 64.125                                       |
| Ca_Kabuli_SNP1503 | [C/T]       | Ca_Kabuli_LG05             | 64.305                                       |
| Ca_Kabuli_SNP1504 | [T/C]       | Ca_Kabuli_LG05             | 65.463                                       |
| Ca_Kabuli_SNP1505 | [G/A]       | Ca_Kabuli_LG05             | 72.368                                       |
| Ca_Kabuli_SNP1506 | [G/A]       | Ca_Kabuli_LG05             | 73.398                                       |
| Ca_Kabuli_SNP1507 | [T/C]       | Ca_Kabuli_LG05             | 76.216                                       |
| Ca_Kabuli_SNP1508 | [T/C]       | Ca_Kabuli_LG05             | 81.444                                       |
| Ca_Kabuli_SNP1509 | [G/T]       | Ca_Kabuli_LG06             | 0.000                                        |
| Ca_Kabuli_SNP1510 | [T/G]       | Ca_Kabuli_LG06             | 5.230                                        |
| Ca_Kabuli_SNP1511 | [T/A]       | Ca_Kabuli_LG06             | 7.464                                        |
| Ca_Kabuli_SNP1512 | [T/G]       | Ca_Kabuli_LG06             | 7.510                                        |
| Ca_Kabuli_SNP1513 | [G/A]       | Ca_Kabuli_LG06             | 7.688                                        |
| Ca_Kabuli_SNP1514 | [G/A]       | Ca_Kabuli_LG06             | 7.936                                        |
| Ca_Kabuli_SNP1515 | [T/C]       | Ca_Kabuli_LG06             | 8.715                                        |
| Ca_Kabuli_SNP1516 | [T/G]       | Ca_Kabuli_LG06             | 8.812                                        |
| Ca_Kabuli_SNP1517 | [T/G]       | Ca_Kabuli_LG06             | 9.972                                        |

| <b>SNP IDs</b>    | <b>SNPs</b> | <b>Linkage Group (LGs)</b> | <b>Genetic positions (cM) of mapped SNPs</b> |
|-------------------|-------------|----------------------------|----------------------------------------------|
| Ca_Kabuli_SNP1518 | [C/T]       | Ca_Kabuli_LG06             | 10.021                                       |
| Ca_Kabuli_SNP1519 | [G/C]       | Ca_Kabuli_LG06             | 11.016                                       |
| Ca_Kabuli_SNP1520 | [G/T]       | Ca_Kabuli_LG06             | 11.142                                       |
| Ca_Kabuli_SNP1521 | [A/G]       | Ca_Kabuli_LG06             | 11.966                                       |
| Ca_Kabuli_SNP1522 | [T/G]       | Ca_Kabuli_LG06             | 11.989                                       |
| Ca_Kabuli_SNP1523 | [A/T]       | Ca_Kabuli_LG06             | 12.079                                       |
| Ca_Kabuli_SNP1524 | [A/C]       | Ca_Kabuli_LG06             | 12.812                                       |
| Ca_Kabuli_SNP1525 | [A/C]       | Ca_Kabuli_LG06             | 13.828                                       |
| Ca_Kabuli_SNP1526 | [G/A]       | Ca_Kabuli_LG06             | 14.198                                       |
| Ca_Kabuli_SNP1527 | [T/G]       | Ca_Kabuli_LG06             | 14.243                                       |
| Ca_Kabuli_SNP1528 | [C/A]       | Ca_Kabuli_LG06             | 15.820                                       |
| Ca_Kabuli_SNP1529 | [T/G]       | Ca_Kabuli_LG06             | 16.237                                       |
| Ca_Kabuli_SNP1530 | [T/G]       | Ca_Kabuli_LG06             | 16.700                                       |
| Ca_Kabuli_SNP1531 | [T/G]       | Ca_Kabuli_LG06             | 16.911                                       |
| Ca_Kabuli_SNP1532 | [A/G]       | Ca_Kabuli_LG06             | 17.179                                       |
| Ca_Kabuli_SNP1533 | [T/C]       | Ca_Kabuli_LG06             | 17.725                                       |
| Ca_Kabuli_SNP1534 | [A/C]       | Ca_Kabuli_LG06             | 18.028                                       |
| Ca_Kabuli_SNP1535 | [C/A]       | Ca_Kabuli_LG06             | 18.108                                       |
| Ca_Kabuli_SNP1536 | [A/G]       | Ca_Kabuli_LG06             | 18.875                                       |
| Ca_Kabuli_SNP1537 | [A/C]       | Ca_Kabuli_LG06             | 19.004                                       |
| Ca_Kabuli_SNP1538 | [C/A]       | Ca_Kabuli_LG06             | 19.554                                       |
| Ca_Kabuli_SNP1539 | [T/G]       | Ca_Kabuli_LG06             | 20.796                                       |
| Ca_Kabuli_SNP1540 | [A/C]       | Ca_Kabuli_LG06             | 21.051                                       |
| Ca_Kabuli_SNP1541 | [A/T]       | Ca_Kabuli_LG06             | 21.182                                       |
| Ca_Kabuli_SNP1542 | [A/C]       | Ca_Kabuli_LG06             | 21.574                                       |
| Ca_Kabuli_SNP1543 | [T/G]       | Ca_Kabuli_LG06             | 22.719                                       |
| Ca_Kabuli_SNP1544 | [C/A]       | Ca_Kabuli_LG06             | 23.461                                       |
| Ca_Kabuli_SNP1545 | [T/G]       | Ca_Kabuli_LG06             | 23.479                                       |
| Ca_Kabuli_SNP1546 | [T/G]       | Ca_Kabuli_LG06             | 23.568                                       |
| Ca_Kabuli_SNP1547 | [T/C]       | Ca_Kabuli_LG06             | 23.767                                       |
| Ca_Kabuli_SNP1548 | [T/G]       | Ca_Kabuli_LG06             | 23.939                                       |



| <b>SNP IDs</b>    | <b>SNPs</b> | <b>Linkage Group (LGs)</b> | <b>Genetic positions (cM) of mapped SNPs</b> |
|-------------------|-------------|----------------------------|----------------------------------------------|
| Ca_Kabuli_SNP1549 | [C/T]       | Ca_Kabuli_LG06             | 24.745                                       |
| Ca_Kabuli_SNP1550 | [T/G]       | Ca_Kabuli_LG06             | 25.262                                       |
| Ca_Kabuli_SNP1551 | [G/C]       | Ca_Kabuli_LG06             | 25.426                                       |
| Ca_Kabuli_SNP1552 | [T/G]       | Ca_Kabuli_LG06             | 25.750                                       |
| Ca_Kabuli_SNP1553 | [A/T]       | Ca_Kabuli_LG06             | 26.286                                       |
| Ca_Kabuli_SNP1554 | [C/T]       | Ca_Kabuli_LG06             | 27.554                                       |
| Ca_Kabuli_SNP1555 | [C/T]       | Ca_Kabuli_LG06             | 28.095                                       |
| Ca_Kabuli_SNP1556 | [G/T]       | Ca_Kabuli_LG06             | 28.820                                       |
| Ca_Kabuli_SNP1557 | [A/C]       | Ca_Kabuli_LG06             | 28.847                                       |
| Ca_Kabuli_SNP1558 | [G/A]       | Ca_Kabuli_LG06             | 29.019                                       |
| Ca_Kabuli_SNP1559 | [A/G]       | Ca_Kabuli_LG06             | 30.831                                       |
| Ca_Kabuli_SNP1560 | [G/T]       | Ca_Kabuli_LG06             | 31.541                                       |
| Ca_Kabuli_SNP1561 | [A/G]       | Ca_Kabuli_LG06             | 31.732                                       |
| Ca_Kabuli_SNP1562 | [G/C]       | Ca_Kabuli_LG06             | 31.737                                       |
| Ca_Kabuli_SNP1563 | [C/T]       | Ca_Kabuli_LG06             | 32.119                                       |
| Ca_Kabuli_SNP1564 | [A/G]       | Ca_Kabuli_LG06             | 32.367                                       |
| Ca_Kabuli_SNP1565 | [A/C]       | Ca_Kabuli_LG06             | 32.574                                       |
| Ca_Kabuli_SNP1566 | [A/T]       | Ca_Kabuli_LG06             | 35.009                                       |
| Ca_Kabuli_SNP1567 | [A/C]       | Ca_Kabuli_LG06             | 35.025                                       |
| Ca_Kabuli_SNP1568 | [T/G]       | Ca_Kabuli_LG06             | 35.465                                       |
| Ca_Kabuli_SNP1569 | [A/T]       | Ca_Kabuli_LG06             | 35.605                                       |
| Ca_Kabuli_SNP1570 | [A/G]       | Ca_Kabuli_LG06             | 35.675                                       |
| Ca_Kabuli_SNP1571 | [C/G]       | Ca_Kabuli_LG06             | 35.704                                       |
| Ca_Kabuli_SNP1572 | [G/C]       | Ca_Kabuli_LG06             | 35.806                                       |
| Ca_Kabuli_SNP1573 | [A/G]       | Ca_Kabuli_LG06             | 35.965                                       |
| Ca_Kabuli_SNP1574 | [C/A]       | Ca_Kabuli_LG06             | 36.394                                       |
| Ca_Kabuli_SNP1575 | [C/A]       | Ca_Kabuli_LG06             | 36.631                                       |
| Ca_Kabuli_SNP1576 | [A/C]       | Ca_Kabuli_LG06             | 36.749                                       |
| Ca_Kabuli_SNP1577 | [T/C]       | Ca_Kabuli_LG06             | 36.864                                       |
| Ca_Kabuli_SNP1578 | [A/C]       | Ca_Kabuli_LG06             | 37.383                                       |
| Ca_Kabuli_SNP1579 | [A/T]       | Ca_Kabuli_LG06             | 37.604                                       |

| <b>SNP IDs</b>    | <b>SNPs</b> | <b>Linkage Group (LGs)</b> | <b>Genetic positions (cM) of mapped SNPs</b> |
|-------------------|-------------|----------------------------|----------------------------------------------|
| Ca_Kabuli_SNP1580 | [C/A]       | Ca_Kabuli_LG06             | 37.621                                       |
| Ca_Kabuli_SNP1581 | [A/C]       | Ca_Kabuli_LG06             | 38.680                                       |
| Ca_Kabuli_SNP1582 | [T/C]       | Ca_Kabuli_LG06             | 38.760                                       |
| Ca_Kabuli_SNP1583 | [A/G]       | Ca_Kabuli_LG06             | 38.816                                       |
| Ca_Kabuli_SNP1584 | [A/C]       | Ca_Kabuli_LG06             | 39.176                                       |
| Ca_Kabuli_SNP1585 | [T/G]       | Ca_Kabuli_LG06             | 39.206                                       |
| Ca_Kabuli_SNP1586 | [A/C]       | Ca_Kabuli_LG06             | 39.425                                       |
| Ca_Kabuli_SNP1587 | [T/G]       | Ca_Kabuli_LG06             | 39.492                                       |
| Ca_Kabuli_SNP1588 | [T/C]       | Ca_Kabuli_LG06             | 39.772                                       |
| Ca_Kabuli_SNP1589 | [C/A]       | Ca_Kabuli_LG06             | 39.955                                       |
| Ca_Kabuli_SNP1590 | [C/A]       | Ca_Kabuli_LG06             | 40.254                                       |
| Ca_Kabuli_SNP1591 | [C/T]       | Ca_Kabuli_LG06             | 40.283                                       |
| Ca_Kabuli_SNP1592 | [C/A]       | Ca_Kabuli_LG06             | 40.902                                       |
| Ca_Kabuli_SNP1593 | [A/C]       | Ca_Kabuli_LG06             | 40.955                                       |
| Ca_Kabuli_SNP1594 | [T/G]       | Ca_Kabuli_LG06             | 41.431                                       |
| Ca_Kabuli_SNP1595 | [T/C]       | Ca_Kabuli_LG06             | 41.455                                       |
| Ca_Kabuli_SNP1596 | [A/C]       | Ca_Kabuli_LG06             | 41.555                                       |
| Ca_Kabuli_SNP1597 | [A/G]       | Ca_Kabuli_LG06             | 41.563                                       |
| Ca_Kabuli_SNP1598 | [A/C]       | Ca_Kabuli_LG06             | 41.567                                       |
| Ca_Kabuli_SNP1599 | [A/T]       | Ca_Kabuli_LG06             | 41.641                                       |
| Ca_Kabuli_SNP1600 | [A/G]       | Ca_Kabuli_LG06             | 41.697                                       |
| Ca_Kabuli_SNP1601 | [G/T]       | Ca_Kabuli_LG06             | 41.801                                       |
| Ca_Kabuli_SNP1602 | [T/G]       | Ca_Kabuli_LG06             | 42.038                                       |
| Ca_Kabuli_SNP1603 | [A/C]       | Ca_Kabuli_LG06             | 42.099                                       |
| Ca_Kabuli_SNP1604 | [C/T]       | Ca_Kabuli_LG06             | 42.250                                       |
| Ca_Kabuli_SNP1605 | [G/A]       | Ca_Kabuli_LG06             | 42.954                                       |
| Ca_Kabuli_SNP1606 | [G/A]       | Ca_Kabuli_LG06             | 43.130                                       |
| Ca_Kabuli_SNP1607 | [C/T]       | Ca_Kabuli_LG06             | 44.751                                       |
| Ca_Kabuli_SNP1608 | [A/G]       | Ca_Kabuli_LG06             | 45.441                                       |
| Ca_Kabuli_SNP1609 | [T/G]       | Ca_Kabuli_LG06             | 45.499                                       |
| Ca_Kabuli_SNP1610 | [G/A]       | Ca_Kabuli_LG06             | 45.840                                       |

| <b>SNP IDs</b>    | <b>SNPs</b> | <b>Linkage Group (LGs)</b> | <b>Genetic positions (cM) of mapped SNPs</b> |
|-------------------|-------------|----------------------------|----------------------------------------------|
| Ca_Kabuli_SNP1611 | [C/T]       | Ca_Kabuli_LG06             | 46.694                                       |
| Ca_Kabuli_SNP1612 | [T/G]       | Ca_Kabuli_LG06             | 47.454                                       |
| Ca_Kabuli_SNP1613 | [T/C]       | Ca_Kabuli_LG06             | 47.561                                       |
| Ca_Kabuli_SNP1614 | [A/T]       | Ca_Kabuli_LG06             | 47.561                                       |
| Ca_Kabuli_SNP1615 | [C/A]       | Ca_Kabuli_LG06             | 47.772                                       |
| Ca_Kabuli_SNP1616 | [T/C]       | Ca_Kabuli_LG06             | 48.510                                       |
| Ca_Kabuli_SNP1617 | [A/C]       | Ca_Kabuli_LG06             | 48.751                                       |
| Ca_Kabuli_SNP1618 | [A/G]       | Ca_Kabuli_LG06             | 48.928                                       |
| Ca_Kabuli_SNP1619 | [A/T]       | Ca_Kabuli_LG06             | 50.097                                       |
| Ca_Kabuli_SNP1620 | [T/G]       | Ca_Kabuli_LG06             | 50.760                                       |
| Ca_Kabuli_SNP1621 | [A/C]       | Ca_Kabuli_LG06             | 51.098                                       |
| Ca_Kabuli_SNP1622 | [C/A]       | Ca_Kabuli_LG06             | 51.206                                       |
| Ca_Kabuli_SNP1623 | [C/A]       | Ca_Kabuli_LG06             | 51.629                                       |
| Ca_Kabuli_SNP1624 | [G/T]       | Ca_Kabuli_LG06             | 51.793                                       |
| Ca_Kabuli_SNP1625 | [G/A]       | Ca_Kabuli_LG06             | 51.870                                       |
| Ca_Kabuli_SNP1626 | [T/A]       | Ca_Kabuli_LG06             | 52.135                                       |
| Ca_Kabuli_SNP1627 | [A/T]       | Ca_Kabuli_LG06             | 52.139                                       |
| Ca_Kabuli_SNP1628 | [C/A]       | Ca_Kabuli_LG06             | 53.003                                       |
| Ca_Kabuli_SNP1629 | [A/G]       | Ca_Kabuli_LG06             | 53.159                                       |
| Ca_Kabuli_SNP1630 | [C/T]       | Ca_Kabuli_LG06             | 53.514                                       |
| Ca_Kabuli_SNP1631 | [G/A]       | Ca_Kabuli_LG06             | 53.520                                       |
| Ca_Kabuli_SNP1632 | [C/T]       | Ca_Kabuli_LG06             | 53.534                                       |
| Ca_Kabuli_SNP1633 | [C/G]       | Ca_Kabuli_LG06             | 53.553                                       |
| Ca_Kabuli_SNP1634 | [T/G]       | Ca_Kabuli_LG06             | 53.612                                       |
| Ca_Kabuli_SNP1635 | [T/A]       | Ca_Kabuli_LG06             | 53.749                                       |
| Ca_Kabuli_SNP1636 | [T/G]       | Ca_Kabuli_LG06             | 54.067                                       |
| Ca_Kabuli_SNP1637 | [C/T]       | Ca_Kabuli_LG06             | 54.274                                       |
| Ca_Kabuli_SNP1638 | [A/C]       | Ca_Kabuli_LG06             | 54.917                                       |
| Ca_Kabuli_SNP1639 | [T/A]       | Ca_Kabuli_LG06             | 54.925                                       |
| Ca_Kabuli_SNP1640 | [A/T]       | Ca_Kabuli_LG06             | 55.039                                       |
| Ca_Kabuli_SNP1641 | [A/C]       | Ca_Kabuli_LG06             | 55.104                                       |

| <b>SNP IDs</b>    | <b>SNPs</b> | <b>Linkage Group (LGs)</b> | <b>Genetic positions (cM) of mapped SNPs</b> |
|-------------------|-------------|----------------------------|----------------------------------------------|
| Ca_Kabuli_SNP1642 | [C/G]       | Ca_Kabuli_LG06             | 55.878                                       |
| Ca_Kabuli_SNP1643 | [G/A]       | Ca_Kabuli_LG06             | 55.965                                       |
| Ca_Kabuli_SNP1644 | [G/A]       | Ca_Kabuli_LG06             | 55.986                                       |
| Ca_Kabuli_SNP1645 | [G/T]       | Ca_Kabuli_LG06             | 56.219                                       |
| Ca_Kabuli_SNP1646 | [T/A]       | Ca_Kabuli_LG06             | 56.429                                       |
| Ca_Kabuli_SNP1647 | [A/G]       | Ca_Kabuli_LG06             | 56.896                                       |
| Ca_Kabuli_SNP1648 | [A/G]       | Ca_Kabuli_LG06             | 56.985                                       |
| Ca_Kabuli_SNP1649 | [G/T]       | Ca_Kabuli_LG06             | 57.375                                       |
| Ca_Kabuli_SNP1650 | [C/A]       | Ca_Kabuli_LG06             | 57.691                                       |
| Ca_Kabuli_SNP1651 | [C/T]       | Ca_Kabuli_LG06             | 57.746                                       |
| Ca_Kabuli_SNP1652 | [G/A]       | Ca_Kabuli_LG06             | 57.831                                       |
| Ca_Kabuli_SNP1653 | [A/G]       | Ca_Kabuli_LG06             | 57.958                                       |
| Ca_Kabuli_SNP1654 | [G/T]       | Ca_Kabuli_LG06             | 58.105                                       |
| Ca_Kabuli_SNP1655 | [C/T]       | Ca_Kabuli_LG06             | 58.247                                       |
| Ca_Kabuli_SNP1656 | [G/A]       | Ca_Kabuli_LG06             | 58.264                                       |
| Ca_Kabuli_SNP1657 | [G/A]       | Ca_Kabuli_LG06             | 58.317                                       |
| Ca_Kabuli_SNP1658 | [T/C]       | Ca_Kabuli_LG06             | 58.681                                       |
| Ca_Kabuli_SNP1659 | [C/T]       | Ca_Kabuli_LG06             | 58.972                                       |
| Ca_Kabuli_SNP1660 | [T/G]       | Ca_Kabuli_LG06             | 59.247                                       |
| Ca_Kabuli_SNP1661 | [A/G]       | Ca_Kabuli_LG06             | 59.366                                       |
| Ca_Kabuli_SNP1662 | [T/G]       | Ca_Kabuli_LG06             | 59.407                                       |
| Ca_Kabuli_SNP1663 | [G/T]       | Ca_Kabuli_LG06             | 59.520                                       |
| Ca_Kabuli_SNP1664 | [G/A]       | Ca_Kabuli_LG06             | 59.747                                       |
| Ca_Kabuli_SNP1665 | [C/T]       | Ca_Kabuli_LG06             | 59.963                                       |
| Ca_Kabuli_SNP1666 | [T/G]       | Ca_Kabuli_LG06             | 60.197                                       |
| Ca_Kabuli_SNP1667 | [C/T]       | Ca_Kabuli_LG06             | 60.205                                       |
| Ca_Kabuli_SNP1668 | [G/A]       | Ca_Kabuli_LG06             | 60.471                                       |
| Ca_Kabuli_SNP1669 | [T/C]       | Ca_Kabuli_LG06             | 60.930                                       |
| Ca_Kabuli_SNP1670 | [T/A]       | Ca_Kabuli_LG06             | 60.931                                       |
| Ca_Kabuli_SNP1671 | [A/C]       | Ca_Kabuli_LG06             | 60.971                                       |
| Ca_Kabuli_SNP1672 | [T/G]       | Ca_Kabuli_LG06             | 60.977                                       |

| <b>SNP IDs</b>    | <b>SNPs</b> | <b>Linkage Group (LGs)</b> | <b>Genetic positions (cM) of mapped SNPs</b> |
|-------------------|-------------|----------------------------|----------------------------------------------|
| Ca_Kabuli_SNP1673 | [T/G]       | Ca_Kabuli_LG06             | 61.134                                       |
| Ca_Kabuli_SNP1674 | [A/G]       | Ca_Kabuli_LG06             | 61.467                                       |
| Ca_Kabuli_SNP1675 | [T/G]       | Ca_Kabuli_LG06             | 61.923                                       |
| Ca_Kabuli_SNP1676 | [G/A]       | Ca_Kabuli_LG06             | 62.153                                       |
| Ca_Kabuli_SNP1677 | [T/G]       | Ca_Kabuli_LG06             | 62.167                                       |
| Ca_Kabuli_SNP1678 | [C/A]       | Ca_Kabuli_LG06             | 62.265                                       |
| Ca_Kabuli_SNP1679 | [G/A]       | Ca_Kabuli_LG06             | 62.444                                       |
| Ca_Kabuli_SNP1680 | [A/G]       | Ca_Kabuli_LG06             | 62.957                                       |
| Ca_Kabuli_SNP1681 | [A/G]       | Ca_Kabuli_LG06             | 63.083                                       |
| Ca_Kabuli_SNP1682 | [A/C]       | Ca_Kabuli_LG06             | 63.208                                       |
| Ca_Kabuli_SNP1683 | [A/T]       | Ca_Kabuli_LG06             | 63.222                                       |
| Ca_Kabuli_SNP1684 | [C/G]       | Ca_Kabuli_LG06             | 63.401                                       |
| Ca_Kabuli_SNP1685 | [C/T]       | Ca_Kabuli_LG06             | 64.348                                       |
| Ca_Kabuli_SNP1686 | [C/G]       | Ca_Kabuli_LG06             | 64.735                                       |
| Ca_Kabuli_SNP1687 | [G/T]       | Ca_Kabuli_LG06             | 65.454                                       |
| Ca_Kabuli_SNP1688 | [T/C]       | Ca_Kabuli_LG06             | 65.468                                       |
| Ca_Kabuli_SNP1689 | [A/G]       | Ca_Kabuli_LG06             | 65.468                                       |
| Ca_Kabuli_SNP1690 | [T/C]       | Ca_Kabuli_LG06             | 65.602                                       |
| Ca_Kabuli_SNP1691 | [A/T]       | Ca_Kabuli_LG06             | 65.623                                       |
| Ca_Kabuli_SNP1692 | [C/T]       | Ca_Kabuli_LG06             | 65.746                                       |
| Ca_Kabuli_SNP1693 | [A/G]       | Ca_Kabuli_LG06             | 66.004                                       |
| Ca_Kabuli_SNP1694 | [A/G]       | Ca_Kabuli_LG06             | 66.325                                       |
| Ca_Kabuli_SNP1695 | [G/A]       | Ca_Kabuli_LG06             | 66.362                                       |
| Ca_Kabuli_SNP1696 | [A/G]       | Ca_Kabuli_LG06             | 67.031                                       |
| Ca_Kabuli_SNP1697 | [G/A]       | Ca_Kabuli_LG06             | 67.035                                       |
| Ca_Kabuli_SNP1698 | [A/G]       | Ca_Kabuli_LG06             | 67.090                                       |
| Ca_Kabuli_SNP1699 | [C/A]       | Ca_Kabuli_LG06             | 67.767                                       |
| Ca_Kabuli_SNP1700 | [A/C]       | Ca_Kabuli_LG06             | 67.866                                       |
| Ca_Kabuli_SNP1701 | [A/C]       | Ca_Kabuli_LG06             | 69.450                                       |
| Ca_Kabuli_SNP1702 | [T/G]       | Ca_Kabuli_LG06             | 69.566                                       |
| Ca_Kabuli_SNP1703 | [A/C]       | Ca_Kabuli_LG06             | 69.899                                       |

| <b>SNP IDs</b>    | <b>SNPs</b> | <b>Linkage Group (LGs)</b> | <b>Genetic positions (cM) of mapped SNPs</b> |
|-------------------|-------------|----------------------------|----------------------------------------------|
| Ca_Kabuli_SNP1704 | [T/G]       | Ca_Kabuli_LG06             | 70.305                                       |
| Ca_Kabuli_SNP1705 | [A/C]       | Ca_Kabuli_LG06             | 70.463                                       |
| Ca_Kabuli_SNP1706 | [A/G]       | Ca_Kabuli_LG06             | 70.571                                       |
| Ca_Kabuli_SNP1707 | [A/G]       | Ca_Kabuli_LG06             | 70.747                                       |
| Ca_Kabuli_SNP1708 | [T/G]       | Ca_Kabuli_LG06             | 70.810                                       |
| Ca_Kabuli_SNP1709 | [T/G]       | Ca_Kabuli_LG06             | 71.072                                       |
| Ca_Kabuli_SNP1710 | [C/G]       | Ca_Kabuli_LG06             | 72.278                                       |
| Ca_Kabuli_SNP1711 | [C/T]       | Ca_Kabuli_LG06             | 72.452                                       |
| Ca_Kabuli_SNP1712 | [T/G]       | Ca_Kabuli_LG06             | 72.496                                       |
| Ca_Kabuli_SNP1713 | [A/T]       | Ca_Kabuli_LG06             | 72.618                                       |
| Ca_Kabuli_SNP1714 | [T/A]       | Ca_Kabuli_LG06             | 73.346                                       |
| Ca_Kabuli_SNP1715 | [A/T]       | Ca_Kabuli_LG06             | 73.427                                       |
| Ca_Kabuli_SNP1716 | [T/A]       | Ca_Kabuli_LG06             | 73.559                                       |
| Ca_Kabuli_SNP1717 | [A/T]       | Ca_Kabuli_LG06             | 73.673                                       |
| Ca_Kabuli_SNP1718 | [T/G]       | Ca_Kabuli_LG06             | 73.830                                       |
| Ca_Kabuli_SNP1719 | [A/C]       | Ca_Kabuli_LG06             | 74.253                                       |
| Ca_Kabuli_SNP1720 | [G/C]       | Ca_Kabuli_LG06             | 74.516                                       |
| Ca_Kabuli_SNP1721 | [A/G]       | Ca_Kabuli_LG06             | 74.683                                       |
| Ca_Kabuli_SNP1722 | [G/A]       | Ca_Kabuli_LG06             | 74.774                                       |
| Ca_Kabuli_SNP1723 | [A/T]       | Ca_Kabuli_LG06             | 75.059                                       |
| Ca_Kabuli_SNP1724 | [C/G]       | Ca_Kabuli_LG06             | 75.098                                       |
| Ca_Kabuli_SNP1725 | [T/C]       | Ca_Kabuli_LG06             | 75.359                                       |
| Ca_Kabuli_SNP1726 | [A/T]       | Ca_Kabuli_LG06             | 75.723                                       |
| Ca_Kabuli_SNP1727 | [G/C]       | Ca_Kabuli_LG06             | 78.198                                       |
| Ca_Kabuli_SNP1728 | [T/G]       | Ca_Kabuli_LG06             | 78.283                                       |
| Ca_Kabuli_SNP1729 | [A/T]       | Ca_Kabuli_LG06             | 78.548                                       |
| Ca_Kabuli_SNP1730 | [C/G]       | Ca_Kabuli_LG06             | 79.297                                       |
| Ca_Kabuli_SNP1731 | [C/A]       | Ca_Kabuli_LG06             | 79.606                                       |
| Ca_Kabuli_SNP1732 | [A/G]       | Ca_Kabuli_LG06             | 79.632                                       |
| Ca_Kabuli_SNP1733 | [G/A]       | Ca_Kabuli_LG06             | 79.709                                       |
| Ca_Kabuli_SNP1734 | [C/T]       | Ca_Kabuli_LG06             | 79.806                                       |

| <b>SNP IDs</b>    | <b>SNPs</b> | <b>Linkage Group (LGs)</b> | <b>Genetic positions (cM) of mapped SNPs</b> |
|-------------------|-------------|----------------------------|----------------------------------------------|
| Ca_Kabuli_SNP1735 | [T/G]       | Ca_Kabuli_LG06             | 80.349                                       |
| Ca_Kabuli_SNP1736 | [G/T]       | Ca_Kabuli_LG06             | 80.486                                       |
| Ca_Kabuli_SNP1737 | [T/A]       | Ca_Kabuli_LG06             | 80.621                                       |
| Ca_Kabuli_SNP1738 | [T/G]       | Ca_Kabuli_LG06             | 81.220                                       |
| Ca_Kabuli_SNP1739 | [T/C]       | Ca_Kabuli_LG06             | 82.576                                       |
| Ca_Kabuli_SNP1740 | [G/A]       | Ca_Kabuli_LG06             | 82.576                                       |
| Ca_Kabuli_SNP1741 | [A/G]       | Ca_Kabuli_LG06             | 83.251                                       |
| Ca_Kabuli_SNP1742 | [A/C]       | Ca_Kabuli_LG06             | 83.383                                       |
| Ca_Kabuli_SNP1743 | [A/T]       | Ca_Kabuli_LG06             | 83.631                                       |
| Ca_Kabuli_SNP1744 | [G/A]       | Ca_Kabuli_LG06             | 83.932                                       |
| Ca_Kabuli_SNP1745 | [A/G]       | Ca_Kabuli_LG06             | 83.932                                       |
| Ca_Kabuli_SNP1746 | [A/T]       | Ca_Kabuli_LG06             | 84.055                                       |
| Ca_Kabuli_SNP1747 | [T/C]       | Ca_Kabuli_LG06             | 84.393                                       |
| Ca_Kabuli_SNP1748 | [C/A]       | Ca_Kabuli_LG06             | 84.439                                       |
| Ca_Kabuli_SNP1749 | [G/A]       | Ca_Kabuli_LG06             | 84.603                                       |
| Ca_Kabuli_SNP1750 | [T/G]       | Ca_Kabuli_LG06             | 84.738                                       |
| Ca_Kabuli_SNP1751 | [C/T]       | Ca_Kabuli_LG06             | 85.480                                       |
| Ca_Kabuli_SNP1752 | [A/C]       | Ca_Kabuli_LG06             | 85.480                                       |
| Ca_Kabuli_SNP1753 | [T/G]       | Ca_Kabuli_LG06             | 85.480                                       |
| Ca_Kabuli_SNP1754 | [T/C]       | Ca_Kabuli_LG06             | 85.480                                       |
| Ca_Kabuli_SNP1755 | [C/T]       | Ca_Kabuli_LG06             | 85.480                                       |
| Ca_Kabuli_SNP1756 | [T/C]       | Ca_Kabuli_LG06             | 86.280                                       |
| Ca_Kabuli_SNP1757 | [T/A]       | Ca_Kabuli_LG06             | 87.704                                       |
| Ca_Kabuli_SNP1758 | [G/A]       | Ca_Kabuli_LG06             | 87.704                                       |
| Ca_Kabuli_SNP1759 | [G/C]       | Ca_Kabuli_LG06             | 88.294                                       |
| Ca_Kabuli_SNP1760 | [T/C]       | Ca_Kabuli_LG06             | 88.416                                       |
| Ca_Kabuli_SNP1761 | [C/T]       | Ca_Kabuli_LG06             | 88.426                                       |
| Ca_Kabuli_SNP1762 | [C/T]       | Ca_Kabuli_LG06             | 88.595                                       |
| Ca_Kabuli_SNP1763 | [G/A]       | Ca_Kabuli_LG06             | 88.971                                       |
| Ca_Kabuli_SNP1764 | [G/A]       | Ca_Kabuli_LG06             | 89.712                                       |
| Ca_Kabuli_SNP1765 | [T/A]       | Ca_Kabuli_LG06             | 90.046                                       |

| <b>SNP IDs</b>    | <b>SNPs</b> | <b>Linkage Group (LGs)</b> | <b>Genetic positions (cM) of mapped SNPs</b> |
|-------------------|-------------|----------------------------|----------------------------------------------|
| Ca_Kabuli_SNP1766 | [G/T]       | Ca_Kabuli_LG06             | 90.046                                       |
| Ca_Kabuli_SNP1767 | [T/G]       | Ca_Kabuli_LG06             | 90.130                                       |
| Ca_Kabuli_SNP1768 | [T/C]       | Ca_Kabuli_LG06             | 90.130                                       |
| Ca_Kabuli_SNP1769 | [A/G]       | Ca_Kabuli_LG06             | 90.553                                       |
| Ca_Kabuli_SNP1770 | [G/C]       | Ca_Kabuli_LG06             | 90.624                                       |
| Ca_Kabuli_SNP1771 | [A/C]       | Ca_Kabuli_LG06             | 90.624                                       |
| Ca_Kabuli_SNP1772 | [A/G]       | Ca_Kabuli_LG06             | 91.432                                       |
| Ca_Kabuli_SNP1773 | [G/C]       | Ca_Kabuli_LG06             | 91.504                                       |
| Ca_Kabuli_SNP1774 | [C/T]       | Ca_Kabuli_LG06             | 91.534                                       |
| Ca_Kabuli_SNP1775 | [A/G]       | Ca_Kabuli_LG06             | 91.719                                       |
| Ca_Kabuli_SNP1776 | [G/A]       | Ca_Kabuli_LG06             | 92.305                                       |
| Ca_Kabuli_SNP1777 | [C/T]       | Ca_Kabuli_LG06             | 92.542                                       |
| Ca_Kabuli_SNP1778 | [T/C]       | Ca_Kabuli_LG06             | 92.632                                       |
| Ca_Kabuli_SNP1779 | [T/A]       | Ca_Kabuli_LG06             | 92.663                                       |
| Ca_Kabuli_SNP1780 | [G/T]       | Ca_Kabuli_LG06             | 93.389                                       |
| Ca_Kabuli_SNP1781 | [A/G]       | Ca_Kabuli_LG06             | 93.389                                       |
| Ca_Kabuli_SNP1782 | [A/C]       | Ca_Kabuli_LG06             | 93.389                                       |
| Ca_Kabuli_SNP1783 | [G/A]       | Ca_Kabuli_LG06             | 93.543                                       |
| Ca_Kabuli_SNP1784 | [G/C]       | Ca_Kabuli_LG06             | 93.720                                       |
| Ca_Kabuli_SNP1785 | [G/A]       | Ca_Kabuli_LG06             | 94.163                                       |
| Ca_Kabuli_SNP1786 | [G/A]       | Ca_Kabuli_LG06             | 94.649                                       |
| Ca_Kabuli_SNP1787 | [C/A]       | Ca_Kabuli_LG06             | 95.510                                       |
| Ca_Kabuli_SNP1788 | [A/C]       | Ca_Kabuli_LG06             | 96.485                                       |
| Ca_Kabuli_SNP1789 | [G/T]       | Ca_Kabuli_LG06             | 100.346                                      |
| Ca_Kabuli_SNP1790 | [T/G]       | Ca_Kabuli_LG06             | 102.225                                      |
| Ca_Kabuli_SNP1791 | [C/T]       | Ca_Kabuli_LG06             | 102.477                                      |
| Ca_Kabuli_SNP1792 | [T/G]       | Ca_Kabuli_LG06             | 106.982                                      |
| Ca_Kabuli_SNP1793 | [T/G]       | Ca_Kabuli_LG06             | 110.009                                      |
| Ca_Kabuli_SNP1794 | [C/A]       | Ca_Kabuli_LG07             | 0.000                                        |
| Ca_Kabuli_SNP1795 | [G/A]       | Ca_Kabuli_LG07             | 9.198                                        |
| Ca_Kabuli_SNP1796 | [A/G]       | Ca_Kabuli_LG07             | 11.628                                       |



| <b>SNP IDs</b>    | <b>SNPs</b> | <b>Linkage Group (LGs)</b> | <b>Genetic positions (cM) of mapped SNPs</b> |
|-------------------|-------------|----------------------------|----------------------------------------------|
| Ca_Kabuli_SNP1797 | [G/A]       | Ca_Kabuli_LG07             | 13.502                                       |
| Ca_Kabuli_SNP1798 | [A/G]       | Ca_Kabuli_LG07             | 14.899                                       |
| Ca_Kabuli_SNP1799 | [T/C]       | Ca_Kabuli_LG07             | 15.501                                       |
| Ca_Kabuli_SNP1800 | [A/T]       | Ca_Kabuli_LG07             | 15.763                                       |
| Ca_Kabuli_SNP1801 | [T/C]       | Ca_Kabuli_LG07             | 15.985                                       |
| Ca_Kabuli_SNP1802 | [T/C]       | Ca_Kabuli_LG07             | 17.323                                       |
| Ca_Kabuli_SNP1803 | [C/A]       | Ca_Kabuli_LG07             | 17.473                                       |
| Ca_Kabuli_SNP1804 | [G/A]       | Ca_Kabuli_LG07             | 17.473                                       |
| Ca_Kabuli_SNP1805 | [C/T]       | Ca_Kabuli_LG07             | 17.978                                       |
| Ca_Kabuli_SNP1806 | [G/A]       | Ca_Kabuli_LG07             | 18.224                                       |
| Ca_Kabuli_SNP1807 | [T/G]       | Ca_Kabuli_LG07             | 18.808                                       |
| Ca_Kabuli_SNP1808 | [T/G]       | Ca_Kabuli_LG07             | 20.390                                       |
| Ca_Kabuli_SNP1809 | [A/G]       | Ca_Kabuli_LG07             | 20.492                                       |
| Ca_Kabuli_SNP1810 | [G/A]       | Ca_Kabuli_LG07             | 20.981                                       |
| Ca_Kabuli_SNP1811 | [T/G]       | Ca_Kabuli_LG07             | 20.981                                       |
| Ca_Kabuli_SNP1812 | [T/C]       | Ca_Kabuli_LG07             | 21.263                                       |
| Ca_Kabuli_SNP1813 | [G/A]       | Ca_Kabuli_LG07             | 21.263                                       |
| Ca_Kabuli_SNP1814 | [A/G]       | Ca_Kabuli_LG07             | 21.697                                       |
| Ca_Kabuli_SNP1815 | [A/T]       | Ca_Kabuli_LG07             | 21.815                                       |
| Ca_Kabuli_SNP1816 | [C/T]       | Ca_Kabuli_LG07             | 22.202                                       |
| Ca_Kabuli_SNP1817 | [T/G]       | Ca_Kabuli_LG07             | 22.327                                       |
| Ca_Kabuli_SNP1818 | [A/G]       | Ca_Kabuli_LG07             | 23.042                                       |
| Ca_Kabuli_SNP1819 | [C/A]       | Ca_Kabuli_LG07             | 23.630                                       |
| Ca_Kabuli_SNP1820 | [T/G]       | Ca_Kabuli_LG07             | 23.761                                       |
| Ca_Kabuli_SNP1821 | [T/A]       | Ca_Kabuli_LG07             | 24.209                                       |
| Ca_Kabuli_SNP1822 | [G/C]       | Ca_Kabuli_LG07             | 24.559                                       |
| Ca_Kabuli_SNP1823 | [G/A]       | Ca_Kabuli_LG07             | 27.055                                       |
| Ca_Kabuli_SNP1824 | [T/G]       | Ca_Kabuli_LG07             | 27.609                                       |
| Ca_Kabuli_SNP1825 | [A/G]       | Ca_Kabuli_LG07             | 28.096                                       |
| Ca_Kabuli_SNP1826 | [T/A]       | Ca_Kabuli_LG07             | 29.494                                       |
| Ca_Kabuli_SNP1827 | [A/C]       | Ca_Kabuli_LG07             | 29.928                                       |

| <b>SNP IDs</b>    | <b>SNPs</b> | <b>Linkage Group (LGs)</b> | <b>Genetic positions (cM) of mapped SNPs</b> |
|-------------------|-------------|----------------------------|----------------------------------------------|
| Ca_Kabuli_SNP1828 | [A/C]       | Ca_Kabuli_LG07             | 30.774                                       |
| Ca_Kabuli_SNP1829 | [G/T]       | Ca_Kabuli_LG07             | 30.893                                       |
| Ca_Kabuli_SNP1830 | [C/T]       | Ca_Kabuli_LG07             | 31.126                                       |
| Ca_Kabuli_SNP1831 | [A/T]       | Ca_Kabuli_LG07             | 31.404                                       |
| Ca_Kabuli_SNP1832 | [T/G]       | Ca_Kabuli_LG07             | 32.689                                       |
| Ca_Kabuli_SNP1833 | [G/T]       | Ca_Kabuli_LG07             | 32.827                                       |
| Ca_Kabuli_SNP1834 | [C/A]       | Ca_Kabuli_LG07             | 33.417                                       |
| Ca_Kabuli_SNP1835 | [A/C]       | Ca_Kabuli_LG07             | 33.726                                       |
| Ca_Kabuli_SNP1836 | [G/A]       | Ca_Kabuli_LG07             | 33.861                                       |
| Ca_Kabuli_SNP1837 | [T/G]       | Ca_Kabuli_LG07             | 34.031                                       |
| Ca_Kabuli_SNP1838 | [C/T]       | Ca_Kabuli_LG07             | 34.079                                       |
| Ca_Kabuli_SNP1839 | [C/T]       | Ca_Kabuli_LG07             | 34.411                                       |
| Ca_Kabuli_SNP1840 | [G/A]       | Ca_Kabuli_LG07             | 34.798                                       |
| Ca_Kabuli_SNP1841 | [T/G]       | Ca_Kabuli_LG07             | 34.919                                       |
| Ca_Kabuli_SNP1842 | [C/A]       | Ca_Kabuli_LG07             | 35.906                                       |
| Ca_Kabuli_SNP1843 | [T/G]       | Ca_Kabuli_LG07             | 35.930                                       |
| Ca_Kabuli_SNP1844 | [C/T]       | Ca_Kabuli_LG07             | 36.821                                       |
| Ca_Kabuli_SNP1845 | [C/A]       | Ca_Kabuli_LG07             | 37.269                                       |
| Ca_Kabuli_SNP1846 | [A/T]       | Ca_Kabuli_LG07             | 37.317                                       |
| Ca_Kabuli_SNP1847 | [G/A]       | Ca_Kabuli_LG07             | 37.385                                       |
| Ca_Kabuli_SNP1848 | [A/T]       | Ca_Kabuli_LG07             | 37.386                                       |
| Ca_Kabuli_SNP1849 | [C/G]       | Ca_Kabuli_LG07             | 37.821                                       |
| Ca_Kabuli_SNP1850 | [A/C]       | Ca_Kabuli_LG07             | 38.137                                       |
| Ca_Kabuli_SNP1851 | [G/T]       | Ca_Kabuli_LG07             | 38.444                                       |
| Ca_Kabuli_SNP1852 | [G/A]       | Ca_Kabuli_LG07             | 38.739                                       |
| Ca_Kabuli_SNP1853 | [T/C]       | Ca_Kabuli_LG07             | 38.809                                       |
| Ca_Kabuli_SNP1854 | [C/T]       | Ca_Kabuli_LG07             | 39.171                                       |
| Ca_Kabuli_SNP1855 | [C/T]       | Ca_Kabuli_LG07             | 40.137                                       |
| Ca_Kabuli_SNP1856 | [T/A]       | Ca_Kabuli_LG07             | 40.293                                       |
| Ca_Kabuli_SNP1857 | [A/T]       | Ca_Kabuli_LG07             | 40.332                                       |
| Ca_Kabuli_SNP1858 | [A/C]       | Ca_Kabuli_LG07             | 40.409                                       |

| <b>SNP IDs</b>    | <b>SNPs</b> | <b>Linkage Group (LGs)</b> | <b>Genetic positions (cM) of mapped SNPs</b> |
|-------------------|-------------|----------------------------|----------------------------------------------|
| Ca_Kabuli_SNP1859 | [T/C]       | Ca_Kabuli_LG07             | 41.095                                       |
| Ca_Kabuli_SNP1860 | [T/G]       | Ca_Kabuli_LG07             | 41.254                                       |
| Ca_Kabuli_SNP1861 | [A/T]       | Ca_Kabuli_LG07             | 41.461                                       |
| Ca_Kabuli_SNP1862 | [G/T]       | Ca_Kabuli_LG07             | 41.498                                       |
| Ca_Kabuli_SNP1863 | [A/C]       | Ca_Kabuli_LG07             | 41.827                                       |
| Ca_Kabuli_SNP1864 | [A/C]       | Ca_Kabuli_LG07             | 42.330                                       |
| Ca_Kabuli_SNP1865 | [T/C]       | Ca_Kabuli_LG07             | 43.206                                       |
| Ca_Kabuli_SNP1866 | [A/T]       | Ca_Kabuli_LG07             | 43.452                                       |
| Ca_Kabuli_SNP1867 | [A/T]       | Ca_Kabuli_LG07             | 44.171                                       |
| Ca_Kabuli_SNP1868 | [A/G]       | Ca_Kabuli_LG07             | 44.490                                       |
| Ca_Kabuli_SNP1869 | [A/T]       | Ca_Kabuli_LG07             | 44.631                                       |
| Ca_Kabuli_SNP1870 | [C/T]       | Ca_Kabuli_LG07             | 44.653                                       |
| Ca_Kabuli_SNP1871 | [T/C]       | Ca_Kabuli_LG07             | 44.782                                       |
| Ca_Kabuli_SNP1872 | [C/T]       | Ca_Kabuli_LG07             | 45.404                                       |
| Ca_Kabuli_SNP1873 | [A/T]       | Ca_Kabuli_LG07             | 45.604                                       |
| Ca_Kabuli_SNP1874 | [T/C]       | Ca_Kabuli_LG07             | 45.735                                       |
| Ca_Kabuli_SNP1875 | [A/C]       | Ca_Kabuli_LG07             | 45.905                                       |
| Ca_Kabuli_SNP1876 | [C/T]       | Ca_Kabuli_LG07             | 46.353                                       |
| Ca_Kabuli_SNP1877 | [G/A]       | Ca_Kabuli_LG07             | 46.386                                       |
| Ca_Kabuli_SNP1878 | [C/A]       | Ca_Kabuli_LG07             | 46.479                                       |
| Ca_Kabuli_SNP1879 | [A/G]       | Ca_Kabuli_LG07             | 46.843                                       |
| Ca_Kabuli_SNP1880 | [G/C]       | Ca_Kabuli_LG07             | 47.784                                       |
| Ca_Kabuli_SNP1881 | [C/A]       | Ca_Kabuli_LG07             | 48.150                                       |
| Ca_Kabuli_SNP1882 | [C/G]       | Ca_Kabuli_LG07             | 48.808                                       |
| Ca_Kabuli_SNP1883 | [G/A]       | Ca_Kabuli_LG07             | 48.836                                       |
| Ca_Kabuli_SNP1884 | [A/C]       | Ca_Kabuli_LG07             | 48.869                                       |
| Ca_Kabuli_SNP1885 | [T/G]       | Ca_Kabuli_LG07             | 49.095                                       |
| Ca_Kabuli_SNP1886 | [C/A]       | Ca_Kabuli_LG07             | 49.662                                       |
| Ca_Kabuli_SNP1887 | [C/G]       | Ca_Kabuli_LG07             | 49.871                                       |
| Ca_Kabuli_SNP1888 | [C/A]       | Ca_Kabuli_LG07             | 50.241                                       |
| Ca_Kabuli_SNP1889 | [T/G]       | Ca_Kabuli_LG07             | 50.621                                       |

| <b>SNP IDs</b>    | <b>SNPs</b> | <b>Linkage Group (LGs)</b> | <b>Genetic positions (cM) of mapped SNPs</b> |
|-------------------|-------------|----------------------------|----------------------------------------------|
| Ca_Kabuli_SNP1890 | [G/T]       | Ca_Kabuli_LG07             | 50.654                                       |
| Ca_Kabuli_SNP1891 | [A/C]       | Ca_Kabuli_LG07             | 51.367                                       |
| Ca_Kabuli_SNP1892 | [A/G]       | Ca_Kabuli_LG07             | 51.670                                       |
| Ca_Kabuli_SNP1893 | [G/T]       | Ca_Kabuli_LG07             | 51.785                                       |
| Ca_Kabuli_SNP1894 | [T/G]       | Ca_Kabuli_LG07             | 51.823                                       |
| Ca_Kabuli_SNP1895 | [G/T]       | Ca_Kabuli_LG07             | 51.879                                       |
| Ca_Kabuli_SNP1896 | [T/C]       | Ca_Kabuli_LG07             | 52.339                                       |
| Ca_Kabuli_SNP1897 | [C/T]       | Ca_Kabuli_LG07             | 52.498                                       |
| Ca_Kabuli_SNP1898 | [T/G]       | Ca_Kabuli_LG07             | 52.843                                       |
| Ca_Kabuli_SNP1899 | [C/T]       | Ca_Kabuli_LG07             | 52.898                                       |
| Ca_Kabuli_SNP1900 | [G/A]       | Ca_Kabuli_LG07             | 53.417                                       |
| Ca_Kabuli_SNP1901 | [C/A]       | Ca_Kabuli_LG07             | 53.945                                       |
| Ca_Kabuli_SNP1902 | [G/T]       | Ca_Kabuli_LG07             | 53.981                                       |
| Ca_Kabuli_SNP1903 | [C/A]       | Ca_Kabuli_LG07             | 53.989                                       |
| Ca_Kabuli_SNP1904 | [A/C]       | Ca_Kabuli_LG07             | 54.161                                       |
| Ca_Kabuli_SNP1905 | [G/A]       | Ca_Kabuli_LG07             | 54.339                                       |
| Ca_Kabuli_SNP1906 | [T/C]       | Ca_Kabuli_LG07             | 54.354                                       |
| Ca_Kabuli_SNP1907 | [T/G]       | Ca_Kabuli_LG07             | 54.779                                       |
| Ca_Kabuli_SNP1908 | [G/A]       | Ca_Kabuli_LG07             | 54.923                                       |
| Ca_Kabuli_SNP1909 | [T/G]       | Ca_Kabuli_LG07             | 55.269                                       |
| Ca_Kabuli_SNP1910 | [A/T]       | Ca_Kabuli_LG07             | 55.717                                       |
| Ca_Kabuli_SNP1911 | [T/G]       | Ca_Kabuli_LG07             | 55.720                                       |
| Ca_Kabuli_SNP1912 | [G/A]       | Ca_Kabuli_LG07             | 55.947                                       |
| Ca_Kabuli_SNP1913 | [G/T]       | Ca_Kabuli_LG07             | 56.049                                       |
| Ca_Kabuli_SNP1914 | [C/G]       | Ca_Kabuli_LG07             | 56.478                                       |
| Ca_Kabuli_SNP1915 | [G/A]       | Ca_Kabuli_LG07             | 56.482                                       |
| Ca_Kabuli_SNP1916 | [G/A]       | Ca_Kabuli_LG07             | 56.606                                       |
| Ca_Kabuli_SNP1917 | [C/G]       | Ca_Kabuli_LG07             | 56.662                                       |
| Ca_Kabuli_SNP1918 | [C/G]       | Ca_Kabuli_LG07             | 56.684                                       |
| Ca_Kabuli_SNP1919 | [A/G]       | Ca_Kabuli_LG07             | 56.883                                       |
| Ca_Kabuli_SNP1920 | [G/C]       | Ca_Kabuli_LG07             | 56.886                                       |

| <b>SNP IDs</b>    | <b>SNPs</b> | <b>Linkage Group (LGs)</b> | <b>Genetic positions (cM) of mapped SNPs</b> |
|-------------------|-------------|----------------------------|----------------------------------------------|
| Ca_Kabuli_SNP1921 | [A/G]       | Ca_Kabuli_LG07             | 57.325                                       |
| Ca_Kabuli_SNP1922 | [C/T]       | Ca_Kabuli_LG07             | 57.528                                       |
| Ca_Kabuli_SNP1923 | [T/C]       | Ca_Kabuli_LG07             | 58.267                                       |
| Ca_Kabuli_SNP1924 | [C/T]       | Ca_Kabuli_LG07             | 58.499                                       |
| Ca_Kabuli_SNP1925 | [C/A]       | Ca_Kabuli_LG07             | 58.619                                       |
| Ca_Kabuli_SNP1926 | [G/C]       | Ca_Kabuli_LG07             | 58.785                                       |
| Ca_Kabuli_SNP1927 | [T/C]       | Ca_Kabuli_LG07             | 59.094                                       |
| Ca_Kabuli_SNP1928 | [T/C]       | Ca_Kabuli_LG07             | 61.235                                       |
| Ca_Kabuli_SNP1929 | [T/C]       | Ca_Kabuli_LG07             | 61.788                                       |
| Ca_Kabuli_SNP1930 | [C/G]       | Ca_Kabuli_LG07             | 62.671                                       |
| Ca_Kabuli_SNP1931 | [A/G]       | Ca_Kabuli_LG07             | 62.800                                       |
| Ca_Kabuli_SNP1932 | [A/G]       | Ca_Kabuli_LG07             | 63.212                                       |
| Ca_Kabuli_SNP1933 | [C/A]       | Ca_Kabuli_LG07             | 63.468                                       |
| Ca_Kabuli_SNP1934 | [C/T]       | Ca_Kabuli_LG07             | 63.525                                       |
| Ca_Kabuli_SNP1935 | [A/G]       | Ca_Kabuli_LG07             | 63.550                                       |
| Ca_Kabuli_SNP1936 | [G/T]       | Ca_Kabuli_LG07             | 63.550                                       |
| Ca_Kabuli_SNP1937 | [C/A]       | Ca_Kabuli_LG07             | 63.907                                       |
| Ca_Kabuli_SNP1938 | [T/G]       | Ca_Kabuli_LG07             | 64.865                                       |
| Ca_Kabuli_SNP1939 | [A/G]       | Ca_Kabuli_LG07             | 65.358                                       |
| Ca_Kabuli_SNP1940 | [G/T]       | Ca_Kabuli_LG07             | 66.218                                       |
| Ca_Kabuli_SNP1941 | [A/G]       | Ca_Kabuli_LG07             | 66.892                                       |
| Ca_Kabuli_SNP1942 | [C/A]       | Ca_Kabuli_LG07             | 67.036                                       |
| Ca_Kabuli_SNP1943 | [A/T]       | Ca_Kabuli_LG07             | 68.613                                       |
| Ca_Kabuli_SNP1944 | [C/T]       | Ca_Kabuli_LG07             | 68.703                                       |
| Ca_Kabuli_SNP1945 | [C/T]       | Ca_Kabuli_LG07             | 69.282                                       |
| Ca_Kabuli_SNP1946 | [G/C]       | Ca_Kabuli_LG07             | 71.280                                       |
| Ca_Kabuli_SNP1947 | [G/C]       | Ca_Kabuli_LG07             | 71.521                                       |
| Ca_Kabuli_SNP1948 | [A/G]       | Ca_Kabuli_LG07             | 71.744                                       |
| Ca_Kabuli_SNP1949 | [G/A]       | Ca_Kabuli_LG07             | 71.941                                       |
| Ca_Kabuli_SNP1950 | [A/G]       | Ca_Kabuli_LG07             | 72.737                                       |
| Ca_Kabuli_SNP1951 | [A/T]       | Ca_Kabuli_LG07             | 73.056                                       |

| <b>SNP IDs</b>    | <b>SNPs</b> | <b>Linkage Group (LGs)</b> | <b>Genetic positions (cM) of mapped SNPs</b> |
|-------------------|-------------|----------------------------|----------------------------------------------|
| Ca_Kabuli_SNP1952 | [A/G]       | Ca_Kabuli_LG07             | 73.180                                       |
| Ca_Kabuli_SNP1953 | [T/G]       | Ca_Kabuli_LG07             | 73.718                                       |
| Ca_Kabuli_SNP1954 | [T/G]       | Ca_Kabuli_LG07             | 74.618                                       |
| Ca_Kabuli_SNP1955 | [A/G]       | Ca_Kabuli_LG07             | 75.222                                       |
| Ca_Kabuli_SNP1956 | [A/G]       | Ca_Kabuli_LG07             | 76.026                                       |
| Ca_Kabuli_SNP1957 | [G/A]       | Ca_Kabuli_LG07             | 76.317                                       |
| Ca_Kabuli_SNP1958 | [T/A]       | Ca_Kabuli_LG07             | 76.376                                       |
| Ca_Kabuli_SNP1959 | [T/G]       | Ca_Kabuli_LG07             | 79.510                                       |
| Ca_Kabuli_SNP1960 | [A/C]       | Ca_Kabuli_LG07             | 79.945                                       |
| Ca_Kabuli_SNP1961 | [C/A]       | Ca_Kabuli_LG07             | 80.559                                       |
| Ca_Kabuli_SNP1962 | [A/T]       | Ca_Kabuli_LG07             | 81.732                                       |
| Ca_Kabuli_SNP1963 | [C/T]       | Ca_Kabuli_LG07             | 82.223                                       |
| Ca_Kabuli_SNP1964 | [G/A]       | Ca_Kabuli_LG07             | 82.561                                       |
| Ca_Kabuli_SNP1965 | [A/G]       | Ca_Kabuli_LG07             | 83.257                                       |
| Ca_Kabuli_SNP1966 | [G/T]       | Ca_Kabuli_LG07             | 84.685                                       |
| Ca_Kabuli_SNP1967 | [A/G]       | Ca_Kabuli_LG07             | 85.416                                       |
| Ca_Kabuli_SNP1968 | [A/T]       | Ca_Kabuli_LG07             | 87.424                                       |
| Ca_Kabuli_SNP1969 | [C/T]       | Ca_Kabuli_LG07             | 90.894                                       |
| Ca_Kabuli_SNP1970 | [A/C]       | Ca_Kabuli_LG07             | 91.411                                       |
| Ca_Kabuli_SNP1971 | [G/A]       | Ca_Kabuli_LG07             | 91.507                                       |
| Ca_Kabuli_SNP1972 | [G/A]       | Ca_Kabuli_LG07             | 92.056                                       |
| Ca_Kabuli_SNP1973 | [A/C]       | Ca_Kabuli_LG07             | 92.448                                       |
| Ca_Kabuli_SNP1974 | [A/C]       | Ca_Kabuli_LG07             | 92.503                                       |
| Ca_Kabuli_SNP1975 | [T/G]       | Ca_Kabuli_LG07             | 92.674                                       |
| Ca_Kabuli_SNP1976 | [C/A]       | Ca_Kabuli_LG07             | 92.789                                       |
| Ca_Kabuli_SNP1977 | [C/T]       | Ca_Kabuli_LG07             | 93.284                                       |
| Ca_Kabuli_SNP1978 | [C/A]       | Ca_Kabuli_LG07             | 93.740                                       |
| Ca_Kabuli_SNP1979 | [A/T]       | Ca_Kabuli_LG07             | 94.931                                       |
| Ca_Kabuli_SNP1980 | [C/A]       | Ca_Kabuli_LG07             | 97.380                                       |
| Ca_Kabuli_SNP1981 | [T/A]       | Ca_Kabuli_LG07             | 97.847                                       |
| Ca_Kabuli_SNP1982 | [T/A]       | Ca_Kabuli_LG07             | 97.968                                       |

| <b>SNP IDs</b>    | <b>SNPs</b> | <b>Linkage Group (LGs)</b> | <b>Genetic positions (cM) of mapped SNPs</b> |
|-------------------|-------------|----------------------------|----------------------------------------------|
| Ca_Kabuli_SNP1983 | [T/C]       | Ca_Kabuli_LG07             | 98.312                                       |
| Ca_Kabuli_SNP1984 | [T/C]       | Ca_Kabuli_LG07             | 98.545                                       |
| Ca_Kabuli_SNP1985 | [A/G]       | Ca_Kabuli_LG07             | 99.754                                       |
| Ca_Kabuli_SNP1986 | [C/T]       | Ca_Kabuli_LG07             | 100.328                                      |
| Ca_Kabuli_SNP1987 | [A/G]       | Ca_Kabuli_LG07             | 105.184                                      |
| Ca_Kabuli_SNP1988 | [T/C]       | Ca_Kabuli_LG08             | 0.000                                        |
| Ca_Kabuli_SNP1989 | [C/T]       | Ca_Kabuli_LG08             | 1.894                                        |
| Ca_Kabuli_SNP1990 | [T/C]       | Ca_Kabuli_LG08             | 3.989                                        |
| Ca_Kabuli_SNP1991 | [C/A]       | Ca_Kabuli_LG08             | 5.298                                        |
| Ca_Kabuli_SNP1992 | [G/A]       | Ca_Kabuli_LG08             | 6.091                                        |
| Ca_Kabuli_SNP1993 | [G/C]       | Ca_Kabuli_LG08             | 6.270                                        |
| Ca_Kabuli_SNP1994 | [A/C]       | Ca_Kabuli_LG08             | 8.231                                        |
| Ca_Kabuli_SNP1995 | [G/C]       | Ca_Kabuli_LG08             | 10.460                                       |
| Ca_Kabuli_SNP1996 | [T/G]       | Ca_Kabuli_LG08             | 10.697                                       |
| Ca_Kabuli_SNP1997 | [G/A]       | Ca_Kabuli_LG08             | 11.002                                       |
| Ca_Kabuli_SNP1998 | [T/A]       | Ca_Kabuli_LG08             | 11.375                                       |
| Ca_Kabuli_SNP1999 | [A/C]       | Ca_Kabuli_LG08             | 12.090                                       |
| Ca_Kabuli_SNP2000 | [C/T]       | Ca_Kabuli_LG08             | 13.232                                       |
| Ca_Kabuli_SNP2001 | [C/T]       | Ca_Kabuli_LG08             | 13.977                                       |
| Ca_Kabuli_SNP2002 | [G/C]       | Ca_Kabuli_LG08             | 14.068                                       |
| Ca_Kabuli_SNP2003 | [A/T]       | Ca_Kabuli_LG08             | 15.054                                       |
| Ca_Kabuli_SNP2004 | [C/T]       | Ca_Kabuli_LG08             | 15.341                                       |
| Ca_Kabuli_SNP2005 | [A/G]       | Ca_Kabuli_LG08             | 15.379                                       |
| Ca_Kabuli_SNP2006 | [A/C]       | Ca_Kabuli_LG08             | 15.690                                       |
| Ca_Kabuli_SNP2007 | [A/C]       | Ca_Kabuli_LG08             | 16.091                                       |
| Ca_Kabuli_SNP2008 | [G/A]       | Ca_Kabuli_LG08             | 16.376                                       |
| Ca_Kabuli_SNP2009 | [T/G]       | Ca_Kabuli_LG08             | 18.568                                       |
| Ca_Kabuli_SNP2010 | [A/G]       | Ca_Kabuli_LG08             | 19.162                                       |
| Ca_Kabuli_SNP2011 | [A/C]       | Ca_Kabuli_LG08             | 20.905                                       |
| Ca_Kabuli_SNP2012 | [C/G]       | Ca_Kabuli_LG08             | 21.192                                       |
| Ca_Kabuli_SNP2013 | [C/T]       | Ca_Kabuli_LG08             | 21.563                                       |

| <b>SNP IDs</b>    | <b>SNPs</b> | <b>Linkage Group (LGs)</b> | <b>Genetic positions (cM) of mapped SNPs</b> |
|-------------------|-------------|----------------------------|----------------------------------------------|
| Ca_Kabuli_SNP2014 | [A/T]       | Ca_Kabuli_LG08             | 22.059                                       |
| Ca_Kabuli_SNP2015 | [G/A]       | Ca_Kabuli_LG08             | 22.584                                       |
| Ca_Kabuli_SNP2016 | [A/C]       | Ca_Kabuli_LG08             | 22.777                                       |
| Ca_Kabuli_SNP2017 | [A/C]       | Ca_Kabuli_LG08             | 23.056                                       |
| Ca_Kabuli_SNP2018 | [C/G]       | Ca_Kabuli_LG08             | 23.906                                       |
| Ca_Kabuli_SNP2019 | [T/C]       | Ca_Kabuli_LG08             | 24.343                                       |
| Ca_Kabuli_SNP2020 | [G/A]       | Ca_Kabuli_LG08             | 24.521                                       |
| Ca_Kabuli_SNP2021 | [C/A]       | Ca_Kabuli_LG08             | 25.008                                       |
| Ca_Kabuli_SNP2022 | [C/T]       | Ca_Kabuli_LG08             | 25.123                                       |
| Ca_Kabuli_SNP2023 | [C/T]       | Ca_Kabuli_LG08             | 25.599                                       |
| Ca_Kabuli_SNP2024 | [A/C]       | Ca_Kabuli_LG08             | 25.922                                       |
| Ca_Kabuli_SNP2025 | [C/T]       | Ca_Kabuli_LG08             | 25.979                                       |
| Ca_Kabuli_SNP2026 | [G/A]       | Ca_Kabuli_LG08             | 26.608                                       |
| Ca_Kabuli_SNP2027 | [C/T]       | Ca_Kabuli_LG08             | 27.486                                       |
| Ca_Kabuli_SNP2028 | [T/G]       | Ca_Kabuli_LG08             | 27.603                                       |
| Ca_Kabuli_SNP2029 | [G/C]       | Ca_Kabuli_LG08             | 27.722                                       |
| Ca_Kabuli_SNP2030 | [C/G]       | Ca_Kabuli_LG08             | 27.797                                       |
| Ca_Kabuli_SNP2031 | [C/T]       | Ca_Kabuli_LG08             | 28.500                                       |
| Ca_Kabuli_SNP2032 | [T/G]       | Ca_Kabuli_LG08             | 30.304                                       |
| Ca_Kabuli_SNP2033 | [T/C]       | Ca_Kabuli_LG08             | 31.818                                       |
| Ca_Kabuli_SNP2034 | [T/G]       | Ca_Kabuli_LG08             | 31.830                                       |
| Ca_Kabuli_SNP2035 | [A/C]       | Ca_Kabuli_LG08             | 32.058                                       |
| Ca_Kabuli_SNP2036 | [C/A]       | Ca_Kabuli_LG08             | 32.163                                       |
| Ca_Kabuli_SNP2037 | [G/C]       | Ca_Kabuli_LG08             | 32.319                                       |
| Ca_Kabuli_SNP2038 | [A/G]       | Ca_Kabuli_LG08             | 32.661                                       |
| Ca_Kabuli_SNP2039 | [A/C]       | Ca_Kabuli_LG08             | 32.961                                       |
| Ca_Kabuli_SNP2040 | [T/A]       | Ca_Kabuli_LG08             | 32.998                                       |
| Ca_Kabuli_SNP2041 | [C/A]       | Ca_Kabuli_LG08             | 33.203                                       |
| Ca_Kabuli_SNP2042 | [A/C]       | Ca_Kabuli_LG08             | 33.618                                       |
| Ca_Kabuli_SNP2043 | [G/C]       | Ca_Kabuli_LG08             | 33.783                                       |
| Ca_Kabuli_SNP2044 | [T/C]       | Ca_Kabuli_LG08             | 34.112                                       |



| <b>SNP IDs</b>    | <b>SNPs</b> | <b>Linkage Group (LGs)</b> | <b>Genetic positions (cM) of mapped SNPs</b> |
|-------------------|-------------|----------------------------|----------------------------------------------|
| Ca_Kabuli_SNP2045 | [G/A]       | Ca_Kabuli_LG08             | 34.304                                       |
| Ca_Kabuli_SNP2046 | [G/C]       | Ca_Kabuli_LG08             | 34.630                                       |
| Ca_Kabuli_SNP2047 | [A/G]       | Ca_Kabuli_LG08             | 34.793                                       |
| Ca_Kabuli_SNP2048 | [A/G]       | Ca_Kabuli_LG08             | 34.835                                       |
| Ca_Kabuli_SNP2049 | [A/T]       | Ca_Kabuli_LG08             | 35.646                                       |
| Ca_Kabuli_SNP2050 | [C/T]       | Ca_Kabuli_LG08             | 36.037                                       |
| Ca_Kabuli_SNP2051 | [T/A]       | Ca_Kabuli_LG08             | 36.504                                       |
| Ca_Kabuli_SNP2052 | [G/A]       | Ca_Kabuli_LG08             | 36.825                                       |
| Ca_Kabuli_SNP2053 | [T/G]       | Ca_Kabuli_LG08             | 36.855                                       |
| Ca_Kabuli_SNP2054 | [C/T]       | Ca_Kabuli_LG08             | 37.228                                       |
| Ca_Kabuli_SNP2055 | [T/C]       | Ca_Kabuli_LG08             | 37.315                                       |
| Ca_Kabuli_SNP2056 | [T/G]       | Ca_Kabuli_LG08             | 37.323                                       |
| Ca_Kabuli_SNP2057 | [C/A]       | Ca_Kabuli_LG08             | 38.162                                       |
| Ca_Kabuli_SNP2058 | [T/G]       | Ca_Kabuli_LG08             | 38.357                                       |
| Ca_Kabuli_SNP2059 | [A/G]       | Ca_Kabuli_LG08             | 38.451                                       |
| Ca_Kabuli_SNP2060 | [A/C]       | Ca_Kabuli_LG08             | 38.699                                       |
| Ca_Kabuli_SNP2061 | [G/C]       | Ca_Kabuli_LG08             | 39.172                                       |
| Ca_Kabuli_SNP2062 | [T/C]       | Ca_Kabuli_LG08             | 39.414                                       |
| Ca_Kabuli_SNP2063 | [C/A]       | Ca_Kabuli_LG08             | 39.679                                       |
| Ca_Kabuli_SNP2064 | [C/T]       | Ca_Kabuli_LG08             | 39.749                                       |
| Ca_Kabuli_SNP2065 | [G/T]       | Ca_Kabuli_LG08             | 40.285                                       |
| Ca_Kabuli_SNP2066 | [G/A]       | Ca_Kabuli_LG08             | 41.092                                       |
| Ca_Kabuli_SNP2067 | [C/G]       | Ca_Kabuli_LG08             | 41.760                                       |
| Ca_Kabuli_SNP2068 | [G/T]       | Ca_Kabuli_LG08             | 42.956                                       |
| Ca_Kabuli_SNP2069 | [G/T]       | Ca_Kabuli_LG08             | 43.661                                       |
| Ca_Kabuli_SNP2070 | [A/T]       | Ca_Kabuli_LG08             | 43.675                                       |
| Ca_Kabuli_SNP2071 | [T/G]       | Ca_Kabuli_LG08             | 44.105                                       |
| Ca_Kabuli_SNP2072 | [C/A]       | Ca_Kabuli_LG08             | 44.475                                       |
| Ca_Kabuli_SNP2073 | [G/T]       | Ca_Kabuli_LG08             | 45.343                                       |
| Ca_Kabuli_SNP2074 | [T/G]       | Ca_Kabuli_LG08             | 45.407                                       |
| Ca_Kabuli_SNP2075 | [T/G]       | Ca_Kabuli_LG08             | 46.177                                       |

| <b>SNP IDs</b>    | <b>SNPs</b> | <b>Linkage Group (LGs)</b> | <b>Genetic positions (cM) of mapped SNPs</b> |
|-------------------|-------------|----------------------------|----------------------------------------------|
| Ca_Kabuli_SNP2076 | [G/T]       | Ca_Kabuli_LG08             | 46.736                                       |
| Ca_Kabuli_SNP2077 | [C/A]       | Ca_Kabuli_LG08             | 46.779                                       |
| Ca_Kabuli_SNP2078 | [A/C]       | Ca_Kabuli_LG08             | 47.070                                       |
| Ca_Kabuli_SNP2079 | [T/G]       | Ca_Kabuli_LG08             | 47.293                                       |
| Ca_Kabuli_SNP2080 | [A/G]       | Ca_Kabuli_LG08             | 48.233                                       |
| Ca_Kabuli_SNP2081 | [C/G]       | Ca_Kabuli_LG08             | 48.340                                       |
| Ca_Kabuli_SNP2082 | [G/A]       | Ca_Kabuli_LG08             | 48.744                                       |
| Ca_Kabuli_SNP2083 | [C/A]       | Ca_Kabuli_LG08             | 48.974                                       |
| Ca_Kabuli_SNP2084 | [A/C]       | Ca_Kabuli_LG08             | 49.291                                       |
| Ca_Kabuli_SNP2085 | [C/T]       | Ca_Kabuli_LG08             | 51.448                                       |
| Ca_Kabuli_SNP2086 | [A/G]       | Ca_Kabuli_LG08             | 51.765                                       |
| Ca_Kabuli_SNP2087 | [T/G]       | Ca_Kabuli_LG08             | 52.265                                       |
| Ca_Kabuli_SNP2088 | [A/C]       | Ca_Kabuli_LG08             | 52.739                                       |
| Ca_Kabuli_SNP2089 | [A/T]       | Ca_Kabuli_LG08             | 52.740                                       |
| Ca_Kabuli_SNP2090 | [A/C]       | Ca_Kabuli_LG08             | 52.740                                       |
| Ca_Kabuli_SNP2091 | [G/A]       | Ca_Kabuli_LG08             | 52.759                                       |
| Ca_Kabuli_SNP2092 | [C/A]       | Ca_Kabuli_LG08             | 53.016                                       |
| Ca_Kabuli_SNP2093 | [C/T]       | Ca_Kabuli_LG08             | 54.252                                       |
| Ca_Kabuli_SNP2094 | [T/G]       | Ca_Kabuli_LG08             | 54.297                                       |
| Ca_Kabuli_SNP2095 | [A/C]       | Ca_Kabuli_LG08             | 54.991                                       |
| Ca_Kabuli_SNP2096 | [T/A]       | Ca_Kabuli_LG08             | 55.392                                       |
| Ca_Kabuli_SNP2097 | [C/T]       | Ca_Kabuli_LG08             | 56.073                                       |
| Ca_Kabuli_SNP2098 | [A/C]       | Ca_Kabuli_LG08             | 56.253                                       |
| Ca_Kabuli_SNP2099 | [A/G]       | Ca_Kabuli_LG08             | 56.405                                       |
| Ca_Kabuli_SNP2100 | [C/T]       | Ca_Kabuli_LG08             | 56.870                                       |
| Ca_Kabuli_SNP2101 | [T/C]       | Ca_Kabuli_LG08             | 57.026                                       |
| Ca_Kabuli_SNP2102 | [A/G]       | Ca_Kabuli_LG08             | 57.481                                       |
| Ca_Kabuli_SNP2103 | [T/G]       | Ca_Kabuli_LG08             | 57.934                                       |
| Ca_Kabuli_SNP2104 | [C/T]       | Ca_Kabuli_LG08             | 58.405                                       |
| Ca_Kabuli_SNP2105 | [A/T]       | Ca_Kabuli_LG08             | 58.617                                       |
| Ca_Kabuli_SNP2106 | [C/A]       | Ca_Kabuli_LG08             | 58.772                                       |

| <b>SNP IDs</b>    | <b>SNPs</b> | <b>Linkage Group (LGs)</b> | <b>Genetic positions (cM) of mapped SNPs</b> |
|-------------------|-------------|----------------------------|----------------------------------------------|
| Ca_Kabuli_SNP2107 | [T/G]       | Ca_Kabuli_LG08             | 58.931                                       |
| Ca_Kabuli_SNP2108 | [A/C]       | Ca_Kabuli_LG08             | 59.276                                       |
| Ca_Kabuli_SNP2109 | [T/G]       | Ca_Kabuli_LG08             | 59.316                                       |
| Ca_Kabuli_SNP2110 | [T/A]       | Ca_Kabuli_LG08             | 59.316                                       |
| Ca_Kabuli_SNP2111 | [G/A]       | Ca_Kabuli_LG08             | 60.274                                       |
| Ca_Kabuli_SNP2112 | [T/C]       | Ca_Kabuli_LG08             | 60.371                                       |
| Ca_Kabuli_SNP2113 | [G/A]       | Ca_Kabuli_LG08             | 60.371                                       |
| Ca_Kabuli_SNP2114 | [A/T]       | Ca_Kabuli_LG08             | 60.460                                       |
| Ca_Kabuli_SNP2115 | [C/T]       | Ca_Kabuli_LG08             | 60.638                                       |
| Ca_Kabuli_SNP2116 | [G/T]       | Ca_Kabuli_LG08             | 60.818                                       |
| Ca_Kabuli_SNP2117 | [C/T]       | Ca_Kabuli_LG08             | 61.136                                       |
| Ca_Kabuli_SNP2118 | [T/C]       | Ca_Kabuli_LG08             | 61.629                                       |
| Ca_Kabuli_SNP2119 | [G/A]       | Ca_Kabuli_LG08             | 61.629                                       |
| Ca_Kabuli_SNP2120 | [A/G]       | Ca_Kabuli_LG08             | 62.982                                       |
| Ca_Kabuli_SNP2121 | [A/C]       | Ca_Kabuli_LG08             | 63.522                                       |
| Ca_Kabuli_SNP2122 | [T/G]       | Ca_Kabuli_LG08             | 64.112                                       |
| Ca_Kabuli_SNP2123 | [T/C]       | Ca_Kabuli_LG08             | 64.706                                       |
| Ca_Kabuli_SNP2124 | [T/A]       | Ca_Kabuli_LG08             | 66.310                                       |
| Ca_Kabuli_SNP2125 | [T/C]       | Ca_Kabuli_LG08             | 66.376                                       |
| Ca_Kabuli_SNP2126 | [A/T]       | Ca_Kabuli_LG08             | 67.748                                       |
| Ca_Kabuli_SNP2127 | [A/G]       | Ca_Kabuli_LG08             | 67.819                                       |
| Ca_Kabuli_SNP2128 | [G/T]       | Ca_Kabuli_LG08             | 67.865                                       |
| Ca_Kabuli_SNP2129 | [C/T]       | Ca_Kabuli_LG08             | 68.043                                       |
| Ca_Kabuli_SNP2130 | [A/T]       | Ca_Kabuli_LG08             | 68.356                                       |
| Ca_Kabuli_SNP2131 | [G/C]       | Ca_Kabuli_LG08             | 68.783                                       |
| Ca_Kabuli_SNP2132 | [T/C]       | Ca_Kabuli_LG08             | 68.783                                       |
| Ca_Kabuli_SNP2133 | [C/T]       | Ca_Kabuli_LG08             | 68.783                                       |
| Ca_Kabuli_SNP2134 | [G/A]       | Ca_Kabuli_LG08             | 69.489                                       |
| Ca_Kabuli_SNP2135 | [C/G]       | Ca_Kabuli_LG08             | 70.934                                       |
| Ca_Kabuli_SNP2136 | [A/G]       | Ca_Kabuli_LG08             | 71.597                                       |
| Ca_Kabuli_SNP2137 | [G/T]       | Ca_Kabuli_LG08             | 71.816                                       |

| <b>SNP IDs</b>    | <b>SNPs</b> | <b>Linkage Group (LGs)</b> | <b>Genetic positions (cM) of mapped SNPs</b> |
|-------------------|-------------|----------------------------|----------------------------------------------|
| Ca_Kabuli_SNP2138 | [G/A]       | Ca_Kabuli_LG08             | 72.761                                       |
| Ca_Kabuli_SNP2139 | [C/T]       | Ca_Kabuli_LG08             | 73.363                                       |
| Ca_Kabuli_SNP2140 | [C/T]       | Ca_Kabuli_LG08             | 73.823                                       |
| Ca_Kabuli_SNP2141 | [G/A]       | Ca_Kabuli_LG08             | 73.922                                       |
| Ca_Kabuli_SNP2142 | [A/G]       | Ca_Kabuli_LG08             | 74.138                                       |
| Ca_Kabuli_SNP2143 | [C/T]       | Ca_Kabuli_LG08             | 74.638                                       |
| Ca_Kabuli_SNP2144 | [G/T]       | Ca_Kabuli_LG08             | 75.715                                       |
| Ca_Kabuli_SNP2145 | [T/C]       | Ca_Kabuli_LG08             | 75.807                                       |
| Ca_Kabuli_SNP2146 | [A/C]       | Ca_Kabuli_LG08             | 75.922                                       |
| Ca_Kabuli_SNP2147 | [G/C]       | Ca_Kabuli_LG08             | 76.550                                       |
| Ca_Kabuli_SNP2148 | [T/C]       | Ca_Kabuli_LG08             | 77.021                                       |
| Ca_Kabuli_SNP2149 | [G/A]       | Ca_Kabuli_LG08             | 77.121                                       |
| Ca_Kabuli_SNP2150 | [C/T]       | Ca_Kabuli_LG08             | 77.633                                       |
| Ca_Kabuli_SNP2151 | [A/T]       | Ca_Kabuli_LG08             | 78.261                                       |
| Ca_Kabuli_SNP2152 | [G/A]       | Ca_Kabuli_LG08             | 79.026                                       |
| Ca_Kabuli_SNP2153 | [A/G]       | Ca_Kabuli_LG08             | 80.076                                       |
| Ca_Kabuli_SNP2154 | [A/C]       | Ca_Kabuli_LG08             | 83.221                                       |
| Ca_Kabuli_SNP2155 | [A/C]       | Ca_Kabuli_LG08             | 83.329                                       |
| Ca_Kabuli_SNP2156 | [G/C]       | Ca_Kabuli_LG08             | 87.335                                       |
| Ca_Kabuli_SNP2157 | [G/A]       | Ca_Kabuli_LG08             | 88.036                                       |
| Ca_Kabuli_SNP2158 | [T/C]       | Ca_Kabuli_LG08             | 88.090                                       |
| Ca_Kabuli_SNP2159 | [A/C]       | Ca_Kabuli_LG08             | 89.169                                       |
| Ca_Kabuli_SNP2160 | [T/G]       | Ca_Kabuli_LG08             | 89.183                                       |
| Ca_Kabuli_SNP2161 | [A/G]       | Ca_Kabuli_LG08             | 89.692                                       |
| Ca_Kabuli_SNP2162 | [A/G]       | Ca_Kabuli_LG08             | 90.571                                       |
| Ca_Kabuli_SNP2163 | [A/C]       | Ca_Kabuli_LG08             | 90.973                                       |
| Ca_Kabuli_SNP2164 | [A/C]       | Ca_Kabuli_LG08             | 92.922                                       |
| Ca_Kabuli_SNP2165 | [T/G]       | Ca_Kabuli_LG08             | 93.224                                       |
| Ca_Kabuli_SNP2166 | [A/C]       | Ca_Kabuli_LG08             | 94.106                                       |
| Ca_Kabuli_SNP2167 | [T/G]       | Ca_Kabuli_LG08             | 94.561                                       |
| Ca_Kabuli_SNP2168 | [T/G]       | Ca_Kabuli_LG08             | 94.723                                       |

| <b>SNP IDs</b>    | <b>SNPs</b> | <b>Linkage Group (LGs)</b> | <b>Genetic positions (cM) of mapped SNPs</b> |
|-------------------|-------------|----------------------------|----------------------------------------------|
| Ca_Kabuli_SNP2169 | [A/G]       | Ca_Kabuli_LG08             | 94.794                                       |
| Ca_Kabuli_SNP2170 | [T/G]       | Ca_Kabuli_LG08             | 96.011                                       |
| Ca_Kabuli_SNP2171 | [C/A]       | Ca_Kabuli_LG08             | 96.340                                       |
| Ca_Kabuli_SNP2172 | [C/T]       | Ca_Kabuli_LG08             | 96.447                                       |
| Ca_Kabuli_SNP2173 | [C/T]       | Ca_Kabuli_LG08             | 96.535                                       |
| Ca_Kabuli_SNP2174 | [T/A]       | Ca_Kabuli_LG08             | 97.689                                       |
| Ca_Kabuli_SNP2175 | [G/T]       | Ca_Kabuli_LG08             | 99.321                                       |
| Ca_Kabuli_SNP2176 | [T/C]       | Ca_Kabuli_LG08             | 102.248                                      |
| Ca_Kabuli_SNP2177 | [G/A]       | Ca_Kabuli_LG08             | 102.516                                      |

**Table S4:** Genome-wide LD estimates among a pairs of SNP loci mapped across eight *desi* and *kabuli* LGs of ultra-high density intra-specific genetic maps

| Linkage Groups (LGs)           | Number of SNP-pairs used | <sup>a</sup> SNP-pairs significant LD in | LD-estimates (average r <sup>2</sup> ) |
|--------------------------------|--------------------------|------------------------------------------|----------------------------------------|
| Ca_ <i>Desi</i> _LG01          | 35525                    | 1923 (5.41%)                             | 0.53                                   |
| Ca_ <i>Desi</i> _LG01          | 18025                    | 1284 (7.12%)                             | 0.60                                   |
| Ca_ <i>Desi</i> _LG01          | 28075                    | 1964 (6.99%)                             | 0.60                                   |
| Ca_ <i>Desi</i> _LG01          | 27425                    | 11739 (42.80%)                           | 0.78                                   |
| Ca_ <i>Desi</i> _LG01          | 13325                    | 694 (5.21%)                              | 0.54                                   |
| Ca_ <i>Desi</i> _LG01          | 20225                    | 1900 (9.39%)                             | 0.63                                   |
| Ca_ <i>Desi</i> _LG01          | 15675                    | 1165 (7.43%)                             | 0.54                                   |
| Ca_ <i>Desi</i> _LG01          | 12775                    | 1744 (13.65%)                            | 0.70                                   |
| <b>Total <i>Desi</i> LGs</b>   | <b>171050</b>            | <b>22413 (13.10%)</b>                    | <b>0.62</b>                            |
|                                |                          |                                          |                                        |
| Ca_ <i>Kabuli</i> _LG01        | 15785                    | 2543 (16.11%)                            | 0.60                                   |
| Ca_ <i>Kabuli</i> _LG01        | 8675                     | 3003 (34.62%)                            | 0.59                                   |
| Ca_ <i>Kabuli</i> _LG01        | 21875                    | 2460 (11.25%)                            | 0.66                                   |
| Ca_ <i>Kabuli</i> _LG01        | 18675                    | 4996 (26.75%)                            | 0.72                                   |
| Ca_ <i>Kabuli</i> _LG01        | 3925                     | 1060 (27.01%)                            | 0.47                                   |
| Ca_ <i>Kabuli</i> _LG01        | 12975                    | 2840 (21.89%)                            | 0.63                                   |
| Ca_ <i>Kabuli</i> _LG01        | 8425                     | 1195 (14.18%)                            | 0.47                                   |
| Ca_ <i>Kabuli</i> _LG01        | 8225                     | 1287 (15.65%)                            | 0.57                                   |
| <b>Total <i>Kabuli</i> LGs</b> | <b>98560</b>             | <b>19384 (19.67%)</b>                    | <b>0.59</b>                            |

<sup>a</sup>SNP-pairs at significant ( $p \leq 10^{-3}$ ) LD

**Table S5:** Statistical measures of three quantitative agronomic traits estimated in parental genotypes and 275 mapping individuals of an intra-specific RIL population (ICC 12299 x ICC 8261)

| Traits                     | Years*  | Parental genotypes |                | RIL mapping population |            |                               | Heritability (%) |
|----------------------------|---------|--------------------|----------------|------------------------|------------|-------------------------------|------------------|
|                            |         | ICC 12299          | ICC 8261       | Mean $\pm$ S.D.        | Range      | Coefficient of variation (CV) |                  |
| Pod number per plant (PN)  | 2010-11 | 100.4 $\pm$ 1.5    | 66.2 $\pm$ 2.1 | 82.6 $\pm$ 11.5        | 52.3-141.2 | 0.14                          | 80               |
|                            | 2011-12 | 102.7 $\pm$ 1.9    | 64.2 $\pm$ 2.3 | 82.3 $\pm$ 12.3        | 51.1-139.0 | 0.15                          | 79               |
|                            | 2012-13 | 103.7 $\pm$ 2.0    | 65.2 $\pm$ 2.0 | 84.2 $\pm$ 11.8        | 52.1-140.0 | 0.14                          | 78               |
| Seed number per plant (SN) | 2010-11 | 161.1 $\pm$ 2.6    | 76.2 $\pm$ 2.2 | 117.7 $\pm$ 21.6       | 64.5-231.6 | 0.18                          | 81               |
|                            | 2011-12 | 158.1 $\pm$ 2.1    | 73.2 $\pm$ 1.7 | 117.9 $\pm$ 24.8       | 62.4-229.3 | 0.21                          | 77               |
|                            | 2012-13 | 163.1 $\pm$ 2.5    | 71.2 $\pm$ 1.9 | 116.4 $\pm$ 22.5       | 60.6-225.8 | 0.19                          | 80               |
| 100-seed weight (g) (SW)   | 2010-11 | 8.3 $\pm$ 2.1      | 32.1 $\pm$ 2.2 | 19.7 $\pm$ 4.6         | 8.9-43.7   | 0.23                          | 89               |
|                            | 2011-12 | 8.6 $\pm$ 2.5      | 30.1 $\pm$ 1.9 | 16 $\pm$ 5.3           | 7.4-41.2   | 0.33                          | 90               |
|                            | 2012-13 | 8.8 $\pm$ 2.3      | 29.5 $\pm$ 1.8 | 18.8 $\pm$ 4.1         | 7.1-40.5   | 0.22                          | 88               |

\*One-way ANOVA probabilities (F-Prob) at  $p \leq 10^{-2}$  showing significant trait variation in RILs across three years

**Table S6A: Structural and functional annotation of 4448 high-quality SNPs (MAF >20%) identified by reference *desi* genome-based GBS assay used for construction of ultra-high density intra-specific genetic linkage maps in chickpea**

| SNP IDs         | Chromosomes   | Physical positions (bp) | SNPs  | Gene accession IDs | Sequence components of genome/genes | Putative functions                             |
|-----------------|---------------|-------------------------|-------|--------------------|-------------------------------------|------------------------------------------------|
| *Ca_Desig_SNP1  | scaffold00582 | 6442                    | [T/C] | Ca_13279           | INTRON                              | (+)-neomenthol dehydrogenase                   |
| *Ca_Desig_SNP2  | scaffold00876 | 7194                    | [C/G] |                    | INTERGENIC                          |                                                |
| *Ca_Desig_SNP3  | scaffold15702 | 53709                   | [C/T] |                    | INTERGENIC                          |                                                |
| *Ca_Desig_SNP4  | Ca_Desig_LG03 | 6499738                 | [A/C] | Ca_02679           | NON_SYNONYMOUS_CODING               | ABC transporter C family member 5              |
| *Ca_Desig_SNP5  | scaffold00996 | 227                     | [A/G] |                    | INTERGENIC                          |                                                |
| *Ca_Desig_SNP6  | scaffold00745 | 3713                    | [G/T] |                    | INTERGENIC                          |                                                |
| *Ca_Desig_SNP7  | Ca_Desig_LG08 | 10194727                | [A/C] | Ca_08722           | SYNONYMOUS_CODING                   | Putative uncharacterized protein               |
| *Ca_Desig_SNP8  | scaffold00934 | 225573                  | [C/T] |                    | INTERGENIC                          |                                                |
| *Ca_Desig_SNP9  | scaffold01025 | 308                     | [G/C] | Ca_14762           | SYNONYMOUS_CODING                   | Protein of unknown function (DUF674)           |
| *Ca_Desig_SNP10 | scaffold00203 | 40465                   | [T/G] | Ca_11303           | SYNONYMOUS_CODING                   | Putative peptide/nitrate transporter At2g37900 |
| *Ca_Desig_SNP11 | scaffold02365 | 27874                   | [A/C] |                    | INTERGENIC                          |                                                |
| *Ca_Desig_SNP12 | scaffold00968 | 166                     | [T/G] |                    | INTERGENIC                          |                                                |
| *Ca_Desig_SNP13 | scaffold00778 | 710                     | [A/G] |                    | INTERGENIC                          |                                                |
| *Ca_Desig_SNP14 | scaffold00167 | 12128                   | [C/A] |                    | INTERGENIC                          |                                                |
| *Ca_Desig_SNP15 | scaffold00261 | 25095                   | [A/T] |                    | INTERGENIC                          |                                                |
| *Ca_Desig_SNP16 | scaffold03349 | 105144                  | [T/C] |                    | INTERGENIC                          |                                                |
| *Ca_Desig_SNP17 | scaffold00775 | 2373                    | [T/C] | Ca_13986           | DOWNSTREAM:976bases                 | Protein of unknown function (DUF3755)          |
| *Ca_Desig_SNP18 | Ca_Desig_LG01 | 27204                   | [C/T] |                    | INTERGENIC                          |                                                |
| *Ca_Desig_SNP19 | scaffold00876 | 7195                    | [C/A] |                    | INTERGENIC                          |                                                |
| *Ca_Desig_SNP20 | scaffold00690 | 3885                    | [A/C] |                    | INTERGENIC                          |                                                |
| *Ca_Desig_SNP21 | scaffold02130 | 148563                  | [T/C] |                    | INTERGENIC                          |                                                |
| *Ca_Desig_SNP22 | scaffold00876 | 889                     | [A/G] |                    | INTERGENIC                          |                                                |
| *Ca_Desig_SNP23 | scaffold00843 | 1243                    | [C/A] | Ca_14251           | NON_SYNONYMOUS_CODING               | --                                             |
| *Ca_Desig_SNP24 | scaffold00952 | 556                     | [T/C] |                    | INTERGENIC                          |                                                |
| *Ca_Desig_SNP25 | scaffold00767 | 2528                    | [T/G] |                    | INTERGENIC                          |                                                |



| SNP IDs         | Chromosomes   | Physical positions (bp) | SNPs  | Gene accession IDs | Sequence components of genome/genes | Putative functions                                   |
|-----------------|---------------|-------------------------|-------|--------------------|-------------------------------------|------------------------------------------------------|
| *Ca_Desig_SNP26 | scaffold13621 | 103009                  | [T/G] |                    | INTERGENIC                          |                                                      |
| *Ca_Desig_SNP27 | scaffold00852 | 835                     | [T/C] | Ca_14286           | SYNONYMOUS_CODING                   | Type I inositol-1,4,5-trisphosphate 5-phosphatase 11 |
| *Ca_Desig_SNP28 | scaffold00888 | 339                     | [T/C] |                    | INTERGENIC                          |                                                      |
| *Ca_Desig_SNP29 | scaffold05945 | 10074                   | [T/G] | Ca_09428           | INTRON                              | Unknown expressed protein                            |
| *Ca_Desig_SNP30 | Ca_Desig_LG07 | 2195792                 | [A/G] | Ca_07527           | INTRON                              | Phospholipid-transporting ATPase 3                   |
| *Ca_Desig_SNP31 | Ca_Desig_LG03 | 4016157                 | [A/C] | Ca_02499           | NON_SYNONYMOUS_CODING               | Calcium homeostasis endoplasmic reticulum protein    |
| *Ca_Desig_SNP32 | scaffold00775 | 2351                    | [T/C] | Ca_13986           | DOWNSTREAM:954bases                 | Protein of unknown function (DUF3755)                |
| *Ca_Desig_SNP33 | scaffold00763 | 1601                    | [T/C] |                    | INTERGENIC                          |                                                      |
| *Ca_Desig_SNP34 | Ca_Desig_LG06 | 7708553                 | [T/C] |                    | INTERGENIC                          |                                                      |
| *Ca_Desig_SNP35 | Ca_Desig_LG01 | 6037738                 | [T/G] |                    | INTERGENIC                          |                                                      |
| *Ca_Desig_SNP36 | scaffold00686 | 3624                    | [T/C] |                    | INTERGENIC                          |                                                      |
| *Ca_Desig_SNP37 | scaffold02462 | 61971                   | [T/G] |                    | INTERGENIC                          |                                                      |
| *Ca_Desig_SNP38 | scaffold00646 | 4895                    | [T/C] |                    | INTERGENIC                          |                                                      |
| *Ca_Desig_SNP39 | scaffold00790 | 863                     | [A/G] |                    | INTERGENIC                          |                                                      |
| *Ca_Desig_SNP40 | scaffold00781 | 14405                   | [A/G] |                    | INTERGENIC                          |                                                      |
| *Ca_Desig_SNP41 | Ca_Desig_LG06 | 6119010                 | [T/C] | Ca_06923           | SYNONYMOUS_CODING                   | Protein spinster                                     |
| *Ca_Desig_SNP42 | scaffold01069 | 72                      | [G/A] |                    | INTERGENIC                          |                                                      |
| *Ca_Desig_SNP43 | scaffold00296 | 4407                    | [A/G] |                    | INTERGENIC                          |                                                      |
| *Ca_Desig_SNP44 | scaffold00582 | 10810                   | [T/A] |                    | INTERGENIC                          |                                                      |
| *Ca_Desig_SNP45 | scaffold00999 | 585                     | [C/T] |                    | INTERGENIC                          |                                                      |
| *Ca_Desig_SNP46 | scaffold00806 | 673                     | [A/T] |                    | INTERGENIC                          |                                                      |
| *Ca_Desig_SNP47 | scaffold00981 | 210                     | [T/C] |                    | INTERGENIC                          |                                                      |
| *Ca_Desig_SNP48 | Ca_Desig_LG02 | 574863                  | [C/A] | Ca_01064           | NON_SYNONYMOUS_CODING               | CCR4-NOT transcription complex subunit 4             |
| *Ca_Desig_SNP49 | scaffold02358 | 55447                   | [A/C] |                    | INTERGENIC                          |                                                      |
| *Ca_Desig_SNP50 | scaffold00779 | 958                     | [A/G] |                    | INTERGENIC                          |                                                      |
| *Ca_Desig_SNP51 | scaffold01158 | 167                     | [G/T] |                    | INTERGENIC                          |                                                      |

| SNP IDs         | Chromosomes   | Physical positions (bp) | SNPs  | Gene accession IDs | Sequence components of genome/genes | Putative functions                                 |
|-----------------|---------------|-------------------------|-------|--------------------|-------------------------------------|----------------------------------------------------|
| *Ca_Desig_SNP52 | scaffold03643 | 1485                    | [C/T] |                    | INTERGENIC                          |                                                    |
| *Ca_Desig_SNP53 | Ca_Desig_LG01 | 836330                  | [T/G] |                    | INTERGENIC                          |                                                    |
| *Ca_Desig_SNP54 | Ca_Desig_LG05 | 9252445                 | [A/C] | Ca_06016           | NON_SYNONYMOUS_CODING               | Uncharacterized protein sll1770                    |
| *Ca_Desig_SNP55 | scaffold01877 | 25754                   | [C/A] |                    | INTERGENIC                          |                                                    |
| *Ca_Desig_SNP56 | Ca_Desig_LG07 | 174201                  | [A/G] |                    | INTERGENIC                          |                                                    |
| *Ca_Desig_SNP57 | scaffold00667 | 5206                    | [G/A] | Ca_13619           | INTRON                              | 50S ribosomal protein L17                          |
| *Ca_Desig_SNP58 | scaffold00494 | 15713                   | [A/T] |                    | INTERGENIC                          |                                                    |
| *Ca_Desig_SNP59 | scaffold00646 | 4910                    | [T/C] |                    | INTERGENIC                          |                                                    |
| *Ca_Desig_SNP60 | Ca_Desig_LG08 | 427233                  | [A/C] |                    | INTERGENIC                          |                                                    |
| *Ca_Desig_SNP61 | Ca_Desig_LG04 | 7647658                 | [G/T] | Ca_04363           | NON_SYNONYMOUS_CODING               | Lysine-specific demethylase 3B                     |
| *Ca_Desig_SNP62 | scaffold00884 | 678                     | [A/G] |                    | INTERGENIC                          |                                                    |
| *Ca_Desig_SNP63 | scaffold00485 | 98148                   | [G/T] |                    | INTERGENIC                          |                                                    |
| *Ca_Desig_SNP64 | Ca_Desig_LG01 | 1389951                 | [T/C] | Ca_00140           | INTRON                              | Soluble inorganic pyrophosphatase 1, chloroplastic |
| *Ca_Desig_SNP65 | scaffold00304 | 30294                   | [T/G] |                    | INTERGENIC                          |                                                    |
| *Ca_Desig_SNP66 | scaffold00735 | 2839                    | [A/G] | Ca_13852           | DOWNSTREAM:1607bases                | MORC family CW-type zinc finger protein 4          |
| *Ca_Desig_SNP67 | scaffold00702 | 6563                    | [T/C] |                    | INTERGENIC                          |                                                    |
| *Ca_Desig_SNP68 | scaffold05583 | 116138                  | [T/G] |                    | INTERGENIC                          |                                                    |
| *Ca_Desig_SNP69 | scaffold03971 | 48122                   | [G/C] |                    | INTERGENIC                          |                                                    |
| *Ca_Desig_SNP70 | scaffold00771 | 2535                    | [T/C] |                    | INTERGENIC                          |                                                    |
| *Ca_Desig_SNP71 | scaffold00989 | 420                     | [C/T] |                    | INTERGENIC                          |                                                    |
| *Ca_Desig_SNP72 | scaffold00748 | 1042                    | [G/A] |                    | INTERGENIC                          |                                                    |
| *Ca_Desig_SNP73 | scaffold00876 | 785                     | [A/G] |                    | INTERGENIC                          |                                                    |
| *Ca_Desig_SNP74 | scaffold00763 | 1603                    | [A/G] |                    | INTERGENIC                          |                                                    |
| *Ca_Desig_SNP75 | Ca_Desig_LG01 | 436895                  | [A/C] | Ca_00021           | DOWNSTREAM:1370bases                | Ribosome biogenesis protein BOP1 homolog           |
| *Ca_Desig_SNP76 | scaffold02472 | 56603                   | [A/G] |                    | INTERGENIC                          |                                                    |
| *Ca_Desig_SNP77 | scaffold01709 | 91152                   | [G/C] |                    | INTERGENIC                          |                                                    |

| SNP IDs          | Chromosomes   | Physical positions (bp) | SNPs  | Gene accession IDs | Sequence components of genome/genes | Putative functions                                   |
|------------------|---------------|-------------------------|-------|--------------------|-------------------------------------|------------------------------------------------------|
| *Ca_Desig_SNP78  | scaffold01004 | 64558                   | [A/G] |                    | INTERGENIC                          |                                                      |
| *Ca_Desig_SNP79  | scaffold00666 | 3294                    | [C/A] |                    | INTERGENIC                          |                                                      |
| *Ca_Desig_SNP80  | scaffold00888 | 352                     | [A/G] |                    | INTERGENIC                          |                                                      |
| *Ca_Desig_SNP81  | scaffold00415 | 21203                   | [C/T] | Ca_09195           | SYNONYMOUS_CODING                   | RNA-binding protein with multiple splicing           |
| *Ca_Desig_SNP82  | scaffold00876 | 5313                    | [T/C] |                    | INTERGENIC                          |                                                      |
| *Ca_Desig_SNP83  | scaffold00768 | 3120                    | [A/G] |                    | INTERGENIC                          |                                                      |
| *Ca_Desig_SNP84  | scaffold00686 | 3643                    | [T/C] |                    | INTERGENIC                          |                                                      |
| *Ca_Desig_SNP85  | scaffold00768 | 3065                    | [T/C] |                    | INTERGENIC                          |                                                      |
| *Ca_Desig_SNP86  | scaffold06141 | 51521                   | [T/G] |                    | INTERGENIC                          |                                                      |
| *Ca_Desig_SNP87  | Ca_Desig_LG01 | 6314651                 | [T/G] |                    | INTERGENIC                          |                                                      |
| *Ca_Desig_SNP88  | scaffold02138 | 54590                   | [C/A] |                    | INTERGENIC                          |                                                      |
| *Ca_Desig_SNP89  | scaffold00775 | 2345                    | [T/C] | Ca_13986           | DOWNSTREAM:948bases                 | Protein of unknown function (DUF3755)                |
| *Ca_Desig_SNP90  | Ca_Desig_LG01 | 13692724                | [A/C] | Ca_00980           | DOWNSTREAM:1448bases                | Methyltransferase-like protein 22                    |
| *Ca_Desig_SNP91  | scaffold00824 | 2793                    | [G/C] |                    | INTERGENIC                          |                                                      |
| *Ca_Desig_SNP92  | scaffold02276 | 9633                    | [A/G] |                    | INTERGENIC                          |                                                      |
| *Ca_Desig_SNP93  | scaffold03129 | 150737                  | [T/G] | Ca_09375           | INTRON                              | TMV resistance protein N                             |
| *Ca_Desig_SNP94  | scaffold00741 | 1040                    | [G/T] |                    | INTERGENIC                          |                                                      |
| *Ca_Desig_SNP95  | scaffold00852 | 971                     | [T/C] | Ca_14286           | INTRON                              | Type I inositol-1,4,5-trisphosphate 5-phosphatase 11 |
| *Ca_Desig_SNP96  | scaffold00740 | 1830                    | [G/T] |                    | INTERGENIC                          |                                                      |
| *Ca_Desig_SNP97  | scaffold01039 | 157631                  | [A/C] |                    | INTERGENIC                          |                                                      |
| *Ca_Desig_SNP98  | Ca_Desig_LG04 | 5678693                 | [T/G] | Ca_04260           | DOWNSTREAM:1522bases                | HR-like lesion-inducing protein-related              |
| *Ca_Desig_SNP99  | scaffold01027 | 79                      | [C/T] |                    | INTERGENIC                          |                                                      |
| *Ca_Desig_SNP100 | scaffold03193 | 53377                   | [G/T] |                    | INTERGENIC                          |                                                      |
| *Ca_Desig_SNP101 | scaffold02009 | 133363                  | [G/T] |                    | INTERGENIC                          |                                                      |
| *Ca_Desig_SNP102 | Ca_Desig_LG03 | 11391312                | [A/G] | Ca_02936           | INTRON                              | Transmembrane protein 8B                             |
| *Ca_Desig_SNP103 | scaffold02276 | 9637                    | [A/C] |                    | INTERGENIC                          |                                                      |

| SNP IDs          | Chromosomes   | Physical positions (bp) | SNPs  | Gene accession IDs | Sequence components of genome/genes | Putative functions                                  |
|------------------|---------------|-------------------------|-------|--------------------|-------------------------------------|-----------------------------------------------------|
| *Ca_Desig_SNP104 | scaffold00854 | 320                     | [T/C] |                    | INTERGENIC                          |                                                     |
| *Ca_Desig_SNP105 | Ca_Desig_LG07 | 7266198                 | [G/C] | Ca_07873           | NON_SYNONYMOUS_CODING               | SBP (S-ribonuclease binding protein) family protein |
| *Ca_Desig_SNP106 | scaffold00917 | 1444                    | [C/T] |                    | INTERGENIC                          |                                                     |
| *Ca_Desig_SNP107 | scaffold00686 | 3637                    | [A/G] |                    | INTERGENIC                          |                                                     |
| *Ca_Desig_SNP108 | scaffold00854 | 335                     | [A/G] |                    | INTERGENIC                          |                                                     |
| *Ca_Desig_SNP109 | scaffold01164 | 240                     | [C/G] |                    | INTERGENIC                          |                                                     |
| *Ca_Desig_SNP110 | scaffold00714 | 2050                    | [A/C] | Ca_13757           | UTR_5_PRIME:9bases                  | Chaperone protein dnaJ 1, mitochondrial             |
| *Ca_Desig_SNP111 | scaffold01284 | 44275                   | [A/C] |                    | INTERGENIC                          |                                                     |
| *Ca_Desig_SNP112 | Ca_Desig_LG05 | 12955254                | [A/C] | Ca_06324           | SYNONYMOUS_CODING                   | Multiple inositol polyphosphate phosphatase 1       |
| *Ca_Desig_SNP113 | scaffold00521 | 11654                   | [T/C] |                    | INTERGENIC                          |                                                     |
| *Ca_Desig_SNP114 | scaffold01009 | 437                     | [G/A] |                    | INTERGENIC                          |                                                     |
| *Ca_Desig_SNP115 | Ca_Desig_LG04 | 15957925                | [G/A] |                    | INTERGENIC                          |                                                     |
| *Ca_Desig_SNP116 | scaffold02630 | 75233                   | [A/C] |                    | INTERGENIC                          |                                                     |
| *Ca_Desig_SNP117 | scaffold01104 | 269                     | [C/T] |                    | INTERGENIC                          |                                                     |
| *Ca_Desig_SNP118 | scaffold00845 | 1664                    | [G/A] |                    | INTERGENIC                          |                                                     |
| *Ca_Desig_SNP119 | scaffold02276 | 9635                    | [G/A] |                    | INTERGENIC                          |                                                     |
| *Ca_Desig_SNP120 | scaffold00761 | 3586                    | [T/C] |                    | INTERGENIC                          |                                                     |
| *Ca_Desig_SNP121 | scaffold01136 | 132                     | [G/T] |                    | INTERGENIC                          |                                                     |
| *Ca_Desig_SNP122 | scaffold00711 | 72462                   | [T/C] |                    | INTERGENIC                          |                                                     |
| *Ca_Desig_SNP123 | scaffold06937 | 32411                   | [T/C] |                    | INTERGENIC                          |                                                     |
| *Ca_Desig_SNP124 | scaffold07131 | 54695                   | [T/G] |                    | INTERGENIC                          |                                                     |
| *Ca_Desig_SNP125 | scaffold00686 | 1865                    | [T/C] |                    | INTERGENIC                          |                                                     |
| *Ca_Desig_SNP126 | scaffold00824 | 1884                    | [A/G] |                    | INTERGENIC                          |                                                     |
| *Ca_Desig_SNP127 | scaffold03349 | 105154                  | [A/C] |                    | INTERGENIC                          |                                                     |
| *Ca_Desig_SNP128 | scaffold00745 | 3710                    | [C/T] |                    | INTERGENIC                          |                                                     |
| *Ca_Desig_SNP129 | Ca_Desig_LG05 | 11028670                | [C/A] | Ca_06158           | DOWNSTREAM:513bases                 | Unknown expressed protein                           |

| SNP IDs          | Chromosomes   | Physical positions (bp) | SNPs  | Gene accession IDs | Sequence components of genome/genes | Putative functions                                     |
|------------------|---------------|-------------------------|-------|--------------------|-------------------------------------|--------------------------------------------------------|
| *Ca_Desig_SNP130 | scaffold00383 | 26396                   | [A/G] |                    | INTERGENIC                          |                                                        |
| *Ca_Desig_SNP131 | Ca_Desig_LG01 | 2471793                 | [C/T] | Ca_00262           | INTRON                              | RING finger protein 141                                |
| *Ca_Desig_SNP132 | scaffold00804 | 720                     | [T/C] |                    | INTERGENIC                          |                                                        |
| *Ca_Desig_SNP133 | scaffold00880 | 892                     | [A/G] |                    | INTERGENIC                          |                                                        |
| *Ca_Desig_SNP134 | Ca_Desig_LG01 | 11929981                | [C/T] | Ca_00908           | INTRON                              | Homeobox-leucine zipper protein REVOLUTA               |
| *Ca_Desig_SNP135 | scaffold01077 | 508                     | [T/C] |                    | INTERGENIC                          |                                                        |
| *Ca_Desig_SNP136 | scaffold01030 | 57                      | [A/C] |                    | INTERGENIC                          |                                                        |
| *Ca_Desig_SNP137 | Ca_Desig_LG06 | 10358319                | [G/T] | Ca_07279           | DOWNSTREAM:498bases                 | Vesicle-fusing ATPase                                  |
| *Ca_Desig_SNP138 | scaffold00788 | 3370                    | [A/G] |                    | INTERGENIC                          |                                                        |
| *Ca_Desig_SNP139 | Ca_Desig_LG06 | 10358300                | [G/A] | Ca_07279           | DOWNSTREAM:517bases                 | Vesicle-fusing ATPase                                  |
| *Ca_Desig_SNP140 | scaffold00888 | 343                     | [T/C] |                    | INTERGENIC                          |                                                        |
| *Ca_Desig_SNP141 | scaffold01106 | 85                      | [T/C] |                    | INTERGENIC                          |                                                        |
| *Ca_Desig_SNP142 | scaffold13504 | 114764                  | [T/C] | Ca_09258           | INTRON                              | Beclin-1-like protein                                  |
| *Ca_Desig_SNP143 | scaffold00686 | 3651                    | [T/C] |                    | INTERGENIC                          |                                                        |
| *Ca_Desig_SNP144 | scaffold02679 | 60476                   | [A/T] |                    | INTERGENIC                          |                                                        |
| *Ca_Desig_SNP145 | scaffold00476 | 21890                   | [A/G] |                    | INTERGENIC                          |                                                        |
| *Ca_Desig_SNP146 | scaffold01141 | 139                     | [C/T] |                    | INTERGENIC                          |                                                        |
| *Ca_Desig_SNP147 | scaffold09892 | 70514                   | [T/G] | Ca_10004           | INTRON                              | Uncharacterized membrane protein yuiD                  |
| *Ca_Desig_SNP148 | Ca_Desig_LG08 | 10010434                | [C/A] |                    | INTERGENIC                          |                                                        |
| *Ca_Desig_SNP149 | scaffold02308 | 11871                   | [T/G] | Ca_10480           | DOWNSTREAM:1488bases                | Metal tolerance protein 5                              |
| *Ca_Desig_SNP150 | scaffold00681 | 4235                    | [T/G] | Ca_13677           | DOWNSTREAM:992bases                 | Probable polygalacturonase non-catalytic subunit JP650 |
| *Ca_Desig_SNP151 | scaffold01171 | 38                      | [T/C] |                    | INTERGENIC                          |                                                        |
| *Ca_Desig_SNP152 | scaffold00872 | 1671                    | [A/G] |                    | INTERGENIC                          |                                                        |
| *Ca_Desig_SNP153 | scaffold12101 | 1952                    | [A/G] |                    | INTERGENIC                          |                                                        |
| *Ca_Desig_SNP154 | scaffold03193 | 53376                   | [C/G] |                    | INTERGENIC                          |                                                        |
| *Ca_Desig_SNP155 | Ca_Desig_LG04 | 367829                  | [A/C] |                    | INTERGENIC                          |                                                        |

| SNP IDs          | Chromosomes   | Physical positions (bp) | SNPs  | Gene accession IDs | Sequence components of genome/genes | Putative functions                                                      |
|------------------|---------------|-------------------------|-------|--------------------|-------------------------------------|-------------------------------------------------------------------------|
| *Ca_Desig_SNP156 | scaffold00207 | 19274                   | [G/T] | Ca_11357           | NON_SYNONYMOUS_CODING               | Chloroplastic group IIA intron splicing facilitator CRS1, chloroplastic |
| *Ca_Desig_SNP157 | scaffold02798 | 72828                   | [G/C] |                    | INTERGENIC                          |                                                                         |
| *Ca_Desig_SNP158 | scaffold00703 | 4000                    | [G/A] |                    | INTERGENIC                          |                                                                         |
| *Ca_Desig_SNP159 | scaffold00078 | 7186                    | [A/G] |                    | INTERGENIC                          |                                                                         |
| *Ca_Desig_SNP160 | Ca_Desig_LG01 | 2637849                 | [C/T] | Ca_00275           | INTRON                              | Protein of unknown function (DUF707)                                    |
| *Ca_Desig_SNP161 | Ca_Desig_LG01 | 1938752                 | [G/T] | Ca_00203           | SYNONYMOUS_CODING                   | Splicing factor 3B subunit 1                                            |
| *Ca_Desig_SNP162 | scaffold00852 | 858                     | [T/C] | Ca_14286           | SYNONYMOUS_CODING                   | Type I inositol-1,4,5-trisphosphate 5-phosphatase 11                    |
| *Ca_Desig_SNP163 | scaffold06934 | 26498                   | [T/C] |                    | INTERGENIC                          |                                                                         |
| *Ca_Desig_SNP164 | scaffold00246 | 19392                   | [A/C] |                    | INTERGENIC                          |                                                                         |
| *Ca_Desig_SNP165 | scaffold00761 | 3606                    | [T/C] |                    | INTERGENIC                          |                                                                         |
| *Ca_Desig_SNP166 | scaffold00837 | 1196                    | [T/G] |                    | INTERGENIC                          |                                                                         |
| *Ca_Desig_SNP167 | scaffold00761 | 3724                    | [A/G] |                    | INTERGENIC                          |                                                                         |
| *Ca_Desig_SNP168 | Ca_Desig_LG02 | 7708760                 | [A/C] | Ca_01613           | NON_SYNONYMOUS_CODING               | Putative DNA-binding protein ESCAROLA                                   |
| *Ca_Desig_SNP169 | scaffold00646 | 2072                    | [G/A] |                    | INTERGENIC                          |                                                                         |
| *Ca_Desig_SNP170 | Ca_Desig_LG03 | 1351568                 | [C/A] |                    | INTERGENIC                          |                                                                         |
| *Ca_Desig_SNP171 | scaffold00876 | 5651                    | [T/C] |                    | INTERGENIC                          |                                                                         |
| *Ca_Desig_SNP172 | scaffold00876 | 6612                    | [A/G] |                    | INTERGENIC                          |                                                                         |
| *Ca_Desig_SNP173 | Ca_Desig_LG03 | 993124                  | [A/C] | Ca_02241           | DOWNSTREAM:1505bases                | bonsai                                                                  |
| *Ca_Desig_SNP174 | scaffold00903 | 443                     | [A/G] |                    | INTERGENIC                          |                                                                         |
| *Ca_Desig_SNP175 | scaffold00860 | 925                     | [T/C] |                    | INTERGENIC                          |                                                                         |
| *Ca_Desig_SNP176 | scaffold03130 | 18110                   | [G/C] |                    | INTERGENIC                          |                                                                         |
| *Ca_Desig_SNP177 | scaffold00876 | 17510                   | [T/C] |                    | INTERGENIC                          |                                                                         |
| *Ca_Desig_SNP178 | scaffold00724 | 88                      | [A/T] |                    | INTERGENIC                          |                                                                         |
| *Ca_Desig_SNP179 | scaffold00761 | 3571                    | [A/G] |                    | INTERGENIC                          |                                                                         |
| *Ca_Desig_SNP180 | scaffold05207 | 86246                   | [G/T] |                    | INTERGENIC                          |                                                                         |
| *Ca_Desig_SNP181 | scaffold01510 | 39150                   | [T/G] |                    | INTERGENIC                          |                                                                         |

| SNP IDs          | Chromosomes   | Physical positions (bp) | SNPs  | Gene accession IDs | Sequence components of genome/genes | Putative functions                                  |
|------------------|---------------|-------------------------|-------|--------------------|-------------------------------------|-----------------------------------------------------|
| *Ca_Desig_SNP182 | scaffold00866 | 905                     | [C/T] | Ca_14324           | DOWNSTREAM:424bases                 | NADP-specific glutamate dehydrogenase               |
| *Ca_Desig_SNP183 | scaffold04453 | 258803                  | [T/C] |                    | INTERGENIC                          |                                                     |
| *Ca_Desig_SNP184 | scaffold00383 | 26368                   | [A/G] |                    | INTERGENIC                          |                                                     |
| *Ca_Desig_SNP185 | scaffold00646 | 4886                    | [A/G] |                    | INTERGENIC                          |                                                     |
| *Ca_Desig_SNP186 | scaffold00884 | 688                     | [T/C] |                    | INTERGENIC                          |                                                     |
| *Ca_Desig_SNP187 | scaffold00258 | 180066                  | [G/C] |                    | INTERGENIC                          |                                                     |
| *Ca_Desig_SNP188 | scaffold00640 | 2734                    | [G/A] | Ca_13529           | DOWNSTREAM:1481bases                | Trihelix transcription factor GT-2                  |
| *Ca_Desig_SNP189 | scaffold01866 | 75513                   | [T/G] |                    | INTERGENIC                          |                                                     |
| *Ca_Desig_SNP190 | scaffold01286 | 173746                  | [A/T] |                    | INTERGENIC                          |                                                     |
| *Ca_Desig_SNP191 | scaffold02206 | 38148                   | [A/G] |                    | INTERGENIC                          |                                                     |
| *Ca_Desig_SNP192 | scaffold00735 | 3614                    | [A/C] | Ca_13852           | DOWNSTREAM:832bases                 | MORC family CW-type zinc finger protein 4           |
| *Ca_Desig_SNP193 | scaffold00824 | 1880                    | [A/G] |                    | INTERGENIC                          |                                                     |
| *Ca_Desig_SNP194 | scaffold00970 | 110854                  | [A/C] |                    | INTERGENIC                          |                                                     |
| *Ca_Desig_SNP195 | scaffold01142 | 93                      | [T/A] |                    | INTERGENIC                          |                                                     |
| *Ca_Desig_SNP196 | scaffold01617 | 77497                   | [A/C] |                    | INTERGENIC                          |                                                     |
| *Ca_Desig_SNP197 | scaffold01139 | 9852                    | [T/G] |                    | INTERGENIC                          |                                                     |
| *Ca_Desig_SNP198 | Ca_Desig_LG04 | 16009861                | [A/C] | Ca_04861           | SYNONYMOUS_CODING                   | Kinesin-4                                           |
| *Ca_Desig_SNP199 | scaffold00226 | 49056                   | [T/G] | Ca_11420           | NON_SYNONYMOUS_CODING               | Staphylococcal nuclease domain-containing protein 1 |
| *Ca_Desig_SNP200 | scaffold00761 | 3566                    | [T/C] |                    | INTERGENIC                          |                                                     |
| *Ca_Desig_SNP201 | scaffold05824 | 124203                  | [A/C] |                    | INTERGENIC                          |                                                     |
| *Ca_Desig_SNP202 | scaffold00185 | 233079                  | [C/G] |                    | INTERGENIC                          |                                                     |
| *Ca_Desig_SNP203 | Ca_Desig_LG01 | 2417658                 | [A/G] |                    | INTERGENIC                          |                                                     |
| *Ca_Desig_SNP204 | scaffold03153 | 57800                   | [T/G] |                    | INTERGENIC                          |                                                     |
| *Ca_Desig_SNP205 | scaffold01346 | 96377                   | [T/G] | Ca_10165           | DOWNSTREAM:1043bases                | Thioredoxin family protein                          |
| *Ca_Desig_SNP206 | scaffold00301 | 24443                   | [A/G] |                    | INTERGENIC                          |                                                     |
| *Ca_Desig_SNP207 | Ca_Desig_LG02 | 11084623                | [C/T] |                    | INTERGENIC                          |                                                     |

| SNP IDs          | Chromosomes   | Physical positions (bp) | SNPs  | Gene accession IDs | Sequence components of genome/genes | Putative functions                                                   |
|------------------|---------------|-------------------------|-------|--------------------|-------------------------------------|----------------------------------------------------------------------|
| *Ca_Desig_SNP208 | scaffold01013 | 638                     | [T/G] |                    | INTERGENIC                          |                                                                      |
| *Ca_Desig_SNP209 | Ca_Desig_LG07 | 8209406                 | [T/G] |                    | INTERGENIC                          |                                                                      |
| *Ca_Desig_SNP210 | scaffold00383 | 24031                   | [C/T] |                    | INTERGENIC                          |                                                                      |
| *Ca_Desig_SNP211 | scaffold00610 | 1307                    | [C/T] |                    | INTERGENIC                          |                                                                      |
| *Ca_Desig_SNP212 | Ca_Desig_LG02 | 16676201                | [C/A] | Ca_02118           | NON_SYNONYMOUS_CODING               | NB-ARC domain-containing disease resistance protein                  |
| *Ca_Desig_SNP213 | Ca_Desig_LG01 | 2491480                 | [A/T] | Ca_00264           | INTRON                              | Probable allantoinase 1                                              |
| *Ca_Desig_SNP214 | Ca_Desig_LG01 | 2281497                 | [T/G] | Ca_00235           | UTR_5_PRIME:241bases                | 3-ketoacyl-CoA synthase 10                                           |
| *Ca_Desig_SNP215 | scaffold00472 | 41142                   | [G/C] |                    | INTERGENIC                          |                                                                      |
| *Ca_Desig_SNP216 | scaffold00227 | 47416                   | [T/G] |                    | INTERGENIC                          |                                                                      |
| *Ca_Desig_SNP217 | scaffold00922 | 603                     | [A/G] |                    | INTERGENIC                          |                                                                      |
| *Ca_Desig_SNP218 | Ca_Desig_LG04 | 368237                  | [C/T] | Ca_03909           | DOWNSTREAM:1637bases                | tRNA (adenine(58)-N(1))-methyltransferase non-catalytic subunit trm6 |
| *Ca_Desig_SNP219 | scaffold00988 | 748                     | [A/T] |                    | INTERGENIC                          |                                                                      |
| *Ca_Desig_SNP220 | Ca_Desig_LG01 | 2637647                 | [C/G] | Ca_00275           | INTRON                              | Protein of unknown function (DUF707)                                 |
| *Ca_Desig_SNP221 | scaffold00937 | 224744                  | [T/C] |                    | INTERGENIC                          |                                                                      |
| *Ca_Desig_SNP222 | Ca_Desig_LG07 | 1631428                 | [T/C] | Ca_07491           | INTRON                              | Transcription factor MYB1R1                                          |
| *Ca_Desig_SNP223 | Ca_Desig_LG06 | 7789059                 | [G/A] | Ca_07063           | NON_SYNONYMOUS_CODING               | Probable adenylate kinase isoenzyme 6                                |
| *Ca_Desig_SNP224 | Ca_Desig_LG04 | 4771448                 | [T/C] |                    | INTERGENIC                          |                                                                      |
| *Ca_Desig_SNP225 | Ca_Desig_LG02 | 14225056                | [T/A] | Ca_01927           | NON_SYNONYMOUS_CODING               | Expansin-A16                                                         |
| *Ca_Desig_SNP226 | Ca_Desig_LG01 | 14190369                | [T/C] | Ca_01024           | INTRON                              | Mitochondrial transcription termination factor family protein        |
| *Ca_Desig_SNP227 | scaffold00768 | 3018                    | [A/G] |                    | INTERGENIC                          |                                                                      |
| *Ca_Desig_SNP228 | scaffold02974 | 60985                   | [A/C] |                    | INTERGENIC                          |                                                                      |
| *Ca_Desig_SNP229 | scaffold01106 | 58                      | [T/C] |                    | INTERGENIC                          |                                                                      |
| *Ca_Desig_SNP230 | scaffold00383 | 26313                   | [C/T] |                    | INTERGENIC                          |                                                                      |
| *Ca_Desig_SNP231 | scaffold01365 | 72627                   | [G/T] |                    | INTERGENIC                          |                                                                      |
| *Ca_Desig_SNP232 | Ca_Desig_LG07 | 3826724                 | [A/C] |                    | INTERGENIC                          |                                                                      |
| *Ca_Desig_SNP233 | scaffold00893 | 1623                    | [A/G] | Ca_14399           | INTRON                              | Tripeptidyl-peptidase 2                                              |



| SNP IDs          | Chromosomes   | Physical positions (bp) | SNPs  | Gene accession IDs | Sequence components of genome/genes | Putative functions                                                   |
|------------------|---------------|-------------------------|-------|--------------------|-------------------------------------|----------------------------------------------------------------------|
| *Ca_Desig_SNP234 | Ca_Desig_LG04 | 5678708                 | [T/A] | Ca_04260           | DOWNSTREAM:1507bases                | HR-like lesion-inducing protein-related                              |
| *Ca_Desig_SNP235 | scaffold00989 | 413                     | [G/A] |                    | INTERGENIC                          |                                                                      |
| *Ca_Desig_SNP236 | scaffold00763 | 250                     | [A/C] |                    | INTERGENIC                          |                                                                      |
| *Ca_Desig_SNP237 | Ca_Desig_LG01 | 12155983                | [G/T] |                    | INTERGENIC                          |                                                                      |
| *Ca_Desig_SNP238 | scaffold00686 | 1882                    | [A/G] |                    | INTERGENIC                          |                                                                      |
| *Ca_Desig_SNP239 | Ca_Desig_LG01 | 2418212                 | [T/A] | Ca_00256           | SYNONYMOUS_CODING                   | Pentatricopeptide repeat-containing protein At2g32230, mitochondrial |
| *Ca_Desig_SNP240 | scaffold00646 | 4861                    | [T/C] |                    | INTERGENIC                          |                                                                      |
| *Ca_Desig_SNP241 | Ca_Desig_LG01 | 3099404                 | [G/C] | Ca_00314           | DOWNSTREAM:561bases                 | Nucleobase-ascorbate transporter 2                                   |
| *Ca_Desig_SNP242 | Ca_Desig_LG01 | 2471996                 | [G/A] | Ca_00262           | INTRON                              | RING finger protein 141                                              |
| *Ca_Desig_SNP243 | scaffold00736 | 39751                   | [A/T] |                    | INTERGENIC                          |                                                                      |
| *Ca_Desig_SNP244 | scaffold00933 | 806                     | [G/A] |                    | INTERGENIC                          |                                                                      |
| *Ca_Desig_SNP245 | Ca_Desig_LG01 | 6956513                 | [A/G] | Ca_00565           | SYNONYMOUS_CODING                   | Protein CLEC16A homolog                                              |
| *Ca_Desig_SNP246 | Ca_Desig_LG04 | 2761592                 | [G/A] | Ca_04069           | INTRON                              | Serine/threonine-protein kinase At5g01020                            |
| *Ca_Desig_SNP247 | scaffold00876 | 5327                    | [T/C] |                    | INTERGENIC                          |                                                                      |
| *Ca_Desig_SNP248 | scaffold00789 | 2247                    | [A/C] |                    | INTERGENIC                          |                                                                      |
| *Ca_Desig_SNP249 | scaffold00876 | 5643                    | [A/G] |                    | INTERGENIC                          |                                                                      |
| *Ca_Desig_SNP250 | scaffold00845 | 1696                    | [C/G] |                    | INTERGENIC                          |                                                                      |
| *Ca_Desig_SNP251 | Ca_Desig_LG01 | 3328457                 | [C/A] | Ca_00339           | NON_SYNONYMOUS_CODING               | U-box domain-containing protein 17                                   |
| *Ca_Desig_SNP252 | scaffold00679 | 2666                    | [C/T] |                    | INTERGENIC                          |                                                                      |
| *Ca_Desig_SNP253 | scaffold00582 | 6351                    | [A/G] | Ca_13279           | INTRON                              | (+)-neomenthol dehydrogenase                                         |
| *Ca_Desig_SNP254 | scaffold00225 | 10201                   | [C/A] | Ca_11400           | INTRON                              | Clathrin heavy chain 1                                               |
| *Ca_Desig_SNP255 | Ca_Desig_LG07 | 1443872                 | [A/C] | Ca_07476           | NON_SYNONYMOUS_CODING               | Transcription initiation factor TFIID subunit 12                     |
| *Ca_Desig_SNP256 | scaffold00735 | 2816                    | [T/C] | Ca_13852           | DOWNSTREAM:1630bases                | MORC family CW-type zinc finger protein 4                            |
| *Ca_Desig_SNP257 | scaffold01067 | 643                     | [C/T] |                    | INTERGENIC                          |                                                                      |
| *Ca_Desig_SNP258 | scaffold02206 | 105062                  | [C/T] |                    | INTERGENIC                          |                                                                      |
| *Ca_Desig_SNP259 | scaffold04586 | 170910                  | [A/C] |                    | INTERGENIC                          |                                                                      |

| SNP IDs         | Chromosomes   | Physical positions (bp) | SNPs  | Gene accession IDs | Sequence components of genome/genes | Putative functions                                                   |
|-----------------|---------------|-------------------------|-------|--------------------|-------------------------------------|----------------------------------------------------------------------|
| *Ca_Desi_SNP260 | scaffold01585 | 34275                   | [T/G] |                    | INTERGENIC                          |                                                                      |
| *Ca_Desi_SNP261 | Ca_Desi_LG03  | 14006868                | [G/A] |                    | INTERGENIC                          |                                                                      |
| *Ca_Desi_SNP262 | scaffold02975 | 78788                   | [T/G] |                    | INTERGENIC                          |                                                                      |
| *Ca_Desi_SNP263 | scaffold00884 | 670                     | [A/G] |                    | INTERGENIC                          |                                                                      |
| *Ca_Desi_SNP264 | scaffold00775 | 2362                    | [A/G] | Ca_13986           | DOWNSTREAM:965bases                 | Protein of unknown function (DUF3755)                                |
| *Ca_Desi_SNP265 | scaffold00852 | 833                     | [T/C] | Ca_14286           | NON_SYNONYMOUS_CODING               | Type I inositol-1,4,5-trisphosphate 5-phosphatase 11                 |
| *Ca_Desi_SNP266 | Ca_Desi_LG02  | 4552112                 | [C/T] |                    | INTERGENIC                          |                                                                      |
| *Ca_Desi_SNP267 | Ca_Desi_LG02  | 437401                  | [C/T] |                    | INTERGENIC                          |                                                                      |
| *Ca_Desi_SNP268 | Ca_Desi_LG02  | 1868845                 | [A/C] |                    | INTERGENIC                          |                                                                      |
| *Ca_Desi_SNP269 | scaffold02472 | 59170                   | [G/A] | Ca_09692           | DOWNSTREAM:882bases                 | Uncharacterised protein family SERF                                  |
| *Ca_Desi_SNP270 | scaffold00618 | 42122                   | [G/A] |                    | INTERGENIC                          |                                                                      |
| *Ca_Desi_SNP271 | Ca_Desi_LG01  | 5022262                 | [T/G] | Ca_00416           | INTRON                              | CASP-like protein POPTRDRAFT_818957                                  |
| *Ca_Desi_SNP272 | Ca_Desi_LG01  | 5061125                 | [C/G] |                    | INTERGENIC                          |                                                                      |
| *Ca_Desi_SNP273 | Ca_Desi_LG02  | 1823564                 | [A/G] |                    | INTERGENIC                          |                                                                      |
| *Ca_Desi_SNP274 | scaffold00526 | 10885                   | [A/C] | Ca_13056           | DOWNSTREAM:1103bases                | --                                                                   |
| *Ca_Desi_SNP275 | Ca_Desi_LG01  | 5059752                 | [G/A] |                    | INTERGENIC                          |                                                                      |
| *Ca_Desi_SNP276 | scaffold04586 | 96512                   | [A/C] |                    | INTERGENIC                          |                                                                      |
| *Ca_Desi_SNP277 | scaffold00553 | 12263                   | [T/C] |                    | INTERGENIC                          |                                                                      |
| *Ca_Desi_SNP278 | Ca_Desi_LG01  | 5050172                 | [T/C] |                    | INTERGENIC                          |                                                                      |
| *Ca_Desi_SNP279 | scaffold00686 | 3648                    | [T/C] |                    | INTERGENIC                          |                                                                      |
| *Ca_Desi_SNP280 | Ca_Desi_LG04  | 8146783                 | [A/G] | Ca_04409           | DOWNSTREAM:994bases                 | Pleiotropic drug resistance protein 1                                |
| *Ca_Desi_SNP281 | scaffold02441 | 90164                   | [C/A] |                    | INTERGENIC                          |                                                                      |
| *Ca_Desi_SNP282 | Ca_Desi_LG04  | 5782799                 | [G/C] | Ca_04265           | NON_SYNONYMOUS_CODING               | Putative uncharacterized protein                                     |
| *Ca_Desi_SNP283 | Ca_Desi_LG01  | 5061196                 | [A/G] |                    | INTERGENIC                          |                                                                      |
| *Ca_Desi_SNP284 | scaffold00977 | 27866                   | [C/T] | Ca_09139           | INTRON                              | Probable LRR receptor-like serine/threonine-protein kinase At3g47570 |
| *Ca_Desi_SNP285 | scaffold04802 | 21850                   | [T/A] |                    | INTERGENIC                          |                                                                      |

| SNP IDs          | Chromosomes   | Physical positions (bp) | SNPs  | Gene accession IDs | Sequence components of genome/genes | Putative functions                                                      |
|------------------|---------------|-------------------------|-------|--------------------|-------------------------------------|-------------------------------------------------------------------------|
| *Ca_Desig_SNP286 | Ca_Desig_LG04 | 5678705                 | [T/A] | Ca_04260           | DOWNSTREAM:1510bases                | HR-like lesion-inducing protein-related                                 |
| *Ca_Desig_SNP287 | scaffold05998 | 31924                   | [T/C] |                    | INTERGENIC                          |                                                                         |
| *Ca_Desig_SNP288 | Ca_Desig_LG01 | 5050016                 | [C/T] |                    | INTERGENIC                          |                                                                         |
| *Ca_Desig_SNP289 | scaffold02772 | 103337                  | [C/T] |                    | INTERGENIC                          |                                                                         |
| *Ca_Desig_SNP290 | Ca_Desig_LG01 | 2418752                 | [A/T] | Ca_00256           | INTRON                              | Pentatricopeptide repeat-containing protein At2g32230, mitochondrial    |
| *Ca_Desig_SNP291 | scaffold01128 | 204                     | [G/C] |                    | INTERGENIC                          |                                                                         |
| *Ca_Desig_SNP292 | Ca_Desig_LG02 | 4238266                 | [A/C] | Ca_01341           | SYNONYMOUS_CODING                   | Importin-9                                                              |
| *Ca_Desig_SNP293 | scaffold01947 | 36319                   | [C/T] | Ca_10410           | INTRON                              | G-type lectin S-receptor-like serine/threonine-protein kinase At4g27290 |
| *Ca_Desig_SNP294 | scaffold04802 | 14584                   | [C/G] |                    | INTERGENIC                          |                                                                         |
| *Ca_Desig_SNP295 | scaffold01045 | 150                     | [C/T] |                    | INTERGENIC                          |                                                                         |
| *Ca_Desig_SNP296 | scaffold01106 | 74                      | [A/G] |                    | INTERGENIC                          |                                                                         |
| *Ca_Desig_SNP297 | scaffold02472 | 28392                   | [A/G] |                    | INTERGENIC                          |                                                                         |
| *Ca_Desig_SNP298 | Ca_Desig_LG01 | 5014318                 | [G/T] | Ca_00415           | INTRON                              | Unknown expressed protein                                               |
| *Ca_Desig_SNP299 | scaffold02090 | 22360                   | [A/C] |                    | INTERGENIC                          |                                                                         |
| *Ca_Desig_SNP300 | scaffold01652 | 10770                   | [A/G] |                    | INTERGENIC                          |                                                                         |
| *Ca_Desig_SNP301 | scaffold02462 | 68716                   | [A/C] |                    | INTERGENIC                          |                                                                         |
| *Ca_Desig_SNP302 | Ca_Desig_LG01 | 5094752                 | [A/G] |                    | INTERGENIC                          |                                                                         |
| *Ca_Desig_SNP303 | scaffold03463 | 25074                   | [A/C] | Ca_10545           | INTRON                              | Acylamino-acid-releasing enzyme                                         |
| *Ca_Desig_SNP304 | scaffold01060 | 74599                   | [T/G] |                    | INTERGENIC                          |                                                                         |
| *Ca_Desig_SNP305 | scaffold02958 | 30081                   | [C/T] | Ca_09707           | DOWNSTREAM:149bases                 | Probable disease resistance protein At1g61180                           |
| *Ca_Desig_SNP306 | Ca_Desig_LG01 | 2418521                 | [G/A] | Ca_00256           | SYNONYMOUS_CODING                   | Pentatricopeptide repeat-containing protein At2g32230, mitochondrial    |
| *Ca_Desig_SNP307 | scaffold00876 | 6625                    | [A/G] |                    | INTERGENIC                          |                                                                         |
| *Ca_Desig_SNP308 | scaffold06937 | 32435                   | [G/C] |                    | INTERGENIC                          |                                                                         |
| *Ca_Desig_SNP309 | scaffold01085 | 53                      | [G/T] |                    | INTERGENIC                          |                                                                         |
| *Ca_Desig_SNP310 | scaffold00977 | 34923                   | [T/C] | Ca_09139           | INTRON                              | Probable LRR receptor-like serine/threonine-protein kinase At3g47570    |
| *Ca_Desig_SNP311 | Ca_Desig_LG01 | 2249232                 | [A/G] | Ca_00232           | DOWNSTREAM:742bases                 | Eukaryotic translation initiation factor 3 subunit D                    |

| SNP IDs          | Chromosomes   | Physical positions (bp) | SNPs  | Gene accession IDs | Sequence components of genome/genes | Putative functions                                                   |
|------------------|---------------|-------------------------|-------|--------------------|-------------------------------------|----------------------------------------------------------------------|
| *Ca_Desig_SNP312 | scaffold00876 | 10377                   | [T/C] |                    | INTERGENIC                          |                                                                      |
| *Ca_Desig_SNP313 | scaffold00364 | 2466                    | [C/T] |                    | INTERGENIC                          |                                                                      |
| *Ca_Desig_SNP314 | scaffold00259 | 28518                   | [A/G] |                    | INTERGENIC                          |                                                                      |
| *Ca_Desig_SNP315 | Ca_Desig_LG01 | 2410385                 | [T/C] |                    | INTERGENIC                          |                                                                      |
| *Ca_Desig_SNP316 | scaffold00876 | 876                     | [A/G] |                    | INTERGENIC                          |                                                                      |
| *Ca_Desig_SNP317 | Ca_Desig_LG01 | 2436035                 | [T/C] | Ca_00257           | INTRON                              | sensitive to freezing 6                                              |
| *Ca_Desig_SNP318 | scaffold01652 | 58176                   | [T/C] |                    | INTERGENIC                          |                                                                      |
| *Ca_Desig_SNP319 | Ca_Desig_LG01 | 5004855                 | [C/A] | Ca_00414           | INTRON                              | Transcriptional adapter ADA2b                                        |
| *Ca_Desig_SNP320 | Ca_Desig_LG02 | 5273243                 | [T/C] |                    | INTERGENIC                          |                                                                      |
| *Ca_Desig_SNP321 | scaffold00876 | 6635                    | [T/C] |                    | INTERGENIC                          |                                                                      |
| *Ca_Desig_SNP322 | scaffold02472 | 49463                   | [T/G] |                    | INTERGENIC                          |                                                                      |
| *Ca_Desig_SNP323 | scaffold16818 | 15272                   | [T/G] |                    | INTERGENIC                          |                                                                      |
| *Ca_Desig_SNP324 | scaffold00840 | 2342                    | [G/A] | Ca_14241           | INTRON                              | ABC transporter B family member 9                                    |
| *Ca_Desig_SNP325 | scaffold01042 | 705                     | [A/G] |                    | INTERGENIC                          |                                                                      |
| *Ca_Desig_SNP326 | scaffold00788 | 3488                    | [T/C] |                    | INTERGENIC                          |                                                                      |
| *Ca_Desig_SNP327 | scaffold02022 | 81366                   | [G/A] |                    | INTERGENIC                          |                                                                      |
| *Ca_Desig_SNP328 | scaffold00636 | 8970                    | [A/G] |                    | INTERGENIC                          |                                                                      |
| *Ca_Desig_SNP329 | scaffold01652 | 117972                  | [A/G] |                    | INTERGENIC                          |                                                                      |
| *Ca_Desig_SNP330 | Ca_Desig_LG01 | 2417996                 | [C/T] | Ca_00256           | SYNONYMOUS_CODING                   | Pentatricopeptide repeat-containing protein At2g32230, mitochondrial |
| *Ca_Desig_SNP331 | scaffold00927 | 1411                    | [T/C] |                    | INTERGENIC                          |                                                                      |
| *Ca_Desig_SNP332 | scaffold00371 | 5372                    | [T/C] |                    | INTERGENIC                          |                                                                      |
| *Ca_Desig_SNP333 | scaffold14943 | 478                     | [C/T] |                    | INTERGENIC                          |                                                                      |
| *Ca_Desig_SNP334 | scaffold03726 | 45602                   | [A/T] |                    | INTERGENIC                          |                                                                      |
| *Ca_Desig_SNP335 | scaffold01413 | 63877                   | [G/A] |                    | INTERGENIC                          |                                                                      |
| *Ca_Desig_SNP336 | scaffold00612 | 54981                   | [T/C] |                    | INTERGENIC                          |                                                                      |
| *Ca_Desig_SNP337 | scaffold02130 | 148600                  | [C/T] |                    | INTERGENIC                          |                                                                      |

| SNP IDs          | Chromosomes   | Physical positions (bp) | SNPs  | Gene accession IDs | Sequence components of genome/genes | Putative functions                                                      |
|------------------|---------------|-------------------------|-------|--------------------|-------------------------------------|-------------------------------------------------------------------------|
| *Ca_Desig_SNP338 | Ca_Desig_LG01 | 2349688                 | [A/C] |                    | INTERGENIC                          |                                                                         |
| *Ca_Desig_SNP339 | scaffold01652 | 120278                  | [C/T] |                    | INTERGENIC                          |                                                                         |
| *Ca_Desig_SNP340 | scaffold00861 | 2033                    | [C/T] |                    | INTERGENIC                          |                                                                         |
| *Ca_Desig_SNP341 | Ca_Desig_LG01 | 7632274                 | [G/T] | Ca_00599           | INTRON                              | Myb family transcription factor APL                                     |
| *Ca_Desig_SNP342 | scaffold01652 | 10938                   | [A/G] |                    | INTERGENIC                          |                                                                         |
| *Ca_Desig_SNP343 | Ca_Desig_LG08 | 357399                  | [T/G] | Ca_08007           | SYNONYMOUS_CODING                   | UPF0420 protein C16orf58 homolog                                        |
| *Ca_Desig_SNP344 | scaffold01652 | 8626                    | [T/C] |                    | INTERGENIC                          |                                                                         |
| *Ca_Desig_SNP345 | Ca_Desig_LG03 | 15332593                | [A/G] | Ca_03190           | SYNONYMOUS_CODING                   | Probable F-box protein At4g22030                                        |
| *Ca_Desig_SNP346 | scaffold04802 | 21891                   | [A/G] |                    | INTERGENIC                          |                                                                         |
| *Ca_Desig_SNP347 | scaffold01652 | 12677                   | [C/A] |                    | INTERGENIC                          |                                                                         |
| *Ca_Desig_SNP348 | scaffold00761 | 3541                    | [A/G] |                    | INTERGENIC                          |                                                                         |
| *Ca_Desig_SNP349 | Ca_Desig_LG01 | 5061066                 | [A/T] |                    | INTERGENIC                          |                                                                         |
| *Ca_Desig_SNP350 | Ca_Desig_LG04 | 21896088                | [G/T] | Ca_05217           | INTRON                              | Coatomer subunit delta                                                  |
| *Ca_Desig_SNP351 | scaffold00500 | 36625                   | [T/G] |                    | INTERGENIC                          |                                                                         |
| *Ca_Desig_SNP352 | scaffold00876 | 6634                    | [A/G] |                    | INTERGENIC                          |                                                                         |
| *Ca_Desig_SNP353 | scaffold00763 | 1610                    | [T/C] |                    | INTERGENIC                          |                                                                         |
| *Ca_Desig_SNP354 | Ca_Desig_LG01 | 2320790                 | [C/T] | Ca_00238           | SYNONYMOUS_CODING                   | Probable ubiquitin-conjugating enzyme E2 24                             |
| *Ca_Desig_SNP355 | scaffold00879 | 1749                    | [T/C] |                    | INTERGENIC                          |                                                                         |
| *Ca_Desig_SNP356 | Ca_Desig_LG07 | 2705542                 | [A/C] | Ca_07558           | NON_SYNONYMOUS_CODING               | L-type lectin-domain containing receptor kinase S.1                     |
| *Ca_Desig_SNP357 | scaffold01159 | 162                     | [A/G] |                    | INTERGENIC                          |                                                                         |
| *Ca_Desig_SNP358 | scaffold02472 | 36997                   | [A/C] |                    | INTERGENIC                          |                                                                         |
| *Ca_Desig_SNP359 | scaffold01947 | 26164                   | [A/G] | Ca_10410           | INTRON                              | G-type lectin S-receptor-like serine/threonine-protein kinase At4g27290 |
| *Ca_Desig_SNP360 | scaffold02472 | 38022                   | [C/T] |                    | INTERGENIC                          |                                                                         |
| *Ca_Desig_SNP361 | scaffold00893 | 1579                    | [A/G] | Ca_14399           | INTRON                              | Tripeptidyl-peptidase 2                                                 |
| *Ca_Desig_SNP362 | scaffold00073 | 28061                   | [G/A] | Ca_10650           | INTRON                              | Meiotic nuclear division protein 1 homolog                              |
| *Ca_Desig_SNP363 | scaffold00555 | 9058                    | [T/C] | Ca_13161           | INTRON                              | YrdC domain-containing protein, mitochondrial                           |

| SNP IDs          | Chromosomes   | Physical positions (bp) | SNPs  | Gene accession IDs | Sequence components of genome/genes | Putative functions                                     |
|------------------|---------------|-------------------------|-------|--------------------|-------------------------------------|--------------------------------------------------------|
| *Ca_Desig_SNP364 | Ca_Desig_LG02 | 2124915                 | [C/A] | Ca_01184           | NON_SYNONYMOUS_CODING               | LOB domain-containing protein 41                       |
| *Ca_Desig_SNP365 | scaffold01183 | 75744                   | [T/A] |                    | INTERGENIC                          |                                                        |
| *Ca_Desig_SNP366 | scaffold00351 | 14365                   | [C/T] |                    | INTERGENIC                          |                                                        |
| *Ca_Desig_SNP367 | scaffold00731 | 2753                    | [A/G] | Ca_13836           | DOWNSTREAM:1971bases                | Protein KIAA0664 homolog                               |
| *Ca_Desig_SNP368 | scaffold01151 | 92                      | [G/A] |                    | INTERGENIC                          |                                                        |
| *Ca_Desig_SNP369 | scaffold00848 | 692                     | [G/C] |                    | INTERGENIC                          |                                                        |
| *Ca_Desig_SNP370 | scaffold00771 | 2497                    | [A/G] |                    | INTERGENIC                          |                                                        |
| *Ca_Desig_SNP371 | Ca_Desig_LG02 | 15677611                | [A/C] | Ca_02055           | NON_SYNONYMOUS_CODING               | U-box domain-containing protein 11                     |
| *Ca_Desig_SNP372 | scaffold01924 | 56240                   | [C/T] |                    | INTERGENIC                          |                                                        |
| *Ca_Desig_SNP373 | scaffold02472 | 28086                   | [C/T] |                    | INTERGENIC                          |                                                        |
| *Ca_Desig_SNP374 | scaffold03127 | 6940                    | [A/C] |                    | INTERGENIC                          |                                                        |
| *Ca_Desig_SNP375 | scaffold00937 | 284063                  | [T/G] |                    | INTERGENIC                          |                                                        |
| *Ca_Desig_SNP376 | scaffold00664 | 7982                    | [T/C] |                    | INTERGENIC                          |                                                        |
| *Ca_Desig_SNP377 | scaffold00620 | 545                     | [C/T] |                    | INTERGENIC                          |                                                        |
| *Ca_Desig_SNP378 | scaffold00559 | 13831                   | [G/A] |                    | INTERGENIC                          |                                                        |
| *Ca_Desig_SNP379 | scaffold00872 | 1397                    | [T/G] |                    | INTERGENIC                          |                                                        |
| *Ca_Desig_SNP380 | scaffold00555 | 9200                    | [G/A] | Ca_13161           | INTRON                              | YrdC domain-containing protein, mitochondrial          |
| *Ca_Desig_SNP381 | scaffold00884 | 655                     | [A/G] |                    | INTERGENIC                          |                                                        |
| *Ca_Desig_SNP382 | scaffold00775 | 2404                    | [A/G] | Ca_13986           | DOWNSTREAM:1007bases                | Protein of unknown function (DUF3755)                  |
| *Ca_Desig_SNP383 | scaffold00742 | 1317                    | [T/G] |                    | INTERGENIC                          |                                                        |
| *Ca_Desig_SNP384 | scaffold00769 | 287                     | [A/C] |                    | INTERGENIC                          |                                                        |
| *Ca_Desig_SNP385 | scaffold00681 | 4158                    | [T/C] | Ca_13677           | DOWNSTREAM:915bases                 | Probable polygalacturonase non-catalytic subunit JP650 |
| *Ca_Desig_SNP386 | scaffold00804 | 1854                    | [T/C] |                    | INTERGENIC                          |                                                        |
| *Ca_Desig_SNP387 | Ca_Desig_LG07 | 1634727                 | [T/C] | Ca_07491           | INTRON                              | Transcription factor MYB1R1                            |
| *Ca_Desig_SNP388 | scaffold00779 | 2250                    | [T/C] |                    | INTERGENIC                          |                                                        |
| *Ca_Desig_SNP389 | scaffold00055 | 41105                   | [A/C] |                    | INTERGENIC                          |                                                        |

| SNP IDs          | Chromosomes   | Physical positions (bp) | SNPs  | Gene accession IDs | Sequence components of genome/genes | Putative functions                                       |
|------------------|---------------|-------------------------|-------|--------------------|-------------------------------------|----------------------------------------------------------|
| *Ca_Desig_SNP390 | scaffold03874 | 141268                  | [T/C] |                    | INTERGENIC                          |                                                          |
| *Ca_Desig_SNP391 | scaffold00741 | 922                     | [A/G] |                    | INTERGENIC                          |                                                          |
| *Ca_Desig_SNP392 | scaffold00998 | 221647                  | [C/A] |                    | INTERGENIC                          |                                                          |
| *Ca_Desig_SNP393 | Ca_Desig_LG04 | 367808                  | [A/C] |                    | INTERGENIC                          |                                                          |
| *Ca_Desig_SNP394 | Ca_Desig_LG06 | 5947020                 | [T/G] | Ca_06902           | SYNONYMOUS_CODING                   | U-box domain-containing protein 4                        |
| *Ca_Desig_SNP395 | scaffold00402 | 10450                   | [A/G] | Ca_12478           | INTRON                              | L-ascorbate oxidase homolog                              |
| *Ca_Desig_SNP396 | Ca_Desig_LG01 | 7632356                 | [C/T] | Ca_00599           | INTRON                              | Myb family transcription factor APL                      |
| *Ca_Desig_SNP397 | Ca_Desig_LG01 | 9028906                 | [T/A] | Ca_00679           | INTRON                              | Tat-binding homolog 7                                    |
| *Ca_Desig_SNP398 | Ca_Desig_LG01 | 5056212                 | [C/T] |                    | INTERGENIC                          |                                                          |
| *Ca_Desig_SNP399 | scaffold00854 | 369                     | [G/A] |                    | INTERGENIC                          |                                                          |
| *Ca_Desig_SNP400 | scaffold00351 | 14233                   | [T/C] |                    | INTERGENIC                          |                                                          |
| *Ca_Desig_SNP401 | scaffold13621 | 156809                  | [C/A] |                    | INTERGENIC                          |                                                          |
| *Ca_Desig_SNP402 | scaffold02472 | 52526                   | [C/A] | Ca_09691           | DOWNSTREAM:1756bases                | Heavy metal transport/detoxification superfamily protein |
| *Ca_Desig_SNP403 | Ca_Desig_LG05 | 5495917                 | [A/G] | Ca_05645           | SYNONYMOUS_CODING                   | Ubiquitin carboxyl-terminal hydrolase 16                 |
| *Ca_Desig_SNP404 | scaffold01034 | 693                     | [A/G] |                    | INTERGENIC                          |                                                          |
| *Ca_Desig_SNP405 | scaffold00876 | 16428                   | [T/C] |                    | INTERGENIC                          |                                                          |
| *Ca_Desig_SNP406 | Ca_Desig_LG05 | 2340835                 | [T/C] |                    | INTERGENIC                          |                                                          |
| *Ca_Desig_SNP407 | scaffold01924 | 56292                   | [C/G] |                    | INTERGENIC                          |                                                          |
| *Ca_Desig_SNP408 | Ca_Desig_LG07 | 3136837                 | [T/G] |                    | INTERGENIC                          |                                                          |
| *Ca_Desig_SNP409 | Ca_Desig_LG08 | 6224399                 | [T/G] |                    | INTERGENIC                          |                                                          |
| *Ca_Desig_SNP410 | Ca_Desig_LG07 | 8369436                 | [T/G] |                    | INTERGENIC                          |                                                          |
| *Ca_Desig_SNP411 | scaffold02301 | 65888                   | [T/A] |                    | INTERGENIC                          |                                                          |
| *Ca_Desig_SNP412 | Ca_Desig_LG01 | 5807567                 | [C/G] | Ca_00500           | INTRON                              | Vacuolar protein sorting-associated protein 53 homolog   |
| *Ca_Desig_SNP413 | Ca_Desig_LG03 | 23235399                | [A/G] | Ca_03869           | SYNONYMOUS_CODING                   | Zinc finger (C3HC4-type RING finger) family protein      |
| *Ca_Desig_SNP414 | scaffold13621 | 156834                  | [C/A] |                    | INTERGENIC                          |                                                          |
| *Ca_Desig_SNP415 | scaffold00804 | 721                     | [T/C] |                    | INTERGENIC                          |                                                          |

| SNP IDs          | Chromosomes   | Physical positions (bp) | SNPs  | Gene accession IDs | Sequence components of genome/genes | Putative functions                                                      |
|------------------|---------------|-------------------------|-------|--------------------|-------------------------------------|-------------------------------------------------------------------------|
| *Ca_Desig_SNP416 | scaffold00582 | 6410                    | [T/C] | Ca_13279           | INTRON                              | (+)-neomenthol dehydrogenase                                            |
| *Ca_Desig_SNP417 | scaffold00788 | 3363                    | [T/C] |                    | INTERGENIC                          |                                                                         |
| *Ca_Desig_SNP418 | scaffold00735 | 3716                    | [A/G] | Ca_13852           | DOWNSTREAM:730bases                 | MORC family CW-type zinc finger protein 4                               |
| *Ca_Desig_SNP419 | scaffold01450 | 60173                   | [A/C] | Ca_10261           | INTRON                              | Sucrose transport protein SUC3                                          |
| *Ca_Desig_SNP420 | scaffold00582 | 5078                    | [T/C] | Ca_13279           | INTRON                              | (+)-neomenthol dehydrogenase                                            |
| *Ca_Desig_SNP421 | Ca_Desig_LG01 | 5059365                 | [C/A] |                    | INTERGENIC                          |                                                                         |
| *Ca_Desig_SNP422 | Ca_Desig_LG02 | 2124931                 | [T/C] | Ca_01184           | SYNONYMOUS_CODING                   | LOB domain-containing protein 41                                        |
| *Ca_Desig_SNP423 | scaffold01167 | 54                      | [A/T] |                    | INTERGENIC                          |                                                                         |
| *Ca_Desig_SNP424 | scaffold00771 | 2491                    | [A/G] |                    | INTERGENIC                          |                                                                         |
| *Ca_Desig_SNP425 | scaffold00622 | 8539                    | [T/G] | Ca_13456           | START_GAINED                        | Late embryogenesis abundant protein 76                                  |
| *Ca_Desig_SNP426 | scaffold00933 | 792                     | [C/T] |                    | INTERGENIC                          |                                                                         |
| *Ca_Desig_SNP427 | Ca_Desig_LG04 | 256283                  | [T/C] | Ca_03901           | SYNONYMOUS_CODING                   | Auxin response factor 5                                                 |
| *Ca_Desig_SNP428 | scaffold01947 | 38150                   | [C/G] | Ca_10410           | INTRON                              | G-type lectin S-receptor-like serine/threonine-protein kinase At4g27290 |
| *Ca_Desig_SNP429 | scaffold00740 | 1961                    | [T/A] |                    | INTERGENIC                          |                                                                         |
| *Ca_Desig_SNP430 | scaffold00197 | 24455                   | [G/C] |                    | INTERGENIC                          |                                                                         |
| *Ca_Desig_SNP431 | Ca_Desig_LG02 | 8436239                 | [C/A] | Ca_01669           | INTRON                              | Probable NOT transcription complex subunit VIP2 (Fragment)              |
| *Ca_Desig_SNP432 | scaffold01473 | 23835                   | [A/G] |                    | INTERGENIC                          |                                                                         |
| *Ca_Desig_SNP433 | scaffold00852 | 1083                    | [T/C] | Ca_14286           | NON_SYNONYMOUS_CODING               | Type I inositol-1,4,5-trisphosphate 5-phosphatase 11                    |
| *Ca_Desig_SNP434 | scaffold00721 | 54443                   | [A/G] |                    | INTERGENIC                          |                                                                         |
| *Ca_Desig_SNP435 | scaffold00795 | 3508                    | [T/G] |                    | INTERGENIC                          |                                                                         |
| *Ca_Desig_SNP436 | scaffold02138 | 54260                   | [T/C] |                    | INTERGENIC                          |                                                                         |
| *Ca_Desig_SNP437 | scaffold00646 | 4969                    | [A/G] |                    | INTERGENIC                          |                                                                         |
| *Ca_Desig_SNP438 | Ca_Desig_LG04 | 7601426                 | [G/T] |                    | INTERGENIC                          |                                                                         |
| *Ca_Desig_SNP439 | scaffold00771 | 2507                    | [A/G] |                    | INTERGENIC                          |                                                                         |
| *Ca_Desig_SNP440 | Ca_Desig_LG01 | 11569811                | [A/C] |                    | INTERGENIC                          |                                                                         |
| *Ca_Desig_SNP441 | scaffold00207 | 19262                   | [T/A] | Ca_11357           | STOP_GAINED                         | Chloroplastic group IIA intron splicing facilitator CRS1, chloroplastic |



| SNP IDs          | Chromosomes   | Physical positions (bp) | SNPs  | Gene accession IDs | Sequence components of genome/genes | Putative functions                                                      |
|------------------|---------------|-------------------------|-------|--------------------|-------------------------------------|-------------------------------------------------------------------------|
| *Ca_Desig_SNP442 | scaffold02308 | 12026                   | [T/G] | Ca_10480           | DOWNSTREAM:1333bases                | Metal tolerance protein 5                                               |
| *Ca_Desig_SNP443 | scaffold00119 | 38220                   | [A/G] |                    | INTERGENIC                          |                                                                         |
| *Ca_Desig_SNP444 | scaffold00664 | 7906                    | [T/A] |                    | INTERGENIC                          |                                                                         |
| *Ca_Desig_SNP445 | scaffold00876 | 808                     | [A/G] |                    | INTERGENIC                          |                                                                         |
| *Ca_Desig_SNP446 | scaffold01585 | 16074                   | [A/T] |                    | INTERGENIC                          |                                                                         |
| *Ca_Desig_SNP447 | scaffold00876 | 5368                    | [T/C] |                    | INTERGENIC                          |                                                                         |
| *Ca_Desig_SNP448 | scaffold01947 | 36488                   | [A/G] | Ca_10410           | INTRON                              | G-type lectin S-receptor-like serine/threonine-protein kinase At4g27290 |
| *Ca_Desig_SNP449 | scaffold00866 | 1065                    | [T/C] | Ca_14324           | DOWNSTREAM:264bases                 | NADP-specific glutamate dehydrogenase                                   |
| *Ca_Desig_SNP450 | scaffold00370 | 3402                    | [A/G] |                    | INTERGENIC                          |                                                                         |
| *Ca_Desig_SNP451 | scaffold01110 | 95                      | [G/T] |                    | INTERGENIC                          |                                                                         |
| *Ca_Desig_SNP452 | Ca_Desig_LG01 | 8973166                 | [T/C] |                    | INTERGENIC                          |                                                                         |
| *Ca_Desig_SNP453 | scaffold00876 | 5305                    | [A/G] |                    | INTERGENIC                          |                                                                         |
| *Ca_Desig_SNP454 | scaffold00822 | 1556                    | [G/T] | Ca_14178           | INTRON                              | Photosystem II 10 kDa polypeptide, chloroplastic                        |
| *Ca_Desig_SNP455 | scaffold00185 | 22712                   | [A/T] |                    | INTERGENIC                          |                                                                         |
| *Ca_Desig_SNP456 | scaffold00876 | 5629                    | [A/G] |                    | INTERGENIC                          |                                                                         |
| *Ca_Desig_SNP457 | scaffold00977 | 10250                   | [C/T] |                    | INTERGENIC                          |                                                                         |
| *Ca_Desig_SNP458 | scaffold00678 | 5381                    | [A/G] |                    | INTERGENIC                          |                                                                         |
| *Ca_Desig_SNP459 | Ca_Desig_LG05 | 15284613                | [A/C] |                    | INTERGENIC                          |                                                                         |
| *Ca_Desig_SNP460 | Ca_Desig_LG05 | 10598523                | [A/C] | Ca_06114           | DOWNSTREAM:274bases                 | Mediator of RNA polymerase II transcription subunit 13 homolog          |
| *Ca_Desig_SNP461 | scaffold00635 | 2260                    | [T/C] |                    | INTERGENIC                          |                                                                         |
| *Ca_Desig_SNP462 | scaffold01058 | 109                     | [G/A] |                    | INTERGENIC                          |                                                                         |
| *Ca_Desig_SNP463 | scaffold02472 | 35868                   | [A/T] |                    | INTERGENIC                          |                                                                         |
| *Ca_Desig_SNP464 | Ca_Desig_LG01 | 7606933                 | [C/T] | Ca_00598           | SYNONYMOUS_CODING                   | Protein of unknown function (DUF620)                                    |
| *Ca_Desig_SNP465 | scaffold00212 | 151712                  | [T/G] | Ca_08884           | INTRON                              | zinc ion binding                                                        |
| *Ca_Desig_SNP466 | scaffold00582 | 5205                    | [G/T] | Ca_13279           | NON_SYNONYMOUS_CODING               | (+)-neomenthol dehydrogenase                                            |
| *Ca_Desig_SNP467 | Ca_Desig_LG02 | 15488573                | [A/C] | Ca_02040           | INTRON                              | SEC12-like protein 2                                                    |

| SNP IDs          | Chromosomes   | Physical positions (bp) | SNPs  | Gene accession IDs | Sequence components of genome/genes | Putative functions                                         |
|------------------|---------------|-------------------------|-------|--------------------|-------------------------------------|------------------------------------------------------------|
| *Ca_Desig_SNP468 | scaffold00341 | 6093                    | [G/T] |                    | INTERGENIC                          |                                                            |
| *Ca_Desig_SNP469 | scaffold00852 | 741                     | [T/C] | Ca_14286           | INTRON                              | Type I inositol-1,4,5-trisphosphate 5-phosphatase 11       |
| *Ca_Desig_SNP470 | scaffold00381 | 5634                    | [C/T] |                    | INTERGENIC                          |                                                            |
| *Ca_Desig_SNP471 | Ca_Desig_LG01 | 3425903                 | [T/G] | Ca_00351           | DOWNSTREAM:975bases                 | 26S proteasome non-ATPase regulatory subunit 14            |
| *Ca_Desig_SNP472 | scaffold00725 | 4443                    | [G/T] |                    | INTERGENIC                          |                                                            |
| *Ca_Desig_SNP473 | scaffold00355 | 6729                    | [A/C] | Ca_12259           | INTRON                              | Protein LURP-one-related 7                                 |
| *Ca_Desig_SNP474 | scaffold00812 | 1972                    | [A/G] |                    | INTERGENIC                          |                                                            |
| *Ca_Desig_SNP475 | scaffold00467 | 15813                   | [G/A] | Ca_12738           | NON_SYNONYMOUS_CODING               | Adenylyl-sulfate kinase 1, chloroplastic                   |
| *Ca_Desig_SNP476 | scaffold00419 | 15619                   | [A/C] |                    | INTERGENIC                          |                                                            |
| *Ca_Desig_SNP477 | Ca_Desig_LG06 | 9245293                 | [T/G] | Ca_07158           | SYNONYMOUS_CODING                   | 3-oxoacyl-[acyl-carrier-protein] synthase I, chloroplastic |
| *Ca_Desig_SNP478 | scaffold00928 | 1233                    | [T/C] |                    | INTERGENIC                          |                                                            |
| *Ca_Desig_SNP479 | scaffold00876 | 10368                   | [T/C] |                    | INTERGENIC                          |                                                            |
| *Ca_Desig_SNP480 | Ca_Desig_LG01 | 7606885                 | [C/G] | Ca_00598           | SYNONYMOUS_CODING                   | Protein of unknown function (DUF620)                       |
| *Ca_Desig_SNP481 | scaffold01690 | 43921                   | [T/C] |                    | INTERGENIC                          |                                                            |
| *Ca_Desig_SNP482 | scaffold01450 | 60176                   | [G/T] | Ca_10261           | INTRON                              | Sucrose transport protein SUC3                             |
| *Ca_Desig_SNP483 | scaffold00879 | 1746                    | [T/C] |                    | INTERGENIC                          |                                                            |
| *Ca_Desig_SNP484 | scaffold00745 | 3741                    | [C/T] |                    | INTERGENIC                          |                                                            |
| *Ca_Desig_SNP485 | scaffold00449 | 27496                   | [A/G] | Ca_12679           | INTRON                              | Subtilisin-like protease                                   |
| *Ca_Desig_SNP486 | Ca_Desig_LG07 | 4370420                 | [A/C] | Ca_07661           | INTRON                              | Putative uncharacterized protein                           |
| *Ca_Desig_SNP487 | scaffold00876 | 6651                    | [T/C] |                    | INTERGENIC                          |                                                            |
| *Ca_Desig_SNP488 | scaffold00205 | 3064                    | [T/C] |                    | INTERGENIC                          |                                                            |
| *Ca_Desig_SNP489 | scaffold02472 | 37051                   | [G/A] |                    | INTERGENIC                          |                                                            |
| *Ca_Desig_SNP490 | scaffold00735 | 2853                    | [A/G] | Ca_13852           | DOWNSTREAM:1593bases                | MORC family CW-type zinc finger protein 4                  |
| *Ca_Desig_SNP491 | scaffold00691 | 4581                    | [T/C] |                    | INTERGENIC                          |                                                            |
| *Ca_Desig_SNP492 | scaffold00853 | 927                     | [G/C] |                    | INTERGENIC                          |                                                            |
| *Ca_Desig_SNP493 | scaffold00576 | 1886                    | [T/A] |                    | INTERGENIC                          |                                                            |

| SNP IDs          | Chromosomes   | Physical positions (bp) | SNPs  | Gene accession IDs | Sequence components of genome/genes | Putative functions                                                                   |
|------------------|---------------|-------------------------|-------|--------------------|-------------------------------------|--------------------------------------------------------------------------------------|
| *Ca_Desig_SNP494 | scaffold01262 | 175256                  | [A/G] |                    | INTERGENIC                          |                                                                                      |
| *Ca_Desig_SNP495 | scaffold00216 | 80667                   | [A/C] |                    | INTERGENIC                          |                                                                                      |
| *Ca_Desig_SNP496 | scaffold00952 | 509                     | [A/G] |                    | INTERGENIC                          |                                                                                      |
| *Ca_Desig_SNP497 | scaffold00860 | 936                     | [G/A] |                    | INTERGENIC                          |                                                                                      |
| *Ca_Desig_SNP498 | scaffold00771 | 2517                    | [T/C] |                    | INTERGENIC                          |                                                                                      |
| *Ca_Desig_SNP499 | scaffold00216 | 63214                   | [A/T] | Ca_08907           | DOWNSTREAM:1987bases                | Pentatricopeptide repeat-containing protein At1g76280                                |
| *Ca_Desig_SNP500 | scaffold00741 | 766                     | [A/G] |                    | INTERGENIC                          |                                                                                      |
| *Ca_Desig_SNP501 | Ca_Desig_LG05 | 11733909                | [A/C] | Ca_06215           | UTR_3_PRIME:899bases                | D111/G-patch domain-containing protein                                               |
| *Ca_Desig_SNP502 | scaffold00851 | 366                     | [C/T] |                    | INTERGENIC                          |                                                                                      |
| *Ca_Desig_SNP503 | scaffold00804 | 1935                    | [T/C] |                    | INTERGENIC                          |                                                                                      |
| *Ca_Desig_SNP504 | scaffold00289 | 12927                   | [A/G] |                    | INTERGENIC                          |                                                                                      |
| *Ca_Desig_SNP505 | scaffold00741 | 811                     | [A/G] |                    | INTERGENIC                          |                                                                                      |
| *Ca_Desig_SNP506 | scaffold00884 | 668                     | [A/G] |                    | INTERGENIC                          |                                                                                      |
| *Ca_Desig_SNP507 | scaffold00789 | 2320                    | [T/C] |                    | INTERGENIC                          |                                                                                      |
| *Ca_Desig_SNP508 | scaffold00451 | 8431                    | [T/C] |                    | INTERGENIC                          |                                                                                      |
| *Ca_Desig_SNP509 | scaffold04453 | 148438                  | [T/A] |                    | INTERGENIC                          |                                                                                      |
| *Ca_Desig_SNP510 | Ca_Desig_LG06 | 10304722                | [C/A] | Ca_07271           | DOWNSTREAM:1374bases                | Stem-specific protein TSJT1                                                          |
| *Ca_Desig_SNP511 | scaffold00725 | 4442                    | [T/C] |                    | INTERGENIC                          |                                                                                      |
| *Ca_Desig_SNP512 | scaffold00824 | 2782                    | [T/C] |                    | INTERGENIC                          |                                                                                      |
| *Ca_Desig_SNP513 | scaffold01652 | 118021                  | [C/T] |                    | INTERGENIC                          |                                                                                      |
| *Ca_Desig_SNP514 | scaffold00382 | 35677                   | [A/G] | Ca_12380           | NON_SYNONYMOUS_CODING               | Probable leucine-rich repeat receptor-like serine/threonine-protein kinase At3g14841 |
| *Ca_Desig_SNP515 | scaffold00582 | 4798                    | [A/G] | Ca_13279           | NON_SYNONYMOUS_CODING               | (+)-neomenthol dehydrogenase                                                         |
| *Ca_Desig_SNP516 | scaffold00991 | 215338                  | [A/C] |                    | INTERGENIC                          |                                                                                      |
| *Ca_Desig_SNP517 | scaffold00779 | 2361                    | [A/C] |                    | INTERGENIC                          |                                                                                      |
| *Ca_Desig_SNP518 | scaffold03298 | 16170                   | [A/T] |                    | INTERGENIC                          |                                                                                      |
| *Ca_Desig_SNP519 | scaffold00691 | 4826                    | [T/C] |                    | INTERGENIC                          |                                                                                      |

| SNP IDs          | Chromosomes   | Physical positions (bp) | SNPs  | Gene accession IDs | Sequence components of genome/genes | Putative functions                     |
|------------------|---------------|-------------------------|-------|--------------------|-------------------------------------|----------------------------------------|
| *Ca_Desig_SNP520 | scaffold05583 | 116128                  | [T/G] |                    | INTERGENIC                          |                                        |
| *Ca_Desig_SNP521 | scaffold00702 | 6540                    | [A/G] |                    | INTERGENIC                          |                                        |
| *Ca_Desig_SNP522 | scaffold00262 | 3126                    | [A/T] |                    | INTERGENIC                          |                                        |
| *Ca_Desig_SNP523 | scaffold00854 | 364                     | [T/C] |                    | INTERGENIC                          |                                        |
| *Ca_Desig_SNP524 | scaffold00824 | 2563                    | [A/T] |                    | INTERGENIC                          |                                        |
| *Ca_Desig_SNP525 | scaffold00876 | 5632                    | [A/G] |                    | INTERGENIC                          |                                        |
| *Ca_Desig_SNP526 | scaffold00582 | 5167                    | [A/G] | Ca_13279           | NON_SYNONYMOUS_CODING               | (+)-neomenthol dehydrogenase           |
| *Ca_Desig_SNP527 | scaffold00824 | 1866                    | [T/C] |                    | INTERGENIC                          |                                        |
| *Ca_Desig_SNP528 | scaffold00876 | 5301                    | [T/C] |                    | INTERGENIC                          |                                        |
| *Ca_Desig_SNP529 | scaffold01652 | 101890                  | [T/C] |                    | INTERGENIC                          |                                        |
| *Ca_Desig_SNP530 | scaffold00262 | 40688                   | [G/C] | Ca_11638           | INTRON                              | Something about silencing protein 10   |
| *Ca_Desig_SNP531 | scaffold00730 | 511                     | [G/A] | Ca_13832           | DOWNSTREAM:1633bases                | --                                     |
| *Ca_Desig_SNP532 | scaffold00691 | 4591                    | [T/C] |                    | INTERGENIC                          |                                        |
| *Ca_Desig_SNP533 | scaffold01668 | 84908                   | [A/G] |                    | INTERGENIC                          |                                        |
| *Ca_Desig_SNP534 | scaffold01985 | 111346                  | [A/C] |                    | INTERGENIC                          |                                        |
| *Ca_Desig_SNP535 | scaffold00995 | 68490                   | [T/G] |                    | INTERGENIC                          |                                        |
| *Ca_Desig_SNP536 | scaffold00571 | 10906                   | [G/A] |                    | INTERGENIC                          |                                        |
| *Ca_Desig_SNP537 | scaffold01138 | 32401                   | [A/C] |                    | INTERGENIC                          |                                        |
| *Ca_Desig_SNP538 | scaffold00771 | 2522                    | [A/G] |                    | INTERGENIC                          |                                        |
| *Ca_Desig_SNP539 | scaffold13918 | 29943                   | [T/G] |                    | INTERGENIC                          |                                        |
| *Ca_Desig_SNP540 | scaffold00126 | 10469                   | [G/T] |                    | INTERGENIC                          |                                        |
| *Ca_Desig_SNP541 | Ca_Desig_LG01 | 780903                  | [T/G] | Ca_00063           | NON_SYNONYMOUS_CODING               | Protein SUPPRESSOR OF GENE SILENCING 3 |
| *Ca_Desig_SNP542 | scaffold00105 | 845                     | [A/C] |                    | INTERGENIC                          |                                        |
| *Ca_Desig_SNP543 | scaffold00777 | 3454                    | [T/A] |                    | INTERGENIC                          |                                        |
| *Ca_Desig_SNP544 | scaffold00995 | 115493                  | [A/C] |                    | INTERGENIC                          |                                        |
| *Ca_Desig_SNP545 | scaffold00789 | 2353                    | [T/C] |                    | INTERGENIC                          |                                        |

| SNP IDs          | Chromosomes   | Physical positions (bp) | SNPs  | Gene accession IDs | Sequence components of genome/genes | Putative functions    |
|------------------|---------------|-------------------------|-------|--------------------|-------------------------------------|-----------------------|
| *Ca_Desig_SNP546 | scaffold00579 | 11899                   | [T/G] |                    | INTERGENIC                          |                       |
| *Ca_Desig_SNP547 | scaffold00698 | 1331                    | [T/C] |                    | INTERGENIC                          |                       |
| *Ca_Desig_SNP548 | scaffold01208 | 184244                  | [T/C] |                    | INTERGENIC                          |                       |
| *Ca_Desig_SNP549 | scaffold04453 | 258704                  | [T/C] |                    | INTERGENIC                          |                       |
| *Ca_Desig_SNP550 | scaffold00744 | 3338                    | [G/A] |                    | INTERGENIC                          |                       |
| *Ca_Desig_SNP551 | scaffold00643 | 115543                  | [T/G] | Ca_09510           | UPSTREAM:694bases                   | --                    |
| *Ca_Desig_SNP552 | scaffold00105 | 843                     | [C/A] |                    | INTERGENIC                          |                       |
| *Ca_Desig_SNP553 | scaffold01428 | 175786                  | [T/G] |                    | INTERGENIC                          |                       |
| *Ca_Desig_SNP554 | Ca_Desig_LG05 | 1498889                 | [A/T] | Ca_05316           | DOWNSTREAM:1889bases                | HMG1/2-like protein   |
| *Ca_Desig_SNP555 | Ca_Desig_LG04 | 22035742                | [G/A] |                    | INTERGENIC                          |                       |
| *Ca_Desig_SNP556 | scaffold00876 | 5373                    | [T/C] |                    | INTERGENIC                          |                       |
| *Ca_Desig_SNP557 | scaffold01165 | 148990                  | [G/A] |                    | INTERGENIC                          |                       |
| *Ca_Desig_SNP558 | scaffold00646 | 4933                    | [A/G] |                    | INTERGENIC                          |                       |
| *Ca_Desig_SNP559 | Ca_Desig_LG03 | 23032363                | [A/G] |                    | INTERGENIC                          |                       |
| *Ca_Desig_SNP560 | scaffold01652 | 12335                   | [A/T] |                    | INTERGENIC                          |                       |
| *Ca_Desig_SNP561 | scaffold04411 | 47403                   | [A/C] |                    | INTERGENIC                          |                       |
| *Ca_Desig_SNP562 | scaffold00675 | 179500                  | [T/G] |                    | INTERGENIC                          |                       |
| *Ca_Desig_SNP563 | scaffold01566 | 23334                   | [A/C] |                    | INTERGENIC                          |                       |
| *Ca_Desig_SNP564 | Ca_Desig_LG02 | 2955638                 | [T/C] |                    | INTERGENIC                          |                       |
| *Ca_Desig_SNP565 | scaffold00788 | 3483                    | [T/C] |                    | INTERGENIC                          |                       |
| *Ca_Desig_SNP566 | scaffold09553 | 141043                  | [C/A] |                    | INTERGENIC                          |                       |
| *Ca_Desig_SNP567 | scaffold01134 | 52                      | [C/T] |                    | INTERGENIC                          |                       |
| *Ca_Desig_SNP568 | scaffold00971 | 147                     | [G/C] |                    | INTERGENIC                          |                       |
| *Ca_Desig_SNP569 | scaffold01652 | 12431                   | [G/A] |                    | INTERGENIC                          |                       |
| *Ca_Desig_SNP570 | Ca_Desig_LG05 | 7932510                 | [C/G] | Ca_05881           | DOWNSTREAM:49bases                  | Protein terminal ear1 |
| *Ca_Desig_SNP571 | scaffold00546 | 3148                    | [A/G] |                    | INTERGENIC                          |                       |

| SNP IDs          | Chromosomes   | Physical positions (bp) | SNPs  | Gene accession IDs | Sequence components of genome/genes | Putative functions                            |
|------------------|---------------|-------------------------|-------|--------------------|-------------------------------------|-----------------------------------------------|
| *Ca_Desig_SNP572 | scaffold01099 | 284                     | [A/G] |                    | INTERGENIC                          |                                               |
| *Ca_Desig_SNP573 | scaffold01042 | 734                     | [A/G] |                    | INTERGENIC                          |                                               |
| *Ca_Desig_SNP574 | scaffold00735 | 2823                    | [A/G] | Ca_13852           | DOWNSTREAM:1623bases                | MORC family CW-type zinc finger protein 4     |
| *Ca_Desig_SNP575 | scaffold00775 | 2356                    | [A/G] | Ca_13986           | DOWNSTREAM:959bases                 | Protein of unknown function (DUF3755)         |
| *Ca_Desig_SNP576 | Ca_Desig_LG01 | 5854373                 | [C/T] |                    | INTERGENIC                          |                                               |
| *Ca_Desig_SNP577 | scaffold00686 | 3633                    | [T/C] |                    | INTERGENIC                          |                                               |
| *Ca_Desig_SNP578 | Ca_Desig_LG06 | 7789032                 | [G/T] | Ca_07063           | STOP_GAINED                         | Probable adenylate kinase isoenzyme 6         |
| *Ca_Desig_SNP579 | scaffold00307 | 37008                   | [G/A] |                    | INTERGENIC                          |                                               |
| *Ca_Desig_SNP580 | scaffold00866 | 903                     | [T/C] | Ca_14324           | DOWNSTREAM:426bases                 | NADP-specific glutamate dehydrogenase         |
| *Ca_Desig_SNP581 | scaffold04461 | 37539                   | [A/C] |                    | INTERGENIC                          |                                               |
| *Ca_Desig_SNP582 | scaffold02138 | 55947                   | [T/C] |                    | INTERGENIC                          |                                               |
| *Ca_Desig_SNP583 | scaffold00731 | 2755                    | [A/G] | Ca_13836           | DOWNSTREAM:1969bases                | Protein KIAA0664 homolog                      |
| *Ca_Desig_SNP584 | scaffold11144 | 108821                  | [A/C] |                    | INTERGENIC                          |                                               |
| *Ca_Desig_SNP585 | scaffold01159 | 174                     | [A/G] |                    | INTERGENIC                          |                                               |
| *Ca_Desig_SNP586 | Ca_Desig_LG03 | 22992410                | [G/A] | Ca_03845           | SYNONYMOUS_CODING                   | Kinase interacting (KIP1-like) family protein |
| *Ca_Desig_SNP587 | scaffold09348 | 6426                    | [T/A] |                    | INTERGENIC                          |                                               |
| *Ca_Desig_SNP588 | scaffold01106 | 44                      | [A/G] |                    | INTERGENIC                          |                                               |
| *Ca_Desig_SNP589 | scaffold01281 | 92050                   | [T/C] |                    | INTERGENIC                          |                                               |
| *Ca_Desig_SNP590 | scaffold00824 | 1903                    | [T/C] |                    | INTERGENIC                          |                                               |
| *Ca_Desig_SNP591 | scaffold00779 | 1694                    | [T/C] |                    | INTERGENIC                          |                                               |
| *Ca_Desig_SNP592 | scaffold00692 | 28728                   | [T/G] | Ca_09609           | SYNONYMOUS_CODING                   | Glycerol-3-phosphate acyltransferase 3        |
| *Ca_Desig_SNP593 | scaffold01232 | 186531                  | [A/C] |                    | INTERGENIC                          |                                               |
| *Ca_Desig_SNP594 | scaffold01103 | 116                     | [C/T] |                    | INTERGENIC                          |                                               |
| *Ca_Desig_SNP595 | scaffold02276 | 82183                   | [T/G] |                    | INTERGENIC                          |                                               |
| *Ca_Desig_SNP596 | scaffold01428 | 148278                  | [T/C] |                    | INTERGENIC                          |                                               |
| *Ca_Desig_SNP597 | scaffold04453 | 258764                  | [T/C] |                    | INTERGENIC                          |                                               |

| SNP IDs          | Chromosomes   | Physical positions (bp) | SNPs  | Gene accession IDs | Sequence components of genome/genes | Putative functions                            |
|------------------|---------------|-------------------------|-------|--------------------|-------------------------------------|-----------------------------------------------|
| *Ca_Desig_SNP598 | scaffold04453 | 258679                  | [A/G] |                    | INTERGENIC                          |                                               |
| *Ca_Desig_SNP599 | scaffold00686 | 1695                    | [A/G] |                    | INTERGENIC                          |                                               |
| *Ca_Desig_SNP600 | scaffold00879 | 1741                    | [A/G] |                    | INTERGENIC                          |                                               |
| *Ca_Desig_SNP601 | scaffold00518 | 5214                    | [G/A] |                    | INTERGENIC                          |                                               |
| *Ca_Desig_SNP602 | scaffold01138 | 158193                  | [T/C] |                    | INTERGENIC                          |                                               |
| *Ca_Desig_SNP603 | scaffold00789 | 2475                    | [T/C] |                    | INTERGENIC                          |                                               |
| *Ca_Desig_SNP604 | scaffold02376 | 61034                   | [T/G] |                    | INTERGENIC                          |                                               |
| *Ca_Desig_SNP605 | scaffold01099 | 307                     | [A/T] |                    | INTERGENIC                          |                                               |
| *Ca_Desig_SNP606 | Ca_Desig_LG02 | 12729864                | [A/G] |                    | INTERGENIC                          |                                               |
| *Ca_Desig_SNP607 | scaffold01162 | 112106                  | [T/A] |                    | INTERGENIC                          |                                               |
| *Ca_Desig_SNP608 | scaffold01652 | 118439                  | [C/T] |                    | INTERGENIC                          |                                               |
| *Ca_Desig_SNP609 | scaffold00876 | 6652                    | [A/G] |                    | INTERGENIC                          |                                               |
| *Ca_Desig_SNP610 | scaffold00761 | 3540                    | [A/G] |                    | INTERGENIC                          |                                               |
| *Ca_Desig_SNP611 | scaffold00804 | 743                     | [T/C] |                    | INTERGENIC                          |                                               |
| *Ca_Desig_SNP612 | Ca_Desig_LG05 | 558133                  | [T/G] | Ca_05271           | NON_SYNONYMOUS_CODING               | RNA polymerase sigma factor rpoD              |
| *Ca_Desig_SNP613 | scaffold00582 | 5183                    | [A/G] | Ca_13279           | SYNONYMOUS_CODING                   | (+)-neomenthol dehydrogenase                  |
| *Ca_Desig_SNP614 | scaffold00775 | 2386                    | [T/C] | Ca_13986           | DOWNSTREAM:989bases                 | Protein of unknown function (DUF3755)         |
| *Ca_Desig_SNP615 | scaffold00768 | 3115                    | [A/G] |                    | INTERGENIC                          |                                               |
| *Ca_Desig_SNP616 | Ca_Desig_LG04 | 11407191                | [T/G] |                    | INTERGENIC                          |                                               |
| *Ca_Desig_SNP617 | scaffold02206 | 96041                   | [T/G] |                    | INTERGENIC                          |                                               |
| *Ca_Desig_SNP618 | scaffold00741 | 812                     | [A/G] |                    | INTERGENIC                          |                                               |
| *Ca_Desig_SNP619 | scaffold00514 | 72994                   | [G/A] | Ca_09347           | INTRON                              | Zinc finger CCCH domain-containing protein 12 |
| *Ca_Desig_SNP620 | scaffold00884 | 1463                    | [A/G] |                    | INTERGENIC                          |                                               |
| *Ca_Desig_SNP621 | scaffold00570 | 14132                   | [G/T] |                    | INTERGENIC                          |                                               |
| *Ca_Desig_SNP622 | scaffold00407 | 31683                   | [C/T] | Ca_12494           | DOWNSTREAM:1832bases                | NAC domain-containing protein 74              |
| *Ca_Desig_SNP623 | scaffold01944 | 47246                   | [A/C] |                    | INTERGENIC                          |                                               |

| SNP IDs          | Chromosomes   | Physical positions (bp) | SNPs  | Gene accession IDs | Sequence components of genome/genes | Putative functions              |
|------------------|---------------|-------------------------|-------|--------------------|-------------------------------------|---------------------------------|
| *Ca_Desig_SNP624 | Ca_Desig_LG05 | 9252450                 | [A/C] | Ca_06016           | NON_SYNONYMOUS_CODING               | Uncharacterized protein sll1770 |
| *Ca_Desig_SNP625 | scaffold00768 | 3099                    | [T/C] |                    | INTERGENIC                          |                                 |
| *Ca_Desig_SNP626 | scaffold01106 | 60                      | [A/G] |                    | INTERGENIC                          |                                 |
| *Ca_Desig_SNP627 | scaffold02276 | 82142                   | [T/G] |                    | INTERGENIC                          |                                 |
| *Ca_Desig_SNP628 | scaffold00876 | 822                     | [A/G] |                    | INTERGENIC                          |                                 |
| *Ca_Desig_SNP629 | scaffold01042 | 707                     | [A/G] |                    | INTERGENIC                          |                                 |
| *Ca_Desig_SNP630 | scaffold03349 | 1779                    | [A/C] |                    | INTERGENIC                          |                                 |
| *Ca_Desig_SNP631 | scaffold02206 | 95933                   | [G/A] |                    | INTERGENIC                          |                                 |
| *Ca_Desig_SNP632 | scaffold00789 | 2126                    | [T/G] |                    | INTERGENIC                          |                                 |
| *Ca_Desig_SNP633 | scaffold00876 | 5635                    | [A/G] |                    | INTERGENIC                          |                                 |
| *Ca_Desig_SNP634 | scaffold00933 | 801                     | [C/T] |                    | INTERGENIC                          |                                 |
| *Ca_Desig_SNP635 | scaffold00343 | 35896                   | [A/C] |                    | INTERGENIC                          |                                 |
| *Ca_Desig_SNP636 | scaffold02974 | 61041                   | [G/A] |                    | INTERGENIC                          |                                 |
| *Ca_Desig_SNP637 | Ca_Desig_LG05 | 11160666                | [T/G] |                    | INTERGENIC                          |                                 |
| *Ca_Desig_SNP638 | scaffold00262 | 3186                    | [G/A] |                    | INTERGENIC                          |                                 |
| *Ca_Desig_SNP639 | scaffold00836 | 1078                    | [A/C] |                    | INTERGENIC                          |                                 |
| *Ca_Desig_SNP640 | scaffold00582 | 6413                    | [A/G] | Ca_13279           | INTRON                              | (+)-neomenthol dehydrogenase    |
| *Ca_Desig_SNP641 | scaffold00582 | 6356                    | [A/G] | Ca_13279           | INTRON                              | (+)-neomenthol dehydrogenase    |
| *Ca_Desig_SNP642 | scaffold03349 | 1794                    | [A/C] |                    | INTERGENIC                          |                                 |
| *Ca_Desig_SNP643 | Ca_Desig_LG07 | 1541646                 | [C/G] | Ca_07484           | NON_SYNONYMOUS_CODING               | Protein TRANSPARENT TESTA 12    |
| *Ca_Desig_SNP644 | scaffold04453 | 258757                  | [A/G] |                    | INTERGENIC                          |                                 |
| *Ca_Desig_SNP645 | scaffold00761 | 3552                    | [T/C] |                    | INTERGENIC                          |                                 |
| *Ca_Desig_SNP646 | scaffold00646 | 4871                    | [T/C] |                    | INTERGENIC                          |                                 |
| *Ca_Desig_SNP647 | scaffold00894 | 5451                    | [C/A] |                    | INTERGENIC                          |                                 |
| *Ca_Desig_SNP648 | scaffold00768 | 3142                    | [T/C] |                    | INTERGENIC                          |                                 |
| *Ca_Desig_SNP649 | Ca_Desig_LG08 | 8802726                 | [A/C] |                    | INTERGENIC                          |                                 |



| SNP IDs          | Chromosomes   | Physical positions (bp) | SNPs  | Gene accession IDs | Sequence components of genome/genes | Putative functions                                   |
|------------------|---------------|-------------------------|-------|--------------------|-------------------------------------|------------------------------------------------------|
| *Ca_Desig_SNP650 | scaffold00691 | 498                     | [T/G] | Ca_13701           | SYNONYMOUS_CODING                   | ABC transporter G family member 1                    |
| *Ca_Desig_SNP651 | scaffold00646 | 4876                    | [A/G] |                    | INTERGENIC                          |                                                      |
| *Ca_Desig_SNP652 | scaffold00262 | 3014                    | [G/A] |                    | INTERGENIC                          |                                                      |
| *Ca_Desig_SNP653 | scaffold00824 | 1790                    | [A/G] |                    | INTERGENIC                          |                                                      |
| *Ca_Desig_SNP654 | Ca_Desig_LG01 | 6108144                 | [A/C] | Ca_00519           | INTRON                              | Probable exocyst complex component 4                 |
| *Ca_Desig_SNP655 | scaffold00888 | 379                     | [T/A] |                    | INTERGENIC                          |                                                      |
| *Ca_Desig_SNP656 | Ca_Desig_LG06 | 4646393                 | [A/C] |                    | INTERGENIC                          |                                                      |
| *Ca_Desig_SNP657 | scaffold01105 | 460                     | [T/C] |                    | INTERGENIC                          |                                                      |
| *Ca_Desig_SNP658 | scaffold00582 | 6319                    | [T/C] | Ca_13279           | INTRON                              | (+)-neomenthol dehydrogenase                         |
| *Ca_Desig_SNP659 | Ca_Desig_LG08 | 556338                  | [T/G] |                    | INTERGENIC                          |                                                      |
| *Ca_Desig_SNP660 | Ca_Desig_LG06 | 2955308                 | [T/A] | Ca_06651           | INTRON                              | Galacturonokinase                                    |
| *Ca_Desig_SNP661 | scaffold01385 | 10460                   | [T/C] |                    | INTERGENIC                          |                                                      |
| *Ca_Desig_SNP662 | scaffold04586 | 184734                  | [G/C] |                    | INTERGENIC                          |                                                      |
| *Ca_Desig_SNP663 | scaffold00644 | 2643                    | [A/C] |                    | INTERGENIC                          |                                                      |
| *Ca_Desig_SNP664 | scaffold00582 | 4806                    | [A/G] | Ca_13279           | NON_SYNONYMOUS_CODING               | (+)-neomenthol dehydrogenase                         |
| *Ca_Desig_SNP665 | Ca_Desig_LG08 | 122422                  | [T/G] | Ca_07980           | SYNONYMOUS_CODING                   | Calcium-independent phospholipase A2-gamma           |
| *Ca_Desig_SNP666 | scaffold00557 | 10302                   | [G/A] |                    | INTERGENIC                          |                                                      |
| *Ca_Desig_SNP667 | scaffold00852 | 1090                    | [T/C] | Ca_14286           | NON_SYNONYMOUS_CODING               | Type I inositol-1,4,5-trisphosphate 5-phosphatase 11 |
| *Ca_Desig_SNP668 | scaffold00482 | 32585                   | [C/T] | Ca_09274           | DOWNSTREAM:637bases                 | Putative uncharacterized protein                     |
| *Ca_Desig_SNP669 | scaffold00582 | 5060                    | [T/C] | Ca_13279           | INTRON                              | (+)-neomenthol dehydrogenase                         |
| *Ca_Desig_SNP670 | scaffold03298 | 77159                   | [C/T] |                    | INTERGENIC                          |                                                      |
| *Ca_Desig_SNP671 | scaffold00876 | 6647                    | [A/G] |                    | INTERGENIC                          |                                                      |
| *Ca_Desig_SNP672 | scaffold00753 | 4104                    | [A/G] | Ca_13933           | DOWNSTREAM:1754bases                | B-block binding subunit of TFIIC                     |
| *Ca_Desig_SNP673 | scaffold07988 | 15440                   | [T/C] |                    | INTERGENIC                          |                                                      |
| *Ca_Desig_SNP674 | scaffold00971 | 182                     | [T/C] |                    | INTERGENIC                          |                                                      |
| *Ca_Desig_SNP675 | scaffold00741 | 821                     | [T/C] |                    | INTERGENIC                          |                                                      |

| SNP IDs          | Chromosomes   | Physical positions (bp) | SNPs  | Gene accession IDs | Sequence components of genome/genes | Putative functions                               |
|------------------|---------------|-------------------------|-------|--------------------|-------------------------------------|--------------------------------------------------|
| *Ca_Desig_SNP676 | scaffold00771 | 2519                    | [A/G] |                    | INTERGENIC                          |                                                  |
| *Ca_Desig_SNP677 | scaffold00953 | 714                     | [A/G] |                    | INTERGENIC                          |                                                  |
| *Ca_Desig_SNP678 | Ca_Desig_LG03 | 11783353                | [A/G] | Ca_02974           | NON_SYNONYMOUS_CODING               | REF4-related 1                                   |
| *Ca_Desig_SNP679 | scaffold03298 | 41429                   | [A/T] | Ca_10561           | UPSTREAM:1766bases                  | Protein WAX2                                     |
| *Ca_Desig_SNP680 | scaffold01024 | 98                      | [C/A] |                    | INTERGENIC                          |                                                  |
| *Ca_Desig_SNP681 | scaffold00582 | 13922                   | [A/T] |                    | INTERGENIC                          |                                                  |
| *Ca_Desig_SNP682 | scaffold01159 | 138                     | [A/G] |                    | INTERGENIC                          |                                                  |
| *Ca_Desig_SNP683 | scaffold00573 | 9307                    | [G/A] |                    | INTERGENIC                          |                                                  |
| *Ca_Desig_SNP684 | scaffold00893 | 1582                    | [T/C] | Ca_14399           | INTRON                              | Tripeptidyl-peptidase 2                          |
| *Ca_Desig_SNP685 | scaffold03298 | 77083                   | [G/A] |                    | INTERGENIC                          |                                                  |
| *Ca_Desig_SNP686 | Ca_Desig_LG05 | 4837608                 | [A/T] | Ca_05583           | NON_SYNONYMOUS_CODING               | Puromycin-sensitive aminopeptidase               |
| *Ca_Desig_SNP687 | scaffold00571 | 5144                    | [C/A] |                    | INTERGENIC                          |                                                  |
| *Ca_Desig_SNP688 | scaffold00761 | 3589                    | [A/G] |                    | INTERGENIC                          |                                                  |
| *Ca_Desig_SNP689 | scaffold00933 | 828                     | [T/C] |                    | INTERGENIC                          |                                                  |
| *Ca_Desig_SNP690 | Ca_Desig_LG07 | 1443880                 | [T/G] | Ca_07476           | SYNONYMOUS_CODING                   | Transcription initiation factor TFIID subunit 12 |
| *Ca_Desig_SNP691 | scaffold00079 | 40384                   | [T/G] |                    | INTERGENIC                          |                                                  |
| *Ca_Desig_SNP692 | Ca_Desig_LG01 | 3328510                 | [A/C] | Ca_00339           | SYNONYMOUS_CODING                   | U-box domain-containing protein 17               |
| *Ca_Desig_SNP693 | scaffold02138 | 54257                   | [A/C] |                    | INTERGENIC                          |                                                  |
| *Ca_Desig_SNP694 | Ca_Desig_LG03 | 19877477                | [T/G] | Ca_03617           | INTRON                              | Probable zinc protease pqqL                      |
| *Ca_Desig_SNP695 | Ca_Desig_LG01 | 13692649                | [A/C] | Ca_00980           | DOWNSTREAM:1373bases                | Methyltransferase-like protein 22                |
| *Ca_Desig_SNP696 | scaffold01106 | 36                      | [T/C] |                    | INTERGENIC                          |                                                  |
| *Ca_Desig_SNP697 | scaffold01140 | 59                      | [C/A] |                    | INTERGENIC                          |                                                  |
| *Ca_Desig_SNP698 | Ca_Desig_LG05 | 7699233                 | [T/G] | Ca_05857           | NON_SYNONYMOUS_CODING               | Trihelix transcription factor GT-1               |
| *Ca_Desig_SNP699 | scaffold00888 | 368                     | [A/G] |                    | INTERGENIC                          |                                                  |
| *Ca_Desig_SNP700 | scaffold00646 | 4960                    | [A/G] |                    | INTERGENIC                          |                                                  |
| *Ca_Desig_SNP701 | scaffold00440 | 10607                   | [C/T] | Ca_12645           | INTRON                              | AdoMet-dependent rRNA methyltransferase spb1     |

| SNP IDs          | Chromosomes   | Physical positions (bp) | SNPs  | Gene accession IDs | Sequence components of genome/genes | Putative functions                                                                                             |
|------------------|---------------|-------------------------|-------|--------------------|-------------------------------------|----------------------------------------------------------------------------------------------------------------|
| *Ca_Desig_SNP702 | scaffold03999 | 7396                    | [T/C] | Ca_10576           | INTRON                              | Putative F-box/FBD/LRR-repeat protein At5g44950                                                                |
| *Ca_Desig_SNP703 | scaffold00557 | 10585                   | [C/T] |                    | INTERGENIC                          |                                                                                                                |
| *Ca_Desig_SNP704 | Ca_Desig_LG04 | 11674619                | [A/C] |                    | INTERGENIC                          |                                                                                                                |
| *Ca_Desig_SNP705 | Ca_Desig_LG06 | 9904506                 | [A/C] |                    | INTERGENIC                          |                                                                                                                |
| *Ca_Desig_SNP706 | scaffold00763 | 1608                    | [T/C] |                    | INTERGENIC                          |                                                                                                                |
| *Ca_Desig_SNP707 | scaffold00741 | 762                     | [A/G] |                    | INTERGENIC                          |                                                                                                                |
| *Ca_Desig_SNP708 | scaffold00884 | 658                     | [A/G] |                    | INTERGENIC                          |                                                                                                                |
| *Ca_Desig_SNP709 | scaffold00686 | 3663                    | [T/A] |                    | INTERGENIC                          |                                                                                                                |
| *Ca_Desig_SNP710 | scaffold00828 | 2676                    | [G/C] |                    | INTERGENIC                          |                                                                                                                |
| *Ca_Desig_SNP711 | scaffold01950 | 75310                   | [C/T] |                    | INTERGENIC                          |                                                                                                                |
| *Ca_Desig_SNP712 | Ca_Desig_LG07 | 1443877                 | [A/T] | Ca_07476           | SYNONYMOUS_CODING                   | Transcription initiation factor TFIID subunit 12                                                               |
| *Ca_Desig_SNP713 | scaffold01947 | 42473                   | [T/C] | Ca_10410           | INTRON                              | G-type lectin S-receptor-like serine/threonine-protein kinase At4g27290                                        |
| *Ca_Desig_SNP714 | scaffold00968 | 184                     | [C/A] |                    | INTERGENIC                          |                                                                                                                |
| *Ca_Desig_SNP715 | scaffold05945 | 10071                   | [T/G] | Ca_09428           | INTRON                              | unknown protein; BEST Arabidopsis thaliana protein match is: unknown protein (TAIR:AT2G41150.2); Has 128 Blast |
| *Ca_Desig_SNP716 | scaffold03781 | 31875                   | [T/G] |                    | INTERGENIC                          |                                                                                                                |
| *Ca_Desig_SNP717 | scaffold00568 | 197                     | [T/C] |                    | INTERGENIC                          |                                                                                                                |
| *Ca_Desig_SNP718 | scaffold00383 | 26397                   | [A/C] |                    | INTERGENIC                          |                                                                                                                |
| *Ca_Desig_SNP719 | scaffold00888 | 376                     | [A/G] |                    | INTERGENIC                          |                                                                                                                |
| *Ca_Desig_SNP720 | scaffold00888 | 371                     | [A/G] |                    | INTERGENIC                          |                                                                                                                |
| *Ca_Desig_SNP721 | Ca_Desig_LG01 | 836842                  | [T/G] |                    | INTERGENIC                          |                                                                                                                |
| *Ca_Desig_SNP722 | Ca_Desig_LG04 | 16362424                | [T/G] | Ca_04902           | SYNONYMOUS_CODING                   | E3 ubiquitin-protein ligase ATL6                                                                               |
| *Ca_Desig_SNP723 | scaffold00686 | 3645                    | [A/G] |                    | INTERGENIC                          |                                                                                                                |
| *Ca_Desig_SNP724 | scaffold00798 | 3272                    | [G/A] |                    | INTERGENIC                          |                                                                                                                |
| *Ca_Desig_SNP725 | scaffold00611 | 2545                    | [T/G] |                    | INTERGENIC                          |                                                                                                                |
| *Ca_Desig_SNP726 | Ca_Desig_LG08 | 10458802                | [T/G] | Ca_08739           | NON_SYNONYMOUS_CODING               | Cell division cycle-associated 7-like protein                                                                  |
| *Ca_Desig_SNP727 | scaffold03999 | 7394                    | [A/C] | Ca_10576           | INTRON                              | Putative F-box/FBD/LRR-repeat protein At5g44950                                                                |

| SNP IDs          | Chromosomes   | Physical positions (bp) | SNPs  | Gene accession IDs | Sequence components of genome/genes | Putative functions                                     |
|------------------|---------------|-------------------------|-------|--------------------|-------------------------------------|--------------------------------------------------------|
| *Ca_Desig_SNP728 | Ca_Desig_LG01 | 845508                  | [C/T] |                    | INTERGENIC                          |                                                        |
| *Ca_Desig_SNP729 | scaffold00824 | 1916                    | [T/C] |                    | INTERGENIC                          |                                                        |
| *Ca_Desig_SNP730 | scaffold00995 | 68498                   | [C/T] |                    | INTERGENIC                          |                                                        |
| *Ca_Desig_SNP731 | Ca_Desig_LG03 | 4016179                 | [T/C] | Ca_02499           | SYNONYMOUS_CODING                   | Calcium homeostasis endoplasmic reticulum protein      |
| *Ca_Desig_SNP732 | scaffold00761 | 3534                    | [A/G] |                    | INTERGENIC                          |                                                        |
| *Ca_Desig_SNP733 | Ca_Desig_LG01 | 872247                  | [G/A] | Ca_00076           | INTRON                              | Protein FAM135A                                        |
| *Ca_Desig_SNP734 | scaffold00763 | 1629                    | [A/T] |                    | INTERGENIC                          |                                                        |
| *Ca_Desig_SNP735 | scaffold00897 | 910                     | [T/C] |                    | INTERGENIC                          |                                                        |
| *Ca_Desig_SNP736 | scaffold00779 | 1037                    | [A/G] |                    | INTERGENIC                          |                                                        |
| *Ca_Desig_SNP737 | scaffold00741 | 818                     | [A/G] |                    | INTERGENIC                          |                                                        |
| *Ca_Desig_SNP738 | scaffold06649 | 37073                   | [A/C] |                    | INTERGENIC                          |                                                        |
| *Ca_Desig_SNP739 | scaffold00789 | 2359                    | [T/C] |                    | INTERGENIC                          |                                                        |
| *Ca_Desig_SNP740 | scaffold06649 | 37070                   | [C/A] |                    | INTERGENIC                          |                                                        |
| *Ca_Desig_SNP741 | scaffold06649 | 37072                   | [T/A] |                    | INTERGENIC                          |                                                        |
| *Ca_Desig_SNP742 | scaffold02753 | 47216                   | [A/C] |                    | INTERGENIC                          |                                                        |
| *Ca_Desig_SNP743 | scaffold00292 | 5046                    | [G/C] |                    | INTERGENIC                          |                                                        |
| *Ca_Desig_SNP744 | scaffold00897 | 581                     | [T/C] |                    | INTERGENIC                          |                                                        |
| *Ca_Desig_SNP745 | scaffold00933 | 814                     | [G/A] |                    | INTERGENIC                          |                                                        |
| *Ca_Desig_SNP746 | Ca_Desig_LG08 | 202026                  | [G/C] |                    | INTERGENIC                          |                                                        |
| *Ca_Desig_SNP747 | Ca_Desig_LG03 | 19041868                | [T/G] | Ca_03528           | INTRON                              | Transformation/transcription domain-associated protein |
| *Ca_Desig_SNP748 | scaffold06649 | 37071                   | [A/G] |                    | INTERGENIC                          |                                                        |
| *Ca_Desig_SNP749 | scaffold01120 | 105                     | [G/A] |                    | INTERGENIC                          |                                                        |
| *Ca_Desig_SNP750 | scaffold00938 | 1143                    | [T/C] |                    | INTERGENIC                          |                                                        |
| *Ca_Desig_SNP751 | scaffold00876 | 6626                    | [T/C] |                    | INTERGENIC                          |                                                        |
| *Ca_Desig_SNP752 | Ca_Desig_LG03 | 22992503                | [G/A] | Ca_03845           | SYNONYMOUS_CODING                   | Kinase interacting (KIP1-like) family protein          |
| *Ca_Desig_SNP753 | scaffold00735 | 3708                    | [T/C] | Ca_13852           | DOWNSTREAM:738bases                 | MORC family CW-type zinc finger protein 4              |

| SNP IDs          | Chromosomes   | Physical positions (bp) | SNPs  | Gene accession IDs | Sequence components of genome/genes | Putative functions                                                                                    |
|------------------|---------------|-------------------------|-------|--------------------|-------------------------------------|-------------------------------------------------------------------------------------------------------|
| *Ca_Desig_SNP754 | Ca_Desig_LG03 | 22980522                | [A/G] | Ca_03844           | SYNONYMOUS_CODING                   | Protein SGT1 homolog At5g65490                                                                        |
| *Ca_Desig_SNP755 | scaffold00768 | 3138                    | [T/C] |                    | INTERGENIC                          |                                                                                                       |
| *Ca_Desig_SNP756 | scaffold01984 | 78372                   | [T/G] |                    | INTERGENIC                          |                                                                                                       |
| *Ca_Desig_SNP757 | scaffold00775 | 2372                    | [T/C] | Ca_13986           | DOWNSTREAM:975bases                 | Protein of unknown function (DUF3755)                                                                 |
| *Ca_Desig_SNP758 | scaffold01060 | 74511                   | [T/C] |                    | INTERGENIC                          |                                                                                                       |
| *Ca_Desig_SNP759 | scaffold02009 | 126578                  | [A/C] |                    | INTERGENIC                          |                                                                                                       |
| *Ca_Desig_SNP760 | Ca_Desig_LG02 | 1245363                 | [C/A] | Ca_01108           | UTR_5_PRIME:230bases                | CONTAINS InterPro DOMAIN/s: RNase P, Rpr2/Rpp21 subunit (InterPro:IPR007175); Has 35333 Blast hits to |
| *Ca_Desig_SNP761 | scaffold01262 | 174012                  | [T/G] |                    | INTERGENIC                          |                                                                                                       |
| *Ca_Desig_SNP762 | scaffold04453 | 258008                  | [C/G] |                    | INTERGENIC                          |                                                                                                       |
| *Ca_Desig_SNP763 | Ca_Desig_LG03 | 22992776                | [A/G] | Ca_03845           | SYNONYMOUS_CODING                   | Kinase interacting (KIP1-like) family protein                                                         |
| *Ca_Desig_SNP764 | scaffold00890 | 1628                    | [T/C] |                    | INTERGENIC                          |                                                                                                       |
| *Ca_Desig_SNP765 | scaffold00775 | 2367                    | [T/C] | Ca_13986           | DOWNSTREAM:970bases                 | Protein of unknown function (DUF3755)                                                                 |
| *Ca_Desig_SNP766 | scaffold01281 | 171019                  | [G/A] |                    | INTERGENIC                          |                                                                                                       |
| *Ca_Desig_SNP767 | scaffold03981 | 55663                   | [A/T] |                    | INTERGENIC                          |                                                                                                       |
| *Ca_Desig_SNP768 | scaffold03204 | 229155                  | [G/T] |                    | INTERGENIC                          |                                                                                                       |
| *Ca_Desig_SNP769 | Ca_Desig_LG07 | 1541580                 | [A/T] | Ca_07484           | NON_SYNONYMOUS_CODING               | Protein TRANSPARENT TESTA 12                                                                          |
| *Ca_Desig_SNP770 | scaffold01510 | 39144                   | [T/G] |                    | INTERGENIC                          |                                                                                                       |
| *Ca_Desig_SNP771 | scaffold00126 | 8146                    | [T/C] |                    | INTERGENIC                          |                                                                                                       |
| *Ca_Desig_SNP772 | scaffold00937 | 224740                  | [A/T] |                    | INTERGENIC                          |                                                                                                       |
| *Ca_Desig_SNP773 | scaffold00248 | 227548                  | [A/T] |                    | INTERGENIC                          |                                                                                                       |
| *Ca_Desig_SNP774 | scaffold13510 | 54809                   | [A/C] |                    | INTERGENIC                          |                                                                                                       |
| *Ca_Desig_SNP775 | scaffold01029 | 468                     | [T/C] |                    | INTERGENIC                          |                                                                                                       |
| *Ca_Desig_SNP776 | scaffold02317 | 22882                   | [C/A] |                    | INTERGENIC                          |                                                                                                       |
| *Ca_Desig_SNP777 | scaffold01129 | 42191                   | [T/G] |                    | INTERGENIC                          |                                                                                                       |
| *Ca_Desig_SNP778 | scaffold00126 | 8221                    | [A/G] |                    | INTERGENIC                          |                                                                                                       |
| *Ca_Desig_SNP779 | scaffold00779 | 2329                    | [T/C] |                    | INTERGENIC                          |                                                                                                       |

| SNP IDs          | Chromosomes   | Physical positions (bp) | SNPs  | Gene accession IDs | Sequence components of genome/genes | Putative functions                                   |
|------------------|---------------|-------------------------|-------|--------------------|-------------------------------------|------------------------------------------------------|
| *Ca_Desig_SNP780 | scaffold00607 | 798                     | [T/G] |                    | INTERGENIC                          |                                                      |
| *Ca_Desig_SNP781 | scaffold00866 | 1069                    | [T/C] | Ca_14324           | DOWNSTREAM:260bases                 | NADP-specific glutamate dehydrogenase                |
| *Ca_Desig_SNP782 | scaffold01281 | 171024                  | [C/A] |                    | INTERGENIC                          |                                                      |
| *Ca_Desig_SNP783 | scaffold00834 | 975                     | [A/C] |                    | INTERGENIC                          |                                                      |
| *Ca_Desig_SNP784 | scaffold00763 | 1617                    | [T/C] |                    | INTERGENIC                          |                                                      |
| *Ca_Desig_SNP785 | scaffold01362 | 106885                  | [T/C] |                    | INTERGENIC                          |                                                      |
| *Ca_Desig_SNP786 | scaffold00908 | 294767                  | [T/G] |                    | INTERGENIC                          |                                                      |
| *Ca_Desig_SNP787 | scaffold00448 | 706                     | [A/C] |                    | INTERGENIC                          |                                                      |
| *Ca_Desig_SNP788 | scaffold00852 | 1111                    | [T/C] | Ca_14286           | NON_SYNONYMOUS_CODING               | Type I inositol-1,4,5-trisphosphate 5-phosphatase 11 |
| *Ca_Desig_SNP789 | scaffold00257 | 10565                   | [T/G] |                    | INTERGENIC                          |                                                      |
| *Ca_Desig_SNP790 | scaffold00763 | 1599                    | [T/C] |                    | INTERGENIC                          |                                                      |
| *Ca_Desig_SNP791 | scaffold00126 | 55399                   | [C/T] | Ca_10982           | INTRON                              | TRICHOME BIREFRINGENCE-LIKE 38                       |
| *Ca_Desig_SNP792 | scaffold00126 | 55410                   | [G/A] | Ca_10982           | INTRON                              | TRICHOME BIREFRINGENCE-LIKE 38                       |
| *Ca_Desig_SNP793 | Ca_Desig_LG07 | 2195618                 | [T/C] | Ca_07527           | INTRON                              | Phospholipid-transporting ATPase 3                   |
| *Ca_Desig_SNP794 | scaffold00683 | 5538                    | [G/A] |                    | INTERGENIC                          |                                                      |
| *Ca_Desig_SNP795 | scaffold05105 | 88252                   | [A/G] |                    | INTERGENIC                          |                                                      |
| *Ca_Desig_SNP796 | Ca_Desig_LG05 | 4837600                 | [A/G] | Ca_05583           | NON_SYNONYMOUS_CODING               | Puromycin-sensitive aminopeptidase                   |
| *Ca_Desig_SNP797 | Ca_Desig_LG03 | 1142320                 | [T/G] | Ca_02258           | SYNONYMOUS_CODING                   | Protein transport protein Sec23A                     |
| *Ca_Desig_SNP798 | Ca_Desig_LG05 | 5123295                 | [T/G] |                    | INTERGENIC                          |                                                      |
| *Ca_Desig_SNP799 | Ca_Desig_LG02 | 5503519                 | [G/A] |                    | INTERGENIC                          |                                                      |
| *Ca_Desig_SNP800 | scaffold00804 | 761                     | [T/C] |                    | INTERGENIC                          |                                                      |
| *Ca_Desig_SNP801 | scaffold00994 | 71982                   | [A/C] |                    | INTERGENIC                          |                                                      |
| *Ca_Desig_SNP802 | scaffold00693 | 2091                    | [G/A] |                    | INTERGENIC                          |                                                      |
| *Ca_Desig_SNP803 | scaffold01006 | 569                     | [C/A] |                    | INTERGENIC                          |                                                      |
| *Ca_Desig_SNP804 | scaffold00582 | 6345                    | [T/C] | Ca_13279           | INTRON                              | (+)-neomenthol dehydrogenase                         |
| *Ca_Desig_SNP805 | scaffold00866 | 904                     | [T/C] | Ca_14324           | DOWNSTREAM:425bases                 | NADP-specific glutamate dehydrogenase                |

| SNP IDs          | Chromosomes   | Physical positions (bp) | SNPs  | Gene accession IDs | Sequence components of genome/genes | Putative functions                                |
|------------------|---------------|-------------------------|-------|--------------------|-------------------------------------|---------------------------------------------------|
| *Ca_Desig_SNP806 | Ca_Desig_LG03 | 4016181                 | [A/C] | Ca_02499           | NON_SYNONYMOUS_CODING               | Calcium homeostasis endoplasmic reticulum protein |
| *Ca_Desig_SNP807 | Ca_Desig_LG02 | 6107404                 | [T/A] |                    | INTERGENIC                          |                                                   |
| *Ca_Desig_SNP808 | scaffold00582 | 13892                   | [A/G] |                    | INTERGENIC                          |                                                   |
| *Ca_Desig_SNP809 | Ca_Desig_LG02 | 15905877                | [A/C] | Ca_02075           | NON_SYNONYMOUS_CODING               | Formin-like protein 5                             |
| *Ca_Desig_SNP810 | scaffold00804 | 1962                    | [A/G] |                    | INTERGENIC                          |                                                   |
| *Ca_Desig_SNP811 | scaffold00601 | 11567                   | [A/C] | Ca_13336           | NON_SYNONYMOUS_CODING               | Disease resistance protein RPM1                   |
| *Ca_Desig_SNP812 | scaffold00998 | 56882                   | [T/C] |                    | INTERGENIC                          |                                                   |
| *Ca_Desig_SNP813 | scaffold00089 | 50956                   | [A/G] |                    | INTERGENIC                          |                                                   |
| *Ca_Desig_SNP814 | scaffold00741 | 914                     | [T/C] |                    | INTERGENIC                          |                                                   |
| *Ca_Desig_SNP815 | Ca_Desig_LG02 | 8510313                 | [C/T] | Ca_01673           | INTRON                              | DNA-directed RNA polymerase III subunit RPC1      |
| *Ca_Desig_SNP816 | scaffold08069 | 60566                   | [A/G] |                    | INTERGENIC                          |                                                   |
| *Ca_Desig_SNP817 | scaffold00906 | 1133                    | [G/A] |                    | INTERGENIC                          |                                                   |
| *Ca_Desig_SNP818 | scaffold00876 | 788                     | [A/G] |                    | INTERGENIC                          |                                                   |
| *Ca_Desig_SNP819 | Ca_Desig_LG02 | 6131704                 | [T/C] |                    | INTERGENIC                          |                                                   |
| *Ca_Desig_SNP820 | scaffold00938 | 1147                    | [T/C] |                    | INTERGENIC                          |                                                   |
| *Ca_Desig_SNP821 | Ca_Desig_LG01 | 6107982                 | [T/G] | Ca_00519           | INTRON                              | Probable exocyst complex component 4              |
| *Ca_Desig_SNP822 | scaffold00876 | 823                     | [A/G] |                    | INTERGENIC                          |                                                   |
| *Ca_Desig_SNP823 | scaffold00735 | 3704                    | [G/A] | Ca_13852           | DOWNSTREAM:742bases                 | MORC family CW-type zinc finger protein 4         |
| *Ca_Desig_SNP824 | scaffold00888 | 351                     | [A/G] |                    | INTERGENIC                          |                                                   |
| *Ca_Desig_SNP825 | Ca_Desig_LG04 | 2978413                 | [T/C] |                    | INTERGENIC                          |                                                   |
| *Ca_Desig_SNP826 | Ca_Desig_LG07 | 1558737                 | [T/A] | Ca_07485           | SYNONYMOUS_CODING                   | Protein TRANSPARENT TESTA 12                      |
| *Ca_Desig_SNP827 | scaffold03107 | 39191                   | [A/T] |                    | INTERGENIC                          |                                                   |
| *Ca_Desig_SNP828 | scaffold00876 | 10482                   | [A/G] |                    | INTERGENIC                          |                                                   |
| *Ca_Desig_SNP829 | scaffold00854 | 224                     | [T/C] |                    | INTERGENIC                          |                                                   |
| *Ca_Desig_SNP830 | scaffold00876 | 6646                    | [A/G] |                    | INTERGENIC                          |                                                   |
| *Ca_Desig_SNP831 | scaffold00126 | 10395                   | [C/T] |                    | INTERGENIC                          |                                                   |

| SNP IDs          | Chromosomes   | Physical positions (bp) | SNPs  | Gene accession IDs | Sequence components of genome/genes | Putative functions                                                             |
|------------------|---------------|-------------------------|-------|--------------------|-------------------------------------|--------------------------------------------------------------------------------|
| *Ca_Desig_SNP832 | Ca_Desig_LG04 | 7411730                 | [A/C] | Ca_04335           | NON_SYNONYMOUS_CODING               | Uncharacterized aarF domain-containing protein kinase At4g31390, chloroplastic |
| *Ca_Desig_SNP833 | scaffold01039 | 49667                   | [A/C] |                    | INTERGENIC                          |                                                                                |
| *Ca_Desig_SNP834 | Ca_Desig_LG01 | 4001436                 | [A/T] | Ca_00402           | DOWNSTREAM:1483bases                | Putative uncharacterized protein                                               |
| *Ca_Desig_SNP835 | scaffold00416 | 131481                  | [C/G] |                    | INTERGENIC                          |                                                                                |
| *Ca_Desig_SNP836 | scaffold00229 | 40362                   | [T/A] |                    | INTERGENIC                          |                                                                                |
| *Ca_Desig_SNP837 | scaffold00779 | 2243                    | [A/G] |                    | INTERGENIC                          |                                                                                |
| *Ca_Desig_SNP838 | scaffold00249 | 31153                   | [C/T] |                    | INTERGENIC                          |                                                                                |
| *Ca_Desig_SNP839 | scaffold00581 | 3657                    | [G/A] | Ca_13271           | DOWNSTREAM:108bases                 | Serine/threonine-protein kinase PRP4 homolog                                   |
| *Ca_Desig_SNP840 | scaffold00876 | 6617                    | [A/G] |                    | INTERGENIC                          |                                                                                |
| *Ca_Desig_SNP841 | Ca_Desig_LG03 | 11146467                | [A/C] | Ca_02911           | DOWNSTREAM:1703bases                | Basic leucine zipper and W2 domain-containing protein 2                        |
| *Ca_Desig_SNP842 | scaffold00936 | 11243                   | [G/A] |                    | INTERGENIC                          |                                                                                |
| *Ca_Desig_SNP843 | scaffold00876 | 17491                   | [T/C] |                    | INTERGENIC                          |                                                                                |
| *Ca_Desig_SNP844 | scaffold03298 | 77529                   | [G/A] |                    | INTERGENIC                          |                                                                                |
| *Ca_Desig_SNP845 | Ca_Desig_LG06 | 2187070                 | [T/A] |                    | INTERGENIC                          |                                                                                |
| *Ca_Desig_SNP846 | Ca_Desig_LG03 | 4581079                 | [T/G] | Ca_02570           | NON_SYNONYMOUS_CODING               | UPF0503 protein At3g09070, chloroplastic                                       |
| *Ca_Desig_SNP847 | scaffold00771 | 2543                    | [A/G] |                    | INTERGENIC                          |                                                                                |
| *Ca_Desig_SNP848 | scaffold00778 | 1625                    | [A/G] |                    | INTERGENIC                          |                                                                                |
| *Ca_Desig_SNP849 | scaffold07915 | 39565                   | [A/C] |                    | INTERGENIC                          |                                                                                |
| *Ca_Desig_SNP850 | scaffold01169 | 7                       | [G/A] |                    | INTERGENIC                          |                                                                                |
| *Ca_Desig_SNP851 | scaffold00744 | 3824                    | [T/A] | Ca_13871           | SYNONYMOUS_CODING                   | Gibberellin 2-beta-dioxygenase 8                                               |
| *Ca_Desig_SNP852 | Ca_Desig_LG08 | 6693920                 | [A/T] | Ca_08481           | NON_SYNONYMOUS_CODING               | ABC transporter B family member 25                                             |
| *Ca_Desig_SNP853 | Ca_Desig_LG06 | 9904535                 | [T/G] |                    | INTERGENIC                          |                                                                                |
| *Ca_Desig_SNP854 | scaffold00876 | 10475                   | [T/C] |                    | INTERGENIC                          |                                                                                |
| *Ca_Desig_SNP855 | scaffold01042 | 723                     | [T/C] |                    | INTERGENIC                          |                                                                                |
| *Ca_Desig_SNP856 | scaffold00741 | 842                     | [A/G] |                    | INTERGENIC                          |                                                                                |
| *Ca_Desig_SNP857 | scaffold00937 | 224746                  | [C/A] |                    | INTERGENIC                          |                                                                                |



| SNP IDs          | Chromosomes   | Physical positions (bp) | SNPs  | Gene accession IDs | Sequence components of genome/genes | Putative functions                                  |
|------------------|---------------|-------------------------|-------|--------------------|-------------------------------------|-----------------------------------------------------|
| *Ca_Desig_SNP858 | Ca_Desig_LG07 | 7266204                 | [A/C] | Ca_07873           | NON_SYNONYMOUS_CODING               | SBP (S-ribonuclease binding protein) family protein |
| *Ca_Desig_SNP859 | scaffold06008 | 35522                   | [A/C] |                    | INTERGENIC                          |                                                     |
| *Ca_Desig_SNP860 | scaffold01344 | 93713                   | [C/A] |                    | INTERGENIC                          |                                                     |
| *Ca_Desig_SNP861 | scaffold00735 | 3674                    | [T/C] | Ca_13852           | DOWNSTREAM:772bases                 | MORC family CW-type zinc finger protein 4           |
| *Ca_Desig_SNP862 | scaffold00768 | 3128                    | [A/G] |                    | INTERGENIC                          |                                                     |
| *Ca_Desig_SNP863 | scaffold00824 | 1805                    | [T/C] |                    | INTERGENIC                          |                                                     |
| *Ca_Desig_SNP864 | scaffold00735 | 2815                    | [A/G] | Ca_13852           | DOWNSTREAM:1631bases                | MORC family CW-type zinc finger protein 4           |
| *Ca_Desig_SNP865 | scaffold01264 | 115786                  | [C/G] | Ca_09863           | INTRON                              | Protein EFR3 homolog B                              |
| *Ca_Desig_SNP866 | scaffold01042 | 711                     | [A/G] |                    | INTERGENIC                          |                                                     |
| *Ca_Desig_SNP867 | scaffold00691 | 6363                    | [T/G] |                    | INTERGENIC                          |                                                     |
| *Ca_Desig_SNP868 | scaffold01704 | 19940                   | [C/A] |                    | INTERGENIC                          |                                                     |
| *Ca_Desig_SNP869 | scaffold00741 | 800                     | [A/G] |                    | INTERGENIC                          |                                                     |
| *Ca_Desig_SNP870 | scaffold00582 | 13901                   | [T/C] | Ca_13282           | DOWNSTREAM:30bases                  | Transaldolase                                       |
| *Ca_Desig_SNP871 | scaffold01044 | 357                     | [A/C] |                    | INTERGENIC                          |                                                     |
| *Ca_Desig_SNP872 | scaffold00880 | 915                     | [T/C] |                    | INTERGENIC                          |                                                     |
| *Ca_Desig_SNP873 | scaffold00417 | 19449                   | [C/T] | Ca_12539           | INTRON                              | GDT1-like protein 3                                 |
| *Ca_Desig_SNP874 | scaffold00876 | 6606                    | [T/C] |                    | INTERGENIC                          |                                                     |
| *Ca_Desig_SNP875 | Ca_Desig_LG04 | 8063854                 | [T/G] |                    | INTERGENIC                          |                                                     |
| *Ca_Desig_SNP876 | Ca_Desig_LG08 | 10458805                | [T/G] | Ca_08739           | NON_SYNONYMOUS_CODING               | Cell division cycle-associated 7-like protein       |
| *Ca_Desig_SNP877 | scaffold00277 | 16900                   | [T/G] |                    | INTERGENIC                          |                                                     |
| *Ca_Desig_SNP878 | scaffold01060 | 74521                   | [A/C] |                    | INTERGENIC                          |                                                     |
| *Ca_Desig_SNP879 | Ca_Desig_LG06 | 3377407                 | [T/G] | Ca_06680           | SYNONYMOUS_CODING                   | Zinc finger CCCH domain-containing protein 41       |
| *Ca_Desig_SNP880 | Ca_Desig_LG04 | 22000431                | [G/T] | Ca_05232           | SYNONYMOUS_CODING                   | Two-component response regulator ARR1               |
| *Ca_Desig_SNP881 | scaffold00612 | 55008                   | [T/G] |                    | INTERGENIC                          |                                                     |
| *Ca_Desig_SNP882 | Ca_Desig_LG04 | 22000430                | [A/C] | Ca_05232           | SYNONYMOUS_CODING                   | Two-component response regulator ARR1               |
| *Ca_Desig_SNP883 | scaffold00444 | 14720                   | [C/T] |                    | INTERGENIC                          |                                                     |

| SNP IDs          | Chromosomes   | Physical positions (bp) | SNPs  | Gene accession IDs | Sequence components of genome/genes | Putative functions                                                                                            |
|------------------|---------------|-------------------------|-------|--------------------|-------------------------------------|---------------------------------------------------------------------------------------------------------------|
| *Ca_Desig_SNP884 | scaffold00788 | 3404                    | [A/G] |                    | INTERGENIC                          |                                                                                                               |
| *Ca_Desig_SNP885 | Ca_Desig_LG08 | 6222618                 | [T/G] | Ca_08430           | SYNONYMOUS_CODING                   | DnaJ homolog subfamily C member 13                                                                            |
| *Ca_Desig_SNP886 | scaffold00771 | 2536                    | [C/T] |                    | INTERGENIC                          |                                                                                                               |
| *Ca_Desig_SNP887 | scaffold01106 | 73                      | [T/C] |                    | INTERGENIC                          |                                                                                                               |
| *Ca_Desig_SNP888 | scaffold00942 | 1294                    | [A/G] |                    | INTERGENIC                          |                                                                                                               |
| *Ca_Desig_SNP889 | scaffold01042 | 729                     | [T/C] |                    | INTERGENIC                          |                                                                                                               |
| *Ca_Desig_SNP890 | Ca_Desig_LG02 | 8568490                 | [C/T] | Ca_01679           | NON_SYNONYMOUS_CODING               | Two-component response regulator-like APRR7                                                                   |
| *Ca_Desig_SNP891 | scaffold15702 | 53706                   | [T/G] |                    | INTERGENIC                          |                                                                                                               |
| *Ca_Desig_SNP892 | Ca_Desig_LG03 | 11018990                | [T/G] | Ca_02899           | NON_SYNONYMOUS_CODING               | unknown protein; BEST Arabidopsis thaliana protein match is: unknown protein (TAIR:AT2G44600.1); Has 60 Blast |
| *Ca_Desig_SNP893 | scaffold00854 | 2288                    | [T/C] |                    | INTERGENIC                          |                                                                                                               |
| *Ca_Desig_SNP894 | scaffold00787 | 113133                  | [A/T] |                    | INTERGENIC                          |                                                                                                               |
| *Ca_Desig_SNP895 | scaffold01958 | 71524                   | [A/G] |                    | INTERGENIC                          |                                                                                                               |
| *Ca_Desig_SNP896 | scaffold01043 | 296                     | [A/G] |                    | INTERGENIC                          |                                                                                                               |
| *Ca_Desig_SNP897 | scaffold00991 | 228438                  | [C/A] |                    | INTERGENIC                          |                                                                                                               |
| *Ca_Desig_SNP898 | scaffold01124 | 43                      | [A/T] |                    | INTERGENIC                          |                                                                                                               |
| *Ca_Desig_SNP899 | scaffold00660 | 1484                    | [A/C] |                    | INTERGENIC                          |                                                                                                               |
| *Ca_Desig_SNP900 | scaffold02056 | 9794                    | [A/C] | Ca_10434           | DOWNSTREAM:1119bases                | Protein of unknown function (DUF3741)                                                                         |
| *Ca_Desig_SNP901 | scaffold00515 | 2544                    | [G/A] |                    | INTERGENIC                          |                                                                                                               |
| *Ca_Desig_SNP902 | scaffold04453 | 258699                  | [A/G] |                    | INTERGENIC                          |                                                                                                               |
| *Ca_Desig_SNP903 | scaffold01997 | 16916                   | [G/T] |                    | INTERGENIC                          |                                                                                                               |
| *Ca_Desig_SNP904 | Ca_Desig_LG06 | 10461678                | [T/G] | Ca_07291           | DOWNSTREAM:1690bases                | Protein of unknown function (DUF1118)                                                                         |
| *Ca_Desig_SNP905 | scaffold00376 | 202672                  | [T/G] |                    | INTERGENIC                          |                                                                                                               |
| *Ca_Desig_SNP906 | scaffold00582 | 5159                    | [A/G] | Ca_13279           | INTRON                              | (+)-neomenthol dehydrogenase                                                                                  |
| *Ca_Desig_SNP907 | scaffold00638 | 1512                    | [T/C] |                    | INTERGENIC                          |                                                                                                               |
| *Ca_Desig_SNP908 | Ca_Desig_LG01 | 6945801                 | [A/C] | Ca_00565           | NON_SYNONYMOUS_CODING               | Protein CLEC16A homolog                                                                                       |
| *Ca_Desig_SNP909 | scaffold02138 | 54280                   | [A/C] |                    | INTERGENIC                          |                                                                                                               |

| SNP IDs          | Chromosomes   | Physical positions (bp) | SNPs  | Gene accession IDs | Sequence components of genome/genes | Putative functions                                   |
|------------------|---------------|-------------------------|-------|--------------------|-------------------------------------|------------------------------------------------------|
| *Ca_Desig_SNP910 | scaffold00852 | 990                     | [A/G] | Ca_14286           | INTRON                              | Type I inositol-1,4,5-trisphosphate 5-phosphatase 11 |
| *Ca_Desig_SNP911 | scaffold01574 | 176925                  | [C/T] |                    | INTERGENIC                          |                                                      |
| *Ca_Desig_SNP912 | Ca_Desig_LG03 | 1416939                 | [T/G] | Ca_02288           | NON_SYNONYMOUS_CODING               | Receptor-like serine/threonine-protein kinase ALE2   |
| *Ca_Desig_SNP913 | scaffold00702 | 6542                    | [A/G] |                    | INTERGENIC                          |                                                      |
| *Ca_Desig_SNP914 | scaffold07146 | 62010                   | [T/C] |                    | INTERGENIC                          |                                                      |
| *Ca_Desig_SNP915 | scaffold00781 | 14344                   | [G/A] |                    | INTERGENIC                          |                                                      |
| *Ca_Desig_SNP916 | scaffold00866 | 907                     | [T/C] | Ca_14324           | DOWNSTREAM:422bases                 | NADP-specific glutamate dehydrogenase                |
| *Ca_Desig_SNP917 | Ca_Desig_LG03 | 15332140                | [G/A] | Ca_03190           | SYNONYMOUS_CODING                   | Probable F-box protein At4g22030                     |
| *Ca_Desig_SNP918 | scaffold00617 | 50052                   | [A/C] |                    | INTERGENIC                          |                                                      |
| *Ca_Desig_SNP919 | scaffold00923 | 486                     | [A/G] |                    | INTERGENIC                          |                                                      |
| *Ca_Desig_SNP920 | scaffold00447 | 16237                   | [G/T] | Ca_12664           | INTRON                              | RNA exonuclease 4                                    |
| *Ca_Desig_SNP921 | scaffold01958 | 62480                   | [T/C] |                    | INTERGENIC                          |                                                      |
| *Ca_Desig_SNP922 | Ca_Desig_LG05 | 9334377                 | [A/T] |                    | INTERGENIC                          |                                                      |
| *Ca_Desig_SNP923 | scaffold00876 | 10452                   | [T/C] |                    | INTERGENIC                          |                                                      |
| *Ca_Desig_SNP924 | scaffold01958 | 67314                   | [C/T] |                    | INTERGENIC                          |                                                      |
| *Ca_Desig_SNP925 | scaffold01958 | 67542                   | [G/C] |                    | INTERGENIC                          |                                                      |
| *Ca_Desig_SNP926 | scaffold00876 | 832                     | [A/G] |                    | INTERGENIC                          |                                                      |
| *Ca_Desig_SNP927 | scaffold00691 | 491                     | [T/G] | Ca_13701           | NON_SYNONYMOUS_CODING               | ABC transporter G family member 1                    |
| *Ca_Desig_SNP928 | scaffold00761 | 3721                    | [A/G] |                    | INTERGENIC                          |                                                      |
| *Ca_Desig_SNP929 | scaffold01958 | 15332                   | [A/G] |                    | INTERGENIC                          |                                                      |
| *Ca_Desig_SNP930 | scaffold00975 | 529                     | [A/G] |                    | INTERGENIC                          |                                                      |
| *Ca_Desig_SNP931 | scaffold00582 | 5180                    | [T/C] | Ca_13279           | SYNONYMOUS_CODING                   | (+)-neomenthol dehydrogenase                         |
| *Ca_Desig_SNP932 | scaffold00686 | 3641                    | [T/C] |                    | INTERGENIC                          |                                                      |
| *Ca_Desig_SNP933 | scaffold00761 | 3535                    | [A/G] |                    | INTERGENIC                          |                                                      |
| *Ca_Desig_SNP934 | scaffold01863 | 98932                   | [G/C] |                    | INTERGENIC                          |                                                      |
| *Ca_Desig_SNP935 | Ca_Desig_LG02 | 6104365                 | [C/T] |                    | INTERGENIC                          |                                                      |

| SNP IDs          | Chromosomes   | Physical positions (bp) | SNPs  | Gene accession IDs | Sequence components of genome/genes | Putative functions                            |
|------------------|---------------|-------------------------|-------|--------------------|-------------------------------------|-----------------------------------------------|
| *Ca_Desig_SNP936 | scaffold01997 | 16875                   | [T/A] |                    | INTERGENIC                          |                                               |
| *Ca_Desig_SNP937 | scaffold02077 | 89873                   | [T/C] |                    | INTERGENIC                          |                                               |
| *Ca_Desig_SNP938 | scaffold00854 | 361                     | [A/G] |                    | INTERGENIC                          |                                               |
| *Ca_Desig_SNP939 | scaffold00510 | 4796                    | [T/G] |                    | INTERGENIC                          |                                               |
| *Ca_Desig_SNP940 | scaffold00865 | 26864                   | [G/A] |                    | INTERGENIC                          |                                               |
| *Ca_Desig_SNP941 | scaffold00998 | 221651                  | [T/C] |                    | INTERGENIC                          |                                               |
| *Ca_Desig_SNP942 | scaffold00750 | 363                     | [C/T] |                    | INTERGENIC                          |                                               |
| *Ca_Desig_SNP943 | scaffold00916 | 363044                  | [C/T] |                    | INTERGENIC                          |                                               |
| *Ca_Desig_SNP944 | Ca_Desig_LG07 | 5882433                 | [C/A] | Ca_07756           | INTRON                              | Exosome complex exonuclease RRP44             |
| *Ca_Desig_SNP945 | Ca_Desig_LG02 | 13260498                | [G/A] | Ca_01862           | DOWNSTREAM:1396bases                | F-box/LRR-repeat protein 3                    |
| *Ca_Desig_SNP946 | scaffold00866 | 1067                    | [T/C] | Ca_14324           | DOWNSTREAM:262bases                 | NADP-specific glutamate dehydrogenase         |
| *Ca_Desig_SNP947 | scaffold01353 | 71975                   | [C/T] |                    | INTERGENIC                          |                                               |
| *Ca_Desig_SNP948 | scaffold01958 | 62463                   | [G/A] |                    | INTERGENIC                          |                                               |
| *Ca_Desig_SNP949 | Ca_Desig_LG02 | 8013247                 | [T/C] | Ca_01644           | SYNONYMOUS_CODING                   | Probable E3 ubiquitin-protein ligase ARI7     |
| *Ca_Desig_SNP950 | scaffold00902 | 1515                    | [T/A] |                    | INTERGENIC                          |                                               |
| *Ca_Desig_SNP951 | scaffold00480 | 11002                   | [G/A] | Ca_12823           | INTRON                              | Protein KIAA0664 homolog                      |
| *Ca_Desig_SNP952 | scaffold00160 | 39667                   | [T/C] |                    | INTERGENIC                          |                                               |
| *Ca_Desig_SNP953 | scaffold00186 | 25858                   | [T/A] |                    | INTERGENIC                          |                                               |
| *Ca_Desig_SNP954 | scaffold01802 | 28223                   | [G/A] |                    | INTERGENIC                          |                                               |
| *Ca_Desig_SNP955 | Ca_Desig_LG05 | 4413238                 | [G/A] |                    | INTERGENIC                          |                                               |
| *Ca_Desig_SNP956 | scaffold00828 | 2672                    | [C/T] |                    | INTERGENIC                          |                                               |
| *Ca_Desig_SNP957 | scaffold00055 | 317134                  | [T/G] |                    | INTERGENIC                          |                                               |
| *Ca_Desig_SNP958 | scaffold00055 | 318214                  | [C/A] | Ca_08802           | DOWNSTREAM:1822bases                | Protein ABIL1                                 |
| *Ca_Desig_SNP959 | scaffold00481 | 18690                   | [C/G] | Ca_12827           | INTRON                              | General transcription factor 3C polypeptide 3 |
| *Ca_Desig_SNP960 | scaffold00935 | 355                     | [T/C] |                    | INTERGENIC                          |                                               |
| *Ca_Desig_SNP961 | scaffold00582 | 13516                   | [T/C] | Ca_13281           | DOWNSTREAM:109bases                 | Uncharacterized protein At4g14100             |

| SNP IDs          | Chromosomes   | Physical positions (bp) | SNPs  | Gene accession IDs | Sequence components of genome/genes | Putative functions                                                                                                     |
|------------------|---------------|-------------------------|-------|--------------------|-------------------------------------|------------------------------------------------------------------------------------------------------------------------|
| *Ca_Desig_SNP962 | scaffold00422 | 7286                    | [T/C] |                    | INTERGENIC                          |                                                                                                                        |
| *Ca_Desig_SNP963 | Ca_Desig_LG01 | 1938758                 | [G/T] | Ca_00203           | SYNONYMOUS_CODING                   | Splicing factor 3B subunit 1                                                                                           |
| *Ca_Desig_SNP964 | Ca_Desig_LG04 | 5678706                 | [T/G] | Ca_04260           | DOWNSTREAM:1509bases                | HR-like lesion-inducing protein-related                                                                                |
| *Ca_Desig_SNP965 | scaffold00481 | 19335                   | [C/A] | Ca_12827           | INTRON                              | General transcription factor 3C polypeptide 3                                                                          |
| *Ca_Desig_SNP966 | scaffold00913 | 47                      | [G/A] |                    | INTERGENIC                          |                                                                                                                        |
| *Ca_Desig_SNP967 | scaffold00635 | 2251                    | [A/C] |                    | INTERGENIC                          |                                                                                                                        |
| *Ca_Desig_SNP968 | scaffold03107 | 11131                   | [G/C] |                    | INTERGENIC                          |                                                                                                                        |
| *Ca_Desig_SNP969 | Ca_Desig_LG02 | 2124937                 | [T/A] | Ca_01184           | STOP_GAINED                         | LOB domain-containing protein 41                                                                                       |
| *Ca_Desig_SNP970 | scaffold03894 | 18727                   | [T/C] |                    | INTERGENIC                          |                                                                                                                        |
| *Ca_Desig_SNP971 | scaffold00741 | 817                     | [A/G] |                    | INTERGENIC                          |                                                                                                                        |
| *Ca_Desig_SNP972 | Ca_Desig_LG02 | 5537769                 | [A/T] | Ca_01418           | NON_SYNONYMOUS_CODING               | Protein TIC 62, chloroplastic                                                                                          |
| *Ca_Desig_SNP973 | scaffold00792 | 431                     | [C/A] |                    | INTERGENIC                          |                                                                                                                        |
| *Ca_Desig_SNP974 | scaffold01023 | 187380                  | [T/G] |                    | INTERGENIC                          |                                                                                                                        |
| *Ca_Desig_SNP975 | Ca_Desig_LG02 | 6025730                 | [G/T] |                    | INTERGENIC                          |                                                                                                                        |
| *Ca_Desig_SNP976 | scaffold00772 | 94                      | [C/T] |                    | INTERGENIC                          |                                                                                                                        |
| *Ca_Desig_SNP977 | Ca_Desig_LG08 | 1399529                 | [T/G] | Ca_08097           | NON_SYNONYMOUS_CODING               | unknown protein; Has 283 Blast hits to 154 proteins in 44 species: Archae - 0; Bacteria - 2; Metazoa - 24; Fungi - 12; |
| *Ca_Desig_SNP978 | scaffold00881 | 1205                    | [T/C] |                    | INTERGENIC                          |                                                                                                                        |
| *Ca_Desig_SNP979 | Ca_Desig_LG02 | 5503727                 | [T/G] |                    | INTERGENIC                          |                                                                                                                        |
| *Ca_Desig_SNP980 | scaffold02761 | 19085                   | [G/T] | Ca_10206           | DOWNSTREAM:1164bases                | Alcohol dehydrogenase-like 6                                                                                           |
| *Ca_Desig_SNP981 | scaffold00735 | 2850                    | [A/G] | Ca_13852           | DOWNSTREAM:1596bases                | MORC family CW-type zinc finger protein 4                                                                              |
| *Ca_Desig_SNP982 | scaffold00870 | 672                     | [A/G] |                    | INTERGENIC                          |                                                                                                                        |
| *Ca_Desig_SNP983 | scaffold01347 | 141021                  | [C/T] |                    | INTERGENIC                          |                                                                                                                        |
| *Ca_Desig_SNP984 | scaffold00571 | 5204                    | [G/T] |                    | INTERGENIC                          |                                                                                                                        |
| *Ca_Desig_SNP985 | scaffold14943 | 34553                   | [C/A] | Ca_10460           | DOWNSTREAM:1815bases                | Ankyrin repeat family protein                                                                                          |
| *Ca_Desig_SNP986 | scaffold00613 | 543                     | [G/A] |                    | INTERGENIC                          |                                                                                                                        |
| *Ca_Desig_SNP987 | scaffold14943 | 34554                   | [C/G] | Ca_10460           | DOWNSTREAM:1816bases                | Ankyrin repeat family protein                                                                                          |

| SNP IDs           | Chromosomes   | Physical positions (bp) | SNPs  | Gene accession IDs | Sequence components of genome/genes | Putative functions                               |
|-------------------|---------------|-------------------------|-------|--------------------|-------------------------------------|--------------------------------------------------|
| *Ca_Desig_SNP988  | Ca_Desig_LG02 | 6010840                 | [G/A] | Ca_01454           | INTRON                              | Calreticulin-3                                   |
| *Ca_Desig_SNP989  | scaffold00968 | 172                     | [A/T] |                    | INTERGENIC                          |                                                  |
| *Ca_Desig_SNP990  | Ca_Desig_LG02 | 5507928                 | [A/C] |                    | INTERGENIC                          |                                                  |
| *Ca_Desig_SNP991  | scaffold00823 | 144                     | [A/G] |                    | INTERGENIC                          |                                                  |
| *Ca_Desig_SNP992  | scaffold00965 | 270                     | [T/C] |                    | INTERGENIC                          |                                                  |
| *Ca_Desig_SNP993  | scaffold01073 | 582                     | [G/A] |                    | INTERGENIC                          |                                                  |
| *Ca_Desig_SNP994  | scaffold07988 | 15438                   | [C/A] |                    | INTERGENIC                          |                                                  |
| *Ca_Desig_SNP995  | Ca_Desig_LG02 | 5503405                 | [T/A] | Ca_01413           | DOWNSTREAM:121bases                 | Plastid division protein PDV2                    |
| *Ca_Desig_SNP996  | Ca_Desig_LG02 | 5699314                 | [A/G] |                    | INTERGENIC                          |                                                  |
| *Ca_Desig_SNP997  | scaffold04586 | 97307                   | [A/T] |                    | INTERGENIC                          |                                                  |
| *Ca_Desig_SNP998  | scaffold02564 | 20357                   | [A/G] |                    | INTERGENIC                          |                                                  |
| *Ca_Desig_SNP999  | scaffold00686 | 5077                    | [G/T] |                    | INTERGENIC                          |                                                  |
| *Ca_Desig_SNP1000 | scaffold00675 | 12626                   | [G/A] |                    | INTERGENIC                          |                                                  |
| *Ca_Desig_SNP1001 | Ca_Desig_LG02 | 6092347                 | [T/G] | Ca_01467           | DOWNSTREAM:1381bases                | unknown protein                                  |
| *Ca_Desig_SNP1002 | scaffold01055 | 429                     | [A/C] |                    | INTERGENIC                          |                                                  |
| *Ca_Desig_SNP1003 | scaffold00630 | 4146                    | [A/G] |                    | INTERGENIC                          |                                                  |
| *Ca_Desig_SNP1004 | Ca_Desig_LG02 | 6103902                 | [T/C] |                    | INTERGENIC                          |                                                  |
| *Ca_Desig_SNP1005 | scaffold00668 | 7605                    | [T/G] |                    | INTERGENIC                          |                                                  |
| *Ca_Desig_SNP1006 | Ca_Desig_LG02 | 5716475                 | [C/T] | Ca_01434           | SYNONYMOUS_CODING                   | Mitogen-activated protein kinase kinase kinase A |
| *Ca_Desig_SNP1007 | scaffold00582 | 5887                    | [C/A] | Ca_13279           | INTRON                              | (+)-neomenthol dehydrogenase                     |
| *Ca_Desig_SNP1008 | Ca_Desig_LG02 | 6103617                 | [A/T] |                    | INTERGENIC                          |                                                  |
| *Ca_Desig_SNP1009 | Ca_Desig_LG02 | 6140423                 | [G/A] |                    | INTERGENIC                          |                                                  |
| *Ca_Desig_SNP1010 | scaffold09553 | 106271                  | [T/G] |                    | INTERGENIC                          |                                                  |
| *Ca_Desig_SNP1011 | scaffold00356 | 206876                  | [A/C] | Ca_09123           | INTRON                              | Extended synaptotagmin-2                         |
| *Ca_Desig_SNP1012 | Ca_Desig_LG02 | 6092092                 | [G/A] | Ca_01467           | DOWNSTREAM:1636bases                | unknown protein                                  |
| *Ca_Desig_SNP1013 | Ca_Desig_LG03 | 18171145                | [A/T] | Ca_03436           | SYNONYMOUS_CODING                   | E3 ubiquitin ligase BIG BROTHER                  |

| SNP IDs           | Chromosomes   | Physical positions (bp) | SNPs  | Gene accession IDs | Sequence components of genome/genes | Putative functions                               |
|-------------------|---------------|-------------------------|-------|--------------------|-------------------------------------|--------------------------------------------------|
| *Ca_Desig_SNP1014 | Ca_Desig_LG02 | 5717021                 | [G/C] | Ca_01434           | NON_SYNONYMOUS_CODING               | Mitogen-activated protein kinase kinase kinase A |
| *Ca_Desig_SNP1015 | scaffold00608 | 43279                   | [A/C] |                    | INTERGENIC                          |                                                  |
| *Ca_Desig_SNP1016 | scaffold00322 | 16495                   | [T/G] |                    | INTERGENIC                          |                                                  |
| *Ca_Desig_SNP1017 | scaffold00937 | 284095                  | [C/A] |                    | INTERGENIC                          |                                                  |
| *Ca_Desig_SNP1018 | scaffold09693 | 80335                   | [T/G] |                    | INTERGENIC                          |                                                  |
| *Ca_Desig_SNP1019 | scaffold01079 | 212                     | [C/T] |                    | INTERGENIC                          |                                                  |
| *Ca_Desig_SNP1020 | Ca_Desig_LG05 | 11038446                | [T/C] |                    | INTERGENIC                          |                                                  |
| *Ca_Desig_SNP1021 | Ca_Desig_LG02 | 5698976                 | [C/T] |                    | INTERGENIC                          |                                                  |
| *Ca_Desig_SNP1022 | Ca_Desig_LG02 | 5698170                 | [T/A] | Ca_01432           | DOWNSTREAM:1619bases                | cold-regulated 413-plasma membrane 2             |
| *Ca_Desig_SNP1023 | scaffold04764 | 57814                   | [T/A] |                    | INTERGENIC                          |                                                  |
| *Ca_Desig_SNP1024 | Ca_Desig_LG01 | 6918766                 | [T/A] |                    | INTERGENIC                          |                                                  |
| *Ca_Desig_SNP1025 | scaffold03023 | 77223                   | [T/G] |                    | INTERGENIC                          |                                                  |
| *Ca_Desig_SNP1026 | Ca_Desig_LG07 | 8369407                 | [A/C] |                    | INTERGENIC                          |                                                  |
| *Ca_Desig_SNP1027 | scaffold01018 | 110                     | [C/G] |                    | INTERGENIC                          |                                                  |
| *Ca_Desig_SNP1028 | scaffold00360 | 17074                   | [T/C] |                    | INTERGENIC                          |                                                  |
| *Ca_Desig_SNP1029 | scaffold00790 | 831                     | [A/G] |                    | INTERGENIC                          |                                                  |
| *Ca_Desig_SNP1030 | scaffold01262 | 154557                  | [C/A] |                    | INTERGENIC                          |                                                  |
| *Ca_Desig_SNP1031 | Ca_Desig_LG02 | 6131587                 | [T/C] |                    | INTERGENIC                          |                                                  |
| *Ca_Desig_SNP1032 | Ca_Desig_LG02 | 6091962                 | [C/T] | Ca_01467           | DOWNSTREAM:1766bases                | unknown protein                                  |
| *Ca_Desig_SNP1033 | Ca_Desig_LG02 | 6011026                 | [G/A] | Ca_01454           | SYNONYMOUS_CODING                   | Calreticulin-3                                   |
| *Ca_Desig_SNP1034 | Ca_Desig_LG02 | 5508906                 | [T/A] | Ca_01415           | DOWNSTREAM:1751bases                | Protein of unknown function, DUF547              |
| *Ca_Desig_SNP1035 | scaffold00879 | 1763                    | [A/G] |                    | INTERGENIC                          |                                                  |
| *Ca_Desig_SNP1036 | Ca_Desig_LG02 | 12796796                | [T/A] | Ca_01833           | SYNONYMOUS_CODING                   | Lignin-forming anionic peroxidase                |
| *Ca_Desig_SNP1037 | Ca_Desig_LG02 | 5745551                 | [G/T] |                    | INTERGENIC                          |                                                  |
| *Ca_Desig_SNP1038 | scaffold00582 | 5069                    | [T/C] | Ca_13279           | INTRON                              | (+)-neomenthol dehydrogenase                     |
| *Ca_Desig_SNP1039 | Ca_Desig_LG01 | 2437948                 | [T/G] |                    | INTERGENIC                          |                                                  |

| SNP IDs           | Chromosomes   | Physical positions (bp) | SNPs  | Gene accession IDs | Sequence components of genome/genes | Putative functions                                  |
|-------------------|---------------|-------------------------|-------|--------------------|-------------------------------------|-----------------------------------------------------|
| *Ca_Desig_SNP1040 | Ca_Desig_LG02 | 6029971                 | [A/G] | Ca_01457           | NON_SYNONYMOUS_CODING               | Unknown expressed protein                           |
| *Ca_Desig_SNP1041 | Ca_Desig_LG02 | 5717899                 | [G/A] | Ca_01434           | SYNONYMOUS_CODING                   | Mitogen-activated protein kinase kinase kinase A    |
| *Ca_Desig_SNP1042 | Ca_Desig_LG05 | 16170915                | [G/T] |                    | INTERGENIC                          |                                                     |
| *Ca_Desig_SNP1043 | scaffold00961 | 484                     | [G/A] |                    | INTERGENIC                          |                                                     |
| *Ca_Desig_SNP1044 | scaffold00829 | 41343                   | [G/T] |                    | INTERGENIC                          |                                                     |
| *Ca_Desig_SNP1045 | scaffold01347 | 141131                  | [C/T] |                    | INTERGENIC                          |                                                     |
| *Ca_Desig_SNP1046 | scaffold00741 | 789                     | [A/G] |                    | INTERGENIC                          |                                                     |
| *Ca_Desig_SNP1047 | scaffold03107 | 100727                  | [C/T] |                    | INTERGENIC                          |                                                     |
| *Ca_Desig_SNP1048 | scaffold00884 | 654                     | [A/G] |                    | INTERGENIC                          |                                                     |
| *Ca_Desig_SNP1049 | Ca_Desig_LG05 | 11038453                | [T/C] |                    | INTERGENIC                          |                                                     |
| *Ca_Desig_SNP1050 | Ca_Desig_LG03 | 993125                  | [C/A] | Ca_02241           | DOWNSTREAM:1506bases                | bonsai                                              |
| *Ca_Desig_SNP1051 | Ca_Desig_LG03 | 993127                  | [G/C] | Ca_02241           | DOWNSTREAM:1508bases                | bonsai                                              |
| *Ca_Desig_SNP1052 | scaffold00876 | 10492                   | [T/C] |                    | INTERGENIC                          |                                                     |
| *Ca_Desig_SNP1053 | Ca_Desig_LG06 | 10334639                | [A/C] | Ca_07275           | NON_SYNONYMOUS_CODING               | MutS2 protein                                       |
| *Ca_Desig_SNP1054 | scaffold00254 | 21012                   | [G/C] |                    | INTERGENIC                          |                                                     |
| *Ca_Desig_SNP1055 | scaffold00201 | 15896                   | [G/A] |                    | INTERGENIC                          |                                                     |
| *Ca_Desig_SNP1056 | scaffold00851 | 380                     | [A/C] |                    | INTERGENIC                          |                                                     |
| *Ca_Desig_SNP1057 | Ca_Desig_LG08 | 8293911                 | [T/G] | Ca_08597           | DOWNSTREAM:46bases                  | Glyceraldehyde-3-phosphate dehydrogenase, cytosolic |
| *Ca_Desig_SNP1058 | scaffold11151 | 51436                   | [A/G] |                    | INTERGENIC                          |                                                     |
| *Ca_Desig_SNP1059 | scaffold01010 | 382                     | [G/A] |                    | INTERGENIC                          |                                                     |
| *Ca_Desig_SNP1060 | scaffold01347 | 141645                  | [C/T] |                    | INTERGENIC                          |                                                     |
| *Ca_Desig_SNP1061 | scaffold00928 | 1230                    | [T/C] |                    | INTERGENIC                          |                                                     |
| *Ca_Desig_SNP1062 | Ca_Desig_LG02 | 6135210                 | [G/A] | Ca_01473           | INTRON                              | Serine/threonine-protein kinase SMG1                |
| *Ca_Desig_SNP1063 | scaffold01143 | 107                     | [A/T] |                    | INTERGENIC                          |                                                     |
| *Ca_Desig_SNP1064 | Ca_Desig_LG02 | 6092158                 | [G/C] | Ca_01467           | DOWNSTREAM:1570bases                | Unknown expressed protein                           |
| *Ca_Desig_SNP1065 | Ca_Desig_LG02 | 5733756                 | [C/A] |                    | INTERGENIC                          |                                                     |



| SNP IDs           | Chromosomes   | Physical positions (bp) | SNPs  | Gene accession IDs | Sequence components of genome/genes | Putative functions                                    |
|-------------------|---------------|-------------------------|-------|--------------------|-------------------------------------|-------------------------------------------------------|
| *Ca_Desig_SNP1066 | Ca_Desig_LG02 | 6018033                 | [C/T] | Ca_01455           | SYNONYMOUS_CODING                   | Plant protein of unknown function (DUF936)            |
| *Ca_Desig_SNP1067 | Ca_Desig_LG02 | 5740309                 | [C/A] | Ca_01436           | DOWNSTREAM:429bases                 | Pentatricopeptide repeat-containing protein At2g15980 |
| *Ca_Desig_SNP1068 | Ca_Desig_LG02 | 6088304                 | [C/T] |                    | INTERGENIC                          |                                                       |
| *Ca_Desig_SNP1069 | Ca_Desig_LG02 | 6089048                 | [T/C] |                    | INTERGENIC                          |                                                       |
| *Ca_Desig_SNP1070 | Ca_Desig_LG02 | 6094379                 | [C/G] |                    | INTERGENIC                          |                                                       |
| *Ca_Desig_SNP1071 | scaffold00374 | 13196                   | [G/T] |                    | INTERGENIC                          |                                                       |
| *Ca_Desig_SNP1072 | scaffold00623 | 7196                    | [A/G] |                    | INTERGENIC                          |                                                       |
| *Ca_Desig_SNP1073 | Ca_Desig_LG02 | 6017510                 | [T/G] | Ca_01455           | SYNONYMOUS_CODING                   | Plant protein of unknown function (DUF936)            |
| *Ca_Desig_SNP1074 | scaffold00623 | 9425                    | [G/A] |                    | INTERGENIC                          |                                                       |
| *Ca_Desig_SNP1075 | scaffold00732 | 3225                    | [T/G] |                    | INTERGENIC                          |                                                       |
| *Ca_Desig_SNP1076 | Ca_Desig_LG02 | 6089357                 | [C/T] |                    | INTERGENIC                          |                                                       |
| *Ca_Desig_SNP1077 | Ca_Desig_LG04 | 5800696                 | [A/G] |                    | INTERGENIC                          |                                                       |
| *Ca_Desig_SNP1078 | scaffold00888 | 345                     | [T/C] |                    | INTERGENIC                          |                                                       |
| *Ca_Desig_SNP1079 | scaffold01347 | 161122                  | [C/A] |                    | INTERGENIC                          |                                                       |
| *Ca_Desig_SNP1080 | Ca_Desig_LG02 | 6017319                 | [T/C] | Ca_01455           | SYNONYMOUS_CODING                   | Plant protein of unknown function (DUF936)            |
| *Ca_Desig_SNP1081 | scaffold01097 | 347                     | [T/G] |                    | INTERGENIC                          |                                                       |
| *Ca_Desig_SNP1082 | scaffold02589 | 134711                  | [C/G] |                    | INTERGENIC                          |                                                       |
| *Ca_Desig_SNP1083 | scaffold00992 | 168282                  | [A/C] |                    | INTERGENIC                          |                                                       |
| *Ca_Desig_SNP1084 | scaffold01082 | 295                     | [G/A] |                    | INTERGENIC                          |                                                       |
| *Ca_Desig_SNP1085 | scaffold00953 | 694                     | [T/C] |                    | INTERGENIC                          |                                                       |
| *Ca_Desig_SNP1086 | Ca_Desig_LG02 | 5657507                 | [A/T] | Ca_01430           | UTR_3_PRIME:1813bases               | Coatomer subunit gamma-2                              |
| *Ca_Desig_SNP1087 | Ca_Desig_LG02 | 5503507                 | [C/A] | Ca_01413           | DOWNSTREAM:19bases                  | Plastid division protein PDV2                         |
| *Ca_Desig_SNP1088 | scaffold00686 | 1890                    | [T/C] |                    | INTERGENIC                          |                                                       |
| *Ca_Desig_SNP1089 | scaffold01135 | 200                     | [G/A] |                    | INTERGENIC                          |                                                       |
| *Ca_Desig_SNP1090 | scaffold00876 | 10479                   | [T/C] |                    | INTERGENIC                          |                                                       |
| *Ca_Desig_SNP1091 | scaffold00741 | 771                     | [T/C] |                    | INTERGENIC                          |                                                       |

| SNP IDs           | Chromosomes   | Physical positions (bp) | SNPs  | Gene accession IDs | Sequence components of genome/genes | Putative functions                           |
|-------------------|---------------|-------------------------|-------|--------------------|-------------------------------------|----------------------------------------------|
| *Ca_Desig_SNP1092 | scaffold00310 | 16654                   | [G/T] |                    | INTERGENIC                          |                                              |
| *Ca_Desig_SNP1093 | scaffold07628 | 53452                   | [T/G] |                    | INTERGENIC                          |                                              |
| *Ca_Desig_SNP1094 | scaffold00414 | 2559                    | [G/A] | Ca_12533           | INTRON                              | Patellin-5                                   |
| *Ca_Desig_SNP1095 | scaffold00876 | 874                     | [T/C] |                    | INTERGENIC                          |                                              |
| *Ca_Desig_SNP1096 | scaffold00788 | 3396                    | [A/G] |                    | INTERGENIC                          |                                              |
| *Ca_Desig_SNP1097 | scaffold04453 | 258771                  | [T/C] |                    | INTERGENIC                          |                                              |
| *Ca_Desig_SNP1098 | Ca_Desig_LG01 | 7013204                 | [T/G] | Ca_00567           | SYNONYMOUS_CODING                   | Protein transport protein Sec61 subunit beta |
| *Ca_Desig_SNP1099 | scaffold00880 | 939                     | [T/C] |                    | INTERGENIC                          |                                              |
| *Ca_Desig_SNP1100 | scaffold00828 | 2675                    | [T/G] |                    | INTERGENIC                          |                                              |
| *Ca_Desig_SNP1101 | Ca_Desig_LG02 | 527633                  | [A/T] |                    | INTERGENIC                          |                                              |
| *Ca_Desig_SNP1102 | scaffold00402 | 10453                   | [T/G] | Ca_12478           | INTRON                              | L-ascorbate oxidase homolog                  |
| *Ca_Desig_SNP1103 | scaffold00463 | 1616                    | [T/G] | Ca_12714           | SYNONYMOUS_CODING                   | unknown protein                              |
| *Ca_Desig_SNP1104 | Ca_Desig_LG02 | 527634                  | [A/C] |                    | INTERGENIC                          |                                              |
| *Ca_Desig_SNP1105 | scaffold00646 | 4880                    | [A/G] |                    | INTERGENIC                          |                                              |
| *Ca_Desig_SNP1106 | Ca_Desig_LG07 | 2047543                 | [G/A] |                    | INTERGENIC                          |                                              |
| *Ca_Desig_SNP1107 | scaffold00541 | 3578                    | [A/G] |                    | INTERGENIC                          |                                              |
| *Ca_Desig_SNP1108 | scaffold01031 | 538                     | [T/C] |                    | INTERGENIC                          |                                              |
| *Ca_Desig_SNP1109 | scaffold00804 | 735                     | [T/C] |                    | INTERGENIC                          |                                              |
| *Ca_Desig_SNP1110 | scaffold01473 | 48952                   | [T/G] |                    | INTERGENIC                          |                                              |
| *Ca_Desig_SNP1111 | scaffold00518 | 1027                    | [A/C] |                    | INTERGENIC                          |                                              |
| *Ca_Desig_SNP1112 | scaffold00884 | 659                     | [G/A] |                    | INTERGENIC                          |                                              |
| *Ca_Desig_SNP1113 | scaffold00930 | 1099                    | [A/G] | Ca_14498           | NON_SYNONYMOUS_CODING               | Peptidyl-prolyl cis-trans isomerase-like 4   |
| *Ca_Desig_SNP1114 | scaffold00741 | 866                     | [T/C] |                    | INTERGENIC                          |                                              |
| *Ca_Desig_SNP1115 | scaffold00741 | 764                     | [T/C] |                    | INTERGENIC                          |                                              |
| *Ca_Desig_SNP1116 | scaffold00928 | 1220                    | [A/G] |                    | INTERGENIC                          |                                              |
| *Ca_Desig_SNP1117 | Ca_Desig_LG06 | 837921                  | [G/A] |                    | INTERGENIC                          |                                              |

| SNP IDs           | Chromosomes   | Physical positions (bp) | SNPs  | Gene accession IDs | Sequence components of genome/genes | Putative functions                                 |
|-------------------|---------------|-------------------------|-------|--------------------|-------------------------------------|----------------------------------------------------|
| *Ca_Desig_SNP1118 | scaffold01075 | 84                      | [G/A] |                    | INTERGENIC                          |                                                    |
| *Ca_Desig_SNP1119 | scaffold03476 | 16238                   | [T/A] |                    | INTERGENIC                          |                                                    |
| *Ca_Desig_SNP1120 | scaffold00692 | 28722                   | [T/G] | Ca_09609           | SYNONYMOUS_CODING                   | Glycerol-3-phosphate acyltransferase 3             |
| *Ca_Desig_SNP1121 | scaffold01041 | 549                     | [A/G] |                    | INTERGENIC                          |                                                    |
| *Ca_Desig_SNP1122 | scaffold04201 | 16538                   | [T/G] |                    | INTERGENIC                          |                                                    |
| *Ca_Desig_SNP1123 | Ca_Desig_LG05 | 1615972                 | [A/C] | Ca_05325           | SYNONYMOUS_CODING                   | Protein NLP4                                       |
| *Ca_Desig_SNP1124 | Ca_Desig_LG02 | 15223718                | [A/G] | Ca_02013           | NON_SYNONYMOUS_CODING               | Two-component response regulator ARR14             |
| *Ca_Desig_SNP1125 | scaffold00763 | 1607                    | [A/G] |                    | INTERGENIC                          |                                                    |
| *Ca_Desig_SNP1126 | scaffold01133 | 242                     | [G/A] | Ca_15037           | STOP_GAINED                         | Integrase, catalytic region; Ribonuclease H        |
| *Ca_Desig_SNP1127 | scaffold00575 | 11135                   | [C/T] |                    | INTERGENIC                          |                                                    |
| *Ca_Desig_SNP1128 | Ca_Desig_LG08 | 6224388                 | [A/C] |                    | INTERGENIC                          |                                                    |
| *Ca_Desig_SNP1129 | scaffold00866 | 1051                    | [T/C] | Ca_14324           | DOWNSTREAM:278bases                 | NADP-specific glutamate dehydrogenase              |
| *Ca_Desig_SNP1130 | scaffold00418 | 19194                   | [T/C] |                    | INTERGENIC                          |                                                    |
| *Ca_Desig_SNP1131 | scaffold00332 | 5918                    | [T/G] | Ca_12098           | DOWNSTREAM:80bases                  | gamma-irradiation and mitomycin c induced 1        |
| *Ca_Desig_SNP1132 | Ca_Desig_LG03 | 6616912                 | [A/G] | Ca_02688           | SYNONYMOUS_CODING                   | Glutathione gamma-glutamylcysteinyltransferase 1   |
| *Ca_Desig_SNP1133 | Ca_Desig_LG03 | 6585721                 | [C/A] |                    | INTERGENIC                          |                                                    |
| *Ca_Desig_SNP1134 | Ca_Desig_LG03 | 6812169                 | [A/G] | Ca_02708           | DOWNSTREAM:1971bases                | Actin-depolymerizing factor                        |
| *Ca_Desig_SNP1135 | scaffold00418 | 19185                   | [C/T] |                    | INTERGENIC                          |                                                    |
| *Ca_Desig_SNP1136 | scaffold00901 | 66                      | [T/C] |                    | INTERGENIC                          |                                                    |
| *Ca_Desig_SNP1137 | scaffold02975 | 100448                  | [T/G] |                    | INTERGENIC                          |                                                    |
| *Ca_Desig_SNP1138 | scaffold01036 | 189                     | [A/G] |                    | INTERGENIC                          |                                                    |
| *Ca_Desig_SNP1139 | Ca_Desig_LG03 | 11633970                | [A/T] |                    | INTERGENIC                          |                                                    |
| *Ca_Desig_SNP1140 | Ca_Desig_LG03 | 17065616                | [T/G] | Ca_03329           | NON_SYNONYMOUS_CODING               | CBS domain-containing protein CBSX1, chloroplastic |
| *Ca_Desig_SNP1141 | scaffold00876 | 780                     | [T/C] |                    | INTERGENIC                          |                                                    |
| *Ca_Desig_SNP1142 | Ca_Desig_LG01 | 10530999                | [T/C] | Ca_00784           | NON_SYNONYMOUS_CODING               | OTU domain-containing protein 5                    |
| *Ca_Desig_SNP1143 | scaffold00609 | 134712                  | [A/T] |                    | INTERGENIC                          |                                                    |

| SNP IDs           | Chromosomes   | Physical positions (bp) | SNPs  | Gene accession IDs | Sequence components of genome/genes | Putative functions                                     |
|-------------------|---------------|-------------------------|-------|--------------------|-------------------------------------|--------------------------------------------------------|
| *Ca_Desig_SNP1144 | scaffold01063 | 314                     | [A/C] |                    | INTERGENIC                          |                                                        |
| *Ca_Desig_SNP1145 | scaffold00866 | 1032                    | [T/C] | Ca_14324           | DOWNSTREAM:297bases                 | NADP-specific glutamate dehydrogenase                  |
| *Ca_Desig_SNP1146 | scaffold01283 | 56048                   | [T/A] |                    | INTERGENIC                          |                                                        |
| *Ca_Desig_SNP1147 | scaffold02111 | 106955                  | [T/G] |                    | INTERGENIC                          |                                                        |
| *Ca_Desig_SNP1148 | scaffold00775 | 2397                    | [A/G] | Ca_13986           | DOWNSTREAM:1000bases                | Protein of unknown function (DUF3755)                  |
| *Ca_Desig_SNP1149 | scaffold00866 | 899                     | [T/C] | Ca_14324           | DOWNSTREAM:430bases                 | NADP-specific glutamate dehydrogenase                  |
| *Ca_Desig_SNP1150 | Ca_Desig_LG06 | 4641674                 | [A/C] | Ca_06808           | DOWNSTREAM:1751bases                | Aminopeptidase N                                       |
| *Ca_Desig_SNP1151 | scaffold00880 | 900                     | [T/C] |                    | INTERGENIC                          |                                                        |
| *Ca_Desig_SNP1152 | scaffold00582 | 5164                    | [A/G] | Ca_13279           | NON_SYNONYMOUS_CODING               | (+)-neomenthol dehydrogenase                           |
| *Ca_Desig_SNP1153 | Ca_Desig_LG05 | 16137753                | [G/A] | Ca_06466           | INTRON                              | Heat shock 70 kDa protein 2                            |
| *Ca_Desig_SNP1154 | scaffold00852 | 861                     | [T/C] | Ca_14286           | NON_SYNONYMOUS_CODING               | Type I inositol-1,4,5-trisphosphate 5-phosphatase 11   |
| *Ca_Desig_SNP1155 | scaffold00702 | 6560                    | [A/G] |                    | INTERGENIC                          |                                                        |
| *Ca_Desig_SNP1156 | scaffold00876 | 5286                    | [T/C] |                    | INTERGENIC                          |                                                        |
| *Ca_Desig_SNP1157 | scaffold00763 | 1585                    | [C/T] |                    | INTERGENIC                          |                                                        |
| *Ca_Desig_SNP1158 | scaffold00933 | 960                     | [C/A] |                    | INTERGENIC                          |                                                        |
| *Ca_Desig_SNP1159 | scaffold00113 | 8685                    | [C/T] | Ca_10890           | DOWNSTREAM:1046bases                | Ethylene-responsive transcription factor ERF012        |
| *Ca_Desig_SNP1160 | scaffold01075 | 83                      | [G/A] |                    | INTERGENIC                          |                                                        |
| *Ca_Desig_SNP1161 | scaffold00582 | 6335                    | [A/G] | Ca_13279           | INTRON                              | Neomenthol dehydrogenase                               |
| *Ca_Desig_SNP1162 | scaffold00761 | 3531                    | [A/G] |                    | INTERGENIC                          |                                                        |
| *Ca_Desig_SNP1163 | scaffold02564 | 20345                   | [T/G] |                    | INTERGENIC                          |                                                        |
| *Ca_Desig_SNP1164 | Ca_Desig_LG08 | 427223                  | [C/T] |                    | INTERGENIC                          |                                                        |
| *Ca_Desig_SNP1165 | Ca_Desig_LG04 | 1929722                 | [A/C] |                    | INTERGENIC                          |                                                        |
| *Ca_Desig_SNP1166 | Ca_Desig_LG03 | 6660873                 | [T/C] | Ca_02694           | DOWNSTREAM:1585bases                | H/ACA ribonucleoprotein complex subunit 3-like protein |
| *Ca_Desig_SNP1167 | scaffold00580 | 11362                   | [T/C] |                    | INTERGENIC                          |                                                        |
| *Ca_Desig_SNP1168 | scaffold00983 | 661                     | [C/T] |                    | INTERGENIC                          |                                                        |
| *Ca_Desig_SNP1169 | Ca_Desig_LG05 | 4939728                 | [T/G] | Ca_05596           | NON_SYNONYMOUS_CODING               | Probable ADP,ATP carrier protein At5g56450             |

| SNP IDs           | Chromosomes   | Physical positions (bp) | SNPs  | Gene accession IDs | Sequence components of genome/genes | Putative functions                                |
|-------------------|---------------|-------------------------|-------|--------------------|-------------------------------------|---------------------------------------------------|
| *Ca_Desig_SNP1170 | scaffold00735 | 2830                    | [T/C] | Ca_13852           | DOWNSTREAM:1616bases                | MORC family CW-type zinc finger protein 4         |
| *Ca_Desig_SNP1171 | scaffold00702 | 6584                    | [A/G] |                    | INTERGENIC                          |                                                   |
| *Ca_Desig_SNP1172 | scaffold00686 | 2621                    | [T/C] |                    | INTERGENIC                          |                                                   |
| *Ca_Desig_SNP1173 | Ca_Desig_LG06 | 2055044                 | [A/C] | Ca_06580           | SYNONYMOUS_CODING                   | Condensin complex subunit 3                       |
| *Ca_Desig_SNP1174 | Ca_Desig_LG04 | 2751571                 | [T/G] | Ca_04069           | INTRON                              | Serine/threonine-protein kinase At5g01020         |
| *Ca_Desig_SNP1175 | scaffold04453 | 258776                  | [A/G] |                    | INTERGENIC                          |                                                   |
| *Ca_Desig_SNP1176 | scaffold00637 | 5436                    | [C/T] |                    | INTERGENIC                          |                                                   |
| *Ca_Desig_SNP1177 | scaffold00686 | 2580                    | [A/G] |                    | INTERGENIC                          |                                                   |
| *Ca_Desig_SNP1178 | scaffold00876 | 807                     | [A/G] |                    | INTERGENIC                          |                                                   |
| *Ca_Desig_SNP1179 | scaffold02686 | 27880                   | [T/G] |                    | INTERGENIC                          |                                                   |
| *Ca_Desig_SNP1180 | scaffold00649 | 479                     | [T/C] |                    | INTERGENIC                          |                                                   |
| *Ca_Desig_SNP1181 | Ca_Desig_LG04 | 2181555                 | [C/T] |                    | INTERGENIC                          |                                                   |
| *Ca_Desig_SNP1182 | Ca_Desig_LG07 | 4370419                 | [T/A] | Ca_07661           | INTRON                              | Putative uncharacterized protein                  |
| *Ca_Desig_SNP1183 | Ca_Desig_LG08 | 6666637                 | [C/A] | Ca_08479           | NON_SYNONYMOUS_CODING               | Rab9 effector protein with kelch motifs           |
| *Ca_Desig_SNP1184 | Ca_Desig_LG03 | 11391313                | [A/G] | Ca_02936           | INTRON                              | Transmembrane protein 8B                          |
| *Ca_Desig_SNP1185 | scaffold00884 | 679                     | [A/G] |                    | INTERGENIC                          |                                                   |
| *Ca_Desig_SNP1186 | scaffold00938 | 1156                    | [A/G] |                    | INTERGENIC                          |                                                   |
| *Ca_Desig_SNP1187 | Ca_Desig_LG03 | 4409758                 | [A/G] | Ca_02551           | DOWNSTREAM:1852bases                | Probable U6 snRNA-associated Sm-like protein LSm4 |
| *Ca_Desig_SNP1188 | scaffold08319 | 83797                   | [T/G] |                    | INTERGENIC                          |                                                   |
| *Ca_Desig_SNP1189 | Ca_Desig_LG03 | 4162921                 | [C/G] | Ca_02517           | INTRON                              | Flavin-containing monooxygenase YUCCA10           |
| *Ca_Desig_SNP1190 | Ca_Desig_LG03 | 6543339                 | [T/A] |                    | INTERGENIC                          |                                                   |
| *Ca_Desig_SNP1191 | Ca_Desig_LG03 | 11391310                | [A/G] | Ca_02936           | INTRON                              | Transmembrane protein 8B                          |
| *Ca_Desig_SNP1192 | Ca_Desig_LG03 | 6539810                 | [C/T] |                    | INTERGENIC                          |                                                   |
| *Ca_Desig_SNP1193 | scaffold00883 | 80728                   | [C/G] |                    | INTERGENIC                          |                                                   |
| *Ca_Desig_SNP1194 | scaffold00884 | 682                     | [T/C] |                    | INTERGENIC                          |                                                   |
| *Ca_Desig_SNP1195 | Ca_Desig_LG04 | 6512192                 | [T/G] | Ca_04287           | INTRON                              | Ubiquitin carboxyl-terminal hydrolase 13          |

| SNP IDs           | Chromosomes   | Physical positions (bp) | SNPs  | Gene accession IDs | Sequence components of genome/genes | Putative functions                           |
|-------------------|---------------|-------------------------|-------|--------------------|-------------------------------------|----------------------------------------------|
| *Ca_Desig_SNP1196 | scaffold00876 | 6645                    | [A/G] |                    | INTERGENIC                          |                                              |
| *Ca_Desig_SNP1197 | scaffold00254 | 20813                   | [A/T] |                    | INTERGENIC                          |                                              |
| *Ca_Desig_SNP1198 | scaffold00775 | 2314                    | [A/G] | Ca_13986           | DOWNSTREAM:917bases                 | Protein of unknown function (DUF3755)        |
| *Ca_Desig_SNP1199 | scaffold01158 | 151                     | [C/A] |                    | INTERGENIC                          |                                              |
| *Ca_Desig_SNP1200 | scaffold01183 | 75731                   | [A/G] |                    | INTERGENIC                          |                                              |
| *Ca_Desig_SNP1201 | Ca_Desig_LG03 | 3567286                 | [T/G] | Ca_02451           | INTRON                              | Putative protease Do-like 14                 |
| *Ca_Desig_SNP1202 | Ca_Desig_LG03 | 3581298                 | [G/A] | Ca_02453           | INTRON                              | Acyl-CoA-binding domain-containing protein 4 |
| *Ca_Desig_SNP1203 | scaffold00876 | 5335                    | [T/C] |                    | INTERGENIC                          |                                              |
| *Ca_Desig_SNP1204 | scaffold02908 | 21294                   | [G/A] |                    | INTERGENIC                          |                                              |
| *Ca_Desig_SNP1205 | Ca_Desig_LG03 | 8498709                 | [T/C] |                    | INTERGENIC                          |                                              |
| *Ca_Desig_SNP1206 | Ca_Desig_LG05 | 8454514                 | [T/G] | Ca_05932           | SYNONYMOUS_CODING                   | Protein of unknown function (DUF581)         |
| *Ca_Desig_SNP1207 | scaffold00501 | 6185                    | [G/T] |                    | INTERGENIC                          |                                              |
| *Ca_Desig_SNP1208 | scaffold01066 | 414                     | [C/T] |                    | INTERGENIC                          |                                              |
| *Ca_Desig_SNP1209 | scaffold00936 | 80789                   | [C/A] |                    | INTERGENIC                          |                                              |
| *Ca_Desig_SNP1210 | Ca_Desig_LG03 | 6543338                 | [C/A] |                    | INTERGENIC                          |                                              |
| *Ca_Desig_SNP1211 | scaffold01310 | 219495                  | [C/T] |                    | INTERGENIC                          |                                              |
| *Ca_Desig_SNP1212 | scaffold00763 | 1583                    | [G/A] |                    | INTERGENIC                          |                                              |
| *Ca_Desig_SNP1213 | scaffold03889 | 16973                   | [A/C] |                    | INTERGENIC                          |                                              |
| *Ca_Desig_SNP1214 | scaffold00330 | 29935                   | [G/A] | Ca_12071           | INTRON                              | Alpha-glucan phosphorylase, H isozyme        |
| *Ca_Desig_SNP1215 | scaffold00573 | 9128                    | [T/A] |                    | INTERGENIC                          |                                              |
| *Ca_Desig_SNP1216 | scaffold02124 | 94351                   | [G/T] |                    | INTERGENIC                          |                                              |
| *Ca_Desig_SNP1217 | scaffold00232 | 39122                   | [G/T] |                    | INTERGENIC                          |                                              |
| *Ca_Desig_SNP1218 | scaffold01105 | 470                     | [A/G] |                    | INTERGENIC                          |                                              |
| *Ca_Desig_SNP1219 | scaffold00935 | 393                     | [T/C] |                    | INTERGENIC                          |                                              |
| *Ca_Desig_SNP1220 | scaffold16742 | 49244                   | [T/G] |                    | INTERGENIC                          |                                              |
| *Ca_Desig_SNP1221 | scaffold05480 | 25188                   | [C/T] |                    | INTERGENIC                          |                                              |

| SNP IDs           | Chromosomes   | Physical positions (bp) | SNPs  | Gene accession IDs | Sequence components of genome/genes | Putative functions                                                      |
|-------------------|---------------|-------------------------|-------|--------------------|-------------------------------------|-------------------------------------------------------------------------|
| *Ca_Desig_SNP1222 | scaffold00430 | 19093                   | [C/A] |                    | INTERGENIC                          |                                                                         |
| *Ca_Desig_SNP1223 | Ca_Desig_LG05 | 9724592                 | [T/G] | Ca_06057           | NON_SYNONYMOUS_CODING               | Splicing factor 3A subunit 3                                            |
| *Ca_Desig_SNP1224 | scaffold00206 | 47601                   | [G/A] | Ca_11345           | INTRON                              | Secologanin synthase                                                    |
| *Ca_Desig_SNP1225 | scaffold01958 | 95793                   | [T/A] |                    | INTERGENIC                          |                                                                         |
| *Ca_Desig_SNP1226 | scaffold00207 | 19253                   | [T/G] | Ca_11357           | NON_SYNONYMOUS_CODING               | Chloroplastic group IIA intron splicing facilitator CRS1, chloroplastic |
| *Ca_Desig_SNP1227 | scaffold00880 | 977                     | [A/G] |                    | INTERGENIC                          |                                                                         |
| *Ca_Desig_SNP1228 | Ca_Desig_LG04 | 1323302                 | [A/C] |                    | INTERGENIC                          |                                                                         |
| *Ca_Desig_SNP1229 | scaffold00852 | 1096                    | [T/C] | Ca_14286           | SYNONYMOUS_CODING                   | Type I inositol-1,4,5-trisphosphate 5-phosphatase 11                    |
| *Ca_Desig_SNP1230 | scaffold00854 | 333                     | [T/C] |                    | INTERGENIC                          |                                                                         |
| *Ca_Desig_SNP1231 | scaffold00747 | 2149                    | [A/C] |                    | INTERGENIC                          |                                                                         |
| *Ca_Desig_SNP1232 | Ca_Desig_LG04 | 20331204                | [A/C] | Ca_05087           | SYNONYMOUS_CODING                   | N-terminal kinase-like protein                                          |
| *Ca_Desig_SNP1233 | scaffold00890 | 1638                    | [T/C] |                    | INTERGENIC                          |                                                                         |
| *Ca_Desig_SNP1234 | scaffold00876 | 10504                   | [A/G] |                    | INTERGENIC                          |                                                                         |
| *Ca_Desig_SNP1235 | Ca_Desig_LG02 | 16714762                | [A/G] | Ca_02121           | NON_SYNONYMOUS_CODING               | Nucleoporin, Nup133/Nup155-like                                         |
| *Ca_Desig_SNP1236 | Ca_Desig_LG04 | 1224856                 | [C/T] | Ca_03974           | INTRON                              | Protein SERAC1                                                          |
| *Ca_Desig_SNP1237 | scaffold07131 | 51583                   | [A/C] |                    | INTERGENIC                          |                                                                         |
| *Ca_Desig_SNP1238 | scaffold00751 | 1936                    | [C/T] |                    | INTERGENIC                          |                                                                         |
| *Ca_Desig_SNP1239 | scaffold00573 | 9287                    | [T/C] |                    | INTERGENIC                          |                                                                         |
| *Ca_Desig_SNP1240 | scaffold00876 | 846                     | [T/C] |                    | INTERGENIC                          |                                                                         |
| *Ca_Desig_SNP1241 | scaffold01138 | 32402                   | [C/A] |                    | INTERGENIC                          |                                                                         |
| *Ca_Desig_SNP1242 | scaffold00876 | 5361                    | [T/C] |                    | INTERGENIC                          |                                                                         |
| *Ca_Desig_SNP1243 | scaffold00723 | 113703                  | [C/T] | Ca_09633           | NON_SYNONYMOUS_CODING               | Probable protein kinase At2g41970                                       |
| *Ca_Desig_SNP1244 | scaffold00212 | 151771                  | [T/G] | Ca_08884           | INTRON                              | zinc ion binding                                                        |
| *Ca_Desig_SNP1245 | scaffold00735 | 2854                    | [A/G] | Ca_13852           | DOWNSTREAM:1592bases                | MORC family CW-type zinc finger protein 4                               |
| *Ca_Desig_SNP1246 | scaffold01756 | 47190                   | [A/C] |                    | INTERGENIC                          |                                                                         |
| *Ca_Desig_SNP1247 | scaffold00582 | 4773                    | [T/C] | Ca_13279           | NON_SYNONYMOUS_CODING               | (+)-neomenthol dehydrogenase                                            |

| SNP IDs           | Chromosomes   | Physical positions (bp) | SNPs  | Gene accession IDs | Sequence components of genome/genes | Putative functions                                                   |
|-------------------|---------------|-------------------------|-------|--------------------|-------------------------------------|----------------------------------------------------------------------|
| *Ca_Desig_SNP1248 | scaffold00854 | 329                     | [T/C] |                    | INTERGENIC                          |                                                                      |
| *Ca_Desig_SNP1249 | scaffold00890 | 442                     | [T/G] |                    | INTERGENIC                          |                                                                      |
| *Ca_Desig_SNP1250 | scaffold13918 | 27531                   | [G/T] |                    | INTERGENIC                          |                                                                      |
| *Ca_Desig_SNP1251 | scaffold00761 | 3600                    | [T/C] |                    | INTERGENIC                          |                                                                      |
| *Ca_Desig_SNP1252 | scaffold00771 | 2514                    | [T/C] |                    | INTERGENIC                          |                                                                      |
| *Ca_Desig_SNP1253 | Ca_Desig_LG03 | 2952449                 | [T/A] | Ca_02387           | NON_SYNONYMOUS_CODING               | Proteasome subunit beta type-4                                       |
| *Ca_Desig_SNP1254 | Ca_Desig_LG03 | 18976029                | [A/C] |                    | INTERGENIC                          |                                                                      |
| *Ca_Desig_SNP1255 | Ca_Desig_LG04 | 3326281                 | [T/G] | Ca_04114           | SYNONYMOUS_CODING                   | 2Fe-2S ferredoxin-like superfamily protein                           |
| *Ca_Desig_SNP1256 | scaffold00882 | 1509                    | [C/A] |                    | INTERGENIC                          |                                                                      |
| *Ca_Desig_SNP1257 | Ca_Desig_LG04 | 368438                  | [G/T] | Ca_03909           | DOWNSTREAM:1436bases                | tRNA (adenine(58)-N(1))-methyltransferase non-catalytic subunit trm6 |
| *Ca_Desig_SNP1258 | scaffold01106 | 64                      | [A/G] |                    | INTERGENIC                          |                                                                      |
| *Ca_Desig_SNP1259 | scaffold00857 | 945                     | [T/A] |                    | INTERGENIC                          |                                                                      |
| *Ca_Desig_SNP1260 | scaffold00646 | 4865                    | [T/C] |                    | INTERGENIC                          |                                                                      |
| *Ca_Desig_SNP1261 | Ca_Desig_LG06 | 6971912                 | [A/C] | Ca_07001           | INTRON                              | Serine/threonine-protein phosphatase PP2A catalytic subunit          |
| *Ca_Desig_SNP1262 | scaffold00768 | 3048                    | [A/G] |                    | INTERGENIC                          |                                                                      |
| *Ca_Desig_SNP1263 | scaffold00383 | 26365                   | [C/A] |                    | INTERGENIC                          |                                                                      |
| *Ca_Desig_SNP1264 | scaffold00775 | 2339                    | [A/G] | Ca_13986           | DOWNSTREAM:942bases                 | Protein of unknown function (DUF3755)                                |
| *Ca_Desig_SNP1265 | Ca_Desig_LG04 | 367818                  | [A/G] |                    | INTERGENIC                          |                                                                      |
| *Ca_Desig_SNP1266 | scaffold01709 | 118046                  | [T/A] |                    | INTERGENIC                          |                                                                      |
| *Ca_Desig_SNP1267 | scaffold00880 | 1034                    | [A/G] |                    | INTERGENIC                          |                                                                      |
| *Ca_Desig_SNP1268 | scaffold00741 | 829                     | [T/C] |                    | INTERGENIC                          |                                                                      |
| *Ca_Desig_SNP1269 | Ca_Desig_LG03 | 4034689                 | [C/T] | Ca_02500           | DOWNSTREAM:976bases                 | Pre-mRNA-splicing factor rse1                                        |
| *Ca_Desig_SNP1270 | scaffold02462 | 61968                   | [T/G] |                    | INTERGENIC                          |                                                                      |
| *Ca_Desig_SNP1271 | Ca_Desig_LG07 | 1761375                 | [G/A] | Ca_07503           | SYNONYMOUS_CODING                   | Probable N-acetyl-gamma-glutamyl-phosphate reductase, chloroplastic  |
| *Ca_Desig_SNP1272 | scaffold00723 | 113712                  | [G/T] | Ca_09633           | SYNONYMOUS_CODING                   | Probable protein kinase At2g41970                                    |
| *Ca_Desig_SNP1273 | scaffold00928 | 1224                    | [A/G] |                    | INTERGENIC                          |                                                                      |



| SNP IDs           | Chromosomes   | Physical positions (bp) | SNPs  | Gene accession IDs | Sequence components of genome/genes | Putative functions                                      |
|-------------------|---------------|-------------------------|-------|--------------------|-------------------------------------|---------------------------------------------------------|
| *Ca_Desig_SNP1274 | Ca_Desig_LG03 | 23032534                | [C/T] |                    | INTERGENIC                          |                                                         |
| *Ca_Desig_SNP1275 | Ca_Desig_LG08 | 5186128                 | [G/T] | Ca_08336           | NON_SYNONYMOUS_CODING               | Glucan endo-1,3-beta-glucosidase 14                     |
| *Ca_Desig_SNP1276 | scaffold00544 | 15252                   | [A/T] | Ca_13113           | DOWNSTREAM:1849bases                | Probable galacturonosyltransferase-like 2               |
| *Ca_Desig_SNP1277 | scaffold00741 | 844                     | [A/G] |                    | INTERGENIC                          |                                                         |
| *Ca_Desig_SNP1278 | scaffold05316 | 82031                   | [T/A] |                    | INTERGENIC                          |                                                         |
| *Ca_Desig_SNP1279 | Ca_Desig_LG04 | 1225164                 | [G/A] | Ca_03974           | INTRON                              | Protein SERAC1                                          |
| *Ca_Desig_SNP1280 | Ca_Desig_LG06 | 9992247                 | [A/C] |                    | INTERGENIC                          |                                                         |
| *Ca_Desig_SNP1281 | scaffold00876 | 6608                    | [A/G] |                    | INTERGENIC                          |                                                         |
| *Ca_Desig_SNP1282 | scaffold00994 | 71840                   | [A/C] |                    | INTERGENIC                          |                                                         |
| *Ca_Desig_SNP1283 | scaffold00860 | 976                     | [A/G] |                    | INTERGENIC                          |                                                         |
| *Ca_Desig_SNP1284 | scaffold00741 | 830                     | [T/C] |                    | INTERGENIC                          |                                                         |
| *Ca_Desig_SNP1285 | scaffold00702 | 6558                    | [T/C] |                    | INTERGENIC                          |                                                         |
| *Ca_Desig_SNP1286 | scaffold00870 | 570                     | [T/G] |                    | INTERGENIC                          |                                                         |
| *Ca_Desig_SNP1287 | scaffold00686 | 1875                    | [T/G] |                    | INTERGENIC                          |                                                         |
| *Ca_Desig_SNP1288 | Ca_Desig_LG01 | 3370815                 | [A/C] | Ca_00343           | DOWNSTREAM:947bases                 | Ankyrin repeat family protein                           |
| *Ca_Desig_SNP1289 | Ca_Desig_LG07 | 4597399                 | [T/G] |                    | INTERGENIC                          |                                                         |
| *Ca_Desig_SNP1290 | scaffold00903 | 462                     | [T/C] |                    | INTERGENIC                          |                                                         |
| *Ca_Desig_SNP1291 | scaffold00876 | 5647                    | [A/G] |                    | INTERGENIC                          |                                                         |
| *Ca_Desig_SNP1292 | scaffold01877 | 73147                   | [C/A] |                    | INTERGENIC                          |                                                         |
| *Ca_Desig_SNP1293 | scaffold00788 | 3485                    | [A/G] |                    | INTERGENIC                          |                                                         |
| *Ca_Desig_SNP1294 | scaffold00804 | 2274                    | [G/T] |                    | INTERGENIC                          |                                                         |
| *Ca_Desig_SNP1295 | scaffold00952 | 554                     | [G/T] |                    | INTERGENIC                          |                                                         |
| *Ca_Desig_SNP1296 | scaffold00804 | 2272                    | [G/T] |                    | INTERGENIC                          |                                                         |
| *Ca_Desig_SNP1297 | Ca_Desig_LG03 | 11146484                | [A/C] | Ca_02911           | DOWNSTREAM:1720bases                | Basic leucine zipper and W2 domain-containing protein 2 |
| *Ca_Desig_SNP1298 | Ca_Desig_LG03 | 22984947                | [G/C] | Ca_03844           | DOWNSTREAM:765bases                 | Protein SGT1 homolog At5g65490                          |
| *Ca_Desig_SNP1299 | scaffold00942 | 1270                    | [G/A] |                    | INTERGENIC                          |                                                         |

| SNP IDs           | Chromosomes   | Physical positions (bp) | SNPs  | Gene accession IDs | Sequence components of genome/genes | Putative functions                                          |
|-------------------|---------------|-------------------------|-------|--------------------|-------------------------------------|-------------------------------------------------------------|
| *Ca_Desig_SNP1300 | scaffold00711 | 10056                   | [A/T] |                    | INTERGENIC                          |                                                             |
| *Ca_Desig_SNP1301 | scaffold03792 | 16869                   | [A/G] | Ca_10485           | SYNONYMOUS_CODING                   | Probable plastid-lipid-associated protein 13, chloroplastic |
| *Ca_Desig_SNP1302 | scaffold01475 | 185674                  | [G/T] |                    | INTERGENIC                          |                                                             |
| *Ca_Desig_SNP1303 | scaffold00908 | 179625                  | [T/G] | Ca_09809           | INTRON                              | Protein LSD1                                                |
| *Ca_Desig_SNP1304 | scaffold00717 | 622                     | [C/T] | Ca_13772           | DOWNSTREAM:814bases                 | General transcription factor 3C polypeptide 2               |
| *Ca_Desig_SNP1305 | scaffold00876 | 860                     | [T/C] |                    | INTERGENIC                          |                                                             |
| *Ca_Desig_SNP1306 | scaffold00634 | 130166                  | [G/A] |                    | INTERGENIC                          |                                                             |
| *Ca_Desig_SNP1307 | scaffold00390 | 141016                  | [A/T] | Ca_09185           | DOWNSTREAM:269bases                 | Probable prefoldin subunit 5                                |
| *Ca_Desig_SNP1308 | scaffold01296 | 134074                  | [T/C] |                    | INTERGENIC                          |                                                             |
| *Ca_Desig_SNP1309 | scaffold01073 | 552                     | [A/G] |                    | INTERGENIC                          |                                                             |
| *Ca_Desig_SNP1310 | Ca_Desig_LG03 | 841817                  | [C/A] |                    | INTERGENIC                          |                                                             |
| *Ca_Desig_SNP1311 | scaffold01173 | 23                      | [C/T] |                    | INTERGENIC                          |                                                             |
| *Ca_Desig_SNP1312 | scaffold00985 | 633                     | [G/A] |                    | INTERGENIC                          |                                                             |
| *Ca_Desig_SNP1313 | scaffold00771 | 2508                    | [A/G] |                    | INTERGENIC                          |                                                             |
| *Ca_Desig_SNP1314 | Ca_Desig_LG03 | 22973073                | [T/C] | Ca_03843           | INTRON                              | Nucleobase-ascorbate transporter 11                         |
| *Ca_Desig_SNP1315 | scaffold01236 | 120402                  | [C/A] |                    | INTERGENIC                          |                                                             |
| *Ca_Desig_SNP1316 | scaffold04317 | 43696                   | [C/T] |                    | INTERGENIC                          |                                                             |
| *Ca_Desig_SNP1317 | scaffold02302 | 85867                   | [A/C] |                    | INTERGENIC                          |                                                             |
| *Ca_Desig_SNP1318 | scaffold01049 | 232212                  | [A/C] |                    | INTERGENIC                          |                                                             |
| *Ca_Desig_SNP1319 | scaffold00925 | 517                     | [C/A] |                    | INTERGENIC                          |                                                             |
| *Ca_Desig_SNP1320 | scaffold00686 | 3630                    | [T/C] |                    | INTERGENIC                          |                                                             |
| *Ca_Desig_SNP1321 | scaffold00880 | 1012                    | [A/G] |                    | INTERGENIC                          |                                                             |
| *Ca_Desig_SNP1322 | Ca_Desig_LG03 | 126485                  | [T/G] |                    | INTERGENIC                          |                                                             |
| *Ca_Desig_SNP1323 | scaffold00937 | 281774                  | [T/C] |                    | INTERGENIC                          |                                                             |
| *Ca_Desig_SNP1324 | scaffold01007 | 30                      | [G/A] |                    | INTERGENIC                          |                                                             |
| *Ca_Desig_SNP1325 | scaffold00771 | 2537                    | [A/G] |                    | INTERGENIC                          |                                                             |

| SNP IDs           | Chromosomes   | Physical positions (bp) | SNPs  | Gene accession IDs | Sequence components of genome/genes | Putative functions                                 |
|-------------------|---------------|-------------------------|-------|--------------------|-------------------------------------|----------------------------------------------------|
| *Ca_Desig_SNP1326 | scaffold00946 | 164                     | [A/C] |                    | INTERGENIC                          |                                                    |
| *Ca_Desig_SNP1327 | scaffold00333 | 98764                   | [C/T] | Ca_09084           | DOWNSTREAM:1238bases                | DNA repair protein XRCC2 homolog                   |
| *Ca_Desig_SNP1328 | scaffold01310 | 219671                  | [G/A] |                    | INTERGENIC                          |                                                    |
| *Ca_Desig_SNP1329 | scaffold02365 | 27886                   | [A/C] |                    | INTERGENIC                          |                                                    |
| *Ca_Desig_SNP1330 | Ca_Desig_LG04 | 1213556                 | [C/T] |                    | INTERGENIC                          |                                                    |
| *Ca_Desig_SNP1331 | scaffold00333 | 64537                   | [T/C] |                    | INTERGENIC                          |                                                    |
| *Ca_Desig_SNP1332 | scaffold00637 | 5429                    | [G/A] |                    | INTERGENIC                          |                                                    |
| *Ca_Desig_SNP1333 | scaffold01159 | 155                     | [A/G] |                    | INTERGENIC                          |                                                    |
| *Ca_Desig_SNP1334 | Ca_Desig_LG03 | 1415304                 | [T/G] | Ca_02288           | INTRON                              | Receptor-like serine/threonine-protein kinase ALE2 |
| *Ca_Desig_SNP1335 | scaffold00626 | 3729                    | [T/A] |                    | INTERGENIC                          |                                                    |
| *Ca_Desig_SNP1336 | scaffold00788 | 3384                    | [A/G] |                    | INTERGENIC                          |                                                    |
| *Ca_Desig_SNP1337 | scaffold00768 | 3044                    | [T/C] |                    | INTERGENIC                          |                                                    |
| *Ca_Desig_SNP1338 | scaffold00876 | 10374                   | [T/C] |                    | INTERGENIC                          |                                                    |
| *Ca_Desig_SNP1339 | scaffold00126 | 8281                    | [T/C] |                    | INTERGENIC                          |                                                    |
| *Ca_Desig_SNP1340 | scaffold01437 | 25682                   | [G/C] |                    | INTERGENIC                          |                                                    |
| *Ca_Desig_SNP1341 | scaffold00451 | 23047                   | [G/T] |                    | INTERGENIC                          |                                                    |
| *Ca_Desig_SNP1342 | scaffold00215 | 253697                  | [C/T] |                    | INTERGENIC                          |                                                    |
| *Ca_Desig_SNP1343 | scaffold00876 | 6661                    | [A/G] |                    | INTERGENIC                          |                                                    |
| *Ca_Desig_SNP1344 | scaffold01040 | 642                     | [G/T] |                    | INTERGENIC                          |                                                    |
| *Ca_Desig_SNP1345 | Ca_Desig_LG01 | 13692705                | [G/A] | Ca_00980           | DOWNSTREAM:1429bases                | Methyltransferase-like protein 22                  |
| *Ca_Desig_SNP1346 | Ca_Desig_LG05 | 8600386                 | [A/C] | Ca_05947           | NON_SYNONYMOUS_CODING               | DUF246 domain-containing protein At1g04910         |
| *Ca_Desig_SNP1347 | scaffold00928 | 1227                    | [T/C] |                    | INTERGENIC                          |                                                    |
| *Ca_Desig_SNP1348 | Ca_Desig_LG05 | 1815460                 | [A/T] |                    | INTERGENIC                          |                                                    |
| *Ca_Desig_SNP1349 | scaffold01070 | 324                     | [C/T] |                    | INTERGENIC                          |                                                    |
| *Ca_Desig_SNP1350 | scaffold00619 | 3642                    | [G/A] |                    | INTERGENIC                          |                                                    |
| *Ca_Desig_SNP1351 | Ca_Desig_LG04 | 131227                  | [A/G] | Ca_03889           | DOWNSTREAM:1500bases                | Abhydrolase domain-containing protein 4            |

| SNP IDs           | Chromosomes   | Physical positions (bp) | SNPs  | Gene accession IDs | Sequence components of genome/genes | Putative functions                                   |
|-------------------|---------------|-------------------------|-------|--------------------|-------------------------------------|------------------------------------------------------|
| *Ca_Desig_SNP1352 | scaffold00844 | 6131                    | [T/G] |                    | INTERGENIC                          |                                                      |
| *Ca_Desig_SNP1353 | scaffold00884 | 663                     | [T/C] |                    | INTERGENIC                          |                                                      |
| *Ca_Desig_SNP1354 | Ca_Desig_LG02 | 14163542                | [A/C] | Ca_01922           | SYNONYMOUS_CODING                   | Lysine-specific histone demethylase 1 homolog 3      |
| *Ca_Desig_SNP1355 | scaffold00852 | 962                     | [T/C] | Ca_14286           | INTRON                              | Type I inositol-1,4,5-trisphosphate 5-phosphatase 11 |
| *Ca_Desig_SNP1356 | Ca_Desig_LG03 | 3590707                 | [C/T] |                    | INTERGENIC                          |                                                      |
| *Ca_Desig_SNP1357 | scaffold00775 | 473                     | [C/A] |                    | INTERGENIC                          |                                                      |
| *Ca_Desig_SNP1358 | scaffold00876 | 6629                    | [T/C] |                    | INTERGENIC                          |                                                      |
| *Ca_Desig_SNP1359 | scaffold04087 | 73770                   | [A/C] |                    | INTERGENIC                          |                                                      |
| *Ca_Desig_SNP1360 | scaffold00918 | 546                     | [C/G] |                    | INTERGENIC                          |                                                      |
| *Ca_Desig_SNP1361 | scaffold05824 | 243442                  | [C/T] | Ca_08932           | INTRON                              | ABC transporter C family member 3                    |
| *Ca_Desig_SNP1362 | scaffold01232 | 148692                  | [A/C] |                    | INTERGENIC                          |                                                      |
| *Ca_Desig_SNP1363 | scaffold00876 | 10484                   | [A/G] |                    | INTERGENIC                          |                                                      |
| *Ca_Desig_SNP1364 | scaffold01958 | 95306                   | [G/A] |                    | INTERGENIC                          |                                                      |
| *Ca_Desig_SNP1365 | scaffold00977 | 97451                   | [T/G] |                    | INTERGENIC                          |                                                      |
| *Ca_Desig_SNP1366 | scaffold00741 | 809                     | [A/G] |                    | INTERGENIC                          |                                                      |
| *Ca_Desig_SNP1367 | scaffold00478 | 12711                   | [T/G] | Ca_12816           | INTRON                              | Adipocyte plasma membrane-associated protein         |
| *Ca_Desig_SNP1368 | scaffold00473 | 18253                   | [G/T] | Ca_12770           | INTRON                              | SWI/SNF complex subunit SWI3C                        |
| *Ca_Desig_SNP1369 | scaffold01355 | 24155                   | [A/C] | Ca_10181           | INTRON                              | MATE efflux family protein FRD3                      |
| *Ca_Desig_SNP1370 | scaffold00450 | 5591                    | [C/A] |                    | INTERGENIC                          |                                                      |
| *Ca_Desig_SNP1371 | scaffold00782 | 3400                    | [A/T] |                    | INTERGENIC                          |                                                      |
| *Ca_Desig_SNP1372 | scaffold00961 | 497                     | [T/C] |                    | INTERGENIC                          |                                                      |
| *Ca_Desig_SNP1373 | scaffold01737 | 119288                  | [G/T] |                    | INTERGENIC                          |                                                      |
| *Ca_Desig_SNP1374 | Ca_Desig_LG01 | 2241298                 | [T/A] | Ca_00231           | DOWNSTREAM:184bases                 | VQ motif-containing protein                          |
| *Ca_Desig_SNP1375 | scaffold00473 | 18252                   | [G/C] | Ca_12770           | INTRON                              | SWI/SNF complex subunit SWI3C                        |
| *Ca_Desig_SNP1376 | Ca_Desig_LG03 | 22973066                | [C/T] | Ca_03843           | INTRON                              | Nucleobase-ascorbate transporter 11                  |
| *Ca_Desig_SNP1377 | scaffold00582 | 10802                   | [A/C] |                    | INTERGENIC                          |                                                      |

| SNP IDs           | Chromosomes   | Physical positions (bp) | SNPs  | Gene accession IDs | Sequence components of genome/genes | Putative functions                    |
|-------------------|---------------|-------------------------|-------|--------------------|-------------------------------------|---------------------------------------|
| *Ca_Desig_SNP1378 | scaffold01147 | 70                      | [G/A] |                    | INTERGENIC                          |                                       |
| *Ca_Desig_SNP1379 | Ca_Desig_LG03 | 869249                  | [C/T] |                    | INTERGENIC                          |                                       |
| *Ca_Desig_SNP1380 | scaffold00971 | 161                     | [G/A] |                    | INTERGENIC                          |                                       |
| *Ca_Desig_SNP1381 | Ca_Desig_LG06 | 3912452                 | [T/G] | Ca_06732           | INTRON                              | Phosphoglucomutase, cytoplasmic       |
| *Ca_Desig_SNP1382 | scaffold00686 | 3627                    | [A/G] |                    | INTERGENIC                          |                                       |
| *Ca_Desig_SNP1383 | Ca_Desig_LG04 | 3379061                 | [G/A] | Ca_04119           | INTRON                              | embryo defective 2410                 |
| *Ca_Desig_SNP1384 | scaffold00771 | 2531                    | [T/C] |                    | INTERGENIC                          |                                       |
| *Ca_Desig_SNP1385 | scaffold09306 | 8116                    | [G/A] |                    | INTERGENIC                          |                                       |
| *Ca_Desig_SNP1386 | Ca_Desig_LG04 | 371754                  | [A/T] |                    | INTERGENIC                          |                                       |
| *Ca_Desig_SNP1387 | scaffold04282 | 36317                   | [C/A] |                    | INTERGENIC                          |                                       |
| *Ca_Desig_SNP1388 | scaffold09892 | 66755                   | [G/A] | Ca_10004           | DOWNSTREAM:469bases                 | Uncharacterized membrane protein yuiD |
| *Ca_Desig_SNP1389 | scaffold00702 | 6590                    | [T/C] |                    | INTERGENIC                          |                                       |
| *Ca_Desig_SNP1390 | Ca_Desig_LG01 | 1486046                 | [T/C] |                    | INTERGENIC                          |                                       |
| *Ca_Desig_SNP1391 | scaffold00502 | 15558                   | [G/T] |                    | INTERGENIC                          |                                       |
| *Ca_Desig_SNP1392 | Ca_Desig_LG05 | 8454530                 | [T/G] | Ca_05932           | NON_SYNONYMOUS_CODING               | Protein of unknown function (DUF581)  |
| *Ca_Desig_SNP1393 | Ca_Desig_LG03 | 8824939                 | [T/C] | Ca_02786           | DOWNSTREAM:688bases                 | Transcription elongation factor SPT6  |
| *Ca_Desig_SNP1394 | scaffold00797 | 2153                    | [T/G] |                    | INTERGENIC                          |                                       |
| *Ca_Desig_SNP1395 | scaffold00761 | 3533                    | [A/G] |                    | INTERGENIC                          |                                       |
| *Ca_Desig_SNP1396 | scaffold00995 | 115499                  | [A/C] |                    | INTERGENIC                          |                                       |
| *Ca_Desig_SNP1397 | scaffold01610 | 5841                    | [T/G] |                    | INTERGENIC                          |                                       |
| *Ca_Desig_SNP1398 | Ca_Desig_LG01 | 3545323                 | [T/G] |                    | INTERGENIC                          |                                       |
| *Ca_Desig_SNP1399 | scaffold00854 | 341                     | [T/C] |                    | INTERGENIC                          |                                       |
| *Ca_Desig_SNP1400 | scaffold00966 | 1007                    | [C/T] |                    | INTERGENIC                          |                                       |
| *Ca_Desig_SNP1401 | Ca_Desig_LG03 | 11115658                | [A/G] | Ca_02909           | INTRON                              | Lysine--tRNA ligase                   |
| *Ca_Desig_SNP1402 | Ca_Desig_LG04 | 3875100                 | [A/C] | Ca_04150           | NON_SYNONYMOUS_CODING               | DNA polymerase theta                  |
| *Ca_Desig_SNP1403 | Ca_Desig_LG04 | 16009846                | [A/C] | Ca_04861           | SYNONYMOUS_CODING                   | Kinesin-4                             |

| SNP IDs          | Chromosomes   | Physical positions (bp) | SNPs  | Gene accession IDs | Sequence components of genome/genes | Putative functions                                                   |
|------------------|---------------|-------------------------|-------|--------------------|-------------------------------------|----------------------------------------------------------------------|
| *Ca_Desi_SNP1404 | scaffold00852 | 825                     | [A/G] | Ca_14286           | NON_SYNONYMOUS_CODING               | Type I inositol-1,4,5-trisphosphate 5-phosphatase 11                 |
| *Ca_Desi_SNP1405 | scaffold12861 | 14490                   | [T/G] |                    | INTERGENIC                          |                                                                      |
| *Ca_Desi_SNP1406 | scaffold16742 | 15395                   | [A/C] |                    | INTERGENIC                          |                                                                      |
| *Ca_Desi_SNP1407 | Ca_Desi_LG01  | 6319042                 | [A/C] | Ca_00541           | SYNONYMOUS_CODING                   | Probable LRR receptor-like serine/threonine-protein kinase At4g20940 |
| *Ca_Desi_SNP1408 | Ca_Desi_LG04  | 325410                  | [A/T] | Ca_03903           | INTRON                              | Filament-like plant protein 4                                        |
| *Ca_Desi_SNP1409 | Ca_Desi_LG03  | 3631276                 | [C/T] | Ca_02457           | SYNONYMOUS_CODING                   | DNA polymerase zeta catalytic subunit                                |
| *Ca_Desi_SNP1410 | scaffold00774 | 3551                    | [T/C] | Ca_13983           | UTR_5_PRIME:536bases                | Squamosa promoter-binding-like protein 6                             |
| *Ca_Desi_SNP1411 | scaffold04914 | 64293                   | [C/T] |                    | INTERGENIC                          |                                                                      |
| *Ca_Desi_SNP1412 | scaffold00971 | 149                     | [T/C] |                    | INTERGENIC                          |                                                                      |
| *Ca_Desi_SNP1413 | scaffold04671 | 17657                   | [T/G] |                    | INTERGENIC                          |                                                                      |
| *Ca_Desi_SNP1414 | Ca_Desi_LG02  | 8234073                 | [T/G] |                    | INTERGENIC                          |                                                                      |
| *Ca_Desi_SNP1415 | scaffold00686 | 3628                    | [C/T] |                    | INTERGENIC                          |                                                                      |
| *Ca_Desi_SNP1416 | Ca_Desi_LG02  | 5917931                 | [T/G] |                    | INTERGENIC                          |                                                                      |
| *Ca_Desi_SNP1417 | scaffold00694 | 717                     | [T/C] |                    | INTERGENIC                          |                                                                      |
| *Ca_Desi_SNP1418 | Ca_Desi_LG04  | 6318869                 | [T/G] |                    | INTERGENIC                          |                                                                      |
| *Ca_Desi_SNP1419 | Ca_Desi_LG01  | 1938766                 | [A/G] | Ca_00203           | NON_SYNONYMOUS_CODING               | Splicing factor 3B subunit 1                                         |
| *Ca_Desi_SNP1420 | scaffold00801 | 2960                    | [A/C] |                    | INTERGENIC                          |                                                                      |
| *Ca_Desi_SNP1421 | scaffold01135 | 183                     | [A/G] |                    | INTERGENIC                          |                                                                      |
| *Ca_Desi_SNP1422 | scaffold00876 | 10392                   | [T/C] |                    | INTERGENIC                          |                                                                      |
| *Ca_Desi_SNP1423 | scaffold00771 | 2542                    | [T/C] |                    | INTERGENIC                          |                                                                      |
| *Ca_Desi_SNP1424 | Ca_Desi_LG04  | 345813                  | [G/A] | Ca_03904           | DOWNSTREAM:1960bases                | 5'-3' exoribonuclease 3                                              |
| *Ca_Desi_SNP1425 | Ca_Desi_LG06  | 4734361                 | [C/A] |                    | INTERGENIC                          |                                                                      |
| *Ca_Desi_SNP1426 | Ca_Desi_LG03  | 22830261                | [A/G] | Ca_03831           | INTRON                              | Probable RNA-dependent RNA polymerase 5                              |
| *Ca_Desi_SNP1427 | scaffold04453 | 258681                  | [A/G] |                    | INTERGENIC                          |                                                                      |
| *Ca_Desi_SNP1428 | scaffold01475 | 246066                  | [C/A] |                    | INTERGENIC                          |                                                                      |
| *Ca_Desi_SNP1429 | scaffold14776 | 279425                  | [A/C] |                    | INTERGENIC                          |                                                                      |

| SNP IDs           | Chromosomes   | Physical positions (bp) | SNPs  | Gene accession IDs | Sequence components of genome/genes | Putative functions                                          |
|-------------------|---------------|-------------------------|-------|--------------------|-------------------------------------|-------------------------------------------------------------|
| *Ca_Desig_SNP1430 | scaffold00876 | 6637                    | [T/C] |                    | INTERGENIC                          |                                                             |
| *Ca_Desig_SNP1431 | Ca_Desig_LG03 | 11490712                | [G/C] | Ca_02943           | SYNONYMOUS_CODING                   | Small subunit processome component 20 homolog               |
| *Ca_Desig_SNP1432 | scaffold00890 | 1593                    | [T/C] |                    | INTERGENIC                          |                                                             |
| *Ca_Desig_SNP1433 | scaffold01675 | 110967                  | [G/A] |                    | INTERGENIC                          |                                                             |
| *Ca_Desig_SNP1434 | scaffold00779 | 2233                    | [T/C] |                    | INTERGENIC                          |                                                             |
| *Ca_Desig_SNP1435 | scaffold10660 | 10227                   | [A/C] |                    | INTERGENIC                          |                                                             |
| *Ca_Desig_SNP1436 | scaffold00646 | 4863                    | [T/C] |                    | INTERGENIC                          |                                                             |
| *Ca_Desig_SNP1437 | scaffold00741 | 775                     | [T/C] |                    | INTERGENIC                          |                                                             |
| *Ca_Desig_SNP1438 | scaffold00768 | 3140                    | [A/G] |                    | INTERGENIC                          |                                                             |
| *Ca_Desig_SNP1439 | Ca_Desig_LG06 | 5960706                 | [T/G] | Ca_06904           | DOWNSTREAM:1677bases                | Peptidyl-prolyl cis-trans isomerase FKBP16-2, chloroplastic |
| *Ca_Desig_SNP1440 | scaffold00897 | 896                     | [T/C] |                    | INTERGENIC                          |                                                             |
| *Ca_Desig_SNP1441 | scaffold01797 | 89411                   | [C/A] |                    | INTERGENIC                          |                                                             |
| *Ca_Desig_SNP1442 | scaffold00611 | 2447                    | [T/C] |                    | INTERGENIC                          |                                                             |
| *Ca_Desig_SNP1443 | Ca_Desig_LG01 | 13692727                | [A/C] | Ca_00980           | DOWNSTREAM:1451bases                | Methyltransferase-like protein 22                           |
| *Ca_Desig_SNP1444 | scaffold00866 | 1022                    | [T/C] | Ca_14324           | DOWNSTREAM:307bases                 | NADP-specific glutamate dehydrogenase                       |
| *Ca_Desig_SNP1445 | scaffold05516 | 73336                   | [A/C] |                    | INTERGENIC                          |                                                             |
| *Ca_Desig_SNP1446 | scaffold00788 | 3487                    | [A/G] |                    | INTERGENIC                          |                                                             |
| *Ca_Desig_SNP1447 | scaffold00860 | 941                     | [T/C] |                    | INTERGENIC                          |                                                             |
| *Ca_Desig_SNP1448 | scaffold01104 | 289                     | [A/G] |                    | INTERGENIC                          |                                                             |
| *Ca_Desig_SNP1449 | scaffold01499 | 5225                    | [T/G] |                    | INTERGENIC                          |                                                             |
| *Ca_Desig_SNP1450 | scaffold01450 | 60175                   | [A/G] | Ca_10261           | INTRON                              | Sucrose transport protein SUC3                              |
| *Ca_Desig_SNP1451 | scaffold00854 | 2306                    | [T/C] |                    | INTERGENIC                          |                                                             |
| *Ca_Desig_SNP1452 | scaffold01281 | 55779                   | [G/A] |                    | INTERGENIC                          |                                                             |
| *Ca_Desig_SNP1453 | scaffold00735 | 2820                    | [A/G] | Ca_13852           | DOWNSTREAM:1626bases                | MORC family CW-type zinc finger protein 4                   |
| *Ca_Desig_SNP1454 | scaffold01106 | 63                      | [A/G] |                    | INTERGENIC                          |                                                             |
| *Ca_Desig_SNP1455 | Ca_Desig_LG03 | 18703050                | [A/C] | Ca_03484           | SYNONYMOUS_CODING                   | Putative copper-transporting ATPase 3                       |

| SNP IDs           | Chromosomes   | Physical positions (bp) | SNPs  | Gene accession IDs | Sequence components of genome/genes | Putative functions                            |
|-------------------|---------------|-------------------------|-------|--------------------|-------------------------------------|-----------------------------------------------|
| *Ca_Desig_SNP1456 | scaffold00876 | 10380                   | [T/C] |                    | INTERGENIC                          |                                               |
| *Ca_Desig_SNP1457 | scaffold00646 | 4954                    | [A/G] |                    | INTERGENIC                          |                                               |
| *Ca_Desig_SNP1458 | scaffold02111 | 106947                  | [T/G] |                    | INTERGENIC                          |                                               |
| *Ca_Desig_SNP1459 | scaffold00813 | 2644                    | [C/T] |                    | INTERGENIC                          |                                               |
| *Ca_Desig_SNP1460 | scaffold01131 | 77                      | [A/T] |                    | INTERGENIC                          |                                               |
| *Ca_Desig_SNP1461 | Ca_Desig_LG03 | 1298497                 | [C/T] | Ca_02274           | SYNONYMOUS_CODING                   | ADP-ribosylation factor 2                     |
| *Ca_Desig_SNP1462 | scaffold01131 | 45                      | [A/C] |                    | INTERGENIC                          |                                               |
| *Ca_Desig_SNP1463 | scaffold00735 | 2849                    | [A/G] | Ca_13852           | DOWNSTREAM:1597bases                | MORC family CW-type zinc finger protein 4     |
| *Ca_Desig_SNP1464 | scaffold00448 | 535                     | [C/T] |                    | INTERGENIC                          |                                               |
| *Ca_Desig_SNP1465 | scaffold00582 | 6317                    | [T/C] | Ca_13279           | INTRON                              | (+)-neomenthol dehydrogenase                  |
| *Ca_Desig_SNP1466 | scaffold00669 | 1502                    | [G/T] |                    | INTERGENIC                          |                                               |
| *Ca_Desig_SNP1467 | scaffold00775 | 2371                    | [T/C] | Ca_13986           | DOWNSTREAM:974bases                 | Protein of unknown function (DUF3755)         |
| *Ca_Desig_SNP1468 | scaffold00582 | 5050                    | [T/C] | Ca_13279           | INTRON                              | (+)-neomenthol dehydrogenase                  |
| *Ca_Desig_SNP1469 | Ca_Desig_LG02 | 2124918                 | [G/C] | Ca_01184           | NON_SYNONYMOUS_CODING               | LOB domain-containing protein 41              |
| *Ca_Desig_SNP1470 | scaffold00729 | 3471                    | [G/T] | Ca_13823           | INTRON                              | E3 ubiquitin protein ligase DRIP1             |
| *Ca_Desig_SNP1471 | scaffold00761 | 3617                    | [T/C] |                    | INTERGENIC                          |                                               |
| *Ca_Desig_SNP1472 | scaffold00719 | 2968                    | [G/A] |                    | INTERGENIC                          |                                               |
| *Ca_Desig_SNP1473 | scaffold04613 | 27914                   | [G/A] | Ca_10567           | INTRON                              | Putative disease resistance protein At3g14460 |
| *Ca_Desig_SNP1474 | Ca_Desig_LG03 | 18702951                | [A/C] | Ca_03484           | SYNONYMOUS_CODING                   | Putative copper-transporting ATPase 3         |
| *Ca_Desig_SNP1475 | scaffold00771 | 2527                    | [A/G] |                    | INTERGENIC                          |                                               |
| *Ca_Desig_SNP1476 | scaffold04784 | 46166                   | [T/G] |                    | INTERGENIC                          |                                               |
| *Ca_Desig_SNP1477 | Ca_Desig_LG02 | 15473630                | [A/T] |                    | INTERGENIC                          |                                               |
| *Ca_Desig_SNP1478 | Ca_Desig_LG04 | 21928532                | [C/T] |                    | INTERGENIC                          |                                               |
| *Ca_Desig_SNP1479 | scaffold01437 | 25677                   | [G/A] |                    | INTERGENIC                          |                                               |
| *Ca_Desig_SNP1480 | scaffold01287 | 54952                   | [A/C] |                    | INTERGENIC                          |                                               |
| *Ca_Desig_SNP1481 | Ca_Desig_LG01 | 3191486                 | [T/C] | Ca_00323           | SYNONYMOUS_CODING                   | Oryzain alpha chain                           |



| SNP IDs           | Chromosomes   | Physical positions (bp) | SNPs  | Gene accession IDs | Sequence components of genome/genes | Putative functions                        |
|-------------------|---------------|-------------------------|-------|--------------------|-------------------------------------|-------------------------------------------|
| *Ca_Desig_SNP1482 | scaffold00801 | 3035                    | [G/T] |                    | INTERGENIC                          |                                           |
| *Ca_Desig_SNP1483 | scaffold01056 | 41046                   | [C/T] |                    | INTERGENIC                          |                                           |
| *Ca_Desig_SNP1484 | scaffold00768 | 3011                    | [T/C] |                    | INTERGENIC                          |                                           |
| *Ca_Desig_SNP1485 | scaffold00224 | 156476                  | [T/C] |                    | INTERGENIC                          |                                           |
| *Ca_Desig_SNP1486 | Ca_Desig_LG02 | 8160750                 | [A/G] | Ca_01655           | DOWNSTREAM:910bases                 | Cytochrome c-type biogenesis protein CcmE |
| *Ca_Desig_SNP1487 | scaffold03653 | 84654                   | [A/T] | Ca_09426           | DOWNSTREAM:830bases                 | Metacaspase-1                             |
| *Ca_Desig_SNP1488 | scaffold00876 | 5662                    | [T/C] |                    | INTERGENIC                          |                                           |
| *Ca_Desig_SNP1489 | Ca_Desig_LG03 | 22969968                | [A/C] | Ca_03843           | UTR_3_PRIME:133bases                | Nucleobase-ascorbate transporter 11       |
| *Ca_Desig_SNP1490 | scaffold09348 | 54402                   | [G/T] |                    | INTERGENIC                          |                                           |
| *Ca_Desig_SNP1491 | scaffold00998 | 81694                   | [T/A] |                    | INTERGENIC                          |                                           |
| *Ca_Desig_SNP1492 | scaffold02375 | 69679                   | [G/A] |                    | INTERGENIC                          |                                           |
| *Ca_Desig_SNP1493 | scaffold01565 | 107482                  | [A/T] |                    | INTERGENIC                          |                                           |
| *Ca_Desig_SNP1494 | Ca_Desig_LG01 | 7489471                 | [T/A] | Ca_00593           | SYNONYMOUS_CODING                   | Eukaryotic initiation factor 4A-15        |
| *Ca_Desig_SNP1495 | scaffold00804 | 731                     | [T/C] |                    | INTERGENIC                          |                                           |
| *Ca_Desig_SNP1496 | scaffold01437 | 25680                   | [A/C] |                    | INTERGENIC                          |                                           |
| *Ca_Desig_SNP1497 | scaffold00971 | 136                     | [A/G] |                    | INTERGENIC                          |                                           |
| *Ca_Desig_SNP1498 | scaffold05583 | 116113                  | [C/A] |                    | INTERGENIC                          |                                           |
| *Ca_Desig_SNP1499 | Ca_Desig_LG05 | 9945176                 | [G/T] | Ca_06081           | DOWNSTREAM:1304bases                | Unknown expressed protein                 |
| *Ca_Desig_SNP1500 | Ca_Desig_LG02 | 7462051                 | [A/C] |                    | INTERGENIC                          |                                           |
| *Ca_Desig_SNP1501 | Ca_Desig_LG05 | 6204622                 | [T/G] |                    | INTERGENIC                          |                                           |
| *Ca_Desig_SNP1502 | scaffold00357 | 3834                    | [G/A] |                    | INTERGENIC                          |                                           |
| *Ca_Desig_SNP1503 | scaffold00637 | 5432                    | [C/A] |                    | INTERGENIC                          |                                           |
| *Ca_Desig_SNP1504 | scaffold00514 | 12620                   | [A/C] | Ca_09344           | DOWNSTREAM:1388bases                | Probable calcium-binding protein CML18    |
| *Ca_Desig_SNP1505 | scaffold00804 | 1944                    | [T/C] |                    | INTERGENIC                          |                                           |
| *Ca_Desig_SNP1506 | scaffold00894 | 220125                  | [G/T] |                    | INTERGENIC                          |                                           |
| *Ca_Desig_SNP1507 | scaffold00637 | 5443                    | [C/A] |                    | INTERGENIC                          |                                           |

| SNP IDs           | Chromosomes   | Physical positions (bp) | SNPs  | Gene accession IDs | Sequence components of genome/genes | Putative functions                                           |
|-------------------|---------------|-------------------------|-------|--------------------|-------------------------------------|--------------------------------------------------------------|
| *Ca_Desig_SNP1508 | scaffold00192 | 43367                   | [A/C] |                    | INTERGENIC                          |                                                              |
| *Ca_Desig_SNP1509 | scaffold00937 | 224733                  | [G/T] |                    | INTERGENIC                          |                                                              |
| *Ca_Desig_SNP1510 | scaffold00487 | 21120                   | [T/G] | Ca_12840           | DOWNSTREAM:448bases                 | Protein of unknown function (DUF167)                         |
| *Ca_Desig_SNP1511 | scaffold00517 | 12790                   | [G/A] | Ca_12994           | INTRON                              | Imidazole glycerol phosphate synthase hisHF, chloroplastic   |
| *Ca_Desig_SNP1512 | scaffold00747 | 2263                    | [A/C] |                    | INTERGENIC                          |                                                              |
| *Ca_Desig_SNP1513 | Ca_Desig_LG01 | 2437941                 | [T/G] |                    | INTERGENIC                          |                                                              |
| *Ca_Desig_SNP1514 | scaffold01842 | 36440                   | [A/C] |                    | INTERGENIC                          |                                                              |
| *Ca_Desig_SNP1515 | scaffold00676 | 3950                    | [C/T] |                    | INTERGENIC                          |                                                              |
| *Ca_Desig_SNP1516 | scaffold00347 | 16941                   | [T/G] |                    | INTERGENIC                          |                                                              |
| *Ca_Desig_SNP1517 | Ca_Desig_LG04 | 6512198                 | [T/G] | Ca_04287           | INTRON                              | Ubiquitin carboxyl-terminal hydrolase 13                     |
| *Ca_Desig_SNP1518 | Ca_Desig_LG02 | 12518481                | [G/T] | Ca_01820           | NON_SYNONYMOUS_CODING               | 3-oxoacyl-[acyl-carrier-protein] synthase 3 A, chloroplastic |
| *Ca_Desig_SNP1519 | scaffold00876 | 795                     | [A/G] |                    | INTERGENIC                          |                                                              |
| *Ca_Desig_SNP1520 | scaffold00852 | 959                     | [A/G] | Ca_14286           | INTRON                              | Type I inositol-1,4,5-trisphosphate 5-phosphatase 11         |
| *Ca_Desig_SNP1521 | Ca_Desig_LG03 | 18823826                | [C/A] |                    | INTERGENIC                          |                                                              |
| *Ca_Desig_SNP1522 | Ca_Desig_LG07 | 463991                  | [G/A] | Ca_07419           | NON_SYNONYMOUS_CODING               | Cytochrome P450 76A2                                         |
| *Ca_Desig_SNP1523 | scaffold01647 | 24275                   | [G/A] |                    | INTERGENIC                          |                                                              |
| *Ca_Desig_SNP1524 | scaffold00495 | 1686                    | [C/A] |                    | INTERGENIC                          |                                                              |
| *Ca_Desig_SNP1525 | Ca_Desig_LG01 | 3545305                 | [T/G] |                    | INTERGENIC                          |                                                              |
| *Ca_Desig_SNP1526 | scaffold01756 | 47134                   | [A/C] |                    | INTERGENIC                          |                                                              |
| *Ca_Desig_SNP1527 | scaffold01172 | 112                     | [A/G] |                    | INTERGENIC                          |                                                              |
| *Ca_Desig_SNP1528 | Ca_Desig_LG03 | 6757836                 | [G/A] | Ca_02701           | SYNONYMOUS_CODING                   | Vacuolar protein sorting-associated protein 27               |
| *Ca_Desig_SNP1529 | Ca_Desig_LG03 | 21550846                | [G/A] |                    | INTERGENIC                          |                                                              |
| *Ca_Desig_SNP1530 | scaffold00261 | 25154                   | [C/G] |                    | INTERGENIC                          |                                                              |
| *Ca_Desig_SNP1531 | scaffold12101 | 1953                    | [G/T] |                    | INTERGENIC                          |                                                              |
| *Ca_Desig_SNP1532 | Ca_Desig_LG05 | 600687                  | [A/T] | Ca_05274           | INTRON                              | Probable alanine-tRNA ligase, chloroplastic                  |
| *Ca_Desig_SNP1533 | scaffold00876 | 855                     | [A/G] |                    | INTERGENIC                          |                                                              |

| SNP IDs           | Chromosomes   | Physical positions (bp) | SNPs  | Gene accession IDs | Sequence components of genome/genes | Putative functions                             |
|-------------------|---------------|-------------------------|-------|--------------------|-------------------------------------|------------------------------------------------|
| *Ca_Desig_SNP1534 | scaffold00820 | 231                     | [A/C] |                    | INTERGENIC                          |                                                |
| *Ca_Desig_SNP1535 | scaffold01165 | 37162                   | [G/T] | Ca_10047           | DOWNSTREAM:818bases                 | --                                             |
| *Ca_Desig_SNP1536 | scaffold00676 | 928                     | [T/C] |                    | INTERGENIC                          |                                                |
| *Ca_Desig_SNP1537 | Ca_Desig_LG03 | 6434304                 | [G/T] |                    | INTERGENIC                          |                                                |
| *Ca_Desig_SNP1538 | Ca_Desig_LG04 | 15874915                | [T/A] | Ca_04846           | DOWNSTREAM:169bases                 | ATP-dependent DNA helicase Q-like SIM          |
| *Ca_Desig_SNP1539 | Ca_Desig_LG03 | 6758332                 | [G/A] | Ca_02701           | SYNONYMOUS_CODING                   | Vacuolar protein sorting-associated protein 27 |
| *Ca_Desig_SNP1540 | scaffold11144 | 108895                  | [A/C] |                    | INTERGENIC                          |                                                |
| *Ca_Desig_SNP1541 | scaffold00368 | 28955                   | [A/C] |                    | INTERGENIC                          |                                                |
| *Ca_Desig_SNP1542 | scaffold00676 | 4068                    | [G/T] |                    | INTERGENIC                          |                                                |
| *Ca_Desig_SNP1543 | scaffold00768 | 3103                    | [T/C] |                    | INTERGENIC                          |                                                |
| *Ca_Desig_SNP1544 | Ca_Desig_LG07 | 1050539                 | [A/T] | Ca_07466           | INTRON                              | Midasin                                        |
| *Ca_Desig_SNP1545 | scaffold00383 | 26380                   | [C/T] |                    | INTERGENIC                          |                                                |
| *Ca_Desig_SNP1546 | scaffold03772 | 41833                   | [A/C] |                    | INTERGENIC                          |                                                |
| *Ca_Desig_SNP1547 | Ca_Desig_LG03 | 6544365                 | [A/G] |                    | INTERGENIC                          |                                                |
| *Ca_Desig_SNP1548 | Ca_Desig_LG07 | 4370423                 | [C/A] | Ca_07661           | INTRON                              | Putative uncharacterized protein               |
| *Ca_Desig_SNP1549 | Ca_Desig_LG03 | 17138109                | [C/A] |                    | INTERGENIC                          |                                                |
| *Ca_Desig_SNP1550 | scaffold00908 | 199681                  | [T/C] |                    | INTERGENIC                          |                                                |
| *Ca_Desig_SNP1551 | scaffold00582 | 5052                    | [T/C] | Ca_13279           | INTRON                              | (+)-neomenthol dehydrogenase                   |
| *Ca_Desig_SNP1552 | scaffold01159 | 177                     | [T/C] |                    | INTERGENIC                          |                                                |
| *Ca_Desig_SNP1553 | scaffold00785 | 2119                    | [A/C] |                    | INTERGENIC                          |                                                |
| *Ca_Desig_SNP1554 | Ca_Desig_LG03 | 18702952                | [C/G] | Ca_03484           | NON_SYNONYMOUS_CODING               | Putative copper-transporting ATPase 3          |
| *Ca_Desig_SNP1555 | Ca_Desig_LG03 | 6434961                 | [T/A] |                    | INTERGENIC                          |                                                |
| *Ca_Desig_SNP1556 | scaffold00676 | 1085                    | [G/C] |                    | INTERGENIC                          |                                                |
| *Ca_Desig_SNP1557 | scaffold00212 | 151757                  | [T/G] | Ca_08884           | INTRON                              | zinc ion binding                               |
| *Ca_Desig_SNP1558 | scaffold00676 | 4213                    | [T/C] |                    | INTERGENIC                          |                                                |
| *Ca_Desig_SNP1559 | Ca_Desig_LG03 | 6776192                 | [G/A] | Ca_02704           | DOWNSTREAM:1797bases                | Putative uncharacterized protein               |

| SNP IDs           | Chromosomes   | Physical positions (bp) | SNPs  | Gene accession IDs | Sequence components of genome/genes | Putative functions                                 |
|-------------------|---------------|-------------------------|-------|--------------------|-------------------------------------|----------------------------------------------------|
| *Ca_Desig_SNP1560 | Ca_Desig_LG05 | 11437653                | [G/T] |                    | INTERGENIC                          |                                                    |
| *Ca_Desig_SNP1561 | scaffold00582 | 5057                    | [T/C] | Ca_13279           | INTRON                              | (+)-neomenthol dehydrogenase                       |
| *Ca_Desig_SNP1562 | Ca_Desig_LG03 | 6593404                 | [A/G] | Ca_02686           | SYNONYMOUS_CODING                   | Long-chain-alcohol oxidase FAO2                    |
| *Ca_Desig_SNP1563 | Ca_Desig_LG03 | 6738992                 | [A/G] | Ca_02699           | SYNONYMOUS_CODING                   | Protein of unknown function (DUF640)               |
| *Ca_Desig_SNP1564 | scaffold00884 | 1604                    | [A/G] |                    | INTERGENIC                          |                                                    |
| *Ca_Desig_SNP1565 | scaffold00078 | 7945                    | [T/C] |                    | INTERGENIC                          |                                                    |
| *Ca_Desig_SNP1566 | scaffold00884 | 686                     | [T/C] |                    | INTERGENIC                          |                                                    |
| *Ca_Desig_SNP1567 | Ca_Desig_LG03 | 7059071                 | [A/G] |                    | INTERGENIC                          |                                                    |
| *Ca_Desig_SNP1568 | Ca_Desig_LG03 | 995109                  | [A/C] |                    | INTERGENIC                          |                                                    |
| *Ca_Desig_SNP1569 | scaffold00582 | 5075                    | [A/C] | Ca_13279           | INTRON                              | (+)-neomenthol dehydrogenase                       |
| *Ca_Desig_SNP1570 | Ca_Desig_LG05 | 7699239                 | [T/G] | Ca_05857           | NON_SYNONYMOUS_CODING               | Trihelix transcription factor GT-1                 |
| *Ca_Desig_SNP1571 | scaffold00788 | 3455                    | [T/C] |                    | INTERGENIC                          |                                                    |
| *Ca_Desig_SNP1572 | scaffold00971 | 134                     | [T/C] |                    | INTERGENIC                          |                                                    |
| *Ca_Desig_SNP1573 | scaffold01122 | 81                      | [A/G] |                    | INTERGENIC                          |                                                    |
| *Ca_Desig_SNP1574 | scaffold00824 | 2784                    | [G/C] |                    | INTERGENIC                          |                                                    |
| *Ca_Desig_SNP1575 | scaffold02299 | 98443                   | [C/T] |                    | INTERGENIC                          |                                                    |
| *Ca_Desig_SNP1576 | Ca_Desig_LG03 | 17065575                | [G/A] | Ca_03329           | SYNONYMOUS_CODING                   | CBS domain-containing protein CBSX1, chloroplastic |
| *Ca_Desig_SNP1577 | Ca_Desig_LG04 | 2449602                 | [T/A] |                    | INTERGENIC                          |                                                    |
| *Ca_Desig_SNP1578 | Ca_Desig_LG03 | 6434644                 | [C/T] |                    | INTERGENIC                          |                                                    |
| *Ca_Desig_SNP1579 | scaffold00941 | 778                     | [G/C] |                    | INTERGENIC                          |                                                    |
| *Ca_Desig_SNP1580 | Ca_Desig_LG03 | 13829504                | [T/C] |                    | INTERGENIC                          |                                                    |
| *Ca_Desig_SNP1581 | scaffold00668 | 2083                    | [T/G] |                    | INTERGENIC                          |                                                    |
| *Ca_Desig_SNP1582 | scaffold00854 | 2293                    | [A/G] |                    | INTERGENIC                          |                                                    |
| *Ca_Desig_SNP1583 | scaffold01096 | 390                     | [C/T] |                    | INTERGENIC                          |                                                    |
| *Ca_Desig_SNP1584 | scaffold01949 | 15901                   | [T/G] | Ca_09783           | INTRON                              | Protein SUPPRESSOR OF npr1-1, CONSTITUTIVE 1       |
| *Ca_Desig_SNP1585 | scaffold00741 | 898                     | [A/G] |                    | INTERGENIC                          |                                                    |

| SNP IDs           | Chromosomes   | Physical positions (bp) | SNPs  | Gene accession IDs | Sequence components of genome/genes | Putative functions                                      |
|-------------------|---------------|-------------------------|-------|--------------------|-------------------------------------|---------------------------------------------------------|
| *Ca_Desig_SNP1586 | Ca_Desig_LG02 | 6088463                 | [T/G] | Ca_01465           | SYNONYMOUS_CODING                   | Arginine decarboxylase                                  |
| *Ca_Desig_SNP1587 | Ca_Desig_LG03 | 6543089                 | [T/A] | Ca_02681           | DOWNSTREAM:1824bases                | Peptide transporter PTR3-A                              |
| *Ca_Desig_SNP1588 | Ca_Desig_LG03 | 6758461                 | [T/C] | Ca_02701           | SYNONYMOUS_CODING                   | Vacuolar protein sorting-associated protein 27          |
| *Ca_Desig_SNP1589 | scaffold00480 | 11006                   | [C/T] | Ca_12823           | INTRON                              | Protein KIAA0664 homolog                                |
| *Ca_Desig_SNP1590 | scaffold00771 | 1920                    | [A/C] |                    | INTERGENIC                          |                                                         |
| *Ca_Desig_SNP1591 | scaffold00778 | 1845                    | [G/T] |                    | INTERGENIC                          |                                                         |
| *Ca_Desig_SNP1592 | scaffold00945 | 206048                  | [A/G] |                    | INTERGENIC                          |                                                         |
| *Ca_Desig_SNP1593 | Ca_Desig_LG03 | 6435914                 | [C/A] |                    | INTERGENIC                          |                                                         |
| *Ca_Desig_SNP1594 | Ca_Desig_LG03 | 6593914                 | [A/G] | Ca_02686           | SYNONYMOUS_CODING                   | Long-chain-alcohol oxidase FAO2                         |
| *Ca_Desig_SNP1595 | scaffold00312 | 17195                   | [A/C] | Ca_11992           | DOWNSTREAM:1289bases                | Ubiquitin-activating enzyme E1 1                        |
| *Ca_Desig_SNP1596 | scaffold00463 | 26272                   | [A/C] |                    | INTERGENIC                          |                                                         |
| *Ca_Desig_SNP1597 | Ca_Desig_LG03 | 6723814                 | [A/G] |                    | INTERGENIC                          |                                                         |
| *Ca_Desig_SNP1598 | scaffold00761 | 3560                    | [A/G] |                    | INTERGENIC                          |                                                         |
| *Ca_Desig_SNP1599 | scaffold00854 | 327                     | [T/C] |                    | INTERGENIC                          |                                                         |
| *Ca_Desig_SNP1600 | Ca_Desig_LG03 | 6641323                 | [A/G] | Ca_02692           | INTRON                              | Casein kinase I isoform delta-like                      |
| *Ca_Desig_SNP1601 | Ca_Desig_LG03 | 6547617                 | [A/C] |                    | INTERGENIC                          |                                                         |
| *Ca_Desig_SNP1602 | Ca_Desig_LG03 | 11146473                | [A/C] | Ca_02911           | DOWNSTREAM:1709bases                | Basic leucine zipper and W2 domain-containing protein 2 |
| *Ca_Desig_SNP1603 | Ca_Desig_LG03 | 3579279                 | [A/T] | Ca_02453           | DOWNSTREAM:1198bases                | Acyl-CoA-binding domain-containing protein 4            |
| *Ca_Desig_SNP1604 | Ca_Desig_LG03 | 6547078                 | [C/T] |                    | INTERGENIC                          |                                                         |
| *Ca_Desig_SNP1605 | Ca_Desig_LG03 | 6544021                 | [A/T] |                    | INTERGENIC                          |                                                         |
| *Ca_Desig_SNP1606 | Ca_Desig_LG03 | 6544126                 | [A/G] |                    | INTERGENIC                          |                                                         |
| *Ca_Desig_SNP1607 | scaffold01675 | 110970                  | [G/T] |                    | INTERGENIC                          |                                                         |
| *Ca_Desig_SNP1608 | Ca_Desig_LG03 | 6436085                 | [A/G] |                    | INTERGENIC                          |                                                         |
| *Ca_Desig_SNP1609 | Ca_Desig_LG03 | 6799092                 | [T/A] | Ca_02707           | INTRON                              | UPF0420 protein C16orf58 homolog                        |
| *Ca_Desig_SNP1610 | scaffold00982 | 271503                  | [G/C] |                    | INTERGENIC                          |                                                         |
| *Ca_Desig_SNP1611 | Ca_Desig_LG03 | 6436024                 | [A/G] |                    | INTERGENIC                          |                                                         |

| SNP IDs           | Chromosomes   | Physical positions (bp) | SNPs  | Gene accession IDs | Sequence components of genome/genes | Putative functions                                     |
|-------------------|---------------|-------------------------|-------|--------------------|-------------------------------------|--------------------------------------------------------|
| *Ca_Desig_SNP1612 | scaffold00852 | 739                     | [T/C] | Ca_14286           | INTRON                              | Type I inositol-1,4,5-trisphosphate 5-phosphatase 11   |
| *Ca_Desig_SNP1613 | scaffold00876 | 5670                    | [T/C] |                    | INTERGENIC                          |                                                        |
| *Ca_Desig_SNP1614 | Ca_Desig_LG03 | 6720703                 | [A/C] | Ca_02698           | DOWNSTREAM:1644bases                | Probable arabinose 5-phosphate isomerase               |
| *Ca_Desig_SNP1615 | Ca_Desig_LG03 | 5955064                 | [A/G] |                    | INTERGENIC                          |                                                        |
| *Ca_Desig_SNP1616 | scaffold00266 | 20083                   | [C/G] |                    | INTERGENIC                          |                                                        |
| *Ca_Desig_SNP1617 | Ca_Desig_LG04 | 21192547                | [A/C] |                    | INTERGENIC                          |                                                        |
| *Ca_Desig_SNP1618 | scaffold02771 | 72300                   | [A/G] |                    | INTERGENIC                          |                                                        |
| *Ca_Desig_SNP1619 | Ca_Desig_LG03 | 6547513                 | [G/A] |                    | INTERGENIC                          |                                                        |
| *Ca_Desig_SNP1620 | scaffold04411 | 47484                   | [A/C] |                    | INTERGENIC                          |                                                        |
| *Ca_Desig_SNP1621 | Ca_Desig_LG05 | 14344088                | [T/C] | Ca_06389           | NON_SYNONYMOUS_CODING               | Vacuolar protein sorting-associated protein 16 homolog |
| *Ca_Desig_SNP1622 | Ca_Desig_LG03 | 3580883                 | [C/T] | Ca_02453           | INTRON                              | Acyl-CoA-binding domain-containing protein 4           |
| *Ca_Desig_SNP1623 | scaffold03310 | 35043                   | [G/T] |                    | INTERGENIC                          |                                                        |
| *Ca_Desig_SNP1624 | scaffold00776 | 2592                    | [G/A] |                    | INTERGENIC                          |                                                        |
| *Ca_Desig_SNP1625 | Ca_Desig_LG05 | 15239787                | [T/C] | Ca_06428           | INTRON                              | tRNA-dihydrouridine synthase A                         |
| *Ca_Desig_SNP1626 | Ca_Desig_LG03 | 4100572                 | [T/C] |                    | INTERGENIC                          |                                                        |
| *Ca_Desig_SNP1627 | scaffold00266 | 27348                   | [C/T] | Ca_11695           | INTRON                              | Polyadenylate-binding protein 2                        |
| *Ca_Desig_SNP1628 | Ca_Desig_LG03 | 6758389                 | [C/T] | Ca_02701           | SYNONYMOUS_CODING                   | Vacuolar protein sorting-associated protein 27         |
| *Ca_Desig_SNP1629 | Ca_Desig_LG03 | 6390861                 | [G/A] | Ca_02666           | INTRON                              | Histone-lysine N-methyltransferase SUV4                |
| *Ca_Desig_SNP1630 | Ca_Desig_LG06 | 4072763                 | [A/C] | Ca_06752           | SYNONYMOUS_CODING                   | Nuclear pore complex protein Nup155                    |
| *Ca_Desig_SNP1631 | scaffold00776 | 2584                    | [T/G] |                    | INTERGENIC                          |                                                        |
| *Ca_Desig_SNP1632 | scaffold00582 | 13914                   | [T/C] | Ca_13282           | DOWNSTREAM:17bases                  | Transaldolase                                          |
| *Ca_Desig_SNP1633 | scaffold00982 | 263751                  | [T/A] |                    | INTERGENIC                          |                                                        |
| *Ca_Desig_SNP1634 | Ca_Desig_LG03 | 6435997                 | [G/A] |                    | INTERGENIC                          |                                                        |
| *Ca_Desig_SNP1635 | scaffold01157 | 4879                    | [G/A] |                    | INTERGENIC                          |                                                        |
| *Ca_Desig_SNP1636 | scaffold00438 | 21822                   | [G/A] |                    | INTERGENIC                          |                                                        |
| *Ca_Desig_SNP1637 | Ca_Desig_LG03 | 6812090                 | [C/T] | Ca_02708           | DOWNSTREAM:1892bases                | Actin-depolymerizing factor                            |

| SNP IDs           | Chromosomes   | Physical positions (bp) | SNPs  | Gene accession IDs | Sequence components of genome/genes | Putative functions                                       |
|-------------------|---------------|-------------------------|-------|--------------------|-------------------------------------|----------------------------------------------------------|
| *Ca_Desig_SNP1638 | scaffold00804 | 751                     | [A/G] |                    | INTERGENIC                          |                                                          |
| *Ca_Desig_SNP1639 | scaffold00768 | 3105                    | [T/C] |                    | INTERGENIC                          |                                                          |
| *Ca_Desig_SNP1640 | scaffold00266 | 24994                   | [C/G] | Ca_11695           | NON_SYNONYMOUS_CODING               | Polyadenylate-binding protein 2                          |
| *Ca_Desig_SNP1641 | scaffold07988 | 102533                  | [A/G] |                    | INTERGENIC                          |                                                          |
| *Ca_Desig_SNP1642 | scaffold00761 | 3573                    | [T/C] |                    | INTERGENIC                          |                                                          |
| *Ca_Desig_SNP1643 | Ca_Desig_LG04 | 4087180                 | [A/G] | Ca_04169           | SYNONYMOUS_CODING                   | Probable galactinol--sucrose galactosyltransferase 1     |
| *Ca_Desig_SNP1644 | scaffold00998 | 221315                  | [A/G] |                    | INTERGENIC                          |                                                          |
| *Ca_Desig_SNP1645 | scaffold00779 | 2322                    | [T/C] |                    | INTERGENIC                          |                                                          |
| *Ca_Desig_SNP1646 | scaffold02578 | 42094                   | [A/C] |                    | INTERGENIC                          |                                                          |
| *Ca_Desig_SNP1647 | scaffold00816 | 2323                    | [G/C] |                    | INTERGENIC                          |                                                          |
| *Ca_Desig_SNP1648 | Ca_Desig_LG03 | 5804745                 | [C/G] | Ca_02600           | SYNONYMOUS_CODING                   | WD repeat-containing protein 3                           |
| *Ca_Desig_SNP1649 | scaffold01585 | 34258                   | [T/G] |                    | INTERGENIC                          |                                                          |
| *Ca_Desig_SNP1650 | scaffold04453 | 258773                  | [T/C] |                    | INTERGENIC                          |                                                          |
| *Ca_Desig_SNP1651 | Ca_Desig_LG03 | 3538547                 | [C/A] | Ca_02448           | INTRON                              | Cell cycle checkpoint control protein RAD9A              |
| *Ca_Desig_SNP1652 | Ca_Desig_LG03 | 12543821                | [T/G] | Ca_03032           | NON_SYNONYMOUS_CODING               | NAD-dependent malic enzyme 59 kDa isoform, mitochondrial |
| *Ca_Desig_SNP1653 | scaffold01428 | 173201                  | [T/A] |                    | INTERGENIC                          |                                                          |
| *Ca_Desig_SNP1654 | scaffold04114 | 5169                    | [T/C] |                    | INTERGENIC                          |                                                          |
| *Ca_Desig_SNP1655 | scaffold00982 | 220494                  | [A/G] |                    | INTERGENIC                          |                                                          |
| *Ca_Desig_SNP1656 | Ca_Desig_LG03 | 4174824                 | [G/T] | Ca_02518           | UTR_3_PRIME:331bases                | Unknown expressed protein                                |
| *Ca_Desig_SNP1657 | scaffold00779 | 2341                    | [G/A] |                    | INTERGENIC                          |                                                          |
| *Ca_Desig_SNP1658 | Ca_Desig_LG03 | 4053071                 | [A/C] |                    | INTERGENIC                          |                                                          |
| *Ca_Desig_SNP1659 | Ca_Desig_LG03 | 3973381                 | [G/A] | Ca_02494           | INTRON                              | Probable glutamate carboxypeptidase 2                    |
| *Ca_Desig_SNP1660 | scaffold04453 | 258779                  | [T/C] |                    | INTERGENIC                          |                                                          |
| *Ca_Desig_SNP1661 | Ca_Desig_LG03 | 4034617                 | [T/G] | Ca_02500           | DOWNSTREAM:904bases                 | Pre-mRNA-splicing factor rse1                            |
| *Ca_Desig_SNP1662 | Ca_Desig_LG03 | 3518795                 | [G/C] |                    | INTERGENIC                          |                                                          |
| *Ca_Desig_SNP1663 | Ca_Desig_LG03 | 4019445                 | [G/T] | Ca_02499           | SYNONYMOUS_CODING                   | Calcium homeostasis endoplasmic reticulum protein        |

| SNP IDs           | Chromosomes   | Physical positions (bp) | SNPs  | Gene accession IDs | Sequence components of genome/genes | Putative functions                                |
|-------------------|---------------|-------------------------|-------|--------------------|-------------------------------------|---------------------------------------------------|
| *Ca_Desig_SNP1664 | scaffold00646 | 2074                    | [T/A] |                    | INTERGENIC                          |                                                   |
| *Ca_Desig_SNP1665 | scaffold00884 | 1618                    | [T/C] |                    | INTERGENIC                          |                                                   |
| *Ca_Desig_SNP1666 | scaffold00735 | 2864                    | [T/C] | Ca_13852           | DOWNSTREAM:1582bases                | MORC family CW-type zinc finger protein 4         |
| *Ca_Desig_SNP1667 | Ca_Desig_LG08 | 8432955                 | [C/A] | Ca_08610           | INTRON                              | Protein MSP1                                      |
| *Ca_Desig_SNP1668 | scaffold00768 | 3125                    | [A/G] |                    | INTERGENIC                          |                                                   |
| *Ca_Desig_SNP1669 | Ca_Desig_LG03 | 4100725                 | [T/A] |                    | INTERGENIC                          |                                                   |
| *Ca_Desig_SNP1670 | Ca_Desig_LG03 | 4004966                 | [G/C] | Ca_02498           | INTRON                              | Uncharacterized protein At3g58460                 |
| *Ca_Desig_SNP1671 | Ca_Desig_LG03 | 2915510                 | [C/T] |                    | INTERGENIC                          |                                                   |
| *Ca_Desig_SNP1672 | scaffold00982 | 264003                  | [G/A] |                    | INTERGENIC                          |                                                   |
| *Ca_Desig_SNP1673 | Ca_Desig_LG03 | 4040430                 | [G/A] | Ca_02500           | DOWNSTREAM:1188bases                | Pre-mRNA-splicing factor rse1                     |
| *Ca_Desig_SNP1674 | scaffold00266 | 37834                   | [A/G] | Ca_11696           | DOWNSTREAM:301bases                 | E3 ubiquitin-protein ligase MARCH6                |
| *Ca_Desig_SNP1675 | Ca_Desig_LG03 | 4118888                 | [A/G] |                    | INTERGENIC                          |                                                   |
| *Ca_Desig_SNP1676 | Ca_Desig_LG03 | 4175622                 | [C/A] | Ca_02518           | INTRON                              | Unknown expressed protein                         |
| *Ca_Desig_SNP1677 | Ca_Desig_LG03 | 4038954                 | [C/G] | Ca_02501           | DOWNSTREAM:964bases                 | Release factor glutamine methyltransferase        |
| *Ca_Desig_SNP1678 | scaffold00207 | 28256                   | [A/C] |                    | INTERGENIC                          |                                                   |
| *Ca_Desig_SNP1679 | scaffold00585 | 5128                    | [A/C] |                    | INTERGENIC                          |                                                   |
| *Ca_Desig_SNP1680 | scaffold00598 | 7505                    | [C/T] |                    | INTERGENIC                          |                                                   |
| *Ca_Desig_SNP1681 | scaffold00779 | 1028                    | [C/A] |                    | INTERGENIC                          |                                                   |
| *Ca_Desig_SNP1682 | Ca_Desig_LG03 | 4003568                 | [C/A] | Ca_02498           | DOWNSTREAM:824bases                 | Uncharacterized protein At3g58460                 |
| *Ca_Desig_SNP1683 | Ca_Desig_LG03 | 3612217                 | [T/C] |                    | INTERGENIC                          |                                                   |
| *Ca_Desig_SNP1684 | Ca_Desig_LG03 | 3967388                 | [A/G] | Ca_02494           | INTRON                              | Probable glutamate carboxypeptidase 2             |
| *Ca_Desig_SNP1685 | scaffold02022 | 85924                   | [C/T] |                    | INTERGENIC                          |                                                   |
| *Ca_Desig_SNP1686 | Ca_Desig_LG03 | 4100741                 | [A/G] |                    | INTERGENIC                          |                                                   |
| *Ca_Desig_SNP1687 | Ca_Desig_LG03 | 3631402                 | [A/G] | Ca_02457           | SYNONYMOUS_CODING                   | DNA polymerase zeta catalytic subunit             |
| *Ca_Desig_SNP1688 | Ca_Desig_LG03 | 4019505                 | [C/T] | Ca_02499           | SYNONYMOUS_CODING                   | Calcium homeostasis endoplasmic reticulum protein |
| *Ca_Desig_SNP1689 | Ca_Desig_LG03 | 4039042                 | [G/A] | Ca_02501           | DOWNSTREAM:876bases                 | Release factor glutamine methyltransferase        |



| SNP IDs           | Chromosomes   | Physical positions (bp) | SNPs  | Gene accession IDs | Sequence components of genome/genes | Putative functions                                                              |
|-------------------|---------------|-------------------------|-------|--------------------|-------------------------------------|---------------------------------------------------------------------------------|
| *Ca_Desig_SNP1690 | Ca_Desig_LG03 | 3633582                 | [A/G] | Ca_02457           | INTRON                              | DNA polymerase zeta catalytic subunit                                           |
| *Ca_Desig_SNP1691 | Ca_Desig_LG03 | 3576686                 | [A/G] |                    | INTERGENIC                          |                                                                                 |
| *Ca_Desig_SNP1692 | Ca_Desig_LG03 | 4053024                 | [A/G] |                    | INTERGENIC                          |                                                                                 |
| *Ca_Desig_SNP1693 | scaffold04453 | 258801                  | [T/C] |                    | INTERGENIC                          |                                                                                 |
| *Ca_Desig_SNP1694 | scaffold00769 | 292                     | [C/T] |                    | INTERGENIC                          |                                                                                 |
| *Ca_Desig_SNP1695 | scaffold00646 | 4934                    | [A/G] |                    | INTERGENIC                          |                                                                                 |
| *Ca_Desig_SNP1696 | Ca_Desig_LG03 | 854698                  | [C/T] | Ca_02225           | DOWNSTREAM:226bases                 | Cytochrome b5 isoform 1                                                         |
| *Ca_Desig_SNP1697 | Ca_Desig_LG03 | 3946457                 | [G/T] | Ca_02491           | SYNONYMOUS_CODING                   | D-lactate dehydrogenase [cytochrome], mitochondrial                             |
| *Ca_Desig_SNP1698 | Ca_Desig_LG03 | 3635915                 | [A/G] |                    | INTERGENIC                          |                                                                                 |
| *Ca_Desig_SNP1699 | scaffold01283 | 56049                   | [T/A] |                    | INTERGENIC                          |                                                                                 |
| *Ca_Desig_SNP1700 | Ca_Desig_LG03 | 4086443                 | [C/T] | Ca_02506           | INTRON                              | Cohesin subunit SA-1                                                            |
| *Ca_Desig_SNP1701 | scaffold00055 | 320076                  | [C/T] | Ca_08802           | NON_SYNONYMOUS_CODING               | Protein ABIL1                                                                   |
| *Ca_Desig_SNP1702 | Ca_Desig_LG03 | 3523403                 | [T/C] | Ca_02446           | INTRON                              | ATP-dependent Clp protease proteolytic subunit-related protein 3, chloroplastic |
| *Ca_Desig_SNP1703 | scaffold00982 | 263922                  | [A/T] |                    | INTERGENIC                          |                                                                                 |
| *Ca_Desig_SNP1704 | Ca_Desig_LG03 | 3567288                 | [T/A] | Ca_02451           | INTRON                              | Putative protease Do-like 14                                                    |
| *Ca_Desig_SNP1705 | scaffold00266 | 38095                   | [G/C] | Ca_11696           | DOWNSTREAM:40bases                  | E3 ubiquitin-protein ligase MARCH6                                              |
| *Ca_Desig_SNP1706 | Ca_Desig_LG03 | 3524914                 | [A/G] | Ca_02446           | SYNONYMOUS_CODING                   | ATP-dependent Clp protease proteolytic subunit-related protein 3, chloroplastic |
| *Ca_Desig_SNP1707 | scaffold00266 | 4100                    | [T/C] |                    | INTERGENIC                          |                                                                                 |
| *Ca_Desig_SNP1708 | Ca_Desig_LG03 | 3567444                 | [C/T] | Ca_02451           | SYNONYMOUS_CODING                   | Putative protease Do-like 14                                                    |
| *Ca_Desig_SNP1709 | Ca_Desig_LG03 | 3576516                 | [C/T] |                    | INTERGENIC                          |                                                                                 |
| *Ca_Desig_SNP1710 | scaffold00779 | 1048                    | [A/G] |                    | INTERGENIC                          |                                                                                 |
| *Ca_Desig_SNP1711 | scaffold00702 | 6578                    | [T/C] |                    | INTERGENIC                          |                                                                                 |
| *Ca_Desig_SNP1712 | scaffold00429 | 26593                   | [G/C] |                    | INTERGENIC                          |                                                                                 |
| *Ca_Desig_SNP1713 | scaffold00938 | 1109                    | [T/C] |                    | INTERGENIC                          |                                                                                 |
| *Ca_Desig_SNP1714 | scaffold11151 | 48706                   | [A/T] |                    | INTERGENIC                          |                                                                                 |
| *Ca_Desig_SNP1715 | scaffold01100 | 252                     | [G/T] |                    | INTERGENIC                          |                                                                                 |

| SNP IDs           | Chromosomes   | Physical positions (bp) | SNPs  | Gene accession IDs | Sequence components of genome/genes | Putative functions                                    |
|-------------------|---------------|-------------------------|-------|--------------------|-------------------------------------|-------------------------------------------------------|
| *Ca_Desig_SNP1716 | scaffold04196 | 26187                   | [T/A] | Ca_10354           | NON_SYNONYMOUS_CODING               | Nuclear-pore anchor                                   |
| *Ca_Desig_SNP1717 | Ca_Desig_LG03 | 23024193                | [C/A] | Ca_03848           | INTRON                              | Mechanosensitive ion channel protein 2, chloroplastic |
| *Ca_Desig_SNP1718 | scaffold13659 | 30796                   | [T/C] |                    | INTERGENIC                          |                                                       |
| *Ca_Desig_SNP1719 | scaffold00670 | 157787                  | [T/C] |                    | INTERGENIC                          |                                                       |
| *Ca_Desig_SNP1720 | scaffold00634 | 48266                   | [T/C] |                    | INTERGENIC                          |                                                       |
| *Ca_Desig_SNP1721 | scaffold02243 | 47531                   | [G/T] |                    | INTERGENIC                          |                                                       |
| *Ca_Desig_SNP1722 | scaffold00378 | 27389                   | [G/A] |                    | INTERGENIC                          |                                                       |
| *Ca_Desig_SNP1723 | Ca_Desig_LG02 | 326926                  | [T/G] | Ca_01051           | INTRON                              | Polypyrimidine tract-binding protein homolog 2        |
| *Ca_Desig_SNP1724 | scaffold00763 | 247                     | [A/C] |                    | INTERGENIC                          |                                                       |
| *Ca_Desig_SNP1725 | scaffold11144 | 88028                   | [C/T] |                    | INTERGENIC                          |                                                       |
| *Ca_Desig_SNP1726 | scaffold00631 | 93636                   | [G/A] |                    | INTERGENIC                          |                                                       |
| *Ca_Desig_SNP1727 | scaffold00643 | 77662                   | [C/T] |                    | INTERGENIC                          |                                                       |
| *Ca_Desig_SNP1728 | scaffold05316 | 60478                   | [T/C] |                    | INTERGENIC                          |                                                       |
| *Ca_Desig_SNP1729 | scaffold00325 | 24474                   | [T/G] |                    | INTERGENIC                          |                                                       |
| *Ca_Desig_SNP1730 | Ca_Desig_LG04 | 4936836                 | [G/A] |                    | INTERGENIC                          |                                                       |
| *Ca_Desig_SNP1731 | scaffold00643 | 78777                   | [A/G] |                    | INTERGENIC                          |                                                       |
| *Ca_Desig_SNP1732 | Ca_Desig_LG04 | 4771738                 | [T/C] |                    | INTERGENIC                          |                                                       |
| *Ca_Desig_SNP1733 | scaffold04586 | 108758                  | [C/T] |                    | INTERGENIC                          |                                                       |
| *Ca_Desig_SNP1734 | scaffold00451 | 27747                   | [T/C] |                    | INTERGENIC                          |                                                       |
| *Ca_Desig_SNP1735 | scaffold07271 | 9978                    | [T/G] |                    | INTERGENIC                          |                                                       |
| *Ca_Desig_SNP1736 | scaffold00270 | 13564                   | [C/T] |                    | INTERGENIC                          |                                                       |
| *Ca_Desig_SNP1737 | Ca_Desig_LG04 | 371113                  | [A/T] |                    | INTERGENIC                          |                                                       |
| *Ca_Desig_SNP1738 | scaffold04235 | 28884                   | [G/C] |                    | INTERGENIC                          |                                                       |
| *Ca_Desig_SNP1739 | scaffold01791 | 65179                   | [C/T] |                    | INTERGENIC                          |                                                       |
| *Ca_Desig_SNP1740 | Ca_Desig_LG04 | 937980                  | [A/T] |                    | INTERGENIC                          |                                                       |
| *Ca_Desig_SNP1741 | scaffold11144 | 82728                   | [C/T] |                    | INTERGENIC                          |                                                       |

| SNP IDs           | Chromosomes   | Physical positions (bp) | SNPs  | Gene accession IDs | Sequence components of genome/genes | Putative functions                                                                                              |
|-------------------|---------------|-------------------------|-------|--------------------|-------------------------------------|-----------------------------------------------------------------------------------------------------------------|
| *Ca_Desig_SNP1742 | scaffold00715 | 2277                    | [G/A] |                    | INTERGENIC                          |                                                                                                                 |
| *Ca_Desig_SNP1743 | scaffold00394 | 21773                   | [G/A] | Ca_12421           | INTRON                              | NHL repeat-containing protein 2                                                                                 |
| *Ca_Desig_SNP1744 | scaffold01984 | 78351                   | [A/G] |                    | INTERGENIC                          |                                                                                                                 |
| *Ca_Desig_SNP1745 | Ca_Desig_LG04 | 3123418                 | [C/T] |                    | INTERGENIC                          |                                                                                                                 |
| *Ca_Desig_SNP1746 | scaffold00423 | 6750                    | [C/T] |                    | INTERGENIC                          |                                                                                                                 |
| *Ca_Desig_SNP1747 | Ca_Desig_LG02 | 6968273                 | [T/G] |                    | INTERGENIC                          |                                                                                                                 |
| *Ca_Desig_SNP1748 | scaffold01432 | 35034                   | [G/T] |                    | INTERGENIC                          |                                                                                                                 |
| *Ca_Desig_SNP1749 | scaffold00523 | 15870                   | [A/T] | Ca_13048           | DOWNSTREAM:1370bases                | unknown protein; Has 30201 Blast hits to 17322 proteins in 780 species: Archae - 12; Bacteria - 1396; Metazoa - |
| *Ca_Desig_SNP1750 | Ca_Desig_LG04 | 4848730                 | [G/A] | Ca_04217           | INTRON                              | Chlorophyllide a oxygenase, chloroplastic                                                                       |
| *Ca_Desig_SNP1751 | scaffold02424 | 86313                   | [A/T] |                    | INTERGENIC                          |                                                                                                                 |
| *Ca_Desig_SNP1752 | scaffold04586 | 185465                  | [C/T] |                    | INTERGENIC                          |                                                                                                                 |
| *Ca_Desig_SNP1753 | scaffold00441 | 71410                   | [C/G] | Ca_09233           | DOWNSTREAM:815bases                 | NF-X1-type zinc finger protein NFXL2                                                                            |
| *Ca_Desig_SNP1754 | scaffold03869 | 30151                   | [C/G] |                    | INTERGENIC                          |                                                                                                                 |
| *Ca_Desig_SNP1755 | scaffold02333 | 27089                   | [T/C] |                    | INTERGENIC                          |                                                                                                                 |
| *Ca_Desig_SNP1756 | scaffold02333 | 87259                   | [A/C] |                    | INTERGENIC                          |                                                                                                                 |
| *Ca_Desig_SNP1757 | scaffold02333 | 27048                   | [T/C] |                    | INTERGENIC                          |                                                                                                                 |
| *Ca_Desig_SNP1758 | scaffold01362 | 93356                   | [T/C] |                    | INTERGENIC                          |                                                                                                                 |
| *Ca_Desig_SNP1759 | scaffold01073 | 566                     | [T/A] |                    | INTERGENIC                          |                                                                                                                 |
| *Ca_Desig_SNP1760 | Ca_Desig_LG04 | 12119500                | [T/C] |                    | INTERGENIC                          |                                                                                                                 |
| *Ca_Desig_SNP1761 | Ca_Desig_LG07 | 1668089                 | [T/C] | Ca_07493           | INTRON                              | tobamovirus multiplication protein 3                                                                            |
| *Ca_Desig_SNP1762 | scaffold02299 | 100048                  | [C/T] |                    | INTERGENIC                          |                                                                                                                 |
| *Ca_Desig_SNP1763 | Ca_Desig_LG04 | 4905849                 | [G/A] | Ca_04222           | INTRON                              | Cell division control protein 48 homolog C                                                                      |
| *Ca_Desig_SNP1764 | scaffold00423 | 6796                    | [T/C] |                    | INTERGENIC                          |                                                                                                                 |
| *Ca_Desig_SNP1765 | Ca_Desig_LG04 | 5408655                 | [C/T] | Ca_04241           | INTRON                              | Cyclin-J18-like                                                                                                 |
| *Ca_Desig_SNP1766 | scaffold00634 | 125412                  | [C/A] |                    | INTERGENIC                          |                                                                                                                 |
| *Ca_Desig_SNP1767 | scaffold00523 | 15551                   | [A/G] | Ca_13048           | DOWNSTREAM:1051bases                | Unknown expressed protein                                                                                       |

| SNP IDs           | Chromosomes   | Physical positions (bp) | SNPs  | Gene accession IDs | Sequence components of genome/genes | Putative functions                             |
|-------------------|---------------|-------------------------|-------|--------------------|-------------------------------------|------------------------------------------------|
| *Ca_Desig_SNP1768 | scaffold00215 | 255917                  | [A/G] |                    | INTERGENIC                          |                                                |
| *Ca_Desig_SNP1769 | Ca_Desig_LG04 | 4939952                 | [C/T] |                    | INTERGENIC                          |                                                |
| *Ca_Desig_SNP1770 | scaffold11144 | 103362                  | [G/A] |                    | INTERGENIC                          |                                                |
| *Ca_Desig_SNP1771 | scaffold03869 | 30012                   | [A/G] |                    | INTERGENIC                          |                                                |
| *Ca_Desig_SNP1772 | Ca_Desig_LG04 | 4771528                 | [G/T] |                    | INTERGENIC                          |                                                |
| *Ca_Desig_SNP1773 | Ca_Desig_LG02 | 6968279                 | [G/C] |                    | INTERGENIC                          |                                                |
| *Ca_Desig_SNP1774 | scaffold00331 | 598                     | [T/C] |                    | INTERGENIC                          |                                                |
| *Ca_Desig_SNP1775 | scaffold00477 | 12208                   | [C/A] |                    | INTERGENIC                          |                                                |
| *Ca_Desig_SNP1776 | scaffold01101 | 230                     | [T/C] |                    | INTERGENIC                          |                                                |
| *Ca_Desig_SNP1777 | Ca_Desig_LG02 | 437745                  | [T/C] |                    | INTERGENIC                          |                                                |
| *Ca_Desig_SNP1778 | scaffold01362 | 107233                  | [C/T] |                    | INTERGENIC                          |                                                |
| *Ca_Desig_SNP1779 | scaffold00215 | 388175                  | [G/A] |                    | INTERGENIC                          |                                                |
| *Ca_Desig_SNP1780 | scaffold00215 | 388191                  | [T/C] |                    | INTERGENIC                          |                                                |
| *Ca_Desig_SNP1781 | scaffold00866 | 1061                    | [T/C] | Ca_14324           | DOWNSTREAM:268bases                 | NADP-specific glutamate dehydrogenase          |
| *Ca_Desig_SNP1782 | scaffold01092 | 18                      | [C/T] |                    | INTERGENIC                          |                                                |
| *Ca_Desig_SNP1783 | scaffold04586 | 123281                  | [C/T] |                    | INTERGENIC                          |                                                |
| *Ca_Desig_SNP1784 | scaffold01709 | 116328                  | [A/G] |                    | INTERGENIC                          |                                                |
| *Ca_Desig_SNP1785 | scaffold00551 | 1913                    | [A/G] |                    | INTERGENIC                          |                                                |
| *Ca_Desig_SNP1786 | Ca_Desig_LG02 | 327691                  | [C/G] | Ca_01051           | INTRON                              | Polypyrimidine tract-binding protein homolog 2 |
| *Ca_Desig_SNP1787 | scaffold00215 | 253358                  | [T/A] |                    | INTERGENIC                          |                                                |
| *Ca_Desig_SNP1788 | Ca_Desig_LG04 | 6110371                 | [A/G] |                    | INTERGENIC                          |                                                |
| *Ca_Desig_SNP1789 | scaffold00835 | 18044                   | [C/G] | Ca_09737           | INTRON                              | DNA polymerase epsilon catalytic subunit A     |
| *Ca_Desig_SNP1790 | scaffold01564 | 66779                   | [T/C] |                    | INTERGENIC                          |                                                |
| *Ca_Desig_SNP1791 | scaffold00876 | 879                     | [T/C] |                    | INTERGENIC                          |                                                |
| *Ca_Desig_SNP1792 | scaffold08121 | 42734                   | [C/G] |                    | INTERGENIC                          |                                                |
| *Ca_Desig_SNP1793 | Ca_Desig_LG02 | 278283                  | [T/A] | Ca_01047           | DOWNSTREAM:654bases                 | Cyclic nucleotide-gated ion channel 1          |

| SNP IDs           | Chromosomes   | Physical positions (bp) | SNPs  | Gene accession IDs | Sequence components of genome/genes | Putative functions                                                             |
|-------------------|---------------|-------------------------|-------|--------------------|-------------------------------------|--------------------------------------------------------------------------------|
| *Ca_Desig_SNP1794 | scaffold00686 | 1911                    | [A/G] |                    | INTERGENIC                          |                                                                                |
| *Ca_Desig_SNP1795 | scaffold00505 | 7701                    | [G/A] |                    | INTERGENIC                          |                                                                                |
| *Ca_Desig_SNP1796 | scaffold01362 | 107009                  | [G/A] |                    | INTERGENIC                          |                                                                                |
| *Ca_Desig_SNP1797 | scaffold00736 | 39841                   | [C/T] |                    | INTERGENIC                          |                                                                                |
| *Ca_Desig_SNP1798 | scaffold05316 | 40819                   | [T/C] |                    | INTERGENIC                          |                                                                                |
| *Ca_Desig_SNP1799 | scaffold00775 | 2378                    | [T/C] | Ca_13986           | DOWNSTREAM:981bases                 | Protein of unknown function (DUF3755)                                          |
| *Ca_Desig_SNP1800 | scaffold01565 | 107481                  | [G/T] |                    | INTERGENIC                          |                                                                                |
| *Ca_Desig_SNP1801 | Ca_Desig_LG02 | 318397                  | [A/C] |                    | INTERGENIC                          |                                                                                |
| *Ca_Desig_SNP1802 | scaffold07356 | 154904                  | [T/G] |                    | INTERGENIC                          |                                                                                |
| *Ca_Desig_SNP1803 | scaffold02036 | 25309                   | [A/C] |                    | INTERGENIC                          |                                                                                |
| *Ca_Desig_SNP1804 | scaffold02036 | 25310                   | [G/T] |                    | INTERGENIC                          |                                                                                |
| *Ca_Desig_SNP1805 | Ca_Desig_LG02 | 11422719                | [G/T] |                    | INTERGENIC                          |                                                                                |
| *Ca_Desig_SNP1806 | Ca_Desig_LG04 | 12119463                | [A/G] |                    | INTERGENIC                          |                                                                                |
| *Ca_Desig_SNP1807 | scaffold00686 | 1896                    | [G/T] |                    | INTERGENIC                          |                                                                                |
| *Ca_Desig_SNP1808 | scaffold02036 | 25308                   | [A/T] |                    | INTERGENIC                          |                                                                                |
| *Ca_Desig_SNP1809 | scaffold00640 | 2803                    | [G/T] | Ca_13529           | DOWNSTREAM:1412bases                | Trihelix transcription factor GT-2                                             |
| *Ca_Desig_SNP1810 | Ca_Desig_LG04 | 367811                  | [A/G] |                    | INTERGENIC                          |                                                                                |
| *Ca_Desig_SNP1811 | scaffold14943 | 34555                   | [G/A] | Ca_10460           | DOWNSTREAM:1817bases                | Ankyrin repeat family protein                                                  |
| *Ca_Desig_SNP1812 | scaffold04721 | 48203                   | [A/T] |                    | INTERGENIC                          |                                                                                |
| *Ca_Desig_SNP1813 | scaffold15702 | 53716                   | [G/T] |                    | INTERGENIC                          |                                                                                |
| *Ca_Desig_SNP1814 | Ca_Desig_LG03 | 17296688                | [T/C] |                    | INTERGENIC                          |                                                                                |
| *Ca_Desig_SNP1815 | Ca_Desig_LG04 | 7406408                 | [G/C] | Ca_04335           | INTRON                              | Uncharacterized aarF domain-containing protein kinase At4q31390, chloroplastic |
| *Ca_Desig_SNP1816 | scaffold00768 | 3108                    | [A/G] |                    | INTERGENIC                          |                                                                                |
| *Ca_Desig_SNP1817 | scaffold00938 | 1151                    | [A/G] |                    | INTERGENIC                          |                                                                                |
| *Ca_Desig_SNP1818 | scaffold00735 | 2847                    | [T/C] | Ca_13852           | DOWNSTREAM:1599bases                | MORC family CW-type zinc finger protein 4                                      |
| *Ca_Desig_SNP1819 | scaffold06803 | 32916                   | [A/C] |                    | INTERGENIC                          |                                                                                |

| SNP IDs           | Chromosomes   | Physical positions (bp) | SNPs  | Gene accession IDs | Sequence components of genome/genes | Putative functions                     |
|-------------------|---------------|-------------------------|-------|--------------------|-------------------------------------|----------------------------------------|
| *Ca_Desig_SNP1820 | scaffold00684 | 6565                    | [A/G] |                    | INTERGENIC                          |                                        |
| *Ca_Desig_SNP1821 | scaffold01194 | 87130                   | [A/C] |                    | INTERGENIC                          |                                        |
| *Ca_Desig_SNP1822 | scaffold00938 | 1154                    | [A/G] |                    | INTERGENIC                          |                                        |
| *Ca_Desig_SNP1823 | scaffold00741 | 838                     | [A/G] |                    | INTERGENIC                          |                                        |
| *Ca_Desig_SNP1824 | scaffold00724 | 78                      | [G/A] |                    | INTERGENIC                          |                                        |
| *Ca_Desig_SNP1825 | scaffold02170 | 35493                   | [T/G] |                    | INTERGENIC                          |                                        |
| *Ca_Desig_SNP1826 | scaffold00861 | 2080                    | [A/C] |                    | INTERGENIC                          |                                        |
| *Ca_Desig_SNP1827 | scaffold03349 | 1946                    | [T/A] |                    | INTERGENIC                          |                                        |
| *Ca_Desig_SNP1828 | scaffold00768 | 3029                    | [T/C] |                    | INTERGENIC                          |                                        |
| *Ca_Desig_SNP1829 | Ca_Desig_LG07 | 1634725                 | [T/G] | Ca_07491           | INTRON                              | Transcription factor MYB1R1            |
| *Ca_Desig_SNP1830 | scaffold00606 | 2552                    | [G/A] |                    | INTERGENIC                          |                                        |
| *Ca_Desig_SNP1831 | scaffold00408 | 2257                    | [T/G] |                    | INTERGENIC                          |                                        |
| *Ca_Desig_SNP1832 | scaffold02483 | 89864                   | [G/A] |                    | INTERGENIC                          |                                        |
| *Ca_Desig_SNP1833 | scaffold00264 | 20705                   | [C/T] | Ca_11677           | UPSTREAM:1244bases                  | Domain of unknown function (DUF3598)   |
| *Ca_Desig_SNP1834 | scaffold00866 | 880                     | [A/G] | Ca_14324           | DOWNSTREAM:449bases                 | NADP-specific glutamate dehydrogenase  |
| *Ca_Desig_SNP1835 | scaffold02645 | 75176                   | [A/C] |                    | INTERGENIC                          |                                        |
| *Ca_Desig_SNP1836 | scaffold00870 | 713                     | [A/G] |                    | INTERGENIC                          |                                        |
| *Ca_Desig_SNP1837 | scaffold01090 | 189794                  | [A/G] |                    | INTERGENIC                          |                                        |
| *Ca_Desig_SNP1838 | scaffold00514 | 18646                   | [A/C] |                    | INTERGENIC                          |                                        |
| *Ca_Desig_SNP1839 | Ca_Desig_LG04 | 1228422                 | [C/A] | Ca_03974           | NON_SYNONYMOUS_CODING               | Protein SERAC1                         |
| *Ca_Desig_SNP1840 | scaffold00603 | 6494                    | [A/T] |                    | INTERGENIC                          |                                        |
| *Ca_Desig_SNP1841 | scaffold00788 | 3470                    | [T/C] |                    | INTERGENIC                          |                                        |
| *Ca_Desig_SNP1842 | Ca_Desig_LG07 | 1634729                 | [T/A] | Ca_07491           | INTRON                              | Transcription factor MYB1R1            |
| *Ca_Desig_SNP1843 | Ca_Desig_LG02 | 281905                  | [C/T] |                    | INTERGENIC                          |                                        |
| *Ca_Desig_SNP1844 | Ca_Desig_LG04 | 4837373                 | [T/G] | Ca_04215           | SYNONYMOUS_CODING                   | Filament-like plant protein (Fragment) |
| *Ca_Desig_SNP1845 | scaffold00583 | 8081                    | [C/T] |                    | INTERGENIC                          |                                        |

| SNP IDs           | Chromosomes   | Physical positions (bp) | SNPs  | Gene accession IDs | Sequence components of genome/genes | Putative functions                                                                                                |
|-------------------|---------------|-------------------------|-------|--------------------|-------------------------------------|-------------------------------------------------------------------------------------------------------------------|
| *Ca_Desig_SNP1846 | scaffold00077 | 50004                   | [T/G] |                    | INTERGENIC                          |                                                                                                                   |
| *Ca_Desig_SNP1847 | scaffold03293 | 45419                   | [C/T] |                    | INTERGENIC                          |                                                                                                                   |
| *Ca_Desig_SNP1848 | scaffold00055 | 318197                  | [T/A] | Ca_08802           | DOWNSTREAM:1839bases                | Protein ABIL1                                                                                                     |
| *Ca_Desig_SNP1849 | scaffold00885 | 477                     | [G/T] | Ca_14382           | DOWNSTREAM:1650bases                | Pollen-specific leucine-rich repeat extensin-like protein 1                                                       |
| *Ca_Desig_SNP1850 | scaffold03896 | 49117                   | [A/T] |                    | INTERGENIC                          |                                                                                                                   |
| *Ca_Desig_SNP1851 | scaffold00534 | 199                     | [T/A] |                    | INTERGENIC                          |                                                                                                                   |
| *Ca_Desig_SNP1852 | scaffold00167 | 12050                   | [A/T] |                    | INTERGENIC                          |                                                                                                                   |
| *Ca_Desig_SNP1853 | scaffold04586 | 184681                  | [C/A] |                    | INTERGENIC                          |                                                                                                                   |
| *Ca_Desig_SNP1854 | scaffold00429 | 11327                   | [C/T] |                    | INTERGENIC                          |                                                                                                                   |
| *Ca_Desig_SNP1855 | Ca_Desig_LG07 | 1635022                 | [A/G] | Ca_07491           | INTRON                              | Transcription factor MYB1R1                                                                                       |
| *Ca_Desig_SNP1856 | scaffold11144 | 109266                  | [A/G] |                    | INTERGENIC                          |                                                                                                                   |
| *Ca_Desig_SNP1857 | Ca_Desig_LG03 | 17835724                | [T/C] | Ca_03392           | DOWNSTREAM:669bases                 | Probable LRR receptor-like serine/threonine-protein kinase At1q12460                                              |
| *Ca_Desig_SNP1858 | scaffold00860 | 955                     | [T/C] |                    | INTERGENIC                          |                                                                                                                   |
| *Ca_Desig_SNP1859 | scaffold00582 | 6398                    | [A/G] | Ca_13279           | INTRON                              | (+)-neomenthol dehydrogenase                                                                                      |
| *Ca_Desig_SNP1860 | scaffold15021 | 38572                   | [T/G] |                    | INTERGENIC                          |                                                                                                                   |
| *Ca_Desig_SNP1861 | Ca_Desig_LG07 | 2203320                 | [A/C] | Ca_07527           | INTRON                              | Phospholipid-transporting ATPase 3                                                                                |
| *Ca_Desig_SNP1862 | scaffold00588 | 13047                   | [A/G] |                    | INTERGENIC                          |                                                                                                                   |
| *Ca_Desig_SNP1863 | Ca_Desig_LG04 | 4768373                 | [T/C] | Ca_04210           | DOWNSTREAM:1477bases                | Ribosomal RNA small subunit methyltransferase NEP1                                                                |
| *Ca_Desig_SNP1864 | scaffold00429 | 11281                   | [T/A] |                    | INTERGENIC                          |                                                                                                                   |
| *Ca_Desig_SNP1865 | scaffold00451 | 23838                   | [G/A] |                    | INTERGENIC                          |                                                                                                                   |
| *Ca_Desig_SNP1866 | Ca_Desig_LG07 | 1635054                 | [A/G] | Ca_07491           | INTRON                              | Transcription factor MYB1R1                                                                                       |
| *Ca_Desig_SNP1867 | Ca_Desig_LG07 | 2736428                 | [A/C] | Ca_07563           | DOWNSTREAM:1968bases                | unknown protein; Has 20 Blast hits to 20 proteins in 7 species: Archae - 0; Bacteria - 0; Metazoa - 0; Fungi - 0; |
| *Ca_Desig_SNP1868 | scaffold02299 | 91967                   | [C/A] |                    | INTERGENIC                          |                                                                                                                   |
| *Ca_Desig_SNP1869 | Ca_Desig_LG01 | 10441613                | [G/A] | Ca_00776           | SYNONYMOUS_CODING                   | unknown protein                                                                                                   |
| *Ca_Desig_SNP1870 | Ca_Desig_LG04 | 4768397                 | [C/A] | Ca_04210           | DOWNSTREAM:1501bases                | Ribosomal RNA small subunit methyltransferase NEP1                                                                |
| *Ca_Desig_SNP1871 | scaffold11144 | 108864                  | [G/A] |                    | INTERGENIC                          |                                                                                                                   |

| SNP IDs           | Chromosomes   | Physical positions (bp) | SNPs  | Gene accession IDs | Sequence components of genome/genes | Putative functions                                      |
|-------------------|---------------|-------------------------|-------|--------------------|-------------------------------------|---------------------------------------------------------|
| *Ca_Desig_SNP1872 | scaffold00824 | 1783                    | [T/C] |                    | INTERGENIC                          |                                                         |
| *Ca_Desig_SNP1873 | scaffold01283 | 84528                   | [A/T] |                    | INTERGENIC                          |                                                         |
| *Ca_Desig_SNP1874 | scaffold11144 | 116871                  | [T/C] |                    | INTERGENIC                          |                                                         |
| *Ca_Desig_SNP1875 | scaffold04586 | 184677                  | [A/C] |                    | INTERGENIC                          |                                                         |
| *Ca_Desig_SNP1876 | scaffold02299 | 98214                   | [T/C] |                    | INTERGENIC                          |                                                         |
| *Ca_Desig_SNP1877 | scaffold00236 | 4178                    | [G/T] |                    | INTERGENIC                          |                                                         |
| *Ca_Desig_SNP1878 | Ca_Desig_LG07 | 1558730                 | [T/G] | Ca_07485           | NON_SYNONYMOUS_CODING               | Protein TRANSPARENT TESTA 12                            |
| *Ca_Desig_SNP1879 | scaffold00469 | 6252                    | [A/G] |                    | INTERGENIC                          |                                                         |
| *Ca_Desig_SNP1880 | scaffold04586 | 108675                  | [A/C] |                    | INTERGENIC                          |                                                         |
| *Ca_Desig_SNP1881 | Ca_Desig_LG03 | 16429260                | [A/C] | Ca_03271           | SYNONYMOUS_CODING                   | Homeobox-leucine zipper protein HAT22                   |
| *Ca_Desig_SNP1882 | scaffold00643 | 115504                  | [G/A] | Ca_09510           | UPSTREAM:655bases                   | --                                                      |
| *Ca_Desig_SNP1883 | Ca_Desig_LG04 | 5028184                 | [C/T] | Ca_04230           | SYNONYMOUS_CODING                   | Two-component response regulator ARR2                   |
| *Ca_Desig_SNP1884 | scaffold00451 | 26838                   | [A/T] |                    | INTERGENIC                          |                                                         |
| *Ca_Desig_SNP1885 | scaffold02299 | 26212                   | [C/T] | Ca_10471           | INTRON                              | Protein prune homolog                                   |
| *Ca_Desig_SNP1886 | scaffold00210 | 30207                   | [T/A] |                    | INTERGENIC                          |                                                         |
| *Ca_Desig_SNP1887 | scaffold00789 | 2355                    | [T/C] |                    | INTERGENIC                          |                                                         |
| *Ca_Desig_SNP1888 | scaffold00394 | 24760                   | [T/C] | Ca_12421           | NON_SYNONYMOUS_CODING               | NHL repeat-containing protein 2                         |
| *Ca_Desig_SNP1889 | scaffold00876 | 5419                    | [A/G] |                    | INTERGENIC                          |                                                         |
| *Ca_Desig_SNP1890 | scaffold00754 | 150289                  | [G/A] | Ca_09655           | INTRON                              | Cationic amino acid transporter 6, chloroplastic        |
| *Ca_Desig_SNP1891 | scaffold01842 | 36418                   | [A/C] |                    | INTERGENIC                          |                                                         |
| *Ca_Desig_SNP1892 | Ca_Desig_LG04 | 4701545                 | [C/G] | Ca_04206           | SYNONYMOUS_CODING                   | Acyl-[acyl-carrier-protein] desaturase 6, chloroplastic |
| *Ca_Desig_SNP1893 | Ca_Desig_LG04 | 5410884                 | [C/T] | Ca_04241           | DOWNSTREAM:686bases                 | Cyclin-J18-like                                         |
| *Ca_Desig_SNP1894 | Ca_Desig_LG02 | 11423145                | [G/A] |                    | INTERGENIC                          |                                                         |
| *Ca_Desig_SNP1895 | scaffold04586 | 108727                  | [T/A] |                    | INTERGENIC                          |                                                         |
| *Ca_Desig_SNP1896 | scaffold11144 | 108752                  | [A/G] |                    | INTERGENIC                          |                                                         |
| *Ca_Desig_SNP1897 | Ca_Desig_LG02 | 327450                  | [C/G] | Ca_01051           | INTRON                              | Polypyrimidine tract-binding protein homolog 2          |



| SNP IDs           | Chromosomes   | Physical positions (bp) | SNPs  | Gene accession IDs | Sequence components of genome/genes | Putative functions                                                                                         |
|-------------------|---------------|-------------------------|-------|--------------------|-------------------------------------|------------------------------------------------------------------------------------------------------------|
| *Ca_Desig_SNP1898 | scaffold00394 | 24624                   | [T/A] | Ca_12421           | INTRON                              | NHL repeat-containing protein 2                                                                            |
| *Ca_Desig_SNP1899 | Ca_Desig_LG01 | 10441697                | [C/A] | Ca_00776           | SYNONYMOUS_CODING                   | unknown protein                                                                                            |
| *Ca_Desig_SNP1900 | scaffold02170 | 35498                   | [T/G] |                    | INTERGENIC                          |                                                                                                            |
| *Ca_Desig_SNP1901 | Ca_Desig_LG06 | 9463929                 | [G/A] |                    | INTERGENIC                          |                                                                                                            |
| *Ca_Desig_SNP1902 | scaffold00876 | 5668                    | [T/C] |                    | INTERGENIC                          |                                                                                                            |
| *Ca_Desig_SNP1903 | scaffold00659 | 86727                   | [T/G] | Ca_09564           | DOWNSTREAM:1522bases                | Protein of unknown function (DUF1677)                                                                      |
| *Ca_Desig_SNP1904 | scaffold00876 | 5317                    | [T/C] |                    | INTERGENIC                          |                                                                                                            |
| *Ca_Desig_SNP1905 | scaffold01432 | 155230                  | [A/G] |                    | INTERGENIC                          |                                                                                                            |
| *Ca_Desig_SNP1906 | scaffold00396 | 31679                   | [A/T] | Ca_12443           | INTRON                              | Lamin-like protein                                                                                         |
| *Ca_Desig_SNP1907 | scaffold00761 | 3562                    | [T/C] |                    | INTERGENIC                          |                                                                                                            |
| *Ca_Desig_SNP1908 | scaffold05316 | 74452                   | [C/T] | Ca_10154           | UPSTREAM:605bases                   | unknown protein; CONTAINS InterPro DOMAIN/s: Protein of unknown function DUF1499 (InterPro:IPR010865); Has |
| *Ca_Desig_SNP1909 | Ca_Desig_LG04 | 11674615                | [C/A] |                    | INTERGENIC                          |                                                                                                            |
| *Ca_Desig_SNP1910 | scaffold04586 | 47816                   | [A/G] | Ca_10065           | DOWNSTREAM:807bases                 | --                                                                                                         |
| *Ca_Desig_SNP1911 | scaffold04586 | 97359                   | [C/A] |                    | INTERGENIC                          |                                                                                                            |
| *Ca_Desig_SNP1912 | scaffold00860 | 919                     | [T/C] |                    | INTERGENIC                          |                                                                                                            |
| *Ca_Desig_SNP1913 | scaffold01046 | 356                     | [G/A] |                    | INTERGENIC                          |                                                                                                            |
| *Ca_Desig_SNP1914 | Ca_Desig_LG04 | 4837602                 | [A/G] | Ca_04215           | SYNONYMOUS_CODING                   | Filament-like plant protein (Fragment)                                                                     |
| *Ca_Desig_SNP1915 | scaffold01159 | 157                     | [C/T] |                    | INTERGENIC                          |                                                                                                            |
| *Ca_Desig_SNP1916 | scaffold00736 | 37194                   | [G/A] |                    | INTERGENIC                          |                                                                                                            |
| *Ca_Desig_SNP1917 | scaffold00261 | 25241                   | [A/T] |                    | INTERGENIC                          |                                                                                                            |
| *Ca_Desig_SNP1918 | scaffold02875 | 67539                   | [A/C] | Ca_10539           | INTRON                              | tRNA (cytosine(34)-C(5))-methyltransferase                                                                 |
| *Ca_Desig_SNP1919 | scaffold00923 | 482                     | [T/A] |                    | INTERGENIC                          |                                                                                                            |
| *Ca_Desig_SNP1920 | scaffold02551 | 44982                   | [A/G] |                    | INTERGENIC                          |                                                                                                            |
| *Ca_Desig_SNP1921 | scaffold04586 | 181554                  | [C/A] |                    | INTERGENIC                          |                                                                                                            |
| *Ca_Desig_SNP1922 | Ca_Desig_LG07 | 2707720                 | [G/T] |                    | INTERGENIC                          |                                                                                                            |
| *Ca_Desig_SNP1923 | Ca_Desig_LG03 | 644806                  | [C/A] | Ca_02197           | INTRON                              | ATPase 10, plasma membrane-type                                                                            |

| SNP IDs           | Chromosomes   | Physical positions (bp) | SNPs  | Gene accession IDs | Sequence components of genome/genes | Putative functions                                                   |
|-------------------|---------------|-------------------------|-------|--------------------|-------------------------------------|----------------------------------------------------------------------|
| *Ca_Desig_SNP1924 | scaffold00791 | 99                      | [G/T] |                    | INTERGENIC                          |                                                                      |
| *Ca_Desig_SNP1925 | scaffold11144 | 109153                  | [C/T] |                    | INTERGENIC                          |                                                                      |
| *Ca_Desig_SNP1926 | scaffold02333 | 91560                   | [G/A] |                    | INTERGENIC                          |                                                                      |
| *Ca_Desig_SNP1927 | scaffold01362 | 129149                  | [G/A] | Ca_10193           | DOWNSTREAM:1566bases                | Actin-related protein 6                                              |
| *Ca_Desig_SNP1928 | scaffold04586 | 52242                   | [T/A] |                    | INTERGENIC                          |                                                                      |
| *Ca_Desig_SNP1929 | Ca_Desig_LG07 | 2707719                 | [T/A] |                    | INTERGENIC                          |                                                                      |
| *Ca_Desig_SNP1930 | scaffold00745 | 3746                    | [G/T] |                    | INTERGENIC                          |                                                                      |
| *Ca_Desig_SNP1931 | Ca_Desig_LG04 | 5097092                 | [G/A] | Ca_04232           | INTRON                              | RNA-dependent RNA polymerase 1                                       |
| *Ca_Desig_SNP1932 | scaffold00212 | 83503                   | [T/G] |                    | INTERGENIC                          |                                                                      |
| *Ca_Desig_SNP1933 | scaffold11144 | 115157                  | [G/T] |                    | INTERGENIC                          |                                                                      |
| *Ca_Desig_SNP1934 | scaffold11144 | 98741                   | [G/A] |                    | INTERGENIC                          |                                                                      |
| *Ca_Desig_SNP1935 | scaffold05316 | 76157                   | [T/G] |                    | INTERGENIC                          |                                                                      |
| *Ca_Desig_SNP1936 | scaffold07271 | 46123                   | [T/C] |                    | INTERGENIC                          |                                                                      |
| *Ca_Desig_SNP1937 | scaffold05316 | 61666                   | [A/G] | Ca_10152           | SYNONYMOUS_CODING                   | Pentatricopeptide repeat-containing protein At1g09220, mitochondrial |
| *Ca_Desig_SNP1938 | Ca_Desig_LG04 | 4652989                 | [A/G] | Ca_04204           | INTRON                              | Probable glucuronosyltransferase GUT1                                |
| *Ca_Desig_SNP1939 | scaffold04586 | 185387                  | [A/G] |                    | INTERGENIC                          |                                                                      |
| *Ca_Desig_SNP1940 | Ca_Desig_LG07 | 1763162                 | [A/C] | Ca_07503           | INTRON                              | Probable N-acetyl-gamma-glutamyl-phosphate reductase, chloroplastic  |
| *Ca_Desig_SNP1941 | scaffold01709 | 62167                   | [A/G] |                    | INTERGENIC                          |                                                                      |
| *Ca_Desig_SNP1942 | scaffold00876 | 6653                    | [T/C] |                    | INTERGENIC                          |                                                                      |
| *Ca_Desig_SNP1943 | scaffold00604 | 7608                    | [A/G] | Ca_13357           | DOWNSTREAM:1106bases                | dual specificity protein phosphatase family protein                  |
| *Ca_Desig_SNP1944 | scaffold00451 | 23349                   | [A/G] |                    | INTERGENIC                          |                                                                      |
| *Ca_Desig_SNP1945 | Ca_Desig_LG04 | 4701443                 | [T/A] | Ca_04206           | SYNONYMOUS_CODING                   | Acyl-[acyl-carrier-protein] desaturase 6, chloroplastic              |
| *Ca_Desig_SNP1946 | scaffold01791 | 33630                   | [T/G] |                    | INTERGENIC                          |                                                                      |
| *Ca_Desig_SNP1947 | Ca_Desig_LG01 | 10441699                | [A/G] | Ca_00776           | SYNONYMOUS_CODING                   | unknown protein                                                      |
| *Ca_Desig_SNP1948 | scaffold00771 | 2505                    | [A/G] |                    | INTERGENIC                          |                                                                      |
| *Ca_Desig_SNP1949 | scaffold03445 | 74335                   | [A/C] |                    | INTERGENIC                          |                                                                      |

| SNP IDs           | Chromosomes   | Physical positions (bp) | SNPs  | Gene accession IDs | Sequence components of genome/genes | Putative functions                                                   |
|-------------------|---------------|-------------------------|-------|--------------------|-------------------------------------|----------------------------------------------------------------------|
| *Ca_Desig_SNP1950 | scaffold01362 | 124388                  | [T/G] | Ca_10193           | NON_SYNONYMOUS_CODING               | Actin-related protein 6                                              |
| *Ca_Desig_SNP1951 | scaffold00508 | 43134                   | [C/T] | Ca_09338           | INTRON                              | Sorting nexin 1                                                      |
| *Ca_Desig_SNP1952 | scaffold02333 | 87097                   | [A/G] |                    | INTERGENIC                          |                                                                      |
| *Ca_Desig_SNP1953 | Ca_Desig_LG03 | 17835739                | [T/C] | Ca_03392           | DOWNSTREAM:684bases                 | Probable LRR receptor-like serine/threonine-protein kinase At1g12460 |
| *Ca_Desig_SNP1954 | scaffold00643 | 7013                    | [G/A] |                    | INTERGENIC                          |                                                                      |
| *Ca_Desig_SNP1955 | scaffold00928 | 1182                    | [A/G] |                    | INTERGENIC                          |                                                                      |
| *Ca_Desig_SNP1956 | scaffold02251 | 123875                  | [A/G] |                    | INTERGENIC                          |                                                                      |
| *Ca_Desig_SNP1957 | scaffold00702 | 6580                    | [A/G] |                    | INTERGENIC                          |                                                                      |
| *Ca_Desig_SNP1958 | Ca_Desig_LG02 | 440424                  | [G/T] |                    | INTERGENIC                          |                                                                      |
| *Ca_Desig_SNP1959 | Ca_Desig_LG02 | 14169133                | [T/C] | Ca_01923           | SYNONYMOUS_CODING                   | calmodulin-binding family protein                                    |
| *Ca_Desig_SNP1960 | Ca_Desig_LG02 | 14169300                | [C/T] | Ca_01923           | SYNONYMOUS_CODING                   | calmodulin-binding family protein                                    |
| *Ca_Desig_SNP1961 | scaffold03193 | 53405                   | [A/C] |                    | INTERGENIC                          |                                                                      |
| *Ca_Desig_SNP1962 | scaffold00385 | 24593                   | [T/G] |                    | INTERGENIC                          |                                                                      |
| *Ca_Desig_SNP1963 | Ca_Desig_LG02 | 11393862                | [C/G] | Ca_01765           | INTRON                              | Uncharacterized lipoprotein syc1174_c                                |
| *Ca_Desig_SNP1964 | scaffold00215 | 282914                  | [G/A] |                    | INTERGENIC                          |                                                                      |
| *Ca_Desig_SNP1965 | Ca_Desig_LG02 | 11403900                | [C/A] | Ca_01766           | SYNONYMOUS_CODING                   | T-complex protein 1 subunit theta                                    |
| *Ca_Desig_SNP1966 | Ca_Desig_LG04 | 4768614                 | [G/A] | Ca_04210           | DOWNSTREAM:1718bases                | Ribosomal RNA small subunit methyltransferase NEP1                   |
| *Ca_Desig_SNP1967 | Ca_Desig_LG02 | 11403821                | [T/A] | Ca_01766           | INTRON                              | T-complex protein 1 subunit theta                                    |
| *Ca_Desig_SNP1968 | scaffold01043 | 159                     | [A/G] |                    | INTERGENIC                          |                                                                      |
| *Ca_Desig_SNP1969 | scaffold02251 | 76069                   | [G/A] |                    | INTERGENIC                          |                                                                      |
| *Ca_Desig_SNP1970 | scaffold02128 | 31749                   | [T/G] | Ca_10448           | INTRON                              | Probable galactinol--sucrose galactosyltransferase 2                 |
| *Ca_Desig_SNP1971 | scaffold00643 | 89610                   | [C/A] |                    | INTERGENIC                          |                                                                      |
| *Ca_Desig_SNP1972 | scaffold00852 | 998                     | [A/G] | Ca_14286           | NON_SYNONYMOUS_CODING               | Type I inositol-1,4,5-trisphosphate 5-phosphatase 11                 |
| *Ca_Desig_SNP1973 | scaffold00210 | 6683                    | [C/T] |                    | INTERGENIC                          |                                                                      |
| *Ca_Desig_SNP1974 | Ca_Desig_LG02 | 430152                  | [C/G] | Ca_01057           | INTRON                              | Plastid division protein PDV1                                        |
| *Ca_Desig_SNP1975 | scaffold02333 | 28524                   | [C/T] |                    | INTERGENIC                          |                                                                      |

| SNP IDs           | Chromosomes   | Physical positions (bp) | SNPs  | Gene accession IDs | Sequence components of genome/genes | Putative functions                                                       |
|-------------------|---------------|-------------------------|-------|--------------------|-------------------------------------|--------------------------------------------------------------------------|
| *Ca_Desig_SNP1976 | scaffold05316 | 99668                   | [A/C] |                    | INTERGENIC                          |                                                                          |
| *Ca_Desig_SNP1977 | Ca_Desig_LG06 | 4273801                 | [A/G] |                    | INTERGENIC                          |                                                                          |
| *Ca_Desig_SNP1978 | scaffold00159 | 46890                   | [A/G] |                    | INTERGENIC                          |                                                                          |
| *Ca_Desig_SNP1979 | scaffold02036 | 15577                   | [G/A] |                    | INTERGENIC                          |                                                                          |
| *Ca_Desig_SNP1980 | Ca_Desig_LG02 | 11366639                | [C/G] |                    | INTERGENIC                          |                                                                          |
| *Ca_Desig_SNP1981 | Ca_Desig_LG08 | 8238163                 | [C/A] | Ca_08594           | NON_SYNONYMOUS_CODING               | Programmed cell death protein 4                                          |
| *Ca_Desig_SNP1982 | scaffold00505 | 7339                    | [G/A] |                    | INTERGENIC                          |                                                                          |
| *Ca_Desig_SNP1983 | scaffold00429 | 16062                   | [G/T] |                    | INTERGENIC                          |                                                                          |
| *Ca_Desig_SNP1984 | Ca_Desig_LG03 | 6721108                 | [C/G] | Ca_02698           | DOWNSTREAM:1239bases                | Probable arabinose 5-phosphate isomerase                                 |
| *Ca_Desig_SNP1985 | scaffold00461 | 12310                   | [A/T] |                    | INTERGENIC                          |                                                                          |
| *Ca_Desig_SNP1986 | Ca_Desig_LG01 | 8232995                 | [T/G] |                    | INTERGENIC                          |                                                                          |
| *Ca_Desig_SNP1987 | scaffold00212 | 151754                  | [A/T] | Ca_08884           | INTRON                              | zinc ion binding                                                         |
| *Ca_Desig_SNP1988 | scaffold00731 | 2736                    | [A/G] | Ca_13836           | DOWNSTREAM:1988bases                | Protein KIAA0664 homolog                                                 |
| *Ca_Desig_SNP1989 | scaffold04586 | 116816                  | [A/G] |                    | INTERGENIC                          |                                                                          |
| *Ca_Desig_SNP1990 | scaffold00429 | 16234                   | [A/C] |                    | INTERGENIC                          |                                                                          |
| *Ca_Desig_SNP1991 | scaffold05316 | 114034                  | [A/T] |                    | INTERGENIC                          |                                                                          |
| *Ca_Desig_SNP1992 | Ca_Desig_LG04 | 5097206                 | [C/A] | Ca_04232           | SYNONYMOUS_CODING                   | RNA-dependent RNA polymerase 1                                           |
| *Ca_Desig_SNP1993 | scaffold04586 | 181642                  | [C/T] |                    | INTERGENIC                          |                                                                          |
| *Ca_Desig_SNP1994 | scaffold01877 | 26460                   | [A/G] |                    | INTERGENIC                          |                                                                          |
| *Ca_Desig_SNP1995 | scaffold01709 | 92102                   | [G/T] |                    | INTERGENIC                          |                                                                          |
| *Ca_Desig_SNP1996 | scaffold00997 | 438                     | [A/C] |                    | INTERGENIC                          |                                                                          |
| *Ca_Desig_SNP1997 | Ca_Desig_LG02 | 440724                  | [T/C] |                    | INTERGENIC                          |                                                                          |
| *Ca_Desig_SNP1998 | Ca_Desig_LG04 | 4878419                 | [T/C] | Ca_04220           | DOWNSTREAM:1037bases                | Pyridine nucleotide-disulfide oxidoreductase domain-containing protein 2 |
| *Ca_Desig_SNP1999 | scaffold00613 | 528                     | [G/A] |                    | INTERGENIC                          |                                                                          |
| *Ca_Desig_SNP2000 | scaffold00394 | 18460                   | [G/A] | Ca_12421           | INTRON                              | NHL repeat-containing protein 2                                          |
| *Ca_Desig_SNP2001 | scaffold00212 | 151692                  | [T/G] | Ca_08884           | INTRON                              | zinc ion binding                                                         |

| SNP IDs           | Chromosomes   | Physical positions (bp) | SNPs  | Gene accession IDs | Sequence components of genome/genes | Putative functions                              |
|-------------------|---------------|-------------------------|-------|--------------------|-------------------------------------|-------------------------------------------------|
| *Ca_Desig_SNP2002 | Ca_Desig_LG04 | 4909312                 | [C/A] |                    | INTERGENIC                          |                                                 |
| *Ca_Desig_SNP2003 | scaffold02696 | 20700                   | [G/C] |                    | INTERGENIC                          |                                                 |
| *Ca_Desig_SNP2004 | Ca_Desig_LG02 | 11403656                | [T/C] | Ca_01766           | INTRON                              | T-complex protein 1 subunit theta               |
| *Ca_Desig_SNP2005 | scaffold02299 | 87099                   | [C/G] |                    | INTERGENIC                          |                                                 |
| *Ca_Desig_SNP2006 | Ca_Desig_LG02 | 11394066                | [A/G] | Ca_01765           | INTRON                              | Uncharacterized lipoprotein syc1174_c           |
| *Ca_Desig_SNP2007 | Ca_Desig_LG04 | 5408962                 | [C/T] | Ca_04241           | SYNONYMOUS_CODING                   | Cyclin-J18-like                                 |
| *Ca_Desig_SNP2008 | Ca_Desig_LG07 | 1634726                 | [C/G] | Ca_07491           | INTRON                              | Transcription factor MYB1R1                     |
| *Ca_Desig_SNP2009 | scaffold00394 | 24459                   | [A/G] | Ca_12421           | INTRON                              | NHL repeat-containing protein 2                 |
| *Ca_Desig_SNP2010 | Ca_Desig_LG07 | 2434160                 | [G/T] | Ca_07545           | INTRON                              | BAH and coiled-coil domain-containing protein 1 |
| *Ca_Desig_SNP2011 | Ca_Desig_LG02 | 11423000                | [C/A] |                    | INTERGENIC                          |                                                 |
| *Ca_Desig_SNP2012 | scaffold00236 | 43142                   | [A/T] |                    | INTERGENIC                          |                                                 |
| *Ca_Desig_SNP2013 | scaffold00210 | 26541                   | [T/C] |                    | INTERGENIC                          |                                                 |
| *Ca_Desig_SNP2014 | scaffold00321 | 12713                   | [T/A] | Ca_12020           | DOWNSTREAM:1115bases                | Protein NSP-INTERACTING KINASE 1                |
| *Ca_Desig_SNP2015 | scaffold11144 | 107480                  | [A/C] |                    | INTERGENIC                          |                                                 |
| *Ca_Desig_SNP2016 | Ca_Desig_LG07 | 1634790                 | [A/G] | Ca_07491           | INTRON                              | Transcription factor MYB1R1                     |
| *Ca_Desig_SNP2017 | scaffold00505 | 7249                    | [C/T] |                    | INTERGENIC                          |                                                 |
| *Ca_Desig_SNP2018 | scaffold02564 | 231983                  | [T/G] |                    | INTERGENIC                          |                                                 |
| *Ca_Desig_SNP2019 | scaffold00505 | 4807                    | [T/C] |                    | INTERGENIC                          |                                                 |
| *Ca_Desig_SNP2020 | scaffold00582 | 5152                    | [A/G] | Ca_13279           | INTRON                              | (+)-neomenthol dehydrogenase                    |
| *Ca_Desig_SNP2021 | scaffold00643 | 87698                   | [T/C] |                    | INTERGENIC                          |                                                 |
| *Ca_Desig_SNP2022 | scaffold00643 | 89365                   | [C/A] |                    | INTERGENIC                          |                                                 |
| *Ca_Desig_SNP2023 | scaffold15702 | 153238                  | [C/T] |                    | INTERGENIC                          |                                                 |
| *Ca_Desig_SNP2024 | scaffold00933 | 816                     | [T/C] |                    | INTERGENIC                          |                                                 |
| *Ca_Desig_SNP2025 | scaffold02036 | 97364                   | [A/C] |                    | INTERGENIC                          |                                                 |
| *Ca_Desig_SNP2026 | scaffold04586 | 184588                  | [C/G] |                    | INTERGENIC                          |                                                 |
| *Ca_Desig_SNP2027 | Ca_Desig_LG02 | 7908862                 | [G/T] | Ca_01635           | UPSTREAM:1641bases                  | GTP-binding protein ERG                         |

| SNP IDs           | Chromosomes   | Physical positions (bp) | SNPs  | Gene accession IDs | Sequence components of genome/genes | Putative functions                        |
|-------------------|---------------|-------------------------|-------|--------------------|-------------------------------------|-------------------------------------------|
| *Ca_Desig_SNP2028 | Ca_Desig_LG02 | 11366670                | [A/T] |                    | INTERGENIC                          |                                           |
| *Ca_Desig_SNP2029 | scaffold00451 | 23018                   | [A/G] |                    | INTERGENIC                          |                                           |
| *Ca_Desig_SNP2030 | scaffold00206 | 47499                   | [A/T] | Ca_11345           | INTRON                              | Secologanin synthase                      |
| *Ca_Desig_SNP2031 | scaffold00735 | 3678                    | [T/C] | Ca_13852           | DOWNSTREAM:768bases                 | MORC family CW-type zinc finger protein 4 |
| *Ca_Desig_SNP2032 | scaffold02679 | 60685                   | [T/C] |                    | INTERGENIC                          |                                           |
| *Ca_Desig_SNP2033 | scaffold02564 | 144862                  | [A/G] |                    | INTERGENIC                          |                                           |
| *Ca_Desig_SNP2034 | scaffold01030 | 685                     | [A/C] |                    | INTERGENIC                          |                                           |
| *Ca_Desig_SNP2035 | scaffold01737 | 36702                   | [T/C] | Ca_10373           | NON_SYNONYMOUS_CODING               | Serine/threonine-protein kinase 36        |
| *Ca_Desig_SNP2036 | Ca_Desig_LG04 | 4687385                 | [T/C] | Ca_04205           | SYNONYMOUS_CODING                   | Probable auxin efflux carrier component 6 |
| *Ca_Desig_SNP2037 | scaffold02333 | 28426                   | [T/A] |                    | INTERGENIC                          |                                           |
| *Ca_Desig_SNP2038 | scaffold05316 | 103678                  | [G/A] |                    | INTERGENIC                          |                                           |
| *Ca_Desig_SNP2039 | scaffold00754 | 147726                  | [T/A] |                    | INTERGENIC                          |                                           |
| *Ca_Desig_SNP2040 | scaffold00236 | 42975                   | [C/T] |                    | INTERGENIC                          |                                           |
| *Ca_Desig_SNP2041 | scaffold11144 | 111691                  | [G/C] |                    | INTERGENIC                          |                                           |
| *Ca_Desig_SNP2042 | Ca_Desig_LG02 | 11393824                | [C/T] | Ca_01765           | INTRON                              | Uncharacterized lipoprotein syc1174_c     |
| *Ca_Desig_SNP2043 | scaffold00394 | 18478                   | [C/T] | Ca_12421           | INTRON                              | NHL repeat-containing protein 2           |
| *Ca_Desig_SNP2044 | scaffold00529 | 6408                    | [G/A] |                    | INTERGENIC                          |                                           |
| *Ca_Desig_SNP2045 | Ca_Desig_LG04 | 7812668                 | [A/G] | Ca_04377           | INTRON                              | DDB1- and CUL4-associated factor 8        |
| *Ca_Desig_SNP2046 | scaffold00912 | 260802                  | [A/C] |                    | INTERGENIC                          |                                           |
| *Ca_Desig_SNP2047 | Ca_Desig_LG02 | 11394153                | [C/T] | Ca_01765           | INTRON                              | Uncharacterized lipoprotein syc1174_c     |
| *Ca_Desig_SNP2048 | scaffold00775 | 2346                    | [T/C] | Ca_13986           | DOWNSTREAM:949bases                 | Protein of unknown function (DUF3755)     |
| *Ca_Desig_SNP2049 | scaffold02299 | 26254                   | [C/T] | Ca_10471           | INTRON                              | Protein prune homolog                     |
| *Ca_Desig_SNP2050 | Ca_Desig_LG02 | 429417                  | [T/C] | Ca_01057           | SYNONYMOUS_CODING                   | Plastid division protein PDV1             |
| *Ca_Desig_SNP2051 | scaffold02299 | 98125                   | [T/C] |                    | INTERGENIC                          |                                           |
| *Ca_Desig_SNP2052 | scaffold11144 | 90321                   | [A/G] | Ca_09212           | DOWNSTREAM:1704bases                | --                                        |
| *Ca_Desig_SNP2053 | scaffold00158 | 15556                   | [T/C] |                    | INTERGENIC                          |                                           |

| SNP IDs           | Chromosomes   | Physical positions (bp) | SNPs  | Gene accession IDs | Sequence components of genome/genes | Putative functions                            |
|-------------------|---------------|-------------------------|-------|--------------------|-------------------------------------|-----------------------------------------------|
| *Ca_Desig_SNP2054 | scaffold00877 | 12632                   | [T/C] |                    | INTERGENIC                          |                                               |
| *Ca_Desig_SNP2055 | scaffold00236 | 3938                    | [G/A] |                    | INTERGENIC                          |                                               |
| *Ca_Desig_SNP2056 | scaffold00684 | 6574                    | [T/G] |                    | INTERGENIC                          |                                               |
| *Ca_Desig_SNP2057 | scaffold02299 | 87031                   | [T/A] |                    | INTERGENIC                          |                                               |
| *Ca_Desig_SNP2058 | Ca_Desig_LG02 | 7897881                 | [C/A] |                    | INTERGENIC                          |                                               |
| *Ca_Desig_SNP2059 | Ca_Desig_LG04 | 6325277                 | [G/T] | Ca_04285           | DOWNSTREAM:102bases                 | TBCC domain-containing protein 1              |
| *Ca_Desig_SNP2060 | scaffold04096 | 24837                   | [T/C] |                    | INTERGENIC                          |                                               |
| *Ca_Desig_SNP2061 | Ca_Desig_LG07 | 1631890                 | [C/T] | Ca_07491           | INTRON                              | Transcription factor MYB1R1                   |
| *Ca_Desig_SNP2062 | scaffold01353 | 71838                   | [C/G] |                    | INTERGENIC                          |                                               |
| *Ca_Desig_SNP2063 | Ca_Desig_LG04 | 4848482                 | [T/A] | Ca_04217           | INTRON                              | Chlorophyllide a oxygenase, chloroplastic     |
| *Ca_Desig_SNP2064 | scaffold02551 | 42501                   | [C/T] | Ca_10429           | DOWNSTREAM:515bases                 | Ankyrin repeat domain-containing protein 13B  |
| *Ca_Desig_SNP2065 | scaffold11144 | 107643                  | [A/T] |                    | INTERGENIC                          |                                               |
| *Ca_Desig_SNP2066 | Ca_Desig_LG01 | 10441806                | [A/C] | Ca_00776           | SYNONYMOUS_CODING                   | unknown protein                               |
| *Ca_Desig_SNP2067 | scaffold15702 | 138407                  | [T/G] |                    | INTERGENIC                          |                                               |
| *Ca_Desig_SNP2068 | scaffold10990 | 34943                   | [A/G] | Ca_09603           | INTRON                              | Zinc finger CCCH domain-containing protein 55 |
| *Ca_Desig_SNP2069 | scaffold00736 | 7876                    | [C/A] |                    | INTERGENIC                          |                                               |
| *Ca_Desig_SNP2070 | scaffold00401 | 184695                  | [T/C] |                    | INTERGENIC                          |                                               |
| *Ca_Desig_SNP2071 | Ca_Desig_LG07 | 1631320                 | [G/A] | Ca_07491           | INTRON                              | Transcription factor MYB1R1                   |
| *Ca_Desig_SNP2072 | Ca_Desig_LG04 | 9224613                 | [A/C] |                    | INTERGENIC                          |                                               |
| *Ca_Desig_SNP2073 | Ca_Desig_LG04 | 8876149                 | [G/A] | Ca_04467           | DOWNSTREAM:1726bases                | Beta-lactamase-like protein 2                 |
| *Ca_Desig_SNP2074 | scaffold07271 | 46045                   | [A/G] |                    | INTERGENIC                          |                                               |
| *Ca_Desig_SNP2075 | Ca_Desig_LG02 | 278031                  | [T/C] | Ca_01047           | DOWNSTREAM:906bases                 | Cyclic nucleotide-gated ion channel 1         |
| *Ca_Desig_SNP2076 | Ca_Desig_LG04 | 4817421                 | [T/C] | Ca_04213           | INTRON                              | Probable inactive receptor kinase At4g23740   |
| *Ca_Desig_SNP2077 | scaffold00876 | 6657                    | [T/C] |                    | INTERGENIC                          |                                               |
| *Ca_Desig_SNP2078 | scaffold03792 | 34654                   | [C/T] |                    | INTERGENIC                          |                                               |
| *Ca_Desig_SNP2079 | scaffold00497 | 11199                   | [T/G] |                    | INTERGENIC                          |                                               |

| SNP IDs           | Chromosomes   | Physical positions (bp) | SNPs  | Gene accession IDs | Sequence components of genome/genes | Putative functions                              |
|-------------------|---------------|-------------------------|-------|--------------------|-------------------------------------|-------------------------------------------------|
| *Ca_Desig_SNP2080 | scaffold02036 | 84456                   | [G/A] |                    | INTERGENIC                          |                                                 |
| *Ca_Desig_SNP2081 | scaffold00754 | 142943                  | [T/C] |                    | INTERGENIC                          |                                                 |
| *Ca_Desig_SNP2082 | Ca_Desig_LG04 | 8884501                 | [T/A] | Ca_04467           | INTRON                              | Beta-lactamase-like protein 2                   |
| *Ca_Desig_SNP2083 | Ca_Desig_LG04 | 8884795                 | [G/T] | Ca_04467           | SYNONYMOUS_CODING                   | Beta-lactamase-like protein 2                   |
| *Ca_Desig_SNP2084 | Ca_Desig_LG04 | 8908491                 | [A/T] | Ca_04469           | DOWNSTREAM:11bases                  | Zinc finger protein 6                           |
| *Ca_Desig_SNP2085 | Ca_Desig_LG04 | 8848071                 | [C/T] |                    | INTERGENIC                          |                                                 |
| *Ca_Desig_SNP2086 | scaffold03520 | 51956                   | [C/T] |                    | INTERGENIC                          |                                                 |
| *Ca_Desig_SNP2087 | scaffold00420 | 4390                    | [G/T] |                    | INTERGENIC                          |                                                 |
| *Ca_Desig_SNP2088 | Ca_Desig_LG04 | 4769524                 | [G/A] |                    | INTERGENIC                          |                                                 |
| *Ca_Desig_SNP2089 | scaffold02681 | 37593                   | [T/C] |                    | INTERGENIC                          |                                                 |
| *Ca_Desig_SNP2090 | scaffold02496 | 25781                   | [A/T] |                    | INTERGENIC                          |                                                 |
| *Ca_Desig_SNP2091 | scaffold01737 | 80862                   | [A/C] |                    | INTERGENIC                          |                                                 |
| *Ca_Desig_SNP2092 | Ca_Desig_LG04 | 4769570                 | [G/A] |                    | INTERGENIC                          |                                                 |
| *Ca_Desig_SNP2093 | scaffold11144 | 108803                  | [A/G] |                    | INTERGENIC                          |                                                 |
| *Ca_Desig_SNP2094 | scaffold00779 | 2267                    | [A/G] |                    | INTERGENIC                          |                                                 |
| *Ca_Desig_SNP2095 | scaffold00316 | 35978                   | [C/A] |                    | INTERGENIC                          |                                                 |
| *Ca_Desig_SNP2096 | Ca_Desig_LG02 | 14163647                | [T/C] | Ca_01922           | SYNONYMOUS_CODING                   | Lysine-specific histone demethylase 1 homolog 3 |
| *Ca_Desig_SNP2097 | scaffold00508 | 39403                   | [G/A] |                    | INTERGENIC                          |                                                 |
| *Ca_Desig_SNP2098 | scaffold00876 | 10480                   | [T/C] |                    | INTERGENIC                          |                                                 |
| *Ca_Desig_SNP2099 | scaffold08121 | 43051                   | [T/G] |                    | INTERGENIC                          |                                                 |
| *Ca_Desig_SNP2100 | scaffold00835 | 19667                   | [G/C] | Ca_09737           | INTRON                              | DNA polymerase epsilon catalytic subunit A      |
| *Ca_Desig_SNP2101 | scaffold00236 | 4036                    | [A/G] |                    | INTERGENIC                          |                                                 |
| *Ca_Desig_SNP2102 | Ca_Desig_LG04 | 8848274                 | [C/T] |                    | INTERGENIC                          |                                                 |
| *Ca_Desig_SNP2103 | Ca_Desig_LG04 | 2873185                 | [C/T] |                    | INTERGENIC                          |                                                 |
| *Ca_Desig_SNP2104 | scaffold00236 | 4013                    | [G/A] |                    | INTERGENIC                          |                                                 |
| *Ca_Desig_SNP2105 | Ca_Desig_LG04 | 7623385                 | [A/C] | Ca_04361           | NON_SYNONYMOUS_CODING               | CAX-interacting protein 4                       |



| SNP IDs           | Chromosomes   | Physical positions (bp) | SNPs  | Gene accession IDs | Sequence components of genome/genes | Putative functions                                   |
|-------------------|---------------|-------------------------|-------|--------------------|-------------------------------------|------------------------------------------------------|
| *Ca_Desig_SNP2106 | scaffold02139 | 29528                   | [C/A] |                    | INTERGENIC                          |                                                      |
| *Ca_Desig_SNP2107 | Ca_Desig_LG04 | 10297440                | [T/G] | Ca_04590           | NON_SYNONYMOUS_CODING               | Late embryogenesis abundant protein D-34             |
| *Ca_Desig_SNP2108 | scaffold11144 | 116688                  | [G/T] |                    | INTERGENIC                          |                                                      |
| *Ca_Desig_SNP2109 | scaffold01808 | 37856                   | [G/A] |                    | INTERGENIC                          |                                                      |
| *Ca_Desig_SNP2110 | scaffold00941 | 612                     | [A/C] |                    | INTERGENIC                          |                                                      |
| *Ca_Desig_SNP2111 | scaffold01336 | 95135                   | [T/G] |                    | INTERGENIC                          |                                                      |
| *Ca_Desig_SNP2112 | scaffold00741 | 782                     | [A/G] |                    | INTERGENIC                          |                                                      |
| *Ca_Desig_SNP2113 | Ca_Desig_LG04 | 1291858                 | [T/G] | Ca_03981           | INTRON                              | Phosphatidate phosphatase LPIN2                      |
| *Ca_Desig_SNP2114 | scaffold00852 | 1093                    | [T/C] | Ca_14286           | SYNONYMOUS_CODING                   | Type I inositol-1,4,5-trisphosphate 5-phosphatase 11 |
| *Ca_Desig_SNP2115 | scaffold15702 | 53689                   | [T/C] |                    | INTERGENIC                          |                                                      |
| *Ca_Desig_SNP2116 | scaffold00212 | 151688                  | [G/T] | Ca_08884           | INTRON                              | zinc ion binding                                     |
| *Ca_Desig_SNP2117 | Ca_Desig_LG04 | 2750818                 | [C/T] | Ca_04069           | INTRON                              | Serine/threonine-protein kinase At5g01020            |
| *Ca_Desig_SNP2118 | scaffold02496 | 25742                   | [T/C] |                    | INTERGENIC                          |                                                      |
| *Ca_Desig_SNP2119 | Ca_Desig_LG03 | 19634550                | [T/G] | Ca_03578           | DOWNSTREAM:77bases                  | --                                                   |
| *Ca_Desig_SNP2120 | scaffold01362 | 42691                   | [C/A] |                    | INTERGENIC                          |                                                      |
| *Ca_Desig_SNP2121 | scaffold00876 | 847                     | [T/C] |                    | INTERGENIC                          |                                                      |
| *Ca_Desig_SNP2122 | Ca_Desig_LG03 | 6963249                 | [T/G] |                    | INTERGENIC                          |                                                      |
| *Ca_Desig_SNP2123 | Ca_Desig_LG06 | 7572571                 | [T/G] | Ca_07044           | INTRON                              | ATP-dependent RNA helicase dhx8                      |
| *Ca_Desig_SNP2124 | scaffold00954 | 229                     | [A/C] |                    | INTERGENIC                          |                                                      |
| *Ca_Desig_SNP2125 | scaffold00944 | 787                     | [C/T] |                    | INTERGENIC                          |                                                      |
| *Ca_Desig_SNP2126 | scaffold00333 | 146690                  | [C/A] | Ca_09088           | INTRON                              | TATA-binding protein-associated factor 2N            |
| *Ca_Desig_SNP2127 | Ca_Desig_LG02 | 14766663                | [A/C] | Ca_01972           | NON_SYNONYMOUS_CODING               | Dual specificity protein kinase splA                 |
| *Ca_Desig_SNP2128 | scaffold00212 | 151698                  | [T/G] | Ca_08884           | INTRON                              | zinc ion binding                                     |
| *Ca_Desig_SNP2129 | Ca_Desig_LG04 | 2620974                 | [A/G] | Ca_04062           | NON_SYNONYMOUS_CODING               | Protein of unknown function (DUF1350)                |
| *Ca_Desig_SNP2130 | scaffold03738 | 8398                    | [C/A] |                    | INTERGENIC                          |                                                      |
| *Ca_Desig_SNP2131 | Ca_Desig_LG04 | 11603546                | [A/G] | Ca_04700           | SYNONYMOUS_CODING                   | Type I inositol-1,4,5-trisphosphate 5-phosphatase 1  |

| SNP IDs           | Chromosomes   | Physical positions (bp) | SNPs  | Gene accession IDs | Sequence components of genome/genes | Putative functions                                                      |
|-------------------|---------------|-------------------------|-------|--------------------|-------------------------------------|-------------------------------------------------------------------------|
| *Ca_Desig_SNP2132 | Ca_Desig_LG04 | 9270773                 | [G/T] |                    | INTERGENIC                          |                                                                         |
| *Ca_Desig_SNP2133 | scaffold00189 | 49234                   | [C/A] | Ca_11200           | NON_SYNONYMOUS_CODING               | Uncharacterized protein KIAA0930 homolog                                |
| *Ca_Desig_SNP2134 | scaffold02111 | 48125                   | [G/T] |                    | INTERGENIC                          |                                                                         |
| *Ca_Desig_SNP2135 | Ca_Desig_LG01 | 9217363                 | [C/A] | Ca_00694           | INTRON                              | Nucleolar GTP-binding protein 1                                         |
| *Ca_Desig_SNP2136 | scaffold00779 | 924                     | [A/G] |                    | INTERGENIC                          |                                                                         |
| *Ca_Desig_SNP2137 | scaffold02111 | 120327                  | [C/T] |                    | INTERGENIC                          |                                                                         |
| *Ca_Desig_SNP2138 | scaffold01105 | 471                     | [A/G] |                    | INTERGENIC                          |                                                                         |
| *Ca_Desig_SNP2139 | Ca_Desig_LG04 | 11542258                | [G/A] | Ca_04694           | SYNONYMOUS_CODING                   | Protein GIGANTEA                                                        |
| *Ca_Desig_SNP2140 | Ca_Desig_LG04 | 11567921                | [T/A] |                    | INTERGENIC                          |                                                                         |
| *Ca_Desig_SNP2141 | Ca_Desig_LG04 | 11572192                | [C/A] | Ca_04696           | INTRON                              | Uncharacterized mitochondrial carrier C12B10.09                         |
| *Ca_Desig_SNP2142 | scaffold00363 | 3479                    | [C/A] | Ca_12308           | NON_SYNONYMOUS_CODING               | E3 ubiquitin-protein ligase KEG                                         |
| *Ca_Desig_SNP2143 | scaffold00888 | 323                     | [A/G] |                    | INTERGENIC                          |                                                                         |
| *Ca_Desig_SNP2144 | scaffold02111 | 85652                   | [A/G] |                    | INTERGENIC                          |                                                                         |
| *Ca_Desig_SNP2145 | scaffold02111 | 174994                  | [G/A] |                    | INTERGENIC                          |                                                                         |
| *Ca_Desig_SNP2146 | scaffold00582 | 5173                    | [T/C] | Ca_13279           | NON_SYNONYMOUS_CODING               | (+)-neomenthol dehydrogenase                                            |
| *Ca_Desig_SNP2147 | Ca_Desig_LG04 | 11572638                | [C/T] | Ca_04696           | INTRON                              | Uncharacterized mitochondrial carrier C12B10.09                         |
| *Ca_Desig_SNP2148 | scaffold02111 | 79429                   | [T/A] | Ca_10008           | INTRON                              | G-type lectin S-receptor-like serine/threonine-protein kinase At1g11330 |
| *Ca_Desig_SNP2149 | scaffold01949 | 7656                    | [A/T] | Ca_09783           | DOWNSTREAM:1088bases                | Protein SUPPRESSOR OF npr1-1, CONSTITUTIVE 1                            |
| *Ca_Desig_SNP2150 | scaffold00691 | 4489                    | [T/C] |                    | INTERGENIC                          |                                                                         |
| *Ca_Desig_SNP2151 | scaffold00423 | 16416                   | [A/C] | Ca_12591           | DOWNSTREAM:1850bases                | Uncharacterized protein At4g08330, chloroplastic                        |
| *Ca_Desig_SNP2152 | scaffold00775 | 2388                    | [T/C] | Ca_13986           | DOWNSTREAM:991bases                 | Protein of unknown function (DUF3755)                                   |
| *Ca_Desig_SNP2153 | scaffold00876 | 6627                    | [T/C] |                    | INTERGENIC                          |                                                                         |
| *Ca_Desig_SNP2154 | scaffold02111 | 79298                   | [A/C] | Ca_10008           | NON_SYNONYMOUS_CODING               | G-type lectin S-receptor-like serine/threonine-protein kinase At1g11330 |
| *Ca_Desig_SNP2155 | Ca_Desig_LG04 | 11541368                | [G/A] | Ca_04694           | SYNONYMOUS_CODING                   | Protein GIGANTEA                                                        |
| *Ca_Desig_SNP2156 | Ca_Desig_LG04 | 11572131                | [A/C] | Ca_04696           | INTRON                              | Uncharacterized mitochondrial carrier C12B10.09                         |
| *Ca_Desig_SNP2157 | Ca_Desig_LG04 | 11603349                | [G/A] | Ca_04700           | SYNONYMOUS_CODING                   | Type I inositol-1,4,5-trisphosphate 5-phosphatase 1                     |

| SNP IDs           | Chromosomes   | Physical positions (bp) | SNPs  | Gene accession IDs | Sequence components of genome/genes | Putative functions                                                      |
|-------------------|---------------|-------------------------|-------|--------------------|-------------------------------------|-------------------------------------------------------------------------|
| *Ca_Desig_SNP2158 | scaffold02111 | 33830                   | [A/G] |                    | INTERGENIC                          |                                                                         |
| *Ca_Desig_SNP2159 | Ca_Desig_LG04 | 11543211                | [A/G] | Ca_04694           | INTRON                              | Protein GIGANTEA                                                        |
| *Ca_Desig_SNP2160 | scaffold02111 | 85381                   | [T/C] |                    | INTERGENIC                          |                                                                         |
| *Ca_Desig_SNP2161 | scaffold02111 | 184858                  | [C/G] |                    | INTERGENIC                          |                                                                         |
| *Ca_Desig_SNP2162 | scaffold02111 | 190023                  | [C/A] |                    | INTERGENIC                          |                                                                         |
| *Ca_Desig_SNP2163 | Ca_Desig_LG04 | 11539401                | [C/T] | Ca_04694           | SYNONYMOUS_CODING                   | Protein GIGANTEA                                                        |
| *Ca_Desig_SNP2164 | Ca_Desig_LG04 | 11538965                | [G/C] | Ca_04694           | SYNONYMOUS_CODING                   | Protein GIGANTEA                                                        |
| *Ca_Desig_SNP2165 | scaffold02111 | 58847                   | [G/A] |                    | INTERGENIC                          |                                                                         |
| *Ca_Desig_SNP2166 | scaffold02111 | 79360                   | [T/C] | Ca_10008           | INTRON                              | G-type lectin S-receptor-like serine/threonine-protein kinase At1g11330 |
| *Ca_Desig_SNP2167 | scaffold02111 | 32066                   | [G/T] |                    | INTERGENIC                          |                                                                         |
| *Ca_Desig_SNP2168 | Ca_Desig_LG04 | 8891953                 | [A/G] | Ca_04468           | SYNONYMOUS_CODING                   | Chaperone protein dnaJ 15                                               |
| *Ca_Desig_SNP2169 | scaffold02111 | 120137                  | [C/T] |                    | INTERGENIC                          |                                                                         |
| *Ca_Desig_SNP2170 | Ca_Desig_LG04 | 11543134                | [A/T] | Ca_04694           | INTRON                              | Protein GIGANTEA                                                        |
| *Ca_Desig_SNP2171 | Ca_Desig_LG04 | 11570353                | [A/G] | Ca_04696           | INTRON                              | Uncharacterized mitochondrial carrier C12B10.09                         |
| *Ca_Desig_SNP2172 | scaffold04453 | 258767                  | [A/G] |                    | INTERGENIC                          |                                                                         |
| *Ca_Desig_SNP2173 | Ca_Desig_LG04 | 9856753                 | [C/T] | Ca_04552           | SYNONYMOUS_CODING                   | Protein TIME FOR COFFEE                                                 |
| *Ca_Desig_SNP2174 | Ca_Desig_LG04 | 11540055                | [G/A] | Ca_04694           | SYNONYMOUS_CODING                   | Protein GIGANTEA                                                        |
| *Ca_Desig_SNP2175 | scaffold00852 | 987                     | [A/G] | Ca_14286           | INTRON                              | Type I inositol-1,4,5-trisphosphate 5-phosphatase 11                    |
| *Ca_Desig_SNP2176 | Ca_Desig_LG04 | 11558941                | [G/A] | Ca_04695           | SYNONYMOUS_CODING                   | Carboxypeptidase D                                                      |
| *Ca_Desig_SNP2177 | scaffold00771 | 2506                    | [A/G] |                    | INTERGENIC                          |                                                                         |
| *Ca_Desig_SNP2178 | Ca_Desig_LG04 | 11540126                | [G/C] | Ca_04694           | INTRON                              | Protein GIGANTEA                                                        |
| *Ca_Desig_SNP2179 | scaffold02111 | 33434                   | [C/T] |                    | INTERGENIC                          |                                                                         |
| *Ca_Desig_SNP2180 | scaffold00893 | 1606                    | [T/C] | Ca_14399           | INTRON                              | Tripeptidyl-peptidase 2                                                 |
| *Ca_Desig_SNP2181 | Ca_Desig_LG04 | 10376604                | [C/G] | Ca_04601           | SYNONYMOUS_CODING                   | Acyl-CoA N-acyltransferase with RING/FYVE/PHD-type zinc finger protein  |
| *Ca_Desig_SNP2182 | Ca_Desig_LG04 | 11570433                | [T/C] | Ca_04696           | INTRON                              | Uncharacterized mitochondrial carrier C12B10.09                         |
| *Ca_Desig_SNP2183 | scaffold00770 | 290                     | [C/G] |                    | INTERGENIC                          |                                                                         |

| SNP IDs          | Chromosomes   | Physical positions (bp) | SNPs  | Gene accession IDs | Sequence components of genome/genes | Putative functions                                                     |
|------------------|---------------|-------------------------|-------|--------------------|-------------------------------------|------------------------------------------------------------------------|
| *Ca_Desi_SNP2184 | Ca_Desi_LG04  | 3009470                 | [A/G] | Ca_04090           | INTRON                              | Probable protein phosphatase 2C 59                                     |
| *Ca_Desi_SNP2185 | Ca_Desi_LG04  | 9856777                 | [T/G] | Ca_04552           | SYNONYMOUS_CODING                   | Protein TIME FOR COFFEE                                                |
| *Ca_Desi_SNP2186 | scaffold02111 | 6166                    | [T/G] |                    | INTERGENIC                          |                                                                        |
| *Ca_Desi_SNP2187 | Ca_Desi_LG04  | 3521277                 | [A/G] |                    | INTERGENIC                          |                                                                        |
| *Ca_Desi_SNP2188 | scaffold02111 | 6101                    | [A/G] |                    | INTERGENIC                          |                                                                        |
| *Ca_Desi_SNP2189 | Ca_Desi_LG04  | 11540314                | [A/G] | Ca_04694           | SYNONYMOUS_CODING                   | Protein GIGANTEA                                                       |
| *Ca_Desi_SNP2190 | Ca_Desi_LG04  | 10249225                | [C/T] |                    | INTERGENIC                          |                                                                        |
| *Ca_Desi_SNP2191 | scaffold14776 | 282223                  | [T/C] |                    | INTERGENIC                          |                                                                        |
| *Ca_Desi_SNP2192 | scaffold00771 | 2492                    | [A/G] |                    | INTERGENIC                          |                                                                        |
| *Ca_Desi_SNP2193 | Ca_Desi_LG04  | 145927                  | [A/G] |                    | INTERGENIC                          |                                                                        |
| *Ca_Desi_SNP2194 | Ca_Desi_LG04  | 10356296                | [A/G] | Ca_04598           | SYNONYMOUS_CODING                   | Thiamine thiazole synthase 2, chloroplastic                            |
| *Ca_Desi_SNP2195 | Ca_Desi_LG04  | 10378656                | [T/G] | Ca_04601           | SYNONYMOUS_CODING                   | Acyl-CoA N-acyltransferase with RING/FYVE/PHD-type zinc finger protein |
| *Ca_Desi_SNP2196 | Ca_Desi_LG04  | 9851330                 | [T/A] |                    | INTERGENIC                          |                                                                        |
| *Ca_Desi_SNP2197 | Ca_Desi_LG04  | 11585305                | [C/T] | Ca_04698           | DOWNSTREAM:673bases                 | Choline/ethanolamine kinase                                            |
| *Ca_Desi_SNP2198 | scaffold01106 | 152                     | [G/T] |                    | INTERGENIC                          |                                                                        |
| *Ca_Desi_SNP2199 | Ca_Desi_LG04  | 9857710                 | [C/T] | Ca_04552           | SYNONYMOUS_CODING                   | Protein TIME FOR COFFEE                                                |
| *Ca_Desi_SNP2200 | Ca_Desi_LG04  | 10351636                | [A/G] | Ca_04598           | DOWNSTREAM:128bases                 | Thiamine thiazole synthase 2, chloroplastic                            |
| *Ca_Desi_SNP2201 | Ca_Desi_LG04  | 10339397                | [A/G] | Ca_04596           | INTRON                              | Protein FRIGIDA                                                        |
| *Ca_Desi_SNP2202 | scaffold00898 | 67                      | [T/C] |                    | INTERGENIC                          |                                                                        |
| *Ca_Desi_SNP2203 | Ca_Desi_LG04  | 123046                  | [G/A] | Ca_03887           | INTRON                              | Protein ACCUMULATION AND REPLICATION OF CHLOROPLASTS 6, chloroplastic  |
| *Ca_Desi_SNP2204 | Ca_Desi_LG04  | 9858208                 | [C/T] | Ca_04552           | SYNONYMOUS_CODING                   | Protein TIME FOR COFFEE                                                |
| *Ca_Desi_SNP2205 | Ca_Desi_LG04  | 9855725                 | [T/G] | Ca_04552           | SYNONYMOUS_CODING                   | Protein TIME FOR COFFEE                                                |
| *Ca_Desi_SNP2206 | Ca_Desi_LG04  | 9856813                 | [T/A] | Ca_04552           | SYNONYMOUS_CODING                   | Protein TIME FOR COFFEE                                                |
| *Ca_Desi_SNP2207 | scaffold01031 | 531                     | [T/C] |                    | INTERGENIC                          |                                                                        |
| *Ca_Desi_SNP2208 | scaffold00770 | 219                     | [C/T] |                    | INTERGENIC                          |                                                                        |
| *Ca_Desi_SNP2209 | Ca_Desi_LG04  | 10354585                | [A/G] | Ca_04598           | INTRON                              | Thiamine thiazole synthase 2, chloroplastic                            |

| SNP IDs          | Chromosomes   | Physical positions (bp) | SNPs  | Gene accession IDs | Sequence components of genome/genes | Putative functions                                                      |
|------------------|---------------|-------------------------|-------|--------------------|-------------------------------------|-------------------------------------------------------------------------|
| *Ca_Desi_SNP2210 | Ca_Desi_LG04  | 9851424                 | [A/T] |                    | INTERGENIC                          |                                                                         |
| *Ca_Desi_SNP2211 | Ca_Desi_LG04  | 9856520                 | [G/A] | Ca_04552           | SYNONYMOUS_CODING                   | Protein TIME FOR COFFEE                                                 |
| *Ca_Desi_SNP2212 | Ca_Desi_LG04  | 348344                  | [G/A] |                    | INTERGENIC                          |                                                                         |
| *Ca_Desi_SNP2213 | scaffold00207 | 19130                   | [C/A] | Ca_11357           | INTRON                              | Chloroplastic group IIA intron splicing facilitator CRS1, chloroplastic |
| *Ca_Desi_SNP2214 | scaffold00307 | 867                     | [C/T] | Ca_11957           | DOWNSTREAM:1412bases                | Ankyrin repeat and SAM domain-containing protein 4B                     |
| *Ca_Desi_SNP2215 | Ca_Desi_LG05  | 6547207                 | [T/G] | Ca_05745           | SYNONYMOUS_CODING                   | Nucleobase-ascorbate transporter 6                                      |
| *Ca_Desi_SNP2216 | Ca_Desi_LG04  | 10311544                | [A/G] | Ca_04592           | SYNONYMOUS_CODING                   | Pentatricopeptide repeat-containing protein At4g14851                   |
| *Ca_Desi_SNP2217 | Ca_Desi_LG04  | 9909450                 | [G/A] |                    | INTERGENIC                          |                                                                         |
| *Ca_Desi_SNP2218 | Ca_Desi_LG04  | 9855664                 | [A/C] | Ca_04552           | SYNONYMOUS_CODING                   | Protein TIME FOR COFFEE                                                 |
| *Ca_Desi_SNP2219 | scaffold00768 | 3094                    | [A/G] |                    | INTERGENIC                          |                                                                         |
| *Ca_Desi_SNP2220 | Ca_Desi_LG01  | 3372364                 | [C/T] |                    | INTERGENIC                          |                                                                         |
| *Ca_Desi_SNP2221 | Ca_Desi_LG04  | 241125                  | [A/G] | Ca_03899           | INTRON                              | Probable pre-mRNA-splicing factor ATP-dependent RNA helicase            |
| *Ca_Desi_SNP2222 | scaffold00582 | 6448                    | [A/G] | Ca_13279           | INTRON                              | (+)-neomenthol dehydrogenase                                            |
| *Ca_Desi_SNP2223 | Ca_Desi_LG04  | 345799                  | [C/T] | Ca_03904           | DOWNSTREAM:1946bases                | 5'-3' exoribonuclease 3                                                 |
| *Ca_Desi_SNP2224 | scaffold03520 | 79148                   | [C/T] |                    | INTERGENIC                          |                                                                         |
| *Ca_Desi_SNP2225 | Ca_Desi_LG04  | 10339669                | [T/C] | Ca_04596           | INTRON                              | Protein FRIGIDA                                                         |
| *Ca_Desi_SNP2226 | scaffold00297 | 10556                   | [A/G] |                    | INTERGENIC                          |                                                                         |
| *Ca_Desi_SNP2227 | Ca_Desi_LG04  | 10354408                | [G/A] | Ca_04598           | INTRON                              | Thiamine thiazole synthase 2, chloroplastic                             |
| *Ca_Desi_SNP2228 | scaffold03520 | 43639                   | [G/T] |                    | INTERGENIC                          |                                                                         |
| *Ca_Desi_SNP2229 | Ca_Desi_LG04  | 256346                  | [C/G] | Ca_03901           | NON_SYNONYMOUS_CODING               | Auxin response factor 5                                                 |
| *Ca_Desi_SNP2230 | scaffold00768 | 3067                    | [T/C] |                    | INTERGENIC                          |                                                                         |
| *Ca_Desi_SNP2231 | scaffold00297 | 24945                   | [T/G] |                    | INTERGENIC                          |                                                                         |
| *Ca_Desi_SNP2232 | scaffold00297 | 10754                   | [G/A] |                    | INTERGENIC                          |                                                                         |
| *Ca_Desi_SNP2233 | scaffold00297 | 24605                   | [G/T] |                    | INTERGENIC                          |                                                                         |
| *Ca_Desi_SNP2234 | scaffold04453 | 258810                  | [A/T] |                    | INTERGENIC                          |                                                                         |
| *Ca_Desi_SNP2235 | scaffold03520 | 27150                   | [T/A] |                    | INTERGENIC                          |                                                                         |

| SNP IDs           | Chromosomes   | Physical positions (bp) | SNPs  | Gene accession IDs | Sequence components of genome/genes | Putative functions                                                            |
|-------------------|---------------|-------------------------|-------|--------------------|-------------------------------------|-------------------------------------------------------------------------------|
| *Ca_Desig_SNP2236 | scaffold00761 | 3576                    | [T/C] |                    | INTERGENIC                          |                                                                               |
| *Ca_Desig_SNP2237 | scaffold00971 | 141                     | [T/C] |                    | INTERGENIC                          |                                                                               |
| *Ca_Desig_SNP2238 | scaffold00297 | 21498                   | [A/G] |                    | INTERGENIC                          |                                                                               |
| *Ca_Desig_SNP2239 | Ca_Desig_LG04 | 367943                  | [A/G] | Ca_03909           | DOWNSTREAM:1931bases                | tRNA (adenine(58)-N(1))-methyltransferase non-catalytic subunit trm6          |
| *Ca_Desig_SNP2240 | Ca_Desig_LG04 | 9834884                 | [C/T] | Ca_04551           | SYNONYMOUS_CODING                   | Sugar transport protein 13                                                    |
| *Ca_Desig_SNP2241 | Ca_Desig_LG04 | 11089940                | [C/T] |                    | INTERGENIC                          |                                                                               |
| *Ca_Desig_SNP2242 | scaffold03520 | 42358                   | [G/A] |                    | INTERGENIC                          |                                                                               |
| *Ca_Desig_SNP2243 | scaffold00297 | 10448                   | [A/G] | Ca_11900           | DOWNSTREAM:264bases                 | Uncharacterized protein At1g18480                                             |
| *Ca_Desig_SNP2244 | scaffold00032 | 42198                   | [G/A] |                    | INTERGENIC                          |                                                                               |
| *Ca_Desig_SNP2245 | scaffold02093 | 7943                    | [A/C] |                    | INTERGENIC                          |                                                                               |
| *Ca_Desig_SNP2246 | scaffold03520 | 42669                   | [T/A] |                    | INTERGENIC                          |                                                                               |
| *Ca_Desig_SNP2247 | Ca_Desig_LG04 | 10369201                | [G/A] | Ca_04599           | DOWNSTREAM:1995bases                | photosystem II 11 kDa protein-related                                         |
| *Ca_Desig_SNP2248 | scaffold00297 | 10694                   | [G/T] |                    | INTERGENIC                          |                                                                               |
| *Ca_Desig_SNP2249 | Ca_Desig_LG04 | 705227                  | [A/G] | Ca_03931           | INTRON                              | Lysophosphatidylcholine acyltransferase 1                                     |
| *Ca_Desig_SNP2250 | Ca_Desig_LG07 | 5885449                 | [T/C] |                    | INTERGENIC                          |                                                                               |
| *Ca_Desig_SNP2251 | Ca_Desig_LG04 | 10249253                | [T/C] |                    | INTERGENIC                          |                                                                               |
| *Ca_Desig_SNP2252 | scaffold01985 | 110138                  | [A/C] |                    | INTERGENIC                          |                                                                               |
| *Ca_Desig_SNP2253 | Ca_Desig_LG04 | 338006                  | [G/A] | Ca_03904           | NON_SYNONYMOUS_CODING               | 5'-3' exoribonuclease 3                                                       |
| *Ca_Desig_SNP2254 | Ca_Desig_LG06 | 4793120                 | [T/G] | Ca_06824           | INTRON                              | Bifunctional aspartokinase/homoserine dehydrogenase, chloroplastic (Fragment) |
| *Ca_Desig_SNP2255 | Ca_Desig_LG05 | 12393562                | [T/G] | Ca_06279           | NON_SYNONYMOUS_CODING               | Callose synthase 10                                                           |
| *Ca_Desig_SNP2256 | Ca_Desig_LG08 | 5177806                 | [G/T] |                    | INTERGENIC                          |                                                                               |
| *Ca_Desig_SNP2257 | scaffold00692 | 28719                   | [T/G] | Ca_09609           | NON_SYNONYMOUS_CODING               | Glycerol-3-phosphate acyltransferase 3                                        |
| *Ca_Desig_SNP2258 | Ca_Desig_LG04 | 232316                  | [T/A] | Ca_03898           | INTRON                              | Small RNA degrading nuclease 3                                                |
| *Ca_Desig_SNP2259 | scaffold03373 | 81423                   | [A/G] |                    | INTERGENIC                          |                                                                               |
| *Ca_Desig_SNP2260 | scaffold13621 | 103016                  | [T/G] |                    | INTERGENIC                          |                                                                               |
| *Ca_Desig_SNP2261 | scaffold00919 | 563                     | [A/G] |                    | INTERGENIC                          |                                                                               |

| SNP IDs           | Chromosomes   | Physical positions (bp) | SNPs  | Gene accession IDs | Sequence components of genome/genes | Putative functions                                     |
|-------------------|---------------|-------------------------|-------|--------------------|-------------------------------------|--------------------------------------------------------|
| *Ca_Desig_SNP2262 | Ca_Desig_LG04 | 181954                  | [C/G] |                    | INTERGENIC                          |                                                        |
| *Ca_Desig_SNP2263 | Ca_Desig_LG04 | 156944                  | [T/C] | Ca_03891           | SYNONYMOUS_CODING                   | Lysine-specific histone demethylase 1 homolog 3        |
| *Ca_Desig_SNP2264 | Ca_Desig_LG03 | 13535547                | [A/T] |                    | INTERGENIC                          |                                                        |
| *Ca_Desig_SNP2265 | scaffold00903 | 1531                    | [G/A] |                    | INTERGENIC                          |                                                        |
| *Ca_Desig_SNP2266 | Ca_Desig_LG01 | 5429008                 | [T/G] |                    | INTERGENIC                          |                                                        |
| *Ca_Desig_SNP2267 | scaffold02645 | 75209                   | [C/A] |                    | INTERGENIC                          |                                                        |
| *Ca_Desig_SNP2268 | scaffold07131 | 54701                   | [T/G] |                    | INTERGENIC                          |                                                        |
| *Ca_Desig_SNP2269 | Ca_Desig_LG04 | 10685259                | [C/A] |                    | INTERGENIC                          |                                                        |
| *Ca_Desig_SNP2270 | scaffold00646 | 4963                    | [T/C] |                    | INTERGENIC                          |                                                        |
| *Ca_Desig_SNP2271 | scaffold00257 | 10671                   | [T/G] |                    | INTERGENIC                          |                                                        |
| *Ca_Desig_SNP2272 | scaffold00767 | 2525                    | [T/G] |                    | INTERGENIC                          |                                                        |
| *Ca_Desig_SNP2273 | scaffold02170 | 35505                   | [T/G] |                    | INTERGENIC                          |                                                        |
| *Ca_Desig_SNP2274 | Ca_Desig_LG03 | 6357520                 | [A/C] | Ca_02662           | DOWNSTREAM:812bases                 | Peptide transporter PTR3-A                             |
| *Ca_Desig_SNP2275 | Ca_Desig_LG03 | 14005543                | [G/C] |                    | INTERGENIC                          |                                                        |
| *Ca_Desig_SNP2276 | scaffold00702 | 6550                    | [T/C] |                    | INTERGENIC                          |                                                        |
| *Ca_Desig_SNP2277 | scaffold01232 | 186533                  | [A/C] |                    | INTERGENIC                          |                                                        |
| *Ca_Desig_SNP2278 | scaffold00854 | 340                     | [T/C] |                    | INTERGENIC                          |                                                        |
| *Ca_Desig_SNP2279 | Ca_Desig_LG05 | 14343517                | [A/C] | Ca_06389           | SYNONYMOUS_CODING                   | Vacuolar protein sorting-associated protein 16 homolog |
| *Ca_Desig_SNP2280 | scaffold00185 | 233077                  | [A/G] |                    | INTERGENIC                          |                                                        |
| *Ca_Desig_SNP2281 | scaffold00876 | 878                     | [A/G] |                    | INTERGENIC                          |                                                        |
| *Ca_Desig_SNP2282 | scaffold00807 | 3310                    | [G/A] | Ca_14119           | SYNONYMOUS_CODING                   | Abscisic acid receptor PYL6                            |
| *Ca_Desig_SNP2283 | Ca_Desig_LG05 | 14343514                | [A/C] | Ca_06389           | SYNONYMOUS_CODING                   | Vacuolar protein sorting-associated protein 16 homolog |
| *Ca_Desig_SNP2284 | Ca_Desig_LG04 | 4087248                 | [T/G] | Ca_04169           | NON_SYNONYMOUS_CODING               | Probable galactinol--sucrose galactosyltransferase 1   |
| *Ca_Desig_SNP2285 | scaffold00876 | 6605                    | [T/C] |                    | INTERGENIC                          |                                                        |
| *Ca_Desig_SNP2286 | scaffold00876 | 820                     | [T/C] |                    | INTERGENIC                          |                                                        |
| *Ca_Desig_SNP2287 | scaffold00789 | 2474                    | [A/G] |                    | INTERGENIC                          |                                                        |

| SNP IDs           | Chromosomes   | Physical positions (bp) | SNPs  | Gene accession IDs | Sequence components of genome/genes | Putative functions                                      |
|-------------------|---------------|-------------------------|-------|--------------------|-------------------------------------|---------------------------------------------------------|
| *Ca_Desig_SNP2288 | scaffold01063 | 312                     | [A/C] |                    | INTERGENIC                          |                                                         |
| *Ca_Desig_SNP2289 | scaffold01437 | 25683                   | [A/T] |                    | INTERGENIC                          |                                                         |
| *Ca_Desig_SNP2290 | Ca_Desig_LG05 | 13173580                | [A/G] | Ca_06337           | DOWNSTREAM:1186bases                | Arogenate dehydrogenase 1, chloroplastic                |
| *Ca_Desig_SNP2291 | Ca_Desig_LG02 | 11979951                | [A/C] | Ca_01786           | INTRON                              | ABC transporter G family member 38                      |
| *Ca_Desig_SNP2292 | scaffold01093 | 344                     | [T/C] |                    | INTERGENIC                          |                                                         |
| *Ca_Desig_SNP2293 | scaffold00804 | 1918                    | [G/A] |                    | INTERGENIC                          |                                                         |
| *Ca_Desig_SNP2294 | Ca_Desig_LG05 | 6204632                 | [A/C] |                    | INTERGENIC                          |                                                         |
| *Ca_Desig_SNP2295 | scaffold01499 | 78789                   | [T/A] |                    | INTERGENIC                          |                                                         |
| *Ca_Desig_SNP2296 | Ca_Desig_LG03 | 4267189                 | [A/C] | Ca_02532           | SYNONYMOUS_CODING                   | MORC family CW-type zinc finger protein 4               |
| *Ca_Desig_SNP2297 | scaffold01737 | 123806                  | [T/C] |                    | INTERGENIC                          |                                                         |
| *Ca_Desig_SNP2298 | scaffold00582 | 4804                    | [A/G] | Ca_13279           | NON_SYNONYMOUS_CODING               | (+)-neomenthol dehydrogenase                            |
| *Ca_Desig_SNP2299 | scaffold00931 | 206141                  | [A/T] |                    | INTERGENIC                          |                                                         |
| *Ca_Desig_SNP2300 | scaffold01164 | 198                     | [C/G] |                    | INTERGENIC                          |                                                         |
| *Ca_Desig_SNP2301 | scaffold02308 | 12754                   | [T/G] |                    | INTERGENIC                          |                                                         |
| *Ca_Desig_SNP2302 | scaffold00876 | 10490                   | [T/C] |                    | INTERGENIC                          |                                                         |
| *Ca_Desig_SNP2303 | Ca_Desig_LG04 | 17026071                | [A/T] | Ca_04952           | NON_SYNONYMOUS_CODING               | Dof zinc finger protein DOF4.6                          |
| *Ca_Desig_SNP2304 | scaffold00824 | 1803                    | [T/C] |                    | INTERGENIC                          |                                                         |
| *Ca_Desig_SNP2305 | Ca_Desig_LG03 | 15332029                | [T/A] | Ca_03190           | SYNONYMOUS_CODING                   | Probable F-box protein At4g22030                        |
| *Ca_Desig_SNP2306 | scaffold00888 | 349                     | [T/C] |                    | INTERGENIC                          |                                                         |
| *Ca_Desig_SNP2307 | scaffold01016 | 304                     | [C/T] |                    | INTERGENIC                          |                                                         |
| *Ca_Desig_SNP2308 | scaffold00931 | 255132                  | [C/T] |                    | INTERGENIC                          |                                                         |
| *Ca_Desig_SNP2309 | Ca_Desig_LG05 | 12979164                | [T/C] | Ca_06327           | SYNONYMOUS_CODING                   | DEAD-box ATP-dependent RNA helicase 18                  |
| *Ca_Desig_SNP2310 | scaffold00771 | 2489                    | [T/C] |                    | INTERGENIC                          |                                                         |
| *Ca_Desig_SNP2311 | scaffold02975 | 72658                   | [T/C] |                    | INTERGENIC                          |                                                         |
| *Ca_Desig_SNP2312 | scaffold00157 | 25741                   | [G/A] |                    | INTERGENIC                          |                                                         |
| *Ca_Desig_SNP2313 | Ca_Desig_LG04 | 16900160                | [T/C] | Ca_04945           | INTRON                              | Tetratricopeptide repeat (TPR)-like superfamily protein |



| SNP IDs          | Chromosomes   | Physical positions (bp) | SNPs  | Gene accession IDs | Sequence components of genome/genes | Putative functions                                   |
|------------------|---------------|-------------------------|-------|--------------------|-------------------------------------|------------------------------------------------------|
| *Ca_Desi_SNP2314 | Ca_Desi_LG04  | 18790760                | [A/G] | Ca_05045           | INTRON                              | Uncharacterized protein At3g63140, chloroplastic     |
| *Ca_Desi_SNP2315 | scaffold00852 | 1004                    | [T/C] | Ca_14286           | NON_SYNONYMOUS_CODING               | Type I inositol-1,4,5-trisphosphate 5-phosphatase 11 |
| *Ca_Desi_SNP2316 | scaffold01031 | 524                     | [A/G] |                    | INTERGENIC                          |                                                      |
| *Ca_Desi_SNP2317 | scaffold00257 | 10507                   | [T/G] |                    | INTERGENIC                          |                                                      |
| *Ca_Desi_SNP2318 | scaffold00854 | 2305                    | [A/G] |                    | INTERGENIC                          |                                                      |
| *Ca_Desi_SNP2319 | scaffold00931 | 140380                  | [C/T] |                    | INTERGENIC                          |                                                      |
| *Ca_Desi_SNP2320 | scaffold00804 | 740                     | [T/C] |                    | INTERGENIC                          |                                                      |
| *Ca_Desi_SNP2321 | scaffold00854 | 318                     | [A/G] |                    | INTERGENIC                          |                                                      |
| *Ca_Desi_SNP2322 | scaffold00931 | 66738                   | [C/T] |                    | INTERGENIC                          |                                                      |
| *Ca_Desi_SNP2323 | scaffold00931 | 257906                  | [A/G] |                    | INTERGENIC                          |                                                      |
| *Ca_Desi_SNP2324 | scaffold00931 | 154538                  | [C/T] |                    | INTERGENIC                          |                                                      |
| *Ca_Desi_SNP2325 | scaffold00771 | 2504                    | [A/G] |                    | INTERGENIC                          |                                                      |
| *Ca_Desi_SNP2326 | scaffold00931 | 204925                  | [C/T] |                    | INTERGENIC                          |                                                      |
| *Ca_Desi_SNP2327 | scaffold00931 | 112847                  | [A/G] |                    | INTERGENIC                          |                                                      |
| *Ca_Desi_SNP2328 | scaffold02975 | 160119                  | [A/G] |                    | INTERGENIC                          |                                                      |
| *Ca_Desi_SNP2329 | scaffold05103 | 75161                   | [A/C] |                    | INTERGENIC                          |                                                      |
| *Ca_Desi_SNP2330 | scaffold00876 | 10488                   | [A/G] |                    | INTERGENIC                          |                                                      |
| *Ca_Desi_SNP2331 | Ca_Desi_LG05  | 12112980                | [C/T] | Ca_06253           | DOWNSTREAM:1069bases                | Cytochrome P450 71A1                                 |
| *Ca_Desi_SNP2332 | scaffold00931 | 254605                  | [G/T] |                    | INTERGENIC                          |                                                      |
| *Ca_Desi_SNP2333 | scaffold01031 | 487                     | [A/T] |                    | INTERGENIC                          |                                                      |
| *Ca_Desi_SNP2334 | scaffold00866 | 1071                    | [T/C] | Ca_14324           | DOWNSTREAM:258bases                 | NADP-specific glutamate dehydrogenase                |
| *Ca_Desi_SNP2335 | scaffold00876 | 10366                   | [T/G] |                    | INTERGENIC                          |                                                      |
| *Ca_Desi_SNP2336 | scaffold00876 | 851                     | [T/C] |                    | INTERGENIC                          |                                                      |
| *Ca_Desi_SNP2337 | Ca_Desi_LG05  | 6376546                 | [T/A] | Ca_05728           | INTRON                              | Protein argonaute 4                                  |
| *Ca_Desi_SNP2338 | Ca_Desi_LG05  | 11063910                | [C/G] | Ca_06164           | INTRON                              | embryo defective 1381                                |
| *Ca_Desi_SNP2339 | scaffold00582 | 5063                    | [T/C] | Ca_13279           | INTRON                              | (+)-neomenthol dehydrogenase                         |

| SNP IDs          | Chromosomes   | Physical positions (bp) | SNPs  | Gene accession IDs | Sequence components of genome/genes | Putative functions                                                                                     |
|------------------|---------------|-------------------------|-------|--------------------|-------------------------------------|--------------------------------------------------------------------------------------------------------|
| *Ca_Desi_SNP2340 | Ca_Desi_LG04  | 21192467                | [A/C] |                    | INTERGENIC                          |                                                                                                        |
| *Ca_Desi_SNP2341 | Ca_Desi_LG03  | 8454791                 | [C/T] |                    | INTERGENIC                          |                                                                                                        |
| *Ca_Desi_SNP2342 | Ca_Desi_LG05  | 13192562                | [A/G] | Ca_06340           | INTRON                              | unknown protein; INVOLVED IN: biological_process<br>unknown; LOCATED IN: chloroplast; BEST Arabidopsis |
| *Ca_Desi_SNP2343 | Ca_Desi_LG05  | 6458466                 | [A/G] |                    | INTERGENIC                          |                                                                                                        |
| *Ca_Desi_SNP2344 | Ca_Desi_LG07  | 2374502                 | [G/A] | Ca_07541           | NON_SYNONYMOUS_CODING               | Putative uncharacterized protein                                                                       |
| *Ca_Desi_SNP2345 | Ca_Desi_LG03  | 9951222                 | [A/C] |                    | INTERGENIC                          |                                                                                                        |
| *Ca_Desi_SNP2346 | Ca_Desi_LG05  | 13191923                | [G/A] | Ca_06340           | INTRON                              | unknown protein; INVOLVED IN: biological_process<br>unknown; LOCATED IN: chloroplast; BEST Arabidopsis |
| *Ca_Desi_SNP2347 | Ca_Desi_LG04  | 16900349                | [A/G] | Ca_04945           | SYNONYMOUS_CODING                   | Tetratricopeptide repeat (TPR)-like superfamily protein                                                |
| *Ca_Desi_SNP2348 | Ca_Desi_LG06  | 7326413                 | [T/G] | Ca_07026           | SYNONYMOUS_CODING                   | Remorin family protein                                                                                 |
| *Ca_Desi_SNP2349 | scaffold00931 | 228299                  | [A/G] |                    | INTERGENIC                          |                                                                                                        |
| *Ca_Desi_SNP2350 | Ca_Desi_LG05  | 13190974                | [G/A] | Ca_06340           | INTRON                              | unknown protein; INVOLVED IN: biological_process<br>unknown; LOCATED IN: chloroplast; BEST Arabidopsis |
| *Ca_Desi_SNP2351 | scaffold00304 | 30271                   | [A/C] |                    | INTERGENIC                          |                                                                                                        |
| *Ca_Desi_SNP2352 | Ca_Desi_LG04  | 3070931                 | [G/A] | Ca_04096           | SYNONYMOUS_CODING                   | F-box only protein 13                                                                                  |
| *Ca_Desi_SNP2353 | scaffold01180 | 172605                  | [T/G] |                    | INTERGENIC                          |                                                                                                        |
| *Ca_Desi_SNP2354 | Ca_Desi_LG04  | 2997431                 | [C/T] | Ca_04089           | DOWNSTREAM:1948bases                | Unknown expressed protein                                                                              |
| *Ca_Desi_SNP2355 | Ca_Desi_LG04  | 16730046                | [A/T] |                    | INTERGENIC                          |                                                                                                        |
| *Ca_Desi_SNP2356 | Ca_Desi_LG04  | 20331243                | [T/G] | Ca_05087           | SYNONYMOUS_CODING                   | N-terminal kinase-like protein                                                                         |
| *Ca_Desi_SNP2357 | Ca_Desi_LG05  | 10960813                | [C/T] | Ca_06149           | INTRON                              | Protein FAM91A1                                                                                        |
| *Ca_Desi_SNP2358 | scaffold00788 | 3465                    | [A/G] |                    | INTERGENIC                          |                                                                                                        |
| *Ca_Desi_SNP2359 | scaffold00322 | 722                     | [T/A] |                    | INTERGENIC                          |                                                                                                        |
| *Ca_Desi_SNP2360 | scaffold01428 | 72386                   | [T/A] | Ca_09944           | INTRON                              | Smr domain-containing protein YPL199C                                                                  |
| *Ca_Desi_SNP2361 | scaffold00398 | 29366                   | [G/T] |                    | INTERGENIC                          |                                                                                                        |
| *Ca_Desi_SNP2362 | scaffold00771 | 2511                    | [T/C] |                    | INTERGENIC                          |                                                                                                        |
| *Ca_Desi_SNP2363 | scaffold00409 | 13887                   | [C/A] | Ca_12514           | DOWNSTREAM:1494bases                | Syntaxin-binding protein 5                                                                             |
| *Ca_Desi_SNP2364 | Ca_Desi_LG07  | 2895784                 | [T/G] | Ca_07581           | SYNONYMOUS_CODING                   | Vignain                                                                                                |
| *Ca_Desi_SNP2365 | scaffold01534 | 137447                  | [A/T] | Ca_10140           | INTRON                              | Heat shock cognate 70 kDa protein 2                                                                    |

| SNP IDs           | Chromosomes   | Physical positions (bp) | SNPs  | Gene accession IDs | Sequence components of genome/genes | Putative functions                                     |
|-------------------|---------------|-------------------------|-------|--------------------|-------------------------------------|--------------------------------------------------------|
| *Ca_Desig_SNP2366 | scaffold01557 | 75197                   | [G/A] |                    | INTERGENIC                          |                                                        |
| *Ca_Desig_SNP2367 | Ca_Desig_LG04 | 16894642                | [A/C] |                    | INTERGENIC                          |                                                        |
| *Ca_Desig_SNP2368 | scaffold00788 | 3453                    | [A/G] |                    | INTERGENIC                          |                                                        |
| *Ca_Desig_SNP2369 | Ca_Desig_LG03 | 4016186                 | [C/T] | Ca_02499           | NON_SYNONYMOUS_CODING               | Calcium homeostasis endoplasmic reticulum protein      |
| *Ca_Desig_SNP2370 | Ca_Desig_LG04 | 16802460                | [C/G] | Ca_04936           | NON_SYNONYMOUS_CODING               | Phosphatidylcholine transfer protein                   |
| *Ca_Desig_SNP2371 | scaffold01183 | 75729                   | [A/C] |                    | INTERGENIC                          |                                                        |
| *Ca_Desig_SNP2372 | scaffold07155 | 1105                    | [G/T] |                    | INTERGENIC                          |                                                        |
| *Ca_Desig_SNP2373 | scaffold00897 | 869                     | [T/C] |                    | INTERGENIC                          |                                                        |
| *Ca_Desig_SNP2374 | scaffold00998 | 221654                  | [G/T] |                    | INTERGENIC                          |                                                        |
| *Ca_Desig_SNP2375 | scaffold00735 | 2824                    | [T/C] | Ca_13852           | DOWNSTREAM:1622bases                | MORC family CW-type zinc finger protein 4              |
| *Ca_Desig_SNP2376 | Ca_Desig_LG05 | 5495924                 | [G/C] | Ca_05645           | NON_SYNONYMOUS_CODING               | Ubiquitin carboxyl-terminal hydrolase 16               |
| *Ca_Desig_SNP2377 | Ca_Desig_LG05 | 15197106                | [C/G] | Ca_06424           | SYNONYMOUS_CODING                   | Kinase-related protein of unknown function (DUF1296)   |
| *Ca_Desig_SNP2378 | scaffold00907 | 20784                   | [A/C] |                    | INTERGENIC                          |                                                        |
| *Ca_Desig_SNP2379 | Ca_Desig_LG04 | 16950056                | [C/T] |                    | INTERGENIC                          |                                                        |
| *Ca_Desig_SNP2380 | scaffold00113 | 9413                    | [G/A] | Ca_10890           | DOWNSTREAM:318bases                 | Ethylene-responsive transcription factor ERF012        |
| *Ca_Desig_SNP2381 | scaffold00646 | 4966                    | [A/G] |                    | INTERGENIC                          |                                                        |
| *Ca_Desig_SNP2382 | scaffold00807 | 3323                    | [G/T] | Ca_14119           | NON_SYNONYMOUS_CODING               | Abscisic acid receptor PYL6                            |
| *Ca_Desig_SNP2383 | scaffold00804 | 744                     | [T/C] |                    | INTERGENIC                          |                                                        |
| *Ca_Desig_SNP2384 | scaffold01008 | 100769                  | [T/C] |                    | INTERGENIC                          |                                                        |
| *Ca_Desig_SNP2385 | Ca_Desig_LG07 | 3683741                 | [C/T] |                    | INTERGENIC                          |                                                        |
| *Ca_Desig_SNP2386 | scaffold00488 | 25498                   | [T/G] | Ca_09295           | DOWNSTREAM:1220bases                | Beta-fructofuranosidase, insoluble isoenzyme CWINV3    |
| *Ca_Desig_SNP2387 | scaffold01920 | 11129                   | [G/A] |                    | INTERGENIC                          |                                                        |
| *Ca_Desig_SNP2388 | scaffold00242 | 43990                   | [A/C] | Ca_11508           | SYNONYMOUS_CODING                   | Probable tRNA (guanine(26)-N(2))-dimethyltransferase 2 |
| *Ca_Desig_SNP2389 | Ca_Desig_LG03 | 18305212                | [A/C] |                    | INTERGENIC                          |                                                        |
| *Ca_Desig_SNP2390 | scaffold00658 | 7969                    | [T/C] |                    | INTERGENIC                          |                                                        |
| *Ca_Desig_SNP2391 | Ca_Desig_LG03 | 18543482                | [C/T] |                    | INTERGENIC                          |                                                        |

| SNP IDs           | Chromosomes   | Physical positions (bp) | SNPs  | Gene accession IDs | Sequence components of genome/genes | Putative functions                  |
|-------------------|---------------|-------------------------|-------|--------------------|-------------------------------------|-------------------------------------|
| *Ca_Desig_SNP2392 | scaffold00747 | 2279                    | [C/T] |                    | INTERGENIC                          |                                     |
| *Ca_Desig_SNP2393 | scaffold02308 | 12517                   | [T/G] |                    | INTERGENIC                          |                                     |
| *Ca_Desig_SNP2394 | scaffold00953 | 675                     | [A/G] |                    | INTERGENIC                          |                                     |
| *Ca_Desig_SNP2395 | scaffold04836 | 19385                   | [T/A] |                    | INTERGENIC                          |                                     |
| *Ca_Desig_SNP2396 | scaffold01158 | 160                     | [C/A] |                    | INTERGENIC                          |                                     |
| *Ca_Desig_SNP2397 | scaffold00347 | 16936                   | [T/G] |                    | INTERGENIC                          |                                     |
| *Ca_Desig_SNP2398 | scaffold01281 | 92034                   | [C/G] |                    | INTERGENIC                          |                                     |
| *Ca_Desig_SNP2399 | scaffold00797 | 2159                    | [T/G] |                    | INTERGENIC                          |                                     |
| *Ca_Desig_SNP2400 | scaffold00490 | 17883                   | [G/A] |                    | INTERGENIC                          |                                     |
| *Ca_Desig_SNP2401 | scaffold00933 | 803                     | [T/C] |                    | INTERGENIC                          |                                     |
| *Ca_Desig_SNP2402 | scaffold00893 | 1581                    | [A/G] | Ca_14399           | INTRON                              | Tripeptidyl-peptidase 2             |
| *Ca_Desig_SNP2403 | Ca_Desig_LG02 | 7462087                 | [T/G] |                    | INTERGENIC                          |                                     |
| *Ca_Desig_SNP2404 | scaffold00938 | 1122                    | [T/C] |                    | INTERGENIC                          |                                     |
| *Ca_Desig_SNP2405 | scaffold01009 | 425                     | [C/T] |                    | INTERGENIC                          |                                     |
| *Ca_Desig_SNP2406 | scaffold01049 | 28461                   | [T/G] |                    | INTERGENIC                          |                                     |
| *Ca_Desig_SNP2407 | scaffold01106 | 35                      | [T/C] |                    | INTERGENIC                          |                                     |
| *Ca_Desig_SNP2408 | scaffold00637 | 5466                    | [G/T] |                    | INTERGENIC                          |                                     |
| *Ca_Desig_SNP2409 | scaffold00624 | 5000                    | [A/C] |                    | INTERGENIC                          |                                     |
| *Ca_Desig_SNP2410 | scaffold00646 | 4903                    | [T/C] |                    | INTERGENIC                          |                                     |
| *Ca_Desig_SNP2411 | scaffold07146 | 32061                   | [G/C] |                    | INTERGENIC                          |                                     |
| *Ca_Desig_SNP2412 | Ca_Desig_LG05 | 11609169                | [G/T] | Ca_06203           | INTRON                              | Serine/threonine-protein kinase ATM |
| *Ca_Desig_SNP2413 | Ca_Desig_LG06 | 3307385                 | [A/C] | Ca_06673           | UTR_5_PRIME:87bases                 | SH3 domain-containing protein       |
| *Ca_Desig_SNP2414 | Ca_Desig_LG02 | 9873103                 | [A/C] | Ca_01706           | SYNONYMOUS_CODING                   | Protein TOC75, chloroplastic        |
| *Ca_Desig_SNP2415 | scaffold00992 | 170636                  | [G/A] |                    | INTERGENIC                          |                                     |
| *Ca_Desig_SNP2416 | Ca_Desig_LG06 | 5942213                 | [T/G] |                    | INTERGENIC                          |                                     |
| *Ca_Desig_SNP2417 | scaffold14776 | 274693                  | [C/A] |                    | INTERGENIC                          |                                     |

| SNP IDs          | Chromosomes   | Physical positions (bp) | SNPs  | Gene accession IDs | Sequence components of genome/genes | Putative functions                                                      |
|------------------|---------------|-------------------------|-------|--------------------|-------------------------------------|-------------------------------------------------------------------------|
| *Ca_Desi_SNP2418 | scaffold01247 | 59939                   | [T/G] |                    | INTERGENIC                          |                                                                         |
| *Ca_Desi_SNP2419 | scaffold01011 | 695                     | [G/A] |                    | INTERGENIC                          |                                                                         |
| *Ca_Desi_SNP2420 | Ca_Desi_LG03  | 17737216                | [G/A] | Ca_03379           | INTRON                              | SNARE-interacting protein KEULE                                         |
| *Ca_Desi_SNP2421 | Ca_Desi_LG06  | 5875912                 | [A/C] |                    | INTERGENIC                          |                                                                         |
| *Ca_Desi_SNP2422 | scaffold08840 | 23205                   | [G/T] |                    | INTERGENIC                          |                                                                         |
| *Ca_Desi_SNP2423 | scaffold07146 | 77422                   | [G/T] |                    | INTERGENIC                          |                                                                         |
| *Ca_Desi_SNP2424 | Ca_Desi_LG05  | 4414372                 | [A/T] |                    | INTERGENIC                          |                                                                         |
| *Ca_Desi_SNP2425 | Ca_Desi_LG01  | 3771480                 | [T/G] |                    | INTERGENIC                          |                                                                         |
| *Ca_Desi_SNP2426 | scaffold00876 | 6631                    | [T/C] |                    | INTERGENIC                          |                                                                         |
| *Ca_Desi_SNP2427 | Ca_Desi_LG05  | 2340833                 | [T/C] |                    | INTERGENIC                          |                                                                         |
| *Ca_Desi_SNP2428 | Ca_Desi_LG04  | 4613305                 | [A/G] | Ca_04202           | NON_SYNONYMOUS_CODING               | Transcriptional corepressor SEUSS                                       |
| *Ca_Desi_SNP2429 | scaffold01547 | 58584                   | [C/T] | Ca_10306           | DOWNSTREAM:1153bases                | Probable LRR receptor-like serine/threonine-protein kinase At4q08850    |
| *Ca_Desi_SNP2430 | Ca_Desi_LG04  | 15957923                | [C/A] |                    | INTERGENIC                          |                                                                         |
| *Ca_Desi_SNP2431 | scaffold03153 | 57793                   | [C/T] |                    | INTERGENIC                          |                                                                         |
| *Ca_Desi_SNP2432 | scaffold01625 | 38506                   | [C/A] | Ca_10330           | DOWNSTREAM:399bases                 | NAD-dependent malic enzyme 59 kDa isoform, mitochondrial                |
| *Ca_Desi_SNP2433 | Ca_Desi_LG04  | 15957917                | [A/G] |                    | INTERGENIC                          |                                                                         |
| *Ca_Desi_SNP2434 | scaffold00686 | 3626                    | [T/C] |                    | INTERGENIC                          |                                                                         |
| *Ca_Desi_SNP2435 | scaffold01528 | 53290                   | [C/T] |                    | INTERGENIC                          |                                                                         |
| *Ca_Desi_SNP2436 | Ca_Desi_LG03  | 4229796                 | [A/C] | Ca_02529           | SYNONYMOUS_CODING                   | BTB/POZ domain-containing protein At1g03010                             |
| *Ca_Desi_SNP2437 | Ca_Desi_LG02  | 14445991                | [C/A] |                    | INTERGENIC                          |                                                                         |
| *Ca_Desi_SNP2438 | scaffold16742 | 49233                   | [A/C] |                    | INTERGENIC                          |                                                                         |
| *Ca_Desi_SNP2439 | Ca_Desi_LG02  | 279256                  | [T/G] | Ca_01046           | DOWNSTREAM:607bases                 | Spermine synthase                                                       |
| *Ca_Desi_SNP2440 | scaffold03971 | 47436                   | [A/T] |                    | INTERGENIC                          |                                                                         |
| *Ca_Desi_SNP2441 | scaffold01031 | 526                     | [A/G] |                    | INTERGENIC                          |                                                                         |
| *Ca_Desi_SNP2442 | scaffold00686 | 3632                    | [A/G] |                    | INTERGENIC                          |                                                                         |
| *Ca_Desi_SNP2443 | Ca_Desi_LG07  | 2226248                 | [A/G] | Ca_07528           | INTRON                              | Putative phosphatidylinositol N-acetylglucosaminyltransferase subunit C |

| SNP IDs           | Chromosomes   | Physical positions (bp) | SNPs  | Gene accession IDs | Sequence components of genome/genes | Putative functions                                       |
|-------------------|---------------|-------------------------|-------|--------------------|-------------------------------------|----------------------------------------------------------|
| *Ca_Desig_SNP2444 | scaffold00968 | 168                     | [G/A] |                    | INTERGENIC                          |                                                          |
| *Ca_Desig_SNP2445 | Ca_Desig_LG08 | 90334                   | [T/A] | Ca_07977           | NON_SYNONYMOUS_CODING               | Beta-glucosidase 46                                      |
| *Ca_Desig_SNP2446 | Ca_Desig_LG05 | 8764866                 | [C/T] | Ca_05965           | DOWNSTREAM:611bases                 | Heavy metal transport/detoxification superfamily protein |
| *Ca_Desig_SNP2447 | scaffold01770 | 43618                   | [G/A] | Ca_10384           | INTRON                              | Serine carboxypeptidase-like 40                          |
| *Ca_Desig_SNP2448 | scaffold00195 | 3386                    | [C/A] | Ca_11235           | INTRON                              | Probable glycerophosphoryl diester phosphodiesterase 1   |
| *Ca_Desig_SNP2449 | scaffold01949 | 7573                    | [A/C] | Ca_09783           | DOWNSTREAM:1171bases                | Protein SUPPRESSOR OF npr1-1, CONSTITUTIVE 1             |
| *Ca_Desig_SNP2450 | scaffold00771 | 2501                    | [A/G] |                    | INTERGENIC                          |                                                          |
| *Ca_Desig_SNP2451 | scaffold00775 | 2406                    | [T/C] | Ca_13986           | DOWNSTREAM:1009bases                | Protein of unknown function (DUF3755)                    |
| *Ca_Desig_SNP2452 | scaffold00794 | 1823                    | [A/G] |                    | INTERGENIC                          |                                                          |
| *Ca_Desig_SNP2453 | Ca_Desig_LG07 | 8452798                 | [A/C] | Ca_07962           | NON_SYNONYMOUS_CODING               | Pentatricopeptide repeat-containing protein At1g10270    |
| *Ca_Desig_SNP2454 | scaffold01437 | 25679                   | [A/G] |                    | INTERGENIC                          |                                                          |
| *Ca_Desig_SNP2455 | scaffold02761 | 49193                   | [C/T] | Ca_10211           | DOWNSTREAM:220bases                 | hydroxyproline-rich glycoprotein family protein          |
| *Ca_Desig_SNP2456 | scaffold01638 | 30192                   | [C/A] | Ca_10333           | SYNONYMOUS_CODING                   | Uridine kinase-like protein 1, chloroplastic             |
| *Ca_Desig_SNP2457 | scaffold00710 | 1039                    | [G/T] |                    | INTERGENIC                          |                                                          |
| *Ca_Desig_SNP2458 | scaffold00854 | 342                     | [A/G] |                    | INTERGENIC                          |                                                          |
| *Ca_Desig_SNP2459 | scaffold06654 | 25522                   | [A/G] |                    | INTERGENIC                          |                                                          |
| *Ca_Desig_SNP2460 | scaffold01208 | 184237                  | [A/C] |                    | INTERGENIC                          |                                                          |
| *Ca_Desig_SNP2461 | Ca_Desig_LG05 | 7699236                 | [T/G] | Ca_05857           | NON_SYNONYMOUS_CODING               | Trihelix transcription factor GT-1                       |
| *Ca_Desig_SNP2462 | scaffold01133 | 248                     | [A/C] | Ca_15037           | NON_SYNONYMOUS_CODING               | Integrase, catalytic region; Ribonuclease H              |
| *Ca_Desig_SNP2463 | scaffold03153 | 57819                   | [C/A] |                    | INTERGENIC                          |                                                          |
| *Ca_Desig_SNP2464 | scaffold00854 | 322                     | [A/G] |                    | INTERGENIC                          |                                                          |
| *Ca_Desig_SNP2465 | scaffold01499 | 78814                   | [T/A] |                    | INTERGENIC                          |                                                          |
| *Ca_Desig_SNP2466 | scaffold00854 | 337                     | [A/G] |                    | INTERGENIC                          |                                                          |
| *Ca_Desig_SNP2467 | scaffold00582 | 6357                    | [A/G] | Ca_13279           | INTRON                              | (+)-neomenthol dehydrogenase                             |
| *Ca_Desig_SNP2468 | scaffold00876 | 6610                    | [A/G] |                    | INTERGENIC                          |                                                          |
| *Ca_Desig_SNP2469 | Ca_Desig_LG02 | 527084                  | [G/A] |                    | INTERGENIC                          |                                                          |

| SNP IDs           | Chromosomes   | Physical positions (bp) | SNPs  | Gene accession IDs | Sequence components of genome/genes | Putative functions                                                   |
|-------------------|---------------|-------------------------|-------|--------------------|-------------------------------------|----------------------------------------------------------------------|
| *Ca_Desig_SNP2470 | Ca_Desig_LG06 | 9245317                 | [T/G] | Ca_07158           | SYNONYMOUS_CODING                   | 3-oxoacyl-[acyl-carrier-protein] synthase I, chloroplastic           |
| *Ca_Desig_SNP2471 | scaffold01133 | 253                     | [C/T] | Ca_15037           | SYNONYMOUS_CODING                   | Integrase, catalytic region; Ribonuclease H                          |
| *Ca_Desig_SNP2472 | scaffold00842 | 2169                    | [G/T] | Ca_14247           | DOWNSTREAM:1543bases                | Putative uncharacterized protein                                     |
| *Ca_Desig_SNP2473 | scaffold01116 | 100495                  | [A/C] | Ca_10001           | DOWNSTREAM:1258bases                | Probable ADP-ribosylation factor GTPase-activating protein AGD8      |
| *Ca_Desig_SNP2474 | scaffold00969 | 164806                  | [A/C] |                    | INTERGENIC                          |                                                                      |
| *Ca_Desig_SNP2475 | scaffold00832 | 395                     | [G/A] |                    | INTERGENIC                          |                                                                      |
| *Ca_Desig_SNP2476 | scaffold03153 | 57811                   | [A/C] |                    | INTERGENIC                          |                                                                      |
| *Ca_Desig_SNP2477 | scaffold00854 | 2324                    | [A/G] |                    | INTERGENIC                          |                                                                      |
| *Ca_Desig_SNP2478 | scaffold00437 | 25190                   | [C/G] |                    | INTERGENIC                          |                                                                      |
| *Ca_Desig_SNP2479 | scaffold02189 | 7925                    | [G/A] |                    | INTERGENIC                          |                                                                      |
| *Ca_Desig_SNP2480 | scaffold00596 | 6759                    | [A/T] |                    | INTERGENIC                          |                                                                      |
| *Ca_Desig_SNP2481 | Ca_Desig_LG08 | 1386352                 | [A/C] | Ca_08096           | INTRON                              | Pyrophosphate-fructose 6-phosphate 1-phosphotransferase subunit beta |
| *Ca_Desig_SNP2482 | Ca_Desig_LG08 | 4300014                 | [A/C] |                    | INTERGENIC                          |                                                                      |
| *Ca_Desig_SNP2483 | scaffold00686 | 3621                    | [T/C] |                    | INTERGENIC                          |                                                                      |
| *Ca_Desig_SNP2484 | scaffold00788 | 3457                    | [A/G] |                    | INTERGENIC                          |                                                                      |
| *Ca_Desig_SNP2485 | scaffold00854 | 331                     | [A/G] |                    | INTERGENIC                          |                                                                      |
| *Ca_Desig_SNP2486 | Ca_Desig_LG01 | 6149342                 | [T/G] | Ca_00524           | NON_SYNONYMOUS_CODING               | Fatty acid 2-hydroxylase                                             |
| *Ca_Desig_SNP2487 | scaffold00771 | 2533                    | [A/G] |                    | INTERGENIC                          |                                                                      |
| *Ca_Desig_SNP2488 | scaffold00897 | 887                     | [T/C] |                    | INTERGENIC                          |                                                                      |
| *Ca_Desig_SNP2489 | scaffold09265 | 63804                   | [T/A] |                    | INTERGENIC                          |                                                                      |
| *Ca_Desig_SNP2490 | scaffold01532 | 30709                   | [C/G] |                    | INTERGENIC                          |                                                                      |
| *Ca_Desig_SNP2491 | scaffold02189 | 53215                   | [G/T] | Ca_10459           | DOWNSTREAM:1450bases                | GCN5-related N-acetyltransferase; BRCT                               |
| *Ca_Desig_SNP2492 | scaffold00702 | 6592                    | [T/C] |                    | INTERGENIC                          |                                                                      |
| *Ca_Desig_SNP2493 | scaffold00852 | 968                     | [T/C] | Ca_14286           | INTRON                              | Type I inositol-1,4,5-trisphosphate 5-phosphatase 11                 |
| *Ca_Desig_SNP2494 | scaffold00852 | 875                     | [A/G] | Ca_14286           | NON_SYNONYMOUS_CODING               | Type I inositol-1,4,5-trisphosphate 5-phosphatase 11                 |
| *Ca_Desig_SNP2495 | scaffold01150 | 225                     | [T/A] |                    | INTERGENIC                          |                                                                      |

| SNP IDs           | Chromosomes   | Physical positions (bp) | SNPs  | Gene accession IDs | Sequence components of genome/genes | Putative functions                                                                               |
|-------------------|---------------|-------------------------|-------|--------------------|-------------------------------------|--------------------------------------------------------------------------------------------------|
| *Ca_Desig_SNP2496 | Ca_Desig_LG04 | 3147921                 | [A/C] | Ca_04103           | INTRON                              | Carbon catabolite repressor protein 4 homolog 6                                                  |
| *Ca_Desig_SNP2497 | scaffold01802 | 29558                   | [T/G] |                    | INTERGENIC                          |                                                                                                  |
| *Ca_Desig_SNP2498 | scaffold00651 | 7870                    | [C/T] | Ca_13583           | DOWNSTREAM:1673bases                | CONTAINS InterPro DOMAIN/s: EGF-like (InterPro:IPR006210); Has 259 Blast hits to 234 proteins in |
| *Ca_Desig_SNP2499 | scaffold01164 | 214                     | [C/T] |                    | INTERGENIC                          |                                                                                                  |
| *Ca_Desig_SNP2500 | scaffold00646 | 4877                    | [A/G] |                    | INTERGENIC                          |                                                                                                  |
| *Ca_Desig_SNP2501 | Ca_Desig_LG05 | 4837586                 | [T/G] | Ca_05583           | NON_SYNONYMOUS_CODING               | Puromycin-sensitive aminopeptidase                                                               |
| *Ca_Desig_SNP2502 | scaffold00761 | 3588                    | [A/G] |                    | INTERGENIC                          |                                                                                                  |
| *Ca_Desig_SNP2503 | scaffold00278 | 88344                   | [G/A] |                    | INTERGENIC                          |                                                                                                  |
| *Ca_Desig_SNP2504 | scaffold02189 | 7126                    | [A/T] |                    | INTERGENIC                          |                                                                                                  |
| *Ca_Desig_SNP2505 | scaffold00582 | 13876                   | [A/T] |                    | INTERGENIC                          |                                                                                                  |
| *Ca_Desig_SNP2506 | scaffold00876 | 853                     | [A/G] |                    | INTERGENIC                          |                                                                                                  |
| *Ca_Desig_SNP2507 | scaffold04071 | 51607                   | [A/C] |                    | INTERGENIC                          |                                                                                                  |
| *Ca_Desig_SNP2508 | scaffold01532 | 15835                   | [G/A] |                    | INTERGENIC                          |                                                                                                  |
| *Ca_Desig_SNP2509 | scaffold01532 | 15632                   | [T/A] |                    | INTERGENIC                          |                                                                                                  |
| *Ca_Desig_SNP2510 | scaffold04113 | 44271                   | [T/G] |                    | INTERGENIC                          |                                                                                                  |
| *Ca_Desig_SNP2511 | scaffold00884 | 681                     | [A/G] |                    | INTERGENIC                          |                                                                                                  |
| *Ca_Desig_SNP2512 | scaffold01532 | 11169                   | [G/A] |                    | INTERGENIC                          |                                                                                                  |
| *Ca_Desig_SNP2513 | scaffold02189 | 53697                   | [G/T] | Ca_10459           | DOWNSTREAM:1932bases                | GCN5-related N-acetyltransferase; BRCT                                                           |
| *Ca_Desig_SNP2514 | scaffold00876 | 868                     | [A/G] |                    | INTERGENIC                          |                                                                                                  |
| *Ca_Desig_SNP2515 | scaffold00824 | 1891                    | [T/C] |                    | INTERGENIC                          |                                                                                                  |
| *Ca_Desig_SNP2516 | scaffold01041 | 548                     | [T/C] |                    | INTERGENIC                          |                                                                                                  |
| *Ca_Desig_SNP2517 | scaffold00972 | 522                     | [G/T] |                    | INTERGENIC                          |                                                                                                  |
| *Ca_Desig_SNP2518 | scaffold05634 | 58210                   | [T/G] |                    | INTERGENIC                          |                                                                                                  |
| *Ca_Desig_SNP2519 | scaffold00614 | 7688                    | [A/C] |                    | INTERGENIC                          |                                                                                                  |
| *Ca_Desig_SNP2520 | scaffold00744 | 3706                    | [T/C] | Ca_13871           | SYNONYMOUS_CODING                   | Gibberellin 2-beta-dioxygenase 8                                                                 |
| *Ca_Desig_SNP2521 | scaffold00686 | 3656                    | [T/C] |                    | INTERGENIC                          |                                                                                                  |



| SNP IDs           | Chromosomes   | Physical positions (bp) | SNPs  | Gene accession IDs | Sequence components of genome/genes | Putative functions                         |
|-------------------|---------------|-------------------------|-------|--------------------|-------------------------------------|--------------------------------------------|
| *Ca_Desig_SNP2522 | scaffold00763 | 399                     | [T/C] |                    | INTERGENIC                          |                                            |
| *Ca_Desig_SNP2523 | scaffold00761 | 3595                    | [T/C] |                    | INTERGENIC                          |                                            |
| *Ca_Desig_SNP2524 | scaffold01140 | 56                      | [A/G] |                    | INTERGENIC                          |                                            |
| *Ca_Desig_SNP2525 | scaffold00989 | 419                     | [G/A] |                    | INTERGENIC                          |                                            |
| *Ca_Desig_SNP2526 | scaffold00702 | 6554                    | [T/C] |                    | INTERGENIC                          |                                            |
| *Ca_Desig_SNP2527 | scaffold00582 | 5067                    | [T/C] | Ca_13279           | INTRON                              | (+)-neomenthol dehydrogenase               |
| *Ca_Desig_SNP2528 | scaffold00166 | 8846                    | [A/C] | Ca_11145           | INTRON                              | Protein NSP-INTERACTING KINASE 3           |
| *Ca_Desig_SNP2529 | Ca_Desig_LG05 | 3218138                 | [T/G] | Ca_05475           | NON_SYNONYMOUS_CODING               | DDB1- and CUL4-associated factor homolog 1 |
| *Ca_Desig_SNP2530 | Ca_Desig_LG06 | 10473110                | [T/G] | Ca_07292           | INTRON                              | Splicing factor 3B subunit 2               |
| *Ca_Desig_SNP2531 | scaffold00962 | 281                     | [T/C] |                    | INTERGENIC                          |                                            |
| *Ca_Desig_SNP2532 | Ca_Desig_LG05 | 7932509                 | [A/C] | Ca_05881           | DOWNSTREAM:48bases                  | Protein terminal ear1                      |
| *Ca_Desig_SNP2533 | scaffold00735 | 2833                    | [A/G] | Ca_13852           | DOWNSTREAM:1613bases                | MORC family CW-type zinc finger protein 4  |
| *Ca_Desig_SNP2534 | Ca_Desig_LG01 | 6108149                 | [A/C] | Ca_00519           | INTRON                              | Probable exocyst complex component 4       |
| *Ca_Desig_SNP2535 | Ca_Desig_LG01 | 9265798                 | [G/T] | Ca_00697           | NON_SYNONYMOUS_CODING               | --                                         |
| *Ca_Desig_SNP2536 | scaffold00744 | 3848                    | [T/G] | Ca_13871           | NON_SYNONYMOUS_CODING               | Gibberellin 2-beta-dioxygenase 8           |
| *Ca_Desig_SNP2537 | scaffold01134 | 19                      | [C/T] |                    | INTERGENIC                          |                                            |
| *Ca_Desig_SNP2538 | scaffold01534 | 3799                    | [T/G] |                    | INTERGENIC                          |                                            |
| *Ca_Desig_SNP2539 | scaffold02501 | 13592                   | [C/T] | Ca_09757           | DOWNSTREAM:87bases                  | --                                         |
| *Ca_Desig_SNP2540 | scaffold00724 | 80                      | [C/T] |                    | INTERGENIC                          |                                            |
| *Ca_Desig_SNP2541 | scaffold00854 | 358                     | [A/G] |                    | INTERGENIC                          |                                            |
| *Ca_Desig_SNP2542 | Ca_Desig_LG04 | 11674624                | [A/C] |                    | INTERGENIC                          |                                            |
| *Ca_Desig_SNP2543 | scaffold00463 | 1619                    | [T/G] | Ca_12714           | SYNONYMOUS_CODING                   | unknown protein                            |
| *Ca_Desig_SNP2544 | scaffold03195 | 16410                   | [G/C] |                    | INTERGENIC                          |                                            |
| *Ca_Desig_SNP2545 | scaffold00491 | 618                     | [G/A] | Ca_12862           | INTRON                              | MLP-like protein 43                        |
| *Ca_Desig_SNP2546 | scaffold00582 | 6311                    | [A/G] | Ca_13279           | INTRON                              | (+)-neomenthol dehydrogenase               |
| *Ca_Desig_SNP2547 | scaffold00854 | 354                     | [A/G] |                    | INTERGENIC                          |                                            |

| SNP IDs           | Chromosomes   | Physical positions (bp) | SNPs  | Gene accession IDs | Sequence components of genome/genes | Putative functions                                                                                            |
|-------------------|---------------|-------------------------|-------|--------------------|-------------------------------------|---------------------------------------------------------------------------------------------------------------|
| *Ca_Desig_SNP2548 | scaffold01947 | 44811                   | [A/C] | Ca_10410           | INTRON                              | G-type lectin S-receptor-like serine/threonine-protein kinase At4g27290                                       |
| *Ca_Desig_SNP2549 | scaffold00520 | 5208                    | [C/T] |                    | INTERGENIC                          |                                                                                                               |
| *Ca_Desig_SNP2550 | scaffold00832 | 373                     | [A/G] |                    | INTERGENIC                          |                                                                                                               |
| *Ca_Desig_SNP2551 | scaffold00933 | 1120                    | [T/C] |                    | INTERGENIC                          |                                                                                                               |
| *Ca_Desig_SNP2552 | Ca_Desig_LG05 | 4779911                 | [A/C] |                    | INTERGENIC                          |                                                                                                               |
| *Ca_Desig_SNP2553 | scaffold00991 | 215325                  | [A/C] |                    | INTERGENIC                          |                                                                                                               |
| *Ca_Desig_SNP2554 | scaffold00288 | 263                     | [T/C] |                    | INTERGENIC                          |                                                                                                               |
| *Ca_Desig_SNP2555 | scaffold01155 | 205743                  | [A/C] |                    | INTERGENIC                          |                                                                                                               |
| *Ca_Desig_SNP2556 | scaffold02036 | 97153                   | [A/T] |                    | INTERGENIC                          |                                                                                                               |
| *Ca_Desig_SNP2557 | scaffold00680 | 3385                    | [G/C] | Ca_13660           | INTRON                              | Lysine-specific demethylase 5D                                                                                |
| *Ca_Desig_SNP2558 | scaffold08840 | 18447                   | [T/A] |                    | INTERGENIC                          |                                                                                                               |
| *Ca_Desig_SNP2559 | scaffold00671 | 6943                    | [C/A] |                    | INTERGENIC                          |                                                                                                               |
| *Ca_Desig_SNP2560 | scaffold00811 | 58359                   | [T/C] | Ca_09715           | NON_SYNONYMOUS_CODING               | unknown protein; BEST Arabidopsis thaliana protein match is: unknown protein (TAIR:AT3G60520.1); Has 98 Blast |
| *Ca_Desig_SNP2561 | scaffold05885 | 82465                   | [T/C] |                    | INTERGENIC                          |                                                                                                               |
| *Ca_Desig_SNP2562 | Ca_Desig_LG04 | 3081906                 | [T/C] |                    | INTERGENIC                          |                                                                                                               |
| *Ca_Desig_SNP2563 | Ca_Desig_LG02 | 14493837                | [G/A] | Ca_01950           | NON_SYNONYMOUS_CODING               | N utilization substance protein B homolog                                                                     |
| *Ca_Desig_SNP2564 | scaffold00740 | 2181                    | [G/A] |                    | INTERGENIC                          |                                                                                                               |
| *Ca_Desig_SNP2565 | scaffold00775 | 2364                    | [T/C] | Ca_13986           | DOWNSTREAM:967bases                 | Protein of unknown function (DUF3755)                                                                         |
| *Ca_Desig_SNP2566 | scaffold00520 | 5029                    | [C/T] |                    | INTERGENIC                          |                                                                                                               |
| *Ca_Desig_SNP2567 | Ca_Desig_LG04 | 237082                  | [C/G] | Ca_03898           | DOWNSTREAM:979bases                 | Small RNA degrading nuclease 3                                                                                |
| *Ca_Desig_SNP2568 | scaffold00961 | 507                     | [A/T] |                    | INTERGENIC                          |                                                                                                               |
| *Ca_Desig_SNP2569 | Ca_Desig_LG02 | 15951105                | [A/C] | Ca_02078           | SYNONYMOUS_CODING                   | Nucleolin                                                                                                     |
| *Ca_Desig_SNP2570 | scaffold02501 | 13555                   | [T/C] | Ca_09757           | DOWNSTREAM:50bases                  | --                                                                                                            |
| *Ca_Desig_SNP2571 | scaffold04229 | 66924                   | [T/C] |                    | INTERGENIC                          |                                                                                                               |
| *Ca_Desig_SNP2572 | Ca_Desig_LG03 | 20240165                | [G/T] | Ca_03666           | STOP_GAINED                         | Protein SPA1-RELATED 2                                                                                        |
| *Ca_Desig_SNP2573 | scaffold00558 | 3636                    | [G/A] |                    | INTERGENIC                          |                                                                                                               |

| SNP IDs           | Chromosomes   | Physical positions (bp) | SNPs  | Gene accession IDs | Sequence components of genome/genes | Putative functions                                                     |
|-------------------|---------------|-------------------------|-------|--------------------|-------------------------------------|------------------------------------------------------------------------|
| *Ca_Desig_SNP2574 | scaffold01618 | 52981                   | [T/G] |                    | INTERGENIC                          |                                                                        |
| *Ca_Desig_SNP2575 | Ca_Desig_LG02 | 5168624                 | [A/C] |                    | INTERGENIC                          |                                                                        |
| *Ca_Desig_SNP2576 | Ca_Desig_LG01 | 531575                  | [C/A] |                    | INTERGENIC                          |                                                                        |
| *Ca_Desig_SNP2577 | scaffold00735 | 2835                    | [A/G] | Ca_13852           | DOWNSTREAM:1611bases                | MORC family CW-type zinc finger protein 4                              |
| *Ca_Desig_SNP2578 | scaffold01164 | 221                     | [C/A] |                    | INTERGENIC                          |                                                                        |
| *Ca_Desig_SNP2579 | scaffold01114 | 181                     | [C/G] |                    | INTERGENIC                          |                                                                        |
| *Ca_Desig_SNP2580 | scaffold00741 | 840                     | [A/G] |                    | INTERGENIC                          |                                                                        |
| *Ca_Desig_SNP2581 | scaffold00876 | 5673                    | [A/G] |                    | INTERGENIC                          |                                                                        |
| *Ca_Desig_SNP2582 | scaffold00643 | 8222                    | [C/A] |                    | INTERGENIC                          |                                                                        |
| *Ca_Desig_SNP2583 | scaffold00931 | 254986                  | [T/G] |                    | INTERGENIC                          |                                                                        |
| *Ca_Desig_SNP2584 | Ca_Desig_LG07 | 5036776                 | [T/G] | Ca_07694           | NON_SYNONYMOUS_CODING               | Proline-rich receptor-like protein kinase PERK12                       |
| *Ca_Desig_SNP2585 | scaffold00143 | 49404                   | [A/G] |                    | INTERGENIC                          |                                                                        |
| *Ca_Desig_SNP2586 | Ca_Desig_LG02 | 2124944                 | [C/G] | Ca_01184           | SYNONYMOUS_CODING                   | LOB domain-containing protein 41                                       |
| *Ca_Desig_SNP2587 | Ca_Desig_LG04 | 4102802                 | [C/T] | Ca_04172           | DOWNSTREAM:1468bases                | Probable amino acid permease 7                                         |
| *Ca_Desig_SNP2588 | scaffold00866 | 882                     | [A/G] | Ca_14324           | DOWNSTREAM:447bases                 | NADP-specific glutamate dehydrogenase                                  |
| *Ca_Desig_SNP2589 | scaffold01039 | 49680                   | [A/C] |                    | INTERGENIC                          |                                                                        |
| *Ca_Desig_SNP2590 | scaffold00790 | 1038                    | [T/C] | Ca_14057           | INTRON                              | TNP1                                                                   |
| *Ca_Desig_SNP2591 | scaffold00686 | 3619                    | [A/G] |                    | INTERGENIC                          |                                                                        |
| *Ca_Desig_SNP2592 | scaffold00113 | 9667                    | [C/A] | Ca_10890           | DOWNSTREAM:64bases                  | Ethylene-responsive transcription factor ERF012                        |
| *Ca_Desig_SNP2593 | scaffold00816 | 2319                    | [G/T] |                    | INTERGENIC                          |                                                                        |
| *Ca_Desig_SNP2594 | Ca_Desig_LG04 | 348384                  | [T/C] |                    | INTERGENIC                          |                                                                        |
| *Ca_Desig_SNP2595 | Ca_Desig_LG04 | 335462                  | [A/G] | Ca_03904           | INTRON                              | 5'-3' exoribonuclease 3                                                |
| *Ca_Desig_SNP2596 | scaffold01001 | 423                     | [C/T] |                    | INTERGENIC                          |                                                                        |
| *Ca_Desig_SNP2597 | scaffold00761 | 3558                    | [A/G] |                    | INTERGENIC                          |                                                                        |
| *Ca_Desig_SNP2598 | Ca_Desig_LG04 | 340829                  | [G/A] |                    | INTERGENIC                          |                                                                        |
| *Ca_Desig_SNP2599 | Ca_Desig_LG05 | 12461786                | [C/A] | Ca_06284           | DOWNSTREAM:754bases                 | Oxygen-independent coproporphyrinogen-III oxidase-like protein sll1917 |

| SNP IDs           | Chromosomes   | Physical positions (bp) | SNPs  | Gene accession IDs | Sequence components of genome/genes | Putative functions                                                                                  |
|-------------------|---------------|-------------------------|-------|--------------------|-------------------------------------|-----------------------------------------------------------------------------------------------------|
| *Ca_Desig_SNP2600 | Ca_Desig_LG05 | 7699256                 | [T/G] | Ca_05857           | SYNONYMOUS_CODING                   | Trihelix transcription factor GT-1                                                                  |
| *Ca_Desig_SNP2601 | scaffold01112 | 91                      | [G/T] |                    | INTERGENIC                          |                                                                                                     |
| *Ca_Desig_SNP2602 | Ca_Desig_LG04 | 198665                  | [T/C] |                    | INTERGENIC                          |                                                                                                     |
| *Ca_Desig_SNP2603 | scaffold00876 | 5677                    | [T/C] |                    | INTERGENIC                          |                                                                                                     |
| *Ca_Desig_SNP2604 | scaffold00876 | 10464                   | [A/G] |                    | INTERGENIC                          |                                                                                                     |
| *Ca_Desig_SNP2605 | scaffold00874 | 95296                   | [A/C] |                    | INTERGENIC                          |                                                                                                     |
| *Ca_Desig_SNP2606 | Ca_Desig_LG03 | 11656952                | [T/G] |                    | INTERGENIC                          |                                                                                                     |
| *Ca_Desig_SNP2607 | scaffold00647 | 29280                   | [T/A] | Ca_09513           | INTRON                              | Probable inactive purple acid phosphatase 28                                                        |
| *Ca_Desig_SNP2608 | Ca_Desig_LG08 | 3960575                 | [T/G] | Ca_08202           | DOWNSTREAM:668bases                 | ABC transporter B family member 21                                                                  |
| *Ca_Desig_SNP2609 | scaffold00647 | 29291                   | [G/A] | Ca_09513           | INTRON                              | Probable inactive purple acid phosphatase 28                                                        |
| *Ca_Desig_SNP2610 | Ca_Desig_LG04 | 368270                  | [G/A] | Ca_03909           | DOWNSTREAM:1604bases                | tRNA (adenine(58)-N(1))-methyltransferase non-catalytic subunit trm6                                |
| *Ca_Desig_SNP2611 | Ca_Desig_LG08 | 5893757                 | [A/C] |                    | INTERGENIC                          |                                                                                                     |
| *Ca_Desig_SNP2612 | Ca_Desig_LG04 | 223008                  | [G/A] | Ca_03898           | INTRON                              | Small RNA degrading nuclease 3                                                                      |
| *Ca_Desig_SNP2613 | scaffold00304 | 30276                   | [T/C] |                    | INTERGENIC                          |                                                                                                     |
| *Ca_Desig_SNP2614 | scaffold00355 | 34128                   | [G/T] | Ca_12261           | DOWNSTREAM:91bases                  | Wound-induced protein 1                                                                             |
| *Ca_Desig_SNP2615 | scaffold00760 | 1364                    | [A/G] |                    | INTERGENIC                          |                                                                                                     |
| *Ca_Desig_SNP2616 | scaffold00992 | 258022                  | [C/T] |                    | INTERGENIC                          |                                                                                                     |
| *Ca_Desig_SNP2617 | scaffold00979 | 336                     | [C/T] |                    | INTERGENIC                          |                                                                                                     |
| *Ca_Desig_SNP2618 | Ca_Desig_LG01 | 10893917                | [T/G] | Ca_00823           | INTRON                              | Serine/threonine-protein phosphatase BSL3                                                           |
| *Ca_Desig_SNP2619 | Ca_Desig_LG06 | 4836649                 | [A/G] | Ca_06829           | SYNONYMOUS_CODING                   | unknown protein; FUNCTIONS IN: molecular_function unknown; INVOLVED IN: biological_process unknown; |
| *Ca_Desig_SNP2620 | scaffold00304 | 30274                   | [G/A] |                    | INTERGENIC                          |                                                                                                     |
| *Ca_Desig_SNP2621 | Ca_Desig_LG02 | 7708765                 | [A/C] | Ca_01613           | NON_SYNONYMOUS_CODING               | Putative DNA-binding protein ESCAROLA                                                               |
| *Ca_Desig_SNP2622 | scaffold04736 | 64787                   | [T/A] |                    | INTERGENIC                          |                                                                                                     |
| *Ca_Desig_SNP2623 | scaffold11457 | 123301                  | [A/C] |                    | INTERGENIC                          |                                                                                                     |
| *Ca_Desig_SNP2624 | Ca_Desig_LG04 | 232426                  | [T/G] | Ca_03898           | INTRON                              | Small RNA degrading nuclease 3                                                                      |
| *Ca_Desig_SNP2625 | scaffold03417 | 80316                   | [A/G] |                    | INTERGENIC                          |                                                                                                     |

| SNP IDs           | Chromosomes   | Physical positions (bp) | SNPs  | Gene accession IDs | Sequence components of genome/genes | Putative functions                                                   |
|-------------------|---------------|-------------------------|-------|--------------------|-------------------------------------|----------------------------------------------------------------------|
| *Ca_Desig_SNP2626 | scaffold00304 | 30272                   | [C/G] |                    | INTERGENIC                          |                                                                      |
| *Ca_Desig_SNP2627 | Ca_Desig_LG02 | 15223713                | [A/G] | Ca_02013           | SYNONYMOUS_CODING                   | Two-component response regulator ARR14                               |
| *Ca_Desig_SNP2628 | Ca_Desig_LG04 | 368030                  | [A/T] | Ca_03909           | DOWNSTREAM:1844bases                | tRNA (adenine(58)-N(1))-methyltransferase non-catalytic subunit trm6 |
| *Ca_Desig_SNP2629 | Ca_Desig_LG06 | 4836631                 | [A/G] | Ca_06829           | SYNONYMOUS_CODING                   | Unknown expressed protein                                            |
| *Ca_Desig_SNP2630 | scaffold01236 | 94938                   | [T/G] |                    | INTERGENIC                          |                                                                      |
| *Ca_Desig_SNP2631 | scaffold00686 | 2568                    | [T/G] |                    | INTERGENIC                          |                                                                      |
| *Ca_Desig_SNP2632 | Ca_Desig_LG02 | 15951074                | [A/G] | Ca_02078           | NON_SYNONYMOUS_CODING               | Nucleolin                                                            |
| *Ca_Desig_SNP2633 | scaffold00928 | 1208                    | [T/C] |                    | INTERGENIC                          |                                                                      |
| *Ca_Desig_SNP2634 | scaffold00582 | 6347                    | [A/G] | Ca_13279           | INTRON                              | (+)-neomenthol dehydrogenase                                         |
| *Ca_Desig_SNP2635 | scaffold00771 | 2526                    | [A/G] |                    | INTERGENIC                          |                                                                      |
| *Ca_Desig_SNP2636 | Ca_Desig_LG02 | 527074                  | [C/T] |                    | INTERGENIC                          |                                                                      |
| *Ca_Desig_SNP2637 | scaffold00536 | 15254                   | [T/A] |                    | INTERGENIC                          |                                                                      |
| *Ca_Desig_SNP2638 | Ca_Desig_LG07 | 6252943                 | [G/A] | Ca_07787           | DOWNSTREAM:1067bases                | zinc finger (Ran-binding) family protein                             |
| *Ca_Desig_SNP2639 | scaffold02761 | 19072                   | [A/T] | Ca_10206           | DOWNSTREAM:1151bases                | Alcohol dehydrogenase-like 6                                         |
| *Ca_Desig_SNP2640 | scaffold00854 | 350                     | [T/C] |                    | INTERGENIC                          |                                                                      |
| *Ca_Desig_SNP2641 | scaffold01829 | 151606                  | [T/G] | Ca_10246           | INTRON                              | OTU domain-containing protein At3g57810                              |
| *Ca_Desig_SNP2642 | scaffold00940 | 632                     | [A/T] |                    | INTERGENIC                          |                                                                      |
| *Ca_Desig_SNP2643 | scaffold00691 | 4501                    | [A/G] |                    | INTERGENIC                          |                                                                      |
| *Ca_Desig_SNP2644 | scaffold00618 | 42128                   | [C/A] |                    | INTERGENIC                          |                                                                      |
| *Ca_Desig_SNP2645 | Ca_Desig_LG04 | 2977378                 | [C/T] |                    | INTERGENIC                          |                                                                      |
| *Ca_Desig_SNP2646 | Ca_Desig_LG04 | 133375                  | [C/A] | Ca_03888           | DOWNSTREAM:1777bases                | Expressed protein                                                    |
| *Ca_Desig_SNP2647 | scaffold00893 | 1600                    | [T/C] | Ca_14399           | INTRON                              | Tripeptidyl-peptidase 2                                              |
| *Ca_Desig_SNP2648 | scaffold16831 | 69578                   | [A/G] | Ca_09735           | DOWNSTREAM:720bases                 | Dihydrolipoyl dehydrogenase                                          |
| *Ca_Desig_SNP2649 | scaffold00093 | 38635                   | [A/C] |                    | INTERGENIC                          |                                                                      |
| *Ca_Desig_SNP2650 | Ca_Desig_LG03 | 12863779                | [T/C] |                    | INTERGENIC                          |                                                                      |
| *Ca_Desig_SNP2651 | Ca_Desig_LG04 | 130836                  | [C/T] | Ca_03889           | DOWNSTREAM:1891bases                | Abhydrolase domain-containing protein 4                              |

| SNP IDs           | Chromosomes   | Physical positions (bp) | SNPs  | Gene accession IDs | Sequence components of genome/genes | Putative functions                                                   |
|-------------------|---------------|-------------------------|-------|--------------------|-------------------------------------|----------------------------------------------------------------------|
| *Ca_Desig_SNP2652 | scaffold00884 | 684                     | [G/A] |                    | INTERGENIC                          |                                                                      |
| *Ca_Desig_SNP2653 | Ca_Desig_LG04 | 2997005                 | [C/T] |                    | INTERGENIC                          |                                                                      |
| *Ca_Desig_SNP2654 | Ca_Desig_LG04 | 3010593                 | [A/G] | Ca_04090           | SYNONYMOUS_CODING                   | Probable protein phosphatase 2C 59                                   |
| *Ca_Desig_SNP2655 | scaffold00482 | 32331                   | [A/C] | Ca_09274           | DOWNSTREAM:891bases                 | Putative uncharacterized protein                                     |
| *Ca_Desig_SNP2656 | scaffold03605 | 29063                   | [C/T] |                    | INTERGENIC                          |                                                                      |
| *Ca_Desig_SNP2657 | scaffold00788 | 2693                    | [A/C] |                    | INTERGENIC                          |                                                                      |
| *Ca_Desig_SNP2658 | Ca_Desig_LG03 | 17065584                | [C/G] | Ca_03329           | SYNONYMOUS_CODING                   | CBS domain-containing protein CBSX1, chloroplastic                   |
| *Ca_Desig_SNP2659 | Ca_Desig_LG04 | 21752246                | [T/G] | Ca_05200           | SYNONYMOUS_CODING                   | Zinc finger protein JACKDAW                                          |
| *Ca_Desig_SNP2660 | scaffold00804 | 765                     | [T/C] |                    | INTERGENIC                          |                                                                      |
| *Ca_Desig_SNP2661 | Ca_Desig_LG02 | 595836                  | [A/T] | Ca_01065           | INTRON                              | Ethylene-responsive transcription factor RAP2-7                      |
| *Ca_Desig_SNP2662 | scaffold00585 | 5216                    | [C/A] |                    | INTERGENIC                          |                                                                      |
| *Ca_Desig_SNP2663 | Ca_Desig_LG03 | 11391311                | [A/G] | Ca_02936           | INTRON                              | Transmembrane protein 8B                                             |
| *Ca_Desig_SNP2664 | scaffold00779 | 951                     | [A/G] |                    | INTERGENIC                          |                                                                      |
| *Ca_Desig_SNP2665 | scaffold00893 | 1588                    | [A/G] | Ca_14399           | INTRON                              | Tripeptidyl-peptidase 2                                              |
| *Ca_Desig_SNP2666 | Ca_Desig_LG04 | 3063851                 | [G/T] |                    | INTERGENIC                          |                                                                      |
| *Ca_Desig_SNP2667 | scaffold00511 | 1919                    | [G/C] |                    | INTERGENIC                          |                                                                      |
| *Ca_Desig_SNP2668 | Ca_Desig_LG06 | 10266792                | [A/C] | Ca_07266           | DOWNSTREAM:1572bases                | Pentatricopeptide repeat-containing protein At5g14770, mitochondrial |
| *Ca_Desig_SNP2669 | scaffold00775 | 2561                    | [T/G] | Ca_13986           | DOWNSTREAM:1164bases                | Protein of unknown function (DUF3755)                                |
| *Ca_Desig_SNP2670 | scaffold01365 | 57798                   | [T/C] |                    | INTERGENIC                          |                                                                      |
| *Ca_Desig_SNP2671 | scaffold07628 | 38037                   | [T/G] |                    | INTERGENIC                          |                                                                      |
| *Ca_Desig_SNP2672 | scaffold13621 | 156800                  | [T/A] |                    | INTERGENIC                          |                                                                      |
| *Ca_Desig_SNP2673 | scaffold00702 | 6571                    | [A/G] |                    | INTERGENIC                          |                                                                      |
| *Ca_Desig_SNP2674 | Ca_Desig_LG06 | 6049168                 | [A/C] |                    | INTERGENIC                          |                                                                      |
| *Ca_Desig_SNP2675 | Ca_Desig_LG07 | 2570445                 | [C/T] | Ca_07547           | DOWNSTREAM:691bases                 | Pentatricopeptide repeat-containing protein At1g71490                |
| *Ca_Desig_SNP2676 | Ca_Desig_LG04 | 2990741                 | [T/A] | Ca_04088           | DOWNSTREAM:307bases                 | Unknown expressed protein                                            |
| *Ca_Desig_SNP2677 | scaffold01365 | 66352                   | [T/A] |                    | INTERGENIC                          |                                                                      |

| SNP IDs           | Chromosomes   | Physical positions (bp) | SNPs  | Gene accession IDs | Sequence components of genome/genes | Putative functions                                                        |
|-------------------|---------------|-------------------------|-------|--------------------|-------------------------------------|---------------------------------------------------------------------------|
| *Ca_Desig_SNP2678 | scaffold01135 | 202                     | [A/G] |                    | INTERGENIC                          |                                                                           |
| *Ca_Desig_SNP2679 | Ca_Desig_LG04 | 3055686                 | [A/C] | Ca_04094           | INTRON                              | Ubiquitin carboxyl-terminal hydrolase 19                                  |
| *Ca_Desig_SNP2680 | scaffold01365 | 72141                   | [A/T] |                    | INTERGENIC                          |                                                                           |
| *Ca_Desig_SNP2681 | Ca_Desig_LG06 | 6045978                 | [C/A] | Ca_06916           | DOWNSTREAM:1486bases                | Acyl-coenzyme A oxidase 2, peroxisomal                                    |
| *Ca_Desig_SNP2682 | scaffold01625 | 91382                   | [T/G] |                    | INTERGENIC                          |                                                                           |
| *Ca_Desig_SNP2683 | scaffold00970 | 55200                   | [T/G] |                    | INTERGENIC                          |                                                                           |
| *Ca_Desig_SNP2684 | scaffold00492 | 15327                   | [T/G] |                    | INTERGENIC                          |                                                                           |
| *Ca_Desig_SNP2685 | Ca_Desig_LG04 | 8131384                 | [T/G] | Ca_04406           | NON_SYNONYMOUS_CODING               | Transcriptional corepressor LEUNIG                                        |
| *Ca_Desig_SNP2686 | Ca_Desig_LG07 | 8187265                 | [T/C] | Ca_07932           | INTRON                              | Probable zinc protease pqqL                                               |
| *Ca_Desig_SNP2687 | scaffold01365 | 149608                  | [G/A] |                    | INTERGENIC                          |                                                                           |
| *Ca_Desig_SNP2688 | scaffold01365 | 153756                  | [C/T] |                    | INTERGENIC                          |                                                                           |
| *Ca_Desig_SNP2689 | Ca_Desig_LG08 | 10194696                | [A/C] | Ca_08722           | NON_SYNONYMOUS_CODING               | Putative uncharacterized protein                                          |
| *Ca_Desig_SNP2690 | Ca_Desig_LG06 | 5881201                 | [C/T] |                    | INTERGENIC                          |                                                                           |
| *Ca_Desig_SNP2691 | Ca_Desig_LG06 | 6103720                 | [G/T] | Ca_06920           | SYNONYMOUS_CODING                   | Late embryogenesis abundant (LEA) hydroxyproline-rich glycoprotein family |
| *Ca_Desig_SNP2692 | Ca_Desig_LG01 | 3570670                 | [T/A] | Ca_00364           | DOWNSTREAM:1997bases                | Eukaryotic translation initiation factor 4E-1                             |
| *Ca_Desig_SNP2693 | scaffold00686 | 1877                    | [T/C] |                    | INTERGENIC                          |                                                                           |
| *Ca_Desig_SNP2694 | scaffold00752 | 3517                    | [A/C] | Ca_13923           | UTR_3_PRIME:123bases                | Uncharacterized protein At5g39865                                         |
| *Ca_Desig_SNP2695 | scaffold00747 | 2273                    | [A/C] |                    | INTERGENIC                          |                                                                           |
| *Ca_Desig_SNP2696 | Ca_Desig_LG06 | 5943564                 | [C/T] | Ca_06902           | SYNONYMOUS_CODING                   | U-box domain-containing protein 4                                         |
| *Ca_Desig_SNP2697 | Ca_Desig_LG06 | 5946749                 | [C/T] | Ca_06902           | SYNONYMOUS_CODING                   | U-box domain-containing protein 4                                         |
| *Ca_Desig_SNP2698 | scaffold01365 | 34405                   | [C/G] |                    | INTERGENIC                          |                                                                           |
| *Ca_Desig_SNP2699 | scaffold01365 | 149512                  | [T/C] |                    | INTERGENIC                          |                                                                           |
| *Ca_Desig_SNP2700 | scaffold00775 | 2365                    | [A/G] | Ca_13986           | DOWNSTREAM:968bases                 | Protein of unknown function (DUF3755)                                     |
| *Ca_Desig_SNP2701 | scaffold01365 | 153806                  | [A/G] |                    | INTERGENIC                          |                                                                           |
| *Ca_Desig_SNP2702 | scaffold00167 | 143780                  | [T/G] |                    | INTERGENIC                          |                                                                           |
| *Ca_Desig_SNP2703 | Ca_Desig_LG06 | 6048824                 | [C/T] |                    | INTERGENIC                          |                                                                           |

| SNP IDs           | Chromosomes   | Physical positions (bp) | SNPs  | Gene accession IDs | Sequence components of genome/genes | Putative functions                                   |
|-------------------|---------------|-------------------------|-------|--------------------|-------------------------------------|------------------------------------------------------|
| *Ca_Desig_SNP2704 | scaffold00514 | 74304                   | [C/T] | Ca_09347           | INTRON                              | Zinc finger CCCH domain-containing protein 12        |
| *Ca_Desig_SNP2705 | Ca_Desig_LG06 | 5765551                 | [G/A] | Ca_06881           | SYNONYMOUS_CODING                   | Uncharacterized GTP-binding protein At5g64813        |
| *Ca_Desig_SNP2706 | scaffold00876 | 6639                    | [A/G] |                    | INTERGENIC                          |                                                      |
| *Ca_Desig_SNP2707 | Ca_Desig_LG08 | 827371                  | [T/G] | Ca_08054           | SYNONYMOUS_CODING                   | UPF0057 membrane protein At4g30660                   |
| *Ca_Desig_SNP2708 | Ca_Desig_LG02 | 13147111                | [T/G] | Ca_01855           | INTRON                              | Beta-adaptin-like protein C                          |
| *Ca_Desig_SNP2709 | scaffold01277 | 116803                  | [A/C] |                    | INTERGENIC                          |                                                      |
| *Ca_Desig_SNP2710 | scaffold01365 | 72452                   | [A/G] |                    | INTERGENIC                          |                                                      |
| *Ca_Desig_SNP2711 | Ca_Desig_LG06 | 5942263                 | [T/G] |                    | INTERGENIC                          |                                                      |
| *Ca_Desig_SNP2712 | Ca_Desig_LG06 | 5943369                 | [C/T] | Ca_06902           | SYNONYMOUS_CODING                   | U-box domain-containing protein 4                    |
| *Ca_Desig_SNP2713 | scaffold01365 | 10298                   | [C/T] |                    | INTERGENIC                          |                                                      |
| *Ca_Desig_SNP2714 | scaffold01365 | 123508                  | [C/A] |                    | INTERGENIC                          |                                                      |
| *Ca_Desig_SNP2715 | scaffold03204 | 229136                  | [A/C] |                    | INTERGENIC                          |                                                      |
| *Ca_Desig_SNP2716 | Ca_Desig_LG02 | 2124933                 | [T/G] | Ca_01184           | SYNONYMOUS_CODING                   | LOB domain-containing protein 41                     |
| *Ca_Desig_SNP2717 | Ca_Desig_LG06 | 5600377                 | [C/A] |                    | INTERGENIC                          |                                                      |
| *Ca_Desig_SNP2718 | scaffold00274 | 17554                   | [G/A] |                    | INTERGENIC                          |                                                      |
| *Ca_Desig_SNP2719 | scaffold01638 | 42282                   | [A/C] |                    | INTERGENIC                          |                                                      |
| *Ca_Desig_SNP2720 | scaffold00499 | 8514                    | [G/A] | Ca_12912           | DOWNSTREAM:1206bases                | Putative respiratory burst oxidase homolog protein H |
| *Ca_Desig_SNP2721 | scaffold00968 | 158                     | [C/A] |                    | INTERGENIC                          |                                                      |
| *Ca_Desig_SNP2722 | scaffold02672 | 80695                   | [A/C] |                    | INTERGENIC                          |                                                      |
| *Ca_Desig_SNP2723 | Ca_Desig_LG06 | 5601147                 | [G/C] |                    | INTERGENIC                          |                                                      |
| *Ca_Desig_SNP2724 | Ca_Desig_LG06 | 5942121                 | [G/A] |                    | INTERGENIC                          |                                                      |
| *Ca_Desig_SNP2725 | scaffold01310 | 213541                  | [G/A] |                    | INTERGENIC                          |                                                      |
| *Ca_Desig_SNP2726 | scaffold01310 | 244409                  | [G/A] |                    | INTERGENIC                          |                                                      |
| *Ca_Desig_SNP2727 | Ca_Desig_LG02 | 2124928                 | [C/A] | Ca_01184           | SYNONYMOUS_CODING                   | LOB domain-containing protein 41                     |
| *Ca_Desig_SNP2728 | Ca_Desig_LG06 | 5944178                 | [C/T] | Ca_06902           | NON_SYNONYMOUS_CODING               | U-box domain-containing protein 4                    |
| *Ca_Desig_SNP2729 | Ca_Desig_LG06 | 5611311                 | [T/A] | Ca_06869           | SYNONYMOUS_CODING                   | Protein DDB_G0268328                                 |



| SNP IDs           | Chromosomes   | Physical positions (bp) | SNPs  | Gene accession IDs | Sequence components of genome/genes | Putative functions                                                     |
|-------------------|---------------|-------------------------|-------|--------------------|-------------------------------------|------------------------------------------------------------------------|
| *Ca_Desig_SNP2730 | scaffold16048 | 61341                   | [C/G] |                    | INTERGENIC                          |                                                                        |
| *Ca_Desig_SNP2731 | scaffold00938 | 1100                    | [A/G] |                    | INTERGENIC                          |                                                                        |
| *Ca_Desig_SNP2732 | scaffold01137 | 82                      | [C/T] |                    | INTERGENIC                          |                                                                        |
| *Ca_Desig_SNP2733 | Ca_Desig_LG06 | 5947178                 | [T/A] | Ca_06902           | SYNONYMOUS_CODING                   | U-box domain-containing protein 4                                      |
| *Ca_Desig_SNP2734 | scaffold16048 | 61340                   | [G/C] |                    | INTERGENIC                          |                                                                        |
| *Ca_Desig_SNP2735 | scaffold01365 | 118443                  | [C/T] |                    | INTERGENIC                          |                                                                        |
| *Ca_Desig_SNP2736 | scaffold00907 | 20787                   | [C/T] |                    | INTERGENIC                          |                                                                        |
| *Ca_Desig_SNP2737 | Ca_Desig_LG06 | 5574091                 | [C/T] | Ca_06865           | DOWNSTREAM:125bases                 | Violaxanthin de-epoxidase, chloroplastic                               |
| *Ca_Desig_SNP2738 | scaffold01365 | 10382                   | [G/C] |                    | INTERGENIC                          |                                                                        |
| *Ca_Desig_SNP2739 | Ca_Desig_LG06 | 5992325                 | [A/C] |                    | INTERGENIC                          |                                                                        |
| *Ca_Desig_SNP2740 | Ca_Desig_LG06 | 5948138                 | [T/A] | Ca_06902           | NON_SYNONYMOUS_CODING               | U-box domain-containing protein 4                                      |
| *Ca_Desig_SNP2741 | scaffold01310 | 214050                  | [C/A] |                    | INTERGENIC                          |                                                                        |
| *Ca_Desig_SNP2742 | Ca_Desig_LG05 | 12461772                | [C/A] | Ca_06284           | DOWNSTREAM:768bases                 | Oxygen-independent coproporphyrinogen-III oxidase-like protein sll1917 |
| *Ca_Desig_SNP2743 | scaffold00852 | 985                     | [T/C] | Ca_14286           | INTRON                              | Type I inositol-1,4,5-trisphosphate 5-phosphatase 11                   |
| *Ca_Desig_SNP2744 | scaffold03153 | 57805                   | [T/C] |                    | INTERGENIC                          |                                                                        |
| *Ca_Desig_SNP2745 | scaffold00898 | 76                      | [G/A] |                    | INTERGENIC                          |                                                                        |
| *Ca_Desig_SNP2746 | Ca_Desig_LG06 | 5933120                 | [C/T] | Ca_06901           | NON_SYNONYMOUS_CODING               | Formation of crista junctions protein 1                                |
| *Ca_Desig_SNP2747 | Ca_Desig_LG04 | 4878479                 | [G/A] | Ca_04219           | DOWNSTREAM:839bases                 | Cysteine/Histidine-rich C1 domain family protein                       |
| *Ca_Desig_SNP2748 | scaffold01300 | 140274                  | [A/C] |                    | INTERGENIC                          |                                                                        |
| *Ca_Desig_SNP2749 | Ca_Desig_LG06 | 5830309                 | [C/T] |                    | INTERGENIC                          |                                                                        |
| *Ca_Desig_SNP2750 | Ca_Desig_LG04 | 334803                  | [T/G] | Ca_03904           | NON_SYNONYMOUS_CODING               | 5'-3' exoribonuclease 3                                                |
| *Ca_Desig_SNP2751 | Ca_Desig_LG04 | 20331211                | [A/C] | Ca_05087           | NON_SYNONYMOUS_CODING               | N-terminal kinase-like protein                                         |
| *Ca_Desig_SNP2752 | Ca_Desig_LG06 | 5855793                 | [T/A] | Ca_06892           | INTRON                              | Uncharacterized protein sll1770                                        |
| *Ca_Desig_SNP2753 | Ca_Desig_LG02 | 1883034                 | [A/C] | Ca_01163           | SYNONYMOUS_CODING                   | Nipped-B-like protein                                                  |
| *Ca_Desig_SNP2754 | Ca_Desig_LG04 | 9726657                 | [T/G] | Ca_04540           | DOWNSTREAM:77bases                  | Transcription regulatory protein SNF2                                  |
| *Ca_Desig_SNP2755 | scaffold00760 | 1346                    | [A/C] |                    | INTERGENIC                          |                                                                        |

| SNP IDs           | Chromosomes   | Physical positions (bp) | SNPs  | Gene accession IDs | Sequence components of genome/genes | Putative functions                    |
|-------------------|---------------|-------------------------|-------|--------------------|-------------------------------------|---------------------------------------|
| *Ca_Desig_SNP2756 | scaffold00779 | 946                     | [T/C] |                    | INTERGENIC                          |                                       |
| *Ca_Desig_SNP2757 | Ca_Desig_LG06 | 4911716                 | [G/T] | Ca_06836           | INTRON                              | Kinesin-like protein KIF15-B          |
| *Ca_Desig_SNP2758 | scaffold02847 | 49647                   | [A/C] |                    | INTERGENIC                          |                                       |
| *Ca_Desig_SNP2759 | scaffold00686 | 5079                    | [G/T] |                    | INTERGENIC                          |                                       |
| *Ca_Desig_SNP2760 | Ca_Desig_LG06 | 7472934                 | [C/T] |                    | INTERGENIC                          |                                       |
| *Ca_Desig_SNP2761 | Ca_Desig_LG06 | 5623892                 | [T/C] | Ca_06869           | INTRON                              | Protein DDB_G0268328                  |
| *Ca_Desig_SNP2762 | Ca_Desig_LG06 | 7597902                 | [A/G] | Ca_07047           | UTR_3_PRIME:165bases                | Cyclin-dependent kinase G-2           |
| *Ca_Desig_SNP2763 | Ca_Desig_LG06 | 7597654                 | [G/A] | Ca_07047           | UTR_3_PRIME:413bases                | Cyclin-dependent kinase G-2           |
| *Ca_Desig_SNP2764 | Ca_Desig_LG03 | 23164542                | [T/C] | Ca_03866           | INTRON                              | Glycogen synthase                     |
| *Ca_Desig_SNP2765 | scaffold00775 | 2390                    | [A/G] | Ca_13986           | DOWNSTREAM:993bases                 | Protein of unknown function (DUF3755) |
| *Ca_Desig_SNP2766 | Ca_Desig_LG06 | 5949037                 | [C/T] | Ca_06902           | SYNONYMOUS_CODING                   | U-box domain-containing protein 4     |
| *Ca_Desig_SNP2767 | scaffold03153 | 57809                   | [G/A] |                    | INTERGENIC                          |                                       |
| *Ca_Desig_SNP2768 | scaffold01173 | 68                      | [A/G] |                    | INTERGENIC                          |                                       |
| *Ca_Desig_SNP2769 | Ca_Desig_LG06 | 5931987                 | [C/T] |                    | INTERGENIC                          |                                       |
| *Ca_Desig_SNP2770 | Ca_Desig_LG06 | 7511058                 | [C/G] | Ca_07041           | DOWNSTREAM:1520bases                | Mannosyl-oligosaccharide glucosidase  |
| *Ca_Desig_SNP2771 | Ca_Desig_LG06 | 5931952                 | [C/G] |                    | INTERGENIC                          |                                       |
| *Ca_Desig_SNP2772 | scaffold01152 | 180                     | [A/T] |                    | INTERGENIC                          |                                       |
| *Ca_Desig_SNP2773 | Ca_Desig_LG06 | 7539901                 | [T/A] | Ca_07041           | INTRON                              | Mannosyl-oligosaccharide glucosidase  |
| *Ca_Desig_SNP2774 | Ca_Desig_LG06 | 7589557                 | [G/A] |                    | INTERGENIC                          |                                       |
| *Ca_Desig_SNP2775 | scaffold00763 | 1594                    | [A/G] |                    | INTERGENIC                          |                                       |
| *Ca_Desig_SNP2776 | scaffold03224 | 10297                   | [C/A] |                    | INTERGENIC                          |                                       |
| *Ca_Desig_SNP2777 | scaffold00884 | 1491                    | [T/C] |                    | INTERGENIC                          |                                       |
| *Ca_Desig_SNP2778 | Ca_Desig_LG06 | 7594832                 | [T/C] |                    | INTERGENIC                          |                                       |
| *Ca_Desig_SNP2779 | Ca_Desig_LG04 | 328232                  | [C/T] | Ca_03903           | INTRON                              | Filament-like plant protein 4         |
| *Ca_Desig_SNP2780 | Ca_Desig_LG06 | 7502284                 | [G/A] |                    | INTERGENIC                          |                                       |
| *Ca_Desig_SNP2781 | Ca_Desig_LG04 | 1104683                 | [A/C] | Ca_03963           | SYNONYMOUS_CODING                   | Nucleobase-ascorbate transporter 3    |

| SNP IDs           | Chromosomes   | Physical positions (bp) | SNPs  | Gene accession IDs | Sequence components of genome/genes | Putative functions                    |
|-------------------|---------------|-------------------------|-------|--------------------|-------------------------------------|---------------------------------------|
| *Ca_Desig_SNP2782 | Ca_Desig_LG06 | 5947130                 | [G/A] | Ca_06902           | SYNONYMOUS_CODING                   | U-box domain-containing protein 4     |
| *Ca_Desig_SNP2783 | scaffold00879 | 1902                    | [A/T] |                    | INTERGENIC                          |                                       |
| *Ca_Desig_SNP2784 | scaffold08694 | 169                     | [C/T] |                    | INTERGENIC                          |                                       |
| *Ca_Desig_SNP2785 | scaffold12042 | 63045                   | [T/G] |                    | INTERGENIC                          |                                       |
| *Ca_Desig_SNP2786 | scaffold02333 | 85348                   | [T/C] |                    | INTERGENIC                          |                                       |
| *Ca_Desig_SNP2787 | Ca_Desig_LG01 | 1938763                 | [A/G] | Ca_00203           | NON_SYNONYMOUS_CODING               | Splicing factor 3B subunit 1          |
| *Ca_Desig_SNP2788 | scaffold14259 | 37430                   | [G/T] |                    | INTERGENIC                          |                                       |
| *Ca_Desig_SNP2789 | scaffold01408 | 39708                   | [T/C] |                    | INTERGENIC                          |                                       |
| *Ca_Desig_SNP2790 | scaffold00883 | 414217                  | [A/G] |                    | INTERGENIC                          |                                       |
| *Ca_Desig_SNP2791 | scaffold00880 | 1015                    | [T/C] |                    | INTERGENIC                          |                                       |
| *Ca_Desig_SNP2792 | scaffold00883 | 223998                  | [T/A] |                    | INTERGENIC                          |                                       |
| *Ca_Desig_SNP2793 | scaffold00771 | 2499                    | [T/C] |                    | INTERGENIC                          |                                       |
| *Ca_Desig_SNP2794 | Ca_Desig_LG04 | 4656183                 | [C/A] | Ca_04204           | INTRON                              | Probable glucuronosyltransferase GUT1 |
| *Ca_Desig_SNP2795 | scaffold04282 | 38335                   | [C/A] |                    | INTERGENIC                          |                                       |
| *Ca_Desig_SNP2796 | scaffold00233 | 726                     | [C/T] | Ca_08976           | INTRON                              | Transcription activator GLK1          |
| *Ca_Desig_SNP2797 | Ca_Desig_LG06 | 7540355                 | [G/A] | Ca_07041           | INTRON                              | Mannosyl-oligosaccharide glucosidase  |
| *Ca_Desig_SNP2798 | Ca_Desig_LG04 | 9345307                 | [A/G] |                    | INTERGENIC                          |                                       |
| *Ca_Desig_SNP2799 | scaffold02308 | 11571                   | [A/C] | Ca_10479           | DOWNSTREAM:1277bases                | Putative uncharacterized protein      |
| *Ca_Desig_SNP2800 | scaffold03282 | 47561                   | [G/A] |                    | INTERGENIC                          |                                       |
| *Ca_Desig_SNP2801 | Ca_Desig_LG03 | 234208                  | [A/T] | Ca_02182           | NON_SYNONYMOUS_CODING               | unknown protein                       |
| *Ca_Desig_SNP2802 | scaffold01310 | 217142                  | [C/T] |                    | INTERGENIC                          |                                       |
| *Ca_Desig_SNP2803 | Ca_Desig_LG06 | 7572470                 | [C/T] | Ca_07044           | NON_SYNONYMOUS_CODING               | ATP-dependent RNA helicase dhx8       |
| *Ca_Desig_SNP2804 | scaffold00998 | 221637                  | [G/T] |                    | INTERGENIC                          |                                       |
| *Ca_Desig_SNP2805 | scaffold03282 | 62521                   | [C/T] |                    | INTERGENIC                          |                                       |
| *Ca_Desig_SNP2806 | scaffold06654 | 25520                   | [T/G] |                    | INTERGENIC                          |                                       |
| *Ca_Desig_SNP2807 | scaffold04453 | 258761                  | [T/C] |                    | INTERGENIC                          |                                       |

| SNP IDs          | Chromosomes   | Physical positions (bp) | SNPs  | Gene accession IDs | Sequence components of genome/genes | Putative functions                                   |
|------------------|---------------|-------------------------|-------|--------------------|-------------------------------------|------------------------------------------------------|
| *Ca_Desi_SNP2808 | scaffold00883 | 223946                  | [A/C] |                    | INTERGENIC                          |                                                      |
| *Ca_Desi_SNP2809 | Ca_Desi_LG02  | 15223716                | [A/G] | Ca_02013           | SYNONYMOUS_CODING                   | Two-component response regulator ARR14               |
| *Ca_Desi_SNP2810 | scaffold00876 | 10369                   | [T/C] |                    | INTERGENIC                          |                                                      |
| *Ca_Desi_SNP2811 | scaffold00982 | 137619                  | [T/C] |                    | INTERGENIC                          |                                                      |
| *Ca_Desi_SNP2812 | scaffold00279 | 41249                   | [T/G] | Ca_11795           | INTRON                              | F-box protein At1g61340                              |
| *Ca_Desi_SNP2813 | scaffold03282 | 47446                   | [G/A] |                    | INTERGENIC                          |                                                      |
| *Ca_Desi_SNP2814 | scaffold00922 | 600                     | [A/G] |                    | INTERGENIC                          |                                                      |
| *Ca_Desi_SNP2815 | Ca_Desi_LG06  | 7539911                 | [A/G] | Ca_07041           | INTRON                              | Mannosyl-oligosaccharide glucosidase                 |
| *Ca_Desi_SNP2816 | scaffold00866 | 933                     | [T/C] | Ca_14324           | DOWNSTREAM:396bases                 | NADP-specific glutamate dehydrogenase                |
| *Ca_Desi_SNP2817 | scaffold01310 | 220130                  | [C/T] |                    | INTERGENIC                          |                                                      |
| *Ca_Desi_SNP2818 | Ca_Desi_LG08  | 355989                  | [A/C] | Ca_08007           | NON_SYNONYMOUS_CODING               | UPF0420 protein C16orf58 homolog                     |
| *Ca_Desi_SNP2819 | Ca_Desi_LG03  | 17840051                | [A/C] |                    | INTERGENIC                          |                                                      |
| *Ca_Desi_SNP2820 | scaffold00884 | 651                     | [T/C] |                    | INTERGENIC                          |                                                      |
| *Ca_Desi_SNP2821 | scaffold11144 | 114751                  | [G/A] |                    | INTERGENIC                          |                                                      |
| *Ca_Desi_SNP2822 | scaffold00852 | 774                     | [T/C] | Ca_14286           | INTRON                              | Type I inositol-1,4,5-trisphosphate 5-phosphatase 11 |
| *Ca_Desi_SNP2823 | scaffold04453 | 258778                  | [T/C] |                    | INTERGENIC                          |                                                      |
| *Ca_Desi_SNP2824 | Ca_Desi_LG06  | 7537055                 | [G/T] | Ca_07041           | INTRON                              | Mannosyl-oligosaccharide glucosidase                 |
| *Ca_Desi_SNP2825 | Ca_Desi_LG02  | 8234071                 | [A/G] |                    | INTERGENIC                          |                                                      |
| *Ca_Desi_SNP2826 | scaffold00989 | 418                     | [C/T] |                    | INTERGENIC                          |                                                      |
| *Ca_Desi_SNP2827 | Ca_Desi_LG04  | 371576                  | [G/T] |                    | INTERGENIC                          |                                                      |
| *Ca_Desi_SNP2828 | Ca_Desi_LG07  | 2196288                 | [T/A] | Ca_07527           | INTRON                              | Phospholipid-transporting ATPase 3                   |
| *Ca_Desi_SNP2829 | scaffold00710 | 698                     | [A/G] |                    | INTERGENIC                          |                                                      |
| *Ca_Desi_SNP2830 | scaffold00928 | 1207                    | [T/C] |                    | INTERGENIC                          |                                                      |
| *Ca_Desi_SNP2831 | scaffold00768 | 3059                    | [T/C] |                    | INTERGENIC                          |                                                      |
| *Ca_Desi_SNP2832 | scaffold00761 | 3635                    | [T/C] |                    | INTERGENIC                          |                                                      |
| *Ca_Desi_SNP2833 | scaffold00725 | 4440                    | [G/A] |                    | INTERGENIC                          |                                                      |

| SNP IDs           | Chromosomes   | Physical positions (bp) | SNPs  | Gene accession IDs | Sequence components of genome/genes | Putative functions                                           |
|-------------------|---------------|-------------------------|-------|--------------------|-------------------------------------|--------------------------------------------------------------|
| *Ca_Desig_SNP2834 | scaffold03282 | 49793                   | [G/A] |                    | INTERGENIC                          |                                                              |
| *Ca_Desig_SNP2835 | scaffold00950 | 353                     | [A/C] |                    | INTERGENIC                          |                                                              |
| *Ca_Desig_SNP2836 | scaffold00809 | 2541                    | [A/G] |                    | INTERGENIC                          |                                                              |
| *Ca_Desig_SNP2837 | Ca_Desig_LG06 | 10334724                | [A/C] | Ca_07275           | NON_SYNONYMOUS_CODING               | MutS2 protein                                                |
| *Ca_Desig_SNP2838 | scaffold01310 | 244444                  | [C/T] |                    | INTERGENIC                          |                                                              |
| *Ca_Desig_SNP2839 | scaffold00714 | 2030                    | [A/C] | Ca_13757           | UTR_5_PRIME:29bases                 | Chaperone protein dnaJ 1, mitochondrial                      |
| *Ca_Desig_SNP2840 | scaffold00642 | 286                     | [A/T] |                    | INTERGENIC                          |                                                              |
| *Ca_Desig_SNP2841 | scaffold04586 | 185726                  | [A/G] |                    | INTERGENIC                          |                                                              |
| *Ca_Desig_SNP2842 | scaffold00943 | 101                     | [T/A] |                    | INTERGENIC                          |                                                              |
| *Ca_Desig_SNP2843 | Ca_Desig_LG03 | 16546905                | [T/G] |                    | INTERGENIC                          |                                                              |
| *Ca_Desig_SNP2844 | scaffold00295 | 33789                   | [G/A] |                    | INTERGENIC                          |                                                              |
| *Ca_Desig_SNP2845 | scaffold01037 | 121309                  | [A/C] |                    | INTERGENIC                          |                                                              |
| *Ca_Desig_SNP2846 | scaffold03282 | 49454                   | [A/T] |                    | INTERGENIC                          |                                                              |
| *Ca_Desig_SNP2847 | Ca_Desig_LG05 | 11868634                | [A/C] |                    | INTERGENIC                          |                                                              |
| *Ca_Desig_SNP2848 | Ca_Desig_LG02 | 14160600                | [A/G] | Ca_01922           | SYNONYMOUS_CODING                   | Lysine-specific histone demethylase 1 homolog 3              |
| *Ca_Desig_SNP2849 | scaffold05741 | 48113                   | [T/G] |                    | INTERGENIC                          |                                                              |
| *Ca_Desig_SNP2850 | scaffold00582 | 4776                    | [T/C] | Ca_13279           | NON_SYNONYMOUS_CODING               | (+)-neomenthol dehydrogenase                                 |
| *Ca_Desig_SNP2851 | scaffold00637 | 5454                    | [C/G] |                    | INTERGENIC                          |                                                              |
| *Ca_Desig_SNP2852 | Ca_Desig_LG03 | 2679441                 | [A/C] |                    | INTERGENIC                          |                                                              |
| *Ca_Desig_SNP2853 | Ca_Desig_LG03 | 15991437                | [T/A] | Ca_03229           | INTRON                              | Putative vacuolar protein sorting-associated protein 13A     |
| *Ca_Desig_SNP2854 | Ca_Desig_LG03 | 11051027                | [G/A] | Ca_02902           | SYNONYMOUS_CODING                   | LETM1 and EF-hand domain-containing protein 1, mitochondrial |
| *Ca_Desig_SNP2855 | scaffold00876 | 836                     | [T/C] |                    | INTERGENIC                          |                                                              |
| *Ca_Desig_SNP2856 | scaffold00945 | 205937                  | [G/T] |                    | INTERGENIC                          |                                                              |
| *Ca_Desig_SNP2857 | scaffold00646 | 4972                    | [A/G] |                    | INTERGENIC                          |                                                              |
| *Ca_Desig_SNP2858 | Ca_Desig_LG04 | 151462                  | [G/C] |                    | INTERGENIC                          |                                                              |
| *Ca_Desig_SNP2859 | Ca_Desig_LG04 | 367814                  | [T/G] |                    | INTERGENIC                          |                                                              |

| SNP IDs           | Chromosomes   | Physical positions (bp) | SNPs  | Gene accession IDs | Sequence components of genome/genes | Putative functions                                   |
|-------------------|---------------|-------------------------|-------|--------------------|-------------------------------------|------------------------------------------------------|
| *Ca_Desig_SNP2860 | Ca_Desig_LG02 | 14660979                | [C/T] |                    | INTERGENIC                          |                                                      |
| *Ca_Desig_SNP2861 | scaffold00876 | 5648                    | [T/C] |                    | INTERGENIC                          |                                                      |
| *Ca_Desig_SNP2862 | scaffold00852 | 1116                    | [T/C] | Ca_14286           | SYNONYMOUS_CODING                   | Type I inositol-1,4,5-trisphosphate 5-phosphatase 11 |
| *Ca_Desig_SNP2863 | scaffold01106 | 41                      | [A/G] |                    | INTERGENIC                          |                                                      |
| *Ca_Desig_SNP2864 | scaffold00644 | 2626                    | [A/C] |                    | INTERGENIC                          |                                                      |
| *Ca_Desig_SNP2865 | scaffold09256 | 10976                   | [T/G] |                    | INTERGENIC                          |                                                      |
| *Ca_Desig_SNP2866 | scaffold00582 | 6353                    | [A/G] | Ca_13279           | INTRON                              | (+)-neomenthol dehydrogenase                         |
| *Ca_Desig_SNP2867 | Ca_Desig_LG04 | 367827                  | [C/A] |                    | INTERGENIC                          |                                                      |
| *Ca_Desig_SNP2868 | scaffold00622 | 8532                    | [A/C] |                    | INTERGENIC                          |                                                      |
| *Ca_Desig_SNP2869 | scaffold00788 | 3451                    | [T/C] |                    | INTERGENIC                          |                                                      |
| *Ca_Desig_SNP2870 | scaffold02650 | 79503                   | [T/C] |                    | INTERGENIC                          |                                                      |
| *Ca_Desig_SNP2871 | scaffold02365 | 27889                   | [A/C] |                    | INTERGENIC                          |                                                      |
| *Ca_Desig_SNP2872 | scaffold00937 | 224738                  | [G/A] |                    | INTERGENIC                          |                                                      |
| *Ca_Desig_SNP2873 | scaffold00876 | 5624                    | [T/C] |                    | INTERGENIC                          |                                                      |
| *Ca_Desig_SNP2874 | scaffold00725 | 4460                    | [T/C] |                    | INTERGENIC                          |                                                      |
| *Ca_Desig_SNP2875 | scaffold00876 | 6649                    | [T/C] |                    | INTERGENIC                          |                                                      |
| *Ca_Desig_SNP2876 | Ca_Desig_LG07 | 2952198                 | [C/T] |                    | INTERGENIC                          |                                                      |
| *Ca_Desig_SNP2877 | scaffold00781 | 9649                    | [T/G] |                    | INTERGENIC                          |                                                      |
| *Ca_Desig_SNP2878 | scaffold01183 | 75745                   | [G/A] |                    | INTERGENIC                          |                                                      |
| *Ca_Desig_SNP2879 | Ca_Desig_LG08 | 10126050                | [A/C] | Ca_08711           | SYNONYMOUS_CODING                   | Chromatin structure-remodeling complex subunit snf21 |
| *Ca_Desig_SNP2880 | scaffold03073 | 274127                  | [A/C] |                    | INTERGENIC                          |                                                      |
| *Ca_Desig_SNP2881 | scaffold00290 | 41537                   | [T/A] |                    | INTERGENIC                          |                                                      |
| *Ca_Desig_SNP2882 | scaffold00854 | 319                     | [A/G] |                    | INTERGENIC                          |                                                      |
| *Ca_Desig_SNP2883 | scaffold08694 | 165                     | [T/C] |                    | INTERGENIC                          |                                                      |
| *Ca_Desig_SNP2884 | scaffold00710 | 886                     | [G/T] |                    | INTERGENIC                          |                                                      |
| *Ca_Desig_SNP2885 | Ca_Desig_LG04 | 2451258                 | [A/G] | Ca_04047           | DOWNSTREAM:1076bases                | K(+) efflux antiporter 6                             |

| SNP IDs           | Chromosomes   | Physical positions (bp) | SNPs  | Gene accession IDs | Sequence components of genome/genes | Putative functions                                                                                  |
|-------------------|---------------|-------------------------|-------|--------------------|-------------------------------------|-----------------------------------------------------------------------------------------------------|
| *Ca_Desig_SNP2886 | scaffold00286 | 35148                   | [A/T] | Ca_11812           | NON_SYNONYMOUS_CODING               | Putative E3 ubiquitin-protein ligase LIN-1                                                          |
| *Ca_Desig_SNP2887 | scaffold00727 | 3776                    | [A/C] | Ca_13805           | DOWNSTREAM:647bases                 | Unknown expressed protein                                                                           |
| *Ca_Desig_SNP2888 | scaffold02650 | 80887                   | [G/A] |                    | INTERGENIC                          |                                                                                                     |
| *Ca_Desig_SNP2889 | Ca_Desig_LG06 | 10710378                | [A/C] |                    | INTERGENIC                          |                                                                                                     |
| *Ca_Desig_SNP2890 | scaffold00735 | 2868                    | [A/G] | Ca_13852           | DOWNSTREAM:1578bases                | MORC family CW-type zinc finger protein 4                                                           |
| *Ca_Desig_SNP2891 | Ca_Desig_LG04 | 2391174                 | [A/G] |                    | INTERGENIC                          |                                                                                                     |
| *Ca_Desig_SNP2892 | scaffold00582 | 5073                    | [T/C] | Ca_13279           | INTRON                              | (+)-neomenthol dehydrogenase                                                                        |
| *Ca_Desig_SNP2893 | scaffold00212 | 83595                   | [T/G] |                    | INTERGENIC                          |                                                                                                     |
| *Ca_Desig_SNP2894 | Ca_Desig_LG05 | 8515283                 | [A/C] | Ca_05938           | NON_SYNONYMOUS_CODING               | U-box domain-containing protein 4                                                                   |
| *Ca_Desig_SNP2895 | Ca_Desig_LG08 | 9962985                 | [T/G] | Ca_08691           | INTRON                              | Protein ALWAYS EARLY 3                                                                              |
| *Ca_Desig_SNP2896 | scaffold02681 | 69994                   | [T/C] |                    | INTERGENIC                          |                                                                                                     |
| *Ca_Desig_SNP2897 | scaffold00880 | 916                     | [T/C] |                    | INTERGENIC                          |                                                                                                     |
| *Ca_Desig_SNP2898 | Ca_Desig_LG06 | 6048304                 | [C/T] | Ca_06915           | DOWNSTREAM:1908bases                | Protein of unknown function (DUF630 and DUF632)                                                     |
| *Ca_Desig_SNP2899 | scaffold01365 | 153343                  | [A/C] |                    | INTERGENIC                          |                                                                                                     |
| *Ca_Desig_SNP2900 | scaffold00938 | 1135                    | [A/G] |                    | INTERGENIC                          |                                                                                                     |
| *Ca_Desig_SNP2901 | Ca_Desig_LG06 | 8732387                 | [G/A] | Ca_07137           | SYNONYMOUS_CODING                   | E3 ubiquitin-protein ligase UPL1                                                                    |
| *Ca_Desig_SNP2902 | Ca_Desig_LG01 | 3191496                 | [G/T] | Ca_00323           | NON_SYNONYMOUS_CODING               | Oryzain alpha chain                                                                                 |
| *Ca_Desig_SNP2903 | scaffold00733 | 3442                    | [A/C] | Ca_13847           | DOWNSTREAM:1795bases                | unknown protein; FUNCTIONS IN: molecular_function unknown; INVOLVED IN: biological_process unknown; |
| *Ca_Desig_SNP2904 | Ca_Desig_LG04 | 21229885                | [A/C] | Ca_05170           | NON_SYNONYMOUS_CODING               | WD repeat-containing protein 48                                                                     |
| *Ca_Desig_SNP2905 | scaffold01365 | 151376                  | [C/T] |                    | INTERGENIC                          |                                                                                                     |
| *Ca_Desig_SNP2906 | scaffold00994 | 71959                   | [A/C] |                    | INTERGENIC                          |                                                                                                     |
| *Ca_Desig_SNP2907 | scaffold03846 | 7814                    | [T/G] |                    | INTERGENIC                          |                                                                                                     |
| *Ca_Desig_SNP2908 | scaffold03846 | 7813                    | [C/A] |                    | INTERGENIC                          |                                                                                                     |
| *Ca_Desig_SNP2909 | scaffold00866 | 1049                    | [A/G] | Ca_14324           | DOWNSTREAM:280bases                 | NADP-specific glutamate dehydrogenase                                                               |
| *Ca_Desig_SNP2910 | scaffold00779 | 2334                    | [T/A] |                    | INTERGENIC                          |                                                                                                     |
| *Ca_Desig_SNP2911 | scaffold01158 | 196                     | [T/A] |                    | INTERGENIC                          |                                                                                                     |

| SNP IDs          | Chromosomes   | Physical positions (bp) | SNPs  | Gene accession IDs | Sequence components of genome/genes | Putative functions                                             |
|------------------|---------------|-------------------------|-------|--------------------|-------------------------------------|----------------------------------------------------------------|
| *Ca_Desi_SNP2912 | Ca_Desi_LG05  | 15301225                | [G/T] | Ca_06432           | INTRON                              | Peroxisome biogenesis protein 5                                |
| *Ca_Desi_SNP2913 | Ca_Desi_LG05  | 15284611                | [A/C] |                    | INTERGENIC                          |                                                                |
| *Ca_Desi_SNP2914 | scaffold00897 | 859                     | [T/C] |                    | INTERGENIC                          |                                                                |
| *Ca_Desi_SNP2915 | scaffold15702 | 53721                   | [G/T] |                    | INTERGENIC                          |                                                                |
| *Ca_Desi_SNP2916 | scaffold00805 | 2450                    | [A/C] |                    | INTERGENIC                          |                                                                |
| *Ca_Desi_SNP2917 | scaffold02772 | 60374                   | [T/G] |                    | INTERGENIC                          |                                                                |
| *Ca_Desi_SNP2918 | scaffold00333 | 138651                  | [A/G] |                    | INTERGENIC                          |                                                                |
| *Ca_Desi_SNP2919 | scaffold01136 | 163                     | [C/T] |                    | INTERGENIC                          |                                                                |
| *Ca_Desi_SNP2920 | Ca_Desi_LG06  | 6048899                 | [C/T] |                    | INTERGENIC                          |                                                                |
| *Ca_Desi_SNP2921 | scaffold00989 | 856                     | [T/C] |                    | INTERGENIC                          |                                                                |
| *Ca_Desi_SNP2922 | scaffold08055 | 52243                   | [C/T] |                    | INTERGENIC                          |                                                                |
| *Ca_Desi_SNP2923 | scaffold01050 | 378                     | [G/A] |                    | INTERGENIC                          |                                                                |
| *Ca_Desi_SNP2924 | scaffold00824 | 1762                    | [T/C] |                    | INTERGENIC                          |                                                                |
| *Ca_Desi_SNP2925 | Ca_Desi_LG05  | 7910722                 | [A/C] | Ca_05878           | DOWNSTREAM:1803bases                | Oxysterol-binding protein-related protein 1D                   |
| *Ca_Desi_SNP2926 | scaffold00879 | 1745                    | [A/T] |                    | INTERGENIC                          |                                                                |
| *Ca_Desi_SNP2927 | scaffold01156 | 62                      | [T/C] |                    | INTERGENIC                          |                                                                |
| *Ca_Desi_SNP2928 | Ca_Desi_LG03  | 12863760                | [G/A] |                    | INTERGENIC                          |                                                                |
| *Ca_Desi_SNP2929 | Ca_Desi_LG04  | 2396705                 | [G/A] | Ca_04041           | NON_SYNONYMOUS_CODING               | Far upstream element-binding protein 1                         |
| *Ca_Desi_SNP2930 | Ca_Desi_LG06  | 6049208                 | [C/A] |                    | INTERGENIC                          |                                                                |
| *Ca_Desi_SNP2931 | scaffold01082 | 389                     | [C/A] |                    | INTERGENIC                          |                                                                |
| *Ca_Desi_SNP2932 | scaffold00763 | 1612                    | [T/C] |                    | INTERGENIC                          |                                                                |
| *Ca_Desi_SNP2933 | Ca_Desi_LG06  | 6058595                 | [G/T] | Ca_06917           | SYNONYMOUS_CODING                   | Unknown expressed protein                                      |
| *Ca_Desi_SNP2934 | scaffold10990 | 58420                   | [C/A] | Ca_09604           | NON_SYNONYMOUS_CODING               | Haloacid dehalogenase-like hydrolase (HAD) superfamily protein |
| *Ca_Desi_SNP2935 | scaffold00637 | 5456                    | [A/G] |                    | INTERGENIC                          |                                                                |
| *Ca_Desi_SNP2936 | scaffold01365 | 76464                   | [A/T] |                    | INTERGENIC                          |                                                                |
| *Ca_Desi_SNP2937 | Ca_Desi_LG06  | 5601304                 | [A/G] |                    | INTERGENIC                          |                                                                |



| SNP IDs           | Chromosomes   | Physical positions (bp) | SNPs  | Gene accession IDs | Sequence components of genome/genes | Putative functions                                          |
|-------------------|---------------|-------------------------|-------|--------------------|-------------------------------------|-------------------------------------------------------------|
| *Ca_Desig_SNP2938 | scaffold00850 | 203                     | [G/A] |                    | INTERGENIC                          |                                                             |
| *Ca_Desig_SNP2939 | Ca_Desig_LG06 | 5582291                 | [T/C] | Ca_06866           | INTRON                              | UPF0202 protein At1g10490                                   |
| *Ca_Desig_SNP2940 | Ca_Desig_LG04 | 2451122                 | [A/G] | Ca_04047           | DOWNSTREAM:1212bases                | K(+) efflux antiporter 6                                    |
| *Ca_Desig_SNP2941 | scaffold01130 | 170                     | [C/T] |                    | INTERGENIC                          |                                                             |
| *Ca_Desig_SNP2942 | scaffold00582 | 6320                    | [T/C] | Ca_13279           | INTRON                              | (+)-neomenthol dehydrogenase                                |
| *Ca_Desig_SNP2943 | Ca_Desig_LG06 | 6004431                 | [G/C] | Ca_06910           | SYNONYMOUS_CODING                   | Probable glucan 1,3-beta-glucosidase A                      |
| *Ca_Desig_SNP2944 | Ca_Desig_LG06 | 5573898                 | [T/C] | Ca_06866           | DOWNSTREAM:324bases                 | UPF0202 protein At1g10490                                   |
| *Ca_Desig_SNP2945 | scaffold01958 | 95448                   | [G/C] |                    | INTERGENIC                          |                                                             |
| *Ca_Desig_SNP2946 | Ca_Desig_LG06 | 9897705                 | [T/A] | Ca_07231           | NON_SYNONYMOUS_CODING               | Vacuolar protein sorting-associated protein 27              |
| *Ca_Desig_SNP2947 | scaffold01365 | 51838                   | [C/T] | Ca_10195           | INTRON                              | Putative ATPase N2B                                         |
| *Ca_Desig_SNP2948 | Ca_Desig_LG06 | 5857703                 | [A/G] |                    | INTERGENIC                          |                                                             |
| *Ca_Desig_SNP2949 | scaffold00308 | 6393                    | [T/C] |                    | INTERGENIC                          |                                                             |
| *Ca_Desig_SNP2950 | scaffold11731 | 63482                   | [T/G] |                    | INTERGENIC                          |                                                             |
| *Ca_Desig_SNP2951 | Ca_Desig_LG04 | 2463339                 | [G/A] | Ca_04048           | INTRON                              | Histone deacetylase 2                                       |
| *Ca_Desig_SNP2952 | Ca_Desig_LG06 | 5960810                 | [C/G] | Ca_06904           | DOWNSTREAM:1573bases                | Peptidyl-prolyl cis-trans isomerase FKBP16-2, chloroplastic |
| *Ca_Desig_SNP2953 | Ca_Desig_LG06 | 5947664                 | [G/A] | Ca_06902           | SYNONYMOUS_CODING                   | U-box domain-containing protein 4                           |
| *Ca_Desig_SNP2954 | scaffold00113 | 9400                    | [T/C] | Ca_10890           | DOWNSTREAM:331bases                 | Ethylene-responsive transcription factor ERF012             |
| *Ca_Desig_SNP2955 | Ca_Desig_LG04 | 18319776                | [A/C] | Ca_05002           | DOWNSTREAM:264bases                 | ETO1-like protein 1                                         |
| *Ca_Desig_SNP2956 | Ca_Desig_LG03 | 16051305                | [A/G] | Ca_03231           | SYNONYMOUS_CODING                   | Lon protease homolog 2, peroxisomal                         |
| *Ca_Desig_SNP2957 | Ca_Desig_LG07 | 770276                  | [A/G] | Ca_07445           | DOWNSTREAM:339bases                 | Small RNA 2'-O-methyltransferase                            |
| *Ca_Desig_SNP2958 | scaffold00741 | 908                     | [T/C] |                    | INTERGENIC                          |                                                             |
| *Ca_Desig_SNP2959 | scaffold00582 | 4790                    | [T/G] | Ca_13279           | NON_SYNONYMOUS_CODING               | (+)-neomenthol dehydrogenase                                |
| *Ca_Desig_SNP2960 | Ca_Desig_LG06 | 5947049                 | [T/G] | Ca_06902           | SYNONYMOUS_CODING                   | U-box domain-containing protein 4                           |
| *Ca_Desig_SNP2961 | Ca_Desig_LG05 | 2562488                 | [A/C] | Ca_05415           | DOWNSTREAM:1473bases                | Leishmanolysin-like peptidase                               |
| *Ca_Desig_SNP2962 | scaffold01958 | 95568                   | [T/C] |                    | INTERGENIC                          |                                                             |
| *Ca_Desig_SNP2963 | Ca_Desig_LG06 | 5830357                 | [C/T] |                    | INTERGENIC                          |                                                             |

| SNP IDs           | Chromosomes   | Physical positions (bp) | SNPs  | Gene accession IDs | Sequence components of genome/genes | Putative functions                                                                          |
|-------------------|---------------|-------------------------|-------|--------------------|-------------------------------------|---------------------------------------------------------------------------------------------|
| *Ca_Desig_SNP2964 | Ca_Desig_LG06 | 5765527                 | [G/T] | Ca_06881           | SYNONYMOUS_CODING                   | Uncharacterized GTP-binding protein At5g64813                                               |
| *Ca_Desig_SNP2965 | scaffold00880 | 1031                    | [A/G] |                    | INTERGENIC                          |                                                                                             |
| *Ca_Desig_SNP2966 | scaffold00308 | 1020                    | [C/T] |                    | INTERGENIC                          |                                                                                             |
| *Ca_Desig_SNP2967 | scaffold00526 | 10896                   | [A/C] | Ca_13056           | DOWNSTREAM:1092bases                | --                                                                                          |
| *Ca_Desig_SNP2968 | scaffold00876 | 10372                   | [A/G] |                    | INTERGENIC                          |                                                                                             |
| *Ca_Desig_SNP2969 | Ca_Desig_LG03 | 19059905                | [T/G] |                    | INTERGENIC                          |                                                                                             |
| *Ca_Desig_SNP2970 | Ca_Desig_LG06 | 5805145                 | [G/T] |                    | INTERGENIC                          |                                                                                             |
| *Ca_Desig_SNP2971 | scaffold17235 | 90081                   | [T/G] |                    | INTERGENIC                          |                                                                                             |
| *Ca_Desig_SNP2972 | Ca_Desig_LG06 | 5967285                 | [C/G] |                    | INTERGENIC                          |                                                                                             |
| *Ca_Desig_SNP2973 | Ca_Desig_LG06 | 5944029                 | [G/A] | Ca_06902           | SYNONYMOUS_CODING                   | U-box domain-containing protein 4                                                           |
| *Ca_Desig_SNP2974 | Ca_Desig_LG06 | 5941908                 | [T/C] |                    | INTERGENIC                          |                                                                                             |
| *Ca_Desig_SNP2975 | Ca_Desig_LG06 | 11453287                | [C/T] |                    | INTERGENIC                          |                                                                                             |
| *Ca_Desig_SNP2976 | Ca_Desig_LG06 | 5855179                 | [G/A] | Ca_06892           | INTRON                              | Uncharacterized protein sll1770                                                             |
| *Ca_Desig_SNP2977 | Ca_Desig_LG06 | 5793661                 | [T/C] |                    | INTERGENIC                          |                                                                                             |
| *Ca_Desig_SNP2978 | scaffold00768 | 3130                    | [T/C] |                    | INTERGENIC                          |                                                                                             |
| *Ca_Desig_SNP2979 | scaffold00880 | 906                     | [A/G] |                    | INTERGENIC                          |                                                                                             |
| *Ca_Desig_SNP2980 | scaffold00455 | 10358                   | [T/C] |                    | INTERGENIC                          |                                                                                             |
| *Ca_Desig_SNP2981 | scaffold01365 | 34042                   | [G/C] |                    | INTERGENIC                          |                                                                                             |
| *Ca_Desig_SNP2982 | Ca_Desig_LG01 | 12162733                | [A/T] | Ca_00932           | NON_SYNONYMOUS_CODING               | Probable NOT transcription complex subunit VIP2 (Fragment)                                  |
| *Ca_Desig_SNP2983 | Ca_Desig_LG01 | 757623                  | [T/G] | Ca_00060           | NON_SYNONYMOUS_CODING               | BEST Arabidopsis thaliana protein match is: hydroxyproline-rich glycoprotein family protein |
| *Ca_Desig_SNP2984 | Ca_Desig_LG03 | 18976057                | [T/C] |                    | INTERGENIC                          |                                                                                             |
| *Ca_Desig_SNP2985 | scaffold00876 | 888                     | [A/G] |                    | INTERGENIC                          |                                                                                             |
| *Ca_Desig_SNP2986 | scaffold00779 | 2245                    | [A/G] |                    | INTERGENIC                          |                                                                                             |
| *Ca_Desig_SNP2987 | scaffold01033 | 601                     | [T/C] |                    | INTERGENIC                          |                                                                                             |
| *Ca_Desig_SNP2988 | scaffold00937 | 224736                  | [T/G] |                    | INTERGENIC                          |                                                                                             |
| *Ca_Desig_SNP2989 | scaffold00879 | 1747                    | [T/C] |                    | INTERGENIC                          |                                                                                             |

| SNP IDs           | Chromosomes   | Physical positions (bp) | SNPs  | Gene accession IDs | Sequence components of genome/genes | Putative functions                            |
|-------------------|---------------|-------------------------|-------|--------------------|-------------------------------------|-----------------------------------------------|
| *Ca_Desig_SNP2990 | Ca_Desig_LG06 | 4910031                 | [G/A] | Ca_06836           | NON_SYNONYMOUS_CODING               | Kinesin-like protein KIF15-B                  |
| *Ca_Desig_SNP2991 | scaffold00876 | 834                     | [T/C] |                    | INTERGENIC                          |                                               |
| *Ca_Desig_SNP2992 | scaffold00854 | 2325                    | [A/G] |                    | INTERGENIC                          |                                               |
| *Ca_Desig_SNP2993 | Ca_Desig_LG06 | 4863652                 | [A/T] |                    | INTERGENIC                          |                                               |
| *Ca_Desig_SNP2994 | Ca_Desig_LG06 | 4910422                 | [C/T] | Ca_06836           | INTRON                              | Kinesin-like protein KIF15-B                  |
| *Ca_Desig_SNP2995 | scaffold01737 | 114457                  | [C/A] |                    | INTERGENIC                          |                                               |
| *Ca_Desig_SNP2996 | Ca_Desig_LG06 | 4915651                 | [A/T] |                    | INTERGENIC                          |                                               |
| *Ca_Desig_SNP2997 | scaffold00206 | 47709                   | [T/C] | Ca_11345           | INTRON                              | Secologanin synthase                          |
| *Ca_Desig_SNP2998 | Ca_Desig_LG06 | 7881974                 | [C/T] | Ca_07073           | INTRON                              | Protein of unknown function (DUF789)          |
| *Ca_Desig_SNP2999 | Ca_Desig_LG02 | 14756579                | [G/T] |                    | INTERGENIC                          |                                               |
| *Ca_Desig_SNP3000 | scaffold02139 | 163211                  | [G/A] |                    | INTERGENIC                          |                                               |
| *Ca_Desig_SNP3001 | scaffold00876 | 5290                    | [A/G] |                    | INTERGENIC                          |                                               |
| *Ca_Desig_SNP3002 | scaffold00805 | 2433                    | [A/G] |                    | INTERGENIC                          |                                               |
| *Ca_Desig_SNP3003 | scaffold01159 | 125                     | [T/C] |                    | INTERGENIC                          |                                               |
| *Ca_Desig_SNP3004 | scaffold00763 | 1596                    | [A/G] |                    | INTERGENIC                          |                                               |
| *Ca_Desig_SNP3005 | scaffold00383 | 24478                   | [G/T] |                    | INTERGENIC                          |                                               |
| *Ca_Desig_SNP3006 | Ca_Desig_LG01 | 1486074                 | [T/G] |                    | INTERGENIC                          |                                               |
| *Ca_Desig_SNP3007 | scaffold00702 | 6591                    | [T/C] |                    | INTERGENIC                          |                                               |
| *Ca_Desig_SNP3008 | scaffold00938 | 1140                    | [T/C] |                    | INTERGENIC                          |                                               |
| *Ca_Desig_SNP3009 | scaffold00989 | 895                     | [T/C] |                    | INTERGENIC                          |                                               |
| *Ca_Desig_SNP3010 | scaffold00747 | 2261                    | [A/C] |                    | INTERGENIC                          |                                               |
| *Ca_Desig_SNP3011 | Ca_Desig_LG08 | 3747504                 | [A/C] | Ca_08175           | NON_SYNONYMOUS_CODING               | Pectinesterase/pectinesterase inhibitor PPE8B |
| *Ca_Desig_SNP3012 | scaffold00771 | 2534                    | [T/C] |                    | INTERGENIC                          |                                               |
| *Ca_Desig_SNP3013 | scaffold00962 | 274                     | [A/C] |                    | INTERGENIC                          |                                               |
| *Ca_Desig_SNP3014 | Ca_Desig_LG05 | 1671297                 | [C/A] | Ca_05329           | DOWNSTREAM:1375bases                | Carboxypeptidase A6                           |
| *Ca_Desig_SNP3015 | scaffold00646 | 4953                    | [A/G] |                    | INTERGENIC                          |                                               |

| SNP IDs           | Chromosomes   | Physical positions (bp) | SNPs  | Gene accession IDs | Sequence components of genome/genes | Putative functions                                     |
|-------------------|---------------|-------------------------|-------|--------------------|-------------------------------------|--------------------------------------------------------|
| *Ca_Desig_SNP3016 | Ca_Desig_LG04 | 21752249                | [T/G] | Ca_05200           | SYNONYMOUS_CODING                   | Zinc finger protein JACKDAW                            |
| *Ca_Desig_SNP3017 | scaffold00824 | 2795                    | [T/C] |                    | INTERGENIC                          |                                                        |
| *Ca_Desig_SNP3018 | scaffold02452 | 33563                   | [C/A] |                    | INTERGENIC                          |                                                        |
| *Ca_Desig_SNP3019 | scaffold00882 | 1533                    | [A/G] |                    | INTERGENIC                          |                                                        |
| *Ca_Desig_SNP3020 | scaffold02206 | 86284                   | [A/C] |                    | INTERGENIC                          |                                                        |
| *Ca_Desig_SNP3021 | scaffold00866 | 884                     | [A/G] | Ca_14324           | DOWNSTREAM:445bases                 | NADP-specific glutamate dehydrogenase                  |
| *Ca_Desig_SNP3022 | scaffold00625 | 1511                    | [C/A] |                    | INTERGENIC                          |                                                        |
| *Ca_Desig_SNP3023 | scaffold00876 | 5637                    | [A/G] |                    | INTERGENIC                          |                                                        |
| *Ca_Desig_SNP3024 | scaffold00833 | 2068                    | [T/G] |                    | INTERGENIC                          |                                                        |
| *Ca_Desig_SNP3025 | scaffold00509 | 4183                    | [A/C] |                    | INTERGENIC                          |                                                        |
| *Ca_Desig_SNP3026 | scaffold00854 | 346                     | [T/C] |                    | INTERGENIC                          |                                                        |
| *Ca_Desig_SNP3027 | scaffold00771 | 2524                    | [A/G] |                    | INTERGENIC                          |                                                        |
| *Ca_Desig_SNP3028 | scaffold00876 | 6641                    | [T/C] |                    | INTERGENIC                          |                                                        |
| *Ca_Desig_SNP3029 | Ca_Desig_LG06 | 9507954                 | [A/C] | Ca_07189           | SYNONYMOUS_CODING                   | Negative regulator of genetic competence ClpC/MecB     |
| *Ca_Desig_SNP3030 | Ca_Desig_LG03 | 19827450                | [C/A] | Ca_03610           | SYNONYMOUS_CODING                   | Bromodomain adjacent to zinc finger domain protein 1A  |
| *Ca_Desig_SNP3031 | scaffold00876 | 781                     | [T/C] |                    | INTERGENIC                          |                                                        |
| *Ca_Desig_SNP3032 | Ca_Desig_LG08 | 3500433                 | [G/T] |                    | INTERGENIC                          |                                                        |
| *Ca_Desig_SNP3033 | Ca_Desig_LG05 | 12992831                | [C/G] | Ca_06328           | NON_SYNONYMOUS_CODING               | unknown protein                                        |
| *Ca_Desig_SNP3034 | scaffold00686 | 3639                    | [T/C] |                    | INTERGENIC                          |                                                        |
| *Ca_Desig_SNP3035 | scaffold00882 | 1545                    | [C/T] |                    | INTERGENIC                          |                                                        |
| *Ca_Desig_SNP3036 | Ca_Desig_LG03 | 11391314                | [A/G] | Ca_02936           | INTRON                              | Transmembrane protein 8B                               |
| *Ca_Desig_SNP3037 | scaffold01081 | 258                     | [T/C] |                    | INTERGENIC                          |                                                        |
| *Ca_Desig_SNP3038 | Ca_Desig_LG04 | 3326298                 | [T/G] | Ca_04114           | NON_SYNONYMOUS_CODING               | 2Fe-2S ferredoxin-like superfamily protein             |
| *Ca_Desig_SNP3039 | Ca_Desig_LG05 | 14343532                | [A/C] | Ca_06389           | SYNONYMOUS_CODING                   | Vacuolar protein sorting-associated protein 16 homolog |
| *Ca_Desig_SNP3040 | scaffold00292 | 4515                    | [C/T] |                    | INTERGENIC                          |                                                        |
| *Ca_Desig_SNP3041 | scaffold13621 | 156795                  | [C/A] |                    | INTERGENIC                          |                                                        |

| SNP IDs           | Chromosomes   | Physical positions (bp) | SNPs  | Gene accession IDs | Sequence components of genome/genes | Putative functions                                                |
|-------------------|---------------|-------------------------|-------|--------------------|-------------------------------------|-------------------------------------------------------------------|
| *Ca_Desig_SNP3042 | scaffold00417 | 19445                   | [G/A] | Ca_12539           | INTRON                              | GDT1-like protein 3                                               |
| *Ca_Desig_SNP3043 | scaffold00852 | 790                     | [T/C] | Ca_14286           | SYNONYMOUS_CODING                   | Type I inositol-1,4,5-trisphosphate 5-phosphatase 11              |
| *Ca_Desig_SNP3044 | scaffold00435 | 21895                   | [A/T] |                    | INTERGENIC                          |                                                                   |
| *Ca_Desig_SNP3045 | scaffold00702 | 6594                    | [A/G] |                    | INTERGENIC                          |                                                                   |
| *Ca_Desig_SNP3046 | scaffold00455 | 10356                   | [C/T] |                    | INTERGENIC                          |                                                                   |
| *Ca_Desig_SNP3047 | Ca_Desig_LG07 | 7497869                 | [G/A] |                    | INTERGENIC                          |                                                                   |
| *Ca_Desig_SNP3048 | scaffold00824 | 1774                    | [A/G] |                    | INTERGENIC                          |                                                                   |
| *Ca_Desig_SNP3049 | scaffold00686 | 3640                    | [A/G] |                    | INTERGENIC                          |                                                                   |
| *Ca_Desig_SNP3050 | scaffold01165 | 2888                    | [A/C] |                    | INTERGENIC                          |                                                                   |
| *Ca_Desig_SNP3051 | Ca_Desig_LG03 | 14172702                | [A/G] | Ca_03117           | INTRON                              | CDP-diacylglycerol-glycerol-3-phosphate 3-phosphatidyltransferase |
| *Ca_Desig_SNP3052 | scaffold00824 | 2562                    | [T/C] |                    | INTERGENIC                          |                                                                   |
| *Ca_Desig_SNP3053 | scaffold00789 | 2034                    | [A/C] |                    | INTERGENIC                          |                                                                   |
| *Ca_Desig_SNP3054 | scaffold00212 | 151725                  | [T/G] | Ca_08884           | INTRON                              | zinc ion binding                                                  |
| *Ca_Desig_SNP3055 | scaffold00876 | 10458                   | [T/C] |                    | INTERGENIC                          |                                                                   |
| *Ca_Desig_SNP3056 | Ca_Desig_LG03 | 993126                  | [A/G] | Ca_02241           | DOWNSTREAM:1507bases                | bonsai                                                            |
| *Ca_Desig_SNP3057 | Ca_Desig_LG04 | 5533572                 | [A/C] | Ca_04247           | NON_SYNONYMOUS_CODING               | Putative white-brown complex homolog protein 30                   |
| *Ca_Desig_SNP3058 | Ca_Desig_LG06 | 10358350                | [G/A] | Ca_07279           | DOWNSTREAM:467bases                 | Vesicle-fusing ATPase                                             |
| *Ca_Desig_SNP3059 | scaffold00346 | 28631                   | [A/G] |                    | INTERGENIC                          |                                                                   |
| *Ca_Desig_SNP3060 | scaffold00346 | 17408                   | [A/C] |                    | INTERGENIC                          |                                                                   |
| *Ca_Desig_SNP3061 | scaffold00741 | 1019                    | [A/G] |                    | INTERGENIC                          |                                                                   |
| *Ca_Desig_SNP3062 | scaffold16742 | 15375                   | [G/T] |                    | INTERGENIC                          |                                                                   |
| *Ca_Desig_SNP3063 | scaffold00741 | 793                     | [T/C] |                    | INTERGENIC                          |                                                                   |
| *Ca_Desig_SNP3064 | scaffold01783 | 9088                    | [A/G] |                    | INTERGENIC                          |                                                                   |
| *Ca_Desig_SNP3065 | scaffold03391 | 114447                  | [T/G] |                    | INTERGENIC                          |                                                                   |
| *Ca_Desig_SNP3066 | scaffold01060 | 28433                   | [T/A] |                    | INTERGENIC                          |                                                                   |
| *Ca_Desig_SNP3067 | Ca_Desig_LG03 | 23164356                | [T/C] | Ca_03866           | INTRON                              | Glycogen synthase                                                 |

| SNP IDs           | Chromosomes   | Physical positions (bp) | SNPs  | Gene accession IDs | Sequence components of genome/genes | Putative functions               |
|-------------------|---------------|-------------------------|-------|--------------------|-------------------------------------|----------------------------------|
| *Ca_Desig_SNP3068 | scaffold01159 | 154                     | [T/C] |                    | INTERGENIC                          |                                  |
| *Ca_Desig_SNP3069 | scaffold00785 | 2241                    | [C/A] |                    | INTERGENIC                          |                                  |
| *Ca_Desig_SNP3070 | scaffold00804 | 746                     | [T/C] |                    | INTERGENIC                          |                                  |
| *Ca_Desig_SNP3071 | scaffold04147 | 23865                   | [A/C] |                    | INTERGENIC                          |                                  |
| *Ca_Desig_SNP3072 | scaffold00686 | 2608                    | [A/G] |                    | INTERGENIC                          |                                  |
| *Ca_Desig_SNP3073 | scaffold00788 | 3359                    | [T/C] |                    | INTERGENIC                          |                                  |
| *Ca_Desig_SNP3074 | scaffold01042 | 653                     | [T/A] |                    | INTERGENIC                          |                                  |
| *Ca_Desig_SNP3075 | scaffold01861 | 87753                   | [T/C] |                    | INTERGENIC                          |                                  |
| *Ca_Desig_SNP3076 | scaffold00582 | 6315                    | [T/C] | Ca_13279           | INTRON                              | (+)-neomenthol dehydrogenase     |
| *Ca_Desig_SNP3077 | scaffold00876 | 854                     | [C/A] |                    | INTERGENIC                          |                                  |
| *Ca_Desig_SNP3078 | scaffold00876 | 857                     | [T/C] |                    | INTERGENIC                          |                                  |
| *Ca_Desig_SNP3079 | scaffold01105 | 433                     | [T/C] |                    | INTERGENIC                          |                                  |
| *Ca_Desig_SNP3080 | scaffold01106 | 48                      | [A/G] |                    | INTERGENIC                          |                                  |
| *Ca_Desig_SNP3081 | Ca_Desig_LG04 | 3012464                 | [G/C] |                    | INTERGENIC                          |                                  |
| *Ca_Desig_SNP3082 | scaffold00789 | 2311                    | [T/C] |                    | INTERGENIC                          |                                  |
| *Ca_Desig_SNP3083 | scaffold00215 | 135130                  | [C/A] | Ca_08894           | INTRON                              | Uridine kinase-like protein 4    |
| *Ca_Desig_SNP3084 | scaffold00601 | 11689                   | [A/G] | Ca_13336           | NON_SYNONYMOUS_CODING               | Disease resistance protein RPM1  |
| *Ca_Desig_SNP3085 | scaffold01063 | 309                     | [A/C] |                    | INTERGENIC                          |                                  |
| *Ca_Desig_SNP3086 | scaffold00686 | 1699                    | [A/G] |                    | INTERGENIC                          |                                  |
| *Ca_Desig_SNP3087 | scaffold00798 | 3197                    | [T/C] |                    | INTERGENIC                          |                                  |
| *Ca_Desig_SNP3088 | scaffold00262 | 957                     | [T/G] | Ca_11634           | NON_SYNONYMOUS_CODING               | maternal effect embryo arrest 14 |
| *Ca_Desig_SNP3089 | scaffold00860 | 930                     | [T/C] |                    | INTERGENIC                          |                                  |
| *Ca_Desig_SNP3090 | scaffold03922 | 68387                   | [C/A] |                    | INTERGENIC                          |                                  |
| *Ca_Desig_SNP3091 | Ca_Desig_LG06 | 6792785                 | [C/A] | Ca_06979           | NON_SYNONYMOUS_CODING               | WD repeat-containing protein 53  |
| *Ca_Desig_SNP3092 | Ca_Desig_LG06 | 6792786                 | [T/C] | Ca_06979           | SYNONYMOUS_CODING                   | WD repeat-containing protein 53  |
| *Ca_Desig_SNP3093 | Ca_Desig_LG08 | 6929295                 | [C/T] | Ca_08499           | INTRON                              | Ribosome production factor 1     |

| SNP IDs           | Chromosomes   | Physical positions (bp) | SNPs  | Gene accession IDs | Sequence components of genome/genes | Putative functions                                                            |
|-------------------|---------------|-------------------------|-------|--------------------|-------------------------------------|-------------------------------------------------------------------------------|
| *Ca_Desig_SNP3094 | scaffold00673 | 7204                    | [C/T] |                    | INTERGENIC                          |                                                                               |
| *Ca_Desig_SNP3095 | scaffold01861 | 99806                   | [C/G] |                    | INTERGENIC                          |                                                                               |
| *Ca_Desig_SNP3096 | scaffold00400 | 29468                   | [T/G] | Ca_12466           | DOWNSTREAM:1150bases                | Core-2/I-branching beta-1,6-N-acetylglucosaminyltransferase family protein    |
| *Ca_Desig_SNP3097 | scaffold00763 | 1597                    | [C/A] |                    | INTERGENIC                          |                                                                               |
| *Ca_Desig_SNP3098 | scaffold00263 | 37852                   | [G/C] | Ca_11660           | DOWNSTREAM:1357bases                | 22.7 kDa class IV heat shock protein                                          |
| *Ca_Desig_SNP3099 | scaffold00804 | 773                     | [A/G] |                    | INTERGENIC                          |                                                                               |
| *Ca_Desig_SNP3100 | scaffold01183 | 106782                  | [A/G] |                    | INTERGENIC                          |                                                                               |
| *Ca_Desig_SNP3101 | Ca_Desig_LG08 | 7032885                 | [T/C] | Ca_08514           | INTRON                              | GDP-fucose protein O-fucosyltransferase 2                                     |
| *Ca_Desig_SNP3102 | scaffold00854 | 317                     | [A/G] |                    | INTERGENIC                          |                                                                               |
| *Ca_Desig_SNP3103 | scaffold01032 | 716                     | [G/A] |                    | INTERGENIC                          |                                                                               |
| *Ca_Desig_SNP3104 | scaffold04233 | 54113                   | [T/C] |                    | INTERGENIC                          |                                                                               |
| *Ca_Desig_SNP3105 | Ca_Desig_LG04 | 15957928                | [G/A] |                    | INTERGENIC                          |                                                                               |
| *Ca_Desig_SNP3106 | Ca_Desig_LG08 | 7060761                 | [A/C] | Ca_08515           | INTRON                              | DNA-directed RNA polymerase III subunit RPC2                                  |
| *Ca_Desig_SNP3107 | Ca_Desig_LG07 | 7980565                 | [T/G] | Ca_07914           | INTRON                              | Nucleoside diphosphate kinase 6                                               |
| *Ca_Desig_SNP3108 | Ca_Desig_LG07 | 3675434                 | [G/C] | Ca_07634           | DOWNSTREAM:1156bases                | SOUL heme-binding family protein                                              |
| *Ca_Desig_SNP3109 | scaffold00761 | 3718                    | [A/G] |                    | INTERGENIC                          |                                                                               |
| *Ca_Desig_SNP3110 | scaffold00261 | 25686                   | [C/T] |                    | INTERGENIC                          |                                                                               |
| *Ca_Desig_SNP3111 | scaffold01168 | 48197                   | [G/A] |                    | INTERGENIC                          |                                                                               |
| *Ca_Desig_SNP3112 | Ca_Desig_LG08 | 6890396                 | [C/T] | Ca_08496           | DOWNSTREAM:864bases                 | B3 domain-containing protein Os03g0120900                                     |
| *Ca_Desig_SNP3113 | Ca_Desig_LG06 | 4793130                 | [T/G] | Ca_06824           | INTRON                              | Bifunctional aspartokinase/homoserine dehydrogenase, chloroplastic (Fragment) |
| *Ca_Desig_SNP3114 | scaffold01536 | 107552                  | [C/T] |                    | INTERGENIC                          |                                                                               |
| *Ca_Desig_SNP3115 | Ca_Desig_LG08 | 6932494                 | [A/C] | Ca_08500           | INTRON                              | Chlorophyll a-b binding protein 7, chloroplastic                              |
| *Ca_Desig_SNP3116 | Ca_Desig_LG08 | 6929663                 | [A/C] |                    | INTERGENIC                          |                                                                               |
| *Ca_Desig_SNP3117 | scaffold00919 | 560                     | [A/C] |                    | INTERGENIC                          |                                                                               |
| *Ca_Desig_SNP3118 | scaffold01164 | 249                     | [T/G] |                    | INTERGENIC                          |                                                                               |
| *Ca_Desig_SNP3119 | Ca_Desig_LG07 | 6484394                 | [G/T] | Ca_07810           | NON_SYNONYMOUS_CODING               | Subtilisin-like protease                                                      |

| SNP IDs           | Chromosomes   | Physical positions (bp) | SNPs  | Gene accession IDs | Sequence components of genome/genes | Putative functions                                           |
|-------------------|---------------|-------------------------|-------|--------------------|-------------------------------------|--------------------------------------------------------------|
| *Ca_Desig_SNP3120 | scaffold02711 | 62227                   | [C/T] | Ca_10496           | UPSTREAM:233bases                   | Probable WRKY transcription factor 19                        |
| *Ca_Desig_SNP3121 | scaffold02711 | 62239                   | [A/G] | Ca_10496           | UPSTREAM:245bases                   | Probable WRKY transcription factor 19                        |
| *Ca_Desig_SNP3122 | scaffold01287 | 54958                   | [A/C] |                    | INTERGENIC                          |                                                              |
| *Ca_Desig_SNP3123 | scaffold00352 | 12901                   | [A/G] |                    | INTERGENIC                          |                                                              |
| *Ca_Desig_SNP3124 | scaffold02786 | 58155                   | [A/G] |                    | INTERGENIC                          |                                                              |
| *Ca_Desig_SNP3125 | Ca_Desig_LG04 | 6325212                 | [T/C] | Ca_04285           | DOWNSTREAM:37bases                  | TBCC domain-containing protein 1                             |
| *Ca_Desig_SNP3126 | scaffold00741 | 881                     | [T/C] |                    | INTERGENIC                          |                                                              |
| *Ca_Desig_SNP3127 | scaffold02786 | 58405                   | [C/A] |                    | INTERGENIC                          |                                                              |
| *Ca_Desig_SNP3128 | scaffold00412 | 2156                    | [G/A] |                    | INTERGENIC                          |                                                              |
| *Ca_Desig_SNP3129 | scaffold02032 | 96364                   | [A/C] |                    | INTERGENIC                          |                                                              |
| *Ca_Desig_SNP3130 | scaffold01333 | 67803                   | [C/T] | Ca_10035           | DOWNSTREAM:1841bases                | --                                                           |
| *Ca_Desig_SNP3131 | scaffold02296 | 255013                  | [T/G] |                    | INTERGENIC                          |                                                              |
| *Ca_Desig_SNP3132 | scaffold00884 | 1620                    | [T/C] |                    | INTERGENIC                          |                                                              |
| *Ca_Desig_SNP3133 | Ca_Desig_LG04 | 7601679                 | [T/G] |                    | INTERGENIC                          |                                                              |
| *Ca_Desig_SNP3134 | scaffold01129 | 42162                   | [T/G] |                    | INTERGENIC                          |                                                              |
| *Ca_Desig_SNP3135 | scaffold00519 | 755                     | [A/T] |                    | INTERGENIC                          |                                                              |
| *Ca_Desig_SNP3136 | Ca_Desig_LG07 | 5137821                 | [C/T] | Ca_07701           | NON_SYNONYMOUS_CODING               | Probable phosphatidylinositol 4-kinase type 2-beta At1g26270 |
| *Ca_Desig_SNP3137 | scaffold02711 | 64438                   | [T/C] |                    | INTERGENIC                          |                                                              |
| *Ca_Desig_SNP3138 | scaffold02711 | 64255                   | [T/C] |                    | INTERGENIC                          |                                                              |
| *Ca_Desig_SNP3139 | Ca_Desig_LG07 | 5138627                 | [G/A] |                    | INTERGENIC                          |                                                              |
| *Ca_Desig_SNP3140 | scaffold00879 | 1735                    | [A/G] |                    | INTERGENIC                          |                                                              |
| *Ca_Desig_SNP3141 | Ca_Desig_LG08 | 7060826                 | [C/G] | Ca_08515           | INTRON                              | DNA-directed RNA polymerase III subunit RPC2                 |
| *Ca_Desig_SNP3142 | scaffold09553 | 106287                  | [T/G] |                    | INTERGENIC                          |                                                              |
| *Ca_Desig_SNP3143 | scaffold02788 | 148327                  | [G/A] |                    | INTERGENIC                          |                                                              |
| *Ca_Desig_SNP3144 | scaffold00884 | 662                     | [T/C] |                    | INTERGENIC                          |                                                              |
| *Ca_Desig_SNP3145 | Ca_Desig_LG08 | 8238171                 | [G/T] | Ca_08594           | NON_SYNONYMOUS_CODING               | Programmed cell death protein 4                              |



| SNP IDs           | Chromosomes   | Physical positions (bp) | SNPs  | Gene accession IDs | Sequence components of genome/genes | Putative functions                                              |
|-------------------|---------------|-------------------------|-------|--------------------|-------------------------------------|-----------------------------------------------------------------|
| *Ca_Desig_SNP3146 | scaffold01668 | 14893                   | [G/A] |                    | INTERGENIC                          |                                                                 |
| *Ca_Desig_SNP3147 | scaffold01333 | 141847                  | [A/T] |                    | INTERGENIC                          |                                                                 |
| *Ca_Desig_SNP3148 | scaffold02786 | 80074                   | [T/C] |                    | INTERGENIC                          |                                                                 |
| *Ca_Desig_SNP3149 | scaffold04233 | 46241                   | [T/C] |                    | INTERGENIC                          |                                                                 |
| *Ca_Desig_SNP3150 | scaffold00675 | 13845                   | [A/G] |                    | INTERGENIC                          |                                                                 |
| *Ca_Desig_SNP3151 | scaffold02711 | 62353                   | [C/G] | Ca_10496           | UPSTREAM:359bases                   | Probable WRKY transcription factor 19                           |
| *Ca_Desig_SNP3152 | scaffold08694 | 100                     | [A/G] |                    | INTERGENIC                          |                                                                 |
| *Ca_Desig_SNP3153 | scaffold02711 | 32937                   | [G/A] | Ca_10495           | INTRON                              | Integrator complex subunit 9                                    |
| *Ca_Desig_SNP3154 | scaffold00538 | 7816                    | [G/A] | Ca_13084           | INTRON                              | Uridine 5'-monophosphate synthase (Fragment)                    |
| *Ca_Desig_SNP3155 | Ca_Desig_LG03 | 11444578                | [T/C] | Ca_02940           | UTR_5_PRIME:5bases                  | Putative mediator of RNA polymerase II transcription subunit 12 |
| *Ca_Desig_SNP3156 | scaffold01138 | 100070                  | [A/C] | Ca_09983           | INTRON                              | DNA-directed RNA polymerase I subunit rpa1                      |
| *Ca_Desig_SNP3157 | scaffold00327 | 33946                   | [T/A] |                    | INTERGENIC                          |                                                                 |
| *Ca_Desig_SNP3158 | scaffold00534 | 193                     | [C/T] |                    | INTERGENIC                          |                                                                 |
| *Ca_Desig_SNP3159 | scaffold00771 | 2540                    | [T/C] |                    | INTERGENIC                          |                                                                 |
| *Ca_Desig_SNP3160 | scaffold00961 | 483                     | [A/G] |                    | INTERGENIC                          |                                                                 |
| *Ca_Desig_SNP3161 | scaffold00876 | 6620                    | [A/G] |                    | INTERGENIC                          |                                                                 |
| *Ca_Desig_SNP3162 | scaffold00937 | 224731                  | [C/T] |                    | INTERGENIC                          |                                                                 |
| *Ca_Desig_SNP3163 | scaffold07155 | 18650                   | [A/T] |                    | INTERGENIC                          |                                                                 |
| *Ca_Desig_SNP3164 | scaffold00880 | 991                     | [A/G] |                    | INTERGENIC                          |                                                                 |
| *Ca_Desig_SNP3165 | Ca_Desig_LG03 | 19113403                | [T/C] | Ca_03534           | NON_SYNONYMOUS_CODING               | armadillo repeat only 2                                         |
| *Ca_Desig_SNP3166 | scaffold02535 | 65955                   | [A/T] |                    | INTERGENIC                          |                                                                 |
| *Ca_Desig_SNP3167 | scaffold00498 | 92634                   | [T/C] |                    | INTERGENIC                          |                                                                 |
| *Ca_Desig_SNP3168 | scaffold01060 | 169474                  | [G/A] |                    | INTERGENIC                          |                                                                 |
| *Ca_Desig_SNP3169 | Ca_Desig_LG01 | 13692610                | [A/C] | Ca_00980           | DOWNSTREAM:1334bases                | Methyltransferase-like protein 22                               |
| *Ca_Desig_SNP3170 | scaffold00890 | 1632                    | [T/G] |                    | INTERGENIC                          |                                                                 |
| *Ca_Desig_SNP3171 | Ca_Desig_LG06 | 6118896                 | [C/T] | Ca_06923           | SYNONYMOUS_CODING                   | Protein spinster                                                |

| SNP IDs           | Chromosomes   | Physical positions (bp) | SNPs  | Gene accession IDs | Sequence components of genome/genes | Putative functions              |
|-------------------|---------------|-------------------------|-------|--------------------|-------------------------------------|---------------------------------|
| *Ca_Desig_SNP3172 | scaffold01333 | 141764                  | [T/G] |                    | INTERGENIC                          |                                 |
| *Ca_Desig_SNP3173 | scaffold01783 | 3779                    | [A/G] |                    | INTERGENIC                          |                                 |
| *Ca_Desig_SNP3174 | scaffold00346 | 9737                    | [C/A] |                    | INTERGENIC                          |                                 |
| *Ca_Desig_SNP3175 | scaffold02786 | 62363                   | [C/G] |                    | INTERGENIC                          |                                 |
| *Ca_Desig_SNP3176 | scaffold01783 | 3601                    | [A/G] |                    | INTERGENIC                          |                                 |
| *Ca_Desig_SNP3177 | Ca_Desig_LG04 | 15957911                | [T/A] |                    | INTERGENIC                          |                                 |
| *Ca_Desig_SNP3178 | scaffold01783 | 71112                   | [C/T] |                    | INTERGENIC                          |                                 |
| *Ca_Desig_SNP3179 | Ca_Desig_LG05 | 1440855                 | [T/G] |                    | INTERGENIC                          |                                 |
| *Ca_Desig_SNP3180 | scaffold01333 | 171714                  | [C/T] |                    | INTERGENIC                          |                                 |
| *Ca_Desig_SNP3181 | scaffold04453 | 148444                  | [G/T] |                    | INTERGENIC                          |                                 |
| *Ca_Desig_SNP3182 | Ca_Desig_LG02 | 7814101                 | [T/G] | Ca_01624           | DOWNSTREAM:1949bases                | Unknown expressed protein       |
| *Ca_Desig_SNP3183 | scaffold01281 | 170998                  | [G/T] |                    | INTERGENIC                          |                                 |
| *Ca_Desig_SNP3184 | scaffold00768 | 3040                    | [A/G] |                    | INTERGENIC                          |                                 |
| *Ca_Desig_SNP3185 | scaffold05316 | 31420                   | [G/T] |                    | INTERGENIC                          |                                 |
| *Ca_Desig_SNP3186 | scaffold01060 | 96479                   | [G/A] |                    | INTERGENIC                          |                                 |
| *Ca_Desig_SNP3187 | scaffold00233 | 805                     | [C/T] | Ca_08976           | INTRON                              | Transcription activator GLK1    |
| *Ca_Desig_SNP3188 | scaffold01365 | 72620                   | [A/C] |                    | INTERGENIC                          |                                 |
| *Ca_Desig_SNP3189 | scaffold00804 | 2005                    | [T/G] |                    | INTERGENIC                          |                                 |
| *Ca_Desig_SNP3190 | Ca_Desig_LG04 | 16318794                | [C/T] |                    | INTERGENIC                          |                                 |
| *Ca_Desig_SNP3191 | Ca_Desig_LG07 | 3150114                 | [A/T] | Ca_07606           | NON_SYNONYMOUS_CODING               | Citrate synthase, mitochondrial |
| *Ca_Desig_SNP3192 | scaffold01060 | 74545                   | [G/A] |                    | INTERGENIC                          |                                 |
| *Ca_Desig_SNP3193 | scaffold01121 | 50                      | [C/A] |                    | INTERGENIC                          |                                 |
| *Ca_Desig_SNP3194 | scaffold01618 | 52978                   | [T/G] |                    | INTERGENIC                          |                                 |
| *Ca_Desig_SNP3195 | scaffold00876 | 5322                    | [A/G] |                    | INTERGENIC                          |                                 |
| *Ca_Desig_SNP3196 | Ca_Desig_LG08 | 8238174                 | [C/G] | Ca_08594           | NON_SYNONYMOUS_CODING               | Programmed cell death protein 4 |
| *Ca_Desig_SNP3197 | scaffold00046 | 234031                  | [G/A] |                    | INTERGENIC                          |                                 |

| SNP IDs           | Chromosomes   | Physical positions (bp) | SNPs  | Gene accession IDs | Sequence components of genome/genes | Putative functions                                   |
|-------------------|---------------|-------------------------|-------|--------------------|-------------------------------------|------------------------------------------------------|
| *Ca_Desig_SNP3198 | scaffold01060 | 28286                   | [G/A] |                    | INTERGENIC                          |                                                      |
| *Ca_Desig_SNP3199 | scaffold01085 | 278                     | [C/T] |                    | INTERGENIC                          |                                                      |
| *Ca_Desig_SNP3200 | scaffold02711 | 64912                   | [C/T] |                    | INTERGENIC                          |                                                      |
| *Ca_Desig_SNP3201 | scaffold01060 | 28063                   | [C/T] |                    | INTERGENIC                          |                                                      |
| *Ca_Desig_SNP3202 | scaffold02711 | 64098                   | [C/T] |                    | INTERGENIC                          |                                                      |
| *Ca_Desig_SNP3203 | scaffold00686 | 1917                    | [A/G] |                    | INTERGENIC                          |                                                      |
| *Ca_Desig_SNP3204 | scaffold01668 | 100047                  | [G/T] |                    | INTERGENIC                          |                                                      |
| *Ca_Desig_SNP3205 | scaffold01093 | 488                     | [A/T] |                    | INTERGENIC                          |                                                      |
| *Ca_Desig_SNP3206 | scaffold01180 | 172587                  | [A/C] |                    | INTERGENIC                          |                                                      |
| *Ca_Desig_SNP3207 | scaffold00876 | 10353                   | [T/C] |                    | INTERGENIC                          |                                                      |
| *Ca_Desig_SNP3208 | scaffold01861 | 88941                   | [T/G] |                    | INTERGENIC                          |                                                      |
| *Ca_Desig_SNP3209 | scaffold00827 | 38181                   | [G/T] | Ca_09722           | SYNONYMOUS_CODING                   | Squamosa promoter-binding-like protein 6             |
| *Ca_Desig_SNP3210 | scaffold07585 | 34201                   | [T/G] |                    | INTERGENIC                          |                                                      |
| *Ca_Desig_SNP3211 | scaffold00824 | 1897                    | [A/G] |                    | INTERGENIC                          |                                                      |
| *Ca_Desig_SNP3212 | scaffold00900 | 288                     | [T/G] |                    | INTERGENIC                          |                                                      |
| *Ca_Desig_SNP3213 | scaffold00352 | 34733                   | [G/A] | Ca_12246           | SYNONYMOUS_CODING                   | Serine/threonine-protein kinase OX11                 |
| *Ca_Desig_SNP3214 | scaffold00789 | 2357                    | [A/G] |                    | INTERGENIC                          |                                                      |
| *Ca_Desig_SNP3215 | scaffold00352 | 34356                   | [A/T] | Ca_12246           | NON_SYNONYMOUS_CODING               | Serine/threonine-protein kinase OX11                 |
| *Ca_Desig_SNP3216 | scaffold00852 | 759                     | [T/C] | Ca_14286           | INTRON                              | Type I inositol-1,4,5-trisphosphate 5-phosphatase 11 |
| *Ca_Desig_SNP3217 | scaffold03971 | 2192                    | [C/G] | Ca_10574           | INTRON                              | Protein KIAA0664 homolog                             |
| *Ca_Desig_SNP3218 | scaffold01264 | 130642                  | [A/G] |                    | INTERGENIC                          |                                                      |
| *Ca_Desig_SNP3219 | Ca_Desig_LG07 | 3970206                 | [A/G] |                    | INTERGENIC                          |                                                      |
| *Ca_Desig_SNP3220 | scaffold00763 | 1595                    | [T/C] |                    | INTERGENIC                          |                                                      |
| *Ca_Desig_SNP3221 | scaffold00761 | 3544                    | [T/C] |                    | INTERGENIC                          |                                                      |
| *Ca_Desig_SNP3222 | scaffold01668 | 100049                  | [A/G] |                    | INTERGENIC                          |                                                      |
| *Ca_Desig_SNP3223 | scaffold02711 | 66131                   | [A/G] |                    | INTERGENIC                          |                                                      |

| SNP IDs           | Chromosomes   | Physical positions (bp) | SNPs  | Gene accession IDs | Sequence components of genome/genes | Putative functions                                   |
|-------------------|---------------|-------------------------|-------|--------------------|-------------------------------------|------------------------------------------------------|
| *Ca_Desig_SNP3224 | scaffold06944 | 66258                   | [T/C] |                    | INTERGENIC                          |                                                      |
| *Ca_Desig_SNP3225 | scaffold00383 | 26247                   | [C/A] |                    | INTERGENIC                          |                                                      |
| *Ca_Desig_SNP3226 | Ca_Desig_LG08 | 598381                  | [A/C] |                    | INTERGENIC                          |                                                      |
| *Ca_Desig_SNP3227 | scaffold00897 | 901                     | [T/C] |                    | INTERGENIC                          |                                                      |
| *Ca_Desig_SNP3228 | scaffold00937 | 284578                  | [C/T] |                    | INTERGENIC                          |                                                      |
| *Ca_Desig_SNP3229 | scaffold00876 | 852                     | [G/A] |                    | INTERGENIC                          |                                                      |
| *Ca_Desig_SNP3230 | scaffold00654 | 126201                  | [G/A] | Ca_09556           | DOWNSTREAM:54bases                  | Probable WRKY transcription factor 70                |
| *Ca_Desig_SNP3231 | scaffold13621 | 65142                   | [T/C] |                    | INTERGENIC                          |                                                      |
| *Ca_Desig_SNP3232 | scaffold00876 | 5628                    | [A/G] |                    | INTERGENIC                          |                                                      |
| *Ca_Desig_SNP3233 | scaffold00346 | 17367                   | [A/G] |                    | INTERGENIC                          |                                                      |
| *Ca_Desig_SNP3234 | scaffold00646 | 4981                    | [T/C] |                    | INTERGENIC                          |                                                      |
| *Ca_Desig_SNP3235 | scaffold01040 | 645                     | [C/G] |                    | INTERGENIC                          |                                                      |
| *Ca_Desig_SNP3236 | scaffold00582 | 7881                    | [C/A] | Ca_13279           | INTRON                              | (+)-neomenthol dehydrogenase                         |
| *Ca_Desig_SNP3237 | scaffold00787 | 113282                  | [T/C] |                    | INTERGENIC                          |                                                      |
| *Ca_Desig_SNP3238 | scaffold00876 | 5626                    | [T/C] |                    | INTERGENIC                          |                                                      |
| *Ca_Desig_SNP3239 | scaffold00582 | 6324                    | [A/G] | Ca_13279           | INTRON                              | (+)-neomenthol dehydrogenase                         |
| *Ca_Desig_SNP3240 | Ca_Desig_LG04 | 1400955                 | [C/A] | Ca_03991           | NON_SYNONYMOUS_CODING               | Trimethylguanosine synthase                          |
| *Ca_Desig_SNP3241 | scaffold11974 | 30859                   | [A/C] |                    | INTERGENIC                          |                                                      |
| *Ca_Desig_SNP3242 | scaffold00702 | 6583                    | [A/G] |                    | INTERGENIC                          |                                                      |
| *Ca_Desig_SNP3243 | scaffold00826 | 66244                   | [G/A] |                    | INTERGENIC                          |                                                      |
| *Ca_Desig_SNP3244 | scaffold00972 | 185                     | [C/A] |                    | INTERGENIC                          |                                                      |
| *Ca_Desig_SNP3245 | scaffold01159 | 171                     | [T/C] |                    | INTERGENIC                          |                                                      |
| *Ca_Desig_SNP3246 | scaffold00587 | 13382                   | [A/G] |                    | INTERGENIC                          |                                                      |
| *Ca_Desig_SNP3247 | scaffold01858 | 91800                   | [G/A] |                    | INTERGENIC                          |                                                      |
| *Ca_Desig_SNP3248 | Ca_Desig_LG08 | 10126045                | [A/C] | Ca_08711           | NON_SYNONYMOUS_CODING               | Chromatin structure-remodeling complex subunit snf21 |
| *Ca_Desig_SNP3249 | scaffold00384 | 5981                    | [A/C] |                    | INTERGENIC                          |                                                      |

| SNP IDs           | Chromosomes   | Physical positions (bp) | SNPs  | Gene accession IDs | Sequence components of genome/genes | Putative functions                                    |
|-------------------|---------------|-------------------------|-------|--------------------|-------------------------------------|-------------------------------------------------------|
| *Ca_Desig_SNP3250 | scaffold00278 | 88352                   | [C/T] |                    | INTERGENIC                          |                                                       |
| *Ca_Desig_SNP3251 | Ca_Desig_LG05 | 13004532                | [C/T] |                    | INTERGENIC                          |                                                       |
| *Ca_Desig_SNP3252 | scaffold00735 | 2818                    | [T/C] | Ca_13852           | DOWNSTREAM:1628bases                | MORC family CW-type zinc finger protein 4             |
| *Ca_Desig_SNP3253 | Ca_Desig_LG02 | 16748726                | [T/A] |                    | INTERGENIC                          |                                                       |
| *Ca_Desig_SNP3254 | scaffold02139 | 163204                  | [T/G] |                    | INTERGENIC                          |                                                       |
| *Ca_Desig_SNP3255 | scaffold01130 | 135                     | [C/T] |                    | INTERGENIC                          |                                                       |
| *Ca_Desig_SNP3256 | Ca_Desig_LG02 | 7462063                 | [A/C] |                    | INTERGENIC                          |                                                       |
| *Ca_Desig_SNP3257 | scaffold00683 | 4667                    | [A/C] |                    | INTERGENIC                          |                                                       |
| *Ca_Desig_SNP3258 | scaffold01148 | 310                     | [A/T] |                    | INTERGENIC                          |                                                       |
| *Ca_Desig_SNP3259 | scaffold00880 | 1009                    | [A/G] |                    | INTERGENIC                          |                                                       |
| *Ca_Desig_SNP3260 | Ca_Desig_LG07 | 4940521                 | [T/G] |                    | INTERGENIC                          |                                                       |
| *Ca_Desig_SNP3261 | scaffold00933 | 826                     | [G/A] |                    | INTERGENIC                          |                                                       |
| *Ca_Desig_SNP3262 | Ca_Desig_LG03 | 12863789                | [C/A] |                    | INTERGENIC                          |                                                       |
| *Ca_Desig_SNP3263 | scaffold00876 | 873                     | [A/G] |                    | INTERGENIC                          |                                                       |
| *Ca_Desig_SNP3264 | Ca_Desig_LG04 | 9851385                 | [G/T] |                    | INTERGENIC                          |                                                       |
| *Ca_Desig_SNP3265 | scaffold00417 | 19451                   | [A/C] | Ca_12539           | INTRON                              | GDT1-like protein 3                                   |
| *Ca_Desig_SNP3266 | scaffold00735 | 3711                    | [A/G] | Ca_13852           | DOWNSTREAM:735bases                 | MORC family CW-type zinc finger protein 4             |
| *Ca_Desig_SNP3267 | scaffold01223 | 38132                   | [A/G] | Ca_10091           | INTRON                              | Probable replication factor C subunit 3               |
| *Ca_Desig_SNP3268 | Ca_Desig_LG01 | 10531007                | [T/G] | Ca_00784           | NON_SYNONYMOUS_CODING               | OTU domain-containing protein 5                       |
| *Ca_Desig_SNP3269 | Ca_Desig_LG02 | 13147119                | [A/T] | Ca_01855           | INTRON                              | Beta-adaptin-like protein C                           |
| *Ca_Desig_SNP3270 | scaffold03605 | 45277                   | [T/G] |                    | INTERGENIC                          |                                                       |
| *Ca_Desig_SNP3271 | scaffold02308 | 11265                   | [T/G] |                    | INTERGENIC                          |                                                       |
| *Ca_Desig_SNP3272 | scaffold01170 | 115704                  | [C/T] |                    | INTERGENIC                          |                                                       |
| *Ca_Desig_SNP3273 | scaffold00216 | 63211                   | [C/A] | Ca_08907           | DOWNSTREAM:1990bases                | Pentatricopeptide repeat-containing protein At1g76280 |
| *Ca_Desig_SNP3274 | scaffold01566 | 34444                   | [A/C] | Ca_10316           | DOWNSTREAM:1073bases                | Heat shock 22 kDa protein, mitochondrial              |
| *Ca_Desig_SNP3275 | scaffold01451 | 46466                   | [T/G] |                    | INTERGENIC                          |                                                       |

| SNP IDs           | Chromosomes   | Physical positions (bp) | SNPs  | Gene accession IDs | Sequence components of genome/genes | Putative functions                                            |
|-------------------|---------------|-------------------------|-------|--------------------|-------------------------------------|---------------------------------------------------------------|
| *Ca_Desig_SNP3276 | scaffold00167 | 143693                  | [T/G] |                    | INTERGENIC                          |                                                               |
| *Ca_Desig_SNP3277 | scaffold00709 | 2350                    | [A/C] |                    | INTERGENIC                          |                                                               |
| *Ca_Desig_SNP3278 | Ca_Desig_LG03 | 3884585                 | [T/G] | Ca_02485           | SYNONYMOUS_CODING                   | Protein downstream neighbor of Son                            |
| *Ca_Desig_SNP3279 | scaffold00691 | 4521                    | [A/G] |                    | INTERGENIC                          |                                                               |
| *Ca_Desig_SNP3280 | scaffold05292 | 18854                   | [C/G] |                    | INTERGENIC                          |                                                               |
| *Ca_Desig_SNP3281 | scaffold01082 | 265                     | [T/A] |                    | INTERGENIC                          |                                                               |
| *Ca_Desig_SNP3282 | Ca_Desig_LG08 | 7067658                 | [A/C] | Ca_08515           | INTRON                              | DNA-directed RNA polymerase III subunit RPC2                  |
| *Ca_Desig_SNP3283 | scaffold00852 | 754                     | [A/G] | Ca_14286           | INTRON                              | Type I inositol-1,4,5-trisphosphate 5-phosphatase 11          |
| *Ca_Desig_SNP3284 | Ca_Desig_LG02 | 16741302                | [C/T] | Ca_02124           | DOWNSTREAM:1272bases                | Chlorophyll a-b binding protein 215, chloroplastic            |
| *Ca_Desig_SNP3285 | scaffold00876 | 797                     | [A/G] |                    | INTERGENIC                          |                                                               |
| *Ca_Desig_SNP3286 | scaffold00880 | 1018                    | [A/G] |                    | INTERGENIC                          |                                                               |
| *Ca_Desig_SNP3287 | scaffold00227 | 47419                   | [A/C] |                    | INTERGENIC                          |                                                               |
| *Ca_Desig_SNP3288 | scaffold00775 | 2399                    | [A/G] | Ca_13986           | DOWNSTREAM:1002bases                | Protein of unknown function (DUF3755)                         |
| *Ca_Desig_SNP3289 | scaffold00686 | 2579                    | [A/G] |                    | INTERGENIC                          |                                                               |
| *Ca_Desig_SNP3290 | Ca_Desig_LG01 | 10530998                | [C/T] | Ca_00784           | NON_SYNONYMOUS_CODING               | OTU domain-containing protein 5                               |
| *Ca_Desig_SNP3291 | Ca_Desig_LG05 | 15609057                | [T/G] | Ca_06445           | INTRON                              | Serine/threonine-protein phosphatase 6 regulatory subunit 3-B |
| *Ca_Desig_SNP3292 | scaffold00686 | 2607                    | [A/G] |                    | INTERGENIC                          |                                                               |
| *Ca_Desig_SNP3293 | scaffold00876 | 6659                    | [T/C] |                    | INTERGENIC                          |                                                               |
| *Ca_Desig_SNP3294 | scaffold00771 | 2502                    | [A/G] |                    | INTERGENIC                          |                                                               |
| *Ca_Desig_SNP3295 | scaffold00557 | 10269                   | [T/C] |                    | INTERGENIC                          |                                                               |
| *Ca_Desig_SNP3296 | scaffold01047 | 302                     | [A/T] |                    | INTERGENIC                          |                                                               |
| *Ca_Desig_SNP3297 | scaffold00582 | 5048                    | [T/C] | Ca_13279           | INTRON                              | (+)-neomenthol dehydrogenase                                  |
| *Ca_Desig_SNP3298 | scaffold00876 | 802                     | [A/G] |                    | INTERGENIC                          |                                                               |
| *Ca_Desig_SNP3299 | scaffold00735 | 2828                    | [A/G] | Ca_13852           | DOWNSTREAM:1618bases                | MORC family CW-type zinc finger protein 4                     |
| *Ca_Desig_SNP3300 | Ca_Desig_LG08 | 10126047                | [A/C] | Ca_08711           | SYNONYMOUS_CODING                   | Chromatin structure-remodeling complex subunit snf21          |
| *Ca_Desig_SNP3301 | scaffold00924 | 1425                    | [C/T] |                    | INTERGENIC                          |                                                               |

| SNP IDs           | Chromosomes   | Physical positions (bp) | SNPs  | Gene accession IDs | Sequence components of genome/genes | Putative functions                         |
|-------------------|---------------|-------------------------|-------|--------------------|-------------------------------------|--------------------------------------------|
| *Ca_Desig_SNP3302 | scaffold00790 | 1181                    | [A/G] | Ca_14057           | INTRON                              | TNP1                                       |
| *Ca_Desig_SNP3303 | scaffold00561 | 2921                    | [A/C] |                    | INTERGENIC                          |                                            |
| *Ca_Desig_SNP3304 | scaffold00582 | 6417                    | [T/C] | Ca_13279           | INTRON                              | (+)-neomenthol dehydrogenase               |
| *Ca_Desig_SNP3305 | scaffold01123 | 69                      | [C/G] |                    | INTERGENIC                          |                                            |
| *Ca_Desig_SNP3306 | scaffold00763 | 1621                    | [A/G] |                    | INTERGENIC                          |                                            |
| *Ca_Desig_SNP3307 | scaffold00798 | 2842                    | [A/G] |                    | INTERGENIC                          |                                            |
| *Ca_Desig_SNP3308 | scaffold00888 | 375                     | [A/G] |                    | INTERGENIC                          |                                            |
| *Ca_Desig_SNP3309 | Ca_Desig_LG03 | 15332490                | [C/G] | Ca_03190           | NON_SYNONYMOUS_CODING               | Probable F-box protein At4g22030           |
| *Ca_Desig_SNP3310 | scaffold03476 | 16242                   | [C/T] |                    | INTERGENIC                          |                                            |
| *Ca_Desig_SNP3311 | scaffold00876 | 6614                    | [A/G] |                    | INTERGENIC                          |                                            |
| *Ca_Desig_SNP3312 | scaffold00582 | 6332                    | [A/G] | Ca_13279           | INTRON                              | (+)-neomenthol dehydrogenase               |
| *Ca_Desig_SNP3313 | Ca_Desig_LG02 | 527061                  | [G/A] |                    | INTERGENIC                          |                                            |
| *Ca_Desig_SNP3314 | scaffold00686 | 3622                    | [T/C] |                    | INTERGENIC                          |                                            |
| *Ca_Desig_SNP3315 | scaffold00233 | 179685                  | [A/C] | Ca_08992           | NON_SYNONYMOUS_CODING               | GTP-binding protein TypA/BipA homolog      |
| *Ca_Desig_SNP3316 | scaffold00775 | 2392                    | [T/C] | Ca_13986           | DOWNSTREAM:995bases                 | Protein of unknown function (DUF3755)      |
| *Ca_Desig_SNP3317 | scaffold00866 | 1073                    | [T/C] | Ca_14324           | DOWNSTREAM:256bases                 | NADP-specific glutamate dehydrogenase      |
| *Ca_Desig_SNP3318 | scaffold00955 | 1114                    | [A/C] |                    | INTERGENIC                          |                                            |
| *Ca_Desig_SNP3319 | scaffold00337 | 3288                    | [G/A] | Ca_12122           | INTRON                              | General transcription factor IIE subunit 1 |
| *Ca_Desig_SNP3320 | scaffold00646 | 4898                    | [A/G] |                    | INTERGENIC                          |                                            |
| *Ca_Desig_SNP3321 | scaffold02139 | 108276                  | [T/G] |                    | INTERGENIC                          |                                            |
| *Ca_Desig_SNP3322 | Ca_Desig_LG05 | 12396987                | [G/A] |                    | INTERGENIC                          |                                            |
| *Ca_Desig_SNP3323 | scaffold00875 | 447                     | [C/T] |                    | INTERGENIC                          |                                            |
| *Ca_Desig_SNP3324 | scaffold00824 | 2555                    | [C/T] |                    | INTERGENIC                          |                                            |
| *Ca_Desig_SNP3325 | scaffold00903 | 572                     | [C/A] |                    | INTERGENIC                          |                                            |
| *Ca_Desig_SNP3326 | scaffold01050 | 404                     | [C/T] |                    | INTERGENIC                          |                                            |
| *Ca_Desig_SNP3327 | scaffold00571 | 5200                    | [T/C] |                    | INTERGENIC                          |                                            |

| SNP IDs           | Chromosomes   | Physical positions (bp) | SNPs  | Gene accession IDs | Sequence components of genome/genes | Putative functions                       |
|-------------------|---------------|-------------------------|-------|--------------------|-------------------------------------|------------------------------------------|
| *Ca_Desig_SNP3328 | Ca_Desig_LG08 | 427208                  | [A/G] |                    | INTERGENIC                          |                                          |
| *Ca_Desig_SNP3329 | scaffold00884 | 648                     | [T/A] |                    | INTERGENIC                          |                                          |
| *Ca_Desig_SNP3330 | scaffold00876 | 827                     | [A/G] |                    | INTERGENIC                          |                                          |
| *Ca_Desig_SNP3331 | Ca_Desig_LG01 | 2438719                 | [T/A] |                    | INTERGENIC                          |                                          |
| *Ca_Desig_SNP3332 | scaffold00198 | 50657                   | [A/G] | Ca_11258           | INTRON                              | DENN domain-containing protein 5B        |
| *Ca_Desig_SNP3333 | Ca_Desig_LG04 | 22035738                | [C/G] |                    | INTERGENIC                          |                                          |
| *Ca_Desig_SNP3334 | scaffold00706 | 5640                    | [C/T] |                    | INTERGENIC                          |                                          |
| *Ca_Desig_SNP3335 | Ca_Desig_LG01 | 3545332                 | [T/G] |                    | INTERGENIC                          |                                          |
| *Ca_Desig_SNP3336 | scaffold00884 | 656                     | [C/A] |                    | INTERGENIC                          |                                          |
| *Ca_Desig_SNP3337 | Ca_Desig_LG04 | 15957942                | [G/A] |                    | INTERGENIC                          |                                          |
| *Ca_Desig_SNP3338 | scaffold04453 | 258721                  | [A/G] |                    | INTERGENIC                          |                                          |
| *Ca_Desig_SNP3339 | scaffold00775 | 2481                    | [A/G] | Ca_13986           | DOWNSTREAM:1084bases                | Protein of unknown function (DUF3755)    |
| *Ca_Desig_SNP3340 | scaffold00745 | 3714                    | [T/C] |                    | INTERGENIC                          |                                          |
| *Ca_Desig_SNP3341 | scaffold00745 | 3760                    | [T/C] |                    | INTERGENIC                          |                                          |
| *Ca_Desig_SNP3342 | scaffold00539 | 11873                   | [T/G] |                    | INTERGENIC                          |                                          |
| *Ca_Desig_SNP3343 | scaffold01015 | 559                     | [C/T] |                    | INTERGENIC                          |                                          |
| *Ca_Desig_SNP3344 | Ca_Desig_LG07 | 1050537                 | [G/T] | Ca_07466           | INTRON                              | Midasin                                  |
| *Ca_Desig_SNP3345 | Ca_Desig_LG03 | 644790                  | [C/A] | Ca_02197           | INTRON                              | ATPase 10, plasma membrane-type          |
| *Ca_Desig_SNP3346 | scaffold00971 | 140                     | [A/G] |                    | INTERGENIC                          |                                          |
| *Ca_Desig_SNP3347 | scaffold01428 | 143614                  | [C/A] |                    | INTERGENIC                          |                                          |
| *Ca_Desig_SNP3348 | scaffold00771 | 2523                    | [A/G] |                    | INTERGENIC                          |                                          |
| *Ca_Desig_SNP3349 | Ca_Desig_LG04 | 10297474                | [A/G] | Ca_04590           | NON_SYNONYMOUS_CODING               | Late embryogenesis abundant protein D-34 |
| *Ca_Desig_SNP3350 | scaffold01159 | 179                     | [T/C] |                    | INTERGENIC                          |                                          |
| *Ca_Desig_SNP3351 | scaffold00212 | 151844                  | [A/G] | Ca_08884           | NON_SYNONYMOUS_CODING               | zinc ion binding                         |
| *Ca_Desig_SNP3352 | scaffold01086 | 313                     | [G/A] |                    | INTERGENIC                          |                                          |
| *Ca_Desig_SNP3353 | scaffold00903 | 192                     | [T/A] |                    | INTERGENIC                          |                                          |



| SNP IDs           | Chromosomes   | Physical positions (bp) | SNPs  | Gene accession IDs | Sequence components of genome/genes | Putative functions                            |
|-------------------|---------------|-------------------------|-------|--------------------|-------------------------------------|-----------------------------------------------|
| *Ca_Desig_SNP3354 | scaffold00305 | 22506                   | [G/A] |                    | INTERGENIC                          |                                               |
| *Ca_Desig_SNP3355 | scaffold00646 | 4930                    | [A/G] |                    | INTERGENIC                          |                                               |
| *Ca_Desig_SNP3356 | scaffold00582 | 5065                    | [T/C] | Ca_13279           | INTRON                              | (+)-neomenthol dehydrogenase                  |
| *Ca_Desig_SNP3357 | scaffold00876 | 6609                    | [A/G] |                    | INTERGENIC                          |                                               |
| *Ca_Desig_SNP3358 | scaffold00768 | 3096                    | [A/G] |                    | INTERGENIC                          |                                               |
| *Ca_Desig_SNP3359 | scaffold00229 | 39791                   | [G/A] |                    | INTERGENIC                          |                                               |
| *Ca_Desig_SNP3360 | scaffold01879 | 75574                   | [G/A] |                    | INTERGENIC                          |                                               |
| *Ca_Desig_SNP3361 | scaffold01979 | 89274                   | [C/A] |                    | INTERGENIC                          |                                               |
| *Ca_Desig_SNP3362 | Ca_Desig_LG02 | 5548807                 | [C/G] |                    | INTERGENIC                          |                                               |
| *Ca_Desig_SNP3363 | scaffold00928 | 1185                    | [T/C] |                    | INTERGENIC                          |                                               |
| *Ca_Desig_SNP3364 | scaffold01722 | 16149                   | [C/A] | Ca_10360           | INTRON                              | Unconventional myosin-Va                      |
| *Ca_Desig_SNP3365 | Ca_Desig_LG08 | 678765                  | [T/G] | Ca_08036           | SYNONYMOUS_CODING                   | Microtubule-associated protein 70-5           |
| *Ca_Desig_SNP3366 | scaffold00212 | 151695                  | [A/T] | Ca_08884           | INTRON                              | zinc ion binding                              |
| *Ca_Desig_SNP3367 | Ca_Desig_LG07 | 3826719                 | [A/C] |                    | INTERGENIC                          |                                               |
| *Ca_Desig_SNP3368 | scaffold00735 | 2832                    | [A/G] | Ca_13852           | DOWNSTREAM:1614bases                | MORC family CW-type zinc finger protein 4     |
| *Ca_Desig_SNP3369 | scaffold00775 | 2297                    | [A/G] | Ca_13986           | DOWNSTREAM:900bases                 | Protein of unknown function (DUF3755)         |
| *Ca_Desig_SNP3370 | scaffold00731 | 2744                    | [C/T] | Ca_13836           | DOWNSTREAM:1980bases                | Protein KIAA0664 homolog                      |
| *Ca_Desig_SNP3371 | scaffold16048 | 61342                   | [A/C] |                    | INTERGENIC                          |                                               |
| *Ca_Desig_SNP3372 | scaffold00582 | 6429                    | [A/G] | Ca_13279           | INTRON                              | (+)-neomenthol dehydrogenase                  |
| *Ca_Desig_SNP3373 | scaffold03162 | 10676                   | [T/G] | Ca_09325           | INTRON                              | Probable serine/threonine-protein kinase abkC |
| *Ca_Desig_SNP3374 | scaffold04615 | 29771                   | [T/G] |                    | INTERGENIC                          |                                               |
| *Ca_Desig_SNP3375 | scaffold01074 | 530                     | [G/A] |                    | INTERGENIC                          |                                               |
| *Ca_Desig_SNP3376 | scaffold00686 | 3653                    | [T/C] |                    | INTERGENIC                          |                                               |
| *Ca_Desig_SNP3377 | scaffold00769 | 205                     | [A/G] |                    | INTERGENIC                          |                                               |
| *Ca_Desig_SNP3378 | scaffold00582 | 5042                    | [T/C] | Ca_13279           | INTRON                              | (+)-neomenthol dehydrogenase                  |
| *Ca_Desig_SNP3379 | Ca_Desig_LG08 | 3659459                 | [G/A] | Ca_08166           | INTRON                              | Polyphosphoinositide phosphatase              |

| SNP IDs           | Chromosomes   | Physical positions (bp) | SNPs  | Gene accession IDs | Sequence components of genome/genes | Putative functions                                   |
|-------------------|---------------|-------------------------|-------|--------------------|-------------------------------------|------------------------------------------------------|
| *Ca_Desig_SNP3380 | Ca_Desig_LG08 | 6019979                 | [C/T] |                    | INTERGENIC                          |                                                      |
| *Ca_Desig_SNP3381 | scaffold00876 | 10451                   | [T/C] |                    | INTERGENIC                          |                                                      |
| *Ca_Desig_SNP3382 | scaffold01022 | 127                     | [T/C] | Ca_14755           | DOWNSTREAM:844bases                 | Disease resistance response protein                  |
| *Ca_Desig_SNP3383 | Ca_Desig_LG08 | 4722955                 | [T/C] |                    | INTERGENIC                          |                                                      |
| *Ca_Desig_SNP3384 | Ca_Desig_LG08 | 10047723                | [G/C] |                    | INTERGENIC                          |                                                      |
| *Ca_Desig_SNP3385 | Ca_Desig_LG08 | 4461931                 | [C/T] | Ca_08253           | SYNONYMOUS_CODING                   | Unknown expressed protein                            |
| *Ca_Desig_SNP3386 | Ca_Desig_LG08 | 10168146                | [A/T] | Ca_08718           | DOWNSTREAM:467bases                 | Unknown expressed protein                            |
| *Ca_Desig_SNP3387 | Ca_Desig_LG08 | 6017379                 | [T/C] |                    | INTERGENIC                          |                                                      |
| *Ca_Desig_SNP3388 | scaffold00718 | 2708                    | [T/C] |                    | INTERGENIC                          |                                                      |
| *Ca_Desig_SNP3389 | Ca_Desig_LG08 | 6021387                 | [G/C] |                    | INTERGENIC                          |                                                      |
| *Ca_Desig_SNP3390 | Ca_Desig_LG08 | 10010446                | [G/T] |                    | INTERGENIC                          |                                                      |
| *Ca_Desig_SNP3391 | scaffold00825 | 2168                    | [C/G] |                    | INTERGENIC                          |                                                      |
| *Ca_Desig_SNP3392 | scaffold00852 | 983                     | [T/C] | Ca_14286           | INTRON                              | Type I inositol-1,4,5-trisphosphate 5-phosphatase 11 |
| *Ca_Desig_SNP3393 | Ca_Desig_LG08 | 10147096                | [G/A] |                    | INTERGENIC                          |                                                      |
| *Ca_Desig_SNP3394 | Ca_Desig_LG03 | 18715729                | [G/C] |                    | INTERGENIC                          |                                                      |
| *Ca_Desig_SNP3395 | Ca_Desig_LG08 | 10139184                | [T/G] | Ca_08713           | SYNONYMOUS_CODING                   | DNAJ heat shock N-terminal domain-containing protein |
| *Ca_Desig_SNP3396 | Ca_Desig_LG03 | 20267301                | [G/A] |                    | INTERGENIC                          |                                                      |
| *Ca_Desig_SNP3397 | Ca_Desig_LG08 | 10247925                | [T/C] |                    | INTERGENIC                          |                                                      |
| *Ca_Desig_SNP3398 | Ca_Desig_LG08 | 4982805                 | [C/A] |                    | INTERGENIC                          |                                                      |
| *Ca_Desig_SNP3399 | scaffold00615 | 7645                    | [A/G] |                    | INTERGENIC                          |                                                      |
| *Ca_Desig_SNP3400 | Ca_Desig_LG03 | 19634546                | [T/G] | Ca_03578           | DOWNSTREAM:81bases                  | --                                                   |
| *Ca_Desig_SNP3401 | Ca_Desig_LG08 | 10099055                | [C/T] |                    | INTERGENIC                          |                                                      |
| *Ca_Desig_SNP3402 | Ca_Desig_LG08 | 6125494                 | [C/T] |                    | INTERGENIC                          |                                                      |
| *Ca_Desig_SNP3403 | Ca_Desig_LG08 | 10090996                | [A/T] | Ca_08707           | DOWNSTREAM:913bases                 | CASP-like protein 7                                  |
| *Ca_Desig_SNP3404 | Ca_Desig_LG08 | 5898197                 | [C/T] | Ca_08402           | INTRON                              | Serine/threonine-protein kinase CTR1                 |
| *Ca_Desig_SNP3405 | scaffold00582 | 6339                    | [T/C] | Ca_13279           | INTRON                              | (+)-neomenthol dehydrogenase                         |

| SNP IDs           | Chromosomes   | Physical positions (bp) | SNPs  | Gene accession IDs | Sequence components of genome/genes | Putative functions                                   |
|-------------------|---------------|-------------------------|-------|--------------------|-------------------------------------|------------------------------------------------------|
| *Ca_Desig_SNP3406 | Ca_Desig_LG08 | 6018400                 | [T/A] |                    | INTERGENIC                          |                                                      |
| *Ca_Desig_SNP3407 | scaffold00575 | 11081                   | [G/A] |                    | INTERGENIC                          |                                                      |
| *Ca_Desig_SNP3408 | Ca_Desig_LG08 | 10033171                | [G/T] |                    | INTERGENIC                          |                                                      |
| *Ca_Desig_SNP3409 | Ca_Desig_LG08 | 10156188                | [C/G] |                    | INTERGENIC                          |                                                      |
| *Ca_Desig_SNP3410 | Ca_Desig_LG08 | 10178649                | [T/C] |                    | INTERGENIC                          |                                                      |
| *Ca_Desig_SNP3411 | Ca_Desig_LG08 | 10092448                | [A/G] |                    | INTERGENIC                          |                                                      |
| *Ca_Desig_SNP3412 | Ca_Desig_LG08 | 10122343                | [C/T] | Ca_08711           | INTRON                              | Chromatin structure-remodeling complex subunit snf21 |
| *Ca_Desig_SNP3413 | scaffold00852 | 749                     | [A/G] | Ca_14286           | INTRON                              | Type I inositol-1,4,5-trisphosphate 5-phosphatase 11 |
| *Ca_Desig_SNP3414 | scaffold01149 | 63111                   | [A/C] |                    | INTERGENIC                          |                                                      |
| *Ca_Desig_SNP3415 | Ca_Desig_LG08 | 10194709                | [C/T] | Ca_08722           | SYNONYMOUS_CODING                   | Putative uncharacterized protein                     |
| *Ca_Desig_SNP3416 | Ca_Desig_LG08 | 5898863                 | [G/A] | Ca_08402           | INTRON                              | Serine/threonine-protein kinase CTR1                 |
| *Ca_Desig_SNP3417 | scaffold00941 | 615                     | [A/C] |                    | INTERGENIC                          |                                                      |
| *Ca_Desig_SNP3418 | Ca_Desig_LG08 | 5834461                 | [G/A] | Ca_08394           | INTRON                              | Large proline-rich protein BAG6                      |
| *Ca_Desig_SNP3419 | scaffold00358 | 17526                   | [T/G] | Ca_12277           | INTRON                              | Protein terminal ear1                                |
| *Ca_Desig_SNP3420 | Ca_Desig_LG08 | 5894433                 | [T/A] | Ca_08402           | SYNONYMOUS_CODING                   | Serine/threonine-protein kinase CTR1                 |
| *Ca_Desig_SNP3421 | Ca_Desig_LG08 | 5430497                 | [C/T] | Ca_08350           | INTRON                              | Telomere-associated protein RIF1                     |
| *Ca_Desig_SNP3422 | Ca_Desig_LG02 | 5176013                 | [C/A] | Ca_01387           | NON_SYNONYMOUS_CODING               | Pyrophosphate-energized membrane proton pump 3       |
| *Ca_Desig_SNP3423 | scaffold00718 | 2861                    | [G/A] |                    | INTERGENIC                          |                                                      |
| *Ca_Desig_SNP3424 | Ca_Desig_LG08 | 5873045                 | [T/G] | Ca_08399           | DOWNSTREAM:1564bases                | E3 ubiquitin-protein ligase RNF13                    |
| *Ca_Desig_SNP3425 | scaffold00804 | 756                     | [T/C] |                    | INTERGENIC                          |                                                      |
| *Ca_Desig_SNP3426 | Ca_Desig_LG08 | 10194865                | [T/G] | Ca_08722           | SYNONYMOUS_CODING                   | Putative uncharacterized protein                     |
| *Ca_Desig_SNP3427 | Ca_Desig_LG08 | 6135840                 | [A/T] | Ca_08424           | DOWNSTREAM:240bases                 | UPF0613 protein PB24D3.06c                           |
| *Ca_Desig_SNP3428 | Ca_Desig_LG08 | 5859673                 | [G/A] |                    | INTERGENIC                          |                                                      |
| *Ca_Desig_SNP3429 | Ca_Desig_LG08 | 10010518                | [A/G] |                    | INTERGENIC                          |                                                      |
| *Ca_Desig_SNP3430 | Ca_Desig_LG08 | 10011198                | [C/G] | Ca_08695           | DOWNSTREAM:1204bases                | Riboflavin biosynthesis protein RibD                 |
| *Ca_Desig_SNP3431 | Ca_Desig_LG08 | 6011053                 | [G/A] | Ca_08411           | INTRON                              | Dicer-like protein 4                                 |

| SNP IDs           | Chromosomes   | Physical positions (bp) | SNPs  | Gene accession IDs | Sequence components of genome/genes | Putative functions                           |
|-------------------|---------------|-------------------------|-------|--------------------|-------------------------------------|----------------------------------------------|
| *Ca_Desig_SNP3432 | scaffold00735 | 2860                    | [A/G] | Ca_13852           | DOWNSTREAM:1586bases                | MORC family CW-type zinc finger protein 4    |
| *Ca_Desig_SNP3433 | Ca_Desig_LG08 | 10194656                | [G/T] | Ca_08722           | UTR_5_PRIME:21bases                 | Putative uncharacterized protein             |
| *Ca_Desig_SNP3434 | scaffold05292 | 18852                   | [T/G] |                    | INTERGENIC                          |                                              |
| *Ca_Desig_SNP3435 | Ca_Desig_LG08 | 6122035                 | [A/G] | Ca_08422           | DOWNSTREAM:1437bases                | TVP38/TMEM64 family membrane protein slr0305 |
| *Ca_Desig_SNP3436 | scaffold00702 | 6559                    | [C/T] |                    | INTERGENIC                          |                                              |
| *Ca_Desig_SNP3437 | scaffold08694 | 137                     | [G/T] |                    | INTERGENIC                          |                                              |
| *Ca_Desig_SNP3438 | Ca_Desig_LG08 | 10089756                | [A/G] | Ca_08708           | DOWNSTREAM:1010bases                | Unknown expressed protein                    |
| *Ca_Desig_SNP3439 | Ca_Desig_LG08 | 10010422                | [T/G] |                    | INTERGENIC                          |                                              |
| *Ca_Desig_SNP3440 | Ca_Desig_LG08 | 6122079                 | [C/T] | Ca_08422           | DOWNSTREAM:1393bases                | TVP38/TMEM64 family membrane protein slr0305 |
| *Ca_Desig_SNP3441 | scaffold02835 | 157340                  | [C/G] |                    | INTERGENIC                          |                                              |
| *Ca_Desig_SNP3442 | Ca_Desig_LG08 | 10092547                | [C/G] |                    | INTERGENIC                          |                                              |
| *Ca_Desig_SNP3443 | Ca_Desig_LG08 | 5861157                 | [A/C] |                    | INTERGENIC                          |                                              |
| *Ca_Desig_SNP3444 | Ca_Desig_LG03 | 20161445                | [G/A] | Ca_03656           | INTRON                              | Putative esterase/lipase HI_0193             |
| *Ca_Desig_SNP3445 | scaffold00582 | 6326                    | [A/G] | Ca_13279           | INTRON                              | (+)-neomenthol dehydrogenase                 |
| *Ca_Desig_SNP3446 | scaffold00762 | 157099                  | [T/G] |                    | INTERGENIC                          |                                              |
| *Ca_Desig_SNP3447 | Ca_Desig_LG08 | 355997                  | [A/C] | Ca_08007           | SYNONYMOUS_CODING                   | UPF0420 protein C16orf58 homolog             |
| *Ca_Desig_SNP3448 | scaffold00860 | 923                     | [T/C] |                    | INTERGENIC                          |                                              |
| *Ca_Desig_SNP3449 | Ca_Desig_LG08 | 5430519                 | [T/C] | Ca_08350           | INTRON                              | Telomere-associated protein RIF1             |
| *Ca_Desig_SNP3450 | scaffold00156 | 5950                    | [A/C] |                    | INTERGENIC                          |                                              |
| *Ca_Desig_SNP3451 | scaffold00582 | 6355                    | [A/G] | Ca_13279           | INTRON                              | (+)-neomenthol dehydrogenase                 |
| *Ca_Desig_SNP3452 | scaffold00911 | 21116                   | [T/A] |                    | INTERGENIC                          |                                              |
| *Ca_Desig_SNP3453 | Ca_Desig_LG08 | 6249690                 | [A/T] | Ca_08434           | SYNONYMOUS_CODING                   | Histone deacetylase 15                       |
| *Ca_Desig_SNP3454 | scaffold00245 | 995                     | [C/G] |                    | INTERGENIC                          |                                              |
| *Ca_Desig_SNP3455 | Ca_Desig_LG04 | 6145876                 | [A/G] |                    | INTERGENIC                          |                                              |
| *Ca_Desig_SNP3456 | scaffold00335 | 19848                   | [T/G] |                    | INTERGENIC                          |                                              |
| *Ca_Desig_SNP3457 | scaffold01078 | 49                      | [G/T] |                    | INTERGENIC                          |                                              |

| SNP IDs          | Chromosomes   | Physical positions (bp) | SNPs  | Gene accession IDs | Sequence components of genome/genes | Putative functions                                   |
|------------------|---------------|-------------------------|-------|--------------------|-------------------------------------|------------------------------------------------------|
| *Ca_Desi_SNP3458 | Ca_Desi_LG03  | 4016170                 | [T/C] | Ca_02499           | SYNONYMOUS_CODING                   | Calcium homeostasis endoplasmic reticulum protein    |
| *Ca_Desi_SNP3459 | Ca_Desi_LG07  | 2705550                 | [G/A] | Ca_07558           | SYNONYMOUS_CODING                   | L-type lectin-domain containing receptor kinase S.1  |
| *Ca_Desi_SNP3460 | Ca_Desi_LG03  | 11457647                | [A/G] |                    | INTERGENIC                          |                                                      |
| *Ca_Desi_SNP3461 | scaffold00876 | 849                     | [A/G] |                    | INTERGENIC                          |                                                      |
| *Ca_Desi_SNP3462 | scaffold00122 | 36092                   | [T/G] |                    | INTERGENIC                          |                                                      |
| *Ca_Desi_SNP3463 | Ca_Desi_LG08  | 8359117                 | [G/A] |                    | INTERGENIC                          |                                                      |
| *Ca_Desi_SNP3464 | scaffold17167 | 43893                   | [C/T] |                    | INTERGENIC                          |                                                      |
| *Ca_Desi_SNP3465 | scaffold01197 | 43943                   | [C/T] | Ca_10074           | INTRON                              | mRNA cap guanine-N7 methyltransferase 1              |
| *Ca_Desi_SNP3466 | Ca_Desi_LG02  | 437750                  | [A/C] |                    | INTERGENIC                          |                                                      |
| *Ca_Desi_SNP3467 | Ca_Desi_LG07  | 2889767                 | [A/G] | Ca_07580           | SYNONYMOUS_CODING                   | Protein tipD                                         |
| *Ca_Desi_SNP3468 | scaffold01557 | 125818                  | [T/G] |                    | INTERGENIC                          |                                                      |
| *Ca_Desi_SNP3469 | scaffold00933 | 794                     | [A/G] |                    | INTERGENIC                          |                                                      |
| *Ca_Desi_SNP3470 | scaffold00335 | 19839                   | [T/G] |                    | INTERGENIC                          |                                                      |
| *Ca_Desi_SNP3471 | scaffold00852 | 969                     | [T/C] | Ca_14286           | INTRON                              | Type I inositol-1,4,5-trisphosphate 5-phosphatase 11 |
| *Ca_Desi_SNP3472 | scaffold01336 | 153544                  | [C/T] |                    | INTERGENIC                          |                                                      |
| *Ca_Desi_SNP3473 | scaffold01166 | 222                     | [T/C] |                    | INTERGENIC                          |                                                      |
| *Ca_Desi_SNP3474 | scaffold00994 | 71859                   | [A/C] |                    | INTERGENIC                          |                                                      |
| *Ca_Desi_SNP3475 | Ca_Desi_LG07  | 1828880                 | [T/G] | Ca_07506           | NON_SYNONYMOUS_CODING               | B3 domain-containing transcription factor VRN1       |
| *Ca_Desi_SNP3476 | Ca_Desi_LG01  | 2021763                 | [A/G] | Ca_00213           | INTRON                              | Chlorophyll a-b binding protein 13, chloroplastic    |
| *Ca_Desi_SNP3477 | Ca_Desi_LG07  | 2705539                 | [A/C] | Ca_07558           | NON_SYNONYMOUS_CODING               | L-type lectin-domain containing receptor kinase S.1  |
| *Ca_Desi_SNP3478 | scaffold01756 | 48009                   | [T/G] |                    | INTERGENIC                          |                                                      |
| *Ca_Desi_SNP3479 | scaffold00984 | 219376                  | [A/T] |                    | INTERGENIC                          |                                                      |
| *Ca_Desi_SNP3480 | scaffold00884 | 660                     | [A/G] |                    | INTERGENIC                          |                                                      |
| *Ca_Desi_SNP3481 | scaffold01159 | 153                     | [A/G] |                    | INTERGENIC                          |                                                      |
| *Ca_Desi_SNP3482 | scaffold07146 | 61755                   | [G/A] |                    | INTERGENIC                          |                                                      |
| *Ca_Desi_SNP3483 | scaffold13504 | 114744                  | [A/C] | Ca_09258           | INTRON                              | Beclin-1-like protein                                |

| SNP IDs           | Chromosomes   | Physical positions (bp) | SNPs  | Gene accession IDs | Sequence components of genome/genes | Putative functions                                                                                                 |
|-------------------|---------------|-------------------------|-------|--------------------|-------------------------------------|--------------------------------------------------------------------------------------------------------------------|
| *Ca_Desig_SNP3484 | scaffold01353 | 73538                   | [A/C] |                    | INTERGENIC                          |                                                                                                                    |
| *Ca_Desig_SNP3485 | Ca_Desig_LG01 | 6859622                 | [A/G] | Ca_00561           | SYNONYMOUS_CODING                   | Subtilisin-like protease                                                                                           |
| *Ca_Desig_SNP3486 | scaffold01004 | 34534                   | [A/G] |                    | INTERGENIC                          |                                                                                                                    |
| *Ca_Desig_SNP3487 | scaffold07146 | 61775                   | [T/G] |                    | INTERGENIC                          |                                                                                                                    |
| *Ca_Desig_SNP3488 | scaffold00775 | 2401                    | [T/C] | Ca_13986           | DOWNSTREAM:1004bases                | Protein of unknown function (DUF3755)                                                                              |
| *Ca_Desig_SNP3489 | Ca_Desig_LG02 | 15937229                | [A/C] | Ca_02077           | DOWNSTREAM:1243bases                | Putative uncharacterized protein                                                                                   |
| *Ca_Desig_SNP3490 | scaffold02645 | 73148                   | [C/T] |                    | INTERGENIC                          |                                                                                                                    |
| *Ca_Desig_SNP3491 | scaffold01227 | 37631                   | [T/G] |                    | INTERGENIC                          |                                                                                                                    |
| *Ca_Desig_SNP3492 | scaffold00810 | 1399                    | [A/T] |                    | INTERGENIC                          |                                                                                                                    |
| *Ca_Desig_SNP3493 | Ca_Desig_LG08 | 427219                  | [A/G] |                    | INTERGENIC                          |                                                                                                                    |
| *Ca_Desig_SNP3494 | scaffold00846 | 2225                    | [G/A] |                    | INTERGENIC                          |                                                                                                                    |
| *Ca_Desig_SNP3495 | scaffold00271 | 19114                   | [C/G] |                    | INTERGENIC                          |                                                                                                                    |
| *Ca_Desig_SNP3496 | Ca_Desig_LG05 | 3219073                 | [T/C] | Ca_05475           | INTRON                              | DDB1- and CUL4-associated factor homolog 1                                                                         |
| *Ca_Desig_SNP3497 | Ca_Desig_LG04 | 2464122                 | [C/A] | Ca_04048           | SYNONYMOUS_CODING                   | Histone deacetylase 2                                                                                              |
| *Ca_Desig_SNP3498 | Ca_Desig_LG05 | 3219074                 | [G/T] | Ca_05475           | INTRON                              | DDB1- and CUL4-associated factor homolog 1                                                                         |
| *Ca_Desig_SNP3499 | scaffold01877 | 22617                   | [A/C] |                    | INTERGENIC                          |                                                                                                                    |
| *Ca_Desig_SNP3500 | Ca_Desig_LG04 | 2413091                 | [C/T] | Ca_04043           | INTRON                              | unknown protein; Has 37 Blast hits to 37 proteins in 12 species: Archae - 0; Bacteria - 0; Metazoa - 0; Fungi - 3; |
| *Ca_Desig_SNP3501 | scaffold03298 | 77445                   | [C/T] |                    | INTERGENIC                          |                                                                                                                    |
| *Ca_Desig_SNP3502 | scaffold00582 | 10795                   | [T/C] |                    | INTERGENIC                          |                                                                                                                    |
| *Ca_Desig_SNP3503 | scaffold01428 | 151242                  | [A/G] | Ca_09945           | INTRON                              | Peptidyl-prolyl cis-trans isomerase CYP20-1                                                                        |
| *Ca_Desig_SNP3504 | scaffold00992 | 170856                  | [A/G] |                    | INTERGENIC                          |                                                                                                                    |
| *Ca_Desig_SNP3505 | scaffold00671 | 6925                    | [A/C] |                    | INTERGENIC                          |                                                                                                                    |
| *Ca_Desig_SNP3506 | scaffold02452 | 27226                   | [T/A] |                    | INTERGENIC                          |                                                                                                                    |
| *Ca_Desig_SNP3507 | scaffold00536 | 1758                    | [C/A] |                    | INTERGENIC                          |                                                                                                                    |
| *Ca_Desig_SNP3508 | Ca_Desig_LG05 | 8545962                 | [C/A] |                    | INTERGENIC                          |                                                                                                                    |
| *Ca_Desig_SNP3509 | scaffold00686 | 3616                    | [T/A] |                    | INTERGENIC                          |                                                                                                                    |

| SNP IDs           | Chromosomes   | Physical positions (bp) | SNPs  | Gene accession IDs | Sequence components of genome/genes | Putative functions                       |
|-------------------|---------------|-------------------------|-------|--------------------|-------------------------------------|------------------------------------------|
| *Ca_Desig_SNP3510 | scaffold00876 | 871                     | [A/G] |                    | INTERGENIC                          |                                          |
| *Ca_Desig_SNP3511 | Ca_Desig_LG03 | 18273114                | [T/G] | Ca_03448           | SYNONYMOUS_CODING                   | Zeaxanthin epoxidase, chloroplastic      |
| *Ca_Desig_SNP3512 | Ca_Desig_LG04 | 2412911                 | [T/C] | Ca_04043           | SYNONYMOUS_CODING                   | Unknown expressed protein                |
| *Ca_Desig_SNP3513 | scaffold01979 | 88227                   | [A/G] |                    | INTERGENIC                          |                                          |
| *Ca_Desig_SNP3514 | scaffold14259 | 37503                   | [G/C] |                    | INTERGENIC                          |                                          |
| *Ca_Desig_SNP3515 | scaffold00761 | 3568                    | [T/C] |                    | INTERGENIC                          |                                          |
| *Ca_Desig_SNP3516 | scaffold00768 | 3122                    | [T/C] |                    | INTERGENIC                          |                                          |
| *Ca_Desig_SNP3517 | scaffold00333 | 98693                   | [T/C] | Ca_09084           | DOWNSTREAM:1309bases                | DNA repair protein XRCC2 homolog         |
| *Ca_Desig_SNP3518 | scaffold00761 | 3564                    | [T/C] |                    | INTERGENIC                          |                                          |
| *Ca_Desig_SNP3519 | scaffold01353 | 71827                   | [A/C] |                    | INTERGENIC                          |                                          |
| *Ca_Desig_SNP3520 | Ca_Desig_LG03 | 839877                  | [T/G] |                    | INTERGENIC                          |                                          |
| *Ca_Desig_SNP3521 | scaffold00301 | 26945                   | [A/C] |                    | INTERGENIC                          |                                          |
| *Ca_Desig_SNP3522 | Ca_Desig_LG04 | 2490877                 | [A/T] | Ca_04052           | UPSTREAM:909bases                   | Uncharacterized protein ycf36            |
| *Ca_Desig_SNP3523 | Ca_Desig_LG08 | 201411                  | [C/A] | Ca_07988           | DOWNSTREAM:1426bases                | Histone H2B.4                            |
| *Ca_Desig_SNP3524 | Ca_Desig_LG04 | 3055868                 | [T/C] | Ca_04094           | INTRON                              | Ubiquitin carboxyl-terminal hydrolase 19 |
| *Ca_Desig_SNP3525 | Ca_Desig_LG06 | 8079590                 | [G/T] | Ca_07092           | DOWNSTREAM:638bases                 | Sodium/hydrogen exchanger 7              |
| *Ca_Desig_SNP3526 | scaffold00606 | 2413                    | [G/T] |                    | INTERGENIC                          |                                          |
| *Ca_Desig_SNP3527 | Ca_Desig_LG04 | 2479967                 | [A/G] |                    | INTERGENIC                          |                                          |
| *Ca_Desig_SNP3528 | Ca_Desig_LG04 | 2410917                 | [G/C] |                    | INTERGENIC                          |                                          |
| *Ca_Desig_SNP3529 | scaffold02564 | 20356                   | [A/C] |                    | INTERGENIC                          |                                          |
| *Ca_Desig_SNP3530 | Ca_Desig_LG04 | 2397043                 | [C/A] | Ca_04041           | SYNONYMOUS_CODING                   | Far upstream element-binding protein 1   |
| *Ca_Desig_SNP3531 | Ca_Desig_LG07 | 7234448                 | [C/G] | Ca_07872           | NON_SYNONYMOUS_CODING               | Unknown expressed protein                |
| *Ca_Desig_SNP3532 | Ca_Desig_LG04 | 2481151                 | [A/T] |                    | INTERGENIC                          |                                          |
| *Ca_Desig_SNP3533 | scaffold00173 | 37276                   | [A/C] | Ca_11169           | DOWNSTREAM:922bases                 | Cellulose synthase-like protein D3       |
| *Ca_Desig_SNP3534 | Ca_Desig_LG03 | 15332493                | [C/A] | Ca_03190           | SYNONYMOUS_CODING                   | Probable F-box protein At4g22030         |
| *Ca_Desig_SNP3535 | Ca_Desig_LG08 | 8432968                 | [T/G] | Ca_08610           | SPLICE_SITE_REGION                  | Protein MSP1                             |

| SNP IDs           | Chromosomes   | Physical positions (bp) | SNPs  | Gene accession IDs | Sequence components of genome/genes | Putative functions                     |
|-------------------|---------------|-------------------------|-------|--------------------|-------------------------------------|----------------------------------------|
| *Ca_Desig_SNP3536 | Ca_Desig_LG03 | 11209929                | [T/G] |                    | INTERGENIC                          |                                        |
| *Ca_Desig_SNP3537 | scaffold00876 | 6642                    | [T/C] |                    | INTERGENIC                          |                                        |
| *Ca_Desig_SNP3538 | scaffold00854 | 365                     | [A/G] |                    | INTERGENIC                          |                                        |
| *Ca_Desig_SNP3539 | scaffold00446 | 248255                  | [A/G] |                    | INTERGENIC                          |                                        |
| *Ca_Desig_SNP3540 | Ca_Desig_LG03 | 23325891                | [C/A] |                    | INTERGENIC                          |                                        |
| *Ca_Desig_SNP3541 | scaffold00536 | 15170                   | [C/G] |                    | INTERGENIC                          |                                        |
| *Ca_Desig_SNP3542 | scaffold00264 | 20687                   | [A/T] | Ca_11677           | UPSTREAM:1226bases                  | Domain of unknown function (DUF3598)   |
| *Ca_Desig_SNP3543 | scaffold01119 | 396                     | [T/C] |                    | INTERGENIC                          |                                        |
| *Ca_Desig_SNP3544 | scaffold00968 | 175                     | [A/G] |                    | INTERGENIC                          |                                        |
| *Ca_Desig_SNP3545 | Ca_Desig_LG04 | 2511853                 | [C/T] |                    | INTERGENIC                          |                                        |
| *Ca_Desig_SNP3546 | Ca_Desig_LG04 | 2456945                 | [C/T] |                    | INTERGENIC                          |                                        |
| *Ca_Desig_SNP3547 | scaffold07417 | 44806                   | [A/C] |                    | INTERGENIC                          |                                        |
| *Ca_Desig_SNP3548 | scaffold00876 | 5407                    | [A/G] |                    | INTERGENIC                          |                                        |
| *Ca_Desig_SNP3549 | scaffold00333 | 138674                  | [C/G] |                    | INTERGENIC                          |                                        |
| *Ca_Desig_SNP3550 | scaffold00592 | 11158                   | [G/A] |                    | INTERGENIC                          |                                        |
| *Ca_Desig_SNP3551 | scaffold00536 | 4463                    | [A/G] |                    | INTERGENIC                          |                                        |
| *Ca_Desig_SNP3552 | scaffold00536 | 17937                   | [G/C] |                    | INTERGENIC                          |                                        |
| *Ca_Desig_SNP3553 | scaffold02000 | 59504                   | [A/C] | Ca_10427           | INTRON                              | Dihydroflavonol-4-reductase (Fragment) |
| *Ca_Desig_SNP3554 | Ca_Desig_LG01 | 8232998                 | [T/G] |                    | INTERGENIC                          |                                        |
| *Ca_Desig_SNP3555 | scaffold01557 | 125813                  | [T/G] |                    | INTERGENIC                          |                                        |
| *Ca_Desig_SNP3556 | Ca_Desig_LG04 | 2396211                 | [A/G] | Ca_04041           | NON_SYNONYMOUS_CODING               | Far upstream element-binding protein 1 |
| *Ca_Desig_SNP3557 | scaffold00208 | 49139                   | [T/C] |                    | INTERGENIC                          |                                        |
| *Ca_Desig_SNP3558 | Ca_Desig_LG02 | 6107483                 | [T/G] |                    | INTERGENIC                          |                                        |
| *Ca_Desig_SNP3559 | scaffold00645 | 4370                    | [T/G] | Ca_13564           | DOWNSTREAM:1015bases                | Threonine--tRNA ligase                 |
| *Ca_Desig_SNP3560 | scaffold00876 | 5644                    | [A/G] |                    | INTERGENIC                          |                                        |
| *Ca_Desig_SNP3561 | scaffold01107 | 97                      | [T/A] |                    | INTERGENIC                          |                                        |



| SNP IDs           | Chromosomes   | Physical positions (bp) | SNPs  | Gene accession IDs | Sequence components of genome/genes | Putative functions                                                   |
|-------------------|---------------|-------------------------|-------|--------------------|-------------------------------------|----------------------------------------------------------------------|
| *Ca_Desig_SNP3562 | scaffold15127 | 6722                    | [T/G] |                    | INTERGENIC                          |                                                                      |
| *Ca_Desig_SNP3563 | Ca_Desig_LG04 | 2620933                 | [T/A] | Ca_04062           | NON_SYNONYMOUS_CODING               | Protein of unknown function (DUF1350)                                |
| *Ca_Desig_SNP3564 | Ca_Desig_LG04 | 9222551                 | [T/A] |                    | INTERGENIC                          |                                                                      |
| *Ca_Desig_SNP3565 | Ca_Desig_LG02 | 16706522                | [T/C] | Ca_02121           | INTRON                              | Nucleoporin, Nup133/Nup155-like                                      |
| *Ca_Desig_SNP3566 | Ca_Desig_LG04 | 2450642                 | [G/A] | Ca_04047           | DOWNSTREAM:1692bases                | K(+) efflux antiporter 6                                             |
| *Ca_Desig_SNP3567 | scaffold00485 | 98179                   | [A/G] |                    | INTERGENIC                          |                                                                      |
| *Ca_Desig_SNP3568 | scaffold00396 | 31778                   | [A/G] | Ca_12443           | INTRON                              | Lamin-like protein                                                   |
| *Ca_Desig_SNP3569 | scaffold00775 | 2303                    | [A/G] | Ca_13986           | DOWNSTREAM:906bases                 | Protein of unknown function (DUF3755)                                |
| *Ca_Desig_SNP3570 | Ca_Desig_LG02 | 16748554                | [G/T] |                    | INTERGENIC                          |                                                                      |
| *Ca_Desig_SNP3571 | scaffold01180 | 167100                  | [T/C] |                    | INTERGENIC                          |                                                                      |
| *Ca_Desig_SNP3572 | Ca_Desig_LG04 | 2391280                 | [C/T] |                    | INTERGENIC                          |                                                                      |
| *Ca_Desig_SNP3573 | Ca_Desig_LG02 | 16748679                | [A/T] |                    | INTERGENIC                          |                                                                      |
| *Ca_Desig_SNP3574 | scaffold00110 | 38145                   | [C/T] | Ca_10864           | INTRON                              | DNA-directed RNA polymerase III subunit RPC3                         |
| *Ca_Desig_SNP3575 | scaffold00446 | 107814                  | [A/G] | Ca_09244           | DOWNSTREAM:1945bases                | Methionine aminopeptidase 1B, chloroplastic                          |
| *Ca_Desig_SNP3576 | Ca_Desig_LG03 | 22737981                | [A/G] | Ca_03824           | SYNONYMOUS_CODING                   | Sugar transport protein 14                                           |
| *Ca_Desig_SNP3577 | Ca_Desig_LG02 | 12797598                | [G/A] | Ca_01833           | SYNONYMOUS_CODING                   | Lignin-forming anionic peroxidase                                    |
| *Ca_Desig_SNP3578 | Ca_Desig_LG04 | 2750844                 | [G/A] | Ca_04069           | INTRON                              | Serine/threonine-protein kinase At5g01020                            |
| *Ca_Desig_SNP3579 | scaffold01094 | 233                     | [G/A] |                    | INTERGENIC                          |                                                                      |
| *Ca_Desig_SNP3580 | Ca_Desig_LG05 | 16081057                | [A/C] | Ca_06461           | NON_SYNONYMOUS_CODING               | ABC transporter A family member 2                                    |
| *Ca_Desig_SNP3581 | scaffold07841 | 1615                    | [T/C] |                    | INTERGENIC                          |                                                                      |
| *Ca_Desig_SNP3582 | scaffold00804 | 777                     | [A/G] |                    | INTERGENIC                          |                                                                      |
| *Ca_Desig_SNP3583 | scaffold00582 | 5189                    | [T/C] | Ca_13279           | NON_SYNONYMOUS_CODING               | (+)-neomenthol dehydrogenase                                         |
| *Ca_Desig_SNP3584 | Ca_Desig_LG08 | 1388732                 | [C/T] | Ca_08096           | SYNONYMOUS_CODING                   | Pyrophosphate-fructose 6-phosphate 1-phosphotransferase subunit beta |
| *Ca_Desig_SNP3585 | scaffold01958 | 109687                  | [A/G] |                    | INTERGENIC                          |                                                                      |
| *Ca_Desig_SNP3586 | scaffold00333 | 156236                  | [T/C] |                    | INTERGENIC                          |                                                                      |
| *Ca_Desig_SNP3587 | scaffold00888 | 348                     | [A/G] |                    | INTERGENIC                          |                                                                      |

| SNP IDs           | Chromosomes   | Physical positions (bp) | SNPs  | Gene accession IDs | Sequence components of genome/genes | Putative functions                                   |
|-------------------|---------------|-------------------------|-------|--------------------|-------------------------------------|------------------------------------------------------|
| *Ca_Desig_SNP3588 | scaffold01109 | 255                     | [T/C] |                    | INTERGENIC                          |                                                      |
| *Ca_Desig_SNP3589 | scaffold00876 | 10352                   | [A/G] |                    | INTERGENIC                          |                                                      |
| *Ca_Desig_SNP3590 | scaffold00928 | 1189                    | [A/G] |                    | INTERGENIC                          |                                                      |
| *Ca_Desig_SNP3591 | Ca_Desig_LG02 | 7980007                 | [T/G] |                    | INTERGENIC                          |                                                      |
| *Ca_Desig_SNP3592 | scaffold00342 | 26626                   | [T/G] |                    | INTERGENIC                          |                                                      |
| *Ca_Desig_SNP3593 | scaffold00646 | 4875                    | [A/G] |                    | INTERGENIC                          |                                                      |
| *Ca_Desig_SNP3594 | Ca_Desig_LG08 | 3960569                 | [G/T] | Ca_08202           | DOWNSTREAM:674bases                 | ABC transporter B family member 21                   |
| *Ca_Desig_SNP3595 | scaffold00852 | 1106                    | [A/G] | Ca_14286           | NON_SYNONYMOUS_CODING               | Type I inositol-1,4,5-trisphosphate 5-phosphatase 11 |
| *Ca_Desig_SNP3596 | Ca_Desig_LG02 | 10864698                | [A/G] |                    | INTERGENIC                          |                                                      |
| *Ca_Desig_SNP3597 | scaffold00815 | 1518                    | [G/A] |                    | INTERGENIC                          |                                                      |
| *Ca_Desig_SNP3598 | Ca_Desig_LG04 | 4771545                 | [C/A] |                    | INTERGENIC                          |                                                      |
| *Ca_Desig_SNP3599 | scaffold00884 | 696                     | [A/T] |                    | INTERGENIC                          |                                                      |
| *Ca_Desig_SNP3600 | scaffold00252 | 6804                    | [T/G] |                    | INTERGENIC                          |                                                      |
| *Ca_Desig_SNP3601 | Ca_Desig_LG05 | 12467283                | [A/G] |                    | INTERGENIC                          |                                                      |
| *Ca_Desig_SNP3602 | scaffold13621 | 103006                  | [A/G] |                    | INTERGENIC                          |                                                      |
| *Ca_Desig_SNP3603 | scaffold01162 | 112094                  | [T/A] |                    | INTERGENIC                          |                                                      |
| *Ca_Desig_SNP3604 | Ca_Desig_LG06 | 837890                  | [A/G] |                    | INTERGENIC                          |                                                      |
| *Ca_Desig_SNP3605 | Ca_Desig_LG05 | 11604585                | [G/T] | Ca_06203           | INTRON                              | Serine/threonine-protein kinase ATM                  |
| *Ca_Desig_SNP3606 | scaffold00866 | 1059                    | [T/C] | Ca_14324           | DOWNSTREAM:270bases                 | NADP-specific glutamate dehydrogenase                |
| *Ca_Desig_SNP3607 | scaffold00888 | 330                     | [A/G] |                    | INTERGENIC                          |                                                      |
| *Ca_Desig_SNP3608 | Ca_Desig_LG05 | 15284605                | [A/G] |                    | INTERGENIC                          |                                                      |
| *Ca_Desig_SNP3609 | scaffold00876 | 5293                    | [A/G] |                    | INTERGENIC                          |                                                      |
| *Ca_Desig_SNP3610 | Ca_Desig_LG08 | 10458811                | [T/G] | Ca_08739           | NON_SYNONYMOUS_CODING               | Cell division cycle-associated 7-like protein        |
| *Ca_Desig_SNP3611 | Ca_Desig_LG03 | 11432250                | [C/A] |                    | INTERGENIC                          |                                                      |
| *Ca_Desig_SNP3612 | scaffold00582 | 4792                    | [A/G] | Ca_13279           | NON_SYNONYMOUS_CODING               | (+)-neomenthol dehydrogenase                         |
| *Ca_Desig_SNP3613 | scaffold00804 | 1921                    | [T/C] |                    | INTERGENIC                          |                                                      |

| SNP IDs           | Chromosomes   | Physical positions (bp) | SNPs  | Gene accession IDs | Sequence components of genome/genes | Putative functions                                                   |
|-------------------|---------------|-------------------------|-------|--------------------|-------------------------------------|----------------------------------------------------------------------|
| *Ca_Desig_SNP3614 | scaffold02376 | 8022                    | [T/G] |                    | INTERGENIC                          |                                                                      |
| *Ca_Desig_SNP3615 | scaffold00763 | 406                     | [T/C] |                    | INTERGENIC                          |                                                                      |
| *Ca_Desig_SNP3616 | scaffold01137 | 130                     | [C/T] |                    | INTERGENIC                          |                                                                      |
| *Ca_Desig_SNP3617 | scaffold00582 | 6258                    | [A/C] | Ca_13279           | INTRON                              | (+)-neomenthol dehydrogenase                                         |
| *Ca_Desig_SNP3618 | scaffold01353 | 73960                   | [A/C] |                    | INTERGENIC                          |                                                                      |
| *Ca_Desig_SNP3619 | Ca_Desig_LG04 | 367816                  | [T/G] |                    | INTERGENIC                          |                                                                      |
| *Ca_Desig_SNP3620 | scaffold01979 | 89286                   | [A/G] |                    | INTERGENIC                          |                                                                      |
| *Ca_Desig_SNP3621 | scaffold00716 | 4275                    | [G/A] |                    | INTERGENIC                          |                                                                      |
| *Ca_Desig_SNP3622 | scaffold00775 | 2387                    | [T/C] | Ca_13986           | DOWNSTREAM:990bases                 | Protein of unknown function (DUF3755)                                |
| *Ca_Desig_SNP3623 | scaffold01080 | 188                     | [A/T] |                    | INTERGENIC                          |                                                                      |
| *Ca_Desig_SNP3624 | Ca_Desig_LG04 | 4771546                 | [A/C] |                    | INTERGENIC                          |                                                                      |
| *Ca_Desig_SNP3625 | scaffold00735 | 2856                    | [T/C] | Ca_13852           | DOWNSTREAM:1590bases                | MORC family CW-type zinc finger protein 4                            |
| Ca_Desig_SNP3626  | Ca_Desig_LG01 | 10441719                | [G/A] | Ca_00776           | SYNONYMOUS_CODING                   | unknown protein                                                      |
| Ca_Desig_SNP3627  | Ca_Desig_LG01 | 10441837                | [A/G] | Ca_00776           | SYNONYMOUS_CODING                   | unknown protein                                                      |
| Ca_Desig_SNP3628  | Ca_Desig_LG01 | 1486057                 | [A/C] |                    | INTERGENIC                          |                                                                      |
| Ca_Desig_SNP3629  | Ca_Desig_LG01 | 2281498                 | [T/G] | Ca_00235           | UTR_5_PRIME:242bases                | 3-ketoacyl-CoA synthase 10                                           |
| Ca_Desig_SNP3630  | Ca_Desig_LG01 | 2281499                 | [G/T] | Ca_00235           | UTR_5_PRIME:243bases                | 3-ketoacyl-CoA synthase 10                                           |
| Ca_Desig_SNP3631  | Ca_Desig_LG01 | 2281552                 | [T/C] | Ca_00235           | UTR_5_PRIME:296bases                | 3-ketoacyl-CoA synthase 10                                           |
| Ca_Desig_SNP3632  | Ca_Desig_LG01 | 2281554                 | [C/T] | Ca_00235           | UTR_5_PRIME:298bases                | 3-ketoacyl-CoA synthase 10                                           |
| Ca_Desig_SNP3633  | Ca_Desig_LG01 | 2417675                 | [G/A] |                    | INTERGENIC                          |                                                                      |
| Ca_Desig_SNP3634  | Ca_Desig_LG01 | 2418782                 | [A/C] | Ca_00256           | INTRON                              | Pentatricopeptide repeat-containing protein At2g32230, mitochondrial |
| Ca_Desig_SNP3635  | Ca_Desig_LG01 | 2491481                 | [A/C] | Ca_00264           | INTRON                              | Probable allantoinase 1                                              |
| Ca_Desig_SNP3636  | Ca_Desig_LG01 | 2491483                 | [T/A] | Ca_00264           | INTRON                              | Probable allantoinase 1                                              |
| Ca_Desig_SNP3637  | Ca_Desig_LG01 | 2491484                 | [T/A] | Ca_00264           | INTRON                              | Probable allantoinase 1                                              |
| Ca_Desig_SNP3638  | Ca_Desig_LG01 | 2637890                 | [G/C] | Ca_00275           | INTRON                              | Protein of unknown function (DUF707)                                 |
| Ca_Desig_SNP3639  | Ca_Desig_LG01 | 3372365                 | [G/C] |                    | INTERGENIC                          |                                                                      |

| SNP IDs          | Chromosomes   | Physical positions (bp) | SNPs  | Gene accession IDs | Sequence components of genome/genes | Putative functions                  |
|------------------|---------------|-------------------------|-------|--------------------|-------------------------------------|-------------------------------------|
| Ca_Desig_SNP3640 | Ca_Desig_LG01 | 3372366                 | [G/T] |                    | INTERGENIC                          |                                     |
| Ca_Desig_SNP3641 | Ca_Desig_LG01 | 5004857                 | [C/G] | Ca_00414           | INTRON                              | Transcriptional adapter ADA2b       |
| Ca_Desig_SNP3642 | Ca_Desig_LG01 | 5050028                 | [T/G] |                    | INTERGENIC                          |                                     |
| Ca_Desig_SNP3643 | Ca_Desig_LG01 | 5094757                 | [C/G] |                    | INTERGENIC                          |                                     |
| Ca_Desig_SNP3644 | Ca_Desig_LG01 | 548203                  | [C/T] |                    | INTERGENIC                          |                                     |
| Ca_Desig_SNP3645 | Ca_Desig_LG01 | 6859628                 | [G/A] | Ca_00561           | SYNONYMOUS_CODING                   | Subtilisin-like protease            |
| Ca_Desig_SNP3646 | Ca_Desig_LG01 | 6859634                 | [T/C] | Ca_00561           | SYNONYMOUS_CODING                   | Subtilisin-like protease            |
| Ca_Desig_SNP3647 | Ca_Desig_LG01 | 6859661                 | [C/A] | Ca_00561           | SYNONYMOUS_CODING                   | Subtilisin-like protease            |
| Ca_Desig_SNP3648 | Ca_Desig_LG01 | 6918782                 | [G/T] |                    | INTERGENIC                          |                                     |
| Ca_Desig_SNP3649 | Ca_Desig_LG01 | 6918819                 | [T/A] |                    | INTERGENIC                          |                                     |
| Ca_Desig_SNP3650 | Ca_Desig_LG01 | 7489492                 | [T/A] | Ca_00593           | SYNONYMOUS_CODING                   | Eukaryotic initiation factor 4A-15  |
| Ca_Desig_SNP3651 | Ca_Desig_LG01 | 7489519                 | [T/A] | Ca_00593           | SYNONYMOUS_CODING                   | Eukaryotic initiation factor 4A-15  |
| Ca_Desig_SNP3652 | Ca_Desig_LG01 | 7632275                 | [T/A] | Ca_00599           | INTRON                              | Myb family transcription factor APL |
| Ca_Desig_SNP3653 | Ca_Desig_LG01 | 7632307                 | [A/G] | Ca_00599           | INTRON                              | Myb family transcription factor APL |
| Ca_Desig_SNP3654 | Ca_Desig_LG01 | 836859                  | [G/A] |                    | INTERGENIC                          |                                     |
| Ca_Desig_SNP3655 | Ca_Desig_LG01 | 872280                  | [C/T] | Ca_00076           | INTRON                              | Protein FAM135A                     |
| Ca_Desig_SNP3656 | scaffold00055 | 318204                  | [A/C] | Ca_08802           | DOWNSTREAM:1832bases                | Protein ABIL1                       |
| Ca_Desig_SNP3657 | scaffold00934 | 225580                  | [G/A] |                    | INTERGENIC                          |                                     |
| Ca_Desig_SNP3658 | scaffold00934 | 225581                  | [A/C] |                    | INTERGENIC                          |                                     |
| Ca_Desig_SNP3659 | scaffold00934 | 225593                  | [T/C] |                    | INTERGENIC                          |                                     |
| Ca_Desig_SNP3660 | scaffold03476 | 16248                   | [G/T] |                    | INTERGENIC                          |                                     |
| Ca_Desig_SNP3661 | scaffold03476 | 16259                   | [C/G] |                    | INTERGENIC                          |                                     |
| Ca_Desig_SNP3662 | scaffold03476 | 16268                   | [T/G] |                    | INTERGENIC                          |                                     |
| Ca_Desig_SNP3663 | scaffold03476 | 16272                   | [T/A] |                    | INTERGENIC                          |                                     |
| Ca_Desig_SNP3664 | scaffold03476 | 16274                   | [G/C] |                    | INTERGENIC                          |                                     |
| Ca_Desig_SNP3665 | scaffold03476 | 16275                   | [T/G] |                    | INTERGENIC                          |                                     |

| SNP IDs         | Chromosomes   | Physical positions (bp) | SNPs  | Gene accession IDs | Sequence components of genome/genes | Putative functions                                       |
|-----------------|---------------|-------------------------|-------|--------------------|-------------------------------------|----------------------------------------------------------|
| Ca_Desi_SNP3666 | scaffold03643 | 1500                    | [C/G] |                    | INTERGENIC                          |                                                          |
| Ca_Desi_SNP3667 | scaffold03643 | 1520                    | [A/G] |                    | INTERGENIC                          |                                                          |
| Ca_Desi_SNP3668 | scaffold00773 | 3368                    | [C/T] |                    | INTERGENIC                          |                                                          |
| Ca_Desi_SNP3669 | scaffold00774 | 3557                    | [A/G] | Ca_13983           | UTR_5_PRIME:530bases                | Squamosa promoter-binding-like protein 6                 |
| Ca_Desi_SNP3670 | scaffold00774 | 3570                    | [A/G] | Ca_13983           | START_GAINED                        | Squamosa promoter-binding-like protein 6                 |
| Ca_Desi_SNP3671 | scaffold03971 | 47470                   | [G/C] |                    | INTERGENIC                          |                                                          |
| Ca_Desi_SNP3672 | scaffold03971 | 48139                   | [C/T] |                    | INTERGENIC                          |                                                          |
| Ca_Desi_SNP3673 | scaffold03653 | 84655                   | [A/C] | Ca_09426           | DOWNSTREAM:831bases                 | Metacaspase-1                                            |
| Ca_Desi_SNP3674 | scaffold03653 | 84656                   | [G/T] | Ca_09426           | DOWNSTREAM:832bases                 | Metacaspase-1                                            |
| Ca_Desi_SNP3675 | scaffold00778 | 1630                    | [A/C] |                    | INTERGENIC                          |                                                          |
| Ca_Desi_SNP3676 | scaffold00778 | 1653                    | [G/T] |                    | INTERGENIC                          |                                                          |
| Ca_Desi_SNP3677 | scaffold00778 | 1672                    | [A/G] |                    | INTERGENIC                          |                                                          |
| Ca_Desi_SNP3678 | scaffold00778 | 732                     | [G/C] |                    | INTERGENIC                          |                                                          |
| Ca_Desi_SNP3679 | scaffold00779 | 2344                    | [A/G] |                    | INTERGENIC                          |                                                          |
| Ca_Desi_SNP3680 | scaffold05945 | 10077                   | [G/T] | Ca_09428           | INTRON                              | Unknown expressed protein                                |
| Ca_Desi_SNP3681 | scaffold05945 | 10080                   | [T/G] | Ca_09428           | INTRON                              | Unknown expressed protein                                |
| Ca_Desi_SNP3682 | scaffold00789 | 2479                    | [T/C] |                    | INTERGENIC                          |                                                          |
| Ca_Desi_SNP3683 | scaffold01145 | 37                      | [C/T] | Ca_15073           | DOWNSTREAM:1795bases                | Vacuolar protein sorting-associated protein 24 homolog 1 |
| Ca_Desi_SNP3684 | scaffold04411 | 47454                   | [C/G] |                    | INTERGENIC                          |                                                          |
| Ca_Desi_SNP3685 | scaffold00791 | 119                     | [A/G] |                    | INTERGENIC                          |                                                          |
| Ca_Desi_SNP3686 | scaffold00794 | 1852                    | [C/T] |                    | INTERGENIC                          |                                                          |
| Ca_Desi_SNP3687 | scaffold00798 | 2848                    | [T/A] |                    | INTERGENIC                          |                                                          |
| Ca_Desi_SNP3688 | scaffold00798 | 3238                    | [A/C] |                    | INTERGENIC                          |                                                          |
| Ca_Desi_SNP3689 | scaffold00801 | 3050                    | [C/T] |                    | INTERGENIC                          |                                                          |
| Ca_Desi_SNP3690 | scaffold04482 | 21629                   | [A/C] |                    | INTERGENIC                          |                                                          |
| Ca_Desi_SNP3691 | scaffold04482 | 21630                   | [G/C] |                    | INTERGENIC                          |                                                          |

| SNP IDs         | Chromosomes   | Physical positions (bp) | SNPs  | Gene accession IDs | Sequence components of genome/genes | Putative functions                               |
|-----------------|---------------|-------------------------|-------|--------------------|-------------------------------------|--------------------------------------------------|
| Ca_Desi_SNP3692 | scaffold04482 | 21631                   | [A/T] |                    | INTERGENIC                          |                                                  |
| Ca_Desi_SNP3693 | scaffold04482 | 21632                   | [T/G] |                    | INTERGENIC                          |                                                  |
| Ca_Desi_SNP3694 | scaffold04721 | 48206                   | [A/G] |                    | INTERGENIC                          |                                                  |
| Ca_Desi_SNP3695 | scaffold04721 | 48230                   | [G/A] |                    | INTERGENIC                          |                                                  |
| Ca_Desi_SNP3696 | scaffold04764 | 57802                   | [C/T] |                    | INTERGENIC                          |                                                  |
| Ca_Desi_SNP3697 | scaffold04764 | 57826                   | [T/A] |                    | INTERGENIC                          |                                                  |
| Ca_Desi_SNP3698 | scaffold04764 | 57835                   | [T/A] |                    | INTERGENIC                          |                                                  |
| Ca_Desi_SNP3699 | scaffold07585 | 34202                   | [C/A] |                    | INTERGENIC                          |                                                  |
| Ca_Desi_SNP3700 | scaffold07585 | 34203                   | [T/G] |                    | INTERGENIC                          |                                                  |
| Ca_Desi_SNP3701 | scaffold06646 | 55321                   | [C/G] |                    | INTERGENIC                          |                                                  |
| Ca_Desi_SNP3702 | scaffold06649 | 37081                   | [C/G] |                    | INTERGENIC                          |                                                  |
| Ca_Desi_SNP3703 | scaffold00822 | 1576                    | [A/C] | Ca_14178           | INTRON                              | Photosystem II 10 kDa polypeptide, chloroplastic |
| Ca_Desi_SNP3704 | scaffold00823 | 374                     | [T/C] |                    | INTERGENIC                          |                                                  |
| Ca_Desi_SNP3705 | scaffold06937 | 32412                   | [T/C] |                    | INTERGENIC                          |                                                  |
| Ca_Desi_SNP3706 | scaffold07271 | 10002                   | [T/A] |                    | INTERGENIC                          |                                                  |
| Ca_Desi_SNP3707 | scaffold07271 | 46136                   | [C/A] |                    | INTERGENIC                          |                                                  |
| Ca_Desi_SNP3708 | scaffold07271 | 46138                   | [A/G] |                    | INTERGENIC                          |                                                  |
| Ca_Desi_SNP3709 | scaffold00824 | 1798                    | [T/C] |                    | INTERGENIC                          |                                                  |
| Ca_Desi_SNP3710 | scaffold00612 | 55002                   | [C/T] |                    | INTERGENIC                          |                                                  |
| Ca_Desi_SNP3711 | scaffold00825 | 2202                    | [G/T] |                    | INTERGENIC                          |                                                  |
| Ca_Desi_SNP3712 | scaffold00617 | 50053                   | [G/T] |                    | INTERGENIC                          |                                                  |
| Ca_Desi_SNP3713 | scaffold10660 | 10244                   | [G/C] |                    | INTERGENIC                          |                                                  |
| Ca_Desi_SNP3714 | scaffold14259 | 37431                   | [A/G] |                    | INTERGENIC                          |                                                  |
| Ca_Desi_SNP3715 | scaffold14259 | 37526                   | [T/G] |                    | INTERGENIC                          |                                                  |
| Ca_Desi_SNP3716 | scaffold00840 | 2354                    | [G/A] | Ca_14241           | INTRON                              | ABC transporter B family member 9                |
| Ca_Desi_SNP3717 | scaffold00842 | 2176                    | [A/C] | Ca_14247           | DOWNSTREAM:1550bases                | Putative uncharacterized protein                 |

| SNP IDs         | Chromosomes   | Physical positions (bp) | SNPs  | Gene accession IDs | Sequence components of genome/genes | Putative functions                                   |
|-----------------|---------------|-------------------------|-------|--------------------|-------------------------------------|------------------------------------------------------|
| Ca_Desi_SNP3718 | scaffold00631 | 93641                   | [A/T] |                    | INTERGENIC                          |                                                      |
| Ca_Desi_SNP3719 | scaffold00631 | 93653                   | [C/A] |                    | INTERGENIC                          |                                                      |
| Ca_Desi_SNP3720 | scaffold00631 | 93666                   | [G/A] |                    | INTERGENIC                          |                                                      |
| Ca_Desi_SNP3721 | scaffold00634 | 48267                   | [C/G] |                    | INTERGENIC                          |                                                      |
| Ca_Desi_SNP3722 | scaffold00634 | 48288                   | [G/A] |                    | INTERGENIC                          |                                                      |
| Ca_Desi_SNP3723 | scaffold00845 | 1701                    | [C/A] |                    | INTERGENIC                          |                                                      |
| Ca_Desi_SNP3724 | scaffold00078 | 7235                    | [A/C] |                    | INTERGENIC                          |                                                      |
| Ca_Desi_SNP3725 | scaffold00078 | 7968                    | [A/G] |                    | INTERGENIC                          |                                                      |
| Ca_Desi_SNP3726 | scaffold00078 | 7971                    | [G/A] |                    | INTERGENIC                          |                                                      |
| Ca_Desi_SNP3727 | scaffold00643 | 8223                    | [A/G] |                    | INTERGENIC                          |                                                      |
| Ca_Desi_SNP3728 | scaffold00643 | 8224                    | [G/A] |                    | INTERGENIC                          |                                                      |
| Ca_Desi_SNP3729 | scaffold00089 | 50966                   | [C/T] |                    | INTERGENIC                          |                                                      |
| Ca_Desi_SNP3730 | scaffold00089 | 50983                   | [C/T] |                    | INTERGENIC                          |                                                      |
| Ca_Desi_SNP3731 | scaffold00089 | 50984                   | [A/G] |                    | INTERGENIC                          |                                                      |
| Ca_Desi_SNP3732 | scaffold00093 | 35307                   | [G/T] | Ca_10801           | DOWNSTREAM:1026bases                | E3 ubiquitin-protein ligase MARCH1                   |
| Ca_Desi_SNP3733 | scaffold00113 | 8686                    | [G/C] | Ca_10890           | DOWNSTREAM:1045bases                | Ethylene-responsive transcription factor ERF012      |
| Ca_Desi_SNP3734 | scaffold00113 | 8691                    | [A/C] | Ca_10890           | DOWNSTREAM:1040bases                | Ethylene-responsive transcription factor ERF012      |
| Ca_Desi_SNP3735 | scaffold00113 | 8708                    | [C/T] | Ca_10890           | DOWNSTREAM:1023bases                | Ethylene-responsive transcription factor ERF012      |
| Ca_Desi_SNP3736 | scaffold00113 | 8725                    | [C/T] | Ca_10890           | DOWNSTREAM:1006bases                | Ethylene-responsive transcription factor ERF012      |
| Ca_Desi_SNP3737 | scaffold00113 | 9419                    | [G/A] | Ca_10890           | DOWNSTREAM:312bases                 | Ethylene-responsive transcription factor ERF012      |
| Ca_Desi_SNP3738 | scaffold00113 | 9705                    | [G/A] | Ca_10890           | DOWNSTREAM:26bases                  | Ethylene-responsive transcription factor ERF012      |
| Ca_Desi_SNP3739 | scaffold15702 | 53715                   | [A/T] |                    | INTERGENIC                          |                                                      |
| Ca_Desi_SNP3740 | scaffold00852 | 989                     | [A/G] | Ca_14286           | INTRON                              | Type I inositol-1,4,5-trisphosphate 5-phosphatase 11 |
| Ca_Desi_SNP3741 | scaffold00158 | 15560                   | [G/T] |                    | INTERGENIC                          |                                                      |
| Ca_Desi_SNP3742 | scaffold00859 | 191                     | [A/T] |                    | INTERGENIC                          |                                                      |
| Ca_Desi_SNP3743 | scaffold00198 | 50658                   | [T/G] | Ca_11258           | INTRON                              | DENN domain-containing protein 5B                    |

| SNP IDs         | Chromosomes   | Physical positions (bp) | SNPs  | Gene accession IDs | Sequence components of genome/genes | Putative functions                                                      |
|-----------------|---------------|-------------------------|-------|--------------------|-------------------------------------|-------------------------------------------------------------------------|
| Ca_Desi_SNP3744 | scaffold00198 | 50659                   | [C/A] | Ca_11258           | INTRON                              | DENN domain-containing protein 5B                                       |
| Ca_Desi_SNP3745 | scaffold00198 | 50660                   | [T/G] | Ca_11258           | INTRON                              | DENN domain-containing protein 5B                                       |
| Ca_Desi_SNP3746 | scaffold00870 | 599                     | [A/G] |                    | INTERGENIC                          |                                                                         |
| Ca_Desi_SNP3747 | scaffold00870 | 620                     | [C/T] |                    | INTERGENIC                          |                                                                         |
| Ca_Desi_SNP3748 | scaffold00870 | 629                     | [C/T] |                    | INTERGENIC                          |                                                                         |
| Ca_Desi_SNP3749 | scaffold00870 | 644                     | [A/C] |                    | INTERGENIC                          |                                                                         |
| Ca_Desi_SNP3750 | scaffold00201 | 15914                   | [G/T] |                    | INTERGENIC                          |                                                                         |
| Ca_Desi_SNP3751 | scaffold00206 | 47609                   | [T/G] | Ca_11345           | INTRON                              | Secologanin synthase                                                    |
| Ca_Desi_SNP3752 | scaffold00206 | 47620                   | [T/G] | Ca_11345           | INTRON                              | Secologanin synthase                                                    |
| Ca_Desi_SNP3753 | scaffold00206 | 47637                   | [T/A] | Ca_11345           | INTRON                              | Secologanin synthase                                                    |
| Ca_Desi_SNP3754 | scaffold00206 | 47685                   | [A/G] | Ca_11345           | INTRON                              | Secologanin synthase                                                    |
| Ca_Desi_SNP3755 | scaffold00207 | 19131                   | [A/T] | Ca_11357           | INTRON                              | Chloroplastic group IIA intron splicing facilitator CRS1, chloroplastic |
| Ca_Desi_SNP3756 | scaffold00207 | 19132                   | [G/C] | Ca_11357           | INTRON                              | Chloroplastic group IIA intron splicing facilitator CRS1, chloroplastic |
| Ca_Desi_SNP3757 | scaffold00207 | 19133                   | [G/T] | Ca_11357           | INTRON                              | Chloroplastic group IIA intron splicing facilitator CRS1, chloroplastic |
| Ca_Desi_SNP3758 | scaffold00208 | 49144                   | [A/T] |                    | INTERGENIC                          |                                                                         |
| Ca_Desi_SNP3759 | scaffold00236 | 3958                    | [A/G] |                    | INTERGENIC                          |                                                                         |
| Ca_Desi_SNP3760 | scaffold00236 | 3986                    | [C/T] |                    | INTERGENIC                          |                                                                         |
| Ca_Desi_SNP3761 | scaffold00236 | 4027                    | [T/C] |                    | INTERGENIC                          |                                                                         |
| Ca_Desi_SNP3762 | scaffold00881 | 1210                    | [G/C] |                    | INTERGENIC                          |                                                                         |
| Ca_Desi_SNP3763 | scaffold00881 | 1236                    | [T/C] |                    | INTERGENIC                          |                                                                         |
| Ca_Desi_SNP3764 | scaffold00249 | 31159                   | [C/T] |                    | INTERGENIC                          |                                                                         |
| Ca_Desi_SNP3765 | scaffold00249 | 31161                   | [A/T] |                    | INTERGENIC                          |                                                                         |
| Ca_Desi_SNP3766 | scaffold00249 | 31163                   | [C/T] |                    | INTERGENIC                          |                                                                         |
| Ca_Desi_SNP3767 | scaffold00249 | 31172                   | [A/G] |                    | INTERGENIC                          |                                                                         |
| Ca_Desi_SNP3768 | scaffold00254 | 21031                   | [A/G] |                    | INTERGENIC                          |                                                                         |
| Ca_Desi_SNP3769 | scaffold00259 | 28552                   | [C/T] |                    | INTERGENIC                          |                                                                         |



| SNP IDs         | Chromosomes   | Physical positions (bp) | SNPs  | Gene accession IDs | Sequence components of genome/genes | Putative functions                                             |
|-----------------|---------------|-------------------------|-------|--------------------|-------------------------------------|----------------------------------------------------------------|
| Ca_Desi_SNP3770 | scaffold03730 | 41519                   | [A/G] | Ca_09570           | INTRON                              | Formin-like protein 20                                         |
| Ca_Desi_SNP3771 | scaffold03730 | 41530                   | [C/T] | Ca_09570           | INTRON                              | Formin-like protein 20                                         |
| Ca_Desi_SNP3772 | scaffold03730 | 41553                   | [A/G] | Ca_09570           | INTRON                              | Formin-like protein 20                                         |
| Ca_Desi_SNP3773 | scaffold00893 | 1584                    | [A/G] | Ca_14399           | INTRON                              | Tripeptidyl-peptidase 2                                        |
| Ca_Desi_SNP3774 | scaffold00262 | 40694                   | [T/C] | Ca_11638           | INTRON                              | Something about silencing protein 10                           |
| Ca_Desi_SNP3775 | scaffold00262 | 40709                   | [C/T] | Ca_11638           | INTRON                              | Something about silencing protein 10                           |
| Ca_Desi_SNP3776 | scaffold00263 | 37854                   | [A/T] | Ca_11660           | DOWNSTREAM:1355bases                | 22.7 kDa class IV heat shock protein                           |
| Ca_Desi_SNP3777 | scaffold00263 | 37873                   | [T/A] | Ca_11660           | DOWNSTREAM:1336bases                | 22.7 kDa class IV heat shock protein                           |
| Ca_Desi_SNP3778 | scaffold00263 | 37877                   | [C/A] | Ca_11660           | DOWNSTREAM:1332bases                | 22.7 kDa class IV heat shock protein                           |
| Ca_Desi_SNP3779 | scaffold00263 | 37879                   | [A/C] | Ca_11660           | DOWNSTREAM:1330bases                | 22.7 kDa class IV heat shock protein                           |
| Ca_Desi_SNP3780 | scaffold00270 | 13566                   | [T/G] |                    | INTERGENIC                          |                                                                |
| Ca_Desi_SNP3781 | scaffold00270 | 13578                   | [C/A] |                    | INTERGENIC                          |                                                                |
| Ca_Desi_SNP3782 | scaffold00270 | 13603                   | [T/C] |                    | INTERGENIC                          |                                                                |
| Ca_Desi_SNP3783 | scaffold00274 | 17555                   | [T/A] |                    | INTERGENIC                          |                                                                |
| Ca_Desi_SNP3784 | scaffold00274 | 17560                   | [A/G] |                    | INTERGENIC                          |                                                                |
| Ca_Desi_SNP3785 | scaffold00274 | 17566                   | [A/G] |                    | INTERGENIC                          |                                                                |
| Ca_Desi_SNP3786 | scaffold00899 | 519                     | [T/C] |                    | INTERGENIC                          |                                                                |
| Ca_Desi_SNP3787 | scaffold00899 | 539                     | [A/G] |                    | INTERGENIC                          |                                                                |
| Ca_Desi_SNP3788 | scaffold00899 | 541                     | [C/A] |                    | INTERGENIC                          |                                                                |
| Ca_Desi_SNP3789 | scaffold00290 | 41539                   | [A/C] |                    | INTERGENIC                          |                                                                |
| Ca_Desi_SNP3790 | scaffold00290 | 41540                   | [G/T] |                    | INTERGENIC                          |                                                                |
| Ca_Desi_SNP3791 | scaffold00292 | 4518                    | [C/T] |                    | INTERGENIC                          |                                                                |
| Ca_Desi_SNP3792 | scaffold00296 | 4436                    | [C/T] |                    | INTERGENIC                          |                                                                |
| Ca_Desi_SNP3793 | scaffold00903 | 1540                    | [A/G] |                    | INTERGENIC                          |                                                                |
| Ca_Desi_SNP3794 | scaffold00304 | 30275                   | [G/C] |                    | INTERGENIC                          |                                                                |
| Ca_Desi_SNP3795 | scaffold10990 | 58421                   | [A/G] | Ca_09604           | NON_SYNONYMOUS_CODING               | Haloacid dehalogenase-like hydrolase (HAD) superfamily protein |

| SNP IDs         | Chromosomes   | Physical positions (bp) | SNPs  | Gene accession IDs | Sequence components of genome/genes | Putative functions                                             |
|-----------------|---------------|-------------------------|-------|--------------------|-------------------------------------|----------------------------------------------------------------|
| Ca_Desi_SNP3796 | scaffold10990 | 58422                   | [T/A] | Ca_09604           | NON_SYNONYMOUS_CODING               | Haloacid dehalogenase-like hydrolase (HAD) superfamily protein |
| Ca_Desi_SNP3797 | scaffold00917 | 1497                    | [A/C] |                    | INTERGENIC                          |                                                                |
| Ca_Desi_SNP3798 | scaffold00305 | 35029                   | [A/G] |                    | INTERGENIC                          |                                                                |
| Ca_Desi_SNP3799 | scaffold00307 | 37036                   | [G/A] |                    | INTERGENIC                          |                                                                |
| Ca_Desi_SNP3800 | scaffold00307 | 37185                   | [A/G] |                    | INTERGENIC                          |                                                                |
| Ca_Desi_SNP3801 | scaffold00307 | 37259                   | [A/G] |                    | INTERGENIC                          |                                                                |
| Ca_Desi_SNP3802 | scaffold00307 | 37275                   | [A/G] |                    | INTERGENIC                          |                                                                |
| Ca_Desi_SNP3803 | scaffold00307 | 37295                   | [A/C] |                    | INTERGENIC                          |                                                                |
| Ca_Desi_SNP3804 | scaffold00308 | 1026                    | [G/T] |                    | INTERGENIC                          |                                                                |
| Ca_Desi_SNP3805 | scaffold00308 | 6420                    | [A/T] |                    | INTERGENIC                          |                                                                |
| Ca_Desi_SNP3806 | scaffold00167 | 12141                   | [A/G] |                    | INTERGENIC                          |                                                                |
| Ca_Desi_SNP3807 | scaffold00167 | 12151                   | [T/C] |                    | INTERGENIC                          |                                                                |
| Ca_Desi_SNP3808 | scaffold00310 | 16673                   | [A/T] |                    | INTERGENIC                          |                                                                |
| Ca_Desi_SNP3809 | scaffold00316 | 35987                   | [T/C] |                    | INTERGENIC                          |                                                                |
| Ca_Desi_SNP3810 | scaffold00924 | 1426                    | [G/A] |                    | INTERGENIC                          |                                                                |
| Ca_Desi_SNP3811 | scaffold00711 | 10104                   | [T/C] |                    | INTERGENIC                          |                                                                |
| Ca_Desi_SNP3812 | scaffold00711 | 72465                   | [A/T] |                    | INTERGENIC                          |                                                                |
| Ca_Desi_SNP3813 | Ca_Desi_LG02  | 10864699                | [G/A] |                    | INTERGENIC                          |                                                                |
| Ca_Desi_SNP3814 | Ca_Desi_LG02  | 10864722                | [T/C] |                    | INTERGENIC                          |                                                                |
| Ca_Desi_SNP3815 | Ca_Desi_LG02  | 10864728                | [C/A] |                    | INTERGENIC                          |                                                                |
| Ca_Desi_SNP3816 | Ca_Desi_LG02  | 11394075                | [G/A] | Ca_01765           | INTRON                              | Uncharacterized lipoprotein syc1174_c                          |
| Ca_Desi_SNP3817 | Ca_Desi_LG02  | 11403678                | [C/T] | Ca_01766           | INTRON                              | T-complex protein 1 subunit theta                              |
| Ca_Desi_SNP3818 | Ca_Desi_LG02  | 11403828                | [C/T] | Ca_01766           | SPLICE_SITE_REGION                  | T-complex protein 1 subunit theta                              |
| Ca_Desi_SNP3819 | Ca_Desi_LG02  | 11422759                | [T/A] |                    | INTERGENIC                          |                                                                |
| Ca_Desi_SNP3820 | Ca_Desi_LG02  | 11423022                | [C/T] |                    | INTERGENIC                          |                                                                |
| Ca_Desi_SNP3821 | Ca_Desi_LG02  | 11423165                | [T/A] |                    | INTERGENIC                          |                                                                |

| SNP IDs         | Chromosomes  | Physical positions (bp) | SNPs  | Gene accession IDs | Sequence components of genome/genes | Putative functions                             |
|-----------------|--------------|-------------------------|-------|--------------------|-------------------------------------|------------------------------------------------|
| Ca_Desi_SNP3822 | Ca_Desi_LG02 | 11979952                | [G/T] | Ca_01786           | INTRON                              | ABC transporter G family member 38             |
| Ca_Desi_SNP3823 | Ca_Desi_LG02 | 11979953                | [A/T] | Ca_01786           | INTRON                              | ABC transporter G family member 38             |
| Ca_Desi_SNP3824 | Ca_Desi_LG02 | 1245365                 | [G/A] | Ca_01108           | UTR_5_PRIME:232bases                | Unknown expressed protein                      |
| Ca_Desi_SNP3825 | Ca_Desi_LG02 | 1245366                 | [C/T] | Ca_01108           | UTR_5_PRIME:233bases                | Unknown expressed protein                      |
| Ca_Desi_SNP3826 | Ca_Desi_LG02 | 1245367                 | [T/C] | Ca_01108           | UTR_5_PRIME:234bases                | Unknown expressed protein                      |
| Ca_Desi_SNP3827 | Ca_Desi_LG02 | 12729870                | [T/A] |                    | INTERGENIC                          |                                                |
| Ca_Desi_SNP3828 | Ca_Desi_LG02 | 12729884                | [G/A] |                    | INTERGENIC                          |                                                |
| Ca_Desi_SNP3829 | Ca_Desi_LG02 | 12729885                | [T/A] |                    | INTERGENIC                          |                                                |
| Ca_Desi_SNP3830 | Ca_Desi_LG02 | 12796811                | [A/T] | Ca_01833           | SYNONYMOUS_CODING                   | Lignin-forming anionic peroxidase              |
| Ca_Desi_SNP3831 | Ca_Desi_LG02 | 12797640                | [A/G] | Ca_01833           | SYNONYMOUS_CODING                   | Lignin-forming anionic peroxidase              |
| Ca_Desi_SNP3832 | Ca_Desi_LG02 | 12985136                | [G/A] |                    | INTERGENIC                          |                                                |
| Ca_Desi_SNP3833 | Ca_Desi_LG02 | 14445992                | [A/G] |                    | INTERGENIC                          |                                                |
| Ca_Desi_SNP3834 | Ca_Desi_LG02 | 14445993                | [T/A] |                    | INTERGENIC                          |                                                |
| Ca_Desi_SNP3835 | Ca_Desi_LG02 | 14445995                | [A/C] |                    | INTERGENIC                          |                                                |
| Ca_Desi_SNP3836 | Ca_Desi_LG02 | 14445996                | [T/G] |                    | INTERGENIC                          |                                                |
| Ca_Desi_SNP3837 | Ca_Desi_LG02 | 16748556                | [T/G] |                    | INTERGENIC                          |                                                |
| Ca_Desi_SNP3838 | Ca_Desi_LG02 | 16748700                | [A/G] |                    | INTERGENIC                          |                                                |
| Ca_Desi_SNP3839 | Ca_Desi_LG02 | 16748779                | [T/A] |                    | INTERGENIC                          |                                                |
| Ca_Desi_SNP3840 | Ca_Desi_LG02 | 327712                  | [T/C] | Ca_01051           | INTRON                              | Polypyrimidine tract-binding protein homolog 2 |
| Ca_Desi_SNP3841 | Ca_Desi_LG02 | 4058389                 | [G/A] | Ca_01329           | INTRON                              | Cytosolic purine 5'-nucleotidase               |
| Ca_Desi_SNP3842 | Ca_Desi_LG02 | 437438                  | [T/C] |                    | INTERGENIC                          |                                                |
| Ca_Desi_SNP3843 | Ca_Desi_LG02 | 437445                  | [T/C] |                    | INTERGENIC                          |                                                |
| Ca_Desi_SNP3844 | Ca_Desi_LG02 | 440754                  | [A/T] |                    | INTERGENIC                          |                                                |
| Ca_Desi_SNP3845 | Ca_Desi_LG02 | 5176014                 | [T/G] | Ca_01387           | SYNONYMOUS_CODING                   | Pyrophosphate-energized membrane proton pump 3 |
| Ca_Desi_SNP3846 | Ca_Desi_LG02 | 5176015                 | [G/A] | Ca_01387           | NON_SYNONYMOUS_CODING               | Pyrophosphate-energized membrane proton pump 3 |
| Ca_Desi_SNP3847 | Ca_Desi_LG02 | 5176016                 | [G/T] | Ca_01387           | NON_SYNONYMOUS_CODING               | Pyrophosphate-energized membrane proton pump 3 |

| SNP IDs          | Chromosomes   | Physical positions (bp) | SNPs  | Gene accession IDs | Sequence components of genome/genes | Putative functions                                         |
|------------------|---------------|-------------------------|-------|--------------------|-------------------------------------|------------------------------------------------------------|
| Ca_Desig_SNP3848 | Ca_Desig_LG02 | 527083                  | [C/T] |                    | INTERGENIC                          |                                                            |
| Ca_Desig_SNP3849 | Ca_Desig_LG02 | 527635                  | [A/C] |                    | INTERGENIC                          |                                                            |
| Ca_Desig_SNP3850 | Ca_Desig_LG02 | 5503406                 | [G/T] | Ca_01413           | DOWNSTREAM:120bases                 | Plastid division protein PDV2                              |
| Ca_Desig_SNP3851 | Ca_Desig_LG02 | 5503509                 | [A/G] | Ca_01413           | DOWNSTREAM:17bases                  | Plastid division protein PDV2                              |
| Ca_Desig_SNP3852 | Ca_Desig_LG02 | 5503732                 | [G/C] |                    | INTERGENIC                          |                                                            |
| Ca_Desig_SNP3853 | Ca_Desig_LG02 | 5548819                 | [G/A] |                    | INTERGENIC                          |                                                            |
| Ca_Desig_SNP3854 | Ca_Desig_LG02 | 5698197                 | [G/A] | Ca_01432           | DOWNSTREAM:1646bases                | cold-regulated 413-plasma membrane 2                       |
| Ca_Desig_SNP3855 | Ca_Desig_LG02 | 574864                  | [T/G] | Ca_01064           | NON_SYNONYMOUS_CODING               | CCR4-NOT transcription complex subunit 4                   |
| Ca_Desig_SNP3856 | Ca_Desig_LG02 | 574865                  | [T/A] | Ca_01064           | NON_SYNONYMOUS_CODING               | CCR4-NOT transcription complex subunit 4                   |
| Ca_Desig_SNP3857 | Ca_Desig_LG02 | 574867                  | [A/C] | Ca_01064           | NON_SYNONYMOUS_CODING               | CCR4-NOT transcription complex subunit 4                   |
| Ca_Desig_SNP3858 | Ca_Desig_LG02 | 6025741                 | [A/G] |                    | INTERGENIC                          |                                                            |
| Ca_Desig_SNP3859 | Ca_Desig_LG02 | 6025764                 | [A/C] |                    | INTERGENIC                          |                                                            |
| Ca_Desig_SNP3860 | Ca_Desig_LG02 | 6089359                 | [A/G] |                    | INTERGENIC                          |                                                            |
| Ca_Desig_SNP3861 | Ca_Desig_LG02 | 6091970                 | [A/C] | Ca_01467           | DOWNSTREAM:1758bases                | unknown protein                                            |
| Ca_Desig_SNP3862 | Ca_Desig_LG02 | 6091973                 | [T/G] | Ca_01467           | DOWNSTREAM:1755bases                | unknown protein                                            |
| Ca_Desig_SNP3863 | Ca_Desig_LG02 | 6091980                 | [T/C] | Ca_01467           | DOWNSTREAM:1748bases                | unknown protein                                            |
| Ca_Desig_SNP3864 | Ca_Desig_LG02 | 6091983                 | [C/T] | Ca_01467           | DOWNSTREAM:1745bases                | unknown protein                                            |
| Ca_Desig_SNP3865 | Ca_Desig_LG02 | 6092094                 | [A/G] | Ca_01467           | DOWNSTREAM:1634bases                | unknown protein                                            |
| Ca_Desig_SNP3866 | Ca_Desig_LG02 | 6092376                 | [T/C] | Ca_01467           | DOWNSTREAM:1352bases                | unknown protein                                            |
| Ca_Desig_SNP3867 | Ca_Desig_LG02 | 6711737                 | [C/A] | Ca_01516           | NON_SYNONYMOUS_CODING               | BTB/POZ and MATH domain-containing protein 4               |
| Ca_Desig_SNP3868 | Ca_Desig_LG02 | 6711738                 | [T/G] | Ca_01516           | SYNONYMOUS_CODING                   | BTB/POZ and MATH domain-containing protein 4               |
| Ca_Desig_SNP3869 | Ca_Desig_LG02 | 8436240                 | [A/G] | Ca_01669           | INTRON                              | Probable NOT transcription complex subunit VIP2 (Fragment) |
| Ca_Desig_SNP3870 | Ca_Desig_LG02 | 8436241                 | [G/A] | Ca_01669           | INTRON                              | Probable NOT transcription complex subunit VIP2 (Fragment) |
| Ca_Desig_SNP3871 | scaffold00343 | 35897                   | [G/T] |                    | INTERGENIC                          |                                                            |
| Ca_Desig_SNP3872 | scaffold00346 | 17368                   | [G/A] |                    | INTERGENIC                          |                                                            |
| Ca_Desig_SNP3873 | scaffold00346 | 17389                   | [T/C] |                    | INTERGENIC                          |                                                            |

| SNP IDs         | Chromosomes   | Physical positions (bp) | SNPs  | Gene accession IDs | Sequence components of genome/genes | Putative functions                                                                   |
|-----------------|---------------|-------------------------|-------|--------------------|-------------------------------------|--------------------------------------------------------------------------------------|
| Ca_Desi_SNP3874 | scaffold00346 | 17390                   | [G/T] |                    | INTERGENIC                          |                                                                                      |
| Ca_Desi_SNP3875 | scaffold00346 | 28664                   | [C/A] |                    | INTERGENIC                          |                                                                                      |
| Ca_Desi_SNP3876 | scaffold00348 | 28435                   | [C/T] |                    | INTERGENIC                          |                                                                                      |
| Ca_Desi_SNP3877 | scaffold00352 | 34366                   | [C/T] | Ca_12246           | SYNONYMOUS_CODING                   | Serine/threonine-protein kinase OX11                                                 |
| Ca_Desi_SNP3878 | scaffold00352 | 34406                   | [A/T] | Ca_12246           | SYNONYMOUS_CODING                   | Serine/threonine-protein kinase OX11                                                 |
| Ca_Desi_SNP3879 | scaffold00925 | 518                     | [A/G] |                    | INTERGENIC                          |                                                                                      |
| Ca_Desi_SNP3880 | scaffold00736 | 37235                   | [G/A] |                    | INTERGENIC                          |                                                                                      |
| Ca_Desi_SNP3881 | scaffold00736 | 39769                   | [C/T] |                    | INTERGENIC                          |                                                                                      |
| Ca_Desi_SNP3882 | scaffold00736 | 39770                   | [G/A] |                    | INTERGENIC                          |                                                                                      |
| Ca_Desi_SNP3883 | scaffold02301 | 65891                   | [T/G] |                    | INTERGENIC                          |                                                                                      |
| Ca_Desi_SNP3884 | scaffold00754 | 147727                  | [A/T] |                    | INTERGENIC                          |                                                                                      |
| Ca_Desi_SNP3885 | scaffold00754 | 147734                  | [T/C] |                    | INTERGENIC                          |                                                                                      |
| Ca_Desi_SNP3886 | scaffold00368 | 28971                   | [A/G] |                    | INTERGENIC                          |                                                                                      |
| Ca_Desi_SNP3887 | scaffold00370 | 3410                    | [C/T] |                    | INTERGENIC                          |                                                                                      |
| Ca_Desi_SNP3888 | scaffold00928 | 1201                    | [A/G] |                    | INTERGENIC                          |                                                                                      |
| Ca_Desi_SNP3889 | scaffold00381 | 5661                    | [A/G] |                    | INTERGENIC                          |                                                                                      |
| Ca_Desi_SNP3890 | scaffold00382 | 35703                   | [G/A] | Ca_12380           | SYNONYMOUS_CODING                   | Probable leucine-rich repeat receptor-like serine/threonine-protein kinase At3g14842 |
| Ca_Desi_SNP3891 | scaffold00382 | 35707                   | [C/T] | Ca_12380           | SYNONYMOUS_CODING                   | Probable leucine-rich repeat receptor-like serine/threonine-protein kinase At3g14843 |
| Ca_Desi_SNP3892 | scaffold00933 | 961                     | [T/G] |                    | INTERGENIC                          |                                                                                      |
| Ca_Desi_SNP3893 | scaffold00933 | 963                     | [A/T] |                    | INTERGENIC                          |                                                                                      |
| Ca_Desi_SNP3894 | scaffold00383 | 24479                   | [T/A] |                    | INTERGENIC                          |                                                                                      |
| Ca_Desi_SNP3895 | scaffold00383 | 26248                   | [A/C] |                    | INTERGENIC                          |                                                                                      |
| Ca_Desi_SNP3896 | scaffold00383 | 26252                   | [G/A] |                    | INTERGENIC                          |                                                                                      |
| Ca_Desi_SNP3897 | scaffold00383 | 26333                   | [A/C] |                    | INTERGENIC                          |                                                                                      |
| Ca_Desi_SNP3898 | scaffold00383 | 26337                   | [A/G] |                    | INTERGENIC                          |                                                                                      |
| Ca_Desi_SNP3899 | scaffold00383 | 26362                   | [A/C] |                    | INTERGENIC                          |                                                                                      |

| SNP IDs          | Chromosomes   | Physical positions (bp) | SNPs  | Gene accession IDs | Sequence components of genome/genes | Putative functions |
|------------------|---------------|-------------------------|-------|--------------------|-------------------------------------|--------------------|
| Ca_Desig_SNP3900 | scaffold00383 | 26366                   | [A/G] |                    | INTERGENIC                          |                    |
| Ca_Desig_SNP3901 | scaffold00383 | 26408                   | [G/A] |                    | INTERGENIC                          |                    |
| Ca_Desig_SNP3902 | scaffold00383 | 26411                   | [T/G] |                    | INTERGENIC                          |                    |
| Ca_Desig_SNP3903 | scaffold00383 | 26437                   | [C/G] |                    | INTERGENIC                          |                    |
| Ca_Desig_SNP3904 | scaffold00385 | 24634                   | [T/C] |                    | INTERGENIC                          |                    |
| Ca_Desig_SNP3905 | scaffold00385 | 24636                   | [C/A] |                    | INTERGENIC                          |                    |
| Ca_Desig_SNP3906 | scaffold00396 | 31705                   | [C/G] | Ca_12443           | INTRON                              | Lamin-like protein |
| Ca_Desig_SNP3907 | scaffold00396 | 31721                   | [C/T] | Ca_12443           | INTRON                              | Lamin-like protein |
| Ca_Desig_SNP3908 | scaffold00396 | 31734                   | [G/A] | Ca_12443           | INTRON                              | Lamin-like protein |
| Ca_Desig_SNP3909 | scaffold00408 | 2258                    | [C/A] |                    | INTERGENIC                          |                    |
| Ca_Desig_SNP3910 | scaffold00408 | 2259                    | [T/G] |                    | INTERGENIC                          |                    |
| Ca_Desig_SNP3911 | scaffold00951 | 391                     | [C/G] |                    | INTERGENIC                          |                    |
| Ca_Desig_SNP3912 | scaffold00952 | 558                     | [A/T] |                    | INTERGENIC                          |                    |
| Ca_Desig_SNP3913 | scaffold00952 | 565                     | [A/C] |                    | INTERGENIC                          |                    |
| Ca_Desig_SNP3914 | scaffold02472 | 38048                   | [A/G] |                    | INTERGENIC                          |                    |
| Ca_Desig_SNP3915 | scaffold00435 | 21896                   | [T/A] |                    | INTERGENIC                          |                    |
| Ca_Desig_SNP3916 | scaffold00435 | 21897                   | [C/A] |                    | INTERGENIC                          |                    |
| Ca_Desig_SNP3917 | scaffold00435 | 21898                   | [T/G] |                    | INTERGENIC                          |                    |
| Ca_Desig_SNP3918 | scaffold00781 | 14347                   | [T/C] |                    | INTERGENIC                          |                    |
| Ca_Desig_SNP3919 | scaffold00781 | 14388                   | [T/G] |                    | INTERGENIC                          |                    |
| Ca_Desig_SNP3920 | scaffold00211 | 121122                  | [C/G] |                    | INTERGENIC                          |                    |
| Ca_Desig_SNP3921 | scaffold00964 | 551                     | [G/T] |                    | INTERGENIC                          |                    |
| Ca_Desig_SNP3922 | scaffold00964 | 589                     | [A/G] |                    | INTERGENIC                          |                    |
| Ca_Desig_SNP3923 | scaffold00463 | 1613                    | [T/G] | Ca_12714           | SYNONYMOUS_CODING                   | unknown protein    |
| Ca_Desig_SNP3924 | scaffold00463 | 26273                   | [T/A] |                    | INTERGENIC                          |                    |
| Ca_Desig_SNP3925 | scaffold00463 | 26274                   | [C/G] |                    | INTERGENIC                          |                    |

| SNP IDs         | Chromosomes   | Physical positions (bp) | SNPs  | Gene accession IDs | Sequence components of genome/genes | Putative functions                                           |
|-----------------|---------------|-------------------------|-------|--------------------|-------------------------------------|--------------------------------------------------------------|
| Ca_Desi_SNP3926 | scaffold00463 | 26275                   | [T/G] |                    | INTERGENIC                          |                                                              |
| Ca_Desi_SNP3927 | scaffold00212 | 151839                  | [C/T] | Ca_08884           | SYNONYMOUS_CODING                   | zinc ion binding                                             |
| Ca_Desi_SNP3928 | scaffold00212 | 151873                  | [C/T] | Ca_08884           | STOP_GAINED                         | zinc ion binding                                             |
| Ca_Desi_SNP3929 | scaffold16831 | 69622                   | [A/T] | Ca_09735           | DOWNSTREAM:676bases                 | Dihydrolipoyl dehydrogenase                                  |
| Ca_Desi_SNP3930 | scaffold00972 | 186                     | [G/C] |                    | INTERGENIC                          |                                                              |
| Ca_Desi_SNP3931 | Ca_Desi_LG03  | 11051028                | [A/T] | Ca_02902           | NON_SYNONYMOUS_CODING               | LETM1 and EF-hand domain-containing protein 1, mitochondrial |
| Ca_Desi_SNP3932 | Ca_Desi_LG03  | 11051029                | [G/C] | Ca_02902           | NON_SYNONYMOUS_CODING               | LETM1 and EF-hand domain-containing protein 1, mitochondrial |
| Ca_Desi_SNP3933 | Ca_Desi_LG03  | 11051030                | [G/T] | Ca_02902           | NON_SYNONYMOUS_CODING               | LETM1 and EF-hand domain-containing protein 1, mitochondrial |
| Ca_Desi_SNP3934 | Ca_Desi_LG03  | 12863764                | [C/T] |                    | INTERGENIC                          |                                                              |
| Ca_Desi_SNP3935 | Ca_Desi_LG03  | 12863810                | [C/T] |                    | INTERGENIC                          |                                                              |
| Ca_Desi_SNP3936 | Ca_Desi_LG03  | 1298524                 | [G/A] | Ca_02274           | SYNONYMOUS_CODING                   | ADP-ribosylation factor 2                                    |
| Ca_Desi_SNP3937 | Ca_Desi_LG03  | 1351569                 | [C/G] |                    | INTERGENIC                          |                                                              |
| Ca_Desi_SNP3938 | Ca_Desi_LG03  | 1351570                 | [T/A] |                    | INTERGENIC                          |                                                              |
| Ca_Desi_SNP3939 | Ca_Desi_LG03  | 1351571                 | [A/T] |                    | INTERGENIC                          |                                                              |
| Ca_Desi_SNP3940 | Ca_Desi_LG03  | 13535548                | [T/G] |                    | INTERGENIC                          |                                                              |
| Ca_Desi_SNP3941 | Ca_Desi_LG03  | 13535549                | [C/T] |                    | INTERGENIC                          |                                                              |
| Ca_Desi_SNP3942 | Ca_Desi_LG03  | 13535550                | [T/G] |                    | INTERGENIC                          |                                                              |
| Ca_Desi_SNP3943 | Ca_Desi_LG03  | 13829505                | [G/T] |                    | INTERGENIC                          |                                                              |
| Ca_Desi_SNP3944 | Ca_Desi_LG03  | 1416895                 | [A/T] | Ca_02288           | SYNONYMOUS_CODING                   | Receptor-like serine/threonine-protein kinase ALE2           |
| Ca_Desi_SNP3945 | Ca_Desi_LG03  | 1416904                 | [A/T] | Ca_02288           | SYNONYMOUS_CODING                   | Receptor-like serine/threonine-protein kinase ALE2           |
| Ca_Desi_SNP3946 | Ca_Desi_LG03  | 1416925                 | [C/T] | Ca_02288           | SYNONYMOUS_CODING                   | Receptor-like serine/threonine-protein kinase ALE2           |
| Ca_Desi_SNP3947 | Ca_Desi_LG03  | 15332497                | [C/T] | Ca_03190           | SYNONYMOUS_CODING                   | Probable F-box protein At4g22030                             |
| Ca_Desi_SNP3948 | Ca_Desi_LG03  | 16209416                | [A/G] | Ca_03249           | INTRON                              | rRNA biogenesis protein RRP36                                |
| Ca_Desi_SNP3949 | Ca_Desi_LG03  | 17138110                | [T/G] |                    | INTERGENIC                          |                                                              |
| Ca_Desi_SNP3950 | Ca_Desi_LG03  | 17138111                | [T/A] |                    | INTERGENIC                          |                                                              |
| Ca_Desi_SNP3951 | Ca_Desi_LG03  | 17138112                | [G/T] |                    | INTERGENIC                          |                                                              |

| SNP IDs         | Chromosomes  | Physical positions (bp) | SNPs  | Gene accession IDs | Sequence components of genome/genes | Putative functions                                    |
|-----------------|--------------|-------------------------|-------|--------------------|-------------------------------------|-------------------------------------------------------|
| Ca_Desi_SNP3952 | Ca_Desi_LG03 | 18171146                | [A/C] | Ca_03436           | SYNONYMOUS_CODING                   | E3 ubiquitin ligase BIG BROTHER                       |
| Ca_Desi_SNP3953 | Ca_Desi_LG03 | 18543500                | [G/T] |                    | INTERGENIC                          |                                                       |
| Ca_Desi_SNP3954 | Ca_Desi_LG03 | 18823827                | [T/G] |                    | INTERGENIC                          |                                                       |
| Ca_Desi_SNP3955 | Ca_Desi_LG03 | 20240166                | [A/C] | Ca_03666           | NON_SYNONYMOUS_CODING               | Protein SPA1-RELATED 2                                |
| Ca_Desi_SNP3956 | Ca_Desi_LG03 | 20240167                | [G/T] | Ca_03666           | NON_SYNONYMOUS_CODING               | Protein SPA1-RELATED 2                                |
| Ca_Desi_SNP3957 | Ca_Desi_LG03 | 22980534                | [C/G] | Ca_03844           | SYNONYMOUS_CODING                   | Protein SGT1 homolog At5g65490                        |
| Ca_Desi_SNP3958 | Ca_Desi_LG03 | 23024242                | [G/T] | Ca_03848           | INTRON                              | Mechanosensitive ion channel protein 2, chloroplastic |
| Ca_Desi_SNP3959 | Ca_Desi_LG03 | 23164549                | [C/A] | Ca_03866           | INTRON                              | Glycogen synthase                                     |
| Ca_Desi_SNP3960 | Ca_Desi_LG03 | 234219                  | [T/A] | Ca_02182           | NON_SYNONYMOUS_CODING               | unknown protein                                       |
| Ca_Desi_SNP3961 | Ca_Desi_LG03 | 2952484                 | [G/A] | Ca_02387           | SYNONYMOUS_CODING                   | Proteasome subunit beta type-4                        |
| Ca_Desi_SNP3962 | Ca_Desi_LG03 | 2952498                 | [A/T] | Ca_02387           | NON_SYNONYMOUS_CODING               | Proteasome subunit beta type-4                        |
| Ca_Desi_SNP3963 | Ca_Desi_LG03 | 3567289                 | [T/G] | Ca_02451           | INTRON                              | Putative protease Do-like 14                          |
| Ca_Desi_SNP3964 | Ca_Desi_LG03 | 3567295                 | [T/C] | Ca_02451           | INTRON                              | Putative protease Do-like 14                          |
| Ca_Desi_SNP3965 | Ca_Desi_LG03 | 3576517                 | [T/C] |                    | INTERGENIC                          |                                                       |
| Ca_Desi_SNP3966 | Ca_Desi_LG03 | 3581299                 | [A/C] | Ca_02453           | INTRON                              | Acyl-CoA-binding domain-containing protein 4          |
| Ca_Desi_SNP3967 | Ca_Desi_LG03 | 3633583                 | [T/G] | Ca_02457           | INTRON                              | DNA polymerase zeta catalytic subunit                 |
| Ca_Desi_SNP3968 | Ca_Desi_LG03 | 3635965                 | [T/C] |                    | INTERGENIC                          |                                                       |
| Ca_Desi_SNP3969 | Ca_Desi_LG03 | 3635966                 | [A/C] |                    | INTERGENIC                          |                                                       |
| Ca_Desi_SNP3970 | Ca_Desi_LG03 | 3635967                 | [G/A] |                    | INTERGENIC                          |                                                       |
| Ca_Desi_SNP3971 | Ca_Desi_LG03 | 4004974                 | [T/A] | Ca_02498           | INTRON                              | Uncharacterized protein At3g58460                     |
| Ca_Desi_SNP3972 | Ca_Desi_LG03 | 4004986                 | [G/A] | Ca_02498           | INTRON                              | Uncharacterized protein At3g58460                     |
| Ca_Desi_SNP3973 | Ca_Desi_LG03 | 4016176                 | [A/C] | Ca_02499           | SYNONYMOUS_CODING                   | Calcium homeostasis endoplasmic reticulum protein     |
| Ca_Desi_SNP3974 | Ca_Desi_LG03 | 4053086                 | [G/T] |                    | INTERGENIC                          |                                                       |
| Ca_Desi_SNP3975 | Ca_Desi_LG03 | 4086479                 | [T/C] | Ca_02506           | INTRON                              | Cohesin subunit SA-1                                  |
| Ca_Desi_SNP3976 | Ca_Desi_LG03 | 4100757                 | [G/T] |                    | INTERGENIC                          |                                                       |
| Ca_Desi_SNP3977 | Ca_Desi_LG03 | 4174837                 | [A/G] | Ca_02518           | UTR_3_PRIME:318bases                | Unknown expressed protein                             |



| SNP IDs         | Chromosomes   | Physical positions (bp) | SNPs  | Gene accession IDs | Sequence components of genome/genes | Putative functions                             |
|-----------------|---------------|-------------------------|-------|--------------------|-------------------------------------|------------------------------------------------|
| Ca_Desi_SNP3978 | Ca_Desi_LG03  | 4174863                 | [A/G] | Ca_02518           | UTR_3_PRIME:292bases                | Unknown expressed protein                      |
| Ca_Desi_SNP3979 | Ca_Desi_LG03  | 6436108                 | [C/A] |                    | INTERGENIC                          |                                                |
| Ca_Desi_SNP3980 | Ca_Desi_LG03  | 6543102                 | [G/A] | Ca_02681           | DOWNSTREAM:1837bases                | Peptide transporter PTR3-A                     |
| Ca_Desi_SNP3981 | Ca_Desi_LG03  | 6544048                 | [T/C] |                    | INTERGENIC                          |                                                |
| Ca_Desi_SNP3982 | Ca_Desi_LG03  | 6723839                 | [G/A] |                    | INTERGENIC                          |                                                |
| Ca_Desi_SNP3983 | Ca_Desi_LG03  | 6723852                 | [C/G] |                    | INTERGENIC                          |                                                |
| Ca_Desi_SNP3984 | Ca_Desi_LG03  | 6758362                 | [T/C] | Ca_02701           | SYNONYMOUS_CODING                   | Vacuolar protein sorting-associated protein 27 |
| Ca_Desi_SNP3985 | Ca_Desi_LG03  | 6758514                 | [C/T] | Ca_02701           | NON_SYNONYMOUS_CODING               | Vacuolar protein sorting-associated protein 27 |
| Ca_Desi_SNP3986 | Ca_Desi_LG03  | 6799102                 | [T/C] | Ca_02707           | INTRON                              | UPF0420 protein C16orf58 homolog               |
| Ca_Desi_SNP3987 | Ca_Desi_LG03  | 6799103                 | [T/C] | Ca_02707           | INTRON                              | UPF0420 protein C16orf58 homolog               |
| Ca_Desi_SNP3988 | Ca_Desi_LG03  | 6812183                 | [G/C] | Ca_02708           | DOWNSTREAM:1985bases                | Actin-depolymerizing factor                    |
| Ca_Desi_SNP3989 | Ca_Desi_LG03  | 6812195                 | [C/T] | Ca_02708           | DOWNSTREAM:1997bases                | Actin-depolymerizing factor                    |
| Ca_Desi_SNP3990 | Ca_Desi_LG03  | 6963252                 | [A/G] |                    | INTERGENIC                          |                                                |
| Ca_Desi_SNP3991 | Ca_Desi_LG03  | 841818                  | [A/G] |                    | INTERGENIC                          |                                                |
| Ca_Desi_SNP3992 | Ca_Desi_LG03  | 841819                  | [T/A] |                    | INTERGENIC                          |                                                |
| Ca_Desi_SNP3993 | scaffold00978 | 410                     | [C/T] |                    | INTERGENIC                          |                                                |
| Ca_Desi_SNP3994 | scaffold00978 | 428                     | [A/T] |                    | INTERGENIC                          |                                                |
| Ca_Desi_SNP3995 | scaffold00491 | 624                     | [A/G] | Ca_12862           | INTRON                              | MLP-like protein 43                            |
| Ca_Desi_SNP3996 | scaffold01704 | 19941                   | [C/T] |                    | INTERGENIC                          |                                                |
| Ca_Desi_SNP3997 | scaffold01704 | 19942                   | [A/C] |                    | INTERGENIC                          |                                                |
| Ca_Desi_SNP3998 | scaffold01704 | 19943                   | [G/T] |                    | INTERGENIC                          |                                                |
| Ca_Desi_SNP3999 | scaffold07146 | 61769                   | [G/A] |                    | INTERGENIC                          |                                                |
| Ca_Desi_SNP4000 | scaffold07146 | 61785                   | [T/C] |                    | INTERGENIC                          |                                                |
| Ca_Desi_SNP4001 | scaffold07146 | 62017                   | [C/T] |                    | INTERGENIC                          |                                                |
| Ca_Desi_SNP4002 | scaffold07146 | 62037                   | [T/C] |                    | INTERGENIC                          |                                                |
| Ca_Desi_SNP4003 | scaffold07146 | 77428                   | [A/G] |                    | INTERGENIC                          |                                                |

| SNP IDs         | Chromosomes   | Physical positions (bp) | SNPs  | Gene accession IDs | Sequence components of genome/genes | Putative functions                                                   |
|-----------------|---------------|-------------------------|-------|--------------------|-------------------------------------|----------------------------------------------------------------------|
| Ca_Desi_SNP4004 | scaffold00989 | 415                     | [A/G] |                    | INTERGENIC                          |                                                                      |
| Ca_Desi_SNP4005 | scaffold00495 | 1688                    | [A/G] |                    | INTERGENIC                          |                                                                      |
| Ca_Desi_SNP4006 | scaffold00505 | 7264                    | [T/C] |                    | INTERGENIC                          |                                                                      |
| Ca_Desi_SNP4007 | scaffold00505 | 7340                    | [A/T] |                    | INTERGENIC                          |                                                                      |
| Ca_Desi_SNP4008 | scaffold00216 | 46686                   | [A/G] |                    | INTERGENIC                          |                                                                      |
| Ca_Desi_SNP4009 | scaffold00216 | 63212                   | [T/G] | Ca_08907           | DOWNSTREAM:1989bases                | Pentatricopeptide repeat-containing protein At1g76280                |
| Ca_Desi_SNP4010 | scaffold00216 | 63213                   | [G/A] | Ca_08907           | DOWNSTREAM:1988bases                | Pentatricopeptide repeat-containing protein At1g76280                |
| Ca_Desi_SNP4011 | scaffold00216 | 63215                   | [T/C] | Ca_08907           | DOWNSTREAM:1986bases                | Pentatricopeptide repeat-containing protein At1g76280                |
| Ca_Desi_SNP4012 | scaffold02501 | 13571                   | [C/A] | Ca_09757           | DOWNSTREAM:66bases                  | --                                                                   |
| Ca_Desi_SNP4013 | scaffold00519 | 758                     | [G/A] |                    | INTERGENIC                          |                                                                      |
| Ca_Desi_SNP4014 | scaffold00519 | 763                     | [T/C] |                    | INTERGENIC                          |                                                                      |
| Ca_Desi_SNP4015 | scaffold00521 | 11655                   | [G/T] |                    | INTERGENIC                          |                                                                      |
| Ca_Desi_SNP4016 | scaffold00522 | 917                     | [C/G] |                    | INTERGENIC                          |                                                                      |
| Ca_Desi_SNP4017 | scaffold00522 | 918                     | [A/G] |                    | INTERGENIC                          |                                                                      |
| Ca_Desi_SNP4018 | scaffold01015 | 334                     | [C/G] |                    | INTERGENIC                          |                                                                      |
| Ca_Desi_SNP4019 | scaffold00549 | 15304                   | [C/G] | Ca_13129           | UTR_3_PRIME:65bases                 | Probable LRR receptor-like serine/threonine-protein kinase At1g06840 |
| Ca_Desi_SNP4020 | scaffold00224 | 156478                  | [G/A] |                    | INTERGENIC                          |                                                                      |
| Ca_Desi_SNP4021 | scaffold01019 | 176                     | [A/T] |                    | INTERGENIC                          |                                                                      |
| Ca_Desi_SNP4022 | scaffold00557 | 10270                   | [G/T] |                    | INTERGENIC                          |                                                                      |
| Ca_Desi_SNP4023 | scaffold00557 | 10597                   | [C/A] |                    | INTERGENIC                          |                                                                      |
| Ca_Desi_SNP4024 | scaffold00557 | 10601                   | [C/T] |                    | INTERGENIC                          |                                                                      |
| Ca_Desi_SNP4025 | scaffold00571 | 5155                    | [G/T] |                    | INTERGENIC                          |                                                                      |
| Ca_Desi_SNP4026 | scaffold00571 | 5163                    | [G/T] |                    | INTERGENIC                          |                                                                      |
| Ca_Desi_SNP4027 | scaffold00571 | 5170                    | [T/G] |                    | INTERGENIC                          |                                                                      |
| Ca_Desi_SNP4028 | scaffold00571 | 5201                    | [G/T] |                    | INTERGENIC                          |                                                                      |
| Ca_Desi_SNP4029 | scaffold00571 | 5244                    | [G/T] |                    | INTERGENIC                          |                                                                      |

| SNP IDs          | Chromosomes   | Physical positions (bp) | SNPs  | Gene accession IDs | Sequence components of genome/genes | Putative functions                              |
|------------------|---------------|-------------------------|-------|--------------------|-------------------------------------|-------------------------------------------------|
| Ca_Desig_SNP4030 | Ca_Desig_LG04 | 11570362                | [T/C] | Ca_04696           | INTRON                              | Uncharacterized mitochondrial carrier C12B10.09 |
| Ca_Desig_SNP4031 | Ca_Desig_LG04 | 11572654                | [A/G] | Ca_04696           | INTRON                              | Uncharacterized mitochondrial carrier C12B10.09 |
| Ca_Desig_SNP4032 | Ca_Desig_LG04 | 11585310                | [C/T] | Ca_04698           | DOWNSTREAM:678bases                 | Choline/ethanolamine kinase                     |
| Ca_Desig_SNP4033 | Ca_Desig_LG04 | 11585312                | [A/G] | Ca_04698           | DOWNSTREAM:680bases                 | Choline/ethanolamine kinase                     |
| Ca_Desig_SNP4034 | Ca_Desig_LG04 | 12119513                | [T/A] |                    | INTERGENIC                          |                                                 |
| Ca_Desig_SNP4035 | Ca_Desig_LG04 | 1228423                 | [T/G] | Ca_03974           | NON_SYNONYMOUS_CODING               | Protein SERAC1                                  |
| Ca_Desig_SNP4036 | Ca_Desig_LG04 | 1228424                 | [T/A] | Ca_03974           | NON_SYNONYMOUS_CODING               | Protein SERAC1                                  |
| Ca_Desig_SNP4037 | Ca_Desig_LG04 | 130850                  | [G/A] | Ca_03889           | DOWNSTREAM:1877bases                | Abhydrolase domain-containing protein 4         |
| Ca_Desig_SNP4038 | Ca_Desig_LG04 | 130883                  | [T/G] | Ca_03889           | DOWNSTREAM:1844bases                | Abhydrolase domain-containing protein 4         |
| Ca_Desig_SNP4039 | Ca_Desig_LG04 | 1400956                 | [A/G] | Ca_03991           | NON_SYNONYMOUS_CODING               | Trimethylguanosine synthase                     |
| Ca_Desig_SNP4040 | Ca_Desig_LG04 | 16318820                | [G/A] |                    | INTERGENIC                          |                                                 |
| Ca_Desig_SNP4041 | Ca_Desig_LG04 | 21144274                | [T/C] |                    | INTERGENIC                          |                                                 |
| Ca_Desig_SNP4042 | Ca_Desig_LG04 | 21144278                | [T/C] |                    | INTERGENIC                          |                                                 |
| Ca_Desig_SNP4043 | Ca_Desig_LG04 | 2181568                 | [G/A] |                    | INTERGENIC                          |                                                 |
| Ca_Desig_SNP4044 | Ca_Desig_LG04 | 2181583                 | [T/C] |                    | INTERGENIC                          |                                                 |
| Ca_Desig_SNP4045 | Ca_Desig_LG04 | 2181587                 | [G/A] |                    | INTERGENIC                          |                                                 |
| Ca_Desig_SNP4046 | Ca_Desig_LG04 | 21928536                | [C/T] |                    | INTERGENIC                          |                                                 |
| Ca_Desig_SNP4047 | Ca_Desig_LG04 | 223012                  | [T/G] | Ca_03898           | INTRON                              | Small RNA degrading nuclease 3                  |
| Ca_Desig_SNP4048 | Ca_Desig_LG04 | 2481165                 | [T/A] |                    | INTERGENIC                          |                                                 |
| Ca_Desig_SNP4049 | Ca_Desig_LG04 | 2750863                 | [A/C] | Ca_04069           | INTRON                              | Serine/threonine-protein kinase At5g01020       |
| Ca_Desig_SNP4050 | Ca_Desig_LG04 | 2978459                 | [A/T] |                    | INTERGENIC                          |                                                 |
| Ca_Desig_SNP4051 | Ca_Desig_LG04 | 2997017                 | [C/T] |                    | INTERGENIC                          |                                                 |
| Ca_Desig_SNP4052 | Ca_Desig_LG04 | 2997039                 | [G/C] |                    | INTERGENIC                          |                                                 |
| Ca_Desig_SNP4053 | Ca_Desig_LG04 | 3009471                 | [C/T] | Ca_04090           | INTRON                              | Probable protein phosphatase 2C 59              |
| Ca_Desig_SNP4054 | Ca_Desig_LG04 | 3379084                 | [T/C] | Ca_04119           | INTRON                              | embryo defective 2410                           |
| Ca_Desig_SNP4055 | Ca_Desig_LG04 | 367835                  | [A/C] |                    | INTERGENIC                          |                                                 |

| SNP IDs          | Chromosomes   | Physical positions (bp) | SNPs  | Gene accession IDs | Sequence components of genome/genes | Putative functions                                                   |
|------------------|---------------|-------------------------|-------|--------------------|-------------------------------------|----------------------------------------------------------------------|
| Ca_Desig_SNP4056 | Ca_Desig_LG04 | 368285                  | [C/G] | Ca_03909           | DOWNSTREAM:1589bases                | tRNA (adenine(58)-N(1))-methyltransferase non-catalytic subunit trm6 |
| Ca_Desig_SNP4057 | Ca_Desig_LG04 | 368472                  | [T/C] | Ca_03909           | DOWNSTREAM:1402bases                | tRNA (adenine(58)-N(1))-methyltransferase non-catalytic subunit trm6 |
| Ca_Desig_SNP4058 | Ca_Desig_LG04 | 4087191                 | [A/G] | Ca_04169           | NON_SYNONYMOUS_CODING               | Probable galactinol--sucrose galactosyltransferase 1                 |
| Ca_Desig_SNP4059 | Ca_Desig_LG04 | 4087209                 | [C/T] | Ca_04169           | NON_SYNONYMOUS_CODING               | Probable galactinol--sucrose galactosyltransferase 1                 |
| Ca_Desig_SNP4060 | Ca_Desig_LG04 | 4087269                 | [C/T] | Ca_04169           | NON_SYNONYMOUS_CODING               | Probable galactinol--sucrose galactosyltransferase 1                 |
| Ca_Desig_SNP4061 | Ca_Desig_LG04 | 4087272                 | [C/T] | Ca_04169           | NON_SYNONYMOUS_CODING               | Probable galactinol--sucrose galactosyltransferase 1                 |
| Ca_Desig_SNP4062 | Ca_Desig_LG04 | 4653036                 | [A/C] | Ca_04204           | INTRON                              | Probable glucuronosyltransferase GUT1                                |
| Ca_Desig_SNP4063 | Ca_Desig_LG04 | 4687388                 | [C/G] | Ca_04205           | SYNONYMOUS_CODING                   | Probable auxin efflux carrier component 6                            |
| Ca_Desig_SNP4064 | Ca_Desig_LG04 | 4769567                 | [G/A] |                    | INTERGENIC                          |                                                                      |
| Ca_Desig_SNP4065 | Ca_Desig_LG04 | 4771473                 | [T/A] |                    | INTERGENIC                          |                                                                      |
| Ca_Desig_SNP4066 | Ca_Desig_LG04 | 4771549                 | [T/A] |                    | INTERGENIC                          |                                                                      |
| Ca_Desig_SNP4067 | Ca_Desig_LG04 | 4817433                 | [C/G] | Ca_04213           | INTRON                              | Probable inactive receptor kinase At4g23740                          |
| Ca_Desig_SNP4068 | Ca_Desig_LG04 | 4837616                 | [A/G] | Ca_04215           | SYNONYMOUS_CODING                   | Filament-like plant protein (Fragment)                               |
| Ca_Desig_SNP4069 | Ca_Desig_LG04 | 4848762                 | [G/A] | Ca_04217           | INTRON                              | Chlorophyllide a oxygenase, chloroplastic                            |
| Ca_Desig_SNP4070 | Ca_Desig_LG04 | 5610468                 | [G/T] | Ca_04253           | SYNONYMOUS_CODING                   | Cell division cycle protein 48 homolog                               |
| Ca_Desig_SNP4071 | Ca_Desig_LG04 | 5610487                 | [C/T] | Ca_04253           | SYNONYMOUS_CODING                   | Cell division cycle protein 48 homolog                               |
| Ca_Desig_SNP4072 | Ca_Desig_LG04 | 5610496                 | [A/G] | Ca_04253           | SYNONYMOUS_CODING                   | Cell division cycle protein 48 homolog                               |
| Ca_Desig_SNP4073 | Ca_Desig_LG04 | 7035560                 | [A/C] | Ca_04308           | NON_SYNONYMOUS_CODING               | DNA helicase INO80                                                   |
| Ca_Desig_SNP4074 | Ca_Desig_LG04 | 7035565                 | [A/G] | Ca_04308           | SYNONYMOUS_CODING                   | DNA helicase INO80                                                   |
| Ca_Desig_SNP4075 | Ca_Desig_LG04 | 7035566                 | [C/T] | Ca_04308           | SYNONYMOUS_CODING                   | DNA helicase INO80                                                   |
| Ca_Desig_SNP4076 | Ca_Desig_LG04 | 9851366                 | [G/T] |                    | INTERGENIC                          |                                                                      |
| Ca_Desig_SNP4077 | Ca_Desig_LG04 | 9857716                 | [T/C] | Ca_04552           | SYNONYMOUS_CODING                   | Protein TIME FOR COFFEE                                              |
| Ca_Desig_SNP4078 | scaffold00876 | 16429                   | [T/C] |                    | INTERGENIC                          |                                                                      |
| Ca_Desig_SNP4079 | scaffold00876 | 16434                   | [T/C] |                    | INTERGENIC                          |                                                                      |
| Ca_Desig_SNP4080 | scaffold01027 | 96                      | [C/T] |                    | INTERGENIC                          |                                                                      |
| Ca_Desig_SNP4081 | scaffold00576 | 1887                    | [C/T] |                    | INTERGENIC                          |                                                                      |

| SNP IDs          | Chromosomes   | Physical positions (bp) | SNPs  | Gene accession IDs | Sequence components of genome/genes | Putative functions                           |
|------------------|---------------|-------------------------|-------|--------------------|-------------------------------------|----------------------------------------------|
| Ca_Desig_SNP4082 | scaffold00576 | 1888                    | [A/C] |                    | INTERGENIC                          |                                              |
| Ca_Desig_SNP4083 | scaffold00576 | 1889                    | [G/T] |                    | INTERGENIC                          |                                              |
| Ca_Desig_SNP4084 | scaffold00580 | 11369                   | [C/T] |                    | INTERGENIC                          |                                              |
| Ca_Desig_SNP4085 | scaffold00580 | 11384                   | [C/T] |                    | INTERGENIC                          |                                              |
| Ca_Desig_SNP4086 | scaffold00581 | 3660                    | [C/T] | Ca_13271           | DOWNSTREAM:105bases                 | Serine/threonine-protein kinase PRP4 homolog |
| Ca_Desig_SNP4087 | scaffold00581 | 3684                    | [C/A] | Ca_13271           | DOWNSTREAM:81bases                  | Serine/threonine-protein kinase PRP4 homolog |
| Ca_Desig_SNP4088 | scaffold00582 | 5888                    | [C/G] | Ca_13279           | INTRON                              | (+)-neomenthol dehydrogenase                 |
| Ca_Desig_SNP4089 | scaffold00582 | 5889                    | [T/A] | Ca_13279           | INTRON                              | (+)-neomenthol dehydrogenase                 |
| Ca_Desig_SNP4090 | scaffold00582 | 5890                    | [A/T] | Ca_13279           | INTRON                              | (+)-neomenthol dehydrogenase                 |
| Ca_Desig_SNP4091 | scaffold00582 | 6396                    | [A/G] | Ca_13279           | INTRON                              | (+)-neomenthol dehydrogenase                 |
| Ca_Desig_SNP4092 | scaffold00582 | 7882                    | [T/G] | Ca_13279           | INTRON                              | (+)-neomenthol dehydrogenase                 |
| Ca_Desig_SNP4093 | scaffold00582 | 7883                    | [T/A] | Ca_13279           | INTRON                              | (+)-neomenthol dehydrogenase                 |
| Ca_Desig_SNP4094 | scaffold00582 | 7884                    | [C/T] | Ca_13279           | INTRON                              | (+)-neomenthol dehydrogenase                 |
| Ca_Desig_SNP4095 | scaffold01036 | 400                     | [G/T] |                    | INTERGENIC                          |                                              |
| Ca_Desig_SNP4096 | scaffold00883 | 223947                  | [T/G] |                    | INTERGENIC                          |                                              |
| Ca_Desig_SNP4097 | scaffold00883 | 223949                  | [A/T] |                    | INTERGENIC                          |                                              |
| Ca_Desig_SNP4098 | scaffold00883 | 223950                  | [T/C] |                    | INTERGENIC                          |                                              |
| Ca_Desig_SNP4099 | scaffold00883 | 223951                  | [G/T] |                    | INTERGENIC                          |                                              |
| Ca_Desig_SNP4100 | scaffold00945 | 205959                  | [C/G] |                    | INTERGENIC                          |                                              |
| Ca_Desig_SNP4101 | scaffold00601 | 11701                   | [C/T] | Ca_13336           | SYNONYMOUS_CODING                   | Disease resistance protein RPM1              |
| Ca_Desig_SNP4102 | scaffold00601 | 9408                    | [A/G] | Ca_13336           | DOWNSTREAM:1664bases                | Disease resistance protein RPM1              |
| Ca_Desig_SNP4103 | scaffold14776 | 274694                  | [A/T] |                    | INTERGENIC                          |                                              |
| Ca_Desig_SNP4104 | scaffold14776 | 274696                  | [G/T] |                    | INTERGENIC                          |                                              |
| Ca_Desig_SNP4105 | scaffold14776 | 279426                  | [G/T] |                    | INTERGENIC                          |                                              |
| Ca_Desig_SNP4106 | scaffold00931 | 206163                  | [G/T] |                    | INTERGENIC                          |                                              |
| Ca_Desig_SNP4107 | scaffold00931 | 206181                  | [A/T] |                    | INTERGENIC                          |                                              |

| SNP IDs          | Chromosomes   | Physical positions (bp) | SNPs  | Gene accession IDs | Sequence components of genome/genes | Putative functions     |
|------------------|---------------|-------------------------|-------|--------------------|-------------------------------------|------------------------|
| Ca_Desig_SNP4108 | scaffold00931 | 254608                  | [A/G] |                    | INTERGENIC                          |                        |
| Ca_Desig_SNP4109 | scaffold00931 | 255133                  | [A/G] |                    | INTERGENIC                          |                        |
| Ca_Desig_SNP4110 | scaffold00931 | 257928                  | [A/G] |                    | INTERGENIC                          |                        |
| Ca_Desig_SNP4111 | scaffold00937 | 224742                  | [G/T] |                    | INTERGENIC                          |                        |
| Ca_Desig_SNP4112 | scaffold00937 | 281782                  | [T/C] |                    | INTERGENIC                          |                        |
| Ca_Desig_SNP4113 | scaffold00937 | 281791                  | [C/G] |                    | INTERGENIC                          |                        |
| Ca_Desig_SNP4114 | scaffold00937 | 281792                  | [T/A] |                    | INTERGENIC                          |                        |
| Ca_Desig_SNP4115 | scaffold00937 | 282254                  | [A/G] |                    | INTERGENIC                          |                        |
| Ca_Desig_SNP4116 | scaffold00937 | 282271                  | [A/G] |                    | INTERGENIC                          |                        |
| Ca_Desig_SNP4117 | scaffold00937 | 284062                  | [G/T] |                    | INTERGENIC                          |                        |
| Ca_Desig_SNP4118 | scaffold00937 | 284071                  | [A/C] |                    | INTERGENIC                          |                        |
| Ca_Desig_SNP4119 | scaffold00937 | 284585                  | [A/G] |                    | INTERGENIC                          |                        |
| Ca_Desig_SNP4120 | scaffold00937 | 284590                  | [C/G] |                    | INTERGENIC                          |                        |
| Ca_Desig_SNP4121 | scaffold01264 | 115787                  | [T/G] | Ca_09863           | INTRON                              | Protein EFR3 homolog B |
| Ca_Desig_SNP4122 | scaffold00982 | 137625                  | [C/T] |                    | INTERGENIC                          |                        |
| Ca_Desig_SNP4123 | scaffold00982 | 137633                  | [A/T] |                    | INTERGENIC                          |                        |
| Ca_Desig_SNP4124 | scaffold00982 | 137670                  | [A/C] |                    | INTERGENIC                          |                        |
| Ca_Desig_SNP4125 | scaffold00982 | 263952                  | [A/G] |                    | INTERGENIC                          |                        |
| Ca_Desig_SNP4126 | scaffold00603 | 6496                    | [A/T] |                    | INTERGENIC                          |                        |
| Ca_Desig_SNP4127 | scaffold00603 | 6497                    | [C/G] |                    | INTERGENIC                          |                        |
| Ca_Desig_SNP4128 | scaffold00603 | 6552                    | [A/T] |                    | INTERGENIC                          |                        |
| Ca_Desig_SNP4129 | scaffold00991 | 215331                  | [T/C] |                    | INTERGENIC                          |                        |
| Ca_Desig_SNP4130 | scaffold00992 | 170178                  | [C/T] |                    | INTERGENIC                          |                        |
| Ca_Desig_SNP4131 | scaffold00992 | 258025                  | [A/G] |                    | INTERGENIC                          |                        |
| Ca_Desig_SNP4132 | scaffold00992 | 258027                  | [C/T] |                    | INTERGENIC                          |                        |
| Ca_Desig_SNP4133 | scaffold01046 | 381                     | [T/A] |                    | INTERGENIC                          |                        |

| SNP IDs          | Chromosomes   | Physical positions (bp) | SNPs  | Gene accession IDs | Sequence components of genome/genes | Putative functions                                  |
|------------------|---------------|-------------------------|-------|--------------------|-------------------------------------|-----------------------------------------------------|
| Ca_Desig_SNP4134 | scaffold00604 | 7615                    | [C/T] | Ca_13357           | DOWNSTREAM:1113bases                | dual specificity protein phosphatase family protein |
| Ca_Desig_SNP4135 | scaffold00604 | 7625                    | [A/C] | Ca_13357           | DOWNSTREAM:1123bases                | dual specificity protein phosphatase family protein |
| Ca_Desig_SNP4136 | scaffold00998 | 56883                   | [G/T] |                    | INTERGENIC                          |                                                     |
| Ca_Desig_SNP4137 | scaffold01310 | 217175                  | [A/G] |                    | INTERGENIC                          |                                                     |
| Ca_Desig_SNP4138 | scaffold00606 | 2419                    | [C/T] |                    | INTERGENIC                          |                                                     |
| Ca_Desig_SNP4139 | scaffold00606 | 2477                    | [A/T] |                    | INTERGENIC                          |                                                     |
| Ca_Desig_SNP4140 | scaffold00606 | 2510                    | [A/G] |                    | INTERGENIC                          |                                                     |
| Ca_Desig_SNP4141 | scaffold01428 | 144076                  | [C/T] |                    | INTERGENIC                          |                                                     |
| Ca_Desig_SNP4142 | scaffold01428 | 148249                  | [T/A] |                    | INTERGENIC                          |                                                     |
| Ca_Desig_SNP4143 | scaffold01428 | 171914                  | [A/T] |                    | INTERGENIC                          |                                                     |
| Ca_Desig_SNP4144 | scaffold01428 | 175798                  | [G/A] |                    | INTERGENIC                          |                                                     |
| Ca_Desig_SNP4145 | scaffold01428 | 192502                  | [A/T] |                    | INTERGENIC                          |                                                     |
| Ca_Desig_SNP4146 | scaffold01428 | 192508                  | [C/T] |                    | INTERGENIC                          |                                                     |
| Ca_Desig_SNP4147 | scaffold01428 | 192552                  | [A/G] |                    | INTERGENIC                          |                                                     |
| Ca_Desig_SNP4148 | scaffold01428 | 19811                   | [G/T] |                    | INTERGENIC                          |                                                     |
| Ca_Desig_SNP4149 | scaffold01428 | 19812                   | [A/G] |                    | INTERGENIC                          |                                                     |
| Ca_Desig_SNP4150 | scaffold01428 | 19813                   | [A/C] |                    | INTERGENIC                          |                                                     |
| Ca_Desig_SNP4151 | scaffold01428 | 19814                   | [A/G] |                    | INTERGENIC                          |                                                     |
| Ca_Desig_SNP4152 | scaffold01428 | 19815                   | [A/G] |                    | INTERGENIC                          |                                                     |
| Ca_Desig_SNP4153 | scaffold01428 | 19816                   | [A/C] |                    | INTERGENIC                          |                                                     |
| Ca_Desig_SNP4154 | scaffold01428 | 222300                  | [C/T] |                    | INTERGENIC                          |                                                     |
| Ca_Desig_SNP4155 | scaffold01428 | 222302                  | [T/G] |                    | INTERGENIC                          |                                                     |
| Ca_Desig_SNP4156 | scaffold02139 | 29529                   | [C/G] |                    | INTERGENIC                          |                                                     |
| Ca_Desig_SNP4157 | scaffold02139 | 29530                   | [C/A] |                    | INTERGENIC                          |                                                     |
| Ca_Desig_SNP4158 | scaffold01060 | 28287                   | [T/C] |                    | INTERGENIC                          |                                                     |
| Ca_Desig_SNP4159 | scaffold01138 | 32406                   | [G/A] |                    | INTERGENIC                          |                                                     |

| SNP IDs         | Chromosomes   | Physical positions (bp) | SNPs  | Gene accession IDs | Sequence components of genome/genes | Putative functions                  |
|-----------------|---------------|-------------------------|-------|--------------------|-------------------------------------|-------------------------------------|
| Ca_Desi_SNP4160 | scaffold01054 | 46                      | [C/T] |                    | INTERGENIC                          |                                     |
| Ca_Desi_SNP4161 | scaffold01054 | 65                      | [C/T] |                    | INTERGENIC                          |                                     |
| Ca_Desi_SNP4162 | scaffold00615 | 7665                    | [A/C] |                    | INTERGENIC                          |                                     |
| Ca_Desi_SNP4163 | scaffold00615 | 7666                    | [C/A] |                    | INTERGENIC                          |                                     |
| Ca_Desi_SNP4164 | scaffold00615 | 7667                    | [T/G] |                    | INTERGENIC                          |                                     |
| Ca_Desi_SNP4165 | scaffold00615 | 7668                    | [C/A] |                    | INTERGENIC                          |                                     |
| Ca_Desi_SNP4166 | scaffold02111 | 175021                  | [G/C] |                    | INTERGENIC                          |                                     |
| Ca_Desi_SNP4167 | scaffold02111 | 48128                   | [C/T] |                    | INTERGENIC                          |                                     |
| Ca_Desi_SNP4168 | scaffold02111 | 58865                   | [C/G] |                    | INTERGENIC                          |                                     |
| Ca_Desi_SNP4169 | scaffold01236 | 120410                  | [T/A] |                    | INTERGENIC                          |                                     |
| Ca_Desi_SNP4170 | scaffold01236 | 120450                  | [T/A] |                    | INTERGENIC                          |                                     |
| Ca_Desi_SNP4171 | scaffold01236 | 94939                   | [G/A] |                    | INTERGENIC                          |                                     |
| Ca_Desi_SNP4172 | scaffold01129 | 190164                  | [A/G] |                    | INTERGENIC                          |                                     |
| Ca_Desi_SNP4173 | scaffold02278 | 232246                  | [C/A] |                    | INTERGENIC                          |                                     |
| Ca_Desi_SNP4174 | scaffold02278 | 232247                  | [T/G] |                    | INTERGENIC                          |                                     |
| Ca_Desi_SNP4175 | scaffold00619 | 3673                    | [A/T] |                    | INTERGENIC                          |                                     |
| Ca_Desi_SNP4176 | Ca_Desi_LG05  | 11609170                | [A/T] | Ca_06203           | INTRON                              | Serine/threonine-protein kinase ATM |
| Ca_Desi_SNP4177 | Ca_Desi_LG05  | 11868638                | [A/T] |                    | INTERGENIC                          |                                     |
| Ca_Desi_SNP4178 | Ca_Desi_LG05  | 11868639                | [G/C] |                    | INTERGENIC                          |                                     |
| Ca_Desi_SNP4179 | Ca_Desi_LG05  | 13004548                | [A/C] |                    | INTERGENIC                          |                                     |
| Ca_Desi_SNP4180 | Ca_Desi_LG05  | 13004551                | [A/G] |                    | INTERGENIC                          |                                     |
| Ca_Desi_SNP4181 | Ca_Desi_LG05  | 13004552                | [A/T] |                    | INTERGENIC                          |                                     |
| Ca_Desi_SNP4182 | Ca_Desi_LG05  | 13190975                | [G/C] | Ca_06340           | INTRON                              | Unknown expressed protein           |
| Ca_Desi_SNP4183 | Ca_Desi_LG05  | 13190987                | [C/T] | Ca_06340           | INTRON                              | Unknown expressed protein           |
| Ca_Desi_SNP4184 | Ca_Desi_LG05  | 13191966                | [C/T] | Ca_06340           | INTRON                              | Unknown expressed protein           |
| Ca_Desi_SNP4185 | Ca_Desi_LG05  | 15284589                | [A/C] |                    | INTERGENIC                          |                                     |



| SNP IDs          | Chromosomes   | Physical positions (bp) | SNPs  | Gene accession IDs | Sequence components of genome/genes | Putative functions                        |
|------------------|---------------|-------------------------|-------|--------------------|-------------------------------------|-------------------------------------------|
| Ca_Desig_SNP4186 | Ca_Desig_LG05 | 16081058                | [T/G] | Ca_06461           | NON_SYNONYMOUS_CODING               | ABC transporter A family member 2         |
| Ca_Desig_SNP4187 | Ca_Desig_LG05 | 16081061                | [T/C] | Ca_06461           | SYNONYMOUS_CODING                   | ABC transporter A family member 2         |
| Ca_Desig_SNP4188 | Ca_Desig_LG05 | 16081062                | [G/T] | Ca_06461           | NON_SYNONYMOUS_CODING               | ABC transporter A family member 2         |
| Ca_Desig_SNP4189 | Ca_Desig_LG05 | 1671298                 | [T/G] | Ca_05329           | DOWNSTREAM:1376bases                | Carboxypeptidase A6                       |
| Ca_Desig_SNP4190 | Ca_Desig_LG05 | 4413259                 | [T/A] |                    | INTERGENIC                          |                                           |
| Ca_Desig_SNP4191 | Ca_Desig_LG05 | 4413292                 | [C/A] |                    | INTERGENIC                          |                                           |
| Ca_Desig_SNP4192 | Ca_Desig_LG05 | 4413294                 | [A/G] |                    | INTERGENIC                          |                                           |
| Ca_Desig_SNP4193 | Ca_Desig_LG05 | 4414378                 | [C/A] |                    | INTERGENIC                          |                                           |
| Ca_Desig_SNP4194 | Ca_Desig_LG05 | 4414399                 | [T/A] |                    | INTERGENIC                          |                                           |
| Ca_Desig_SNP4195 | Ca_Desig_LG05 | 4837598                 | [A/G] | Ca_05583           | NON_SYNONYMOUS_CODING               | Puromycin-sensitive aminopeptidase        |
| Ca_Desig_SNP4196 | Ca_Desig_LG05 | 5495919                 | [A/C] | Ca_05645           | SYNONYMOUS_CODING                   | Ubiquitin carboxyl-terminal hydrolase 16  |
| Ca_Desig_SNP4197 | Ca_Desig_LG05 | 6547198                 | [T/G] | Ca_05745           | SYNONYMOUS_CODING                   | Nucleobase-ascorbate transporter 6        |
| Ca_Desig_SNP4198 | Ca_Desig_LG05 | 8545963                 | [C/G] |                    | INTERGENIC                          |                                           |
| Ca_Desig_SNP4199 | Ca_Desig_LG05 | 8545964                 | [T/A] |                    | INTERGENIC                          |                                           |
| Ca_Desig_SNP4200 | Ca_Desig_LG05 | 8545965                 | [A/T] |                    | INTERGENIC                          |                                           |
| Ca_Desig_SNP4201 | scaffold01183 | 75746                   | [G/A] |                    | INTERGENIC                          |                                           |
| Ca_Desig_SNP4202 | scaffold04586 | 181674                  | [T/A] |                    | INTERGENIC                          |                                           |
| Ca_Desig_SNP4203 | scaffold04586 | 97308                   | [T/C] |                    | INTERGENIC                          |                                           |
| Ca_Desig_SNP4204 | scaffold04586 | 97309                   | [G/T] |                    | INTERGENIC                          |                                           |
| Ca_Desig_SNP4205 | scaffold00623 | 9449                    | [A/C] |                    | INTERGENIC                          |                                           |
| Ca_Desig_SNP4206 | scaffold00333 | 146692                  | [A/C] | Ca_09088           | INTRON                              | TATA-binding protein-associated factor 2N |
| Ca_Desig_SNP4207 | scaffold00333 | 156237                  | [A/G] |                    | INTERGENIC                          |                                           |
| Ca_Desig_SNP4208 | scaffold01296 | 134078                  | [G/T] |                    | INTERGENIC                          |                                           |
| Ca_Desig_SNP4209 | scaffold01223 | 38133                   | [C/T] | Ca_10091           | INTRON                              | Probable replication factor C subunit 3   |
| Ca_Desig_SNP4210 | scaffold01223 | 38134                   | [C/A] | Ca_10091           | INTRON                              | Probable replication factor C subunit 3   |
| Ca_Desig_SNP4211 | scaffold01232 | 91743                   | [A/G] |                    | INTERGENIC                          |                                           |

| SNP IDs          | Chromosomes   | Physical positions (bp) | SNPs  | Gene accession IDs | Sequence components of genome/genes | Putative functions |
|------------------|---------------|-------------------------|-------|--------------------|-------------------------------------|--------------------|
| Ca_Desig_SNP4212 | scaffold01232 | 91763                   | [C/G] |                    | INTERGENIC                          |                    |
| Ca_Desig_SNP4213 | scaffold01647 | 24276                   | [A/T] |                    | INTERGENIC                          |                    |
| Ca_Desig_SNP4214 | scaffold01647 | 24277                   | [A/C] |                    | INTERGENIC                          |                    |
| Ca_Desig_SNP4215 | scaffold01647 | 24278                   | [G/T] |                    | INTERGENIC                          |                    |
| Ca_Desig_SNP4216 | scaffold00628 | 1915                    | [T/G] |                    | INTERGENIC                          |                    |
| Ca_Desig_SNP4217 | scaffold01262 | 154558                  | [T/G] |                    | INTERGENIC                          |                    |
| Ca_Desig_SNP4218 | scaffold00630 | 4156                    | [C/A] |                    | INTERGENIC                          |                    |
| Ca_Desig_SNP4219 | scaffold00630 | 4160                    | [T/C] |                    | INTERGENIC                          |                    |
| Ca_Desig_SNP4220 | scaffold00630 | 4184                    | [T/C] |                    | INTERGENIC                          |                    |
| Ca_Desig_SNP4221 | scaffold01281 | 92036                   | [T/G] |                    | INTERGENIC                          |                    |
| Ca_Desig_SNP4222 | scaffold01283 | 84529                   | [A/C] |                    | INTERGENIC                          |                    |
| Ca_Desig_SNP4223 | scaffold01283 | 84530                   | [G/T] |                    | INTERGENIC                          |                    |
| Ca_Desig_SNP4224 | scaffold01286 | 173794                  | [T/C] |                    | INTERGENIC                          |                    |
| Ca_Desig_SNP4225 | scaffold01286 | 173799                  | [G/T] |                    | INTERGENIC                          |                    |
| Ca_Desig_SNP4226 | scaffold01286 | 173803                  | [C/A] |                    | INTERGENIC                          |                    |
| Ca_Desig_SNP4227 | scaffold05316 | 103696                  | [A/C] |                    | INTERGENIC                          |                    |
| Ca_Desig_SNP4228 | scaffold05316 | 103711                  | [T/G] |                    | INTERGENIC                          |                    |
| Ca_Desig_SNP4229 | scaffold01344 | 93714                   | [C/G] |                    | INTERGENIC                          |                    |
| Ca_Desig_SNP4230 | scaffold01344 | 93715                   | [T/A] |                    | INTERGENIC                          |                    |
| Ca_Desig_SNP4231 | scaffold01347 | 141022                  | [A/G] |                    | INTERGENIC                          |                    |
| Ca_Desig_SNP4232 | scaffold01353 | 71990                   | [T/A] |                    | INTERGENIC                          |                    |
| Ca_Desig_SNP4233 | scaffold01353 | 72008                   | [T/C] |                    | INTERGENIC                          |                    |
| Ca_Desig_SNP4234 | scaffold01353 | 73358                   | [C/T] |                    | INTERGENIC                          |                    |
| Ca_Desig_SNP4235 | scaffold01353 | 73421                   | [A/G] |                    | INTERGENIC                          |                    |
| Ca_Desig_SNP4236 | scaffold01353 | 73553                   | [T/A] |                    | INTERGENIC                          |                    |
| Ca_Desig_SNP4237 | scaffold01362 | 106886                  | [G/T] |                    | INTERGENIC                          |                    |

| SNP IDs         | Chromosomes   | Physical positions (bp) | SNPs  | Gene accession IDs | Sequence components of genome/genes | Putative functions                                                             |
|-----------------|---------------|-------------------------|-------|--------------------|-------------------------------------|--------------------------------------------------------------------------------|
| Ca_Desi_SNP4238 | scaffold00649 | 496                     | [G/A] |                    | INTERGENIC                          |                                                                                |
| Ca_Desi_SNP4239 | scaffold00649 | 501                     | [T/C] |                    | INTERGENIC                          |                                                                                |
| Ca_Desi_SNP4240 | scaffold02564 | 20358                   | [A/G] |                    | INTERGENIC                          |                                                                                |
| Ca_Desi_SNP4241 | scaffold02130 | 148585                  | [T/C] |                    | INTERGENIC                          |                                                                                |
| Ca_Desi_SNP4242 | scaffold02130 | 148627                  | [C/A] |                    | INTERGENIC                          |                                                                                |
| Ca_Desi_SNP4243 | scaffold07356 | 154913                  | [G/A] |                    | INTERGENIC                          |                                                                                |
| Ca_Desi_SNP4244 | scaffold07356 | 154922                  | [A/T] |                    | INTERGENIC                          |                                                                                |
| Ca_Desi_SNP4245 | scaffold07356 | 154924                  | [C/T] |                    | INTERGENIC                          |                                                                                |
| Ca_Desi_SNP4246 | scaffold00657 | 4032                    | [G/T] |                    | INTERGENIC                          |                                                                                |
| Ca_Desi_SNP4247 | scaffold01445 | 41793                   | [A/T] | Ca_10259           | DOWNSTREAM:1678bases                | Uncharacterized aarF domain-containing protein kinase At1g79600, chloroplastic |
| Ca_Desi_SNP4248 | scaffold01445 | 41794                   | [A/T] | Ca_10259           | DOWNSTREAM:1679bases                | Uncharacterized aarF domain-containing protein kinase At1g79600, chloroplastic |
| Ca_Desi_SNP4249 | scaffold01445 | 41815                   | [A/C] | Ca_10259           | DOWNSTREAM:1700bases                | Uncharacterized aarF domain-containing protein kinase At1g79600, chloroplastic |
| Ca_Desi_SNP4250 | scaffold00664 | 7985                    | [C/G] |                    | INTERGENIC                          |                                                                                |
| Ca_Desi_SNP4251 | scaffold00664 | 7987                    | [C/A] |                    | INTERGENIC                          |                                                                                |
| Ca_Desi_SNP4252 | scaffold02317 | 22883                   | [C/G] |                    | INTERGENIC                          |                                                                                |
| Ca_Desi_SNP4253 | scaffold02317 | 22884                   | [G/A] |                    | INTERGENIC                          |                                                                                |
| Ca_Desi_SNP4254 | scaffold01092 | 32                      | [T/G] |                    | INTERGENIC                          |                                                                                |
| Ca_Desi_SNP4255 | scaffold01092 | 61                      | [A/G] |                    | INTERGENIC                          |                                                                                |
| Ca_Desi_SNP4256 | scaffold03349 | 105163                  | [T/G] |                    | INTERGENIC                          |                                                                                |
| Ca_Desi_SNP4257 | scaffold03349 | 105172                  | [C/A] |                    | INTERGENIC                          |                                                                                |
| Ca_Desi_SNP4258 | scaffold03349 | 1939                    | [A/C] |                    | INTERGENIC                          |                                                                                |
| Ca_Desi_SNP4259 | scaffold03349 | 1948                    | [A/C] |                    | INTERGENIC                          |                                                                                |
| Ca_Desi_SNP4260 | scaffold03349 | 1954                    | [A/C] |                    | INTERGENIC                          |                                                                                |
| Ca_Desi_SNP4261 | scaffold03349 | 1955                    | [C/A] |                    | INTERGENIC                          |                                                                                |
| Ca_Desi_SNP4262 | scaffold04453 | 258009                  | [C/A] |                    | INTERGENIC                          |                                                                                |
| Ca_Desi_SNP4263 | scaffold04453 | 258752                  | [T/C] |                    | INTERGENIC                          |                                                                                |

| SNP IDs          | Chromosomes   | Physical positions (bp) | SNPs  | Gene accession IDs | Sequence components of genome/genes | Putative functions                |
|------------------|---------------|-------------------------|-------|--------------------|-------------------------------------|-----------------------------------|
| Ca_Desig_SNP4264 | scaffold04453 | 258769                  | [A/G] |                    | INTERGENIC                          |                                   |
| Ca_Desig_SNP4265 | scaffold00667 | 5207                    | [A/T] | Ca_13619           | INTRON                              | 50S ribosomal protein L17         |
| Ca_Desig_SNP4266 | scaffold00667 | 5209                    | [G/T] | Ca_13619           | INTRON                              | 50S ribosomal protein L17         |
| Ca_Desig_SNP4267 | scaffold01093 | 388                     | [A/G] |                    | INTERGENIC                          |                                   |
| Ca_Desig_SNP4268 | Ca_Desig_LG06 | 10304723                | [T/G] | Ca_07271           | DOWNSTREAM:1373bases                | Stem-specific protein TSJT1       |
| Ca_Desig_SNP4269 | Ca_Desig_LG06 | 10304724                | [G/A] | Ca_07271           | DOWNSTREAM:1372bases                | Stem-specific protein TSJT1       |
| Ca_Desig_SNP4270 | Ca_Desig_LG06 | 10304725                | [A/T] | Ca_07271           | DOWNSTREAM:1371bases                | Stem-specific protein TSJT1       |
| Ca_Desig_SNP4271 | Ca_Desig_LG06 | 2187091                 | [A/C] |                    | INTERGENIC                          |                                   |
| Ca_Desig_SNP4272 | Ca_Desig_LG06 | 2187115                 | [T/C] |                    | INTERGENIC                          |                                   |
| Ca_Desig_SNP4273 | Ca_Desig_LG06 | 4734362                 | [T/G] |                    | INTERGENIC                          |                                   |
| Ca_Desig_SNP4274 | Ca_Desig_LG06 | 4734363                 | [T/A] |                    | INTERGENIC                          |                                   |
| Ca_Desig_SNP4275 | Ca_Desig_LG06 | 4734364                 | [C/T] |                    | INTERGENIC                          |                                   |
| Ca_Desig_SNP4276 | Ca_Desig_LG06 | 4863685                 | [C/A] |                    | INTERGENIC                          |                                   |
| Ca_Desig_SNP4277 | Ca_Desig_LG06 | 4910434                 | [T/C] | Ca_06836           | INTRON                              | Kinesin-like protein KIF15-B      |
| Ca_Desig_SNP4278 | Ca_Desig_LG06 | 4915652                 | [A/G] |                    | INTERGENIC                          |                                   |
| Ca_Desig_SNP4279 | Ca_Desig_LG06 | 4915673                 | [G/T] |                    | INTERGENIC                          |                                   |
| Ca_Desig_SNP4280 | Ca_Desig_LG06 | 5793689                 | [A/C] |                    | INTERGENIC                          |                                   |
| Ca_Desig_SNP4281 | Ca_Desig_LG06 | 5805148                 | [T/C] |                    | INTERGENIC                          |                                   |
| Ca_Desig_SNP4282 | Ca_Desig_LG06 | 5805150                 | [T/C] |                    | INTERGENIC                          |                                   |
| Ca_Desig_SNP4283 | Ca_Desig_LG06 | 5830337                 | [G/T] |                    | INTERGENIC                          |                                   |
| Ca_Desig_SNP4284 | Ca_Desig_LG06 | 5855826                 | [C/T] | Ca_06892           | INTRON                              | Uncharacterized protein sll1770   |
| Ca_Desig_SNP4285 | Ca_Desig_LG06 | 5944054                 | [A/G] | Ca_06902           | SYNONYMOUS_CODING                   | U-box domain-containing protein 4 |
| Ca_Desig_SNP4286 | Ca_Desig_LG06 | 5944184                 | [C/T] | Ca_06902           | NON_SYNONYMOUS_CODING               | U-box domain-containing protein 4 |
| Ca_Desig_SNP4287 | Ca_Desig_LG06 | 5947076                 | [A/G] | Ca_06902           | SYNONYMOUS_CODING                   | U-box domain-containing protein 4 |
| Ca_Desig_SNP4288 | Ca_Desig_LG06 | 6048900                 | [A/G] |                    | INTERGENIC                          |                                   |
| Ca_Desig_SNP4289 | Ca_Desig_LG06 | 6048909                 | [T/C] |                    | INTERGENIC                          |                                   |

| SNP IDs          | Chromosomes   | Physical positions (bp) | SNPs  | Gene accession IDs | Sequence components of genome/genes | Putative functions                                                   |
|------------------|---------------|-------------------------|-------|--------------------|-------------------------------------|----------------------------------------------------------------------|
| Ca_Desig_SNP4290 | Ca_Desig_LG06 | 6049189                 | [C/T] |                    | INTERGENIC                          |                                                                      |
| Ca_Desig_SNP4291 | Ca_Desig_LG06 | 6119060                 | [A/G] | Ca_06923           | NON_SYNONYMOUS_CODING               | Protein spinster                                                     |
| Ca_Desig_SNP4292 | Ca_Desig_LG06 | 6792795                 | [A/G] | Ca_06979           | SYNONYMOUS_CODING                   | WD repeat-containing protein 53                                      |
| Ca_Desig_SNP4293 | Ca_Desig_LG06 | 6971913                 | [G/C] | Ca_07001           | INTRON                              | Serine/threonine-protein phosphatase PP2A catalytic subunit          |
| Ca_Desig_SNP4294 | Ca_Desig_LG06 | 6971915                 | [T/A] | Ca_07001           | INTRON                              | Serine/threonine-protein phosphatase PP2A catalytic subunit          |
| Ca_Desig_SNP4295 | Ca_Desig_LG06 | 6971916                 | [C/A] | Ca_07001           | INTRON                              | Serine/threonine-protein phosphatase PP2A catalytic subunit          |
| Ca_Desig_SNP4296 | Ca_Desig_LG06 | 7803317                 | [C/A] |                    | INTERGENIC                          |                                                                      |
| Ca_Desig_SNP4297 | Ca_Desig_LG06 | 7803318                 | [T/G] |                    | INTERGENIC                          |                                                                      |
| Ca_Desig_SNP4298 | Ca_Desig_LG06 | 9904529                 | [G/T] |                    | INTERGENIC                          |                                                                      |
| Ca_Desig_SNP4299 | scaffold01528 | 53315                   | [A/G] |                    | INTERGENIC                          |                                                                      |
| Ca_Desig_SNP4300 | scaffold01528 | 53338                   | [A/C] |                    | INTERGENIC                          |                                                                      |
| Ca_Desig_SNP4301 | scaffold01532 | 15856                   | [A/G] |                    | INTERGENIC                          |                                                                      |
| Ca_Desig_SNP4302 | scaffold01532 | 15868                   | [A/G] |                    | INTERGENIC                          |                                                                      |
| Ca_Desig_SNP4303 | scaffold01547 | 58588                   | [T/C] | Ca_10306           | DOWNSTREAM:1149bases                | Probable LRR receptor-like serine/threonine-protein kinase At4g08850 |
| Ca_Desig_SNP4304 | scaffold01585 | 16091                   | [C/G] |                    | INTERGENIC                          |                                                                      |
| Ca_Desig_SNP4305 | scaffold00676 | 3952                    | [T/A] |                    | INTERGENIC                          |                                                                      |
| Ca_Desig_SNP4306 | scaffold00676 | 3968                    | [G/C] |                    | INTERGENIC                          |                                                                      |
| Ca_Desig_SNP4307 | scaffold00676 | 4097                    | [T/C] |                    | INTERGENIC                          |                                                                      |
| Ca_Desig_SNP4308 | scaffold00676 | 4117                    | [T/A] |                    | INTERGENIC                          |                                                                      |
| Ca_Desig_SNP4309 | scaffold01101 | 235                     | [G/A] |                    | INTERGENIC                          |                                                                      |
| Ca_Desig_SNP4310 | scaffold01787 | 132697                  | [A/T] |                    | INTERGENIC                          |                                                                      |
| Ca_Desig_SNP4311 | scaffold01787 | 132731                  | [T/C] |                    | INTERGENIC                          |                                                                      |
| Ca_Desig_SNP4312 | scaffold01103 | 148                     | [T/A] |                    | INTERGENIC                          |                                                                      |
| Ca_Desig_SNP4313 | scaffold07417 | 44807                   | [T/A] |                    | INTERGENIC                          |                                                                      |
| Ca_Desig_SNP4314 | scaffold07417 | 44808                   | [C/A] |                    | INTERGENIC                          |                                                                      |
| Ca_Desig_SNP4315 | scaffold07417 | 44809                   | [T/G] |                    | INTERGENIC                          |                                                                      |

| SNP IDs         | Chromosomes   | Physical positions (bp) | SNPs  | Gene accession IDs | Sequence components of genome/genes | Putative functions                                                  |
|-----------------|---------------|-------------------------|-------|--------------------|-------------------------------------|---------------------------------------------------------------------|
| Ca_Desi_SNP4316 | scaffold01652 | 10950                   | [A/G] |                    | INTERGENIC                          |                                                                     |
| Ca_Desi_SNP4317 | scaffold00684 | 6593                    | [T/C] |                    | INTERGENIC                          |                                                                     |
| Ca_Desi_SNP4318 | scaffold00401 | 184697                  | [T/C] |                    | INTERGENIC                          |                                                                     |
| Ca_Desi_SNP4319 | scaffold01722 | 16150                   | [C/G] | Ca_10360           | INTRON                              | Unconventional myosin-Va                                            |
| Ca_Desi_SNP4320 | scaffold01722 | 16151                   | [C/A] | Ca_10360           | INTRON                              | Unconventional myosin-Va                                            |
| Ca_Desi_SNP4321 | scaffold02093 | 7946                    | [C/G] |                    | INTERGENIC                          |                                                                     |
| Ca_Desi_SNP4322 | scaffold00686 | 2513                    | [T/G] |                    | INTERGENIC                          |                                                                     |
| Ca_Desi_SNP4323 | scaffold00686 | 2573                    | [G/T] |                    | INTERGENIC                          |                                                                     |
| Ca_Desi_SNP4324 | scaffold01737 | 114458                  | [A/G] |                    | INTERGENIC                          |                                                                     |
| Ca_Desi_SNP4325 | scaffold01737 | 119289                  | [A/C] |                    | INTERGENIC                          |                                                                     |
| Ca_Desi_SNP4326 | scaffold01737 | 119290                  | [G/T] |                    | INTERGENIC                          |                                                                     |
| Ca_Desi_SNP4327 | scaffold03195 | 16411                   | [G/T] |                    | INTERGENIC                          |                                                                     |
| Ca_Desi_SNP4328 | scaffold01783 | 3780                    | [G/T] |                    | INTERGENIC                          |                                                                     |
| Ca_Desi_SNP4329 | scaffold01783 | 9110                    | [G/A] |                    | INTERGENIC                          |                                                                     |
| Ca_Desi_SNP4330 | scaffold00696 | 5210                    | [C/T] |                    | INTERGENIC                          |                                                                     |
| Ca_Desi_SNP4331 | scaffold00696 | 5240                    | [A/G] |                    | INTERGENIC                          |                                                                     |
| Ca_Desi_SNP4332 | Ca_Desi_LG07  | 1050542                 | [A/T] | Ca_07466           | INTRON                              | Midasin                                                             |
| Ca_Desi_SNP4333 | Ca_Desi_LG07  | 1635068                 | [C/T] | Ca_07491           | INTRON                              | Transcription factor MYB1R1                                         |
| Ca_Desi_SNP4334 | Ca_Desi_LG07  | 1668112                 | [C/T] | Ca_07493           | INTRON                              | tobamovirus multiplication protein 3                                |
| Ca_Desi_SNP4335 | Ca_Desi_LG07  | 1761414                 | [G/A] | Ca_07503           | INTRON                              | Probable N-acetyl-gamma-glutamyl-phosphate reductase, chloroplastic |
| Ca_Desi_SNP4336 | Ca_Desi_LG07  | 2195622                 | [G/A] | Ca_07527           | INTRON                              | Phospholipid-transporting ATPase 3                                  |
| Ca_Desi_SNP4337 | Ca_Desi_LG07  | 2195623                 | [G/T] | Ca_07527           | INTRON                              | Phospholipid-transporting ATPase 3                                  |
| Ca_Desi_SNP4338 | Ca_Desi_LG07  | 2570459                 | [A/C] | Ca_07547           | DOWNSTREAM:705bases                 | Pentatricopeptide repeat-containing protein At1g71490               |
| Ca_Desi_SNP4339 | Ca_Desi_LG07  | 2570483                 | [G/T] | Ca_07547           | DOWNSTREAM:729bases                 | Pentatricopeptide repeat-containing protein At1g71490               |
| Ca_Desi_SNP4340 | Ca_Desi_LG07  | 2570489                 | [C/T] | Ca_07547           | DOWNSTREAM:735bases                 | Pentatricopeptide repeat-containing protein At1g71490               |
| Ca_Desi_SNP4341 | Ca_Desi_LG07  | 2707722                 | [G/T] |                    | INTERGENIC                          |                                                                     |

| SNP IDs         | Chromosomes   | Physical positions (bp) | SNPs  | Gene accession IDs | Sequence components of genome/genes | Putative functions                |
|-----------------|---------------|-------------------------|-------|--------------------|-------------------------------------|-----------------------------------|
| Ca_Desi_SNP4342 | Ca_Desi_LG07  | 4370421                 | [C/G] | Ca_07661           | INTRON                              | Putative uncharacterized protein  |
| Ca_Desi_SNP4343 | Ca_Desi_LG07  | 463993                  | [A/C] | Ca_07419           | NON_SYNONYMOUS_CODING               | Cytochrome P450 76A2              |
| Ca_Desi_SNP4344 | Ca_Desi_LG07  | 463994                  | [G/T] | Ca_07419           | NON_SYNONYMOUS_CODING               | Cytochrome P450 76A2              |
| Ca_Desi_SNP4345 | Ca_Desi_LG07  | 5882434                 | [T/G] | Ca_07756           | INTRON                              | Exosome complex exonuclease RRP44 |
| Ca_Desi_SNP4346 | Ca_Desi_LG07  | 5882437                 | [T/G] | Ca_07756           | INTRON                              | Exosome complex exonuclease RRP44 |
| Ca_Desi_SNP4347 | Ca_Desi_LG07  | 770323                  | [C/G] | Ca_07445           | DOWNSTREAM:292bases                 | Small RNA 2'-O-methyltransferase  |
| Ca_Desi_SNP4348 | scaffold11144 | 108754                  | [A/G] |                    | INTERGENIC                          |                                   |
| Ca_Desi_SNP4349 | scaffold11144 | 109304                  | [C/T] |                    | INTERGENIC                          |                                   |
| Ca_Desi_SNP4350 | scaffold11144 | 109320                  | [A/G] |                    | INTERGENIC                          |                                   |
| Ca_Desi_SNP4351 | scaffold11144 | 114793                  | [T/A] |                    | INTERGENIC                          |                                   |
| Ca_Desi_SNP4352 | scaffold01797 | 89412                   | [C/G] |                    | INTERGENIC                          |                                   |
| Ca_Desi_SNP4353 | scaffold01797 | 89414                   | [A/T] |                    | INTERGENIC                          |                                   |
| Ca_Desi_SNP4354 | scaffold03107 | 11132                   | [A/C] |                    | INTERGENIC                          |                                   |
| Ca_Desi_SNP4355 | scaffold00703 | 4030                    | [C/T] |                    | INTERGENIC                          |                                   |
| Ca_Desi_SNP4356 | scaffold00703 | 4038                    | [G/A] |                    | INTERGENIC                          |                                   |
| Ca_Desi_SNP4357 | scaffold04736 | 64788                   | [C/A] |                    | INTERGENIC                          |                                   |
| Ca_Desi_SNP4358 | scaffold04736 | 64789                   | [T/G] |                    | INTERGENIC                          |                                   |
| Ca_Desi_SNP4359 | scaffold01920 | 11139                   | [G/A] |                    | INTERGENIC                          |                                   |
| Ca_Desi_SNP4360 | scaffold00710 | 890                     | [G/C] |                    | INTERGENIC                          |                                   |
| Ca_Desi_SNP4361 | scaffold01958 | 95130                   | [C/T] |                    | INTERGENIC                          |                                   |
| Ca_Desi_SNP4362 | scaffold01958 | 95148                   | [A/G] |                    | INTERGENIC                          |                                   |
| Ca_Desi_SNP4363 | scaffold01958 | 95154                   | [C/T] |                    | INTERGENIC                          |                                   |
| Ca_Desi_SNP4364 | scaffold01958 | 95341                   | [G/A] |                    | INTERGENIC                          |                                   |
| Ca_Desi_SNP4365 | scaffold01958 | 95483                   | [C/A] |                    | INTERGENIC                          |                                   |
| Ca_Desi_SNP4366 | scaffold01958 | 95501                   | [G/A] |                    | INTERGENIC                          |                                   |
| Ca_Desi_SNP4367 | scaffold04282 | 36318                   | [A/G] |                    | INTERGENIC                          |                                   |

| SNP IDs         | Chromosomes   | Physical positions (bp) | SNPs  | Gene accession IDs | Sequence components of genome/genes | Putative functions                                                    |
|-----------------|---------------|-------------------------|-------|--------------------|-------------------------------------|-----------------------------------------------------------------------|
| Ca_Desi_SNP4368 | scaffold00716 | 4302                    | [C/T] |                    | INTERGENIC                          |                                                                       |
| Ca_Desi_SNP4369 | scaffold00716 | 4303                    | [T/A] |                    | INTERGENIC                          |                                                                       |
| Ca_Desi_SNP4370 | scaffold00716 | 4333                    | [T/G] |                    | INTERGENIC                          |                                                                       |
| Ca_Desi_SNP4371 | scaffold02000 | 59515                   | [A/G] | Ca_10427           | INTRON                              | Dihydroflavonol-4-reductase (Fragment)                                |
| Ca_Desi_SNP4372 | scaffold00441 | 71456                   | [C/T] | Ca_09233           | DOWNSTREAM:769bases                 | NF-X1 -type zinc finger protein NFXL2                                 |
| Ca_Desi_SNP4373 | scaffold02022 | 85954                   | [C/T] |                    | INTERGENIC                          |                                                                       |
| Ca_Desi_SNP4374 | scaffold02022 | 85957                   | [A/G] |                    | INTERGENIC                          |                                                                       |
| Ca_Desi_SNP4375 | scaffold02551 | 45017                   | [T/C] |                    | INTERGENIC                          |                                                                       |
| Ca_Desi_SNP4376 | scaffold00724 | 104                     | [C/T] |                    | INTERGENIC                          |                                                                       |
| Ca_Desi_SNP4377 | scaffold00724 | 108                     | [G/A] |                    | INTERGENIC                          |                                                                       |
| Ca_Desi_SNP4378 | scaffold04802 | 21851                   | [A/T] |                    | INTERGENIC                          |                                                                       |
| Ca_Desi_SNP4379 | scaffold02189 | 53698                   | [T/G] | Ca_10459           | DOWNSTREAM:1933bases                | GCN5-related N-acetyltransferase; BRCT                                |
| Ca_Desi_SNP4380 | scaffold00726 | 2495                    | [A/C] |                    | INTERGENIC                          |                                                                       |
| Ca_Desi_SNP4381 | scaffold14943 | 64832                   | [C/T] |                    | INTERGENIC                          |                                                                       |
| Ca_Desi_SNP4382 | scaffold02206 | 105071                  | [A/C] |                    | INTERGENIC                          |                                                                       |
| Ca_Desi_SNP4383 | scaffold02299 | 98155                   | [C/T] |                    | INTERGENIC                          |                                                                       |
| Ca_Desi_SNP4384 | Ca_Desi_LG08  | 10089757                | [G/A] | Ca_08708           | DOWNSTREAM:1009bases                | Unknown expressed protein                                             |
| Ca_Desi_SNP4385 | Ca_Desi_LG08  | 10156217                | [T/G] |                    | INTERGENIC                          |                                                                       |
| Ca_Desi_SNP4386 | Ca_Desi_LG08  | 10194719                | [A/C] | Ca_08722           | SYNONYMOUS_CODING                   | Putative uncharacterized protein                                      |
| Ca_Desi_SNP4387 | Ca_Desi_LG08  | 1041386                 | [G/C] | Ca_08077           | SYNONYMOUS_CODING                   | CBL-interacting serine/threonine-protein kinase 6                     |
| Ca_Desi_SNP4388 | Ca_Desi_LG08  | 1388750                 | [G/A] | Ca_08096           | SYNONYMOUS_CODING                   | Pyrophosphate--fructose 6-phosphate 1-phosphotransferase subunit beta |
| Ca_Desi_SNP4389 | Ca_Desi_LG08  | 201422                  | [C/T] | Ca_07988           | DOWNSTREAM:1437bases                | Histone H2B.4                                                         |
| Ca_Desi_SNP4390 | Ca_Desi_LG08  | 202036                  | [G/T] |                    | INTERGENIC                          |                                                                       |
| Ca_Desi_SNP4391 | Ca_Desi_LG08  | 427213                  | [G/T] |                    | INTERGENIC                          |                                                                       |
| Ca_Desi_SNP4392 | Ca_Desi_LG08  | 427216                  | [G/T] |                    | INTERGENIC                          |                                                                       |
| Ca_Desi_SNP4393 | Ca_Desi_LG08  | 5430520                 | [G/C] | Ca_08350           | INTRON                              | Telomere-associated protein RIF1                                      |



| SNP IDs         | Chromosomes   | Physical positions (bp) | SNPs  | Gene accession IDs | Sequence components of genome/genes | Putative functions                               |
|-----------------|---------------|-------------------------|-------|--------------------|-------------------------------------|--------------------------------------------------|
| Ca_Desi_SNP4394 | Ca_Desi_LG08  | 6122094                 | [C/G] | Ca_08422           | DOWNSTREAM:1378bases                | TVP38/TMEM64 family membrane protein slr0305     |
| Ca_Desi_SNP4395 | Ca_Desi_LG08  | 6693921                 | [A/C] | Ca_08481           | NON_SYNONYMOUS_CODING               | ABC transporter B family member 25               |
| Ca_Desi_SNP4396 | Ca_Desi_LG08  | 6693922                 | [G/T] | Ca_08481           | NON_SYNONYMOUS_CODING               | ABC transporter B family member 25               |
| Ca_Desi_SNP4397 | Ca_Desi_LG08  | 6890398                 | [A/G] | Ca_08496           | DOWNSTREAM:866bases                 | B3 domain-containing protein Os03g0120900        |
| Ca_Desi_SNP4398 | Ca_Desi_LG08  | 6929305                 | [G/T] | Ca_08499           | INTRON                              | Ribosome production factor 1                     |
| Ca_Desi_SNP4399 | Ca_Desi_LG08  | 6932498                 | [C/T] | Ca_08500           | INTRON                              | Chlorophyll a-b binding protein 7, chloroplastic |
| Ca_Desi_SNP4400 | scaffold02276 | 9638                    | [C/G] |                    | INTERGENIC                          |                                                  |
| Ca_Desi_SNP4401 | scaffold02308 | 11010                   | [A/C] |                    | INTERGENIC                          |                                                  |
| Ca_Desi_SNP4402 | scaffold02308 | 11390                   | [G/T] | Ca_10479           | DOWNSTREAM:1096bases                | Putative uncharacterized protein                 |
| Ca_Desi_SNP4403 | scaffold02308 | 11403                   | [C/T] | Ca_10479           | DOWNSTREAM:1109bases                | Putative uncharacterized protein                 |
| Ca_Desi_SNP4404 | scaffold02308 | 11432                   | [G/T] | Ca_10479           | DOWNSTREAM:1138bases                | Putative uncharacterized protein                 |
| Ca_Desi_SNP4405 | scaffold02333 | 27063                   | [A/T] |                    | INTERGENIC                          |                                                  |
| Ca_Desi_SNP4406 | scaffold00728 | 2438                    | [A/C] |                    | INTERGENIC                          |                                                  |
| Ca_Desi_SNP4407 | scaffold00728 | 2494                    | [C/G] |                    | INTERGENIC                          |                                                  |
| Ca_Desi_SNP4408 | scaffold00482 | 32344                   | [C/T] | Ca_09274           | DOWNSTREAM:878bases                 | Putative uncharacterized protein                 |
| Ca_Desi_SNP4409 | scaffold00482 | 32354                   | [C/G] | Ca_09274           | DOWNSTREAM:868bases                 | Putative uncharacterized protein                 |
| Ca_Desi_SNP4410 | scaffold00482 | 32631                   | [C/T] | Ca_09274           | DOWNSTREAM:591bases                 | Putative uncharacterized protein                 |
| Ca_Desi_SNP4411 | scaffold00485 | 98164                   | [T/A] |                    | INTERGENIC                          |                                                  |
| Ca_Desi_SNP4412 | scaffold05885 | 82466                   | [G/T] |                    | INTERGENIC                          |                                                  |
| Ca_Desi_SNP4413 | scaffold08121 | 42759                   | [T/C] |                    | INTERGENIC                          |                                                  |
| Ca_Desi_SNP4414 | scaffold02452 | 33564                   | [A/T] |                    | INTERGENIC                          |                                                  |
| Ca_Desi_SNP4415 | scaffold02452 | 33565                   | [A/C] |                    | INTERGENIC                          |                                                  |
| Ca_Desi_SNP4416 | scaffold02452 | 33566                   | [G/T] |                    | INTERGENIC                          |                                                  |
| Ca_Desi_SNP4417 | scaffold02462 | 68717                   | [G/T] |                    | INTERGENIC                          |                                                  |
| Ca_Desi_SNP4418 | scaffold02483 | 89889                   | [G/T] |                    | INTERGENIC                          |                                                  |
| Ca_Desi_SNP4419 | scaffold02483 | 89894                   | [A/T] |                    | INTERGENIC                          |                                                  |

| SNP IDs         | Chromosomes   | Physical positions (bp) | SNPs  | Gene accession IDs | Sequence components of genome/genes | Putative functions                          |
|-----------------|---------------|-------------------------|-------|--------------------|-------------------------------------|---------------------------------------------|
| Ca_Desi_SNP4420 | scaffold02645 | 75218                   | [C/T] |                    | INTERGENIC                          |                                             |
| Ca_Desi_SNP4421 | scaffold02650 | 79464                   | [C/T] |                    | INTERGENIC                          |                                             |
| Ca_Desi_SNP4422 | scaffold02650 | 79478                   | [A/G] |                    | INTERGENIC                          |                                             |
| Ca_Desi_SNP4423 | scaffold02650 | 79509                   | [A/T] |                    | INTERGENIC                          |                                             |
| Ca_Desi_SNP4424 | scaffold02650 | 80915                   | [T/C] |                    | INTERGENIC                          |                                             |
| Ca_Desi_SNP4425 | scaffold02650 | 80919                   | [C/T] |                    | INTERGENIC                          |                                             |
| Ca_Desi_SNP4426 | scaffold02679 | 60700                   | [G/A] |                    | INTERGENIC                          |                                             |
| Ca_Desi_SNP4427 | scaffold00745 | 3695                    | [C/T] |                    | INTERGENIC                          |                                             |
| Ca_Desi_SNP4428 | scaffold00745 | 3765                    | [G/A] |                    | INTERGENIC                          |                                             |
| Ca_Desi_SNP4429 | scaffold00747 | 2142                    | [A/C] |                    | INTERGENIC                          |                                             |
| Ca_Desi_SNP4430 | scaffold02696 | 44762                   | [C/T] |                    | INTERGENIC                          |                                             |
| Ca_Desi_SNP4431 | scaffold00748 | 1167                    | [A/C] |                    | INTERGENIC                          |                                             |
| Ca_Desi_SNP4432 | scaffold00748 | 1198                    | [A/T] |                    | INTERGENIC                          |                                             |
| Ca_Desi_SNP4433 | scaffold01133 | 273                     | [A/G] | Ca_15037           | SYNONYMOUS_CODING                   | Integrase, catalytic region; Ribonuclease H |
| Ca_Desi_SNP4434 | scaffold04114 | 5202                    | [A/G] |                    | INTERGENIC                          |                                             |
| Ca_Desi_SNP4435 | scaffold03130 | 18111                   | [G/T] |                    | INTERGENIC                          |                                             |
| Ca_Desi_SNP4436 | scaffold03224 | 10299                   | [C/A] |                    | INTERGENIC                          |                                             |
| Ca_Desi_SNP4437 | scaffold03224 | 10300                   | [C/T] |                    | INTERGENIC                          |                                             |
| Ca_Desi_SNP4438 | scaffold00751 | 1963                    | [A/T] |                    | INTERGENIC                          |                                             |
| Ca_Desi_SNP4439 | scaffold03282 | 47600                   | [A/T] |                    | INTERGENIC                          |                                             |
| Ca_Desi_SNP4440 | scaffold03282 | 49831                   | [G/A] |                    | INTERGENIC                          |                                             |
| Ca_Desi_SNP4441 | scaffold00752 | 3513                    | [A/G] | Ca_13923           | UTR_3_PRIME:127bases                | Uncharacterized protein At5g39865           |
| Ca_Desi_SNP4442 | scaffold00752 | 3529                    | [C/T] | Ca_13923           | UTR_3_PRIME:111bases                | Uncharacterized protein At5g39865           |
| Ca_Desi_SNP4443 | scaffold00752 | 3546                    | [A/G] | Ca_13923           | UTR_3_PRIME:94bases                 | Uncharacterized protein At5g39865           |
| Ca_Desi_SNP4444 | scaffold00752 | 3548                    | [A/G] | Ca_13923           | UTR_3_PRIME:92bases                 | Uncharacterized protein At5g39865           |
| Ca_Desi_SNP4445 | scaffold00760 | 1370                    | [A/T] |                    | INTERGENIC                          |                                             |

| SNP IDs                                                                         | Chromosomes   | Physical positions (bp) | SNPs  | Gene accession IDs | Sequence components of genome/genes | Putative functions |
|---------------------------------------------------------------------------------|---------------|-------------------------|-------|--------------------|-------------------------------------|--------------------|
| Ca_Desi_SNP4446                                                                 | scaffold03298 | 41437                   | [A/C] | Ca_10561           | UPSTREAM:1774bases                  | Protein WAX2       |
| Ca_Desi_SNP4447                                                                 | scaffold03298 | 77198                   | [A/G] |                    | INTERGENIC                          |                    |
| Ca_Desi_SNP4448                                                                 | scaffold11974 | 30864                   | [C/T] |                    | INTERGENIC                          |                    |
| <b>*3625 SNPs mapped on eight LGs of <i>desi</i> intra-specific genetic map</b> |               |                         |       |                    |                                     |                    |

**Table S6B: Structural and functional annotation of 2689 high-quality SNPs (MAF >20%) identified by reference *kabuli* genome-based GBS assay used for construction of ultra-high density intra-specific genetic linkage maps in chickpea**

| SNP IDs          | Chromosomes    | Physical positions (bp) | SNPs  | Gene accession IDs | Sequence components of genome/genes | Putative functions                           |
|------------------|----------------|-------------------------|-------|--------------------|-------------------------------------|----------------------------------------------|
| #Ca_Kabuli_SNP1  | Ca_Kabuli_LG05 | 17494714                | [A/G] |                    | INTERGENIC                          |                                              |
| #Ca_Kabuli_SNP2  | scaffold3454   | 1404                    | [C/A] |                    | INTERGENIC                          |                                              |
| #Ca_Kabuli_SNP3  | Ca_Kabuli_LG01 | 43933984                | [C/T] | Ca_13539           | DOWNSTREAM:284bases                 | --                                           |
| #Ca_Kabuli_SNP4  | Ca_Kabuli_LG01 | 28082758                | [C/T] | Ca_18523           | INTRON                              | Vps54-like                                   |
| #Ca_Kabuli_SNP5  | Ca_Kabuli_LG02 | 32844739                | [G/C] | Ca_10238           | NON_SYNONYMOUS_CODING               | Late embryogenesis abundant protein, group 2 |
| #Ca_Kabuli_SNP6  | scaffold2146   | 7377                    | [A/G] |                    | INTERGENIC                          |                                              |
| #Ca_Kabuli_SNP7  | Ca_Kabuli_LG01 | 37690416                | [G/A] | Ca_23533           | INTRON                              | Myb, DNA-binding                             |
| #Ca_Kabuli_SNP8  | Ca_Kabuli_LG01 | 40346280                | [A/C] | Ca_13893           | INTRON                              | Tetratricopeptide, MLP1/MLP2-like            |
| #Ca_Kabuli_SNP9  | Ca_Kabuli_LG01 | 34161921                | [G/A] | Ca_25473           | DOWNSTREAM:127bases                 | Zinc finger, RING-type                       |
| #Ca_Kabuli_SNP10 | Ca_Kabuli_LG01 | 37690497                | [A/T] | Ca_23533           | INTRON                              | Myb, DNA-binding                             |
| #Ca_Kabuli_SNP11 | Ca_Kabuli_LG01 | 38877670                | [T/C] |                    | INTERGENIC                          |                                              |
| #Ca_Kabuli_SNP12 | scaffold2477   | 62768                   | [G/A] |                    | INTERGENIC                          |                                              |
| #Ca_Kabuli_SNP13 | Ca_Kabuli_LG01 | 23149053                | [G/A] | Ca_22359           | SYNONYMOUS_CODING                   | Initiation factor 2B-related                 |
| #Ca_Kabuli_SNP14 | Ca_Kabuli_LG01 | 26807402                | [C/A] |                    | INTERGENIC                          |                                              |
| #Ca_Kabuli_SNP15 | Ca_Kabuli_LG07 | 25428660                | [G/A] |                    | INTERGENIC                          |                                              |
| #Ca_Kabuli_SNP16 | Ca_Kabuli_LG01 | 19526652                | [T/G] | Ca_08868           | INTRON                              | Aldose 1-epimerase                           |
| #Ca_Kabuli_SNP17 | Ca_Kabuli_LG01 | 19254161                | [A/G] | Ca_17349           | INTRON                              | --                                           |
| #Ca_Kabuli_SNP18 | Ca_Kabuli_LG01 | 40343216                | [G/T] | Ca_13893           | INTRON                              | Tetratricopeptide, MLP1/MLP2-like            |
| #Ca_Kabuli_SNP19 | Ca_Kabuli_LG01 | 37722143                | [G/C] | Ca_23534           | SYNONYMOUS_CODING                   | Protein of unknown function DUF620           |
| #Ca_Kabuli_SNP20 | Ca_Kabuli_LG01 | 37722095                | [G/A] | Ca_23534           | SYNONYMOUS_CODING                   | Protein of unknown function DUF620           |
| #Ca_Kabuli_SNP21 | Ca_Kabuli_LG01 | 34272025                | [A/G] |                    | INTERGENIC                          |                                              |
| #Ca_Kabuli_SNP22 | Ca_Kabuli_LG01 | 34272024                | [A/G] |                    | INTERGENIC                          |                                              |
| #Ca_Kabuli_SNP23 | Ca_Kabuli_LG01 | 34727251                | [T/G] | Ca_21419           | SYNONYMOUS_CODING                   | Zinc finger, CCCH-type                       |
| #Ca_Kabuli_SNP24 | Ca_Kabuli_LG01 | 39663432                | [C/G] | Ca_13922           | INTRON                              | ABC transporter-like                         |
| #Ca_Kabuli_SNP25 | Ca_Kabuli_LG01 | 28065140                | [C/T] | Ca_18523           | INTRON                              | Vps54-like                                   |
| #Ca_Kabuli_SNP26 | Ca_Kabuli_LG06 | 12810876                | [C/A] |                    | INTERGENIC                          |                                              |
| #Ca_Kabuli_SNP27 | Ca_Kabuli_LG07 | 33099304                | [C/T] |                    | INTERGENIC                          |                                              |
| #Ca_Kabuli_SNP28 | Ca_Kabuli_LG01 | 40367940                | [G/A] | Ca_13893           | INTRON                              | Tetratricopeptide, MLP1/MLP2-like            |
| #Ca_Kabuli_SNP29 | Ca_Kabuli_LG01 | 40358747                | [T/G] | Ca_13893           | INTRON                              | Tetratricopeptide, MLP1/MLP2-like            |

| SNP IDs          | Chromosomes    | Physical positions (bp) | SNPs  | Gene accession IDs | Sequence components of genome/genes | Putative functions                                  |
|------------------|----------------|-------------------------|-------|--------------------|-------------------------------------|-----------------------------------------------------|
| #Ca_Kabuli_SNP30 | Ca_Kabuli_LG01 | 38877710                | [T/A] |                    | INTERGENIC                          |                                                     |
| #Ca_Kabuli_SNP31 | Ca_Kabuli_LG01 | 38877711                | [A/T] |                    | INTERGENIC                          |                                                     |
| #Ca_Kabuli_SNP32 | Ca_Kabuli_LG01 | 33695857                | [A/G] | Ca_19455           | INTRON                              | Glycosyl-phosphatidyl inositol-anchored, plant      |
| #Ca_Kabuli_SNP33 | Ca_Kabuli_LG04 | 48502687                | [A/G] |                    | INTERGENIC                          |                                                     |
| #Ca_Kabuli_SNP34 | Ca_Kabuli_LG01 | 39436182                | [T/C] | Ca_13931           | SYNONYMOUS_CODING                   | IQ motif, EF-hand binding site                      |
| #Ca_Kabuli_SNP35 | Ca_Kabuli_LG01 | 30990317                | [G/A] |                    | INTERGENIC                          |                                                     |
| #Ca_Kabuli_SNP36 | Ca_Kabuli_LG01 | 31590263                | [C/G] | Ca_21868           | INTRON                              | Orotidine 5'-phosphate decarboxylase domain         |
| #Ca_Kabuli_SNP37 | scaffold1305   | 9398                    | [C/A] |                    | INTERGENIC                          |                                                     |
| #Ca_Kabuli_SNP38 | Ca_Kabuli_LG06 | 9834198                 | [C/A] | Ca_08608           | NON_SYNONYMOUS_CODING               | WD40 repeat                                         |
| #Ca_Kabuli_SNP39 | Ca_Kabuli_LG03 | 29207307                | [A/C] | Ca_07227           | DOWNSTREAM:95bases                  | GDP-fucose protein O-fucosyltransferase             |
| #Ca_Kabuli_SNP40 | Ca_Kabuli_LG01 | 31136007                | [C/T] |                    | INTERGENIC                          |                                                     |
| #Ca_Kabuli_SNP41 | Ca_Kabuli_LG01 | 39663380                | [C/T] | Ca_13922           | INTRON                              | ABC transporter-like                                |
| #Ca_Kabuli_SNP42 | Ca_Kabuli_LG01 | 34272001                | [C/G] |                    | INTERGENIC                          |                                                     |
| #Ca_Kabuli_SNP43 | Ca_Kabuli_LG07 | 29313239                | [C/T] |                    | INTERGENIC                          |                                                     |
| #Ca_Kabuli_SNP44 | Ca_Kabuli_LG01 | 37768333                | [A/G] |                    | INTERGENIC                          |                                                     |
| #Ca_Kabuli_SNP45 | Ca_Kabuli_LG01 | 37768299                | [C/T] |                    | INTERGENIC                          |                                                     |
| #Ca_Kabuli_SNP46 | Ca_Kabuli_LG06 | 21489042                | [T/C] |                    | INTERGENIC                          |                                                     |
| #Ca_Kabuli_SNP47 | Ca_Kabuli_LG01 | 28088501                | [T/C] | Ca_18523           | SYNONYMOUS_CODING                   | Vps54-like                                          |
| #Ca_Kabuli_SNP48 | Ca_Kabuli_LG02 | 7125992                 | [T/G] | Ca_19128           | NON_SYNONYMOUS_CODING               | Oxidoreductase, N-terminal                          |
| #Ca_Kabuli_SNP49 | Ca_Kabuli_LG01 | 37870835                | [G/A] | Ca_23539           | INTRON                              | Zinc finger, PHD-type                               |
| #Ca_Kabuli_SNP50 | Ca_Kabuli_LG01 | 30232233                | [T/C] | Ca_22467           | DOWNSTREAM:1671bases                | Protein of unknown function DUF617, plant           |
| #Ca_Kabuli_SNP51 | Ca_Kabuli_LG01 | 1117444                 | [G/T] | Ca_00138           | SYNONYMOUS_CODING                   | HEAT                                                |
| #Ca_Kabuli_SNP52 | Ca_Kabuli_LG01 | 37870666                | [T/C] | Ca_23539           | INTRON                              | Zinc finger, PHD-type                               |
| #Ca_Kabuli_SNP53 | Ca_Kabuli_LG05 | 28335455                | [A/C] | Ca_13389           | SYNONYMOUS_CODING                   | Histidine phosphatase superfamily, clade-3          |
| #Ca_Kabuli_SNP54 | Ca_Kabuli_LG01 | 42271245                | [C/G] | Ca_22675           | NON_SYNONYMOUS_CODING               | --                                                  |
| #Ca_Kabuli_SNP55 | scaffold327    | 131751                  | [G/C] |                    | INTERGENIC                          |                                                     |
| #Ca_Kabuli_SNP56 | Ca_Kabuli_LG01 | 40199841                | [T/A] |                    | INTERGENIC                          |                                                     |
| #Ca_Kabuli_SNP57 | Ca_Kabuli_LG06 | 49044814                | [G/T] |                    | INTERGENIC                          |                                                     |
| #Ca_Kabuli_SNP58 | Ca_Kabuli_LG02 | 18671574                | [G/A] |                    | INTERGENIC                          |                                                     |
| #Ca_Kabuli_SNP59 | Ca_Kabuli_LG06 | 23145617                | [A/T] | Ca_11137           | INTRON                              | Clathrin/coatomer adaptor, adaptin-like, N-terminal |
| #Ca_Kabuli_SNP60 | scaffold2825   | 25070                   | [C/T] |                    | INTERGENIC                          |                                                     |

| SNP IDs          | Chromosomes    | Physical positions (bp) | SNPs  | Gene accession IDs | Sequence components of genome/genes | Putative functions                                    |
|------------------|----------------|-------------------------|-------|--------------------|-------------------------------------|-------------------------------------------------------|
| #Ca_Kabuli_SNP61 | Ca_Kabuli_LG08 | 6477777                 | [C/T] |                    | INTERGENIC                          |                                                       |
| #Ca_Kabuli_SNP62 | Ca_Kabuli_LG04 | 12534847                | [C/T] | Ca_04476           | DOWNSTREAM:1646bases                | Remorin, C-terminal                                   |
| #Ca_Kabuli_SNP63 | Ca_Kabuli_LG03 | 23340882                | [T/C] | Ca_06186           | INTRON                              | Protein of unknown function DUF3523                   |
| #Ca_Kabuli_SNP64 | scaffold247    | 3263                    | [A/G] |                    | INTERGENIC                          |                                                       |
| #Ca_Kabuli_SNP65 | Ca_Kabuli_LG01 | 43304559                | [T/G] | Ca_13580           | NON_SYNONYMOUS_CODING               | Tetratricopeptide repeat-containing                   |
| #Ca_Kabuli_SNP66 | Ca_Kabuli_LG07 | 27210881                | [C/T] |                    | INTERGENIC                          |                                                       |
| #Ca_Kabuli_SNP67 | scaffold1127   | 23440                   | [A/T] |                    | INTERGENIC                          |                                                       |
| #Ca_Kabuli_SNP68 | Ca_Kabuli_LG01 | 37732133                | [C/T] |                    | INTERGENIC                          |                                                       |
| #Ca_Kabuli_SNP69 | Ca_Kabuli_LG01 | 46523221                | [T/C] | Ca_21550           | NON_SYNONYMOUS_CODING               | --                                                    |
| #Ca_Kabuli_SNP70 | scaffold932    | 228328                  | [G/T] |                    | INTERGENIC                          |                                                       |
| #Ca_Kabuli_SNP71 | Ca_Kabuli_LG01 | 17462461                | [G/A] | Ca_14788           | DOWNSTREAM:1246bases                | Glycoside hydrolase, family 3, N-terminal             |
| #Ca_Kabuli_SNP72 | Ca_Kabuli_LG01 | 17359686                | [T/C] | Ca_22785           | INTRON                              | Domain of unknown function DUF625                     |
| #Ca_Kabuli_SNP73 | scaffold36     | 74743                   | [G/A] |                    | INTERGENIC                          |                                                       |
| #Ca_Kabuli_SNP74 | Ca_Kabuli_LG05 | 42004600                | [T/G] | Ca_11412           | INTRON                              | Rab-GAP/TBC domain                                    |
| #Ca_Kabuli_SNP75 | scaffold2371   | 186189                  | [T/G] |                    | INTERGENIC                          |                                                       |
| #Ca_Kabuli_SNP76 | scaffold68     | 779324                  | [G/A] |                    | INTERGENIC                          |                                                       |
| #Ca_Kabuli_SNP77 | Ca_Kabuli_LG01 | 8112343                 | [C/T] | Ca_08057           | SYNONYMOUS_CODING                   | RNA helicase, ATP-dependent, DEAD-box, conserved site |
| #Ca_Kabuli_SNP78 | scaffold5557   | 6564                    | [G/A] |                    | INTERGENIC                          |                                                       |
| #Ca_Kabuli_SNP79 | Ca_Kabuli_LG03 | 24024538                | [A/C] |                    | INTERGENIC                          |                                                       |
| #Ca_Kabuli_SNP80 | Ca_Kabuli_LG01 | 8108014                 | [C/T] | Ca_08057           | NON_SYNONYMOUS_CODING               | RNA helicase, ATP-dependent, DEAD-box, conserved site |
| #Ca_Kabuli_SNP81 | Ca_Kabuli_LG02 | 11246842                | [G/A] |                    | INTERGENIC                          |                                                       |
| #Ca_Kabuli_SNP82 | Ca_Kabuli_LG01 | 3711516                 | [T/G] |                    | INTERGENIC                          |                                                       |
| #Ca_Kabuli_SNP83 | Ca_Kabuli_LG06 | 49044794                | [T/A] |                    | INTERGENIC                          |                                                       |
| #Ca_Kabuli_SNP84 | Ca_Kabuli_LG03 | 18506357                | [G/A] |                    | INTERGENIC                          |                                                       |
| #Ca_Kabuli_SNP85 | Ca_Kabuli_LG01 | 7811388                 | [C/T] |                    | INTERGENIC                          |                                                       |
| #Ca_Kabuli_SNP86 | Ca_Kabuli_LG07 | 5577329                 | [A/C] | Ca_06805           | SYNONYMOUS_CODING                   | F-box domain, cyclin-like                             |
| #Ca_Kabuli_SNP87 | Ca_Kabuli_LG07 | 34875630                | [A/T] |                    | INTERGENIC                          |                                                       |
| #Ca_Kabuli_SNP88 | Ca_Kabuli_LG01 | 8133516                 | [G/A] | Ca_08059           | DOWNSTREAM:1841bases                | Bicarbonate transporter, eukaryotic                   |
| #Ca_Kabuli_SNP89 | Ca_Kabuli_LG01 | 7925666                 | [A/C] | Ca_08042           | SYNONYMOUS_CODING                   | Biopterin transport-related protein BT1               |
| #Ca_Kabuli_SNP90 | Ca_Kabuli_LG02 | 28897976                | [T/G] |                    | INTERGENIC                          |                                                       |
| #Ca_Kabuli_SNP91 | scaffold4500   | 6819                    | [A/G] |                    | INTERGENIC                          |                                                       |

| SNP IDs           | Chromosomes    | Physical positions (bp) | SNPs  | Gene accession IDs | Sequence components of genome/genes | Putative functions                                    |
|-------------------|----------------|-------------------------|-------|--------------------|-------------------------------------|-------------------------------------------------------|
| #Ca_Kabuli_SNP92  | scaffold1860   | 129934                  | [C/A] |                    | INTERGENIC                          |                                                       |
| #Ca_Kabuli_SNP93  | Ca_Kabuli_LG01 | 8112247                 | [A/G] | Ca_08057           | SYNONYMOUS_CODING                   | RNA helicase, ATP-dependent, DEAD-box, conserved site |
| #Ca_Kabuli_SNP94  | Ca_Kabuli_LG07 | 815452                  | [T/G] | Ca_03396           | NON_SYNONYMOUS_CODING               | Armadillo                                             |
| #Ca_Kabuli_SNP95  | Ca_Kabuli_LG01 | 8036903                 | [A/T] | Ca_08051           | INTRON                              | NAD-dependent epimerase/dehydratase                   |
| #Ca_Kabuli_SNP96  | Ca_Kabuli_LG01 | 8036917                 | [T/G] | Ca_08051           | INTRON                              | NAD-dependent epimerase/dehydratase                   |
| #Ca_Kabuli_SNP97  | Ca_Kabuli_LG04 | 28060964                | [C/G] | Ca_23178           | SYNONYMOUS_CODING                   | --                                                    |
| #Ca_Kabuli_SNP98  | Ca_Kabuli_LG01 | 7969218                 | [T/C] |                    | INTERGENIC                          |                                                       |
| #Ca_Kabuli_SNP99  | Ca_Kabuli_LG02 | 3164298                 | [A/T] | Ca_10531           | DOWNSTREAM:195bases                 | Cysteamine dioxygenase                                |
| #Ca_Kabuli_SNP100 | Ca_Kabuli_LG05 | 32383737                | [T/C] |                    | INTERGENIC                          |                                                       |
| #Ca_Kabuli_SNP101 | Ca_Kabuli_LG01 | 7925774                 | [C/T] | Ca_08042           | SYNONYMOUS_CODING                   | Biopterin transport-related protein BT1               |
| #Ca_Kabuli_SNP102 | Ca_Kabuli_LG01 | 8131157                 | [T/G] |                    | INTERGENIC                          |                                                       |
| #Ca_Kabuli_SNP103 | Ca_Kabuli_LG01 | 7811444                 | [G/T] |                    | INTERGENIC                          |                                                       |
| #Ca_Kabuli_SNP104 | Ca_Kabuli_LG07 | 9888225                 | [T/A] | Ca_12754           | NON_SYNONYMOUS_CODING               | --                                                    |
| #Ca_Kabuli_SNP105 | Ca_Kabuli_LG01 | 15965278                | [A/G] |                    | INTERGENIC                          |                                                       |
| #Ca_Kabuli_SNP106 | scaffold1305   | 10541                   | [C/G] |                    | INTERGENIC                          |                                                       |
| #Ca_Kabuli_SNP107 | Ca_Kabuli_LG04 | 8682191                 | [T/C] | Ca_08364           | NON_SYNONYMOUS_CODING               | Disease resistance protein                            |
| #Ca_Kabuli_SNP108 | scaffold948    | 1066731                 | [A/C] |                    | INTERGENIC                          |                                                       |
| #Ca_Kabuli_SNP109 | Ca_Kabuli_LG01 | 8036666                 | [C/T] | Ca_08051           | INTRON                              | NAD-dependent epimerase/dehydratase                   |
| #Ca_Kabuli_SNP110 | Ca_Kabuli_LG05 | 21933954                | [A/C] | Ca_24469           | DOWNSTREAM:1804bases                | Glycoside hydrolase, family 28                        |
| #Ca_Kabuli_SNP111 | Ca_Kabuli_LG04 | 13646773                | [A/G] | Ca_04583           | NON_SYNONYMOUS_CODING               | Seed maturation protein                               |
| #Ca_Kabuli_SNP112 | Ca_Kabuli_LG04 | 8852420                 | [C/T] |                    | INTERGENIC                          |                                                       |
| #Ca_Kabuli_SNP113 | Ca_Kabuli_LG05 | 41464556                | [A/T] |                    | INTERGENIC                          |                                                       |
| #Ca_Kabuli_SNP114 | Ca_Kabuli_LG04 | 46713940                | [A/C] | Ca_19246           | NON_SYNONYMOUS_CODING               | PGAP1-like                                            |
| #Ca_Kabuli_SNP115 | Ca_Kabuli_LG04 | 23267891                | [C/A] |                    | INTERGENIC                          |                                                       |
| #Ca_Kabuli_SNP116 | Ca_Kabuli_LG02 | 12519430                | [T/A] | Ca_18078           | SYNONYMOUS_CODING                   | WD40 repeat                                           |
| #Ca_Kabuli_SNP117 | Ca_Kabuli_LG07 | 27210894                | [T/C] |                    | INTERGENIC                          |                                                       |
| #Ca_Kabuli_SNP118 | Ca_Kabuli_LG01 | 14015757                | [T/C] | Ca_07128           | NON_SYNONYMOUS_CODING               | Ionotropic glutamate receptor                         |
| #Ca_Kabuli_SNP119 | Ca_Kabuli_LG01 | 17404600                | [C/A] |                    | INTERGENIC                          |                                                       |
| #Ca_Kabuli_SNP120 | Ca_Kabuli_LG01 | 6433838                 | [C/T] | Ca_07907           | SYNONYMOUS_CODING                   | NUDIX hydrolase domain                                |
| #Ca_Kabuli_SNP121 | Ca_Kabuli_LG07 | 8848940                 | [A/C] | Ca_15327           | INTRON                              | ATPase, P-type, H+ transporting proton pump           |
| #Ca_Kabuli_SNP122 | Ca_Kabuli_LG05 | 27000258                | [G/A] |                    | INTERGENIC                          |                                                       |

| SNP IDs           | Chromosomes    | Physical positions (bp) | SNPs  | Gene accession IDs | Sequence components of genome/genes | Putative functions                         |
|-------------------|----------------|-------------------------|-------|--------------------|-------------------------------------|--------------------------------------------|
| #Ca_Kabuli_SNP123 | Ca_Kabuli_LG01 | 5793815                 | [G/A] |                    | INTERGENIC                          |                                            |
| #Ca_Kabuli_SNP124 | Ca_Kabuli_LG04 | 8656635                 | [T/C] | Ca_08359           | SYNONYMOUS_CODING                   | Protein of unknown function DUF594         |
| #Ca_Kabuli_SNP125 | Ca_Kabuli_LG04 | 8684220                 | [A/G] | Ca_08364           | SYNONYMOUS_CODING                   | Disease resistance protein                 |
| #Ca_Kabuli_SNP126 | Ca_Kabuli_LG01 | 6433934                 | [T/A] | Ca_07907           | SYNONYMOUS_CODING                   | NUDIX hydrolase domain                     |
| #Ca_Kabuli_SNP127 | Ca_Kabuli_LG04 | 8805839                 | [A/G] |                    | INTERGENIC                          |                                            |
| #Ca_Kabuli_SNP128 | Ca_Kabuli_LG08 | 14007360                | [A/T] |                    | INTERGENIC                          |                                            |
| #Ca_Kabuli_SNP129 | Ca_Kabuli_LG05 | 32149981                | [C/A] | Ca_04916           | DOWNSTREAM:1362bases                | Thioredoxin                                |
| #Ca_Kabuli_SNP130 | scaffold270    | 33479                   | [A/C] |                    | INTERGENIC                          |                                            |
| #Ca_Kabuli_SNP131 | Ca_Kabuli_LG02 | 28897971                | [T/G] |                    | INTERGENIC                          |                                            |
| #Ca_Kabuli_SNP132 | Ca_Kabuli_LG03 | 27105602                | [A/C] |                    | INTERGENIC                          |                                            |
| #Ca_Kabuli_SNP133 | Ca_Kabuli_LG06 | 49044805                | [A/G] |                    | INTERGENIC                          |                                            |
| #Ca_Kabuli_SNP134 | Ca_Kabuli_LG07 | 12492059                | [A/G] | Ca_09267           | NON_SYNONYMOUS_CODING               | --                                         |
| #Ca_Kabuli_SNP135 | scaffold585    | 108825                  | [T/A] |                    | INTERGENIC                          |                                            |
| #Ca_Kabuli_SNP136 | scaffold493    | 370559                  | [C/G] |                    | INTERGENIC                          |                                            |
| #Ca_Kabuli_SNP137 | Ca_Kabuli_LG04 | 8681949                 | [A/G] | Ca_08364           | SYNONYMOUS_CODING                   | Disease resistance protein                 |
| #Ca_Kabuli_SNP138 | Ca_Kabuli_LG01 | 6332153                 | [T/C] | Ca_07893           | INTRON                              | Bromo adjacent homology (BAH) domain       |
| #Ca_Kabuli_SNP139 | Ca_Kabuli_LG04 | 615704                  | [C/T] | Ca_07692           | SYNONYMOUS_CODING                   | HEAT, type 2                               |
| #Ca_Kabuli_SNP140 | Ca_Kabuli_LG01 | 6332104                 | [G/A] | Ca_07893           | INTRON                              | Bromo adjacent homology (BAH) domain       |
| #Ca_Kabuli_SNP141 | scaffold269    | 43170                   | [A/T] |                    | INTERGENIC                          |                                            |
| #Ca_Kabuli_SNP142 | Ca_Kabuli_LG04 | 37706496                | [G/A] | Ca_15110           | DOWNSTREAM:1728bases                | Cytochrome c oxidase subunit II C-terminal |
| #Ca_Kabuli_SNP143 | Ca_Kabuli_LG06 | 10395273                | [T/G] | Ca_08553           | INTRON                              | Small ubiquitin-related modifier, SUMO     |
| #Ca_Kabuli_SNP144 | scaffold307    | 215952                  | [C/A] |                    | INTERGENIC                          |                                            |
| #Ca_Kabuli_SNP145 | Ca_Kabuli_LG07 | 14782508                | [A/C] | Ca_09968           | NON_SYNONYMOUS_CODING               | Heat shock protein DnaJ, N-terminal        |
| #Ca_Kabuli_SNP146 | Ca_Kabuli_LG01 | 13680008                | [G/C] |                    | INTERGENIC                          |                                            |
| #Ca_Kabuli_SNP147 | Ca_Kabuli_LG02 | 7616806                 | [T/G] |                    | INTERGENIC                          |                                            |
| #Ca_Kabuli_SNP148 | Ca_Kabuli_LG06 | 16463615                | [T/G] | Ca_19650           | DOWNSTREAM:1296bases                | Membrane insertion protein, OxaA/YidC      |
| #Ca_Kabuli_SNP149 | Ca_Kabuli_LG01 | 5249868                 | [A/G] | Ca_00613           | NON_SYNONYMOUS_CODING               | Protein of unknown function DUF584         |
| #Ca_Kabuli_SNP150 | Ca_Kabuli_LG04 | 5647745                 | [T/G] | Ca_03685           | SYNONYMOUS_CODING                   | Kinesin, motor domain                      |
| #Ca_Kabuli_SNP151 | Ca_Kabuli_LG04 | 38358096                | [G/T] | Ca_13120           | NON_SYNONYMOUS_CODING               | C2 calcium-dependent membrane targeting    |
| #Ca_Kabuli_SNP152 | scaffold1579   | 199119                  | [T/G] |                    | INTERGENIC                          |                                            |
| #Ca_Kabuli_SNP153 | Ca_Kabuli_LG04 | 48360127                | [C/G] | Ca_10751           | DOWNSTREAM:1295bases                | Exonuclease                                |



| SNP IDs           | Chromosomes    | Physical positions (bp) | SNPs  | Gene accession IDs | Sequence components of genome/genes | Putative functions                                      |
|-------------------|----------------|-------------------------|-------|--------------------|-------------------------------------|---------------------------------------------------------|
| #Ca_Kabuli_SNP154 | Ca_Kabuli_LG02 | 31534265                | [A/C] |                    | INTERGENIC                          |                                                         |
| #Ca_Kabuli_SNP155 | scaffold894    | 62751                   | [C/T] |                    | INTERGENIC                          |                                                         |
| #Ca_Kabuli_SNP156 | Ca_Kabuli_LG04 | 10430617                | [A/C] |                    | INTERGENIC                          |                                                         |
| #Ca_Kabuli_SNP157 | Ca_Kabuli_LG05 | 19886396                | [A/C] | Ca_22815           | SYNONYMOUS_CODING                   | Vps16, C-terminal                                       |
| #Ca_Kabuli_SNP158 | scaffold402    | 300957                  | [T/G] |                    | INTERGENIC                          |                                                         |
| #Ca_Kabuli_SNP159 | Ca_Kabuli_LG04 | 48382603                | [T/C] | Ca_10748           | SYNONYMOUS_CODING                   | AUX/IAA protein                                         |
| #Ca_Kabuli_SNP160 | Ca_Kabuli_LG03 | 31091960                | [T/G] | Ca_12206           | NON_SYNONYMOUS_CODING               | Histone H1/H5                                           |
| #Ca_Kabuli_SNP161 | Ca_Kabuli_LG01 | 824                     | [A/G] |                    | INTERGENIC                          |                                                         |
| #Ca_Kabuli_SNP162 | Ca_Kabuli_LG03 | 2461959                 | [A/G] |                    | INTERGENIC                          |                                                         |
| #Ca_Kabuli_SNP163 | Ca_Kabuli_LG06 | 16715751                | [A/C] | Ca_06303           | NON_SYNONYMOUS_CODING               | DNA mismatch repair protein MutS, C-terminal domain     |
| #Ca_Kabuli_SNP164 | Ca_Kabuli_LG04 | 23634799                | [A/C] | Ca_14434           | NON_SYNONYMOUS_CODING               | Glycosyl transferase, group 1                           |
| #Ca_Kabuli_SNP165 | Ca_Kabuli_LG01 | 3349259                 | [C/G] | Ca_00404           | DOWNSTREAM:561bases                 | Xanthine/uracil/vitamin C permease                      |
| #Ca_Kabuli_SNP166 | Ca_Kabuli_LG04 | 11246164                | [A/G] |                    | INTERGENIC                          |                                                         |
| #Ca_Kabuli_SNP167 | Ca_Kabuli_LG03 | 22225139                | [G/T] | Ca_20408           | SYNONYMOUS_CODING                   | Plastocyanin-like                                       |
| #Ca_Kabuli_SNP168 | Ca_Kabuli_LG04 | 12525328                | [G/A] | Ca_04475           | SYNONYMOUS_CODING                   | Cytochrome b561, eukaryote                              |
| #Ca_Kabuli_SNP169 | Ca_Kabuli_LG07 | 10223034                | [T/G] |                    | INTERGENIC                          |                                                         |
| #Ca_Kabuli_SNP170 | scaffold1461   | 71580                   | [C/A] |                    | INTERGENIC                          |                                                         |
| #Ca_Kabuli_SNP171 | scaffold3055   | 13169                   | [A/C] |                    | INTERGENIC                          |                                                         |
| #Ca_Kabuli_SNP172 | Ca_Kabuli_LG04 | 30258595                | [A/G] | Ca_14190           | DOWNSTREAM:1281bases                | Zinc finger, CCCH-type                                  |
| #Ca_Kabuli_SNP173 | scaffold1245   | 625388                  | [C/T] |                    | INTERGENIC                          |                                                         |
| #Ca_Kabuli_SNP174 | Ca_Kabuli_LG03 | 5224976                 | [A/G] | Ca_23868           | NON_SYNONYMOUS_CODING               | Per1-like                                               |
| #Ca_Kabuli_SNP175 | Ca_Kabuli_LG06 | 19478546                | [G/C] | Ca_06554           | NON_SYNONYMOUS_CODING               | NusB/RsmB/TIM44                                         |
| #Ca_Kabuli_SNP176 | Ca_Kabuli_LG06 | 57533116                | [T/G] |                    | INTERGENIC                          |                                                         |
| #Ca_Kabuli_SNP177 | Ca_Kabuli_LG06 | 11302033                | [T/C] | Ca_20493           | NON_SYNONYMOUS_CODING               | Signal recognition particle, SRP72 subunit, RNA-binding |
| #Ca_Kabuli_SNP178 | Ca_Kabuli_LG04 | 12506450                | [T/A] |                    | INTERGENIC                          |                                                         |
| #Ca_Kabuli_SNP179 | Ca_Kabuli_LG04 | 23195429                | [G/T] | Ca_14451           | INTRON                              | Helicase, C-terminal                                    |
| #Ca_Kabuli_SNP180 | Ca_Kabuli_LG03 | 37316816                | [T/C] | Ca_01065           | DOWNSTREAM:1847bases                | Zinc finger, Sec23/Sec24-type                           |
| #Ca_Kabuli_SNP181 | Ca_Kabuli_LG05 | 33754236                | [A/G] |                    | INTERGENIC                          |                                                         |
| #Ca_Kabuli_SNP182 | Ca_Kabuli_LG05 | 40710814                | [T/C] |                    | INTERGENIC                          |                                                         |
| #Ca_Kabuli_SNP183 | Ca_Kabuli_LG04 | 43676592                | [A/C] | Ca_09052           | SYNONYMOUS_CODING                   | Leucine-rich repeat                                     |
| #Ca_Kabuli_SNP184 | Ca_Kabuli_LG04 | 48678296                | [T/C] | Ca_23018           | SYNONYMOUS_CODING                   | Transcription factor IIS, N-terminal                    |

| SNP IDs           | Chromosomes    | Physical positions (bp) | SNPs  | Gene accession IDs | Sequence components of genome/genes | Putative functions                                  |
|-------------------|----------------|-------------------------|-------|--------------------|-------------------------------------|-----------------------------------------------------|
| #Ca_Kabuli_SNP185 | Ca_Kabuli_LG06 | 8091218                 | [A/C] |                    | INTERGENIC                          |                                                     |
| #Ca_Kabuli_SNP186 | Ca_Kabuli_LG04 | 12558541                | [C/T] | Ca_04478           | INTRON                              | NUDIX hydrolase domain                              |
| #Ca_Kabuli_SNP187 | Ca_Kabuli_LG02 | 33399393                | [C/T] | Ca_10186           | NON_SYNONYMOUS_CODING               | Disease resistance protein                          |
| #Ca_Kabuli_SNP188 | Ca_Kabuli_LG02 | 33399397                | [C/A] | Ca_10186           | NON_SYNONYMOUS_CODING               | Disease resistance protein                          |
| #Ca_Kabuli_SNP189 | Ca_Kabuli_LG02 | 33399381                | [C/T] | Ca_10186           | SYNONYMOUS_CODING                   | Disease resistance protein                          |
| #Ca_Kabuli_SNP190 | scaffold764    | 11115                   | [G/T] |                    | INTERGENIC                          |                                                     |
| #Ca_Kabuli_SNP191 | Ca_Kabuli_LG04 | 13588928                | [C/T] |                    | INTERGENIC                          |                                                     |
| #Ca_Kabuli_SNP192 | Ca_Kabuli_LG02 | 5451165                 | [A/C] | Ca_14662           | SYNONYMOUS_CODING                   | Cytochrome c1                                       |
| #Ca_Kabuli_SNP193 | Ca_Kabuli_LG05 | 38180987                | [A/C] |                    | INTERGENIC                          |                                                     |
| #Ca_Kabuli_SNP194 | scaffold1714   | 3936                    | [A/G] |                    | INTERGENIC                          |                                                     |
| #Ca_Kabuli_SNP195 | scaffold168    | 404479                  | [C/A] |                    | INTERGENIC                          |                                                     |
| #Ca_Kabuli_SNP196 | Ca_Kabuli_LG04 | 3990334                 | [G/A] | Ca_03854           | SYNONYMOUS_CODING                   | Major intrinsic protein                             |
| #Ca_Kabuli_SNP197 | Ca_Kabuli_LG02 | 30091161                | [A/C] | Ca_16081           | SYNONYMOUS_CODING                   | Peptidase S8/S53, subtilisin/kexin/sedolisin        |
| #Ca_Kabuli_SNP198 | scaffold932    | 228459                  | [T/A] |                    | INTERGENIC                          |                                                     |
| #Ca_Kabuli_SNP199 | Ca_Kabuli_LG04 | 13687456                | [A/G] | Ca_04589           | INTRON                              | Frigida-like                                        |
| #Ca_Kabuli_SNP200 | Ca_Kabuli_LG04 | 13840484                | [C/T] | Ca_04608           | SYNONYMOUS_CODING                   | Copper amine oxidase                                |
| #Ca_Kabuli_SNP201 | Ca_Kabuli_LG04 | 13726718                | [T/G] | Ca_04596           | SYNONYMOUS_CODING                   | Zinc finger, PHD-type                               |
| #Ca_Kabuli_SNP202 | Ca_Kabuli_LG07 | 33099299                | [T/C] |                    | INTERGENIC                          |                                                     |
| #Ca_Kabuli_SNP203 | Ca_Kabuli_LG03 | 36046937                | [A/C] | Ca_00903           | NON_SYNONYMOUS_CODING               | SWAP/Surp                                           |
| #Ca_Kabuli_SNP204 | Ca_Kabuli_LG04 | 13840191                | [A/T] | Ca_04608           | SYNONYMOUS_CODING                   | Copper amine oxidase                                |
| #Ca_Kabuli_SNP205 | Ca_Kabuli_LG01 | 9705127                 | [C/T] | Ca_02826           | DOWNSTREAM:1556bases                | Nicotinamide N-methyltransferase, putative          |
| #Ca_Kabuli_SNP206 | Ca_Kabuli_LG04 | 3888185                 | [A/G] |                    | INTERGENIC                          |                                                     |
| #Ca_Kabuli_SNP207 | Ca_Kabuli_LG04 | 30131105                | [T/C] |                    | INTERGENIC                          |                                                     |
| #Ca_Kabuli_SNP208 | Ca_Kabuli_LG06 | 23010554                | [A/C] |                    | INTERGENIC                          |                                                     |
| #Ca_Kabuli_SNP209 | Ca_Kabuli_LG03 | 7204087                 | [C/T] |                    | INTERGENIC                          |                                                     |
| #Ca_Kabuli_SNP210 | Ca_Kabuli_LG04 | 19056752                | [A/C] | Ca_14006           | SYNONYMOUS_CODING                   | Lipase, class 3                                     |
| #Ca_Kabuli_SNP211 | Ca_Kabuli_LG04 | 12581371                | [G/T] | Ca_04480           | SYNONYMOUS_CODING                   | DNA mismatch repair protein MutS, C-terminal domain |
| #Ca_Kabuli_SNP212 | Ca_Kabuli_LG04 | 35328213                | [C/T] | Ca_20018           | SYNONYMOUS_CODING                   | IQ motif, EF-hand binding site                      |
| #Ca_Kabuli_SNP213 | Ca_Kabuli_LG01 | 2885997                 | [A/G] |                    | INTERGENIC                          |                                                     |
| #Ca_Kabuli_SNP214 | Ca_Kabuli_LG07 | 10649622                | [C/A] | Ca_12822           | NON_SYNONYMOUS_CODING               | Dynammin central domain                             |
| #Ca_Kabuli_SNP215 | Ca_Kabuli_LG02 | 23217524                | [A/C] | Ca_14970           | SYNONYMOUS_CODING                   | Protein kinase, catalytic domain                    |

| SNP IDs           | Chromosomes    | Physical positions (bp) | SNPs  | Gene accession IDs | Sequence components of genome/genes | Putative functions                       |
|-------------------|----------------|-------------------------|-------|--------------------|-------------------------------------|------------------------------------------|
| #Ca_Kabuli_SNP216 | Ca_Kabuli_LG01 | 2072627                 | [A/T] | Ca_00263           | NON_SYNONYMOUS_CODING               | Disease resistance protein               |
| #Ca_Kabuli_SNP217 | Ca_Kabuli_LG07 | 3070531                 | [A/C] |                    | INTERGENIC                          |                                          |
| #Ca_Kabuli_SNP218 | scaffold470    | 78864                   | [C/T] |                    | INTERGENIC                          |                                          |
| #Ca_Kabuli_SNP219 | Ca_Kabuli_LG05 | 30811243                | [G/C] |                    | INTERGENIC                          |                                          |
| #Ca_Kabuli_SNP220 | Ca_Kabuli_LG06 | 18938492                | [T/G] |                    | INTERGENIC                          |                                          |
| #Ca_Kabuli_SNP221 | scaffold1223   | 133489                  | [G/A] |                    | INTERGENIC                          |                                          |
| #Ca_Kabuli_SNP222 | Ca_Kabuli_LG04 | 3290298                 | [G/T] |                    | INTERGENIC                          |                                          |
| #Ca_Kabuli_SNP223 | Ca_Kabuli_LG08 | 6477772                 | [G/T] |                    | INTERGENIC                          |                                          |
| #Ca_Kabuli_SNP224 | Ca_Kabuli_LG02 | 26121519                | [T/G] | Ca_14315           | DOWNSTREAM:1871bases                | NAD-dependent epimerase/dehydratase      |
| #Ca_Kabuli_SNP225 | scaffold6212   | 402                     | [G/A] |                    | INTERGENIC                          |                                          |
| #Ca_Kabuli_SNP226 | scaffold586    | 90407                   | [A/T] |                    | INTERGENIC                          |                                          |
| #Ca_Kabuli_SNP227 | Ca_Kabuli_LG04 | 15926160                | [G/A] |                    | INTERGENIC                          |                                          |
| #Ca_Kabuli_SNP228 | scaffold402    | 404045                  | [T/A] |                    | INTERGENIC                          |                                          |
| #Ca_Kabuli_SNP229 | Ca_Kabuli_LG02 | 24048087                | [A/C] | Ca_21673           | INTRON                              | PUCc protein                             |
| #Ca_Kabuli_SNP230 | Ca_Kabuli_LG01 | 2306323                 | [C/T] |                    | INTERGENIC                          |                                          |
| #Ca_Kabuli_SNP231 | Ca_Kabuli_LG01 | 2306340                 | [T/C] |                    | INTERGENIC                          |                                          |
| #Ca_Kabuli_SNP232 | Ca_Kabuli_LG01 | 2252270                 | [C/T] | Ca_00281           | INTRON                              | Zinc finger, RING-type                   |
| #Ca_Kabuli_SNP233 | Ca_Kabuli_LG04 | 6411039                 | [G/A] |                    | INTERGENIC                          |                                          |
| #Ca_Kabuli_SNP234 | Ca_Kabuli_LG01 | 2290092                 | [A/G] | Ca_00287           | INTRON                              | --                                       |
| #Ca_Kabuli_SNP235 | Ca_Kabuli_LG07 | 40340134                | [C/T] |                    | INTERGENIC                          |                                          |
| #Ca_Kabuli_SNP236 | Ca_Kabuli_LG01 | 2883201                 | [G/A] |                    | INTERGENIC                          |                                          |
| #Ca_Kabuli_SNP237 | scaffold31     | 1052918                 | [T/G] |                    | INTERGENIC                          |                                          |
| #Ca_Kabuli_SNP238 | Ca_Kabuli_LG05 | 27000259                | [G/A] |                    | INTERGENIC                          |                                          |
| #Ca_Kabuli_SNP239 | Ca_Kabuli_LG05 | 31192391                | [A/T] |                    | INTERGENIC                          |                                          |
| #Ca_Kabuli_SNP240 | Ca_Kabuli_LG01 | 35260260                | [A/G] |                    | INTERGENIC                          |                                          |
| #Ca_Kabuli_SNP241 | Ca_Kabuli_LG07 | 28931222                | [T/A] |                    | INTERGENIC                          |                                          |
| #Ca_Kabuli_SNP242 | Ca_Kabuli_LG04 | 17275870                | [T/C] |                    | INTERGENIC                          |                                          |
| #Ca_Kabuli_SNP243 | Ca_Kabuli_LG04 | 16782993                | [C/A] | Ca_05447           | INTRON                              | Clathrin adaptor, mu subunit, C-terminal |
| #Ca_Kabuli_SNP244 | Ca_Kabuli_LG01 | 2305786                 | [A/T] | Ca_00288           | SYNONYMOUS_CODING                   | Ribonuclease Zc3h12a-like                |
| #Ca_Kabuli_SNP245 | Ca_Kabuli_LG01 | 2313615                 | [A/G] |                    | INTERGENIC                          |                                          |
| #Ca_Kabuli_SNP246 | Ca_Kabuli_LG04 | 36831273                | [C/T] | Ca_14805           | SYNONYMOUS_CODING                   | --                                       |

| SNP IDs           | Chromosomes    | Physical positions (bp) | SNPs  | Gene accession IDs | Sequence components of genome/genes | Putative functions                                      |
|-------------------|----------------|-------------------------|-------|--------------------|-------------------------------------|---------------------------------------------------------|
| #Ca_Kabuli_SNP247 | scaffold29     | 541373                  | [G/T] |                    | INTERGENIC                          |                                                         |
| #Ca_Kabuli_SNP248 | Ca_Kabuli_LG01 | 777273                  | [C/T] |                    | INTERGENIC                          |                                                         |
| #Ca_Kabuli_SNP249 | Ca_Kabuli_LG04 | 20161601                | [A/G] | Ca_17138           | SYNONYMOUS_CODING                   | BTB/POZ-like                                            |
| #Ca_Kabuli_SNP250 | Ca_Kabuli_LG08 | 7563373                 | [T/A] | Ca_10631           | DOWNSTREAM:1984bases                | Kinesin, motor domain                                   |
| #Ca_Kabuli_SNP251 | Ca_Kabuli_LG04 | 3429035                 | [G/A] | Ca_12144           | INTRON                              | Castor/Pollux ion channel                               |
| #Ca_Kabuli_SNP252 | Ca_Kabuli_LG06 | 21238138                | [A/C] | Ca_19881           | DOWNSTREAM:1730bases                | Protein kinase, catalytic domain                        |
| #Ca_Kabuli_SNP253 | Ca_Kabuli_LG04 | 22860656                | [C/A] |                    | INTERGENIC                          |                                                         |
| #Ca_Kabuli_SNP254 | Ca_Kabuli_LG01 | 2473309                 | [T/C] |                    | INTERGENIC                          |                                                         |
| #Ca_Kabuli_SNP255 | scaffold703    | 492398                  | [A/C] |                    | INTERGENIC                          |                                                         |
| #Ca_Kabuli_SNP256 | Ca_Kabuli_LG01 | 2305477                 | [C/T] | Ca_00288           | SYNONYMOUS_CODING                   | Ribonuclease Zc3h12a-like                               |
| #Ca_Kabuli_SNP257 | Ca_Kabuli_LG01 | 23149096                | [A/G] | Ca_22359           | NON_SYNONYMOUS_CODING               | Initiation factor 2B-related                            |
| #Ca_Kabuli_SNP258 | Ca_Kabuli_LG04 | 646567                  | [C/T] |                    | INTERGENIC                          |                                                         |
| #Ca_Kabuli_SNP259 | Ca_Kabuli_LG03 | 17056557                | [G/C] |                    | INTERGENIC                          |                                                         |
| #Ca_Kabuli_SNP260 | Ca_Kabuli_LG01 | 2305246                 | [T/G] | Ca_00288           | INTRON                              | Ribonuclease Zc3h12a-like                               |
| #Ca_Kabuli_SNP261 | Ca_Kabuli_LG01 | 2305216                 | [T/A] | Ca_00288           | INTRON                              | Ribonuclease Zc3h12a-like                               |
| #Ca_Kabuli_SNP262 | Ca_Kabuli_LG01 | 750693                  | [C/T] |                    | INTERGENIC                          |                                                         |
| #Ca_Kabuli_SNP263 | Ca_Kabuli_LG03 | 31790393                | [G/T] |                    | INTERGENIC                          |                                                         |
| #Ca_Kabuli_SNP264 | Ca_Kabuli_LG01 | 2439971                 | [G/A] |                    | INTERGENIC                          |                                                         |
| #Ca_Kabuli_SNP265 | Ca_Kabuli_LG01 | 2439915                 | [A/G] |                    | INTERGENIC                          |                                                         |
| #Ca_Kabuli_SNP266 | Ca_Kabuli_LG01 | 2439970                 | [C/A] |                    | INTERGENIC                          |                                                         |
| #Ca_Kabuli_SNP267 | Ca_Kabuli_LG01 | 2439917                 | [A/C] |                    | INTERGENIC                          |                                                         |
| #Ca_Kabuli_SNP268 | Ca_Kabuli_LG01 | 2439972                 | [A/C] |                    | INTERGENIC                          |                                                         |
| #Ca_Kabuli_SNP269 | Ca_Kabuli_LG03 | 39839997                | [G/T] | Ca_01370           | INTRON                              | ATPase, P-type, H <sup>+</sup> transporting proton pump |
| #Ca_Kabuli_SNP270 | Ca_Kabuli_LG06 | 24498895                | [C/A] |                    | INTERGENIC                          |                                                         |
| #Ca_Kabuli_SNP271 | Ca_Kabuli_LG04 | 37688124                | [G/T] |                    | INTERGENIC                          |                                                         |
| #Ca_Kabuli_SNP272 | Ca_Kabuli_LG04 | 37293773                | [T/A] |                    | INTERGENIC                          |                                                         |
| #Ca_Kabuli_SNP273 | Ca_Kabuli_LG01 | 2306002                 | [G/A] | Ca_00288           | SYNONYMOUS_CODING                   | Ribonuclease Zc3h12a-like                               |
| #Ca_Kabuli_SNP274 | Ca_Kabuli_LG01 | 2373480                 | [T/G] |                    | INTERGENIC                          |                                                         |
| #Ca_Kabuli_SNP275 | Ca_Kabuli_LG06 | 17027023                | [G/T] |                    | INTERGENIC                          |                                                         |
| #Ca_Kabuli_SNP276 | Ca_Kabuli_LG05 | 235820                  | [T/G] | Ca_18178           | SYNONYMOUS_CODING                   | Protein of unknown function DUF647                      |
| #Ca_Kabuli_SNP277 | Ca_Kabuli_LG03 | 31357732                | [G/C] | Ca_12235           | DOWNSTREAM:1713bases                | Cystathionine beta-synthase, core                       |

| SNP IDs           | Chromosomes    | Physical positions (bp) | SNPs  | Gene accession IDs | Sequence components of genome/genes | Putative functions                                |
|-------------------|----------------|-------------------------|-------|--------------------|-------------------------------------|---------------------------------------------------|
| #Ca_Kabuli_SNP278 | Ca_Kabuli_LG02 | 21159158                | [A/T] | Ca_24622           | DOWNSTREAM:730bases                 | --                                                |
| #Ca_Kabuli_SNP279 | Ca_Kabuli_LG03 | 18110539                | [C/A] |                    | INTERGENIC                          |                                                   |
| #Ca_Kabuli_SNP280 | scaffold31     | 1052983                 | [A/G] |                    | INTERGENIC                          |                                                   |
| #Ca_Kabuli_SNP281 | Ca_Kabuli_LG01 | 2042071                 | [C/G] |                    | INTERGENIC                          |                                                   |
| #Ca_Kabuli_SNP282 | Ca_Kabuli_LG04 | 42001659                | [G/A] |                    | INTERGENIC                          |                                                   |
| #Ca_Kabuli_SNP283 | Ca_Kabuli_LG04 | 38179583                | [A/C] |                    | INTERGENIC                          |                                                   |
| #Ca_Kabuli_SNP284 | Ca_Kabuli_LG01 | 40339065                | [T/C] | Ca_13893           | INTRON                              | Tetratricopeptide, MLP1/MLP2-like                 |
| #Ca_Kabuli_SNP285 | Ca_Kabuli_LG01 | 2082760                 | [C/G] | Ca_00265           | INTRON                              | Protein of unknown function DUF707                |
| #Ca_Kabuli_SNP286 | Ca_Kabuli_LG01 | 2053830                 | [A/G] | Ca_00260           | SYNONYMOUS_CODING                   | Disease resistance protein                        |
| #Ca_Kabuli_SNP287 | Ca_Kabuli_LG07 | 26149441                | [A/C] | Ca_23640           | INTRON                              | IQ motif, EF-hand binding site                    |
| #Ca_Kabuli_SNP288 | Ca_Kabuli_LG01 | 37892139                | [T/A] | Ca_23539           | DOWNSTREAM:1382bases                | Zinc finger, PHD-type                             |
| #Ca_Kabuli_SNP289 | Ca_Kabuli_LG01 | 2041027                 | [C/G] | Ca_00257           | DOWNSTREAM:1290bases                | --                                                |
| #Ca_Kabuli_SNP290 | Ca_Kabuli_LG01 | 2252473                 | [G/A] | Ca_00281           | INTRON                              | Zinc finger, RING-type                            |
| #Ca_Kabuli_SNP291 | Ca_Kabuli_LG03 | 30141557                | [T/G] |                    | INTERGENIC                          |                                                   |
| #Ca_Kabuli_SNP292 | Ca_Kabuli_LG07 | 1120977                 | [A/C] | Ca_03363           | SYNONYMOUS_CODING                   | Armadillo                                         |
| #Ca_Kabuli_SNP293 | Ca_Kabuli_LG06 | 17369736                | [A/C] | Ca_06352           | SYNONYMOUS_CODING                   | Transcriptional factor B3                         |
| #Ca_Kabuli_SNP294 | Ca_Kabuli_LG01 | 2083003                 | [G/C] | Ca_00265           | INTRON                              | Protein of unknown function DUF707                |
| #Ca_Kabuli_SNP295 | Ca_Kabuli_LG04 | 17913731                | [A/C] |                    | INTERGENIC                          |                                                   |
| #Ca_Kabuli_SNP296 | Ca_Kabuli_LG01 | 35260396                | [G/A] |                    | INTERGENIC                          |                                                   |
| #Ca_Kabuli_SNP297 | Ca_Kabuli_LG01 | 35260363                | [T/G] |                    | INTERGENIC                          |                                                   |
| #Ca_Kabuli_SNP298 | Ca_Kabuli_LG01 | 2044359                 | [C/T] | Ca_00259           | DOWNSTREAM:1791bases                | SCAMP                                             |
| #Ca_Kabuli_SNP299 | scaffold1729   | 33413                   | [T/A] |                    | INTERGENIC                          |                                                   |
| #Ca_Kabuli_SNP300 | scaffold402    | 390787                  | [A/C] |                    | INTERGENIC                          |                                                   |
| #Ca_Kabuli_SNP301 | Ca_Kabuli_LG05 | 39869389                | [A/C] | Ca_07512           | SYNONYMOUS_CODING                   | Xanthine/uracil/vitamin C permease                |
| #Ca_Kabuli_SNP302 | scaffold1419   | 535                     | [T/C] |                    | INTERGENIC                          |                                                   |
| #Ca_Kabuli_SNP303 | scaffold121    | 99116                   | [A/C] |                    | INTERGENIC                          |                                                   |
| #Ca_Kabuli_SNP304 | Ca_Kabuli_LG02 | 8802121                 | [T/C] |                    | INTERGENIC                          |                                                   |
| #Ca_Kabuli_SNP305 | Ca_Kabuli_LG04 | 4097989                 | [G/A] |                    | INTERGENIC                          |                                                   |
| #Ca_Kabuli_SNP306 | Ca_Kabuli_LG01 | 43543945                | [A/C] | Ca_13568           | SYNONYMOUS_CODING                   | Translation elongation factor EFG/EF2, C-terminal |
| #Ca_Kabuli_SNP307 | scaffold832    | 33582                   | [T/A] |                    | INTERGENIC                          |                                                   |
| #Ca_Kabuli_SNP308 | scaffold307    | 215949                  | [A/C] |                    | INTERGENIC                          |                                                   |

| SNP IDs           | Chromosomes    | Physical positions (bp) | SNPs  | Gene accession IDs | Sequence components of genome/genes | Putative functions                                       |
|-------------------|----------------|-------------------------|-------|--------------------|-------------------------------------|----------------------------------------------------------|
| #Ca_Kabuli_SNP309 | Ca_Kabuli_LG01 | 1528325                 | [A/G] | Ca_00185           | INTRON                              | Inorganic pyrophosphatase                                |
| #Ca_Kabuli_SNP310 | Ca_Kabuli_LG04 | 44906255                | [A/G] |                    | INTERGENIC                          |                                                          |
| #Ca_Kabuli_SNP311 | Ca_Kabuli_LG02 | 30928725                | [A/G] | Ca_12470           | INTRON                              | Clathrin, heavy chain/VPS, 7-fold repeat                 |
| #Ca_Kabuli_SNP312 | Ca_Kabuli_LG04 | 42246458                | [C/T] |                    | INTERGENIC                          |                                                          |
| #Ca_Kabuli_SNP313 | scaffold31     | 1052920                 | [T/C] |                    | INTERGENIC                          |                                                          |
| #Ca_Kabuli_SNP314 | Ca_Kabuli_LG03 | 26322681                | [T/G] |                    | INTERGENIC                          |                                                          |
| #Ca_Kabuli_SNP315 | Ca_Kabuli_LG08 | 875236                  | [T/G] | Ca_11831           | INTRON                              | Peptidase M16, C-terminal                                |
| #Ca_Kabuli_SNP316 | Ca_Kabuli_LG01 | 2075015                 | [A/G] | Ca_00263           | DOWNSTREAM:1039bases                | Disease resistance protein                               |
| #Ca_Kabuli_SNP317 | Ca_Kabuli_LG01 | 6268630                 | [A/G] |                    | INTERGENIC                          |                                                          |
| #Ca_Kabuli_SNP318 | Ca_Kabuli_LG04 | 3427522                 | [G/T] | Ca_12144           | INTRON                              | Castor/Pollux ion channel                                |
| #Ca_Kabuli_SNP319 | Ca_Kabuli_LG01 | 6296986                 | [A/C] | Ca_07890           | INTRON                              | Uncharacterised protein family UPF0497, trans-membrane p |
| #Ca_Kabuli_SNP320 | Ca_Kabuli_LG02 | 25249615                | [T/G] |                    | INTERGENIC                          |                                                          |
| #Ca_Kabuli_SNP321 | Ca_Kabuli_LG03 | 27633010                | [T/A] | Ca_08144           | INTRON                              | Myb, DNA-binding                                         |
| #Ca_Kabuli_SNP322 | Ca_Kabuli_LG01 | 6257582                 | [T/C] |                    | INTERGENIC                          |                                                          |
| #Ca_Kabuli_SNP323 | Ca_Kabuli_LG04 | 4245016                 | [G/C] | Ca_03833           | SYNONYMOUS_CODING                   | Lipid-binding START                                      |
| #Ca_Kabuli_SNP324 | Ca_Kabuli_LG01 | 6224010                 | [G/C] |                    | INTERGENIC                          |                                                          |
| #Ca_Kabuli_SNP325 | Ca_Kabuli_LG01 | 6224015                 | [T/C] |                    | INTERGENIC                          |                                                          |
| #Ca_Kabuli_SNP326 | Ca_Kabuli_LG07 | 33912902                | [A/T] |                    | INTERGENIC                          |                                                          |
| #Ca_Kabuli_SNP327 | Ca_Kabuli_LG07 | 30691318                | [A/C] | Ca_23327           | NON_SYNONYMOUS_CODING               | Crotonase, core                                          |
| #Ca_Kabuli_SNP328 | Ca_Kabuli_LG01 | 6435499                 | [C/T] | Ca_07907           | INTRON                              | NUDIX hydrolase domain                                   |
| #Ca_Kabuli_SNP329 | Ca_Kabuli_LG08 | 11332970                | [T/A] |                    | INTERGENIC                          |                                                          |
| #Ca_Kabuli_SNP330 | scaffold35     | 39438                   | [C/A] |                    | INTERGENIC                          |                                                          |
| #Ca_Kabuli_SNP331 | Ca_Kabuli_LG01 | 6391016                 | [A/G] | Ca_07902           | SYNONYMOUS_CODING                   | Smr protein/MutS2 C-terminal                             |
| #Ca_Kabuli_SNP332 | Ca_Kabuli_LG02 | 19901593                | [G/A] |                    | INTERGENIC                          |                                                          |
| #Ca_Kabuli_SNP333 | Ca_Kabuli_LG01 | 6437643                 | [A/G] |                    | INTERGENIC                          |                                                          |
| #Ca_Kabuli_SNP334 | Ca_Kabuli_LG01 | 6315397                 | [G/C] | Ca_07892           | INTRON                              | Zinc finger, ZZ-type                                     |
| #Ca_Kabuli_SNP335 | Ca_Kabuli_LG01 | 6433592                 | [G/T] | Ca_07907           | DOWNSTREAM:177bases                 | NUDIX hydrolase domain                                   |
| #Ca_Kabuli_SNP336 | Ca_Kabuli_LG01 | 6435331                 | [T/C] | Ca_07907           | INTRON                              | NUDIX hydrolase domain                                   |
| #Ca_Kabuli_SNP337 | Ca_Kabuli_LG01 | 6435319                 | [T/C] | Ca_07907           | INTRON                              | NUDIX hydrolase domain                                   |
| #Ca_Kabuli_SNP338 | Ca_Kabuli_LG05 | 9127099                 | [A/C] | Ca_19964           | NON_SYNONYMOUS_CODING               | Protein kinase, catalytic domain                         |
| #Ca_Kabuli_SNP339 | Ca_Kabuli_LG08 | 9383023                 | [C/A] | Ca_11559           | NON_SYNONYMOUS_CODING               | Initiation factor 2B-related                             |

| SNP IDs           | Chromosomes    | Physical positions (bp) | SNPs  | Gene accession IDs | Sequence components of genome/genes | Putative functions                                     |
|-------------------|----------------|-------------------------|-------|--------------------|-------------------------------------|--------------------------------------------------------|
| #Ca_Kabuli_SNP340 | Ca_Kabuli_LG05 | 28721383                | [A/C] |                    | INTERGENIC                          |                                                        |
| #Ca_Kabuli_SNP341 | Ca_Kabuli_LG01 | 6329847                 | [G/A] | Ca_07893           | SYNONYMOUS_CODING                   | Bromo adjacent homology (BAH) domain                   |
| #Ca_Kabuli_SNP342 | Ca_Kabuli_LG01 | 6257712                 | [T/A] |                    | INTERGENIC                          |                                                        |
| #Ca_Kabuli_SNP343 | Ca_Kabuli_LG05 | 26999390                | [A/C] |                    | INTERGENIC                          |                                                        |
| #Ca_Kabuli_SNP344 | Ca_Kabuli_LG01 | 41437430                | [A/C] | Ca_23118           | INTRON                              | Protein kinase, catalytic domain                       |
| #Ca_Kabuli_SNP345 | Ca_Kabuli_LG02 | 36046593                | [A/T] |                    | INTERGENIC                          |                                                        |
| #Ca_Kabuli_SNP346 | Ca_Kabuli_LG07 | 33762053                | [A/T] |                    | INTERGENIC                          |                                                        |
| #Ca_Kabuli_SNP347 | Ca_Kabuli_LG01 | 9097885                 | [G/T] |                    | INTERGENIC                          |                                                        |
| #Ca_Kabuli_SNP348 | Ca_Kabuli_LG05 | 29437146                | [G/T] | Ca_16634           | DOWNSTREAM:1059bases                | Integrase, catalytic core                              |
| #Ca_Kabuli_SNP349 | Ca_Kabuli_LG02 | 35441180                | [A/T] |                    | INTERGENIC                          |                                                        |
| #Ca_Kabuli_SNP350 | Ca_Kabuli_LG05 | 37207850                | [T/C] | Ca_01496           | NON_SYNONYMOUS_CODING               | Peptidase C19, ubiquitin carboxyl-terminal hydrolase 2 |
| #Ca_Kabuli_SNP351 | Ca_Kabuli_LG02 | 32096192                | [T/G] |                    | INTERGENIC                          |                                                        |
| #Ca_Kabuli_SNP352 | Ca_Kabuli_LG07 | 33912899                | [A/G] |                    | INTERGENIC                          |                                                        |
| #Ca_Kabuli_SNP353 | Ca_Kabuli_LG01 | 37732150                | [A/C] |                    | INTERGENIC                          |                                                        |
| #Ca_Kabuli_SNP354 | Ca_Kabuli_LG05 | 27555713                | [A/G] | Ca_08899           | NON_SYNONYMOUS_CODING               | --                                                     |
| #Ca_Kabuli_SNP355 | Ca_Kabuli_LG01 | 10715409                | [A/G] |                    | INTERGENIC                          |                                                        |
| #Ca_Kabuli_SNP356 | Ca_Kabuli_LG01 | 9097878                 | [A/G] |                    | INTERGENIC                          |                                                        |
| #Ca_Kabuli_SNP357 | Ca_Kabuli_LG01 | 37862342                | [A/G] | Ca_23539           | SYNONYMOUS_CODING                   | Zinc finger, PHD-type                                  |
| #Ca_Kabuli_SNP358 | Ca_Kabuli_LG01 | 37864681                | [T/C] | Ca_23539           | SYNONYMOUS_CODING                   | Zinc finger, PHD-type                                  |
| #Ca_Kabuli_SNP359 | scaffold35     | 39470                   | [G/A] |                    | INTERGENIC                          |                                                        |
| #Ca_Kabuli_SNP360 | Ca_Kabuli_LG05 | 34244775                | [A/T] | Ca_01824           | INTRON                              | WD40 repeat                                            |
| #Ca_Kabuli_SNP361 | Ca_Kabuli_LG06 | 39382231                | [A/T] |                    | INTERGENIC                          |                                                        |
| #Ca_Kabuli_SNP362 | scaffold948    | 871634                  | [C/T] |                    | INTERGENIC                          |                                                        |
| #Ca_Kabuli_SNP363 | Ca_Kabuli_LG06 | 13131578                | [A/T] | Ca_05086           | NON_SYNONYMOUS_CODING               | Cyclic nucleotide-binding domain                       |
| #Ca_Kabuli_SNP364 | scaffold948    | 1265638                 | [G/A] |                    | INTERGENIC                          |                                                        |
| #Ca_Kabuli_SNP365 | Ca_Kabuli_LG05 | 22116961                | [C/T] |                    | INTERGENIC                          |                                                        |
| #Ca_Kabuli_SNP366 | scaffold617    | 26108                   | [G/A] |                    | INTERGENIC                          |                                                        |
| #Ca_Kabuli_SNP367 | Ca_Kabuli_LG04 | 44472237                | [T/G] | Ca_09120           | NON_SYNONYMOUS_CODING               | Protein of unknown function DUF1351                    |
| #Ca_Kabuli_SNP368 | Ca_Kabuli_LG05 | 43790694                | [A/T] |                    | INTERGENIC                          |                                                        |
| #Ca_Kabuli_SNP369 | scaffold7122   | 6261                    | [T/A] |                    | INTERGENIC                          |                                                        |
| #Ca_Kabuli_SNP370 | scaffold5127   | 9558                    | [G/A] |                    | INTERGENIC                          |                                                        |

| SNP IDs           | Chromosomes    | Physical positions (bp) | SNPs  | Gene accession IDs | Sequence components of genome/genes | Putative functions                                 |
|-------------------|----------------|-------------------------|-------|--------------------|-------------------------------------|----------------------------------------------------|
| #Ca_Kabuli_SNP371 | Ca_Kabuli_LG01 | 31535331                | [A/G] | Ca_21865           | INTRON                              | Peptidase S49                                      |
| #Ca_Kabuli_SNP372 | Ca_Kabuli_LG04 | 44832121                | [C/T] | Ca_09147           | DOWNSTREAM:1635bases                | Dilute                                             |
| #Ca_Kabuli_SNP373 | Ca_Kabuli_LG03 | 21687959                | [C/T] | Ca_09523           | NON_SYNONYMOUS_CODING               | Aminoacyl-tRNA synthetase, class II (D/K/N)        |
| #Ca_Kabuli_SNP374 | Ca_Kabuli_LG04 | 28246771                | [A/C] |                    | INTERGENIC                          |                                                    |
| #Ca_Kabuli_SNP375 | Ca_Kabuli_LG02 | 36323606                | [C/A] |                    | INTERGENIC                          |                                                    |
| #Ca_Kabuli_SNP376 | Ca_Kabuli_LG06 | 23478806                | [G/A] |                    | INTERGENIC                          |                                                    |
| #Ca_Kabuli_SNP377 | Ca_Kabuli_LG05 | 24090523                | [G/T] | Ca_17656           | DOWNSTREAM:808bases                 | Protein of unknown function DUF3437                |
| #Ca_Kabuli_SNP378 | Ca_Kabuli_LG04 | 44824105                | [A/G] |                    | INTERGENIC                          |                                                    |
| #Ca_Kabuli_SNP379 | Ca_Kabuli_LG06 | 27710496                | [T/G] | Ca_14588           | NON_SYNONYMOUS_CODING               | Preprotein translocase Sec, Sec61-beta subunit     |
| #Ca_Kabuli_SNP380 | Ca_Kabuli_LG02 | 22104801                | [C/T] | Ca_15010           | DOWNSTREAM:1358bases                | Transposase, Ptta/En/Spm, plant                    |
| #Ca_Kabuli_SNP381 | Ca_Kabuli_LG04 | 36537074                | [A/T] | Ca_14825           | NON_SYNONYMOUS_CODING               | Transcriptional factor B3                          |
| #Ca_Kabuli_SNP382 | Ca_Kabuli_LG05 | 7467768                 | [T/C] |                    | INTERGENIC                          |                                                    |
| #Ca_Kabuli_SNP383 | Ca_Kabuli_LG04 | 45035589                | [A/G] | Ca_09166           | DOWNSTREAM:1090bases                | Zinc/iron permease                                 |
| #Ca_Kabuli_SNP384 | Ca_Kabuli_LG04 | 40805740                | [T/G] | Ca_23902           | NON_SYNONYMOUS_CODING               | DNA-directed DNA polymerase, family A, palm domain |
| #Ca_Kabuli_SNP385 | Ca_Kabuli_LG08 | 4172368                 | [A/C] | Ca_02150           | SYNONYMOUS_CODING                   | Forkhead-associated (FHA) domain                   |
| #Ca_Kabuli_SNP386 | Ca_Kabuli_LG07 | 7756487                 | [A/C] | Ca_13243           | SYNONYMOUS_CODING                   | SNF2-related                                       |
| #Ca_Kabuli_SNP387 | Ca_Kabuli_LG05 | 7775298                 | [T/G] |                    | INTERGENIC                          |                                                    |
| #Ca_Kabuli_SNP388 | Ca_Kabuli_LG04 | 2032773                 | [T/A] |                    | INTERGENIC                          |                                                    |
| #Ca_Kabuli_SNP389 | Ca_Kabuli_LG02 | 23910254                | [C/T] |                    | INTERGENIC                          |                                                    |
| #Ca_Kabuli_SNP390 | Ca_Kabuli_LG07 | 16936139                | [T/A] | Ca_15885           | NON_SYNONYMOUS_CODING               | H/ACA ribonucleoprotein complex, subunit Nop10     |
| #Ca_Kabuli_SNP391 | Ca_Kabuli_LG04 | 45152327                | [T/A] | Ca_09178           | SYNONYMOUS_CODING                   | Histone deacetylase superfamily                    |
| #Ca_Kabuli_SNP392 | Ca_Kabuli_LG07 | 10649594                | [A/T] | Ca_12822           | NON_SYNONYMOUS_CODING               | Dynamin central domain                             |
| #Ca_Kabuli_SNP393 | Ca_Kabuli_LG04 | 45204033                | [C/T] | Ca_09182           | INTRON                              | Cation/H+ exchanger                                |
| #Ca_Kabuli_SNP394 | Ca_Kabuli_LG04 | 39086269                | [C/T] | Ca_13074           | DOWNSTREAM:904bases                 | Cyclic nucleotide-binding domain                   |
| #Ca_Kabuli_SNP395 | scaffold1997   | 101448                  | [A/T] |                    | INTERGENIC                          |                                                    |
| #Ca_Kabuli_SNP396 | Ca_Kabuli_LG07 | 16936124                | [A/C] | Ca_15885           | NON_SYNONYMOUS_CODING               | H/ACA ribonucleoprotein complex, subunit Nop10     |
| #Ca_Kabuli_SNP397 | Ca_Kabuli_LG04 | 36977253                | [T/G] |                    | INTERGENIC                          |                                                    |
| #Ca_Kabuli_SNP398 | Ca_Kabuli_LG04 | 37316713                | [T/A] | Ca_15144           | NON_SYNONYMOUS_CODING               | Zinc finger, RING-type                             |
| #Ca_Kabuli_SNP399 | Ca_Kabuli_LG04 | 38756510                | [A/G] | Ca_13097           | NON_SYNONYMOUS_CODING               | Auxin efflux carrier                               |
| #Ca_Kabuli_SNP400 | Ca_Kabuli_LG04 | 38008205                | [A/C] |                    | INTERGENIC                          |                                                    |
| #Ca_Kabuli_SNP401 | Ca_Kabuli_LG04 | 37630404                | [G/T] |                    | INTERGENIC                          |                                                    |



| SNP IDs           | Chromosomes    | Physical positions (bp) | SNPs  | Gene accession IDs | Sequence components of genome/genes | Putative functions                                          |
|-------------------|----------------|-------------------------|-------|--------------------|-------------------------------------|-------------------------------------------------------------|
| #Ca_Kabuli_SNP402 | scaffold99     | 213404                  | [A/G] |                    | INTERGENIC                          |                                                             |
| #Ca_Kabuli_SNP403 | scaffold637    | 11776                   | [G/A] |                    | INTERGENIC                          |                                                             |
| #Ca_Kabuli_SNP404 | scaffold99     | 100228                  | [A/C] |                    | INTERGENIC                          |                                                             |
| #Ca_Kabuli_SNP405 | Ca_Kabuli_LG06 | 5396888                 | [C/A] |                    | INTERGENIC                          |                                                             |
| #Ca_Kabuli_SNP406 | Ca_Kabuli_LG04 | 14132752                | [A/G] |                    | INTERGENIC                          |                                                             |
| #Ca_Kabuli_SNP407 | scaffold29     | 520311                  | [G/T] |                    | INTERGENIC                          |                                                             |
| #Ca_Kabuli_SNP408 | Ca_Kabuli_LG04 | 32853838                | [T/C] | Ca_15495           | INTRON                              | DNA topoisomerase I, C-terminal                             |
| #Ca_Kabuli_SNP409 | scaffold1997   | 82417                   | [T/G] |                    | INTERGENIC                          |                                                             |
| #Ca_Kabuli_SNP410 | Ca_Kabuli_LG04 | 30668893                | [C/T] | Ca_14210           | DOWNSTREAM:530bases                 | CARP motif                                                  |
| #Ca_Kabuli_SNP411 | Ca_Kabuli_LG07 | 16881                   | [G/A] |                    | INTERGENIC                          |                                                             |
| #Ca_Kabuli_SNP412 | scaffold240    | 54627                   | [A/T] |                    | INTERGENIC                          |                                                             |
| #Ca_Kabuli_SNP413 | Ca_Kabuli_LG04 | 31224001                | [C/A] |                    | INTERGENIC                          |                                                             |
| #Ca_Kabuli_SNP414 | scaffold1023   | 74434                   | [G/A] |                    | INTERGENIC                          |                                                             |
| #Ca_Kabuli_SNP415 | Ca_Kabuli_LG06 | 9341277                 | [T/C] | Ca_08666           | SYNONYMOUS_CODING                   | AIG1                                                        |
| #Ca_Kabuli_SNP416 | Ca_Kabuli_LG02 | 24511121                | [G/A] |                    | INTERGENIC                          |                                                             |
| #Ca_Kabuli_SNP417 | Ca_Kabuli_LG08 | 3499013                 | [G/A] | Ca_02229           | INTRON                              | Ras GTPase                                                  |
| #Ca_Kabuli_SNP418 | Ca_Kabuli_LG01 | 11277884                | [T/C] |                    | INTERGENIC                          |                                                             |
| #Ca_Kabuli_SNP419 | Ca_Kabuli_LG04 | 37806689                | [A/G] | Ca_15095           | DOWNSTREAM:399bases                 | NUDIX hydrolase domain                                      |
| #Ca_Kabuli_SNP420 | Ca_Kabuli_LG04 | 38039289                | [C/G] | Ca_13141           | INTRON                              | Protein of unknown function DUF3326                         |
| #Ca_Kabuli_SNP421 | Ca_Kabuli_LG04 | 16926515                | [T/A] | Ca_05430           | SYNONYMOUS_CODING                   | Zinc finger, C2H2-type                                      |
| #Ca_Kabuli_SNP422 | Ca_Kabuli_LG04 | 38194159                | [A/G] | Ca_13134           | SYNONYMOUS_CODING                   | Domain of unknown function DUF250                           |
| #Ca_Kabuli_SNP423 | Ca_Kabuli_LG04 | 38289052                | [A/C] | Ca_13128           | NON_SYNONYMOUS_CODING               | Protein of unknown function DUF869, plant                   |
| #Ca_Kabuli_SNP424 | Ca_Kabuli_LG04 | 37349212                | [A/G] | Ca_15141           | SYNONYMOUS_CODING                   | Methyltransferase TRM13                                     |
| #Ca_Kabuli_SNP425 | Ca_Kabuli_LG04 | 33276089                | [A/C] | Ca_24020           | DOWNSTREAM:433bases                 | Putative esterase                                           |
| #Ca_Kabuli_SNP426 | Ca_Kabuli_LG04 | 39033838                | [G/C] | Ca_13078           | INTRON                              | RNA recognition motif domain                                |
| #Ca_Kabuli_SNP427 | Ca_Kabuli_LG04 | 30334005                | [T/C] |                    | INTERGENIC                          |                                                             |
| #Ca_Kabuli_SNP428 | Ca_Kabuli_LG07 | 1293601                 | [T/A] | Ca_03339           | SYNONYMOUS_CODING                   | Protein kinase, catalytic domain                            |
| #Ca_Kabuli_SNP429 | scaffold256    | 441609                  | [T/A] |                    | INTERGENIC                          |                                                             |
| #Ca_Kabuli_SNP430 | Ca_Kabuli_LG04 | 20905105                | [A/G] | Ca_19045           | INTRON                              | Serine/threonine dehydratase, pyridoxal-phosphate-binding s |
| #Ca_Kabuli_SNP431 | Ca_Kabuli_LG04 | 18171522                | [G/T] | Ca_18655           | SYNONYMOUS_CODING                   | Domain of unknown function DUF1115                          |
| #Ca_Kabuli_SNP432 | Ca_Kabuli_LG04 | 15934607                | [G/C] | Ca_05513           | INTRON                              | Beta-lactamase-like                                         |

| SNP IDs           | Chromosomes    | Physical positions (bp) | SNPs  | Gene accession IDs | Sequence components of genome/genes | Putative functions                                             |
|-------------------|----------------|-------------------------|-------|--------------------|-------------------------------------|----------------------------------------------------------------|
| #Ca_Kabuli_SNP433 | Ca_Kabuli_LG02 | 27056855                | [G/A] | Ca_15636           | SYNONYMOUS_CODING                   | DNA topoisomerase I, C-terminal                                |
| #Ca_Kabuli_SNP434 | Ca_Kabuli_LG04 | 16046928                | [A/G] | Ca_05504           | NON_SYNONYMOUS_CODING               | Glutamyl/glutaminyl-tRNA synthetase, class Ic                  |
| #Ca_Kabuli_SNP435 | Ca_Kabuli_LG04 | 16149998                | [G/C] |                    | INTERGENIC                          |                                                                |
| #Ca_Kabuli_SNP436 | Ca_Kabuli_LG04 | 15957070                | [G/T] | Ca_05511           | DOWNSTREAM:28bases                  | Zinc finger, C2H2-type                                         |
| #Ca_Kabuli_SNP437 | Ca_Kabuli_LG07 | 122600                  | [G/A] | Ca_20232           | SYNONYMOUS_CODING                   | Myosin II heavy chain-like                                     |
| #Ca_Kabuli_SNP438 | scaffold1830   | 37063                   | [T/C] |                    | INTERGENIC                          |                                                                |
| #Ca_Kabuli_SNP439 | Ca_Kabuli_LG04 | 44814982                | [G/T] | Ca_09146           | INTRON                              | IQ motif, EF-hand binding site                                 |
| #Ca_Kabuli_SNP440 | Ca_Kabuli_LG07 | 29190643                | [G/A] | Ca_11786           | NON_SYNONYMOUS_CODING               | Glutamyl/glutaminyl-tRNA synthetase, class Ic                  |
| #Ca_Kabuli_SNP441 | Ca_Kabuli_LG07 | 3521257                 | [T/C] | Ca_03116           | INTRON                              | Synaptojanin, N-terminal                                       |
| #Ca_Kabuli_SNP442 | Ca_Kabuli_LG04 | 45104767                | [A/T] |                    | INTERGENIC                          |                                                                |
| #Ca_Kabuli_SNP443 | Ca_Kabuli_LG04 | 45022634                | [T/G] | Ca_09165           | INTRON                              | Mrp, conserved site                                            |
| #Ca_Kabuli_SNP444 | Ca_Kabuli_LG04 | 45220916                | [A/C] | Ca_09184           | NON_SYNONYMOUS_CODING               | K Homology                                                     |
| #Ca_Kabuli_SNP445 | Ca_Kabuli_LG07 | 5467645                 | [T/G] |                    | INTERGENIC                          |                                                                |
| #Ca_Kabuli_SNP446 | Ca_Kabuli_LG07 | 5560122                 | [C/A] |                    | INTERGENIC                          |                                                                |
| #Ca_Kabuli_SNP447 | Ca_Kabuli_LG07 | 6069979                 | [G/T] | Ca_06752           | INTRON                              | Phox/Bem1p                                                     |
| #Ca_Kabuli_SNP448 | Ca_Kabuli_LG07 | 5678992                 | [C/G] | Ca_06789           | INTRON                              | RNA polymerase I specific transcription initiation factor RRN3 |
| #Ca_Kabuli_SNP449 | Ca_Kabuli_LG07 | 6110019                 | [A/T] |                    | INTERGENIC                          |                                                                |
| #Ca_Kabuli_SNP450 | Ca_Kabuli_LG07 | 5406524                 | [A/C] |                    | INTERGENIC                          |                                                                |
| #Ca_Kabuli_SNP451 | Ca_Kabuli_LG07 | 5802607                 | [A/T] | Ca_06778           | SYNONYMOUS_CODING                   | RNA recognition motif domain                                   |
| #Ca_Kabuli_SNP452 | Ca_Kabuli_LG07 | 5504454                 | [A/G] | Ca_06816           | INTRON                              | SNF2-related                                                   |
| #Ca_Kabuli_SNP453 | Ca_Kabuli_LG07 | 5846477                 | [T/C] |                    | INTERGENIC                          |                                                                |
| #Ca_Kabuli_SNP454 | Ca_Kabuli_LG04 | 45136480                | [C/A] |                    | INTERGENIC                          |                                                                |
| #Ca_Kabuli_SNP455 | Ca_Kabuli_LG07 | 5554841                 | [A/C] | Ca_06808           | SYNONYMOUS_CODING                   | Inosine/uridine-preferring nucleoside hydrolase domain         |
| #Ca_Kabuli_SNP456 | Ca_Kabuli_LG07 | 5554807                 | [G/C] | Ca_06808           | SYNONYMOUS_CODING                   | Inosine/uridine-preferring nucleoside hydrolase domain         |
| #Ca_Kabuli_SNP457 | Ca_Kabuli_LG07 | 5466193                 | [G/A] | Ca_06821           | DOWNSTREAM:1109bases                | Uncharacterised protein family UPF0497, trans-membrane p       |
| #Ca_Kabuli_SNP458 | Ca_Kabuli_LG07 | 5957696                 | [T/G] | Ca_06761           | INTRON                              | Ribonuclease III                                               |
| #Ca_Kabuli_SNP459 | Ca_Kabuli_LG07 | 5467744                 | [A/C] |                    | INTERGENIC                          |                                                                |
| #Ca_Kabuli_SNP460 | Ca_Kabuli_LG07 | 5631304                 | [C/T] |                    | INTERGENIC                          |                                                                |
| #Ca_Kabuli_SNP461 | Ca_Kabuli_LG07 | 6096238                 | [C/T] |                    | INTERGENIC                          |                                                                |
| #Ca_Kabuli_SNP462 | Ca_Kabuli_LG07 | 5577258                 | [G/T] |                    | INTERGENIC                          |                                                                |
| #Ca_Kabuli_SNP463 | Ca_Kabuli_LG04 | 44803694                | [C/T] | Ca_09145           | INTRON                              | Phosphoribosyltransferase C-terminal                           |

| SNP IDs           | Chromosomes    | Physical positions (bp) | SNPs  | Gene accession IDs | Sequence components of genome/genes | Putative functions                                     |
|-------------------|----------------|-------------------------|-------|--------------------|-------------------------------------|--------------------------------------------------------|
| #Ca_Kabuli_SNP464 | Ca_Kabuli_LG07 | 5383671                 | [T/C] | Ca_06832           | DOWNSTREAM:1039bases                | Pentatricopeptide repeat                               |
| #Ca_Kabuli_SNP465 | Ca_Kabuli_LG07 | 5383767                 | [A/C] |                    | INTERGENIC                          |                                                        |
| #Ca_Kabuli_SNP466 | Ca_Kabuli_LG04 | 44871469                | [A/C] | Ca_09151           | SYNONYMOUS_CODING                   | Methyltransferase type 12                              |
| #Ca_Kabuli_SNP467 | Ca_Kabuli_LG04 | 44871398                | [G/T] | Ca_09151           | NON_SYNONYMOUS_CODING               | Methyltransferase type 12                              |
| #Ca_Kabuli_SNP468 | Ca_Kabuli_LG04 | 44431501                | [C/G] | Ca_09114           | INTRON                              | Peptidase C19, ubiquitin carboxyl-terminal hydrolase 2 |
| #Ca_Kabuli_SNP469 | Ca_Kabuli_LG07 | 5836421                 | [T/G] | Ca_06776           | DOWNSTREAM:240bases                 | Protein of unknown function DUF1749                    |
| #Ca_Kabuli_SNP470 | Ca_Kabuli_LG07 | 5713977                 | [T/G] | Ca_06787           | DOWNSTREAM:1043bases                | Copper amine oxidase                                   |
| #Ca_Kabuli_SNP471 | Ca_Kabuli_LG07 | 5529888                 | [C/G] |                    | INTERGENIC                          |                                                        |
| #Ca_Kabuli_SNP472 | Ca_Kabuli_LG07 | 5951374                 | [A/C] |                    | INTERGENIC                          |                                                        |
| #Ca_Kabuli_SNP473 | Ca_Kabuli_LG07 | 4625723                 | [A/C] |                    | INTERGENIC                          |                                                        |
| #Ca_Kabuli_SNP474 | Ca_Kabuli_LG07 | 4884236                 | [T/A] |                    | INTERGENIC                          |                                                        |
| #Ca_Kabuli_SNP475 | scaffold673    | 97310                   | [G/T] |                    | INTERGENIC                          |                                                        |
| #Ca_Kabuli_SNP476 | Ca_Kabuli_LG07 | 5714130                 | [A/T] | Ca_06787           | DOWNSTREAM:1196bases                | Copper amine oxidase                                   |
| #Ca_Kabuli_SNP477 | Ca_Kabuli_LG07 | 7462028                 | [C/T] | Ca_06613           | SYNONYMOUS_CODING                   | Histone deacetylase superfamily                        |
| #Ca_Kabuli_SNP478 | Ca_Kabuli_LG07 | 5774329                 | [T/G] | Ca_06781           | INTRON                              | Dienelactone hydrolase                                 |
| #Ca_Kabuli_SNP479 | Ca_Kabuli_LG07 | 5774325                 | [A/T] | Ca_06781           | INTRON                              | Dienelactone hydrolase                                 |
| #Ca_Kabuli_SNP480 | Ca_Kabuli_LG07 | 5774328                 | [G/A] | Ca_06781           | INTRON                              | Dienelactone hydrolase                                 |
| #Ca_Kabuli_SNP481 | Ca_Kabuli_LG07 | 5774327                 | [T/C] | Ca_06781           | INTRON                              | Dienelactone hydrolase                                 |
| #Ca_Kabuli_SNP482 | Ca_Kabuli_LG07 | 5537851                 | [C/A] |                    | INTERGENIC                          |                                                        |
| #Ca_Kabuli_SNP483 | Ca_Kabuli_LG07 | 5537880                 | [T/G] |                    | INTERGENIC                          |                                                        |
| #Ca_Kabuli_SNP484 | Ca_Kabuli_LG07 | 5577321                 | [G/T] | Ca_06805           | SYNONYMOUS_CODING                   | F-box domain, cyclin-like                              |
| #Ca_Kabuli_SNP485 | Ca_Kabuli_LG07 | 5672156                 | [A/G] | Ca_06790           | DOWNSTREAM:1284bases                | F-box domain, cyclin-like                              |
| #Ca_Kabuli_SNP486 | Ca_Kabuli_LG04 | 23195447                | [G/T] | Ca_14451           | INTRON                              | Helicase, C-terminal                                   |
| #Ca_Kabuli_SNP487 | Ca_Kabuli_LG07 | 5521659                 | [A/T] | Ca_06814           | SYNONYMOUS_CODING                   | Heat shock protein DnaJ, N-terminal                    |
| #Ca_Kabuli_SNP488 | Ca_Kabuli_LG07 | 5756269                 | [A/G] |                    | INTERGENIC                          |                                                        |
| #Ca_Kabuli_SNP489 | Ca_Kabuli_LG07 | 5383695                 | [C/G] | Ca_06832           | DOWNSTREAM:1015bases                | Pentatricopeptide repeat                               |
| #Ca_Kabuli_SNP490 | Ca_Kabuli_LG07 | 5946536                 | [C/T] |                    | INTERGENIC                          |                                                        |
| #Ca_Kabuli_SNP491 | Ca_Kabuli_LG07 | 5950352                 | [T/G] |                    | INTERGENIC                          |                                                        |
| #Ca_Kabuli_SNP492 | Ca_Kabuli_LG04 | 39033052                | [G/A] | Ca_13078           | INTRON                              | RNA recognition motif domain                           |
| #Ca_Kabuli_SNP493 | Ca_Kabuli_LG07 | 5854575                 | [C/G] |                    | INTERGENIC                          |                                                        |
| #Ca_Kabuli_SNP494 | Ca_Kabuli_LG07 | 5854598                 | [T/G] |                    | INTERGENIC                          |                                                        |

| SNP IDs           | Chromosomes    | Physical positions (bp) | SNPs  | Gene accession IDs | Sequence components of genome/genes | Putative functions                                    |
|-------------------|----------------|-------------------------|-------|--------------------|-------------------------------------|-------------------------------------------------------|
| #Ca_Kabuli_SNP495 | Ca_Kabuli_LG07 | 5854576                 | [C/G] |                    | INTERGENIC                          |                                                       |
| #Ca_Kabuli_SNP496 | Ca_Kabuli_LG07 | 5854578                 | [G/T] |                    | INTERGENIC                          |                                                       |
| #Ca_Kabuli_SNP497 | Ca_Kabuli_LG07 | 5854577                 | [T/C] |                    | INTERGENIC                          |                                                       |
| #Ca_Kabuli_SNP498 | scaffold6688   | 1267                    | [G/T] |                    | INTERGENIC                          |                                                       |
| #Ca_Kabuli_SNP499 | Ca_Kabuli_LG07 | 7146159                 | [A/C] |                    | INTERGENIC                          |                                                       |
| #Ca_Kabuli_SNP500 | Ca_Kabuli_LG07 | 6108535                 | [T/C] |                    | INTERGENIC                          |                                                       |
| #Ca_Kabuli_SNP501 | Ca_Kabuli_LG07 | 6540624                 | [C/T] | Ca_06700           | INTRON                              | Rap1-interacting factor 1 N-terminal                  |
| #Ca_Kabuli_SNP502 | Ca_Kabuli_LG06 | 5497983                 | [C/T] |                    | INTERGENIC                          |                                                       |
| #Ca_Kabuli_SNP503 | Ca_Kabuli_LG03 | 36282094                | [C/T] | Ca_00938           | NON_SYNONYMOUS_CODING               | Domain of unknown function DUF255                     |
| #Ca_Kabuli_SNP504 | Ca_Kabuli_LG07 | 5730386                 | [A/G] | Ca_06785           | DOWNSTREAM:1624bases                | Alpha/beta hydrolase fold-1                           |
| #Ca_Kabuli_SNP505 | scaffold666    | 42329                   | [C/G] |                    | INTERGENIC                          |                                                       |
| #Ca_Kabuli_SNP506 | Ca_Kabuli_LG04 | 30599220                | [T/C] | Ca_14208           | DOWNSTREAM:1983bases                | Protein of unknown function DUF773                    |
| #Ca_Kabuli_SNP507 | Ca_Kabuli_LG03 | 19978334                | [G/C] | Ca_09399           | NON_SYNONYMOUS_CODING               | Ammonium transporter                                  |
| #Ca_Kabuli_SNP508 | Ca_Kabuli_LG04 | 38979793                | [G/T] | Ca_13081           | INTRON                              | Folylpolylglutamate synthetase                        |
| #Ca_Kabuli_SNP509 | Ca_Kabuli_LG04 | 36712806                | [A/T] |                    | INTERGENIC                          |                                                       |
| #Ca_Kabuli_SNP510 | Ca_Kabuli_LG04 | 41339625                | [A/G] | Ca_10974           | INTRON                              | Protein kinase, catalytic domain                      |
| #Ca_Kabuli_SNP511 | scaffold179    | 631375                  | [G/T] |                    | INTERGENIC                          |                                                       |
| #Ca_Kabuli_SNP512 | Ca_Kabuli_LG03 | 11378540                | [T/A] | Ca_19376           | NON_SYNONYMOUS_CODING               | ABC transporter, transmembrane domain                 |
| #Ca_Kabuli_SNP513 | Ca_Kabuli_LG04 | 16278671                | [G/A] | Ca_05487           | SYNONYMOUS_CODING                   | Zinc finger, B-box                                    |
| #Ca_Kabuli_SNP514 | Ca_Kabuli_LG01 | 11669794                | [G/T] | Ca_02583           | SYNONYMOUS_CODING                   | Ankyrin repeat                                        |
| #Ca_Kabuli_SNP515 | Ca_Kabuli_LG07 | 10485397                | [A/C] | Ca_12810           | NON_SYNONYMOUS_CODING               | Protein of unknown function DUF702                    |
| #Ca_Kabuli_SNP516 | Ca_Kabuli_LG04 | 22289561                | [G/T] |                    | INTERGENIC                          |                                                       |
| #Ca_Kabuli_SNP517 | Ca_Kabuli_LG02 | 16563133                | [T/G] | Ca_22041           | INTRON                              | BSD                                                   |
| #Ca_Kabuli_SNP518 | Ca_Kabuli_LG07 | 15013576                | [T/C] | Ca_09953           | INTRON                              | RNA helicase, ATP-dependent, DEAD-box, conserved site |
| #Ca_Kabuli_SNP519 | scaffold894    | 133107                  | [C/G] |                    | INTERGENIC                          |                                                       |
| #Ca_Kabuli_SNP520 | scaffold948    | 1265627                 | [A/T] |                    | INTERGENIC                          |                                                       |
| #Ca_Kabuli_SNP521 | scaffold948    | 1072750                 | [A/G] |                    | INTERGENIC                          |                                                       |
| #Ca_Kabuli_SNP522 | Ca_Kabuli_LG01 | 46717322                | [C/T] | Ca_25108           | INTRON                              | --                                                    |
| #Ca_Kabuli_SNP523 | Ca_Kabuli_LG01 | 8824843                 | [C/T] |                    | INTERGENIC                          |                                                       |
| #Ca_Kabuli_SNP524 | Ca_Kabuli_LG03 | 3701398                 | [A/C] |                    | INTERGENIC                          |                                                       |
| #Ca_Kabuli_SNP525 | Ca_Kabuli_LG02 | 30954317                | [T/G] | Ca_12469           | INTRON                              | Clathrin, heavy chain/VPS, 7-fold repeat              |

| SNP IDs           | Chromosomes    | Physical positions (bp) | SNPs  | Gene accession IDs | Sequence components of genome/genes | Putative functions                                          |
|-------------------|----------------|-------------------------|-------|--------------------|-------------------------------------|-------------------------------------------------------------|
| #Ca_Kabuli_SNP526 | Ca_Kabuli_LG01 | 10739567                | [C/T] | Ca_02687           | INTRON                              | Ribokinase                                                  |
| #Ca_Kabuli_SNP527 | Ca_Kabuli_LG02 | 30925755                | [G/A] | Ca_12470           | INTRON                              | Clathrin, heavy chain/VPS, 7-fold repeat                    |
| #Ca_Kabuli_SNP528 | Ca_Kabuli_LG08 | 1507766                 | [G/C] | Ca_15020           | NON_SYNONYMOUS_CODING               | Aldose 1-epimerase                                          |
| #Ca_Kabuli_SNP529 | Ca_Kabuli_LG01 | 15285011                | [A/T] | Ca_07005           | DOWNSTREAM:1573bases                | --                                                          |
| #Ca_Kabuli_SNP530 | Ca_Kabuli_LG02 | 30977572                | [G/A] |                    | INTERGENIC                          |                                                             |
| #Ca_Kabuli_SNP531 | Ca_Kabuli_LG02 | 30408063                | [T/A] | Ca_12511           | INTRON                              | --                                                          |
| #Ca_Kabuli_SNP532 | Ca_Kabuli_LG02 | 31005845                | [G/A] | Ca_12464           | SYNONYMOUS_CODING                   | Lateral organ boundaries, LOB                               |
| #Ca_Kabuli_SNP533 | Ca_Kabuli_LG04 | 5701919                 | [C/G] |                    | INTERGENIC                          |                                                             |
| #Ca_Kabuli_SNP534 | scaffold68     | 586257                  | [T/G] |                    | INTERGENIC                          |                                                             |
| #Ca_Kabuli_SNP535 | scaffold2727   | 66073                   | [T/G] |                    | INTERGENIC                          |                                                             |
| #Ca_Kabuli_SNP536 | Ca_Kabuli_LG08 | 1782034                 | [C/T] |                    | INTERGENIC                          |                                                             |
| #Ca_Kabuli_SNP537 | Ca_Kabuli_LG02 | 31686714                | [T/C] |                    | INTERGENIC                          |                                                             |
| #Ca_Kabuli_SNP538 | Ca_Kabuli_LG07 | 17620142                | [C/T] | Ca_15847           | NON_SYNONYMOUS_CODING               | Peptidase M50, mammalian sterol-regulatory element binding  |
| #Ca_Kabuli_SNP539 | scaffold6052   | 1167                    | [T/G] |                    | INTERGENIC                          |                                                             |
| #Ca_Kabuli_SNP540 | Ca_Kabuli_LG02 | 36046741                | [A/G] |                    | INTERGENIC                          |                                                             |
| #Ca_Kabuli_SNP541 | Ca_Kabuli_LG02 | 33490058                | [A/G] |                    | INTERGENIC                          |                                                             |
| #Ca_Kabuli_SNP542 | scaffold5557   | 21649                   | [G/T] |                    | INTERGENIC                          |                                                             |
| #Ca_Kabuli_SNP543 | Ca_Kabuli_LG06 | 46734678                | [A/T] |                    | INTERGENIC                          |                                                             |
| #Ca_Kabuli_SNP544 | scaffold29     | 413713                  | [A/C] |                    | INTERGENIC                          |                                                             |
| #Ca_Kabuli_SNP545 | Ca_Kabuli_LG04 | 6851628                 | [G/T] | Ca_03554           | NON_SYNONYMOUS_CODING               | ABC transporter, transmembrane domain                       |
| #Ca_Kabuli_SNP546 | scaffold901    | 316037                  | [G/A] |                    | INTERGENIC                          |                                                             |
| #Ca_Kabuli_SNP547 | Ca_Kabuli_LG07 | 27350854                | [T/A] | Ca_16224           | NON_SYNONYMOUS_CODING               | --                                                          |
| #Ca_Kabuli_SNP548 | Ca_Kabuli_LG01 | 19165715                | [C/A] |                    | INTERGENIC                          |                                                             |
| #Ca_Kabuli_SNP549 | scaffold470    | 78871                   | [C/G] |                    | INTERGENIC                          |                                                             |
| #Ca_Kabuli_SNP550 | Ca_Kabuli_LG02 | 35754677                | [T/A] | Ca_09749           | DOWNSTREAM:1737bases                | Regulatory protein RecX                                     |
| #Ca_Kabuli_SNP551 | Ca_Kabuli_LG07 | 7737688                 | [C/A] |                    | INTERGENIC                          |                                                             |
| #Ca_Kabuli_SNP552 | Ca_Kabuli_LG02 | 25725688                | [G/A] |                    | INTERGENIC                          |                                                             |
| #Ca_Kabuli_SNP553 | Ca_Kabuli_LG04 | 8669513                 | [A/G] | Ca_08361           | NON_SYNONYMOUS_CODING               | Disease resistance protein                                  |
| #Ca_Kabuli_SNP554 | Ca_Kabuli_LG06 | 8091225                 | [G/T] |                    | INTERGENIC                          |                                                             |
| #Ca_Kabuli_SNP555 | Ca_Kabuli_LG04 | 13840227                | [A/C] | Ca_04608           | SYNONYMOUS_CODING                   | Copper amine oxidase                                        |
| #Ca_Kabuli_SNP556 | Ca_Kabuli_LG05 | 35773046                | [A/G] | Ca_01648           | NON_SYNONYMOUS_CODING               | Peptidase M1, alanine aminopeptidase/leukotriene A4 hydroly |

| SNP IDs           | Chromosomes    | Physical positions (bp) | SNPs  | Gene accession IDs | Sequence components of genome/genes | Putative functions                                             |
|-------------------|----------------|-------------------------|-------|--------------------|-------------------------------------|----------------------------------------------------------------|
| #Ca_Kabuli_SNP557 | scaffold617    | 144885                  | [C/T] |                    | INTERGENIC                          |                                                                |
| #Ca_Kabuli_SNP558 | Ca_Kabuli_LG01 | 3260253                 | [A/G] | Ca_00397           | NON_SYNONYMOUS_CODING               | Granulin                                                       |
| #Ca_Kabuli_SNP559 | scaffold1181   | 150281                  | [G/T] |                    | INTERGENIC                          |                                                                |
| #Ca_Kabuli_SNP560 | Ca_Kabuli_LG02 | 32781827                | [A/C] |                    | INTERGENIC                          |                                                                |
| #Ca_Kabuli_SNP561 | Ca_Kabuli_LG01 | 2053788                 | [A/G] | Ca_00260           | NON_SYNONYMOUS_CODING               | Disease resistance protein                                     |
| #Ca_Kabuli_SNP562 | Ca_Kabuli_LG07 | 26940934                | [A/G] | Ca_16240           | SYNONYMOUS_CODING                   | Plastocyanin-like                                              |
| #Ca_Kabuli_SNP563 | Ca_Kabuli_LG01 | 3711525                 | [T/G] |                    | INTERGENIC                          |                                                                |
| #Ca_Kabuli_SNP564 | scaffold669    | 20765                   | [G/T] |                    | INTERGENIC                          |                                                                |
| #Ca_Kabuli_SNP565 | Ca_Kabuli_LG03 | 171675                  | [A/T] | Ca_22938           | SYNONYMOUS_CODING                   | NAD-dependent epimerase/dehydratase                            |
| #Ca_Kabuli_SNP566 | Ca_Kabuli_LG02 | 26121431                | [G/T] | Ca_14315           | DOWNSTREAM:1783bases                | NAD-dependent epimerase/dehydratase                            |
| #Ca_Kabuli_SNP567 | Ca_Kabuli_LG05 | 32598189                | [A/G] | Ca_04965           | DOWNSTREAM:1514bases                | Epidermal growth factor-like, type 3                           |
| #Ca_Kabuli_SNP568 | Ca_Kabuli_LG03 | 21687962                | [T/G] | Ca_09523           | SYNONYMOUS_CODING                   | Aminoacyl-tRNA synthetase, class II (D/K/N)                    |
| #Ca_Kabuli_SNP569 | Ca_Kabuli_LG03 | 19445925                | [T/A] | Ca_19342           | DOWNSTREAM:64bases                  | Protein of unknown function DUF647                             |
| #Ca_Kabuli_SNP570 | Ca_Kabuli_LG03 | 19445920                | [A/G] | Ca_19342           | DOWNSTREAM:69bases                  | Protein of unknown function DUF647                             |
| #Ca_Kabuli_SNP571 | Ca_Kabuli_LG07 | 41387502                | [A/C] | Ca_17996           | NON_SYNONYMOUS_CODING               | WD40 repeat                                                    |
| #Ca_Kabuli_SNP572 | Ca_Kabuli_LG06 | 48255559                | [A/G] | Ca_24604           | DOWNSTREAM:176bases                 | DNA/RNA helicase, DEAD/DEAH box type, N-terminal               |
| #Ca_Kabuli_SNP573 | Ca_Kabuli_LG02 | 451206                  | [T/C] | Ca_16985           | INTRON                              | Ubiquitin-associated/translation elongation factor EF1B, N-ter |
| #Ca_Kabuli_SNP574 | Ca_Kabuli_LG06 | 10027025                | [A/C] | Ca_08589           | DOWNSTREAM:1783bases                | Mitochondrial substrate/solute carrier                         |
| #Ca_Kabuli_SNP575 | scaffold901    | 463286                  | [C/T] |                    | INTERGENIC                          |                                                                |
| #Ca_Kabuli_SNP576 | Ca_Kabuli_LG08 | 11751093                | [T/G] | Ca_16797           | NON_SYNONYMOUS_CODING               | Cell division cycle-associated protein                         |
| #Ca_Kabuli_SNP577 | Ca_Kabuli_LG06 | 46734717                | [A/G] |                    | INTERGENIC                          |                                                                |
| #Ca_Kabuli_SNP578 | Ca_Kabuli_LG06 | 53124142                | [G/T] | Ca_22912           | NON_SYNONYMOUS_CODING               | 3-Oxoacyl-[acyl-carrier-protein (ACP)] synthase III C-terminal |
| #Ca_Kabuli_SNP579 | scaffold924    | 115808                  | [C/T] |                    | INTERGENIC                          |                                                                |
| #Ca_Kabuli_SNP580 | Ca_Kabuli_LG07 | 32784916                | [A/C] | Ca_10015           | NON_SYNONYMOUS_CODING               | Transcription initiation factor TFIID                          |
| #Ca_Kabuli_SNP581 | Ca_Kabuli_LG02 | 24286153                | [C/A] |                    | INTERGENIC                          |                                                                |
| #Ca_Kabuli_SNP582 | Ca_Kabuli_LG06 | 1817599                 | [C/T] |                    | INTERGENIC                          |                                                                |
| #Ca_Kabuli_SNP583 | Ca_Kabuli_LG03 | 20552836                | [T/G] | Ca_09446           | NON_SYNONYMOUS_CODING               | --                                                             |
| #Ca_Kabuli_SNP584 | Ca_Kabuli_LG01 | 12169598                | [G/A] | Ca_02539           | INTRON                              | Homeobox                                                       |
| #Ca_Kabuli_SNP585 | Ca_Kabuli_LG06 | 23039459                | [C/T] |                    | INTERGENIC                          |                                                                |
| #Ca_Kabuli_SNP586 | scaffold269    | 43179                   | [A/C] |                    | INTERGENIC                          |                                                                |
| #Ca_Kabuli_SNP587 | Ca_Kabuli_LG02 | 7870843                 | [A/C] |                    | INTERGENIC                          |                                                                |

| SNP IDs           | Chromosomes    | Physical positions (bp) | SNPs  | Gene accession IDs | Sequence components of genome/genes | Putative functions                                          |
|-------------------|----------------|-------------------------|-------|--------------------|-------------------------------------|-------------------------------------------------------------|
| #Ca_Kabuli_SNP588 | Ca_Kabuli_LG04 | 29923380                | [A/G] | Ca_14177           | SYNONYMOUS_CODING                   | Plant peroxidase                                            |
| #Ca_Kabuli_SNP589 | scaffold847    | 46904                   | [T/C] |                    | INTERGENIC                          |                                                             |
| #Ca_Kabuli_SNP590 | Ca_Kabuli_LG07 | 42032                   | [A/C] |                    | INTERGENIC                          |                                                             |
| #Ca_Kabuli_SNP591 | Ca_Kabuli_LG06 | 9834208                 | [A/G] | Ca_08608           | SYNONYMOUS_CODING                   | WD40 repeat                                                 |
| #Ca_Kabuli_SNP592 | Ca_Kabuli_LG07 | 22987832                | [C/G] | Ca_19519           | DOWNSTREAM:595bases                 | Glycosyl-phosphatidyl inositol-anchored, plant              |
| #Ca_Kabuli_SNP593 | Ca_Kabuli_LG01 | 16467635                | [G/T] | Ca_06917           | DOWNSTREAM:1254bases                | Chlorophyll A-B binding protein, plant                      |
| #Ca_Kabuli_SNP594 | Ca_Kabuli_LG03 | 24194574                | [T/C] | Ca_06100           | INTRON                              | Aminoacyl-tRNA synthetase, class II (D/K/N)                 |
| #Ca_Kabuli_SNP595 | Ca_Kabuli_LG07 | 31960453                | [C/A] | Ca_10068           | INTRON                              | IQ motif, EF-hand binding site                              |
| #Ca_Kabuli_SNP596 | scaffold112    | 280062                  | [C/T] |                    | INTERGENIC                          |                                                             |
| #Ca_Kabuli_SNP597 | Ca_Kabuli_LG04 | 22860484                | [T/G] |                    | INTERGENIC                          |                                                             |
| #Ca_Kabuli_SNP598 | scaffold1579   | 212519                  | [T/A] |                    | INTERGENIC                          |                                                             |
| #Ca_Kabuli_SNP599 | Ca_Kabuli_LG06 | 11659814                | [G/A] | Ca_25060           | SYNONYMOUS_CODING                   | Excinuclease ABC, C subunit, N-terminal                     |
| #Ca_Kabuli_SNP600 | Ca_Kabuli_LG04 | 37576578                | [C/A] | Ca_15125           | INTRON                              | Mediator complex subunit Med23                              |
| #Ca_Kabuli_SNP601 | Ca_Kabuli_LG05 | 43698024                | [T/G] | Ca_12682           | SYNONYMOUS_CODING                   | Protein of unknown function DUF581                          |
| #Ca_Kabuli_SNP602 | Ca_Kabuli_LG04 | 28246772                | [G/T] |                    | INTERGENIC                          |                                                             |
| #Ca_Kabuli_SNP603 | Ca_Kabuli_LG04 | 36984795                | [A/T] | Ca_14795           | INTRON                              | SNF2-related                                                |
| #Ca_Kabuli_SNP604 | Ca_Kabuli_LG05 | 23674580                | [A/C] |                    | INTERGENIC                          |                                                             |
| #Ca_Kabuli_SNP605 | Ca_Kabuli_LG04 | 30258056                | [G/A] | Ca_14190           | DOWNSTREAM:1820bases                | Zinc finger, CCCH-type                                      |
| #Ca_Kabuli_SNP606 | Ca_Kabuli_LG04 | 22971853                | [A/C] | Ca_14460           | SYNONYMOUS_CODING                   | --                                                          |
| #Ca_Kabuli_SNP607 | Ca_Kabuli_LG04 | 5701900                 | [G/T] |                    | INTERGENIC                          |                                                             |
| #Ca_Kabuli_SNP608 | Ca_Kabuli_LG05 | 10004424                | [T/G] | Ca_20512           | SYNONYMOUS_CODING                   | Tetratricopeptide TPR-1                                     |
| #Ca_Kabuli_SNP609 | Ca_Kabuli_LG06 | 11665233                | [A/G] | Ca_25061           | SYNONYMOUS_CODING                   | Amine oxidase                                               |
| #Ca_Kabuli_SNP610 | Ca_Kabuli_LG04 | 30153505                | [G/C] | Ca_14185           | DOWNSTREAM:783bases                 | Plastid lipid-associated protein/fibrillin conserved domain |
| #Ca_Kabuli_SNP611 | Ca_Kabuli_LG03 | 7204053                 | [G/A] |                    | INTERGENIC                          |                                                             |
| #Ca_Kabuli_SNP612 | Ca_Kabuli_LG04 | 37356919                | [T/A] | Ca_15140           | INTRON                              | HEAT                                                        |
| #Ca_Kabuli_SNP613 | Ca_Kabuli_LG02 | 36171325                | [C/A] | Ca_09797           | DOWNSTREAM:1086bases                | Aldo/keto reductase                                         |
| #Ca_Kabuli_SNP614 | scaffold1997   | 107437                  | [T/C] |                    | INTERGENIC                          |                                                             |
| #Ca_Kabuli_SNP615 | Ca_Kabuli_LG04 | 17473312                | [C/A] |                    | INTERGENIC                          |                                                             |
| #Ca_Kabuli_SNP616 | Ca_Kabuli_LG03 | 24637837                | [A/C] |                    | INTERGENIC                          |                                                             |
| #Ca_Kabuli_SNP617 | Ca_Kabuli_LG04 | 38834477                | [G/A] |                    | INTERGENIC                          |                                                             |
| #Ca_Kabuli_SNP618 | Ca_Kabuli_LG03 | 7204099                 | [C/T] |                    | INTERGENIC                          |                                                             |

| SNP IDs           | Chromosomes    | Physical positions (bp) | SNPs  | Gene accession IDs | Sequence components of genome/genes | Putative functions                                 |
|-------------------|----------------|-------------------------|-------|--------------------|-------------------------------------|----------------------------------------------------|
| #Ca_Kabuli_SNP619 | scaffold790    | 341416                  | [A/T] |                    | INTERGENIC                          |                                                    |
| #Ca_Kabuli_SNP620 | Ca_Kabuli_LG03 | 37438148                | [G/A] |                    | INTERGENIC                          |                                                    |
| #Ca_Kabuli_SNP621 | Ca_Kabuli_LG04 | 38834474                | [G/A] |                    | INTERGENIC                          |                                                    |
| #Ca_Kabuli_SNP622 | Ca_Kabuli_LG03 | 25145247                | [C/T] | Ca_06015           | SYNONYMOUS_CODING                   | LisH dimerisation motif                            |
| #Ca_Kabuli_SNP623 | Ca_Kabuli_LG01 | 1292472                 | [A/C] |                    | INTERGENIC                          |                                                    |
| #Ca_Kabuli_SNP624 | Ca_Kabuli_LG04 | 46263193                | [T/G] |                    | INTERGENIC                          |                                                    |
| #Ca_Kabuli_SNP625 | Ca_Kabuli_LG04 | 29671606                | [G/A] | Ca_14166           | DOWNSTREAM:1293bases                | Kinesin, motor domain                              |
| #Ca_Kabuli_SNP626 | scaffold1997   | 104549                  | [C/G] |                    | INTERGENIC                          |                                                    |
| #Ca_Kabuli_SNP627 | Ca_Kabuli_LG06 | 23145625                | [A/C] | Ca_11137           | INTRON                              | Clathrin/coatome adaptor, adaptin-like, N-terminal |
| #Ca_Kabuli_SNP628 | Ca_Kabuli_LG04 | 38422037                | [T/C] | Ca_13115           | INTRON                              | Zinc finger, CCCH-type                             |
| #Ca_Kabuli_SNP629 | Ca_Kabuli_LG04 | 12175299                | [C/A] | Ca_04442           | NON_SYNONYMOUS_CODING               | Transcription factor GRAS                          |
| #Ca_Kabuli_SNP630 | Ca_Kabuli_LG04 | 26002991                | [A/C] | Ca_16610           | INTRON                              | Aldo/keto reductase                                |
| #Ca_Kabuli_SNP631 | Ca_Kabuli_LG04 | 38888791                | [C/G] | Ca_13087           | NON_SYNONYMOUS_CODING               | Protein kinase, catalytic domain                   |
| #Ca_Kabuli_SNP632 | Ca_Kabuli_LG07 | 27070635                | [A/G] |                    | INTERGENIC                          |                                                    |
| #Ca_Kabuli_SNP633 | Ca_Kabuli_LG03 | 27887405                | [T/C] | Ca_08120           | INTRON                              | Ribosomal protein S1, RNA-binding domain           |
| #Ca_Kabuli_SNP634 | Ca_Kabuli_LG04 | 24857501                | [G/A] | Ca_20847           | INTRON                              | Protein kinase, catalytic domain                   |
| #Ca_Kabuli_SNP635 | Ca_Kabuli_LG07 | 6788869                 | [C/A] |                    | INTERGENIC                          |                                                    |
| #Ca_Kabuli_SNP636 | Ca_Kabuli_LG04 | 5186399                 | [T/C] |                    | INTERGENIC                          |                                                    |
| #Ca_Kabuli_SNP637 | scaffold1997   | 125716                  | [T/C] |                    | INTERGENIC                          |                                                    |
| #Ca_Kabuli_SNP638 | Ca_Kabuli_LG04 | 38770450                | [C/G] | Ca_13096           | SYNONYMOUS_CODING                   | Fatty acid desaturase, type 2                      |
| #Ca_Kabuli_SNP639 | Ca_Kabuli_LG03 | 38103366                | [T/G] | Ca_01154           | INTRON                              | Peptidase S1/S6, chymotrypsin/Hap                  |
| #Ca_Kabuli_SNP640 | Ca_Kabuli_LG04 | 37450206                | [C/A] |                    | INTERGENIC                          |                                                    |
| #Ca_Kabuli_SNP641 | scaffold3450   | 55347                   | [G/T] |                    | INTERGENIC                          |                                                    |
| #Ca_Kabuli_SNP642 | Ca_Kabuli_LG05 | 45478398                | [G/T] | Ca_03994           | DOWNSTREAM:1551bases                | --                                                 |
| #Ca_Kabuli_SNP643 | Ca_Kabuli_LG07 | 32309397                | [T/A] | Ca_10045           | INTRON                              | von Willebrand factor, type A                      |
| #Ca_Kabuli_SNP644 | scaffold99     | 100529                  | [T/C] |                    | INTERGENIC                          |                                                    |
| #Ca_Kabuli_SNP645 | Ca_Kabuli_LG03 | 38127341                | [C/T] |                    | INTERGENIC                          |                                                    |
| #Ca_Kabuli_SNP646 | Ca_Kabuli_LG04 | 5920659                 | [T/G] | Ca_03658           | NON_SYNONYMOUS_CODING               | Dormancyauxin associated                           |
| #Ca_Kabuli_SNP647 | Ca_Kabuli_LG04 | 48498334                | [G/T] | Ca_10742           | DOWNSTREAM:156bases                 | TB2/DP1/HVA22-related protein                      |
| #Ca_Kabuli_SNP648 | scaffold608    | 52689                   | [T/A] |                    | INTERGENIC                          |                                                    |
| #Ca_Kabuli_SNP649 | scaffold608    | 52688                   | [T/G] |                    | INTERGENIC                          |                                                    |



| SNP IDs           | Chromosomes    | Physical positions (bp) | SNPs  | Gene accession IDs | Sequence components of genome/genes | Putative functions                                           |
|-------------------|----------------|-------------------------|-------|--------------------|-------------------------------------|--------------------------------------------------------------|
| #Ca_Kabuli_SNP650 | Ca_Kabuli_LG04 | 26089832                | [T/C] |                    | INTERGENIC                          |                                                              |
| #Ca_Kabuli_SNP651 | scaffold608    | 52687                   | [C/A] |                    | INTERGENIC                          |                                                              |
| #Ca_Kabuli_SNP652 | Ca_Kabuli_LG03 | 38117585                | [G/A] | Ca_01156           | INTRON                              | Acyl-CoA-binding protein, ACBP                               |
| #Ca_Kabuli_SNP653 | Ca_Kabuli_LG03 | 38117584                | [A/C] | Ca_01156           | INTRON                              | Acyl-CoA-binding protein, ACBP                               |
| #Ca_Kabuli_SNP654 | scaffold240    | 132873                  | [A/G] |                    | INTERGENIC                          |                                                              |
| #Ca_Kabuli_SNP655 | Ca_Kabuli_LG04 | 6889981                 | [T/G] |                    | INTERGENIC                          |                                                              |
| #Ca_Kabuli_SNP656 | scaffold1068   | 197789                  | [G/A] |                    | INTERGENIC                          |                                                              |
| #Ca_Kabuli_SNP657 | scaffold31     | 1053247                 | [A/G] |                    | INTERGENIC                          |                                                              |
| #Ca_Kabuli_SNP658 | Ca_Kabuli_LG04 | 34798657                | [A/C] |                    | INTERGENIC                          |                                                              |
| #Ca_Kabuli_SNP659 | Ca_Kabuli_LG04 | 38153183                | [A/C] | Ca_13138           | SYNONYMOUS_CODING                   | Tetrahydrofolate dehydrogenase/cyclohydrolase                |
| #Ca_Kabuli_SNP660 | Ca_Kabuli_LG04 | 29675337                | [C/T] | Ca_14166           | INTRON                              | Kinesin, motor domain                                        |
| #Ca_Kabuli_SNP661 | Ca_Kabuli_LG05 | 33754240                | [A/G] |                    | INTERGENIC                          |                                                              |
| #Ca_Kabuli_SNP662 | Ca_Kabuli_LG07 | 43119052                | [G/A] |                    | INTERGENIC                          |                                                              |
| #Ca_Kabuli_SNP663 | Ca_Kabuli_LG05 | 27282826                | [A/G] | Ca_08913           | DOWNSTREAM:1147bases                | Pathogenesis-related transcriptional factor/ERF, DNA-binding |
| #Ca_Kabuli_SNP664 | Ca_Kabuli_LG03 | 25822584                | [T/C] |                    | INTERGENIC                          |                                                              |
| #Ca_Kabuli_SNP665 | Ca_Kabuli_LG03 | 25822560                | [T/A] |                    | INTERGENIC                          |                                                              |
| #Ca_Kabuli_SNP666 | Ca_Kabuli_LG03 | 4243649                 | [G/T] | Ca_22376           | INTRON                              | RNA recognition motif domain                                 |
| #Ca_Kabuli_SNP667 | scaffold764    | 11144                   | [T/A] |                    | INTERGENIC                          |                                                              |
| #Ca_Kabuli_SNP668 | Ca_Kabuli_LG06 | 10441742                | [A/C] |                    | INTERGENIC                          |                                                              |
| #Ca_Kabuli_SNP669 | scaffold669    | 22590                   | [T/G] |                    | INTERGENIC                          |                                                              |
| #Ca_Kabuli_SNP670 | Ca_Kabuli_LG05 | 40194187                | [C/A] | Ca_07544           | NON_SYNONYMOUS_CODING               | RNA recognition motif domain                                 |
| #Ca_Kabuli_SNP671 | Ca_Kabuli_LG03 | 31951994                | [A/G] | Ca_12295           | SYNONYMOUS_CODING                   | HEAT                                                         |
| #Ca_Kabuli_SNP672 | Ca_Kabuli_LG04 | 48475447                | [C/T] |                    | INTERGENIC                          |                                                              |
| #Ca_Kabuli_SNP673 | Ca_Kabuli_LG04 | 37698067                | [C/T] | Ca_15111           | INTRON                              | ATP-grasp fold                                               |
| #Ca_Kabuli_SNP674 | scaffold703    | 642850                  | [A/C] |                    | INTERGENIC                          |                                                              |
| #Ca_Kabuli_SNP675 | Ca_Kabuli_LG04 | 48263603                | [A/G] |                    | INTERGENIC                          |                                                              |
| #Ca_Kabuli_SNP676 | Ca_Kabuli_LG02 | 25725692                | [C/T] |                    | INTERGENIC                          |                                                              |
| #Ca_Kabuli_SNP677 | Ca_Kabuli_LG07 | 34474614                | [A/C] | Ca_17602           | NON_SYNONYMOUS_CODING               | SSXT                                                         |
| #Ca_Kabuli_SNP678 | Ca_Kabuli_LG03 | 29974595                | [C/T] |                    | INTERGENIC                          |                                                              |
| #Ca_Kabuli_SNP679 | Ca_Kabuli_LG02 | 27172582                | [A/G] |                    | INTERGENIC                          |                                                              |
| #Ca_Kabuli_SNP680 | Ca_Kabuli_LG06 | 15544732                | [A/T] | Ca_05339           | NON_SYNONYMOUS_CODING               | Tetratricopeptide repeat                                     |

| SNP IDs           | Chromosomes    | Physical positions (bp) | SNPs  | Gene accession IDs | Sequence components of genome/genes | Putative functions                                      |
|-------------------|----------------|-------------------------|-------|--------------------|-------------------------------------|---------------------------------------------------------|
| #Ca_Kabuli_SNP681 | Ca_Kabuli_LG03 | 30837284                | [T/C] |                    | INTERGENIC                          |                                                         |
| #Ca_Kabuli_SNP682 | Ca_Kabuli_LG05 | 11356511                | [G/A] |                    | INTERGENIC                          |                                                         |
| #Ca_Kabuli_SNP683 | Ca_Kabuli_LG03 | 34982544                | [C/T] | Ca_00773           | INTRON                              | Glycosyl hydrolase, family 13, catalytic domain         |
| #Ca_Kabuli_SNP684 | Ca_Kabuli_LG04 | 44591405                | [T/G] | Ca_09131           | INTRON                              | Protein phosphatase 2C, manganese/magnesium aspartate k |
| #Ca_Kabuli_SNP685 | Ca_Kabuli_LG06 | 7829577                 | [T/G] |                    | INTERGENIC                          |                                                         |
| #Ca_Kabuli_SNP686 | Ca_Kabuli_LG03 | 37637641                | [A/T] | Ca_01102           | DOWNSTREAM:1713bases                | Zinc finger, U1-type                                    |
| #Ca_Kabuli_SNP687 | Ca_Kabuli_LG03 | 37637642                | [A/T] | Ca_01102           | DOWNSTREAM:1714bases                | Zinc finger, U1-type                                    |
| #Ca_Kabuli_SNP688 | Ca_Kabuli_LG05 | 438428                  | [T/G] |                    | INTERGENIC                          |                                                         |
| #Ca_Kabuli_SNP689 | Ca_Kabuli_LG01 | 2948260                 | [G/A] |                    | INTERGENIC                          |                                                         |
| #Ca_Kabuli_SNP690 | Ca_Kabuli_LG03 | 7654644                 | [A/T] |                    | INTERGENIC                          |                                                         |
| #Ca_Kabuli_SNP691 | Ca_Kabuli_LG04 | 44590652                | [C/T] | Ca_09131           | SYNONYMOUS_CODING                   | Protein phosphatase 2C, manganese/magnesium aspartate k |
| #Ca_Kabuli_SNP692 | Ca_Kabuli_LG01 | 7500494                 | [T/G] | Ca_08003           | SYNONYMOUS_CODING                   | Protein kinase, catalytic domain                        |
| #Ca_Kabuli_SNP693 | Ca_Kabuli_LG03 | 31630195                | [C/T] |                    | INTERGENIC                          |                                                         |
| #Ca_Kabuli_SNP694 | Ca_Kabuli_LG03 | 31521155                | [A/T] | Ca_12251           | DOWNSTREAM:157bases                 | Oligopeptide transporter                                |
| #Ca_Kabuli_SNP695 | Ca_Kabuli_LG05 | 3643160                 | [C/T] |                    | INTERGENIC                          |                                                         |
| #Ca_Kabuli_SNP696 | Ca_Kabuli_LG03 | 31321725                | [G/A] | Ca_12232           | SYNONYMOUS_CODING                   | VHS                                                     |
| #Ca_Kabuli_SNP697 | Ca_Kabuli_LG04 | 46613068                | [T/G] | Ca_19257           | DOWNSTREAM:1878bases                | Glycoside hydrolase, family 13                          |
| #Ca_Kabuli_SNP698 | Ca_Kabuli_LG07 | 12635956                | [A/C] | Ca_09258           | SYNONYMOUS_CODING                   | WD40 repeat                                             |
| #Ca_Kabuli_SNP699 | Ca_Kabuli_LG04 | 17858140                | [A/C] | Ca_18622           | INTRON                              | IKI3                                                    |
| #Ca_Kabuli_SNP700 | scaffold269    | 43158                   | [C/A] |                    | INTERGENIC                          |                                                         |
| #Ca_Kabuli_SNP701 | Ca_Kabuli_LG04 | 42246467                | [G/T] |                    | INTERGENIC                          |                                                         |
| #Ca_Kabuli_SNP702 | scaffold294    | 478760                  | [G/T] |                    | INTERGENIC                          |                                                         |
| #Ca_Kabuli_SNP703 | Ca_Kabuli_LG04 | 44439492                | [G/T] |                    | INTERGENIC                          |                                                         |
| #Ca_Kabuli_SNP704 | Ca_Kabuli_LG04 | 48097268                | [G/A] |                    | INTERGENIC                          |                                                         |
| #Ca_Kabuli_SNP705 | Ca_Kabuli_LG03 | 31631622                | [A/G] |                    | INTERGENIC                          |                                                         |
| #Ca_Kabuli_SNP706 | Ca_Kabuli_LG03 | 31279605                | [A/G] | Ca_12224           | INTRON                              | Protein of unknown function DUF647                      |
| #Ca_Kabuli_SNP707 | Ca_Kabuli_LG07 | 40692817                | [C/G] | Ca_20271           | SYNONYMOUS_CODING                   | Protein kinase, catalytic domain                        |
| #Ca_Kabuli_SNP708 | Ca_Kabuli_LG03 | 31520119                | [T/C] | Ca_12251           | INTRON                              | Oligopeptide transporter                                |
| #Ca_Kabuli_SNP709 | Ca_Kabuli_LG04 | 44373412                | [C/T] |                    | INTERGENIC                          |                                                         |
| #Ca_Kabuli_SNP710 | Ca_Kabuli_LG03 | 31520198                | [A/G] | Ca_12251           | INTRON                              | Oligopeptide transporter                                |
| #Ca_Kabuli_SNP711 | Ca_Kabuli_LG03 | 31520225                | [T/A] | Ca_12251           | INTRON                              | Oligopeptide transporter                                |

| SNP IDs           | Chromosomes    | Physical positions (bp) | SNPs  | Gene accession IDs | Sequence components of genome/genes | Putative functions                                        |
|-------------------|----------------|-------------------------|-------|--------------------|-------------------------------------|-----------------------------------------------------------|
| #Ca_Kabuli_SNP712 | Ca_Kabuli_LG03 | 31516662                | [T/G] | Ca_12250           | SYNONYMOUS_CODING                   | Oligopeptide transporter                                  |
| #Ca_Kabuli_SNP713 | Ca_Kabuli_LG03 | 31516766                | [C/T] | Ca_12250           | INTRON                              | Oligopeptide transporter                                  |
| #Ca_Kabuli_SNP714 | scaffold1676   | 50722                   | [A/G] |                    | INTERGENIC                          |                                                           |
| #Ca_Kabuli_SNP715 | Ca_Kabuli_LG03 | 31358137                | [T/G] |                    | INTERGENIC                          |                                                           |
| #Ca_Kabuli_SNP716 | Ca_Kabuli_LG01 | 13158171                | [T/A] |                    | INTERGENIC                          |                                                           |
| #Ca_Kabuli_SNP717 | Ca_Kabuli_LG03 | 31478882                | [T/C] | Ca_12246           | SYNONYMOUS_CODING                   | Glucose-methanol-choline oxidoreductase, N-terminal       |
| #Ca_Kabuli_SNP718 | Ca_Kabuli_LG06 | 5401607                 | [T/G] |                    | INTERGENIC                          |                                                           |
| #Ca_Kabuli_SNP719 | Ca_Kabuli_LG04 | 46717200                | [C/T] | Ca_19246           | INTRON                              | PGAP1-like                                                |
| #Ca_Kabuli_SNP720 | Ca_Kabuli_LG03 | 7204105                 | [G/A] |                    | INTERGENIC                          |                                                           |
| #Ca_Kabuli_SNP721 | Ca_Kabuli_LG03 | 16032148                | [A/C] | Ca_17062           | SYNONYMOUS_CODING                   | MIF4G-like, type 3                                        |
| #Ca_Kabuli_SNP722 | Ca_Kabuli_LG04 | 48501662                | [A/T] |                    | INTERGENIC                          |                                                           |
| #Ca_Kabuli_SNP723 | scaffold1330   | 339103                  | [C/A] |                    | INTERGENIC                          |                                                           |
| #Ca_Kabuli_SNP724 | Ca_Kabuli_LG06 | 44711166                | [A/G] |                    | INTERGENIC                          |                                                           |
| #Ca_Kabuli_SNP725 | Ca_Kabuli_LG03 | 31355001                | [G/C] |                    | INTERGENIC                          |                                                           |
| #Ca_Kabuli_SNP726 | Ca_Kabuli_LG03 | 31355026                | [C/T] |                    | INTERGENIC                          |                                                           |
| #Ca_Kabuli_SNP727 | Ca_Kabuli_LG03 | 31354988                | [T/C] |                    | INTERGENIC                          |                                                           |
| #Ca_Kabuli_SNP728 | Ca_Kabuli_LG06 | 10234386                | [A/C] | Ca_08566           | INTRON                              | Metallo-dependent phosphatase                             |
| #Ca_Kabuli_SNP729 | Ca_Kabuli_LG04 | 15039822                | [C/A] |                    | INTERGENIC                          |                                                           |
| #Ca_Kabuli_SNP730 | Ca_Kabuli_LG03 | 31431216                | [T/C] | Ca_12240           | INTRON                              | Protein kinase, catalytic domain                          |
| #Ca_Kabuli_SNP731 | Ca_Kabuli_LG04 | 7771948                 | [T/C] | Ca_03463           | NON_SYNONYMOUS_CODING               | Mitochondrial inner membrane translocase complex, subunit |
| #Ca_Kabuli_SNP732 | Ca_Kabuli_LG04 | 1189985                 | [A/C] | Ca_07749           | INTRON                              | Ribosomal protein L21e                                    |
| #Ca_Kabuli_SNP733 | Ca_Kabuli_LG04 | 44388391                | [G/C] |                    | INTERGENIC                          |                                                           |
| #Ca_Kabuli_SNP734 | Ca_Kabuli_LG04 | 17429446                | [C/A] | Ca_05384           | NON_SYNONYMOUS_CODING               | Transcription factor jumonji/aspartyl beta-hydroxylase    |
| #Ca_Kabuli_SNP735 | Ca_Kabuli_LG06 | 2286237                 | [C/T] | Ca_10358           | DOWNSTREAM:1995bases                | 3-oxo-5-alpha-steroid 4-dehydrogenase, C-terminal         |
| #Ca_Kabuli_SNP736 | Ca_Kabuli_LG08 | 6192944                 | [T/G] | Ca_01927           | SYNONYMOUS_CODING                   | Pentatricopeptide repeat                                  |
| #Ca_Kabuli_SNP737 | Ca_Kabuli_LG01 | 4017077                 | [T/G] | Ca_00483           | DOWNSTREAM:946bases                 | --                                                        |
| #Ca_Kabuli_SNP738 | Ca_Kabuli_LG04 | 44353354                | [C/T] |                    | INTERGENIC                          |                                                           |
| #Ca_Kabuli_SNP739 | Ca_Kabuli_LG02 | 35449653                | [A/G] | Ca_09705           | INTRON                              | ABC transporter, transmembrane domain                     |
| #Ca_Kabuli_SNP740 | scaffold128    | 355771                  | [A/T] |                    | INTERGENIC                          |                                                           |
| #Ca_Kabuli_SNP741 | Ca_Kabuli_LG03 | 30383534                | [T/C] | Ca_07359           | SYNONYMOUS_CODING                   | --                                                        |
| #Ca_Kabuli_SNP742 | Ca_Kabuli_LG03 | 29954612                | [T/G] |                    | INTERGENIC                          |                                                           |

| SNP IDs           | Chromosomes    | Physical positions (bp) | SNPs  | Gene accession IDs | Sequence components of genome/genes | Putative functions                           |
|-------------------|----------------|-------------------------|-------|--------------------|-------------------------------------|----------------------------------------------|
| #Ca_Kabuli_SNP743 | Ca_Kabuli_LG03 | 31814796                | [T/A] | Ca_12284           | SYNONYMOUS_CODING                   | WD40 repeat                                  |
| #Ca_Kabuli_SNP744 | Ca_Kabuli_LG06 | 52618275                | [T/G] | Ca_17543           | DOWNSTREAM:1446bases                | --                                           |
| #Ca_Kabuli_SNP745 | Ca_Kabuli_LG08 | 10887602                | [G/T] | Ca_19739           | DOWNSTREAM:240bases                 | Pentatricopeptide repeat                     |
| #Ca_Kabuli_SNP746 | Ca_Kabuli_LG04 | 48475461                | [G/A] |                    | INTERGENIC                          |                                              |
| #Ca_Kabuli_SNP747 | Ca_Kabuli_LG03 | 29958891                | [G/C] | Ca_07306           | NON_SYNONYMOUS_CODING               | Nse5                                         |
| #Ca_Kabuli_SNP748 | Ca_Kabuli_LG03 | 39839981                | [G/T] | Ca_01370           | INTRON                              | ATPase, P-type, H+ transporting proton pump  |
| #Ca_Kabuli_SNP749 | Ca_Kabuli_LG03 | 29666633                | [C/T] | Ca_07271           | DOWNSTREAM:1647bases                | ABC transporter-like                         |
| #Ca_Kabuli_SNP750 | Ca_Kabuli_LG03 | 29804107                | [C/A] |                    | INTERGENIC                          |                                              |
| #Ca_Kabuli_SNP751 | Ca_Kabuli_LG03 | 29666126                | [A/G] |                    | INTERGENIC                          |                                              |
| #Ca_Kabuli_SNP752 | Ca_Kabuli_LG03 | 29666138                | [C/T] |                    | INTERGENIC                          |                                              |
| #Ca_Kabuli_SNP753 | scaffold1997   | 107345                  | [T/G] |                    | INTERGENIC                          |                                              |
| #Ca_Kabuli_SNP754 | Ca_Kabuli_LG03 | 29804058                | [A/T] |                    | INTERGENIC                          |                                              |
| #Ca_Kabuli_SNP755 | Ca_Kabuli_LG03 | 29804078                | [A/G] |                    | INTERGENIC                          |                                              |
| #Ca_Kabuli_SNP756 | Ca_Kabuli_LG04 | 5701907                 | [G/T] |                    | INTERGENIC                          |                                              |
| #Ca_Kabuli_SNP757 | Ca_Kabuli_LG03 | 37160795                | [A/C] | Ca_01047           | SYNONYMOUS_CODING                   | Zinc finger, Sec23/Sec24-type                |
| #Ca_Kabuli_SNP758 | Ca_Kabuli_LG02 | 13217903                | [A/C] | Ca_11681           | SYNONYMOUS_CODING                   | Zinc finger, DHHC-type, palmitoyltransferase |
| #Ca_Kabuli_SNP759 | Ca_Kabuli_LG06 | 23891044                | [G/T] | Ca_11072           | NON_SYNONYMOUS_CODING               | WW/Rsp5/WWP                                  |
| #Ca_Kabuli_SNP760 | Ca_Kabuli_LG03 | 31317521                | [T/G] |                    | INTERGENIC                          |                                              |
| #Ca_Kabuli_SNP761 | Ca_Kabuli_LG03 | 30012090                | [G/A] | Ca_07314           | INTRON                              | Protein phosphatase 2C-like                  |
| #Ca_Kabuli_SNP762 | Ca_Kabuli_LG03 | 30012110                | [T/G] | Ca_07314           | INTRON                              | Protein phosphatase 2C-like                  |
| #Ca_Kabuli_SNP763 | Ca_Kabuli_LG03 | 30011759                | [T/C] | Ca_07314           | NON_SYNONYMOUS_CODING               | Protein phosphatase 2C-like                  |
| #Ca_Kabuli_SNP764 | Ca_Kabuli_LG03 | 1507162                 | [G/A] |                    | INTERGENIC                          |                                              |
| #Ca_Kabuli_SNP765 | Ca_Kabuli_LG03 | 1507167                 | [A/T] |                    | INTERGENIC                          |                                              |
| #Ca_Kabuli_SNP766 | Ca_Kabuli_LG03 | 1507166                 | [C/T] |                    | INTERGENIC                          |                                              |
| #Ca_Kabuli_SNP767 | Ca_Kabuli_LG03 | 29932378                | [C/G] | Ca_07304           | INTRON                              | Myb, DNA-binding                             |
| #Ca_Kabuli_SNP768 | Ca_Kabuli_LG03 | 29932502                | [G/C] | Ca_07304           | INTRON                              | Myb, DNA-binding                             |
| #Ca_Kabuli_SNP769 | Ca_Kabuli_LG04 | 2032475                 | [G/A] | Ca_07822           | INTRON                              | RNA-processing protein, HAT helix            |
| #Ca_Kabuli_SNP770 | Ca_Kabuli_LG05 | 41285171                | [G/T] | Ca_07642           | NON_SYNONYMOUS_CODING               | Protein of unknown function DUF1296          |
| #Ca_Kabuli_SNP771 | Ca_Kabuli_LG03 | 30011669                | [A/G] | Ca_07314           | NON_SYNONYMOUS_CODING               | Protein phosphatase 2C-like                  |
| #Ca_Kabuli_SNP772 | Ca_Kabuli_LG07 | 6780547                 | [C/A] | Ca_06684           | NON_SYNONYMOUS_CODING               | Glycoside hydrolase, family 17               |
| #Ca_Kabuli_SNP773 | Ca_Kabuli_LG03 | 21272962                | [A/C] |                    | INTERGENIC                          |                                              |

| SNP IDs           | Chromosomes    | Physical positions (bp) | SNPs  | Gene accession IDs | Sequence components of genome/genes | Putative functions                                        |
|-------------------|----------------|-------------------------|-------|--------------------|-------------------------------------|-----------------------------------------------------------|
| #Ca_Kabuli_SNP774 | Ca_Kabuli_LG03 | 29958058                | [T/C] |                    | INTERGENIC                          |                                                           |
| #Ca_Kabuli_SNP775 | Ca_Kabuli_LG01 | 9797352                 | [G/T] | Ca_02811           | NON_SYNONYMOUS_CODING               | Pentatricopeptide repeat                                  |
| #Ca_Kabuli_SNP776 | Ca_Kabuli_LG06 | 8091232                 | [C/T] |                    | INTERGENIC                          |                                                           |
| #Ca_Kabuli_SNP777 | Ca_Kabuli_LG03 | 29807248                | [A/G] | Ca_07289           | DOWNSTREAM:1061bases                | Prenylated rab acceptor PRA1                              |
| #Ca_Kabuli_SNP778 | Ca_Kabuli_LG06 | 3394921                 | [A/G] |                    | INTERGENIC                          |                                                           |
| #Ca_Kabuli_SNP779 | Ca_Kabuli_LG03 | 30011584                | [T/C] | Ca_07314           | INTRON                              | Protein phosphatase 2C-like                               |
| #Ca_Kabuli_SNP780 | Ca_Kabuli_LG01 | 662611                  | [T/G] | Ca_00079           | NON_SYNONYMOUS_CODING               | --                                                        |
| #Ca_Kabuli_SNP781 | Ca_Kabuli_LG03 | 29698166                | [G/T] |                    | INTERGENIC                          |                                                           |
| #Ca_Kabuli_SNP782 | Ca_Kabuli_LG04 | 3002826                 | [A/C] | Ca_12098           | SYNONYMOUS_CODING                   | Peptidase M20                                             |
| #Ca_Kabuli_SNP783 | scaffold1579   | 199116                  | [G/T] |                    | INTERGENIC                          |                                                           |
| #Ca_Kabuli_SNP784 | scaffold1860   | 58750                   | [T/G] |                    | INTERGENIC                          |                                                           |
| #Ca_Kabuli_SNP785 | Ca_Kabuli_LG07 | 31314421                | [T/A] |                    | INTERGENIC                          |                                                           |
| #Ca_Kabuli_SNP786 | Ca_Kabuli_LG03 | 31630512                | [T/A] |                    | INTERGENIC                          |                                                           |
| #Ca_Kabuli_SNP787 | Ca_Kabuli_LG06 | 28177397                | [A/C] | Ca_26122           | INTRON                              | SIT4 phosphatase-associated protein family                |
| #Ca_Kabuli_SNP788 | Ca_Kabuli_LG06 | 27591765                | [C/A] |                    | INTERGENIC                          |                                                           |
| #Ca_Kabuli_SNP789 | Ca_Kabuli_LG03 | 1746337                 | [T/G] | Ca_19405           | INTRON                              | Helicase, C-terminal                                      |
| #Ca_Kabuli_SNP790 | Ca_Kabuli_LG08 | 4895122                 | [A/C] |                    | INTERGENIC                          |                                                           |
| #Ca_Kabuli_SNP791 | Ca_Kabuli_LG07 | 10223027                | [T/G] |                    | INTERGENIC                          |                                                           |
| #Ca_Kabuli_SNP792 | Ca_Kabuli_LG03 | 29869380                | [G/A] |                    | INTERGENIC                          |                                                           |
| #Ca_Kabuli_SNP793 | Ca_Kabuli_LG03 | 29954498                | [G/A] |                    | INTERGENIC                          |                                                           |
| #Ca_Kabuli_SNP794 | Ca_Kabuli_LG04 | 45231839                | [T/C] | Ca_09187           | DOWNSTREAM:953bases                 | Phosphorylated adapter RNA export protein, RNA-binding do |
| #Ca_Kabuli_SNP795 | Ca_Kabuli_LG06 | 15451994                | [T/G] | Ca_05328           | SYNONYMOUS_CODING                   | Peptidase A1                                              |
| #Ca_Kabuli_SNP796 | scaffold5120   | 1686                    | [G/C] |                    | INTERGENIC                          |                                                           |
| #Ca_Kabuli_SNP797 | Ca_Kabuli_LG03 | 29982638                | [A/G] |                    | INTERGENIC                          |                                                           |
| #Ca_Kabuli_SNP798 | Ca_Kabuli_LG03 | 29807091                | [C/G] |                    | INTERGENIC                          |                                                           |
| #Ca_Kabuli_SNP799 | Ca_Kabuli_LG03 | 31302060                | [C/T] | Ca_12228           | DOWNSTREAM:1970bases                | --                                                        |
| #Ca_Kabuli_SNP800 | scaffold746    | 148947                  | [G/T] |                    | INTERGENIC                          |                                                           |
| #Ca_Kabuli_SNP801 | Ca_Kabuli_LG06 | 647322                  | [A/C] | Ca_13283           | SYNONYMOUS_CODING                   | --                                                        |
| #Ca_Kabuli_SNP802 | Ca_Kabuli_LG03 | 30004311                | [T/G] |                    | INTERGENIC                          |                                                           |
| #Ca_Kabuli_SNP803 | Ca_Kabuli_LG03 | 29803962                | [A/G] |                    | INTERGENIC                          |                                                           |
| #Ca_Kabuli_SNP804 | Ca_Kabuli_LG08 | 634853                  | [T/G] |                    | INTERGENIC                          |                                                           |

| SNP IDs           | Chromosomes    | Physical positions (bp) | SNPs  | Gene accession IDs | Sequence components of genome/genes | Putative functions                                        |
|-------------------|----------------|-------------------------|-------|--------------------|-------------------------------------|-----------------------------------------------------------|
| #Ca_Kabuli_SNP805 | Ca_Kabuli_LG03 | 31629855                | [G/T] |                    | INTERGENIC                          |                                                           |
| #Ca_Kabuli_SNP806 | Ca_Kabuli_LG04 | 46733965                | [G/A] |                    | INTERGENIC                          |                                                           |
| #Ca_Kabuli_SNP807 | Ca_Kabuli_LG03 | 29954648                | [A/T] |                    | INTERGENIC                          |                                                           |
| #Ca_Kabuli_SNP808 | Ca_Kabuli_LG03 | 31519880                | [T/C] | Ca_12251           | SYNONYMOUS_CODING                   | Oligopeptide transporter                                  |
| #Ca_Kabuli_SNP809 | Ca_Kabuli_LG06 | 10670739                | [T/G] | Ca_08530           | INTRON                              | Aspartate/glutamate/uridylate kinase                      |
| #Ca_Kabuli_SNP810 | Ca_Kabuli_LG07 | 39235271                | [A/C] | Ca_19581           | INTRON                              | BEACH domain                                              |
| #Ca_Kabuli_SNP811 | Ca_Kabuli_LG05 | 48111896                | [T/G] | Ca_04273           | NON_SYNONYMOUS_CODING               | Tudor domain                                              |
| #Ca_Kabuli_SNP812 | Ca_Kabuli_LG06 | 20786070                | [G/C] | Ca_16351           | SYNONYMOUS_CODING                   | Toll-Interleukin receptor                                 |
| #Ca_Kabuli_SNP813 | Ca_Kabuli_LG06 | 20786071                | [G/T] | Ca_16351           | NON_SYNONYMOUS_CODING               | Toll-Interleukin receptor                                 |
| #Ca_Kabuli_SNP814 | Ca_Kabuli_LG03 | 31321907                | [C/T] | Ca_12232           | SYNONYMOUS_CODING                   | VHS                                                       |
| #Ca_Kabuli_SNP815 | Ca_Kabuli_LG03 | 31321877                | [A/G] | Ca_12232           | SYNONYMOUS_CODING                   | VHS                                                       |
| #Ca_Kabuli_SNP816 | Ca_Kabuli_LG05 | 42928969                | [T/G] | Ca_11315           | NON_SYNONYMOUS_CODING               | SANT domain, DNA binding                                  |
| #Ca_Kabuli_SNP817 | Ca_Kabuli_LG03 | 31322404                | [C/T] | Ca_12232           | SYNONYMOUS_CODING                   | VHS                                                       |
| #Ca_Kabuli_SNP818 | Ca_Kabuli_LG02 | 30921092                | [C/A] | Ca_12470           | SYNONYMOUS_CODING                   | Clathrin, heavy chain/VPS, 7-fold repeat                  |
| #Ca_Kabuli_SNP819 | Ca_Kabuli_LG02 | 36016362                | [A/G] |                    | INTERGENIC                          |                                                           |
| #Ca_Kabuli_SNP820 | Ca_Kabuli_LG05 | 35877479                | [T/A] | Ca_01638           | NON_SYNONYMOUS_CODING               | Mitochondrial carrier protein                             |
| #Ca_Kabuli_SNP821 | Ca_Kabuli_LG02 | 36046767                | [T/A] |                    | INTERGENIC                          |                                                           |
| #Ca_Kabuli_SNP822 | Ca_Kabuli_LG03 | 29804223                | [A/T] |                    | INTERGENIC                          |                                                           |
| #Ca_Kabuli_SNP823 | Ca_Kabuli_LG03 | 39642781                | [A/T] |                    | INTERGENIC                          |                                                           |
| #Ca_Kabuli_SNP824 | Ca_Kabuli_LG07 | 29313283                | [T/C] |                    | INTERGENIC                          |                                                           |
| #Ca_Kabuli_SNP825 | Ca_Kabuli_LG05 | 46260828                | [A/C] | Ca_04079           | SYNONYMOUS_CODING                   | Mitochondrial inner membrane translocase complex, subunit |
| #Ca_Kabuli_SNP826 | Ca_Kabuli_LG04 | 14785557                | [A/C] | Ca_05626           | DOWNSTREAM:1585bases                | WD40 repeat                                               |
| #Ca_Kabuli_SNP827 | Ca_Kabuli_LG08 | 9112184                 | [A/C] | Ca_11534           | SYNONYMOUS_CODING                   | Protein of unknown function DUF1399                       |
| #Ca_Kabuli_SNP828 | Ca_Kabuli_LG04 | 44590697                | [A/C] | Ca_09131           | SYNONYMOUS_CODING                   | Protein phosphatase 2C, manganese/magnesium aspartate k   |
| #Ca_Kabuli_SNP829 | Ca_Kabuli_LG08 | 11243263                | [A/C] | Ca_16834           | NON_SYNONYMOUS_CODING               | Histone H1/H5                                             |
| #Ca_Kabuli_SNP830 | Ca_Kabuli_LG07 | 17662191                | [A/C] |                    | INTERGENIC                          |                                                           |
| #Ca_Kabuli_SNP831 | Ca_Kabuli_LG05 | 30939325                | [G/T] | Ca_04791           | DOWNSTREAM:1364bases                | BURP                                                      |
| #Ca_Kabuli_SNP832 | Ca_Kabuli_LG03 | 25311403                | [T/A] | Ca_05997           | INTRON                              | Protein of unknown function DUF506, plant                 |
| #Ca_Kabuli_SNP833 | Ca_Kabuli_LG04 | 6952876                 | [T/G] | Ca_03542           | SYNONYMOUS_CODING                   | Protein kinase, catalytic domain                          |
| #Ca_Kabuli_SNP834 | Ca_Kabuli_LG04 | 7163980                 | [A/C] | Ca_03518           | INTRON                              | Peptidase S14, ClpP                                       |
| #Ca_Kabuli_SNP835 | Ca_Kabuli_LG04 | 18168385                | [G/T] | Ca_18655           | INTRON                              | Domain of unknown function DUF1115                        |

| SNP IDs           | Chromosomes    | Physical positions (bp) | SNPs  | Gene accession IDs | Sequence components of genome/genes | Putative functions                                   |
|-------------------|----------------|-------------------------|-------|--------------------|-------------------------------------|------------------------------------------------------|
| #Ca_Kabuli_SNP836 | Ca_Kabuli_LG01 | 7160645                 | [T/C] | Ca_07974           | INTRON                              | NUDIX hydrolase domain                               |
| #Ca_Kabuli_SNP837 | Ca_Kabuli_LG02 | 14134681                | [C/A] |                    | INTERGENIC                          |                                                      |
| #Ca_Kabuli_SNP838 | scaffold1676   | 50680                   | [A/C] |                    | INTERGENIC                          |                                                      |
| #Ca_Kabuli_SNP839 | Ca_Kabuli_LG03 | 38496235                | [T/A] | Ca_01203           | INTRON                              | Exportin-1/Importin-beta-like                        |
| #Ca_Kabuli_SNP840 | Ca_Kabuli_LG05 | 40700290                | [C/A] | Ca_07589           | NON_SYNONYMOUS_CODING               | Glycoside hydrolase, family 17                       |
| #Ca_Kabuli_SNP841 | Ca_Kabuli_LG03 | 17918036                | [A/C] |                    | INTERGENIC                          |                                                      |
| #Ca_Kabuli_SNP842 | Ca_Kabuli_LG04 | 18117799                | [G/T] | Ca_18651           | NON_SYNONYMOUS_CODING               | Chalcone isomerase, subgroup                         |
| #Ca_Kabuli_SNP843 | Ca_Kabuli_LG07 | 815504                  | [G/T] | Ca_03396           | NON_SYNONYMOUS_CODING               | Armadillo                                            |
| #Ca_Kabuli_SNP844 | Ca_Kabuli_LG06 | 24480359                | [C/A] | Ca_11023           | NON_SYNONYMOUS_CODING               | Armadillo                                            |
| #Ca_Kabuli_SNP845 | Ca_Kabuli_LG04 | 5233688                 | [A/C] |                    | INTERGENIC                          |                                                      |
| #Ca_Kabuli_SNP846 | Ca_Kabuli_LG07 | 2554390                 | [C/A] | Ca_03223           | NON_SYNONYMOUS_CODING               | Peptidase S8/S53, subtilisin/kexin/sedolisin         |
| #Ca_Kabuli_SNP847 | Ca_Kabuli_LG04 | 45225059                | [G/A] |                    | INTERGENIC                          |                                                      |
| #Ca_Kabuli_SNP848 | Ca_Kabuli_LG06 | 11665338                | [T/G] | Ca_25061           | SYNONYMOUS_CODING                   | Amine oxidase                                        |
| #Ca_Kabuli_SNP849 | Ca_Kabuli_LG04 | 6462846                 | [C/A] | Ca_03597           | NON_SYNONYMOUS_CODING               | Peptidase A1                                         |
| #Ca_Kabuli_SNP850 | Ca_Kabuli_LG01 | 12413016                | [T/A] | Ca_02509           | NON_SYNONYMOUS_CODING               | ATPase, P-type, K/Mg/Cd/Cu/Zn/Na/Ca/Na/H-transporter |
| #Ca_Kabuli_SNP851 | Ca_Kabuli_LG03 | 36206615                | [C/A] | Ca_00925           | INTRON                              | rRNA processing                                      |
| #Ca_Kabuli_SNP852 | Ca_Kabuli_LG03 | 19978343                | [A/C] | Ca_09399           | NON_SYNONYMOUS_CODING               | Ammonium transporter                                 |
| #Ca_Kabuli_SNP853 | Ca_Kabuli_LG03 | 36150722                | [A/G] |                    | INTERGENIC                          |                                                      |
| #Ca_Kabuli_SNP854 | Ca_Kabuli_LG05 | 39597565                | [C/A] | Ca_07489           | INTRON                              | Phosphatidylinositol 3-/4-kinase, catalytic          |
| #Ca_Kabuli_SNP855 | Ca_Kabuli_LG01 | 3544912                 | [A/C] | Ca_00430           | DOWNSTREAM:946bases                 | Ankyrin repeat                                       |
| #Ca_Kabuli_SNP856 | Ca_Kabuli_LG03 | 36070879                | [C/G] | Ca_00905           | DOWNSTREAM:1492bases                | DNA methylase, N-6 adenine-specific, conserved site  |
| #Ca_Kabuli_SNP857 | Ca_Kabuli_LG04 | 37356892                | [T/C] | Ca_15140           | INTRON                              | HEAT                                                 |
| #Ca_Kabuli_SNP858 | Ca_Kabuli_LG03 | 36205806                | [G/T] | Ca_00925           | DOWNSTREAM:342bases                 | rRNA processing                                      |
| #Ca_Kabuli_SNP859 | Ca_Kabuli_LG08 | 1794714                 | [T/G] | Ca_02426           | SYNONYMOUS_CODING                   | ATPase, P-type, K/Mg/Cd/Cu/Zn/Na/Ca/Na/H-transporter |
| #Ca_Kabuli_SNP860 | Ca_Kabuli_LG03 | 36118120                | [C/T] | Ca_00911           | INTRON                              | --                                                   |
| #Ca_Kabuli_SNP861 | Ca_Kabuli_LG07 | 21616285                | [A/G] | Ca_14512           | INTRON                              | Clathrin/coatomer adaptor, adaptin-like, N-terminal  |
| #Ca_Kabuli_SNP862 | Ca_Kabuli_LG05 | 17494702                | [G/A] |                    | INTERGENIC                          |                                                      |
| #Ca_Kabuli_SNP863 | Ca_Kabuli_LG03 | 36004668                | [G/A] | Ca_00896           | INTRON                              | Protease-associated domain, PA                       |
| #Ca_Kabuli_SNP864 | Ca_Kabuli_LG07 | 34947544                | [A/C] | Ca_17626           | INTRON                              | Phosphoribosyltransferase                            |
| #Ca_Kabuli_SNP865 | Ca_Kabuli_LG06 | 46898699                | [G/T] |                    | INTERGENIC                          |                                                      |
| #Ca_Kabuli_SNP866 | Ca_Kabuli_LG06 | 27331819                | [A/C] | Ca_14617           | NON_SYNONYMOUS_CODING               | RNA recognition motif domain                         |

| SNP IDs           | Chromosomes    | Physical positions (bp) | SNPs  | Gene accession IDs | Sequence components of genome/genes | Putative functions                                   |
|-------------------|----------------|-------------------------|-------|--------------------|-------------------------------------|------------------------------------------------------|
| #Ca_Kabuli_SNP867 | scaffold36     | 74749                   | [G/A] |                    | INTERGENIC                          |                                                      |
| #Ca_Kabuli_SNP868 | Ca_Kabuli_LG06 | 56593129                | [A/C] | Ca_17397           | SYNONYMOUS_CODING                   | Helicase, C-terminal                                 |
| #Ca_Kabuli_SNP869 | Ca_Kabuli_LG07 | 12692636                | [G/T] | Ca_09251           | DOWNSTREAM:904bases                 | Tetratricopeptide TPR-1                              |
| #Ca_Kabuli_SNP870 | Ca_Kabuli_LG01 | 32286506                | [A/C] |                    | INTERGENIC                          |                                                      |
| #Ca_Kabuli_SNP871 | Ca_Kabuli_LG01 | 548                     | [G/C] |                    | INTERGENIC                          |                                                      |
| #Ca_Kabuli_SNP872 | Ca_Kabuli_LG08 | 1794813                 | [T/G] | Ca_02426           | SYNONYMOUS_CODING                   | ATPase, P-type, K/Mg/Cd/Cu/Zn/Na/Ca/Na/H-transporter |
| #Ca_Kabuli_SNP873 | Ca_Kabuli_LG03 | 36050259                | [G/T] | Ca_00903           | SYNONYMOUS_CODING                   | SWAP/Surp                                            |
| #Ca_Kabuli_SNP874 | Ca_Kabuli_LG03 | 29676564                | [A/G] | Ca_07272           | DOWNSTREAM:1041bases                | --                                                   |
| #Ca_Kabuli_SNP875 | Ca_Kabuli_LG03 | 36132586                | [G/T] |                    | INTERGENIC                          |                                                      |
| #Ca_Kabuli_SNP876 | Ca_Kabuli_LG03 | 36072770                | [G/A] |                    | INTERGENIC                          |                                                      |
| #Ca_Kabuli_SNP877 | Ca_Kabuli_LG03 | 31228557                | [G/T] |                    | INTERGENIC                          |                                                      |
| #Ca_Kabuli_SNP878 | Ca_Kabuli_LG07 | 17133036                | [C/T] |                    | INTERGENIC                          |                                                      |
| #Ca_Kabuli_SNP879 | scaffold703    | 491190                  | [A/C] |                    | INTERGENIC                          |                                                      |
| #Ca_Kabuli_SNP880 | Ca_Kabuli_LG03 | 35979412                | [G/T] |                    | INTERGENIC                          |                                                      |
| #Ca_Kabuli_SNP881 | Ca_Kabuli_LG02 | 26092916                | [C/A] |                    | INTERGENIC                          |                                                      |
| #Ca_Kabuli_SNP882 | Ca_Kabuli_LG02 | 30951724                | [T/A] | Ca_12469           | SYNONYMOUS_CODING                   | Clathrin, heavy chain/VPS, 7-fold repeat             |
| #Ca_Kabuli_SNP883 | Ca_Kabuli_LG03 | 36071033                | [G/A] | Ca_00905           | DOWNSTREAM:1338bases                | DNA methylase, N-6 adenine-specific, conserved site  |
| #Ca_Kabuli_SNP884 | Ca_Kabuli_LG03 | 8933221                 | [T/A] | Ca_25280           | INTRON                              | ABC transporter-like                                 |
| #Ca_Kabuli_SNP885 | Ca_Kabuli_LG03 | 36085966                | [A/G] |                    | INTERGENIC                          |                                                      |
| #Ca_Kabuli_SNP886 | Ca_Kabuli_LG07 | 22731293                | [T/G] | Ca_19530           | INTRON                              | Haloacid dehalogenase-like hydrolase                 |
| #Ca_Kabuli_SNP887 | Ca_Kabuli_LG01 | 14623271                | [T/C] | Ca_07071           | NON_SYNONYMOUS_CODING               | Ovarian tumour, otubain                              |
| #Ca_Kabuli_SNP888 | Ca_Kabuli_LG04 | 48464448                | [T/G] | Ca_10746           | NON_SYNONYMOUS_CODING               | Zinc finger, CCHC-type                               |
| #Ca_Kabuli_SNP889 | Ca_Kabuli_LG04 | 9498227                 | [A/C] | Ca_08437           | NON_SYNONYMOUS_CODING               | Malectin                                             |
| #Ca_Kabuli_SNP890 | scaffold39     | 47663                   | [A/T] |                    | INTERGENIC                          |                                                      |
| #Ca_Kabuli_SNP891 | Ca_Kabuli_LG01 | 42452647                | [T/G] |                    | INTERGENIC                          |                                                      |
| #Ca_Kabuli_SNP892 | Ca_Kabuli_LG03 | 31457191                | [C/T] | Ca_12244           | SYNONYMOUS_CODING                   | Phytochelatin synthase                               |
| #Ca_Kabuli_SNP893 | Ca_Kabuli_LG01 | 1117450                 | [G/T] | Ca_00138           | SYNONYMOUS_CODING                   | HEAT                                                 |
| #Ca_Kabuli_SNP894 | Ca_Kabuli_LG03 | 36050319                | [C/T] | Ca_00903           | SYNONYMOUS_CODING                   | SWAP/Surp                                            |
| #Ca_Kabuli_SNP895 | Ca_Kabuli_LG03 | 15745336                | [A/C] | Ca_17048           | INTRON                              | Forkhead-associated (FHA) domain                     |
| #Ca_Kabuli_SNP896 | Ca_Kabuli_LG05 | 45254112                | [T/G] | Ca_03969           | NON_SYNONYMOUS_CODING               | Zinc finger, C2H2-type matrin                        |
| #Ca_Kabuli_SNP897 | Ca_Kabuli_LG01 | 579                     | [C/T] |                    | INTERGENIC                          |                                                      |



| SNP IDs           | Chromosomes    | Physical positions (bp) | SNPs  | Gene accession IDs | Sequence components of genome/genes | Putative functions                                     |
|-------------------|----------------|-------------------------|-------|--------------------|-------------------------------------|--------------------------------------------------------|
| #Ca_Kabuli_SNP898 | Ca_Kabuli_LG04 | 39081951                | [A/G] | Ca_13074           | INTRON                              | Cyclic nucleotide-binding domain                       |
| #Ca_Kabuli_SNP899 | Ca_Kabuli_LG08 | 4807088                 | [T/G] |                    | INTERGENIC                          |                                                        |
| #Ca_Kabuli_SNP900 | Ca_Kabuli_LG01 | 4906831                 | [G/T] | Ca_00577           | DOWNSTREAM:1036bases                | Disease resistance protein                             |
| #Ca_Kabuli_SNP901 | Ca_Kabuli_LG06 | 21322884                | [A/G] |                    | INTERGENIC                          |                                                        |
| #Ca_Kabuli_SNP902 | scaffold1027   | 3793                    | [G/A] |                    | INTERGENIC                          |                                                        |
| #Ca_Kabuli_SNP903 | scaffold7116   | 964                     | [C/A] |                    | INTERGENIC                          |                                                        |
| #Ca_Kabuli_SNP904 | Ca_Kabuli_LG02 | 33399066                | [G/T] | Ca_10186           | STOP_GAINED                         | Disease resistance protein                             |
| #Ca_Kabuli_SNP905 | Ca_Kabuli_LG03 | 21687960                | [A/T] | Ca_09523           | NON_SYNONYMOUS_CODING               | Aminoacyl-tRNA synthetase, class II (D/K/N)            |
| #Ca_Kabuli_SNP906 | Ca_Kabuli_LG06 | 14857680                | [G/A] | Ca_05260           | SYNONYMOUS_CODING                   | Integrase, catalytic core                              |
| #Ca_Kabuli_SNP907 | Ca_Kabuli_LG04 | 30300334                | [C/T] | Ca_14192           | SYNONYMOUS_CODING                   | SNF2-related                                           |
| #Ca_Kabuli_SNP908 | Ca_Kabuli_LG03 | 35920780                | [T/G] | Ca_00884           | SYNONYMOUS_CODING                   | --                                                     |
| #Ca_Kabuli_SNP909 | Ca_Kabuli_LG03 | 36003699                | [A/G] | Ca_00896           | INTRON                              | Protease-associated domain, PA                         |
| #Ca_Kabuli_SNP910 | scaffold57     | 257344                  | [C/T] |                    | INTERGENIC                          |                                                        |
| #Ca_Kabuli_SNP911 | Ca_Kabuli_LG03 | 30358849                | [T/G] |                    | INTERGENIC                          |                                                        |
| #Ca_Kabuli_SNP912 | scaffold844    | 70506                   | [G/A] |                    | INTERGENIC                          |                                                        |
| #Ca_Kabuli_SNP913 | scaffold2881   | 3806                    | [C/G] |                    | INTERGENIC                          |                                                        |
| #Ca_Kabuli_SNP914 | Ca_Kabuli_LG03 | 38074259                | [C/A] | Ca_01151           | DOWNSTREAM:911bases                 | Rad10                                                  |
| #Ca_Kabuli_SNP915 | Ca_Kabuli_LG06 | 17026983                | [T/A] |                    | INTERGENIC                          |                                                        |
| #Ca_Kabuli_SNP916 | Ca_Kabuli_LG03 | 31267639                | [T/A] |                    | INTERGENIC                          |                                                        |
| #Ca_Kabuli_SNP917 | Ca_Kabuli_LG02 | 5866795                 | [A/G] |                    | INTERGENIC                          |                                                        |
| #Ca_Kabuli_SNP918 | scaffold214    | 136077                  | [C/G] |                    | INTERGENIC                          |                                                        |
| #Ca_Kabuli_SNP919 | Ca_Kabuli_LG01 | 11405118                | [G/A] |                    | INTERGENIC                          |                                                        |
| #Ca_Kabuli_SNP920 | Ca_Kabuli_LG04 | 42143779                | [G/A] | Ca_10910           | INTRON                              | Glycoside hydrolase, family 28                         |
| #Ca_Kabuli_SNP921 | scaffold1207   | 29514                   | [C/T] |                    | INTERGENIC                          |                                                        |
| #Ca_Kabuli_SNP922 | scaffold99     | 142843                  | [C/T] |                    | INTERGENIC                          |                                                        |
| #Ca_Kabuli_SNP923 | Ca_Kabuli_LG04 | 5630336                 | [G/A] |                    | INTERGENIC                          |                                                        |
| #Ca_Kabuli_SNP924 | Ca_Kabuli_LG03 | 39504242                | [A/G] | Ca_01321           | DOWNSTREAM:1205bases                | Zinc finger, RING-type                                 |
| #Ca_Kabuli_SNP925 | Ca_Kabuli_LG03 | 36205845                | [A/G] | Ca_00925           | DOWNSTREAM:303bases                 | rRNA processing                                        |
| #Ca_Kabuli_SNP926 | Ca_Kabuli_LG03 | 36205819                | [A/G] | Ca_00925           | DOWNSTREAM:329bases                 | rRNA processing                                        |
| #Ca_Kabuli_SNP927 | Ca_Kabuli_LG04 | 3353586                 | [A/G] | Ca_12138           | INTRON                              | Mg2+ transporter protein, CorA-like                    |
| #Ca_Kabuli_SNP928 | Ca_Kabuli_LG05 | 37207855                | [G/T] | Ca_01496           | NON_SYNONYMOUS_CODING               | Peptidase C19, ubiquitin carboxyl-terminal hydrolase 2 |

| SNP IDs           | Chromosomes    | Physical positions (bp) | SNPs  | Gene accession IDs | Sequence components of genome/genes | Putative functions                |
|-------------------|----------------|-------------------------|-------|--------------------|-------------------------------------|-----------------------------------|
| #Ca_Kabuli_SNP929 | Ca_Kabuli_LG03 | 37942807                | [A/G] |                    | INTERGENIC                          |                                   |
| #Ca_Kabuli_SNP930 | Ca_Kabuli_LG01 | 11361625                | [A/C] | Ca_02617           | SYNONYMOUS_CODING                   | Protein kinase, catalytic domain  |
| #Ca_Kabuli_SNP931 | scaffold1420   | 328816                  | [T/A] |                    | INTERGENIC                          |                                   |
| #Ca_Kabuli_SNP932 | Ca_Kabuli_LG05 | 39038254                | [A/T] |                    | INTERGENIC                          |                                   |
| #Ca_Kabuli_SNP933 | Ca_Kabuli_LG03 | 31542359                | [A/C] | Ca_12254           | DOWNSTREAM:811bases                 | Oligopeptide transporter          |
| #Ca_Kabuli_SNP934 | Ca_Kabuli_LG07 | 32522207                | [T/G] | Ca_10028           | SYNONYMOUS_CODING                   | SANT domain, DNA binding          |
| #Ca_Kabuli_SNP935 | Ca_Kabuli_LG04 | 38215267                | [A/G] | Ca_13132           | INTRON                              | AMP-dependent synthetase/ligase   |
| #Ca_Kabuli_SNP936 | Ca_Kabuli_LG04 | 45225077                | [A/T] |                    | INTERGENIC                          |                                   |
| #Ca_Kabuli_SNP937 | Ca_Kabuli_LG04 | 45225093                | [G/A] |                    | INTERGENIC                          |                                   |
| #Ca_Kabuli_SNP938 | Ca_Kabuli_LG03 | 38060814                | [A/G] | Ca_01149           | SYNONYMOUS_CODING                   | Peptidase S14, ClpP               |
| #Ca_Kabuli_SNP939 | Ca_Kabuli_LG03 | 38049996                | [A/G] |                    | INTERGENIC                          |                                   |
| #Ca_Kabuli_SNP940 | Ca_Kabuli_LG01 | 39107150                | [G/C] |                    | INTERGENIC                          |                                   |
| #Ca_Kabuli_SNP941 | Ca_Kabuli_LG03 | 36441575                | [A/G] |                    | INTERGENIC                          |                                   |
| #Ca_Kabuli_SNP942 | Ca_Kabuli_LG03 | 37985947                | [A/T] | Ca_01139           | SYNONYMOUS_CODING                   | Metallo-dependent phosphatase     |
| #Ca_Kabuli_SNP943 | Ca_Kabuli_LG03 | 37985977                | [A/G] | Ca_01139           | SYNONYMOUS_CODING                   | Metallo-dependent phosphatase     |
| #Ca_Kabuli_SNP944 | Ca_Kabuli_LG02 | 32670089                | [C/A] | Ca_10254           | NON_SYNONYMOUS_CODING               | BTB/POZ-like                      |
| #Ca_Kabuli_SNP945 | Ca_Kabuli_LG06 | 56793039                | [T/A] |                    | INTERGENIC                          |                                   |
| #Ca_Kabuli_SNP946 | Ca_Kabuli_LG03 | 38103368                | [T/A] | Ca_01154           | INTRON                              | Peptidase S1/S6, chymotrypsin/Hap |
| #Ca_Kabuli_SNP947 | Ca_Kabuli_LG06 | 25575045                | [C/A] | Ca_24008           | NON_SYNONYMOUS_CODING               | --                                |
| #Ca_Kabuli_SNP948 | Ca_Kabuli_LG04 | 40481316                | [T/G] | Ca_14877           | NON_SYNONYMOUS_CODING               | Alpha/beta hydrolase fold-1       |
| #Ca_Kabuli_SNP949 | Ca_Kabuli_LG04 | 48497704                | [A/C] |                    | INTERGENIC                          |                                   |
| #Ca_Kabuli_SNP950 | scaffold617    | 26134                   | [C/A] |                    | INTERGENIC                          |                                   |
| #Ca_Kabuli_SNP951 | Ca_Kabuli_LG01 | 17523921                | [C/T] |                    | INTERGENIC                          |                                   |
| #Ca_Kabuli_SNP952 | scaffold518    | 72953                   | [A/T] |                    | INTERGENIC                          |                                   |
| #Ca_Kabuli_SNP953 | scaffold168    | 208768                  | [G/A] |                    | INTERGENIC                          |                                   |
| #Ca_Kabuli_SNP954 | Ca_Kabuli_LG03 | 38112802                | [C/T] |                    | INTERGENIC                          |                                   |
| #Ca_Kabuli_SNP955 | Ca_Kabuli_LG03 | 38112801                | [T/C] |                    | INTERGENIC                          |                                   |
| #Ca_Kabuli_SNP956 | Ca_Kabuli_LG03 | 31228552                | [C/A] |                    | INTERGENIC                          |                                   |
| #Ca_Kabuli_SNP957 | Ca_Kabuli_LG06 | 2175768                 | [A/C] |                    | INTERGENIC                          |                                   |
| #Ca_Kabuli_SNP958 | Ca_Kabuli_LG05 | 21033919                | [A/C] |                    | INTERGENIC                          |                                   |
| #Ca_Kabuli_SNP959 | Ca_Kabuli_LG03 | 38059303                | [T/C] | Ca_01149           | DOWNSTREAM:54bases                  | Peptidase S14, ClpP               |

| SNP IDs           | Chromosomes    | Physical positions (bp) | SNPs  | Gene accession IDs | Sequence components of genome/genes | Putative functions                                        |
|-------------------|----------------|-------------------------|-------|--------------------|-------------------------------------|-----------------------------------------------------------|
| #Ca_Kabuli_SNP960 | Ca_Kabuli_LG04 | 16149795                | [C/T] |                    | INTERGENIC                          |                                                           |
| #Ca_Kabuli_SNP961 | scaffold6688   | 898                     | [T/A] |                    | INTERGENIC                          |                                                           |
| #Ca_Kabuli_SNP962 | Ca_Kabuli_LG03 | 38026725                | [G/A] | Ca_01143           | SYNONYMOUS_CODING                   | --                                                        |
| #Ca_Kabuli_SNP963 | Ca_Kabuli_LG04 | 14960467                | [T/G] | Ca_05605           | NON_SYNONYMOUS_CODING               | Protein of unknown function DUF1168                       |
| #Ca_Kabuli_SNP964 | Ca_Kabuli_LG03 | 38117169                | [C/T] | Ca_01156           | INTRON                              | Acyl-CoA-binding protein, ACBP                            |
| #Ca_Kabuli_SNP965 | Ca_Kabuli_LG04 | 34915986                | [C/T] | Ca_19997           | INTRON                              | Inosine/uridine-preferring nucleoside hydrolase domain    |
| #Ca_Kabuli_SNP966 | Ca_Kabuli_LG03 | 38112971                | [A/G] |                    | INTERGENIC                          |                                                           |
| #Ca_Kabuli_SNP967 | Ca_Kabuli_LG03 | 38115564                | [A/T] | Ca_01156           | DOWNSTREAM:1360bases                | Acyl-CoA-binding protein, ACBP                            |
| #Ca_Kabuli_SNP968 | Ca_Kabuli_LG01 | 3711498                 | [T/G] |                    | INTERGENIC                          |                                                           |
| #Ca_Kabuli_SNP969 | Ca_Kabuli_LG01 | 40137893                | [T/G] | Ca_13900           | SYNONYMOUS_CODING                   | Helicase, C-terminal                                      |
| #Ca_Kabuli_SNP970 | Ca_Kabuli_LG03 | 37985776                | [T/A] | Ca_01139           | SYNONYMOUS_CODING                   | Metallo-dependent phosphatase                             |
| #Ca_Kabuli_SNP971 | Ca_Kabuli_LG04 | 24729198                | [A/C] | Ca_20853           | INTRON                              | Protein kinase, catalytic domain                          |
| #Ca_Kabuli_SNP972 | scaffold190    | 49263                   | [G/A] |                    | INTERGENIC                          |                                                           |
| #Ca_Kabuli_SNP973 | Ca_Kabuli_LG07 | 33912866                | [C/T] |                    | INTERGENIC                          |                                                           |
| #Ca_Kabuli_SNP974 | Ca_Kabuli_LG03 | 38034006                | [G/C] |                    | INTERGENIC                          |                                                           |
| #Ca_Kabuli_SNP975 | scaffold6688   | 897                     | [C/G] |                    | INTERGENIC                          |                                                           |
| #Ca_Kabuli_SNP976 | Ca_Kabuli_LG03 | 28176375                | [A/C] | Ca_26949           | DOWNSTREAM:1622bases                | WD40 repeat                                               |
| #Ca_Kabuli_SNP977 | Ca_Kabuli_LG05 | 32383735                | [T/C] |                    | INTERGENIC                          |                                                           |
| #Ca_Kabuli_SNP978 | Ca_Kabuli_LG05 | 80027                   | [C/A] | Ca_18162           | NON_SYNONYMOUS_CODING               | Peptidase S8/S53, subtilisin/kexin/sedolisin              |
| #Ca_Kabuli_SNP979 | Ca_Kabuli_LG02 | 20812096                | [G/A] |                    | INTERGENIC                          |                                                           |
| #Ca_Kabuli_SNP980 | Ca_Kabuli_LG06 | 1817775                 | [G/A] |                    | INTERGENIC                          |                                                           |
| #Ca_Kabuli_SNP981 | scaffold6688   | 899                     | [A/T] |                    | INTERGENIC                          |                                                           |
| #Ca_Kabuli_SNP982 | Ca_Kabuli_LG03 | 38171434                | [A/G] |                    | INTERGENIC                          |                                                           |
| #Ca_Kabuli_SNP983 | Ca_Kabuli_LG03 | 38171485                | [T/C] |                    | INTERGENIC                          |                                                           |
| #Ca_Kabuli_SNP984 | Ca_Kabuli_LG03 | 38171486                | [A/C] |                    | INTERGENIC                          |                                                           |
| #Ca_Kabuli_SNP985 | Ca_Kabuli_LG03 | 38171484                | [G/A] |                    | INTERGENIC                          |                                                           |
| #Ca_Kabuli_SNP986 | Ca_Kabuli_LG03 | 39124767                | [A/C] | Ca_01274           | INTRON                              | HEAT                                                      |
| #Ca_Kabuli_SNP987 | Ca_Kabuli_LG07 | 47840119                | [A/C] | Ca_22546           | SYNONYMOUS_CODING                   | Ubiquitin-conjugating enzyme, E2                          |
| #Ca_Kabuli_SNP988 | scaffold6688   | 896                     | [C/A] |                    | INTERGENIC                          |                                                           |
| #Ca_Kabuli_SNP989 | Ca_Kabuli_LG06 | 54237764                | [A/C] | Ca_16280           | SYNONYMOUS_CODING                   | Bacterial surface antigen (D15)                           |
| #Ca_Kabuli_SNP990 | Ca_Kabuli_LG03 | 38169102                | [T/G] | Ca_01160           | INTRON                              | DNA-directed DNA polymerase, family B, exonuclease domain |

| SNP IDs            | Chromosomes    | Physical positions (bp) | SNPs  | Gene accession IDs | Sequence components of genome/genes | Putative functions                                        |
|--------------------|----------------|-------------------------|-------|--------------------|-------------------------------------|-----------------------------------------------------------|
| #Ca_Kabuli_SNP991  | Ca_Kabuli_LG03 | 38169101                | [A/G] | Ca_01160           | INTRON                              | DNA-directed DNA polymerase, family B, exonuclease domain |
| #Ca_Kabuli_SNP992  | Ca_Kabuli_LG03 | 39628916                | [G/A] | Ca_01341           | DOWNSTREAM:305bases                 | Cytochrome b5                                             |
| #Ca_Kabuli_SNP993  | Ca_Kabuli_LG03 | 38913449                | [C/T] | Ca_01250           | DOWNSTREAM:1021bases                | --                                                        |
| #Ca_Kabuli_SNP994  | Ca_Kabuli_LG02 | 24220955                | [G/T] | Ca_21666           | INTRON                              | SNF2-related                                              |
| #Ca_Kabuli_SNP995  | Ca_Kabuli_LG04 | 10200523                | [A/C] | Ca_08490           | INTRON                              | Peptidase M28                                             |
| #Ca_Kabuli_SNP996  | Ca_Kabuli_LG03 | 38147699                | [T/C] |                    | INTERGENIC                          |                                                           |
| #Ca_Kabuli_SNP997  | Ca_Kabuli_LG06 | 2973756                 | [A/C] | Ca_10439           | INTRON                              | Alpha-D-phosphohexomutase                                 |
| #Ca_Kabuli_SNP998  | Ca_Kabuli_LG04 | 10200521                | [C/A] | Ca_08490           | INTRON                              | Peptidase M28                                             |
| #Ca_Kabuli_SNP999  | Ca_Kabuli_LG05 | 44422686                | [C/A] | Ca_03889           | INTRON                              | SET domain                                                |
| #Ca_Kabuli_SNP1000 | Ca_Kabuli_LG07 | 7737899                 | [T/C] |                    | INTERGENIC                          |                                                           |
| #Ca_Kabuli_SNP1001 | Ca_Kabuli_LG06 | 6444243                 | [G/A] |                    | INTERGENIC                          |                                                           |
| #Ca_Kabuli_SNP1002 | Ca_Kabuli_LG05 | 41678072                | [A/T] | Ca_19215           | INTRON                              | Argonaute/Dicer protein, PAZ                              |
| #Ca_Kabuli_SNP1003 | scaffold307    | 215950                  | [G/C] |                    | INTERGENIC                          |                                                           |
| #Ca_Kabuli_SNP1004 | Ca_Kabuli_LG08 | 8560283                 | [A/C] |                    | INTERGENIC                          |                                                           |
| #Ca_Kabuli_SNP1005 | Ca_Kabuli_LG02 | 26035673                | [C/T] | Ca_14310           | NON_SYNONYMOUS_CODING               | Pentatricopeptide repeat                                  |
| #Ca_Kabuli_SNP1006 | Ca_Kabuli_LG08 | 16284238                | [C/T] | Ca_15549           | INTRON                              | --                                                        |
| #Ca_Kabuli_SNP1007 | Ca_Kabuli_LG01 | 2481257                 | [A/T] |                    | INTERGENIC                          |                                                           |
| #Ca_Kabuli_SNP1008 | Ca_Kabuli_LG05 | 32171632                | [G/A] | Ca_04917           | INTRON                              | Tetrapyrrole methylase                                    |
| #Ca_Kabuli_SNP1009 | scaffold1245   | 625332                  | [A/C] |                    | INTERGENIC                          |                                                           |
| #Ca_Kabuli_SNP1010 | Ca_Kabuli_LG06 | 20766355                | [A/C] |                    | INTERGENIC                          |                                                           |
| #Ca_Kabuli_SNP1011 | Ca_Kabuli_LG06 | 11128164                | [G/T] | Ca_20479           | INTRON                              | Glycoside hydrolase, family 63                            |
| #Ca_Kabuli_SNP1012 | Ca_Kabuli_LG05 | 48005082                | [T/C] |                    | INTERGENIC                          |                                                           |
| #Ca_Kabuli_SNP1013 | Ca_Kabuli_LG05 | 34857308                | [G/T] | Ca_01754           | INTRON                              | AUX/IAA protein                                           |
| #Ca_Kabuli_SNP1014 | Ca_Kabuli_LG04 | 30603950                | [A/G] |                    | INTERGENIC                          |                                                           |
| #Ca_Kabuli_SNP1015 | Ca_Kabuli_LG07 | 27210919                | [C/T] |                    | INTERGENIC                          |                                                           |
| #Ca_Kabuli_SNP1016 | scaffold948    | 732450                  | [A/C] |                    | INTERGENIC                          |                                                           |
| #Ca_Kabuli_SNP1017 | Ca_Kabuli_LG06 | 11131020                | [A/G] | Ca_20479           | INTRON                              | Glycoside hydrolase, family 63                            |
| #Ca_Kabuli_SNP1018 | scaffold1860   | 129956                  | [T/A] |                    | INTERGENIC                          |                                                           |
| #Ca_Kabuli_SNP1019 | Ca_Kabuli_LG05 | 43758846                | [A/C] | Ca_12676           | NON_SYNONYMOUS_CODING               | C2 calcium-dependent membrane targeting                   |
| #Ca_Kabuli_SNP1020 | Ca_Kabuli_LG03 | 22225134                | [A/T] | Ca_20408           | NON_SYNONYMOUS_CODING               | Plastocyanin-like                                         |
| #Ca_Kabuli_SNP1021 | Ca_Kabuli_LG04 | 15389726                | [A/T] | Ca_05557           | NON_SYNONYMOUS_CODING               | Multi antimicrobial extrusion protein                     |

| SNP IDs            | Chromosomes    | Physical positions (bp) | SNPs  | Gene accession IDs | Sequence components of genome/genes | Putative functions                         |
|--------------------|----------------|-------------------------|-------|--------------------|-------------------------------------|--------------------------------------------|
| #Ca_Kabuli_SNP1022 | scaffold3270   | 23636                   | [A/G] |                    | INTERGENIC                          |                                            |
| #Ca_Kabuli_SNP1023 | Ca_Kabuli_LG01 | 11676536                | [A/T] |                    | INTERGENIC                          |                                            |
| #Ca_Kabuli_SNP1024 | Ca_Kabuli_LG06 | 11106776                | [C/G] |                    | INTERGENIC                          |                                            |
| #Ca_Kabuli_SNP1025 | Ca_Kabuli_LG06 | 11180702                | [G/A] |                    | INTERGENIC                          |                                            |
| #Ca_Kabuli_SNP1026 | Ca_Kabuli_LG06 | 11189051                | [A/G] | Ca_20485           | SYNONYMOUS_CODING                   | Protein kinase, catalytic domain           |
| #Ca_Kabuli_SNP1027 | Ca_Kabuli_LG06 | 11185980                | [T/C] |                    | INTERGENIC                          |                                            |
| #Ca_Kabuli_SNP1028 | Ca_Kabuli_LG02 | 33486730                | [T/G] | Ca_10183           | SYNONYMOUS_CODING                   | Telomerase activating protein Est1         |
| #Ca_Kabuli_SNP1029 | scaffold292    | 103596                  | [A/G] |                    | INTERGENIC                          |                                            |
| #Ca_Kabuli_SNP1030 | scaffold1236   | 9015                    | [C/T] |                    | INTERGENIC                          |                                            |
| #Ca_Kabuli_SNP1031 | Ca_Kabuli_LG06 | 11131010                | [T/A] | Ca_20479           | INTRON                              | Glycoside hydrolase, family 63             |
| #Ca_Kabuli_SNP1032 | Ca_Kabuli_LG06 | 11098001                | [G/A] |                    | INTERGENIC                          |                                            |
| #Ca_Kabuli_SNP1033 | scaffold194    | 3546                    | [A/C] |                    | INTERGENIC                          |                                            |
| #Ca_Kabuli_SNP1034 | Ca_Kabuli_LG04 | 48322502                | [T/C] | Ca_10754           | DOWNSTREAM:1634bases                | Cytochrome P450                            |
| #Ca_Kabuli_SNP1035 | Ca_Kabuli_LG06 | 11188803                | [G/A] | Ca_20485           | NON_SYNONYMOUS_CODING               | Protein kinase, catalytic domain           |
| #Ca_Kabuli_SNP1036 | Ca_Kabuli_LG06 | 11069554                | [C/T] |                    | INTERGENIC                          |                                            |
| #Ca_Kabuli_SNP1037 | Ca_Kabuli_LG06 | 14353624                | [G/A] |                    | INTERGENIC                          |                                            |
| #Ca_Kabuli_SNP1038 | Ca_Kabuli_LG04 | 5701902                 | [C/T] |                    | INTERGENIC                          |                                            |
| #Ca_Kabuli_SNP1039 | Ca_Kabuli_LG06 | 10991717                | [T/A] | Ca_20467           | NON_SYNONYMOUS_CODING               | Zinc finger, MYND-type                     |
| #Ca_Kabuli_SNP1040 | Ca_Kabuli_LG05 | 10919414                | [C/A] | Ca_23750           | INTRON                              | MoeA, C-terminal, domain IV                |
| #Ca_Kabuli_SNP1041 | Ca_Kabuli_LG06 | 10781522                | [G/T] | Ca_08519           | INTRON                              | Kinesin, motor domain                      |
| #Ca_Kabuli_SNP1042 | Ca_Kabuli_LG03 | 26849263                | [A/C] | Ca_08222           | NON_SYNONYMOUS_CODING               | Regulator of chromosome condensation, RCC1 |
| #Ca_Kabuli_SNP1043 | Ca_Kabuli_LG04 | 615690                  | [A/C] | Ca_07692           | NON_SYNONYMOUS_CODING               | HEAT, type 2                               |
| #Ca_Kabuli_SNP1044 | Ca_Kabuli_LG04 | 48470477                | [G/A] |                    | INTERGENIC                          |                                            |
| #Ca_Kabuli_SNP1045 | Ca_Kabuli_LG06 | 10785459                | [A/G] |                    | INTERGENIC                          |                                            |
| #Ca_Kabuli_SNP1046 | Ca_Kabuli_LG04 | 26645875                | [A/G] | Ca_24999           | SYNONYMOUS_CODING                   | Excinuclease ABC, C subunit, N-terminal    |
| #Ca_Kabuli_SNP1047 | Ca_Kabuli_LG04 | 48478058                | [T/C] |                    | INTERGENIC                          |                                            |
| #Ca_Kabuli_SNP1048 | Ca_Kabuli_LG04 | 48355358                | [T/A] | Ca_10751           | INTRON                              | Exonuclease                                |
| #Ca_Kabuli_SNP1049 | Ca_Kabuli_LG02 | 13297596                | [G/A] | Ca_11679           | DOWNSTREAM:1269bases                | Initiation factor 2B-related               |
| #Ca_Kabuli_SNP1050 | Ca_Kabuli_LG04 | 23267886                | [T/A] |                    | INTERGENIC                          |                                            |
| #Ca_Kabuli_SNP1051 | Ca_Kabuli_LG06 | 7609380                 | [G/A] | Ca_09623           | DOWNSTREAM:314bases                 | Ribosomal protein L6E                      |
| #Ca_Kabuli_SNP1052 | Ca_Kabuli_LG06 | 8029310                 | [G/C] | Ca_09571           | SYNONYMOUS_CODING                   | TLDC                                       |

| SNP IDs            | Chromosomes    | Physical positions (bp) | SNPs  | Gene accession IDs | Sequence components of genome/genes | Putative functions                            |
|--------------------|----------------|-------------------------|-------|--------------------|-------------------------------------|-----------------------------------------------|
| #Ca_Kabuli_SNP1053 | Ca_Kabuli_LG06 | 7581956                 | [C/G] |                    | INTERGENIC                          |                                               |
| #Ca_Kabuli_SNP1054 | Ca_Kabuli_LG04 | 48478018                | [G/A] |                    | INTERGENIC                          |                                               |
| #Ca_Kabuli_SNP1055 | Ca_Kabuli_LG04 | 2034429                 | [C/T] |                    | INTERGENIC                          |                                               |
| #Ca_Kabuli_SNP1056 | Ca_Kabuli_LG06 | 7829627                 | [T/G] |                    | INTERGENIC                          |                                               |
| #Ca_Kabuli_SNP1057 | Ca_Kabuli_LG07 | 10521431                | [G/C] | Ca_12811           | NON_SYNONYMOUS_CODING               | Zinc finger, RING-type                        |
| #Ca_Kabuli_SNP1058 | Ca_Kabuli_LG06 | 7582726                 | [G/T] |                    | INTERGENIC                          |                                               |
| #Ca_Kabuli_SNP1059 | Ca_Kabuli_LG06 | 8029226                 | [C/T] | Ca_09571           | SYNONYMOUS_CODING                   | TLDc                                          |
| #Ca_Kabuli_SNP1060 | scaffold61     | 27925                   | [T/G] |                    | INTERGENIC                          |                                               |
| #Ca_Kabuli_SNP1061 | scaffold948    | 871632                  | [G/A] |                    | INTERGENIC                          |                                               |
| #Ca_Kabuli_SNP1062 | Ca_Kabuli_LG06 | 8139446                 | [C/A] |                    | INTERGENIC                          |                                               |
| #Ca_Kabuli_SNP1063 | Ca_Kabuli_LG06 | 8091050                 | [A/G] |                    | INTERGENIC                          |                                               |
| #Ca_Kabuli_SNP1064 | Ca_Kabuli_LG06 | 2812773                 | [T/G] | Ca_10416           | SYNONYMOUS_CODING                   | Nucleoporin, Nup155-like                      |
| #Ca_Kabuli_SNP1065 | Ca_Kabuli_LG04 | 48382666                | [C/G] | Ca_10748           | NON_SYNONYMOUS_CODING               | AUX/IAA protein                               |
| #Ca_Kabuli_SNP1066 | Ca_Kabuli_LG06 | 7994732                 | [G/T] | Ca_09576           | SYNONYMOUS_CODING                   | Late embryogenesis abundant protein, group 2  |
| #Ca_Kabuli_SNP1067 | Ca_Kabuli_LG04 | 48497839                | [A/G] |                    | INTERGENIC                          |                                               |
| #Ca_Kabuli_SNP1068 | Ca_Kabuli_LG06 | 8170633                 | [A/G] | Ca_09552           | INTRON                              | Enhancer of polycomb-like, N-terminal         |
| #Ca_Kabuli_SNP1069 | Ca_Kabuli_LG05 | 35715571                | [A/C] |                    | INTERGENIC                          |                                               |
| #Ca_Kabuli_SNP1070 | Ca_Kabuli_LG04 | 48498181                | [C/G] | Ca_10741           | DOWNSTREAM:1816bases                | Eukaryotic initiation factor 3, gamma subunit |
| #Ca_Kabuli_SNP1071 | Ca_Kabuli_LG04 | 48345604                | [G/A] | Ca_10752           | INTRON                              | IQ motif, EF-hand binding site                |
| #Ca_Kabuli_SNP1072 | scaffold239    | 7549                    | [G/C] |                    | INTERGENIC                          |                                               |
| #Ca_Kabuli_SNP1073 | Ca_Kabuli_LG04 | 45165191                | [T/C] | Ca_09179           | DOWNSTREAM:1240bases                | Cation/H+ exchanger                           |
| #Ca_Kabuli_SNP1074 | Ca_Kabuli_LG06 | 8076394                 | [T/C] | Ca_09564           | INTRON                              | Ras GTPase                                    |
| #Ca_Kabuli_SNP1075 | Ca_Kabuli_LG06 | 8166339                 | [T/C] | Ca_09552           | INTRON                              | Enhancer of polycomb-like, N-terminal         |
| #Ca_Kabuli_SNP1076 | Ca_Kabuli_LG01 | 46437023                | [T/G] | Ca_21547           | SYNONYMOUS_CODING                   | Adenylate kinase                              |
| #Ca_Kabuli_SNP1077 | Ca_Kabuli_LG04 | 19263967                | [T/G] | Ca_14024           | INTRON                              | --                                            |
| #Ca_Kabuli_SNP1078 | Ca_Kabuli_LG07 | 5577298                 | [A/C] | Ca_06805           | NON_SYNONYMOUS_CODING               | F-box domain, cyclin-like                     |
| #Ca_Kabuli_SNP1079 | scaffold559    | 465704                  | [T/C] |                    | INTERGENIC                          |                                               |
| #Ca_Kabuli_SNP1080 | scaffold269    | 34175                   | [T/G] |                    | INTERGENIC                          |                                               |
| #Ca_Kabuli_SNP1081 | Ca_Kabuli_LG06 | 8170583                 | [C/T] | Ca_09552           | INTRON                              | Enhancer of polycomb-like, N-terminal         |
| #Ca_Kabuli_SNP1082 | Ca_Kabuli_LG04 | 45220422                | [C/T] | Ca_09184           | NON_SYNONYMOUS_CODING               | K Homology                                    |
| #Ca_Kabuli_SNP1083 | Ca_Kabuli_LG06 | 7832023                 | [C/T] | Ca_09595           | NON_SYNONYMOUS_CODING               | C2 calcium-dependent membrane targeting       |

| SNP IDs            | Chromosomes    | Physical positions (bp) | SNPs  | Gene accession IDs | Sequence components of genome/genes | Putative functions                             |
|--------------------|----------------|-------------------------|-------|--------------------|-------------------------------------|------------------------------------------------|
| #Ca_Kabuli_SNP1084 | scaffold948    | 1263455                 | [C/A] |                    | INTERGENIC                          |                                                |
| #Ca_Kabuli_SNP1085 | Ca_Kabuli_LG01 | 24450415                | [T/C] | Ca_18343           | INTRON                              | Ribulose-phosphate 3-epimerase                 |
| #Ca_Kabuli_SNP1086 | Ca_Kabuli_LG04 | 48355468                | [T/G] | Ca_10751           | INTRON                              | Exonuclease                                    |
| #Ca_Kabuli_SNP1087 | Ca_Kabuli_LG06 | 7929607                 | [A/C] |                    | INTERGENIC                          |                                                |
| #Ca_Kabuli_SNP1088 | scaffold184    | 150147                  | [C/G] |                    | INTERGENIC                          |                                                |
| #Ca_Kabuli_SNP1089 | Ca_Kabuli_LG04 | 45153110                | [C/T] | Ca_09178           | INTRON                              | Histone deacetylase superfamily                |
| #Ca_Kabuli_SNP1090 | Ca_Kabuli_LG06 | 7926416                 | [C/A] | Ca_09581           | DOWNSTREAM:1853bases                | Acyl-CoA oxidase, C-terminal                   |
| #Ca_Kabuli_SNP1091 | Ca_Kabuli_LG06 | 8084950                 | [T/A] | Ca_09563           | DOWNSTREAM:115bases                 | Mitochondrial carrier protein                  |
| #Ca_Kabuli_SNP1092 | Ca_Kabuli_LG02 | 31975322                | [A/C] |                    | INTERGENIC                          |                                                |
| #Ca_Kabuli_SNP1093 | Ca_Kabuli_LG04 | 48497926                | [A/T] |                    | INTERGENIC                          |                                                |
| #Ca_Kabuli_SNP1094 | Ca_Kabuli_LG06 | 7831409                 | [C/T] | Ca_09595           | SYNONYMOUS_CODING                   | C2 calcium-dependent membrane targeting        |
| #Ca_Kabuli_SNP1095 | Ca_Kabuli_LG06 | 7834595                 | [C/T] | Ca_09595           | SYNONYMOUS_CODING                   | C2 calcium-dependent membrane targeting        |
| #Ca_Kabuli_SNP1096 | Ca_Kabuli_LG06 | 7835984                 | [T/A] | Ca_09595           | NON_SYNONYMOUS_CODING               | C2 calcium-dependent membrane targeting        |
| #Ca_Kabuli_SNP1097 | Ca_Kabuli_LG06 | 7770357                 | [C/T] |                    | INTERGENIC                          |                                                |
| #Ca_Kabuli_SNP1098 | Ca_Kabuli_LG04 | 10971334                | [A/T] | Ca_04330           | SYNONYMOUS_CODING                   | WD40 repeat                                    |
| #Ca_Kabuli_SNP1099 | Ca_Kabuli_LG06 | 7829485                 | [G/A] |                    | INTERGENIC                          |                                                |
| #Ca_Kabuli_SNP1100 | scaffold1860   | 129950                  | [T/C] |                    | INTERGENIC                          |                                                |
| #Ca_Kabuli_SNP1101 | Ca_Kabuli_LG04 | 44754355                | [C/T] | Ca_09143           | INTRON                              | F-box domain, cyclin-like                      |
| #Ca_Kabuli_SNP1102 | Ca_Kabuli_LG01 | 27017559                | [G/A] | Ca_20299           | INTRON                              | Cystathionine beta-synthase, core              |
| #Ca_Kabuli_SNP1103 | Ca_Kabuli_LG06 | 7667301                 | [T/C] | Ca_09615           | INTRON                              | Ribosomal protein L6E                          |
| #Ca_Kabuli_SNP1104 | Ca_Kabuli_LG06 | 7667328                 | [A/T] | Ca_09615           | INTRON                              | Ribosomal protein L6E                          |
| #Ca_Kabuli_SNP1105 | Ca_Kabuli_LG04 | 25729905                | [C/A] |                    | INTERGENIC                          |                                                |
| #Ca_Kabuli_SNP1106 | Ca_Kabuli_LG06 | 7835024                 | [T/A] | Ca_09595           | SYNONYMOUS_CODING                   | C2 calcium-dependent membrane targeting        |
| #Ca_Kabuli_SNP1107 | Ca_Kabuli_LG04 | 44832144                | [T/C] | Ca_09147           | DOWNSTREAM:1658bases                | Dilute                                         |
| #Ca_Kabuli_SNP1108 | Ca_Kabuli_LG06 | 7876049                 | [A/C] | Ca_09590           | DOWNSTREAM:220bases                 | 1-aminocyclopropane-1-carboxylate synthase     |
| #Ca_Kabuli_SNP1109 | scaffold844    | 70535                   | [G/A] |                    | INTERGENIC                          |                                                |
| #Ca_Kabuli_SNP1110 | Ca_Kabuli_LG07 | 7792748                 | [T/G] |                    | INTERGENIC                          |                                                |
| #Ca_Kabuli_SNP1111 | Ca_Kabuli_LG06 | 17353443                | [A/C] |                    | INTERGENIC                          |                                                |
| #Ca_Kabuli_SNP1112 | Ca_Kabuli_LG02 | 32058615                | [T/G] | Ca_17816           | NON_SYNONYMOUS_CODING               | Ankyrin repeat                                 |
| #Ca_Kabuli_SNP1113 | Ca_Kabuli_LG06 | 7820481                 | [C/T] | Ca_09596           | NON_SYNONYMOUS_CODING               | Mitochondrial inner membrane protein Mitofilin |
| #Ca_Kabuli_SNP1114 | Ca_Kabuli_LG07 | 15966762                | [G/A] | Ca_09880           | NON_SYNONYMOUS_CODING               | Sugar/inositol transporter                     |

| SNP IDs            | Chromosomes    | Physical positions (bp) | SNPs  | Gene accession IDs | Sequence components of genome/genes | Putative functions                                       |
|--------------------|----------------|-------------------------|-------|--------------------|-------------------------------------|----------------------------------------------------------|
| #Ca_Kabuli_SNP1115 | Ca_Kabuli_LG06 | 57704216                | [T/G] | Ca_13674           | SYNONYMOUS_CODING                   | Orn/Lys/Arg decarboxylase, major domain                  |
| #Ca_Kabuli_SNP1116 | Ca_Kabuli_LG04 | 45019764                | [C/T] |                    | INTERGENIC                          |                                                          |
| #Ca_Kabuli_SNP1117 | Ca_Kabuli_LG06 | 19433516                | [A/C] |                    | INTERGENIC                          |                                                          |
| #Ca_Kabuli_SNP1118 | Ca_Kabuli_LG01 | 42452191                | [T/G] |                    | INTERGENIC                          |                                                          |
| #Ca_Kabuli_SNP1119 | Ca_Kabuli_LG06 | 15123033                | [C/T] | Ca_05293           | INTRON                              | Dynamin central domain                                   |
| #Ca_Kabuli_SNP1120 | Ca_Kabuli_LG04 | 48465107                | [A/G] | Ca_10746           | INTRON                              | Zinc finger, CCHC-type                                   |
| #Ca_Kabuli_SNP1121 | Ca_Kabuli_LG06 | 7719829                 | [C/T] |                    | INTERGENIC                          |                                                          |
| #Ca_Kabuli_SNP1122 | Ca_Kabuli_LG06 | 7719857                 | [G/T] |                    | INTERGENIC                          |                                                          |
| #Ca_Kabuli_SNP1123 | scaffold948    | 1234641                 | [T/G] |                    | INTERGENIC                          |                                                          |
| #Ca_Kabuli_SNP1124 | Ca_Kabuli_LG02 | 12519400                | [A/C] | Ca_18078           | INTRON                              | WD40 repeat                                              |
| #Ca_Kabuli_SNP1125 | Ca_Kabuli_LG06 | 7819313                 | [C/G] |                    | INTERGENIC                          |                                                          |
| #Ca_Kabuli_SNP1126 | scaffold847    | 86981                   | [G/A] |                    | INTERGENIC                          |                                                          |
| #Ca_Kabuli_SNP1127 | Ca_Kabuli_LG04 | 13970649                | [A/C] |                    | INTERGENIC                          |                                                          |
| #Ca_Kabuli_SNP1128 | scaffold1245   | 192417                  | [C/A] |                    | INTERGENIC                          |                                                          |
| #Ca_Kabuli_SNP1129 | Ca_Kabuli_LG02 | 36275168                | [A/C] |                    | INTERGENIC                          |                                                          |
| #Ca_Kabuli_SNP1130 | Ca_Kabuli_LG08 | 11906095                | [T/G] | Ca_23838           | DOWNSTREAM:829bases                 | Per1-like                                                |
| #Ca_Kabuli_SNP1131 | Ca_Kabuli_LG06 | 7819348                 | [C/T] |                    | INTERGENIC                          |                                                          |
| #Ca_Kabuli_SNP1132 | Ca_Kabuli_LG07 | 14685017                | [C/T] | Ca_09976           | DOWNSTREAM:1307bases                | Zinc finger, RanBP2-type                                 |
| #Ca_Kabuli_SNP1133 | scaffold950    | 204642                  | [T/A] |                    | INTERGENIC                          |                                                          |
| #Ca_Kabuli_SNP1134 | Ca_Kabuli_LG04 | 45225165                | [T/C] |                    | INTERGENIC                          |                                                          |
| #Ca_Kabuli_SNP1135 | Ca_Kabuli_LG05 | 41283153                | [G/T] | Ca_07642           | NON_SYNONYMOUS_CODING               | Protein of unknown function DUF1296                      |
| #Ca_Kabuli_SNP1136 | Ca_Kabuli_LG08 | 4807099                 | [A/C] |                    | INTERGENIC                          |                                                          |
| #Ca_Kabuli_SNP1137 | Ca_Kabuli_LG04 | 8660125                 | [A/C] | Ca_08360           | NON_SYNONYMOUS_CODING               | Disease resistance protein                               |
| #Ca_Kabuli_SNP1138 | Ca_Kabuli_LG04 | 6854533                 | [A/C] | Ca_03554           | INTRON                              | ABC transporter, transmembrane domain                    |
| #Ca_Kabuli_SNP1139 | Ca_Kabuli_LG04 | 45022550                | [A/T] | Ca_09165           | INTRON                              | Mrp, conserved site                                      |
| #Ca_Kabuli_SNP1140 | Ca_Kabuli_LG05 | 9851952                 | [C/A] | Ca_20503           | INTRON                              | Tetratricopeptide TPR-1                                  |
| #Ca_Kabuli_SNP1141 | Ca_Kabuli_LG06 | 6517785                 | [T/C] |                    | INTERGENIC                          |                                                          |
| #Ca_Kabuli_SNP1142 | Ca_Kabuli_LG06 | 14769691                | [A/C] |                    | INTERGENIC                          |                                                          |
| #Ca_Kabuli_SNP1143 | Ca_Kabuli_LG04 | 45204213                | [A/G] | Ca_09182           | SYNONYMOUS_CODING                   | Cation/H+ exchanger                                      |
| #Ca_Kabuli_SNP1144 | Ca_Kabuli_LG04 | 5528421                 | [T/G] | Ca_03702           | SYNONYMOUS_CODING                   | Zinc finger, RING-type                                   |
| #Ca_Kabuli_SNP1145 | Ca_Kabuli_LG07 | 24021690                | [T/G] | Ca_19916           | NON_SYNONYMOUS_CODING               | ZF-HD homeobox protein, Cys/His-rich dimerisation domain |



| SNP IDs            | Chromosomes    | Physical positions (bp) | SNPs  | Gene accession IDs | Sequence components of genome/genes | Putative functions                                     |
|--------------------|----------------|-------------------------|-------|--------------------|-------------------------------------|--------------------------------------------------------|
| #Ca_Kabuli_SNP1146 | Ca_Kabuli_LG08 | 5870664                 | [T/C] | Ca_01965           | NON_SYNONYMOUS_CODING               | Armadillo                                              |
| #Ca_Kabuli_SNP1147 | Ca_Kabuli_LG04 | 44372986                | [C/T] |                    | INTERGENIC                          |                                                        |
| #Ca_Kabuli_SNP1148 | Ca_Kabuli_LG04 | 44446575                | [G/A] | Ca_09116           | SYNONYMOUS_CODING                   | F-box domain, cyclin-like                              |
| #Ca_Kabuli_SNP1149 | Ca_Kabuli_LG01 | 4908732                 | [A/T] | Ca_00577           | NON_SYNONYMOUS_CODING               | Disease resistance protein                             |
| #Ca_Kabuli_SNP1150 | Ca_Kabuli_LG05 | 41525956                | [C/G] |                    | INTERGENIC                          |                                                        |
| #Ca_Kabuli_SNP1151 | Ca_Kabuli_LG06 | 5185380                 | [A/G] | Ca_05778           | NON_SYNONYMOUS_CODING               | Protein BYPASS-related                                 |
| #Ca_Kabuli_SNP1152 | Ca_Kabuli_LG03 | 31952330                | [T/C] | Ca_12295           | SYNONYMOUS_CODING                   | HEAT                                                   |
| #Ca_Kabuli_SNP1153 | scaffold436    | 245036                  | [T/A] |                    | INTERGENIC                          |                                                        |
| #Ca_Kabuli_SNP1154 | Ca_Kabuli_LG06 | 46734665                | [C/T] |                    | INTERGENIC                          |                                                        |
| #Ca_Kabuli_SNP1155 | Ca_Kabuli_LG04 | 44431319                | [A/C] | Ca_09114           | INTRON                              | Peptidase C19, ubiquitin carboxyl-terminal hydrolase 2 |
| #Ca_Kabuli_SNP1156 | scaffold559    | 34700                   | [A/C] |                    | INTERGENIC                          |                                                        |
| #Ca_Kabuli_SNP1157 | Ca_Kabuli_LG06 | 6248218                 | [G/A] |                    | INTERGENIC                          |                                                        |
| #Ca_Kabuli_SNP1158 | Ca_Kabuli_LG04 | 44366719                | [T/A] | Ca_09107           | DOWNSTREAM:619bases                 | --                                                     |
| #Ca_Kabuli_SNP1159 | Ca_Kabuli_LG06 | 4994876                 | [T/A] | Ca_05794           | NON_SYNONYMOUS_CODING               | K+ potassium transporter                               |
| #Ca_Kabuli_SNP1160 | scaffold461    | 309725                  | [C/T] |                    | INTERGENIC                          |                                                        |
| #Ca_Kabuli_SNP1161 | Ca_Kabuli_LG06 | 27385025                | [A/G] |                    | INTERGENIC                          |                                                        |
| #Ca_Kabuli_SNP1162 | Ca_Kabuli_LG06 | 10780228                | [C/T] | Ca_08519           | INTRON                              | Kinesin, motor domain                                  |
| #Ca_Kabuli_SNP1163 | Ca_Kabuli_LG06 | 10780240                | [T/C] | Ca_08519           | INTRON                              | Kinesin, motor domain                                  |
| #Ca_Kabuli_SNP1164 | Ca_Kabuli_LG04 | 23267869                | [A/C] |                    | INTERGENIC                          |                                                        |
| #Ca_Kabuli_SNP1165 | Ca_Kabuli_LG06 | 10744029                | [C/A] |                    | INTERGENIC                          |                                                        |
| #Ca_Kabuli_SNP1166 | Ca_Kabuli_LG06 | 10743996                | [A/T] |                    | INTERGENIC                          |                                                        |
| #Ca_Kabuli_SNP1167 | Ca_Kabuli_LG01 | 18748594                | [C/A] | Ca_17381           | SYNONYMOUS_CODING                   | APO protein, plant                                     |
| #Ca_Kabuli_SNP1168 | Ca_Kabuli_LG06 | 10670729                | [T/G] | Ca_08530           | INTRON                              | Aspartate/glutamate/uridylylate kinase                 |
| #Ca_Kabuli_SNP1169 | Ca_Kabuli_LG04 | 35634712                | [A/G] | Ca_22441           | DOWNSTREAM:1361bases                | Translation elongation factor EFG/EF2, C-terminal      |
| #Ca_Kabuli_SNP1170 | Ca_Kabuli_LG06 | 15123074                | [G/A] | Ca_05293           | INTRON                              | Dynamin central domain                                 |
| #Ca_Kabuli_SNP1171 | Ca_Kabuli_LG03 | 24262412                | [C/A] | Ca_06094           | NON_SYNONYMOUS_CODING               | LETM1-like                                             |
| #Ca_Kabuli_SNP1172 | scaffold327    | 133397                  | [G/T] |                    | INTERGENIC                          |                                                        |
| #Ca_Kabuli_SNP1173 | Ca_Kabuli_LG04 | 37897351                | [C/A] |                    | INTERGENIC                          |                                                        |
| #Ca_Kabuli_SNP1174 | Ca_Kabuli_LG01 | 42452837                | [A/C] |                    | INTERGENIC                          |                                                        |
| #Ca_Kabuli_SNP1175 | Ca_Kabuli_LG02 | 32844733                | [T/G] | Ca_10238           | NON_SYNONYMOUS_CODING               | Late embryogenesis abundant protein, group 2           |
| #Ca_Kabuli_SNP1176 | Ca_Kabuli_LG04 | 44059060                | [C/T] |                    | INTERGENIC                          |                                                        |

| SNP IDs            | Chromosomes    | Physical positions (bp) | SNPs  | Gene accession IDs | Sequence components of genome/genes | Putative functions                                |
|--------------------|----------------|-------------------------|-------|--------------------|-------------------------------------|---------------------------------------------------|
| #Ca_Kabuli_SNP1177 | scaffold775    | 58074                   | [T/C] |                    | INTERGENIC                          |                                                   |
| #Ca_Kabuli_SNP1178 | Ca_Kabuli_LG04 | 3741522                 | [T/G] | Ca_12175           | SYNONYMOUS_CODING                   | Histone deacetylation protein Rxt3                |
| #Ca_Kabuli_SNP1179 | Ca_Kabuli_LG04 | 38836381                | [T/A] |                    | INTERGENIC                          |                                                   |
| #Ca_Kabuli_SNP1180 | Ca_Kabuli_LG06 | 10779837                | [G/A] | Ca_08519           | NON_SYNONYMOUS_CODING               | Kinesin, motor domain                             |
| #Ca_Kabuli_SNP1181 | Ca_Kabuli_LG04 | 5272594                 | [A/C] | Ca_03728           | NON_SYNONYMOUS_CODING               | WD40 repeat                                       |
| #Ca_Kabuli_SNP1182 | scaffold6212   | 575                     | [C/T] |                    | INTERGENIC                          |                                                   |
| #Ca_Kabuli_SNP1183 | scaffold402    | 404364                  | [T/C] |                    | INTERGENIC                          |                                                   |
| #Ca_Kabuli_SNP1184 | Ca_Kabuli_LG01 | 9705183                 | [T/G] | Ca_02826           | DOWNSTREAM:1500bases                | Nicotinamide N-methyltransferase, putative        |
| #Ca_Kabuli_SNP1185 | scaffold19     | 113584                  | [G/A] |                    | INTERGENIC                          |                                                   |
| #Ca_Kabuli_SNP1186 | Ca_Kabuli_LG04 | 38474123                | [A/T] | Ca_13112           | INTRON                              | BRCT                                              |
| #Ca_Kabuli_SNP1187 | Ca_Kabuli_LG04 | 38474149                | [T/C] | Ca_13112           | INTRON                              | BRCT                                              |
| #Ca_Kabuli_SNP1188 | Ca_Kabuli_LG06 | 36689043                | [C/T] |                    | INTERGENIC                          |                                                   |
| #Ca_Kabuli_SNP1189 | Ca_Kabuli_LG04 | 37349160                | [A/T] | Ca_15141           | NON_SYNONYMOUS_CODING               | Methyltransferase TRM13                           |
| #Ca_Kabuli_SNP1190 | Ca_Kabuli_LG04 | 37454374                | [C/T] | Ca_15130           | INTRON                              | Mediator complex subunit Med23                    |
| #Ca_Kabuli_SNP1191 | Ca_Kabuli_LG05 | 24822644                | [T/C] |                    | INTERGENIC                          |                                                   |
| #Ca_Kabuli_SNP1192 | Ca_Kabuli_LG04 | 40941283                | [A/G] | Ca_11014           | SYNONYMOUS_CODING                   | Proteasome component (PCI) domain                 |
| #Ca_Kabuli_SNP1193 | Ca_Kabuli_LG04 | 17858133                | [C/T] | Ca_18622           | INTRON                              | IKI3                                              |
| #Ca_Kabuli_SNP1194 | Ca_Kabuli_LG06 | 1843341                 | [G/A] |                    | INTERGENIC                          |                                                   |
| #Ca_Kabuli_SNP1195 | Ca_Kabuli_LG07 | 25218387                | [A/C] |                    | INTERGENIC                          |                                                   |
| #Ca_Kabuli_SNP1196 | Ca_Kabuli_LG04 | 35634873                | [T/G] | Ca_22441           | DOWNSTREAM:1522bases                | Translation elongation factor EFG/EF2, C-terminal |
| #Ca_Kabuli_SNP1197 | scaffold204    | 15590                   | [G/T] |                    | INTERGENIC                          |                                                   |
| #Ca_Kabuli_SNP1198 | Ca_Kabuli_LG04 | 36975361                | [C/A] | Ca_14796           | INTRON                              | Helicase, C-terminal                              |
| #Ca_Kabuli_SNP1199 | Ca_Kabuli_LG04 | 35171719                | [C/T] | Ca_20011           | INTRON                              | --                                                |
| #Ca_Kabuli_SNP1200 | Ca_Kabuli_LG04 | 36670226                | [G/A] | Ca_14814           | INTRON                              | ATPase, AAA+ type, core                           |
| #Ca_Kabuli_SNP1201 | Ca_Kabuli_LG01 | 10861326                | [T/G] | Ca_02673           | INTRON                              | Glycoside hydrolase, family 1                     |
| #Ca_Kabuli_SNP1202 | Ca_Kabuli_LG03 | 26659077                | [A/C] | Ca_08243           | NON_SYNONYMOUS_CODING               | Heat shock protein DnaJ, N-terminal               |
| #Ca_Kabuli_SNP1203 | Ca_Kabuli_LG04 | 38195346                | [A/G] | Ca_13134           | SYNONYMOUS_CODING                   | Domain of unknown function DUF250                 |
| #Ca_Kabuli_SNP1204 | scaffold7112   | 1683                    | [G/A] |                    | INTERGENIC                          |                                                   |
| #Ca_Kabuli_SNP1205 | Ca_Kabuli_LG07 | 13605200                | [A/C] | Ca_16044           | SYNONYMOUS_CODING                   | Zinc finger, C2H2-type                            |
| #Ca_Kabuli_SNP1206 | Ca_Kabuli_LG04 | 38181292                | [G/A] | Ca_13135           | NON_SYNONYMOUS_CODING               | --                                                |
| #Ca_Kabuli_SNP1207 | scaffold7112   | 1685                    | [T/C] |                    | INTERGENIC                          |                                                   |

| SNP IDs            | Chromosomes    | Physical positions (bp) | SNPs  | Gene accession IDs | Sequence components of genome/genes | Putative functions                                           |
|--------------------|----------------|-------------------------|-------|--------------------|-------------------------------------|--------------------------------------------------------------|
| #Ca_Kabuli_SNP1208 | scaffold1997   | 133462                  | [G/A] |                    | INTERGENIC                          |                                                              |
| #Ca_Kabuli_SNP1209 | Ca_Kabuli_LG04 | 39116656                | [A/G] |                    | INTERGENIC                          |                                                              |
| #Ca_Kabuli_SNP1210 | scaffold1997   | 112836                  | [C/T] |                    | INTERGENIC                          |                                                              |
| #Ca_Kabuli_SNP1211 | Ca_Kabuli_LG04 | 38929681                | [A/G] | Ca_13085           | SYNONYMOUS_CODING                   | --                                                           |
| #Ca_Kabuli_SNP1212 | Ca_Kabuli_LG05 | 20460859                | [T/G] | Ca_18208           | NON_SYNONYMOUS_CODING               | Tetratricopeptide TPR-1                                      |
| #Ca_Kabuli_SNP1213 | Ca_Kabuli_LG04 | 49012793                | [T/G] | Ca_20771           | DOWNSTREAM:159bases                 | Glycoside hydrolase, family 13                               |
| #Ca_Kabuli_SNP1214 | scaffold1997   | 101084                  | [A/C] |                    | INTERGENIC                          |                                                              |
| #Ca_Kabuli_SNP1215 | Ca_Kabuli_LG04 | 30299995                | [T/A] | Ca_14192           | SYNONYMOUS_CODING                   | SNF2-related                                                 |
| #Ca_Kabuli_SNP1216 | Ca_Kabuli_LG03 | 33715215                | [T/G] |                    | INTERGENIC                          |                                                              |
| #Ca_Kabuli_SNP1217 | Ca_Kabuli_LG07 | 5508162                 | [A/C] | Ca_06816           | SYNONYMOUS_CODING                   | SNF2-related                                                 |
| #Ca_Kabuli_SNP1218 | Ca_Kabuli_LG05 | 438442                  | [T/C] |                    | INTERGENIC                          |                                                              |
| #Ca_Kabuli_SNP1219 | Ca_Kabuli_LG06 | 2540711                 | [C/T] | Ca_10386           | NON_SYNONYMOUS_CODING               | Phox/Bem1p                                                   |
| #Ca_Kabuli_SNP1220 | Ca_Kabuli_LG06 | 2540749                 | [C/T] | Ca_10386           | SYNONYMOUS_CODING                   | Phox/Bem1p                                                   |
| #Ca_Kabuli_SNP1221 | Ca_Kabuli_LG06 | 27310343                | [T/A] | Ca_14618           | INTRON                              | Pathogenesis-related transcriptional factor/ERF, DNA-binding |
| #Ca_Kabuli_SNP1222 | Ca_Kabuli_LG04 | 38540247                | [G/A] |                    | INTERGENIC                          |                                                              |
| #Ca_Kabuli_SNP1223 | Ca_Kabuli_LG06 | 7846335                 | [C/G] |                    | INTERGENIC                          |                                                              |
| #Ca_Kabuli_SNP1224 | Ca_Kabuli_LG06 | 1220523                 | [C/T] |                    | INTERGENIC                          |                                                              |
| #Ca_Kabuli_SNP1225 | Ca_Kabuli_LG04 | 29958122                | [G/T] |                    | INTERGENIC                          |                                                              |
| #Ca_Kabuli_SNP1226 | scaffold99     | 352747                  | [T/C] |                    | INTERGENIC                          |                                                              |
| #Ca_Kabuli_SNP1227 | Ca_Kabuli_LG04 | 37754127                | [C/T] | Ca_15104           | INTRON                              | NUDIX hydrolase domain                                       |
| #Ca_Kabuli_SNP1228 | Ca_Kabuli_LG04 | 38029136                | [G/T] | Ca_13142           | NON_SYNONYMOUS_CODING               | Chaperonin TCP-1, conserved site                             |
| #Ca_Kabuli_SNP1229 | Ca_Kabuli_LG04 | 38770348                | [T/A] | Ca_13096           | NON_SYNONYMOUS_CODING               | Fatty acid desaturase, type 2                                |
| #Ca_Kabuli_SNP1230 | Ca_Kabuli_LG04 | 38721207                | [A/C] | Ca_13098           | INTRON                              | Exostosin-like                                               |
| #Ca_Kabuli_SNP1231 | Ca_Kabuli_LG05 | 43167941                | [A/C] |                    | INTERGENIC                          |                                                              |
| #Ca_Kabuli_SNP1232 | Ca_Kabuli_LG08 | 15692070                | [A/G] | Ca_17876           | INTRON                              | RNA-dependent RNA polymerase, eukaryotic-type                |
| #Ca_Kabuli_SNP1233 | Ca_Kabuli_LG04 | 38038959                | [G/A] | Ca_13141           | INTRON                              | Protein of unknown function DUF3326                          |
| #Ca_Kabuli_SNP1234 | Ca_Kabuli_LG06 | 1843376                 | [C/T] |                    | INTERGENIC                          |                                                              |
| #Ca_Kabuli_SNP1235 | Ca_Kabuli_LG06 | 1815245                 | [C/T] | Ca_10308           | DOWNSTREAM:913bases                 | Zinc finger, LIM-type                                        |
| #Ca_Kabuli_SNP1236 | Ca_Kabuli_LG06 | 1815278                 | [A/G] | Ca_10308           | DOWNSTREAM:880bases                 | Zinc finger, LIM-type                                        |
| #Ca_Kabuli_SNP1237 | scaffold99     | 151081                  | [G/A] |                    | INTERGENIC                          |                                                              |
| #Ca_Kabuli_SNP1238 | Ca_Kabuli_LG04 | 37454296                | [A/G] | Ca_15130           | INTRON                              | Mediator complex subunit Med23                               |

| SNP IDs            | Chromosomes    | Physical positions (bp) | SNPs  | Gene accession IDs | Sequence components of genome/genes | Putative functions                                           |
|--------------------|----------------|-------------------------|-------|--------------------|-------------------------------------|--------------------------------------------------------------|
| #Ca_Kabuli_SNP1239 | scaffold191    | 19215                   | [C/A] |                    | INTERGENIC                          |                                                              |
| #Ca_Kabuli_SNP1240 | scaffold107    | 263899                  | [A/G] |                    | INTERGENIC                          |                                                              |
| #Ca_Kabuli_SNP1241 | scaffold1700   | 222808                  | [T/A] |                    | INTERGENIC                          |                                                              |
| #Ca_Kabuli_SNP1242 | Ca_Kabuli_LG06 | 8090739                 | [A/T] |                    | INTERGENIC                          |                                                              |
| #Ca_Kabuli_SNP1243 | scaffold402    | 300960                  | [C/T] |                    | INTERGENIC                          |                                                              |
| #Ca_Kabuli_SNP1244 | Ca_Kabuli_LG06 | 8134381                 | [C/T] | Ca_09555           | DOWNSTREAM:672bases                 | ATPase, P-type, H+ transporting proton pump                  |
| #Ca_Kabuli_SNP1245 | Ca_Kabuli_LG04 | 38425720                | [T/A] | Ca_13115           | NON_SYNONYMOUS_CODING               | Zinc finger, CCCH-type                                       |
| #Ca_Kabuli_SNP1246 | Ca_Kabuli_LG04 | 37241235                | [G/A] | Ca_15151           | SYNONYMOUS_CODING                   | Signal transduction response regulator, receiver domain      |
| #Ca_Kabuli_SNP1247 | Ca_Kabuli_LG03 | 31952316                | [G/T] | Ca_12295           | NON_SYNONYMOUS_CODING               | HEAT                                                         |
| #Ca_Kabuli_SNP1248 | Ca_Kabuli_LG01 | 2649739                 | [A/T] | Ca_00326           | NON_SYNONYMOUS_CODING               | Pathogenesis-related transcriptional factor/ERF, DNA-binding |
| #Ca_Kabuli_SNP1249 | Ca_Kabuli_LG06 | 24516532                | [T/C] | Ca_27822           | SYNONYMOUS_CODING                   | --                                                           |
| #Ca_Kabuli_SNP1250 | Ca_Kabuli_LG06 | 7929647                 | [C/A] |                    | INTERGENIC                          |                                                              |
| #Ca_Kabuli_SNP1251 | Ca_Kabuli_LG04 | 38370848                | [A/G] |                    | INTERGENIC                          |                                                              |
| #Ca_Kabuli_SNP1252 | Ca_Kabuli_LG06 | 8170170                 | [A/C] | Ca_09552           | INTRON                              | Enhancer of polycomb-like, N-terminal                        |
| #Ca_Kabuli_SNP1253 | scaffold1997   | 49533                   | [T/A] |                    | INTERGENIC                          |                                                              |
| #Ca_Kabuli_SNP1254 | scaffold1245   | 192713                  | [G/T] |                    | INTERGENIC                          |                                                              |
| #Ca_Kabuli_SNP1255 | Ca_Kabuli_LG04 | 38008062                | [A/T] |                    | INTERGENIC                          |                                                              |
| #Ca_Kabuli_SNP1256 | scaffold31     | 871346                  | [A/G] |                    | INTERGENIC                          |                                                              |
| #Ca_Kabuli_SNP1257 | scaffold1997   | 107486                  | [C/T] |                    | INTERGENIC                          |                                                              |
| #Ca_Kabuli_SNP1258 | Ca_Kabuli_LG04 | 35231891                | [C/T] | Ca_20015           | DOWNSTREAM:1888bases                | Metallo-dependent phosphatase                                |
| #Ca_Kabuli_SNP1259 | Ca_Kabuli_LG04 | 35304102                | [C/T] | Ca_20017           | SYNONYMOUS_CODING                   | --                                                           |
| #Ca_Kabuli_SNP1260 | Ca_Kabuli_LG04 | 31263205                | [T/A] | Ca_14230           | NON_SYNONYMOUS_CODING               | Pentatricopeptide repeat                                     |
| #Ca_Kabuli_SNP1261 | Ca_Kabuli_LG06 | 7939281                 | [G/T] | Ca_09580           | SYNONYMOUS_CODING                   | --                                                           |
| #Ca_Kabuli_SNP1262 | scaffold1997   | 108599                  | [T/A] |                    | INTERGENIC                          |                                                              |
| #Ca_Kabuli_SNP1263 | Ca_Kabuli_LG06 | 8070427                 | [C/T] |                    | INTERGENIC                          |                                                              |
| #Ca_Kabuli_SNP1264 | scaffold404    | 110896                  | [C/A] |                    | INTERGENIC                          |                                                              |
| #Ca_Kabuli_SNP1265 | Ca_Kabuli_LG04 | 38060338                | [T/A] |                    | INTERGENIC                          |                                                              |
| #Ca_Kabuli_SNP1266 | scaffold932    | 138411                  | [G/T] |                    | INTERGENIC                          |                                                              |
| #Ca_Kabuli_SNP1267 | Ca_Kabuli_LG06 | 2541088                 | [T/A] | Ca_10386           | SYNONYMOUS_CODING                   | Phox/Bem1p                                                   |
| #Ca_Kabuli_SNP1268 | Ca_Kabuli_LG06 | 8166435                 | [G/A] | Ca_09552           | INTRON                              | Enhancer of polycomb-like, N-terminal                        |
| #Ca_Kabuli_SNP1269 | Ca_Kabuli_LG06 | 8052624                 | [G/C] | Ca_09568           | INTRON                              | TLDC                                                         |

| SNP IDs            | Chromosomes    | Physical positions (bp) | SNPs  | Gene accession IDs | Sequence components of genome/genes | Putative functions                                 |
|--------------------|----------------|-------------------------|-------|--------------------|-------------------------------------|----------------------------------------------------|
| #Ca_Kabuli_SNP1270 | Ca_Kabuli_LG04 | 38029380                | [A/G] | Ca_13142           | INTRON                              | Chaperonin TCP-1, conserved site                   |
| #Ca_Kabuli_SNP1271 | scaffold402    | 161754                  | [C/T] |                    | INTERGENIC                          |                                                    |
| #Ca_Kabuli_SNP1272 | Ca_Kabuli_LG03 | 39612568                | [T/A] | Ca_01338           | SYNONYMOUS_CODING                   | Profilin/allergen                                  |
| #Ca_Kabuli_SNP1273 | scaffold149    | 58689                   | [T/A] |                    | INTERGENIC                          |                                                    |
| #Ca_Kabuli_SNP1274 | Ca_Kabuli_LG04 | 36984727                | [G/C] | Ca_14795           | INTRON                              | SNF2-related                                       |
| #Ca_Kabuli_SNP1275 | Ca_Kabuli_LG06 | 7929339                 | [A/G] |                    | INTERGENIC                          |                                                    |
| #Ca_Kabuli_SNP1276 | Ca_Kabuli_LG06 | 11659981                | [A/G] | Ca_25060           | SYNONYMOUS_CODING                   | Excinuclease ABC, C subunit, N-terminal            |
| #Ca_Kabuli_SNP1277 | Ca_Kabuli_LG04 | 30463117                | [A/C] | Ca_14198           | DOWNSTREAM:1742bases                | Myb, DNA-binding                                   |
| #Ca_Kabuli_SNP1278 | Ca_Kabuli_LG04 | 38833521                | [G/A] | Ca_13092           | DOWNSTREAM:1995bases                | Ribosomal biogenesis, methyltransferase, EMG1/NEP1 |
| #Ca_Kabuli_SNP1279 | scaffold2477   | 38566                   | [T/G] |                    | INTERGENIC                          |                                                    |
| #Ca_Kabuli_SNP1280 | scaffold191    | 410571                  | [C/A] |                    | INTERGENIC                          |                                                    |
| #Ca_Kabuli_SNP1281 | Ca_Kabuli_LG04 | 37453497                | [C/G] | Ca_15130           | SYNONYMOUS_CODING                   | Mediator complex subunit Med23                     |
| #Ca_Kabuli_SNP1282 | Ca_Kabuli_LG04 | 38475449                | [T/A] | Ca_13112           | INTRON                              | BRCT                                               |
| #Ca_Kabuli_SNP1283 | scaffold99     | 106331                  | [G/A] |                    | INTERGENIC                          |                                                    |
| #Ca_Kabuli_SNP1284 | Ca_Kabuli_LG04 | 36979926                | [G/T] |                    | INTERGENIC                          |                                                    |
| #Ca_Kabuli_SNP1285 | Ca_Kabuli_LG04 | 38833280                | [T/C] | Ca_13092           | DOWNSTREAM:1754bases                | Ribosomal biogenesis, methyltransferase, EMG1/NEP1 |
| #Ca_Kabuli_SNP1286 | Ca_Kabuli_LG04 | 38833304                | [C/A] | Ca_13092           | DOWNSTREAM:1778bases                | Ribosomal biogenesis, methyltransferase, EMG1/NEP1 |
| #Ca_Kabuli_SNP1287 | Ca_Kabuli_LG04 | 38370941                | [A/G] |                    | INTERGENIC                          |                                                    |
| #Ca_Kabuli_SNP1288 | scaffold1997   | 108763                  | [T/G] |                    | INTERGENIC                          |                                                    |
| #Ca_Kabuli_SNP1289 | scaffold1997   | 107087                  | [G/A] |                    | INTERGENIC                          |                                                    |
| #Ca_Kabuli_SNP1290 | Ca_Kabuli_LG06 | 2527768                 | [A/G] |                    | INTERGENIC                          |                                                    |
| #Ca_Kabuli_SNP1291 | Ca_Kabuli_LG06 | 49222290                | [C/T] | Ca_20725           | DOWNSTREAM:1925bases                | Development/cell death domain                      |
| #Ca_Kabuli_SNP1292 | Ca_Kabuli_LG04 | 38288823                | [T/G] | Ca_13128           | NON_SYNONYMOUS_CODING               | Protein of unknown function DUF869, plant          |
| #Ca_Kabuli_SNP1293 | Ca_Kabuli_LG06 | 7835510                 | [G/A] | Ca_09595           | SYNONYMOUS_CODING                   | C2 calcium-dependent membrane targeting            |
| #Ca_Kabuli_SNP1294 | Ca_Kabuli_LG04 | 36756913                | [A/G] | Ca_14808           | SYNONYMOUS_CODING                   | Phosphofructokinase domain                         |
| #Ca_Kabuli_SNP1295 | Ca_Kabuli_LG06 | 7747254                 | [A/G] |                    | INTERGENIC                          |                                                    |
| #Ca_Kabuli_SNP1296 | Ca_Kabuli_LG05 | 20443993                | [A/G] |                    | INTERGENIC                          |                                                    |
| #Ca_Kabuli_SNP1297 | Ca_Kabuli_LG04 | 38918424                | [A/G] | Ca_13086           | SYNONYMOUS_CODING                   | General substrate transporter                      |
| #Ca_Kabuli_SNP1298 | Ca_Kabuli_LG04 | 36639382                | [T/C] | Ca_14816           | DOWNSTREAM:1236bases                | FAD dependent oxidoreductase                       |
| #Ca_Kabuli_SNP1299 | scaffold31     | 1050164                 | [C/T] |                    | INTERGENIC                          |                                                    |
| #Ca_Kabuli_SNP1300 | Ca_Kabuli_LG04 | 38029215                | [A/T] | Ca_13142           | INTRON                              | Chaperonin TCP-1, conserved site                   |

| SNP IDs            | Chromosomes    | Physical positions (bp) | SNPs  | Gene accession IDs | Sequence components of genome/genes | Putative functions                                         |
|--------------------|----------------|-------------------------|-------|--------------------|-------------------------------------|------------------------------------------------------------|
| #Ca_Kabuli_SNP1301 | scaffold99     | 355222                  | [G/A] |                    | INTERGENIC                          |                                                            |
| #Ca_Kabuli_SNP1302 | scaffold31     | 911602                  | [G/T] |                    | INTERGENIC                          |                                                            |
| #Ca_Kabuli_SNP1303 | Ca_Kabuli_LG06 | 7831899                 | [A/G] | Ca_09595           | SYNONYMOUS_CODING                   | C2 calcium-dependent membrane targeting                    |
| #Ca_Kabuli_SNP1304 | Ca_Kabuli_LG04 | 38976822                | [A/C] | Ca_13081           | INTRON                              | Folypolyglutamate synthetase                               |
| #Ca_Kabuli_SNP1305 | Ca_Kabuli_LG04 | 38039251                | [G/C] | Ca_13141           | INTRON                              | Protein of unknown function DUF3326                        |
| #Ca_Kabuli_SNP1306 | Ca_Kabuli_LG06 | 7609573                 | [A/G] | Ca_09623           | DOWNSTREAM:121bases                 | Ribosomal protein L6E                                      |
| #Ca_Kabuli_SNP1307 | scaffold443    | 183063                  | [G/A] |                    | INTERGENIC                          |                                                            |
| #Ca_Kabuli_SNP1308 | Ca_Kabuli_LG04 | 38475547                | [C/T] | Ca_13112           | INTRON                              | BRCT                                                       |
| #Ca_Kabuli_SNP1309 | Ca_Kabuli_LG04 | 24261779                | [A/C] | Ca_14398           | DOWNSTREAM:1318bases                | --                                                         |
| #Ca_Kabuli_SNP1310 | Ca_Kabuli_LG06 | 3985519                 | [A/G] |                    | INTERGENIC                          |                                                            |
| #Ca_Kabuli_SNP1311 | scaffold608    | 62660                   | [C/T] |                    | INTERGENIC                          |                                                            |
| #Ca_Kabuli_SNP1312 | Ca_Kabuli_LG04 | 39033314                | [G/C] | Ca_13078           | INTRON                              | RNA recognition motif domain                               |
| #Ca_Kabuli_SNP1313 | Ca_Kabuli_LG04 | 38343796                | [T/C] | Ca_13121           | DOWNSTREAM:186bases                 | Peptidase A2                                               |
| #Ca_Kabuli_SNP1314 | Ca_Kabuli_LG06 | 7581799                 | [C/T] |                    | INTERGENIC                          |                                                            |
| #Ca_Kabuli_SNP1315 | Ca_Kabuli_LG04 | 38475310                | [A/C] | Ca_13112           | INTRON                              | BRCT                                                       |
| #Ca_Kabuli_SNP1316 | Ca_Kabuli_LG06 | 7851000                 | [C/G] |                    | INTERGENIC                          |                                                            |
| #Ca_Kabuli_SNP1317 | Ca_Kabuli_LG04 | 36799668                | [T/G] |                    | INTERGENIC                          |                                                            |
| #Ca_Kabuli_SNP1318 | Ca_Kabuli_LG04 | 36754378                | [C/T] | Ca_14808           | INTRON                              | Phosphofructokinase domain                                 |
| #Ca_Kabuli_SNP1319 | Ca_Kabuli_LG04 | 38358398                | [A/G] | Ca_13120           | SYNONYMOUS_CODING                   | C2 calcium-dependent membrane targeting                    |
| #Ca_Kabuli_SNP1320 | Ca_Kabuli_LG04 | 37454636                | [A/G] | Ca_15130           | INTRON                              | Mediator complex subunit Med23                             |
| #Ca_Kabuli_SNP1321 | Ca_Kabuli_LG04 | 36673677                | [C/A] | Ca_14813           | DOWNSTREAM:1785bases                | Domain of unknown function DUF862, eukaryotic              |
| #Ca_Kabuli_SNP1322 | Ca_Kabuli_LG04 | 38405153                | [C/T] | Ca_13117           | INTRON                              | Protein of unknown function DUF248, methyltransferase puta |
| #Ca_Kabuli_SNP1323 | Ca_Kabuli_LG04 | 38060368                | [G/C] |                    | INTERGENIC                          |                                                            |
| #Ca_Kabuli_SNP1324 | scaffold1074   | 92106                   | [C/G] |                    | INTERGENIC                          |                                                            |
| #Ca_Kabuli_SNP1325 | Ca_Kabuli_LG04 | 38039046                | [T/C] | Ca_13141           | INTRON                              | Protein of unknown function DUF3326                        |
| #Ca_Kabuli_SNP1326 | scaffold1997   | 49700                   | [G/A] |                    | INTERGENIC                          |                                                            |
| #Ca_Kabuli_SNP1327 | Ca_Kabuli_LG06 | 2543096                 | [C/T] | Ca_10386           | DOWNSTREAM:1235bases                | Phox/Bem1p                                                 |
| #Ca_Kabuli_SNP1328 | Ca_Kabuli_LG04 | 38724356                | [C/A] | Ca_13098           | INTRON                              | Exostosin-like                                             |
| #Ca_Kabuli_SNP1329 | scaffold1997   | 106936                  | [G/A] |                    | INTERGENIC                          |                                                            |
| #Ca_Kabuli_SNP1330 | Ca_Kabuli_LG04 | 35574088                | [C/G] | Ca_22438           | DOWNSTREAM:137bases                 | Transcription factor, MADS-box                             |
| #Ca_Kabuli_SNP1331 | Ca_Kabuli_LG04 | 35229966                | [C/T] | Ca_20015           | NON_SYNONYMOUS_CODING               | Metallo-dependent phosphatase                              |

| SNP IDs            | Chromosomes    | Physical positions (bp) | SNPs  | Gene accession IDs | Sequence components of genome/genes | Putative functions                      |
|--------------------|----------------|-------------------------|-------|--------------------|-------------------------------------|-----------------------------------------|
| #Ca_Kabuli_SNP1332 | Ca_Kabuli_LG03 | 26659097                | [A/C] | Ca_08243           | NON_SYNONYMOUS_CODING               | Heat shock protein DnaJ, N-terminal     |
| #Ca_Kabuli_SNP1333 | Ca_Kabuli_LG06 | 7834922                 | [A/G] | Ca_09595           | SYNONYMOUS_CODING                   | C2 calcium-dependent membrane targeting |
| #Ca_Kabuli_SNP1334 | Ca_Kabuli_LG04 | 37450294                | [C/T] |                    | INTERGENIC                          |                                         |
| #Ca_Kabuli_SNP1335 | Ca_Kabuli_LG06 | 158938                  | [T/A] | Ca_13246           | INTRON                              | Zinc finger, PHD-type                   |
| #Ca_Kabuli_SNP1336 | Ca_Kabuli_LG04 | 37364980                | [A/G] |                    | INTERGENIC                          |                                         |
| #Ca_Kabuli_SNP1337 | scaffold402    | 137196                  | [T/G] |                    | INTERGENIC                          |                                         |
| #Ca_Kabuli_SNP1338 | Ca_Kabuli_LG06 | 7744730                 | [G/A] | Ca_09604           | INTRON                              | ABC-1                                   |
| #Ca_Kabuli_SNP1339 | scaffold403    | 110316                  | [T/C] |                    | INTERGENIC                          |                                         |
| #Ca_Kabuli_SNP1340 | Ca_Kabuli_LG06 | 2542942                 | [T/A] | Ca_10386           | DOWNSTREAM:1081bases                | Phox/Bem1p                              |
| #Ca_Kabuli_SNP1341 | Ca_Kabuli_LG06 | 2542981                 | [C/T] | Ca_10386           | DOWNSTREAM:1120bases                | Phox/Bem1p                              |
| #Ca_Kabuli_SNP1342 | Ca_Kabuli_LG04 | 38362132                | [A/T] | Ca_13120           | NON_SYNONYMOUS_CODING               | C2 calcium-dependent membrane targeting |
| #Ca_Kabuli_SNP1343 | scaffold256    | 299009                  | [A/C] |                    | INTERGENIC                          |                                         |
| #Ca_Kabuli_SNP1344 | Ca_Kabuli_LG03 | 19792758                | [G/T] |                    | INTERGENIC                          |                                         |
| #Ca_Kabuli_SNP1345 | Ca_Kabuli_LG06 | 7694594                 | [G/T] |                    | INTERGENIC                          |                                         |
| #Ca_Kabuli_SNP1346 | Ca_Kabuli_LG06 | 7719877                 | [C/T] |                    | INTERGENIC                          |                                         |
| #Ca_Kabuli_SNP1347 | Ca_Kabuli_LG01 | 24450511                | [A/G] | Ca_18343           | INTRON                              | Ribulose-phosphate 3-epimerase          |
| #Ca_Kabuli_SNP1348 | Ca_Kabuli_LG04 | 2113227                 | [T/C] |                    | INTERGENIC                          |                                         |
| #Ca_Kabuli_SNP1349 | Ca_Kabuli_LG06 | 3803788                 | [A/C] |                    | INTERGENIC                          |                                         |
| #Ca_Kabuli_SNP1350 | Ca_Kabuli_LG03 | 10142131                | [T/G] | Ca_18811           | INTRON                              | WD40 repeat                             |
| #Ca_Kabuli_SNP1351 | Ca_Kabuli_LG06 | 7661924                 | [C/T] |                    | INTERGENIC                          |                                         |
| #Ca_Kabuli_SNP1352 | scaffold31     | 1053215                 | [A/G] |                    | INTERGENIC                          |                                         |
| #Ca_Kabuli_SNP1353 | Ca_Kabuli_LG02 | 33345575                | [A/G] |                    | INTERGENIC                          |                                         |
| #Ca_Kabuli_SNP1354 | scaffold1997   | 107376                  | [C/T] |                    | INTERGENIC                          |                                         |
| #Ca_Kabuli_SNP1355 | Ca_Kabuli_LG07 | 21736778                | [G/A] |                    | INTERGENIC                          |                                         |
| #Ca_Kabuli_SNP1356 | scaffold1997   | 82328                   | [A/G] |                    | INTERGENIC                          |                                         |
| #Ca_Kabuli_SNP1357 | scaffold1997   | 99364                   | [A/G] |                    | INTERGENIC                          |                                         |
| #Ca_Kabuli_SNP1358 | Ca_Kabuli_LG06 | 24235632                | [C/T] |                    | INTERGENIC                          |                                         |
| #Ca_Kabuli_SNP1359 | scaffold123    | 143434                  | [A/T] |                    | INTERGENIC                          |                                         |
| #Ca_Kabuli_SNP1360 | scaffold402    | 300972                  | [G/T] |                    | INTERGENIC                          |                                         |
| #Ca_Kabuli_SNP1361 | Ca_Kabuli_LG06 | 5590085                 | [A/G] |                    | INTERGENIC                          |                                         |
| #Ca_Kabuli_SNP1362 | scaffold733    | 70241                   | [T/A] |                    | INTERGENIC                          |                                         |

| SNP IDs            | Chromosomes    | Physical positions (bp) | SNPs  | Gene accession IDs | Sequence components of genome/genes | Putative functions                                  |
|--------------------|----------------|-------------------------|-------|--------------------|-------------------------------------|-----------------------------------------------------|
| #Ca_Kabuli_SNP1363 | Ca_Kabuli_LG04 | 48457876                | [C/T] | Ca_10747           | INTRON                              | Protein of unknown function DUF869, plant           |
| #Ca_Kabuli_SNP1364 | Ca_Kabuli_LG01 | 3260243                 | [C/A] | Ca_00397           | NON_SYNONYMOUS_CODING               | Granulin                                            |
| #Ca_Kabuli_SNP1365 | Ca_Kabuli_LG04 | 42592218                | [C/T] |                    | INTERGENIC                          |                                                     |
| #Ca_Kabuli_SNP1366 | Ca_Kabuli_LG06 | 10395281                | [C/T] | Ca_08553           | INTRON                              | Small ubiquitin-related modifier, SUMO              |
| #Ca_Kabuli_SNP1367 | Ca_Kabuli_LG01 | 15964060                | [T/A] |                    | INTERGENIC                          |                                                     |
| #Ca_Kabuli_SNP1368 | Ca_Kabuli_LG05 | 40632788                | [C/T] |                    | INTERGENIC                          |                                                     |
| #Ca_Kabuli_SNP1369 | Ca_Kabuli_LG07 | 26692131                | [T/C] |                    | INTERGENIC                          |                                                     |
| #Ca_Kabuli_SNP1370 | Ca_Kabuli_LG05 | 234410                  | [A/C] | Ca_18178           | NON_SYNONYMOUS_CODING               | Protein of unknown function DUF647                  |
| #Ca_Kabuli_SNP1371 | Ca_Kabuli_LG04 | 13588956                | [T/C] |                    | INTERGENIC                          |                                                     |
| #Ca_Kabuli_SNP1372 | Ca_Kabuli_LG06 | 8749010                 | [A/C] |                    | INTERGENIC                          |                                                     |
| #Ca_Kabuli_SNP1373 | Ca_Kabuli_LG04 | 13660846                | [A/G] | Ca_04585           | SYNONYMOUS_CODING                   | Pentatricopeptide repeat                            |
| #Ca_Kabuli_SNP1374 | Ca_Kabuli_LG04 | 11274281                | [C/T] | Ca_04359           | SYNONYMOUS_CODING                   | Peptidase M14, carboxypeptidase A                   |
| #Ca_Kabuli_SNP1375 | Ca_Kabuli_LG07 | 21639244                | [T/G] |                    | INTERGENIC                          |                                                     |
| #Ca_Kabuli_SNP1376 | Ca_Kabuli_LG06 | 16715836                | [A/C] | Ca_06303           | NON_SYNONYMOUS_CODING               | DNA mismatch repair protein MutS, C-terminal domain |
| #Ca_Kabuli_SNP1377 | Ca_Kabuli_LG05 | 29007884                | [A/C] | Ca_23834           | NON_SYNONYMOUS_CODING               | Camphor resistance CrcB protein                     |
| #Ca_Kabuli_SNP1378 | Ca_Kabuli_LG04 | 11343230                | [C/G] | Ca_04368           | INTRON                              | Zinc finger, DHHC-type, palmitoyltransferase        |
| #Ca_Kabuli_SNP1379 | Ca_Kabuli_LG04 | 11465075                | [C/T] |                    | INTERGENIC                          |                                                     |
| #Ca_Kabuli_SNP1380 | Ca_Kabuli_LG06 | 33495705                | [G/T] |                    | INTERGENIC                          |                                                     |
| #Ca_Kabuli_SNP1381 | Ca_Kabuli_LG07 | 26940955                | [T/G] | Ca_16240           | SYNONYMOUS_CODING                   | Plastocyanin-like                                   |
| #Ca_Kabuli_SNP1382 | Ca_Kabuli_LG02 | 26706782                | [G/A] |                    | INTERGENIC                          |                                                     |
| #Ca_Kabuli_SNP1383 | Ca_Kabuli_LG04 | 11276413                | [C/G] | Ca_04359           | INTRON                              | Peptidase M14, carboxypeptidase A                   |
| #Ca_Kabuli_SNP1384 | Ca_Kabuli_LG04 | 11257588                | [C/T] | Ca_04358           | SYNONYMOUS_CODING                   | Peptidase M14, carboxypeptidase A                   |
| #Ca_Kabuli_SNP1385 | Ca_Kabuli_LG04 | 11490496                | [G/A] | Ca_04384           | SYNONYMOUS_CODING                   | Tubby, C-terminal                                   |
| #Ca_Kabuli_SNP1386 | Ca_Kabuli_LG04 | 11277574                | [C/G] | Ca_04359           | SYNONYMOUS_CODING                   | Peptidase M14, carboxypeptidase A                   |
| #Ca_Kabuli_SNP1387 | Ca_Kabuli_LG04 | 11435651                | [A/G] | Ca_04378           | SYNONYMOUS_CODING                   | Zinc finger, DHHC-type, palmitoyltransferase        |
| #Ca_Kabuli_SNP1388 | Ca_Kabuli_LG04 | 11441735                | [T/G] |                    | INTERGENIC                          |                                                     |
| #Ca_Kabuli_SNP1389 | Ca_Kabuli_LG04 | 11435380                | [T/C] | Ca_04378           | SYNONYMOUS_CODING                   | Zinc finger, DHHC-type, palmitoyltransferase        |
| #Ca_Kabuli_SNP1390 | Ca_Kabuli_LG06 | 15589539                | [A/T] | Ca_05341           | INTRON                              | Terpene synthase-like                               |
| #Ca_Kabuli_SNP1391 | Ca_Kabuli_LG06 | 8787559                 | [A/T] |                    | INTERGENIC                          |                                                     |
| #Ca_Kabuli_SNP1392 | scaffold932    | 7296                    | [A/T] |                    | INTERGENIC                          |                                                     |
| #Ca_Kabuli_SNP1393 | Ca_Kabuli_LG02 | 36375627                | [A/C] | Ca_09827           | NON_SYNONYMOUS_CODING               | Domain of unknown function DUF632                   |



| SNP IDs            | Chromosomes    | Physical positions (bp) | SNPs  | Gene accession IDs | Sequence components of genome/genes | Putative functions                            |
|--------------------|----------------|-------------------------|-------|--------------------|-------------------------------------|-----------------------------------------------|
| #Ca_Kabuli_SNP1394 | scaffold844    | 70526                   | [T/C] |                    | INTERGENIC                          |                                               |
| #Ca_Kabuli_SNP1395 | Ca_Kabuli_LG02 | 33398550                | [G/A] | Ca_10186           | DOWNSTREAM:300bases                 | Disease resistance protein                    |
| #Ca_Kabuli_SNP1396 | Ca_Kabuli_LG04 | 8865427                 | [A/G] | Ca_08384           | DOWNSTREAM:1383bases                | Peptidase M22, glycoprotease                  |
| #Ca_Kabuli_SNP1397 | Ca_Kabuli_LG03 | 31091085                | [A/C] | Ca_12206           | NON_SYNONYMOUS_CODING               | Histone H1/H5                                 |
| #Ca_Kabuli_SNP1398 | Ca_Kabuli_LG04 | 8695562                 | [T/C] | Ca_08365           | INTRON                              | Glycoside hydrolase, family 13, N-terminal    |
| #Ca_Kabuli_SNP1399 | scaffold214    | 60932                   | [T/G] |                    | INTERGENIC                          |                                               |
| #Ca_Kabuli_SNP1400 | Ca_Kabuli_LG04 | 8660115                 | [T/A] | Ca_08360           | SYNONYMOUS_CODING                   | Disease resistance protein                    |
| #Ca_Kabuli_SNP1401 | Ca_Kabuli_LG04 | 8752822                 | [T/C] | Ca_08371           | NON_SYNONYMOUS_CODING               | No apical meristem (NAM) protein              |
| #Ca_Kabuli_SNP1402 | Ca_Kabuli_LG04 | 8805667                 | [T/C] |                    | INTERGENIC                          |                                               |
| #Ca_Kabuli_SNP1403 | Ca_Kabuli_LG04 | 8656398                 | [A/G] | Ca_08359           | SYNONYMOUS_CODING                   | Protein of unknown function DUF594            |
| #Ca_Kabuli_SNP1404 | Ca_Kabuli_LG05 | 25697494                | [G/A] | Ca_09026           | NON_SYNONYMOUS_CODING               | Ribosomal protein S21                         |
| #Ca_Kabuli_SNP1405 | scaffold436    | 245034                  | [C/T] |                    | INTERGENIC                          |                                               |
| #Ca_Kabuli_SNP1406 | Ca_Kabuli_LG07 | 32784921                | [A/T] | Ca_10015           | SYNONYMOUS_CODING                   | Transcription initiation factor TFIID         |
| #Ca_Kabuli_SNP1407 | Ca_Kabuli_LG05 | 30035763                | [A/C] | Ca_04680           | SYNONYMOUS_CODING                   | Sugar/inositol transporter                    |
| #Ca_Kabuli_SNP1408 | Ca_Kabuli_LG04 | 3037899                 | [A/C] | Ca_12102           | NON_SYNONYMOUS_CODING               | --                                            |
| #Ca_Kabuli_SNP1409 | Ca_Kabuli_LG07 | 13860754                | [A/C] |                    | INTERGENIC                          |                                               |
| #Ca_Kabuli_SNP1410 | Ca_Kabuli_LG07 | 27157236                | [C/A] | Ca_16230           | INTRON                              | Bromo adjacent homology (BAH) domain          |
| #Ca_Kabuli_SNP1411 | scaffold247    | 3221                    | [A/C] |                    | INTERGENIC                          |                                               |
| #Ca_Kabuli_SNP1412 | Ca_Kabuli_LG02 | 9756955                 | [G/A] |                    | INTERGENIC                          |                                               |
| #Ca_Kabuli_SNP1413 | scaffold1676   | 50671                   | [A/G] |                    | INTERGENIC                          |                                               |
| #Ca_Kabuli_SNP1414 | scaffold186    | 111933                  | [C/T] |                    | INTERGENIC                          |                                               |
| #Ca_Kabuli_SNP1415 | Ca_Kabuli_LG04 | 1708370                 | [C/T] | Ca_07797           | SYNONYMOUS_CODING                   | BEACH domain                                  |
| #Ca_Kabuli_SNP1416 | Ca_Kabuli_LG03 | 30004211                | [C/T] |                    | INTERGENIC                          |                                               |
| #Ca_Kabuli_SNP1417 | Ca_Kabuli_LG04 | 42038742                | [A/T] | Ca_10919           | DOWNSTREAM:1003bases                | Glycoside hydrolase, family 28                |
| #Ca_Kabuli_SNP1418 | Ca_Kabuli_LG07 | 22707344                | [T/C] |                    | INTERGENIC                          |                                               |
| #Ca_Kabuli_SNP1419 | Ca_Kabuli_LG04 | 48498133                | [C/T] | Ca_10741           | DOWNSTREAM:1864bases                | Eukaryotic initiation factor 3, gamma subunit |
| #Ca_Kabuli_SNP1420 | Ca_Kabuli_LG01 | 215053                  | [G/T] | Ca_00017           | INTRON                              | Protein kinase, catalytic domain              |
| #Ca_Kabuli_SNP1421 | scaffold1676   | 50701                   | [T/A] |                    | INTERGENIC                          |                                               |
| #Ca_Kabuli_SNP1422 | Ca_Kabuli_LG04 | 24861477                | [T/G] | Ca_20847           | INTRON                              | Protein kinase, catalytic domain              |
| #Ca_Kabuli_SNP1423 | Ca_Kabuli_LG04 | 3307908                 | [A/T] | Ca_12131           | INTRON                              | Actin-binding, cofilin/tropomyosin type       |
| #Ca_Kabuli_SNP1424 | Ca_Kabuli_LG08 | 16102356                | [G/T] |                    | INTERGENIC                          |                                               |

| SNP IDs            | Chromosomes    | Physical positions (bp) | SNPs  | Gene accession IDs | Sequence components of genome/genes | Putative functions                               |
|--------------------|----------------|-------------------------|-------|--------------------|-------------------------------------|--------------------------------------------------|
| #Ca_Kabuli_SNP1425 | Ca_Kabuli_LG07 | 14325903                | [T/A] |                    | INTERGENIC                          |                                                  |
| #Ca_Kabuli_SNP1426 | scaffold165    | 3158                    | [C/G] |                    | INTERGENIC                          |                                                  |
| #Ca_Kabuli_SNP1427 | Ca_Kabuli_LG05 | 46156202                | [C/T] | Ca_04067           | DOWNSTREAM:1050bases                | Heavy metal transport/detoxification protein     |
| #Ca_Kabuli_SNP1428 | Ca_Kabuli_LG04 | 4154507                 | [T/G] | Ca_03840           | INTRON                              | --                                               |
| #Ca_Kabuli_SNP1429 | Ca_Kabuli_LG05 | 30811245                | [C/T] |                    | INTERGENIC                          |                                                  |
| #Ca_Kabuli_SNP1430 | Ca_Kabuli_LG06 | 50378387                | [A/C] | Ca_13465           | SYNONYMOUS_CODING                   | ABC transporter-like                             |
| #Ca_Kabuli_SNP1431 | scaffold365    | 401905                  | [A/T] |                    | INTERGENIC                          |                                                  |
| #Ca_Kabuli_SNP1432 | Ca_Kabuli_LG05 | 44887020                | [C/T] | Ca_03932           | SYNONYMOUS_CODING                   | Sec1-like protein                                |
| #Ca_Kabuli_SNP1433 | Ca_Kabuli_LG05 | 41837505                | [A/C] |                    | INTERGENIC                          |                                                  |
| #Ca_Kabuli_SNP1434 | Ca_Kabuli_LG05 | 44938814                | [T/A] |                    | INTERGENIC                          |                                                  |
| #Ca_Kabuli_SNP1435 | Ca_Kabuli_LG07 | 21639238                | [G/A] |                    | INTERGENIC                          |                                                  |
| #Ca_Kabuli_SNP1436 | Ca_Kabuli_LG05 | 44911842                | [T/C] |                    | INTERGENIC                          |                                                  |
| #Ca_Kabuli_SNP1437 | Ca_Kabuli_LG04 | 39042938                | [T/G] |                    | INTERGENIC                          |                                                  |
| #Ca_Kabuli_SNP1438 | scaffold6371   | 375                     | [G/C] |                    | INTERGENIC                          |                                                  |
| #Ca_Kabuli_SNP1439 | scaffold32     | 137462                  | [A/G] |                    | INTERGENIC                          |                                                  |
| #Ca_Kabuli_SNP1440 | scaffold120    | 108985                  | [G/T] |                    | INTERGENIC                          |                                                  |
| #Ca_Kabuli_SNP1441 | scaffold404    | 71998                   | [A/T] |                    | INTERGENIC                          |                                                  |
| #Ca_Kabuli_SNP1442 | Ca_Kabuli_LG05 | 44824496                | [C/T] | Ca_03925           | INTRON                              | Transcription elongation factor Spt5, NGN domain |
| #Ca_Kabuli_SNP1443 | scaffold585    | 108908                  | [T/G] |                    | INTERGENIC                          |                                                  |
| #Ca_Kabuli_SNP1444 | scaffold2931   | 96223                   | [C/G] |                    | INTERGENIC                          |                                                  |
| #Ca_Kabuli_SNP1445 | Ca_Kabuli_LG06 | 49044802                | [C/T] |                    | INTERGENIC                          |                                                  |
| #Ca_Kabuli_SNP1446 | Ca_Kabuli_LG05 | 25747850                | [T/A] | Ca_09023           | NON_SYNONYMOUS_CODING               | AB-hydrolase-associated lipase region            |
| #Ca_Kabuli_SNP1447 | Ca_Kabuli_LG04 | 12609670                | [A/C] | Ca_04483           | DOWNSTREAM:1034bases                | Zinc finger, RING-type                           |
| #Ca_Kabuli_SNP1448 | Ca_Kabuli_LG03 | 11906828                | [G/A] | Ca_22253           | INTRON                              | --                                               |
| #Ca_Kabuli_SNP1449 | Ca_Kabuli_LG07 | 26161030                | [C/T] |                    | INTERGENIC                          |                                                  |
| #Ca_Kabuli_SNP1450 | Ca_Kabuli_LG04 | 44458789                | [T/C] | Ca_09118           | INTRON                              | Oxoglutarate/iron-dependent oxygenase            |
| #Ca_Kabuli_SNP1451 | Ca_Kabuli_LG05 | 22065859                | [G/A] | Ca_21161           | SYNONYMOUS_CODING                   | --                                               |
| #Ca_Kabuli_SNP1452 | Ca_Kabuli_LG04 | 35977422                | [A/G] | Ca_14857           | INTRON                              | Ribosomal protein L19                            |
| #Ca_Kabuli_SNP1453 | scaffold62     | 287933                  | [T/C] |                    | INTERGENIC                          |                                                  |
| #Ca_Kabuli_SNP1454 | Ca_Kabuli_LG05 | 40359446                | [G/A] |                    | INTERGENIC                          |                                                  |
| #Ca_Kabuli_SNP1455 | Ca_Kabuli_LG05 | 40359447                | [T/C] |                    | INTERGENIC                          |                                                  |

| SNP IDs            | Chromosomes    | Physical positions (bp) | SNPs  | Gene accession IDs | Sequence components of genome/genes | Putative functions                                    |
|--------------------|----------------|-------------------------|-------|--------------------|-------------------------------------|-------------------------------------------------------|
| #Ca_Kabuli_SNP1456 | Ca_Kabuli_LG05 | 40359451                | [T/G] |                    | INTERGENIC                          |                                                       |
| #Ca_Kabuli_SNP1457 | Ca_Kabuli_LG05 | 40359449                | [C/A] |                    | INTERGENIC                          |                                                       |
| #Ca_Kabuli_SNP1458 | scaffold6212   | 595                     | [T/A] |                    | INTERGENIC                          |                                                       |
| #Ca_Kabuli_SNP1459 | Ca_Kabuli_LG05 | 40736291                | [C/G] | Ca_07594           | INTRON                              | --                                                    |
| #Ca_Kabuli_SNP1460 | Ca_Kabuli_LG05 | 38857770                | [G/A] | Ca_07437           | DOWNSTREAM:1069bases                | Cytochrome P450                                       |
| #Ca_Kabuli_SNP1461 | Ca_Kabuli_LG05 | 39943298                | [T/C] |                    | INTERGENIC                          |                                                       |
| #Ca_Kabuli_SNP1462 | Ca_Kabuli_LG05 | 40025377                | [A/T] | Ca_07531           | INTRON                              | Argonaute/Dicer protein, PAZ                          |
| #Ca_Kabuli_SNP1463 | Ca_Kabuli_LG05 | 28757485                | [C/A] | Ca_13354           | SYNONYMOUS_CODING                   | Protein of unknown function DUF827, plant             |
| #Ca_Kabuli_SNP1464 | scaffold727    | 90013                   | [G/T] |                    | INTERGENIC                          |                                                       |
| #Ca_Kabuli_SNP1465 | Ca_Kabuli_LG08 | 1475873                 | [A/C] | Ca_15024           | NON_SYNONYMOUS_CODING               | WD40 repeat                                           |
| #Ca_Kabuli_SNP1466 | Ca_Kabuli_LG05 | 28721236                | [T/C] |                    | INTERGENIC                          |                                                       |
| #Ca_Kabuli_SNP1467 | Ca_Kabuli_LG05 | 28721237                | [G/A] |                    | INTERGENIC                          |                                                       |
| #Ca_Kabuli_SNP1468 | Ca_Kabuli_LG01 | 2288186                 | [A/C] |                    | INTERGENIC                          |                                                       |
| #Ca_Kabuli_SNP1469 | Ca_Kabuli_LG05 | 28854486                | [T/C] | Ca_13347           | DOWNSTREAM:1247bases                | Transcription factor Tfb4                             |
| #Ca_Kabuli_SNP1470 | Ca_Kabuli_LG05 | 28758723                | [G/A] | Ca_13354           | INTRON                              | Protein of unknown function DUF827, plant             |
| #Ca_Kabuli_SNP1471 | scaffold764    | 11108                   | [C/A] |                    | INTERGENIC                          |                                                       |
| #Ca_Kabuli_SNP1472 | Ca_Kabuli_LG05 | 28817832                | [G/A] | Ca_13351           | DOWNSTREAM:1775bases                | Domain of unknown function DUF250                     |
| #Ca_Kabuli_SNP1473 | Ca_Kabuli_LG05 | 28717362                | [T/C] |                    | INTERGENIC                          |                                                       |
| #Ca_Kabuli_SNP1474 | Ca_Kabuli_LG05 | 28717384                | [T/C] |                    | INTERGENIC                          |                                                       |
| #Ca_Kabuli_SNP1475 | Ca_Kabuli_LG05 | 28360495                | [T/C] | Ca_13386           | SYNONYMOUS_CODING                   | RNA helicase, ATP-dependent, DEAD-box, conserved site |
| #Ca_Kabuli_SNP1476 | Ca_Kabuli_LG05 | 27692804                | [C/T] |                    | INTERGENIC                          |                                                       |
| #Ca_Kabuli_SNP1477 | scaffold232    | 165818                  | [G/A] |                    | INTERGENIC                          |                                                       |
| #Ca_Kabuli_SNP1478 | Ca_Kabuli_LG05 | 28581827                | [G/A] | Ca_13367           | DOWNSTREAM:1316bases                | Sel1-like                                             |
| #Ca_Kabuli_SNP1479 | Ca_Kabuli_LG05 | 28581814                | [G/C] | Ca_13367           | DOWNSTREAM:1329bases                | Sel1-like                                             |
| #Ca_Kabuli_SNP1480 | Ca_Kabuli_LG05 | 28581815                | [C/T] | Ca_13367           | DOWNSTREAM:1328bases                | Sel1-like                                             |
| #Ca_Kabuli_SNP1481 | Ca_Kabuli_LG05 | 28748061                | [T/C] | Ca_13355           | INTRON                              | Haloacid dehalogenase-like hydrolase                  |
| #Ca_Kabuli_SNP1482 | Ca_Kabuli_LG05 | 12590512                | [G/A] | Ca_17072           | SYNONYMOUS_CODING                   | Glycerophosphoryl diester phosphodiesterase           |
| #Ca_Kabuli_SNP1483 | Ca_Kabuli_LG05 | 28582806                | [G/A] | Ca_13367           | DOWNSTREAM:337bases                 | Sel1-like                                             |
| #Ca_Kabuli_SNP1484 | Ca_Kabuli_LG05 | 28582763                | [C/T] | Ca_13367           | DOWNSTREAM:380bases                 | Sel1-like                                             |
| #Ca_Kabuli_SNP1485 | Ca_Kabuli_LG05 | 37040045                | [G/A] | Ca_01510           | SYNONYMOUS_CODING                   | Protein of unknown function DUF2053, membrane         |
| #Ca_Kabuli_SNP1486 | Ca_Kabuli_LG05 | 21163371                | [G/A] |                    | INTERGENIC                          |                                                       |

| SNP IDs            | Chromosomes    | Physical positions (bp) | SNPs  | Gene accession IDs | Sequence components of genome/genes | Putative functions                                     |
|--------------------|----------------|-------------------------|-------|--------------------|-------------------------------------|--------------------------------------------------------|
| #Ca_Kabuli_SNP1487 | Ca_Kabuli_LG03 | 30221810                | [A/T] | Ca_07337           | INTRON                              | Colon cancer-associated Mic1-like                      |
| #Ca_Kabuli_SNP1488 | Ca_Kabuli_LG05 | 37083275                | [G/T] | Ca_01507           | INTRON                              | GRAM                                                   |
| #Ca_Kabuli_SNP1489 | scaffold404    | 110898                  | [A/T] |                    | INTERGENIC                          |                                                        |
| #Ca_Kabuli_SNP1490 | Ca_Kabuli_LG07 | 1350851                 | [A/T] | Ca_03334           | DOWNSTREAM:173bases                 | Peptidase C19, ubiquitin carboxyl-terminal hydrolase 2 |
| #Ca_Kabuli_SNP1491 | scaffold493    | 370374                  | [C/T] |                    | INTERGENIC                          |                                                        |
| #Ca_Kabuli_SNP1492 | Ca_Kabuli_LG03 | 37316817                | [G/T] | Ca_01065           | DOWNSTREAM:1846bases                | Zinc finger, Sec23/Sec24-type                          |
| #Ca_Kabuli_SNP1493 | Ca_Kabuli_LG02 | 35754679                | [A/T] | Ca_09749           | DOWNSTREAM:1735bases                | Regulatory protein RecX                                |
| #Ca_Kabuli_SNP1494 | scaffold4067   | 15766                   | [T/G] |                    | INTERGENIC                          |                                                        |
| #Ca_Kabuli_SNP1495 | Ca_Kabuli_LG07 | 7435434                 | [T/A] |                    | INTERGENIC                          |                                                        |
| #Ca_Kabuli_SNP1496 | Ca_Kabuli_LG05 | 33754233                | [G/T] |                    | INTERGENIC                          |                                                        |
| #Ca_Kabuli_SNP1497 | Ca_Kabuli_LG06 | 22194363                | [T/G] | Ca_11219           | SYNONYMOUS_CODING                   | Exostosin-like                                         |
| #Ca_Kabuli_SNP1498 | scaffold948    | 451962                  | [T/G] |                    | INTERGENIC                          |                                                        |
| #Ca_Kabuli_SNP1499 | Ca_Kabuli_LG06 | 4362850                 | [A/C] |                    | INTERGENIC                          |                                                        |
| #Ca_Kabuli_SNP1500 | Ca_Kabuli_LG06 | 7765068                 | [A/C] |                    | INTERGENIC                          |                                                        |
| #Ca_Kabuli_SNP1501 | scaffold948    | 732463                  | [G/T] |                    | INTERGENIC                          |                                                        |
| #Ca_Kabuli_SNP1502 | Ca_Kabuli_LG06 | 11399318                | [T/C] |                    | INTERGENIC                          |                                                        |
| #Ca_Kabuli_SNP1503 | scaffold1263   | 164769                  | [C/T] |                    | INTERGENIC                          |                                                        |
| #Ca_Kabuli_SNP1504 | scaffold1263   | 164771                  | [T/C] |                    | INTERGENIC                          |                                                        |
| #Ca_Kabuli_SNP1505 | Ca_Kabuli_LG04 | 3280217                 | [G/A] | Ca_12128           | DOWNSTREAM:447bases                 | --                                                     |
| #Ca_Kabuli_SNP1506 | scaffold932    | 228679                  | [G/A] |                    | INTERGENIC                          |                                                        |
| #Ca_Kabuli_SNP1507 | Ca_Kabuli_LG03 | 23340884                | [T/C] | Ca_06186           | INTRON                              | Protein of unknown function DUF3525                    |
| #Ca_Kabuli_SNP1508 | Ca_Kabuli_LG06 | 28284375                | [T/C] |                    | INTERGENIC                          |                                                        |
| #Ca_Kabuli_SNP1509 | Ca_Kabuli_LG01 | 11502160                | [G/T] |                    | INTERGENIC                          |                                                        |
| #Ca_Kabuli_SNP1510 | Ca_Kabuli_LG04 | 11059414                | [T/G] |                    | INTERGENIC                          |                                                        |
| #Ca_Kabuli_SNP1511 | Ca_Kabuli_LG08 | 2827832                 | [T/A] | Ca_02297           | INTRON                              | Pleckstrin homology domain                             |
| #Ca_Kabuli_SNP1512 | Ca_Kabuli_LG01 | 38252610                | [T/G] |                    | INTERGENIC                          |                                                        |
| #Ca_Kabuli_SNP1513 | scaffold2119   | 248                     | [G/A] |                    | INTERGENIC                          |                                                        |
| #Ca_Kabuli_SNP1514 | Ca_Kabuli_LG04 | 29972164                | [G/A] |                    | INTERGENIC                          |                                                        |
| #Ca_Kabuli_SNP1515 | Ca_Kabuli_LG04 | 48936870                | [T/C] | Ca_20762           | NON_SYNONYMOUS_CODING               | Pentatricopeptide repeat                               |
| #Ca_Kabuli_SNP1516 | Ca_Kabuli_LG01 | 7486109                 | [T/G] | Ca_08001           | NON_SYNONYMOUS_CODING               | Protein kinase, catalytic domain                       |
| #Ca_Kabuli_SNP1517 | scaffold85     | 218336                  | [T/G] |                    | INTERGENIC                          |                                                        |

| SNP IDs            | Chromosomes    | Physical positions (bp) | SNPs  | Gene accession IDs | Sequence components of genome/genes | Putative functions                                           |
|--------------------|----------------|-------------------------|-------|--------------------|-------------------------------------|--------------------------------------------------------------|
| #Ca_Kabuli_SNP1518 | scaffold600    | 295823                  | [C/T] |                    | INTERGENIC                          |                                                              |
| #Ca_Kabuli_SNP1519 | Ca_Kabuli_LG06 | 32201432                | [G/C] | Ca_15217           | NON_SYNONYMOUS_CODING               | --                                                           |
| #Ca_Kabuli_SNP1520 | Ca_Kabuli_LG04 | 48936871                | [G/T] | Ca_20762           | NON_SYNONYMOUS_CODING               | Pentatricopeptide repeat                                     |
| #Ca_Kabuli_SNP1521 | scaffold1775   | 28507                   | [A/G] |                    | INTERGENIC                          |                                                              |
| #Ca_Kabuli_SNP1522 | Ca_Kabuli_LG04 | 48936868                | [T/G] | Ca_20762           | SYNONYMOUS_CODING                   | Pentatricopeptide repeat                                     |
| #Ca_Kabuli_SNP1523 | Ca_Kabuli_LG04 | 48936869                | [A/T] | Ca_20762           | NON_SYNONYMOUS_CODING               | Pentatricopeptide repeat                                     |
| #Ca_Kabuli_SNP1524 | Ca_Kabuli_LG04 | 35455095                | [A/C] | Ca_22430           | DOWNSTREAM:385bases                 | Pentatricopeptide repeat                                     |
| #Ca_Kabuli_SNP1525 | Ca_Kabuli_LG06 | 35337974                | [A/C] | Ca_15781           | NON_SYNONYMOUS_CODING               | RNA recognition motif domain                                 |
| #Ca_Kabuli_SNP1526 | scaffold5315   | 549                     | [G/A] |                    | INTERGENIC                          |                                                              |
| #Ca_Kabuli_SNP1527 | Ca_Kabuli_LG01 | 12326232                | [T/G] | Ca_02517           | NON_SYNONYMOUS_CODING               | Mlo-related protein                                          |
| #Ca_Kabuli_SNP1528 | Ca_Kabuli_LG01 | 17799607                | [C/A] | Ca_14758           | NON_SYNONYMOUS_CODING               | Pathogenesis-related transcriptional factor/ERF, DNA-binding |
| #Ca_Kabuli_SNP1529 | Ca_Kabuli_LG06 | 36309173                | [T/G] |                    | INTERGENIC                          |                                                              |
| #Ca_Kabuli_SNP1530 | Ca_Kabuli_LG07 | 24181341                | [T/G] | Ca_19912           | SYNONYMOUS_CODING                   | Zinc finger, RING-CH-type                                    |
| #Ca_Kabuli_SNP1531 | Ca_Kabuli_LG06 | 3803817                 | [T/G] |                    | INTERGENIC                          |                                                              |
| #Ca_Kabuli_SNP1532 | Ca_Kabuli_LG01 | 41795347                | [A/G] |                    | INTERGENIC                          |                                                              |
| #Ca_Kabuli_SNP1533 | Ca_Kabuli_LG05 | 29007879                | [T/C] | Ca_23834           | NON_SYNONYMOUS_CODING               | Camphor resistance CrcB protein                              |
| #Ca_Kabuli_SNP1534 | Ca_Kabuli_LG03 | 8536421                 | [A/C] |                    | INTERGENIC                          |                                                              |
| #Ca_Kabuli_SNP1535 | Ca_Kabuli_LG01 | 462814                  | [C/A] | Ca_00053           | NON_SYNONYMOUS_CODING               | CMP/dCMP deaminase, zinc-binding                             |
| #Ca_Kabuli_SNP1536 | Ca_Kabuli_LG05 | 7775516                 | [A/G] |                    | INTERGENIC                          |                                                              |
| #Ca_Kabuli_SNP1537 | Ca_Kabuli_LG08 | 15638443                | [A/C] |                    | INTERGENIC                          |                                                              |
| #Ca_Kabuli_SNP1538 | Ca_Kabuli_LG07 | 10137826                | [C/A] | Ca_12775           | NON_SYNONYMOUS_CODING               | Pathogenesis-related transcriptional factor/ERF, DNA-binding |
| #Ca_Kabuli_SNP1539 | Ca_Kabuli_LG07 | 21616287                | [T/G] | Ca_14512           | INTRON                              | Clathrin/coatomer adaptor, adaptin-like, N-terminal          |
| #Ca_Kabuli_SNP1540 | scaffold1964   | 180056                  | [A/C] |                    | INTERGENIC                          |                                                              |
| #Ca_Kabuli_SNP1541 | scaffold175    | 728809                  | [A/T] |                    | INTERGENIC                          |                                                              |
| #Ca_Kabuli_SNP1542 | Ca_Kabuli_LG04 | 4403213                 | [A/C] | Ca_03821           | NON_SYNONYMOUS_CODING               | HEAT, type 2                                                 |
| #Ca_Kabuli_SNP1543 | Ca_Kabuli_LG01 | 9705108                 | [T/G] | Ca_02826           | DOWNSTREAM:1575bases                | Nicotinamide N-methyltransferase, putative                   |
| #Ca_Kabuli_SNP1544 | scaffold950    | 204629                  | [C/A] |                    | INTERGENIC                          |                                                              |
| #Ca_Kabuli_SNP1545 | Ca_Kabuli_LG07 | 20921527                | [T/G] | Ca_14484           | NON_SYNONYMOUS_CODING               | --                                                           |
| #Ca_Kabuli_SNP1546 | Ca_Kabuli_LG02 | 34862134                | [T/G] |                    | INTERGENIC                          |                                                              |
| #Ca_Kabuli_SNP1547 | scaffold359    | 11292                   | [T/C] |                    | INTERGENIC                          |                                                              |
| #Ca_Kabuli_SNP1548 | Ca_Kabuli_LG05 | 23669836                | [T/G] |                    | INTERGENIC                          |                                                              |

| SNP IDs            | Chromosomes    | Physical positions (bp) | SNPs  | Gene accession IDs | Sequence components of genome/genes | Putative functions               |
|--------------------|----------------|-------------------------|-------|--------------------|-------------------------------------|----------------------------------|
| #Ca_Kabuli_SNP1549 | Ca_Kabuli_LG07 | 15966805                | [C/T] | Ca_09880           | NON_SYNONYMOUS_CODING               | Sugar/inositol transporter       |
| #Ca_Kabuli_SNP1550 | Ca_Kabuli_LG01 | 41795349                | [T/G] |                    | INTERGENIC                          |                                  |
| #Ca_Kabuli_SNP1551 | scaffold1860   | 129937                  | [G/C] |                    | INTERGENIC                          |                                  |
| #Ca_Kabuli_SNP1552 | Ca_Kabuli_LG06 | 37491450                | [T/G] | Ca_19795           | NON_SYNONYMOUS_CODING               | Armadillo                        |
| #Ca_Kabuli_SNP1553 | Ca_Kabuli_LG05 | 10919455                | [A/T] | Ca_23750           | INTRON                              | MoeA, C-terminal, domain IV      |
| #Ca_Kabuli_SNP1554 | Ca_Kabuli_LG06 | 15123051                | [C/T] | Ca_05293           | INTRON                              | Dynamin central domain           |
| #Ca_Kabuli_SNP1555 | scaffold168    | 208957                  | [C/T] |                    | INTERGENIC                          |                                  |
| #Ca_Kabuli_SNP1556 | scaffold184    | 150172                  | [G/T] |                    | INTERGENIC                          |                                  |
| #Ca_Kabuli_SNP1557 | Ca_Kabuli_LG07 | 30691324                | [A/C] | Ca_23327           | NON_SYNONYMOUS_CODING               | Crotonase, core                  |
| #Ca_Kabuli_SNP1558 | Ca_Kabuli_LG06 | 38514165                | [G/A] |                    | INTERGENIC                          |                                  |
| #Ca_Kabuli_SNP1559 | Ca_Kabuli_LG06 | 49629674                | [A/G] |                    | INTERGENIC                          |                                  |
| #Ca_Kabuli_SNP1560 | Ca_Kabuli_LG04 | 6514900                 | [G/T] |                    | INTERGENIC                          |                                  |
| #Ca_Kabuli_SNP1561 | Ca_Kabuli_LG05 | 16929897                | [A/G] | Ca_17949           | INTRON                              | tRNA-dihydrouridine synthase     |
| #Ca_Kabuli_SNP1562 | scaffold1097   | 81468                   | [G/C] |                    | INTERGENIC                          |                                  |
| #Ca_Kabuli_SNP1563 | Ca_Kabuli_LG03 | 30004207                | [C/T] |                    | INTERGENIC                          |                                  |
| #Ca_Kabuli_SNP1564 | scaffold790    | 360585                  | [A/G] |                    | INTERGENIC                          |                                  |
| #Ca_Kabuli_SNP1565 | Ca_Kabuli_LG07 | 13605194                | [A/C] | Ca_16044           | SYNONYMOUS_CODING                   | Zinc finger, C2H2-type           |
| #Ca_Kabuli_SNP1566 | scaffold640    | 275493                  | [A/T] |                    | INTERGENIC                          |                                  |
| #Ca_Kabuli_SNP1567 | Ca_Kabuli_LG04 | 34924595                | [A/C] | Ca_19998           | NON_SYNONYMOUS_CODING               | Metallo-dependent phosphatase    |
| #Ca_Kabuli_SNP1568 | Ca_Kabuli_LG03 | 20240118                | [T/G] | Ca_09424           | INTRON                              | CCAAT-binding factor             |
| #Ca_Kabuli_SNP1569 | Ca_Kabuli_LG06 | 16646750                | [A/T] | Ca_06294           | DOWNSTREAM:1933bases                | Pentatricopeptide repeat         |
| #Ca_Kabuli_SNP1570 | scaffold555    | 129263                  | [A/G] |                    | INTERGENIC                          |                                  |
| #Ca_Kabuli_SNP1571 | Ca_Kabuli_LG04 | 48305147                | [C/G] |                    | INTERGENIC                          |                                  |
| #Ca_Kabuli_SNP1572 | Ca_Kabuli_LG07 | 10649623                | [G/C] | Ca_12822           | SYNONYMOUS_CODING                   | Dynamin central domain           |
| #Ca_Kabuli_SNP1573 | scaffold112    | 280047                  | [A/G] |                    | INTERGENIC                          |                                  |
| #Ca_Kabuli_SNP1574 | Ca_Kabuli_LG07 | 15887950                | [C/A] | Ca_09885           | INTRON                              | Ribonuclease II/R                |
| #Ca_Kabuli_SNP1575 | Ca_Kabuli_LG03 | 31952326                | [C/A] | Ca_12295           | NON_SYNONYMOUS_CODING               | HEAT                             |
| #Ca_Kabuli_SNP1576 | Ca_Kabuli_LG03 | 24297866                | [A/C] | Ca_06091           | NON_SYNONYMOUS_CODING               | --                               |
| #Ca_Kabuli_SNP1577 | Ca_Kabuli_LG05 | 40710821                | [T/C] |                    | INTERGENIC                          |                                  |
| #Ca_Kabuli_SNP1578 | Ca_Kabuli_LG04 | 8751638                 | [A/C] | Ca_08371           | SYNONYMOUS_CODING                   | No apical meristem (NAM) protein |
| #Ca_Kabuli_SNP1579 | scaffold5766   | 2056                    | [A/T] |                    | INTERGENIC                          |                                  |

| SNP IDs            | Chromosomes    | Physical positions (bp) | SNPs  | Gene accession IDs | Sequence components of genome/genes | Putative functions                                      |
|--------------------|----------------|-------------------------|-------|--------------------|-------------------------------------|---------------------------------------------------------|
| #Ca_Kabuli_SNP1580 | Ca_Kabuli_LG07 | 28931223                | [C/A] |                    | INTERGENIC                          |                                                         |
| #Ca_Kabuli_SNP1581 | Ca_Kabuli_LG07 | 26701603                | [A/C] | Ca_16249           | DOWNSTREAM:100bases                 | Plastocyanin-like                                       |
| #Ca_Kabuli_SNP1582 | Ca_Kabuli_LG06 | 8787557                 | [T/C] |                    | INTERGENIC                          |                                                         |
| #Ca_Kabuli_SNP1583 | Ca_Kabuli_LG07 | 26701628                | [A/G] | Ca_16249           | DOWNSTREAM:75bases                  | Plastocyanin-like                                       |
| #Ca_Kabuli_SNP1584 | Ca_Kabuli_LG06 | 40128885                | [A/C] | Ca_15941           | NON_SYNONYMOUS_CODING               | Metal-dependent phosphohydrolase, HD domain             |
| #Ca_Kabuli_SNP1585 | Ca_Kabuli_LG01 | 17558883                | [T/G] | Ca_14780           | SYNONYMOUS_CODING                   | Signal transduction response regulator, receiver domain |
| #Ca_Kabuli_SNP1586 | Ca_Kabuli_LG04 | 41790245                | [A/C] | Ca_10936           | SYNONYMOUS_CODING                   | Ferredoxin                                              |
| #Ca_Kabuli_SNP1587 | scaffold57     | 16401                   | [T/G] |                    | INTERGENIC                          |                                                         |
| #Ca_Kabuli_SNP1588 | Ca_Kabuli_LG06 | 57753193                | [T/C] |                    | INTERGENIC                          |                                                         |
| #Ca_Kabuli_SNP1589 | Ca_Kabuli_LG01 | 439736                  | [C/A] |                    | INTERGENIC                          |                                                         |
| #Ca_Kabuli_SNP1590 | Ca_Kabuli_LG01 | 17558882                | [C/A] | Ca_14780           | SYNONYMOUS_CODING                   | Signal transduction response regulator, receiver domain |
| #Ca_Kabuli_SNP1591 | Ca_Kabuli_LG05 | 33754245                | [C/T] |                    | INTERGENIC                          |                                                         |
| #Ca_Kabuli_SNP1592 | Ca_Kabuli_LG07 | 7983630                 | [C/A] | Ca_13220           | NON_SYNONYMOUS_CODING               | ABC transporter, transmembrane domain                   |
| #Ca_Kabuli_SNP1593 | Ca_Kabuli_LG03 | 39118505                | [A/C] | Ca_01274           | INTRON                              | HEAT                                                    |
| #Ca_Kabuli_SNP1594 | Ca_Kabuli_LG05 | 31403655                | [T/G] |                    | INTERGENIC                          |                                                         |
| #Ca_Kabuli_SNP1595 | Ca_Kabuli_LG04 | 23195437                | [T/C] | Ca_14451           | INTRON                              | Helicase, C-terminal                                    |
| #Ca_Kabuli_SNP1596 | Ca_Kabuli_LG06 | 12448511                | [A/C] |                    | INTERGENIC                          |                                                         |
| #Ca_Kabuli_SNP1597 | Ca_Kabuli_LG03 | 21069672                | [A/G] | Ca_09474           | SYNONYMOUS_CODING                   | Aminoacyl-tRNA synthetase, class II (D/K/N)             |
| #Ca_Kabuli_SNP1598 | Ca_Kabuli_LG07 | 30114687                | [A/C] | Ca_11716           | SYNONYMOUS_CODING                   | Protein kinase, catalytic domain                        |
| #Ca_Kabuli_SNP1599 | Ca_Kabuli_LG03 | 39093228                | [A/T] |                    | INTERGENIC                          |                                                         |
| #Ca_Kabuli_SNP1600 | scaffold2871   | 17199                   | [A/G] |                    | INTERGENIC                          |                                                         |
| #Ca_Kabuli_SNP1601 | Ca_Kabuli_LG01 | 12413012                | [G/T] | Ca_02509           | NON_SYNONYMOUS_CODING               | ATPase, P-type, K/Mg/Cd/Cu/Zn/Na/Ca/Na/H-transporter    |
| #Ca_Kabuli_SNP1602 | scaffold1472   | 179759                  | [T/G] |                    | INTERGENIC                          |                                                         |
| #Ca_Kabuli_SNP1603 | Ca_Kabuli_LG04 | 26221338                | [A/C] |                    | INTERGENIC                          |                                                         |
| #Ca_Kabuli_SNP1604 | Ca_Kabuli_LG04 | 8692150                 | [C/T] | Ca_08365           | INTRON                              | Glycoside hydrolase, family 13, N-terminal              |
| #Ca_Kabuli_SNP1605 | Ca_Kabuli_LG01 | 1117455                 | [G/A] | Ca_00138           | SYNONYMOUS_CODING                   | HEAT                                                    |
| #Ca_Kabuli_SNP1606 | scaffold179    | 251412                  | [G/A] |                    | INTERGENIC                          |                                                         |
| #Ca_Kabuli_SNP1607 | Ca_Kabuli_LG02 | 17681915                | [C/T] |                    | INTERGENIC                          |                                                         |
| #Ca_Kabuli_SNP1608 | Ca_Kabuli_LG06 | 28076458                | [A/G] | Ca_14561           | INTRON                              | Double-stranded RNA-binding                             |
| #Ca_Kabuli_SNP1609 | scaffold1860   | 129952                  | [T/G] |                    | INTERGENIC                          |                                                         |
| #Ca_Kabuli_SNP1610 | Ca_Kabuli_LG04 | 42143836                | [G/A] | Ca_10910           | INTRON                              | Glycoside hydrolase, family 28                          |

| SNP IDs            | Chromosomes    | Physical positions (bp) | SNPs  | Gene accession IDs | Sequence components of genome/genes | Putative functions                                  |
|--------------------|----------------|-------------------------|-------|--------------------|-------------------------------------|-----------------------------------------------------|
| #Ca_Kabuli_SNP1611 | scaffold617    | 26113                   | [C/T] |                    | INTERGENIC                          |                                                     |
| #Ca_Kabuli_SNP1612 | Ca_Kabuli_LG08 | 14715490                | [T/G] |                    | INTERGENIC                          |                                                     |
| #Ca_Kabuli_SNP1613 | Ca_Kabuli_LG01 | 12337445                | [T/C] |                    | INTERGENIC                          |                                                     |
| #Ca_Kabuli_SNP1614 | Ca_Kabuli_LG07 | 39214271                | [A/T] | Ca_19581           | NON_SYNONYMOUS_CODING               | BEACH domain                                        |
| #Ca_Kabuli_SNP1615 | Ca_Kabuli_LG07 | 39214268                | [C/A] | Ca_19581           | NON_SYNONYMOUS_CODING               | BEACH domain                                        |
| #Ca_Kabuli_SNP1616 | Ca_Kabuli_LG04 | 11276225                | [T/C] | Ca_04359           | SYNONYMOUS_CODING                   | Peptidase M14, carboxypeptidase A                   |
| #Ca_Kabuli_SNP1617 | Ca_Kabuli_LG04 | 1813891                 | [A/C] |                    | INTERGENIC                          |                                                     |
| #Ca_Kabuli_SNP1618 | Ca_Kabuli_LG01 | 27017560                | [A/G] | Ca_20299           | INTRON                              | Cystathionine beta-synthase, core                   |
| #Ca_Kabuli_SNP1619 | Ca_Kabuli_LG04 | 45752874                | [A/T] |                    | INTERGENIC                          |                                                     |
| #Ca_Kabuli_SNP1620 | Ca_Kabuli_LG05 | 34438983                | [T/G] |                    | INTERGENIC                          |                                                     |
| #Ca_Kabuli_SNP1621 | Ca_Kabuli_LG07 | 1153230                 | [A/C] |                    | INTERGENIC                          |                                                     |
| #Ca_Kabuli_SNP1622 | scaffold764    | 11099                   | [C/A] |                    | INTERGENIC                          |                                                     |
| #Ca_Kabuli_SNP1623 | scaffold2188   | 33532                   | [C/A] |                    | INTERGENIC                          |                                                     |
| #Ca_Kabuli_SNP1624 | Ca_Kabuli_LG04 | 11328227                | [G/T] | Ca_04366           | DOWNSTREAM:1462bases                | Protein kinase, catalytic domain                    |
| #Ca_Kabuli_SNP1625 | Ca_Kabuli_LG04 | 11277138                | [G/A] | Ca_04359           | SYNONYMOUS_CODING                   | Peptidase M14, carboxypeptidase A                   |
| #Ca_Kabuli_SNP1626 | Ca_Kabuli_LG01 | 5430676                 | [T/A] | Ca_00628           | SYNONYMOUS_CODING                   | Protein of unknown function DUF584                  |
| #Ca_Kabuli_SNP1627 | Ca_Kabuli_LG04 | 11441604                | [A/T] |                    | INTERGENIC                          |                                                     |
| #Ca_Kabuli_SNP1628 | Ca_Kabuli_LG04 | 11491864                | [C/A] |                    | INTERGENIC                          |                                                     |
| #Ca_Kabuli_SNP1629 | Ca_Kabuli_LG04 | 11246093                | [A/G] |                    | INTERGENIC                          |                                                     |
| #Ca_Kabuli_SNP1630 | scaffold382    | 110785                  | [C/T] |                    | INTERGENIC                          |                                                     |
| #Ca_Kabuli_SNP1631 | Ca_Kabuli_LG04 | 11398889                | [G/A] |                    | INTERGENIC                          |                                                     |
| #Ca_Kabuli_SNP1632 | Ca_Kabuli_LG04 | 12004209                | [C/T] |                    | INTERGENIC                          |                                                     |
| #Ca_Kabuli_SNP1633 | Ca_Kabuli_LG05 | 30124086                | [C/G] | Ca_04688           | SYNONYMOUS_CODING                   | Sugar/inositol transporter                          |
| #Ca_Kabuli_SNP1634 | Ca_Kabuli_LG02 | 3074493                 | [T/G] | Ca_10542           | INTRON                              | Histidine phosphatase superfamily, clade-2          |
| #Ca_Kabuli_SNP1635 | Ca_Kabuli_LG04 | 11273405                | [T/A] | Ca_04359           | INTRON                              | Peptidase M14, carboxypeptidase A                   |
| #Ca_Kabuli_SNP1636 | Ca_Kabuli_LG04 | 12581711                | [T/G] | Ca_04480           | INTRON                              | DNA mismatch repair protein MutS, C-terminal domain |
| #Ca_Kabuli_SNP1637 | Ca_Kabuli_LG04 | 12558680                | [C/T] | Ca_04478           | INTRON                              | NUDIX hydrolase domain                              |
| #Ca_Kabuli_SNP1638 | Ca_Kabuli_LG03 | 35184973                | [A/C] |                    | INTERGENIC                          |                                                     |
| #Ca_Kabuli_SNP1639 | Ca_Kabuli_LG04 | 12525639                | [T/A] | Ca_04475           | INTRON                              | Cytochrome b561, eukaryote                          |
| #Ca_Kabuli_SNP1640 | Ca_Kabuli_LG04 | 12484911                | [A/T] |                    | INTERGENIC                          |                                                     |
| #Ca_Kabuli_SNP1641 | Ca_Kabuli_LG02 | 11121441                | [A/C] | Ca_17550           | NON_SYNONYMOUS_CODING               | Protein kinase, catalytic domain                    |



| SNP IDs            | Chromosomes    | Physical positions (bp) | SNPs  | Gene accession IDs | Sequence components of genome/genes | Putative functions                |
|--------------------|----------------|-------------------------|-------|--------------------|-------------------------------------|-----------------------------------|
| #Ca_Kabuli_SNP1642 | Ca_Kabuli_LG04 | 22850596                | [C/G] | Ca_14467           | NON_SYNONYMOUS_CODING               | --                                |
| #Ca_Kabuli_SNP1643 | Ca_Kabuli_LG04 | 12568905                | [G/A] | Ca_04479           | SYNONYMOUS_CODING                   | Homoserine kinase                 |
| #Ca_Kabuli_SNP1644 | scaffold5557   | 21624                   | [G/A] |                    | INTERGENIC                          |                                   |
| #Ca_Kabuli_SNP1645 | Ca_Kabuli_LG04 | 12568845                | [G/T] | Ca_04479           | SYNONYMOUS_CODING                   | Homoserine kinase                 |
| #Ca_Kabuli_SNP1646 | Ca_Kabuli_LG04 | 13646739                | [T/A] | Ca_04583           | NON_SYNONYMOUS_CODING               | Seed maturation protein           |
| #Ca_Kabuli_SNP1647 | Ca_Kabuli_LG04 | 12568599                | [A/G] | Ca_04479           | SYNONYMOUS_CODING                   | Homoserine kinase                 |
| #Ca_Kabuli_SNP1648 | Ca_Kabuli_LG04 | 12568707                | [A/G] | Ca_04479           | SYNONYMOUS_CODING                   | Homoserine kinase                 |
| #Ca_Kabuli_SNP1649 | Ca_Kabuli_LG06 | 23549267                | [G/T] |                    | INTERGENIC                          |                                   |
| #Ca_Kabuli_SNP1650 | Ca_Kabuli_LG07 | 5383683                 | [C/A] | Ca_06832           | DOWNSTREAM:1027bases                | Pentatricopeptide repeat          |
| #Ca_Kabuli_SNP1651 | Ca_Kabuli_LG06 | 31057806                | [C/T] | Ca_16498           | DOWNSTREAM:338bases                 | Peptidase M76, ATP23              |
| #Ca_Kabuli_SNP1652 | Ca_Kabuli_LG04 | 13858972                | [G/A] | Ca_04609           | SYNONYMOUS_CODING                   | Sugar/inositol transporter        |
| #Ca_Kabuli_SNP1653 | Ca_Kabuli_LG04 | 13702641                | [A/G] |                    | INTERGENIC                          |                                   |
| #Ca_Kabuli_SNP1654 | scaffold5557   | 21592                   | [G/T] |                    | INTERGENIC                          |                                   |
| #Ca_Kabuli_SNP1655 | Ca_Kabuli_LG06 | 37943905                | [C/T] | Ca_19549           | DOWNSTREAM:1417bases                | --                                |
| #Ca_Kabuli_SNP1656 | Ca_Kabuli_LG06 | 49377275                | [G/A] | Ca_13522           | DOWNSTREAM:741bases                 | Leucine-rich repeat               |
| #Ca_Kabuli_SNP1657 | Ca_Kabuli_LG06 | 22208093                | [G/A] |                    | INTERGENIC                          |                                   |
| #Ca_Kabuli_SNP1658 | Ca_Kabuli_LG06 | 45293271                | [T/C] |                    | INTERGENIC                          |                                   |
| #Ca_Kabuli_SNP1659 | Ca_Kabuli_LG04 | 13787649                | [C/T] | Ca_04604           | DOWNSTREAM:1204bases                | Copper amine oxidase              |
| #Ca_Kabuli_SNP1660 | Ca_Kabuli_LG04 | 16628559                | [T/G] |                    | INTERGENIC                          |                                   |
| #Ca_Kabuli_SNP1661 | Ca_Kabuli_LG04 | 13839288                | [A/G] | Ca_04608           | SYNONYMOUS_CODING                   | Copper amine oxidase              |
| #Ca_Kabuli_SNP1662 | Ca_Kabuli_LG03 | 22007902                | [T/G] | Ca_20426           | NON_SYNONYMOUS_CODING               | SEC7-like                         |
| #Ca_Kabuli_SNP1663 | scaffold538    | 259396                  | [G/T] |                    | INTERGENIC                          |                                   |
| #Ca_Kabuli_SNP1664 | Ca_Kabuli_LG04 | 13717261                | [G/A] |                    | INTERGENIC                          |                                   |
| #Ca_Kabuli_SNP1665 | Ca_Kabuli_LG01 | 215048                  | [C/T] | Ca_00017           | INTRON                              | Protein kinase, catalytic domain  |
| #Ca_Kabuli_SNP1666 | Ca_Kabuli_LG03 | 30475732                | [T/G] |                    | INTERGENIC                          |                                   |
| #Ca_Kabuli_SNP1667 | scaffold5315   | 503                     | [C/T] |                    | INTERGENIC                          |                                   |
| #Ca_Kabuli_SNP1668 | Ca_Kabuli_LG07 | 2881235                 | [G/A] | Ca_03187           | INTRON                              | FAD linked oxidase, N-terminal    |
| #Ca_Kabuli_SNP1669 | Ca_Kabuli_LG04 | 11273328                | [T/C] | Ca_04359           | INTRON                              | Peptidase M14, carboxypeptidase A |
| #Ca_Kabuli_SNP1670 | Ca_Kabuli_LG04 | 13845581                | [T/A] |                    | INTERGENIC                          |                                   |
| #Ca_Kabuli_SNP1671 | Ca_Kabuli_LG04 | 11517517                | [A/C] |                    | INTERGENIC                          |                                   |
| #Ca_Kabuli_SNP1672 | scaffold190    | 49266                   | [T/G] |                    | INTERGENIC                          |                                   |

| SNP IDs            | Chromosomes    | Physical positions (bp) | SNPs  | Gene accession IDs | Sequence components of genome/genes | Putative functions                                           |
|--------------------|----------------|-------------------------|-------|--------------------|-------------------------------------|--------------------------------------------------------------|
| #Ca_Kabuli_SNP1673 | Ca_Kabuli_LG07 | 7809179                 | [T/G] |                    | INTERGENIC                          |                                                              |
| #Ca_Kabuli_SNP1674 | Ca_Kabuli_LG04 | 11441673                | [A/G] |                    | INTERGENIC                          |                                                              |
| #Ca_Kabuli_SNP1675 | Ca_Kabuli_LG04 | 11244395                | [T/G] |                    | INTERGENIC                          |                                                              |
| #Ca_Kabuli_SNP1676 | Ca_Kabuli_LG04 | 13838796                | [G/A] | Ca_04608           | SYNONYMOUS_CODING                   | Copper amine oxidase                                         |
| #Ca_Kabuli_SNP1677 | Ca_Kabuli_LG04 | 13841340                | [T/G] | Ca_04608           | SYNONYMOUS_CODING                   | Copper amine oxidase                                         |
| #Ca_Kabuli_SNP1678 | Ca_Kabuli_LG06 | 23023346                | [C/A] | Ca_11145           | DOWNSTREAM:1817bases                | --                                                           |
| #Ca_Kabuli_SNP1679 | Ca_Kabuli_LG04 | 11231137                | [G/A] | Ca_04356           | DOWNSTREAM:874bases                 | Choline/ethanolamine kinase                                  |
| #Ca_Kabuli_SNP1680 | Ca_Kabuli_LG04 | 30302554                | [A/G] | Ca_14192           | SYNONYMOUS_CODING                   | SNF2-related                                                 |
| #Ca_Kabuli_SNP1681 | scaffold6052   | 1205                    | [A/G] |                    | INTERGENIC                          |                                                              |
| #Ca_Kabuli_SNP1682 | Ca_Kabuli_LG07 | 35134809                | [A/C] | Ca_17638           | NON_SYNONYMOUS_CODING               | Pathogenesis-related transcriptional factor/ERF, DNA-binding |
| #Ca_Kabuli_SNP1683 | Ca_Kabuli_LG04 | 11248605                | [A/T] |                    | INTERGENIC                          |                                                              |
| #Ca_Kabuli_SNP1684 | Ca_Kabuli_LG04 | 13724666                | [C/G] | Ca_04596           | SYNONYMOUS_CODING                   | Zinc finger, PHD-type                                        |
| #Ca_Kabuli_SNP1685 | Ca_Kabuli_LG06 | 19653654                | [C/T] | Ca_06571           | SYNONYMOUS_CODING                   | --                                                           |
| #Ca_Kabuli_SNP1686 | Ca_Kabuli_LG06 | 29163022                | [C/G] |                    | INTERGENIC                          |                                                              |
| #Ca_Kabuli_SNP1687 | Ca_Kabuli_LG05 | 27282828                | [G/T] | Ca_08913           | DOWNSTREAM:1145bases                | Pathogenesis-related transcriptional factor/ERF, DNA-binding |
| #Ca_Kabuli_SNP1688 | scaffold1156   | 31589                   | [T/C] |                    | INTERGENIC                          |                                                              |
| #Ca_Kabuli_SNP1689 | Ca_Kabuli_LG04 | 12167568                | [A/G] |                    | INTERGENIC                          |                                                              |
| #Ca_Kabuli_SNP1690 | Ca_Kabuli_LG04 | 3428929                 | [T/C] | Ca_12144           | SYNONYMOUS_CODING                   | Castor/Pollux ion channel                                    |
| #Ca_Kabuli_SNP1691 | Ca_Kabuli_LG06 | 28044805                | [A/T] | Ca_14563           | NON_SYNONYMOUS_CODING               | DNA-directed DNA polymerase, family B, exonuclease domain    |
| #Ca_Kabuli_SNP1692 | Ca_Kabuli_LG06 | 20505038                | [C/T] | Ca_16381           | INTRON                              | Cullin, N-terminal                                           |
| #Ca_Kabuli_SNP1693 | Ca_Kabuli_LG06 | 27091882                | [A/G] | Ca_14634           | INTRON                              | NOT2/NOT3/NOT5                                               |
| #Ca_Kabuli_SNP1694 | Ca_Kabuli_LG01 | 13034819                | [A/G] |                    | INTERGENIC                          |                                                              |
| #Ca_Kabuli_SNP1695 | Ca_Kabuli_LG06 | 28453063                | [G/A] |                    | INTERGENIC                          |                                                              |
| #Ca_Kabuli_SNP1696 | Ca_Kabuli_LG06 | 29205940                | [A/G] | Ca_17457           | NON_SYNONYMOUS_CODING               | DNA ligase, ATP-dependent, N-terminal                        |
| #Ca_Kabuli_SNP1697 | Ca_Kabuli_LG02 | 26457480                | [G/A] | Ca_17247           | INTRON                              | Metallo-dependent phosphatase                                |
| #Ca_Kabuli_SNP1698 | Ca_Kabuli_LG06 | 27515293                | [A/G] | Ca_14606           | NON_SYNONYMOUS_CODING               | Tetraspanin, subgroup                                        |
| #Ca_Kabuli_SNP1699 | Ca_Kabuli_LG06 | 29163667                | [C/A] |                    | INTERGENIC                          |                                                              |
| #Ca_Kabuli_SNP1700 | scaffold3490   | 6722                    | [A/C] |                    | INTERGENIC                          |                                                              |
| #Ca_Kabuli_SNP1701 | scaffold1970   | 966                     | [A/C] |                    | INTERGENIC                          |                                                              |
| #Ca_Kabuli_SNP1702 | Ca_Kabuli_LG03 | 27447437                | [T/G] | Ca_08162           | SYNONYMOUS_CODING                   | RNA polymerase II, large subunit, CTD                        |
| #Ca_Kabuli_SNP1703 | Ca_Kabuli_LG05 | 21933944                | [A/C] | Ca_24469           | DOWNSTREAM:1794bases                | Glycoside hydrolase, family 28                               |

| SNP IDs            | Chromosomes    | Physical positions (bp) | SNPs  | Gene accession IDs | Sequence components of genome/genes | Putative functions                                    |
|--------------------|----------------|-------------------------|-------|--------------------|-------------------------------------|-------------------------------------------------------|
| #Ca_Kabuli_SNP1704 | Ca_Kabuli_LG07 | 33912921                | [T/G] |                    | INTERGENIC                          |                                                       |
| #Ca_Kabuli_SNP1705 | scaffold96     | 245866                  | [A/C] |                    | INTERGENIC                          |                                                       |
| #Ca_Kabuli_SNP1706 | Ca_Kabuli_LG05 | 26605966                | [A/G] | Ca_08963           | DOWNSTREAM:1646bases                | Plant peroxidase                                      |
| #Ca_Kabuli_SNP1707 | Ca_Kabuli_LG04 | 35328337                | [A/G] | Ca_20018           | INTRON                              | IQ motif, EF-hand binding site                        |
| #Ca_Kabuli_SNP1708 | Ca_Kabuli_LG03 | 5224979                 | [T/G] | Ca_23868           | NON_SYNONYMOUS_CODING               | Per1-like                                             |
| #Ca_Kabuli_SNP1709 | Ca_Kabuli_LG03 | 3182276                 | [T/G] |                    | INTERGENIC                          |                                                       |
| #Ca_Kabuli_SNP1710 | Ca_Kabuli_LG05 | 43188867                | [C/G] | Ca_12740           | DOWNSTREAM:49bases                  | RNA recognition motif domain                          |
| #Ca_Kabuli_SNP1711 | Ca_Kabuli_LG06 | 26353512                | [C/T] |                    | INTERGENIC                          |                                                       |
| #Ca_Kabuli_SNP1712 | Ca_Kabuli_LG02 | 3548789                 | [T/G] |                    | INTERGENIC                          |                                                       |
| #Ca_Kabuli_SNP1713 | Ca_Kabuli_LG05 | 17043790                | [A/T] |                    | INTERGENIC                          |                                                       |
| #Ca_Kabuli_SNP1714 | Ca_Kabuli_LG06 | 27383746                | [T/A] |                    | INTERGENIC                          |                                                       |
| #Ca_Kabuli_SNP1715 | Ca_Kabuli_LG05 | 30748799                | [A/T] |                    | INTERGENIC                          |                                                       |
| #Ca_Kabuli_SNP1716 | Ca_Kabuli_LG05 | 31521962                | [T/A] | Ca_04855           | SYNONYMOUS_CODING                   | Peptidase S9, prolyl oligopeptidase, catalytic domain |
| #Ca_Kabuli_SNP1717 | Ca_Kabuli_LG04 | 44354436                | [A/T] |                    | INTERGENIC                          |                                                       |
| #Ca_Kabuli_SNP1718 | Ca_Kabuli_LG06 | 27383745                | [T/G] |                    | INTERGENIC                          |                                                       |
| #Ca_Kabuli_SNP1719 | Ca_Kabuli_LG02 | 36467100                | [A/C] | Ca_09835           | SYNONYMOUS_CODING                   | EPS15 homology (EH)                                   |
| #Ca_Kabuli_SNP1720 | Ca_Kabuli_LG06 | 26353740                | [G/C] |                    | INTERGENIC                          |                                                       |
| #Ca_Kabuli_SNP1721 | Ca_Kabuli_LG06 | 54333329                | [A/G] | Ca_16289           | INTRON                              | Peptidase M41                                         |
| #Ca_Kabuli_SNP1722 | Ca_Kabuli_LG06 | 58908024                | [G/A] |                    | INTERGENIC                          |                                                       |
| #Ca_Kabuli_SNP1723 | Ca_Kabuli_LG04 | 43431772                | [A/T] |                    | INTERGENIC                          |                                                       |
| #Ca_Kabuli_SNP1724 | Ca_Kabuli_LG06 | 26383500                | [C/G] |                    | INTERGENIC                          |                                                       |
| #Ca_Kabuli_SNP1725 | Ca_Kabuli_LG04 | 48678692                | [T/C] | Ca_23018           | SYNONYMOUS_CODING                   | Transcription factor IIS, N-terminal                  |
| #Ca_Kabuli_SNP1726 | Ca_Kabuli_LG04 | 22865436                | [A/T] |                    | INTERGENIC                          |                                                       |
| #Ca_Kabuli_SNP1727 | Ca_Kabuli_LG06 | 57894590                | [G/C] | Ca_13650           | NON_SYNONYMOUS_CODING               | Domain of unknown function DUF547                     |
| #Ca_Kabuli_SNP1728 | Ca_Kabuli_LG06 | 57894585                | [T/G] | Ca_13650           | NON_SYNONYMOUS_CODING               | Domain of unknown function DUF547                     |
| #Ca_Kabuli_SNP1729 | Ca_Kabuli_LG06 | 57931382                | [A/T] | Ca_13645           | SYNONYMOUS_CODING                   | NmrA-like                                             |
| #Ca_Kabuli_SNP1730 | Ca_Kabuli_LG06 | 57710133                | [C/G] | Ca_13673           | DOWNSTREAM:1117bases                | Trigger factor, ribosome-binding, bacterial           |
| #Ca_Kabuli_SNP1731 | Ca_Kabuli_LG06 | 57870893                | [C/A] |                    | INTERGENIC                          |                                                       |
| #Ca_Kabuli_SNP1732 | Ca_Kabuli_LG06 | 57748565                | [A/G] | Ca_13666           | SYNONYMOUS_CODING                   | --                                                    |
| #Ca_Kabuli_SNP1733 | Ca_Kabuli_LG06 | 57625320                | [G/A] | Ca_13683           | SYNONYMOUS_CODING                   | Calreticulin/calnexin                                 |
| #Ca_Kabuli_SNP1734 | Ca_Kabuli_LG06 | 57704057                | [C/T] | Ca_13674           | SYNONYMOUS_CODING                   | Orn/Lys/Arg decarboxylase, major domain               |

| SNP IDs            | Chromosomes    | Physical positions (bp) | SNPs  | Gene accession IDs | Sequence components of genome/genes | Putative functions                          |
|--------------------|----------------|-------------------------|-------|--------------------|-------------------------------------|---------------------------------------------|
| #Ca_Kabuli_SNP1735 | Ca_Kabuli_LG06 | 58201715                | [T/G] | Ca_13621           | SYNONYMOUS_CODING                   | Protein kinase, catalytic domain            |
| #Ca_Kabuli_SNP1736 | Ca_Kabuli_LG06 | 57882773                | [G/T] | Ca_13652           | NON_SYNONYMOUS_CODING               | DC1                                         |
| #Ca_Kabuli_SNP1737 | Ca_Kabuli_LG06 | 57899764                | [T/A] | Ca_13648           | DOWNSTREAM:1984bases                | Domain of unknown function DUF547           |
| #Ca_Kabuli_SNP1738 | Ca_Kabuli_LG04 | 17451460                | [T/G] | Ca_05383           | NON_SYNONYMOUS_CODING               | Zinc finger, CCHC-type                      |
| #Ca_Kabuli_SNP1739 | Ca_Kabuli_LG06 | 58244129                | [T/C] |                    | INTERGENIC                          |                                             |
| #Ca_Kabuli_SNP1740 | Ca_Kabuli_LG06 | 58244128                | [G/A] |                    | INTERGENIC                          |                                             |
| #Ca_Kabuli_SNP1741 | Ca_Kabuli_LG06 | 57894377                | [A/G] | Ca_13650           | DOWNSTREAM:7bases                   | Domain of unknown function DUF547           |
| #Ca_Kabuli_SNP1742 | Ca_Kabuli_LG06 | 57898786                | [A/C] |                    | INTERGENIC                          |                                             |
| #Ca_Kabuli_SNP1743 | Ca_Kabuli_LG06 | 58053878                | [A/T] |                    | INTERGENIC                          |                                             |
| #Ca_Kabuli_SNP1744 | Ca_Kabuli_LG06 | 57707848                | [G/A] | Ca_13672           | DOWNSTREAM:1747bases                | Phosphatidylinositol 3-/4-kinase, catalytic |
| #Ca_Kabuli_SNP1745 | Ca_Kabuli_LG06 | 57707846                | [A/G] | Ca_13672           | DOWNSTREAM:1749bases                | Phosphatidylinositol 3-/4-kinase, catalytic |
| #Ca_Kabuli_SNP1746 | Ca_Kabuli_LG06 | 57720161                | [A/T] |                    | INTERGENIC                          |                                             |
| #Ca_Kabuli_SNP1747 | Ca_Kabuli_LG06 | 57704802                | [T/C] |                    | INTERGENIC                          |                                             |
| #Ca_Kabuli_SNP1748 | Ca_Kabuli_LG03 | 34699114                | [C/A] | Ca_00745           | NON_SYNONYMOUS_CODING               | HECT                                        |
| #Ca_Kabuli_SNP1749 | Ca_Kabuli_LG06 | 57756699                | [G/A] | Ca_13665           | INTRON                              | Phosphatidylinositol 3-/4-kinase, catalytic |
| #Ca_Kabuli_SNP1750 | Ca_Kabuli_LG06 | 57631963                | [T/G] | Ca_13682           | SYNONYMOUS_CODING                   | Protein of unknown function DUF936, plant   |
| #Ca_Kabuli_SNP1751 | Ca_Kabuli_LG06 | 57707737                | [C/T] | Ca_13672           | DOWNSTREAM:1858bases                | Phosphatidylinositol 3-/4-kinase, catalytic |
| #Ca_Kabuli_SNP1752 | Ca_Kabuli_LG06 | 57707716                | [A/C] | Ca_13672           | DOWNSTREAM:1879bases                | Phosphatidylinositol 3-/4-kinase, catalytic |
| #Ca_Kabuli_SNP1753 | Ca_Kabuli_LG06 | 57707734                | [T/G] | Ca_13672           | DOWNSTREAM:1861bases                | Phosphatidylinositol 3-/4-kinase, catalytic |
| #Ca_Kabuli_SNP1754 | Ca_Kabuli_LG06 | 57707727                | [T/C] | Ca_13672           | DOWNSTREAM:1868bases                | Phosphatidylinositol 3-/4-kinase, catalytic |
| #Ca_Kabuli_SNP1755 | Ca_Kabuli_LG06 | 57707724                | [C/T] | Ca_13672           | DOWNSTREAM:1871bases                | Phosphatidylinositol 3-/4-kinase, catalytic |
| #Ca_Kabuli_SNP1756 | Ca_Kabuli_LG06 | 57753076                | [T/C] |                    | INTERGENIC                          |                                             |
| #Ca_Kabuli_SNP1757 | Ca_Kabuli_LG06 | 57835120                | [T/A] | Ca_13657           | DOWNSTREAM:1899bases                | Cold acclimation WCOR413                    |
| #Ca_Kabuli_SNP1758 | Ca_Kabuli_LG06 | 57835093                | [G/A] | Ca_13657           | DOWNSTREAM:1872bases                | Cold acclimation WCOR413                    |
| #Ca_Kabuli_SNP1759 | Ca_Kabuli_LG06 | 57854068                | [G/C] | Ca_13655           | INTRON                              | Protein kinase, catalytic domain            |
| #Ca_Kabuli_SNP1760 | Ca_Kabuli_LG06 | 57720446                | [T/C] |                    | INTERGENIC                          |                                             |
| #Ca_Kabuli_SNP1761 | Ca_Kabuli_LG06 | 57835899                | [C/T] |                    | INTERGENIC                          |                                             |
| #Ca_Kabuli_SNP1762 | Ca_Kabuli_LG06 | 57853458                | [C/T] | Ca_13655           | SYNONYMOUS_CODING                   | Protein kinase, catalytic domain            |
| #Ca_Kabuli_SNP1763 | Ca_Kabuli_LG06 | 57761758                | [G/A] |                    | INTERGENIC                          |                                             |
| #Ca_Kabuli_SNP1764 | Ca_Kabuli_LG06 | 57625134                | [G/A] | Ca_13683           | INTRON                              | Calreticulin/calnexin                       |
| #Ca_Kabuli_SNP1765 | Ca_Kabuli_LG06 | 57894264                | [T/A] | Ca_13650           | DOWNSTREAM:120bases                 | Domain of unknown function DUF547           |

| SNP IDs            | Chromosomes    | Physical positions (bp) | SNPs  | Gene accession IDs | Sequence components of genome/genes | Putative functions                                  |
|--------------------|----------------|-------------------------|-------|--------------------|-------------------------------------|-----------------------------------------------------|
| #Ca_Kabuli_SNP1766 | Ca_Kabuli_LG06 | 57894263                | [G/T] | Ca_13650           | DOWNSTREAM:121bases                 | Domain of unknown function DUF547                   |
| #Ca_Kabuli_SNP1767 | Ca_Kabuli_LG06 | 57708101                | [T/G] | Ca_13672           | DOWNSTREAM:1494bases                | Phosphatidylinositol 3-/4-kinase, catalytic         |
| #Ca_Kabuli_SNP1768 | Ca_Kabuli_LG06 | 57708130                | [T/C] | Ca_13672           | DOWNSTREAM:1465bases                | Phosphatidylinositol 3-/4-kinase, catalytic         |
| #Ca_Kabuli_SNP1769 | Ca_Kabuli_LG06 | 57644429                | [A/G] | Ca_13681           | SYNONYMOUS_CODING                   | Ribosomal protein L38e                              |
| #Ca_Kabuli_SNP1770 | Ca_Kabuli_LG06 | 58028664                | [G/C] | Ca_13633           | SYNONYMOUS_CODING                   | Sugar/inositol transporter                          |
| #Ca_Kabuli_SNP1771 | Ca_Kabuli_LG06 | 58028665                | [A/C] | Ca_13633           | SYNONYMOUS_CODING                   | Sugar/inositol transporter                          |
| #Ca_Kabuli_SNP1772 | Ca_Kabuli_LG06 | 57836237                | [A/G] |                    | INTERGENIC                          |                                                     |
| #Ca_Kabuli_SNP1773 | Ca_Kabuli_LG04 | 14206957                | [G/C] |                    | INTERGENIC                          |                                                     |
| #Ca_Kabuli_SNP1774 | Ca_Kabuli_LG06 | 57705111                | [C/T] |                    | INTERGENIC                          |                                                     |
| #Ca_Kabuli_SNP1775 | Ca_Kabuli_LG06 | 57705113                | [A/G] |                    | INTERGENIC                          |                                                     |
| #Ca_Kabuli_SNP1776 | Ca_Kabuli_LG06 | 57854946                | [G/A] | Ca_13655           | SYNONYMOUS_CODING                   | Protein kinase, catalytic domain                    |
| #Ca_Kabuli_SNP1777 | Ca_Kabuli_LG06 | 58110605                | [C/T] |                    | INTERGENIC                          |                                                     |
| #Ca_Kabuli_SNP1778 | Ca_Kabuli_LG06 | 57631772                | [T/C] | Ca_13682           | SYNONYMOUS_CODING                   | Protein of unknown function DUF936, plant           |
| #Ca_Kabuli_SNP1779 | Ca_Kabuli_LG06 | 58165739                | [T/A] | Ca_13624           | DOWNSTREAM:44bases                  | Clathrin/coatomer adaptor, adaptin-like, N-terminal |
| #Ca_Kabuli_SNP1780 | Ca_Kabuli_LG06 | 57640197                | [G/T] | Ca_13681           | INTRON                              | Ribosomal protein L38e                              |
| #Ca_Kabuli_SNP1781 | Ca_Kabuli_LG06 | 57640220                | [A/G] | Ca_13681           | INTRON                              | Ribosomal protein L38e                              |
| #Ca_Kabuli_SNP1782 | Ca_Kabuli_LG06 | 57640186                | [A/C] | Ca_13681           | INTRON                              | Ribosomal protein L38e                              |
| #Ca_Kabuli_SNP1783 | Ca_Kabuli_LG06 | 58244019                | [G/A] |                    | INTERGENIC                          |                                                     |
| #Ca_Kabuli_SNP1784 | Ca_Kabuli_LG06 | 57707912                | [G/C] | Ca_13672           | DOWNSTREAM:1683bases                | Phosphatidylinositol 3-/4-kinase, catalytic         |
| #Ca_Kabuli_SNP1785 | Ca_Kabuli_LG08 | 281622                  | [G/A] | Ca_11908           | DOWNSTREAM:1524bases                | EGF-like calcium-binding                            |
| #Ca_Kabuli_SNP1786 | scaffold6774   | 1561                    | [G/A] |                    | INTERGENIC                          |                                                     |
| #Ca_Kabuli_SNP1787 | scaffold186    | 111936                  | [C/A] |                    | INTERGENIC                          |                                                     |
| #Ca_Kabuli_SNP1788 | Ca_Kabuli_LG06 | 41699134                | [A/C] | Ca_21940           | INTRON                              | Ribonuclease II/R                                   |
| #Ca_Kabuli_SNP1789 | Ca_Kabuli_LG05 | 37082797                | [G/T] | Ca_01507           | SYNONYMOUS_CODING                   | GRAM                                                |
| #Ca_Kabuli_SNP1790 | Ca_Kabuli_LG07 | 2639984                 | [T/G] | Ca_03214           | NON_SYNONYMOUS_CODING               | --                                                  |
| #Ca_Kabuli_SNP1791 | scaffold6774   | 1563                    | [C/T] |                    | INTERGENIC                          |                                                     |
| #Ca_Kabuli_SNP1792 | Ca_Kabuli_LG07 | 11383747                | [T/G] |                    | INTERGENIC                          |                                                     |
| #Ca_Kabuli_SNP1793 | Ca_Kabuli_LG01 | 41075343                | [T/G] | Ca_18474           | INTRON                              | --                                                  |
| #Ca_Kabuli_SNP1794 | Ca_Kabuli_LG04 | 14132760                | [C/A] |                    | INTERGENIC                          |                                                     |
| #Ca_Kabuli_SNP1795 | Ca_Kabuli_LG02 | 7051424                 | [G/A] |                    | INTERGENIC                          |                                                     |
| #Ca_Kabuli_SNP1796 | Ca_Kabuli_LG02 | 7051422                 | [A/G] |                    | INTERGENIC                          |                                                     |

| SNP IDs            | Chromosomes    | Physical positions (bp) | SNPs  | Gene accession IDs | Sequence components of genome/genes | Putative functions                                           |
|--------------------|----------------|-------------------------|-------|--------------------|-------------------------------------|--------------------------------------------------------------|
| #Ca_Kabuli_SNP1797 | Ca_Kabuli_LG07 | 33835856                | [G/A] | Ca_16191           | SYNONYMOUS_CODING                   | Pectinesterase, catalytic                                    |
| #Ca_Kabuli_SNP1798 | Ca_Kabuli_LG07 | 33761944                | [A/G] |                    | INTERGENIC                          |                                                              |
| #Ca_Kabuli_SNP1799 | Ca_Kabuli_LG07 | 33480940                | [T/C] |                    | INTERGENIC                          |                                                              |
| #Ca_Kabuli_SNP1800 | Ca_Kabuli_LG07 | 33641882                | [A/T] | Ca_16180           | INTRON                              | Pathogenesis-related transcriptional factor/ERF, DNA-binding |
| #Ca_Kabuli_SNP1801 | Ca_Kabuli_LG07 | 33867674                | [T/C] | Ca_16193           | INTRON                              | Exocyst complex component Sec10                              |
| #Ca_Kabuli_SNP1802 | Ca_Kabuli_LG07 | 33867491                | [T/C] | Ca_16193           | INTRON                              | Exocyst complex component Sec10                              |
| #Ca_Kabuli_SNP1803 | Ca_Kabuli_LG07 | 34279715                | [C/A] | Ca_20990           | INTRON                              | Brix domain                                                  |
| #Ca_Kabuli_SNP1804 | Ca_Kabuli_LG07 | 34279725                | [G/A] | Ca_20990           | INTRON                              | Brix domain                                                  |
| #Ca_Kabuli_SNP1805 | Ca_Kabuli_LG07 | 33674454                | [C/T] | Ca_16181           | SYNONYMOUS_CODING                   | Peptidase S8/S53, subtilisin/kexin/sedolisin                 |
| #Ca_Kabuli_SNP1806 | Ca_Kabuli_LG07 | 16735437                | [G/A] |                    | INTERGENIC                          |                                                              |
| #Ca_Kabuli_SNP1807 | Ca_Kabuli_LG07 | 33641799                | [T/G] | Ca_16180           | NON_SYNONYMOUS_CODING               | Pathogenesis-related transcriptional factor/ERF, DNA-binding |
| #Ca_Kabuli_SNP1808 | Ca_Kabuli_LG07 | 34279357                | [T/G] |                    | INTERGENIC                          |                                                              |
| #Ca_Kabuli_SNP1809 | Ca_Kabuli_LG07 | 33460918                | [A/G] |                    | INTERGENIC                          |                                                              |
| #Ca_Kabuli_SNP1810 | Ca_Kabuli_LG07 | 34277010                | [G/A] |                    | INTERGENIC                          |                                                              |
| #Ca_Kabuli_SNP1811 | Ca_Kabuli_LG07 | 34277014                | [T/G] |                    | INTERGENIC                          |                                                              |
| #Ca_Kabuli_SNP1812 | Ca_Kabuli_LG07 | 34318862                | [T/C] |                    | INTERGENIC                          |                                                              |
| #Ca_Kabuli_SNP1813 | Ca_Kabuli_LG07 | 34318860                | [G/A] |                    | INTERGENIC                          |                                                              |
| #Ca_Kabuli_SNP1814 | Ca_Kabuli_LG04 | 30668958                | [A/G] | Ca_14210           | DOWNSTREAM:465bases                 | CARP motif                                                   |
| #Ca_Kabuli_SNP1815 | Ca_Kabuli_LG01 | 2288179                 | [A/T] |                    | INTERGENIC                          |                                                              |
| #Ca_Kabuli_SNP1816 | Ca_Kabuli_LG07 | 33573605                | [C/T] |                    | INTERGENIC                          |                                                              |
| #Ca_Kabuli_SNP1817 | Ca_Kabuli_LG07 | 34152720                | [T/G] | Ca_21006           | INTRON                              | DNA-directed RNA polymerase, subunit 2, domain 6             |
| #Ca_Kabuli_SNP1818 | Ca_Kabuli_LG07 | 33753917                | [A/G] | Ca_16183           | SYNONYMOUS_CODING                   | Initiation factor 2B-related                                 |
| #Ca_Kabuli_SNP1819 | Ca_Kabuli_LG07 | 33461168                | [C/A] |                    | INTERGENIC                          |                                                              |
| #Ca_Kabuli_SNP1820 | scaffold584    | 28172                   | [T/G] |                    | INTERGENIC                          |                                                              |
| #Ca_Kabuli_SNP1821 | Ca_Kabuli_LG08 | 7563378                 | [T/A] | Ca_10631           | DOWNSTREAM:1989bases                | Kinesin, motor domain                                        |
| #Ca_Kabuli_SNP1822 | scaffold584    | 129326                  | [G/C] |                    | INTERGENIC                          |                                                              |
| #Ca_Kabuli_SNP1823 | scaffold584    | 78956                   | [G/A] |                    | INTERGENIC                          |                                                              |
| #Ca_Kabuli_SNP1824 | Ca_Kabuli_LG07 | 11383752                | [T/G] |                    | INTERGENIC                          |                                                              |
| #Ca_Kabuli_SNP1825 | scaffold256    | 46734                   | [A/G] |                    | INTERGENIC                          |                                                              |
| #Ca_Kabuli_SNP1826 | scaffold31     | 1052922                 | [T/A] |                    | INTERGENIC                          |                                                              |
| #Ca_Kabuli_SNP1827 | Ca_Kabuli_LG07 | 5508157                 | [A/C] | Ca_06816           | NON_SYNONYMOUS_CODING               | SNF2-related                                                 |

| SNP IDs            | Chromosomes    | Physical positions (bp) | SNPs  | Gene accession IDs | Sequence components of genome/genes | Putative functions                                  |
|--------------------|----------------|-------------------------|-------|--------------------|-------------------------------------|-----------------------------------------------------|
| #Ca_Kabuli_SNP1828 | Ca_Kabuli_LG04 | 20398685                | [A/C] | Ca_17149           | NON_SYNONYMOUS_CODING               | --                                                  |
| #Ca_Kabuli_SNP1829 | Ca_Kabuli_LG07 | 11383746                | [G/T] |                    | INTERGENIC                          |                                                     |
| #Ca_Kabuli_SNP1830 | Ca_Kabuli_LG07 | 47395540                | [C/T] |                    | INTERGENIC                          |                                                     |
| #Ca_Kabuli_SNP1831 | Ca_Kabuli_LG07 | 35181514                | [A/T] | Ca_17639           | NON_SYNONYMOUS_CODING               | Helix-loop-helix DNA-binding domain                 |
| #Ca_Kabuli_SNP1832 | Ca_Kabuli_LG07 | 35258029                | [T/G] | Ca_17644           | INTRON                              | Dynamin central domain                              |
| #Ca_Kabuli_SNP1833 | Ca_Kabuli_LG01 | 48028191                | [G/T] | Ca_12875           | NON_SYNONYMOUS_CODING               | GTP1/OBG                                            |
| #Ca_Kabuli_SNP1834 | Ca_Kabuli_LG07 | 24181322                | [C/A] | Ca_19912           | NON_SYNONYMOUS_CODING               | Zinc finger, RING-CH-type                           |
| #Ca_Kabuli_SNP1835 | scaffold240    | 132907                  | [A/C] |                    | INTERGENIC                          |                                                     |
| #Ca_Kabuli_SNP1836 | Ca_Kabuli_LG01 | 578                     | [G/A] |                    | INTERGENIC                          |                                                     |
| #Ca_Kabuli_SNP1837 | Ca_Kabuli_LG07 | 21616294                | [T/G] | Ca_14512           | INTRON                              | Clathrin/coatomer adaptor, adaptin-like, N-terminal |
| #Ca_Kabuli_SNP1838 | Ca_Kabuli_LG04 | 37371411                | [C/T] | Ca_15139           | SYNONYMOUS_CODING                   | Ankyrin repeat                                      |
| #Ca_Kabuli_SNP1839 | Ca_Kabuli_LG07 | 38283909                | [C/T] |                    | INTERGENIC                          |                                                     |
| #Ca_Kabuli_SNP1840 | Ca_Kabuli_LG04 | 15900602                | [G/A] | Ca_05518           | SYNONYMOUS_CODING                   | Protein phosphatase 2C-like                         |
| #Ca_Kabuli_SNP1841 | Ca_Kabuli_LG01 | 3940980                 | [T/G] |                    | INTERGENIC                          |                                                     |
| #Ca_Kabuli_SNP1842 | Ca_Kabuli_LG02 | 35972953                | [C/A] | Ca_09772           | NON_SYNONYMOUS_CODING               | Disease resistance protein                          |
| #Ca_Kabuli_SNP1843 | Ca_Kabuli_LG04 | 38157210                | [T/G] |                    | INTERGENIC                          |                                                     |
| #Ca_Kabuli_SNP1844 | scaffold1039   | 86018                   | [C/T] |                    | INTERGENIC                          |                                                     |
| #Ca_Kabuli_SNP1845 | Ca_Kabuli_LG04 | 30258604                | [C/A] | Ca_14190           | DOWNSTREAM:1272bases                | Zinc finger, CCCH-type                              |
| #Ca_Kabuli_SNP1846 | scaffold4344   | 2114                    | [A/T] |                    | INTERGENIC                          |                                                     |
| #Ca_Kabuli_SNP1847 | scaffold1039   | 86049                   | [G/A] |                    | INTERGENIC                          |                                                     |
| #Ca_Kabuli_SNP1848 | Ca_Kabuli_LG05 | 37039246                | [A/T] | Ca_01510           | DOWNSTREAM:184bases                 | Protein of unknown function DUF2053, membrane       |
| #Ca_Kabuli_SNP1849 | Ca_Kabuli_LG07 | 35263736                | [C/G] | Ca_17644           | DOWNSTREAM:320bases                 | Dynamin central domain                              |
| #Ca_Kabuli_SNP1850 | Ca_Kabuli_LG07 | 5508159                 | [A/C] | Ca_06816           | SYNONYMOUS_CODING                   | SNF2-related                                        |
| #Ca_Kabuli_SNP1851 | Ca_Kabuli_LG04 | 15934901                | [G/T] | Ca_05513           | NON_SYNONYMOUS_CODING               | Beta-lactamase-like                                 |
| #Ca_Kabuli_SNP1852 | scaffold2881   | 6802                    | [G/A] |                    | INTERGENIC                          |                                                     |
| #Ca_Kabuli_SNP1853 | Ca_Kabuli_LG04 | 38363041                | [T/C] | Ca_13120           | SYNONYMOUS_CODING                   | C2 calcium-dependent membrane targeting             |
| #Ca_Kabuli_SNP1854 | Ca_Kabuli_LG07 | 28620851                | [C/T] | Ca_18949           | INTRON                              | Heat shock protein DnaJ, cysteine-rich domain       |
| #Ca_Kabuli_SNP1855 | scaffold744    | 63669                   | [C/T] |                    | INTERGENIC                          |                                                     |
| #Ca_Kabuli_SNP1856 | scaffold3105   | 7255                    | [T/A] |                    | INTERGENIC                          |                                                     |
| #Ca_Kabuli_SNP1857 | Ca_Kabuli_LG06 | 20802761                | [A/T] | Ca_16348           | INTRON                              | Pentatricopeptide repeat                            |
| #Ca_Kabuli_SNP1858 | Ca_Kabuli_LG01 | 47203115                | [A/C] |                    | INTERGENIC                          |                                                     |

| SNP IDs            | Chromosomes    | Physical positions (bp) | SNPs  | Gene accession IDs | Sequence components of genome/genes | Putative functions                               |
|--------------------|----------------|-------------------------|-------|--------------------|-------------------------------------|--------------------------------------------------|
| #Ca_Kabuli_SNP1859 | Ca_Kabuli_LG05 | 19886970                | [T/C] | Ca_22815           | NON_SYNONYMOUS_CODING               | Vps16, C-terminal                                |
| #Ca_Kabuli_SNP1860 | Ca_Kabuli_LG05 | 26997335                | [T/G] |                    | INTERGENIC                          |                                                  |
| #Ca_Kabuli_SNP1861 | Ca_Kabuli_LG04 | 43889033                | [A/T] | Ca_09068           | NON_SYNONYMOUS_CODING               | Homeobox                                         |
| #Ca_Kabuli_SNP1862 | Ca_Kabuli_LG03 | 22225125                | [G/T] | Ca_20408           | SYNONYMOUS_CODING                   | Plastocyanin-like                                |
| #Ca_Kabuli_SNP1863 | Ca_Kabuli_LG01 | 347620                  | [A/C] | Ca_00036           | DOWNSTREAM:1579bases                | WD40 repeat                                      |
| #Ca_Kabuli_SNP1864 | Ca_Kabuli_LG03 | 36872737                | [A/C] | Ca_01013           | INTRON                              | Protein kinase, catalytic domain                 |
| #Ca_Kabuli_SNP1865 | Ca_Kabuli_LG03 | 7204071                 | [T/C] |                    | INTERGENIC                          |                                                  |
| #Ca_Kabuli_SNP1866 | scaffold61     | 294493                  | [A/T] |                    | INTERGENIC                          |                                                  |
| #Ca_Kabuli_SNP1867 | scaffold898    | 615                     | [A/T] |                    | INTERGENIC                          |                                                  |
| #Ca_Kabuli_SNP1868 | Ca_Kabuli_LG04 | 13699663                | [A/G] | Ca_04591           | INTRON                              | XS domain                                        |
| #Ca_Kabuli_SNP1869 | Ca_Kabuli_LG05 | 37012371                | [A/T] |                    | INTERGENIC                          |                                                  |
| #Ca_Kabuli_SNP1870 | Ca_Kabuli_LG05 | 37012168                | [C/T] |                    | INTERGENIC                          |                                                  |
| #Ca_Kabuli_SNP1871 | Ca_Kabuli_LG04 | 13687728                | [T/C] | Ca_04589           | INTRON                              | Frigida-like                                     |
| #Ca_Kabuli_SNP1872 | Ca_Kabuli_LG04 | 7143234                 | [C/T] |                    | INTERGENIC                          |                                                  |
| #Ca_Kabuli_SNP1873 | Ca_Kabuli_LG04 | 4027829                 | [A/T] |                    | INTERGENIC                          |                                                  |
| #Ca_Kabuli_SNP1874 | scaffold1068   | 160749                  | [T/C] |                    | INTERGENIC                          |                                                  |
| #Ca_Kabuli_SNP1875 | scaffold2881   | 3753                    | [A/C] |                    | INTERGENIC                          |                                                  |
| #Ca_Kabuli_SNP1876 | Ca_Kabuli_LG07 | 14492362                | [C/T] |                    | INTERGENIC                          |                                                  |
| #Ca_Kabuli_SNP1877 | scaffold121    | 96397                   | [G/A] |                    | INTERGENIC                          |                                                  |
| #Ca_Kabuli_SNP1878 | Ca_Kabuli_LG04 | 13787448                | [C/A] | Ca_04604           | DOWNSTREAM:1405bases                | Copper amine oxidase                             |
| #Ca_Kabuli_SNP1879 | Ca_Kabuli_LG01 | 12948219                | [A/G] |                    | INTERGENIC                          |                                                  |
| #Ca_Kabuli_SNP1880 | Ca_Kabuli_LG05 | 36999074                | [G/C] |                    | INTERGENIC                          |                                                  |
| #Ca_Kabuli_SNP1881 | Ca_Kabuli_LG03 | 11677780                | [C/A] |                    | INTERGENIC                          |                                                  |
| #Ca_Kabuli_SNP1882 | scaffold294    | 478761                  | [C/G] |                    | INTERGENIC                          |                                                  |
| #Ca_Kabuli_SNP1883 | Ca_Kabuli_LG07 | 22839776                | [G/A] | Ca_19528           | DOWNSTREAM:1716bases                | --                                               |
| #Ca_Kabuli_SNP1884 | Ca_Kabuli_LG06 | 2244901                 | [A/C] |                    | INTERGENIC                          |                                                  |
| #Ca_Kabuli_SNP1885 | Ca_Kabuli_LG07 | 34145280                | [T/G] | Ca_21006           | INTRON                              | DNA-directed RNA polymerase, subunit 2, domain 6 |
| #Ca_Kabuli_SNP1886 | Ca_Kabuli_LG01 | 31528988                | [C/A] | Ca_21865           | INTRON                              | Peptidase S49                                    |
| #Ca_Kabuli_SNP1887 | Ca_Kabuli_LG04 | 3400828                 | [C/G] | Ca_12141           | INTRON                              | Glycoside hydrolase, family 47                   |
| #Ca_Kabuli_SNP1888 | Ca_Kabuli_LG08 | 822853                  | [C/A] | Ca_11839           | SYNONYMOUS_CODING                   | Zinc finger, PHD-type                            |
| #Ca_Kabuli_SNP1889 | Ca_Kabuli_LG06 | 2001909                 | [T/G] | Ca_10323           | NON_SYNONYMOUS_CODING               | Tetratricopeptide repeat-containing              |



| SNP IDs            | Chromosomes    | Physical positions (bp) | SNPs  | Gene accession IDs | Sequence components of genome/genes | Putative functions                                             |
|--------------------|----------------|-------------------------|-------|--------------------|-------------------------------------|----------------------------------------------------------------|
| #Ca_Kabuli_SNP1890 | Ca_Kabuli_LG04 | 11244334                | [G/T] |                    | INTERGENIC                          |                                                                |
| #Ca_Kabuli_SNP1891 | Ca_Kabuli_LG07 | 31223945                | [A/C] | Ca_10134           | NON_SYNONYMOUS_CODING               | Nucleotidyl transferase domain                                 |
| #Ca_Kabuli_SNP1892 | scaffold1068   | 189700                  | [A/G] |                    | INTERGENIC                          |                                                                |
| #Ca_Kabuli_SNP1893 | scaffold555    | 129265                  | [G/T] |                    | INTERGENIC                          |                                                                |
| #Ca_Kabuli_SNP1894 | Ca_Kabuli_LG04 | 16448200                | [T/G] | Ca_05482           | NON_SYNONYMOUS_CODING               | Ubiquitin-associated/translation elongation factor EF1B, N-ter |
| #Ca_Kabuli_SNP1895 | Ca_Kabuli_LG04 | 46534848                | [G/T] | Ca_19264           | NON_SYNONYMOUS_CODING               | WW/Rsp5/WWP                                                    |
| #Ca_Kabuli_SNP1896 | Ca_Kabuli_LG04 | 11490100                | [T/C] | Ca_04384           | SYNONYMOUS_CODING                   | Tubby, C-terminal                                              |
| #Ca_Kabuli_SNP1897 | scaffold744    | 63671                   | [C/T] |                    | INTERGENIC                          |                                                                |
| #Ca_Kabuli_SNP1898 | scaffold586    | 39934                   | [T/G] |                    | INTERGENIC                          |                                                                |
| #Ca_Kabuli_SNP1899 | Ca_Kabuli_LG04 | 3245405                 | [C/T] |                    | INTERGENIC                          |                                                                |
| #Ca_Kabuli_SNP1900 | scaffold1775   | 28547                   | [G/A] |                    | INTERGENIC                          |                                                                |
| #Ca_Kabuli_SNP1901 | Ca_Kabuli_LG05 | 31371625                | [C/A] | Ca_04838           | DOWNSTREAM:1375bases                | Peptidase M14, carboxypeptidase A                              |
| #Ca_Kabuli_SNP1902 | scaffold2290   | 896                     | [G/T] |                    | INTERGENIC                          |                                                                |
| #Ca_Kabuli_SNP1903 | Ca_Kabuli_LG07 | 1655087                 | [C/A] |                    | INTERGENIC                          |                                                                |
| #Ca_Kabuli_SNP1904 | Ca_Kabuli_LG05 | 2700484                 | [A/C] |                    | INTERGENIC                          |                                                                |
| #Ca_Kabuli_SNP1905 | Ca_Kabuli_LG07 | 12161451                | [G/A] | Ca_09293           | NON_SYNONYMOUS_CODING               | Protein of unknown function DUF869, plant                      |
| #Ca_Kabuli_SNP1906 | Ca_Kabuli_LG06 | 41682991                | [T/C] |                    | INTERGENIC                          |                                                                |
| #Ca_Kabuli_SNP1907 | Ca_Kabuli_LG06 | 11163711                | [T/G] | Ca_20482           | INTRON                              | Helicase, C-terminal                                           |
| #Ca_Kabuli_SNP1908 | Ca_Kabuli_LG05 | 36978252                | [G/A] | Ca_01520           | DOWNSTREAM:1896bases                | Protein of unknown function DUF2053, membrane                  |
| #Ca_Kabuli_SNP1909 | scaffold2574   | 1550                    | [T/G] |                    | INTERGENIC                          |                                                                |
| #Ca_Kabuli_SNP1910 | Ca_Kabuli_LG04 | 8686216                 | [A/T] | Ca_08364           | DOWNSTREAM:97bases                  | Disease resistance protein                                     |
| #Ca_Kabuli_SNP1911 | Ca_Kabuli_LG05 | 30903110                | [T/G] |                    | INTERGENIC                          |                                                                |
| #Ca_Kabuli_SNP1912 | Ca_Kabuli_LG07 | 44232220                | [G/A] | Ca_21369           | NON_SYNONYMOUS_CODING               | Protein kinase, catalytic domain                               |
| #Ca_Kabuli_SNP1913 | scaffold1063   | 289997                  | [G/T] |                    | INTERGENIC                          |                                                                |
| #Ca_Kabuli_SNP1914 | Ca_Kabuli_LG07 | 33463300                | [C/G] | Ca_16168           | SYNONYMOUS_CODING                   | --                                                             |
| #Ca_Kabuli_SNP1915 | scaffold2146   | 7348                    | [G/A] |                    | INTERGENIC                          |                                                                |
| #Ca_Kabuli_SNP1916 | Ca_Kabuli_LG04 | 8805504                 | [G/A] |                    | INTERGENIC                          |                                                                |
| #Ca_Kabuli_SNP1917 | scaffold7112   | 1681                    | [C/G] |                    | INTERGENIC                          |                                                                |
| #Ca_Kabuli_SNP1918 | scaffold2290   | 888                     | [C/G] |                    | INTERGENIC                          |                                                                |
| #Ca_Kabuli_SNP1919 | scaffold17     | 136                     | [A/G] |                    | INTERGENIC                          |                                                                |
| #Ca_Kabuli_SNP1920 | scaffold9      | 47760                   | [G/C] |                    | INTERGENIC                          |                                                                |

| SNP IDs            | Chromosomes    | Physical positions (bp) | SNPs  | Gene accession IDs | Sequence components of genome/genes | Putative functions                            |
|--------------------|----------------|-------------------------|-------|--------------------|-------------------------------------|-----------------------------------------------|
| #Ca_Kabuli_SNP1921 | Ca_Kabuli_LG05 | 36978251                | [A/G] | Ca_01520           | DOWNSTREAM:1897bases                | Protein of unknown function DUF2053, membrane |
| #Ca_Kabuli_SNP1922 | Ca_Kabuli_LG07 | 33867334                | [C/T] | Ca_16193           | INTRON                              | Exocyst complex component Sec10               |
| #Ca_Kabuli_SNP1923 | Ca_Kabuli_LG05 | 27749043                | [T/C] |                    | INTERGENIC                          |                                               |
| #Ca_Kabuli_SNP1924 | Ca_Kabuli_LG07 | 33868148                | [C/T] | Ca_16193           | SYNONYMOUS_CODING                   | Exocyst complex component Sec10               |
| #Ca_Kabuli_SNP1925 | Ca_Kabuli_LG07 | 32406152                | [C/A] |                    | INTERGENIC                          |                                               |
| #Ca_Kabuli_SNP1926 | Ca_Kabuli_LG07 | 42272939                | [G/C] |                    | INTERGENIC                          |                                               |
| #Ca_Kabuli_SNP1927 | Ca_Kabuli_LG01 | 25176176                | [T/C] | Ca_18308           | NON_SYNONYMOUS_CODING               | 5'(3')-deoxyribonucleotidase                  |
| #Ca_Kabuli_SNP1928 | scaffold1423   | 106                     | [T/C] |                    | INTERGENIC                          |                                               |
| #Ca_Kabuli_SNP1929 | Ca_Kabuli_LG07 | 45034281                | [T/C] |                    | INTERGENIC                          |                                               |
| #Ca_Kabuli_SNP1930 | scaffold1860   | 129963                  | [C/G] |                    | INTERGENIC                          |                                               |
| #Ca_Kabuli_SNP1931 | scaffold901    | 409761                  | [A/G] |                    | INTERGENIC                          |                                               |
| #Ca_Kabuli_SNP1932 | Ca_Kabuli_LG07 | 35274680                | [A/G] | Ca_17646           | DOWNSTREAM:1308bases                | Dynamin central domain                        |
| #Ca_Kabuli_SNP1933 | Ca_Kabuli_LG03 | 21863769                | [C/A] |                    | INTERGENIC                          |                                               |
| #Ca_Kabuli_SNP1934 | Ca_Kabuli_LG07 | 35339078                | [C/T] |                    | INTERGENIC                          |                                               |
| #Ca_Kabuli_SNP1935 | Ca_Kabuli_LG07 | 35274858                | [A/G] | Ca_17646           | DOWNSTREAM:1130bases                | Dynamin central domain                        |
| #Ca_Kabuli_SNP1936 | Ca_Kabuli_LG07 | 35274859                | [G/T] | Ca_17646           | DOWNSTREAM:1129bases                | Dynamin central domain                        |
| #Ca_Kabuli_SNP1937 | scaffold3105   | 7237                    | [C/A] |                    | INTERGENIC                          |                                               |
| #Ca_Kabuli_SNP1938 | Ca_Kabuli_LG07 | 1461463                 | [T/G] | Ca_03318           | SYNONYMOUS_CODING                   | Uncharacterised protein family UPF0057        |
| #Ca_Kabuli_SNP1939 | scaffold1420   | 382520                  | [A/G] |                    | INTERGENIC                          |                                               |
| #Ca_Kabuli_SNP1940 | Ca_Kabuli_LG04 | 15109738                | [G/T] |                    | INTERGENIC                          |                                               |
| #Ca_Kabuli_SNP1941 | Ca_Kabuli_LG07 | 35181660                | [A/G] | Ca_17639           | SYNONYMOUS_CODING                   | Helix-loop-helix DNA-binding domain           |
| #Ca_Kabuli_SNP1942 | Ca_Kabuli_LG07 | 35227794                | [C/A] | Ca_17641           | SYNONYMOUS_CODING                   | --                                            |
| #Ca_Kabuli_SNP1943 | Ca_Kabuli_LG07 | 10223040                | [A/T] |                    | INTERGENIC                          |                                               |
| #Ca_Kabuli_SNP1944 | Ca_Kabuli_LG07 | 35112785                | [C/T] | Ca_17637           | SYNONYMOUS_CODING                   | Importin-beta, N-terminal                     |
| #Ca_Kabuli_SNP1945 | Ca_Kabuli_LG07 | 23574823                | [C/T] |                    | INTERGENIC                          |                                               |
| #Ca_Kabuli_SNP1946 | scaffold318    | 660749                  | [G/C] |                    | INTERGENIC                          |                                               |
| #Ca_Kabuli_SNP1947 | scaffold2789   | 5385                    | [G/C] |                    | INTERGENIC                          |                                               |
| #Ca_Kabuli_SNP1948 | Ca_Kabuli_LG07 | 41425049                | [A/G] | Ca_17995           | DOWNSTREAM:518bases                 | Disease resistance protein                    |
| #Ca_Kabuli_SNP1949 | Ca_Kabuli_LG07 | 46485934                | [G/A] | Ca_22756           | INTRON                              | --                                            |
| #Ca_Kabuli_SNP1950 | Ca_Kabuli_LG07 | 42915851                | [A/G] |                    | INTERGENIC                          |                                               |
| #Ca_Kabuli_SNP1951 | Ca_Kabuli_LG06 | 22137481                | [A/T] | Ca_11226           | DOWNSTREAM:1608bases                | Cation/H+ exchanger                           |

| SNP IDs            | Chromosomes    | Physical positions (bp) | SNPs  | Gene accession IDs | Sequence components of genome/genes | Putative functions                                  |
|--------------------|----------------|-------------------------|-------|--------------------|-------------------------------------|-----------------------------------------------------|
| #Ca_Kabuli_SNP1952 | Ca_Kabuli_LG05 | 34527336                | [A/G] | Ca_01787           | DOWNSTREAM:994bases                 | ABC transporter-like                                |
| #Ca_Kabuli_SNP1953 | scaffold966    | 8115                    | [T/G] |                    | INTERGENIC                          |                                                     |
| #Ca_Kabuli_SNP1954 | Ca_Kabuli_LG07 | 40692822                | [T/G] | Ca_20271           | NON_SYNONYMOUS_CODING               | Protein kinase, catalytic domain                    |
| #Ca_Kabuli_SNP1955 | scaffold5736   | 4415                    | [A/G] |                    | INTERGENIC                          |                                                     |
| #Ca_Kabuli_SNP1956 | scaffold496    | 25019                   | [A/G] |                    | INTERGENIC                          |                                                     |
| #Ca_Kabuli_SNP1957 | Ca_Kabuli_LG07 | 21644342                | [G/A] | Ca_14515           | DOWNSTREAM:1220bases                | Clathrin/coatomer adaptor, adaptin-like, N-terminal |
| #Ca_Kabuli_SNP1958 | Ca_Kabuli_LG03 | 21558387                | [T/A] |                    | INTERGENIC                          |                                                     |
| #Ca_Kabuli_SNP1959 | Ca_Kabuli_LG02 | 13297594                | [T/G] | Ca_11679           | DOWNSTREAM:1271bases                | Initiation factor 2B-related                        |
| #Ca_Kabuli_SNP1960 | Ca_Kabuli_LG05 | 30903096                | [A/C] |                    | INTERGENIC                          |                                                     |
| #Ca_Kabuli_SNP1961 | Ca_Kabuli_LG07 | 18462652                | [C/A] | Ca_22127           | STOP_GAINED                         | Pectinesterase, catalytic                           |
| #Ca_Kabuli_SNP1962 | Ca_Kabuli_LG07 | 32309394                | [A/T] | Ca_10045           | INTRON                              | von Willebrand factor, type A                       |
| #Ca_Kabuli_SNP1963 | Ca_Kabuli_LG03 | 36046966                | [C/T] | Ca_00903           | NON_SYNONYMOUS_CODING               | SWAP/Surp                                           |
| #Ca_Kabuli_SNP1964 | Ca_Kabuli_LG07 | 13949259                | [G/A] | Ca_16067           | SYNONYMOUS_CODING                   | Heat shock protein DnaJ, N-terminal                 |
| #Ca_Kabuli_SNP1965 | Ca_Kabuli_LG07 | 12390774                | [A/G] | Ca_09275           | NON_SYNONYMOUS_CODING               | --                                                  |
| #Ca_Kabuli_SNP1966 | Ca_Kabuli_LG07 | 9281257                 | [G/T] | Ca_17331           | DOWNSTREAM:1894bases                | --                                                  |
| #Ca_Kabuli_SNP1967 | Ca_Kabuli_LG08 | 4807094                 | [A/G] |                    | INTERGENIC                          |                                                     |
| #Ca_Kabuli_SNP1968 | Ca_Kabuli_LG01 | 34324590                | [A/T] | Ca_25479           | NON_SYNONYMOUS_CODING               | Citrate synthase-like                               |
| #Ca_Kabuli_SNP1969 | Ca_Kabuli_LG04 | 2032480                 | [C/T] | Ca_07822           | INTRON                              | RNA-processing protein, HAT helix                   |
| #Ca_Kabuli_SNP1970 | Ca_Kabuli_LG01 | 12688435                | [A/C] |                    | INTERGENIC                          |                                                     |
| #Ca_Kabuli_SNP1971 | scaffold1039   | 322287                  | [G/A] |                    | INTERGENIC                          |                                                     |
| #Ca_Kabuli_SNP1972 | scaffold168    | 208939                  | [G/A] |                    | INTERGENIC                          |                                                     |
| #Ca_Kabuli_SNP1973 | Ca_Kabuli_LG04 | 23267883                | [A/C] |                    | INTERGENIC                          |                                                     |
| #Ca_Kabuli_SNP1974 | Ca_Kabuli_LG02 | 27063609                | [A/C] | Ca_15636           | NON_SYNONYMOUS_CODING               | DNA topoisomerase I, C-terminal                     |
| #Ca_Kabuli_SNP1975 | scaffold461    | 608623                  | [T/G] |                    | INTERGENIC                          |                                                     |
| #Ca_Kabuli_SNP1976 | scaffold586    | 90401                   | [C/A] |                    | INTERGENIC                          |                                                     |
| #Ca_Kabuli_SNP1977 | Ca_Kabuli_LG01 | 14623270                | [C/T] | Ca_07071           | NON_SYNONYMOUS_CODING               | Ovarian tumour, otubain                             |
| #Ca_Kabuli_SNP1978 | Ca_Kabuli_LG07 | 11685190                | [C/A] | Ca_09331           | NON_SYNONYMOUS_CODING               | Peptidase S8/S53, subtilisin/kexin/sedolisin        |
| #Ca_Kabuli_SNP1979 | Ca_Kabuli_LG07 | 44232228                | [A/T] | Ca_21369           | NON_SYNONYMOUS_CODING               | Protein kinase, catalytic domain                    |
| #Ca_Kabuli_SNP1980 | Ca_Kabuli_LG04 | 13845620                | [C/A] |                    | INTERGENIC                          |                                                     |
| #Ca_Kabuli_SNP1981 | Ca_Kabuli_LG07 | 33912896                | [T/A] |                    | INTERGENIC                          |                                                     |
| #Ca_Kabuli_SNP1982 | Ca_Kabuli_LG03 | 23340886                | [T/A] | Ca_06186           | INTRON                              | Protein of unknown function DUF3526                 |

| SNP IDs            | Chromosomes    | Physical positions (bp) | SNPs  | Gene accession IDs | Sequence components of genome/genes | Putative functions                                     |
|--------------------|----------------|-------------------------|-------|--------------------|-------------------------------------|--------------------------------------------------------|
| #Ca_Kabuli_SNP1983 | Ca_Kabuli_LG06 | 26151464                | [T/C] |                    | INTERGENIC                          |                                                        |
| #Ca_Kabuli_SNP1984 | Ca_Kabuli_LG05 | 37207857                | [T/C] | Ca_01496           | SYNONYMOUS_CODING                   | Peptidase C19, ubiquitin carboxyl-terminal hydrolase 2 |
| #Ca_Kabuli_SNP1985 | Ca_Kabuli_LG04 | 12462635                | [A/G] | Ca_04469           | INTRON                              | Zinc finger, CCHC-type                                 |
| #Ca_Kabuli_SNP1986 | scaffold3203   | 276                     | [C/T] |                    | INTERGENIC                          |                                                        |
| #Ca_Kabuli_SNP1987 | Ca_Kabuli_LG04 | 9075565                 | [A/G] |                    | INTERGENIC                          |                                                        |
| #Ca_Kabuli_SNP1988 | Ca_Kabuli_LG03 | 23340883                | [T/C] | Ca_06186           | INTRON                              | Protein of unknown function DUF3524                    |
| #Ca_Kabuli_SNP1989 | Ca_Kabuli_LG02 | 13297600                | [C/T] | Ca_11679           | DOWNSTREAM:1265bases                | Initiation factor 2B-related                           |
| #Ca_Kabuli_SNP1990 | Ca_Kabuli_LG02 | 18712473                | [T/C] | Ca_15966           | DOWNSTREAM:68bases                  | --                                                     |
| #Ca_Kabuli_SNP1991 | Ca_Kabuli_LG05 | 17494699                | [C/A] |                    | INTERGENIC                          |                                                        |
| #Ca_Kabuli_SNP1992 | Ca_Kabuli_LG07 | 20586113                | [G/A] | Ca_12409           | DOWNSTREAM:212bases                 | Integrase, catalytic core                              |
| #Ca_Kabuli_SNP1993 | Ca_Kabuli_LG02 | 34848963                | [G/C] | Ca_16883           | NON_SYNONYMOUS_CODING               | Bromodomain                                            |
| #Ca_Kabuli_SNP1994 | Ca_Kabuli_LG03 | 38772170                | [A/C] | Ca_01236           | INTRON                              | Mediator complex, subunit Med14                        |
| #Ca_Kabuli_SNP1995 | scaffold7068   | 2152                    | [G/C] |                    | INTERGENIC                          |                                                        |
| #Ca_Kabuli_SNP1996 | Ca_Kabuli_LG04 | 28092712                | [T/G] | Ca_23175           | NON_SYNONYMOUS_CODING               | Crotonase, core                                        |
| #Ca_Kabuli_SNP1997 | Ca_Kabuli_LG02 | 24709295                | [G/A] | Ca_22892           | INTRON                              | DNA mismatch repair protein MutS, C-terminal domain    |
| #Ca_Kabuli_SNP1998 | Ca_Kabuli_LG03 | 21687443                | [T/A] | Ca_09523           | NON_SYNONYMOUS_CODING               | Aminoacyl-tRNA synthetase, class II (D/K/N)            |
| #Ca_Kabuli_SNP1999 | Ca_Kabuli_LG07 | 4198812                 | [A/C] |                    | INTERGENIC                          |                                                        |
| #Ca_Kabuli_SNP2000 | Ca_Kabuli_LG06 | 33495711                | [C/T] |                    | INTERGENIC                          |                                                        |
| #Ca_Kabuli_SNP2001 | Ca_Kabuli_LG05 | 17494697                | [C/T] |                    | INTERGENIC                          |                                                        |
| #Ca_Kabuli_SNP2002 | Ca_Kabuli_LG06 | 21489040                | [G/C] |                    | INTERGENIC                          |                                                        |
| #Ca_Kabuli_SNP2003 | Ca_Kabuli_LG04 | 38008527                | [A/T] |                    | INTERGENIC                          |                                                        |
| #Ca_Kabuli_SNP2004 | scaffold168    | 208788                  | [C/T] |                    | INTERGENIC                          |                                                        |
| #Ca_Kabuli_SNP2005 | Ca_Kabuli_LG01 | 1117458                 | [A/G] | Ca_00138           | NON_SYNONYMOUS_CODING               | HEAT                                                   |
| #Ca_Kabuli_SNP2006 | Ca_Kabuli_LG07 | 13605197                | [A/C] | Ca_16044           | SYNONYMOUS_CODING                   | Zinc finger, C2H2-type                                 |
| #Ca_Kabuli_SNP2007 | Ca_Kabuli_LG06 | 14332018                | [A/C] | Ca_05203           | NON_SYNONYMOUS_CODING               | Protein kinase, catalytic domain                       |
| #Ca_Kabuli_SNP2008 | Ca_Kabuli_LG08 | 15131175                | [G/A] | Ca_12965           | SYNONYMOUS_CODING                   | Sugar/inositol transporter                             |
| #Ca_Kabuli_SNP2009 | Ca_Kabuli_LG04 | 35346558                | [T/G] | Ca_20018           | INTRON                              | IQ motif, EF-hand binding site                         |
| #Ca_Kabuli_SNP2010 | scaffold31     | 961089                  | [A/G] |                    | INTERGENIC                          |                                                        |
| #Ca_Kabuli_SNP2011 | Ca_Kabuli_LG04 | 36467980                | [A/C] | Ca_14830           | INTRON                              | Semialdehyde dehydrogenase, NAD-binding                |
| #Ca_Kabuli_SNP2012 | Ca_Kabuli_LG06 | 46734706                | [C/G] |                    | INTERGENIC                          |                                                        |
| #Ca_Kabuli_SNP2013 | Ca_Kabuli_LG04 | 37633044                | [C/T] | Ca_15118           | DOWNSTREAM:903bases                 | --                                                     |

| SNP IDs            | Chromosomes    | Physical positions (bp) | SNPs  | Gene accession IDs | Sequence components of genome/genes | Putative functions                     |
|--------------------|----------------|-------------------------|-------|--------------------|-------------------------------------|----------------------------------------|
| #Ca_Kabuli_SNP2014 | Ca_Kabuli_LG04 | 39086017                | [A/T] | Ca_13074           | DOWNSTREAM:652bases                 | Cyclic nucleotide-binding domain       |
| #Ca_Kabuli_SNP2015 | Ca_Kabuli_LG04 | 38302413                | [G/A] | Ca_13126           | DOWNSTREAM:1724bases                | Pentatricopeptide repeat               |
| #Ca_Kabuli_SNP2016 | Ca_Kabuli_LG03 | 28176380                | [A/C] | Ca_26949           | DOWNSTREAM:1627bases                | WD40 repeat                            |
| #Ca_Kabuli_SNP2017 | Ca_Kabuli_LG04 | 38536332                | [A/C] | Ca_13110           | DOWNSTREAM:168bases                 | BRCT                                   |
| #Ca_Kabuli_SNP2018 | scaffold179    | 123585                  | [C/G] |                    | INTERGENIC                          |                                        |
| #Ca_Kabuli_SNP2019 | Ca_Kabuli_LG04 | 38836649                | [T/C] |                    | INTERGENIC                          |                                        |
| #Ca_Kabuli_SNP2020 | Ca_Kabuli_LG01 | 24658546                | [G/A] | Ca_18337           | SYNONYMOUS_CODING                   | Auxin responsive SAUR protein          |
| #Ca_Kabuli_SNP2021 | Ca_Kabuli_LG04 | 10430613                | [C/A] |                    | INTERGENIC                          |                                        |
| #Ca_Kabuli_SNP2022 | Ca_Kabuli_LG04 | 37356951                | [C/T] | Ca_15140           | INTRON                              | HEAT                                   |
| #Ca_Kabuli_SNP2023 | Ca_Kabuli_LG04 | 35229659                | [C/T] | Ca_20015           | INTRON                              | Metallo-dependent phosphatase          |
| #Ca_Kabuli_SNP2024 | Ca_Kabuli_LG08 | 9112172                 | [A/C] | Ca_11534           | SYNONYMOUS_CODING                   | Protein of unknown function DUF1399    |
| #Ca_Kabuli_SNP2025 | scaffold99     | 213518                  | [C/T] |                    | INTERGENIC                          |                                        |
| #Ca_Kabuli_SNP2026 | scaffold1997   | 128027                  | [G/A] |                    | INTERGENIC                          |                                        |
| #Ca_Kabuli_SNP2027 | scaffold99     | 103027                  | [C/T] |                    | INTERGENIC                          |                                        |
| #Ca_Kabuli_SNP2028 | Ca_Kabuli_LG01 | 31535330                | [T/G] | Ca_21865           | INTRON                              | Peptidase S49                          |
| #Ca_Kabuli_SNP2029 | Ca_Kabuli_LG01 | 41437428                | [G/C] | Ca_23118           | INTRON                              | Protein kinase, catalytic domain       |
| #Ca_Kabuli_SNP2030 | Ca_Kabuli_LG01 | 41437429                | [C/G] | Ca_23118           | INTRON                              | Protein kinase, catalytic domain       |
| #Ca_Kabuli_SNP2031 | Ca_Kabuli_LG02 | 35661053                | [C/T] | Ca_09736           | DOWNSTREAM:1693bases                | Uncharacterised protein family UPF0172 |
| #Ca_Kabuli_SNP2032 | Ca_Kabuli_LG05 | 22116956                | [T/G] |                    | INTERGENIC                          |                                        |
| #Ca_Kabuli_SNP2033 | scaffold542    | 360756                  | [T/C] |                    | INTERGENIC                          |                                        |
| #Ca_Kabuli_SNP2034 | Ca_Kabuli_LG04 | 46392555                | [T/G] |                    | INTERGENIC                          |                                        |
| #Ca_Kabuli_SNP2035 | Ca_Kabuli_LG05 | 23663999                | [A/C] |                    | INTERGENIC                          |                                        |
| #Ca_Kabuli_SNP2036 | scaffold269    | 43299                   | [C/A] |                    | INTERGENIC                          |                                        |
| #Ca_Kabuli_SNP2037 | Ca_Kabuli_LG01 | 17523925                | [G/C] |                    | INTERGENIC                          |                                        |
| #Ca_Kabuli_SNP2038 | Ca_Kabuli_LG05 | 43919028                | [A/G] |                    | INTERGENIC                          |                                        |
| #Ca_Kabuli_SNP2039 | scaffold357    | 266729                  | [A/C] |                    | INTERGENIC                          |                                        |
| #Ca_Kabuli_SNP2040 | Ca_Kabuli_LG06 | 32262837                | [T/A] |                    | INTERGENIC                          |                                        |
| #Ca_Kabuli_SNP2041 | Ca_Kabuli_LG06 | 59367115                | [C/A] | Ca_18844           | NON_SYNONYMOUS_CODING               | Pyrophosphate-energised proton pump    |
| #Ca_Kabuli_SNP2042 | Ca_Kabuli_LG04 | 660041                  | [A/C] |                    | INTERGENIC                          |                                        |
| #Ca_Kabuli_SNP2043 | scaffold2881   | 1214                    | [G/C] |                    | INTERGENIC                          |                                        |
| #Ca_Kabuli_SNP2044 | scaffold431    | 107625                  | [T/C] |                    | INTERGENIC                          |                                        |

| SNP IDs            | Chromosomes    | Physical positions (bp) | SNPs  | Gene accession IDs | Sequence components of genome/genes | Putative functions                               |
|--------------------|----------------|-------------------------|-------|--------------------|-------------------------------------|--------------------------------------------------|
| #Ca_Kabuli_SNP2045 | Ca_Kabuli_LG08 | 1194886                 | [G/A] | Ca_15060           | INTRON                              | Alpha/beta hydrolase fold-2                      |
| #Ca_Kabuli_SNP2046 | Ca_Kabuli_LG03 | 17679400                | [G/C] | Ca_21115           | NON_SYNONYMOUS_CODING               | DNA-directed RNA polymerase, subunit 2, domain 6 |
| #Ca_Kabuli_SNP2047 | Ca_Kabuli_LG04 | 18719417                | [A/G] | Ca_13978           | INTRON                              | --                                               |
| #Ca_Kabuli_SNP2048 | Ca_Kabuli_LG07 | 234624                  | [A/G] |                    | INTERGENIC                          |                                                  |
| #Ca_Kabuli_SNP2049 | scaffold2290   | 904                     | [A/T] |                    | INTERGENIC                          |                                                  |
| #Ca_Kabuli_SNP2050 | Ca_Kabuli_LG04 | 5900290                 | [C/T] | Ca_03661           | DOWNSTREAM:167bases                 | Hypoxia induced protein, domain                  |
| #Ca_Kabuli_SNP2051 | Ca_Kabuli_LG04 | 28092727                | [T/A] | Ca_23175           | NON_SYNONYMOUS_CODING               | Crotonase, core                                  |
| #Ca_Kabuli_SNP2052 | scaffold214    | 136106                  | [G/A] |                    | INTERGENIC                          |                                                  |
| #Ca_Kabuli_SNP2053 | Ca_Kabuli_LG06 | 7834866                 | [T/G] | Ca_09595           | SYNONYMOUS_CODING                   | C2 calcium-dependent membrane targeting          |
| #Ca_Kabuli_SNP2054 | Ca_Kabuli_LG05 | 26696533                | [C/T] | Ca_08950           | DOWNSTREAM:460bases                 | Disease resistance protein                       |
| #Ca_Kabuli_SNP2055 | Ca_Kabuli_LG06 | 27710498                | [T/C] | Ca_14588           | SYNONYMOUS_CODING                   | Preprotein translocase Sec, Sec61-beta subunit   |
| #Ca_Kabuli_SNP2056 | Ca_Kabuli_LG03 | 4597225                 | [T/G] | Ca_22082           | SYNONYMOUS_CODING                   | Pectinesterase, catalytic                        |
| #Ca_Kabuli_SNP2057 | Ca_Kabuli_LG06 | 32035932                | [C/A] | Ca_15208           | INTRON                              | MD-2-related lipid-recognition                   |
| #Ca_Kabuli_SNP2058 | Ca_Kabuli_LG06 | 32035933                | [T/G] | Ca_15208           | INTRON                              | MD-2-related lipid-recognition                   |
| #Ca_Kabuli_SNP2059 | Ca_Kabuli_LG05 | 20443995                | [A/G] |                    | INTERGENIC                          |                                                  |
| #Ca_Kabuli_SNP2060 | Ca_Kabuli_LG01 | 5430645                 | [A/C] |                    | INTERGENIC                          |                                                  |
| #Ca_Kabuli_SNP2061 | scaffold168    | 208786                  | [G/C] |                    | INTERGENIC                          |                                                  |
| #Ca_Kabuli_SNP2062 | Ca_Kabuli_LG03 | 26849303                | [T/C] | Ca_08222           | NON_SYNONYMOUS_CODING               | Regulator of chromosome condensation, RCC1       |
| #Ca_Kabuli_SNP2063 | Ca_Kabuli_LG01 | 47979058                | [C/A] |                    | INTERGENIC                          |                                                  |
| #Ca_Kabuli_SNP2064 | Ca_Kabuli_LG01 | 4902036                 | [C/T] |                    | INTERGENIC                          |                                                  |
| #Ca_Kabuli_SNP2065 | Ca_Kabuli_LG08 | 4807080                 | [G/T] |                    | INTERGENIC                          |                                                  |
| #Ca_Kabuli_SNP2066 | scaffold403    | 294438                  | [G/A] |                    | INTERGENIC                          |                                                  |
| #Ca_Kabuli_SNP2067 | Ca_Kabuli_LG04 | 41969260                | [C/G] | Ca_10924           | SYNONYMOUS_CODING                   | Endonuclease/exonuclease/phosphatase             |
| #Ca_Kabuli_SNP2068 | scaffold168    | 208932                  | [G/T] |                    | INTERGENIC                          |                                                  |
| #Ca_Kabuli_SNP2069 | scaffold382    | 110772                  | [G/T] |                    | INTERGENIC                          |                                                  |
| #Ca_Kabuli_SNP2070 | Ca_Kabuli_LG04 | 5779788                 | [A/T] | Ca_03672           | DOWNSTREAM:169bases                 | Helicase, C-terminal                             |
| #Ca_Kabuli_SNP2071 | Ca_Kabuli_LG04 | 6889974                 | [T/G] |                    | INTERGENIC                          |                                                  |
| #Ca_Kabuli_SNP2072 | Ca_Kabuli_LG07 | 16936123                | [C/A] | Ca_15885           | NON_SYNONYMOUS_CODING               | H/ACA ribonucleoprotein complex, subunit Nop10   |
| #Ca_Kabuli_SNP2073 | Ca_Kabuli_LG02 | 25725665                | [G/T] |                    | INTERGENIC                          |                                                  |
| #Ca_Kabuli_SNP2074 | Ca_Kabuli_LG04 | 6889964                 | [T/G] |                    | INTERGENIC                          |                                                  |
| #Ca_Kabuli_SNP2075 | Ca_Kabuli_LG01 | 14623279                | [T/G] | Ca_07071           | NON_SYNONYMOUS_CODING               | Ovarian tumour, otubain                          |

| SNP IDs            | Chromosomes    | Physical positions (bp) | SNPs  | Gene accession IDs | Sequence components of genome/genes | Putative functions                                           |
|--------------------|----------------|-------------------------|-------|--------------------|-------------------------------------|--------------------------------------------------------------|
| #Ca_Kabuli_SNP2076 | Ca_Kabuli_LG07 | 8007992                 | [G/T] | Ca_13217           | NON_SYNONYMOUS_CODING               | Kelch repeat type 1                                          |
| #Ca_Kabuli_SNP2077 | Ca_Kabuli_LG02 | 23219939                | [C/A] | Ca_14970           | NON_SYNONYMOUS_CODING               | Protein kinase, catalytic domain                             |
| #Ca_Kabuli_SNP2078 | Ca_Kabuli_LG03 | 31091141                | [A/C] | Ca_12206           | SYNONYMOUS_CODING                   | Histone H1/H5                                                |
| #Ca_Kabuli_SNP2079 | scaffold4067   | 36336                   | [T/G] |                    | INTERGENIC                          |                                                              |
| #Ca_Kabuli_SNP2080 | Ca_Kabuli_LG08 | 14821416                | [A/G] | Ca_12987           | SYNONYMOUS_CODING                   | Mrp, conserved site                                          |
| #Ca_Kabuli_SNP2081 | Ca_Kabuli_LG04 | 8683953                 | [C/G] | Ca_08364           | NON_SYNONYMOUS_CODING               | Disease resistance protein                                   |
| #Ca_Kabuli_SNP2082 | Ca_Kabuli_LG04 | 8685875                 | [G/A] | Ca_08364           | NON_SYNONYMOUS_CODING               | Disease resistance protein                                   |
| #Ca_Kabuli_SNP2083 | Ca_Kabuli_LG04 | 30258607                | [C/A] | Ca_14190           | DOWNSTREAM:1269bases                | Zinc finger, CCCH-type                                       |
| #Ca_Kabuli_SNP2084 | Ca_Kabuli_LG05 | 282870                  | [A/C] | Ca_18182           | DOWNSTREAM:1340bases                | Short-chain dehydrogenase/reductase SDR                      |
| #Ca_Kabuli_SNP2085 | Ca_Kabuli_LG01 | 3546461                 | [C/T] |                    | INTERGENIC                          |                                                              |
| #Ca_Kabuli_SNP2086 | scaffold416    | 62540                   | [A/G] |                    | INTERGENIC                          |                                                              |
| #Ca_Kabuli_SNP2087 | Ca_Kabuli_LG01 | 3736956                 | [T/G] |                    | INTERGENIC                          |                                                              |
| #Ca_Kabuli_SNP2088 | Ca_Kabuli_LG02 | 5259270                 | [A/C] | Ca_14682           | NON_SYNONYMOUS_CODING               | --                                                           |
| #Ca_Kabuli_SNP2089 | Ca_Kabuli_LG08 | 4073077                 | [A/T] | Ca_02163           | SYNONYMOUS_CODING                   | Zinc finger, RING-type                                       |
| #Ca_Kabuli_SNP2090 | Ca_Kabuli_LG08 | 4073076                 | [A/C] | Ca_02163           | SYNONYMOUS_CODING                   | Zinc finger, RING-type                                       |
| #Ca_Kabuli_SNP2091 | Ca_Kabuli_LG02 | 31534283                | [G/A] |                    | INTERGENIC                          |                                                              |
| #Ca_Kabuli_SNP2092 | Ca_Kabuli_LG08 | 14124588                | [C/A] | Ca_13047           | DOWNSTREAM:43bases                  | Protein phosphatase 2C-like                                  |
| #Ca_Kabuli_SNP2093 | Ca_Kabuli_LG04 | 8692321                 | [C/T] | Ca_08365           | NON_SYNONYMOUS_CODING               | Glycoside hydrolase, family 13, N-terminal                   |
| #Ca_Kabuli_SNP2094 | Ca_Kabuli_LG02 | 7125951                 | [T/G] | Ca_19128           | SYNONYMOUS_CODING                   | Oxidoreductase, N-terminal                                   |
| #Ca_Kabuli_SNP2095 | Ca_Kabuli_LG06 | 3962444                 | [A/C] |                    | INTERGENIC                          |                                                              |
| #Ca_Kabuli_SNP2096 | Ca_Kabuli_LG07 | 35134887                | [T/A] | Ca_17638           | NON_SYNONYMOUS_CODING               | Pathogenesis-related transcriptional factor/ERF, DNA-binding |
| #Ca_Kabuli_SNP2097 | scaffold382    | 110759                  | [C/T] |                    | INTERGENIC                          |                                                              |
| #Ca_Kabuli_SNP2098 | Ca_Kabuli_LG04 | 10430622                | [A/C] |                    | INTERGENIC                          |                                                              |
| #Ca_Kabuli_SNP2099 | Ca_Kabuli_LG08 | 11087143                | [A/G] |                    | INTERGENIC                          |                                                              |
| #Ca_Kabuli_SNP2100 | Ca_Kabuli_LG02 | 24741195                | [C/T] | Ca_22889           | SYNONYMOUS_CODING                   | --                                                           |
| #Ca_Kabuli_SNP2101 | Ca_Kabuli_LG06 | 20679819                | [T/C] |                    | INTERGENIC                          |                                                              |
| #Ca_Kabuli_SNP2102 | Ca_Kabuli_LG08 | 11403805                | [A/G] | Ca_16820           | NON_SYNONYMOUS_CODING               | SANT domain, DNA binding                                     |
| #Ca_Kabuli_SNP2103 | Ca_Kabuli_LG01 | 17983298                | [T/G] | Ca_14744           | NON_SYNONYMOUS_CODING               | RAG1-activating protein-1-related                            |
| #Ca_Kabuli_SNP2104 | Ca_Kabuli_LG08 | 11066644                | [C/T] | Ca_16843           | SYNONYMOUS_CODING                   | Multi antimicrobial extrusion protein                        |
| #Ca_Kabuli_SNP2105 | Ca_Kabuli_LG08 | 11087302                | [A/T] |                    | INTERGENIC                          |                                                              |
| #Ca_Kabuli_SNP2106 | Ca_Kabuli_LG08 | 14325980                | [C/A] | Ca_13032           | INTRON                              | Kinesin, motor domain                                        |

| SNP IDs            | Chromosomes    | Physical positions (bp) | SNPs  | Gene accession IDs | Sequence components of genome/genes | Putative functions                                           |
|--------------------|----------------|-------------------------|-------|--------------------|-------------------------------------|--------------------------------------------------------------|
| #Ca_Kabuli_SNP2107 | Ca_Kabuli_LG05 | 32011781                | [T/G] | Ca_04904           | INTRON                              | Kinesin, motor domain                                        |
| #Ca_Kabuli_SNP2108 | Ca_Kabuli_LG07 | 13580931                | [A/C] | Ca_16043           | SYNONYMOUS_CODING                   | Transcription factor GRAS                                    |
| #Ca_Kabuli_SNP2109 | Ca_Kabuli_LG08 | 11102892                | [T/G] | Ca_16842           | INTRON                              | Protein kinase, catalytic domain                             |
| #Ca_Kabuli_SNP2110 | Ca_Kabuli_LG08 | 11102884                | [T/A] | Ca_16842           | INTRON                              | Protein kinase, catalytic domain                             |
| #Ca_Kabuli_SNP2111 | Ca_Kabuli_LG08 | 11066728                | [G/A] | Ca_16843           | INTRON                              | Multi antimicrobial extrusion protein                        |
| #Ca_Kabuli_SNP2112 | Ca_Kabuli_LG08 | 11067014                | [T/C] | Ca_16843           | INTRON                              | Multi antimicrobial extrusion protein                        |
| #Ca_Kabuli_SNP2113 | Ca_Kabuli_LG08 | 11066975                | [G/A] | Ca_16843           | INTRON                              | Multi antimicrobial extrusion protein                        |
| #Ca_Kabuli_SNP2114 | Ca_Kabuli_LG08 | 11128030                | [A/T] |                    | INTERGENIC                          |                                                              |
| #Ca_Kabuli_SNP2115 | Ca_Kabuli_LG08 | 11087123                | [C/T] |                    | INTERGENIC                          |                                                              |
| #Ca_Kabuli_SNP2116 | Ca_Kabuli_LG03 | 22225100                | [G/T] | Ca_20408           | SYNONYMOUS_CODING                   | Plastocyanin-like                                            |
| #Ca_Kabuli_SNP2117 | Ca_Kabuli_LG08 | 11067090                | [C/T] | Ca_16843           | SYNONYMOUS_CODING                   | Multi antimicrobial extrusion protein                        |
| #Ca_Kabuli_SNP2118 | scaffold57     | 253574                  | [T/C] |                    | INTERGENIC                          |                                                              |
| #Ca_Kabuli_SNP2119 | scaffold57     | 253596                  | [G/A] |                    | INTERGENIC                          |                                                              |
| #Ca_Kabuli_SNP2120 | Ca_Kabuli_LG06 | 32717450                | [A/G] |                    | INTERGENIC                          |                                                              |
| #Ca_Kabuli_SNP2121 | Ca_Kabuli_LG08 | 8066006                 | [A/C] |                    | INTERGENIC                          |                                                              |
| #Ca_Kabuli_SNP2122 | scaffold2091   | 56358                   | [T/G] |                    | INTERGENIC                          |                                                              |
| #Ca_Kabuli_SNP2123 | Ca_Kabuli_LG08 | 13248268                | [T/C] | Ca_20108           | SYNONYMOUS_CODING                   | C2 calcium-dependent membrane targeting                      |
| #Ca_Kabuli_SNP2124 | Ca_Kabuli_LG02 | 7701206                 | [T/A] | Ca_18123           | SYNONYMOUS_CODING                   | Multi antimicrobial extrusion protein                        |
| #Ca_Kabuli_SNP2125 | Ca_Kabuli_LG04 | 47592455                | [T/C] | Ca_10830           | INTRON                              | Phospholipid/glycerol acyltransferase                        |
| #Ca_Kabuli_SNP2126 | Ca_Kabuli_LG02 | 7714332                 | [A/T] | Ca_18124           | INTRON                              | Multi antimicrobial extrusion protein                        |
| #Ca_Kabuli_SNP2127 | Ca_Kabuli_LG07 | 20613547                | [A/G] |                    | INTERGENIC                          |                                                              |
| #Ca_Kabuli_SNP2128 | Ca_Kabuli_LG07 | 20498626                | [G/T] | Ca_12400           | INTRON                              | Pathogenesis-related transcriptional factor/ERF, DNA-binding |
| #Ca_Kabuli_SNP2129 | Ca_Kabuli_LG07 | 20543112                | [C/T] |                    | INTERGENIC                          |                                                              |
| #Ca_Kabuli_SNP2130 | Ca_Kabuli_LG02 | 7679627                 | [A/T] | Ca_18121           | NON_SYNONYMOUS_CODING               | Multi antimicrobial extrusion protein                        |
| #Ca_Kabuli_SNP2131 | Ca_Kabuli_LG02 | 7753419                 | [G/C] |                    | INTERGENIC                          |                                                              |
| #Ca_Kabuli_SNP2132 | Ca_Kabuli_LG02 | 7753440                 | [T/C] |                    | INTERGENIC                          |                                                              |
| #Ca_Kabuli_SNP2133 | Ca_Kabuli_LG02 | 7753425                 | [C/T] |                    | INTERGENIC                          |                                                              |
| #Ca_Kabuli_SNP2134 | Ca_Kabuli_LG02 | 7714220                 | [G/A] |                    | INTERGENIC                          |                                                              |
| #Ca_Kabuli_SNP2135 | Ca_Kabuli_LG02 | 7679693                 | [C/G] | Ca_18121           | NON_SYNONYMOUS_CODING               | Multi antimicrobial extrusion protein                        |
| #Ca_Kabuli_SNP2136 | Ca_Kabuli_LG04 | 38536170                | [A/G] | Ca_13110           | DOWNSTREAM:6bases                   | BRCT                                                         |
| #Ca_Kabuli_SNP2137 | Ca_Kabuli_LG04 | 12526606                | [G/T] | Ca_04475           | SYNONYMOUS_CODING                   | Cytochrome b561, eukaryote                                   |



| SNP IDs            | Chromosomes    | Physical positions (bp) | SNPs  | Gene accession IDs | Sequence components of genome/genes | Putative functions                                           |
|--------------------|----------------|-------------------------|-------|--------------------|-------------------------------------|--------------------------------------------------------------|
| #Ca_Kabuli_SNP2138 | Ca_Kabuli_LG02 | 7714392                 | [G/A] | Ca_18124           | NON_SYNONYMOUS_CODING               | Multi antimicrobial extrusion protein                        |
| #Ca_Kabuli_SNP2139 | Ca_Kabuli_LG07 | 20613718                | [C/T] |                    | INTERGENIC                          |                                                              |
| #Ca_Kabuli_SNP2140 | scaffold99     | 106349                  | [C/T] |                    | INTERGENIC                          |                                                              |
| #Ca_Kabuli_SNP2141 | Ca_Kabuli_LG07 | 20564024                | [G/A] | Ca_12406           | SYNONYMOUS_CODING                   | KIP1-like                                                    |
| #Ca_Kabuli_SNP2142 | Ca_Kabuli_LG07 | 20564297                | [A/G] | Ca_12406           | SYNONYMOUS_CODING                   | KIP1-like                                                    |
| #Ca_Kabuli_SNP2143 | Ca_Kabuli_LG04 | 14206908                | [C/T] |                    | INTERGENIC                          |                                                              |
| #Ca_Kabuli_SNP2144 | scaffold1679   | 55438                   | [G/T] |                    | INTERGENIC                          |                                                              |
| #Ca_Kabuli_SNP2145 | Ca_Kabuli_LG07 | 20543119                | [T/C] |                    | INTERGENIC                          |                                                              |
| #Ca_Kabuli_SNP2146 | Ca_Kabuli_LG04 | 5233608                 | [A/C] |                    | INTERGENIC                          |                                                              |
| #Ca_Kabuli_SNP2147 | Ca_Kabuli_LG07 | 20556466                | [G/C] | Ca_12405           | DOWNSTREAM:1199bases                | SGT1                                                         |
| #Ca_Kabuli_SNP2148 | Ca_Kabuli_LG07 | 20496303                | [T/C] | Ca_12400           | SYNONYMOUS_CODING                   | Pathogenesis-related transcriptional factor/ERF, DNA-binding |
| #Ca_Kabuli_SNP2149 | Ca_Kabuli_LG07 | 20452278                | [G/A] | Ca_12396           | SYNONYMOUS_CODING                   | Protein kinase, catalytic domain                             |
| #Ca_Kabuli_SNP2150 | Ca_Kabuli_LG07 | 20498552                | [C/T] | Ca_12400           | INTRON                              | Pathogenesis-related transcriptional factor/ERF, DNA-binding |
| #Ca_Kabuli_SNP2151 | Ca_Kabuli_LG08 | 9388734                 | [A/T] |                    | INTERGENIC                          |                                                              |
| #Ca_Kabuli_SNP2152 | Ca_Kabuli_LG07 | 20452457                | [G/A] | Ca_12396           | NON_SYNONYMOUS_CODING               | Protein kinase, catalytic domain                             |
| #Ca_Kabuli_SNP2153 | Ca_Kabuli_LG06 | 23776635                | [A/G] | Ca_11079           | INTRON                              | Tetratricopeptide repeat-containing                          |
| #Ca_Kabuli_SNP2154 | scaffold271    | 81752                   | [A/C] |                    | INTERGENIC                          |                                                              |
| #Ca_Kabuli_SNP2155 | scaffold1196   | 82935                   | [A/C] |                    | INTERGENIC                          |                                                              |
| #Ca_Kabuli_SNP2156 | Ca_Kabuli_LG08 | 1794812                 | [G/C] | Ca_02426           | NON_SYNONYMOUS_CODING               | ATPase, P-type, K/Mg/Cd/Cu/Zn/Na/Ca/Na/H-transporter         |
| #Ca_Kabuli_SNP2157 | scaffold1561   | 4821                    | [G/A] |                    | INTERGENIC                          |                                                              |
| #Ca_Kabuli_SNP2158 | Ca_Kabuli_LG02 | 35121978                | [T/C] | Ca_16857           | INTRON                              | Metallo-dependent phosphatase                                |
| #Ca_Kabuli_SNP2159 | Ca_Kabuli_LG03 | 15962250                | [A/C] | Ca_17058           | NON_SYNONYMOUS_CODING               | Zinc finger, LSD1-type                                       |
| #Ca_Kabuli_SNP2160 | Ca_Kabuli_LG01 | 18015870                | [T/G] | Ca_14741           | NON_SYNONYMOUS_CODING               | Pentatricopeptide repeat                                     |
| #Ca_Kabuli_SNP2161 | scaffold2139   | 33631                   | [A/G] |                    | INTERGENIC                          |                                                              |
| #Ca_Kabuli_SNP2162 | Ca_Kabuli_LG08 | 4611043                 | [A/G] | Ca_02096           | NON_SYNONYMOUS_CODING               | SET domain                                                   |
| #Ca_Kabuli_SNP2163 | Ca_Kabuli_LG08 | 310131                  | [A/C] | Ca_11904           | NON_SYNONYMOUS_CODING               | --                                                           |
| #Ca_Kabuli_SNP2164 | Ca_Kabuli_LG02 | 24220954                | [A/C] | Ca_21666           | INTRON                              | SNF2-related                                                 |
| #Ca_Kabuli_SNP2165 | Ca_Kabuli_LG08 | 14715495                | [T/G] |                    | INTERGENIC                          |                                                              |
| #Ca_Kabuli_SNP2166 | Ca_Kabuli_LG05 | 46260817                | [A/C] | Ca_04079           | NON_SYNONYMOUS_CODING               | Mitochondrial inner membrane translocase complex, subunit    |
| #Ca_Kabuli_SNP2167 | scaffold1466   | 122512                  | [T/G] |                    | INTERGENIC                          |                                                              |
| #Ca_Kabuli_SNP2168 | Ca_Kabuli_LG01 | 34911033                | [T/G] | Ca_21409           | NON_SYNONYMOUS_CODING               | --                                                           |

| SNP IDs            | Chromosomes    | Physical positions (bp) | SNPs  | Gene accession IDs | Sequence components of genome/genes | Putative functions                                             |
|--------------------|----------------|-------------------------|-------|--------------------|-------------------------------------|----------------------------------------------------------------|
| #Ca_Kabuli_SNP2169 | scaffold170    | 72469                   | [A/G] |                    | INTERGENIC                          |                                                                |
| #Ca_Kabuli_SNP2170 | Ca_Kabuli_LG01 | 43782277                | [T/G] | Ca_13549           | INTRON                              | --                                                             |
| #Ca_Kabuli_SNP2171 | Ca_Kabuli_LG04 | 615692                  | [C/A] | Ca_07692           | NON_SYNONYMOUS_CODING               | HEAT, type 2                                                   |
| #Ca_Kabuli_SNP2172 | scaffold190    | 195000                  | [C/T] |                    | INTERGENIC                          |                                                                |
| #Ca_Kabuli_SNP2173 | Ca_Kabuli_LG05 | 21033922                | [C/T] |                    | INTERGENIC                          |                                                                |
| #Ca_Kabuli_SNP2174 | Ca_Kabuli_LG01 | 36408325                | [T/A] | Ca_21687           | NON_SYNONYMOUS_CODING               | Ubiquitin-associated/translation elongation factor EF1B, N-ter |
| #Ca_Kabuli_SNP2175 | scaffold559    | 465722                  | [G/T] |                    | INTERGENIC                          |                                                                |
| #Ca_Kabuli_SNP2176 | Ca_Kabuli_LG07 | 29190657                | [T/C] | Ca_11786           | SYNONYMOUS_CODING                   | Glutamyl/glutaminyl-tRNA synthetase, class Ic                  |
| #Ca_Kabuli_SNP2177 | scaffold170    | 72495                   | [G/A] |                    | INTERGENIC                          |                                                                |
| Ca_Kabuli_SNP2178  | Ca_Kabuli_LG01 | 2885508                 | [C/T] | Ca_00351           | DOWNSTREAM:1877bases                | Disease resistance protein                                     |
| Ca_Kabuli_SNP2179  | Ca_Kabuli_LG01 | 2885525                 | [C/T] | Ca_00351           | DOWNSTREAM:1894bases                | Disease resistance protein                                     |
| Ca_Kabuli_SNP2180  | Ca_Kabuli_LG01 | 4906830                 | [T/C] | Ca_00577           | DOWNSTREAM:1037bases                | Disease resistance protein                                     |
| Ca_Kabuli_SNP2181  | Ca_Kabuli_LG01 | 10339063                | [G/T] | Ca_02745           | DOWNSTREAM:1630bases                | Glucose-methanol-choline oxidoreductase, N-terminal            |
| Ca_Kabuli_SNP2182  | Ca_Kabuli_LG01 | 17462593                | [A/G] | Ca_14788           | DOWNSTREAM:1378bases                | Glycoside hydrolase, family 3, N-terminal                      |
| Ca_Kabuli_SNP2183  | Ca_Kabuli_LG01 | 2886005                 | [A/G] |                    | INTERGENIC                          |                                                                |
| Ca_Kabuli_SNP2184  | Ca_Kabuli_LG01 | 2885988                 | [G/C] |                    | INTERGENIC                          |                                                                |
| Ca_Kabuli_SNP2185  | Ca_Kabuli_LG01 | 2885987                 | [A/T] |                    | INTERGENIC                          |                                                                |
| Ca_Kabuli_SNP2186  | Ca_Kabuli_LG01 | 11193251                | [T/A] |                    | INTERGENIC                          |                                                                |
| Ca_Kabuli_SNP2187  | Ca_Kabuli_LG01 | 3546462                 | [G/C] |                    | INTERGENIC                          |                                                                |
| Ca_Kabuli_SNP2188  | Ca_Kabuli_LG01 | 3546463                 | [G/T] |                    | INTERGENIC                          |                                                                |
| Ca_Kabuli_SNP2189  | Ca_Kabuli_LG01 | 2287408                 | [A/T] |                    | INTERGENIC                          |                                                                |
| Ca_Kabuli_SNP2190  | Ca_Kabuli_LG01 | 777240                  | [G/A] |                    | INTERGENIC                          |                                                                |
| Ca_Kabuli_SNP2191  | Ca_Kabuli_LG01 | 1292473                 | [G/T] |                    | INTERGENIC                          |                                                                |
| Ca_Kabuli_SNP2192  | Ca_Kabuli_LG01 | 1292471                 | [A/T] |                    | INTERGENIC                          |                                                                |
| Ca_Kabuli_SNP2193  | Ca_Kabuli_LG01 | 1292470                 | [C/A] |                    | INTERGENIC                          |                                                                |
| Ca_Kabuli_SNP2194  | Ca_Kabuli_LG01 | 10715410                | [T/A] |                    | INTERGENIC                          |                                                                |
| Ca_Kabuli_SNP2195  | Ca_Kabuli_LG01 | 10715411                | [C/A] |                    | INTERGENIC                          |                                                                |
| Ca_Kabuli_SNP2196  | Ca_Kabuli_LG01 | 10715412                | [T/G] |                    | INTERGENIC                          |                                                                |
| Ca_Kabuli_SNP2197  | Ca_Kabuli_LG01 | 32286505                | [G/A] |                    | INTERGENIC                          |                                                                |
| Ca_Kabuli_SNP2198  | Ca_Kabuli_LG01 | 2948258                 | [C/A] |                    | INTERGENIC                          |                                                                |
| Ca_Kabuli_SNP2199  | Ca_Kabuli_LG01 | 2948249                 | [C/A] |                    | INTERGENIC                          |                                                                |

| SNP IDs           | Chromosomes    | Physical positions (bp) | SNPs  | Gene accession IDs | Sequence components of genome/genes | Putative functions                                    |
|-------------------|----------------|-------------------------|-------|--------------------|-------------------------------------|-------------------------------------------------------|
| Ca_Kabuli_SNP2200 | Ca_Kabuli_LG01 | 2883717                 | [C/A] |                    | INTERGENIC                          |                                                       |
| Ca_Kabuli_SNP2201 | Ca_Kabuli_LG01 | 2883716                 | [A/C] |                    | INTERGENIC                          |                                                       |
| Ca_Kabuli_SNP2202 | Ca_Kabuli_LG01 | 2883684                 | [G/T] |                    | INTERGENIC                          |                                                       |
| Ca_Kabuli_SNP2203 | Ca_Kabuli_LG01 | 2883194                 | [T/C] |                    | INTERGENIC                          |                                                       |
| Ca_Kabuli_SNP2204 | Ca_Kabuli_LG01 | 2883189                 | [G/C] |                    | INTERGENIC                          |                                                       |
| Ca_Kabuli_SNP2205 | Ca_Kabuli_LG01 | 12948253                | [T/A] |                    | INTERGENIC                          |                                                       |
| Ca_Kabuli_SNP2206 | Ca_Kabuli_LG01 | 12992445                | [A/C] |                    | INTERGENIC                          |                                                       |
| Ca_Kabuli_SNP2207 | Ca_Kabuli_LG01 | 26807403                | [T/C] |                    | INTERGENIC                          |                                                       |
| Ca_Kabuli_SNP2208 | Ca_Kabuli_LG01 | 2232774                 | [A/T] | Ca_00279           | INTRON                              | Amidohydrolase 1                                      |
| Ca_Kabuli_SNP2209 | Ca_Kabuli_LG01 | 2232775                 | [A/T] | Ca_00279           | INTRON                              | Amidohydrolase 1                                      |
| Ca_Kabuli_SNP2210 | Ca_Kabuli_LG01 | 2232777                 | [T/G] | Ca_00279           | INTRON                              | Amidohydrolase 1                                      |
| Ca_Kabuli_SNP2211 | Ca_Kabuli_LG01 | 2232778                 | [T/A] | Ca_00279           | INTRON                              | Amidohydrolase 1                                      |
| Ca_Kabuli_SNP2212 | Ca_Kabuli_LG01 | 10739566                | [C/A] | Ca_02687           | INTRON                              | Ribokinase                                            |
| Ca_Kabuli_SNP2213 | Ca_Kabuli_LG01 | 6315399                 | [G/T] | Ca_07892           | INTRON                              | Zinc finger, ZZ-type                                  |
| Ca_Kabuli_SNP2214 | Ca_Kabuli_LG01 | 7160640                 | [T/G] | Ca_07974           | INTRON                              | NUDIX hydrolase domain                                |
| Ca_Kabuli_SNP2215 | Ca_Kabuli_LG01 | 24450483                | [T/G] | Ca_18343           | INTRON                              | Ribulose-phosphate 3-epimerase                        |
| Ca_Kabuli_SNP2216 | Ca_Kabuli_LG01 | 27017570                | [A/G] | Ca_20299           | INTRON                              | Cystathionine beta-synthase, core                     |
| Ca_Kabuli_SNP2217 | Ca_Kabuli_LG01 | 27017606                | [C/T] | Ca_20299           | INTRON                              | Cystathionine beta-synthase, core                     |
| Ca_Kabuli_SNP2218 | Ca_Kabuli_LG01 | 31528989                | [T/G] | Ca_21865           | INTRON                              | Peptidase S49                                         |
| Ca_Kabuli_SNP2219 | Ca_Kabuli_LG01 | 31528990                | [T/A] | Ca_21865           | INTRON                              | Peptidase S49                                         |
| Ca_Kabuli_SNP2220 | Ca_Kabuli_LG01 | 31528991                | [G/T] | Ca_21865           | INTRON                              | Peptidase S49                                         |
| Ca_Kabuli_SNP2221 | Ca_Kabuli_LG01 | 37690465                | [T/C] | Ca_23533           | INTRON                              | Myb, DNA-binding                                      |
| Ca_Kabuli_SNP2222 | Ca_Kabuli_LG01 | 37690498                | [C/A] | Ca_23533           | INTRON                              | Myb, DNA-binding                                      |
| Ca_Kabuli_SNP2223 | Ca_Kabuli_LG01 | 4908733                 | [C/A] | Ca_00577           | NON_SYNONYMOUS_CODING               | Disease resistance protein                            |
| Ca_Kabuli_SNP2224 | Ca_Kabuli_LG01 | 11230109                | [T/C] | Ca_02632           | NON_SYNONYMOUS_CODING               | Pumilio RNA-binding repeat                            |
| Ca_Kabuli_SNP2225 | Ca_Kabuli_LG01 | 17093640                | [T/G] | Ca_06863           | NON_SYNONYMOUS_CODING               | --                                                    |
| Ca_Kabuli_SNP2226 | Ca_Kabuli_LG01 | 8113398                 | [C/G] | Ca_08057           | NON_SYNONYMOUS_CODING               | RNA helicase, ATP-dependent, DEAD-box, conserved site |
| Ca_Kabuli_SNP2227 | Ca_Kabuli_LG01 | 8113403                 | [A/T] | Ca_08057           | NON_SYNONYMOUS_CODING               | RNA helicase, ATP-dependent, DEAD-box, conserved site |
| Ca_Kabuli_SNP2228 | Ca_Kabuli_LG01 | 40336759                | [C/T] | Ca_13893           | NON_SYNONYMOUS_CODING               | Tetratricopeptide, MLP1/MLP2-like                     |
| Ca_Kabuli_SNP2229 | Ca_Kabuli_LG01 | 18748595                | [C/G] | Ca_17381           | NON_SYNONYMOUS_CODING               | APO protein, plant                                    |
| Ca_Kabuli_SNP2230 | Ca_Kabuli_LG01 | 18748596                | [G/A] | Ca_17381           | NON_SYNONYMOUS_CODING               | APO protein, plant                                    |

| SNP IDs           | Chromosomes    | Physical positions (bp) | SNPs  | Gene accession IDs | Sequence components of genome/genes | Putative functions                                    |
|-------------------|----------------|-------------------------|-------|--------------------|-------------------------------------|-------------------------------------------------------|
| Ca_Kabuli_SNP2231 | Ca_Kabuli_LG01 | 2053787                 | [C/A] | Ca_00260           | STOP_GAINED                         | Disease resistance protein                            |
| Ca_Kabuli_SNP2232 | Ca_Kabuli_LG01 | 2053744                 | [A/C] | Ca_00260           | SYNONYMOUS_CODING                   | Disease resistance protein                            |
| Ca_Kabuli_SNP2233 | Ca_Kabuli_LG01 | 2053784                 | [A/C] | Ca_00260           | SYNONYMOUS_CODING                   | Disease resistance protein                            |
| Ca_Kabuli_SNP2234 | Ca_Kabuli_LG01 | 2053819                 | [C/A] | Ca_00260           | SYNONYMOUS_CODING                   | Disease resistance protein                            |
| Ca_Kabuli_SNP2235 | Ca_Kabuli_LG01 | 2053833                 | [T/G] | Ca_00260           | SYNONYMOUS_CODING                   | Disease resistance protein                            |
| Ca_Kabuli_SNP2236 | Ca_Kabuli_LG01 | 2053856                 | [T/G] | Ca_00260           | SYNONYMOUS_CODING                   | Disease resistance protein                            |
| Ca_Kabuli_SNP2237 | Ca_Kabuli_LG01 | 9270090                 | [T/G] | Ca_02867           | SYNONYMOUS_CODING                   | Nucleoporin interacting component Nup93/Nic96         |
| Ca_Kabuli_SNP2238 | Ca_Kabuli_LG01 | 8113449                 | [T/A] | Ca_08057           | SYNONYMOUS_CODING                   | RNA helicase, ATP-dependent, DEAD-box, conserved site |
| Ca_Kabuli_SNP2239 | Ca_Kabuli_LG01 | 17983310                | [T/G] | Ca_14744           | SYNONYMOUS_CODING                   | RAG1-activating protein-1-related                     |
| Ca_Kabuli_SNP2240 | Ca_Kabuli_LG02 | 36171327                | [T/A] | Ca_09797           | DOWNSTREAM:1084bases                | Aldo/keto reductase                                   |
| Ca_Kabuli_SNP2241 | Ca_Kabuli_LG02 | 36171326                | [T/G] | Ca_09797           | DOWNSTREAM:1085bases                | Aldo/keto reductase                                   |
| Ca_Kabuli_SNP2242 | Ca_Kabuli_LG02 | 33398549                | [T/C] | Ca_10186           | DOWNSTREAM:301bases                 | Disease resistance protein                            |
| Ca_Kabuli_SNP2243 | Ca_Kabuli_LG02 | 30977522                | [A/T] |                    | INTERGENIC                          |                                                       |
| Ca_Kabuli_SNP2244 | Ca_Kabuli_LG02 | 30977528                | [C/T] |                    | INTERGENIC                          |                                                       |
| Ca_Kabuli_SNP2245 | Ca_Kabuli_LG02 | 5866794                 | [C/A] |                    | INTERGENIC                          |                                                       |
| Ca_Kabuli_SNP2246 | Ca_Kabuli_LG02 | 36275166                | [T/A] |                    | INTERGENIC                          |                                                       |
| Ca_Kabuli_SNP2247 | Ca_Kabuli_LG02 | 36275167                | [G/T] |                    | INTERGENIC                          |                                                       |
| Ca_Kabuli_SNP2248 | Ca_Kabuli_LG02 | 36275169                | [G/T] |                    | INTERGENIC                          |                                                       |
| Ca_Kabuli_SNP2249 | Ca_Kabuli_LG02 | 36046595                | [T/G] |                    | INTERGENIC                          |                                                       |
| Ca_Kabuli_SNP2250 | Ca_Kabuli_LG02 | 36046720                | [A/T] |                    | INTERGENIC                          |                                                       |
| Ca_Kabuli_SNP2251 | Ca_Kabuli_LG02 | 36046820                | [T/A] |                    | INTERGENIC                          |                                                       |
| Ca_Kabuli_SNP2252 | Ca_Kabuli_LG02 | 28097395                | [T/C] |                    | INTERGENIC                          |                                                       |
| Ca_Kabuli_SNP2253 | Ca_Kabuli_LG02 | 19901595                | [T/C] |                    | INTERGENIC                          |                                                       |
| Ca_Kabuli_SNP2254 | Ca_Kabuli_LG02 | 32096180                | [C/G] |                    | INTERGENIC                          |                                                       |
| Ca_Kabuli_SNP2255 | Ca_Kabuli_LG02 | 32096186                | [T/A] |                    | INTERGENIC                          |                                                       |
| Ca_Kabuli_SNP2256 | Ca_Kabuli_LG02 | 30954305                | [T/G] | Ca_12469           | INTRON                              | Clathrin, heavy chain/VPS, 7-fold repeat              |
| Ca_Kabuli_SNP2257 | Ca_Kabuli_LG02 | 35121976                | [T/C] | Ca_16857           | INTRON                              | Metallo-dependent phosphatase                         |
| Ca_Kabuli_SNP2258 | Ca_Kabuli_LG02 | 33399065                | [T/C] | Ca_10186           | NON_SYNONYMOUS_CODING               | Disease resistance protein                            |
| Ca_Kabuli_SNP2259 | Ca_Kabuli_LG02 | 26035674                | [G/C] | Ca_14310           | NON_SYNONYMOUS_CODING               | Pentatricopeptide repeat                              |
| Ca_Kabuli_SNP2260 | Ca_Kabuli_LG02 | 26035675                | [G/T] | Ca_14310           | NON_SYNONYMOUS_CODING               | Pentatricopeptide repeat                              |
| Ca_Kabuli_SNP2261 | Ca_Kabuli_LG02 | 27063610                | [G/T] | Ca_15636           | NON_SYNONYMOUS_CODING               | DNA topoisomerase I, C-terminal                       |

| SNP IDs           | Chromosomes    | Physical positions (bp) | SNPs  | Gene accession IDs | Sequence components of genome/genes | Putative functions                           |
|-------------------|----------------|-------------------------|-------|--------------------|-------------------------------------|----------------------------------------------|
| Ca_Kabuli_SNP2262 | Ca_Kabuli_LG02 | 34848964                | [G/T] | Ca_16883           | NON_SYNONYMOUS_CODING               | Bromodomain                                  |
| Ca_Kabuli_SNP2263 | Ca_Kabuli_LG02 | 26871568                | [C/A] | Ca_17275           | NON_SYNONYMOUS_CODING               | Zinc finger, RING-type                       |
| Ca_Kabuli_SNP2264 | Ca_Kabuli_LG02 | 26871569                | [T/G] | Ca_17275           | NON_SYNONYMOUS_CODING               | Zinc finger, RING-type                       |
| Ca_Kabuli_SNP2265 | Ca_Kabuli_LG02 | 7701199                 | [T/G] | Ca_18123           | NON_SYNONYMOUS_CODING               | Multi antimicrobial extrusion protein        |
| Ca_Kabuli_SNP2266 | Ca_Kabuli_LG02 | 26871570                | [T/A] | Ca_17275           | STOP_GAINED                         | Zinc finger, RING-type                       |
| Ca_Kabuli_SNP2267 | Ca_Kabuli_LG02 | 32670090                | [T/G] | Ca_10254           | SYNONYMOUS_CODING                   | BTB/POZ-like                                 |
| Ca_Kabuli_SNP2268 | Ca_Kabuli_LG02 | 13217904                | [G/T] | Ca_11681           | SYNONYMOUS_CODING                   | Zinc finger, DHHC-type, palmitoyltransferase |
| Ca_Kabuli_SNP2269 | Ca_Kabuli_LG02 | 13217905                | [A/C] | Ca_11681           | SYNONYMOUS_CODING                   | Zinc finger, DHHC-type, palmitoyltransferase |
| Ca_Kabuli_SNP2270 | Ca_Kabuli_LG02 | 13217906                | [T/C] | Ca_11681           | SYNONYMOUS_CODING                   | Zinc finger, DHHC-type, palmitoyltransferase |
| Ca_Kabuli_SNP2271 | Ca_Kabuli_LG02 | 31005847                | [T/G] | Ca_12464           | SYNONYMOUS_CODING                   | Lateral organ boundaries, LOB                |
| Ca_Kabuli_SNP2272 | Ca_Kabuli_LG02 | 34551849                | [A/C] | Ca_15281           | SYNONYMOUS_CODING                   | Like-Sm ribonucleoprotein (LSM) domain       |
| Ca_Kabuli_SNP2273 | Ca_Kabuli_LG02 | 30091140                | [C/T] | Ca_16081           | SYNONYMOUS_CODING                   | Peptidase S8/S53, subtilisin/kexin/sedolisin |
| Ca_Kabuli_SNP2274 | Ca_Kabuli_LG02 | 30091146                | [A/T] | Ca_16081           | SYNONYMOUS_CODING                   | Peptidase S8/S53, subtilisin/kexin/sedolisin |
| Ca_Kabuli_SNP2275 | Ca_Kabuli_LG02 | 30091173                | [C/T] | Ca_16081           | SYNONYMOUS_CODING                   | Peptidase S8/S53, subtilisin/kexin/sedolisin |
| Ca_Kabuli_SNP2276 | Ca_Kabuli_LG02 | 26871571                | [C/T] | Ca_17275           | SYNONYMOUS_CODING                   | Zinc finger, RING-type                       |
| Ca_Kabuli_SNP2277 | Ca_Kabuli_LG03 | 37316818                | [T/G] | Ca_01065           | DOWNSTREAM:1845bases                | Zinc finger, Sec23/Sec24-type                |
| Ca_Kabuli_SNP2278 | Ca_Kabuli_LG03 | 31521142                | [C/T] | Ca_12251           | DOWNSTREAM:144bases                 | Oligopeptide transporter                     |
| Ca_Kabuli_SNP2279 | Ca_Kabuli_LG03 | 12897831                | [A/C] | Ca_21013           | DOWNSTREAM:1478bases                | --                                           |
| Ca_Kabuli_SNP2280 | Ca_Kabuli_LG03 | 17056558                | [G/T] |                    | INTERGENIC                          |                                              |
| Ca_Kabuli_SNP2281 | Ca_Kabuli_LG03 | 31790392                | [T/C] |                    | INTERGENIC                          |                                              |
| Ca_Kabuli_SNP2282 | Ca_Kabuli_LG03 | 39642782                | [T/C] |                    | INTERGENIC                          |                                              |
| Ca_Kabuli_SNP2283 | Ca_Kabuli_LG03 | 39642783                | [G/T] |                    | INTERGENIC                          |                                              |
| Ca_Kabuli_SNP2284 | Ca_Kabuli_LG03 | 11677781                | [T/G] |                    | INTERGENIC                          |                                              |
| Ca_Kabuli_SNP2285 | Ca_Kabuli_LG03 | 11677779                | [T/A] |                    | INTERGENIC                          |                                              |
| Ca_Kabuli_SNP2286 | Ca_Kabuli_LG03 | 29869381                | [G/A] |                    | INTERGENIC                          |                                              |
| Ca_Kabuli_SNP2287 | Ca_Kabuli_LG03 | 17918037                | [G/A] |                    | INTERGENIC                          |                                              |
| Ca_Kabuli_SNP2288 | Ca_Kabuli_LG03 | 17918038                | [A/C] |                    | INTERGENIC                          |                                              |
| Ca_Kabuli_SNP2289 | Ca_Kabuli_LG03 | 17918039                | [T/A] |                    | INTERGENIC                          |                                              |
| Ca_Kabuli_SNP2290 | Ca_Kabuli_LG03 | 29804207                | [C/G] |                    | INTERGENIC                          |                                              |
| Ca_Kabuli_SNP2291 | Ca_Kabuli_LG03 | 29804225                | [G/A] |                    | INTERGENIC                          |                                              |
| Ca_Kabuli_SNP2292 | Ca_Kabuli_LG03 | 19792757                | [T/C] |                    | INTERGENIC                          |                                              |

| SNP IDs           | Chromosomes    | Physical positions (bp) | SNPs  | Gene accession IDs | Sequence components of genome/genes | Putative functions                               |
|-------------------|----------------|-------------------------|-------|--------------------|-------------------------------------|--------------------------------------------------|
| Ca_Kabuli_SNP2293 | Ca_Kabuli_LG03 | 31631644                | [C/A] |                    | INTERGENIC                          |                                                  |
| Ca_Kabuli_SNP2294 | Ca_Kabuli_LG03 | 2461960                 | [A/G] |                    | INTERGENIC                          |                                                  |
| Ca_Kabuli_SNP2295 | Ca_Kabuli_LG03 | 8536213                 | [C/T] |                    | INTERGENIC                          |                                                  |
| Ca_Kabuli_SNP2296 | Ca_Kabuli_LG03 | 8536275                 | [C/T] |                    | INTERGENIC                          |                                                  |
| Ca_Kabuli_SNP2297 | Ca_Kabuli_LG03 | 8536295                 | [A/T] |                    | INTERGENIC                          |                                                  |
| Ca_Kabuli_SNP2298 | Ca_Kabuli_LG03 | 38103369                | [T/G] | Ca_01154           | INTRON                              | Peptidase S1/S6, chymotrypsin/Hap                |
| Ca_Kabuli_SNP2299 | Ca_Kabuli_LG03 | 38103375                | [T/C] | Ca_01154           | INTRON                              | Peptidase S1/S6, chymotrypsin/Hap                |
| Ca_Kabuli_SNP2300 | Ca_Kabuli_LG03 | 23340887                | [A/C] | Ca_06186           | INTRON                              | Protein of unknown function DUF3527              |
| Ca_Kabuli_SNP2301 | Ca_Kabuli_LG03 | 31279606                | [A/G] | Ca_12224           | INTRON                              | Protein of unknown function DUF647               |
| Ca_Kabuli_SNP2302 | Ca_Kabuli_LG03 | 31279616                | [A/T] | Ca_12224           | INTRON                              | Protein of unknown function DUF647               |
| Ca_Kabuli_SNP2303 | Ca_Kabuli_LG03 | 15745337                | [G/T] | Ca_17048           | INTRON                              | Forkhead-associated (FHA) domain                 |
| Ca_Kabuli_SNP2304 | Ca_Kabuli_LG03 | 36752677                | [A/C] | Ca_00998           | NON_SYNONYMOUS_CODING               | Glycoside hydrolase, family 3, N-terminal        |
| Ca_Kabuli_SNP2305 | Ca_Kabuli_LG03 | 37608935                | [C/A] | Ca_01099           | NON_SYNONYMOUS_CODING               | Calmodulin binding protein-like                  |
| Ca_Kabuli_SNP2306 | Ca_Kabuli_LG03 | 37608936                | [T/G] | Ca_01099           | NON_SYNONYMOUS_CODING               | Calmodulin binding protein-like                  |
| Ca_Kabuli_SNP2307 | Ca_Kabuli_LG03 | 37608937                | [T/A] | Ca_01099           | NON_SYNONYMOUS_CODING               | Calmodulin binding protein-like                  |
| Ca_Kabuli_SNP2308 | Ca_Kabuli_LG03 | 24262413                | [C/G] | Ca_06094           | NON_SYNONYMOUS_CODING               | LETM1-like                                       |
| Ca_Kabuli_SNP2309 | Ca_Kabuli_LG03 | 24262414                | [T/A] | Ca_06094           | NON_SYNONYMOUS_CODING               | LETM1-like                                       |
| Ca_Kabuli_SNP2310 | Ca_Kabuli_LG03 | 24262415                | [C/T] | Ca_06094           | NON_SYNONYMOUS_CODING               | LETM1-like                                       |
| Ca_Kabuli_SNP2311 | Ca_Kabuli_LG03 | 29107925                | [A/T] | Ca_07215           | NON_SYNONYMOUS_CODING               | Heat shock protein DnaJ, N-terminal              |
| Ca_Kabuli_SNP2312 | Ca_Kabuli_LG03 | 29107926                | [A/C] | Ca_07215           | NON_SYNONYMOUS_CODING               | Heat shock protein DnaJ, N-terminal              |
| Ca_Kabuli_SNP2313 | Ca_Kabuli_LG03 | 29107927                | [G/T] | Ca_07215           | NON_SYNONYMOUS_CODING               | Heat shock protein DnaJ, N-terminal              |
| Ca_Kabuli_SNP2314 | Ca_Kabuli_LG03 | 21687978                | [A/G] | Ca_09523           | NON_SYNONYMOUS_CODING               | Aminoacyl-tRNA synthetase, class II (D/K/N)      |
| Ca_Kabuli_SNP2315 | Ca_Kabuli_LG03 | 31698432                | [A/C] | Ca_12272           | NON_SYNONYMOUS_CODING               | ABC transporter, transmembrane domain            |
| Ca_Kabuli_SNP2316 | Ca_Kabuli_LG03 | 31952333                | [G/T] | Ca_12295           | NON_SYNONYMOUS_CODING               | HEAT                                             |
| Ca_Kabuli_SNP2317 | Ca_Kabuli_LG03 | 7026895                 | [C/A] | Ca_16540           | NON_SYNONYMOUS_CODING               | Zinc finger, ZZ-type                             |
| Ca_Kabuli_SNP2318 | Ca_Kabuli_LG03 | 21069917                | [A/G] | Ca_09474           | SYNONYMOUS_CODING                   | Aminoacyl-tRNA synthetase, class II (D/K/N)      |
| Ca_Kabuli_SNP2319 | Ca_Kabuli_LG03 | 17679402                | [T/G] | Ca_21115           | SYNONYMOUS_CODING                   | DNA-directed RNA polymerase, subunit 2, domain 6 |
| Ca_Kabuli_SNP2320 | Ca_Kabuli_LG03 | 17984978                | [T/G] | Ca_21132           | SYNONYMOUS_CODING                   | Protein kinase, catalytic domain                 |
| Ca_Kabuli_SNP2321 | Ca_Kabuli_LG04 | 11231142                | [G/A] | Ca_04356           | DOWNSTREAM:869bases                 | Choline/ethanolamine kinase                      |
| Ca_Kabuli_SNP2322 | Ca_Kabuli_LG04 | 11231135                | [T/C] | Ca_04356           | DOWNSTREAM:876bases                 | Choline/ethanolamine kinase                      |
| Ca_Kabuli_SNP2323 | Ca_Kabuli_LG04 | 12609673                | [C/G] | Ca_04483           | DOWNSTREAM:1031bases                | Zinc finger, RING-type                           |

| SNP IDs           | Chromosomes    | Physical positions (bp) | SNPs  | Gene accession IDs | Sequence components of genome/genes | Putative functions                                |
|-------------------|----------------|-------------------------|-------|--------------------|-------------------------------------|---------------------------------------------------|
| Ca_Kabuli_SNP2324 | Ca_Kabuli_LG04 | 48498368                | [T/C] | Ca_10741           | DOWNSTREAM:1629bases                | Eukaryotic initiation factor 3, gamma subunit     |
| Ca_Kabuli_SNP2325 | Ca_Kabuli_LG04 | 48498166                | [G/A] | Ca_10741           | DOWNSTREAM:1831bases                | Eukaryotic initiation factor 3, gamma subunit     |
| Ca_Kabuli_SNP2326 | Ca_Kabuli_LG04 | 42038745                | [A/T] | Ca_10919           | DOWNSTREAM:1006bases                | Glycoside hydrolase, family 28                    |
| Ca_Kabuli_SNP2327 | Ca_Kabuli_LG04 | 38302445                | [G/A] | Ca_13126           | DOWNSTREAM:1756bases                | Pentatricopeptide repeat                          |
| Ca_Kabuli_SNP2328 | Ca_Kabuli_LG04 | 30258596                | [C/G] | Ca_14190           | DOWNSTREAM:1280bases                | Zinc finger, CCCH-type                            |
| Ca_Kabuli_SNP2329 | Ca_Kabuli_LG04 | 30258045                | [T/A] | Ca_14190           | DOWNSTREAM:1831bases                | Zinc finger, CCCH-type                            |
| Ca_Kabuli_SNP2330 | Ca_Kabuli_LG04 | 30258044                | [T/A] | Ca_14190           | DOWNSTREAM:1832bases                | Zinc finger, CCCH-type                            |
| Ca_Kabuli_SNP2331 | Ca_Kabuli_LG04 | 30463074                | [G/T] | Ca_14198           | DOWNSTREAM:1699bases                | Myb, DNA-binding                                  |
| Ca_Kabuli_SNP2332 | Ca_Kabuli_LG04 | 30463076                | [A/G] | Ca_14198           | DOWNSTREAM:1701bases                | Myb, DNA-binding                                  |
| Ca_Kabuli_SNP2333 | Ca_Kabuli_LG04 | 40349162                | [C/G] | Ca_14889           | DOWNSTREAM:1573bases                | Ionotropic glutamate receptor                     |
| Ca_Kabuli_SNP2334 | Ca_Kabuli_LG04 | 40349163                | [A/G] | Ca_14889           | DOWNSTREAM:1574bases                | Ionotropic glutamate receptor                     |
| Ca_Kabuli_SNP2335 | Ca_Kabuli_LG04 | 37706498                | [T/G] | Ca_15110           | DOWNSTREAM:1730bases                | Cytochrome c oxidase subunit II C-terminal        |
| Ca_Kabuli_SNP2336 | Ca_Kabuli_LG04 | 35634751                | [A/G] | Ca_22441           | DOWNSTREAM:1400bases                | Translation elongation factor EFG/EF2, C-terminal |
| Ca_Kabuli_SNP2337 | Ca_Kabuli_LG04 | 38008082                | [C/T] |                    | INTERGENIC                          |                                                   |
| Ca_Kabuli_SNP2338 | Ca_Kabuli_LG04 | 44373020                | [G/C] |                    | INTERGENIC                          |                                                   |
| Ca_Kabuli_SNP2339 | Ca_Kabuli_LG04 | 38836356                | [T/C] |                    | INTERGENIC                          |                                                   |
| Ca_Kabuli_SNP2340 | Ca_Kabuli_LG04 | 44372998                | [C/T] |                    | INTERGENIC                          |                                                   |
| Ca_Kabuli_SNP2341 | Ca_Kabuli_LG04 | 38008227                | [G/T] |                    | INTERGENIC                          |                                                   |
| Ca_Kabuli_SNP2342 | Ca_Kabuli_LG04 | 37450326                | [T/A] |                    | INTERGENIC                          |                                                   |
| Ca_Kabuli_SNP2343 | Ca_Kabuli_LG04 | 38008567                | [C/A] |                    | INTERGENIC                          |                                                   |
| Ca_Kabuli_SNP2344 | Ca_Kabuli_LG04 | 2034304                 | [G/A] |                    | INTERGENIC                          |                                                   |
| Ca_Kabuli_SNP2345 | Ca_Kabuli_LG04 | 11465057                | [G/C] |                    | INTERGENIC                          |                                                   |
| Ca_Kabuli_SNP2346 | Ca_Kabuli_LG04 | 2034266                 | [C/T] |                    | INTERGENIC                          |                                                   |
| Ca_Kabuli_SNP2347 | Ca_Kabuli_LG04 | 15022270                | [T/A] |                    | INTERGENIC                          |                                                   |
| Ca_Kabuli_SNP2348 | Ca_Kabuli_LG04 | 44354390                | [T/C] |                    | INTERGENIC                          |                                                   |
| Ca_Kabuli_SNP2349 | Ca_Kabuli_LG04 | 37630445                | [G/A] |                    | INTERGENIC                          |                                                   |
| Ca_Kabuli_SNP2350 | Ca_Kabuli_LG04 | 30603949                | [C/A] |                    | INTERGENIC                          |                                                   |
| Ca_Kabuli_SNP2351 | Ca_Kabuli_LG04 | 30603951                | [T/A] |                    | INTERGENIC                          |                                                   |
| Ca_Kabuli_SNP2352 | Ca_Kabuli_LG04 | 16457966                | [T/G] |                    | INTERGENIC                          |                                                   |
| Ca_Kabuli_SNP2353 | Ca_Kabuli_LG04 | 8805867                 | [C/A] |                    | INTERGENIC                          |                                                   |
| Ca_Kabuli_SNP2354 | Ca_Kabuli_LG04 | 48502714                | [C/T] |                    | INTERGENIC                          |                                                   |

| SNP IDs           | Chromosomes    | Physical positions (bp) | SNPs  | Gene accession IDs | Sequence components of genome/genes | Putative functions                           |
|-------------------|----------------|-------------------------|-------|--------------------|-------------------------------------|----------------------------------------------|
| Ca_Kabuli_SNP2355 | Ca_Kabuli_LG04 | 48502718                | [C/G] |                    | INTERGENIC                          |                                              |
| Ca_Kabuli_SNP2356 | Ca_Kabuli_LG04 | 38370926                | [T/C] |                    | INTERGENIC                          |                                              |
| Ca_Kabuli_SNP2357 | Ca_Kabuli_LG04 | 38370939                | [C/A] |                    | INTERGENIC                          |                                              |
| Ca_Kabuli_SNP2358 | Ca_Kabuli_LG04 | 6514899                 | [T/C] |                    | INTERGENIC                          |                                              |
| Ca_Kabuli_SNP2359 | Ca_Kabuli_LG04 | 34798602                | [A/G] |                    | INTERGENIC                          |                                              |
| Ca_Kabuli_SNP2360 | Ca_Kabuli_LG04 | 5701888                 | [T/C] |                    | INTERGENIC                          |                                              |
| Ca_Kabuli_SNP2361 | Ca_Kabuli_LG04 | 7806626                 | [A/C] |                    | INTERGENIC                          |                                              |
| Ca_Kabuli_SNP2362 | Ca_Kabuli_LG04 | 11246173                | [T/C] |                    | INTERGENIC                          |                                              |
| Ca_Kabuli_SNP2363 | Ca_Kabuli_LG04 | 26221325                | [C/T] |                    | INTERGENIC                          |                                              |
| Ca_Kabuli_SNP2364 | Ca_Kabuli_LG04 | 26221326                | [C/T] |                    | INTERGENIC                          |                                              |
| Ca_Kabuli_SNP2365 | Ca_Kabuli_LG04 | 26221327                | [G/T] |                    | INTERGENIC                          |                                              |
| Ca_Kabuli_SNP2366 | Ca_Kabuli_LG04 | 28246738                | [C/T] |                    | INTERGENIC                          |                                              |
| Ca_Kabuli_SNP2367 | Ca_Kabuli_LG04 | 44824103                | [T/G] |                    | INTERGENIC                          |                                              |
| Ca_Kabuli_SNP2368 | Ca_Kabuli_LG04 | 45019778                | [C/T] |                    | INTERGENIC                          |                                              |
| Ca_Kabuli_SNP2369 | Ca_Kabuli_LG04 | 45752844                | [G/A] |                    | INTERGENIC                          |                                              |
| Ca_Kabuli_SNP2370 | Ca_Kabuli_LG04 | 45752869                | [G/T] |                    | INTERGENIC                          |                                              |
| Ca_Kabuli_SNP2371 | Ca_Kabuli_LG04 | 11343257                | [C/T] | Ca_04368           | INTRON                              | Zinc finger, DHHC-type, palmitoyltransferase |
| Ca_Kabuli_SNP2372 | Ca_Kabuli_LG04 | 1189966                 | [G/T] | Ca_07749           | INTRON                              | Ribosomal protein L21e                       |
| Ca_Kabuli_SNP2373 | Ca_Kabuli_LG04 | 2032481                 | [T/G] | Ca_07822           | INTRON                              | RNA-processing protein, HAT helix            |
| Ca_Kabuli_SNP2374 | Ca_Kabuli_LG04 | 44814981                | [T/C] | Ca_09146           | INTRON                              | IQ motif, EF-hand binding site               |
| Ca_Kabuli_SNP2375 | Ca_Kabuli_LG04 | 48345608                | [T/G] | Ca_10752           | INTRON                              | IQ motif, EF-hand binding site               |
| Ca_Kabuli_SNP2376 | Ca_Kabuli_LG04 | 39033073                | [G/C] | Ca_13078           | INTRON                              | RNA recognition motif domain                 |
| Ca_Kabuli_SNP2377 | Ca_Kabuli_LG04 | 38976835                | [T/G] | Ca_13081           | INTRON                              | Folylpolyglutamate synthetase                |
| Ca_Kabuli_SNP2378 | Ca_Kabuli_LG04 | 38721160                | [A/G] | Ca_13098           | INTRON                              | Exostosin-like                               |
| Ca_Kabuli_SNP2379 | Ca_Kabuli_LG04 | 38474108                | [T/C] | Ca_13112           | INTRON                              | BRCT                                         |
| Ca_Kabuli_SNP2380 | Ca_Kabuli_LG04 | 38029358                | [G/A] | Ca_13142           | INTRON                              | Chaperonin TCP-1, conserved site             |
| Ca_Kabuli_SNP2381 | Ca_Kabuli_LG04 | 36975360                | [G/A] | Ca_14796           | INTRON                              | Helicase, C-terminal                         |
| Ca_Kabuli_SNP2382 | Ca_Kabuli_LG04 | 36754377                | [T/A] | Ca_14808           | INTRON                              | Phosphofructokinase domain                   |
| Ca_Kabuli_SNP2383 | Ca_Kabuli_LG04 | 37754128                | [T/C] | Ca_15104           | INTRON                              | NUDIX hydrolase domain                       |
| Ca_Kabuli_SNP2384 | Ca_Kabuli_LG04 | 37754129                | [G/T] | Ca_15104           | INTRON                              | NUDIX hydrolase domain                       |
| Ca_Kabuli_SNP2385 | Ca_Kabuli_LG04 | 37550161                | [T/G] | Ca_15125           | INTRON                              | Mediator complex subunit Med23               |



| SNP IDs           | Chromosomes    | Physical positions (bp) | SNPs  | Gene accession IDs | Sequence components of genome/genes | Putative functions                                      |
|-------------------|----------------|-------------------------|-------|--------------------|-------------------------------------|---------------------------------------------------------|
| Ca_Kabuli_SNP2386 | Ca_Kabuli_LG04 | 32853834                | [T/C] | Ca_15495           | INTRON                              | DNA topoisomerase I, C-terminal                         |
| Ca_Kabuli_SNP2387 | Ca_Kabuli_LG04 | 35328336                | [C/A] | Ca_20018           | INTRON                              | IQ motif, EF-hand binding site                          |
| Ca_Kabuli_SNP2388 | Ca_Kabuli_LG04 | 12175301                | [T/A] | Ca_04442           | NON_SYNONYMOUS_CODING               | Transcription factor GRAS                               |
| Ca_Kabuli_SNP2389 | Ca_Kabuli_LG04 | 12175302                | [G/T] | Ca_04442           | NON_SYNONYMOUS_CODING               | Transcription factor GRAS                               |
| Ca_Kabuli_SNP2390 | Ca_Kabuli_LG04 | 14699270                | [T/C] | Ca_05634           | NON_SYNONYMOUS_CODING               | --                                                      |
| Ca_Kabuli_SNP2391 | Ca_Kabuli_LG04 | 8668945                 | [C/T] | Ca_08361           | NON_SYNONYMOUS_CODING               | Disease resistance protein                              |
| Ca_Kabuli_SNP2392 | Ca_Kabuli_LG04 | 8684185                 | [G/A] | Ca_08364           | NON_SYNONYMOUS_CODING               | Disease resistance protein                              |
| Ca_Kabuli_SNP2393 | Ca_Kabuli_LG04 | 44590678                | [G/A] | Ca_09131           | NON_SYNONYMOUS_CODING               | Protein phosphatase 2C, manganese/magnesium aspartate k |
| Ca_Kabuli_SNP2394 | Ca_Kabuli_LG04 | 38888779                | [T/C] | Ca_13087           | NON_SYNONYMOUS_CODING               | Protein kinase, catalytic domain                        |
| Ca_Kabuli_SNP2395 | Ca_Kabuli_LG04 | 38756507                | [T/C] | Ca_13097           | NON_SYNONYMOUS_CODING               | Auxin efflux carrier                                    |
| Ca_Kabuli_SNP2396 | Ca_Kabuli_LG04 | 37349162                | [G/T] | Ca_15141           | NON_SYNONYMOUS_CODING               | Methyltransferase TRM13                                 |
| Ca_Kabuli_SNP2397 | Ca_Kabuli_LG04 | 37316738                | [C/T] | Ca_15144           | NON_SYNONYMOUS_CODING               | Zinc finger, RING-type                                  |
| Ca_Kabuli_SNP2398 | Ca_Kabuli_LG04 | 46713939                | [A/T] | Ca_19246           | NON_SYNONYMOUS_CODING               | PGAP1-like                                              |
| Ca_Kabuli_SNP2399 | Ca_Kabuli_LG04 | 46713941                | [G/T] | Ca_19246           | NON_SYNONYMOUS_CODING               | PGAP1-like                                              |
| Ca_Kabuli_SNP2400 | Ca_Kabuli_LG04 | 46534847                | [T/C] | Ca_19264           | NON_SYNONYMOUS_CODING               | WW/Rsp5/WWP                                             |
| Ca_Kabuli_SNP2401 | Ca_Kabuli_LG04 | 48936860                | [G/C] | Ca_20762           | NON_SYNONYMOUS_CODING               | Pentatricopeptide repeat                                |
| Ca_Kabuli_SNP2402 | Ca_Kabuli_LG04 | 38029208                | [G/A] | Ca_13142           | SPLICE_SITE_REGION                  | Chaperonin TCP-1, conserved site                        |
| Ca_Kabuli_SNP2403 | Ca_Kabuli_LG04 | 6462847                 | [T/G] | Ca_03597           | SYNONYMOUS_CODING                   | Peptidase A1                                            |
| Ca_Kabuli_SNP2404 | Ca_Kabuli_LG04 | 12568602                | [C/T] | Ca_04479           | SYNONYMOUS_CODING                   | Homoserine kinase                                       |
| Ca_Kabuli_SNP2405 | Ca_Kabuli_LG04 | 13839294                | [G/A] | Ca_04608           | SYNONYMOUS_CODING                   | Copper amine oxidase                                    |
| Ca_Kabuli_SNP2406 | Ca_Kabuli_LG04 | 2032449                 | [G/A] | Ca_07822           | SYNONYMOUS_CODING                   | RNA-processing protein, HAT helix                       |
| Ca_Kabuli_SNP2407 | Ca_Kabuli_LG04 | 8669515                 | [T/C] | Ca_08361           | SYNONYMOUS_CODING                   | Disease resistance protein                              |
| Ca_Kabuli_SNP2408 | Ca_Kabuli_LG04 | 8684184                 | [G/A] | Ca_08364           | SYNONYMOUS_CODING                   | Disease resistance protein                              |
| Ca_Kabuli_SNP2409 | Ca_Kabuli_LG04 | 41969261                | [T/G] | Ca_10924           | SYNONYMOUS_CODING                   | Endonuclease/exonuclease/phosphatase                    |
| Ca_Kabuli_SNP2410 | Ca_Kabuli_LG04 | 38918394                | [T/A] | Ca_13086           | SYNONYMOUS_CODING                   | General substrate transporter                           |
| Ca_Kabuli_SNP2411 | Ca_Kabuli_LG04 | 38918724                | [C/A] | Ca_13086           | SYNONYMOUS_CODING                   | General substrate transporter                           |
| Ca_Kabuli_SNP2412 | Ca_Kabuli_LG04 | 38289066                | [A/G] | Ca_13128           | SYNONYMOUS_CODING                   | Protein of unknown function DUF869, plant               |
| Ca_Kabuli_SNP2413 | Ca_Kabuli_LG04 | 38153198                | [T/G] | Ca_13138           | SYNONYMOUS_CODING                   | Tetrahydrofolate dehydrogenase/cyclohydrolase           |
| Ca_Kabuli_SNP2414 | Ca_Kabuli_LG04 | 38153216                | [C/T] | Ca_13138           | SYNONYMOUS_CODING                   | Tetrahydrofolate dehydrogenase/cyclohydrolase           |
| Ca_Kabuli_SNP2415 | Ca_Kabuli_LG04 | 37349161                | [T/C] | Ca_15141           | SYNONYMOUS_CODING                   | Methyltransferase TRM13                                 |
| Ca_Kabuli_SNP2416 | Ca_Kabuli_LG05 | 31371626                | [T/G] | Ca_04838           | DOWNSTREAM:1376bases                | Peptidase M14, carboxypeptidase A                       |

| SNP IDs           | Chromosomes    | Physical positions (bp) | SNPs  | Gene accession IDs | Sequence components of genome/genes | Putative functions                                            |
|-------------------|----------------|-------------------------|-------|--------------------|-------------------------------------|---------------------------------------------------------------|
| Ca_Kabuli_SNP2417 | Ca_Kabuli_LG05 | 29437171                | [T/A] | Ca_16634           | DOWNSTREAM:1034bases                | Integrase, catalytic core                                     |
| Ca_Kabuli_SNP2418 | Ca_Kabuli_LG05 | 29437162                | [C/A] | Ca_16634           | DOWNSTREAM:1043bases                | Integrase, catalytic core                                     |
| Ca_Kabuli_SNP2419 | Ca_Kabuli_LG05 | 29437139                | [T/C] | Ca_16634           | DOWNSTREAM:1066bases                | Integrase, catalytic core                                     |
| Ca_Kabuli_SNP2420 | Ca_Kabuli_LG05 | 17043827                | [G/T] |                    | INTERGENIC                          |                                                               |
| Ca_Kabuli_SNP2421 | Ca_Kabuli_LG05 | 17043824                | [A/T] |                    | INTERGENIC                          |                                                               |
| Ca_Kabuli_SNP2422 | Ca_Kabuli_LG05 | 17043811                | [G/C] |                    | INTERGENIC                          |                                                               |
| Ca_Kabuli_SNP2423 | Ca_Kabuli_LG05 | 35126977                | [A/C] |                    | INTERGENIC                          |                                                               |
| Ca_Kabuli_SNP2424 | Ca_Kabuli_LG05 | 30811244                | [T/A] |                    | INTERGENIC                          |                                                               |
| Ca_Kabuli_SNP2425 | Ca_Kabuli_LG05 | 43790691                | [C/A] |                    | INTERGENIC                          |                                                               |
| Ca_Kabuli_SNP2426 | Ca_Kabuli_LG05 | 43790692                | [C/G] |                    | INTERGENIC                          |                                                               |
| Ca_Kabuli_SNP2427 | Ca_Kabuli_LG05 | 43790693                | [T/A] |                    | INTERGENIC                          |                                                               |
| Ca_Kabuli_SNP2428 | Ca_Kabuli_LG05 | 41525957                | [T/A] |                    | INTERGENIC                          |                                                               |
| Ca_Kabuli_SNP2429 | Ca_Kabuli_LG05 | 41525961                | [T/G] |                    | INTERGENIC                          |                                                               |
| Ca_Kabuli_SNP2430 | Ca_Kabuli_LG05 | 438448                  | [A/C] |                    | INTERGENIC                          |                                                               |
| Ca_Kabuli_SNP2431 | Ca_Kabuli_LG05 | 438445                  | [A/C] |                    | INTERGENIC                          |                                                               |
| Ca_Kabuli_SNP2432 | Ca_Kabuli_LG05 | 2700479                 | [T/A] |                    | INTERGENIC                          |                                                               |
| Ca_Kabuli_SNP2433 | Ca_Kabuli_LG05 | 7467769                 | [G/T] |                    | INTERGENIC                          |                                                               |
| Ca_Kabuli_SNP2434 | Ca_Kabuli_LG05 | 7775497                 | [G/C] |                    | INTERGENIC                          |                                                               |
| Ca_Kabuli_SNP2435 | Ca_Kabuli_LG05 | 17494725                | [C/T] |                    | INTERGENIC                          |                                                               |
| Ca_Kabuli_SNP2436 | Ca_Kabuli_LG05 | 37012135                | [T/C] |                    | INTERGENIC                          |                                                               |
| Ca_Kabuli_SNP2437 | Ca_Kabuli_LG05 | 37012147                | [T/C] |                    | INTERGENIC                          |                                                               |
| Ca_Kabuli_SNP2438 | Ca_Kabuli_LG05 | 37274583                | [C/T] |                    | INTERGENIC                          |                                                               |
| Ca_Kabuli_SNP2439 | Ca_Kabuli_LG05 | 43919009                | [C/T] |                    | INTERGENIC                          |                                                               |
| Ca_Kabuli_SNP2440 | Ca_Kabuli_LG05 | 43919017                | [T/G] |                    | INTERGENIC                          |                                                               |
| Ca_Kabuli_SNP2441 | Ca_Kabuli_LG05 | 43919022                | [G/C] |                    | INTERGENIC                          |                                                               |
| Ca_Kabuli_SNP2442 | Ca_Kabuli_LG05 | 37083276                | [T/G] | Ca_01507           | INTRON                              | GRAM                                                          |
| Ca_Kabuli_SNP2443 | Ca_Kabuli_LG05 | 34244774                | [T/C] | Ca_01824           | INTRON                              | WD40 repeat                                                   |
| Ca_Kabuli_SNP2444 | Ca_Kabuli_LG05 | 27181851                | [T/C] | Ca_08922           | INTRON                              | --                                                            |
| Ca_Kabuli_SNP2445 | Ca_Kabuli_LG05 | 42004602                | [A/G] | Ca_11412           | INTRON                              | Rab-GAP/TBC domain                                            |
| Ca_Kabuli_SNP2446 | Ca_Kabuli_LG05 | 35773044                | [A/G] | Ca_01648           | NON_SYNONYMOUS_CODING               | Peptidase M1, alanine aminopeptidase/leukotriene A4 hydrolase |
| Ca_Kabuli_SNP2447 | Ca_Kabuli_LG05 | 30124077                | [G/C] | Ca_04688           | NON_SYNONYMOUS_CODING               | Sugar/inositol transporter                                    |

| SNP IDs           | Chromosomes    | Physical positions (bp) | SNPs  | Gene accession IDs | Sequence components of genome/genes | Putative functions                               |
|-------------------|----------------|-------------------------|-------|--------------------|-------------------------------------|--------------------------------------------------|
| Ca_Kabuli_SNP2448 | Ca_Kabuli_LG05 | 41285170                | [T/C] | Ca_07642           | NON_SYNONYMOUS_CODING               | Protein of unknown function DUF1296              |
| Ca_Kabuli_SNP2449 | Ca_Kabuli_LG05 | 25697491                | [G/A] | Ca_09026           | NON_SYNONYMOUS_CODING               | Ribosomal protein S21                            |
| Ca_Kabuli_SNP2450 | Ca_Kabuli_LG05 | 31314012                | [A/C] | Ca_04834           | SYNONYMOUS_CODING                   | Phox/Bem1p                                       |
| Ca_Kabuli_SNP2451 | Ca_Kabuli_LG05 | 39194838                | [T/G] | Ca_07467           | SYNONYMOUS_CODING                   | D111/G-patch                                     |
| Ca_Kabuli_SNP2452 | Ca_Kabuli_LG05 | 25697492                | [A/C] | Ca_09026           | SYNONYMOUS_CODING                   | Ribosomal protein S21                            |
| Ca_Kabuli_SNP2453 | Ca_Kabuli_LG05 | 28757467                | [T/A] | Ca_13354           | SYNONYMOUS_CODING                   | Protein of unknown function DUF827, plant        |
| Ca_Kabuli_SNP2454 | Ca_Kabuli_LG05 | 28757507                | [T/A] | Ca_13354           | SYNONYMOUS_CODING                   | Protein of unknown function DUF827, plant        |
| Ca_Kabuli_SNP2455 | Ca_Kabuli_LG05 | 12590478                | [C/T] | Ca_17072           | SYNONYMOUS_CODING                   | Glycerophosphoryl diester phosphodiesterase      |
| Ca_Kabuli_SNP2456 | Ca_Kabuli_LG05 | 10004427                | [G/T] | Ca_20512           | SYNONYMOUS_CODING                   | Tetratricopeptide TPR-1                          |
| Ca_Kabuli_SNP2457 | Ca_Kabuli_LG05 | 10004430                | [T/G] | Ca_20512           | SYNONYMOUS_CODING                   | Tetratricopeptide TPR-1                          |
| Ca_Kabuli_SNP2458 | Ca_Kabuli_LG05 | 29007886                | [A/C] | Ca_23834           | SYNONYMOUS_CODING                   | Camphor resistance CrcB protein                  |
| Ca_Kabuli_SNP2459 | Ca_Kabuli_LG06 | 49222291                | [G/A] | Ca_20725           | DOWNSTREAM:1924bases                | Development/cell death domain                    |
| Ca_Kabuli_SNP2460 | Ca_Kabuli_LG06 | 48255568                | [G/A] | Ca_24604           | DOWNSTREAM:167bases                 | DNA/RNA helicase, DEAD/DEAH box type, N-terminal |
| Ca_Kabuli_SNP2461 | Ca_Kabuli_LG06 | 48255558                | [C/T] | Ca_24604           | DOWNSTREAM:177bases                 | DNA/RNA helicase, DEAD/DEAH box type, N-terminal |
| Ca_Kabuli_SNP2462 | Ca_Kabuli_LG06 | 48255538                | [G/A] | Ca_24604           | DOWNSTREAM:197bases                 | DNA/RNA helicase, DEAD/DEAH box type, N-terminal |
| Ca_Kabuli_SNP2463 | Ca_Kabuli_LG06 | 19433512                | [C/A] |                    | INTERGENIC                          |                                                  |
| Ca_Kabuli_SNP2464 | Ca_Kabuli_LG06 | 19433513                | [A/G] |                    | INTERGENIC                          |                                                  |
| Ca_Kabuli_SNP2465 | Ca_Kabuli_LG06 | 19433514                | [T/A] |                    | INTERGENIC                          |                                                  |
| Ca_Kabuli_SNP2466 | Ca_Kabuli_LG06 | 19433517                | [T/G] |                    | INTERGENIC                          |                                                  |
| Ca_Kabuli_SNP2467 | Ca_Kabuli_LG06 | 46734675                | [T/C] |                    | INTERGENIC                          |                                                  |
| Ca_Kabuli_SNP2468 | Ca_Kabuli_LG06 | 27383744                | [T/G] |                    | INTERGENIC                          |                                                  |
| Ca_Kabuli_SNP2469 | Ca_Kabuli_LG06 | 7929338                 | [C/T] |                    | INTERGENIC                          |                                                  |
| Ca_Kabuli_SNP2470 | Ca_Kabuli_LG06 | 7929348                 | [T/C] |                    | INTERGENIC                          |                                                  |
| Ca_Kabuli_SNP2471 | Ca_Kabuli_LG06 | 7929628                 | [C/T] |                    | INTERGENIC                          |                                                  |
| Ca_Kabuli_SNP2472 | Ca_Kabuli_LG06 | 10785458                | [A/T] |                    | INTERGENIC                          |                                                  |
| Ca_Kabuli_SNP2473 | Ca_Kabuli_LG06 | 10785480                | [G/T] |                    | INTERGENIC                          |                                                  |
| Ca_Kabuli_SNP2474 | Ca_Kabuli_LG06 | 23478807                | [G/C] |                    | INTERGENIC                          |                                                  |
| Ca_Kabuli_SNP2475 | Ca_Kabuli_LG06 | 23478808                | [A/T] |                    | INTERGENIC                          |                                                  |
| Ca_Kabuli_SNP2476 | Ca_Kabuli_LG06 | 23478809                | [T/G] |                    | INTERGENIC                          |                                                  |
| Ca_Kabuli_SNP2477 | Ca_Kabuli_LG06 | 3394908                 | [G/T] |                    | INTERGENIC                          |                                                  |
| Ca_Kabuli_SNP2478 | Ca_Kabuli_LG06 | 3394876                 | [G/A] |                    | INTERGENIC                          |                                                  |

| SNP IDs           | Chromosomes    | Physical positions (bp) | SNPs  | Gene accession IDs | Sequence components of genome/genes | Putative functions                      |
|-------------------|----------------|-------------------------|-------|--------------------|-------------------------------------|-----------------------------------------|
| Ca_Kabuli_SNP2479 | Ca_Kabuli_LG06 | 7661930                 | [G/T] |                    | INTERGENIC                          |                                         |
| Ca_Kabuli_SNP2480 | Ca_Kabuli_LG06 | 5497981                 | [G/A] |                    | INTERGENIC                          |                                         |
| Ca_Kabuli_SNP2481 | Ca_Kabuli_LG06 | 5497982                 | [A/T] |                    | INTERGENIC                          |                                         |
| Ca_Kabuli_SNP2482 | Ca_Kabuli_LG06 | 5497984                 | [G/T] |                    | INTERGENIC                          |                                         |
| Ca_Kabuli_SNP2483 | Ca_Kabuli_LG06 | 21322875                | [T/C] |                    | INTERGENIC                          |                                         |
| Ca_Kabuli_SNP2484 | Ca_Kabuli_LG06 | 21322854                | [G/A] |                    | INTERGENIC                          |                                         |
| Ca_Kabuli_SNP2485 | Ca_Kabuli_LG06 | 21322836                | [C/T] |                    | INTERGENIC                          |                                         |
| Ca_Kabuli_SNP2486 | Ca_Kabuli_LG06 | 24498913                | [T/C] |                    | INTERGENIC                          |                                         |
| Ca_Kabuli_SNP2487 | Ca_Kabuli_LG06 | 24498915                | [T/C] |                    | INTERGENIC                          |                                         |
| Ca_Kabuli_SNP2488 | Ca_Kabuli_LG06 | 24498923                | [G/A] |                    | INTERGENIC                          |                                         |
| Ca_Kabuli_SNP2489 | Ca_Kabuli_LG06 | 7694597                 | [T/C] |                    | INTERGENIC                          |                                         |
| Ca_Kabuli_SNP2490 | Ca_Kabuli_LG06 | 7694599                 | [T/C] |                    | INTERGENIC                          |                                         |
| Ca_Kabuli_SNP2491 | Ca_Kabuli_LG06 | 12810877                | [T/G] |                    | INTERGENIC                          |                                         |
| Ca_Kabuli_SNP2492 | Ca_Kabuli_LG06 | 24235675                | [C/T] |                    | INTERGENIC                          |                                         |
| Ca_Kabuli_SNP2493 | Ca_Kabuli_LG06 | 31324962                | [A/C] |                    | INTERGENIC                          |                                         |
| Ca_Kabuli_SNP2494 | Ca_Kabuli_LG06 | 31324976                | [A/G] |                    | INTERGENIC                          |                                         |
| Ca_Kabuli_SNP2495 | Ca_Kabuli_LG06 | 38514168                | [G/A] |                    | INTERGENIC                          |                                         |
| Ca_Kabuli_SNP2496 | Ca_Kabuli_LG06 | 15123030                | [T/A] | Ca_05293           | INTRON                              | Dynamin central domain                  |
| Ca_Kabuli_SNP2497 | Ca_Kabuli_LG06 | 10234387                | [G/C] | Ca_08566           | INTRON                              | Metallo-dependent phosphatase           |
| Ca_Kabuli_SNP2498 | Ca_Kabuli_LG06 | 10234389                | [T/A] | Ca_08566           | INTRON                              | Metallo-dependent phosphatase           |
| Ca_Kabuli_SNP2499 | Ca_Kabuli_LG06 | 10234390                | [C/A] | Ca_08566           | INTRON                              | Metallo-dependent phosphatase           |
| Ca_Kabuli_SNP2500 | Ca_Kabuli_LG06 | 23776650                | [G/C] | Ca_11079           | INTRON                              | Tetratricopeptide repeat-containing     |
| Ca_Kabuli_SNP2501 | Ca_Kabuli_LG06 | 23776668                | [C/T] | Ca_11079           | INTRON                              | Tetratricopeptide repeat-containing     |
| Ca_Kabuli_SNP2502 | Ca_Kabuli_LG06 | 27091881                | [C/A] | Ca_14634           | INTRON                              | NOT2/NOT3/NOT5                          |
| Ca_Kabuli_SNP2503 | Ca_Kabuli_LG06 | 27091883                | [G/A] | Ca_14634           | INTRON                              | NOT2/NOT3/NOT5                          |
| Ca_Kabuli_SNP2504 | Ca_Kabuli_LG06 | 32035934                | [G/A] | Ca_15208           | INTRON                              | MD-2-related lipid-recognition          |
| Ca_Kabuli_SNP2505 | Ca_Kabuli_LG06 | 7832029                 | [C/T] | Ca_09595           | NON_SYNONYMOUS_CODING               | C2 calcium-dependent membrane targeting |
| Ca_Kabuli_SNP2506 | Ca_Kabuli_LG06 | 27331816                | [T/G] | Ca_14617           | NON_SYNONYMOUS_CODING               | RNA recognition motif domain            |
| Ca_Kabuli_SNP2507 | Ca_Kabuli_LG06 | 27331818                | [A/T] | Ca_14617           | NON_SYNONYMOUS_CODING               | RNA recognition motif domain            |
| Ca_Kabuli_SNP2508 | Ca_Kabuli_LG06 | 27331820                | [G/T] | Ca_14617           | NON_SYNONYMOUS_CODING               | RNA recognition motif domain            |
| Ca_Kabuli_SNP2509 | Ca_Kabuli_LG06 | 59367117                | [G/A] | Ca_18844           | NON_SYNONYMOUS_CODING               | Pyrophosphate-energised proton pump     |

| SNP IDs           | Chromosomes    | Physical positions (bp) | SNPs  | Gene accession IDs | Sequence components of genome/genes | Putative functions                                    |
|-------------------|----------------|-------------------------|-------|--------------------|-------------------------------------|-------------------------------------------------------|
| Ca_Kabuli_SNP2510 | Ca_Kabuli_LG06 | 59367118                | [G/T] | Ca_18844           | NON_SYNONYMOUS_CODING               | Pyrophosphate-energised proton pump                   |
| Ca_Kabuli_SNP2511 | Ca_Kabuli_LG06 | 9834199                 | [T/C] | Ca_08608           | SYNONYMOUS_CODING                   | WD40 repeat                                           |
| Ca_Kabuli_SNP2512 | Ca_Kabuli_LG06 | 7831874                 | [G/A] | Ca_09595           | SYNONYMOUS_CODING                   | C2 calcium-dependent membrane targeting               |
| Ca_Kabuli_SNP2513 | Ca_Kabuli_LG06 | 7834895                 | [T/G] | Ca_09595           | SYNONYMOUS_CODING                   | C2 calcium-dependent membrane targeting               |
| Ca_Kabuli_SNP2514 | Ca_Kabuli_LG06 | 50378388                | [G/T] | Ca_13465           | SYNONYMOUS_CODING                   | ABC transporter-like                                  |
| Ca_Kabuli_SNP2515 | Ca_Kabuli_LG06 | 50378389                | [A/T] | Ca_13465           | SYNONYMOUS_CODING                   | ABC transporter-like                                  |
| Ca_Kabuli_SNP2516 | Ca_Kabuli_LG06 | 59367116                | [T/G] | Ca_18844           | SYNONYMOUS_CODING                   | Pyrophosphate-energised proton pump                   |
| Ca_Kabuli_SNP2517 | Ca_Kabuli_LG07 | 22987838                | [A/G] | Ca_19519           | DOWNSTREAM:589bases                 | Glycosyl-phosphatidyl inositol-anchored, plant        |
| Ca_Kabuli_SNP2518 | Ca_Kabuli_LG07 | 22987819                | [A/G] | Ca_19519           | DOWNSTREAM:608bases                 | Glycosyl-phosphatidyl inositol-anchored, plant        |
| Ca_Kabuli_SNP2519 | Ca_Kabuli_LG07 | 21744514                | [T/C] |                    | INTERGENIC                          |                                                       |
| Ca_Kabuli_SNP2520 | Ca_Kabuli_LG07 | 7737689                 | [T/G] |                    | INTERGENIC                          |                                                       |
| Ca_Kabuli_SNP2521 | Ca_Kabuli_LG07 | 34875605                | [A/T] |                    | INTERGENIC                          |                                                       |
| Ca_Kabuli_SNP2522 | Ca_Kabuli_LG07 | 8835757                 | [C/T] |                    | INTERGENIC                          |                                                       |
| Ca_Kabuli_SNP2523 | Ca_Kabuli_LG07 | 17662183                | [A/T] |                    | INTERGENIC                          |                                                       |
| Ca_Kabuli_SNP2524 | Ca_Kabuli_LG07 | 17662190                | [A/T] |                    | INTERGENIC                          |                                                       |
| Ca_Kabuli_SNP2525 | Ca_Kabuli_LG07 | 26226146                | [C/G] |                    | INTERGENIC                          |                                                       |
| Ca_Kabuli_SNP2526 | Ca_Kabuli_LG07 | 27070630                | [A/C] |                    | INTERGENIC                          |                                                       |
| Ca_Kabuli_SNP2527 | Ca_Kabuli_LG07 | 27210871                | [A/C] |                    | INTERGENIC                          |                                                       |
| Ca_Kabuli_SNP2528 | Ca_Kabuli_LG07 | 29313273                | [G/A] |                    | INTERGENIC                          |                                                       |
| Ca_Kabuli_SNP2529 | Ca_Kabuli_LG07 | 32406153                | [T/G] |                    | INTERGENIC                          |                                                       |
| Ca_Kabuli_SNP2530 | Ca_Kabuli_LG07 | 32406154                | [T/A] |                    | INTERGENIC                          |                                                       |
| Ca_Kabuli_SNP2531 | Ca_Kabuli_LG07 | 32406155                | [C/T] |                    | INTERGENIC                          |                                                       |
| Ca_Kabuli_SNP2532 | Ca_Kabuli_LG07 | 47335940                | [G/A] |                    | INTERGENIC                          |                                                       |
| Ca_Kabuli_SNP2533 | Ca_Kabuli_LG07 | 2554391                 | [C/G] | Ca_03223           | INTRON                              | Peptidase S8/S53, subtilisin/kexin/sedolisin          |
| Ca_Kabuli_SNP2534 | Ca_Kabuli_LG07 | 2554392                 | [T/A] | Ca_03223           | INTRON                              | Peptidase S8/S53, subtilisin/kexin/sedolisin          |
| Ca_Kabuli_SNP2535 | Ca_Kabuli_LG07 | 2554393                 | [G/T] | Ca_03223           | INTRON                              | Peptidase S8/S53, subtilisin/kexin/sedolisin          |
| Ca_Kabuli_SNP2536 | Ca_Kabuli_LG07 | 15887951                | [T/G] | Ca_09885           | INTRON                              | Ribonuclease II/R                                     |
| Ca_Kabuli_SNP2537 | Ca_Kabuli_LG07 | 15887954                | [T/G] | Ca_09885           | INTRON                              | Ribonuclease II/R                                     |
| Ca_Kabuli_SNP2538 | Ca_Kabuli_LG07 | 15013577                | [G/A] | Ca_09953           | INTRON                              | RNA helicase, ATP-dependent, DEAD-box, conserved site |
| Ca_Kabuli_SNP2539 | Ca_Kabuli_LG07 | 38143361                | [G/A] | Ca_16396           | INTRON                              | RNA recognition motif domain                          |
| Ca_Kabuli_SNP2540 | Ca_Kabuli_LG07 | 38143524                | [T/A] | Ca_16396           | INTRON                              | RNA recognition motif domain                          |

| SNP IDs           | Chromosomes    | Physical positions (bp) | SNPs  | Gene accession IDs | Sequence components of genome/genes | Putative functions                    |
|-------------------|----------------|-------------------------|-------|--------------------|-------------------------------------|---------------------------------------|
| Ca_Kabuli_SNP2541 | Ca_Kabuli_LG07 | 7983631                 | [T/G] | Ca_13220           | NON_SYNONYMOUS_CODING               | ABC transporter, transmembrane domain |
| Ca_Kabuli_SNP2542 | Ca_Kabuli_LG07 | 7983632                 | [T/A] | Ca_13220           | NON_SYNONYMOUS_CODING               | ABC transporter, transmembrane domain |
| Ca_Kabuli_SNP2543 | Ca_Kabuli_LG07 | 8937338                 | [G/A] | Ca_15321           | NON_SYNONYMOUS_CODING               | WW domain binding protein 12          |
| Ca_Kabuli_SNP2544 | Ca_Kabuli_LG07 | 8937339                 | [G/T] | Ca_15321           | NON_SYNONYMOUS_CODING               | WW domain binding protein 13          |
| Ca_Kabuli_SNP2545 | Ca_Kabuli_LG07 | 8937341                 | [G/T] | Ca_15321           | NON_SYNONYMOUS_CODING               | WW domain binding protein 14          |
| Ca_Kabuli_SNP2546 | Ca_Kabuli_LG07 | 26694546                | [T/A] | Ca_16250           | NON_SYNONYMOUS_CODING               | --                                    |
| Ca_Kabuli_SNP2547 | Ca_Kabuli_LG07 | 39214270                | [G/A] | Ca_19581           | NON_SYNONYMOUS_CODING               | BEACH domain                          |
| Ca_Kabuli_SNP2548 | Ca_Kabuli_LG07 | 18462653                | [C/G] | Ca_22127           | NON_SYNONYMOUS_CODING               | Pectinesterase, catalytic             |
| Ca_Kabuli_SNP2549 | Ca_Kabuli_LG07 | 18462654                | [T/A] | Ca_22127           | NON_SYNONYMOUS_CODING               | Pectinesterase, catalytic             |
| Ca_Kabuli_SNP2550 | Ca_Kabuli_LG07 | 5577311                 | [C/T] | Ca_06805           | SYNONYMOUS_CODING                   | F-box domain, cyclin-like             |
| Ca_Kabuli_SNP2551 | Ca_Kabuli_LG07 | 30114688                | [G/C] | Ca_11716           | SYNONYMOUS_CODING                   | Protein kinase, catalytic domain      |
| Ca_Kabuli_SNP2552 | Ca_Kabuli_LG07 | 36998096                | [T/C] | Ca_13784           | SYNONYMOUS_CODING                   | Peptidase C48, SUMO/Sentrin/Ubl1      |
| Ca_Kabuli_SNP2553 | Ca_Kabuli_LG07 | 8937340                 | [T/C] | Ca_15321           | SYNONYMOUS_CODING                   | WW domain binding protein 15          |
| Ca_Kabuli_SNP2554 | Ca_Kabuli_LG07 | 13580932                | [G/C] | Ca_16043           | SYNONYMOUS_CODING                   | Transcription factor GRAS             |
| Ca_Kabuli_SNP2555 | Ca_Kabuli_LG07 | 13580933                | [A/T] | Ca_16043           | SYNONYMOUS_CODING                   | Transcription factor GRAS             |
| Ca_Kabuli_SNP2556 | Ca_Kabuli_LG07 | 13580934                | [T/G] | Ca_16043           | SYNONYMOUS_CODING                   | Transcription factor GRAS             |
| Ca_Kabuli_SNP2557 | Ca_Kabuli_LG07 | 35181661                | [C/T] | Ca_17639           | SYNONYMOUS_CODING                   | Helix-loop-helix DNA-binding domain   |
| Ca_Kabuli_SNP2558 | Ca_Kabuli_LG07 | 39214269                | [T/G] | Ca_19581           | SYNONYMOUS_CODING                   | BEACH domain                          |
| Ca_Kabuli_SNP2559 | Ca_Kabuli_LG07 | 39214272                | [T/C] | Ca_19581           | SYNONYMOUS_CODING                   | BEACH domain                          |
| Ca_Kabuli_SNP2560 | Ca_Kabuli_LG07 | 44232221                | [T/C] | Ca_21369           | SYNONYMOUS_CODING                   | Protein kinase, catalytic domain      |
| Ca_Kabuli_SNP2561 | Ca_Kabuli_LG07 | 44232225                | [T/C] | Ca_21369           | SYNONYMOUS_CODING                   | Protein kinase, catalytic domain      |
| Ca_Kabuli_SNP2562 | Ca_Kabuli_LG08 | 4895123                 | [G/T] |                    | INTERGENIC                          |                                       |
| Ca_Kabuli_SNP2563 | Ca_Kabuli_LG08 | 4807106                 | [G/A] |                    | INTERGENIC                          |                                       |
| Ca_Kabuli_SNP2564 | Ca_Kabuli_LG08 | 1742958                 | [G/T] |                    | INTERGENIC                          |                                       |
| Ca_Kabuli_SNP2565 | Ca_Kabuli_LG08 | 1742959                 | [G/C] |                    | INTERGENIC                          |                                       |
| Ca_Kabuli_SNP2566 | Ca_Kabuli_LG08 | 1742960                 | [G/T] |                    | INTERGENIC                          |                                       |
| Ca_Kabuli_SNP2567 | Ca_Kabuli_LG08 | 7776897                 | [A/T] | Ca_10607           | INTRON                              | Kinesin, motor domain                 |
| Ca_Kabuli_SNP2568 | Ca_Kabuli_LG08 | 1475874                 | [G/T] | Ca_15024           | NON_SYNONYMOUS_CODING               | WD40 repeat                           |
| Ca_Kabuli_SNP2569 | Ca_Kabuli_LG08 | 1475872                 | [G/T] | Ca_15024           | STOP_GAINED                         | WD40 repeat                           |
| Ca_Kabuli_SNP2570 | Ca_Kabuli_LG08 | 3269088                 | [A/C] | Ca_02251           | SYNONYMOUS_CODING                   | Homeobox                              |
| Ca_Kabuli_SNP2571 | Ca_Kabuli_LG08 | 7775908                 | [G/T] | Ca_10607           | SYNONYMOUS_CODING                   | Kinesin, motor domain                 |

| SNP IDs           | Chromosomes    | Physical positions (bp) | SNPs  | Gene accession IDs | Sequence components of genome/genes | Putative functions |
|-------------------|----------------|-------------------------|-------|--------------------|-------------------------------------|--------------------|
| Ca_Kabuli_SNP2572 | Ca_Kabuli_LG08 | 11243256                | [A/C] | Ca_16834           | SYNONYMOUS_CODING                   | Histone H1/H5      |
| Ca_Kabuli_SNP2573 | scaffold1001   | 76627                   | [A/C] |                    | INTERGENIC                          |                    |
| Ca_Kabuli_SNP2574 | scaffold1023   | 74436                   | [T/C] |                    | INTERGENIC                          |                    |
| Ca_Kabuli_SNP2575 | scaffold1027   | 3758                    | [T/G] |                    | INTERGENIC                          |                    |
| Ca_Kabuli_SNP2576 | scaffold1027   | 3764                    | [G/T] |                    | INTERGENIC                          |                    |
| Ca_Kabuli_SNP2577 | scaffold1027   | 3800                    | [T/G] |                    | INTERGENIC                          |                    |
| Ca_Kabuli_SNP2578 | scaffold1039   | 322315                  | [G/T] |                    | INTERGENIC                          |                    |
| Ca_Kabuli_SNP2579 | scaffold1068   | 197790                  | [G/A] |                    | INTERGENIC                          |                    |
| Ca_Kabuli_SNP2580 | scaffold1068   | 197819                  | [T/G] |                    | INTERGENIC                          |                    |
| Ca_Kabuli_SNP2581 | scaffold1082   | 20734                   | [A/C] |                    | INTERGENIC                          |                    |
| Ca_Kabuli_SNP2582 | scaffold112    | 280023                  | [C/T] |                    | INTERGENIC                          |                    |
| Ca_Kabuli_SNP2583 | scaffold1207   | 29483                   | [G/A] |                    | INTERGENIC                          |                    |
| Ca_Kabuli_SNP2584 | scaffold1207   | 29511                   | [G/A] |                    | INTERGENIC                          |                    |
| Ca_Kabuli_SNP2585 | scaffold121    | 96363                   | [T/G] |                    | INTERGENIC                          |                    |
| Ca_Kabuli_SNP2586 | scaffold121    | 96394                   | [T/A] |                    | INTERGENIC                          |                    |
| Ca_Kabuli_SNP2587 | scaffold121    | 96444                   | [A/G] |                    | INTERGENIC                          |                    |
| Ca_Kabuli_SNP2588 | scaffold121    | 96456                   | [C/T] |                    | INTERGENIC                          |                    |
| Ca_Kabuli_SNP2589 | scaffold121    | 96532                   | [G/T] |                    | INTERGENIC                          |                    |
| Ca_Kabuli_SNP2590 | scaffold121    | 96580                   | [G/T] |                    | INTERGENIC                          |                    |
| Ca_Kabuli_SNP2591 | scaffold121    | 96589                   | [A/T] |                    | INTERGENIC                          |                    |
| Ca_Kabuli_SNP2592 | scaffold1223   | 133488                  | [T/C] |                    | INTERGENIC                          |                    |
| Ca_Kabuli_SNP2593 | scaffold1245   | 625365                  | [T/C] |                    | INTERGENIC                          |                    |
| Ca_Kabuli_SNP2594 | scaffold1263   | 164730                  | [T/G] |                    | INTERGENIC                          |                    |
| Ca_Kabuli_SNP2595 | scaffold1305   | 10563                   | [T/C] |                    | INTERGENIC                          |                    |
| Ca_Kabuli_SNP2596 | scaffold1420   | 328817                  | [T/G] |                    | INTERGENIC                          |                    |
| Ca_Kabuli_SNP2597 | scaffold1420   | 328823                  | [T/A] |                    | INTERGENIC                          |                    |
| Ca_Kabuli_SNP2598 | scaffold1420   | 328828                  | [T/A] |                    | INTERGENIC                          |                    |
| Ca_Kabuli_SNP2599 | scaffold1461   | 71581                   | [T/G] |                    | INTERGENIC                          |                    |
| Ca_Kabuli_SNP2600 | scaffold1461   | 71582                   | [T/A] |                    | INTERGENIC                          |                    |
| Ca_Kabuli_SNP2601 | scaffold1622   | 5538                    | [A/T] |                    | INTERGENIC                          |                    |
| Ca_Kabuli_SNP2602 | scaffold1622   | 5562                    | [C/T] |                    | INTERGENIC                          |                    |

| SNP IDs           | Chromosomes  | Physical positions (bp) | SNPs  | Gene accession IDs | Sequence components of genome/genes | Putative functions |
|-------------------|--------------|-------------------------|-------|--------------------|-------------------------------------|--------------------|
| Ca_Kabuli_SNP2603 | scaffold1622 | 5570                    | [C/T] |                    | INTERGENIC                          |                    |
| Ca_Kabuli_SNP2604 | scaffold165  | 3151                    | [G/T] |                    | INTERGENIC                          |                    |
| Ca_Kabuli_SNP2605 | scaffold168  | 208793                  | [G/C] |                    | INTERGENIC                          |                    |
| Ca_Kabuli_SNP2606 | scaffold168  | 208958                  | [C/T] |                    | INTERGENIC                          |                    |
| Ca_Kabuli_SNP2607 | scaffold168  | 208981                  | [G/T] |                    | INTERGENIC                          |                    |
| Ca_Kabuli_SNP2608 | scaffold17   | 95                      | [G/A] |                    | INTERGENIC                          |                    |
| Ca_Kabuli_SNP2609 | scaffold17   | 134                     | [T/C] |                    | INTERGENIC                          |                    |
| Ca_Kabuli_SNP2610 | scaffold17   | 140                     | [C/A] |                    | INTERGENIC                          |                    |
| Ca_Kabuli_SNP2611 | scaffold170  | 72491                   | [T/C] |                    | INTERGENIC                          |                    |
| Ca_Kabuli_SNP2612 | scaffold1714 | 3923                    | [T/C] |                    | INTERGENIC                          |                    |
| Ca_Kabuli_SNP2613 | scaffold184  | 150181                  | [A/G] |                    | INTERGENIC                          |                    |
| Ca_Kabuli_SNP2614 | scaffold1997 | 82319                   | [T/C] |                    | INTERGENIC                          |                    |
| Ca_Kabuli_SNP2615 | scaffold1997 | 82342                   | [C/T] |                    | INTERGENIC                          |                    |
| Ca_Kabuli_SNP2616 | scaffold1997 | 82369                   | [G/A] |                    | INTERGENIC                          |                    |
| Ca_Kabuli_SNP2617 | scaffold1997 | 82397                   | [T/C] |                    | INTERGENIC                          |                    |
| Ca_Kabuli_SNP2618 | scaffold1997 | 101490                  | [C/T] |                    | INTERGENIC                          |                    |
| Ca_Kabuli_SNP2619 | scaffold1997 | 106920                  | [T/C] |                    | INTERGENIC                          |                    |
| Ca_Kabuli_SNP2620 | scaffold1997 | 106974                  | [T/C] |                    | INTERGENIC                          |                    |
| Ca_Kabuli_SNP2621 | scaffold1997 | 107488                  | [C/T] |                    | INTERGENIC                          |                    |
| Ca_Kabuli_SNP2622 | scaffold2119 | 253                     | [T/C] |                    | INTERGENIC                          |                    |
| Ca_Kabuli_SNP2623 | scaffold2119 | 272                     | [T/C] |                    | INTERGENIC                          |                    |
| Ca_Kabuli_SNP2624 | scaffold2139 | 33632                   | [G/T] |                    | INTERGENIC                          |                    |
| Ca_Kabuli_SNP2625 | scaffold2139 | 33655                   | [A/G] |                    | INTERGENIC                          |                    |
| Ca_Kabuli_SNP2626 | scaffold214  | 136096                  | [T/C] |                    | INTERGENIC                          |                    |
| Ca_Kabuli_SNP2627 | scaffold240  | 132896                  | [T/C] |                    | INTERGENIC                          |                    |
| Ca_Kabuli_SNP2628 | scaffold243  | 227608                  | [A/T] |                    | INTERGENIC                          |                    |
| Ca_Kabuli_SNP2629 | scaffold256  | 299010                  | [G/T] |                    | INTERGENIC                          |                    |
| Ca_Kabuli_SNP2630 | scaffold269  | 43300                   | [C/G] |                    | INTERGENIC                          |                    |
| Ca_Kabuli_SNP2631 | scaffold269  | 43301                   | [T/A] |                    | INTERGENIC                          |                    |
| Ca_Kabuli_SNP2632 | scaffold269  | 43302                   | [G/T] |                    | INTERGENIC                          |                    |
| Ca_Kabuli_SNP2633 | scaffold271  | 81750                   | [G/A] |                    | INTERGENIC                          |                    |



| SNP IDs           | Chromosomes  | Physical positions (bp) | SNPs  | Gene accession IDs | Sequence components of genome/genes | Putative functions |
|-------------------|--------------|-------------------------|-------|--------------------|-------------------------------------|--------------------|
| Ca_Kabuli_SNP2634 | scaffold271  | 81751                   | [G/T] |                    | INTERGENIC                          |                    |
| Ca_Kabuli_SNP2635 | scaffold271  | 81753                   | [G/T] |                    | INTERGENIC                          |                    |
| Ca_Kabuli_SNP2636 | scaffold2871 | 17198                   | [C/T] |                    | INTERGENIC                          |                    |
| Ca_Kabuli_SNP2637 | scaffold2881 | 1196                    | [C/T] |                    | INTERGENIC                          |                    |
| Ca_Kabuli_SNP2638 | scaffold2881 | 1201                    | [G/T] |                    | INTERGENIC                          |                    |
| Ca_Kabuli_SNP2639 | scaffold2881 | 1206                    | [A/C] |                    | INTERGENIC                          |                    |
| Ca_Kabuli_SNP2640 | scaffold2881 | 1208                    | [A/G] |                    | INTERGENIC                          |                    |
| Ca_Kabuli_SNP2641 | scaffold2881 | 3751                    | [T/A] |                    | INTERGENIC                          |                    |
| Ca_Kabuli_SNP2642 | scaffold2881 | 3752                    | [G/T] |                    | INTERGENIC                          |                    |
| Ca_Kabuli_SNP2643 | scaffold2881 | 3754                    | [G/T] |                    | INTERGENIC                          |                    |
| Ca_Kabuli_SNP2644 | scaffold2881 | 3807                    | [T/A] |                    | INTERGENIC                          |                    |
| Ca_Kabuli_SNP2645 | scaffold2881 | 3808                    | [G/T] |                    | INTERGENIC                          |                    |
| Ca_Kabuli_SNP2646 | scaffold2881 | 3809                    | [T/C] |                    | INTERGENIC                          |                    |
| Ca_Kabuli_SNP2647 | scaffold2881 | 3810                    | [G/T] |                    | INTERGENIC                          |                    |
| Ca_Kabuli_SNP2648 | scaffold29   | 413719                  | [G/A] |                    | INTERGENIC                          |                    |
| Ca_Kabuli_SNP2649 | scaffold31   | 1053261                 | [C/T] |                    | INTERGENIC                          |                    |
| Ca_Kabuli_SNP2650 | scaffold327  | 111894                  | [A/T] |                    | INTERGENIC                          |                    |
| Ca_Kabuli_SNP2651 | scaffold3490 | 6693                    | [T/C] |                    | INTERGENIC                          |                    |
| Ca_Kabuli_SNP2652 | scaffold3490 | 6736                    | [G/A] |                    | INTERGENIC                          |                    |
| Ca_Kabuli_SNP2653 | scaffold359  | 147568                  | [T/G] |                    | INTERGENIC                          |                    |
| Ca_Kabuli_SNP2654 | scaffold362  | 17488                   | [A/C] |                    | INTERGENIC                          |                    |
| Ca_Kabuli_SNP2655 | scaffold382  | 110753                  | [G/A] |                    | INTERGENIC                          |                    |
| Ca_Kabuli_SNP2656 | scaffold382  | 110765                  | [C/T] |                    | INTERGENIC                          |                    |
| Ca_Kabuli_SNP2657 | scaffold402  | 300966                  | [A/T] |                    | INTERGENIC                          |                    |
| Ca_Kabuli_SNP2658 | scaffold443  | 183054                  | [T/C] |                    | INTERGENIC                          |                    |
| Ca_Kabuli_SNP2659 | scaffold470  | 78842                   | [G/A] |                    | INTERGENIC                          |                    |
| Ca_Kabuli_SNP2660 | scaffold470  | 78883                   | [T/G] |                    | INTERGENIC                          |                    |
| Ca_Kabuli_SNP2661 | scaffold493  | 370639                  | [T/A] |                    | INTERGENIC                          |                    |
| Ca_Kabuli_SNP2662 | scaffold5127 | 9563                    | [A/G] |                    | INTERGENIC                          |                    |
| Ca_Kabuli_SNP2663 | scaffold5557 | 21590                   | [T/C] |                    | INTERGENIC                          |                    |
| Ca_Kabuli_SNP2664 | scaffold559  | 34684                   | [G/A] |                    | INTERGENIC                          |                    |

| SNP IDs           | Chromosomes  | Physical positions (bp) | SNPs  | Gene accession IDs | Sequence components of genome/genes | Putative functions |
|-------------------|--------------|-------------------------|-------|--------------------|-------------------------------------|--------------------|
| Ca_Kabuli_SNP2665 | scaffold57   | 257376                  | [T/A] |                    | INTERGENIC                          |                    |
| Ca_Kabuli_SNP2666 | scaffold6371 | 410                     | [A/C] |                    | INTERGENIC                          |                    |
| Ca_Kabuli_SNP2667 | scaffold68   | 586256                  | [T/C] |                    | INTERGENIC                          |                    |
| Ca_Kabuli_SNP2668 | scaffold7068 | 2169                    | [T/A] |                    | INTERGENIC                          |                    |
| Ca_Kabuli_SNP2669 | scaffold7112 | 1684                    | [G/C] |                    | INTERGENIC                          |                    |
| Ca_Kabuli_SNP2670 | scaffold7116 | 965                     | [T/G] |                    | INTERGENIC                          |                    |
| Ca_Kabuli_SNP2671 | scaffold7116 | 966                     | [C/A] |                    | INTERGENIC                          |                    |
| Ca_Kabuli_SNP2672 | scaffold731  | 303408                  | [A/G] |                    | INTERGENIC                          |                    |
| Ca_Kabuli_SNP2673 | scaffold731  | 303409                  | [C/T] |                    | INTERGENIC                          |                    |
| Ca_Kabuli_SNP2674 | scaffold731  | 303410                  | [C/A] |                    | INTERGENIC                          |                    |
| Ca_Kabuli_SNP2675 | scaffold744  | 63662                   | [T/G] |                    | INTERGENIC                          |                    |
| Ca_Kabuli_SNP2676 | scaffold744  | 63703                   | [T/C] |                    | INTERGENIC                          |                    |
| Ca_Kabuli_SNP2677 | scaffold808  | 128537                  | [T/A] |                    | INTERGENIC                          |                    |
| Ca_Kabuli_SNP2678 | scaffold847  | 86949                   | [T/C] |                    | INTERGENIC                          |                    |
| Ca_Kabuli_SNP2679 | scaffold894  | 62775                   | [T/C] |                    | INTERGENIC                          |                    |
| Ca_Kabuli_SNP2680 | scaffold894  | 62778                   | [T/A] |                    | INTERGENIC                          |                    |
| Ca_Kabuli_SNP2681 | scaffold898  | 618                     | [G/A] |                    | INTERGENIC                          |                    |
| Ca_Kabuli_SNP2682 | scaffold898  | 623                     | [T/C] |                    | INTERGENIC                          |                    |
| Ca_Kabuli_SNP2683 | scaffold9    | 47761                   | [G/T] |                    | INTERGENIC                          |                    |
| Ca_Kabuli_SNP2684 | scaffold901  | 409760                  | [C/A] |                    | INTERGENIC                          |                    |
| Ca_Kabuli_SNP2685 | scaffold901  | 409762                  | [T/A] |                    | INTERGENIC                          |                    |
| Ca_Kabuli_SNP2686 | scaffold901  | 409763                  | [C/T] |                    | INTERGENIC                          |                    |
| Ca_Kabuli_SNP2687 | scaffold932  | 7306                    | [G/A] |                    | INTERGENIC                          |                    |
| Ca_Kabuli_SNP2688 | scaffold932  | 138407                  | [T/C] |                    | INTERGENIC                          |                    |
| Ca_Kabuli_SNP2689 | scaffold948  | 1263457                 | [C/A] |                    | INTERGENIC                          |                    |

**#2177 SNPs mapped on eight LGs of *kabuli* intra-specific genetic map**

**Table S7: A seed weight-specific association panel (244 accessions) constituted previously by Kujur *et al.* (2014) have been utilized for QTL region-specific haplotype (LD)-based high-resolution trait association mapping in chickpea**

| Sl. No. | Genotypes with Accession No. | Cultivar types | Geographical origin                 | Inferred population ancestry       |
|---------|------------------------------|----------------|-------------------------------------|------------------------------------|
| 1       | ICC3421                      | <i>Kabuli</i>  | Israel                              | <i>Kabuli</i> (Population Group I) |
| 2       | ICC9402                      | <i>Kabuli</i>  | Iran                                | <i>Kabuli</i> (Population Group I) |
| 3       | ICC13764                     | <i>Kabuli</i>  | Iran                                | <i>Kabuli</i> (Population Group I) |
| 4       | ICC12037                     | <i>Kabuli</i>  | Mexico                              | <i>Kabuli</i> (Population Group I) |
| 5       | ICC12492                     | <i>Kabuli</i>  | India                               | <i>Kabuli</i> (Population Group I) |
| 6       | ICC13441                     | <i>Kabuli</i>  | Iran                                | <i>Kabuli</i> (Population Group I) |
| 7       | ICC8855                      | <i>Kabuli</i>  | Afghanistan                         | <i>Kabuli</i> (Population Group I) |
| 8       | ICC9862                      | <i>Kabuli</i>  | Afghanistan                         | <i>Kabuli</i> (Population Group I) |
| 9       | ICC13461                     | <i>Kabuli</i>  | Iran                                | <i>Kabuli</i> (Population Group I) |
| 10      | ICC13628                     | <i>Kabuli</i>  | Iran                                | <i>Kabuli</i> (Population Group I) |
| 11      | ICC13523                     | <i>Kabuli</i>  | Iran                                | <i>Kabuli</i> (Population Group I) |
| 12      | ICC13187                     | <i>Kabuli</i>  | Iran                                | <i>Kabuli</i> (Population Group I) |
| 13      | ICC15802                     | <i>Kabuli</i>  | Syrian Arab Republic                | <i>Kabuli</i> (Population Group I) |
| 14      | ICC13077                     | <i>Kabuli</i>  | India                               | <i>Kabuli</i> (Population Group I) |
| 15      | ICC5337                      | <i>Kabuli</i>  | India                               | <i>Kabuli</i> (Population Group I) |
| 16      | ICC4841                      | <i>Kabuli</i>  | Morocco                             | <i>Kabuli</i> (Population Group I) |
| 17      | ICC7571                      | <i>Kabuli</i>  | Israel                              | <i>Kabuli</i> (Population Group I) |
| 18      | ICC15264                     | <i>Kabuli</i>  | Iran                                | <i>Kabuli</i> (Population Group I) |
| 19      | ICC7308                      | <i>Kabuli</i>  | Peru                                | <i>Kabuli</i> (Population Group I) |
| 20      | ICC2277                      | <i>Kabuli</i>  | Iran                                | <i>Kabuli</i> (Population Group I) |
| 21      | ICC6263                      | <i>Kabuli</i>  | Union of Soviet Socialist Republics | <i>Kabuli</i> (Population Group I) |
| 22      | ICC8740                      | <i>Kabuli</i>  | Afghanistan                         | <i>Kabuli</i> (Population Group I) |
| 23      | ICC13357                     | <i>Kabuli</i>  | Iran                                | <i>Kabuli</i> (Population Group I) |
| 24      | ICC7255                      | <i>Kabuli</i>  | India                               | <i>Kabuli</i> (Population Group I) |
| 25      | ICC7272                      | <i>Kabuli</i>  | Algeria                             | <i>Kabuli</i> (Population Group I) |
| 26      | ICC15435                     | <i>Kabuli</i>  | Morocco                             | <i>Kabuli</i> (Population Group I) |
| 27      | ICC11764                     | <i>Kabuli</i>  | Chile                               | <i>Kabuli</i> (Population Group I) |
| 28      | ICC15697                     | <i>Kabuli</i>  | Syria                               | <i>Kabuli</i> (Population Group I) |
| 29      | ICC13816                     | <i>Kabuli</i>  | Union of Soviet Socialist Republics | <i>Kabuli</i> (Population Group I) |
| 30      | ICC7668                      | <i>Kabuli</i>  | Union of Soviet Socialist Republics | <i>Kabuli</i> (Population Group I) |
| 31      | ICC13283                     | <i>Kabuli</i>  | Iran                                | <i>Kabuli</i> (Population Group I) |
| 32      | ICC7295                      | <i>Kabuli</i>  | Tunisia                             | <i>Kabuli</i> (Population Group I) |
| 33      | ICC12328                     | <i>Kabuli</i>  | Cyprus                              | <i>Kabuli</i> (Population Group I) |
| 34      | ICC7315                      | <i>Kabuli</i>  | Iran                                | <i>Kabuli</i> (Population Group I) |
| 35      | ICC11879                     | <i>Kabuli</i>  | Turkey                              | <i>Kabuli</i> (Population Group I) |
| 36      | ICC14446                     | <i>Kabuli</i>  | Italy                               | <i>Kabuli</i> (Population Group I) |
| 37      | ICC10755                     | <i>Kabuli</i>  | Turkey                              | <i>Kabuli</i> (Population Group I) |
| 38      | ICC14190                     | <i>Kabuli</i>  | India                               | <i>Kabuli</i> (Population Group I) |
| 39      | ICC15333                     | <i>Kabuli</i>  | Iran                                | <i>Kabuli</i> (Population Group I) |
| 40      | ICC8042                      | <i>Kabuli</i>  | Iran                                | <i>Kabuli</i> (Population Group I) |

| Sl. No. | Genotypes with Accession No. | Cultivar types | Geographical origin  | Inferred population ancestry       |
|---------|------------------------------|----------------|----------------------|------------------------------------|
| 41      | ICC8261                      | <i>Kabuli</i>  | Turkey               | <i>Kabuli</i> (Population Group I) |
| 42      | ICC10885                     | <i>Kabuli</i>  | Ethiopia             | <i>Kabuli</i> (Population Group I) |
| 43      | ICC8058                      | <i>Kabuli</i>  | Iran                 | <i>Kabuli</i> (Population Group I) |
| 44      | ICC15512                     | <i>Kabuli</i>  | Morocco              | <i>Kabuli</i> (Population Group I) |
| 45      | ICC9137                      | <i>Kabuli</i>  | Iran                 | <i>Kabuli</i> (Population Group I) |
| 46      | ICC15406                     | <i>Kabuli</i>  | Morocco              | <i>Kabuli</i> (Population Group I) |
| 47      | ICC10884                     | <i>Kabuli</i>  | Ethiopia             | <i>Kabuli</i> (Population Group I) |
| 48      | ICC15551                     | <i>Kabuli</i>  | Australia            | <i>Kabuli</i> (Population Group I) |
| 49      | ICC15725                     | <i>Kabuli</i>  | Syrian Arab Republic | <i>Kabuli</i> (Population Group I) |
| 50      | ICC6204                      | <i>Kabuli</i>  | Spain                | <i>Kabuli</i> (Population Group I) |
| 51      | ICC6210                      | <i>Kabuli</i>  | Spain                | <i>Kabuli</i> (Population Group I) |
| 52      | ICC11847                     | <i>Kabuli</i>  | Chile                | <i>Kabuli</i> (Population Group I) |
| 53      | ICC7654                      | <i>Kabuli</i>  | Turkey               | <i>Kabuli</i> (Population Group I) |
| 54      | ICC11749                     | <i>Kabuli</i>  | Chile                | <i>Kabuli</i> (Population Group I) |
| 55      | ICC14199                     | <i>Kabuli</i>  | Mexico               | <i>Kabuli</i> (Population Group I) |
| 56      | ICC15518                     | <i>Kabuli</i>  | Morocco              | <i>Kabuli</i> (Population Group I) |
| 57      | ICC16814                     | <i>Kabuli</i>  | Portugal             | <i>Kabuli</i> (Population Group I) |
| 58      | ICC16796                     | <i>Kabuli</i>  | Portugal             | <i>Kabuli</i> (Population Group I) |
| 59      | ICC16811                     | <i>Kabuli</i>  | India                | <i>Kabuli</i> (Population Group I) |
| 60      | ICC6253                      | <i>Kabuli</i>  | Morocco              | <i>Kabuli</i> (Population Group I) |
| 61      | ICC11301                     | <i>Kabuli</i>  | USA                  | <i>Kabuli</i> (Population Group I) |
| 62      | ICC10749                     | <i>Kabuli</i>  | Turkey               | <i>Kabuli</i> (Population Group I) |
| 63      | ICC14216                     | <i>Kabuli</i>  | Mexico               | <i>Kabuli</i> (Population Group I) |
| 64      | ICC14203                     | <i>Kabuli</i>  | Mexico               | <i>Kabuli</i> (Population Group I) |
| 65      | ICC11742                     | <i>Kabuli</i>  | Chile                | <i>Kabuli</i> (Population Group I) |
| 66      | ICC13821                     | <i>Kabuli</i>  | Ethiopia             | <i>Kabuli</i> (Population Group I) |
| 67      | ICC14462                     | <i>Kabuli</i>  | USA                  | <i>Kabuli</i> (Population Group I) |
| 68      | ICC14220                     | <i>Kabuli</i>  | Kenya                | <i>Kabuli</i> (Population Group I) |
| 69      | ICC15944                     | <i>Kabuli</i>  | USA                  | <i>Kabuli</i> (Population Group I) |
| 70      | ICC11303                     | <i>Kabuli</i>  | Chile                | <i>Kabuli</i> (Population Group I) |
| 71      | ICC12034                     | <i>Kabuli</i>  | Mexico               | <i>Kabuli</i> (Population Group I) |
| 72      | ICC7346                      | <i>Kabuli</i>  | Mexico               | <i>Kabuli</i> (Population Group I) |
| 73      | ICC15994                     | <i>Kabuli</i>  | Spain                | <i>Kabuli</i> (Population Group I) |
| 74      | ICC18591                     | <i>Kabuli</i>  | Mexico               | <i>Kabuli</i> (Population Group I) |
| 75      | ICC8155                      | <i>Kabuli</i>  | USA                  | <i>Kabuli</i> (Population Group I) |
| 76      | ICC8151                      | <i>Kabuli</i>  | USA                  | <i>Kabuli</i> (Population Group I) |
| 77      | ICC20268                     | <i>Kabuli</i>  | India                | <i>Kabuli</i> (Population Group I) |
| 78      | ICCX-810800                  | <i>Desi</i>    | India                | <i>Desi</i> (Population Group II)  |
| 79      | ICC5590                      | <i>Desi</i>    | India                | <i>Desi</i> (Population Group II)  |
| 80      | ICC6013                      | <i>Desi</i>    | India                | <i>Desi</i> (Population Group II)  |
| 81      | ICC5002                      | <i>Desi</i>    | India                | <i>Desi</i> (Population Group II)  |
| 82      | ICC3362                      | <i>Desi</i>    | Iran                 | <i>Desi</i> (Population Group II)  |
| 83      | ICC7184                      | <i>Desi</i>    | Turkey               | <i>Desi</i> (Population Group II)  |
| 84      | ICC3946                      | <i>Desi</i>    | Iran                 | <i>Desi</i> (Population Group II)  |

| Sl. No. | Genotypes with Accession No. | Cultivar types | Geographical origin | Inferred population ancestry      |
|---------|------------------------------|----------------|---------------------|-----------------------------------|
| 85      | ICC4926                      | <i>Desi</i>    | India               | <i>Desi</i> (Population Group II) |
| 86      | ICC12299                     | <i>Desi</i>    | Nepal               | <i>Desi</i> (Population Group II) |
| 87      | ICC4657                      | <i>Desi</i>    | India               | <i>Desi</i> (Population Group II) |
| 88      | ICC12824                     | <i>Desi</i>    | Ethiopia            | <i>Desi</i> (Population Group II) |
| 89      | ICC1052                      | <i>Desi</i>    | Pakistan            | <i>Desi</i> (Population Group II) |
| 90      | ICC3761                      | <i>Desi</i>    | Iran                | <i>Desi</i> (Population Group II) |
| 91      | ICC5878                      | <i>Desi</i>    | India               | <i>Desi</i> (Population Group II) |
| 92      | ICC456                       | <i>Desi</i>    | India               | <i>Desi</i> (Population Group II) |
| 93      | ICC5135                      | <i>Desi</i>    | India               | <i>Desi</i> (Population Group II) |
| 94      | ICC16207                     | <i>Desi</i>    | Myanmar             | <i>Desi</i> (Population Group II) |
| 95      | ICC12537                     | <i>Desi</i>    | Ethiopia            | <i>Desi</i> (Population Group II) |
| 96      | ICC12654                     | <i>Desi</i>    | Ethiopia            | <i>Desi</i> (Population Group II) |
| 97      | ICC12726                     | <i>Desi</i>    | Ethiopia            | <i>Desi</i> (Population Group II) |
| 98      | ICC11944                     | <i>Desi</i>    | Nepal               | <i>Desi</i> (Population Group II) |
| 99      | ICC12866                     | <i>Desi</i>    | Ethiopia            | <i>Desi</i> (Population Group II) |
| 100     | ICC4814                      | <i>Desi</i>    | Iran                | <i>Desi</i> (Population Group II) |
| 101     | ICC6293                      | <i>Desi</i>    | Italy               | <i>Desi</i> (Population Group II) |
| 102     | ICC3776                      | <i>Desi</i>    | Iran                | <i>Desi</i> (Population Group II) |
| 103     | ICC4418                      | <i>Desi</i>    | Iran                | <i>Desi</i> (Population Group II) |
| 104     | ICC4463                      | <i>Desi</i>    | Iran                | <i>Desi</i> (Population Group II) |
| 105     | ICC12916                     | <i>Desi</i>    | India               | <i>Desi</i> (Population Group II) |
| 106     | ICC11627                     | <i>Desi</i>    | India               | <i>Desi</i> (Population Group II) |
| 107     | ICC8607                      | <i>Desi</i>    | Ethiopia            | <i>Desi</i> (Population Group II) |
| 108     | ICC11498                     | <i>Desi</i>    | India               | <i>Desi</i> (Population Group II) |
| 109     | ICC12928                     | <i>Desi</i>    | India               | <i>Desi</i> (Population Group II) |
| 110     | ICC12947                     | <i>Desi</i>    | India               | <i>Desi</i> (Population Group II) |
| 111     | ICC4182                      | <i>Desi</i>    | Iran                | <i>Desi</i> (Population Group II) |
| 112     | ICC5845                      | <i>Desi</i>    | India               | <i>Desi</i> (Population Group II) |
| 113     | ICC9942                      | <i>Desi</i>    | India               | <i>Desi</i> (Population Group II) |
| 114     | ICC16261                     | <i>Desi</i>    | Malawi              | <i>Desi</i> (Population Group II) |
| 115     | ICC2629                      | <i>Desi</i>    | Iran                | <i>Desi</i> (Population Group II) |
| 116     | ICC6571                      | <i>Desi</i>    | Iran                | <i>Desi</i> (Population Group II) |
| 117     | ICC762                       | <i>Desi</i>    | India               | <i>Desi</i> (Population Group II) |
| 118     | ICC3218                      | <i>Desi</i>    | Iran                | <i>Desi</i> (Population Group II) |
| 119     | ICC3325                      | <i>Desi</i>    | Cyprus              | <i>Desi</i> (Population Group II) |
| 120     | ICC11584                     | <i>Desi</i>    | India               | <i>Desi</i> (Population Group II) |
| 121     | ICC1392                      | <i>Desi</i>    | India               | <i>Desi</i> (Population Group II) |
| 122     | ICC3631                      | <i>Desi</i>    | Iran                | <i>Desi</i> (Population Group II) |
| 123     | ICC14402                     | <i>Desi</i>    | India               | <i>Desi</i> (Population Group II) |
| 124     | ICC2242                      | <i>Desi</i>    | India               | <i>Desi</i> (Population Group II) |
| 125     | ICC11664                     | <i>Desi</i>    | India               | <i>Desi</i> (Population Group II) |
| 126     | ICC15868                     | <i>Desi</i>    | India               | <i>Desi</i> (Population Group II) |
| 127     | ICC1710                      | <i>Desi</i>    | India               | <i>Desi</i> (Population Group II) |
| 128     | ICC791                       | <i>Desi</i>    | India               | <i>Desi</i> (Population Group II) |

| Sl. No. | Genotypes with Accession No. | Cultivar types | Geographical origin | Inferred population ancestry      |
|---------|------------------------------|----------------|---------------------|-----------------------------------|
| 129     | ICC2072                      | <i>Desi</i>    | India               | <i>Desi</i> (Population Group II) |
| 130     | ICC13524                     | <i>Desi</i>    | Iran                | <i>Desi</i> (Population Group II) |
| 131     | ICC2507                      | <i>Desi</i>    | Iran                | <i>Desi</i> (Population Group II) |
| 132     | ICC440                       | <i>Desi</i>    | India               | <i>Desi</i> (Population Group II) |
| 133     | ICC2065                      | <i>Desi</i>    | India               | <i>Desi</i> (Population Group II) |
| 134     | ICC9586                      | <i>Desi</i>    | India               | <i>Desi</i> (Population Group II) |
| 135     | ICC13863                     | <i>Desi</i>    | Ethiopia            | <i>Desi</i> (Population Group II) |
| 136     | ICC14077                     | <i>Desi</i>    | Ethiopia            | <i>Desi</i> (Population Group II) |
| 137     | ICC16487                     | <i>Desi</i>    | Pakistan            | <i>Desi</i> (Population Group II) |
| 138     | ICC1161                      | <i>Desi</i>    | Pakistan            | <i>Desi</i> (Population Group II) |
| 139     | ICC6537                      | <i>Desi</i>    | Iran                | <i>Desi</i> (Population Group II) |
| 140     | ICC9737                      | <i>Desi</i>    | India               | <i>Desi</i> (Population Group II) |
| 141     | ICC2263                      | <i>Desi</i>    | Iran                | <i>Desi</i> (Population Group II) |
| 142     | ICC6874                      | <i>Desi</i>    | Iran                | <i>Desi</i> (Population Group II) |
| 143     | ICC10945                     | <i>Desi</i>    | India               | <i>Desi</i> (Population Group II) |
| 144     | ICC13892                     | <i>Desi</i>    | Ethiopia            | <i>Desi</i> (Population Group II) |
| 145     | ICC15618                     | <i>Desi</i>    | India               | <i>Desi</i> (Population Group II) |
| 146     | ICC9002                      | <i>Desi</i>    | Iran                | <i>Desi</i> (Population Group II) |
| 147     | ICC16269                     | <i>Desi</i>    | Malawi              | <i>Desi</i> (Population Group II) |
| 148     | ICC2210                      | <i>Desi</i>    | Algeria             | <i>Desi</i> (Population Group II) |
| 149     | ICC14051                     | <i>Desi</i>    | Ethiopia            | <i>Desi</i> (Population Group II) |
| 150     | ICC6811                      | <i>Desi</i>    | Iran                | <i>Desi</i> (Population Group II) |
| 151     | ICC9643                      | <i>Desi</i>    | Afghanistan         | <i>Desi</i> (Population Group II) |
| 152     | ICC12307                     | <i>Desi</i>    | Myanmar             | <i>Desi</i> (Population Group II) |
| 153     | ICC14778                     | <i>Desi</i>    | India               | <i>Desi</i> (Population Group II) |
| 154     | ICC8195                      | <i>Desi</i>    | Pakistan            | <i>Desi</i> (Population Group II) |
| 155     | ICC1715                      | <i>Desi</i>    | India               | <i>Desi</i> (Population Group II) |
| 156     | ICC4495                      | <i>Desi</i>    | Turkey              | <i>Desi</i> (Population Group II) |
| 157     | ICC11378                     | <i>Desi</i>    | India               | <i>Desi</i> (Population Group II) |
| 158     | ICC1431                      | <i>Desi</i>    | India               | <i>Desi</i> (Population Group II) |
| 159     | ICC7441                      | <i>Desi</i>    | India               | <i>Desi</i> (Population Group II) |
| 160     | ICC12155                     | <i>Desi</i>    | Bangladesh          | <i>Desi</i> (Population Group II) |
| 161     | ICC2884                      | <i>Desi</i>    | Iran                | <i>Desi</i> (Population Group II) |
| 162     | ICC15606                     | <i>Desi</i>    | India               | <i>Desi</i> (Population Group II) |
| 163     | ICC8950                      | <i>Desi</i>    | India               | <i>Desi</i> (Population Group II) |
| 164     | ICC12851                     | <i>Desi</i>    | Ethiopia            | <i>Desi</i> (Population Group II) |
| 165     | ICC6816                      | <i>Desi</i>    | Iran                | <i>Desi</i> (Population Group II) |
| 166     | ICC10393                     | <i>Desi</i>    | India               | <i>Desi</i> (Population Group II) |
| 167     | ICC11198                     | <i>Desi</i>    | India               | <i>Desi</i> (Population Group II) |
| 168     | ICC6579                      | <i>Desi</i>    | Iran                | <i>Desi</i> (Population Group II) |
| 169     | ICC67                        | <i>Desi</i>    | India               | <i>Desi</i> (Population Group II) |
| 170     | ICC1923                      | <i>Desi</i>    | India               | <i>Desi</i> (Population Group II) |
| 171     | ICC2720                      | <i>Desi</i>    | Iran                | <i>Desi</i> (Population Group II) |
| 172     | ICC4567                      | <i>Desi</i>    | India               | <i>Desi</i> (Population Group II) |

| Sl. No. | Genotypes with Accession No. | Cultivar types | Geographical origin                 | Inferred population ancestry      |
|---------|------------------------------|----------------|-------------------------------------|-----------------------------------|
| 173     | ICC637                       | <i>Desi</i>    | India                               | <i>Desi</i> (Population Group II) |
| 174     | ICC1882                      | <i>Desi</i>    | India                               | <i>Desi</i> (Population Group II) |
| 175     | ICC5639                      | <i>Desi</i>    | India                               | <i>Desi</i> (Population Group II) |
| 176     | ICC8384                      | <i>Desi</i>    | India                               | <i>Desi</i> (Population Group II) |
| 177     | ICC95                        | <i>Desi</i>    | India                               | <i>Desi</i> (Population Group II) |
| 178     | ICC1098                      | <i>Desi</i>    | Iran                                | <i>Desi</i> (Population Group II) |
| 179     | ICC708                       | <i>Desi</i>    | India                               | <i>Desi</i> (Population Group II) |
| 180     | ICC14098                     | <i>Desi</i>    | Ethiopia                            | <i>Desi</i> (Population Group II) |
| 181     | ICC1083                      | <i>Desi</i>    | Iran                                | <i>Desi</i> (Population Group II) |
| 182     | ICC1164                      | <i>Desi</i>    | Nigeria                             | <i>Desi</i> (Population Group II) |
| 183     | ICC1205                      | <i>Desi</i>    | India                               | <i>Desi</i> (Population Group II) |
| 184     | ICC14831                     | <i>Desi</i>    | India                               | <i>Desi</i> (Population Group II) |
| 185     | ICC5434                      | <i>Desi</i>    | India                               | <i>Desi</i> (Population Group II) |
| 186     | ICC10399                     | <i>Desi</i>    | India                               | <i>Desi</i> (Population Group II) |
| 187     | ICC4593                      | <i>Desi</i>    | India                               | <i>Desi</i> (Population Group II) |
| 188     | ICC11121                     | <i>Desi</i>    | India                               | <i>Desi</i> (Population Group II) |
| 189     | ICC15612                     | <i>Desi</i>    | Tanzania                            | <i>Desi</i> (Population Group II) |
| 190     | ICC3230                      | <i>Desi</i>    | Iran                                | <i>Desi</i> (Population Group II) |
| 191     | ICC867                       | <i>Desi</i>    | India                               | <i>Desi</i> (Population Group II) |
| 192     | ICC16915                     | <i>Desi</i>    | India                               | <i>Desi</i> (Population Group II) |
| 193     | ICC6802                      | <i>Desi</i>    | Iran                                | <i>Desi</i> (Population Group II) |
| 194     | ICC14815                     | <i>Desi</i>    | India                               | <i>Desi</i> (Population Group II) |
| 195     | ICC1356                      | <i>Desi</i>    | India                               | <i>Desi</i> (Population Group II) |
| 196     | ICC13219                     | <i>Desi</i>    | Iran                                | <i>Desi</i> (Population Group II) |
| 197     | ICC1422                      | <i>Desi</i>    | India                               | <i>Desi</i> (Population Group II) |
| 198     | ICC5613                      | <i>Desi</i>    | India                               | <i>Desi</i> (Population Group II) |
| 199     | ICC14799                     | <i>Desi</i>    | India                               | <i>Desi</i> (Population Group II) |
| 200     | ICC2969                      | <i>Desi</i>    | Iran                                | <i>Desi</i> (Population Group II) |
| 201     | ICC1194                      | <i>Desi</i>    | India                               | <i>Desi</i> (Population Group II) |
| 202     | ICC15567                     | <i>Desi</i>    | India                               | <i>Desi</i> (Population Group II) |
| 203     | ICC506                       | <i>Desi</i>    | India                               | <i>Desi</i> (Population Group II) |
| 204     | ICC11284                     | <i>Desi</i>    | Union of Soviet Socialist Republics | <i>Desi</i> (Population Group II) |
| 205     | ICC4639                      | <i>Desi</i>    | India                               | <i>Desi</i> (Population Group II) |
| 206     | ICC8621                      | <i>Desi</i>    | Ethiopia                            | <i>Desi</i> (Population Group II) |
| 207     | ICC2580                      | <i>Desi</i>    | Iran                                | <i>Desi</i> (Population Group II) |
| 208     | ICC283                       | <i>Desi</i>    | India                               | <i>Desi</i> (Population Group II) |
| 209     | ICC1180                      | <i>Desi</i>    | India                               | <i>Desi</i> (Population Group II) |
| 210     | ICC9755                      | <i>Desi</i>    | Afghanistan                         | <i>Desi</i> (Population Group II) |
| 211     | ICC1397                      | <i>Desi</i>    | India                               | <i>Desi</i> (Population Group II) |
| 212     | ICC14669                     | <i>Desi</i>    | India                               | <i>Desi</i> (Population Group II) |
| 213     | ICC3512                      | <i>Desi</i>    | Iran                                | <i>Desi</i> (Population Group II) |
| 214     | ICC1510                      | <i>Desi</i>    | India                               | <i>Desi</i> (Population Group II) |
| 215     | ICC2990                      | <i>Desi</i>    | Iran                                | <i>Desi</i> (Population Group II) |
| 216     | ICC7323                      | <i>Desi</i>    | Unknown                             | <i>Desi</i> (Population Group II) |

| <b>Sl. No.</b> | <b>Genotypes with Accession No.</b> | <b>Cultivar types</b> | <b>Geographical origin</b>          | <b>Inferred population ancestry</b> |
|----------------|-------------------------------------|-----------------------|-------------------------------------|-------------------------------------|
| 217            | ICC4533                             | <i>Desi</i>           | India                               | <i>Desi</i> (Population Group II)   |
| 218            | ICC16903                            | <i>Desi</i>           | India                               | <i>Desi</i> (Population Group II)   |
| 219            | ICC7867                             | <i>Desi</i>           | Iran                                | <i>Desi</i> (Population Group II)   |
| 220            | ICC8522                             | <i>Desi</i>           | Italy                               | <i>Desi</i> (Population Group II)   |
| 221            | ICC16374                            | <i>Desi</i>           | Malawi                              | <i>Desi</i> (Population Group II)   |
| 222            | ICC12028                            | <i>Desi</i>           | Mexico                              | <i>Desi</i> (Population Group II)   |
| 223            | ICC1230                             | <i>Desi</i>           | India                               | <i>Desi</i> (Population Group II)   |
| 224            | ICC8318                             | <i>Desi</i>           | India                               | <i>Desi</i> (Population Group II)   |
| 225            | ICC2919                             | <i>Desi</i>           | Iran                                | <i>Desi</i> (Population Group II)   |
| 226            | ICC5504                             | <i>Desi</i>           | Mexico                              | <i>Desi</i> (Population Group II)   |
| 227            | ICC5383                             | <i>Desi</i>           | India                               | <i>Desi</i> (Population Group II)   |
| 228            | ICC15610                            | <i>Desi</i>           | India                               | <i>Desi</i> (Population Group II)   |
| 229            | ICC1398                             | <i>Desi</i>           | India                               | <i>Desi</i> (Population Group II)   |
| 230            | ICC14595                            | <i>Desi</i>           | India                               | <i>Desi</i> (Population Group II)   |
| 231            | ICC13599                            | <i>Desi</i>           | Iran                                | <i>Desi</i> (Population Group II)   |
| 232            | ICC15510                            | <i>Desi</i>           | Morocco                             | <i>Desi</i> (Population Group II)   |
| 233            | ICC7554                             | <i>Desi</i>           | Iran                                | <i>Desi</i> (Population Group II)   |
| 234            | ICC15294                            | <i>Desi</i>           | Iran                                | <i>Desi</i> (Population Group II)   |
| 235            | ICC4918                             | <i>Desi</i>           | India                               | <i>Desi</i> (Population Group II)   |
| 236            | ICC7819                             | <i>Desi</i>           | Iran                                | <i>Desi</i> (Population Group II)   |
| 237            | ICC1915                             | <i>Desi</i>           | India                               | <i>Desi</i> (Population Group II)   |
| 238            | ICC6279                             | <i>Desi</i>           | India                               | <i>Desi</i> (Population Group II)   |
| 239            | ICC6306                             | <i>Desi</i>           | Union of Soviet Socialist Republics | <i>Desi</i> (Population Group II)   |
| 240            | ICC16524                            | <i>Desi</i>           | Pakistan                            | <i>Desi</i> (Population Group II)   |
| 241            | ICC6877                             | <i>Desi</i>           | Iran                                | <i>Desi</i> (Population Group II)   |
| 242            | ICC1836                             | <i>Desi</i>           | India                               | <i>Desi</i> (Population Group II)   |
| 243            | ICC15061                            | <i>Desi</i>           | India                               | <i>Desi</i> (Population Group II)   |
| 244            | ICC13124                            | <i>Desi</i>           | India                               | <i>Desi</i> (Population Group II)   |
